# Supplementary material for: Multiomics integrative analysis identifies APOE allele-specific blood biomarkers associated to Alzheimer’s disease etiopathogenesis
Source: Aging (Albany NY). 2021 Apr 12;13(7):9277–329. doi: 10.18632/aging.202950 (PMC8064208; doi:10.18632/aging.202950)
Supplement: Supplementary Table 1 [file aging-13-202950-s003.xlsx]

## Sheet: Sheet1
Supplementary Table 1. Stage I-III APOE2 stratified meta-analysis results (p<10-4).
CHR	BP	SNP	A1	A2	HRC_AF	N	P	P.R.	OR	OR.R.	Q	I	StageI	StageII	StageIII	ANNOT
8	124967556	rs4642628	A	G	0.0724207	3	3.667e-07	0.04631	1.9195	1.7396	0.018	75.12	0.9058	2.3161	2.2778	FAM91A1(+139.9kb)|FER1L6(0)|FER1L6-AS1(-28.82kb)|FER1L6-AS2(-90.76kb)
19	44187494	rs75425987	T	C	0.0495534	3	7.258e-07	7.258e-07	1.815	1.815	0.7923	0	1.78	1.5382	1.9283	CADM4(+43.5kb)|ETHE1(+156.1kb)|IRGC(-32.72kb)|IRGQ(+87.21kb)|KCNN4(-83.19kb)|LYPD5(-112.6kb)|PHLDB3(+178.5kb)|PINLYP(+101.2kb)|PLAUR(+13kb)|SMG9(-47.81kb)|SRRM5(+68.84kb)|XRCC1(+107.8kb)|ZNF283(-144kb)|ZNF404(-189kb)|ZNF428(+63.48kb)|ZNF575(+147.2kb)|ZNF576(+82.91kb)
16	49922094	rs150839028	G	C	0.0155066	2	7.716e-07	0.007974	3.094	2.8104	0.1146	59.84	NA	1.7754	3.9102	CNEP1R1(-137.1kb)|HEATR3(-177.8kb)|ZNF423(+30.26kb)
19	44189441	rs13344768	A	G	0.0732522	3	8.805e-07	8.805e-07	1.7401	1.7401	0.5966	0	1.6155	1.4344	1.9166	CADM4(+45.45kb)|ETHE1(+158kb)|IRGC(-30.77kb)|IRGQ(+89.15kb)|KCNN4(-81.24kb)|LYPD5(-110.6kb)|PHLDB3(+180.5kb)|PINLYP(+103.2kb)|PLAUR(+14.94kb)|SMG9(-45.86kb)|SRRM5(+70.79kb)|XRCC1(+109.7kb)|ZNF283(-142kb)|ZNF404(-187.1kb)|ZNF428(+65.43kb)|ZNF575(+149.2kb)|ZNF576(+84.85kb)
19	44189286	rs520130	T	A	0.0763782	3	1.092e-06	1.092e-06	1.729	1.729	0.5923	0	1.6185	1.4153	1.9021	CADM4(+45.3kb)|ETHE1(+157.9kb)|IRGC(-30.93kb)|IRGQ(+89kb)|KCNN4(-81.4kb)|LYPD5(-110.8kb)|PHLDB3(+180.3kb)|PINLYP(+103kb)|PLAUR(+14.79kb)|SMG9(-46.01kb)|SRRM5(+70.64kb)|XRCC1(+109.6kb)|ZNF283(-142.2kb)|ZNF404(-187.2kb)|ZNF428(+65.27kb)|ZNF575(+149kb)|ZNF576(+84.7kb)
16	52364843	rs117226581	T	G	0.0159686	2	1.093e-06	0.001511	3.3668	3.8159	0.1382	54.49	NA	6.5446	2.7425	TOX3(-107.1kb)
19	44189160	rs519137	T	C	0.0763782	3	1.151e-06	1.151e-06	1.727	1.727	0.5861	0	1.6191	1.409	1.9011	CADM4(+45.17kb)|ETHE1(+157.8kb)|IRGC(-31.05kb)|IRGQ(+88.87kb)|KCNN4(-81.52kb)|LYPD5(-110.9kb)|PHLDB3(+180.2kb)|PINLYP(+102.9kb)|PLAUR(+14.66kb)|SMG9(-46.14kb)|SRRM5(+70.51kb)|XRCC1(+109.4kb)|ZNF283(-142.3kb)|ZNF404(-187.4kb)|ZNF428(+65.15kb)|ZNF575(+148.9kb)|ZNF576(+84.57kb)
20	40797881	rs10485686	T	C	0.018417	3	1.46e-06	1.46e-06	2.7716	2.7716	0.8616	0	3.4178	2.7491	2.559	PTPRT(0)
6	105237327	rs116935456	G	A	0.0156144	3	1.732e-06	1.732e-06	2.9608	2.9608	0.5289	0	3.1644	4.3584	2.3513	HACE1(0)|LIN28B(-167.6kb)|LINC00577(-146.8kb)
1	164419064	rs148830716	A	G	0.0216816	3	1.933e-06	1.11e-05	3.4567	3.5722	0.3114	14.3	6.231	4.64	2.4854	PBX1(-109.5kb)
13	31860488	rs56266656	G	A	0.0235448	3	1.952e-06	0.00161	2.5612	2.4556	0.1614	45.18	3.4382	1.293	3.0534	B3GALTL(0)|HSPH1(+124.4kb)
10	30890602	rs78400248	G	A	0.0140129	2	2.236e-06	2.236e-06	2.9596	2.9596	0.961	0	NA	3.0246	2.9425	LYZL2(-10.1kb)|MAP3K8(+139.8kb)|SVILP1(-90.6kb)
1	94053881	rs141641986	T	C	0.0266092	2	2.591e-06	2.591e-06	7.3718	7.3718	0.6896	0	6.099	8.582	NA	BCAR3(0)|FNBP1L(+33.66kb)|LOC100129046(-3.643kb)
1	246961219	rs12118999	C	G	0.0393594	3	2.635e-06	2.635e-06	1.9444	1.9444	0.4753	0	2.4006	1.4772	2.0029	AHCTF1(-41.18kb)|CNST(+129.3kb)|LOC149134(+6.431kb)|SCCPDH(+29.78kb)|ZNF670-ZNF695(-147.6kb)|ZNF695(-147.6kb)
20	40819225	rs78847999	A	C	0.0184016	3	2.662e-06	2.662e-06	2.7224	2.7224	0.8618	0	3.39	2.5409	2.5671	PTPRT(0)
14	87903232	rs61981988	C	A	0.373114	3	2.99e-06	2.99e-06	1.3594	1.3594	0.4068	0	1.1744	1.4789	1.3987	.
18	59565942	rs4941084	G	A	0.931953	3	2.993e-06	0.0008781	0.5661	0.5443	0.1193	52.96	0.5557	0.3787	0.701	LOC100996669(+144kb)|PIGN(-145.5kb)|RNF152(+5.638kb)
12	53330700	rs1907670	A	G	0.036911	3	3.139e-06	3.139e-06	2.1254	2.1254	0.8505	0	2.463	2.2387	1.9588	EIF4B(-69.36kb)|IGFBP6(-160.7kb)|KRT3(+140.8kb)|KRT4(+122.8kb)|KRT8(0)|KRT18(-11.95kb)|KRT76(+159.6kb)|KRT78(+87.92kb)|KRT79(+102.6kb)|LOC283335(-106.3kb)|SOAT2(-166.6kb)|SPRYD3(-127.4kb)|TENC1(-110.1kb)
5	128010246	rs62392640	C	T	0.0191099	3	3.2e-06	0.0007114	2.6235	2.4721	0.223	33.35	2.3046	1.4388	3.4697	FBN2(+136.5kb)
1	195303556	rs61818578	C	T	0.0386973	3	3.279e-06	3.279e-06	1.8727	1.8727	0.7181	0	2.2808	1.6834	1.7869	.
5	1243009	rs7721679	G	A	0.871173	3	3.303e-06	3.303e-06	0.6547	0.6547	0.5314	0	0.5809	0.7697	0.6373	CLPTM1L(-74.99kb)|MIR4457(-66.42kb)|MIR4635(+179.9kb)|SLC6A3(-149.9kb)|SLC6A18(0)|SLC6A19(+17.78kb)|SLC12A7(+130.8kb)|TERT(-10.28kb)
1	246970689	rs144230454	T	C	0.0232984	3	3.391e-06	3.391e-06	2.1793	2.1793	0.9579	0	2.3587	2.0596	2.1511	AHCTF1(-31.71kb)|CNST(+138.8kb)|LOC149134(+15.9kb)|SCCPDH(+39.25kb)|ZNF670-ZNF695(-138.2kb)|ZNF695(-138.2kb)
19	44198376	rs1808261	G	C	0.063551	3	3.486e-06	3.486e-06	1.6869	1.6869	0.6921	0	1.6636	1.3856	1.8049	CADM4(+54.38kb)|ETHE1(+167kb)|IRGC(-21.84kb)|IRGQ(+98.09kb)|KCNN4(-72.31kb)|LOC100505715(-197.6kb)|LYPD5(-101.7kb)|PHLDB3(+189.4kb)|PINLYP(+112.1kb)|PLAUR(+23.88kb)|SMG9(-36.92kb)|SRRM5(+79.73kb)|XRCC1(+118.6kb)|ZNF283(-133.1kb)|ZNF404(-178.1kb)|ZNF428(+74.36kb)|ZNF575(+158.1kb)|ZNF576(+93.79kb)
6	105212205	rs139422742	A	G	0.0148137	3	3.643e-06	3.643e-06	2.8035	2.8035	0.7499	0	3.0018	3.5428	2.3771	HACE1(0)|LIN28B(-192.7kb)|LINC00577(-172kb)
19	44188002	rs466266	G	C	0.0702033	3	3.674e-06	3.674e-06	1.6917	1.6917	0.6787	0	1.6828	1.3813	1.8132	CADM4(+44.01kb)|ETHE1(+156.6kb)|IRGC(-32.21kb)|IRGQ(+87.72kb)|KCNN4(-82.68kb)|LYPD5(-112.1kb)|PHLDB3(+179kb)|PINLYP(+101.7kb)|PLAUR(+13.5kb)|SMG9(-47.3kb)|SRRM5(+69.35kb)|XRCC1(+108.3kb)|ZNF283(-143.5kb)|ZNF404(-188.5kb)|ZNF428(+63.99kb)|ZNF575(+147.7kb)|ZNF576(+83.42kb)
19	44202855	rs346058	T	A	0.0611642	3	3.757e-06	3.757e-06	1.7037	1.7037	0.7881	0	1.7058	1.4439	1.7944	CADM4(+58.86kb)|ETHE1(+171.5kb)|IRGC(-17.36kb)|IRGQ(+102.6kb)|KCNN4(-67.83kb)|LOC100505715(-193.1kb)|LYPD5(-97.22kb)|PHLDB3(+193.9kb)|PINLYP(+116.6kb)|PLAUR(+28.36kb)|SMG9(-32.44kb)|SRRM5(+84.2kb)|XRCC1(+123.1kb)|ZNF283(-128.6kb)|ZNF404(-173.7kb)|ZNF428(+78.84kb)|ZNF575(+162.6kb)|ZNF576(+98.27kb)
3	102343690	rs73134037	T	C	0.0168617	2	3.769e-06	1.423e-05	3.0396	3.0771	0.292	9.93	NA	4.5586	2.5944	ZPLD1(+145kb)
8	104314477	rs62525497	T	C	0.0501078	3	3.77e-06	0.03395	1.8742	2.1192	0.0023	83.54	4.8299	1.4053	1.5182	BAALC(+71.94kb)|C8orf56(+160.9kb)|CTHRC1(-69.26kb)|DCAF13(-112.5kb)|FZD6(0)|LOC100499183(+130.1kb)|MIR3151(+147.6kb)|RIMS2(-198.5kb)|SLC25A32(-96.39kb)
8	128020910	rs146149359	C	T	0.0206806	3	4.113e-06	2.075e-05	2.3418	2.3776	0.3064	15.45	2.5858	3.5612	1.8	PCAT1(-4.488kb)
19	44196889	rs740588	T	G	0.063474	3	4.148e-06	4.148e-06	1.679	1.679	0.7214	0	1.6568	1.3949	1.7893	CADM4(+52.9kb)|ETHE1(+165.5kb)|IRGC(-23.32kb)|IRGQ(+96.6kb)|KCNN4(-73.8kb)|LOC100505715(-199.1kb)|LYPD5(-103.2kb)|PHLDB3(+187.9kb)|PINLYP(+110.6kb)|PLAUR(+22.39kb)|SMG9(-38.41kb)|SRRM5(+78.24kb)|XRCC1(+117.2kb)|ZNF283(-134.6kb)|ZNF404(-179.6kb)|ZNF428(+72.88kb)|ZNF575(+156.6kb)|ZNF576(+92.3kb)
19	44187577	rs399300	G	A	0.0715738	3	4.348e-06	4.348e-06	1.6842	1.6842	0.6947	0	1.6864	1.3821	1.7975	CADM4(+43.59kb)|ETHE1(+156.2kb)|IRGC(-32.64kb)|IRGQ(+87.29kb)|KCNN4(-83.11kb)|LYPD5(-112.5kb)|PHLDB3(+178.6kb)|PINLYP(+101.3kb)|PLAUR(+13.08kb)|SMG9(-47.72kb)|SRRM5(+68.93kb)|XRCC1(+107.8kb)|ZNF283(-143.9kb)|ZNF404(-188.9kb)|ZNF428(+63.56kb)|ZNF575(+147.3kb)|ZNF576(+82.99kb)
1	246962522	rs6701484	T	C	0.0408223	3	4.572e-06	4.572e-06	1.9165	1.9165	0.4931	0	2.3924	1.4832	1.9468	AHCTF1(-39.88kb)|CNST(+130.6kb)|LOC149134(+7.734kb)|SCCPDH(+31.08kb)|ZNF670-ZNF695(-146.3kb)|ZNF695(-146.3kb)
19	44198884	rs346061	A	G	0.0653834	3	5.014e-06	5.014e-06	1.6789	1.6789	0.7113	0	1.6686	1.3871	1.7906	CADM4(+54.89kb)|ETHE1(+167.5kb)|IRGC(-21.33kb)|IRGQ(+98.6kb)|KCNN4(-71.8kb)|LOC100505715(-197.1kb)|LYPD5(-101.2kb)|PHLDB3(+189.9kb)|PINLYP(+112.6kb)|PLAUR(+24.39kb)|SMG9(-36.42kb)|SRRM5(+80.23kb)|XRCC1(+119.2kb)|ZNF283(-132.6kb)|ZNF404(-177.6kb)|ZNF428(+74.87kb)|ZNF575(+158.6kb)|ZNF576(+94.3kb)
14	87992800	rs12897521	C	T	0.40211	3	5.172e-06	5.172e-06	1.3476	1.3476	0.5722	0	1.205	1.4506	1.3649	.
3	102368850	rs116070123	G	A	0.0150909	2	5.183e-06	2.443e-05	3.0848	3.1318	0.2855	12.33	NA	4.6663	2.6067	ZPLD1(+170.2kb)
10	12492379	rs1077685	A	G	0.0626116	3	5.231e-06	0.0001355	1.7296	1.7791	0.2278	32.41	1.9437	2.3833	1.4319	CAMK1D(0)|CDC123(+199.8kb)|MIR4480(-128.4kb)
3	102352409	rs114880288	C	T	0.0145365	2	5.487e-06	6.333e-05	3.0733	3.1527	0.2623	20.42	NA	4.7189	2.5701	ZPLD1(+153.7kb)
16	57828107	rs76214653	C	G	0.0282723	3	5.495e-06	0.000112	2.7564	2.8879	0.2405	29.82	3.106	5.197	2.0059	CCDC135(+62.74kb)|CNGB1(-88.14kb)|GPR56(+129.2kb)|GPR97(+104.8kb)|KATNB1(+36.94kb)|KIFC3(0)|LOC388282(-16.44kb)|TEPP(-182.2kb)
14	87983256	rs4904384	G	C	0.399014	3	5.9e-06	5.9e-06	1.3477	1.3477	0.521	0	1.2005	1.473	1.356	.
1	246966206	rs150873882	T	C	0.0233446	3	5.957e-06	5.957e-06	2.1551	2.1551	0.9204	0	2.405	1.9926	2.1145	AHCTF1(-36.2kb)|CNST(+134.3kb)|LOC149134(+11.42kb)|SCCPDH(+34.77kb)|ZNF670-ZNF695(-142.6kb)|ZNF695(-142.6kb)
15	70452956	rs6494847	A	G	0.253573	3	5.965e-06	1.969e-05	1.3726	1.3685	0.3364	8.2	1.2	1.2933	1.5195	MIR629(+81.15kb)|TLE3(+62.7kb)
19	44201920	rs28633233	C	T	0.0624423	3	6.091e-06	6.091e-06	1.6756	1.6756	0.6951	0	1.7109	1.3632	1.7727	CADM4(+57.93kb)|ETHE1(+170.5kb)|IRGC(-18.29kb)|IRGQ(+101.6kb)|KCNN4(-68.76kb)|LOC100505715(-194kb)|LYPD5(-98.16kb)|PHLDB3(+192.9kb)|PINLYP(+115.7kb)|PLAUR(+27.42kb)|SMG9(-33.38kb)|SRRM5(+83.27kb)|XRCC1(+122.2kb)|ZNF283(-129.6kb)|ZNF404(-174.6kb)|ZNF428(+77.91kb)|ZNF575(+161.6kb)|ZNF576(+97.33kb)
19	44199523	rs346060	T	C	0.0647675	3	6.126e-06	6.126e-06	1.6708	1.6708	0.7249	0	1.6671	1.3857	1.7762	CADM4(+55.53kb)|ETHE1(+168.1kb)|IRGC(-20.69kb)|IRGQ(+99.24kb)|KCNN4(-71.16kb)|LOC100505715(-196.4kb)|LYPD5(-100.6kb)|PHLDB3(+190.5kb)|PINLYP(+113.3kb)|PLAUR(+25.02kb)|SMG9(-35.78kb)|SRRM5(+80.87kb)|XRCC1(+119.8kb)|ZNF283(-131.9kb)|ZNF404(-177kb)|ZNF428(+75.51kb)|ZNF575(+159.2kb)|ZNF576(+94.94kb)
3	102681322	rs73147099	C	T	0.0161072	2	6.174e-06	0.006769	3.0118	3.3954	0.0867	65.92	NA	5.6978	2.2905	.
19	44199926	rs10409774	A	G	0.0630582	3	6.265e-06	6.265e-06	1.6722	1.6722	0.7013	0	1.677	1.3707	1.7801	CADM4(+55.94kb)|ETHE1(+168.5kb)|IRGC(-20.29kb)|IRGQ(+99.64kb)|KCNN4(-70.76kb)|LOC100505715(-196kb)|LYPD5(-100.2kb)|PHLDB3(+190.9kb)|PINLYP(+113.7kb)|PLAUR(+25.43kb)|SMG9(-35.37kb)|SRRM5(+81.28kb)|XRCC1(+120.2kb)|ZNF283(-131.5kb)|ZNF404(-176.6kb)|ZNF428(+75.91kb)|ZNF575(+159.6kb)|ZNF576(+95.34kb)
18	59561867	rs144768089	T	C	0.0744687	3	6.299e-06	0.002489	1.7006	1.7836	0.0831	59.8	1.7587	2.5826	1.3563	LOC100996669(+139.9kb)|PIGN(-149.6kb)|RNF152(+1.563kb)
1	185670423	rs16824380	T	C	0.0138897	2	6.377e-06	6.377e-06	3.8925	3.8925	0.8885	0	NA	4.1891	3.7992	HMCN1(-33.26kb)
18	59561688	rs118136768	G	C	0.0744533	3	6.62e-06	0.002648	1.6989	1.7826	0.0811	60.18	1.7556	2.587	1.3536	LOC100996669(+139.8kb)|PIGN(-149.8kb)|RNF152(+1.384kb)
19	44201167	rs4802191	T	C	0.0773175	3	6.702e-06	6.702e-06	1.6507	1.6507	0.6761	0	1.6972	1.3392	1.743	CADM4(+57.18kb)|ETHE1(+169.8kb)|IRGC(-19.05kb)|IRGQ(+100.9kb)|KCNN4(-69.52kb)|LOC100505715(-194.8kb)|LYPD5(-98.91kb)|PHLDB3(+192.2kb)|PINLYP(+114.9kb)|PLAUR(+26.67kb)|SMG9(-34.13kb)|SRRM5(+82.52kb)|XRCC1(+121.4kb)|ZNF283(-130.3kb)|ZNF404(-175.3kb)|ZNF428(+77.15kb)|ZNF575(+160.9kb)|ZNF576(+96.58kb)
12	10523236	rs17514108	G	T	0.047875	3	6.719e-06	0.03668	1.9878	1.812	0.0407	68.76	1.149	1.6537	2.8319	GABARAPL1(+147.5kb)|KLRC1(-75.4kb)|KLRC2(-59.97kb)|KLRC3(-41.68kb)|KLRC4(-36.75kb)|KLRC4-KLRK1(-1.715kb)|KLRD1(+53.39kb)|KLRK1(-1.715kb)|OLR1(+198.4kb)|TMEM52B(+178.8kb)
19	44200667	rs28677840	A	C	0.0773637	3	6.719e-06	6.719e-06	1.6495	1.6495	0.6826	0	1.6898	1.3422	1.7426	CADM4(+56.68kb)|ETHE1(+169.3kb)|IRGC(-19.55kb)|IRGQ(+100.4kb)|KCNN4(-70.02kb)|LOC100505715(-195.3kb)|LYPD5(-99.41kb)|PHLDB3(+191.7kb)|PINLYP(+114.4kb)|PLAUR(+26.17kb)|SMG9(-34.63kb)|SRRM5(+82.02kb)|XRCC1(+120.9kb)|ZNF283(-130.8kb)|ZNF404(-175.8kb)|ZNF428(+76.65kb)|ZNF575(+160.4kb)|ZNF576(+96.08kb)
18	59526359	rs111267255	T	C	0.0592239	3	6.754e-06	0.002943	1.7378	1.8506	0.0717	62.06	2.0128	2.5911	1.3367	LOC100996669(+104.4kb)|PIGN(-185.1kb)|RNF152(0)
19	44200812	rs59684608	T	C	0.0773637	3	6.774e-06	6.774e-06	1.6495	1.6495	0.6814	0	1.6927	1.3412	1.7417	CADM4(+56.82kb)|ETHE1(+169.4kb)|IRGC(-19.4kb)|IRGQ(+100.5kb)|KCNN4(-69.87kb)|LOC100505715(-195.1kb)|LYPD5(-99.27kb)|PHLDB3(+191.8kb)|PINLYP(+114.6kb)|PLAUR(+26.31kb)|SMG9(-34.49kb)|SRRM5(+82.16kb)|XRCC1(+121.1kb)|ZNF283(-130.7kb)|ZNF404(-175.7kb)|ZNF428(+76.8kb)|ZNF575(+160.5kb)|ZNF576(+96.22kb)
19	44200928	rs28468406	C	G	0.0773483	3	6.844e-06	6.844e-06	1.6495	1.6495	0.6792	0	1.6949	1.3399	1.7414	CADM4(+56.94kb)|ETHE1(+169.5kb)|IRGC(-19.28kb)|IRGQ(+100.6kb)|KCNN4(-69.76kb)|LOC100505715(-195kb)|LYPD5(-99.15kb)|PHLDB3(+191.9kb)|PINLYP(+114.7kb)|PLAUR(+26.43kb)|SMG9(-34.37kb)|SRRM5(+82.28kb)|XRCC1(+121.2kb)|ZNF283(-130.5kb)|ZNF404(-175.6kb)|ZNF428(+76.91kb)|ZNF575(+160.6kb)|ZNF576(+96.34kb)
19	44201312	rs4802192	T	C	0.0773021	3	6.869e-06	6.869e-06	1.65	1.65	0.6774	0	1.6997	1.3388	1.7405	CADM4(+57.32kb)|ETHE1(+169.9kb)|IRGC(-18.9kb)|IRGQ(+101kb)|KCNN4(-69.37kb)|LOC100505715(-194.6kb)|LYPD5(-98.77kb)|PHLDB3(+192.3kb)|PINLYP(+115.1kb)|PLAUR(+26.81kb)|SMG9(-33.99kb)|SRRM5(+82.66kb)|XRCC1(+121.6kb)|ZNF283(-130.2kb)|ZNF404(-175.2kb)|ZNF428(+77.3kb)|ZNF575(+161kb)|ZNF576(+96.72kb)
10	30897357	rs117473562	T	C	0.00997844	2	6.925e-06	6.925e-06	3.437	3.437	0.7523	0	NA	2.9884	3.6267	LYZL2(-3.35kb)|MAP3K8(+146.6kb)|SVILP1(-83.84kb)
18	59525845	rs113426267	T	G	0.0589313	3	7.006e-06	0.00297	1.7373	1.8499	0.072	62	2.0093	2.5933	1.3366	LOC100996669(+103.9kb)|PIGN(-185.6kb)|RNF152(0)
6	100653013	rs145269582	T	A	0.0111334	3	7.512e-06	7.512e-06	3.01	3.01	0.6392	0	3.3903	4.0636	2.4276	LOC728012(+128.7kb)|SIM1(-183.7kb)
5	167671894	rs112639489	T	C	0.0506006	3	7.674e-06	7.674e-06	1.744	1.744	0.5043	0	2.228	1.5218	1.6474	TENM2(0)|WWC1(-47.17kb)
5	167670979	rs111494730	T	C	0.0506006	3	7.726e-06	7.726e-06	1.746	1.746	0.4899	0	2.246	1.5236	1.6443	TENM2(0)|WWC1(-48.08kb)
19	44205852	rs78242215	A	G	0.0534647	3	8.542e-06	8.542e-06	1.7071	1.7071	0.6167	0	1.8845	1.3447	1.7656	CADM4(+61.86kb)|ETHE1(+174.5kb)|IRGC(-14.36kb)|IRGQ(+105.6kb)|KCNN4(-64.83kb)|LOC100505715(-190.1kb)|LYPD5(-94.23kb)|PHLDB3(+196.9kb)|PINLYP(+119.6kb)|PLAUR(+31.35kb)|SMG9(-29.45kb)|SRRM5(+87.2kb)|XRCC1(+126.1kb)|ZNF283(-125.6kb)|ZNF404(-170.7kb)|ZNF428(+81.84kb)|ZNF575(+165.6kb)|ZNF576(+101.3kb)
19	44206375	rs79762104	A	G	0.0534031	3	8.573e-06	8.573e-06	1.708	1.708	0.6114	0	1.8907	1.3428	1.7652	CADM4(+62.38kb)|ETHE1(+175kb)|IRGC(-13.84kb)|IRGQ(+106.1kb)|KCNN4(-64.31kb)|LOC100505715(-189.6kb)|LYPD5(-93.7kb)|PHLDB3(+197.4kb)|PINLYP(+120.1kb)|PLAUR(+31.88kb)|SMG9(-28.92kb)|SRRM5(+87.72kb)|XRCC1(+126.6kb)|ZNF283(-125.1kb)|ZNF404(-170.1kb)|ZNF428(+82.36kb)|ZNF575(+166.1kb)|ZNF576(+101.8kb)
6	105187043	rs150281830	A	G	0.0226055	3	8.575e-06	8.575e-06	2.5735	2.5735	0.4341	0	2.7691	3.8002	1.9892	HACE1(0)|LINC00577(-197.1kb)
18	59547153	rs113778872	G	C	0.0594087	3	8.678e-06	0.009679	1.7264	1.8682	0.0269	72.34	1.9761	2.8047	1.2708	LOC100996669(+125.2kb)|PIGN(-164.3kb)|RNF152(0)
18	58363010	rs6567183	A	C	0.650616	3	8.696e-06	8.696e-06	0.7565	0.7565	0.756	0	0.7116	0.8102	0.7547	.
18	59550519	rs112860853	A	G	0.0594395	3	9.178e-06	0.0105	1.7223	1.8689	0.0248	72.95	1.9447	2.8492	1.2726	LOC100996669(+128.6kb)|PIGN(-160.9kb)|RNF152(0)
18	59533920	rs4941072	G	A	0.0617185	3	9.274e-06	0.00827	1.7257	1.867	0.0326	70.78	1.9959	2.7579	1.2824	LOC100996669(+112kb)|PIGN(-177.5kb)|RNF152(0)
18	59546794	rs4941077	A	G	0.0595011	3	9.365e-06	0.01016	1.7191	1.8649	0.0258	72.67	1.9765	2.7997	1.2669	LOC100996669(+124.9kb)|PIGN(-164.7kb)|RNF152(0)
18	59546754	rs4941076	T	C	0.0594087	3	9.372e-06	0.01014	1.7191	1.8647	0.0258	72.65	1.9765	2.7987	1.267	LOC100996669(+124.8kb)|PIGN(-164.7kb)|RNF152(0)
15	80657915	rs76132181	A	G	0.0132122	2	9.479e-06	9.479e-06	3.3867	3.3867	0.9079	0	NA	3.5675	3.3212	ARNT2(-38.78kb)|FAH(+179kb)|LINC00927(+23.77kb)
15	80657761	rs117038874	T	C	0.0132122	2	9.533e-06	9.533e-06	3.3844	3.3844	0.9123	0	NA	3.5559	3.322	ARNT2(-38.93kb)|FAH(+178.8kb)|LINC00927(+23.61kb)
12	125837876	rs2166874	C	T	0.0545119	3	9.763e-06	9.763e-06	1.9063	1.9063	0.5413	0	1.7699	2.5521	1.7298	TMEM132B(0)
14	87878266	rs12432560	G	A	0.374453	3	9.977e-06	9.977e-06	1.3222	1.3222	0.4914	0	1.1914	1.4661	1.3192	.
18	59539775	rs76186745	C	T	0.0622729	3	1.029e-05	0.01035	1.7144	1.8581	0.0263	72.52	1.9736	2.7788	1.2636	LOC100996669(+117.8kb)|PIGN(-171.7kb)|RNF152(0)
18	59531522	rs79494360	T	C	0.0587157	3	1.03e-05	0.007809	1.7212	1.8589	0.036	69.92	1.9916	2.7289	1.2839	LOC100996669(+109.6kb)|PIGN(-179.9kb)|RNF152(0)
18	59545705	rs77680585	A	G	0.0595165	3	1.036e-05	0.01058	1.714	1.86	0.0254	72.77	1.981	2.7834	1.2613	LOC100996669(+123.8kb)|PIGN(-165.8kb)|RNF152(0)
8	128016374	rs142139715	G	T	0.0223283	3	1.072e-05	0.000608	2.1948	2.2905	0.1753	42.58	2.2779	3.7128	1.6442	PCAT1(-9.024kb)
18	59545000	rs112399911	G	T	0.0594395	3	1.075e-05	0.01053	1.7121	1.8567	0.026	72.6	1.9774	2.7741	1.261	LOC100996669(+123.1kb)|PIGN(-166.5kb)|RNF152(0)
18	59544730	rs113025132	T	C	0.0593625	3	1.095e-05	0.01035	1.7111	1.8541	0.0268	72.36	1.9755	2.7643	1.2615	LOC100996669(+122.8kb)|PIGN(-166.7kb)|RNF152(0)
4	120655472	rs72680967	T	C	0.0409763	3	1.104e-05	0.002686	1.8065	1.7462	0.1804	41.62	1.151	1.9857	2.1031	PDE5A(+105.5kb)
17	70392186	rs7212633	T	C	0.0511549	3	1.12e-05	1.12e-05	1.7804	1.7804	0.396	0	1.4537	1.4322	2.0716	LINC00673(-7.276kb)
18	59541110	rs112803661	T	C	0.0593625	3	1.121e-05	0.009958	1.7101	1.8509	0.0284	71.91	1.9736	2.7493	1.2635	LOC100996669(+119.2kb)|PIGN(-170.3kb)|RNF152(0)
18	59542368	rs4941075	A	G	0.0593625	3	1.126e-05	0.01009	1.7097	1.8509	0.028	72.02	1.974	2.7506	1.2624	LOC100996669(+120.4kb)|PIGN(-169.1kb)|RNF152(0)
18	59541676	rs112749574	A	G	0.0593471	3	1.128e-05	0.01004	1.7099	1.8507	0.0282	71.97	1.9738	2.7497	1.2627	LOC100996669(+119.7kb)|PIGN(-169.8kb)|RNF152(0)
17	70391429	rs6501539	G	C	0.0516169	3	1.185e-05	1.185e-05	1.7735	1.7735	0.4023	0	1.4602	1.4232	2.059	LINC00673(-8.033kb)
4	76041236	rs140585410	T	A	0.0277025	2	1.195e-05	3.686e-05	2.5202	2.5487	0.2991	7.26	NA	3.848	2.2497	PARM1(+65.91kb)
4	76041237	rs150408251	T	C	0.0277025	2	1.197e-05	3.694e-05	2.52	2.5485	0.2991	7.26	NA	3.8477	2.2495	PARM1(+65.91kb)
9	106082492	rs16922767	T	C	0.0749461	3	1.292e-05	1.292e-05	1.6603	1.6603	0.561	0	1.4213	1.5112	1.8701	.
1	62265376	rs6699562	A	G	0.0429319	3	1.316e-05	1.316e-05	1.9598	1.9598	0.783	0	2.1952	1.5599	2.006	INADL(0)|MGC34796(+143.6kb)|TM2D1(+74.28kb)
10	30753711	rs1754244	T	C	0.0311826	3	1.354e-05	1.354e-05	2.4258	2.4258	0.8165	0	2.1051	3.0108	2.307	LYZL2(-147kb)|MAP3K8(+2.949kb)|MTPAP(+115.4kb)
13	31920778	rs117930710	G	C	0.0243302	3	1.355e-05	0.002145	2.4027	2.3229	0.1948	38.86	3.2261	1.2732	2.8755	B3GALTL(+14.37kb)|HSPH1(+184.7kb)
2	5288240	rs10202896	C	G	0.889929	3	1.413e-05	0.006831	0.6751	0.6936	0.1229	52.31	0.6508	0.9273	0.589	.
21	41523937	rs73225247	T	G	0.0334617	3	1.415e-05	0.0009352	1.9779	1.9112	0.234	31.16	1.4116	1.625	2.54	DSCAM(0)|MIR4760(-60.34kb)
18	59558084	rs113286440	G	A	0.0594395	3	1.431e-05	0.0131	1.7072	1.8522	0.0229	73.51	1.8695	2.8937	1.2657	LOC100996669(+136.2kb)|PIGN(-153.4kb)|RNF152(0)
2	16224036	rs62118661	T	A	0.0385741	2	1.438e-05	0.01637	2.3181	2.1447	0.1313	56.08	NA	1.4601	2.7892	MYCN(+136.9kb)|MYCNOS(+142.2kb)
21	41523522	rs73225246	A	G	0.0338004	3	1.449e-05	0.0009421	1.9753	1.9092	0.234	31.16	1.4112	1.6236	2.5377	DSCAM(0)|MIR4760(-60.76kb)
4	120619030	rs72678594	A	G	0.0410995	3	1.451e-05	0.0006525	1.81	1.772	0.2473	28.43	1.2005	1.9686	2.0879	LOC645513(+198.3kb)|PDE5A(+69.05kb)
18	59557997	rs111559884	A	T	0.0594395	3	1.453e-05	0.01325	1.7064	1.8516	0.0227	73.59	1.8709	2.8923	1.2641	LOC100996669(+136.1kb)|PIGN(-153.5kb)|RNF152(0)
18	59558252	rs112639447	C	G	0.0593625	3	1.453e-05	0.01318	1.7069	1.8522	0.0229	73.53	1.869	2.8951	1.2655	LOC100996669(+136.3kb)|PIGN(-153.2kb)|RNF152(0)
21	41523288	rs73225241	T	C	0.0338004	3	1.454e-05	0.0009392	1.9753	1.9093	0.2341	31.14	1.4112	1.6242	2.538	DSCAM(0)|MIR4760(-60.99kb)
21	41523433	rs73225242	A	G	0.0338004	3	1.459e-05	0.0009358	1.9749	1.909	0.2344	31.08	1.4111	1.6238	2.5369	DSCAM(0)|MIR4760(-60.84kb)
21	41523183	rs73225239	G	A	0.033785	3	1.464e-05	0.0009325	1.9748	1.9092	0.2345	31.05	1.4111	1.6244	2.5371	DSCAM(0)|MIR4760(-61.1kb)
21	41523181	rs73225237	T	A	0.033785	3	1.465e-05	0.0009327	1.9748	1.9092	0.2345	31.04	1.4111	1.6244	2.5371	DSCAM(0)|MIR4760(-61.1kb)
9	85948533	rs79282878	T	C	0.0459809	3	1.466e-05	0.0009103	1.8819	1.8944	0.2117	35.58	2.8871	1.3183	1.8193	FRMD3(0)
18	59559145	rs113443351	A	G	0.0591469	3	1.475e-05	0.01274	1.708	1.8514	0.0242	73.13	1.8645	2.8911	1.2692	LOC100996669(+137.2kb)|PIGN(-152.3kb)|RNF152(0)
14	87918282	rs35509809	T	C	0.358439	3	1.48e-05	1.48e-05	1.3413	1.3413	0.3726	0	1.1489	1.4783	1.3772	.
4	120639982	rs72680951	A	C	0.0409609	3	1.484e-05	0.001709	1.8	1.7503	0.2069	36.52	1.1664	1.9852	2.0836	PDE5A(+90kb)
4	120621525	rs56085109	T	C	0.0411303	3	1.486e-05	0.0007209	1.8076	1.7686	0.2439	29.13	1.1967	1.9675	2.0857	PDE5A(+71.54kb)
4	120640052	rs72680952	A	G	0.0409917	3	1.489e-05	0.001712	1.7999	1.7502	0.207	36.52	1.1662	1.9854	2.0833	PDE5A(+90.07kb)
7	53100058	rs6964356	G	T	0.052741	3	1.496e-05	0.03809	1.6889	1.6033	0.0369	69.69	1.8613	0.9969	2.1021	POM121L12(-3.29kb)
13	61064551	rs75397803	T	C	0.0177702	3	1.498e-05	0.05186	2.417	2.0961	0.0471	67.26	2.1555	1.0227	3.56	TDRD3(0)
4	120622440	rs72680905	C	T	0.0412381	3	1.503e-05	0.00074	1.8073	1.7681	0.2432	29.27	1.1957	1.9681	2.0854	PDE5A(+72.46kb)
14	87878904	rs4354851	C	T	0.374715	3	1.504e-05	1.504e-05	1.3158	1.3158	0.4763	0	1.1734	1.4504	1.3253	.
4	120626577	rs116614033	A	C	0.0411303	3	1.508e-05	0.0009066	1.8043	1.7626	0.2349	30.96	1.1885	1.9675	2.0839	PDE5A(+76.6kb)
2	16223655	rs62116759	G	A	0.0414844	2	1.52e-05	0.0166	2.3055	2.1347	0.131	56.16	NA	1.4565	2.7746	MYCN(+136.5kb)|MYCNOS(+141.8kb)
5	173903026	rs115356342	C	T	0.0199877	3	1.541e-05	0.002569	3.1415	3.1327	0.1372	49.65	6.3349	2.319	2.0189	.
21	41522426	rs73225235	G	A	0.0339082	3	1.544e-05	0.0009317	1.9723	1.9076	0.2358	30.79	1.4094	1.6249	2.5337	DSCAM(0)|MIR4760(-61.85kb)
10	121598173	rs12772291	G	A	0.0223591	3	1.549e-05	1.549e-05	2.2958	2.2958	0.3721	0	1.7599	4.3754	2.2858	BAG3(+160.8kb)|INPP5F(+9.511kb)|MCMBP(0)|MIR4682(-119.9kb)|SEC23IP(-53.91kb)
4	187755533	rs57174886	G	T	0.0728673	3	1.55e-05	1.55e-05	1.6979	1.6979	0.6945	0	2.0664	1.5078	1.6777	FAT1(+110.5kb)
21	41522358	rs16999371	G	C	0.0338158	3	1.558e-05	0.0009314	1.9719	1.9073	0.236	30.75	1.4092	1.6249	2.5332	DSCAM(0)|MIR4760(-61.92kb)
21	41522064	rs73225234	G	C	0.033785	3	1.59e-05	0.0009432	1.971	1.9066	0.2359	30.77	1.4083	1.6249	2.5327	DSCAM(0)|MIR4760(-62.21kb)
12	125833360	rs61943122	C	T	0.0455035	3	1.591e-05	1.591e-05	1.8828	1.8828	0.5681	0	1.8044	2.4864	1.6898	TMEM132B(0)
13	60982122	rs113833353	C	G	0.0195719	3	1.609e-05	0.02047	2.4204	2.1585	0.1016	56.27	2.1273	1.1368	3.3816	TDRD3(0)
3	139986457	rs79651574	A	G	0.0128272	2	1.615e-05	1.615e-05	3.3206	3.3206	0.8375	0	NA	3.0491	3.4498	CLSTN2(0)
5	167692214	rs72835098	A	T	0.0514167	3	1.63e-05	1.63e-05	1.7086	1.7086	0.5514	0	2.1295	1.5305	1.5942	TENM2(+1.052kb)|WWC1(-26.85kb)
16	77445198	rs74316403	C	G	0.0140283	2	1.632e-05	1.632e-05	2.8861	2.8861	0.4057	0	4.0222	NA	2.5445	ADAMTS18(0)|SYCE1L(+198.2kb)
5	167692005	rs72835096	C	T	0.0514475	3	1.641e-05	1.641e-05	1.7079	1.7079	0.5484	0	2.1301	1.5264	1.5946	TENM2(+0.843kb)|WWC1(-27.06kb)
4	120658358	rs72680969	T	A	0.0408839	3	1.644e-05	0.002398	1.7901	1.7371	0.1938	39.05	1.1513	1.9855	2.0737	PDE5A(+108.4kb)
18	59559247	rs113834567	A	G	0.0588389	3	1.652e-05	0.0135	1.7056	1.8465	0.0238	73.25	1.854	2.8923	1.264	LOC100996669(+137.3kb)|PIGN(-152.2kb)|RNF152(0)
21	41521965	rs68079376	C	T	0.0338158	3	1.657e-05	0.0009399	1.9694	1.9057	0.2369	30.56	1.408	1.6243	2.5311	DSCAM(0)|MIR4760(-62.31kb)
17	9086344	rs77908798	A	G	0.0151217	2	1.661e-05	1.661e-05	3.5847	3.5847	0.9389	0	NA	3.4322	3.6276	NTN1(0)|STX8(-67.44kb)
3	75051314	rs144960528	C	A	0.0197875	2	1.667e-05	1.667e-05	3.8655	3.8655	0.8713	0	NA	4.2097	3.7499	.
16	77691409	rs4888656	C	A	0.872713	3	1.668e-05	1.668e-05	0.6874	0.6874	0.8655	0	0.7362	0.6986	0.6601	NUDT7(-64.98kb)|VAT1L(-131.1kb)
15	70452747	rs7180351	G	A	0.261565	3	1.68e-05	1.68e-05	1.3482	1.3482	0.5452	0	1.2215	1.2911	1.4548	MIR629(+80.94kb)|TLE3(+62.49kb)
4	120650069	rs72680964	G	C	0.0409763	3	1.705e-05	0.002207	1.7874	1.7361	0.1991	38.04	1.1528	1.985	2.0653	PDE5A(+100.1kb)
3	102690207	rs147811405	A	G	0.0145365	3	1.722e-05	0.0001047	2.4289	2.4499	0.2979	17.42	1.7238	4.332	2.3652	.
13	61020548	rs112065023	A	G	0.0174161	3	1.734e-05	0.05827	2.4013	2.0783	0.0429	68.24	2.1352	1.0107	3.5669	TDRD3(0)
21	41520845	rs73225232	G	T	0.0339082	3	1.736e-05	0.0009804	1.967	1.9032	0.2362	30.7	1.4049	1.6241	2.5293	DSCAM(0)|MIR4760(-63.43kb)
21	41520791	rs73225230	A	T	0.033939	3	1.74e-05	0.0009651	1.967	1.9036	0.2369	30.56	1.4055	1.6243	2.5289	DSCAM(0)|MIR4760(-63.49kb)
13	61029821	rs7999859	A	G	0.0200031	3	1.742e-05	0.01988	2.4023	2.1515	0.1027	56.06	2.1683	1.1246	3.3366	TDRD3(0)
5	167677075	rs79478844	A	G	0.0514013	3	1.763e-05	1.763e-05	1.7007	1.7007	0.5408	0	2.1241	1.4807	1.6153	TENM2(0)|WWC1(-41.99kb)
20	33889704	rs76650348	G	T	0.0107176	2	1.769e-05	1.769e-05	3.3696	3.3696	0.5642	0	NA	4.281	3.0148	CEP250(-153.5kb)|EDEM2(+154.5kb)|EIF6(+17.08kb)|FAM83C(+9.479kb)|GDF5(-131.4kb)|MMP24(+24.9kb)|MMP24-AS1(+23.74kb)|PROCR(+124.5kb)|UQCC(-0.664kb)
21	41520627	rs73225228	G	A	0.0339082	3	1.782e-05	0.0009758	1.9657	1.9025	0.237	30.55	1.4043	1.6244	2.5276	DSCAM(0)|MIR4760(-63.65kb)
13	61004842	rs191752033	T	C	0.0176009	3	1.787e-05	0.04972	2.4317	2.0892	0.0593	64.6	2.1254	1.0012	3.5014	TDRD3(0)
5	167680977	rs72835088	G	T	0.0520326	3	1.794e-05	1.794e-05	1.7026	1.7026	0.6111	0	2.0839	1.5292	1.608	TENM2(0)|WWC1(-38.09kb)
21	41520477	rs75049662	T	C	0.0338158	3	1.797e-05	0.0009804	1.9654	1.9023	0.237	30.55	1.4039	1.6245	2.5275	DSCAM(0)|MIR4760(-63.8kb)
4	42194357	rs74883111	C	T	0.0275485	3	1.801e-05	1.801e-05	2.3072	2.3072	0.387	0	1.7626	3.6145	2.0568	BEND4(+39.46kb)|SLC30A9(+104.8kb)
21	41520476	rs77171436	T	G	0.0338158	3	1.803e-05	0.0009833	1.9653	1.9021	0.2369	30.56	1.4037	1.6245	2.5274	DSCAM(0)|MIR4760(-63.8kb)
1	175571863	rs146900726	C	T	0.0216508	3	1.821e-05	1.821e-05	2.5414	2.5414	0.919	0	2.7876	2.8044	2.3372	TNR(0)
21	40649965	rs117858213	C	G	0.0153372	2	1.822e-05	1.822e-05	3.1184	3.1184	0.6617	0	NA	2.6277	3.3739	BRWD1(0)|BRWD1-AS1(-37.67kb)|BRWD1-IT2(-35.9kb)|HMGN1(-64.28kb)|LCA5L(-127.8kb)|PSMG1(+94.52kb)|SH3BGR(-167.8kb)|WRB(-102.2kb)
21	41520150	rs10483063	C	T	0.0339082	3	1.841e-05	0.0009884	1.9641	1.9012	0.2372	30.5	1.403	1.6241	2.526	DSCAM(0)|MIR4760(-64.13kb)
21	41520090	rs73225227	A	C	0.0338466	3	1.886e-05	0.0009904	1.9628	1.9003	0.2376	30.41	1.4022	1.624	2.5243	DSCAM(0)|MIR4760(-64.19kb)
21	41520075	rs73225226	C	T	0.033939	3	1.898e-05	0.0009949	1.9626	1.9001	0.2376	30.42	1.4019	1.624	2.5243	DSCAM(0)|MIR4760(-64.2kb)
10	121608148	rs71482894	C	A	0.0224053	3	1.901e-05	2.558e-05	2.2801	2.2831	0.3596	2.22	1.7574	4.4443	2.2551	BAG3(+170.8kb)|INPP5F(+19.49kb)|MCMBP(0)|MIR4682(-109.9kb)|SEC23IP(-43.94kb)
5	167699626	rs72835099	A	T	0.0516631	3	1.904e-05	1.904e-05	1.704	1.704	0.5811	0	2.1086	1.5526	1.5854	TENM2(+8.464kb)|WWC1(-19.44kb)
8	115547554	rs187742999	A	C	0.0151217	2	1.911e-05	3.757e-05	4.1002	4.109	0.2992	7.22	2.9949	5.9586	NA	.
8	12691761	rs111271934	A	G	0.0201263	2	1.914e-05	1.914e-05	2.5808	2.5808	0.4982	0	NA	3.3874	2.3753	KIAA1456(-111.4kb)|LINC00681(+15.96kb)|LOC340357(+22.85kb)|LOC729732(+168.6kb)|LONRF1(+78.77kb)|MIR3926-1(+106.9kb)|MIR3926-2(+107kb)
11	133769537	rs73032038	T	C	0.0157992	2	1.918e-05	1.918e-05	5.2865	5.2865	0.3269	0	3.3481	7.2757	NA	IGSF9B(-8.982kb)|JAM3(-169.3kb)|LOC100128239(-132.6kb)|MIR4697(+1.061kb)|MIR4697HG(0)|SPATA19(+54.14kb)
13	60978866	rs141617380	A	G	0.0170619	3	1.936e-05	0.07267	2.4195	2.066	0.0353	70.09	2.1092	0.9772	3.6617	TDRD3(0)
13	61010541	rs117901484	A	T	0.0176009	3	1.955e-05	0.06422	2.4006	2.0621	0.0421	68.43	2.0739	1.0063	3.5822	TDRD3(0)
1	247016386	rs12123173	C	T	0.0230674	3	1.998e-05	1.998e-05	2.182	2.182	0.659	0	2.7894	2.323	1.888	AHCTF1(0)|CNST(+184.5kb)|LOC149134(+61.6kb)|SCCPDH(+84.95kb)|ZNF670(-181.6kb)|ZNF670-ZNF695(-92.46kb)|ZNF695(-92.46kb)
5	167700279	rs17551008	C	T	0.0516169	3	2.046e-05	2.046e-05	1.7006	1.7006	0.5814	0	2.1048	1.5566	1.5788	TENM2(+9.117kb)|WWC1(-18.78kb)
4	67905261	rs12647409	T	C	0.136711	3	2.071e-05	2.071e-05	1.4694	1.4694	0.5693	0	1.7135	1.3857	1.3831	.
1	241837183	rs116398282	C	T	0.0145211	2	2.079e-05	0.03626	3.5881	4.0487	0.0302	78.72	NA	8.1632	2.1435	CHML(+37.95kb)|EXO1(-174.3kb)|FH(+154.1kb)|KMO(+78.23kb)|OPN3(+33.48kb)|WDR64(0)
17	75643906	rs62079253	A	G	0.244333	3	2.094e-05	2.094e-05	1.3439	1.3439	0.9799	0	1.3748	1.3263	1.3363	LOC100507351(+82.8kb)|SEPT9(+147.2kb)
3	113711153	rs62267061	T	C	0.0319526	3	2.13e-05	2.13e-05	2.0881	2.0881	0.8705	0	2.4137	1.8934	2.0218	ATP6V1A(+180.2kb)|DRD3(-136.4kb)|GRAMD1C(+45.13kb)|KIAA1407(0)|QTRTD1(-64.43kb)|ZDHHC23(+29.33kb)
2	16216633	rs73218548	C	T	0.0352633	2	2.164e-05	0.02593	2.3037	2.108	0.1205	58.51	NA	1.4079	2.7829	MYCN(+129.5kb)|MYCNOS(+134.8kb)
2	4298287	rs77304911	T	C	0.0172467	2	2.189e-05	2.189e-05	3.0992	3.0992	0.9838	0	NA	3.1307	3.0903	.
21	40578832	rs148938553	C	T	0.0161688	2	2.192e-05	2.192e-05	3.0035	3.0035	0.5517	0	NA	2.4037	3.3419	BRWD1(0)|BRWD1-AS1(-108.8kb)|BRWD1-IT2(-107kb)|HMGN1(-135.4kb)|LCA5L(-198.9kb)|PSMG1(+23.39kb)|WRB(-173.4kb)
21	40545450	rs117703689	A	T	0.0155682	2	2.217e-05	2.217e-05	2.9762	2.9762	0.5002	0	NA	2.3235	3.3602	BRWD1(-11.95kb)|BRWD1-AS1(-142.2kb)|BRWD1-IT2(-140.4kb)|HMGN1(-168.8kb)|PSMG1(-1.921kb)
3	150622735	rs11717908	C	T	0.0719587	3	2.225e-05	0.008233	1.5996	1.5326	0.1419	48.8	1.177	1.4103	1.95	CLRN1(-21.21kb)|CLRN1-AS1(-67.73kb)|MED12L(-181.9kb)|SIAH2(+141.5kb)
2	16218823	rs28459658	A	G	0.0353403	2	2.274e-05	0.02327	2.3012	2.1132	0.1259	57.3	NA	1.4175	2.7746	MYCN(+131.7kb)|MYCNOS(+137kb)
13	60994471	rs113284403	T	G	0.0173853	3	2.275e-05	0.0644	2.3791	2.0543	0.0421	68.44	2.1174	0.9917	3.5365	TDRD3(0)
3	102217329	rs73150411	G	A	0.0179396	2	2.284e-05	2.284e-05	2.7033	2.7033	0.3403	0	NA	3.8339	2.3419	ZPLD1(+18.64kb)
7	136886128	rs114601314	T	C	0.0156914	3	2.287e-05	2.287e-05	2.6238	2.6238	0.5021	0	3.2554	1.7053	2.9985	CHRM2(+184.4kb)|DGKI(-188.3kb)|LOC349160(+37.04kb)|PTN(-25.96kb)
7	53100051	rs6977554	A	G	0.0549738	3	2.295e-05	0.04159	1.6628	1.5885	0.0348	70.22	1.8502	0.9969	2.0792	POM121L12(-3.297kb)
20	49634333	rs6063582	C	T	0.0342624	3	2.296e-05	2.296e-05	2.4767	2.4767	0.8398	0	3.0047	2.0713	2.5534	ADNP(+86.81kb)|BCAS4(+140.6kb)|DPM1(+59.27kb)|KCNG1(0)|MOCS3(+55.93kb)
2	16219158	rs62116756	G	T	0.0353403	2	2.31e-05	0.02313	2.3006	2.1134	0.1263	57.22	NA	1.4181	2.7742	MYCN(+132kb)|MYCNOS(+137.3kb)
2	4298359	rs75034042	G	A	0.0172775	2	2.333e-05	2.333e-05	3.0829	3.0829	0.9764	0	NA	3.1287	3.07	.
21	40545446	rs117307306	C	T	0.015137	2	2.367e-05	2.367e-05	2.9644	2.9644	0.4616	0	NA	2.2682	3.3889	BRWD1(-11.96kb)|BRWD1-AS1(-142.2kb)|BRWD1-IT2(-140.4kb)|HMGN1(-168.8kb)|PSMG1(-1.925kb)
8	63341813	rs62511461	C	T	0.0478904	3	2.375e-05	4.452e-05	1.7742	1.7684	0.3543	3.61	1.9235	1.1988	1.9657	NKAIN3(0)
4	120661739	rs72680974	T	C	0.0408839	3	2.38e-05	0.002154	1.7741	1.7277	0.2073	36.46	1.1511	1.9852	2.0442	PDE5A(+111.8kb)
3	102221341	rs73150414	T	G	0.0171543	2	2.386e-05	2.386e-05	2.7007	2.7007	0.3259	0	NA	3.8718	2.3288	ZPLD1(+22.66kb)
12	1301749	rs117089864	T	C	0.0236218	2	2.394e-05	2.394e-05	2.8561	2.8561	0.9848	0	NA	2.8381	2.8662	ERC1(0)
2	4298419	rs76665560	G	C	0.0172775	2	2.4e-05	2.4e-05	3.0791	3.0791	0.979	0	NA	3.1197	3.0676	.
8	127973720	rs117224285	G	A	0.0212196	3	2.403e-05	0.0008269	2.1374	2.233	0.1851	40.73	2.2163	3.6569	1.6179	PCAT1(-51.68kb)
12	584843	rs151019919	C	T	0.018494	2	2.406e-05	2.406e-05	2.7024	2.7024	0.3809	0	NA	1.8339	3.0158	B4GALNT3(0)|CCDC77(+33.04kb)|KDM5A(+86.22kb)|NINJ2(-88.62kb)
12	125831606	rs61943121	C	T	0.0437789	3	2.415e-05	2.415e-05	1.8829	1.8829	0.6565	0	1.7216	2.4266	1.7639	TMEM132B(0)
7	134535042	rs62479512	C	T	0.0224977	3	2.418e-05	0.02122	2.1124	1.9018	0.1253	51.85	1.1581	1.7296	2.7747	AGBL3(-136.2kb)|BPGM(+170.5kb)|CALD1(0)
13	61004611	rs111508071	C	T	0.0176163	3	2.441e-05	0.06099	2.3638	2.0533	0.0444	67.9	2.1253	1.0007	3.5002	TDRD3(0)
3	105179541	rs1438543	T	C	0.0141515	2	2.458e-05	2.458e-05	3.0262	3.0262	0.3479	0	1.7314	NA	3.3737	ALCAM(0)|CBLB(-197.6kb)
5	172290712	rs793011	A	T	0.956437	3	2.461e-05	2.461e-05	0.5362	0.5362	0.791	0	0.5146	0.6475	0.5046	ATP6V0E1(-120kb)|CREBRF(-192.6kb)|DUSP1(+92.51kb)|ERGIC1(0)|LOC100268168(-91.07kb)|NEURL1B(+172.2kb)|RPL26L1(-95.73kb)|SNORA74B(-157kb)
8	28582622	rs118190171	G	A	0.0146751	2	2.466e-05	2.466e-05	3.61	3.61	0.5571	0	NA	2.7036	4.0316	EXTL3(0)|FZD3(+150.8kb)|HMBOX1(-165.3kb)|INTS9(-42.55kb)
17	70380265	rs34455951	G	A	0.0499538	3	2.491e-05	2.491e-05	1.7225	1.7225	0.4183	0	1.4941	1.3615	1.9907	LINC00673(-19.2kb)
3	102738964	rs73153134	C	T	0.0137666	2	2.493e-05	8.645e-05	2.8901	2.9315	0.2872	11.72	NA	4.3792	2.4315	.
7	53081982	rs75218543	G	A	0.0539113	3	2.495e-05	0.04534	1.6578	1.5734	0.0358	69.96	1.832	0.9781	2.0567	POM121L12(-21.37kb)
7	53093032	rs75323174	T	C	0.0534647	3	2.505e-05	0.04454	1.6608	1.5781	0.0359	69.94	1.841	0.9808	2.0628	POM121L12(-10.32kb)
7	53079014	rs2201277	A	G	0.0538959	3	2.506e-05	0.04557	1.6574	1.5721	0.036	69.92	1.8267	0.9774	2.0568	POM121L12(-24.33kb)
16	77690863	rs8059387	T	A	0.873021	3	2.52e-05	2.52e-05	0.6913	0.6913	0.9201	0	0.7294	0.6973	0.6706	NUDT7(-65.52kb)|VAT1L(-131.6kb)
7	53072673	rs147697709	T	C	0.0538805	3	2.522e-05	0.04558	1.656	1.5685	0.037	69.67	1.81	0.9768	2.0561	POM121L12(-30.68kb)
7	53090298	rs17557004	T	C	0.0538959	3	2.563e-05	0.04465	1.6574	1.5749	0.0363	69.85	1.837	0.9802	2.0555	POM121L12(-13.05kb)
17	52821057	rs16954972	G	T	0.0225747	2	2.566e-05	2.566e-05	3.3621	3.3621	0.8878	0	NA	3.1452	3.4464	TOM1L1(-157kb)
3	65712754	rs17073575	C	T	0.177487	3	2.567e-05	2.567e-05	1.416	1.416	0.5613	0	1.3106	1.2823	1.5476	MAGI1(0)|MAGI1-AS1(-166.7kb)
7	53089706	rs76650991	G	C	0.0538959	3	2.57e-05	0.0447	1.6574	1.5747	0.0363	69.83	1.8361	0.98	2.0554	POM121L12(-13.64kb)
21	40577883	rs10460678	A	G	0.0641361	3	2.573e-05	2.573e-05	1.6784	1.6784	0.6136	0	1.6366	1.3788	1.8486	BRWD1(0)|BRWD1-AS1(-109.7kb)|BRWD1-IT2(-108kb)|HMGN1(-136.4kb)|LCA5L(-199.9kb)|PSMG1(+22.44kb)|WRB(-174.3kb)
1	175572345	rs149445011	G	A	0.0218509	3	2.576e-05	2.576e-05	2.4828	2.4828	0.9293	0	2.816	2.5826	2.3086	TNR(0)
3	102610117	rs73134409	A	G	0.0137666	2	2.591e-05	0.0001802	2.8878	2.9594	0.2677	18.61	NA	4.486	2.4187	.
18	58375675	rs2061793	A	T	0.651555	3	2.656e-05	2.656e-05	0.7668	0.7668	0.7299	0	0.73	0.8325	0.7542	.
12	52564449	rs6580862	T	C	0.344641	3	2.665e-05	2.665e-05	1.3224	1.3224	0.9208	0	1.383	1.2899	1.3086	ACVR1B(+173.6kb)|C12orf44(+93.17kb)|C12orf80(-34.92kb)|GRASP(+154.8kb)|KRT7(-62.5kb)|KRT80(0)|KRT81(-115.2kb)|KRT83(-143.6kb)|KRT85(-189.3kb)|KRT86(-131.2kb)|LINC00592(-40.26kb)|NR4A1(+111.2kb)
16	77693233	rs11150008	C	T	0.867016	3	2.665e-05	2.665e-05	0.6975	0.6975	0.8335	0	0.7468	0.7214	0.6652	NUDT7(-63.16kb)|VAT1L(-129.2kb)
13	24308825	rs117989091	T	C	0.0197105	3	2.681e-05	2.681e-05	2.7071	2.7071	0.683	0	2.1446	3.7008	2.4985	ANKRD20A19P(-172.6kb)|C1QTNF9B(-156.6kb)|C1QTNF9B-AS1(-154.2kb)|MIPEP(0)|TNFRSF19(+58.58kb)
7	53077609	rs113311232	C	T	0.0561749	3	2.696e-05	0.04599	1.6453	1.5564	0.0396	69.02	1.8001	0.9731	2.0224	POM121L12(-25.74kb)
12	90444283	rs75754170	C	T	0.0180782	3	2.71e-05	0.000658	2.5707	2.508	0.2565	26.51	1.1974	3.5113	2.7702	.
7	53091820	rs77586813	C	G	0.0534185	3	2.713e-05	0.04544	1.6605	1.5775	0.0363	69.84	1.8569	0.9754	2.0528	POM121L12(-11.53kb)
3	102644411	rs73136570	C	A	0.0146135	2	2.718e-05	0.0002857	2.8127	2.8993	0.2539	23.18	NA	4.3713	2.3509	.
15	70452945	rs8040467	C	A	0.261087	3	2.727e-05	2.727e-05	1.3383	1.3383	0.5016	0	1.1958	1.2929	1.4482	MIR629(+81.14kb)|TLE3(+62.69kb)
7	53070775	rs17556892	T	C	0.0540037	3	2.744e-05	0.04122	1.6489	1.5682	0.041	68.7	1.8048	0.9885	2.0422	POM121L12(-32.57kb)
5	87927745	rs11954690	C	T	0.0855097	3	2.746e-05	0.003869	1.6333	1.6615	0.1218	52.51	2.4311	1.3283	1.461	LINC00461(0)|MEF2C(-86.31kb)|MIR9-2(-34.92kb)|TMEM161B-AS1(+195.3kb)
1	235088280	rs79208210	C	T	0.0165845	2	2.758e-05	0.003301	4.3545	4.3181	0.1561	50.28	2.6028	7.0458	NA	TOMM20(-184.4kb)
1	235088706	rs78367569	G	T	0.0165691	2	2.773e-05	0.003278	4.3576	4.3204	0.1566	50.16	2.6041	7.0469	NA	TOMM20(-184kb)
13	37349846	rs9576109	T	C	0.251725	3	2.774e-05	2.774e-05	1.3376	1.3376	0.3909	0	1.5464	1.1895	1.3148	ALG5(-174.1kb)|RFXAP(-43.49kb)|SERTM1(+77.87kb)|SMAD9(-69.12kb)
7	53100146	rs6977734	T	G	0.0535725	3	2.792e-05	0.04203	1.6592	1.5806	0.0387	69.25	1.8511	0.9851	2.0543	POM121L12(-3.202kb)
1	101657847	rs11166550	T	A	0.440206	3	2.804e-05	0.01267	0.7674	0.7739	0.0761	61.18	0.9604	0.6939	0.7042	DPH5(+166.5kb)|RNU6-31P(-148.6kb)|S1PR1(-44.46kb)
1	22739010	rs77575121	A	G	0.089113	3	2.826e-05	2.826e-05	1.6207	1.6207	0.7835	0	1.5674	1.4389	1.7446	EPHA8(-151kb)|ZBTB40(-39.33kb)
1	235088833	rs140199072	T	C	0.0167077	2	2.834e-05	0.003769	4.3489	4.312	0.151	51.52	2.5827	7.0845	NA	TOMM20(-183.8kb)
7	53064897	rs17643201	G	C	0.0548352	3	2.853e-05	0.05363	1.6498	1.5529	0.034	70.42	1.743	0.9693	2.0776	POM121L12(-38.45kb)
12	90244621	rs137981946	A	G	0.0192639	3	2.862e-05	0.08256	2.4717	2.1297	0.0332	70.64	0.6583	3.9728	2.7139	ATP2B1(+194.8kb)|LINC00936(+138.9kb)
1	234241926	rs72758208	T	C	0.0537881	3	2.867e-05	2.867e-05	1.7291	1.7291	0.618	0	1.4659	1.5511	1.9547	SLC35F3(0)
7	53063865	rs17643172	C	T	0.0548814	3	2.869e-05	0.05347	1.6498	1.5528	0.0343	70.34	1.7425	0.9693	2.0769	POM121L12(-39.48kb)
7	53061229	rs73701278	C	T	0.0564213	3	2.871e-05	0.05093	1.6474	1.551	0.0368	69.72	1.7215	0.9765	2.0755	POM121L12(-42.12kb)
5	172287617	rs793016	G	T	0.960086	3	2.881e-05	2.881e-05	0.5342	0.5342	0.7782	0	0.4869	0.6472	0.5154	ATP6V0E1(-123.1kb)|CREBRF(-195.7kb)|DUSP1(+89.41kb)|ERGIC1(0)|LOC100268168(-94.17kb)|NEURL1B(+169.1kb)|RPL26L1(-98.82kb)|SNORA74B(-160.1kb)
4	120626166	rs72680918	C	T	0.0467662	3	2.885e-05	0.00248	1.7487	1.7037	0.2067	36.56	1.1374	1.9751	1.9999	PDE5A(+76.18kb)
6	105336021	rs77494224	T	C	0.0138897	2	2.889e-05	2.889e-05	3.0607	3.0607	0.5019	0	NA	3.8745	2.6693	HACE1(+28.23kb)|LIN28B(-68.9kb)|LINC00577(-48.15kb)
8	127978559	rs60614382	C	T	0.0239298	3	2.89e-05	0.0009125	2.1167	2.2091	0.1861	40.53	2.181	3.618	1.606	PCAT1(-46.84kb)
12	52246936	rs303793	A	C	0.894426	3	2.899e-05	0.00197	0.6794	0.6884	0.1941	39	0.6559	0.8788	0.5925	ACVR1B(-98.51kb)|ACVRL1(-54.26kb)|ANKRD33(-34.86kb)|FIGNL2(+21.24kb)|GRASP(-153.8kb)|NR4A1(-169.7kb)|SCN8A(+40.29kb)
1	235085444	rs2673992	A	G	0.0170157	2	2.904e-05	0.004149	4.3154	4.2809	0.1471	52.44	2.5589	7.0586	NA	TOMM20(-187.2kb)
1	7093912	rs150371496	T	C	0.0464275	3	2.921e-05	0.2208	1.7501	1.4886	0.0087	78.92	1.6477	0.7951	2.2944	CAMTA1(0)
2	16219896	rs62116758	C	T	0.0367262	2	2.973e-05	0.01046	2.2659	2.127	0.1639	48.39	NA	1.4694	2.6903	MYCN(+132.8kb)|MYCNOS(+138.1kb)
7	53085574	rs76259291	G	A	0.0561595	3	2.976e-05	0.04546	1.6495	1.5672	0.0377	69.49	1.8255	0.9771	2.0411	POM121L12(-17.77kb)
2	16219824	rs62116757	G	T	0.0367262	2	2.987e-05	0.01043	2.2651	2.1265	0.1641	48.34	NA	1.4693	2.6891	MYCN(+132.7kb)|MYCNOS(+138kb)
18	59520586	rs117399583	A	G	0.0551124	3	2.987e-05	0.02163	1.7277	1.8941	0.0144	76.41	2.1628	2.8435	1.1868	LOC100996669(+98.66kb)|PIGN(-190.9kb)|RNF152(0)
7	53100268	rs6960678	T	A	0.0536957	3	2.992e-05	0.04396	1.6559	1.5768	0.0377	69.5	1.8506	0.9802	2.0501	POM121L12(-3.08kb)
17	75640393	rs2077502	A	G	0.0116261	3	3.004e-05	3.004e-05	1.347	1.347	0.7231	0	1.3092	1.2433	1.4219	LOC100507351(+79.29kb)|SEPT9(+143.7kb)
4	165588256	rs140660032	A	T	0.0219433	2	3.005e-05	3.005e-05	2.6475	2.6475	0.7481	0	NA	2.904	2.4916	LOC100505989(-87.03kb)|MIR5684(0)
5	86234641	rs13360868	A	G	0.0200339	3	3.011e-05	3.011e-05	2.3847	2.3847	0.5192	0	1.7775	3.5992	2.2815	MIR4280(-176.1kb)
4	120682782	rs72680995	G	T	0.0408685	3	3.016e-05	0.003127	1.7762	1.7269	0.1906	39.67	1.142	1.9809	2.0735	PDE5A(+132.8kb)
7	53081141	rs73698717	A	G	0.0569603	3	3.016e-05	0.04656	1.6482	1.5633	0.0378	69.48	1.8133	0.9742	2.0406	POM121L12(-22.21kb)
3	118814436	rs144923269	T	A	0.0167231	2	3.017e-05	3.017e-05	2.6342	2.6342	0.6183	0	NA	2.1582	2.8172	ARHGAP31(-198.8kb)|B4GALT4(-116.2kb)|C3orf30(-50.56kb)|IGSF11(0)|IGSF11-AS1(+147.3kb)|UPK1B(-77.99kb)
1	235081825	rs545307680	G	A	0.0167847	2	3.026e-05	0.01186	4.4924	4.4249	0.101	62.81	2.4283	7.9198	NA	TOMM20(-190.8kb)
7	53072970	rs111510578	T	C	0.0539113	3	3.036e-05	0.0456	1.6479	1.5626	0.0392	69.14	1.8043	0.9763	2.0405	POM121L12(-30.38kb)
3	150622860	rs2168445	T	A	0.0861873	3	3.046e-05	0.001138	1.5766	1.5436	0.2446	28.98	1.2021	1.4561	1.8555	CLRN1(-21.09kb)|CLRN1-AS1(-67.6kb)|MED12L(-181.8kb)|SIAH2(+141.6kb)
17	75649995	rs11655951	A	G	0.244148	3	3.053e-05	3.053e-05	1.3359	1.3359	0.9511	0	1.3763	1.2945	1.336	LOC100507351(+88.89kb)|SEPT9(+153.3kb)
7	53088272	rs17643338	C	A	0.0538959	3	3.067e-05	0.04817	1.6486	1.5626	0.0366	69.76	1.7846	0.9799	2.062	POM121L12(-15.08kb)
14	38550184	rs117920544	A	G	0.0199107	3	3.072e-05	3.072e-05	2.3264	2.3264	0.4646	0	1.7021	2.0741	2.9698	CLEC14A(-173kb)|SSTR1(-127kb)
7	52958705	rs117035741	A	T	0.0116415	2	3.077e-05	0.4039	2.8331	1.935	0.0086	85.51	NA	0.8204	4.0105	POM121L12(-144.6kb)
7	53082557	rs4133882	C	T	0.0561595	3	3.084e-05	0.04623	1.6478	1.5646	0.0378	69.48	1.8199	0.9752	2.0394	POM121L12(-20.79kb)
7	53074694	rs78658179	A	G	0.0559901	3	3.094e-05	0.04774	1.6467	1.56	0.0375	69.55	1.8007	0.9721	2.043	POM121L12(-28.65kb)
7	53080071	rs76330522	G	T	0.0571143	3	3.098e-05	0.04635	1.6461	1.5633	0.0375	69.54	1.8147	0.9762	2.0395	POM121L12(-23.28kb)
21	40648241	rs35200633	T	C	0.0641361	3	3.114e-05	3.114e-05	1.6839	1.6839	0.831	0	1.5865	1.5109	1.7961	BRWD1(0)|BRWD1-AS1(-39.39kb)|BRWD1-IT2(-37.62kb)|HMGN1(-66kb)|LCA5L(-129.5kb)|PSMG1(+92.8kb)|SH3BGR(-169.6kb)|WRB(-104kb)
7	53075542	rs79480444	G	A	0.0561441	3	3.128e-05	0.04731	1.6462	1.5599	0.038	69.41	1.8026	0.9724	2.0396	POM121L12(-27.81kb)
7	53069980	rs6593045	A	G	0.0536957	3	3.13e-05	0.05347	1.6468	1.5517	0.0348	70.21	1.7408	0.9707	2.0745	POM121L12(-33.37kb)
7	53100699	rs79550985	T	C	0.0537265	3	3.151e-05	0.04282	1.6542	1.5761	0.0395	69.06	1.8511	0.9818	2.0429	POM121L12(-2.649kb)
5	172288697	rs11749499	A	C	0.956745	3	3.156e-05	3.156e-05	0.5389	0.5389	0.816	0	0.5009	0.6417	0.5189	ATP6V0E1(-122.1kb)|CREBRF(-194.7kb)|DUSP1(+90.49kb)|ERGIC1(0)|LOC100268168(-93.09kb)|NEURL1B(+170.2kb)|RPL26L1(-97.74kb)|SNORA74B(-159kb)
7	53072010	rs112109035	G	A	0.0561441	3	3.156e-05	0.04752	1.6444	1.5573	0.0383	69.34	1.7914	0.9725	2.0395	POM121L12(-31.34kb)
7	53072830	rs113338787	C	G	0.0561441	3	3.162e-05	0.04767	1.6445	1.5578	0.038	69.41	1.7944	0.9723	2.0395	POM121L12(-30.52kb)
19	40882352	rs74429191	C	T	0.0300585	3	3.18e-05	3.18e-05	2.158	2.158	0.5852	0	2.1406	1.5518	2.4929	AKT2(+91.05kb)|BLVRB(-71.34kb)|C19orf47(+27.92kb)|CNTD2(+149.8kb)|HIPK4(-2.825kb)|MAP3K10(+160.9kb)|MIR641(+93.8kb)|PLD3(0)|PRX(-17.32kb)|SERTAD1(-46.06kb)|SERTAD3(-64.4kb)|SPTBN4(-90.77kb)|TTC9B(+158kb)
4	67839637	rs11736089	C	T	0.0962581	3	3.182e-05	0.003853	1.5518	1.5855	0.117	53.39	2.2487	1.3516	1.3702	.
7	53075602	rs73698715	T	C	0.0569757	3	3.182e-05	0.04779	1.6444	1.5582	0.0378	69.47	1.7975	0.9721	2.0392	POM121L12(-27.75kb)
2	199895199	rs138367458	A	G	0.0597167	3	3.183e-05	0.0008983	1.7573	1.7263	0.2425	29.41	1.6627	1.2848	2.1818	.
7	53075978	rs77394028	T	C	0.0539267	3	3.198e-05	0.04906	1.649	1.5602	0.037	69.66	1.772	0.9767	2.0664	POM121L12(-27.37kb)
2	4296506	rs77108658	C	T	0.0168309	2	3.218e-05	3.218e-05	3.0707	3.0707	0.9329	0	NA	3.2024	3.0332	.
16	752237	rs4984917	T	C	0.202525	3	3.22e-05	3.22e-05	1.4156	1.4156	0.3943	0	1.6842	1.4011	1.2819	C16orf11(+136.7kb)|C16orf13(+65.89kb)|CAPN15(+147.6kb)|CCDC78(-20.34kb)|CHTF18(-86.38kb)|FAM173A(-18.9kb)|FAM195A(+53.76kb)|FBXL16(0)|GNG13(-95.8kb)|HAGHL(-25.03kb)|JMJD8(+17.8kb)|LINC00235(+174.8kb)|LMF1(-151.4kb)|METRN(-12.94kb)|MIR662(-67.94kb)|MIR3176(+158.9kb)|MIR5587(+166.9kb)|MSLN(-58.53kb)|NARFL(-27.53kb)|NHLRC4(+132.7kb)|PIGQ(+118.1kb)|PRR25(-103.2kb)|RAB11FIP3(+179.8kb)|RAB40C(+72.96kb)…
2	199894297	rs56170534	T	C	0.0596705	3	3.223e-05	0.0009181	1.7568	1.7257	0.2419	29.54	1.6635	1.2836	2.1813	.
7	53081033	rs78619076	A	G	0.0539267	3	3.256e-05	0.0482	1.6469	1.5602	0.0377	69.5	1.7814	0.9778	2.0568	POM121L12(-22.32kb)
16	23517300	rs867131	T	C	0.0679088	2	3.257e-05	3.257e-05	1.9906	1.9906	0.4158	0	2.3125	1.7632	NA	COG7(+52.79kb)|DCTN5(-135.4kb)|EARS2(-16.03kb)|ERN2(-184.3kb)|GGA2(0)|NDUFAB1(-75.03kb)|PALB2(-97.18kb)|PLK1(-172.9kb)|SCNN1B(+124.7kb)|UBFD1(-51.56kb)
4	178422416	rs112876916	T	C	0.0202649	3	3.262e-05	3.262e-05	2.2733	2.2733	0.4775	0	3.6107	1.7404	2.1172	AGA(+58.76kb)|NEIL3(+138.3kb)
8	127966516	rs73707736	C	A	0.0233292	3	3.268e-05	0.001016	2.1012	2.1922	0.1844	40.85	2.117	3.6417	1.6074	PCAT1(-58.88kb)
2	4298920	rs113727461	T	C	0.0167693	2	3.273e-05	3.273e-05	3.0776	3.0776	0.9938	0	NA	3.0894	3.0741	.
7	53073106	rs78661562	A	G	0.0560517	3	3.29e-05	0.04784	1.6437	1.5565	0.0387	69.26	1.788	0.9723	2.0398	POM121L12(-30.24kb)
4	120663407	rs72680976	A	G	0.0408685	3	3.311e-05	0.0019	1.7593	1.7189	0.2213	33.7	1.1516	1.985	2.0156	PDE5A(+113.4kb)
20	34101477	rs78282190	A	C	0.0193255	2	3.323e-05	3.323e-05	2.3657	2.3657	0.856	0	NA	2.5185	2.3127	C20orf173(-7.092kb)|CEP250(+1.674kb)|CPNE1(-112.5kb)|ERGIC3(-28.3kb)|GDF5(+75.45kb)|NFS1(-155.1kb)|RBM12(-135.4kb)|RBM39(-190.1kb)|ROMO1(-185.8kb)|SPAG4(-102.3kb)|UQCC(+101.5kb)
8	127961375	rs59848774	A	G	0.0231906	3	3.324e-05	0.000988	2.0993	2.1894	0.1868	40.4	2.1157	3.6342	1.6085	PCAT1(-64.02kb)
2	4299290	rs1518851	C	G	0.0167693	2	3.332e-05	3.332e-05	3.0816	3.0816	0.9978	0	NA	3.0775	3.0829	.
19	41240147	rs117825933	C	T	0.0300585	2	3.332e-05	3.332e-05	2.1576	2.1576	0.8068	0	NA	2.0057	2.2192	ADCK4(+17.36kb)|C19orf54(-6.613kb)|CYP2A6(-109.3kb)|CYP2A7(-141.2kb)|CYP2B7P1(-190kb)|CYP2G1P(-156.6kb)|EGLN2(-64.9kb)|ITPKC(0)|LTBP4(+104.4kb)|MIA(-40.93kb)|MIA-RAB4B(-41.29kb)|NUMBL(+43.59kb)|RAB4B(-43.98kb)|RAB4B-EGLN2(-43.98kb)|SHKBP1(+142.8kb)|SNRPA(-16.61kb)|SPTBN4(+157.8kb)
19	41239995	rs117529756	T	A	0.0300893	2	3.333e-05	3.333e-05	2.1577	2.1577	0.8069	0	NA	2.0058	2.2192	ADCK4(+17.2kb)|C19orf54(-6.765kb)|CYP2A6(-109.4kb)|CYP2A7(-141.3kb)|CYP2B7P1(-190.2kb)|CYP2G1P(-156.7kb)|EGLN2(-65.05kb)|ITPKC(0)|LTBP4(+104.3kb)|MIA(-41.09kb)|MIA-RAB4B(-41.45kb)|NUMBL(+43.44kb)|RAB4B(-44.13kb)|RAB4B-EGLN2(-44.13kb)|SHKBP1(+142.7kb)|SNRPA(-16.76kb)|SPTBN4(+157.6kb)
19	41246907	rs62621363	T	C	0.0301201	2	3.335e-05	3.335e-05	2.157	2.157	0.8016	0	NA	2.0006	2.22	ADCK4(+24.12kb)|C19orf54(0)|CYP2A6(-102.5kb)|CYP2A7(-134.4kb)|CYP2B7P1(-183.3kb)|CYP2G1P(-149.8kb)|EGLN2(-58.14kb)|ITPKC(+0.142kb)|LTBP4(+111.2kb)|MIA(-34.17kb)|MIA-RAB4B(-34.53kb)|NUMBL(+50.35kb)|RAB4B(-37.22kb)|RAB4B-EGLN2(-37.22kb)|SHKBP1(+149.6kb)|SNRPA(-9.851kb)|SPTBN4(+164.5kb)
19	41246888	rs117499206	G	C	0.0301201	2	3.339e-05	3.339e-05	2.1569	2.1569	0.8017	0	NA	2.0006	2.2199	ADCK4(+24.1kb)|C19orf54(0)|CYP2A6(-102.6kb)|CYP2A7(-134.5kb)|CYP2B7P1(-183.3kb)|CYP2G1P(-149.8kb)|EGLN2(-58.16kb)|ITPKC(+0.123kb)|LTBP4(+111.2kb)|MIA(-34.19kb)|MIA-RAB4B(-34.55kb)|NUMBL(+50.33kb)|RAB4B(-37.24kb)|RAB4B-EGLN2(-37.24kb)|SHKBP1(+149.6kb)|SNRPA(-9.87kb)|SPTBN4(+164.5kb)
2	128833421	rs72841761	C	T	0.0384355	3	3.348e-05	3.348e-05	1.9186	1.9186	0.9064	0	1.9107	2.1753	1.8238	AMMECR1L(+189.9kb)|HS6ST1(-189.6kb)|SAP130(+48.55kb)|UGGT1(-15.33kb)
19	41246238	rs139556022	T	C	0.0301355	2	3.35e-05	3.35e-05	2.1565	2.1565	0.8013	0	NA	1.9999	2.2196	ADCK4(+23.45kb)|C19orf54(-0.522kb)|CYP2A6(-103.2kb)|CYP2A7(-135.1kb)|CYP2B7P1(-183.9kb)|CYP2G1P(-150.5kb)|EGLN2(-58.81kb)|ITPKC(0)|LTBP4(+110.5kb)|MIA(-34.84kb)|MIA-RAB4B(-35.2kb)|NUMBL(+49.68kb)|RAB4B(-37.88kb)|RAB4B-EGLN2(-37.88kb)|SHKBP1(+148.9kb)|SNRPA(-10.52kb)|SPTBN4(+163.9kb)
19	41245120	rs117032961	T	C	0.0301047	2	3.353e-05	3.353e-05	2.1564	2.1564	0.802	0	NA	2.0004	2.2193	ADCK4(+22.33kb)|C19orf54(-1.64kb)|CYP2A6(-104.3kb)|CYP2A7(-136.2kb)|CYP2B7P1(-185kb)|CYP2G1P(-151.6kb)|EGLN2(-59.93kb)|ITPKC(0)|LTBP4(+109.4kb)|MIA(-35.96kb)|MIA-RAB4B(-36.32kb)|NUMBL(+48.56kb)|RAB4B(-39kb)|RAB4B-EGLN2(-39kb)|SHKBP1(+147.8kb)|SNRPA(-11.64kb)|SPTBN4(+162.8kb)
4	120663466	rs72680978	C	T	0.0408531	3	3.355e-05	0.001891	1.7586	1.7186	0.2219	33.59	1.1516	1.985	2.0144	PDE5A(+113.5kb)
4	41996967	rs17530003	T	A	0.0376039	2	3.372e-05	0.02495	1.8947	1.7617	0.1542	50.74	NA	1.2629	2.1338	BEND4(-115.9kb)|DCAF4L1(+8.483kb)|SLC30A9(0)|TMEM33(+34.14kb)
21	40666442	rs71316668	A	G	0.0645981	3	3.372e-05	3.372e-05	1.683	1.683	0.8133	0	1.5934	1.4963	1.8022	BRWD1(0)|BRWD1-AS1(-21.19kb)|BRWD1-IT2(-19.42kb)|HMGN1(-47.8kb)|LCA5L(-111.3kb)|PSMG1(+111kb)|SH3BGR(-151.4kb)|WRB(-85.77kb)
7	53062648	rs75337857	C	T	0.0586695	3	3.383e-05	0.0511	1.6396	1.5462	0.0381	69.4	1.722	0.9755	2.0604	POM121L12(-40.7kb)
4	120649880	rs114110723	C	T	0.0386665	3	3.389e-05	0.001348	1.7842	1.7409	0.2442	29.06	1.1734	1.9006	2.078	PDE5A(+99.9kb)
7	53084409	rs78175328	C	T	0.0539267	3	3.407e-05	0.04835	1.645	1.5595	0.0377	69.49	1.7786	0.9791	2.0568	POM121L12(-18.94kb)
10	121697905	rs34255946	A	G	0.021389	3	3.417e-05	0.0001481	2.274	2.2946	0.3192	12.44	1.7232	4.7704	2.2377	INPP5F(+109.2kb)|MCMBP(+64.76kb)|MIR4682(-20.12kb)|SEC23IP(0)
14	20687477	rs78353735	G	T	0.0481983	3	3.426e-05	3.426e-05	1.8245	1.8245	0.483	0	1.6267	2.4394	1.6485	CCNB1IP1(-92.05kb)|OR4K13(+184.6kb)|OR4K17(+100.9kb)|OR4L1(+158.3kb)|OR4N5(+74.66kb)|OR11G2(+20.94kb)|OR11H4(-23.47kb)|OR11H6(-4.391kb)|PARP2(-124.3kb)|RPPH1(-123.8kb)|SNORD126(-107.1kb)|TEP1(-146.3kb)|TTC5(-69.82kb)
7	42135643	rs17172009	T	G	0.0152448	3	3.43e-05	0.02272	2.3114	2.2428	0.0496	66.71	1.142	4.2166	2.2069	GLI3(0)
6	97485730	rs12524312	T	C	0.0734986	3	3.453e-05	3.453e-05	1.6166	1.6166	0.8766	0	1.4568	1.6334	1.6846	KLHL32(0)|MIR548H3(-52.11kb)|MMS22L(-104.3kb)|NDUFAF4(+140kb)
4	155493554	rs116381809	T	G	0.0159378	2	3.466e-05	0.1744	2.491	2.097	0.0223	80.84	NA	1.1652	3.478	DCHS2(+80.62kb)|FGA(-10.72kb)|FGB(0)|FGG(-31.73kb)|LRAT(-171.6kb)|PLRG1(+21.97kb)
3	118892533	rs6788712	T	C	0.946289	3	3.467e-05	3.467e-05	0.5478	0.5478	0.3763	0	0.7005	0.3867	0.5546	ARHGAP31(-120.7kb)|B4GALT4(-38.06kb)|C3orf30(+22.23kb)|IGSF11(+27.64kb)|UPK1B(0)
20	34101224	rs145428671	G	A	0.0193871	2	3.469e-05	3.469e-05	2.3588	2.3588	0.8483	0	NA	2.5191	2.3031	C20orf173(-7.345kb)|CEP250(+1.421kb)|CPNE1(-112.7kb)|ERGIC3(-28.55kb)|GDF5(+75.2kb)|NFS1(-155.4kb)|RBM12(-135.6kb)|RBM39(-190.3kb)|ROMO1(-186kb)|SPAG4(-102.6kb)|UQCC(+101.3kb)
16	754083	rs4984684	C	T	0.221943	3	3.471e-05	0.0001616	1.4083	1.4149	0.2965	17.74	1.7302	1.3572	1.2734	C16orf11(+138.6kb)|C16orf13(+67.74kb)|CAPN15(+149.4kb)|CCDC78(-18.5kb)|CHTF18(-84.54kb)|FAM173A(-17.06kb)|FAM195A(+55.61kb)|FBXL16(0)|GNG13(-93.96kb)|HAGHL(-23.18kb)|JMJD8(+19.64kb)|LINC00235(+176.7kb)|LMF1(-149.6kb)|METRN(-11.09kb)|MIR662(-66.1kb)|MIR3176(+160.7kb)|MIR5587(+168.7kb)|MSLN(-56.68kb)|NARFL(-25.68kb)|NHLRC4(+134.6kb)|PIGQ(+119.9kb)|PRR25(-101.4kb)|RAB11FIP3(+181.6kb)|RAB40C(+74.81kb…
15	77006448	rs78955901	A	T	0.0339544	3	3.495e-05	0.02097	1.9276	1.8913	0.0585	64.78	1.0623	3.071	1.9961	SCAPER(0)
7	53058936	rs112095163	A	C	0.0542809	3	3.497e-05	0.05034	1.6408	1.5465	0.0402	68.89	1.7438	0.9691	2.043	POM121L12(-44.41kb)
7	53054964	rs74814591	T	C	0.0543117	3	3.508e-05	0.05813	1.6435	1.5416	0.0352	70.12	1.7434	0.9523	2.0538	POM121L12(-48.38kb)
3	102110333	rs62274719	T	G	0.0118571	2	3.51e-05	3.51e-05	3.3079	3.3079	0.3765	0	NA	4.7322	2.7559	ZPLD1(-43.52kb)
1	213781198	rs17021090	A	G	0.134801	3	3.529e-05	0.01666	0.6735	0.6355	0.0241	73.15	0.5526	0.4975	0.8827	.
20	31760953	rs76549422	G	T	0.023668	2	3.531e-05	3.531e-05	2.7861	2.7861	0.3354	0	NA	1.9823	3.2934	BPIFA1(-62.85kb)|BPIFA2(0)|BPIFA3(-44.18kb)|BPIFA4P(-20.46kb)|BPIFB1(-110kb)|BPIFB2(+149.4kb)|BPIFB3(+99.52kb)|BPIFB4(+61.4kb)|BPIFB6(+129.1kb)|CDK5RAP1(-185.7kb)|SUN5(+168.7kb)
4	26491433	rs2071011	G	C	0.02587	3	3.54e-05	0.03734	2.1948	2.2536	0.0261	72.56	5.1735	1.0803	2.1248	CCKAR(0)|RBPJ(+54.68kb)|TBC1D19(-94.11kb)
10	121580016	rs12770196	A	G	0.0226825	3	3.54e-05	3.54e-05	2.2295	2.2295	0.3723	0	1.69	4.278	2.2512	BAG3(+142.7kb)|INPP5F(0)|MCMBP(-8.899kb)|MIR4682(-138kb)|SEC23IP(-72.07kb)
18	58256651	rs603119	C	T	0.645442	3	3.554e-05	3.554e-05	0.7715	0.7715	0.81	0	0.7306	0.8176	0.7714	.
3	118849273	rs151336615	T	G	0.0164767	2	3.604e-05	3.604e-05	2.6032	2.6032	0.6483	0	NA	2.1708	2.7681	ARHGAP31(-163.9kb)|B4GALT4(-81.32kb)|C3orf30(-15.72kb)|IGSF11(0)|IGSF11-AS1(+182.2kb)|UPK1B(-43.15kb)
5	86288600	rs111459128	A	T	0.0226671	3	3.611e-05	3.611e-05	2.2777	2.2777	0.5232	0	1.596	3.2247	2.3199	MIR4280(-122.1kb)
7	53063823	rs17135475	G	A	0.0585156	3	3.62e-05	0.05326	1.6361	1.5428	0.0369	69.69	1.7216	0.9715	2.0573	POM121L12(-39.52kb)
1	7084794	rs61780948	T	C	0.0415152	3	3.623e-05	0.05386	1.8004	1.6439	0.0657	63.28	1.8589	0.965	2.2241	CAMTA1(0)
19	41249223	rs142449067	T	C	0.0300739	2	3.623e-05	3.623e-05	2.1489	2.1489	0.8128	0	NA	2.0017	2.208	ADCK4(+26.43kb)|C19orf54(0)|CYP2A6(-100.2kb)|CYP2A7(-132.1kb)|CYP2B7P1(-180.9kb)|CYP2G1P(-147.5kb)|EGLN2(-55.82kb)|ITPKC(+2.458kb)|LTBP4(+113.5kb)|MIA(-31.86kb)|MIA-RAB4B(-32.22kb)|NUMBL(+52.67kb)|RAB4B(-34.9kb)|RAB4B-EGLN2(-34.9kb)|SHKBP1(+151.9kb)|SNRPA(-7.535kb)|SPTBN4(+166.9kb)
4	120654831	rs17005547	C	T	0.0467662	3	3.633e-05	0.004344	1.7198	1.6669	0.1844	40.85	1.1191	1.8734	2.0036	PDE5A(+104.8kb)
4	67910084	rs11940944	T	C	0.138066	3	3.693e-05	3.693e-05	1.4517	1.4517	0.6204	0	1.6681	1.335	1.3968	.
14	89641968	rs141456581	G	T	0.015291	3	3.7e-05	3.7e-05	2.4533	2.4533	0.5951	0	1.6657	3.0361	2.6597	FOXN3(0)
4	120619868	rs72678601	T	C	0.0467354	3	3.722e-05	0.001931	1.7434	1.7054	0.2235	33.26	1.1461	1.9836	1.9854	LOC645513(+199.1kb)|PDE5A(+69.89kb)
16	754314	rs4984687	T	C	0.206991	3	3.734e-05	0.0001222	1.4084	1.4133	0.3137	13.75	1.7214	1.3569	1.2755	C16orf11(+138.8kb)|C16orf13(+67.97kb)|CAPN15(+149.7kb)|CCDC78(-18.27kb)|CHTF18(-84.31kb)|FAM173A(-16.83kb)|FAM195A(+55.84kb)|FBXL16(0)|GNG13(-93.73kb)|HAGHL(-22.95kb)|JMJD8(+19.88kb)|LINC00235(+176.9kb)|LMF1(-149.3kb)|METRN(-10.86kb)|MIR662(-65.87kb)|MIR3176(+160.9kb)|MIR5587(+168.9kb)|MSLN(-56.45kb)|NARFL(-25.45kb)|NHLRC4(+134.8kb)|PIGQ(+120.2kb)|PRR25(-101.1kb)|RAB11FIP3(+181.8kb)|RAB40C(+75.04…
16	754477	rs56824938	A	C	0.207345	3	3.755e-05	0.0001233	1.4083	1.4131	0.3135	13.78	1.7216	1.3556	1.2759	C16orf11(+138.9kb)|C16orf13(+68.13kb)|CAPN15(+149.8kb)|CCDC78(-18.1kb)|CHTF18(-84.14kb)|FAM173A(-16.66kb)|FAM195A(+56kb)|FBXL16(0)|GNG13(-93.56kb)|HAGHL(-22.79kb)|JMJD8(+20.04kb)|LINC00235(+177.1kb)|LMF1(-149.2kb)|METRN(-10.7kb)|MIR662(-65.7kb)|MIR3176(+161.1kb)|MIR5587(+169.1kb)|MSLN(-56.29kb)|NARFL(-25.29kb)|NHLRC4(+135kb)|PIGQ(+120.3kb)|PRR25(-101kb)|RAB11FIP3(+182kb)|RAB40C(+75.2kb)|RHBDL1(+2…
7	53056352	rs78655734	A	C	0.0542963	3	3.771e-05	0.05486	1.6388	1.5411	0.038	69.41	1.7439	0.9583	2.0409	POM121L12(-47kb)
4	120619590	rs72678597	G	T	0.0467046	3	3.773e-05	0.001853	1.7431	1.7053	0.2263	32.71	1.1474	1.9762	1.9863	LOC645513(+198.8kb)|PDE5A(+69.61kb)
15	54855854	rs146982817	C	T	0.0257468	3	3.779e-05	3.779e-05	2.0593	2.0593	0.9084	0	1.8045	2.3253	2.0575	UNC13C(0)
2	16203839	rs62116721	T	C	0.0519403	3	3.78e-05	0.0001549	1.7996	1.7801	0.3317	9.39	1.4506	1.3744	2.1718	MYCN(+116.7kb)|MYCNOS(+122kb)
4	120619493	rs72678596	A	T	0.0454881	3	3.78e-05	0.001846	1.743	1.7054	0.2264	32.67	1.1476	1.9764	1.9862	LOC645513(+198.7kb)|PDE5A(+69.51kb)
11	29518104	rs16919194	C	T	0.0459963	3	3.785e-05	3.785e-05	1.7583	1.7583	0.6313	0	2.098	1.4165	1.7747	.
11	29517614	rs16919192	G	A	0.0460425	3	3.792e-05	3.792e-05	1.7582	1.7582	0.6296	0	2.099	1.4155	1.7746	.
4	120619455	rs72678595	C	G	0.0455035	3	3.794e-05	0.001839	1.7429	1.7054	0.2267	32.61	1.1477	1.9762	1.986	LOC645513(+198.7kb)|PDE5A(+69.47kb)
16	77697750	rs7205655	C	T	0.869988	3	3.797e-05	3.797e-05	0.7032	0.7032	0.7688	0	0.7752	0.703	0.6695	NUDT7(-58.64kb)|VAT1L(-124.7kb)
4	120619817	rs72678599	C	T	0.0467354	3	3.809e-05	0.001901	1.7423	1.7044	0.2252	32.92	1.1466	1.9763	1.9857	LOC645513(+199.1kb)|PDE5A(+69.84kb)
4	120623268	rs72680908	G	A	0.0467662	3	3.814e-05	0.002104	1.7405	1.7012	0.2207	33.81	1.1422	1.9755	1.9843	PDE5A(+73.29kb)
4	120619989	rs72678602	A	G	0.0467354	3	3.815e-05	0.001895	1.7423	1.7044	0.2255	32.86	1.1465	1.9763	1.9854	LOC645513(+199.2kb)|PDE5A(+70.01kb)
11	29516195	rs1912766	C	A	0.0460579	3	3.815e-05	3.815e-05	1.7583	1.7583	0.6289	0	2.1018	1.4164	1.7733	.
4	120621299	rs56195631	C	T	0.0451802	3	3.822e-05	0.001998	1.7419	1.7033	0.223	33.36	1.1448	1.9751	1.9866	PDE5A(+71.32kb)
4	120624053	rs114569900	T	G	0.0465661	3	3.835e-05	0.002104	1.7404	1.7013	0.2209	33.77	1.1423	1.9763	1.984	PDE5A(+74.07kb)
4	120622192	rs72680904	A	C	0.0467662	3	3.842e-05	0.002163	1.7427	1.7031	0.2188	34.2	1.143	1.9753	1.9914	PDE5A(+72.21kb)
4	120620910	rs7659472	A	T	0.0467508	3	3.847e-05	0.001952	1.7413	1.7031	0.2243	33.1	1.1453	1.9755	1.9846	PDE5A(+70.93kb)
19	41227183	rs76870783	C	G	0.0302741	2	3.849e-05	3.849e-05	2.1445	2.1445	0.8455	0	NA	2.0251	2.1939	ADCK4(+4.393kb)|C19orf54(-19.58kb)|CYP2A6(-122.3kb)|CYP2A7(-154.2kb)|CYP2G1P(-169.5kb)|EGLN2(-77.86kb)|ITPKC(0)|LTBP4(+91.46kb)|MIA(-53.9kb)|MIA-RAB4B(-54.26kb)|NUMBL(+30.63kb)|RAB4B(-56.94kb)|RAB4B-EGLN2(-56.94kb)|SHKBP1(+129.9kb)|SNRPA(-29.58kb)|SPTBN4(+144.8kb)
19	41249416	rs145469712	C	G	0.0307977	2	3.854e-05	3.854e-05	2.1218	2.1218	0.5727	0	NA	1.8003	2.2636	ADCK4(+26.63kb)|C19orf54(0)|CYP2A6(-100kb)|CYP2A7(-131.9kb)|CYP2B7P1(-180.8kb)|CYP2G1P(-147.3kb)|EGLN2(-55.63kb)|ITPKC(+2.651kb)|LTBP4(+113.7kb)|MIA(-31.66kb)|MIA-RAB4B(-32.02kb)|NUMBL(+52.86kb)|RAB4B(-34.71kb)|RAB4B-EGLN2(-34.71kb)|SHKBP1(+152.1kb)|SNRPA(-7.342kb)|SPTBN4(+167.1kb)
4	120626947	rs72680926	C	G	0.0451648	3	3.856e-05	0.002465	1.7384	1.6972	0.2133	35.27	1.1362	1.9752	1.9846	PDE5A(+76.97kb)
4	120626770	rs138790146	T	C	0.0467201	3	3.86e-05	0.002481	1.7378	1.6966	0.213	35.33	1.136	1.9752	1.9837	PDE5A(+76.79kb)
17	9133546	rs149611003	T	A	0.033785	3	3.864e-05	3.864e-05	2.3206	2.3206	0.4382	0	2.7395	3.1965	1.7588	NTN1(0)|STX8(-20.24kb)
4	120621278	rs7682153	G	C	0.0467662	3	3.873e-05	0.001971	1.7408	1.7026	0.2241	33.14	1.1448	1.9752	1.9839	PDE5A(+71.3kb)
4	120625215	rs72680911	A	G	0.0467662	3	3.874e-05	0.002267	1.7387	1.6987	0.2175	34.44	1.1392	1.9754	1.9829	PDE5A(+75.23kb)
4	120625246	rs72680912	C	T	0.0468894	3	3.878e-05	0.002268	1.7387	1.6987	0.2176	34.43	1.1391	1.9753	1.9828	PDE5A(+75.26kb)
19	41227458	rs139383406	C	G	0.0302741	2	3.878e-05	3.878e-05	2.1439	2.1439	0.8437	0	NA	2.023	2.1938	ADCK4(+4.668kb)|C19orf54(-19.3kb)|CYP2A6(-122kb)|CYP2A7(-153.9kb)|CYP2G1P(-169.3kb)|EGLN2(-77.59kb)|ITPKC(0)|LTBP4(+91.73kb)|MIA(-53.62kb)|MIA-RAB4B(-53.98kb)|NUMBL(+30.9kb)|RAB4B(-56.66kb)|RAB4B-EGLN2(-56.66kb)|SHKBP1(+130.2kb)|SNRPA(-29.3kb)|SPTBN4(+145.1kb)
4	120621676	rs10434034	T	C	0.0467816	3	3.883e-05	0.002012	1.7403	1.7019	0.2232	33.32	1.1439	1.9753	1.9835	PDE5A(+71.7kb)
19	41238232	rs142171259	A	G	0.0301971	2	3.888e-05	3.888e-05	2.1425	2.1425	0.8253	0	NA	2.006	2.1976	ADCK4(+15.44kb)|C19orf54(-8.528kb)|CYP2A6(-111.2kb)|CYP2A7(-143.1kb)|CYP2B7P1(-191.9kb)|CYP2G1P(-158.5kb)|EGLN2(-66.82kb)|ITPKC(0)|LTBP4(+102.5kb)|MIA(-42.85kb)|MIA-RAB4B(-43.21kb)|NUMBL(+41.68kb)|RAB4B(-45.89kb)|RAB4B-EGLN2(-45.89kb)|SHKBP1(+140.9kb)|SNRPA(-18.53kb)|SPTBN4(+155.9kb)
11	29518996	rs2356591	C	A	0.0459809	3	3.889e-05	3.889e-05	1.7572	1.7572	0.6376	0	2.0885	1.4167	1.7762	.
7	53085398	rs74764453	C	G	0.0561903	3	3.894e-05	0.04823	1.6385	1.5542	0.0397	69	1.7762	0.977	2.0406	POM121L12(-17.95kb)
3	102505396	rs73141834	C	T	0.0143825	2	3.905e-05	0.0005825	2.8481	2.9587	0.2364	28.67	NA	4.5215	2.3402	.
1	246887131	rs61852473	T	C	0.0260394	3	3.906e-05	3.906e-05	1.9852	1.9852	0.9662	0	2.0182	1.836	2.0418	AHCTF1(-115.3kb)|CNST(+55.25kb)|LOC149134(-65.79kb)|LOC255654(+199.5kb)|SCCPDH(-0.246kb)|TFB2M(+157.6kb)
21	40523026	rs9305667	C	T	0.0858331	3	3.906e-05	0.003135	1.5341	1.5038	0.1957	38.7	1.6256	1.123	1.7496	BRWD1(-34.38kb)|BRWD1-AS1(-164.6kb)|BRWD1-IT2(-162.8kb)|HMGN1(-191.2kb)|PSMG1(-24.34kb)
4	120625600	rs72680916	C	T	0.0455497	3	3.908e-05	0.002314	1.738	1.6979	0.2168	34.6	1.1384	1.975	1.9824	PDE5A(+75.62kb)
4	120626325	rs72680921	G	T	0.0467201	3	3.917e-05	0.002386	1.7375	1.6969	0.2154	34.86	1.137	1.9752	1.9818	PDE5A(+76.34kb)
2	113109203	rs142989363	C	T	0.0153372	2	3.928e-05	3.928e-05	2.7451	2.7451	0.849	0	NA	2.5303	2.8198	FBLN7(+163.4kb)|POLR1B(-190.3kb)|RGPD5(-16.76kb)|RGPD8(-16.74kb)|TTL(-130.5kb)|ZC3H6(+11.56kb)|ZC3H8(+96.54kb)
4	120626314	rs72680920	T	C	0.0467201	3	3.928e-05	0.002398	1.7372	1.6967	0.2152	34.91	1.137	1.9753	1.9816	PDE5A(+76.33kb)
4	120621417	rs7682717	A	G	0.046797	3	3.932e-05	0.001977	1.7399	1.7016	0.2245	33.06	1.1445	1.971	1.9838	PDE5A(+71.44kb)
4	120622479	rs72680906	A	G	0.0467354	3	3.934e-05	0.002069	1.7396	1.701	0.2223	33.5	1.1428	1.9755	1.9828	PDE5A(+72.5kb)
4	120626383	rs72680923	C	G	0.0467201	3	3.938e-05	0.002406	1.7371	1.6965	0.2151	34.92	1.1367	1.9752	1.9814	PDE5A(+76.4kb)
8	127990255	rs753228	T	C	0.023206	3	3.938e-05	0.002321	2.0825	2.1897	0.1411	48.93	2.0723	3.6944	1.5607	PCAT1(-35.14kb)
4	120622607	rs72680907	C	T	0.0467354	3	3.939e-05	0.002088	1.7395	1.7007	0.2219	33.58	1.1424	1.9755	1.9827	PDE5A(+72.63kb)
17	75651025	rs11653967	G	T	0.244164	3	3.942e-05	3.942e-05	1.3306	1.3306	0.9531	0	1.3626	1.2852	1.3374	LOC100507351(+89.92kb)|SEPT9(+154.3kb)
4	120638132	rs72680949	T	A	0.0453804	3	3.95e-05	0.004102	1.7319	1.685	0.188	40.16	1.1162	1.9922	1.9808	PDE5A(+88.15kb)
14	87815638	rs61980137	G	A	0.361934	3	3.953e-05	3.953e-05	1.2971	1.2971	0.5751	0	1.1659	1.3856	1.327	.
4	120626727	rs72680925	G	A	0.0467201	3	3.958e-05	0.002442	1.7366	1.696	0.2145	35.04	1.1361	1.9752	1.981	PDE5A(+76.75kb)
4	120627183	rs72680928	T	G	0.0468278	3	3.966e-05	0.002478	1.7363	1.6954	0.2139	35.16	1.1354	1.9751	1.9806	PDE5A(+77.2kb)
4	120627177	rs72680927	C	T	0.0468278	3	3.969e-05	0.002469	1.7363	1.6955	0.2141	35.11	1.1355	1.975	1.9805	PDE5A(+77.2kb)
4	67849860	rs2318538	G	A	0.132461	3	3.971e-05	3.971e-05	1.4585	1.4585	0.5176	0	1.7255	1.4198	1.3445	.
1	235078491	rs115610777	T	C	0.0164459	2	3.972e-05	0.00822	4.1502	4.1216	0.1219	58.21	2.3998	7.0088	NA	TOMM20(-194.2kb)
19	41231698	rs118114394	A	G	0.0302895	2	3.979e-05	3.979e-05	2.1419	2.1419	0.8391	0	NA	2.0169	2.193	ADCK4(+8.908kb)|C19orf54(-15.06kb)|CYP2A6(-117.7kb)|CYP2A7(-149.6kb)|CYP2B7P1(-198.5kb)|CYP2G1P(-165kb)|EGLN2(-73.35kb)|ITPKC(0)|LTBP4(+95.97kb)|MIA(-49.38kb)|MIA-RAB4B(-49.74kb)|NUMBL(+35.14kb)|RAB4B(-52.42kb)|RAB4B-EGLN2(-52.42kb)|SHKBP1(+134.4kb)|SNRPA(-25.06kb)|SPTBN4(+149.3kb)
11	29512867	rs111487995	G	T	0.0460887	3	3.98e-05	3.98e-05	1.7569	1.7569	0.6268	0	2.104	1.4156	1.7699	.
7	53049389	rs77412351	G	T	0.0543271	3	3.995e-05	0.05673	1.637	1.5378	0.0378	69.47	1.7443	0.9525	2.0356	POM121L12(-53.96kb)
11	29512647	rs16919184	T	A	0.0461195	3	3.995e-05	3.995e-05	1.7568	1.7568	0.6265	0	2.1043	1.4155	1.7697	.
11	29512736	rs16919187	A	G	0.0460733	3	3.995e-05	3.995e-05	1.7567	1.7567	0.6264	0	2.1042	1.4154	1.7697	.
4	136042770	rs79853407	T	G	0.0187096	3	3.998e-05	3.998e-05	2.3414	2.3414	0.61	0	2.4765	1.5953	2.6474	.
9	14997687	rs116888601	A	G	0.0160918	3	4e-05	4e-05	2.8929	2.8929	0.4986	0	3.4769	4.7294	2.2814	FREM1(+86.69kb)|LOC389705(0)|TTC39B(-173.2kb)
6	9609264	rs855249	G	A	0.0195257	3	4.032e-05	4.032e-05	2.3932	2.3932	0.4785	0	2.0341	1.6684	2.9995	.
11	29512076	rs76429300	G	A	0.0461195	3	4.035e-05	4.035e-05	1.7563	1.7563	0.6257	0	2.1048	1.415	1.7688	.
4	67879573	rs17746199	T	C	0.0957807	3	4.044e-05	0.005657	1.546	1.5832	0.1002	56.54	2.2749	1.342	1.3569	.
5	94247253	rs469942	C	T	0.668109	3	4.072e-05	0.002222	1.3195	1.324	0.1661	44.29	1.1501	1.6039	1.2718	MCTP1(0)
10	7743940	rs113241510	C	T	0.0695719	3	4.076e-05	4.076e-05	0.5365	0.5365	0.6915	0	0.658	0.497	0.4909	ATP5C1(-86.15kb)|ITIH2(-1.295kb)|ITIH5(+34.98kb)|KIN(-48.98kb)|TAF3(-116.5kb)
4	120629959	rs72680937	T	A	0.0471204	3	4.077e-05	0.002726	1.7333	1.6916	0.21	35.92	1.1313	1.9747	1.9776	PDE5A(+79.98kb)
5	171629959	rs187800500	T	C	0.0179704	3	4.079e-05	0.0001902	2.3704	2.3956	0.3109	14.39	4.1495	1.7375	2.0718	EFCAB9(0)|FBXW11(+196.1kb)|SH3PXD2B(-130.5kb)|STK10(+14.61kb)|UBTD2(-6.69kb)
15	70428662	rs61999944	A	G	0.074284	3	4.084e-05	0.01231	1.5935	1.5431	0.1183	53.16	1.0557	1.7721	1.8419	MIR629(+56.86kb)|TLE3(+38.41kb)
4	120629974	rs72680938	C	T	0.0472436	3	4.086e-05	0.002731	1.7331	1.6914	0.21	35.93	1.1312	1.9747	1.9773	PDE5A(+79.99kb)
4	120633203	rs56324051	A	C	0.0472436	3	4.097e-05	0.003113	1.7314	1.688	0.2035	37.19	1.126	1.9748	1.9775	PDE5A(+83.22kb)
16	84858553	rs13339223	C	T	0.0309824	3	4.097e-05	0.001377	2.2657	2.4489	0.172	43.19	2.3603	5.144	1.7523	CRISPLD2(0)|KLHL36(+162.6kb)|USP10(+45.03kb)|ZDHHC7(-149.5kb)
4	67869650	rs11940210	T	C	0.0967354	3	4.114e-05	0.005546	1.5451	1.5841	0.1003	56.51	2.2727	1.3585	1.3475	.
7	53044756	rs112925675	A	T	0.0540191	3	4.114e-05	0.05651	1.6381	1.5392	0.038	69.43	1.7436	0.953	2.0408	POM121L12(-58.59kb)
4	120634176	rs138958717	C	G	0.0472282	3	4.116e-05	0.003238	1.7309	1.687	0.2016	37.55	1.1244	1.9746	1.9778	PDE5A(+84.2kb)
10	121608382	rs117845256	C	A	0.0149369	2	4.123e-05	4.123e-05	8.9759	8.9759	0.3898	0	5.5181	13.8739	NA	BAG3(+171.1kb)|INPP5F(+19.72kb)|MCMBP(0)|MIR4682(-109.6kb)|SEC23IP(-43.7kb)
3	125999011	rs4679233	C	T	0.894826	3	4.125e-05	4.125e-05	0.6677	0.6677	0.6696	0	0.7437	0.714	0.6123	ALDH1L1(+98.98kb)|ALDH1L1-AS1(+172.1kb)|ALDH1L1-AS2(+70kb)|CCDC37(-114.8kb)|KLF15(-62.47kb)|LOC100506907(-112.9kb)|SLC41A3(+178.6kb)|ZXDC(-157.4kb)
4	120634198	rs72680944	C	T	0.0470896	3	4.131e-05	0.003265	1.7306	1.6866	0.2013	37.61	1.124	1.9747	1.9773	PDE5A(+84.22kb)
16	23477213	rs1135088	C	G	0.0644441	2	4.132e-05	4.132e-05	2.0814	2.0814	0.8692	0	2.151	2.0273	NA	COG7(+12.7kb)|DCTN5(-175.5kb)|EARS2(-56.12kb)|GGA2(0)|NDUFAB1(-115.1kb)|PALB2(-137.3kb)|SCNN1B(+84.59kb)|UBFD1(-91.65kb)
11	29521046	rs115842459	G	A	0.0460271	3	4.137e-05	4.137e-05	1.7537	1.7537	0.6477	0	2.0745	1.4175	1.7744	.
17	17254808	rs1009720	G	A	0.771374	3	4.147e-05	0.002177	0.7395	0.7527	0.2264	32.68	0.8711	0.814	0.6569	COPS3(+70.19kb)|FLCN(+114.3kb)|MED9(-125.5kb)|MPRIP(+158.8kb)|NT5M(+3.831kb)|PEMT(-154.1kb)|PLD6(+145.2kb)|RASD1(-142.9kb)|SMCR9(-67.85kb)
4	120625878	rs72680917	A	G	0.0470896	3	4.155e-05	0.003059	1.7314	1.6886	0.2046	36.97	1.1262	1.98	1.975	PDE5A(+75.9kb)
8	128001464	rs75374744	A	G	0.0231752	3	4.172e-05	0.002289	2.0817	2.1838	0.1444	48.33	2.056	3.6836	1.5614	PCAT1(-23.93kb)
12	90260065	rs148161153	T	C	0.0201417	3	4.189e-05	0.08686	2.4444	2.1126	0.0343	70.34	0.6509	3.9939	2.6503	LINC00936(+154.3kb)
9	73018089	rs139308065	C	T	0.0189252	2	4.193e-05	4.193e-05	2.5434	2.5434	0.8034	0	NA	2.3201	2.634	KLF9(0)|MAMDC2(+176.2kb)|SMC5(+48.3kb)|SMC5-AS1(+144.3kb)|TRPM3(-131.9kb)
3	102379159	rs73134094	C	T	0.0150293	2	4.215e-05	0.001964	2.8108	2.9945	0.1875	42.45	NA	4.6985	2.2662	ZPLD1(+180.5kb)
8	63164923	rs62510111	C	A	0.104373	3	4.223e-05	4.223e-05	1.4966	1.4966	0.7575	0	1.3258	1.6188	1.5398	NKAIN3(0)
2	76960366	rs56078403	G	T	0.301324	3	4.231e-05	4.231e-05	1.3114	1.3114	0.9523	0	1.2657	1.3322	1.3244	LRRTM4(-14.48kb)
4	120633868	rs143594221	T	C	0.0454881	3	4.238e-05	0.003514	1.7296	1.685	0.1978	38.3	1.1217	1.9748	1.9788	PDE5A(+83.89kb)
7	53056949	rs80031946	G	A	0.0542809	3	4.241e-05	0.05277	1.6338	1.5394	0.0409	68.71	1.7439	0.9612	2.028	POM121L12(-46.4kb)
3	102380488	rs73134097	A	G	0.0146751	2	4.271e-05	0.001893	2.8484	3.0353	0.1898	41.83	NA	4.7917	2.2945	ZPLD1(+181.8kb)
5	61191064	rs73109821	T	C	0.0528488	3	4.271e-05	4.271e-05	1.841	1.841	0.4568	0	1.4481	2.534	1.8611	C5orf64(+188.7kb)
4	120647831	rs11098535	C	T	0.0453188	3	4.273e-05	0.005794	1.7229	1.6722	0.1717	43.25	1.0998	1.992	1.9747	PDE5A(+97.85kb)
3	102490516	rs73139740	T	C	0.0148137	2	4.303e-05	0.0007849	2.8258	2.9481	0.2272	31.41	NA	4.5206	2.3133	.
4	120653942	rs56296554	T	C	0.0457807	3	4.351e-05	0.006384	1.7218	1.67	0.1663	44.25	1.096	1.9931	1.9767	PDE5A(+104kb)
7	53670353	rs13438638	C	A	0.190268	3	4.353e-05	4.353e-05	1.3558	1.3558	0.4203	0	1.3331	1.1649	1.4804	FLJ45974(-52.85kb)
11	29524720	rs1009071	C	T	0.0460733	3	4.354e-05	4.354e-05	1.7517	1.7517	0.6691	0	2.0402	1.4188	1.7826	.
15	54794187	rs76329328	T	C	0.0247151	3	4.355e-05	4.355e-05	2.1206	2.1206	0.9601	0	2.09	2.3433	2.0554	UNC13C(0)
18	59524393	rs113345113	T	C	0.0608562	3	4.355e-05	0.01477	1.6604	1.8071	0.0288	71.81	2.053	2.577	1.2113	LOC100996669(+102.5kb)|PIGN(-187.1kb)|RNF152(0)
15	77054648	rs62028731	C	T	0.0341238	3	4.361e-05	0.0231	1.9118	1.8802	0.0553	65.46	1.0588	3.0663	1.9851	RCN2(-169.3kb)|SCAPER(0)
4	120648027	rs11098536	G	A	0.0460117	3	4.378e-05	0.005707	1.7209	1.6709	0.1733	42.94	1.1	1.9915	1.9703	PDE5A(+98.05kb)
11	29524031	rs76091565	A	G	0.0459501	3	4.38e-05	4.38e-05	1.7514	1.7514	0.6619	0	2.0527	1.4185	1.7777	.
2	29809027	rs62131138	G	T	0.0929935	3	4.387e-05	4.387e-05	1.5376	1.5376	0.575	0	1.847	1.5154	1.4085	ALK(0)
8	127950187	rs16901872	T	C	0.023437	3	4.387e-05	0.001321	2.0756	2.1701	0.1788	41.9	2.097	3.6182	1.5849	PCAT1(-75.21kb)
16	754565	rs7200757	C	T	0.222159	3	4.394e-05	0.0002861	1.4028	1.4113	0.2761	22.29	1.7331	1.355	1.2625	C16orf11(+139kb)|C16orf13(+68.22kb)|CAPN15(+149.9kb)|CCDC78(-18.02kb)|CHTF18(-84.06kb)|FAM173A(-16.58kb)|FAM195A(+56.09kb)|FBXL16(0)|GNG13(-93.48kb)|HAGHL(-22.7kb)|JMJD8(+20.13kb)|LINC00235(+177.2kb)|LMF1(-149.1kb)|METRN(-10.61kb)|MIR662(-65.62kb)|MIR3176(+161.2kb)|MIR5587(+169.2kb)|MSLN(-56.2kb)|NARFL(-25.2kb)|NHLRC4(+135.1kb)|PIGQ(+120.4kb)|PRR25(-100.9kb)|RAB11FIP3(+182.1kb)|RAB40C(+75.29kb)|R…
11	29525295	rs78664920	T	C	0.0459039	3	4.402e-05	4.402e-05	1.7511	1.7511	0.6705	0	2.0356	1.4179	1.7835	.
16	49500910	rs76517560	G	C	0.0185556	2	4.416e-05	0.04779	3.0115	3.6321	0.0237	80.44	NA	7.3055	1.978	C16orf78(+67.59kb)|CBLN1(+185.2kb)|ZNF423(-23.6kb)
5	86361543	rs113609715	T	A	0.0206806	3	4.432e-05	4.432e-05	2.3064	2.3064	0.5698	0	1.7421	3.4224	2.2564	MIR4280(-49.15kb)
1	246901319	rs140725729	A	G	0.0262704	3	4.438e-05	4.438e-05	1.9642	1.9642	0.9773	0	2.0238	1.8437	1.9914	AHCTF1(-101.1kb)|CNST(+69.44kb)|LOC149134(-51.6kb)|SCCPDH(0)|TFB2M(+171.8kb)
8	127949625	rs56073101	C	A	0.0234216	3	4.449e-05	0.00135	2.0751	2.1701	0.1779	42.09	2.1013	3.6167	1.5819	PCAT1(-75.77kb)
1	235096148	rs142069811	C	T	0.0184324	3	4.452e-05	0.001174	2.5875	2.7685	0.1892	39.93	2.5999	5.6105	1.8986	RBM34(-198.3kb)|SNORA14B(-195kb)|TOMM20(-176.5kb)
2	76960160	rs58242146	T	A	0.302448	3	4.456e-05	4.456e-05	1.3107	1.3107	0.9511	0	1.2647	1.3338	1.3226	LRRTM4(-14.69kb)
1	214749261	rs76955245	T	C	0.0500616	3	4.463e-05	4.463e-05	1.792	1.792	0.4671	0	1.6148	1.3595	2.0809	CENPF(-27.27kb)|PTPN14(+24.24kb)
4	178405711	rs76750716	A	G	0.0225747	3	4.473e-05	4.473e-05	2.2404	2.2404	0.3983	0	3.6724	1.9353	1.9375	AGA(+42.05kb)|NEIL3(+121.6kb)
10	83718134	rs79665202	C	T	0.0319834	3	4.483e-05	4.483e-05	2.018	2.018	0.5936	0	2.0457	1.4236	2.2615	NRG3(0)
14	89647946	rs117229483	T	C	0.0154758	3	4.485e-05	4.485e-05	2.4061	2.4061	0.5636	0	1.6137	3.0012	2.6214	FOXN3(0)
7	53054373	rs76952187	G	A	0.0542963	3	4.493e-05	0.05633	1.6324	1.5352	0.0394	69.09	1.7444	0.9525	2.0255	POM121L12(-48.98kb)
4	15374135	rs9994660	C	T	0.254573	3	4.504e-05	4.504e-05	0.7428	0.7428	0.3987	0	0.8504	0.6516	0.7357	C1QTNF7(0)|CC2D2A(-97.35kb)
7	11628468	rs2189633	A	C	0.136988	3	4.517e-05	4.517e-05	1.608	1.608	0.5316	0	1.517	2.0431	1.4888	THSD7A(0)
1	214749573	rs114592116	A	G	0.0500924	3	4.52e-05	4.52e-05	1.7917	1.7917	0.469	0	1.6149	1.3602	2.0799	CENPF(-26.96kb)|PTPN14(+24.55kb)
5	87868068	rs17422400	T	A	0.0256391	3	4.53e-05	4.53e-05	2.2211	2.2211	0.8427	0	2.394	1.7897	2.3472	LINC00461(0)|MEF2C(-146kb)|MIR9-2(-94.6kb)|TMEM161B-AS1(+135.6kb)
3	102154715	rs62274739	C	T	0.0155374	2	4.536e-05	0.0002898	2.7345	2.7998	0.2652	19.45	NA	4.1693	2.2862	ZPLD1(0)
4	120631878	rs72680941	C	T	0.0484139	3	4.542e-05	0.001714	1.7169	1.6794	0.2362	30.71	1.1504	1.8585	1.9816	PDE5A(+81.9kb)
21	41524162	rs16999381	A	G	0.0352017	3	4.6e-05	0.001935	1.8827	1.818	0.2351	30.92	1.4121	1.4478	2.4223	DSCAM(0)|MIR4760(-60.12kb)
15	97207764	rs6496179	G	T	0.121343	3	4.606e-05	0.0006341	0.6543	0.6493	0.2373	30.47	0.7504	0.4874	0.7115	SPATA8(-118.9kb)|SPATA8-AS1(-107.5kb)
7	53049705	rs78727334	G	A	0.0543117	3	4.613e-05	0.05618	1.6306	1.5343	0.0396	69.04	1.7442	0.9529	2.0226	POM121L12(-53.64kb)
4	15386383	rs4132788	T	C	0.251124	3	4.618e-05	0.0006886	0.7431	0.7435	0.2453	28.84	0.885	0.6403	0.724	C1QTNF7(0)|CC2D2A(-85.1kb)
4	120640435	rs72680953	G	T	0.0481983	3	4.63e-05	0.002555	1.7125	1.6706	0.2176	34.43	1.1358	1.8731	1.9771	PDE5A(+90.45kb)
4	120627476	rs72680931	T	C	0.0478288	3	4.642e-05	0.001423	1.7178	1.683	0.2452	28.86	1.1567	1.8576	1.9805	PDE5A(+77.5kb)
2	16221966	rs73218559	G	A	0.0373884	2	4.643e-05	0.008869	2.2228	2.1021	0.1779	44.91	NA	1.4658	2.6286	MYCN(+134.8kb)|MYCNOS(+140.1kb)
3	55741014	rs815426	T	A	0.641638	3	4.643e-05	4.643e-05	1.3009	1.3009	0.8313	0	1.363	1.3334	1.2483	ERC2(0)|ERC2-IT1(+47.52kb)|MIR3938(-145.5kb)
3	32876886	rs62251926	A	G	0.0173853	3	4.65e-05	4.65e-05	2.5649	2.5649	0.8495	0	1.8888	2.4461	2.8261	CCR4(-116.2kb)|CNOT10(+61.52kb)|GLB1(-161.2kb)|TRIM71(0)
4	120629090	rs116785762	G	A	0.0476902	3	4.652e-05	0.001434	1.7212	1.6859	0.2449	28.91	1.158	1.8563	1.988	PDE5A(+79.11kb)
19	41258922	rs79570674	C	T	0.029227	2	4.657e-05	4.657e-05	2.1231	2.1231	0.6113	0	NA	1.8302	2.2532	ADCK4(+36.13kb)|C19orf54(+3.094kb)|CYP2A6(-90.52kb)|CYP2A7(-122.4kb)|CYP2B7P1(-171.2kb)|CYP2G1P(-137.8kb)|EGLN2(-46.12kb)|ITPKC(+12.16kb)|LTBP4(+123.2kb)|MIA(-22.16kb)|MIA-RAB4B(-22.52kb)|NUMBL(+62.37kb)|RAB4B(-25.2kb)|RAB4B-EGLN2(-25.2kb)|SHKBP1(+161.6kb)|SNRPA(0)|SPTBN4(+176.6kb)
2	217710965	rs183576056	C	T	0.0138589	2	4.659e-05	4.659e-05	3.1672	3.1672	0.4554	0	NA	2.2309	3.5977	IGFBP2(+181.8kb)|IGFBP5(+150.7kb)|TNP1(-13.22kb)
4	120640908	rs139839559	G	A	0.0482137	3	4.673e-05	0.002631	1.7118	1.6696	0.2164	34.66	1.1345	1.8731	1.9763	PDE5A(+90.93kb)
15	87872218	rs142781917	C	T	0.0342932	3	4.684e-05	4.684e-05	2.0492	2.0492	0.4056	0	2.8184	2.5663	1.6826	.
15	45740392	rs9806699	A	G	0.29846	3	4.687e-05	4.687e-05	1.3197	1.3197	0.729	0	1.2138	1.339	1.3788	BLOC1S6(-139kb)|C15orf48(+14.74kb)|GATM(+69.41kb)|GATM-AS1(+68.07kb)|HMGN2P46(-62.94kb)|MIR147B(+15.06kb)|SLC28A2(+172.3kb)|SLC30A4(-34.29kb)|SPATA5L1(+26.78kb)|SQRDL(-183kb)
4	120641341	rs56199127	C	T	0.0483677	3	4.693e-05	0.002694	1.7113	1.6688	0.2153	34.88	1.1337	1.873	1.9762	PDE5A(+91.36kb)
2	16221047	rs61745688	T	C	0.0368186	2	4.698e-05	0.0074	2.2227	2.1083	0.1862	42.76	NA	1.4737	2.6181	MYCN(+133.9kb)|MYCNOS(+139.2kb)
4	120628124	rs72680932	G	A	0.0490915	3	4.702e-05	0.001435	1.7168	1.6821	0.2452	28.85	1.1557	1.859	1.9779	PDE5A(+78.14kb)
4	120630935	rs55922435	G	A	0.0481059	3	4.718e-05	0.001618	1.7154	1.6791	0.2399	29.96	1.1519	1.8573	1.9784	PDE5A(+80.95kb)
4	120641924	rs72680956	G	C	0.0483523	3	4.718e-05	0.002767	1.7107	1.668	0.2142	35.11	1.1326	1.8729	1.9758	PDE5A(+91.94kb)
7	53048185	rs79603609	G	C	0.0540499	3	4.721e-05	0.0562	1.6323	1.5361	0.0395	69.05	1.744	0.953	2.029	POM121L12(-55.16kb)
4	120628607	rs72680933	G	C	0.0481213	3	4.725e-05	0.001459	1.7163	1.6814	0.2446	28.98	1.1552	1.8576	1.9779	PDE5A(+78.63kb)
4	120628993	rs72680935	T	C	0.0481059	3	4.731e-05	0.001485	1.7161	1.681	0.2439	29.13	1.1546	1.8574	1.9779	PDE5A(+79.01kb)
5	172288907	rs11743007	C	A	0.956945	3	4.734e-05	4.734e-05	0.5455	0.5455	0.8463	0	0.5273	0.6399	0.5177	ATP6V0E1(-121.9kb)|CREBRF(-194.4kb)|DUSP1(+90.7kb)|ERGIC1(0)|LOC100268168(-92.88kb)|NEURL1B(+170.4kb)|RPL26L1(-97.53kb)|SNORA74B(-158.8kb)
10	83731408	rs4933267	A	T	0.0320296	3	4.738e-05	4.738e-05	2.0146	2.0146	0.5922	0	2.0371	1.4192	2.2597	NRG3(0)
4	120629095	rs77836546	G	T	0.0481059	3	4.739e-05	0.001506	1.7159	1.6806	0.2432	29.26	1.1543	1.8574	1.978	PDE5A(+79.11kb)
5	172291316	rs13177110	G	C	0.957053	3	4.742e-05	4.742e-05	0.5465	0.5465	0.7583	0	0.5443	0.6665	0.503	ATP6V0E1(-119.4kb)|CREBRF(-192kb)|DUSP1(+93.11kb)|ERGIC1(0)|LOC100268168(-90.47kb)|NEURL1B(+172.8kb)|RPL26L1(-95.12kb)|SNORA74B(-156.4kb)
2	5294494	rs111893897	C	T	0.102556	3	4.743e-05	0.01656	1.4464	1.4077	0.0981	56.92	1.5439	1.0366	1.6567	.
4	120629382	rs72680936	G	A	0.0481059	3	4.743e-05	0.001517	1.7158	1.6805	0.243	29.31	1.1539	1.8575	1.9778	PDE5A(+79.4kb)
4	120632631	rs113988766	G	A	0.0483985	3	4.774e-05	0.001742	1.7141	1.677	0.2368	30.58	1.1491	1.8571	1.9776	PDE5A(+82.65kb)
4	120635557	rs72680945	A	G	0.0481059	3	4.775e-05	0.001989	1.7129	1.6741	0.2306	31.84	1.1445	1.8579	1.9778	PDE5A(+85.58kb)
4	120643792	rs72680958	G	A	0.047028	3	4.782e-05	0.002996	1.7092	1.6655	0.2106	35.8	1.1292	1.8729	1.9747	PDE5A(+93.81kb)
10	7748495	rs112258838	A	G	0.0695411	3	4.786e-05	4.786e-05	0.54	0.54	0.6757	0	0.6668	0.4954	0.4962	ATP5C1(-81.6kb)|ITIH2(0)|ITIH5(+39.53kb)|KIN(-44.43kb)|TAF3(-112kb)
4	120643960	rs72680959	C	T	0.0481983	3	4.81e-05	0.003018	1.7087	1.6649	0.2105	35.83	1.1288	1.8726	1.974	PDE5A(+93.98kb)
4	15384544	rs4515160	G	C	0.251694	3	4.826e-05	0.0005951	0.7438	0.7442	0.255	26.83	0.8845	0.6432	0.7242	C1QTNF7(0)|CC2D2A(-86.94kb)
1	214727301	rs138967820	C	T	0.050308	3	4.856e-05	4.856e-05	1.7894	1.7894	0.4519	0	1.6554	1.3319	2.0772	CENPF(-49.23kb)|PTPN14(+2.277kb)
16	23696004	rs117890820	A	C	0.0183092	3	4.858e-05	0.000191	2.2904	2.2944	0.3178	12.77	1.5073	3.7809	2.3365	CHP2(-69.94kb)|DCTN5(+10.94kb)|EARS2(+127.3kb)|ERN2(-5.621kb)|GGA2(+174.2kb)|NDUFAB1(+88.36kb)|PALB2(+43.33kb)|PLK1(0)|PRKCB(-151.3kb)|UBFD1(+110.3kb)
4	120628956	rs72680934	A	G	0.0481367	3	4.865e-05	0.00155	1.7147	1.6794	0.2426	29.39	1.1531	1.8567	1.9769	PDE5A(+78.98kb)
6	40608156	rs34567093	G	C	0.211457	3	4.868e-05	4.868e-05	1.3963	1.3963	0.5041	0	1.6365	1.3547	1.3007	LRFN2(+53.03kb)
6	101435600	rs113075410	G	A	0.0164306	3	4.872e-05	0.0006373	2.7095	2.6705	0.2678	24.09	1.3508	4.0409	3.0047	ASCC3(+106.4kb)
4	67855730	rs10005677	T	C	0.132184	3	4.877e-05	4.877e-05	1.4537	1.4537	0.463	0	1.7403	1.4236	1.3261	.
11	29527608	rs79325442	C	A	0.0457961	3	4.89e-05	4.89e-05	1.7456	1.7456	0.6553	0	2.0259	1.4005	1.7859	.
4	120658267	rs72680968	C	T	0.0455651	3	4.897e-05	0.006418	1.719	1.6687	0.168	43.94	1.0961	1.9928	1.9746	PDE5A(+108.3kb)
2	30973223	rs546987	T	C	0.63571	3	4.935e-05	4.935e-05	0.7745	0.7745	0.4054	0	0.7337	0.8908	0.7372	CAPN13(0)|GALNT14(-160.1kb)|LCLAT1(+106.1kb)
21	46225312	rs79119995	G	C	0.100323	3	4.958e-05	4.958e-05	1.4822	1.4822	0.4502	0	1.7672	1.5099	1.3111	C21orf67(-127.9kb)|FAM207A(-134.6kb)|ITGB2(-80.56kb)|ITGB2-AS1(-115.6kb)|KRTAP10-8(+192.4kb)|KRTAP10-9(+177kb)|KRTAP10-10(+166.9kb)|KRTAP10-11(+157.7kb)|KRTAP10-12(+107.4kb)|KRTAP12-1(+123.2kb)|KRTAP12-2(+138.5kb)|KRTAP12-3(+147.1kb)|KRTAP12-4(+150.7kb)|LINC00162(-193.8kb)|LINC00163(-184.5kb)|PTTG1IP(-44.19kb)|SUMO3(-0.219kb)|TSPEAR(+93.82kb)|UBE2G2(+3.561kb)
10	7744227	rs59814098	T	C	0.0702957	3	4.972e-05	4.972e-05	0.5414	0.5414	0.7105	0	0.6591	0.4964	0.5032	ATP5C1(-85.86kb)|ITIH2(-1.008kb)|ITIH5(+35.27kb)|KIN(-48.7kb)|TAF3(-116.2kb)
19	41256492	rs117375307	A	G	0.0292424	2	4.974e-05	4.974e-05	2.1197	2.1197	0.6133	0	NA	1.8291	2.2494	ADCK4(+33.7kb)|C19orf54(+0.664kb)|CYP2A6(-92.95kb)|CYP2A7(-124.9kb)|CYP2B7P1(-173.7kb)|CYP2G1P(-140.2kb)|EGLN2(-48.56kb)|ITPKC(+9.727kb)|LTBP4(+120.8kb)|MIA(-24.59kb)|MIA-RAB4B(-24.95kb)|NUMBL(+59.94kb)|RAB4B(-27.63kb)|RAB4B-EGLN2(-27.63kb)|SHKBP1(+159.2kb)|SNRPA(-0.266kb)|SPTBN4(+174.1kb)
4	15372325	rs4076789	A	G	0.253665	3	4.976e-05	4.976e-05	0.744	0.744	0.3951	0	0.8517	0.6516	0.7374	C1QTNF7(0)|CC2D2A(-99.16kb)
15	93795911	rs10438413	A	G	0.362427	3	5.014e-05	5.014e-05	1.3217	1.3217	0.6843	0	1.4475	1.2322	1.3051	RGMA(+163.5kb)
19	41255768	rs4802088	T	C	0.0293348	2	5.038e-05	5.038e-05	2.1187	2.1187	0.6132	0	NA	1.8282	2.2484	ADCK4(+32.98kb)|C19orf54(0)|CYP2A6(-93.67kb)|CYP2A7(-125.6kb)|CYP2B7P1(-174.4kb)|CYP2G1P(-141kb)|EGLN2(-49.28kb)|ITPKC(+9.003kb)|LTBP4(+120kb)|MIA(-25.31kb)|MIA-RAB4B(-25.67kb)|NUMBL(+59.21kb)|RAB4B(-28.36kb)|RAB4B-EGLN2(-28.36kb)|SHKBP1(+158.5kb)|SNRPA(-0.99kb)|SPTBN4(+173.4kb)
1	214730866	rs60569881	A	G	0.0569757	3	5.05e-05	5.05e-05	1.7681	1.7681	0.426	0	1.576	1.3368	2.0746	CENPF(-45.66kb)|PTPN14(+5.842kb)
21	40697510	rs117601216	G	A	0.0143979	2	5.056e-05	5.056e-05	3.0769	3.0769	0.4699	0	NA	2.3034	3.5346	BRWD1(+11.8kb)|BRWD1-AS1(+2.366kb)|BRWD1-IT2(+10.62kb)|HMGN1(-16.73kb)|LCA5L(-80.26kb)|PSMG1(+142.1kb)|SH3BGR(-120.3kb)|WRB(-54.7kb)
16	754230	rs4984685	A	G	0.217354	3	5.064e-05	0.0003673	1.3988	1.4074	0.2691	23.81	1.7351	1.3359	1.2639	C16orf11(+138.7kb)|C16orf13(+67.88kb)|CAPN15(+149.6kb)|CCDC78(-18.35kb)|CHTF18(-84.39kb)|FAM173A(-16.91kb)|FAM195A(+55.76kb)|FBXL16(0)|GNG13(-93.81kb)|HAGHL(-23.04kb)|JMJD8(+19.79kb)|LINC00235(+176.8kb)|LMF1(-149.4kb)|METRN(-10.94kb)|MIR662(-65.95kb)|MIR3176(+160.9kb)|MIR5587(+168.9kb)|MSLN(-56.53kb)|NARFL(-25.54kb)|NHLRC4(+134.7kb)|PIGQ(+120.1kb)|PRR25(-101.2kb)|RAB11FIP3(+181.7kb)|RAB40C(+74.96…
3	55741894	rs709339	A	T	0.641885	3	5.066e-05	5.066e-05	1.2993	1.2993	0.8233	0	1.3648	1.3301	1.2458	ERC2(0)|ERC2-IT1(+48.4kb)|MIR3938(-144.6kb)
1	214730401	rs35329321	C	T	0.0569295	3	5.071e-05	5.071e-05	1.7679	1.7679	0.4258	0	1.5769	1.336	2.0742	CENPF(-46.13kb)|PTPN14(+5.377kb)
13	59806688	rs141016515	C	T	0.0265938	3	5.074e-05	0.002985	2.0321	1.9592	0.2034	37.21	1.4224	1.6254	2.7886	.
17	75652241	rs62079256	T	C	0.239144	3	5.086e-05	5.086e-05	1.3247	1.3247	0.9328	0	1.2968	1.2868	1.3602	LOC100507351(+91.14kb)|SEPT9(+155.6kb)
7	53040800	rs6975058	C	A	0.0540961	3	5.087e-05	0.05638	1.6285	1.5333	0.0403	68.86	1.7423	0.952	2.0215	POM121L12(-62.55kb)
2	5299980	rs11686548	T	A	0.0997228	3	5.088e-05	0.01668	1.4483	1.41	0.0994	56.68	1.5565	1.035	1.6546	.
18	46313173	rs78127660	A	C	0.0405451	3	5.088e-05	5.088e-05	1.7962	1.7962	0.5173	0	1.8498	1.2718	1.9771	CTIF(0)|MIR4743(+116.1kb)|SMAD7(-133kb)
2	169089920	rs16855160	C	T	0.113212	3	5.09e-05	5.09e-05	1.4955	1.4955	0.398	0	1.2676	1.3484	1.7021	STK39(0)
10	7749748	rs111297004	A	G	0.0698337	3	5.1e-05	5.1e-05	0.5416	0.5416	0.6734	0	0.6692	0.4956	0.4984	ATP5C1(-80.34kb)|ITIH2(0)|ITIH5(+40.79kb)|KIN(-43.18kb)|TAF3(-110.7kb)
4	120648905	rs72680962	C	G	0.0457191	3	5.105e-05	0.005954	1.7164	1.6679	0.1736	42.89	1.0985	1.9919	1.9666	PDE5A(+98.92kb)
1	214732288	rs6675792	G	T	0.0566985	3	5.108e-05	5.108e-05	1.7676	1.7676	0.4276	0	1.5734	1.3385	2.0738	CENPF(-44.24kb)|PTPN14(+7.264kb)
15	97206757	rs1521571	T	C	0.121574	3	5.121e-05	0.0007982	0.6574	0.6518	0.2279	32.38	0.7515	0.4876	0.7173	SPATA8(-119.9kb)|SPATA8-AS1(-108.5kb)
4	42673990	rs17448631	T	C	0.0939791	3	5.144e-05	5.144e-05	1.4789	1.4789	0.9165	0	1.3867	1.5137	1.518	ATP8A1(+14.87kb)
3	101923830	rs73151495	C	T	0.0128426	3	5.15e-05	5.15e-05	2.78	2.78	0.5465	0	1.814	3.776	3.0915	.
16	754288	rs4984686	T	C	0.230459	3	5.156e-05	0.0001964	1.3966	1.4028	0.3029	16.26	1.7087	1.3608	1.2585	C16orf11(+138.8kb)|C16orf13(+67.94kb)|CAPN15(+149.7kb)|CCDC78(-18.29kb)|CHTF18(-84.33kb)|FAM173A(-16.85kb)|FAM195A(+55.81kb)|FBXL16(0)|GNG13(-93.75kb)|HAGHL(-22.98kb)|JMJD8(+19.85kb)|LINC00235(+176.9kb)|LMF1(-149.3kb)|METRN(-10.88kb)|MIR662(-65.89kb)|MIR3176(+160.9kb)|MIR5587(+168.9kb)|MSLN(-56.48kb)|NARFL(-25.48kb)|NHLRC4(+134.8kb)|PIGQ(+120.2kb)|PRR25(-101.2kb)|RAB11FIP3(+181.8kb)|RAB40C(+75.02…
9	125016042	rs6478560	T	C	0.958824	3	5.157e-05	0.003291	0.546	0.5463	0.1773	42.19	0.3664	0.8256	0.5221	LHX6(+24.95kb)|MIR4478(+133.6kb)|MORN5(+53.68kb)|MRRF(-10.84kb)|NDUFA8(+93.94kb)|PTGS1(-116.8kb)|RBM18(0)|TTLL11(+160.2kb)
20	33914380	rs77422622	G	A	0.0114105	3	5.16e-05	5.16e-05	2.8046	2.8046	0.806	0	1.8804	2.9839	3.0187	C20orf173(-194.2kb)|CEP250(-128.8kb)|EDEM2(+179.2kb)|EIF6(+41.76kb)|FAM83C(+34.16kb)|GDF5(-106.8kb)|MMP24(+49.58kb)|MMP24-AS1(+48.42kb)|PROCR(+149.2kb)|UQCC(0)
10	7750201	rs17142914	C	T	0.0696027	3	5.247e-05	5.247e-05	0.5422	0.5422	0.6734	0	0.67	0.4958	0.4994	ATP5C1(-79.89kb)|ITIH2(0)|ITIH5(+41.24kb)|KIN(-42.72kb)|TAF3(-110.3kb)
2	16223551	rs28477832	T	G	0.03745	2	5.252e-05	0.01317	2.2083	2.0765	0.1616	48.95	NA	1.4403	2.633	MYCN(+136.4kb)|MYCNOS(+141.7kb)
1	241890279	rs141233006	G	C	0.0260086	2	5.261e-05	0.0001338	3.127	3.1577	0.2902	10.61	NA	4.6844	2.5094	CHML(+91.05kb)|EXO1(-121.2kb)|KMO(+131.3kb)|OPN3(+86.58kb)|WDR64(0)
2	16227195	rs60153905	T	C	0.0376193	2	5.262e-05	0.01039	2.2133	2.0915	0.1708	46.68	NA	1.4596	2.6337	MYCN(+140.1kb)|MYCNOS(+145.4kb)
20	49646310	rs78533665	C	G	0.0214814	3	5.266e-05	5.266e-05	2.6195	2.6195	0.9523	0	2.7639	2.8788	2.44	ADNP(+98.78kb)|BCAS4(+152.6kb)|DPM1(+71.25kb)|KCNG1(+6.635kb)|MOCS3(+67.91kb)
13	34540949	rs17676901	G	C	0.0721743	3	5.267e-05	5.267e-05	1.5576	1.5576	0.4406	0	1.6696	1.193	1.6801	RFC3(+0.254kb)
8	480106	rs78141699	A	G	0.0490453	3	5.269e-05	5.269e-05	1.7426	1.7426	0.6604	0	1.8378	2.199	1.5804	ERICH1(-134.1kb)|FAM87A(+146.9kb)|FBXO25(+60.23kb)|TDRP(0)
4	42691861	rs28431293	C	T	0.0585771	3	5.298e-05	0.001139	1.6347	1.6412	0.2251	32.93	1.2436	2.259	1.637	ATP8A1(+32.74kb)
8	76632003	rs117212676	A	G	0.0172621	2	5.306e-05	5.306e-05	2.7071	2.7071	0.4565	0	NA	3.6082	2.4078	HNF4G(+152.9kb)
19	41253488	rs151246387	A	G	0.0293194	2	5.309e-05	5.309e-05	2.1144	2.1144	0.6137	0	NA	1.8251	2.2439	ADCK4(+30.7kb)|C19orf54(0)|CYP2A6(-95.95kb)|CYP2A7(-127.9kb)|CYP2B7P1(-176.7kb)|CYP2G1P(-143.2kb)|EGLN2(-51.56kb)|ITPKC(+6.723kb)|LTBP4(+117.8kb)|MIA(-27.59kb)|MIA-RAB4B(-27.95kb)|NUMBL(+56.93kb)|RAB4B(-30.64kb)|RAB4B-EGLN2(-30.64kb)|SHKBP1(+156.2kb)|SNRPA(-3.27kb)|SPTBN4(+171.1kb)
15	54794796	rs117348940	A	G	0.0275947	3	5.32e-05	5.32e-05	2.0151	2.0151	0.9768	0	1.8596	2.0506	2.0509	UNC13C(0)
11	856020	rs61867550	C	T	0.0430089	3	5.33e-05	5.33e-05	1.967	1.967	0.6904	0	1.5657	2.3785	1.9589	AP2A2(-69.79kb)|CD151(+17.18kb)|CEND1(+65.89kb)|CHID1(-11.84kb)|DEAF1(+160.3kb)|EFCAB4A(+24.03kb)|EPS8L2(+128.3kb)|MUC6(-156.8kb)|NS3BP(+75.26kb)|PDDC1(+78.53kb)|PIDD(+50.77kb)|PNPLA2(+30.45kb)|POLR2L(+13.49kb)|RPLP2(+43.14kb)|SLC25A22(+57.75kb)|SNORA52(+44.21kb)|TALDO1(+91kb)|TMEM80(+151kb)|TSPAN4(0)
2	16224667	rs57832146	A	G	0.0374808	2	5.334e-05	0.01113	2.2099	2.0854	0.1688	47.19	NA	1.4526	2.6294	MYCN(+137.5kb)|MYCNOS(+142.8kb)
8	134852761	rs147210946	A	G	0.0100708	2	5.334e-05	0.002208	3.313	3.6237	0.2013	38.76	NA	6.5074	2.6785	.
1	214731816	rs79054984	T	C	0.0502926	3	5.337e-05	5.337e-05	1.7836	1.7836	0.4651	0	1.6468	1.336	2.0655	CENPF(-44.72kb)|PTPN14(+6.792kb)
19	41253075	rs117354824	A	G	0.0294272	2	5.342e-05	5.342e-05	2.1136	2.1136	0.6137	0	NA	1.8244	2.243	ADCK4(+30.28kb)|C19orf54(0)|CYP2A6(-96.37kb)|CYP2A7(-128.3kb)|CYP2B7P1(-177.1kb)|CYP2G1P(-143.7kb)|EGLN2(-51.97kb)|ITPKC(+6.31kb)|LTBP4(+117.4kb)|MIA(-28.01kb)|MIA-RAB4B(-28.37kb)|NUMBL(+56.52kb)|RAB4B(-31.05kb)|RAB4B-EGLN2(-31.05kb)|SHKBP1(+155.8kb)|SNRPA(-3.683kb)|SPTBN4(+170.7kb)
6	384546	rs7745887	C	G	0.0275485	2	5.351e-05	0.008025	2.5328	2.3778	0.1875	42.44	NA	1.5569	3.0595	DUSP22(+33.19kb)|EXOC2(-100.6kb)|IRF4(-7.192kb)
2	16224879	rs73218565	A	C	0.0374654	2	5.367e-05	0.01084	2.2099	2.0866	0.17	46.89	NA	1.4543	2.6284	MYCN(+137.8kb)|MYCNOS(+143kb)
7	53666370	rs2194642	T	A	0.19033	3	5.373e-05	5.373e-05	1.352	1.352	0.3872	0	1.3223	1.1553	1.4847	FLJ45974(-56.83kb)
1	173399677	rs148137538	G	A	0.0179088	2	5.382e-05	0.01577	2.8551	3.0962	0.0805	67.27	NA	5.1523	2.0134	ANKRD45(-177.8kb)|LOC100506023(0)|PRDX6(-46.81kb)|SLC9C2(-69.93kb)
6	112678176	rs77371951	T	C	0.0266092	3	5.39e-05	5.39e-05	2.1163	2.1163	0.9725	0	2.3138	2.1415	2.048	LAMA4(+102.3kb)|RFPL4B(+5.678kb)
4	15375073	rs4326010	G	C	0.254912	3	5.392e-05	5.392e-05	0.7455	0.7455	0.3776	0	0.8574	0.6526	0.7367	C1QTNF7(0)|CC2D2A(-96.42kb)
6	116386706	rs149079154	G	A	0.0212042	2	5.402e-05	5.402e-05	2.7658	2.7658	0.716	0	NA	3.3077	2.6389	COL10A1(-53.38kb)|FRK(+4.785kb)|NT5DC1(-35.29kb)|TPI1P3(+25.6kb)|TSPYL4(-184.4kb)
4	42696745	rs6820172	A	G	0.0581922	3	5.406e-05	0.001238	1.6335	1.6398	0.2213	33.7	1.2385	2.2557	1.6387	ATP8A1(+37.62kb)|GRXCR1(-198.5kb)
5	61190329	rs150824587	A	C	0.0409763	3	5.406e-05	5.406e-05	1.8498	1.8498	0.3743	0	1.4212	2.7318	1.8683	C5orf64(+188kb)
9	125013443	rs10818661	G	A	0.95887	3	5.412e-05	0.003213	0.5474	0.5475	0.1801	41.66	0.3675	0.8247	0.5242	LHX6(+22.35kb)|MIR4478(+131kb)|MORN5(+51.08kb)|MRRF(-13.44kb)|NDUFA8(+91.34kb)|PTGS1(-119.4kb)|RBM18(0)|TTLL11(+157.6kb)
8	9164211	rs7823376	A	G	0.0517863	3	5.418e-05	5.418e-05	1.76	1.76	0.5842	0	2.2108	1.4624	1.7026	LOC157273(-18.35kb)|PPP1R3B(+155.1kb)
15	87866712	rs72768429	A	G	0.033631	3	5.418e-05	0.0002331	2.0262	2.0834	0.3	16.94	2.9756	2.5538	1.6225	.
2	30979487	rs2681676	C	T	0.694795	3	5.449e-05	5.449e-05	0.7667	0.7667	0.5721	0	0.743	0.8616	0.7318	CAPN13(0)|GALNT14(-153.8kb)|LCLAT1(+112.4kb)
1	214733194	rs115016705	A	C	0.0501232	3	5.454e-05	5.454e-05	1.7825	1.7825	0.4662	0	1.6427	1.3367	2.0644	CENPF(-43.34kb)|PTPN14(+8.17kb)
4	78260931	rs146793435	T	C	0.0323837	3	5.458e-05	0.002015	1.9717	2.0997	0.1515	47	2.378	3.1937	1.4634	CCNG2(+169.7kb)|CXCL13(-172kb)
7	53673564	rs28852695	T	C	0.188497	3	5.466e-05	5.466e-05	1.3522	1.3522	0.4264	0	1.347	1.1575	1.4704	FLJ45974(-49.64kb)
2	16226288	rs62118665	A	G	0.0367878	2	5.472e-05	0.008611	2.2123	2.0975	0.1804	44.26	NA	1.4678	2.6207	MYCN(+139.2kb)|MYCNOS(+144.4kb)
18	59521047	rs118181257	C	T	0.0651371	3	5.474e-05	0.01998	1.6378	1.7939	0.0201	74.4	2.0636	2.5612	1.1806	LOC100996669(+99.12kb)|PIGN(-190.4kb)|RNF152(0)
2	16226340	rs62118666	A	G	0.0367724	2	5.477e-05	0.008677	2.2124	2.0973	0.1801	44.35	NA	1.4675	2.6213	MYCN(+139.2kb)|MYCNOS(+144.5kb)
9	124999290	rs7021302	T	C	0.958808	3	5.487e-05	0.003353	0.5464	0.545	0.1752	42.6	0.3587	0.8168	0.5284	LHX6(+8.199kb)|MIR4478(+116.8kb)|MORN5(+36.92kb)|MRRF(-27.59kb)|NDUFA8(+77.19kb)|PTGS1(-133.5kb)|RBM18(-2.543kb)|TTLL11(+143.4kb)
4	187811191	rs62343075	T	C	0.0484909	3	5.489e-05	0.0002934	1.7714	1.8158	0.2838	20.61	2.6324	1.9779	1.4794	FAT1(+166.2kb)
15	87866662	rs72768428	A	G	0.0336002	3	5.491e-05	0.0002455	2.0258	2.0849	0.2977	17.47	2.9754	2.5602	1.6204	.
7	53039608	rs116903224	C	T	0.0540037	3	5.504e-05	0.0554	1.6256	1.5316	0.0422	68.4	1.7414	0.9524	2.0131	POM121L12(-63.74kb)
15	87867518	rs72768432	G	A	0.0336464	3	5.508e-05	0.0002334	2.0259	2.0825	0.3006	16.81	2.9735	2.5523	1.6217	.
1	214750508	rs139734914	G	A	0.0501386	3	5.514e-05	5.514e-05	1.7828	1.7828	0.4879	0	1.6161	1.3611	2.0625	CENPF(-26.02kb)|PTPN14(+25.48kb)
1	214730212	rs73079780	C	G	0.0571143	3	5.555e-05	5.555e-05	1.7634	1.7634	0.4336	0	1.5722	1.338	2.0663	CENPF(-46.32kb)|PTPN14(+5.188kb)
4	120625473	rs72680914	C	T	0.0467508	3	5.579e-05	0.002032	1.7208	1.6869	0.2326	31.42	1.1385	1.9752	1.9483	PDE5A(+75.49kb)
1	165145599	rs144526087	A	G	0.015984	3	5.614e-05	5.614e-05	2.5274	2.5274	0.9618	0	2.2593	2.6956	2.6036	LMX1A(-25.5kb)
19	41252072	rs4803362	C	G	0.0294118	2	5.618e-05	5.618e-05	2.1087	2.1087	0.6156	0	NA	1.8218	2.2371	ADCK4(+29.28kb)|C19orf54(0)|CYP2A6(-97.37kb)|CYP2A7(-129.3kb)|CYP2B7P1(-178.1kb)|CYP2G1P(-144.7kb)|EGLN2(-52.98kb)|ITPKC(+5.307kb)|LTBP4(+116.3kb)|MIA(-29.01kb)|MIA-RAB4B(-29.37kb)|NUMBL(+55.52kb)|RAB4B(-32.05kb)|RAB4B-EGLN2(-32.05kb)|SHKBP1(+154.8kb)|SNRPA(-4.686kb)|SPTBN4(+169.7kb)
15	87867517	rs72768431	G	A	0.0336772	3	5.634e-05	0.0002302	2.0229	2.0777	0.3024	16.39	2.9745	2.5328	1.6212	.
17	17255640	rs12602578	C	T	0.792378	3	5.635e-05	5.635e-05	0.7344	0.7344	0.405	0	0.8224	0.8159	0.6664	COPS3(+71.02kb)|FLCN(+115.1kb)|MED9(-124.7kb)|MPRIP(+159.7kb)|NT5M(+4.663kb)|PEMT(-153.2kb)|PLD6(+146kb)|RASD1(-142.1kb)|SMCR9(-67.02kb)
11	29502903	rs74930505	C	T	0.0469972	3	5.656e-05	5.656e-05	1.7393	1.7393	0.4624	0	2.2114	1.3305	1.7489	.
5	61191427	rs114773313	C	G	0.0409763	3	5.696e-05	5.696e-05	1.8468	1.8468	0.3766	0	1.4201	2.7246	1.8647	C5orf64(+189.1kb)
3	23066407	rs9859210	T	C	0.120311	3	5.699e-05	5.699e-05	1.4429	1.4429	0.4974	0	1.3925	1.2192	1.5799	UBE2E2(-178.4kb)
4	120648105	rs11098537	G	A	0.0470126	3	5.718e-05	0.003492	1.7022	1.6586	0.2067	36.58	1.1228	1.8724	1.9692	PDE5A(+98.12kb)
4	26492222	rs1800908	A	C	0.0296273	3	5.74e-05	0.04375	2.1534	2.2259	0.0232	73.44	5.2239	1.0696	2.0606	CCKAR(+0.18kb)|RBPJ(+55.47kb)|TBC1D19(-93.32kb)
7	53039019	rs2091644	A	C	0.0539729	3	5.772e-05	0.05557	1.6234	1.5303	0.0425	68.33	1.7413	0.9521	2.0096	POM121L12(-64.33kb)
4	42698369	rs28861482	C	T	0.0586079	3	5.78e-05	0.001311	1.6303	1.637	0.2203	33.9	1.2376	2.2564	1.6327	ATP8A1(+39.25kb)|GRXCR1(-196.9kb)
14	89650887	rs115000747	C	T	0.0172005	3	5.781e-05	5.781e-05	2.3621	2.3621	0.5821	0	1.5958	2.815	2.6148	FOXN3(0)
21	41506570	rs113807870	C	G	0.0266862	3	5.824e-05	5.824e-05	1.9728	1.9728	0.5843	0	1.5475	1.8335	2.3141	DSCAM(0)|MIR4760(-77.71kb)
1	165310293	rs138153362	T	G	0.00987065	2	5.83e-05	5.83e-05	2.8878	2.8878	0.868	0	2.659	NA	2.9559	LMX1A(0)|LOC400794(-135.8kb)|RXRG(-59.86kb)
4	42702937	rs10026660	A	G	0.0580382	3	5.84e-05	0.001431	1.63	1.6369	0.2155	34.84	1.2347	2.2611	1.6324	ATP8A1(+43.82kb)|GRXCR1(-192.3kb)
1	214741815	rs76420027	C	G	0.0501232	3	5.898e-05	5.898e-05	1.7778	1.7778	0.4885	0	1.6267	1.3512	2.0532	CENPF(-34.72kb)|PTPN14(+16.79kb)
2	220659454	rs982695	C	T	0.693363	3	5.909e-05	0.05416	0.7711	0.7964	0.0428	68.27	0.9327	0.8606	0.6533	MIR4268(-111.8kb)|SLC4A3(+152.8kb)|STK11IP(+178.3kb)
7	53676837	rs17624383	C	G	0.188405	3	5.919e-05	5.919e-05	1.35	1.35	0.4431	0	1.3452	1.1593	1.4645	FLJ45974(-46.36kb)
9	125011789	rs4837953	C	T	0.955112	3	5.921e-05	0.002793	0.5497	0.5496	0.1911	39.58	0.3701	0.819	0.5283	LHX6(+20.7kb)|MIR4478(+129.3kb)|MORN5(+49.42kb)|MRRF(-15.09kb)|NDUFA8(+89.69kb)|PTGS1(-121kb)|RBM18(0)|TTLL11(+155.9kb)
21	41528099	rs112676871	T	C	0.0342316	3	5.923e-05	5.923e-05	1.8801	1.8801	0.4662	0	1.491	1.5957	2.2584	DSCAM(0)|MIR4760(-56.18kb)
5	61188115	rs141927230	A	G	0.0410225	3	5.966e-05	6.951e-05	1.8451	1.8456	0.3628	1.38	1.4192	2.7585	1.8549	C5orf64(+185.8kb)
21	40691570	rs35784053	A	G	0.0682168	3	5.973e-05	5.973e-05	1.6435	1.6435	0.735	0	1.8337	1.4029	1.7006	BRWD1(+5.858kb)|BRWD1-AS1(0)|BRWD1-IT2(+4.682kb)|HMGN1(-22.67kb)|LCA5L(-86.2kb)|PSMG1(+136.1kb)|SH3BGR(-126.2kb)|WRB(-60.64kb)
5	167716351	rs72838315	T	G	0.0567909	3	5.98e-05	5.98e-05	1.6613	1.6613	0.679	0	1.8603	1.8417	1.4824	RARS(-197.1kb)|TENM2(+25.19kb)|WWC1(-2.713kb)
9	125010858	rs10739607	A	G	0.958777	3	5.984e-05	0.003182	0.5498	0.5498	0.1838	40.97	0.3691	0.8243	0.5278	LHX6(+19.77kb)|MIR4478(+128.4kb)|MORN5(+48.49kb)|MRRF(-16.02kb)|NDUFA8(+88.76kb)|PTGS1(-122kb)|RBM18(0)|TTLL11(+155kb)
5	61188109	rs147568402	T	A	0.0410225	3	5.986e-05	6.983e-05	1.8448	1.8454	0.3627	1.39	1.4191	2.7584	1.8545	C5orf64(+185.7kb)
16	52240981	rs117285516	A	C	0.0142747	2	6.043e-05	6.043e-05	2.8	2.8	0.3664	0	NA	4.208	2.4538	C16orf97(+133.1kb)|LINC00919(+122kb)
5	87638126	rs77332145	C	T	0.0234524	3	6.065e-05	6.065e-05	2.3514	2.3514	0.9944	0	2.443	2.3672	2.3104	LINC00461(-198.5kb)|TMEM161B(+73.46kb)|TMEM161B-AS1(0)
7	136872468	rs150057131	T	C	0.0141515	3	6.099e-05	6.099e-05	2.5701	2.5701	0.6208	0	2.8785	1.7702	3.0041	CHRM2(+170.7kb)|LOC349160(+23.38kb)|PTN(-39.62kb)
12	17551629	rs140756858	G	T	0.0359101	3	6.119e-05	0.000853	1.8811	1.8994	0.2468	28.54	1.3988	2.9605	1.7776	.
3	143215794	rs861418	T	C	0.429119	3	6.135e-05	0.004907	0.7803	0.7624	0.0989	56.77	0.713	0.6624	0.8951	SLC9A9(0)|SLC9A9-AS1(+149.9kb)
6	114668893	rs74801158	A	T	0.015907	2	6.137e-05	6.137e-05	2.7883	2.7883	0.6188	0	NA	2.2745	3.0193	.
1	214744525	rs116698470	A	G	0.0501232	3	6.161e-05	6.161e-05	1.7749	1.7749	0.494	0	1.618	1.3552	2.0491	CENPF(-32.01kb)|PTPN14(+19.5kb)
10	130733283	rs61863574	C	G	0.0380967	3	6.186e-05	6.186e-05	1.9956	1.9956	0.7296	0	1.578	2.4252	1.9883	.
4	120651906	rs72680965	C	A	0.046797	3	6.197e-05	0.003596	1.696	1.6533	0.2076	36.39	1.1198	1.8733	1.9575	PDE5A(+101.9kb)
7	136660652	rs77640264	A	G	0.0105482	3	6.217e-05	6.217e-05	3.3077	3.3077	0.5604	0	5.8308	3.9025	2.6187	CHRM2(0)|LOC349160(0)|MIR490(+72.61kb)
4	15375950	rs4355387	T	C	0.251109	3	6.258e-05	6.617e-05	0.7468	0.7468	0.3657	0.59	0.8645	0.6553	0.7347	C1QTNF7(0)|CC2D2A(-95.54kb)
4	42694943	rs974787	T	C	0.0566831	3	6.274e-05	0.001402	1.6286	1.6362	0.2183	34.29	1.2396	2.2643	1.6257	ATP8A1(+35.82kb)
5	61182730	rs13436883	A	G	0.0466277	3	6.346e-05	0.0003815	1.8393	1.853	0.2934	18.45	1.4171	2.9221	1.8061	C5orf64(+180.4kb)
6	109035696	rs1268153	A	G	0.0459039	3	6.363e-05	6.363e-05	2.0358	2.0358	0.8202	0	2.2344	2.3198	1.8237	ARMC2(-133.9kb)|FOXO3(+29.72kb)|LACE1(+191.4kb)|LINC00222(-37.16kb)
4	15375984	rs4303974	A	C	0.251555	3	6.366e-05	7.179e-05	0.7471	0.7471	0.3631	1.28	0.8654	0.6554	0.7347	C1QTNF7(0)|CC2D2A(-95.5kb)
5	61183589	rs75995048	C	T	0.0409763	3	6.368e-05	0.0001177	1.8426	1.8454	0.346	5.78	1.4138	2.7908	1.8465	C5orf64(+181.2kb)
1	214746009	rs954414	C	T	0.0518633	3	6.385e-05	6.385e-05	1.7627	1.7627	0.4355	0	1.4996	1.3786	2.0725	CENPF(-30.52kb)|PTPN14(+20.98kb)
7	53037272	rs77065463	G	A	0.0539575	3	6.413e-05	0.05527	1.6192	1.5274	0.0442	67.93	1.7403	0.9514	1.9996	POM121L12(-66.08kb)
3	143214114	rs838598	C	T	0.430305	3	6.418e-05	0.00568	0.7809	0.7621	0.0909	58.31	0.7159	0.658	0.8972	SLC9A9(0)|SLC9A9-AS1(+148.2kb)
1	214746359	rs59110162	T	G	0.0518633	3	6.434e-05	6.434e-05	1.7624	1.7624	0.4371	0	1.4997	1.3792	2.0715	CENPF(-30.17kb)|PTPN14(+21.34kb)
11	121327917	rs116947130	A	G	0.0176625	2	6.438e-05	6.438e-05	4.3669	4.3669	0.6621	0	3.7777	5.2243	NA	SC5D(+143.8kb)|SORL1(0)
17	75634000	rs72888863	A	G	0.245396	3	6.439e-05	6.439e-05	1.3282	1.3282	0.6241	0	1.457	1.1999	1.333	LOC100507351(+72.9kb)|SEPT9(+137.3kb)
1	191510771	rs147005149	G	A	0.041623	3	6.45e-05	6.45e-05	1.7982	1.7982	0.7282	0	1.9531	1.49	1.9238	.
18	58717642	rs6567197	G	A	0.595719	3	6.45e-05	6.45e-05	0.7783	0.7783	0.577	0	0.7513	0.87	0.7472	.
21	41490888	rs112616853	T	C	0.0265322	3	6.452e-05	6.452e-05	1.9611	1.9611	0.605	0	1.567	1.8153	2.2983	DSCAM(0)|MIR4760(-93.39kb)|PCP4(+189.6kb)
7	87131423	rs12539997	C	T	0.182399	3	6.468e-05	6.468e-05	1.3595	1.3595	0.9765	0	1.3317	1.3953	1.3597	ABCB1(-1.755kb)|ABCB4(+26.4kb)|CROT(+102.3kb)|RUNDC3B(-126.3kb)|TP53TG1(+156.6kb)
5	80382832	rs147665836	C	G	0.0261164	3	6.47e-05	6.47e-05	2.0557	2.0557	0.6259	0	2.2769	1.5098	2.2655	CKMT2(-146.3kb)|LOC100131067(-150.6kb)|RASGRF2(0)|RNU5D-1(-118.6kb)|RNU5E-1(-118.6kb)
3	143216783	rs838601	A	G	0.425069	3	6.481e-05	0.005604	0.7812	0.7624	0.0919	58.11	0.7112	0.6625	0.8979	SLC9A9(0)|SLC9A9-AS1(+150.9kb)
7	53037026	rs79390260	G	T	0.0539575	3	6.514e-05	0.05547	1.6182	1.5269	0.0441	67.95	1.74	0.9514	1.9987	POM121L12(-66.32kb)
15	24148196	rs72705912	A	T	0.0171235	3	6.532e-05	6.532e-05	2.4821	2.4821	0.8297	0	3.2943	2.2799	2.3367	.
1	9733736	rs114116433	T	C	0.0143671	2	6.541e-05	0.1168	4.2126	3.6227	0.0264	79.7	1.5329	7.9283	NA	C1orf200(+19.09kb)|CLSTN1(-55.34kb)|CTNNBIP1(-174.6kb)|PIK3CD(0)|SLC25A33(+90.9kb)|TMEM201(+58.8kb)
1	214747693	rs17792294	T	C	0.0518633	3	6.561e-05	6.561e-05	1.7614	1.7614	0.4396	0	1.4988	1.3802	2.0693	CENPF(-28.84kb)|PTPN14(+22.67kb)
7	53050859	rs113308012	A	G	0.0543887	3	6.568e-05	0.05554	1.6175	1.5275	0.0437	68.07	1.7481	0.9515	1.9959	POM121L12(-52.49kb)
17	75636701	rs12150507	G	A	0.24498	3	6.572e-05	6.572e-05	1.3234	1.3234	0.6878	0	1.4427	1.2167	1.3216	LOC100507351(+75.6kb)|SEPT9(+140kb)
1	214747718	rs17735873	C	A	0.0518633	3	6.577e-05	6.577e-05	1.7613	1.7613	0.4397	0	1.4989	1.3802	2.0693	CENPF(-28.81kb)|PTPN14(+22.69kb)
1	214748651	rs17735908	G	A	0.0518633	3	6.595e-05	6.595e-05	1.7614	1.7614	0.4406	0	1.4987	1.381	2.0692	CENPF(-27.88kb)|PTPN14(+23.63kb)
1	214748813	rs150109226	G	A	0.0518633	3	6.599e-05	6.599e-05	1.7614	1.7614	0.4408	0	1.4987	1.3811	2.0691	CENPF(-27.72kb)|PTPN14(+23.79kb)
22	25743904	rs117648274	T	C	0.0409917	2	6.624e-05	6.624e-05	3.1232	3.1232	0.4533	0	2.3893	3.7061	NA	CRYBB2(+116.1kb)|CRYBB2P1(-100.1kb)|CRYBB3(+140.6kb)|IGLL3P(+27.71kb)|KIAA1671(+150.5kb)|LRP5L(-3.48kb)
21	40681268	rs75794179	A	T	0.0643517	3	6.629e-05	6.629e-05	1.644	1.644	0.7327	0	1.6202	1.402	1.776	BRWD1(0)|BRWD1-AS1(-6.364kb)|BRWD1-IT2(-4.592kb)|HMGN1(-32.97kb)|LCA5L(-96.5kb)|PSMG1(+125.8kb)|SH3BGR(-136.5kb)|WRB(-70.94kb)
15	76692136	rs62028388	G	A	0.033785	3	6.645e-05	0.02805	1.8716	1.8567	0.0487	66.91	1.0579	3.1213	1.9133	C15orf27(+194.8kb)|ETFA(+88.33kb)|ISL2(+57.32kb)|SCAPER(0)|TYRO3P(+139.6kb)
7	53036780	rs6962475	T	C	0.0539575	3	6.646e-05	0.05547	1.6174	1.5263	0.0444	67.89	1.7397	0.9512	1.997	POM121L12(-66.57kb)
5	2283852	rs2652150	G	A	0.778965	3	6.649e-05	6.649e-05	0.7374	0.7374	0.4912	0	0.6418	0.8292	0.749	.
16	84857308	rs16938	T	C	0.0293964	3	6.653e-05	0.00322	2.2296	2.4814	0.1271	51.52	2.7057	5.0522	1.6031	CRISPLD2(0)|KLHL36(+161.4kb)|USP10(+43.78kb)|ZDHHC7(-150.8kb)
20	56788088	rs6026132	T	G	0.337789	3	6.662e-05	6.662e-05	0.7627	0.7627	0.4527	0	0.8062	0.8424	0.696	C20orf85(+51.9kb)|PPP4R1L(-19.74kb)|RAB22A(-96.68kb)|VAPB(-176.1kb)
4	120624153	rs115807288	A	G	0.0464891	3	6.668e-05	0.002015	1.7213	1.6896	0.2358	30.78	1.142	1.976	1.9556	PDE5A(+74.17kb)
1	214749463	rs76363526	G	T	0.0518633	3	6.697e-05	6.697e-05	1.7611	1.7611	0.4421	0	1.4982	1.382	2.0686	CENPF(-27.07kb)|PTPN14(+24.44kb)
11	29499135	rs75508519	G	A	0.046951	3	6.702e-05	6.702e-05	1.7342	1.7342	0.4403	0	2.2287	1.3181	1.7416	.
7	53036626	rs6977979	T	A	0.0539421	3	6.709e-05	0.05535	1.6171	1.5261	0.0447	67.82	1.7397	0.9511	1.9958	POM121L12(-66.72kb)
4	120661282	rs72680972	G	A	0.0470742	3	6.717e-05	0.006018	1.7049	1.6602	0.179	41.87	1.0968	1.9937	1.9477	PDE5A(+111.3kb)
5	80393475	rs115860918	T	C	0.0243455	3	6.717e-05	6.717e-05	2.1153	2.1153	0.7099	0	2.4676	1.6268	2.221	CKMT2(-135.7kb)|LOC100131067(-139.9kb)|RASGRF2(0)|RNU5D-1(-108kb)|RNU5E-1(-108kb)
5	87608152	rs192962155	G	A	0.0235602	3	6.734e-05	6.734e-05	2.3403	2.3403	0.9937	0	2.4334	2.3649	2.2955	TMEM161B(+43.49kb)|TMEM161B-AS1(0)
4	42664508	rs28424875	C	A	0.0586541	3	6.754e-05	0.0005194	1.6468	1.6514	0.2765	22.2	1.2739	2.2503	1.6451	ATP8A1(+5.386kb)
6	153803712	rs3849800	G	A	0.137912	3	6.779e-05	0.03363	1.3668	1.3493	0.0463	67.45	1.5689	1.0096	1.5378	.
12	10524821	rs17549124	G	A	0.0464121	3	6.788e-05	0.0576	1.8237	1.7055	0.0428	68.26	1.001	1.9133	2.4427	GABARAPL1(+149.1kb)|KLRC1(-73.82kb)|KLRC2(-58.38kb)|KLRC3(-40.09kb)|KLRC4(-35.16kb)|KLRC4-KLRK1(-0.13kb)|KLRD1(+54.97kb)|KLRK1(-0.13kb)|TMEM52B(+180.4kb)
15	87892607	rs16940197	T	C	0.0343856	3	6.793e-05	6.793e-05	1.9751	1.9751	0.4229	0	2.6976	2.4836	1.6525	.
14	56197878	rs1959088	C	T	0.331367	3	6.797e-05	6.797e-05	1.288	1.288	0.7954	0	1.3313	1.1962	1.3134	KTN1(+46.58kb)|KTN1-AS1(+151.1kb)|LINC00520(-49.97kb)|RPL13AP3(-35.08kb)
15	87876466	rs55676872	T	C	0.0343548	3	6.798e-05	6.798e-05	1.9994	1.9994	0.3803	0	2.7635	2.5591	1.6396	.
16	23452050	rs68121442	C	T	0.0641515	2	6.805e-05	6.805e-05	2.0569	2.0569	0.9847	0	2.0489	2.0633	NA	COG7(0)|EARS2(-81.28kb)|GGA2(-22.81kb)|NDUFAB1(-140.3kb)|PALB2(-162.4kb)|SCNN1B(+59.43kb)|UBFD1(-116.8kb)
11	29503442	rs78917475	G	T	0.047105	3	6.817e-05	6.817e-05	1.7283	1.7283	0.5049	0	2.145	1.3321	1.7496	.
7	53036003	rs112181107	G	A	0.0537573	3	6.83e-05	0.05565	1.6168	1.5263	0.0445	67.87	1.7441	0.9504	1.9945	POM121L12(-67.34kb)
18	43645384	rs143793747	G	A	0.015907	3	6.837e-05	0.001061	2.4359	2.3528	0.279	21.66	1.5712	1.71	3.3991	ATP5A1(-18.72kb)|C18orf25(-108.6kb)|EPG5(+98.08kb)|HAUS1(-38.91kb)|PSTPIP2(0)
1	214749941	rs114303448	G	A	0.0517555	3	6.857e-05	6.857e-05	1.7604	1.7604	0.4453	0	1.4991	1.3825	2.0666	CENPF(-26.59kb)|PTPN14(+24.92kb)
11	29503182	rs79887156	G	T	0.0470896	3	6.866e-05	6.866e-05	1.728	1.728	0.503	0	2.1465	1.3311	1.7491	.
4	120661298	rs72680973	G	A	0.0455497	3	6.869e-05	0.006121	1.7041	1.6594	0.1786	41.95	1.096	1.9926	1.9475	PDE5A(+111.3kb)
4	182095154	rs57165958	G	C	0.110487	3	6.87e-05	6.87e-05	1.5098	1.5098	0.8998	0	1.4728	1.4028	1.573	LINC00290(+14.85kb)
1	214771279	rs77219191	G	A	0.0419002	3	6.896e-05	6.896e-05	1.8648	1.8648	0.8218	0	1.7905	1.5832	2.0196	CENPF(-5.252kb)|PTPN14(+46.26kb)
4	42665539	rs28536499	A	G	0.0579766	3	6.934e-05	0.0005296	1.6463	1.652	0.2752	22.49	1.2826	2.2651	1.6368	ATP8A1(+6.417kb)
4	42664463	rs28363903	T	G	0.0585617	3	6.94e-05	0.0005357	1.6465	1.651	0.2759	22.34	1.2727	2.2496	1.6453	ATP8A1(+5.341kb)
1	201145116	rs146502897	T	C	0.0135356	3	6.945e-05	6.945e-05	2.6847	2.6847	0.4504	0	3.9936	1.5485	2.6754	ASCL5(+60.62kb)|CACNA1S(+63.42kb)|IGFN1(-14.84kb)|KIF21B(+152.3kb)|PKP1(-107.5kb)|TMEM9(+21.48kb)|TNNT2(-183kb)
14	87845954	rs1426790	T	C	0.355744	3	6.948e-05	6.948e-05	1.2861	1.2861	0.6381	0	1.1823	1.3946	1.2888	.
9	125004988	rs7046902	G	A	0.955251	3	6.953e-05	0.0024	0.5536	0.5534	0.2059	36.73	0.375	0.8156	0.5347	LHX6(+13.9kb)|MIR4478(+122.5kb)|MORN5(+42.62kb)|MRRF(-21.89kb)|NDUFA8(+82.89kb)|PTGS1(-127.8kb)|RBM18(0)|TTLL11(+149.1kb)
13	34532694	rs12869423	A	G	0.0737142	3	6.963e-05	6.963e-05	1.5461	1.5461	0.3691	0	1.6784	1.1532	1.6771	RFC3(0)
2	206509961	rs849505	C	T	0.0306129	3	6.986e-05	0.0104	2.1627	2.021	0.1615	45.16	2.1218	1.1027	2.8419	NRP2(-37.26kb)|PARD3B(+25.08kb)
7	22505906	rs58273145	T	C	0.299877	3	7.024e-05	7.024e-05	0.7541	0.7541	0.6984	0	0.685	0.7683	0.7896	LOC100506178(-97.05kb)|RAPGEF5(+109.4kb)|STEAP1B(0)
10	7754632	rs76962144	T	C	0.0691869	3	7.04e-05	7.04e-05	0.5491	0.5491	0.678	0	0.6772	0.4984	0.5104	ATP5C1(-75.46kb)|ITIH2(0)|ITIH5(+45.67kb)|KIN(-38.29kb)|TAF3(-105.8kb)
17	6217645	rs10432026	T	A	0.00143209	2	7.041e-05	7.041e-05	1.4462	1.4462	0.5104	0	1.5707	NA	1.3823	ACKR6(-136.9kb)|AIPL1(-109.4kb)|FAM64A(-130.1kb)|PITPNM3(-136.9kb)|WSCD1(+189.9kb)
9	114017834	rs146791245	G	A	0.0157992	3	7.058e-05	7.058e-05	2.2986	2.2986	0.7847	0	2.2805	2.8998	2.0262	KIAA0368(-105.1kb)|OR2K2(-71.93kb)
1	214750240	rs79911579	A	G	0.0519249	3	7.069e-05	7.069e-05	1.759	1.759	0.4463	0	1.4971	1.3828	2.0649	CENPF(-26.29kb)|PTPN14(+25.22kb)
20	49369808	rs78735395	T	C	0.015291	2	7.105e-05	7.105e-05	4.7482	4.7482	0.404	0	3.3448	6.4457	NA	ADNP(-137.1kb)|BCAS4(-41.66kb)|DPM1(-181.6kb)|FAM65C(+116.4kb)|MIR645(+167.4kb)|PARD6B(0)|PTPN1(+168.5kb)
9	125006462	rs7024398	A	G	0.955266	3	7.108e-05	0.002687	0.5541	0.5538	0.1995	37.95	0.3743	0.8189	0.534	LHX6(+15.37kb)|MIR4478(+124kb)|MORN5(+44.1kb)|MRRF(-20.42kb)|NDUFA8(+84.36kb)|PTGS1(-126.3kb)|RBM18(0)|TTLL11(+150.6kb)
19	44234515	rs17560331	C	T	0.0617339	3	7.143e-05	7.143e-05	1.5869	1.5869	0.5143	0	1.326	1.442	1.7944	CADM4(+90.52kb)|IRGC(+10.35kb)|IRGQ(+134.2kb)|KCNN4(-36.17kb)|LOC100505715(-161.4kb)|LYPD5(-65.56kb)|PINLYP(+148.3kb)|PLAUR(+60.02kb)|SMG9(-0.785kb)|SRRM5(+115.9kb)|XRCC1(+154.8kb)|ZNF45(-182.3kb)|ZNF283(-96.96kb)|ZNF404(-142kb)|ZNF428(+110.5kb)|ZNF575(+194.2kb)|ZNF576(+129.9kb)
7	53049684	rs76956440	C	T	0.0542963	3	7.145e-05	0.05432	1.6144	1.5259	0.046	67.53	1.7443	0.9531	1.9888	POM121L12(-53.66kb)
5	61185276	rs1579324	C	T	0.0502926	3	7.161e-05	7.161e-05	1.8175	1.8175	0.3904	0	1.4184	2.6265	1.8134	C5orf64(+182.9kb)
5	61193612	rs10059979	A	C	0.0464121	3	7.169e-05	7.37e-05	1.8301	1.8302	0.3669	0.26	1.4174	2.7394	1.8287	C5orf64(+191.2kb)
1	229681398	rs12119828	C	T	0.0516631	3	7.17e-05	7.17e-05	1.7346	1.7346	0.7692	0	1.7627	1.4504	1.8621	ABCB10(0)|ACTA1(+111.6kb)|NUP133(+37.31kb)|TAF5L(-47.47kb)|URB2(-80.58kb)
4	172060881	rs13148038	G	A	0.268325	3	7.201e-05	0.004755	0.7556	0.7483	0.1296	51.05	0.5967	0.8458	0.8088	LOC100506122(+80.57kb)
15	45641098	rs2467864	C	T	0.297844	3	7.22e-05	7.22e-05	1.3142	1.3142	0.9123	0	1.264	1.372	1.316	C15orf48(-81.63kb)|DUOX1(+183.3kb)|GATM(-12.22kb)|GATM-AS1(-29.8kb)|HMGN2P46(-162.2kb)|MIR147B(-84.15kb)|SHF(+147.7kb)|SLC28A2(+72.97kb)|SLC30A4(-133.6kb)|SPATA5L1(-53.42kb)
17	70377096	rs35530084	A	C	0.0544349	3	7.311e-05	0.0002687	1.6498	1.6348	0.3319	9.34	1.454	1.2654	1.9378	LINC00673(-22.37kb)
4	120688105	rs56041000	A	T	0.0456267	3	7.321e-05	0.008181	1.7201	1.6722	0.1571	45.96	1.0909	2.0032	2.0024	PDE5A(+138.1kb)
1	214775560	rs2362215	A	G	0.041777	3	7.333e-05	7.333e-05	1.8586	1.8586	0.8306	0	1.7852	1.5852	2.0079	CENPF(-0.971kb)|PTPN14(+50.54kb)
1	214726137	rs115433466	G	T	0.0520942	3	7.334e-05	7.334e-05	1.7577	1.7577	0.4293	0	1.5379	1.345	2.0674	CENPF(-50.39kb)|PTPN14(+1.113kb)
6	153804092	rs3899493	G	A	0.137989	3	7.356e-05	0.03344	1.3648	1.3479	0.0477	67.13	1.5687	1.0097	1.5332	.
4	172060367	rs34539715	C	T	0.268371	3	7.367e-05	0.004771	0.7559	0.7486	0.1302	50.94	0.5971	0.8461	0.809	LOC100506122(+80.06kb)
9	125001985	rs10733657	T	C	0.95887	3	7.369e-05	0.002881	0.5558	0.5558	0.1978	38.28	0.376	0.8241	0.5354	LHX6(+10.89kb)|MIR4478(+119.5kb)|MORN5(+39.62kb)|MRRF(-24.9kb)|NDUFA8(+79.89kb)|PTGS1(-130.8kb)|RBM18(0)|TTLL11(+146.1kb)
6	153813602	rs12203713	C	T	0.137927	3	7.37e-05	0.03314	1.3649	1.3484	0.0479	67.1	1.5689	1.0107	1.5341	.
17	70377207	rs34910504	A	G	0.0544965	3	7.37e-05	0.0002644	1.6494	1.6347	0.3326	9.17	1.4541	1.2655	1.9372	LINC00673(-22.26kb)
17	70393181	rs72846310	A	G	0.0591931	3	7.378e-05	0.0007371	1.6126	1.5855	0.295	18.08	1.2947	1.3324	1.9167	LINC00673(-6.281kb)
4	120690394	rs72681002	G	A	0.0455959	3	7.38e-05	0.008281	1.7217	1.6736	0.1561	46.16	1.0912	2.0025	2.008	PDE5A(+140.4kb)
10	7755722	rs79843198	G	A	0.0693563	3	7.38e-05	7.38e-05	0.5503	0.5503	0.68	0	0.6781	0.4993	0.512	ATP5C1(-74.37kb)|ITIH2(0)|ITIH5(+46.76kb)|KIN(-37.2kb)|TAF3(-104.7kb)
15	45640191	rs7169818	A	G	0.297829	3	7.387e-05	7.387e-05	1.3138	1.3138	0.9124	0	1.2642	1.3722	1.3149	C15orf48(-82.54kb)|DUOX1(+182.4kb)|GATM(-13.13kb)|GATM-AS1(-30.71kb)|HMGN2P46(-163.1kb)|MIR147B(-85.06kb)|SHF(+146.8kb)|SLC28A2(+72.06kb)|SLC30A4(-134.5kb)|SPATA5L1(-54.33kb)
17	59489707	rs77617620	T	C	0.0485217	3	7.394e-05	7.394e-05	1.7416	1.7416	0.6189	0	2.0688	1.4065	1.7802	BCAS3(+19.51kb)|C17orf82(0)|NACA2(-178.1kb)|TBX2(+2.88kb)|TBX4(-44.1kb)
6	153803500	rs78569085	C	T	0.138004	3	7.411e-05	0.0333	1.3648	1.3476	0.0483	67	1.5682	1.0095	1.5324	.
2	16230507	rs62118671	T	C	0.0384509	2	7.419e-05	0.006125	2.1794	2.0872	0.196	40.2	NA	1.4851	2.5794	MYCN(+143.4kb)|MYCNOS(+148.7kb)
2	47406618	rs114149768	G	C	0.0134124	2	7.429e-05	7.429e-05	2.6054	2.6054	0.4941	0	NA	1.8125	2.8091	C2orf61(+24.1kb)|CALM2(+2.878kb)|EPCAM(-189.7kb)|MIR559(-198.2kb)|TTC7A(+103.3kb)
6	97445359	rs72926883	T	C	0.073052	3	7.439e-05	7.439e-05	1.6034	1.6034	0.9304	0	1.5381	1.7458	1.5822	GPR63(+160kb)|KLHL32(0)|MIR548H3(-92.48kb)|MMS22L(-144.7kb)|NDUFAF4(+99.59kb)
9	125003528	rs7042018	G	A	0.955297	3	7.443e-05	0.002615	0.5563	0.5559	0.2034	37.21	0.3757	0.8187	0.5376	LHX6(+12.44kb)|MIR4478(+121.1kb)|MORN5(+41.16kb)|MRRF(-23.35kb)|NDUFA8(+81.43kb)|PTGS1(-129.3kb)|RBM18(0)|TTLL11(+147.6kb)
6	101299180	rs117882942	T	C	0.0184016	3	7.449e-05	0.001618	2.6549	2.5998	0.2312	31.71	1.2822	3.8455	3.0724	ASCC3(0)
1	157051247	rs16838026	G	A	0.0227749	2	7.468e-05	7.468e-05	3.165	3.165	0.9672	0	3.1286	3.2044	NA	ARHGEF11(+36.08kb)|CYCSP52(-46.91kb)|ETV3(-43.21kb)|ETV3L(-10.59kb)|LRRC71(+148.4kb)|MIR765(+145.2kb)|NTRK1(+199.6kb)|PEAR1(+165kb)
2	217742195	rs2372923	T	C	0.0103018	2	7.491e-05	7.491e-05	3.2034	3.2034	0.9577	0	NA	3.2912	3.1748	IGFBP5(+181.9kb)|TNP1(+17.41kb)
20	49638524	rs74721589	G	A	0.0243148	3	7.496e-05	7.496e-05	2.3792	2.3792	0.7097	0	2.6101	1.7929	2.6976	ADNP(+91kb)|BCAS4(+144.8kb)|DPM1(+63.46kb)|KCNG1(0)|MOCS3(+60.12kb)
3	143217359	rs708485	A	G	0.425008	3	7.512e-05	0.006043	0.7826	0.7638	0.0915	58.19	0.7105	0.6653	0.9003	SLC9A9(0)|SLC9A9-AS1(+151.4kb)
1	214750603	rs115658451	A	G	0.0515861	3	7.528e-05	7.528e-05	1.7613	1.7613	0.4649	0	1.5203	1.3822	2.0618	CENPF(-25.93kb)|PTPN14(+25.58kb)
4	120629081	rs116048124	T	G	0.0472898	3	7.536e-05	0.002228	1.7025	1.6647	0.2395	30.03	1.1434	1.8123	1.9824	PDE5A(+79.1kb)
4	15724816	rs77989247	C	T	0.0229751	3	7.55e-05	0.04676	2.2556	1.9296	0.1285	51.26	1.1596	1.4315	3.0645	BST1(0)|CC2D2A(+121.6kb)|CD38(-55.11kb)|FAM200B(+32.75kb)|FBXL5(+67.78kb)
15	45646283	rs61524473	C	T	0.280952	3	7.56e-05	7.56e-05	1.314	1.314	0.947	0	1.2674	1.3388	1.3296	C15orf48(-76.44kb)|DUOX1(+188.5kb)|GATM(-7.038kb)|GATM-AS1(-24.61kb)|HMGN2P46(-157kb)|MIR147B(-78.96kb)|SHF(+152.9kb)|SLC28A2(+78.15kb)|SLC30A4(-128.4kb)|SPATA5L1(-48.24kb)
1	235090371	rs79686862	G	A	0.0165229	2	7.567e-05	0.04836	2.8583	3.5249	0.0279	79.31	NA	7.0641	1.9621	TOMM20(-182.3kb)
10	7752660	rs79640258	T	G	0.0697567	3	7.574e-05	7.574e-05	0.5511	0.5511	0.6894	0	0.6757	0.497	0.5172	ATP5C1(-77.43kb)|ITIH2(0)|ITIH5(+43.7kb)|KIN(-40.26kb)|TAF3(-107.8kb)
6	153812348	rs7450597	T	G	0.137773	3	7.59e-05	0.03173	1.3649	1.3474	0.0517	66.24	1.5609	1.0123	1.5334	.
21	34554844	rs145108915	T	C	0.0322298	3	7.624e-05	7.624e-05	1.8485	1.8485	0.6499	0	1.4392	1.9615	2.0271	C21orf54(+12.3kb)|IFNAR1(-142.4kb)|IFNAR2(-47.39kb)|IL10RB(-83.82kb)|IL10RB-AS1(-83.09kb)|OLIG1(+110.1kb)|OLIG2(+153.3kb)
7	8000992	rs145488025	A	G	0.0123345	2	7.635e-05	0.1805	4.2791	3.002	0.0727	68.95	NA	1.109	5.9054	GLCCI1(-7.381kb)|ICA1(-151.8kb)|LOC729852(+82.14kb)
4	120690964	rs72682804	C	T	0.0455959	3	7.639e-05	0.008154	1.7203	1.673	0.1578	45.84	1.0917	2.0037	2.0044	PDE5A(+141kb)
15	24072587	rs12911531	C	T	0.080967	3	7.642e-05	7.642e-05	1.6658	1.6658	0.7785	0	1.4654	1.5407	1.8044	MAGEL2(+179.6kb)|NDN(+140.1kb)
6	153812659	rs12194704	T	C	0.137773	3	7.643e-05	0.03195	1.3645	1.3472	0.0513	66.34	1.5609	1.0122	1.5335	.
15	87874816	rs56313653	A	G	0.036295	3	7.644e-05	0.0002013	1.9868	2.0264	0.323	11.5	2.7878	2.6493	1.6048	.
2	64360515	rs77682283	G	A	0.0194333	3	7.646e-05	0.01886	2.3378	2.799	0.0335	70.57	1.9156	8.0211	1.7799	LINC00309(-51.7kb)|PELI1(0)|VPS54(+114.3kb)
1	214769965	rs75933630	C	T	0.0438867	3	7.666e-05	7.666e-05	1.8425	1.8425	0.7538	0	1.6272	1.6065	2.0432	CENPF(-6.566kb)|PTPN14(+44.94kb)
6	170514985	rs4710768	C	T	0.888143	3	7.681e-05	7.681e-05	0.6853	0.6853	0.9732	0	0.6621	0.6817	0.6987	DLL1(-76.31kb)|FAM120B(-100.9kb)|LOC154449(-48.44kb)|MIR4644(-124.9kb)
9	124998893	rs944220	G	T	0.963982	3	7.688e-05	0.004324	0.5468	0.5452	0.1691	43.73	0.3574	0.8258	0.5225	LHX6(+7.802kb)|MIR4478(+116.4kb)|MORN5(+36.53kb)|MRRF(-27.99kb)|NDUFA8(+76.8kb)|PTGS1(-133.9kb)|RBM18(-2.94kb)|TTLL11(+143kb)
2	76972429	rs4853269	G	A	0.236988	3	7.709e-05	7.709e-05	1.3265	1.3265	0.8963	0	1.3696	1.2565	1.345	LRRTM4(-2.42kb)
15	45633166	rs55885762	A	C	0.280736	3	7.74e-05	7.74e-05	1.3131	1.3131	0.9584	0	1.273	1.3411	1.3231	C15orf48(-89.56kb)|DUOX1(+175.4kb)|GATM(-20.16kb)|GATM-AS1(-37.73kb)|HMGN2P46(-170.2kb)|MIR147B(-92.08kb)|SHF(+139.8kb)|SLC28A2(+65.03kb)|SLC30A4(-141.5kb)|SPATA5L1(-61.35kb)
4	120680235	rs143273706	T	C	0.0455805	3	7.743e-05	0.007781	1.7148	1.6677	0.1628	44.91	1.092	1.9929	1.9915	PDE5A(+130.3kb)
6	155616787	rs116972800	T	C	0.0262088	3	7.772e-05	0.1338	2.092	1.7622	0.031	71.23	1.826	0.8451	2.9916	CLDN20(+19.1kb)|NOX3(-99.71kb)|TFB1M(0)|TIAM2(+37.93kb)
4	26492175	rs1799723	C	T	0.0377271	3	7.775e-05	0.03405	2.0673	2.1013	0.0418	68.49	4.3917	1.0896	1.9659	CCKAR(+0.133kb)|RBPJ(+55.42kb)|TBC1D19(-93.37kb)
6	170509564	rs7743286	G	T	0.895257	3	7.776e-05	7.776e-05	0.6788	0.6788	0.8211	0	0.6238	0.6545	0.7187	DLL1(-81.73kb)|FAM120B(-106.3kb)|LOC154449(-53.86kb)|MIR4644(-130.3kb)
20	49636694	rs139016568	A	C	0.0222821	3	7.801e-05	7.801e-05	2.5164	2.5164	0.7869	0	2.8222	1.8945	2.7325	ADNP(+89.17kb)|BCAS4(+143kb)|DPM1(+61.63kb)|KCNG1(0)|MOCS3(+58.3kb)
12	93672058	rs11106942	T	C	0.0834617	3	7.81e-05	0.006087	1.4963	1.4903	0.1526	46.8	1.105	1.8984	1.5963	LOC643339(0)|MRPL42(-189.2kb)|NUDT4(-99.64kb)|NUDT4P1(-99.69kb)|UBE2N(-130kb)
4	172061293	rs67218016	A	G	0.267047	3	7.819e-05	0.005195	0.7568	0.749	0.1261	51.7	0.5964	0.8454	0.8118	LOC100506122(+80.98kb)
12	93672134	rs12372391	A	T	0.0834771	3	7.819e-05	0.00613	1.4963	1.4902	0.1522	46.88	1.1047	1.8986	1.5963	LOC643339(0)|MRPL42(-189.1kb)|NUDT4(-99.57kb)|NUDT4P1(-99.61kb)|UBE2N(-130kb)
1	214728675	rs78339675	G	A	0.057915	3	7.821e-05	7.821e-05	1.7447	1.7447	0.443	0	1.5802	1.3186	2.0381	CENPF(-47.86kb)|PTPN14(+3.651kb)
9	129042823	rs77851046	C	T	0.0508469	3	7.838e-05	7.838e-05	1.6369	1.6369	0.6528	0	1.3641	1.8857	1.6949	MVB12B(-46.3kb)|NRON(-127.2kb)
6	153811839	rs4410735	A	G	0.137804	3	7.853e-05	0.03231	1.3634	1.3466	0.0507	66.46	1.5612	1.0121	1.5326	.
4	120818870	rs72684542	C	A	0.0272251	3	7.862e-05	7.862e-05	2.0259	2.0259	0.6257	0	1.9362	1.5222	2.3118	MAD2L1(-161.7kb)
15	45645154	rs11070453	G	C	0.280782	3	7.884e-05	7.884e-05	1.3126	1.3126	0.9523	0	1.2689	1.3393	1.3254	C15orf48(-77.57kb)|DUOX1(+187.4kb)|GATM(-8.167kb)|GATM-AS1(-25.74kb)|HMGN2P46(-158.2kb)|MIR147B(-80.09kb)|SHF(+151.8kb)|SLC28A2(+77.02kb)|SLC30A4(-129.5kb)|SPATA5L1(-49.36kb)
15	45644685	rs4774577	C	A	0.280875	3	7.908e-05	7.908e-05	1.3126	1.3126	0.9526	0	1.2691	1.3395	1.3252	C15orf48(-78.04kb)|DUOX1(+186.9kb)|GATM(-8.636kb)|GATM-AS1(-26.21kb)|HMGN2P46(-158.6kb)|MIR147B(-80.56kb)|SHF(+151.3kb)|SLC28A2(+76.55kb)|SLC30A4(-130kb)|SPATA5L1(-49.83kb)
15	45645378	rs2453541	A	G	0.29786	3	7.911e-05	7.911e-05	1.3123	1.3123	0.9079	0	1.2606	1.3711	1.3144	C15orf48(-77.35kb)|DUOX1(+187.6kb)|GATM(-7.943kb)|GATM-AS1(-25.52kb)|HMGN2P46(-158kb)|MIR147B(-79.87kb)|SHF(+152kb)|SLC28A2(+77.25kb)|SLC30A4(-129.3kb)|SPATA5L1(-49.14kb)
20	34011482	rs78732698	A	C	0.0117493	2	7.913e-05	7.913e-05	2.9111	2.9111	0.9546	0	NA	2.8442	2.941	C20orf173(-97.09kb)|CEP250(-31.74kb)|EIF6(+138.9kb)|ERGIC3(-118.3kb)|FAM83C(+131.3kb)|GDF5(-9.666kb)|MMP24(+146.7kb)|MMP24-AS1(+145.5kb)|SPAG4(-192.3kb)|UQCC(+11.54kb)
12	20110651	rs7295275	T	C	0.133954	3	7.92e-05	7.92e-05	1.401	1.401	0.9807	0	1.3715	1.3851	1.4238	LOC100506393(-56.97kb)
1	214772955	rs149426951	T	C	0.0418694	3	7.923e-05	7.923e-05	1.8507	1.8507	0.8458	0	1.79	1.5865	1.9885	CENPF(-3.576kb)|PTPN14(+47.93kb)
15	45633118	rs56850226	C	T	0.280751	3	7.953e-05	7.953e-05	1.3128	1.3128	0.9589	0	1.2731	1.3411	1.3224	C15orf48(-89.61kb)|DUOX1(+175.3kb)|GATM(-20.2kb)|GATM-AS1(-37.78kb)|HMGN2P46(-170.2kb)|MIR147B(-92.13kb)|SHF(+139.7kb)|SLC28A2(+64.99kb)|SLC30A4(-141.6kb)|SPATA5L1(-61.4kb)
17	75642623	rs9907467	T	C	0.247505	3	7.96e-05	7.96e-05	1.3239	1.3239	0.934	0	1.3829	1.2975	1.3061	LOC100507351(+81.52kb)|SEPT9(+145.9kb)
6	153820897	rs12207067	G	T	0.137696	3	7.963e-05	0.03718	1.3665	1.3454	0.0465	67.4	1.5656	1.0001	1.535	.
12	117347885	rs7302127	T	A	0.750862	3	7.966e-05	0.007057	0.7409	0.7542	0.1631	44.85	0.7564	0.9213	0.65	C12orf49(+172kb)|FBXW8(-0.875kb)|HRK(+28.65kb)|LOC100506551(-67.36kb)|RNFT2(+56.45kb)|TESC(-128.8kb)
12	66131812	rs148303730	G	A	0.00843856	3	7.976e-05	0.00311	3.0007	2.8128	0.2723	23.13	3.2251	1.3292	3.9269	HMGA2(-86.43kb)|RPSAP52(-19.99kb)
11	11212924	rs142474020	A	G	0.0172005	3	7.984e-05	7.984e-05	2.4794	2.4794	0.673	0	2.574	1.652	2.7848	CSNK2A3(-160.6kb)|GALNT18(-79.5kb)
3	70818062	rs13077865	C	A	0.381491	3	7.994e-05	0.0008038	1.274	1.2721	0.264	24.92	1.4409	1.0944	1.2837	FOXP1(-185.8kb)
1	186908691	rs75806020	G	C	0.0140591	2	8.005e-05	0.06301	3.9645	3.256	0.1077	61.36	NA	1.5061	5.4928	PLA2G4A(0)
6	101653981	rs112498930	A	G	0.0215584	2	8.008e-05	8.008e-05	2.7146	2.7146	0.896	0	NA	2.8525	2.6552	GRIK2(-192.9kb)
18	59519020	rs9949250	C	T	0.0740068	3	8.014e-05	0.02153	1.6154	1.7554	0.0229	73.53	2.0123	2.48	1.1671	LOC100996669(+97.09kb)|PIGN(-192.4kb)|RNF152(0)
10	83622736	rs34738926	A	G	0.0331229	3	8.025e-05	8.025e-05	1.9846	1.9846	0.6381	0	2.0225	1.4482	2.2092	NRG3(-12.33kb)
3	54073075	rs62255070	G	A	0.0310594	3	8.03e-05	0.002603	2.2112	2.3709	0.1504	47.21	3.037	3.5156	1.5115	ACTR8(+156.8kb)|CACNA2D3(-83.62kb)|CHDH(+192.7kb)|IL17RB(+173.2kb)|SELK(+147.1kb)
1	214724473	rs150598229	T	C	0.0524638	3	8.052e-05	8.052e-05	1.7522	1.7522	0.4441	0	1.5453	1.3435	2.053	CENPF(-52.06kb)|PTPN14(0)
10	7756434	rs112178049	T	C	0.0691253	3	8.077e-05	8.077e-05	0.5521	0.5521	0.6718	0	0.6825	0.5	0.5133	ATP5C1(-73.66kb)|ITIH2(0)|ITIH5(+47.47kb)|KIN(-36.49kb)|TAF3(-104kb)
1	214734154	rs113551530	G	A	0.0520788	3	8.133e-05	8.133e-05	1.7525	1.7525	0.4578	0	1.5282	1.3604	2.0493	CENPF(-42.38kb)|PTPN14(+9.13kb)
3	70818543	rs34077295	C	A	0.375885	3	8.134e-05	0.0005977	1.2743	1.2726	0.2805	21.34	1.4338	1.0957	1.2881	FOXP1(-185.3kb)
16	49096220	rs78677439	G	C	0.058146	3	8.141e-05	8.141e-05	1.6775	1.6775	0.52	0	2.1982	1.5062	1.5576	.
15	45646051	rs4774578	A	G	0.280828	3	8.143e-05	8.143e-05	1.3119	1.3119	0.95	0	1.2672	1.3391	1.3251	C15orf48(-76.68kb)|DUOX1(+188.3kb)|GATM(-7.27kb)|GATM-AS1(-24.85kb)|HMGN2P46(-157.3kb)|MIR147B(-79.2kb)|SHF(+152.7kb)|SLC28A2(+77.92kb)|SLC30A4(-128.6kb)|SPATA5L1(-48.47kb)
4	120190597	rs72676009	T	G	0.0135664	3	8.193e-05	8.193e-05	2.4372	2.4372	0.4378	0	1.8874	4.415	2.1985	C4orf3(-26.98kb)|FABP2(-47.81kb)|FLJ14186(-136.1kb)|LOC645513(-185.3kb)|MYOZ2(+81.65kb)|USP53(0)
6	40534189	rs143907223	T	C	0.0372036	3	8.195e-05	0.03903	1.8728	1.8613	0.0319	70.97	3.377	1.1483	1.6264	LRFN2(0)|TDRG1(+186.6kb)
20	49656651	rs58550560	T	G	0.0263628	3	8.197e-05	8.197e-05	2.587	2.587	0.9906	0	2.7507	2.5054	2.5622	ADNP(+109.1kb)|BCAS4(+162.9kb)|DPM1(+81.59kb)|KCNG1(+16.98kb)|MOCS3(+78.25kb)
4	132331804	rs115989829	C	A	0.0181706	3	8.216e-05	0.04986	2.1711	2.0145	0.0737	61.66	0.8843	3.3644	2.5248	.
1	246449418	rs76909574	T	A	0.0393132	3	8.217e-05	0.001193	1.7792	1.8144	0.2381	30.31	2.8584	1.4492	1.6185	SMYD3(0)
10	130499623	rs12265034	G	A	0.110194	3	8.221e-05	0.0003536	1.6008	1.5843	0.3261	10.76	1.3942	1.2381	1.8707	.
14	89622463	rs143392391	C	T	0.017955	2	8.225e-05	8.225e-05	2.7394	2.7394	0.8655	0	NA	2.9341	2.6654	FOXN3(-0.052kb)
12	90425858	rs142784474	T	G	0.018186	3	8.251e-05	0.0002521	2.4102	2.3904	0.3299	9.82	1.1983	3.128	2.6025	.
1	214739565	rs114101098	A	T	0.0521712	3	8.278e-05	8.278e-05	1.7503	1.7503	0.4579	0	1.5093	1.3702	2.0484	CENPF(-36.97kb)|PTPN14(+14.54kb)
7	15136476	rs111372466	A	G	0.0333693	3	8.286e-05	0.08997	2.0801	1.773	0.0633	63.76	1.4478	1.0569	2.9468	AGMO(-103.5kb)
15	45647427	rs2461702	G	A	0.29786	3	8.299e-05	8.299e-05	1.311	1.311	0.9055	0	1.2581	1.3697	1.3141	C15orf48(-75.3kb)|DUOX1(+189.7kb)|GATM(-5.894kb)|GATM-AS1(-23.47kb)|HMGN2P46(-155.9kb)|MIR147B(-77.82kb)|SHF(+154.1kb)|SLC28A2(+79.3kb)|SLC30A4(-127.3kb)|SPATA5L1(-47.09kb)
2	76961886	rs7584590	C	T	0.298707	3	8.303e-05	8.303e-05	1.2992	1.2992	0.9263	0	1.248	1.3413	1.3033	LRRTM4(-12.96kb)
2	224127787	rs80031591	T	C	0.0493071	3	8.318e-05	0.0008861	0.5409	0.5446	0.2568	26.45	0.7758	0.4009	0.5559	.
1	214733591	rs112144962	T	G	0.0520942	3	8.331e-05	8.331e-05	1.7506	1.7506	0.4532	0	1.522	1.3596	2.0499	CENPF(-42.94kb)|PTPN14(+8.567kb)
15	45646434	rs4572329	T	C	0.280828	3	8.336e-05	8.336e-05	1.3115	1.3115	0.9513	0	1.2675	1.3388	1.3242	C15orf48(-76.29kb)|DUOX1(+188.7kb)|GATM(-6.887kb)|GATM-AS1(-24.46kb)|HMGN2P46(-156.9kb)|MIR147B(-78.81kb)|SHF(+153.1kb)|SLC28A2(+78.3kb)|SLC30A4(-128.2kb)|SPATA5L1(-48.08kb)
1	214733650	rs114567272	T	C	0.0520942	3	8.338e-05	8.338e-05	1.7506	1.7506	0.4535	0	1.5219	1.3597	2.0497	CENPF(-42.88kb)|PTPN14(+8.626kb)
6	153826844	rs270269	C	T	0.227918	3	8.346e-05	0.01204	1.312	1.287	0.1356	49.94	1.3024	1.0592	1.4763	.
19	40103200	rs62120750	C	A	0.289637	3	8.361e-05	8.361e-05	1.3043	1.3043	0.8635	0	1.3128	1.3827	1.2629	CLC(-118.7kb)|DLL3(+104.1kb)|EID2(+72.36kb)|EID2B(+79.71kb)|LEUTX(-164kb)|LGALS13(+5.086kb)|LGALS14(-91.74kb)|LGALS16(-43.36kb)|LGALS17A(-66.81kb)|LOC100129935(-26.12kb)|PLEKHG2(+184.1kb)|RPS16(+176.6kb)|SELV(+91.87kb)|SUPT5H(+135.9kb)|TIMM50(+121.7kb)
14	42778440	rs2626440	C	T	0.590715	3	8.363e-05	0.0001063	1.2804	1.2809	0.3572	2.85	1.4866	1.2001	1.2198	.
15	45647236	rs10444821	T	C	0.280813	3	8.398e-05	8.398e-05	1.3111	1.3111	0.9493	0	1.2661	1.3382	1.3246	C15orf48(-75.49kb)|DUOX1(+189.5kb)|GATM(-6.085kb)|GATM-AS1(-23.66kb)|HMGN2P46(-156.1kb)|MIR147B(-78.01kb)|SHF(+153.9kb)|SLC28A2(+79.1kb)|SLC30A4(-127.4kb)|SPATA5L1(-47.28kb)
14	42779017	rs1601171	G	T	0.590607	3	8.406e-05	0.0001099	1.2803	1.2809	0.3559	3.2	1.4869	1.1999	1.2196	.
7	87098520	rs113813094	C	G	0.186126	3	8.413e-05	8.413e-05	1.351	1.351	0.7744	0	1.2902	1.4927	1.3277	ABCB1(-34.66kb)|ABCB4(0)|CROT(+69.41kb)|RUNDC3B(-159.2kb)|TP53TG1(+123.7kb)
4	67883597	rs62315322	C	T	0.132784	3	8.439e-05	8.439e-05	1.4351	1.4351	0.5049	0	1.7042	1.3929	1.3223	.
1	214736786	rs60323172	T	A	0.0520788	3	8.449e-05	8.449e-05	1.7499	1.7499	0.4631	0	1.5161	1.3687	2.0457	CENPF(-39.74kb)|PTPN14(+11.76kb)
14	42779977	rs2626436	A	T	0.590437	3	8.458e-05	0.0001127	1.28	1.2807	0.3551	3.42	1.4868	1.1998	1.2192	.
1	214735980	rs79253862	G	T	0.0518479	3	8.459e-05	8.459e-05	1.7513	1.7513	0.4609	0	1.5203	1.3658	2.0483	CENPF(-40.55kb)|PTPN14(+10.96kb)
15	45647433	rs72623915	T	C	0.280813	3	8.478e-05	8.478e-05	1.3109	1.3109	0.9489	0	1.2657	1.3379	1.3245	C15orf48(-75.29kb)|DUOX1(+189.7kb)|GATM(-5.888kb)|GATM-AS1(-23.46kb)|HMGN2P46(-155.9kb)|MIR147B(-77.81kb)|SHF(+154.1kb)|SLC28A2(+79.3kb)|SLC30A4(-127.2kb)|SPATA5L1(-47.08kb)
4	7278298	rs12500160	T	C	0.018186	2	8.481e-05	0.1688	2.5058	2.0811	0.0413	75.98	NA	1.1483	3.3535	FLJ36777(+173.2kb)|MIR4274(-183.5kb)|MIR4798(-33.88kb)|PSAPL1(-153.7kb)|SORCS2(0)
2	224084303	rs1400796	A	C	0.945488	3	8.483e-05	0.008381	1.8057	1.7934	0.1163	53.53	1.2888	2.7469	1.5912	KCNE4(+163.9kb)
8	49394458	rs116900969	T	C	0.018032	3	8.512e-05	8.512e-05	2.306	2.306	0.6217	0	2.9444	1.5816	2.2097	.
6	8237754	rs141864440	A	G	0.119403	3	8.533e-05	8.533e-05	1.4203	1.4203	0.4563	0	1.6574	1.2055	1.4186	BLOC1S5(+173.1kb)|BLOC1S5-TXNDC5(+173.1kb)|EEF1E1(+134.9kb)|EEF1E1-MUTED(+134.9kb)|LOC100506207(-198.1kb)|SCARNA27(+151kb)|SLC35B3(-175.5kb)
18	59586116	rs59723157	G	A	0.181198	3	8.536e-05	8.977e-05	1.3551	1.3554	0.3654	0.67	1.5398	1.4551	1.2094	LOC100996669(+164.2kb)|PIGN(-125.3kb)|RNF152(+25.81kb)
15	45648038	rs66714503	C	G	0.280828	3	8.538e-05	8.538e-05	1.3107	1.3107	0.9475	0	1.2648	1.3375	1.3249	C15orf48(-74.69kb)|DUOX1(+190.3kb)|GATM(-5.283kb)|GATM-AS1(-22.86kb)|HMGN2P46(-155.3kb)|MIR147B(-77.21kb)|SHF(+154.7kb)|SLC28A2(+79.91kb)|SLC30A4(-126.6kb)|SPATA5L1(-46.48kb)
2	5302712	rs112056344	A	G	0.101232	3	8.571e-05	0.03862	1.429	1.3773	0.0664	63.13	1.455	1.0081	1.6891	.
1	214727761	rs113323507	A	T	0.0578996	3	8.592e-05	8.592e-05	1.74	1.74	0.4503	0	1.5766	1.3195	2.0302	CENPF(-48.77kb)|PTPN14(+2.737kb)
13	34604686	rs36015381	T	C	0.100447	3	8.593e-05	8.593e-05	1.4863	1.4863	0.6286	0	1.4607	1.2548	1.6056	RFC3(+63.99kb)
19	41184347	rs4802082	T	C	0.0214506	2	8.596e-05	8.596e-05	2.4709	2.4709	0.9778	0	NA	2.448	2.4818	ADCK4(-13.09kb)|C19orf54(-62.41kb)|CYP2A6(-165.1kb)|CYP2A7(-197kb)|EGLN2(-120.7kb)|ITPKC(-38.66kb)|LTBP4(+48.62kb)|MIA(-96.73kb)|MIA-RAB4B(-97.09kb)|NUMBL(0)|RAB4B(-99.78kb)|RAB4B-EGLN2(-99.78kb)|SHKBP1(+87.04kb)|SNRPA(-72.41kb)|SPTBN4(+102kb)
1	214739035	rs17735632	G	A	0.0521558	3	8.604e-05	8.604e-05	1.7487	1.7487	0.4646	0	1.5138	1.3697	2.0438	CENPF(-37.5kb)|PTPN14(+14.01kb)
17	75646156	rs2870771	G	A	0.283985	3	8.632e-05	8.632e-05	1.2978	1.2978	0.9125	0	1.3205	1.2352	1.3184	LOC100507351(+85.05kb)|SEPT9(+149.5kb)
4	120675349	rs72680990	T	C	0.0456421	3	8.645e-05	0.006519	1.7036	1.6606	0.1782	42.02	1.0959	1.9899	1.9584	PDE5A(+125.4kb)
4	132586505	rs114787950	G	A	0.0390822	3	8.649e-05	0.05359	1.9273	1.7688	0.0676	62.88	0.9682	2.0818	2.4901	.
1	214733853	rs74442040	C	T	0.052125	3	8.651e-05	8.651e-05	1.7481	1.7481	0.4499	0	1.5133	1.3601	2.0494	CENPF(-42.68kb)|PTPN14(+8.829kb)
2	128793764	rs144748907	T	C	0.0227903	3	8.655e-05	0.0001046	2.2648	2.2718	0.3613	1.78	3.9225	2.1694	1.885	AMMECR1L(+150.2kb)|POLR2D(+178kb)|SAP130(+8.895kb)|UGGT1(-54.99kb)
15	45640379	rs7169587	G	A	0.283015	3	8.669e-05	8.669e-05	1.3106	1.3106	0.9432	0	1.2642	1.3445	1.3216	C15orf48(-82.35kb)|DUOX1(+182.6kb)|GATM(-12.94kb)|GATM-AS1(-30.52kb)|HMGN2P46(-163kb)|MIR147B(-84.87kb)|SHF(+147kb)|SLC28A2(+72.25kb)|SLC30A4(-134.3kb)|SPATA5L1(-54.14kb)
17	75646415	rs2870772	A	G	0.284262	3	8.678e-05	8.678e-05	1.2977	1.2977	0.9141	0	1.3198	1.2357	1.3183	LOC100507351(+85.31kb)|SEPT9(+149.7kb)
4	140801949	rs9999030	G	A	0.0431937	3	8.682e-05	0.01497	1.6945	1.5948	0.1645	44.59	1.3699	1.1756	2.1051	MAML3(0)|MGST2(+140kb)
15	76576060	rs78052129	G	A	0.0424392	3	8.686e-05	0.02905	1.7837	1.809	0.0454	67.67	1.1092	3.189	1.702	C15orf27(+78.76kb)|ETFA(0)|ISL2(-53.09kb)|SCAPER(-64.47kb)|TYRO3P(+23.57kb)
1	214740939	rs112519203	T	A	0.0521558	3	8.697e-05	8.697e-05	1.748	1.748	0.4663	0	1.5115	1.3715	2.0425	CENPF(-35.59kb)|PTPN14(+15.92kb)
17	75646488	rs7503375	C	G	0.284262	3	8.706e-05	8.706e-05	1.2976	1.2976	0.914	0	1.3196	1.2356	1.3183	LOC100507351(+85.38kb)|SEPT9(+149.8kb)
2	151190677	rs13028516	T	C	0.0328303	3	8.707e-05	8.707e-05	1.8994	1.8994	0.6883	0	2.3732	1.5585	1.8922	RND3(-134kb)
13	34604939	rs985018	C	T	0.100585	3	8.71e-05	8.71e-05	1.4857	1.4857	0.6271	0	1.4593	1.2542	1.6056	RFC3(+64.24kb)
1	214671091	rs114144238	C	T	0.0566215	3	8.717e-05	8.717e-05	1.792	1.792	0.6807	0	1.8249	1.4152	1.9605	CENPF(-105.4kb)|PTPN14(0)|SMYD2(+160.6kb)
18	13770318	rs62086665	A	C	0.288636	3	8.717e-05	8.717e-05	1.3038	1.3038	0.9425	0	1.2602	1.3448	1.3067	FAM210A(+43.73kb)|LDLRAD4(+117.6kb)|MC2R(-111.7kb)|MC5R(-55.22kb)|MIR4526(+159.1kb)|RNMT(+5.764kb)
17	75637908	rs55806153	A	C	0.223191	3	8.728e-05	8.728e-05	1.3268	1.3268	0.6228	0	1.3407	1.1833	1.4014	LOC100507351(+76.8kb)|SEPT9(+141.2kb)
19	50383636	rs3745486	C	T	0.434478	3	8.732e-05	8.732e-05	1.2751	1.2751	0.9569	0	1.2782	1.2383	1.2947	ADM5(+189.4kb)|AKT1S1(+2.023kb)|AP2A1(+73.27kb)|ATF5(-48.32kb)|CPT1C(+166.6kb)|FLJ26850(-170.3kb)|FUZ(+67.07kb)|IL4I1(-9.276kb)|MED25(+43.4kb)|MIR4749(+25.73kb)|MIR4750(-7.795kb)|MIR4751(-52.68kb)|MIR5088(+198.2kb)|NUP62(-26.45kb)|PNKP(+12.81kb)|PRMT1(+191.9kb)|PTOV1(+19.64kb)|PTOV1-AS1(+28.7kb)|SIGLEC11(-68.61kb)|SIGLEC16(-89.28kb)|TBC1D17(0)|TSKS(+117.1kb)|VRK3(-96.09kb)|ZNF473(-145.6kb)
4	120674169	rs72680989	T	C	0.0456729	3	8.738e-05	0.006408	1.7021	1.6595	0.1799	41.71	1.096	1.9893	1.9543	PDE5A(+124.2kb)
15	45640172	rs12591058	C	T	0.283	3	8.744e-05	8.744e-05	1.3104	1.3104	0.9433	0	1.2642	1.3446	1.3212	C15orf48(-82.55kb)|DUOX1(+182.4kb)|GATM(-13.15kb)|GATM-AS1(-30.72kb)|HMGN2P46(-163.2kb)|MIR147B(-85.08kb)|SHF(+146.8kb)|SLC28A2(+72.04kb)|SLC30A4(-134.5kb)|SPATA5L1(-54.35kb)
13	34604969	rs985017	T	A	0.100585	3	8.752e-05	8.752e-05	1.4856	1.4856	0.6273	0	1.4591	1.2542	1.6055	RFC3(+64.27kb)
16	13156143	rs276629	G	C	0.155651	3	8.782e-05	0.0001862	1.408	1.4083	0.3377	7.87	1.1827	1.7	1.3837	SHISA9(0)
1	214742100	rs74447685	T	C	0.0521404	3	8.799e-05	8.799e-05	1.7472	1.7472	0.4673	0	1.5084	1.3734	2.0415	CENPF(-34.43kb)|PTPN14(+17.08kb)
1	214774867	rs17792674	T	C	0.0438097	3	8.802e-05	8.802e-05	1.8309	1.8309	0.7788	0	1.6237	1.6137	2.0166	CENPF(-1.664kb)|PTPN14(+49.84kb)
12	52239754	rs303783	G	A	0.903927	3	8.807e-05	0.02658	0.6862	0.7031	0.0742	61.54	0.6708	0.9441	0.5664	ACVR1B(-105.7kb)|ACVRL1(-61.45kb)|ANKRD33(-42.04kb)|FIGNL2(+14.05kb)|GRASP(-161kb)|NR4A1(-176.9kb)|SCN8A(+33.11kb)
5	38176521	rs6897859	G	A	0.160009	3	8.81e-05	8.81e-05	1.4116	1.4116	0.7653	0	1.2947	1.3541	1.4999	EGFLAM(-81.99kb)|EGFLAM-AS4(-105.8kb)
19	50386340	rs746738	C	T	0.434509	3	8.822e-05	8.822e-05	1.2754	1.2754	0.957	0	1.2787	1.2387	1.2951	ADM5(+192.1kb)|AKT1S1(+4.727kb)|AP2A1(+75.97kb)|ATF5(-45.62kb)|CPT1C(+169.4kb)|FLJ26850(-167.6kb)|FUZ(+69.77kb)|IL4I1(-6.572kb)|MED25(+46.1kb)|MIR4749(+28.43kb)|MIR4750(-5.091kb)|MIR4751(-49.98kb)|NUP62(-23.74kb)|PNKP(+15.52kb)|PRMT1(+194.6kb)|PTOV1(+22.34kb)|PTOV1-AS1(+31.41kb)|SIGLEC11(-65.91kb)|SIGLEC16(-86.57kb)|TBC1D17(0)|TSKS(+119.8kb)|VRK3(-93.38kb)|ZNF473(-142.9kb)
5	2282548	rs635063	A	G	0.777841	3	8.83e-05	8.83e-05	0.7439	0.7439	0.4439	0	0.6388	0.8306	0.7635	.
7	79998372	rs191861937	C	T	0.0189868	3	8.839e-05	8.839e-05	2.3092	2.3092	0.9875	0	2.4416	2.2231	2.2907	GNAI1(+149.6kb)|GNAT3(-89.61kb)
7	87102251	rs4148810	T	C	0.186634	3	8.858e-05	8.858e-05	1.3501	1.3501	0.771	0	1.2906	1.4936	1.3251	ABCB1(-30.93kb)|ABCB4(0)|CROT(+73.14kb)|RUNDC3B(-155.5kb)|TP53TG1(+127.4kb)
17	75647236	rs7222257	A	G	0.284093	3	8.861e-05	8.861e-05	1.2974	1.2974	0.907	0	1.3247	1.2331	1.3165	LOC100507351(+86.13kb)|SEPT9(+150.6kb)
17	75647079	rs7222067	C	G	0.283985	3	8.867e-05	8.867e-05	1.2977	1.2977	0.9017	0	1.3266	1.2315	1.3169	LOC100507351(+85.98kb)|SEPT9(+150.4kb)
15	45636667	rs12439274	C	T	0.283046	3	8.874e-05	8.874e-05	1.3101	1.3101	0.9449	0	1.2649	1.345	1.3198	C15orf48(-86.06kb)|DUOX1(+178.9kb)|GATM(-16.65kb)|GATM-AS1(-34.23kb)|HMGN2P46(-166.7kb)|MIR147B(-88.58kb)|SHF(+143.3kb)|SLC28A2(+68.54kb)|SLC30A4(-138kb)|SPATA5L1(-57.85kb)
4	132437063	rs140963082	C	A	0.0190484	3	8.891e-05	0.03979	2.1504	1.9936	0.0873	58.99	0.9292	2.984	2.5892	.
15	45637152	rs113358875	A	G	0.283061	3	8.899e-05	8.899e-05	1.3101	1.3101	0.9449	0	1.2649	1.345	1.3198	C15orf48(-85.57kb)|DUOX1(+179.4kb)|GATM(-16.17kb)|GATM-AS1(-33.74kb)|HMGN2P46(-166.2kb)|MIR147B(-88.1kb)|SHF(+143.8kb)|SLC28A2(+69.02kb)|SLC30A4(-137.5kb)|SPATA5L1(-57.37kb)
4	120672472	rs72680987	T	G	0.0456267	3	8.903e-05	0.006394	1.6996	1.6575	0.1807	41.55	1.0957	1.9901	1.9486	PDE5A(+122.5kb)
15	45639471	rs7167900	G	A	0.282984	3	8.904e-05	8.904e-05	1.31	1.31	0.9443	0	1.2645	1.3448	1.3201	C15orf48(-83.26kb)|DUOX1(+181.7kb)|GATM(-13.85kb)|GATM-AS1(-31.43kb)|HMGN2P46(-163.9kb)|MIR147B(-85.78kb)|SHF(+146.1kb)|SLC28A2(+71.34kb)|SLC30A4(-135.2kb)|SPATA5L1(-55.05kb)
15	45642884	rs9783731	C	T	0.28303	3	8.912e-05	8.912e-05	1.3099	1.3099	0.9425	0	1.2633	1.344	1.321	C15orf48(-79.84kb)|DUOX1(+185.1kb)|GATM(-10.44kb)|GATM-AS1(-28.01kb)|HMGN2P46(-160.4kb)|MIR147B(-82.36kb)|SHF(+149.5kb)|SLC28A2(+74.75kb)|SLC30A4(-131.8kb)|SPATA5L1(-51.63kb)
8	70119534	rs1841671	G	A	0.479751	3	8.917e-05	0.02617	0.7864	0.8024	0.0808	60.25	0.9205	0.8569	0.678	LOC100505718(+103.1kb)
11	8351657	rs7124392	C	T	0.850092	3	8.931e-05	8.931e-05	0.7127	0.7127	0.8447	0	0.6797	0.7751	0.7003	LMO1(+61.48kb)|RIC3(+161.1kb)|STK33(-61.76kb)
14	78796789	rs57934221	A	G	0.0346936	2	8.943e-05	8.943e-05	2.1213	2.1213	0.6195	0	NA	2.4426	1.9889	NRXN3(0)
21	22453394	rs11088849	G	A	0.0905605	3	8.95e-05	8.95e-05	1.5506	1.5506	0.7727	0	1.5816	1.3599	1.6474	NCAM2(0)
15	45634928	rs7182300	A	G	0.2832	3	8.956e-05	8.956e-05	1.31	1.31	0.9437	0	1.2645	1.3458	1.3195	C15orf48(-87.8kb)|DUOX1(+177.2kb)|GATM(-18.39kb)|GATM-AS1(-35.97kb)|HMGN2P46(-168.4kb)|MIR147B(-90.32kb)|SHF(+141.6kb)|SLC28A2(+66.8kb)|SLC30A4(-139.8kb)|SPATA5L1(-59.59kb)
20	49608180	rs6067606	A	G	0.0218509	3	8.957e-05	8.957e-05	2.6554	2.6554	0.7457	0	1.517	3.0247	2.7474	ADNP(+60.65kb)|BCAS4(+114.5kb)|DPM1(+33.12kb)|KCNG1(-12.01kb)|MOCS3(+29.78kb)
14	42782920	rs2626431	G	A	0.590715	3	8.958e-05	0.0001228	1.2789	1.2796	0.3537	3.79	1.4858	1.1993	1.2175	.
15	45639374	rs7163720	A	G	0.282969	3	8.991e-05	8.991e-05	1.3098	1.3098	0.9445	0	1.2645	1.3448	1.3196	C15orf48(-83.35kb)|DUOX1(+181.6kb)|GATM(-13.95kb)|GATM-AS1(-31.52kb)|HMGN2P46(-164kb)|MIR147B(-85.87kb)|SHF(+146kb)|SLC28A2(+71.24kb)|SLC30A4(-135.3kb)|SPATA5L1(-55.14kb)
1	214742742	rs111587352	T	C	0.0521712	3	8.998e-05	8.998e-05	1.746	1.746	0.4629	0	1.5066	1.3704	2.0425	CENPF(-33.79kb)|PTPN14(+17.72kb)
7	15139810	rs10245707	G	T	0.0602402	3	9.017e-05	0.1951	1.6487	1.4346	0.016	75.8	1.0821	1.0814	2.2701	AGMO(-100.1kb)
1	214743325	rs112221561	G	C	0.052125	3	9.022e-05	9.022e-05	1.7455	1.7455	0.4694	0	1.5046	1.3753	2.039	CENPF(-33.21kb)|PTPN14(+18.3kb)
8	49373711	rs56292868	G	T	0.0168155	3	9.022e-05	9.022e-05	2.4928	2.4928	0.4034	0	3.4444	1.3152	2.4323	.
2	128732814	rs78115589	A	G	0.0237758	3	9.052e-05	9.052e-05	2.2051	2.2051	0.5209	0	3.2278	2.4859	1.8532	AMMECR1L(+89.3kb)|POLR2D(+117.1kb)|SAP130(0)|UGGT1(-115.9kb)|WDR33(+164.1kb)
4	78204054	rs72648546	C	A	0.0279181	3	9.062e-05	0.001716	1.9938	2.105	0.184	40.93	2.6591	2.9113	1.4603	CCNG2(+112.8kb)
2	61161166	rs140260936	T	A	0.015445	3	9.075e-05	0.001952	2.3437	2.2452	0.2758	22.36	2.1839	1.2857	3.002	FLJ16341(+52.72kb)|KIAA1841(-131.8kb)|PAPOLG(+131.9kb)|PEX13(-83.64kb)|PUS10(-6.381kb)|REL(+10.99kb)
15	45639131	rs11852800	T	C	0.283	3	9.079e-05	9.079e-05	1.3096	1.3096	0.9447	0	1.2645	1.3449	1.3192	C15orf48(-83.6kb)|DUOX1(+181.4kb)|GATM(-14.19kb)|GATM-AS1(-31.77kb)|HMGN2P46(-164.2kb)|MIR147B(-86.12kb)|SHF(+145.8kb)|SLC28A2(+71kb)|SLC30A4(-135.5kb)|SPATA5L1(-55.39kb)
15	45627979	rs7171577	A	G	0.283092	3	9.086e-05	9.086e-05	1.31	1.31	0.9475	0	1.2665	1.346	1.318	C15orf48(-94.75kb)|DUOX1(+170.2kb)|GATM(-25.34kb)|GATM-AS1(-42.92kb)|HMGN2P46(-175.4kb)|MIR147B(-97.27kb)|SHF(+134.6kb)|SLC28A2(+59.85kb)|SLC30A4(-146.7kb)|SPATA5L1(-66.54kb)
16	750762	rs35692463	T	C	0.206052	3	9.092e-05	9.092e-05	1.3814	1.3814	0.4821	0	1.624	1.3034	1.2967	C16orf11(+135.2kb)|C16orf13(+64.42kb)|CAPN15(+146.1kb)|CCDC78(-21.82kb)|CHTF18(-87.86kb)|FAM173A(-20.38kb)|FAM195A(+52.29kb)|FBXL16(0)|GNG13(-97.28kb)|HAGHL(-26.5kb)|JMJD8(+16.32kb)|LINC00235(+173.4kb)|LMF1(-152.9kb)|METRN(-14.41kb)|MIR662(-69.42kb)|MIR3176(+157.4kb)|MIR5587(+165.4kb)|MSLN(-60kb)|NARFL(-29.01kb)|NHLRC4(+131.3kb)|PIGQ(+116.6kb)|PRR25(-104.7kb)|RAB11FIP3(+178.3kb)|RAB40C(+71.49kb)|…
15	45638294	rs4775906	T	C	0.283015	3	9.096e-05	9.096e-05	1.3096	1.3096	0.9453	0	1.2648	1.3449	1.319	C15orf48(-84.43kb)|DUOX1(+180.5kb)|GATM(-15.03kb)|GATM-AS1(-32.6kb)|HMGN2P46(-165kb)|MIR147B(-86.95kb)|SHF(+144.9kb)|SLC28A2(+70.16kb)|SLC30A4(-136.4kb)|SPATA5L1(-56.22kb)
3	29604960	rs115426533	T	G	0.0312904	3	9.106e-05	0.0009318	1.9517	2.0094	0.2484	28.19	1.693	3.5242	1.7042	RBMS3(0)
15	45637814	rs56806728	G	A	0.28303	3	9.114e-05	9.114e-05	1.3096	1.3096	0.9452	0	1.2648	1.345	1.3189	C15orf48(-84.91kb)|DUOX1(+180kb)|GATM(-15.51kb)|GATM-AS1(-33.08kb)|HMGN2P46(-165.5kb)|MIR147B(-87.43kb)|SHF(+144.4kb)|SLC28A2(+69.68kb)|SLC30A4(-136.9kb)|SPATA5L1(-56.7kb)
17	3394769	rs76398592	A	G	0.0635356	3	9.118e-05	9.118e-05	1.6854	1.6854	0.6625	0	1.9654	1.8595	1.5076	ASPA(0)|CTNS(-145kb)|EMC6(-177.3kb)|OR1E1(+93.06kb)|OR1E2(+57.63kb)|OR3A1(+198.9kb)|OR3A3(+69.94kb)|OR3A4P(+180kb)|P2RX5(-181.8kb)|P2RX5-TAX1BP3(-171.4kb)|SHPK(-116.8kb)|SPATA22(+19.63kb)|TAX1BP3(-171.4kb)|TRPV1(-73.97kb)|TRPV3(-19.03kb)
15	45648272	rs2056493	G	A	0.280828	3	9.119e-05	9.119e-05	1.3092	1.3092	0.9504	0	1.265	1.3371	1.3218	C15orf48(-74.45kb)|DUOX1(+190.5kb)|GATM(-5.049kb)|GATM-AS1(-22.62kb)|HMGN2P46(-155.1kb)|MIR147B(-76.98kb)|SHF(+154.9kb)|SLC28A2(+80.14kb)|SLC30A4(-126.4kb)|SPATA5L1(-46.25kb)
15	45638331	rs7179743	C	G	0.283015	3	9.12e-05	9.12e-05	1.3096	1.3096	0.9451	0	1.2647	1.3449	1.3189	C15orf48(-84.4kb)|DUOX1(+180.6kb)|GATM(-14.99kb)|GATM-AS1(-32.57kb)|HMGN2P46(-165kb)|MIR147B(-86.92kb)|SHF(+145kb)|SLC28A2(+70.2kb)|SLC30A4(-136.3kb)|SPATA5L1(-56.19kb)
18	56878309	rs77017644	A	T	0.0203419	2	9.127e-05	9.127e-05	2.7725	2.7725	0.7268	0	NA	2.3169	2.9036	CPLX4(-84.33kb)|GRP(-9.09kb)|LMAN1(-116.7kb)|OACYLP(+157.9kb)|RAX(-55.96kb)|SEC11C(+52.25kb)
15	45637662	rs11858495	A	G	0.28303	3	9.128e-05	9.128e-05	1.3096	1.3096	0.9455	0	1.2649	1.345	1.3187	C15orf48(-85.06kb)|DUOX1(+179.9kb)|GATM(-15.66kb)|GATM-AS1(-33.24kb)|HMGN2P46(-165.7kb)|MIR147B(-87.58kb)|SHF(+144.3kb)|SLC28A2(+69.53kb)|SLC30A4(-137kb)|SPATA5L1(-56.86kb)
15	45637729	rs56669689	C	A	0.28303	3	9.134e-05	9.134e-05	1.3096	1.3096	0.9454	0	1.2648	1.3449	1.3188	C15orf48(-85kb)|DUOX1(+180kb)|GATM(-15.59kb)|GATM-AS1(-33.17kb)|HMGN2P46(-165.6kb)|MIR147B(-87.52kb)|SHF(+144.4kb)|SLC28A2(+69.6kb)|SLC30A4(-137kb)|SPATA5L1(-56.79kb)
15	45638647	rs4775907	A	G	0.283	3	9.146e-05	9.146e-05	1.3095	1.3095	0.9452	0	1.2647	1.3449	1.3188	C15orf48(-84.08kb)|DUOX1(+180.9kb)|GATM(-14.67kb)|GATM-AS1(-32.25kb)|HMGN2P46(-164.7kb)|MIR147B(-86.6kb)|SHF(+145.3kb)|SLC28A2(+70.52kb)|SLC30A4(-136kb)|SPATA5L1(-55.87kb)
4	43259528	rs145021863	T	C	0.01081	2	9.148e-05	9.148e-05	2.9691	2.9691	0.3401	0	NA	1.8151	3.4259	.
1	214745555	rs17792227	T	A	0.052048	3	9.159e-05	9.159e-05	1.7445	1.7445	0.4748	0	1.4996	1.3812	2.036	CENPF(-30.98kb)|PTPN14(+20.53kb)
14	89612606	rs116862066	C	G	0.016292	2	9.171e-05	9.171e-05	2.8052	2.8052	0.9749	0	NA	2.7685	2.8199	FOXN3(-9.909kb)
19	40111212	rs2158938	A	T	0.289698	3	9.193e-05	9.193e-05	1.3057	1.3057	0.8305	0	1.323	1.3906	1.2564	CLC(-110.7kb)|DLL3(+112.1kb)|EID2(+80.37kb)|EID2B(+87.72kb)|LEUTX(-156kb)|LGALS13(+13.1kb)|LGALS14(-83.73kb)|LGALS16(-35.34kb)|LGALS17A(-58.8kb)|LOC100129935(-18.11kb)|PLEKHG2(+192.2kb)|RPS16(+184.6kb)|SELV(+99.89kb)|SUPT5H(+143.9kb)|TIMM50(+129.7kb)
22	36040677	rs145066618	C	T	0.0198645	2	9.193e-05	9.193e-05	2.5833	2.5833	0.9949	0	NA	2.5763	2.5856	APOL5(-73.24kb)|APOL6(-3.746kb)|MB(+21.28kb)|RASD2(+90.63kb)|RBFOX2(-94.1kb)
15	45622786	rs1618874	G	A	0.287666	3	9.224e-05	9.224e-05	1.3111	1.3111	0.9012	0	1.2577	1.3741	1.3128	C15orf48(-99.94kb)|DUOX1(+165kb)|GATM(-30.54kb)|GATM-AS1(-48.11kb)|HMGN2P46(-180.5kb)|MIR147B(-102.5kb)|SHF(+129.4kb)|SLC28A2(+54.65kb)|SLC30A4(-151.9kb)|SPATA5L1(-71.73kb)
19	50384882	rs7248498	G	A	0.43457	3	9.253e-05	9.253e-05	1.274	1.274	0.9603	0	1.2785	1.2384	1.2922	ADM5(+190.6kb)|AKT1S1(+3.269kb)|AP2A1(+74.51kb)|ATF5(-47.08kb)|CPT1C(+167.9kb)|FLJ26850(-169.1kb)|FUZ(+68.32kb)|IL4I1(-8.03kb)|MED25(+44.64kb)|MIR4749(+26.97kb)|MIR4750(-6.549kb)|MIR4751(-51.44kb)|MIR5088(+199.5kb)|NUP62(-25.2kb)|PNKP(+14.06kb)|PRMT1(+193.2kb)|PTOV1(+20.88kb)|PTOV1-AS1(+29.95kb)|SIGLEC11(-67.37kb)|SIGLEC16(-88.03kb)|TBC1D17(0)|TSKS(+118.4kb)|VRK3(-94.84kb)|ZNF473(-144.3kb)
8	98810792	rs2245044	A	G	0.488035	2	9.261e-05	9.261e-05	1.3833	1.3833	0.6244	0	1.4388	1.3264	NA	LAPTM4B(0)|MATN2(-70.52kb)|MTDH(+68.3kb)
2	111808077	rs72836317	T	C	0.0414998	3	9.266e-05	9.266e-05	1.71	1.71	0.4673	0	1.9884	1.9915	1.4155	ACOXL(0)|BCL2L11(-70.41kb)
19	38910063	rs12611194	C	T	0.288297	3	9.281e-05	0.001313	0.7598	0.7593	0.2334	31.27	0.8828	0.6409	0.7721	C19orf33(+114.4kb)|CATSPERG(+48.47kb)|DPF1(+189.7kb)|EIF3K(-199.7kb)|FAM98C(+10.34kb)|GGN(+31.4kb)|KCNK6(+90.41kb)|MAP4K1(-168.2kb)|PPP1R14A(+162.8kb)|PSMD8(+35.6kb)|RASGRP4(0)|RYR1(-14.28kb)|SPINT2(+126.8kb)|SPRED3(+19.54kb)|YIF1B(+103.5kb)
11	8351264	rs11041884	G	A	0.849954	3	9.288e-05	9.288e-05	0.7145	0.7145	0.9676	0	0.7078	0.7426	0.7044	LMO1(+61.08kb)|RIC3(+160.7kb)|STK33(-62.15kb)
18	13766166	rs9953436	A	G	0.288528	3	9.292e-05	9.292e-05	1.302	1.302	0.943	0	1.2594	1.3436	1.304	FAM210A(+39.58kb)|LDLRAD4(+113.4kb)|MC2R(-115.9kb)|MC5R(-59.38kb)|MIR4526(+155kb)|RNMT(+1.612kb)
19	16920006	rs112791293	T	C	0.0685094	3	9.302e-05	9.302e-05	1.655	1.655	0.9333	0	1.6826	1.791	1.593	CPAMD8(-83.76kb)|F2RL3(-79.82kb)|MED26(+181kb)|NWD1(0)|SIN3B(-20.2kb)|SMIM7(+149kb)|TMEM38A(+120.2kb)
11	123670729	rs17682150	C	G	0.0147675	3	9.305e-05	9.305e-05	2.3951	2.3951	0.8284	0	2.0072	2.2241	2.7451	GRAMD1B(+177.2kb)|OR4D5(-139.6kb)|OR6M1(-5.386kb)|OR6T1(-142.8kb)|OR6X1(+45.5kb)|OR8D4(-106.4kb)|OR10S1(-176.7kb)|SCN3B(+145.4kb)|TMEM225(-82.9kb)|ZNF202(+58.37kb)
15	45622116	rs1613559	G	A	0.287696	3	9.315e-05	9.315e-05	1.3108	1.3108	0.9007	0	1.2574	1.3741	1.3124	C15orf48(-100.6kb)|DUOX1(+164.3kb)|GATM(-31.2kb)|GATM-AS1(-48.78kb)|HMGN2P46(-181.2kb)|MIR147B(-103.1kb)|SHF(+128.7kb)|SLC28A2(+53.98kb)|SLC30A4(-152.6kb)|SPATA5L1(-72.4kb)
4	99563530	rs883510	T	C	0.351309	3	9.317e-05	0.003534	1.2834	1.3097	0.1358	49.91	1.5063	1.3919	1.1284	RAP1GDS1(+198.5kb)|TSPAN5(0)
4	120663021	rs72680975	T	C	0.0466123	3	9.323e-05	0.005853	1.69	1.6502	0.189	39.98	1.0958	1.9923	1.9212	PDE5A(+113kb)
1	81539862	rs142845637	T	C	0.0215276	3	9.33e-05	0.03377	2.0921	1.9628	0.07	62.4	2.5668	0.9682	2.7343	.
1	166672000	rs12047705	G	A	0.209224	3	9.337e-05	9.337e-05	1.3344	1.3344	0.7646	0	1.2353	1.3085	1.4048	FMO9P(+77.53kb)|POGK(-136.7kb)|TADA1(-153.7kb)
15	45649307	rs67831559	T	G	0.280859	3	9.342e-05	9.342e-05	1.3086	1.3086	0.9495	0	1.264	1.3365	1.3215	C15orf48(-73.42kb)|DUOX1(+191.5kb)|GATM(-4.014kb)|GATM-AS1(-21.59kb)|HMGN2P46(-154kb)|MIR147B(-75.94kb)|SHF(+155.9kb)|SLC28A2(+81.18kb)|SLC30A4(-125.4kb)|SPATA5L1(-45.21kb)
7	145960392	rs147402786	A	C	0.0217893	3	9.343e-05	0.05806	2.6626	2.2415	0.0796	60.49	1.1834	1.6764	4.3216	CNTNAP2(0)
17	75647192	rs7223995	G	A	0.281444	3	9.359e-05	9.359e-05	1.2966	1.2966	0.9045	0	1.337	1.2344	1.3075	LOC100507351(+86.09kb)|SEPT9(+150.5kb)
7	147095036	rs58935552	T	A	0.0672313	3	9.367e-05	9.367e-05	1.6749	1.6749	0.6134	0	1.3915	1.5174	1.879	CNTNAP2(0)|MIR548F4(+19.82kb)|MIR548I4(0)
15	45649996	rs1145091	C	T	0.297875	3	9.377e-05	9.377e-05	1.3081	1.3081	0.9054	0	1.2561	1.3677	1.3104	C15orf48(-72.73kb)|DUOX1(+192.2kb)|GATM(-3.325kb)|GATM-AS1(-20.9kb)|HMGN2P46(-153.3kb)|MIR147B(-75.25kb)|SHF(+156.6kb)|SLC28A2(+81.86kb)|SLC30A4(-124.7kb)|SPATA5L1(-44.52kb)
15	45649787	rs4775911	C	A	0.280859	3	9.379e-05	9.379e-05	1.3085	1.3085	0.9495	0	1.2639	1.3362	1.3215	C15orf48(-72.94kb)|DUOX1(+192kb)|GATM(-3.534kb)|GATM-AS1(-21.11kb)|HMGN2P46(-153.5kb)|MIR147B(-75.46kb)|SHF(+156.4kb)|SLC28A2(+81.66kb)|SLC30A4(-124.9kb)|SPATA5L1(-44.73kb)
15	45633003	rs16942000	T	C	0.282954	3	9.383e-05	9.383e-05	1.309	1.309	0.9448	0	1.2642	1.3452	1.3178	C15orf48(-89.72kb)|DUOX1(+175.2kb)|GATM(-20.32kb)|GATM-AS1(-37.89kb)|HMGN2P46(-170.3kb)|MIR147B(-92.24kb)|SHF(+139.6kb)|SLC28A2(+64.87kb)|SLC30A4(-141.7kb)|SPATA5L1(-61.52kb)
13	34603442	rs12429500	A	C	0.0999384	3	9.387e-05	9.387e-05	1.4882	1.4882	0.6911	0	1.4593	1.2784	1.5968	RFC3(+62.75kb)
15	45617417	rs12593370	T	C	0.272806	3	9.407e-05	9.407e-05	1.3122	1.3122	0.9256	0	1.2613	1.3601	1.319	C15orf48(-105.3kb)|DUOX1(+159.6kb)|DUOXA1(+195.3kb)|GATM(-35.9kb)|GATM-AS1(-53.48kb)|HMGN2P46(-185.9kb)|MIR147B(-107.8kb)|SHF(+124kb)|SLC28A2(+49.28kb)|SLC30A4(-157.3kb)|SPATA5L1(-77.1kb)
2	224126719	rs75990217	T	A	0.0493686	3	9.43e-05	0.0009445	0.5435	0.5472	0.2582	26.14	0.78	0.4034	0.5569	.
13	34606744	rs35386129	G	C	0.100724	3	9.433e-05	9.433e-05	1.483	1.483	0.621	0	1.4518	1.2519	1.6056	RFC3(+66.05kb)
7	136506	rs11185559	G	C	0.546273	3	9.434e-05	9.434e-05	0.7352	0.7352	0.7642	0	0.8105	0.7034	0.7143	FAM20C(-56.46kb)|LOC100288524(-193.6kb)
14	43324352	rs8007649	C	T	0.869649	3	9.435e-05	9.435e-05	0.6544	0.6544	0.5964	0	0.5868	0.7924	0.6313	.
15	45620985	rs1719247	T	C	0.287481	3	9.44e-05	9.44e-05	1.3106	1.3106	0.8997	0	1.2569	1.3742	1.3122	C15orf48(-101.7kb)|DUOX1(+163.2kb)|DUOXA1(+198.9kb)|GATM(-32.34kb)|GATM-AS1(-49.91kb)|HMGN2P46(-182.3kb)|MIR147B(-104.3kb)|SHF(+127.6kb)|SLC28A2(+52.85kb)|SLC30A4(-153.7kb)|SPATA5L1(-73.53kb)
7	87101486	rs4148811	G	T	0.186634	3	9.447e-05	9.447e-05	1.3483	1.3483	0.765	0	1.2901	1.4945	1.3213	ABCB1(-31.69kb)|ABCB4(0)|CROT(+72.37kb)|RUNDC3B(-156.2kb)|TP53TG1(+126.7kb)
7	38688733	rs112318331	G	A	0.0342624	3	9.449e-05	9.449e-05	1.9238	1.9238	0.5232	0	2.6625	1.5888	1.7817	AMPH(+17.57kb)|FAM183B(-36.21kb)|VPS41(-74.81kb)
7	87096271	rs7782643	A	G	0.135617	3	9.449e-05	9.449e-05	1.3964	1.3964	0.6739	0	1.4373	1.5628	1.2971	ABCB1(-36.91kb)|ABCB4(0)|CROT(+67.16kb)|RUNDC3B(-161.5kb)|TP53TG1(+121.5kb)
1	195256477	rs79727703	T	G	0.0399292	3	9.452e-05	0.001911	1.74	1.7657	0.2226	33.44	2.6372	1.3645	1.5649	.
15	45650018	rs2066090	C	T	0.280875	3	9.471e-05	9.471e-05	1.3083	1.3083	0.9497	0	1.2638	1.3359	1.3213	C15orf48(-72.71kb)|DUOX1(+192.2kb)|GATM(-3.303kb)|GATM-AS1(-20.88kb)|HMGN2P46(-153.3kb)|MIR147B(-75.23kb)|SHF(+156.6kb)|SLC28A2(+81.89kb)|SLC30A4(-124.7kb)|SPATA5L1(-44.5kb)
17	59491499	rs28688948	A	G	0.0485525	3	9.472e-05	9.472e-05	1.7216	1.7216	0.6255	0	2.0506	1.3977	1.7513	BCAS3(+21.3kb)|C17orf82(+0.858kb)|NACA2(-176.3kb)|TBX2(+4.672kb)|TBX4(-42.31kb)
3	129683292	rs142957335	T	G	0.015368	2	9.474e-05	0.01039	3.0894	3.6807	0.1595	49.47	7.5466	NA	2.5676	ALG1L2(-117.4kb)|FAM86HP(-133.3kb)|LOC100507032(+55.54kb)|TMCC1(+70.87kb)|TRH(-9.943kb)
1	214735985	rs75673522	A	G	0.0516323	3	9.478e-05	9.478e-05	1.745	1.745	0.4689	0	1.5152	1.3662	2.0381	CENPF(-40.55kb)|PTPN14(+10.96kb)
6	153828648	rs270276	T	C	0.225362	3	9.488e-05	0.01712	1.3088	1.283	0.1146	53.84	1.3192	1.0444	1.4735	.
7	87091944	rs2302386	G	A	0.142501	3	9.494e-05	9.494e-05	1.3955	1.3955	0.6469	0	1.4205	1.5825	1.2966	ABCB1(-41.23kb)|ABCB4(0)|CROT(+62.83kb)|RUNDC3B(-165.8kb)|TP53TG1(+117.1kb)
15	45650666	rs12101539	G	C	0.280844	3	9.522e-05	9.522e-05	1.3081	1.3081	0.9499	0	1.2637	1.3356	1.3212	C15orf48(-72.06kb)|DUOX1(+192.9kb)|GATM(-2.655kb)|GATM-AS1(-20.23kb)|HMGN2P46(-152.7kb)|MIR147B(-74.58kb)|SHF(+157.3kb)|SLC28A2(+82.53kb)|SLC30A4(-124kb)|SPATA5L1(-43.85kb)
15	87860080	rs16940155	T	C	0.0454265	3	9.531e-05	0.002571	1.9289	2.1076	0.1579	45.83	3.0058	2.6779	1.4814	.
7	87091826	rs2302385	C	T	0.142501	3	9.538e-05	9.538e-05	1.3954	1.3954	0.6468	0	1.4203	1.5825	1.2965	ABCB1(-41.35kb)|ABCB4(0)|CROT(+62.71kb)|RUNDC3B(-165.9kb)|TP53TG1(+117kb)
1	246913471	rs61852486	T	C	0.0310286	3	9.552e-05	9.552e-05	1.8584	1.8584	0.8718	0	1.8903	1.612	1.9759	AHCTF1(-88.93kb)|CNST(+81.59kb)|LOC149134(-39.45kb)|SCCPDH(0)|TFB2M(+183.9kb)|ZNF670-ZNF695(-195.4kb)|ZNF695(-195.4kb)
3	105324500	rs115049091	C	T	0.0200185	3	9.575e-05	0.01565	2.0836	1.9884	0.1486	47.55	2.981	0.9904	2.3185	ALCAM(+28.74kb)|CBLB(-52.61kb)
1	88639510	rs140288448	A	G	0.0154604	3	9.58e-05	9.58e-05	2.9114	2.9114	0.9481	0	3.1425	3.2405	2.6814	.
15	45651309	rs8032904	T	C	0.281444	3	9.599e-05	9.599e-05	1.3079	1.3079	0.9503	0	1.2637	1.3352	1.321	C15orf48(-71.42kb)|DUOX1(+193.5kb)|GATM(-2.012kb)|GATM-AS1(-19.59kb)|HMGN2P46(-152kb)|MIR147B(-73.94kb)|SHF(+157.9kb)|SLC28A2(+83.18kb)|SLC30A4(-123.4kb)|SPATA5L1(-43.21kb)
15	45631795	rs10519021	A	G	0.283077	3	9.6e-05	9.6e-05	1.3085	1.3085	0.9437	0	1.2633	1.3452	1.3172	C15orf48(-90.93kb)|DUOX1(+174kb)|GATM(-21.53kb)|GATM-AS1(-39.1kb)|HMGN2P46(-171.5kb)|MIR147B(-93.45kb)|SHF(+138.4kb)|SLC28A2(+63.66kb)|SLC30A4(-142.9kb)|SPATA5L1(-62.72kb)
4	120666445	rs72680985	T	C	0.0456267	3	9.602e-05	0.005905	1.6904	1.6507	0.1889	39.99	1.0958	1.9916	1.9236	PDE5A(+116.5kb)
15	45651537	rs8038342	C	T	0.281414	3	9.607e-05	9.607e-05	1.3079	1.3079	0.9503	0	1.2637	1.3352	1.321	C15orf48(-71.19kb)|DUOX1(+193.8kb)|GATM(-1.784kb)|GATM-AS1(-19.36kb)|HMGN2P46(-151.8kb)|MIR147B(-73.71kb)|SHF(+158.2kb)|SLC28A2(+83.4kb)|SLC30A4(-123.1kb)|SPATA5L1(-42.98kb)
7	87089898	rs45502492	T	C	0.142532	3	9.615e-05	9.615e-05	1.3951	1.3951	0.6474	0	1.4192	1.5825	1.2966	ABCB1(-43.28kb)|ABCB4(0)|CROT(+60.79kb)|RUNDC3B(-167.8kb)|TP53TG1(+115.1kb)
7	87091543	rs4148814	C	T	0.142501	3	9.617e-05	9.617e-05	1.3951	1.3951	0.6459	0	1.4201	1.5825	1.2961	ABCB1(-41.64kb)|ABCB4(0)|CROT(+62.43kb)|RUNDC3B(-166.2kb)|TP53TG1(+116.7kb)
19	44240028	rs78310538	A	G	0.0264706	3	9.617e-05	9.617e-05	1.8323	1.8323	0.6692	0	1.7561	1.3952	2.0268	CADM4(+96.04kb)|IRGC(+15.86kb)|IRGQ(+139.7kb)|KCNN4(-30.66kb)|LOC100505715(-155.9kb)|LYPD5(-60.05kb)|PINLYP(+153.8kb)|PLAUR(+65.53kb)|SMG9(0)|SRRM5(+121.4kb)|XRCC1(+160.3kb)|ZNF45(-176.7kb)|ZNF283(-91.44kb)|ZNF404(-136.5kb)|ZNF428(+116kb)|ZNF575(+199.7kb)|ZNF576(+135.4kb)
7	87089927	rs45526438	A	G	0.142547	3	9.622e-05	9.622e-05	1.395	1.395	0.6471	0	1.4192	1.5825	1.2965	ABCB1(-43.25kb)|ABCB4(0)|CROT(+60.82kb)|RUNDC3B(-167.8kb)|TP53TG1(+115.1kb)
12	73308353	rs17800145	T	A	0.0115491	2	9.63e-05	0.0002533	3.698	3.7226	0.2853	12.41	2.7156	5.6046	NA	.
13	34606186	rs2321744	G	A	0.100693	3	9.666e-05	9.666e-05	1.4822	1.4822	0.6283	0	1.4554	1.2522	1.602	RFC3(+65.49kb)
15	45651803	rs4774579	A	G	0.281414	3	9.669e-05	9.669e-05	1.3078	1.3078	0.9504	0	1.2636	1.3349	1.3209	C15orf48(-70.92kb)|DUOX1(+194kb)|GATM(-1.518kb)|GATM-AS1(-19.09kb)|HMGN2P46(-151.5kb)|MIR147B(-73.44kb)|SHF(+158.4kb)|SLC28A2(+83.67kb)|SLC30A4(-122.9kb)|SPATA5L1(-42.72kb)
11	8349506	rs1026347	T	C	0.142593	3	9.679e-05	9.679e-05	1.4006	1.4006	0.9327	0	1.3741	1.3414	1.4456	LMO1(+59.32kb)|RIC3(+158.9kb)|STK33(-63.91kb)
4	120665458	rs72680982	A	C	0.0455959	3	9.682e-05	0.005822	1.6893	1.65	0.1902	39.75	1.0959	1.9921	1.9202	PDE5A(+115.5kb)
18	60097602	rs35822778	G	A	0.594102	3	9.682e-05	9.682e-05	1.2894	1.2894	0.7485	0	1.3869	1.296	1.2312	KIAA1468(+123.2kb)|TNFRSF11A(+42.66kb)|ZCCHC2(-93.06kb)
2	224125953	rs74584645	T	G	0.0493225	3	9.693e-05	0.0009684	0.5443	0.5479	0.258	26.18	0.7813	0.4041	0.5576	.
13	83971899	rs34028301	C	T	0.0124269	2	9.702e-05	9.702e-05	3.1171	3.1171	0.3931	0	NA	4.7427	2.6887	.
17	17252844	rs624242	G	A	0.813597	3	9.705e-05	9.705e-05	0.7302	0.7302	0.6791	0	0.8214	0.7224	0.6912	COPS3(+68.23kb)|FLCN(+112.3kb)|MED9(-127.5kb)|MPRIP(+156.9kb)|NT5M(+1.867kb)|PEMT(-156kb)|PLD6(+143.2kb)|RASD1(-144.9kb)|SMCR9(-69.81kb)
7	87084403	rs67721532	G	A	0.135818	3	9.721e-05	9.721e-05	1.3953	1.3953	0.6776	0	1.433	1.5626	1.2976	ABCB1(-48.78kb)|ABCB4(0)|CROT(+55.29kb)|RUNDC3B(-173.3kb)|TP53TG1(+109.6kb)
15	45650311	rs61365925	C	T	0.280859	3	9.722e-05	9.722e-05	1.3078	1.3078	0.9505	0	1.2638	1.3357	1.3204	C15orf48(-72.42kb)|DUOX1(+192.5kb)|GATM(-3.01kb)|GATM-AS1(-20.59kb)|HMGN2P46(-153kb)|MIR147B(-74.94kb)|SHF(+156.9kb)|SLC28A2(+82.18kb)|SLC30A4(-124.4kb)|SPATA5L1(-44.21kb)
14	42797402	rs2626423	G	A	0.587311	3	9.731e-05	9.731e-05	1.2761	1.2761	0.4615	0	1.4453	1.1826	1.239	.
4	124476378	rs57049398	C	T	0.0802279	3	9.754e-05	0.002798	1.5857	1.6381	0.1552	46.33	1.7148	2.2488	1.2725	LOC285419(-97.56kb)|SPRY1(+151.5kb)
4	120664363	rs72680980	G	A	0.0456729	3	9.76e-05	0.005705	1.6884	1.6494	0.1919	39.42	1.0964	1.99	1.9181	PDE5A(+114.4kb)
15	45652703	rs1153858	T	C	0.297813	3	9.78e-05	9.78e-05	1.3072	1.3072	0.9074	0	1.2556	1.3658	1.3097	C15orf48(-70.02kb)|DUOX1(+194.9kb)|GATM(-0.618kb)|GATM-AS1(-18.19kb)|HMGN2P46(-150.6kb)|MIR147B(-72.54kb)|SHF(+159.3kb)|SLC28A2(+84.57kb)|SLC30A4(-122kb)|SPATA5L1(-41.82kb)
18	30887310	rs144775649	C	T	0.0159378	2	9.798e-05	9.798e-05	3.8299	3.8299	0.793	0	NA	4.2877	3.5622	CCDC178(0)
15	87864477	rs60155240	T	G	0.033939	3	9.801e-05	0.001023	1.963	2.0746	0.2355	30.85	3.0085	2.531	1.5504	.
15	45646968	rs12593230	T	A	0.280798	3	9.803e-05	9.803e-05	1.3082	1.3082	0.9535	0	1.2662	1.3382	1.3184	C15orf48(-75.76kb)|DUOX1(+189.2kb)|GATM(-6.353kb)|GATM-AS1(-23.93kb)|HMGN2P46(-156.4kb)|MIR147B(-78.28kb)|SHF(+153.6kb)|SLC28A2(+78.84kb)|SLC30A4(-127.7kb)|SPATA5L1(-47.55kb)
19	50385031	rs7248744	G	A	0.42721	3	9.808e-05	9.808e-05	1.2725	1.2725	0.9536	0	1.277	1.2341	1.2923	ADM5(+190.8kb)|AKT1S1(+3.418kb)|AP2A1(+74.66kb)|ATF5(-46.93kb)|CPT1C(+168kb)|FLJ26850(-168.9kb)|FUZ(+68.46kb)|IL4I1(-7.881kb)|MED25(+44.79kb)|MIR4749(+27.12kb)|MIR4750(-6.4kb)|MIR4751(-51.29kb)|MIR5088(+199.6kb)|NUP62(-25.05kb)|PNKP(+14.21kb)|PRMT1(+193.3kb)|PTOV1(+21.03kb)|PTOV1-AS1(+30.1kb)|SIGLEC11(-67.22kb)|SIGLEC16(-87.88kb)|TBC1D17(0)|TSKS(+118.5kb)|VRK3(-94.69kb)|ZNF473(-144.2kb)
7	87083157	rs56223611	A	C	0.142701	3	9.815e-05	9.815e-05	1.3944	1.3944	0.655	0	1.4132	1.582	1.2988	ABCB1(-50.02kb)|ABCB4(0)|CROT(+54.04kb)|RUNDC3B(-174.6kb)|TP53TG1(+108.3kb)
7	87086931	rs17149647	C	T	0.144949	3	9.818e-05	9.818e-05	1.3944	1.3944	0.6514	0	1.4159	1.5817	1.2974	ABCB1(-46.25kb)|ABCB4(0)|CROT(+57.82kb)|RUNDC3B(-170.8kb)|TP53TG1(+112.1kb)
15	45652730	rs4271549	A	G	0.281414	3	9.848e-05	9.848e-05	1.3074	1.3074	0.9512	0	1.2635	1.3341	1.3205	C15orf48(-70kb)|DUOX1(+195kb)|GATM(-0.591kb)|GATM-AS1(-18.17kb)|HMGN2P46(-150.6kb)|MIR147B(-72.52kb)|SHF(+159.4kb)|SLC28A2(+84.6kb)|SLC30A4(-121.9kb)|SPATA5L1(-41.79kb)
18	58319984	rs8084953	C	A	0.636002	3	9.865e-05	9.865e-05	0.7831	0.7831	0.6265	0	0.7265	0.8587	0.7773	.
17	75645991	rs4539666	T	C	0.281568	3	9.866e-05	9.866e-05	1.2955	1.2955	0.9157	0	1.3345	1.2377	1.3047	LOC100507351(+84.89kb)|SEPT9(+149.3kb)
15	45652768	rs4627277	A	C	0.281414	3	9.868e-05	9.868e-05	1.3073	1.3073	0.9511	0	1.2634	1.334	1.3205	C15orf48(-69.96kb)|DUOX1(+195kb)|GATM(-0.553kb)|GATM-AS1(-18.13kb)|HMGN2P46(-150.6kb)|MIR147B(-72.48kb)|SHF(+159.4kb)|SLC28A2(+84.64kb)|SLC30A4(-121.9kb)|SPATA5L1(-41.75kb)
15	45641720	rs28605551	T	C	0.28303	3	9.869e-05	9.869e-05	1.3081	1.3081	0.9455	0	1.2638	1.3441	1.3169	C15orf48(-81.01kb)|DUOX1(+183.9kb)|GATM(-11.6kb)|GATM-AS1(-29.18kb)|HMGN2P46(-161.6kb)|MIR147B(-83.53kb)|SHF(+148.3kb)|SLC28A2(+73.59kb)|SLC30A4(-133kb)|SPATA5L1(-52.8kb)
13	37365786	rs148459133	T	C	0.0258392	3	9.875e-05	0.001565	2.6075	2.8895	0.2058	36.74	5.6481	3.8854	1.8449	ALG5(-158.1kb)|RFXAP(-27.55kb)|SERTM1(+93.81kb)|SMAD9(-53.18kb)
11	11056604	rs12275034	A	G	0.0494148	3	9.876e-05	0.005685	1.6757	1.6493	0.1716	43.26	1.0949	2.1115	1.8308	ZBED5(+177kb)|ZBED5-AS1(+155.8kb)
7	87090480	rs45590633	T	C	0.135818	3	9.888e-05	9.888e-05	1.395	1.395	0.6719	0	1.4349	1.5628	1.2958	ABCB1(-42.7kb)|ABCB4(0)|CROT(+61.37kb)|RUNDC3B(-167.2kb)|TP53TG1(+115.7kb)
20	49632175	rs6067610	G	T	0.0250231	3	9.891e-05	9.891e-05	2.4725	2.4725	0.8423	0	2.3685	1.997	2.7592	ADNP(+84.65kb)|BCAS4(+138.5kb)|DPM1(+57.12kb)|KCNG1(0)|MOCS3(+53.78kb)
7	87103670	rs2888611	G	C	0.186249	3	9.897e-05	9.897e-05	1.3471	1.3471	0.7697	0	1.2919	1.4921	1.3187	ABCB1(-29.51kb)|ABCB4(0)|CROT(+74.56kb)|RUNDC3B(-154.1kb)|TP53TG1(+128.9kb)
16	49096266	rs77440440	G	A	0.058223	3	9.903e-05	9.903e-05	1.6678	1.6678	0.5014	0	2.1938	1.454	1.5606	.
15	45652889	rs4395020	C	A	0.281414	3	9.911e-05	9.911e-05	1.3072	1.3072	0.9513	0	1.2634	1.3338	1.3204	C15orf48(-69.84kb)|DUOX1(+195.1kb)|GATM(-0.432kb)|GATM-AS1(-18.01kb)|HMGN2P46(-150.4kb)|MIR147B(-72.36kb)|SHF(+159.5kb)|SLC28A2(+84.76kb)|SLC30A4(-121.8kb)|SPATA5L1(-41.63kb)
9	29683303	rs72715165	C	T	0.00999384	2	9.927e-05	9.927e-05	3.226	3.226	0.577	0	NA	2.4242	3.5602	.
15	45652926	rs4625670	T	C	0.281414	3	9.928e-05	9.928e-05	1.3072	1.3072	0.9514	0	1.2634	1.3337	1.3204	C15orf48(-69.8kb)|DUOX1(+195.2kb)|GATM(-0.395kb)|GATM-AS1(-17.97kb)|HMGN2P46(-150.4kb)|MIR147B(-72.32kb)|SHF(+159.6kb)|SLC28A2(+84.79kb)|SLC30A4(-121.8kb)|SPATA5L1(-41.59kb)
15	45661678	rs1288775	A	T	0.297813	3	9.933e-05	9.933e-05	1.307	1.307	0.9105	0	1.2558	1.3638	1.31	C15orf48(-61.05kb)|GATM(0)|GATM-AS1(-9.219kb)|HMGN2P46(-141.7kb)|MIR147B(-63.57kb)|SHF(+168.3kb)|SLC28A2(+93.55kb)|SLC30A4(-113kb)|SPATA5L1(-32.84kb)
15	45652933	rs4534782	A	G	0.281383	3	9.936e-05	9.936e-05	1.3072	1.3072	0.9514	0	1.2634	1.3337	1.3203	C15orf48(-69.79kb)|DUOX1(+195.2kb)|GATM(-0.388kb)|GATM-AS1(-17.96kb)|HMGN2P46(-150.4kb)|MIR147B(-72.31kb)|SHF(+159.6kb)|SLC28A2(+84.8kb)|SLC30A4(-121.7kb)|SPATA5L1(-41.58kb)
15	45617392	rs12593402	A	G	0.272929	3	9.938e-05	9.938e-05	1.3109	1.3109	0.932	0	1.2613	1.3544	1.3191	C15orf48(-105.3kb)|DUOX1(+159.6kb)|DUOXA1(+195.3kb)|GATM(-35.93kb)|GATM-AS1(-53.5kb)|HMGN2P46(-185.9kb)|MIR147B(-107.9kb)|SHF(+124kb)|SLC28A2(+49.26kb)|SLC30A4(-157.3kb)|SPATA5L1(-77.13kb)
15	45653592	rs1049508	G	A	0.297844	3	9.941e-05	9.941e-05	1.3068	1.3068	0.9083	0	1.2555	1.3651	1.3093	C15orf48(-69.13kb)|DUOX1(+195.8kb)|GATM(0)|GATM-AS1(-17.3kb)|HMGN2P46(-149.7kb)|MIR147B(-71.66kb)|SHF(+160.2kb)|SLC28A2(+85.46kb)|SLC30A4(-121.1kb)|SPATA5L1(-40.93kb)
4	99563676	rs883509	G	A	0.353973	3	9.967e-05	0.005231	1.2815	1.3118	0.11	54.7	1.51	1.4036	1.119	RAP1GDS1(+198.7kb)|TSPAN5(0)
18	13749744	rs68098007	A	C	0.277702	3	9.967e-05	9.967e-05	1.3031	1.3031	0.8749	0	1.2382	1.3662	1.3063	FAM210A(+23.15kb)|LDLRAD4(+96.99kb)|MC2R(-132.3kb)|MC5R(-75.8kb)|MIR4526(+138.5kb)|RNMT(0)
15	45730926	rs28569043	T	A	0.271682	3	9.972e-05	9.972e-05	1.3138	1.3138	0.9903	0	1.3008	1.3028	1.3275	BLOC1S6(-148.5kb)|C15orf48(+5.279kb)|GATM(+59.95kb)|GATM-AS1(+58.6kb)|HMGN2P46(-72.41kb)|MIR147B(+5.599kb)|SLC28A2(+162.8kb)|SLC30A4(-43.75kb)|SPATA5L1(+17.31kb)|SQRDL(-192.4kb)
15	45640084	rs12593371	A	G	0.283015	3	9.974e-05	9.974e-05	1.3079	1.3079	0.9461	0	1.2642	1.3446	1.3158	C15orf48(-82.64kb)|DUOX1(+182.3kb)|GATM(-13.24kb)|GATM-AS1(-30.81kb)|HMGN2P46(-163.2kb)|MIR147B(-85.16kb)|SHF(+146.7kb)|SLC28A2(+71.95kb)|SLC30A4(-134.6kb)|SPATA5L1(-54.43kb)
3	102514676	rs73141852	T	C	0.0145211	2	9.978e-05	0.002515	2.712	2.8679	0.198	39.66	NA	4.4708	2.1809	.
15	45652086	rs4774580	A	G	0.281429	3	9.99e-05	9.99e-05	1.3072	1.3072	0.9515	0	1.2636	1.3343	1.32	C15orf48(-70.64kb)|DUOX1(+194.3kb)|GATM(-1.235kb)|GATM-AS1(-18.81kb)|HMGN2P46(-151.2kb)|MIR147B(-73.16kb)|SHF(+158.7kb)|SLC28A2(+83.95kb)|SLC30A4(-122.6kb)|SPATA5L1(-42.43kb)
15	45663299	rs1890565	C	T	0.281321	3	9.994e-05	9.994e-05	1.3071	1.3071	0.9536	0	1.2642	1.3322	1.3205	C15orf48(-59.43kb)|GATM(0)|GATM-AS1(-7.598kb)|HMGN2P46(-140kb)|MIR147B(-61.95kb)|SHF(+169.9kb)|SLC28A2(+95.17kb)|SLC30A4(-111.4kb)|SPATA5L1(-31.22kb)
19	41258381	rs112046926	C	T	0.0301509	2	9.994e-05	9.994e-05	2.0459	2.0459	0.4319	0	NA	1.6338	2.2452	ADCK4(+35.59kb)|C19orf54(+2.553kb)|CYP2A6(-91.06kb)|CYP2A7(-123kb)|CYP2B7P1(-171.8kb)|CYP2G1P(-138.3kb)|EGLN2(-46.67kb)|ITPKC(+11.62kb)|LTBP4(+122.7kb)|MIA(-22.7kb)|MIA-RAB4B(-23.06kb)|NUMBL(+61.82kb)|RAB4B(-25.74kb)|RAB4B-EGLN2(-25.74kb)|SHKBP1(+161.1kb)|SNRPA(0)|SPTBN4(+176kb)
