# Supplementary material for: Multiomics integrative analysis identifies APOE allele-specific blood biomarkers associated to Alzheimer’s disease etiopathogenesis
Source: Aging (Albany NY). 2021 Apr 12;13(7):9277–329. doi: 10.18632/aging.202950 (PMC8064208; doi:10.18632/aging.202950)
Supplement: Supplementary Table 2 [file aging-13-202950-s004.xlsx]

## Sheet: Sheet1
Supplementary Table 2. Stage I-III APOE3 stratified meta-analysis results (p<10-4).
CHR	BP	SNP	A1	A2	HRC_AF	N	P	P.R.	OR	OR.R.	Q	I	StageI	StageII	StageIII	ANNOT
2	127892810	rs6733839	T	C	0.381968	3	2.155e-14	7.245e-08	1.2205	1.2221	0.1334	50.37	1.2967	1.2301	1.1483	BIN1(+27.91kb)|CYP27C1(-48.6kb)|ERCC3(-122.1kb)|MAP3K2(-163.4kb)
2	127891427	rs4663105	C	A	0.411349	3	9.516e-13	8.843e-07	1.202	1.2037	0.1208	52.69	1.278	1.2116	1.13	BIN1(+26.52kb)|CYP27C1(-49.98kb)|ERCC3(-123.4kb)|MAP3K2(-164.8kb)
2	127888757	rs11680911	C	A	0.320819	3	9.774e-09	0.001338	1.162	1.1642	0.0397	69.01	1.2577	1.1666	1.0779	BIN1(+23.85kb)|CYP27C1(-52.65kb)|ERCC3(-126.1kb)|MAP3K2(-167.5kb)
2	127889637	rs7561528	A	G	0.320604	3	1.096e-08	0.001059	1.1614	1.1633	0.0467	67.35	1.2554	1.1632	1.0801	BIN1(+24.73kb)|CYP27C1(-51.77kb)|ERCC3(-125.2kb)|MAP3K2(-166.6kb)
11	85868640	rs3851179	C	T	0.639344	3	2.575e-08	8.753e-05	1.1523	1.1543	0.1306	50.87	1.2205	1.1672	1.0846	C11orf73(-144.6kb)|EED(-87.16kb)|PICALM(+87.72kb)
19	1039444	rs3795065	T	C	0.648537	3	2.965e-08	7.507e-05	0.8495	0.8469	0.1323	50.56	0.7957	0.8287	0.9136	ABCA7(-0.657kb)|ARID3A(+66.64kb)|C19orf26(-190.5kb)|CFD(+175.8kb)|CNN2(+0.38kb)|ELANE(+183.2kb)|GPX4(-64.49kb)|GRIN3B(+29.72kb)|HMHA1(-26.48kb)|KISS1R(+118.4kb)|MED16(+146.2kb)|POLR2E(-47.13kb)|PRTN3(+191.3kb)|R3HDM4(+126.2kb)|SBNO2(-68.19kb)|STK11(-166.4kb)|TMEM259(+18.3kb)|WDR18(+44.88kb)
11	85867875	rs10792832	G	A	0.640853	3	3.086e-08	5.933e-05	1.1514	1.1533	0.1467	47.9	1.2168	1.1675	1.0853	C11orf73(-145.4kb)|EED(-87.93kb)|PICALM(+86.95kb)
2	127886233	rs13025765	T	C	0.282445	3	4.234e-08	1.659e-06	1.1634	1.1658	0.2648	24.75	1.1706	1.2448	1.1101	BIN1(+21.33kb)|CYP27C1(-55.18kb)|ERCC3(-128.6kb)|MAP3K2(-170kb)
2	127886158	rs13025717	T	C	0.283277	3	4.407e-08	1.812e-06	1.163	1.1655	0.263	25.14	1.1708	1.2443	1.1095	BIN1(+21.26kb)|CYP27C1(-55.25kb)|ERCC3(-128.7kb)|MAP3K2(-170.1kb)
2	127886371	rs12618593	C	T	0.283277	3	4.422e-08	1.772e-06	1.163	1.1655	0.2637	24.97	1.1708	1.2443	1.1096	BIN1(+21.47kb)|CYP27C1(-55.04kb)|ERCC3(-128.5kb)|MAP3K2(-169.9kb)
2	127886416	rs12617835	C	A	0.283261	3	4.563e-08	1.798e-06	1.1628	1.1653	0.264	24.9	1.1709	1.2438	1.1093	BIN1(+21.51kb)|CYP27C1(-55kb)|ERCC3(-128.4kb)|MAP3K2(-169.8kb)
19	1039323	rs111278892	G	C	0.147136	2	4.959e-08	4.959e-08	1.3056	1.3056	0.7033	0	1.2798	1.3285	NA	ABCA7(-0.778kb)|ARID3A(+66.52kb)|C19orf26(-190.6kb)|CFD(+175.7kb)|CNN2(+0.259kb)|ELANE(+183.1kb)|GPX4(-64.61kb)|GRIN3B(+29.6kb)|HMHA1(-26.6kb)|KISS1R(+118.3kb)|MED16(+146.1kb)|POLR2E(-47.25kb)|PRTN3(+191.1kb)|R3HDM4(+126.1kb)|SBNO2(-68.31kb)|STK11(-166.5kb)|TMEM259(+18.18kb)|WDR18(+44.75kb)
19	1040046	rs3764642	A	G	0.490314	3	1.109e-07	1.109e-07	0.8588	0.8588	0.5972	0	0.8286	0.8516	0.8888	ABCA7(-0.055kb)|ARID3A(+67.24kb)|C19orf26(-189.9kb)|CFD(+176.4kb)|CNN2(+0.982kb)|ELANE(+183.8kb)|GPX4(-63.89kb)|GRIN3B(+30.32kb)|HMHA1(-25.88kb)|KISS1R(+119kb)|MED16(+146.8kb)|POLR2E(-46.53kb)|PRTN3(+191.9kb)|R3HDM4(+126.8kb)|SBNO2(-67.59kb)|STK11(-165.8kb)|TMEM259(+18.9kb)|WDR18(+45.48kb)
19	1040765	rs4147904	G	A	0.489282	3	1.122e-07	1.122e-07	0.8591	0.8591	0.6045	0	0.8316	0.8487	0.8897	ABCA7(0)|ARID3A(+67.96kb)|C19orf26(-189.2kb)|CFD(+177.2kb)|CNN2(+1.701kb)|ELANE(+184.5kb)|GPX4(-63.17kb)|GRIN3B(+31.04kb)|HMHA1(-25.16kb)|KISS1R(+119.8kb)|MED16(+147.5kb)|POLR2E(-45.81kb)|PRTN3(+192.6kb)|R3HDM4(+127.5kb)|SBNO2(-66.87kb)|STK11(-165kb)|TMEM259(+19.62kb)|WDR18(+46.2kb)
19	1036704	rs11670373	T	C	0.15636	2	1.677e-07	1.677e-07	1.286	1.286	0.635	0	1.2544	1.3132	NA	ABCA7(-3.397kb)|ARID3A(+63.9kb)|C19orf26(-193.2kb)|CFD(+173.1kb)|CNN2(0)|ELANE(+180.5kb)|GPX4(-67.23kb)|GRIN3B(+26.98kb)|HMHA1(-29.22kb)|KISS1R(+115.7kb)|MED16(+143.5kb)|POLR2E(-49.87kb)|PRTN3(+188.5kb)|R3HDM4(+123.5kb)|SBNO2(-70.93kb)|STK11(-169.1kb)|TMEM259(+15.56kb)|WDR18(+42.14kb)
19	1036691	rs11670349	T	C	0.156391	2	1.834e-07	1.834e-07	1.2852	1.2852	0.6471	0	1.2547	1.3114	NA	ABCA7(-3.41kb)|ARID3A(+63.89kb)|C19orf26(-193.3kb)|CFD(+173.1kb)|CNN2(0)|ELANE(+180.4kb)|GPX4(-67.24kb)|GRIN3B(+26.97kb)|HMHA1(-29.23kb)|KISS1R(+115.7kb)|MED16(+143.5kb)|POLR2E(-49.89kb)|PRTN3(+188.5kb)|R3HDM4(+123.5kb)|SBNO2(-70.94kb)|STK11(-169.1kb)|TMEM259(+15.55kb)|WDR18(+42.12kb)
2	127847930	rs35114168	A	G	0.324684	3	1.891e-07	0.001899	1.1447	1.1469	0.0581	64.86	1.2349	1.1449	1.0697	BIN1(0)|CYP27C1(-93.48kb)|ERCC3(-166.9kb)
19	1039186	rs4807468	A	G	0.663597	3	2.144e-07	0.0004158	0.8572	0.8542	0.106	55.45	0.8093	0.8229	0.9287	ABCA7(-0.915kb)|ARID3A(+66.38kb)|C19orf26(-190.8kb)|CFD(+175.6kb)|CNN2(+0.122kb)|ELANE(+182.9kb)|GPX4(-64.75kb)|GRIN3B(+29.46kb)|HMHA1(-26.74kb)|KISS1R(+118.2kb)|MED16(+146kb)|POLR2E(-47.39kb)|PRTN3(+191kb)|R3HDM4(+126kb)|SBNO2(-68.45kb)|STK11(-166.6kb)|TMEM259(+18.04kb)|WDR18(+44.62kb)
19	1042809	rs3764645	G	A	0.464906	2	2.44e-07	2.44e-07	0.8284	0.8284	0.7333	0	0.8177	0.8383	NA	ABCA7(0)|ARID3A(+70.01kb)|ATP5D(-198.9kb)|C19orf26(-187.1kb)|CFD(+179.2kb)|CNN2(+3.745kb)|ELANE(+186.6kb)|GPX4(-61.13kb)|GRIN3B(+33.09kb)|HMHA1(-23.11kb)|KISS1R(+121.8kb)|MED16(+149.6kb)|POLR2E(-43.77kb)|PRTN3(+194.6kb)|R3HDM4(+129.6kb)|SBNO2(-64.82kb)|STK11(-163kb)|TMEM259(+21.67kb)|WDR18(+48.24kb)
19	1038571	rs1057874	T	C	0.665722	3	2.546e-07	0.0007134	0.8579	0.8544	0.0881	58.83	0.8061	0.8238	0.9318	ABCA7(-1.53kb)|ARID3A(+65.77kb)|C19orf26(-191.4kb)|CFD(+175kb)|CNN2(0)|ELANE(+182.3kb)|GPX4(-65.36kb)|GRIN3B(+28.85kb)|HMHA1(-27.35kb)|KISS1R(+117.6kb)|MED16(+145.4kb)|POLR2E(-48.01kb)|PRTN3(+190.4kb)|R3HDM4(+125.3kb)|SBNO2(-69.06kb)|STK11(-167.2kb)|TMEM259(+17.43kb)|WDR18(+44kb)
19	1050874	rs12151021	G	A	0.680782	3	2.714e-07	0.0135	0.8581	0.8531	0.0096	78.46	0.8234	0.7812	0.9608	ABCA7(0)|ARID3A(+78.07kb)|ATP5D(-190.9kb)|C19orf26(-179.1kb)|CFD(+187.3kb)|CNN2(+11.81kb)|ELANE(+194.6kb)|GPX4(-53.06kb)|GRIN3B(+41.15kb)|HMHA1(-15.05kb)|KISS1R(+129.9kb)|MED16(+157.7kb)|MIDN(-197.7kb)|POLR2E(-35.7kb)|R3HDM4(+137.6kb)|SBNO2(-56.76kb)|STK11(-154.9kb)|TMEM259(+29.73kb)|WDR18(+56.3kb)
2	127892768	rs34779859	T	G	0.296381	3	3.386e-07	3.386e-07	1.1516	1.1516	0.5955	0	1.1915	1.1537	1.1159	BIN1(+27.86kb)|CYP27C1(-48.64kb)|ERCC3(-122.1kb)|MAP3K2(-163.5kb)
20	54979171	rs7806	T	C	0.268571	3	3.688e-07	3.688e-07	0.8501	0.8501	0.428	0	0.8076	0.8948	0.8519	AURKA(+11.82kb)|CASS4(-7.996kb)|CSTF1(0)|FAM209A(-120.6kb)|FAM209B(-129.1kb)|FAM210B(+35.45kb)|GCNT7(-87.38kb)|MC3R(+154.3kb)|RTFDC1(-64.48kb)
2	127894098	rs56368748	A	G	0.294456	3	4.463e-07	4.463e-07	1.1508	1.1508	0.4173	0	1.2059	1.1425	1.1077	BIN1(+29.2kb)|CYP27C1(-47.31kb)|ERCC3(-120.8kb)|MAP3K2(-162.1kb)
20	23601516	rs2983649	A	G	0.450631	3	5.147e-07	0.0007474	1.1409	1.1373	0.1246	51.99	1.2099	1.0531	1.1423	CST1(-126.7kb)|CST3(-12.78kb)|CST4(-64.76kb)|CST8(+124.9kb)|CST9(+14.91kb)|CST9L(+52.13kb)|CST11(+168kb)|CST13P(+78.86kb)|CSTL1(+175.9kb)|NAPB(+199.4kb)
19	1043864	rs4622634	C	G	0.404466	2	8.097e-07	8.097e-07	0.8329	0.8329	0.7745	0	0.8237	0.8414	NA	ABCA7(0)|ARID3A(+71.06kb)|ATP5D(-197.9kb)|C19orf26(-186.1kb)|CFD(+180.3kb)|CNN2(+4.8kb)|ELANE(+187.6kb)|GPX4(-60.07kb)|GRIN3B(+34.14kb)|HMHA1(-22.06kb)|KISS1R(+122.8kb)|MED16(+150.6kb)|POLR2E(-42.71kb)|PRTN3(+195.7kb)|R3HDM4(+130.6kb)|SBNO2(-63.77kb)|STK11(-161.9kb)|TMEM259(+22.72kb)|WDR18(+49.3kb)
19	1037563	rs111525696	G	A	0.182245	2	8.755e-07	8.755e-07	1.2517	1.2517	0.742	0	1.2315	1.2692	NA	ABCA7(-2.538kb)|ARID3A(+64.76kb)|C19orf26(-192.4kb)|CFD(+174kb)|CNN2(0)|ELANE(+181.3kb)|GPX4(-66.37kb)|GRIN3B(+27.84kb)|HMHA1(-28.36kb)|KISS1R(+116.5kb)|MED16(+144.3kb)|POLR2E(-49.01kb)|PRTN3(+189.4kb)|R3HDM4(+124.3kb)|SBNO2(-70.07kb)|STK11(-168.2kb)|TMEM259(+16.42kb)|WDR18(+42.99kb)
19	1037551	rs113353568	A	G	0.182338	2	8.838e-07	8.838e-07	1.2515	1.2515	0.7445	0	1.2315	1.2688	NA	ABCA7(-2.55kb)|ARID3A(+64.75kb)|C19orf26(-192.4kb)|CFD(+173.9kb)|CNN2(0)|ELANE(+181.3kb)|GPX4(-66.38kb)|GRIN3B(+27.83kb)|HMHA1(-28.37kb)|KISS1R(+116.5kb)|MED16(+144.3kb)|POLR2E(-49.03kb)|PRTN3(+189.4kb)|R3HDM4(+124.3kb)|SBNO2(-70.08kb)|STK11(-168.2kb)|TMEM259(+16.41kb)|WDR18(+42.98kb)
19	1037584	rs72973561	T	C	0.182261	2	8.864e-07	8.864e-07	1.2515	1.2515	0.7406	0	1.2312	1.2691	NA	ABCA7(-2.517kb)|ARID3A(+64.78kb)|C19orf26(-192.4kb)|CFD(+174kb)|CNN2(0)|ELANE(+181.3kb)|GPX4(-66.35kb)|GRIN3B(+27.86kb)|HMHA1(-28.34kb)|KISS1R(+116.6kb)|MED16(+144.4kb)|POLR2E(-48.99kb)|PRTN3(+189.4kb)|R3HDM4(+124.4kb)|SBNO2(-70.05kb)|STK11(-168.2kb)|TMEM259(+16.44kb)|WDR18(+43.02kb)
19	1036913	rs11670441	T	C	0.182276	2	8.904e-07	8.904e-07	1.2516	1.2516	0.7507	0	1.2321	1.2685	NA	ABCA7(-3.188kb)|ARID3A(+64.11kb)|C19orf26(-193kb)|CFD(+173.3kb)|CNN2(0)|ELANE(+180.7kb)|GPX4(-67.02kb)|GRIN3B(+27.19kb)|HMHA1(-29.01kb)|KISS1R(+115.9kb)|MED16(+143.7kb)|POLR2E(-49.66kb)|PRTN3(+188.7kb)|R3HDM4(+123.7kb)|SBNO2(-70.72kb)|STK11(-168.9kb)|TMEM259(+15.77kb)|WDR18(+42.34kb)
19	1037170	rs11665845	A	T	0.182338	2	8.969e-07	8.969e-07	1.2513	1.2513	0.7451	0	1.2313	1.2685	NA	ABCA7(-2.931kb)|ARID3A(+64.37kb)|C19orf26(-192.8kb)|CFD(+173.6kb)|CNN2(0)|ELANE(+180.9kb)|GPX4(-66.76kb)|GRIN3B(+27.45kb)|HMHA1(-28.75kb)|KISS1R(+116.2kb)|MED16(+144kb)|POLR2E(-49.41kb)|PRTN3(+189kb)|R3HDM4(+123.9kb)|SBNO2(-70.46kb)|STK11(-168.6kb)|TMEM259(+16.03kb)|WDR18(+42.6kb)
1	232745707	rs10910575	A	G	0.105528	3	1.238e-06	0.002444	0.8089	0.8085	0.0776	60.89	0.7184	0.8099	0.9078	MAP10(-194.9kb)|SIPA1L2(+94.46kb)
17	44866602	rs199497	C	T	0.150046	3	1.33e-06	1.33e-06	0.8403	0.8403	0.9271	0	0.8437	0.8233	0.8515	GOSR2(-133.9kb)|MIR5089(-183.8kb)|NSF(+31.77kb)|NSFP1(+148.6kb)|RPRML(-188.9kb)|WNT3(0)|WNT9B(-62.36kb)
19	1039410	rs3795064	G	C	0.182861	2	1.406e-06	1.406e-06	1.2451	1.2451	0.7209	0	1.2235	1.264	NA	ABCA7(-0.691kb)|ARID3A(+66.61kb)|C19orf26(-190.5kb)|CFD(+175.8kb)|CNN2(+0.346kb)|ELANE(+183.2kb)|GPX4(-64.52kb)|GRIN3B(+29.69kb)|HMHA1(-26.51kb)|KISS1R(+118.4kb)|MED16(+146.2kb)|POLR2E(-47.17kb)|PRTN3(+191.2kb)|R3HDM4(+126.2kb)|SBNO2(-68.22kb)|STK11(-166.4kb)|TMEM259(+18.27kb)|WDR18(+44.84kb)
2	127894615	rs744373	G	A	0.289791	3	1.518e-06	0.01874	1.1416	1.141	0.0167	75.55	1.2642	1.1102	1.0572	BIN1(+29.71kb)|CYP27C1(-46.8kb)|ERCC3(-120.2kb)|MAP3K2(-161.6kb)
2	127894484	rs730482	T	A	0.289837	3	1.567e-06	0.01905	1.1412	1.1407	0.0165	75.63	1.2643	1.1092	1.0574	BIN1(+29.58kb)|CYP27C1(-46.93kb)|ERCC3(-120.4kb)|MAP3K2(-161.8kb)
2	127885247	rs58682665	G	A	0.298814	3	1.675e-06	1.675e-06	0.8732	0.8732	0.6911	0	0.8588	0.8536	0.9001	BIN1(+20.34kb)|CYP27C1(-56.16kb)|ERCC3(-129.6kb)|MAP3K2(-171kb)
2	127885651	rs719054	A	G	0.297967	3	1.738e-06	1.738e-06	0.8733	0.8733	0.651	0	0.8572	0.853	0.9025	BIN1(+20.75kb)|CYP27C1(-55.76kb)|ERCC3(-129.2kb)|MAP3K2(-170.6kb)
18	77716540	rs12958810	C	T	0.422883	2	1.794e-06	1.794e-06	0.8702	0.8702	0.5261	0	0.8873	NA	0.8551	ADNP2(-150.4kb)|HSBP1L1(-8.041kb)|KCNG2(+56.72kb)|PARD6G(-198.6kb)|PARD6G-AS1(-189.3kb)|PQLC1(+4.887kb)|RBFA(-77.8kb)|RBFADN(-110.7kb)|TXNL4A(-16.33kb)
12	121800927	rs11830481	C	A	0.0450262	2	1.8e-06	1.8e-06	1.5036	1.5036	0.9236	0	1.4932	1.5182	NA	ANAPC5(+8.915kb)|CAMKK2(+64.82kb)|KDM2B(-65.97kb)|P2RX4(+129kb)|P2RX7(+176.6kb)|RNF34(-36.96kb)
18	77713494	rs11663082	T	C	0.417555	2	1.835e-06	1.835e-06	0.8699	0.8699	0.6845	0	0.8808	NA	0.8601	ADNP2(-153.4kb)|CTDP1(+199kb)|HSBP1L1(-11.09kb)|KCNG2(+53.68kb)|PARD6G-AS1(-192.3kb)|PQLC1(+1.841kb)|RBFA(-80.85kb)|RBFADN(-113.8kb)|TXNL4A(-19.37kb)
18	77713591	rs11662894	A	G	0.417539	2	1.838e-06	1.838e-06	0.8699	0.8699	0.6858	0	0.8808	NA	0.8602	ADNP2(-153.3kb)|CTDP1(+199.1kb)|HSBP1L1(-10.99kb)|KCNG2(+53.78kb)|PARD6G-AS1(-192.2kb)|PQLC1(+1.938kb)|RBFA(-80.75kb)|RBFADN(-113.7kb)|TXNL4A(-19.28kb)
1	232734151	rs7523501	G	C	0.886742	3	1.902e-06	0.005758	1.2189	1.2234	0.0469	67.31	1.3547	1.268	1.0715	SIPA1L2(+82.91kb)
20	40240867	rs117984553	T	C	0.0140899	3	1.942e-06	0.002191	2.0801	2.133	0.0964	57.25	1.4741	3.6684	1.858	CHD6(0)
18	77706294	rs7238269	G	A	0.425947	2	2.059e-06	2.059e-06	0.8706	0.8706	0.7668	0	0.8786	NA	0.8635	ADNP2(-160.6kb)|CTDP1(+191.8kb)|HSBP1L1(-18.29kb)|KCNG2(+46.48kb)|PARD6G-AS1(-199.5kb)|PQLC1(0)|RBFA(-88.05kb)|RBFADN(-121kb)|TXNL4A(-26.57kb)
18	77695384	rs7230837	A	T	0.429196	2	2.19e-06	2.19e-06	0.8716	0.8716	0.6417	0	0.8842	NA	0.8606	ADNP2(-171.5kb)|CTDP1(+180.9kb)|HSBP1L1(-29.2kb)|KCNG2(+35.57kb)|PQLC1(0)|RBFA(-98.96kb)|RBFADN(-131.9kb)|TXNL4A(-37.48kb)
12	121797905	rs111794294	A	G	0.0452264	2	2.266e-06	2.266e-06	1.4989	1.4989	0.9317	0	1.4896	1.5119	NA	ANAPC5(+5.893kb)|CAMKK2(+61.79kb)|KDM2B(-68.99kb)|P2RX4(+126kb)|P2RX7(+173.6kb)|RNF34(-39.98kb)
2	127865100	rs13032148	A	G	0.322082	3	2.273e-06	9.156e-05	1.1324	1.1356	0.2218	33.6	1.1337	1.2159	1.0822	BIN1(+0.197kb)|CYP27C1(-76.31kb)|ERCC3(-149.8kb)|MAP3K2(-191.1kb)
19	1036631	rs11672916	C	T	0.192778	2	2.411e-06	2.411e-06	1.2353	1.2353	0.6155	0	1.2053	1.261	NA	ABCA7(-3.47kb)|ARID3A(+63.83kb)|C19orf26(-193.3kb)|CFD(+173kb)|CNN2(0)|ELANE(+180.4kb)|GPX4(-67.3kb)|GRIN3B(+26.91kb)|HMHA1(-29.29kb)|KISS1R(+115.6kb)|MED16(+143.4kb)|POLR2E(-49.95kb)|PRTN3(+188.5kb)|R3HDM4(+123.4kb)|SBNO2(-71kb)|STK11(-169.2kb)|TMEM259(+15.49kb)|WDR18(+42.06kb)
19	1036314	rs112340731	G	A	0.192855	2	2.413e-06	2.413e-06	1.2354	1.2354	0.6273	0	1.2064	1.2603	NA	ABCA7(-3.787kb)|ARID3A(+63.51kb)|C19orf26(-193.6kb)|CFD(+172.7kb)|CNN2(0)|ELANE(+180.1kb)|GPX4(-67.62kb)|GRIN3B(+26.59kb)|HMHA1(-29.61kb)|KISS1R(+115.3kb)|MED16(+143.1kb)|POLR2E(-50.26kb)|PRTN3(+188.1kb)|R3HDM4(+123.1kb)|SBNO2(-71.32kb)|STK11(-169.5kb)|TMEM259(+15.17kb)|WDR18(+41.74kb)
19	1036575	rs2304260	A	G	0.192778	2	2.448e-06	2.448e-06	1.2352	1.2352	0.6226	0	1.2058	1.2604	NA	ABCA7(-3.526kb)|ARID3A(+63.77kb)|C19orf26(-193.4kb)|CFD(+173kb)|CNN2(0)|ELANE(+180.3kb)|GPX4(-67.36kb)|GRIN3B(+26.85kb)|HMHA1(-29.35kb)|KISS1R(+115.6kb)|MED16(+143.4kb)|POLR2E(-50kb)|PRTN3(+188.4kb)|R3HDM4(+123.4kb)|SBNO2(-71.06kb)|STK11(-169.2kb)|TMEM259(+15.43kb)|WDR18(+42.01kb)
19	1036468	rs1064411	G	A	0.192809	2	2.503e-06	2.503e-06	1.2349	1.2349	0.6393	0	1.2069	1.2589	NA	ABCA7(-3.633kb)|ARID3A(+63.66kb)|C19orf26(-193.5kb)|CFD(+172.9kb)|CNN2(0)|ELANE(+180.2kb)|GPX4(-67.47kb)|GRIN3B(+26.74kb)|HMHA1(-29.45kb)|KISS1R(+115.5kb)|MED16(+143.2kb)|POLR2E(-50.11kb)|PRTN3(+188.3kb)|R3HDM4(+123.2kb)|SBNO2(-71.16kb)|STK11(-169.3kb)|TMEM259(+15.33kb)|WDR18(+41.9kb)
19	1036456	rs1064410	G	C	0.192793	2	2.508e-06	2.508e-06	1.2349	1.2349	0.6373	0	1.2067	1.259	NA	ABCA7(-3.645kb)|ARID3A(+63.65kb)|C19orf26(-193.5kb)|CFD(+172.8kb)|CNN2(0)|ELANE(+180.2kb)|GPX4(-67.48kb)|GRIN3B(+26.73kb)|HMHA1(-29.46kb)|KISS1R(+115.4kb)|MED16(+143.2kb)|POLR2E(-50.12kb)|PRTN3(+188.3kb)|R3HDM4(+123.2kb)|SBNO2(-71.18kb)|STK11(-169.3kb)|TMEM259(+15.32kb)|WDR18(+41.89kb)
19	1036793	rs11672975	A	T	0.192778	2	2.535e-06	2.535e-06	1.2345	1.2345	0.6227	0	1.2052	1.2597	NA	ABCA7(-3.308kb)|ARID3A(+63.99kb)|C19orf26(-193.2kb)|CFD(+173.2kb)|CNN2(0)|ELANE(+180.5kb)|GPX4(-67.14kb)|GRIN3B(+27.07kb)|HMHA1(-29.13kb)|KISS1R(+115.8kb)|MED16(+143.6kb)|POLR2E(-49.78kb)|PRTN3(+188.6kb)|R3HDM4(+123.6kb)|SBNO2(-70.84kb)|STK11(-169kb)|TMEM259(+15.65kb)|WDR18(+42.22kb)
17	44874453	rs1563304	T	C	0.157299	3	2.63e-06	2.63e-06	0.85	0.85	0.9972	0	0.8531	0.849	0.8481	GOSR2(-126kb)|MIR5089(-175.9kb)|NSF(+39.62kb)|NSFP1(+156.4kb)|RPRML(-181.1kb)|WNT3(0)|WNT9B(-54.51kb)
12	121786802	rs78375200	G	T	0.0440561	2	2.638e-06	2.638e-06	1.4964	1.4964	0.8279	0	1.473	1.5298	NA	ANAPC5(0)|CAMKK2(+50.69kb)|KDM2B(-80.1kb)|P2RX4(+114.9kb)|P2RX7(+162.4kb)|RNF34(-51.08kb)
19	1036718	rs11667191	A	G	0.191993	2	2.674e-06	2.674e-06	1.2348	1.2348	0.6446	0	1.2071	1.2584	NA	ABCA7(-3.383kb)|ARID3A(+63.92kb)|C19orf26(-193.2kb)|CFD(+173.1kb)|CNN2(0)|ELANE(+180.5kb)|GPX4(-67.22kb)|GRIN3B(+27kb)|HMHA1(-29.2kb)|KISS1R(+115.7kb)|MED16(+143.5kb)|POLR2E(-49.86kb)|PRTN3(+188.5kb)|R3HDM4(+123.5kb)|SBNO2(-70.91kb)|STK11(-169.1kb)|TMEM259(+15.58kb)|WDR18(+42.15kb)
19	1028149	rs75364577	A	G	0.155574	2	2.94e-06	3.282e-06	1.2595	1.2594	0.3151	0.91	1.1928	1.3177	NA	ABCA7(-11.95kb)|ARID3A(+55.35kb)|AZU1(+196.1kb)|CFD(+164.5kb)|CNN2(0)|ELANE(+171.9kb)|GPX4(-75.79kb)|GRIN3B(+18.43kb)|HMHA1(-37.77kb)|KISS1R(+107.1kb)|MED16(+134.9kb)|POLR2E(-58.43kb)|PRTN3(+180kb)|R3HDM4(+114.9kb)|SBNO2(-79.48kb)|STK11(-177.6kb)|TMEM259(+7.008kb)|WDR18(+33.58kb)
20	54981233	rs6014718	A	G	0.28725	3	3.077e-06	7.855e-06	0.8652	0.8653	0.3368	8.1	0.8173	0.9157	0.8686	AURKA(+13.88kb)|CASS4(-5.934kb)|CSTF1(+1.651kb)|FAM209A(-118.6kb)|FAM209B(-127.1kb)|FAM210B(+37.52kb)|GCNT7(-85.31kb)|MC3R(+156.4kb)|RTFDC1(-62.41kb)
15	48715448	rs9920570	G	A	0.728657	3	3.082e-06	3.082e-06	1.1441	1.1441	0.6763	0	1.1292	1.1937	1.1246	DUT(+79.88kb)|FBN1(0)|SLC12A1(+119.2kb)
15	48714838	rs1467953	G	T	0.728734	3	3.102e-06	3.102e-06	1.1441	1.1441	0.68	0	1.1291	1.1934	1.1249	DUT(+79.27kb)|FBN1(0)|SLC12A1(+118.6kb)
19	1024106	rs8111988	A	T	0.157545	2	3.151e-06	0.0007701	1.2564	1.2524	0.1734	46.04	1.1669	1.3343	NA	ABCA7(-16kb)|ARID3A(+51.3kb)|AZU1(+192.1kb)|CFD(+160.5kb)|CNN2(-2.191kb)|ELANE(+167.9kb)|GPX4(-79.83kb)|GRIN3B(+14.38kb)|HMHA1(-41.82kb)|KISS1R(+103.1kb)|MED16(+130.9kb)|POLR2E(-62.47kb)|PRTN3(+175.9kb)|R3HDM4(+110.9kb)|SBNO2(-83.53kb)|STK11(-181.7kb)|TMEM259(+2.965kb)|WDR18(+29.54kb)
20	54986274	rs6127744	T	G	0.125146	3	3.201e-06	3.201e-06	0.8242	0.8242	0.3826	0	0.7669	0.8822	0.8377	AURKA(+18.92kb)|CASS4(-0.893kb)|CSTF1(+6.692kb)|FAM209A(-113.5kb)|FAM209B(-122kb)|FAM210B(+42.56kb)|GCNT7(-80.27kb)|MC3R(+161.4kb)|RTFDC1(-57.37kb)
1	170336085	rs113452299	C	T	0.0574992	3	3.233e-06	0.003697	0.7771	0.7781	0.0809	60.23	0.6625	0.8201	0.8705	GORAB(-165.2kb)|LOC284688(+82.74kb)|METTL11B(+199.2kb)
1	68625697	rs79654635	T	C	0.0309209	3	3.339e-06	3.339e-06	1.4325	1.4325	0.6391	0	1.5404	1.2583	1.4517	DIRAS3(+109.2kb)|GNG12-AS1(0)|MIR1262(-23.5kb)|WLS(0)
12	121792142	rs112607932	T	C	0.044133	2	3.427e-06	3.427e-06	1.489	1.489	0.8557	0	1.4695	1.5167	NA	ANAPC5(+0.13kb)|CAMKK2(+56.03kb)|KDM2B(-74.76kb)|P2RX4(+120.2kb)|P2RX7(+167.8kb)|RNF34(-45.74kb)
15	48744489	rs2245752	A	C	0.730243	3	3.454e-06	3.454e-06	1.1424	1.1424	0.6602	0	1.1233	1.1932	1.1258	DUT(+108.9kb)|FBN1(0)|SLC12A1(+148.2kb)
15	48740097	rs8029993	T	C	0.729643	3	3.492e-06	3.492e-06	1.1424	1.1424	0.6664	0	1.1227	1.1925	1.1267	DUT(+104.5kb)|FBN1(0)|SLC12A1(+143.8kb)
15	48745322	rs2725550	A	G	0.729689	3	3.514e-06	3.514e-06	1.1423	1.1423	0.6621	0	1.1232	1.1929	1.1258	DUT(+109.8kb)|FBN1(0)|SLC12A1(+149kb)
15	48835355	rs8041668	C	T	0.726394	3	3.57e-06	3.57e-06	1.1422	1.1422	0.8675	0	1.1344	1.1715	1.1295	CEP152(-194.8kb)|DUT(+199.8kb)|FBN1(0)
1	232739491	rs7546863	C	T	0.108731	3	3.581e-06	0.02009	0.8218	0.8186	0.0168	75.53	0.7152	0.8062	0.9483	SIPA1L2(+88.25kb)
6	32441679	rs7739375	G	A	0.560841	2	3.612e-06	3.612e-06	0.8578	0.8578	0.8594	0	0.862	0.8518	NA	BTNL2(+66.78kb)|C6orf10(+102kb)|HCG23(+80.21kb)|HLA-DQA1(-163.5kb)|HLA-DQB1(-185.6kb)|HLA-DRA(+28.85kb)|HLA-DRB1(-104.9kb)|HLA-DRB5(-43.47kb)|HLA-DRB6(-78.81kb)
11	86396188	rs142045450	T	C	0.0186942	3	3.702e-06	3.702e-06	1.4833	1.4833	0.4397	0	1.5818	1.1998	1.5607	ME3(+12.51kb)|OR7E2P(-171.8kb)|PRSS23(-115.3kb)
19	1043324	rs11672201	G	C	0.0751463	2	3.789e-06	3.789e-06	1.3461	1.3461	0.5574	0	1.2947	1.3962	NA	ABCA7(0)|ARID3A(+70.52kb)|ATP5D(-198.4kb)|C19orf26(-186.6kb)|CFD(+179.7kb)|CNN2(+4.26kb)|ELANE(+187.1kb)|GPX4(-60.61kb)|GRIN3B(+33.6kb)|HMHA1(-22.6kb)|KISS1R(+122.3kb)|MED16(+150.1kb)|POLR2E(-43.25kb)|PRTN3(+195.1kb)|R3HDM4(+130.1kb)|SBNO2(-64.31kb)|STK11(-162.5kb)|TMEM259(+22.18kb)|WDR18(+48.76kb)
18	77633271	rs76838079	T	C	0.130505	2	3.823e-06	0.0777	1.2416	1.2259	0.0145	83.26	1.0894	NA	1.3724	CTDP1(+118.8kb)|HSBP1L1(-91.31kb)|KCNG2(0)|PQLC1(-29.15kb)|RBFA(-161.1kb)|RBFADN(-194kb)|TXNL4A(-99.6kb)
1	68615039	rs1367454	A	G	0.0325377	3	3.885e-06	3.885e-06	1.4181	1.4181	0.529	0	1.5193	1.2115	1.4593	DIRAS3(+98.58kb)|GNG12-AS1(0)|MIR1262(-34.16kb)|WLS(0)
15	48720526	rs363832	C	G	0.749923	3	3.915e-06	3.915e-06	1.1468	1.1468	0.9259	0	1.1449	1.1678	1.1342	DUT(+84.96kb)|FBN1(0)|SLC12A1(+124.3kb)
1	68618634	rs17130533	T	C	0.0317678	3	3.959e-06	3.959e-06	1.4191	1.4191	0.5628	0	1.5189	1.2213	1.4551	DIRAS3(+102.2kb)|GNG12-AS1(0)|MIR1262(-30.57kb)|WLS(0)
1	68623009	rs12090994	A	C	0.0313212	3	3.961e-06	3.961e-06	1.4243	1.4243	0.6008	0	1.5321	1.2391	1.4486	DIRAS3(+106.5kb)|GNG12-AS1(0)|MIR1262(-26.19kb)|WLS(0)
15	48728634	rs2042747	T	C	0.73049	3	4.103e-06	4.103e-06	1.1419	1.1419	0.6934	0	1.1227	1.1895	1.1273	DUT(+93.06kb)|FBN1(0)|SLC12A1(+132.4kb)
15	35058220	rs16959728	A	G	0.0288728	3	4.165e-06	4.165e-06	1.3812	1.3812	0.7912	0	1.4744	1.3676	1.3203	ACTC1(-22.08kb)|AQR(-90.33kb)|GJD2(+11.44kb)|GOLGA8B(+182.4kb)
20	54980606	rs6024857	C	T	0.137096	3	4.165e-06	0.0006136	0.8305	0.8312	0.1678	43.98	0.7489	0.8679	0.8866	AURKA(+13.26kb)|CASS4(-6.561kb)|CSTF1(+1.024kb)|FAM209A(-119.2kb)|FAM209B(-127.7kb)|FAM210B(+36.89kb)|GCNT7(-85.94kb)|MC3R(+155.7kb)|RTFDC1(-63.04kb)
1	68627426	rs150861303	A	G	0.031352	3	4.215e-06	4.215e-06	1.4292	1.4292	0.6978	0	1.5361	1.2779	1.4365	DIRAS3(+111kb)|GNG12-AS1(0)|MIR1262(-21.77kb)|WLS(0)
15	48747440	rs2555470	T	C	0.729751	3	4.233e-06	4.233e-06	1.141	1.141	0.6707	0	1.1222	1.1908	1.1249	DUT(+111.9kb)|FBN1(0)|SLC12A1(+151.2kb)
20	54987216	rs17462136	C	G	0.0838158	3	4.233e-06	0.0002471	0.8078	0.8094	0.2142	35.09	0.7293	0.889	0.8276	AURKA(+19.86kb)|CASS4(0)|CSTF1(+7.634kb)|FAM209A(-112.6kb)|FAM209B(-121.1kb)|FAM210B(+43.5kb)|GCNT7(-79.33kb)|MC3R(+162.3kb)|RTFDC1(-56.43kb)
15	48754122	rs2620361	T	G	0.729735	3	4.369e-06	4.369e-06	1.1404	1.1404	0.6473	0	1.1222	1.1925	1.1225	DUT(+118.6kb)|FBN1(0)|SLC12A1(+157.8kb)
15	35051823	rs1521850	T	G	0.0273175	3	4.381e-06	4.381e-06	1.3921	1.3921	0.6897	0	1.5178	1.3421	1.326	ACTC1(-28.47kb)|AQR(-96.73kb)|GJD2(+5.041kb)|GOLGA8B(+176.1kb)
15	48750520	rs1812873	A	C	0.730305	3	4.393e-06	4.393e-06	1.1406	1.1406	0.6669	0	1.1219	1.1908	1.1243	DUT(+115kb)|FBN1(0)|SLC12A1(+154.2kb)
17	1143549	rs62088736	T	C	0.0433323	2	4.411e-06	2.849e-05	0.6343	0.6353	0.2748	16.14	0.7139	0.5744	NA	ABR(+52.93kb)|BHLHA9(-30.31kb)|CRK(-181.1kb)|TUSC5(-39.41kb)|YWHAE(-104.3kb)
19	1043638	rs3752231	T	C	0.247644	2	4.452e-06	4.452e-06	1.2072	1.2072	0.88	0	1.2153	1.2003	NA	ABCA7(0)|ARID3A(+70.84kb)|ATP5D(-198.1kb)|C19orf26(-186.3kb)|CFD(+180kb)|CNN2(+4.574kb)|ELANE(+187.4kb)|GPX4(-60.3kb)|GRIN3B(+33.92kb)|HMHA1(-22.28kb)|KISS1R(+122.6kb)|MED16(+150.4kb)|POLR2E(-42.94kb)|PRTN3(+195.5kb)|R3HDM4(+130.4kb)|SBNO2(-63.99kb)|STK11(-162.2kb)|TMEM259(+22.5kb)|WDR18(+49.07kb)
1	68627892	rs114890255	A	G	0.0316292	3	4.504e-06	4.504e-06	1.4297	1.4297	0.6851	0	1.55	1.2821	1.4274	DIRAS3(+111.4kb)|GNG12-AS1(0)|MIR1262(-21.31kb)|WLS(0)
15	48753624	rs2433394	A	C	0.729704	3	4.505e-06	4.505e-06	1.1402	1.1402	0.6422	0	1.1215	1.1928	1.1225	DUT(+118.1kb)|FBN1(0)|SLC12A1(+157.3kb)
15	35059306	rs75133717	A	G	0.0289344	3	4.515e-06	4.515e-06	1.3798	1.3798	0.7927	0	1.4732	1.3629	1.3204	ACTC1(-20.99kb)|AQR(-89.24kb)|GJD2(+12.52kb)|GOLGA8B(+183.5kb)
5	11944898	rs4701928	G	A	0.425947	3	4.588e-06	4.588e-06	1.1215	1.1215	0.4287	0	1.1524	1.1493	1.0769	CTNND2(+40.79kb)
15	48736684	rs2303502	T	A	0.730859	3	4.611e-06	4.611e-06	1.1406	1.1406	0.67	0	1.1199	1.1902	1.1262	DUT(+101.1kb)|FBN1(0)|SLC12A1(+140.4kb)
15	48739274	rs2303500	G	A	0.731475	3	4.671e-06	4.671e-06	1.1405	1.1405	0.6873	0	1.121	1.1885	1.126	DUT(+103.7kb)|FBN1(0)|SLC12A1(+143kb)
15	35055253	rs117584857	G	A	0.0226825	3	4.727e-06	4.727e-06	1.4462	1.4462	0.6706	0	1.5744	1.2988	1.4525	ACTC1(-25.04kb)|AQR(-93.3kb)|GJD2(+8.471kb)|GOLGA8B(+179.5kb)
18	58060461	rs8083286	G	A	0.211949	3	4.755e-06	0.0002996	0.8722	0.8702	0.1955	38.72	0.834	0.8374	0.9332	MC4R(+20.46kb)
12	121809119	rs7955122	C	T	0.0550354	2	4.765e-06	4.765e-06	1.4663	1.4663	0.9467	0	1.4733	1.4567	NA	ANAPC5(+17.11kb)|CAMKK2(+73.01kb)|KDM2B(-57.78kb)|P2RX4(+137.2kb)|P2RX7(+184.8kb)|RNF34(-28.77kb)
15	48733625	rs1426718	T	C	0.730228	3	4.765e-06	4.765e-06	1.1406	1.1406	0.6818	0	1.1194	1.189	1.1274	DUT(+98.06kb)|FBN1(0)|SLC12A1(+137.4kb)
11	85831690	rs472486	G	A	0.654342	3	4.807e-06	0.00231	1.1251	1.1292	0.0951	57.49	1.1838	1.1674	1.0504	C11orf73(-181.6kb)|EED(-124.1kb)|PICALM(+50.77kb)
15	48706571	rs12916536	G	A	0.730567	3	4.857e-06	4.857e-06	1.1414	1.1414	0.6774	0	1.1218	1.1909	1.1261	DUT(+71kb)|FBN1(0)|SLC12A1(+110.3kb)
20	54989833	rs6014722	A	T	0.086218	3	4.936e-06	0.0005026	0.8095	0.8116	0.187	40.36	0.7293	0.8979	0.8259	AURKA(+22.48kb)|CASS4(0)|CSTF1(+10.25kb)|FAM209A(-110kb)|FAM209B(-118.5kb)|FAM210B(+46.12kb)|GCNT7(-76.71kb)|MC3R(+165kb)|RTFDC1(-53.81kb)
8	139669017	rs72727856	A	G	0.0151063	3	4.941e-06	4.941e-06	1.5716	1.5716	0.4413	0	1.411	1.3714	1.7923	COL22A1(0)|FAM135B(+160kb)
8	139677595	rs72727878	C	G	0.0140899	3	4.966e-06	4.966e-06	1.5747	1.5747	0.6807	0	1.3999	1.5319	1.7172	COL22A1(0)|FAM135B(+168.5kb)
15	48753145	rs2466792	A	C	0.729689	3	5.043e-06	5.043e-06	1.1394	1.1394	0.6588	0	1.1213	1.1904	1.1222	DUT(+117.6kb)|FBN1(0)|SLC12A1(+156.9kb)
15	48757460	rs7171359	C	T	0.270357	3	5.05e-06	5.05e-06	0.8778	0.8778	0.6338	0	0.8933	0.8385	0.8911	DUT(+121.9kb)|FBN1(0)|SLC12A1(+161.2kb)
1	68620446	rs77561205	A	T	0.0319834	3	5.086e-06	5.086e-06	1.4159	1.4159	0.6091	0	1.5146	1.2327	1.4448	DIRAS3(+104kb)|GNG12-AS1(0)|MIR1262(-28.75kb)|WLS(0)
22	25466553	rs6004423	A	G	0.240099	3	5.092e-06	5.092e-06	0.8794	0.8794	0.4271	0	0.8691	0.8367	0.9166	CRYBB2(-149.1kb)|CRYBB3(-129.3kb)|KIAA1671(0)|LOC100128531(-31.83kb)|SGSM1(+143.7kb)|TMEM211(+131.2kb)
15	48757195	rs10519177	G	A	0.270326	3	5.11e-06	5.11e-06	0.8778	0.8778	0.6317	0	0.8934	0.8384	0.8912	DUT(+121.6kb)|FBN1(0)|SLC12A1(+160.9kb)
11	85800279	rs561655	A	G	0.653403	3	5.155e-06	0.01159	1.1245	1.1302	0.0309	71.23	1.2056	1.1619	1.0367	CCDC83(+169.2kb)|EED(-155.5kb)|PICALM(+19.36kb)
1	68606515	rs114410805	T	C	0.0305359	3	5.178e-06	5.178e-06	1.4141	1.4141	0.4207	0	1.5864	1.2002	1.417	DIRAS3(+90.06kb)|GNG12-AS1(0)|MIR1262(-42.68kb)|WLS(0)
3	181589727	rs116149390	A	G	0.0226671	3	5.188e-06	0.0001539	1.5392	1.554	0.2247	33.01	1.9784	1.5122	1.3257	SOX2(+157.5kb)|SOX2-OT(+129.7kb)
15	35072858	rs139796331	G	A	0.0226209	3	5.228e-06	5.228e-06	1.4512	1.4512	0.671	0	1.572	1.2958	1.4689	ACTC1(-7.438kb)|AQR(-75.69kb)|GJD2(+26.08kb)|GOLGA8B(+197.1kb)|ZNF770(-197.7kb)
1	68619490	rs2288660	T	C	0.0316754	3	5.235e-06	5.235e-06	1.4138	1.4138	0.5893	0	1.5144	1.2257	1.4442	DIRAS3(+103kb)|GNG12-AS1(0)|MIR1262(-29.71kb)|WLS(0)
1	68600278	rs12062874	G	A	0.0320912	3	5.244e-06	5.244e-06	1.4128	1.4128	0.3941	0	1.5822	1.1855	1.4245	DIRAS3(+83.82kb)|GNG12-AS1(0)|MIR1262(-48.92kb)|WLS(0)
11	85828548	rs598726	A	G	0.664244	3	5.259e-06	0.00771	1.1257	1.1309	0.0455	67.63	1.2026	1.1616	1.0417	C11orf73(-184.7kb)|CCDC83(+197.5kb)|EED(-127.3kb)|PICALM(+47.62kb)
2	127893897	rs745717	C	G	0.088805	3	5.266e-06	0.0001187	1.2245	1.2264	0.2451	28.89	1.3281	1.2529	1.1204	BIN1(+28.99kb)|CYP27C1(-47.51kb)|ERCC3(-121kb)|MAP3K2(-162.3kb)
1	68628127	rs118180678	T	C	0.0310286	3	5.374e-06	5.374e-06	1.4258	1.4258	0.7088	0	1.54	1.285	1.4236	DIRAS3(+111.7kb)|GNG12-AS1(0)|MIR1262(-21.07kb)|WLS(0)
15	48843598	rs626492	T	C	0.273606	3	5.399e-06	5.399e-06	0.8775	0.8775	0.8748	0	0.8832	0.8562	0.8872	CEP152(-186.5kb)|FBN1(0)
15	48702873	rs1042078	A	G	0.714136	3	5.513e-06	5.513e-06	1.1385	1.1385	0.883	0	1.1204	1.1625	1.1389	DUT(+67.3kb)|FBN1(0)|SLC12A1(+106.6kb)
1	68618586	rs59405367	C	T	0.0315676	3	5.524e-06	5.524e-06	1.4128	1.4128	0.5694	0	1.5232	1.2217	1.439	DIRAS3(+102.1kb)|GNG12-AS1(0)|MIR1262(-30.61kb)|WLS(0)
15	48751329	rs714290	G	C	0.749538	3	5.688e-06	5.688e-06	1.143	1.143	0.9536	0	1.1395	1.1601	1.1346	DUT(+115.8kb)|FBN1(0)|SLC12A1(+155.1kb)
20	54988072	rs73156368	T	C	0.0883431	3	5.979e-06	0.0002792	0.811	0.8126	0.2188	34.18	0.734	0.8943	0.827	AURKA(+20.72kb)|CASS4(0)|CSTF1(+8.49kb)|FAM209A(-111.7kb)|FAM209B(-120.2kb)|FAM210B(+44.35kb)|GCNT7(-78.48kb)|MC3R(+163.2kb)|RTFDC1(-55.57kb)
12	121808645	rs144339186	C	A	0.0550508	2	6.021e-06	6.021e-06	1.4595	1.4595	0.9012	0	1.4725	1.4419	NA	ANAPC5(+16.63kb)|CAMKK2(+72.53kb)|KDM2B(-58.25kb)|P2RX4(+136.7kb)|P2RX7(+184.3kb)|RNF34(-29.24kb)
15	48835935	rs589668	T	C	0.266908	3	6.108e-06	6.108e-06	0.8778	0.8778	0.7936	0	0.8809	0.851	0.8938	CEP152(-194.2kb)|FBN1(0)
4	111483003	rs1448816	G	A	0.0277333	3	6.118e-06	8.92e-05	1.4366	1.4374	0.27	23.62	1.2042	1.6111	1.5625	ENPEP(0)|PITX2(-55.58kb)
1	68623492	rs12070956	A	G	0.0306745	3	6.127e-06	6.127e-06	1.4158	1.4158	0.6336	0	1.5248	1.2443	1.4327	DIRAS3(+107kb)|GNG12-AS1(0)|MIR1262(-25.71kb)|WLS(0)
1	68601181	rs12064323	G	A	0.0309209	3	6.283e-06	6.283e-06	1.4094	1.4094	0.3849	0	1.5884	1.185	1.4135	DIRAS3(+84.72kb)|GNG12-AS1(0)|MIR1262(-48.02kb)|WLS(0)
1	68612978	rs75813423	A	G	0.0319218	3	6.351e-06	6.351e-06	1.4089	1.4089	0.5308	0	1.5209	1.2075	1.4417	DIRAS3(+96.52kb)|GNG12-AS1(0)|MIR1262(-36.22kb)|WLS(0)
15	48755168	rs9806595	C	T	0.250939	3	6.444e-06	6.444e-06	0.8758	0.8758	0.9035	0	0.878	0.8575	0.8864	DUT(+119.6kb)|FBN1(0)|SLC12A1(+158.9kb)
1	68613206	rs77167914	C	T	0.0313828	3	6.467e-06	6.467e-06	1.4086	1.4086	0.5321	0	1.5181	1.2067	1.4431	DIRAS3(+96.75kb)|GNG12-AS1(0)|MIR1262(-35.99kb)|WLS(0)
20	41978884	rs79401176	T	G	0.0180474	3	6.488e-06	0.0008705	1.4966	1.4678	0.206	36.71	1.5099	1.1111	1.6888	L3MBTL1(-157.4kb)|PTPRT(+160.3kb)|SRSF6(-107.6kb)
11	85811696	rs566975	A	C	0.652356	3	6.537e-06	0.003592	1.123	1.1277	0.0802	60.37	1.1831	1.1681	1.0461	CCDC83(+180.6kb)|EED(-144.1kb)|PICALM(+30.77kb)
20	54983075	rs6069736	T	C	0.0963505	3	6.616e-06	3.481e-05	0.8114	0.812	0.3087	14.91	0.7439	0.8862	0.8226	AURKA(+15.72kb)|CASS4(-4.092kb)|CSTF1(+3.493kb)|FAM209A(-116.7kb)|FAM209B(-125.2kb)|FAM210B(+39.36kb)|GCNT7(-83.47kb)|MC3R(+158.2kb)|RTFDC1(-60.57kb)
15	35052766	rs78486118	C	T	0.0301201	3	6.69e-06	6.69e-06	1.372	1.372	0.7626	0	1.4746	1.3431	1.3126	ACTC1(-27.53kb)|AQR(-95.78kb)|GJD2(+5.984kb)|GOLGA8B(+177kb)
19	1039626	rs3795066	T	C	0.623114	3	6.757e-06	6.146e-05	0.8745	0.8736	0.2788	21.72	0.8315	0.8549	0.9282	ABCA7(-0.475kb)|ARID3A(+66.82kb)|C19orf26(-190.3kb)|CFD(+176kb)|CNN2(+0.562kb)|ELANE(+183.4kb)|GPX4(-64.31kb)|GRIN3B(+29.9kb)|HMHA1(-26.3kb)|KISS1R(+118.6kb)|MED16(+146.4kb)|POLR2E(-46.95kb)|PRTN3(+191.5kb)|R3HDM4(+126.4kb)|SBNO2(-68.01kb)|STK11(-166.2kb)|TMEM259(+18.48kb)|WDR18(+45.06kb)
6	32431867	rs9268888	T	G	0.556329	2	6.784e-06	6.784e-06	0.8643	0.8643	0.9972	0	0.8644	0.8642	NA	BTNL2(+56.97kb)|C6orf10(+92.21kb)|HCG23(+70.4kb)|HLA-DQA1(-173.3kb)|HLA-DQB1(-195.4kb)|HLA-DRA(+19.04kb)|HLA-DRB1(-114.7kb)|HLA-DRB5(-53.29kb)|HLA-DRB6(-88.62kb)
1	47172352	rs1440484	A	C	0.482953	3	6.787e-06	9.504e-06	1.1177	1.1179	0.3556	3.27	1.1512	1.1495	1.0699	ATPAF1(+38.25kb)|CYP4B1(-92.32kb)|CYP4Z2P(-136.4kb)|DMBX1(+192.5kb)|EFCAB14(0)|EFCAB14-AS1(+14.58kb)|KNCN(+155.5kb)|MKNK1(+102.4kb)|MKNK1-AS1(+136.4kb)|MOB3C(+89.79kb)|TEX38(+33.1kb)
6	32440910	rs9269079	G	T	0.556267	2	6.855e-06	6.855e-06	0.8629	0.8629	0.9903	0	0.8626	0.8633	NA	BTNL2(+66.01kb)|C6orf10(+101.3kb)|HCG23(+79.44kb)|HLA-DQA1(-164.3kb)|HLA-DQB1(-186.3kb)|HLA-DRA(+28.08kb)|HLA-DRB1(-105.6kb)|HLA-DRB5(-44.24kb)|HLA-DRB6(-79.58kb)
6	32431147	rs9268877	G	A	0.556714	2	6.861e-06	6.861e-06	0.8645	0.8645	0.9986	0	0.8645	0.8646	NA	BTNL2(+56.25kb)|C6orf10(+91.49kb)|HCG23(+69.68kb)|HLA-DQA1(-174kb)|HLA-DQB1(-196.1kb)|HLA-DRA(+18.32kb)|HLA-DRB1(-115.4kb)|HLA-DRB5(-54.01kb)|HLA-DRB6(-89.34kb)
1	47177684	rs10890413	A	G	0.482938	3	6.864e-06	1.118e-05	1.118	1.1182	0.35	4.75	1.1511	1.1512	1.0697	ATPAF1(+43.58kb)|CYP4B1(-86.98kb)|CYP4Z2P(-131.1kb)|DMBX1(+197.8kb)|EFCAB14(0)|EFCAB14-AS1(+19.92kb)|KNCN(+160.8kb)|MKNK1(+107.7kb)|MKNK1-AS1(+141.8kb)|MOB3C(+95.12kb)|TEX38(+38.43kb)
4	94673037	rs72659522	C	A	0.0236372	3	6.91e-06	0.001543	1.4038	1.3788	0.182	41.31	1.2141	1.2461	1.6193	ATOH1(-77.04kb)|GRID2(0)
1	47174149	rs10890412	C	T	0.482923	3	6.915e-06	9.365e-06	1.1176	1.1177	0.3568	2.95	1.1508	1.1497	1.0699	ATPAF1(+40.05kb)|CYP4B1(-90.52kb)|CYP4Z2P(-134.6kb)|DMBX1(+194.3kb)|EFCAB14(0)|EFCAB14-AS1(+16.38kb)|KNCN(+157.3kb)|MKNK1(+104.2kb)|MKNK1-AS1(+138.2kb)|MOB3C(+91.59kb)|TEX38(+34.89kb)
1	47170649	rs12029031	C	T	0.483	3	6.927e-06	1.009e-05	1.1174	1.1176	0.3541	3.67	1.1509	1.1493	1.0696	ATPAF1(+36.55kb)|CYP4B1(-94.02kb)|CYP4Z2P(-138.1kb)|DMBX1(+190.8kb)|EFCAB14(0)|EFCAB14-AS1(+12.88kb)|KNCN(+153.8kb)|MKNK1(+100.7kb)|MKNK1-AS1(+134.7kb)|MOB3C(+88.09kb)|TEX38(+31.39kb)
8	139680531	rs72727882	C	T	0.013397	3	6.929e-06	6.929e-06	1.5847	1.5847	0.8224	0	1.4426	1.5872	1.6775	COL22A1(0)|FAM135B(+171.5kb)
15	48827144	rs7164585	C	T	0.270373	3	6.941e-06	6.941e-06	0.8786	0.8786	0.7331	0	0.898	0.8478	0.8828	DUT(+191.6kb)|FBN1(0)
18	39903930	rs62083864	A	T	0.584293	3	7.026e-06	7.026e-06	1.1211	1.1211	0.4036	0	1.0911	1.0897	1.1697	LINC00907(0)
16	81807032	rs67497653	T	A	0.368063	3	7.027e-06	7.027e-06	0.8824	0.8824	0.642	0	0.8848	0.8489	0.9058	CMIP(+61.66kb)|LOC100129617(+106.2kb)|PLCG2(-5.866kb)
15	48705206	rs16960901	C	T	0.731136	3	7.032e-06	7.032e-06	1.1389	1.1389	0.687	0	1.1164	1.1868	1.1272	DUT(+69.64kb)|FBN1(0)|SLC12A1(+108.9kb)
2	11858913	rs4471859	C	T	0.870095	3	7.084e-06	0.0004971	0.8441	0.848	0.2141	35.12	0.8275	0.9415	0.802	GREB1(+76kb)|LPIN1(0)|MIR4262(-118.1kb)|MIR4429(+178.1kb)|NTSR2(+48.58kb)
6	32429594	rs9268852	G	A	0.556791	2	7.114e-06	7.114e-06	0.8648	0.8648	0.9677	0	0.8639	0.8662	NA	BTNL2(+54.69kb)|C6orf10(+89.94kb)|HCG23(+68.13kb)|HLA-DQA1(-175.6kb)|HLA-DQB1(-197.6kb)|HLA-DRA(+16.77kb)|HLA-DRB1(-117kb)|HLA-DRB5(-55.56kb)|HLA-DRB6(-90.9kb)
1	68593852	rs12096889	C	T	0.0314906	3	7.153e-06	9.742e-06	1.4054	1.4049	0.3591	2.36	1.5696	1.1625	1.4286	DIRAS3(+77.39kb)|GNG12-AS1(0)|MIR1262(-55.35kb)|WLS(0)
15	48759291	rs4774517	T	G	0.26891	3	7.163e-06	7.163e-06	0.8794	0.8794	0.6743	0	0.8957	0.8429	0.8901	DUT(+123.7kb)|FBN1(0)|SLC12A1(+163kb)
7	81502697	rs77094958	T	C	0.0362334	3	7.173e-06	0.001601	1.3234	1.324	0.1369	49.71	1.5808	1.1503	1.2737	CACNA2D1(-76.72kb)|HGF(+103.2kb)
10	11720308	rs7920721	G	A	0.375146	3	7.176e-06	0.002171	1.1247	1.1263	0.113	54.14	1.2001	1.1323	1.055	ECHDC3(-64.05kb)|PROSER2(-145.1kb)|PROSER2-AS1(-171.3kb)|USP6NL(+66.63kb)
16	58819856	rs76659395	T	C	0.0386203	3	7.19e-06	7.19e-06	1.4057	1.4057	0.7323	0	1.2952	1.4769	1.4639	CNOT1(+156.1kb)|GOT2(+51.61kb)|SLC38A7(+101.2kb)
15	48769044	rs35026266	T	C	0.260764	3	7.202e-06	7.202e-06	0.8788	0.8788	0.6704	0	0.8956	0.8419	0.8893	DUT(+133.5kb)|FBN1(0)|SLC12A1(+172.8kb)
20	54984140	rs6024861	A	G	0.0831999	3	7.205e-06	0.0007494	0.8113	0.8133	0.1781	42.05	0.7276	0.8976	0.8326	AURKA(+16.79kb)|CASS4(-3.027kb)|CSTF1(+4.558kb)|FAM209A(-115.6kb)|FAM209B(-124.2kb)|FAM210B(+40.42kb)|GCNT7(-82.41kb)|MC3R(+159.3kb)|RTFDC1(-59.51kb)
6	32440467	rs9269071	C	T	0.556606	2	7.214e-06	7.214e-06	0.8633	0.8633	0.9944	0	0.8631	0.8635	NA	BTNL2(+65.57kb)|C6orf10(+100.8kb)|HCG23(+79kb)|HLA-DQA1(-164.7kb)|HLA-DQB1(-186.8kb)|HLA-DRA(+27.64kb)|HLA-DRB1(-106.1kb)|HLA-DRB5(-44.69kb)|HLA-DRB6(-80.02kb)
6	32432509	rs9268912	A	C	0.556452	2	7.237e-06	7.237e-06	0.8646	0.8646	0.993	0	0.8648	0.8643	NA	BTNL2(+57.61kb)|C6orf10(+92.85kb)|HCG23(+71.04kb)|HLA-DQA1(-172.7kb)|HLA-DQB1(-194.7kb)|HLA-DRA(+19.68kb)|HLA-DRB1(-114kb)|HLA-DRB5(-52.64kb)|HLA-DRB6(-87.98kb)
6	32440362	rs9269069	T	C	0.556575	2	7.274e-06	7.274e-06	0.8633	0.8633	0.9986	0	0.8633	0.8634	NA	BTNL2(+65.46kb)|C6orf10(+100.7kb)|HCG23(+78.89kb)|HLA-DQA1(-164.8kb)|HLA-DQB1(-186.9kb)|HLA-DRA(+27.54kb)|HLA-DRB1(-106.2kb)|HLA-DRB5(-44.79kb)|HLA-DRB6(-80.13kb)
8	139680867	rs72727883	T	C	0.0134124	3	7.277e-06	7.277e-06	1.5826	1.5826	0.8254	0	1.4419	1.5856	1.6742	COL22A1(0)|FAM135B(+171.8kb)
3	19559150	rs78736039	G	C	0.0188482	3	7.33e-06	7.33e-06	1.5017	1.5017	0.7781	0	1.3696	1.535	1.5802	KCNH8(0)
20	54984064	rs1884913	C	G	0.257114	3	7.391e-06	7.391e-06	0.8668	0.8668	0.463	0	0.8353	0.9185	0.8542	AURKA(+16.71kb)|CASS4(-3.103kb)|CSTF1(+4.482kb)|FAM209A(-115.7kb)|FAM209B(-124.2kb)|FAM210B(+40.35kb)|GCNT7(-82.48kb)|MC3R(+159.2kb)|RTFDC1(-59.58kb)
6	32441555	rs7739203	G	A	0.556683	2	7.406e-06	7.406e-06	0.8631	0.8631	1	0	0.8631	0.8631	NA	BTNL2(+66.66kb)|C6orf10(+101.9kb)|HCG23(+80.09kb)|HLA-DQA1(-163.6kb)|HLA-DQB1(-185.7kb)|HLA-DRA(+28.73kb)|HLA-DRB1(-105kb)|HLA-DRB5(-43.6kb)|HLA-DRB6(-78.93kb)
18	77698967	rs7228070	T	C	0.429643	2	7.417e-06	7.417e-06	0.8775	0.8775	0.7314	0	0.8869	NA	0.8693	ADNP2(-167.9kb)|CTDP1(+184.5kb)|HSBP1L1(-25.61kb)|KCNG2(+39.15kb)|PQLC1(0)|RBFA(-95.38kb)|RBFADN(-128.3kb)|TXNL4A(-33.9kb)
6	32439964	rs5026743	T	G	0.556637	2	7.421e-06	7.421e-06	0.8635	0.8635	0.9972	0	0.8636	0.8634	NA	BTNL2(+65.06kb)|C6orf10(+100.3kb)|HCG23(+78.5kb)|HLA-DQA1(-165.2kb)|HLA-DQB1(-187.3kb)|HLA-DRA(+27.14kb)|HLA-DRB1(-106.6kb)|HLA-DRB5(-45.19kb)|HLA-DRB6(-80.52kb)
6	32440879	rs9269078	T	C	0.556544	2	7.428e-06	7.428e-06	0.8633	0.8633	1	0	0.8633	0.8633	NA	BTNL2(+65.98kb)|C6orf10(+101.2kb)|HCG23(+79.41kb)|HLA-DQA1(-164.3kb)|HLA-DQB1(-186.4kb)|HLA-DRA(+28.05kb)|HLA-DRB1(-105.7kb)|HLA-DRB5(-44.27kb)|HLA-DRB6(-79.61kb)
6	32430289	rs9268863	G	A	0.556668	2	7.484e-06	7.484e-06	0.8651	0.8651	0.9832	0	0.8646	0.8658	NA	BTNL2(+55.39kb)|C6orf10(+90.63kb)|HCG23(+68.82kb)|HLA-DQA1(-174.9kb)|HLA-DQB1(-197kb)|HLA-DRA(+17.46kb)|HLA-DRB1(-116.3kb)|HLA-DRB5(-54.86kb)|HLA-DRB6(-90.2kb)
8	139673442	rs72727870	T	C	0.0135202	3	7.603e-06	7.603e-06	1.5814	1.5814	0.7823	0	1.4203	1.5989	1.6802	COL22A1(0)|FAM135B(+164.4kb)
1	205609410	rs17347710	G	A	0.123914	3	7.66e-06	0.01641	1.1811	1.1771	0.0378	69.46	1.3428	1.0854	1.1116	BLACAT1(+184.2kb)|CDK18(+107.5kb)|ELK4(+7.41kb)|LOC284578(+83.65kb)|MFSD4(+37.36kb)|MIR135B(+191.9kb)|NUCKS1(-72.54kb)|PM20D1(-187.7kb)|RAB7L1(-127.7kb)|SLC41A1(-148.8kb)|SLC45A3(-17.57kb)
6	32440805	rs9269076	A	C	0.55194	2	7.679e-06	7.679e-06	0.8628	0.8628	1	0	0.8628	0.8628	NA	BTNL2(+65.9kb)|C6orf10(+101.1kb)|HCG23(+79.34kb)|HLA-DQA1(-164.4kb)|HLA-DQB1(-186.4kb)|HLA-DRA(+27.98kb)|HLA-DRB1(-105.7kb)|HLA-DRB5(-44.35kb)|HLA-DRB6(-79.68kb)
6	32435044	rs9268979	C	T	0.556606	2	7.718e-06	7.718e-06	0.8645	0.8645	0.9972	0	0.8644	0.8646	NA	BTNL2(+60.14kb)|C6orf10(+95.39kb)|HCG23(+73.58kb)|HLA-DQA1(-170.1kb)|HLA-DQB1(-192.2kb)|HLA-DRA(+22.22kb)|HLA-DRB1(-111.5kb)|HLA-DRB5(-50.11kb)|HLA-DRB6(-85.44kb)
6	32431606	rs9268881	A	T	0.555728	2	7.721e-06	7.721e-06	0.865	0.865	0.9748	0	0.8643	0.8661	NA	BTNL2(+56.71kb)|C6orf10(+91.95kb)|HCG23(+70.14kb)|HLA-DQA1(-173.6kb)|HLA-DQB1(-195.6kb)|HLA-DRA(+18.78kb)|HLA-DRB1(-114.9kb)|HLA-DRB5(-53.55kb)|HLA-DRB6(-88.88kb)
2	127895487	rs6431223	A	G	0.267601	3	7.735e-06	0.0006883	0.8726	0.8709	0.1687	43.8	0.8428	0.8272	0.9404	BIN1(+30.58kb)|CYP27C1(-45.92kb)|ERCC3(-119.4kb)|MAP3K2(-160.8kb)
11	85811364	rs526904	C	T	0.652664	3	7.749e-06	0.005012	1.1218	1.127	0.0677	62.86	1.1841	1.1683	1.0429	CCDC83(+180.3kb)|EED(-144.4kb)|PICALM(+30.44kb)
18	39905301	rs7233088	T	A	0.584724	3	7.832e-06	7.832e-06	1.1206	1.1206	0.4213	0	1.0954	1.0851	1.1679	LINC00907(0)
1	68591195	rs41287844	T	C	0.030967	3	7.977e-06	0.0001532	1.4036	1.3974	0.2687	23.91	1.5909	1.1328	1.432	DIRAS3(+74.74kb)|GNG12-AS1(0)|MIR1262(-58kb)|WLS(0)
20	54997568	rs6024870	A	G	0.0820604	3	8.039e-06	0.0001427	0.8137	0.8148	0.2582	26.15	0.7381	0.8854	0.8387	AURKA(+30.22kb)|CASS4(0)|CSTF1(+17.99kb)|FAM209A(-102.2kb)|FAM209B(-110.7kb)|FAM210B(+53.85kb)|GCNT7(-68.98kb)|MC3R(+172.7kb)|RTFDC1(-46.08kb)
19	1049012	rs4147912	C	A	0.753126	2	8.046e-06	8.046e-06	0.8322	0.8322	0.5842	0	0.8522	0.8146	NA	ABCA7(0)|ARID3A(+76.21kb)|ATP5D(-192.7kb)|C19orf26(-180.9kb)|CFD(+185.4kb)|CNN2(+9.948kb)|ELANE(+192.8kb)|GPX4(-54.92kb)|GRIN3B(+39.29kb)|HMHA1(-16.91kb)|KISS1R(+128kb)|MED16(+155.8kb)|MIDN(-199.5kb)|POLR2E(-37.56kb)|R3HDM4(+135.8kb)|SBNO2(-58.62kb)|STK11(-156.8kb)|TMEM259(+27.87kb)|WDR18(+54.44kb)
18	39904853	rs7228604	G	A	0.58554	3	8.09e-06	8.09e-06	1.1204	1.1204	0.4149	0	1.0938	1.0858	1.1681	LINC00907(0)
19	7843780	rs10421514	A	G	0.30482	3	8.125e-06	8.125e-06	1.136	1.136	0.867	0	1.1159	1.1296	1.1561	C19orf59(+99.06kb)|CAMSAP3(+160.6kb)|CD209(+31.32kb)|CLEC4G(+46.72kb)|CLEC4GP1(-8.589kb)|CLEC4M(+9.289kb)|CTXN1(-145.6kb)|ELAVL1(-179.7kb)|EVI5L(-51.38kb)|FCER2(+76.75kb)|FLJ22184(-89.82kb)|LOC388499(-99.74kb)|LRRC8E(-109.6kb)|MAP2K7(-125kb)|PCP2(+145.1kb)|PET100(+147.3kb)|RETN(+108.4kb)|SNAPC2(-141.4kb)|STXBP2(+131kb)|TGFBR3L(-137.3kb)|TIMM44(-147.8kb)|TRAPPC5(+96.03kb)|XAB2(+149.3kb)
12	121810504	rs6489807	G	A	0.0561903	2	8.219e-06	8.219e-06	1.4531	1.4531	0.7923	0	1.4808	1.4161	NA	ANAPC5(+18.49kb)|CAMKK2(+74.39kb)|KDM2B(-56.4kb)|P2RX4(+138.6kb)|P2RX7(+186.2kb)|RNF34(-27.38kb)
5	11953353	rs1379903	C	T	0.436464	3	8.257e-06	8.257e-06	1.1177	1.1177	0.4661	0	1.1511	1.137	1.0759	CTNND2(+49.24kb)
22	25467916	rs713848	A	G	0.237758	3	8.321e-06	8.321e-06	0.882	0.882	0.3806	0	0.8699	0.8374	0.9222	CRYBB2(-147.7kb)|CRYBB3(-127.9kb)|KIAA1671(0)|LOC100128531(-30.47kb)|SGSM1(+145.1kb)|TMEM211(+132.6kb)
10	11718331	rs2011704	C	T	0.361842	3	8.388e-06	0.002269	1.125	1.1261	0.1164	53.51	1.2067	1.1184	1.0604	ECHDC3(-66.02kb)|PROSER2(-147.1kb)|PROSER2-AS1(-173.3kb)|USP6NL(+64.65kb)
20	55003465	rs718022	A	G	0.0815984	3	8.412e-06	0.0003894	0.8145	0.8161	0.2146	35.03	0.7337	0.8893	0.8433	AURKA(+36.11kb)|CASS4(0)|CSTF1(+23.88kb)|FAM209A(-96.32kb)|FAM209B(-104.8kb)|FAM210B(+59.75kb)|GCNT7(-63.08kb)|MC3R(+178.6kb)|RTFDC1(-40.18kb)
20	54982351	rs6014720	T	G	0.118971	3	8.494e-06	8.494e-06	0.8293	0.8293	0.3879	0	0.7676	0.8757	0.8562	AURKA(+15kb)|CASS4(-4.816kb)|CSTF1(+2.769kb)|FAM209A(-117.4kb)|FAM209B(-126kb)|FAM210B(+38.63kb)|GCNT7(-84.2kb)|MC3R(+157.5kb)|RTFDC1(-61.3kb)
15	48803839	rs9806163	C	T	0.270342	3	8.501e-06	8.501e-06	0.8798	0.8798	0.6349	0	0.8978	0.8407	0.8911	DUT(+168.3kb)|FBN1(0)
6	32441408	rs7755212	T	C	0.556637	2	8.52e-06	8.52e-06	0.8639	0.8639	0.9751	0	0.8632	0.865	NA	BTNL2(+66.51kb)|C6orf10(+101.8kb)|HCG23(+79.94kb)|HLA-DQA1(-163.8kb)|HLA-DQB1(-185.8kb)|HLA-DRA(+28.58kb)|HLA-DRB1(-105.1kb)|HLA-DRB5(-43.74kb)|HLA-DRB6(-79.08kb)
5	11941460	rs9312787	G	A	0.426101	3	8.596e-06	5.555e-05	1.1178	1.1189	0.2924	18.68	1.1465	1.1631	1.065	CTNND2(+37.35kb)
12	121812274	rs138471243	T	C	0.0552202	2	8.598e-06	8.598e-06	1.4607	1.4607	0.9997	0	1.4607	1.4606	NA	ANAPC5(+20.26kb)|CAMKK2(+76.16kb)|KDM2B(-54.62kb)|P2RX4(+140.4kb)|P2RX7(+187.9kb)|RNF34(-25.61kb)
8	139672229	rs72727866	G	C	0.0141207	3	8.674e-06	8.674e-06	1.5581	1.5581	0.5956	0	1.3745	1.4776	1.7297	COL22A1(0)|FAM135B(+163.2kb)
1	47182483	rs3737729	C	T	0.483015	3	8.689e-06	1.874e-05	1.117	1.1174	0.3385	7.68	1.1497	1.1523	1.0679	ATPAF1(+48.38kb)|CYP4B1(-82.19kb)|CYP4Z2P(-126.3kb)|EFCAB14(0)|EFCAB14-AS1(+24.71kb)|KNCN(+165.6kb)|MKNK1(+112.5kb)|MKNK1-AS1(+146.6kb)|MOB3C(+99.92kb)|TEX38(+43.23kb)
20	55009854	rs6099146	G	A	0.0792732	3	8.785e-06	0.0005719	0.8167	0.8185	0.1976	38.33	0.734	0.8913	0.8478	AURKA(+42.5kb)|CASS4(0)|CSTF1(+30.27kb)|FAM209A(-89.93kb)|FAM209B(-98.45kb)|FAM210B(+66.14kb)|GCNT7(-56.69kb)|MC3R(+185kb)|RTFDC1(-33.79kb)|TFAP2C(-194.5kb)
18	39905310	rs7233219	A	C	0.584694	3	8.804e-06	8.804e-06	1.1199	1.1199	0.4304	0	1.0952	1.0847	1.1666	LINC00907(0)
18	39906133	rs7238159	G	A	0.585848	3	8.864e-06	8.864e-06	1.1197	1.1197	0.4098	0	1.0965	1.0812	1.1674	LINC00907(0)
10	11719074	rs11257240	G	T	0.361534	3	8.872e-06	0.002032	1.1247	1.1256	0.1238	52.13	1.2059	1.1158	1.0619	ECHDC3(-65.28kb)|PROSER2(-146.3kb)|PROSER2-AS1(-172.5kb)|USP6NL(+65.4kb)
15	48803919	rs16961062	G	T	0.268094	3	8.888e-06	8.888e-06	0.8801	0.8801	0.6163	0	0.8983	0.8396	0.892	DUT(+168.3kb)|FBN1(0)
22	25469198	rs9624718	A	C	0.237712	3	9.188e-06	9.188e-06	0.8826	0.8826	0.3934	0	0.8705	0.8392	0.9223	CRYBB2(-146.4kb)|CRYBB3(-126.6kb)|KIAA1671(0)|LOC100128531(-29.18kb)|SGSM1(+146.4kb)|TMEM211(+133.9kb)
20	54984768	rs6064392	T	G	0.0835541	3	9.22e-06	0.0004979	0.8138	0.8156	0.2051	36.89	0.7335	0.8964	0.8344	AURKA(+17.42kb)|CASS4(-2.399kb)|CSTF1(+5.186kb)|FAM209A(-115kb)|FAM209B(-123.5kb)|FAM210B(+41.05kb)|GCNT7(-81.78kb)|MC3R(+159.9kb)|RTFDC1(-58.88kb)
15	48820068	rs8036173	C	T	0.268894	3	9.247e-06	9.247e-06	0.8802	0.8802	0.7097	0	0.8961	0.8462	0.8898	DUT(+184.5kb)|FBN1(0)
19	7844184	rs4804232	A	G	0.304712	3	9.311e-06	9.311e-06	1.135	1.135	0.8798	0	1.1164	1.1283	1.1542	C19orf59(+99.46kb)|CAMSAP3(+161kb)|CD209(+31.72kb)|CLEC4G(+47.13kb)|CLEC4GP1(-8.185kb)|CLEC4M(+9.693kb)|CTXN1(-145.2kb)|ELAVL1(-179.3kb)|EVI5L(-50.98kb)|FCER2(+77.15kb)|FLJ22184(-89.42kb)|LOC388499(-99.33kb)|LRRC8E(-109.2kb)|MAP2K7(-124.6kb)|PCP2(+145.6kb)|PET100(+147.7kb)|RETN(+108.8kb)|SNAPC2(-141kb)|STXBP2(+131.4kb)|TGFBR3L(-136.8kb)|TIMM44(-147.4kb)|TRAPPC5(+96.44kb)|XAB2(+149.7kb)
15	48789634	rs140605	C	T	0.268248	3	9.319e-06	9.319e-06	0.8803	0.8803	0.6825	0	0.8981	0.8445	0.8892	DUT(+154.1kb)|FBN1(0)|SLC12A1(+193.4kb)
5	11936946	rs1458468	A	T	0.426039	3	9.364e-06	4.541e-05	1.1174	1.1184	0.3043	15.95	1.144	1.1639	1.0656	CTNND2(+32.84kb)
7	81501789	rs78700728	G	A	0.0360949	3	9.373e-06	0.001798	1.3187	1.319	0.1384	49.43	1.572	1.1419	1.2751	CACNA2D1(-77.63kb)|HGF(+102.3kb)
15	48792444	rs9652450	G	A	0.270126	3	9.465e-06	9.465e-06	0.8803	0.8803	0.7013	0	0.8992	0.8463	0.887	DUT(+156.9kb)|FBN1(0)|SLC12A1(+196.2kb)
8	139671449	rs72727862	A	C	0.0141361	3	9.471e-06	9.471e-06	1.5565	1.5565	0.612	0	1.3954	1.4477	1.7276	COL22A1(0)|FAM135B(+162.4kb)
5	89275132	rs112082526	T	C	0.0320758	3	9.499e-06	0.04068	0.7148	0.7197	0.0114	77.66	0.5536	0.954	0.7097	MIR3660(-37.3kb)
15	48805637	rs2306352	A	G	0.268309	3	9.53e-06	9.53e-06	0.8804	0.8804	0.6374	0	0.9008	0.8419	0.8889	DUT(+170.1kb)|FBN1(0)
22	25471962	rs5996832	T	C	0.237743	3	9.536e-06	9.536e-06	0.8827	0.8827	0.4206	0	0.8712	0.8408	0.921	CRYBB2(-143.6kb)|CRYBB3(-123.9kb)|KIAA1671(0)|LOC100128531(-26.42kb)|SGSM1(+149.1kb)|TMEM211(+136.6kb)
8	139671450	rs72727864	A	C	0.0141207	3	9.58e-06	9.58e-06	1.557	1.557	0.6105	0	1.3927	1.4507	1.7281	COL22A1(0)|FAM135B(+162.4kb)
5	11939936	rs10462682	A	G	0.424423	3	9.628e-06	7.915e-05	1.1172	1.1184	0.2806	21.32	1.146	1.1635	1.0635	CTNND2(+35.83kb)
15	48784497	rs11070644	C	T	0.270835	3	9.705e-06	9.705e-06	0.8806	0.8806	0.6947	0	0.898	0.8456	0.8892	DUT(+148.9kb)|FBN1(0)|SLC12A1(+188.2kb)
18	39898977	rs977557	T	C	0.585294	3	9.773e-06	9.773e-06	1.119	1.119	0.4056	0	1.0869	1.0904	1.167	LINC00907(0)
5	11927307	rs12515088	T	G	0.426009	3	9.782e-06	3.708e-05	1.1175	1.1182	0.3148	13.47	1.1455	1.1613	1.066	CTNND2(+23.2kb)
1	232754332	rs12118318	A	G	0.119664	3	9.808e-06	0.003381	0.8365	0.835	0.0998	56.61	0.7626	0.8155	0.9321	MAP10(-186.3kb)|SIPA1L2(+103.1kb)
12	89005401	rs139112196	G	A	0.0614567	3	9.821e-06	9.821e-06	1.3129	1.3129	0.9651	0	1.3444	1.2989	1.2976	KITLG(+31.15kb)
5	11933801	rs7707364	G	A	0.426055	3	9.869e-06	4.485e-05	1.1171	1.1181	0.3067	15.38	1.1429	1.1643	1.0656	CTNND2(+29.69kb)
8	139670881	rs72727860	T	C	0.0146289	3	1.001e-05	1.001e-05	1.5542	1.5542	0.605	0	1.3997	1.4332	1.7281	COL22A1(0)|FAM135B(+161.8kb)
15	48892939	rs920184	T	C	0.273268	3	1.016e-05	1.016e-05	0.8808	0.8808	0.847	0	0.8731	0.8651	0.8991	CEP152(-137.2kb)|FBN1(0)
15	48799348	rs7164277	C	T	0.270804	3	1.018e-05	1.018e-05	0.8808	0.8808	0.6806	0	0.8975	0.8446	0.8909	DUT(+163.8kb)|FBN1(0)
7	128843169	rs2566871	T	C	0.510487	3	1.022e-05	1.022e-05	0.8912	0.8912	0.3852	0	0.8838	0.943	0.8625	AHCYL2(-21.68kb)|LOC407835(+75.12kb)|SMO(0)|TNPO3(+147.9kb)|TPI1P2(+145.9kb)|TSPAN33(+33.64kb)
16	89871376	rs17232309	A	G	0.100924	2	1.023e-05	1.023e-05	1.2629	1.2629	0.6538	0	1.234	NA	1.294	AFG3L1P(-167.6kb)|CDK10(+108.6kb)|CENPBD1(-164.8kb)|CHMP1A(+147.2kb)|DBNDD1(-199.9kb)|DEF8(-143.8kb)|DPEP1(+166.5kb)|FANCA(0)|MC1R(-112.9kb)|SPATA2L(+103.3kb)|SPATA33(+134.5kb)|SPIRE2(-23.53kb)|TCF25(-68.62kb)|TUBB3(-117kb)|VPS9D1(+83.98kb)|VPS9D1-AS1(+86.8kb)|ZNF276(+64.04kb)
10	11717397	rs11257238	C	T	0.360964	3	1.024e-05	0.001986	1.1237	1.1248	0.1284	51.28	1.2039	1.116	1.0612	ECHDC3(-66.96kb)|PROSER2(-148kb)|PROSER2-AS1(-174.2kb)|USP6NL(+63.72kb)
12	95358264	rs17321133	G	A	0.13879	3	1.028e-05	1.028e-05	0.8576	0.8576	0.8582	0	0.8377	0.8592	0.876	FGD6(-112.3kb)|KRT19P2(+129.5kb)|MIR492(+130kb)|NDUFA12(-6.839kb)|NR2C1(-55.74kb)
5	11931945	rs62339988	C	A	0.42607	3	1.03e-05	4.239e-05	1.1168	1.1177	0.3109	14.4	1.1437	1.1622	1.0654	CTNND2(+27.84kb)
4	94706935	rs72659535	T	C	0.0259162	3	1.031e-05	1.031e-05	1.3776	1.3776	0.4161	0	1.2861	1.2239	1.5224	ATOH1(-43.14kb)|GRID2(+13.29kb)
15	48770580	rs2413906	G	A	0.265707	3	1.042e-05	1.042e-05	0.8809	0.8809	0.6938	0	0.8985	0.8458	0.8893	DUT(+135kb)|FBN1(0)|SLC12A1(+174.3kb)
15	48882966	rs657635	C	A	0.274161	3	1.046e-05	1.046e-05	0.881	0.881	0.857	0	0.8773	0.8627	0.8975	CEP152(-147.2kb)|FBN1(0)
1	68633192	rs58584549	C	G	0.0333693	3	1.047e-05	1.047e-05	1.4151	1.4151	0.919	0	1.479	1.3559	1.4038	DIRAS3(+116.7kb)|GNG12-AS1(0)|MIR1262(-16.01kb)|WLS(0)
5	11934266	rs1585249	T	C	0.423622	3	1.048e-05	4.524e-05	1.1168	1.1177	0.3084	14.99	1.1408	1.1657	1.0657	CTNND2(+30.16kb)
8	139670530	rs72727859	T	C	0.0146289	3	1.049e-05	1.049e-05	1.5526	1.5526	0.5907	0	1.3991	1.4233	1.7309	COL22A1(0)|FAM135B(+161.5kb)
5	11929913	rs6884647	T	G	0.426163	3	1.052e-05	3.887e-05	1.1167	1.1174	0.3155	13.32	1.1437	1.1613	1.0655	CTNND2(+25.8kb)
2	11862030	rs11675463	G	C	0.101678	3	1.056e-05	1.056e-05	1.1942	1.1942	0.4313	0	1.1559	1.1211	1.263	GREB1(+79.12kb)|LPIN1(0)|MIR4262(-115kb)|MIR4429(+181.2kb)|NTSR2(+51.7kb)
15	48766250	rs56686382	C	G	0.265045	3	1.056e-05	1.056e-05	0.8808	0.8808	0.6887	0	0.899	0.8455	0.889	DUT(+130.7kb)|FBN1(0)|SLC12A1(+170kb)
1	179787054	rs73041623	C	T	0.0386819	3	1.058e-05	0.03749	1.3205	1.2962	0.0245	73.03	1.0587	1.295	1.5657	CEP350(-136.9kb)|FAM163A(+1.721kb)|TDRD5(+126.6kb)|TOR1AIP1(-64.12kb)|TOR1AIP2(-22.05kb)
11	85815030	rs1237999	A	G	0.651986	3	1.059e-05	0.005906	1.1196	1.125	0.0653	63.35	1.1813	1.1679	1.0407	C11orf73(-198.2kb)|CCDC83(+184kb)|EED(-140.8kb)|PICALM(+34.11kb)
1	179786871	rs113164188	G	A	0.0386665	3	1.063e-05	0.03769	1.3202	1.2962	0.0243	73.1	1.0583	1.2959	1.5656	CEP350(-137kb)|FAM163A(+1.538kb)|TDRD5(+126.5kb)|TOR1AIP1(-64.3kb)|TOR1AIP2(-22.23kb)
1	205616154	rs12126801	C	T	0.0964275	3	1.064e-05	0.03731	1.1991	1.1908	0.0168	75.53	1.3736	1.0137	1.2029	BLACAT1(+190.9kb)|CDK18(+114.2kb)|ELK4(+14.15kb)|LOC284578(+90.39kb)|MFSD4(+44.11kb)|MIR135B(+198.6kb)|NUCKS1(-65.79kb)|PM20D1(-181kb)|RAB7L1(-121kb)|SLC41A1(-142.1kb)|SLC45A3(-10.83kb)
4	129764838	rs11734137	A	G	0.0809516	3	1.064e-05	3.69e-05	1.2509	1.2491	0.3277	10.37	1.1849	1.1571	1.3678	PHF17(0)|SCLT1(-40.31kb)
20	55005224	rs56012565	A	G	0.0796735	3	1.065e-05	0.0003955	0.8169	0.8182	0.2202	33.91	0.7347	0.881	0.8552	AURKA(+37.87kb)|CASS4(0)|CSTF1(+25.64kb)|FAM209A(-94.56kb)|FAM209B(-103.1kb)|FAM210B(+61.51kb)|GCNT7(-61.32kb)|MC3R(+180.4kb)|RTFDC1(-38.42kb)|TFAP2C(-199.1kb)
19	7843875	rs8110858	T	G	0.306822	3	1.067e-05	1.067e-05	1.1341	1.1341	0.8879	0	1.1166	1.1269	1.1527	C19orf59(+99.16kb)|CAMSAP3(+160.7kb)|CD209(+31.41kb)|CLEC4G(+46.82kb)|CLEC4GP1(-8.494kb)|CLEC4M(+9.384kb)|CTXN1(-145.5kb)|ELAVL1(-179.6kb)|EVI5L(-51.28kb)|FCER2(+76.84kb)|FLJ22184(-89.73kb)|LOC388499(-99.64kb)|LRRC8E(-109.5kb)|MAP2K7(-124.9kb)|PCP2(+145.2kb)|PET100(+147.4kb)|RETN(+108.5kb)|SNAPC2(-141.3kb)|STXBP2(+131.1kb)|TGFBR3L(-137.2kb)|TIMM44(-147.7kb)|TRAPPC5(+96.13kb)|XAB2(+149.4kb)
18	39899546	rs1461707	T	C	0.685802	3	1.074e-05	1.074e-05	1.1281	1.1281	0.3814	0	1.0804	1.1179	1.1799	LINC00907(0)
1	179787272	rs16854786	G	A	0.0386819	3	1.077e-05	0.03794	1.3201	1.2958	0.0243	73.1	1.0584	1.294	1.5659	CEP350(-136.6kb)|FAM163A(+1.939kb)|TDRD5(+126.9kb)|TOR1AIP1(-63.9kb)|TOR1AIP2(-21.83kb)
11	85812210	rs497816	T	C	0.652294	3	1.08e-05	0.005915	1.1196	1.1249	0.0658	63.25	1.1812	1.1676	1.0406	CCDC83(+181.2kb)|EED(-143.6kb)|PICALM(+31.29kb)
21	27525506	rs6516727	G	A	0.341962	3	1.08e-05	1.08e-05	0.8916	0.8916	0.3994	0	0.8544	0.8902	0.9276	APP(0)
5	11949210	rs1542428	T	C	0.419033	3	1.083e-05	0.0002468	1.1166	1.1187	0.2295	32.07	1.1465	1.168	1.0592	CTNND2(+45.1kb)
18	39896924	rs1461706	C	T	0.586249	3	1.086e-05	1.086e-05	1.1185	1.1185	0.4401	0	1.088	1.091	1.1643	LINC00907(0)
1	47138139	rs2007344	T	A	0.47952	3	1.091e-05	1.091e-05	1.1148	1.1148	0.3999	0	1.1447	1.1465	1.0698	ATPAF1(+4.04kb)|CYP4B1(-126.5kb)|CYP4Z2P(-170.6kb)|DMBX1(+158.3kb)|EFCAB14(-2.691kb)|EFCAB14-AS1(-1.568kb)|KNCN(+121.3kb)|MKNK1(+68.17kb)|MKNK1-AS1(+102.2kb)|MOB3C(+55.58kb)|TEX38(0)
21	27530610	rs2830099	G	C	0.302957	3	1.093e-05	1.093e-05	0.8881	0.8881	0.5643	0	0.8592	0.8834	0.9185	APP(0)
5	11933423	rs4701926	A	G	0.422575	3	1.099e-05	4.427e-05	1.1165	1.1173	0.3111	14.35	1.1398	1.1658	1.0657	CTNND2(+29.31kb)
4	111385905	rs74418880	A	G	0.026717	3	1.107e-05	0.000397	1.3994	1.3946	0.2286	32.24	1.1941	1.3868	1.6112	ENPEP(-11.32kb)|PITX2(-152.7kb)
8	139676401	rs72727876	A	G	0.0154758	3	1.112e-05	1.112e-05	1.5446	1.5446	0.6004	0	1.401	1.4145	1.7194	COL22A1(0)|FAM135B(+167.3kb)
18	39898498	rs9966406	G	C	0.585941	3	1.114e-05	1.114e-05	1.1183	1.1183	0.4581	0	1.0893	1.0904	1.1629	LINC00907(0)
16	89905880	rs112626584	C	G	0.114275	2	1.115e-05	1.115e-05	1.2541	1.2541	0.9365	0	1.249	NA	1.2593	AFG3L1P(-133.1kb)|C16orf3(-189.4kb)|CDK10(+143.1kb)|CENPBD1(-130.3kb)|CHMP1A(+181.7kb)|DBNDD1(-165.4kb)|DEF8(-109.3kb)|FANCA(+22.82kb)|GAS8(-183.1kb)|MC1R(-78.41kb)|SPATA2L(+137.8kb)|SPATA33(+169kb)|SPIRE2(0)|TCF25(-34.11kb)|TUBB3(-82.54kb)|VPS9D1(+118.5kb)|VPS9D1-AS1(+121.3kb)|ZNF276(+98.55kb)
12	95353605	rs78223670	A	T	0.137958	3	1.117e-05	1.117e-05	0.8582	0.8582	0.8883	0	0.8406	0.8598	0.8743	FGD6(-116.9kb)|KRT19P2(+124.8kb)|MIR492(+125.3kb)|NDUFA12(-11.5kb)|NR2C1(-60.4kb)
18	39895631	rs1461705	C	T	0.587527	3	1.117e-05	1.117e-05	1.1184	1.1184	0.4322	0	1.0862	1.0926	1.1647	LINC00907(0)
2	11862774	rs62113263	G	A	0.101463	3	1.118e-05	1.118e-05	1.194	1.194	0.401	0	1.1607	1.1126	1.2646	GREB1(+79.86kb)|LPIN1(0)|MIR4262(-114.3kb)|MIR4429(+182kb)|NTSR2(+52.44kb)
20	54998544	rs6014724	G	A	0.0950416	3	1.122e-05	1.122e-05	0.8179	0.8179	0.3718	0	0.754	0.8817	0.8356	AURKA(+31.19kb)|CASS4(0)|CSTF1(+18.96kb)|FAM209A(-101.2kb)|FAM209B(-109.8kb)|FAM210B(+54.83kb)|GCNT7(-68kb)|MC3R(+173.7kb)|RTFDC1(-45.1kb)
1	205612463	rs12128988	G	T	0.0964275	3	1.124e-05	0.04208	1.1969	1.1893	0.0136	76.73	1.3754	1.0102	1.2027	BLACAT1(+187.2kb)|CDK18(+110.5kb)|ELK4(+10.46kb)|LOC284578(+86.7kb)|MFSD4(+40.42kb)|MIR135B(+194.9kb)|NUCKS1(-69.48kb)|PM20D1(-184.7kb)|RAB7L1(-124.6kb)|SLC41A1(-145.8kb)|SLC45A3(-14.52kb)
5	11932655	rs1458469	C	T	0.425855	3	1.131e-05	7.909e-05	1.1163	1.1175	0.2864	20.02	1.1434	1.1641	1.0633	CTNND2(+28.54kb)
5	11959930	rs1350497	T	C	0.435417	3	1.136e-05	1.136e-05	1.116	1.116	0.4297	0	1.1509	1.1369	1.072	CTNND2(+55.82kb)
1	47136223	rs12118483	C	G	0.479473	3	1.142e-05	1.142e-05	1.1145	1.1145	0.395	0	1.1446	1.1465	1.0693	ATPAF1(+2.124kb)|CYP4B1(-128.4kb)|CYP4Z2P(-172.5kb)|DMBX1(+156.3kb)|EFCAB14(-4.607kb)|EFCAB14-AS1(-3.484kb)|KNCN(+119.3kb)|MKNK1(+66.26kb)|MKNK1-AS1(+100.3kb)|MOB3C(+53.66kb)|TEX38(-1.273kb)
1	47095954	rs10890409	T	G	0.495581	3	1.144e-05	1.144e-05	1.1177	1.1177	0.6109	0	1.149	1.1264	1.0852	ATPAF1(-4.756kb)|CYP4B1(-168.7kb)|DMBX1(+116.1kb)|EFCAB14(-44.88kb)|EFCAB14-AS1(-43.75kb)|KNCN(+79.07kb)|LOC729041(+184.6kb)|MKNK1(+25.99kb)|MKNK1-AS1(+60.03kb)|MOB3C(+13.39kb)|TEX38(-41.54kb)
8	139670120	rs72727858	T	C	0.0146751	3	1.148e-05	1.148e-05	1.5497	1.5497	0.5619	0	1.3942	1.4093	1.7367	COL22A1(0)|FAM135B(+161.1kb)
15	35042906	rs78709222	A	G	0.029458	3	1.149e-05	1.149e-05	1.3758	1.3758	0.7945	0	1.4693	1.3673	1.3118	ACTC1(-37.39kb)|AQR(-105.6kb)|GJD2(-1.735kb)|GOLGA8B(+167.1kb)
4	111478240	rs114901494	T	C	0.0279335	3	1.153e-05	0.0001963	1.4173	1.419	0.2542	26.99	1.1862	1.6012	1.5382	ENPEP(0)|PITX2(-60.34kb)
1	179788136	rs73041624	G	A	0.0386973	3	1.154e-05	0.04043	1.3187	1.294	0.0229	73.52	1.0561	1.2906	1.5669	CEP350(-135.8kb)|FAM163A(+2.803kb)|TDRD5(+127.7kb)|TOR1AIP1(-63.04kb)|TOR1AIP2(-20.96kb)
15	48859733	rs2448485	G	A	0.266692	3	1.158e-05	1.158e-05	0.8808	0.8808	0.7708	0	0.8787	0.8549	0.9011	CEP152(-170.4kb)|FBN1(0)
1	179788988	rs73041625	C	T	0.0387897	3	1.16e-05	0.04139	1.3186	1.2936	0.0223	73.71	1.0556	1.2886	1.5682	CEP350(-134.9kb)|FAM163A(+3.655kb)|TDRD5(+128.6kb)|TOR1AIP1(-62.19kb)|TOR1AIP2(-20.11kb)
5	11922555	rs1458482	T	A	0.422328	3	1.165e-05	5.507e-05	1.1169	1.1179	0.3039	16.05	1.144	1.1636	1.0649	CTNND2(+18.44kb)
18	77678327	rs12454768	G	A	0.620249	2	1.165e-05	1.165e-05	1.1443	1.1443	0.7303	0	1.1571	NA	1.1328	ADNP2(-188.6kb)|CTDP1(+163.8kb)|HSBP1L1(-46.25kb)|KCNG2(+18.51kb)|PQLC1(0)|RBFA(-116kb)|RBFADN(-148.9kb)|TXNL4A(-54.54kb)
12	121809369	rs78191642	C	T	0.0549122	2	1.192e-05	1.192e-05	1.4453	1.4453	0.986	0	1.4471	1.4428	NA	ANAPC5(+17.36kb)|CAMKK2(+73.26kb)|KDM2B(-57.53kb)|P2RX4(+137.5kb)|P2RX7(+185kb)|RNF34(-28.52kb)
5	11962977	rs2400100	T	G	0.438497	3	1.197e-05	1.197e-05	1.1159	1.1159	0.4604	0	1.1475	1.139	1.0734	CTNND2(+58.87kb)
16	89863385	rs112443034	A	C	0.0943178	2	1.207e-05	1.207e-05	1.2744	1.2744	0.8006	0	1.2571	NA	1.2928	AFG3L1P(-175.6kb)|CDK10(+100.6kb)|CENPBD1(-172.8kb)|CHMP1A(+139.2kb)|CPNE7(+199.7kb)|DEF8(-151.8kb)|DPEP1(+158.5kb)|FANCA(0)|MC1R(-120.9kb)|SPATA2L(+95.26kb)|SPATA33(+126.5kb)|SPIRE2(-31.52kb)|TCF25(-76.61kb)|TUBB3(-125kb)|VPS9D1(+75.99kb)|VPS9D1-AS1(+78.81kb)|ZNF276(+56.05kb)
1	47121419	rs11211334	C	T	0.479858	3	1.21e-05	1.21e-05	1.1145	1.1145	0.4188	0	1.143	1.147	1.0708	ATPAF1(0)|CYP4B1(-143.2kb)|CYP4Z2P(-187.3kb)|DMBX1(+141.5kb)|EFCAB14(-19.41kb)|EFCAB14-AS1(-18.29kb)|KNCN(+104.5kb)|MKNK1(+51.45kb)|MKNK1-AS1(+85.49kb)|MOB3C(+38.86kb)|TEX38(-16.08kb)
8	139679217	rs72727879	C	T	0.0154604	3	1.212e-05	1.212e-05	1.542	1.542	0.5912	0	1.3966	1.4103	1.7195	COL22A1(0)|FAM135B(+170.2kb)
8	143837802	rs76153070	A	G	0.0596397	3	1.219e-05	4.419e-05	1.2916	1.2889	0.3261	10.77	1.2176	1.1767	1.4266	ARC(+142kb)|CYP11B1(-116kb)|CYP11B2(-154.2kb)|GML(-78.41kb)|JRK(+86.39kb)|LOC100288181(+29.41kb)|LY6D(-28.5kb)|LY6K(+52.22kb)|LYNX1(-7.953kb)|LYPD2(+3.85kb)|PSCA(+73.66kb)|SLURP1(+13.97kb)|THEM6(+19.45kb)
18	77682069	rs35095763	A	G	0.610533	2	1.223e-05	1.223e-05	1.1419	1.1419	0.8153	0	1.1334	NA	1.1496	ADNP2(-184.8kb)|CTDP1(+167.6kb)|HSBP1L1(-42.51kb)|KCNG2(+22.25kb)|PQLC1(0)|RBFA(-112.3kb)|RBFADN(-145.2kb)|TXNL4A(-50.8kb)
5	11939866	rs10462681	T	A	0.42219	3	1.225e-05	7.305e-05	1.1157	1.1169	0.2928	18.6	1.1401	1.1658	1.0637	CTNND2(+35.76kb)
15	48870456	rs7183203	T	C	0.749245	3	1.225e-05	1.225e-05	1.1351	1.1351	0.7514	0	1.1476	1.1632	1.1048	CEP152(-159.7kb)|FBN1(0)
5	11949315	rs1379901	T	C	0.419018	3	1.227e-05	0.0002784	1.1158	1.118	0.2276	32.43	1.1453	1.1679	1.0584	CTNND2(+45.2kb)
14	33101551	rs10140278	C	T	0.285864	3	1.227e-05	0.0006708	1.1262	1.1304	0.1773	42.2	1.1406	1.209	1.065	AKAP6(0)
15	48697676	rs28481454	A	G	0.727148	3	1.228e-05	1.228e-05	1.136	1.136	0.4811	0	1.1243	1.2029	1.1028	DUT(+62.11kb)|FBN1(-2.826kb)|SLC12A1(+101.4kb)
14	33111257	rs10143113	T	C	0.278657	3	1.231e-05	0.001379	1.126	1.1313	0.1375	49.59	1.1398	1.216	1.0612	AKAP6(0)
15	35042999	rs75157847	T	C	0.0293964	3	1.236e-05	1.236e-05	1.3761	1.3761	0.8051	0	1.4687	1.3605	1.316	ACTC1(-37.3kb)|AQR(-105.6kb)|GJD2(-1.642kb)|GOLGA8B(+167.2kb)
8	139680987	rs72727885	A	T	0.0153372	3	1.241e-05	1.241e-05	1.5431	1.5431	0.5918	0	1.3967	1.4112	1.7207	COL22A1(0)|FAM135B(+171.9kb)
1	47100099	rs1139759	A	C	0.479674	3	1.244e-05	1.244e-05	1.1157	1.1157	0.4005	0	1.1456	1.1486	1.0701	ATPAF1(-0.611kb)|CYP4B1(-164.6kb)|DMBX1(+120.2kb)|EFCAB14(-40.73kb)|EFCAB14-AS1(-39.61kb)|KNCN(+83.21kb)|LOC729041(+188.7kb)|MKNK1(+30.13kb)|MKNK1-AS1(+64.17kb)|MOB3C(+17.54kb)|TEX38(-37.4kb)
15	48701612	rs4775760	C	A	0.748121	3	1.249e-05	1.249e-05	1.1383	1.1383	0.9714	0	1.1378	1.1508	1.1303	DUT(+66.04kb)|FBN1(0)|SLC12A1(+105.3kb)
1	47147728	rs2275380	T	C	0.479088	3	1.253e-05	1.323e-05	1.1136	1.1136	0.3658	0.56	1.1459	1.1453	1.0667	ATPAF1(+13.63kb)|CYP4B1(-116.9kb)|CYP4Z2P(-161kb)|DMBX1(+167.8kb)|EFCAB14(0)|EFCAB14-AS1(0)|KNCN(+130.8kb)|MKNK1(+77.76kb)|MKNK1-AS1(+111.8kb)|MOB3C(+65.16kb)|TEX38(+8.472kb)
1	47147533	rs11211339	C	T	0.479196	3	1.255e-05	1.358e-05	1.1136	1.1136	0.3649	0.81	1.1458	1.1456	1.0667	ATPAF1(+13.43kb)|CYP4B1(-117.1kb)|CYP4Z2P(-161.2kb)|DMBX1(+167.6kb)|EFCAB14(0)|EFCAB14-AS1(0)|KNCN(+130.6kb)|MKNK1(+77.57kb)|MKNK1-AS1(+111.6kb)|MOB3C(+64.97kb)|TEX38(+8.277kb)
15	48774288	rs11634866	G	A	0.26526	3	1.261e-05	1.261e-05	0.8819	0.8819	0.7016	0	0.9004	0.8476	0.8889	DUT(+138.7kb)|FBN1(0)|SLC12A1(+178kb)
1	47153855	rs11211340	A	T	0.479227	3	1.262e-05	1.494e-05	1.1136	1.1137	0.3614	1.75	1.1459	1.146	1.0665	ATPAF1(+19.76kb)|CYP4B1(-110.8kb)|CYP4Z2P(-154.9kb)|DMBX1(+174kb)|EFCAB14(0)|EFCAB14-AS1(0)|KNCN(+137kb)|MKNK1(+83.89kb)|MKNK1-AS1(+117.9kb)|MOB3C(+71.29kb)|TEX38(+14.6kb)
2	11863579	rs62113264	T	C	0.10137	3	1.265e-05	1.265e-05	1.1932	1.1932	0.4149	0	1.161	1.1127	1.2624	GREB1(+80.67kb)|LPIN1(0)|MIR4262(-113.5kb)|MIR4429(+182.8kb)|NTSR2(+53.25kb)
8	5719039	rs73189793	C	A	0.137912	3	1.268e-05	1.268e-05	1.1643	1.1643	0.4211	0	1.1951	1.0761	1.1963	.
5	11951517	rs9885061	A	G	0.423483	3	1.276e-05	0.0001268	1.1154	1.1169	0.2685	23.95	1.1436	1.1638	1.0612	CTNND2(+47.41kb)
1	179789319	rs111750882	A	G	0.0466123	3	1.293e-05	0.03653	1.2909	1.2626	0.0294	71.63	1.0996	1.1627	1.5384	CEP350(-134.6kb)|FAM163A(+3.986kb)|TDRD5(+128.9kb)|TOR1AIP1(-61.86kb)|TOR1AIP2(-19.78kb)
3	19421907	rs148195313	T	C	0.0140437	3	1.313e-05	1.313e-05	1.587	1.587	0.7704	0	1.5086	1.8241	1.5352	KCNH8(0)|MIR4791(+65.48kb)
5	75422686	rs10514058	A	G	0.0249461	3	1.317e-05	0.0346	1.3799	1.3329	0.0413	68.63	1.5119	0.9705	1.5305	SV2C(0)
15	48764391	rs61364280	G	C	0.266877	3	1.322e-05	1.322e-05	0.8823	0.8823	0.6862	0	0.9012	0.847	0.8898	DUT(+128.8kb)|FBN1(0)|SLC12A1(+168.1kb)
1	47146408	rs12048954	C	T	0.477256	3	1.325e-05	1.325e-05	1.1133	1.1133	0.386	0	1.1462	1.142	1.0677	ATPAF1(+12.31kb)|CYP4B1(-118.3kb)|CYP4Z2P(-162.4kb)|DMBX1(+166.5kb)|EFCAB14(0)|EFCAB14-AS1(0)|KNCN(+129.5kb)|MKNK1(+76.44kb)|MKNK1-AS1(+110.5kb)|MOB3C(+63.84kb)|TEX38(+7.152kb)
20	54995699	rs6069737	T	C	0.0824145	3	1.349e-05	0.000407	0.8179	0.8193	0.2268	32.6	0.7375	0.8901	0.8476	AURKA(+28.35kb)|CASS4(0)|CSTF1(+16.12kb)|FAM209A(-104.1kb)|FAM209B(-112.6kb)|FAM210B(+51.98kb)|GCNT7(-70.85kb)|MC3R(+170.8kb)|RTFDC1(-47.95kb)
14	102510098	rs17541582	T	C	0.0275485	2	1.35e-05	1.35e-05	1.6706	1.6706	0.7124	0	1.5912	1.7367	NA	DYNC1H1(0)|HSP90AA1(-36.98kb)|MOK(-180.7kb)|PPP2R5C(+115.8kb)|WDR20(-96.09kb)
6	32451650	rs28619202	C	T	0.64478	2	1.359e-05	0.002233	0.8599	0.8632	0.1701	46.88	0.8261	0.9099	NA	BTNL2(+76.75kb)|C6orf10(+112kb)|HCG23(+90.18kb)|HLA-DQA1(-153.5kb)|HLA-DQB1(-175.6kb)|HLA-DRA(+38.82kb)|HLA-DRB1(-94.9kb)|HLA-DRB5(-33.5kb)|HLA-DRB6(-68.84kb)
1	179787639	rs76687234	G	C	0.0350785	3	1.383e-05	0.03021	1.3183	1.2963	0.0346	70.27	1.0641	1.3021	1.5494	CEP350(-136.3kb)|FAM163A(+2.306kb)|TDRD5(+127.2kb)|TOR1AIP1(-63.54kb)|TOR1AIP2(-21.46kb)
12	121802251	rs116964268	C	G	0.0346936	2	1.383e-05	1.383e-05	1.4911	1.4911	0.6997	0	1.5367	1.4302	NA	ANAPC5(+10.24kb)|CAMKK2(+66.14kb)|KDM2B(-64.65kb)|P2RX4(+130.3kb)|P2RX7(+177.9kb)|RNF34(-35.63kb)
7	37227355	rs1420427	G	T	0.744903	3	1.463e-05	1.463e-05	0.8829	0.8829	0.9764	0	0.8766	0.8809	0.8893	ELMO1(0)
7	37231377	rs1961587	C	G	0.746797	3	1.465e-05	1.465e-05	0.8824	0.8824	0.9716	0	0.8742	0.8831	0.8885	ELMO1(0)
1	3418391	rs4648508	T	C	0.31891	3	1.474e-05	0.0001117	1.15	1.1512	0.2803	21.37	1.1581	1.227	1.0847	ARHGEF16(+20.71kb)|MEGF6(0)|MIR551A(-58.87kb)|PRDM16(+63.21kb)|TP73(-150.7kb)|TPRG1L(-123.2kb)|WRAP73(-128.9kb)
15	48692460	rs7171330	A	T	0.729828	3	1.477e-05	1.477e-05	1.1387	1.1387	0.4393	0	1.1344	1.209	1.0974	CTXN2(+196.5kb)|DUT(+56.89kb)|FBN1(-8.042kb)|SLC12A1(+96.18kb)
12	121812302	rs115026170	T	C	0.0507545	2	1.483e-05	1.483e-05	1.456	1.456	0.9239	0	1.4458	1.4703	NA	ANAPC5(+20.29kb)|CAMKK2(+76.19kb)|KDM2B(-54.6kb)|P2RX4(+140.4kb)|P2RX7(+187.9kb)|RNF34(-25.58kb)
15	48812020	rs755251	G	A	0.266831	3	1.485e-05	1.485e-05	0.883	0.883	0.6782	0	0.9005	0.8467	0.8924	DUT(+176.4kb)|FBN1(0)
11	95825797	rs7931870	G	A	0.565784	3	1.524e-05	1.524e-05	1.1156	1.1156	0.4013	0	1.0723	1.1095	1.1603	MAML2(0)|MTMR2(+168.4kb)
5	11940457	rs1598933	A	G	0.41295	3	1.542e-05	0.0002404	1.1145	1.1165	0.2432	29.27	1.1406	1.1684	1.0588	CTNND2(+36.35kb)
5	11938331	rs56122009	T	C	0.412766	3	1.571e-05	0.000265	1.1144	1.1164	0.2388	30.17	1.1407	1.1687	1.0584	CTNND2(+34.22kb)
15	48906577	rs612617	G	A	0.248707	3	1.573e-05	1.573e-05	0.8822	0.8822	0.7187	0	0.8652	0.8669	0.909	CEP152(-123.6kb)|FBN1(0)
11	95821678	rs1939484	G	T	0.563551	3	1.584e-05	1.584e-05	1.1147	1.1147	0.4457	0	1.0737	1.1103	1.1562	MAML2(0)|MTMR2(+164.3kb)
15	35040634	rs78517710	T	A	0.0293348	3	1.609e-05	1.609e-05	1.3707	1.3707	0.7904	0	1.4636	1.3678	1.304	ACTC1(-39.66kb)|AQR(-107.9kb)|GJD2(-4.007kb)|GOLGA8B(+164.9kb)
7	37224114	rs2392484	C	T	0.747228	3	1.623e-05	1.623e-05	0.8834	0.8834	0.952	0	0.8741	0.881	0.8925	ELMO1(0)
18	39893758	rs11082272	A	C	0.585248	3	1.644e-05	1.644e-05	1.1171	1.1171	0.3951	0	1.0829	1.0898	1.1662	LINC00907(0)
15	48901389	rs645509	C	T	0.248275	3	1.653e-05	1.653e-05	0.8827	0.8827	0.7094	0	0.8664	0.866	0.9101	CEP152(-128.7kb)|FBN1(0)
18	39893746	rs11082271	G	T	0.585864	3	1.654e-05	1.654e-05	1.117	1.117	0.4135	0	1.0842	1.0898	1.165	LINC00907(0)
6	32440451	rs9269070	A	G	0.567816	2	1.668e-05	1.668e-05	0.8681	0.8681	0.8671	0	0.8641	0.8738	NA	BTNL2(+65.55kb)|C6orf10(+100.8kb)|HCG23(+78.98kb)|HLA-DQA1(-164.7kb)|HLA-DQB1(-186.8kb)|HLA-DRA(+27.62kb)|HLA-DRB1(-106.1kb)|HLA-DRB5(-44.7kb)|HLA-DRB6(-80.04kb)
8	143834311	rs149921283	T	A	0.0570065	3	1.673e-05	5.797e-05	1.2954	1.2926	0.3267	10.61	1.1877	1.207	1.4345	ARC(+138.5kb)|CYP11B1(-119.5kb)|CYP11B2(-157.7kb)|GML(-81.9kb)|JRK(+82.9kb)|LOC100288181(+25.92kb)|LY6D(-31.99kb)|LY6K(+48.73kb)|LYNX1(-11.44kb)|LYPD2(+0.359kb)|PSCA(+70.17kb)|SLURP1(+10.48kb)|THEM6(+15.96kb)
11	95824785	rs7105034	G	A	0.564706	3	1.676e-05	1.676e-05	1.1147	1.1147	0.4478	0	1.0735	1.1106	1.1559	MAML2(0)|MTMR2(+167.4kb)
15	48849728	rs2437948	T	C	0.266107	3	1.682e-05	1.682e-05	0.8828	0.8828	0.7761	0	0.8836	0.8555	0.9013	CEP152(-180.4kb)|FBN1(0)
5	11938481	rs10067456	A	C	0.412843	3	1.694e-05	0.000259	1.1139	1.1159	0.2427	29.38	1.139	1.1691	1.0585	CTNND2(+34.37kb)
11	95816458	rs7947986	C	T	0.565953	3	1.696e-05	1.696e-05	1.1144	1.1144	0.4333	0	1.0738	1.1069	1.1574	MAML2(0)|MTMR2(+159.1kb)
5	11950084	rs1545666	T	C	0.412535	3	1.697e-05	0.0003768	1.1137	1.116	0.2234	33.29	1.1426	1.1668	1.0562	CTNND2(+45.97kb)
11	95816454	rs948001	A	T	0.565938	3	1.702e-05	1.702e-05	1.1144	1.1144	0.4316	0	1.0737	1.1069	1.1575	MAML2(0)|MTMR2(+159.1kb)
15	48888988	rs1506524	T	A	0.268371	3	1.706e-05	1.706e-05	0.8831	0.8831	0.7542	0	0.8738	0.8619	0.9071	CEP152(-141.1kb)|FBN1(0)
21	27516617	rs2226350	C	T	0.339575	3	1.712e-05	1.712e-05	0.894	0.894	0.4188	0	0.8572	0.8942	0.9286	APP(0)
4	126611566	rs115992110	A	G	0.0135048	2	1.716e-05	1.716e-05	1.7095	1.7095	0.8106	0	1.6455	NA	1.75	FAT4(+197.5kb)|MIR2054(+183.1kb)
18	39893799	rs11082273	A	G	0.586387	3	1.723e-05	1.723e-05	1.1166	1.1166	0.4266	0	1.0839	1.0908	1.1637	LINC00907(0)
11	85828551	rs474479	G	C	0.68454	3	1.731e-05	0.004513	1.1203	1.1224	0.0978	56.98	1.1985	1.1271	1.0504	C11orf73(-184.7kb)|CCDC83(+197.5kb)|EED(-127.3kb)|PICALM(+47.63kb)
15	58527765	rs28578652	C	T	0.071466	3	1.731e-05	0.007741	0.7941	0.7888	0.0649	63.44	0.6855	0.7695	0.9206	ALDH1A2(+169.6kb)|AQP9(+49.66kb)|LIPC(-196.4kb)
8	28808794	rs148255197	T	C	0.0705728	3	1.74e-05	0.01875	1.2193	1.2087	0.0506	66.48	1.371	1.0205	1.2422	EXTL3(+197.6kb)|HMBOX1(0)|INTS9(+61.1kb)|KIF13B(-116kb)
11	85831541	rs471470	A	C	0.666585	3	1.759e-05	0.002312	1.118	1.1205	0.1311	50.78	1.1819	1.1406	1.05	C11orf73(-181.7kb)|EED(-124.3kb)|PICALM(+50.62kb)
14	33110441	rs10139992	T	A	0.279905	3	1.763e-05	0.001304	1.1233	1.1281	0.1524	46.85	1.1419	1.2063	1.0585	AKAP6(0)
7	52948897	rs12718708	A	G	0.175423	3	1.77e-05	1.77e-05	0.869	0.869	0.4954	0	0.8862	0.8133	0.8913	POM121L12(-154.5kb)
17	44865603	rs199498	C	T	0.220311	3	1.775e-05	1.775e-05	0.8747	0.8747	0.8111	0	0.8695	0.9016	0.8585	GOSR2(-134.9kb)|MIR5089(-184.8kb)|NSF(+30.78kb)|NSFP1(+147.6kb)|RPRML(-189.9kb)|WNT3(0)|WNT9B(-63.36kb)
11	95824593	rs7104859	G	A	0.564829	3	1.778e-05	1.778e-05	1.1142	1.1142	0.4552	0	1.0733	1.1109	1.1548	MAML2(0)|MTMR2(+167.2kb)
14	33110538	rs10129321	C	T	0.279997	3	1.779e-05	0.001327	1.1233	1.1281	0.1516	46.99	1.1422	1.2061	1.0583	AKAP6(0)
5	11935729	rs7718183	A	G	0.412827	3	1.781e-05	0.0002266	1.1137	1.1156	0.2515	27.55	1.1377	1.1689	1.059	CTNND2(+31.62kb)
15	48899745	rs585256	G	A	0.248707	3	1.781e-05	1.781e-05	0.8832	0.8832	0.7071	0	0.8665	0.8668	0.9107	CEP152(-130.4kb)|FBN1(0)
15	48897416	rs924816	A	G	0.267986	3	1.789e-05	1.789e-05	0.8834	0.8834	0.7768	0	0.8747	0.8631	0.906	CEP152(-132.7kb)|FBN1(0)
1	47200286	rs11211353	T	C	0.459285	3	1.791e-05	2.851e-05	1.1158	1.1161	0.3486	5.12	1.1255	1.1767	1.0715	ATPAF1(+66.19kb)|CYP4A11(-194.6kb)|CYP4B1(-64.38kb)|CYP4Z2P(-108.5kb)|EFCAB14(+15.55kb)|EFCAB14-AS1(+42.52kb)|KNCN(+183.4kb)|MKNK1(+130.3kb)|MKNK1-AS1(+164.4kb)|MOB3C(+117.7kb)|TEX38(+61.03kb)
11	95824377	rs7104742	A	T	0.564567	3	1.794e-05	1.794e-05	1.1142	1.1142	0.4566	0	1.0732	1.1112	1.1546	MAML2(0)|MTMR2(+167kb)
15	48896830	rs1678979	C	T	0.248399	3	1.797e-05	1.797e-05	0.8833	0.8833	0.7	0	0.8669	0.866	0.9112	CEP152(-133.3kb)|FBN1(0)
17	43670696	rs531934295	C	G	0.183277	3	1.81e-05	1.81e-05	0.8599	0.8599	0.9082	0	0.8546	0.8456	0.8772	ARHGAP27(+160.4kb)|CRHR1(-27.01kb)|CRHR1-IT1(-45.64kb)|LOC644172(-6.794kb)|LRRC37A4P(+72.81kb)|MGC57346(-27.02kb)|MIR4315-1(+117.9kb)|MIR4315-2(+117.9kb)|PLEKHM1(+102.6kb)
15	48883696	rs1354738	C	T	0.246581	3	1.813e-05	1.813e-05	0.8833	0.8833	0.7395	0	0.8685	0.8669	0.9089	CEP152(-146.4kb)|FBN1(0)
8	42442018	rs13253502	A	G	0.390838	3	1.815e-05	1.815e-05	1.1153	1.1153	0.5823	0	1.0919	1.0915	1.1525	CHRNA6(-165.8kb)|CHRNB3(-110.5kb)|SLC20A2(+44.66kb)|SMIM19(+33.88kb)|VDAC3(+178.6kb)
21	27524465	rs2234991	C	T	0.309162	3	1.824e-05	1.824e-05	0.8918	0.8918	0.4421	0	0.8579	0.8855	0.9283	APP(0)
5	11946039	rs10067565	G	A	0.41295	3	1.836e-05	0.0003481	1.1132	1.1155	0.2302	31.92	1.1403	1.1677	1.0567	CTNND2(+41.93kb)
15	58532507	rs11632498	C	T	0.926717	3	1.838e-05	0.01166	1.2556	1.2655	0.0469	67.31	1.4701	1.2912	1.0786	ALDH1A2(+174.4kb)|AQP9(+54.4kb)|LIPC(-191.7kb)
19	1046076	rs72973584	T	C	0.103465	2	1.838e-05	5.34e-05	1.2704	1.2702	0.2894	10.9	1.1954	1.3457	NA	ABCA7(0)|ARID3A(+73.27kb)|ATP5D(-195.7kb)|C19orf26(-183.9kb)|CFD(+182.5kb)|CNN2(+7.012kb)|ELANE(+189.8kb)|GPX4(-57.86kb)|GRIN3B(+36.35kb)|HMHA1(-19.84kb)|KISS1R(+125.1kb)|MED16(+152.9kb)|POLR2E(-40.5kb)|PRTN3(+197.9kb)|R3HDM4(+132.9kb)|SBNO2(-61.56kb)|STK11(-159.7kb)|TMEM259(+24.94kb)|WDR18(+51.51kb)
15	58532291	rs2414554	G	C	0.926732	3	1.839e-05	0.01127	1.2558	1.2655	0.0485	66.95	1.469	1.2912	1.0793	ALDH1A2(+174.2kb)|AQP9(+54.18kb)|LIPC(-191.9kb)
1	47099235	rs4660950	C	A	0.483092	3	1.843e-05	2.656e-05	1.1136	1.1138	0.3532	3.92	1.1465	1.1474	1.065	ATPAF1(-1.475kb)|CYP4B1(-165.4kb)|DMBX1(+119.3kb)|EFCAB14(-41.6kb)|EFCAB14-AS1(-40.47kb)|KNCN(+82.35kb)|LOC729041(+187.9kb)|MKNK1(+29.27kb)|MKNK1-AS1(+63.31kb)|MOB3C(+16.67kb)|TEX38(-38.26kb)
12	57826790	rs117118210	T	C	0.020696	3	1.844e-05	1.844e-05	0.6234	0.6234	0.6427	0	0.5663	0.5842	0.7112	ARHGAP9(-39.25kb)|ARHGEF25(-177.2kb)|B4GALNT1(-192.9kb)|DCTN2(-97.04kb)|DDIT3(-83.58kb)|DTX3(-171.8kb)|GLI1(-27.13kb)|INHBC(-1.752kb)|INHBE(-22.3kb)|KIF5A(-117.1kb)|MARS(-54.94kb)|MBD6(-89.87kb)|NDUFA4L2(+192.3kb)|PIP4K2C(-158.2kb)|R3HDM2(+122.5kb)|SHMT2(+198.1kb)|SLC26A10(-186.9kb)|STAC3(+181.8kb)
7	130932663	rs11514963	T	C	0.826532	3	1.85e-05	6.754e-05	1.1637	1.1638	0.3165	13.08	1.2474	1.145	1.1029	FLJ43663(+139.1kb)|MKLN1(0)
18	77716624	rs12953577	A	G	0.450585	2	1.854e-05	1.854e-05	0.8832	0.8832	0.5068	0	0.9013	NA	0.8672	ADNP2(-150.3kb)|HSBP1L1(-7.957kb)|KCNG2(+56.81kb)|PARD6G(-198.5kb)|PARD6G-AS1(-189.2kb)|PQLC1(+4.971kb)|RBFA(-77.72kb)|RBFADN(-110.6kb)|TXNL4A(-16.24kb)
21	27534175	rs62224882	G	T	0.308562	3	1.856e-05	1.856e-05	0.8916	0.8916	0.3789	0	0.8585	0.8765	0.9333	APP(0)
8	22270124	rs13271192	A	G	0.040037	3	1.864e-05	1.864e-05	1.3325	1.3325	0.8376	0	1.3133	1.4352	1.2986	C8orf58(-187kb)|KIAA1967(-192kb)|MIR320A(+167.6kb)|PDLIM2(-166.1kb)|PHYHIP(+180.3kb)|PIWIL2(+56.54kb)|POLR3D(+161.4kb)|PPP3CC(-28.36kb)|SLC39A14(0)|SORBS3(-139.1kb)
6	39111824	rs228823	A	G	0.107545	3	1.865e-05	1.865e-05	0.8372	0.8372	0.5046	0	0.8233	0.9068	0.8046	DNAH8(+113.2kb)|GLP1R(+56.3kb)|KCNK5(-44.92kb)|KCNK16(-170.6kb)|KCNK17(-155kb)|KIF6(-191.1kb)|LOC100131047(+190.9kb)|SAYSD1(+28.96kb)
15	58532584	rs12908890	T	G	0.926501	3	1.88e-05	0.01169	1.2553	1.2652	0.0472	67.26	1.4699	1.2906	1.0786	ALDH1A2(+174.5kb)|AQP9(+54.47kb)|LIPC(-191.6kb)
16	19055390	rs73528937	G	A	0.0419156	3	1.887e-05	1.887e-05	1.3159	1.3159	0.6309	0	1.3944	1.3638	1.2188	COQ7(-23.53kb)|ITPRIPL2(-69.86kb)|SMG1(+117.7kb)|SYT17(-124.2kb)|TMC7(0)
19	7845110	rs62125169	G	T	0.258577	3	1.895e-05	1.895e-05	1.1358	1.1358	0.6718	0	1.1166	1.1055	1.1722	C19orf59(+100.4kb)|CAMSAP3(+161.9kb)|CD209(+32.65kb)|CLEC4G(+48.05kb)|CLEC4GP1(-7.259kb)|CLEC4M(+10.62kb)|CTXN1(-144.3kb)|ELAVL1(-178.3kb)|EVI5L(-50.05kb)|FCER2(+78.08kb)|FLJ22184(-88.49kb)|LOC388499(-98.41kb)|LRRC8E(-108.3kb)|MAP2K7(-123.7kb)|PCP2(+146.5kb)|PET100(+148.6kb)|RETN(+109.8kb)|SNAPC2(-140.1kb)|STXBP2(+132.4kb)|TGFBR3L(-135.9kb)|TIMM44(-146.5kb)|TRAPPC5(+97.36kb)|XAB2(+150.7kb)
15	48696730	rs28421836	C	A	0.72818	3	1.897e-05	1.897e-05	1.1335	1.1335	0.497	0	1.1197	1.1997	1.1026	DUT(+61.16kb)|FBN1(-3.772kb)|SLC12A1(+100.5kb)
20	18026231	rs73899394	A	G	0.0486911	3	1.897e-05	0.03232	1.2947	1.2762	0.0294	71.66	1.2923	1.0318	1.5325	CSRP2BP(-96.64kb)|MGME1(+54.47kb)|OVOL2(0)|PET117(-92.27kb)|SNORD17(+82.64kb)|SNX5(+76.74kb)
8	22231994	rs35160235	T	C	0.0374961	3	1.904e-05	1.904e-05	1.3472	1.3472	0.8681	0	1.4102	1.369	1.2971	BMP1(+162.2kb)|MIR320A(+129.4kb)|PHYHIP(+142.1kb)|PIWIL2(+18.41kb)|POLR3D(+123.3kb)|PPP3CC(-66.49kb)|SLC39A14(0)|SORBS3(-177.3kb)
13	61457854	rs139222133	G	A	0.0199415	3	1.916e-05	0.001195	0.6739	0.6719	0.1728	43.04	0.6399	0.5518	0.8468	.
1	179790060	rs73041634	T	C	0.0454111	3	1.919e-05	0.02853	1.2846	1.2583	0.0447	67.83	1.1043	1.1619	1.513	CEP350(-133.8kb)|FAM163A(+4.727kb)|TDRD5(+129.7kb)|TOR1AIP1(-61.12kb)|TOR1AIP2(-19.04kb)
19	7853275	rs77872764	A	G	0.207345	3	1.927e-05	1.927e-05	1.1448	1.1448	0.9967	0	1.1492	1.1423	1.1432	C19orf59(+108.6kb)|CAMSAP3(+170.1kb)|CD209(+40.81kb)|CLEC4G(+56.22kb)|CLEC4GP1(0)|CLEC4M(+18.78kb)|CTXN1(-136.1kb)|ELAVL1(-170.2kb)|EVI5L(-41.88kb)|FCER2(+86.24kb)|FLJ22184(-80.33kb)|LOC388499(-90.24kb)|LRRC8E(-100.1kb)|MAP2K7(-115.5kb)|PCP2(+154.6kb)|PET100(+156.8kb)|RETN(+117.9kb)|SNAPC2(-131.9kb)|STXBP2(+140.5kb)|TGFBR3L(-127.8kb)|TIMM44(-138.3kb)|TRAPPC5(+105.5kb)|XAB2(+158.8kb)
5	11956633	rs1458479	G	A	0.422605	3	1.931e-05	1.931e-05	1.1128	1.1128	0.4153	0	1.1433	1.1419	1.0676	CTNND2(+52.52kb)
1	205606830	rs12125386	A	G	0.0951648	3	1.934e-05	0.05576	1.1919	1.1835	0.0106	78	1.3722	0.9983	1.2017	BLACAT1(+181.6kb)|CDK18(+104.9kb)|ELK4(+4.83kb)|LOC284578(+81.07kb)|MFSD4(+34.78kb)|MIR135B(+189.3kb)|NUCKS1(-75.12kb)|PM20D1(-190.3kb)|RAB7L1(-130.3kb)|SLC41A1(-151.4kb)|SLC45A3(-20.15kb)
5	11956711	rs1458480	C	T	0.422636	3	1.942e-05	1.942e-05	1.1128	1.1128	0.414	0	1.1433	1.1419	1.0675	CTNND2(+52.6kb)
15	58524142	rs7172755	C	T	0.0639359	3	1.946e-05	0.00383	0.7906	0.7856	0.102	56.2	0.698	0.7505	0.9129	ALDH1A2(+166kb)|AQP9(+46.03kb)
12	121812316	rs112613885	C	T	0.0549584	2	1.96e-05	1.96e-05	1.4432	1.4432	0.8841	0	1.4588	1.4223	NA	ANAPC5(+20.3kb)|CAMKK2(+76.2kb)|KDM2B(-54.58kb)|P2RX4(+140.4kb)|P2RX7(+188kb)|RNF34(-25.57kb)
11	85858538	rs7941541	A	G	0.690453	3	1.961e-05	1.961e-05	1.1207	1.1207	0.3944	0	1.1658	1.133	1.0727	C11orf73(-154.7kb)|EED(-97.27kb)|PICALM(+77.62kb)
6	72313534	rs13200766	C	T	0.521204	2	1.968e-05	1.968e-05	0.8668	0.8668	0.8075	0	0.8729	0.8586	NA	LINC00472(+183.1kb)
21	27524825	rs2830095	A	G	0.310533	3	1.969e-05	1.969e-05	0.8924	0.8924	0.4272	0	0.858	0.885	0.9296	APP(0)
15	48720271	rs3929051	T	C	0.767324	3	1.97e-05	1.97e-05	1.1365	1.1365	0.8797	0	1.1553	1.1423	1.1158	DUT(+84.7kb)|FBN1(0)|SLC12A1(+124kb)
11	85824859	rs659023	G	A	0.624915	3	1.987e-05	0.0005661	1.1144	1.1164	0.2097	35.99	1.1617	1.1465	1.0546	C11orf73(-188.4kb)|CCDC83(+193.8kb)|EED(-130.9kb)|PICALM(+43.94kb)
8	29019988	rs17455458	G	T	0.0872806	3	1.995e-05	0.004378	1.1975	1.1919	0.1252	51.87	1.3181	1.0491	1.2045	DUSP4(-170.6kb)|HMBOX1(+109.7kb)|KIF13B(0)
14	105680474	rs35736913	T	C	0.0868802	3	2.01e-05	2.01e-05	0.8065	0.8065	0.4625	0	0.736	0.8311	0.8506	BRF1(0)|BTBD6(-34.4kb)|CDCA4(+193kb)|GPR132(+148.6kb)|JAG2(+45.31kb)|NUDT14(+32.81kb)|PACS2(-86.7kb)|TEX22(-184.4kb)
11	85832424	rs519961	C	T	0.674453	3	2.014e-05	0.0008557	1.1181	1.1196	0.1917	39.47	1.1782	1.1337	1.0568	C11orf73(-180.8kb)|EED(-123.4kb)|PICALM(+51.5kb)
15	48810499	rs7184016	T	G	0.262273	3	2.031e-05	2.031e-05	0.884	0.884	0.6532	0	0.8987	0.8455	0.8979	DUT(+174.9kb)|FBN1(0)
6	32441199	rs9269084	G	A	0.530459	2	2.032e-05	2.032e-05	0.8664	0.8664	0.8792	0	0.8627	0.8717	NA	BTNL2(+66.3kb)|C6orf10(+101.5kb)|HCG23(+79.73kb)|HLA-DQA1(-164kb)|HLA-DQB1(-186kb)|HLA-DRA(+28.37kb)|HLA-DRB1(-105.3kb)|HLA-DRB5(-43.95kb)|HLA-DRB6(-79.29kb)
19	7735297	rs3745368	A	G	0.0336464	2	2.033e-05	2.033e-05	1.7231	1.7231	0.6528	0	1.6074	1.8069	NA	ARHGEF18(+197.9kb)|C19orf45(+162kb)|C19orf59(-6.645kb)|CAMSAP3(+52.1kb)|CD209(-69.58kb)|CLEC4G(-58.54kb)|CLEC4GP1(-117.1kb)|CLEC4M(-92.74kb)|EVI5L(-159.9kb)|FCER2(-18.34kb)|FLJ22184(-198.3kb)|LOC100128573(+197kb)|MCOLN1(+136.4kb)|PCP2(+36.66kb)|PET100(+38.79kb)|PEX11G(+181.4kb)|PNPLA6(+108.6kb)|RETN(0)|STXBP2(+22.54kb)|TRAPPC5(-10.41kb)|XAB2(+40.86kb)|ZNF358(+149.4kb)
2	127830219	rs17014873	C	A	0.068494	3	2.036e-05	2.036e-05	1.2308	1.2308	0.498	0	1.3306	1.158	1.1965	BIN1(0)|CYP27C1(-111.2kb)|ERCC3(-184.6kb)
11	85831246	rs573167	A	G	0.674315	3	2.039e-05	0.0008557	1.118	1.1195	0.192	39.4	1.1779	1.1337	1.0567	C11orf73(-182kb)|EED(-124.6kb)|PICALM(+50.32kb)
17	43988205	rs2435204	G	A	0.209932	3	2.044e-05	2.044e-05	0.8802	0.8802	0.9125	0	0.8821	0.8638	0.8917	CRHR1(+75.01kb)|KANSL1(-119.1kb)|MAPT(0)|MAPT-AS1(+15.33kb)|MAPT-IT1(+12.04kb)|SPPL2C(+63.77kb)|STH(-88.41kb)
21	27524755	rs2830094	T	C	0.310456	3	2.054e-05	2.054e-05	0.8926	0.8926	0.4419	0	0.8589	0.8854	0.9291	APP(0)
1	179790074	rs73041637	A	C	0.0465969	3	2.078e-05	0.02761	1.2831	1.2573	0.047	67.29	1.1032	1.1636	1.5088	CEP350(-133.8kb)|FAM163A(+4.741kb)|TDRD5(+129.7kb)|TOR1AIP1(-61.1kb)|TOR1AIP2(-19.03kb)
1	179790265	rs113921162	A	G	0.0465661	3	2.078e-05	0.02806	1.283	1.2572	0.0463	67.45	1.103	1.163	1.5094	CEP350(-133.6kb)|FAM163A(+4.932kb)|TDRD5(+129.9kb)|TOR1AIP1(-60.91kb)|TOR1AIP2(-18.84kb)
1	179790348	rs112363799	G	A	0.0465815	3	2.078e-05	0.02816	1.2831	1.2571	0.0462	67.47	1.1029	1.1629	1.5095	CEP350(-133.6kb)|FAM163A(+5.015kb)|TDRD5(+129.9kb)|TOR1AIP1(-60.83kb)|TOR1AIP2(-18.75kb)
1	179790235	rs112050168	T	C	0.0465815	3	2.086e-05	0.028	1.283	1.2571	0.0465	67.41	1.103	1.163	1.5092	CEP350(-133.7kb)|FAM163A(+4.902kb)|TDRD5(+129.8kb)|TOR1AIP1(-60.94kb)|TOR1AIP2(-18.87kb)
1	179790168	rs73041639	G	A	0.0465661	3	2.087e-05	0.0279	1.2829	1.2571	0.0466	67.39	1.1031	1.1631	1.5091	CEP350(-133.7kb)|FAM163A(+4.835kb)|TDRD5(+129.8kb)|TOR1AIP1(-61.01kb)|TOR1AIP2(-18.93kb)
5	11924973	rs2168882	T	G	0.411811	3	2.101e-05	0.0001958	1.1133	1.1149	0.2656	24.58	1.1384	1.1662	1.0592	CTNND2(+20.86kb)
1	179790833	rs16854795	G	A	0.0477056	3	2.106e-05	0.02832	1.2828	1.2569	0.0461	67.51	1.1024	1.1631	1.5093	CEP350(-133.1kb)|FAM163A(+5.5kb)|TDRD5(+130.4kb)|TOR1AIP1(-60.34kb)|TOR1AIP2(-18.27kb)
5	11949566	rs9885582	A	G	0.408639	3	2.109e-05	0.001008	1.1125	1.1159	0.1753	42.57	1.1397	1.1746	1.0517	CTNND2(+45.46kb)
5	11924237	rs2125388	A	G	0.41275	3	2.11e-05	0.0003094	1.1133	1.1153	0.2418	29.56	1.1398	1.1676	1.0573	CTNND2(+20.13kb)
5	11924521	rs2168881	C	G	0.412658	3	2.13e-05	0.0002865	1.1132	1.1152	0.2462	28.65	1.1391	1.1677	1.0577	CTNND2(+20.41kb)
2	127826533	rs1060743	G	A	0.309332	3	2.144e-05	0.07673	1.1186	1.1228	0.0025	83.35	1.2564	1.1081	1.0182	BIN1(0)|CYP27C1(-114.9kb)|ERCC3(-188.3kb)
2	11855513	rs11683719	A	G	0.108269	3	2.146e-05	2.146e-05	1.1841	1.1841	0.5971	0	1.1858	1.1085	1.2266	GREB1(+72.6kb)|LPIN1(0)|MIR4262(-121.5kb)|MIR4429(+174.7kb)|NTSR2(+45.18kb)
12	88670147	rs117811542	T	C	0.0571451	3	2.146e-05	2.146e-05	1.27	1.27	0.6931	0	1.1893	1.3375	1.2984	CEP290(+134.2kb)|TMTC3(+76.48kb)
1	179789946	rs73041632	T	G	0.0465507	3	2.147e-05	0.02794	1.2828	1.2571	0.0468	67.33	1.1022	1.1642	1.5089	CEP350(-134kb)|FAM163A(+4.613kb)|TDRD5(+129.5kb)|TOR1AIP1(-61.23kb)|TOR1AIP2(-19.16kb)
21	27535105	rs2830103	C	T	0.308516	3	2.15e-05	3.098e-05	0.8924	0.8923	0.3532	3.92	0.858	0.8769	0.9356	APP(0)
17	44161470	rs80028338	C	A	0.185433	3	2.156e-05	2.156e-05	0.8714	0.8714	0.8228	0	0.8768	0.8454	0.8881	KANSL1(0)|KANSL1-AS1(-109.5kb)|MAPT(+55.77kb)|MAPT-AS1(+188.6kb)|MAPT-IT1(+185.3kb)|STH(+84.41kb)
1	179789989	rs76545202	C	A	0.0465815	3	2.165e-05	0.02818	1.2826	1.2569	0.0465	67.4	1.102	1.1639	1.509	CEP350(-133.9kb)|FAM163A(+4.656kb)|TDRD5(+129.6kb)|TOR1AIP1(-61.19kb)|TOR1AIP2(-19.11kb)
15	58528746	rs7181221	A	T	0.0699569	3	2.178e-05	0.008929	0.7962	0.7905	0.062	64.03	0.6864	0.7709	0.9237	ALDH1A2(+170.6kb)|AQP9(+50.64kb)|LIPC(-195.4kb)
20	55018260	rs7274581	C	T	0.0829843	3	2.184e-05	0.001869	0.8269	0.8292	0.1656	44.39	0.7442	0.9187	0.8438	AURKA(+50.91kb)|CASS4(0)|CSTF1(+38.68kb)|FAM209A(-81.52kb)|FAM209B(-90.04kb)|FAM210B(+74.54kb)|GCNT7(-48.29kb)|MC3R(+193.4kb)|RTFDC1(-25.39kb)|TFAP2C(-186.1kb)
17	19208340	rs62065871	T	C	0.0117031	2	2.186e-05	0.002206	2.023	1.9695	0.1954	40.35	1.5116	NA	2.3704	B9D1(-32.53kb)|EPN2(0)|EPN2-AS1(0)|EPN2-IT1(+30.64kb)|GRAPL(+146.2kb)|MAPK7(-72.69kb)|MFAP4(-78.41kb)|MIR1180(-39.48kb)|RNF112(-106.2kb)
5	11927009	rs6878789	C	T	0.412735	3	2.187e-05	0.0002963	1.1127	1.1147	0.2454	28.82	1.1382	1.1676	1.0574	CTNND2(+22.9kb)
5	33439454	rs76642289	A	G	0.0140591	3	2.211e-05	0.06847	1.5408	1.5535	0.0037	82.12	2.4473	1.0284	1.4985	ADAMTS12(-87.83kb)|TARS(-1.347kb)
15	48765044	rs28730795	G	T	0.336449	3	2.215e-05	2.215e-05	0.8906	0.8906	0.8794	0	0.9066	0.8759	0.8867	DUT(+129.5kb)|FBN1(0)|SLC12A1(+168.8kb)
2	127883899	rs7559175	A	G	0.740437	3	2.236e-05	2.236e-05	1.1331	1.1331	0.8162	0	1.1598	1.1339	1.1099	BIN1(+19kb)|CYP27C1(-57.51kb)|ERCC3(-131kb)|MAP3K2(-172.3kb)
8	42400823	rs34432089	A	G	0.38785	3	2.24e-05	2.24e-05	1.1139	1.1139	0.5796	0	1.0914	1.0887	1.1511	CHRNB3(-151.7kb)|DKK4(+166.1kb)|POLB(+171.5kb)|SLC20A2(+3.467kb)|SMIM19(0)|VDAC3(+137.4kb)
11	85830157	rs567075	C	T	0.684139	3	2.247e-05	0.004777	1.1184	1.1203	0.1015	56.29	1.1959	1.1242	1.0494	C11orf73(-183.1kb)|CCDC83(+199.1kb)|EED(-125.6kb)|PICALM(+49.23kb)
5	11960056	rs10067822	C	T	0.422313	3	2.25e-05	2.25e-05	1.112	1.112	0.4069	0	1.1431	1.1411	1.0663	CTNND2(+55.95kb)
11	85856187	rs7110631	G	C	0.690976	3	2.261e-05	2.261e-05	1.1197	1.1197	0.3832	0	1.1667	1.1296	1.0717	C11orf73(-157.1kb)|EED(-99.62kb)|PICALM(+75.26kb)
8	42382917	rs12676817	A	T	0.382584	3	2.275e-05	2.275e-05	1.116	1.116	0.6518	0	1.1064	1.0822	1.1475	CHRNB3(-169.6kb)|DKK4(+148.2kb)|IKBKB(+192.7kb)|POLB(+153.6kb)|SLC20A2(0)|SMIM19(-13.38kb)|VDAC3(+119.5kb)
5	11958352	rs10065227	A	T	0.422636	3	2.283e-05	2.283e-05	1.1119	1.1119	0.4024	0	1.1429	1.1415	1.0659	CTNND2(+54.24kb)
12	95350637	rs74512707	A	G	0.110733	3	2.292e-05	2.292e-05	0.8489	0.8489	0.8738	0	0.8272	0.8558	0.8655	FGD6(-119.9kb)|KRT19P2(+121.8kb)|MIR492(+122.3kb)|NDUFA12(-14.47kb)|NR2C1(-63.37kb)
1	179789223	rs113540146	C	T	0.0466277	3	2.294e-05	0.02957	1.2808	1.2554	0.0449	67.78	1.0999	1.1631	1.5081	CEP350(-134.7kb)|FAM163A(+3.89kb)|TDRD5(+128.8kb)|TOR1AIP1(-61.95kb)|TOR1AIP2(-19.88kb)
12	88895093	rs73199409	T	C	0.0626424	3	2.296e-05	2.296e-05	1.2837	1.2837	0.9926	0	1.2965	1.2737	1.28	KITLG(0)
1	179789753	rs77944721	G	A	0.0465815	3	2.341e-05	0.03048	1.2803	1.2547	0.0439	68.01	1.0994	1.1616	1.5085	CEP350(-134.2kb)|FAM163A(+4.42kb)|TDRD5(+129.3kb)|TOR1AIP1(-61.42kb)|TOR1AIP2(-19.35kb)
8	139681417	rs72727892	T	C	0.0182476	3	2.342e-05	2.342e-05	1.5204	1.5204	0.6172	0	1.3708	1.4103	1.6868	COL22A1(0)|FAM135B(+172.4kb)
8	42399906	rs13273204	T	C	0.388251	3	2.344e-05	2.344e-05	1.1136	1.1136	0.5779	0	1.0911	1.0883	1.1509	CHRNB3(-152.7kb)|DKK4(+165.2kb)|POLB(+170.6kb)|SLC20A2(+2.55kb)|SMIM19(0)|VDAC3(+136.5kb)
18	77717182	rs12963360	C	T	0.448629	2	2.347e-05	2.347e-05	0.8844	0.8844	0.5029	0	0.9027	NA	0.8682	ADNP2(-149.7kb)|HSBP1L1(-7.399kb)|KCNG2(+57.37kb)|PARD6G(-197.9kb)|PARD6G-AS1(-188.6kb)|PQLC1(+5.529kb)|RBFA(-77.16kb)|RBFADN(-110.1kb)|TXNL4A(-15.68kb)
20	18027801	rs79216698	A	G	0.0497382	3	2.347e-05	0.03442	1.2913	1.2731	0.0291	71.72	1.2863	1.0304	1.531	CSRP2BP(-95.07kb)|MGME1(+56.04kb)|OVOL2(0)|PET117(-90.7kb)|SNORD17(+84.21kb)|SNX5(+78.31kb)
15	48926415	rs611483	A	G	0.719541	3	2.353e-05	2.353e-05	1.1301	1.1301	0.8524	0	1.138	1.1525	1.1081	CEP152(-103.7kb)|FBN1(0)|SHC4(-189.5kb)
7	81516652	rs9986674	T	C	0.0554666	3	2.363e-05	2.363e-05	1.2505	1.2505	0.6076	0	1.3495	1.1826	1.2272	CACNA2D1(-62.76kb)|HGF(+117.2kb)
12	121812438	rs182864755	C	G	0.0345088	2	2.367e-05	2.367e-05	1.4844	1.4844	0.6954	0	1.5315	1.4221	NA	ANAPC5(+20.43kb)|CAMKK2(+76.33kb)|KDM2B(-54.46kb)|P2RX4(+140.5kb)|P2RX7(+188.1kb)|RNF34(-25.45kb)
1	206803132	rs17350271	T	C	0.0285032	3	2.401e-05	2.401e-05	1.3837	1.3837	0.6944	0	1.2557	1.4314	1.454	DYRK3(-5.748kb)|EIF2D(+17.23kb)|IKBKE(+132.9kb)|IL10(-137.8kb)|IL19(-169.1kb)|MAPKAPK2(-55.23kb)|RASSF5(+40.52kb)|SRGAP2(+165.3kb)
2	65180817	rs4671635	A	G	0.251601	3	2.422e-05	2.422e-05	1.1307	1.1307	0.734	0	1.1654	1.1244	1.1058	CEP68(-102.7kb)|LOC400958(+21.24kb)|RAB1A(-133.2kb)|SLC1A4(-34.76kb)
12	88888491	rs73199405	C	T	0.0628118	3	2.423e-05	2.423e-05	1.2811	1.2811	0.9932	0	1.2778	1.2701	1.2911	KITLG(0)
1	179789556	rs73041630	C	A	0.0465815	3	2.426e-05	0.03125	1.2799	1.2544	0.0431	68.2	1.0981	1.1619	1.5091	CEP350(-134.4kb)|FAM163A(+4.223kb)|TDRD5(+129.1kb)|TOR1AIP1(-61.62kb)|TOR1AIP2(-19.54kb)
22	25472183	rs9612855	A	C	0.132753	3	2.447e-05	0.001624	0.864	0.8603	0.1537	46.6	0.92	0.7756	0.8774	CRYBB2(-143.4kb)|CRYBB3(-123.6kb)|KIAA1671(0)|LOC100128531(-26.2kb)|SGSM1(+149.4kb)|TMEM211(+136.9kb)
21	27526347	rs2830096	A	C	0.311672	3	2.482e-05	3.694e-05	0.8939	0.8938	0.3518	4.27	0.8547	0.8887	0.9343	APP(0)
20	55018469	rs113902203	G	A	0.0782877	3	2.487e-05	0.002872	0.8277	0.8303	0.1461	48	0.7418	0.9225	0.846	AURKA(+51.12kb)|CASS4(0)|CSTF1(+38.89kb)|FAM209A(-81.32kb)|FAM209B(-89.83kb)|FAM210B(+74.75kb)|GCNT7(-48.08kb)|MC3R(+193.6kb)|RTFDC1(-25.18kb)|TFAP2C(-185.9kb)
21	27526363	rs2830097	C	T	0.311811	3	2.488e-05	2.488e-05	0.894	0.894	0.3754	0	0.8559	0.8888	0.933	APP(0)
15	58532740	rs11637278	C	G	0.926748	3	2.505e-05	0.01521	1.2506	1.2616	0.0398	68.97	1.4698	1.2894	1.0706	ALDH1A2(+174.6kb)|AQP9(+54.63kb)|LIPC(-191.4kb)
20	18033309	rs73899402	T	C	0.0487219	3	2.505e-05	0.04164	1.2963	1.2767	0.0233	73.41	1.2691	1.0331	1.5619	CSRP2BP(-89.56kb)|MGME1(+61.55kb)|OVOL2(0)|PET117(-85.19kb)|SNORD17(+89.72kb)|SNX5(+83.82kb)
11	106941304	rs61903020	A	C	0.0373114	3	2.508e-05	0.00679	1.296	1.2956	0.0959	57.35	1.0749	1.4338	1.4201	GUCY1A2(+52.13kb)
14	101901068	rs9707396	T	G	0.123252	3	2.514e-05	2.514e-05	1.195	1.195	0.7958	0	1.1985	1.1446	1.2277	DIO3(-126.6kb)|DIO3OS(-117.5kb)|MIR1247(-125.6kb)
20	55015166	rs927174	C	A	0.0785186	3	2.519e-05	0.002826	0.8288	0.8316	0.1485	47.57	0.7448	0.9251	0.8453	AURKA(+47.82kb)|CASS4(0)|CSTF1(+35.58kb)|FAM209A(-84.62kb)|FAM209B(-93.14kb)|FAM210B(+71.45kb)|GCNT7(-51.38kb)|MC3R(+190.3kb)|RTFDC1(-28.48kb)|TFAP2C(-189.2kb)
18	77718044	rs62101205	C	A	0.448783	2	2.522e-05	2.522e-05	0.8848	0.8848	0.4935	0	0.9035	NA	0.8682	ADNP2(-148.9kb)|HSBP1L1(-6.537kb)|KCNG2(+58.23kb)|PARD6G(-197.1kb)|PARD6G-AS1(-187.8kb)|PQLC1(+6.391kb)|RBFA(-76.3kb)|RBFADN(-109.2kb)|TXNL4A(-14.82kb)
15	58527658	rs28663995	T	C	0.0692177	3	2.58e-05	0.009515	0.7976	0.7917	0.0617	64.09	0.6888	0.7688	0.9266	ALDH1A2(+169.5kb)|AQP9(+49.55kb)|LIPC(-196.5kb)
8	22262139	rs7012503	T	C	0.0404219	3	2.608e-05	2.608e-05	1.3254	1.3254	0.9385	0	1.3217	1.3832	1.3008	BMP1(+192.3kb)|C8orf58(-195kb)|MIR320A(+159.6kb)|PDLIM2(-174.1kb)|PHYHIP(+172.3kb)|PIWIL2(+48.56kb)|POLR3D(+153.5kb)|PPP3CC(-36.34kb)|SLC39A14(0)|SORBS3(-147.1kb)
20	18029970	rs73899395	C	T	0.049692	3	2.621e-05	0.03644	1.2908	1.2732	0.0277	72.11	1.2818	1.031	1.5372	CSRP2BP(-92.9kb)|MGME1(+58.21kb)|OVOL2(0)|PET117(-88.53kb)|SNORD17(+86.38kb)|SNX5(+80.48kb)
16	58943970	rs12444410	T	C	0.0681552	3	2.622e-05	0.006641	1.2535	1.2389	0.1211	52.63	1.1629	1.116	1.4231	GOT2(+175.7kb)
15	58533268	rs67690745	A	G	0.060964	3	2.63e-05	0.005592	0.7938	0.7882	0.0887	58.72	0.6964	0.755	0.9187	ALDH1A2(+175.1kb)|AQP9(+55.16kb)|LIPC(-190.9kb)
17	43744203	rs62053943	T	C	0.136649	3	2.638e-05	2.638e-05	0.8497	0.8497	0.4855	0	0.8469	0.799	0.8965	CRHR1(0)|CRHR1-IT1(+20.61kb)|LOC644172(+64.46kb)|LRRC37A4P(+146.3kb)|MAPT-AS1(-176.5kb)|MGC57346(+28.87kb)|MIR4315-1(+191.4kb)|MIR4315-2(+191.4kb)|PLEKHM1(+176.1kb)|SPPL2C(-178.1kb)
10	69621084	rs184431922	A	G	0.00697567	2	2.64e-05	0.01097	2.4992	2.5994	0.0885	65.54	3.8654	1.8218	NA	CTNNA3(+165.1kb)|DNAJC12(+23.15kb)|HERC4(-60.57kb)|SIRT1(-23.34kb)
18	77586290	rs536654	G	A	0.293255	2	2.659e-05	0.0865	1.1424	1.1365	0.019	81.82	1.0535	NA	1.2231	CTDP1(+71.78kb)|HSBP1L1(-138.3kb)|KCNG2(-37.38kb)|PQLC1(-76.13kb)|TXNL4A(-146.6kb)
1	55608005	rs1165226	T	C	0.616015	3	2.666e-05	2.666e-05	0.8982	0.8982	0.4663	0	0.8627	0.9054	0.9273	BSND(+133.5kb)|LOC100507634(-73.08kb)|MIR4422(-83.31kb)|PCSK9(+77.48kb)|TMEM61(+150kb)|USP24(0)
2	65181253	rs6725785	C	A	0.253465	3	2.669e-05	2.669e-05	1.1296	1.1296	0.768	0	1.162	1.1214	1.1077	CEP68(-102.2kb)|LOC400958(+21.67kb)|RAB1A(-132.7kb)|SLC1A4(-34.32kb)
2	127875660	rs10929007	G	A	0.765707	3	2.673e-05	2.673e-05	1.1368	1.1368	0.7825	0	1.1595	1.1526	1.1073	BIN1(+10.76kb)|CYP27C1(-65.75kb)|ERCC3(-139.2kb)|MAP3K2(-180.6kb)
11	84049907	rs148890041	C	T	0.0100246	3	2.675e-05	2.675e-05	1.5726	1.5726	0.4968	0	1.3628	1.4707	1.8162	DLG2(0)
2	127875389	rs3845674	G	T	0.765707	3	2.676e-05	2.676e-05	1.1367	1.1367	0.7819	0	1.1595	1.1524	1.1072	BIN1(+10.49kb)|CYP27C1(-66.02kb)|ERCC3(-139.5kb)|MAP3K2(-180.9kb)
20	55012992	rs76842328	C	T	0.0776409	3	2.678e-05	0.0008685	0.827	0.829	0.2139	35.15	0.7489	0.9109	0.8472	AURKA(+45.64kb)|CASS4(0)|CSTF1(+33.41kb)|FAM209A(-86.79kb)|FAM209B(-95.31kb)|FAM210B(+69.27kb)|GCNT7(-53.56kb)|MC3R(+188.1kb)|RTFDC1(-30.65kb)|TFAP2C(-191.4kb)
15	48744005	rs4775762	C	T	0.769156	3	2.684e-05	2.684e-05	1.1339	1.1339	0.8945	0	1.1511	1.1398	1.1146	DUT(+108.4kb)|FBN1(0)|SLC12A1(+147.7kb)
12	121812133	rs150313203	A	G	0.0359563	2	2.694e-05	2.694e-05	1.4749	1.4749	0.6422	0	1.5306	1.4031	NA	ANAPC5(+20.12kb)|CAMKK2(+76.02kb)|KDM2B(-54.77kb)|P2RX4(+140.2kb)|P2RX7(+187.8kb)|RNF34(-25.75kb)
16	69718693	rs13336317	A	G	0.0652294	3	2.694e-05	2.694e-05	1.2388	1.2388	0.4958	0	1.3434	1.1829	1.1852	MIR1538(+118.9kb)|NFAT5(0)|NOB1(-57.06kb)|NQO1(-24.61kb)|WWP2(-77.49kb)
17	44104347	rs2158256	A	G	0.0303511	2	2.694e-05	2.694e-05	0.6009	0.6009	0.7466	0	0.5771	0.6242	NA	CRHR1(+191.2kb)|KANSL1(-2.934kb)|KANSL1-AS1(-166.6kb)|MAPT(0)|MAPT-AS1(+131.5kb)|MAPT-IT1(+128.2kb)|SPPL2C(+179.9kb)|STH(+27.29kb)
11	85820077	rs543293	G	A	0.675485	3	2.715e-05	0.001179	1.1161	1.1179	0.1831	41.1	1.1754	1.1353	1.0536	C11orf73(-193.2kb)|CCDC83(+189kb)|EED(-135.7kb)|PICALM(+39.15kb)
12	88675668	rs73192939	C	T	0.0567755	3	2.728e-05	2.728e-05	1.268	1.268	0.722	0	1.1953	1.3435	1.2842	CEP290(+139.7kb)|TMTC3(+82kb)
1	232745403	rs10910573	C	T	0.141253	3	2.734e-05	5.819e-05	0.8524	0.8522	0.3364	8.2	0.806	0.833	0.916	MAP10(-195.2kb)|SIPA1L2(+94.16kb)
2	127878438	rs4663100	G	C	0.76757	3	2.734e-05	2.734e-05	1.1368	1.1368	0.7519	0	1.1609	1.1547	1.105	BIN1(+13.54kb)|CYP27C1(-62.97kb)|ERCC3(-136.4kb)|MAP3K2(-177.8kb)
18	77586223	rs537502	T	C	0.292501	2	2.735e-05	0.07682	1.1423	1.1366	0.023	80.66	1.056	NA	1.2205	CTDP1(+71.71kb)|HSBP1L1(-138.4kb)|KCNG2(-37.44kb)|PQLC1(-76.2kb)|TXNL4A(-146.6kb)
2	127878432	rs4663099	A	C	0.76757	3	2.748e-05	2.748e-05	1.1368	1.1368	0.751	0	1.1609	1.1547	1.1049	BIN1(+13.53kb)|CYP27C1(-62.98kb)|ERCC3(-136.4kb)|MAP3K2(-177.8kb)
6	32578052	rs532098	A	G	0.419726	2	2.758e-05	2.758e-05	0.8626	0.8626	0.8395	0	0.8574	0.8699	NA	HLA-DQA1(-27.13kb)|HLA-DQA2(-131.1kb)|HLA-DQB1(-49.19kb)|HLA-DQB2(-145.8kb)|HLA-DRA(+165.2kb)|HLA-DRB1(+20.44kb)|HLA-DRB5(+80.05kb)|HLA-DRB6(+50.27kb)
1	68655214	rs114283254	T	C	0.0151832	3	2.759e-05	2.759e-05	1.5432	1.5432	0.8569	0	1.6477	1.4101	1.5521	DIRAS3(+138.8kb)|GNG12-AS1(0)|MIR1262(+5.921kb)|WLS(0)
8	139683189	rs13268861	T	G	0.018263	3	2.762e-05	2.762e-05	1.5129	1.5129	0.5726	0	1.3544	1.3934	1.6899	COL22A1(0)|FAM135B(+174.1kb)
12	88675663	rs73192938	C	T	0.0568063	3	2.764e-05	2.764e-05	1.2678	1.2678	0.7232	0	1.1953	1.3431	1.2839	CEP290(+139.7kb)|TMTC3(+82kb)
20	18021967	rs41276410	T	C	0.0476286	3	2.778e-05	0.0314	1.2859	1.2682	0.035	70.18	1.2909	1.0282	1.5093	CSRP2BP(-100.9kb)|MGME1(+50.2kb)|OVOL2(0)|PET117(-96.53kb)|SNORD17(+78.38kb)|SNX5(+72.48kb)
2	127873035	rs4663098	C	T	0.767447	3	2.794e-05	2.794e-05	1.136	1.136	0.7305	0	1.1627	1.1526	1.1031	BIN1(+8.132kb)|CYP27C1(-68.38kb)|ERCC3(-141.8kb)|MAP3K2(-183.2kb)
21	27535027	rs2830102	T	C	0.310502	3	2.8e-05	5.326e-05	0.8939	0.8937	0.3409	7.09	0.8584	0.8791	0.9377	APP(0)
2	127878839	rs10929009	C	T	0.765661	3	2.828e-05	2.828e-05	1.1365	1.1365	0.7925	0	1.1591	1.1512	1.1078	BIN1(+13.94kb)|CYP27C1(-62.57kb)|ERCC3(-136kb)|MAP3K2(-177.4kb)
2	127881368	rs7564197	G	A	0.740453	3	2.843e-05	2.843e-05	1.1312	1.1312	0.8476	0	1.1562	1.1293	1.1113	BIN1(+16.46kb)|CYP27C1(-60.04kb)|ERCC3(-133.5kb)|MAP3K2(-174.9kb)
6	32579868	rs150165719	T	G	0.419911	2	2.87e-05	2.87e-05	0.8621	0.8621	0.8569	0	0.8575	0.8687	NA	HLA-DQA1(-25.31kb)|HLA-DQA2(-129.3kb)|HLA-DQB1(-47.37kb)|HLA-DQB2(-144kb)|HLA-DRA(+167kb)|HLA-DRB1(+22.26kb)|HLA-DRB5(+81.86kb)|HLA-DRB6(+52.09kb)
2	127880449	rs6431220	G	A	0.740407	3	2.874e-05	2.874e-05	1.131	1.131	0.8439	0	1.1567	1.1277	1.1114	BIN1(+15.55kb)|CYP27C1(-60.96kb)|ERCC3(-134.4kb)|MAP3K2(-175.8kb)
3	1675959	rs75050120	T	G	0.0402217	3	2.89e-05	0.001912	0.7418	0.7368	0.1513	47.06	0.8525	0.604	0.7579	.
4	132735275	rs188012353	G	A	0.031968	2	2.892e-05	2.892e-05	1.632	1.632	0.5363	0	1.7451	1.5091	NA	.
2	127887750	rs62158731	T	C	0.240114	3	2.902e-05	2.902e-05	0.8799	0.8799	0.94	0	0.8692	0.8771	0.8911	BIN1(+22.85kb)|CYP27C1(-53.66kb)|ERCC3(-127.1kb)|MAP3K2(-168.5kb)
21	27534816	rs2830101	A	G	0.313566	3	2.902e-05	2.902e-05	0.8942	0.8942	0.3793	0	0.8595	0.8819	0.9353	APP(0)
2	174255983	rs10198631	C	A	0.357961	3	2.91e-05	0.004925	0.894	0.8957	0.1205	52.73	0.8316	0.9508	0.9144	CDCA7(+22.26kb)|MLK7-AS1(+109.2kb)|ZAK(+123.2kb)
6	32579708	rs13207945	C	T	0.412458	2	2.925e-05	2.925e-05	0.862	0.862	0.8823	0	0.8582	0.8674	NA	HLA-DQA1(-25.47kb)|HLA-DQA2(-129.5kb)|HLA-DQB1(-47.53kb)|HLA-DQB2(-144.2kb)|HLA-DRA(+166.9kb)|HLA-DRB1(+22.1kb)|HLA-DRB5(+81.7kb)|HLA-DRB6(+51.93kb)
8	143808424	rs138227826	A	G	0.0563751	3	2.959e-05	2.959e-05	1.2882	1.2882	0.3956	0	1.1631	1.2461	1.4082	ARC(+112.6kb)|BAI1(+182.1kb)|CYP11B1(-145.3kb)|CYP11B2(-183.6kb)|GML(-107.8kb)|JRK(+57.01kb)|LOC100288181(+0.033kb)|LY6D(-57.87kb)|LY6K(+22.84kb)|LYNX1(-37.33kb)|LYPD2(-23.2kb)|PSCA(+44.28kb)|SLURP1(-13.94kb)|THEM6(-0.196kb)
11	85814486	rs586274	G	T	0.67279	3	2.983e-05	0.002149	1.1152	1.1174	0.1513	47.05	1.1777	1.1355	1.0497	C11orf73(-198.8kb)|CCDC83(+183.4kb)|EED(-141.3kb)|PICALM(+33.56kb)
5	73936775	rs191698600	C	T	0.0101478	2	2.987e-05	0.00268	2.3216	2.3695	0.1576	49.94	1.8132	3.226	NA	ENC1(0)|FAM169A(-136.6kb)|GFM2(-80.26kb)|HEXB(-44.19kb)|NSA2(-126kb)
6	32578958	rs502803	A	G	0.420142	2	3e-05	3e-05	0.8628	0.8628	0.8667	0	0.8585	0.8689	NA	HLA-DQA1(-26.22kb)|HLA-DQA2(-130.2kb)|HLA-DQB1(-48.28kb)|HLA-DQB2(-144.9kb)|HLA-DRA(+166.1kb)|HLA-DRB1(+21.34kb)|HLA-DRB5(+80.95kb)|HLA-DRB6(+51.18kb)
11	95824618	rs7118784	A	G	0.550108	3	3.007e-05	3.007e-05	1.1106	1.1106	0.7251	0	1.0952	1.0895	1.1386	MAML2(0)|MTMR2(+167.2kb)
21	27522344	rs8130724	C	T	0.310872	3	3.007e-05	3.007e-05	0.8947	0.8947	0.428	0	0.8585	0.8917	0.9307	APP(0)
6	32579775	rs12523808	T	A	0.419495	2	3.024e-05	3.024e-05	0.8628	0.8628	0.882	0	0.859	0.8682	NA	HLA-DQA1(-25.41kb)|HLA-DQA2(-129.4kb)|HLA-DQB1(-47.46kb)|HLA-DQB2(-144.1kb)|HLA-DRA(+166.9kb)|HLA-DRB1(+22.16kb)|HLA-DRB5(+81.77kb)|HLA-DRB6(+52kb)
9	106087352	rs373637	T	C	0.453234	3	3.039e-05	3.039e-05	1.1121	1.1121	0.8119	0	1.1367	1.0937	1.1024	.
12	121812377	rs149632076	A	G	0.0357715	2	3.045e-05	3.045e-05	1.4741	1.4741	0.6703	0	1.5254	1.408	NA	ANAPC5(+20.36kb)|CAMKK2(+76.27kb)|KDM2B(-54.52kb)|P2RX4(+140.5kb)|P2RX7(+188kb)|RNF34(-25.51kb)
14	105688082	rs28406206	T	C	0.0858331	3	3.046e-05	3.046e-05	0.8061	0.8061	0.5445	0	0.742	0.8211	0.8513	BRF1(0)|BTBD6(-26.8kb)|GPR132(+156.2kb)|JAG2(+52.92kb)|MTA1(-198.1kb)|NUDT14(+40.42kb)|PACS2(-79.09kb)|TEX22(-176.8kb)
15	48949168	rs893161	C	G	0.796227	3	3.047e-05	3.047e-05	1.1389	1.1389	0.6484	0	1.1778	1.1446	1.1008	CEP152(-80.97kb)|FBN1(+11.18kb)|SHC4(-166.8kb)
6	32579743	rs13208027	A	T	0.419372	2	3.058e-05	3.058e-05	0.8629	0.8629	0.8833	0	0.8591	0.8682	NA	HLA-DQA1(-25.44kb)|HLA-DQA2(-129.4kb)|HLA-DQB1(-47.5kb)|HLA-DQB2(-144.1kb)|HLA-DRA(+166.9kb)|HLA-DRB1(+22.13kb)|HLA-DRB5(+81.74kb)|HLA-DRB6(+51.96kb)
6	32583653	rs28383224	G	A	0.558254	2	3.059e-05	3.059e-05	0.8633	0.8633	0.8643	0	0.8678	0.8573	NA	HLA-DOB(-196.9kb)|HLA-DQA1(-21.53kb)|HLA-DQA2(-125.5kb)|HLA-DQB1(-43.59kb)|HLA-DQB2(-140.2kb)|HLA-DRA(+170.8kb)|HLA-DRB1(+26.04kb)|HLA-DRB5(+85.65kb)|HLA-DRB6(+55.87kb)
21	27522353	rs8129936	A	G	0.310256	3	3.065e-05	3.065e-05	0.8948	0.8948	0.4246	0	0.8585	0.8917	0.931	APP(0)
2	127830121	rs72959016	T	C	0.0442408	3	3.08e-05	3.08e-05	1.2871	1.2871	0.4557	0	1.4301	1.1862	1.2417	BIN1(0)|CYP27C1(-111.3kb)|ERCC3(-184.7kb)
20	54983786	rs6024860	G	A	0.295488	3	3.089e-05	3.089e-05	0.8787	0.8787	0.5829	0	0.8466	0.9175	0.8763	AURKA(+16.44kb)|CASS4(-3.381kb)|CSTF1(+4.204kb)|FAM209A(-116kb)|FAM209B(-124.5kb)|FAM210B(+40.07kb)|GCNT7(-82.76kb)|MC3R(+158.9kb)|RTFDC1(-59.86kb)
2	174255928	rs10187514	C	T	0.357946	3	3.093e-05	0.005249	0.8944	0.8961	0.1187	53.08	0.8318	0.9516	0.9146	CDCA7(+22.21kb)|MLK7-AS1(+109.2kb)|ZAK(+123.2kb)
1	47130594	rs2218190	T	C	0.448814	3	3.095e-05	3.095e-05	1.1093	1.1093	0.4572	0	1.1312	1.1464	1.0682	ATPAF1(0)|CYP4B1(-134.1kb)|CYP4Z2P(-178.2kb)|DMBX1(+150.7kb)|EFCAB14(-10.24kb)|EFCAB14-AS1(-9.113kb)|KNCN(+113.7kb)|MKNK1(+60.63kb)|MKNK1-AS1(+94.67kb)|MOB3C(+48.03kb)|TEX38(-6.902kb)
21	27525323	rs8126837	C	A	0.311996	3	3.102e-05	3.102e-05	0.8952	0.8952	0.3887	0	0.8582	0.889	0.9339	APP(0)
15	58532664	rs11637181	T	C	0.931968	3	3.122e-05	0.004502	1.2551	1.2633	0.1048	55.67	1.4256	1.3144	1.0915	ALDH1A2(+174.5kb)|AQP9(+54.55kb)|LIPC(-191.5kb)
12	121790178	rs11541850	A	G	0.0355405	2	3.131e-05	3.131e-05	1.4641	1.4641	0.7635	0	1.4991	1.4178	NA	ANAPC5(0)|CAMKK2(+54.07kb)|KDM2B(-76.72kb)|P2RX4(+118.3kb)|P2RX7(+165.8kb)|RNF34(-47.71kb)
15	48931451	rs2247876	C	T	0.272775	3	3.158e-05	3.158e-05	0.8862	0.8862	0.8506	0	0.8759	0.8731	0.9048	CEP152(-98.68kb)|FBN1(0)|SHC4(-184.5kb)
9	20834307	rs71478259	T	G	0.0370958	3	3.165e-05	3.165e-05	0.7648	0.7648	0.8031	0	0.7868	0.797	0.7252	FOCAD(0)|MIR491(+118.1kb)|PTPLAD2(-172.1kb)
8	22261770	rs34489445	A	C	0.0405143	3	3.176e-05	3.176e-05	1.3206	1.3206	0.9136	0	1.3036	1.3924	1.2986	BMP1(+191.9kb)|C8orf58(-195.3kb)|MIR320A(+159.2kb)|PDLIM2(-174.5kb)|PHYHIP(+171.9kb)|PIWIL2(+48.19kb)|POLR3D(+153.1kb)|PPP3CC(-36.71kb)|SLC39A14(0)|SORBS3(-147.5kb)
22	25472463	rs11703834	A	G	0.132353	3	3.178e-05	0.001146	0.8654	0.8623	0.1829	41.14	0.9161	0.7795	0.8816	CRYBB2(-143.1kb)|CRYBB3(-123.4kb)|KIAA1671(0)|LOC100128531(-25.92kb)|SGSM1(+149.6kb)|TMEM211(+137.1kb)
15	48926002	rs2437946	A	G	0.279612	3	3.18e-05	3.18e-05	0.8865	0.8865	0.8726	0	0.8809	0.8706	0.9028	CEP152(-104.1kb)|FBN1(0)|SHC4(-189.9kb)
22	25474566	rs17668246	G	A	0.13263	3	3.198e-05	0.001371	0.8656	0.8624	0.1732	42.96	0.9217	0.7804	0.8765	CRYBB2(-141kb)|CRYBB3(-121.2kb)|KIAA1671(0)|LOC100128531(-23.82kb)|SGSM1(+151.8kb)|TMEM211(+139.3kb)
5	11964182	rs12186674	G	A	0.422944	3	3.217e-05	3.217e-05	1.1099	1.1099	0.4375	0	1.1396	1.1379	1.0661	CTNND2(+60.07kb)
6	32580136	rs3104419	T	C	0.419787	2	3.226e-05	3.226e-05	0.8632	0.8632	0.8504	0	0.8584	0.8701	NA	HLA-DQA1(-25.05kb)|HLA-DQA2(-129kb)|HLA-DQB1(-47.1kb)|HLA-DQB2(-143.7kb)|HLA-DRA(+167.3kb)|HLA-DRB1(+22.52kb)|HLA-DRB5(+82.13kb)|HLA-DRB6(+52.36kb)
12	95323430	rs9705593	T	C	0.657684	3	3.234e-05	3.234e-05	0.897	0.897	0.9364	0	0.8865	0.8974	0.9062	FGD6(-147.1kb)|KRT19P2(+94.63kb)|MIR492(+95.14kb)|NDUFA12(-41.67kb)|NR2C1(-90.57kb)
19	45477111	rs204480	T	C	0.234447	3	3.243e-05	3.243e-05	1.1341	1.1341	0.7382	0	1.1341	1.1747	1.1082	APOC1(+54.5kb)|APOC1P1(+42.47kb)|APOC2(+24.29kb)|APOC4(+28.36kb)|APOC4-APOC2(+24.29kb)|APOE(+64.46kb)|BCAM(+152.4kb)|CBLC(+173.2kb)|CLASRP(-65.19kb)|CLPTM1(0)|GEMIN7(-105.4kb)|NKPD1(-175.9kb)|PPP1R37(-119.3kb)|PVRL2(+84.63kb)|RELB(-27.6kb)|TOMM40(+70.16kb)|TRAPPC6A(-189.1kb)|ZNF296(-97.65kb)
16	56650474	rs12934166	T	G	0.107592	3	3.244e-05	0.01235	0.8511	0.8442	0.05	66.61	0.7982	0.777	0.9577	AMFR(+191kb)|BBS2(+96.47kb)|MT1A(-22.1kb)|MT1B(-35.34kb)|MT1DP(-27.12kb)|MT1E(-9.11kb)|MT1F(-41.38kb)|MT1G(-50.18kb)|MT1H(-53.25kb)|MT1IP(-59.17kb)|MT1JP(-19.18kb)|MT1L(-0.898kb)|MT1M(-16.06kb)|MT1X(-65.91kb)|MT2A(+7.065kb)|MT3(+25.47kb)|MT4(+47.6kb)|NUDT21(+165.2kb)|NUP93(-113.5kb)|OGFOD1(+139.1kb)
5	11965380	rs6877278	T	C	0.422729	3	3.246e-05	3.246e-05	1.1099	1.1099	0.4313	0	1.1391	1.1393	1.0657	CTNND2(+61.27kb)
6	32580331	rs2858861	T	C	0.420157	2	3.248e-05	3.248e-05	0.8633	0.8633	0.853	0	0.8585	0.87	NA	HLA-DQA1(-24.85kb)|HLA-DQA2(-128.8kb)|HLA-DQB1(-46.91kb)|HLA-DQB2(-143.5kb)|HLA-DRA(+167.5kb)|HLA-DRB1(+22.72kb)|HLA-DRB5(+82.32kb)|HLA-DRB6(+52.55kb)
13	27087103	rs9512229	T	G	0.310533	3	3.266e-05	3.266e-05	0.8849	0.8849	0.7103	0	0.9064	0.8526	0.8893	CDK8(+108.5kb)|WASF3(-44.74kb)
14	33114659	rs1569976	G	T	0.281999	3	3.272e-05	0.003612	1.1192	1.1253	0.1114	54.43	1.141	1.2076	1.0493	AKAP6(0)
1	3413868	rs4648506	G	C	0.292886	3	3.279e-05	0.001298	1.1491	1.1531	0.1757	42.49	1.2217	1.1945	1.0646	ARHGEF16(+16.19kb)|MEGF6(0)|MIR551A(-63.39kb)|PRDM16(+58.68kb)|TP73(-155.3kb)|TPRG1L(-127.7kb)|WRAP73(-133.5kb)
11	132378489	rs144342410	A	G	0.0174007	3	3.284e-05	3.284e-05	1.4473	1.4473	0.8137	0	1.4231	1.3426	1.5412	NTM(+171.8kb)|OPCML(0)
5	11964616	rs12659420	G	T	0.423006	3	3.287e-05	3.287e-05	1.1098	1.1098	0.4344	0	1.1397	1.1379	1.0658	CTNND2(+60.51kb)
17	43810902	rs77301847	G	A	0.200539	3	3.299e-05	3.299e-05	0.8805	0.8805	0.8958	0	0.877	0.8653	0.8962	CRHR1(0)|CRHR1-IT1(+87.31kb)|LOC644172(+131.2kb)|MAPT(-160.8kb)|MAPT-AS1(-109.8kb)|MAPT-IT1(-162.2kb)|MGC57346(+95.57kb)|SPPL2C(-111.4kb)
6	166204288	rs9365921	A	G	0.576979	3	3.303e-05	3.303e-05	1.1114	1.1114	0.5979	0	1.1463	1.0735	1.1055	LINC00473(-133.2kb)|LINC00602(-196.8kb)|PDE10A(+128.7kb)
15	58527957	rs28510553	C	G	0.0671235	3	3.324e-05	0.002598	0.7963	0.7921	0.1389	49.35	0.7095	0.7581	0.9102	ALDH1A2(+169.8kb)|AQP9(+49.85kb)|LIPC(-196.2kb)
1	55557540	rs667353	C	T	0.620188	3	3.33e-05	3.33e-05	0.898	0.898	0.4508	0	0.8627	0.9002	0.9304	BSND(+83.08kb)|LOC100507634(-123.5kb)|MIR4422(-133.8kb)|PCSK9(+27.01kb)|TMEM61(+99.57kb)|USP24(0)
17	43949342	rs34739559	A	G	0.205112	3	3.346e-05	3.346e-05	0.8826	0.8826	0.8744	0	0.8823	0.8638	0.8981	CRHR1(+36.15kb)|KANSL1(-157.9kb)|MAPT(-22.4kb)|MAPT-AS1(0)|MAPT-IT1(-23.81kb)|SPPL2C(+24.9kb)|STH(-127.3kb)
4	129472178	rs28449727	G	A	0.267955	3	3.354e-05	3.354e-05	1.1241	1.1241	0.5115	0	1.0975	1.0904	1.1694	.
16	69601930	rs111779538	T	A	0.0649677	3	3.376e-05	3.376e-05	1.2359	1.2359	0.5166	0	1.338	1.1815	1.1848	CYB5B(+101.8kb)|MIR1538(+2.159kb)|NFAT5(0)|NOB1(-173.8kb)|NQO1(-141.4kb)|TERF2(+182kb)|WWP2(-194.3kb)
7	37231416	rs727189	G	A	0.775485	3	3.38e-05	3.38e-05	0.8849	0.8849	0.9609	0	0.8745	0.8903	0.89	ELMO1(0)
21	27538386	rs2234992	A	G	0.306067	3	3.38e-05	7.349e-05	0.8947	0.8945	0.3343	8.73	0.8587	0.88	0.9391	APP(0)
2	64219057	rs12995137	G	A	0.0552202	3	3.398e-05	0.007973	1.2385	1.2356	0.1026	56.09	1.0673	1.3029	1.3598	LINC00309(-193.2kb)|PELI1(-100.7kb)|UGP2(+100.4kb)|VPS54(0)
1	55556428	rs1165285	A	T	0.61911	3	3.413e-05	3.413e-05	0.8982	0.8982	0.4594	0	0.8632	0.9004	0.9301	BSND(+81.96kb)|LOC100507634(-124.7kb)|MIR4422(-134.9kb)|PCSK9(+25.9kb)|TMEM61(+98.46kb)|USP24(0)
15	48772936	rs10851468	G	A	0.33782	3	3.422e-05	3.422e-05	0.8935	0.8935	0.7762	0	0.9176	0.8803	0.8816	DUT(+137.4kb)|FBN1(0)|SLC12A1(+176.7kb)
14	52330620	rs113660493	T	A	0.0109332	2	3.439e-05	0.04287	0.4677	0.4146	0.0258	79.87	0.2601	NA	0.6219	C14orf166(-125.6kb)|FRMD6(+133.2kb)|GNG2(0)|NID2(-140.9kb)
21	27525859	rs882762	C	G	0.315969	3	3.44e-05	3.44e-05	0.8957	0.8957	0.3796	0	0.8565	0.894	0.9335	APP(0)
21	27521417	rs13049230	G	A	0.307299	3	3.443e-05	3.443e-05	0.8954	0.8954	0.4386	0	0.8598	0.8921	0.931	APP(0)
17	43789978	rs62056933	A	G	0.20405	3	3.456e-05	3.456e-05	0.8827	0.8827	0.8592	0	0.8758	0.8673	0.9017	CRHR1(0)|CRHR1-IT1(+66.38kb)|LOC644172(+110.2kb)|LRRC37A4P(+192.1kb)|MAPT(-181.8kb)|MAPT-AS1(-130.7kb)|MAPT-IT1(-183.2kb)|MGC57346(+74.65kb)|SPPL2C(-132.3kb)
1	206798473	rs151312826	A	G	0.0284262	3	3.462e-05	3.462e-05	1.3763	1.3763	0.6808	0	1.2482	1.4018	1.4592	DYRK3(-10.41kb)|EIF2D(+12.57kb)|IKBKE(+128.2kb)|IL10(-142.5kb)|IL19(-173.7kb)|MAPKAPK2(-59.89kb)|RASSF5(+35.86kb)|SRGAP2(+160.7kb)
7	81525200	rs10261647	T	C	0.0551432	3	3.463e-05	3.463e-05	1.2478	1.2478	0.4982	0	1.3709	1.1817	1.2075	CACNA2D1(-54.22kb)|HGF(+125.7kb)
22	25468830	rs17668150	G	A	0.133169	3	3.464e-05	0.001398	0.8668	0.8636	0.1746	42.7	0.9208	0.7812	0.8797	CRYBB2(-146.8kb)|CRYBB3(-127kb)|KIAA1671(0)|LOC100128531(-29.55kb)|SGSM1(+146kb)|TMEM211(+133.5kb)
8	139682779	rs11989534	A	C	0.0182168	3	3.466e-05	3.466e-05	1.5062	1.5062	0.5992	0	1.3571	1.3906	1.6766	COL22A1(0)|FAM135B(+173.7kb)
8	139682782	rs11989535	G	C	0.0182014	3	3.474e-05	3.474e-05	1.5063	1.5063	0.5978	0	1.3564	1.3908	1.677	COL22A1(0)|FAM135B(+173.7kb)
17	43810851	rs77807457	C	G	0.202664	3	3.482e-05	3.482e-05	0.8818	0.8818	0.9252	0	0.8792	0.8689	0.8948	CRHR1(0)|CRHR1-IT1(+87.26kb)|LOC644172(+131.1kb)|MAPT(-160.9kb)|MAPT-AS1(-109.9kb)|MAPT-IT1(-162.3kb)|MGC57346(+95.52kb)|SPPL2C(-111.4kb)
22	25467143	rs17668090	T	C	0.1328	3	3.492e-05	0.002697	0.8664	0.862	0.134	50.24	0.922	0.7731	0.8828	CRYBB2(-148.5kb)|CRYBB3(-128.7kb)|KIAA1671(0)|LOC100128531(-31.24kb)|SGSM1(+144.3kb)|TMEM211(+131.8kb)
1	2205581	rs12045693	A	C	0.40967	3	3.498e-05	3.498e-05	0.8995	0.8995	0.8138	0	0.8865	0.8888	0.9176	C1orf86(+61.42kb)|LOC100129534(-76.27kb)|MORN1(-47.11kb)|PEX10(-130.7kb)|PRKCZ(+88.75kb)|RER1(-117.6kb)|SKI(0)
2	65175319	rs13001750	G	C	0.256144	3	3.502e-05	3.502e-05	1.1275	1.1275	0.8296	0	1.1555	1.1113	1.1144	CEP68(-108.2kb)|LOC400958(+15.74kb)|RAB1A(-138.7kb)|SLC1A4(-40.26kb)
5	11956063	rs1157903	T	G	0.412242	3	3.508e-05	0.0008883	1.1096	1.1124	0.201	37.67	1.1334	1.1708	1.0514	CTNND2(+51.95kb)
17	43789971	rs62056932	C	G	0.204034	3	3.509e-05	3.509e-05	0.8827	0.8827	0.8612	0	0.876	0.8674	0.9016	CRHR1(0)|CRHR1-IT1(+66.38kb)|LOC644172(+110.2kb)|LRRC37A4P(+192.1kb)|MAPT(-181.8kb)|MAPT-AS1(-130.8kb)|MAPT-IT1(-183.2kb)|MGC57346(+74.64kb)|SPPL2C(-132.3kb)
9	18601460	rs10756981	A	G	0.666754	3	3.514e-05	3.514e-05	0.8969	0.8969	0.9373	0	0.8924	0.9118	0.8917	ADAMTSL1(0)|MIR3152(+28.08kb)
21	27596793	rs2830117	A	G	0.110702	3	3.517e-05	3.517e-05	0.8508	0.8508	0.6506	0	0.8464	0.808	0.8855	APP(+53.35kb)
21	27601541	rs469076	C	T	0.463181	3	3.518e-05	0.006474	1.1096	1.1162	0.079	60.61	1.1019	1.214	1.0527	APP(+58.1kb)
22	25468406	rs9612851	G	A	0.133169	3	3.523e-05	0.0015	0.8668	0.8635	0.1709	43.4	0.921	0.7805	0.88	CRYBB2(-147.2kb)|CRYBB3(-127.4kb)|KIAA1671(0)|LOC100128531(-29.98kb)|SGSM1(+145.6kb)|TMEM211(+133.1kb)
10	11720620	rs113111379	T	C	0.35365	3	3.532e-05	0.000919	1.1156	1.1167	0.2067	36.57	1.1768	1.1274	1.0544	ECHDC3(-63.74kb)|PROSER2(-144.8kb)|PROSER2-AS1(-171kb)|USP6NL(+66.94kb)
8	139683144	rs11990354	A	C	0.0182784	3	3.556e-05	3.556e-05	1.5061	1.5061	0.5996	0	1.3554	1.3925	1.6765	COL22A1(0)|FAM135B(+174.1kb)
8	139683249	rs66644529	A	G	0.0182784	3	3.598e-05	3.598e-05	1.5062	1.5062	0.5989	0	1.3541	1.3938	1.6768	COL22A1(0)|FAM135B(+174.2kb)
15	58492833	rs8035209	G	T	0.947659	3	3.603e-05	3.603e-05	1.2963	1.2963	0.9155	0	1.3442	1.284	1.2641	ALDH1A2(+134.7kb)|AQP9(+14.72kb)
6	72354012	rs10942959	A	C	0.566723	3	3.604e-05	0.0002734	0.9023	0.9014	0.2722	23.16	0.8696	0.8794	0.948	.
12	1517799	rs118038461	A	G	0.0179858	2	3.621e-05	0.01068	0.5613	0.5726	0.122	58.19	0.7229	0.4666	NA	ERC1(0)|FBXL14(-157.4kb)|LINC00942(-91.86kb)
6	32584153	rs28383233	A	G	0.547305	2	3.63e-05	3.63e-05	0.8635	0.8635	0.8743	0	0.8677	0.8579	NA	HLA-DOB(-196.4kb)|HLA-DQA1(-21.03kb)|HLA-DQA2(-125kb)|HLA-DQB1(-43.09kb)|HLA-DQB2(-139.7kb)|HLA-DRA(+171.3kb)|HLA-DRB1(+26.54kb)|HLA-DRB5(+86.15kb)|HLA-DRB6(+56.37kb)
22	45090577	rs75252295	A	G	0.0167693	3	3.642e-05	0.01501	1.5199	1.5756	0.0368	69.73	2.2215	1.1405	1.6309	ARHGAP8(-57.86kb)|LDOC1L(+196.6kb)|LINC00207(+122.2kb)|LINC00229(+69.28kb)|PHF21B(-186.5kb)|PRR5(0)|PRR5-ARHGAP8(-7.804kb)
1	206797407	rs12410624	A	C	0.0283646	3	3.652e-05	3.652e-05	1.3754	1.3754	0.6673	0	1.2435	1.4058	1.4588	DYRK3(-11.47kb)|EIF2D(+11.5kb)|IKBKE(+127.2kb)|IL10(-143.5kb)|IL19(-174.8kb)|MAPKAPK2(-60.96kb)|RASSF5(+34.79kb)|SRGAP2(+159.6kb)
8	139683444	rs11994143	G	A	0.018571	3	3.655e-05	3.655e-05	1.5059	1.5059	0.5984	0	1.3526	1.3947	1.6765	COL22A1(0)|FAM135B(+174.4kb)
20	18024553	rs6034944	G	C	0.0518633	3	3.682e-05	0.02464	1.2781	1.264	0.0472	67.24	1.295	1.0333	1.4845	CSRP2BP(-98.31kb)|MGME1(+52.79kb)|OVOL2(0)|PET117(-93.94kb)|SNORD17(+80.96kb)|SNX5(+75.06kb)
18	39893621	rs1381346	T	A	0.581783	3	3.698e-05	3.698e-05	1.1122	1.1122	0.521	0	1.0799	1.0954	1.1527	LINC00907(0)
8	139683566	rs11990481	G	C	0.018571	3	3.702e-05	3.702e-05	1.5057	1.5057	0.5971	0	1.3511	1.3954	1.6765	COL22A1(0)|FAM135B(+174.5kb)
7	156822706	rs35629295	G	A	0.175269	2	3.721e-05	3.721e-05	1.2226	1.2226	0.9886	0	1.2234	1.2217	NA	LMBR1(+136.8kb)|LOC645249(+13.59kb)|MNX1(+19.36kb)|NOM1(+56.83kb)|UBE3C(-108.9kb)
19	1039509	rs72973575	A	C	0.0740222	2	3.729e-05	3.729e-05	1.3077	1.3077	0.6699	0	1.271	1.3435	NA	ABCA7(-0.592kb)|ARID3A(+66.71kb)|C19orf26(-190.4kb)|CFD(+175.9kb)|CNN2(+0.445kb)|ELANE(+183.3kb)|GPX4(-64.43kb)|GRIN3B(+29.79kb)|HMHA1(-26.41kb)|KISS1R(+118.5kb)|MED16(+146.3kb)|POLR2E(-47.07kb)|PRTN3(+191.3kb)|R3HDM4(+126.3kb)|SBNO2(-68.12kb)|STK11(-166.3kb)|TMEM259(+18.37kb)|WDR18(+44.94kb)
1	206797354	rs150780096	A	G	0.0283646	3	3.74e-05	3.74e-05	1.3763	1.3763	0.6684	0	1.2429	1.4186	1.4547	DYRK3(-11.53kb)|EIF2D(+11.45kb)|IKBKE(+127.1kb)|IL10(-143.6kb)|IL19(-174.9kb)|MAPKAPK2(-61.01kb)|RASSF5(+34.74kb)|SRGAP2(+159.6kb)
11	80171021	rs2512468	G	A	0.781968	3	3.74e-05	3.74e-05	1.1404	1.1404	0.8497	0	1.1394	1.1714	1.1192	.
8	139683792	rs11997487	A	G	0.0185248	3	3.746e-05	3.746e-05	1.5059	1.5059	0.5958	0	1.3488	1.3975	1.6767	COL22A1(0)|FAM135B(+174.7kb)
17	39648257	rs3760521	A	G	0.275085	3	3.748e-05	0.0009133	1.1199	1.1192	0.2213	33.7	1.1945	1.0729	1.0871	EIF1(-196.9kb)|KRT9(-73.84kb)|KRT13(-8.975kb)|KRT14(-90.27kb)|KRT15(-21.74kb)|KRT16(-117.8kb)|KRT17(-127.4kb)|KRT19(-31.61kb)|KRT31(+94.41kb)|KRT32(+24.62kb)|KRT33A(+141.2kb)|KRT33B(+122.2kb)|KRT34(+109.6kb)|KRT35(+10.86kb)|KRT36(+2.141kb)|KRT37(+67.44kb)|KRT38(+50.66kb)|KRT42P(-134.3kb)|KRTAP16-1(+182.8kb)|KRTAP17-1(+176.3kb)|KRTAP29-1(+189.2kb)|LINC00974(-57.6kb)|LOC100505782(+79.42kb)
17	44865439	rs2074404	G	T	0.2585	3	3.77e-05	3.77e-05	0.8859	0.8859	0.9618	0	0.8959	0.8801	0.8811	GOSR2(-135kb)|MIR5089(-184.9kb)|NSF(+30.61kb)|NSFP1(+147.4kb)|RPRML(-190.1kb)|WNT3(0)|WNT9B(-63.53kb)
6	72363620	rs7743293	G	A	0.566846	3	3.772e-05	0.0003793	0.9026	0.9014	0.2561	26.58	0.8701	0.8775	0.9494	.
17	43779624	rs1526128	T	C	0.203619	3	3.777e-05	3.777e-05	0.883	0.883	0.9212	0	0.8773	0.8723	0.8972	CRHR1(0)|CRHR1-IT1(+56.03kb)|LOC644172(+99.88kb)|LRRC37A4P(+181.7kb)|MAPT(-192.1kb)|MAPT-AS1(-141.1kb)|MAPT-IT1(-193.5kb)|MGC57346(+64.3kb)|SPPL2C(-142.6kb)
7	37223401	rs2160430	C	T	0.751063	3	3.79e-05	3.79e-05	0.8874	0.8874	0.9747	0	0.8838	0.8813	0.8944	ELMO1(0)
6	32583212	rs28383221	G	A	0.563597	2	3.793e-05	3.793e-05	0.8645	0.8645	0.9007	0	0.8678	0.8601	NA	HLA-DOB(-197.3kb)|HLA-DQA1(-21.97kb)|HLA-DQA2(-126kb)|HLA-DQB1(-44.03kb)|HLA-DQB2(-140.7kb)|HLA-DRA(+170.4kb)|HLA-DRB1(+25.6kb)|HLA-DRB5(+85.21kb)|HLA-DRB6(+55.43kb)
5	27533049	rs115600263	G	A	0.0150755	3	3.823e-05	0.001475	1.5998	1.5861	0.2028	37.33	1.2312	2.0517	1.4995	LOC643401(+36.54kb)
5	11970847	rs6876343	T	C	0.422251	3	3.828e-05	3.828e-05	1.1088	1.1088	0.3995	0	1.141	1.1373	1.0629	CTNND2(+66.74kb)
15	58533034	rs16939962	C	G	0.0646597	3	3.841e-05	0.009083	0.8006	0.7948	0.0719	62.01	0.6956	0.7688	0.9274	ALDH1A2(+174.9kb)|AQP9(+54.92kb)|LIPC(-191.1kb)
17	43671099	rs539288087	A	C	0.20502	3	3.844e-05	3.844e-05	0.8792	0.8792	0.916	0	0.8735	0.8682	0.8951	ARHGAP27(+160.8kb)|CRHR1(-26.61kb)|CRHR1-IT1(-45.24kb)|LOC644172(-6.391kb)|LRRC37A4P(+73.21kb)|MGC57346(-26.61kb)|MIR4315-1(+118.3kb)|MIR4315-2(+118.3kb)|PLEKHM1(+103kb)
11	121977751	rs10790486	C	G	0.60542	3	3.854e-05	0.0001034	1.1156	1.1159	0.3241	11.25	1.1623	1.1333	1.0611	BLID(-8.31kb)|MIR100(-45.18kb)|MIR100HG(0)|MIR125B1(+7.199kb)|MIRLET7A2(-39.48kb)
22	22908089	rs73397354	C	T	0.0225131	2	3.856e-05	3.856e-05	0.5455	0.5455	0.6069	0	0.5932	0.5094	NA	GGTLC2(-80.69kb)|LOC648691(0)|POM121L1P(-65.94kb)|PRAME(+6.393kb)|ZNF280A(+33.48kb)|ZNF280B(+44.58kb)
9	32740037	rs28582525	C	T	0.0244533	3	3.897e-05	3.897e-05	1.3776	1.3776	0.8886	0	1.3486	1.4779	1.3507	NDUFB6(+166.9kb)|TAF1L(+104.4kb)|TMEM215(-43.46kb)|TOPORS(+187.4kb)|TOPORS-AS1(+173.2kb)
6	72362565	rs13190763	C	G	0.566877	3	3.902e-05	0.0004346	0.9027	0.9015	0.2501	27.85	0.8699	0.8776	0.95	.
2	127867815	rs4494685	C	T	0.766923	3	3.904e-05	3.904e-05	1.1336	1.1336	0.7588	0	1.1584	1.1494	1.1027	BIN1(+2.912kb)|CYP27C1(-73.6kb)|ERCC3(-147kb)|MAP3K2(-188.4kb)
10	11707915	rs11257227	G	A	0.341192	2	3.917e-05	3.917e-05	1.1504	1.1504	0.4239	0	1.1789	1.116	NA	ECHDC3(-76.44kb)|PROSER2(-157.5kb)|PROSER2-AS1(-183.7kb)|USP6NL(+54.24kb)
3	19631497	rs139846187	C	T	0.0115953	2	3.929e-05	3.929e-05	1.6957	1.6957	0.4513	0	1.5068	NA	1.8356	KCNH8(+54.36kb)
1	47204946	rs1595896	G	A	0.484001	3	3.933e-05	3.933e-05	1.1119	1.1119	0.3861	0	1.1204	1.1709	1.07	ATPAF1(+70.85kb)|CYP4A11(-189.9kb)|CYP4B1(-59.72kb)|CYP4Z2P(-103.8kb)|EFCAB14(+20.21kb)|EFCAB14-AS1(+47.18kb)|KNCN(+188.1kb)|MKNK1(+135kb)|MKNK1-AS1(+169kb)|MOB3C(+122.4kb)|TEX38(+65.69kb)
12	15914405	rs11056634	G	A	0.0339544	3	3.938e-05	3.938e-05	1.398	1.398	0.4244	0	1.2087	1.3531	1.5684	DERA(-149.8kb)|EPS8(0)|PTPRO(+163.1kb)|STRAP(-120.9kb)
19	1049935	rs35528332	G	A	0.231645	2	3.947e-05	3.947e-05	0.8063	0.8063	0.8666	0	0.7989	0.8131	NA	ABCA7(0)|ARID3A(+77.13kb)|ATP5D(-191.8kb)|C19orf26(-180kb)|CFD(+186.3kb)|CNN2(+10.87kb)|ELANE(+193.7kb)|GPX4(-54kb)|GRIN3B(+40.21kb)|HMHA1(-15.99kb)|KISS1R(+128.9kb)|MED16(+156.7kb)|MIDN(-198.6kb)|POLR2E(-36.64kb)|R3HDM4(+136.7kb)|SBNO2(-57.7kb)|STK11(-155.9kb)|TMEM259(+28.79kb)|WDR18(+55.37kb)
14	33099863	rs7160301	A	T	0.275731	3	3.959e-05	0.002753	1.1177	1.1232	0.1332	50.39	1.1317	1.2077	1.0531	AKAP6(0)
22	35543405	rs2899243	T	G	0.105805	3	3.962e-05	0.0006668	1.1902	1.1966	0.2182	34.31	1.218	1.3141	1.1008	HMGXB4(-110kb)|ISX(+60.02kb)|MIR3909(-188.2kb)|TOM1(-151.9kb)
7	37225235	rs1420423	G	A	0.775839	3	3.964e-05	3.964e-05	0.8863	0.8863	0.9515	0	0.8758	0.8862	0.895	ELMO1(0)
15	48698503	rs2013984	C	T	0.761195	3	3.964e-05	3.964e-05	1.1312	1.1312	0.8086	0	1.1465	1.1519	1.1038	DUT(+62.93kb)|FBN1(-1.999kb)|SLC12A1(+102.2kb)
1	55666477	rs7536204	A	C	0.617385	3	3.965e-05	4.837e-05	0.9	0.9	0.3599	2.15	0.8595	0.9063	0.9349	BSND(+192kb)|LOC100507634(-14.6kb)|MIR4422(-24.84kb)|PCSK9(+136kb)|USP24(0)
7	37229353	rs1035175	T	C	0.775192	3	3.965e-05	3.965e-05	0.8862	0.8862	0.9605	0	0.8759	0.8891	0.8927	ELMO1(0)
6	72351393	rs717519	A	G	0.566615	3	3.966e-05	0.0003071	0.9028	0.9018	0.2695	23.74	0.8713	0.8777	0.9488	.
17	44351285	rs562855425	G	A	0.203742	3	3.975e-05	3.975e-05	0.8807	0.8807	0.917	0	0.889	0.863	0.8868	ARL17A(-25.21kb)|ARL17B(-25.63kb)|KANSL1(+48.54kb)|KANSL1-AS1(+77.2kb)|LRRC37A(-21.21kb)|NSFP1(-98.89kb)
17	43782693	rs62056905	G	A	0.206052	3	3.985e-05	3.985e-05	0.884	0.884	0.8649	0	0.8767	0.8697	0.9028	CRHR1(0)|CRHR1-IT1(+59.1kb)|LOC644172(+102.9kb)|LRRC37A4P(+184.8kb)|MAPT(-189.1kb)|MAPT-AS1(-138kb)|MAPT-IT1(-190.5kb)|MGC57346(+67.36kb)|SPPL2C(-139.6kb)
21	27533329	rs2830100	A	G	0.313982	3	3.992e-05	4.272e-05	0.8959	0.8959	0.365	0.78	0.8616	0.8811	0.9384	APP(0)
15	58529510	rs8025888	C	T	0.0631198	3	4.004e-05	0.0009808	0.7964	0.7935	0.2031	37.27	0.7215	0.7558	0.9008	ALDH1A2(+171.4kb)|AQP9(+51.4kb)|LIPC(-194.7kb)
11	95817904	rs1939478	A	G	0.543117	3	4.01e-05	4.01e-05	1.1084	1.1084	0.749	0	1.0923	1.0906	1.135	MAML2(0)|MTMR2(+160.5kb)
17	43810896	rs77804065	T	C	0.206437	3	4.028e-05	4.028e-05	0.8823	0.8823	0.9641	0	0.8784	0.8751	0.8918	CRHR1(0)|CRHR1-IT1(+87.3kb)|LOC644172(+131.1kb)|MAPT(-160.9kb)|MAPT-AS1(-109.8kb)|MAPT-IT1(-162.3kb)|MGC57346(+95.57kb)|SPPL2C(-111.4kb)
6	32578481	rs5021726	C	T	0.419941	2	4.053e-05	4.053e-05	0.8632	0.8632	0.7781	0	0.8558	0.8735	NA	HLA-DQA1(-26.7kb)|HLA-DQA2(-130.7kb)|HLA-DQB1(-48.76kb)|HLA-DQB2(-145.4kb)|HLA-DRA(+165.7kb)|HLA-DRB1(+20.87kb)|HLA-DRB5(+80.48kb)|HLA-DRB6(+50.7kb)
17	43810873	rs75022332	T	A	0.201432	3	4.053e-05	4.053e-05	0.8821	0.8821	0.926	0	0.8789	0.8696	0.8953	CRHR1(0)|CRHR1-IT1(+87.28kb)|LOC644172(+131.1kb)|MAPT(-160.9kb)|MAPT-AS1(-109.8kb)|MAPT-IT1(-162.3kb)|MGC57346(+95.54kb)|SPPL2C(-111.4kb)
9	26628782	rs114080125	A	G	0.0155528	3	4.082e-05	4.082e-05	1.5674	1.5674	0.5145	0	1.8699	1.5535	1.391	.
7	37227699	rs17170912	A	G	0.22296	3	4.143e-05	4.143e-05	1.1282	1.1282	0.9703	0	1.1392	1.1267	1.1202	ELMO1(0)
12	104124723	rs11612532	A	G	0.0855867	3	4.143e-05	4.143e-05	1.2014	1.2014	0.382	0	1.1305	1.1626	1.2973	GNN(-112.8kb)|HSP90B1(-199.4kb)|MIR3652(-199.5kb)|NT5DC3(-41.36kb)|STAB2(0)
22	22904146	rs113179946	T	C	0.0207268	2	4.167e-05	4.167e-05	0.5417	0.5417	0.6808	0	0.58	0.5125	NA	GGTLC2(-84.64kb)|LOC648691(0)|POM121L1P(-69.88kb)|PRAME(+2.45kb)|ZNF280A(+29.53kb)|ZNF280B(+40.64kb)
17	43850645	rs60814418	T	C	0.214444	3	4.19e-05	4.19e-05	0.8853	0.8853	0.8641	0	0.8815	0.8679	0.9027	CRHR1(0)|CRHR1-IT1(+127kb)|LOC644172(+170.9kb)|MAPT(-121.1kb)|MAPT-AS1(-70.08kb)|MAPT-IT1(-122.5kb)|MGC57346(+135.3kb)|SPPL2C(-71.61kb)
11	85795950	rs480781	G	A	0.700955	3	4.191e-05	0.01774	1.1163	1.121	0.043	68.21	1.2075	1.133	1.0347	CCDC83(+164.9kb)|EED(-159.9kb)|PICALM(+15.03kb)
15	48864367	rs682938	G	A	0.343286	3	4.193e-05	4.193e-05	0.8946	0.8946	0.9681	0	0.9024	0.8941	0.8879	CEP152(-165.8kb)|FBN1(0)
6	166199513	rs6456014	A	C	0.577487	3	4.194e-05	4.194e-05	1.1081	1.1081	0.628	0	1.1406	1.0725	1.1026	LINC00473(-138kb)|PDE10A(+123.9kb)
17	43783803	rs62056909	G	A	0.205929	3	4.197e-05	4.197e-05	0.884	0.884	0.8278	0	0.8772	0.8662	0.9051	CRHR1(0)|CRHR1-IT1(+60.21kb)|LOC644172(+104.1kb)|LRRC37A4P(+185.9kb)|MAPT(-187.9kb)|MAPT-AS1(-136.9kb)|MAPT-IT1(-189.3kb)|MGC57346(+68.47kb)|SPPL2C(-138.5kb)
21	27448770	rs2830042	C	T	0.0674623	3	4.198e-05	4.198e-05	0.8126	0.8126	0.5525	0	0.8656	0.823	0.76	APP(0)
17	44347218	rs530676870	A	C	0.204019	3	4.208e-05	4.208e-05	0.8806	0.8806	0.9214	0	0.8889	0.8635	0.8865	ARL17A(-29.28kb)|ARL17B(-29.69kb)|KANSL1(+44.48kb)|KANSL1-AS1(+73.13kb)|LRRC37A(-25.28kb)|NSFP1(-103kb)
3	60264266	rs213358	G	T	0.905405	3	4.215e-05	0.003823	0.8427	0.8477	0.1584	45.73	0.8425	0.9484	0.7784	FHIT(0)
6	166199295	rs6456013	A	G	0.577564	3	4.228e-05	4.228e-05	1.108	1.108	0.6261	0	1.1405	1.0722	1.1027	LINC00473(-138.2kb)|PDE10A(+123.7kb)
17	43840016	rs11079720	A	G	0.202633	3	4.234e-05	4.234e-05	0.8838	0.8838	0.8103	0	0.8715	0.8697	0.9067	CRHR1(0)|CRHR1-IT1(+116.4kb)|LOC644172(+160.3kb)|MAPT(-131.7kb)|MAPT-AS1(-80.7kb)|MAPT-IT1(-133.1kb)|MGC57346(+124.7kb)|SPPL2C(-82.24kb)
11	47378396	rs10769256	T	C	0.401063	2	4.236e-05	0.09921	1.1406	1.1308	0.0216	81.04	1.2159	1.0474	NA	ACP2(+107.9kb)|ARFGAP2(+179.7kb)|C11orf49(+192.5kb)|CELF1(-109.1kb)|DDB2(+117.6kb)|MADD(+26.81kb)|MYBPC3(+4.143kb)|NR1H3(+87.81kb)|PACSIN3(+170.4kb)|PSMC3(-61.92kb)|RAPSN(-80.91kb)|SLC39A13(-51.65kb)|SPI1(0)
1	3440028	rs10797398	C	G	0.70134	3	4.248e-05	0.006277	0.8815	0.8775	0.0916	58.16	0.8323	0.8386	0.9593	ARHGEF16(+42.35kb)|MEGF6(0)|MIR551A(-37.23kb)|PRDM16(+84.84kb)|TP73(-129.1kb)|TPRG1L(-101.5kb)|WRAP73(-107.3kb)
1	47204938	rs1595897	C	T	0.48611	3	4.254e-05	4.254e-05	1.1113	1.1113	0.3825	0	1.1207	1.1699	1.0689	ATPAF1(+70.84kb)|CYP4A11(-189.9kb)|CYP4B1(-59.73kb)|CYP4Z2P(-103.8kb)|EFCAB14(+20.2kb)|EFCAB14-AS1(+47.17kb)|KNCN(+188.1kb)|MKNK1(+135kb)|MKNK1-AS1(+169kb)|MOB3C(+122.4kb)|TEX38(+65.68kb)
17	43792418	rs55849973	C	T	0.204758	3	4.271e-05	4.271e-05	0.884	0.884	0.8657	0	0.8803	0.8667	0.9017	CRHR1(0)|CRHR1-IT1(+68.82kb)|LOC644172(+112.7kb)|LRRC37A4P(+194.5kb)|MAPT(-179.3kb)|MAPT-AS1(-128.3kb)|MAPT-IT1(-180.7kb)|MGC57346(+77.09kb)|SPPL2C(-129.8kb)
6	32451361	rs12191360	A	C	0.658377	2	4.274e-05	4.274e-05	0.8666	0.8666	0.3769	0	0.8442	0.8988	NA	BTNL2(+76.46kb)|C6orf10(+111.7kb)|HCG23(+89.89kb)|HLA-DQA1(-153.8kb)|HLA-DQB1(-175.9kb)|HLA-DRA(+38.54kb)|HLA-DRB1(-95.18kb)|HLA-DRB5(-33.79kb)|HLA-DRB6(-69.13kb)
6	166199291	rs6934322	A	G	0.577579	3	4.285e-05	4.285e-05	1.1079	1.1079	0.6277	0	1.1403	1.0722	1.1026	LINC00473(-138.2kb)|PDE10A(+123.7kb)
17	43792411	rs56167560	G	A	0.204466	3	4.292e-05	4.292e-05	0.8841	0.8841	0.8649	0	0.8803	0.8667	0.9018	CRHR1(0)|CRHR1-IT1(+68.82kb)|LOC644172(+112.7kb)|LRRC37A4P(+194.5kb)|MAPT(-179.3kb)|MAPT-AS1(-128.3kb)|MAPT-IT1(-180.7kb)|MGC57346(+77.08kb)|SPPL2C(-129.8kb)
17	39650076	rs1902220	T	C	0.284062	3	4.323e-05	0.0006709	1.119	1.1185	0.242	29.53	1.1915	1.0789	1.0831	EIF1(-195kb)|KRT9(-72.02kb)|KRT13(-7.156kb)|KRT14(-88.45kb)|KRT15(-19.92kb)|KRT16(-116kb)|KRT17(-125.6kb)|KRT19(-29.79kb)|KRT31(+96.23kb)|KRT32(+26.44kb)|KRT33A(+143kb)|KRT33B(+124kb)|KRT34(+111.4kb)|KRT35(+12.68kb)|KRT36(+3.96kb)|KRT37(+69.25kb)|KRT38(+52.48kb)|KRT42P(-132.5kb)|KRTAP16-1(+184.6kb)|KRTAP17-1(+178.1kb)|KRTAP29-1(+191kb)|LINC00974(-55.78kb)|LOC100505782(+81.24kb)
1	55652983	rs6676563	T	G	0.617185	3	4.327e-05	4.327e-05	0.9005	0.9005	0.3855	0	0.8612	0.9067	0.9341	BSND(+178.5kb)|LOC100507634(-28.1kb)|MIR4422(-38.33kb)|PCSK9(+122.5kb)|TMEM61(+195kb)|USP24(0)
22	22909240	rs73397363	G	C	0.0225285	2	4.348e-05	4.348e-05	0.5493	0.5493	0.5767	0	0.6011	0.51	NA	GGTLC2(-79.54kb)|LOC648691(+0.233kb)|POM121L1P(-64.79kb)|PRAME(+7.544kb)|ZNF280A(+34.63kb)|ZNF280B(+45.74kb)
17	43798401	rs62056946	A	G	0.205821	3	4.352e-05	4.352e-05	0.8847	0.8847	0.8864	0	0.8795	0.8702	0.9013	CRHR1(0)|CRHR1-IT1(+74.81kb)|LOC644172(+118.7kb)|MAPT(-173.3kb)|MAPT-AS1(-122.3kb)|MAPT-IT1(-174.7kb)|MGC57346(+83.07kb)|SPPL2C(-123.9kb)
22	35544140	rs134254	A	G	0.105929	3	4.366e-05	0.0006841	1.1887	1.195	0.2206	33.83	1.2165	1.3118	1.0999	HMGXB4(-109.3kb)|ISX(+60.76kb)|MIR3909(-187.5kb)|TOM1(-151.1kb)
1	233717958	rs142619391	A	G	0.0155528	2	4.381e-05	0.0693	1.7375	1.7115	0.029	79.03	2.2916	1.2681	NA	KCNK1(-31.79kb)|KIAA1804(+197.1kb)|MIR4427(-41.94kb)
8	27456253	rs2279590	C	T	0.60676	3	4.381e-05	0.0002811	1.111	1.1122	0.2766	22.19	1.1379	1.1595	1.0554	CCDC25(-134.6kb)|CHRNA2(+119.4kb)|CLU(0)|EPHX2(+53.81kb)|ESCO2(-175.8kb)|MIR3622A(-102.9kb)|MIR3622B(-102.9kb)|PTK2B(+139.3kb)|SCARA3(-35.32kb)
6	32578285	rs9271184	C	A	0.727548	2	4.387e-05	4.387e-05	0.8233	0.8233	0.9831	0	0.824	0.8223	NA	HLA-DQA1(-26.9kb)|HLA-DQA2(-130.9kb)|HLA-DQB1(-48.96kb)|HLA-DQB2(-145.6kb)|HLA-DRA(+165.5kb)|HLA-DRB1(+20.67kb)|HLA-DRB5(+80.28kb)|HLA-DRB6(+50.51kb)
7	37226871	rs10250337	G	T	0.224269	3	4.389e-05	4.389e-05	1.1275	1.1275	0.9572	0	1.141	1.125	1.1183	ELMO1(0)
17	43804306	rs62054384	C	T	0.205836	3	4.392e-05	4.392e-05	0.8847	0.8847	0.8781	0	0.8789	0.87	0.9021	CRHR1(0)|CRHR1-IT1(+80.71kb)|LOC644172(+124.6kb)|MAPT(-167.4kb)|MAPT-AS1(-116.4kb)|MAPT-IT1(-168.8kb)|MGC57346(+88.98kb)|SPPL2C(-117.9kb)
15	48949078	rs7166445	A	G	0.772174	3	4.393e-05	4.393e-05	1.132	1.132	0.7979	0	1.1496	1.1513	1.1031	CEP152(-81.06kb)|FBN1(+11.09kb)|SHC4(-166.9kb)
6	166199063	rs6935239	T	C	0.577749	3	4.399e-05	4.399e-05	1.1075	1.1075	0.6277	0	1.1401	1.0722	1.1019	LINC00473(-138.5kb)|PDE10A(+123.5kb)
17	43840006	rs11079719	G	T	0.20308	3	4.399e-05	4.399e-05	0.884	0.884	0.8068	0	0.8716	0.8698	0.9072	CRHR1(0)|CRHR1-IT1(+116.4kb)|LOC644172(+160.3kb)|MAPT(-131.7kb)|MAPT-AS1(-80.72kb)|MAPT-IT1(-133.1kb)|MGC57346(+124.7kb)|SPPL2C(-82.25kb)
17	44350090	rs2532329	A	G	0.203988	3	4.404e-05	4.404e-05	0.8813	0.8813	0.917	0	0.8891	0.8636	0.888	ARL17A(-26.41kb)|ARL17B(-26.82kb)|KANSL1(+47.35kb)|KANSL1-AS1(+76kb)|LRRC37A(-22.41kb)|NSFP1(-100.1kb)
17	43800987	rs62054380	A	C	0.20579	3	4.419e-05	4.419e-05	0.8847	0.8847	0.88	0	0.879	0.8702	0.902	CRHR1(0)|CRHR1-IT1(+77.39kb)|LOC644172(+121.2kb)|MAPT(-170.8kb)|MAPT-AS1(-119.7kb)|MAPT-IT1(-172.2kb)|MGC57346(+85.66kb)|SPPL2C(-121.3kb)
17	43839951	rs11079718	T	A	0.204466	3	4.422e-05	4.422e-05	0.8845	0.8845	0.7944	0	0.8713	0.8702	0.9084	CRHR1(0)|CRHR1-IT1(+116.4kb)|LOC644172(+160.2kb)|MAPT(-131.8kb)|MAPT-AS1(-80.77kb)|MAPT-IT1(-133.2kb)|MGC57346(+124.6kb)|SPPL2C(-82.3kb)
7	81541699	rs149059879	C	A	0.0148137	2	4.423e-05	0.0006363	1.7462	1.7509	0.2299	30.62	2.0756	1.4949	NA	CACNA2D1(-37.72kb)|HGF(+142.2kb)
17	39649950	rs1902222	C	T	0.285602	3	4.474e-05	0.00104	1.1185	1.1178	0.2201	33.94	1.1932	1.0747	1.0833	EIF1(-195.2kb)|KRT9(-72.14kb)|KRT13(-7.282kb)|KRT14(-88.58kb)|KRT15(-20.05kb)|KRT16(-116.1kb)|KRT17(-125.7kb)|KRT19(-29.92kb)|KRT31(+96.11kb)|KRT32(+26.31kb)|KRT33A(+142.9kb)|KRT33B(+123.9kb)|KRT34(+111.3kb)|KRT35(+12.56kb)|KRT36(+3.834kb)|KRT37(+69.13kb)|KRT38(+52.35kb)|KRT42P(-132.6kb)|KRTAP16-1(+184.4kb)|KRTAP17-1(+178kb)|KRTAP29-1(+190.8kb)|LINC00974(-55.91kb)|LOC100505782(+81.11kb)
5	11968844	rs57729460	T	C	0.422513	3	4.48e-05	4.48e-05	1.1078	1.1078	0.4305	0	1.1391	1.1343	1.0638	CTNND2(+64.73kb)
15	48701029	rs11070641	T	C	0.765753	3	4.497e-05	4.497e-05	1.1306	1.1306	0.925	0	1.149	1.1219	1.12	DUT(+65.46kb)|FBN1(0)|SLC12A1(+104.8kb)
8	42436956	rs11776348	T	A	0.362011	3	4.498e-05	4.498e-05	1.1114	1.1114	0.6759	0	1.0801	1.1117	1.1394	CHRNA6(-170.8kb)|CHRNB3(-115.6kb)|SLC20A2(+39.6kb)|SMIM19(+28.82kb)|VDAC3(+173.5kb)
11	76448286	rs11236918	A	C	0.121312	3	4.499e-05	4.499e-05	1.1734	1.1734	0.9577	0	1.1811	1.151	1.1818	ACER3(-123.6kb)|C11orf30(+185.7kb)|GUCY2EP(+15.45kb)|LRRC32(+66.5kb)|TSKU(-45.07kb)
17	43804619	rs56380663	T	C	0.205805	3	4.501e-05	4.501e-05	0.8849	0.8849	0.8769	0	0.879	0.8702	0.9024	CRHR1(0)|CRHR1-IT1(+81.02kb)|LOC644172(+124.9kb)|MAPT(-167.1kb)|MAPT-AS1(-116.1kb)|MAPT-IT1(-168.5kb)|MGC57346(+89.29kb)|SPPL2C(-117.6kb)
17	39650073	rs1902221	A	C	0.284062	3	4.511e-05	0.0007546	1.1187	1.1182	0.2376	30.42	1.1916	1.077	1.0835	EIF1(-195.1kb)|KRT9(-72.02kb)|KRT13(-7.159kb)|KRT14(-88.46kb)|KRT15(-19.92kb)|KRT16(-116kb)|KRT17(-125.6kb)|KRT19(-29.8kb)|KRT31(+96.23kb)|KRT32(+26.44kb)|KRT33A(+143kb)|KRT33B(+124kb)|KRT34(+111.4kb)|KRT35(+12.68kb)|KRT36(+3.957kb)|KRT37(+69.25kb)|KRT38(+52.48kb)|KRT42P(-132.5kb)|KRTAP16-1(+184.6kb)|KRTAP17-1(+178.1kb)|KRTAP29-1(+191kb)|LINC00974(-55.78kb)|LOC100505782(+81.23kb)
11	95820027	rs10831478	A	T	0.542624	3	4.523e-05	4.523e-05	1.1077	1.1077	0.7083	0	1.0877	1.0916	1.1367	MAML2(0)|MTMR2(+162.7kb)
21	27507649	rs2830081	C	A	0.311765	3	4.532e-05	4.532e-05	0.8972	0.8972	0.3913	0	0.8586	0.8952	0.9345	APP(0)
21	27506969	rs13046704	C	G	0.310995	3	4.533e-05	4.533e-05	0.8972	0.8972	0.3904	0	0.8588	0.8944	0.9348	APP(0)
19	7853716	rs36056976	G	C	0.210841	3	4.535e-05	4.535e-05	1.1376	1.1376	0.9026	0	1.1583	1.1406	1.1197	C19orf59(+109kb)|CAMSAP3(+170.5kb)|CD209(+41.25kb)|CLEC4G(+56.66kb)|CLEC4GP1(0)|CLEC4M(+19.22kb)|CTXN1(-135.7kb)|ELAVL1(-169.7kb)|EVI5L(-41.44kb)|FCER2(+86.68kb)|FLJ22184(-79.89kb)|LOC388499(-89.8kb)|LRRC8E(-99.67kb)|MAP2K7(-115kb)|PCP2(+155.1kb)|PET100(+157.2kb)|RETN(+118.4kb)|SNAPC2(-131.5kb)|STXBP2(+141kb)|TGFBR3L(-127.3kb)|TIMM44(-137.9kb)|TRAPPC5(+106kb)|XAB2(+159.3kb)
11	76448859	rs76829346	C	T	0.119787	3	4.544e-05	4.544e-05	1.1733	1.1733	0.9569	0	1.1804	1.1506	1.1822	ACER3(-123.1kb)|C11orf30(+186.3kb)|GUCY2EP(+16.03kb)|LRRC32(+67.07kb)|TSKU(-44.5kb)
6	166199560	rs6456015	T	C	0.5745	3	4.557e-05	4.557e-05	1.1075	1.1075	0.6374	0	1.1386	1.0712	1.1038	LINC00473(-138kb)|PDE10A(+124kb)
12	104116134	rs79956596	C	T	0.0833693	3	4.561e-05	4.561e-05	1.2034	1.2034	0.4218	0	1.142	1.1553	1.2974	GNN(-121.4kb)|NT5DC3(-49.95kb)|STAB2(0)
16	30078492	rs9783783	C	G	0.492254	3	4.564e-05	4.564e-05	0.8998	0.8998	0.6677	0	0.8731	0.902	0.9221	ALDOA(0)|ASPHD1(+161.1kb)|BOLA2(-125.8kb)|BOLA2B(-125.8kb)|C16orf92(+42.47kb)|CDIPT-AS1(+199.1kb)|CORO1A(-116.2kb)|DOC2A(+56.09kb)|FAM57B(+36.31kb)|GDPD3(-37.64kb)|HIRIP3(+71.08kb)|INO80E(+61.38kb)|KCTD13(+140.9kb)|LOC388242(-137.1kb)|LOC606724(-121.5kb)|LOC613037(-155.9kb)|LOC613038(-137.1kb)|MAPK3(-46.93kb)|PPP4C(-8.891kb)|SEZ6L2(+167.9kb)|SLX1A(-126.7kb)|SLX1A-SULT1A3(-127.3kb)|SLX1B(-126.7kb)…
11	85787824	rs536841	T	C	0.68631	3	4.567e-05	0.02931	1.1129	1.12	0.0217	73.89	1.2071	1.1431	1.0244	CCDC83(+156.8kb)|EED(-168kb)|PICALM(+6.901kb)
7	112167217	rs62475892	T	C	0.1838	3	4.578e-05	4.578e-05	1.1411	1.1411	0.7095	0	1.134	1.1937	1.1156	IFRD1(+49.96kb)|LSMEM1(+36.27kb)|ZNF277(+183.2kb)
1	38367246	rs77532933	T	C	0.0882815	3	4.62e-05	0.0001467	0.8155	0.8152	0.3151	13.41	0.8731	0.7302	0.8439	C1orf122(+92.12kb)|CDCA8(+191.9kb)|EPHA10(+136.4kb)|FHL3(-95.2kb)|INPP5B(0)|MANEAL(+99.97kb)|MIR3659(-187.7kb)|MTF1(+41.95kb)|POU3F1(-142.3kb)|SF3A3(-55.4kb)|UTP11L(-111.1kb)|YRDC(+93.38kb)
10	7527613	rs74315794	C	T	0.0600092	3	4.62e-05	4.62e-05	1.2222	1.2222	0.5516	0	1.2979	1.2426	1.1482	ITIH5(-73.62kb)|SFMBT2(+74.16kb)
14	92359022	rs2244643	C	A	0.321143	3	4.62e-05	0.01796	1.1125	1.1151	0.0487	66.92	1.0211	1.1722	1.1646	ATXN3(-165.9kb)|CATSPERB(+160.6kb)|FBLN5(0)|TC2N(+25.14kb)|TRIP11(-75.22kb)
12	109595386	rs11065695	T	C	0.829966	3	4.632e-05	0.007368	0.8712	0.8767	0.127	51.54	0.9034	0.9448	0.8039	ACACB(0)|ALKBH2(+64.09kb)|FOXN4(-120.4kb)|SVOP(+136.5kb)|UNG(+46.59kb)|USP30(+69.56kb)|USP30-AS1(+103.6kb)
11	76448471	rs56325636	A	G	0.119772	3	4.641e-05	4.641e-05	1.1732	1.1732	0.9566	0	1.1803	1.1504	1.1821	ACER3(-123.4kb)|C11orf30(+185.9kb)|GUCY2EP(+15.64kb)|LRRC32(+66.68kb)|TSKU(-44.88kb)
17	43789698	rs62056931	A	G	0.204635	3	4.648e-05	4.648e-05	0.8844	0.8844	0.8598	0	0.8792	0.8678	0.9031	CRHR1(0)|CRHR1-IT1(+66.1kb)|LOC644172(+110kb)|LRRC37A4P(+191.8kb)|MAPT(-182kb)|MAPT-AS1(-131kb)|MAPT-IT1(-183.4kb)|MGC57346(+74.37kb)|SPPL2C(-132.6kb)
8	27468503	rs867230	A	C	0.606483	3	4.65e-05	0.002548	1.1113	1.1143	0.1504	47.22	1.1582	1.1554	1.0433	CCDC25(-122.3kb)|CHRNA2(+131.7kb)|CLU(0)|EPHX2(+66.06kb)|ESCO2(-163.6kb)|MIR3622A(-90.69kb)|MIR3622B(-90.69kb)|PBK(-198.6kb)|PTK2B(+151.6kb)|SCARA3(-23.07kb)
17	43804389	rs56205560	A	T	0.205821	3	4.655e-05	4.655e-05	0.8852	0.8852	0.8689	0	0.8789	0.8701	0.9033	CRHR1(0)|CRHR1-IT1(+80.79kb)|LOC644172(+124.6kb)|MAPT(-167.4kb)|MAPT-AS1(-116.3kb)|MAPT-IT1(-168.8kb)|MGC57346(+89.06kb)|SPPL2C(-117.9kb)
10	115455291	rs7911410	A	G	0.103619	3	4.665e-05	4.665e-05	1.1696	1.1696	0.9092	0	1.1554	1.1493	1.1924	CASP7(0)|DCLRE1A(-139.2kb)|HABP2(+105.9kb)|MIR4483(-82.46kb)|NHLRC2(-159.1kb)|NRAP(+31.46kb)|PLEKHS1(-55.92kb)
17	43794182	rs4609898	A	G	0.205467	3	4.668e-05	4.668e-05	0.8846	0.8846	0.8842	0	0.8807	0.8691	0.9013	CRHR1(0)|CRHR1-IT1(+70.59kb)|LOC644172(+114.4kb)|LRRC37A4P(+196.3kb)|MAPT(-177.6kb)|MAPT-AS1(-126.5kb)|MAPT-IT1(-179kb)|MGC57346(+78.85kb)|SPPL2C(-128.1kb)
17	43806451	rs4617909	T	C	0.206498	3	4.673e-05	4.673e-05	0.8852	0.8852	0.8718	0	0.879	0.8703	0.9031	CRHR1(0)|CRHR1-IT1(+82.86kb)|LOC644172(+126.7kb)|MAPT(-165.3kb)|MAPT-AS1(-114.3kb)|MAPT-IT1(-166.7kb)|MGC57346(+91.12kb)|SPPL2C(-115.8kb)
17	43840864	rs77849344	A	G	0.205297	3	4.679e-05	4.679e-05	0.8854	0.8854	0.8683	0	0.8802	0.8693	0.9031	CRHR1(0)|CRHR1-IT1(+117.3kb)|LOC644172(+161.1kb)|MAPT(-130.9kb)|MAPT-AS1(-79.86kb)|MAPT-IT1(-132.3kb)|MGC57346(+125.5kb)|SPPL2C(-81.39kb)
17	43799810	rs76667867	C	G	0.205744	3	4.683e-05	4.683e-05	0.8851	0.8851	0.869	0	0.8793	0.8696	0.9031	CRHR1(0)|CRHR1-IT1(+76.22kb)|LOC644172(+120.1kb)|MAPT(-171.9kb)|MAPT-AS1(-120.9kb)|MAPT-IT1(-173.3kb)|MGC57346(+84.48kb)|SPPL2C(-122.4kb)
17	43801695	rs17563501	T	C	0.20579	3	4.684e-05	4.684e-05	0.8851	0.8851	0.8715	0	0.879	0.8702	0.9031	CRHR1(0)|CRHR1-IT1(+78.1kb)|LOC644172(+121.9kb)|MAPT(-170.1kb)|MAPT-AS1(-119kb)|MAPT-IT1(-171.5kb)|MGC57346(+86.37kb)|SPPL2C(-120.6kb)
17	43799804	rs77819001	A	C	0.205775	3	4.685e-05	4.685e-05	0.8851	0.8851	0.8693	0	0.8794	0.8696	0.9031	CRHR1(0)|CRHR1-IT1(+76.21kb)|LOC644172(+120.1kb)|MAPT(-171.9kb)|MAPT-AS1(-120.9kb)|MAPT-IT1(-173.3kb)|MGC57346(+84.48kb)|SPPL2C(-122.5kb)
17	43794209	rs4605208	C	G	0.205759	3	4.697e-05	4.697e-05	0.8845	0.8845	0.8946	0	0.8804	0.8701	0.9006	CRHR1(0)|CRHR1-IT1(+70.61kb)|LOC644172(+114.5kb)|LRRC37A4P(+196.3kb)|MAPT(-177.5kb)|MAPT-AS1(-126.5kb)|MAPT-IT1(-178.9kb)|MGC57346(+78.88kb)|SPPL2C(-128kb)
17	43799667	rs62054378	A	C	0.205775	3	4.702e-05	4.702e-05	0.8851	0.8851	0.8684	0	0.8794	0.8696	0.9032	CRHR1(0)|CRHR1-IT1(+76.07kb)|LOC644172(+119.9kb)|MAPT(-172.1kb)|MAPT-AS1(-121.1kb)|MAPT-IT1(-173.5kb)|MGC57346(+84.34kb)|SPPL2C(-122.6kb)
17	43803788	rs56280222	C	T	0.205805	3	4.704e-05	4.704e-05	0.8852	0.8852	0.8706	0	0.879	0.8702	0.9032	CRHR1(0)|CRHR1-IT1(+80.19kb)|LOC644172(+124kb)|MAPT(-168kb)|MAPT-AS1(-116.9kb)|MAPT-IT1(-169.4kb)|MGC57346(+88.46kb)|SPPL2C(-118.5kb)
17	43801593	rs17649019	A	G	0.205821	3	4.71e-05	4.71e-05	0.8852	0.8852	0.8706	0	0.879	0.8702	0.9032	CRHR1(0)|CRHR1-IT1(+78kb)|LOC644172(+121.8kb)|MAPT(-170.2kb)|MAPT-AS1(-119.1kb)|MAPT-IT1(-171.6kb)|MGC57346(+86.26kb)|SPPL2C(-120.7kb)
17	43799509	rs55653963	C	A	0.205497	3	4.711e-05	4.711e-05	0.8851	0.8851	0.8684	0	0.8794	0.8696	0.9032	CRHR1(0)|CRHR1-IT1(+75.91kb)|LOC644172(+119.8kb)|MAPT(-172.2kb)|MAPT-AS1(-121.2kb)|MAPT-IT1(-173.6kb)|MGC57346(+84.18kb)|SPPL2C(-122.7kb)
17	43840899	rs74918686	C	G	0.205251	3	4.72e-05	4.72e-05	0.8853	0.8853	0.87	0	0.8804	0.8692	0.9029	CRHR1(0)|CRHR1-IT1(+117.3kb)|LOC644172(+161.2kb)|MAPT(-130.8kb)|MAPT-AS1(-79.82kb)|MAPT-IT1(-132.2kb)|MGC57346(+125.6kb)|SPPL2C(-81.36kb)
17	43799052	rs55787734	G	A	0.204081	3	4.725e-05	4.725e-05	0.8846	0.8846	0.8623	0	0.878	0.8692	0.9034	CRHR1(0)|CRHR1-IT1(+75.46kb)|LOC644172(+119.3kb)|MAPT(-172.7kb)|MAPT-AS1(-121.7kb)|MAPT-IT1(-174.1kb)|MGC57346(+83.72kb)|SPPL2C(-123.2kb)
17	43801092	rs112570965	C	T	0.205805	3	4.732e-05	4.732e-05	0.8852	0.8852	0.8707	0	0.879	0.8702	0.9032	CRHR1(0)|CRHR1-IT1(+77.5kb)|LOC644172(+121.3kb)|MAPT(-170.7kb)|MAPT-AS1(-119.6kb)|MAPT-IT1(-172.1kb)|MGC57346(+85.76kb)|SPPL2C(-121.2kb)
17	43804317	rs9897399	G	A	0.792408	3	4.733e-05	4.733e-05	1.1296	1.1296	0.8705	0	1.1344	1.1516	1.108	CRHR1(0)|CRHR1-IT1(+80.72kb)|LOC644172(+124.6kb)|MAPT(-167.4kb)|MAPT-AS1(-116.4kb)|MAPT-IT1(-168.8kb)|MGC57346(+88.99kb)|SPPL2C(-117.9kb)
17	43812218	rs1526126	T	C	0.206452	3	4.737e-05	4.737e-05	0.8853	0.8853	0.8758	0	0.8789	0.871	0.903	CRHR1(0)|CRHR1-IT1(+88.62kb)|LOC644172(+132.5kb)|MAPT(-159.5kb)|MAPT-AS1(-108.5kb)|MAPT-IT1(-160.9kb)|MGC57346(+96.89kb)|SPPL2C(-110kb)
17	43800404	rs77370070	G	T	0.205821	3	4.742e-05	4.742e-05	0.8852	0.8852	0.8709	0	0.8791	0.8702	0.9032	CRHR1(0)|CRHR1-IT1(+76.81kb)|LOC644172(+120.7kb)|MAPT(-171.3kb)|MAPT-AS1(-120.3kb)|MAPT-IT1(-172.7kb)|MGC57346(+85.08kb)|SPPL2C(-121.9kb)
15	86142632	rs79443949	T	C	0.0373422	3	4.748e-05	4.748e-05	1.301	1.301	0.6367	0	1.2364	1.2306	1.3973	AKAP13(0)|KLHL25(-159.9kb)|MIR1276(-171.1kb)
17	43800351	rs17563433	C	A	0.205805	3	4.75e-05	4.75e-05	0.8852	0.8852	0.8709	0	0.8791	0.8702	0.9032	CRHR1(0)|CRHR1-IT1(+76.76kb)|LOC644172(+120.6kb)|MAPT(-171.4kb)|MAPT-AS1(-120.4kb)|MAPT-IT1(-172.8kb)|MGC57346(+85.02kb)|SPPL2C(-121.9kb)
17	43799033	rs55962674	T	C	0.20579	3	4.759e-05	4.759e-05	0.8852	0.8852	0.8701	0	0.8795	0.8697	0.9031	CRHR1(0)|CRHR1-IT1(+75.44kb)|LOC644172(+119.3kb)|MAPT(-172.7kb)|MAPT-AS1(-121.7kb)|MAPT-IT1(-174.1kb)|MGC57346(+83.7kb)|SPPL2C(-123.2kb)
17	43784935	rs78568882	G	C	0.205082	3	4.768e-05	4.768e-05	0.885	0.885	0.8786	0	0.8806	0.8692	0.902	CRHR1(0)|CRHR1-IT1(+61.34kb)|LOC644172(+105.2kb)|LRRC37A4P(+187kb)|MAPT(-186.8kb)|MAPT-AS1(-135.8kb)|MAPT-IT1(-188.2kb)|MGC57346(+69.61kb)|SPPL2C(-137.3kb)
17	43782708	rs62056906	C	T	0.206221	3	4.769e-05	4.769e-05	0.8851	0.8851	0.885	0	0.8813	0.8695	0.9015	CRHR1(0)|CRHR1-IT1(+59.11kb)|LOC644172(+103kb)|LRRC37A4P(+184.8kb)|MAPT(-189kb)|MAPT-AS1(-138kb)|MAPT-IT1(-190.4kb)|MGC57346(+67.38kb)|SPPL2C(-139.5kb)
6	72348103	rs1575211	A	C	0.565214	3	4.771e-05	0.0002885	0.9038	0.9029	0.2807	21.28	0.8723	0.8797	0.9491	.
21	27520714	rs2186302	C	T	0.314182	3	4.772e-05	4.772e-05	0.8977	0.8977	0.37	0	0.8574	0.8975	0.9355	APP(0)
11	95817926	rs1939479	G	C	0.545026	3	4.775e-05	4.775e-05	1.1074	1.1074	0.7524	0	1.0911	1.09	1.1337	MAML2(0)|MTMR2(+160.6kb)
17	43807134	rs4471726	C	T	0.206175	3	4.778e-05	4.778e-05	0.8852	0.8852	0.8822	0	0.8789	0.8714	0.9025	CRHR1(0)|CRHR1-IT1(+83.54kb)|LOC644172(+127.4kb)|MAPT(-164.6kb)|MAPT-AS1(-113.6kb)|MAPT-IT1(-166kb)|MGC57346(+91.8kb)|SPPL2C(-115.1kb)
17	43807113	rs4609899	T	C	0.20619	3	4.783e-05	4.783e-05	0.8852	0.8852	0.8831	0	0.8789	0.8714	0.9024	CRHR1(0)|CRHR1-IT1(+83.52kb)|LOC644172(+127.4kb)|MAPT(-164.6kb)|MAPT-AS1(-113.6kb)|MAPT-IT1(-166kb)|MGC57346(+91.78kb)|SPPL2C(-115.1kb)
11	95814849	rs11021427	T	G	0.532784	3	4.793e-05	4.793e-05	1.1075	1.1075	0.6996	0	1.0831	1.098	1.1362	MAML2(0)|MTMR2(+157.5kb)
17	39639789	rs12951998	T	C	0.272174	3	4.796e-05	0.001993	1.1183	1.1173	0.1868	40.4	1.1968	1.0705	1.0821	KRT9(-82.3kb)|KRT13(-17.44kb)|KRT14(-98.74kb)|KRT15(-30.21kb)|KRT16(-126.2kb)|KRT17(-135.9kb)|KRT19(-40.08kb)|KRT31(+85.94kb)|KRT32(+16.15kb)|KRT33A(+132.7kb)|KRT33B(+113.7kb)|KRT34(+101.2kb)|KRT35(+2.397kb)|KRT36(-2.598kb)|KRT37(+58.97kb)|KRT38(+42.19kb)|KRT42P(-142.8kb)|KRTAP16-1(+174.3kb)|KRTAP17-1(+167.8kb)|KRTAP29-1(+180.7kb)|LINC00974(-66.07kb)|LOC100505782(+70.95kb)
17	43802525	rs62054382	T	C	0.205759	3	4.809e-05	4.809e-05	0.8853	0.8853	0.8725	0	0.8791	0.8705	0.9032	CRHR1(0)|CRHR1-IT1(+78.93kb)|LOC644172(+122.8kb)|MAPT(-169.2kb)|MAPT-AS1(-118.2kb)|MAPT-IT1(-170.6kb)|MGC57346(+87.2kb)|SPPL2C(-119.7kb)
7	112150716	rs886852	T	C	0.198352	3	4.815e-05	4.815e-05	1.1384	1.1384	0.7168	0	1.1177	1.1911	1.1254	IFRD1(+33.46kb)|LSMEM1(+19.77kb)|ZNF277(+166.7kb)
17	43776742	rs80143279	C	T	0.203834	3	4.818e-05	4.818e-05	0.8844	0.8844	0.8834	0	0.8786	0.8701	0.9016	CRHR1(0)|CRHR1-IT1(+53.15kb)|LOC644172(+96.99kb)|LRRC37A4P(+178.9kb)|MAPT(-195kb)|MAPT-AS1(-144kb)|MAPT-IT1(-196.4kb)|MGC57346(+61.41kb)|SPPL2C(-145.5kb)
2	127887985	rs12989701	A	C	0.144872	3	4.824e-05	0.0006732	1.1493	1.1515	0.2351	30.92	1.2132	1.1913	1.0697	BIN1(+23.08kb)|CYP27C1(-53.43kb)|ERCC3(-126.9kb)|MAP3K2(-168.3kb)
19	7851580	rs62125079	T	C	0.206452	3	4.826e-05	4.826e-05	1.1372	1.1372	0.9998	0	1.1366	1.1382	1.137	C19orf59(+106.9kb)|CAMSAP3(+168.4kb)|CD209(+39.12kb)|CLEC4G(+54.52kb)|CLEC4GP1(-0.789kb)|CLEC4M(+17.09kb)|CTXN1(-137.8kb)|ELAVL1(-171.9kb)|EVI5L(-43.58kb)|FCER2(+84.55kb)|FLJ22184(-82.02kb)|LOC388499(-91.94kb)|LRRC8E(-101.8kb)|MAP2K7(-117.2kb)|PCP2(+152.9kb)|PET100(+155.1kb)|RETN(+116.2kb)|SNAPC2(-133.6kb)|STXBP2(+138.8kb)|TGFBR3L(-129.5kb)|TIMM44(-140kb)|TRAPPC5(+103.8kb)|XAB2(+157.1kb)
9	459566	rs10814996	G	T	0.795735	3	4.831e-05	0.0002633	1.1336	1.1353	0.2833	20.72	1.1019	1.2307	1.1001	DOCK8(0)|KANK1(-10.73kb)
12	104126668	rs17034439	A	C	0.13012	3	4.834e-05	4.834e-05	1.1657	1.1657	0.8944	0	1.1391	1.1898	1.1749	GNN(-110.9kb)|HSP90B1(-197.4kb)|MIR3652(-197.5kb)|NT5DC3(-39.41kb)|STAB2(0)
17	43811060	rs62054395	G	T	0.206437	3	4.837e-05	4.837e-05	0.8853	0.8853	0.8818	0	0.8792	0.8713	0.9026	CRHR1(0)|CRHR1-IT1(+87.46kb)|LOC644172(+131.3kb)|MAPT(-160.7kb)|MAPT-AS1(-109.7kb)|MAPT-IT1(-162.1kb)|MGC57346(+95.73kb)|SPPL2C(-111.2kb)
17	43802907	rs62054383	C	T	0.20579	3	4.84e-05	4.84e-05	0.8853	0.8853	0.8739	0	0.8793	0.8705	0.9031	CRHR1(0)|CRHR1-IT1(+79.31kb)|LOC644172(+123.2kb)|MAPT(-168.8kb)|MAPT-AS1(-117.8kb)|MAPT-IT1(-170.2kb)|MGC57346(+87.58kb)|SPPL2C(-119.3kb)
6	32453191	rs527369852	C	T	0.592023	2	4.85e-05	4.85e-05	0.8705	0.8705	0.525	0	0.8545	0.8929	NA	BTNL2(+78.29kb)|C6orf10(+113.5kb)|HCG23(+91.72kb)|HLA-DQA1(-152kb)|HLA-DQB1(-174kb)|HLA-DRA(+40.36kb)|HLA-DRB1(-93.36kb)|HLA-DRB5(-31.96kb)|HLA-DRB6(-67.3kb)
17	43802971	rs10514879	T	C	0.205805	3	4.853e-05	4.853e-05	0.8854	0.8854	0.873	0	0.8793	0.8705	0.9032	CRHR1(0)|CRHR1-IT1(+79.38kb)|LOC644172(+123.2kb)|MAPT(-168.8kb)|MAPT-AS1(-117.8kb)|MAPT-IT1(-170.2kb)|MGC57346(+87.64kb)|SPPL2C(-119.3kb)
10	115460603	rs11196439	T	C	0.105482	3	4.861e-05	4.861e-05	1.169	1.169	0.9033	0	1.1526	1.1503	1.1927	CASP7(0)|DCLRE1A(-133.9kb)|HABP2(+111.2kb)|MIR4483(-77.15kb)|NHLRC2(-153.8kb)|NRAP(+36.77kb)|PLEKHS1(-50.61kb)
17	43790005	rs62056934	G	A	0.204881	3	4.862e-05	4.862e-05	0.885	0.885	0.8653	0	0.8785	0.8699	0.9036	CRHR1(0)|CRHR1-IT1(+66.41kb)|LOC644172(+110.3kb)|LRRC37A4P(+192.1kb)|MAPT(-181.7kb)|MAPT-AS1(-130.7kb)|MAPT-IT1(-183.1kb)|MGC57346(+74.68kb)|SPPL2C(-132.2kb)
17	43807485	rs79226879	C	T	0.206452	3	4.862e-05	4.862e-05	0.8853	0.8853	0.8798	0	0.879	0.8713	0.9028	CRHR1(0)|CRHR1-IT1(+83.89kb)|LOC644172(+127.7kb)|MAPT(-164.3kb)|MAPT-AS1(-113.2kb)|MAPT-IT1(-165.7kb)|MGC57346(+92.16kb)|SPPL2C(-114.8kb)
17	43807099	rs2902661	A	G	0.206483	3	4.864e-05	4.864e-05	0.8854	0.8854	0.878	0	0.879	0.8713	0.903	CRHR1(0)|CRHR1-IT1(+83.5kb)|LOC644172(+127.4kb)|MAPT(-164.6kb)|MAPT-AS1(-113.6kb)|MAPT-IT1(-166kb)|MGC57346(+91.77kb)|SPPL2C(-115.2kb)
17	43798546	rs75403953	G	A	0.205805	3	4.868e-05	4.868e-05	0.8853	0.8853	0.872	0	0.8795	0.8702	0.9032	CRHR1(0)|CRHR1-IT1(+74.95kb)|LOC644172(+118.8kb)|MAPT(-173.2kb)|MAPT-AS1(-122.2kb)|MAPT-IT1(-174.6kb)|MGC57346(+83.22kb)|SPPL2C(-123.7kb)
10	115453125	rs11196432	C	G	0.105497	3	4.87e-05	4.87e-05	1.1691	1.1691	0.9107	0	1.1543	1.1498	1.1917	CASP7(0)|DCLRE1A(-141.4kb)|HABP2(+103.8kb)|MIR4483(-84.63kb)|NHLRC2(-161.3kb)|NRAP(+29.3kb)|PLEKHS1(-58.09kb)
17	43798160	rs55989971	A	G	0.20579	3	4.871e-05	4.871e-05	0.8854	0.8854	0.8722	0	0.8796	0.8702	0.9032	CRHR1(0)|CRHR1-IT1(+74.56kb)|LOC644172(+118.4kb)|MAPT(-173.6kb)|MAPT-AS1(-122.6kb)|MAPT-IT1(-175kb)|MGC57346(+82.83kb)|SPPL2C(-124.1kb)
20	18032957	rs73899400	A	C	0.0492763	3	4.872e-05	0.04386	1.2818	1.266	0.0262	72.53	1.27	1.0264	1.5353	CSRP2BP(-89.91kb)|MGME1(+61.2kb)|OVOL2(0)|PET117(-85.54kb)|SNORD17(+89.37kb)|SNX5(+83.47kb)
17	43776741	rs76761706	C	T	0.203834	3	4.886e-05	4.886e-05	0.8845	0.8845	0.8852	0	0.8787	0.8704	0.9016	CRHR1(0)|CRHR1-IT1(+53.15kb)|LOC644172(+96.99kb)|LRRC37A4P(+178.9kb)|MAPT(-195kb)|MAPT-AS1(-144kb)|MAPT-IT1(-196.4kb)|MGC57346(+61.41kb)|SPPL2C(-145.5kb)
22	22913016	rs113183087	G	C	0.02085	2	4.89e-05	4.89e-05	0.5522	0.5522	0.6233	0	0.5972	0.517	NA	GGTLC2(-75.76kb)|LOC648691(+4.009kb)|POM121L1P(-61.01kb)|PRAME(+11.32kb)|ZNF280A(+38.4kb)|ZNF280B(+49.51kb)
8	139682520	rs72727898	G	A	0.0182168	3	4.891e-05	4.891e-05	1.4964	1.4964	0.6346	0	1.3597	1.3842	1.6571	COL22A1(0)|FAM135B(+173.5kb)
19	1032689	rs1141534	T	G	0.204004	2	4.891e-05	4.891e-05	1.2016	1.2016	0.4868	0	1.1616	1.2372	NA	ABCA7(-7.412kb)|ARID3A(+59.89kb)|C19orf26(-197.3kb)|CFD(+169.1kb)|CNN2(0)|ELANE(+176.4kb)|GPX4(-71.25kb)|GRIN3B(+22.97kb)|HMHA1(-33.23kb)|KISS1R(+111.7kb)|MED16(+139.5kb)|POLR2E(-53.89kb)|PRTN3(+184.5kb)|R3HDM4(+119.5kb)|SBNO2(-74.94kb)|STK11(-173.1kb)|TMEM259(+11.55kb)|WDR18(+38.12kb)
17	43807063	rs2864087	T	C	0.206483	3	4.893e-05	4.893e-05	0.8855	0.8855	0.8776	0	0.879	0.8714	0.9031	CRHR1(0)|CRHR1-IT1(+83.47kb)|LOC644172(+127.3kb)|MAPT(-164.7kb)|MAPT-AS1(-113.7kb)|MAPT-IT1(-166.1kb)|MGC57346(+91.73kb)|SPPL2C(-115.2kb)
8	139682542	rs67017256	A	C	0.0182014	3	4.894e-05	4.894e-05	1.4965	1.4965	0.6328	0	1.3589	1.3845	1.6577	COL22A1(0)|FAM135B(+173.5kb)
17	43840935	rs79545140	C	T	0.205266	3	4.9e-05	4.9e-05	0.8856	0.8856	0.8654	0	0.8805	0.8692	0.9035	CRHR1(0)|CRHR1-IT1(+117.3kb)|LOC644172(+161.2kb)|MAPT(-130.8kb)|MAPT-AS1(-79.79kb)|MAPT-IT1(-132.2kb)|MGC57346(+125.6kb)|SPPL2C(-81.32kb)
17	43806925	rs2902662	A	G	0.206468	3	4.902e-05	4.902e-05	0.8855	0.8855	0.8772	0	0.879	0.8713	0.9031	CRHR1(0)|CRHR1-IT1(+83.33kb)|LOC644172(+127.2kb)|MAPT(-164.8kb)|MAPT-AS1(-113.8kb)|MAPT-IT1(-166.2kb)|MGC57346(+91.6kb)|SPPL2C(-115.3kb)
17	43798015	rs56323722	C	A	0.20579	3	4.905e-05	4.905e-05	0.8854	0.8854	0.8725	0	0.8797	0.8702	0.9032	CRHR1(0)|CRHR1-IT1(+74.42kb)|LOC644172(+118.3kb)|MAPT(-173.7kb)|MAPT-AS1(-122.7kb)|MAPT-IT1(-175.1kb)|MGC57346(+82.69kb)|SPPL2C(-124.2kb)
17	43778752	rs62056876	T	C	0.205667	3	4.915e-05	4.915e-05	0.8853	0.8853	0.8781	0	0.8791	0.871	0.9029	CRHR1(0)|CRHR1-IT1(+55.16kb)|LOC644172(+99kb)|LRRC37A4P(+180.9kb)|MAPT(-193kb)|MAPT-AS1(-142kb)|MAPT-IT1(-194.4kb)|MGC57346(+63.42kb)|SPPL2C(-143.5kb)
17	43808067	rs17649138	A	G	0.206452	3	4.917e-05	4.917e-05	0.8855	0.8855	0.8728	0	0.879	0.8709	0.9034	CRHR1(0)|CRHR1-IT1(+84.47kb)|LOC644172(+128.3kb)|MAPT(-163.7kb)|MAPT-AS1(-112.7kb)|MAPT-IT1(-165.1kb)|MGC57346(+92.74kb)|SPPL2C(-114.2kb)
17	43781105	rs968028	G	A	0.205513	3	4.921e-05	4.921e-05	0.8853	0.8853	0.8724	0	0.8782	0.8713	0.9035	CRHR1(0)|CRHR1-IT1(+57.51kb)|LOC644172(+101.4kb)|LRRC37A4P(+183.2kb)|MAPT(-190.6kb)|MAPT-AS1(-139.6kb)|MAPT-IT1(-192kb)|MGC57346(+65.78kb)|SPPL2C(-141.2kb)
12	123901621	rs76355364	A	G	0.0454573	2	4.923e-05	4.923e-05	0.7161	0.7161	0.4994	0	0.675	0.7545	NA	C12orf65(+159.1kb)|CDK2AP1(+144.8kb)|DDX55(-185kb)|MIR3908(-119.3kb)|MPHOSPH9(+183.8kb)|RILPL1(-54.29kb)|RILPL2(0)|SBNO1(+66.63kb)|SETD8(+7.721kb)|SNRNP35(-41.03kb)|TMED2(-167.5kb)
17	43810782	rs113790915	C	G	0.206452	3	4.926e-05	4.926e-05	0.8855	0.8855	0.8774	0	0.8791	0.8713	0.9031	CRHR1(0)|CRHR1-IT1(+87.19kb)|LOC644172(+131kb)|MAPT(-161kb)|MAPT-AS1(-109.9kb)|MAPT-IT1(-162.4kb)|MGC57346(+95.45kb)|SPPL2C(-111.5kb)
17	43811072	rs17563683	G	A	0.206421	3	4.927e-05	4.927e-05	0.8855	0.8855	0.8778	0	0.8791	0.8714	0.9031	CRHR1(0)|CRHR1-IT1(+87.48kb)|LOC644172(+131.3kb)|MAPT(-160.7kb)|MAPT-AS1(-109.6kb)|MAPT-IT1(-162.1kb)|MGC57346(+95.74kb)|SPPL2C(-111.2kb)
17	43806264	rs1880752	T	C	0.206452	3	4.928e-05	4.928e-05	0.8855	0.8855	0.8772	0	0.879	0.8713	0.9031	CRHR1(0)|CRHR1-IT1(+82.67kb)|LOC644172(+126.5kb)|MAPT(-165.5kb)|MAPT-AS1(-114.5kb)|MAPT-IT1(-166.9kb)|MGC57346(+90.94kb)|SPPL2C(-116kb)
17	43792896	rs1568950	C	T	0.205759	3	4.929e-05	4.929e-05	0.8851	0.8851	0.8785	0	0.8808	0.8693	0.9022	CRHR1(0)|CRHR1-IT1(+69.3kb)|LOC644172(+113.1kb)|LRRC37A4P(+195kb)|MAPT(-178.9kb)|MAPT-AS1(-127.8kb)|MAPT-IT1(-180.3kb)|MGC57346(+77.57kb)|SPPL2C(-129.4kb)
9	109325158	rs111665752	A	G	0.0201263	3	4.943e-05	4.943e-05	1.4392	1.4392	0.6189	0	1.4184	1.2687	1.5791	.
17	43792895	rs1568951	G	T	0.205759	3	4.946e-05	4.946e-05	0.8851	0.8851	0.8785	0	0.8808	0.8693	0.9022	CRHR1(0)|CRHR1-IT1(+69.3kb)|LOC644172(+113.1kb)|LRRC37A4P(+195kb)|MAPT(-178.9kb)|MAPT-AS1(-127.8kb)|MAPT-IT1(-180.3kb)|MGC57346(+77.57kb)|SPPL2C(-129.4kb)
17	43798360	rs55938136	G	A	0.205805	3	4.947e-05	4.947e-05	0.8855	0.8855	0.8696	0	0.8795	0.8702	0.9035	CRHR1(0)|CRHR1-IT1(+74.76kb)|LOC644172(+118.6kb)|MAPT(-173.4kb)|MAPT-AS1(-122.4kb)|MAPT-IT1(-174.8kb)|MGC57346(+83.03kb)|SPPL2C(-123.9kb)
17	43805525	rs62054387	C	A	0.20616	3	4.947e-05	4.947e-05	0.8855	0.8855	0.872	0	0.879	0.8709	0.9035	CRHR1(0)|CRHR1-IT1(+81.93kb)|LOC644172(+125.8kb)|MAPT(-166.2kb)|MAPT-AS1(-115.2kb)|MAPT-IT1(-167.6kb)|MGC57346(+90.2kb)|SPPL2C(-116.7kb)
17	43788782	rs62056928	T	C	0.205513	3	4.951e-05	4.951e-05	0.8853	0.8853	0.8761	0	0.8804	0.8698	0.9027	CRHR1(0)|CRHR1-IT1(+65.19kb)|LOC644172(+109kb)|LRRC37A4P(+190.9kb)|MAPT(-183kb)|MAPT-AS1(-131.9kb)|MAPT-IT1(-184.4kb)|MGC57346(+73.45kb)|SPPL2C(-133.5kb)
17	43801185	rs62054381	G	A	0.206391	3	4.952e-05	4.952e-05	0.8855	0.8855	0.8858	0	0.8784	0.8726	0.9026	CRHR1(0)|CRHR1-IT1(+77.59kb)|LOC644172(+121.4kb)|MAPT(-170.6kb)|MAPT-AS1(-119.5kb)|MAPT-IT1(-172kb)|MGC57346(+85.86kb)|SPPL2C(-121.1kb)
17	43666906	rs57213017	C	G	0.20656	3	4.953e-05	4.953e-05	0.8814	0.8814	0.9213	0	0.877	0.87	0.8966	ARHGAP27(+156.6kb)|CRHR1(-30.8kb)|CRHR1-IT1(-49.43kb)|LOC644172(-10.58kb)|LRRC37A4P(+69.02kb)|MGC57346(-30.8kb)|MIR4315-1(+114.1kb)|MIR4315-2(+114.1kb)|PLEKHM1(+98.76kb)
17	43810608	rs62054394	A	T	0.206452	3	4.953e-05	4.953e-05	0.8856	0.8856	0.8757	0	0.8791	0.8713	0.9033	CRHR1(0)|CRHR1-IT1(+87.01kb)|LOC644172(+130.9kb)|MAPT(-161.1kb)|MAPT-AS1(-110.1kb)|MAPT-IT1(-162.5kb)|MGC57346(+95.28kb)|SPPL2C(-111.6kb)
10	115452443	rs11196431	A	T	0.103588	3	4.96e-05	4.96e-05	1.169	1.169	0.9155	0	1.1555	1.1492	1.1909	CASP7(0)|DCLRE1A(-142kb)|HABP2(+103.1kb)|MIR4483(-85.31kb)|NHLRC2(-161.9kb)|NRAP(+28.61kb)|PLEKHS1(-58.77kb)
10	115466836	rs11196443	G	T	0.099923	3	4.961e-05	4.961e-05	1.1689	1.1689	0.8807	0	1.1489	1.1501	1.1953	CASP7(0)|DCLRE1A(-127.6kb)|HABP2(+117.5kb)|MIR4483(-70.92kb)|NHLRC2(-147.6kb)|NRAP(+43.01kb)|PLEKHS1(-44.38kb)
17	44333423	rs2532363	T	G	0.206945	3	4.962e-05	4.962e-05	0.8813	0.8813	0.8679	0	0.8924	0.8591	0.8891	ARL17A(-43.08kb)|ARL17B(-43.49kb)|KANSL1(+30.68kb)|KANSL1-AS1(+59.33kb)|LRRC37A(-39.07kb)|NSFP1(-116.8kb)
17	43810371	rs17649162	C	G	0.206452	3	4.964e-05	4.964e-05	0.8856	0.8856	0.8758	0	0.8791	0.8713	0.9033	CRHR1(0)|CRHR1-IT1(+86.78kb)|LOC644172(+130.6kb)|MAPT(-161.4kb)|MAPT-AS1(-110.4kb)|MAPT-IT1(-162.8kb)|MGC57346(+95.04kb)|SPPL2C(-111.9kb)
17	43811673	rs17563718	T	C	0.206468	3	4.964e-05	4.964e-05	0.8856	0.8856	0.8773	0	0.8792	0.8714	0.9032	CRHR1(0)|CRHR1-IT1(+88.08kb)|LOC644172(+131.9kb)|MAPT(-160.1kb)|MAPT-AS1(-109kb)|MAPT-IT1(-161.5kb)|MGC57346(+96.34kb)|SPPL2C(-110.6kb)
17	43811510	rs62054396	C	T	0.206452	3	4.966e-05	4.966e-05	0.8856	0.8856	0.8774	0	0.8792	0.8714	0.9032	CRHR1(0)|CRHR1-IT1(+87.92kb)|LOC644172(+131.8kb)|MAPT(-160.2kb)|MAPT-AS1(-109.2kb)|MAPT-IT1(-161.6kb)|MGC57346(+96.18kb)|SPPL2C(-110.7kb)
17	43795768	rs112995313	C	T	0.20579	3	4.972e-05	4.972e-05	0.8854	0.8854	0.8753	0	0.88	0.8701	0.9029	CRHR1(0)|CRHR1-IT1(+72.17kb)|LOC644172(+116kb)|LRRC37A4P(+197.9kb)|MAPT(-176kb)|MAPT-AS1(-125kb)|MAPT-IT1(-177.4kb)|MGC57346(+80.44kb)|SPPL2C(-126.5kb)
17	43811792	rs62054397	T	C	0.206468	3	4.973e-05	4.973e-05	0.8856	0.8856	0.8775	0	0.8793	0.8714	0.9032	CRHR1(0)|CRHR1-IT1(+88.2kb)|LOC644172(+132kb)|MAPT(-160kb)|MAPT-AS1(-108.9kb)|MAPT-IT1(-161.4kb)|MGC57346(+96.46kb)|SPPL2C(-110.5kb)
17	43809328	rs75986348	G	A	0.206437	3	4.979e-05	4.979e-05	0.8856	0.8856	0.875	0	0.8791	0.8713	0.9034	CRHR1(0)|CRHR1-IT1(+85.73kb)|LOC644172(+129.6kb)|MAPT(-162.4kb)|MAPT-AS1(-111.4kb)|MAPT-IT1(-163.8kb)|MGC57346(+94kb)|SPPL2C(-112.9kb)
17	43797246	rs56046792	T	C	0.205451	3	4.981e-05	4.981e-05	0.8854	0.8854	0.8729	0	0.8798	0.8702	0.9032	CRHR1(0)|CRHR1-IT1(+73.65kb)|LOC644172(+117.5kb)|LRRC37A4P(+199.4kb)|MAPT(-174.5kb)|MAPT-AS1(-123.5kb)|MAPT-IT1(-175.9kb)|MGC57346(+81.92kb)|SPPL2C(-125kb)
17	43811950	rs4569335	C	A	0.206468	3	4.981e-05	4.981e-05	0.8856	0.8856	0.8775	0	0.8793	0.8714	0.9032	CRHR1(0)|CRHR1-IT1(+88.36kb)|LOC644172(+132.2kb)|MAPT(-159.8kb)|MAPT-AS1(-108.8kb)|MAPT-IT1(-161.2kb)|MGC57346(+96.62kb)|SPPL2C(-110.3kb)
17	43806015	rs4401083	A	G	0.206529	3	4.993e-05	4.993e-05	0.8856	0.8856	0.8749	0	0.879	0.8713	0.9034	CRHR1(0)|CRHR1-IT1(+82.42kb)|LOC644172(+126.3kb)|MAPT(-165.7kb)|MAPT-AS1(-114.7kb)|MAPT-IT1(-167.1kb)|MGC57346(+90.69kb)|SPPL2C(-116.2kb)
17	43809016	rs4390635	T	C	0.206437	3	4.993e-05	4.993e-05	0.8856	0.8856	0.8751	0	0.8791	0.8713	0.9034	CRHR1(0)|CRHR1-IT1(+85.42kb)|LOC644172(+129.3kb)|MAPT(-162.7kb)|MAPT-AS1(-111.7kb)|MAPT-IT1(-164.1kb)|MGC57346(+93.69kb)|SPPL2C(-113.2kb)
6	39125575	rs2815079	T	G	0.0935941	3	4.995e-05	0.0004984	0.8355	0.8373	0.268	24.05	0.8093	0.939	0.7908	DNAH8(+127kb)|GLP1R(+70.06kb)|KCNK5(-31.17kb)|KCNK16(-156.9kb)|KCNK17(-141.2kb)|KIF6(-177.3kb)|SAYSD1(+42.71kb)
17	43808763	rs55947210	G	A	0.206452	3	4.996e-05	4.996e-05	0.8856	0.8856	0.8751	0	0.8791	0.8713	0.9034	CRHR1(0)|CRHR1-IT1(+85.17kb)|LOC644172(+129kb)|MAPT(-163kb)|MAPT-AS1(-112kb)|MAPT-IT1(-164.4kb)|MGC57346(+93.43kb)|SPPL2C(-113.5kb)
17	43812177	rs1526125	T	C	0.206468	3	4.997e-05	4.997e-05	0.8857	0.8857	0.8773	0	0.8794	0.8713	0.9032	CRHR1(0)|CRHR1-IT1(+88.58kb)|LOC644172(+132.4kb)|MAPT(-159.6kb)|MAPT-AS1(-108.5kb)|MAPT-IT1(-161kb)|MGC57346(+96.85kb)|SPPL2C(-110.1kb)
22	18065633	rs182775150	T	C	0.0141053	2	5.002e-05	5.002e-05	1.8575	1.8575	0.9615	0	1.8701	1.8426	NA	ATP6V1E1(-9.269kb)|BCL2L13(-55.72kb)|BID(-151.3kb)|CECR2(+31.79kb)|LINC00528(-194.4kb)|MIR3198-1(-181.3kb)|SLC25A18(0)
17	43808945	rs62054392	T	C	0.206437	3	5.006e-05	5.006e-05	0.8856	0.8856	0.8751	0	0.8791	0.8713	0.9034	CRHR1(0)|CRHR1-IT1(+85.35kb)|LOC644172(+129.2kb)|MAPT(-162.8kb)|MAPT-AS1(-111.8kb)|MAPT-IT1(-164.2kb)|MGC57346(+93.62kb)|SPPL2C(-113.3kb)
17	43784994	rs62056913	T	C	0.20502	3	5.007e-05	5.007e-05	0.8852	0.8852	0.8768	0	0.8809	0.8693	0.9024	CRHR1(0)|CRHR1-IT1(+61.4kb)|LOC644172(+105.2kb)|LRRC37A4P(+187.1kb)|MAPT(-186.8kb)|MAPT-AS1(-135.7kb)|MAPT-IT1(-188.2kb)|MGC57346(+69.66kb)|SPPL2C(-137.3kb)
22	22909014	rs73397359	C	T	0.0207884	2	5.007e-05	5.007e-05	0.5491	0.5491	0.6475	0	0.5915	0.5164	NA	GGTLC2(-79.77kb)|LOC648691(+0.007kb)|POM121L1P(-65.01kb)|PRAME(+7.318kb)|ZNF280A(+34.4kb)|ZNF280B(+45.51kb)
17	43808321	rs62054389	A	G	0.206468	3	5.02e-05	5.02e-05	0.8856	0.8856	0.874	0	0.879	0.8713	0.9035	CRHR1(0)|CRHR1-IT1(+84.73kb)|LOC644172(+128.6kb)|MAPT(-163.4kb)|MAPT-AS1(-112.4kb)|MAPT-IT1(-164.8kb)|MGC57346(+92.99kb)|SPPL2C(-113.9kb)
17	43796541	rs1880750	A	T	0.205744	3	5.021e-05	5.021e-05	0.8855	0.8855	0.8734	0	0.88	0.8702	0.9032	CRHR1(0)|CRHR1-IT1(+72.95kb)|LOC644172(+116.8kb)|LRRC37A4P(+198.7kb)|MAPT(-175.2kb)|MAPT-AS1(-124.2kb)|MAPT-IT1(-176.6kb)|MGC57346(+81.21kb)|SPPL2C(-125.7kb)
17	43807955	rs17563599	C	A	0.206468	3	5.023e-05	5.023e-05	0.8856	0.8856	0.8741	0	0.879	0.8713	0.9035	CRHR1(0)|CRHR1-IT1(+84.36kb)|LOC644172(+128.2kb)|MAPT(-163.8kb)|MAPT-AS1(-112.8kb)|MAPT-IT1(-165.2kb)|MGC57346(+92.63kb)|SPPL2C(-114.3kb)
15	58526816	rs67047612	G	C	0.0611026	3	5.029e-05	0.0009942	0.799	0.7965	0.2118	35.56	0.7223	0.7634	0.9018	ALDH1A2(+168.7kb)|AQP9(+48.71kb)|LIPC(-197.4kb)
17	43808443	rs62054390	C	A	0.206452	3	5.03e-05	5.03e-05	0.8856	0.8856	0.8743	0	0.8791	0.8713	0.9035	CRHR1(0)|CRHR1-IT1(+84.85kb)|LOC644172(+128.7kb)|MAPT(-163.3kb)|MAPT-AS1(-112.3kb)|MAPT-IT1(-164.7kb)|MGC57346(+93.11kb)|SPPL2C(-113.8kb)
17	43778406	rs17688875	G	A	0.205728	3	5.034e-05	5.034e-05	0.8855	0.8855	0.8833	0	0.8783	0.8727	0.903	CRHR1(0)|CRHR1-IT1(+54.81kb)|LOC644172(+98.66kb)|LRRC37A4P(+180.5kb)|MAPT(-193.3kb)|MAPT-AS1(-142.3kb)|MAPT-IT1(-194.7kb)|MGC57346(+63.08kb)|SPPL2C(-143.8kb)
10	115461225	rs117293163	T	C	0.100262	3	5.039e-05	5.039e-05	1.1689	1.1689	0.9114	0	1.1537	1.1503	1.1915	CASP7(0)|DCLRE1A(-133.3kb)|HABP2(+111.9kb)|MIR4483(-76.53kb)|NHLRC2(-153.2kb)|NRAP(+37.4kb)|PLEKHS1(-49.99kb)
17	43795634	rs113991678	T	C	0.205805	3	5.05e-05	5.05e-05	0.8855	0.8855	0.874	0	0.8801	0.8701	0.9031	CRHR1(0)|CRHR1-IT1(+72.04kb)|LOC644172(+115.9kb)|LRRC37A4P(+197.7kb)|MAPT(-176.1kb)|MAPT-AS1(-125.1kb)|MAPT-IT1(-177.5kb)|MGC57346(+80.3kb)|SPPL2C(-126.6kb)
17	43852742	rs111370985	C	T	0.204188	3	5.05e-05	5.05e-05	0.8857	0.8857	0.8395	0	0.8782	0.8692	0.9059	CRHR1(0)|CRHR1-IT1(+129.1kb)|LOC644172(+173kb)|MAPT(-119kb)|MAPT-AS1(-67.98kb)|MAPT-IT1(-120.4kb)|MGC57346(+137.4kb)|SPPL2C(-69.51kb)
17	43805590	rs62054388	T	C	0.206437	3	5.06e-05	5.06e-05	0.8856	0.8856	0.8733	0	0.879	0.8713	0.9036	CRHR1(0)|CRHR1-IT1(+82kb)|LOC644172(+125.8kb)|MAPT(-166.2kb)|MAPT-AS1(-115.1kb)|MAPT-IT1(-167.6kb)|MGC57346(+90.26kb)|SPPL2C(-116.7kb)
17	43781505	rs79892630	T	C	0.205497	3	5.065e-05	5.065e-05	0.8855	0.8855	0.8699	0	0.8799	0.87	0.9035	CRHR1(0)|CRHR1-IT1(+57.91kb)|LOC644172(+101.8kb)|LRRC37A4P(+183.6kb)|MAPT(-190.2kb)|MAPT-AS1(-139.2kb)|MAPT-IT1(-191.6kb)|MGC57346(+66.18kb)|SPPL2C(-140.8kb)
17	43782558	rs17689116	C	T	0.205451	3	5.066e-05	5.066e-05	0.8855	0.8855	0.8667	0	0.8799	0.8697	0.9037	CRHR1(0)|CRHR1-IT1(+58.96kb)|LOC644172(+102.8kb)|LRRC37A4P(+184.7kb)|MAPT(-189.2kb)|MAPT-AS1(-138.2kb)|MAPT-IT1(-190.6kb)|MGC57346(+67.23kb)|SPPL2C(-139.7kb)
17	43782492	rs17689104	G	A	0.205405	3	5.071e-05	5.071e-05	0.8855	0.8855	0.8695	0	0.8799	0.8699	0.9035	CRHR1(0)|CRHR1-IT1(+58.9kb)|LOC644172(+102.7kb)|LRRC37A4P(+184.6kb)|MAPT(-189.3kb)|MAPT-AS1(-138.2kb)|MAPT-IT1(-190.7kb)|MGC57346(+67.16kb)|SPPL2C(-139.8kb)
11	95814093	rs11021425	A	G	0.532707	3	5.076e-05	5.076e-05	1.1071	1.1071	0.6876	0	1.0826	1.0966	1.1367	MAML2(0)|MTMR2(+156.7kb)
17	43795573	rs111415173	T	C	0.20579	3	5.078e-05	5.078e-05	0.8855	0.8855	0.8732	0	0.8801	0.8701	0.9032	CRHR1(0)|CRHR1-IT1(+71.98kb)|LOC644172(+115.8kb)|LRRC37A4P(+197.7kb)|MAPT(-176.2kb)|MAPT-AS1(-125.1kb)|MAPT-IT1(-177.6kb)|MGC57346(+80.24kb)|SPPL2C(-126.7kb)
17	43788666	rs62056926	G	C	0.205436	3	5.085e-05	5.085e-05	0.8855	0.8855	0.8676	0	0.8806	0.8692	0.9034	CRHR1(0)|CRHR1-IT1(+65.07kb)|LOC644172(+108.9kb)|LRRC37A4P(+190.8kb)|MAPT(-183.1kb)|MAPT-AS1(-132.1kb)|MAPT-IT1(-184.5kb)|MGC57346(+73.34kb)|SPPL2C(-133.6kb)
17	43788649	rs62056925	C	T	0.205436	3	5.087e-05	5.087e-05	0.8854	0.8854	0.8685	0	0.8806	0.8692	0.9033	CRHR1(0)|CRHR1-IT1(+65.05kb)|LOC644172(+108.9kb)|LRRC37A4P(+190.8kb)|MAPT(-183.1kb)|MAPT-AS1(-132.1kb)|MAPT-IT1(-184.5kb)|MGC57346(+73.32kb)|SPPL2C(-133.6kb)
1	179794012	rs80218162	A	G	0.0319064	3	5.089e-05	0.1078	1.338	1.308	0.0068	79.95	0.9672	1.4279	1.6124	CEP350(-129.9kb)|FAM163A(+8.679kb)|TDRD5(+133.6kb)|TOR1AIP1(-57.16kb)|TOR1AIP2(-15.09kb)
6	32431927	rs9268893	T	C	0.425531	2	5.089e-05	5.089e-05	0.8672	0.8672	0.7077	0	0.8774	0.8544	NA	BTNL2(+57.03kb)|C6orf10(+92.27kb)|HCG23(+70.46kb)|HLA-DQA1(-173.3kb)|HLA-DQB1(-195.3kb)|HLA-DRA(+19.1kb)|HLA-DRB1(-114.6kb)|HLA-DRB5(-53.23kb)|HLA-DRB6(-88.56kb)
15	48910240	rs1807301	G	A	0.273961	3	5.094e-05	5.094e-05	0.8896	0.8896	0.7204	0	0.8804	0.8655	0.9152	CEP152(-119.9kb)|FBN1(0)
10	115457889	rs7085113	C	T	0.104897	3	5.095e-05	5.095e-05	1.1686	1.1686	0.9136	0	1.1542	1.1495	1.1908	CASP7(0)|DCLRE1A(-136.6kb)|HABP2(+108.5kb)|MIR4483(-79.86kb)|NHLRC2(-156.5kb)|NRAP(+34.06kb)|PLEKHS1(-53.32kb)
17	43795238	rs76007856	A	G	0.205775	3	5.099e-05	5.099e-05	0.8856	0.8856	0.8725	0	0.8802	0.8701	0.9033	CRHR1(0)|CRHR1-IT1(+71.64kb)|LOC644172(+115.5kb)|LRRC37A4P(+197.3kb)|MAPT(-176.5kb)|MAPT-AS1(-125.5kb)|MAPT-IT1(-177.9kb)|MGC57346(+79.91kb)|SPPL2C(-127kb)
5	150597946	rs3097796	G	T	0.385494	3	5.1e-05	5.1e-05	0.8976	0.8976	0.7693	0	0.8773	0.9213	0.9005	ANXA6(+60.5kb)|CCDC69(0)|GM2A(-34.67kb)|GPX3(+189.4kb)|SLC36A2(-96.59kb)|SLC36A3(-57.98kb)|TNIP1(+130.7kb)
17	43782304	rs62056880	C	T	0.205513	3	5.101e-05	5.101e-05	0.8855	0.8855	0.8712	0	0.8801	0.87	0.9034	CRHR1(0)|CRHR1-IT1(+58.71kb)|LOC644172(+102.6kb)|LRRC37A4P(+184.4kb)|MAPT(-189.4kb)|MAPT-AS1(-138.4kb)|MAPT-IT1(-190.8kb)|MGC57346(+66.98kb)|SPPL2C(-140kb)
17	44338735	rs569025098	T	C	0.207823	3	5.109e-05	5.109e-05	0.882	0.882	0.8908	0	0.891	0.8618	0.89	ARL17A(-37.76kb)|ARL17B(-38.18kb)|KANSL1(+36kb)|KANSL1-AS1(+64.65kb)|LRRC37A(-33.76kb)|NSFP1(-111.4kb)
17	43792586	rs1880749	C	A	0.205759	3	5.11e-05	5.11e-05	0.8855	0.8855	0.8697	0	0.8808	0.8692	0.9032	CRHR1(0)|CRHR1-IT1(+68.99kb)|LOC644172(+112.8kb)|LRRC37A4P(+194.7kb)|MAPT(-179.2kb)|MAPT-AS1(-128.1kb)|MAPT-IT1(-180.6kb)|MGC57346(+77.26kb)|SPPL2C(-129.7kb)
17	43782455	rs62056881	T	G	0.205405	3	5.112e-05	5.112e-05	0.8856	0.8856	0.87	0	0.8798	0.8702	0.9036	CRHR1(0)|CRHR1-IT1(+58.86kb)|LOC644172(+102.7kb)|LRRC37A4P(+184.6kb)|MAPT(-189.3kb)|MAPT-AS1(-138.3kb)|MAPT-IT1(-190.7kb)|MGC57346(+67.13kb)|SPPL2C(-139.8kb)
17	43799048	rs55896111	A	G	0.203496	3	5.12e-05	5.12e-05	0.8849	0.8849	0.8795	0	0.8784	0.8708	0.9025	CRHR1(0)|CRHR1-IT1(+75.45kb)|LOC644172(+119.3kb)|MAPT(-172.7kb)|MAPT-AS1(-121.7kb)|MAPT-IT1(-174.1kb)|MGC57346(+83.72kb)|SPPL2C(-123.2kb)
17	43786698	rs62056919	T	C	0.205374	3	5.135e-05	5.135e-05	0.8856	0.8856	0.8672	0	0.881	0.869	0.9034	CRHR1(0)|CRHR1-IT1(+63.1kb)|LOC644172(+107kb)|LRRC37A4P(+188.8kb)|MAPT(-185kb)|MAPT-AS1(-134kb)|MAPT-IT1(-186.4kb)|MGC57346(+71.37kb)|SPPL2C(-135.6kb)
6	166198938	rs9347087	C	T	0.574854	3	5.138e-05	5.138e-05	1.1064	1.1064	0.6319	0	1.1384	1.0709	1.1015	LINC00473(-138.6kb)|PDE10A(+123.4kb)
17	44363929	rs567135833	T	C	0.203927	3	5.141e-05	5.141e-05	0.8803	0.8803	0.9149	0	0.8881	0.8625	0.8878	ARL17A(-12.57kb)|ARL17B(-12.98kb)|KANSL1(+61.19kb)|KANSL1-AS1(+89.84kb)|LRRC37A(-8.567kb)|NSFP1(-86.25kb)
17	44351387	rs2732708	T	C	0.203973	3	5.142e-05	5.142e-05	0.8823	0.8823	0.9087	0	0.8889	0.8637	0.8908	ARL17A(-25.11kb)|ARL17B(-25.52kb)|KANSL1(+48.65kb)|KANSL1-AS1(+77.3kb)|LRRC37A(-21.11kb)|NSFP1(-98.79kb)
17	43705756	rs393838	C	G	0.221512	3	5.153e-05	5.153e-05	0.8849	0.8849	0.9202	0	0.8797	0.8738	0.8993	ARHGAP27(+195.5kb)|CRHR1(0)|CRHR1-IT1(-10.58kb)|LOC644172(+26.01kb)|LRRC37A4P(+107.9kb)|MGC57346(0)|MIR4315-1(+153kb)|MIR4315-2(+153kb)|PLEKHM1(+137.6kb)
17	43786676	rs62056918	G	T	0.205405	3	5.154e-05	5.154e-05	0.8855	0.8855	0.8687	0	0.881	0.8691	0.9033	CRHR1(0)|CRHR1-IT1(+63.08kb)|LOC644172(+106.9kb)|LRRC37A4P(+188.8kb)|MAPT(-185.1kb)|MAPT-AS1(-134kb)|MAPT-IT1(-186.5kb)|MGC57346(+71.35kb)|SPPL2C(-135.6kb)
20	55025377	rs6024883	T	G	0.0786572	3	5.156e-05	0.005538	0.8282	0.8302	0.1262	51.68	0.7374	0.9331	0.8379	AURKA(+58.03kb)|CASS4(0)|CSTF1(+45.8kb)|FAM209A(-74.41kb)|FAM209B(-82.92kb)|FAM210B(+81.66kb)|GCNT7(-41.17kb)|RTFDC1(-18.27kb)|TFAP2C(-179kb)
17	43794286	rs75310534	T	C	0.205497	3	5.159e-05	5.159e-05	0.8856	0.8856	0.8739	0	0.8804	0.8701	0.9032	CRHR1(0)|CRHR1-IT1(+70.69kb)|LOC644172(+114.5kb)|LRRC37A4P(+196.4kb)|MAPT(-177.5kb)|MAPT-AS1(-126.4kb)|MAPT-IT1(-178.9kb)|MGC57346(+78.96kb)|SPPL2C(-128kb)
17	43792326	rs56220242	T	C	0.205759	3	5.162e-05	5.162e-05	0.8856	0.8856	0.8657	0	0.8807	0.8691	0.9036	CRHR1(0)|CRHR1-IT1(+68.73kb)|LOC644172(+112.6kb)|LRRC37A4P(+194.4kb)|MAPT(-179.4kb)|MAPT-AS1(-128.4kb)|MAPT-IT1(-180.8kb)|MGC57346(+77kb)|SPPL2C(-129.9kb)
13	83710266	rs9546302	T	C	0.739975	3	5.166e-05	5.166e-05	0.891	0.891	0.9259	0	0.8861	0.8796	0.9031	.
17	43793828	rs4479288	A	G	0.205836	3	5.169e-05	5.169e-05	0.8856	0.8856	0.8741	0	0.8801	0.8704	0.9033	CRHR1(0)|CRHR1-IT1(+70.23kb)|LOC644172(+114.1kb)|LRRC37A4P(+195.9kb)|MAPT(-177.9kb)|MAPT-AS1(-126.9kb)|MAPT-IT1(-179.3kb)|MGC57346(+78.5kb)|SPPL2C(-128.4kb)
13	21958918	rs9316335	C	A	0.655112	3	5.183e-05	5.183e-05	0.8982	0.8982	0.3727	0	0.9322	0.9168	0.8589	LINC00539(+39.92kb)|MICU2(-107.9kb)|MIPEPP3(0)|ZDHHC20(0)
3	39160399	rs1877564	C	T	0.184863	3	5.184e-05	5.184e-05	0.8787	0.8787	0.8359	0	0.8989	0.88	0.8603	CSRNP1(-22.94kb)|CX3CR1(-144.6kb)|GORASP1(+10.54kb)|SCN11A(+168.3kb)|TTC21A(0)|WDR48(+22.52kb)|XIRP1(-64.31kb)
6	166198548	rs6913604	G	T	0.578827	3	5.186e-05	5.186e-05	1.1065	1.1065	0.6095	0	1.1412	1.0723	1.0981	LINC00473(-139kb)|PDE10A(+123kb)
17	43705601	rs365825	G	A	0.221389	3	5.196e-05	5.196e-05	0.8849	0.8849	0.9186	0	0.8796	0.8738	0.8995	ARHGAP27(+195.3kb)|CRHR1(0)|CRHR1-IT1(-10.74kb)|LOC644172(+25.85kb)|LRRC37A4P(+107.7kb)|MGC57346(0)|MIR4315-1(+152.8kb)|MIR4315-2(+152.8kb)|PLEKHM1(+137.5kb)
17	43793651	rs7502718	A	G	0.205775	3	5.196e-05	5.196e-05	0.8856	0.8856	0.8741	0	0.8805	0.8701	0.9032	CRHR1(0)|CRHR1-IT1(+70.06kb)|LOC644172(+113.9kb)|LRRC37A4P(+195.8kb)|MAPT(-178.1kb)|MAPT-AS1(-127.1kb)|MAPT-IT1(-179.5kb)|MGC57346(+78.32kb)|SPPL2C(-128.6kb)
17	43792358	rs56160448	G	A	0.205744	3	5.197e-05	5.197e-05	0.8856	0.8856	0.8652	0	0.8806	0.8692	0.9037	CRHR1(0)|CRHR1-IT1(+68.76kb)|LOC644172(+112.6kb)|LRRC37A4P(+194.5kb)|MAPT(-179.4kb)|MAPT-AS1(-128.4kb)|MAPT-IT1(-180.8kb)|MGC57346(+77.03kb)|SPPL2C(-129.9kb)
6	72354480	rs12211185	T	C	0.566662	3	5.203e-05	0.0007204	0.9041	0.9028	0.2331	31.33	0.871	0.8777	0.953	.
17	43749949	rs62053954	A	G	0.205698	3	5.205e-05	5.205e-05	0.8855	0.8855	0.8798	0	0.878	0.8727	0.9034	CRHR1(0)|CRHR1-IT1(+26.35kb)|LOC644172(+70.2kb)|LRRC37A4P(+152.1kb)|MAPT-AS1(-170.8kb)|MGC57346(+34.62kb)|MIR4315-1(+197.1kb)|MIR4315-2(+197.1kb)|PLEKHM1(+181.8kb)|SPPL2C(-172.3kb)
17	43793665	rs7502937	G	A	0.205775	3	5.206e-05	5.206e-05	0.8856	0.8856	0.8742	0	0.8805	0.8701	0.9032	CRHR1(0)|CRHR1-IT1(+70.07kb)|LOC644172(+113.9kb)|LRRC37A4P(+195.8kb)|MAPT(-178.1kb)|MAPT-AS1(-127.1kb)|MAPT-IT1(-179.5kb)|MGC57346(+78.34kb)|SPPL2C(-128.6kb)
17	43790649	rs75076131	A	C	0.205775	3	5.208e-05	5.208e-05	0.8855	0.8855	0.8793	0	0.8807	0.8702	0.9027	CRHR1(0)|CRHR1-IT1(+67.05kb)|LOC644172(+110.9kb)|LRRC37A4P(+192.8kb)|MAPT(-181.1kb)|MAPT-AS1(-130.1kb)|MAPT-IT1(-182.5kb)|MGC57346(+75.32kb)|SPPL2C(-131.6kb)
17	43793951	rs4479289	A	G	0.205759	3	5.219e-05	5.219e-05	0.8857	0.8857	0.8733	0	0.8805	0.8701	0.9033	CRHR1(0)|CRHR1-IT1(+70.36kb)|LOC644172(+114.2kb)|LRRC37A4P(+196.1kb)|MAPT(-177.8kb)|MAPT-AS1(-126.8kb)|MAPT-IT1(-179.2kb)|MGC57346(+78.62kb)|SPPL2C(-128.3kb)
17	43809264	rs62054393	G	T	0.206421	3	5.224e-05	5.224e-05	0.8859	0.8859	0.8687	0	0.8791	0.8713	0.9042	CRHR1(0)|CRHR1-IT1(+85.67kb)|LOC644172(+129.5kb)|MAPT(-162.5kb)|MAPT-AS1(-111.5kb)|MAPT-IT1(-163.9kb)|MGC57346(+93.94kb)|SPPL2C(-113kb)
2	71254271	rs72485363	A	C	0.0255467	2	5.232e-05	5.232e-05	0.6197	0.6197	0.4773	0	0.6649	0.5605	NA	ANKRD53(+41.64kb)|ATP6V1B1(+61.71kb)|CD207(+191.3kb)|MCEE(-82.53kb)|MPHOSPH10(-103.2kb)|NAGK(-41.14kb)|OR7E91P(0)|PAIP2B(-155.6kb)|TEX261(+32.27kb)|VAX2(+93.7kb)
17	43792252	rs55973918	A	C	0.20579	3	5.243e-05	5.243e-05	0.8857	0.8857	0.8758	0	0.8806	0.8702	0.9031	CRHR1(0)|CRHR1-IT1(+68.66kb)|LOC644172(+112.5kb)|LRRC37A4P(+194.4kb)|MAPT(-179.5kb)|MAPT-AS1(-128.5kb)|MAPT-IT1(-180.9kb)|MGC57346(+76.92kb)|SPPL2C(-130kb)
17	44334052	rs62073157	A	G	0.206868	3	5.244e-05	5.244e-05	0.8817	0.8817	0.8863	0	0.8921	0.8612	0.8887	ARL17A(-42.45kb)|ARL17B(-42.86kb)|KANSL1(+31.31kb)|KANSL1-AS1(+59.96kb)|LRRC37A(-38.44kb)|NSFP1(-116.1kb)
17	43788767	rs62056927	A	G	0.205482	3	5.247e-05	5.247e-05	0.8857	0.8857	0.8763	0	0.8808	0.8701	0.903	CRHR1(0)|CRHR1-IT1(+65.17kb)|LOC644172(+109kb)|LRRC37A4P(+190.9kb)|MAPT(-183kb)|MAPT-AS1(-132kb)|MAPT-IT1(-184.4kb)|MGC57346(+73.44kb)|SPPL2C(-133.5kb)
17	43793200	rs1105571	T	A	0.205759	3	5.25e-05	5.25e-05	0.8858	0.8858	0.874	0	0.8806	0.8702	0.9033	CRHR1(0)|CRHR1-IT1(+69.6kb)|LOC644172(+113.5kb)|LRRC37A4P(+195.3kb)|MAPT(-178.5kb)|MAPT-AS1(-127.5kb)|MAPT-IT1(-179.9kb)|MGC57346(+77.87kb)|SPPL2C(-129.1kb)
17	43789144	rs62056929	A	G	0.205467	3	5.257e-05	5.257e-05	0.8857	0.8857	0.8769	0	0.8808	0.8702	0.903	CRHR1(0)|CRHR1-IT1(+65.55kb)|LOC644172(+109.4kb)|LRRC37A4P(+191.3kb)|MAPT(-182.6kb)|MAPT-AS1(-131.6kb)|MAPT-IT1(-184kb)|MGC57346(+73.82kb)|SPPL2C(-133.1kb)
17	43792975	rs1568949	A	G	0.205805	3	5.259e-05	5.259e-05	0.8857	0.8857	0.8739	0	0.8805	0.8702	0.9033	CRHR1(0)|CRHR1-IT1(+69.38kb)|LOC644172(+113.2kb)|LRRC37A4P(+195.1kb)|MAPT(-178.8kb)|MAPT-AS1(-127.7kb)|MAPT-IT1(-180.2kb)|MGC57346(+77.65kb)|SPPL2C(-129.3kb)
17	43793342	rs1105570	G	A	0.205775	3	5.259e-05	5.259e-05	0.8857	0.8857	0.8739	0	0.8805	0.8702	0.9033	CRHR1(0)|CRHR1-IT1(+69.75kb)|LOC644172(+113.6kb)|LRRC37A4P(+195.5kb)|MAPT(-178.4kb)|MAPT-AS1(-127.4kb)|MAPT-IT1(-179.8kb)|MGC57346(+78.01kb)|SPPL2C(-128.9kb)
17	43791332	rs62056939	C	T	0.20579	3	5.26e-05	5.26e-05	0.8857	0.8857	0.8759	0	0.8807	0.8702	0.9031	CRHR1(0)|CRHR1-IT1(+67.74kb)|LOC644172(+111.6kb)|LRRC37A4P(+193.4kb)|MAPT(-180.4kb)|MAPT-AS1(-129.4kb)|MAPT-IT1(-181.8kb)|MGC57346(+76kb)|SPPL2C(-130.9kb)
17	43793388	rs1105569	T	C	0.205759	3	5.263e-05	5.263e-05	0.8858	0.8858	0.8741	0	0.8806	0.8702	0.9033	CRHR1(0)|CRHR1-IT1(+69.79kb)|LOC644172(+113.6kb)|LRRC37A4P(+195.5kb)|MAPT(-178.4kb)|MAPT-AS1(-127.3kb)|MAPT-IT1(-179.8kb)|MGC57346(+78.06kb)|SPPL2C(-128.9kb)
17	44340253	rs561504284	G	A	0.207669	3	5.266e-05	5.266e-05	0.8824	0.8824	0.8686	0	0.8923	0.8601	0.8912	ARL17A(-36.25kb)|ARL17B(-36.66kb)|KANSL1(+37.51kb)|KANSL1-AS1(+66.16kb)|LRRC37A(-32.24kb)|NSFP1(-109.9kb)
17	43791652	rs74579538	A	G	0.205805	3	5.271e-05	5.271e-05	0.8857	0.8857	0.875	0	0.8806	0.8702	0.9032	CRHR1(0)|CRHR1-IT1(+68.06kb)|LOC644172(+111.9kb)|LRRC37A4P(+193.8kb)|MAPT(-180.1kb)|MAPT-AS1(-129.1kb)|MAPT-IT1(-181.5kb)|MGC57346(+76.32kb)|SPPL2C(-130.6kb)
17	43791468	rs75990322	C	T	0.205805	3	5.274e-05	5.274e-05	0.8857	0.8857	0.8751	0	0.8807	0.8702	0.9032	CRHR1(0)|CRHR1-IT1(+67.87kb)|LOC644172(+111.7kb)|LRRC37A4P(+193.6kb)|MAPT(-180.3kb)|MAPT-AS1(-129.3kb)|MAPT-IT1(-181.7kb)|MGC57346(+76.14kb)|SPPL2C(-130.8kb)
17	43779657	rs1526129	C	T	0.205544	3	5.277e-05	5.277e-05	0.8858	0.8858	0.8714	0	0.8808	0.8699	0.9035	CRHR1(0)|CRHR1-IT1(+56.06kb)|LOC644172(+99.91kb)|LRRC37A4P(+181.8kb)|MAPT(-192.1kb)|MAPT-AS1(-141.1kb)|MAPT-IT1(-193.5kb)|MGC57346(+64.33kb)|SPPL2C(-142.6kb)
17	43791344	rs62056940	A	T	0.20579	3	5.282e-05	5.282e-05	0.8857	0.8857	0.8751	0	0.8807	0.8702	0.9032	CRHR1(0)|CRHR1-IT1(+67.75kb)|LOC644172(+111.6kb)|LRRC37A4P(+193.5kb)|MAPT(-180.4kb)|MAPT-AS1(-129.4kb)|MAPT-IT1(-181.8kb)|MGC57346(+76.02kb)|SPPL2C(-130.9kb)
17	43791405	rs78803763	A	C	0.205775	3	5.287e-05	5.287e-05	0.8857	0.8857	0.8751	0	0.8807	0.8702	0.9032	CRHR1(0)|CRHR1-IT1(+67.81kb)|LOC644172(+111.7kb)|LRRC37A4P(+193.5kb)|MAPT(-180.3kb)|MAPT-AS1(-129.3kb)|MAPT-IT1(-181.7kb)|MGC57346(+76.08kb)|SPPL2C(-130.8kb)
6	39117893	rs2162838	A	T	0.0933631	3	5.288e-05	0.0003233	0.8357	0.8371	0.2911	18.96	0.8096	0.9365	0.7931	DNAH8(+119.3kb)|GLP1R(+62.37kb)|KCNK5(-38.85kb)|KCNK16(-164.6kb)|KCNK17(-148.9kb)|KIF6(-185kb)|LOC100131047(+197kb)|SAYSD1(+35.03kb)
17	43791610	rs113661667	C	T	0.205821	3	5.29e-05	5.29e-05	0.8857	0.8857	0.8752	0	0.8807	0.8702	0.9032	CRHR1(0)|CRHR1-IT1(+68.02kb)|LOC644172(+111.9kb)|LRRC37A4P(+193.7kb)|MAPT(-180.1kb)|MAPT-AS1(-129.1kb)|MAPT-IT1(-181.5kb)|MGC57346(+76.28kb)|SPPL2C(-130.6kb)
17	43791429	rs77387379	A	G	0.205759	3	5.293e-05	5.293e-05	0.8857	0.8857	0.8752	0	0.8807	0.8702	0.9032	CRHR1(0)|CRHR1-IT1(+67.83kb)|LOC644172(+111.7kb)|LRRC37A4P(+193.5kb)|MAPT(-180.3kb)|MAPT-AS1(-129.3kb)|MAPT-IT1(-181.7kb)|MGC57346(+76.1kb)|SPPL2C(-130.8kb)
2	127862133	rs6431219	T	C	0.396412	3	5.296e-05	0.002916	1.1068	1.1078	0.1575	45.9	1.1795	1.0939	1.0555	BIN1(0)|CYP27C1(-79.28kb)|ERCC3(-152.7kb)|MAP3K2(-194.1kb)
17	43779419	rs17688944	A	T	0.205544	3	5.297e-05	5.297e-05	0.8858	0.8858	0.8728	0	0.8808	0.87	0.9034	CRHR1(0)|CRHR1-IT1(+55.82kb)|LOC644172(+99.67kb)|LRRC37A4P(+181.5kb)|MAPT(-192.3kb)|MAPT-AS1(-141.3kb)|MAPT-IT1(-193.7kb)|MGC57346(+64.09kb)|SPPL2C(-142.8kb)
17	43791181	rs62056937	C	A	0.205805	3	5.301e-05	5.301e-05	0.8857	0.8857	0.8752	0	0.8807	0.8702	0.9032	CRHR1(0)|CRHR1-IT1(+67.59kb)|LOC644172(+111.4kb)|LRRC37A4P(+193.3kb)|MAPT(-180.6kb)|MAPT-AS1(-129.5kb)|MAPT-IT1(-182kb)|MGC57346(+75.85kb)|SPPL2C(-131.1kb)
17	43781778	rs17762361	G	A	0.205528	3	5.303e-05	5.303e-05	0.8858	0.8858	0.8752	0	0.8798	0.871	0.9035	CRHR1(0)|CRHR1-IT1(+58.18kb)|LOC644172(+102kb)|LRRC37A4P(+183.9kb)|MAPT(-190kb)|MAPT-AS1(-138.9kb)|MAPT-IT1(-191.4kb)|MGC57346(+66.45kb)|SPPL2C(-140.5kb)
17	43790446	rs62056935	G	A	0.205775	3	5.316e-05	5.316e-05	0.8858	0.8858	0.8744	0	0.8807	0.8702	0.9033	CRHR1(0)|CRHR1-IT1(+66.85kb)|LOC644172(+110.7kb)|LRRC37A4P(+192.6kb)|MAPT(-181.3kb)|MAPT-AS1(-130.3kb)|MAPT-IT1(-182.7kb)|MGC57346(+75.12kb)|SPPL2C(-131.8kb)
17	44364649	rs535576035	T	C	0.203573	3	5.316e-05	5.316e-05	0.8804	0.8804	0.9219	0	0.8886	0.8634	0.8868	ARL17A(-11.85kb)|ARL17B(-12.26kb)|KANSL1(+61.91kb)|KANSL1-AS1(+90.56kb)|LRRC37A(-7.847kb)|NSFP1(-85.53kb)
17	43743045	rs17760631	C	T	0.205667	3	5.317e-05	5.317e-05	0.8857	0.8857	0.8811	0	0.8784	0.8727	0.9034	CRHR1(0)|CRHR1-IT1(+19.45kb)|LOC644172(+63.3kb)|LRRC37A4P(+145.2kb)|MAPT-AS1(-177.7kb)|MGC57346(+27.72kb)|MIR4315-1(+190.2kb)|MIR4315-2(+190.2kb)|PLEKHM1(+174.9kb)|SPPL2C(-179.2kb)
17	43790911	rs62056936	T	A	0.20579	3	5.319e-05	5.319e-05	0.8858	0.8858	0.8743	0	0.8807	0.8702	0.9033	CRHR1(0)|CRHR1-IT1(+67.32kb)|LOC644172(+111.2kb)|LRRC37A4P(+193kb)|MAPT(-180.8kb)|MAPT-AS1(-129.8kb)|MAPT-IT1(-182.2kb)|MGC57346(+75.58kb)|SPPL2C(-131.3kb)
17	44351686	rs2732706	T	C	0.203896	3	5.321e-05	5.321e-05	0.8825	0.8825	0.896	0	0.8882	0.8628	0.8928	ARL17A(-24.81kb)|ARL17B(-25.23kb)|KANSL1(+48.95kb)|KANSL1-AS1(+77.6kb)|LRRC37A(-20.81kb)|NSFP1(-98.49kb)
17	43781426	rs62056879	C	T	0.205544	3	5.33e-05	5.33e-05	0.8858	0.8858	0.8776	0	0.8798	0.8713	0.9034	CRHR1(0)|CRHR1-IT1(+57.83kb)|LOC644172(+101.7kb)|LRRC37A4P(+183.5kb)|MAPT(-190.3kb)|MAPT-AS1(-139.3kb)|MAPT-IT1(-191.7kb)|MGC57346(+66.1kb)|SPPL2C(-140.8kb)
17	43752039	rs62055661	T	C	0.206083	3	5.331e-05	5.331e-05	0.8858	0.8858	0.8741	0	0.8789	0.8718	0.9039	CRHR1(0)|CRHR1-IT1(+28.44kb)|LOC644172(+72.29kb)|LRRC37A4P(+154.2kb)|MAPT-AS1(-168.7kb)|MGC57346(+36.71kb)|MIR4315-1(+199.2kb)|MIR4315-2(+199.2kb)|PLEKHM1(+183.9kb)|SPPL2C(-170.2kb)
17	43790401	rs79322350	G	A	0.205775	3	5.335e-05	5.335e-05	0.8858	0.8858	0.8754	0	0.8808	0.8702	0.9032	CRHR1(0)|CRHR1-IT1(+66.81kb)|LOC644172(+110.7kb)|LRRC37A4P(+192.5kb)|MAPT(-181.3kb)|MAPT-AS1(-130.3kb)|MAPT-IT1(-182.7kb)|MGC57346(+75.07kb)|SPPL2C(-131.9kb)
17	43788419	rs56397077	A	C	0.205467	3	5.341e-05	5.341e-05	0.8858	0.8858	0.8748	0	0.8809	0.8702	0.9033	CRHR1(0)|CRHR1-IT1(+64.82kb)|LOC644172(+108.7kb)|LRRC37A4P(+190.5kb)|MAPT(-183.3kb)|MAPT-AS1(-132.3kb)|MAPT-IT1(-184.7kb)|MGC57346(+73.09kb)|SPPL2C(-133.8kb)
17	44316449	rs62073098	C	A	0.207391	3	5.341e-05	5.341e-05	0.882	0.882	0.9027	0	0.89	0.8631	0.8902	ARL17A(-60.05kb)|ARL17B(-60.46kb)|KANSL1(+13.71kb)|KANSL1-AS1(+42.36kb)|LRRC37A(-56.05kb)|NSFP1(-133.7kb)
17	43770595	rs62056863	G	A	0.205698	3	5.347e-05	5.347e-05	0.8858	0.8858	0.886	0	0.8791	0.8727	0.903	CRHR1(0)|CRHR1-IT1(+47kb)|LOC644172(+90.85kb)|LRRC37A4P(+172.7kb)|MAPT-AS1(-150.1kb)|MGC57346(+55.27kb)|SPPL2C(-151.7kb)
17	43784948	rs62056912	T	G	0.205266	3	5.356e-05	5.356e-05	0.8858	0.8858	0.8738	0	0.8809	0.87	0.9033	CRHR1(0)|CRHR1-IT1(+61.35kb)|LOC644172(+105.2kb)|LRRC37A4P(+187.1kb)|MAPT(-186.8kb)|MAPT-AS1(-135.8kb)|MAPT-IT1(-188.2kb)|MGC57346(+69.62kb)|SPPL2C(-137.3kb)
17	43787130	rs17762535	C	T	0.205482	3	5.365e-05	5.365e-05	0.8858	0.8858	0.8743	0	0.8809	0.8701	0.9033	CRHR1(0)|CRHR1-IT1(+63.54kb)|LOC644172(+107.4kb)|LRRC37A4P(+189.2kb)|MAPT(-184.6kb)|MAPT-AS1(-133.6kb)|MAPT-IT1(-186kb)|MGC57346(+71.8kb)|SPPL2C(-135.1kb)
17	43749980	rs62053955	C	T	0.205744	3	5.371e-05	5.371e-05	0.8858	0.8858	0.8827	0	0.8787	0.8727	0.9033	CRHR1(0)|CRHR1-IT1(+26.38kb)|LOC644172(+70.23kb)|LRRC37A4P(+152.1kb)|MAPT-AS1(-170.7kb)|MGC57346(+34.65kb)|MIR4315-1(+197.2kb)|MIR4315-2(+197.2kb)|PLEKHM1(+181.8kb)|SPPL2C(-172.3kb)
17	44316076	rs55653937	T	G	0.206914	3	5.372e-05	5.372e-05	0.8821	0.8821	0.9024	0	0.89	0.8631	0.8903	ARL17A(-60.42kb)|ARL17B(-60.84kb)|KANSL1(+13.34kb)|KANSL1-AS1(+41.99kb)|LRRC37A(-56.42kb)|NSFP1(-134.1kb)
17	43707619	rs681485	A	C	0.205682	3	5.384e-05	5.384e-05	0.8849	0.8849	0.8818	0	0.8774	0.8723	0.9029	ARHGAP27(+197.3kb)|CRHR1(0)|CRHR1-IT1(-8.721kb)|LOC644172(+27.87kb)|LRRC37A4P(+109.7kb)|MGC57346(0)|MIR4315-1(+154.8kb)|MIR4315-2(+154.8kb)|PLEKHM1(+139.5kb)
17	43750238	rs17687625	G	A	0.205744	3	5.386e-05	5.386e-05	0.8858	0.8858	0.8817	0	0.8788	0.8726	0.9034	CRHR1(0)|CRHR1-IT1(+26.64kb)|LOC644172(+70.49kb)|LRRC37A4P(+152.3kb)|MAPT-AS1(-170.5kb)|MGC57346(+34.91kb)|MIR4315-1(+197.4kb)|MIR4315-2(+197.4kb)|PLEKHM1(+182.1kb)|SPPL2C(-172kb)
17	43707620	rs594591	T	G	0.205682	3	5.387e-05	5.387e-05	0.8849	0.8849	0.8818	0	0.8774	0.8723	0.9029	ARHGAP27(+197.3kb)|CRHR1(0)|CRHR1-IT1(-8.72kb)|LOC644172(+27.87kb)|LRRC37A4P(+109.7kb)|MGC57346(0)|MIR4315-1(+154.8kb)|MIR4315-2(+154.8kb)|PLEKHM1(+139.5kb)
17	43780948	rs17762308	C	T	0.205713	3	5.388e-05	5.388e-05	0.8858	0.8858	0.8673	0	0.8804	0.87	0.904	CRHR1(0)|CRHR1-IT1(+57.35kb)|LOC644172(+101.2kb)|LRRC37A4P(+183.1kb)|MAPT(-190.8kb)|MAPT-AS1(-139.8kb)|MAPT-IT1(-192.2kb)|MGC57346(+65.62kb)|SPPL2C(-141.3kb)
17	43776391	rs12150435	C	G	0.205682	3	5.391e-05	5.391e-05	0.8857	0.8857	0.891	0	0.8795	0.8726	0.9025	CRHR1(0)|CRHR1-IT1(+52.8kb)|LOC644172(+96.64kb)|LRRC37A4P(+178.5kb)|MAPT(-195.4kb)|MAPT-AS1(-144.3kb)|MAPT-IT1(-196.8kb)|MGC57346(+61.06kb)|SPPL2C(-145.9kb)
15	58485773	rs6493986	G	A	0.947983	3	5.392e-05	5.392e-05	1.2865	1.2865	0.953	0	1.3219	1.2661	1.2714	ALDH1A2(+127.7kb)|AQP9(+7.663kb)
3	146879965	rs2018627	T	C	0.0287188	2	5.397e-05	5.397e-05	1.4521	1.4521	0.4939	0	1.5269	1.3411	NA	.
10	115448403	rs4554845	C	T	0.105467	3	5.397e-05	5.397e-05	1.1683	1.1683	0.9164	0	1.1545	1.149	1.1901	CASP7(0)|DCLRE1A(-146.1kb)|HABP2(+99.04kb)|MIR4483(-89.35kb)|NHLRC2(-166kb)|NRAP(+24.57kb)|PLEKHS1(-62.81kb)
2	107920663	rs6745020	A	G	0.018263	2	5.399e-05	5.399e-05	0.5837	0.5837	0.4184	0	NA	0.531	0.6601	.
17	43785808	rs17689218	C	T	0.205451	3	5.399e-05	5.399e-05	0.8858	0.8858	0.8742	0	0.8811	0.87	0.9033	CRHR1(0)|CRHR1-IT1(+62.21kb)|LOC644172(+106.1kb)|LRRC37A4P(+187.9kb)|MAPT(-185.9kb)|MAPT-AS1(-134.9kb)|MAPT-IT1(-187.3kb)|MGC57346(+70.48kb)|SPPL2C(-136.4kb)
17	43787563	rs62056922	G	C	0.20542	3	5.401e-05	5.401e-05	0.8858	0.8858	0.8736	0	0.8809	0.8701	0.9034	CRHR1(0)|CRHR1-IT1(+63.97kb)|LOC644172(+107.8kb)|LRRC37A4P(+189.7kb)|MAPT(-184.2kb)|MAPT-AS1(-133.2kb)|MAPT-IT1(-185.6kb)|MGC57346(+72.23kb)|SPPL2C(-134.7kb)
17	43750315	rs62053956	G	A	0.205759	3	5.411e-05	5.411e-05	0.8858	0.8858	0.8806	0	0.8787	0.8726	0.9035	CRHR1(0)|CRHR1-IT1(+26.72kb)|LOC644172(+70.57kb)|LRRC37A4P(+152.4kb)|MAPT-AS1(-170.4kb)|MGC57346(+34.99kb)|MIR4315-1(+197.5kb)|MIR4315-2(+197.5kb)|PLEKHM1(+182.2kb)|SPPL2C(-171.9kb)
17	43762554	rs62055711	G	A	0.205713	3	5.411e-05	5.411e-05	0.8857	0.8857	0.8872	0	0.8791	0.8727	0.9029	CRHR1(0)|CRHR1-IT1(+38.96kb)|LOC644172(+82.81kb)|LRRC37A4P(+164.7kb)|MAPT-AS1(-158.2kb)|MGC57346(+47.22kb)|PLEKHM1(+194.4kb)|SPPL2C(-159.7kb)
17	43784624	rs62056911	C	T	0.205482	3	5.415e-05	5.415e-05	0.8859	0.8859	0.8734	0	0.8811	0.87	0.9034	CRHR1(0)|CRHR1-IT1(+61.03kb)|LOC644172(+104.9kb)|LRRC37A4P(+186.7kb)|MAPT(-187.1kb)|MAPT-AS1(-136.1kb)|MAPT-IT1(-188.5kb)|MGC57346(+69.3kb)|SPPL2C(-137.6kb)
17	43785627	rs62056915	T	A	0.205497	3	5.416e-05	5.416e-05	0.8859	0.8859	0.8734	0	0.8811	0.87	0.9034	CRHR1(0)|CRHR1-IT1(+62.03kb)|LOC644172(+105.9kb)|LRRC37A4P(+187.7kb)|MAPT(-186.1kb)|MAPT-AS1(-135.1kb)|MAPT-IT1(-187.5kb)|MGC57346(+70.3kb)|SPPL2C(-136.6kb)
17	43785938	rs62056916	T	C	0.205451	3	5.417e-05	5.417e-05	0.8859	0.8859	0.8734	0	0.8811	0.87	0.9034	CRHR1(0)|CRHR1-IT1(+62.34kb)|LOC644172(+106.2kb)|LRRC37A4P(+188kb)|MAPT(-185.8kb)|MAPT-AS1(-134.8kb)|MAPT-IT1(-187.2kb)|MGC57346(+70.61kb)|SPPL2C(-136.3kb)
17	43786013	rs62056917	T	G	0.205436	3	5.419e-05	5.419e-05	0.8859	0.8859	0.8734	0	0.8811	0.87	0.9034	CRHR1(0)|CRHR1-IT1(+62.42kb)|LOC644172(+106.3kb)|LRRC37A4P(+188.1kb)|MAPT(-185.7kb)|MAPT-AS1(-134.7kb)|MAPT-IT1(-187.1kb)|MGC57346(+70.68kb)|SPPL2C(-136.2kb)
17	43776371	rs12150464	T	C	0.205682	3	5.434e-05	5.434e-05	0.8857	0.8857	0.8903	0	0.8795	0.8726	0.9026	CRHR1(0)|CRHR1-IT1(+52.78kb)|LOC644172(+96.62kb)|LRRC37A4P(+178.5kb)|MAPT(-195.4kb)|MAPT-AS1(-144.4kb)|MAPT-IT1(-196.8kb)|MGC57346(+61.04kb)|SPPL2C(-145.9kb)
17	43705356	rs383241	A	G	0.205728	3	5.44e-05	5.44e-05	0.8852	0.8852	0.8713	0	0.877	0.8722	0.9039	ARHGAP27(+195.1kb)|CRHR1(0)|CRHR1-IT1(-10.98kb)|LOC644172(+25.61kb)|LRRC37A4P(+107.5kb)|MGC57346(0)|MIR4315-1(+152.6kb)|MIR4315-2(+152.6kb)|PLEKHM1(+137.2kb)
17	43778602	rs17762165	T	C	0.205651	3	5.445e-05	5.445e-05	0.886	0.886	0.8733	0	0.8789	0.8722	0.9042	CRHR1(0)|CRHR1-IT1(+55.01kb)|LOC644172(+98.85kb)|LRRC37A4P(+180.7kb)|MAPT(-193.1kb)|MAPT-AS1(-142.1kb)|MAPT-IT1(-194.5kb)|MGC57346(+63.27kb)|SPPL2C(-143.7kb)
22	35550231	rs134271	A	G	0.105405	3	5.445e-05	0.0007896	1.1863	1.1925	0.2212	33.72	1.209	1.3129	1.0993	HMGXB4(-103.2kb)|ISX(+66.85kb)|MIR3909(-181.4kb)|TOM1(-145kb)
17	43757777	rs562098568	T	C	0.205651	3	5.446e-05	5.446e-05	0.8855	0.8855	0.8964	0	0.8795	0.8728	0.902	CRHR1(0)|CRHR1-IT1(+34.18kb)|LOC644172(+78.03kb)|LRRC37A4P(+159.9kb)|MAPT-AS1(-162.9kb)|MGC57346(+42.45kb)|PLEKHM1(+189.6kb)|SPPL2C(-164.5kb)
17	43750010	rs17687571	A	G	0.205728	3	5.45e-05	5.45e-05	0.8859	0.8859	0.8814	0	0.8788	0.8727	0.9035	CRHR1(0)|CRHR1-IT1(+26.42kb)|LOC644172(+70.26kb)|LRRC37A4P(+152.1kb)|MAPT-AS1(-170.7kb)|MGC57346(+34.68kb)|MIR4315-1(+197.2kb)|MIR4315-2(+197.2kb)|PLEKHM1(+181.9kb)|SPPL2C(-172.2kb)
1	232745295	rs10797584	T	G	0.140206	3	5.452e-05	0.0002423	0.8572	0.8569	0.2979	17.42	0.8059	0.8401	0.9239	MAP10(-195.3kb)|SIPA1L2(+94.05kb)
17	43705518	rs376120	G	A	0.205728	3	5.454e-05	5.454e-05	0.8852	0.8852	0.8713	0	0.877	0.8722	0.9039	ARHGAP27(+195.2kb)|CRHR1(0)|CRHR1-IT1(-10.82kb)|LOC644172(+25.77kb)|LRRC37A4P(+107.6kb)|MGC57346(0)|MIR4315-1(+152.7kb)|MIR4315-2(+152.7kb)|PLEKHM1(+137.4kb)
17	43760199	rs113728380	T	C	0.205744	3	5.456e-05	5.456e-05	0.8857	0.8857	0.8906	0	0.8794	0.8727	0.9026	CRHR1(0)|CRHR1-IT1(+36.6kb)|LOC644172(+80.45kb)|LRRC37A4P(+162.3kb)|MAPT-AS1(-160.5kb)|MGC57346(+44.87kb)|PLEKHM1(+192.1kb)|SPPL2C(-162.1kb)
17	1018050	rs34218629	C	T	0.161503	2	5.46e-05	0.03512	0.8231	0.8237	0.0565	72.51	0.9034	0.7515	NA	ABR(0)|BHLHA9(-155.8kb)|MIR3183(+92.25kb)|NXN(+135.1kb)|TIMM22(+112.7kb)|TUSC5(-164.9kb)
17	43757776	rs543716852	C	T	0.205651	3	5.467e-05	5.467e-05	0.8855	0.8855	0.8964	0	0.8795	0.8728	0.902	CRHR1(0)|CRHR1-IT1(+34.18kb)|LOC644172(+78.03kb)|LRRC37A4P(+159.9kb)|MAPT-AS1(-162.9kb)|MGC57346(+42.45kb)|PLEKHM1(+189.6kb)|SPPL2C(-164.5kb)
17	43710371	rs16940633	A	G	0.205621	3	5.468e-05	5.468e-05	0.8853	0.8853	0.8713	0	0.8768	0.8727	0.9041	CRHR1(0)|CRHR1-IT1(-5.969kb)|LOC644172(+30.62kb)|LRRC37A4P(+112.5kb)|MGC57346(0)|MIR4315-1(+157.6kb)|MIR4315-2(+157.6kb)|PLEKHM1(+142.2kb)
17	43749579	rs17687534	C	T	0.205713	3	5.468e-05	5.468e-05	0.8859	0.8859	0.8804	0	0.8787	0.8727	0.9036	CRHR1(0)|CRHR1-IT1(+25.98kb)|LOC644172(+69.83kb)|LRRC37A4P(+151.7kb)|MAPT-AS1(-171.1kb)|MGC57346(+34.25kb)|MIR4315-1(+196.8kb)|MIR4315-2(+196.8kb)|PLEKHM1(+181.4kb)|SPPL2C(-172.7kb)
17	43750137	rs17760817	C	G	0.205713	3	5.469e-05	5.469e-05	0.8859	0.8859	0.8806	0	0.8788	0.8727	0.9036	CRHR1(0)|CRHR1-IT1(+26.54kb)|LOC644172(+70.39kb)|LRRC37A4P(+152.2kb)|MAPT-AS1(-170.6kb)|MGC57346(+34.81kb)|MIR4315-1(+197.3kb)|MIR4315-2(+197.3kb)|PLEKHM1(+182kb)|SPPL2C(-172.1kb)
20	55021575	rs6069749	T	C	0.0759162	3	5.478e-05	0.002817	0.8302	0.8319	0.1688	43.78	0.7453	0.925	0.8422	AURKA(+54.22kb)|CASS4(0)|CSTF1(+41.99kb)|FAM209A(-78.21kb)|FAM209B(-86.73kb)|FAM210B(+77.86kb)|GCNT7(-44.97kb)|MC3R(+196.7kb)|RTFDC1(-22.07kb)|TFAP2C(-182.8kb)
14	33100829	rs11627900	G	A	0.277318	3	5.48e-05	0.004997	1.1152	1.1216	0.106	55.44	1.1298	1.2102	1.0476	AKAP6(0)
17	43749454	rs62053953	A	G	0.205713	3	5.486e-05	5.486e-05	0.8859	0.8859	0.8796	0	0.8787	0.8727	0.9037	CRHR1(0)|CRHR1-IT1(+25.86kb)|LOC644172(+69.71kb)|LRRC37A4P(+151.6kb)|MAPT-AS1(-171.3kb)|MGC57346(+34.12kb)|MIR4315-1(+196.7kb)|MIR4315-2(+196.7kb)|PLEKHM1(+181.3kb)|SPPL2C(-172.8kb)
17	43788371	rs56290582	T	C	0.205574	3	5.493e-05	5.493e-05	0.886	0.886	0.876	0	0.8812	0.8703	0.9033	CRHR1(0)|CRHR1-IT1(+64.78kb)|LOC644172(+108.6kb)|LRRC37A4P(+190.5kb)|MAPT(-183.4kb)|MAPT-AS1(-132.4kb)|MAPT-IT1(-184.8kb)|MGC57346(+73.04kb)|SPPL2C(-133.9kb)
17	43749168	rs62053951	C	G	0.205682	3	5.497e-05	5.497e-05	0.8859	0.8859	0.8797	0	0.8787	0.8727	0.9037	CRHR1(0)|CRHR1-IT1(+25.57kb)|LOC644172(+69.42kb)|LRRC37A4P(+151.3kb)|MAPT-AS1(-171.6kb)|MGC57346(+33.84kb)|MIR4315-1(+196.4kb)|MIR4315-2(+196.4kb)|PLEKHM1(+181kb)|SPPL2C(-173.1kb)
17	43749261	rs62053952	C	T	0.205713	3	5.497e-05	5.497e-05	0.8859	0.8859	0.8797	0	0.8787	0.8727	0.9037	CRHR1(0)|CRHR1-IT1(+25.67kb)|LOC644172(+69.51kb)|LRRC37A4P(+151.4kb)|MAPT-AS1(-171.5kb)|MGC57346(+33.93kb)|MIR4315-1(+196.5kb)|MIR4315-2(+196.5kb)|PLEKHM1(+181.1kb)|SPPL2C(-173kb)
17	43787226	rs62056920	A	G	0.205467	3	5.507e-05	5.507e-05	0.886	0.886	0.8706	0	0.881	0.8701	0.9038	CRHR1(0)|CRHR1-IT1(+63.63kb)|LOC644172(+107.5kb)|LRRC37A4P(+189.3kb)|MAPT(-184.5kb)|MAPT-AS1(-133.5kb)|MAPT-IT1(-185.9kb)|MGC57346(+71.9kb)|SPPL2C(-135kb)
6	166203969	rs9355548	A	G	0.628934	3	5.51e-05	5.51e-05	1.1096	1.1096	0.4476	0	1.159	1.0796	1.085	LINC00473(-133.6kb)|LINC00602(-197.1kb)|PDE10A(+128.4kb)
11	76447123	rs12291515	G	A	0.121297	3	5.517e-05	5.517e-05	1.1722	1.1722	0.9882	0	1.1749	1.1605	1.1776	ACER3(-124.8kb)|C11orf30(+184.5kb)|GUCY2EP(+14.29kb)|LRRC32(+65.33kb)|TSKU(-46.23kb)
20	42056122	rs79042159	T	C	0.0177702	3	5.529e-05	5.529e-05	1.4635	1.4635	0.6356	0	1.443	1.2515	1.5869	IFT52(-163.5kb)|L3MBTL1(-80.2kb)|SGK2(-131.5kb)|SRSF6(-30.38kb)
17	43768727	rs56110538	A	G	0.205805	3	5.536e-05	5.536e-05	0.8861	0.8861	0.8805	0	0.8791	0.8727	0.9037	CRHR1(0)|CRHR1-IT1(+45.13kb)|LOC644172(+88.98kb)|LRRC37A4P(+170.8kb)|MAPT-AS1(-152kb)|MGC57346(+53.4kb)|SPPL2C(-153.5kb)
17	43787306	rs62056921	C	T	0.205467	3	5.537e-05	5.537e-05	0.886	0.886	0.8707	0	0.881	0.8701	0.9038	CRHR1(0)|CRHR1-IT1(+63.71kb)|LOC644172(+107.6kb)|LRRC37A4P(+189.4kb)|MAPT(-184.4kb)|MAPT-AS1(-133.4kb)|MAPT-IT1(-185.8kb)|MGC57346(+71.98kb)|SPPL2C(-134.9kb)
17	43768633	rs56323832	A	G	0.205759	3	5.54e-05	5.54e-05	0.886	0.886	0.8791	0	0.8788	0.8727	0.9038	CRHR1(0)|CRHR1-IT1(+45.04kb)|LOC644172(+88.88kb)|LRRC37A4P(+170.7kb)|MAPT-AS1(-152.1kb)|MGC57346(+53.3kb)|SPPL2C(-153.6kb)
18	58086458	rs1943229	T	G	0.170927	3	5.542e-05	0.003506	0.8792	0.8759	0.1386	49.41	0.8271	0.8465	0.949	MC4R(+46.46kb)
17	43750939	rs62053957	C	T	0.205713	3	5.544e-05	5.544e-05	0.886	0.886	0.8791	0	0.8788	0.8727	0.9038	CRHR1(0)|CRHR1-IT1(+27.34kb)|LOC644172(+71.19kb)|LRRC37A4P(+153kb)|MAPT-AS1(-169.8kb)|MGC57346(+35.61kb)|MIR4315-1(+198.1kb)|MIR4315-2(+198.1kb)|PLEKHM1(+182.8kb)|SPPL2C(-171.3kb)
17	43748046	rs62053948	T	C	0.205713	3	5.548e-05	5.548e-05	0.886	0.886	0.8757	0	0.8786	0.8726	0.9041	CRHR1(0)|CRHR1-IT1(+24.45kb)|LOC644172(+68.3kb)|LRRC37A4P(+150.2kb)|MAPT-AS1(-172.7kb)|MGC57346(+32.72kb)|MIR4315-1(+195.2kb)|MIR4315-2(+195.2kb)|PLEKHM1(+179.9kb)|SPPL2C(-174.2kb)
17	43760192	rs112169475	G	A	0.205713	3	5.548e-05	5.548e-05	0.8858	0.8858	0.8883	0	0.8794	0.8727	0.9029	CRHR1(0)|CRHR1-IT1(+36.6kb)|LOC644172(+80.44kb)|LRRC37A4P(+162.3kb)|MAPT-AS1(-160.5kb)|MGC57346(+44.86kb)|PLEKHM1(+192kb)|SPPL2C(-162.1kb)
17	43764565	rs62055712	G	A	0.205667	3	5.55e-05	5.55e-05	0.886	0.886	0.8793	0	0.8789	0.8727	0.9038	CRHR1(0)|CRHR1-IT1(+40.97kb)|LOC644172(+84.82kb)|LRRC37A4P(+166.7kb)|MAPT-AS1(-156.2kb)|MGC57346(+49.24kb)|PLEKHM1(+196.4kb)|SPPL2C(-157.7kb)
17	43778003	rs62056875	A	T	0.205698	3	5.552e-05	5.552e-05	0.8861	0.8861	0.879	0	0.8792	0.8725	0.9038	CRHR1(0)|CRHR1-IT1(+54.41kb)|LOC644172(+98.26kb)|LRRC37A4P(+180.1kb)|MAPT(-193.7kb)|MAPT-AS1(-142.7kb)|MAPT-IT1(-195.1kb)|MGC57346(+62.67kb)|SPPL2C(-144.3kb)
17	43748412	rs62053950	G	A	0.205713	3	5.557e-05	5.557e-05	0.886	0.886	0.877	0	0.8786	0.8727	0.904	CRHR1(0)|CRHR1-IT1(+24.82kb)|LOC644172(+68.66kb)|LRRC37A4P(+150.5kb)|MAPT-AS1(-172.3kb)|MGC57346(+33.08kb)|MIR4315-1(+195.6kb)|MIR4315-2(+195.6kb)|PLEKHM1(+180.3kb)|SPPL2C(-173.8kb)
17	44847707	rs199526	G	C	0.774346	3	5.557e-05	5.557e-05	1.128	1.128	0.9816	0	1.121	1.1256	1.136	ARL17A(+190.6kb)|GOSR2(-152.8kb)|NSF(+12.88kb)|NSFP1(+129.7kb)|WNT3(0)|WNT9B(-81.26kb)
17	43777578	rs62056874	T	C	0.205682	3	5.558e-05	5.558e-05	0.8861	0.8861	0.8793	0	0.8793	0.8725	0.9038	CRHR1(0)|CRHR1-IT1(+53.98kb)|LOC644172(+97.83kb)|LRRC37A4P(+179.7kb)|MAPT(-194.2kb)|MAPT-AS1(-143.1kb)|MAPT-IT1(-195.6kb)|MGC57346(+62.25kb)|SPPL2C(-144.7kb)
17	43761482	rs62055707	C	T	0.205713	3	5.562e-05	5.562e-05	0.886	0.886	0.8826	0	0.8792	0.8727	0.9035	CRHR1(0)|CRHR1-IT1(+37.89kb)|LOC644172(+81.73kb)|LRRC37A4P(+163.6kb)|MAPT-AS1(-159.2kb)|MGC57346(+46.15kb)|PLEKHM1(+193.3kb)|SPPL2C(-160.8kb)
17	43764685	rs62055713	T	C	0.205651	3	5.562e-05	5.562e-05	0.8861	0.8861	0.8796	0	0.879	0.8727	0.9038	CRHR1(0)|CRHR1-IT1(+41.09kb)|LOC644172(+84.94kb)|LRRC37A4P(+166.8kb)|MAPT-AS1(-156kb)|MGC57346(+49.36kb)|PLEKHM1(+196.5kb)|SPPL2C(-157.6kb)
17	43764847	rs62055715	A	G	0.205636	3	5.562e-05	5.562e-05	0.8861	0.8861	0.8784	0	0.8789	0.8727	0.9039	CRHR1(0)|CRHR1-IT1(+41.25kb)|LOC644172(+85.1kb)|LRRC37A4P(+167kb)|MAPT-AS1(-155.9kb)|MGC57346(+49.52kb)|PLEKHM1(+196.7kb)|SPPL2C(-157.4kb)
17	43764796	rs62055714	T	G	0.205651	3	5.563e-05	5.563e-05	0.8861	0.8861	0.8784	0	0.8789	0.8727	0.9039	CRHR1(0)|CRHR1-IT1(+41.2kb)|LOC644172(+85.05kb)|LRRC37A4P(+166.9kb)|MAPT-AS1(-155.9kb)|MGC57346(+49.47kb)|PLEKHM1(+196.6kb)|SPPL2C(-157.5kb)
17	43777542	rs17688767	G	A	0.205682	3	5.563e-05	5.563e-05	0.8861	0.8861	0.8793	0	0.8793	0.8725	0.9038	CRHR1(0)|CRHR1-IT1(+53.95kb)|LOC644172(+97.79kb)|LRRC37A4P(+179.7kb)|MAPT(-194.2kb)|MAPT-AS1(-143.2kb)|MAPT-IT1(-195.6kb)|MGC57346(+62.21kb)|SPPL2C(-144.7kb)
17	43777710	rs17688773	C	T	0.205698	3	5.567e-05	5.567e-05	0.8861	0.8861	0.8793	0	0.8793	0.8725	0.9038	CRHR1(0)|CRHR1-IT1(+54.12kb)|LOC644172(+97.96kb)|LRRC37A4P(+179.8kb)|MAPT(-194kb)|MAPT-AS1(-143kb)|MAPT-IT1(-195.4kb)|MGC57346(+62.38kb)|SPPL2C(-144.5kb)
17	43709867	rs650927	G	T	0.205651	3	5.568e-05	5.568e-05	0.8855	0.8855	0.8724	0	0.8779	0.872	0.904	ARHGAP27(+199.6kb)|CRHR1(0)|CRHR1-IT1(-6.473kb)|LOC644172(+30.12kb)|LRRC37A4P(+112kb)|MGC57346(0)|MIR4315-1(+157.1kb)|MIR4315-2(+157.1kb)|PLEKHM1(+141.7kb)
1	81483546	rs72682531	T	A	0.0558977	3	5.569e-05	5.569e-05	1.2588	1.2588	0.6739	0	1.3524	1.2018	1.2236	.
17	43707951	rs444071	T	C	0.205667	3	5.572e-05	5.572e-05	0.8854	0.8854	0.8739	0	0.8775	0.8724	0.9039	ARHGAP27(+197.7kb)|CRHR1(0)|CRHR1-IT1(-8.389kb)|LOC644172(+28.2kb)|LRRC37A4P(+110.1kb)|MGC57346(0)|MIR4315-1(+155.2kb)|MIR4315-2(+155.2kb)|PLEKHM1(+139.8kb)
6	166198471	rs6913563	G	T	0.578934	3	5.573e-05	5.573e-05	1.1059	1.1059	0.6187	0	1.1399	1.0719	1.0982	LINC00473(-139.1kb)|PDE10A(+122.9kb)
17	43710127	rs81632	A	T	0.205667	3	5.574e-05	5.574e-05	0.8855	0.8855	0.8807	0	0.878	0.8727	0.9034	ARHGAP27(+199.8kb)|CRHR1(0)|CRHR1-IT1(-6.213kb)|LOC644172(+30.38kb)|LRRC37A4P(+112.2kb)|MGC57346(0)|MIR4315-1(+157.3kb)|MIR4315-2(+157.3kb)|PLEKHM1(+142kb)
17	43773447	rs62056869	C	T	0.205651	3	5.575e-05	5.575e-05	0.8861	0.8861	0.8746	0	0.8788	0.8725	0.9042	CRHR1(0)|CRHR1-IT1(+49.85kb)|LOC644172(+93.7kb)|LRRC37A4P(+175.6kb)|MAPT(-198.3kb)|MAPT-AS1(-147.3kb)|MAPT-IT1(-199.7kb)|MGC57346(+58.12kb)|SPPL2C(-148.8kb)
17	43748101	rs62053949	G	A	0.205698	3	5.576e-05	5.576e-05	0.886	0.886	0.8762	0	0.8786	0.8727	0.9041	CRHR1(0)|CRHR1-IT1(+24.51kb)|LOC644172(+68.35kb)|LRRC37A4P(+150.2kb)|MAPT-AS1(-172.6kb)|MGC57346(+32.77kb)|MIR4315-1(+195.3kb)|MIR4315-2(+195.3kb)|PLEKHM1(+180kb)|SPPL2C(-174.2kb)
17	43707955	rs396593	A	C	0.205667	3	5.577e-05	5.577e-05	0.8854	0.8854	0.8739	0	0.8775	0.8724	0.9039	ARHGAP27(+197.7kb)|CRHR1(0)|CRHR1-IT1(-8.385kb)|LOC644172(+28.21kb)|LRRC37A4P(+110.1kb)|MGC57346(0)|MIR4315-1(+155.2kb)|MIR4315-2(+155.2kb)|PLEKHM1(+139.8kb)
17	43765450	rs17761387	A	G	0.205759	3	5.579e-05	5.579e-05	0.886	0.886	0.8797	0	0.879	0.8727	0.9038	CRHR1(0)|CRHR1-IT1(+41.86kb)|LOC644172(+85.7kb)|LRRC37A4P(+167.6kb)|MAPT-AS1(-155.3kb)|MGC57346(+50.12kb)|PLEKHM1(+197.3kb)|SPPL2C(-156.8kb)
17	43764987	rs17688090	A	G	0.205667	3	5.58e-05	5.58e-05	0.8861	0.8861	0.8787	0	0.879	0.8727	0.9039	CRHR1(0)|CRHR1-IT1(+41.39kb)|LOC644172(+85.24kb)|LRRC37A4P(+167.1kb)|MAPT-AS1(-155.7kb)|MGC57346(+49.66kb)|PLEKHM1(+196.8kb)|SPPL2C(-157.3kb)
10	115448363	rs4554844	C	T	0.105467	3	5.583e-05	5.583e-05	1.168	1.168	0.9187	0	1.1544	1.149	1.1895	CASP7(0)|DCLRE1A(-146.1kb)|HABP2(+99kb)|MIR4483(-89.39kb)|NHLRC2(-166kb)|NRAP(+24.53kb)|PLEKHS1(-62.85kb)
17	43767219	rs2040844	C	A	0.205682	3	5.585e-05	5.585e-05	0.8861	0.8861	0.8762	0	0.879	0.8725	0.9041	CRHR1(0)|CRHR1-IT1(+43.62kb)|LOC644172(+87.47kb)|LRRC37A4P(+169.3kb)|MAPT-AS1(-153.5kb)|MGC57346(+51.89kb)|PLEKHM1(+199.1kb)|SPPL2C(-155kb)
17	43752566	rs62055662	T	C	0.205744	3	5.587e-05	5.587e-05	0.886	0.886	0.8787	0	0.8789	0.8727	0.9039	CRHR1(0)|CRHR1-IT1(+28.97kb)|LOC644172(+72.82kb)|LRRC37A4P(+154.7kb)|MAPT-AS1(-168.2kb)|MGC57346(+37.24kb)|MIR4315-1(+199.8kb)|MIR4315-2(+199.8kb)|PLEKHM1(+184.4kb)|SPPL2C(-169.7kb)
17	43763241	rs17688056	T	C	0.205713	3	5.591e-05	5.591e-05	0.8861	0.8861	0.8787	0	0.879	0.8727	0.9039	CRHR1(0)|CRHR1-IT1(+39.65kb)|LOC644172(+83.49kb)|LRRC37A4P(+165.4kb)|MAPT-AS1(-157.5kb)|MGC57346(+47.91kb)|PLEKHM1(+195.1kb)|SPPL2C(-159kb)
1	232745700	rs10910574	A	G	0.140176	3	5.599e-05	0.0002681	0.8574	0.8571	0.2938	18.36	0.8058	0.8402	0.9245	MAP10(-194.9kb)|SIPA1L2(+94.46kb)
3	146945824	rs35844042	A	G	0.0300123	3	5.599e-05	0.001493	1.3232	1.3293	0.1972	38.4	1.5387	1.3442	1.1558	ZIC1(-181.4kb)|ZIC4(-158kb)
17	43747683	rs62053947	A	G	0.205682	3	5.6e-05	5.6e-05	0.886	0.886	0.8751	0	0.8785	0.8727	0.9042	CRHR1(0)|CRHR1-IT1(+24.09kb)|LOC644172(+67.94kb)|LRRC37A4P(+149.8kb)|MAPT-AS1(-173kb)|MGC57346(+32.35kb)|MIR4315-1(+194.9kb)|MIR4315-2(+194.9kb)|PLEKHM1(+179.5kb)|SPPL2C(-174.6kb)
5	43591234	rs116125702	T	C	0.0274407	3	5.601e-05	0.004972	1.3665	1.357	0.1412	48.92	1.2098	1.2157	1.6643	C5orf28(+107.2kb)|C5orf34(+75.96kb)|CCL28(+178.7kb)|LOC100652772(0)|NNT(-11.56kb)|PAIP1(+33.71kb)
17	43777745	rs17762073	A	C	0.205698	3	5.602e-05	5.602e-05	0.8862	0.8862	0.8796	0	0.8794	0.8725	0.9038	CRHR1(0)|CRHR1-IT1(+54.15kb)|LOC644172(+98kb)|LRRC37A4P(+179.9kb)|MAPT(-194kb)|MAPT-AS1(-143kb)|MAPT-IT1(-195.4kb)|MGC57346(+62.42kb)|SPPL2C(-144.5kb)
5	93902848	rs62365664	G	C	0.238743	3	5.605e-05	5.605e-05	1.1196	1.1196	0.7027	0	1.1415	1.1399	1.0871	ANKRD32(-51.54kb)|KIAA0825(0)|MCTP1(-139.4kb)
17	43797087	rs56167344	T	A	0.205867	3	5.605e-05	5.605e-05	0.8862	0.8862	0.8844	0	0.8816	0.871	0.9028	CRHR1(0)|CRHR1-IT1(+73.49kb)|LOC644172(+117.3kb)|LRRC37A4P(+199.2kb)|MAPT(-174.7kb)|MAPT-AS1(-123.6kb)|MAPT-IT1(-176.1kb)|MGC57346(+81.76kb)|SPPL2C(-125.2kb)
17	43747677	rs62053946	T	C	0.205682	3	5.607e-05	5.607e-05	0.886	0.886	0.8752	0	0.8785	0.8727	0.9042	CRHR1(0)|CRHR1-IT1(+24.08kb)|LOC644172(+67.93kb)|LRRC37A4P(+149.8kb)|MAPT-AS1(-173kb)|MGC57346(+32.35kb)|MIR4315-1(+194.9kb)|MIR4315-2(+194.9kb)|PLEKHM1(+179.5kb)|SPPL2C(-174.6kb)
17	43765778	rs62055716	T	C	0.205728	3	5.608e-05	5.608e-05	0.8861	0.8861	0.8777	0	0.8789	0.8727	0.904	CRHR1(0)|CRHR1-IT1(+42.18kb)|LOC644172(+86.03kb)|LRRC37A4P(+167.9kb)|MAPT-AS1(-154.9kb)|MGC57346(+50.45kb)|PLEKHM1(+197.6kb)|SPPL2C(-156.5kb)
17	43760389	rs17761100	G	A	0.205713	3	5.61e-05	5.61e-05	0.8861	0.8861	0.8845	0	0.8794	0.8728	0.9034	CRHR1(0)|CRHR1-IT1(+36.79kb)|LOC644172(+80.64kb)|LRRC37A4P(+162.5kb)|MAPT-AS1(-160.3kb)|MGC57346(+45.06kb)|PLEKHM1(+192.2kb)|SPPL2C(-161.9kb)
17	43741028	rs62053940	G	A	0.205682	3	5.615e-05	5.615e-05	0.886	0.886	0.8729	0	0.8783	0.8727	0.9044	CRHR1(0)|CRHR1-IT1(+17.43kb)|LOC644172(+61.28kb)|LRRC37A4P(+143.1kb)|MAPT-AS1(-179.7kb)|MGC57346(+25.7kb)|MIR4315-1(+188.2kb)|MIR4315-2(+188.2kb)|PLEKHM1(+172.9kb)|SPPL2C(-181.2kb)
17	43746839	rs62053945	C	T	0.205713	3	5.615e-05	5.615e-05	0.886	0.886	0.8743	0	0.8785	0.8727	0.9043	CRHR1(0)|CRHR1-IT1(+23.24kb)|LOC644172(+67.09kb)|LRRC37A4P(+149kb)|MAPT-AS1(-173.9kb)|MGC57346(+31.51kb)|MIR4315-1(+194kb)|MIR4315-2(+194kb)|PLEKHM1(+178.7kb)|SPPL2C(-175.4kb)
17	43741452	rs17760577	T	C	0.205667	3	5.616e-05	5.616e-05	0.886	0.886	0.8729	0	0.8783	0.8727	0.9044	CRHR1(0)|CRHR1-IT1(+17.86kb)|LOC644172(+61.7kb)|LRRC37A4P(+143.6kb)|MAPT-AS1(-179.3kb)|MGC57346(+26.12kb)|MIR4315-1(+188.7kb)|MIR4315-2(+188.7kb)|PLEKHM1(+173.3kb)|SPPL2C(-180.8kb)
17	43765080	rs17688126	G	A	0.205651	3	5.622e-05	5.622e-05	0.8861	0.8861	0.8789	0	0.879	0.8727	0.9039	CRHR1(0)|CRHR1-IT1(+41.48kb)|LOC644172(+85.33kb)|LRRC37A4P(+167.2kb)|MAPT-AS1(-155.6kb)|MGC57346(+49.75kb)|PLEKHM1(+196.9kb)|SPPL2C(-157.2kb)
17	43709893	rs671740	G	A	0.205651	3	5.623e-05	5.623e-05	0.8856	0.8856	0.8721	0	0.8779	0.8721	0.9041	ARHGAP27(+199.6kb)|CRHR1(0)|CRHR1-IT1(-6.447kb)|LOC644172(+30.14kb)|LRRC37A4P(+112kb)|MGC57346(0)|MIR4315-1(+157.1kb)|MIR4315-2(+157.1kb)|PLEKHM1(+141.7kb)
17	43767538	rs62055751	G	A	0.205698	3	5.623e-05	5.623e-05	0.8861	0.8861	0.878	0	0.879	0.8727	0.904	CRHR1(0)|CRHR1-IT1(+43.94kb)|LOC644172(+87.79kb)|LRRC37A4P(+169.6kb)|MAPT-AS1(-153.2kb)|MGC57346(+52.21kb)|PLEKHM1(+199.4kb)|SPPL2C(-154.7kb)
17	43763202	rs17688032	A	G	0.205682	3	5.627e-05	5.627e-05	0.8861	0.8861	0.8791	0	0.8791	0.8727	0.9039	CRHR1(0)|CRHR1-IT1(+39.61kb)|LOC644172(+83.45kb)|LRRC37A4P(+165.3kb)|MAPT-AS1(-157.5kb)|MGC57346(+47.87kb)|PLEKHM1(+195.1kb)|SPPL2C(-159.1kb)
10	11714507	rs74347557	T	C	0.341454	3	5.628e-05	0.0008644	1.1137	1.1143	0.23	31.95	1.18	1.1105	1.0592	ECHDC3(-69.85kb)|PROSER2(-150.9kb)|PROSER2-AS1(-177.1kb)|USP6NL(+60.83kb)
17	43765381	rs77310586	C	G	0.205698	3	5.628e-05	5.628e-05	0.8861	0.8861	0.8778	0	0.8789	0.8727	0.904	CRHR1(0)|CRHR1-IT1(+41.79kb)|LOC644172(+85.63kb)|LRRC37A4P(+167.5kb)|MAPT-AS1(-155.3kb)|MGC57346(+50.05kb)|PLEKHM1(+197.2kb)|SPPL2C(-156.9kb)
10	115445526	rs75232915	T	G	0.104681	3	5.629e-05	5.629e-05	1.1682	1.1682	0.9316	0	1.154	1.1531	1.188	CASP7(0)|DCLRE1A(-149kb)|HABP2(+96.17kb)|MIR4483(-92.22kb)|NHLRC2(-168.9kb)|NRAP(+21.7kb)|PLEKHS1(-65.69kb)
17	43746418	rs79675109	A	T	0.205713	3	5.629e-05	5.629e-05	0.886	0.886	0.8743	0	0.8785	0.8727	0.9043	CRHR1(0)|CRHR1-IT1(+22.82kb)|LOC644172(+66.67kb)|LRRC37A4P(+148.5kb)|MAPT-AS1(-174.3kb)|MGC57346(+31.09kb)|MIR4315-1(+193.6kb)|MIR4315-2(+193.6kb)|PLEKHM1(+178.3kb)|SPPL2C(-175.8kb)
17	43766352	rs17688205	C	G		3	5.631e-05	5.631e-05	0.8861	0.8861	0.878	0	0.879	0.8727	0.904	CRHR1(0)|CRHR1-IT1(+42.76kb)|LOC644172(+86.6kb)|LRRC37A4P(+168.5kb)|MAPT-AS1(-154.4kb)|MGC57346(+51.02kb)|PLEKHM1(+198.2kb)|SPPL2C(-155.9kb)
17	44096553	rs62062288	A	G		3	5.632e-05	5.632e-05	0.8816	0.8816	0.8465	0	0.8938	0.8575	0.8901	CRHR1(+183.4kb)|KANSL1(-10.73kb)|KANSL1-AS1(-174.4kb)|MAPT(0)|MAPT-AS1(+123.7kb)|MAPT-IT1(+120.4kb)|SPPL2C(+172.1kb)|STH(+19.49kb)
17	43753454	rs62055663	G	A		3	5.636e-05	5.636e-05	0.8861	0.8861	0.8779	0	0.8789	0.8727	0.904	CRHR1(0)|CRHR1-IT1(+29.86kb)|LOC644172(+73.71kb)|LRRC37A4P(+155.6kb)|MAPT-AS1(-167.3kb)|MGC57346(+38.12kb)|PLEKHM1(+185.3kb)|SPPL2C(-168.8kb)
17	43766754	rs17688249	T	C		3	5.637e-05	5.637e-05	0.8861	0.8861	0.878	0	0.879	0.8727	0.904	CRHR1(0)|CRHR1-IT1(+43.16kb)|LOC644172(+87.01kb)|LRRC37A4P(+168.9kb)|MAPT-AS1(-154kb)|MGC57346(+51.42kb)|PLEKHM1(+198.6kb)|SPPL2C(-155.5kb)
17	43769516	rs56312737	A	C		3	5.638e-05	5.638e-05	0.8861	0.8861	0.8792	0	0.8791	0.8727	0.9039	CRHR1(0)|CRHR1-IT1(+45.92kb)|LOC644172(+89.77kb)|LRRC37A4P(+171.6kb)|MAPT-AS1(-151.2kb)|MGC57346(+54.19kb)|SPPL2C(-152.7kb)
17	43746721	rs17687504	G	A		3	5.639e-05	5.639e-05	0.8861	0.8861	0.8734	0	0.8785	0.8727	0.9044	CRHR1(0)|CRHR1-IT1(+23.13kb)|LOC644172(+66.97kb)|LRRC37A4P(+148.8kb)|MAPT-AS1(-174kb)|MGC57346(+31.39kb)|MIR4315-1(+193.9kb)|MIR4315-2(+193.9kb)|PLEKHM1(+178.6kb)|SPPL2C(-175.5kb)
17	43740856	rs62053939	T	C		3	5.642e-05	5.642e-05	0.8861	0.8861	0.8724	0	0.8784	0.8727	0.9045	CRHR1(0)|CRHR1-IT1(+17.26kb)|LOC644172(+61.11kb)|LRRC37A4P(+143kb)|MAPT-AS1(-179.9kb)|MGC57346(+25.53kb)|MIR4315-1(+188.1kb)|MIR4315-2(+188.1kb)|PLEKHM1(+172.7kb)|SPPL2C(-181.4kb)
17	43709415	rs436667	T	C		3	5.643e-05	5.643e-05	0.8856	0.8856	0.874	0	0.8778	0.8724	0.904	ARHGAP27(+199.1kb)|CRHR1(0)|CRHR1-IT1(-6.925kb)|LOC644172(+29.67kb)|LRRC37A4P(+111.5kb)|MGC57346(0)|MIR4315-1(+156.6kb)|MIR4315-2(+156.6kb)|PLEKHM1(+141.3kb)
17	43746276	rs17760733	T	G		3	5.643e-05	5.643e-05	0.8861	0.8861	0.8734	0	0.8785	0.8727	0.9044	CRHR1(0)|CRHR1-IT1(+22.68kb)|LOC644172(+66.53kb)|LRRC37A4P(+148.4kb)|MAPT-AS1(-174.4kb)|MGC57346(+30.95kb)|MIR4315-1(+193.5kb)|MIR4315-2(+193.5kb)|PLEKHM1(+178.1kb)|SPPL2C(-176kb)
17	43762846	rs2040846	G	A		3	5.643e-05	5.643e-05	0.8861	0.8861	0.8791	0	0.8791	0.8727	0.9039	CRHR1(0)|CRHR1-IT1(+39.25kb)|LOC644172(+83.1kb)|LRRC37A4P(+165kb)|MAPT-AS1(-157.9kb)|MGC57346(+47.52kb)|PLEKHM1(+194.7kb)|SPPL2C(-159.4kb)
17	43727887	rs424243	T	A		3	5.647e-05	5.647e-05	0.8861	0.8861	0.8642	0	0.8788	0.8716	0.905	CRHR1(0)|CRHR1-IT1(+4.292kb)|LOC644172(+48.14kb)|LRRC37A4P(+130kb)|MAPT-AS1(-192.8kb)|MGC57346(+12.56kb)|MIR4315-1(+175.1kb)|MIR4315-2(+175.1kb)|PLEKHM1(+159.7kb)|SPPL2C(-194.4kb)
17	43776945	rs62056873	C	T		3	5.649e-05	5.649e-05	0.8862	0.8862	0.8802	0	0.8794	0.8726	0.9038	CRHR1(0)|CRHR1-IT1(+53.35kb)|LOC644172(+97.2kb)|LRRC37A4P(+179.1kb)|MAPT(-194.8kb)|MAPT-AS1(-143.8kb)|MAPT-IT1(-196.2kb)|MGC57346(+61.62kb)|SPPL2C(-145.3kb)
17	43763007	rs4486953	C	T		3	5.65e-05	5.65e-05	0.8861	0.8861	0.8792	0	0.8791	0.8727	0.9039	CRHR1(0)|CRHR1-IT1(+39.41kb)|LOC644172(+83.26kb)|LRRC37A4P(+165.1kb)|MAPT-AS1(-157.7kb)|MGC57346(+47.68kb)|PLEKHM1(+194.9kb)|SPPL2C(-159.2kb)
17	43762594	rs17688002	T	A		3	5.651e-05	5.651e-05	0.8861	0.8861	0.8792	0	0.8791	0.8727	0.9039	CRHR1(0)|CRHR1-IT1(+39kb)|LOC644172(+82.85kb)|LRRC37A4P(+164.7kb)|MAPT-AS1(-158.1kb)|MGC57346(+47.26kb)|PLEKHM1(+194.4kb)|SPPL2C(-159.7kb)
17	43763935	rs17688068	G	A		3	5.652e-05	5.652e-05	0.8862	0.8862	0.8797	0	0.879	0.8729	0.9039	CRHR1(0)|CRHR1-IT1(+40.34kb)|LOC644172(+84.19kb)|LRRC37A4P(+166kb)|MAPT-AS1(-156.8kb)|MGC57346(+48.61kb)|PLEKHM1(+195.8kb)|SPPL2C(-158.3kb)
17	43767631	rs62055753	A	G		3	5.652e-05	5.652e-05	0.8862	0.8862	0.8771	0	0.879	0.8727	0.9041	CRHR1(0)|CRHR1-IT1(+44.04kb)|LOC644172(+87.88kb)|LRRC37A4P(+169.7kb)|MAPT-AS1(-153.1kb)|MGC57346(+52.3kb)|PLEKHM1(+199.5kb)|SPPL2C(-154.6kb)
17	43753642	rs62055664	G	A		3	5.654e-05	5.654e-05	0.8861	0.8861	0.877	0	0.8789	0.8727	0.9041	CRHR1(0)|CRHR1-IT1(+30.05kb)|LOC644172(+73.89kb)|LRRC37A4P(+155.8kb)|MAPT-AS1(-167.1kb)|MGC57346(+38.31kb)|PLEKHM1(+185.5kb)|SPPL2C(-168.6kb)
17	43768230	rs62055754	G	C		3	5.656e-05	5.656e-05	0.8862	0.8862	0.8771	0	0.879	0.8727	0.9041	CRHR1(0)|CRHR1-IT1(+44.64kb)|LOC644172(+88.48kb)|LRRC37A4P(+170.3kb)|MAPT-AS1(-152.5kb)|MGC57346(+52.9kb)|SPPL2C(-154kb)
16	8865269	rs1273415	C	T		3	5.657e-05	5.657e-05	0.6972	0.6972	0.6404	0	0.6391	0.675	0.7705	ABAT(0)|CARHSP1(-81.53kb)|METTL22(+125.2kb)|PMM2(-26.4kb)|TMEM186(-23.77kb)|USP7(-120.7kb)
17	43754505	rs62055665	C	A		3	5.659e-05	5.659e-05	0.8861	0.8861	0.8771	0	0.8789	0.8727	0.9041	CRHR1(0)|CRHR1-IT1(+30.91kb)|LOC644172(+74.76kb)|LRRC37A4P(+156.6kb)|MAPT-AS1(-166.2kb)|MGC57346(+39.18kb)|PLEKHM1(+186.4kb)|SPPL2C(-167.8kb)
17	43775145	rs12150141	A	G		3	5.66e-05	5.66e-05	0.8862	0.8862	0.8791	0	0.8793	0.8726	0.9039	CRHR1(0)|CRHR1-IT1(+51.55kb)|LOC644172(+95.4kb)|LRRC37A4P(+177.3kb)|MAPT(-196.6kb)|MAPT-AS1(-145.6kb)|MAPT-IT1(-198kb)|MGC57346(+59.82kb)|SPPL2C(-147.1kb)
17	43762255	rs17761207	C	T		3	5.661e-05	5.661e-05	0.8862	0.8862	0.8795	0	0.8792	0.8727	0.9039	CRHR1(0)|CRHR1-IT1(+38.66kb)|LOC644172(+82.51kb)|LRRC37A4P(+164.4kb)|MAPT-AS1(-158.5kb)|MGC57346(+46.93kb)|PLEKHM1(+194.1kb)|SPPL2C(-160kb)
17	43754850	rs62055691	C	T		3	5.665e-05	5.665e-05	0.8861	0.8861	0.877	0	0.8789	0.8727	0.9041	CRHR1(0)|CRHR1-IT1(+31.26kb)|LOC644172(+75.1kb)|LRRC37A4P(+157kb)|MAPT-AS1(-165.9kb)|MGC57346(+39.52kb)|PLEKHM1(+186.7kb)|SPPL2C(-167.4kb)
17	43710384	rs17686610	C	A		3	5.666e-05	5.666e-05	0.8856	0.8856	0.874	0	0.8776	0.8727	0.9041	CRHR1(0)|CRHR1-IT1(-5.956kb)|LOC644172(+30.64kb)|LRRC37A4P(+112.5kb)|MGC57346(0)|MIR4315-1(+157.6kb)|MIR4315-2(+157.6kb)|PLEKHM1(+142.2kb)
17	43744990	rs17687462	T	C		3	5.667e-05	5.667e-05	0.8861	0.8861	0.8724	0	0.8784	0.8727	0.9045	CRHR1(0)|CRHR1-IT1(+21.4kb)|LOC644172(+65.24kb)|LRRC37A4P(+147.1kb)|MAPT-AS1(-175.7kb)|MGC57346(+29.66kb)|MIR4315-1(+192.2kb)|MIR4315-2(+192.2kb)|PLEKHM1(+176.8kb)|SPPL2C(-177.3kb)
17	43759426	rs76333921	T	C		3	5.671e-05	5.671e-05	0.8861	0.8861	0.8827	0	0.8795	0.8727	0.9036	CRHR1(0)|CRHR1-IT1(+35.83kb)|LOC644172(+79.68kb)|LRRC37A4P(+161.5kb)|MAPT-AS1(-161.3kb)|MGC57346(+44.1kb)|PLEKHM1(+191.3kb)|SPPL2C(-162.8kb)
17	43775929	rs17688682	G	C		3	5.672e-05	5.672e-05	0.8862	0.8862	0.8791	0	0.8795	0.8725	0.9039	CRHR1(0)|CRHR1-IT1(+52.33kb)|LOC644172(+96.18kb)|LRRC37A4P(+178kb)|MAPT(-195.8kb)|MAPT-AS1(-144.8kb)|MAPT-IT1(-197.2kb)|MGC57346(+60.6kb)|SPPL2C(-146.3kb)
17	43761381	rs75115093	G	A		3	5.673e-05	5.673e-05	0.8861	0.8861	0.8806	0	0.8793	0.8727	0.9038	CRHR1(0)|CRHR1-IT1(+37.79kb)|LOC644172(+81.63kb)|LRRC37A4P(+163.5kb)|MAPT-AS1(-159.3kb)|MGC57346(+46.05kb)|PLEKHM1(+193.2kb)|SPPL2C(-160.9kb)
17	43761856	rs2049515	T	C		3	5.673e-05	5.673e-05	0.8862	0.8862	0.8795	0	0.8792	0.8727	0.9039	CRHR1(0)|CRHR1-IT1(+38.26kb)|LOC644172(+82.11kb)|LRRC37A4P(+164kb)|MAPT-AS1(-158.9kb)|MGC57346(+46.53kb)|PLEKHM1(+193.7kb)|SPPL2C(-160.4kb)
17	43754209	rs79073784	C	G		3	5.674e-05	5.674e-05	0.8861	0.8861	0.8771	0	0.8789	0.8727	0.9041	CRHR1(0)|CRHR1-IT1(+30.61kb)|LOC644172(+74.46kb)|LRRC37A4P(+156.3kb)|MAPT-AS1(-166.5kb)|MGC57346(+38.88kb)|PLEKHM1(+186.1kb)|SPPL2C(-168kb)
17	43761974	rs62055708	A	C		3	5.674e-05	5.674e-05	0.8862	0.8862	0.8795	0	0.8792	0.8727	0.9039	CRHR1(0)|CRHR1-IT1(+38.38kb)|LOC644172(+82.23kb)|LRRC37A4P(+164.1kb)|MAPT-AS1(-158.7kb)|MGC57346(+46.64kb)|PLEKHM1(+193.8kb)|SPPL2C(-160.3kb)
17	43761985	rs76927677	T	A		3	5.674e-05	5.674e-05	0.8862	0.8862	0.8795	0	0.8792	0.8727	0.9039	CRHR1(0)|CRHR1-IT1(+38.39kb)|LOC644172(+82.24kb)|LRRC37A4P(+164.1kb)|MAPT-AS1(-158.7kb)|MGC57346(+46.66kb)|PLEKHM1(+193.8kb)|SPPL2C(-160.3kb)
17	43767815	rs17688296	T	C		3	5.674e-05	5.674e-05	0.8862	0.8862	0.8773	0	0.879	0.8727	0.9041	CRHR1(0)|CRHR1-IT1(+44.22kb)|LOC644172(+88.07kb)|LRRC37A4P(+169.9kb)|MAPT-AS1(-152.9kb)|MGC57346(+52.49kb)|PLEKHM1(+199.7kb)|SPPL2C(-154.4kb)
17	43754010	rs76717812	C	T		3	5.675e-05	5.675e-05	0.8861	0.8861	0.8771	0	0.8789	0.8727	0.9041	CRHR1(0)|CRHR1-IT1(+30.42kb)|LOC644172(+74.26kb)|LRRC37A4P(+156.1kb)|MAPT-AS1(-166.7kb)|MGC57346(+38.68kb)|PLEKHM1(+185.9kb)|SPPL2C(-168.2kb)
17	43768703	rs55972157	T	C		3	5.675e-05	5.675e-05	0.8862	0.8862	0.8759	0	0.879	0.8726	0.9042	CRHR1(0)|CRHR1-IT1(+45.11kb)|LOC644172(+88.96kb)|LRRC37A4P(+170.8kb)|MAPT-AS1(-152kb)|MGC57346(+53.37kb)|SPPL2C(-153.6kb)
17	43769321	rs56283089	C	A		3	5.675e-05	5.675e-05	0.8862	0.8862	0.8759	0	0.879	0.8726	0.9042	CRHR1(0)|CRHR1-IT1(+45.73kb)|LOC644172(+89.57kb)|LRRC37A4P(+171.4kb)|MAPT-AS1(-151.4kb)|MGC57346(+53.99kb)|SPPL2C(-152.9kb)
17	43775015	rs62056872	C	T		3	5.675e-05	5.675e-05	0.8862	0.8862	0.8792	0	0.8795	0.8725	0.9039	CRHR1(0)|CRHR1-IT1(+51.42kb)|LOC644172(+95.27kb)|LRRC37A4P(+177.1kb)|MAPT(-196.7kb)|MAPT-AS1(-145.7kb)|MAPT-IT1(-198.1kb)|MGC57346(+59.69kb)|SPPL2C(-147.2kb)
17	43769088	rs17761581	C	T		3	5.676e-05	5.676e-05	0.8862	0.8862	0.8759	0	0.879	0.8726	0.9042	CRHR1(0)|CRHR1-IT1(+45.49kb)|LOC644172(+89.34kb)|LRRC37A4P(+171.2kb)|MAPT-AS1(-151.6kb)|MGC57346(+53.76kb)|SPPL2C(-153.2kb)
17	43776787	rs17761985	T	C		3	5.676e-05	5.676e-05	0.8862	0.8862	0.8806	0	0.8794	0.8727	0.9038	CRHR1(0)|CRHR1-IT1(+53.19kb)|LOC644172(+97.04kb)|LRRC37A4P(+178.9kb)|MAPT(-195kb)|MAPT-AS1(-143.9kb)|MAPT-IT1(-196.4kb)|MGC57346(+61.46kb)|SPPL2C(-145.5kb)
9	460325	rs10758627	T	C		3	5.677e-05	0.0005039	1.1321	1.1344	0.2534	27.15	1.1004	1.2332	1.0961	DOCK8(0)|KANK1(-9.968kb)
17	43773784	rs62056870	A	C		3	5.677e-05	5.677e-05	0.8862	0.8862	0.8755	0	0.8794	0.8723	0.9042	CRHR1(0)|CRHR1-IT1(+50.19kb)|LOC644172(+94.04kb)|LRRC37A4P(+175.9kb)|MAPT(-198kb)|MAPT-AS1(-146.9kb)|MAPT-IT1(-199.4kb)|MGC57346(+58.46kb)|SPPL2C(-148.5kb)
17	43754099	rs17687667	A	G		3	5.68e-05	5.68e-05	0.8861	0.8861	0.8771	0	0.8789	0.8727	0.9041	CRHR1(0)|CRHR1-IT1(+30.5kb)|LOC644172(+74.35kb)|LRRC37A4P(+156.2kb)|MAPT-AS1(-166.6kb)|MGC57346(+38.77kb)|PLEKHM1(+186kb)|SPPL2C(-168.2kb)
17	43768467	rs56100013	T	C		3	5.682e-05	5.682e-05	0.8862	0.8862	0.8775	0	0.8791	0.8727	0.9041	CRHR1(0)|CRHR1-IT1(+44.87kb)|LOC644172(+88.72kb)|LRRC37A4P(+170.6kb)|MAPT-AS1(-152.3kb)|MGC57346(+53.14kb)|SPPL2C(-153.8kb)
17	43775402	rs12150608	C	T		3	5.682e-05	5.682e-05	0.8862	0.8862	0.8794	0	0.8794	0.8726	0.9039	CRHR1(0)|CRHR1-IT1(+51.81kb)|LOC644172(+95.65kb)|LRRC37A4P(+177.5kb)|MAPT(-196.3kb)|MAPT-AS1(-145.3kb)|MAPT-IT1(-197.7kb)|MGC57346(+60.07kb)|SPPL2C(-146.9kb)
17	43760685	rs62055706	C	T		3	5.685e-05	5.685e-05	0.8862	0.8862	0.8806	0	0.8793	0.8727	0.9038	CRHR1(0)|CRHR1-IT1(+37.09kb)|LOC644172(+80.94kb)|LRRC37A4P(+162.8kb)|MAPT-AS1(-160kb)|MGC57346(+45.36kb)|PLEKHM1(+192.5kb)|SPPL2C(-161.6kb)
17	43775546	rs12150547	G	A		3	5.685e-05	5.685e-05	0.8863	0.8863	0.8794	0	0.8796	0.8725	0.9039	CRHR1(0)|CRHR1-IT1(+51.95kb)|LOC644172(+95.8kb)|LRRC37A4P(+177.7kb)|MAPT(-196.2kb)|MAPT-AS1(-145.2kb)|MAPT-IT1(-197.6kb)|MGC57346(+60.22kb)|SPPL2C(-146.7kb)
17	43754576	rs62055690	G	C		3	5.687e-05	5.687e-05	0.8861	0.8861	0.8774	0	0.879	0.8727	0.9041	CRHR1(0)|CRHR1-IT1(+30.98kb)|LOC644172(+74.83kb)|LRRC37A4P(+156.7kb)|MAPT-AS1(-166.1kb)|MGC57346(+39.25kb)|PLEKHM1(+186.4kb)|SPPL2C(-167.7kb)
17	44318184	rs566979023	G	A		3	5.688e-05	5.688e-05	0.8824	0.8824	0.9094	0	0.8901	0.8641	0.8902	ARL17A(-58.32kb)|ARL17B(-58.73kb)|KANSL1(+15.44kb)|KANSL1-AS1(+44.1kb)|LRRC37A(-54.31kb)|NSFP1(-132kb)
17	43776242	rs12150091	G	A		3	5.69e-05	5.69e-05	0.8863	0.8863	0.8796	0	0.8795	0.8726	0.9039	CRHR1(0)|CRHR1-IT1(+52.65kb)|LOC644172(+96.49kb)|LRRC37A4P(+178.4kb)|MAPT(-195.5kb)|MAPT-AS1(-144.5kb)|MAPT-IT1(-196.9kb)|MGC57346(+60.91kb)|SPPL2C(-146kb)
17	43759431	rs76453925	T	C		3	5.692e-05	5.692e-05	0.8862	0.8862	0.8819	0	0.8795	0.8727	0.9037	CRHR1(0)|CRHR1-IT1(+35.84kb)|LOC644172(+79.68kb)|LRRC37A4P(+161.5kb)|MAPT-AS1(-161.3kb)|MGC57346(+44.1kb)|PLEKHM1(+191.3kb)|SPPL2C(-162.8kb)
17	43774959	rs17761838	C	T		3	5.693e-05	5.693e-05	0.8863	0.8863	0.8783	0	0.8795	0.8725	0.904	CRHR1(0)|CRHR1-IT1(+51.36kb)|LOC644172(+95.21kb)|LRRC37A4P(+177.1kb)|MAPT(-196.8kb)|MAPT-AS1(-145.8kb)|MAPT-IT1(-198.2kb)|MGC57346(+59.63kb)|SPPL2C(-147.3kb)
17	43759719	rs17687849	G	A		3	5.694e-05	5.694e-05	0.8862	0.8862	0.8819	0	0.8795	0.8727	0.9037	CRHR1(0)|CRHR1-IT1(+36.12kb)|LOC644172(+79.97kb)|LRRC37A4P(+161.8kb)|MAPT-AS1(-161kb)|MGC57346(+44.39kb)|PLEKHM1(+191.6kb)|SPPL2C(-162.5kb)
20	40386038	rs3091968	G	A		3	5.694e-05	0.002794	1.2055	1.2056	0.1639	44.7	1.3577	1.1653	1.1072	CHD6(+138.9kb)
17	43761939	rs2158474	C	G		3	5.695e-05	5.695e-05	0.8862	0.8862	0.8786	0	0.8792	0.8727	0.904	CRHR1(0)|CRHR1-IT1(+38.34kb)|LOC644172(+82.19kb)|LRRC37A4P(+164kb)|MAPT-AS1(-158.8kb)|MGC57346(+46.61kb)|PLEKHM1(+193.8kb)|SPPL2C(-160.3kb)
17	43774845	rs56391096	T	C		3	5.697e-05	5.697e-05	0.8863	0.8863	0.8785	0	0.8794	0.8726	0.904	CRHR1(0)|CRHR1-IT1(+51.25kb)|LOC644172(+95.1kb)|LRRC37A4P(+177kb)|MAPT(-196.9kb)|MAPT-AS1(-145.9kb)|MAPT-IT1(-198.3kb)|MGC57346(+59.52kb)|SPPL2C(-147.4kb)
17	43773248	rs10491143	T	A		3	5.704e-05	5.704e-05	0.8862	0.8862	0.8764	0	0.8792	0.8726	0.9042	CRHR1(0)|CRHR1-IT1(+49.65kb)|LOC644172(+93.5kb)|LRRC37A4P(+175.4kb)|MAPT(-198.5kb)|MAPT-AS1(-147.5kb)|MAPT-IT1(-199.9kb)|MGC57346(+57.92kb)|SPPL2C(-149kb)
21	27512956	rs2830086	T	A		3	5.704e-05	5.704e-05	0.8985	0.8985	0.4412	0	0.862	0.8978	0.933	APP(0)
17	43776061	rs12150454	T	C		3	5.707e-05	5.707e-05	0.8862	0.8862	0.8797	0	0.8795	0.8726	0.9039	CRHR1(0)|CRHR1-IT1(+52.47kb)|LOC644172(+96.31kb)|LRRC37A4P(+178.2kb)|MAPT(-195.7kb)|MAPT-AS1(-144.7kb)|MAPT-IT1(-197.1kb)|MGC57346(+60.73kb)|SPPL2C(-146.2kb)
17	43774497	rs56162163	T	A		3	5.71e-05	5.71e-05	0.8862	0.8862	0.8781	0	0.8794	0.8725	0.904	CRHR1(0)|CRHR1-IT1(+50.9kb)|LOC644172(+94.75kb)|LRRC37A4P(+176.6kb)|MAPT(-197.2kb)|MAPT-AS1(-146.2kb)|MAPT-IT1(-198.7kb)|MGC57346(+59.17kb)|SPPL2C(-147.8kb)
17	43759048	rs17687838	C	T		3	5.711e-05	5.711e-05	0.8862	0.8862	0.8819	0	0.8795	0.8727	0.9037	CRHR1(0)|CRHR1-IT1(+35.45kb)|LOC644172(+79.3kb)|LRRC37A4P(+161.2kb)|MAPT-AS1(-161.7kb)|MGC57346(+43.72kb)|PLEKHM1(+190.9kb)|SPPL2C(-163.2kb)
17	43772018	rs56200760	T	G		3	5.711e-05	5.711e-05	0.8862	0.8862	0.8775	0	0.8792	0.8726	0.9041	CRHR1(0)|CRHR1-IT1(+48.42kb)|LOC644172(+92.27kb)|LRRC37A4P(+174.1kb)|MAPT(-199.7kb)|MAPT-AS1(-148.7kb)|MGC57346(+56.69kb)|SPPL2C(-150.2kb)
17	43852733	rs113871181	A	G		3	5.711e-05	5.711e-05	0.8865	0.8865	0.832	0	0.8792	0.8692	0.9071	CRHR1(0)|CRHR1-IT1(+129.1kb)|LOC644172(+173kb)|MAPT(-119kb)|MAPT-AS1(-67.99kb)|MAPT-IT1(-120.4kb)|MGC57346(+137.4kb)|SPPL2C(-69.52kb)
17	43692935	rs611351	G	A		3	5.714e-05	5.714e-05	0.885	0.885	0.8826	0	0.8778	0.8721	0.9029	ARHGAP27(+182.7kb)|CRHR1(-4.774kb)|CRHR1-IT1(-23.4kb)|LOC644172(+13.19kb)|LRRC37A4P(+95.05kb)|MGC57346(-4.776kb)|MIR4315-1(+140.1kb)|MIR4315-2(+140.1kb)|PLEKHM1(+124.8kb)
17	43760516	rs17761124	T	A		3	5.715e-05	5.715e-05	0.8862	0.8862	0.8802	0	0.8793	0.8728	0.9039	CRHR1(0)|CRHR1-IT1(+36.92kb)|LOC644172(+80.77kb)|LRRC37A4P(+162.6kb)|MAPT-AS1(-160.2kb)|MGC57346(+45.19kb)|PLEKHM1(+192.4kb)|SPPL2C(-161.7kb)
17	43773124	rs10491144	C	A		3	5.715e-05	5.715e-05	0.8862	0.8862	0.8765	0	0.8792	0.8726	0.9042	CRHR1(0)|CRHR1-IT1(+49.53kb)|LOC644172(+93.38kb)|LRRC37A4P(+175.2kb)|MAPT(-198.6kb)|MAPT-AS1(-147.6kb)|MGC57346(+57.8kb)|SPPL2C(-149.1kb)
17	43770443	rs62056861	C	T		3	5.717e-05	5.717e-05	0.8862	0.8862	0.8767	0	0.8791	0.8727	0.9042	CRHR1(0)|CRHR1-IT1(+46.85kb)|LOC644172(+90.7kb)|LRRC37A4P(+172.6kb)|MAPT-AS1(-150.3kb)|MGC57346(+55.11kb)|SPPL2C(-151.8kb)
17	43760599	rs62055705	C	A		3	5.719e-05	5.719e-05	0.8862	0.8862	0.8802	0	0.8793	0.8728	0.9039	CRHR1(0)|CRHR1-IT1(+37kb)|LOC644172(+80.85kb)|LRRC37A4P(+162.7kb)|MAPT-AS1(-160.1kb)|MGC57346(+45.27kb)|PLEKHM1(+192.5kb)|SPPL2C(-161.7kb)
17	43773085	rs17688452	A	G		3	5.719e-05	5.719e-05	0.8862	0.8862	0.876	0	0.8792	0.8725	0.9042	CRHR1(0)|CRHR1-IT1(+49.49kb)|LOC644172(+93.34kb)|LRRC37A4P(+175.2kb)|MAPT(-198.7kb)|MAPT-AS1(-147.6kb)|MGC57346(+57.76kb)|SPPL2C(-149.2kb)
17	43773607	rs17688511	G	T		3	5.722e-05	5.722e-05	0.8863	0.8863	0.8779	0	0.8794	0.8726	0.9041	CRHR1(0)|CRHR1-IT1(+50.01kb)|LOC644172(+93.86kb)|LRRC37A4P(+175.7kb)|MAPT(-198.1kb)|MAPT-AS1(-147.1kb)|MAPT-IT1(-199.5kb)|MGC57346(+58.28kb)|SPPL2C(-148.6kb)
17	43770995	rs62056864	A	G		3	5.725e-05	5.725e-05	0.8862	0.8862	0.8754	0	0.8791	0.8726	0.9043	CRHR1(0)|CRHR1-IT1(+47.4kb)|LOC644172(+91.25kb)|LRRC37A4P(+173.1kb)|MAPT-AS1(-149.7kb)|MGC57346(+55.67kb)|SPPL2C(-151.3kb)
17	43771193	rs62056865	C	T		3	5.725e-05	5.725e-05	0.8862	0.8862	0.8754	0	0.8791	0.8726	0.9043	CRHR1(0)|CRHR1-IT1(+47.6kb)|LOC644172(+91.44kb)|LRRC37A4P(+173.3kb)|MAPT-AS1(-149.5kb)|MGC57346(+55.86kb)|SPPL2C(-151.1kb)
17	43771627	rs62056867	G	A		3	5.726e-05	5.726e-05	0.8862	0.8862	0.8754	0	0.8791	0.8726	0.9043	CRHR1(0)|CRHR1-IT1(+48.03kb)|LOC644172(+91.88kb)|LRRC37A4P(+173.7kb)|MAPT-AS1(-149.1kb)|MGC57346(+56.3kb)|SPPL2C(-150.6kb)
17	43773943	rs17688558	G	A		3	5.726e-05	5.726e-05	0.8863	0.8863	0.8778	0	0.8794	0.8726	0.9041	CRHR1(0)|CRHR1-IT1(+50.35kb)|LOC644172(+94.2kb)|LRRC37A4P(+176.1kb)|MAPT(-197.8kb)|MAPT-AS1(-146.8kb)|MAPT-IT1(-199.2kb)|MGC57346(+58.61kb)|SPPL2C(-148.3kb)
17	43771493	rs62056866	A	G		3	5.727e-05	5.727e-05	0.8862	0.8862	0.8754	0	0.8791	0.8726	0.9043	CRHR1(0)|CRHR1-IT1(+47.9kb)|LOC644172(+91.74kb)|LRRC37A4P(+173.6kb)|MAPT-AS1(-149.2kb)|MGC57346(+56.16kb)|SPPL2C(-150.8kb)
17	43772540	rs17688434	A	G		3	5.727e-05	5.727e-05	0.8863	0.8863	0.8756	0	0.8792	0.8726	0.9043	CRHR1(0)|CRHR1-IT1(+48.94kb)|LOC644172(+92.79kb)|LRRC37A4P(+174.7kb)|MAPT(-199.2kb)|MAPT-AS1(-148.2kb)|MGC57346(+57.21kb)|SPPL2C(-149.7kb)
1	39140254	rs912783	A	T		3	5.729e-05	5.729e-05	0.9015	0.9015	0.9227	0	0.8885	0.9079	0.9083	GJA9(-199.5kb)|GJA9-MYCBP(-187.9kb)|MYCBP(-187.9kb)|RRAGC(-163.6kb)
17	43760577	rs62055704	A	G		3	5.73e-05	5.73e-05	0.8862	0.8862	0.8802	0	0.8793	0.8728	0.9039	CRHR1(0)|CRHR1-IT1(+36.98kb)|LOC644172(+80.83kb)|LRRC37A4P(+162.7kb)|MAPT-AS1(-160.1kb)|MGC57346(+45.25kb)|PLEKHM1(+192.4kb)|SPPL2C(-161.7kb)
17	43773877	rs17688534	T	A		3	5.73e-05	5.73e-05	0.8863	0.8863	0.8779	0	0.8794	0.8726	0.9041	CRHR1(0)|CRHR1-IT1(+50.28kb)|LOC644172(+94.13kb)|LRRC37A4P(+176kb)|MAPT(-197.9kb)|MAPT-AS1(-146.8kb)|MAPT-IT1(-199.3kb)|MGC57346(+58.55kb)|SPPL2C(-148.4kb)
17	43758238	rs62055698	T	C		3	5.732e-05	5.732e-05	0.8862	0.8862	0.8826	0	0.8796	0.8726	0.9036	CRHR1(0)|CRHR1-IT1(+34.64kb)|LOC644172(+78.49kb)|LRRC37A4P(+160.3kb)|MAPT-AS1(-162.5kb)|MGC57346(+42.91kb)|PLEKHM1(+190.1kb)|SPPL2C(-164kb)
17	43758011	rs55651627	C	G		3	5.739e-05	5.739e-05	0.8862	0.8862	0.8829	0	0.8797	0.8726	0.9036	CRHR1(0)|CRHR1-IT1(+34.42kb)|LOC644172(+78.26kb)|LRRC37A4P(+160.1kb)|MAPT-AS1(-162.7kb)|MGC57346(+42.68kb)|PLEKHM1(+189.9kb)|SPPL2C(-164.2kb)
17	43769277	rs55840731	G	C		3	5.739e-05	5.739e-05	0.8863	0.8863	0.8758	0	0.8791	0.8727	0.9043	CRHR1(0)|CRHR1-IT1(+45.68kb)|LOC644172(+89.53kb)|LRRC37A4P(+171.4kb)|MAPT-AS1(-151.4kb)|MGC57346(+53.95kb)|SPPL2C(-153kb)
17	43738627	rs241021	G	T		3	5.74e-05	5.74e-05	0.8862	0.8862	0.8708	0	0.8784	0.8727	0.9047	CRHR1(0)|CRHR1-IT1(+15.03kb)|LOC644172(+58.88kb)|LRRC37A4P(+140.7kb)|MAPT-AS1(-182.1kb)|MGC57346(+23.3kb)|MIR4315-1(+185.8kb)|MIR4315-2(+185.8kb)|PLEKHM1(+170.5kb)|SPPL2C(-183.6kb)
17	44095467	rs58879558	C	T		3	5.74e-05	5.74e-05	0.8859	0.8859	0.904	0	0.891	0.8678	0.8961	CRHR1(+182.3kb)|KANSL1(-11.81kb)|KANSL1-AS1(-175.5kb)|MAPT(0)|MAPT-AS1(+122.6kb)|MAPT-IT1(+119.3kb)|SPPL2C(+171kb)|STH(+18.41kb)
6	166198277	rs6928099	C	G		3	5.742e-05	5.742e-05	1.1058	1.1058	0.6127	0	1.1401	1.0714	1.098	LINC00473(-139.3kb)|PDE10A(+122.7kb)
17	43738676	rs241020	A	C		3	5.743e-05	5.743e-05	0.8862	0.8862	0.8708	0	0.8784	0.8727	0.9047	CRHR1(0)|CRHR1-IT1(+15.08kb)|LOC644172(+58.93kb)|LRRC37A4P(+140.8kb)|MAPT-AS1(-182kb)|MGC57346(+23.35kb)|MIR4315-1(+185.9kb)|MIR4315-2(+185.9kb)|PLEKHM1(+170.5kb)|SPPL2C(-183.6kb)
17	43754569	rs62055689	A	G		3	5.743e-05	5.743e-05	0.8862	0.8862	0.8758	0	0.879	0.8727	0.9043	CRHR1(0)|CRHR1-IT1(+30.97kb)|LOC644172(+74.82kb)|LRRC37A4P(+156.7kb)|MAPT-AS1(-166.2kb)|MGC57346(+39.24kb)|PLEKHM1(+186.4kb)|SPPL2C(-167.7kb)
17	43770416	rs74765707	C	T		3	5.743e-05	5.743e-05	0.8863	0.8863	0.8759	0	0.8791	0.8727	0.9043	CRHR1(0)|CRHR1-IT1(+46.82kb)|LOC644172(+90.67kb)|LRRC37A4P(+172.5kb)|MAPT-AS1(-150.3kb)|MGC57346(+55.09kb)|SPPL2C(-151.8kb)
17	43772407	rs55927630	T	C		3	5.747e-05	5.747e-05	0.8863	0.8863	0.8757	0	0.8792	0.8726	0.9043	CRHR1(0)|CRHR1-IT1(+48.81kb)|LOC644172(+92.66kb)|LRRC37A4P(+174.5kb)|MAPT(-199.3kb)|MAPT-AS1(-148.3kb)|MGC57346(+57.08kb)|SPPL2C(-149.8kb)
17	43711539	rs2942169	C	G		3	5.75e-05	5.75e-05	0.8857	0.8857	0.8745	0	0.8782	0.8724	0.9041	CRHR1(0)|CRHR1-IT1(-4.801kb)|LOC644172(+31.79kb)|LRRC37A4P(+113.6kb)|MGC57346(0)|MIR4315-1(+158.7kb)|MIR4315-2(+158.7kb)|PLEKHM1(+143.4kb)
13	83708119	rs2800364	T	C		3	5.752e-05	5.752e-05	0.8925	0.8925	0.8713	0	0.8793	0.8857	0.9087	.
17	43772251	rs17688410	T	C		3	5.755e-05	5.755e-05	0.8863	0.8863	0.8748	0	0.8792	0.8726	0.9044	CRHR1(0)|CRHR1-IT1(+48.66kb)|LOC644172(+92.5kb)|LRRC37A4P(+174.4kb)|MAPT(-199.5kb)|MAPT-AS1(-148.5kb)|MGC57346(+56.92kb)|SPPL2C(-150kb)
17	43756506	rs757502	T	C		3	5.756e-05	5.756e-05	0.8862	0.8862	0.8795	0	0.8791	0.8729	0.904	CRHR1(0)|CRHR1-IT1(+32.91kb)|LOC644172(+76.76kb)|LRRC37A4P(+158.6kb)|MAPT-AS1(-164.2kb)|MGC57346(+41.18kb)|PLEKHM1(+188.4kb)|SPPL2C(-165.7kb)
2	127887560	rs13004848	C	T		3	5.758e-05	0.001311	1.1477	1.1504	0.2027	37.35	1.2151	1.1912	1.0644	BIN1(+22.66kb)|CYP27C1(-53.85kb)|ERCC3(-127.3kb)|MAP3K2(-168.7kb)
15	58532730	rs16939960	C	T		3	5.763e-05	0.001355	0.7991	0.796	0.1978	38.29	0.7205	0.7611	0.9039	ALDH1A2(+174.6kb)|AQP9(+54.62kb)|LIPC(-191.4kb)
17	43758148	rs62055697	T	C		3	5.766e-05	5.766e-05	0.8862	0.8862	0.8829	0	0.8797	0.8726	0.9036	CRHR1(0)|CRHR1-IT1(+34.55kb)|LOC644172(+78.4kb)|LRRC37A4P(+160.3kb)|MAPT-AS1(-162.6kb)|MGC57346(+42.82kb)|PLEKHM1(+190kb)|SPPL2C(-164.1kb)
21	27449355	rs11701307	A	G		3	5.773e-05	5.773e-05	0.8881	0.8881	0.8012	0	0.9121	0.8784	0.8736	APP(0)
17	43762429	rs62055709	T	C		3	5.774e-05	5.774e-05	0.8862	0.8862	0.8781	0	0.8792	0.8727	0.9041	CRHR1(0)|CRHR1-IT1(+38.83kb)|LOC644172(+82.68kb)|LRRC37A4P(+164.5kb)|MAPT-AS1(-158.3kb)|MGC57346(+47.1kb)|PLEKHM1(+194.3kb)|SPPL2C(-159.8kb)
17	43712337	rs241045	T	C		3	5.778e-05	5.778e-05	0.8858	0.8858	0.8739	0	0.8783	0.8724	0.9042	CRHR1(0)|CRHR1-IT1(-4.003kb)|LOC644172(+32.59kb)|LRRC37A4P(+114.4kb)|MGC57346(0)|MIR4315-1(+159.5kb)|MIR4315-2(+159.5kb)|PLEKHM1(+144.2kb)
17	43772109	rs17688391	A	C		3	5.78e-05	5.78e-05	0.8863	0.8863	0.8749	0	0.8792	0.8726	0.9044	CRHR1(0)|CRHR1-IT1(+48.51kb)|LOC644172(+92.36kb)|LRRC37A4P(+174.2kb)|MAPT(-199.6kb)|MAPT-AS1(-148.6kb)|MGC57346(+56.78kb)|SPPL2C(-150.1kb)
17	43712464	rs241044	A	G		3	5.781e-05	5.781e-05	0.8858	0.8858	0.8739	0	0.8783	0.8724	0.9042	CRHR1(0)|CRHR1-IT1(-3.876kb)|LOC644172(+32.72kb)|LRRC37A4P(+114.6kb)|MGC57346(0)|MIR4315-1(+159.7kb)|MIR4315-2(+159.7kb)|PLEKHM1(+144.3kb)
6	39124195	rs2815075	T	C		3	5.782e-05	0.0004968	0.8369	0.8386	0.2736	22.84	0.812	0.9393	0.7915	DNAH8(+125.6kb)|GLP1R(+68.68kb)|KCNK5(-32.55kb)|KCNK16(-158.3kb)|KCNK17(-142.6kb)|KIF6(-178.7kb)|SAYSD1(+41.33kb)
3	23223617	rs55767896	C	T		3	5.79e-05	5.79e-05	1.1053	1.1053	0.671	0	1.108	1.1418	1.0794	MIR548AC(-152kb)|UBE2E2(-21.17kb)
17	43718336	rs434805	C	T		3	5.794e-05	5.794e-05	0.8863	0.8863	0.9132	0	0.8817	0.874	0.901	CRHR1(0)|CRHR1-IT1(0)|LOC644172(+38.59kb)|LRRC37A4P(+120.4kb)|MGC57346(+3.007kb)|MIR4315-1(+165.5kb)|MIR4315-2(+165.5kb)|PLEKHM1(+150.2kb)
17	43775479	rs12150610	C	T		3	5.796e-05	5.796e-05	0.8864	0.8864	0.8788	0	0.8794	0.8728	0.9041	CRHR1(0)|CRHR1-IT1(+51.88kb)|LOC644172(+95.73kb)|LRRC37A4P(+177.6kb)|MAPT(-196.3kb)|MAPT-AS1(-145.2kb)|MAPT-IT1(-197.7kb)|MGC57346(+60.15kb)|SPPL2C(-146.8kb)
17	43770525	rs62056862	T	C		3	5.798e-05	5.798e-05	0.8863	0.8863	0.8767	0	0.8792	0.8728	0.9043	CRHR1(0)|CRHR1-IT1(+46.93kb)|LOC644172(+90.78kb)|LRRC37A4P(+172.6kb)|MAPT-AS1(-150.2kb)|MGC57346(+55.2kb)|SPPL2C(-151.7kb)
5	179584475	rs6873598	A	T		3	5.799e-05	5.799e-05	0.9004	0.9004	0.7114	0	0.8768	0.926	0.9052	GFPT2(-143.2kb)|MAPK9(-76.12kb)|MIR340(+142.1kb)|RASGEF1C(0)|RNF130(+85.37kb)
17	43737730	rs241022	C	T		3	5.804e-05	5.804e-05	0.8862	0.8862	0.8705	0	0.8784	0.8728	0.9048	CRHR1(0)|CRHR1-IT1(+14.14kb)|LOC644172(+57.98kb)|LRRC37A4P(+139.8kb)|MAPT-AS1(-183kb)|MGC57346(+22.4kb)|MIR4315-1(+184.9kb)|MIR4315-2(+184.9kb)|PLEKHM1(+169.6kb)|SPPL2C(-184.5kb)
17	43693538	rs541886938	T	G		3	5.807e-05	5.807e-05	0.8856	0.8856	0.8692	0	0.8771	0.8726	0.9044	ARHGAP27(+183.3kb)|CRHR1(-4.171kb)|CRHR1-IT1(-22.8kb)|LOC644172(+13.79kb)|LRRC37A4P(+95.65kb)|MGC57346(-4.173kb)|MIR4315-1(+140.7kb)|MIR4315-2(+140.7kb)|PLEKHM1(+125.4kb)
17	43715924	rs117368197	G	A		3	5.807e-05	5.807e-05	0.8858	0.8858	0.8816	0	0.879	0.8725	0.9036	CRHR1(0)|CRHR1-IT1(-0.416kb)|LOC644172(+36.18kb)|LRRC37A4P(+118kb)|MGC57346(+0.595kb)|MIR4315-1(+163.1kb)|MIR4315-2(+163.1kb)|PLEKHM1(+147.8kb)
17	43780561	rs62056878	T	C		3	5.811e-05	5.811e-05	0.8863	0.8863	0.8813	0	0.8813	0.8713	0.9034	CRHR1(0)|CRHR1-IT1(+56.97kb)|LOC644172(+100.8kb)|LRRC37A4P(+182.7kb)|MAPT(-191.2kb)|MAPT-AS1(-140.2kb)|MAPT-IT1(-192.6kb)|MGC57346(+65.23kb)|SPPL2C(-141.7kb)
12	7827072	rs11055171	C	T		3	5.813e-05	0.007935	1.1353	1.1285	0.1295	51.08	1.1433	1.0249	1.2038	APOBEC1(+8.57kb)|CD163(+170.7kb)|CLEC4C(-54.94kb)|DPPA3(-37.02kb)|GDF3(-15.31kb)|NANOG(-114.9kb)|NANOGNB(-90.74kb)|SLC2A14(-139.3kb)
17	43711312	rs2942170	T	C		3	5.82e-05	5.82e-05	0.8858	0.8858	0.8755	0	0.8781	0.8727	0.9041	CRHR1(0)|CRHR1-IT1(-5.028kb)|LOC644172(+31.56kb)|LRRC37A4P(+113.4kb)|MGC57346(0)|MIR4315-1(+158.5kb)|MIR4315-2(+158.5kb)|PLEKHM1(+143.2kb)
17	43779351	rs17688922	A	G		3	5.821e-05	5.821e-05	0.8864	0.8864	0.8834	0	0.8805	0.8722	0.9035	CRHR1(0)|CRHR1-IT1(+55.76kb)|LOC644172(+99.6kb)|LRRC37A4P(+181.5kb)|MAPT(-192.4kb)|MAPT-AS1(-141.4kb)|MAPT-IT1(-193.8kb)|MGC57346(+64.02kb)|SPPL2C(-142.9kb)
17	43737040	rs241023	A	G		3	5.835e-05	5.835e-05	0.8863	0.8863	0.87	0	0.8785	0.8728	0.9049	CRHR1(0)|CRHR1-IT1(+13.44kb)|LOC644172(+57.29kb)|LRRC37A4P(+139.2kb)|MAPT-AS1(-183.7kb)|MGC57346(+21.71kb)|MIR4315-1(+184.2kb)|MIR4315-2(+184.2kb)|PLEKHM1(+168.9kb)|SPPL2C(-185.2kb)
17	43758382	rs17761046	C	T		3	5.842e-05	5.842e-05	0.8864	0.8864	0.8714	0	0.8789	0.8727	0.9048	CRHR1(0)|CRHR1-IT1(+34.79kb)|LOC644172(+78.63kb)|LRRC37A4P(+160.5kb)|MAPT-AS1(-162.3kb)|MGC57346(+43.05kb)|PLEKHM1(+190.2kb)|SPPL2C(-163.9kb)
17	43723189	rs413917	A	G		3	5.849e-05	5.849e-05	0.8862	0.8862	0.8754	0	0.879	0.8727	0.9044	CRHR1(0)|CRHR1-IT1(0)|LOC644172(+43.44kb)|LRRC37A4P(+125.3kb)|MAPT-AS1(-197.5kb)|MGC57346(+7.86kb)|MIR4315-1(+170.4kb)|MIR4315-2(+170.4kb)|PLEKHM1(+155kb)|SPPL2C(-199.1kb)
17	43758742	rs62055700	C	T		3	5.849e-05	5.849e-05	0.8863	0.8863	0.8838	0	0.8796	0.873	0.9037	CRHR1(0)|CRHR1-IT1(+35.15kb)|LOC644172(+78.99kb)|LRRC37A4P(+160.9kb)|MAPT-AS1(-162kb)|MGC57346(+43.41kb)|PLEKHM1(+190.6kb)|SPPL2C(-163.5kb)
17	43736763	rs241024	T	C		3	5.857e-05	5.857e-05	0.8863	0.8863	0.8701	0	0.8785	0.8728	0.9049	CRHR1(0)|CRHR1-IT1(+13.17kb)|LOC644172(+57.02kb)|LRRC37A4P(+138.9kb)|MAPT-AS1(-184kb)|MGC57346(+21.43kb)|MIR4315-1(+184kb)|MIR4315-2(+184kb)|PLEKHM1(+168.6kb)|SPPL2C(-185.5kb)
17	43712657	rs241042	C	T		3	5.859e-05	5.859e-05	0.886	0.886	0.873	0	0.8784	0.8725	0.9044	CRHR1(0)|CRHR1-IT1(-3.683kb)|LOC644172(+32.91kb)|LRRC37A4P(+114.8kb)|MGC57346(0)|MIR4315-1(+159.9kb)|MIR4315-2(+159.9kb)|PLEKHM1(+144.5kb)
3	23223979	rs9879713	G	A		3	5.861e-05	5.861e-05	1.1053	1.1053	0.6732	0	1.1082	1.1414	1.0793	MIR548AC(-151.6kb)|UBE2E2(-20.8kb)
15	58529466	rs16939955	C	G		3	5.867e-05	0.001041	0.7991	0.7964	0.2148	34.99	0.7225	0.762	0.9015	ALDH1A2(+171.3kb)|AQP9(+51.36kb)|LIPC(-194.7kb)
17	43719143	rs393152	G	A		3	5.871e-05	5.871e-05	0.8864	0.8864	0.9128	0	0.8817	0.8742	0.9012	CRHR1(0)|CRHR1-IT1(0)|LOC644172(+39.4kb)|LRRC37A4P(+121.3kb)|MGC57346(+3.814kb)|MIR4315-1(+166.3kb)|MIR4315-2(+166.3kb)|PLEKHM1(+151kb)
2	127889118	rs13009551	T	C		3	5.878e-05	0.001006	1.1478	1.1502	0.2195	34.06	1.2123	1.192	1.0661	BIN1(+24.22kb)|CYP27C1(-52.29kb)|ERCC3(-125.7kb)|MAP3K2(-167.1kb)
17	43735478	rs241027	G	A		3	5.891e-05	5.891e-05	0.8863	0.8863	0.8693	0	0.8785	0.8728	0.905	CRHR1(0)|CRHR1-IT1(+11.88kb)|LOC644172(+55.73kb)|LRRC37A4P(+137.6kb)|MAPT-AS1(-185.2kb)|MGC57346(+20.15kb)|MIR4315-1(+182.7kb)|MIR4315-2(+182.7kb)|PLEKHM1(+167.3kb)|SPPL2C(-186.8kb)
17	43768501	rs55669046	T	C		3	5.892e-05	5.892e-05	0.8864	0.8864	0.8792	0	0.8791	0.8732	0.9042	CRHR1(0)|CRHR1-IT1(+44.91kb)|LOC644172(+88.75kb)|LRRC37A4P(+170.6kb)|MAPT-AS1(-152.2kb)|MGC57346(+53.17kb)|SPPL2C(-153.8kb)
17	43730636	rs241037	T	G		3	5.895e-05	5.895e-05	0.8862	0.8862	0.8733	0	0.8786	0.8728	0.9046	CRHR1(0)|CRHR1-IT1(+7.041kb)|LOC644172(+50.89kb)|LRRC37A4P(+132.7kb)|MAPT-AS1(-190.1kb)|MGC57346(+15.31kb)|MIR4315-1(+177.8kb)|MIR4315-2(+177.8kb)|PLEKHM1(+162.5kb)|SPPL2C(-191.6kb)
17	43688317	rs546997548	G	A		3	5.897e-05	5.897e-05	0.8847	0.8847	0.9331	0	0.8821	0.8729	0.8975	ARHGAP27(+178kb)|CRHR1(-9.392kb)|CRHR1-IT1(-28.02kb)|LOC644172(+8.569kb)|LRRC37A4P(+90.43kb)|MGC57346(-9.394kb)|MIR4315-1(+135.5kb)|MIR4315-2(+135.5kb)|PLEKHM1(+120.2kb)
6	39119628	rs1366324	T	G		3	5.899e-05	0.0004393	0.8368	0.8384	0.2806	21.32	0.8096	0.9391	0.794	DNAH8(+121.1kb)|GLP1R(+64.11kb)|KCNK5(-37.12kb)|KCNK16(-162.8kb)|KCNK17(-147.1kb)|KIF6(-183.2kb)|LOC100131047(+198.7kb)|SAYSD1(+36.76kb)
17	43573419	rs62065453	T	C		3	5.9e-05	5.9e-05	0.8818	0.8818	0.9464	0	0.8775	0.8727	0.8942	ARHGAP27(+63.14kb)|CRHR1(-124.3kb)|CRHR1-IT1(-142.9kb)|LOC644172(-104.1kb)|LRRC37A4P(-9.829kb)|MAP3K14(+179kb)|MGC57346(-124.3kb)|MIR4315-1(+20.62kb)|MIR4315-2(+20.62kb)|PLEKHM1(+5.273kb)
17	43735276	rs241028	T	C		3	5.9e-05	5.9e-05	0.8863	0.8863	0.8693	0	0.8785	0.8728	0.905	CRHR1(0)|CRHR1-IT1(+11.68kb)|LOC644172(+55.53kb)|LRRC37A4P(+137.4kb)|MAPT-AS1(-185.4kb)|MGC57346(+19.95kb)|MIR4315-1(+182.5kb)|MIR4315-2(+182.5kb)|PLEKHM1(+167.1kb)|SPPL2C(-187kb)
17	43735555	rs241026	A	G		3	5.9e-05	5.9e-05	0.8863	0.8863	0.8693	0	0.8785	0.8728	0.905	CRHR1(0)|CRHR1-IT1(+11.96kb)|LOC644172(+55.81kb)|LRRC37A4P(+137.7kb)|MAPT-AS1(-185.2kb)|MGC57346(+20.23kb)|MIR4315-1(+182.8kb)|MIR4315-2(+182.8kb)|PLEKHM1(+167.4kb)|SPPL2C(-186.7kb)
17	43733983	rs241033	A	G		3	5.902e-05	5.902e-05	0.8863	0.8863	0.8683	0	0.8786	0.8727	0.9051	CRHR1(0)|CRHR1-IT1(+10.39kb)|LOC644172(+54.24kb)|LRRC37A4P(+136.1kb)|MAPT-AS1(-186.7kb)|MGC57346(+18.65kb)|MIR4315-1(+181.2kb)|MIR4315-2(+181.2kb)|PLEKHM1(+165.8kb)|SPPL2C(-188.3kb)
16	69737846	rs2965757	C	G		3	5.907e-05	5.907e-05	1.1807	1.1807	0.7673	0	1.1603	1.1423	1.2243	MIR1538(+138.1kb)|NFAT5(0)|NOB1(-37.91kb)|NQO1(-5.457kb)|WWP2(-58.34kb)
17	43768496	rs55980621	T	C		3	5.909e-05	5.909e-05	0.8864	0.8864	0.8796	0	0.8792	0.8732	0.9042	CRHR1(0)|CRHR1-IT1(+44.9kb)|LOC644172(+88.75kb)|LRRC37A4P(+170.6kb)|MAPT-AS1(-152.2kb)|MGC57346(+53.17kb)|SPPL2C(-153.8kb)
17	44106219	rs78681971	T	C		3	5.91e-05	5.91e-05	0.8845	0.8845	0.917	0	0.8856	0.8689	0.8969	CRHR1(+193kb)|KANSL1(-1.062kb)|KANSL1-AS1(-164.7kb)|MAPT(+0.52kb)|MAPT-AS1(+133.3kb)|MAPT-IT1(+130.1kb)|SPPL2C(+181.8kb)|STH(+29.16kb)
17	43713925	rs241041	G	A		3	5.912e-05	5.912e-05	0.8861	0.8861	0.8727	0	0.8786	0.8725	0.9045	CRHR1(0)|CRHR1-IT1(-2.415kb)|LOC644172(+34.18kb)|LRRC37A4P(+116kb)|MGC57346(0)|MIR4315-1(+161.1kb)|MIR4315-2(+161.1kb)|PLEKHM1(+145.8kb)
17	43730598	rs241038	A	G		3	5.912e-05	5.912e-05	0.8863	0.8863	0.8715	0	0.8786	0.8728	0.9048	CRHR1(0)|CRHR1-IT1(+7.003kb)|LOC644172(+50.85kb)|LRRC37A4P(+132.7kb)|MAPT-AS1(-190.1kb)|MGC57346(+15.27kb)|MIR4315-1(+177.8kb)|MIR4315-2(+177.8kb)|PLEKHM1(+162.5kb)|SPPL2C(-191.7kb)
17	44277923	rs540260849	A	G		3	5.916e-05	5.916e-05	0.8846	0.8846	0.9078	0	0.8904	0.8663	0.8938	ARL17A(-98.58kb)|ARL17B(-98.99kb)|KANSL1(0)|KANSL1-AS1(+3.834kb)|LRRC37A(-94.57kb)|MAPT(+172.2kb)|NSFP1(-172.3kb)
17	43727061	rs453997	T	C		3	5.918e-05	5.918e-05	0.8863	0.8863	0.8703	0	0.8787	0.8727	0.9049	CRHR1(0)|CRHR1-IT1(+3.466kb)|LOC644172(+47.31kb)|LRRC37A4P(+129.2kb)|MAPT-AS1(-193.7kb)|MGC57346(+11.73kb)|MIR4315-1(+174.3kb)|MIR4315-2(+174.3kb)|PLEKHM1(+158.9kb)|SPPL2C(-195.2kb)
17	43756340	rs74398257	C	T		3	5.919e-05	5.919e-05	0.8864	0.8864	0.8806	0	0.8798	0.8727	0.904	CRHR1(0)|CRHR1-IT1(+32.74kb)|LOC644172(+76.59kb)|LRRC37A4P(+158.5kb)|MAPT-AS1(-164.4kb)|MGC57346(+41.01kb)|PLEKHM1(+188.2kb)|SPPL2C(-165.9kb)
17	43714673	rs241039	T	A		3	5.921e-05	5.921e-05	0.8861	0.8861	0.8729	0	0.8787	0.8725	0.9045	CRHR1(0)|CRHR1-IT1(-1.667kb)|LOC644172(+34.92kb)|LRRC37A4P(+116.8kb)|MGC57346(0)|MIR4315-1(+161.9kb)|MIR4315-2(+161.9kb)|PLEKHM1(+146.5kb)
17	43932129	rs56323304	T	C		3	5.921e-05	5.921e-05	0.8867	0.8867	0.8847	0	0.8855	0.8691	0.9018	CRHR1(+18.94kb)|KANSL1(-175.2kb)|MAPT(-39.62kb)|MAPT-AS1(0)|MAPT-IT1(-41.02kb)|SPPL2C(+7.691kb)|STH(-144.5kb)
17	43836051	rs76669427	A	T		3	5.926e-05	5.926e-05	0.8869	0.8869	0.8261	0	0.8784	0.8703	0.9082	CRHR1(0)|CRHR1-IT1(+112.5kb)|LOC644172(+156.3kb)|MAPT(-135.7kb)|MAPT-AS1(-84.67kb)|MAPT-IT1(-137.1kb)|MGC57346(+120.7kb)|SPPL2C(-86.2kb)
17	44106220	rs79772576	G	A		3	5.933e-05	5.933e-05	0.8845	0.8845	0.9169	0	0.8857	0.8689	0.8969	CRHR1(+193kb)|KANSL1(-1.061kb)|KANSL1-AS1(-164.7kb)|MAPT(+0.521kb)|MAPT-AS1(+133.3kb)|MAPT-IT1(+130.1kb)|SPPL2C(+181.8kb)|STH(+29.16kb)
17	43723605	rs393675	C	T		3	5.934e-05	5.934e-05	0.8863	0.8863	0.8727	0	0.8789	0.8727	0.9047	CRHR1(0)|CRHR1-IT1(+0.01kb)|LOC644172(+43.86kb)|LRRC37A4P(+125.7kb)|MAPT-AS1(-197.1kb)|MGC57346(+8.276kb)|MIR4315-1(+170.8kb)|MIR4315-2(+170.8kb)|PLEKHM1(+155.5kb)|SPPL2C(-198.6kb)
14	33098582	rs10135558	G	A		3	5.936e-05	0.005765	1.1148	1.1215	0.0995	56.67	1.1285	1.2122	1.0466	AKAP6(0)
17	43756685	rs757501	G	A		3	5.936e-05	5.936e-05	0.8864	0.8864	0.8844	0	0.88	0.8729	0.9037	CRHR1(0)|CRHR1-IT1(+33.09kb)|LOC644172(+76.94kb)|LRRC37A4P(+158.8kb)|MAPT-AS1(-164kb)|MGC57346(+41.36kb)|PLEKHM1(+188.5kb)|SPPL2C(-165.6kb)
17	43714850	rs2942168	A	G		3	5.94e-05	5.94e-05	0.8861	0.8861	0.8733	0	0.8788	0.8725	0.9045	CRHR1(0)|CRHR1-IT1(-1.49kb)|LOC644172(+35.1kb)|LRRC37A4P(+117kb)|MGC57346(0)|MIR4315-1(+162kb)|MIR4315-2(+162kb)|PLEKHM1(+146.7kb)
17	43734304	rs241031	C	T		3	5.941e-05	5.941e-05	0.8863	0.8863	0.8685	0	0.8785	0.8728	0.9051	CRHR1(0)|CRHR1-IT1(+10.71kb)|LOC644172(+54.56kb)|LRRC37A4P(+136.4kb)|MAPT-AS1(-186.4kb)|MGC57346(+18.98kb)|MIR4315-1(+181.5kb)|MIR4315-2(+181.5kb)|PLEKHM1(+166.2kb)|SPPL2C(-188kb)
17	39650804	rs7226052	T	C		3	5.942e-05	0.00158	1.1169	1.1163	0.2065	36.61	1.1936	1.0744	1.0794	EIF1(-194.3kb)|KRT9(-71.29kb)|KRT13(-6.428kb)|KRT14(-87.73kb)|KRT15(-19.19kb)|KRT16(-115.2kb)|KRT17(-124.9kb)|KRT19(-29.06kb)|KRT31(+96.96kb)|KRT32(+27.17kb)|KRT33A(+143.7kb)|KRT33B(+124.8kb)|KRT34(+112.2kb)|KRT35(+13.41kb)|KRT36(+4.688kb)|KRT37(+69.98kb)|KRT38(+53.21kb)|KRT42P(-131.8kb)|KRTAP16-1(+185.3kb)|KRTAP17-1(+178.9kb)|KRTAP29-1(+191.7kb)|LINC00974(-55.05kb)|LOC100505782(+81.96kb)
6	39123564	rs1366322	C	A		3	5.944e-05	0.0004911	0.8371	0.8388	0.2753	22.47	0.8129	0.9393	0.7914	DNAH8(+125kb)|GLP1R(+68.04kb)|KCNK5(-33.18kb)|KCNK16(-158.9kb)|KCNK17(-143.2kb)|KIF6(-179.3kb)|SAYSD1(+40.7kb)
17	43726574	rs455028	C	T		3	5.944e-05	5.944e-05	0.8864	0.8864	0.871	0	0.8788	0.8728	0.9049	CRHR1(0)|CRHR1-IT1(+2.979kb)|LOC644172(+46.83kb)|LRRC37A4P(+128.7kb)|MAPT-AS1(-194.1kb)|MGC57346(+11.24kb)|MIR4315-1(+173.8kb)|MIR4315-2(+173.8kb)|PLEKHM1(+158.4kb)|SPPL2C(-195.7kb)
17	43725684	rs434428	A	G		3	5.945e-05	5.945e-05	0.8863	0.8863	0.872	0	0.8788	0.8728	0.9048	CRHR1(0)|CRHR1-IT1(+2.089kb)|LOC644172(+45.94kb)|LRRC37A4P(+127.8kb)|MAPT-AS1(-195kb)|MGC57346(+10.36kb)|MIR4315-1(+172.9kb)|MIR4315-2(+172.9kb)|PLEKHM1(+157.5kb)|SPPL2C(-196.6kb)
17	43723462	rs3418	T	C		3	5.946e-05	5.946e-05	0.8863	0.8863	0.8726	0	0.8789	0.8727	0.9047	CRHR1(0)|CRHR1-IT1(0)|LOC644172(+43.71kb)|LRRC37A4P(+125.6kb)|MAPT-AS1(-197.3kb)|MGC57346(+8.133kb)|MIR4315-1(+170.7kb)|MIR4315-2(+170.7kb)|PLEKHM1(+155.3kb)|SPPL2C(-198.8kb)
17	44184375	rs79346219	G	A		3	5.946e-05	5.946e-05	0.8853	0.8853	0.8822	0	0.8888	0.8655	0.8983	ARL17A(-192.1kb)|ARL17B(-192.5kb)|KANSL1(0)|KANSL1-AS1(-86.56kb)|LRRC37A(-188.1kb)|MAPT(+78.68kb)|STH(+107.3kb)
17	43725762	rs434598	A	G		3	5.949e-05	5.949e-05	0.8863	0.8863	0.872	0	0.8788	0.8728	0.9048	CRHR1(0)|CRHR1-IT1(+2.167kb)|LOC644172(+46.01kb)|LRRC37A4P(+127.9kb)|MAPT-AS1(-195kb)|MGC57346(+10.43kb)|MIR4315-1(+173kb)|MIR4315-2(+173kb)|PLEKHM1(+157.6kb)|SPPL2C(-196.5kb)
10	11714686	rs77892763	T	C		3	5.951e-05	0.0008821	1.1133	1.1139	0.231	31.76	1.1793	1.1107	1.0587	ECHDC3(-69.67kb)|PROSER2(-150.7kb)|PROSER2-AS1(-176.9kb)|USP6NL(+61.01kb)
17	43715619	rs2942165	C	G		3	5.951e-05	5.951e-05	0.8861	0.8861	0.8757	0	0.879	0.8725	0.9043	CRHR1(0)|CRHR1-IT1(-0.721kb)|LOC644172(+35.87kb)|LRRC37A4P(+117.7kb)|MGC57346(+0.29kb)|MIR4315-1(+162.8kb)|MIR4315-2(+162.8kb)|PLEKHM1(+147.5kb)
17	43734503	rs241030	G	A		3	5.951e-05	5.951e-05	0.8864	0.8864	0.8692	0	0.8786	0.8729	0.9051	CRHR1(0)|CRHR1-IT1(+10.91kb)|LOC644172(+54.76kb)|LRRC37A4P(+136.6kb)|MAPT-AS1(-186.2kb)|MGC57346(+19.17kb)|MIR4315-1(+181.7kb)|MIR4315-2(+181.7kb)|PLEKHM1(+166.4kb)|SPPL2C(-187.8kb)
6	39129242	rs962311	A	G		3	5.952e-05	0.0008143	0.837	0.8392	0.2495	27.97	0.8029	0.9441	0.7971	DNAH8(+130.7kb)|GLP1R(+73.72kb)|KCNK5(-27.5kb)|KCNK16(-153.2kb)|KCNK17(-137.5kb)|KIF6(-173.6kb)|SAYSD1(+46.38kb)
17	43726125	rs385691	C	A		3	5.953e-05	5.953e-05	0.8863	0.8863	0.872	0	0.8788	0.8728	0.9048	CRHR1(0)|CRHR1-IT1(+2.53kb)|LOC644172(+46.38kb)|LRRC37A4P(+128.2kb)|MAPT-AS1(-194.6kb)|MGC57346(+10.8kb)|MIR4315-1(+173.3kb)|MIR4315-2(+173.3kb)|PLEKHM1(+158kb)|SPPL2C(-196.1kb)
17	43734643	rs241029	C	T		3	5.957e-05	5.957e-05	0.8864	0.8864	0.8689	0	0.8785	0.8729	0.9051	CRHR1(0)|CRHR1-IT1(+11.05kb)|LOC644172(+54.9kb)|LRRC37A4P(+136.8kb)|MAPT-AS1(-186.1kb)|MGC57346(+19.31kb)|MIR4315-1(+181.8kb)|MIR4315-2(+181.8kb)|PLEKHM1(+166.5kb)|SPPL2C(-187.6kb)
17	43731896	rs241035	T	C		3	5.958e-05	5.958e-05	0.8864	0.8864	0.8702	0	0.8786	0.8729	0.905	CRHR1(0)|CRHR1-IT1(+8.301kb)|LOC644172(+52.15kb)|LRRC37A4P(+134kb)|MAPT-AS1(-188.8kb)|MGC57346(+16.57kb)|MIR4315-1(+179.1kb)|MIR4315-2(+179.1kb)|PLEKHM1(+163.8kb)|SPPL2C(-190.4kb)
17	43756833	rs757500	A	C		3	5.959e-05	5.959e-05	0.8864	0.8864	0.8819	0	0.88	0.8727	0.9039	CRHR1(0)|CRHR1-IT1(+33.24kb)|LOC644172(+77.08kb)|LRRC37A4P(+158.9kb)|MAPT-AS1(-163.9kb)|MGC57346(+41.5kb)|PLEKHM1(+188.7kb)|SPPL2C(-165.4kb)
8	121876077	rs10092683	G	A		3	5.96e-05	5.96e-05	0.7501	0.7501	0.6102	0	0.6852	0.7847	0.8009	SNTB1(+51.77kb)
17	43728137	rs422112	A	G		3	5.961e-05	5.961e-05	0.8864	0.8864	0.87	0	0.8787	0.8728	0.905	CRHR1(0)|CRHR1-IT1(+4.542kb)|LOC644172(+48.39kb)|LRRC37A4P(+130.2kb)|MAPT-AS1(-192.6kb)|MGC57346(+12.81kb)|MIR4315-1(+175.3kb)|MIR4315-2(+175.3kb)|PLEKHM1(+160kb)|SPPL2C(-194.1kb)
17	43725212	rs448830	A	G		3	5.962e-05	5.962e-05	0.8864	0.8864	0.8723	0	0.8789	0.8728	0.9048	CRHR1(0)|CRHR1-IT1(+1.617kb)|LOC644172(+45.46kb)|LRRC37A4P(+127.3kb)|MAPT-AS1(-195.5kb)|MGC57346(+9.883kb)|MIR4315-1(+172.4kb)|MIR4315-2(+172.4kb)|PLEKHM1(+157.1kb)|SPPL2C(-197kb)
17	43725992	rs434971	A	G		3	5.963e-05	5.963e-05	0.8864	0.8864	0.8711	0	0.8788	0.8728	0.9049	CRHR1(0)|CRHR1-IT1(+2.397kb)|LOC644172(+46.24kb)|LRRC37A4P(+128.1kb)|MAPT-AS1(-194.7kb)|MGC57346(+10.66kb)|MIR4315-1(+173.2kb)|MIR4315-2(+173.2kb)|PLEKHM1(+157.8kb)|SPPL2C(-196.3kb)
17	43729432	rs647483	T	C		3	5.964e-05	5.964e-05	0.8864	0.8864	0.87	0	0.8787	0.8728	0.905	CRHR1(0)|CRHR1-IT1(+5.837kb)|LOC644172(+49.68kb)|LRRC37A4P(+131.5kb)|MAPT-AS1(-191.3kb)|MGC57346(+14.1kb)|MIR4315-1(+176.6kb)|MIR4315-2(+176.6kb)|PLEKHM1(+161.3kb)|SPPL2C(-192.8kb)
17	43729384	rs413844	A	G		3	5.965e-05	5.965e-05	0.8864	0.8864	0.8688	0	0.8786	0.8728	0.9051	CRHR1(0)|CRHR1-IT1(+5.789kb)|LOC644172(+49.64kb)|LRRC37A4P(+131.5kb)|MAPT-AS1(-191.3kb)|MGC57346(+14.06kb)|MIR4315-1(+176.6kb)|MIR4315-2(+176.6kb)|PLEKHM1(+161.2kb)|SPPL2C(-192.9kb)
17	43717415	rs389978	G	A		3	5.968e-05	5.968e-05	0.8863	0.8863	0.8737	0	0.8788	0.8728	0.9046	CRHR1(0)|CRHR1-IT1(0)|LOC644172(+37.67kb)|LRRC37A4P(+119.5kb)|MGC57346(+2.086kb)|MIR4315-1(+164.6kb)|MIR4315-2(+164.6kb)|PLEKHM1(+149.3kb)
10	7520633	rs74513508	A	G		3	5.969e-05	5.969e-05	1.2357	1.2357	0.5823	0	1.3252	1.2336	1.1662	ITIH5(-80.6kb)|SFMBT2(+67.18kb)
17	43715018	rs2942167	C	T		3	5.972e-05	5.972e-05	0.8862	0.8862	0.8727	0	0.8789	0.8725	0.9046	CRHR1(0)|CRHR1-IT1(-1.322kb)|LOC644172(+35.27kb)|LRRC37A4P(+117.1kb)|MGC57346(0)|MIR4315-1(+162.2kb)|MIR4315-2(+162.2kb)|PLEKHM1(+146.9kb)
17	43724555	rs449501	A	G		3	5.977e-05	5.977e-05	0.8864	0.8864	0.8714	0	0.8789	0.8728	0.9049	CRHR1(0)|CRHR1-IT1(+0.96kb)|LOC644172(+44.81kb)|LRRC37A4P(+126.7kb)|MAPT-AS1(-196.2kb)|MGC57346(+9.226kb)|MIR4315-1(+171.8kb)|MIR4315-2(+171.8kb)|PLEKHM1(+156.4kb)|SPPL2C(-197.7kb)
17	43733048	rs241034	T	A		3	5.98e-05	5.98e-05	0.8864	0.8864	0.8693	0	0.8786	0.8729	0.9051	CRHR1(0)|CRHR1-IT1(+9.453kb)|LOC644172(+53.3kb)|LRRC37A4P(+135.2kb)|MAPT-AS1(-187.7kb)|MGC57346(+17.72kb)|MIR4315-1(+180.2kb)|MIR4315-2(+180.2kb)|PLEKHM1(+164.9kb)|SPPL2C(-189.2kb)
17	43731719	rs241036	C	A		3	5.982e-05	5.982e-05	0.8864	0.8864	0.8693	0	0.8786	0.8729	0.9051	CRHR1(0)|CRHR1-IT1(+8.124kb)|LOC644172(+51.97kb)|LRRC37A4P(+133.8kb)|MAPT-AS1(-189kb)|MGC57346(+16.39kb)|MIR4315-1(+178.9kb)|MIR4315-2(+178.9kb)|PLEKHM1(+163.6kb)|SPPL2C(-190.5kb)
1	179802295	rs111799388	A	G		3	5.984e-05	0.1845	1.3325	1.2849	0.0017	84.35	0.9122	1.4087	1.6365	CEP350(-121.6kb)|FAM163A(+16.96kb)|TDRD5(+141.9kb)|TOR1AIP1(-48.88kb)|TOR1AIP2(-6.806kb)
17	43726588	rs366858	T	C		3	5.986e-05	5.986e-05	0.8864	0.8864	0.8714	0	0.8789	0.8728	0.9049	CRHR1(0)|CRHR1-IT1(+2.993kb)|LOC644172(+46.84kb)|LRRC37A4P(+128.7kb)|MAPT-AS1(-194.1kb)|MGC57346(+11.26kb)|MIR4315-1(+173.8kb)|MIR4315-2(+173.8kb)|PLEKHM1(+158.4kb)|SPPL2C(-195.7kb)
17	43833981	rs34579278	G	A		3	5.987e-05	5.987e-05	0.8869	0.8869	0.8343	0	0.879	0.8704	0.9076	CRHR1(0)|CRHR1-IT1(+110.4kb)|LOC644172(+154.2kb)|MAPT(-137.8kb)|MAPT-AS1(-86.74kb)|MAPT-IT1(-139.2kb)|MGC57346(+118.7kb)|SPPL2C(-88.27kb)
17	44865498	rs199499	T	C		3	5.998e-05	5.998e-05	0.8781	0.8781	0.9703	0	0.8786	0.8682	0.8855	GOSR2(-135kb)|MIR5089(-184.9kb)|NSF(+30.67kb)|NSFP1(+147.5kb)|RPRML(-190kb)|WNT3(0)|WNT9B(-63.47kb)
13	83697215	rs2800374	C	T		3	6.001e-05	6.001e-05	0.8922	0.8922	0.8698	0	0.8787	0.8854	0.9085	.
6	72321751	rs720744	G	T		3	6.003e-05	0.002685	1.1068	1.1091	0.1604	45.37	1.1638	1.1305	1.0443	LINC00472(+191.3kb)
15	58532274	rs67215667	C	G		3	6.013e-05	0.00121	0.7996	0.7967	0.2064	36.63	0.7232	0.7602	0.9034	ALDH1A2(+174.2kb)|AQP9(+54.16kb)|LIPC(-191.9kb)
17	43721457	rs1706746	T	C		3	6.018e-05	6.018e-05	0.8864	0.8864	0.8724	0	0.8791	0.8727	0.9048	CRHR1(0)|CRHR1-IT1(0)|LOC644172(+41.71kb)|LRRC37A4P(+123.6kb)|MAPT-AS1(-199.3kb)|MGC57346(+6.128kb)|MIR4315-1(+168.7kb)|MIR4315-2(+168.7kb)|PLEKHM1(+153.3kb)
17	43721283	rs2942164	C	G		3	6.022e-05	6.022e-05	0.8864	0.8864	0.8724	0	0.8791	0.8727	0.9048	CRHR1(0)|CRHR1-IT1(0)|LOC644172(+41.54kb)|LRRC37A4P(+123.4kb)|MAPT-AS1(-199.4kb)|MGC57346(+5.954kb)|MIR4315-1(+168.5kb)|MIR4315-2(+168.5kb)|PLEKHM1(+153.1kb)
17	43756910	rs62055693	C	T		3	6.027e-05	6.027e-05	0.8865	0.8865	0.8831	0	0.8799	0.873	0.9039	CRHR1(0)|CRHR1-IT1(+33.32kb)|LOC644172(+77.16kb)|LRRC37A4P(+159kb)|MAPT-AS1(-163.8kb)|MGC57346(+41.58kb)|PLEKHM1(+188.8kb)|SPPL2C(-165.3kb)
17	43719870	rs3108317	A	G		3	6.03e-05	6.03e-05	0.8864	0.8864	0.8736	0	0.8792	0.8727	0.9047	CRHR1(0)|CRHR1-IT1(0)|LOC644172(+40.12kb)|LRRC37A4P(+122kb)|MGC57346(+4.541kb)|MIR4315-1(+167.1kb)|MIR4315-2(+167.1kb)|PLEKHM1(+151.7kb)
17	43756376	rs17687740	C	G		3	6.032e-05	6.032e-05	0.8865	0.8865	0.8871	0	0.8804	0.8729	0.9035	CRHR1(0)|CRHR1-IT1(+32.78kb)|LOC644172(+76.63kb)|LRRC37A4P(+158.5kb)|MAPT-AS1(-164.3kb)|MGC57346(+41.05kb)|PLEKHM1(+188.2kb)|SPPL2C(-165.9kb)
4	111321182	rs116402762	G	T		3	6.039e-05	6.039e-05	1.2678	1.2678	0.4871	0	1.1524	1.338	1.3354	ENPEP(-76.05kb)
17	44184428	rs111295615	C	T		3	6.055e-05	6.055e-05	0.8853	0.8853	0.8849	0	0.8889	0.8658	0.8982	ARL17A(-192.1kb)|ARL17B(-192.5kb)|KANSL1(0)|KANSL1-AS1(-86.51kb)|LRRC37A(-188.1kb)|MAPT(+78.73kb)|STH(+107.4kb)
10	7519002	rs139815960	G	A		3	6.062e-05	6.062e-05	1.2354	1.2354	0.5895	0	1.3251	1.2292	1.1681	ITIH5(-82.23kb)|SFMBT2(+65.55kb)
17	43717131	rs389217	T	C		3	6.062e-05	6.062e-05	0.8864	0.8864	0.8704	0	0.879	0.8725	0.9049	CRHR1(0)|CRHR1-IT1(0)|LOC644172(+37.38kb)|LRRC37A4P(+119.2kb)|MGC57346(+1.802kb)|MIR4315-1(+164.3kb)|MIR4315-2(+164.3kb)|PLEKHM1(+149kb)
17	43758078	rs112155389	A	G		3	6.062e-05	6.062e-05	0.8866	0.8866	0.8751	0	0.8797	0.8726	0.9046	CRHR1(0)|CRHR1-IT1(+34.48kb)|LOC644172(+78.33kb)|LRRC37A4P(+160.2kb)|MAPT-AS1(-162.6kb)|MGC57346(+42.75kb)|PLEKHM1(+189.9kb)|SPPL2C(-164.2kb)
10	7520555	rs35805121	C	T		3	6.07e-05	6.07e-05	1.2355	1.2355	0.5842	0	1.3248	1.2332	1.1663	ITIH5(-80.68kb)|SFMBT2(+67.11kb)
8	121912870	rs75336481	T	G		3	6.073e-05	6.073e-05	0.7576	0.7576	0.4188	0	0.6752	0.8391	0.7839	SNTB1(+88.56kb)
17	43839253	rs71375313	A	G		3	6.076e-05	6.076e-05	0.887	0.887	0.8063	0	0.8767	0.8707	0.9099	CRHR1(0)|CRHR1-IT1(+115.7kb)|LOC644172(+159.5kb)|MAPT(-132.5kb)|MAPT-AS1(-81.47kb)|MAPT-IT1(-133.9kb)|MGC57346(+123.9kb)|SPPL2C(-83kb)
2	179377280	rs8179648	A	G		3	6.077e-05	6.077e-05	1.1499	1.1499	0.4709	0	1.0976	1.1268	1.2078	DFNB59(+51.17kb)|FKBP7(+33.92kb)|MIR548N(0)|OSBPL6(+113.1kb)|PLEKHA3(+7.498kb)|PRKRA(+61.32kb)|TTN(-13.44kb)|TTN-AS1(-10.27kb)
11	58080085	rs111921931	T	C		3	6.084e-05	0.001959	1.2565	1.2682	0.1682	43.91	1.261	1.4853	1.131	OR1S1(+96.89kb)|OR1S2(+108.4kb)|OR5B2(-109.7kb)|OR5B3(-89.85kb)|OR5B12(-126.5kb)|OR5B17(-45.51kb)|OR5B21(-194.6kb)|OR9I1(+193.2kb)|OR9Q1(+131kb)|OR9Q2(+121.1kb)|OR10Q1(+83.7kb)|OR10W1(+44.35kb)
17	43716885	rs413778	G	A		3	6.095e-05	6.095e-05	0.8864	0.8864	0.871	0	0.8792	0.8725	0.9049	CRHR1(0)|CRHR1-IT1(0)|LOC644172(+37.14kb)|LRRC37A4P(+119kb)|MGC57346(+1.556kb)|MIR4315-1(+164.1kb)|MIR4315-2(+164.1kb)|PLEKHM1(+148.7kb)
21	27510315	rs11701908	C	G		3	6.096e-05	6.096e-05	0.8985	0.8985	0.3957	0	0.8585	0.9009	0.9342	APP(0)
17	43784222	rs62056910	C	T		3	6.099e-05	6.099e-05	0.8866	0.8866	0.8883	0	0.8835	0.8707	0.9025	CRHR1(0)|CRHR1-IT1(+60.63kb)|LOC644172(+104.5kb)|LRRC37A4P(+186.3kb)|MAPT(-187.5kb)|MAPT-AS1(-136.5kb)|MAPT-IT1(-188.9kb)|MGC57346(+68.89kb)|SPPL2C(-138kb)
1	39127567	rs2209461	C	T		3	6.101e-05	6.101e-05	0.9018	0.9018	0.8655	0	0.8859	0.9025	0.915	RRAGC(-176.3kb)
17	44193097	rs17661027	A	C		3	6.102e-05	6.102e-05	0.8854	0.8854	0.9142	0	0.8883	0.8686	0.8964	ARL17A(-183.4kb)|ARL17B(-183.8kb)|KANSL1(0)|KANSL1-AS1(-77.84kb)|LRRC37A(-179.4kb)|MAPT(+87.4kb)|STH(+116kb)
17	44313757	rs552419936	A	G		3	6.108e-05	6.108e-05	0.883	0.883	0.9098	0	0.8901	0.8648	0.8914	ARL17A(-62.74kb)|ARL17B(-63.16kb)|KANSL1(+11.02kb)|KANSL1-AS1(+39.67kb)|LRRC37A(-58.74kb)|NSFP1(-136.4kb)
10	7520242	rs2256196	G	A		3	6.112e-05	0.0358	0.9038	0.9034	0.0273	72.23	0.825	0.9316	0.9599	ITIH5(-80.99kb)|SFMBT2(+66.79kb)
22	35547623	rs134266	A	G		3	6.114e-05	0.001086	1.1846	1.1916	0.2058	36.74	1.2109	1.312	1.0951	HMGXB4(-105.8kb)|ISX(+64.24kb)|MIR3909(-184kb)|TOM1(-147.6kb)
10	7519579	rs79235281	A	T		3	6.124e-05	6.124e-05	1.2352	1.2352	0.588	0	1.3249	1.23	1.1675	ITIH5(-81.65kb)|SFMBT2(+66.13kb)
13	83710289	rs9546303	A	G		3	6.124e-05	6.124e-05	0.8921	0.8921	0.8888	0	0.8843	0.8797	0.9074	.
17	43781250	rs968027	T	C		3	6.124e-05	6.124e-05	0.8865	0.8865	0.8796	0	0.8809	0.8718	0.9039	CRHR1(0)|CRHR1-IT1(+57.66kb)|LOC644172(+101.5kb)|LRRC37A4P(+183.4kb)|MAPT(-190.5kb)|MAPT-AS1(-139.5kb)|MAPT-IT1(-191.9kb)|MGC57346(+65.92kb)|SPPL2C(-141kb)
15	58532076	rs67026867	T	C		3	6.127e-05	0.001252	0.7998	0.7968	0.2051	36.88	0.7228	0.761	0.9037	ALDH1A2(+174kb)|AQP9(+53.97kb)|LIPC(-192.1kb)
17	44207887	rs10514904	T	C		3	6.143e-05	6.143e-05	0.8853	0.8853	0.9074	0	0.8894	0.8675	0.896	ARL17A(-168.6kb)|ARL17B(-169kb)|KANSL1(0)|KANSL1-AS1(-63.05kb)|LRRC37A(-164.6kb)|MAPT(+102.2kb)|STH(+130.8kb)
17	43760080	rs56400821	A	C		3	6.145e-05	6.145e-05	0.8866	0.8866	0.8887	0	0.879	0.8746	0.9038	CRHR1(0)|CRHR1-IT1(+36.48kb)|LOC644172(+80.33kb)|LRRC37A4P(+162.2kb)|MAPT-AS1(-160.6kb)|MGC57346(+44.75kb)|PLEKHM1(+191.9kb)|SPPL2C(-162.2kb)
17	43838720	rs62055888	T	C		3	6.151e-05	6.151e-05	0.8861	0.8861	0.8441	0	0.8801	0.8685	0.9058	CRHR1(0)|CRHR1-IT1(+115.1kb)|LOC644172(+159kb)|MAPT(-133kb)|MAPT-AS1(-82kb)|MAPT-IT1(-134.4kb)|MGC57346(+123.4kb)|SPPL2C(-83.54kb)
6	39141389	rs1864061	T	G		3	6.155e-05	0.0003519	0.8462	0.8474	0.2924	18.66	0.8042	0.9406	0.8221	DNAH8(+142.8kb)|GLP1R(+85.87kb)|KCNK5(-15.36kb)|KCNK16(-141.1kb)|KCNK17(-125.4kb)|KIF6(-161.5kb)|SAYSD1(+58.52kb)
2	204659985	rs58038423	C	A		3	6.168e-05	0.002852	1.1406	1.1372	0.181	41.49	1.1821	1.035	1.1867	CD28(+56.35kb)|CTLA4(-72.52kb)|ICOS(-141.5kb)
6	166198107	rs6927713	A	G		3	6.176e-05	6.176e-05	1.1053	1.1053	0.6226	0	1.1385	1.0705	1.0989	LINC00473(-139.4kb)|PDE10A(+122.5kb)
17	43798902	rs55838058	T	C		3	6.177e-05	6.177e-05	0.886	0.886	0.856	0	0.8814	0.8685	0.9048	CRHR1(0)|CRHR1-IT1(+75.31kb)|LOC644172(+119.2kb)|MAPT(-172.8kb)|MAPT-AS1(-121.8kb)|MAPT-IT1(-174.2kb)|MGC57346(+83.57kb)|SPPL2C(-123.4kb)
16	69672037	rs77616498	A	G		3	6.178e-05	6.178e-05	1.18	1.18	0.752	0	1.1601	1.139	1.225	CYB5B(+171.9kb)|MIR1538(+72.27kb)|NFAT5(0)|NOB1(-103.7kb)|NQO1(-71.27kb)|WWP2(-124.1kb)
17	43572419	rs56328224	T	C		3	6.185e-05	6.185e-05	0.8826	0.8826	0.9368	0	0.8789	0.8719	0.8958	ARHGAP27(+62.14kb)|CRHR1(-125.3kb)|CRHR1-IT1(-143.9kb)|LOC644172(-105.1kb)|LRRC37A4P(-10.83kb)|MAP3K14(+178kb)|MGC57346(-125.3kb)|MIR4315-1(+19.62kb)|MIR4315-2(+19.62kb)|PLEKHM1(+4.273kb)
6	166198088	rs6912860	A	T		3	6.192e-05	6.192e-05	1.1053	1.1053	0.6101	0	1.1399	1.071	1.0973	LINC00473(-139.4kb)|PDE10A(+122.5kb)
17	43757161	rs78487840	T	C		3	6.194e-05	6.194e-05	0.8867	0.8867	0.8754	0	0.8799	0.8727	0.9047	CRHR1(0)|CRHR1-IT1(+33.57kb)|LOC644172(+77.41kb)|LRRC37A4P(+159.3kb)|MAPT-AS1(-163.6kb)|MGC57346(+41.83kb)|PLEKHM1(+189kb)|SPPL2C(-165.1kb)
17	43789640	rs62056930	C	A		3	6.198e-05	6.198e-05	0.8868	0.8868	0.8772	0	0.8817	0.8714	0.9041	CRHR1(0)|CRHR1-IT1(+66.04kb)|LOC644172(+109.9kb)|LRRC37A4P(+191.8kb)|MAPT(-182.1kb)|MAPT-AS1(-131.1kb)|MAPT-IT1(-183.5kb)|MGC57346(+74.31kb)|SPPL2C(-132.6kb)
17	44184404	rs73984689	A	G		3	6.215e-05	6.215e-05	0.8855	0.8855	0.8888	0	0.8893	0.8662	0.8979	ARL17A(-192.1kb)|ARL17B(-192.5kb)|KANSL1(0)|KANSL1-AS1(-86.53kb)|LRRC37A(-188.1kb)|MAPT(+78.7kb)|STH(+107.3kb)
17	44351929	rs2732705	G	T		3	6.232e-05	6.232e-05	0.8836	0.8836	0.922	0	0.8898	0.8664	0.8913	ARL17A(-24.57kb)|ARL17B(-24.98kb)|KANSL1(+49.19kb)|KANSL1-AS1(+77.84kb)|LRRC37A(-20.57kb)|NSFP1(-98.25kb)
17	43740967	rs111273167	T	C		3	6.236e-05	6.236e-05	0.8865	0.8865	0.8606	0	0.8783	0.8727	0.906	CRHR1(0)|CRHR1-IT1(+17.37kb)|LOC644172(+61.22kb)|LRRC37A4P(+143.1kb)|MAPT-AS1(-179.8kb)|MGC57346(+25.64kb)|MIR4315-1(+188.2kb)|MIR4315-2(+188.2kb)|PLEKHM1(+172.8kb)|SPPL2C(-181.3kb)
17	43798903	rs56062621	G	A		3	6.236e-05	6.236e-05	0.8861	0.8861	0.8558	0	0.8814	0.8686	0.9049	CRHR1(0)|CRHR1-IT1(+75.31kb)|LOC644172(+119.2kb)|MAPT(-172.8kb)|MAPT-AS1(-121.8kb)|MAPT-IT1(-174.2kb)|MGC57346(+83.57kb)|SPPL2C(-123.4kb)
15	48699929	rs2114438	C	T		3	6.25e-05	6.25e-05	1.1176	1.1176	0.8006	0	1.0895	1.1292	1.1349	DUT(+64.36kb)|FBN1(-0.573kb)|SLC12A1(+103.7kb)
17	43994252	rs77926909	C	T		3	6.252e-05	6.252e-05	0.8868	0.8868	0.8181	0	0.8816	0.8671	0.9082	CRHR1(+81.06kb)|KANSL1(-113kb)|MAPT(0)|MAPT-AS1(+21.37kb)|MAPT-IT1(+18.09kb)|SPPL2C(+69.81kb)|STH(-82.36kb)
17	43785349	rs61667602	C	T		3	6.256e-05	6.256e-05	0.8868	0.8868	0.8989	0	0.882	0.8731	0.9025	CRHR1(0)|CRHR1-IT1(+61.75kb)|LOC644172(+105.6kb)|LRRC37A4P(+187.5kb)|MAPT(-186.4kb)|MAPT-AS1(-135.4kb)|MAPT-IT1(-187.8kb)|MGC57346(+70.02kb)|SPPL2C(-136.9kb)
17	43849415	rs79730878	C	T		3	6.256e-05	6.256e-05	0.8875	0.8875	0.8663	0	0.8783	0.8749	0.9061	CRHR1(0)|CRHR1-IT1(+125.8kb)|LOC644172(+169.7kb)|MAPT(-122.3kb)|MAPT-AS1(-71.31kb)|MAPT-IT1(-123.7kb)|MGC57346(+134.1kb)|SPPL2C(-72.84kb)
2	23340379	rs4257356	A	G		3	6.277e-05	0.06144	0.9011	0.9033	0.0137	76.69	0.8129	0.9563	0.9514	.
17	43887480	rs62057103	C	T		3	6.279e-05	6.279e-05	0.8879	0.8879	0.8407	0	0.8837	0.8686	0.9066	CRHR1(0)|CRHR1-IT1(+163.9kb)|MAPT(-84.27kb)|MAPT-AS1(-33.24kb)|MAPT-IT1(-85.67kb)|MGC57346(+172.2kb)|SPPL2C(-34.78kb)|STH(-189.1kb)
17	44267904	rs530892614	C	T		3	6.284e-05	6.284e-05	0.885	0.885	0.919	0	0.8907	0.8679	0.8934	ARL17A(-108.6kb)|ARL17B(-109kb)|KANSL1(0)|KANSL1-AS1(-3.034kb)|LRRC37A(-104.6kb)|MAPT(+162.2kb)|NSFP1(-182.3kb)|STH(+190.8kb)
17	44352131	rs2668622	T	G		3	6.295e-05	6.295e-05	0.8836	0.8836	0.8868	0	0.8897	0.8629	0.8942	ARL17A(-24.37kb)|ARL17B(-24.78kb)|KANSL1(+49.39kb)|KANSL1-AS1(+78.04kb)|LRRC37A(-20.36kb)|NSFP1(-98.05kb)
17	44267227	rs564912328	G	A		3	6.297e-05	6.297e-05	0.885	0.885	0.9151	0	0.8906	0.8675	0.8938	ARL17A(-109.3kb)|ARL17B(-109.7kb)|KANSL1(0)|KANSL1-AS1(-3.711kb)|LRRC37A(-105.3kb)|MAPT(+161.5kb)|NSFP1(-183kb)|STH(+190.2kb)
2	211900434	rs112966128	G	A		3	6.299e-05	0.0005471	1.3797	1.3834	0.2567	26.46	1.5675	1.4858	1.1618	.
17	18126037	rs62072499	G	A		3	6.309e-05	6.309e-05	1.4289	1.4289	0.9297	0	1.363	1.494	1.4383	ALKBH5(+12.77kb)|ATPAF2(+183.6kb)|DRG2(+114.7kb)|EVPLL(-155kb)|FLII(-22.09kb)|GID4(+154.3kb)|LLGL1(-2.898kb)|LOC339240(-199.5kb)|MYO15A(+42.92kb)|SHMT1(-105.1kb)|SMCR7(-37.81kb)|SMCR8(-92.56kb)|TOP3A(-51.2kb)
17	44276013	rs563074118	A	G		3	6.319e-05	6.319e-05	0.885	0.885	0.8894	0	0.8909	0.865	0.8956	ARL17A(-100.5kb)|ARL17B(-100.9kb)|KANSL1(0)|KANSL1-AS1(+1.924kb)|LRRC37A(-96.48kb)|MAPT(+170.3kb)|NSFP1(-174.2kb)|STH(+199kb)
7	75653185	rs184114817	A	G		3	6.322e-05	6.322e-05	0.6297	0.6297	0.6243	0	0.7323	0.565	0.6085	MDH2(-24.21kb)|MIR4651(+108.6kb)|POR(+37.01kb)|RHBDD2(+134.9kb)|SNORA14A(+79.95kb)|SRRM3(-178kb)|STYXL1(0)|TMEM120A(+29.19kb)
17	43515985	rs535784805	A	C		3	6.34e-05	6.34e-05	0.7491	0.7491	0.8514	0	0.7227	0.7295	0.7894	ARHGAP27(+5.703kb)|CRHR1(-181.7kb)|FMNL1(+191.3kb)|LOC644172(-161.5kb)|LRRC37A4P(-67.26kb)|MAP3K14(+121.6kb)|MAP3K14-AS1(+170kb)|MGC57346(-181.7kb)|MIR4315-1(-36.74kb)|MIR4315-2(-36.74kb)|PLEKHM1(0)|SPATA32(+176.5kb)
17	44192618	rs4606752	G	A		3	6.343e-05	6.343e-05	0.8852	0.8852	0.9194	0	0.8891	0.8688	0.8954	ARL17A(-183.9kb)|ARL17B(-184.3kb)|KANSL1(0)|KANSL1-AS1(-78.32kb)|LRRC37A(-179.9kb)|MAPT(+86.92kb)|STH(+115.6kb)
6	39129406	rs2815088	T	C		3	6.344e-05	0.0008266	0.8375	0.8397	0.2511	27.64	0.8037	0.9444	0.7975	DNAH8(+130.8kb)|GLP1R(+73.89kb)|KCNK5(-27.34kb)|KCNK16(-153.1kb)|KCNK17(-137.4kb)|KIF6(-173.5kb)|SAYSD1(+46.54kb)
17	43830685	rs62055869	A	G		3	6.356e-05	6.356e-05	0.8873	0.8873	0.8272	0	0.8791	0.8705	0.9085	CRHR1(0)|CRHR1-IT1(+107.1kb)|LOC644172(+150.9kb)|MAPT(-141.1kb)|MAPT-AS1(-90.04kb)|MAPT-IT1(-142.5kb)|MGC57346(+115.4kb)|SPPL2C(-91.57kb)
12	80525583	rs142465010	G	A		3	6.358e-05	0.04318	1.6214	1.6536	0.0147	76.3	1.1865	2.7543	1.4111	OTOGL(-77.65kb)|PPP1R12A(+196.3kb)
10	115454543	rs11196435	G	T		3	6.373e-05	6.373e-05	1.1666	1.1666	0.9367	0	1.1533	1.1518	1.1856	CASP7(0)|DCLRE1A(-139.9kb)|HABP2(+105.2kb)|MIR4483(-83.21kb)|NHLRC2(-159.8kb)|NRAP(+30.71kb)|PLEKHS1(-56.67kb)
17	43764378	rs77220413	A	G		3	6.383e-05	6.383e-05	0.8869	0.8869	0.8592	0	0.8789	0.8727	0.9063	CRHR1(0)|CRHR1-IT1(+40.78kb)|LOC644172(+84.63kb)|LRRC37A4P(+166.5kb)|MAPT-AS1(-156.3kb)|MGC57346(+49.05kb)|PLEKHM1(+196.2kb)|SPPL2C(-157.9kb)
17	44267617	rs559790424	G	A		3	6.383e-05	6.383e-05	0.885	0.885	0.9183	0	0.8907	0.8679	0.8936	ARL17A(-108.9kb)|ARL17B(-109.3kb)|KANSL1(0)|KANSL1-AS1(-3.321kb)|LRRC37A(-104.9kb)|MAPT(+161.9kb)|NSFP1(-182.6kb)|STH(+190.6kb)
11	60869481	rs545230	A	C		3	6.39e-05	6.39e-05	1.11	1.11	0.703	0	1.0863	1.0959	1.1398	CD5(-0.448kb)|CD6(+81.63kb)|DDB1(-197.4kb)|PGA3(-101.5kb)|PGA4(-120.3kb)|PGA5(-139.2kb)|PRPF19(+195.4kb)|SLC15A3(+150.2kb)|TMEM109(+178.6kb)|TMEM132A(+164.8kb)|VPS37C(-28.25kb)|VWCE(-156.3kb)
17	44189858	rs76640332	A	G		3	6.394e-05	6.394e-05	0.8843	0.8843	0.9222	0	0.8878	0.8683	0.8948	ARL17A(-186.6kb)|ARL17B(-187.1kb)|KANSL1(0)|KANSL1-AS1(-81.08kb)|LRRC37A(-182.6kb)|MAPT(+84.16kb)|STH(+112.8kb)
17	43768346	rs78471340	A	G		3	6.398e-05	6.398e-05	0.8863	0.8863	0.8794	0	0.8802	0.8721	0.9041	CRHR1(0)|CRHR1-IT1(+44.75kb)|LOC644172(+88.6kb)|LRRC37A4P(+170.5kb)|MAPT-AS1(-152.4kb)|MGC57346(+53.02kb)|SPPL2C(-153.9kb)
11	121977902	rs4121975	A	G		3	6.404e-05	0.0008514	1.1113	1.1122	0.2351	30.94	1.166	1.1276	1.0513	BLID(-8.159kb)|MIR100(-45.03kb)|MIR100HG(0)|MIR125B1(+7.35kb)|MIRLET7A2(-39.33kb)
4	129872196	rs35094990	C	T		3	6.411e-05	6.411e-05	1.1706	1.1706	0.378	0	1.0877	1.1868	1.2349	C4orf33(-142.6kb)|PHF17(+75.82kb)|SCLT1(0)
17	43758885	rs112431991	G	A		3	6.413e-05	6.413e-05	0.886	0.886	0.9147	0	0.8814	0.8736	0.9006	CRHR1(0)|CRHR1-IT1(+35.29kb)|LOC644172(+79.14kb)|LRRC37A4P(+161kb)|MAPT-AS1(-161.8kb)|MGC57346(+43.56kb)|PLEKHM1(+190.7kb)|SPPL2C(-163.4kb)
17	43830640	rs62055868	T	C		3	6.413e-05	6.413e-05	0.8873	0.8873	0.8264	0	0.8791	0.8705	0.9086	CRHR1(0)|CRHR1-IT1(+107kb)|LOC644172(+150.9kb)|MAPT(-141.1kb)|MAPT-AS1(-90.08kb)|MAPT-IT1(-142.5kb)|MGC57346(+115.3kb)|SPPL2C(-91.62kb)
10	115457597	rs7100728	A	G		3	6.422e-05	6.422e-05	1.1665	1.1665	0.9294	0	1.1532	1.1497	1.1865	CASP7(0)|DCLRE1A(-136.9kb)|HABP2(+108.2kb)|MIR4483(-80.15kb)|NHLRC2(-156.8kb)|NRAP(+33.77kb)|PLEKHS1(-53.62kb)
1	179794752	rs150122101	T	C		3	6.433e-05	0.1091	1.3325	1.3049	0.0072	79.75	0.9648	1.4333	1.6009	CEP350(-129.2kb)|FAM163A(+9.419kb)|TDRD5(+134.3kb)|TOR1AIP1(-56.42kb)|TOR1AIP2(-14.35kb)
17	44280902	rs554424146	C	G		3	6.434e-05	6.434e-05	0.8851	0.8851	0.9026	0	0.891	0.8663	0.8947	ARL17A(-95.6kb)|ARL17B(-96.01kb)|KANSL1(0)|KANSL1-AS1(+6.813kb)|LRRC37A(-91.59kb)|MAPT(+175.2kb)|NSFP1(-169.3kb)
17	44186055	rs62061821	A	G		3	6.441e-05	6.441e-05	0.8853	0.8853	0.874	0	0.8896	0.8646	0.8985	ARL17A(-190.4kb)|ARL17B(-190.9kb)|KANSL1(0)|KANSL1-AS1(-84.88kb)|LRRC37A(-186.4kb)|MAPT(+80.36kb)|STH(+109kb)
10	115457450	rs77120019	A	G		3	6.447e-05	6.447e-05	1.1664	1.1664	0.93	0	1.1532	1.1498	1.1864	CASP7(0)|DCLRE1A(-137kb)|HABP2(+108.1kb)|MIR4483(-80.3kb)|NHLRC2(-156.9kb)|NRAP(+33.62kb)|PLEKHS1(-53.76kb)
10	7516210	rs148340838	C	G		3	6.451e-05	6.451e-05	1.2318	1.2318	0.6629	0	1.3124	1.2174	1.1768	ITIH5(-85.02kb)|SFMBT2(+62.76kb)
13	83686039	rs265664	A	G		3	6.456e-05	6.456e-05	0.8926	0.8926	0.8623	0	0.8789	0.8853	0.9095	.
17	43830938	rs17426174	C	G		3	6.459e-05	6.459e-05	0.8874	0.8874	0.8246	0	0.8791	0.8705	0.9088	CRHR1(0)|CRHR1-IT1(+107.3kb)|LOC644172(+151.2kb)|MAPT(-140.8kb)|MAPT-AS1(-89.78kb)|MAPT-IT1(-142.2kb)|MGC57346(+115.6kb)|SPPL2C(-91.32kb)
17	43834970	rs7350923	T	C		3	6.463e-05	6.463e-05	0.8874	0.8874	0.8188	0	0.8793	0.8699	0.9091	CRHR1(0)|CRHR1-IT1(+111.4kb)|LOC644172(+155.2kb)|MAPT(-136.8kb)|MAPT-AS1(-85.75kb)|MAPT-IT1(-138.2kb)|MGC57346(+119.6kb)|SPPL2C(-87.28kb)
17	44281722	rs544669576	C	T		3	6.463e-05	6.463e-05	0.8851	0.8851	0.9027	0	0.891	0.8663	0.8947	ARL17A(-94.78kb)|ARL17B(-95.19kb)|KANSL1(0)|KANSL1-AS1(+7.633kb)|LRRC37A(-90.77kb)|MAPT(+176kb)|NSFP1(-168.5kb)
17	43836191	rs74514268	A	G		3	6.464e-05	6.464e-05	0.8874	0.8874	0.8193	0	0.8793	0.87	0.9091	CRHR1(0)|CRHR1-IT1(+112.6kb)|LOC644172(+156.4kb)|MAPT(-135.6kb)|MAPT-AS1(-84.53kb)|MAPT-IT1(-137kb)|MGC57346(+120.9kb)|SPPL2C(-86.06kb)
3	6959249	rs148087178	G	A		3	6.465e-05	0.01289	1.4972	1.5295	0.0594	64.57	1.445	2.1417	1.1955	GRM7(0)
10	115463679	rs74780205	A	G		3	6.467e-05	6.467e-05	1.1664	1.1664	0.9208	0	1.151	1.1503	1.1877	CASP7(0)|DCLRE1A(-130.8kb)|HABP2(+114.3kb)|MIR4483(-74.07kb)|NHLRC2(-150.7kb)|NRAP(+39.85kb)|PLEKHS1(-47.53kb)
10	115467308	rs10509984	G	C		3	6.47e-05	6.47e-05	1.1663	1.1663	0.9059	0	1.1485	1.1503	1.1897	CASP7(0)|DCLRE1A(-127.2kb)|HABP2(+117.9kb)|MIR4483(-70.44kb)|NHLRC2(-147.1kb)|NRAP(+43.48kb)|PLEKHS1(-43.9kb)
17	44281588	rs544227999	C	T		3	6.474e-05	6.474e-05	0.8851	0.8851	0.9027	0	0.891	0.8663	0.8947	ARL17A(-94.91kb)|ARL17B(-95.32kb)|KANSL1(0)|KANSL1-AS1(+7.499kb)|LRRC37A(-90.91kb)|MAPT(+175.9kb)|NSFP1(-168.6kb)
4	42850840	rs114647201	A	G		2	6.475e-05	0.002052	0.5259	0.5322	0.2069	37.22	0.6671	0.4422	NA	ATP8A1(+191.7kb)|GRXCR1(-44.44kb)
17	44191835	rs17577313	G	A		3	6.476e-05	6.476e-05	0.8858	0.8858	0.8969	0	0.8891	0.8674	0.898	ARL17A(-184.7kb)|ARL17B(-185.1kb)|KANSL1(0)|KANSL1-AS1(-79.1kb)|LRRC37A(-180.7kb)|MAPT(+86.14kb)|STH(+114.8kb)
20	55020557	rs16979933	C	T		3	6.483e-05	0.004071	0.8335	0.8358	0.1545	46.45	0.751	0.9356	0.8398	AURKA(+53.21kb)|CASS4(0)|CSTF1(+40.98kb)|FAM209A(-79.23kb)|FAM209B(-87.74kb)|FAM210B(+76.84kb)|GCNT7(-45.99kb)|MC3R(+195.7kb)|RTFDC1(-23.09kb)|TFAP2C(-183.8kb)
1	3440824	rs10797399	A	G		3	6.49e-05	0.00638	1.1309	1.1356	0.1027	56.06	1.1966	1.1863	1.0411	ARHGEF16(+43.15kb)|MEGF6(0)|MIR551A(-36.44kb)|PRDM16(+85.64kb)|TP73(-128.3kb)|TPRG1L(-100.7kb)|WRAP73(-106.5kb)
17	43840107	rs11079721	A	C		3	6.491e-05	6.491e-05	0.8874	0.8874	0.8353	0	0.8792	0.8713	0.9081	CRHR1(0)|CRHR1-IT1(+116.5kb)|LOC644172(+160.4kb)|MAPT(-131.6kb)|MAPT-AS1(-80.61kb)|MAPT-IT1(-133kb)|MGC57346(+124.8kb)|SPPL2C(-82.15kb)
17	44203131	rs56273589	G	C		3	6.492e-05	6.492e-05	0.8857	0.8857	0.9162	0	0.8897	0.8688	0.8958	ARL17A(-173.4kb)|ARL17B(-173.8kb)|KANSL1(0)|KANSL1-AS1(-67.81kb)|LRRC37A(-169.4kb)|MAPT(+97.43kb)|STH(+126.1kb)
17	44166500	rs17660228	A	G		3	6.497e-05	6.497e-05	0.886	0.886	0.8954	0	0.8884	0.8678	0.8989	KANSL1(0)|KANSL1-AS1(-104.4kb)|MAPT(+60.8kb)|MAPT-AS1(+193.6kb)|MAPT-IT1(+190.3kb)|STH(+89.44kb)
17	44202952	rs55885063	G	C		3	6.498e-05	6.498e-05	0.8857	0.8857	0.916	0	0.8898	0.8688	0.8958	ARL17A(-173.5kb)|ARL17B(-174kb)|KANSL1(0)|KANSL1-AS1(-67.99kb)|LRRC37A(-169.5kb)|MAPT(+97.25kb)|STH(+125.9kb)
17	43767628	rs62055752	A	G		3	6.5e-05	6.5e-05	0.887	0.887	0.8819	0	0.8792	0.8745	0.9047	CRHR1(0)|CRHR1-IT1(+44.03kb)|LOC644172(+87.88kb)|LRRC37A4P(+169.7kb)|MAPT-AS1(-153.1kb)|MGC57346(+52.3kb)|PLEKHM1(+199.5kb)|SPPL2C(-154.6kb)
17	44203413	rs76380490	T	C		3	6.5e-05	6.5e-05	0.8857	0.8857	0.9162	0	0.8897	0.8688	0.8958	ARL17A(-173.1kb)|ARL17B(-173.5kb)|KANSL1(0)|KANSL1-AS1(-67.52kb)|LRRC37A(-169.1kb)|MAPT(+97.71kb)|STH(+126.4kb)
10	115466648	rs11196442	G	C		3	6.503e-05	6.503e-05	1.1663	1.1663	0.9083	0	1.1489	1.1501	1.1893	CASP7(0)|DCLRE1A(-127.8kb)|HABP2(+117.3kb)|MIR4483(-71.1kb)|NHLRC2(-147.7kb)|NRAP(+42.82kb)|PLEKHS1(-44.56kb)
17	44169437	rs62061772	C	T		3	6.505e-05	6.505e-05	0.8858	0.8858	0.9019	0	0.8882	0.8682	0.8983	KANSL1(0)|KANSL1-AS1(-101.5kb)|MAPT(+63.74kb)|MAPT-AS1(+196.6kb)|MAPT-IT1(+193.3kb)|STH(+92.38kb)
13	83694854	rs265691	A	C		3	6.506e-05	6.506e-05	0.8927	0.8927	0.8575	0	0.8787	0.8854	0.9099	.
17	43722509	rs1706748	G	C		3	6.506e-05	6.506e-05	0.8867	0.8867	0.8969	0	0.8804	0.8743	0.9032	CRHR1(0)|CRHR1-IT1(0)|LOC644172(+42.76kb)|LRRC37A4P(+124.6kb)|MAPT-AS1(-198.2kb)|MGC57346(+7.18kb)|MIR4315-1(+169.7kb)|MIR4315-2(+169.7kb)|PLEKHM1(+154.4kb)|SPPL2C(-199.7kb)
17	44267863	rs570203120	A	G		3	6.507e-05	6.507e-05	0.8852	0.8852	0.9164	0	0.8908	0.8679	0.894	ARL17A(-108.6kb)|ARL17B(-109kb)|KANSL1(0)|KANSL1-AS1(-3.075kb)|LRRC37A(-104.6kb)|MAPT(+162.2kb)|NSFP1(-182.3kb)|STH(+190.8kb)
13	83694962	rs265692	C	T		3	6.508e-05	6.508e-05	0.8927	0.8927	0.8575	0	0.8787	0.8854	0.9099	.
17	43834482	rs12943085	A	G		3	6.508e-05	6.508e-05	0.8875	0.8875	0.8208	0	0.8792	0.8703	0.9091	CRHR1(0)|CRHR1-IT1(+110.9kb)|LOC644172(+154.7kb)|MAPT(-137.3kb)|MAPT-AS1(-86.24kb)|MAPT-IT1(-138.7kb)|MGC57346(+119.2kb)|SPPL2C(-87.77kb)
14	98679071	rs12894205	T	A		3	6.509e-05	6.509e-05	0.9022	0.9022	0.3681	0	0.9357	0.9178	0.8628	.
17	43715427	rs2942166	C	T		3	6.509e-05	6.509e-05	0.8867	0.8867	0.8997	0	0.8779	0.8771	0.9032	CRHR1(0)|CRHR1-IT1(-0.913kb)|LOC644172(+35.68kb)|LRRC37A4P(+117.5kb)|MGC57346(+0.098kb)|MIR4315-1(+162.6kb)|MIR4315-2(+162.6kb)|PLEKHM1(+147.3kb)
15	91699438	rs4932594	G	A		3	6.51e-05	8.474e-05	0.747	0.7468	0.3558	3.24	0.7664	0.641	0.8306	PRC1(+161.6kb)|PRC1-AS1(+167.6kb)|RCCD1(+193.1kb)|SV2B(0)|VPS33B(+133.6kb)
17	44169406	rs62061771	A	G		3	6.51e-05	6.51e-05	0.8858	0.8858	0.9019	0	0.8882	0.8682	0.8983	KANSL1(0)|KANSL1-AS1(-101.5kb)|MAPT(+63.71kb)|MAPT-AS1(+196.5kb)|MAPT-IT1(+193.2kb)|STH(+92.35kb)
13	83695022	rs265693	A	T		3	6.514e-05	6.514e-05	0.8927	0.8927	0.8575	0	0.8787	0.8854	0.9099	.
17	44203366	rs62063172	C	T		3	6.514e-05	6.514e-05	0.8857	0.8857	0.9162	0	0.8897	0.8688	0.8958	ARL17A(-173.1kb)|ARL17B(-173.5kb)|KANSL1(0)|KANSL1-AS1(-67.57kb)|LRRC37A(-169.1kb)|MAPT(+97.67kb)|STH(+126.3kb)
10	7528546	rs78844792	T	G		3	6.518e-05	6.518e-05	1.2182	1.2182	0.5318	0	1.2948	1.242	1.1414	ITIH5(-72.68kb)|SFMBT2(+75.1kb)
10	115457114	rs78849490	A	G		3	6.519e-05	6.519e-05	1.1664	1.1664	0.9308	0	1.1533	1.1497	1.1862	CASP7(0)|DCLRE1A(-137.4kb)|HABP2(+107.8kb)|MIR4483(-80.64kb)|NHLRC2(-157.3kb)|NRAP(+33.28kb)|PLEKHS1(-54.1kb)
17	44126650	rs112746008	T	C		3	6.519e-05	6.519e-05	0.8856	0.8856	0.9091	0	0.8886	0.8685	0.8973	KANSL1(0)|KANSL1-AS1(-144.3kb)|MAPT(+20.95kb)|MAPT-AS1(+153.8kb)|MAPT-IT1(+150.5kb)|STH(+49.59kb)
17	44357351	rs17665188	C	T		3	6.519e-05	6.519e-05	0.8828	0.8828	0.8877	0	0.889	0.8623	0.8937	ARL17A(-19.15kb)|ARL17B(-19.56kb)|KANSL1(+54.61kb)|KANSL1-AS1(+83.26kb)|LRRC37A(-15.14kb)|NSFP1(-92.83kb)
15	58490392	rs7182416	G	C		3	6.52e-05	6.52e-05	1.2837	1.2837	0.9117	0	1.3309	1.2762	1.2488	ALDH1A2(+132.3kb)|AQP9(+12.28kb)
21	39696858	rs9976872	C	T		3	6.521e-05	6.521e-05	0.8154	0.8154	0.5933	0	0.7897	0.774	0.8714	DSCR8(+168.3kb)|DSCR10(+116.1kb)|ERG(-42.32kb)|KCNJ15(+23.11kb)
21	27510311	rs11702016	C	T		3	6.524e-05	6.524e-05	0.8989	0.8989	0.3962	0	0.8589	0.9011	0.9346	APP(0)
17	44078982	rs2435201	A	T		3	6.527e-05	6.527e-05	1.1103	1.1103	0.5847	0	1.081	1.156	1.1061	CRHR1(+165.8kb)|KANSL1(-28.3kb)|KANSL1-AS1(-192kb)|MAPT(0)|MAPT-AS1(+106.1kb)|MAPT-IT1(+102.8kb)|SPPL2C(+154.5kb)|STH(+1.922kb)
17	44194835	rs17577496	C	T		3	6.529e-05	6.529e-05	0.8858	0.8858	0.9127	0	0.8892	0.8688	0.8967	ARL17A(-181.7kb)|ARL17B(-182.1kb)|KANSL1(0)|KANSL1-AS1(-76.1kb)|LRRC37A(-177.7kb)|MAPT(+89.14kb)|STH(+117.8kb)
9	458846	rs10974576	T	G		3	6.535e-05	0.04237	1.1144	1.1259	0.0104	78.1	1.077	1.2759	1.0484	DOCK8(0)|KANK1(-11.45kb)
17	43831112	rs62055871	A	G		3	6.54e-05	6.54e-05	0.8875	0.8875	0.8214	0	0.879	0.8705	0.9091	CRHR1(0)|CRHR1-IT1(+107.5kb)|LOC644172(+151.4kb)|MAPT(-140.6kb)|MAPT-AS1(-89.61kb)|MAPT-IT1(-142kb)|MGC57346(+115.8kb)|SPPL2C(-91.14kb)
17	44279760	rs573536609	A	G		3	6.543e-05	6.543e-05	0.8853	0.8853	0.9013	0	0.8909	0.8664	0.8952	ARL17A(-96.74kb)|ARL17B(-97.15kb)|KANSL1(0)|KANSL1-AS1(+5.671kb)|LRRC37A(-92.74kb)|MAPT(+174.1kb)|NSFP1(-170.4kb)
1	3434984	rs2794362	C	G		3	6.545e-05	0.003157	0.8821	0.8792	0.1473	47.78	0.8525	0.8291	0.9517	ARHGEF16(+37.31kb)|MEGF6(0)|MIR551A(-42.28kb)|PRDM16(+79.8kb)|TP73(-134.1kb)|TPRG1L(-106.6kb)|WRAP73(-112.3kb)
17	44280523	rs559886250	G	A		3	6.547e-05	6.547e-05	0.8853	0.8853	0.9014	0	0.891	0.8663	0.895	ARL17A(-95.98kb)|ARL17B(-96.39kb)|KANSL1(0)|KANSL1-AS1(+6.434kb)|LRRC37A(-91.97kb)|MAPT(+174.8kb)|NSFP1(-169.7kb)
13	83695448	rs265695	A	G		3	6.549e-05	6.549e-05	0.8928	0.8928	0.8565	0	0.8787	0.8854	0.91	.
13	83692185	rs265686	T	C		3	6.551e-05	6.551e-05	0.8927	0.8927	0.8576	0	0.8787	0.8854	0.9099	.
17	43803189	rs1358071	A	C		3	6.551e-05	6.551e-05	1.1201	1.1201	0.7932	0	1.1038	1.1551	1.1096	CRHR1(0)|CRHR1-IT1(+79.59kb)|LOC644172(+123.4kb)|MAPT(-168.6kb)|MAPT-AS1(-117.5kb)|MAPT-IT1(-170kb)|MGC57346(+87.86kb)|SPPL2C(-119.1kb)
17	43835854	rs62055878	A	C		3	6.558e-05	6.558e-05	0.8875	0.8875	0.8214	0	0.8792	0.8704	0.9091	CRHR1(0)|CRHR1-IT1(+112.3kb)|LOC644172(+156.1kb)|MAPT(-135.9kb)|MAPT-AS1(-84.87kb)|MAPT-IT1(-137.3kb)|MGC57346(+120.5kb)|SPPL2C(-86.4kb)
13	83699719	rs265701	A	G		3	6.56e-05	6.56e-05	0.8928	0.8928	0.8567	0	0.8788	0.8852	0.91	.
10	115464033	rs77429461	C	T		3	6.562e-05	6.562e-05	1.1662	1.1662	0.9189	0	1.1507	1.1499	1.1878	CASP7(0)|DCLRE1A(-130.4kb)|HABP2(+114.7kb)|MIR4483(-73.72kb)|NHLRC2(-150.4kb)|NRAP(+40.2kb)|PLEKHS1(-47.18kb)
13	83700698	rs265703	T	C		3	6.562e-05	6.562e-05	0.8928	0.8928	0.8589	0	0.879	0.8852	0.9099	.
16	7954183	rs12929528	G	A		3	6.562e-05	6.562e-05	1.3981	1.3981	0.9398	0	1.358	1.3704	1.4484	RBFOX1(+190.8kb)
17	43768347	rs78052495	T	C		3	6.565e-05	6.565e-05	0.8865	0.8865	0.8806	0	0.8807	0.8721	0.9041	CRHR1(0)|CRHR1-IT1(+44.75kb)|LOC644172(+88.6kb)|LRRC37A4P(+170.5kb)|MAPT-AS1(-152.4kb)|MGC57346(+53.02kb)|SPPL2C(-153.9kb)
17	43832115	rs55645418	G	A		3	6.568e-05	6.568e-05	0.8875	0.8875	0.8218	0	0.8791	0.8705	0.9091	CRHR1(0)|CRHR1-IT1(+108.5kb)|LOC644172(+152.4kb)|MAPT(-139.6kb)|MAPT-AS1(-88.61kb)|MAPT-IT1(-141kb)|MGC57346(+116.8kb)|SPPL2C(-90.14kb)
19	1044328	rs4147909	T	C		2	6.568e-05	6.568e-05	0.8471	0.8471	0.6435	0	0.8302	0.8628	NA	ABCA7(0)|ARID3A(+71.52kb)|ATP5D(-197.4kb)|C19orf26(-185.6kb)|CFD(+180.7kb)|CNN2(+5.264kb)|ELANE(+188.1kb)|GPX4(-59.61kb)|GRIN3B(+34.6kb)|HMHA1(-21.59kb)|KISS1R(+123.3kb)|MED16(+151.1kb)|POLR2E(-42.25kb)|PRTN3(+196.2kb)|R3HDM4(+131.1kb)|SBNO2(-63.3kb)|STK11(-161.5kb)|TMEM259(+23.19kb)|WDR18(+49.76kb)
13	83701650	rs2669197	C	A		3	6.571e-05	6.571e-05	0.8928	0.8928	0.8577	0	0.879	0.8851	0.91	.
17	44283571	rs547806241	T	C		3	6.571e-05	6.571e-05	0.8688	0.8688	0.9583	0	0.8607	0.8629	0.88	ARL17A(-92.93kb)|ARL17B(-93.34kb)|KANSL1(0)|KANSL1-AS1(+9.482kb)|LRRC37A(-88.92kb)|MAPT(+177.9kb)|NSFP1(-166.6kb)
17	44188645	rs62061823	T	C		3	6.574e-05	6.574e-05	0.8858	0.8858	0.9109	0	0.8888	0.8688	0.8972	ARL17A(-187.9kb)|ARL17B(-188.3kb)|KANSL1(0)|KANSL1-AS1(-82.29kb)|LRRC37A(-183.9kb)|MAPT(+82.95kb)|STH(+111.6kb)
17	43837782	rs79882507	G	A		3	6.579e-05	6.579e-05	0.8875	0.8875	0.8219	0	0.8796	0.8701	0.909	CRHR1(0)|CRHR1-IT1(+114.2kb)|LOC644172(+158kb)|MAPT(-134kb)|MAPT-AS1(-82.94kb)|MAPT-IT1(-135.4kb)|MGC57346(+122.5kb)|SPPL2C(-84.47kb)
17	44126673	rs112333322	G	A		3	6.581e-05	6.581e-05	0.8849	0.8849	0.9015	0	0.8886	0.8667	0.8967	KANSL1(0)|KANSL1-AS1(-144.3kb)|MAPT(+20.97kb)|MAPT-AS1(+153.8kb)|MAPT-IT1(+150.5kb)|STH(+49.61kb)
17	43838014	rs62055885	G	A		3	6.582e-05	6.582e-05	0.8875	0.8875	0.8252	0	0.8793	0.8705	0.9088	CRHR1(0)|CRHR1-IT1(+114.4kb)|LOC644172(+158.3kb)|MAPT(-133.7kb)|MAPT-AS1(-82.71kb)|MAPT-IT1(-135.1kb)|MGC57346(+122.7kb)|SPPL2C(-84.24kb)
16	8865418	rs1273417	C	T		3	6.584e-05	6.584e-05	0.7034	0.7034	0.6808	0	0.6503	0.6784	0.7704	ABAT(0)|CARHSP1(-81.38kb)|METTL22(+125.3kb)|PMM2(-26.25kb)|TMEM186(-23.62kb)|USP7(-120.5kb)
17	44176092	rs55900347	A	G		3	6.586e-05	6.586e-05	0.886	0.886	0.9089	0	0.8895	0.8686	0.8971	KANSL1(0)|KANSL1-AS1(-94.85kb)|LRRC37A(-196.4kb)|MAPT(+70.39kb)|MAPT-IT1(+199.9kb)|STH(+99.03kb)
17	44280188	rs551188913	A	T		3	6.587e-05	6.587e-05	0.8853	0.8853	0.9002	0	0.8909	0.8663	0.8953	ARL17A(-96.31kb)|ARL17B(-96.72kb)|KANSL1(0)|KANSL1-AS1(+6.099kb)|LRRC37A(-92.31kb)|MAPT(+174.5kb)|NSFP1(-170kb)
17	43837567	rs62055884	T	C		3	6.588e-05	6.588e-05	0.8875	0.8875	0.8219	0	0.8796	0.8701	0.909	CRHR1(0)|CRHR1-IT1(+114kb)|LOC644172(+157.8kb)|MAPT(-134.2kb)|MAPT-AS1(-83.15kb)|MAPT-IT1(-135.6kb)|MGC57346(+122.2kb)|SPPL2C(-84.69kb)
13	83699198	rs197283	G	T		3	6.589e-05	6.589e-05	0.8928	0.8928	0.857	0	0.8788	0.8853	0.91	.
17	43833921	rs34195569	A	G		3	6.589e-05	6.589e-05	0.8876	0.8876	0.821	0	0.8792	0.8705	0.9092	CRHR1(0)|CRHR1-IT1(+110.3kb)|LOC644172(+154.2kb)|MAPT(-137.8kb)|MAPT-AS1(-86.8kb)|MAPT-IT1(-139.2kb)|MGC57346(+118.6kb)|SPPL2C(-88.33kb)
17	44196799	rs112813897	A	G		3	6.591e-05	6.591e-05	0.8859	0.8859	0.9112	0	0.8892	0.8687	0.8969	ARL17A(-179.7kb)|ARL17B(-180.1kb)|KANSL1(0)|KANSL1-AS1(-74.14kb)|LRRC37A(-175.7kb)|MAPT(+91.1kb)|STH(+119.7kb)
17	43833824	rs36047693	C	G		3	6.592e-05	6.592e-05	0.8876	0.8876	0.8211	0	0.8792	0.8705	0.9092	CRHR1(0)|CRHR1-IT1(+110.2kb)|LOC644172(+154.1kb)|MAPT(-137.9kb)|MAPT-AS1(-86.9kb)|MAPT-IT1(-139.3kb)|MGC57346(+118.5kb)|SPPL2C(-88.43kb)
17	44197032	rs111678697	C	T		3	6.592e-05	6.592e-05	0.8859	0.8859	0.9111	0	0.8892	0.8687	0.8969	ARL17A(-179.5kb)|ARL17B(-179.9kb)|KANSL1(0)|KANSL1-AS1(-73.91kb)|LRRC37A(-175.5kb)|MAPT(+91.33kb)|STH(+120kb)
13	83703275	rs2669198	C	A		3	6.593e-05	6.593e-05	0.8928	0.8928	0.8582	0	0.8792	0.8848	0.91	.
17	44194621	rs111880194	G	C		3	6.594e-05	6.594e-05	0.8859	0.8859	0.9067	0	0.8894	0.8683	0.8972	ARL17A(-181.9kb)|ARL17B(-182.3kb)|KANSL1(0)|KANSL1-AS1(-76.32kb)|LRRC37A(-177.9kb)|MAPT(+88.92kb)|STH(+117.6kb)
3	24147788	rs13073046	A	G		3	6.599e-05	6.599e-05	1.3057	1.3057	0.3864	0	1.4252	1.3897	1.1701	LINC00691(+3.05kb)|NKIRAS1(+189.3kb)|NR1D2(+125.7kb)|RPL15(+182.6kb)|THRB(-10.86kb)
17	43834314	rs34008514	G	A		3	6.6e-05	6.6e-05	0.8876	0.8876	0.8211	0	0.8792	0.8705	0.9092	CRHR1(0)|CRHR1-IT1(+110.7kb)|LOC644172(+154.6kb)|MAPT(-137.4kb)|MAPT-AS1(-86.41kb)|MAPT-IT1(-138.8kb)|MGC57346(+119kb)|SPPL2C(-87.94kb)
17	44196822	rs113909426	A	G		3	6.604e-05	6.604e-05	0.8859	0.8859	0.9112	0	0.8892	0.8687	0.8969	ARL17A(-179.7kb)|ARL17B(-180.1kb)|KANSL1(0)|KANSL1-AS1(-74.12kb)|LRRC37A(-175.7kb)|MAPT(+91.12kb)|STH(+119.8kb)
17	44196447	rs1468240	A	T		3	6.605e-05	6.605e-05	0.8859	0.8859	0.9106	0	0.8892	0.8687	0.897	ARL17A(-180.1kb)|ARL17B(-180.5kb)|KANSL1(0)|KANSL1-AS1(-74.49kb)|LRRC37A(-176kb)|MAPT(+90.75kb)|STH(+119.4kb)
17	44277691	rs556496186	C	T		3	6.605e-05	6.605e-05	0.8853	0.8853	0.9025	0	0.8909	0.8665	0.8951	ARL17A(-98.81kb)|ARL17B(-99.22kb)|KANSL1(0)|KANSL1-AS1(+3.602kb)|LRRC37A(-94.8kb)|MAPT(+172kb)|NSFP1(-172.5kb)
10	115458981	rs11196438	G	A		3	6.609e-05	6.609e-05	1.1662	1.1662	0.9264	0	1.152	1.1499	1.1867	CASP7(0)|DCLRE1A(-135.5kb)|HABP2(+109.6kb)|MIR4483(-78.77kb)|NHLRC2(-155.4kb)|NRAP(+35.15kb)|PLEKHS1(-52.23kb)
17	43832618	rs35282504	A	G		3	6.61e-05	6.61e-05	0.8875	0.8875	0.8209	0	0.8791	0.8705	0.9092	CRHR1(0)|CRHR1-IT1(+109kb)|LOC644172(+152.9kb)|MAPT(-139.1kb)|MAPT-AS1(-88.1kb)|MAPT-IT1(-140.5kb)|MGC57346(+117.3kb)|SPPL2C(-89.64kb)
17	43832864	rs62055875	C	T		3	6.61e-05	6.61e-05	0.8875	0.8875	0.8209	0	0.8791	0.8705	0.9092	CRHR1(0)|CRHR1-IT1(+109.3kb)|LOC644172(+153.1kb)|MAPT(-138.9kb)|MAPT-AS1(-87.86kb)|MAPT-IT1(-140.3kb)|MGC57346(+117.5kb)|SPPL2C(-89.39kb)
17	43837237	rs55801356	G	A		3	6.61e-05	6.61e-05	0.8876	0.8876	0.82	0	0.8794	0.8702	0.9092	CRHR1(0)|CRHR1-IT1(+113.6kb)|LOC644172(+157.5kb)|MAPT(-134.5kb)|MAPT-AS1(-83.48kb)|MAPT-IT1(-135.9kb)|MGC57346(+121.9kb)|SPPL2C(-85.02kb)
13	83687722	rs265675	T	C		3	6.613e-05	6.613e-05	0.8928	0.8928	0.852	0	0.8784	0.8854	0.9103	.
13	83689738	rs174731	A	G		3	6.613e-05	6.613e-05	0.8928	0.8928	0.8504	0	0.8783	0.8854	0.9104	.
17	43893259	rs117365970	A	G		3	6.613e-05	6.613e-05	0.8875	0.8875	0.8632	0	0.8839	0.8696	0.9049	CRHR1(0)|CRHR1-IT1(+169.7kb)|MAPT(-78.49kb)|MAPT-AS1(-27.46kb)|MAPT-IT1(-79.89kb)|MGC57346(+177.9kb)|SPPL2C(-29kb)|STH(-183.4kb)
17	44188764	rs55794067	C	T		3	6.615e-05	6.615e-05	0.8859	0.8859	0.9102	0	0.8889	0.8688	0.8973	ARL17A(-187.7kb)|ARL17B(-188.1kb)|KANSL1(0)|KANSL1-AS1(-82.17kb)|LRRC37A(-183.7kb)|MAPT(+83.06kb)|STH(+111.7kb)
13	83702369	rs2247180	C	G		3	6.618e-05	6.618e-05	0.8929	0.8929	0.8571	0	0.8791	0.885	0.9101	.
13	83702469	rs1877488	C	T		3	6.618e-05	6.618e-05	0.8929	0.8929	0.8571	0	0.8791	0.885	0.9101	.
1	75505909	rs111831643	A	C		3	6.622e-05	0.002465	0.88	0.8821	0.1915	39.49	0.9261	0.9159	0.8182	LHX8(-88.21kb)|SLC44A5(-161.9kb)
17	43828935	rs17426106	C	G		3	6.623e-05	6.623e-05	0.8876	0.8876	0.8361	0	0.8792	0.8717	0.9083	CRHR1(0)|CRHR1-IT1(+105.3kb)|LOC644172(+149.2kb)|MAPT(-142.8kb)|MAPT-AS1(-91.79kb)|MAPT-IT1(-144.2kb)|MGC57346(+113.6kb)|SPPL2C(-93.32kb)
17	44268488	rs2141298	T	C		3	6.624e-05	6.624e-05	0.8853	0.8853	0.915	0	0.891	0.8678	0.8941	ARL17A(-108kb)|ARL17B(-108.4kb)|KANSL1(0)|KANSL1-AS1(-2.45kb)|LRRC37A(-104kb)|MAPT(+162.8kb)|NSFP1(-181.7kb)|STH(+191.4kb)
13	83704216	rs7987839	T	C		3	6.634e-05	6.634e-05	1.1201	1.1201	0.859	0	1.1359	1.1325	1.0988	.
17	44277867	rs572762545	A	G		3	6.634e-05	6.634e-05	0.8853	0.8853	0.902	0	0.8909	0.8665	0.8952	ARL17A(-98.63kb)|ARL17B(-99.04kb)|KANSL1(0)|KANSL1-AS1(+3.778kb)|LRRC37A(-94.63kb)|MAPT(+172.2kb)|NSFP1(-172.3kb)
18	39907414	rs4243260	A	G		3	6.634e-05	0.0001079	0.9035	0.9037	0.3486	5.11	0.9088	0.9517	0.8673	LINC00907(0)
17	18094461	rs62073657	A	G		3	6.636e-05	6.636e-05	1.4218	1.4218	0.9375	0	1.3576	1.4738	1.4377	ALKBH5(0)|ATPAF2(+152kb)|DRG2(+83.16kb)|EVPLL(-186.6kb)|FLII(-53.67kb)|GID4(+122.7kb)|LLGL1(-34.47kb)|LRRC48(+174.3kb)|MYO15A(+11.34kb)|SHMT1(-136.7kb)|SMCR7(-69.39kb)|SMCR8(-124.1kb)|TOP3A(-82.77kb)
17	43836673	rs12948216	T	C		3	6.637e-05	6.637e-05	0.8876	0.8876	0.8206	0	0.8794	0.8703	0.9092	CRHR1(0)|CRHR1-IT1(+113.1kb)|LOC644172(+156.9kb)|MAPT(-135.1kb)|MAPT-AS1(-84.05kb)|MAPT-IT1(-136.5kb)|MGC57346(+121.3kb)|SPPL2C(-85.58kb)
17	44277818	rs545270044	G	A		3	6.641e-05	6.641e-05	0.8853	0.8853	0.902	0	0.8909	0.8665	0.8952	ARL17A(-98.68kb)|ARL17B(-99.09kb)|KANSL1(0)|KANSL1-AS1(+3.729kb)|LRRC37A(-94.68kb)|MAPT(+172.1kb)|NSFP1(-172.4kb)
6	39136818	rs2815090	A	G		3	6.642e-05	0.0003527	0.8377	0.8391	0.2958	17.9	0.7919	0.9376	0.8156	DNAH8(+138.2kb)|GLP1R(+81.3kb)|KCNK5(-19.93kb)|KCNK16(-145.7kb)|KCNK17(-130kb)|KIF6(-166.1kb)|SAYSD1(+53.95kb)
17	44191682	rs62061847	A	G		3	6.642e-05	6.642e-05	0.886	0.886	0.9101	0	0.889	0.8689	0.8974	ARL17A(-184.8kb)|ARL17B(-185.2kb)|KANSL1(0)|KANSL1-AS1(-79.26kb)|LRRC37A(-180.8kb)|MAPT(+85.98kb)|STH(+114.6kb)
13	83703363	rs2819297	T	C		3	6.644e-05	6.644e-05	0.8929	0.8929	0.8575	0	0.8792	0.8849	0.9101	.
13	83685736	rs265665	A	C		3	6.648e-05	6.648e-05	0.8928	0.8928	0.8541	0	0.8786	0.8853	0.9102	.
17	43834074	rs34211253	G	C		3	6.651e-05	6.651e-05	0.8876	0.8876	0.8207	0	0.8794	0.8703	0.9092	CRHR1(0)|CRHR1-IT1(+110.5kb)|LOC644172(+154.3kb)|MAPT(-137.7kb)|MAPT-AS1(-86.65kb)|MAPT-IT1(-139.1kb)|MGC57346(+118.7kb)|SPPL2C(-88.18kb)
17	43840681	rs62055890	T	C		3	6.654e-05	6.654e-05	0.8876	0.8876	0.8194	0	0.8804	0.8693	0.909	CRHR1(0)|CRHR1-IT1(+117.1kb)|LOC644172(+160.9kb)|MAPT(-131.1kb)|MAPT-AS1(-80.04kb)|MAPT-IT1(-132.5kb)|MGC57346(+125.4kb)|SPPL2C(-81.57kb)
17	44196153	rs1468241	G	A		3	6.654e-05	6.654e-05	0.886	0.886	0.9112	0	0.889	0.8689	0.8972	ARL17A(-180.3kb)|ARL17B(-180.8kb)|KANSL1(0)|KANSL1-AS1(-74.78kb)|LRRC37A(-176.3kb)|MAPT(+90.45kb)|STH(+119.1kb)
2	127889932	rs6710467	A	G		3	6.659e-05	0.001878	1.1444	1.1483	0.1835	41.02	1.2116	1.1942	1.0615	BIN1(+25.03kb)|CYP27C1(-51.48kb)|ERCC3(-124.9kb)|MAP3K2(-166.3kb)
17	44188477	rs17577159	G	T		3	6.659e-05	6.659e-05	0.8861	0.8861	0.907	0	0.8888	0.8688	0.8979	ARL17A(-188kb)|ARL17B(-188.4kb)|KANSL1(0)|KANSL1-AS1(-82.46kb)|LRRC37A(-184kb)|MAPT(+82.78kb)|STH(+111.4kb)
17	43756466	rs757503	C	T		3	6.663e-05	6.663e-05	0.8867	0.8867	0.91	0	0.8806	0.8752	0.902	CRHR1(0)|CRHR1-IT1(+32.87kb)|LOC644172(+76.72kb)|LRRC37A4P(+158.6kb)|MAPT-AS1(-164.3kb)|MGC57346(+41.14kb)|PLEKHM1(+188.3kb)|SPPL2C(-165.8kb)
17	43717803	rs439558	C	T		3	6.665e-05	6.665e-05	0.887	0.887	0.8954	0	0.8794	0.8756	0.9037	CRHR1(0)|CRHR1-IT1(0)|LOC644172(+38.06kb)|LRRC37A4P(+119.9kb)|MGC57346(+2.474kb)|MIR4315-1(+165kb)|MIR4315-2(+165kb)|PLEKHM1(+149.7kb)
17	44277265	rs2532229	C	A		3	6.666e-05	6.666e-05	0.8854	0.8854	0.9024	0	0.891	0.8666	0.8952	ARL17A(-99.23kb)|ARL17B(-99.65kb)|KANSL1(0)|KANSL1-AS1(+3.176kb)|LRRC37A(-95.23kb)|MAPT(+171.6kb)|NSFP1(-172.9kb)
17	43837091	rs56168907	C	T		3	6.668e-05	6.668e-05	0.8876	0.8876	0.8219	0	0.8795	0.8703	0.9091	CRHR1(0)|CRHR1-IT1(+113.5kb)|LOC644172(+157.3kb)|MAPT(-134.7kb)|MAPT-AS1(-83.63kb)|MAPT-IT1(-136.1kb)|MGC57346(+121.8kb)|SPPL2C(-85.16kb)
17	43837115	rs55747440	G	A		3	6.67e-05	6.67e-05	0.8876	0.8876	0.824	0	0.8795	0.8705	0.909	CRHR1(0)|CRHR1-IT1(+113.5kb)|LOC644172(+157.4kb)|MAPT(-134.6kb)|MAPT-AS1(-83.61kb)|MAPT-IT1(-136kb)|MGC57346(+121.8kb)|SPPL2C(-85.14kb)
17	43838071	rs28439278	T	C		3	6.67e-05	6.67e-05	0.8877	0.8877	0.8239	0	0.8797	0.8704	0.909	CRHR1(0)|CRHR1-IT1(+114.5kb)|LOC644172(+158.3kb)|MAPT(-133.7kb)|MAPT-AS1(-82.65kb)|MAPT-IT1(-135.1kb)|MGC57346(+122.7kb)|SPPL2C(-84.18kb)
17	43994648	rs17649553	T	C		3	6.672e-05	6.672e-05	0.8873	0.8873	0.8503	0	0.8817	0.8704	0.9069	CRHR1(+81.45kb)|KANSL1(-112.6kb)|MAPT(0)|MAPT-AS1(+21.77kb)|MAPT-IT1(+18.48kb)|SPPL2C(+70.21kb)|STH(-81.97kb)
6	39119814	rs2815056	T	G		3	6.673e-05	0.0004855	0.838	0.8396	0.2803	21.37	0.8125	0.94	0.7937	DNAH8(+121.2kb)|GLP1R(+64.29kb)|KCNK5(-36.93kb)|KCNK16(-162.7kb)|KCNK17(-147kb)|KIF6(-183.1kb)|LOC100131047(+198.9kb)|SAYSD1(+36.95kb)
13	83703841	rs2639474	T	C		3	6.673e-05	6.673e-05	0.8929	0.8929	0.8561	0	0.8791	0.8849	0.9102	.
17	43837446	rs62055883	G	C		3	6.676e-05	6.676e-05	0.8877	0.8877	0.8229	0	0.8795	0.8705	0.9091	CRHR1(0)|CRHR1-IT1(+113.9kb)|LOC644172(+157.7kb)|MAPT(-134.3kb)|MAPT-AS1(-83.28kb)|MAPT-IT1(-135.7kb)|MGC57346(+122.1kb)|SPPL2C(-84.81kb)
17	44192395	rs4548919	T	G		3	6.676e-05	6.676e-05	0.886	0.886	0.9105	0	0.8891	0.8689	0.8973	ARL17A(-184.1kb)|ARL17B(-184.5kb)|KANSL1(0)|KANSL1-AS1(-78.54kb)|LRRC37A(-180.1kb)|MAPT(+86.7kb)|STH(+115.3kb)
17	44275035	rs569087361	G	T		3	6.676e-05	6.676e-05	0.8854	0.8854	0.9041	0	0.891	0.8668	0.8951	ARL17A(-101.5kb)|ARL17B(-101.9kb)|KANSL1(0)|KANSL1-AS1(+0.946kb)|LRRC37A(-97.46kb)|MAPT(+169.3kb)|NSFP1(-175.1kb)|STH(+198kb)
5	94085039	rs11960129	G	A		3	6.677e-05	0.0003341	1.1158	1.1171	0.2861	20.09	1.1525	1.1599	1.0574	ANKRD32(+53.47kb)|KIAA0825(+130.7kb)|MCTP1(0)
20	23600755	rs2424567	A	G		3	6.678e-05	0.05414	1.1042	1.1002	0.0193	74.67	1.1974	1.0024	1.1048	CST1(-127.4kb)|CST3(-13.54kb)|CST4(-65.52kb)|CST8(+124.1kb)|CST9(+14.14kb)|CST9L(+51.37kb)|CST11(+167.3kb)|CST13P(+78.1kb)|CSTL1(+175.2kb)|NAPB(+198.6kb)
5	82896062	rs113066179	A	G		3	6.68e-05	6.68e-05	1.1982	1.1982	0.8949	0	1.1888	1.2449	1.1804	HAPLN1(-37.95kb)|VCAN(+17.94kb)
17	44189408	rs17660865	C	T		3	6.681e-05	6.681e-05	0.8861	0.8861	0.908	0	0.8889	0.8688	0.8977	ARL17A(-187.1kb)|ARL17B(-187.5kb)|KANSL1(0)|KANSL1-AS1(-81.53kb)|LRRC37A(-183.1kb)|MAPT(+83.71kb)|STH(+112.3kb)
17	44276330	rs545648705	C	T		3	6.682e-05	6.682e-05	0.8854	0.8854	0.9036	0	0.891	0.8667	0.8951	ARL17A(-100.2kb)|ARL17B(-100.6kb)|KANSL1(0)|KANSL1-AS1(+2.241kb)|LRRC37A(-96.17kb)|MAPT(+170.6kb)|NSFP1(-173.8kb)|STH(+199.3kb)
17	44196015	rs17661141	G	C		3	6.683e-05	6.683e-05	0.886	0.886	0.9111	0	0.8893	0.8688	0.897	ARL17A(-180.5kb)|ARL17B(-180.9kb)|KANSL1(0)|KANSL1-AS1(-74.92kb)|LRRC37A(-176.5kb)|MAPT(+90.32kb)|STH(+119kb)
13	83704031	rs2819300	C	G		3	6.688e-05	6.688e-05	0.8929	0.8929	0.8551	0	0.8791	0.8849	0.9103	.
17	44189373	rs17660847	T	C		3	6.688e-05	6.688e-05	0.8861	0.8861	0.9075	0	0.8889	0.8688	0.8978	ARL17A(-187.1kb)|ARL17B(-187.5kb)|KANSL1(0)|KANSL1-AS1(-81.56kb)|LRRC37A(-183.1kb)|MAPT(+83.67kb)|STH(+112.3kb)
17	44195424	rs62061852	C	A		3	6.691e-05	6.691e-05	0.886	0.886	0.911	0	0.8894	0.8688	0.897	ARL17A(-181.1kb)|ARL17B(-181.5kb)|KANSL1(0)|KANSL1-AS1(-75.51kb)|LRRC37A(-177.1kb)|MAPT(+89.72kb)|STH(+118.4kb)
13	83694165	rs265688	G	A		3	6.693e-05	6.693e-05	0.8929	0.8929	0.8617	0	0.8792	0.8854	0.9098	.
17	43835351	rs11079717	C	T		3	6.694e-05	6.694e-05	0.8877	0.8877	0.8177	0	0.8792	0.8704	0.9095	CRHR1(0)|CRHR1-IT1(+111.8kb)|LOC644172(+155.6kb)|MAPT(-136.4kb)|MAPT-AS1(-85.37kb)|MAPT-IT1(-137.8kb)|MGC57346(+120kb)|SPPL2C(-86.9kb)
17	43836920	rs56013908	C	T		3	6.694e-05	6.694e-05	0.8877	0.8877	0.8215	0	0.8795	0.8704	0.9092	CRHR1(0)|CRHR1-IT1(+113.3kb)|LOC644172(+157.2kb)|MAPT(-134.8kb)|MAPT-AS1(-83.8kb)|MAPT-IT1(-136.2kb)|MGC57346(+121.6kb)|SPPL2C(-85.34kb)
6	39122848	rs1544934	T	G		3	6.696e-05	0.0004661	0.8381	0.8396	0.2824	20.91	0.8146	0.9392	0.7923	DNAH8(+124.3kb)|GLP1R(+67.33kb)|KCNK5(-33.9kb)|KCNK16(-159.6kb)|KCNK17(-143.9kb)|KIF6(-180kb)|SAYSD1(+39.98kb)
12	7847834	rs117402167	A	G		3	6.696e-05	6.696e-05	1.3913	1.3913	0.6041	0	1.4485	1.1968	1.4632	APOBEC1(+29.33kb)|CD163(+191.4kb)|CLEC4C(-34.18kb)|DPPA3(-16.25kb)|GDF3(0)|NANOG(-94.16kb)|NANOGNB(-69.98kb)|SLC2A14(-118.6kb)
10	115455536	rs11196436	T	G		3	6.702e-05	6.702e-05	1.1662	1.1662	0.9324	0	1.1534	1.1496	1.1858	CASP7(0)|DCLRE1A(-138.9kb)|HABP2(+106.2kb)|MIR4483(-82.22kb)|NHLRC2(-158.9kb)|NRAP(+31.71kb)|PLEKHS1(-55.68kb)
17	44302881	rs555719522	T	C		3	6.709e-05	6.709e-05	0.8842	0.8842	0.8958	0	0.8904	0.8647	0.8944	ARL17A(-73.62kb)|ARL17B(-74.03kb)|KANSL1(+0.141kb)|KANSL1-AS1(+28.79kb)|LRRC37A(-69.62kb)|MAPT(+197.2kb)|NSFP1(-147.3kb)
10	115453763	rs11196434	A	G		3	6.71e-05	6.71e-05	1.1661	1.1661	0.9335	0	1.1535	1.1495	1.1855	CASP7(0)|DCLRE1A(-140.7kb)|HABP2(+104.4kb)|MIR4483(-83.99kb)|NHLRC2(-160.6kb)|NRAP(+29.93kb)|PLEKHS1(-57.45kb)
17	44197806	rs1966345	C	T		3	6.711e-05	6.711e-05	0.886	0.886	0.9118	0	0.8895	0.8688	0.8968	ARL17A(-178.7kb)|ARL17B(-179.1kb)|KANSL1(0)|KANSL1-AS1(-73.13kb)|LRRC37A(-174.7kb)|MAPT(+92.11kb)|STH(+120.7kb)
17	44266531	rs2696566	A	G		3	6.714e-05	6.714e-05	0.8855	0.8855	0.9133	0	0.891	0.8678	0.8945	ARL17A(-110kb)|ARL17B(-110.4kb)|KANSL1(0)|KANSL1-AS1(-4.407kb)|LRRC37A(-106kb)|MAPT(+160.8kb)|NSFP1(-183.6kb)|STH(+189.5kb)
17	44178884	rs62061810	A	G		3	6.721e-05	6.721e-05	0.8862	0.8862	0.909	0	0.8896	0.8688	0.8973	ARL17A(-197.6kb)|ARL17B(-198kb)|KANSL1(0)|KANSL1-AS1(-92.05kb)|LRRC37A(-193.6kb)|MAPT(+73.18kb)|STH(+101.8kb)
17	43994435	rs62056859	G	A		3	6.723e-05	6.723e-05	0.8872	0.8872	0.8472	0	0.8841	0.8681	0.906	CRHR1(+81.24kb)|KANSL1(-112.8kb)|MAPT(0)|MAPT-AS1(+21.56kb)|MAPT-IT1(+18.27kb)|SPPL2C(+70kb)|STH(-82.18kb)
13	103766332	rs9518934	T	C		3	6.724e-05	6.724e-05	0.6223	0.6223	0.988	0	0.6329	0.6054	0.6273	MIR548AS(-168.5kb)|SLC10A2(+47.14kb)
10	115453268	rs11196433	C	T		3	6.728e-05	6.728e-05	1.166	1.166	0.9337	0	1.1535	1.1494	1.1854	CASP7(0)|DCLRE1A(-141.2kb)|HABP2(+103.9kb)|MIR4483(-84.48kb)|NHLRC2(-161.1kb)|NRAP(+29.44kb)|PLEKHS1(-57.94kb)
17	43828698	rs17426064	T	C		3	6.728e-05	6.728e-05	0.8877	0.8877	0.8348	0	0.8793	0.8717	0.9085	CRHR1(0)|CRHR1-IT1(+105.1kb)|LOC644172(+149kb)|MAPT(-143kb)|MAPT-AS1(-92.02kb)|MAPT-IT1(-144.4kb)|MGC57346(+113.4kb)|SPPL2C(-93.56kb)
17	44217226	rs552177258	G	A		3	6.73e-05	6.73e-05	0.8856	0.8856	0.9122	0	0.8881	0.8688	0.8972	ARL17A(-159.3kb)|ARL17B(-159.7kb)|KANSL1(0)|KANSL1-AS1(-53.71kb)|LRRC37A(-155.3kb)|MAPT(+111.5kb)|STH(+140.2kb)
17	44191159	rs17660936	T	C		3	6.731e-05	6.731e-05	0.8861	0.8861	0.9079	0	0.889	0.8688	0.8977	ARL17A(-185.3kb)|ARL17B(-185.8kb)|KANSL1(0)|KANSL1-AS1(-79.78kb)|LRRC37A(-181.3kb)|MAPT(+85.46kb)|STH(+114.1kb)
17	44194381	rs17577447	A	T		3	6.731e-05	6.731e-05	0.886	0.886	0.9113	0	0.8893	0.8689	0.8971	ARL17A(-182.1kb)|ARL17B(-182.5kb)|KANSL1(0)|KANSL1-AS1(-76.56kb)|LRRC37A(-178.1kb)|MAPT(+88.68kb)|STH(+117.3kb)
10	115460770	rs11196441	T	C		3	6.732e-05	6.732e-05	1.166	1.166	0.9269	0	1.1517	1.1499	1.1864	CASP7(0)|DCLRE1A(-133.7kb)|HABP2(+111.4kb)|MIR4483(-76.98kb)|NHLRC2(-153.6kb)|NRAP(+36.94kb)|PLEKHS1(-50.44kb)
17	44198080	rs62061854	T	C		3	6.733e-05	6.733e-05	0.886	0.886	0.9119	0	0.8895	0.8688	0.8968	ARL17A(-178.4kb)|ARL17B(-178.8kb)|KANSL1(0)|KANSL1-AS1(-72.86kb)|LRRC37A(-174.4kb)|MAPT(+92.38kb)|STH(+121kb)
17	44265702	rs563972143	T	A		3	6.734e-05	6.734e-05	0.8855	0.8855	0.913	0	0.8911	0.8678	0.8945	ARL17A(-110.8kb)|ARL17B(-111.2kb)|KANSL1(0)|KANSL1-AS1(-5.236kb)|LRRC37A(-106.8kb)|MAPT(+160kb)|NSFP1(-184.5kb)|STH(+188.6kb)
17	44261753	rs548762783	C	T		3	6.735e-05	6.735e-05	0.8855	0.8855	0.91	0	0.8913	0.8675	0.8946	ARL17A(-114.7kb)|ARL17B(-115.2kb)|KANSL1(0)|KANSL1-AS1(-9.185kb)|LRRC37A(-110.7kb)|MAPT(+156.1kb)|NSFP1(-188.4kb)|STH(+184.7kb)
17	43828221	rs12150604	A	T		3	6.738e-05	6.738e-05	0.8877	0.8877	0.8282	0	0.8787	0.8717	0.909	CRHR1(0)|CRHR1-IT1(+104.6kb)|LOC644172(+148.5kb)|MAPT(-143.5kb)|MAPT-AS1(-92.5kb)|MAPT-IT1(-144.9kb)|MGC57346(+112.9kb)|SPPL2C(-94.03kb)
17	44191085	rs17660907	A	G		3	6.738e-05	6.738e-05	0.8861	0.8861	0.9079	0	0.889	0.8688	0.8977	ARL17A(-185.4kb)|ARL17B(-185.8kb)|KANSL1(0)|KANSL1-AS1(-79.85kb)|LRRC37A(-181.4kb)|MAPT(+85.39kb)|STH(+114kb)
17	44194519	rs62061850	C	T		3	6.738e-05	6.738e-05	0.8861	0.8861	0.91	0	0.8894	0.8688	0.8972	ARL17A(-182kb)|ARL17B(-182.4kb)|KANSL1(0)|KANSL1-AS1(-76.42kb)|LRRC37A(-178kb)|MAPT(+88.82kb)|STH(+117.5kb)
11	76451038	rs7924748	C	T		3	6.739e-05	6.739e-05	1.1513	1.1513	0.6654	0	1.1381	1.103	1.1914	ACER3(-120.9kb)|C11orf30(+188.4kb)|GUCY2EP(+18.2kb)|LRRC32(+69.25kb)|TSKU(-42.32kb)
17	44195495	rs727425	A	G		3	6.739e-05	6.739e-05	0.886	0.886	0.9105	0	0.8894	0.8688	0.8971	ARL17A(-181kb)|ARL17B(-181.4kb)|KANSL1(0)|KANSL1-AS1(-75.44kb)|LRRC37A(-177kb)|MAPT(+89.8kb)|STH(+118.4kb)
13	83695889	rs265696	A	G		3	6.741e-05	6.741e-05	0.893	0.893	0.86	0	0.8792	0.8855	0.91	.
13	83704104	rs2819301	G	A		3	6.742e-05	6.742e-05	0.893	0.893	0.8542	0	0.8791	0.8849	0.9104	.
17	43824348	rs62054433	C	T		3	6.742e-05	6.742e-05	0.8873	0.8873	0.8468	0	0.8794	0.8719	0.9075	CRHR1(0)|CRHR1-IT1(+100.8kb)|LOC644172(+144.6kb)|MAPT(-147.4kb)|MAPT-AS1(-96.37kb)|MAPT-IT1(-148.8kb)|MGC57346(+109kb)|SPPL2C(-97.91kb)
17	44264717	rs539073154	C	A		3	6.742e-05	6.742e-05	0.8855	0.8855	0.9139	0	0.891	0.8679	0.8945	ARL17A(-111.8kb)|ARL17B(-112.2kb)|KANSL1(0)|KANSL1-AS1(-6.221kb)|LRRC37A(-107.8kb)|MAPT(+159kb)|NSFP1(-185.5kb)|STH(+187.7kb)
17	44196653	rs75229280	A	G		3	6.743e-05	6.743e-05	0.886	0.886	0.9116	0	0.8894	0.8689	0.897	ARL17A(-179.8kb)|ARL17B(-180.3kb)|KANSL1(0)|KANSL1-AS1(-74.28kb)|LRRC37A(-175.8kb)|MAPT(+90.95kb)|STH(+119.6kb)
17	44264943	rs566214080	C	T		3	6.744e-05	6.744e-05	0.8855	0.8855	0.9139	0	0.891	0.8679	0.8945	ARL17A(-111.6kb)|ARL17B(-112kb)|KANSL1(0)|KANSL1-AS1(-5.995kb)|LRRC37A(-107.6kb)|MAPT(+159.2kb)|NSFP1(-185.2kb)|STH(+187.9kb)
17	44279252	rs1918787	G	A		3	6.744e-05	6.744e-05	0.8855	0.8855	0.8991	0	0.8909	0.8664	0.8957	ARL17A(-97.25kb)|ARL17B(-97.66kb)|KANSL1(0)|KANSL1-AS1(+5.163kb)|LRRC37A(-93.24kb)|MAPT(+173.6kb)|NSFP1(-170.9kb)
10	7523750	rs117676446	T	C		3	6.745e-05	6.745e-05	1.2345	1.2345	0.5258	0	1.3281	1.2434	1.1553	ITIH5(-77.48kb)|SFMBT2(+70.3kb)
17	44179969	rs112893440	A	G		3	6.745e-05	6.745e-05	0.8862	0.8862	0.9099	0	0.8895	0.8689	0.8973	ARL17A(-196.5kb)|ARL17B(-196.9kb)|KANSL1(0)|KANSL1-AS1(-90.97kb)|LRRC37A(-192.5kb)|MAPT(+74.27kb)|STH(+102.9kb)
17	44261137	rs532904601	T	C		3	6.745e-05	6.745e-05	0.8855	0.8855	0.9102	0	0.8914	0.8675	0.8945	ARL17A(-115.4kb)|ARL17B(-115.8kb)|KANSL1(0)|KANSL1-AS1(-9.801kb)|LRRC37A(-111.4kb)|MAPT(+155.4kb)|NSFP1(-189kb)|STH(+184.1kb)
17	44194152	rs17661045	A	T		3	6.747e-05	6.747e-05	0.886	0.886	0.9102	0	0.8893	0.8688	0.8972	ARL17A(-182.3kb)|ARL17B(-182.8kb)|KANSL1(0)|KANSL1-AS1(-76.79kb)|LRRC37A(-178.3kb)|MAPT(+88.45kb)|STH(+117.1kb)
17	44265328	rs576672302	G	A		3	6.748e-05	6.748e-05	0.8854	0.8854	0.9133	0	0.891	0.8678	0.8945	ARL17A(-111.2kb)|ARL17B(-111.6kb)|KANSL1(0)|KANSL1-AS1(-5.61kb)|LRRC37A(-107.2kb)|MAPT(+159.6kb)|NSFP1(-184.8kb)|STH(+188.3kb)
17	44276821	rs539364020	A	G		3	6.749e-05	6.749e-05	0.8854	0.8854	0.902	0	0.891	0.8666	0.8953	ARL17A(-99.68kb)|ARL17B(-100.1kb)|KANSL1(0)|KANSL1-AS1(+2.732kb)|LRRC37A(-95.68kb)|MAPT(+171.1kb)|NSFP1(-173.4kb)|STH(+199.8kb)
17	43843943	rs62055894	A	G		3	6.751e-05	6.751e-05	0.8878	0.8878	0.844	0	0.8797	0.8721	0.9078	CRHR1(0)|CRHR1-IT1(+120.3kb)|LOC644172(+164.2kb)|MAPT(-127.8kb)|MAPT-AS1(-76.78kb)|MAPT-IT1(-129.2kb)|MGC57346(+128.6kb)|SPPL2C(-78.31kb)
17	43828617	rs17334944	A	G		3	6.752e-05	6.752e-05	0.8877	0.8877	0.8335	0	0.8792	0.8717	0.9086	CRHR1(0)|CRHR1-IT1(+105kb)|LOC644172(+148.9kb)|MAPT(-143.1kb)|MAPT-AS1(-92.1kb)|MAPT-IT1(-144.5kb)|MGC57346(+113.3kb)|SPPL2C(-93.64kb)
17	44186593	rs77635460	C	T		3	6.756e-05	6.756e-05	0.8862	0.8862	0.908	0	0.889	0.8689	0.8978	ARL17A(-189.9kb)|ARL17B(-190.3kb)|KANSL1(0)|KANSL1-AS1(-84.34kb)|LRRC37A(-185.9kb)|MAPT(+80.89kb)|STH(+109.5kb)
17	44194735	rs10514901	T	G		3	6.756e-05	6.756e-05	0.886	0.886	0.9102	0	0.8893	0.8688	0.8972	ARL17A(-181.8kb)|ARL17B(-182.2kb)|KANSL1(0)|KANSL1-AS1(-76.2kb)|LRRC37A(-177.8kb)|MAPT(+89.04kb)|STH(+117.7kb)
17	44278742	rs17664048	G	A		3	6.76e-05	6.76e-05	0.8854	0.8854	0.8996	0	0.8909	0.8664	0.8956	ARL17A(-97.76kb)|ARL17B(-98.17kb)|KANSL1(0)|KANSL1-AS1(+4.653kb)|LRRC37A(-93.75kb)|MAPT(+173kb)|NSFP1(-171.4kb)
17	44188755	rs62061824	C	T		3	6.761e-05	6.761e-05	0.8862	0.8862	0.9064	0	0.8889	0.8688	0.898	ARL17A(-187.7kb)|ARL17B(-188.2kb)|KANSL1(0)|KANSL1-AS1(-82.18kb)|LRRC37A(-183.7kb)|MAPT(+83.06kb)|STH(+111.7kb)
17	44183403	rs111676341	G	A		3	6.762e-05	6.762e-05	0.8862	0.8862	0.9095	0	0.8894	0.8689	0.8974	ARL17A(-193.1kb)|ARL17B(-193.5kb)|KANSL1(0)|KANSL1-AS1(-87.54kb)|LRRC37A(-189.1kb)|MAPT(+77.7kb)|STH(+106.3kb)
17	44183790	rs79923708	A	G		3	6.763e-05	6.763e-05	0.8861	0.8861	0.9098	0	0.8893	0.8689	0.8974	ARL17A(-192.7kb)|ARL17B(-193.1kb)|KANSL1(0)|KANSL1-AS1(-87.15kb)|LRRC37A(-188.7kb)|MAPT(+78.09kb)|STH(+106.7kb)
17	44186301	rs17577052	C	T		3	6.765e-05	6.765e-05	0.8861	0.8861	0.9075	0	0.889	0.8688	0.8978	ARL17A(-190.2kb)|ARL17B(-190.6kb)|KANSL1(0)|KANSL1-AS1(-84.64kb)|LRRC37A(-186.2kb)|MAPT(+80.6kb)|STH(+109.2kb)
17	44187492	rs17577094	G	A		3	6.765e-05	6.765e-05	0.8862	0.8862	0.9065	0	0.8889	0.8688	0.898	ARL17A(-189kb)|ARL17B(-189.4kb)|KANSL1(0)|KANSL1-AS1(-83.45kb)|LRRC37A(-185kb)|MAPT(+81.79kb)|STH(+110.4kb)
6	166199016	rs9347088	T	C		3	6.766e-05	6.766e-05	1.1047	1.1047	0.5899	0	1.1394	1.0674	1.0986	LINC00473(-138.5kb)|PDE10A(+123.4kb)
17	44194891	rs62061851	T	C		3	6.766e-05	6.766e-05	0.8861	0.8861	0.91	0	0.8894	0.8688	0.8972	ARL17A(-181.6kb)|ARL17B(-182kb)|KANSL1(0)|KANSL1-AS1(-76.05kb)|LRRC37A(-177.6kb)|MAPT(+89.19kb)|STH(+117.8kb)
17	43818222	rs17563827	A	C		3	6.767e-05	6.767e-05	0.8876	0.8876	0.8357	0	0.8794	0.8716	0.9084	CRHR1(0)|CRHR1-IT1(+94.63kb)|LOC644172(+138.5kb)|MAPT(-153.5kb)|MAPT-AS1(-102.5kb)|MAPT-IT1(-154.9kb)|MGC57346(+102.9kb)|SPPL2C(-104kb)
17	43844798	rs56082319	A	G		3	6.767e-05	6.767e-05	0.8879	0.8879	0.85	0	0.8807	0.8719	0.9073	CRHR1(0)|CRHR1-IT1(+121.2kb)|LOC644172(+165kb)|MAPT(-126.9kb)|MAPT-AS1(-75.92kb)|MAPT-IT1(-128.4kb)|MGC57346(+129.5kb)|SPPL2C(-77.46kb)
17	44266022	rs549710507	G	A		3	6.771e-05	6.771e-05	0.8856	0.8856	0.9132	0	0.8911	0.8679	0.8946	ARL17A(-110.5kb)|ARL17B(-110.9kb)|KANSL1(0)|KANSL1-AS1(-4.916kb)|LRRC37A(-106.5kb)|MAPT(+160.3kb)|NSFP1(-184.2kb)|STH(+189kb)
8	28831304	rs117976396	T	C		3	6.775e-05	0.0002491	1.284	1.2816	0.3147	13.5	1.3613	1.0962	1.3592	HMBOX1(0)|INTS9(+83.61kb)|KIF13B(-93.49kb)
17	43818611	rs80072429	A	G		3	6.779e-05	6.779e-05	0.8877	0.8877	0.8347	0	0.8794	0.8716	0.9085	CRHR1(0)|CRHR1-IT1(+95.02kb)|LOC644172(+138.9kb)|MAPT(-153.1kb)|MAPT-AS1(-102.1kb)|MAPT-IT1(-154.5kb)|MGC57346(+103.3kb)|SPPL2C(-103.6kb)
17	43818657	rs77114624	C	T		3	6.78e-05	6.78e-05	0.8877	0.8877	0.8347	0	0.8794	0.8716	0.9085	CRHR1(0)|CRHR1-IT1(+95.06kb)|LOC644172(+138.9kb)|MAPT(-153.1kb)|MAPT-AS1(-102.1kb)|MAPT-IT1(-154.5kb)|MGC57346(+103.3kb)|SPPL2C(-103.6kb)
17	44186252	rs17577024	A	G		3	6.78e-05	6.78e-05	0.8862	0.8862	0.9069	0	0.889	0.8688	0.8979	ARL17A(-190.2kb)|ARL17B(-190.7kb)|KANSL1(0)|KANSL1-AS1(-84.69kb)|LRRC37A(-186.2kb)|MAPT(+80.55kb)|STH(+109.2kb)
17	43818690	rs76311426	T	G		3	6.783e-05	6.783e-05	0.8877	0.8877	0.8347	0	0.8794	0.8716	0.9085	CRHR1(0)|CRHR1-IT1(+95.1kb)|LOC644172(+138.9kb)|MAPT(-153.1kb)|MAPT-AS1(-102kb)|MAPT-IT1(-154.5kb)|MGC57346(+103.4kb)|SPPL2C(-103.6kb)
17	44263729	rs562357125	G	C		3	6.788e-05	6.788e-05	0.8855	0.8855	0.9137	0	0.8911	0.8679	0.8945	ARL17A(-112.8kb)|ARL17B(-113.2kb)|KANSL1(0)|KANSL1-AS1(-7.209kb)|LRRC37A(-108.8kb)|MAPT(+158kb)|NSFP1(-186.4kb)|STH(+186.7kb)
17	43818906	rs17563861	G	A		3	6.791e-05	6.791e-05	0.8877	0.8877	0.8352	0	0.8794	0.8717	0.9085	CRHR1(0)|CRHR1-IT1(+95.31kb)|LOC644172(+139.2kb)|MAPT(-152.8kb)|MAPT-AS1(-101.8kb)|MAPT-IT1(-154.2kb)|MGC57346(+103.6kb)|SPPL2C(-103.3kb)
17	44260416	rs578055951	C	T		3	6.791e-05	6.791e-05	0.8855	0.8855	0.9098	0	0.8914	0.8675	0.8946	ARL17A(-116.1kb)|ARL17B(-116.5kb)|KANSL1(0)|KANSL1-AS1(-10.52kb)|LRRC37A(-112.1kb)|MAPT(+154.7kb)|NSFP1(-189.8kb)|STH(+183.4kb)
17	44279101	rs1918786	G	A		3	6.792e-05	6.792e-05	0.8855	0.8855	0.8989	0	0.8908	0.8664	0.8958	ARL17A(-97.4kb)|ARL17B(-97.81kb)|KANSL1(0)|KANSL1-AS1(+5.012kb)|LRRC37A(-93.4kb)|MAPT(+173.4kb)|NSFP1(-171.1kb)
17	43830382	rs35879086	A	G		3	6.793e-05	6.793e-05	0.8877	0.8877	0.8505	0	0.8799	0.8725	0.9074	CRHR1(0)|CRHR1-IT1(+106.8kb)|LOC644172(+150.6kb)|MAPT(-141.4kb)|MAPT-AS1(-90.34kb)|MAPT-IT1(-142.8kb)|MGC57346(+115.1kb)|SPPL2C(-91.87kb)
17	43818160	rs76728632	C	A		3	6.797e-05	6.797e-05	0.8877	0.8877	0.8348	0	0.8794	0.8716	0.9085	CRHR1(0)|CRHR1-IT1(+94.56kb)|LOC644172(+138.4kb)|MAPT(-153.6kb)|MAPT-AS1(-102.6kb)|MAPT-IT1(-155kb)|MGC57346(+102.8kb)|SPPL2C(-104.1kb)
17	44200510	rs75652502	A	C		3	6.797e-05	6.797e-05	0.8861	0.8861	0.9121	0	0.8897	0.8689	0.8968	ARL17A(-176kb)|ARL17B(-176.4kb)|KANSL1(0)|KANSL1-AS1(-70.43kb)|LRRC37A(-172kb)|MAPT(+94.81kb)|STH(+123.4kb)
17	43818946	rs17563889	T	A		3	6.8e-05	6.8e-05	0.8877	0.8877	0.8353	0	0.8794	0.8717	0.9085	CRHR1(0)|CRHR1-IT1(+95.35kb)|LOC644172(+139.2kb)|MAPT(-152.8kb)|MAPT-AS1(-101.8kb)|MAPT-IT1(-154.2kb)|MGC57346(+103.6kb)|SPPL2C(-103.3kb)
17	44182917	rs62061818	G	C		3	6.801e-05	6.801e-05	0.8862	0.8862	0.909	0	0.8894	0.8689	0.8975	ARL17A(-193.6kb)|ARL17B(-194kb)|KANSL1(0)|KANSL1-AS1(-88.02kb)|LRRC37A(-189.6kb)|MAPT(+77.22kb)|STH(+105.9kb)
17	44181454	rs111952388	T	C		3	6.806e-05	6.806e-05	0.8863	0.8863	0.909	0	0.8897	0.8689	0.8974	ARL17A(-195kb)|ARL17B(-195.5kb)|KANSL1(0)|KANSL1-AS1(-89.48kb)|LRRC37A(-191kb)|MAPT(+75.76kb)|STH(+104.4kb)
17	44179992	rs17576842	G	A		3	6.808e-05	6.808e-05	0.8862	0.8862	0.9085	0	0.8894	0.8689	0.8976	ARL17A(-196.5kb)|ARL17B(-196.9kb)|KANSL1(0)|KANSL1-AS1(-90.95kb)|LRRC37A(-192.5kb)|MAPT(+74.29kb)|STH(+102.9kb)
1	75565047	rs169453	C	T		3	6.809e-05	0.002758	0.8803	0.8825	0.1861	40.53	0.9268	0.9165	0.818	LHX8(-29.07kb)|SLC44A5(-102.8kb)
1	179769266	rs73039699	G	A		3	6.809e-05	0.1102	1.3312	1.3042	0.0071	79.77	0.9636	1.4363	1.5979	CEP350(-154.6kb)|FAM163A(0)|TDRD5(+108.9kb)|TOR1AIP1(-81.91kb)|TOR1AIP2(-39.84kb)
17	44263479	rs544098746	C	T		3	6.809e-05	6.809e-05	0.8855	0.8855	0.9143	0	0.8911	0.868	0.8945	ARL17A(-113kb)|ARL17B(-113.4kb)|KANSL1(0)|KANSL1-AS1(-7.459kb)|LRRC37A(-109kb)|MAPT(+157.8kb)|NSFP1(-186.7kb)|STH(+186.4kb)
17	44185245	rs76761511	A	C		3	6.813e-05	6.813e-05	0.8862	0.8862	0.9084	0	0.8892	0.8689	0.8977	ARL17A(-191.3kb)|ARL17B(-191.7kb)|KANSL1(0)|KANSL1-AS1(-85.69kb)|LRRC37A(-187.3kb)|MAPT(+79.55kb)|STH(+108.2kb)
17	43519760	rs117029704	T	G		3	6.816e-05	6.816e-05	0.7386	0.7386	0.6762	0	0.6889	0.7166	0.8019	ARHGAP27(+9.478kb)|CRHR1(-177.9kb)|CRHR1-IT1(-196.6kb)|FMNL1(+195.1kb)|LOC644172(-157.7kb)|LRRC37A4P(-63.49kb)|MAP3K14(+125.3kb)|MAP3K14-AS1(+173.8kb)|MGC57346(-178kb)|MIR4315-1(-32.97kb)|MIR4315-2(-32.97kb)|PLEKHM1(0)|SPATA32(+180.3kb)
17	44197603	rs4383188	C	T		3	6.816e-05	6.816e-05	0.8861	0.8861	0.8986	0	0.8913	0.8673	0.8967	ARL17A(-178.9kb)|ARL17B(-179.3kb)|KANSL1(0)|KANSL1-AS1(-73.34kb)|LRRC37A(-174.9kb)|MAPT(+91.9kb)|STH(+120.5kb)
17	44258422	rs573087816	T	G		3	6.816e-05	6.816e-05	0.8856	0.8856	0.9104	0	0.8917	0.8676	0.8944	ARL17A(-118.1kb)|ARL17B(-118.5kb)|KANSL1(0)|KANSL1-AS1(-12.52kb)|LRRC37A(-114.1kb)|MAPT(+152.7kb)|NSFP1(-191.8kb)|STH(+181.4kb)
21	27517909	rs10432774	A	C		3	6.816e-05	6.816e-05	0.8995	0.8995	0.4319	0	0.8632	0.8968	0.9352	APP(0)
14	98745557	rs7154028	A	G		3	6.818e-05	6.818e-05	0.8976	0.8976	0.8798	0	0.8862	0.8902	0.913	.
17	44179749	rs112102887	A	G		3	6.824e-05	6.824e-05	0.8862	0.8862	0.9094	0	0.8895	0.8689	0.8974	ARL17A(-196.8kb)|ARL17B(-197.2kb)|KANSL1(0)|KANSL1-AS1(-91.19kb)|LRRC37A(-192.7kb)|MAPT(+74.05kb)|STH(+102.7kb)
17	43817608	rs56384960	A	G		3	6.825e-05	6.825e-05	0.8877	0.8877	0.8353	0	0.8795	0.8716	0.9085	CRHR1(0)|CRHR1-IT1(+94.01kb)|LOC644172(+137.9kb)|MAPT(-154.1kb)|MAPT-AS1(-103.1kb)|MAPT-IT1(-155.5kb)|MGC57346(+102.3kb)|SPPL2C(-104.6kb)
17	44264045	rs539179202	C	T		3	6.827e-05	6.827e-05	0.8855	0.8855	0.9133	0	0.8911	0.8679	0.8946	ARL17A(-112.5kb)|ARL17B(-112.9kb)|KANSL1(0)|KANSL1-AS1(-6.893kb)|LRRC37A(-108.5kb)|MAPT(+158.3kb)|NSFP1(-186.1kb)|STH(+187kb)
17	43817832	rs56178230	A	G		3	6.832e-05	6.832e-05	0.8877	0.8877	0.8352	0	0.8795	0.8716	0.9085	CRHR1(0)|CRHR1-IT1(+94.24kb)|LOC644172(+138.1kb)|MAPT(-153.9kb)|MAPT-AS1(-102.9kb)|MAPT-IT1(-155.3kb)|MGC57346(+102.5kb)|SPPL2C(-104.4kb)
17	43816106	rs75500942	A	C		3	6.833e-05	6.833e-05	0.8877	0.8877	0.8352	0	0.8795	0.8716	0.9085	CRHR1(0)|CRHR1-IT1(+92.51kb)|LOC644172(+136.4kb)|MAPT(-155.6kb)|MAPT-AS1(-104.6kb)|MAPT-IT1(-157kb)|MGC57346(+100.8kb)|SPPL2C(-106.1kb)
17	43817898	rs80157557	A	G		3	6.833e-05	6.833e-05	0.8877	0.8877	0.8352	0	0.8795	0.8716	0.9085	CRHR1(0)|CRHR1-IT1(+94.3kb)|LOC644172(+138.2kb)|MAPT(-153.8kb)|MAPT-AS1(-102.8kb)|MAPT-IT1(-155.2kb)|MGC57346(+102.6kb)|SPPL2C(-104.4kb)
17	44258354	rs557923371	C	G		3	6.833e-05	6.833e-05	0.8856	0.8856	0.9104	0	0.8917	0.8676	0.8944	ARL17A(-118.1kb)|ARL17B(-118.6kb)|KANSL1(0)|KANSL1-AS1(-12.58kb)|LRRC37A(-114.1kb)|MAPT(+152.7kb)|NSFP1(-191.8kb)|STH(+181.3kb)
17	44259792	rs567324860	A	G		3	6.833e-05	6.833e-05	0.8856	0.8856	0.9096	0	0.8915	0.8675	0.8946	ARL17A(-116.7kb)|ARL17B(-117.1kb)|KANSL1(0)|KANSL1-AS1(-11.15kb)|LRRC37A(-112.7kb)|MAPT(+154.1kb)|NSFP1(-190.4kb)|STH(+182.7kb)
10	115452383	rs11196430	A	G		3	6.834e-05	6.834e-05	1.1659	1.1659	0.9357	0	1.1535	1.1495	1.1849	CASP7(0)|DCLRE1A(-142.1kb)|HABP2(+103kb)|MIR4483(-85.37kb)|NHLRC2(-162kb)|NRAP(+28.55kb)|PLEKHS1(-58.83kb)
8	5721151	rs1398480	G	A		3	6.839e-05	0.002727	1.1472	1.1433	0.1904	39.7	1.2123	1.0351	1.1703	.
17	43819384	rs62054424	A	G		3	6.84e-05	6.84e-05	0.8877	0.8877	0.8344	0	0.8794	0.8717	0.9086	CRHR1(0)|CRHR1-IT1(+95.79kb)|LOC644172(+139.6kb)|MAPT(-152.4kb)|MAPT-AS1(-101.3kb)|MAPT-IT1(-153.8kb)|MGC57346(+104.1kb)|SPPL2C(-102.9kb)
17	44263965	rs527375859	C	T		3	6.844e-05	6.844e-05	0.8855	0.8855	0.913	0	0.8909	0.8679	0.8948	ARL17A(-112.5kb)|ARL17B(-112.9kb)|KANSL1(0)|KANSL1-AS1(-6.973kb)|LRRC37A(-108.5kb)|MAPT(+158.3kb)|NSFP1(-186.2kb)|STH(+186.9kb)
17	43817557	rs56295996	T	C		3	6.845e-05	6.845e-05	0.8877	0.8877	0.8343	0	0.8795	0.8716	0.9086	CRHR1(0)|CRHR1-IT1(+93.96kb)|LOC644172(+137.8kb)|MAPT(-154.2kb)|MAPT-AS1(-103.2kb)|MAPT-IT1(-155.6kb)|MGC57346(+102.2kb)|SPPL2C(-104.7kb)
17	44183616	rs17576989	A	C		3	6.845e-05	6.845e-05	0.8862	0.8862	0.9082	0	0.8893	0.8689	0.8977	ARL17A(-192.9kb)|ARL17B(-193.3kb)|KANSL1(0)|KANSL1-AS1(-87.32kb)|LRRC37A(-188.9kb)|MAPT(+77.92kb)|STH(+106.6kb)
17	44196125	rs62061853	C	T		3	6.845e-05	6.845e-05	0.8861	0.8861	0.9099	0	0.8895	0.8688	0.8972	ARL17A(-180.4kb)|ARL17B(-180.8kb)|KANSL1(0)|KANSL1-AS1(-74.81kb)|LRRC37A(-176.4kb)|MAPT(+90.43kb)|STH(+119.1kb)
17	43838678	rs62055886	A	G		3	6.846e-05	6.846e-05	0.8877	0.8877	0.8195	0	0.8798	0.87	0.9093	CRHR1(0)|CRHR1-IT1(+115.1kb)|LOC644172(+158.9kb)|MAPT(-133.1kb)|MAPT-AS1(-82.04kb)|MAPT-IT1(-134.5kb)|MGC57346(+123.3kb)|SPPL2C(-83.58kb)
17	44214815	rs570877560	G	C		3	6.847e-05	6.847e-05	0.8857	0.8857	0.9172	0	0.888	0.8695	0.8971	ARL17A(-161.7kb)|ARL17B(-162.1kb)|KANSL1(0)|KANSL1-AS1(-56.12kb)|LRRC37A(-157.7kb)|MAPT(+109.1kb)|STH(+137.8kb)
17	44258954	rs578046020	C	G		3	6.847e-05	6.847e-05	0.8856	0.8856	0.9105	0	0.8917	0.8676	0.8944	ARL17A(-117.5kb)|ARL17B(-118kb)|KANSL1(0)|KANSL1-AS1(-11.98kb)|LRRC37A(-113.5kb)|MAPT(+153.3kb)|NSFP1(-191.2kb)|STH(+181.9kb)
17	44193882	rs62061849	T	C		3	6.848e-05	6.848e-05	0.8861	0.8861	0.9121	0	0.8893	0.869	0.8971	ARL17A(-182.6kb)|ARL17B(-183kb)|KANSL1(0)|KANSL1-AS1(-77.06kb)|LRRC37A(-178.6kb)|MAPT(+88.18kb)|STH(+116.8kb)
9	107668886	rs2777794	T	A		3	6.849e-05	0.0006835	1.1074	1.1098	0.2427	29.38	1.0764	1.1933	1.0839	ABCA1(0)|LOC286367(+128.8kb)|NIPSNAP3A(+146.5kb)|NIPSNAP3B(+132.6kb)
10	115460208	rs4132820	T	C		3	6.849e-05	6.849e-05	1.1657	1.1657	0.9342	0	1.1526	1.1501	1.1851	CASP7(0)|DCLRE1A(-134.3kb)|HABP2(+110.8kb)|MIR4483(-77.54kb)|NHLRC2(-154.2kb)|NRAP(+36.38kb)|PLEKHS1(-51kb)
17	44255777	rs534369494	A	G		3	6.849e-05	6.849e-05	0.8856	0.8856	0.911	0	0.892	0.8677	0.8942	ARL17A(-120.7kb)|ARL17B(-121.1kb)|KANSL1(0)|KANSL1-AS1(-15.16kb)|LRRC37A(-116.7kb)|MAPT(+150.1kb)|NSFP1(-194.4kb)|STH(+178.7kb)
17	44259040	rs560714845	C	G		3	6.849e-05	6.849e-05	0.8856	0.8856	0.9105	0	0.8917	0.8676	0.8944	ARL17A(-117.5kb)|ARL17B(-117.9kb)|KANSL1(0)|KANSL1-AS1(-11.9kb)|LRRC37A(-113.5kb)|MAPT(+153.3kb)|NSFP1(-191.1kb)|STH(+182kb)
17	44182706	rs62061817	G	A		3	6.852e-05	6.852e-05	0.8863	0.8863	0.908	0	0.8894	0.8689	0.8977	ARL17A(-193.8kb)|ARL17B(-194.2kb)|KANSL1(0)|KANSL1-AS1(-88.23kb)|LRRC37A(-189.8kb)|MAPT(+77.01kb)|STH(+105.6kb)
1	179795802	rs75304022	C	G		3	6.854e-05	0.1085	1.3322	1.3065	0.0071	79.76	0.9643	1.4411	1.6006	CEP350(-128.1kb)|FAM163A(+10.47kb)|TDRD5(+135.4kb)|TOR1AIP1(-55.37kb)|TOR1AIP2(-13.3kb)
17	44198806	rs3087534	C	T		3	6.855e-05	6.855e-05	0.8861	0.8861	0.9088	0	0.8897	0.8686	0.8971	ARL17A(-177.7kb)|ARL17B(-178.1kb)|KANSL1(0)|KANSL1-AS1(-72.13kb)|LRRC37A(-173.7kb)|MAPT(+93.11kb)|STH(+121.7kb)
17	44271152	rs546821167	A	G		3	6.855e-05	6.855e-05	0.8855	0.8855	0.9096	0	0.8909	0.8675	0.895	ARL17A(-105.3kb)|ARL17B(-105.8kb)|KANSL1(0)|KANSL1-AS1(0)|LRRC37A(-101.3kb)|MAPT(+165.5kb)|NSFP1(-179kb)|STH(+194.1kb)
1	179795801	rs79228562	C	T		3	6.857e-05	0.1085	1.3323	1.3064	0.0072	79.75	0.9642	1.4411	1.6004	CEP350(-128.1kb)|FAM163A(+10.47kb)|TDRD5(+135.4kb)|TOR1AIP1(-55.38kb)|TOR1AIP2(-13.3kb)
17	44283022	rs571792649	G	A		3	6.858e-05	6.858e-05	0.8854	0.8854	0.8968	0	0.8909	0.8661	0.8958	ARL17A(-93.48kb)|ARL17B(-93.89kb)|KANSL1(0)|KANSL1-AS1(+8.933kb)|LRRC37A(-89.47kb)|MAPT(+177.3kb)|NSFP1(-167.2kb)
17	44181933	rs17576954	C	T		3	6.859e-05	6.859e-05	0.8863	0.8863	0.9082	0	0.8896	0.8689	0.8976	ARL17A(-194.6kb)|ARL17B(-195kb)|KANSL1(0)|KANSL1-AS1(-89kb)|LRRC37A(-190.6kb)|MAPT(+76.23kb)|STH(+104.9kb)
5	94086368	rs10062248	A	T		3	6.86e-05	0.0007283	1.1165	1.1186	0.2412	29.68	1.1489	1.1718	1.0543	ANKRD32(+54.8kb)|KIAA0825(+132.1kb)|MCTP1(0)
17	43778828	rs62056877	G	T		3	6.86e-05	6.86e-05	0.8874	0.8874	0.8715	0	0.8803	0.8733	0.9057	CRHR1(0)|CRHR1-IT1(+55.23kb)|LOC644172(+99.08kb)|LRRC37A4P(+180.9kb)|MAPT(-192.9kb)|MAPT-AS1(-141.9kb)|MAPT-IT1(-194.3kb)|MGC57346(+63.5kb)|SPPL2C(-143.4kb)
17	43824382	rs62054434	G	T		3	6.862e-05	6.862e-05	0.8875	0.8875	0.842	0	0.8794	0.8719	0.908	CRHR1(0)|CRHR1-IT1(+100.8kb)|LOC644172(+144.6kb)|MAPT(-147.4kb)|MAPT-AS1(-96.34kb)|MAPT-IT1(-148.8kb)|MGC57346(+109.1kb)|SPPL2C(-97.87kb)
17	43817459	rs17563800	T	C		3	6.865e-05	6.865e-05	0.8877	0.8877	0.8344	0	0.8795	0.8716	0.9086	CRHR1(0)|CRHR1-IT1(+93.86kb)|LOC644172(+137.7kb)|MAPT(-154.3kb)|MAPT-AS1(-103.3kb)|MAPT-IT1(-155.7kb)|MGC57346(+102.1kb)|SPPL2C(-104.8kb)
17	44200078	rs112560196	T	A		3	6.869e-05	6.869e-05	0.8861	0.8861	0.9114	0	0.8896	0.8689	0.897	ARL17A(-176.4kb)|ARL17B(-176.8kb)|KANSL1(0)|KANSL1-AS1(-70.86kb)|LRRC37A(-172.4kb)|MAPT(+94.38kb)|STH(+123kb)
17	44182181	rs77924366	C	T		3	6.87e-05	6.87e-05	0.8863	0.8863	0.9084	0	0.8895	0.8689	0.8976	ARL17A(-194.3kb)|ARL17B(-194.7kb)|KANSL1(0)|KANSL1-AS1(-88.76kb)|LRRC37A(-190.3kb)|MAPT(+76.48kb)|STH(+105.1kb)
13	83705801	rs2819225	G	T		3	6.871e-05	6.871e-05	0.8931	0.8931	0.8539	0	0.8789	0.8856	0.9105	.
17	44269546	rs547806751	T	C		3	6.871e-05	6.871e-05	0.8856	0.8856	0.9115	0	0.8907	0.8678	0.8951	ARL17A(-107kb)|ARL17B(-107.4kb)|KANSL1(0)|KANSL1-AS1(-1.392kb)|LRRC37A(-103kb)|MAPT(+163.8kb)|NSFP1(-180.6kb)|STH(+192.5kb)
17	43838710	rs62055887	C	T		3	6.872e-05	6.872e-05	0.8877	0.8877	0.8196	0	0.8798	0.87	0.9093	CRHR1(0)|CRHR1-IT1(+115.1kb)|LOC644172(+159kb)|MAPT(-133kb)|MAPT-AS1(-82.01kb)|MAPT-IT1(-134.4kb)|MGC57346(+123.4kb)|SPPL2C(-83.54kb)
17	44182336	rs62061816	A	C		3	6.876e-05	6.876e-05	0.8863	0.8863	0.9078	0	0.8895	0.8689	0.8977	ARL17A(-194.2kb)|ARL17B(-194.6kb)|KANSL1(0)|KANSL1-AS1(-88.6kb)|LRRC37A(-190.2kb)|MAPT(+76.64kb)|STH(+105.3kb)
8	143702431	rs78210260	C	G		3	6.88e-05	6.88e-05	1.2624	1.2624	0.4502	0	1.142	1.2566	1.3605	ARC(+6.598kb)|BAI1(+76.06kb)|JRK(-36.44kb)|LOC100288181(-81.24kb)|LY6D(-163.9kb)|LY6K(-79.1kb)|LYNX1(-143.3kb)|LYPD2(-129.2kb)|PSCA(-49.29kb)|SLURP1(-119.9kb)|THEM6(-106.2kb)
12	68791581	rs147656434	T	C		2	6.881e-05	6.881e-05	0.5192	0.5192	0.5566	0	0.4792	0.5836	NA	IL22(+144.3kb)|IL26(+172kb)|MDM1(+65.42kb)
17	43815713	rs1608955	T	C		3	6.882e-05	6.882e-05	0.8877	0.8877	0.8342	0	0.8796	0.8715	0.9086	CRHR1(0)|CRHR1-IT1(+92.12kb)|LOC644172(+136kb)|MAPT(-156kb)|MAPT-AS1(-105kb)|MAPT-IT1(-157.4kb)|MGC57346(+100.4kb)|SPPL2C(-106.5kb)
17	44255532	rs533467502	C	T		3	6.884e-05	6.884e-05	0.8856	0.8856	0.911	0	0.892	0.8677	0.8942	ARL17A(-121kb)|ARL17B(-121.4kb)|KANSL1(0)|KANSL1-AS1(-15.41kb)|LRRC37A(-117kb)|MAPT(+149.8kb)|NSFP1(-194.6kb)|STH(+178.5kb)
15	79309257	rs1373203	A	G		3	6.886e-05	6.886e-05	1.1032	1.1032	0.5548	0	1.089	1.1544	1.0833	CTSH(+71.84kb)|LOC729911(-174.8kb)|MIR184(-192.9kb)|MORF4L1(+119.2kb)|RASGRF1(0)
17	43815820	rs1608956	A	T		3	6.886e-05	6.886e-05	0.8877	0.8877	0.8342	0	0.8796	0.8715	0.9086	CRHR1(0)|CRHR1-IT1(+92.22kb)|LOC644172(+136.1kb)|MAPT(-155.9kb)|MAPT-AS1(-104.9kb)|MAPT-IT1(-157.3kb)|MGC57346(+100.5kb)|SPPL2C(-106.4kb)
13	83705444	rs2800361	C	A		3	6.89e-05	6.89e-05	0.8931	0.8931	0.8534	0	0.8788	0.8856	0.9105	.
17	43815336	rs56298110	G	A		3	6.894e-05	6.894e-05	0.8878	0.8878	0.8345	0	0.8797	0.8715	0.9086	CRHR1(0)|CRHR1-IT1(+91.74kb)|LOC644172(+135.6kb)|MAPT(-156.4kb)|MAPT-AS1(-105.4kb)|MAPT-IT1(-157.8kb)|MGC57346(+100kb)|SPPL2C(-106.9kb)
17	44181508	rs62061814	G	T		3	6.894e-05	6.894e-05	0.8863	0.8863	0.9083	0	0.8896	0.8689	0.8976	ARL17A(-195kb)|ARL17B(-195.4kb)|KANSL1(0)|KANSL1-AS1(-89.43kb)|LRRC37A(-191kb)|MAPT(+75.81kb)|STH(+104.4kb)
17	44181118	rs546325422	A	G		3	6.895e-05	6.895e-05	0.8863	0.8863	0.908	0	0.8897	0.8689	0.8976	ARL17A(-195.4kb)|ARL17B(-195.8kb)|KANSL1(0)|KANSL1-AS1(-89.82kb)|LRRC37A(-191.4kb)|MAPT(+75.42kb)|STH(+104.1kb)
20	55024101	rs113221226	A	G		3	6.895e-05	0.007191	0.831	0.8331	0.119	53.03	0.7376	0.9357	0.8436	AURKA(+56.75kb)|CASS4(0)|CSTF1(+44.52kb)|FAM209A(-75.68kb)|FAM209B(-84.2kb)|FAM210B(+80.38kb)|GCNT7(-42.45kb)|MC3R(+199.2kb)|RTFDC1(-19.54kb)|TFAP2C(-180.3kb)
17	44180997	rs62061812	T	C		3	6.899e-05	6.899e-05	0.8863	0.8863	0.9086	0	0.8897	0.8689	0.8975	ARL17A(-195.5kb)|ARL17B(-195.9kb)|KANSL1(0)|KANSL1-AS1(-89.94kb)|LRRC37A(-191.5kb)|MAPT(+75.3kb)|STH(+103.9kb)
2	71258691	rs148536794	A	G		2	6.902e-05	6.902e-05	0.6257	0.6257	0.5174	0	0.6667	0.5709	NA	ANKRD53(+46.06kb)|ATP6V1B1(+66.13kb)|CD207(+195.7kb)|MCEE(-78.11kb)|MPHOSPH10(-98.75kb)|NAGK(-36.72kb)|OR7E91P(+1.631kb)|PAIP2B(-151.2kb)|TEX261(+36.69kb)|VAX2(+98.12kb)
17	43841571	rs56369036	A	T		3	6.905e-05	6.905e-05	0.8879	0.8879	0.8278	0	0.8806	0.8703	0.9088	CRHR1(0)|CRHR1-IT1(+118kb)|LOC644172(+161.8kb)|MAPT(-130.2kb)|MAPT-AS1(-79.15kb)|MAPT-IT1(-131.6kb)|MGC57346(+126.2kb)|SPPL2C(-80.68kb)
17	43946318	rs753236	C	T		3	6.905e-05	6.905e-05	0.8873	0.8873	0.9066	0	0.8866	0.8714	0.9008	CRHR1(+33.12kb)|KANSL1(-161kb)|MAPT(-25.43kb)|MAPT-AS1(0)|MAPT-IT1(-26.83kb)|SPPL2C(+21.88kb)|STH(-130.3kb)
17	43841912	rs11079724	T	C		3	6.906e-05	6.906e-05	0.8879	0.8879	0.8263	0	0.8806	0.8702	0.9089	CRHR1(0)|CRHR1-IT1(+118.3kb)|LOC644172(+162.2kb)|MAPT(-129.8kb)|MAPT-AS1(-78.81kb)|MAPT-IT1(-131.2kb)|MGC57346(+126.6kb)|SPPL2C(-80.34kb)
17	43819450	rs17563923	A	G		3	6.91e-05	6.91e-05	0.8878	0.8878	0.8326	0	0.8794	0.8717	0.9088	CRHR1(0)|CRHR1-IT1(+95.86kb)|LOC644172(+139.7kb)|MAPT(-152.3kb)|MAPT-AS1(-101.3kb)|MAPT-IT1(-153.7kb)|MGC57346(+104.1kb)|SPPL2C(-102.8kb)
17	43844044	rs62055895	G	A		3	6.91e-05	6.91e-05	0.8879	0.8879	0.8481	0	0.8803	0.8722	0.9076	CRHR1(0)|CRHR1-IT1(+120.4kb)|LOC644172(+164.3kb)|MAPT(-127.7kb)|MAPT-AS1(-76.68kb)|MAPT-IT1(-129.1kb)|MGC57346(+128.7kb)|SPPL2C(-78.21kb)
17	44178272	rs17576779	T	C		3	6.91e-05	6.91e-05	0.8864	0.8864	0.9069	0	0.8897	0.8688	0.8977	ARL17A(-198.2kb)|ARL17B(-198.6kb)|KANSL1(0)|KANSL1-AS1(-92.67kb)|LRRC37A(-194.2kb)|MAPT(+72.57kb)|STH(+101.2kb)
17	44180954	rs17660595	G	A		3	6.91e-05	6.91e-05	0.8864	0.8864	0.9081	0	0.8897	0.8689	0.8976	ARL17A(-195.5kb)|ARL17B(-196kb)|KANSL1(0)|KANSL1-AS1(-89.98kb)|LRRC37A(-191.5kb)|MAPT(+75.26kb)|STH(+103.9kb)
17	43815859	rs62054417	C	A		3	6.911e-05	6.911e-05	0.8878	0.8878	0.8332	0	0.8796	0.8715	0.9087	CRHR1(0)|CRHR1-IT1(+92.26kb)|LOC644172(+136.1kb)|MAPT(-155.9kb)|MAPT-AS1(-104.9kb)|MAPT-IT1(-157.3kb)|MGC57346(+100.5kb)|SPPL2C(-106.4kb)
17	44178839	rs62061809	C	T		3	6.911e-05	6.911e-05	0.8863	0.8863	0.908	0	0.8897	0.8689	0.8976	ARL17A(-197.7kb)|ARL17B(-198.1kb)|KANSL1(0)|KANSL1-AS1(-92.1kb)|LRRC37A(-193.7kb)|MAPT(+73.14kb)|STH(+101.8kb)
17	44272679	rs574644730	C	G		3	6.912e-05	6.912e-05	0.8856	0.8856	0.9085	0	0.8911	0.8674	0.895	ARL17A(-103.8kb)|ARL17B(-104.2kb)|KANSL1(0)|KANSL1-AS1(0)|LRRC37A(-99.82kb)|MAPT(+167kb)|NSFP1(-177.5kb)|STH(+195.6kb)
17	44216226	rs575816835	G	A		3	6.913e-05	6.913e-05	0.8861	0.8861	0.9132	0	0.888	0.8695	0.8978	ARL17A(-160.3kb)|ARL17B(-160.7kb)|KANSL1(0)|KANSL1-AS1(-54.71kb)|LRRC37A(-156.3kb)|MAPT(+110.5kb)|STH(+139.2kb)
17	43932028	rs55942528	G	A		3	6.916e-05	6.916e-05	0.8877	0.8877	0.8911	0	0.8866	0.8707	0.9024	CRHR1(+18.83kb)|KANSL1(-175.3kb)|MAPT(-39.72kb)|MAPT-AS1(0)|MAPT-IT1(-41.12kb)|SPPL2C(+7.59kb)|STH(-144.6kb)
10	115451781	rs12358524	T	C		3	6.917e-05	6.917e-05	1.1658	1.1658	0.9337	0	1.1532	1.1493	1.1852	CASP7(0)|DCLRE1A(-142.7kb)|HABP2(+102.4kb)|MIR4483(-85.97kb)|NHLRC2(-162.6kb)|NRAP(+27.95kb)|PLEKHS1(-59.43kb)
17	43815141	rs56006248	G	A		3	6.92e-05	6.92e-05	0.8878	0.8878	0.8335	0	0.8797	0.8715	0.9087	CRHR1(0)|CRHR1-IT1(+91.55kb)|LOC644172(+135.4kb)|MAPT(-156.6kb)|MAPT-AS1(-105.6kb)|MAPT-IT1(-158kb)|MGC57346(+99.81kb)|SPPL2C(-107.1kb)
17	43819480	rs62054425	T	C		3	6.92e-05	6.92e-05	0.8878	0.8878	0.8326	0	0.8794	0.8717	0.9088	CRHR1(0)|CRHR1-IT1(+95.88kb)|LOC644172(+139.7kb)|MAPT(-152.3kb)|MAPT-AS1(-101.2kb)|MAPT-IT1(-153.7kb)|MGC57346(+104.2kb)|SPPL2C(-102.8kb)
17	44272928	rs535751452	A	C		3	6.925e-05	6.925e-05	0.8856	0.8856	0.9083	0	0.891	0.8674	0.8951	ARL17A(-103.6kb)|ARL17B(-104kb)|KANSL1(0)|KANSL1-AS1(0)|LRRC37A(-99.57kb)|MAPT(+167.2kb)|NSFP1(-177.2kb)|STH(+195.9kb)
17	44258231	rs539303688	G	A		3	6.926e-05	6.926e-05	0.8856	0.8856	0.9109	0	0.8918	0.8677	0.8944	ARL17A(-118.3kb)|ARL17B(-118.7kb)|KANSL1(0)|KANSL1-AS1(-12.71kb)|LRRC37A(-114.3kb)|MAPT(+152.5kb)|NSFP1(-191.9kb)|STH(+181.2kb)
17	44181681	rs62061815	G	A		3	6.927e-05	6.927e-05	0.8863	0.8863	0.9083	0	0.8896	0.8689	0.8976	ARL17A(-194.8kb)|ARL17B(-195.2kb)|KANSL1(0)|KANSL1-AS1(-89.26kb)|LRRC37A(-190.8kb)|MAPT(+75.98kb)|STH(+104.6kb)
17	1018426	rs12952217	G	C		2	6.928e-05	0.03628	0.8254	0.826	0.0583	72.1	0.9052	0.7541	NA	ABR(0)|BHLHA9(-155.4kb)|MIR3183(+92.63kb)|NXN(+135.4kb)|TIMM22(+113kb)|TUSC5(-164.5kb)
17	44178337	rs17660488	C	T		3	6.932e-05	6.932e-05	0.8864	0.8864	0.9069	0	0.8897	0.8688	0.8977	ARL17A(-198.2kb)|ARL17B(-198.6kb)|KANSL1(0)|KANSL1-AS1(-92.6kb)|LRRC37A(-194.2kb)|MAPT(+72.64kb)|STH(+101.3kb)
13	83705268	rs2819224	A	C		3	6.934e-05	6.934e-05	0.8931	0.8931	0.853	0	0.8789	0.8856	0.9106	.
17	43845041	rs62055901	A	G		3	6.935e-05	6.935e-05	0.8879	0.8879	0.846	0	0.8806	0.8718	0.9077	CRHR1(0)|CRHR1-IT1(+121.4kb)|LOC644172(+165.3kb)|MAPT(-126.7kb)|MAPT-AS1(-75.68kb)|MAPT-IT1(-128.1kb)|MGC57346(+129.7kb)|SPPL2C(-77.21kb)
17	43814427	rs76421814	C	T		3	6.936e-05	6.936e-05	0.8878	0.8878	0.833	0	0.8797	0.8714	0.9087	CRHR1(0)|CRHR1-IT1(+90.83kb)|LOC644172(+134.7kb)|MAPT(-157.3kb)|MAPT-AS1(-106.3kb)|MAPT-IT1(-158.7kb)|MGC57346(+99.1kb)|SPPL2C(-107.8kb)
17	44180173	rs62061811	G	T		3	6.938e-05	6.938e-05	0.8863	0.8863	0.9081	0	0.8897	0.8689	0.8976	ARL17A(-196.3kb)|ARL17B(-196.7kb)|KANSL1(0)|KANSL1-AS1(-90.76kb)|LRRC37A(-192.3kb)|MAPT(+74.47kb)|STH(+103.1kb)
17	44249621	rs564755460	G	A		3	6.938e-05	6.938e-05	0.8858	0.8858	0.9125	0	0.893	0.868	0.8935	ARL17A(-126.9kb)|ARL17B(-127.3kb)|KANSL1(0)|KANSL1-AS1(-21.32kb)|LRRC37A(-122.9kb)|MAPT(+143.9kb)|STH(+172.6kb)
19	1021637	rs8100672	C	T		2	6.939e-05	6.939e-05	0.8499	0.8499	0.496	0	0.876	0.8284	NA	ABCA7(-18.46kb)|ARID3A(+48.83kb)|AZU1(+189.6kb)|CFD(+158kb)|CNN2(-4.66kb)|ELANE(+165.4kb)|GPX4(-82.3kb)|GRIN3B(+11.91kb)|HMHA1(-44.28kb)|KISS1R(+100.6kb)|LPPR3(+199.7kb)|MED16(+128.4kb)|POLR2E(-64.94kb)|PRTN3(+173.5kb)|R3HDM4(+108.4kb)|SBNO2(-86kb)|STK11(-184.2kb)|TMEM259(+0.496kb)|WDR18(+27.07kb)
17	44174351	rs62061802	A	T		3	6.942e-05	6.942e-05	0.8863	0.8863	0.9078	0	0.8896	0.8689	0.8977	KANSL1(0)|KANSL1-AS1(-96.59kb)|LRRC37A(-198.1kb)|MAPT(+68.65kb)|MAPT-IT1(+198.2kb)|STH(+97.29kb)
17	44272552	rs553226241	T	C		3	6.942e-05	6.942e-05	0.8856	0.8856	0.9087	0	0.8911	0.8675	0.8951	ARL17A(-103.9kb)|ARL17B(-104.4kb)|KANSL1(0)|KANSL1-AS1(0)|LRRC37A(-99.94kb)|MAPT(+166.9kb)|NSFP1(-177.6kb)|STH(+195.5kb)
17	43813002	rs62054412	A	G		3	6.945e-05	6.945e-05	0.8878	0.8878	0.8331	0	0.8797	0.8714	0.9087	CRHR1(0)|CRHR1-IT1(+89.41kb)|LOC644172(+133.3kb)|MAPT(-158.7kb)|MAPT-AS1(-107.7kb)|MAPT-IT1(-160.1kb)|MGC57346(+97.67kb)|SPPL2C(-109.3kb)
17	43844486	rs55725840	A	T		3	6.945e-05	6.945e-05	0.888	0.888	0.8485	0	0.8804	0.8722	0.9076	CRHR1(0)|CRHR1-IT1(+120.9kb)|LOC644172(+164.7kb)|MAPT(-127.3kb)|MAPT-AS1(-76.24kb)|MAPT-IT1(-128.7kb)|MGC57346(+129.2kb)|SPPL2C(-77.77kb)
17	44177669	rs77604208	T	C		3	6.945e-05	6.945e-05	0.8864	0.8864	0.907	0	0.8897	0.8688	0.8977	ARL17A(-198.8kb)|ARL17B(-199.2kb)|KANSL1(0)|KANSL1-AS1(-93.27kb)|LRRC37A(-194.8kb)|MAPT(+71.97kb)|STH(+100.6kb)
17	43827508	rs12150455	G	A		3	6.946e-05	6.946e-05	0.8878	0.8878	0.8306	0	0.8792	0.8718	0.909	CRHR1(0)|CRHR1-IT1(+103.9kb)|LOC644172(+147.8kb)|MAPT(-144.2kb)|MAPT-AS1(-93.21kb)|MAPT-IT1(-145.6kb)|MGC57346(+112.2kb)|SPPL2C(-94.75kb)
17	44177993	rs17660464	A	C		3	6.947e-05	6.947e-05	0.8864	0.8864	0.9076	0	0.8897	0.8689	0.8977	ARL17A(-198.5kb)|ARL17B(-198.9kb)|KANSL1(0)|KANSL1-AS1(-92.94kb)|LRRC37A(-194.5kb)|MAPT(+72.29kb)|STH(+100.9kb)
13	83707803	rs2800363	G	A		3	6.949e-05	6.949e-05	0.8932	0.8932	0.8614	0	0.8794	0.8859	0.9101	.
17	44180442	rs17576870	G	A		3	6.949e-05	6.949e-05	0.8864	0.8864	0.9085	0	0.8898	0.869	0.8976	ARL17A(-196.1kb)|ARL17B(-196.5kb)|KANSL1(0)|KANSL1-AS1(-90.5kb)|LRRC37A(-192.1kb)|MAPT(+74.74kb)|STH(+103.4kb)
13	103570055	rs79326373	A	G		3	6.95e-05	6.95e-05	1.3745	1.3745	0.5014	0	1.2902	1.6341	1.3181	BIVM(+76.17kb)|BIVM-ERCC5(+41.7kb)|CCDC168(+158.6kb)|ERCC5(+41.7kb)|KDELC1(+118.7kb)|METTL21EP(+21.67kb)|SLC10A2(-126.3kb)|TEX30(+143.9kb)
17	43851971	rs62055946	A	C		3	6.951e-05	6.951e-05	0.8881	0.8881	0.8501	0	0.8816	0.8715	0.9073	CRHR1(0)|CRHR1-IT1(+128.4kb)|LOC644172(+172.2kb)|MAPT(-119.8kb)|MAPT-AS1(-68.75kb)|MAPT-IT1(-121.2kb)|MGC57346(+136.6kb)|SPPL2C(-70.28kb)
17	44272000	rs569635106	A	G		3	6.954e-05	6.954e-05	0.8856	0.8856	0.9096	0	0.891	0.8676	0.8951	ARL17A(-104.5kb)|ARL17B(-104.9kb)|KANSL1(0)|KANSL1-AS1(0)|LRRC37A(-100.5kb)|MAPT(+166.3kb)|NSFP1(-178.2kb)|STH(+194.9kb)
17	43844201	rs62055896	T	C		3	6.955e-05	6.955e-05	0.888	0.888	0.8475	0	0.8804	0.8722	0.9077	CRHR1(0)|CRHR1-IT1(+120.6kb)|LOC644172(+164.5kb)|MAPT(-127.5kb)|MAPT-AS1(-76.52kb)|MAPT-IT1(-128.9kb)|MGC57346(+128.9kb)|SPPL2C(-78.05kb)
17	43813370	rs62054413	C	G		3	6.96e-05	6.96e-05	0.8878	0.8878	0.8334	0	0.8798	0.8714	0.9087	CRHR1(0)|CRHR1-IT1(+89.78kb)|LOC644172(+133.6kb)|MAPT(-158.4kb)|MAPT-AS1(-107.4kb)|MAPT-IT1(-159.8kb)|MGC57346(+98.04kb)|SPPL2C(-108.9kb)
17	44177337	rs62061808	T	C		3	6.96e-05	6.96e-05	0.8864	0.8864	0.907	0	0.8897	0.8689	0.8978	ARL17A(-199.2kb)|ARL17B(-199.6kb)|KANSL1(0)|KANSL1-AS1(-93.6kb)|LRRC37A(-195.2kb)|MAPT(+71.64kb)|STH(+100.3kb)
17	43812398	rs1526127	G	C		3	6.963e-05	6.963e-05	0.8878	0.8878	0.8319	0	0.8796	0.8714	0.9088	CRHR1(0)|CRHR1-IT1(+88.8kb)|LOC644172(+132.6kb)|MAPT(-159.3kb)|MAPT-AS1(-108.3kb)|MAPT-IT1(-160.8kb)|MGC57346(+97.07kb)|SPPL2C(-109.9kb)
17	44217112	rs563314190	T	G		3	6.963e-05	6.963e-05	0.8861	0.8861	0.9055	0	0.8881	0.8688	0.8984	ARL17A(-159.4kb)|ARL17B(-159.8kb)|KANSL1(0)|KANSL1-AS1(-53.83kb)|LRRC37A(-155.4kb)|MAPT(+111.4kb)|STH(+140.1kb)
17	43812684	rs62054411	G	A		3	6.964e-05	6.964e-05	0.8878	0.8878	0.8332	0	0.8797	0.8714	0.9087	CRHR1(0)|CRHR1-IT1(+89.09kb)|LOC644172(+132.9kb)|MAPT(-159.1kb)|MAPT-AS1(-108kb)|MAPT-IT1(-160.5kb)|MGC57346(+97.36kb)|SPPL2C(-109.6kb)
17	44283139	rs542442671	A	C		3	6.964e-05	6.964e-05	0.8855	0.8855	0.8956	0	0.891	0.8661	0.896	ARL17A(-93.36kb)|ARL17B(-93.77kb)|KANSL1(0)|KANSL1-AS1(+9.05kb)|LRRC37A(-89.36kb)|MAPT(+177.4kb)|NSFP1(-167kb)
17	43812599	rs62054398	G	A		3	6.965e-05	6.965e-05	0.8878	0.8878	0.8319	0	0.8796	0.8714	0.9088	CRHR1(0)|CRHR1-IT1(+89kb)|LOC644172(+132.9kb)|MAPT(-159.1kb)|MAPT-AS1(-108.1kb)|MAPT-IT1(-160.5kb)|MGC57346(+97.27kb)|SPPL2C(-109.7kb)
17	43813252	rs17563787	G	C		3	6.965e-05	6.965e-05	0.8878	0.8878	0.8334	0	0.8798	0.8714	0.9087	CRHR1(0)|CRHR1-IT1(+89.66kb)|LOC644172(+133.5kb)|MAPT(-158.5kb)|MAPT-AS1(-107.5kb)|MAPT-IT1(-159.9kb)|MGC57346(+97.92kb)|SPPL2C(-109kb)
13	83706247	rs2175642	C	A		3	6.967e-05	6.967e-05	0.8932	0.8932	0.8552	0	0.8791	0.8856	0.9105	.
17	44201680	rs55672516	C	A		3	6.968e-05	6.968e-05	0.8862	0.8862	0.908	0	0.8894	0.8687	0.8975	ARL17A(-174.8kb)|ARL17B(-175.2kb)|KANSL1(0)|KANSL1-AS1(-69.26kb)|LRRC37A(-170.8kb)|MAPT(+95.98kb)|STH(+124.6kb)
17	44201667	rs56257094	A	G		3	6.971e-05	6.971e-05	0.8862	0.8862	0.908	0	0.8894	0.8687	0.8975	ARL17A(-174.8kb)|ARL17B(-175.2kb)|KANSL1(0)|KANSL1-AS1(-69.27kb)|LRRC37A(-170.8kb)|MAPT(+95.97kb)|STH(+124.6kb)
17	44273218	rs2532233	T	C		3	6.971e-05	6.971e-05	0.8856	0.8856	0.907	0	0.8911	0.8673	0.8952	ARL17A(-103.3kb)|ARL17B(-103.7kb)|KANSL1(0)|KANSL1-AS1(0)|LRRC37A(-99.28kb)|MAPT(+167.5kb)|NSFP1(-177kb)|STH(+196.2kb)
13	83710444	rs2669205	T	A		3	6.974e-05	6.974e-05	0.893	0.893	0.9005	0	0.8852	0.8819	0.9075	.
17	43812624	rs62054399	A	G		3	6.974e-05	6.974e-05	0.8878	0.8878	0.8319	0	0.8796	0.8714	0.9088	CRHR1(0)|CRHR1-IT1(+89.03kb)|LOC644172(+132.9kb)|MAPT(-159.1kb)|MAPT-AS1(-108.1kb)|MAPT-IT1(-160.5kb)|MGC57346(+97.3kb)|SPPL2C(-109.6kb)
17	44201109	rs62061859	G	C		3	6.974e-05	6.974e-05	0.8862	0.8862	0.9103	0	0.8897	0.8689	0.8972	ARL17A(-175.4kb)|ARL17B(-175.8kb)|KANSL1(0)|KANSL1-AS1(-69.83kb)|LRRC37A(-171.4kb)|MAPT(+95.41kb)|STH(+124kb)
17	44272266	rs570486150	G	A		3	6.976e-05	6.976e-05	0.8856	0.8856	0.9087	0	0.8911	0.8675	0.8951	ARL17A(-104.2kb)|ARL17B(-104.6kb)|KANSL1(0)|KANSL1-AS1(0)|LRRC37A(-100.2kb)|MAPT(+166.6kb)|NSFP1(-177.9kb)|STH(+195.2kb)
17	44274560	rs570399582	C	T		3	6.976e-05	6.976e-05	0.8856	0.8856	0.9009	0	0.8909	0.8668	0.8959	ARL17A(-101.9kb)|ARL17B(-102.4kb)|KANSL1(0)|KANSL1-AS1(+0.471kb)|LRRC37A(-97.94kb)|MAPT(+168.9kb)|NSFP1(-175.6kb)|STH(+197.5kb)
17	43812649	rs62054400	C	T		3	6.977e-05	6.977e-05	0.8878	0.8878	0.8322	0	0.8797	0.8714	0.9088	CRHR1(0)|CRHR1-IT1(+89.05kb)|LOC644172(+132.9kb)|MAPT(-159.1kb)|MAPT-AS1(-108.1kb)|MAPT-IT1(-160.5kb)|MGC57346(+97.32kb)|SPPL2C(-109.6kb)
17	43813415	rs62054414	A	G		3	6.977e-05	6.977e-05	0.8878	0.8878	0.8332	0	0.8797	0.8714	0.9087	CRHR1(0)|CRHR1-IT1(+89.82kb)|LOC644172(+133.7kb)|MAPT(-158.3kb)|MAPT-AS1(-107.3kb)|MAPT-IT1(-159.7kb)|MGC57346(+98.09kb)|SPPL2C(-108.8kb)
17	44042366	rs55907036	A	G		3	6.979e-05	6.979e-05	0.8863	0.8863	0.878	0	0.8853	0.8682	0.9024	CRHR1(+129.2kb)|KANSL1(-64.92kb)|MAPT(0)|MAPT-AS1(+69.49kb)|MAPT-IT1(+66.2kb)|SPPL2C(+117.9kb)|STH(-34.25kb)
17	44352872	rs568873066	G	A		3	6.981e-05	6.981e-05	0.8843	0.8843	0.8849	0	0.8894	0.8636	0.8958	ARL17A(-23.63kb)|ARL17B(-24.04kb)|KANSL1(+50.13kb)|KANSL1-AS1(+78.78kb)|LRRC37A(-19.62kb)|NSFP1(-97.31kb)
17	44254413	rs569247938	G	A		3	6.983e-05	6.983e-05	0.8857	0.8857	0.9108	0	0.8923	0.8678	0.8942	ARL17A(-122.1kb)|ARL17B(-122.5kb)|KANSL1(0)|KANSL1-AS1(-16.52kb)|LRRC37A(-118.1kb)|MAPT(+148.7kb)|NSFP1(-195.8kb)|STH(+177.4kb)
17	44172773	rs75412750	T	C		3	6.984e-05	6.984e-05	0.8863	0.8863	0.9096	0	0.8896	0.869	0.8975	KANSL1(0)|KANSL1-AS1(-98.16kb)|LRRC37A(-199.7kb)|MAPT(+67.07kb)|MAPT-AS1(+199.9kb)|MAPT-IT1(+196.6kb)|STH(+95.71kb)
17	44273264	rs545914867	A	G		3	6.985e-05	6.985e-05	0.8856	0.8856	0.9065	0	0.8911	0.8673	0.8953	ARL17A(-103.2kb)|ARL17B(-103.6kb)|KANSL1(0)|KANSL1-AS1(0)|LRRC37A(-99.23kb)|MAPT(+167.6kb)|NSFP1(-176.9kb)|STH(+196.2kb)
17	44284057	rs548785130	T	C		3	6.985e-05	6.985e-05	0.8856	0.8856	0.8935	0	0.891	0.866	0.8963	ARL17A(-92.44kb)|ARL17B(-92.86kb)|KANSL1(0)|KANSL1-AS1(+9.968kb)|LRRC37A(-88.44kb)|MAPT(+178.4kb)|NSFP1(-166.1kb)
17	43734145	rs241032	C	T		3	6.99e-05	6.99e-05	0.8874	0.8874	0.8549	0	0.8795	0.8727	0.9071	CRHR1(0)|CRHR1-IT1(+10.55kb)|LOC644172(+54.4kb)|LRRC37A4P(+136.3kb)|MAPT-AS1(-186.6kb)|MGC57346(+18.82kb)|MIR4315-1(+181.3kb)|MIR4315-2(+181.3kb)|PLEKHM1(+166kb)|SPPL2C(-188.1kb)
17	43816306	rs62054418	A	G		3	6.992e-05	6.992e-05	0.8878	0.8878	0.8331	0	0.8795	0.8717	0.9088	CRHR1(0)|CRHR1-IT1(+92.71kb)|LOC644172(+136.6kb)|MAPT(-155.4kb)|MAPT-AS1(-104.4kb)|MAPT-IT1(-156.8kb)|MGC57346(+101kb)|SPPL2C(-105.9kb)
17	43838919	rs62055889	A	G		3	6.994e-05	6.994e-05	0.8879	0.8879	0.8282	0	0.8799	0.871	0.909	CRHR1(0)|CRHR1-IT1(+115.3kb)|LOC644172(+159.2kb)|MAPT(-132.8kb)|MAPT-AS1(-81.8kb)|MAPT-IT1(-134.2kb)|MGC57346(+123.6kb)|SPPL2C(-83.34kb)
17	44218242	rs534210380	T	C		3	6.997e-05	6.997e-05	0.8861	0.8861	0.9066	0	0.8882	0.8689	0.8983	ARL17A(-158.3kb)|ARL17B(-158.7kb)|KANSL1(0)|KANSL1-AS1(-52.7kb)|LRRC37A(-154.3kb)|MAPT(+112.5kb)|STH(+141.2kb)
13	83705856	rs2819227	G	T		3	7e-05	7e-05	0.8932	0.8932	0.8515	0	0.879	0.8855	0.9108	.
17	43932049	rs56254732	T	C		3	7e-05	7e-05	0.8878	0.8878	0.8936	0	0.8865	0.8711	0.9024	CRHR1(+18.86kb)|KANSL1(-175.2kb)|MAPT(-39.7kb)|MAPT-AS1(0)|MAPT-IT1(-41.1kb)|SPPL2C(+7.611kb)|STH(-144.6kb)
17	43820741	rs62054426	T	A		3	7.003e-05	7.003e-05	0.8879	0.8879	0.831	0	0.8794	0.8717	0.909	CRHR1(0)|CRHR1-IT1(+97.15kb)|LOC644172(+141kb)|MAPT(-151kb)|MAPT-AS1(-99.98kb)|MAPT-IT1(-152.4kb)|MGC57346(+105.4kb)|SPPL2C(-101.5kb)
17	43814020	rs10451283	C	T		3	7.004e-05	7.004e-05	0.8879	0.8879	0.8539	0	0.8802	0.8729	0.9074	CRHR1(0)|CRHR1-IT1(+90.42kb)|LOC644172(+134.3kb)|MAPT(-157.7kb)|MAPT-AS1(-106.7kb)|MAPT-IT1(-159.1kb)|MGC57346(+98.69kb)|SPPL2C(-108.2kb)
12	123909289	rs73216937	T	C		2	7.006e-05	7.006e-05	0.7207	0.7207	0.507	0	0.6799	0.7586	NA	C12orf65(+166.8kb)|CDK2AP1(+152.4kb)|DDX55(-177.4kb)|EIF2B1(-196.3kb)|MIR3908(-111.7kb)|MPHOSPH9(+191.5kb)|RILPL1(-46.62kb)|RILPL2(0)|SBNO1(+74.3kb)|SETD8(+15.39kb)|SNRNP35(-33.36kb)|TMED2(-159.8kb)
17	44202608	rs55686102	T	C		3	7.006e-05	7.006e-05	0.8862	0.8862	0.91	0	0.8896	0.8689	0.8973	ARL17A(-173.9kb)|ARL17B(-174.3kb)|KANSL1(0)|KANSL1-AS1(-68.33kb)|LRRC37A(-169.9kb)|MAPT(+96.91kb)|STH(+125.5kb)
13	83706014	rs2669200	A	G		3	7.009e-05	7.009e-05	0.8932	0.8932	0.8515	0	0.879	0.8855	0.9108	.
17	43838482	rs12150621	T	G		3	7.012e-05	7.012e-05	0.8879	0.8879	0.8264	0	0.8805	0.8704	0.909	CRHR1(0)|CRHR1-IT1(+114.9kb)|LOC644172(+158.7kb)|MAPT(-133.3kb)|MAPT-AS1(-82.24kb)|MAPT-IT1(-134.7kb)|MGC57346(+123.2kb)|SPPL2C(-83.77kb)
17	43816605	rs62054419	C	A		3	7.022e-05	7.022e-05	0.8879	0.8879	0.8321	0	0.8796	0.8716	0.9089	CRHR1(0)|CRHR1-IT1(+93.01kb)|LOC644172(+136.9kb)|MAPT(-155.1kb)|MAPT-AS1(-104.1kb)|MAPT-IT1(-156.5kb)|MGC57346(+101.3kb)|SPPL2C(-105.6kb)
17	43841729	rs11079723	C	T		3	7.023e-05	7.023e-05	0.888	0.888	0.8278	0	0.8807	0.8704	0.9089	CRHR1(0)|CRHR1-IT1(+118.1kb)|LOC644172(+162kb)|MAPT(-130kb)|MAPT-AS1(-78.99kb)|MAPT-IT1(-131.4kb)|MGC57346(+126.4kb)|SPPL2C(-80.53kb)
17	44201791	rs112073200	C	G		3	7.025e-05	7.025e-05	0.8861	0.8861	0.9126	0	0.8897	0.869	0.8969	ARL17A(-174.7kb)|ARL17B(-175.1kb)|KANSL1(0)|KANSL1-AS1(-69.15kb)|LRRC37A(-170.7kb)|MAPT(+96.09kb)|STH(+124.7kb)
17	43842494	rs62055893	G	A		3	7.026e-05	7.026e-05	0.8879	0.8879	0.8353	0	0.8811	0.8704	0.9082	CRHR1(0)|CRHR1-IT1(+118.9kb)|LOC644172(+162.7kb)|MAPT(-129.3kb)|MAPT-AS1(-78.23kb)|MAPT-IT1(-130.7kb)|MGC57346(+127.2kb)|SPPL2C(-79.76kb)
17	44249800	rs532291518	A	G		3	7.027e-05	7.027e-05	0.8859	0.8859	0.9124	0	0.8924	0.8681	0.8942	ARL17A(-126.7kb)|ARL17B(-127.1kb)|KANSL1(0)|KANSL1-AS1(-21.14kb)|LRRC37A(-122.7kb)|MAPT(+144.1kb)|STH(+172.7kb)
6	123479765	rs9375227	T	C		3	7.032e-05	7.032e-05	0.8959	0.8959	0.5276	0	0.9185	0.8505	0.9073	CLVS2(+94.7kb)|TRDN(-57.72kb)
11	85811238	rs542126	G	A		3	7.032e-05	0.003334	1.1062	1.1092	0.1494	47.4	1.1615	1.1374	1.0422	CCDC83(+180.2kb)|EED(-144.6kb)|PICALM(+30.32kb)
17	44270059	rs2696633	T	A		3	7.033e-05	7.033e-05	0.8857	0.8857	0.9096	0	0.8911	0.8677	0.8952	ARL17A(-106.4kb)|ARL17B(-106.9kb)|KANSL1(0)|KANSL1-AS1(-0.879kb)|LRRC37A(-102.4kb)|MAPT(+164.4kb)|NSFP1(-180.1kb)|STH(+193kb)
17	44201344	rs55802590	C	G		3	7.038e-05	7.038e-05	0.8862	0.8862	0.9127	0	0.8897	0.8691	0.897	ARL17A(-175.2kb)|ARL17B(-175.6kb)|KANSL1(0)|KANSL1-AS1(-69.59kb)|LRRC37A(-171.2kb)|MAPT(+95.64kb)|STH(+124.3kb)
17	43816052	rs78440279	T	C		3	7.041e-05	7.041e-05	0.8878	0.8878	0.8396	0	0.8803	0.8714	0.9082	CRHR1(0)|CRHR1-IT1(+92.46kb)|LOC644172(+136.3kb)|MAPT(-155.7kb)|MAPT-AS1(-104.7kb)|MAPT-IT1(-157.1kb)|MGC57346(+100.7kb)|SPPL2C(-106.2kb)
13	83709212	rs2800365	G	A		3	7.047e-05	7.047e-05	0.8931	0.8931	0.9012	0	0.8856	0.8817	0.9075	.
18	76537183	rs142486734	A	G		2	7.048e-05	9.114e-05	1.5609	1.56	0.3108	2.65	1.3615	NA	1.7153	.
17	43821062	rs62054427	G	A		3	7.051e-05	7.051e-05	0.8879	0.8879	0.8305	0	0.8794	0.8718	0.9091	CRHR1(0)|CRHR1-IT1(+97.47kb)|LOC644172(+141.3kb)|MAPT(-150.7kb)|MAPT-AS1(-99.66kb)|MAPT-IT1(-152.1kb)|MGC57346(+105.7kb)|SPPL2C(-101.2kb)
17	43844859	rs56109643	G	A		3	7.054e-05	7.054e-05	0.8881	0.8881	0.8483	0	0.8806	0.8722	0.9077	CRHR1(0)|CRHR1-IT1(+121.3kb)|LOC644172(+165.1kb)|MAPT(-126.9kb)|MAPT-AS1(-75.86kb)|MAPT-IT1(-128.3kb)|MGC57346(+129.5kb)|SPPL2C(-77.4kb)
13	83704599	rs2819303	A	T		3	7.056e-05	7.056e-05	0.8933	0.8933	0.8545	0	0.8791	0.8857	0.9106	.
13	83709471	rs2819240	T	C		3	7.056e-05	7.056e-05	0.8932	0.8932	0.8988	0	0.8855	0.8816	0.9077	.
7	81513700	rs75348470	G	T		3	7.057e-05	7.057e-05	1.2355	1.2355	0.6532	0	1.3251	1.1709	1.2162	CACNA2D1(-65.72kb)|HGF(+114.2kb)
17	44269964	rs11079733	A	T		3	7.058e-05	7.058e-05	0.8857	0.8857	0.9096	0	0.8911	0.8677	0.8952	ARL17A(-106.5kb)|ARL17B(-106.9kb)|KANSL1(0)|KANSL1-AS1(-0.974kb)|LRRC37A(-102.5kb)|MAPT(+164.3kb)|NSFP1(-180.2kb)|STH(+192.9kb)
17	44202564	rs55669501	A	G		3	7.059e-05	7.059e-05	0.8863	0.8863	0.909	0	0.8896	0.8689	0.8975	ARL17A(-173.9kb)|ARL17B(-174.3kb)|KANSL1(0)|KANSL1-AS1(-68.37kb)|LRRC37A(-169.9kb)|MAPT(+96.86kb)|STH(+125.5kb)
13	83705140	rs2819222	C	T		3	7.061e-05	7.061e-05	0.8933	0.8933	0.8484	0	0.8787	0.8857	0.911	.
17	44174513	rs62061803	A	C		3	7.061e-05	7.061e-05	0.8864	0.8864	0.9063	0	0.8896	0.8689	0.898	KANSL1(0)|KANSL1-AS1(-96.42kb)|LRRC37A(-198kb)|MAPT(+68.81kb)|MAPT-IT1(+198.3kb)|STH(+97.45kb)
17	44215823	rs552471054	G	A		3	7.067e-05	7.067e-05	0.8862	0.8862	0.9117	0	0.888	0.8696	0.8982	ARL17A(-160.7kb)|ARL17B(-161.1kb)|KANSL1(0)|KANSL1-AS1(-55.12kb)|LRRC37A(-156.7kb)|MAPT(+110.1kb)|STH(+138.8kb)
1	39135474	rs1930556	G	C		3	7.069e-05	7.069e-05	0.9029	0.9029	0.8485	0	0.8847	0.9094	0.9143	GJA9-MYCBP(-192.7kb)|MYCBP(-192.7kb)|RRAGC(-168.4kb)
17	44177755	rs80120913	G	C		3	7.069e-05	7.069e-05	0.8864	0.8864	0.9074	0	0.8899	0.8689	0.8977	ARL17A(-198.7kb)|ARL17B(-199.2kb)|KANSL1(0)|KANSL1-AS1(-93.18kb)|LRRC37A(-194.7kb)|MAPT(+72.06kb)|STH(+100.7kb)
17	43823229	rs76171147	C	T		3	7.072e-05	7.072e-05	0.8879	0.8879	0.8305	0	0.8792	0.8719	0.9091	CRHR1(0)|CRHR1-IT1(+99.63kb)|LOC644172(+143.5kb)|MAPT(-148.5kb)|MAPT-AS1(-97.49kb)|MAPT-IT1(-149.9kb)|MGC57346(+107.9kb)|SPPL2C(-99.03kb)
17	43842462	rs55707339	C	T		3	7.073e-05	7.073e-05	0.8879	0.8879	0.8332	0	0.881	0.8704	0.9084	CRHR1(0)|CRHR1-IT1(+118.9kb)|LOC644172(+162.7kb)|MAPT(-129.3kb)|MAPT-AS1(-78.26kb)|MAPT-IT1(-130.7kb)|MGC57346(+127.1kb)|SPPL2C(-79.79kb)
20	18025903	rs140188545	C	T		3	7.077e-05	0.00331	1.5873	1.5565	0.1956	38.72	1.4358	1.1967	1.9934	CSRP2BP(-96.96kb)|MGME1(+54.14kb)|OVOL2(0)|PET117(-92.6kb)|SNORD17(+82.31kb)|SNX5(+76.41kb)
15	79309078	rs8032724	T	C		3	7.08e-05	7.08e-05	1.1029	1.1029	0.5527	0	1.0874	1.1544	1.0841	CTSH(+71.66kb)|LOC729911(-175kb)|MIR184(-193.1kb)|MORF4L1(+119kb)|RASGRF1(0)
8	42468218	rs13251378	T	C		3	7.081e-05	0.002964	1.1105	1.109	0.1766	42.32	1.069	1.0709	1.1847	CHRNA6(-139.6kb)|CHRNB3(-84.34kb)|SLC20A2(+70.86kb)|SMIM19(+60.08kb)
17	44172327	rs17576695	A	T		3	7.083e-05	7.083e-05	0.8865	0.8865	0.9052	0	0.8896	0.8689	0.8982	KANSL1(0)|KANSL1-AS1(-98.61kb)|MAPT(+66.63kb)|MAPT-AS1(+199.4kb)|MAPT-IT1(+196.2kb)|STH(+95.27kb)
1	75555399	rs795573	A	G		3	7.084e-05	0.002747	0.8806	0.8827	0.1873	40.31	0.9279	0.9152	0.8184	LHX8(-38.72kb)|SLC44A5(-112.4kb)
17	44252098	rs568534287	T	C		3	7.086e-05	7.086e-05	0.886	0.886	0.9094	0	0.8923	0.8679	0.8947	ARL17A(-124.4kb)|ARL17B(-124.8kb)|KANSL1(0)|KANSL1-AS1(-18.84kb)|LRRC37A(-120.4kb)|MAPT(+146.4kb)|NSFP1(-198.1kb)|STH(+175kb)
17	43827471	rs12150048	C	G		3	7.087e-05	7.087e-05	0.8879	0.8879	0.8309	0	0.8793	0.8719	0.9091	CRHR1(0)|CRHR1-IT1(+103.9kb)|LOC644172(+147.7kb)|MAPT(-144.3kb)|MAPT-AS1(-93.25kb)|MAPT-IT1(-145.7kb)|MGC57346(+112.1kb)|SPPL2C(-94.78kb)
5	33421592	rs115009272	C	T		3	7.089e-05	0.05397	1.4317	1.4282	0.0158	75.89	1.922	0.9945	1.5219	ADAMTS12(-105.7kb)|TARS(-19.21kb)
17	44173179	rs62061795	A	C		3	7.092e-05	7.092e-05	0.8865	0.8865	0.9069	0	0.8896	0.869	0.898	KANSL1(0)|KANSL1-AS1(-97.76kb)|LRRC37A(-199.3kb)|MAPT(+67.48kb)|MAPT-IT1(+197kb)|STH(+96.12kb)
17	43816657	rs62054421	A	G		3	7.093e-05	7.093e-05	0.888	0.888	0.8303	0	0.8796	0.8716	0.9091	CRHR1(0)|CRHR1-IT1(+93.06kb)|LOC644172(+136.9kb)|MAPT(-155.1kb)|MAPT-AS1(-104.1kb)|MAPT-IT1(-156.5kb)|MGC57346(+101.3kb)|SPPL2C(-105.6kb)
17	44220942	rs550997647	A	G		3	7.094e-05	7.094e-05	0.8862	0.8862	0.9142	0	0.8883	0.8696	0.8977	ARL17A(-155.6kb)|ARL17B(-156kb)|KANSL1(0)|KANSL1-AS1(-50kb)|LRRC37A(-151.6kb)|MAPT(+115.2kb)|STH(+143.9kb)
17	44133142	rs17653906	A	G		3	7.097e-05	7.097e-05	0.8865	0.8865	0.8934	0	0.8873	0.8689	0.9007	KANSL1(0)|KANSL1-AS1(-137.8kb)|MAPT(+27.44kb)|MAPT-AS1(+160.3kb)|MAPT-IT1(+157kb)|STH(+56.08kb)
17	44203311	rs62063171	T	C		3	7.097e-05	7.097e-05	0.8862	0.8862	0.9098	0	0.8895	0.8689	0.8974	ARL17A(-173.2kb)|ARL17B(-173.6kb)|KANSL1(0)|KANSL1-AS1(-67.63kb)|LRRC37A(-169.2kb)|MAPT(+97.61kb)|STH(+126.3kb)
17	43845002	rs62055900	G	C		3	7.098e-05	7.098e-05	0.8881	0.8881	0.8485	0	0.8801	0.8727	0.9078	CRHR1(0)|CRHR1-IT1(+121.4kb)|LOC644172(+165.3kb)|MAPT(-126.7kb)|MAPT-AS1(-75.72kb)|MAPT-IT1(-128.1kb)|MGC57346(+129.7kb)|SPPL2C(-77.25kb)
17	43848968	rs62055937	T	G		3	7.099e-05	7.099e-05	0.8877	0.8877	0.8342	0	0.8801	0.8708	0.9083	CRHR1(0)|CRHR1-IT1(+125.4kb)|LOC644172(+169.2kb)|MAPT(-122.8kb)|MAPT-AS1(-71.75kb)|MAPT-IT1(-124.2kb)|MGC57346(+133.6kb)|SPPL2C(-73.29kb)
17	43822511	rs62054428	A	G		3	7.101e-05	7.101e-05	0.8879	0.8879	0.8367	0	0.8794	0.8722	0.9087	CRHR1(0)|CRHR1-IT1(+98.92kb)|LOC644172(+142.8kb)|MAPT(-149.2kb)|MAPT-AS1(-98.21kb)|MAPT-IT1(-150.6kb)|MGC57346(+107.2kb)|SPPL2C(-99.74kb)
17	44172408	rs77044307	G	C		3	7.101e-05	7.101e-05	0.8865	0.8865	0.8999	0	0.8898	0.8683	0.8984	KANSL1(0)|KANSL1-AS1(-98.53kb)|MAPT(+66.71kb)|MAPT-AS1(+199.5kb)|MAPT-IT1(+196.2kb)|STH(+95.35kb)
17	43827391	rs62054440	C	G		3	7.102e-05	7.102e-05	0.888	0.888	0.8295	0	0.8792	0.8719	0.9092	CRHR1(0)|CRHR1-IT1(+103.8kb)|LOC644172(+147.6kb)|MAPT(-144.4kb)|MAPT-AS1(-93.33kb)|MAPT-IT1(-145.8kb)|MGC57346(+112.1kb)|SPPL2C(-94.86kb)
17	44189910	rs78929339	G	A		3	7.102e-05	7.102e-05	0.886	0.886	0.9093	0	0.8896	0.8686	0.8971	ARL17A(-186.6kb)|ARL17B(-187kb)|KANSL1(0)|KANSL1-AS1(-81.03kb)|LRRC37A(-182.6kb)|MAPT(+84.21kb)|STH(+112.8kb)
1	75555686	rs397781	G	A		3	7.103e-05	0.002761	0.8806	0.8827	0.187	40.35	0.9279	0.9153	0.8184	LHX8(-38.43kb)|SLC44A5(-112.1kb)
17	43816655	rs62054420	G	C		3	7.106e-05	7.106e-05	0.8879	0.8879	0.8303	0	0.8796	0.8716	0.9091	CRHR1(0)|CRHR1-IT1(+93.06kb)|LOC644172(+136.9kb)|MAPT(-155.1kb)|MAPT-AS1(-104.1kb)|MAPT-IT1(-156.5kb)|MGC57346(+101.3kb)|SPPL2C(-105.6kb)
17	43844977	rs62055899	A	T		3	7.109e-05	7.109e-05	0.8881	0.8881	0.85	0	0.8801	0.8728	0.9077	CRHR1(0)|CRHR1-IT1(+121.4kb)|LOC644172(+165.2kb)|MAPT(-126.8kb)|MAPT-AS1(-75.74kb)|MAPT-IT1(-128.2kb)|MGC57346(+129.6kb)|SPPL2C(-77.28kb)
17	44215045	rs557534113	C	T		3	7.11e-05	7.11e-05	0.8862	0.8862	0.9106	0	0.888	0.8695	0.8983	ARL17A(-161.5kb)|ARL17B(-161.9kb)|KANSL1(0)|KANSL1-AS1(-55.89kb)|LRRC37A(-157.5kb)|MAPT(+109.3kb)|STH(+138kb)
17	44217293	rs528392906	A	G		3	7.11e-05	7.11e-05	0.8862	0.8862	0.911	0	0.8881	0.8695	0.8982	ARL17A(-159.2kb)|ARL17B(-159.6kb)|KANSL1(0)|KANSL1-AS1(-53.64kb)|LRRC37A(-155.2kb)|MAPT(+111.6kb)|STH(+140.2kb)
17	43848461	rs62055933	A	G		3	7.113e-05	7.113e-05	0.888	0.888	0.8567	0	0.8818	0.8717	0.9068	CRHR1(0)|CRHR1-IT1(+124.9kb)|LOC644172(+168.7kb)|MAPT(-123.3kb)|MAPT-AS1(-72.26kb)|MAPT-IT1(-124.7kb)|MGC57346(+133.1kb)|SPPL2C(-73.79kb)
17	44213712	rs564905548	A	G		3	7.113e-05	7.113e-05	0.8863	0.8863	0.9089	0	0.888	0.8694	0.8985	ARL17A(-162.8kb)|ARL17B(-163.2kb)|KANSL1(0)|KANSL1-AS1(-57.23kb)|LRRC37A(-158.8kb)|MAPT(+108kb)|STH(+136.7kb)
17	44220454	rs564301026	G	T		3	7.113e-05	7.113e-05	0.8862	0.8862	0.9131	0	0.8883	0.8696	0.8979	ARL17A(-156kb)|ARL17B(-156.5kb)|KANSL1(0)|KANSL1-AS1(-50.48kb)|LRRC37A(-152kb)|MAPT(+114.8kb)|STH(+143.4kb)
17	43821685	rs74464991	A	C		3	7.114e-05	7.114e-05	0.888	0.888	0.8297	0	0.8794	0.8718	0.9092	CRHR1(0)|CRHR1-IT1(+98.09kb)|LOC644172(+141.9kb)|MAPT(-150.1kb)|MAPT-AS1(-99.04kb)|MAPT-IT1(-151.5kb)|MGC57346(+106.4kb)|SPPL2C(-100.6kb)
17	44221602	rs538148047	C	G		3	7.114e-05	7.114e-05	0.8862	0.8862	0.9137	0	0.8883	0.8696	0.8978	ARL17A(-154.9kb)|ARL17B(-155.3kb)|KANSL1(0)|KANSL1-AS1(-49.34kb)|LRRC37A(-150.9kb)|MAPT(+115.9kb)|STH(+144.5kb)
17	43823326	rs75643244	G	A		3	7.115e-05	7.115e-05	0.888	0.888	0.8285	0	0.8792	0.8719	0.9093	CRHR1(0)|CRHR1-IT1(+99.73kb)|LOC644172(+143.6kb)|MAPT(-148.4kb)|MAPT-AS1(-97.4kb)|MAPT-IT1(-149.8kb)|MGC57346(+108kb)|SPPL2C(-98.93kb)
17	43924200	rs12373142	G	C		3	7.115e-05	7.115e-05	0.8874	0.8874	0.872	0	0.8855	0.8692	0.9038	CRHR1(+11.01kb)|KANSL1(-183.1kb)|MAPT(-47.55kb)|MAPT-AS1(0)|MAPT-IT1(-48.95kb)|SPPL2C(0)|STH(-152.4kb)
17	44252197	rs569311806	T	G		3	7.117e-05	7.117e-05	0.886	0.886	0.909	0	0.8923	0.8679	0.8948	ARL17A(-124.3kb)|ARL17B(-124.7kb)|KANSL1(0)|KANSL1-AS1(-18.74kb)|LRRC37A(-120.3kb)|MAPT(+146.5kb)|NSFP1(-198kb)|STH(+175.1kb)
17	44164323	rs55692232	A	G		3	7.119e-05	7.119e-05	0.8864	0.8864	0.9031	0	0.8892	0.8688	0.8986	KANSL1(0)|KANSL1-AS1(-106.6kb)|MAPT(+58.62kb)|MAPT-AS1(+191.4kb)|MAPT-IT1(+188.2kb)|STH(+87.26kb)
17	43822398	rs2004260	C	T		3	7.12e-05	7.12e-05	0.888	0.888	0.8311	0	0.8794	0.8719	0.9091	CRHR1(0)|CRHR1-IT1(+98.8kb)|LOC644172(+142.6kb)|MAPT(-149.3kb)|MAPT-AS1(-98.32kb)|MAPT-IT1(-150.8kb)|MGC57346(+107.1kb)|SPPL2C(-99.86kb)
17	44173356	rs17576709	G	C		3	7.124e-05	7.124e-05	0.8865	0.8865	0.9056	0	0.8897	0.8689	0.8981	KANSL1(0)|KANSL1-AS1(-97.58kb)|LRRC37A(-199.1kb)|MAPT(+67.66kb)|MAPT-IT1(+197.2kb)|STH(+96.3kb)
17	44202231	rs62063166	G	A		3	7.125e-05	7.125e-05	0.8863	0.8863	0.9108	0	0.8896	0.8691	0.8974	ARL17A(-174.3kb)|ARL17B(-174.7kb)|KANSL1(0)|KANSL1-AS1(-68.71kb)|LRRC37A(-170.3kb)|MAPT(+96.53kb)|STH(+125.2kb)
17	44042361	rs56226437	C	T		3	7.127e-05	7.127e-05	0.8864	0.8864	0.8788	0	0.8855	0.8683	0.9024	CRHR1(+129.2kb)|KANSL1(-64.92kb)|MAPT(0)|MAPT-AS1(+69.48kb)|MAPT-IT1(+66.2kb)|SPPL2C(+117.9kb)|STH(-34.25kb)
17	44172698	rs79348289	C	T		3	7.128e-05	7.128e-05	0.8865	0.8865	0.9064	0	0.8896	0.869	0.8981	KANSL1(0)|KANSL1-AS1(-98.24kb)|LRRC37A(-199.8kb)|MAPT(+67kb)|MAPT-AS1(+199.8kb)|MAPT-IT1(+196.5kb)|STH(+95.64kb)
1	75549318	rs623123	G	T		3	7.129e-05	0.0037	0.8806	0.883	0.17	43.57	0.9279	0.9182	0.8165	LHX8(-44.8kb)|SLC44A5(-118.5kb)
13	83706606	rs2137438	G	A		3	7.129e-05	7.129e-05	0.8933	0.8933	0.8518	0	0.8792	0.8854	0.9109	.
17	44202147	rs62063165	G	A		3	7.13e-05	7.13e-05	0.8863	0.8863	0.9108	0	0.8896	0.8691	0.8974	ARL17A(-174.4kb)|ARL17B(-174.8kb)|KANSL1(0)|KANSL1-AS1(-68.79kb)|LRRC37A(-170.3kb)|MAPT(+96.45kb)|STH(+125.1kb)
17	44199029	rs76924476	C	T		3	7.134e-05	7.134e-05	0.8863	0.8863	0.9142	0	0.8901	0.8693	0.8968	ARL17A(-177.5kb)|ARL17B(-177.9kb)|KANSL1(0)|KANSL1-AS1(-71.91kb)|LRRC37A(-173.5kb)|MAPT(+93.33kb)|STH(+122kb)
17	44201865	rs62063163	T	C		3	7.136e-05	7.136e-05	0.8863	0.8863	0.9097	0	0.8896	0.869	0.8975	ARL17A(-174.6kb)|ARL17B(-175kb)|KANSL1(0)|KANSL1-AS1(-69.07kb)|LRRC37A(-170.6kb)|MAPT(+96.17kb)|STH(+124.8kb)
17	44251582	rs530881963	C	T		3	7.136e-05	7.136e-05	0.886	0.886	0.9098	0	0.8924	0.868	0.8947	ARL17A(-124.9kb)|ARL17B(-125.3kb)|KANSL1(0)|KANSL1-AS1(-19.36kb)|LRRC37A(-120.9kb)|MAPT(+145.9kb)|NSFP1(-198.6kb)|STH(+174.5kb)
17	44252416	rs536694159	C	G		3	7.137e-05	7.137e-05	0.886	0.886	0.909	0	0.8923	0.8679	0.8948	ARL17A(-124.1kb)|ARL17B(-124.5kb)|KANSL1(0)|KANSL1-AS1(-18.52kb)|LRRC37A(-120.1kb)|MAPT(+146.7kb)|NSFP1(-197.8kb)|STH(+175.4kb)
17	44172391	rs80020809	T	C		3	7.138e-05	7.138e-05	0.8865	0.8865	0.9006	0	0.8898	0.8684	0.8984	KANSL1(0)|KANSL1-AS1(-98.55kb)|MAPT(+66.69kb)|MAPT-AS1(+199.5kb)|MAPT-IT1(+196.2kb)|STH(+95.33kb)
17	44173408	rs62061796	A	G		3	7.14e-05	7.14e-05	0.8866	0.8866	0.9051	0	0.8897	0.8689	0.8982	KANSL1(0)|KANSL1-AS1(-97.53kb)|LRRC37A(-199.1kb)|MAPT(+67.71kb)|MAPT-IT1(+197.2kb)|STH(+96.35kb)
17	44169377	rs62061770	C	G		3	7.141e-05	7.141e-05	0.8864	0.8864	0.9058	0	0.8896	0.8689	0.8981	KANSL1(0)|KANSL1-AS1(-101.6kb)|MAPT(+63.68kb)|MAPT-AS1(+196.5kb)|MAPT-IT1(+193.2kb)|STH(+92.32kb)
17	44203520	rs113120855	T	C		3	7.142e-05	7.142e-05	0.8863	0.8863	0.9085	0	0.8896	0.8689	0.8976	ARL17A(-173kb)|ARL17B(-173.4kb)|KANSL1(0)|KANSL1-AS1(-67.42kb)|LRRC37A(-169kb)|MAPT(+97.82kb)|STH(+126.5kb)
17	44204739	rs4581739	C	T		3	7.142e-05	7.142e-05	0.8863	0.8863	0.9101	0	0.8899	0.8689	0.8972	ARL17A(-171.8kb)|ARL17B(-172.2kb)|KANSL1(0)|KANSL1-AS1(-66.2kb)|LRRC37A(-167.8kb)|MAPT(+99.04kb)|STH(+127.7kb)
17	44222067	rs573082572	G	T		3	7.149e-05	7.149e-05	0.8862	0.8862	0.9148	0	0.8883	0.8697	0.8977	ARL17A(-154.4kb)|ARL17B(-154.8kb)|KANSL1(0)|KANSL1-AS1(-48.87kb)|LRRC37A(-150.4kb)|MAPT(+116.4kb)|STH(+145kb)
15	79308215	rs930538	T	C		3	7.15e-05	7.15e-05	1.1028	1.1028	0.5743	0	1.0867	1.1525	1.0855	CTSH(+70.8kb)|LOC729911(-175.8kb)|MIR184(-193.9kb)|MORF4L1(+118.1kb)|RASGRF1(0)
17	44251769	rs570968715	G	A		3	7.15e-05	7.15e-05	0.886	0.886	0.9091	0	0.8923	0.8679	0.8948	ARL17A(-124.7kb)|ARL17B(-125.1kb)|KANSL1(0)|KANSL1-AS1(-19.17kb)|LRRC37A(-120.7kb)|MAPT(+146.1kb)|NSFP1(-198.4kb)|STH(+174.7kb)
19	1021627	rs117481827	C	T		2	7.151e-05	7.209e-05	1.2278	1.2278	0.3171	0.09	1.1587	1.2858	NA	ABCA7(-18.47kb)|ARID3A(+48.82kb)|AZU1(+189.6kb)|CFD(+158kb)|CNN2(-4.67kb)|ELANE(+165.4kb)|GPX4(-82.31kb)|GRIN3B(+11.9kb)|HMHA1(-44.29kb)|KISS1R(+100.6kb)|LPPR3(+199.7kb)|MED16(+128.4kb)|POLR2E(-64.95kb)|PRTN3(+173.5kb)|R3HDM4(+108.4kb)|SBNO2(-86kb)|STK11(-184.2kb)|TMEM259(+0.486kb)|WDR18(+27.06kb)
4	132802838	rs9685383	A	G		2	7.157e-05	7.157e-05	1.576	1.576	0.8254	0	1.6136	1.5339	NA	.
5	7804053	rs115247394	G	A		3	7.157e-05	0.0001255	1.1154	1.1149	0.3464	5.67	1.0818	1.0737	1.1693	ADCY2(0)|C5orf49(-26.44kb)|FASTKD3(-55.22kb)|MTRR(-65.16kb)
20	23600443	rs2424566	A	C		3	7.163e-05	0.05611	1.1033	1.0999	0.0178	75.18	1.1975	1.0022	1.1048	CST1(-127.7kb)|CST3(-13.85kb)|CST4(-65.83kb)|CST8(+123.8kb)|CST9(+13.83kb)|CST9L(+51.06kb)|CST11(+167kb)|CST13P(+77.79kb)|CSTL1(+174.9kb)|NAPB(+198.3kb)
17	44204749	rs113638513	G	A		3	7.168e-05	7.168e-05	0.8863	0.8863	0.9096	0	0.8899	0.8689	0.8973	ARL17A(-171.8kb)|ARL17B(-172.2kb)|KANSL1(0)|KANSL1-AS1(-66.19kb)|LRRC37A(-167.7kb)|MAPT(+99.05kb)|STH(+127.7kb)
17	44221350	rs2532307	A	G		3	7.17e-05	7.17e-05	0.8862	0.8862	0.9131	0	0.8883	0.8696	0.8979	ARL17A(-155.1kb)|ARL17B(-155.6kb)|KANSL1(0)|KANSL1-AS1(-49.59kb)|LRRC37A(-151.1kb)|MAPT(+115.7kb)|STH(+144.3kb)
13	83710915	rs968679	A	G		3	7.175e-05	7.175e-05	0.8932	0.8932	0.8947	0	0.8851	0.8817	0.9081	.
17	44201887	rs62063164	T	C		3	7.176e-05	7.176e-05	0.8864	0.8864	0.9103	0	0.8896	0.8691	0.8975	ARL17A(-174.6kb)|ARL17B(-175kb)|KANSL1(0)|KANSL1-AS1(-69.05kb)|LRRC37A(-170.6kb)|MAPT(+96.19kb)|STH(+124.8kb)
17	44171024	rs62061791	C	T		3	7.181e-05	7.181e-05	0.8866	0.8866	0.9046	0	0.8897	0.8689	0.8983	KANSL1(0)|KANSL1-AS1(-99.91kb)|MAPT(+65.32kb)|MAPT-AS1(+198.1kb)|MAPT-IT1(+194.9kb)|STH(+93.96kb)
7	81502995	rs10242546	A	G		3	7.191e-05	7.191e-05	1.2367	1.2367	0.6355	0	1.3331	1.1765	1.211	CACNA2D1(-76.42kb)|HGF(+103.5kb)
13	83710490	rs2819243	G	A		3	7.191e-05	7.191e-05	0.8932	0.8932	0.8924	0	0.8856	0.8809	0.9082	.
17	44250616	rs535725934	A	G		3	7.195e-05	7.195e-05	0.886	0.886	0.9135	0	0.8923	0.8684	0.8945	ARL17A(-125.9kb)|ARL17B(-126.3kb)|KANSL1(0)|KANSL1-AS1(-20.32kb)|LRRC37A(-121.9kb)|MAPT(+144.9kb)|NSFP1(-199.6kb)|STH(+173.6kb)
17	44169605	rs17660337	C	T		3	7.196e-05	7.196e-05	0.8866	0.8866	0.9042	0	0.8896	0.8689	0.8984	KANSL1(0)|KANSL1-AS1(-101.3kb)|MAPT(+63.91kb)|MAPT-AS1(+196.7kb)|MAPT-IT1(+193.4kb)|STH(+92.54kb)
17	44176170	rs56240678	G	C		3	7.203e-05	7.203e-05	0.8866	0.8866	0.9034	0	0.8897	0.8688	0.8984	KANSL1(0)|KANSL1-AS1(-94.77kb)|LRRC37A(-196.3kb)|MAPT(+70.47kb)|STH(+99.11kb)
5	33430237	rs114938373	A	G		3	7.205e-05	0.05666	1.4314	1.4257	0.015	76.17	1.9176	0.9886	1.5242	ADAMTS12(-97.05kb)|TARS(-10.56kb)
1	75547944	rs370800	T	A		3	7.208e-05	0.003726	0.8807	0.8831	0.17	43.56	0.9278	0.9186	0.8166	LHX8(-46.17kb)|SLC44A5(-119.9kb)
17	44286128	rs547005230	G	A		3	7.212e-05	7.212e-05	0.8858	0.8858	0.8898	0	0.891	0.8658	0.8968	ARL17A(-90.37kb)|ARL17B(-90.78kb)|KANSL1(0)|KANSL1-AS1(+12.04kb)|LRRC37A(-86.37kb)|MAPT(+180.4kb)|NSFP1(-164kb)
17	44214094	rs536077496	G	A		3	7.22e-05	7.22e-05	0.8864	0.8864	0.9096	0	0.888	0.8696	0.8986	ARL17A(-162.4kb)|ARL17B(-162.8kb)|KANSL1(0)|KANSL1-AS1(-56.84kb)|LRRC37A(-158.4kb)|MAPT(+108.4kb)|STH(+137kb)
6	79176424	rs17222925	G	T		3	7.221e-05	7.221e-05	1.1477	1.1477	0.7344	0	1.1797	1.0966	1.1504	.
4	129872344	rs35363237	A	C		3	7.223e-05	0.0001282	1.17	1.1697	0.3438	6.35	1.0845	1.1813	1.2402	C4orf33(-142.5kb)|PHF17(+75.96kb)|SCLT1(0)
17	44253364	rs563621837	A	G		3	7.224e-05	7.224e-05	0.886	0.886	0.9076	0	0.8923	0.8678	0.895	ARL17A(-123.1kb)|ARL17B(-123.5kb)|KANSL1(0)|KANSL1-AS1(-17.57kb)|LRRC37A(-119.1kb)|MAPT(+147.7kb)|NSFP1(-196.8kb)|STH(+176.3kb)
13	83707335	rs2669202	A	G		3	7.226e-05	7.226e-05	0.8934	0.8934	0.853	0	0.8793	0.8856	0.9109	.
17	44170238	rs112596352	A	G		3	7.227e-05	7.227e-05	0.8865	0.8865	0.9041	0	0.8897	0.8688	0.8983	KANSL1(0)|KANSL1-AS1(-100.7kb)|MAPT(+64.54kb)|MAPT-AS1(+197.4kb)|MAPT-IT1(+194.1kb)|STH(+93.18kb)
17	44169769	rs62061789	T	C		3	7.231e-05	7.231e-05	0.8866	0.8866	0.9037	0	0.8896	0.8689	0.8985	KANSL1(0)|KANSL1-AS1(-101.2kb)|MAPT(+64.07kb)|MAPT-AS1(+196.9kb)|MAPT-IT1(+193.6kb)|STH(+92.71kb)
17	44222335	rs544161107	A	G		3	7.231e-05	7.231e-05	0.8863	0.8863	0.9186	0	0.8881	0.8703	0.8977	ARL17A(-154.2kb)|ARL17B(-154.6kb)|KANSL1(0)|KANSL1-AS1(-48.6kb)|LRRC37A(-150.2kb)|MAPT(+116.6kb)|STH(+145.3kb)
17	43847039	rs113934115	T	C		3	7.234e-05	7.234e-05	0.8881	0.8881	0.8507	0	0.881	0.8722	0.9076	CRHR1(0)|CRHR1-IT1(+123.4kb)|LOC644172(+167.3kb)|MAPT(-124.7kb)|MAPT-AS1(-73.68kb)|MAPT-IT1(-126.1kb)|MGC57346(+131.7kb)|SPPL2C(-75.22kb)
10	115451432	rs12356550	A	G		3	7.237e-05	7.237e-05	1.1654	1.1654	0.9366	0	1.1531	1.1492	1.1843	CASP7(0)|DCLRE1A(-143kb)|HABP2(+102.1kb)|MIR4483(-86.32kb)|NHLRC2(-163kb)|NRAP(+27.6kb)|PLEKHS1(-59.78kb)
17	44170414	rs62061790	A	G		3	7.237e-05	7.237e-05	0.8867	0.8867	0.9029	0	0.8897	0.8689	0.8986	KANSL1(0)|KANSL1-AS1(-100.5kb)|MAPT(+64.72kb)|MAPT-AS1(+197.5kb)|MAPT-IT1(+194.2kb)|STH(+93.35kb)
6	166204137	rs9348047	C	G		3	7.238e-05	7.238e-05	1.1062	1.1062	0.5798	0	1.1418	1.067	1.1006	LINC00473(-133.4kb)|LINC00602(-196.9kb)|PDE10A(+128.5kb)
12	95292646	rs35493346	T	C		3	7.239e-05	7.239e-05	0.8566	0.8566	0.5803	0	0.8487	0.9134	0.8252	FGD6(-177.9kb)|KRT19P2(+63.84kb)|MIR492(+64.36kb)|NDUFA12(-72.46kb)|NR2C1(-121.4kb)
5	11985075	rs981316	A	G		3	7.242e-05	7.242e-05	0.9047	0.9047	0.3934	0	0.8813	0.8782	0.9444	CTNND2(+80.96kb)
17	44297148	rs560050580	A	G		3	7.244e-05	7.244e-05	0.8848	0.8848	0.8641	0	0.897	0.8625	0.8916	ARL17A(-79.35kb)|ARL17B(-79.76kb)|KANSL1(0)|KANSL1-AS1(+23.06kb)|LRRC37A(-75.35kb)|MAPT(+191.4kb)|NSFP1(-153kb)
11	35971750	rs263096	A	G		3	7.246e-05	7.246e-05	1.1817	1.1817	0.7714	0	1.1302	1.2042	1.2076	LDLRAD3(0)|MIR3973(-59.9kb)|TRIM44(+140.8kb)
17	44186894	rs62061822	C	A		3	7.246e-05	7.246e-05	0.8866	0.8866	0.9166	0	0.8889	0.8703	0.8979	ARL17A(-189.6kb)|ARL17B(-190kb)|KANSL1(0)|KANSL1-AS1(-84.04kb)|LRRC37A(-185.6kb)|MAPT(+81.2kb)|STH(+109.8kb)
9	460036	rs4740781	T	C		3	7.247e-05	0.0001939	1.1321	1.1331	0.3185	12.59	1.0959	1.2251	1.105	DOCK8(0)|KANK1(-10.26kb)
17	44169759	rs62061788	A	G		3	7.249e-05	7.249e-05	0.8866	0.8866	0.9037	0	0.8896	0.8689	0.8985	KANSL1(0)|KANSL1-AS1(-101.2kb)|MAPT(+64.06kb)|MAPT-AS1(+196.9kb)|MAPT-IT1(+193.6kb)|STH(+92.7kb)
13	83686854	rs2996569	T	C		3	7.25e-05	7.25e-05	0.8934	0.8934	0.8447	0	0.8788	0.8854	0.9114	.
17	44356793	rs2696524	G	A		3	7.251e-05	7.251e-05	0.8837	0.8837	0.8908	0	0.8895	0.8635	0.8946	ARL17A(-19.71kb)|ARL17B(-20.12kb)|KANSL1(+54.05kb)|KANSL1-AS1(+82.7kb)|LRRC37A(-15.7kb)|NSFP1(-93.38kb)
17	44213204	rs542524111	T	C		3	7.255e-05	7.255e-05	0.8864	0.8864	0.9126	0	0.8891	0.8695	0.8977	ARL17A(-163.3kb)|ARL17B(-163.7kb)|KANSL1(0)|KANSL1-AS1(-57.73kb)|LRRC37A(-159.3kb)|MAPT(+107.5kb)|STH(+136.1kb)
17	44254494	rs570324382	C	T		3	7.259e-05	7.259e-05	0.886	0.886	0.9087	0	0.8923	0.8679	0.8949	ARL17A(-122kb)|ARL17B(-122.4kb)|KANSL1(0)|KANSL1-AS1(-16.44kb)|LRRC37A(-118kb)|MAPT(+148.8kb)|NSFP1(-195.7kb)|STH(+177.4kb)
17	43852621	rs62055948	C	T		3	7.26e-05	7.26e-05	0.888	0.888	0.8374	0	0.8812	0.8707	0.9082	CRHR1(0)|CRHR1-IT1(+129kb)|LOC644172(+172.9kb)|MAPT(-119.1kb)|MAPT-AS1(-68.1kb)|MAPT-IT1(-120.5kb)|MGC57346(+137.3kb)|SPPL2C(-69.63kb)
17	44170612	rs17660398	T	C		3	7.26e-05	7.26e-05	0.8867	0.8867	0.9035	0	0.8897	0.8689	0.8985	KANSL1(0)|KANSL1-AS1(-100.3kb)|MAPT(+64.91kb)|MAPT-AS1(+197.7kb)|MAPT-IT1(+194.4kb)|STH(+93.55kb)
17	44120608	rs79252344	G	A		3	7.261e-05	7.261e-05	0.8867	0.8867	0.9092	0	0.8891	0.8697	0.8986	KANSL1(0)|KANSL1-AS1(-150.3kb)|MAPT(+14.91kb)|MAPT-AS1(+147.7kb)|MAPT-IT1(+144.4kb)|SPPL2C(+196.2kb)|STH(+43.55kb)
17	44164090	rs62060858	C	G		3	7.265e-05	7.265e-05	0.8867	0.8867	0.8992	0	0.8892	0.8688	0.8993	KANSL1(0)|KANSL1-AS1(-106.8kb)|MAPT(+58.39kb)|MAPT-AS1(+191.2kb)|MAPT-IT1(+187.9kb)|STH(+87.03kb)
17	44189855	rs79772780	A	G		3	7.265e-05	7.265e-05	0.8847	0.8847	0.9146	0	0.8885	0.8678	0.8957	ARL17A(-186.6kb)|ARL17B(-187.1kb)|KANSL1(0)|KANSL1-AS1(-81.08kb)|LRRC37A(-182.6kb)|MAPT(+84.16kb)|STH(+112.8kb)
17	43827431	rs12150451	G	A		3	7.267e-05	7.267e-05	0.8881	0.8881	0.8262	0	0.8793	0.8719	0.9096	CRHR1(0)|CRHR1-IT1(+103.8kb)|LOC644172(+147.7kb)|MAPT(-144.3kb)|MAPT-AS1(-93.29kb)|MAPT-IT1(-145.7kb)|MGC57346(+112.1kb)|SPPL2C(-94.82kb)
17	44121469	rs569670697	T	C		3	7.269e-05	7.269e-05	0.8867	0.8867	0.9092	0	0.8891	0.8697	0.8986	KANSL1(0)|KANSL1-AS1(-149.5kb)|MAPT(+15.77kb)|MAPT-AS1(+148.6kb)|MAPT-IT1(+145.3kb)|SPPL2C(+197kb)|STH(+44.41kb)
17	44254379	rs550757212	T	C		3	7.269e-05	7.269e-05	0.8861	0.8861	0.9068	0	0.8923	0.8678	0.8952	ARL17A(-122.1kb)|ARL17B(-122.5kb)|KANSL1(0)|KANSL1-AS1(-16.56kb)|LRRC37A(-118.1kb)|MAPT(+148.7kb)|NSFP1(-195.8kb)|STH(+177.3kb)
17	43849366	rs75916678	C	T		3	7.276e-05	7.276e-05	0.8883	0.8883	0.8311	0	0.8803	0.8715	0.9091	CRHR1(0)|CRHR1-IT1(+125.8kb)|LOC644172(+169.6kb)|MAPT(-122.4kb)|MAPT-AS1(-71.36kb)|MAPT-IT1(-123.8kb)|MGC57346(+134kb)|SPPL2C(-72.89kb)
17	44131622	rs62063682	A	G		3	7.277e-05	7.277e-05	0.8867	0.8867	0.8934	0	0.8882	0.8687	0.9004	KANSL1(0)|KANSL1-AS1(-139.3kb)|MAPT(+25.92kb)|MAPT-AS1(+158.7kb)|MAPT-IT1(+155.5kb)|STH(+54.56kb)
1	39144793	rs10128034	C	A		3	7.278e-05	7.278e-05	0.9027	0.9027	0.5197	0	0.8746	0.8908	0.9346	GJA9(-194.9kb)|GJA9-MYCBP(-183.4kb)|MYCBP(-183.4kb)|RRAGC(-159.1kb)
10	115449440	rs77119201	C	A		3	7.279e-05	7.279e-05	1.1654	1.1654	0.9393	0	1.154	1.1489	1.1839	CASP7(0)|DCLRE1A(-145kb)|HABP2(+100.1kb)|MIR4483(-88.31kb)|NHLRC2(-165kb)|NRAP(+25.61kb)|PLEKHS1(-61.77kb)
17	44120442	rs41374248	G	A		3	7.279e-05	7.279e-05	0.8866	0.8866	0.9098	0	0.8891	0.8697	0.8985	KANSL1(0)|KANSL1-AS1(-150.5kb)|MAPT(+14.74kb)|MAPT-AS1(+147.6kb)|MAPT-IT1(+144.3kb)|SPPL2C(+196kb)|STH(+43.38kb)
17	44859410	rs199505	G	A		3	7.281e-05	7.281e-05	1.1282	1.1282	0.9982	0	1.1286	1.1309	1.1259	GOSR2(-141.1kb)|MIR5089(-191kb)|NSF(+24.58kb)|NSFP1(+141.4kb)|RPRML(-196.1kb)|WNT3(0)|WNT9B(-69.56kb)
7	81524887	rs10276586	G	A		3	7.283e-05	7.283e-05	1.237	1.237	0.5453	0	1.349	1.1686	1.2054	CACNA2D1(-54.53kb)|HGF(+125.4kb)
17	44164133	rs62060859	A	G		3	7.284e-05	7.284e-05	0.8867	0.8867	0.8992	0	0.8892	0.8688	0.8993	KANSL1(0)|KANSL1-AS1(-106.8kb)|MAPT(+58.43kb)|MAPT-AS1(+191.3kb)|MAPT-IT1(+188kb)|STH(+87.07kb)
17	44169581	rs111970616	C	T		3	7.284e-05	7.284e-05	0.8866	0.8866	0.9036	0	0.8897	0.8689	0.8985	KANSL1(0)|KANSL1-AS1(-101.4kb)|MAPT(+63.88kb)|MAPT-AS1(+196.7kb)|MAPT-IT1(+193.4kb)|STH(+92.52kb)
17	44168508	rs111364350	T	C		3	7.288e-05	7.288e-05	0.8867	0.8867	0.9028	0	0.8898	0.8689	0.8986	KANSL1(0)|KANSL1-AS1(-102.4kb)|MAPT(+62.81kb)|MAPT-AS1(+195.6kb)|MAPT-IT1(+192.3kb)|STH(+91.45kb)
17	43847868	rs56070245	C	T		3	7.293e-05	7.293e-05	0.8883	0.8883	0.8482	0	0.881	0.8723	0.9079	CRHR1(0)|CRHR1-IT1(+124.3kb)|LOC644172(+168.1kb)|MAPT(-123.9kb)|MAPT-AS1(-72.85kb)|MAPT-IT1(-125.3kb)|MGC57346(+132.5kb)|SPPL2C(-74.39kb)
17	43846668	rs62055903	A	C		3	7.294e-05	7.294e-05	0.8883	0.8883	0.8468	0	0.881	0.8722	0.908	CRHR1(0)|CRHR1-IT1(+123.1kb)|LOC644172(+166.9kb)|MAPT(-125.1kb)|MAPT-AS1(-74.05kb)|MAPT-IT1(-126.5kb)|MGC57346(+131.3kb)|SPPL2C(-75.59kb)
17	44167729	rs62061767	G	A		3	7.294e-05	7.294e-05	0.8867	0.8867	0.9025	0	0.8897	0.8689	0.8987	KANSL1(0)|KANSL1-AS1(-103.2kb)|MAPT(+62.03kb)|MAPT-AS1(+194.8kb)|MAPT-IT1(+191.6kb)|STH(+90.67kb)
17	43824201	rs111497072	A	G		3	7.295e-05	7.295e-05	0.8881	0.8881	0.8261	0	0.8794	0.8718	0.9096	CRHR1(0)|CRHR1-IT1(+100.6kb)|LOC644172(+144.5kb)|MAPT(-147.5kb)|MAPT-AS1(-96.52kb)|MAPT-IT1(-148.9kb)|MGC57346(+108.9kb)|SPPL2C(-98.05kb)
17	44165098	rs3912061	T	C		3	7.303e-05	7.303e-05	0.8868	0.8868	0.9005	0	0.8895	0.8689	0.8991	KANSL1(0)|KANSL1-AS1(-105.8kb)|MAPT(+59.4kb)|MAPT-AS1(+192.2kb)|MAPT-IT1(+188.9kb)|STH(+88.04kb)
17	44132887	rs62060760	T	C		3	7.305e-05	7.305e-05	0.8868	0.8868	0.899	0	0.8891	0.8689	0.8995	KANSL1(0)|KANSL1-AS1(-138.1kb)|MAPT(+27.19kb)|MAPT-AS1(+160kb)|MAPT-IT1(+156.7kb)|STH(+55.83kb)
13	83707174	rs2175643	C	T		3	7.306e-05	7.306e-05	0.8935	0.8935	0.8543	0	0.8795	0.8856	0.9109	.
17	44167661	rs79923630	T	G		3	7.308e-05	7.308e-05	0.8867	0.8867	0.9025	0	0.8897	0.8689	0.8987	KANSL1(0)|KANSL1-AS1(-103.3kb)|MAPT(+61.96kb)|MAPT-AS1(+194.8kb)|MAPT-IT1(+191.5kb)|STH(+90.6kb)
17	43823880	rs62054431	T	C		3	7.309e-05	7.309e-05	0.8882	0.8882	0.8266	0	0.8794	0.8719	0.9096	CRHR1(0)|CRHR1-IT1(+100.3kb)|LOC644172(+144.1kb)|MAPT(-147.9kb)|MAPT-AS1(-96.84kb)|MAPT-IT1(-149.3kb)|MGC57346(+108.6kb)|SPPL2C(-98.38kb)
17	44167101	rs17660294	C	T		3	7.312e-05	7.312e-05	0.8867	0.8867	0.9019	0	0.8897	0.8689	0.8988	KANSL1(0)|KANSL1-AS1(-103.8kb)|MAPT(+61.4kb)|MAPT-AS1(+194.2kb)|MAPT-IT1(+190.9kb)|STH(+90.04kb)
17	44223387	rs568850733	C	T		3	7.313e-05	7.313e-05	0.8863	0.8863	0.9172	0	0.8879	0.8703	0.898	ARL17A(-153.1kb)|ARL17B(-153.5kb)|KANSL1(0)|KANSL1-AS1(-47.55kb)|LRRC37A(-149.1kb)|MAPT(+117.7kb)|STH(+146.3kb)
17	44131559	rs62063680	A	C		3	7.314e-05	7.314e-05	0.8867	0.8867	0.8933	0	0.8883	0.8687	0.9004	KANSL1(0)|KANSL1-AS1(-139.4kb)|MAPT(+25.86kb)|MAPT-AS1(+158.7kb)|MAPT-IT1(+155.4kb)|STH(+54.5kb)
17	43823889	rs62054432	A	C		3	7.315e-05	7.315e-05	0.8882	0.8882	0.8266	0	0.8794	0.8719	0.9096	CRHR1(0)|CRHR1-IT1(+100.3kb)|LOC644172(+144.1kb)|MAPT(-147.9kb)|MAPT-AS1(-96.83kb)|MAPT-IT1(-149.3kb)|MGC57346(+108.6kb)|SPPL2C(-98.37kb)
17	43846820	rs111374028	A	G		3	7.32e-05	7.32e-05	0.8884	0.8884	0.8459	0	0.881	0.8722	0.9081	CRHR1(0)|CRHR1-IT1(+123.2kb)|LOC644172(+167.1kb)|MAPT(-124.9kb)|MAPT-AS1(-73.9kb)|MAPT-IT1(-126.3kb)|MGC57346(+131.5kb)|SPPL2C(-75.44kb)
17	44132592	rs62063687	G	A		3	7.323e-05	7.323e-05	0.8864	0.8864	0.901	0	0.8887	0.8688	0.8992	KANSL1(0)|KANSL1-AS1(-138.3kb)|MAPT(+26.89kb)|MAPT-AS1(+159.7kb)|MAPT-IT1(+156.4kb)|STH(+55.53kb)
17	44233589	rs575572584	C	T		3	7.323e-05	7.323e-05	0.8863	0.8863	0.9246	0	0.8892	0.8705	0.8965	ARL17A(-142.9kb)|ARL17B(-143.3kb)|KANSL1(0)|KANSL1-AS1(-37.35kb)|LRRC37A(-138.9kb)|MAPT(+127.9kb)|STH(+156.5kb)
17	44356949	rs571516577	C	T		3	7.326e-05	7.326e-05	0.8838	0.8838	0.8905	0	0.8895	0.8636	0.8948	ARL17A(-19.55kb)|ARL17B(-19.96kb)|KANSL1(+54.21kb)|KANSL1-AS1(+82.86kb)|LRRC37A(-15.55kb)|NSFP1(-93.23kb)
17	43823125	rs62054429	A	G		3	7.327e-05	7.327e-05	0.8881	0.8881	0.8284	0	0.8784	0.8729	0.9096	CRHR1(0)|CRHR1-IT1(+99.53kb)|LOC644172(+143.4kb)|MAPT(-148.6kb)|MAPT-AS1(-97.6kb)|MAPT-IT1(-150kb)|MGC57346(+107.8kb)|SPPL2C(-99.13kb)
17	43845480	rs58089049	C	T		3	7.328e-05	7.328e-05	1.1184	1.1184	0.7156	0	1.0961	1.1599	1.1097	CRHR1(0)|CRHR1-IT1(+121.9kb)|LOC644172(+165.7kb)|MAPT(-126.3kb)|MAPT-AS1(-75.24kb)|MAPT-IT1(-127.7kb)|MGC57346(+130.2kb)|SPPL2C(-76.78kb)
17	43852605	rs62055947	T	C		3	7.328e-05	7.328e-05	0.8881	0.8881	0.84	0	0.8815	0.8707	0.908	CRHR1(0)|CRHR1-IT1(+129kb)|LOC644172(+172.9kb)|MAPT(-119.1kb)|MAPT-AS1(-68.12kb)|MAPT-IT1(-120.5kb)|MGC57346(+137.3kb)|SPPL2C(-69.65kb)
17	44222460	rs533125554	G	T		3	7.329e-05	7.329e-05	0.8863	0.8863	0.9175	0	0.8882	0.8702	0.8978	ARL17A(-154kb)|ARL17B(-154.5kb)|KANSL1(0)|KANSL1-AS1(-48.48kb)|LRRC37A(-150kb)|MAPT(+116.8kb)|STH(+145.4kb)
17	43824848	rs12150683	G	A		3	7.33e-05	7.33e-05	0.8882	0.8882	0.8256	0	0.8794	0.8719	0.9097	CRHR1(0)|CRHR1-IT1(+101.3kb)|LOC644172(+145.1kb)|MAPT(-146.9kb)|MAPT-AS1(-95.87kb)|MAPT-IT1(-148.3kb)|MGC57346(+109.5kb)|SPPL2C(-97.41kb)
17	44167464	rs62061766	A	G		3	7.331e-05	7.331e-05	0.8867	0.8867	0.9025	0	0.8897	0.8689	0.8987	KANSL1(0)|KANSL1-AS1(-103.5kb)|MAPT(+61.76kb)|MAPT-AS1(+194.6kb)|MAPT-IT1(+191.3kb)|STH(+90.4kb)
8	121896783	rs61661053	A	C		3	7.334e-05	0.0001143	0.7606	0.7609	0.3489	5.02	0.6716	0.8554	0.7839	SNTB1(+72.47kb)
17	44166197	rs62061764	G	A		3	7.334e-05	7.334e-05	0.8867	0.8867	0.9028	0	0.8896	0.869	0.8988	KANSL1(0)|KANSL1-AS1(-104.7kb)|MAPT(+60.5kb)|MAPT-AS1(+193.3kb)|MAPT-IT1(+190kb)|STH(+89.14kb)
17	43829353	rs62054442	G	A		3	7.336e-05	7.336e-05	0.8882	0.8882	0.837	0	0.8792	0.873	0.909	CRHR1(0)|CRHR1-IT1(+105.8kb)|LOC644172(+149.6kb)|MAPT(-142.4kb)|MAPT-AS1(-91.37kb)|MAPT-IT1(-143.8kb)|MGC57346(+114kb)|SPPL2C(-92.9kb)
17	44224686	rs577620178	T	A		3	7.342e-05	7.342e-05	0.8864	0.8864	0.9166	0	0.888	0.8703	0.8981	ARL17A(-151.8kb)|ARL17B(-152.2kb)|KANSL1(0)|KANSL1-AS1(-46.25kb)|LRRC37A(-147.8kb)|MAPT(+119kb)|STH(+147.6kb)
1	39130023	rs2377500	C	T		3	7.343e-05	7.343e-05	0.9029	0.9029	0.9289	0	0.8907	0.9068	0.9108	GJA9-MYCBP(-198.1kb)|MYCBP(-198.1kb)|RRAGC(-173.8kb)
17	43824908	rs12150332	T	C		3	7.343e-05	7.343e-05	0.8882	0.8882	0.8257	0	0.8794	0.8719	0.9097	CRHR1(0)|CRHR1-IT1(+101.3kb)|LOC644172(+145.2kb)|MAPT(-146.8kb)|MAPT-AS1(-95.81kb)|MAPT-IT1(-148.2kb)|MGC57346(+109.6kb)|SPPL2C(-97.35kb)
17	44057595	rs3785884	A	G		3	7.344e-05	7.344e-05	0.8875	0.8875	0.919	0	0.8872	0.8727	0.9001	CRHR1(+144.4kb)|KANSL1(-49.69kb)|MAPT(0)|MAPT-AS1(+84.72kb)|MAPT-IT1(+81.43kb)|SPPL2C(+133.2kb)|STH(-19.02kb)
17	44355602	rs2696532	G	A		3	7.344e-05	7.344e-05	0.8831	0.8831	0.8597	0	0.8889	0.86	0.8962	ARL17A(-20.9kb)|ARL17B(-21.31kb)|KANSL1(+52.86kb)|KANSL1-AS1(+81.51kb)|LRRC37A(-16.89kb)|NSFP1(-94.58kb)
17	43825339	rs62054435	G	C		3	7.349e-05	7.349e-05	0.8882	0.8882	0.8242	0	0.8794	0.8718	0.9098	CRHR1(0)|CRHR1-IT1(+101.7kb)|LOC644172(+145.6kb)|MAPT(-146.4kb)|MAPT-AS1(-95.38kb)|MAPT-IT1(-147.8kb)|MGC57346(+110kb)|SPPL2C(-96.92kb)
17	44122484	rs529844822	T	C		3	7.349e-05	7.349e-05	0.8868	0.8868	0.9087	0	0.8891	0.8698	0.8988	KANSL1(0)|KANSL1-AS1(-148.5kb)|MAPT(+16.78kb)|MAPT-AS1(+149.6kb)|MAPT-IT1(+146.3kb)|SPPL2C(+198kb)|STH(+45.42kb)
17	44162284	rs17660065	C	T		3	7.352e-05	7.352e-05	0.8868	0.8868	0.8959	0	0.8886	0.8689	0.9001	KANSL1(0)|KANSL1-AS1(-108.7kb)|MAPT(+56.58kb)|MAPT-AS1(+189.4kb)|MAPT-IT1(+186.1kb)|STH(+85.22kb)
17	44256655	rs573087564	A	G		3	7.352e-05	7.352e-05	0.8708	0.8708	0.9594	0	0.8645	0.8632	0.8819	ARL17A(-119.8kb)|ARL17B(-120.3kb)|KANSL1(0)|KANSL1-AS1(-14.28kb)|LRRC37A(-115.8kb)|MAPT(+151kb)|NSFP1(-193.5kb)|STH(+179.6kb)
1	39137056	rs10082128	C	G		3	7.353e-05	7.353e-05	0.903	0.903	0.9085	0	0.8889	0.9102	0.9104	GJA9-MYCBP(-191.1kb)|MYCBP(-191.1kb)|RRAGC(-166.8kb)
17	44163411	rs55864131	C	T		3	7.354e-05	7.354e-05	0.8868	0.8868	0.8978	0	0.889	0.8689	0.8997	KANSL1(0)|KANSL1-AS1(-107.5kb)|MAPT(+57.71kb)|MAPT-AS1(+190.5kb)|MAPT-IT1(+187.2kb)|STH(+86.35kb)
17	44228529	rs577482939	A	G		3	7.356e-05	7.356e-05	0.8864	0.8864	0.919	0	0.8883	0.8704	0.8977	ARL17A(-148kb)|ARL17B(-148.4kb)|KANSL1(0)|KANSL1-AS1(-42.41kb)|LRRC37A(-144kb)|MAPT(+122.8kb)|STH(+151.5kb)
12	7825135	rs11055158	A	G		3	7.357e-05	0.008363	1.1331	1.1265	0.1328	50.47	1.1428	1.0232	1.1999	APOBEC1(+6.633kb)|CD163(+168.7kb)|CLEC4C(-56.88kb)|DPPA3(-38.95kb)|GDF3(-17.24kb)|NANOG(-116.9kb)|NANOGNB(-92.68kb)|SLC2A14(-141.3kb)
17	43994623	rs112647192	A	G		3	7.357e-05	7.357e-05	0.8877	0.8877	0.8594	0	0.8835	0.8703	0.9062	CRHR1(+81.43kb)|KANSL1(-112.7kb)|MAPT(0)|MAPT-AS1(+21.74kb)|MAPT-IT1(+18.46kb)|SPPL2C(+70.18kb)|STH(-81.99kb)
17	43825478	rs75715199	A	G		3	7.358e-05	7.358e-05	0.8882	0.8882	0.8242	0	0.8794	0.8718	0.9098	CRHR1(0)|CRHR1-IT1(+101.9kb)|LOC644172(+145.7kb)|MAPT(-146.3kb)|MAPT-AS1(-95.24kb)|MAPT-IT1(-147.7kb)|MGC57346(+110.1kb)|SPPL2C(-96.78kb)
17	44165435	rs3912060	T	C		3	7.358e-05	7.358e-05	0.8867	0.8867	0.9024	0	0.8895	0.869	0.8989	KANSL1(0)|KANSL1-AS1(-105.5kb)|MAPT(+59.74kb)|MAPT-AS1(+192.6kb)|MAPT-IT1(+189.3kb)|STH(+88.38kb)
17	44223060	rs527778993	A	G		3	7.363e-05	7.363e-05	0.8864	0.8864	0.9166	0	0.888	0.8703	0.8981	ARL17A(-153.4kb)|ARL17B(-153.9kb)|KANSL1(0)|KANSL1-AS1(-47.88kb)|LRRC37A(-149.4kb)|MAPT(+117.4kb)|STH(+146kb)
17	44251230	rs541260793	C	T		3	7.367e-05	7.367e-05	0.8862	0.8862	0.9077	0	0.8923	0.868	0.8953	ARL17A(-125.3kb)|ARL17B(-125.7kb)|KANSL1(0)|KANSL1-AS1(-19.71kb)|LRRC37A(-121.3kb)|MAPT(+145.5kb)|NSFP1(-198.9kb)|STH(+174.2kb)
1	162252870	rs10919060	C	T		3	7.372e-05	7.372e-05	0.896	0.896	0.5925	0	0.8672	0.8915	0.9261	C1orf111(-90.64kb)|C1orf226(-95.82kb)|MIR556(-59.46kb)|MIR4654(+125.9kb)|NOS1AP(0)|SH2D1B(-112.2kb)
17	44223243	rs567744882	A	G		3	7.373e-05	7.373e-05	0.8864	0.8864	0.917	0	0.8882	0.8702	0.8979	ARL17A(-153.3kb)|ARL17B(-153.7kb)|KANSL1(0)|KANSL1-AS1(-47.7kb)|LRRC37A(-149.3kb)|MAPT(+117.5kb)|STH(+146.2kb)
17	44166311	rs17660167	T	C		3	7.376e-05	7.376e-05	0.8868	0.8868	0.9008	0	0.8897	0.8689	0.899	KANSL1(0)|KANSL1-AS1(-104.6kb)|MAPT(+60.61kb)|MAPT-AS1(+193.4kb)|MAPT-IT1(+190.1kb)|STH(+89.25kb)
17	44251972	rs547200563	A	G		3	7.376e-05	7.376e-05	0.8862	0.8862	0.9067	0	0.8923	0.8679	0.8954	ARL17A(-124.5kb)|ARL17B(-124.9kb)|KANSL1(0)|KANSL1-AS1(-18.97kb)|LRRC37A(-120.5kb)|MAPT(+146.3kb)|NSFP1(-198.2kb)|STH(+174.9kb)
17	44225802	rs556323004	T	C		3	7.378e-05	7.378e-05	0.8864	0.8864	0.9172	0	0.888	0.8703	0.898	ARL17A(-150.7kb)|ARL17B(-151.1kb)|KANSL1(0)|KANSL1-AS1(-45.14kb)|LRRC37A(-146.7kb)|MAPT(+120.1kb)|STH(+148.7kb)
17	43903336	rs17763050	A	G		3	7.38e-05	7.38e-05	0.8882	0.8882	0.8579	0	0.8845	0.8699	0.9059	CRHR1(0)|CRHR1-IT1(+179.7kb)|MAPT(-68.41kb)|MAPT-AS1(-17.38kb)|MAPT-IT1(-69.81kb)|MGC57346(+188kb)|SPPL2C(-18.92kb)|STH(-173.3kb)
17	44207778	rs17661385	G	A		3	7.38e-05	7.38e-05	0.8865	0.8865	0.9037	0	0.8896	0.8687	0.8983	ARL17A(-168.7kb)|ARL17B(-169.1kb)|KANSL1(0)|KANSL1-AS1(-63.16kb)|LRRC37A(-164.7kb)|MAPT(+102.1kb)|STH(+130.7kb)
17	44226126	rs543124303	C	A		3	7.382e-05	7.382e-05	0.8864	0.8864	0.9172	0	0.888	0.8703	0.898	ARL17A(-150.4kb)|ARL17B(-150.8kb)|KANSL1(0)|KANSL1-AS1(-44.81kb)|LRRC37A(-146.4kb)|MAPT(+120.4kb)|STH(+149.1kb)
17	43847374	rs62055928	A	G		3	7.383e-05	7.383e-05	0.8883	0.8883	0.8421	0	0.8812	0.8717	0.9083	CRHR1(0)|CRHR1-IT1(+123.8kb)|LOC644172(+167.6kb)|MAPT(-124.4kb)|MAPT-AS1(-73.35kb)|MAPT-IT1(-125.8kb)|MGC57346(+132kb)|SPPL2C(-74.88kb)
1	228921636	rs12756030	T	C		3	7.39e-05	0.001708	1.2627	1.2635	0.209	36.11	1.0927	1.4006	1.3353	DUSP5P1(+133.5kb)|RHOU(+39.22kb)
17	44165852	rs74348235	G	A		3	7.39e-05	7.39e-05	0.8869	0.8869	0.9015	0	0.8897	0.869	0.899	KANSL1(0)|KANSL1-AS1(-105.1kb)|MAPT(+60.15kb)|MAPT-AS1(+193kb)|MAPT-IT1(+189.7kb)|STH(+88.79kb)
17	44228609	rs541759959	G	C		3	7.392e-05	7.392e-05	0.8864	0.8864	0.919	0	0.8883	0.8704	0.8977	ARL17A(-147.9kb)|ARL17B(-148.3kb)|KANSL1(0)|KANSL1-AS1(-42.33kb)|LRRC37A(-143.9kb)|MAPT(+122.9kb)|STH(+151.5kb)
17	44226030	rs553779720	A	G		3	7.393e-05	7.393e-05	0.8864	0.8864	0.916	0	0.888	0.8703	0.8982	ARL17A(-150.5kb)|ARL17B(-150.9kb)|KANSL1(0)|KANSL1-AS1(-44.91kb)|LRRC37A(-146.5kb)|MAPT(+120.3kb)|STH(+149kb)
17	44161875	rs62060856	C	A		3	7.394e-05	7.394e-05	0.8869	0.8869	0.8972	0	0.8886	0.8691	0.9001	KANSL1(0)|KANSL1-AS1(-109.1kb)|MAPT(+56.18kb)|MAPT-AS1(+189kb)|MAPT-IT1(+185.7kb)|STH(+84.82kb)
17	44161985	rs2316955	G	T		3	7.394e-05	7.394e-05	0.8868	0.8868	0.8966	0	0.8886	0.869	0.9001	KANSL1(0)|KANSL1-AS1(-109kb)|MAPT(+56.29kb)|MAPT-AS1(+189.1kb)|MAPT-IT1(+185.8kb)|STH(+84.92kb)
17	44161860	rs62060855	T	C		3	7.397e-05	7.397e-05	0.8869	0.8869	0.8972	0	0.8886	0.8691	0.9001	KANSL1(0)|KANSL1-AS1(-109.1kb)|MAPT(+56.16kb)|MAPT-AS1(+189kb)|MAPT-IT1(+185.7kb)|STH(+84.8kb)
17	44166646	rs17660251	T	C		3	7.403e-05	7.403e-05	0.8868	0.8868	0.9009	0	0.8897	0.8689	0.899	KANSL1(0)|KANSL1-AS1(-104.3kb)|MAPT(+60.95kb)|MAPT-AS1(+193.8kb)|MAPT-IT1(+190.5kb)|STH(+89.59kb)
17	43827209	rs17334894	A	G		3	7.404e-05	7.404e-05	0.8883	0.8883	0.8223	0	0.8794	0.8718	0.91	CRHR1(0)|CRHR1-IT1(+103.6kb)|LOC644172(+147.5kb)|MAPT(-144.5kb)|MAPT-AS1(-93.51kb)|MAPT-IT1(-145.9kb)|MGC57346(+111.9kb)|SPPL2C(-95.05kb)
17	44123685	rs74571696	A	G		3	7.406e-05	7.406e-05	0.8868	0.8868	0.9092	0	0.8892	0.8698	0.8987	KANSL1(0)|KANSL1-AS1(-147.3kb)|MAPT(+17.99kb)|MAPT-AS1(+150.8kb)|MAPT-IT1(+147.5kb)|SPPL2C(+199.2kb)|STH(+46.62kb)
17	44165803	rs17660132	C	T		3	7.411e-05	7.411e-05	0.8869	0.8869	0.9019	0	0.8898	0.869	0.8989	KANSL1(0)|KANSL1-AS1(-105.1kb)|MAPT(+60.1kb)|MAPT-AS1(+192.9kb)|MAPT-IT1(+189.6kb)|STH(+88.74kb)
17	44287310	rs531013081	G	A		3	7.42e-05	7.42e-05	0.886	0.886	0.8852	0	0.8911	0.8656	0.8974	ARL17A(-89.19kb)|ARL17B(-89.6kb)|KANSL1(0)|KANSL1-AS1(+13.22kb)|LRRC37A(-85.19kb)|MAPT(+181.6kb)|NSFP1(-162.9kb)
17	44205122	rs62063174	G	C		3	7.421e-05	7.421e-05	0.8866	0.8866	0.9049	0	0.8899	0.8688	0.8981	ARL17A(-171.4kb)|ARL17B(-171.8kb)|KANSL1(0)|KANSL1-AS1(-65.82kb)|LRRC37A(-167.4kb)|MAPT(+99.42kb)|STH(+128.1kb)
17	43826351	rs12150363	G	A		3	7.423e-05	7.423e-05	0.8883	0.8883	0.8223	0	0.8794	0.8718	0.91	CRHR1(0)|CRHR1-IT1(+102.8kb)|LOC644172(+146.6kb)|MAPT(-145.4kb)|MAPT-AS1(-94.37kb)|MAPT-IT1(-146.8kb)|MGC57346(+111kb)|SPPL2C(-95.9kb)
17	43825912	rs17334797	G	A		3	7.425e-05	7.425e-05	0.8883	0.8883	0.8236	0	0.8795	0.8718	0.9099	CRHR1(0)|CRHR1-IT1(+102.3kb)|LOC644172(+146.2kb)|MAPT(-145.8kb)|MAPT-AS1(-94.81kb)|MAPT-IT1(-147.2kb)|MGC57346(+110.6kb)|SPPL2C(-96.34kb)
17	43825711	rs62054438	C	A		3	7.427e-05	7.427e-05	0.8883	0.8883	0.8237	0	0.8795	0.8718	0.9099	CRHR1(0)|CRHR1-IT1(+102.1kb)|LOC644172(+146kb)|MAPT(-146kb)|MAPT-AS1(-95.01kb)|MAPT-IT1(-147.4kb)|MGC57346(+110.4kb)|SPPL2C(-96.54kb)
17	43825725	rs62054439	T	G		3	7.429e-05	7.429e-05	0.8883	0.8883	0.8237	0	0.8795	0.8718	0.9099	CRHR1(0)|CRHR1-IT1(+102.1kb)|LOC644172(+146kb)|MAPT(-146kb)|MAPT-AS1(-95kb)|MAPT-IT1(-147.4kb)|MGC57346(+110.4kb)|SPPL2C(-96.53kb)
13	83707600	rs2639478	G	A		3	7.432e-05	7.432e-05	0.8936	0.8936	0.861	0	0.8793	0.8871	0.9104	.
17	44123717	rs79698033	T	C		3	7.433e-05	7.433e-05	0.8868	0.8868	0.9087	0	0.8892	0.8698	0.8988	KANSL1(0)|KANSL1-AS1(-147.2kb)|MAPT(+18.02kb)|MAPT-AS1(+150.8kb)|MAPT-IT1(+147.6kb)|SPPL2C(+199.3kb)|STH(+46.66kb)
17	43849327	rs76294809	A	G		3	7.435e-05	7.435e-05	0.8884	0.8884	0.8397	0	0.8814	0.8715	0.9085	CRHR1(0)|CRHR1-IT1(+125.7kb)|LOC644172(+169.6kb)|MAPT(-122.4kb)|MAPT-AS1(-71.39kb)|MAPT-IT1(-123.8kb)|MGC57346(+134kb)|SPPL2C(-72.93kb)
17	43994386	rs17649518	A	C		3	7.437e-05	7.437e-05	0.8878	0.8878	0.8616	0	0.8837	0.8705	0.9061	CRHR1(+81.19kb)|KANSL1(-112.9kb)|MAPT(0)|MAPT-AS1(+21.51kb)|MAPT-IT1(+18.22kb)|SPPL2C(+69.95kb)|STH(-82.23kb)
17	44126977	rs74977736	C	G		3	7.44e-05	7.44e-05	0.8868	0.8868	0.9009	0	0.8888	0.8693	0.8997	KANSL1(0)|KANSL1-AS1(-144kb)|MAPT(+21.28kb)|MAPT-AS1(+154.1kb)|MAPT-IT1(+150.8kb)|STH(+49.92kb)
17	43826305	rs12150658	A	G		3	7.441e-05	7.441e-05	0.8883	0.8883	0.8229	0	0.8794	0.8719	0.91	CRHR1(0)|CRHR1-IT1(+102.7kb)|LOC644172(+146.6kb)|MAPT(-145.4kb)|MAPT-AS1(-94.42kb)|MAPT-IT1(-146.8kb)|MGC57346(+111kb)|SPPL2C(-95.95kb)
17	44225485	rs566458560	C	T		3	7.443e-05	7.443e-05	0.8864	0.8864	0.9161	0	0.888	0.8703	0.8982	ARL17A(-151kb)|ARL17B(-151.4kb)|KANSL1(0)|KANSL1-AS1(-45.45kb)|LRRC37A(-147kb)|MAPT(+119.8kb)|STH(+148.4kb)
17	44204304	rs77095128	G	T		3	7.447e-05	7.447e-05	0.8866	0.8866	0.9043	0	0.8897	0.8688	0.8983	ARL17A(-172.2kb)|ARL17B(-172.6kb)|KANSL1(0)|KANSL1-AS1(-66.63kb)|LRRC37A(-168.2kb)|MAPT(+98.6kb)|STH(+127.2kb)
17	44205839	rs1122381	G	A		3	7.448e-05	7.448e-05	0.8866	0.8866	0.9038	0	0.8899	0.8687	0.8982	ARL17A(-170.7kb)|ARL17B(-171.1kb)|KANSL1(0)|KANSL1-AS1(-65.1kb)|LRRC37A(-166.7kb)|MAPT(+100.1kb)|STH(+128.8kb)
17	44285531	rs559754274	A	G		3	7.453e-05	7.453e-05	0.8859	0.8859	0.8899	0	0.8912	0.866	0.897	ARL17A(-90.97kb)|ARL17B(-91.38kb)|KANSL1(0)|KANSL1-AS1(+11.44kb)|LRRC37A(-86.96kb)|MAPT(+179.8kb)|NSFP1(-164.6kb)
17	43826637	rs12150672	A	G		3	7.456e-05	7.456e-05	0.8883	0.8883	0.8228	0	0.8795	0.8718	0.91	CRHR1(0)|CRHR1-IT1(+103kb)|LOC644172(+146.9kb)|MAPT(-145.1kb)|MAPT-AS1(-94.08kb)|MAPT-IT1(-146.5kb)|MGC57346(+111.3kb)|SPPL2C(-95.62kb)
17	43923703	rs12185235	T	C		3	7.457e-05	7.457e-05	0.8885	0.8885	0.871	0	0.8858	0.8707	0.9051	CRHR1(+10.51kb)|KANSL1(-183.6kb)|MAPT(-48.04kb)|MAPT-AS1(0)|MAPT-IT1(-49.44kb)|SPPL2C(0)|STH(-152.9kb)
7	81523305	rs77462545	T	C		3	7.463e-05	7.463e-05	1.2367	1.2367	0.5477	0	1.3483	1.1691	1.2047	CACNA2D1(-56.11kb)|HGF(+123.9kb)
17	43847741	rs56268325	C	T		3	7.463e-05	7.463e-05	0.8885	0.8885	0.8458	0	0.8812	0.8722	0.9082	CRHR1(0)|CRHR1-IT1(+124.1kb)|LOC644172(+168kb)|MAPT(-124kb)|MAPT-AS1(-72.98kb)|MAPT-IT1(-125.4kb)|MGC57346(+132.4kb)|SPPL2C(-74.51kb)
12	7825560	rs10845675	G	T		3	7.466e-05	0.007677	1.1332	1.1269	0.1379	49.53	1.1456	1.0234	1.1981	APOBEC1(+7.058kb)|CD163(+169.1kb)|CLEC4C(-56.45kb)|DPPA3(-38.53kb)|GDF3(-16.82kb)|NANOG(-116.4kb)|NANOGNB(-92.25kb)|SLC2A14(-140.8kb)
1	162169268	rs10918859	A	G		3	7.469e-05	0.003266	0.882	0.8789	0.1496	47.37	0.8573	0.822	0.9514	C1orf111(-174.2kb)|C1orf226(-179.4kb)|MIR556(-143.1kb)|MIR4654(+42.3kb)|NOS1AP(0)|OLFML2B(+175.6kb)|SH2D1B(-195.8kb)
17	44207066	rs17661348	G	A		3	7.469e-05	7.469e-05	0.8866	0.8866	0.9036	0	0.89	0.8687	0.8982	ARL17A(-169.4kb)|ARL17B(-169.8kb)|KANSL1(0)|KANSL1-AS1(-63.87kb)|LRRC37A(-165.4kb)|MAPT(+101.4kb)|STH(+130kb)
13	83707616	rs2800362	C	A		3	7.473e-05	7.473e-05	0.8936	0.8936	0.8611	0	0.8793	0.8871	0.9104	.
17	44131798	rs79180862	T	C		3	7.473e-05	7.473e-05	0.8868	0.8868	0.8924	0	0.8887	0.8686	0.9004	KANSL1(0)|KANSL1-AS1(-139.1kb)|MAPT(+26.1kb)|MAPT-AS1(+158.9kb)|MAPT-IT1(+155.6kb)|STH(+54.74kb)
17	43847912	rs56387266	C	T		3	7.478e-05	7.478e-05	0.8885	0.8885	0.8457	0	0.8812	0.8722	0.9082	CRHR1(0)|CRHR1-IT1(+124.3kb)|LOC644172(+168.2kb)|MAPT(-123.8kb)|MAPT-AS1(-72.81kb)|MAPT-IT1(-125.2kb)|MGC57346(+132.6kb)|SPPL2C(-74.34kb)
17	44281452	rs555346866	G	A		3	7.478e-05	7.478e-05	0.8859	0.8859	0.8918	0	0.8906	0.8663	0.8973	ARL17A(-95.05kb)|ARL17B(-95.46kb)|KANSL1(0)|KANSL1-AS1(+7.363kb)|LRRC37A(-91.04kb)|MAPT(+175.8kb)|NSFP1(-168.7kb)
17	43844560	rs55657917	G	T		3	7.483e-05	7.483e-05	0.8873	0.8873	0.7988	0	0.8835	0.8647	0.9089	CRHR1(0)|CRHR1-IT1(+121kb)|LOC644172(+164.8kb)|MAPT(-127.2kb)|MAPT-AS1(-76.16kb)|MAPT-IT1(-128.6kb)|MGC57346(+129.2kb)|SPPL2C(-77.7kb)
17	43964561	rs62055545	T	C		3	7.483e-05	7.483e-05	0.8868	0.8868	0.8656	0	0.8846	0.8683	0.9041	CRHR1(+51.37kb)|KANSL1(-142.7kb)|MAPT(-7.186kb)|MAPT-AS1(0)|MAPT-IT1(-8.587kb)|SPPL2C(+40.12kb)|STH(-112.1kb)
13	83707638	rs2669203	A	T		3	7.484e-05	7.484e-05	0.8937	0.8937	0.8591	0	0.8793	0.8871	0.9106	.
17	43844559	rs56194509	G	T		3	7.486e-05	7.486e-05	0.8873	0.8873	0.7988	0	0.8835	0.8647	0.9089	CRHR1(0)|CRHR1-IT1(+121kb)|LOC644172(+164.8kb)|MAPT(-127.2kb)|MAPT-AS1(-76.16kb)|MAPT-IT1(-128.6kb)|MGC57346(+129.2kb)|SPPL2C(-77.7kb)
17	43994358	rs111541901	T	C		3	7.492e-05	7.492e-05	0.8878	0.8878	0.8614	0	0.8836	0.8706	0.9062	CRHR1(+81.16kb)|KANSL1(-112.9kb)|MAPT(0)|MAPT-AS1(+21.48kb)|MAPT-IT1(+18.19kb)|SPPL2C(+69.92kb)|STH(-82.26kb)
17	44205500	rs17577650	G	A		3	7.497e-05	7.497e-05	0.8866	0.8866	0.9033	0	0.8899	0.8687	0.8983	ARL17A(-171kb)|ARL17B(-171.4kb)|KANSL1(0)|KANSL1-AS1(-65.44kb)|LRRC37A(-167kb)|MAPT(+99.8kb)|STH(+128.4kb)
17	43832940	rs62055876	G	A		3	7.498e-05	7.498e-05	0.8882	0.8882	0.8094	0	0.8794	0.8706	0.9107	CRHR1(0)|CRHR1-IT1(+109.3kb)|LOC644172(+153.2kb)|MAPT(-138.8kb)|MAPT-AS1(-87.78kb)|MAPT-IT1(-140.2kb)|MGC57346(+117.6kb)|SPPL2C(-89.32kb)
17	44170018	rs17576631	C	G		3	7.499e-05	7.499e-05	0.8868	0.8868	0.8934	0	0.8898	0.8682	0.8995	KANSL1(0)|KANSL1-AS1(-100.9kb)|MAPT(+64.32kb)|MAPT-AS1(+197.1kb)|MAPT-IT1(+193.9kb)|STH(+92.96kb)
17	44123248	rs62063670	C	T		3	7.502e-05	7.502e-05	0.8869	0.8869	0.9076	0	0.8892	0.8698	0.899	KANSL1(0)|KANSL1-AS1(-147.7kb)|MAPT(+17.55kb)|MAPT-AS1(+150.4kb)|MAPT-IT1(+147.1kb)|SPPL2C(+198.8kb)|STH(+46.19kb)
17	44161302	rs113788190	G	A		3	7.502e-05	7.502e-05	0.8869	0.8869	0.8992	0	0.8886	0.8694	0.9001	KANSL1(0)|KANSL1-AS1(-109.6kb)|MAPT(+55.6kb)|MAPT-AS1(+188.4kb)|MAPT-IT1(+185.1kb)|STH(+84.24kb)
17	44161360	rs112364920	T	A		3	7.505e-05	7.505e-05	0.8869	0.8869	0.8992	0	0.8886	0.8694	0.9001	KANSL1(0)|KANSL1-AS1(-109.6kb)|MAPT(+55.66kb)|MAPT-AS1(+188.5kb)|MAPT-IT1(+185.2kb)|STH(+84.3kb)
17	44165069	rs3912062	G	A		3	7.515e-05	7.515e-05	0.8866	0.8866	0.9056	0	0.8888	0.8693	0.8989	KANSL1(0)|KANSL1-AS1(-105.9kb)|MAPT(+59.37kb)|MAPT-AS1(+192.2kb)|MAPT-IT1(+188.9kb)|STH(+88.01kb)
1	162166043	rs1415263	T	C		3	7.516e-05	0.002178	0.9048	0.9019	0.1736	42.89	0.8791	0.8601	0.9577	C1orf111(-177.5kb)|C1orf226(-182.7kb)|MIR556(-146.3kb)|MIR4654(+39.07kb)|NOS1AP(0)|OLFML2B(+172.4kb)|SH2D1B(-199kb)
17	43848181	rs34303488	T	C		3	7.517e-05	7.517e-05	0.8885	0.8885	0.8451	0	0.8813	0.8722	0.9083	CRHR1(0)|CRHR1-IT1(+124.6kb)|LOC644172(+168.4kb)|MAPT(-123.6kb)|MAPT-AS1(-72.54kb)|MAPT-IT1(-125kb)|MGC57346(+132.9kb)|SPPL2C(-74.07kb)
8	33350385	rs181938797	G	T		3	7.521e-05	0.03475	1.6085	1.5985	0.0338	70.47	1.2049	2.4766	1.3524	DUSP26(-98.47kb)|FUT10(+19.72kb)|MAK16(0)|RNF122(-54.89kb)|TTI2(-5.641kb)
17	43908151	rs16940671	T	C		3	7.521e-05	7.521e-05	0.8879	0.8879	0.8553	0	0.8855	0.8687	0.9056	CRHR1(0)|CRHR1-IT1(+184.6kb)|KANSL1(-199.1kb)|MAPT(-63.6kb)|MAPT-AS1(-12.57kb)|MAPT-IT1(-65kb)|MGC57346(+192.8kb)|SPPL2C(-14.1kb)|STH(-168.5kb)
17	43893260	rs117646503	C	T		3	7.523e-05	7.523e-05	0.8887	0.8887	0.8678	0	0.8849	0.8713	0.9058	CRHR1(0)|CRHR1-IT1(+169.7kb)|MAPT(-78.49kb)|MAPT-AS1(-27.46kb)|MAPT-IT1(-79.89kb)|MGC57346(+177.9kb)|SPPL2C(-29kb)|STH(-183.4kb)
1	39127081	rs730218	C	T		3	7.524e-05	7.524e-05	0.9031	0.9031	0.7803	0	0.8818	0.906	0.9197	RRAGC(-176.8kb)
17	44206646	rs10514903	G	C		3	7.526e-05	7.526e-05	0.8867	0.8867	0.9027	0	0.8899	0.8687	0.8984	ARL17A(-169.9kb)|ARL17B(-170.3kb)|KANSL1(0)|KANSL1-AS1(-64.29kb)|LRRC37A(-165.8kb)|MAPT(+100.9kb)|STH(+129.6kb)
1	162184521	rs4411117	A	T		3	7.531e-05	0.004659	0.9052	0.9014	0.1235	52.19	0.8762	0.8579	0.9631	C1orf111(-159kb)|C1orf226(-164.2kb)|MIR556(-127.8kb)|MIR4654(+57.55kb)|NOS1AP(0)|OLFML2B(+190.9kb)|SH2D1B(-180.5kb)
17	44228770	rs542300723	G	A		3	7.533e-05	7.533e-05	0.8865	0.8865	0.917	0	0.8883	0.8704	0.8981	ARL17A(-147.7kb)|ARL17B(-148.1kb)|KANSL1(0)|KANSL1-AS1(-42.17kb)|LRRC37A(-143.7kb)|MAPT(+123.1kb)|STH(+151.7kb)
6	20062778	rs4712447	G	T		3	7.534e-05	7.534e-05	1.1265	1.1265	0.7246	0	1.1009	1.1121	1.1609	MBOAT1(-37.14kb)
17	44206482	rs62063200	T	C		3	7.536e-05	7.536e-05	0.8867	0.8867	0.9028	0	0.8899	0.8687	0.8984	ARL17A(-170kb)|ARL17B(-170.4kb)|KANSL1(0)|KANSL1-AS1(-64.46kb)|LRRC37A(-166kb)|MAPT(+100.8kb)|STH(+129.4kb)
17	44165049	rs3912063	G	A		3	7.544e-05	7.544e-05	0.8866	0.8866	0.9056	0	0.8888	0.8693	0.8989	KANSL1(0)|KANSL1-AS1(-105.9kb)|MAPT(+59.35kb)|MAPT-AS1(+192.2kb)|MAPT-IT1(+188.9kb)|STH(+87.99kb)
17	44128125	rs12150447	C	A		3	7.546e-05	7.546e-05	0.8869	0.8869	0.8994	0	0.8891	0.8692	0.8998	KANSL1(0)|KANSL1-AS1(-142.8kb)|MAPT(+22.43kb)|MAPT-AS1(+155.2kb)|MAPT-IT1(+152kb)|STH(+51.06kb)
17	44210988	rs12150087	G	C		3	7.546e-05	7.546e-05	0.8866	0.8866	0.9053	0	0.8903	0.8687	0.8978	ARL17A(-165.5kb)|ARL17B(-165.9kb)|KANSL1(0)|KANSL1-AS1(-59.95kb)|LRRC37A(-161.5kb)|MAPT(+105.3kb)|STH(+133.9kb)
17	43918418	rs112583797	G	A		3	7.547e-05	7.547e-05	0.8887	0.8887	0.8791	0	0.8862	0.8714	0.9046	CRHR1(+5.224kb)|CRHR1-IT1(+194.8kb)|KANSL1(-188.9kb)|MAPT(-53.33kb)|MAPT-AS1(-2.303kb)|MAPT-IT1(-54.73kb)|SPPL2C(-3.837kb)|STH(-158.2kb)
17	43758790	rs62055702	T	C		3	7.551e-05	7.551e-05	0.8874	0.8874	0.9051	0	0.8798	0.877	0.9034	CRHR1(0)|CRHR1-IT1(+35.2kb)|LOC644172(+79.04kb)|LRRC37A4P(+160.9kb)|MAPT-AS1(-161.9kb)|MGC57346(+43.46kb)|PLEKHM1(+190.6kb)|SPPL2C(-163.5kb)
17	43849896	rs62055940	G	A		3	7.555e-05	7.555e-05	0.8886	0.8886	0.8379	0	0.8816	0.8714	0.9087	CRHR1(0)|CRHR1-IT1(+126.3kb)|LOC644172(+170.1kb)|MAPT(-121.9kb)|MAPT-AS1(-70.82kb)|MAPT-IT1(-123.3kb)|MGC57346(+134.6kb)|SPPL2C(-72.36kb)
17	43916932	rs78328427	A	G		3	7.555e-05	7.555e-05	0.8887	0.8887	0.8695	0	0.8867	0.8703	0.905	CRHR1(+3.738kb)|CRHR1-IT1(+193.3kb)|KANSL1(-190.3kb)|MAPT(-54.82kb)|MAPT-AS1(-3.789kb)|MAPT-IT1(-56.22kb)|SPPL2C(-5.323kb)|STH(-159.7kb)
17	44132379	rs545434959	G	A		3	7.557e-05	7.557e-05	0.8869	0.8869	0.8931	0	0.8887	0.8688	0.9005	KANSL1(0)|KANSL1-AS1(-138.6kb)|MAPT(+26.68kb)|MAPT-AS1(+159.5kb)|MAPT-IT1(+156.2kb)|STH(+55.32kb)
17	44206079	rs1122380	T	C		3	7.557e-05	7.557e-05	0.8867	0.8867	0.9036	0	0.8898	0.8688	0.8984	ARL17A(-170.4kb)|ARL17B(-170.8kb)|KANSL1(0)|KANSL1-AS1(-64.86kb)|LRRC37A(-166.4kb)|MAPT(+100.4kb)|STH(+129kb)
17	43908152	rs16940672	T	C		3	7.558e-05	7.558e-05	0.8879	0.8879	0.856	0	0.8855	0.8688	0.9056	CRHR1(0)|CRHR1-IT1(+184.6kb)|KANSL1(-199.1kb)|MAPT(-63.6kb)|MAPT-AS1(-12.57kb)|MAPT-IT1(-65kb)|MGC57346(+192.8kb)|SPPL2C(-14.1kb)|STH(-168.5kb)
17	43854449	rs62055956	T	C		3	7.56e-05	7.56e-05	0.8886	0.8886	0.8311	0	0.8822	0.8705	0.909	CRHR1(0)|CRHR1-IT1(+130.9kb)|LOC644172(+174.7kb)|MAPT(-117.3kb)|MAPT-AS1(-66.27kb)|MAPT-IT1(-118.7kb)|MGC57346(+139.1kb)|SPPL2C(-67.81kb)
17	44160674	rs17660017	C	G		3	7.562e-05	7.562e-05	0.887	0.887	0.9006	0	0.8885	0.8696	0.9001	KANSL1(0)|KANSL1-AS1(-110.3kb)|MAPT(+54.98kb)|MAPT-AS1(+187.8kb)|MAPT-IT1(+184.5kb)|STH(+83.61kb)
17	44128876	rs17653836	A	T		3	7.565e-05	7.565e-05	0.8869	0.8869	0.8982	0	0.8891	0.8691	0.8999	KANSL1(0)|KANSL1-AS1(-142.1kb)|MAPT(+23.18kb)|MAPT-AS1(+156kb)|MAPT-IT1(+152.7kb)|STH(+51.82kb)
17	44121917	rs575200428	T	C		3	7.567e-05	7.567e-05	0.8869	0.8869	0.9088	0	0.8896	0.8698	0.8987	KANSL1(0)|KANSL1-AS1(-149kb)|MAPT(+16.22kb)|MAPT-AS1(+149kb)|MAPT-IT1(+145.8kb)|SPPL2C(+197.5kb)|STH(+44.86kb)
17	44129253	rs17575423	C	T		3	7.567e-05	7.567e-05	0.887	0.887	0.8976	0	0.8891	0.8691	0.9	KANSL1(0)|KANSL1-AS1(-141.7kb)|MAPT(+23.55kb)|MAPT-AS1(+156.4kb)|MAPT-IT1(+153.1kb)|STH(+52.19kb)
11	60869612	rs546241	G	A		3	7.568e-05	7.568e-05	1.1089	1.1089	0.7611	0	1.0876	1.0972	1.135	CD5(-0.317kb)|CD6(+81.76kb)|DDB1(-197.3kb)|PGA3(-101.4kb)|PGA4(-120.2kb)|PGA5(-139kb)|PRPF19(+195.6kb)|SLC15A3(+150.4kb)|TMEM109(+178.7kb)|TMEM132A(+165kb)|VPS37C(-28.12kb)|VWCE(-156.1kb)
17	43918190	rs17763533	C	T		3	7.571e-05	7.571e-05	0.8887	0.8887	0.8778	0	0.8862	0.8713	0.9047	CRHR1(+4.996kb)|CRHR1-IT1(+194.6kb)|KANSL1(-189.1kb)|MAPT(-53.56kb)|MAPT-AS1(-2.531kb)|MAPT-IT1(-54.96kb)|SPPL2C(-4.065kb)|STH(-158.4kb)
17	44132269	rs62063684	C	T		3	7.577e-05	7.577e-05	0.8869	0.8869	0.8932	0	0.8887	0.8688	0.9005	KANSL1(0)|KANSL1-AS1(-138.7kb)|MAPT(+26.57kb)|MAPT-AS1(+159.4kb)|MAPT-IT1(+156.1kb)|STH(+55.21kb)
4	90678541	rs2736990	A	G		3	7.578e-05	7.578e-05	1.1035	1.1035	0.631	0	1.1385	1.0743	1.0919	LOC644248(-79.01kb)|MMRN1(-137.5kb)|SNCA(0)
17	43849787	rs62055939	T	A		3	7.578e-05	7.578e-05	0.8886	0.8886	0.838	0	0.8816	0.8714	0.9087	CRHR1(0)|CRHR1-IT1(+126.2kb)|LOC644172(+170kb)|MAPT(-122kb)|MAPT-AS1(-70.93kb)|MAPT-IT1(-123.4kb)|MGC57346(+134.5kb)|SPPL2C(-72.47kb)
17	44210442	rs17577975	T	C		3	7.578e-05	7.578e-05	0.8866	0.8866	0.9147	0	0.8889	0.87	0.898	ARL17A(-166.1kb)|ARL17B(-166.5kb)|KANSL1(0)|KANSL1-AS1(-60.5kb)|LRRC37A(-162.1kb)|MAPT(+104.7kb)|STH(+133.4kb)
17	44288579	rs2532418	C	T		3	7.578e-05	7.578e-05	0.8861	0.8861	0.8832	0	0.8911	0.8656	0.8978	ARL17A(-87.92kb)|ARL17B(-88.33kb)|KANSL1(0)|KANSL1-AS1(+14.49kb)|LRRC37A(-83.92kb)|MAPT(+182.9kb)|NSFP1(-161.6kb)
17	44082514	rs62064666	C	T		3	7.579e-05	7.579e-05	0.8869	0.8869	0.8599	0	0.8891	0.8659	0.9025	CRHR1(+169.3kb)|KANSL1(-24.77kb)|KANSL1-AS1(-188.4kb)|MAPT(0)|MAPT-AS1(+109.6kb)|MAPT-IT1(+106.4kb)|SPPL2C(+158.1kb)|STH(+5.454kb)
17	43917776	rs56023973	T	G		3	7.58e-05	7.58e-05	0.8887	0.8887	0.8778	0	0.8862	0.8713	0.9047	CRHR1(+4.582kb)|CRHR1-IT1(+194.2kb)|KANSL1(-189.5kb)|MAPT(-53.97kb)|MAPT-AS1(-2.945kb)|MAPT-IT1(-55.37kb)|SPPL2C(-4.479kb)|STH(-158.8kb)
17	44128407	rs12150064	A	C		3	7.584e-05	7.584e-05	0.887	0.887	0.8986	0	0.8893	0.8691	0.8998	KANSL1(0)|KANSL1-AS1(-142.5kb)|MAPT(+22.71kb)|MAPT-AS1(+155.5kb)|MAPT-IT1(+152.2kb)|STH(+51.35kb)
17	44157982	rs62060850	T	A		3	7.584e-05	7.584e-05	0.887	0.887	0.9024	0	0.888	0.87	0.9003	KANSL1(0)|KANSL1-AS1(-113kb)|MAPT(+52.28kb)|MAPT-AS1(+185.1kb)|MAPT-IT1(+181.8kb)|STH(+80.92kb)
17	44125704	rs12150336	T	C		3	7.587e-05	7.587e-05	0.8869	0.8869	0.9062	0	0.8894	0.8697	0.8991	KANSL1(0)|KANSL1-AS1(-145.2kb)|MAPT(+20kb)|MAPT-AS1(+152.8kb)|MAPT-IT1(+149.5kb)|STH(+48.64kb)
17	44228824	rs560926498	G	A		3	7.588e-05	7.588e-05	0.8866	0.8866	0.916	0	0.8882	0.8704	0.8983	ARL17A(-147.7kb)|ARL17B(-148.1kb)|KANSL1(0)|KANSL1-AS1(-42.11kb)|LRRC37A(-143.7kb)|MAPT(+123.1kb)|STH(+151.8kb)
17	44129885	rs62063677	T	C		3	7.589e-05	7.589e-05	0.8869	0.8869	0.897	0	0.8891	0.869	0.9	KANSL1(0)|KANSL1-AS1(-141.1kb)|MAPT(+24.19kb)|MAPT-AS1(+157kb)|MAPT-IT1(+153.7kb)|STH(+52.82kb)
17	44130924	rs112674766	T	A		3	7.59e-05	7.59e-05	0.887	0.887	0.895	0	0.8892	0.8688	0.9001	KANSL1(0)|KANSL1-AS1(-140kb)|MAPT(+25.22kb)|MAPT-AS1(+158kb)|MAPT-IT1(+154.8kb)|STH(+53.86kb)
17	43918651	rs62054811	G	C		3	7.591e-05	7.591e-05	0.8887	0.8887	0.8778	0	0.8862	0.8713	0.9047	CRHR1(+5.457kb)|CRHR1-IT1(+195.1kb)|KANSL1(-188.6kb)|MAPT(-53.1kb)|MAPT-AS1(-2.07kb)|MAPT-IT1(-54.5kb)|SPPL2C(-3.604kb)|STH(-158kb)
17	44157992	rs62060851	C	T		3	7.592e-05	7.592e-05	0.887	0.887	0.9011	0	0.888	0.8699	0.9004	KANSL1(0)|KANSL1-AS1(-112.9kb)|MAPT(+52.29kb)|MAPT-AS1(+185.1kb)|MAPT-IT1(+181.8kb)|STH(+80.93kb)
10	115472912	rs11196447	G	C		3	7.598e-05	7.598e-05	1.1648	1.1648	0.8693	0	1.1442	1.1449	1.1927	CASP7(0)|DCLRE1A(-121.6kb)|HABP2(+123.6kb)|MIR4483(-64.84kb)|NHLRC2(-141.5kb)|NRAP(+49.08kb)|PLEKHS1(-38.3kb)
17	43849656	rs62055938	A	C		3	7.604e-05	7.604e-05	0.8886	0.8886	0.8373	0	0.8815	0.8715	0.9088	CRHR1(0)|CRHR1-IT1(+126.1kb)|LOC644172(+169.9kb)|MAPT(-122.1kb)|MAPT-AS1(-71.06kb)|MAPT-IT1(-123.5kb)|MGC57346(+134.3kb)|SPPL2C(-72.6kb)
17	44160592	rs62060853	A	G		3	7.604e-05	7.604e-05	0.887	0.887	0.9012	0	0.8886	0.8697	0.9001	KANSL1(0)|KANSL1-AS1(-110.3kb)|MAPT(+54.89kb)|MAPT-AS1(+187.7kb)|MAPT-IT1(+184.4kb)|STH(+83.53kb)
1	232746120	rs3795367	C	T		3	7.606e-05	0.008563	0.863	0.8607	0.098	56.94	0.7951	0.8356	0.9538	MAP10(-194.5kb)|SIPA1L2(+94.88kb)
17	43918524	rs74922289	G	A		3	7.606e-05	7.606e-05	0.8887	0.8887	0.8779	0	0.8862	0.8713	0.9047	CRHR1(+5.33kb)|CRHR1-IT1(+194.9kb)|KANSL1(-188.8kb)|MAPT(-53.22kb)|MAPT-AS1(-2.197kb)|MAPT-IT1(-54.62kb)|SPPL2C(-3.731kb)|STH(-158.1kb)
17	43917818	rs17763515	A	G		3	7.607e-05	7.607e-05	0.8887	0.8887	0.8778	0	0.8862	0.8713	0.9047	CRHR1(+4.624kb)|CRHR1-IT1(+194.2kb)|KANSL1(-189.5kb)|MAPT(-53.93kb)|MAPT-AS1(-2.903kb)|MAPT-IT1(-55.33kb)|SPPL2C(-4.437kb)|STH(-158.8kb)
17	43766418	rs62055718	T	C		3	7.615e-05	7.615e-05	0.8874	0.8874	0.8721	0	0.8805	0.873	0.9057	CRHR1(0)|CRHR1-IT1(+42.82kb)|LOC644172(+86.67kb)|LRRC37A4P(+168.5kb)|MAPT-AS1(-154.3kb)|MGC57346(+51.09kb)|PLEKHM1(+198.3kb)|SPPL2C(-155.8kb)
17	44124535	rs79065019	C	T		3	7.616e-05	7.616e-05	0.887	0.887	0.9089	0	0.8896	0.8699	0.8988	KANSL1(0)|KANSL1-AS1(-146.4kb)|MAPT(+18.84kb)|MAPT-AS1(+151.7kb)|MAPT-IT1(+148.4kb)|STH(+47.48kb)
17	44233776	rs576400151	C	T		3	7.617e-05	7.617e-05	0.8866	0.8866	0.9213	0	0.8892	0.8705	0.8972	ARL17A(-142.7kb)|ARL17B(-143.1kb)|KANSL1(0)|KANSL1-AS1(-37.16kb)|LRRC37A(-138.7kb)|MAPT(+128.1kb)|STH(+156.7kb)
9	459024	rs7853027	C	T		3	7.625e-05	0.004135	1.1194	1.125	0.1296	51.05	1.0999	1.2314	1.0679	DOCK8(0)|KANK1(-11.27kb)
17	43969136	rs17770296	T	C		3	7.626e-05	7.626e-05	0.8881	0.8881	0.8674	0	0.8884	0.8684	0.9038	CRHR1(+55.94kb)|KANSL1(-138.1kb)|MAPT(-2.611kb)|MAPT-AS1(0)|MAPT-IT1(-4.012kb)|SPPL2C(+44.7kb)|STH(-107.5kb)
17	43758787	rs62055701	A	G		3	7.629e-05	7.629e-05	0.8875	0.8875	0.9034	0	0.8798	0.8769	0.9036	CRHR1(0)|CRHR1-IT1(+35.19kb)|LOC644172(+79.04kb)|LRRC37A4P(+160.9kb)|MAPT-AS1(-161.9kb)|MGC57346(+43.46kb)|PLEKHM1(+190.6kb)|SPPL2C(-163.5kb)
17	43885291	rs62057101	A	G		3	7.629e-05	7.629e-05	0.889	0.889	0.8368	0	0.8826	0.8712	0.9088	CRHR1(0)|CRHR1-IT1(+161.7kb)|MAPT(-86.46kb)|MAPT-AS1(-35.43kb)|MAPT-IT1(-87.86kb)|MGC57346(+170kb)|SPPL2C(-36.96kb)|STH(-191.3kb)
6	39143925	rs2815092	T	C		3	7.633e-05	0.0006892	0.8382	0.8399	0.2675	24.17	0.786	0.9407	0.8195	DNAH8(+145.4kb)|GLP1R(+88.4kb)|KCNK5(-12.82kb)|KCNK16(-138.5kb)|KCNK17(-122.9kb)|KIF6(-159kb)|SAYSD1(+61.06kb)
17	44130587	rs79649865	G	T		3	7.635e-05	7.635e-05	0.887	0.887	0.8951	0	0.8892	0.8689	0.9002	KANSL1(0)|KANSL1-AS1(-140.4kb)|MAPT(+24.89kb)|MAPT-AS1(+157.7kb)|MAPT-IT1(+154.4kb)|STH(+53.53kb)
17	44289101	rs2732629	G	A		3	7.635e-05	7.635e-05	0.8861	0.8861	0.882	0	0.8909	0.8656	0.8981	ARL17A(-87.4kb)|ARL17B(-87.81kb)|KANSL1(0)|KANSL1-AS1(+15.01kb)|LRRC37A(-83.4kb)|MAPT(+183.4kb)|NSFP1(-161.1kb)
17	44233811	rs540782647	T	C		3	7.636e-05	7.636e-05	0.8866	0.8866	0.9213	0	0.8892	0.8705	0.8972	ARL17A(-142.7kb)|ARL17B(-143.1kb)|KANSL1(0)|KANSL1-AS1(-37.13kb)|LRRC37A(-138.7kb)|MAPT(+128.1kb)|STH(+156.8kb)
17	43924803	rs17690679	G	A		3	7.639e-05	7.639e-05	0.8886	0.8886	0.8457	0	0.8867	0.8684	0.9065	CRHR1(+11.61kb)|KANSL1(-182.5kb)|MAPT(-46.94kb)|MAPT-AS1(0)|MAPT-IT1(-48.34kb)|SPPL2C(+0.365kb)|STH(-151.8kb)
17	43960918	rs56301449	C	T		3	7.642e-05	7.642e-05	0.8881	0.8881	0.8616	0	0.8881	0.8682	0.9044	CRHR1(+47.72kb)|KANSL1(-146.4kb)|MAPT(-10.83kb)|MAPT-AS1(0)|MAPT-IT1(-12.23kb)|SPPL2C(+36.48kb)|STH(-115.7kb)
17	43895008	rs739644	G	C		3	7.643e-05	7.643e-05	0.889	0.889	0.8532	0	0.8842	0.8712	0.9073	CRHR1(0)|CRHR1-IT1(+171.4kb)|MAPT(-76.74kb)|MAPT-AS1(-25.71kb)|MAPT-IT1(-78.14kb)|MGC57346(+179.7kb)|SPPL2C(-27.25kb)|STH(-181.6kb)
17	43968937	rs55895732	C	T		3	7.65e-05	7.65e-05	0.8881	0.8881	0.8681	0	0.8883	0.8685	0.9038	CRHR1(+55.74kb)|KANSL1(-138.3kb)|MAPT(-2.81kb)|MAPT-AS1(0)|MAPT-IT1(-4.211kb)|SPPL2C(+44.5kb)|STH(-107.7kb)
17	44131717	rs62063683	A	G		3	7.65e-05	7.65e-05	0.887	0.887	0.8915	0	0.8891	0.8686	0.9005	KANSL1(0)|KANSL1-AS1(-139.2kb)|MAPT(+26.02kb)|MAPT-AS1(+158.8kb)|MAPT-IT1(+155.6kb)|STH(+54.66kb)
17	44129800	rs62063676	A	G		3	7.653e-05	7.653e-05	0.887	0.887	0.8958	0	0.8891	0.869	0.9002	KANSL1(0)|KANSL1-AS1(-141.1kb)|MAPT(+24.1kb)|MAPT-AS1(+156.9kb)|MAPT-IT1(+153.6kb)|STH(+52.74kb)
17	44209474	rs112401617	T	A		3	7.653e-05	7.653e-05	0.8867	0.8867	0.9032	0	0.8903	0.8687	0.8982	ARL17A(-167kb)|ARL17B(-167.4kb)|KANSL1(0)|KANSL1-AS1(-61.46kb)|LRRC37A(-163kb)|MAPT(+103.8kb)|STH(+132.4kb)
17	44231326	rs537399285	A	G		3	7.655e-05	7.655e-05	0.8866	0.8866	0.916	0	0.8883	0.8704	0.8983	ARL17A(-145.2kb)|ARL17B(-145.6kb)|KANSL1(0)|KANSL1-AS1(-39.61kb)|LRRC37A(-141.2kb)|MAPT(+125.6kb)|STH(+154.3kb)
17	43968994	rs55960528	C	T		3	7.656e-05	7.656e-05	0.8881	0.8881	0.8673	0	0.8883	0.8685	0.9039	CRHR1(+55.8kb)|KANSL1(-138.3kb)|MAPT(-2.753kb)|MAPT-AS1(0)|MAPT-IT1(-4.154kb)|SPPL2C(+44.56kb)|STH(-107.6kb)
17	43969019	rs55877243	C	T		3	7.657e-05	7.657e-05	0.8881	0.8881	0.8673	0	0.8883	0.8685	0.9039	CRHR1(+55.82kb)|KANSL1(-138.3kb)|MAPT(-2.728kb)|MAPT-AS1(0)|MAPT-IT1(-4.129kb)|SPPL2C(+44.58kb)|STH(-107.6kb)
17	43850519	rs76885724	T	C		3	7.658e-05	7.658e-05	0.8887	0.8887	0.8378	0	0.8817	0.8715	0.9088	CRHR1(0)|CRHR1-IT1(+126.9kb)|LOC644172(+170.8kb)|MAPT(-121.2kb)|MAPT-AS1(-70.2kb)|MAPT-IT1(-122.6kb)|MGC57346(+135.2kb)|SPPL2C(-71.74kb)
17	44209313	rs62063203	C	T		3	7.658e-05	7.658e-05	0.8867	0.8867	0.9036	0	0.8904	0.8687	0.8981	ARL17A(-167.2kb)|ARL17B(-167.6kb)|KANSL1(0)|KANSL1-AS1(-61.62kb)|LRRC37A(-163.2kb)|MAPT(+103.6kb)|STH(+132.3kb)
3	146954138	rs79829603	T	G		3	7.661e-05	0.001909	1.3167	1.3222	0.1955	38.73	1.5378	1.3221	1.1533	ZIC1(-173kb)|ZIC4(-149.7kb)
17	44082528	rs62064667	T	A		3	7.665e-05	7.665e-05	0.8869	0.8869	0.8581	0	0.8894	0.8657	0.9025	CRHR1(+169.3kb)|KANSL1(-24.75kb)|KANSL1-AS1(-188.4kb)|MAPT(0)|MAPT-AS1(+109.6kb)|MAPT-IT1(+106.4kb)|SPPL2C(+158.1kb)|STH(+5.468kb)
17	44231295	rs569963579	A	G		3	7.666e-05	7.666e-05	0.8867	0.8867	0.9154	0	0.8883	0.8704	0.8984	ARL17A(-145.2kb)|ARL17B(-145.6kb)|KANSL1(0)|KANSL1-AS1(-39.64kb)|LRRC37A(-141.2kb)|MAPT(+125.6kb)|STH(+154.2kb)
17	44209628	rs17577954	C	T		3	7.667e-05	7.667e-05	0.8867	0.8867	0.9018	0	0.8904	0.8685	0.8982	ARL17A(-166.9kb)|ARL17B(-167.3kb)|KANSL1(0)|KANSL1-AS1(-61.31kb)|LRRC37A(-162.9kb)|MAPT(+103.9kb)|STH(+132.6kb)
17	43956370	rs62055515	T	G		3	7.673e-05	7.673e-05	0.8881	0.8881	0.8838	0	0.8875	0.8702	0.9032	CRHR1(+43.18kb)|KANSL1(-150.9kb)|MAPT(-15.38kb)|MAPT-AS1(0)|MAPT-IT1(-16.78kb)|SPPL2C(+31.93kb)|STH(-120.2kb)
17	44126218	rs12150570	A	G		3	7.674e-05	7.674e-05	0.8871	0.8871	0.9034	0	0.8894	0.8696	0.8995	KANSL1(0)|KANSL1-AS1(-144.7kb)|MAPT(+20.52kb)|MAPT-AS1(+153.3kb)|MAPT-IT1(+150.1kb)|STH(+49.16kb)
17	44209364	rs111724389	A	G		3	7.674e-05	7.674e-05	0.8867	0.8867	0.9036	0	0.8904	0.8687	0.8981	ARL17A(-167.1kb)|ARL17B(-167.5kb)|KANSL1(0)|KANSL1-AS1(-61.57kb)|LRRC37A(-163.1kb)|MAPT(+103.7kb)|STH(+132.3kb)
17	43995098	rs17564153	A	G		3	7.678e-05	7.678e-05	0.888	0.888	0.8613	0	0.884	0.8706	0.9063	CRHR1(+81.9kb)|KANSL1(-112.2kb)|MAPT(0)|MAPT-AS1(+22.22kb)|MAPT-IT1(+18.93kb)|SPPL2C(+70.66kb)|STH(-81.52kb)
18	58060126	rs17773774	A	C		3	7.678e-05	0.003639	0.8832	0.8811	0.1522	46.88	0.8261	0.8666	0.9483	MC4R(+20.12kb)
17	43858482	rs78917495	T	C		3	7.682e-05	7.682e-05	0.8888	0.8888	0.8396	0	0.882	0.8716	0.9087	CRHR1(0)|CRHR1-IT1(+134.9kb)|LOC644172(+178.7kb)|MAPT(-113.3kb)|MAPT-AS1(-62.24kb)|MAPT-IT1(-114.7kb)|MGC57346(+143.2kb)|SPPL2C(-63.77kb)
17	44211502	rs111424940	A	G		3	7.683e-05	7.683e-05	0.8866	0.8866	0.9045	0	0.89	0.8687	0.8981	ARL17A(-165kb)|ARL17B(-165.4kb)|KANSL1(0)|KANSL1-AS1(-59.44kb)|LRRC37A(-161kb)|MAPT(+105.8kb)|STH(+134.4kb)
6	41681692	rs77126919	T	C		2	7.685e-05	0.328	1.5792	1.448	0.0015	90.04	0.9822	NA	2.0942	FOXP4(+111.6kb)|FRS3(-56.22kb)|MDFI(+59.71kb)|MED20(-191.4kb)|MIR4641(+115.2kb)|PGC(-22.76kb)|PRICKLE4(-66.81kb)|TFEB(0)|TOMM6(-73.49kb)|USP49(-83.69kb)
17	43894159	rs28364023	T	C		3	7.686e-05	7.686e-05	0.889	0.889	0.8529	0	0.8849	0.8707	0.9071	CRHR1(0)|CRHR1-IT1(+170.6kb)|MAPT(-77.59kb)|MAPT-AS1(-26.56kb)|MAPT-IT1(-78.99kb)|MGC57346(+178.8kb)|SPPL2C(-28.1kb)|STH(-182.5kb)
17	44125484	rs62063673	G	T		3	7.686e-05	7.686e-05	0.887	0.887	0.9059	0	0.8897	0.8697	0.8991	KANSL1(0)|KANSL1-AS1(-145.5kb)|MAPT(+19.78kb)|MAPT-AS1(+152.6kb)|MAPT-IT1(+149.3kb)|STH(+48.42kb)
17	43851018	rs62055943	C	T		3	7.688e-05	7.688e-05	0.8887	0.8887	0.838	0	0.8818	0.8715	0.9088	CRHR1(0)|CRHR1-IT1(+127.4kb)|LOC644172(+171.3kb)|MAPT(-120.7kb)|MAPT-AS1(-69.7kb)|MAPT-IT1(-122.1kb)|MGC57346(+135.7kb)|SPPL2C(-71.24kb)
14	97171916	rs11625269	T	C		3	7.689e-05	7.689e-05	0.9047	0.9047	0.7503	0	0.8926	0.9339	0.8959	PAPOLA(+138.5kb)|VRK1(-91.77kb)
17	44022593	rs62062780	T	C		3	7.691e-05	7.691e-05	0.8873	0.8873	0.8691	0	0.8901	0.8666	0.9016	CRHR1(+109.4kb)|KANSL1(-84.69kb)|MAPT(0)|MAPT-AS1(+49.71kb)|MAPT-IT1(+46.43kb)|SPPL2C(+98.16kb)|STH(-54.02kb)
1	179790900	rs57664351	T	C		3	7.695e-05	0.1182	1.3262	1.3007	0.0058	80.58	0.9476	1.4666	1.5801	CEP350(-133kb)|FAM163A(+5.567kb)|TDRD5(+130.5kb)|TOR1AIP1(-60.28kb)|TOR1AIP2(-18.2kb)
20	55020689	rs6024881	G	T		3	7.695e-05	0.0007536	0.8495	0.8505	0.258	26.18	0.7781	0.916	0.8718	AURKA(+53.34kb)|CASS4(0)|CSTF1(+41.11kb)|FAM209A(-79.1kb)|FAM209B(-87.61kb)|FAM210B(+76.97kb)|GCNT7(-45.86kb)|MC3R(+195.8kb)|RTFDC1(-22.96kb)|TFAP2C(-183.7kb)
17	44125066	rs112578465	T	C		3	7.699e-05	7.699e-05	0.8871	0.8871	0.9063	0	0.8898	0.8697	0.899	KANSL1(0)|KANSL1-AS1(-145.9kb)|MAPT(+19.37kb)|MAPT-AS1(+152.2kb)|MAPT-IT1(+148.9kb)|STH(+48.01kb)
17	43894990	rs739645	G	T		3	7.701e-05	7.701e-05	0.889	0.889	0.8533	0	0.8842	0.8712	0.9073	CRHR1(0)|CRHR1-IT1(+171.4kb)|MAPT(-76.76kb)|MAPT-AS1(-25.73kb)|MAPT-IT1(-78.16kb)|MGC57346(+179.7kb)|SPPL2C(-27.26kb)|STH(-181.6kb)
17	44131022	rs112074397	C	T		3	7.703e-05	7.703e-05	0.8871	0.8871	0.8933	0	0.8892	0.8688	0.9004	KANSL1(0)|KANSL1-AS1(-139.9kb)|MAPT(+25.32kb)|MAPT-AS1(+158.1kb)|MAPT-IT1(+154.9kb)|STH(+53.96kb)
17	43917086	rs77692262	G	A		3	7.704e-05	7.704e-05	0.8888	0.8888	0.8764	0	0.8862	0.8713	0.9049	CRHR1(+3.892kb)|CRHR1-IT1(+193.5kb)|KANSL1(-190.2kb)|MAPT(-54.66kb)|MAPT-AS1(-3.635kb)|MAPT-IT1(-56.06kb)|SPPL2C(-5.169kb)|STH(-159.5kb)
17	44209985	rs56119705	C	T		3	7.706e-05	7.706e-05	0.8867	0.8867	0.9021	0	0.8905	0.8685	0.8981	ARL17A(-166.5kb)|ARL17B(-166.9kb)|KANSL1(0)|KANSL1-AS1(-60.95kb)|LRRC37A(-162.5kb)|MAPT(+104.3kb)|STH(+132.9kb)
17	43987154	rs62056812	A	G		3	7.71e-05	7.71e-05	0.8879	0.8879	0.8385	0	0.886	0.8673	0.9067	CRHR1(+73.96kb)|KANSL1(-120.1kb)|MAPT(0)|MAPT-AS1(+14.28kb)|MAPT-IT1(+10.99kb)|SPPL2C(+62.72kb)|STH(-89.46kb)
17	44231117	rs529970690	C	T		3	7.71e-05	7.71e-05	0.8867	0.8867	0.9155	0	0.8883	0.8704	0.8984	ARL17A(-145.4kb)|ARL17B(-145.8kb)|KANSL1(0)|KANSL1-AS1(-39.82kb)|LRRC37A(-141.4kb)|MAPT(+125.4kb)|STH(+154.1kb)
17	44130878	rs111853996	G	A		3	7.714e-05	7.714e-05	0.8871	0.8871	0.8933	0	0.8892	0.8688	0.9004	KANSL1(0)|KANSL1-AS1(-140.1kb)|MAPT(+25.18kb)|MAPT-AS1(+158kb)|MAPT-IT1(+154.7kb)|STH(+53.82kb)
17	44208945	rs62063202	T	C		3	7.717e-05	7.717e-05	0.8868	0.8868	0.9026	0	0.8904	0.8687	0.8983	ARL17A(-167.6kb)|ARL17B(-168kb)|KANSL1(0)|KANSL1-AS1(-61.99kb)|LRRC37A(-163.6kb)|MAPT(+103.2kb)|STH(+131.9kb)
16	69668552	rs9921652	T	C		3	7.718e-05	7.718e-05	1.1766	1.1766	0.8075	0	1.1562	1.1445	1.2156	CYB5B(+168.4kb)|MIR1538(+68.78kb)|NFAT5(0)|NOB1(-107.2kb)|NQO1(-74.75kb)|WWP2(-127.6kb)
17	44159988	rs17576200	A	G		3	7.719e-05	7.719e-05	0.8872	0.8872	0.9025	0	0.8886	0.87	0.9002	KANSL1(0)|KANSL1-AS1(-111kb)|MAPT(+54.29kb)|MAPT-AS1(+187.1kb)|MAPT-IT1(+183.8kb)|STH(+82.93kb)
17	44160050	rs62060852	A	G		3	7.721e-05	7.721e-05	0.8871	0.8871	0.9019	0	0.8886	0.8699	0.9002	KANSL1(0)|KANSL1-AS1(-110.9kb)|MAPT(+54.35kb)|MAPT-AS1(+187.2kb)|MAPT-IT1(+183.9kb)|STH(+82.99kb)
17	44209957	rs55909047	G	A		3	7.73e-05	7.73e-05	0.8868	0.8868	0.9011	0	0.8905	0.8685	0.8983	ARL17A(-166.5kb)|ARL17B(-167kb)|KANSL1(0)|KANSL1-AS1(-60.98kb)|LRRC37A(-162.5kb)|MAPT(+104.3kb)|STH(+132.9kb)
17	43994952	rs17649571	G	A		3	7.735e-05	7.735e-05	0.8881	0.8881	0.8607	0	0.8841	0.8706	0.9064	CRHR1(+81.76kb)|KANSL1(-112.3kb)|MAPT(0)|MAPT-AS1(+22.07kb)|MAPT-IT1(+18.79kb)|SPPL2C(+70.51kb)|STH(-81.66kb)
13	83708745	rs2819238	G	T		3	7.738e-05	7.738e-05	0.8937	0.8937	0.8931	0	0.8854	0.8822	0.9087	.
17	43766415	rs62055717	G	A		3	7.747e-05	7.747e-05	0.8875	0.8875	0.8705	0	0.8806	0.8731	0.906	CRHR1(0)|CRHR1-IT1(+42.82kb)|LOC644172(+86.67kb)|LRRC37A4P(+168.5kb)|MAPT-AS1(-154.3kb)|MGC57346(+51.09kb)|PLEKHM1(+198.3kb)|SPPL2C(-155.8kb)
17	43918239	rs62054809	T	C		3	7.747e-05	7.747e-05	0.8889	0.8889	0.8763	0	0.8867	0.8711	0.9048	CRHR1(+5.045kb)|CRHR1-IT1(+194.6kb)|KANSL1(-189kb)|MAPT(-53.51kb)|MAPT-AS1(-2.482kb)|MAPT-IT1(-54.91kb)|SPPL2C(-4.016kb)|STH(-158.4kb)
17	43916509	rs10445333	G	A		3	7.748e-05	7.748e-05	0.8889	0.8889	0.8757	0	0.8863	0.8713	0.905	CRHR1(+3.315kb)|CRHR1-IT1(+192.9kb)|KANSL1(-190.8kb)|MAPT(-55.24kb)|MAPT-AS1(-4.212kb)|MAPT-IT1(-56.64kb)|SPPL2C(-5.746kb)|STH(-160.1kb)
17	43897722	rs79600142	C	T		3	7.75e-05	7.75e-05	0.8891	0.8891	0.848	0	0.8838	0.8713	0.9079	CRHR1(0)|CRHR1-IT1(+174.1kb)|MAPT(-74.02kb)|MAPT-AS1(-23kb)|MAPT-IT1(-75.43kb)|MGC57346(+182.4kb)|SPPL2C(-24.53kb)|STH(-178.9kb)
17	43915054	rs62054805	G	A		3	7.754e-05	7.754e-05	0.8888	0.8888	0.8766	0	0.8864	0.8713	0.9049	CRHR1(+1.86kb)|CRHR1-IT1(+191.5kb)|KANSL1(-192.2kb)|MAPT(-56.69kb)|MAPT-AS1(-5.667kb)|MAPT-IT1(-58.09kb)|MGC57346(+199.7kb)|SPPL2C(-7.201kb)|STH(-161.6kb)
17	44159725	rs17659953	T	C		3	7.756e-05	7.756e-05	0.8872	0.8872	0.9026	0	0.8886	0.87	0.9002	KANSL1(0)|KANSL1-AS1(-111.2kb)|MAPT(+54.03kb)|MAPT-AS1(+186.8kb)|MAPT-IT1(+183.6kb)|STH(+82.66kb)
17	44231617	rs553321776	T	A		3	7.756e-05	7.756e-05	0.8867	0.8867	0.9159	0	0.8885	0.8704	0.8983	ARL17A(-144.9kb)|ARL17B(-145.3kb)|KANSL1(0)|KANSL1-AS1(-39.32kb)|LRRC37A(-140.9kb)|MAPT(+125.9kb)|STH(+154.6kb)
17	44131592	rs62063681	G	A		3	7.76e-05	7.76e-05	0.8871	0.8871	0.8869	0	0.8882	0.8687	0.9015	KANSL1(0)|KANSL1-AS1(-139.3kb)|MAPT(+25.89kb)|MAPT-AS1(+158.7kb)|MAPT-IT1(+155.4kb)|STH(+54.53kb)
17	44159849	rs17576165	C	T		3	7.761e-05	7.761e-05	0.8872	0.8872	0.9026	0	0.8886	0.87	0.9002	KANSL1(0)|KANSL1-AS1(-111.1kb)|MAPT(+54.15kb)|MAPT-AS1(+187kb)|MAPT-IT1(+183.7kb)|STH(+82.79kb)
17	44159695	rs77925835	T	C		3	7.764e-05	7.764e-05	0.8872	0.8872	0.9026	0	0.8886	0.87	0.9002	KANSL1(0)|KANSL1-AS1(-111.2kb)|MAPT(+54kb)|MAPT-AS1(+186.8kb)|MAPT-IT1(+183.5kb)|STH(+82.64kb)
17	44207932	rs79301522	G	A		3	7.765e-05	7.765e-05	0.8869	0.8869	0.8998	0	0.8901	0.8686	0.8988	ARL17A(-168.6kb)|ARL17B(-169kb)|KANSL1(0)|KANSL1-AS1(-63.01kb)|LRRC37A(-164.6kb)|MAPT(+102.2kb)|STH(+130.9kb)
17	43850966	rs62055942	G	A		3	7.767e-05	7.767e-05	0.8887	0.8887	0.8373	0	0.8818	0.8715	0.9089	CRHR1(0)|CRHR1-IT1(+127.4kb)|LOC644172(+171.2kb)|MAPT(-120.8kb)|MAPT-AS1(-69.76kb)|MAPT-IT1(-122.2kb)|MGC57346(+135.6kb)|SPPL2C(-71.29kb)
17	43916356	rs10445364	A	G		3	7.768e-05	7.768e-05	0.8889	0.8889	0.8758	0	0.8863	0.8713	0.905	CRHR1(+3.162kb)|CRHR1-IT1(+192.8kb)|KANSL1(-190.9kb)|MAPT(-55.39kb)|MAPT-AS1(-4.365kb)|MAPT-IT1(-56.79kb)|SPPL2C(-5.899kb)|STH(-160.3kb)
17	43992244	rs56042957	A	G		3	7.768e-05	7.768e-05	0.8877	0.8877	0.8475	0	0.8839	0.869	0.9068	CRHR1(+79.05kb)|KANSL1(-115kb)|MAPT(0)|MAPT-AS1(+19.36kb)|MAPT-IT1(+16.08kb)|SPPL2C(+67.81kb)|STH(-84.37kb)
17	44137311	rs55690782	A	G		3	7.773e-05	7.773e-05	0.8871	0.8871	0.8889	0	0.8887	0.8687	0.9011	KANSL1(0)|KANSL1-AS1(-133.6kb)|MAPT(+31.61kb)|MAPT-AS1(+164.4kb)|MAPT-IT1(+161.1kb)|STH(+60.25kb)
17	44159672	rs111519055	G	A		3	7.773e-05	7.773e-05	0.8872	0.8872	0.9026	0	0.8886	0.87	0.9002	KANSL1(0)|KANSL1-AS1(-111.3kb)|MAPT(+53.97kb)|MAPT-AS1(+186.8kb)|MAPT-IT1(+183.5kb)|STH(+82.61kb)
17	43919301	rs56150806	C	T		3	7.778e-05	7.778e-05	0.8889	0.8889	0.8773	0	0.8864	0.8714	0.9049	CRHR1(+6.107kb)|CRHR1-IT1(+195.7kb)|KANSL1(-188kb)|MAPT(-52.45kb)|MAPT-AS1(-1.42kb)|MAPT-IT1(-53.85kb)|SPPL2C(-2.954kb)|STH(-157.3kb)
13	29706827	rs7326726	G	A		3	7.779e-05	7.779e-05	1.1177	1.1177	0.9253	0	1.1345	1.1123	1.1065	MTUS2(0)
17	43919884	rs17690314	G	T		3	7.781e-05	7.781e-05	0.8888	0.8888	0.8759	0	0.8863	0.8713	0.905	CRHR1(+6.69kb)|CRHR1-IT1(+196.3kb)|KANSL1(-187.4kb)|MAPT(-51.86kb)|MAPT-AS1(-0.837kb)|MAPT-IT1(-53.26kb)|SPPL2C(-2.371kb)|STH(-156.7kb)
17	43992283	rs55810795	G	A		3	7.786e-05	7.786e-05	0.8877	0.8877	0.8466	0	0.8839	0.869	0.9069	CRHR1(+79.09kb)|KANSL1(-115kb)|MAPT(0)|MAPT-AS1(+19.4kb)|MAPT-IT1(+16.12kb)|SPPL2C(+67.84kb)|STH(-84.33kb)
17	44159631	rs111913701	G	T		3	7.786e-05	7.786e-05	0.8872	0.8872	0.902	0	0.8886	0.87	0.9003	KANSL1(0)|KANSL1-AS1(-111.3kb)|MAPT(+53.93kb)|MAPT-AS1(+186.8kb)|MAPT-IT1(+183.5kb)|STH(+82.57kb)
17	44133534	rs111259120	T	C		3	7.791e-05	7.791e-05	0.8871	0.8871	0.8936	0	0.889	0.869	0.9006	KANSL1(0)|KANSL1-AS1(-137.4kb)|MAPT(+27.84kb)|MAPT-AS1(+160.7kb)|MAPT-IT1(+157.4kb)|STH(+56.47kb)
17	43879308	rs80184151	G	A		3	7.794e-05	7.794e-05	0.8891	0.8891	0.842	0	0.8831	0.8714	0.9085	CRHR1(0)|CRHR1-IT1(+155.7kb)|LOC644172(+199.6kb)|MAPT(-92.44kb)|MAPT-AS1(-41.41kb)|MAPT-IT1(-93.84kb)|MGC57346(+164kb)|SPPL2C(-42.95kb)|STH(-197.3kb)
17	44291365	rs2732606	T	C		3	7.795e-05	7.795e-05	0.8862	0.8862	0.8754	0	0.8909	0.8651	0.8987	ARL17A(-85.13kb)|ARL17B(-85.55kb)|KANSL1(0)|KANSL1-AS1(+17.28kb)|LRRC37A(-81.13kb)|MAPT(+185.7kb)|NSFP1(-158.8kb)
17	44155707	rs55972730	T	C		3	7.796e-05	7.796e-05	0.8872	0.8872	0.902	0	0.8886	0.87	0.9003	KANSL1(0)|KANSL1-AS1(-115.2kb)|MAPT(+50.01kb)|MAPT-AS1(+182.8kb)|MAPT-IT1(+179.5kb)|STH(+78.65kb)
17	44159555	rs77138434	A	C		3	7.8e-05	7.8e-05	0.8872	0.8872	0.902	0	0.8886	0.87	0.9003	KANSL1(0)|KANSL1-AS1(-111.4kb)|MAPT(+53.86kb)|MAPT-AS1(+186.7kb)|MAPT-IT1(+183.4kb)|STH(+82.5kb)
10	115447794	rs11196428	T	C		3	7.803e-05	7.803e-05	1.1648	1.1648	0.9406	0	1.1534	1.1486	1.1831	CASP7(0)|DCLRE1A(-146.7kb)|HABP2(+98.43kb)|MIR4483(-89.96kb)|NHLRC2(-166.6kb)|NRAP(+23.96kb)|PLEKHS1(-63.42kb)
17	44159102	rs1476554	T	C		3	7.807e-05	7.807e-05	0.8872	0.8872	0.902	0	0.8886	0.87	0.9003	KANSL1(0)|KANSL1-AS1(-111.8kb)|MAPT(+53.4kb)|MAPT-AS1(+186.2kb)|MAPT-IT1(+182.9kb)|STH(+82.04kb)
17	44157597	rs17659881	G	A		3	7.808e-05	7.808e-05	0.8872	0.8872	0.902	0	0.8886	0.87	0.9003	KANSL1(0)|KANSL1-AS1(-113.3kb)|MAPT(+51.9kb)|MAPT-AS1(+184.7kb)|MAPT-IT1(+181.4kb)|STH(+80.54kb)
17	44155157	rs56100031	T	C		3	7.809e-05	7.809e-05	0.8872	0.8872	0.9021	0	0.8886	0.87	0.9003	KANSL1(0)|KANSL1-AS1(-115.8kb)|MAPT(+49.46kb)|MAPT-AS1(+182.3kb)|MAPT-IT1(+179kb)|STH(+78.1kb)
18	77631198	rs59183289	G	A		2	7.809e-05	0.07068	1.1242	1.1207	0.0337	77.83	1.0513	NA	1.1926	CTDP1(+116.7kb)|HSBP1L1(-93.38kb)|KCNG2(0)|PQLC1(-31.22kb)|RBFA(-163.1kb)|RBFADN(-196.1kb)|TXNL4A(-101.7kb)
17	43920300	rs56233672	C	T		3	7.81e-05	7.81e-05	0.8888	0.8888	0.8773	0	0.8863	0.8714	0.9049	CRHR1(+7.106kb)|CRHR1-IT1(+196.7kb)|KANSL1(-187kb)|MAPT(-51.45kb)|MAPT-AS1(-0.421kb)|MAPT-IT1(-52.85kb)|SPPL2C(-1.955kb)|STH(-156.3kb)
17	44229986	rs577520390	C	T		3	7.811e-05	7.811e-05	0.8867	0.8867	0.9134	0	0.8882	0.8704	0.8988	ARL17A(-146.5kb)|ARL17B(-146.9kb)|KANSL1(0)|KANSL1-AS1(-40.95kb)|LRRC37A(-142.5kb)|MAPT(+124.3kb)|STH(+152.9kb)
17	44124837	rs62063671	G	A		3	7.814e-05	7.814e-05	0.8872	0.8872	0.9059	0	0.8898	0.8698	0.8992	KANSL1(0)|KANSL1-AS1(-146.1kb)|MAPT(+19.14kb)|MAPT-AS1(+152kb)|MAPT-IT1(+148.7kb)|STH(+47.78kb)
17	44289628	rs2668670	C	A		3	7.817e-05	7.817e-05	0.8863	0.8863	0.8787	0	0.8909	0.8655	0.8986	ARL17A(-86.87kb)|ARL17B(-87.28kb)|KANSL1(0)|KANSL1-AS1(+15.54kb)|LRRC37A(-82.87kb)|MAPT(+183.9kb)|NSFP1(-160.6kb)
2	236171268	rs77560977	T	C		3	7.82e-05	0.001692	0.768	0.7631	0.1928	39.25	0.8126	0.6308	0.8396	.
17	44154946	rs62060847	T	C		3	7.821e-05	7.821e-05	0.8872	0.8872	0.9014	0	0.8886	0.87	0.9004	KANSL1(0)|KANSL1-AS1(-116kb)|MAPT(+49.25kb)|MAPT-AS1(+182.1kb)|MAPT-IT1(+178.8kb)|STH(+77.89kb)
17	43881790	rs17689378	T	C		3	7.822e-05	7.822e-05	0.8892	0.8892	0.8422	0	0.8832	0.8714	0.9085	CRHR1(0)|CRHR1-IT1(+158.2kb)|MAPT(-89.96kb)|MAPT-AS1(-38.93kb)|MAPT-IT1(-91.36kb)|MGC57346(+166.5kb)|SPPL2C(-40.46kb)|STH(-194.8kb)
17	44157622	rs78938131	G	T		3	7.826e-05	7.826e-05	0.8872	0.8872	0.902	0	0.8886	0.87	0.9003	KANSL1(0)|KANSL1-AS1(-113.3kb)|MAPT(+51.92kb)|MAPT-AS1(+184.7kb)|MAPT-IT1(+181.5kb)|STH(+80.56kb)
17	44230647	rs564591344	T	C		3	7.827e-05	7.827e-05	0.8868	0.8868	0.9128	0	0.8882	0.8704	0.8989	ARL17A(-145.9kb)|ARL17B(-146.3kb)|KANSL1(0)|KANSL1-AS1(-40.29kb)|LRRC37A(-141.8kb)|MAPT(+124.9kb)|STH(+153.6kb)
4	90674431	rs356168	A	G		3	7.832e-05	7.832e-05	1.1032	1.1032	0.6211	0	1.1393	1.0754	1.0898	LOC644248(-83.12kb)|MMRN1(-141.6kb)|SNCA(0)
1	179789680	rs113600993	A	G		3	7.834e-05	0.1232	1.327	1.2982	0.0056	80.7	0.949	1.4401	1.5942	CEP350(-134.2kb)|FAM163A(+4.347kb)|TDRD5(+129.3kb)|TOR1AIP1(-61.5kb)|TOR1AIP2(-19.42kb)
17	44208144	rs17661428	G	C		3	7.834e-05	7.834e-05	0.8869	0.8869	0.901	0	0.8904	0.8687	0.8986	ARL17A(-168.4kb)|ARL17B(-168.8kb)|KANSL1(0)|KANSL1-AS1(-62.79kb)|LRRC37A(-164.4kb)|MAPT(+102.4kb)|STH(+131.1kb)
17	44291479	rs2732601	A	G		3	7.834e-05	7.834e-05	0.8863	0.8863	0.8777	0	0.8908	0.8654	0.8987	ARL17A(-85.02kb)|ARL17B(-85.43kb)|KANSL1(0)|KANSL1-AS1(+17.39kb)|LRRC37A(-81.02kb)|MAPT(+185.8kb)|NSFP1(-158.7kb)
17	43851851	rs62055945	A	G		3	7.835e-05	7.835e-05	0.8889	0.8889	0.8365	0	0.8821	0.8714	0.909	CRHR1(0)|CRHR1-IT1(+128.3kb)|LOC644172(+172.1kb)|MAPT(-119.9kb)|MAPT-AS1(-68.87kb)|MAPT-IT1(-121.3kb)|MGC57346(+136.5kb)|SPPL2C(-70.4kb)
17	44150464	rs974292	C	T		3	7.835e-05	7.835e-05	0.8872	0.8872	0.9015	0	0.8886	0.8699	0.9003	KANSL1(0)|KANSL1-AS1(-120.5kb)|MAPT(+44.76kb)|MAPT-AS1(+177.6kb)|MAPT-IT1(+174.3kb)|STH(+73.4kb)
17	44154607	rs74481389	C	T		3	7.835e-05	7.835e-05	0.8872	0.8872	0.9014	0	0.8886	0.87	0.9004	KANSL1(0)|KANSL1-AS1(-116.3kb)|MAPT(+48.91kb)|MAPT-AS1(+181.7kb)|MAPT-IT1(+178.4kb)|STH(+77.55kb)
18	58059529	rs7240064	T	C		3	7.835e-05	0.002334	0.8826	0.8807	0.1812	41.45	0.828	0.8659	0.945	MC4R(+19.53kb)
17	43940020	rs74944644	C	T		3	7.838e-05	7.838e-05	0.8864	0.8864	0.8799	0	0.8862	0.8677	0.9018	CRHR1(+26.83kb)|KANSL1(-167.3kb)|MAPT(-31.73kb)|MAPT-AS1(0)|MAPT-IT1(-33.13kb)|SPPL2C(+15.58kb)|STH(-136.6kb)
8	107680261	rs3101533	C	A		3	7.839e-05	7.839e-05	1.1249	1.1249	0.4584	0	1.1555	1.0575	1.1454	ABRA(-91.45kb)|OXR1(0)
17	43898459	rs111739681	T	C		3	7.839e-05	7.839e-05	0.8892	0.8892	0.8453	0	0.8838	0.8713	0.9082	CRHR1(0)|CRHR1-IT1(+174.9kb)|MAPT(-73.29kb)|MAPT-AS1(-22.26kb)|MAPT-IT1(-74.69kb)|MGC57346(+183.1kb)|SPPL2C(-23.8kb)|STH(-178.2kb)
[truncated: 1,072 more rows]
