# Supplementary material for: Multiomics integrative analysis identifies APOE allele-specific blood biomarkers associated to Alzheimer’s disease etiopathogenesis
Source: Aging (Albany NY). 2021 Apr 12;13(7):9277–329. doi: 10.18632/aging.202950 (PMC8064208; doi:10.18632/aging.202950)
Supplement: Supplementary Table 3 [file aging-13-202950-s005.xlsx]

## Sheet: Sheet1
Supplementary Table 3. Stage I-III APOE4 stratified meta-analysis results (p<10-4).
CHR	BP	SNP	A1	A2	HRC_AF	N	P	P.R.	OR	OR.R.	Q	I	StageI	StageII	StageIII	ANNOT
19	45416741	rs438811	T	C	0.219864	3	1.515e-63	3.599e-09	2.5714	2.5318	0.0004	87.24	3.4305	2.2029	2.1336	APOC1(-1.179kb)|APOC1P1(-13.32kb)|APOC2(-32.5kb)|APOC4(-28.75kb)|APOC4-APOC2(-28.75kb)|APOE(+4.091kb)|BCAM(+92.06kb)|BCL3(+153.4kb)|CBLC(+112.8kb)|CLASRP(-125.6kb)|CLPTM1(-41.1kb)|GEMIN7(-165.8kb)|PPP1R37(-179.7kb)|PVRL2(+24.26kb)|RELB(-87.96kb)|TOMM40(+9.795kb)|ZNF296(-158kb)
19	45416178	rs483082	T	G	0.218479	3	2.044e-63	2.214e-09	2.564	2.5237	0.0005	86.85	3.4006	2.2041	2.1301	APOC1(-1.742kb)|APOC1P1(-13.88kb)|APOC2(-33.06kb)|APOC4(-29.32kb)|APOC4-APOC2(-29.32kb)|APOE(+3.528kb)|BCAM(+91.5kb)|BCL3(+152.9kb)|CBLC(+112.3kb)|CLASRP(-126.1kb)|CLPTM1(-41.66kb)|GEMIN7(-166.3kb)|PPP1R37(-180.3kb)|PVRL2(+23.69kb)|RELB(-88.53kb)|TOMM40(+9.232kb)|ZNF296(-158.6kb)
19	45411941	rs429358	C	T	0.140838	3	6.95e-62	6.944e-09	2.4923	2.4361	0.0004	87.09	3.2631	2.0683	2.1221	APOC1(-5.979kb)|APOC1P1(-18.12kb)|APOC2(-37.3kb)|APOC4(-33.55kb)|APOC4-APOC2(-33.55kb)|APOE(0)|BCAM(+87.26kb)|BCL3(+148.6kb)|CBLC(+108kb)|CEACAM16(+198kb)|CLASRP(-130.4kb)|CLPTM1(-45.9kb)|GEMIN7(-170.6kb)|PPP1R37(-184.5kb)|PVRL2(+19.46kb)|RELB(-92.76kb)|TOMM40(+4.995kb)|ZNF296(-162.8kb)
19	45418790	rs5117	C	T	0.211503	3	6.462e-60	6.288e-08	2.4588	2.4219	0.0002	88.6	3.3226	2.0341	2.0903	APOC1(0)|APOC1P1(-11.27kb)|APOC2(-30.45kb)|APOC4(-26.7kb)|APOC4-APOC2(-26.7kb)|APOE(+6.14kb)|BCAM(+94.11kb)|BCL3(+155.5kb)|CBLC(+114.9kb)|CLASRP(-123.5kb)|CLPTM1(-39.05kb)|GEMIN7(-163.7kb)|PPP1R37(-177.6kb)|PVRL2(+26.3kb)|RELB(-85.92kb)|TOMM40(+11.84kb)|ZNF296(-156kb)
19	45422160	rs12721051	G	C	0.174607	3	1.657e-48	6.432e-08	2.0719	2.0433	0.0009	85.75	2.636	1.7803	1.8058	APOC1(0)|APOC1P1(-7.899kb)|APOC2(-27.08kb)|APOC4(-23.33kb)|APOC4-APOC2(-23.33kb)|APOE(+9.51kb)|BCAM(+97.48kb)|BCL3(+158.9kb)|CBLC(+118.3kb)|CLASRP(-120.1kb)|CLPTM1(-35.68kb)|GEMIN7(-160.4kb)|PPP1R37(-174.3kb)|PVRL2(+29.68kb)|RELB(-82.55kb)|TOMM40(+15.21kb)|ZNF296(-152.6kb)
19	45422846	rs56131196	A	G	0.178103	3	1.824e-48	1.034e-07	2.0659	2.0379	0.0007	86.2	2.6384	1.7688	1.8021	APOC1(+0.24kb)|APOC1P1(-7.213kb)|APOC2(-26.39kb)|APOC4(-22.65kb)|APOC4-APOC2(-22.65kb)|APOE(+10.2kb)|BCAM(+98.17kb)|BCL3(+159.5kb)|CBLC(+118.9kb)|CLASRP(-119.5kb)|CLPTM1(-35kb)|GEMIN7(-159.7kb)|PPP1R37(-173.6kb)|PVRL2(+30.36kb)|RELB(-81.86kb)|TOMM40(+15.9kb)|ZNF296(-151.9kb)
19	45422946	rs4420638	G	A	0.178072	3	2.162e-48	1.13e-07	2.0644	2.0364	0.0007	86.26	2.6378	1.7677	1.7996	APOC1(+0.34kb)|APOC1P1(-7.113kb)|APOC2(-26.29kb)|APOC4(-22.55kb)|APOC4-APOC2(-22.55kb)|APOE(+10.3kb)|BCAM(+98.27kb)|BCL3(+159.6kb)|CBLC(+119kb)|CLASRP(-119.4kb)|CLPTM1(-34.9kb)|GEMIN7(-159.6kb)|PPP1R37(-173.5kb)|PVRL2(+30.46kb)|RELB(-81.76kb)|TOMM40(+16kb)|ZNF296(-151.8kb)
19	45396665	rs59007384	T	G	0.198953	3	2.218e-41	0.0008699	1.9116	1.8534	0	93.2	2.6043	1.6989	1.4302	APOC1(-21.26kb)|APOC1P1(-33.39kb)|APOC2(-52.57kb)|APOC4(-48.83kb)|APOC4-APOC2(-48.83kb)|APOE(-12.37kb)|BCAM(+71.99kb)|BCL3(+133.4kb)|CBLC(+92.76kb)|CEACAM16(+182.7kb)|CLASRP(-145.6kb)|CLPTM1(-61.18kb)|GEMIN7(-185.9kb)|PPP1R37(-199.8kb)|PVRL2(+4.18kb)|RELB(-108kb)|TOMM40(0)|ZNF296(-178.1kb)
19	45396219	rs157582	T	C	0.212134	3	4.689e-39	0.0004226	1.8518	1.8029	0	91.95	2.4076	1.747	1.3846	APOC1(-21.7kb)|APOC1P1(-33.84kb)|APOC2(-53.02kb)|APOC4(-49.28kb)|APOC4-APOC2(-49.28kb)|APOE(-12.82kb)|BCAM(+71.54kb)|BCL3(+132.9kb)|CBLC(+92.32kb)|CEACAM16(+182.2kb)|CLASRP(-146.1kb)|CLPTM1(-61.62kb)|GEMIN7(-186.3kb)|PVRL2(+3.734kb)|RELB(-108.5kb)|TOMM40(0)|ZNF296(-178.5kb)
19	45392254	rs6857	T	C	0.151355	3	1.953e-38	7.203e-05	1.8354	1.784	0.0001	89.53	2.3294	1.6524	1.462	APOC1(-25.67kb)|APOC1P1(-37.8kb)|APOC2(-56.98kb)|APOC4(-53.24kb)|APOC4-APOC2(-53.24kb)|APOE(-16.78kb)|BCAM(+67.58kb)|BCL3(+129kb)|CBLC(+88.35kb)|CEACAM16(+178.3kb)|CLASRP(-150kb)|CLPTM1(-65.59kb)|GEMIN7(-190.3kb)|PVRL2(0)|RELB(-112.5kb)|TOMM40(-2.222kb)|ZNF296(-182.5kb)
19	45395714	rs157581	C	T	0.214644	3	2.782e-38	0.0003962	1.8372	1.7889	0	91.69	2.3753	1.7361	1.3793	APOC1(-22.21kb)|APOC1P1(-34.34kb)|APOC2(-53.52kb)|APOC4(-49.78kb)|APOC4-APOC2(-49.78kb)|APOE(-13.32kb)|BCAM(+71.04kb)|BCL3(+132.4kb)|CBLC(+91.81kb)|CEACAM16(+181.7kb)|CLASRP(-146.6kb)|CLPTM1(-62.13kb)|GEMIN7(-186.8kb)|PVRL2(+3.229kb)|RELB(-109kb)|TOMM40(0)|ZNF296(-179kb)
19	45390333	rs283815	G	A	0.213705	3	7.155e-38	0.0002179	1.8283	1.7837	0	90.91	2.3566	1.697	1.4097	APOC1(-27.59kb)|APOC1P1(-39.73kb)|APOC2(-58.9kb)|APOC4(-55.16kb)|APOC4-APOC2(-55.16kb)|APOE(-18.7kb)|BCAM(+65.66kb)|BCL3(+127kb)|CBLC(+86.43kb)|CEACAM16(+176.3kb)|CLASRP(-152kb)|CLPTM1(-67.51kb)|GEMIN7(-192.2kb)|PVRL2(0)|RELB(-114.4kb)|TOMM40(-4.143kb)|ZNF296(-184.4kb)
19	45394969	rs184017	G	T	0.212781	3	1.021e-36	0.0009066	1.8083	1.7571	0	92.32	2.3865	1.6448	1.3731	APOC1(-22.95kb)|APOC1P1(-35.09kb)|APOC2(-54.27kb)|APOC4(-50.52kb)|APOC4-APOC2(-50.52kb)|APOE(-14.07kb)|BCAM(+70.29kb)|BCL3(+131.7kb)|CBLC(+91.07kb)|CEACAM16(+181kb)|CLASRP(-147.3kb)|CLPTM1(-62.87kb)|GEMIN7(-187.5kb)|PVRL2(+2.484kb)|RELB(-109.7kb)|TOMM40(0)|ZNF296(-179.8kb)
19	45415713	rs10414043	A	G	0.114998	3	1.955e-32	0.0002726	1.6661	1.6294	0.0001	89.6	2.1015	1.4033	1.4565	APOC1(-2.207kb)|APOC1P1(-14.35kb)|APOC2(-33.52kb)|APOC4(-29.78kb)|APOC4-APOC2(-29.78kb)|APOE(+3.063kb)|BCAM(+91.04kb)|BCL3(+152.4kb)|CBLC(+111.8kb)|CLASRP(-126.6kb)|CLPTM1(-42.13kb)|GEMIN7(-166.8kb)|PPP1R37(-180.7kb)|PVRL2(+23.23kb)|RELB(-88.99kb)|TOMM40(+8.767kb)|ZNF296(-159kb)
19	45415935	rs7256200	T	G	0.115075	3	2.018e-32	0.0002447	1.6663	1.63	0.0001	89.44	2.0988	1.4072	1.4559	APOC1(-1.985kb)|APOC1P1(-14.12kb)|APOC2(-33.3kb)|APOC4(-29.56kb)|APOC4-APOC2(-29.56kb)|APOE(+3.285kb)|BCAM(+91.26kb)|BCL3(+152.6kb)|CBLC(+112kb)|CLASRP(-126.4kb)|CLPTM1(-41.91kb)|GEMIN7(-166.6kb)|PPP1R37(-180.5kb)|PVRL2(+23.45kb)|RELB(-88.77kb)|TOMM40(+8.989kb)|ZNF296(-158.8kb)
19	45413576	rs75627662	T	C	0.181444	3	2.89e-32	0.0001035	1.6788	1.6447	0.0002	88.2	2.0964	1.4194	1.4838	APOC1(-4.344kb)|APOC1P1(-16.48kb)|APOC2(-35.66kb)|APOC4(-31.92kb)|APOC4-APOC2(-31.92kb)|APOE(+0.926kb)|BCAM(+88.9kb)|BCL3(+150.3kb)|CBLC(+109.7kb)|CEACAM16(+199.6kb)|CLASRP(-128.7kb)|CLPTM1(-44.26kb)|GEMIN7(-168.9kb)|PPP1R37(-182.9kb)|PVRL2(+21.09kb)|RELB(-91.13kb)|TOMM40(+6.63kb)|ZNF296(-161.2kb)
19	45406673	rs10119	A	G	0.27182	3	5.584e-32	4.963e-05	1.7297	1.7064	0.0004	87.41	2.1659	1.6178	1.4105	APOC1(-11.25kb)|APOC1P1(-23.39kb)|APOC2(-42.56kb)|APOC4(-38.82kb)|APOC4-APOC2(-38.82kb)|APOE(-2.365kb)|BCAM(+82kb)|BCL3(+143.4kb)|CBLC(+102.8kb)|CEACAM16(+192.7kb)|CLASRP(-135.6kb)|CLPTM1(-51.17kb)|GEMIN7(-175.8kb)|PPP1R37(-189.8kb)|PVRL2(+14.19kb)|RELB(-98.03kb)|TOMM40(0)|ZNF296(-168.1kb)
19	45410002	rs769449	A	G	0.108285	3	1.303e-31	0.000143	1.6507	1.6145	0.0002	88.29	2.047	1.3967	1.46	APOC1(-7.918kb)|APOC1P1(-20.06kb)|APOC2(-39.24kb)|APOC4(-35.49kb)|APOC4-APOC2(-35.49kb)|APOE(0)|BCAM(+85.32kb)|BCL3(+146.7kb)|CBLC(+106.1kb)|CEACAM16(+196kb)|CLASRP(-132.3kb)|CLPTM1(-47.84kb)|GEMIN7(-172.5kb)|PPP1R37(-186.4kb)|PVRL2(+17.52kb)|RELB(-94.7kb)|TOMM40(+3.056kb)|ZNF296(-164.8kb)
19	45421254	rs12721046	A	G	0.145257	3	4.997e-27	7.371e-05	1.5662	1.541	0.0011	85.27	1.8935	1.3402	1.4302	APOC1(0)|APOC1P1(-8.805kb)|APOC2(-27.98kb)|APOC4(-24.24kb)|APOC4-APOC2(-24.24kb)|APOE(+8.604kb)|BCAM(+96.58kb)|BCL3(+158kb)|CBLC(+117.4kb)|CLASRP(-121kb)|CLPTM1(-36.59kb)|GEMIN7(-161.3kb)|PPP1R37(-175.2kb)|PVRL2(+28.77kb)|RELB(-83.45kb)|TOMM40(+14.31kb)|ZNF296(-153.5kb)
19	45427125	rs111789331	A	T	0.14635	3	1.67e-26	0.0001124	1.5693	1.5442	0.0009	85.74	1.9111	1.3417	1.4248	APOC1(+4.519kb)|APOC1P1(-2.934kb)|APOC2(-22.11kb)|APOC4(-18.37kb)|APOC4-APOC2(-18.37kb)|APOE(+14.48kb)|BCAM(+102.4kb)|BCL3(+163.8kb)|CBLC(+123.2kb)|CLASRP(-115.2kb)|CLPTM1(-30.72kb)|GEMIN7(-155.4kb)|PPP1R37(-169.3kb)|PVRL2(+34.64kb)|RELB(-77.58kb)|TOMM40(+20.18kb)|ZNF296(-147.6kb)
19	45428234	rs66626994	A	G	0.148845	3	4.852e-26	0.0002323	1.5661	1.5398	0.0005	86.75	1.9242	1.3342	1.4115	APOC1(+5.628kb)|APOC1P1(-1.825kb)|APOC2(-21kb)|APOC4(-17.26kb)|APOC4-APOC2(-17.26kb)|APOE(+15.58kb)|BCAM(+103.6kb)|BCL3(+164.9kb)|CBLC(+124.3kb)|CLASRP(-114.1kb)|CLPTM1(-29.61kb)|GEMIN7(-154.3kb)|PPP1R37(-168.2kb)|PVRL2(+35.75kb)|RELB(-76.47kb)|TOMM40(+21.29kb)|ZNF296(-146.5kb)
19	45396144	rs11556505	T	C	0.130813	3	4.364e-24	0.000953	1.5058	1.4759	0.0002	88.06	1.8326	1.376	1.2655	APOC1(-21.78kb)|APOC1P1(-33.92kb)|APOC2(-53.09kb)|APOC4(-49.35kb)|APOC4-APOC2(-49.35kb)|APOE(-12.89kb)|BCAM(+71.47kb)|BCL3(+132.8kb)|CBLC(+92.24kb)|CEACAM16(+182.2kb)|CLASRP(-146.2kb)|CLPTM1(-61.7kb)|GEMIN7(-186.4kb)|PVRL2(+3.659kb)|RELB(-108.6kb)|TOMM40(0)|ZNF296(-178.6kb)
19	45395909	rs34404554	G	C	0.130336	3	5.857e-24	0.0009346	1.504	1.474	0.0002	87.95	1.8287	1.3736	1.2655	APOC1(-22.01kb)|APOC1P1(-34.15kb)|APOC2(-53.33kb)|APOC4(-49.58kb)|APOC4-APOC2(-49.58kb)|APOE(-13.13kb)|BCAM(+71.23kb)|BCL3(+132.6kb)|CBLC(+92.01kb)|CEACAM16(+181.9kb)|CLASRP(-146.4kb)|CLPTM1(-61.93kb)|GEMIN7(-186.6kb)|PVRL2(+3.424kb)|RELB(-108.8kb)|TOMM40(0)|ZNF296(-178.8kb)
19	45395619	rs2075650	G	A	0.131306	3	5.878e-24	0.0009781	1.5032	1.4732	0.0002	88.03	1.8273	1.377	1.2614	APOC1(-22.3kb)|APOC1P1(-34.44kb)|APOC2(-53.62kb)|APOC4(-49.88kb)|APOC4-APOC2(-49.88kb)|APOE(-13.42kb)|BCAM(+70.94kb)|BCL3(+132.3kb)|CBLC(+91.72kb)|CEACAM16(+181.6kb)|CLASRP(-146.7kb)|CLPTM1(-62.22kb)|GEMIN7(-186.9kb)|PVRL2(+3.134kb)|RELB(-109.1kb)|TOMM40(0)|ZNF296(-179.1kb)
19	45387459	rs12972156	G	C	0.12935	3	1.013e-23	0.0009006	1.5019	1.4734	0.0003	87.82	1.8356	1.337	1.2937	APOC1(-30.46kb)|APOC1P1(-42.6kb)|APOC2(-61.78kb)|APOC4(-58.04kb)|APOC4-APOC2(-58.04kb)|APOE(-21.58kb)|BCAM(+62.78kb)|BCL3(+124.2kb)|CBLC(+83.56kb)|CEACAM16(+173.5kb)|CEACAM19(+199.8kb)|CLASRP(-154.8kb)|CLPTM1(-70.38kb)|GEMIN7(-195.1kb)|PVRL2(0)|RELB(-117.2kb)|TOMM40(-7.017kb)|ZNF296(-187.3kb)
19	45387596	rs12972970	A	G	0.129489	3	1.198e-23	0.000962	1.5008	1.472	0.0003	87.9	1.835	1.3366	1.291	APOC1(-30.32kb)|APOC1P1(-42.46kb)|APOC2(-61.64kb)|APOC4(-57.9kb)|APOC4-APOC2(-57.9kb)|APOE(-21.44kb)|BCAM(+62.92kb)|BCL3(+124.3kb)|CBLC(+83.69kb)|CEACAM16(+173.6kb)|CEACAM19(+200kb)|CLASRP(-154.7kb)|CLPTM1(-70.24kb)|GEMIN7(-194.9kb)|PVRL2(0)|RELB(-117.1kb)|TOMM40(-6.88kb)|ZNF296(-187.2kb)
19	45388130	rs34342646	A	G	0.133184	3	1.887e-23	0.001102	1.4965	1.4682	0.0002	88.08	1.8314	1.3395	1.281	APOC1(-29.79kb)|APOC1P1(-41.93kb)|APOC2(-61.11kb)|APOC4(-57.36kb)|APOC4-APOC2(-57.36kb)|APOE(-20.91kb)|BCAM(+63.45kb)|BCL3(+124.8kb)|CBLC(+84.23kb)|CEACAM16(+174.1kb)|CLASRP(-154.2kb)|CLPTM1(-69.71kb)|GEMIN7(-194.4kb)|PVRL2(0)|RELB(-116.6kb)|TOMM40(-6.346kb)|ZNF296(-186.6kb)
19	45394336	rs71352238	C	T	0.131367	3	7.128e-23	0.0009787	1.4874	1.4586	0.0003	87.44	1.8046	1.3458	1.2681	APOC1(-23.58kb)|APOC1P1(-35.72kb)|APOC2(-54.9kb)|APOC4(-51.16kb)|APOC4-APOC2(-51.16kb)|APOE(-14.7kb)|BCAM(+69.66kb)|BCL3(+131kb)|CBLC(+90.43kb)|CEACAM16(+180.4kb)|CLASRP(-148kb)|CLPTM1(-63.5kb)|GEMIN7(-188.2kb)|PVRL2(+1.851kb)|RELB(-110.4kb)|TOMM40(-0.14kb)|ZNF296(-180.4kb)
19	45407788	rs7259620	A	G	0.454512	3	2.356e-15	2.29e-09	0.7125	0.715	0.1833	41.06	0.646	0.7831	0.7361	APOC1(-10.13kb)|APOC1P1(-22.27kb)|APOC2(-41.45kb)|APOC4(-37.71kb)|APOC4-APOC2(-37.71kb)|APOE(-1.25kb)|BCAM(+83.11kb)|BCL3(+144.5kb)|CBLC(+103.9kb)|CEACAM16(+193.8kb)|CLASRP(-134.5kb)|CLPTM1(-50.05kb)|GEMIN7(-174.7kb)|PPP1R37(-188.6kb)|PVRL2(+15.3kb)|RELB(-96.92kb)|TOMM40(+0.842kb)|ZNF296(-167kb)
19	45403412	rs1160985	T	C	0.461164	3	3.37e-15	2.163e-09	0.7156	0.7181	0.188	40.17	0.6498	0.7864	0.7385	APOC1(-14.51kb)|APOC1P1(-26.65kb)|APOC2(-45.83kb)|APOC4(-42.08kb)|APOC4-APOC2(-42.08kb)|APOE(-5.626kb)|BCAM(+78.73kb)|BCL3(+140.1kb)|CBLC(+99.51kb)|CEACAM16(+189.4kb)|CLASRP(-138.9kb)|CLPTM1(-54.43kb)|GEMIN7(-179.1kb)|PPP1R37(-193kb)|PVRL2(+10.93kb)|RELB(-101.3kb)|TOMM40(0)|ZNF296(-171.3kb)
19	45403858	rs760136	G	A	0.46121	3	3.435e-15	2.023e-09	0.7156	0.7181	0.1892	39.93	0.65	0.7866	0.7381	APOC1(-14.06kb)|APOC1P1(-26.2kb)|APOC2(-45.38kb)|APOC4(-41.64kb)|APOC4-APOC2(-41.64kb)|APOE(-5.18kb)|BCAM(+79.18kb)|BCL3(+140.6kb)|CBLC(+99.96kb)|CEACAM16(+189.9kb)|CLASRP(-138.4kb)|CLPTM1(-53.98kb)|GEMIN7(-178.7kb)|PPP1R37(-192.6kb)|PVRL2(+11.37kb)|RELB(-100.8kb)|TOMM40(0)|ZNF296(-170.9kb)
19	45404431	rs741780	C	T	0.461334	3	4.006e-15	4.351e-09	0.7161	0.7188	0.1783	42.01	0.6495	0.7891	0.7384	APOC1(-13.49kb)|APOC1P1(-25.63kb)|APOC2(-44.81kb)|APOC4(-41.06kb)|APOC4-APOC2(-41.06kb)|APOE(-4.607kb)|BCAM(+79.75kb)|BCL3(+141.1kb)|CBLC(+100.5kb)|CEACAM16(+190.4kb)|CLASRP(-137.9kb)|CLPTM1(-53.41kb)|GEMIN7(-178.1kb)|PPP1R37(-192kb)|PVRL2(+11.95kb)|RELB(-100.3kb)|TOMM40(0)|ZNF296(-170.3kb)
19	45404972	rs1038025	C	T	0.461272	3	4.155e-15	3.967e-09	0.716	0.7187	0.1799	41.7	0.6493	0.7878	0.7392	APOC1(-12.95kb)|APOC1P1(-25.09kb)|APOC2(-44.27kb)|APOC4(-40.52kb)|APOC4-APOC2(-40.52kb)|APOE(-4.066kb)|BCAM(+80.29kb)|BCL3(+141.7kb)|CBLC(+101.1kb)|CEACAM16(+191kb)|CLASRP(-137.3kb)|CLPTM1(-52.87kb)|GEMIN7(-177.5kb)|PPP1R37(-191.5kb)|PVRL2(+12.49kb)|RELB(-99.73kb)|TOMM40(0)|ZNF296(-169.8kb)
19	45405062	rs1038026	G	A	0.461611	3	4.382e-15	9.404e-10	0.7162	0.7184	0.2037	37.15	0.6517	0.7849	0.7388	APOC1(-12.86kb)|APOC1P1(-25kb)|APOC2(-44.18kb)|APOC4(-40.43kb)|APOC4-APOC2(-40.43kb)|APOE(-3.976kb)|BCAM(+80.38kb)|BCL3(+141.8kb)|CBLC(+101.2kb)|CEACAM16(+191.1kb)|CLASRP(-137.2kb)|CLPTM1(-52.78kb)|GEMIN7(-177.5kb)|PPP1R37(-191.4kb)|PVRL2(+12.58kb)|RELB(-99.64kb)|TOMM40(0)|ZNF296(-169.7kb)
19	45416291	rs59325138	T	C	0.40539	3	5.271e-15	0.0002829	0.7025	0.7131	0.0152	76.11	0.6039	0.8364	0.7292	APOC1(-1.629kb)|APOC1P1(-13.77kb)|APOC2(-32.95kb)|APOC4(-29.2kb)|APOC4-APOC2(-29.2kb)|APOE(+3.641kb)|BCAM(+91.61kb)|BCL3(+153kb)|CBLC(+112.4kb)|CLASRP(-126kb)|CLPTM1(-41.55kb)|GEMIN7(-166.2kb)|PPP1R37(-180.1kb)|PVRL2(+23.81kb)|RELB(-88.42kb)|TOMM40(+9.345kb)|ZNF296(-158.5kb)
19	45395844	rs34095326	A	G	0.10077	3	5.757e-15	3.604e-06	1.3656	1.3584	0.0662	63.18	1.5247	1.326	1.2297	APOC1(-22.08kb)|APOC1P1(-34.22kb)|APOC2(-53.39kb)|APOC4(-49.65kb)|APOC4-APOC2(-49.65kb)|APOE(-13.19kb)|BCAM(+71.17kb)|BCL3(+132.5kb)|CBLC(+91.94kb)|CEACAM16(+181.9kb)|CLASRP(-146.5kb)|CLPTM1(-62kb)|GEMIN7(-186.7kb)|PVRL2(+3.359kb)|RELB(-108.9kb)|TOMM40(0)|ZNF296(-178.9kb)
19	45401666	rs8106922	G	A	0.40773	3	1.908e-14	3.569e-06	0.7188	0.7239	0.0763	61.13	0.6371	0.8097	0.7469	APOC1(-16.25kb)|APOC1P1(-28.39kb)|APOC2(-47.57kb)|APOC4(-43.83kb)|APOC4-APOC2(-43.83kb)|APOE(-7.372kb)|BCAM(+76.99kb)|BCL3(+138.4kb)|CBLC(+97.76kb)|CEACAM16(+187.7kb)|CLASRP(-140.6kb)|CLPTM1(-56.18kb)|GEMIN7(-180.9kb)|PPP1R37(-194.8kb)|PVRL2(+9.181kb)|RELB(-103kb)|TOMM40(0)|ZNF296(-173.1kb)
19	45410444	rs769450	A	G	0.412196	3	4.005e-14	4.237e-06	0.7175	0.7224	0.0777	60.86	0.6334	0.8017	0.7534	APOC1(-7.476kb)|APOC1P1(-19.62kb)|APOC2(-38.79kb)|APOC4(-35.05kb)|APOC4-APOC2(-35.05kb)|APOE(0)|BCAM(+85.77kb)|BCL3(+147.1kb)|CBLC(+106.5kb)|CEACAM16(+196.5kb)|CLASRP(-131.9kb)|CLPTM1(-47.4kb)|GEMIN7(-172.1kb)|PPP1R37(-186kb)|PVRL2(+17.96kb)|RELB(-94.26kb)|TOMM40(+3.498kb)|ZNF296(-164.3kb)
19	45402477	rs34878901	T	C	0.41295	3	6.27e-14	7.763e-06	0.723	0.728	0.0704	62.31	0.6379	0.8096	0.7581	APOC1(-15.44kb)|APOC1P1(-27.58kb)|APOC2(-46.76kb)|APOC4(-43.02kb)|APOC4-APOC2(-43.02kb)|APOE(-6.561kb)|BCAM(+77.8kb)|BCL3(+139.2kb)|CBLC(+98.57kb)|CEACAM16(+188.5kb)|CLASRP(-139.8kb)|CLPTM1(-55.36kb)|GEMIN7(-180kb)|PPP1R37(-194kb)|PVRL2(+9.992kb)|RELB(-102.2kb)|TOMM40(0)|ZNF296(-172.3kb)
19	45405521	rs1305062	C	G	0.411349	3	6.911e-14	9.843e-06	0.7222	0.7274	0.067	63	0.6367	0.8134	0.7543	APOC1(-12.4kb)|APOC1P1(-24.54kb)|APOC2(-43.72kb)|APOC4(-39.97kb)|APOC4-APOC2(-39.97kb)|APOE(-3.517kb)|BCAM(+80.84kb)|BCL3(+142.2kb)|CBLC(+101.6kb)|CEACAM16(+191.5kb)|CLASRP(-136.8kb)|CLPTM1(-52.32kb)|GEMIN7(-177kb)|PPP1R37(-190.9kb)|PVRL2(+13.04kb)|RELB(-99.18kb)|TOMM40(0)|ZNF296(-169.2kb)
19	45398817	rs2238681	T	C	0.40676	3	7.056e-14	7.074e-05	0.726	0.7324	0.0366	69.76	0.6324	0.8211	0.7664	APOC1(-19.1kb)|APOC1P1(-31.24kb)|APOC2(-50.42kb)|APOC4(-46.68kb)|APOC4-APOC2(-46.68kb)|APOE(-10.22kb)|BCAM(+74.14kb)|BCL3(+135.5kb)|CBLC(+94.91kb)|CEACAM16(+184.8kb)|CLASRP(-143.5kb)|CLPTM1(-59.02kb)|GEMIN7(-183.7kb)|PPP1R37(-197.6kb)|PVRL2(+6.332kb)|RELB(-105.9kb)|TOMM40(0)|ZNF296(-175.9kb)
8	27466157	rs1532276	C	T	0.608931	3	3.527e-13	3.735e-13	1.2617	1.2617	0.3671	0.22	1.1991	1.3442	1.2738	CCDC25(-124.7kb)|CHRNA2(+129.3kb)|CLU(0)|EPHX2(+63.72kb)|ESCO2(-165.9kb)|MIR3622A(-93.04kb)|MIR3622B(-93.03kb)|PTK2B(+149.2kb)|SCARA3(-25.42kb)
8	27464519	rs11136000	C	T	0.6087	3	4.664e-13	4.664e-13	1.2594	1.2594	0.3842	0	1.1985	1.3395	1.2712	CCDC25(-126.3kb)|CHRNA2(+127.7kb)|CLU(0)|EPHX2(+62.08kb)|ESCO2(-167.5kb)|MIR3622A(-94.67kb)|MIR3622B(-94.67kb)|PTK2B(+147.6kb)|SCARA3(-27.06kb)
8	27465312	rs11787077	C	T	0.608269	3	5.483e-13	5.483e-13	1.2586	1.2586	0.3861	0	1.198	1.3387	1.2701	CCDC25(-125.5kb)|CHRNA2(+128.5kb)|CLU(0)|EPHX2(+62.87kb)|ESCO2(-166.7kb)|MIR3622A(-93.88kb)|MIR3622B(-93.88kb)|PTK2B(+148.4kb)|SCARA3(-26.26kb)
8	27466181	rs1532277	C	T	0.622467	3	6.897e-13	6.897e-13	1.2586	1.2586	0.4207	0	1.1967	1.3265	1.2795	CCDC25(-124.7kb)|CHRNA2(+129.4kb)|CLU(0)|EPHX2(+63.74kb)|ESCO2(-165.9kb)|MIR3622A(-93.01kb)|MIR3622B(-93.01kb)|PTK2B(+149.3kb)|SCARA3(-25.4kb)
8	27464929	rs4236673	G	A	0.622174	3	7.294e-13	7.294e-13	1.2573	1.2573	0.4292	0	1.1968	1.3254	1.2765	CCDC25(-125.9kb)|CHRNA2(+128.1kb)|CLU(0)|EPHX2(+62.49kb)|ESCO2(-167.1kb)|MIR3622A(-94.26kb)|MIR3622B(-94.26kb)|PTK2B(+148kb)|SCARA3(-26.65kb)
8	27466315	rs1532278	C	T	0.622513	3	8.514e-13	8.514e-13	1.2589	1.2589	0.4465	0	1.1967	1.318	1.2851	CCDC25(-124.5kb)|CHRNA2(+129.5kb)|CLU(0)|EPHX2(+63.88kb)|ESCO2(-165.7kb)|MIR3622A(-92.88kb)|MIR3622B(-92.87kb)|PTK2B(+149.4kb)|SCARA3(-25.26kb)
19	45427353	rs4803770	G	C	0.373144	3	9.256e-13	2.273e-05	0.7119	0.7188	0.0704	62.31	0.6445	0.8468	0.6937	APOC1(+4.747kb)|APOC1P1(-2.706kb)|APOC2(-21.88kb)|APOC4(-18.14kb)|APOC4-APOC2(-18.14kb)|APOE(+14.7kb)|BCAM(+102.7kb)|BCL3(+164.1kb)|CBLC(+123.4kb)|CLASRP(-114.9kb)|CLPTM1(-30.49kb)|GEMIN7(-155.2kb)|PPP1R37(-169.1kb)|PVRL2(+34.87kb)|RELB(-77.35kb)|TOMM40(+20.41kb)|ZNF296(-147.4kb)
8	27462481	rs7982	G	A	0.613505	3	1.007e-12	2.623e-12	1.256	1.2563	0.3538	3.75	1.1916	1.3379	1.2701	CCDC25(-128.4kb)|CHRNA2(+125.7kb)|CLU(0)|EPHX2(+60.04kb)|ESCO2(-169.6kb)|MIR3622A(-96.71kb)|MIR3622B(-96.71kb)|PTK2B(+145.6kb)|SCARA3(-29.1kb)
19	45425460	rs157595	G	A	0.615245	3	1.751e-12	0.009035	1.3805	1.3868	0.0006	86.54	1.5977	1.537	1.0891	APOC1(+2.854kb)|APOC1P1(-4.599kb)|APOC2(-23.78kb)|APOC4(-20.03kb)|APOC4-APOC2(-20.03kb)|APOE(+12.81kb)|BCAM(+100.8kb)|BCL3(+162.2kb)|CBLC(+121.6kb)|CLASRP(-116.8kb)|CLPTM1(-32.38kb)|GEMIN7(-157.1kb)|PPP1R37(-171kb)|PVRL2(+32.98kb)|RELB(-79.25kb)|TOMM40(+18.51kb)|ZNF296(-149.3kb)
19	45421100	rs3925681	A	G	0.414891	3	3.032e-12	5.201e-05	0.7178	0.7228	0.0595	64.55	0.6209	0.7956	0.7736	APOC1(0)|APOC1P1(-8.959kb)|APOC2(-28.14kb)|APOC4(-24.39kb)|APOC4-APOC2(-24.39kb)|APOE(+8.45kb)|BCAM(+96.42kb)|BCL3(+157.8kb)|CBLC(+117.2kb)|CLASRP(-121.2kb)|CLPTM1(-36.74kb)|GEMIN7(-161.4kb)|PPP1R37(-175.3kb)|PVRL2(+28.62kb)|RELB(-83.61kb)|TOMM40(+14.15kb)|ZNF296(-153.7kb)
19	45414451	rs439401	C	T	0.63146	3	3.041e-12	0.007805	1.3681	1.3759	0.0009	85.78	1.5586	1.5385	1.0905	APOC1(-3.469kb)|APOC1P1(-15.61kb)|APOC2(-34.79kb)|APOC4(-31.04kb)|APOC4-APOC2(-31.04kb)|APOE(+1.801kb)|BCAM(+89.77kb)|BCL3(+151.2kb)|CBLC(+110.5kb)|CLASRP(-127.8kb)|CLPTM1(-43.39kb)|GEMIN7(-168.1kb)|PPP1R37(-182kb)|PVRL2(+21.97kb)|RELB(-90.26kb)|TOMM40(+7.505kb)|ZNF296(-160.3kb)
19	45416478	rs584007	G	A	0.6336	3	3.088e-12	0.007613	1.3706	1.3784	0.0009	85.68	1.5613	1.5425	1.0916	APOC1(-1.442kb)|APOC1P1(-13.58kb)|APOC2(-32.76kb)|APOC4(-29.02kb)|APOC4-APOC2(-29.02kb)|APOE(+3.828kb)|BCAM(+91.8kb)|BCL3(+153.2kb)|CBLC(+112.6kb)|CLASRP(-125.8kb)|CLPTM1(-41.36kb)|GEMIN7(-166kb)|PPP1R37(-180kb)|PVRL2(+23.99kb)|RELB(-88.23kb)|TOMM40(+9.532kb)|ZNF296(-158.3kb)
8	27468503	rs867230	A	C	0.606483	3	3.787e-12	3.787e-12	1.2508	1.2508	0.4054	0	1.1942	1.3338	1.2558	CCDC25(-122.3kb)|CHRNA2(+131.7kb)|CLU(0)|EPHX2(+66.06kb)|ESCO2(-163.6kb)|MIR3622A(-90.69kb)|MIR3622B(-90.69kb)|PBK(-198.6kb)|PTK2B(+151.6kb)|SCARA3(-23.07kb)
8	27467686	rs9331896	T	C	0.602464	3	8.151e-12	1.059e-11	1.2453	1.2454	0.3637	1.12	1.1902	1.3375	1.2427	CCDC25(-123.1kb)|CHRNA2(+130.9kb)|CLU(0)|EPHX2(+65.25kb)|ESCO2(-164.4kb)|MIR3622A(-91.51kb)|MIR3622B(-91.5kb)|PBK(-199.5kb)|PTK2B(+150.8kb)|SCARA3(-23.89kb)
8	27467821	rs2070926	G	C	0.618355	3	1.022e-11	1.022e-11	1.245	1.245	0.4254	0	1.19	1.3249	1.25	CCDC25(-123kb)|CHRNA2(+131kb)|CLU(0)|EPHX2(+65.38kb)|ESCO2(-164.2kb)|MIR3622A(-91.37kb)|MIR3622B(-91.37kb)|PBK(-199.3kb)|PTK2B(+150.9kb)|SCARA3(-23.76kb)
8	27456253	rs2279590	C	T	0.60676	3	1.796e-11	1.796e-11	1.2389	1.2389	0.5381	0	1.1896	1.301	1.2489	CCDC25(-134.6kb)|CHRNA2(+119.4kb)|CLU(0)|EPHX2(+53.81kb)|ESCO2(-175.8kb)|MIR3622A(-102.9kb)|MIR3622B(-102.9kb)|PTK2B(+139.3kb)|SCARA3(-35.32kb)
2	127892810	rs6733839	T	C	0.381968	3	7.546e-11	3.071e-09	1.2377	1.2387	0.2991	17.16	1.2752	1.3023	1.159	BIN1(+27.91kb)|CYP27C1(-48.6kb)|ERCC3(-122.1kb)|MAP3K2(-163.4kb)
19	45421744	rs12721056	T	G	0.344333	3	2.267e-10	9.825e-07	0.7332	0.7365	0.1987	38.13	0.6713	0.8383	0.7273	APOC1(0)|APOC1P1(-8.315kb)|APOC2(-27.49kb)|APOC4(-23.75kb)|APOC4-APOC2(-23.75kb)|APOE(+9.094kb)|BCAM(+97.07kb)|BCL3(+158.4kb)|CBLC(+117.8kb)|CLASRP(-120.6kb)|CLPTM1(-36.1kb)|GEMIN7(-160.8kb)|PPP1R37(-174.7kb)|PVRL2(+29.26kb)|RELB(-82.96kb)|TOMM40(+14.8kb)|ZNF296(-153kb)
11	85814486	rs586274	G	T	0.67279	3	2.774e-10	2.774e-10	1.226	1.226	0.4837	0	1.2193	1.3056	1.1811	C11orf73(-198.8kb)|CCDC83(+183.4kb)|EED(-141.3kb)|PICALM(+33.56kb)
11	85831541	rs471470	A	C	0.666585	3	3.072e-10	3.072e-10	1.2248	1.2248	0.7757	0	1.2153	1.2737	1.2027	C11orf73(-181.7kb)|EED(-124.3kb)|PICALM(+50.62kb)
19	45409167	rs440446	G	C	0.639359	3	5.064e-10	0.01966	1.3129	1.3182	0.0007	86.15	1.5687	1.3682	1.0695	APOC1(-8.753kb)|APOC1P1(-20.89kb)|APOC2(-40.07kb)|APOC4(-36.33kb)|APOC4-APOC2(-36.33kb)|APOE(0)|BCAM(+84.49kb)|BCL3(+145.9kb)|CBLC(+105.3kb)|CEACAM16(+195.2kb)|CLASRP(-133.1kb)|CLPTM1(-48.67kb)|GEMIN7(-173.4kb)|PPP1R37(-187.3kb)|PVRL2(+16.68kb)|RELB(-95.54kb)|TOMM40(+2.221kb)|ZNF296(-165.6kb)
11	85831246	rs573167	A	G	0.674315	3	5.891e-10	5.891e-10	1.2222	1.2222	0.5768	0	1.2168	1.2914	1.183	C11orf73(-182kb)|EED(-124.6kb)|PICALM(+50.32kb)
11	85832424	rs519961	C	T	0.674453	3	6.306e-10	6.306e-10	1.2219	1.2219	0.5719	0	1.2168	1.2914	1.1821	C11orf73(-180.8kb)|EED(-123.4kb)|PICALM(+51.5kb)
19	45423636	rs78959900	A	G	0.342254	3	7.532e-10	2.829e-07	0.739	0.7412	0.2469	28.51	0.6811	0.8378	0.7318	APOC1(+1.03kb)|APOC1P1(-6.423kb)|APOC2(-25.6kb)|APOC4(-21.86kb)|APOC4-APOC2(-21.86kb)|APOE(+10.99kb)|BCAM(+98.96kb)|BCL3(+160.3kb)|CBLC(+119.7kb)|CLASRP(-118.7kb)|CLPTM1(-34.2kb)|GEMIN7(-158.9kb)|PPP1R37(-172.8kb)|PVRL2(+31.15kb)|RELB(-81.07kb)|TOMM40(+16.69kb)|ZNF296(-151.1kb)
11	85820077	rs543293	G	A	0.675485	3	1.02e-09	1.02e-09	1.2187	1.2187	0.5703	0	1.2183	1.2854	1.1759	C11orf73(-193.2kb)|CCDC83(+189kb)|EED(-135.7kb)|PICALM(+39.15kb)
19	45408564	rs449647	T	A	0.172913	3	1.076e-09	1.076e-09	0.6675	0.6675	0.8359	0	0.6349	0.6904	0.6874	APOC1(-9.356kb)|APOC1P1(-21.5kb)|APOC2(-40.67kb)|APOC4(-36.93kb)|APOC4-APOC2(-36.93kb)|APOE(-0.474kb)|BCAM(+83.89kb)|BCL3(+145.3kb)|CBLC(+104.7kb)|CEACAM16(+194.6kb)|CLASRP(-133.7kb)|CLPTM1(-49.28kb)|GEMIN7(-174kb)|PPP1R37(-187.9kb)|PVRL2(+16.08kb)|RELB(-96.14kb)|TOMM40(+1.618kb)|ZNF296(-166.2kb)
11	85828551	rs474479	G	C	0.68454	3	1.122e-09	1.122e-09	1.2214	1.2214	0.59	0	1.2298	1.2804	1.1743	C11orf73(-184.7kb)|CCDC83(+197.5kb)|EED(-127.3kb)|PICALM(+47.63kb)
11	85830157	rs567075	C	T	0.684139	3	1.132e-09	1.132e-09	1.221	1.221	0.5825	0	1.2292	1.2809	1.1736	C11orf73(-183.1kb)|CCDC83(+199.1kb)|EED(-125.6kb)|PICALM(+49.23kb)
11	85811364	rs526904	C	T	0.652664	3	1.547e-09	1.547e-09	1.2125	1.2125	0.5792	0	1.1943	1.2845	1.1848	CCDC83(+180.3kb)|EED(-144.4kb)|PICALM(+30.44kb)
11	85811696	rs566975	A	C	0.652356	3	1.551e-09	1.551e-09	1.2127	1.2127	0.5807	0	1.1942	1.2845	1.1852	CCDC83(+180.6kb)|EED(-144.1kb)|PICALM(+30.77kb)
11	85800279	rs561655	A	G	0.653403	3	1.645e-09	1.645e-09	1.214	1.214	0.8425	0	1.2008	1.2547	1.2013	CCDC83(+169.2kb)|EED(-155.5kb)|PICALM(+19.36kb)
19	45395330	rs2075649	G	A	0.402033	3	1.691e-09	4.823e-05	0.7812	0.7846	0.1237	52.16	0.7021	0.8371	0.8323	APOC1(-22.59kb)|APOC1P1(-34.73kb)|APOC2(-53.91kb)|APOC4(-50.16kb)|APOC4-APOC2(-50.16kb)|APOE(-13.71kb)|BCAM(+70.65kb)|BCL3(+132kb)|CBLC(+91.43kb)|CEACAM16(+181.3kb)|CLASRP(-147kb)|CLPTM1(-62.51kb)|GEMIN7(-187.2kb)|PVRL2(+2.845kb)|RELB(-109.4kb)|TOMM40(0)|ZNF296(-179.4kb)
11	85809825	rs645293	C	T	0.653957	3	2.034e-09	1.693e-07	1.2099	1.2121	0.2655	24.6	1.2089	1.3105	1.1463	CCDC83(+178.8kb)|EED(-146kb)|PICALM(+28.9kb)
11	85831690	rs472486	G	A	0.654342	3	2.838e-09	2.838e-09	1.2094	1.2094	0.6078	0	1.1883	1.2786	1.1866	C11orf73(-181.6kb)|EED(-124.1kb)|PICALM(+50.77kb)
19	45395266	rs157580	A	G	0.623237	3	3.779e-09	0.04505	1.2888	1.2977	0.0001	88.83	1.5724	1.3441	1.0366	APOC1(-22.65kb)|APOC1P1(-34.79kb)|APOC2(-53.97kb)|APOC4(-50.23kb)|APOC4-APOC2(-50.23kb)|APOE(-13.77kb)|BCAM(+70.59kb)|BCL3(+132kb)|CBLC(+91.36kb)|CEACAM16(+181.3kb)|CLASRP(-147kb)|CLPTM1(-62.58kb)|GEMIN7(-187.3kb)|PVRL2(+2.781kb)|RELB(-109.4kb)|TOMM40(0)|ZNF296(-179.5kb)
11	85828548	rs598726	A	G	0.664244	3	3.897e-09	3.897e-09	1.2103	1.2103	0.6816	0	1.2045	1.2682	1.1789	C11orf73(-184.7kb)|CCDC83(+197.5kb)|EED(-127.3kb)|PICALM(+47.62kb)
11	85812210	rs497816	T	C	0.652294	3	4.539e-09	4.539e-09	1.2058	1.2058	0.5218	0	1.1837	1.2844	1.1779	CCDC83(+181.2kb)|EED(-143.6kb)|PICALM(+31.29kb)
11	85815030	rs1237999	A	G	0.651986	3	4.616e-09	4.616e-09	1.2056	1.2056	0.5139	0	1.1835	1.2851	1.1772	C11orf73(-198.2kb)|CCDC83(+184kb)|EED(-140.8kb)|PICALM(+34.11kb)
2	127891427	rs4663105	C	A	0.411349	3	5.536e-09	5.536e-09	1.2078	1.2078	0.4695	0	1.2424	1.2491	1.1466	BIN1(+26.52kb)|CYP27C1(-49.98kb)|ERCC3(-123.4kb)|MAP3K2(-164.8kb)
19	45385759	rs3745150	C	G	0.403003	3	6.596e-09	0.003524	0.7873	0.793	0.0257	72.7	0.6821	0.8602	0.8576	APOC1(-32.16kb)|APOC1P1(-44.3kb)|APOC2(-63.48kb)|APOC4(-59.74kb)|APOC4-APOC2(-59.74kb)|APOE(-23.28kb)|BCAM(+61.08kb)|BCL3(+122.5kb)|CBLC(+81.86kb)|CEACAM16(+171.8kb)|CEACAM19(+198.1kb)|CLASRP(-156.5kb)|CLPTM1(-72.08kb)|GEMIN7(-196.8kb)|PVRL2(0)|RELB(-118.9kb)|TOMM40(-8.717kb)|ZNF296(-189kb)
11	85811238	rs542126	G	A	0.633646	3	9.227e-09	1.676e-08	1.1983	1.1987	0.3543	3.63	1.1862	1.2919	1.1509	CCDC83(+180.2kb)|EED(-144.6kb)|PICALM(+30.32kb)
11	85856187	rs7110631	G	C	0.690976	3	1.191e-08	1.191e-08	1.2082	1.2082	0.5897	0	1.2126	1.2708	1.1637	C11orf73(-157.1kb)|EED(-99.62kb)|PICALM(+75.26kb)
11	85858538	rs7941541	A	G	0.690453	3	1.243e-08	1.243e-08	1.2079	1.2079	0.5871	0	1.2095	1.2727	1.1647	C11orf73(-154.7kb)|EED(-97.27kb)|PICALM(+77.62kb)
19	45382034	rs6859	G	A	0.576794	3	1.368e-08	1.368e-08	0.8268	0.8268	0.657	0	0.8507	0.8379	0.7937	APOC1(-35.89kb)|APOC1P1(-48.02kb)|APOC2(-67.2kb)|APOC4(-63.46kb)|APOC4-APOC2(-63.46kb)|APOE(-27kb)|BCAM(+57.36kb)|BCL3(+118.7kb)|CBLC(+78.13kb)|CEACAM16(+168kb)|CEACAM19(+194.4kb)|CLASRP(-160.3kb)|CLPTM1(-75.81kb)|PVRL2(0)|RELB(-122.7kb)|TOMM40(-12.44kb)|ZNF296(-192.7kb)
19	45428459	rs4803772	T	C	0.335725	3	1.542e-08	0.0004189	0.7538	0.7597	0.0896	58.55	0.6735	0.8872	0.7469	APOC1(+5.853kb)|APOC1P1(-1.6kb)|APOC2(-20.78kb)|APOC4(-17.04kb)|APOC4-APOC2(-17.04kb)|APOE(+15.81kb)|BCAM(+103.8kb)|BCL3(+165.2kb)|CBLC(+124.6kb)|CLASRP(-113.8kb)|CLPTM1(-29.38kb)|GEMIN7(-154.1kb)|PPP1R37(-168kb)|PVRL2(+35.97kb)|RELB(-76.25kb)|TOMM40(+21.51kb)|ZNF296(-146.3kb)
7	145943872	rs149553270	T	C	0.0159224	2	1.548e-08	1.548e-08	0.3424	0.3424	0.6857	0	0.3624	0.3087	NA	CNTNAP2(0)
11	85824859	rs659023	G	A	0.624915	3	4.401e-08	2.535e-06	1.1875	1.1903	0.253	27.24	1.1745	1.2945	1.1333	C11orf73(-188.4kb)|CCDC83(+193.8kb)|EED(-130.9kb)|PICALM(+43.94kb)
8	27477509	rs484377	T	C	0.563058	3	7.78e-08	7.78e-08	1.1798	1.1798	0.4122	0	1.1336	1.1594	1.2424	CCDC25(-113.3kb)|CHRNA2(+140.7kb)|CLU(+5.181kb)|EPHX2(+75.07kb)|ESCO2(-154.5kb)|MIR3622A(-81.68kb)|MIR3622B(-81.68kb)|PBK(-189.6kb)|PTK2B(+160.6kb)|SCARA3(-14.07kb)
8	27475767	rs536332	A	G	0.570727	3	8.651e-08	8.651e-08	1.1799	1.1799	0.4224	0	1.1347	1.1582	1.2419	CCDC25(-115.1kb)|CHRNA2(+139kb)|CLU(+3.439kb)|EPHX2(+73.33kb)|ESCO2(-156.3kb)|MIR3622A(-83.43kb)|MIR3622B(-83.42kb)|PBK(-191.4kb)|PTK2B(+158.9kb)|SCARA3(-15.81kb)
8	27476815	rs538181	A	G	0.562242	3	1.039e-07	1.039e-07	1.1779	1.1779	0.3963	0	1.133	1.1527	1.2425	CCDC25(-114kb)|CHRNA2(+140kb)|CLU(+4.487kb)|EPHX2(+74.38kb)|ESCO2(-155.2kb)|MIR3622A(-82.38kb)|MIR3622B(-82.37kb)|PBK(-190.3kb)|PTK2B(+159.9kb)|SCARA3(-14.76kb)
8	27480455	rs1073742	T	A	0.563305	3	1.08e-07	1.08e-07	1.1773	1.1773	0.3782	0	1.1276	1.1593	1.2421	CCDC25(-110.4kb)|CHRNA2(+143.6kb)|CLU(+8.127kb)|EPHX2(+78.02kb)|ESCO2(-151.6kb)|MIR3622A(-78.74kb)|MIR3622B(-78.73kb)|PBK(-186.7kb)|PTK2B(+163.5kb)|SCARA3(-11.12kb)
8	27479103	rs520186	G	A	0.563243	3	1.115e-07	1.115e-07	1.1771	1.1771	0.3725	0	1.1274	1.1582	1.2426	CCDC25(-111.7kb)|CHRNA2(+142.3kb)|CLU(+6.775kb)|EPHX2(+76.66kb)|ESCO2(-153kb)|MIR3622A(-80.09kb)|MIR3622B(-80.09kb)|PBK(-188kb)|PTK2B(+162.2kb)|SCARA3(-12.47kb)
8	27480210	rs1073743	G	A	0.563305	3	1.154e-07	1.154e-07	1.1768	1.1768	0.3762	0	1.1271	1.1586	1.2418	CCDC25(-110.6kb)|CHRNA2(+143.4kb)|CLU(+7.882kb)|EPHX2(+77.77kb)|ESCO2(-151.8kb)|MIR3622A(-78.98kb)|MIR3622B(-78.98kb)|PBK(-186.9kb)|PTK2B(+163.3kb)|SCARA3(-11.37kb)
8	27480025	rs2582367	T	C	0.562843	3	1.337e-07	1.337e-07	1.1758	1.1758	0.3783	0	1.1264	1.1577	1.2407	CCDC25(-110.8kb)|CHRNA2(+143.2kb)|CLU(+7.697kb)|EPHX2(+77.59kb)|ESCO2(-152kb)|MIR3622A(-79.17kb)|MIR3622B(-79.16kb)|PBK(-187.1kb)|PTK2B(+163.1kb)|SCARA3(-11.55kb)
8	27479745	rs518317	C	G	0.562889	3	1.366e-07	1.366e-07	1.1757	1.1757	0.3727	0	1.127	1.155	1.2415	CCDC25(-111.1kb)|CHRNA2(+142.9kb)|CLU(+7.417kb)|EPHX2(+77.31kb)|ESCO2(-152.3kb)|MIR3622A(-79.45kb)|MIR3622B(-79.44kb)|PBK(-187.4kb)|PTK2B(+162.8kb)|SCARA3(-11.83kb)
19	45380970	rs11668861	T	G	0.473391	3	1.613e-07	1.613e-07	0.8361	0.8361	0.7655	0	0.8561	0.8446	0.8091	APOC1(-36.95kb)|APOC1P1(-49.09kb)|APOC2(-68.27kb)|APOC4(-64.52kb)|APOC4-APOC2(-64.52kb)|APOE(-28.07kb)|BCAM(+56.29kb)|BCL3(+117.7kb)|CBLC(+77.07kb)|CEACAM16(+167kb)|CEACAM19(+193.3kb)|CLASRP(-161.3kb)|CLPTM1(-76.87kb)|PVRL2(0)|RELB(-123.7kb)|TOMM40(-13.51kb)|ZNF296(-193.8kb)
7	145819555	rs139303548	C	A	0.0126886	2	1.784e-07	1.784e-07	0.3302	0.3302	0.6397	0	0.3565	0.2903	NA	CNTNAP2(0)
8	27489959	rs485902	C	G	0.430828	3	2.472e-07	2.472e-07	0.8531	0.8531	0.4832	0	0.8876	0.8599	0.8152	CCDC25(-100.9kb)|CHRNA2(+153.1kb)|CLU(+17.63kb)|EPHX2(+87.52kb)|ESCO2(-142.1kb)|MIR3622A(-69.23kb)|MIR3622B(-69.23kb)|PBK(-177.2kb)|PTK2B(+173.1kb)|SCARA3(-1.617kb)
11	85845473	rs7938634	G	A	0.623298	3	2.881e-07	3.032e-05	1.1754	1.1784	0.2147	35	1.1933	1.2666	1.1009	C11orf73(-167.8kb)|EED(-110.3kb)|PICALM(+64.55kb)
19	45398633	rs11668327	C	G	0.157299	3	3.18e-07	3.18e-07	0.7202	0.7202	0.5867	0	0.6709	0.7159	0.7839	APOC1(-19.29kb)|APOC1P1(-31.43kb)|APOC2(-50.6kb)|APOC4(-46.86kb)|APOC4-APOC2(-46.86kb)|APOE(-10.4kb)|BCAM(+73.96kb)|BCL3(+135.3kb)|CBLC(+94.73kb)|CEACAM16(+184.6kb)|CLASRP(-143.7kb)|CLPTM1(-59.21kb)|GEMIN7(-183.9kb)|PPP1R37(-197.8kb)|PVRL2(+6.148kb)|RELB(-106.1kb)|TOMM40(0)|ZNF296(-176.1kb)
11	85798020	rs631639	G	T	0.696089	3	3.231e-07	3.231e-07	1.1869	1.1869	0.8065	0	1.19	1.2265	1.1585	CCDC83(+167kb)|EED(-157.8kb)|PICALM(+17.1kb)
11	85776544	rs867611	A	G	0.682584	3	3.813e-07	3.813e-07	1.1815	1.1815	0.8679	0	1.1719	1.2182	1.1677	CCDC83(+145.5kb)|EED(-179.3kb)|PICALM(0)
11	85794542	rs535590	G	A	0.68959	3	3.862e-07	3.862e-07	1.184	1.184	0.7844	0	1.1775	1.2313	1.1604	CCDC83(+163.5kb)|EED(-161.3kb)|PICALM(+13.62kb)
11	85760028	rs694011	C	T	0.678734	3	3.976e-07	3.976e-07	1.1806	1.1806	0.9286	0	1.1692	1.2067	1.1756	CCDC83(+129kb)|EED(-195.8kb)|PICALM(0)
11	85757613	rs659863	G	C	0.680182	3	4.071e-07	4.071e-07	1.1816	1.1816	0.8353	0	1.1602	1.2209	1.1785	CCDC83(+126.6kb)|EED(-198.2kb)|PICALM(0)
11	85757617	rs677869	T	C	0.680135	3	4.089e-07	4.089e-07	1.1816	1.1816	0.8348	0	1.1602	1.221	1.1784	CCDC83(+126.6kb)|EED(-198.2kb)|PICALM(0)
19	45384405	rs73052307	C	T	0.131337	3	4.167e-07	4.167e-07	0.7058	0.7058	0.6296	0	0.6549	0.7099	0.7643	APOC1(-33.52kb)|APOC1P1(-45.65kb)|APOC2(-64.83kb)|APOC4(-61.09kb)|APOC4-APOC2(-61.09kb)|APOE(-24.63kb)|BCAM(+59.73kb)|BCL3(+121.1kb)|CBLC(+80.5kb)|CEACAM16(+170.4kb)|CEACAM19(+196.8kb)|CLASRP(-157.9kb)|CLPTM1(-73.44kb)|GEMIN7(-198.1kb)|PVRL2(0)|RELB(-120.3kb)|TOMM40(-10.07kb)|ZNF296(-190.4kb)
11	85724661	rs636355	C	T	0.677533	3	5.16e-07	5.16e-07	1.1788	1.1788	0.9408	0	1.1663	1.2013	1.1771	CCDC83(+93.61kb)|PICALM(0)
11	85794760	rs683912	T	C	0.684555	3	5.232e-07	5.232e-07	1.1815	1.1815	0.8799	0	1.1714	1.2168	1.169	CCDC83(+163.7kb)|EED(-161kb)|PICALM(+13.84kb)
19	45398716	rs157590	C	A	0.498706	3	5.351e-07	0.003075	0.8373	0.8423	0.0702	62.36	0.7687	0.9439	0.8333	APOC1(-19.2kb)|APOC1P1(-31.34kb)|APOC2(-50.52kb)|APOC4(-46.78kb)|APOC4-APOC2(-46.78kb)|APOE(-10.32kb)|BCAM(+74.04kb)|BCL3(+135.4kb)|CBLC(+94.81kb)|CEACAM16(+184.7kb)|CLASRP(-143.6kb)|CLPTM1(-59.12kb)|GEMIN7(-183.8kb)|PPP1R37(-197.7kb)|PVRL2(+6.231kb)|RELB(-106kb)|TOMM40(0)|ZNF296(-176kb)
11	85717923	rs2508696	C	A	0.678041	3	5.639e-07	5.639e-07	1.1782	1.1782	0.9068	0	1.164	1.2077	1.1738	CCDC83(+86.87kb)|PICALM(0)|SYTL2(+195.7kb)
11	85794761	rs534128	G	A	0.695781	3	5.642e-07	5.642e-07	1.183	1.183	0.8384	0	1.1819	1.2212	1.1595	CCDC83(+163.7kb)|EED(-161kb)|PICALM(+13.84kb)
2	127888757	rs11680911	C	A	0.320819	3	5.971e-07	0.00331	1.1762	1.1832	0.047	67.28	1.2232	1.287	1.0629	BIN1(+23.85kb)|CYP27C1(-52.65kb)|ERCC3(-126.1kb)|MAP3K2(-167.5kb)
4	33650872	rs12641122	T	G	0.0942408	3	6.279e-07	6.279e-07	0.7557	0.7557	0.8459	0	0.7295	0.7572	0.7875	.
11	85795524	rs565719	C	T	0.694102	3	6.297e-07	6.297e-07	1.1818	1.1818	0.8237	0	1.1812	1.2216	1.157	CCDC83(+164.5kb)|EED(-160.3kb)|PICALM(+14.6kb)
4	33644536	rs13141649	T	C	0.0942254	3	6.507e-07	6.507e-07	0.7562	0.7562	0.8388	0	0.7289	0.7585	0.7882	.
4	33653757	rs717947	T	C	0.0980598	3	7.377e-07	7.377e-07	0.7613	0.7613	0.8069	0	0.7333	0.7598	0.798	.
4	33646216	rs35440893	C	T	0.0934401	3	7.446e-07	7.446e-07	0.7565	0.7565	0.867	0	0.7323	0.7573	0.7861	.
2	127889637	rs7561528	A	G	0.320604	3	7.797e-07	0.003374	1.1741	1.181	0.0496	66.71	1.2219	1.2825	1.0619	BIN1(+24.73kb)|CYP27C1(-51.77kb)|ERCC3(-125.2kb)|MAP3K2(-166.6kb)
11	85868640	rs3851179	C	T	0.639344	3	7.799e-07	7.799e-07	1.1701	1.1701	0.6129	0	1.1708	1.2285	1.1323	C11orf73(-144.6kb)|EED(-87.16kb)|PICALM(+87.72kb)
11	85795950	rs480781	G	A	0.700955	3	7.885e-07	7.885e-07	1.1805	1.1805	0.7637	0	1.1812	1.2265	1.1503	CCDC83(+164.9kb)|EED(-159.9kb)|PICALM(+15.03kb)
4	33657126	rs16989140	T	C	0.0983061	3	8.239e-07	8.239e-07	0.7619	0.7619	0.8204	0	0.7353	0.7594	0.7975	.
8	27491186	rs530324	C	G	0.541931	3	8.458e-07	8.458e-07	0.8592	0.8592	0.3916	0	0.9032	0.8558	0.8197	CCDC25(-99.65kb)|CHRNA2(+154.4kb)|CLU(+18.86kb)|EPHX2(+88.75kb)|ESCO2(-140.9kb)|MIR3622A(-68.01kb)|MIR3622B(-68kb)|PBK(-176kb)|PTK2B(+174.3kb)|SCARA3(-0.39kb)
4	33669293	rs1454600	A	G	0.0983523	3	9.625e-07	9.625e-07	0.7627	0.7627	0.82	0	0.7361	0.7597	0.7985	.
11	85765298	rs493254	A	G	0.681768	3	9.98e-07	9.98e-07	1.1742	1.1742	0.8499	0	1.1648	1.2133	1.1589	CCDC83(+134.2kb)|EED(-190.5kb)|PICALM(0)
11	85757589	rs677909	T	C	0.677533	3	1.008e-06	1.008e-06	1.1737	1.1737	0.9065	0	1.1588	1.2028	1.1705	CCDC83(+126.5kb)|EED(-198.2kb)|PICALM(0)
19	45398264	rs157588	T	C	0.49304	3	1.036e-06	0.001695	0.8412	0.8455	0.104	55.82	0.7766	0.9391	0.8395	APOC1(-19.66kb)|APOC1P1(-31.8kb)|APOC2(-50.97kb)|APOC4(-47.23kb)|APOC4-APOC2(-47.23kb)|APOE(-10.77kb)|BCAM(+73.59kb)|BCL3(+135kb)|CBLC(+94.36kb)|CEACAM16(+184.3kb)|CLASRP(-144kb)|CLPTM1(-59.58kb)|GEMIN7(-184.3kb)|PPP1R37(-198.2kb)|PVRL2(+5.779kb)|RELB(-106.4kb)|TOMM40(0)|ZNF296(-176.5kb)
11	85740409	rs609903	G	A	0.674299	3	1.069e-06	1.069e-06	1.1733	1.1733	0.8679	0	1.1575	1.2092	1.1665	CCDC83(+109.4kb)|PICALM(0)
11	85746037	rs561646	T	C	0.674669	3	1.075e-06	1.075e-06	1.1732	1.1732	0.8673	0	1.1577	1.2093	1.166	CCDC83(+115kb)|PICALM(0)
11	85788351	rs541458	T	C	0.680059	3	1.103e-06	1.103e-06	1.1744	1.1744	0.854	0	1.1606	1.2133	1.1637	CCDC83(+157.3kb)|EED(-167.5kb)|PICALM(+7.428kb)
19	45397512	rs157585	C	A	0.493178	3	1.111e-06	0.001857	0.8417	0.846	0.1016	56.27	0.7762	0.9395	0.8411	APOC1(-20.41kb)|APOC1P1(-32.55kb)|APOC2(-51.73kb)|APOC4(-47.98kb)|APOC4-APOC2(-47.98kb)|APOE(-11.53kb)|BCAM(+72.83kb)|BCL3(+134.2kb)|CBLC(+93.61kb)|CEACAM16(+183.5kb)|CLASRP(-144.8kb)|CLPTM1(-60.33kb)|GEMIN7(-185kb)|PPP1R37(-198.9kb)|PVRL2(+5.027kb)|RELB(-107.2kb)|TOMM40(0)|ZNF296(-177.2kb)
11	85762244	rs669813	T	C	0.681598	3	1.139e-06	1.139e-06	1.1732	1.1732	0.8575	0	1.163	1.2113	1.1593	CCDC83(+131.2kb)|EED(-193.6kb)|PICALM(0)
11	85787824	rs536841	T	C	0.68631	3	1.17e-06	1.17e-06	1.1743	1.1743	0.8189	0	1.1633	1.218	1.1576	CCDC83(+156.8kb)|EED(-168kb)|PICALM(+6.901kb)
11	85748386	rs1973630	C	T	0.682599	3	1.236e-06	1.236e-06	1.1725	1.1725	0.832	0	1.1559	1.2139	1.1631	CCDC83(+117.3kb)|PICALM(0)
11	85734010	rs676733	T	C	0.676933	3	1.288e-06	1.288e-06	1.1719	1.1719	0.8941	0	1.1565	1.2032	1.1678	CCDC83(+103kb)|PICALM(0)
4	33655292	rs16989137	C	A	0.119187	3	1.301e-06	1.301e-06	0.7803	0.7803	0.774	0	0.7585	0.7622	0.8209	.
8	27448028	rs6983452	T	C	0.434509	3	1.328e-06	1.328e-06	1.1621	1.1621	0.666	0	1.1781	1.1071	1.1837	CCDC25(-142.8kb)|CHRNA2(+111.2kb)|CLU(-6.405kb)|EPHX2(+45.59kb)|ESCO2(-184kb)|MIR3622A(-111.2kb)|MIR3622B(-111.2kb)|PTK2B(+131.1kb)|SCARA3(-43.55kb)
11	85867875	rs10792832	G	A	0.640853	3	1.409e-06	1.409e-06	1.166	1.166	0.5911	0	1.1658	1.2272	1.1276	C11orf73(-145.4kb)|EED(-87.93kb)|PICALM(+86.95kb)
11	85750671	rs2508691	T	A	0.682507	3	1.41e-06	1.41e-06	1.1715	1.1715	0.8288	0	1.1568	1.2136	1.1596	CCDC83(+119.6kb)|PICALM(0)
20	4613814	rs78186890	G	A	0.0528488	3	1.416e-06	1.416e-06	1.4509	1.4509	0.8294	0	1.4057	1.385	1.5372	PRND(-88.74kb)|PRNP(-52.98kb)|PRNT(-98.11kb)|RASSF2(-146.9kb)
4	33665133	rs2124029	C	G	0.119095	3	1.417e-06	1.417e-06	0.7806	0.7806	0.7714	0	0.7598	0.7603	0.8216	.
4	33668235	rs7685939	C	T	0.119141	3	1.427e-06	1.427e-06	0.7807	0.7807	0.7584	0	0.759	0.76	0.823	.
4	33670840	rs12649294	C	T	0.119172	3	1.449e-06	1.449e-06	0.7807	0.7807	0.7513	0	0.7585	0.76	0.8238	.
11	85718231	rs602222	T	G	0.671497	3	1.542e-06	1.542e-06	1.1702	1.1702	0.9928	0	1.167	1.1783	1.1683	CCDC83(+87.18kb)|PICALM(0)|SYTL2(+196.1kb)
4	33658066	rs28549134	A	G	0.130413	3	1.552e-06	1.552e-06	0.7843	0.7843	0.8544	0	0.7581	0.7949	0.8077	.
4	33666588	rs73125178	T	G	0.117108	3	1.582e-06	1.582e-06	0.7814	0.7814	0.7427	0	0.7588	0.7601	0.8254	.
11	85689712	rs587038	T	A	0.676809	3	1.599e-06	1.599e-06	1.1702	1.1702	0.9713	0	1.1631	1.1864	1.1672	CCDC83(+58.66kb)|PICALM(0)|SYTL2(+167.5kb)
11	85741130	rs682928	T	C	0.680367	3	1.602e-06	1.602e-06	1.1706	1.1706	0.808	0	1.1554	1.2155	1.1574	CCDC83(+110.1kb)|PICALM(0)
8	27477019	rs569205	A	T	0.612504	3	1.607e-06	1.607e-06	1.162	1.162	0.6811	0	1.1405	1.1339	1.2041	CCDC25(-113.8kb)|CHRNA2(+140.2kb)|CLU(+4.691kb)|EPHX2(+74.58kb)|ESCO2(-155kb)|MIR3622A(-82.17kb)|MIR3622B(-82.17kb)|PBK(-190.1kb)|PTK2B(+160.1kb)|SCARA3(-14.56kb)
8	27441521	rs4732728	G	C	0.432461	3	1.636e-06	1.636e-06	1.16	1.16	0.7647	0	1.1711	1.1156	1.1791	CCDC25(-149.3kb)|CHRNA2(+104.7kb)|CLU(-12.91kb)|EPHX2(+39.08kb)|ESCO2(-190.5kb)|MIR3622A(-117.7kb)|MIR3622B(-117.7kb)|PTK2B(+124.6kb)|SCARA3(-50.06kb)
11	85691810	rs645299	A	C	0.676116	3	1.673e-06	1.673e-06	1.1697	1.1697	0.9871	0	1.1646	1.1803	1.1681	CCDC83(+60.76kb)|PICALM(0)|SYTL2(+169.6kb)
4	33671412	rs13135144	T	C	0.130305	3	1.699e-06	1.699e-06	0.7847	0.7847	0.8191	0	0.7557	0.7934	0.8128	.
4	33664488	rs74446780	T	G	0.117077	3	1.726e-06	1.726e-06	0.7821	0.7821	0.7553	0	0.7607	0.7604	0.8248	.
4	33671090	rs10023739	G	A	0.130397	3	1.726e-06	1.726e-06	0.7847	0.7847	0.819	0	0.7557	0.7936	0.8128	.
8	27475320	rs504038	G	T	0.617632	3	1.726e-06	1.726e-06	1.1626	1.1626	0.6886	0	1.1401	1.1362	1.2044	CCDC25(-115.5kb)|CHRNA2(+138.5kb)|CLU(+2.992kb)|EPHX2(+72.88kb)|ESCO2(-156.7kb)|MIR3622A(-83.87kb)|MIR3622B(-83.87kb)|PBK(-191.8kb)|PTK2B(+158.4kb)|SCARA3(-16.26kb)
4	33658459	rs6830471	A	G	0.131783	3	1.749e-06	1.749e-06	0.7854	0.7854	0.8627	0	0.7603	0.7934	0.8092	.
11	85670945	rs673751	C	A	0.676702	3	1.807e-06	1.807e-06	1.1692	1.1692	0.9695	0	1.1588	1.1834	1.1708	CCDC83(+39.89kb)|PICALM(0)|SYTL2(+148.8kb)
11	85682817	rs606505	G	A	0.676471	3	1.819e-06	1.819e-06	1.169	1.169	0.9733	0	1.1608	1.1839	1.168	CCDC83(+51.77kb)|PICALM(0)|SYTL2(+160.6kb)
8	27434722	rs10780145	T	C	0.430828	3	1.852e-06	1.852e-06	1.159	1.159	0.774	0	1.1659	1.1166	1.1808	CCDC25(-156.1kb)|CHRNA2(+97.91kb)|CLU(-19.71kb)|EPHX2(+32.28kb)|ESCO2(-197.3kb)|MIR3622A(-124.5kb)|MIR3622B(-124.5kb)|PTK2B(+117.8kb)|SCARA3(-56.85kb)
8	27430506	rs7831810	G	A	0.455282	3	1.906e-06	1.906e-06	1.1584	1.1584	0.8836	0	1.1814	1.141	1.1474	CCDC25(-160.3kb)|CHRNA2(+93.69kb)|CLU(-23.93kb)|EPHX2(+28.07kb)|MIR3622A(-128.7kb)|MIR3622B(-128.7kb)|PTK2B(+113.6kb)|SCARA3(-61.07kb)
4	33668380	rs7675932	G	C	0.131783	3	1.927e-06	1.927e-06	0.7858	0.7858	0.8314	0	0.7582	0.7926	0.8136	.
4	33662124	rs9998025	C	T	0.140822	3	1.968e-06	1.968e-06	0.7884	0.7884	0.9341	0	0.7707	0.7984	0.8016	.
4	33658676	rs6811233	G	A	0.140776	3	1.994e-06	1.994e-06	0.7886	0.7886	0.9384	0	0.7715	0.7993	0.8007	.
10	116818842	rs75334075	G	A	0.0136434	3	2.148e-06	2.148e-06	0.4958	0.4958	0.9592	0	0.4843	0.4822	0.5333	ATRNL1(-34.28kb)|FAM160B1(+159.3kb)|TRUB1(+81.4kb)
4	33661435	rs28634392	C	G	0.140715	3	2.198e-06	2.198e-06	0.7892	0.7892	0.9305	0	0.771	0.8016	0.8014	.
8	133369094	rs978152	G	C	0.352803	3	2.233e-06	2.233e-06	0.8586	0.8586	0.5629	0	0.8905	0.8666	0.8232	KCNQ3(0)
11	85681583	rs639012	G	A	0.680212	3	2.325e-06	2.325e-06	1.1675	1.1675	0.9486	0	1.1613	1.1896	1.1596	CCDC83(+50.53kb)|PICALM(0)|SYTL2(+159.4kb)
4	33642926	rs1378041	C	T	0.097105	3	2.533e-06	2.533e-06	0.7691	0.7691	0.7905	0	0.7334	0.7903	0.7953	.
4	33643360	rs1454607	C	A	0.0997844	3	2.615e-06	2.615e-06	0.7694	0.7694	0.7885	0	0.7336	0.7961	0.7915	.
4	33643627	rs1454608	G	A	0.099846	3	2.702e-06	2.702e-06	0.7697	0.7697	0.8145	0	0.7363	0.7942	0.7904	.
4	91559594	rs144941129	T	C	0.0129658	2	2.791e-06	0.006996	0.4714	0.4885	0.1048	61.99	0.3824	NA	0.6517	CCSER1(0)
8	27476426	rs4732732	A	G	0.441885	3	2.869e-06	2.869e-06	1.1549	1.1549	0.6316	0	1.1161	1.1558	1.1946	CCDC25(-114.4kb)|CHRNA2(+139.6kb)|CLU(+4.098kb)|EPHX2(+73.99kb)|ESCO2(-155.6kb)|MIR3622A(-82.77kb)|MIR3622B(-82.76kb)|PBK(-190.7kb)|PTK2B(+159.5kb)|SCARA3(-15.15kb)
8	27479227	rs492638	G	T	0.69381	3	2.869e-06	2.869e-06	1.1668	1.1668	0.6986	0	1.1422	1.1414	1.2097	CCDC25(-111.6kb)|CHRNA2(+142.4kb)|CLU(+6.899kb)|EPHX2(+76.79kb)|ESCO2(-152.8kb)|MIR3622A(-79.97kb)|MIR3622B(-79.96kb)|PBK(-187.9kb)|PTK2B(+162.3kb)|SCARA3(-12.35kb)
8	133364229	rs9297847	T	G	0.323268	3	2.876e-06	2.876e-06	0.8572	0.8572	0.4442	0	0.8855	0.886	0.8123	KCNQ3(0)
10	116813089	rs145529924	A	T	0.0136126	3	2.878e-06	2.878e-06	0.5001	0.5001	0.9691	0	0.4926	0.4842	0.5321	ATRNL1(-40.03kb)|FAM160B1(+153.5kb)|TRUB1(+75.65kb)
8	27429228	rs1316801	T	C	0.430659	3	2.879e-06	2.879e-06	1.1556	1.1556	0.7866	0	1.1635	1.1142	1.1755	CCDC25(-161.6kb)|CHRNA2(+92.42kb)|CLU(-25.2kb)|EPHX2(+26.79kb)|MIR3622A(-130kb)|MIR3622B(-130kb)|PTK2B(+112.3kb)|SCARA3(-62.35kb)
8	133363846	rs11995561	A	G	0.326886	3	2.904e-06	2.904e-06	0.8574	0.8574	0.4219	0	0.8876	0.8857	0.8113	KCNQ3(0)
19	45408836	rs405509	G	T	0.524869	3	2.958e-06	0.002537	0.849	0.8527	0.1044	55.74	0.7851	0.9456	0.8442	APOC1(-9.084kb)|APOC1P1(-21.22kb)|APOC2(-40.4kb)|APOC4(-36.66kb)|APOC4-APOC2(-36.66kb)|APOE(-0.202kb)|BCAM(+84.16kb)|BCL3(+145.5kb)|CBLC(+104.9kb)|CEACAM16(+194.8kb)|CLASRP(-133.5kb)|CLPTM1(-49kb)|GEMIN7(-173.7kb)|PPP1R37(-187.6kb)|PVRL2(+16.35kb)|RELB(-95.87kb)|TOMM40(+1.89kb)|ZNF296(-165.9kb)
8	133368240	rs28401651	G	C	0.349584	3	2.984e-06	2.984e-06	0.8602	0.8602	0.5459	0	0.8902	0.8742	0.8227	KCNQ3(0)
8	27476347	rs11136001	T	G	0.439914	3	3.016e-06	3.016e-06	1.1546	1.1546	0.6173	0	1.1147	1.1559	1.1951	CCDC25(-114.5kb)|CHRNA2(+139.5kb)|CLU(+4.019kb)|EPHX2(+73.91kb)|ESCO2(-155.7kb)|MIR3622A(-82.85kb)|MIR3622B(-82.84kb)|PBK(-190.8kb)|PTK2B(+159.4kb)|SCARA3(-15.23kb)
4	33653138	rs1378044	G	T	0.137804	3	3.059e-06	3.059e-06	0.7915	0.7915	0.97	0	0.7799	0.7953	0.8021	.
19	45383037	rs11673139	T	A	0.08919	3	3.135e-06	3.135e-06	0.7112	0.7112	0.9954	0	0.7148	0.7031	0.7137	APOC1(-34.88kb)|APOC1P1(-47.02kb)|APOC2(-66.2kb)|APOC4(-62.46kb)|APOC4-APOC2(-62.46kb)|APOE(-26kb)|BCAM(+58.36kb)|BCL3(+119.7kb)|CBLC(+79.13kb)|CEACAM16(+169.1kb)|CEACAM19(+195.4kb)|CLASRP(-159.3kb)|CLPTM1(-74.8kb)|GEMIN7(-199.5kb)|PVRL2(0)|RELB(-121.7kb)|TOMM40(-11.44kb)|ZNF296(-191.7kb)
19	45382984	rs11669338	G	T	0.08919	3	3.178e-06	3.178e-06	0.7115	0.7115	0.9956	0	0.7149	0.7035	0.7139	APOC1(-34.94kb)|APOC1P1(-47.08kb)|APOC2(-66.25kb)|APOC4(-62.51kb)|APOC4-APOC2(-62.51kb)|APOE(-26.05kb)|BCAM(+58.31kb)|BCL3(+119.7kb)|CBLC(+79.08kb)|CEACAM16(+169kb)|CEACAM19(+195.4kb)|CLASRP(-159.3kb)|CLPTM1(-74.86kb)|GEMIN7(-199.5kb)|PVRL2(0)|RELB(-121.7kb)|TOMM40(-11.49kb)|ZNF296(-191.8kb)
4	33646883	rs10517289	T	A	0.135109	3	3.313e-06	3.313e-06	0.7908	0.7908	0.9529	0	0.7755	0.7992	0.8019	.
4	33651649	rs1378042	A	T	0.135109	3	3.362e-06	3.362e-06	0.7907	0.7907	0.9511	0	0.7751	0.7998	0.8017	.
4	33647071	rs9992435	T	C	0.135109	3	3.381e-06	3.381e-06	0.7909	0.7909	0.9528	0	0.7756	0.7994	0.802	.
8	133368495	rs12679098	G	A	0.324053	3	3.465e-06	3.465e-06	0.8584	0.8584	0.4168	0	0.8866	0.8903	0.8119	KCNQ3(0)
10	116817144	rs142583867	C	A	0.013628	3	3.615e-06	3.615e-06	0.5029	0.5029	0.9538	0	0.4917	0.4864	0.5437	ATRNL1(-35.98kb)|FAM160B1(+157.6kb)|TRUB1(+79.7kb)
4	101278482	rs11724321	T	A	0.0286726	3	3.657e-06	3.019e-05	0.662	0.6607	0.2895	19.33	0.6579	0.5469	0.7798	DDIT4L(+166.8kb)|EMCN(-38.02kb)
4	33652352	rs10517290	T	C	0.137003	3	3.695e-06	3.695e-06	0.7916	0.7916	0.9561	0	0.7769	0.7989	0.8029	.
4	33649928	rs66948132	G	A	0.137065	3	3.709e-06	3.709e-06	0.7916	0.7916	0.955	0	0.7768	0.7989	0.8032	.
2	127894484	rs730482	T	A	0.289837	3	3.98e-06	3.98e-06	1.1721	1.1721	0.4355	0	1.1897	1.237	1.1087	BIN1(+29.58kb)|CYP27C1(-46.93kb)|ERCC3(-120.4kb)|MAP3K2(-161.8kb)
8	133364487	rs9297850	T	C	0.323683	3	3.986e-06	3.986e-06	0.8592	0.8592	0.4183	0	0.8873	0.8911	0.8127	KCNQ3(0)
11	85843197	rs67598967	A	G	0.140576	3	4.16e-06	0.0007525	0.8145	0.8091	0.1402	49.1	0.8349	0.7045	0.879	C11orf73(-170.1kb)|EED(-112.6kb)|PICALM(+62.27kb)
4	33644431	rs13141447	A	C	0.135017	3	4.42e-06	4.42e-06	0.7932	0.7932	0.9385	0	0.7761	0.7992	0.8083	.
8	133364297	rs9297848	A	G	0.320034	3	4.566e-06	4.566e-06	0.8599	0.8599	0.4493	0	0.8863	0.8912	0.8152	KCNQ3(0)
11	85812785	rs17745409	G	A	0.14789	3	4.724e-06	0.002897	0.8215	0.8142	0.0782	60.75	0.8475	0.7004	0.8911	CCDC83(+181.7kb)|EED(-143kb)|PICALM(+31.86kb)
4	33674642	rs2198597	G	C	0.121682	3	5.183e-06	5.183e-06	0.7874	0.7874	0.6239	0	0.7397	0.8249	0.8175	.
4	33677276	rs12648086	T	C	0.0911149	3	5.301e-06	5.301e-06	0.7706	0.7706	0.6243	0	0.7199	0.8025	0.8092	.
8	27486916	rs576748	A	G	0.299184	3	5.326e-06	5.326e-06	0.8602	0.8602	0.7364	0	0.875	0.8812	0.832	CCDC25(-103.9kb)|CHRNA2(+150.1kb)|CLU(+14.59kb)|EPHX2(+84.48kb)|ESCO2(-145.1kb)|MIR3622A(-72.28kb)|MIR3622B(-72.27kb)|PBK(-180.2kb)|PTK2B(+170kb)|SCARA3(-4.66kb)
9	109150314	rs7847056	G	A	0.0483985	3	5.362e-06	0.0001159	0.6587	0.6608	0.2574	26.32	0.5649	0.649	0.8034	.
2	127894615	rs744373	G	A	0.289791	3	5.378e-06	5.378e-06	1.1698	1.1698	0.445	0	1.1893	1.2315	1.1063	BIN1(+29.71kb)|CYP27C1(-46.8kb)|ERCC3(-120.2kb)|MAP3K2(-161.6kb)
4	33678116	rs61548475	A	T	0.0910687	3	5.435e-06	5.435e-06	0.7708	0.7708	0.623	0	0.7199	0.8028	0.8094	.
13	101840510	rs61456777	C	T	0.074207	3	5.562e-06	5.562e-06	1.3159	1.3159	0.4643	0	1.2798	1.1888	1.4269	NALCN(0)|NALCN-AS1(+128.9kb)
3	146959039	rs13321249	A	G	0.235448	3	5.563e-06	5.563e-06	0.8437	0.8437	0.9988	0	0.8455	0.8433	0.842	ZIC1(-168.1kb)|ZIC4(-144.8kb)
10	81227956	rs7909698	C	T	0.336372	3	5.6e-06	0.001184	0.8517	0.8553	0.1588	45.66	0.8598	0.9368	0.7896	EIF5AL1(-44.4kb)|PPIF(+112.9kb)|SFTPA1(-142.7kb)|SFTPA2(-87.65kb)|ZCCHC24(+22.57kb)|ZMIZ1(+151.7kb)
22	30224141	rs1071962	A	G	0.130428	3	5.805e-06	5.805e-06	1.2297	1.2297	0.5817	0	1.2715	1.1366	1.2602	ASCC2(0)|CABP7(+96.32kb)|MTMR3(-55.02kb)|NF2(+129.6kb)|UQCR10(+57.74kb)|ZMAT5(+61.17kb)
7	114760513	rs10953774	A	G	0.372575	3	5.806e-06	6.02e-05	0.8645	0.8657	0.2888	19.49	0.8147	0.9243	0.8785	MDFIC(+100.5kb)
1	72070718	rs78085588	T	C	0.0328611	3	5.962e-06	0.001478	0.6794	0.6673	0.1132	54.1	0.8052	0.5095	0.6877	NEGR1(0)|NEGR1-IT1(-189.2kb)
8	15315598	rs117296777	A	G	0.0152602	3	5.962e-06	5.962e-06	0.5785	0.5785	0.5858	0	0.5249	0.5524	0.6996	TUSC3(-82kb)
8	27482354	rs495150	G	T	0.298491	3	6.057e-06	6.057e-06	0.8612	0.8612	0.7404	0	0.876	0.8819	0.8333	CCDC25(-108.5kb)|CHRNA2(+145.5kb)|CLU(+10.03kb)|EPHX2(+79.92kb)|ESCO2(-149.7kb)|MIR3622A(-76.84kb)|MIR3622B(-76.84kb)|PBK(-184.8kb)|PTK2B(+165.4kb)|SCARA3(-9.222kb)
4	33686974	rs6852504	A	T	0.0910995	3	6.104e-06	6.104e-06	0.7724	0.7724	0.6208	0	0.7214	0.8048	0.811	.
7	114761401	rs12670173	A	G	0.372559	3	6.261e-06	5.403e-05	0.8648	0.8659	0.2951	18.06	0.8156	0.9246	0.8783	MDFIC(+101.4kb)
10	126015595	rs117858338	G	A	0.0186018	2	6.502e-06	6.502e-06	0.5043	0.5043	0.5322	0	0.4661	0.5653	NA	CHST15(+162.5kb)|LHPP(-134.7kb)|NKX1-2(-120.4kb)|OAT(-70.28kb)
13	50874346	rs806359	T	A	0.0451186	3	6.713e-06	6.713e-06	0.6939	0.6939	0.7592	0	0.6969	0.6359	0.7429	DLEU1(+194.9kb)|DLEU2(+174.7kb)|ST13P4(+126.6kb)
4	33702749	rs36076196	G	A	0.0914228	3	6.755e-06	6.755e-06	0.7743	0.7743	0.6697	0	0.7277	0.8128	0.8024	.
8	27481984	rs507341	T	C	0.700909	3	6.811e-06	6.811e-06	1.1601	1.1601	0.7486	0	1.1408	1.1335	1.1982	CCDC25(-108.8kb)|CHRNA2(+145.2kb)|CLU(+9.656kb)|EPHX2(+79.54kb)|ESCO2(-150.1kb)|MIR3622A(-77.21kb)|MIR3622B(-77.2kb)|PBK(-185.2kb)|PTK2B(+165.1kb)|SCARA3(-9.592kb)
20	4615056	rs118035623	G	T	0.0585771	3	6.829e-06	6.829e-06	1.3905	1.3905	0.8343	0	1.3804	1.3071	1.459	PRND(-87.5kb)|PRNP(-51.74kb)|PRNT(-96.87kb)|RASSF2(-145.6kb)
13	101840470	rs59088048	G	T	0.0761472	3	6.835e-06	6.835e-06	1.3116	1.3116	0.4272	0	1.2791	1.1765	1.4269	NALCN(0)|NALCN-AS1(+128.8kb)
22	26941385	rs75453083	C	T	0.0124269	2	6.839e-06	6.839e-06	0.4599	0.4599	0.6858	0	0.4842	0.4183	NA	ASPHD2(+100.4kb)|CRYBA4(-76.54kb)|CRYBB1(-53.98kb)|HPS4(+61.56kb)|MIAT(-112.1kb)|MIR548J(-9.792kb)|SEZ6L(+161.8kb)|SRRD(+53.48kb)|TFIP11(+32.95kb)|TPST2(0)
13	101840407	rs72652930	G	C	0.0698029	3	6.846e-06	6.846e-06	1.3141	1.3141	0.4671	0	1.2806	1.1854	1.4239	NALCN(0)|NALCN-AS1(+128.8kb)
13	101840253	rs7982111	T	C	0.0762242	3	6.894e-06	6.894e-06	1.3114	1.3114	0.4203	0	1.2828	1.1725	1.4262	NALCN(0)|NALCN-AS1(+128.6kb)
13	101841944	rs17678470	A	G	0.0702187	3	6.973e-06	6.973e-06	1.312	1.312	0.4661	0	1.2777	1.1846	1.4218	NALCN(0)|NALCN-AS1(+130.3kb)
12	103889728	rs78143608	A	G	0.0514167	3	6.999e-06	6.999e-06	1.3811	1.3811	0.7282	0	1.4739	1.4098	1.2913	C12orf42(0)|STAB2(-91.34kb)
4	70999619	rs1399252	A	C	0.738743	3	7.18e-06	1.495e-05	0.8509	0.8514	0.3453	5.96	0.866	0.9137	0.8028	C4orf40(-20.28kb)|CSN1S1(+187.3kb)|CSN1S2AP(+48.63kb)|CSN1S2BP(0)|CSN2(+172.9kb)|CSN3(-108.7kb)|FDCSP(-92.17kb)|HTN1(+75.06kb)|HTN3(+97.36kb)|ODAM(-62.62kb)|STATH(+131.4kb)
13	101839083	rs17621925	T	C	0.0742378	3	7.198e-06	7.198e-06	1.3118	1.3118	0.4831	0	1.2865	1.1817	1.416	NALCN(0)|NALCN-AS1(+127.4kb)
9	109152503	rs1825421	A	G	0.0471204	3	7.278e-06	7.278e-06	0.6508	0.6508	0.3997	0	0.5753	0.631	0.7781	.
13	52077517	rs57387518	C	T	0.0595011	3	7.396e-06	9.648e-06	0.7399	0.7397	0.3581	2.62	0.7685	0.6381	0.8052	INTS6(+50.24kb)|INTS6-AS1(+48.67kb)|MIR4703(-49.21kb)|MIR5693(+154.7kb)|SERPINE3(+141.3kb)|WDFY2(-80.97kb)
4	190103259	rs6553285	T	G	0.935725	3	7.406e-06	7.406e-06	1.3364	1.3364	0.4147	0	1.2368	1.2968	1.5016	.
13	32899468	rs4942423	T	G	0.0714506	3	7.556e-06	8.84e-06	0.7501	0.7502	0.363	1.33	0.7229	0.8718	0.6959	BRCA2(0)|FRY(+28.69kb)|MINOS1P1(-170.9kb)|N4BP2L1(-75.39kb)|N4BP2L2(-107.2kb)|N4BP2L2-IT2(-179.2kb)|ZAR1L(+13.38kb)
4	33689724	rs7680059	A	G	0.0910841	3	7.876e-06	7.876e-06	0.7755	0.7755	0.6452	0	0.7264	0.8096	0.8101	.
4	33682353	rs28582986	C	A	0.122451	3	7.943e-06	7.943e-06	0.7924	0.7924	0.6076	0	0.7434	0.8317	0.8226	.
4	33682460	rs28379456	T	G	0.122251	3	7.982e-06	7.982e-06	0.7925	0.7925	0.6073	0	0.7434	0.8317	0.8227	.
4	33700983	rs6847997	A	C	0.111842	3	8.053e-06	8.053e-06	0.7906	0.7906	0.6724	0	0.7489	0.8006	0.8341	.
4	33704589	rs67509867	G	A	0.111857	3	8.115e-06	8.115e-06	0.7907	0.7907	0.6626	0	0.7483	0.8006	0.8351	.
4	33706768	rs73127077	G	A	0.111903	3	8.127e-06	8.127e-06	0.7906	0.7906	0.6649	0	0.7484	0.8004	0.8349	.
4	33686138	rs723626	C	T	0.122467	3	8.164e-06	8.164e-06	0.7928	0.7928	0.6051	0	0.7436	0.8318	0.8235	.
4	33694666	rs33916925	T	C	0.111842	3	8.172e-06	8.172e-06	0.7907	0.7907	0.6745	0	0.7491	0.8005	0.834	.
13	101840416	rs59229434	A	T	0.0756544	3	8.19e-06	8.19e-06	1.3102	1.3102	0.4574	0	1.2804	1.179	1.4201	NALCN(0)|NALCN-AS1(+128.8kb)
18	56297826	rs7239507	T	C	0.284262	3	8.196e-06	8.196e-06	1.1676	1.1676	0.9371	0	1.1604	1.151	1.1856	ALPK2(+1.637kb)|MALT1(-40.79kb)|MIR122(+179.4kb)|MIR3591(+179.4kb)
4	33677120	rs11097022	C	T	0.122482	3	8.197e-06	8.197e-06	0.7925	0.7925	0.6098	0	0.7436	0.8317	0.8226	.
4	33692652	rs1965242	G	T	0.111857	3	8.205e-06	8.205e-06	0.7906	0.7906	0.675	0	0.7491	0.8003	0.834	.
4	33679539	rs28430802	A	G	0.122467	3	8.211e-06	8.211e-06	0.7926	0.7926	0.6082	0	0.7435	0.8315	0.823	.
4	33679588	rs28429235	G	A	0.122451	3	8.219e-06	8.219e-06	0.7926	0.7926	0.6078	0	0.7435	0.8316	0.823	.
15	79281841	rs28391216	C	T	0.0214968	3	8.242e-06	0.0001285	1.6264	1.609	0.2814	21.14	1.4784	1.3069	1.9453	ADAMTS7(+178.1kb)|CTSH(+44.42kb)|MORF4L1(+91.76kb)|RASGRF1(0)
4	33680069	rs28422026	G	C	0.122451	3	8.257e-06	8.257e-06	0.7927	0.7927	0.607	0	0.7435	0.8316	0.8232	.
4	33711007	rs71602006	C	T	0.111888	3	8.296e-06	8.296e-06	0.7908	0.7908	0.6545	0	0.7478	0.8006	0.836	.
2	127886416	rs12617835	C	A	0.283261	3	8.337e-06	0.0001216	1.165	1.1684	0.2521	27.42	1.1511	1.2834	1.1094	BIN1(+21.51kb)|CYP27C1(-55kb)|ERCC3(-128.4kb)|MAP3K2(-169.8kb)
3	149431671	rs549211656	C	G	0.0162304	2	8.385e-06	0.03398	0.3746	0.3503	0.0269	79.58	0.5649	0.2099	NA	ANKUB1(-47.22kb)|COMMD2(-24.58kb)|RNF13(-98.8kb)|WWTR1(+10.61kb)|WWTR1-AS1(+52.52kb)
4	33697873	rs67906834	G	A	0.0911765	3	8.476e-06	8.476e-06	0.7764	0.7764	0.6414	0	0.727	0.8117	0.8105	.
2	127886158	rs13025717	T	C	0.283277	3	8.493e-06	0.0001251	1.1648	1.1682	0.2514	27.57	1.1506	1.2835	1.1094	BIN1(+21.26kb)|CYP27C1(-55.25kb)|ERCC3(-128.7kb)|MAP3K2(-170.1kb)
4	33686660	rs719776	C	G	0.133369	3	8.511e-06	8.511e-06	0.7956	0.7956	0.7245	0	0.7571	0.8336	0.8131	.
4	33684995	rs7340840	C	A	0.133415	3	8.519e-06	8.519e-06	0.7956	0.7956	0.7237	0	0.7571	0.834	0.8128	.
2	127886371	rs12618593	C	T	0.283277	3	8.576e-06	0.0001265	1.1648	1.1682	0.2513	27.6	1.1508	1.2833	1.1091	BIN1(+21.47kb)|CYP27C1(-55.04kb)|ERCC3(-128.5kb)|MAP3K2(-169.9kb)
4	33702522	rs67281747	G	A	0.0913459	3	8.615e-06	8.615e-06	0.7767	0.7767	0.6368	0	0.7269	0.8122	0.8111	.
4	33701461	rs73127069	A	G	0.111857	3	8.704e-06	8.704e-06	0.7914	0.7914	0.661	0	0.7489	0.8009	0.8361	.
2	127886233	rs13025765	T	C	0.282445	3	8.742e-06	0.0001366	1.1646	1.1681	0.2482	28.25	1.1503	1.2838	1.1089	BIN1(+21.33kb)|CYP27C1(-55.18kb)|ERCC3(-128.6kb)|MAP3K2(-170kb)
2	127847930	rs35114168	A	G	0.324684	3	8.911e-06	0.01493	1.1534	1.1628	0.0257	72.7	1.1999	1.2774	1.0365	BIN1(0)|CYP27C1(-93.48kb)|ERCC3(-166.9kb)
4	33711830	rs34365744	A	G	0.109886	3	8.961e-06	8.961e-06	0.7914	0.7914	0.6255	0	0.7464	0.8005	0.8396	.
4	33704296	rs67239648	G	A	0.0911919	3	8.989e-06	8.989e-06	0.777	0.777	0.6331	0	0.7269	0.8123	0.8121	.
4	33712418	rs28855206	G	A	0.133462	3	9.072e-06	9.072e-06	0.7965	0.7965	0.7466	0	0.7595	0.8304	0.8153	.
8	27500427	rs12542107	A	G	0.440022	3	9.143e-06	9.143e-06	1.1457	1.1457	0.4239	0	1.1014	1.1266	1.2048	CCDC25(-90.4kb)|CHRNA2(+163.6kb)|CLU(+28.1kb)|EPHX2(+97.99kb)|ESCO2(-131.6kb)|MIR3622A(-58.77kb)|MIR3622B(-58.76kb)|PBK(-166.7kb)|PTK2B(+183.5kb)|SCARA3(0)
4	961919	rs62294486	T	C	0.392301	2	9.206e-06	9.206e-06	1.2024	1.2024	0.4329	0	1.1692	1.2489	NA	CPLX1(+142kb)|DGKQ(0)|FGFRL1(-43.69kb)|GAK(+35.74kb)|IDUA(-18.86kb)|LOC100129917(+186.3kb)|PCGF3(+197.5kb)|RNF212(-103.3kb)|SLC26A1(-10.94kb)|SPON2(-198.8kb)|TMED11P(-147.1kb)|TMEM175(+9.476kb)
15	79280385	rs28716558	G	T	0.0206498	3	9.225e-06	0.0003537	1.6248	1.5999	0.2463	28.63	1.4833	1.2809	1.9554	ADAMTS7(+176.6kb)|CTSH(+42.96kb)|MORF4L1(+90.3kb)|RASGRF1(0)
4	33708074	rs67441316	T	C	0.0913151	3	9.349e-06	9.349e-06	0.7773	0.7773	0.6307	0	0.727	0.8127	0.8127	.
4	190104939	rs4452510	G	T	0.936849	3	9.378e-06	9.378e-06	1.3329	1.3329	0.5104	0	1.2422	1.3065	1.4745	.
4	190104957	rs4241866	A	T	0.936849	3	9.39e-06	9.39e-06	1.3329	1.3329	0.5102	0	1.2421	1.3067	1.4745	.
4	190105157	rs4273547	G	A	0.936849	3	9.411e-06	9.411e-06	1.3328	1.3328	0.5113	0	1.2421	1.3068	1.4741	.
15	79280235	rs28709904	C	A	0.0208654	3	9.48e-06	0.0003853	1.6238	1.5984	0.2436	29.2	1.4841	1.2776	1.955	ADAMTS7(+176.5kb)|CTSH(+42.82kb)|MORF4L1(+90.15kb)|RASGRF1(0)
4	190102609	rs4241862	A	G	0.936742	3	9.567e-06	9.567e-06	1.3324	1.3324	0.4958	0	1.2405	1.3046	1.4776	.
4	33708824	rs34151233	C	A	0.0911919	3	9.616e-06	9.616e-06	0.7774	0.7774	0.6272	0	0.7268	0.8128	0.8133	.
20	4639156	rs59606031	C	T	0.0420542	3	9.669e-06	9.669e-06	1.4441	1.4441	0.7644	0	1.3343	1.5104	1.5152	PRND(-63.4kb)|PRNP(-27.64kb)|PRNT(-72.77kb)|RASSF2(-121.5kb)|SLC23A2(-193.8kb)
15	79280182	rs28516885	T	G	0.0206344	3	9.683e-06	0.0004234	1.6231	1.5971	0.2402	29.89	1.4863	1.2737	1.9551	ADAMTS7(+176.4kb)|CTSH(+42.76kb)|MORF4L1(+90.1kb)|RASGRF1(0)
22	30216174	rs249402	T	C	0.138081	3	9.743e-06	9.743e-06	1.224	1.224	0.4068	0	1.2888	1.1085	1.2547	ASCC2(0)|CABP7(+88.35kb)|MTMR3(-62.98kb)|NF2(+121.6kb)|UQCR10(+49.77kb)|ZMAT5(+53.2kb)
4	101339134	rs75944035	C	T	0.0292578	3	9.752e-06	4.326e-05	0.6759	0.675	0.3089	14.88	0.6659	0.5661	0.7964	EMCN(0)
4	190102503	rs4241861	G	A	0.936726	3	9.782e-06	9.782e-06	1.3319	1.3319	0.4971	0	1.2403	1.3041	1.4768	.
4	190102390	rs4241860	G	A	0.936726	3	9.821e-06	9.821e-06	1.3319	1.3319	0.4966	0	1.2402	1.304	1.4769	.
15	97940925	rs7166971	C	G	0.174361	2	9.831e-06	9.831e-06	0.7993	0.7993	0.9263	0	0.8024	0.7948	NA	.
4	190100925	rs9312392	A	T	0.936772	3	9.838e-06	9.838e-06	1.3324	1.3324	0.4925	0	1.2397	1.305	1.4783	.
4	190102360	rs4241859	T	G	0.936726	3	9.849e-06	9.849e-06	1.3318	1.3318	0.4965	0	1.2401	1.3039	1.4768	.
18	56301851	rs4940416	G	C	0.285171	3	9.85e-06	9.85e-06	1.1652	1.1652	0.9898	0	1.166	1.156	1.1706	ALPK2(+5.662kb)|MALT1(-36.77kb)|MIR122(+183.5kb)|MIR3591(+183.5kb)
4	190101262	rs9312393	C	A	0.936726	3	9.88e-06	9.88e-06	1.3321	1.3321	0.4915	0	1.2397	1.3036	1.4783	.
4	190101462	rs34527746	A	G	0.936726	3	9.927e-06	9.927e-06	1.332	1.332	0.4921	0	1.2397	1.3037	1.4781	.
13	101839909	rs7982751	A	T	0.0795042	3	9.971e-06	9.543e-05	1.2986	1.2939	0.2911	18.96	1.2895	1.1267	1.4228	NALCN(0)|NALCN-AS1(+128.3kb)
18	56302375	rs56191568	C	T	0.284955	3	9.98e-06	9.98e-06	1.1651	1.1651	0.991	0	1.166	1.1564	1.1701	ALPK2(+6.186kb)|MALT1(-36.24kb)|MIR122(+184kb)|MIR3591(+184kb)
13	101839135	rs16958539	G	A	0.076178	3	1.002e-05	1.002e-05	1.3054	1.3054	0.47	0	1.2871	1.1708	1.4085	NALCN(0)|NALCN-AS1(+127.5kb)
4	190101832	rs7689338	G	A	0.936726	3	1.003e-05	1.003e-05	1.3317	1.3317	0.4959	0	1.2398	1.3038	1.4768	.
4	33731022	rs35304177	T	C	0.109193	3	1.007e-05	1.007e-05	0.7925	0.7925	0.5896	0	0.7452	0.8002	0.8445	.
13	101839820	rs7981101	C	A	0.0795504	3	1.027e-05	8.317e-05	1.2981	1.2938	0.2973	17.56	1.2896	1.1272	1.4208	NALCN(0)|NALCN-AS1(+128.2kb)
18	56301610	rs6566993	G	T	0.288636	3	1.028e-05	1.028e-05	1.1648	1.1648	0.9861	0	1.1641	1.1549	1.172	ALPK2(+5.421kb)|MALT1(-37.01kb)|MIR122(+183.2kb)|MIR3591(+183.2kb)
4	33716016	rs13147878	T	C	0.0911919	3	1.03e-05	1.03e-05	0.7782	0.7782	0.6058	0	0.7258	0.8137	0.8164	.
4	33686562	rs67448032	C	G	0.113228	3	1.031e-05	1.031e-05	0.7922	0.7922	0.6424	0	0.7489	0.7989	0.8401	.
4	190106519	rs12651001	T	G	0.936911	3	1.034e-05	1.034e-05	1.3312	1.3312	0.5239	0	1.2419	1.3066	1.4696	.
4	33725631	rs2166108	G	A	0.109763	3	1.035e-05	1.035e-05	0.7927	0.7927	0.5965	0	0.7458	0.8011	0.8439	.
4	190106915	rs7676106	T	C	0.936911	3	1.035e-05	1.035e-05	1.3311	1.3311	0.5236	0	1.2415	1.3071	1.4693	.
14	92938855	rs12590654	A	G	0.33648	3	1.035e-05	1.035e-05	0.8638	0.8638	0.4166	0	0.8953	0.8911	0.8163	RIN3(-41.27kb)|SLC24A4(0)
4	190106471	rs4282263	T	A	0.936911	3	1.036e-05	1.036e-05	1.3312	1.3312	0.5246	0	1.242	1.3066	1.4695	.
4	190106968	rs6553287	T	A	0.936911	3	1.037e-05	1.037e-05	1.3311	1.3311	0.5234	0	1.2414	1.3073	1.4693	.
5	102442067	rs34827	T	C	0.0234832	3	1.038e-05	0.008462	0.6433	0.6255	0.0439	68	0.7592	0.4215	0.7311	C5orf30(-152.4kb)|GIN1(0)|PAM(+75.26kb)|PPIP5K2(-13.89kb)
1	198640167	rs66469062	G	A	0.425916	3	1.04e-05	0.002528	0.8733	0.8771	0.1388	49.36	0.8575	0.9641	0.8285	ATP6V1G3(+130.1kb)|MIR181A1(-188kb)|MIR181A1HG(-137kb)|MIR181B1(-187.8kb)|PTPRC(0)
4	190104165	rs4241865	T	A	0.937111	3	1.041e-05	1.041e-05	1.3316	1.3316	0.5191	0	1.2438	1.3008	1.4724	.
4	190106567	rs12644872	T	A	0.936896	3	1.045e-05	1.045e-05	1.331	1.331	0.526	0	1.242	1.3063	1.4689	.
4	33718892	rs16989190	C	G	0.0911919	3	1.053e-05	1.053e-05	0.7785	0.7785	0.6002	0	0.7256	0.8138	0.8174	.
4	33691930	rs10026556	A	G	0.122467	3	1.054e-05	1.054e-05	0.7957	0.7957	0.6221	0	0.7479	0.836	0.8234	.
8	27496681	rs17467992	A	C	0.439868	3	1.058e-05	1.058e-05	1.1447	1.1447	0.448	0	1.1024	1.1252	1.2021	CCDC25(-94.15kb)|CHRNA2(+159.9kb)|CLU(+24.35kb)|EPHX2(+94.24kb)|ESCO2(-135.4kb)|MIR3622A(-62.51kb)|MIR3622B(-62.51kb)|PBK(-170.5kb)|PTK2B(+179.8kb)|SCARA3(0)
18	56303070	rs8097776	A	T	0.285063	3	1.058e-05	1.058e-05	1.1647	1.1647	0.9916	0	1.1648	1.1566	1.1699	ALPK2(+6.881kb)|MALT1(-35.55kb)|MIR122(+184.7kb)|MIR3591(+184.7kb)
13	32958887	rs10492396	A	G	0.0695873	3	1.079e-05	2.377e-05	0.7521	0.7528	0.3414	6.96	0.7169	0.8799	0.7029	BRCA2(0)|FRY(+88.11kb)|MINOS1P1(-111.5kb)|N4BP2L1(-15.97kb)|N4BP2L2(-47.74kb)|N4BP2L2-IT2(-119.8kb)|ZAR1L(+72.8kb)
5	102440103	rs153010	A	G	0.023976	3	1.082e-05	0.006797	0.6468	0.6302	0.0538	65.79	0.756	0.4313	0.733	C5orf30(-154.3kb)|GIN1(0)|PAM(+73.3kb)|PPIP5K2(-15.85kb)
12	6614181	rs74576183	G	A	0.0193101	2	1.084e-05	0.0002011	0.4811	0.49	0.2743	16.33	0.4347	0.6663	NA	ACRBP(-133.1kb)|CD27(+53.3kb)|CD27-AS1(+53.5kb)|CHD4(-65.07kb)|GAPDH(-29.4kb)|IFFO1(-34.51kb)|ING4(-145.5kb)|LPAR5(-113.8kb)|LTBR(+113.4kb)|MRPL51(+11.71kb)|NCAPD2(0)|NOP2(-51.85kb)|PIANP(-188.8kb)|PLEKHG6(+176.5kb)|SCARNA10(-5.206kb)|SCARNA11(-76.46kb)|SCNN1A(+127.7kb)|TAPBPL(+42.69kb)|TNFRSF1A(+162.9kb)|VAMP1(+34.34kb)|ZNF384(-161.5kb)
4	33730683	rs1454599	T	C	0.132199	3	1.085e-05	1.085e-05	0.7979	0.7979	0.7185	0	0.7582	0.8306	0.8213	.
8	27422740	rs17466060	A	G	0.446658	3	1.086e-05	1.086e-05	1.1474	1.1474	0.9656	0	1.1466	1.1333	1.1577	CCDC25(-168.1kb)|CHRNA2(+85.93kb)|CLU(-31.69kb)|EPHX2(+20.3kb)|MIR3622A(-136.5kb)|MIR3622B(-136.4kb)|PTK2B(+105.8kb)|SCARA3(-68.84kb)
3	146953963	rs9849890	T	C	0.248152	3	1.088e-05	1.088e-05	0.853	0.853	0.9935	0	0.8572	0.8524	0.8491	ZIC1(-173.2kb)|ZIC4(-149.9kb)
1	198639968	rs34051705	C	G	0.426655	3	1.102e-05	0.002078	0.8737	0.8772	0.1501	47.28	0.8624	0.9612	0.8269	ATP6V1G3(+129.9kb)|MIR181A1(-188.2kb)|MIR181A1HG(-137.2kb)|MIR181B1(-188kb)|PTPRC(0)
4	37069182	rs35221773	G	A	0.325624	3	1.102e-05	0.01686	0.863	0.8686	0.0485	66.95	0.7796	0.9161	0.9268	KIAA1239(-177.5kb)|MIR4801(-174.3kb)
13	101839589	rs60863524	G	T	0.0794888	3	1.102e-05	7.781e-05	1.2971	1.2931	0.3019	16.51	1.2913	1.1262	1.4178	NALCN(0)|NALCN-AS1(+128kb)
15	79280493	rs28624404	G	T	0.020773	3	1.111e-05	0.0006639	1.616	1.5876	0.2241	33.15	1.4836	1.2606	1.9548	ADAMTS7(+176.7kb)|CTSH(+43.07kb)|MORF4L1(+90.41kb)|RASGRF1(0)
19	13955506	rs62122067	A	G	0.251232	3	1.111e-05	1.111e-05	1.1855	1.1855	0.409	0	1.1019	1.2176	1.2373	C19orf53(+65.92kb)|C19orf57(-37.66kb)|CC2D1A(-61.45kb)|CCDC130(+81.4kb)|DCAF15(-107.8kb)|IL27RA(-187kb)|LOC284454(+8.403kb)|MIR23A(+8.033kb)|MIR24-2(+8.333kb)|MIR27A(+8.175kb)|MIR181C(-30.01kb)|MIR181D(-30.18kb)|MRI1(+70.41kb)|NANOS3(-32.56kb)|PODNL1(-86.49kb)|RFX1(-116.8kb)|RLN3(-183.5kb)|ZSWIM4(+12.46kb)
4	70999943	rs13123139	T	C	0.732014	3	1.116e-05	4.109e-05	0.854	0.8549	0.3245	11.16	0.8733	0.9149	0.8029	C4orf40(-19.96kb)|CSN1S1(+187.7kb)|CSN1S2AP(+48.96kb)|CSN1S2BP(0)|CSN2(+173.2kb)|CSN3(-108.4kb)|FDCSP(-91.84kb)|HTN1(+75.38kb)|HTN3(+97.69kb)|ODAM(-62.3kb)|STATH(+131.8kb)
19	45396899	rs157584	C	T	0.49692	3	1.122e-05	0.000848	0.8576	0.86	0.1906	39.66	0.7962	0.934	0.8675	APOC1(-21.02kb)|APOC1P1(-33.16kb)|APOC2(-52.34kb)|APOC4(-48.6kb)|APOC4-APOC2(-48.6kb)|APOE(-12.14kb)|BCAM(+72.22kb)|BCL3(+133.6kb)|CBLC(+93kb)|CEACAM16(+182.9kb)|CLASRP(-145.4kb)|CLPTM1(-60.94kb)|GEMIN7(-185.6kb)|PPP1R37(-199.5kb)|PVRL2(+4.414kb)|RELB(-107.8kb)|TOMM40(0)|ZNF296(-177.9kb)
4	33681108	rs16989149	T	C	0.115291	3	1.128e-05	1.128e-05	0.795	0.795	0.6179	0	0.7468	0.8364	0.8229	.
4	33681750	rs34714161	T	G	0.115306	3	1.129e-05	1.129e-05	0.795	0.795	0.6174	0	0.7468	0.8363	0.8231	.
20	4645538	rs2181020	T	C	0.0385587	3	1.131e-05	1.131e-05	1.4586	1.4586	0.7562	0	1.3426	1.4822	1.5544	PRND(-57.02kb)|PRNP(-21.26kb)|PRNT(-66.39kb)|RASSF2(-115.1kb)|SLC23A2(-187.5kb)
4	33681016	rs16989147	A	G	0.115276	3	1.133e-05	1.133e-05	0.795	0.795	0.618	0	0.7468	0.8363	0.823	.
4	33679619	rs60362807	T	G	0.114814	3	1.135e-05	1.135e-05	0.7949	0.7949	0.605	0	0.7456	0.8369	0.8237	.
5	176975693	rs335423	G	A	0.926086	2	1.135e-05	1.135e-05	0.6427	0.6427	0.5788	0	0.6094	0.6816	NA	B4GALT7(-51.42kb)|DBN1(+75kb)|DDX41(+31.73kb)|DOK3(+38.27kb)|F12(+139.1kb)|FAM153A(-174.7kb)|FAM193B(0)|GRK6(+105.8kb)|LMAN2(+196.8kb)|LOC202181(-69.81kb)|PDLIM7(+51.09kb)|PFN3(+148.1kb)|PRR7(+92.41kb)|PRR7-AS1(+100.7kb)|RGS14(+176.1kb)|SLC34A1(+149.8kb)|TMED9(-43.52kb)
4	33682959	rs7662105	C	A	0.115291	3	1.138e-05	1.138e-05	0.7951	0.7951	0.6159	0	0.7468	0.8364	0.8234	.
4	190107088	rs6553288	G	A	0.93668	3	1.149e-05	1.149e-05	1.3294	1.3294	0.512	0	1.2374	1.3072	1.4693	.
4	33683908	rs35071135	G	T	0.115306	3	1.151e-05	1.151e-05	0.7952	0.7952	0.6153	0	0.7468	0.8363	0.8237	.
4	70999052	rs13116191	T	C	0.731937	3	1.151e-05	4.459e-05	0.8543	0.8553	0.3225	11.63	0.8747	0.9145	0.8029	C4orf40(-20.85kb)|CSN1S1(+186.8kb)|CSN1S2AP(+48.06kb)|CSN1S2BP(-0.268kb)|CSN2(+172.3kb)|CSN3(-109.3kb)|FDCSP(-92.74kb)|HTN1(+74.49kb)|HTN3(+96.8kb)|ODAM(-63.19kb)|STATH(+130.9kb)
4	190108408	rs6553291	G	A	0.936341	3	1.157e-05	1.157e-05	1.3296	1.3296	0.4989	0	1.2357	1.3075	1.4726	.
4	190107375	rs6553289	C	G	0.93668	3	1.163e-05	1.163e-05	1.3292	1.3292	0.513	0	1.2372	1.3074	1.4688	.
5	176973151	rs335454	A	G	0.928888	2	1.165e-05	1.165e-05	0.6414	0.6414	0.5727	0	0.6073	0.6809	NA	B4GALT7(-53.97kb)|DBN1(+72.46kb)|DDX41(+29.18kb)|DOK3(+35.72kb)|F12(+136.6kb)|FAM153A(-177.2kb)|FAM193B(0)|GRK6(+103.3kb)|LMAN2(+194.3kb)|LOC202181(-72.35kb)|PDLIM7(+48.54kb)|PFN3(+145.5kb)|PRR7(+89.86kb)|PRR7-AS1(+98.21kb)|RGS14(+173.6kb)|SLC34A1(+147.3kb)|TMED9(-46.06kb)
5	176974019	rs337351	C	T	0.927102	2	1.169e-05	1.169e-05	0.6419	0.6419	0.5657	0	0.6072	0.6821	NA	B4GALT7(-53.1kb)|DBN1(+73.32kb)|DDX41(+30.05kb)|DOK3(+36.59kb)|F12(+137.4kb)|FAM153A(-176.3kb)|FAM193B(0)|GRK6(+104.2kb)|LMAN2(+195.1kb)|LOC202181(-71.48kb)|PDLIM7(+49.41kb)|PFN3(+146.4kb)|PRR7(+90.73kb)|PRR7-AS1(+99.07kb)|RGS14(+174.4kb)|SLC34A1(+148.2kb)|TMED9(-45.19kb)
4	33698200	rs1378039	A	G	0.123868	3	1.171e-05	1.171e-05	0.7968	0.7968	0.64	0	0.7503	0.8344	0.8249	.
4	33678662	rs28495407	G	A	0.115276	3	1.178e-05	1.178e-05	0.7953	0.7953	0.616	0	0.7468	0.8362	0.8238	.
5	176972620	rs335455	T	C	0.926317	2	1.182e-05	1.182e-05	0.6422	0.6422	0.5704	0	0.6081	0.6821	NA	B4GALT7(-54.5kb)|DBN1(+71.93kb)|DDX41(+28.65kb)|DOK3(+35.19kb)|F12(+136kb)|FAM153A(-177.7kb)|FAM193B(0)|GRK6(+102.8kb)|LMAN2(+193.7kb)|LOC202181(-72.88kb)|PDLIM7(+48.01kb)|PFN3(+145kb)|PRR7(+89.33kb)|PRR7-AS1(+97.68kb)|RGS14(+173kb)|SLC34A1(+146.8kb)|TMED9(-46.59kb)
4	190107538	rs6553290	C	T	0.93688	3	1.184e-05	1.184e-05	1.3289	1.3289	0.5157	0	1.2372	1.3074	1.4679	.
4	33699859	rs10015938	T	C	0.123884	3	1.185e-05	1.185e-05	0.7969	0.7969	0.639	0	0.7503	0.8344	0.8252	.
4	33680174	rs28600300	T	A	0.115276	3	1.186e-05	1.186e-05	0.7953	0.7953	0.6149	0	0.7468	0.8363	0.824	.
4	33689067	rs13128976	G	A	0.115291	3	1.186e-05	1.186e-05	0.7957	0.7957	0.6173	0	0.7474	0.8365	0.8241	.
4	33689708	rs7661047	G	A	0.115276	3	1.187e-05	1.187e-05	0.7957	0.7957	0.6184	0	0.7475	0.8365	0.824	.
4	76515504	rs116128088	G	A	0.0176009	3	1.188e-05	1.188e-05	1.6731	1.6731	0.9014	0	1.7306	1.7754	1.5745	C4orf26(+24.4kb)|CDKL2(0)|G3BP2(-52.45kb)|RCHY1(+75.86kb)|THAP6(+60.27kb)|USO1(-134.3kb)
5	176971073	rs163198	C	G	0.926286	2	1.188e-05	1.188e-05	0.642	0.642	0.5635	0	0.6072	0.6826	NA	B4GALT7(-56.04kb)|DBN1(+70.38kb)|DDX41(+27.11kb)|DOK3(+33.65kb)|F12(+134.5kb)|FAM153A(-179.3kb)|FAM193B(0)|GRK6(+101.2kb)|LMAN2(+192.2kb)|LOC202181(-74.43kb)|PDLIM7(+46.47kb)|PFN3(+143.4kb)|PRR7(+87.79kb)|PRR7-AS1(+96.13kb)|RGS14(+171.5kb)|SLC34A1(+145.2kb)|TMED9(-48.14kb)
4	190107822	rs10013538	C	A	0.93688	3	1.192e-05	1.192e-05	1.3288	1.3288	0.5149	0	1.2368	1.3077	1.4678	.
4	33701687	rs28372416	G	C	0.123914	3	1.194e-05	1.194e-05	0.7971	0.7971	0.6389	0	0.7504	0.8343	0.8255	.
5	176967662	rs335459	C	G	0.926332	2	1.195e-05	1.195e-05	0.6414	0.6414	0.5492	0	0.6054	0.6837	NA	B4GALT7(-59.46kb)|DBN1(+66.97kb)|DDX41(+23.7kb)|DOK3(+30.24kb)|F12(+131.1kb)|FAM153A(-182.7kb)|FAM193B(0)|GRK6(+97.81kb)|LMAN2(+188.8kb)|LOC202181(-77.84kb)|PDLIM7(+43.06kb)|PFN3(+140kb)|PRR7(+84.38kb)|PRR7-AS1(+92.72kb)|RGS14(+168.1kb)|SLC34A1(+141.8kb)|TMED9(-51.55kb)
8	133370871	rs1533402	G	C	0.347305	3	1.199e-05	0.0008323	0.8674	0.8688	0.1919	39.43	0.9155	0.8974	0.8051	KCNQ3(0)
5	102486072	rs28043	G	A	0.0228211	3	1.2e-05	0.008323	0.6483	0.6305	0.0465	67.41	0.7635	0.4277	0.7331	C5orf30(-108.4kb)|GIN1(+30.23kb)|PAM(+119.3kb)|PPIP5K2(0)
5	176977052	rs335422	A	G	0.927087	2	1.203e-05	1.203e-05	0.6435	0.6435	0.5908	0	0.6111	0.6811	NA	B4GALT7(-50.07kb)|DBN1(+76.36kb)|DDX41(+33.08kb)|DOK3(+39.62kb)|F12(+140.5kb)|FAM153A(-173.3kb)|FAM193B(0)|GRK6(+107.2kb)|LMAN2(+198.2kb)|LOC202181(-68.45kb)|PDLIM7(+52.45kb)|PFN3(+149.4kb)|PRR7(+93.76kb)|PRR7-AS1(+102.1kb)|RGS14(+177.5kb)|SLC34A1(+151.2kb)|TMED9(-42.16kb)
4	33695359	rs1902083	T	G	0.123884	3	1.206e-05	1.206e-05	0.797	0.797	0.6383	0	0.7503	0.8346	0.8253	.
4	33703680	rs2166111	A	T	0.123899	3	1.211e-05	1.211e-05	0.7971	0.7971	0.6358	0	0.7502	0.8343	0.826	.
5	176972259	rs335456	A	G	0.926917	2	1.225e-05	1.225e-05	0.6426	0.6426	0.5656	0	0.608	0.683	NA	B4GALT7(-54.86kb)|DBN1(+71.56kb)|DDX41(+28.29kb)|DOK3(+34.83kb)|F12(+135.7kb)|FAM153A(-178.1kb)|FAM193B(0)|GRK6(+102.4kb)|LMAN2(+193.4kb)|LOC202181(-73.24kb)|PDLIM7(+47.65kb)|PFN3(+144.6kb)|PRR7(+88.97kb)|PRR7-AS1(+97.31kb)|RGS14(+172.7kb)|SLC34A1(+146.4kb)|TMED9(-46.95kb)
4	33705060	rs10019596	G	A	0.123914	3	1.226e-05	1.226e-05	0.7971	0.7971	0.632	0	0.7499	0.8343	0.8265	.
4	33705850	rs10022483	G	A	0.123899	3	1.227e-05	1.227e-05	0.7972	0.7972	0.6311	0	0.7499	0.8343	0.8267	.
6	47448336	rs9367279	G	A	0.257037	3	1.23e-05	1.23e-05	1.1612	1.1612	0.9729	0	1.1495	1.172	1.1653	CD2AP(0)|GPR111(-176kb)|TNFRSF21(+170.7kb)
5	176982662	rs28510818	T	C	0.0644287	2	1.231e-05	1.231e-05	1.5872	1.5872	0.9021	0	1.607	1.5657	NA	B4GALT7(-44.46kb)|DBN1(+81.97kb)|DDX41(+38.7kb)|DOK3(+45.24kb)|F12(+146.1kb)|FAM153A(-167.7kb)|FAM193B(+1.114kb)|GRK6(+112.8kb)|LOC202181(-62.84kb)|PDLIM7(+58.06kb)|PFN3(+155kb)|PRR7(+99.38kb)|PRR7-AS1(+107.7kb)|RGS14(+183.1kb)|SLC34A1(+156.8kb)|TMED9(-36.55kb)
18	56299078	rs55772181	G	A	0.288251	3	1.233e-05	1.233e-05	1.1635	1.1635	0.9761	0	1.1588	1.1537	1.1744	ALPK2(+2.889kb)|MALT1(-39.54kb)|MIR122(+180.7kb)|MIR3591(+180.7kb)
8	27426229	rs1565736	G	A	0.342809	3	1.242e-05	1.242e-05	1.1512	1.1512	0.655	0	1.1744	1.0942	1.1681	CCDC25(-164.6kb)|CHRNA2(+89.42kb)|CLU(-28.2kb)|EPHX2(+23.79kb)|MIR3622A(-133kb)|MIR3622B(-133kb)|PTK2B(+109.3kb)|SCARA3(-65.35kb)
4	43319727	rs115470739	A	C	0.0373576	3	1.246e-05	1.246e-05	1.493	1.493	0.5029	0	1.3783	1.363	1.7093	.
4	33745907	rs2166110	A	G	0.109024	3	1.249e-05	1.249e-05	0.7938	0.7938	0.5907	0	0.7453	0.806	0.8438	.
6	47447041	rs4715019	A	T	0.256468	3	1.251e-05	1.251e-05	1.1611	1.1611	0.9672	0	1.148	1.1721	1.1664	CD2AP(0)|GPR111(-177.3kb)|TNFRSF21(+169.4kb)
2	127865100	rs13032148	A	G	0.322082	3	1.256e-05	1.256e-05	1.1537	1.1537	0.3785	0	1.1412	1.2471	1.1101	BIN1(+0.197kb)|CYP27C1(-76.31kb)|ERCC3(-149.8kb)|MAP3K2(-191.1kb)
8	27425117	rs9632863	T	C	0.321374	3	1.257e-05	1.597e-05	1.1534	1.1532	0.36	2.11	1.1616	1.0703	1.205	CCDC25(-165.7kb)|CHRNA2(+88.3kb)|CLU(-29.32kb)|EPHX2(+22.68kb)|MIR3622A(-134.1kb)|MIR3622B(-134.1kb)|PTK2B(+108.2kb)|SCARA3(-66.46kb)
15	79281163	rs28501391	A	G	0.0205266	3	1.259e-05	0.0011	1.6131	1.5802	0.2057	36.75	1.4779	1.2455	1.96	ADAMTS7(+177.4kb)|CTSH(+43.74kb)|MORF4L1(+91.08kb)|RASGRF1(0)
6	47431284	rs9473117	C	A	0.260825	3	1.274e-05	1.274e-05	1.1611	1.1611	0.966	0	1.1475	1.1705	1.168	CD2AP(-14.24kb)|GPR111(-193kb)|TNFRSF21(+153.6kb)
22	30215177	rs249399	C	T	0.137989	3	1.283e-05	1.283e-05	1.2204	1.2204	0.416	0	1.2889	1.1079	1.246	ASCC2(0)|CABP7(+87.36kb)|MTMR3(-63.98kb)|NF2(+120.6kb)|UQCR10(+48.78kb)|ZMAT5(+52.21kb)
4	190108426	rs6553292	C	G	0.936865	3	1.284e-05	1.284e-05	1.3276	1.3276	0.4999	0	1.2328	1.3082	1.4691	.
4	190107897	rs10013615	C	A	0.936849	3	1.285e-05	1.285e-05	1.3274	1.3274	0.5044	0	1.2335	1.3078	1.4681	.
4	190107942	rs10013635	C	A	0.936849	3	1.286e-05	1.286e-05	1.3274	1.3274	0.5042	0	1.2334	1.3079	1.4681	.
5	176984163	rs335472	C	A	0.0657684	2	1.29e-05	1.29e-05	1.5819	1.5819	0.8489	0	1.6126	1.5492	NA	B4GALT7(-42.96kb)|DBN1(+83.47kb)|DDX41(+40.2kb)|DOK3(+46.74kb)|F12(+147.6kb)|FAM153A(-166.2kb)|FAM193B(+2.615kb)|GRK6(+114.3kb)|LOC202181(-61.34kb)|PDLIM7(+59.56kb)|PFN3(+156.5kb)|PRR7(+100.9kb)|PRR7-AS1(+109.2kb)|RGS14(+184.6kb)|SLC34A1(+158.3kb)|TMED9(-35.05kb)
4	190108621	rs7699929	C	A	0.936865	3	1.296e-05	1.296e-05	1.3275	1.3275	0.4998	0	1.2325	1.3084	1.4689	.
4	190108135	rs7683011	T	C	0.936849	3	1.297e-05	1.297e-05	1.3273	1.3273	0.503	0	1.233	1.308	1.4681	.
4	190109991	rs4863113	A	G	0.936834	3	1.301e-05	1.301e-05	1.3281	1.3281	0.4699	0	1.2283	1.3096	1.4761	.
4	33714566	rs11945628	T	C	0.123868	3	1.309e-05	1.309e-05	0.7977	0.7977	0.6121	0	0.7489	0.835	0.8292	.
5	176963349	rs335460	A	G	0.927302	2	1.309e-05	1.309e-05	0.6408	0.6408	0.558	0	0.6053	0.6823	NA	B4GALT7(-63.77kb)|DBN1(+62.66kb)|DDX41(+19.38kb)|DOK3(+25.92kb)|F12(+126.8kb)|FAM153A(-187kb)|FAM193B(0)|GRK6(+93.5kb)|LMAN2(+184.5kb)|LOC202181(-82.15kb)|PDLIM7(+38.74kb)|PFN3(+135.7kb)|PRR7(+80.06kb)|PRR7-AS1(+88.4kb)|RGS14(+163.8kb)|SLC34A1(+137.5kb)|TMED9(-55.86kb)
4	190109990	rs4863112	C	T	0.936834	3	1.311e-05	1.311e-05	1.3279	1.3279	0.4725	0	1.2284	1.3096	1.4752	.
4	33715339	rs4475134	G	A	0.123868	3	1.319e-05	1.319e-05	0.7977	0.7977	0.6112	0	0.7488	0.8349	0.8294	.
6	47450618	rs9473119	A	G	0.256976	3	1.319e-05	1.319e-05	1.1605	1.1605	0.9652	0	1.147	1.1718	1.166	CD2AP(0)|GPR111(-173.7kb)|TNFRSF21(+172.9kb)
4	33735331	rs61139508	A	G	0.0909917	3	1.32e-05	1.32e-05	0.7806	0.7806	0.5853	0	0.7264	0.8149	0.8221	.
5	176970435	rs163197	C	T	0.927087	2	1.326e-05	1.326e-05	0.6432	0.6432	0.5713	0	0.609	0.6831	NA	B4GALT7(-56.68kb)|DBN1(+69.74kb)|DDX41(+26.47kb)|DOK3(+33.01kb)|F12(+133.9kb)|FAM153A(-179.9kb)|FAM193B(0)|GRK6(+100.6kb)|LMAN2(+191.6kb)|LOC202181(-75.06kb)|PDLIM7(+45.83kb)|PFN3(+142.8kb)|PRR7(+87.15kb)|PRR7-AS1(+95.49kb)|RGS14(+170.8kb)|SLC34A1(+144.6kb)|TMED9(-48.78kb)
4	190109220	rs12651495	C	T	0.93688	3	1.337e-05	1.337e-05	1.3271	1.3271	0.4919	0	1.2306	1.3088	1.4699	.
4	71001002	rs13143449	T	C	0.733092	3	1.342e-05	1.342e-05	0.8549	0.8549	0.369	0	0.869	0.9158	0.8078	C4orf40(-18.9kb)|CABS1(-199.7kb)|CSN1S1(+188.7kb)|CSN1S2AP(+50.01kb)|CSN1S2BP(0)|CSN2(+174.3kb)|CSN3(-107.3kb)|FDCSP(-90.78kb)|HTN1(+76.44kb)|HTN3(+98.75kb)|ODAM(-61.24kb)|STATH(+132.8kb)
1	20860254	rs1152983	G	A	0.853603	3	1.344e-05	1.344e-05	1.2243	1.2243	0.5003	0	1.3107	1.1909	1.1615	CAMK2N1(+47.53kb)|CDA(-55.19kb)|DDOST(-118kb)|FAM43B(-18.68kb)|KIF17(-130.3kb)|LOC339505(+105kb)|MUL1(+25.58kb)|PINK1(-99.69kb)|SH2D5(-186kb)|VWA5B1(+178.9kb)
4	33720126	rs7667563	G	T	0.123822	3	1.347e-05	1.347e-05	0.7979	0.7979	0.604	0	0.7484	0.8348	0.8306	.
15	79281776	rs28513164	T	C	0.0205574	3	1.349e-05	0.001392	1.6099	1.5753	0.1966	38.53	1.474	1.2388	1.9615	ADAMTS7(+178kb)|CTSH(+44.36kb)|MORF4L1(+91.7kb)|RASGRF1(0)
4	190109266	rs4862949	T	C	0.936865	3	1.353e-05	1.353e-05	1.3268	1.3268	0.4942	0	1.2306	1.3089	1.4691	.
5	176968990	rs163009	C	T	0.927102	2	1.354e-05	1.354e-05	0.6432	0.6432	0.5656	0	0.6084	0.6837	NA	B4GALT7(-58.13kb)|DBN1(+68.3kb)|DDX41(+25.02kb)|DOK3(+31.56kb)|F12(+132.4kb)|FAM153A(-181.4kb)|FAM193B(0)|GRK6(+99.14kb)|LMAN2(+190.1kb)|LOC202181(-76.51kb)|PDLIM7(+44.38kb)|PFN3(+141.4kb)|PRR7(+85.7kb)|PRR7-AS1(+94.04kb)|RGS14(+169.4kb)|SLC34A1(+143.1kb)|TMED9(-50.22kb)
4	33676938	rs12649881	G	T	0.114968	3	1.355e-05	1.355e-05	0.7963	0.7963	0.6429	0	0.7498	0.8361	0.8229	.
8	47387853	rs75503922	C	G	0.0274099	2	1.355e-05	1.355e-05	2.101	2.101	0.844	0	2.0229	2.1645	NA	.
5	176968653	rs163010	T	C	0.927102	2	1.361e-05	1.361e-05	0.6432	0.6432	0.5657	0	0.6084	0.6837	NA	B4GALT7(-58.46kb)|DBN1(+67.96kb)|DDX41(+24.69kb)|DOK3(+31.23kb)|F12(+132.1kb)|FAM153A(-181.7kb)|FAM193B(0)|GRK6(+98.8kb)|LMAN2(+189.8kb)|LOC202181(-76.85kb)|PDLIM7(+44.05kb)|PFN3(+141kb)|PRR7(+85.37kb)|PRR7-AS1(+93.71kb)|RGS14(+169.1kb)|SLC34A1(+142.8kb)|TMED9(-50.56kb)
15	79281923	rs28461937	C	T	0.0205266	3	1.365e-05	0.001482	1.6093	1.5742	0.1939	39.04	1.4733	1.237	1.9624	ADAMTS7(+178.2kb)|CTSH(+44.5kb)|MORF4L1(+91.84kb)|RASGRF1(0)
19	13956663	rs4271693	G	T	0.2662	3	1.369e-05	1.369e-05	1.1832	1.1832	0.5135	0	1.1126	1.2007	1.2337	C19orf53(+67.08kb)|C19orf57(-36.5kb)|CC2D1A(-60.29kb)|CCDC130(+82.56kb)|DCAF15(-106.7kb)|IL27RA(-185.9kb)|LOC284454(+9.56kb)|MIR23A(+9.19kb)|MIR24-2(+9.49kb)|MIR27A(+9.332kb)|MIR181C(-28.85kb)|MIR181D(-29.02kb)|MRI1(+71.57kb)|NANOS3(-31.4kb)|PODNL1(-85.34kb)|RFX1(-115.7kb)|RLN3(-182.4kb)|ZSWIM4(+13.62kb)
4	190109540	rs4863109	A	G	0.936849	3	1.37e-05	1.37e-05	1.3268	1.3268	0.4914	0	1.2298	1.3094	1.4694	.
3	146951901	rs28418273	T	C	0.247813	3	1.371e-05	1.371e-05	0.8546	0.8546	0.9939	0	0.8589	0.8523	0.8516	ZIC1(-175.3kb)|ZIC4(-151.9kb)
6	47433751	rs9369693	C	A	0.258639	3	1.376e-05	1.376e-05	1.1606	1.1606	0.9958	0	1.1559	1.1627	1.1639	CD2AP(-11.77kb)|GPR111(-190.6kb)|TNFRSF21(+156.1kb)
6	56424232	rs9349828	C	T	0.309994	3	1.376e-05	1.376e-05	0.8608	0.8608	0.3736	0	0.868	0.9178	0.8114	DST(0)|RNU6-71P(0)
10	127083187	rs150478085	A	G	0.0474592	3	1.376e-05	1.376e-05	0.6917	0.6917	0.8982	0	0.7145	0.6455	0.6964	LOC100169752(-179.8kb)
6	47427281	rs1931833	A	T	0.260995	3	1.378e-05	1.378e-05	1.1608	1.1608	0.9689	0	1.1487	1.1619	1.1719	CD2AP(-18.24kb)|GPR111(-197kb)|TNFRSF21(+149.6kb)
15	79281999	rs28705105	G	T	0.0205266	3	1.379e-05	0.001537	1.6088	1.5735	0.1924	39.33	1.4728	1.2359	1.9627	ADAMTS7(+178.2kb)|CTSH(+44.58kb)|MORF4L1(+91.92kb)|RASGRF1(0)
20	4628458	rs57172108	T	C	0.0445334	3	1.386e-05	1.386e-05	1.4173	1.4173	0.8376	0	1.332	1.4937	1.4513	PRND(-74.1kb)|PRNP(-38.34kb)|PRNT(-83.47kb)|RASSF2(-132.2kb)
5	176966623	rs73336014	C	T	0.0695873	2	1.388e-05	1.388e-05	1.5569	1.5569	0.5613	0	1.6476	1.4635	NA	B4GALT7(-60.5kb)|DBN1(+65.93kb)|DDX41(+22.66kb)|DOK3(+29.2kb)|F12(+130kb)|FAM153A(-183.7kb)|FAM193B(0)|GRK6(+96.77kb)|LMAN2(+187.7kb)|LOC202181(-78.88kb)|PDLIM7(+42.02kb)|PFN3(+139kb)|PRR7(+83.34kb)|PRR7-AS1(+91.68kb)|RGS14(+167kb)|SLC34A1(+140.8kb)|TMED9(-52.59kb)
18	56298180	rs6566992	G	A	0.284632	3	1.396e-05	1.396e-05	1.1625	1.1625	0.9788	0	1.1592	1.1521	1.1724	ALPK2(+1.991kb)|MALT1(-40.44kb)|MIR122(+179.8kb)|MIR3591(+179.8kb)
8	47390560	rs113064505	C	T	0.0274715	2	1.398e-05	1.398e-05	2.0984	2.0984	0.8434	0	2.0201	2.162	NA	.
4	190109717	rs4863110	T	C	0.935848	3	1.401e-05	1.401e-05	1.3261	1.3261	0.505	0	1.2344	1.3001	1.4681	.
20	4626630	rs1966244	G	A	0.0438867	3	1.408e-05	1.408e-05	1.4177	1.4177	0.8768	0	1.3433	1.4812	1.4486	PRND(-75.92kb)|PRNP(-40.17kb)|PRNT(-85.3kb)|RASSF2(-134kb)
19	45343579	rs55840414	A	G	0.120172	3	1.409e-05	1.409e-05	0.7744	0.7744	0.6456	0	0.7508	0.7401	0.8396	APOC1(-74.34kb)|APOC1P1(-86.48kb)|APOC2(-105.7kb)|APOC4(-101.9kb)|APOC4-APOC2(-101.9kb)|APOE(-65.46kb)|BCAM(+18.9kb)|BCL3(+80.28kb)|CBLC(+39.68kb)|CEACAM16(+129.6kb)|CEACAM19(+156kb)|CLASRP(-198.7kb)|CLPTM1(-114.3kb)|MIR4531(+186.6kb)|PVR(+174.2kb)|PVRL2(-5.813kb)|RELB(-161.1kb)|TOMM40(-50.9kb)
8	133372988	rs2896657	G	C	0.346427	3	1.413e-05	0.0005372	0.8686	0.87	0.2193	34.09	0.9089	0.9062	0.808	HPYR1(-199.8kb)|KCNQ3(0)
18	56304801	rs57287567	C	T	0.28474	3	1.414e-05	1.414e-05	1.1623	1.1623	0.9862	0	1.1598	1.1538	1.1702	ALPK2(+8.612kb)|MALT1(-33.82kb)|MIR122(+186.4kb)|MIR3591(+186.4kb)
4	33688886	rs34425475	C	A	0.115276	3	1.417e-05	1.417e-05	0.7976	0.7976	0.6293	0	0.7505	0.8401	0.8233	.
6	47451883	rs9296558	T	C	0.257037	3	1.418e-05	1.418e-05	1.1598	1.1598	0.9661	0	1.1467	1.1718	1.1644	CD2AP(0)|GPR111(-172.4kb)|TNFRSF21(+174.2kb)
20	4635366	rs6139510	T	G	0.044441	3	1.42e-05	1.42e-05	1.415	1.415	0.8863	0	1.3434	1.4408	1.4661	PRND(-67.19kb)|PRNP(-31.43kb)|PRNT(-76.56kb)|RASSF2(-125.3kb)|SLC23A2(-197.6kb)
20	4635221	rs11697826	T	C	0.0445488	3	1.423e-05	1.423e-05	1.4148	1.4148	0.8886	0	1.344	1.4408	1.4652	PRND(-67.33kb)|PRNP(-31.58kb)|PRNT(-76.71kb)|RASSF2(-125.4kb)|SLC23A2(-197.8kb)
8	15278804	rs117848049	T	G	0.0170619	3	1.426e-05	1.426e-05	0.6139	0.6139	0.6702	0	0.5654	0.592	0.7111	SGCZ(+183kb)|TUSC3(-118.8kb)
3	143098422	rs7650880	A	C	0.826009	3	1.428e-05	1.428e-05	0.8397	0.8397	0.8873	0	0.8586	0.8148	0.8385	SLC9A9(0)|SLC9A9-AS1(+32.51kb)
4	33689490	rs66541787	A	G	0.115322	3	1.431e-05	1.431e-05	0.7978	0.7978	0.6306	0	0.7508	0.8402	0.8234	.
6	47452270	rs9296559	C	T	0.257037	3	1.431e-05	1.431e-05	1.1596	1.1596	0.9656	0	1.1465	1.1718	1.1643	CD2AP(0)|GPR111(-172.1kb)|TNFRSF21(+174.6kb)
6	47453378	rs9349407	C	G	0.256929	3	1.436e-05	1.436e-05	1.1597	1.1597	0.9655	0	1.1465	1.1718	1.1644	CD2AP(0)|GPR111(-170.9kb)|TNFRSF21(+175.7kb)
15	79282479	rs28718997	T	C	0.0205574	3	1.439e-05	0.002089	1.6063	1.5686	0.1782	42.02	1.4765	1.2239	1.9665	ADAMTS7(+178.7kb)|CTSH(+45.06kb)|MORF4L1(+92.4kb)|RASGRF1(0)
15	79282366	rs28674868	C	T	0.020542	3	1.445e-05	0.001891	1.6066	1.5696	0.1834	41.03	1.4693	1.2303	1.9658	ADAMTS7(+178.6kb)|CTSH(+44.95kb)|MORF4L1(+92.28kb)|RASGRF1(0)
4	33691405	rs1454603	G	A	0.115306	3	1.447e-05	1.447e-05	0.798	0.798	0.6333	0	0.7512	0.8402	0.8234	.
4	33699210	rs16989167	C	T	0.115276	3	1.451e-05	1.451e-05	0.7983	0.7983	0.6379	0	0.7519	0.8404	0.8231	.
4	33691904	rs28611496	C	T	0.115306	3	1.454e-05	1.454e-05	0.798	0.798	0.6336	0	0.7513	0.8403	0.8234	.
6	47429767	rs9381562	A	C	0.258716	3	1.455e-05	1.455e-05	1.1603	1.1603	0.9951	0	1.1554	1.1613	1.1645	CD2AP(-15.76kb)|GPR111(-194.6kb)|TNFRSF21(+152.1kb)
5	176953018	rs335445	A	G	0.926255	2	1.46e-05	1.46e-05	0.6413	0.6413	0.5058	0	0.6009	0.6888	NA	B4GALT7(-74.1kb)|DBN1(+52.32kb)|DDX41(+9.051kb)|DOK3(+15.59kb)|F12(+116.4kb)|FAM153A(-197.3kb)|FAM193B(0)|GRK6(+83.17kb)|LMAN2(+174.1kb)|LOC202181(-92.48kb)|PDLIM7(+28.41kb)|PFN3(+125.4kb)|PRR7(+69.73kb)|PRR7-AS1(+78.07kb)|RGS14(+153.4kb)|SLC34A1(+127.2kb)|TMED9(-66.19kb)
5	176986424	rs335473	A	G	0.0663536	2	1.46e-05	1.46e-05	1.5745	1.5745	0.8659	0	1.6015	1.5458	NA	B4GALT7(-40.69kb)|DBN1(+85.73kb)|DDX41(+42.46kb)|DOK3(+49kb)|F12(+149.8kb)|FAM153A(-163.9kb)|FAM193B(+4.876kb)|GRK6(+116.6kb)|LOC202181(-59.08kb)|PDLIM7(+61.82kb)|PFN3(+158.8kb)|PRR7(+103.1kb)|PRR7-AS1(+111.5kb)|RGS14(+186.8kb)|SLC34A1(+160.6kb)|TMED9(-32.79kb)
4	33724262	rs12642628	T	A	0.123714	3	1.461e-05	1.461e-05	0.7986	0.7986	0.6017	0	0.7488	0.8349	0.832	.
2	127892768	rs34779859	T	G	0.296381	3	1.464e-05	0.0001755	1.1627	1.1623	0.2684	23.98	1.2456	1.1473	1.0947	BIN1(+27.86kb)|CYP27C1(-48.64kb)|ERCC3(-122.1kb)|MAP3K2(-163.5kb)
4	33696234	rs10010769	C	T	0.115291	3	1.465e-05	1.465e-05	0.7982	0.7982	0.6372	0	0.7518	0.8404	0.8232	.
4	33800585	rs10022215	C	A	0.118802	3	1.467e-05	1.467e-05	0.7988	0.7988	0.5309	0	0.7437	0.837	0.8383	.
4	33693330	rs12641809	G	A	0.11526	3	1.469e-05	1.469e-05	0.7981	0.7981	0.6346	0	0.7515	0.8403	0.8235	.
6	47427611	rs7740963	T	C	0.26061	3	1.469e-05	1.469e-05	1.1602	1.1602	0.9737	0	1.1485	1.164	1.1692	CD2AP(-17.91kb)|GPR111(-196.7kb)|TNFRSF21(+149.9kb)
6	47552180	rs9369716	T	A	0.256468	3	1.47e-05	1.47e-05	1.1596	1.1596	0.9617	0	1.1459	1.1731	1.1639	CD2AP(0)|GPR111(-72.14kb)|GPR115(-114.1kb)|OPN5(-197.6kb)
4	33692888	rs13140075	C	G	0.115276	3	1.474e-05	1.474e-05	0.7982	0.7982	0.6339	0	0.7515	0.8404	0.8236	.
4	33701555	rs28612122	A	C	0.115291	3	1.476e-05	1.476e-05	0.7984	0.7984	0.6357	0	0.7518	0.8403	0.8237	.
3	13081514	rs7646860	A	G	0.0571297	3	1.485e-05	1.485e-05	0.7401	0.7401	0.832	0	0.7772	0.7064	0.7211	IQSEC1(0)|RPL32(+198.4kb)|SNORA7A(+199.6kb)
22	27634799	rs512856	C	G	0.263659	3	1.488e-05	0.0003878	1.172	1.1684	0.2432	29.28	1.1352	1.09	1.26	.
6	47456118	rs4711878	G	A	0.261334	3	1.489e-05	1.489e-05	1.1592	1.1592	0.9432	0	1.1422	1.1748	1.1652	CD2AP(0)|GPR111(-168.2kb)|TNFRSF21(+178.4kb)
4	33706615	rs13136846	G	T	0.115322	3	1.492e-05	1.492e-05	0.7984	0.7984	0.6318	0	0.7515	0.8402	0.8244	.
15	79282414	rs28464364	C	T	0.0205266	3	1.493e-05	0.001994	1.6051	1.5679	0.1817	41.35	1.4684	1.2281	1.9649	ADAMTS7(+178.6kb)|CTSH(+44.99kb)|MORF4L1(+92.33kb)|RASGRF1(0)
8	27448888	rs7012217	C	T	0.32239	3	1.496e-05	1.496e-05	1.1514	1.1514	0.4023	0	1.1732	1.0691	1.1891	CCDC25(-141.9kb)|CHRNA2(+112.1kb)|CLU(-5.545kb)|EPHX2(+46.45kb)|ESCO2(-183.2kb)|MIR3622A(-110.3kb)|MIR3622B(-110.3kb)|PTK2B(+132kb)|SCARA3(-42.69kb)
6	47590476	rs7754971	T	C	0.260795	3	1.498e-05	1.498e-05	1.1598	1.1598	0.9401	0	1.1419	1.1738	1.1681	CD2AP(0)|GPR111(-33.85kb)|GPR115(-75.81kb)|OPN5(-159.3kb)
4	33706961	rs13131261	G	A	0.115353	3	1.499e-05	1.499e-05	0.7985	0.7985	0.6315	0	0.7515	0.8403	0.8244	.
20	4637712	rs77945340	G	A	0.0360025	3	1.503e-05	1.503e-05	1.4612	1.4612	0.7169	0	1.3304	1.53	1.5502	PRND(-64.84kb)|PRNP(-29.08kb)|PRNT(-74.22kb)|RASSF2(-123kb)|SLC23A2(-195.3kb)
4	33710584	rs10033461	A	C	0.115399	3	1.504e-05	1.504e-05	0.7984	0.7984	0.6305	0	0.7513	0.8393	0.8254	.
4	33705996	rs13130383	G	T	0.115291	3	1.51e-05	1.51e-05	0.7986	0.7986	0.6274	0	0.7513	0.8406	0.8248	.
4	33707621	rs35437107	T	C	0.115337	3	1.51e-05	1.51e-05	0.7985	0.7985	0.6319	0	0.7516	0.8403	0.8245	.
6	47515811	rs2171089	G	A	0.256668	3	1.51e-05	1.51e-05	1.1592	1.1592	0.9497	0	1.1437	1.1752	1.1637	CD2AP(0)|GPR111(-108.5kb)|GPR115(-150.5kb)
4	33707628	rs34003616	A	T	0.115337	3	1.511e-05	1.511e-05	0.7985	0.7985	0.6308	0	0.7515	0.8404	0.8245	.
4	33708152	rs28872587	A	G	0.115353	3	1.512e-05	1.512e-05	0.7985	0.7985	0.6314	0	0.7515	0.84	0.8248	.
8	47303656	rs113724891	G	A	0.0268864	2	1.512e-05	1.512e-05	2.1158	2.1158	0.8669	0	2.0449	2.1688	NA	.
4	33709675	rs10021740	A	G	0.115383	3	1.518e-05	1.518e-05	0.7985	0.7985	0.6341	0	0.7517	0.8393	0.8252	.
6	47432637	rs9381563	T	C	0.644256	3	1.519e-05	1.519e-05	0.8714	0.8714	0.7811	0	0.8726	0.9011	0.8506	CD2AP(-12.89kb)|GPR111(-191.7kb)|TNFRSF21(+155kb)
4	33708059	rs28880369	A	C	0.115337	3	1.522e-05	1.522e-05	0.7986	0.7986	0.6302	0	0.7515	0.8404	0.8247	.
4	33708740	rs10470879	G	A	0.115322	3	1.528e-05	1.528e-05	0.7986	0.7986	0.6289	0	0.7514	0.8404	0.8249	.
4	33709926	rs10030710	A	C	0.115322	3	1.529e-05	1.529e-05	0.7986	0.7986	0.6279	0	0.7513	0.8404	0.825	.
4	33725713	rs7665615	G	A	0.115199	3	1.529e-05	1.529e-05	0.7986	0.7986	0.6283	0	0.7514	0.8403	0.8252	.
8	133374822	rs7820317	A	G	0.346658	3	1.53e-05	0.0004657	0.8691	0.8705	0.2288	32.21	0.9088	0.9064	0.8094	HPYR1(-197.9kb)|KCNQ3(0)
4	33710204	rs57420599	A	T	0.115322	3	1.531e-05	1.531e-05	0.7986	0.7986	0.6275	0	0.7513	0.8404	0.8251	.
4	33709759	rs10034901	T	A	0.115353	3	1.532e-05	1.532e-05	0.7986	0.7986	0.6271	0	0.7513	0.8404	0.8252	.
4	33711686	rs28893243	T	C	0.115476	3	1.533e-05	1.533e-05	0.7986	0.7986	0.624	0	0.751	0.8405	0.8254	.
4	33710817	rs10025016	T	G	0.115322	3	1.539e-05	1.539e-05	0.7986	0.7986	0.6262	0	0.7512	0.8404	0.8253	.
4	33710829	rs9993419	T	A	0.115322	3	1.541e-05	1.541e-05	0.7986	0.7986	0.6262	0	0.7512	0.8404	0.8253	.
4	33726506	rs9997046	A	G	0.115245	3	1.546e-05	1.546e-05	0.7986	0.7986	0.6277	0	0.7514	0.8403	0.8254	.
3	68487684	rs73111015	G	A	0.151617	3	1.551e-05	0.005062	0.8312	0.8367	0.1125	54.22	0.795	0.963	0.7793	FAM19A1(0)
4	33711926	rs28848573	A	G	0.115322	3	1.554e-05	1.554e-05	0.7987	0.7987	0.6231	0	0.751	0.8405	0.8257	.
4	33702758	rs9884306	A	G	0.11469	3	1.556e-05	1.556e-05	0.7985	0.7985	0.6302	0	0.7515	0.842	0.8231	.
4	33712087	rs28884892	T	C	0.115322	3	1.556e-05	1.556e-05	0.7987	0.7987	0.6222	0	0.751	0.8406	0.8258	.
4	33712631	rs28830587	T	G	0.115337	3	1.559e-05	1.559e-05	0.7988	0.7988	0.6209	0	0.7509	0.8406	0.826	.
4	33712717	rs28558465	G	C	0.115322	3	1.562e-05	1.562e-05	0.7988	0.7988	0.6215	0	0.751	0.8406	0.826	.
6	47585912	rs1948047	C	T	0.260795	3	1.562e-05	1.562e-05	1.159	1.159	0.9493	0	1.1427	1.1723	1.1662	CD2AP(0)|GPR111(-38.41kb)|GPR115(-80.38kb)|OPN5(-163.9kb)
4	33713291	rs13137090	T	A	0.115337	3	1.563e-05	1.563e-05	0.7987	0.7987	0.6209	0	0.7509	0.8407	0.8259	.
8	47296358	rs76474759	A	G	0.0269172	2	1.566e-05	1.566e-05	2.1229	2.1229	0.8656	0	2.0513	2.1774	NA	.
4	33713463	rs13142365	T	A	0.115322	3	1.567e-05	1.567e-05	0.7988	0.7988	0.6202	0	0.7509	0.8407	0.8261	.
4	33726675	rs28394002	A	G	0.115276	3	1.567e-05	1.567e-05	0.7988	0.7988	0.6245	0	0.7513	0.8404	0.826	.
4	33713384	rs13142161	G	A	0.115322	3	1.568e-05	1.568e-05	0.7988	0.7988	0.6197	0	0.7509	0.8408	0.8261	.
4	33725405	rs2120677	T	C	0.115199	3	1.575e-05	1.575e-05	0.7988	0.7988	0.6261	0	0.7514	0.8403	0.8259	.
8	133373121	rs7016984	A	G	0.346458	3	1.577e-05	0.0004638	0.8692	0.8705	0.2299	31.99	0.909	0.9062	0.8095	HPYR1(-199.6kb)|KCNQ3(0)
8	14902794	rs10888101	T	C	0.969218	3	1.58e-05	1.58e-05	0.6324	0.6324	0.3813	0	0.6506	0.5036	0.7186	MIR383(+191.8kb)|SGCZ(0)
3	146944737	rs9826260	C	G	0.248553	3	1.585e-05	1.585e-05	0.8556	0.8556	0.9891	0	0.8613	0.8538	0.851	ZIC1(-182.4kb)|ZIC4(-159.1kb)
4	33714385	rs28877976	C	T	0.115276	3	1.585e-05	1.585e-05	0.7989	0.7989	0.6116	0	0.7503	0.841	0.827	.
4	33716311	rs9995797	A	T	0.115276	3	1.587e-05	1.587e-05	0.7989	0.7989	0.6091	0	0.7501	0.8411	0.8272	.
3	146943112	rs9839538	C	T	0.248583	3	1.588e-05	1.588e-05	0.8557	0.8557	0.989	0	0.8613	0.854	0.8509	ZIC1(-184.1kb)|ZIC4(-160.7kb)
4	33715418	rs35664299	G	A	0.115276	3	1.589e-05	1.589e-05	0.7989	0.7989	0.6102	0	0.7502	0.841	0.8272	.
4	33715771	rs9992483	C	A	0.115276	3	1.589e-05	1.589e-05	0.799	0.799	0.6098	0	0.7502	0.841	0.8273	.
15	79282845	rs28683537	C	T	0.0205728	3	1.59e-05	0.0026	1.602	1.5627	0.1699	43.58	1.4672	1.2188	1.9681	ADAMTS7(+179.1kb)|CTSH(+45.42kb)|MORF4L1(+92.76kb)|RASGRF1(0)
7	114778640	rs10249920	G	A	0.382415	3	1.592e-05	1.592e-05	0.8709	0.8709	0.3819	0	0.825	0.9187	0.8881	MDFIC(+118.7kb)
4	33716085	rs9995588	G	T	0.115276	3	1.594e-05	1.594e-05	0.799	0.799	0.6095	0	0.7502	0.841	0.8274	.
4	70994104	rs6814963	C	A	0.733277	3	1.602e-05	3.467e-05	0.857	0.8576	0.3419	6.83	0.8769	0.9151	0.8067	C4orf40(-25.8kb)|CSN1S1(+181.8kb)|CSN1S2AP(+43.12kb)|CSN1S2BP(-5.216kb)|CSN2(+167.4kb)|CSN3(-114.2kb)|FDCSP(-97.68kb)|HTN1(+69.54kb)|HTN3(+91.85kb)|ODAM(-68.14kb)|STATH(+125.9kb)
4	33716979	rs7694031	C	T	0.115276	3	1.604e-05	1.604e-05	0.799	0.799	0.6077	0	0.7501	0.8411	0.8276	.
4	33719030	rs28661791	C	T	0.11526	3	1.612e-05	1.612e-05	0.7991	0.7991	0.6049	0	0.7499	0.841	0.8281	.
8	27430572	rs7814146	A	C	0.346135	3	1.612e-05	1.612e-05	1.1489	1.1489	0.6025	0	1.1781	1.0876	1.163	CCDC25(-160.3kb)|CHRNA2(+93.76kb)|CLU(-23.86kb)|EPHX2(+28.13kb)|MIR3622A(-128.6kb)|MIR3622B(-128.6kb)|PTK2B(+113.7kb)|SCARA3(-61kb)
4	33717042	rs7660710	A	G	0.115276	3	1.617e-05	1.617e-05	0.7991	0.7991	0.6075	0	0.7501	0.8411	0.8277	.
4	33717820	rs1444377	C	T	0.115276	3	1.617e-05	1.617e-05	0.7991	0.7991	0.6067	0	0.7501	0.8411	0.8279	.
4	33722764	rs13139622	C	G	0.11526	3	1.619e-05	1.619e-05	0.7991	0.7991	0.5955	0	0.7492	0.8412	0.8291	.
6	47549495	rs9357546	T	C	0.261118	3	1.621e-05	1.621e-05	1.1584	1.1584	0.9381	0	1.1407	1.1746	1.165	CD2AP(0)|GPR111(-74.83kb)|GPR115(-116.8kb)
4	33721064	rs28859331	A	G	0.115291	3	1.622e-05	1.622e-05	0.7992	0.7992	0.6027	0	0.7498	0.8411	0.8284	.
4	33718663	rs16989187	G	A	0.115276	3	1.623e-05	1.623e-05	0.7991	0.7991	0.6063	0	0.7501	0.8411	0.828	.
4	33720130	rs7661640	G	A	0.11526	3	1.631e-05	1.631e-05	0.7992	0.7992	0.6029	0	0.7498	0.8411	0.8284	.
4	33721205	rs28814696	T	A	0.115291	3	1.631e-05	1.631e-05	0.7992	0.7992	0.602	0	0.7498	0.8411	0.8286	.
4	33719597	rs1596581	T	C	0.11526	3	1.632e-05	1.632e-05	0.7992	0.7992	0.6046	0	0.75	0.8411	0.8283	.
6	47481833	rs9473126	G	C	0.256468	3	1.64e-05	1.64e-05	1.1585	1.1585	0.9595	0	1.144	1.1707	1.1645	CD2AP(0)|GPR111(-142.5kb)|GPR115(-184.5kb)
6	47489708	rs13201473	A	G	0.256575	3	1.64e-05	1.64e-05	1.1585	1.1585	0.9541	0	1.1429	1.1705	1.1658	CD2AP(0)|GPR111(-134.6kb)|GPR115(-176.6kb)
4	33721327	rs13150067	G	T	0.115306	3	1.65e-05	1.65e-05	0.7993	0.7993	0.6017	0	0.7499	0.8412	0.8288	.
4	33722198	rs28613726	C	T	0.11526	3	1.652e-05	1.652e-05	0.7993	0.7993	0.6011	0	0.7498	0.8411	0.8289	.
4	33722226	rs28588941	T	C	0.115291	3	1.652e-05	1.652e-05	0.7993	0.7993	0.6011	0	0.7498	0.841	0.829	.
6	47542864	rs9395279	T	C	0.261087	3	1.652e-05	1.652e-05	1.1582	1.1582	0.9395	0	1.1406	1.1739	1.1649	CD2AP(0)|GPR111(-81.46kb)|GPR115(-123.4kb)
3	68485443	rs7634101	G	A	0.151832	3	1.654e-05	0.004685	0.8318	0.8372	0.1184	53.13	0.7955	0.9624	0.7813	FAM19A1(0)
4	33721443	rs13110392	G	A	0.11526	3	1.658e-05	1.658e-05	0.7993	0.7993	0.6008	0	0.7498	0.8412	0.8289	.
19	45429543	rs71352239	T	C	0.313397	3	1.658e-05	0.0008338	0.8124	0.8153	0.2026	37.37	0.7522	0.9291	0.7905	APOC1(+6.937kb)|APOC1P1(-0.516kb)|APOC2(-19.7kb)|APOC4(-15.95kb)|APOC4-APOC2(-15.95kb)|APOE(+16.89kb)|BCAM(+104.9kb)|BCL3(+166.2kb)|CBLC(+125.6kb)|CLASRP(-112.8kb)|CLPTM1(-28.3kb)|GEMIN7(-153kb)|PPP1R37(-166.9kb)|PVRL2(+37.06kb)|RELB(-75.16kb)|TOMM40(+22.6kb)|ZNF296(-145.2kb)
3	146954332	rs9850664	A	G	0.248198	3	1.661e-05	1.661e-05	0.8559	0.8559	0.9977	0	0.8573	0.8523	0.857	ZIC1(-172.8kb)|ZIC4(-149.5kb)
10	22822393	rs9787624	G	T	0.258161	3	1.664e-05	1.664e-05	0.8618	0.8618	0.4433	0	0.8563	0.8074	0.9052	LOC100499489(+95.54kb)|PIP4K2A(-1.372kb)|SPAG6(+115.9kb)
1	20814522	rs1152984	G	A	0.796997	3	1.67e-05	1.67e-05	1.1854	1.1854	0.4079	0	1.2429	1.2228	1.1081	CAMK2N1(+1.794kb)|CDA(-100.9kb)|DDOST(-163.7kb)|FAM43B(-64.41kb)|KIF17(-176kb)|LOC339505(+59.24kb)|MUL1(-11.42kb)|PINK1(-145.4kb)|VWA5B1(+133.1kb)
6	47590104	rs2171086	T	C	0.260995	3	1.684e-05	1.684e-05	1.1587	1.1587	0.9412	0	1.1413	1.174	1.1658	CD2AP(0)|GPR111(-34.22kb)|GPR115(-76.18kb)|OPN5(-159.7kb)
8	133373107	rs4458854	A	C	0.340776	3	1.684e-05	0.0007435	0.8695	0.871	0.2087	36.18	0.9104	0.9079	0.8077	HPYR1(-199.6kb)|KCNQ3(0)
4	33728153	rs28696054	C	T	0.115229	3	1.686e-05	1.686e-05	0.7995	0.7995	0.6155	0	0.7511	0.8404	0.8283	.
15	79279039	rs28501618	G	A	0.0204034	3	1.694e-05	0.002633	1.6031	1.5637	0.1715	43.28	1.4933	1.2034	1.9597	ADAMTS7(+175.3kb)|CTSH(+41.62kb)|MORF4L1(+88.96kb)|RASGRF1(0)
5	176987724	rs335480	A	G	0.0662766	2	1.704e-05	1.704e-05	1.5709	1.5709	0.8612	0	1.5988	1.5411	NA	B4GALT7(-39.39kb)|DBN1(+87.03kb)|DDX41(+43.76kb)|DOK3(+50.3kb)|F12(+151.1kb)|FAM153A(-162.6kb)|FAM193B(+6.176kb)|GRK6(+117.9kb)|LOC202181(-57.78kb)|PDLIM7(+63.12kb)|PFN3(+160.1kb)|PRR7(+104.4kb)|PRR7-AS1(+112.8kb)|RGS14(+188.1kb)|SLC34A1(+161.9kb)|TMED9(-31.49kb)
8	133373550	rs4736414	A	G	0.340822	3	1.707e-05	0.0007079	0.8696	0.8711	0.2116	35.61	0.9103	0.9079	0.8081	HPYR1(-199.2kb)|KCNQ3(0)
20	4671835	rs117757976	C	A	0.0223129	3	1.709e-05	1.709e-05	1.6977	1.6977	0.7193	0	1.8761	1.7945	1.502	PRND(-30.72kb)|PRNP(0)|PRNT(-40.09kb)|RASSF2(-88.83kb)|SLC23A2(-161.2kb)
3	68486196	rs73111013	A	G	0.15174	3	1.71e-05	0.004698	0.8321	0.8375	0.1192	52.99	0.7955	0.9626	0.7819	FAM19A1(0)
3	146959431	rs13325063	G	T	0.24863	3	1.712e-05	1.712e-05	0.8559	0.8559	0.9855	0	0.8625	0.8503	0.8528	ZIC1(-167.7kb)|ZIC4(-144.4kb)
6	47465267	rs9395262	C	T	0.261349	3	1.714e-05	1.714e-05	1.158	1.158	0.9442	0	1.1412	1.1734	1.1641	CD2AP(0)|GPR111(-159.1kb)|TNFRSF21(+187.6kb)
3	146963255	rs13065309	C	T	0.247983	3	1.715e-05	1.715e-05	0.8556	0.8556	0.9993	0	0.8568	0.8538	0.8556	ZIC1(-163.9kb)|ZIC4(-140.6kb)
6	47440565	rs9369695	A	C	0.257176	3	1.715e-05	1.715e-05	1.1584	1.1584	0.9811	0	1.1484	1.1627	1.1654	CD2AP(-4.959kb)|GPR111(-183.8kb)|TNFRSF21(+162.9kb)
6	47469273	rs7738044	G	A	0.261303	3	1.718e-05	1.718e-05	1.158	1.158	0.9393	0	1.1402	1.1731	1.1652	CD2AP(0)|GPR111(-155.1kb)|GPR115(-197kb)|TNFRSF21(+191.6kb)
15	79283855	rs28567804	C	T	0.0205882	3	1.719e-05	0.004079	1.5969	1.5536	0.1488	47.52	1.4568	1.2059	1.9771	ADAMTS7(+180.1kb)|CTSH(+46.44kb)|MORF4L1(+93.77kb)|RASGRF1(0)
5	176985515	rs1001530	G	A	0.0636896	2	1.721e-05	1.721e-05	1.5709	1.5709	0.8787	0	1.5953	1.5449	NA	B4GALT7(-41.6kb)|DBN1(+84.82kb)|DDX41(+41.55kb)|DOK3(+48.09kb)|F12(+148.9kb)|FAM153A(-164.8kb)|FAM193B(+3.967kb)|GRK6(+115.7kb)|LOC202181(-59.98kb)|PDLIM7(+60.91kb)|PFN3(+157.9kb)|PRR7(+102.2kb)|PRR7-AS1(+110.6kb)|RGS14(+185.9kb)|SLC34A1(+159.7kb)|TMED9(-33.7kb)
4	33733482	rs35803493	G	T	0.115245	3	1.722e-05	1.722e-05	0.7996	0.7996	0.6085	0	0.7506	0.8405	0.8292	.
12	6635166	rs71579349	G	A	0.0192331	2	1.724e-05	0.0007437	0.4855	0.499	0.254	23.14	0.4362	0.6844	NA	ACRBP(-112.1kb)|CD27(+74.28kb)|CD27-AS1(+74.48kb)|CHD4(-44.08kb)|COPS7A(-198kb)|GAPDH(-8.418kb)|IFFO1(-13.53kb)|ING4(-124.5kb)|LPAR5(-92.83kb)|LTBR(+134.4kb)|MRPL51(+32.7kb)|NCAPD2(0)|NOP2(-30.87kb)|PIANP(-167.8kb)|PLEKHG6(+197.5kb)|SCARNA10(+15.45kb)|SCARNA11(-55.47kb)|SCNN1A(+148.6kb)|TAPBPL(+63.68kb)|TNFRSF1A(+183.9kb)|VAMP1(+55.32kb)|ZNF384(-140.5kb)
5	176952919	rs335446	T	C	0.927071	2	1.727e-05	1.727e-05	0.6434	0.6434	0.5172	0	0.6038	0.6897	NA	B4GALT7(-74.2kb)|DBN1(+52.22kb)|DDX41(+8.952kb)|DOK3(+15.49kb)|F12(+116.3kb)|FAM153A(-197.4kb)|FAM193B(0)|GRK6(+83.07kb)|LMAN2(+174kb)|LOC202181(-92.58kb)|PDLIM7(+28.31kb)|PFN3(+125.3kb)|PRR7(+69.63kb)|PRR7-AS1(+77.97kb)|RGS14(+153.3kb)|SLC34A1(+127.1kb)|TMED9(-66.29kb)
4	33723567	rs1444378	C	T	0.11526	3	1.731e-05	1.731e-05	0.7997	0.7997	0.6017	0	0.7501	0.8412	0.8294	.
4	33723284	rs28489645	C	T	0.115199	3	1.733e-05	1.733e-05	0.7997	0.7997	0.6017	0	0.7501	0.8412	0.8294	.
4	33798995	rs6847698	C	T	0.132953	3	1.733e-05	1.733e-05	0.8024	0.8024	0.7109	0	0.7617	0.827	0.8329	.
6	47552817	rs13193054	A	C	0.261072	3	1.733e-05	1.733e-05	1.1578	1.1578	0.942	0	1.1406	1.173	1.1647	CD2AP(0)|GPR111(-71.51kb)|GPR115(-113.5kb)|OPN5(-197kb)
4	33728615	rs34184639	T	C	0.11526	3	1.735e-05	1.735e-05	0.7998	0.7998	0.6123	0	0.7511	0.8404	0.8292	.
4	33733376	rs7673650	T	C	0.115276	3	1.738e-05	1.738e-05	0.7997	0.7997	0.6039	0	0.7503	0.8404	0.83	.
4	33737372	rs6819323	C	A	0.11526	3	1.746e-05	1.746e-05	0.7998	0.7998	0.5995	0	0.75	0.8405	0.8305	.
4	33738150	rs61572732	G	A	0.11526	3	1.746e-05	1.746e-05	0.7998	0.7998	0.5974	0	0.7498	0.8405	0.8307	.
4	33737674	rs6819931	G	A	0.11526	3	1.747e-05	1.747e-05	0.7998	0.7998	0.5984	0	0.7499	0.8405	0.8306	.
4	33738371	rs10018223	A	G	0.11526	3	1.747e-05	1.747e-05	0.7998	0.7998	0.5973	0	0.7498	0.8405	0.8307	.
4	33737296	rs6814418	T	A	0.115276	3	1.748e-05	1.748e-05	0.7998	0.7998	0.5995	0	0.75	0.8405	0.8305	.
4	33737759	rs28811734	G	C	0.11526	3	1.748e-05	1.748e-05	0.7998	0.7998	0.5985	0	0.7499	0.8405	0.8306	.
6	47541415	rs12193051	G	C	0.261195	3	1.748e-05	1.748e-05	1.1577	1.1577	0.9325	0	1.1391	1.1743	1.1648	CD2AP(0)|GPR111(-82.91kb)|GPR115(-124.9kb)
8	140299491	rs80242316	A	G	0.105682	2	1.748e-05	1.748e-05	0.7072	0.7072	0.8005	0	0.7205	0.6916	NA	.
6	47556630	rs1485780	C	A	0.261041	3	1.749e-05	1.749e-05	1.1578	1.1578	0.9423	0	1.1405	1.1724	1.1651	CD2AP(0)|GPR111(-67.7kb)|GPR115(-109.7kb)|OPN5(-193.1kb)
6	47556634	rs9381578	T	C	0.261041	3	1.749e-05	1.749e-05	1.1578	1.1578	0.9421	0	1.1405	1.1724	1.1652	CD2AP(0)|GPR111(-67.69kb)|GPR115(-109.7kb)|OPN5(-193.1kb)
4	33737266	rs6814399	G	A	0.11526	3	1.75e-05	1.75e-05	0.7998	0.7998	0.5995	0	0.75	0.8405	0.8305	.
6	47441871	rs4715018	C	T	0.256929	3	1.75e-05	1.75e-05	1.1583	1.1583	0.9802	0	1.148	1.1626	1.1654	CD2AP(-3.653kb)|GPR111(-182.5kb)|TNFRSF21(+164.2kb)
6	47442377	rs1931837	T	C	0.256652	3	1.75e-05	1.75e-05	1.1582	1.1582	0.9795	0	1.1478	1.1626	1.1655	CD2AP(-3.147kb)|GPR111(-181.9kb)|TNFRSF21(+164.7kb)
4	33724564	rs9990714	T	G	0.115168	3	1.755e-05	1.755e-05	0.7998	0.7998	0.5999	0	0.7501	0.8412	0.8299	.
4	33738578	rs10031577	G	A	0.11526	3	1.755e-05	1.755e-05	0.7998	0.7998	0.597	0	0.7498	0.8405	0.8308	.
6	47551444	rs9395283	C	T	0.26121	3	1.755e-05	1.755e-05	1.1577	1.1577	0.931	0	1.1389	1.1746	1.1648	CD2AP(0)|GPR111(-72.88kb)|GPR115(-114.8kb)|OPN5(-198.3kb)
4	33731818	rs28589771	G	A	0.115661	3	1.757e-05	1.757e-05	0.7995	0.7995	0.6167	0	0.7512	0.8403	0.8285	.
4	33736362	rs34015464	T	C	0.11526	3	1.757e-05	1.757e-05	0.7999	0.7999	0.6009	0	0.7502	0.8405	0.8305	.
6	47556680	rs9381579	T	C	0.261041	3	1.757e-05	1.757e-05	1.1578	1.1578	0.9415	0	1.1404	1.1725	1.1652	CD2AP(0)|GPR111(-67.64kb)|GPR115(-109.6kb)|OPN5(-193.1kb)
8	47389376	rs113671637	A	C	0.0271173	2	1.757e-05	1.757e-05	2.0906	2.0906	0.8654	0	2.0231	2.1453	NA	.
15	79283958	rs28587174	T	C	0.0205882	3	1.757e-05	0.00432	1.5959	1.5521	0.1462	47.98	1.4557	1.2038	1.9777	ADAMTS7(+180.2kb)|CTSH(+46.54kb)|MORF4L1(+93.88kb)|RASGRF1(0)
4	33733213	rs28801803	T	C	0.115276	3	1.758e-05	1.758e-05	0.7999	0.7999	0.6061	0	0.7506	0.8404	0.83	.
4	33735440	rs57620630	A	G	0.11526	3	1.758e-05	1.758e-05	0.7999	0.7999	0.6013	0	0.7502	0.8405	0.8304	.
4	33736828	rs13130631	G	A	0.11526	3	1.759e-05	1.759e-05	0.7999	0.7999	0.5999	0	0.7501	0.8405	0.8306	.
6	47480676	rs4711880	G	A	0.256483	3	1.759e-05	1.759e-05	1.1579	1.1579	0.9587	0	1.1433	1.1704	1.1638	CD2AP(0)|GPR111(-143.6kb)|GPR115(-185.6kb)
4	33733107	rs10016004	G	T	0.115245	3	1.76e-05	1.76e-05	0.8	0.8	0.6058	0	0.7507	0.8405	0.8301	.
4	33735435	rs10017591	G	C	0.115245	3	1.76e-05	1.76e-05	0.7999	0.7999	0.6014	0	0.7502	0.8405	0.8304	.
4	33735695	rs28848857	G	A	0.11526	3	1.76e-05	1.76e-05	0.7999	0.7999	0.6014	0	0.7502	0.8405	0.8304	.
4	33736165	rs28768429	A	G	0.11526	3	1.76e-05	1.76e-05	0.7999	0.7999	0.6009	0	0.7502	0.8405	0.8305	.
4	70994910	rs1399248	A	G	0.732199	3	1.76e-05	4.995e-05	0.8577	0.8585	0.3319	9.34	0.8766	0.9177	0.807	C4orf40(-24.99kb)|CSN1S1(+182.6kb)|CSN1S2AP(+43.92kb)|CSN1S2BP(-4.41kb)|CSN2(+168.2kb)|CSN3(-113.4kb)|FDCSP(-96.88kb)|HTN1(+70.35kb)|HTN3(+92.66kb)|ODAM(-67.33kb)|STATH(+126.7kb)
4	33733643	rs7688975	C	T	0.11526	3	1.761e-05	1.761e-05	0.7999	0.7999	0.6056	0	0.7506	0.8404	0.8301	.
4	33739488	rs7681658	G	T	0.115245	3	1.761e-05	1.761e-05	0.7999	0.7999	0.5978	0	0.7499	0.8405	0.8308	.
4	33731881	rs76396788	A	G	0.115245	3	1.763e-05	1.763e-05	0.7999	0.7999	0.6078	0	0.7508	0.8405	0.8298	.
4	33728895	rs6849478	A	T	0.11526	3	1.767e-05	1.767e-05	0.7999	0.7999	0.61	0	0.751	0.8404	0.8297	.
4	33728922	rs6814808	A	G	0.11526	3	1.768e-05	1.768e-05	0.8	0.8	0.6096	0	0.751	0.8404	0.8298	.
4	33733757	rs6531771	G	A	0.115245	3	1.768e-05	1.768e-05	0.7999	0.7999	0.6043	0	0.7505	0.8404	0.8303	.
4	33729954	rs28526875	A	C	0.115245	3	1.769e-05	1.769e-05	0.8	0.8	0.6092	0	0.751	0.8404	0.8299	.
4	33733962	rs6831968	A	C	0.11526	3	1.77e-05	1.77e-05	0.7999	0.7999	0.6043	0	0.7505	0.8404	0.8303	.
4	33736622	rs28764846	G	A	0.115584	3	1.77e-05	1.77e-05	0.7999	0.7999	0.6004	0	0.7502	0.841	0.8302	.
4	33734008	rs1813425	T	G	0.115245	3	1.771e-05	1.771e-05	0.7999	0.7999	0.6043	0	0.7505	0.8404	0.8303	.
6	47474962	rs9473122	T	C	0.261272	3	1.771e-05	1.771e-05	1.1577	1.1577	0.9361	0	1.1394	1.1727	1.1657	CD2AP(0)|GPR111(-149.4kb)|GPR115(-191.3kb)|TNFRSF21(+197.3kb)
4	33731477	rs28513091	T	G	0.11526	3	1.772e-05	1.772e-05	0.8	0.8	0.6081	0	0.7509	0.8404	0.83	.
4	33729933	rs7664751	A	G	0.115245	3	1.773e-05	1.773e-05	0.8	0.8	0.6088	0	0.751	0.8405	0.8299	.
4	33734587	rs28780405	C	T	0.11526	3	1.773e-05	1.773e-05	0.8	0.8	0.6028	0	0.7504	0.8405	0.8304	.
4	33737899	rs13127916	T	C	0.11526	3	1.773e-05	1.773e-05	0.7998	0.7998	0.5984	0	0.7499	0.8405	0.8307	.
4	33729617	rs13117702	G	A	0.115276	3	1.774e-05	1.774e-05	0.8	0.8	0.6092	0	0.751	0.8404	0.8299	.
15	79283525	rs28565526	A	C	0.0205574	3	1.774e-05	0.003371	1.5968	1.5557	0.1593	45.55	1.4595	1.2109	1.9697	ADAMTS7(+179.8kb)|CTSH(+46.1kb)|MORF4L1(+93.44kb)|RASGRF1(0)
4	33730175	rs1813445	A	G	0.115245	3	1.777e-05	1.777e-05	0.8	0.8	0.6084	0	0.751	0.8405	0.83	.
4	33730876	rs67655711	C	G	0.11526	3	1.777e-05	1.777e-05	0.8001	0.8001	0.6073	0	0.7509	0.8405	0.8301	.
6	47443806	rs9381564	G	A	0.257237	3	1.778e-05	1.778e-05	1.158	1.158	0.9796	0	1.1476	1.1627	1.1651	CD2AP(-1.718kb)|GPR111(-180.5kb)|TNFRSF21(+166.1kb)
4	33730221	rs2197376	G	T	0.115245	3	1.779e-05	1.779e-05	0.8001	0.8001	0.608	0	0.751	0.8405	0.8301	.
4	33730652	rs28361960	G	A	0.11526	3	1.779e-05	1.779e-05	0.8001	0.8001	0.6074	0	0.7509	0.8405	0.8301	.
5	176983463	rs61142792	T	C	0.0591931	2	1.779e-05	1.779e-05	1.5738	1.5738	0.9545	0	1.5829	1.5639	NA	B4GALT7(-43.66kb)|DBN1(+82.77kb)|DDX41(+39.5kb)|DOK3(+46.04kb)|F12(+146.9kb)|FAM153A(-166.9kb)|FAM193B(+1.915kb)|GRK6(+113.6kb)|LOC202181(-62.04kb)|PDLIM7(+58.86kb)|PFN3(+155.8kb)|PRR7(+100.2kb)|PRR7-AS1(+108.5kb)|RGS14(+183.9kb)|SLC34A1(+157.6kb)|TMED9(-35.75kb)
4	33747044	rs7688152	C	A	0.0908377	3	1.781e-05	1.781e-05	0.7829	0.7829	0.5781	0	0.7276	0.8219	0.822	.
4	33774322	rs3863828	A	G	0.118556	3	1.781e-05	1.781e-05	0.801	0.801	0.4822	0	0.742	0.8458	0.8407	.
4	33731075	rs28526073	C	A	0.11526	3	1.782e-05	1.782e-05	0.8001	0.8001	0.6074	0	0.7509	0.8405	0.8301	.
4	33731120	rs28542952	C	T	0.11526	3	1.783e-05	1.783e-05	0.8001	0.8001	0.607	0	0.7509	0.8405	0.8302	.
15	79284127	rs28603308	A	C	0.0205728	3	1.783e-05	0.004449	1.5952	1.5513	0.145	48.21	1.4553	1.2026	1.9778	ADAMTS7(+180.4kb)|CTSH(+46.71kb)|LOC729911(-199.9kb)|MORF4L1(+94.05kb)|RASGRF1(0)
4	33729776	rs7691996	G	A	0.11526	3	1.786e-05	1.786e-05	0.8001	0.8001	0.6081	0	0.751	0.8405	0.8301	.
3	68465791	rs17047652	G	T	0.184524	3	1.788e-05	5.669e-05	0.8427	0.8436	0.328	10.3	0.7907	0.9192	0.8519	FAM19A1(0)
5	176982391	rs61505517	T	C	0.0592239	2	1.791e-05	1.791e-05	1.5749	1.5749	0.9448	0	1.5859	1.5628	NA	B4GALT7(-44.73kb)|DBN1(+81.7kb)|DDX41(+38.42kb)|DOK3(+44.96kb)|F12(+145.8kb)|FAM153A(-168kb)|FAM193B(+0.843kb)|GRK6(+112.5kb)|LOC202181(-63.11kb)|PDLIM7(+57.78kb)|PFN3(+154.8kb)|PRR7(+99.1kb)|PRR7-AS1(+107.4kb)|RGS14(+182.8kb)|SLC34A1(+156.5kb)|TMED9(-36.82kb)
6	47528764	rs9381575	G	C	0.261087	3	1.792e-05	1.792e-05	1.1574	1.1574	0.9294	0	1.1385	1.1747	1.1645	CD2AP(0)|GPR111(-95.56kb)|GPR115(-137.5kb)
5	176948716	rs2242319	G	T	0.0651063	2	1.793e-05	1.793e-05	1.5589	1.5589	0.6112	0	1.6393	1.4754	NA	B4GALT7(-78.4kb)|DBN1(+48.02kb)|DDX41(+4.749kb)|DOK3(+11.29kb)|F12(+112.1kb)|FAM193B(0)|GRK6(+78.87kb)|LMAN2(+169.8kb)|LOC202181(-96.78kb)|PDLIM7(+24.11kb)|PFN3(+121.1kb)|PRR7(+65.43kb)|PRR7-AS1(+73.77kb)|RGS14(+149.1kb)|SLC34A1(+122.9kb)|TMED9(-70.5kb)
6	47551861	rs9349415	C	T	0.261195	3	1.796e-05	1.796e-05	1.1575	1.1575	0.9328	0	1.1389	1.1738	1.1649	CD2AP(0)|GPR111(-72.46kb)|GPR115(-114.4kb)|OPN5(-197.9kb)
4	33731359	rs28455700	T	C	0.115491	3	1.797e-05	1.797e-05	0.8	0.8	0.6131	0	0.7513	0.84	0.8299	.
6	47445017	rs1004173	T	C	0.257145	3	1.797e-05	1.797e-05	1.1579	1.1579	0.9792	0	1.1473	1.1629	1.1648	CD2AP(-0.507kb)|GPR111(-179.3kb)|TNFRSF21(+167.3kb)
4	33729231	rs6844110	G	A	0.11526	3	1.8e-05	1.8e-05	0.8002	0.8002	0.6085	0	0.7511	0.8404	0.8303	.
6	47562915	rs6903331	G	A	0.261703	3	1.8e-05	1.8e-05	1.1575	1.1575	0.9263	0	1.1381	1.1749	1.1651	CD2AP(0)|GPR111(-61.41kb)|GPR115(-103.4kb)|OPN5(-186.9kb)
6	47575332	rs9395286	C	T	0.260718	3	1.8e-05	1.8e-05	1.1578	1.1578	0.9437	0	1.1406	1.1717	1.1655	CD2AP(0)|GPR111(-48.99kb)|GPR115(-90.96kb)|OPN5(-174.4kb)
8	27432174	rs1532279	G	C	0.324253	3	1.802e-05	3.829e-05	1.15	1.1494	0.3416	6.89	1.1665	1.0628	1.1969	CCDC25(-158.7kb)|CHRNA2(+95.36kb)|CLU(-22.26kb)|EPHX2(+29.74kb)|ESCO2(-199.9kb)|MIR3622A(-127kb)|MIR3622B(-127kb)|PTK2B(+115.3kb)|SCARA3(-59.4kb)
6	47585615	rs10948367	G	A	0.261195	3	1.803e-05	1.803e-05	1.1577	1.1577	0.9396	0	1.1399	1.1723	1.1655	CD2AP(0)|GPR111(-38.71kb)|GPR115(-80.67kb)|OPN5(-164.2kb)
6	47576367	rs13212790	C	T	0.261149	3	1.811e-05	1.811e-05	1.1577	1.1577	0.9446	0	1.1407	1.1716	1.1653	CD2AP(0)|GPR111(-47.96kb)|GPR115(-89.92kb)|OPN5(-173.4kb)
6	47463126	rs9349409	T	G	0.261303	3	1.812e-05	1.812e-05	1.1575	1.1575	0.9465	0	1.1414	1.1736	1.1625	CD2AP(0)|GPR111(-161.2kb)|TNFRSF21(+185.4kb)
6	47475339	rs9473123	A	G	0.261657	3	1.812e-05	1.812e-05	1.1575	1.1575	0.9458	0	1.1409	1.1726	1.1635	CD2AP(0)|GPR111(-149kb)|GPR115(-190.9kb)|TNFRSF21(+197.7kb)
5	176947153	rs337388	T	C	0.927102	2	1.814e-05	1.814e-05	0.6424	0.6424	0.4999	0	0.6009	0.6908	NA	B4GALT7(-79.96kb)|DBN1(+46.46kb)|DDX41(+3.186kb)|DOK3(+9.726kb)|F12(+110.6kb)|FAM193B(0)|GRK6(+77.3kb)|LMAN2(+168.3kb)|LOC202181(-98.35kb)|PDLIM7(+22.55kb)|PFN3(+119.5kb)|PRR7(+63.87kb)|PRR7-AS1(+72.21kb)|RGS14(+147.6kb)|SLC34A1(+121.3kb)|TMED9(-72.06kb)
6	47489104	rs6913202	G	A	0.256606	3	1.819e-05	1.819e-05	1.1576	1.1576	0.9585	0	1.143	1.1704	1.1632	CD2AP(0)|GPR111(-135.2kb)|GPR115(-177.2kb)
6	47461913	rs6931478	A	C	0.261272	3	1.82e-05	1.82e-05	1.1575	1.1575	0.9476	0	1.1415	1.1733	1.1625	CD2AP(0)|GPR111(-162.4kb)|TNFRSF21(+184.2kb)
6	47585106	rs9463342	T	A	0.260841	3	1.82e-05	1.82e-05	1.1576	1.1576	0.939	0	1.1397	1.1722	1.1655	CD2AP(0)|GPR111(-39.22kb)|GPR115(-81.18kb)|OPN5(-164.7kb)
6	47536444	rs34744382	T	C	0.261318	3	1.822e-05	1.822e-05	1.1574	1.1574	0.933	0	1.1389	1.1739	1.1646	CD2AP(0)|GPR111(-87.88kb)|GPR115(-129.8kb)
6	47551938	rs9349416	A	G	0.26118	3	1.825e-05	1.825e-05	1.1573	1.1573	0.9311	0	1.1385	1.1738	1.1649	CD2AP(0)|GPR111(-72.39kb)|GPR115(-114.4kb)|OPN5(-197.8kb)
4	33729812	rs7664540	A	G	0.122852	3	1.833e-05	1.833e-05	0.8005	0.8005	0.5894	0	0.7498	0.8405	0.8327	.
6	47516369	rs9367284	G	A	0.260964	3	1.834e-05	1.834e-05	1.1573	1.1573	0.9287	0	1.1382	1.1745	1.1645	CD2AP(0)|GPR111(-108kb)|GPR115(-149.9kb)
6	47483653	rs4715025	G	C	0.256514	3	1.835e-05	1.835e-05	1.1575	1.1575	0.9616	0	1.1437	1.1705	1.1623	CD2AP(0)|GPR111(-140.7kb)|GPR115(-182.6kb)
6	47514758	rs7774667	A	G	0.261287	3	1.836e-05	1.836e-05	1.1572	1.1572	0.9299	0	1.1383	1.1741	1.1646	CD2AP(0)|GPR111(-109.6kb)|GPR115(-151.5kb)
6	47559451	rs10456570	G	A	0.26121	3	1.836e-05	1.836e-05	1.1574	1.1574	0.9331	0	1.1387	1.1729	1.1655	CD2AP(0)|GPR111(-64.87kb)|GPR115(-106.8kb)|OPN5(-190.3kb)
6	47515663	rs2151975	C	T	0.26121	3	1.84e-05	1.84e-05	1.1573	1.1573	0.9311	0	1.1385	1.1741	1.1644	CD2AP(0)|GPR111(-108.7kb)|GPR115(-150.6kb)
4	70994634	rs1399249	T	C	0.732569	3	1.847e-05	5.71e-05	0.8581	0.8589	0.3285	10.16	0.8779	0.9176	0.8069	C4orf40(-25.27kb)|CSN1S1(+182.3kb)|CSN1S2AP(+43.65kb)|CSN1S2BP(-4.686kb)|CSN2(+167.9kb)|CSN3(-113.7kb)|FDCSP(-97.15kb)|HTN1(+70.08kb)|HTN3(+92.38kb)|ODAM(-67.61kb)|STATH(+126.5kb)
6	47514246	rs901186	A	T	0.261287	3	1.852e-05	1.852e-05	1.1572	1.1572	0.9298	0	1.1382	1.174	1.1646	CD2AP(0)|GPR111(-110.1kb)|GPR115(-152kb)
12	6644139	rs3741917	T	C	0.0184324	2	1.856e-05	0.005584	0.4861	0.5123	0.1973	39.84	0.4301	0.7149	NA	ACRBP(-103.1kb)|CD27(+83.26kb)|CD27-AS1(+83.46kb)|CHD4(-35.11kb)|COPS7A(-189kb)|GAPDH(0)|IFFO1(-4.554kb)|ING4(-115.6kb)|LPAR5(-83.86kb)|LTBR(+143.4kb)|MRPL51(+41.67kb)|NCAPD2(+3.007kb)|NOP2(-21.9kb)|PIANP(-158.8kb)|SCARNA10(+24.42kb)|SCARNA11(-46.5kb)|SCNN1A(+157.6kb)|TAPBPL(+72.65kb)|TNFRSF1A(+192.9kb)|VAMP1(+64.3kb)|ZNF384(-131.5kb)
4	33914418	rs10517298	G	T	0.111565	3	1.859e-05	1.859e-05	0.8	0.8	0.5313	0	0.7488	0.8069	0.8574	.
4	33869008	rs13131876	G	C	0.111026	3	1.865e-05	1.865e-05	0.7992	0.7992	0.5282	0	0.7481	0.8045	0.858	.
6	47487762	rs10948363	G	A	0.256514	3	1.868e-05	1.868e-05	1.1574	1.1574	0.9596	0	1.143	1.1701	1.1628	CD2AP(0)|GPR111(-136.6kb)|GPR115(-178.5kb)
4	33734690	rs1838401	T	C	0.122698	3	1.882e-05	1.882e-05	0.8007	0.8007	0.5815	0	0.7493	0.8406	0.8338	.
6	47568696	rs2396825	G	A	0.260964	3	1.883e-05	1.883e-05	1.1573	1.1573	0.9331	0	1.1386	1.173	1.1652	CD2AP(0)|GPR111(-55.63kb)|GPR115(-97.59kb)|OPN5(-181.1kb)
1	145590124	rs61816167	A	G	0.0303819	3	1.887e-05	1.887e-05	0.5884	0.5884	0.4783	0	0.5563	0.7425	0.5123	ANKRD34A(+114.5kb)|ANKRD35(+21.6kb)|CD160(-105.7kb)|GNRHR2(+74.05kb)|GPR89A(-174.5kb)|HFE2(+172.6kb)|ITGA10(+46.26kb)|LIX1L(+91.03kb)|LOC100288142(0)|NBPF10(0)|NUDT17(+0.689kb)|PDZK1(-137.5kb)|PEX11B(+66.39kb)|PIAS3(+3.578kb)|POLR3C(-2.48kb)|POLR3GL(+119.7kb)|RBM8A(+76.59kb)|RNF115(-20.86kb)|TXNIP(+147.5kb)
4	33739340	rs10034933	C	T	0.122729	3	1.911e-05	1.911e-05	0.8009	0.8009	0.576	0	0.749	0.8407	0.8346	.
4	33807703	rs58656292	A	G	0.132984	3	1.913e-05	1.913e-05	0.8033	0.8033	0.6843	0	0.7607	0.8249	0.8384	.
6	47485126	rs7767350	T	C	0.256529	3	1.914e-05	1.914e-05	1.1572	1.1572	0.9615	0	1.1434	1.1704	1.1617	CD2AP(0)|GPR111(-139.2kb)|GPR115(-181.2kb)
6	47505010	rs9473128	T	C	0.261334	3	1.915e-05	1.915e-05	1.1568	1.1568	0.9293	0	1.1377	1.1733	1.1646	CD2AP(0)|GPR111(-119.3kb)|GPR115(-161.3kb)
6	47480975	rs1872505	G	C	0.261241	3	1.917e-05	1.917e-05	1.157	1.157	0.9385	0	1.1391	1.1721	1.1644	CD2AP(0)|GPR111(-143.4kb)|GPR115(-185.3kb)
4	33867668	rs7693129	A	G	0.111226	3	1.918e-05	1.918e-05	0.7993	0.7993	0.522	0	0.7478	0.8043	0.8589	.
8	27451727	rs7817366	G	A	0.321913	3	1.922e-05	1.922e-05	1.1503	1.1503	0.4674	0	1.1699	1.0747	1.1854	CCDC25(-139.1kb)|CHRNA2(+114.9kb)|CLU(-2.706kb)|EPHX2(+49.29kb)|ESCO2(-180.3kb)|MIR3622A(-107.5kb)|MIR3622B(-107.5kb)|PTK2B(+134.8kb)|SCARA3(-39.85kb)
1	20816568	rs1144966	C	T	0.796581	3	1.924e-05	1.924e-05	1.1838	1.1838	0.3886	0	1.2441	1.2198	1.1049	CAMK2N1(+3.84kb)|CDA(-98.88kb)|DDOST(-161.7kb)|FAM43B(-62.36kb)|KIF17(-173.9kb)|LOC339505(+61.28kb)|MUL1(-9.372kb)|PINK1(-143.4kb)|VWA5B1(+135.2kb)
6	47503497	rs6904764	T	A	0.261334	3	1.929e-05	1.929e-05	1.1568	1.1568	0.9298	0	1.1377	1.1731	1.1646	CD2AP(0)|GPR111(-120.8kb)|GPR115(-162.8kb)
6	47515630	rs2151974	A	G	0.261503	3	1.933e-05	1.933e-05	1.1568	1.1568	0.9277	0	1.1369	1.1684	1.1685	CD2AP(0)|GPR111(-108.7kb)|GPR115(-150.7kb)
4	33901442	rs10031964	G	T	0.120927	3	1.938e-05	1.938e-05	0.8028	0.8028	0.5424	0	0.7487	0.8422	0.8399	.
4	33731149	rs28546199	A	C	0.11526	3	1.94e-05	1.94e-05	0.8007	0.8007	0.5999	0	0.7509	0.8405	0.8323	.
7	114804186	rs9691498	C	G	0.374207	3	1.941e-05	9.2e-05	0.872	0.8728	0.3102	14.57	0.8217	0.9266	0.889	MDFIC(+144.2kb)
8	27429649	rs1000108	T	C	0.324253	3	1.941e-05	7.72e-05	1.1492	1.1481	0.3178	12.77	1.166	1.0596	1.198	CCDC25(-161.2kb)|CHRNA2(+92.84kb)|CLU(-24.78kb)|EPHX2(+27.21kb)|MIR3622A(-129.5kb)|MIR3622B(-129.5kb)|PTK2B(+112.7kb)|SCARA3(-61.93kb)
6	47502024	rs7754282	C	G	0.261334	3	1.943e-05	1.943e-05	1.1567	1.1567	0.9297	0	1.1376	1.1729	1.1647	CD2AP(0)|GPR111(-122.3kb)|GPR115(-164.3kb)
4	33779769	rs28538874	G	A	0.116708	3	1.954e-05	1.954e-05	0.8013	0.8013	0.5685	0	0.749	0.8385	0.838	.
6	47525202	rs6931011	A	G	0.263212	3	1.955e-05	1.955e-05	1.1564	1.1564	0.8805	0	1.1314	1.1784	1.1664	CD2AP(0)|GPR111(-99.12kb)|GPR115(-141.1kb)
7	114834683	rs28391310	C	T	0.378565	3	1.975e-05	7.131e-05	0.8729	0.8735	0.321	11.99	0.823	0.9238	0.8926	MDFIC(+174.7kb)
5	176988487	rs72494547	G	C	0.0611334	2	1.979e-05	1.979e-05	1.5677	1.5677	0.8881	0	1.5901	1.5436	NA	B4GALT7(-38.63kb)|DBN1(+87.79kb)|DDX41(+44.52kb)|DOK3(+51.06kb)|F12(+151.9kb)|FAM153A(-161.9kb)|FAM193B(+6.939kb)|GRK6(+118.6kb)|LOC202181(-57.01kb)|PDLIM7(+63.88kb)|PFN3(+160.8kb)|PRR7(+105.2kb)|PRR7-AS1(+113.5kb)|RGS14(+188.9kb)|SLC34A1(+162.6kb)|TMED9(-30.72kb)
4	33803938	rs10015299	G	A	0.118109	3	1.98e-05	1.98e-05	0.8014	0.8014	0.5613	0	0.7485	0.8389	0.8386	.
4	33806368	rs10024171	T	A	0.116646	3	1.983e-05	1.983e-05	0.8013	0.8013	0.5726	0	0.7492	0.8351	0.8399	.
6	47488938	rs9296561	A	G	0.261303	3	1.984e-05	1.984e-05	1.1565	1.1565	0.9319	0	1.1376	1.1718	1.1649	CD2AP(0)|GPR111(-135.4kb)|GPR115(-177.4kb)
4	33837944	rs36051778	T	C	0.120619	3	2.025e-05	2.025e-05	0.8022	0.8022	0.5407	0	0.7477	0.8389	0.8418	.
10	65861658	rs79756774	G	A	0.0133662	2	2.027e-05	0.009558	0.4321	0.4186	0.0909	65.02	0.5762	0.294	NA	.
6	47494759	rs9296564	G	A	0.260979	3	2.028e-05	2.028e-05	1.1564	1.1564	0.9329	0	1.1377	1.1719	1.1645	CD2AP(0)|GPR111(-129.6kb)|GPR115(-171.5kb)
4	33732554	rs13142011	T	C	0.116739	3	2.03e-05	2.03e-05	0.8013	0.8013	0.6175	0	0.7527	0.839	0.8325	.
1	241334052	rs78943134	C	T	0.0134124	2	2.032e-05	0.004123	0.4786	0.4719	0.1315	56.04	0.6065	0.3591	NA	MIR3123(+38.41kb)|RGS7(0)
5	176978967	rs75192957	A	G	0.0601786	2	2.033e-05	2.033e-05	1.545	1.545	0.7064	0	1.6024	1.4836	NA	B4GALT7(-48.15kb)|DBN1(+78.27kb)|DDX41(+35kb)|DOK3(+41.54kb)|F12(+142.4kb)|FAM153A(-171.4kb)|FAM193B(0)|GRK6(+109.1kb)|LOC202181(-66.53kb)|PDLIM7(+54.36kb)|PFN3(+151.3kb)|PRR7(+95.68kb)|PRR7-AS1(+104kb)|RGS14(+179.4kb)|SLC34A1(+153.1kb)|TMED9(-40.24kb)
6	47580657	rs9349417	G	A	0.260949	3	2.034e-05	2.034e-05	1.1566	1.1566	0.9385	0	1.139	1.1727	1.1634	CD2AP(0)|GPR111(-43.67kb)|GPR115(-85.63kb)|OPN5(-169.1kb)
6	47580695	rs9381581	A	G	0.260964	3	2.035e-05	2.035e-05	1.1566	1.1566	0.9385	0	1.139	1.1727	1.1634	CD2AP(0)|GPR111(-43.63kb)|GPR115(-85.59kb)|OPN5(-169.1kb)
6	47493940	rs7749167	A	G	0.261318	3	2.042e-05	2.042e-05	1.1563	1.1563	0.9318	0	1.1374	1.1718	1.1645	CD2AP(0)|GPR111(-130.4kb)|GPR115(-172.3kb)
4	33735802	rs28760098	T	C	0.116708	3	2.058e-05	2.058e-05	0.8014	0.8014	0.6091	0	0.7521	0.8391	0.8335	.
6	47485002	rs7749271	C	T	0.261257	3	2.058e-05	2.058e-05	1.1563	1.1563	0.9372	0	1.1383	1.172	1.1633	CD2AP(0)|GPR111(-139.3kb)|GPR115(-181.3kb)
5	176986300	rs7734910	T	C	0.0595165	2	2.076e-05	2.076e-05	1.5633	1.5633	0.9199	0	1.5792	1.5462	NA	B4GALT7(-40.82kb)|DBN1(+85.61kb)|DDX41(+42.33kb)|DOK3(+48.87kb)|F12(+149.7kb)|FAM153A(-164.1kb)|FAM193B(+4.752kb)|GRK6(+116.4kb)|LOC202181(-59.2kb)|PDLIM7(+61.69kb)|PFN3(+158.7kb)|PRR7(+103kb)|PRR7-AS1(+111.4kb)|RGS14(+186.7kb)|SLC34A1(+160.5kb)|TMED9(-32.91kb)
8	47330737	rs113780660	A	T	0.0257006	2	2.084e-05	2.084e-05	2.1276	2.1276	0.9579	0	2.1517	2.1111	NA	.
20	4627047	rs11700363	T	C	0.0448568	3	2.088e-05	2.088e-05	1.407	1.407	0.8543	0	1.3271	1.4781	1.4389	PRND(-75.51kb)|PRNP(-39.75kb)|PRNT(-84.88kb)|RASSF2(-133.6kb)
4	33740421	rs67239693	A	C	0.111103	3	2.093e-05	2.093e-05	0.7998	0.7998	0.5781	0	0.7506	0.8105	0.8516	.
8	133361917	rs62520380	T	C	0.320557	3	2.108e-05	2.108e-05	1.1587	1.1587	0.4394	0	1.1426	1.2475	1.1177	KCNQ3(0)
5	176968540	rs2112472	T	C	0.0648907	2	2.148e-05	2.148e-05	1.5417	1.5417	0.6314	0	1.6155	1.4649	NA	B4GALT7(-58.58kb)|DBN1(+67.85kb)|DDX41(+24.57kb)|DOK3(+31.11kb)|F12(+132kb)|FAM153A(-181.8kb)|FAM193B(0)|GRK6(+98.69kb)|LMAN2(+189.7kb)|LOC202181(-76.96kb)|PDLIM7(+43.93kb)|PFN3(+140.9kb)|PRR7(+85.25kb)|PRR7-AS1(+93.6kb)|RGS14(+168.9kb)|SLC34A1(+142.7kb)|TMED9(-50.67kb)
4	33747192	rs7694226	C	T	0.114829	3	2.151e-05	2.151e-05	0.8013	0.8013	0.5779	0	0.7498	0.8472	0.8302	.
4	33854437	rs55878929	C	A	0.117216	3	2.156e-05	2.156e-05	0.8024	0.8024	0.5932	0	0.7521	0.8363	0.8391	.
13	52386280	rs12864768	A	C	0.0304435	3	2.161e-05	0.0001035	0.6841	0.6814	0.2968	17.69	0.8019	0.5727	0.6513	ATP7B(-120.5kb)|CCDC70(-49.84kb)|DHRS12(+7.982kb)|LINC00282(-1.202kb)|WDFY2(+50.11kb)
3	143097979	rs7650457	T	C	0.826471	3	2.166e-05	2.166e-05	0.8432	0.8432	0.9151	0	0.8587	0.8208	0.8431	SLC9A9(0)|SLC9A9-AS1(+32.07kb)
4	76639357	rs148172014	C	T	0.0203727	3	2.168e-05	2.168e-05	1.6379	1.6379	0.8824	0	1.6504	1.7756	1.536	C4orf26(+148.3kb)|CDKL2(+83.64kb)|G3BP2(+40.69kb)|NAAA(-192.4kb)|PPEF2(-141.7kb)|RCHY1(+199.7kb)|THAP6(+184.1kb)|USO1(-10.47kb)
4	33771909	rs6816408	T	C	0.132877	3	2.172e-05	2.172e-05	0.8047	0.8047	0.6913	0	0.7624	0.8374	0.8313	.
14	53232108	rs12434497	C	T	0.0465661	3	2.185e-05	2.185e-05	0.7248	0.7248	0.6976	0	0.6711	0.7815	0.7481	ERO1L(+69.69kb)|FERMT2(-91.88kb)|GNPNAT1(-9.802kb)|GPR137C(+127.7kb)|PSMC6(+37.39kb)|STYX(0)
5	176972147	rs28875175	T	C	0.0602248	2	2.187e-05	2.187e-05	1.5465	1.5465	0.6857	0	1.6087	1.4802	NA	B4GALT7(-54.97kb)|DBN1(+71.45kb)|DDX41(+28.18kb)|DOK3(+34.72kb)|F12(+135.6kb)|FAM153A(-178.2kb)|FAM193B(0)|GRK6(+102.3kb)|LMAN2(+193.3kb)|LOC202181(-73.35kb)|PDLIM7(+47.54kb)|PFN3(+144.5kb)|PRR7(+88.86kb)|PRR7-AS1(+97.2kb)|RGS14(+172.5kb)|SLC34A1(+146.3kb)|TMED9(-47.06kb)
5	176957126	rs1477296	C	T	0.0651832	2	2.196e-05	2.196e-05	1.5459	1.5459	0.574	0	1.6336	1.4554	NA	B4GALT7(-69.99kb)|DBN1(+56.43kb)|DDX41(+13.16kb)|DOK3(+19.7kb)|F12(+120.5kb)|FAM153A(-193.2kb)|FAM193B(0)|GRK6(+87.28kb)|LMAN2(+178.2kb)|LOC202181(-88.37kb)|PDLIM7(+32.52kb)|PFN3(+129.5kb)|PRR7(+73.84kb)|PRR7-AS1(+82.18kb)|RGS14(+157.5kb)|SLC34A1(+131.3kb)|TMED9(-62.09kb)
4	33798955	rs6847534	C	T	0.115799	3	2.204e-05	2.204e-05	0.8023	0.8023	0.5619	0	0.7493	0.8395	0.8397	.
6	33817929	rs4713693	C	T	0.450169	3	2.204e-05	2.204e-05	1.1405	1.1405	0.41	0	1.1009	1.2224	1.1285	GRM4(-171.7kb)|IP6K3(+103.2kb)|ITPR3(+153.6kb)|LEMD2(+61.02kb)|LOC100507584(-39.36kb)|MIR1275(-149.8kb)|MLN(+46.14kb)|MNF1(+138.4kb)
11	85839935	rs7114401	T	C	0.586634	3	2.21e-05	2.21e-05	1.1408	1.1408	0.9575	0	1.1515	1.1437	1.1277	C11orf73(-173.3kb)|EED(-115.9kb)|PICALM(+59.01kb)
15	79275466	rs28407629	A	G	0.0208192	3	2.213e-05	0.004567	1.5901	1.5485	0.1484	47.59	1.5153	1.1694	1.9477	ADAMTS7(+171.7kb)|CTSH(+38.05kb)|MORF4L1(+85.38kb)|RASGRF1(0)
4	33746376	rs13112341	G	A	0.11506	3	2.215e-05	2.215e-05	0.8015	0.8015	0.5919	0	0.7511	0.8465	0.8297	.
8	27450073	rs17057438	A	G	0.321497	3	2.258e-05	2.258e-05	1.1482	1.1482	0.4414	0	1.1695	1.0701	1.1833	CCDC25(-140.8kb)|CHRNA2(+113.3kb)|CLU(-4.36kb)|EPHX2(+47.63kb)|ESCO2(-182kb)|MIR3622A(-109.1kb)|MIR3622B(-109.1kb)|PTK2B(+133.2kb)|SCARA3(-41.5kb)
6	47595155	rs1385742	T	A	0.654835	3	2.264e-05	2.264e-05	0.8715	0.8715	0.9222	0	0.8747	0.8872	0.8582	CD2AP(+0.159kb)|GPR111(-29.17kb)|GPR115(-71.13kb)|OPN5(-154.6kb)
8	47638233	rs79564538	G	A	0.0189252	2	2.264e-05	2.264e-05	2.5585	2.5585	0.8137	0	2.7243	2.4496	NA	LINC00293(-114.3kb)
13	92574887	rs79136110	A	G	0.0177549	3	2.268e-05	2.268e-05	0.5967	0.5967	0.8054	0	0.6589	0.572	0.551	GPC5(0)
4	190112276	rs139125610	A	G	0.0602248	3	2.273e-05	2.273e-05	0.7582	0.7582	0.4805	0	0.8174	0.7737	0.6823	.
1	72045412	rs56017177	G	A	0.0371728	3	2.281e-05	0.004464	0.704	0.6902	0.0881	58.83	0.8426	0.5277	0.7057	NEGR1(0)
4	33835619	rs16995875	C	T	0.0940253	3	2.282e-05	2.282e-05	0.7873	0.7873	0.5581	0	0.7308	0.815	0.8356	.
7	12159827	rs35572431	A	G	0.111642	3	2.287e-05	0.000284	1.2192	1.2215	0.2549	26.85	1.3412	1.2259	1.122	TMEM106B(-91.02kb)
15	79277391	rs117481060	G	T	0.0204496	3	2.29e-05	0.004602	1.5895	1.5475	0.1492	47.44	1.5026	1.1734	1.9512	ADAMTS7(+173.6kb)|CTSH(+39.97kb)|MORF4L1(+87.31kb)|RASGRF1(0)
4	33741315	rs9996627	A	T	0.116954	3	2.295e-05	2.295e-05	0.8023	0.8023	0.5595	0	0.7492	0.847	0.8342	.
15	79277780	rs28368520	A	C	0.0204034	3	2.304e-05	0.004764	1.59	1.5473	0.1479	47.68	1.4999	1.1728	1.9535	ADAMTS7(+174kb)|CTSH(+40.36kb)|MORF4L1(+87.7kb)|RASGRF1(0)
8	47426618	rs112112167	A	C	0.026717	2	2.312e-05	2.312e-05	2.0711	2.0711	0.9245	0	2.0339	2.1017	NA	.
8	133368197	rs16904671	C	T	0.421882	3	2.317e-05	2.317e-05	0.876	0.876	0.5508	0	0.9079	0.8847	0.8401	KCNQ3(0)
20	4641650	rs11698202	T	G	0.0426702	3	2.317e-05	2.317e-05	1.4195	1.4195	0.743	0	1.3121	1.4409	1.5169	PRND(-60.9kb)|PRNP(-25.15kb)|PRNT(-70.28kb)|RASSF2(-119kb)|SLC23A2(-191.4kb)
4	33752222	rs7691401	G	C	0.111087	3	2.319e-05	2.319e-05	0.801	0.801	0.5742	0	0.7518	0.8109	0.8536	.
7	114672367	rs7790936	T	A	0.39595	3	2.32e-05	2.32e-05	0.8763	0.8763	0.418	0	0.8331	0.9198	0.8939	MDFIC(+12.4kb)
8	47453974	rs79392808	C	A	0.0267632	2	2.329e-05	2.329e-05	2.068	2.068	0.9366	0	2.0365	2.0933	NA	.
7	12157175	rs34213872	G	T	0.112026	3	2.33e-05	0.0003413	1.2189	1.2213	0.2461	28.67	1.3425	1.2253	1.1206	TMEM106B(-93.67kb)
4	33789961	rs13123502	T	C	0.115722	3	2.337e-05	2.337e-05	0.8026	0.8026	0.5523	0	0.7489	0.8389	0.8419	.
4	33728864	rs35922419	A	G	0.0939175	3	2.342e-05	2.342e-05	0.7569	0.7569	0.4909	0	0.6918	0.8396	0.7748	.
9	79585848	rs117623083	T	C	0.0143671	2	2.352e-05	0.0002428	0.5272	0.5288	0.2519	23.82	0.4486	NA	0.6352	FOXB2(-48.72kb)|PCA3(+183.4kb)|PRUNE2(+64.84kb)
9	104558585	rs118136220	A	G	0.0305359	3	2.358e-05	0.007736	0.6702	0.6675	0.0765	61.09	0.717	0.4955	0.8303	GRIN3A(+57.72kb)
8	27452044	rs7821500	G	T	0.321897	3	2.389e-05	2.389e-05	1.1485	1.1485	0.4932	0	1.1698	1.0752	1.1801	CCDC25(-138.8kb)|CHRNA2(+115.2kb)|CLU(-2.389kb)|EPHX2(+49.6kb)|ESCO2(-180kb)|MIR3622A(-107.1kb)|MIR3622B(-107.1kb)|PTK2B(+135.1kb)|SCARA3(-39.53kb)
4	33846831	rs7691370	C	T	0.129612	3	2.399e-05	2.399e-05	0.8038	0.8038	0.6049	0	0.7545	0.8331	0.8424	.
4	33745577	rs6858079	C	G	0.109008	3	2.401e-05	2.401e-05	0.8012	0.8012	0.5523	0	0.7503	0.8107	0.8559	.
4	33731801	rs28439288	T	C	0.097105	3	2.402e-05	2.402e-05	0.7893	0.7893	0.506	0	0.7333	0.8607	0.8047	.
9	109150272	rs7846958	G	A	0.052048	3	2.402e-05	2.402e-05	0.6844	0.6844	0.3862	0	0.6006	0.6868	0.8019	.
3	13084630	rs6764646	T	C	0.057838	3	2.439e-05	2.439e-05	0.7472	0.7472	0.8412	0	0.7824	0.7109	0.7325	IQSEC1(0)
5	176950823	rs28629788	C	G	0.0651371	2	2.439e-05	2.439e-05	1.5454	1.5454	0.5585	0	1.6374	1.4511	NA	B4GALT7(-76.3kb)|DBN1(+50.13kb)|DDX41(+6.856kb)|DOK3(+13.4kb)|F12(+114.2kb)|FAM153A(-199.5kb)|FAM193B(0)|GRK6(+80.97kb)|LMAN2(+171.9kb)|LOC202181(-94.68kb)|PDLIM7(+26.22kb)|PFN3(+123.2kb)|PRR7(+67.54kb)|PRR7-AS1(+75.88kb)|RGS14(+151.2kb)|SLC34A1(+125kb)|TMED9(-68.39kb)
20	12067997	rs6041082	G	T	0.837958	3	2.446e-05	2.446e-05	1.1964	1.1964	0.9518	0	1.206	1.1696	1.2056	BTBD3(+160.8kb)
9	112830219	rs539817	C	T	0.69866	3	2.449e-05	0.004624	0.8679	0.8713	0.126	51.73	0.7994	0.9506	0.8818	AKAP2(0)|C9orf152(-131.6kb)|PALM2(+116.5kb)|PALM2-AKAP2(0)|TXN(-175.9kb)
4	33746578	rs12640941	T	A	0.132815	3	2.457e-05	2.457e-05	0.8061	0.8061	0.6854	0	0.7632	0.8394	0.8327	.
4	33740758	rs16989196	C	T	0.115091	3	2.48e-05	2.48e-05	0.8029	0.8029	0.5888	0	0.7523	0.8485	0.8309	.
11	59857581	rs2583476	A	G	0.394657	3	2.483e-05	9.11e-05	0.8763	0.8769	0.319	12.48	0.8284	0.933	0.888	MS4A2(0)|MS4A3(+18.99kb)|MS4A4A(-190.4kb)|MS4A6A(-81.5kb)|PLAC1L(+42.06kb)
4	33740853	rs4395486	G	C	0.115091	3	2.484e-05	2.484e-05	0.8029	0.8029	0.5884	0	0.7523	0.8486	0.8309	.
5	176963333	rs74292777	C	G	0.0599476	2	2.485e-05	2.485e-05	1.5495	1.5495	0.6637	0	1.617	1.4771	NA	B4GALT7(-63.78kb)|DBN1(+62.64kb)|DDX41(+19.37kb)|DOK3(+25.91kb)|F12(+126.8kb)|FAM153A(-187kb)|FAM193B(0)|GRK6(+93.48kb)|LMAN2(+184.4kb)|LOC202181(-82.17kb)|PDLIM7(+38.73kb)|PFN3(+135.7kb)|PRR7(+80.05kb)|PRR7-AS1(+88.39kb)|RGS14(+163.7kb)|SLC34A1(+137.5kb)|TMED9(-55.88kb)
15	79285851	rs117499319	G	T	0.0208808	3	2.491e-05	0.004405	1.5806	1.5399	0.1537	46.61	1.4509	1.1969	1.9516	ADAMTS7(+182.1kb)|CTSH(+48.43kb)|LOC729911(-198.2kb)|MORF4L1(+95.77kb)|RASGRF1(0)
4	186797343	rs139128029	T	C	0.0405759	3	2.492e-05	0.000503	0.7169	0.7082	0.215	34.95	0.8134	0.5726	0.7109	SORBS2(0)|TLR3(-193kb)
7	114720096	rs427623	A	T	0.600955	3	2.493e-05	2.493e-05	1.14	1.14	0.4358	0	1.1996	1.0995	1.1084	MDFIC(+60.13kb)
7	114721177	rs2709474	A	C	0.600939	3	2.495e-05	2.495e-05	1.14	1.14	0.4384	0	1.1994	1.0998	1.1084	MDFIC(+61.21kb)
7	114672720	rs7791565	G	A	0.397552	3	2.496e-05	2.496e-05	0.8773	0.8773	0.437	0	0.8352	0.9193	0.8946	MDFIC(+12.75kb)
10	22820532	rs12355895	A	C	0.256144	3	2.497e-05	2.497e-05	0.8646	0.8646	0.5519	0	0.8719	0.8112	0.8936	LOC100499489(+93.67kb)|PIP4K2A(-3.233kb)|SPAG6(+114kb)
15	79286187	rs117369765	T	C	0.0208346	3	2.501e-05	0.004835	1.5806	1.539	0.1486	47.54	1.4522	1.1932	1.9549	ADAMTS7(+182.4kb)|CTSH(+48.77kb)|LOC729911(-197.9kb)|MORF4L1(+96.11kb)|RASGRF1(0)
7	114721780	rs388879	A	G	0.60097	3	2.508e-05	2.508e-05	1.14	1.14	0.4393	0	1.1993	1.0997	1.1085	MDFIC(+61.81kb)
7	114722105	rs602664	C	A	0.60097	3	2.512e-05	2.512e-05	1.14	1.14	0.4393	0	1.1993	1.0997	1.1085	MDFIC(+62.14kb)
14	53179701	rs143406075	C	G	0.0450724	3	2.528e-05	2.528e-05	0.7179	0.7179	0.9045	0	0.691	0.7549	0.7215	ERO1L(+17.28kb)|FERMT2(-144.3kb)|GNPNAT1(-62.21kb)|GPR137C(+75.27kb)|PSMC6(0)|STYX(-17.18kb)|TXNDC16(+160.4kb)
5	176948121	rs3805550	T	G	0.0650908	2	2.531e-05	2.531e-05	1.5459	1.5459	0.5538	0	1.6393	1.4502	NA	B4GALT7(-79kb)|DBN1(+47.43kb)|DDX41(+4.154kb)|DOK3(+10.69kb)|F12(+111.5kb)|FAM193B(0)|GRK6(+78.27kb)|LMAN2(+169.2kb)|LOC202181(-97.38kb)|PDLIM7(+23.52kb)|PFN3(+120.5kb)|PRR7(+64.83kb)|PRR7-AS1(+73.18kb)|RGS14(+148.5kb)|SLC34A1(+122.3kb)|TMED9(-71.09kb)
4	33827852	rs35698610	G	A	0.0936095	3	2.534e-05	2.534e-05	0.7884	0.7884	0.5548	0	0.7313	0.8226	0.8331	.
17	43857449	rs145447536	T	C	0.0126578	2	2.539e-05	2.539e-05	0.4045	0.4045	0.8882	0	0.3946	0.4197	NA	CRHR1(0)|CRHR1-IT1(+133.9kb)|LOC644172(+177.7kb)|MAPT(-114.3kb)|MAPT-AS1(-63.27kb)|MAPT-IT1(-115.7kb)|MGC57346(+142.1kb)|SPPL2C(-64.81kb)
20	4642180	rs11696732	G	A	0.0429011	3	2.546e-05	2.546e-05	1.4179	1.4179	0.7643	0	1.3107	1.4755	1.4922	PRND(-60.38kb)|PRNP(-24.62kb)|PRNT(-69.75kb)|RASSF2(-118.5kb)|SLC23A2(-190.8kb)
7	114672627	rs7791536	T	C	0.397521	3	2.554e-05	2.554e-05	0.8774	0.8774	0.4413	0	0.8355	0.9188	0.895	MDFIC(+12.66kb)
8	47383031	rs147227136	G	A	0.0184786	2	2.575e-05	2.575e-05	2.6385	2.6385	0.8545	0	2.7802	2.5498	NA	.
1	151805389	rs74960752	T	C	0.0584232	3	2.578e-05	0.0001872	0.7364	0.7344	0.2766	22.18	0.778	0.6122	0.8072	C2CD4D(-4.949kb)|CELF3(+116.1kb)|LINGO4(+27.51kb)|LOC100132111(-5.555kb)|MRPL9(+69.35kb)|NBPF18P(-185.4kb)|OAZ3(+61.58kb)|RIIAD1(+103.3kb)|RORC(+1.041kb)|S100A10(-150kb)|S100A11(-199.6kb)|SNX27(+133.8kb)|TDRKH(+42.38kb)|THEM4(-37.95kb)|THEM5(-14.19kb)
4	33812235	rs10010838	A	G	0.131722	3	2.578e-05	2.578e-05	0.8057	0.8057	0.7103	0	0.7648	0.8298	0.837	.
8	47471871	rs118040117	A	G	0.0183862	2	2.583e-05	2.583e-05	2.598	2.598	0.7043	0	2.8906	2.4236	NA	.
6	169003677	rs79915039	A	G	0.0232214	3	2.589e-05	0.001224	0.6459	0.6401	0.1783	42.01	0.6349	0.4847	0.8097	SMOC2(0)
7	114818842	rs35612060	T	C	0.377856	3	2.598e-05	0.0001631	0.8743	0.8753	0.2965	17.74	0.8235	0.9308	0.8905	MDFIC(+158.9kb)
3	149438385	rs147142329	C	T	0.0157376	2	2.615e-05	0.06423	0.3918	0.3649	0.0157	82.85	0.6201	0.2085	NA	ANKUB1(-40.5kb)|COMMD2(-17.87kb)|RNF13(-92.09kb)|WWTR1(+17.32kb)|WWTR1-AS1(+59.24kb)
15	79284922	rs117513043	T	C	0.0207422	3	2.623e-05	0.003656	1.5788	1.5404	0.165	44.5	1.4485	1.2029	1.9426	ADAMTS7(+181.1kb)|CTSH(+47.5kb)|LOC729911(-199.1kb)|MORF4L1(+94.84kb)|RASGRF1(0)
7	114672366	rs7790935	T	A	0.395966	3	2.625e-05	2.625e-05	0.8771	0.8771	0.427	0	0.8342	0.9192	0.8953	MDFIC(+12.4kb)
11	59865671	rs2847655	C	T	0.389975	3	2.63e-05	4.598e-05	0.8767	0.8769	0.3474	5.43	0.8275	0.92	0.8991	MS4A2(0)|MS4A3(+27.08kb)|MS4A4A(-182.3kb)|MS4A6A(-73.41kb)|PLAC1L(+50.16kb)
15	79276523	rs28722773	T	C	0.020465	3	2.635e-05	0.004349	1.5845	1.5447	0.1552	46.32	1.5063	1.1714	1.9397	ADAMTS7(+172.8kb)|CTSH(+39.1kb)|MORF4L1(+86.44kb)|RASGRF1(0)
4	33863306	rs13120706	C	T	0.118201	3	2.639e-05	2.639e-05	0.8044	0.8044	0.5704	0	0.7521	0.8388	0.843	.
4	190113615	rs114658031	T	C	0.0583616	3	2.645e-05	2.645e-05	0.7584	0.7584	0.5056	0	0.8203	0.7643	0.6872	.
1	201964389	rs61821541	A	G	0.0897444	3	2.651e-05	2.651e-05	0.7688	0.7688	0.7094	0	0.8143	0.7149	0.7572	ARL8A(-138.1kb)|ELF3(-15.3kb)|GPR37L1(-127.6kb)|IPO9(+111kb)|LGR6(-198.7kb)|LMOD1(+48.67kb)|MIR1231(+186.6kb)|NAV1(+168.3kb)|PTPN7(-151.8kb)|PTPRVP(-172.8kb)|RNPEP(0)|RNU6-79P(+196.6kb)|SHISA4(+102.7kb)|TIMM17A(+24.6kb)
4	33738654	rs10018438	A	G	0.115291	3	2.657e-05	2.657e-05	0.8044	0.8044	0.5764	0	0.7524	0.8424	0.8396	.
4	33738740	rs10034321	G	T	0.11526	3	2.661e-05	2.661e-05	0.8044	0.8044	0.5764	0	0.7524	0.8424	0.8396	.
19	13953120	rs7250028	G	T	0.242932	3	2.661e-05	0.0003089	1.1788	1.1774	0.2657	24.56	1.0871	1.1775	1.2629	C19orf53(+63.53kb)|C19orf57(-40.05kb)|CC2D1A(-63.84kb)|CCDC130(+79.01kb)|DCAF15(-110.2kb)|IL27RA(-189.4kb)|LOC284454(+6.017kb)|MIR23A(+5.647kb)|MIR24-2(+5.947kb)|MIR27A(+5.789kb)|MIR181C(-32.39kb)|MIR181D(-32.57kb)|MRI1(+68.02kb)|NANOS3(-34.94kb)|PODNL1(-88.88kb)|RFX1(-119.2kb)|RLN3(-185.9kb)|ZSWIM4(+10.08kb)
3	128405522	rs142033455	T	C	0.0142901	2	2.688e-05	0.03121	0.527	0.5402	0.0627	71.12	0.4099	NA	0.7263	ACAD9(-192.8kb)|C3orf27(+110.6kb)|GATA2(+193.5kb)|LOC90246(+176.1kb)|LOC653712(-174.8kb)|RAB7A(-39.46kb)|RPN1(+35.8kb)
8	934539	rs2654014	A	G	0.272498	3	2.69e-05	2.69e-05	1.1592	1.1592	0.6563	0	1.1466	1.224	1.1299	ERICH1-AS1(0)
5	176936590	rs2112181	C	T	0.0649831	2	2.695e-05	2.695e-05	1.5554	1.5554	0.4861	0	1.6698	1.442	NA	B4GALT7(-90.53kb)|DBN1(+35.9kb)|DDX41(-1.987kb)|DOK3(0)|F12(+100kb)|FAM193B(-10.2kb)|GRK6(+66.74kb)|LMAN2(+157.7kb)|LOC202181(-108.9kb)|MXD3(+197.3kb)|PDLIM7(+11.98kb)|PFN3(+109kb)|PRR7(+53.3kb)|PRR7-AS1(+61.64kb)|RGS14(+137kb)|SLC34A1(+110.7kb)|TMED9(-82.62kb)
20	4682332	rs41279422	T	C	0.0215738	3	2.707e-05	2.707e-05	1.6928	1.6928	0.5463	0	1.949	1.82	1.4301	PRND(-20.22kb)|PRNP(+0.098kb)|PRNT(-29.6kb)|RASSF2(-78.34kb)|SLC23A2(-150.7kb)
1	20818115	rs1152985	G	A	0.786295	3	2.709e-05	2.709e-05	1.1789	1.1789	0.5325	0	1.2273	1.2072	1.1142	CAMK2N1(+5.387kb)|CDA(-97.33kb)|DDOST(-160.1kb)|FAM43B(-60.82kb)|KIF17(-172.4kb)|LOC339505(+62.83kb)|MUL1(-7.825kb)|PINK1(-141.8kb)|VWA5B1(+136.7kb)
13	51869401	rs17194886	T	C	0.0584848	3	2.748e-05	2.748e-05	0.7521	0.7521	0.5507	0	0.8123	0.6766	0.748	FAM124A(+11.02kb)|INTS6(-66.3kb)|INTS6-AS1(-158.1kb)|LINC00371(+122.9kb)|MIR5693(-53.3kb)|SERPINE3(-45.77kb)
10	12616233	rs2815615	C	A	0.413874	3	2.759e-05	0.0005147	1.142	1.1413	0.2405	29.82	1.2219	1.1155	1.0847	CAMK1D(0)|MIR4480(-4.518kb)
8	47459136	rs113706192	G	A	0.0268864	2	2.786e-05	2.786e-05	2.0552	2.0552	0.9485	0	2.0298	2.0757	NA	.
5	176988223	rs113051847	T	A	0.0538497	2	2.832e-05	2.832e-05	1.5633	1.5633	0.9969	0	1.5627	1.564	NA	B4GALT7(-38.9kb)|DBN1(+87.53kb)|DDX41(+44.26kb)|DOK3(+50.8kb)|F12(+151.6kb)|FAM153A(-162.1kb)|FAM193B(+6.675kb)|GRK6(+118.4kb)|LOC202181(-57.28kb)|PDLIM7(+63.62kb)|PFN3(+160.6kb)|PRR7(+104.9kb)|PRR7-AS1(+113.3kb)|RGS14(+188.6kb)|SLC34A1(+162.4kb)|TMED9(-30.99kb)
11	85849094	rs11234554	G	C	0.544472	3	2.841e-05	2.841e-05	1.1369	1.1369	0.7389	0	1.1479	1.1704	1.1038	C11orf73(-164.2kb)|EED(-106.7kb)|PICALM(+68.17kb)
12	71085597	rs17108605	G	A	0.0343856	3	2.847e-05	2.847e-05	0.6943	0.6943	0.7593	0	0.7345	0.7048	0.6322	PTPRB(+54.38kb)|PTPRR(0)
5	176937339	rs2279397	T	A	0.0649369	2	2.854e-05	2.854e-05	1.551	1.551	0.4989	0	1.6609	1.4411	NA	B4GALT7(-89.78kb)|DBN1(+36.64kb)|DDX41(-1.238kb)|DOK3(0)|F12(+100.8kb)|FAM193B(-9.45kb)|GRK6(+67.49kb)|LMAN2(+158.5kb)|LOC202181(-108.2kb)|MXD3(+198kb)|PDLIM7(+12.73kb)|PFN3(+109.7kb)|PRR7(+54.05kb)|PRR7-AS1(+62.39kb)|RGS14(+137.7kb)|SLC34A1(+111.5kb)|TMED9(-81.87kb)
4	33826260	rs34229754	T	A	0.0935017	3	2.861e-05	2.861e-05	0.7898	0.7898	0.5331	0	0.7309	0.8228	0.8376	.
6	55007551	rs9475165	C	T	0.226856	3	2.863e-05	2.863e-05	0.8603	0.8603	0.9446	0	0.8728	0.8472	0.8553	FAM83B(+197.7kb)|GFRAL(-184.7kb)|HCRTR2(-31.52kb)
15	79273244	rs28546944	T	C	0.0204342	3	2.875e-05	0.005244	1.5805	1.54	0.1468	47.89	1.5156	1.1598	1.9362	ADAMTS7(+169.5kb)|CTSH(+35.82kb)|MORF4L1(+83.16kb)|RASGRF1(0)
2	127893897	rs745717	C	G	0.088805	3	2.879e-05	0.0004151	1.2582	1.2617	0.2398	29.98	1.1378	1.4425	1.2514	BIN1(+28.99kb)|CYP27C1(-47.51kb)|ERCC3(-121kb)|MAP3K2(-162.3kb)
4	33866184	rs67724268	G	A	0.116985	3	2.897e-05	2.897e-05	0.8054	0.8054	0.5531	0	0.7516	0.8438	0.8428	.
4	33863879	rs10010176	T	C	0.11697	3	2.904e-05	2.904e-05	0.8053	0.8053	0.5528	0	0.7515	0.8436	0.8429	.
4	33827835	rs35069317	G	A	0.0934709	3	2.918e-05	2.918e-05	0.79	0.79	0.5312	0	0.7309	0.8228	0.8381	.
7	114683661	rs2709492	T	C	0.601863	3	2.921e-05	2.921e-05	1.1384	1.1384	0.4595	0	1.1948	1.0912	1.1145	MDFIC(+23.69kb)
7	114673180	rs7792333	T	C	0.39749	3	2.927e-05	2.927e-05	0.8783	0.8783	0.4357	0	0.8358	0.919	0.8969	MDFIC(+13.21kb)
5	16704806	rs3860136	A	G	0.241577	3	2.928e-05	2.928e-05	1.1615	1.1615	0.3741	0	1.1745	1.2505	1.0999	FAM134B(+87.64kb)|MYO10(0)
20	4631476	rs11699537	A	G	0.0436865	3	2.93e-05	2.93e-05	1.4004	1.4004	0.8973	0	1.3321	1.4433	1.4385	PRND(-71.08kb)|PRNP(-35.32kb)|PRNT(-80.45kb)|RASSF2(-129.2kb)
4	33828803	rs13149722	G	C	0.0939483	3	2.938e-05	2.938e-05	0.7899	0.7899	0.5271	0	0.7305	0.8227	0.8386	.
4	33883366	rs10008587	C	T	0.129227	3	2.94e-05	2.94e-05	0.8066	0.8066	0.6202	0	0.7583	0.8402	0.8404	.
4	33828610	rs13114401	G	T	0.0935325	3	2.947e-05	2.947e-05	0.7901	0.7901	0.5305	0	0.731	0.823	0.8383	.
11	59859609	rs2847667	T	C	0.388682	3	2.959e-05	5.453e-05	0.8776	0.8779	0.3451	6	0.8287	0.9235	0.8978	MS4A2(0)|MS4A3(+21.02kb)|MS4A4A(-188.4kb)|MS4A6A(-79.47kb)|PLAC1L(+44.09kb)
8	133364187	rs9297846	G	T	0.444241	3	2.964e-05	2.964e-05	0.8789	0.8789	0.5791	0	0.9067	0.8921	0.8439	KCNQ3(0)
4	33868659	rs13129585	T	G	0.117185	3	2.968e-05	2.968e-05	0.8059	0.8059	0.5584	0	0.7525	0.8443	0.8426	.
4	33829135	rs66577325	T	C	0.0934555	3	2.985e-05	2.985e-05	0.7902	0.7902	0.5297	0	0.731	0.8229	0.8386	.
8	133373779	rs4736576	G	A	0.444102	3	2.986e-05	2.986e-05	0.879	0.879	0.6129	0	0.9047	0.8924	0.8456	HPYR1(-199kb)|KCNQ3(0)
19	13955161	rs12162265	A	G	0.236788	3	2.997e-05	0.0002267	1.1786	1.1773	0.2846	20.44	1.0894	1.1748	1.2617	C19orf53(+65.58kb)|C19orf57(-38.01kb)|CC2D1A(-61.79kb)|CCDC130(+81.06kb)|DCAF15(-108.2kb)|IL27RA(-187.4kb)|LOC284454(+8.058kb)|MIR23A(+7.688kb)|MIR24-2(+7.988kb)|MIR27A(+7.83kb)|MIR181C(-30.35kb)|MIR181D(-30.53kb)|MRI1(+70.06kb)|NANOS3(-32.9kb)|PODNL1(-86.84kb)|RFX1(-117.2kb)|RLN3(-183.9kb)|ZSWIM4(+12.12kb)
4	33775637	rs28620007	A	T	0.121851	3	3.01e-05	3.01e-05	0.7994	0.7994	0.686	0	0.7559	0.8161	0.8398	.
4	33814838	rs6835901	C	T	0.125531	3	3.011e-05	3.011e-05	0.8056	0.8056	0.5564	0	0.7519	0.8399	0.8455	.
7	114727332	rs969916	C	A	0.573098	3	3.018e-05	3.018e-05	1.1383	1.1383	0.6319	0	1.1824	1.1105	1.1132	MDFIC(+67.36kb)
5	176956226	rs77001462	T	C	0.0602248	2	3.028e-05	3.028e-05	1.5442	1.5442	0.6275	0	1.6198	1.4638	NA	B4GALT7(-70.89kb)|DBN1(+55.53kb)|DDX41(+12.26kb)|DOK3(+18.8kb)|F12(+119.6kb)|FAM153A(-194.1kb)|FAM193B(0)|GRK6(+86.38kb)|LMAN2(+177.3kb)|LOC202181(-89.27kb)|PDLIM7(+31.62kb)|PFN3(+128.6kb)|PRR7(+72.94kb)|PRR7-AS1(+81.28kb)|RGS14(+156.6kb)|SLC34A1(+130.4kb)|TMED9(-62.99kb)
11	99482548	rs139898878	T	A	0.0106868	2	3.031e-05	0.09876	0.4959	0.5471	0.0414	75.96	0.3912	0.8144	NA	CNTN5(0)
9	7480472	rs2986278	G	T	0.394441	3	3.038e-05	3.038e-05	0.8781	0.8781	0.9763	0	0.8787	0.8683	0.8838	.
3	197304904	rs7610849	A	T	0.0915922	2	3.047e-05	0.0001051	0.6959	0.6972	0.2861	12.1	0.6431	0.776	NA	BDH1(+4.71kb)|FYTTD1(-171.5kb)|KIAA0226(-93.35kb)|LOC220729(-35.99kb)|MIR922(-96.46kb)
8	133373599	rs4736575	G	A	0.444041	3	3.05e-05	3.05e-05	0.8791	0.8791	0.6079	0	0.9051	0.8924	0.8454	HPYR1(-199.1kb)|KCNQ3(0)
10	127869726	rs7078367	T	C	0.0252541	3	3.055e-05	3.055e-05	0.6183	0.6183	0.6553	0	0.6691	0.5199	0.6437	ADAM12(0)|FANK1(+171.6kb)
11	85845045	rs4944560	G	A	0.552495	3	3.059e-05	3.059e-05	1.1364	1.1364	0.5048	0	1.1439	1.1954	1.0906	C11orf73(-168.2kb)|EED(-110.8kb)|PICALM(+64.12kb)
11	85850243	rs3844143	T	C	0.506113	3	3.068e-05	3.068e-05	1.1357	1.1357	0.6322	0	1.1116	1.1938	1.122	C11orf73(-163kb)|EED(-105.6kb)|PICALM(+69.32kb)
4	43393351	rs71610065	T	C	0.0417	3	3.073e-05	8.428e-05	1.4219	1.4195	0.3295	9.92	1.3348	1.2396	1.655	.
4	33881411	rs6857201	C	T	0.129381	3	3.091e-05	3.091e-05	0.8068	0.8068	0.6077	0	0.7574	0.8393	0.8427	.
11	59859576	rs2847666	G	A	0.388728	3	3.094e-05	5.184e-05	0.8778	0.8781	0.3487	5.09	0.8292	0.9238	0.8977	MS4A2(0)|MS4A3(+20.99kb)|MS4A4A(-188.4kb)|MS4A6A(-79.5kb)|PLAC1L(+44.06kb)
8	15349876	rs17577076	G	C	0.0164459	3	3.129e-05	3.129e-05	0.625	0.625	0.3994	0	0.6082	0.5111	0.7618	TUSC3(-47.72kb)
19	45381292	rs150639620	T	G	0.0551124	3	3.138e-05	3.138e-05	0.6839	0.6839	0.7221	0	0.696	0.7484	0.6222	APOC1(-36.63kb)|APOC1P1(-48.77kb)|APOC2(-67.95kb)|APOC4(-64.2kb)|APOC4-APOC2(-64.2kb)|APOE(-27.75kb)|BCAM(+56.61kb)|BCL3(+118kb)|CBLC(+77.39kb)|CEACAM16(+167.3kb)|CEACAM19(+193.7kb)|CLASRP(-161kb)|CLPTM1(-76.55kb)|PVRL2(0)|RELB(-123.4kb)|TOMM40(-13.18kb)|ZNF296(-193.5kb)
6	169004133	rs73789145	A	G	0.0243148	3	3.139e-05	0.003055	0.649	0.6406	0.1288	51.2	0.6479	0.4706	0.8217	SMOC2(0)
15	55384349	rs75282705	C	A	0.0418386	3	3.145e-05	3.145e-05	1.3968	1.3968	0.4614	0	1.5925	1.3936	1.2637	RAB27A(-110.8kb)|RSL24D1(-89.16kb)
15	79272450	rs28651192	A	G	0.0204034	3	3.146e-05	0.005639	1.5769	1.5363	0.1451	48.19	1.5117	1.1566	1.9333	ADAMTS7(+168.7kb)|CTSH(+35.03kb)|MORF4L1(+82.37kb)|RASGRF1(0)
5	176935159	rs76251313	C	T	0.0600092	2	3.161e-05	3.161e-05	1.5646	1.5646	0.5295	0	1.6695	1.4581	NA	B4GALT7(-91.96kb)|DBN1(+34.46kb)|DDX41(-3.418kb)|DOK3(0)|F12(+98.58kb)|FAM193B(-11.63kb)|GRK6(+65.31kb)|LMAN2(+156.3kb)|LOC202181(-110.3kb)|MXD3(+195.9kb)|PDLIM7(+10.55kb)|PFN3(+107.5kb)|PRR7(+51.87kb)|PRR7-AS1(+60.21kb)|RGS14(+135.6kb)|SLC34A1(+109.3kb)|TMED9(-84.05kb)
7	12154419	rs62433253	A	G	0.111888	3	3.17e-05	0.0003004	1.2147	1.2167	0.2648	24.74	1.3359	1.2173	1.1204	TMEM106B(-96.43kb)
19	13954336	rs2594713	C	A	0.240129	3	3.174e-05	0.0003429	1.1771	1.1756	0.2673	24.2	1.0872	1.1712	1.2626	C19orf53(+64.75kb)|C19orf57(-38.83kb)|CC2D1A(-62.62kb)|CCDC130(+80.23kb)|DCAF15(-109kb)|IL27RA(-188.2kb)|LOC284454(+7.233kb)|MIR23A(+6.863kb)|MIR24-2(+7.163kb)|MIR27A(+7.005kb)|MIR181C(-31.18kb)|MIR181D(-31.35kb)|MRI1(+69.24kb)|NANOS3(-33.73kb)|PODNL1(-87.66kb)|RFX1(-118kb)|RLN3(-184.7kb)|ZSWIM4(+11.29kb)
7	114681206	rs2520598	C	A	0.601371	3	3.175e-05	3.175e-05	1.1377	1.1377	0.443	0	1.1958	1.0917	1.1113	MDFIC(+21.24kb)
15	79272427	rs28547879	A	G	0.0204188	3	3.179e-05	0.005678	1.5764	1.5357	0.145	48.21	1.5109	1.1563	1.9328	ADAMTS7(+168.7kb)|CTSH(+35.01kb)|MORF4L1(+82.35kb)|RASGRF1(0)
8	124165850	rs10481150	T	G	0.328934	3	3.184e-05	3.184e-05	1.145	1.145	0.5014	0	1.1396	1.2186	1.1048	ATAD2(-166.2kb)|C8orf76(-66.34kb)|DERL1(+111.2kb)|FAM83A(-28.9kb)|FAM83A-AS1(-47.56kb)|MIR4663(-62.18kb)|TBC1D31(+1.458kb)|ZHX1(-94.84kb)|ZHX1-C8ORF76(-72.58kb)|ZHX2(+179.1kb)
4	33766824	rs12643668	G	C	0.118109	3	3.185e-05	3.185e-05	0.8063	0.8063	0.5518	0	0.7523	0.8441	0.8443	.
4	76596574	rs116061213	C	G	0.0143825	3	3.185e-05	3.185e-05	1.6975	1.6975	0.5463	0	1.8456	1.9786	1.4467	C4orf26(+105.5kb)|CDKL2(+40.85kb)|G3BP2(0)|PPEF2(-184.5kb)|RCHY1(+156.9kb)|THAP6(+141.3kb)|USO1(-53.25kb)
8	27435201	rs4352801	C	T	0.417093	3	3.185e-05	3.185e-05	1.1377	1.1377	0.7447	0	1.13	1.1017	1.1696	CCDC25(-155.6kb)|CHRNA2(+98.39kb)|CLU(-19.23kb)|EPHX2(+32.76kb)|ESCO2(-196.9kb)|MIR3622A(-124kb)|MIR3622B(-124kb)|PTK2B(+118.3kb)|SCARA3(-56.38kb)
4	33766164	rs1373493	T	C	0.118124	3	3.199e-05	3.199e-05	0.8064	0.8064	0.5522	0	0.7524	0.8442	0.8443	.
7	12154227	rs35170219	C	T	0.111903	3	3.213e-05	0.000307	1.2146	1.2166	0.2642	24.87	1.3358	1.2173	1.1201	TMEM106B(-96.62kb)
5	176936819	rs3749728	G	C	0.0649215	2	3.218e-05	3.218e-05	1.5504	1.5504	0.4723	0	1.6676	1.4328	NA	B4GALT7(-90.3kb)|DBN1(+36.12kb)|DDX41(-1.758kb)|DOK3(0)|F12(+100.2kb)|FAM193B(-9.97kb)|GRK6(+66.97kb)|LMAN2(+157.9kb)|LOC202181(-108.7kb)|MXD3(+197.5kb)|PDLIM7(+12.21kb)|PFN3(+109.2kb)|PRR7(+53.53kb)|PRR7-AS1(+61.87kb)|RGS14(+137.2kb)|SLC34A1(+111kb)|TMED9(-82.39kb)
20	9683141	rs74489981	T	C	0.0137512	2	3.235e-05	3.235e-05	0.4648	0.4648	0.4506	0	0.415	0.5513	NA	LAMP5(+172kb)|PAK7(0)
11	59862261	rs2847668	T	A	0.399322	3	3.249e-05	9.334e-05	0.8784	0.8789	0.3276	10.39	0.8312	0.9343	0.8901	MS4A2(0)|MS4A3(+23.67kb)|MS4A4A(-185.8kb)|MS4A6A(-76.82kb)|PLAC1L(+46.74kb)
4	33745441	rs13111438	C	T	0.118063	3	3.259e-05	3.259e-05	0.8066	0.8066	0.5544	0	0.7527	0.8448	0.8439	.
11	59861983	rs2070970	T	C	0.39943	3	3.264e-05	9.446e-05	0.8784	0.879	0.3273	10.47	0.8311	0.9342	0.8903	MS4A2(0)|MS4A3(+23.4kb)|MS4A4A(-186kb)|MS4A6A(-77.1kb)|PLAC1L(+46.47kb)
8	46913606	rs117011973	C	G	0.0259316	2	3.268e-05	3.268e-05	2.1964	2.1964	0.8689	0	2.1199	2.2578	NA	.
11	85823324	rs631611	T	C	0.540176	3	3.268e-05	3.268e-05	1.1355	1.1355	0.4542	0	1.1399	1.2013	1.0883	C11orf73(-189.9kb)|CCDC83(+192.3kb)|EED(-132.5kb)|PICALM(+42.4kb)
4	33780462	rs10517294	C	T	0.0907607	3	3.277e-05	3.277e-05	0.7904	0.7904	0.55	0	0.7329	0.8232	0.8372	.
4	33840198	rs2166109	G	A	0.0934401	3	3.282e-05	3.282e-05	0.7908	0.7908	0.522	0	0.731	0.823	0.8408	.
19	13954633	rs2607276	G	T	0.242947	3	3.297e-05	0.0002208	1.1768	1.1756	0.2895	19.33	1.09	1.1697	1.2601	C19orf53(+65.05kb)|C19orf57(-38.53kb)|CC2D1A(-62.32kb)|CCDC130(+80.53kb)|DCAF15(-108.7kb)|IL27RA(-187.9kb)|LOC284454(+7.53kb)|MIR23A(+7.16kb)|MIR24-2(+7.46kb)|MIR27A(+7.302kb)|MIR181C(-30.88kb)|MIR181D(-31.06kb)|MRI1(+69.54kb)|NANOS3(-33.43kb)|PODNL1(-87.37kb)|RFX1(-117.7kb)|RLN3(-184.4kb)|ZSWIM4(+11.59kb)
3	70242154	rs6549297	T	G	0.574007	3	3.3e-05	3.3e-05	0.8799	0.8799	0.4295	0	0.8649	0.9448	0.8562	.
9	104510066	rs141365357	C	T	0.0206806	3	3.303e-05	3.303e-05	0.5954	0.5954	0.7728	0	0.6336	0.5154	0.6253	GRIN3A(+9.204kb)|PPP3R2(+152.8kb)|RNF20(+184.4kb)
7	9021130	rs12702824	G	C	0.13032	3	3.306e-05	0.001601	0.8122	0.8135	0.1863	40.49	0.8583	0.884	0.7173	.
4	33850102	rs13102670	A	G	0.0933323	3	3.316e-05	3.316e-05	0.7912	0.7912	0.4982	0	0.7294	0.825	0.8426	.
15	79271725	rs28738778	C	G	0.0204188	3	3.335e-05	0.005904	1.5741	1.5334	0.1441	48.39	1.5076	1.1549	1.9313	ADAMTS7(+168kb)|CTSH(+34.3kb)|MORF4L1(+81.64kb)|RASGRF1(0)
11	59923508	rs983392	G	A	0.385248	3	3.357e-05	3.357e-05	0.8782	0.8782	0.3703	0	0.8297	0.9151	0.9041	MS4A2(+57.57kb)|MS4A3(+84.92kb)|MS4A4A(-124.5kb)|MS4A6A(-15.57kb)|MS4A6E(-178.8kb)|PLAC1L(+108kb)
8	133379521	rs9656994	G	A	0.443132	3	3.362e-05	3.362e-05	0.8797	0.8797	0.6156	0	0.9056	0.8924	0.8464	HPYR1(-193.2kb)|KCNQ3(0)
4	33741934	rs35639548	A	G	0.0908685	3	3.371e-05	3.371e-05	0.7907	0.7907	0.5515	0	0.733	0.8273	0.8346	.
3	190482826	rs116249622	T	C	0.0161226	3	3.375e-05	0.009165	0.5657	0.5783	0.0986	56.83	0.3963	0.7991	0.6422	GMNC(-87.7kb)|IL1RAP(+107.8kb)|SNAR-I(-112.9kb)
2	127885247	rs58682665	G	A	0.298814	3	3.39e-05	3.39e-05	0.8643	0.8643	0.5412	0	0.8538	0.8222	0.9061	BIN1(+20.34kb)|CYP27C1(-56.16kb)|ERCC3(-129.6kb)|MAP3K2(-171kb)
11	59861814	rs2583471	A	G	0.399399	3	3.399e-05	0.000111	0.8787	0.8793	0.3222	11.72	0.8311	0.9351	0.8904	MS4A2(0)|MS4A3(+23.23kb)|MS4A4A(-186.2kb)|MS4A6A(-77.26kb)|PLAC1L(+46.3kb)
4	33888049	rs9284579	G	C	0.117416	3	3.408e-05	3.408e-05	0.8043	0.8043	0.6074	0	0.757	0.8591	0.8215	.
15	79291221	rs117782998	A	G	0.0206498	3	3.411e-05	0.003713	1.5771	1.5396	0.1722	43.15	1.4486	1.2011	1.9384	ADAMTS7(+187.4kb)|CTSH(+53.8kb)|LOC729911(-192.8kb)|MORF4L1(+101.1kb)|RASGRF1(0)
4	33742386	rs35107776	G	A	0.0908685	3	3.414e-05	3.414e-05	0.7909	0.7909	0.5521	0	0.7332	0.8273	0.8348	.
11	59906972	rs7124974	T	G	0.384786	3	3.426e-05	4.389e-05	0.8782	0.8783	0.3586	2.49	0.8289	0.9152	0.905	MS4A2(+41.03kb)|MS4A3(+68.38kb)|MS4A4A(-141kb)|MS4A6A(-32.11kb)|MS4A6E(-195.4kb)|PLAC1L(+91.46kb)
3	143103842	rs2293330	G	T	0.821358	3	3.427e-05	3.427e-05	0.8466	0.8466	0.9627	0	0.8554	0.8309	0.8485	SLC9A9(0)|SLC9A9-AS1(+37.93kb)
2	127885651	rs719054	A	G	0.297967	3	3.453e-05	3.453e-05	0.8644	0.8644	0.5175	0	0.8518	0.8224	0.9085	BIN1(+20.75kb)|CYP27C1(-55.76kb)|ERCC3(-129.2kb)|MAP3K2(-170.6kb)
11	59867379	rs17528859	C	T	0.399322	3	3.453e-05	0.0001009	0.8788	0.8794	0.3266	10.64	0.8313	0.9344	0.8909	MS4A2(+1.439kb)|MS4A3(+28.79kb)|MS4A4A(-180.6kb)|MS4A6A(-71.7kb)|PLAC1L(+51.86kb)
8	1490065	rs2019514	G	A	0.936403	3	3.476e-05	0.01472	1.2933	1.2713	0.0869	59.06	1.5106	1.0956	1.1981	DLGAP2(0)|LOC100507435(-23.61kb)
8	47292300	rs150572832	T	C	0.0177856	2	3.481e-05	3.481e-05	2.6715	2.6715	0.8319	0	2.8464	2.5666	NA	.
4	33743990	rs59660596	A	G	0.0908377	3	3.482e-05	3.482e-05	0.7912	0.7912	0.5497	0	0.7333	0.8272	0.8356	.
4	33873585	rs6531286	A	G	0.129165	3	3.491e-05	3.491e-05	0.8081	0.8081	0.5896	0	0.7572	0.839	0.8468	.
5	176936194	rs79999495	C	G	0.0599938	2	3.492e-05	3.492e-05	1.557	1.557	0.5386	0	1.6582	1.4536	NA	B4GALT7(-90.92kb)|DBN1(+35.5kb)|DDX41(-2.383kb)|DOK3(0)|F12(+99.62kb)|FAM193B(-10.6kb)|GRK6(+66.34kb)|LMAN2(+157.3kb)|LOC202181(-109.3kb)|MXD3(+196.9kb)|PDLIM7(+11.59kb)|PFN3(+108.6kb)|PRR7(+52.91kb)|PRR7-AS1(+61.25kb)|RGS14(+136.6kb)|SLC34A1(+110.3kb)|TMED9(-83.02kb)
11	59858497	rs2847664	A	G	0.398784	3	3.492e-05	0.0001139	0.8788	0.8794	0.322	11.75	0.8308	0.9344	0.8914	MS4A2(0)|MS4A3(+19.91kb)|MS4A4A(-189.5kb)|MS4A6A(-80.58kb)|PLAC1L(+42.98kb)
4	33794893	rs66770627	T	C	0.0906837	3	3.496e-05	3.496e-05	0.7908	0.7908	0.546	0	0.733	0.8215	0.8395	.
4	33820882	rs7665834	G	A	0.0911149	3	3.505e-05	3.505e-05	0.7915	0.7915	0.4466	0	0.725	0.8289	0.8463	.
19	13954571	rs2594714	A	G	0.242886	3	3.512e-05	0.000262	1.1762	1.1749	0.2839	20.58	1.0886	1.1693	1.26	C19orf53(+64.98kb)|C19orf57(-38.6kb)|CC2D1A(-62.38kb)|CCDC130(+80.46kb)|DCAF15(-108.7kb)|IL27RA(-188kb)|LOC284454(+7.468kb)|MIR23A(+7.098kb)|MIR24-2(+7.398kb)|MIR27A(+7.24kb)|MIR181C(-30.94kb)|MIR181D(-31.12kb)|MRI1(+69.48kb)|NANOS3(-33.49kb)|PODNL1(-87.43kb)|RFX1(-117.8kb)|RLN3(-184.4kb)|ZSWIM4(+11.53kb)
11	59902799	rs61901691	T	C	0.384709	3	3.532e-05	4.959e-05	0.8784	0.8785	0.3551	3.42	0.8288	0.9152	0.9056	MS4A2(+36.86kb)|MS4A3(+64.21kb)|MS4A4A(-145.2kb)|MS4A6A(-36.28kb)|MS4A6E(-199.6kb)|PLAC1L(+87.28kb)
4	33836707	rs13117838	A	C	0.129196	3	3.533e-05	3.533e-05	0.8075	0.8075	0.5738	0	0.7554	0.8382	0.8483	.
11	59858036	rs2847663	G	C	0.402525	3	3.549e-05	0.0001123	0.8788	0.8794	0.3233	11.45	0.8314	0.9355	0.8902	MS4A2(0)|MS4A3(+19.45kb)|MS4A4A(-190kb)|MS4A6A(-81.04kb)|PLAC1L(+42.52kb)
8	47207439	rs112171368	T	C	0.0256391	2	3.561e-05	3.561e-05	2.0991	2.0991	0.9258	0	2.0598	2.1303	NA	.
19	13950294	rs34597097	A	G	0.212766	3	3.566e-05	3.566e-05	1.1814	1.1814	0.4093	0	1.0967	1.1989	1.2426	C19orf53(+60.71kb)|C19orf57(-42.87kb)|CC2D1A(-66.66kb)|CCDC130(+76.19kb)|DCAF15(-113kb)|IL27RA(-192.3kb)|LOC284454(+3.191kb)|MIR23A(+2.821kb)|MIR24-2(+3.121kb)|MIR27A(+2.963kb)|MIR181C(-35.22kb)|MIR181D(-35.39kb)|MRI1(+65.2kb)|NANOS3(-37.77kb)|PODNL1(-91.7kb)|RFX1(-122kb)|RLN3(-188.7kb)|ZSWIM4(+7.25kb)
4	33747424	rs7684329	T	C	0.0908377	3	3.569e-05	3.569e-05	0.7915	0.7915	0.5457	0	0.7334	0.8272	0.8367	.
19	13950221	rs35421192	C	G	0.212519	3	3.578e-05	3.578e-05	1.1815	1.1815	0.4007	0	1.0955	1.1999	1.243	C19orf53(+60.64kb)|C19orf57(-42.95kb)|CC2D1A(-66.73kb)|CCDC130(+76.12kb)|DCAF15(-113.1kb)|IL27RA(-192.3kb)|LOC284454(+3.118kb)|MIR23A(+2.748kb)|MIR24-2(+3.048kb)|MIR27A(+2.89kb)|MIR181C(-35.29kb)|MIR181D(-35.47kb)|MRI1(+65.12kb)|NANOS3(-37.84kb)|PODNL1(-91.78kb)|RFX1(-122.1kb)|RLN3(-188.8kb)|ZSWIM4(+7.177kb)
4	33849730	rs34357057	G	C	0.0932553	3	3.582e-05	3.582e-05	0.791	0.791	0.5004	0	0.7296	0.8252	0.8431	.
11	59866309	rs2855017	T	C	0.399492	3	3.6e-05	0.0001171	0.8791	0.8797	0.322	11.77	0.8311	0.9346	0.8918	MS4A2(+0.369kb)|MS4A3(+27.72kb)|MS4A4A(-181.7kb)|MS4A6A(-72.77kb)|PLAC1L(+50.79kb)
8	66635118	rs35042734	G	A	0.0568217	3	3.626e-05	0.0002458	1.3251	1.3289	0.277	22.1	1.4766	1.4086	1.1615	ARMC1(+88.67kb)|LOC286186(+160.2kb)|MTFR1(+12.32kb)|PDE7A(0)
20	22348613	rs79558928	A	C	0.0584078	3	3.64e-05	0.003234	0.7203	0.7183	0.1356	49.95	0.894	0.6538	0.6289	LINC00261(-192.6kb)|LOC284788(-32.36kb)
7	114686066	rs2709489	T	C	0.603711	3	3.641e-05	3.641e-05	1.1366	1.1366	0.4279	0	1.1953	1.0866	1.1124	MDFIC(+26.1kb)
7	114680304	rs2709493	A	G	0.603957	3	3.649e-05	3.649e-05	1.1366	1.1366	0.4194	0	1.1962	1.0868	1.1114	MDFIC(+20.33kb)
11	59919165	rs11230160	T	C	0.399215	3	3.649e-05	3.649e-05	0.879	0.879	0.4187	0	0.8345	0.9198	0.8981	MS4A2(+53.22kb)|MS4A3(+80.58kb)|MS4A4A(-128.8kb)|MS4A6A(-19.91kb)|MS4A6E(-183.2kb)|PLAC1L(+103.6kb)
7	114684293	rs2520595	T	G	0.60368	3	3.655e-05	3.655e-05	1.1366	1.1366	0.4255	0	1.1954	1.0861	1.1126	MDFIC(+24.32kb)
7	114689271	rs2520593	A	G	0.603788	3	3.663e-05	3.663e-05	1.1366	1.1366	0.4328	0	1.195	1.0873	1.1122	MDFIC(+29.3kb)
7	114692016	rs2709487	G	C	0.603819	3	3.674e-05	3.674e-05	1.1366	1.1366	0.4371	0	1.1948	1.0883	1.1117	MDFIC(+32.05kb)
4	33914068	rs10517297	A	C	0.111195	3	3.675e-05	3.675e-05	0.8061	0.8061	0.572	0	0.7592	0.8059	0.8629	.
4	33801719	rs6825189	C	A	0.0907145	3	3.682e-05	3.682e-05	0.7915	0.7915	0.5465	0	0.7336	0.8224	0.8399	.
4	33802351	rs71602010	T	C	0.0906991	3	3.692e-05	3.692e-05	0.7915	0.7915	0.546	0	0.7336	0.8224	0.84	.
4	33752090	rs7672940	A	G	0.0908377	3	3.695e-05	3.695e-05	0.7919	0.7919	0.5422	0	0.7335	0.8276	0.8375	.
8	133381178	rs6471063	A	G	0.40716	3	3.714e-05	3.714e-05	0.879	0.879	0.6046	0	0.9013	0.8997	0.8442	HPYR1(-191.6kb)|KCNQ3(0)
4	33742337	rs28744428	C	A	0.11697	3	3.715e-05	3.715e-05	0.8077	0.8077	0.5421	0	0.7528	0.8495	0.8438	.
4	34272339	rs34783624	C	A	0.0708962	3	3.728e-05	3.728e-05	0.7729	0.7729	0.3859	0	0.7001	0.7814	0.8547	.
4	33752770	rs13134089	T	A	0.0908069	3	3.73e-05	3.73e-05	0.792	0.792	0.5413	0	0.7335	0.8277	0.8377	.
4	33804015	rs12645118	T	C	0.0907453	3	3.745e-05	3.745e-05	0.7916	0.7916	0.5465	0	0.7337	0.8226	0.84	.
4	33743907	rs7674046	C	T	0.11697	3	3.761e-05	3.761e-05	0.8079	0.8079	0.5391	0	0.7527	0.8497	0.8442	.
7	114675968	rs2520601	G	A	0.395827	3	3.77e-05	3.77e-05	0.8799	0.8799	0.4168	0	0.836	0.921	0.8995	MDFIC(+16kb)
10	123855947	rs111611891	T	C	0.0318448	3	3.779e-05	3.779e-05	0.6704	0.6704	0.6293	0	0.6045	0.7441	0.7153	ATE1(+168.4kb)|BTBD16(-174.9kb)|NSMCE4A(+121.2kb)|TACC2(0)
4	33751795	rs2006646	C	T	0.116954	3	3.792e-05	3.792e-05	0.8081	0.8081	0.541	0	0.7531	0.8494	0.8446	.
17	14707629	rs1860376	C	A	0.0354173	3	3.797e-05	0.0001873	0.7145	0.7126	0.2929	18.57	0.7617	0.5812	0.7868	.
4	33745959	rs6810417	C	G	0.116939	3	3.798e-05	3.798e-05	0.8081	0.8081	0.5389	0	0.7529	0.8494	0.8448	.
4	33806145	rs59554896	G	A	0.0907453	3	3.803e-05	3.803e-05	0.7917	0.7917	0.5466	0	0.7338	0.8228	0.8401	.
8	114782860	rs1257820	T	A	0.215276	3	3.807e-05	3.807e-05	1.2066	1.2066	0.531	0	1.2434	1.1082	1.2455	.
8	124172209	rs1670189	T	G	0.676286	3	3.824e-05	3.824e-05	0.8742	0.8742	0.6412	0	0.8796	0.8302	0.8981	ATAD2(-159.9kb)|C8orf76(-59.99kb)|DERL1(+117.5kb)|FAM83A(-22.54kb)|FAM83A-AS1(-41.2kb)|MIR4663(-55.82kb)|TBC1D31(+7.817kb)|ZHX1(-88.48kb)|ZHX1-C8ORF76(-66.22kb)|ZHX2(+185.5kb)
1	183104947	rs10752905	C	T	0.549122	3	3.838e-05	3.838e-05	1.1419	1.1419	0.6202	0	1.1731	1.0823	1.1502	LAMC1(0)|LAMC2(-50.23kb)|NMNAT2(-112.4kb)|SHCBP1L(+182.4kb)
4	33760867	rs13140898	C	A	0.117185	3	3.841e-05	3.841e-05	0.8081	0.8081	0.538	0	0.7529	0.8491	0.8453	.
1	198629336	rs72738024	C	T	0.044595	3	3.842e-05	0.0004238	0.7237	0.7272	0.269	23.84	0.6308	0.869	0.7368	ATP6V1G3(+119.3kb)|MIR181A1(-198.8kb)|MIR181A1HG(-147.8kb)|MIR181B1(-198.7kb)|PTPRC(0)
11	59924959	rs920573	A	G	0.399184	3	3.862e-05	3.862e-05	0.8794	0.8794	0.4197	0	0.8348	0.9196	0.8989	MS4A2(+59.02kb)|MS4A3(+86.37kb)|MS4A4A(-123.1kb)|MS4A6A(-14.12kb)|MS4A6E(-177.4kb)|PLAC1L(+109.4kb)
7	114684099	rs2520596	C	T	0.49709	3	3.871e-05	0.025	1.1326	1.13	0.0418	68.5	1.2469	1.095	1.0525	MDFIC(+24.13kb)
4	33760025	rs34911043	T	G	0.116985	3	3.901e-05	3.901e-05	0.8083	0.8083	0.5362	0	0.7529	0.8492	0.8457	.
7	114677961	rs10247481	G	A	0.601586	3	3.902e-05	3.902e-05	1.1362	1.1362	0.4539	0	1.1933	1.0907	1.1103	MDFIC(+17.99kb)
5	176943673	rs2242320	T	C	0.06004	2	3.908e-05	3.908e-05	1.5425	1.5425	0.5995	0	1.6254	1.4549	NA	B4GALT7(-83.44kb)|DBN1(+42.98kb)|DDX41(0)|DOK3(+6.246kb)|F12(+107.1kb)|FAM193B(-3.116kb)|GRK6(+73.82kb)|LMAN2(+164.8kb)|LOC202181(-101.8kb)|PDLIM7(+19.07kb)|PFN3(+116kb)|PRR7(+60.39kb)|PRR7-AS1(+68.73kb)|RGS14(+144.1kb)|SLC34A1(+117.8kb)|TMED9(-75.54kb)
4	33759865	rs35872036	G	A	0.116985	3	3.911e-05	3.911e-05	0.8083	0.8083	0.5358	0	0.7529	0.8492	0.8458	.
6	56290411	rs607934	T	C	0.115029	3	3.928e-05	3.928e-05	1.2084	1.2084	0.5477	0	1.272	1.2407	1.1371	COL21A1(+178kb)|DST(-32.37kb)|RNU6-71P(0)
1	151803889	rs74948431	A	G	0.0586079	3	3.929e-05	0.0004708	0.742	0.7393	0.2446	28.99	0.7769	0.6125	0.8245	C2CD4D(-6.449kb)|CELF3(+114.6kb)|LINGO4(+26.01kb)|LOC100132111(-7.055kb)|MRPL9(+67.85kb)|NBPF18P(-186.9kb)|OAZ3(+60.08kb)|RIIAD1(+101.8kb)|RORC(0)|S100A10(-151.5kb)|SNX27(+132.3kb)|TDRKH(+40.88kb)|THEM4(-39.45kb)|THEM5(-15.69kb)
11	81695712	rs145824910	A	T	0.0175085	2	3.952e-05	3.952e-05	0.5702	0.5702	0.3206	0	0.5182	0.6914	NA	MIR4300(+93.83kb)
6	149584456	rs74972107	G	A	0.0091623	2	3.958e-05	3.958e-05	0.4371	0.4371	0.7844	0	0.4137	0.4619	NA	SUMO4(-137kb)|TAB2(-54.98kb)|UST(+186.3kb)|ZC3H12D(-184.3kb)
4	63795758	rs7678421	G	T	0.142039	3	3.962e-05	0.008566	0.8349	0.8415	0.1103	54.64	0.7508	0.9402	0.8612	.
4	33825499	rs13143780	G	T	0.0926086	3	3.978e-05	3.978e-05	0.7931	0.7931	0.5796	0	0.7377	0.8245	0.8372	.
4	13042560	rs116276750	T	G	0.0189252	2	4.016e-05	0.006306	0.5375	0.534	0.1291	56.58	0.6686	0.4223	NA	.
4	33748526	rs1373494	C	A	0.11506	3	4.016e-05	4.016e-05	0.8084	0.8084	0.5742	0	0.7562	0.8508	0.8408	.
4	33742001	rs10011550	A	G	0.115091	3	4.021e-05	4.021e-05	0.8084	0.8084	0.5721	0	0.7559	0.851	0.8407	.
4	33742165	rs10050065	T	C	0.115106	3	4.036e-05	4.036e-05	0.8083	0.8083	0.5709	0	0.7558	0.8513	0.8406	.
20	22328921	rs11700378	T	C	0.0571913	3	4.04e-05	0.001827	0.7243	0.7231	0.1734	42.93	0.8865	0.6532	0.6483	LOC284788(-52.05kb)
4	33823543	rs35506174	T	C	0.0911765	3	4.049e-05	4.049e-05	0.7925	0.7925	0.5245	0	0.7326	0.8242	0.8427	.
7	114677437	rs2520599	T	A	0.604127	3	4.054e-05	4.054e-05	1.1359	1.1359	0.4175	0	1.1956	1.086	1.1105	MDFIC(+17.47kb)
4	33769628	rs12648131	C	T	0.114059	3	4.091e-05	4.091e-05	0.8085	0.8085	0.5551	0	0.7547	0.8509	0.843	.
17	26598575	rs76538025	C	G	0.0492301	3	4.094e-05	4.094e-05	1.3821	1.3821	0.594	0	1.3411	1.2466	1.511	IFT20(-56.78kb)|KRT18P55(-4.436kb)|MIR4723(-89.1kb)|NLK(+75.17kb)|POLDIP2(-75.08kb)|PPY2(+23.26kb)|PYY2(+43.49kb)|SARM1(-100.4kb)|SEBOX(-92.71kb)|SLC46A1(-123.1kb)|TMEM97(-47.54kb)|TMEM199(-86.11kb)|TNFAIP1(-63.97kb)|VTN(-95.72kb)
4	33744897	rs4444815	C	G	0.11506	3	4.096e-05	4.096e-05	0.8087	0.8087	0.5696	0	0.756	0.851	0.8415	.
17	14719659	rs72813669	A	T	0.0351555	3	4.096e-05	0.0001721	0.7175	0.7158	0.3003	16.88	0.7717	0.5863	0.7807	.
4	33750171	rs2338361	G	T	0.11506	3	4.111e-05	4.111e-05	0.8087	0.8087	0.5713	0	0.7562	0.8508	0.8416	.
8	133376210	rs7843765	A	T	0.439929	3	4.111e-05	4.111e-05	0.8808	0.8808	0.7072	0	0.9045	0.8877	0.8531	HPYR1(-196.5kb)|KCNQ3(0)
4	33747408	rs7693464	G	A	0.115075	3	4.119e-05	4.119e-05	0.8087	0.8087	0.5709	0	0.7562	0.8508	0.8417	.
4	33754612	rs57166361	T	A	0.115075	3	4.12e-05	4.12e-05	0.8088	0.8088	0.5705	0	0.7562	0.8509	0.8417	.
4	33752968	rs1822683	T	C	0.115045	3	4.122e-05	4.122e-05	0.8088	0.8088	0.5705	0	0.7562	0.8509	0.8417	.
4	33744866	rs28819970	G	T	0.11506	3	4.123e-05	4.123e-05	0.8087	0.8087	0.5709	0	0.7561	0.851	0.8414	.
4	33754375	rs28479420	A	G	0.115045	3	4.125e-05	4.125e-05	0.8088	0.8088	0.5705	0	0.7562	0.8509	0.8417	.
8	47123570	rs113405613	A	G	0.026255	2	4.129e-05	4.129e-05	2.0733	2.0733	0.8887	0	2.0139	2.118	NA	.
4	33798016	rs73132844	G	A	0.0965199	3	4.133e-05	4.133e-05	0.7956	0.7956	0.457	0	0.733	0.8659	0.8205	.
4	33752170	rs7659816	A	T	0.11506	3	4.137e-05	4.137e-05	0.8088	0.8088	0.5702	0	0.7562	0.8509	0.8418	.
4	33753547	rs1348541	G	A	0.115045	3	4.138e-05	4.138e-05	0.8088	0.8088	0.5702	0	0.7562	0.8509	0.8418	.
7	114714282	rs639470	A	G	0.599923	3	4.141e-05	4.141e-05	1.1357	1.1357	0.38	0	1.1999	1.0914	1.1026	MDFIC(+54.31kb)
4	33752150	rs7691242	T	C	0.11506	3	4.142e-05	4.142e-05	0.8088	0.8088	0.5713	0	0.7563	0.8509	0.8417	.
4	33751131	rs7673977	C	T	0.11506	3	4.144e-05	4.144e-05	0.8088	0.8088	0.5713	0	0.7563	0.8509	0.8417	.
20	18891183	rs11699650	C	G	0.0139359	2	4.147e-05	4.147e-05	0.4239	0.4239	0.3852	0	0.491	0.3385	NA	C20orf78(+80.34kb)|DTD1(+146.6kb)|LINC00652(+116kb)|LOC100270804(+114.5kb)|SCP2D1(+96.15kb)
4	33749326	rs10033782	A	G	0.115075	3	4.152e-05	4.152e-05	0.8088	0.8088	0.5718	0	0.7563	0.8508	0.8417	.
11	59903793	rs55847558	G	C	0.395488	3	4.155e-05	5.167e-05	0.8799	0.8799	0.3597	2.21	0.832	0.9261	0.8987	MS4A2(+37.85kb)|MS4A3(+65.2kb)|MS4A4A(-144.2kb)|MS4A6A(-35.29kb)|MS4A6E(-198.6kb)|PLAC1L(+88.28kb)
8	47120102	rs112309440	T	C	0.0262242	2	4.156e-05	4.156e-05	2.073	2.073	0.8909	0	2.0147	2.1167	NA	.
4	33746160	rs13113238	C	T	0.114629	3	4.16e-05	4.16e-05	0.8085	0.8085	0.5837	0	0.7569	0.8507	0.84	.
11	59924422	rs11600716	C	G	0.396042	3	4.163e-05	4.163e-05	0.8799	0.8799	0.3683	0	0.8328	0.9263	0.8979	MS4A2(+58.48kb)|MS4A3(+85.83kb)|MS4A4A(-123.6kb)|MS4A6A(-14.66kb)|MS4A6E(-177.9kb)|PLAC1L(+108.9kb)
12	89267447	rs516378	T	G	0.101925	3	4.199e-05	4.199e-05	0.775	0.775	0.9668	0	0.7642	0.7689	0.7924	LOC728084(-137.5kb)
1	204214395	rs140125581	C	T	0.0142285	3	4.202e-05	0.001831	0.5767	0.5889	0.2132	35.3	0.4499	0.6572	0.7608	ETNK2(+93.09kb)|GOLT1A(+31.18kb)|KISS1(+48.78kb)|LINC00628(-123.2kb)|PIK3C2B(-177.4kb)|PLEKHA6(0)|PPP1R15B(-158.1kb)|REN(+78.93kb)|SOX13(+117.5kb)
3	143104044	rs2293331	G	A	0.821004	3	4.212e-05	4.212e-05	0.8486	0.8486	0.9606	0	0.8565	0.8319	0.8517	SLC9A9(0)|SLC9A9-AS1(+38.13kb)
4	33766955	rs12645598	C	T	0.0907299	3	4.216e-05	4.216e-05	0.7933	0.7933	0.5285	0	0.7337	0.8281	0.8411	.
7	114697896	rs2520588	T	A	0.60368	3	4.217e-05	4.217e-05	1.1354	1.1354	0.4331	0	1.1944	1.0894	1.1084	MDFIC(+37.93kb)
11	59920231	rs11230161	A	C	0.396689	3	4.219e-05	4.308e-05	0.88	0.88	0.3671	0.21	0.8328	0.9264	0.8981	MS4A2(+54.29kb)|MS4A3(+81.64kb)|MS4A4A(-127.8kb)|MS4A6A(-18.85kb)|MS4A6E(-182.1kb)|PLAC1L(+104.7kb)
15	79269226	rs12101364	T	G	0.0212966	3	4.222e-05	0.004969	1.5534	1.5191	0.157	46	1.4926	1.1576	1.8983	ADAMTS7(+165.5kb)|CTSH(+31.81kb)|MORF4L1(+79.14kb)|RASGRF1(0)
7	114679703	rs12706006	G	A	0.480105	3	4.224e-05	0.01067	1.1325	1.13	0.088	58.86	1.2328	1.0937	1.0641	MDFIC(+19.73kb)
4	33799202	rs6832462	T	C	0.0964583	3	4.242e-05	4.242e-05	0.7959	0.7959	0.4594	0	0.7335	0.866	0.8207	.
11	59872498	rs1813217	C	G	0.399661	3	4.243e-05	8.535e-05	0.8802	0.8805	0.341	7.05	0.8338	0.9354	0.8913	MS4A2(+6.558kb)|MS4A3(+33.91kb)|MS4A4A(-175.5kb)|MS4A6A(-66.58kb)|PLAC1L(+56.98kb)
10	60671677	rs3910869	C	T	0.421327	3	4.247e-05	0.0002926	1.1363	1.1355	0.2869	19.9	1.21	1.0966	1.0911	BICC1(+82.83kb)|FAM133CP(+194.4kb)
12	40780396	rs149979405	T	C	0.0439021	3	4.267e-05	0.0006902	0.7365	0.7332	0.231	31.77	0.7123	0.6161	0.8612	LRRK2(+17.31kb)
11	59877394	rs11230147	T	C	0.399954	3	4.3e-05	8.888e-05	0.8803	0.8806	0.3399	7.33	0.8341	0.9362	0.8907	MS4A2(+11.45kb)|MS4A3(+38.81kb)|MS4A4A(-170.6kb)|MS4A6A(-61.68kb)|PLAC1L(+61.88kb)
9	23040524	rs146532721	T	G	0.0198029	3	4.306e-05	4.306e-05	0.625	0.625	0.376	0	0.5646	0.8269	0.5779	.
11	59906792	rs2165525	C	A	0.395581	3	4.307e-05	5.71e-05	0.8801	0.8802	0.3572	2.86	0.8321	0.9267	0.8988	MS4A2(+40.85kb)|MS4A3(+68.2kb)|MS4A4A(-141.2kb)|MS4A6A(-32.29kb)|MS4A6E(-195.6kb)|PLAC1L(+91.28kb)
4	63792287	rs7694579	T	A	0.16469	3	4.312e-05	0.01837	0.8395	0.8472	0.0695	62.49	0.7504	0.9581	0.8606	.
11	59923194	rs10897009	A	G	0.401478	3	4.317e-05	4.317e-05	0.8801	0.8801	0.4328	0	0.8365	0.921	0.898	MS4A2(+57.25kb)|MS4A3(+84.61kb)|MS4A4A(-124.8kb)|MS4A6A(-15.88kb)|MS4A6E(-179.2kb)|PLAC1L(+107.7kb)
4	33756525	rs7676477	T	C	0.115014	3	4.331e-05	4.331e-05	0.8092	0.8092	0.565	0	0.7561	0.8509	0.8431	.
3	68489097	rs7646334	T	A	0.149661	3	4.337e-05	0.0002833	0.8372	0.8385	0.2902	19.18	0.8301	0.9315	0.7808	FAM19A1(0)
19	13950206	rs62122064	G	A	0.219141	3	4.342e-05	4.342e-05	1.1789	1.1789	0.4248	0	1.0953	1.1999	1.2364	C19orf53(+60.62kb)|C19orf57(-42.96kb)|CC2D1A(-66.75kb)|CCDC130(+76.1kb)|DCAF15(-113.1kb)|IL27RA(-192.3kb)|LOC284454(+3.103kb)|MIR23A(+2.733kb)|MIR24-2(+3.033kb)|MIR27A(+2.875kb)|MIR181C(-35.31kb)|MIR181D(-35.48kb)|MRI1(+65.11kb)|NANOS3(-37.86kb)|PODNL1(-91.79kb)|RFX1(-122.1kb)|RLN3(-188.8kb)|ZSWIM4(+7.162kb)
10	81230315	rs7910124	G	A	0.277379	3	4.363e-05	0.01281	0.8657	0.871	0.0869	59.06	0.8804	0.9622	0.791	EIF5AL1(-42.04kb)|PPIF(+115.2kb)|SFTPA1(-140.4kb)|SFTPA2(-85.29kb)|ZCCHC24(+24.93kb)|ZMIZ1(+154kb)
7	114682603	rs1978097	T	G		3	4.365e-05	0.01107	1.1322	1.1296	0.0867	59.11	1.2329	1.093	1.0638	MDFIC(+22.63kb)
15	79267955	rs9920807	G	A		3	4.368e-05	0.005094	1.5554	1.5223	0.1555	46.27	1.5337	1.1454	1.8876	ADAMTS7(+164.2kb)|CTSH(+30.54kb)|MORF4L1(+77.87kb)|RASGRF1(0)
4	33803004	rs68130551	T	C		3	4.371e-05	4.371e-05	0.7962	0.7962	0.4585	0	0.7337	0.8665	0.8209	.
7	114709443	rs10441335	C	T		3	4.375e-05	4.375e-05	1.1352	1.1352	0.3688	0	1.2002	1.0887	1.1028	MDFIC(+49.47kb)
20	4619461	rs4813710	G	A		3	4.379e-05	4.379e-05	1.4001	1.4001	0.7846	0	1.3031	1.5072	1.4256	PRND(-83.09kb)|PRNP(-47.34kb)|PRNT(-92.47kb)|RASSF2(-141.2kb)
4	33825143	rs1838405	T	C		3	4.383e-05	4.383e-05	0.7943	0.7943	0.6037	0	0.7411	0.8195	0.8396	.
19	13950253	rs62122066	C	T		3	4.383e-05	4.383e-05	1.1876	1.1876	0.5733	0	1.1166	1.1987	1.2387	C19orf53(+60.67kb)|C19orf57(-42.91kb)|CC2D1A(-66.7kb)|CCDC130(+76.15kb)|DCAF15(-113.1kb)|IL27RA(-192.3kb)|LOC284454(+3.15kb)|MIR23A(+2.78kb)|MIR24-2(+3.08kb)|MIR27A(+2.922kb)|MIR181C(-35.26kb)|MIR181D(-35.44kb)|MRI1(+65.16kb)|NANOS3(-37.81kb)|PODNL1(-91.75kb)|RFX1(-122.1kb)|RLN3(-188.8kb)|ZSWIM4(+7.209kb)
11	59877967	rs4939311	T	C		3	4.39e-05	0.0001128	0.8804	0.8809	0.3309	9.58	0.8334	0.9364	0.8917	MS4A2(+12.03kb)|MS4A3(+39.38kb)|MS4A4A(-170kb)|MS4A6A(-61.11kb)|PLAC1L(+62.45kb)
7	114682852	rs2157948	A	G		3	4.392e-05	0.01111	1.1321	1.1296	0.0866	59.12	1.2328	1.093	1.0637	MDFIC(+22.88kb)
19	5066523	rs144804890	A	G		3	4.403e-05	0.0001789	1.492	1.4855	0.316	13.2	1.2727	1.3556	1.7622	ARRDC5(+163.6kb)|KDM4B(0)|MIR4747(+133.8kb)|PLIN3(+198.7kb)|PTPRS(-139kb)|UHRF1(+104.4kb)
11	59904959	rs11230155	T	C		3	4.416e-05	6.284e-05	0.8803	0.8804	0.3544	3.59	0.8321	0.9271	0.899	MS4A2(+39.02kb)|MS4A3(+66.37kb)|MS4A4A(-143.1kb)|MS4A6A(-34.12kb)|MS4A6E(-197.4kb)|PLAC1L(+89.44kb)
8	98581199	rs138670216	A	G		3	4.417e-05	4.417e-05	0.5925	0.5925	0.6827	0	0.5181	0.6561	0.6469	MTDH(-75.21kb)
5	176936272	rs2161110	T	G		2	4.42e-05	4.42e-05	1.5504	1.5504	0.5556	0	1.6471	1.4511	NA	B4GALT7(-90.85kb)|DBN1(+35.58kb)|DDX41(-2.305kb)|DOK3(0)|F12(+99.7kb)|FAM193B(-10.52kb)|GRK6(+66.42kb)|LMAN2(+157.4kb)|LOC202181(-109.2kb)|MXD3(+197kb)|PDLIM7(+11.67kb)|PFN3(+108.6kb)|PRR7(+52.98kb)|PRR7-AS1(+61.33kb)|RGS14(+136.7kb)|SLC34A1(+110.4kb)|TMED9(-82.94kb)
3	143103785	rs2293329	A	G		3	4.427e-05	4.427e-05	0.849	0.849	0.9599	0	0.857	0.8321	0.852	SLC9A9(0)|SLC9A9-AS1(+37.87kb)
15	79268166	rs28427472	T	C		3	4.433e-05	0.004909	1.5553	1.5226	0.1581	45.79	1.5342	1.1463	1.8856	ADAMTS7(+164.4kb)|CTSH(+30.75kb)|MORF4L1(+78.08kb)|RASGRF1(0)
8	47150992	rs116890494	T	C		2	4.434e-05	4.434e-05	2.6486	2.6486	0.8019	0	2.8618	2.5289	NA	.
11	59909647	rs1863472	G	C		3	4.441e-05	5.779e-05	0.8802	0.8803	0.3579	2.68	0.8322	0.9264	0.8994	MS4A2(+43.71kb)|MS4A3(+71.06kb)|MS4A4A(-138.4kb)|MS4A6A(-29.43kb)|MS4A6E(-192.7kb)|PLAC1L(+94.13kb)
11	59900106	rs4939312	T	C		3	4.454e-05	7.437e-05	0.8803	0.8805	0.3481	5.24	0.8316	0.9271	0.8996	MS4A2(+34.17kb)|MS4A3(+61.52kb)|MS4A4A(-147.9kb)|MS4A6A(-38.97kb)|PLAC1L(+84.59kb)
2	212319043	rs6435628	T	C		3	4.467e-05	4.467e-05	1.1738	1.1738	0.5574	0	1.2325	1.1129	1.1501	ERBB4(0)
4	33913556	rs12640723	A	C		3	4.467e-05	4.467e-05	0.8104	0.8104	0.6055	0	0.7605	0.8412	0.8477	.
8	133359303	rs897902	T	G		3	4.488e-05	4.488e-05	0.8809	0.8809	0.7024	0	0.9077	0.8813	0.8547	KCNQ3(0)
4	174339129	rs7659514	A	C		3	4.528e-05	4.528e-05	0.778	0.778	0.5632	0	0.7255	0.8579	0.7875	GALNT7(+94.01kb)|HAND2(-108.5kb)|HAND2-AS1(-112.5kb)|HMGB2(+83.53kb)|SAP30(+40.45kb)|SCRG1(+18.51kb)
7	114842099	rs7795551	G	T		3	4.531e-05	0.001247	0.8801	0.8821	0.2185	34.26	0.8219	0.9322	0.9087	MDFIC(+182.1kb)
10	49651435	rs2377351	C	T		3	4.536e-05	0.006303	0.8804	0.8847	0.1307	50.86	0.8203	0.9621	0.891	ARHGAP22(-2.632kb)|FRMPD2(+168.5kb)|MAPK8(+4.033kb)
22	19522164	rs143430013	A	G		3	4.55e-05	4.55e-05	0.8269	0.8269	0.6153	0	0.7812	0.8415	0.8662	C22orf39(+86.41kb)|CDC45(+14.03kb)|CLDN5(+9.304kb)|GP1BB(-188.9kb)|HIRA(+102.9kb)|LINC00895(-31.49kb)|MRPL40(+98.57kb)|SEPT5(-179.8kb)|SEPT5-GP1BB(-182.6kb)|UFD1L(+55.43kb)
4	33920109	rs56217707	C	G		3	4.574e-05	4.574e-05	0.8105	0.8105	0.6145	0	0.7613	0.841	0.8472	.
11	85849411	rs11234556	C	T		3	4.577e-05	4.577e-05	1.1324	1.1324	0.5952	0	1.1069	1.1941	1.1179	C11orf73(-163.8kb)|EED(-106.4kb)|PICALM(+68.49kb)
7	114846807	rs57077008	T	C		3	4.591e-05	0.001177	0.88	0.8818	0.2213	33.7	0.8214	0.9282	0.9114	MDFIC(+186.8kb)
8	47035134	rs111875994	G	A		2	4.616e-05	4.616e-05	2.0705	2.0705	0.8771	0	2.0046	2.1199	NA	.
11	59900575	rs4939314	C	T		3	4.616e-05	7.027e-05	0.8805	0.8807	0.3517	4.3	0.8321	0.9273	0.8996	MS4A2(+34.64kb)|MS4A3(+61.99kb)|MS4A4A(-147.4kb)|MS4A6A(-38.5kb)|PLAC1L(+85.06kb)
14	53223482	rs140692404	T	C		3	4.624e-05	4.624e-05	0.7167	0.7167	0.7787	0	0.6717	0.7769	0.7266	ERO1L(+61.06kb)|FERMT2(-100.5kb)|GNPNAT1(-18.43kb)|GPR137C(+119.1kb)|PSMC6(+28.77kb)|STYX(0)
9	79597762	rs150215406	A	G		2	4.625e-05	0.0003328	0.5391	0.5404	0.2584	21.7	0.459	NA	0.6471	FOXB2(-36.81kb)|PCA3(+195.3kb)|PRUNE2(+76.76kb)|VPS13A(-194.6kb)|VPS13A-AS1(-193.9kb)
8	96187048	rs2599720	C	T		3	4.666e-05	0.02155	0.8767	0.8787	0.0515	66.29	0.9433	0.9116	0.7927	C8orf37(-70.09kb)|C8orf69(-32.19kb)|LOC100616530(-94.02kb)|MIR3150A(+101.8kb)|MIR3150B(+101.8kb)|NDUFAF6(+116.1kb)|PLEKHF2(+18.14kb)
10	60675285	rs10740764	T	G		3	4.666e-05	0.0002984	1.1357	1.1347	0.2899	19.23	1.209	1.0919	1.0931	BICC1(+86.44kb)|FAM133CP(+198kb)
7	114746968	rs12531336	C	T		3	4.677e-05	4.677e-05	1.1372	1.1372	0.4302	0	1.1962	1.0833	1.1162	MDFIC(+87kb)
3	68487284	rs75899003	A	C		3	4.683e-05	0.00135	0.8361	0.8392	0.2164	34.67	0.8069	0.95	0.7896	FAM19A1(0)
10	22809571	rs7092319	C	T		3	4.693e-05	4.693e-05	0.868	0.868	0.4994	0	0.8878	0.808	0.8894	BMI1(+189.2kb)|COMMD3-BMI1(+189.2kb)|LOC100499489(+82.71kb)|PIP4K2A(-14.19kb)|SPAG6(+103kb)
4	33818942	rs3910837	C	T		3	4.712e-05	4.712e-05	0.7945	0.7945	0.4864	0	0.7311	0.8303	0.8461	.
10	60667535	rs7086860	G	A		3	4.751e-05	0.0003336	1.1366	1.1357	0.2851	20.31	1.2112	1.0946	1.092	BICC1(+78.69kb)|FAM133CP(+190.2kb)
3	13093735	rs28393314	A	G		3	4.769e-05	4.769e-05	0.7558	0.7558	0.8584	0	0.79	0.7252	0.7377	IQSEC1(0)
4	33819992	rs13133597	G	A		3	4.769e-05	4.769e-05	0.7946	0.7946	0.4866	0	0.7313	0.8304	0.8463	.
19	48739590	rs112854952	A	G		3	4.782e-05	4.782e-05	1.1479	1.1479	0.9961	0	1.1444	1.1466	1.1522	CABP5(+192.3kb)|CARD8(0)|CCDC114(-60.12kb)|EMP3(-89.04kb)|GRIN2D(-158.5kb)|KDELR1(-146.2kb)|LIG1(+66.03kb)|LOC100505812(-19.34kb)|PLA2G4C(+125.5kb)|SYNGR4(-128.1kb)|TMEM143(-96.02kb)|ZNF114(-35.06kb)
16	76875223	rs12926398	A	G		2	4.841e-05	4.841e-05	0.4825	0.4825	0.8183	0	0.4692	0.5127	NA	MIR4719(-27.61kb)
22	19156117	rs712964	C	T		3	4.854e-05	4.854e-05	1.1364	1.1364	0.9405	0	1.1205	1.1447	1.1471	CLTCL1(-10.87kb)|DGCR2(+46.15kb)|DGCR5(+174kb)|DGCR9(+148.4kb)|DGCR10(+145.1kb)|DGCR11(+120.2kb)|DGCR14(+23.93kb)|GSC2(+18.32kb)|HIRA(-162.1kb)|LOC100652736(-3.101kb)|SLC25A1(-6.97kb)|TSSK2(+35.98kb)
6	56247749	rs12202464	G	C		3	4.858e-05	4.858e-05	1.2475	1.2475	0.8145	0	1.2651	1.3047	1.1994	COL21A1(+135.4kb)|DST(-75.04kb)|RNU6-71P(0)
12	71081827	rs949663	C	G		3	4.901e-05	4.901e-05	0.702	0.702	0.763	0	0.7396	0.7187	0.6388	PTPRB(+50.61kb)|PTPRR(0)
15	79268857	rs118135174	G	A		3	4.901e-05	0.004847	1.5516	1.5197	0.1617	45.12	1.5289	1.1467	1.8803	ADAMTS7(+165.1kb)|CTSH(+31.44kb)|MORF4L1(+78.78kb)|RASGRF1(0)
4	33821740	rs7689523	C	T		3	4.904e-05	4.904e-05	0.7949	0.7949	0.4876	0	0.7316	0.8308	0.8464	.
4	33821826	rs7689692	G	T		3	4.911e-05	4.911e-05	0.7949	0.7949	0.4869	0	0.7315	0.8307	0.8465	.
4	33927521	rs13121333	A	G		3	4.911e-05	4.911e-05	0.8102	0.8102	0.6113	0	0.7603	0.8431	0.8457	.
7	114663063	rs2709495	A	G		3	4.922e-05	4.922e-05	1.1335	1.1335	0.648	0	1.1761	1.1112	1.1067	MDFIC(+3.093kb)
16	24857773	rs2161440	C	T		2	4.922e-05	0.002135	2.2001	2.1902	0.189	42.04	2.8098	1.686	NA	ARHGAP17(-72.94kb)|LOC554206(-185.3kb)|SLC5A11(0)|TNRC6A(+20.23kb)
7	114663021	rs2709496	A	G		3	4.929e-05	4.929e-05	1.1335	1.1335	0.6481	0	1.1761	1.1112	1.1067	MDFIC(+3.051kb)
13	101833837	rs72652920	G	C		3	4.949e-05	4.949e-05	1.2751	1.2751	0.4373	0	1.2739	1.1279	1.3713	NALCN(0)|NALCN-AS1(+122.2kb)
8	96187043	rs2599721	G	A		3	4.951e-05	0.02127	0.8771	0.879	0.0529	65.99	0.9442	0.9104	0.7936	C8orf37(-70.1kb)|C8orf69(-32.19kb)|LOC100616530(-94.02kb)|MIR3150A(+101.8kb)|MIR3150B(+101.8kb)|NDUFAF6(+116.1kb)|PLEKHF2(+18.13kb)
4	152003115	rs11725983	C	T		3	4.957e-05	4.957e-05	1.706	1.706	0.9802	0	1.6605	1.7578	1.744	LRBA(+66.47kb)|PRSS48(-195.2kb)|RPS3A(-17.61kb)|SH3D19(-38.32kb)|SNORD73A(-21.86kb)
11	59896901	rs11230153	T	G		3	4.957e-05	0.0001082	0.8808	0.8812	0.3369	8.08	0.8313	0.9281	0.9009	MS4A2(+30.96kb)|MS4A3(+58.31kb)|MS4A4A(-151.1kb)|MS4A6A(-42.18kb)|PLAC1L(+81.38kb)
10	81248316	rs7920426	C	T		3	4.968e-05	0.02223	0.8668	0.8727	0.0592	64.63	0.8748	0.9749	0.7889	BEND3P3(-194.4kb)|EIF5AL1(-24.04kb)|PPIF(+133.2kb)|SFTPA1(-122.4kb)|SFTPA2(-67.29kb)|ZCCHC24(+42.93kb)|ZMIZ1(+172kb)
4	34061835	rs7438105	G	A		3	4.986e-05	0.000277	0.8057	0.8051	0.2886	19.52	0.7602	0.7518	0.9017	.
12	6644958	rs41334949	G	C		2	4.987e-05	0.1024	0.5349	0.5964	0.0705	69.44	0.4543	0.8617	NA	ACRBP(-102.3kb)|CD27(+84.07kb)|CD27-AS1(+84.28kb)|CHD4(-34.29kb)|COPS7A(-188.2kb)|GAPDH(0)|IFFO1(-3.735kb)|ING4(-114.7kb)|LPAR5(-83.04kb)|LTBR(+144.2kb)|MRPL51(+42.49kb)|NCAPD2(+3.826kb)|NOP2(-21.08kb)|PIANP(-158kb)|SCARNA10(+25.24kb)|SCARNA11(-45.68kb)|SCNN1A(+158.4kb)|TAPBPL(+73.47kb)|TNFRSF1A(+193.7kb)|VAMP1(+65.12kb)|ZNF384(-130.7kb)
9	27249533	rs6475978	T	C		3	5.003e-05	0.008971	1.1352	1.1311	0.1077	55.12	1.0729	1.0835	1.233	EQTN(-35.12kb)|IFT74(+186.6kb)|LINC00032(0)|MOB3B(-75.67kb)|TEK(+19.36kb)
10	81237430	rs1923370	G	T		3	5.017e-05	0.0128	0.8664	0.8716	0.0901	58.46	0.8789	0.964	0.7927	EIF5AL1(-34.93kb)|PPIF(+122.3kb)|SFTPA1(-133.3kb)|SFTPA2(-78.18kb)|ZCCHC24(+32.05kb)|ZMIZ1(+161.1kb)
4	34059933	rs10033733	A	G		3	5.019e-05	0.0002521	0.8056	0.8051	0.2938	18.37	0.7605	0.7521	0.9011	.
12	122025422	rs36120620	A	G		2	5.026e-05	0.000666	0.663	0.6579	0.23	30.61	0.732	0.5709	NA	KDM2B(+6.502kb)|MORN3(-63.87kb)|ORAI1(-39.03kb)|RHOF(-190.2kb)|RNF34(+163.3kb)|TMEM120B(-125.2kb)
10	81229959	rs11003011	A	G		3	5.029e-05	0.01192	0.8667	0.8719	0.0947	57.58	0.881	0.9621	0.7935	EIF5AL1(-42.4kb)|PPIF(+114.9kb)|SFTPA1(-140.7kb)|SFTPA2(-85.65kb)|ZCCHC24(+24.58kb)|ZMIZ1(+153.7kb)
8	14909339	rs7844246	G	T		3	5.044e-05	5.044e-05	1.4875	1.4875	0.649	0	1.5276	1.6854	1.3519	MIR383(+198.3kb)|SGCZ(0)
18	44300078	rs11659770	A	G		3	5.046e-05	0.002452	1.2181	1.2121	0.1864	40.48	1.2801	1.0515	1.2927	LOXHD1(+63.08kb)|PIAS2(-89.94kb)|ST8SIA5(0)
7	114682117	rs12113289	G	A		3	5.05e-05	0.00917	1.1311	1.1287	0.1011	56.37	1.2285	1.0927	1.0651	MDFIC(+22.15kb)
10	22809934	rs7096205	C	T		3	5.053e-05	5.053e-05	0.8685	0.8685	0.529	0	0.8865	0.8109	0.8899	BMI1(+189.5kb)|COMMD3-BMI1(+189.5kb)|LOC100499489(+83.08kb)|PIP4K2A(-13.83kb)|SPAG6(+103.4kb)
20	32466177	rs6119411	T	C		3	5.063e-05	0.0005838	1.1804	1.18	0.2538	27.08	1.2964	1.1157	1.13	CHMP4B(+24kb)|E2F1(+192kb)|MIR4755(-170.7kb)|PXMP4(+158kb)|RALY(-115.3kb)|ZNF341(+86.1kb)
10	81216207	rs7069587	G	A		3	5.072e-05	0.0244	0.8649	0.8712	0.0555	65.41	0.8749	0.9748	0.7852	EIF5AL1(-56.15kb)|PPIF(+101.1kb)|SFTPA1(-154.5kb)|SFTPA2(-99.4kb)|ZCCHC24(+10.82kb)|ZMIZ1(+139.9kb)
7	114702557	rs1623973	A	T		3	5.083e-05	5.083e-05	1.134	1.134	0.3733	0	1.1983	1.0868	1.1025	MDFIC(+42.59kb)
10	49549254	rs867631	A	G		3	5.093e-05	0.0001129	1.1335	1.1329	0.3368	8.12	1.1982	1.0724	1.1109	ARHGAP22(-104.8kb)|FRMPD2(+66.31kb)|FRMPD2P1(+166kb)|MAPK8(0)
10	49562574	rs1345103	T	A		3	5.121e-05	0.000162	1.1334	1.1326	0.3219	11.79	1.1996	1.0717	1.1098	ARHGAP22(-91.49kb)|FRMPD2(+79.63kb)|FRMPD2P1(+179.3kb)|MAPK8(0)
7	114698654	rs2520586	A	T		3	5.147e-05	5.712e-05	1.1337	1.1337	0.3639	1.07	1.1989	1.0863	1.1017	MDFIC(+38.68kb)
10	49550694	rs6537561	T	A		3	5.148e-05	0.0001209	1.1333	1.1328	0.3343	8.73	1.1983	1.0721	1.1108	ARHGAP22(-103.4kb)|FRMPD2(+67.75kb)|FRMPD2P1(+167.5kb)|MAPK8(0)
4	34065253	rs7441790	G	A		3	5.161e-05	0.000329	0.8061	0.8055	0.2812	21.17	0.7598	0.7521	0.9032	.
8	47044519	rs112908759	A	C		2	5.162e-05	5.162e-05	2.059	2.059	0.8961	0	2.0036	2.1004	NA	.
10	49549403	rs1919708	G	A		3	5.167e-05	0.0001173	1.1333	1.1328	0.3357	8.38	1.1982	1.0723	1.1107	ARHGAP22(-104.7kb)|FRMPD2(+66.46kb)|FRMPD2P1(+166.2kb)|MAPK8(0)
10	81239361	rs10762867	A	C		3	5.174e-05	0.01311	0.8667	0.8719	0.0896	58.55	0.879	0.9646	0.793	EIF5AL1(-33kb)|PPIF(+124.3kb)|SFTPA1(-131.3kb)|SFTPA2(-76.25kb)|ZCCHC24(+33.98kb)|ZMIZ1(+163.1kb)
11	59885493	rs1125357	C	A		3	5.183e-05	8.481e-05	0.8814	0.8816	0.3487	5.07	0.8353	0.9358	0.8928	MS4A2(+19.55kb)|MS4A3(+46.9kb)|MS4A4A(-162.5kb)|MS4A6A(-53.59kb)|PLAC1L(+69.98kb)
11	127158875	rs145111386	C	T		3	5.183e-05	0.004019	0.7235	0.7125	0.1215	52.56	0.8612	0.6873	0.5905	.
9	112839944	rs1746020	T	C		3	5.197e-05	0.0001939	0.88	0.8805	0.3134	13.81	0.8277	0.9286	0.9012	AKAP2(0)|C9orf152(-121.9kb)|PALM2(+126.2kb)|PALM2-AKAP2(0)|TXN(-166.1kb)
7	114736232	rs2460485	C	T		3	5.199e-05	5.199e-05	1.1356	1.1356	0.4232	0	1.1958	1.0845	1.1117	MDFIC(+76.26kb)
22	19522510	rs7290191	G	T		3	5.204e-05	5.204e-05	0.8297	0.8297	0.7398	0	0.7934	0.8439	0.8591	C22orf39(+86.76kb)|CDC45(+14.38kb)|CLDN5(+9.65kb)|GP1BB(-188.6kb)|HIRA(+103.3kb)|LINC00895(-31.14kb)|MRPL40(+98.91kb)|SEPT5(-179.5kb)|SEPT5-GP1BB(-182.2kb)|UFD1L(+55.77kb)
10	49578487	rs2590381	C	A		3	5.211e-05	0.0002098	1.1332	1.1322	0.3113	14.31	1.2001	1.0701	1.1099	ARHGAP22(-75.58kb)|FRMPD2(+95.55kb)|FRMPD2P1(+195.2kb)|MAPK8(0)
20	4641163	rs11698114	C	G		3	5.222e-05	5.222e-05	1.4238	1.4238	0.7047	0	1.3053	1.4258	1.5431	PRND(-61.39kb)|PRNP(-25.63kb)|PRNT(-70.76kb)|RASSF2(-119.5kb)|SLC23A2(-191.8kb)
11	59927039	rs17529983	A	G		3	5.223e-05	6.739e-05	0.8814	0.8815	0.358	2.65	0.833	0.9261	0.9018	MS4A2(+61.1kb)|MS4A3(+88.45kb)|MS4A4A(-121kb)|MS4A6A(-12.04kb)|MS4A6E(-175.3kb)|PLAC1L(+111.5kb)
10	49497301	rs11101284	A	C		3	5.234e-05	5.234e-05	0.8577	0.8577	0.5118	0	0.8124	0.88	0.8936	ARHGAP22(-156.8kb)|FRMPD2(+14.36kb)|FRMPD2P1(+114.1kb)|MAPK8(-17.38kb)
7	114702127	rs2709475	G	A		3	5.245e-05	5.441e-05	1.1335	1.1335	0.3665	0.38	1.1985	1.0867	1.1013	MDFIC(+42.16kb)
15	79268934	rs28549817	A	G		3	5.25e-05	0.005451	1.5487	1.5163	0.1567	46.04	1.5281	1.1417	1.8793	ADAMTS7(+165.2kb)|CTSH(+31.51kb)|MORF4L1(+78.85kb)|RASGRF1(0)
6	55009408	rs9475168	G	T		3	5.262e-05	5.262e-05	0.8628	0.8628	0.788	0	0.8829	0.826	0.8644	FAM83B(+199.5kb)|GFRAL(-182.9kb)|HCRTR2(-29.66kb)
8	27441010	rs7828131	C	T		3	5.266e-05	5.266e-05	1.1341	1.1341	0.4179	0	1.1237	1.0714	1.1886	CCDC25(-149.8kb)|CHRNA2(+104.2kb)|CLU(-13.42kb)|EPHX2(+38.57kb)|ESCO2(-191kb)|MIR3622A(-118.2kb)|MIR3622B(-118.2kb)|PTK2B(+124.1kb)|SCARA3(-50.57kb)
15	79292552	rs28557276	T	C		3	5.274e-05	0.01075	1.5619	1.5133	0.1248	51.95	1.3919	1.1756	1.9671	ADAMTS7(+188.8kb)|CTSH(+55.13kb)|LOC729911(-191.5kb)|MORF4L1(+102.5kb)|RASGRF1(0)
6	55007242	rs9475164	A	G		3	5.276e-05	5.276e-05	0.8633	0.8633	0.8864	0	0.8798	0.8395	0.8606	FAM83B(+197.3kb)|GFRAL(-185kb)|HCRTR2(-31.83kb)
3	143106999	rs6440169	G	A		3	5.277e-05	5.277e-05	0.8501	0.8501	0.9122	0	0.8622	0.8249	0.8546	SLC9A9(0)|SLC9A9-AS1(+41.09kb)
4	33934578	rs57271245	C	G		3	5.277e-05	5.277e-05	0.811	0.811	0.4575	0	0.7599	0.7984	0.8815	.
4	33790246	rs1822681	A	G		3	5.305e-05	5.305e-05	0.798	0.798	0.4874	0	0.7382	0.867	0.8204	.
4	63788331	rs7668525	G	A		3	5.32e-05	0.01826	0.8414	0.849	0.0744	61.52	0.7532	0.9582	0.8629	.
3	143109679	rs7633451	G	A		3	5.321e-05	5.321e-05	0.85	0.85	0.9174	0	0.8602	0.8252	0.856	SLC9A9(0)|SLC9A9-AS1(+43.77kb)
4	33879862	rs6531287	A	G		3	5.321e-05	5.321e-05	0.8112	0.8112	0.6385	0	0.7637	0.8396	0.8473	.
4	34067994	rs59339146	A	G		3	5.323e-05	0.0003728	0.8065	0.8058	0.276	22.33	0.7598	0.7522	0.9043	.
19	13949751	rs7248169	T	C		3	5.334e-05	5.334e-05	1.1761	1.1761	0.4013	0	1.0906	1.1978	1.2355	C19orf53(+60.16kb)|C19orf57(-43.42kb)|CC2D1A(-67.2kb)|CCDC130(+75.64kb)|DCAF15(-113.6kb)|IL27RA(-192.8kb)|LOC284454(+2.648kb)|MIR23A(+2.278kb)|MIR24-2(+2.578kb)|MIR27A(+2.42kb)|MIR181C(-35.76kb)|MIR181D(-35.94kb)|MRI1(+64.66kb)|NANOS3(-38.31kb)|PODNL1(-92.25kb)|RFX1(-122.6kb)|RLN3(-189.3kb)|ZSWIM4(+6.707kb)
2	161837324	rs12620689	A	G		3	5.341e-05	9.541e-05	1.689	1.6852	0.347	5.51	1.3814	1.4982	2.0872	TANK(-156.1kb)
6	158326198	rs2490565	G	A		3	5.342e-05	5.342e-05	1.2832	1.2832	0.5379	0	1.2503	1.1767	1.3907	SNX9(0)|SYNJ2(-76.69kb)|SYNJ2-IT1(-95.94kb)
10	81248115	rs12356768	G	C		3	5.347e-05	0.02272	0.8672	0.873	0.059	64.67	0.8754	0.975	0.7888	BEND3P3(-194.6kb)|EIF5AL1(-24.24kb)|PPIF(+133kb)|SFTPA1(-122.6kb)|SFTPA2(-67.49kb)|ZCCHC24(+42.73kb)|ZMIZ1(+171.8kb)
1	22114902	rs113737793	A	G		3	5.357e-05	5.357e-05	0.7772	0.7772	0.6267	0	0.8117	0.8167	0.7179	CELA3B(-188.5kb)|HSPG2(-33.83kb)|LDLRAD2(-23.86kb)|RAP1GAP(+119kb)|USP48(+5.214kb)
10	81249333	rs731491	G	A		3	5.39e-05	0.02187	0.8672	0.873	0.0614	64.16	0.875	0.9748	0.7897	BEND3P3(-193.4kb)|EIF5AL1(-23.02kb)|PPIF(+134.2kb)|SFTPA1(-121.4kb)|SFTPA2(-66.27kb)|ZCCHC24(+43.95kb)|ZMIZ1(+173kb)
4	63793562	rs1879461	A	G		3	5.391e-05	0.01821	0.8409	0.8484	0.0742	61.55	0.7521	0.9577	0.8625	.
14	90544392	rs76818375	G	T		3	5.392e-05	5.392e-05	0.6228	0.6228	0.5147	0	0.6109	0.5115	0.7246	EFCAB11(+123.3kb)|KCNK13(0)|PSMC1(-178.5kb)|TDP1(+33.28kb)
20	32465070	rs6141427	T	C		3	5.392e-05	0.0001594	1.1801	1.18	0.3208	12.04	1.2852	1.1227	1.1324	CHMP4B(+22.9kb)|E2F1(+190.9kb)|MIR4755(-171.9kb)|PXMP4(+156.9kb)|RALY(-116.4kb)|ZNF341(+85kb)
20	32467139	rs6120401	T	C		3	5.409e-05	0.0005937	1.1798	1.1793	0.2558	26.66	1.2953	1.1122	1.1319	CHMP4B(+24.97kb)|E2F1(+192.9kb)|MIR4755(-169.8kb)|PXMP4(+159kb)|RALY(-114.3kb)|ZNF341(+87.06kb)
11	84973611	rs75095640	C	T		3	5.456e-05	5.456e-05	1.3286	1.3286	0.7361	0	1.2369	1.334	1.4038	DLG2(0)
4	34063280	rs10027052	C	G		3	5.466e-05	8.212e-05	0.8065	0.8064	0.3502	4.68	0.7692	0.7509	0.8942	.
10	22811861	rs12769611	C	T		3	5.467e-05	5.467e-05	0.8693	0.8693	0.4792	0	0.8881	0.8077	0.8929	BMI1(+191.4kb)|COMMD3-BMI1(+191.4kb)|LOC100499489(+85kb)|PIP4K2A(-11.9kb)|SPAG6(+105.3kb)
8	47062450	rs111865150	A	G		2	5.504e-05	5.504e-05	2.0635	2.0635	0.8535	0	1.9851	2.1229	NA	.
6	133461980	rs117430002	T	C		2	5.51e-05	0.0006956	2.0503	2.0211	0.2524	23.65	1.5601	NA	2.3867	EYA4(-100.5kb)|LINC00326(+34.26kb)
9	108926704	rs74557749	A	G		3	5.522e-05	5.522e-05	0.6648	0.6648	0.9765	0	0.6692	0.6827	0.6457	.
10	81249357	rs2008131	G	T		3	5.529e-05	0.02297	0.8675	0.8733	0.0591	64.64	0.8749	0.9757	0.7895	BEND3P3(-193.4kb)|EIF5AL1(-23kb)|PPIF(+134.3kb)|SFTPA1(-121.3kb)|SFTPA2(-66.25kb)|ZCCHC24(+43.97kb)|ZMIZ1(+173.1kb)
10	81247362	rs7092604	G	T		3	5.531e-05	0.02501	0.8676	0.8736	0.055	65.52	0.8772	0.976	0.788	BEND3P3(-195.4kb)|EIF5AL1(-24.99kb)|PPIF(+132.3kb)|SFTPA1(-123.3kb)|SFTPA2(-68.24kb)|ZCCHC24(+41.98kb)|ZMIZ1(+171.1kb)
13	71414528	rs7992811	C	A		3	5.56e-05	5.56e-05	1.1458	1.1458	0.9929	0	1.1449	1.1532	1.1414	LINC00348(-174.7kb)
3	24889632	rs868569	G	C		3	5.562e-05	5.562e-05	1.1388	1.1388	0.7997	0	1.171	1.1249	1.117	.
6	55008560	rs6901139	A	C		3	5.573e-05	5.573e-05	0.8636	0.8636	0.8865	0	0.8793	0.8387	0.8624	FAM83B(+198.7kb)|GFRAL(-183.7kb)|HCRTR2(-30.51kb)
6	56290409	rs607935	A	C		3	5.582e-05	5.582e-05	1.2037	1.2037	0.5852	0	1.2599	1.239	1.1359	COL21A1(+178kb)|DST(-32.38kb)|RNU6-71P(0)
4	34236284	rs34808200	C	A		3	5.59e-05	0.0001046	0.7804	0.7808	0.3426	6.65	0.7028	0.7982	0.8643	.
7	27355950	rs17438410	A	G		3	5.598e-05	5.598e-05	0.7686	0.7686	0.8203	0	0.7425	0.7512	0.812	EVX1(+69.76kb)|HOTTIP(+109.8kb)|HOXA-AS3(+160.4kb)|HOXA-AS4(+144.4kb)|HOXA3(+189.3kb)|HOXA4(+185.6kb)|HOXA5(+172.7kb)|HOXA6(+168.6kb)|HOXA7(+159.7kb)|HOXA9(+150.8kb)|HOXA10(+136.1kb)|HOXA10-HOXA9(+136.1kb)|HOXA11(+131.1kb)|HOXA11-AS(+127kb)|HOXA13(+116.2kb)|MIR196B(+146.8kb)
4	33824262	rs1838404	A	G		3	5.602e-05	5.602e-05	0.7959	0.7959	0.5596	0	0.7386	0.8273	0.8428	.
4	33810391	rs13104973	C	A		3	5.608e-05	5.608e-05	0.7987	0.7987	0.4575	0	0.7361	0.8701	0.8225	.
4	33940192	rs12642034	A	C		3	5.613e-05	5.613e-05	0.8117	0.8117	0.4554	0	0.7606	0.7984	0.8825	.
9	21919974	rs10965183	C	T		3	5.627e-05	0.06862	1.1647	1.1726	0.0056	80.69	1.0088	1.2115	1.3256	C9orf53(-47.16kb)|CDKN2A(-47.78kb)|CDKN2B(-82.93kb)|CDKN2B-AS1(-74.82kb)|MTAP(+54kb)
3	70242111	rs6549296	T	C		3	5.628e-05	5.628e-05	0.8833	0.8833	0.4338	0	0.8674	0.948	0.8604	.
18	30045494	rs12604660	T	C		3	5.628e-05	0.0006946	0.8758	0.874	0.238	30.34	0.8521	0.8215	0.9387	GAREM(0)|WBP11P1(-46.13kb)
10	49575993	rs734371	C	G		3	5.629e-05	0.000149	1.1326	1.1319	0.329	10.05	1.1978	1.0708	1.11	ARHGAP22(-78.07kb)|FRMPD2(+93.05kb)|FRMPD2P1(+192.8kb)|MAPK8(0)
8	133357494	rs6988532	C	G		3	5.65e-05	5.65e-05	0.8821	0.8821	0.691	0	0.9089	0.8845	0.8546	KCNQ3(0)
10	81261043	rs1250766	G	A		3	5.654e-05	0.01714	0.8654	0.8707	0.0749	61.41	0.8738	0.9697	0.789	BEND3P3(-181.7kb)|EIF5AL1(-11.31kb)|PPIF(+146kb)|SFTPA1(-109.7kb)|SFTPA2(-54.56kb)|ZCCHC24(+55.66kb)|ZMIZ1(+184.8kb)
19	48881876	rs111354716	T	C		3	5.654e-05	5.654e-05	1.4053	1.4053	0.946	0	1.4434	1.4347	1.3599	CARD8(+122.7kb)|CCDC114(+58.54kb)|CYTH2(-90.59kb)|EMP3(+48.07kb)|GRIN2D(-16.26kb)|GRWD1(-67.15kb)|KCNJ14(-77.09kb)|KDELR1(-3.95kb)|LMTK3(-106.7kb)|LOC100505812(+120.4kb)|SULT2B1(-173.6kb)|SYNGR4(+2.242kb)|TMEM143(+14.69kb)|ZNF114(+91.01kb)
4	33810431	rs13126161	A	G		3	5.659e-05	5.659e-05	0.7988	0.7988	0.4658	0	0.7369	0.8693	0.8224	.
4	33938010	rs13133476	T	A		3	5.66e-05	5.66e-05	0.8118	0.8118	0.4502	0	0.7604	0.7984	0.8832	.
4	33941745	rs1446287	T	C		3	5.666e-05	5.666e-05	0.8118	0.8118	0.4553	0	0.7607	0.7985	0.8826	.
10	26952899	rs61838926	G	A		3	5.685e-05	9.858e-05	0.5733	0.5733	0.3436	6.4	0.6085	0.4344	0.7122	ABI1(-82.62kb)|APBB1IP(+96.17kb)|LINC00202-2(+10.52kb)|LINC00264(+69.65kb)|PDSS1(-33.7kb)
3	68485620	rs9683295	G	A		3	5.689e-05	0.004608	0.8548	0.8596	0.1573	45.94	0.8007	0.9656	0.8401	FAM19A1(0)
4	190117139	rs6553293	C	T		3	5.689e-05	5.689e-05	1.3039	1.3039	0.6059	0	1.2182	1.2956	1.4181	.
4	33906982	rs28836841	T	C		3	5.7e-05	5.7e-05	0.8124	0.8124	0.6352	0	0.7646	0.8419	0.8479	.
6	54972232	rs56003919	T	C		3	5.726e-05	5.726e-05	0.8642	0.8642	0.8343	0	0.8851	0.8362	0.8591	FAM83B(+162.3kb)|HCRTR2(-66.84kb)
4	33916706	rs13133479	G	C		3	5.727e-05	5.727e-05	0.8123	0.8123	0.6655	0	0.767	0.8386	0.847	.
7	114747766	rs7788565	G	A		3	5.727e-05	5.727e-05	1.1351	1.1351	0.4455	0	1.1944	1.089	1.1089	MDFIC(+87.8kb)
8	96187103	rs297574	G	A		3	5.742e-05	0.02577	0.8781	0.8804	0.0466	67.4	0.9445	0.9161	0.7923	C8orf37(-70.04kb)|C8orf69(-32.13kb)|LOC100616530(-93.96kb)|MIR3150A(+101.9kb)|MIR3150B(+101.9kb)|NDUFAF6(+116.2kb)|PLEKHF2(+18.19kb)
10	81260567	rs1250765	G	A		3	5.752e-05	0.01718	0.8657	0.8709	0.0751	61.37	0.8741	0.9697	0.7893	BEND3P3(-182.2kb)|EIF5AL1(-11.79kb)|PPIF(+145.5kb)|SFTPA1(-110.1kb)|SFTPA2(-55.04kb)|ZCCHC24(+55.18kb)|ZMIZ1(+184.3kb)
10	60668547	rs10740763	C	T		3	5.766e-05	0.0003679	1.1346	1.1339	0.2866	19.99	1.2078	1.1051	1.0835	BICC1(+79.7kb)|FAM133CP(+191.3kb)
9	112832326	rs491533	C	T		3	5.769e-05	0.0001254	0.881	0.8813	0.3363	8.24	0.8298	0.9254	0.9036	AKAP2(0)|C9orf152(-129.5kb)|PALM2(+118.6kb)|PALM2-AKAP2(0)|TXN(-173.8kb)
4	33899462	rs13136224	A	G		3	5.77e-05	5.77e-05	0.7973	0.7973	0.6148	0	0.7445	0.8311	0.8362	.
7	114750436	rs12706009	T	C		3	5.771e-05	5.771e-05	1.1352	1.1352	0.4334	0	1.1957	1.0893	1.1076	MDFIC(+90.47kb)
4	33868288	rs13125172	G	C		3	5.807e-05	5.807e-05	0.7967	0.7967	0.5926	0	0.742	0.8277	0.8401	.
1	161883083	rs4657121	A	G		3	5.818e-05	5.818e-05	1.146	1.146	0.742	0	1.1129	1.1432	1.1822	ATF6(0)|DUSP12(+156.1kb)|FCRLA(+198.9kb)|FCRLB(+185.2kb)|NOS1AP(-156.5kb)|OLFML2B(-69.9kb)
4	186801064	rs78368938	T	C		3	5.823e-05	5.823e-05	0.7297	0.7297	0.3814	0	0.8128	0.619	0.7133	SORBS2(0)|TLR3(-189.2kb)
6	92942447	rs2325434	C	T		3	5.827e-05	0.01612	1.1367	1.1322	0.0762	61.16	1.2471	1.0736	1.0748	.
6	55007612	rs9475166	T	C		3	5.828e-05	5.828e-05	0.8641	0.8641	0.8877	0	0.8795	0.8391	0.8631	FAM83B(+197.7kb)|GFRAL(-184.7kb)|HCRTR2(-31.46kb)
4	34073418	rs7676914	G	T		3	5.829e-05	0.0004812	0.8074	0.8067	0.266	24.49	0.7598	0.7526	0.9067	.
4	33802955	rs68074884	G	A		3	5.833e-05	5.833e-05	0.7991	0.7991	0.4853	0	0.7391	0.8687	0.8211	.
10	81242370	rs10762868	C	G		3	5.855e-05	0.01599	0.8677	0.873	0.0806	60.29	0.8791	0.9679	0.7926	EIF5AL1(-29.99kb)|PPIF(+127.3kb)|SFTPA1(-128.3kb)|SFTPA2(-73.24kb)|ZCCHC24(+36.99kb)|ZMIZ1(+166.1kb)
6	55007120	rs10440849	C	G		3	5.862e-05	5.862e-05	0.8642	0.8642	0.8869	0	0.8799	0.8394	0.8628	FAM83B(+197.2kb)|GFRAL(-185.1kb)|HCRTR2(-31.95kb)
3	143105881	rs6440167	C	T		3	5.879e-05	5.879e-05	0.8508	0.8508	0.9206	0	0.8629	0.8271	0.8546	SLC9A9(0)|SLC9A9-AS1(+39.97kb)
10	22813283	rs4388776	T	C		3	5.883e-05	5.883e-05	0.8699	0.8699	0.4715	0	0.8903	0.8076	0.8924	BMI1(+192.9kb)|COMMD3-BMI1(+192.9kb)|LOC100499489(+86.42kb)|PIP4K2A(-10.48kb)|SPAG6(+106.7kb)
6	56184859	rs62411945	G	A		3	5.891e-05	5.891e-05	1.3167	1.3167	0.5875	0	1.4605	1.2538	1.2554	COL21A1(+72.48kb)|DST(-137.9kb)|RNU6-71P(0)
6	92953536	rs1444142	G	C		3	5.894e-05	0.01247	1.137	1.1331	0.0899	58.49	1.2441	1.0796	1.0745	.
7	114745678	rs10282722	A	T		3	5.897e-05	5.897e-05	1.1349	1.1349	0.4015	0	1.1964	1.0797	1.1127	MDFIC(+85.71kb)
4	34074422	rs6531291	G	A		3	5.904e-05	0.0004978	0.8076	0.8068	0.2647	24.76	0.7598	0.7528	0.9071	.
13	92561474	rs117944313	A	G		3	5.913e-05	5.913e-05	0.607	0.607	0.741	0	0.6862	0.555	0.5703	GPC5(0)
10	81255554	rs1250758	A	G		3	5.918e-05	0.01325	0.8667	0.8718	0.0914	58.2	0.8754	0.9666	0.7939	BEND3P3(-187.2kb)|EIF5AL1(-16.8kb)|PPIF(+140.5kb)|SFTPA1(-115.1kb)|SFTPA2(-60.05kb)|ZCCHC24(+50.17kb)|ZMIZ1(+179.3kb)
14	94550820	rs117637701	C	T		3	5.925e-05	5.925e-05	0.6546	0.6546	0.7906	0	0.6266	0.7424	0.6301	ASB2(+107.7kb)|DDX24(+3.262kb)|FAM181A(+154.9kb)|FAM181A-AS1(+158.1kb)|IFI27(-26.26kb)|IFI27L1(0)|IFI27L2(-43.3kb)|LINC00521(+72.78kb)|OTUB2(+35.54kb)|PPP4R4(-89.83kb)|SERPINA10(-198.8kb)
8	940157	rs11137119	C	G		3	5.935e-05	5.935e-05	1.1469	1.1469	0.3781	0	1.1616	1.2224	1.0847	ERICH1-AS1(0)
9	112830871	rs567073	A	G		3	5.961e-05	5.961e-05	0.8812	0.8812	0.3819	0	0.8332	0.9237	0.9019	AKAP2(0)|C9orf152(-131kb)|PALM2(+117.1kb)|PALM2-AKAP2(0)|TXN(-175.2kb)
13	39950178	rs9548748	T	C		3	5.963e-05	5.963e-05	0.8833	0.8833	0.4939	0	0.9045	0.9158	0.8433	LHFP(0)
11	8349208	rs74574685	G	A		3	5.969e-05	5.969e-05	0.6484	0.6484	0.6291	0	0.6269	0.5763	0.7456	LMO1(+59.03kb)|RIC3(+158.6kb)|STK33(-64.21kb)
10	81260180	rs1250762	T	C		3	5.996e-05	0.01839	0.8661	0.8714	0.0721	61.98	0.8743	0.9709	0.7893	BEND3P3(-182.6kb)|EIF5AL1(-12.18kb)|PPIF(+145.1kb)|SFTPA1(-110.5kb)|SFTPA2(-55.43kb)|ZCCHC24(+54.8kb)|ZMIZ1(+183.9kb)
1	102532785	rs72733603	T	C		3	6.004e-05	6.004e-05	0.5979	0.5979	0.7126	0	0.5442	0.7051	0.5869	DNAJA1P5(+172.5kb)|OLFM3(+70kb)
8	133358503	rs1379581	G	A		3	6.022e-05	6.022e-05	0.8827	0.8827	0.6567	0	0.9109	0.8865	0.8532	KCNQ3(0)
4	63787858	rs10034146	C	T		3	6.027e-05	0.01977	0.8426	0.8502	0.0723	61.94	0.7539	0.9599	0.8639	.
7	114720359	rs439321	A	T		3	6.031e-05	6.031e-05	1.1317	1.1317	0.7098	0	1.1685	1.1201	1.1035	MDFIC(+60.39kb)
9	112830614	rs475530	A	G		3	6.052e-05	6.052e-05	0.8814	0.8814	0.3818	0	0.8334	0.9244	0.9015	AKAP2(0)|C9orf152(-131.2kb)|PALM2(+116.9kb)|PALM2-AKAP2(0)|TXN(-175.5kb)
6	125918763	rs12202920	C	A		3	6.057e-05	0.004165	1.1328	1.1376	0.1275	51.45	1.0485	1.2207	1.1666	HEY2(-152kb)|LOC643623(-76.74kb)|NCOA7(-183.5kb)
20	4616911	rs11697146	T	C		3	6.057e-05	6.057e-05	1.2747	1.2747	0.6502	0	1.2973	1.1602	1.3324	PRND(-85.64kb)|PRNP(-49.88kb)|PRNT(-95.02kb)|RASSF2(-143.8kb)
1	161914752	rs56041058	A	G		3	6.063e-05	6.063e-05	1.1462	1.1462	0.8151	0	1.1165	1.1506	1.1737	ATF6(0)|DUSP12(+187.8kb)|NOS1AP(-124.8kb)|OLFML2B(-38.23kb)
6	55006797	rs7767652	T	C		3	6.075e-05	6.075e-05	0.8645	0.8645	0.888	0	0.88	0.8397	0.8634	FAM83B(+196.9kb)|GFRAL(-185.5kb)|HCRTR2(-32.27kb)
4	33807199	rs67910708	A	C		3	6.079e-05	6.079e-05	0.7995	0.7995	0.4843	0	0.7394	0.8693	0.8214	.
10	81260240	rs1250763	A	G		3	6.085e-05	0.0184	0.8662	0.8715	0.0724	61.92	0.8744	0.9709	0.7893	BEND3P3(-182.5kb)|EIF5AL1(-12.12kb)|PPIF(+145.2kb)|SFTPA1(-110.5kb)|SFTPA2(-55.37kb)|ZCCHC24(+54.86kb)|ZMIZ1(+184kb)
10	81223803	rs10762865	G	A		3	6.094e-05	0.01165	0.8678	0.8728	0.1005	56.48	0.8834	0.9608	0.7948	EIF5AL1(-48.55kb)|PPIF(+108.7kb)|SFTPA1(-146.9kb)|SFTPA2(-91.8kb)|ZCCHC24(+18.42kb)|ZMIZ1(+147.5kb)
6	133304157	rs144835821	A	T		2	6.096e-05	0.003585	2.0627	2.0173	0.1893	41.96	1.5343	NA	2.494	LINC00326(-105.1kb)|RPS12(+165.5kb)|SLC18B1(+184.4kb)|SNORA33(+165.7kb)|SNORD100(+166.1kb)|SNORD101(+167.6kb)
6	92950534	rs7765501	G	A		3	6.107e-05	0.01332	1.1366	1.1327	0.0868	59.09	1.2445	1.0792	1.0736	.
2	127862653	rs744368	G	T		3	6.11e-05	6.11e-05	1.1602	1.1602	0.4248	0	1.2296	1.148	1.1006	BIN1(0)|CYP27C1(-78.76kb)|ERCC3(-152.2kb)|MAP3K2(-193.6kb)
13	39953327	rs532238	A	C		3	6.11e-05	6.11e-05	1.1415	1.1415	0.3941	0	1.1226	1.0756	1.2032	LHFP(0)
18	56204644	rs12963422	G	T		3	6.121e-05	0.007847	0.8802	0.8843	0.1262	51.69	0.9031	0.9552	0.814	ALPK2(0)|MALT1(-134kb)|MIR122(+86.25kb)|MIR3591(+86.26kb)|NEDD4L(+135.9kb)
4	33812733	rs35999284	G	A		3	6.142e-05	6.142e-05	0.7996	0.7996	0.462	0	0.737	0.8695	0.8245	.
17	45906599	rs55916822	C	T		3	6.152e-05	0.1299	1.2987	1.2728	0.0027	83.1	1.1803	1.0125	1.7055	CDK5RAP3(-141.3kb)|COPZ2(-196.9kb)|KPNB1(+145.6kb)|LOC100506325(-69.15kb)|LRRC46(-2.393kb)|MRPL10(0)|OSBPL7(+7.452kb)|PNPO(-112.3kb)|PRR15L(-122.7kb)|SCRN2(-8.447kb)|SP2(-66.92kb)|SP6(-15.68kb)|TBKBP1(+117.2kb)|TBX21(+83.11kb)
6	54985946	rs9475151	T	C		3	6.168e-05	6.168e-05	0.8648	0.8648	0.8656	0	0.8845	0.842	0.8582	FAM83B(+176kb)|HCRTR2(-53.12kb)
11	127119528	rs12272476	G	T		3	6.17e-05	0.003373	0.7343	0.7234	0.1338	50.28	0.8787	0.6504	0.6367	.
3	68490366	rs73111018	A	G		3	6.173e-05	0.0006047	0.8407	0.8424	0.2667	24.34	0.8328	0.9381	0.7825	FAM19A1(0)
6	56197961	rs62412405	T	C		3	6.174e-05	6.174e-05	1.3169	1.3169	0.5957	0	1.4586	1.2506	1.2582	COL21A1(+85.58kb)|DST(-124.8kb)|RNU6-71P(0)
19	49432219	rs12976795	A	T		2	6.174e-05	0.04009	1.4081	1.4007	0.0549	72.86	1.1863	1.6473	NA	BAX(-25.9kb)|BCAT2(+117.9kb)|C19orf73(-189.4kb)|CGB(-93.91kb)|CGB1(-106.6kb)|CGB2(-102.9kb)|CGB5(-114.9kb)|CGB7(-125.3kb)|CGB8(-118.7kb)|DHDH(-4.719kb)|FGF21(+170.6kb)|FTL(-36.35kb)|FUT1(+173.6kb)|GYS1(-39.16kb)|HSD17B14(+92.28kb)|IZUMO1(+182.1kb)|KCNA7(-138.5kb)|LHB(-87.02kb)|LIN7B(-185.4kb)|LOC101059948(-89.28kb)|NTF4(-132.2kb)|NUCB1(+5.679kb)|PLEKHA4(+60.34kb)|PPFIA3(-190.4kb)|PPP1R15A(+52.9kb…
4	63785331	rs11935716	A	G		3	6.197e-05	0.01031	0.8401	0.8467	0.1115	54.42	0.7568	0.9464	0.8648	.
10	22811413	rs11013032	C	T		3	6.198e-05	6.198e-05	0.8702	0.8702	0.4682	0	0.8873	0.8078	0.8961	BMI1(+191kb)|COMMD3-BMI1(+191kb)|LOC100499489(+84.56kb)|PIP4K2A(-12.35kb)|SPAG6(+104.9kb)
4	184839303	rs67853527	T	C		3	6.214e-05	0.04075	0.7652	0.7797	0.0382	69.38	0.6303	0.954	0.8081	ENPP6(-170.6kb)|STOX2(0)
4	33849909	rs67574316	A	G		3	6.216e-05	6.216e-05	0.7957	0.7957	0.5854	0	0.7404	0.8276	0.8406	.
4	40198846	rs2245466	C	G		3	6.239e-05	6.239e-05	0.8646	0.8646	0.6623	0	0.8336	0.8597	0.9001	CHRNA9(-138.5kb)|LOC344967(+140kb)|N4BP2(+38.97kb)|RHOH(0)
5	55223755	rs62363861	A	G		3	6.242e-05	0.0001352	1.2977	1.2977	0.3338	8.87	1.4798	1.1579	1.2723	ANKRD55(-171.8kb)|DDX4(+110.8kb)|FLJ31104(-67.24kb)|IL6ST(-7.169kb)|IL31RA(+5.073kb)
6	55005418	rs7761418	T	A		3	6.249e-05	6.249e-05	0.8648	0.8648	0.8804	0	0.8811	0.8394	0.8631	FAM83B(+195.5kb)|GFRAL(-186.8kb)|HCRTR2(-33.65kb)
16	54982880	rs77513659	T	C		3	6.255e-05	6.255e-05	0.6932	0.6932	0.4096	0	0.7922	0.5916	0.7122	CRNDE(+19.78kb)|IRX5(+14.48kb)
4	33922356	rs13113071	C	T		3	6.259e-05	6.259e-05	0.8137	0.8137	0.6667	0	0.7686	0.8403	0.8481	.
19	36512906	rs148138352	T	G		2	6.261e-05	6.261e-05	0.4668	0.4668	0.5069	0	0.5239	0.4065	NA	ALKBH6(+7.765kb)|APLP1(+142.2kb)|CAPNS1(-118kb)|CLIP3(0)|COX7A1(-128.9kb)|HCST(+117.7kb)|KIRREL2(+154.9kb)|LRFN3(+76.81kb)|NFKBID(+121.4kb)|NPHS1(+170kb)|OVOL3(-89.2kb)|POLR2I(-91.7kb)|SDHAF1(+25.69kb)|SYNE4(+13.23kb)|TBCB(-92.98kb)|THAP8(-12.98kb)|TYROBP(+113.7kb)|WDR62(-32.88kb)|ZNF146(-192.6kb)|ZNF565(-160.3kb)
4	184839844	rs28667509	A	G		3	6.268e-05	0.03293	0.7686	0.7821	0.0488	66.88	0.6354	0.9297	0.8313	ENPP6(-170kb)|STOX2(0)
8	47434617	rs117764750	G	A		2	6.275e-05	6.275e-05	2.5317	2.5317	0.7715	0	2.7483	2.3954	NA	.
10	81244627	rs11003030	G	A		3	6.279e-05	0.02294	0.8685	0.8742	0.0618	64.08	0.8773	0.9752	0.7905	BEND3P3(-198.1kb)|EIF5AL1(-27.73kb)|PPIF(+129.5kb)|SFTPA1(-126.1kb)|SFTPA2(-70.98kb)|ZCCHC24(+39.24kb)|ZMIZ1(+168.3kb)
16	24858657	rs2431775	C	A		2	6.297e-05	0.00497	2.1772	2.1659	0.1573	50	2.8371	1.6363	NA	ARHGAP17(-72.05kb)|LOC554206(-184.4kb)|SLC5A11(0)|TNRC6A(+21.11kb)
4	33912277	rs4144789	A	G		3	6.376e-05	6.376e-05	0.8139	0.8139	0.6587	0	0.7681	0.8407	0.8489	.
10	49542733	rs10776596	C	A		3	6.403e-05	8.835e-05	1.1316	1.1314	0.3553	3.36	1.1951	1.0734	1.1085	ARHGAP22(-111.3kb)|FRMPD2(+59.79kb)|FRMPD2P1(+159.5kb)|MAPK8(0)
10	81250783	rs10160081	C	G		3	6.41e-05	0.02106	0.8676	0.8732	0.0668	63.05	0.875	0.9745	0.7907	BEND3P3(-191.9kb)|EIF5AL1(-21.57kb)|PPIF(+135.7kb)|SFTPA1(-119.9kb)|SFTPA2(-64.82kb)|ZCCHC24(+45.4kb)|ZMIZ1(+174.5kb)
3	143118810	rs1404573	C	T		3	6.441e-05	6.441e-05	0.8515	0.8515	0.9205	0	0.8579	0.8269	0.8604	SLC9A9(0)|SLC9A9-AS1(+52.9kb)
4	33948401	rs2028868	T	C		3	6.444e-05	6.444e-05	0.815	0.815	0.5235	0	0.7598	0.8359	0.8657	.
8	133445778	rs7841732	C	T		3	6.465e-05	0.0003655	1.1631	1.1616	0.2929	18.55	1.1385	1.0804	1.2504	HPYR1(-127kb)|KCNQ3(0)|LRRC6(-138.4kb)
11	74391679	rs34474423	T	C		3	6.47e-05	6.47e-05	1.1701	1.1701	0.6202	0	1.1502	1.2507	1.1396	CHRDL2(-15.79kb)|LIPT2(+186.9kb)|MIR4696(-39.63kb)|POLD3(+37.57kb)|RNF169(-68.23kb)|XRRA1(-160.3kb)
11	84984715	rs7924587	C	T		3	6.477e-05	6.477e-05	1.3305	1.3305	0.6486	0	1.2248	1.3276	1.4265	DLG2(0)
10	49568078	rs2698766	T	C		3	6.481e-05	0.0001263	1.1315	1.131	0.3413	6.98	1.1958	1.0713	1.1088	ARHGAP22(-85.99kb)|FRMPD2(+85.14kb)|FRMPD2P1(+184.8kb)|MAPK8(0)
6	56188218	rs11964876	T	C		3	6.483e-05	6.483e-05	1.315	1.315	0.5795	0	1.4606	1.249	1.2543	COL21A1(+75.84kb)|DST(-134.6kb)|RNU6-71P(0)
1	72209846	rs1459790	A	G		3	6.488e-05	0.0006833	1.1366	1.1392	0.2426	29.39	1.0731	1.2348	1.1388	NEGR1(0)|NEGR1-IT1(-50.07kb)
13	101880646	rs17485827	A	C		3	6.497e-05	6.497e-05	1.2757	1.2757	0.3809	0	1.2668	1.1205	1.3874	NALCN(0)|NALCN-AS1(+169kb)
3	143120237	rs4839632	G	A		3	6.506e-05	6.506e-05	0.8516	0.8516	0.9079	0	0.8567	0.8255	0.8627	SLC9A9(0)|SLC9A9-AS1(+54.32kb)
12	122069663	rs11609269	C	T		2	6.511e-05	0.004526	0.5218	0.4961	0.156	50.3	0.6072	0.3669	NA	KDM2B(+50.74kb)|LOC338799(-163.5kb)|MORN3(-19.63kb)|ORAI1(0)|RHOF(-146kb)|SETD1B(-173kb)|TMEM120B(-80.99kb)
10	81251748	rs1250752	C	A		3	6.518e-05	0.02218	0.8681	0.8737	0.0639	63.65	0.8735	0.9763	0.7915	BEND3P3(-191kb)|EIF5AL1(-20.61kb)|PPIF(+136.7kb)|SFTPA1(-118.9kb)|SFTPA2(-63.86kb)|ZCCHC24(+46.36kb)|ZMIZ1(+175.5kb)
11	84944706	rs72947961	G	C		3	6.521e-05	6.521e-05	1.3292	1.3292	0.5836	0	1.2101	1.334	1.4333	DLG2(0)
10	49591456	rs2463960	A	G		3	6.523e-05	0.0003276	1.1311	1.1299	0.2997	17.01	1.1991	1.0675	1.1073	ARHGAP22(-62.61kb)|FRMPD2(+108.5kb)|MAPK8(0)
11	84944542	rs17810291	A	G		3	6.542e-05	6.542e-05	1.3291	1.3291	0.584	0	1.2101	1.3341	1.4331	DLG2(0)
4	151909011	rs3990470	A	G		3	6.553e-05	6.553e-05	0.6139	0.6139	0.9926	0	0.619	0.5975	0.6189	LRBA(0)|RPS3A(-111.7kb)|SH3D19(-132.4kb)|SNORD73A(-116kb)
5	167675926	rs2112553	C	T		3	6.555e-05	0.009628	0.8817	0.8809	0.0946	57.59	0.8167	0.8744	0.9552	TENM2(0)|WWC1(-43.14kb)
2	116319306	rs6744736	C	T		3	6.56e-05	6.56e-05	0.8702	0.8702	0.4779	0	0.8339	0.9293	0.8686	DPP10(0)
6	164549376	rs73020537	C	T		3	6.561e-05	6.561e-05	1.1767	1.1767	0.5384	0	1.1081	1.2178	1.2177	.
8	96186655	rs297573	C	T		3	6.577e-05	0.02599	0.8793	0.8812	0.0476	67.15	0.9483	0.9117	0.7946	C8orf37(-70.48kb)|C8orf69(-32.58kb)|LOC100616530(-94.41kb)|MIR3150A(+101.4kb)|MIR3150B(+101.4kb)|NDUFAF6(+115.7kb)|PLEKHF2(+17.74kb)
6	56199161	rs11968872	T	C		3	6.579e-05	6.579e-05	1.3156	1.3156	0.61	0	1.4528	1.2491	1.2587	COL21A1(+86.78kb)|DST(-123.6kb)|RNU6-71P(0)
16	69753259	rs45467396	G	A		3	6.594e-05	0.006851	0.6145	0.6147	0.1187	53.07	0.4817	0.5638	0.8505	MIR1538(+153.5kb)|NFAT5(+14.69kb)|NOB1(-22.5kb)|NQO1(0)|WWP2(-42.93kb)
22	19156543	rs712963	G	A		3	6.596e-05	6.596e-05	1.1337	1.1337	0.9019	0	1.1163	1.1588	1.1358	CLTCL1(-10.44kb)|DGCR2(+46.58kb)|DGCR5(+174.4kb)|DGCR9(+148.8kb)|DGCR10(+145.5kb)|DGCR11(+120.7kb)|DGCR14(+24.35kb)|GSC2(+18.75kb)|HIRA(-161.7kb)|LOC100652736(-2.675kb)|SLC25A1(-6.544kb)|TSSK2(+36.41kb)
8	27482870	rs499046	T	C		3	6.608e-05	6.608e-05	0.8804	0.8804	0.7029	0	0.8899	0.91	0.8521	CCDC25(-108kb)|CHRNA2(+146.1kb)|CLU(+10.54kb)|EPHX2(+80.43kb)|ESCO2(-149.2kb)|MIR3622A(-76.32kb)|MIR3622B(-76.32kb)|PBK(-184.3kb)|PTK2B(+166kb)|SCARA3(-8.706kb)
7	145513810	rs117924245	T	C		3	6.625e-05	0.0001929	0.5678	0.5659	0.3177	12.79	0.537	0.4171	0.733	.
6	55497584	rs12212074	G	C		3	6.628e-05	6.628e-05	0.6366	0.6366	0.7659	0	0.6968	0.6423	0.5706	BMP5(-122.7kb)|HMGCLL1(+53.57kb)
8	27487790	rs569214	T	G		3	6.631e-05	6.631e-05	0.8805	0.8805	0.6885	0	0.8889	0.9122	0.8518	CCDC25(-103kb)|CHRNA2(+151kb)|CLU(+15.46kb)|EPHX2(+85.35kb)|ESCO2(-144.3kb)|MIR3622A(-71.4kb)|MIR3622B(-71.4kb)|PBK(-179.3kb)|PTK2B(+170.9kb)|SCARA3(-3.786kb)
10	49591718	rs2698761	T	C		3	6.64e-05	0.0003785	1.1309	1.1296	0.2936	18.4	1.1994	1.0666	1.1072	ARHGAP22(-62.35kb)|FRMPD2(+108.8kb)|MAPK8(0)
8	19490663	rs117779957	T	C		3	6.65e-05	6.65e-05	1.5521	1.5521	0.4956	0	1.7707	1.2901	1.6188	CSGALNACT1(0)|INTS10(-184.3kb)
10	26964362	rs117380133	A	G		3	6.659e-05	6.659e-05	0.5804	0.5804	0.4668	0	0.6099	0.4615	0.6955	ABI1(-71.16kb)|APBB1IP(+107.6kb)|LINC00202-2(+21.98kb)|LINC00264(+81.11kb)|PDSS1(-22.23kb)
4	63747771	rs72633022	T	C		3	6.678e-05	0.005844	0.8398	0.8453	0.1485	47.56	0.7582	0.9241	0.8813	.
4	190118907	rs6820247	C	T		3	6.679e-05	6.679e-05	1.3005	1.3005	0.5914	0	1.2122	1.2943	1.4164	.
10	49540940	rs10776595	G	A		3	6.684e-05	7.7e-05	1.1313	1.1312	0.3624	1.48	1.1941	1.0735	1.1085	ARHGAP22(-113.1kb)|FRMPD2(+58kb)|FRMPD2P1(+157.7kb)|MAPK8(0)
3	143129061	rs9849797	A	G		3	6.701e-05	6.701e-05	0.8515	0.8515	0.9073	0	0.857	0.8251	0.8623	SLC9A9(0)|SLC9A9-AS1(+63.15kb)
15	67120415	rs11638562	C	T		3	6.715e-05	9.205e-05	0.8126	0.8129	0.3557	3.25	0.7468	0.9	0.8296	SMAD6(+46.08kb)
9	31894764	rs7024321	T	G		3	6.724e-05	0.0008623	0.8562	0.8571	0.2473	28.43	0.7908	0.8754	0.917	.
9	112831013	rs561222	A	T		3	6.729e-05	0.0001602	0.882	0.8824	0.3319	9.34	0.8309	0.9291	0.9028	AKAP2(0)|C9orf152(-130.8kb)|PALM2(+117.3kb)|PALM2-AKAP2(0)|TXN(-175.1kb)
15	67120510	rs11633339	A	C		3	6.734e-05	0.0001167	0.8127	0.8132	0.3464	5.67	0.7463	0.9017	0.8293	SMAD6(+46.17kb)
15	67121132	rs142927108	C	G		3	6.739e-05	0.000105	0.8126	0.8131	0.3507	4.57	0.7468	0.9016	0.8285	SMAD6(+46.8kb)
9	108885333	rs1589031	G	A		3	6.749e-05	6.749e-05	0.6886	0.6886	0.9139	0	0.676	0.7354	0.6686	.
21	28991811	rs2187233	A	C		3	6.775e-05	0.009001	0.8843	0.8882	0.1174	53.33	0.8306	0.9759	0.8755	LINC00113(-102.9kb)|MIR5009(0)
4	184838494	rs4862268	T	C		3	6.806e-05	0.04313	0.7662	0.7807	0.0367	69.75	0.6298	0.9554	0.8103	ENPP6(-171.4kb)|STOX2(0)
3	143127587	rs4839633	G	A		3	6.812e-05	6.812e-05	0.8515	0.8515	0.9218	0	0.8555	0.8276	0.8622	SLC9A9(0)|SLC9A9-AS1(+61.67kb)
6	133328902	rs76157079	C	G		2	6.83e-05	6.83e-05	0.4981	0.4981	0.7825	0	0.5183	0.4697	NA	LINC00326(-80.32kb)|RPS12(+190.2kb)|SNORA33(+190.4kb)|SNORD100(+190.9kb)|SNORD101(+192.4kb)
5	104722916	rs76482840	A	T		3	6.833e-05	6.833e-05	1.2605	1.2605	0.459	0	1.1947	1.4411	1.229	.
6	54968520	rs7741358	A	G		3	6.837e-05	6.837e-05	0.8656	0.8656	0.8121	0	0.8895	0.8388	0.8571	FAM83B(+158.6kb)|HCRTR2(-70.55kb)
5	167676736	rs2337158	C	T		3	6.84e-05	0.01066	0.8822	0.8812	0.089	58.66	0.8176	0.872	0.9574	TENM2(0)|WWC1(-42.33kb)
8	27248546	rs13265352	T	C		3	6.856e-05	6.856e-05	0.7989	0.7989	0.8408	0	0.8049	0.7542	0.8217	CHRNA2(-68.73kb)|EPHX2(-99.97kb)|PTK2B(0)|STMN4(+132.6kb)|TRIM35(+79.71kb)
8	133355335	rs10087382	C	G		3	6.865e-05	6.865e-05	0.8817	0.8817	0.6705	0	0.8891	0.9158	0.853	KCNQ3(0)
14	22795806	rs12886518	A	G		3	6.887e-05	0.009369	0.8618	0.8577	0.0866	59.12	0.815	0.7985	0.9583	.
8	66496415	rs34279110	T	A		3	6.889e-05	6.889e-05	1.3087	1.3087	0.4475	0	1.4218	1.3821	1.1817	ARMC1(-18.28kb)|LOC286186(+21.51kb)|MTFR1(-60.47kb)|PDE7A(-130.2kb)
3	143124579	rs6803395	T	A		3	6.905e-05	6.905e-05	0.8517	0.8517	0.9106	0	0.8554	0.8263	0.8636	SLC9A9(0)|SLC9A9-AS1(+58.67kb)
4	33946092	rs1446286	A	T		3	6.937e-05	6.937e-05	0.8157	0.8157	0.5171	0	0.7602	0.8357	0.8676	.
5	167680532	rs35960642	G	A		3	6.94e-05	0.01377	0.882	0.8816	0.0766	61.08	0.8113	0.8828	0.9561	TENM2(0)|WWC1(-38.53kb)
3	41431230	rs187205214	G	A		2	6.942e-05	0.001341	1.9869	1.9407	0.2566	22.32	NA	1.4316	2.2334	CTNNB1(+149.3kb)|ULK4(0)
10	49521863	rs11101290	G	A		3	6.947e-05	9.887e-05	1.1311	1.1309	0.354	3.72	1.1951	1.0744	1.1061	ARHGAP22(-132.2kb)|FRMPD2(+38.92kb)|FRMPD2P1(+138.6kb)|MAPK8(0)
18	30042753	rs9950386	C	T		3	6.959e-05	0.002175	0.878	0.8751	0.175	42.62	0.8515	0.8187	0.9468	GAREM(0)|WBP11P1(-48.87kb)
5	167677870	rs6889555	C	T		3	6.963e-05	0.007255	0.8822	0.8815	0.1137	54	0.8201	0.8747	0.9529	TENM2(0)|WWC1(-41.19kb)
12	89235211	rs11105077	C	T		3	6.972e-05	6.972e-05	0.77	0.77	0.9911	0	0.7731	0.7593	0.7753	LOC728084(-169.7kb)
4	34074560	rs6531292	T	C		3	6.989e-05	0.0005057	0.8095	0.8089	0.2712	23.36	0.7595	0.7588	0.9082	.
3	143124927	rs4839593	A	T		3	6.996e-05	6.996e-05	0.8519	0.8519	0.91	0	0.8554	0.8264	0.8639	SLC9A9(0)|SLC9A9-AS1(+59.01kb)
19	14027121	rs7256924	G	T		2	7.007e-05	7.007e-05	0.537	0.537	0.4145	0	0.4752	0.6135	NA	C19orf53(+137.5kb)|C19orf57(+10.21kb)|C19orf67(-165.3kb)|CC2D1A(0)|CCDC130(+153kb)|DCAF15(-36.2kb)|IL27RA(-115.4kb)|LOC113230(-156.7kb)|LOC284454(+80.02kb)|MIR23A(+79.65kb)|MIR24-2(+79.95kb)|MIR27A(+79.79kb)|MIR181C(+41.5kb)|MIR181D(+41.3kb)|MRI1(+142kb)|NANOS3(+35.55kb)|PALM3(-137.1kb)|PODNL1(-14.88kb)|PRKACA(-175.4kb)|RFX1(-45.22kb)|RLN3(-111.9kb)|SAMD1(-172.1kb)|ZSWIM4(+84.08kb)
8	46981960	rs117470713	A	T		2	7.009e-05	7.009e-05	2.0642	2.0642	0.841	0	1.9771	2.1292	NA	.
10	22809648	rs10828311	C	T		3	7.035e-05	7.035e-05	0.8707	0.8707	0.5578	0	0.8859	0.8153	0.8932	BMI1(+189.2kb)|COMMD3-BMI1(+189.2kb)|LOC100499489(+82.79kb)|PIP4K2A(-14.12kb)|SPAG6(+103.1kb)
10	49620267	rs9888128	G	A		3	7.035e-05	7.215e-05	0.8844	0.8844	0.3669	0.27	0.8382	0.9314	0.9028	ARHGAP22(-33.8kb)|FRMPD2(+137.3kb)|MAPK8(0)
6	56252131	rs10456733	A	T		3	7.059e-05	7.059e-05	1.241	1.241	0.8032	0	1.2552	1.303	1.1929	COL21A1(+139.8kb)|DST(-70.65kb)|RNU6-71P(0)
10	45811168	rs74445258	C	T		3	7.088e-05	0.1219	0.6217	0.6523	0.0052	80.95	0.3894	0.8675	0.848	ALOX5(-58.46kb)|ANKRD30BP3(+129.7kb)|MARCH8(-141.6kb)|MIR3156-1(+151.6kb)|OR13A1(+0.112kb)|RSU1P2(+161.1kb)
20	32465159	rs6142039	T	C		3	7.121e-05	0.0004625	1.1766	1.1762	0.2803	21.38	1.287	1.1108	1.1305	CHMP4B(+22.99kb)|E2F1(+190.9kb)|MIR4755(-171.8kb)|PXMP4(+157kb)|RALY(-116.3kb)|ZNF341(+85.08kb)
6	56257793	rs10949000	C	T		3	7.124e-05	7.124e-05	1.2369	1.2369	0.8316	0	1.2038	1.3065	1.2229	COL21A1(+145.4kb)|DST(-64.99kb)|RNU6-71P(0)
1	46993203	rs72894662	G	A		3	7.125e-05	0.002777	0.6563	0.652	0.1667	44.19	0.7956	0.6852	0.4991	ATPAF1(-107.5kb)|DMBX1(+13.32kb)|EFCAB14(-147.6kb)|EFCAB14-AS1(-146.5kb)|FAAH(+113.7kb)|KNCN(-18.11kb)|LOC729041(+81.83kb)|MKNK1(-29.88kb)|MKNK1-AS1(-11.16kb)|MOB3C(-80.18kb)|NSUN4(+162.4kb)|TEX38(-144.3kb)
6	56252236	rs10456734	A	G		3	7.131e-05	7.131e-05	1.2408	1.2408	0.8026	0	1.255	1.303	1.1927	COL21A1(+139.9kb)|DST(-70.55kb)|RNU6-71P(0)
3	2637372	rs112527296	T	C		3	7.159e-05	7.159e-05	1.4217	1.4217	0.6264	0	1.391	1.6383	1.3269	CNTN4(0)
22	19159015	rs712959	T	C		3	7.164e-05	7.164e-05	1.1332	1.1332	0.9731	0	1.1228	1.1423	1.138	CLTCL1(-7.971kb)|DGCR2(+49.05kb)|DGCR5(+176.9kb)|DGCR9(+151.3kb)|DGCR10(+148kb)|DGCR11(+123.1kb)|DGCR14(+26.82kb)|GSC2(+21.22kb)|HIRA(-159.2kb)|LOC100652736(-0.203kb)|SLC25A1(-4.072kb)|TSSK2(+38.88kb)
2	127895487	rs6431223	A	G		3	7.167e-05	7.167e-05	0.8613	0.8613	0.6648	0	0.8363	0.8458	0.9016	BIN1(+30.58kb)|CYP27C1(-45.92kb)|ERCC3(-119.4kb)|MAP3K2(-160.8kb)
5	167680109	rs35200122	T	C		3	7.168e-05	0.01002	0.8824	0.8816	0.0943	57.65	0.8181	0.8735	0.9566	TENM2(0)|WWC1(-38.96kb)
10	22810279	rs2885992	C	A		3	7.183e-05	7.183e-05	0.8709	0.8709	0.559	0	0.8855	0.8157	0.8939	BMI1(+189.9kb)|COMMD3-BMI1(+189.9kb)|LOC100499489(+83.42kb)|PIP4K2A(-13.49kb)|SPAG6(+103.7kb)
4	190115713	rs114492429	A	G		3	7.199e-05	7.199e-05	0.7689	0.7689	0.6272	0	0.8163	0.7855	0.7064	.
1	14731789	rs116324134	C	T		2	7.204e-05	7.204e-05	0.5475	0.5475	0.9036	0	0.5393	0.5599	NA	KAZN(-193.4kb)
2	116235637	rs34884623	G	A		3	7.218e-05	7.218e-05	0.8609	0.8609	0.3824	0	0.8234	0.9391	0.8492	DPP10(0)
4	33911261	rs66706929	A	G		3	7.225e-05	7.225e-05	0.7999	0.7999	0.6017	0	0.7462	0.8274	0.8445	.
3	2725785	rs1878181	C	T		3	7.228e-05	7.228e-05	1.1636	1.1636	0.6028	0	1.1206	1.2403	1.1593	CNTN4(0)
18	30042099	rs1492832	G	A		3	7.243e-05	0.002049	0.8783	0.8755	0.1803	41.62	0.8529	0.8186	0.9463	GAREM(0)|WBP11P1(-49.53kb)
8	27488582	rs491672	G	A		3	7.249e-05	7.249e-05	0.8811	0.8811	0.6853	0	0.8887	0.9137	0.8524	CCDC25(-102.2kb)|CHRNA2(+151.8kb)|CLU(+16.25kb)|EPHX2(+86.14kb)|ESCO2(-143.5kb)|MIR3622A(-70.61kb)|MIR3622B(-70.61kb)|PBK(-178.6kb)|PTK2B(+171.7kb)|SCARA3(-2.994kb)
5	31061347	rs77518811	T	C		3	7.254e-05	7.254e-05	0.6337	0.6337	0.7026	0	0.6848	0.5482	0.6649	CDH6(-132.4kb)
5	167678938	rs10447203	G	A		3	7.276e-05	0.006989	0.8825	0.8818	0.1173	53.33	0.8207	0.8749	0.9527	TENM2(0)|WWC1(-40.13kb)
6	56193982	rs9382619	G	A		3	7.281e-05	7.281e-05	1.3122	1.3122	0.5613	0	1.4612	1.2332	1.2573	COL21A1(+81.6kb)|DST(-128.8kb)|RNU6-71P(0)
15	79298496	rs117070374	G	C		3	7.282e-05	0.0005856	1.4814	1.4727	0.2811	21.2	1.4311	1.213	1.7449	ADAMTS7(+194.7kb)|CTSH(+61.08kb)|LOC729911(-185.6kb)|MORF4L1(+108.4kb)|RASGRF1(0)
11	84933810	rs17148049	A	G		3	7.329e-05	7.329e-05	1.327	1.327	0.6555	0	1.2202	1.3344	1.4177	DLG2(0)
20	32465926	rs6120400	T	C		3	7.333e-05	0.0003341	1.1759	1.1756	0.298	17.4	1.2834	1.1127	1.1304	CHMP4B(+23.75kb)|E2F1(+191.7kb)|MIR4755(-171kb)|PXMP4(+157.8kb)|RALY(-115.5kb)|ZNF341(+85.85kb)
5	167675922	rs2112554	G	A		3	7.387e-05	0.009337	0.8825	0.8818	0.1001	56.54	0.8179	0.8764	0.9549	TENM2(0)|WWC1(-43.14kb)
13	71417921	rs1571316	C	T		3	7.392e-05	7.392e-05	1.1392	1.1392	0.9337	0	1.1233	1.1578	1.1429	LINC00348(-171.4kb)
10	49583234	rs2263102	A	C		3	7.413e-05	0.0001324	1.1304	1.13	0.3445	6.15	1.1942	1.07	1.1083	ARHGAP22(-70.83kb)|FRMPD2(+100.3kb)|FRMPD2P1(+200kb)|MAPK8(0)
6	56290542	rs607427	T	C		3	7.424e-05	7.424e-05	1.1991	1.1991	0.5142	0	1.2665	1.2292	1.1254	COL21A1(+178.2kb)|DST(-32.24kb)|RNU6-71P(0)
5	167679824	rs62385563	C	T		3	7.429e-05	0.008878	0.8827	0.882	0.1032	55.96	0.8187	0.8761	0.9546	TENM2(0)|WWC1(-39.24kb)
10	60615161	rs3125445	G	A		3	7.43e-05	0.00129	1.174	1.1734	0.2278	32.4	1.2674	1.1771	1.0812	BICC1(+26.32kb)|FAM133CP(+137.9kb)
12	6640910	rs112826761	C	T		2	7.43e-05	0.04959	0.554	0.5986	0.1193	58.8	0.4839	0.8253	NA	ACRBP(-106.3kb)|CD27(+80.03kb)|CD27-AS1(+80.23kb)|CHD4(-38.34kb)|COPS7A(-192.2kb)|GAPDH(-2.674kb)|IFFO1(-7.783kb)|ING4(-118.8kb)|LPAR5(-87.09kb)|LTBR(+140.2kb)|MRPL51(+38.44kb)|NCAPD2(0)|NOP2(-25.12kb)|PIANP(-162kb)|SCARNA10(+21.19kb)|SCARNA11(-49.73kb)|SCNN1A(+154.4kb)|TAPBPL(+69.42kb)|TNFRSF1A(+189.6kb)|VAMP1(+61.07kb)|ZNF384(-134.7kb)
13	71417857	rs6562650	T	A		3	7.449e-05	7.449e-05	1.1392	1.1392	0.932	0	1.1227	1.1572	1.144	LINC00348(-171.4kb)
6	54957928	rs115469097	G	C		3	7.455e-05	7.455e-05	0.8488	0.8488	0.4182	0	0.9072	0.8087	0.8134	FAM83B(+148kb)|HCRTR2(-81.14kb)
4	33925448	rs13134840	G	A		3	7.477e-05	7.477e-05	0.8154	0.8154	0.6804	0	0.7713	0.8407	0.8494	.
22	19521298	rs112135032	G	A		3	7.493e-05	7.493e-05	0.8312	0.8312	0.6252	0	0.7861	0.844	0.8708	C22orf39(+85.54kb)|CDC45(+13.16kb)|CLDN5(+8.438kb)|GP1BB(-189.8kb)|HIRA(+102.1kb)|LINC00895(-32.35kb)|MRPL40(+97.7kb)|SEPT5(-180.7kb)|SEPT5-GP1BB(-183.4kb)|UFD1L(+54.56kb)
8	27460368	rs9331928	C	G		3	7.501e-05	0.0007447	1.1407	1.1436	0.2422	29.48	1.081	1.2477	1.1331	CCDC25(-130.5kb)|CHRNA2(+123.6kb)|CLU(0)|EPHX2(+57.93kb)|ESCO2(-171.7kb)|MIR3622A(-98.82kb)|MIR3622B(-98.82kb)|PTK2B(+143.5kb)|SCARA3(-31.21kb)
18	30041994	rs1492830	G	A		3	7.51e-05	0.002221	0.8785	0.8757	0.1767	42.32	0.8529	0.8186	0.9471	GAREM(0)|WBP11P1(-49.63kb)
10	22808844	rs12768143	T	A		3	7.513e-05	7.513e-05	0.871	0.871	0.5126	0	0.8874	0.8118	0.8951	BMI1(+188.4kb)|COMMD3(+199.6kb)|COMMD3-BMI1(+188.4kb)|LOC100499489(+81.99kb)|PIP4K2A(-14.92kb)|SPAG6(+102.3kb)
15	97938797	rs12442398	G	A		3	7.518e-05	0.01071	0.8553	0.8493	0.0755	61.3	0.8073	0.7824	0.9564	.
12	76948106	rs117762977	A	G		3	7.533e-05	7.533e-05	0.6825	0.6825	0.5029	0	0.6055	0.7916	0.6987	OSBPL8(0)
11	86623082	rs117636528	C	G		3	7.562e-05	7.562e-05	0.7391	0.7391	0.9534	0	0.7533	0.7477	0.7144	FZD4(-33.63kb)|LOC100506368(-43.58kb)|OR7E2P(+54.09kb)|PRSS23(+100.8kb)|TMEM135(-125.8kb)
9	109136192	rs10978470	C	T		3	7.565e-05	7.565e-05	0.6822	0.6822	0.6623	0	0.6226	0.671	0.7623	.
6	54862461	rs72957245	T	C		3	7.576e-05	0.0001084	0.8486	0.8483	0.3516	4.33	0.9128	0.8109	0.806	FAM83B(+52.56kb)|HCRTR2(-176.6kb)
6	129400752	rs9482981	C	T		3	7.581e-05	8.936e-05	0.6571	0.6569	0.3608	1.91	0.5193	0.7635	0.695	LAMA2(0)
10	49611860	rs11598434	C	T		3	7.586e-05	0.0001528	0.8848	0.8852	0.3395	7.44	0.8374	0.9355	0.9022	ARHGAP22(-42.21kb)|FRMPD2(+128.9kb)|MAPK8(0)
6	54991318	rs113312346	A	T		3	7.589e-05	0.0006303	0.8528	0.8509	0.2585	26.08	0.9248	0.8061	0.809	FAM83B(+181.4kb)|HCRTR2(-47.75kb)
6	54987859	rs4560650	G	A		3	7.597e-05	7.597e-05	0.8665	0.8665	0.8463	0	0.8874	0.8412	0.8602	FAM83B(+178kb)|HCRTR2(-51.21kb)
4	151714449	rs6851019	T	C		3	7.612e-05	7.612e-05	1.6632	1.6632	0.784	0	1.5998	1.9636	1.5631	LRBA(0)
6	54987729	rs151260831	T	C		3	7.613e-05	7.613e-05	0.8665	0.8665	0.8463	0	0.8874	0.8412	0.8602	FAM83B(+177.8kb)|HCRTR2(-51.34kb)
10	81251800	rs1250753	G	T		3	7.614e-05	0.02248	0.8692	0.8747	0.0662	63.18	0.8735	0.9774	0.7933	BEND3P3(-190.9kb)|EIF5AL1(-20.56kb)|PPIF(+136.7kb)|SFTPA1(-118.9kb)|SFTPA2(-63.81kb)|ZCCHC24(+46.42kb)|ZMIZ1(+175.5kb)
3	13095532	rs6784345	A	G		3	7.673e-05	7.673e-05	0.7626	0.7626	0.7897	0	0.8062	0.727	0.7382	IQSEC1(0)
6	32626475	rs9273368	A	G		2	7.679e-05	7.679e-05	0.8079	0.8079	0.7279	0	0.7969	0.8289	NA	HLA-DOB(-154.1kb)|HLA-DQA1(+15.05kb)|HLA-DQA2(-82.69kb)|HLA-DQB1(-0.765kb)|HLA-DQB2(-97.4kb)|HLA-DRB1(+68.86kb)|HLA-DRB5(+128.5kb)|HLA-DRB6(+98.7kb)|LOC100507463(-185.4kb)|PSMB8(-182kb)|PSMB9(-195.5kb)|TAP1(-186.5kb)|TAP2(-163.1kb)
15	24278595	rs387171	A	G		3	7.703e-05	7.703e-05	1.1329	1.1329	0.406	0	1.1919	1.1233	1.0815	PWRN2(-131.3kb)
3	13073958	rs146282446	A	G		3	7.72e-05	7.72e-05	0.7506	0.7506	0.7773	0	0.7937	0.6989	0.741	CAND2(+197.6kb)|IQSEC1(0)|RPL32(+190.9kb)|SNORA7A(+192kb)
7	46716579	rs112231458	C	T		2	7.732e-05	0.01017	0.4724	0.4687	0.1205	58.53	0.6259	0.347	NA	.
6	56254699	rs10456187	G	A		3	7.736e-05	7.736e-05	1.2393	1.2393	0.8038	0	1.2526	1.3019	1.1918	COL21A1(+142.3kb)|DST(-68.08kb)|RNU6-71P(0)
6	158468964	rs2502602	C	G		3	7.742e-05	7.742e-05	0.7186	0.7186	0.4217	0	0.6789	0.8666	0.6706	GTF2H5(-120.4kb)|SERAC1(-61.57kb)|SNX9(+102.9kb)|SYNJ2(0)|SYNJ2-IT1(+45.55kb)
11	84943456	rs72947957	C	T		3	7.756e-05	7.756e-05	1.3246	1.3246	0.5614	0	1.2017	1.3335	1.4311	DLG2(0)
10	49623024	rs11101317	T	G		3	7.765e-05	0.0001378	0.885	0.8853	0.3447	6.11	0.8376	0.9344	0.9032	ARHGAP22(-31.04kb)|FRMPD2(+140.1kb)|MAPK8(0)
10	49625583	rs11101318	A	G		3	7.775e-05	0.0001367	0.885	0.8853	0.3451	6.02	0.8376	0.9343	0.9032	ARHGAP22(-28.48kb)|FRMPD2(+142.6kb)|MAPK8(0)
13	71414798	rs9572562	T	C		3	7.813e-05	7.813e-05	1.142	1.142	0.9734	0	1.1527	1.1392	1.1323	LINC00348(-174.5kb)
5	1473113	rs2962065	G	T		3	7.817e-05	7.817e-05	1.166	1.166	0.8409	0	1.1367	1.206	1.1679	CLPTM1L(+128.1kb)|LOC728613(-124.6kb)|LPCAT1(0)|MIR4457(+163.6kb)|SDHAP3(-98.96kb)|SLC6A3(+27.57kb)|TERT(+178kb)
11	84946223	rs2032410	T	G		3	7.818e-05	7.818e-05	1.3236	1.3236	0.6316	0	1.2174	1.3152	1.4231	DLG2(0)
20	18463897	rs2424212	T	C		3	7.844e-05	7.844e-05	1.2056	1.2056	0.4691	0	1.2601	1.2584	1.1156	DTD1(-104.7kb)|DZANK1(+16.07kb)|LINC00493(-84.18kb)|LINC00851(+101.8kb)|MIR3192(+12.56kb)|POLR3F(0)|RBBP9(-3.29kb)|SEC23B(-24.29kb)|ZNF133(+166.3kb)
10	81252784	rs1250754	G	A		3	7.884e-05	0.02268	0.8692	0.8747	0.0665	63.11	0.873	0.978	0.7935	BEND3P3(-189.9kb)|EIF5AL1(-19.57kb)|PPIF(+137.7kb)|SFTPA1(-117.9kb)|SFTPA2(-62.82kb)|ZCCHC24(+47.4kb)|ZMIZ1(+176.5kb)
18	53911294	rs147892410	G	A		3	7.89e-05	7.89e-05	1.2161	1.2161	0.4717	0	1.2318	1.1042	1.2837	LOC100505474(+106.5kb)
4	152054944	rs10011421	T	C		3	7.893e-05	7.893e-05	1.6773	1.6773	0.9877	0	1.6459	1.7352	1.6879	LRBA(+118.3kb)|PRSS48(-143.4kb)|RPS3A(+29.14kb)|SH3D19(0)|SNORD73A(+29.9kb)
20	4619919	rs117881101	T	C		3	7.899e-05	7.899e-05	1.3849	1.3849	0.7983	0	1.2924	1.4871	1.4087	PRND(-82.64kb)|PRNP(-46.88kb)|PRNT(-92.01kb)|RASSF2(-140.7kb)
3	143134005	rs2140764	G	A		3	7.908e-05	7.908e-05	0.8522	0.8522	0.9535	0	0.8499	0.8363	0.8633	SLC9A9(0)|SLC9A9-AS1(+68.09kb)
10	49615761	rs7904142	G	A		3	7.91e-05	0.0001429	0.8852	0.8855	0.3439	6.32	0.8377	0.9346	0.9033	ARHGAP22(-38.31kb)|FRMPD2(+132.8kb)|MAPK8(0)
4	33819940	rs13139684	C	T		3	7.928e-05	7.928e-05	0.8026	0.8026	0.4334	0	0.7375	0.8758	0.8284	.
1	82293431	rs11163385	A	G		3	7.938e-05	7.938e-05	0.8842	0.8842	0.8235	0	0.8655	0.8811	0.9049	LPHN2(0)
11	74367040	rs10899025	A	G		3	7.944e-05	7.944e-05	1.2204	1.2204	0.8253	0	1.2275	1.1583	1.2535	CHRDL2(-40.43kb)|KCNE3(+188.4kb)|LIPT2(+162.3kb)|MIR4696(-64.27kb)|POLD3(+12.94kb)|RNF169(-92.87kb)|XRRA1(-184.9kb)
4	33819524	rs13132539	G	A		3	7.984e-05	7.984e-05	0.8028	0.8028	0.4323	0	0.7375	0.8758	0.8289	.
14	22818413	rs9796491	T	C		3	7.987e-05	0.02088	0.8663	0.8615	0.0463	67.45	0.8018	0.8142	0.9704	.
6	32626302	rs9273364	G	T		2	7.998e-05	7.998e-05	0.8083	0.8083	0.7266	0	0.7972	0.8294	NA	HLA-DOB(-154.2kb)|HLA-DQA1(+14.87kb)|HLA-DQA2(-82.86kb)|HLA-DQB1(-0.938kb)|HLA-DQB2(-97.57kb)|HLA-DRB1(+68.69kb)|HLA-DRB5(+128.3kb)|HLA-DRB6(+98.52kb)|LOC100507463(-185.6kb)|PSMB8(-182.2kb)|PSMB9(-195.6kb)|TAP1(-186.7kb)|TAP2(-163.3kb)
11	84945237	rs2056182	A	C		3	8e-05	8e-05	1.3231	1.3231	0.634	0	1.2172	1.3154	1.422	DLG2(0)
6	32626272	rs9273363	A	C		2	8.012e-05	8.012e-05	0.8084	0.8084	0.7265	0	0.7973	0.8295	NA	HLA-DOB(-154.3kb)|HLA-DQA1(+14.84kb)|HLA-DQA2(-82.89kb)|HLA-DQB1(-0.968kb)|HLA-DQB2(-97.6kb)|HLA-DRB1(+68.66kb)|HLA-DRB5(+128.3kb)|HLA-DRB6(+98.49kb)|LOC100507463(-185.6kb)|PSMB8(-182.2kb)|PSMB9(-195.7kb)|TAP1(-186.7kb)|TAP2(-163.3kb)
4	43060156	rs35940220	A	G		3	8.022e-05	8.022e-05	1.3043	1.3043	0.7152	0	1.2279	1.4133	1.3049	GRXCR1(+27.48kb)
10	49614391	rs3827680	A	G		3	8.025e-05	0.0001605	0.8853	0.8857	0.3395	7.43	0.8375	0.9348	0.9037	ARHGAP22(-39.68kb)|FRMPD2(+131.4kb)|MAPK8(0)
16	85230723	rs8048537	G	A		3	8.029e-05	8.029e-05	0.88	0.88	0.4092	0	0.9303	0.836	0.8646	FAM92B(+84.61kb)|KIAA0513(+102.9kb)|LINC00311(-85.84kb)|LOC400548(+47.67kb)|MIR5093(-109.1kb)|ZDHHC7(+185.6kb)
1	176884266	rs10913276	C	T		3	8.036e-05	8.036e-05	0.7804	0.7804	0.6048	0	0.8427	0.7253	0.7573	ASTN1(0)|MIR488(-114.2kb)|PAPPA2(+72.3kb)
10	49642146	rs11101320	A	G		3	8.059e-05	8.059e-05	0.8852	0.8852	0.3705	0	0.8389	0.9305	0.9051	ARHGAP22(-11.92kb)|FRMPD2(+159.2kb)|MAPK8(0)
7	27355657	rs17438403	G	A		3	8.072e-05	8.072e-05	0.769	0.769	0.8794	0	0.7556	0.7409	0.8034	EVX1(+69.46kb)|HOTTIP(+109.5kb)|HOXA-AS3(+160.1kb)|HOXA-AS4(+144.1kb)|HOXA3(+189kb)|HOXA4(+185.3kb)|HOXA5(+172.4kb)|HOXA6(+168.3kb)|HOXA7(+159.4kb)|HOXA9(+150.5kb)|HOXA10(+135.8kb)|HOXA10-HOXA9(+135.8kb)|HOXA11(+130.8kb)|HOXA11-AS(+126.7kb)|HOXA13(+115.9kb)|MIR196B(+146.5kb)
6	54999632	rs4434472	C	T		3	8.074e-05	8.074e-05	0.8669	0.8669	0.8471	0	0.8866	0.8394	0.8632	FAM83B(+189.7kb)|GFRAL(-192.6kb)|HCRTR2(-39.44kb)
12	6615152	rs73257105	T	G		2	8.09e-05	0.05433	0.527	0.5737	0.1122	60.37	0.4521	0.8141	NA	ACRBP(-132.1kb)|CD27(+54.27kb)|CD27-AS1(+54.47kb)|CHD4(-64.1kb)|GAPDH(-28.43kb)|IFFO1(-33.54kb)|ING4(-144.6kb)|LPAR5(-112.8kb)|LTBR(+114.4kb)|MRPL51(+12.68kb)|NCAPD2(0)|NOP2(-50.88kb)|PIANP(-187.8kb)|PLEKHG6(+177.5kb)|SCARNA10(-4.235kb)|SCARNA11(-75.49kb)|SCNN1A(+128.6kb)|TAPBPL(+43.66kb)|TNFRSF1A(+163.9kb)|VAMP1(+35.31kb)|ZNF384(-160.5kb)
7	114722787	rs641459	T	G		3	8.092e-05	8.092e-05	1.1295	1.1295	0.6204	0	1.1735	1.1125	1.0979	MDFIC(+62.82kb)
7	114722698	rs589606	T	A		3	8.106e-05	8.106e-05	1.1295	1.1295	0.6205	0	1.1735	1.1125	1.0979	MDFIC(+62.73kb)
6	56197696	rs56400248	C	T		3	8.11e-05	8.11e-05	1.3111	1.3111	0.5809	0	1.455	1.2337	1.2575	COL21A1(+85.32kb)|DST(-125.1kb)|RNU6-71P(0)
6	47553402	rs9296567	A	G		3	8.122e-05	8.122e-05	1.145	1.145	0.9962	0	1.1415	1.1438	1.1493	CD2AP(0)|GPR111(-70.92kb)|GPR115(-112.9kb)|OPN5(-196.4kb)
17	14916361	rs7226336	A	C		2	8.153e-05	0.04466	0.7315	0.7108	0.0363	77.18	0.8356	0.5945	NA	CDRT7(-17.93kb)|CDRT8(-91.94kb)
8	27461492	rs4732729	A	C		3	8.159e-05	0.0006555	1.1398	1.1425	0.2538	27.07	1.0818	1.2453	1.1314	CCDC25(-129.3kb)|CHRNA2(+124.7kb)|CLU(0)|EPHX2(+59.05kb)|ESCO2(-170.6kb)|MIR3622A(-97.7kb)|MIR3622B(-97.7kb)|PTK2B(+144.6kb)|SCARA3(-30.08kb)
10	49497432	rs11101285	T	C		3	8.205e-05	0.0001138	0.8765	0.8766	0.3543	3.62	0.8255	0.8982	0.9181	ARHGAP22(-156.6kb)|FRMPD2(+14.49kb)|FRMPD2P1(+114.2kb)|MAPK8(-17.25kb)
2	116290608	rs67307325	A	T		3	8.21e-05	8.21e-05	0.8584	0.8584	0.3955	0	0.8085	0.924	0.8693	DPP10(0)
11	74363890	rs7935426	T	C		3	8.21e-05	8.21e-05	1.2195	1.2195	0.8405	0	1.2263	1.1605	1.2509	CHRDL2(-43.58kb)|KCNE3(+185.3kb)|LIPT2(+159.1kb)|MIR4696(-67.42kb)|POLD3(+9.785kb)|RNF169(-96.02kb)|XRRA1(-188.1kb)
9	31894144	rs10970584	G	A		3	8.236e-05	0.0009037	0.8579	0.8588	0.2532	27.19	0.7922	0.881	0.9161	.
6	47554468	rs9369717	G	T		3	8.259e-05	8.259e-05	1.1449	1.1449	0.9961	0	1.1416	1.1432	1.1493	CD2AP(0)|GPR111(-69.86kb)|GPR115(-111.8kb)|OPN5(-195.3kb)
9	31898250	rs10970591	C	A		3	8.271e-05	0.0008707	0.858	0.859	0.2556	26.69	0.7921	0.8837	0.9145	.
9	31898357	rs7040900	G	A		3	8.284e-05	0.0008736	0.858	0.859	0.2555	26.72	0.7921	0.8838	0.9145	.
11	84947079	rs72947963	T	C		3	8.287e-05	8.287e-05	1.3223	1.3223	0.6305	0	1.2157	1.3152	1.4216	DLG2(0)
15	97940051	rs62028011	C	T		3	8.287e-05	0.01066	0.8561	0.8512	0.0811	60.19	0.799	0.7969	0.9571	.
9	16257601	rs1029081	C	T		3	8.305e-05	0.0007781	1.1921	1.1951	0.2482	28.23	1.2113	1.3222	1.0915	BNC2(-151.9kb)|C9orf92(0)
4	113252176	rs34699840	A	G		3	8.31e-05	0.03687	1.2119	1.2014	0.0423	68.38	1.0645	1.1503	1.4004	ALPK1(0)|AP1AR(+60.96kb)|C4orf32(+141.9kb)|NEUROG2(-182.5kb)|TIFA(+45.12kb)
11	74372200	rs11236198	T	G		3	8.315e-05	8.315e-05	1.2203	1.2203	0.8312	0	1.2259	1.1597	1.2537	CHRDL2(-35.27kb)|KCNE3(+193.6kb)|LIPT2(+167.4kb)|MIR4696(-59.11kb)|POLD3(+18.1kb)|RNF169(-87.71kb)|XRRA1(-179.8kb)
1	161907320	rs11590304	C	T		3	8.331e-05	8.331e-05	1.1343	1.1343	0.6595	0	1.1344	1.0844	1.1692	ATF6(0)|DUSP12(+180.4kb)|NOS1AP(-132.3kb)|OLFML2B(-45.66kb)
18	56297110	rs4940733	C	T		3	8.332e-05	8.332e-05	1.1308	1.1308	0.9794	0	1.1292	1.1206	1.1389	ALPK2(+0.921kb)|MALT1(-41.51kb)|MIR122(+178.7kb)|MIR3591(+178.7kb)
12	6613169	rs77985929	T	G		2	8.333e-05	0.06748	0.5274	0.5777	0.0985	63.37	0.449	0.8258	NA	ACRBP(-134.1kb)|CD27(+52.28kb)|CD27-AS1(+52.49kb)|CHD4(-66.08kb)|GAPDH(-30.42kb)|IFFO1(-35.52kb)|ING4(-146.5kb)|LPAR5(-114.8kb)|LTBR(+112.4kb)|MRPL51(+10.7kb)|NCAPD2(0)|NOP2(-52.87kb)|PIANP(-189.8kb)|PLEKHG6(+175.5kb)|SCARNA10(-6.218kb)|SCARNA11(-77.47kb)|SCNN1A(+126.6kb)|TAPBPL(+41.68kb)|TNFRSF1A(+161.9kb)|VAMP1(+33.33kb)|ZNF384(-162.5kb)
7	145456000	rs143981706	A	T		3	8.334e-05	0.0004165	0.5943	0.5911	0.2877	19.73	0.5811	0.4275	0.7536	.
6	54967506	rs59419160	G	T		3	8.343e-05	8.343e-05	0.8668	0.8668	0.8515	0	0.8869	0.841	0.8613	FAM83B(+157.6kb)|HCRTR2(-71.56kb)
9	31898375	rs7040912	C	A		3	8.347e-05	0.0008771	0.8581	0.8591	0.2556	26.7	0.7922	0.8838	0.9146	.
10	49642210	rs7086275	T	A		3	8.355e-05	8.355e-05	0.8855	0.8855	0.3757	0	0.8395	0.9305	0.9052	ARHGAP22(-11.86kb)|FRMPD2(+159.3kb)|MAPK8(0)
4	33937121	rs28691127	A	G		3	8.37e-05	8.37e-05	0.8179	0.8179	0.5868	0	0.7684	0.8321	0.8664	.
4	29024757	rs6845673	C	G		3	8.371e-05	8.371e-05	0.8703	0.8703	0.6178	0	0.8512	0.9233	0.8545	.
6	47554177	rs9395285	A	G		3	8.386e-05	8.386e-05	1.1448	1.1448	0.9957	0	1.141	1.1435	1.1493	CD2AP(0)|GPR111(-70.15kb)|GPR115(-112.1kb)|OPN5(-195.6kb)
16	83697255	rs57055514	G	A		3	8.389e-05	8.389e-05	0.7146	0.7146	0.4725	0	0.6382	0.7183	0.8129	CDH13(0)|HSBP1(-144.3kb)|MIR3182(+155.2kb)
4	29024800	rs6845700	A	G		3	8.394e-05	8.394e-05	0.8704	0.8704	0.6172	0	0.8512	0.9234	0.8546	.
4	33935750	rs7664105	A	G		3	8.403e-05	8.403e-05	0.8176	0.8176	0.5455	0	0.7639	0.8383	0.8666	.
2	106105543	rs72819726	C	T		3	8.417e-05	8.417e-05	1.232	1.232	0.5044	0	1.2316	1.1243	1.3117	C2orf49(+143.6kb)|FHL2(+50.31kb)|LOC285000(-104kb)|TGFBRAP1(+159.4kb)
11	127123697	rs7108709	A	T		3	8.438e-05	0.006344	0.7405	0.7271	0.1018	56.22	0.8946	0.6404	0.6454	.
2	116278787	rs17044606	C	T		3	8.446e-05	8.446e-05	0.8586	0.8586	0.3953	0	0.8086	0.924	0.8699	DPP10(0)
9	31894033	rs10970583	T	A		3	8.45e-05	0.0009415	0.858	0.8591	0.2522	27.41	0.792	0.8827	0.9156	.
3	6763835	rs11714530	A	G		3	8.461e-05	8.461e-05	1.4177	1.4177	0.9268	0	1.3794	1.3625	1.4711	GRM7(-139kb)
5	16711780	rs58989958	G	A		3	8.468e-05	0.001901	1.1482	1.1531	0.1894	39.9	1.2013	1.225	1.0633	FAM134B(+94.61kb)|MYO10(0)
11	127123823	rs7126174	T	C		3	8.476e-05	0.006382	0.7406	0.7272	0.1017	56.25	0.8949	0.6402	0.6458	.
2	116279388	rs17044615	T	G		3	8.498e-05	8.498e-05	0.8586	0.8586	0.3954	0	0.8086	0.924	0.87	DPP10(0)
11	74332664	rs12287097	G	A		3	8.498e-05	8.498e-05	1.219	1.219	0.8325	0	1.2244	1.1583	1.2519	CHRDL2(-74.81kb)|KCNE3(+154.1kb)|LIPT2(+127.9kb)|MIR4696(-98.65kb)|POLD3(0)|RNF169(-127.2kb)
4	165219293	rs6845721	A	C		3	8.499e-05	8.499e-05	1.1633	1.1633	0.5619	0	1.1418	1.2491	1.1305	ANP32C(+100.4kb)|MARCH1(0)
2	116284135	rs4849404	C	T		3	8.5e-05	8.5e-05	0.8587	0.8587	0.3925	0	0.8084	0.9241	0.8703	DPP10(0)
1	161910782	rs10918243	C	T		3	8.505e-05	8.505e-05	1.1342	1.1342	0.7029	0	1.1341	1.0882	1.1663	ATF6(0)|DUSP12(+183.8kb)|NOS1AP(-128.8kb)|OLFML2B(-42.2kb)
9	31894217	rs7039733	C	T		3	8.511e-05	0.0009415	0.8582	0.8592	0.2523	27.38	0.7925	0.881	0.9167	.
10	127872992	rs76184798	T	C		3	8.524e-05	8.524e-05	0.6238	0.6238	0.6777	0	0.6945	0.5378	0.6026	ADAM12(0)|FANK1(+174.8kb)
1	72181770	rs12747621	G	A		3	8.542e-05	0.0009407	1.1343	1.1372	0.2349	30.97	1.0709	1.2347	1.1355	NEGR1(0)|NEGR1-IT1(-78.14kb)
2	116283668	rs984066	A	G		3	8.552e-05	8.552e-05	0.8587	0.8587	0.3938	0	0.8085	0.9241	0.8702	DPP10(0)
2	116282401	rs55697033	A	G		3	8.564e-05	8.564e-05	0.8587	0.8587	0.3944	0	0.8086	0.9241	0.8702	DPP10(0)
6	33811207	rs12663194	A	C		3	8.59e-05	8.59e-05	1.1406	1.1406	0.4359	0	1.1623	1.2036	1.0833	GRM4(-178.4kb)|IP6K3(+96.44kb)|ITPR3(+146.9kb)|LEMD2(+54.3kb)|LOC100507584(-46.08kb)|MIR1275(-156.5kb)|MLN(+39.41kb)|MNF1(+131.7kb)
6	54948514	rs72976488	A	G		3	8.609e-05	8.609e-05	0.8501	0.8501	0.4177	0	0.9086	0.8116	0.8135	FAM83B(+138.6kb)|HCRTR2(-90.56kb)
9	31898998	rs7041750	G	A		3	8.611e-05	0.0009112	0.8583	0.8593	0.2548	26.87	0.7923	0.8841	0.9149	.
2	116288535	rs1375148	C	A		3	8.649e-05	8.649e-05	0.8588	0.8588	0.3956	0	0.8088	0.9242	0.87	DPP10(0)
15	88909327	rs72760065	T	A		2	8.649e-05	8.649e-05	0.7177	0.7177	0.4988	0	0.6807	0.7634	NA	DET1(-146.4kb)|MRPL46(-93.38kb)|MRPS11(-101.4kb)|NTRK3(+109.4kb)|NTRK3-AS1(+95.03kb)
6	54945716	rs72976482	A	G		3	8.663e-05	8.663e-05	0.8502	0.8502	0.422	0	0.9084	0.8134	0.813	FAM83B(+135.8kb)|HCRTR2(-93.35kb)
9	31898075	rs10970590	G	A		3	8.699e-05	0.0009987	0.8584	0.8595	0.25	27.86	0.7921	0.8837	0.9158	.
4	34076851	rs13144643	C	G		3	8.7e-05	0.0005055	0.8114	0.8107	0.2802	21.4	0.7656	0.7556	0.909	.
9	31900348	rs1928214	T	G		3	8.701e-05	0.000853	0.8583	0.8593	0.2589	26	0.7926	0.8844	0.9144	.
15	97930690	rs62028003	G	C		3	8.701e-05	0.0066	0.8596	0.8554	0.112	54.32	0.8214	0.7895	0.9518	.
4	34076785	rs13146184	T	C		3	8.726e-05	0.0005092	0.8115	0.8108	0.2799	21.47	0.7656	0.7556	0.909	.
16	83700765	rs73248731	T	C		3	8.727e-05	9.642e-05	0.7225	0.7225	0.3638	1.1	0.6374	0.7209	0.8367	CDH13(0)|HSBP1(-140.7kb)|MIR3182(+158.8kb)
11	74334201	rs11236174	A	G		3	8.728e-05	8.728e-05	1.2187	1.2187	0.8338	0	1.2244	1.158	1.2511	CHRDL2(-73.27kb)|KCNE3(+155.6kb)|LIPT2(+129.4kb)|MIR4696(-97.11kb)|POLD3(0)|RNF169(-125.7kb)
11	127124523	rs78273511	G	A		3	8.778e-05	0.006702	0.7413	0.7277	0.0994	56.68	0.8962	0.6396	0.6467	.
5	55222866	rs112353520	A	G		3	8.781e-05	0.002231	1.302	1.3022	0.1951	38.81	1.5389	1.1296	1.2697	ANKRD55(-172.6kb)|DDX4(+109.9kb)|FLJ31104(-68.13kb)|IL6ST(-8.058kb)|IL31RA(+4.184kb)
4	63782728	rs11131419	C	T		3	8.784e-05	0.0227	0.8462	0.8537	0.0725	61.89	0.7557	0.9596	0.8726	.
11	74330888	rs11236172	A	G		3	8.791e-05	8.791e-05	1.2185	1.2185	0.8211	0	1.2247	1.1554	1.2522	CHRDL2(-76.58kb)|KCNE3(+152.3kb)|LIPT2(+126.1kb)|MIR4696(-100.4kb)|POLD3(0)|RNF169(-129kb)
6	54940740	rs72970780	A	C		3	8.832e-05	8.832e-05	0.8502	0.8502	0.4179	0	0.9088	0.812	0.8135	FAM83B(+130.8kb)|HCRTR2(-98.33kb)
6	138395283	rs12173883	G	A		3	8.852e-05	8.852e-05	1.3183	1.3183	0.7665	0	1.3547	1.2092	1.363	KIAA1244(-87.77kb)|PBOV1(-141.8kb)|PERP(-14.36kb)|TNFAIP3(+190.8kb)
20	21809386	rs77584949	G	A		3	8.853e-05	0.0005842	0.6474	0.6442	0.2665	24.37	0.7998	0.5106	0.6232	PAX1(+110.3kb)
11	85854176	rs2888903	T	G		3	8.859e-05	8.859e-05	1.1284	1.1284	0.5354	0	1.1334	1.1864	1.0858	C11orf73(-159.1kb)|EED(-101.6kb)|PICALM(+73.25kb)
15	97934032	rs4476155	G	A		3	8.872e-05	0.006035	0.8602	0.8561	0.1183	53.15	0.8228	0.7908	0.9508	.
11	74362865	rs11236186	A	G		3	8.881e-05	8.881e-05	1.2183	1.2183	0.8421	0	1.2258	1.1594	1.249	CHRDL2(-44.61kb)|KCNE3(+184.3kb)|LIPT2(+158.1kb)|MIR4696(-68.45kb)|POLD3(+8.76kb)|RNF169(-97.05kb)|XRRA1(-189.1kb)
9	31897397	rs10970588	G	A		3	8.885e-05	0.0005191	0.8576	0.8584	0.2857	20.18	0.7946	0.879	0.9143	.
4	63782312	rs11946852	G	T		3	8.89e-05	0.01123	0.8435	0.8498	0.1158	53.61	0.7602	0.948	0.8687	.
14	69435333	rs17106670	T	C		3	8.898e-05	0.00291	0.8705	0.8736	0.1959	38.65	0.8288	0.9667	0.8478	ACTN1(0)|ACTN1-AS1(-11.06kb)|DCAF5(-82.3kb)|ZFP36L1(+172.4kb)
4	151615684	rs7655761	A	G		3	8.9e-05	8.9e-05	1.6498	1.6498	0.8414	0	1.5805	1.898	1.5915	LRBA(0)|MAB21L2(+109.8kb)
11	74317985	rs61901541	C	T		3	8.937e-05	8.937e-05	1.2189	1.2189	0.8647	0	1.221	1.1657	1.2498	CHRDL2(-89.49kb)|KCNE3(+139.4kb)|LIPT2(+113.2kb)|MIR4696(-113.3kb)|POLD3(0)|RNF169(-141.9kb)
5	104668046	rs78533343	C	T		3	8.949e-05	8.949e-05	1.2567	1.2567	0.462	0	1.1936	1.4369	1.2226	.
4	34063946	rs66932503	T	C		3	8.975e-05	0.0002783	0.8115	0.8111	0.3136	13.76	0.7665	0.7595	0.9046	.
3	124773675	rs34598459	A	G		3	8.991e-05	0.01895	1.1306	1.1415	0.0419	68.47	1.1415	1.273	1.0393	HEG1(0)|ITGB5(+167.5kb)|MIR5092(-96.63kb)|MUC13(+120.1kb)|SLC12A8(-27.8kb)|ZNF148(-170.8kb)
4	63736779	rs17083005	G	A		3	8.991e-05	0.008227	0.8413	0.8473	0.1372	49.66	0.7584	0.9339	0.8783	.
18	30045824	rs10775452	G	C		3	9.005e-05	0.001228	0.8793	0.8772	0.2225	33.46	0.8562	0.8222	0.9431	GAREM(0)|WBP11P1(-45.8kb)
4	190117477	rs116007245	T	C		3	9.006e-05	9.006e-05	0.7718	0.7718	0.5952	0	0.822	0.7896	0.7058	.
9	31899756	rs11788750	T	G		3	9.013e-05	0.000846	0.8584	0.8592	0.2601	25.75	0.7935	0.8789	0.9174	.
3	150331736	rs370941512	G	A		2	9.015e-05	0.001304	0.5168	0.5065	0.2199	33.55	0.6038	0.3926	NA	EIF2A(+27.93kb)|FAM194A(-45.94kb)|SELT(0)|SERP1(+67.31kb)|SIAH2(-127.2kb)|TSC22D2(+154.1kb)
6	47511491	rs9349413	G	A		3	9.017e-05	9.017e-05	1.1443	1.1443	0.9933	0	1.1397	1.1425	1.15	CD2AP(0)|GPR111(-112.8kb)|GPR115(-154.8kb)
10	22814930	rs11013035	G	C		3	9.019e-05	9.019e-05	0.8728	0.8728	0.5064	0	0.8927	0.8129	0.8937	BMI1(+194.5kb)|COMMD3-BMI1(+194.5kb)|LOC100499489(+88.07kb)|PIP4K2A(-8.835kb)|SPAG6(+108.4kb)
4	33932477	rs13152635	C	T		3	9.02e-05	9.02e-05	0.8023	0.8023	0.5967	0	0.7482	0.8281	0.8486	.
9	31901679	rs2008771	A	G		3	9.029e-05	0.0007422	0.8583	0.8591	0.2674	24.18	0.794	0.8794	0.9164	.
2	137539995	rs13412066	G	A		3	9.033e-05	9.033e-05	0.8031	0.8031	0.8815	0	0.789	0.7849	0.8358	.
6	54938910	rs72970770	A	T		3	9.035e-05	9.035e-05	0.8505	0.8505	0.4201	0	0.9089	0.8142	0.8129	FAM83B(+129kb)|HCRTR2(-100.2kb)
2	119273569	rs113878592	G	C		3	9.038e-05	9.038e-05	1.2397	1.2397	0.7381	0	1.1867	1.2154	1.3037	.
20	32464933	rs6141426	T	C		3	9.04e-05	9.04e-05	1.1774	1.1774	0.4851	0	1.2616	1.1285	1.1401	CHMP4B(+22.76kb)|E2F1(+190.7kb)|MIR4755(-172kb)|PXMP4(+156.8kb)|RALY(-116.5kb)|ZNF341(+84.86kb)
1	72177417	rs11209829	T	A		3	9.059e-05	0.0009415	1.1337	1.1366	0.2374	30.45	1.0706	1.2337	1.1351	NEGR1(0)|NEGR1-IT1(-82.5kb)
9	31897398	rs10970589	T	C		3	9.059e-05	0.0004789	0.8578	0.8585	0.2907	19.07	0.7952	0.879	0.9141	.
18	53917332	rs112418066	C	G		3	9.06e-05	9.06e-05	1.211	1.211	0.6311	0	1.2038	1.1319	1.2732	LOC100505474(+112.6kb)
5	28112541	rs7728832	G	A		3	9.071e-05	9.071e-05	1.1509	1.1509	0.4172	0	1.2139	1.1492	1.089	.
11	127125260	rs11220843	T	C		3	9.074e-05	0.006961	0.7419	0.7282	0.098	56.95	0.8974	0.6394	0.6475	.
1	194113279	rs2506075	T	C		3	9.092e-05	9.092e-05	1.348	1.348	0.4052	0	1.3445	1.1476	1.4792	.
19	13951830	rs1531212	A	G		3	9.144e-05	0.0009807	1.1659	1.1643	0.2536	27.11	1.0771	1.1567	1.2542	C19orf53(+62.24kb)|C19orf57(-41.34kb)|CC2D1A(-65.12kb)|CCDC130(+77.72kb)|DCAF15(-111.5kb)|IL27RA(-190.7kb)|LOC284454(+4.727kb)|MIR23A(+4.357kb)|MIR24-2(+4.657kb)|MIR27A(+4.499kb)|MIR181C(-33.68kb)|MIR181D(-33.86kb)|MRI1(+66.73kb)|NANOS3(-36.23kb)|PODNL1(-90.17kb)|RFX1(-120.5kb)|RLN3(-187.2kb)|ZSWIM4(+8.786kb)
14	89536435	rs1295195	T	C		3	9.16e-05	9.16e-05	0.6809	0.6809	0.6835	0	0.7336	0.7055	0.5968	FOXN3(-86.08kb)|TTC8(+192.1kb)
7	9210594	rs79038158	G	T		2	9.176e-05	9.176e-05	0.4616	0.4616	0.7116	0	0.4368	0.5085	NA	.
7	145641471	rs117606093	G	A		3	9.179e-05	0.0009052	0.6057	0.6012	0.2483	28.23	0.5733	0.4427	0.7839	CNTNAP2(-172kb)
17	14537340	rs7213116	A	G		3	9.212e-05	0.0003921	1.1767	1.1747	0.3063	15.48	1.1922	1.0578	1.2449	.
11	93884016	rs141337486	A	G		3	9.224e-05	9.224e-05	0.5959	0.5959	0.4105	0	0.4882	0.7064	0.6881	FOLR4(-154.8kb)|HEPHL1(+36.64kb)|PANX1(0)
6	47479136	rs9463335	A	G		3	9.266e-05	9.266e-05	1.1438	1.1438	0.9959	0	1.1404	1.1421	1.1483	CD2AP(0)|GPR111(-145.2kb)|GPR115(-187.2kb)
7	24074565	rs80348575	T	C		3	9.271e-05	9.271e-05	1.2393	1.2393	0.6838	0	1.2442	1.3361	1.1809	.
4	63739571	rs72633006	C	A		3	9.276e-05	0.01012	0.8421	0.8484	0.1253	51.86	0.7573	0.9355	0.8809	.
4	63779473	rs10517832	C	T		3	9.276e-05	0.01044	0.8438	0.8499	0.1216	52.54	0.7616	0.9478	0.868	.
9	31904700	rs7044768	A	G		3	9.277e-05	0.0009733	0.8589	0.86	0.2543	26.96	0.7927	0.8858	0.915	.
4	34068060	rs13120010	T	C		3	9.278e-05	0.0003393	0.812	0.8115	0.3048	15.84	0.7662	0.7597	0.9062	.
3	146969959	rs9840869	T	A		3	9.279e-05	9.279e-05	0.8684	0.8684	0.7996	0	0.8459	0.8666	0.8944	ZIC1(-157.2kb)|ZIC4(-133.9kb)
4	63777074	rs72633077	C	T		3	9.292e-05	0.01126	0.8436	0.8499	0.1168	53.43	0.7603	0.9479	0.869	.
14	22797782	rs17793833	T	C		3	9.294e-05	0.01161	0.8652	0.8613	0.0822	59.99	0.8166	0.8038	0.9626	.
4	34067212	rs6824096	C	T		3	9.305e-05	0.0002636	0.8124	0.812	0.3177	12.79	0.7725	0.7548	0.9046	.
2	116242562	rs2008948	A	G		3	9.307e-05	9.307e-05	0.8629	0.8629	0.3782	0	0.8262	0.9421	0.8494	DPP10(0)
4	63744916	rs72633017	G	A		3	9.312e-05	0.01044	0.8427	0.8491	0.1237	52.16	0.7579	0.9357	0.8821	.
2	137543318	rs2114750	G	T		3	9.32e-05	9.32e-05	0.8035	0.8035	0.8774	0	0.7887	0.7857	0.8369	.
11	127125938	rs7104405	A	C		3	9.32e-05	0.007071	0.7422	0.7285	0.0978	56.99	0.8979	0.6398	0.6476	.
11	84972664	rs72950109	T	G		3	9.328e-05	9.328e-05	1.3202	1.3202	0.6579	0	1.2199	1.309	1.416	DLG2(0)
12	125519429	rs4765210	T	C		3	9.344e-05	0.006187	1.1486	1.1479	0.1361	49.86	1.2617	1.1088	1.0777	AACS(-30.5kb)|BRI3BP(+9.08kb)|DHX37(+45.76kb)|MIR5188(+119.2kb)|SCARB1(+170.9kb)|UBC(+119.8kb)
4	34069970	rs35776025	A	T		3	9.347e-05	0.0003535	0.812	0.8116	0.303	16.25	0.766	0.7599	0.9066	.
10	49644416	rs8428	C	T		3	9.358e-05	9.358e-05	0.8862	0.8862	0.3965	0	0.8415	0.9304	0.905	ARHGAP22(-9.651kb)|FRMPD2(+161.5kb)|MAPK8(0)
2	116281815	rs1900750	C	G		3	9.36e-05	9.36e-05	0.8593	0.8593	0.4122	0	0.8104	0.9234	0.8702	DPP10(0)
9	109151968	rs7043438	A	T		3	9.364e-05	9.364e-05	0.7	0.7	0.4266	0	0.6186	0.694	0.8172	.
5	28105316	rs28616279	T	C		3	9.395e-05	9.395e-05	1.1506	1.1506	0.3971	0	1.216	1.1473	1.0876	.
6	54999842	rs4486012	T	C		3	9.395e-05	9.395e-05	0.8678	0.8678	0.8514	0	0.8844	0.8374	0.8687	FAM83B(+189.9kb)|GFRAL(-192.4kb)|HCRTR2(-39.23kb)
5	16937236	rs184504032	C	T		2	9.396e-05	9.396e-05	0.4196	0.4196	0.677	0	0.4667	0.3871	NA	LOC285696(-192.9kb)|MYO10(+0.851kb)
14	22801234	rs3811257	G	A		3	9.398e-05	0.01493	0.8659	0.8614	0.0669	63.04	0.813	0.8049	0.9662	.
10	81224429	rs34799261	A	G		3	9.414e-05	0.01447	0.8711	0.8761	0.0989	56.78	0.892	0.9605	0.7961	EIF5AL1(-47.93kb)|PPIF(+109.3kb)|SFTPA1(-146.3kb)|SFTPA2(-91.18kb)|ZCCHC24(+19.05kb)|ZMIZ1(+148.1kb)
6	54995540	rs72967886	A	G		3	9.423e-05	9.423e-05	0.867	0.867	0.7538	0	0.8928	0.8307	0.8624	FAM83B(+185.6kb)|GFRAL(-196.7kb)|HCRTR2(-43.53kb)
11	74348426	rs7112664	C	T		3	9.434e-05	9.434e-05	1.2176	1.2176	0.8453	0	1.2232	1.1593	1.2488	CHRDL2(-59.05kb)|KCNE3(+169.8kb)|LIPT2(+143.7kb)|MIR4696(-82.89kb)|POLD3(0)|RNF169(-111.5kb)
1	194114603	rs2485044	A	T		3	9.444e-05	9.444e-05	1.3482	1.3482	0.4064	0	1.3445	1.148	1.4801	.
10	22814936	rs11013036	T	G		3	9.466e-05	9.466e-05	0.8732	0.8732	0.5044	0	0.8938	0.8131	0.8935	BMI1(+194.5kb)|COMMD3-BMI1(+194.5kb)|LOC100499489(+88.08kb)|PIP4K2A(-8.829kb)|SPAG6(+108.4kb)
8	79766627	rs79421168	A	C		3	9.472e-05	0.01458	0.7275	0.715	0.0625	63.94	0.6608	0.5805	0.9204	IL7(+48.87kb)|LOC101241902(+130kb)|ZC2HC1A(+134.6kb)
2	212328743	rs13425064	A	G		3	9.482e-05	0.000209	1.1618	1.1608	0.336	8.3	1.2394	1.0781	1.136	ERBB4(0)
5	28110527	rs1845488	T	G		3	9.489e-05	9.489e-05	1.1505	1.1505	0.4066	0	1.215	1.1469	1.0883	.
10	81224191	rs7923505	C	T		3	9.498e-05	0.01449	0.8712	0.8762	0.0991	56.74	0.8922	0.9605	0.7962	EIF5AL1(-48.16kb)|PPIF(+109.1kb)|SFTPA1(-146.5kb)|SFTPA2(-91.42kb)|ZCCHC24(+18.81kb)|ZMIZ1(+147.9kb)
19	45383830	rs148303016	T	C		3	9.502e-05	9.502e-05	0.7039	0.7039	0.9228	0	0.7301	0.7105	0.6713	APOC1(-34.09kb)|APOC1P1(-46.23kb)|APOC2(-65.41kb)|APOC4(-61.66kb)|APOC4-APOC2(-61.66kb)|APOE(-25.21kb)|BCAM(+59.15kb)|BCL3(+120.5kb)|CBLC(+79.93kb)|CEACAM16(+169.8kb)|CEACAM19(+196.2kb)|CLASRP(-158.5kb)|CLPTM1(-74.01kb)|GEMIN7(-198.7kb)|PVRL2(0)|RELB(-120.9kb)|TOMM40(-10.65kb)|ZNF296(-190.9kb)
10	22779693	rs12570045	G	A		3	9.504e-05	9.504e-05	0.8589	0.8589	0.5441	0	0.884	0.797	0.8761	BMI1(+159.3kb)|COMMD3(+170.4kb)|COMMD3-BMI1(+159.3kb)|LOC100499489(+52.84kb)|PIP4K2A(-44.07kb)|SPAG6(+73.15kb)
5	2782715	rs1024052	A	G		3	9.513e-05	0.003755	0.8162	0.8138	0.1617	45.12	0.7594	0.7514	0.9291	C5orf38(+27.2kb)|IRX2(+30.95kb)
11	74348205	rs7112384	G	T		3	9.517e-05	9.517e-05	1.2175	1.2175	0.846	0	1.223	1.1593	1.2486	CHRDL2(-59.27kb)|KCNE3(+169.6kb)|LIPT2(+143.4kb)|MIR4696(-83.11kb)|POLD3(0)|RNF169(-111.7kb)
11	74338054	rs10899021	G	A		3	9.52e-05	9.52e-05	1.2172	1.2172	0.8414	0	1.2229	1.1581	1.2487	CHRDL2(-69.42kb)|KCNE3(+159.5kb)|LIPT2(+133.3kb)|MIR4696(-93.26kb)|POLD3(0)|RNF169(-121.9kb)
16	73505199	rs34149712	C	T		3	9.544e-05	0.0007452	1.1841	1.1842	0.2639	24.94	1.3074	1.1285	1.124	LOC100506172(+49.9kb)
16	83697062	rs73248718	T	A		3	9.544e-05	9.544e-05	0.7239	0.7239	0.4267	0	0.6441	0.7274	0.8269	CDH13(0)|HSBP1(-144.4kb)|MIR3182(+155kb)
4	63779683	rs72633082	T	C		3	9.551e-05	0.01074	0.8441	0.8502	0.1205	52.73	0.7615	0.9478	0.8688	.
16	19878986	rs72771007	A	G		3	9.554e-05	9.554e-05	0.771	0.771	0.4951	0	0.8491	0.7321	0.717	C16orf62(+166.5kb)|GPR139(-164.1kb)|GPRC5B(0)|IQCK(+10.13kb)|KNOP1(+149.5kb)
4	33938185	rs13107117	T	C		3	9.556e-05	9.556e-05	0.8029	0.8029	0.5955	0	0.7488	0.8283	0.8497	.
11	74323175	rs7122710	T	C		3	9.56e-05	9.56e-05	1.2177	1.2177	0.8397	0	1.2217	1.1589	1.2506	CHRDL2(-84.3kb)|KCNE3(+144.6kb)|LIPT2(+118.4kb)|MIR4696(-108.1kb)|POLD3(0)|RNF169(-136.7kb)
9	31889142	rs10813651	C	T		3	9.591e-05	0.000899	0.8585	0.8594	0.2596	25.84	0.7929	0.8819	0.9162	.
2	116261143	rs7421696	T	C		3	9.641e-05	0.0001526	0.8636	0.864	0.3492	4.95	0.8232	0.9447	0.853	DPP10(0)
9	31889404	rs10813652	T	A		3	9.649e-05	0.0009832	0.8586	0.8596	0.2548	26.87	0.793	0.8805	0.9177	.
4	29026567	rs10010789	A	G		3	9.653e-05	9.653e-05	0.8713	0.8713	0.6238	0	0.8537	0.9239	0.8543	.
6	22268346	rs2655444	G	A		2	9.66e-05	0.1899	1.9475	1.9108	0.0039	88	3.1234	1.1629	NA	LINC00340(+73.73kb)|LOC729177(+120.9kb)|PRL(-19.13kb)
14	22799313	rs113450536	A	T		3	9.679e-05	0.01567	0.8661	0.8614	0.0644	63.54	0.8139	0.803	0.9671	.
11	84971940	rs72950104	A	C		3	9.681e-05	9.681e-05	1.3193	1.3193	0.6522	0	1.2178	1.309	1.4158	DLG2(0)
18	30044365	rs66569206	C	T		3	9.685e-05	0.002174	0.88	0.8775	0.1891	39.95	0.8501	0.8257	0.9483	GAREM(0)|WBP11P1(-47.26kb)
4	165221971	rs6829588	T	G		3	9.711e-05	9.711e-05	1.2099	1.2099	0.9973	0	1.2074	1.2177	1.2075	ANP32C(+103.1kb)|MARCH1(0)
3	75808624	rs111593626	T	C		2	9.72e-05	9.72e-05	0.5101	0.5101	0.4941	0	0.455	0.5763	NA	FLJ20518(+92.26kb)|FRG2C(+92.26kb)|LINC00960(+80.17kb)|MIR1324(+128.6kb)|MIR4273(+21.11kb)|ZNF717(0)
14	22817156	rs12436199	A	G		3	9.721e-05	0.0245	0.8681	0.8625	0.0407	68.76	0.8037	0.8118	0.9739	.
11	84979877	rs6592235	G	A		3	9.722e-05	9.722e-05	1.319	1.319	0.6519	0	1.2173	1.3099	1.4154	DLG2(0)
4	970724	rs4690229	T	A		2	9.741e-05	9.741e-05	1.1691	1.1691	0.5728	0	1.1467	1.2004	NA	CPLX1(+150.8kb)|DGKQ(+3.376kb)|FGFRL1(-34.88kb)|GAK(+44.55kb)|IDUA(-10.06kb)|LOC100129917(+195.1kb)|RNF212(-94.54kb)|SLC26A1(-2.136kb)|SPON2(-190kb)|TMED11P(-138.3kb)|TMEM175(+18.28kb)
2	116228909	rs1517367	G	A		3	9.773e-05	9.773e-05	0.8634	0.8634	0.4027	0	0.8268	0.9396	0.8519	DPP10(0)
6	54966551	rs9464190	T	C		3	9.775e-05	9.775e-05	0.866	0.866	0.9005	0	0.8777	0.8396	0.8693	FAM83B(+156.7kb)|HCRTR2(-72.52kb)
3	24888822	rs73045692	A	G		3	9.776e-05	9.776e-05	1.135	1.135	0.5727	0	1.1874	1.106	1.1056	.
3	157095393	rs114835249	T	C		2	9.78e-05	0.002358	1.9354	1.8888	0.2369	28.51	NA	1.4292	2.2096	C3orf55(-165.7kb)|PTX3(-59.19kb)|VEPH1(0)
18	30044465	rs72935565	A	T		3	9.785e-05	0.002218	0.8801	0.8775	0.1881	40.15	0.8501	0.8256	0.9484	GAREM(0)|WBP11P1(-47.16kb)
14	22804827	rs34914916	T	C		3	9.792e-05	0.01792	0.8667	0.8619	0.0575	64.99	0.8104	0.8068	0.9692	.
3	190367727	rs114523823	G	A		3	9.799e-05	0.005398	0.5291	0.5402	0.1628	44.91	0.3762	0.7997	0.5632	IL1RAP(0)
7	145884300	rs146115671	C	T		3	9.802e-05	0.1579	0.5619	0.5542	0.0004	87.16	0.3582	0.3783	1.2404	CNTNAP2(0)
9	31897380	rs10970587	A	G		3	9.802e-05	0.0006469	0.8589	0.8596	0.2778	21.94	0.7952	0.879	0.9163	.
2	137547016	rs1427600	G	A		3	9.803e-05	9.803e-05	0.8039	0.8039	0.8318	0	0.7843	0.7859	0.8437	.
6	138361839	rs9389550	G	A		3	9.807e-05	9.807e-05	1.3198	1.3198	0.9755	0	1.3194	1.2889	1.3415	KIAA1244(-121.2kb)|LOC100130476(+172.5kb)|PBOV1(-175.3kb)|PERP(-47.8kb)|TNFAIP3(+157.4kb)
4	138552261	rs57710658	T	A		3	9.819e-05	9.819e-05	1.1339	1.1339	0.6652	0	1.1408	1.1802	1.0957	PCDH18(+98.63kb)
5	16705915	rs3849106	T	C		3	9.839e-05	0.0004301	1.1447	1.1473	0.2868	19.93	1.149	1.2501	1.0846	FAM134B(+88.75kb)|MYO10(0)
10	49654195	rs1051509	G	A		3	9.854e-05	0.00174	0.8864	0.8881	0.2278	32.4	0.8288	0.937	0.9144	ARHGAP22(0)|FRMPD2(+171.3kb)|MAPK8(+6.793kb)
15	68970772	rs2087707	A	G		3	9.873e-05	0.006331	1.1361	1.1371	0.1306	50.87	1.0473	1.155	1.219	ANP32A(-100.1kb)|ANP32A-IT1(-125.4kb)|CORO2B(0)|MIR548H4(-145.5kb)|MIR4312(-123.4kb)
2	116265767	rs34003104	C	T		3	9.883e-05	0.0001313	0.8637	0.864	0.3564	3.06	0.8248	0.9447	0.8515	DPP10(0)
2	116270106	rs1375151	C	G		3	9.891e-05	0.0002153	0.8637	0.8644	0.3356	8.42	0.8215	0.9459	0.8543	DPP10(0)
2	116270110	rs4255969	G	A		3	9.894e-05	0.0002208	0.8637	0.8644	0.3344	8.7	0.8215	0.946	0.8541	DPP10(0)
2	116307108	rs4849408	A	G		3	9.899e-05	9.899e-05	0.8597	0.8597	0.3854	0	0.8084	0.9251	0.8722	DPP10(0)
14	101722809	rs144824001	G	A		2	9.901e-05	9.901e-05	1.962	1.962	0.3619	0	1.6828	2.3078	NA	MEG9(+183.5kb)|MIR154(+196.6kb)|MIR369(+190.8kb)|MIR377(+194.4kb)|MIR409(+191.1kb)|MIR410(+190.5kb)|MIR412(+190.9kb)|MIR496(+195.8kb)|MIR541(+191.9kb)|MIR656(+189.7kb)
1	72225409	rs11579404	T	C		3	9.902e-05	0.002902	1.1329	1.1381	0.1644	44.62	1.0724	1.2535	1.1186	NEGR1(0)|NEGR1-IT1(-34.5kb)
6	138367590	rs9376319	A	G		3	9.914e-05	9.914e-05	1.3177	1.3177	0.9809	0	1.3142	1.2924	1.3382	KIAA1244(-115.5kb)|LOC100130476(+178.2kb)|PBOV1(-169.5kb)|PERP(-42.05kb)|TNFAIP3(+163.1kb)
2	31549959	rs207426	A	C		3	9.929e-05	9.929e-05	0.8782	0.8782	0.934	0	0.8894	0.8829	0.865	CAPN14(+109.5kb)|EHD3(+58.7kb)|GALNT14(+188.4kb)|SRD5A2(-199.7kb)|XDH(-7.228kb)
3	191067863	rs448643	C	T		3	9.936e-05	9.936e-05	0.8726	0.8726	0.9621	0	0.883	0.8634	0.8676	CCDC50(0)|OSTN(+99.95kb)|PYDC2(-111.1kb)|UTS2B(+19.54kb)
12	101952926	rs11110849	G	A		3	9.95e-05	9.95e-05	0.8189	0.8189	0.3715	0	0.8164	0.7401	0.8912	ARL1(+151.4kb)|CHPT1(-138.5kb)|GNPTAB(-186.3kb)|MYBPC1(-35.78kb)|SPIC(+72.15kb)|SYCP3(-169.5kb)|UTP20(+172.5kb)
16	69797847	rs78100281	C	G		3	9.968e-05	0.005382	0.6153	0.6146	0.1469	47.86	0.4917	0.5515	0.8452	CLEC18A(-186.8kb)|MIR140(-169.1kb)|MIR1538(+198.1kb)|NFAT5(+59.28kb)|NOB1(+8.976kb)|NQO1(+37.31kb)|WWP2(0)
4	33946773	rs16989268	C	T		3	9.976e-05	9.976e-05	0.8186	0.8186	0.4841	0	0.7664	0.8133	0.8842	.
10	46093866	rs190225437	T	C		2	9.976e-05	0.00525	0.4575	0.4673	0.1797	44.46	0.3649	0.631	NA	ALOX5(+152.3kb)|FAM21C(-128.8kb)|MARCH8(+3.512kb)|ZFAND4(-17.17kb)
10	98101262	rs34561415	T	G		3	9.981e-05	0.001455	1.1509	1.154	0.2155	34.84	1.1999	1.2237	1.0635	BLNK(+69.93kb)|DNTT(+2.941kb)|OPALIN(-1.712kb)|TLL2(-23.1kb)|TM9SF3(-176.6kb)|ZNF518A(+177.7kb)
8	591873	rs906890	A	G		3	9.997e-05	0.0008432	0.8148	0.8116	0.2489	28.1	0.8267	0.7046	0.8855	ERICH1(-22.33kb)|ERICH1-AS1(-95.71kb)|FBXO25(+172kb)|TDRP(+96.09kb)
