# Supplementary material for: Multiomics integrative analysis identifies APOE allele-specific blood biomarkers associated to Alzheimer’s disease etiopathogenesis
Source: Aging (Albany NY). 2021 Apr 12;13(7):9277–329. doi: 10.18632/aging.202950 (PMC8064208; doi:10.18632/aging.202950)
Supplement: Supplementary Table 4 [file aging-13-202950-s006.xlsx]

## Sheet: Sheet1
Supplementary Table 4. Stage I-IV APOE2 stratified meta-analysis results (p<10-4).
CHR	BP	SNP	A1	A2	N	P	P(R)	OR	OR(R)	Q	I	StageIV	StageI-III	Annotation
1	195303556	rs61818578	C	T	2	1.453e-07	1.453e-07	1.9053	1.9053	0.7383	0	2.0995	1.8727	.
19	44189441	rs13344768	A	G	2	3.347e-07	3.347e-07	1.6988	1.6988	0.5393	0	1.4345	1.7401	CADM4(+45.45kb)|ETHE1(+158kb)|IRGC(-30.77kb)|IRGQ(+89.15kb)|KCNN4(-81.24kb)|LYPD5(-110.6kb)|PHLDB3(+180.5kb)|PINLYP(+103.2kb)|PLAUR(+14.94kb)|SMG9(-45.86kb)|SRRM5(+70.79kb)|XRCC1(+109.7kb)|ZNF283(-142kb)|ZNF404(-187.1kb)|ZNF428(+65.43kb)|ZNF575(+149.2kb)|ZNF576(+84.85kb)
19	44189286	rs520130	T	A	2	4.731e-07	4.731e-07	1.6851	1.6851	0.5089	0	1.4048	1.729	CADM4(+45.3kb)|ETHE1(+157.9kb)|IRGC(-30.93kb)|IRGQ(+89kb)|KCNN4(-81.4kb)|LYPD5(-110.8kb)|PHLDB3(+180.3kb)|PINLYP(+103kb)|PLAUR(+14.79kb)|SMG9(-46.01kb)|SRRM5(+70.64kb)|XRCC1(+109.6kb)|ZNF283(-142.2kb)|ZNF404(-187.2kb)|ZNF428(+65.27kb)|ZNF575(+149kb)|ZNF576(+84.7kb)
19	44189160	rs519137	T	C	2	4.997e-07	4.997e-07	1.6833	1.6833	0.5105	0	1.4044	1.727	CADM4(+45.17kb)|ETHE1(+157.8kb)|IRGC(-31.05kb)|IRGQ(+88.87kb)|KCNN4(-81.52kb)|LYPD5(-110.9kb)|PHLDB3(+180.2kb)|PINLYP(+102.9kb)|PLAUR(+14.66kb)|SMG9(-46.14kb)|SRRM5(+70.51kb)|XRCC1(+109.4kb)|ZNF283(-142.3kb)|ZNF404(-187.4kb)|ZNF428(+65.15kb)|ZNF575(+148.9kb)|ZNF576(+84.57kb)
21	34554844	rs145108915	T	C	2	5.255e-07	0.000212	2.0071	2.1053	0.2162	34.61	2.8719	1.8485	C21orf54(+12.3kb)|IFNAR1(-142.4kb)|IFNAR2(-47.39kb)|IL10RB(-83.82kb)|IL10RB-AS1(-83.09kb)|OLIG1(+110.1kb)|OLIG2(+153.3kb)
3	102681322	rs73147099	C	T	2	5.617e-07	5.617e-07	2.9437	2.9437	0.8309	0	2.6829	3.0118	.
19	44187494	rs75425987	T	C	2	6.438e-07	1.645e-06	1.7446	1.7405	0.3132	1.67	1.2649	1.815	CADM4(+43.5kb)|ETHE1(+156.1kb)|IRGC(-32.72kb)|IRGQ(+87.21kb)|KCNN4(-83.19kb)|LYPD5(-112.6kb)|PHLDB3(+178.5kb)|PINLYP(+101.2kb)|PLAUR(+13kb)|SMG9(-47.81kb)|SRRM5(+68.84kb)|XRCC1(+107.8kb)|ZNF283(-144kb)|ZNF404(-189kb)|ZNF428(+63.48kb)|ZNF575(+147.2kb)|ZNF576(+82.91kb)
3	102343690	rs73134037	T	C	2	6.607e-07	6.607e-07	2.9182	2.9182	0.6825	0	2.4122	3.0396	ZPLD1(+145kb)
3	102368850	rs116070123	G	A	2	6.641e-07	6.641e-07	2.9797	2.9797	0.7448	0	2.5713	3.0848	ZPLD1(+170.2kb)
4	42194357	rs74883111	C	T	2	7.234e-07	7.234e-07	2.4054	2.4054	0.5848	0	3.0114	2.3072	BEND4(+39.46kb)|SLC30A9(+104.8kb)
4	42673990	rs17448631	T	C	2	7.354e-07	3.916e-05	1.5434	1.5684	0.269	18.16	1.923	1.4789	ATP8A1(+14.87kb)
3	102352409	rs114880288	C	T	2	8.807e-07	8.807e-07	2.9446	2.9446	0.6867	0	2.4511	3.0733	ZPLD1(+153.7kb)
1	185670423	rs16824380	T	C	2	8.934e-07	8.934e-07	3.6523	3.6523	0.6437	0	2.892	3.8925	HMCN1(-33.26kb)
14	87903232	rs61981988	C	A	2	1.069e-06	1.069e-06	1.3361	1.3361	0.507	0	1.2212	1.3594	.
4	136042770	rs79853407	T	G	2	1.317e-06	1.317e-06	2.4248	2.4248	0.705	0	2.7815	2.3414	.
19	44201167	rs4802191	T	C	2	1.41e-06	1.41e-06	1.644	1.644	0.9153	0	1.5962	1.6507	CADM4(+57.18kb)|ETHE1(+169.8kb)|IRGC(-19.05kb)|IRGQ(+100.9kb)|KCNN4(-69.52kb)|LOC100505715(-194.8kb)|LYPD5(-98.91kb)|PHLDB3(+192.2kb)|PINLYP(+114.9kb)|PLAUR(+26.67kb)|SMG9(-34.13kb)|SRRM5(+82.52kb)|XRCC1(+121.4kb)|ZNF283(-130.3kb)|ZNF404(-175.3kb)|ZNF428(+77.15kb)|ZNF575(+160.9kb)|ZNF576(+96.58kb)
3	102738964	rs73153134	C	T	2	1.41e-06	1.41e-06	2.9362	2.9362	0.8862	0	3.1318	2.8901	.
3	102690207	rs147811405	A	G	2	1.424e-06	1.424e-06	2.4814	2.4814	0.7859	0	2.8052	2.4289	.
19	44200667	rs28677840	A	C	2	1.437e-06	1.437e-06	1.6423	1.6423	0.909	0	1.5911	1.6495	CADM4(+56.68kb)|ETHE1(+169.3kb)|IRGC(-19.55kb)|IRGQ(+100.4kb)|KCNN4(-70.02kb)|LOC100505715(-195.3kb)|LYPD5(-99.41kb)|PHLDB3(+191.7kb)|PINLYP(+114.4kb)|PLAUR(+26.17kb)|SMG9(-34.63kb)|SRRM5(+82.02kb)|XRCC1(+120.9kb)|ZNF283(-130.8kb)|ZNF404(-175.8kb)|ZNF428(+76.65kb)|ZNF575(+160.4kb)|ZNF576(+96.08kb)
19	44201312	rs4802192	T	C	2	1.438e-06	1.438e-06	1.6436	1.6436	0.9194	0	1.5981	1.65	CADM4(+57.32kb)|ETHE1(+169.9kb)|IRGC(-18.9kb)|IRGQ(+101kb)|KCNN4(-69.37kb)|LOC100505715(-194.6kb)|LYPD5(-98.77kb)|PHLDB3(+192.3kb)|PINLYP(+115.1kb)|PLAUR(+26.81kb)|SMG9(-33.99kb)|SRRM5(+82.66kb)|XRCC1(+121.6kb)|ZNF283(-130.2kb)|ZNF404(-175.2kb)|ZNF428(+77.3kb)|ZNF575(+161kb)|ZNF576(+96.72kb)
19	44200812	rs59684608	T	C	2	1.441e-06	1.441e-06	1.6425	1.6425	0.9119	0	1.5929	1.6495	CADM4(+56.82kb)|ETHE1(+169.4kb)|IRGC(-19.4kb)|IRGQ(+100.5kb)|KCNN4(-69.87kb)|LOC100505715(-195.1kb)|LYPD5(-99.27kb)|PHLDB3(+191.8kb)|PINLYP(+114.6kb)|PLAUR(+26.31kb)|SMG9(-34.49kb)|SRRM5(+82.16kb)|XRCC1(+121.1kb)|ZNF283(-130.7kb)|ZNF404(-175.7kb)|ZNF428(+76.8kb)|ZNF575(+160.5kb)|ZNF576(+96.22kb)
19	44200928	rs28468406	C	G	2	1.45e-06	1.45e-06	1.6427	1.6427	0.9141	0	1.5943	1.6495	CADM4(+56.94kb)|ETHE1(+169.5kb)|IRGC(-19.28kb)|IRGQ(+100.6kb)|KCNN4(-69.76kb)|LOC100505715(-195kb)|LYPD5(-99.15kb)|PHLDB3(+191.9kb)|PINLYP(+114.7kb)|PLAUR(+26.43kb)|SMG9(-34.37kb)|SRRM5(+82.28kb)|XRCC1(+121.2kb)|ZNF283(-130.5kb)|ZNF404(-175.6kb)|ZNF428(+76.91kb)|ZNF575(+160.6kb)|ZNF576(+96.34kb)
19	44202855	rs346058	T	A	2	1.591e-06	1.591e-06	1.6697	1.6697	0.605	0	1.4354	1.7037	CADM4(+58.86kb)|ETHE1(+171.5kb)|IRGC(-17.36kb)|IRGQ(+102.6kb)|KCNN4(-67.83kb)|LOC100505715(-193.1kb)|LYPD5(-97.22kb)|PHLDB3(+193.9kb)|PINLYP(+116.6kb)|PLAUR(+28.36kb)|SMG9(-32.44kb)|SRRM5(+84.2kb)|XRCC1(+123.1kb)|ZNF283(-128.6kb)|ZNF404(-173.7kb)|ZNF428(+78.84kb)|ZNF575(+162.6kb)|ZNF576(+98.27kb)
1	201145116	rs146502897	T	C	2	1.623e-06	1.623e-06	2.8551	2.8551	0.5854	0	3.599	2.6847	ASCL5(+60.62kb)|CACNA1S(+63.42kb)|IGFN1(-14.84kb)|KIF21B(+152.3kb)|PKP1(-107.5kb)|TMEM9(+21.48kb)|TNNT2(-183kb)
5	167699626	rs72835099	A	T	2	1.68e-06	1.68e-06	1.6977	1.6977	0.946	0	1.6722	1.704	TENM2(+8.464kb)|WWC1(-19.44kb)
19	44198376	rs1808261	G	C	2	1.715e-06	1.715e-06	1.6495	1.6495	0.5529	0	1.389	1.6869	CADM4(+54.38kb)|ETHE1(+167kb)|IRGC(-21.84kb)|IRGQ(+98.09kb)|KCNN4(-72.31kb)|LOC100505715(-197.6kb)|LYPD5(-101.7kb)|PHLDB3(+189.4kb)|PINLYP(+112.1kb)|PLAUR(+23.88kb)|SMG9(-36.92kb)|SRRM5(+79.73kb)|XRCC1(+118.6kb)|ZNF283(-133.1kb)|ZNF404(-178.1kb)|ZNF428(+74.36kb)|ZNF575(+158.1kb)|ZNF576(+93.79kb)
5	167700279	rs17551008	C	T	2	1.799e-06	1.799e-06	1.6951	1.6951	0.9531	0	1.673	1.7006	TENM2(+9.117kb)|WWC1(-18.78kb)
19	44188002	rs466266	G	C	2	1.893e-06	1.893e-06	1.6492	1.6492	0.5163	0	1.3743	1.6917	CADM4(+44.01kb)|ETHE1(+156.6kb)|IRGC(-32.21kb)|IRGQ(+87.72kb)|KCNN4(-82.68kb)|LYPD5(-112.1kb)|PHLDB3(+179kb)|PINLYP(+101.7kb)|PLAUR(+13.5kb)|SMG9(-47.3kb)|SRRM5(+69.35kb)|XRCC1(+108.3kb)|ZNF283(-143.5kb)|ZNF404(-188.5kb)|ZNF428(+63.99kb)|ZNF575(+147.7kb)|ZNF576(+83.42kb)
21	34572058	rs76681806	A	G	2	2.053e-06	0.0006739	1.9417	2.053	0.2037	38.1	2.8293	1.7856	C21orf54(+29.52kb)|IFNAR1(-125.2kb)|IFNAR2(-30.17kb)|IL10RB(-66.61kb)|IL10RB-AS1(-65.88kb)|OLIG1(+127.3kb)|OLIG2(+170.6kb)
19	44196889	rs740588	T	G	2	2.091e-06	2.091e-06	1.6416	1.6416	0.5515	0	1.3823	1.679	CADM4(+52.9kb)|ETHE1(+165.5kb)|IRGC(-23.32kb)|IRGQ(+96.6kb)|KCNN4(-73.8kb)|LOC100505715(-199.1kb)|LYPD5(-103.2kb)|PHLDB3(+187.9kb)|PINLYP(+110.6kb)|PLAUR(+22.39kb)|SMG9(-38.41kb)|SRRM5(+78.24kb)|XRCC1(+117.2kb)|ZNF283(-134.6kb)|ZNF404(-179.6kb)|ZNF428(+72.88kb)|ZNF575(+156.6kb)|ZNF576(+92.3kb)
8	124967556	rs4642628	A	G	2	2.128e-06	0.3422	1.7497	1.4138	0.0379	76.79	0.9154	1.9195	FAM91A1(+139.9kb)|FER1L6(0)|FER1L6-AS1(-28.82kb)|FER1L6-AS2(-90.76kb)
3	102610117	rs73134409	A	G	2	2.184e-06	2.184e-06	2.8804	2.8804	0.9815	0	2.8506	2.8878	.
19	44198884	rs346061	A	G	2	2.194e-06	2.194e-06	1.6469	1.6469	0.6147	0	1.4229	1.6789	CADM4(+54.89kb)|ETHE1(+167.5kb)|IRGC(-21.33kb)|IRGQ(+98.6kb)|KCNN4(-71.8kb)|LOC100505715(-197.1kb)|LYPD5(-101.2kb)|PHLDB3(+189.9kb)|PINLYP(+112.6kb)|PLAUR(+24.39kb)|SMG9(-36.42kb)|SRRM5(+80.23kb)|XRCC1(+119.2kb)|ZNF283(-132.6kb)|ZNF404(-177.6kb)|ZNF428(+74.87kb)|ZNF575(+158.6kb)|ZNF576(+94.3kb)
19	44187577	rs399300	G	A	2	2.266e-06	2.266e-06	1.6424	1.6424	0.521	0	1.3715	1.6842	CADM4(+43.59kb)|ETHE1(+156.2kb)|IRGC(-32.64kb)|IRGQ(+87.29kb)|KCNN4(-83.11kb)|LYPD5(-112.5kb)|PHLDB3(+178.6kb)|PINLYP(+101.3kb)|PLAUR(+13.08kb)|SMG9(-47.72kb)|SRRM5(+68.93kb)|XRCC1(+107.8kb)|ZNF283(-143.9kb)|ZNF404(-188.9kb)|ZNF428(+63.56kb)|ZNF575(+147.3kb)|ZNF576(+82.99kb)
5	167692214	rs72835098	A	T	2	2.342e-06	2.342e-06	1.6855	1.6855	0.7999	0	1.591	1.7086	TENM2(+1.052kb)|WWC1(-26.85kb)
5	167671894	rs112639489	T	C	2	2.4e-06	2.4e-06	1.6878	1.6878	0.5338	0	1.459	1.744	TENM2(0)|WWC1(-47.17kb)
3	102644411	rs73136570	C	A	2	2.444e-06	2.444e-06	2.7984	2.7984	0.9626	0	2.7415	2.8127	.
5	167670979	rs111494730	T	C	2	2.508e-06	2.508e-06	1.6885	1.6885	0.525	0	1.4541	1.746	TENM2(0)|WWC1(-48.08kb)
10	121608382	rs117845256	C	A	2	2.512e-06	2.512e-06	7.3529	7.3529	0.5311	0	5.1645	8.9759	BAG3(+171.1kb)|INPP5F(+19.72kb)|MCMBP(0)|MIR4682(-109.6kb)|SEC23IP(-43.7kb)
19	44201920	rs28633233	C	T	2	2.521e-06	2.521e-06	1.6462	1.6462	0.6464	0	1.4404	1.6756	CADM4(+57.93kb)|ETHE1(+170.5kb)|IRGC(-18.29kb)|IRGQ(+101.6kb)|KCNN4(-68.76kb)|LOC100505715(-194kb)|LYPD5(-98.16kb)|PHLDB3(+192.9kb)|PINLYP(+115.7kb)|PLAUR(+27.42kb)|SMG9(-33.38kb)|SRRM5(+83.27kb)|XRCC1(+122.2kb)|ZNF283(-129.6kb)|ZNF404(-174.6kb)|ZNF428(+77.91kb)|ZNF575(+161.6kb)|ZNF576(+97.33kb)
5	167692005	rs72835096	C	T	2	2.531e-06	2.531e-06	1.6826	1.6826	0.7807	0	1.579	1.7079	TENM2(+0.843kb)|WWC1(-27.06kb)
19	44199926	rs10409774	A	G	2	2.583e-06	2.583e-06	1.6433	1.6433	0.6504	0	1.4405	1.6722	CADM4(+55.94kb)|ETHE1(+168.5kb)|IRGC(-20.29kb)|IRGQ(+99.64kb)|KCNN4(-70.76kb)|LOC100505715(-196kb)|LYPD5(-100.2kb)|PHLDB3(+190.9kb)|PINLYP(+113.7kb)|PLAUR(+25.43kb)|SMG9(-35.37kb)|SRRM5(+81.28kb)|XRCC1(+120.2kb)|ZNF283(-131.5kb)|ZNF404(-176.6kb)|ZNF428(+75.91kb)|ZNF575(+159.6kb)|ZNF576(+95.34kb)
14	87878266	rs12432560	G	A	2	2.623e-06	2.623e-06	1.3084	1.3084	0.6766	0	1.2392	1.3222	.
19	44199523	rs346060	T	C	2	2.668e-06	2.668e-06	1.6402	1.6402	0.6283	0	1.425	1.6708	CADM4(+55.53kb)|ETHE1(+168.1kb)|IRGC(-20.69kb)|IRGQ(+99.24kb)|KCNN4(-71.16kb)|LOC100505715(-196.4kb)|LYPD5(-100.6kb)|PHLDB3(+190.5kb)|PINLYP(+113.3kb)|PLAUR(+25.02kb)|SMG9(-35.78kb)|SRRM5(+80.87kb)|XRCC1(+119.8kb)|ZNF283(-131.9kb)|ZNF404(-177kb)|ZNF428(+75.51kb)|ZNF575(+159.2kb)|ZNF576(+94.94kb)
18	59565942	rs4941084	G	A	2	2.939e-06	0.001882	0.6038	0.6242	0.223	32.66	0.7897	0.5661	LOC100996669(+144kb)|PIGN(-145.5kb)|RNF152(+5.638kb)
15	97207764	rs6496179	G	T	2	2.998e-06	2.998e-06	0.6341	0.6341	0.3507	0	0.4868	0.6543	SPATA8(-118.9kb)|SPATA8-AS1(-107.5kb)
12	53330700	rs1907670	A	G	2	3.092e-06	0.0003533	1.9846	1.9312	0.2711	17.42	1.3552	2.1254	EIF4B(-69.36kb)|IGFBP6(-160.7kb)|KRT3(+140.8kb)|KRT4(+122.8kb)|KRT8(0)|KRT18(-11.95kb)|KRT76(+159.6kb)|KRT78(+87.92kb)|KRT79(+102.6kb)|LOC283335(-106.3kb)|SOAT2(-166.6kb)|SPRYD3(-127.4kb)|TENC1(-110.1kb)
5	1243009	rs7721679	G	A	2	3.109e-06	9.215e-05	0.6791	0.6856	0.2894	10.92	0.8392	0.6547	CLPTM1L(-74.99kb)|MIR4457(-66.42kb)|MIR4635(+179.9kb)|SLC6A3(-149.9kb)|SLC6A18(0)|SLC6A19(+17.78kb)|SLC12A7(+130.8kb)|TERT(-10.28kb)
15	97206757	rs1521571	T	C	2	3.427e-06	3.427e-06	0.6372	0.6372	0.3505	0	0.4897	0.6574	SPATA8(-119.9kb)|SPATA8-AS1(-108.5kb)
10	12492379	rs1077685	A	G	2	3.753e-06	3.753e-06	1.6582	1.6582	0.363	0	1.3111	1.7296	CAMK1D(0)|CDC123(+199.8kb)|MIR4480(-128.4kb)
2	71330331	rs7558220	T	C	2	3.803e-06	4.387e-05	1.6271	1.6473	0.2815	13.78	2.0559	1.54	ANKRD53(+117.7kb)|ATP6V1B1(+137.8kb)|MCEE(-6.474kb)|MPHOSPH10(-27.11kb)|NAGK(+24.33kb)|OR7E91P(+73.27kb)|PAIP2B(-79.54kb)|TEX261(+108.3kb)|VAX2(+169.8kb)
8	104314477	rs62525497	T	C	2	3.813e-06	0.001635	1.7495	1.6898	0.233	29.69	1.2926	1.8742	BAALC(+71.94kb)|C8orf56(+160.9kb)|CTHRC1(-69.26kb)|DCAF13(-112.5kb)|FZD6(0)|LOC100499183(+130.1kb)|MIR3151(+147.6kb)|RIMS2(-198.5kb)|SLC25A32(-96.39kb)
3	102154715	rs62274739	C	T	2	3.989e-06	3.989e-06	2.7438	2.7438	0.9751	0	2.7818	2.7345	ZPLD1(0)
3	102217329	rs73150411	G	A	2	4.015e-06	4.015e-06	2.6419	2.6419	0.8147	0	2.3758	2.7033	ZPLD1(+18.64kb)
3	102505396	rs73141834	C	T	2	4.183e-06	4.183e-06	2.8152	2.8152	0.9187	0	2.6904	2.8481	.
3	102221341	rs73150414	T	G	2	4.202e-06	4.202e-06	2.64	2.64	0.817	0	2.3771	2.7007	ZPLD1(+22.66kb)
5	167680977	rs72835088	G	T	2	4.418e-06	4.418e-06	1.663	1.663	0.6561	0	1.4995	1.7026	TENM2(0)|WWC1(-38.09kb)
4	187755533	rs57174886	G	T	2	4.469e-06	4.469e-06	1.6681	1.6681	0.7086	0	1.5122	1.6979	FAT1(+110.5kb)
14	87878904	rs4354851	C	T	2	4.623e-06	4.623e-06	1.3006	1.3006	0.6468	0	1.2254	1.3158	.
1	164419064	rs148830716	A	G	2	4.665e-06	0.06811	2.9229	2.3967	0.1122	60.37	1.2805	3.4567	PBX1(-109.5kb)
5	128010246	rs62392640	C	T	2	4.676e-06	0.0118	2.4055	2.194	0.2202	33.46	1.2726	2.6235	FBN2(+136.5kb)
5	167677075	rs79478844	A	G	2	5.056e-06	5.056e-06	1.6562	1.6562	0.6128	0	1.4717	1.7007	TENM2(0)|WWC1(-41.99kb)
5	172290712	rs793011	A	T	2	5.216e-06	5.216e-06	0.5465	0.5465	0.7578	0	0.5968	0.5362	ATP6V0E1(-120kb)|CREBRF(-192.6kb)|DUSP1(+92.51kb)|ERGIC1(0)|LOC100268168(-91.07kb)|NEURL1B(+172.2kb)|RPL26L1(-95.73kb)|SNORA74B(-157kb)
2	151190677	rs13028516	T	C	2	5.455e-06	5.455e-06	1.9638	1.9638	0.6096	0	2.3332	1.8994	RND3(-134kb)
1	185026908	rs79091515	A	G	2	5.592e-06	9.21e-05	2.1951	2.2507	0.279	14.68	3.3538	2.0205	FAM129A(+83.19kb)|RNF2(0)|SWT1(-99.28kb)|TRMT1L(-60.31kb)
4	42682561	rs28869230	G	A	2	5.615e-06	5.615e-06	1.4212	1.4212	0.3294	0	1.6849	1.3744	ATP8A1(+23.44kb)
4	14740442	rs12644719	G	A	2	5.725e-06	5.725e-06	1.6658	1.6658	0.6462	0	1.8434	1.6225	LOC441009(-171.1kb)
1	214727301	rs138967820	C	T	2	5.79e-06	5.79e-06	1.7785	1.7785	0.9235	0	1.7356	1.7894	CENPF(-49.23kb)|PTPN14(+2.277kb)
5	172287617	rs793016	G	T	2	5.873e-06	5.873e-06	0.5442	0.5442	0.7685	0	0.5919	0.5342	ATP6V0E1(-123.1kb)|CREBRF(-195.7kb)|DUSP1(+89.41kb)|ERGIC1(0)|LOC100268168(-94.17kb)|NEURL1B(+169.1kb)|RPL26L1(-98.82kb)|SNORA74B(-160.1kb)
3	102490516	rs73139740	T	C	2	6.135e-06	6.135e-06	2.7603	2.7603	0.8362	0	2.5179	2.8258	.
4	14744878	rs73797457	A	G	2	6.211e-06	6.211e-06	1.6546	1.6546	0.6241	0	1.8405	1.6089	LOC441009(-166.7kb)
14	87918282	rs35509809	T	C	2	6.417e-06	6.417e-06	1.3188	1.3188	0.5327	0	1.2093	1.3413	.
1	214731816	rs79054984	T	C	2	6.541e-06	6.541e-06	1.7729	1.7729	0.9242	0	1.7304	1.7836	CENPF(-44.72kb)|PTPN14(+6.792kb)
5	172288697	rs11749499	A	C	2	6.597e-06	6.597e-06	0.5484	0.5484	0.7778	0	0.5945	0.5389	ATP6V0E1(-122.1kb)|CREBRF(-194.7kb)|DUSP1(+90.49kb)|ERGIC1(0)|LOC100268168(-93.09kb)|NEURL1B(+170.2kb)|RPL26L1(-97.74kb)|SNORA74B(-159kb)
1	214730866	rs60569881	A	G	2	6.68e-06	6.68e-06	1.7566	1.7566	0.9152	0	1.7095	1.7681	CENPF(-45.66kb)|PTPN14(+5.842kb)
1	214730401	rs35329321	C	T	2	6.685e-06	6.685e-06	1.7566	1.7566	0.9166	0	1.7103	1.7679	CENPF(-46.13kb)|PTPN14(+5.377kb)
1	214733194	rs115016705	A	C	2	6.798e-06	6.798e-06	1.7713	1.7713	0.9207	0	1.7269	1.7825	CENPF(-43.34kb)|PTPN14(+8.17kb)
1	214732288	rs6675792	G	T	2	6.846e-06	6.846e-06	1.7556	1.7556	0.9115	0	1.7065	1.7676	CENPF(-44.24kb)|PTPN14(+7.264kb)
1	214749261	rs76955245	T	C	2	6.852e-06	6.852e-06	1.7689	1.7689	0.8365	0	1.6781	1.792	CENPF(-27.27kb)|PTPN14(+24.24kb)
1	214749573	rs114592116	A	G	2	7.035e-06	7.035e-06	1.7681	1.7681	0.8334	0	1.6756	1.7917	CENPF(-26.96kb)|PTPN14(+24.55kb)
1	246970689	rs144230454	T	C	2	7.326e-06	0.06841	1.993	1.7548	0.1434	53.3	1.1306	2.1793	AHCTF1(-31.71kb)|CNST(+138.8kb)|LOC149134(+15.9kb)|SCCPDH(+39.25kb)|ZNF670-ZNF695(-138.2kb)|ZNF695(-138.2kb)
1	214730212	rs73079780	C	G	2	7.33e-06	7.33e-06	1.753	1.753	0.9236	0	1.7107	1.7634	CENPF(-46.32kb)|PTPN14(+5.188kb)
14	87992800	rs12897521	C	T	2	7.337e-06	0.01037	1.3018	1.2678	0.1965	40.05	1.1018	1.3476	.
18	59520586	rs117399583	A	G	2	7.405e-06	7.405e-06	1.6821	1.6821	0.6439	0	1.5107	1.7277	LOC100996669(+98.66kb)|PIGN(-190.9kb)|RNF152(0)
16	52364843	rs117226581	T	G	2	7.414e-06	0.4246	2.8008	1.8025	0.0325	78.13	0.754	3.3668	TOX3(-107.1kb)
3	101923830	rs73151495	C	T	2	7.547e-06	7.547e-06	2.8048	2.8048	0.9277	0	2.9463	2.78	.
14	87815638	rs61980137	G	A	2	7.603e-06	7.603e-06	1.2923	1.2923	0.8835	0	1.2681	1.2971	.
2	33608276	rs150324364	T	C	2	7.614e-06	7.614e-06	2.749	2.749	0.9319	0	2.8386	2.7172	LTBP1(0)|RASGRP3(-53.14kb)
3	118892533	rs6788712	T	C	2	7.736e-06	7.736e-06	0.5622	0.5622	0.6861	0	0.6239	0.5478	ARHGAP31(-120.7kb)|B4GALT4(-38.06kb)|C3orf30(+22.23kb)|IGSF11(+27.64kb)|UPK1B(0)
3	118814436	rs144923269	T	A	2	7.795e-06	7.795e-06	2.4602	2.4602	0.5375	0	1.9634	2.6342	ARHGAP31(-198.8kb)|B4GALT4(-116.2kb)|C3orf30(-50.56kb)|IGSF11(0)|IGSF11-AS1(+147.3kb)|UPK1B(-77.99kb)
19	44206375	rs79762104	A	G	2	8.143e-06	8.143e-06	1.652	1.652	0.3844	0	1.2393	1.708	CADM4(+62.38kb)|ETHE1(+175kb)|IRGC(-13.84kb)|IRGQ(+106.1kb)|KCNN4(-64.31kb)|LOC100505715(-189.6kb)|LYPD5(-93.7kb)|PHLDB3(+197.4kb)|PINLYP(+120.1kb)|PLAUR(+31.88kb)|SMG9(-28.92kb)|SRRM5(+87.72kb)|XRCC1(+126.6kb)|ZNF283(-125.1kb)|ZNF404(-170.1kb)|ZNF428(+82.36kb)|ZNF575(+166.1kb)|ZNF576(+101.8kb)
19	44205852	rs78242215	A	G	2	8.159e-06	8.159e-06	1.6511	1.6511	0.3827	0	1.2373	1.7071	CADM4(+61.86kb)|ETHE1(+174.5kb)|IRGC(-14.36kb)|IRGQ(+105.6kb)|KCNN4(-64.83kb)|LOC100505715(-190.1kb)|LYPD5(-94.23kb)|PHLDB3(+196.9kb)|PINLYP(+119.6kb)|PLAUR(+31.35kb)|SMG9(-29.45kb)|SRRM5(+87.2kb)|XRCC1(+126.1kb)|ZNF283(-125.6kb)|ZNF404(-170.7kb)|ZNF428(+81.84kb)|ZNF575(+165.6kb)|ZNF576(+101.3kb)
3	102379159	rs73134094	C	T	2	8.176e-06	8.176e-06	2.7082	2.7082	0.7404	0	2.3374	2.8108	ZPLD1(+180.5kb)
3	118849273	rs151336615	T	G	2	8.19e-06	8.19e-06	2.4467	2.4467	0.5769	0	1.9992	2.6032	ARHGAP31(-163.9kb)|B4GALT4(-81.32kb)|C3orf30(-15.72kb)|IGSF11(0)|IGSF11-AS1(+182.2kb)|UPK1B(-43.15kb)
1	214741815	rs76420027	C	G	2	8.204e-06	8.204e-06	1.7624	1.7624	0.8907	0	1.7017	1.7778	CENPF(-34.72kb)|PTPN14(+16.79kb)
15	70452956	rs6494847	A	G	2	8.256e-06	0.007911	1.3264	1.2925	0.214	35.23	1.1066	1.3726	MIR629(+81.15kb)|TLE3(+62.7kb)
6	105237327	rs116935456	G	A	2	8.716e-06	0.2602	2.5067	1.8696	0.0524	73.42	0.9548	2.9608	HACE1(0)|LIN28B(-167.6kb)|LINC00577(-146.8kb)
18	59525845	rs113426267	T	G	2	8.777e-06	0.004373	1.6344	1.5742	0.2248	32.13	1.2173	1.7373	LOC100996669(+103.9kb)|PIGN(-185.6kb)|RNF152(0)
1	214750508	rs139734914	G	A	2	8.831e-06	8.831e-06	1.7601	1.7601	0.8393	0	1.6711	1.7828	CENPF(-26.02kb)|PTPN14(+25.48kb)
12	126730138	rs35771378	C	T	2	8.908e-06	8.908e-06	2.9492	2.9492	0.8923	0	2.7949	3.0094	LOC100128554(-196.9kb)
1	214744525	rs116698470	A	G	2	8.963e-06	8.963e-06	1.7578	1.7578	0.8784	0	1.6906	1.7749	CENPF(-32.01kb)|PTPN14(+19.5kb)
10	30890602	rs78400248	G	A	2	9.041e-06	0.5981	2.635	1.5412	0.0505	73.85	0.549	2.9596	LYZL2(-10.1kb)|MAP3K8(+139.8kb)|SVILP1(-90.6kb)
9	101119012	rs591019	G	T	2	9.231e-06	9.231e-06	1.3132	1.3132	0.5888	0	1.4212	1.295	CORO2A(+164.1kb)|GABBR2(0)|TBC1D2(+101kb)
7	52958705	rs117035741	A	T	2	9.301e-06	9.301e-06	2.7268	2.7268	0.7021	0	2.2417	2.8331	POM121L12(-144.6kb)
9	26707779	rs76772962	T	C	2	9.483e-06	9.483e-06	2.5402	2.5402	0.7236	0	2.8853	2.432	CAAP1(-132.9kb)|PLAA(-195.6kb)
6	160413074	rs8191711	A	G	2	9.494e-06	0.008831	1.4865	1.5965	0.1138	60.01	2.0141	1.3916	AIRN(-11.25kb)|IGF2R(0)|LOC729603(-101kb)|MAS1(+83.97kb)|MRPL18(+193.6kb)|PNLDC1(+171.3kb)|SLC22A1(-129.8kb)
3	70855904	rs6784898	G	A	2	9.522e-06	9.522e-06	1.2801	1.2801	0.6009	0	1.3736	1.2647	FOXP1(-148kb)
2	151166722	rs13004929	A	G	2	9.575e-06	9.575e-06	1.9022	1.9022	0.5663	0	2.3046	1.8346	RND3(-158kb)
14	51548449	rs57535388	A	G	2	9.578e-06	9.578e-06	1.314	1.314	0.5162	0	1.4438	1.2918	ABHD12B(+176.8kb)|PYGL(+137.2kb)|TMX1(-158.4kb)|TRIM9(0)
3	102514676	rs73141852	T	C	2	9.581e-06	9.581e-06	2.7274	2.7274	0.9609	0	2.7876	2.712	.
3	102563068	rs73143526	C	T	2	9.703e-06	9.703e-06	2.7385	2.7385	0.8528	0	2.9778	2.6808	.
1	214726137	rs115433466	G	T	2	9.72e-06	9.72e-06	1.7485	1.7485	0.9335	0	1.7118	1.7577	CENPF(-50.39kb)|PTPN14(+1.113kb)
15	54855854	rs146982817	C	T	2	9.722e-06	9.722e-06	2.0043	2.0043	0.7136	0	1.7724	2.0593	UNC13C(0)
20	40797881	rs10485686	T	C	2	9.779e-06	0.7522	2.4288	1.3173	0.0206	81.36	0.473	2.7716	PTPRT(0)
5	172288907	rs11743007	C	A	2	9.966e-06	9.966e-06	0.554	0.554	0.8049	0	0.5945	0.5455	ATP6V0E1(-121.9kb)|CREBRF(-194.4kb)|DUSP1(+90.7kb)|ERGIC1(0)|LOC100268168(-92.88kb)|NEURL1B(+170.4kb)|RPL26L1(-97.53kb)|SNORA74B(-158.8kb)
14	87845954	rs1426790	T	C	2	9.984e-06	9.984e-06	1.2878	1.2878	0.9579	0	1.2966	1.2861	.
1	214774179	rs77164779	A	G	2	1.02e-05	1.02e-05	1.8426	1.8426	0.9842	0	1.8523	1.84	CENPF(-2.352kb)|PTPN14(+49.16kb)
3	102516693	rs73141859	T	A	2	1.022e-05	1.022e-05	2.7117	2.7117	0.9692	0	2.7584	2.6996	.
5	172291316	rs13177110	G	C	2	1.024e-05	1.024e-05	0.5553	0.5553	0.797	0	0.5976	0.5465	ATP6V0E1(-119.4kb)|CREBRF(-192kb)|DUSP1(+93.11kb)|ERGIC1(0)|LOC100268168(-90.47kb)|NEURL1B(+172.8kb)|RPL26L1(-95.12kb)|SNORA74B(-156.4kb)
1	214728675	rs78339675	G	A	2	1.033e-05	1.033e-05	1.7384	1.7384	0.9529	0	1.7124	1.7447	CENPF(-47.86kb)|PTPN14(+3.651kb)
1	214746009	rs954414	C	T	2	1.037e-05	1.037e-05	1.742	1.742	0.8501	0	1.6605	1.7627	CENPF(-30.52kb)|PTPN14(+20.98kb)
1	214746359	rs59110162	T	G	2	1.047e-05	1.047e-05	1.7416	1.7416	0.8498	0	1.66	1.7624	CENPF(-30.17kb)|PTPN14(+21.34kb)
19	50358170	rs1290657	C	T	2	1.048e-05	1.048e-05	0.7629	0.7629	0.4217	0	0.6813	0.7795	ADM5(+163.9kb)|AKT1S1(-14.12kb)|AP2A1(+47.8kb)|ATF5(-73.79kb)|BCL2L12(+181kb)|CPT1C(+141.2kb)|FLJ26850(-195.8kb)|FUZ(+41.6kb)|IL4I1(-34.74kb)|IRF3(+189kb)|MED25(+17.93kb)|MIR4749(+0.262kb)|MIR4750(-33.26kb)|MIR4751(-78.15kb)|MIR5088(+172.8kb)|NUP62(-51.91kb)|PNKP(-6.289kb)|PRMT1(+166.5kb)|PTOV1(0)|PTOV1-AS1(+3.237kb)|SCAF1(+196.3kb)|SIGLEC11(-94.08kb)|SIGLEC16(-114.7kb)|TBC1D17(-22.51kb)|TSKS(+91…
1	214724473	rs150598229	T	C	2	1.054e-05	1.054e-05	1.7448	1.7448	0.9462	0	1.7151	1.7522	CENPF(-52.06kb)|PTPN14(0)
12	90269777	rs17192317	T	C	2	1.058e-05	0.0003623	1.7416	1.7909	0.2597	21.27	2.4096	1.6368	LINC00936(+164kb)
10	121598173	rs12772291	G	A	2	1.059e-05	1.059e-05	2.147	2.147	0.3905	0	1.5417	2.2958	BAG3(+160.8kb)|INPP5F(+9.511kb)|MCMBP(0)|MIR4682(-119.9kb)|SEC23IP(-53.91kb)
14	87983256	rs4904384	G	C	2	1.065e-05	0.0291	1.2981	1.2532	0.1628	48.66	1.0818	1.3477	.
2	71322674	rs7601468	T	C	2	1.076e-05	0.0003403	1.5913	1.6282	0.2508	24.18	2.0406	1.5	ANKRD53(+110kb)|ATP6V1B1(+130.1kb)|MCEE(-14.13kb)|MPHOSPH10(-34.77kb)|NAGK(+16.68kb)|OR7E91P(+65.61kb)|PAIP2B(-87.19kb)|TEX261(+100.7kb)|VAX2(+162.1kb)
3	102380488	rs73134097	A	G	2	1.076e-05	1.076e-05	2.7196	2.7196	0.6795	0	2.2474	2.8484	ZPLD1(+181.8kb)
1	214747693	rs17792294	T	C	2	1.08e-05	1.08e-05	1.7403	1.7403	0.8476	0	1.6576	1.7614	CENPF(-28.84kb)|PTPN14(+22.67kb)
15	97199562	rs61581859	C	T	2	1.081e-05	1.081e-05	0.6395	0.6395	0.3493	0	0.4858	0.6609	SPATA8(-127.1kb)|SPATA8-AS1(-115.7kb)
1	214747718	rs17735873	C	A	2	1.085e-05	1.085e-05	1.7402	1.7402	0.8475	0	1.6574	1.7613	CENPF(-28.81kb)|PTPN14(+22.69kb)
1	214748651	rs17735908	G	A	2	1.098e-05	1.098e-05	1.7399	1.7399	0.8445	0	1.6555	1.7614	CENPF(-27.88kb)|PTPN14(+23.63kb)
1	214735980	rs79253862	G	T	2	1.099e-05	1.099e-05	1.7473	1.7473	0.9709	0	1.7309	1.7513	CENPF(-40.55kb)|PTPN14(+10.96kb)
18	59526359	rs111267255	T	C	2	1.102e-05	0.01919	1.6246	1.5342	0.18	44.38	1.1734	1.7378	LOC100996669(+104.4kb)|PIGN(-185.1kb)|RNF152(0)
1	214748813	rs150109226	G	A	2	1.103e-05	1.103e-05	1.7398	1.7398	0.8437	0	1.6549	1.7614	CENPF(-27.72kb)|PTPN14(+23.79kb)
3	70818543	rs34077295	C	A	2	1.115e-05	1.115e-05	1.2802	1.2802	0.8449	0	1.3141	1.2743	FOXP1(-185.3kb)
1	214734154	rs113551530	G	A	2	1.128e-05	1.128e-05	1.7424	1.7424	0.9266	0	1.702	1.7525	CENPF(-42.38kb)|PTPN14(+9.13kb)
10	3948793	rs10904133	A	G	2	1.129e-05	0.008303	1.5342	1.6505	0.1165	59.42	2.1111	1.4257	KLF6(+121.3kb)
18	59561867	rs144768089	T	C	2	1.132e-05	0.02716	1.5819	1.4904	0.1538	50.83	1.1639	1.7006	LOC100996669(+139.9kb)|PIGN(-149.6kb)|RNF152(+1.563kb)
1	214727761	rs113323507	A	T	2	1.135e-05	1.135e-05	1.7347	1.7347	0.9606	0	1.713	1.74	CENPF(-48.77kb)|PTPN14(+2.737kb)
1	214749463	rs76363526	G	T	2	1.144e-05	1.144e-05	1.7387	1.7387	0.838	0	1.6507	1.7611	CENPF(-27.07kb)|PTPN14(+24.44kb)
1	214775560	rs2362215	A	G	2	1.146e-05	1.146e-05	1.8273	1.8273	0.8128	0	1.7169	1.8586	CENPF(-0.971kb)|PTPN14(+50.54kb)
1	214733591	rs112144962	T	G	2	1.151e-05	1.151e-05	1.741	1.741	0.9305	0	1.7028	1.7506	CENPF(-42.94kb)|PTPN14(+8.567kb)
1	214733650	rs114567272	T	C	2	1.153e-05	1.153e-05	1.741	1.741	0.9302	0	1.7026	1.7506	CENPF(-42.88kb)|PTPN14(+8.626kb)
2	213032758	rs114854372	A	G	2	1.18e-05	1.18e-05	3.0029	3.0029	0.6189	0	3.8247	2.8155	ERBB4(0)
1	214791141	rs79428297	T	C	2	1.185e-05	1.185e-05	1.8264	1.8264	0.8679	0	1.9066	1.8043	CENPF(0)|PTPN14(+66.12kb)
18	46313173	rs78127660	A	C	2	1.189e-05	1.189e-05	1.789	1.789	0.9407	0	1.7458	1.7962	CTIF(0)|MIR4743(+116.1kb)|SMAD7(-133kb)
1	214749941	rs114303448	G	A	2	1.195e-05	1.195e-05	1.7374	1.7374	0.8337	0	1.6471	1.7604	CENPF(-26.59kb)|PTPN14(+24.92kb)
1	214733853	rs74442040	C	T	2	1.201e-05	1.201e-05	1.7389	1.7389	0.9327	0	1.7019	1.7481	CENPF(-42.68kb)|PTPN14(+8.829kb)
18	59561688	rs118136768	G	C	2	1.203e-05	0.02805	1.5801	1.4883	0.1532	50.97	1.1619	1.6989	LOC100996669(+139.8kb)|PIGN(-149.8kb)|RNF152(+1.384kb)
9	26730912	rs117681700	A	G	2	1.208e-05	1.208e-05	2.3472	2.3472	0.9567	0	2.394	2.3339	CAAP1(-109.8kb)|PLAA(-172.5kb)
1	214671091	rs114144238	C	T	2	1.214e-05	1.214e-05	1.7755	1.7755	0.8908	0	1.7142	1.792	CENPF(-105.4kb)|PTPN14(0)|SMYD2(+160.6kb)
1	214771279	rs77219191	G	A	2	1.221e-05	1.221e-05	1.8265	1.8265	0.7722	0	1.6917	1.8648	CENPF(-5.252kb)|PTPN14(+46.26kb)
3	102476616	rs73139730	C	T	2	1.222e-05	1.222e-05	2.7075	2.7075	0.9737	0	2.6675	2.7178	.
1	214792673	rs79890895	T	G	2	1.224e-05	1.224e-05	1.8245	1.8245	0.8639	0	1.9072	1.8018	CENPF(0)|PTPN14(+67.65kb)
1	214736786	rs60323172	T	A	2	1.226e-05	1.226e-05	1.7381	1.7381	0.9143	0	1.6912	1.7499	CENPF(-39.74kb)|PTPN14(+11.76kb)
15	97188666	rs28480646	G	A	2	1.235e-05	1.235e-05	0.6381	0.6381	0.4923	0	0.5239	0.6544	SPATA8(-138kb)|SPATA8-AS1(-126.6kb)
1	214735985	rs75673522	A	G	2	1.238e-05	1.238e-05	1.7422	1.7422	0.9791	0	1.7304	1.745	CENPF(-40.55kb)|PTPN14(+10.96kb)
3	139986457	rs79651574	A	G	2	1.247e-05	1.247e-05	3.0115	3.0115	0.3745	0	1.8015	3.3206	CLSTN2(0)
1	214750240	rs79911579	A	G	2	1.248e-05	1.248e-05	1.7358	1.7358	0.8322	0	1.6447	1.759	CENPF(-26.29kb)|PTPN14(+25.22kb)
13	31860488	rs56266656	G	A	2	1.253e-05	0.2525	2.1654	1.7125	0.0403	76.22	0.989	2.5612	B3GALTL(0)|HSPH1(+124.4kb)
7	16228893	rs4001545	C	T	2	1.266e-05	1.911e-05	0.7727	0.7719	0.3127	1.89	0.6747	0.7932	ISPD(0)|LOC100506025(-21.22kb)
7	16228254	rs6975387	G	T	2	1.268e-05	1.814e-05	0.7727	0.772	0.3133	1.64	0.6749	0.7932	ISPD(0)|LOC100506025(-21.86kb)
3	102455469	rs115801072	T	C	2	1.273e-05	1.273e-05	2.69	2.69	0.9813	0	2.6621	2.6973	.
15	97188291	rs28723504	A	G	2	1.274e-05	1.274e-05	0.6385	0.6385	0.4909	0	0.5238	0.6549	SPATA8(-138.4kb)|SPATA8-AS1(-126.9kb)
1	214739035	rs17735632	G	A	2	1.28e-05	1.28e-05	1.7359	1.7359	0.9067	0	1.6849	1.7487	CENPF(-37.5kb)|PTPN14(+14.01kb)
20	33889704	rs76650348	G	T	2	1.288e-05	1.288e-05	3.0454	3.0454	0.3788	0	1.849	3.3696	CEP250(-153.5kb)|EDEM2(+154.5kb)|EIF6(+17.08kb)|FAM83C(+9.479kb)|GDF5(-131.4kb)|MMP24(+24.9kb)|MMP24-AS1(+23.74kb)|PROCR(+124.5kb)|UQCC(-0.664kb)
1	214750603	rs115658451	A	G	2	1.291e-05	1.291e-05	1.7396	1.7396	0.8444	0	1.6546	1.7613	CENPF(-25.93kb)|PTPN14(+25.58kb)
1	246966206	rs150873882	T	C	2	1.292e-05	0.07215	1.9752	1.7427	0.1515	51.38	1.112	2.1551	AHCTF1(-36.2kb)|CNST(+134.3kb)|LOC149134(+11.42kb)|SCCPDH(+34.77kb)|ZNF670-ZNF695(-142.6kb)|ZNF695(-142.6kb)
15	97200728	rs9920948	A	G	2	1.296e-05	1.296e-05	0.6428	0.6428	0.3495	0	0.4891	0.6643	SPATA8(-126kb)|SPATA8-AS1(-114.5kb)
15	97201055	rs4636878	A	G	2	1.301e-05	1.301e-05	0.6429	0.6429	0.35	0	0.4894	0.6644	SPATA8(-125.6kb)|SPATA8-AS1(-114.2kb)
15	97201062	rs4508393	G	T	2	1.304e-05	1.304e-05	0.6429	0.6429	0.3503	0	0.4895	0.6644	SPATA8(-125.6kb)|SPATA8-AS1(-114.2kb)
3	55741014	rs815426	T	A	2	1.312e-05	1.312e-05	1.2943	1.2943	0.8349	0	1.256	1.3009	ERC2(0)|ERC2-IT1(+47.52kb)|MIR3938(-145.5kb)
10	121608148	rs71482894	C	A	2	1.316e-05	1.316e-05	2.1331	2.1331	0.395	0	1.5364	2.2801	BAG3(+170.8kb)|INPP5F(+19.49kb)|MCMBP(0)|MIR4682(-109.9kb)|SEC23IP(-43.94kb)
1	214740939	rs112519203	T	A	2	1.318e-05	1.318e-05	1.7344	1.7344	0.9008	0	1.6803	1.748	CENPF(-35.59kb)|PTPN14(+15.92kb)
1	214772955	rs149426951	T	C	2	1.321e-05	1.321e-05	1.8184	1.8184	0.8052	0	1.7037	1.8507	CENPF(-3.576kb)|PTPN14(+47.93kb)
2	151087930	rs35743118	G	A	2	1.327e-05	1.327e-05	1.8693	1.8693	0.5048	0	2.3119	1.7903	.
7	16240154	rs10244600	T	G	2	1.33e-05	0.008203	0.7749	0.7413	0.1337	55.55	0.6354	0.8056	ISPD(0)|LOC100506025(-9.956kb)
7	16227939	rs13240803	C	A	2	1.331e-05	1.99e-05	0.7733	0.7725	0.3128	1.86	0.6753	0.7938	ISPD(0)|LOC100506025(-22.17kb)
1	214742100	rs74447685	T	C	2	1.353e-05	1.353e-05	1.7329	1.7329	0.896	0	1.6763	1.7472	CENPF(-34.43kb)|PTPN14(+17.08kb)
21	40545450	rs117703689	A	T	2	1.359e-05	1.359e-05	2.6491	2.6491	0.3351	0	1.7755	2.9762	BRWD1(-11.95kb)|BRWD1-AS1(-142.2kb)|BRWD1-IT2(-140.4kb)|HMGN1(-168.8kb)|PSMG1(-1.921kb)
15	57805219	rs55777040	C	A	2	1.36e-05	0.009475	1.3627	1.4412	0.1183	59	1.7343	1.2947	CGNL1(0)|GCOM1(-78.88kb)|MYZAP(-78.88kb)|POLR2M(-193.7kb)
21	40545446	rs117307306	C	T	2	1.361e-05	1.361e-05	2.6568	2.6568	0.3592	0	1.8038	2.9644	BRWD1(-11.96kb)|BRWD1-AS1(-142.2kb)|BRWD1-IT2(-140.4kb)|HMGN1(-168.8kb)|PSMG1(-1.925kb)
4	120655472	rs72680967	T	C	2	1.37e-05	0.002037	1.703	1.6525	0.2562	22.44	1.2273	1.8065	PDE5A(+105.5kb)
15	97206141	rs7181180	A	G	2	1.378e-05	1.378e-05	0.6435	0.6435	0.3524	0	0.4911	0.665	SPATA8(-120.5kb)|SPATA8-AS1(-109.1kb)
3	142842030	rs4149495	A	T	2	1.389e-05	1.389e-05	0.7194	0.7194	0.4977	0	0.6362	0.735	CHST2(0)|LOC100289361(+121.7kb)|LOC100507389(+180.7kb)|PAQR9(+159.9kb)|SLC9A9(-142kb)|U2SURP(+62.46kb)
1	214742742	rs111587352	T	C	2	1.404e-05	1.404e-05	1.7313	1.7313	0.8929	0	1.6731	1.746	CENPF(-33.79kb)|PTPN14(+17.72kb)
16	11345817	rs61418899	T	G	2	1.41e-05	1.41e-05	2.2523	2.2523	0.6479	0	2.646	2.1526	CLEC16A(+69.77kb)|PRM1(-28.88kb)|PRM2(-23.68kb)|PRM3(-21.33kb)|RMI2(-93.49kb)|SOCS1(-2.456kb)|TNP2(-15.9kb)
1	214789637	rs74722867	T	A	2	1.42e-05	1.42e-05	1.8086	1.8086	0.9245	0	1.7649	1.821	CENPF(0)|PTPN14(+64.61kb)
1	214743325	rs112221561	G	C	2	1.421e-05	1.421e-05	1.7303	1.7303	0.8894	0	1.6703	1.7455	CENPF(-33.21kb)|PTPN14(+18.3kb)
3	70818062	rs13077865	C	A	2	1.428e-05	1.428e-05	1.2758	1.2758	0.9517	0	1.2862	1.274	FOXP1(-185.8kb)
1	214790634	rs146293279	A	G	2	1.436e-05	1.436e-05	1.8078	1.8078	0.9259	0	1.765	1.82	CENPF(0)|PTPN14(+65.61kb)
3	55741894	rs709339	A	T	2	1.436e-05	1.436e-05	1.2929	1.2929	0.8394	0	1.2557	1.2993	ERC2(0)|ERC2-IT1(+48.4kb)|MIR3938(-144.6kb)
3	102110333	rs62274719	T	G	2	1.444e-05	1.444e-05	3.0828	3.0828	0.5597	0	2.227	3.3079	ZPLD1(-43.52kb)
1	214804353	rs76649870	G	A	2	1.446e-05	1.446e-05	1.8142	1.8142	0.8397	0	1.9116	1.7876	CENPF(0)|PTPN14(+79.33kb)
1	214781971	rs180811596	T	C	2	1.454e-05	1.454e-05	1.8111	1.8111	0.8953	0	1.7502	1.8284	CENPF(0)|PTPN14(+56.95kb)
10	7743940	rs113241510	C	T	2	1.455e-05	1.455e-05	0.5502	0.5502	0.6752	0	0.6282	0.5365	ATP5C1(-86.15kb)|ITIH2(-1.295kb)|ITIH5(+34.98kb)|KIN(-48.98kb)|TAF3(-116.5kb)
16	11343560	rs77979769	A	G	2	1.469e-05	1.469e-05	2.2491	2.2491	0.6487	0	2.6398	2.1494	CLEC16A(+67.51kb)|PRM1(-31.13kb)|PRM2(-25.93kb)|PRM3(-23.58kb)|RMI2(-95.75kb)|SOCS1(-4.713kb)|TNP2(-18.15kb)
1	214736227	rs77572081	G	A	2	1.494e-05	1.494e-05	1.7261	1.7261	0.94	0	1.6933	1.7342	CENPF(-40.3kb)|PTPN14(+11.2kb)
1	214745555	rs17792227	T	A	2	1.497e-05	1.497e-05	1.7275	1.7275	0.8766	0	1.6609	1.7445	CENPF(-30.98kb)|PTPN14(+20.53kb)
1	214781264	rs184741075	A	G	2	1.497e-05	1.497e-05	1.8103	1.8103	0.8911	0	1.7469	1.8283	CENPF(0)|PTPN14(+56.24kb)
1	214779714	rs147335836	A	T	2	1.501e-05	1.501e-05	1.811	1.811	0.8796	0	1.7408	1.8309	CENPF(0)|PTPN14(+54.69kb)
10	3947583	rs10904132	G	A	2	1.501e-05	0.001792	1.5053	1.5631	0.2032	38.25	1.9405	1.422	KLF6(+120.1kb)
21	33611264	rs74781253	C	A	2	1.508e-05	0.004815	1.6667	1.788	0.163	48.62	2.3975	1.5469	C21orf119(-154.2kb)|EVA1C(-173.5kb)|LINC00159(+152.7kb)|MIS18A(-29.26kb)|MRAP(-52.86kb)|SNORA80(-138.2kb)|URB1(-72.06kb)
15	97205609	rs7179934	T	C	2	1.512e-05	1.512e-05	0.6452	0.6452	0.3589	0	0.4942	0.6664	SPATA8(-121.1kb)|SPATA8-AS1(-109.6kb)
1	214774867	rs17792674	T	C	2	1.521e-05	1.521e-05	1.8005	1.8005	0.8111	0	1.6906	1.8309	CENPF(-1.664kb)|PTPN14(+49.84kb)
8	10448142	rs12681639	T	C	2	1.53e-05	1.53e-05	0.7257	0.7257	0.3659	0	0.6087	0.7445	C8orf74(-82kb)|MSRA(+161.7kb)|PINX1(-174.7kb)|PRSS55(+36.47kb)|RP1L1(-15.72kb)|SOX7(-133.1kb)
1	214769965	rs75933630	C	T	2	1.535e-05	1.535e-05	1.803	1.803	0.7566	0	1.6605	1.8425	CENPF(-6.566kb)|PTPN14(+44.94kb)
1	214797345	rs116298547	C	A	2	1.541e-05	1.541e-05	1.8196	1.8196	0.9547	0	1.8468	1.812	CENPF(0)|PTPN14(+72.32kb)
10	7748495	rs112258838	A	G	2	1.543e-05	1.543e-05	0.5514	0.5514	0.7267	0	0.616	0.54	ATP5C1(-81.6kb)|ITIH2(0)|ITIH5(+39.53kb)|KIN(-44.43kb)|TAF3(-112kb)
1	195256477	rs79727703	T	G	2	1.558e-05	1.558e-05	1.7414	1.7414	0.9886	0	1.7486	1.74	.
1	214777654	rs76296577	C	T	2	1.566e-05	1.566e-05	1.8114	1.8114	0.8615	0	1.7305	1.8344	CENPF(0)|PTPN14(+52.63kb)
15	97192171	rs28477210	T	C	2	1.569e-05	1.569e-05	0.6429	0.6429	0.4815	0	0.5256	0.6597	SPATA8(-134.5kb)|SPATA8-AS1(-123.1kb)
1	214806907	rs75753836	G	A	2	1.588e-05	1.588e-05	1.8085	1.8085	0.8335	0	1.9094	1.781	CENPF(0)|PTPN14(+81.88kb)
2	151077858	rs115957303	T	C	2	1.625e-05	1.625e-05	1.8513	1.8513	0.477	0	2.3173	1.7681	.
10	7749748	rs111297004	A	G	2	1.632e-05	1.632e-05	0.5526	0.5526	0.7359	0	0.615	0.5416	ATP5C1(-80.34kb)|ITIH2(0)|ITIH5(+40.79kb)|KIN(-43.18kb)|TAF3(-110.7kb)
2	16948319	rs75894859	G	C	2	1.635e-05	0.01369	1.6905	1.8735	0.0878	65.69	2.5644	1.5238	FAM49A(+101.2kb)
10	7750201	rs17142914	C	T	2	1.637e-05	1.637e-05	0.5526	0.5526	0.7496	0	0.6116	0.5422	ATP5C1(-79.89kb)|ITIH2(0)|ITIH5(+41.24kb)|KIN(-42.72kb)|TAF3(-110.3kb)
20	40819225	rs78847999	A	C	2	1.675e-05	0.6866	2.3817	1.383	0.0264	79.7	0.5327	2.7224	PTPRT(0)
15	97192336	rs12915782	T	C	2	1.676e-05	1.676e-05	0.6439	0.6439	0.4792	0	0.5259	0.6608	SPATA8(-134.3kb)|SPATA8-AS1(-122.9kb)
2	71321941	rs6707236	A	T	2	1.684e-05	1.684e-05	1.5764	1.5764	0.3197	0	1.9609	1.4984	ANKRD53(+109.3kb)|ATP6V1B1(+129.4kb)|MCEE(-14.86kb)|MPHOSPH10(-35.5kb)|NAGK(+15.94kb)|OR7E91P(+64.88kb)|PAIP2B(-87.93kb)|TEX261(+99.94kb)|VAX2(+161.4kb)
15	97192398	rs12916230	A	G	2	1.691e-05	1.691e-05	0.644	0.644	0.4792	0	0.526	0.6609	SPATA8(-134.3kb)|SPATA8-AS1(-122.8kb)
10	7744227	rs59814098	T	C	2	1.694e-05	1.694e-05	0.5536	0.5536	0.7094	0	0.6229	0.5414	ATP5C1(-85.86kb)|ITIH2(-1.008kb)|ITIH5(+35.27kb)|KIN(-48.7kb)|TAF3(-116.2kb)
18	59533920	rs4941072	G	A	2	1.705e-05	0.02999	1.6094	1.5109	0.167	47.63	1.1511	1.7257	LOC100996669(+112kb)|PIGN(-177.5kb)|RNF152(0)
12	19978865	rs12831504	G	A	2	1.707e-05	1.707e-05	1.5027	1.5027	0.3372	0	1.8294	1.4409	LOC100506393(-188.8kb)
7	16242168	rs1527224	C	G	2	1.719e-05	0.009865	0.7771	0.742	0.1271	57.05	0.6351	0.8086	ISPD(0)|LOC100506025(-7.942kb)
15	97203653	rs11858104	G	A	2	1.727e-05	1.727e-05	0.6365	0.6365	0.4551	0	0.5109	0.6546	SPATA8(-123kb)|SPATA8-AS1(-111.6kb)
1	214799370	rs75749310	G	A	2	1.73e-05	1.73e-05	1.7971	1.7971	0.9498	0	1.7682	1.8053	CENPF(0)|PTPN14(+74.35kb)
15	97203676	rs11858121	G	A	2	1.742e-05	1.742e-05	0.6366	0.6366	0.4551	0	0.511	0.6547	SPATA8(-123kb)|SPATA8-AS1(-111.6kb)
5	172295320	rs793023	A	G	2	1.742e-05	1.742e-05	0.568	0.568	0.8346	0	0.5367	0.5756	ATP6V0E1(-115.4kb)|CREBRF(-188kb)|DUSP1(+97.12kb)|ERGIC1(0)|LOC100268168(-86.46kb)|NEURL1B(+176.8kb)|RPL26L1(-91.12kb)|SNORA74B(-152.4kb)
1	248213934	rs77358868	A	G	2	1.763e-05	1.763e-05	2.3519	2.3519	0.6	0	2.8795	2.2284	OR2AK2(+84.29kb)|OR2L1P(+59.44kb)|OR2L2(+11.33kb)|OR2L3(-10.05kb)|OR2L5(+27.75kb)|OR2L8(+100.8kb)|OR2L13(0)|OR2M1P(-71.5kb)|OR2M2(-129.4kb)|OR2M3(-152.4kb)|OR2M4(-188.3kb)|OR2M5(-94.52kb)|OR2T8(+128.7kb)|OR2W3(+154.1kb)|TRIM58(+170.5kb)
21	40578832	rs148938553	C	T	2	1.771e-05	0.0002449	2.6317	2.5715	0.2793	14.56	1.6777	3.0035	BRWD1(0)|BRWD1-AS1(-108.8kb)|BRWD1-IT2(-107kb)|HMGN1(-135.4kb)|LCA5L(-198.9kb)|PSMG1(+23.39kb)|WRB(-173.4kb)
20	4106392	rs7271304	A	G	2	1.778e-05	0.01297	1.4152	1.5163	0.0998	63.09	1.8756	1.3288	ADRA1D(-94.88kb)|LOC728228(-67.34kb)|RNF24(+110.2kb)|SMOX(-23.03kb)
18	59531522	rs79494360	T	C	2	1.804e-05	0.02464	1.6074	1.5155	0.1761	45.36	1.158	1.7212	LOC100996669(+109.6kb)|PIGN(-179.9kb)|RNF152(0)
1	214814059	rs61732042	G	T	2	1.805e-05	1.805e-05	1.8011	1.8011	0.8188	0	1.9109	1.7713	CENPF(0)|PTPN14(+89.04kb)
21	40648241	rs35200633	T	C	2	1.81e-05	1.81e-05	1.6215	1.6215	0.4619	0	1.3515	1.6839	BRWD1(0)|BRWD1-AS1(-39.39kb)|BRWD1-IT2(-37.62kb)|HMGN1(-66kb)|LCA5L(-129.5kb)|PSMG1(+92.8kb)|SH3BGR(-169.6kb)|WRB(-104kb)
1	214813072	rs77560612	C	T	2	1.815e-05	1.815e-05	1.8006	1.8006	0.8184	0	1.9106	1.7707	CENPF(0)|PTPN14(+88.05kb)
2	16951903	rs17586179	C	G	2	1.817e-05	0.01407	1.6864	1.8691	0.0882	65.59	2.5594	1.5205	FAM49A(+104.8kb)
20	51622107	rs11699642	T	C	2	1.817e-05	1.817e-05	1.7294	1.7294	0.5827	0	2.0019	1.6721	TSHZ2(0)
3	70817820	rs34546093	C	T	2	1.82e-05	1.82e-05	1.2727	1.2727	0.9346	0	1.2867	1.2702	FOXP1(-186kb)
4	120619030	rs72678594	A	G	2	1.837e-05	0.002371	1.7027	1.6515	0.2547	22.92	1.2268	1.81	LOC645513(+198.3kb)|PDE5A(+69.05kb)
1	246961219	rs12118999	C	G	2	1.838e-05	0.4503	1.7497	1.368	0.0329	78.04	0.838	1.9444	AHCTF1(-41.18kb)|CNST(+129.3kb)|LOC149134(+6.431kb)|SCCPDH(+29.78kb)|ZNF670-ZNF695(-147.6kb)|ZNF695(-147.6kb)
4	120639982	rs72680951	A	C	2	1.843e-05	0.001758	1.6963	1.6506	0.2615	20.68	1.2275	1.8	PDE5A(+90kb)
4	120640052	rs72680952	A	G	2	1.849e-05	0.001753	1.6962	1.6506	0.2616	20.66	1.2275	1.7999	PDE5A(+90.07kb)
15	70452747	rs7180351	G	A	2	1.854e-05	0.0003787	1.3091	1.299	0.2852	12.46	1.1229	1.3482	MIR629(+80.94kb)|TLE3(+62.49kb)
1	214803649	rs17736682	C	T	2	1.868e-05	1.868e-05	1.7926	1.7926	0.96	0	1.7696	1.7991	CENPF(0)|PTPN14(+78.62kb)
4	120621525	rs56085109	T	C	2	1.87e-05	0.002168	1.7011	1.6516	0.2568	22.22	1.2275	1.8076	PDE5A(+71.54kb)
1	247016386	rs12123173	C	T	2	1.873e-05	1.873e-05	2.0386	2.0386	0.3393	0	1.4052	2.182	AHCTF1(0)|CNST(+184.5kb)|LOC149134(+61.6kb)|SCCPDH(+84.95kb)|ZNF670(-181.6kb)|ZNF670-ZNF695(-92.46kb)|ZNF695(-92.46kb)
4	120622440	rs72680905	C	T	2	1.877e-05	0.001963	1.7013	1.6535	0.259	21.52	1.2289	1.8073	PDE5A(+72.46kb)
10	3946311	rs11252179	A	G	2	1.883e-05	1.883e-05	1.5807	1.5807	0.4887	0	1.8539	1.5272	KLF6(+118.8kb)
4	120626577	rs116614033	A	C	2	1.889e-05	0.001999	1.6989	1.651	0.2588	21.57	1.2274	1.8043	PDE5A(+76.6kb)
1	214739565	rs114101098	A	T	2	1.902e-05	1.902e-05	1.7188	1.7188	0.7698	0	1.5935	1.7503	CENPF(-36.97kb)|PTPN14(+14.54kb)
5	61191064	rs73109821	T	C	2	1.904e-05	1.904e-05	1.7516	1.7516	0.4651	0	1.4568	1.841	C5orf64(+188.7kb)
6	14586454	rs75314746	C	T	2	1.931e-05	1.931e-05	0.5574	0.5574	0.5401	0	0.4479	0.5756	.
1	214812125	rs141039845	T	C	2	1.933e-05	1.933e-05	1.7971	1.7971	0.8128	0	1.9104	1.7663	CENPF(0)|PTPN14(+87.1kb)
1	214750875	rs114438396	A	C	2	1.938e-05	1.938e-05	1.7182	1.7182	0.8618	0	1.6438	1.7372	CENPF(-25.66kb)|PTPN14(+25.85kb)
11	866133	rs11246335	A	G	2	1.944e-05	1.944e-05	1.878	1.878	0.9241	0	1.8247	1.8909	AP2A2(-59.68kb)|CD151(+27.3kb)|CEND1(+76.01kb)|CHID1(-1.725kb)|DEAF1(+170.4kb)|EFCAB4A(+34.14kb)|EPS8L2(+138.4kb)|MUC6(-146.7kb)|NS3BP(+85.38kb)|PDDC1(+88.65kb)|PIDD(+60.88kb)|PNPLA2(+40.56kb)|POLR2L(+23.6kb)|RPLP2(+53.26kb)|SLC25A22(+67.86kb)|SNORA52(+54.32kb)|TALDO1(+101.1kb)|TMEM80(+161.1kb)|TSPAN4(0)
20	51624551	rs73620421	G	A	2	1.98e-05	1.98e-05	1.7247	1.7247	0.6005	0	1.983	1.6703	TSHZ2(0)
11	856020	rs61867550	C	T	2	1.987e-05	1.987e-05	1.8946	1.8946	0.5994	0	1.6063	1.967	AP2A2(-69.79kb)|CD151(+17.18kb)|CEND1(+65.89kb)|CHID1(-11.84kb)|DEAF1(+160.3kb)|EFCAB4A(+24.03kb)|EPS8L2(+128.3kb)|MUC6(-156.8kb)|NS3BP(+75.26kb)|PDDC1(+78.53kb)|PIDD(+50.77kb)|PNPLA2(+30.45kb)|POLR2L(+13.49kb)|RPLP2(+43.14kb)|SLC25A22(+57.75kb)|SNORA52(+44.21kb)|TALDO1(+91kb)|TMEM80(+151kb)|TSPAN4(0)
1	214794595	rs115870166	A	G	2	1.993e-05	1.993e-05	1.7988	1.7988	0.8177	0	1.9093	1.7687	CENPF(0)|PTPN14(+69.57kb)
18	59550519	rs112860853	A	G	2	1.993e-05	0.05115	1.5992	1.4849	0.1425	53.5	1.1255	1.7223	LOC100996669(+128.6kb)|PIGN(-160.9kb)|RNF152(0)
2	191887584	rs12469810	G	A	2	1.995e-05	1.995e-05	2.1462	2.1462	0.8266	0	2.3201	2.1042	GLS(+57.31kb)|STAT1(+8.608kb)|STAT4(-6.717kb)
2	161604844	rs616635	T	G	2	2.011e-05	2.011e-05	0.7329	0.7329	0.3841	0	0.6571	0.7604	.
4	120658358	rs72680969	T	A	2	2.021e-05	0.001361	1.689	1.6484	0.2677	18.61	1.2269	1.7901	PDE5A(+108.4kb)
3	70795054	rs12635679	C	T	2	2.034e-05	2.034e-05	1.2712	1.2712	0.8651	0	1.3001	1.266	.
21	40649965	rs117858213	C	G	2	2.044e-05	0.00237	2.7105	2.5614	0.2384	28.06	1.5744	3.1184	BRWD1(0)|BRWD1-AS1(-37.67kb)|BRWD1-IT2(-35.9kb)|HMGN1(-64.28kb)|LCA5L(-127.8kb)|PSMG1(+94.52kb)|SH3BGR(-167.8kb)|WRB(-102.2kb)
1	195235040	rs61815655	T	G	2	2.046e-05	2.046e-05	1.7268	1.7268	0.8538	0	1.8184	1.7082	.
18	59547153	rs113778872	G	C	2	2.058e-05	0.06512	1.5994	1.4754	0.1307	56.22	1.1118	1.7264	LOC100996669(+125.2kb)|PIGN(-164.3kb)|RNF152(0)
4	120650069	rs72680964	G	C	2	2.085e-05	0.001223	1.687	1.6483	0.2699	17.84	1.2274	1.7874	PDE5A(+100.1kb)
7	53100058	rs6964356	G	T	2	2.104e-05	0.005221	1.602	1.5479	0.2443	26.23	1.1692	1.6889	POM121L12(-3.29kb)
9	109812139	rs79153724	A	G	2	2.122e-05	2.122e-05	1.6574	1.6574	0.7747	0	1.7832	1.6314	MIR548Q(0)|ZNF462(+38.34kb)
10	7754632	rs76962144	T	C	2	2.128e-05	2.128e-05	0.5579	0.5579	0.788	0	0.6077	0.5491	ATP5C1(-75.46kb)|ITIH2(0)|ITIH5(+45.67kb)|KIN(-38.29kb)|TAF3(-105.8kb)
14	38550184	rs117920544	A	G	2	2.133e-05	2.133e-05	2.1509	2.1509	0.3732	0	1.5491	2.3264	CLEC14A(-173kb)|SSTR1(-127kb)
2	160960552	rs76737990	C	G	2	2.133e-05	2.133e-05	2.3081	2.3081	0.4156	0	3.1679	2.1284	ITGB6(0)|LOC100505984(-153.7kb)|LY75(+199.3kb)|LY75-CD302(+199.3kb)|PLA2R1(+41.43kb)|RBMS1(-168.1kb)
20	4684286	rs6084836	A	T	2	2.142e-05	2.142e-05	1.3105	1.3105	0.6463	0	1.4025	1.2941	PRND(-18.27kb)|PRNP(+2.052kb)|PRNT(-27.64kb)|RASSF2(-76.38kb)|SLC23A2(-148.7kb)
21	40577883	rs10460678	A	G	2	2.146e-05	2.146e-05	1.6019	1.6019	0.3544	0	1.2779	1.6784	BRWD1(0)|BRWD1-AS1(-109.7kb)|BRWD1-IT2(-108kb)|HMGN1(-136.4kb)|LCA5L(-199.9kb)|PSMG1(+22.44kb)|WRB(-174.3kb)
4	76041236	rs140585410	T	A	2	2.179e-05	0.02714	2.2101	2.0025	0.1585	49.7	1.3032	2.5202	PARM1(+65.91kb)
15	97196430	rs11854256	C	T	2	2.18e-05	2.18e-05	0.6468	0.6468	0.3503	0	0.4908	0.6687	SPATA8(-130.2kb)|SPATA8-AS1(-118.8kb)
4	76041237	rs150408251	T	C	2	2.183e-05	0.02716	2.2099	2.0024	0.1585	49.7	1.3031	2.52	PARM1(+65.91kb)
18	59546794	rs4941077	A	G	2	2.201e-05	0.06426	1.5944	1.4723	0.1333	55.63	1.1105	1.7191	LOC100996669(+124.9kb)|PIGN(-164.7kb)|RNF152(0)
18	59546754	rs4941076	T	C	2	2.202e-05	0.06426	1.5944	1.4723	0.1333	55.63	1.1105	1.7191	LOC100996669(+124.8kb)|PIGN(-164.7kb)|RNF152(0)
10	7755722	rs79843198	G	A	2	2.21e-05	2.21e-05	0.5588	0.5588	0.7965	0	0.6065	0.5503	ATP5C1(-74.37kb)|ITIH2(0)|ITIH5(+46.76kb)|KIN(-37.2kb)|TAF3(-104.7kb)
14	87817327	rs12880465	A	C	2	2.21e-05	2.21e-05	1.2751	1.2751	0.9455	0	1.2639	1.2773	.
15	54794796	rs117348940	A	G	2	2.223e-05	2.223e-05	1.9436	1.9436	0.6085	0	1.6261	2.0151	UNC13C(0)
8	250661	rs139121842	G	A	2	2.228e-05	2.228e-05	2.0996	2.0996	0.9952	0	2.1033	2.0983	FAM87A(-75.27kb)|FBXO25(-106.1kb)|OR4F21(+133.6kb)|RPL23AP53(+68.34kb)|TDRP(-189.1kb)|ZNF596(+53.32kb)
15	97215196	rs4383104	G	A	2	2.233e-05	3.614e-05	0.6449	0.6437	0.3136	1.52	0.4794	0.669	SPATA8(-111.5kb)|SPATA8-AS1(-100kb)
19	40882352	rs74429191	C	T	2	2.246e-05	2.246e-05	2.0934	2.0934	0.5876	0	1.5601	2.158	AKT2(+91.05kb)|BLVRB(-71.34kb)|C19orf47(+27.92kb)|CNTD2(+149.8kb)|HIPK4(-2.825kb)|MAP3K10(+160.9kb)|MIR641(+93.8kb)|PLD3(0)|PRX(-17.32kb)|SERTAD1(-46.06kb)|SERTAD3(-64.4kb)|SPTBN4(-90.77kb)|TTC9B(+158kb)
14	87840700	rs11159811	A	G	2	2.248e-05	2.248e-05	1.275	1.275	0.9194	0	1.2585	1.2783	.
5	28335477	rs7725564	T	A	2	2.248e-05	0.0003897	1.2734	1.2866	0.2704	17.68	1.4709	1.239	.
16	50718526	rs62029062	T	C	2	2.255e-05	2.255e-05	2.2661	2.2661	0.7862	0	2.5023	2.2043	CYLD(-57.43kb)|NKD1(+43.76kb)|NOD2(-12.52kb)|SNX20(+3.262kb)
1	214810281	rs17736783	C	G	2	2.258e-05	2.258e-05	1.7811	1.7811	0.9792	0	1.7692	1.7845	CENPF(0)|PTPN14(+85.26kb)
11	9076556	rs117833876	C	G	2	2.263e-05	0.001915	1.9244	2.0385	0.203	38.3	2.8647	1.7461	AKIP1(+134.9kb)|ASCL3(+112kb)|C11orf16(+122kb)|DENND5A(-83.82kb)|KRT8P41(-39.35kb)|MIR5691(-35.3kb)|NRIP3(+50.96kb)|SCUBE2(0)|ST5(+144.1kb)|TMEM9B(+90.57kb)|TMEM9B-AS1(+78.73kb)
1	214671495	rs79925437	T	C	2	2.284e-05	2.284e-05	1.6659	1.6659	0.9431	0	1.6362	1.6728	CENPF(-105kb)|PTPN14(0)|SMYD2(+161kb)
2	191886609	rs73979325	T	C	2	2.304e-05	2.304e-05	2.1335	2.1335	0.8127	0	2.3212	2.0885	GLS(+56.34kb)|STAT1(+7.633kb)|STAT4(-7.692kb)
1	201092565	rs142455546	G	A	2	2.313e-05	2.313e-05	2.3926	2.3926	0.4344	0	3.3237	2.2109	ASCL5(+8.065kb)|CACNA1S(+10.87kb)|IGFN1(-67.39kb)|KIF21B(+99.74kb)|PKP1(-160kb)|TMEM9(-11.33kb)
1	214671597	rs76900298	A	G	2	2.314e-05	2.314e-05	1.6648	1.6648	0.9437	0	1.6354	1.6716	CENPF(-104.9kb)|PTPN14(0)|SMYD2(+161.1kb)
1	214671742	rs80032620	C	T	2	2.316e-05	2.316e-05	1.6633	1.6633	0.9503	0	1.6374	1.6693	CENPF(-104.8kb)|PTPN14(0)|SMYD2(+161.3kb)
18	59539775	rs76186745	C	T	2	2.326e-05	0.05849	1.5925	1.475	0.14	54.1	1.1142	1.7144	LOC100996669(+117.8kb)|PIGN(-171.7kb)|RNF152(0)
4	172060881	rs13148038	G	A	2	2.329e-05	2.329e-05	0.7623	0.7623	0.7516	0	0.7986	0.7556	LOC100506122(+80.57kb)
2	16223655	rs62116759	G	A	2	2.346e-05	0.01414	2.0606	1.9166	0.1871	42.53	1.31	2.3055	MYCN(+136.5kb)|MYCNOS(+141.8kb)
5	61190329	rs150824587	A	C	2	2.353e-05	2.353e-05	1.7571	1.7571	0.4683	0	1.465	1.8498	C5orf64(+188kb)
16	49922094	rs150839028	G	C	2	2.36e-05	0.6051	2.386	1.5013	0.0045	87.64	0.6392	3.094	CNEP1R1(-137.1kb)|HEATR3(-177.8kb)|ZNF423(+30.26kb)
5	28328493	rs7449217	A	T	2	2.371e-05	2.371e-05	0.7893	0.7893	0.7069	0	0.7512	0.7964	.
10	7752660	rs79640258	T	G	2	2.372e-05	2.372e-05	0.5603	0.5603	0.7797	0	0.6123	0.5511	ATP5C1(-77.43kb)|ITIH2(0)|ITIH5(+43.7kb)|KIN(-40.26kb)|TAF3(-107.8kb)
18	59545705	rs77680585	A	G	2	2.373e-05	0.06024	1.5912	1.4729	0.1379	54.56	1.113	1.714	LOC100996669(+123.8kb)|PIGN(-165.8kb)|RNF152(0)
3	70844997	rs13069400	T	C	2	2.379e-05	2.379e-05	1.264	1.264	0.5346	0	1.3722	1.2459	FOXP1(-158.9kb)
21	40666442	rs71316668	A	G	2	2.38e-05	2.38e-05	1.6145	1.6145	0.4154	0	1.3153	1.683	BRWD1(0)|BRWD1-AS1(-21.19kb)|BRWD1-IT2(-19.42kb)|HMGN1(-47.8kb)|LCA5L(-111.3kb)|PSMG1(+111kb)|SH3BGR(-151.4kb)|WRB(-85.77kb)
5	28335333	rs7725784	A	G	2	2.382e-05	2.382e-05	0.79	0.79	0.7015	0	0.7512	0.7972	.
5	28329088	rs11957078	C	G	2	2.389e-05	2.389e-05	0.7894	0.7894	0.6948	0	0.7497	0.7968	.
17	17255640	rs12602578	C	T	2	2.393e-05	2.393e-05	0.7453	0.7453	0.6289	0	0.8048	0.7344	COPS3(+71.02kb)|FLCN(+115.1kb)|MED9(-124.7kb)|MPRIP(+159.7kb)|NT5M(+4.663kb)|PEMT(-153.2kb)|PLD6(+146kb)|RASD1(-142.1kb)|SMCR9(-67.02kb)
10	7756434	rs112178049	T	C	2	2.406e-05	2.406e-05	0.5601	0.5601	0.8068	0	0.6055	0.5521	ATP5C1(-73.66kb)|ITIH2(0)|ITIH5(+47.47kb)|KIN(-36.49kb)|TAF3(-104kb)
4	187789534	rs58617465	G	A	2	2.406e-05	2.406e-05	1.5843	1.5843	0.873	0	1.6484	1.5722	FAT1(+144.5kb)
1	214766033	rs77510655	C	T	2	2.41e-05	2.41e-05	1.8127	1.8127	0.8856	0	1.7433	1.8319	CENPF(-10.5kb)|PTPN14(+41.01kb)
8	12691761	rs111271934	A	G	2	2.419e-05	0.00203	2.3384	2.2367	0.2603	21.09	1.3901	2.5808	KIAA1456(-111.4kb)|LINC00681(+15.96kb)|LOC340357(+22.85kb)|LOC729732(+168.6kb)|LONRF1(+78.77kb)|MIR3926-1(+106.9kb)|MIR3926-2(+107kb)
10	130733283	rs61863574	C	G	2	2.422e-05	2.422e-05	1.9605	1.9605	0.7736	0	1.7414	1.9956	.
4	172060367	rs34539715	C	T	2	2.426e-05	2.426e-05	0.7628	0.7628	0.7462	0	0.7999	0.7559	LOC100506122(+80.06kb)
13	24308825	rs117989091	T	C	2	2.443e-05	2.443e-05	2.5053	2.5053	0.379	0	1.5609	2.7071	ANKRD20A19P(-172.6kb)|C1QTNF9B(-156.6kb)|C1QTNF9B-AS1(-154.2kb)|MIPEP(0)|TNFRSF19(+58.58kb)
4	187785169	rs62345962	A	G	2	2.448e-05	2.448e-05	1.5827	1.5827	0.8551	0	1.6561	1.569	FAT1(+140.2kb)
5	28325173	rs4345329	T	C	2	2.46e-05	2.46e-05	0.7888	0.7888	0.4926	0	0.7206	0.8019	.
7	16284326	rs10486791	T	C	2	2.464e-05	0.0005931	1.3188	1.3379	0.2561	22.47	1.5509	1.2744	ISPD(0)|LOC100506025(0)
15	97211157	rs28679706	A	T	2	2.471e-05	2.471e-05	0.6493	0.6493	0.3369	0	0.4907	0.6721	SPATA8(-115.5kb)|SPATA8-AS1(-104.1kb)
18	59545000	rs112399911	G	T	2	2.473e-05	0.06111	1.5895	1.4713	0.138	54.56	1.1115	1.7121	LOC100996669(+123.1kb)|PIGN(-166.5kb)|RNF152(0)
13	67724857	rs9564374	G	A	2	2.481e-05	0.07102	2.1296	2.8522	0.0084	85.58	5.3651	1.6731	PCDH9(0)|PCDH9-AS3(+164.9kb)
5	61191427	rs114773313	C	G	2	2.494e-05	2.494e-05	1.7547	1.7547	0.4705	0	1.4639	1.8468	C5orf64(+189.1kb)
15	97215275	rs4539562	A	C	2	2.5e-05	5.532e-05	0.6461	0.6439	0.3109	2.63	0.4791	0.6704	SPATA8(-111.4kb)|SPATA8-AS1(-99.96kb)
20	4671225	rs6052769	G	T	2	2.5e-05	2.5e-05	1.2839	1.2839	0.9336	0	1.2691	1.2866	PRND(-31.33kb)|PRNP(0)|PRNT(-40.7kb)|RASSF2(-89.44kb)|SLC23A2(-161.8kb)
8	251104	rs142201349	T	A	2	2.504e-05	2.504e-05	2.0888	2.0888	0.9837	0	2.1015	2.0844	FAM87A(-74.83kb)|FBXO25(-105.7kb)|OR4F21(+134.1kb)|RPL23AP53(+68.79kb)|TDRP(-188.7kb)|ZNF596(+53.76kb)
6	14584902	rs56105705	G	C	2	2.505e-05	2.505e-05	0.5649	0.5649	0.5184	0	0.4486	0.584	.
18	59544730	rs113025132	T	C	2	2.509e-05	0.06055	1.5889	1.4712	0.1388	54.37	1.1117	1.7111	LOC100996669(+122.8kb)|PIGN(-166.7kb)|RNF152(0)
3	70833849	rs13076062	T	G	2	2.514e-05	2.514e-05	1.2621	1.2621	0.5545	0	1.3642	1.2449	FOXP1(-170kb)
7	16296385	rs11765428	C	T	2	2.514e-05	0.0009751	1.3188	1.3428	0.241	27.25	1.5596	1.273	ISPD(0)|LOC100506025(0)
4	136189260	rs77767529	C	T	2	2.52e-05	4.201e-05	2.3337	2.3453	0.3087	3.5	3.4484	2.0961	.
18	59541110	rs112803661	T	C	2	2.524e-05	0.05791	1.589	1.4731	0.1416	53.72	1.1137	1.7101	LOC100996669(+119.2kb)|PIGN(-170.3kb)|RNF152(0)
4	172061293	rs67218016	A	G	2	2.526e-05	2.526e-05	0.7633	0.7633	0.759	0	0.7985	0.7568	LOC100506122(+80.98kb)
18	59541676	rs112749574	A	G	2	2.544e-05	0.05813	1.5887	1.4728	0.1414	53.76	1.1135	1.7099	LOC100996669(+119.7kb)|PIGN(-169.8kb)|RNF152(0)
5	28349377	rs12188000	G	A	2	2.544e-05	2.544e-05	0.7906	0.7906	0.7452	0	0.7576	0.7967	.
5	61188115	rs141927230	A	G	2	2.544e-05	2.544e-05	1.7542	1.7542	0.4777	0	1.4685	1.8451	C5orf64(+185.8kb)
18	59542368	rs4941075	A	G	2	2.545e-05	0.05843	1.5884	1.4724	0.1411	53.82	1.1132	1.7097	LOC100996669(+120.4kb)|PIGN(-169.1kb)|RNF152(0)
5	61188109	rs147568402	T	A	2	2.55e-05	2.55e-05	1.754	1.754	0.4781	0	1.4686	1.8448	C5orf64(+185.7kb)
10	30897357	rs117473562	T	C	2	2.552e-05	0.3852	2.9642	1.9255	0.0764	68.16	0.7209	3.437	LYZL2(-3.35kb)|MAP3K8(+146.6kb)|SVILP1(-83.84kb)
3	150622735	rs11717908	C	T	2	2.553e-05	0.00037	1.5278	1.5112	0.2896	10.83	1.1928	1.5996	CLRN1(-21.21kb)|CLRN1-AS1(-67.73kb)|MED12L(-181.9kb)|SIAH2(+141.5kb)
4	7278298	rs12500160	T	C	2	2.555e-05	2.555e-05	2.4693	2.4693	0.8666	0	2.2597	2.5058	FLJ36777(+173.2kb)|MIR4274(-183.5kb)|MIR4798(-33.88kb)|PSAPL1(-153.7kb)|SORCS2(0)
7	53072673	rs147697709	T	C	2	2.561e-05	2.561e-05	1.5854	1.5854	0.3368	0	1.2303	1.656	POM121L12(-30.68kb)
1	240207875	rs80196739	G	A	2	2.564e-05	2.564e-05	2.006	2.006	0.9597	0	2.0388	1.9974	CHRM3(+135.2kb)|FMN2(-47.31kb)|RPS7P5(+31.32kb)
18	59558084	rs113286440	G	A	2	2.576e-05	0.02645	1.5917	1.5026	0.1743	45.82	1.1543	1.7072	LOC100996669(+136.2kb)|PIGN(-153.4kb)|RNF152(0)
9	129042823	rs77851046	C	T	2	2.576e-05	2.576e-05	1.6186	1.6186	0.8116	0	1.5147	1.6369	MVB12B(-46.3kb)|NRON(-127.2kb)
5	28325899	rs12332698	T	C	2	2.6e-05	2.6e-05	0.7898	0.7898	0.5423	0	0.7293	0.8015	.
6	105212205	rs139422742	A	G	2	2.611e-05	0.4569	2.3692	1.6185	0.0325	78.14	0.755	2.8035	HACE1(0)|LIN28B(-192.7kb)|LINC00577(-172kb)
10	21240455	rs7902401	T	C	2	2.612e-05	2.612e-05	1.4101	1.4101	0.5028	0	1.5921	1.3757	C10orf113(-174.2kb)|NEBL(0)
18	59558252	rs112639447	C	G	2	2.613e-05	0.02633	1.5914	1.5026	0.1746	45.74	1.1544	1.7069	LOC100996669(+136.3kb)|PIGN(-153.2kb)|RNF152(0)
18	59557997	rs111559884	A	T	2	2.63e-05	0.027	1.5908	1.5015	0.1738	45.95	1.1531	1.7064	LOC100996669(+136.1kb)|PIGN(-153.5kb)|RNF152(0)
18	59559145	rs113443351	A	G	2	2.631e-05	0.02547	1.5928	1.5048	0.1765	45.27	1.1555	1.708	LOC100996669(+137.2kb)|PIGN(-152.3kb)|RNF152(0)
2	191853891	rs4853536	C	G	2	2.631e-05	0.002206	2.177	2.3358	0.198	39.64	3.4999	1.9317	GLS(+23.62kb)|STAT1(0)|STAT4(-40.41kb)
4	178422416	rs112876916	T	C	2	2.639e-05	2.639e-05	2.1178	2.1178	0.3771	0	1.4909	2.2733	AGA(+58.76kb)|NEIL3(+138.3kb)
2	128833421	rs72841761	C	T	2	2.645e-05	2.645e-05	1.8068	1.8068	0.3639	0	1.3765	1.9186	AMMECR1L(+189.9kb)|HS6ST1(-189.6kb)|SAP130(+48.55kb)|UGGT1(-15.33kb)
2	151197522	rs13021441	T	G	2	2.649e-05	2.649e-05	1.8443	1.8443	0.5654	0	2.2384	1.7787	RND3(-127.2kb)
2	71319922	rs6741602	A	G	2	2.651e-05	2.651e-05	1.5603	1.5603	0.3199	0	1.9399	1.4828	ANKRD53(+107.3kb)|ATP6V1B1(+127.4kb)|MCEE(-16.88kb)|MPHOSPH10(-37.52kb)|NAGK(+13.92kb)|OR7E91P(+62.86kb)|PAIP2B(-89.94kb)|TEX261(+97.92kb)|VAX2(+159.3kb)
1	214751882	rs151197284	G	A	2	2.653e-05	2.653e-05	1.8091	1.8091	0.9124	0	1.756	1.8238	CENPF(-24.65kb)|PTPN14(+26.86kb)
6	153826844	rs270269	C	T	2	2.659e-05	2.659e-05	1.3001	1.3001	0.7444	0	1.2423	1.312	.
15	97213506	rs12899282	G	A	2	2.661e-05	2.661e-05	0.6495	0.6495	0.3394	0	0.4923	0.6725	SPATA8(-113.2kb)|SPATA8-AS1(-101.7kb)
5	61183589	rs75995048	C	T	2	2.67e-05	2.67e-05	1.7528	1.7528	0.4842	0	1.4715	1.8426	C5orf64(+181.2kb)
17	17252844	rs624242	G	A	2	2.682e-05	2.682e-05	0.7353	0.7353	0.83	0	0.762	0.7302	COPS3(+68.23kb)|FLCN(+112.3kb)|MED9(-127.5kb)|MPRIP(+156.9kb)|NT5M(+1.867kb)|PEMT(-156kb)|PLD6(+143.2kb)|RASD1(-144.9kb)|SMCR9(-69.81kb)
17	17249606	rs242243	G	A	2	2.689e-05	2.689e-05	0.6922	0.6922	0.8129	0	0.723	0.6854	COPS3(+64.99kb)|FLCN(+109.1kb)|MED9(-130.7kb)|MPRIP(+153.6kb)|NT5M(0)|PEMT(-159.3kb)|PLD6(+140kb)|RASD1(-148.1kb)|SMCR9(-73.05kb)
5	28344653	rs58515706	T	A	2	2.701e-05	2.701e-05	0.7913	0.7913	0.7471	0	0.7586	0.7974	.
5	28336243	rs61390992	C	T	2	2.709e-05	2.709e-05	0.7913	0.7913	0.7062	0	0.7531	0.7984	.
5	28336609	rs1035886	C	T	2	2.709e-05	2.709e-05	0.7913	0.7913	0.7062	0	0.7531	0.7984	.
3	70822905	rs10511011	C	G	2	2.711e-05	2.711e-05	1.2609	1.2609	0.6152	0	1.3472	1.2463	FOXP1(-181kb)
5	28349030	rs2195357	A	G	2	2.72e-05	2.72e-05	0.7912	0.7912	0.7403	0	0.7576	0.7975	.
16	83723511	rs12600325	T	C	2	2.741e-05	2.741e-05	1.4388	1.4388	0.6878	0	1.55	1.4155	CDH13(0)|HSBP1(-118kb)|MIR3182(+181.5kb)
15	97210955	rs9744336	T	C	2	2.751e-05	2.751e-05	0.6511	0.6511	0.3615	0	0.499	0.6728	SPATA8(-115.7kb)|SPATA8-AS1(-104.3kb)
5	28343587	rs58572175	G	A	2	2.765e-05	2.765e-05	0.7917	0.7917	0.7459	0	0.7588	0.7978	.
5	28338714	rs6884749	C	T	2	2.769e-05	2.769e-05	0.7917	0.7917	0.7293	0	0.7566	0.7982	.
4	26491433	rs2071011	G	C	2	2.77e-05	2.77e-05	2.0393	2.0393	0.3632	0	1.4732	2.1948	CCKAR(0)|RBPJ(+54.68kb)|TBC1D19(-94.11kb)
3	70843614	rs76272321	T	A	2	2.778e-05	2.778e-05	1.2608	1.2608	0.5311	0	1.3694	1.2426	FOXP1(-160.2kb)
5	28344497	rs58116711	T	C	2	2.782e-05	2.782e-05	0.7917	0.7917	0.7446	0	0.7586	0.7978	.
1	214672835	rs78154676	G	A	2	2.789e-05	2.789e-05	1.6513	1.6513	0.9714	0	1.6365	1.6547	CENPF(-103.7kb)|PTPN14(0)|SMYD2(+162.4kb)
8	262629	rs150990016	G	C	2	2.82e-05	2.82e-05	1.921	1.921	0.7655	0	2.0776	1.8687	FAM87A(-63.3kb)|FBXO25(-94.18kb)|OR4F21(+145.6kb)|RPL23AP53(+80.31kb)|TDRP(-177.2kb)|ZNF596(+65.29kb)
2	16216633	rs73218548	C	T	2	2.831e-05	0.005425	2.0738	1.9675	0.2233	32.57	1.3515	2.3037	MYCN(+129.5kb)|MYCNOS(+134.8kb)
5	61182730	rs13436883	A	G	2	2.833e-05	2.833e-05	1.7476	1.7476	0.4711	0	1.4587	1.8393	C5orf64(+180.4kb)
7	147095036	rs58935552	T	A	2	2.838e-05	2.838e-05	1.629	1.629	0.6413	0	1.4651	1.6749	CNTNAP2(0)|MIR548F4(+19.82kb)|MIR548I4(0)
5	28325902	rs12332325	G	A	2	2.839e-05	2.839e-05	0.7907	0.7907	0.6772	0	0.7486	0.7986	.
8	251083	rs139976946	C	G	2	2.844e-05	2.844e-05	2.083	2.083	0.9625	0	2.1123	2.0729	FAM87A(-74.85kb)|FBXO25(-105.7kb)|OR4F21(+134.1kb)|RPL23AP53(+68.76kb)|TDRP(-188.7kb)|ZNF596(+53.74kb)
4	42691861	rs28431293	C	T	2	2.853e-05	2.853e-05	1.589	1.589	0.5519	0	1.3638	1.6347	ATP8A1(+32.74kb)
12	125837876	rs2166874	C	T	2	2.872e-05	0.1326	1.7443	1.537	0.1109	60.65	1.0517	1.9063	TMEM132B(0)
4	120661739	rs72680974	T	C	2	2.897e-05	0.0008527	1.6754	1.6445	0.2791	14.64	1.2265	1.7741	PDE5A(+111.8kb)
3	70838669	rs13075219	T	C	2	2.902e-05	2.902e-05	1.2605	1.2605	0.5918	0	1.353	1.2449	FOXP1(-165.2kb)
18	59559247	rs113834567	A	G	2	2.906e-05	0.02382	1.5909	1.5057	0.1802	44.32	1.1575	1.7056	LOC100996669(+137.3kb)|PIGN(-152.2kb)|RNF152(0)
18	46327155	rs76667091	A	G	2	2.911e-05	2.911e-05	1.6742	1.6742	0.9399	0	1.6367	1.6806	CTIF(0)|MIR4743(+130.1kb)|SMAD7(-119.1kb)
7	53079014	rs2201277	A	G	2	2.923e-05	0.0001696	1.5818	1.5706	0.3018	6.23	1.2014	1.6574	POM121L12(-24.33kb)
1	214162260	rs79397593	A	C	2	2.93e-05	2.93e-05	1.898	1.898	0.7033	0	2.1538	1.8475	LINC00538(+62.26kb)|PROX1(0)
14	87872241	rs7155212	A	G	2	2.944e-05	2.944e-05	1.2646	1.2646	0.6837	0	1.3324	1.252	.
1	246962522	rs6701484	T	C	2	2.945e-05	0.4343	1.7278	1.3685	0.0381	76.75	0.8485	1.9165	AHCTF1(-39.88kb)|CNST(+130.6kb)|LOC149134(+7.734kb)|SCCPDH(+31.08kb)|ZNF670-ZNF695(-146.3kb)|ZNF695(-146.3kb)
1	214673113	rs76545379	A	G	2	2.956e-05	2.956e-05	1.6471	1.6471	0.982	0	1.6378	1.6492	CENPF(-103.4kb)|PTPN14(0)|SMYD2(+162.6kb)
2	4293615	rs79790349	T	C	2	2.957e-05	2.957e-05	1.9255	1.9255	0.6971	0	2.2528	1.8803	.
6	153828648	rs270276	T	C	2	2.964e-05	2.964e-05	1.2977	1.2977	0.7618	0	1.2441	1.3088	.
3	70840395	rs1821632	T	A	2	2.984e-05	2.984e-05	1.2598	1.2598	0.5676	0	1.3583	1.2432	FOXP1(-163.5kb)
3	150622860	rs2168445	T	A	2	2.986e-05	2.986e-05	1.5138	1.5138	0.3406	0	1.2145	1.5766	CLRN1(-21.09kb)|CLRN1-AS1(-67.6kb)|MED12L(-181.8kb)|SIAH2(+141.6kb)
1	42700875	rs201553373	T	G	2	2.999e-05	2.999e-05	1.8812	1.8812	0.6309	0	1.6773	1.97	FOXJ3(0)|GUCA2A(+70.48kb)|GUCA2B(+79.38kb)|HIVEP3(+199.3kb)|RIMKLA(-145.6kb)|ZMYND12(-195.1kb)
5	28339265	rs62357411	A	G	2	3e-05	3e-05	0.7927	0.7927	0.73	0	0.7577	0.7992	.
4	42665539	rs28536499	A	G	2	3.013e-05	3.013e-05	1.609	1.609	0.6425	0	1.4241	1.6463	ATP8A1(+6.417kb)
10	7756316	rs113682227	T	C	2	3.018e-05	3.018e-05	0.5645	0.5645	0.827	0	0.6052	0.5573	ATP5C1(-73.78kb)|ITIH2(0)|ITIH5(+47.36kb)|KIN(-36.61kb)|TAF3(-104.2kb)
4	155493554	rs116381809	T	G	2	3.019e-05	3.019e-05	2.2923	2.2923	0.3561	0	1.5289	2.491	DCHS2(+80.62kb)|FGA(-10.72kb)|FGB(0)|FGG(-31.73kb)|LRAT(-171.6kb)|PLRG1(+21.97kb)
8	128020910	rs146149359	C	T	2	3.022e-05	0.4052	2.0221	1.5224	0.0336	77.85	0.8421	2.3418	PCAT1(-4.488kb)
8	103732081	rs80200900	C	T	2	3.023e-05	3.023e-05	1.6923	1.6923	0.6528	0	1.9569	1.6552	AZIN1(-106.5kb)|KLF10(+63.95kb)|ODF1(+158.8kb)
3	70853155	rs10511013	C	G	2	3.026e-05	3.026e-05	1.2586	1.2586	0.4466	0	1.3926	1.2369	FOXP1(-150.7kb)
4	42664508	rs28424875	C	A	2	3.029e-05	3.029e-05	1.6083	1.6083	0.631	0	1.4171	1.6468	ATP8A1(+5.386kb)
10	30753711	rs1754244	T	C	2	3.048e-05	0.08144	2.1864	1.8907	0.156	50.31	1.106	2.4258	LYZL2(-147kb)|MAP3K8(+2.949kb)|MTPAP(+115.4kb)
7	53070775	rs17556892	T	C	2	3.051e-05	4.402e-05	1.5754	1.5734	0.3144	1.19	1.2101	1.6489	POM121L12(-32.57kb)
8	256147	rs145872443	G	C	2	3.055e-05	3.055e-05	2.0632	2.0632	0.9841	0	2.0754	2.059	FAM87A(-69.78kb)|FBXO25(-100.7kb)|OR4F21(+139.1kb)|RPL23AP53(+73.83kb)|TDRP(-183.6kb)|ZNF596(+58.81kb)
1	214752110	rs116047010	C	T	2	3.062e-05	3.062e-05	1.7732	1.7732	0.7009	0	1.5982	1.8214	CENPF(-24.42kb)|PTPN14(+27.09kb)
7	16255602	rs4389828	T	A	2	3.063e-05	0.003461	0.7842	0.7636	0.2	39.11	0.662	0.8105	ISPD(0)|LOC100506025(0)
1	213781198	rs17021090	A	G	2	3.072e-05	3.072e-05	0.6946	0.6946	0.3944	0	0.8314	0.6735	.
7	53081982	rs75218543	G	A	2	3.072e-05	0.0005646	1.5801	1.559	0.288	11.42	1.1902	1.6578	POM121L12(-21.37kb)
1	214673445	rs17734395	T	C	2	3.076e-05	3.076e-05	1.6438	1.6438	0.9903	0	1.6388	1.6449	CENPF(-103.1kb)|PTPN14(0)|SMYD2(+163kb)
2	16218823	rs28459658	A	G	2	3.077e-05	0.006485	2.0701	1.9589	0.2196	33.65	1.3412	2.3012	MYCN(+131.7kb)|MYCNOS(+137kb)
7	53077609	rs113311232	C	T	2	3.08e-05	5.964e-05	1.5732	1.5694	0.3121	2.12	1.2017	1.6453	POM121L12(-25.74kb)
4	120682782	rs72680995	G	T	2	3.088e-05	3.088e-05	1.6842	1.6842	0.326	0	1.2681	1.7762	PDE5A(+132.8kb)
5	61185276	rs1579324	C	T	2	3.095e-05	3.095e-05	1.7335	1.7335	0.4956	0	1.4608	1.8175	C5orf64(+182.9kb)
1	214673402	rs79477923	T	G	2	3.101e-05	3.101e-05	1.6435	1.6435	0.9891	0	1.6379	1.6448	CENPF(-103.1kb)|PTPN14(0)|SMYD2(+162.9kb)
7	53072970	rs111510578	T	C	2	3.101e-05	3.101e-05	1.5783	1.5783	0.3419	0	1.2276	1.6479	POM121L12(-30.38kb)
7	16118171	rs2389581	G	C	2	3.104e-05	3.104e-05	0.7779	0.7779	0.9932	0	0.7788	0.7777	ISPD(-8.98kb)|LOC100506025(-131.9kb)
7	16274499	rs1295173	G	A	2	3.105e-05	0.004235	1.275	1.3126	0.1904	41.68	1.5162	1.2328	ISPD(0)|LOC100506025(0)
5	28340173	rs11949289	A	G	2	3.114e-05	3.114e-05	0.7931	0.7931	0.7383	0	0.7592	0.7994	.
6	137570062	rs117451378	G	A	2	3.116e-05	0.00019	1.5762	1.5944	0.2826	13.38	1.9868	1.4851	IFNGR1(+29.5kb)|IL22RA2(+75.28kb)
4	42664463	rs28363903	T	G	2	3.123e-05	3.123e-05	1.6079	1.6079	0.6308	0	1.4166	1.6465	ATP8A1(+5.341kb)
2	16219158	rs62116756	G	T	2	3.124e-05	0.006424	2.0697	1.9591	0.2201	33.49	1.3412	2.3006	MYCN(+132kb)|MYCNOS(+137.3kb)
2	16224036	rs62118661	T	A	2	3.124e-05	0.04733	2.0508	1.8434	0.1428	53.44	1.2173	2.3181	MYCN(+136.9kb)|MYCNOS(+142.2kb)
5	28351508	rs60479311	C	G	2	3.13e-05	3.13e-05	0.7925	0.7925	0.7288	0	0.7573	0.7991	.
7	53100051	rs6977554	A	G	2	3.134e-05	0.002769	1.5817	1.542	0.2634	20.05	1.168	1.6628	POM121L12(-3.297kb)
8	264121	rs137878866	C	T	2	3.135e-05	3.135e-05	2.0278	2.0278	0.9817	0	2.0146	2.0325	FAM87A(-61.81kb)|FBXO25(-92.69kb)|OR4F21(+147.1kb)|RPL23AP53(+81.8kb)|TDRP(-175.7kb)|ZNF596(+66.78kb)
22	28514738	rs147975440	A	T	2	3.142e-05	3.142e-05	3.6048	3.6048	0.9753	0	3.5568	3.6294	MIR3199-1(+198.1kb)|MIR3199-2(+198.1kb)|PITPNB(+199.5kb)|TTC28(0)|TTC28-AS1(+116.1kb)
4	42696745	rs6820172	A	G	2	3.143e-05	3.143e-05	1.5854	1.5854	0.5292	0	1.3477	1.6335	ATP8A1(+37.62kb)|GRXCR1(-198.5kb)
3	70848181	rs1579594	A	G	2	3.158e-05	3.158e-05	1.259	1.259	0.4844	0	1.3812	1.2388	FOXP1(-155.7kb)
1	246449418	rs76909574	T	A	2	3.16e-05	3.16e-05	1.7631	1.7631	0.8552	0	1.6473	1.7792	SMYD3(0)
2	71324045	rs6757800	G	C	2	3.179e-05	0.004361	1.5274	1.6051	0.1701	46.87	2.0232	1.425	ANKRD53(+111.4kb)|ATP6V1B1(+131.5kb)|MCEE(-12.76kb)|MPHOSPH10(-33.4kb)|NAGK(+18.05kb)|OR7E91P(+66.98kb)|PAIP2B(-85.82kb)|TEX261(+102kb)|VAX2(+163.5kb)
4	26492222	rs1800908	A	C	2	3.187e-05	3.187e-05	2.0259	2.0259	0.4625	0	1.5701	2.1534	CCKAR(+0.18kb)|RBPJ(+55.47kb)|TBC1D19(-93.32kb)
10	121580016	rs12770196	A	G	2	3.204e-05	3.204e-05	2.0667	2.0667	0.3428	0	1.4394	2.2295	BAG3(+142.7kb)|INPP5F(0)|MCMBP(-8.899kb)|MIR4682(-138kb)|SEC23IP(-72.07kb)
10	21216512	rs10828154	C	T	2	3.209e-05	3.209e-05	1.3931	1.3931	0.796	0	1.4603	1.3806	C10orf113(-198.2kb)|NEBL(0)
7	16254996	rs6976343	C	A	2	3.214e-05	0.003964	0.7845	0.7627	0.194	40.72	0.6608	0.8112	ISPD(0)|LOC100506025(0)
17	17254808	rs1009720	G	A	2	3.228e-05	3.228e-05	0.7567	0.7567	0.4219	0	0.8584	0.7395	COPS3(+70.19kb)|FLCN(+114.3kb)|MED9(-125.5kb)|MPRIP(+158.8kb)|NT5M(+3.831kb)|PEMT(-154.1kb)|PLD6(+145.2kb)|RASD1(-142.9kb)|SMCR9(-67.85kb)
7	53072010	rs112109035	G	A	2	3.236e-05	3.236e-05	1.575	1.575	0.3416	0	1.226	1.6444	POM121L12(-31.34kb)
3	78220440	rs73120195	A	G	2	3.242e-05	3.242e-05	2.1403	2.1403	0.775	0	1.9246	2.1962	.
4	120649880	rs114110723	C	T	2	3.246e-05	3.246e-05	1.6953	1.6953	0.35	0	1.2867	1.7842	PDE5A(+99.9kb)
7	53069980	rs6593045	A	G	2	3.258e-05	3.258e-05	1.5754	1.5754	0.3338	0	1.2242	1.6468	POM121L12(-33.37kb)
3	70839752	rs10511012	T	G	2	3.269e-05	3.269e-05	1.2578	1.2578	0.5572	0	1.3588	1.2408	FOXP1(-164.1kb)
3	165167101	rs74372302	A	G	2	3.29e-05	3.29e-05	2.0279	2.0279	0.9443	0	1.9856	2.0416	.
5	28339432	rs1428290	G	A	2	3.29e-05	3.29e-05	1.2628	1.2628	0.519	0	1.3729	1.2431	.
4	136256552	rs79996202	G	A	2	3.296e-05	3.296e-05	2.1444	2.1444	0.3504	0	3.0355	1.9702	.
7	53072830	rs113338787	C	G	2	3.299e-05	3.299e-05	1.5746	1.5746	0.3376	0	1.2223	1.6445	POM121L12(-30.52kb)
7	53074694	rs78658179	A	G	2	3.302e-05	3.302e-05	1.576	1.576	0.3316	0	1.2179	1.6467	POM121L12(-28.65kb)
7	53064897	rs17643201	G	C	2	3.325e-05	0.0002247	1.5728	1.5603	0.2991	7.24	1.2024	1.6498	POM121L12(-38.45kb)
15	54794187	rs76329328	T	C	2	3.33e-05	3.33e-05	1.9911	1.9911	0.4017	0	1.464	2.1206	UNC13C(0)
11	123670729	rs17682150	C	G	2	3.343e-05	3.343e-05	2.3067	2.3067	0.6843	0	1.9298	2.3951	GRAMD1B(+177.2kb)|OR4D5(-139.6kb)|OR6M1(-5.386kb)|OR6T1(-142.8kb)|OR6X1(+45.5kb)|OR8D4(-106.4kb)|OR10S1(-176.7kb)|SCN3B(+145.4kb)|TMEM225(-82.9kb)|ZNF202(+58.37kb)
7	105504890	rs113264683	A	G	2	3.351e-05	3.351e-05	1.3412	1.3412	0.817	0	1.2921	1.3509	ATXN7L1(0)|CDHR3(-98.77kb)
5	61193612	rs10059979	A	C	2	3.383e-05	3.383e-05	1.7389	1.7389	0.4683	0	1.4478	1.8301	C5orf64(+191.2kb)
7	16116964	rs17357511	T	C	2	3.384e-05	3.384e-05	0.7789	0.7789	0.9933	0	0.7798	0.7787	ISPD(-10.19kb)|LOC100506025(-133.1kb)
2	16829645	rs75641443	A	C	2	3.394e-05	0.004204	1.5527	1.6349	0.1856	42.94	2.1068	1.4554	FAM49A(0)
7	53073106	rs78661562	A	G	2	3.398e-05	3.398e-05	1.5745	1.5745	0.342	0	1.2243	1.6437	POM121L12(-30.24kb)
7	16116919	rs62440852	A	T	2	3.4e-05	3.4e-05	0.7789	0.7789	0.992	0	0.78	0.7787	ISPD(-10.23kb)|LOC100506025(-133.2kb)
4	120626166	rs72680918	C	T	2	3.401e-05	0.0002882	1.6572	1.6403	0.2964	8.29	1.226	1.7487	PDE5A(+76.18kb)
7	16113964	rs17357253	C	T	2	3.401e-05	3.401e-05	0.779	0.779	1	0	0.779	0.779	ISPD(-13.19kb)|LOC100506025(-136.1kb)
10	121697905	rs34255946	A	G	2	3.425e-05	3.425e-05	2.1006	2.1006	0.3236	0	1.4161	2.274	INPP5F(+109.2kb)|MCMBP(+64.76kb)|MIR4682(-20.12kb)|SEC23IP(0)
4	42698369	rs28861482	C	T	2	3.427e-05	3.427e-05	1.5821	1.5821	0.5268	0	1.3433	1.6303	ATP8A1(+39.25kb)|GRXCR1(-196.9kb)
7	16113523	rs1528147	C	T	2	3.438e-05	3.438e-05	0.7791	0.7791	0.9994	0	0.779	0.7791	ISPD(-13.63kb)|LOC100506025(-136.6kb)
5	28355152	rs10155575	A	G	2	3.443e-05	3.443e-05	1.2608	1.2608	0.6771	0	1.3318	1.2484	.
4	180522804	rs34243105	T	C	2	3.45e-05	3.45e-05	1.7385	1.7385	0.9364	0	1.7027	1.748	.
7	53075542	rs79480444	G	A	2	3.467e-05	3.467e-05	1.5741	1.5741	0.3218	0	1.2098	1.6462	POM121L12(-27.81kb)
12	106528526	rs73193874	A	C	2	3.477e-05	3.477e-05	2.4351	2.4351	0.9325	0	2.3552	2.4594	CKAP4(-103.1kb)|NUAK1(0)|TCP11L2(-168.1kb)
7	53063865	rs17643172	C	T	2	3.485e-05	0.0005514	1.5708	1.5509	0.2881	11.37	1.1946	1.6498	POM121L12(-39.48kb)
7	53075978	rs77394028	T	C	2	3.491e-05	3.491e-05	1.5768	1.5768	0.3255	0	1.2142	1.649	POM121L12(-27.37kb)
5	28324647	rs1006069	A	C	2	3.507e-05	3.507e-05	0.793	0.793	0.5639	0	0.7355	0.8041	.
7	53075602	rs73698715	T	C	2	3.519e-05	3.519e-05	1.5728	1.5728	0.3233	0	1.2097	1.6444	POM121L12(-27.75kb)
16	57828107	rs76214653	C	G	2	3.533e-05	0.59	2.3736	1.4866	0.0319	78.28	0.6184	2.7564	CCDC135(+62.74kb)|CNGB1(-88.14kb)|GPR56(+129.2kb)|GPR97(+104.8kb)|KATNB1(+36.94kb)|KIFC3(0)|LOC388282(-16.44kb)|TEPP(-182.2kb)
16	83690501	rs4782550	A	G	2	3.535e-05	0.001971	1.4076	1.4484	0.2204	33.42	1.7506	1.3429	CDH13(0)|HSBP1(-151kb)|MIR3182(+148.5kb)
18	72940802	rs78563512	T	C	2	3.543e-05	3.543e-05	2.2199	2.2199	0.9057	0	2.3258	2.1952	SMIM21(-181kb)|TSHZ1(0)|ZADH2(+19.52kb)|ZNF407(+163.2kb)
20	55539581	rs143902901	A	G	2	3.549e-05	3.549e-05	2.5524	2.5524	0.7628	0	2.2764	2.6589	.
20	33914380	rs77422622	G	A	2	3.55e-05	3.55e-05	2.6216	2.6216	0.4864	0	1.7748	2.8046	C20orf173(-194.2kb)|CEP250(-128.8kb)|EDEM2(+179.2kb)|EIF6(+41.76kb)|FAM83C(+34.16kb)|GDF5(-106.8kb)|MMP24(+49.58kb)|MMP24-AS1(+48.42kb)|PROCR(+149.2kb)|UQCC(0)
4	42694943	rs974787	T	C	2	3.554e-05	3.554e-05	1.5821	1.5821	0.544	0	1.3531	1.6286	ATP8A1(+35.82kb)
3	70826231	rs2037888	A	G	2	3.605e-05	3.605e-05	1.2566	1.2566	0.59	0	1.349	1.241	FOXP1(-177.6kb)
10	3940545	rs55863175	A	G	2	3.612e-05	3.612e-05	1.5379	1.5379	0.3333	0	1.9084	1.4672	KLF6(+113.1kb)
7	53093032	rs75323174	T	C	2	3.616e-05	0.005253	1.5766	1.5282	0.2504	24.31	1.1579	1.6608	POM121L12(-10.32kb)
10	3938370	rs11252171	A	G	2	3.623e-05	0.001228	1.5395	1.5845	0.2357	28.9	1.9946	1.4509	KLF6(+110.9kb)
22	20104819	rs713982	C	A	2	3.623e-05	3.623e-05	0.757	0.757	0.3971	0	0.668	0.777	ARVCF(+100.5kb)|COMT(+147.3kb)|DGCR6L(-196.9kb)|DGCR8(+5.419kb)|LINC00896(-89.04kb)|LOC284865(-81.43kb)|LOC388849(-31.29kb)|MIR185(+84.08kb)|MIR1286(-131.8kb)|MIR1306(+31.15kb)|MIR3618(+31.46kb)|MIR4761(+153.5kb)|RANBP1(0)|RTN4R(-124.1kb)|TANGO2(+51.37kb)|TRMT2A(+0.001kb)|TXNRD2(+175.5kb)|ZDHHC8(-14.54kb)
16	77691409	rs4888656	C	A	2	3.628e-05	0.07301	0.7179	0.7611	0.1649	48.15	0.9557	0.6874	NUDT7(-64.98kb)|VAT1L(-131.1kb)
1	214676487	rs78219802	T	C	2	3.641e-05	3.641e-05	1.631	1.631	0.9565	0	1.653	1.6259	CENPF(-100kb)|PTPN14(0)|SMYD2(+166kb)
8	271309	rs141828585	A	T	2	3.645e-05	3.645e-05	2.0717	2.0717	0.8696	0	1.973	2.1076	FAM87A(-54.62kb)|FBXO25(-85.5kb)|OR4F21(+154.3kb)|RPL23AP53(+88.99kb)|TDRP(-168.5kb)|ZNF596(+73.97kb)
1	241837183	rs116398282	C	T	2	3.671e-05	0.02356	3.0084	2.6497	0.1767	45.22	1.4385	3.5881	CHML(+37.95kb)|EXO1(-174.3kb)|FH(+154.1kb)|KMO(+78.23kb)|OPN3(+33.48kb)|WDR64(0)
1	214674783	rs77741413	C	T	2	3.675e-05	3.675e-05	1.6337	1.6337	0.9861	0	1.6408	1.6321	CENPF(-101.7kb)|PTPN14(0)|SMYD2(+164.3kb)
1	214677669	rs77184811	A	G	2	3.677e-05	3.677e-05	1.6289	1.6289	0.9389	0	1.6598	1.6218	CENPF(-98.86kb)|PTPN14(0)|SMYD2(+167.2kb)
7	53090298	rs17557004	T	C	2	3.684e-05	0.005022	1.5736	1.5263	0.2513	24.02	1.1587	1.6574	POM121L12(-13.05kb)
7	22505906	rs58273145	T	C	2	3.687e-05	3.687e-05	0.7657	0.7657	0.5827	0	0.832	0.7541	LOC100506178(-97.05kb)|RAPGEF5(+109.4kb)|STEAP1B(0)
7	53089706	rs76650991	G	C	2	3.694e-05	0.005024	1.5735	1.5262	0.2513	24.02	1.1587	1.6574	POM121L12(-13.64kb)
16	11345752	rs60607857	A	G	2	3.7e-05	3.7e-05	2.126	2.126	0.7597	0	2.3562	2.0623	CLEC16A(+69.71kb)|PRM1(-28.94kb)|PRM2(-23.74kb)|PRM3(-21.39kb)|RMI2(-93.56kb)|SOCS1(-2.521kb)|TNP2(-15.96kb)
1	214673902	rs17734456	G	T	2	3.728e-05	3.728e-05	1.6394	1.6394	0.9994	0	1.6391	1.6395	CENPF(-102.6kb)|PTPN14(0)|SMYD2(+163.4kb)
7	53081141	rs73698717	A	G	2	3.733e-05	0.0004731	1.5717	1.5537	0.2922	9.87	1.187	1.6482	POM121L12(-22.21kb)
4	42702937	rs10026660	A	G	2	3.735e-05	3.735e-05	1.5792	1.5792	0.5033	0	1.3273	1.63	ATP8A1(+43.82kb)|GRXCR1(-192.3kb)
10	7759679	rs35076349	A	G	2	3.738e-05	3.738e-05	0.5692	0.5692	0.8531	0	0.6036	0.563	ATP5C1(-70.41kb)|ITIH2(0)|ITIH5(+50.72kb)|KIN(-33.24kb)|TAF3(-100.8kb)
8	271362	rs117182035	A	C	2	3.744e-05	3.744e-05	2.0707	2.0707	0.8695	0	1.972	2.1067	FAM87A(-54.57kb)|FBXO25(-85.44kb)|OR4F21(+154.3kb)|RPL23AP53(+89.04kb)|TDRP(-168.4kb)|ZNF596(+74.02kb)
15	78818072	rs187618975	T	C	2	3.747e-05	3.747e-05	2.9414	2.9414	0.6354	0	3.7128	2.7532	CHRNA3(-67.32kb)|CHRNA5(-39.79kb)|CHRNB4(-98.56kb)|CRABP1(+177.5kb)|HYKK(0)|IREB2(+24.27kb)|PSMA4(-14.67kb)
16	11343992	rs2021760	G	A	2	3.747e-05	3.747e-05	2.1251	2.1251	0.7646	0	2.3496	2.0626	CLEC16A(+67.95kb)|PRM1(-30.7kb)|PRM2(-25.5kb)|PRM3(-23.15kb)|RMI2(-95.32kb)|SOCS1(-4.281kb)|TNP2(-17.72kb)
7	53080071	rs76330522	G	T	2	3.752e-05	0.0002763	1.5708	1.5575	0.2987	7.4	1.191	1.6461	POM121L12(-23.28kb)
7	53061229	rs73701278	C	T	2	3.76e-05	0.001886	1.5653	1.5327	0.2689	18.2	1.1799	1.6474	POM121L12(-42.12kb)
5	173903026	rs115356342	C	T	2	3.771e-05	0.04926	2.5351	2.2377	0.1064	61.64	1.3646	3.1415	.
22	28489528	rs145803752	C	T	2	3.781e-05	3.781e-05	3.4583	3.4583	0.9088	0	3.2921	3.5429	MIR3199-1(+172.9kb)|MIR3199-2(+172.9kb)|PITPNB(+174.3kb)|TTC28(0)|TTC28-AS1(+90.86kb)
14	87874298	rs1430559	G	A	2	3.784e-05	3.784e-05	1.2613	1.2613	0.952	0	1.2516	1.2632	.
18	59521047	rs118181257	C	T	2	3.785e-05	3.785e-05	1.5642	1.5642	0.3929	0	1.2973	1.6378	LOC100996669(+99.12kb)|PIGN(-190.4kb)|RNF152(0)
7	53091820	rs77586813	C	G	2	3.79e-05	0.003512	1.5775	1.5357	0.2596	21.31	1.1648	1.6605	POM121L12(-11.53kb)
7	53100146	rs6977734	T	G	2	3.797e-05	0.002447	1.5775	1.541	0.2669	18.87	1.1699	1.6592	POM121L12(-3.202kb)
14	87810172	rs877219	G	A	2	3.826e-05	3.826e-05	1.2625	1.2625	0.9439	0	1.274	1.2603	.
1	185845862	rs11586312	G	A	2	3.827e-05	3.827e-05	0.7463	0.7463	0.5217	0	0.6677	0.7603	HMCN1(0)|MIR548F1(-184kb)
5	28323385	rs11749920	A	T	2	3.833e-05	3.833e-05	0.7938	0.7938	0.7495	0	0.7614	0.7999	.
3	70833362	rs17007804	A	C	2	3.834e-05	3.834e-05	1.2554	1.2554	0.6316	0	1.3372	1.2415	FOXP1(-170.5kb)
7	53082557	rs4133882	C	T	2	3.862e-05	0.000583	1.5709	1.5512	0.2898	10.76	1.1845	1.6478	POM121L12(-20.79kb)
1	214677422	rs17023103	A	C	2	3.871e-05	3.871e-05	1.6196	1.6196	0.9882	0	1.6255	1.6183	CENPF(-99.11kb)|PTPN14(0)|SMYD2(+166.9kb)
8	134852761	rs147210946	A	G	2	3.873e-05	3.873e-05	3.0405	3.0405	0.4564	0	1.8968	3.313	.
15	70452945	rs8040467	C	A	2	3.882e-05	0.005527	1.2961	1.2728	0.2433	26.55	1.0949	1.3383	MIR629(+81.14kb)|TLE3(+62.69kb)
14	87813714	rs28450466	A	G	2	3.888e-05	3.888e-05	1.2622	1.2622	0.9345	0	1.2756	1.2596	.
19	39043947	rs144643290	G	C	2	3.891e-05	3.891e-05	1.7065	1.7065	0.5935	0	1.9952	1.6548	ACTN4(-94.32kb)|CAPN12(-176.9kb)|CATSPERG(+182.4kb)|EIF3K(-65.77kb)|FAM98C(+144.2kb)|GGN(+165.3kb)|MAP4K1(-34.33kb)|PSMD8(+169.5kb)|RASGRP4(+127kb)|RYR1(0)|SPRED3(+153.4kb)
6	153798307	rs270321	A	T	2	3.899e-05	3.899e-05	0.772	0.772	0.7531	0	0.8066	0.7651	.
7	16125678	rs62440855	A	G	2	3.901e-05	3.901e-05	0.7806	0.7806	0.9945	0	0.7798	0.7807	ISPD(-1.473kb)|LOC100506025(-124.4kb)
7	53081033	rs78619076	A	G	2	3.914e-05	0.0002246	1.5715	1.56	0.3013	6.41	1.1932	1.6469	POM121L12(-22.32kb)
7	16121864	rs6952865	A	G	2	3.936e-05	3.936e-05	0.7806	0.7806	0.9865	0	0.7787	0.7809	ISPD(-5.287kb)|LOC100506025(-128.2kb)
4	120663407	rs72680976	A	G	2	3.99e-05	0.0004972	1.663	1.6413	0.2902	10.6	1.2262	1.7593	PDE5A(+113.4kb)
5	28355862	rs5001524	T	C	2	3.998e-05	3.998e-05	1.2584	1.2584	0.6523	0	1.3346	1.2449	.
1	214674660	rs115575776	C	G	2	3.999e-05	3.999e-05	1.6351	1.6351	0.9911	0	1.6396	1.634	CENPF(-101.9kb)|PTPN14(0)|SMYD2(+164.2kb)
12	106528046	rs73193871	A	G	2	4.009e-05	4.009e-05	2.409	2.409	0.9977	0	2.4062	2.4098	CKAP4(-103.6kb)|NUAK1(0)|TCP11L2(-168.5kb)
20	34011482	rs78732698	A	C	2	4.012e-05	4.012e-05	2.7308	2.7308	0.5632	0	1.9974	2.9111	C20orf173(-97.09kb)|CEP250(-31.74kb)|EIF6(+138.9kb)|ERGIC3(-118.3kb)|FAM83C(+131.3kb)|GDF5(-9.666kb)|MMP24(+146.7kb)|MMP24-AS1(+145.5kb)|SPAG4(-192.3kb)|UQCC(+11.54kb)
1	214768136	rs77994634	T	C	2	4.018e-05	4.018e-05	1.7666	1.7666	0.6932	0	1.5882	1.8169	CENPF(-8.395kb)|PTPN14(+43.11kb)
7	53100268	rs6960678	T	A	2	4.019e-05	0.001968	1.575	1.5419	0.2714	17.32	1.1719	1.6559	POM121L12(-3.08kb)
4	120663466	rs72680978	C	T	2	4.04e-05	0.0004827	1.6625	1.6412	0.2908	10.4	1.2262	1.7586	PDE5A(+113.5kb)
3	55738747	rs815440	C	T	2	4.046e-05	4.046e-05	1.2733	1.2733	0.8984	0	1.2966	1.2693	ERC2(0)|ERC2-IT1(+45.25kb)|MIR3938(-147.8kb)
10	3940618	rs10795095	T	C	2	4.054e-05	4.054e-05	1.438	1.438	0.3823	0	1.7167	1.3903	KLF6(+113.1kb)
22	28477370	rs146921298	T	C	2	4.072e-05	4.072e-05	3.4305	3.4305	0.8721	0	3.201	3.5483	MIR3199-1(+160.8kb)|MIR3199-2(+160.8kb)|PITPNB(+162.1kb)|TTC28(0)|TTC28-AS1(+78.7kb)
20	34109775	rs117612812	T	C	2	4.077e-05	4.077e-05	2.6602	2.6602	0.8838	0	2.4657	2.7031	C20orf173(0)|CEP250(+9.972kb)|CPNE1(-104.2kb)|ERGIC3(-20kb)|GDF5(+83.75kb)|NFS1(-146.8kb)|RBM12(-127.1kb)|RBM39(-181.8kb)|ROMO1(-177.5kb)|SPAG4(-94.03kb)|UQCC(+109.8kb)
1	214674876	rs78483506	A	C	2	4.083e-05	4.083e-05	1.6337	1.6337	0.9872	0	1.6402	1.6322	CENPF(-101.7kb)|PTPN14(0)|SMYD2(+164.4kb)
5	2283852	rs2652150	G	A	2	4.084e-05	4.084e-05	0.7518	0.7518	0.5191	0	0.8343	0.7374	.
19	44175982	rs36229204	T	C	2	4.09e-05	4.09e-05	1.7413	1.7413	0.7332	0	1.9493	1.7088	CADM4(+31.99kb)|ETHE1(+144.6kb)|IRGC(-44.23kb)|IRGQ(+75.7kb)|KCNN4(-94.7kb)|LYPD5(-124.1kb)|PHLDB3(+167kb)|PINLYP(+89.73kb)|PLAUR(+1.484kb)|SMG9(-59.32kb)|SRRM5(+57.33kb)|XRCC1(+96.25kb)|ZNF283(-155.5kb)|ZNF428(+51.97kb)|ZNF575(+135.7kb)|ZNF576(+71.4kb)
12	46021204	rs149307714	A	G	2	4.123e-05	4.123e-05	3.24	3.24	0.821	0	3.6705	3.1325	ANO6(+187kb)|ARID2(-102.4kb)|LINC00938(-98.3kb)
5	28361057	rs9292248	A	T	2	4.125e-05	4.125e-05	1.2581	1.2581	0.6121	0	1.3442	1.2429	.
17	52821057	rs16954972	G	T	2	4.172e-05	0.9224	3.1955	0.8189	0.0977	63.54	0.0418	3.3621	TOM1L1(-157kb)
5	28334784	rs2329736	T	C	2	4.199e-05	4.199e-05	0.7952	0.7952	0.5474	0	0.7349	0.8067	.
1	214675538	rs75605069	T	G	2	4.2e-05	4.2e-05	1.6312	1.6312	0.9707	0	1.646	1.6277	CENPF(-101kb)|PTPN14(0)|SMYD2(+165.1kb)
6	21469798	rs75866925	T	A	2	4.201e-05	0.001076	3.0076	3.1489	0.21	36.37	4.8901	2.3809	LINC00340(-196.9kb)|LINC00581(-16.49kb)|SOX4(-124.2kb)
16	11345728	rs57061256	T	C	2	4.21e-05	4.21e-05	2.1146	2.1146	0.7477	0	2.3561	2.048	CLEC16A(+69.68kb)|PRM1(-28.96kb)|PRM2(-23.76kb)|PRM3(-21.42kb)|RMI2(-93.58kb)|SOCS1(-2.545kb)|TNP2(-15.98kb)
1	248228247	rs75288294	A	G	2	4.212e-05	4.212e-05	2.3151	2.3151	0.602	0	2.836	2.1883	OR2AK2(+98.61kb)|OR2L1P(+73.75kb)|OR2L2(+25.64kb)|OR2L3(+3.325kb)|OR2L5(+42.06kb)|OR2L8(+115.1kb)|OR2L13(0)|OR2M1P(-57.19kb)|OR2M2(-115kb)|OR2M3(-138.1kb)|OR2M4(-174kb)|OR2M5(-80.2kb)|OR2T8(+143kb)|OR2W3(+168.4kb)|TRIM58(+184.8kb)
7	53058936	rs112095163	A	C	2	4.214e-05	0.000397	1.5628	1.5472	0.2942	9.13	1.1949	1.6408	POM121L12(-44.41kb)
10	7766669	rs78793708	C	T	2	4.229e-05	4.229e-05	0.5712	0.5712	0.8694	0	0.6018	0.5657	ATP5C1(-63.42kb)|ITIH2(0)|ITIH5(+57.71kb)|KIN(-26.26kb)|TAF3(-93.8kb)
10	21224046	rs10828157	C	T	2	4.234e-05	4.234e-05	1.3998	1.3998	0.6808	0	1.5098	1.3788	C10orf113(-190.6kb)|NEBL(0)
7	53062648	rs75337857	C	T	2	4.246e-05	0.0008145	1.5607	1.5385	0.2845	12.7	1.1859	1.6396	POM121L12(-40.7kb)
3	70820769	rs13095475	T	A	2	4.247e-05	4.247e-05	1.257	1.257	0.7769	0	1.3054	1.2487	FOXP1(-183.1kb)
10	21241314	rs7082326	T	C	2	4.259e-05	4.259e-05	1.3993	1.3993	0.5481	0	1.562	1.3687	C10orf113(-173.4kb)|NEBL(0)
3	70838728	rs7640120	C	T	2	4.259e-05	4.259e-05	1.2545	1.2545	0.6724	0	1.3265	1.2422	FOXP1(-165.1kb)
5	28323112	rs28497139	T	G	2	4.263e-05	4.263e-05	0.7948	0.7948	0.7433	0	0.7616	0.8011	.
5	28323113	rs28647324	C	A	2	4.263e-05	4.263e-05	0.7949	0.7949	0.742	0	0.7615	0.8012	.
1	248145324	rs6700062	T	A	2	4.273e-05	4.273e-05	2.3839	2.3839	0.902	0	2.4755	2.3411	OR2AK2(+15.68kb)|OR2L1P(-8.244kb)|OR2L2(-56.15kb)|OR2L3(-78.66kb)|OR2L5(-39.92kb)|OR2L8(+32.23kb)|OR2L13(0)|OR2M1P(-140.1kb)|OR2M2(-198kb)|OR2M5(-163.1kb)|OR2T8(+60.07kb)|OR2W3(+85.49kb)|OR11L1(+140.1kb)|OR14A16(+166.3kb)|TRIM58(+101.9kb)
7	53085574	rs76259291	G	A	2	4.289e-05	0.00474	1.5668	1.522	0.2546	22.95	1.156	1.6495	POM121L12(-17.77kb)
3	165126036	rs112697703	T	G	2	4.325e-05	4.325e-05	1.8926	1.8926	0.8401	0	2.0141	1.8627	.
7	53063823	rs17135475	G	A	2	4.331e-05	0.0002678	1.56	1.548	0.2996	7.07	1.1941	1.6361	POM121L12(-39.52kb)
15	78826166	rs11633027	T	C	2	4.347e-05	4.347e-05	2.9177	2.9177	0.6792	0	3.571	2.7531	CHRNA3(-59.23kb)|CHRNA5(-31.7kb)|CHRNB4(-90.47kb)|CRABP1(+185.6kb)|HYKK(0)|IREB2(+32.37kb)|PSMA4(-6.58kb)
7	53054964	rs74814591	T	C	2	4.347e-05	0.0007071	1.5636	1.5428	0.2864	12.02	1.1905	1.6435	POM121L12(-48.38kb)
18	59461531	rs79019762	A	C	2	4.348e-05	4.348e-05	1.595	1.595	0.9874	0	1.601	1.5936	LOC100996669(+39.6kb)|RNF152(-20.77kb)
10	21225116	rs6482154	C	T	2	4.35e-05	4.35e-05	1.3995	1.3995	0.6771	0	1.5111	1.3783	C10orf113(-189.6kb)|NEBL(0)
16	83697789	rs4782833	T	C	2	4.35e-05	0.001333	1.4005	1.4324	0.2405	27.43	1.7259	1.3392	CDH13(0)|HSBP1(-143.7kb)|MIR3182(+155.8kb)
5	28334818	rs2329737	T	C	2	4.35e-05	4.35e-05	0.7956	0.7956	0.5461	0	0.735	0.8071	.
5	172293750	rs793028	C	T	2	4.351e-05	4.351e-05	0.5758	0.5758	0.8421	0	0.6093	0.5685	ATP6V0E1(-117kb)|CREBRF(-189.6kb)|DUSP1(+95.55kb)|ERGIC1(0)|LOC100268168(-88.04kb)|NEURL1B(+175.2kb)|RPL26L1(-92.69kb)|SNORA74B(-154kb)
3	165158453	rs79490243	T	C	2	4.352e-05	4.352e-05	2.0001	2.0001	0.9201	0	1.9407	2.0194	.
7	53088272	rs17643338	C	A	2	4.354e-05	0.003947	1.5666	1.5248	0.2587	21.61	1.159	1.6486	POM121L12(-15.08kb)
8	98866757	rs118124465	C	G	2	4.363e-05	0.01118	2.1151	2.3758	0.1111	60.61	3.6336	1.8067	LAPTM4B(+1.927kb)|MATN2(-14.55kb)|MTDH(+124.3kb)|RPL30(-187.2kb)|SNORA72(-187.6kb)
11	16685154	rs117947332	C	T	2	4.368e-05	4.368e-05	1.6816	1.6816	0.8404	0	1.7629	1.6584	C11orf58(-74.99kb)|PLEKHA7(-124.1kb)|SOX6(+187.2kb)
8	267834	rs6996568	A	G	2	4.39e-05	4.39e-05	2.0086	2.0086	0.937	0	1.9644	2.0251	FAM87A(-58.1kb)|FBXO25(-88.97kb)|OR4F21(+150.8kb)|RPL23AP53(+85.52kb)|TDRP(-172kb)|ZNF596(+70.5kb)
5	28357783	rs4371764	C	A	2	4.391e-05	4.391e-05	1.257	1.257	0.6484	0	1.334	1.2433	.
4	120619868	rs72678601	T	C	2	4.406e-05	0.000244	1.6515	1.638	0.3005	6.7	1.2254	1.7434	LOC645513(+199.1kb)|PDE5A(+69.89kb)
16	83695697	rs10781971	G	A	2	4.419e-05	0.0005061	1.3997	1.4187	0.2703	17.7	1.701	1.3418	CDH13(0)|HSBP1(-145.8kb)|MIR3182(+153.7kb)
16	83698706	rs9940706	A	C	2	4.422e-05	0.0006911	1.3988	1.4213	0.2618	20.59	1.7058	1.3401	CDH13(0)|HSBP1(-142.8kb)|MIR3182(+156.7kb)
7	16278622	rs1295170	T	G	2	4.435e-05	0.006659	1.2693	1.3123	0.1735	46.03	1.5195	1.2255	ISPD(0)|LOC100506025(0)
1	107651286	rs184251197	C	T	2	4.437e-05	4.437e-05	2.4497	2.4497	0.7643	0	2.6967	2.3418	NTNG1(-31.34kb)|PRMT6(+49.37kb)
4	120654831	rs17005547	C	T	2	4.438e-05	0.0003114	1.6329	1.6178	0.2986	7.46	1.2091	1.7198	PDE5A(+104.8kb)
4	120619590	rs72678597	G	T	2	4.455e-05	0.0002266	1.6513	1.6386	0.3015	6.34	1.226	1.7431	LOC645513(+198.8kb)|PDE5A(+69.61kb)
20	34012649	rs144643409	A	G	2	4.457e-05	4.457e-05	2.7608	2.7608	0.6232	0	2.1143	2.9198	C20orf173(-95.92kb)|CEP250(-30.57kb)|EIF6(+140kb)|ERGIC3(-117.1kb)|FAM83C(+132.4kb)|GDF5(-8.499kb)|MMP24(+147.8kb)|MMP24-AS1(+146.7kb)|SPAG4(-191.2kb)|UQCC(+12.7kb)
16	49500910	rs76517560	G	C	2	4.459e-05	0.003369	2.5332	2.4131	0.2173	34.29	1.6054	3.0115	C16orf78(+67.59kb)|CBLN1(+185.2kb)|ZNF423(-23.6kb)
3	165155716	rs57790805	T	C	2	4.459e-05	4.459e-05	1.998	1.998	0.9203	0	1.9388	2.0172	.
1	195161456	rs12130371	C	A	2	4.46e-05	4.46e-05	1.7296	1.7296	0.8884	0	1.6582	1.7442	.
6	69669003	rs9454658	T	A	2	4.46e-05	4.46e-05	0.7768	0.7768	0.974	0	0.7805	0.7761	BAI3(0)
4	120619493	rs72678596	A	T	2	4.463e-05	0.0002253	1.6512	1.6386	0.3016	6.31	1.226	1.743	LOC645513(+198.7kb)|PDE5A(+69.51kb)
3	165156642	rs111716340	T	C	2	4.464e-05	4.464e-05	1.998	1.998	0.9215	0	1.9397	2.0169	.
9	129049506	rs74987934	T	C	2	4.466e-05	4.466e-05	1.5939	1.5939	0.8059	0	1.4876	1.6122	MVB12B(-39.62kb)|NRON(-120.5kb)
16	83694796	rs28583495	G	A	2	4.47e-05	0.0005333	1.3996	1.4191	0.2691	18.12	1.7017	1.3415	CDH13(0)|HSBP1(-146.7kb)|MIR3182(+152.8kb)
10	21221544	rs6482153	G	A	2	4.475e-05	4.475e-05	1.3914	1.3914	0.6448	0	1.5131	1.3685	C10orf113(-193.1kb)|NEBL(0)
4	120619455	rs72678595	C	G	2	4.479e-05	0.0002242	1.6511	1.6385	0.3016	6.27	1.226	1.7429	LOC645513(+198.7kb)|PDE5A(+69.47kb)
19	50383636	rs3745486	C	T	2	4.481e-05	4.481e-05	1.2598	1.2598	0.6133	0	1.1774	1.2751	ADM5(+189.4kb)|AKT1S1(+2.023kb)|AP2A1(+73.27kb)|ATF5(-48.32kb)|CPT1C(+166.6kb)|FLJ26850(-170.3kb)|FUZ(+67.07kb)|IL4I1(-9.276kb)|MED25(+43.4kb)|MIR4749(+25.73kb)|MIR4750(-7.795kb)|MIR4751(-52.68kb)|MIR5088(+198.2kb)|NUP62(-26.45kb)|PNKP(+12.81kb)|PRMT1(+191.9kb)|PTOV1(+19.64kb)|PTOV1-AS1(+28.7kb)|SIGLEC11(-68.61kb)|SIGLEC16(-89.28kb)|TBC1D17(0)|TSKS(+117.1kb)|VRK3(-96.09kb)|ZNF473(-145.6kb)
4	120623268	rs72680908	G	A	2	4.486e-05	0.0001932	1.6495	1.6383	0.3034	5.6	1.226	1.7405	PDE5A(+73.29kb)
7	53100699	rs79550985	T	C	2	4.488e-05	0.004059	1.5711	1.5286	0.2584	21.72	1.1596	1.6542	POM121L12(-2.649kb)
3	55739360	rs815437	T	C	2	4.493e-05	4.493e-05	1.2693	1.2693	0.8885	0	1.2946	1.265	ERC2(0)|ERC2-IT1(+45.86kb)|MIR3938(-147.2kb)
4	120619817	rs72678599	C	T	2	4.493e-05	0.0002164	1.6507	1.6385	0.3021	6.1	1.226	1.7423	LOC645513(+199.1kb)|PDE5A(+69.84kb)
8	480106	rs78141699	A	G	2	4.494e-05	4.494e-05	1.6581	1.6581	0.3774	0	1.3033	1.7426	ERICH1(-134.1kb)|FAM87A(+146.9kb)|FBXO25(+60.23kb)|TDRP(0)
4	120619989	rs72678602	A	G	2	4.5e-05	0.0002165	1.6507	1.6385	0.3021	6.1	1.226	1.7423	LOC645513(+199.2kb)|PDE5A(+70.01kb)
7	134535042	rs62479512	C	T	2	4.503e-05	0.03361	1.9389	1.779	0.1959	40.2	1.1597	2.1124	AGBL3(-136.2kb)|BPGM(+170.5kb)|CALD1(0)
4	120621299	rs56195631	C	T	2	4.506e-05	0.0002113	1.6504	1.6384	0.3024	5.98	1.226	1.7419	PDE5A(+71.32kb)
3	150622100	rs79788943	T	A	2	4.514e-05	4.514e-05	1.6898	1.6898	0.6841	0	1.5122	1.732	CLRN1(-21.85kb)|CLRN1-AS1(-68.36kb)|MED12L(-182.6kb)|SIAH2(+140.8kb)
4	120624053	rs114569900	T	G	2	4.517e-05	0.0001962	1.6494	1.6381	0.3033	5.63	1.2256	1.7404	PDE5A(+74.07kb)
4	120626947	rs72680926	C	G	2	4.525e-05	0.0001728	1.648	1.6379	0.3047	5.08	1.2258	1.7384	PDE5A(+76.97kb)
14	87816092	rs1863619	T	C	2	4.526e-05	4.526e-05	1.2597	1.2597	0.9657	0	1.2528	1.2611	.
4	120626770	rs138790146	T	C	2	4.526e-05	0.000166	1.6476	1.6379	0.3051	4.91	1.2258	1.7378	PDE5A(+76.79kb)
6	37691696	rs11753653	C	G	2	4.526e-05	0.08957	2.0997	2.7995	0.005	87.33	5.3602	1.5894	MDGA1(+25.93kb)|MIR4462(+168.5kb)|ZFAND3(-95.61kb)
13	60982122	rs113833353	C	G	2	4.529e-05	0.1856	2.1748	1.7745	0.1227	58.04	0.9694	2.4204	TDRD3(0)
4	120620910	rs7659472	A	T	2	4.532e-05	0.000204	1.65	1.6384	0.3028	5.81	1.226	1.7413	PDE5A(+70.93kb)
21	40697510	rs117601216	G	A	2	4.535e-05	8.95e-05	2.7061	2.6898	0.3088	3.44	1.6737	3.0769	BRWD1(+11.8kb)|BRWD1-AS1(+2.366kb)|BRWD1-IT2(+10.62kb)|HMGN1(-16.73kb)|LCA5L(-80.26kb)|PSMG1(+142.1kb)|SH3BGR(-120.3kb)|WRB(-54.7kb)
4	120622192	rs72680904	A	C	2	4.537e-05	0.0002225	1.6509	1.6385	0.3018	6.2	1.226	1.7427	PDE5A(+72.21kb)
3	70830771	rs1529871	A	T	2	4.545e-05	4.545e-05	1.2548	1.2548	0.7292	0	1.3137	1.2447	FOXP1(-173.1kb)
5	28359780	rs4305646	G	A	2	4.545e-05	4.545e-05	1.2562	1.2562	0.6401	0	1.3352	1.2422	.
4	120625215	rs72680911	A	G	2	4.546e-05	0.0001728	1.6482	1.6381	0.3047	5.06	1.226	1.7387	PDE5A(+75.23kb)
19	44174441	rs4251805	T	C	2	4.55e-05	4.55e-05	1.7308	1.7308	0.7172	0	1.9515	1.6969	CADM4(+30.45kb)|ETHE1(+143kb)|IRGC(-45.77kb)|IRGQ(+74.15kb)|KCNN4(-96.24kb)|LYPD5(-125.6kb)|PHLDB3(+165.5kb)|PINLYP(+88.18kb)|PLAUR(0)|SMG9(-60.86kb)|SRRM5(+55.79kb)|XRCC1(+94.71kb)|ZNF283(-157kb)|ZNF428(+50.43kb)|ZNF575(+134.2kb)|ZNF576(+69.85kb)
4	120625246	rs72680912	C	T	2	4.551e-05	0.0001728	1.6482	1.6381	0.3047	5.06	1.226	1.7387	PDE5A(+75.26kb)
4	120621278	rs7682153	G	C	2	4.56e-05	0.0001981	1.6496	1.6383	0.3032	5.65	1.226	1.7408	PDE5A(+71.3kb)
19	50391299	rs2305917	T	C	2	4.561e-05	4.561e-05	1.2918	1.2918	0.877	0	1.2643	1.2975	ADM5(+197.1kb)|AKT1S1(+9.686kb)|AP2A1(+80.93kb)|ATF5(-40.66kb)|CPT1C(+174.3kb)|FLJ26850(-162.6kb)|FUZ(+74.73kb)|IL4I1(-1.613kb)|MED25(+51.06kb)|MIR4749(+33.39kb)|MIR4750(-0.132kb)|MIR4751(-45.02kb)|NUP62(-18.78kb)|PNKP(+20.48kb)|PRMT1(+199.6kb)|PTOV1(+27.3kb)|PTOV1-AS1(+36.37kb)|SIGLEC11(-60.95kb)|SIGLEC16(-81.61kb)|TBC1D17(0)|TSKS(+124.8kb)|VRK3(-88.42kb)|ZNF473(-137.9kb)
18	59524393	rs113345113	T	C	2	4.565e-05	0.0001758	1.5726	1.5636	0.3019	6.16	1.2346	1.6604	LOC100996669(+102.5kb)|PIGN(-187.1kb)|RNF152(0)
4	120621676	rs10434034	T	C	2	4.569e-05	0.000192	1.6492	1.6382	0.3036	5.51	1.226	1.7403	PDE5A(+71.7kb)
6	105187043	rs150281830	A	G	2	4.579e-05	0.3373	2.2099	1.6633	0.0533	73.23	0.8734	2.5735	HACE1(0)|LINC00577(-197.1kb)
14	87867775	rs59560292	G	A	2	4.58e-05	4.58e-05	1.2621	1.2621	0.6847	0	1.1978	1.2751	.
4	120625600	rs72680916	C	T	2	4.582e-05	0.0001654	1.6477	1.638	0.3053	4.85	1.226	1.738	PDE5A(+75.62kb)
4	120626325	rs72680921	G	T	2	4.589e-05	0.00016	1.6473	1.638	0.3056	4.71	1.226	1.7375	PDE5A(+76.34kb)
4	120638132	rs72680949	T	A	2	4.589e-05	0.0001087	1.6436	1.6374	0.3096	3.12	1.2259	1.7319	PDE5A(+88.15kb)
5	28320623	rs28510581	T	C	2	4.597e-05	4.597e-05	0.7955	0.7955	0.7563	0	0.7641	0.8015	.
4	120626314	rs72680920	T	C	2	4.6e-05	0.000157	1.6471	1.6379	0.3059	4.62	1.226	1.7372	PDE5A(+76.33kb)
7	53056352	rs78655734	A	C	2	4.601e-05	0.0004718	1.5603	1.5438	0.2927	9.68	1.1923	1.6388	POM121L12(-47kb)
5	28317135	rs13354707	G	A	2	4.602e-05	4.602e-05	0.7947	0.7947	0.9384	0	0.7867	0.7962	.
6	100653013	rs145269582	T	A	2	4.602e-05	0.6922	2.5791	1.4241	0.0294	78.92	0.4906	3.01	LOC728012(+128.7kb)|SIM1(-183.7kb)
10	3940706	rs10795096	C	T	2	4.609e-05	0.0007346	1.4811	1.5093	0.2671	18.79	1.8957	1.414	KLF6(+113.2kb)
16	77445198	rs74316403	C	G	2	4.611e-05	0.248	2.5622	1.9286	0.1195	58.75	0.8649	2.8861	ADAMTS18(0)|SYCE1L(+198.2kb)
4	120626383	rs72680923	C	G	2	4.612e-05	0.0001561	1.647	1.6379	0.306	4.58	1.226	1.7371	PDE5A(+76.4kb)
2	128741938	rs751602	T	C	2	4.618e-05	4.618e-05	1.3177	1.3177	0.8604	0	1.3554	1.3111	AMMECR1L(+98.42kb)|POLR2D(+126.2kb)|SAP130(0)|UGGT1(-106.8kb)|WDR33(+173.2kb)
4	120621417	rs7682717	A	G	2	4.63e-05	0.000192	1.6488	1.6379	0.3037	5.47	1.2258	1.7399	PDE5A(+71.44kb)
4	120622479	rs72680906	A	G	2	4.63e-05	0.0001861	1.6487	1.6381	0.3041	5.32	1.2257	1.7396	PDE5A(+72.5kb)
14	87809766	rs1430566	T	C	2	4.631e-05	4.631e-05	1.2561	1.2561	0.9418	0	1.2677	1.2538	.
4	120626727	rs72680925	G	A	2	4.634e-05	0.0001528	1.6466	1.6378	0.3062	4.48	1.2259	1.7366	PDE5A(+76.75kb)
4	120622607	rs72680907	C	T	2	4.636e-05	0.000185	1.6486	1.6381	0.3042	5.29	1.2257	1.7395	PDE5A(+72.63kb)
13	37349846	rs9576109	T	C	2	4.64e-05	0.01752	1.2934	1.2596	0.2138	35.29	1.0764	1.3376	ALG5(-174.1kb)|RFXAP(-43.49kb)|SERTM1(+77.87kb)|SMAD9(-69.12kb)
4	120627183	rs72680928	T	G	2	4.644e-05	0.0001515	1.6464	1.6376	0.3063	4.43	1.2258	1.7363	PDE5A(+77.2kb)
4	120627177	rs72680927	C	T	2	4.647e-05	0.0001515	1.6464	1.6376	0.3063	4.43	1.2258	1.7363	PDE5A(+77.2kb)
5	28323667	rs10940719	A	G	2	4.658e-05	4.658e-05	0.7958	0.7958	0.7329	0	0.7612	0.8024	.
7	53044756	rs112925675	A	T	2	4.663e-05	7.786e-05	1.5622	1.5591	0.3128	1.86	1.2073	1.6381	POM121L12(-58.59kb)
7	38688733	rs112318331	G	A	2	4.666e-05	4.666e-05	1.8446	1.8446	0.5531	0	1.5266	1.9238	AMPH(+17.57kb)|FAM183B(-36.21kb)|VPS41(-74.81kb)
5	28319612	rs10061823	A	G	2	4.705e-05	4.705e-05	0.7957	0.7957	0.7545	0	0.7641	0.8018	.
19	50386340	rs746738	C	T	2	4.712e-05	4.712e-05	1.2593	1.2593	0.5965	0	1.1733	1.2754	ADM5(+192.1kb)|AKT1S1(+4.727kb)|AP2A1(+75.97kb)|ATF5(-45.62kb)|CPT1C(+169.4kb)|FLJ26850(-167.6kb)|FUZ(+69.77kb)|IL4I1(-6.572kb)|MED25(+46.1kb)|MIR4749(+28.43kb)|MIR4750(-5.091kb)|MIR4751(-49.98kb)|NUP62(-23.74kb)|PNKP(+15.52kb)|PRMT1(+194.6kb)|PTOV1(+22.34kb)|PTOV1-AS1(+31.41kb)|SIGLEC11(-65.91kb)|SIGLEC16(-86.57kb)|TBC1D17(0)|TSKS(+119.8kb)|VRK3(-93.38kb)|ZNF473(-142.9kb)
7	21795205	rs57038242	A	G	2	4.743e-05	4.743e-05	1.5896	1.5896	0.7589	0	1.4759	1.616	CDCA7L(-145.3kb)|DNAH11(0)
3	75051314	rs144960528	C	A	2	4.745e-05	0.0808	3.0773	2.5323	0.1081	61.26	1.2965	3.8655	.
4	120629959	rs72680937	T	A	2	4.755e-05	0.0001238	1.6442	1.6373	0.3086	3.52	1.2258	1.7333	PDE5A(+79.98kb)
2	128749837	rs12992494	T	C	2	4.76e-05	4.76e-05	1.317	1.317	0.8584	0	1.3552	1.3103	AMMECR1L(+106.3kb)|POLR2D(+134.1kb)|SAP130(0)|UGGT1(-98.92kb)|WDR33(+181.1kb)
3	70791669	rs7633132	C	A	2	4.764e-05	4.764e-05	1.2544	1.2544	0.8835	0	1.279	1.2501	.
4	120629974	rs72680938	C	T	2	4.765e-05	0.0001221	1.6441	1.6372	0.3088	3.46	1.2258	1.7331	PDE5A(+79.99kb)
4	120633203	rs56324051	A	C	2	4.765e-05	0.0001076	1.643	1.6371	0.31	2.96	1.2258	1.7314	PDE5A(+83.22kb)
19	50384882	rs7248498	G	A	2	4.783e-05	4.783e-05	1.2587	1.2587	0.6142	0	1.1766	1.274	ADM5(+190.6kb)|AKT1S1(+3.269kb)|AP2A1(+74.51kb)|ATF5(-47.08kb)|CPT1C(+167.9kb)|FLJ26850(-169.1kb)|FUZ(+68.32kb)|IL4I1(-8.03kb)|MED25(+44.64kb)|MIR4749(+26.97kb)|MIR4750(-6.549kb)|MIR4751(-51.44kb)|MIR5088(+199.5kb)|NUP62(-25.2kb)|PNKP(+14.06kb)|PRMT1(+193.2kb)|PTOV1(+20.88kb)|PTOV1-AS1(+29.95kb)|SIGLEC11(-67.37kb)|SIGLEC16(-88.03kb)|TBC1D17(0)|TSKS(+118.4kb)|VRK3(-94.84kb)|ZNF473(-144.3kb)
7	16099434	rs60333130	G	A	2	4.783e-05	4.783e-05	0.7833	0.7833	0.8846	0	0.7995	0.7804	ISPD(-27.72kb)|LOC100506025(-150.7kb)
4	120634176	rs138958717	C	G	2	4.784e-05	0.0001038	1.6426	1.6371	0.3104	2.8	1.2258	1.7309	PDE5A(+84.2kb)
1	7084794	rs61780948	T	C	2	4.799e-05	4.799e-05	1.7285	1.7285	0.3309	0	1.1355	1.8004	CAMTA1(0)
4	120634198	rs72680944	C	T	2	4.799e-05	0.0001016	1.6424	1.637	0.3107	2.71	1.2258	1.7306	PDE5A(+84.22kb)
5	28322842	rs11749149	A	T	2	4.815e-05	4.815e-05	0.7962	0.7962	0.7335	0	0.7617	0.8028	.
11	9081931	rs72547297	C	T	2	4.816e-05	0.002017	1.9785	2.083	0.2068	37.25	2.9252	1.7638	AKIP1(+140.3kb)|ASCL3(+117.4kb)|C11orf16(+127.4kb)|DENND5A(-78.44kb)|KRT8P41(-33.98kb)|MIR5691(-29.93kb)|NRIP3(+56.34kb)|SCUBE2(0)|ST5(+149.4kb)|TMEM9B(+95.94kb)|TMEM9B-AS1(+84.1kb)
7	53084409	rs78175328	C	T	2	4.817e-05	0.003547	1.5635	1.5242	0.262	20.51	1.1591	1.645	POM121L12(-18.94kb)
3	70821641	rs6782010	A	G	2	4.825e-05	4.825e-05	1.2531	1.2531	0.6777	0	1.3239	1.241	FOXP1(-182.2kb)
2	210478443	rs112641034	A	G	2	4.828e-05	8.98e-05	3.0674	3.0816	0.2991	7.24	4.3835	2.4379	MAP2(0)|UNC80(-158.3kb)
3	55742095	rs815421	G	C	2	4.828e-05	4.828e-05	1.2676	1.2676	0.9018	0	1.2898	1.2638	ERC2(0)|ERC2-IT1(+48.6kb)|MIR3938(-144.4kb)
14	87841807	rs1430573	A	C	2	4.829e-05	4.829e-05	1.2591	1.2591	0.9272	0	1.2444	1.262	.
3	70826776	rs36013405	G	T	2	4.837e-05	4.837e-05	1.2539	1.2539	0.6817	0	1.3239	1.2419	FOXP1(-177.1kb)
5	28322462	rs10075823	C	T	2	4.84e-05	4.84e-05	0.7963	0.7963	0.7347	0	0.7619	0.8028	.
5	28323208	rs17600312	A	G	2	4.845e-05	4.845e-05	0.7963	0.7963	0.7317	0	0.7615	0.8029	.
2	71316784	rs79362190	A	G	2	4.851e-05	0.0004787	1.5392	1.5645	0.2707	17.58	1.9602	1.4546	ANKRD53(+104.2kb)|ATP6V1B1(+124.2kb)|MCEE(-20.02kb)|MPHOSPH10(-40.66kb)|NAGK(+10.79kb)|OR7E91P(+59.72kb)|PAIP2B(-93.08kb)|TEX261(+94.78kb)|VAX2(+156.2kb)
3	70796696	rs13091518	C	T	2	4.859e-05	4.859e-05	1.254	1.254	0.7675	0	1.3045	1.2454	.
5	167716351	rs72838315	T	G	2	4.861e-05	4.861e-05	1.5906	1.5906	0.3992	0	1.285	1.6613	RARS(-197.1kb)|TENM2(+25.19kb)|WWC1(-2.713kb)
5	28323775	rs10940720	T	A	2	4.866e-05	4.866e-05	0.7963	0.7963	0.7286	0	0.7611	0.803	.
3	70852992	rs6774564	G	A	2	4.869e-05	4.869e-05	1.252	1.252	0.4084	0	1.3983	1.2285	FOXP1(-150.9kb)
5	28322553	rs3890386	T	C	2	4.874e-05	4.874e-05	0.7963	0.7963	0.7341	0	0.7619	0.8029	.
4	120625878	rs72680917	A	G	2	4.88e-05	0.0001373	1.6425	1.6349	0.3079	3.83	1.2236	1.7314	PDE5A(+75.9kb)
4	120647831	rs11098535	C	T	2	4.905e-05	5.255e-05	1.6371	1.6366	0.3167	0.23	1.226	1.7229	PDE5A(+97.85kb)
4	177721542	rs12503281	T	C	2	4.906e-05	4.906e-05	0.6986	0.6986	0.9135	0	0.7138	0.6956	VEGFC(+7.643kb)
3	55742035	rs815423	G	A	2	4.922e-05	4.922e-05	1.2673	1.2673	0.8995	0	1.29	1.2634	ERC2(0)|ERC2-IT1(+48.54kb)|MIR3938(-144.5kb)
4	120633868	rs143594221	T	C	2	4.923e-05	9.624e-05	1.6415	1.6367	0.3114	2.42	1.2257	1.7296	PDE5A(+83.89kb)
6	153787225	rs270258	T	C	2	4.941e-05	4.941e-05	0.7742	0.7742	0.7936	0	0.8029	0.7684	.
5	28323551	rs10940718	G	A	2	4.942e-05	4.942e-05	0.7963	0.7963	0.7306	0	0.7614	0.803	.
2	80257332	rs3755093	G	A	2	4.951e-05	0.000652	2.1868	2.2631	0.2534	23.33	3.3011	1.9439	CTNNA2(0)
3	165130669	rs80328421	A	G	2	4.969e-05	4.969e-05	1.8826	1.8826	0.8179	0	2.021	1.8487	.
19	50385031	rs7248744	G	A	2	4.973e-05	4.973e-05	1.2578	1.2578	0.6268	0	1.1785	1.2725	ADM5(+190.8kb)|AKT1S1(+3.418kb)|AP2A1(+74.66kb)|ATF5(-46.93kb)|CPT1C(+168kb)|FLJ26850(-168.9kb)|FUZ(+68.46kb)|IL4I1(-7.881kb)|MED25(+44.79kb)|MIR4749(+27.12kb)|MIR4750(-6.4kb)|MIR4751(-51.29kb)|MIR5088(+199.6kb)|NUP62(-25.05kb)|PNKP(+14.21kb)|PRMT1(+193.3kb)|PTOV1(+21.03kb)|PTOV1-AS1(+30.1kb)|SIGLEC11(-67.22kb)|SIGLEC16(-87.88kb)|TBC1D17(0)|TSKS(+118.5kb)|VRK3(-94.69kb)|ZNF473(-144.2kb)
4	120653942	rs56296554	T	C	2	4.991e-05	4.991e-05	1.6362	1.6362	0.3175	0	1.2259	1.7218	PDE5A(+104kb)
5	28321947	rs9292246	A	G	2	4.999e-05	4.999e-05	0.7967	0.7967	0.7441	0	0.7636	0.803	.
5	28334807	rs4339359	T	A	2	5.006e-05	5.006e-05	0.797	0.797	0.7222	0	0.7606	0.8038	.
2	128746734	rs2461460	A	G	2	5.01e-05	5.01e-05	1.316	1.316	0.8537	0	1.3555	1.3091	AMMECR1L(+103.2kb)|POLR2D(+131kb)|SAP130(0)|UGGT1(-102kb)|WDR33(+178kb)
4	120648027	rs11098536	G	A	2	5.013e-05	5.013e-05	1.6356	1.6356	0.3183	0	1.226	1.7209	PDE5A(+98.05kb)
10	7765556	rs41290287	C	T	2	5.015e-05	5.015e-05	0.5752	0.5752	0.8874	0	0.6016	0.5704	ATP5C1(-64.54kb)|ITIH2(0)|ITIH5(+56.6kb)|KIN(-27.37kb)|TAF3(-94.91kb)
18	59512201	rs117415869	T	C	2	5.042e-05	5.042e-05	1.6541	1.6541	0.521	0	1.4111	1.7215	LOC100996669(+90.27kb)|PIGN(-199.3kb)|RNF152(0)
7	147054373	rs826823	C	T	2	5.046e-05	5.046e-05	1.5311	1.5311	0.7295	0	1.6446	1.5031	CNTNAP2(0)|MIR548F4(-20.74kb)|MIR548I4(0)
5	61196687	rs146325162	C	A	2	5.051e-05	5.051e-05	1.7346	1.7346	0.5529	0	1.4915	1.8109	C5orf64(+194.3kb)
7	53049389	rs77412351	G	T	2	5.054e-05	0.0008677	1.5572	1.5355	0.2849	12.56	1.185	1.637	POM121L12(-53.96kb)
15	97180299	rs34952534	T	C	2	5.057e-05	5.057e-05	0.6488	0.6488	0.5408	0	0.5421	0.6644	SPATA8(-146.4kb)|SPATA8-AS1(-134.9kb)
18	59519020	rs9949250	C	T	2	5.058e-05	5.058e-05	1.5499	1.5499	0.4382	0	1.308	1.6154	LOC100996669(+97.09kb)|PIGN(-192.4kb)|RNF152(0)
2	128748238	rs11680146	A	G	2	5.069e-05	5.069e-05	1.3158	1.3158	0.8531	0	1.3554	1.3088	AMMECR1L(+104.7kb)|POLR2D(+132.5kb)|SAP130(0)|UGGT1(-100.5kb)|WDR33(+179.5kb)
2	191857351	rs73979322	A	G	2	5.093e-05	5.093e-05	2.1356	2.1356	0.363	0	3.0222	1.9644	GLS(+27.08kb)|STAT1(0)|STAT4(-36.95kb)
9	10956452	rs80312252	T	G	2	5.1e-05	5.1e-05	1.5629	1.5629	0.7969	0	1.6727	1.5445	.
9	10956090	rs79203086	G	C	2	5.103e-05	5.103e-05	1.5631	1.5631	0.7975	0	1.6725	1.5447	.
6	101299180	rs117882942	T	C	2	5.119e-05	5.119e-05	2.4198	2.4198	0.3997	0	1.6813	2.6549	ASCC3(0)
7	53056949	rs80031946	G	A	2	5.125e-05	0.0003237	1.5564	1.5439	0.2986	7.46	1.1931	1.6338	POM121L12(-46.4kb)
15	63298302	rs4775596	A	G	2	5.129e-05	0.0002903	1.6179	1.6382	0.2896	10.84	2.1532	1.5307	LACTB(-115.7kb)|MIR190A(+182.1kb)|RAB8B(-183.4kb)|RPS27L(-147.2kb)|TLN2(+161.5kb)|TPM1(-36.54kb)
19	50391301	rs2305916	G	T	2	5.133e-05	5.133e-05	1.2603	1.2603	0.6592	0	1.1879	1.2739	ADM5(+197.1kb)|AKT1S1(+9.688kb)|AP2A1(+80.93kb)|ATF5(-40.66kb)|CPT1C(+174.3kb)|FLJ26850(-162.6kb)|FUZ(+74.73kb)|IL4I1(-1.611kb)|MED25(+51.06kb)|MIR4749(+33.39kb)|MIR4750(-0.13kb)|MIR4751(-45.02kb)|NUP62(-18.78kb)|PNKP(+20.48kb)|PRMT1(+199.6kb)|PTOV1(+27.3kb)|PTOV1-AS1(+36.37kb)|SIGLEC11(-60.95kb)|SIGLEC16(-81.61kb)|TBC1D17(0)|TSKS(+124.8kb)|VRK3(-88.42kb)|ZNF473(-137.9kb)
5	28371625	rs12658709	A	G	2	5.14e-05	5.14e-05	1.2543	1.2543	0.6291	0	1.3358	1.2398	.
3	55738573	rs2643619	A	G	2	5.141e-05	5.141e-05	1.2678	1.2678	0.8937	0	1.292	1.2637	ERC2(0)|ERC2-IT1(+45.08kb)|MIR3938(-147.9kb)
13	61064551	rs75397803	T	C	2	5.147e-05	0.3137	2.1638	1.6574	0.0918	64.82	0.8509	2.417	TDRD3(0)
2	277995	rs6855	G	A	2	5.147e-05	5.147e-05	1.3441	1.3441	0.8767	0	1.3776	1.3371	ACP1(0)|FAM150B(-1.565kb)|SH3YL1(+13.93kb)
8	479381	rs79746965	G	A	2	5.161e-05	5.161e-05	1.5287	1.5287	0.7465	0	1.4163	1.5519	ERICH1(-134.8kb)|FAM87A(+146.2kb)|FBXO25(+59.51kb)|TDRP(0)
21	40691570	rs35784053	A	G	2	5.172e-05	5.172e-05	1.5757	1.5757	0.3929	0	1.2664	1.6435	BRWD1(+5.858kb)|BRWD1-AS1(0)|BRWD1-IT2(+4.682kb)|HMGN1(-22.67kb)|LCA5L(-86.2kb)|PSMG1(+136.1kb)|SH3BGR(-126.2kb)|WRB(-60.64kb)
4	124476378	rs57049398	C	T	2	5.181e-05	5.181e-05	1.53	1.53	0.494	0	1.3243	1.5857	LOC285419(-97.56kb)|SPRY1(+151.5kb)
11	10519151	rs72859103	G	A	2	5.182e-05	5.182e-05	1.5665	1.5665	0.8367	0	1.6585	1.5522	ADM(+190.2kb)|AMPD3(0)|CAND1.11(+66.93kb)|LYVE1(-60.26kb)|MIR4485(-10.66kb)|MRVI1(-75.49kb)|MRVI1-AS1(-43.63kb)|MTRNR2L8(-10.28kb)|RNF141(-14.07kb)
16	77690863	rs8059387	T	A	2	5.192e-05	0.05815	0.7212	0.7595	0.1805	44.24	0.9504	0.6913	NUDT7(-65.52kb)|VAT1L(-131.6kb)
12	93648897	rs73219318	A	G	2	5.194e-05	5.194e-05	2.0167	2.0167	0.3713	0	2.892	1.8867	LOC643339(0)|NUDT4(-122.8kb)|NUDT4P1(-122.8kb)|UBE2N(-153.2kb)
14	30302922	rs11624891	G	A	2	5.198e-05	5.198e-05	2.4035	2.4035	0.6709	0	1.9899	2.5139	MIR548AI(+128.3kb)|PRKD1(0)
21	16615717	rs116884399	T	C	2	5.206e-05	5.206e-05	2.5483	2.5483	0.6419	0	2.1305	2.7182	NRIP1(+178.6kb)
1	212805262	rs61830699	A	G	2	5.207e-05	5.207e-05	0.7438	0.7438	0.3351	0	0.6271	0.7658	ATF3(+11.14kb)|BATF3(-54.5kb)|C1orf227(-198.2kb)|FAM71A(+5.142kb)|NENF(+185.5kb)|NSL1(-94.23kb)|TATDN3(-159.9kb)
8	256631	rs149789645	T	C	2	5.219e-05	5.219e-05	1.9227	1.9227	0.7406	0	2.1096	1.8643	FAM87A(-69.3kb)|FBXO25(-100.2kb)|OR4F21(+139.6kb)|RPL23AP53(+74.31kb)|TDRP(-183.2kb)|ZNF596(+59.29kb)
12	66131812	rs148303730	G	A	2	5.23e-05	5.23e-05	2.8132	2.8132	0.5367	0	1.9111	3.0007	HMGA2(-86.43kb)|RPSAP52(-19.99kb)
7	53048185	rs79603609	G	C	2	5.242e-05	5.242e-05	1.558	1.558	0.3225	0	1.2102	1.6323	POM121L12(-55.16kb)
9	10958165	rs76345254	G	A	2	5.251e-05	5.251e-05	1.562	1.562	0.7906	0	1.6754	1.543	.
1	62265376	rs6699562	A	G	2	5.258e-05	0.5791	1.8098	1.3217	0.06	71.73	0.6957	1.9598	INADL(0)|MGC34796(+143.6kb)|TM2D1(+74.28kb)
1	185855289	rs12078444	C	T	2	5.295e-05	0.005894	0.757	0.7306	0.202	38.56	0.6079	0.7841	HMCN1(0)|MIR548F1(-174.6kb)
3	55738985	rs864622	G	T	2	5.3e-05	5.3e-05	1.2667	1.2667	0.8766	0	1.2947	1.2619	ERC2(0)|ERC2-IT1(+45.49kb)|MIR3938(-147.5kb)
7	54047042	rs10276683	G	A	2	5.303e-05	5.303e-05	1.2606	1.2606	0.9639	0	1.2531	1.262	FLJ45974(+167.4kb)
6	69669063	rs9454659	A	G	2	5.309e-05	5.309e-05	0.7786	0.7786	0.987	0	0.7805	0.7783	BAI3(0)
12	584843	rs151019919	C	T	2	5.333e-05	0.04821	2.3194	2.0553	0.1436	53.25	1.2643	2.7024	B4GALNT3(0)|CCDC77(+33.04kb)|KDM5A(+86.22kb)|NINJ2(-88.62kb)
2	128742474	rs2438028	C	T	2	5.342e-05	5.342e-05	1.3151	1.3151	0.8512	0	1.3552	1.308	AMMECR1L(+98.96kb)|POLR2D(+126.7kb)|SAP130(0)|UGGT1(-106.3kb)|WDR33(+173.7kb)
7	16111974	rs62440849	A	G	2	5.344e-05	5.344e-05	0.7841	0.7841	0.9217	0	0.795	0.7821	ISPD(-15.18kb)|LOC100506025(-138.1kb)
1	5702132	rs138605933	A	G	2	5.352e-05	5.352e-05	2.1382	2.1382	0.7242	0	1.8263	2.1988	MIR4417(+77.93kb)
8	266545	rs6558631	G	A	2	5.353e-05	5.353e-05	1.3616	1.3616	0.8823	0	1.3954	1.3545	FAM87A(-59.38kb)|FBXO25(-90.26kb)|OR4F21(+149.5kb)|RPL23AP53(+84.23kb)|TDRP(-173.2kb)|ZNF596(+69.21kb)
11	34215900	rs2982599	C	G	2	5.354e-05	0.009379	0.6883	0.6495	0.1428	53.43	0.5191	0.7346	ABTB2(0)|CAPRIN1(+91.74kb)|NAT10(+47.44kb)
3	70823854	rs1435633	G	A	2	5.398e-05	5.398e-05	1.2496	1.2496	0.6845	0	1.3181	1.2379	FOXP1(-180kb)
5	28373812	rs4317327	G	T	2	5.41e-05	5.41e-05	1.2533	1.2533	0.6195	0	1.3372	1.2385	.
10	7763010	rs2388323	C	G	2	5.416e-05	5.416e-05	0.573	0.573	0.7996	0	0.621	0.5643	ATP5C1(-67.08kb)|ITIH2(0)|ITIH5(+54.05kb)|KIN(-29.91kb)|TAF3(-97.46kb)
1	42409770	rs78038796	A	G	2	5.425e-05	5.425e-05	2.2511	2.2511	0.7213	0	2.041	2.3724	HIVEP3(0)
4	172053101	rs17188567	T	C	2	5.428e-05	5.428e-05	0.7632	0.7632	0.8686	0	0.7434	0.7668	LOC100506122(+72.79kb)
19	44170593	rs4251824	T	C	2	5.433e-05	5.433e-05	1.739	1.739	0.6809	0	1.9943	1.6991	CADM4(+26.6kb)|ETHE1(+139.2kb)|IRGC(-49.62kb)|IRGQ(+70.31kb)|KCNN4(-100.1kb)|LYPD5(-129.5kb)|PHLDB3(+161.6kb)|PINLYP(+84.34kb)|PLAUR(0)|SMG9(-64.71kb)|SRRM5(+51.94kb)|XRCC1(+90.86kb)|ZNF283(-160.9kb)|ZNF428(+46.58kb)|ZNF575(+130.3kb)|ZNF576(+66.01kb)
13	95333204	rs151172885	C	T	2	5.458e-05	5.458e-05	3.2159	3.2159	0.4975	0	2.2939	3.6048	GPR180(+46.3kb)|SOX21(-28.67kb)|TGDS(+84.69kb)
9	106082492	rs16922767	T	C	2	5.468e-05	0.3173	1.5426	1.3273	0.0719	69.13	0.9278	1.6603	.
19	52040716	rs73067315	C	A	2	5.472e-05	5.472e-05	2.2399	2.2399	0.3897	0	3.0986	2.0449	CEACAM18(+46.86kb)|CLDND2(+168.5kb)|ETFB(+171kb)|FLJ30403(-54.32kb)|HAS1(-175.6kb)|LIM2(+149.5kb)|LINC00085(-155.9kb)|LOC147646(+146.9kb)|LOC100129083(+120kb)|MIR99B(-155.1kb)|MIR125A(-155.8kb)|MIRLET7E(-155.3kb)|NKG7(+164.8kb)|SIGLEC5(-74.04kb)|SIGLEC6(+5.606kb)|SIGLEC8(+79.01kb)|SIGLEC10(+119.7kb)|SIGLEC12(+35.67kb)|SIGLEC14(-105.1kb)|VSIG10L(+195.3kb)|ZNF175(-33.81kb)
7	53054373	rs76952187	G	A	2	5.474e-05	0.0003653	1.5547	1.5416	0.2977	7.8	1.1914	1.6324	POM121L12(-48.98kb)
2	16219896	rs62116758	C	T	2	5.48e-05	0.02707	2.0156	1.8567	0.1744	45.79	1.2527	2.2659	MYCN(+132.8kb)|MYCNOS(+138.1kb)
18	46317994	rs75412454	A	G	2	5.488e-05	5.488e-05	1.6511	1.6511	0.7844	0	1.5206	1.6745	CTIF(0)|MIR4743(+121kb)|SMAD7(-128.2kb)
18	59515871	rs117456246	T	C	2	5.489e-05	5.489e-05	1.6509	1.6509	0.5105	0	1.4017	1.7198	LOC100996669(+93.94kb)|PIGN(-195.6kb)|RNF152(0)
2	16219824	rs62116757	G	T	2	5.501e-05	0.02698	2.015	1.8565	0.1746	45.74	1.2528	2.2651	MYCN(+132.7kb)|MYCNOS(+138kb)
3	70834468	rs6784769	G	C	2	5.509e-05	5.509e-05	1.2493	1.2493	0.55	0	1.3528	1.2323	FOXP1(-169.4kb)
5	28380056	rs9292252	C	T	2	5.515e-05	5.515e-05	1.2533	1.2533	0.6	0	1.342	1.2376	.
6	153784775	rs270262	T	C	2	5.528e-05	5.528e-05	0.7751	0.7751	0.7854	0	0.8051	0.7691	.
4	120631878	rs72680941	C	T	2	5.542e-05	0.0002507	1.6293	1.6178	0.3028	5.81	1.2103	1.7169	PDE5A(+81.9kb)
7	53085398	rs74764453	C	G	2	5.544e-05	0.003541	1.5576	1.5197	0.2638	19.93	1.156	1.6385	POM121L12(-17.95kb)
1	165145599	rs144526087	A	G	2	5.548e-05	5.548e-05	2.3525	2.3525	0.3913	0	1.483	2.5274	LMX1A(-25.5kb)
19	50352900	rs11672587	A	T	2	5.561e-05	5.561e-05	1.2723	1.2723	0.6561	0	1.3512	1.2574	ADM5(+158.7kb)|AKT1S1(-19.39kb)|AP2A1(+42.53kb)|ATF5(-79.06kb)|BCL2L12(+175.7kb)|CPT1C(+135.9kb)|FUZ(+36.33kb)|IL4I1(-40.01kb)|IRF3(+183.8kb)|MED25(+12.66kb)|MIR4749(-4.947kb)|MIR4750(-38.53kb)|MIR4751(-83.42kb)|MIR5088(+167.5kb)|NUP62(-57.18kb)|PNKP(-11.56kb)|PRMT1(+161.2kb)|PTOV1(-1.515kb)|PTOV1-AS1(0)|SCAF1(+191kb)|SIGLEC11(-99.35kb)|SIGLEC16(-120kb)|TBC1D17(-27.78kb)|TSKS(+86.38kb)|VRK3(-126.…
5	28322937	rs11739863	C	A	2	5.57e-05	5.57e-05	0.7975	0.7975	0.9056	0	0.7852	0.7998	.
3	55738509	rs2702143	G	T	2	5.574e-05	5.574e-05	1.2665	1.2665	0.8878	0	1.2921	1.2622	ERC2(0)|ERC2-IT1(+45.01kb)|MIR3938(-148kb)
3	55738864	rs815438	G	A	2	5.586e-05	5.586e-05	1.2658	1.2658	0.8803	0	1.293	1.2612	ERC2(0)|ERC2-IT1(+45.37kb)|MIR3938(-147.7kb)
1	81539862	rs142845637	T	C	2	5.592e-05	5.592e-05	2.0048	2.0048	0.559	0	1.579	2.0921	.
19	50396263	rs11673399	C	T	2	5.602e-05	5.602e-05	1.2598	1.2598	0.6724	0	1.1912	1.2731	AKT1S1(+14.65kb)|AP2A1(+85.89kb)|ATF5(-35.7kb)|CPT1C(+179.3kb)|FLJ26850(-157.7kb)|FUZ(+79.7kb)|IL4I1(0)|MED25(+56.03kb)|MIR4749(+38.36kb)|MIR4750(+4.776kb)|MIR4751(-40.06kb)|NUP62(-13.82kb)|PNKP(+25.44kb)|PTOV1(+32.26kb)|PTOV1-AS1(+41.33kb)|SIGLEC11(-55.99kb)|SIGLEC16(-76.65kb)|SNAR-A3(-199.5kb)|SNAR-A4(-199.5kb)|SNAR-A5(-199.5kb)|SNAR-A6(-199.5kb)|SNAR-A7(-199.5kb)|SNAR-A8(-199.5kb)|SNAR-A9(-199…
4	160855910	rs111625827	T	G	2	5.609e-05	5.609e-05	0.6608	0.6608	0.3216	0	0.5068	0.6872	.
4	120629090	rs116785762	G	A	2	5.613e-05	0.0001799	1.6335	1.6248	0.3065	4.36	1.214	1.7212	PDE5A(+79.11kb)
3	55742066	rs815422	G	T	2	5.618e-05	5.618e-05	1.2647	1.2647	0.8881	0	1.29	1.2604	ERC2(0)|ERC2-IT1(+48.57kb)|MIR3938(-144.5kb)
20	31760953	rs76549422	G	T	2	5.62e-05	0.01026	2.5289	2.3476	0.2517	23.89	1.2313	2.7861	BPIFA1(-62.85kb)|BPIFA2(0)|BPIFA3(-44.18kb)|BPIFA4P(-20.46kb)|BPIFB1(-110kb)|BPIFB2(+149.4kb)|BPIFB3(+99.52kb)|BPIFB4(+61.4kb)|BPIFB6(+129.1kb)|CDK5RAP1(-185.7kb)|SUN5(+168.7kb)
4	120658267	rs72680968	C	T	2	5.632e-05	5.632e-05	1.6333	1.6333	0.3194	0	1.2253	1.719	PDE5A(+108.3kb)
4	120640435	rs72680953	G	T	2	5.641e-05	0.0002152	1.626	1.616	0.3047	5.06	1.2091	1.7125	PDE5A(+90.45kb)
6	69666520	rs7757138	C	T	2	5.649e-05	5.649e-05	0.7795	0.7795	0.9511	0	0.7866	0.7783	BAI3(0)
11	9081603	rs75043630	C	T	2	5.652e-05	0.002124	1.9639	2.0657	0.2087	36.73	2.8986	1.7522	AKIP1(+140kb)|ASCL3(+117kb)|C11orf16(+127kb)|DENND5A(-78.77kb)|KRT8P41(-34.31kb)|MIR5691(-30.26kb)|NRIP3(+56.01kb)|SCUBE2(0)|ST5(+149.1kb)|TMEM9B(+95.61kb)|TMEM9B-AS1(+83.77kb)
22	20046344	rs5748515	G	A	2	5.664e-05	5.664e-05	1.2948	1.2948	0.5806	0	1.4005	1.2742	ARVCF(+42.04kb)|COMT(+88.85kb)|DGCR8(-21.41kb)|LINC00896(-147.5kb)|LOC284865(-139.9kb)|LOC388849(-89.76kb)|MIR185(+25.6kb)|MIR1286(-190.3kb)|MIR1306(-27.24kb)|MIR3618(-26.92kb)|MIR4761(+94.99kb)|RANBP1(-57.12kb)|RTN4R(-182.6kb)|TANGO2(0)|TRMT2A(-53.04kb)|TXNRD2(+117kb)|ZDHHC8(-73.02kb)
1	185856250	rs10911781	A	G	2	5.666e-05	0.006535	0.7577	0.7303	0.1982	39.6	0.6072	0.7851	HMCN1(0)|MIR548F1(-173.6kb)
4	26492175	rs1799723	C	T	2	5.671e-05	5.671e-05	1.9389	1.9389	0.4144	0	1.464	2.0673	CCKAR(+0.133kb)|RBPJ(+55.42kb)|TBC1D19(-93.37kb)
3	55741742	rs709338	G	A	2	5.681e-05	5.681e-05	1.2649	1.2649	0.8796	0	1.2922	1.2603	ERC2(0)|ERC2-IT1(+48.24kb)|MIR3938(-144.8kb)
4	120640908	rs139839559	G	A	2	5.689e-05	0.0002059	1.6255	1.6159	0.3053	4.84	1.2091	1.7118	PDE5A(+90.93kb)
4	120627476	rs72680931	T	C	2	5.709e-05	0.0003026	1.6295	1.6164	0.3009	6.55	1.209	1.7178	PDE5A(+77.5kb)
4	120641341	rs56199127	C	T	2	5.709e-05	0.0001992	1.6251	1.6159	0.3057	4.69	1.2091	1.7113	PDE5A(+91.36kb)
7	53040800	rs6975058	C	A	2	5.728e-05	5.728e-05	1.5542	1.5542	0.3211	0	1.2066	1.6285	POM121L12(-62.55kb)
4	120641924	rs72680956	G	C	2	5.734e-05	0.0001891	1.6248	1.6159	0.3063	4.46	1.2091	1.7107	PDE5A(+91.94kb)
8	124089884	rs112125299	G	C	2	5.771e-05	0.02852	1.4252	1.5605	0.0667	70.25	1.9942	1.3187	C8orf76(-142.3kb)|DERL1(+35.22kb)|FAM83A(-104.9kb)|FAM83A-AS1(-123.5kb)|MIR4663(-138.1kb)|TBC1D31(0)|ZHX1(-170.8kb)|ZHX1-C8ORF76(-148.5kb)|ZHX2(+103.1kb)
21	16625516	rs117324321	A	G	2	5.772e-05	5.772e-05	2.4529	2.4529	0.6164	0	2.0218	2.6166	NRIP1(+188.4kb)
7	53049705	rs78727334	G	A	2	5.775e-05	0.0006049	1.5521	1.5349	0.2916	10.1	1.1856	1.6306	POM121L12(-53.64kb)
4	120628124	rs72680932	G	A	2	5.778e-05	0.0002887	1.6287	1.6162	0.3016	6.3	1.2089	1.7168	PDE5A(+78.14kb)
4	120630935	rs55922435	G	A	2	5.785e-05	0.0002648	1.6278	1.6161	0.3026	5.9	1.2089	1.7154	PDE5A(+80.95kb)
3	55739435	rs815436	C	T	2	5.787e-05	5.787e-05	1.2646	1.2646	0.8692	0	1.2943	1.2596	ERC2(0)|ERC2-IT1(+45.94kb)|MIR3938(-147.1kb)
6	109035696	rs1268153	A	G	2	5.788e-05	5.788e-05	1.901	1.901	0.3572	0	1.3862	2.0358	ARMC2(-133.9kb)|FOXO3(+29.72kb)|LACE1(+191.4kb)|LINC00222(-37.16kb)
13	61020548	rs112065023	A	G	2	5.791e-05	0.3068	2.1536	1.6594	0.0962	63.87	0.8538	2.4013	TDRD3(0)
11	9081299	rs117920820	C	T	2	5.792e-05	0.002116	1.9619	2.0628	0.2095	36.5	2.8936	1.7508	AKIP1(+139.7kb)|ASCL3(+116.7kb)|C11orf16(+126.7kb)|DENND5A(-79.08kb)|KRT8P41(-34.61kb)|MIR5691(-30.56kb)|NRIP3(+55.7kb)|SCUBE2(0)|ST5(+148.8kb)|TMEM9B(+95.31kb)|TMEM9B-AS1(+83.47kb)
4	120643792	rs72680958	G	A	2	5.8e-05	0.0001709	1.6237	1.6158	0.3074	4	1.2091	1.7092	PDE5A(+93.81kb)
4	120628607	rs72680933	G	C	2	5.803e-05	0.0002804	1.6283	1.6161	0.302	6.15	1.2089	1.7163	PDE5A(+78.63kb)
10	3940427	rs10904128	C	G	2	5.804e-05	5.804e-05	1.4288	1.4288	0.3659	0	1.7159	1.3794	KLF6(+113kb)
13	61029821	rs7999859	A	G	2	5.807e-05	0.3052	2.1543	1.6611	0.0965	63.8	0.8552	2.4023	TDRD3(0)
4	120628993	rs72680935	T	C	2	5.808e-05	0.000277	1.6282	1.6161	0.3021	6.09	1.2089	1.7161	PDE5A(+79.01kb)
11	9080574	rs72549238	T	C	2	5.812e-05	0.002031	1.9613	2.0602	0.2114	35.97	2.8874	1.7511	AKIP1(+138.9kb)|ASCL3(+116kb)|C11orf16(+126kb)|DENND5A(-79.8kb)|KRT8P41(-35.34kb)|MIR5691(-31.28kb)|NRIP3(+54.98kb)|SCUBE2(0)|ST5(+148.1kb)|TMEM9B(+94.58kb)|TMEM9B-AS1(+82.74kb)
4	120629095	rs77836546	G	T	2	5.817e-05	0.0002737	1.6281	1.6161	0.3023	6.03	1.2089	1.7159	PDE5A(+79.11kb)
4	120629382	rs72680936	G	A	2	5.821e-05	0.0002721	1.628	1.6161	0.3023	6	1.2089	1.7158	PDE5A(+79.4kb)
21	40681268	rs75794179	A	T	2	5.826e-05	5.826e-05	1.5742	1.5742	0.3876	0	1.2642	1.644	BRWD1(0)|BRWD1-AS1(-6.364kb)|BRWD1-IT2(-4.592kb)|HMGN1(-32.97kb)|LCA5L(-96.5kb)|PSMG1(+125.8kb)|SH3BGR(-136.5kb)|WRB(-70.94kb)
4	120635557	rs72680945	A	G	2	5.83e-05	0.0002235	1.6261	1.6159	0.3046	5.12	1.209	1.7129	PDE5A(+85.58kb)
4	120643960	rs72680959	C	T	2	5.831e-05	0.0001651	1.6233	1.6157	0.3078	3.84	1.2091	1.7087	PDE5A(+93.98kb)
4	120648905	rs72680962	C	G	2	5.841e-05	5.841e-05	1.6313	1.6313	0.3223	0	1.2259	1.7164	PDE5A(+98.92kb)
4	120632631	rs113988766	G	A	2	5.843e-05	0.0002446	1.6268	1.6159	0.3036	5.51	1.2089	1.7141	PDE5A(+82.65kb)
14	87874307	rs1430558	T	C	2	5.874e-05	5.874e-05	1.2536	1.2536	0.9181	0	1.2372	1.2568	.
4	120628956	rs72680934	A	G	2	5.882e-05	0.0001821	1.6276	1.6192	0.3068	4.26	1.2122	1.7147	PDE5A(+78.98kb)
22	20025767	rs9606221	T	C	2	5.886e-05	5.886e-05	1.2987	1.2987	0.4815	0	1.4372	1.2721	ARVCF(+21.46kb)|C22orf29(+183.4kb)|COMT(+68.27kb)|DGCR8(-41.99kb)|GNB1L(+183.3kb)|LINC00896(-168.1kb)|LOC284865(-160.5kb)|LOC388849(-110.3kb)|MIR185(+5.024kb)|MIR1306(-47.81kb)|MIR3618(-47.5kb)|MIR4761(+74.41kb)|RANBP1(-77.69kb)|TANGO2(0)|TRMT2A(-73.62kb)|TXNRD2(+96.41kb)|ZDHHC8(-93.6kb)
8	258296	rs116869350	T	G	2	5.912e-05	5.912e-05	2.0014	2.0014	0.9939	0	2.0059	1.9998	FAM87A(-67.63kb)|FBXO25(-98.51kb)|OR4F21(+141.3kb)|RPL23AP53(+75.98kb)|TDRP(-181.5kb)|ZNF596(+60.96kb)
1	149899389	rs45548131	A	G	2	5.913e-05	5.913e-05	1.4957	1.4957	0.4558	0	1.7734	1.4474	BOLA1(+27.04kb)|FCGR1A(+135.3kb)|HIST2H2AA3(+76.23kb)|HIST2H2AA4(+76.23kb)|HIST2H2AB(+39.92kb)|HIST2H2AC(+40.43kb)|HIST2H2BC(+77.05kb)|HIST2H2BE(+41.16kb)|HIST2H2BF(+115.5kb)|HIST2H3A(+74.7kb)|HIST2H3C(+74.7kb)|HIST2H3D(+114.2kb)|HIST2H4A(+66.66kb)|HIST2H4B(+66.66kb)|MTMR11(-1.153kb)|OTUD7B(-12.84kb)|SF3B4(0)|SV2A(+9.955kb)|VPS45(-140kb)
7	147041543	rs80312825	A	G	2	5.914e-05	5.914e-05	1.5261	1.5261	0.7154	0	1.6456	1.4966	CNTNAP2(0)|MIR548F4(-33.56kb)|MIR548I4(0)
2	128787054	rs6726022	C	T	2	5.915e-05	5.915e-05	0.7611	0.7611	0.8295	0	0.7352	0.7658	AMMECR1L(+143.5kb)|POLR2D(+171.3kb)|SAP130(+2.185kb)|UGGT1(-61.7kb)
15	97208038	rs139783354	C	A	2	5.93e-05	5.93e-05	0.6553	0.6553	0.4499	0	0.525	0.6743	SPATA8(-118.6kb)|SPATA8-AS1(-107.2kb)
2	128772310	rs35312230	T	C	2	5.944e-05	5.944e-05	0.7619	0.7619	0.8672	0	0.7418	0.7656	AMMECR1L(+128.8kb)|POLR2D(+156.6kb)|SAP130(0)|UGGT1(-76.44kb)
3	55740355	rs815431	C	A	2	5.946e-05	5.946e-05	1.2639	1.2639	0.8724	0	1.2928	1.259	ERC2(0)|ERC2-IT1(+46.86kb)|MIR3938(-146.2kb)
21	33544256	rs55837997	C	T	2	5.951e-05	7.29e-05	1.4137	1.415	0.3146	1.13	1.7166	1.36	HUNK(+167.9kb)|LINC00159(+85.65kb)|MIS18A(-96.27kb)|MRAP(-119.9kb)|URB1(-139.1kb)
2	128787056	rs6726023	G	T	2	5.966e-05	5.966e-05	0.7611	0.7611	0.8284	0	0.7351	0.7659	AMMECR1L(+143.5kb)|POLR2D(+171.3kb)|SAP130(+2.187kb)|UGGT1(-61.7kb)
18	59514323	rs79390252	T	C	2	5.971e-05	5.971e-05	1.6461	1.6461	0.5133	0	1.3995	1.7143	LOC100996669(+92.4kb)|PIGN(-197.1kb)|RNF152(0)
1	149888384	rs72692803	T	C	2	5.982e-05	5.982e-05	1.4999	1.4999	0.4568	0	1.7786	1.451	BOLA1(+16.04kb)|FCGR1A(+124.3kb)|HIST2H2AA3(+65.22kb)|HIST2H2AA4(+65.22kb)|HIST2H2AB(+28.92kb)|HIST2H2AC(+29.42kb)|HIST2H2BC(+66.04kb)|HIST2H2BE(+30.15kb)|HIST2H2BF(+104.5kb)|HIST2H3A(+63.7kb)|HIST2H3C(+63.7kb)|HIST2H3D(+103.1kb)|HIST2H4A(+55.66kb)|HIST2H4B(+55.66kb)|MTMR11(-12.16kb)|OTUD7B(-23.84kb)|SF3B4(-6.824kb)|SV2A(0)|VPS45(-151kb)
3	55738780	rs815439	G	C	2	5.982e-05	5.982e-05	1.2648	1.2648	0.8775	0	1.2927	1.2601	ERC2(0)|ERC2-IT1(+45.28kb)|MIR3938(-147.7kb)
1	185863735	rs1407426	C	T	2	5.994e-05	0.006517	0.758	0.7309	0.1993	39.29	0.6077	0.7854	HMCN1(0)|MIR548F1(-166.1kb)
15	97208333	rs142495518	A	G	2	6.024e-05	6.024e-05	0.6555	0.6555	0.4587	0	0.5276	0.6741	SPATA8(-118.3kb)|SPATA8-AS1(-106.9kb)
7	105506048	rs11983303	T	C	2	6.035e-05	6.035e-05	1.3309	1.3309	0.7715	0	1.269	1.3429	ATXN7L1(0)|CDHR3(-97.61kb)
3	55740038	rs815434	T	G	2	6.045e-05	6.045e-05	1.2638	1.2638	0.8679	0	1.2937	1.2587	ERC2(0)|ERC2-IT1(+46.54kb)|MIR3938(-146.5kb)
15	97207544	rs12905290	T	C	2	6.057e-05	6.057e-05	0.6562	0.6562	0.4593	0	0.5285	0.6748	SPATA8(-119.1kb)|SPATA8-AS1(-107.7kb)
3	55741396	rs860096	A	G	2	6.076e-05	6.076e-05	1.2635	1.2635	0.8798	0	1.2907	1.2589	ERC2(0)|ERC2-IT1(+47.9kb)|MIR3938(-145.1kb)
12	95237500	rs7136771	C	T	2	6.089e-05	6.089e-05	0.7581	0.7581	0.8982	0	0.7422	0.7609	KRT19P2(+8.696kb)|MIR492(+9.211kb)|NDUFA12(-127.6kb)|NR2C1(-176.5kb)|TMCC3(+193.2kb)
7	16107358	rs1528149	T	C	2	6.104e-05	6.104e-05	0.7857	0.7857	0.9147	0	0.7976	0.7835	ISPD(-19.79kb)|LOC100506025(-142.8kb)
4	120690394	rs72681002	G	A	2	6.107e-05	6.107e-05	1.648	1.648	0.42	0	1.3081	1.7217	PDE5A(+140.4kb)
7	51557927	rs140829366	C	T	2	6.11e-05	6.11e-05	2.4746	2.4746	0.856	0	2.2339	2.5156	COBL(+173.4kb)
18	59569522	rs17701676	G	T	2	6.127e-05	6.127e-05	1.3427	1.3427	0.6783	0	1.2546	1.3612	LOC100996669(+147.6kb)|PIGN(-141.9kb)|RNF152(+9.218kb)
12	125833360	rs61943122	C	T	2	6.138e-05	0.2419	1.7136	1.4611	0.0839	66.54	0.9658	1.8828	TMEM132B(0)
12	670266	rs148132269	G	T	2	6.144e-05	6.144e-05	2.1276	2.1276	0.505	0	2.7805	2.0058	B4GALNT3(0)|CCDC77(+118.5kb)|KDM5A(+171.6kb)|NINJ2(-3.195kb)|WNK1(-191.8kb)
12	95231996	rs919946	T	G	2	6.147e-05	6.147e-05	0.7574	0.7574	0.8802	0	0.7387	0.7607	KRT19P2(+3.192kb)|MIR492(+3.707kb)|NDUFA12(-133.1kb)|NR2C1(-182kb)|TMCC3(+187.7kb)
4	120690964	rs72682804	C	T	2	6.149e-05	6.149e-05	1.648	1.648	0.4294	0	1.3146	1.7203	PDE5A(+141kb)
13	104776220	rs139496951	T	A	2	6.157e-05	6.157e-05	2.4071	2.4071	0.9931	0	2.3973	2.4092	.
7	53039608	rs116903224	C	T	2	6.157e-05	6.157e-05	1.5519	1.5519	0.3252	0	1.2074	1.6256	POM121L12(-63.74kb)
3	70852740	rs6774314	T	A	2	6.159e-05	6.159e-05	1.2478	1.2478	0.3874	0	1.401	1.2235	FOXP1(-151.1kb)
5	28347623	rs12519723	C	G	2	6.187e-05	6.187e-05	1.2612	1.2612	0.7897	0	1.3071	1.2528	.
3	70840018	rs35632073	G	A	2	6.21e-05	6.21e-05	1.2476	1.2476	0.5394	0	1.3534	1.2301	FOXP1(-163.8kb)
15	77006448	rs78955901	A	T	2	6.224e-05	0.02408	1.7782	1.6665	0.202	38.57	1.1718	1.9276	SCAPER(0)
3	55740268	rs815432	T	C	2	6.226e-05	6.226e-05	1.2632	1.2632	0.8686	0	1.293	1.2582	ERC2(0)|ERC2-IT1(+46.77kb)|MIR3938(-146.3kb)
5	28338116	rs2434560	T	C	2	6.23e-05	6.23e-05	1.2615	1.2615	0.8193	0	1.3007	1.2543	.
16	86443847	rs16941185	T	C	2	6.235e-05	6.235e-05	1.5271	1.5271	0.8847	0	1.4741	1.5373	FENDRR(-64.28kb)|FLJ30679(-145.1kb)|FOXC2(-157kb)|FOXF1(-100.3kb)|FOXL1(-168.3kb)|LINC00917(+64.56kb)|LOC146513(+116.9kb)|MTHFSD(-119.9kb)
13	60978866	rs141617380	A	G	2	6.246e-05	0.2988	2.1716	1.6764	0.1012	62.78	0.8545	2.4195	TDRD3(0)
11	34215363	rs2982601	C	G	2	6.251e-05	0.01038	0.6909	0.6513	0.1394	54.23	0.5205	0.7379	ABTB2(0)|CAPRIN1(+91.21kb)|NAT10(+46.9kb)
12	10523236	rs17514108	G	T	2	6.252e-05	0.4443	1.7404	1.3791	0.0259	79.85	0.8508	1.9878	GABARAPL1(+147.5kb)|KLRC1(-75.4kb)|KLRC2(-59.97kb)|KLRC3(-41.68kb)|KLRC4(-36.75kb)|KLRC4-KLRK1(-1.715kb)|KLRD1(+53.39kb)|KLRK1(-1.715kb)|OLR1(+198.4kb)|TMEM52B(+178.8kb)
20	4683196	rs2181021	A	T	2	6.262e-05	6.262e-05	1.2918	1.2918	0.5673	0	1.1849	1.312	PRND(-19.36kb)|PRNP(+0.962kb)|PRNT(-28.73kb)|RASSF2(-77.47kb)|SLC23A2(-149.8kb)
10	21230937	rs55763641	T	A	2	6.27e-05	6.27e-05	1.384	1.384	0.6055	0	1.5206	1.3584	C10orf113(-183.8kb)|NEBL(0)
13	61004842	rs191752033	T	C	2	6.278e-05	0.3223	2.17	1.6552	0.0902	65.17	0.8436	2.4317	TDRD3(0)
19	50360046	rs10418141	A	C	2	6.29e-05	6.29e-05	1.2709	1.2709	0.5642	0	1.3745	1.2517	ADM5(+165.8kb)|AKT1S1(-12.24kb)|AP2A1(+49.68kb)|ATF5(-71.91kb)|BCL2L12(+182.9kb)|CPT1C(+143.1kb)|FLJ26850(-193.9kb)|FUZ(+43.48kb)|IL4I1(-32.87kb)|IRF3(+190.9kb)|MED25(+19.81kb)|MIR4749(+2.138kb)|MIR4750(-31.38kb)|MIR4751(-76.27kb)|MIR5088(+174.6kb)|NUP62(-50.04kb)|PNKP(-4.413kb)|PRMT1(+168.3kb)|PTOV1(0)|PTOV1-AS1(+5.113kb)|SCAF1(+198.1kb)|SIGLEC11(-92.2kb)|SIGLEC16(-112.9kb)|TBC1D17(-20.64kb)|TSK…
3	55740114	rs815433	T	C	2	6.298e-05	6.298e-05	1.2631	1.2631	0.8664	0	1.2934	1.258	ERC2(0)|ERC2-IT1(+46.62kb)|MIR3938(-146.4kb)
3	70804075	rs34766731	C	T	2	6.305e-05	6.305e-05	1.2518	1.2518	0.8592	0	1.2819	1.2466	FOXP1(-199.8kb)
2	191853419	rs4853535	C	T	2	6.321e-05	6.321e-05	2.119	2.119	0.3431	0	3.0499	1.9425	GLS(+23.15kb)|STAT1(0)|STAT4(-40.88kb)
15	97206581	rs7163690	C	A	2	6.325e-05	6.325e-05	0.6723	0.6723	0.3941	0	0.5282	0.6925	SPATA8(-120.1kb)|SPATA8-AS1(-108.7kb)
3	165122891	rs74521892	C	A	2	6.332e-05	6.332e-05	1.8712	1.8712	0.8181	0	2.0087	1.8373	.
7	21804045	rs16872944	G	A	2	6.334e-05	0.0001777	1.4914	1.5003	0.2974	7.89	1.8299	1.4144	CDCA7L(-136.5kb)|DNAH11(0)
9	85948533	rs79282878	T	C	2	6.336e-05	0.3234	1.7142	1.42	0.0706	69.41	0.9076	1.8819	FRMD3(0)
2	128792495	rs10928794	T	G	2	6.346e-05	6.346e-05	1.3139	1.3139	0.8856	0	1.3447	1.3084	AMMECR1L(+149kb)|POLR2D(+176.8kb)|SAP130(+7.626kb)|UGGT1(-56.26kb)
3	55740832	rs815427	G	A	2	6.361e-05	6.361e-05	1.2629	1.2629	0.8708	0	1.2921	1.2579	ERC2(0)|ERC2-IT1(+47.34kb)|MIR3938(-145.7kb)
9	10955969	rs75161282	A	G	2	6.377e-05	6.377e-05	1.5563	1.5563	0.7828	0	1.6736	1.5365	.
2	128783326	rs6706800	G	A	2	6.387e-05	6.387e-05	0.7623	0.7623	0.8441	0	0.7386	0.7666	AMMECR1L(+139.8kb)|POLR2D(+167.6kb)|SAP130(0)|UGGT1(-65.43kb)
2	128763958	rs6430964	C	T	2	6.398e-05	6.398e-05	0.7626	0.7626	0.8562	0	0.7408	0.7666	AMMECR1L(+120.4kb)|POLR2D(+148.2kb)|SAP130(0)|UGGT1(-84.8kb)|WDR33(+195.2kb)
3	55739691	rs815435	A	G	2	6.399e-05	6.399e-05	1.2629	1.2629	0.8634	0	1.2938	1.2576	ERC2(0)|ERC2-IT1(+46.19kb)|MIR3938(-146.8kb)
8	272392	rs56891928	G	A	2	6.411e-05	6.411e-05	1.9633	1.9633	0.8641	0	1.8696	1.9971	FAM87A(-53.54kb)|FBXO25(-84.42kb)|OR4F21(+155.4kb)|RPL23AP53(+90.07kb)|TDRP(-167.4kb)|ZNF596(+75.05kb)
3	70836444	rs6804071	G	A	2	6.416e-05	6.416e-05	1.2453	1.2453	0.6316	0	1.3264	1.2317	FOXP1(-167.4kb)
7	53039019	rs2091644	A	C	2	6.428e-05	6.428e-05	1.5502	1.5502	0.3281	0	1.2078	1.6234	POM121L12(-64.33kb)
10	3940263	rs10795094	G	A	2	6.436e-05	6.436e-05	1.4251	1.4251	0.3557	0	1.7168	1.3747	KLF6(+112.8kb)
3	55740724	rs815428	A	G	2	6.438e-05	6.438e-05	1.2625	1.2625	0.8686	0	1.2923	1.2575	ERC2(0)|ERC2-IT1(+47.23kb)|MIR3938(-145.8kb)
4	43259528	rs145021863	T	C	2	6.443e-05	0.0003743	2.5292	2.49	0.2819	13.63	1.7136	2.9691	.
12	95231990	rs919947	G	A	2	6.447e-05	6.447e-05	0.7579	0.7579	0.877	0	0.7387	0.7613	KRT19P2(+3.186kb)|MIR492(+3.701kb)|NDUFA12(-133.1kb)|NR2C1(-182kb)|TMCC3(+187.7kb)
4	120625473	rs72680914	C	T	2	6.448e-05	6.448e-05	1.6335	1.6335	0.3195	0	1.226	1.7208	PDE5A(+75.49kb)
2	128774921	rs6430967	G	A	2	6.451e-05	6.451e-05	0.763	0.763	0.8601	0	0.7418	0.7669	AMMECR1L(+131.4kb)|POLR2D(+159.2kb)|SAP130(0)|UGGT1(-73.83kb)
2	128789204	rs4491677	G	A	2	6.46e-05	6.46e-05	1.3133	1.3133	0.8499	0	1.3538	1.3061	AMMECR1L(+145.7kb)|POLR2D(+173.5kb)|SAP130(+4.335kb)|UGGT1(-59.55kb)
3	55741252	rs815424	A	G	2	6.463e-05	6.463e-05	1.2624	1.2624	0.8741	0	1.2909	1.2576	ERC2(0)|ERC2-IT1(+47.76kb)|MIR3938(-145.3kb)
7	16102403	rs740823	T	C	2	6.475e-05	6.475e-05	0.7863	0.7863	0.9083	0	0.7992	0.784	ISPD(-24.75kb)|LOC100506025(-147.7kb)
3	55741141	rs815425	A	G	2	6.488e-05	6.488e-05	1.2622	1.2622	0.8715	0	1.2913	1.2573	ERC2(0)|ERC2-IT1(+47.64kb)|MIR3938(-145.4kb)
7	16245752	rs1527219	C	T	2	6.49e-05	6.49e-05	0.7925	0.7925	0.8442	0	0.8142	0.7887	ISPD(0)|LOC100506025(-4.358kb)
13	61010541	rs117901484	A	T	2	6.493e-05	0.3067	2.1524	1.6601	0.0976	63.57	0.8524	2.4006	TDRD3(0)
16	83704933	rs28536785	C	A	2	6.507e-05	0.0008375	1.3892	1.4108	0.2638	19.93	1.693	1.331	CDH13(0)|HSBP1(-136.6kb)|MIR3182(+162.9kb)
18	4682279	rs150753225	T	G	2	6.519e-05	6.519e-05	2.3635	2.3635	0.5575	0	2.8633	2.1748	.
4	120688105	rs56041000	A	T	2	6.536e-05	6.536e-05	1.6437	1.6437	0.3987	0	1.2893	1.7201	PDE5A(+138.1kb)
8	259536	rs138078672	G	A	2	6.545e-05	6.545e-05	1.9917	1.9917	0.997	0	1.9895	1.9925	FAM87A(-66.39kb)|FBXO25(-97.27kb)|OR4F21(+142.5kb)|RPL23AP53(+77.22kb)|TDRP(-180.3kb)|ZNF596(+62.2kb)
2	128793609	rs10803591	C	G	2	6.549e-05	6.549e-05	1.3132	1.3132	0.9158	0	1.3358	1.3092	AMMECR1L(+150.1kb)|POLR2D(+177.9kb)|SAP130(+8.74kb)|UGGT1(-55.14kb)
4	26496544	rs115006984	A	G	2	6.56e-05	6.56e-05	1.9629	1.9629	0.4853	0	1.5402	2.0787	CCKAR(+4.502kb)|RBPJ(+59.79kb)|TBC1D19(-89kb)
5	28384195	rs10061578	A	G	2	6.561e-05	6.561e-05	1.2502	1.2502	0.4599	0	1.376	1.2281	.
3	165163533	rs59239842	T	C	2	6.575e-05	6.575e-05	1.8379	1.8379	0.8487	0	1.9499	1.8118	.
5	28345493	rs4867532	G	A	2	6.577e-05	6.577e-05	1.2602	1.2602	0.788	0	1.3064	1.2517	.
16	11884499	rs112874986	A	G	2	6.612e-05	6.612e-05	0.755	0.755	0.943	0	0.7642	0.7534	BCAR4(-29.19kb)|GSPT1(-77.48kb)|RSL1D1(-43.56kb)|SNN(+111.5kb)|SNX29(-186.1kb)|TNFRSF17(-174.5kb)|TXNDC11(+47.85kb)|ZC3H7A(0)
18	60022139	rs75718597	G	A	2	6.618e-05	6.618e-05	2.1989	2.1989	0.7008	0	2.5492	2.1149	KIAA1468(+47.78kb)|PIGN(+167.8kb)|TNFRSF11A(0)|ZCCHC2(-168.5kb)
12	27989377	rs142200831	A	G	2	6.643e-05	0.02228	3.3772	3.6102	0.0693	69.69	6.5223	2.1177	KLHL42(+33.4kb)|MANSC4(+65.17kb)|MRPS35(+80.14kb)|PPFIBP1(+140.9kb)|PTHLH(-121.6kb)|REP15(+138.8kb)
1	204306832	rs116668659	T	C	2	6.7e-05	6.7e-05	2.3853	2.3853	0.7827	0	2.6853	2.3136	ETNK2(+185.5kb)|GOLT1A(+123.6kb)|KISS1(+141.2kb)|LINC00628(-30.72kb)|MDM4(-178.7kb)|PIK3C2B(-84.92kb)|PLEKHA6(0)|PPP1R15B(-65.66kb)|REN(+171.4kb)
10	3939543	rs11252173	G	A	2	6.72e-05	0.001201	1.4244	1.4531	0.2575	22.01	1.7853	1.3621	KLF6(+112.1kb)
8	260095	rs186293690	T	G	2	6.722e-05	6.722e-05	1.9891	1.9891	0.9947	0	1.9852	1.9904	FAM87A(-65.84kb)|FBXO25(-96.71kb)|OR4F21(+143.1kb)|RPL23AP53(+77.78kb)|TDRP(-179.7kb)|ZNF596(+62.76kb)
5	28342140	rs12655969	C	T	2	6.73e-05	6.73e-05	1.2601	1.2601	0.8357	0	1.2955	1.2535	.
3	121962478	rs4045771	C	T	2	6.752e-05	6.752e-05	1.2594	1.2594	0.4116	0	1.4083	1.2342	CASR(0)|CCDC58(-116kb)|CD86(+122.5kb)|CSTA(-81.53kb)|FAM162A(-140.5kb)|KPNA1(-178.3kb)|WDR5B(-168.2kb)
8	260113	rs192009051	C	G	2	6.766e-05	6.766e-05	1.9885	1.9885	0.9948	0	1.9847	1.9898	FAM87A(-65.82kb)|FBXO25(-96.69kb)|OR4F21(+143.1kb)|RPL23AP53(+77.8kb)|TDRP(-179.7kb)|ZNF596(+62.77kb)
1	149897966	rs72692812	G	T	2	6.769e-05	6.769e-05	1.495	1.495	0.5288	0	1.7315	1.4544	BOLA1(+25.62kb)|FCGR1A(+133.9kb)|HIST2H2AA3(+74.8kb)|HIST2H2AA4(+74.8kb)|HIST2H2AB(+38.5kb)|HIST2H2AC(+39kb)|HIST2H2BC(+75.63kb)|HIST2H2BE(+39.73kb)|HIST2H2BF(+114kb)|HIST2H3A(+73.28kb)|HIST2H3C(+73.28kb)|HIST2H3D(+112.7kb)|HIST2H4A(+65.24kb)|HIST2H4B(+65.24kb)|MTMR11(-2.576kb)|OTUD7B(-14.26kb)|SF3B4(0)|SV2A(+8.532kb)|VPS45(-141.4kb)
7	21778887	rs2965363	A	C	2	6.771e-05	6.771e-05	1.4664	1.4664	0.6387	0	1.3271	1.4966	CDCA7L(-161.6kb)|DNAH11(0)
10	3939516	rs11252172	A	G	2	6.794e-05	0.001257	1.4238	1.4531	0.2563	22.38	1.7858	1.3615	KLF6(+112kb)
16	86444189	rs16941191	C	A	2	6.807e-05	6.807e-05	1.518	1.518	0.8099	0	1.4318	1.5346	FENDRR(-63.94kb)|FLJ30679(-144.7kb)|FOXC2(-156.7kb)|FOXF1(-99.94kb)|FOXL1(-167.9kb)|LINC00917(+64.9kb)|LOC146513(+117.2kb)|MTHFSD(-119.6kb)
3	165056250	rs73877152	A	T	2	6.837e-05	6.837e-05	1.8102	1.8102	0.6068	0	1.5513	1.8805	SLITRK3(+141.8kb)
5	28342326	rs12657955	T	A	2	6.846e-05	6.846e-05	1.2599	1.2599	0.833	0	1.2959	1.2532	.
3	54073075	rs62255070	G	A	2	6.853e-05	6.853e-05	2.101	2.101	0.4719	0	1.4774	2.2112	ACTR8(+156.8kb)|CACNA2D3(-83.62kb)|CHDH(+192.7kb)|IL17RB(+173.2kb)|SELK(+147.1kb)
16	11878033	rs72782727	T	G	2	6.854e-05	6.854e-05	0.7565	0.7565	0.9307	0	0.7676	0.7546	BCAR4(-35.66kb)|GSPT1(-83.95kb)|LITAF(+196.7kb)|RSL1D1(-50.02kb)|SNN(+105kb)|SNX29(-192.6kb)|TNFRSF17(-180.9kb)|TXNDC11(+41.38kb)|ZC3H7A(0)
1	149897528	rs55705001	A	T	2	6.867e-05	6.867e-05	1.4943	1.4943	0.5272	0	1.7316	1.4536	BOLA1(+25.18kb)|FCGR1A(+133.5kb)|HIST2H2AA3(+74.37kb)|HIST2H2AA4(+74.37kb)|HIST2H2AB(+38.06kb)|HIST2H2AC(+38.57kb)|HIST2H2BC(+75.19kb)|HIST2H2BE(+39.3kb)|HIST2H2BF(+113.6kb)|HIST2H3A(+72.84kb)|HIST2H3C(+72.84kb)|HIST2H3D(+112.3kb)|HIST2H4A(+64.8kb)|HIST2H4B(+64.8kb)|MTMR11(-3.014kb)|OTUD7B(-14.7kb)|SF3B4(0)|SV2A(+8.094kb)|VPS45(-141.8kb)
2	128771094	rs4392195	G	C	2	6.868e-05	6.868e-05	0.7635	0.7635	0.8569	0	0.7418	0.7675	AMMECR1L(+127.6kb)|POLR2D(+155.4kb)|SAP130(0)|UGGT1(-77.66kb)
4	120818870	rs72684542	C	A	2	6.877e-05	6.877e-05	1.903	1.903	0.3904	0	1.3985	2.0259	MAD2L1(-161.7kb)
1	214711039	rs116329186	T	C	2	6.894e-05	6.894e-05	1.5705	1.5705	0.7332	0	1.6865	1.5379	CENPF(-65.49kb)|PTPN14(0)
4	120648105	rs11098537	G	A	2	6.9e-05	0.000106	1.6176	1.6146	0.3135	1.54	1.2092	1.7022	PDE5A(+98.12kb)
6	139177069	rs79501372	C	T	2	6.905e-05	6.905e-05	2.058	2.058	0.5747	0	1.6934	2.1703	ABRACL(-172.7kb)|CCDC28A(+62.61kb)|ECT2L(0)|FLJ46906(+158.6kb)|LOC100507462(+82.25kb)|REPS1(-48.55kb)
6	139177054	rs75247295	T	C	2	6.912e-05	6.912e-05	2.0604	2.0604	0.5977	0	1.7167	2.1668	ABRACL(-172.8kb)|CCDC28A(+62.6kb)|ECT2L(0)|FLJ46906(+158.6kb)|LOC100507462(+82.24kb)|REPS1(-48.56kb)
10	3940063	rs7902593	T	C	2	6.913e-05	6.913e-05	0.7027	0.7027	0.3523	0	0.5826	0.7287	KLF6(+112.6kb)
7	21804677	rs17145312	G	A	2	6.918e-05	0.0003596	1.488	1.5038	0.2822	13.55	1.837	1.4087	CDCA7L(-135.8kb)|DNAH11(0)
7	21804852	rs60175069	A	G	2	6.945e-05	0.0004428	1.4882	1.5066	0.2764	15.57	1.8414	1.4078	CDCA7L(-135.7kb)|DNAH11(0)
2	71342838	rs28588591	T	A	2	6.949e-05	0.02758	2.1241	2.5968	0.0858	66.12	4.4927	1.8442	ANKRD53(+130.2kb)|ATP6V1B1(+150.3kb)|MCEE(0)|MPHOSPH10(-14.6kb)|NAGK(+36.84kb)|OR7E91P(+85.78kb)|PAIP2B(-67.03kb)|TEX261(+120.8kb)|VAX2(+182.3kb)
9	134079898	rs141393430	C	T	2	6.965e-05	6.965e-05	3.9102	3.9102	0.6723	0	4.834	3.5411	AIF1L(+81.36kb)|FAM78A(-53.57kb)|LAMC3(+111.5kb)|NUP214(0)|PPAPDC3(-85.18kb)
2	128768159	rs72841726	G	A	2	6.973e-05	6.973e-05	0.7638	0.7638	0.8552	0	0.7418	0.7678	AMMECR1L(+124.6kb)|POLR2D(+152.4kb)|SAP130(0)|UGGT1(-80.59kb)|WDR33(+199.4kb)
18	59573867	rs62094968	G	C	2	6.978e-05	6.978e-05	1.3389	1.3389	0.6976	0	1.2564	1.3561	LOC100996669(+151.9kb)|PIGN(-137.6kb)|RNF152(+13.56kb)
1	175571863	rs146900726	C	T	2	6.98e-05	0.3401	2.2399	1.6749	0.0809	67.17	0.8308	2.5414	TNR(0)
7	113795318	rs142079400	T	G	2	6.98e-05	6.98e-05	2.8532	2.8532	0.6699	0	3.6386	2.7088	FOXP2(0)
16	77693233	rs11150008	C	T	2	6.985e-05	0.1343	0.73	0.7827	0.1386	54.41	0.9873	0.6975	NUDT7(-63.16kb)|VAT1L(-129.2kb)
15	97188397	rs28707119	G	T	2	6.999e-05	6.999e-05	0.6519	0.6519	0.4034	0	0.5068	0.6732	SPATA8(-138.3kb)|SPATA8-AS1(-126.8kb)
1	149896923	rs72692811	T	C	2	7.004e-05	7.004e-05	1.4938	1.4938	0.5232	0	1.7334	1.4527	BOLA1(+24.58kb)|FCGR1A(+132.8kb)|HIST2H2AA3(+73.76kb)|HIST2H2AA4(+73.76kb)|HIST2H2AB(+37.46kb)|HIST2H2AC(+37.96kb)|HIST2H2BC(+74.58kb)|HIST2H2BE(+38.69kb)|HIST2H2BF(+113kb)|HIST2H3A(+72.24kb)|HIST2H3C(+72.24kb)|HIST2H3D(+111.7kb)|HIST2H4A(+64.2kb)|HIST2H4B(+64.2kb)|MTMR11(-3.619kb)|OTUD7B(-15.3kb)|SF3B4(0)|SV2A(+7.489kb)|VPS45(-142.4kb)
5	28329159	rs2217287	G	T	2	7.007e-05	7.007e-05	1.2603	1.2603	0.8625	0	1.2899	1.2548	.
2	128779763	rs6736698	T	C	2	7.025e-05	7.025e-05	0.7638	0.7638	0.8558	0	0.7419	0.7678	AMMECR1L(+136.2kb)|POLR2D(+164kb)|SAP130(0)|UGGT1(-68.99kb)
11	9073579	rs118167738	C	T	2	7.026e-05	0.005024	1.9644	2.1064	0.168	47.39	3.0012	1.726	AKIP1(+132kb)|ASCL3(+109kb)|C11orf16(+119kb)|DENND5A(-86.8kb)|KRT8P41(-42.33kb)|MIR5691(-38.28kb)|NRIP3(+47.98kb)|SCUBE2(0)|ST5(+141.1kb)|TMEM9B(+87.59kb)|TMEM9B-AS1(+75.75kb)
7	79998372	rs191861937	C	T	2	7.032e-05	7.032e-05	2.1694	2.1694	0.4514	0	1.5367	2.3092	GNAI1(+149.6kb)|GNAT3(-89.61kb)
5	28343221	rs10044146	G	A	2	7.033e-05	7.033e-05	1.2592	1.2592	0.7874	0	1.3055	1.2507	.
8	124091546	rs62520596	A	G	2	7.033e-05	0.02907	1.4193	1.5514	0.0687	69.83	1.9788	1.3136	C8orf76(-140.6kb)|DERL1(+36.88kb)|FAM83A(-103.2kb)|FAM83A-AS1(-121.9kb)|MIR4663(-136.5kb)|TBC1D31(0)|ZHX1(-169.1kb)|ZHX1-C8ORF76(-146.9kb)|ZHX2(+104.8kb)
3	70871090	rs1002202	A	G	2	7.04e-05	7.04e-05	1.2467	1.2467	0.385	0	1.4014	1.2222	FOXP1(-132.8kb)
20	51622378	rs11697754	C	T	2	7.05e-05	7.05e-05	1.802	1.802	0.536	0	1.4675	1.8773	TSHZ2(0)
7	115069810	rs73201952	A	C	2	7.059e-05	0.0177	2.2735	2.6165	0.0885	65.54	4.2541	1.8655	.
15	97188826	rs12898753	T	G	2	7.063e-05	7.063e-05	0.6522	0.6522	0.4024	0	0.5069	0.6735	SPATA8(-137.9kb)|SPATA8-AS1(-126.4kb)
7	53037272	rs77065463	G	A	2	7.063e-05	7.063e-05	1.5471	1.5471	0.3345	0	1.2092	1.6192	POM121L12(-66.08kb)
5	28345603	rs6450614	T	C	2	7.065e-05	7.065e-05	1.2589	1.2589	0.7818	0	1.3065	1.2502	.
15	97210283	rs192814433	A	C	2	7.069e-05	7.069e-05	0.6568	0.6568	0.4504	0	0.5265	0.676	SPATA8(-116.4kb)|SPATA8-AS1(-105kb)
8	128016374	rs142139715	G	T	2	7.069e-05	0.3715	1.9069	1.4981	0.0419	75.85	0.8769	2.1948	PCAT1(-9.024kb)
1	149896855	rs72692810	A	G	2	7.073e-05	7.073e-05	1.4935	1.4935	0.522	0	1.7338	1.4523	BOLA1(+24.51kb)|FCGR1A(+132.8kb)|HIST2H2AA3(+73.69kb)|HIST2H2AA4(+73.69kb)|HIST2H2AB(+37.39kb)|HIST2H2AC(+37.89kb)|HIST2H2BC(+74.52kb)|HIST2H2BE(+38.62kb)|HIST2H2BF(+112.9kb)|HIST2H3A(+72.17kb)|HIST2H3C(+72.17kb)|HIST2H3D(+111.6kb)|HIST2H4A(+64.13kb)|HIST2H4B(+64.13kb)|MTMR11(-3.687kb)|OTUD7B(-15.37kb)|SF3B4(0)|SV2A(+7.421kb)|VPS45(-142.5kb)
7	21803619	rs74298651	G	C	2	7.118e-05	7.118e-05	1.4873	1.4873	0.3302	0	1.8006	1.4154	CDCA7L(-136.9kb)|DNAH11(0)
10	125637766	rs7070153	A	G	2	7.138e-05	7.138e-05	1.6655	1.6655	0.5736	0	1.9007	1.6009	CHST15(-129.4kb)|CPXM2(0)|GPR26(+180.9kb)
8	282438	rs73669425	C	T	2	7.141e-05	7.141e-05	1.9609	1.9609	0.8887	0	2.0404	1.9333	FAM87A(-43.49kb)|FBXO25(-74.37kb)|OR4F21(+165.4kb)|RPL23AP53(+100.1kb)|TDRP(-157.4kb)|ZNF596(+85.1kb)
4	178405711	rs76750716	A	G	2	7.142e-05	0.01233	2.0317	1.91	0.2244	32.24	1.2561	2.2404	AGA(+42.05kb)|NEIL3(+121.6kb)
7	53037026	rs79390260	G	T	2	7.165e-05	7.165e-05	1.5463	1.5463	0.3355	0	1.2092	1.6182	POM121L12(-66.32kb)
2	128769869	rs112200738	C	T	2	7.169e-05	7.169e-05	0.764	0.764	0.8536	0	0.7418	0.7681	AMMECR1L(+126.4kb)|POLR2D(+154.1kb)|SAP130(0)|UGGT1(-78.88kb)
5	28384611	rs4583892	C	T	2	7.176e-05	7.176e-05	1.2486	1.2486	0.4538	0	1.3761	1.2263	.
4	187811191	rs62343075	T	C	2	7.187e-05	0.0005809	1.6758	1.6565	0.2962	8.35	1.2017	1.7714	FAT1(+166.2kb)
15	97188312	rs28691201	A	G	2	7.192e-05	7.192e-05	0.6523	0.6523	0.4014	0	0.5065	0.6737	SPATA8(-138.4kb)|SPATA8-AS1(-126.9kb)
7	21797403	rs12672447	T	C	2	7.257e-05	7.257e-05	1.5733	1.5733	0.6158	0	1.3908	1.6158	CDCA7L(-143.1kb)|DNAH11(0)
9	20739921	rs146021075	A	G	2	7.257e-05	0.003163	2.4279	2.6291	0.2076	37.04	4.2902	2.1119	FOCAD(0)|MIR491(+23.73kb)|MLLT3(+117.4kb)
10	64804566	rs74474447	T	C	2	7.267e-05	0.03815	1.5764	1.7897	0.0474	74.55	2.483	1.4068	JMJD1C(-122.4kb)|NRBF2(-88.44kb)
5	28383181	rs13175277	T	C	2	7.269e-05	7.269e-05	1.2485	1.2485	0.4555	0	1.3754	1.2262	.
7	16316655	rs1295129	C	G	2	7.272e-05	7.272e-05	1.2547	1.2547	0.9159	0	1.2372	1.258	ISPD(0)|LOC100506025(+6.426kb)|SOSTDC1(-184.4kb)
15	97187446	rs34224063	T	C	2	7.281e-05	7.281e-05	0.6523	0.6523	0.4004	0	0.5061	0.6737	SPATA8(-139.2kb)|SPATA8-AS1(-127.8kb)
1	149896413	rs72692808	G	A	2	7.286e-05	7.286e-05	1.4925	1.4925	0.5194	0	1.7342	1.451	BOLA1(+24.06kb)|FCGR1A(+132.3kb)|HIST2H2AA3(+73.25kb)|HIST2H2AA4(+73.25kb)|HIST2H2AB(+36.95kb)|HIST2H2AC(+37.45kb)|HIST2H2BC(+74.07kb)|HIST2H2BE(+38.18kb)|HIST2H2BF(+112.5kb)|HIST2H3A(+71.73kb)|HIST2H3C(+71.73kb)|HIST2H3D(+111.2kb)|HIST2H4A(+63.69kb)|HIST2H4B(+63.69kb)|MTMR11(-4.129kb)|OTUD7B(-15.82kb)|SF3B4(0)|SV2A(+6.979kb)|VPS45(-142.9kb)
5	28386515	rs4277925	A	T	2	7.29e-05	7.29e-05	1.2485	1.2485	0.4492	0	1.3772	1.2259	.
7	53036780	rs6962475	T	C	2	7.294e-05	7.294e-05	1.5457	1.5457	0.3367	0	1.2095	1.6174	POM121L12(-66.57kb)
8	103977940	rs62525270	T	C	2	7.294e-05	7.294e-05	2.3302	2.3302	0.3751	0	3.2909	2.1007	ATP6V1C1(-55.31kb)|AZIN1(+101.5kb)|BAALC(-175kb)|C8orf56(-167.2kb)|LOC100499183(-199.8kb)|MIR3151(-188.9kb)
16	6448022	rs7205563	G	C	2	7.321e-05	7.321e-05	1.3001	1.3001	0.5987	0	1.2031	1.3206	RBFOX1(0)
14	95337175	rs10141904	G	A	2	7.325e-05	7.325e-05	0.7978	0.7978	0.4728	0	0.8743	0.7834	GSC(+100.7kb)
3	70871399	rs1002200	T	A	2	7.331e-05	7.331e-05	1.246	1.246	0.382	0	1.4011	1.2213	FOXP1(-132.5kb)
5	28388069	rs34342578	G	C	2	7.348e-05	7.348e-05	1.2487	1.2487	0.4468	0	1.3781	1.2259	.
7	53036626	rs6977979	T	A	2	7.358e-05	7.358e-05	1.5454	1.5454	0.3372	0	1.2096	1.6171	POM121L12(-66.72kb)
7	16247249	rs7778438	A	T	2	7.373e-05	7.373e-05	0.7939	0.7939	0.774	0	0.8257	0.7883	ISPD(0)|LOC100506025(-2.861kb)
5	28387581	rs4867537	T	A	2	7.389e-05	7.389e-05	1.2486	1.2486	0.4473	0	1.3778	1.2258	.
3	70871131	rs1002201	A	G	2	7.397e-05	7.397e-05	1.246	1.246	0.3943	0	1.3972	1.2219	FOXP1(-132.7kb)
17	17253603	rs242245	A	G	2	7.417e-05	7.417e-05	0.7637	0.7637	0.7289	0	0.8055	0.7558	COPS3(+68.99kb)|FLCN(+113.1kb)|MED9(-126.7kb)|MPRIP(+157.6kb)|NT5M(+2.626kb)|PEMT(-155.3kb)|PLD6(+144kb)|RASD1(-144.1kb)|SMCR9(-69.05kb)
10	3939728	rs10795093	T	C	2	7.421e-05	7.421e-05	1.4208	1.4208	0.3507	0	1.7147	1.37	KLF6(+112.3kb)
4	120651906	rs72680965	C	A	2	7.427e-05	7.427e-05	1.6128	1.6128	0.3185	0	1.2091	1.696	PDE5A(+101.9kb)
4	132437063	rs140963082	C	A	2	7.439e-05	7.439e-05	2.053	2.053	0.4937	0	1.4712	2.1504	.
6	69663785	rs7754659	C	G	2	7.439e-05	7.439e-05	0.7828	0.7828	0.9724	0	0.7868	0.7821	BAI3(0)
7	136886128	rs114601314	T	C	2	7.449e-05	0.2119	2.2983	1.8272	0.1053	61.87	0.9592	2.6238	CHRM2(+184.4kb)|DGKI(-188.3kb)|LOC349160(+37.04kb)|PTN(-25.96kb)
1	149894673	rs72692807	A	C	2	7.454e-05	7.454e-05	1.488	1.488	0.4745	0	1.7524	1.4419	BOLA1(+22.32kb)|FCGR1A(+130.6kb)|HIST2H2AA3(+71.51kb)|HIST2H2AA4(+71.51kb)|HIST2H2AB(+35.21kb)|HIST2H2AC(+35.71kb)|HIST2H2BC(+72.33kb)|HIST2H2BE(+36.44kb)|HIST2H2BF(+110.7kb)|HIST2H3A(+69.99kb)|HIST2H3C(+69.99kb)|HIST2H3D(+109.4kb)|HIST2H4A(+61.95kb)|HIST2H4B(+61.95kb)|MTMR11(-5.869kb)|OTUD7B(-17.56kb)|SF3B4(-0.535kb)|SV2A(+5.239kb)|VPS45(-144.7kb)
5	80382832	rs147665836	C	G	2	7.46e-05	0.0003345	1.9014	1.8823	0.2995	7.08	1.3227	2.0557	CKMT2(-146.3kb)|LOC100131067(-150.6kb)|RASGRF2(0)|RNU5D-1(-118.6kb)|RNU5E-1(-118.6kb)
15	97186720	rs7171935	C	G	2	7.463e-05	7.463e-05	0.6528	0.6528	0.397	0	0.5055	0.6744	SPATA8(-140kb)|SPATA8-AS1(-128.5kb)
3	165135974	rs74834456	G	T	2	7.482e-05	7.482e-05	1.8575	1.8575	0.7826	0	2.0221	1.8172	.
2	226258375	rs6730527	A	G	2	7.493e-05	7.493e-05	1.5768	1.5768	0.6735	0	1.433	1.616	NYAP2(-7.226kb)
3	165135620	rs74903144	G	C	2	7.501e-05	7.501e-05	1.8573	1.8573	0.7829	0	2.0217	1.8171	.
1	149894355	rs72692805	A	G	2	7.511e-05	7.511e-05	1.4878	1.4878	0.4731	0	1.753	1.4415	BOLA1(+22.01kb)|FCGR1A(+130.3kb)|HIST2H2AA3(+71.19kb)|HIST2H2AA4(+71.19kb)|HIST2H2AB(+34.89kb)|HIST2H2AC(+35.39kb)|HIST2H2BC(+72.02kb)|HIST2H2BE(+36.12kb)|HIST2H2BF(+110.4kb)|HIST2H3A(+69.67kb)|HIST2H3C(+69.67kb)|HIST2H3D(+109.1kb)|HIST2H4A(+61.63kb)|HIST2H4B(+61.63kb)|MTMR11(-6.187kb)|OTUD7B(-17.87kb)|SF3B4(-0.853kb)|SV2A(+4.921kb)|VPS45(-145kb)
15	97185260	rs7182140	C	A	2	7.52e-05	7.52e-05	0.6527	0.6527	0.392	0	0.5038	0.6745	SPATA8(-141.4kb)|SPATA8-AS1(-130kb)
7	21778966	rs2965362	A	C	2	7.523e-05	7.523e-05	1.4633	1.4633	0.6275	0	1.32	1.4945	CDCA7L(-161.6kb)|DNAH11(0)
7	53036003	rs112181107	G	A	2	7.53e-05	7.53e-05	1.5451	1.5451	0.3368	0	1.2084	1.6168	POM121L12(-67.34kb)
15	97186228	rs2222380	T	C	2	7.532e-05	7.532e-05	0.653	0.653	0.3963	0	0.5054	0.6746	SPATA8(-140.4kb)|SPATA8-AS1(-129kb)
2	128757804	rs10928793	T	C	2	7.547e-05	7.547e-05	1.3092	1.3092	0.8788	0	1.3415	1.3034	AMMECR1L(+114.3kb)|POLR2D(+142.1kb)|SAP130(0)|UGGT1(-90.95kb)|WDR33(+189kb)
4	136232246	rs77772299	C	T	2	7.582e-05	0.0001919	2.177	2.2005	0.2986	7.43	3.2286	1.9582	.
19	50358133	rs75478119	G	T	2	7.585e-05	7.585e-05	1.2687	1.2687	0.9969	0	1.2694	1.2686	ADM5(+163.9kb)|AKT1S1(-14.16kb)|AP2A1(+47.76kb)|ATF5(-73.82kb)|BCL2L12(+181kb)|CPT1C(+141.1kb)|FLJ26850(-195.8kb)|FUZ(+41.57kb)|IL4I1(-34.78kb)|IRF3(+189kb)|MED25(+17.9kb)|MIR4749(+0.225kb)|MIR4750(-33.3kb)|MIR4751(-78.19kb)|MIR5088(+172.7kb)|NUP62(-51.95kb)|PNKP(-6.326kb)|PRMT1(+166.4kb)|PTOV1(0)|PTOV1-AS1(+3.2kb)|SCAF1(+196.2kb)|SIGLEC11(-94.12kb)|SIGLEC16(-114.8kb)|TBC1D17(-22.55kb)|TSKS(+91.6…
10	64811460	rs79467439	A	G	2	7.595e-05	0.03748	1.5722	1.7812	0.0493	74.13	2.4638	1.4049	JMJD1C(-115.5kb)|NRBF2(-81.55kb)
13	60994471	rs113284403	T	G	2	7.606e-05	0.3147	2.1335	1.6456	0.0973	63.62	0.8457	2.3791	TDRD3(0)
1	185855836	rs17461534	A	C	2	7.609e-05	7.609e-05	0.7522	0.7522	0.3241	0	0.6307	0.774	HMCN1(0)|MIR548F1(-174kb)
18	4695410	rs148427283	A	G	2	7.609e-05	7.609e-05	2.4169	2.4169	0.5657	0	2.9305	2.2195	.
4	124477923	rs6826759	T	C	2	7.627e-05	7.627e-05	1.5134	1.5134	0.5129	0	1.3184	1.5658	LOC285419(-96.02kb)|SPRY1(+153kb)
5	120722261	rs143653901	A	T	2	7.629e-05	7.629e-05	2.1942	2.1942	0.5199	0	2.6973	2.0272	.
4	72101397	rs2579317	A	G	2	7.63e-05	7.63e-05	0.4185	0.4185	0.7269	0	0.3616	0.4358	SLC4A4(0)
4	120680235	rs143273706	T	C	2	7.654e-05	7.654e-05	1.6349	1.6349	0.3724	0	1.2634	1.7148	PDE5A(+130.3kb)
4	120661282	rs72680972	G	A	2	7.655e-05	7.655e-05	1.6213	1.6213	0.3313	0	1.2249	1.7049	PDE5A(+111.3kb)
10	3948429	rs7915142	T	C	2	7.689e-05	7.689e-05	1.5115	1.5115	0.6502	0	1.675	1.4788	KLF6(+121kb)
11	123708583	rs183957951	T	C	2	7.694e-05	7.694e-05	2.3241	2.3241	0.6571	0	1.8742	2.423	OR4D5(-101.7kb)|OR6M1(+31.53kb)|OR6T1(-105kb)|OR6X1(+83.36kb)|OR8D4(-68.56kb)|OR10G4(-177.7kb)|OR10G8(-191.7kb)|OR10G9(-185.1kb)|OR10S1(-138.8kb)|SCN3B(+183.3kb)|TMEM225(-45.05kb)|ZNF202(+96.22kb)
4	120624153	rs115807288	A	G	2	7.713e-05	7.713e-05	1.6326	1.6326	0.3219	0	1.2275	1.7213	PDE5A(+74.17kb)
11	9080360	rs140115529	A	T	2	7.732e-05	0.0031	1.9487	2.0598	0.1974	39.8	2.9	1.73	AKIP1(+138.7kb)|ASCL3(+115.8kb)|C11orf16(+125.8kb)|DENND5A(-80.01kb)|KRT8P41(-35.55kb)|MIR5691(-31.5kb)|NRIP3(+54.76kb)|SCUBE2(0)|ST5(+147.9kb)|TMEM9B(+94.37kb)|TMEM9B-AS1(+82.53kb)
1	149881959	rs56265028	G	A	2	7.733e-05	7.733e-05	1.4864	1.4864	0.4546	0	1.761	1.4379	BOLA1(+9.611kb)|FCGR1A(+117.9kb)|HIST2H2AA3(+58.8kb)|HIST2H2AA4(+58.8kb)|HIST2H2AB(+22.49kb)|HIST2H2AC(+23kb)|HIST2H2BC(+59.62kb)|HIST2H2BE(+23.73kb)|HIST2H2BF(+98.03kb)|HIST2H3A(+57.27kb)|HIST2H3C(+57.27kb)|HIST2H3D(+96.72kb)|HIST2H4A(+49.23kb)|HIST2H4B(+49.23kb)|MTMR11(-18.58kb)|OTUD7B(-30.27kb)|SF3B4(-13.25kb)|SV2A(0)|VPS45(-157.4kb)
3	40453609	rs41286044	G	A	2	7.749e-05	7.749e-05	2.3727	2.3727	0.4271	0	3.4619	2.1907	EIF1B(+99.69kb)|EIF1B-AS1(+102.4kb)|ENTPD3(0)|ENTPD3-AS1(0)|MYRIP(+151.8kb)|RPL14(-45.17kb)|ZNF619(-64.99kb)|ZNF620(-93.92kb)|ZNF621(-112.8kb)
2	71324359	rs115597420	A	G	2	7.783e-05	0.01011	2.1502	2.4249	0.1556	50.42	3.9283	1.8963	ANKRD53(+111.7kb)|ATP6V1B1(+131.8kb)|MCEE(-12.45kb)|MPHOSPH10(-33.08kb)|NAGK(+18.36kb)|OR7E91P(+67.3kb)|PAIP2B(-85.51kb)|TEX261(+102.4kb)|VAX2(+163.8kb)
17	9086344	rs77908798	A	G	2	7.803e-05	0.4065	2.9693	1.9146	0.0609	71.53	0.7211	3.5847	NTN1(0)|STX8(-67.44kb)
5	5539934	rs17821528	G	T	2	7.806e-05	7.806e-05	1.4385	1.4385	0.9405	0	1.4612	1.4342	KIAA0947(+49.59kb)
10	69558243	rs12763908	A	G	2	7.81e-05	7.81e-05	1.7052	1.7052	0.9768	0	1.7207	1.7023	CTNNA3(+102.3kb)|DNAJC12(0)|HERC4(-123.4kb)|SIRT1(-86.18kb)
17	17261846	rs242253	C	T	2	7.819e-05	7.819e-05	0.7382	0.7382	0.9012	0	0.723	0.7414	COPS3(+77.23kb)|FLCN(+121.3kb)|MED9(-118.5kb)|MPRIP(+165.9kb)|NT5M(+10.87kb)|PEMT(-147kb)|PLD6(+152.2kb)|RASD1(-135.9kb)|SMCR9(-60.81kb)
1	149882811	rs72708162	T	G	2	7.82e-05	7.82e-05	1.4891	1.4891	0.4883	0	1.7477	1.4444	BOLA1(+10.46kb)|FCGR1A(+118.7kb)|HIST2H2AA3(+59.65kb)|HIST2H2AA4(+59.65kb)|HIST2H2AB(+23.34kb)|HIST2H2AC(+23.85kb)|HIST2H2BC(+60.47kb)|HIST2H2BE(+24.58kb)|HIST2H2BF(+98.88kb)|HIST2H3A(+58.12kb)|HIST2H3C(+58.12kb)|HIST2H3D(+97.58kb)|HIST2H4A(+50.09kb)|HIST2H4B(+50.09kb)|MTMR11(-17.73kb)|OTUD7B(-29.42kb)|SF3B4(-12.4kb)|SV2A(0)|VPS45(-156.5kb)
4	120661298	rs72680973	G	A	2	7.822e-05	7.822e-05	1.6206	1.6206	0.3321	0	1.225	1.7041	PDE5A(+111.3kb)
17	3394769	rs76398592	A	G	2	7.831e-05	7.831e-05	1.6072	1.6072	0.3916	0	1.286	1.6854	ASPA(0)|CTNS(-145kb)|EMC6(-177.3kb)|OR1E1(+93.06kb)|OR1E2(+57.63kb)|OR3A1(+198.9kb)|OR3A3(+69.94kb)|OR3A4P(+180kb)|P2RX5(-181.8kb)|P2RX5-TAX1BP3(-171.4kb)|SHPK(-116.8kb)|SPATA22(+19.63kb)|TAX1BP3(-171.4kb)|TRPV1(-73.97kb)|TRPV3(-19.03kb)
5	28329650	rs1582923	A	C	2	7.847e-05	7.847e-05	1.2582	1.2582	0.8711	0	1.2859	1.2531	.
2	241648209	rs4234120	A	G	2	7.848e-05	7.848e-05	0.7755	0.7755	0.8407	0	0.7981	0.771	AGXT(-160kb)|ANKMY1(+150.8kb)|AQP12A(+10.31kb)|AQP12B(+25.89kb)|C2orf54(-177.3kb)|CAPN10(+109.7kb)|CAPN10-AS1(+122.5kb)|DUSP28(+144.8kb)|GPR35(+77.53kb)|KIF1A(-4.971kb)|RNPEPL1(+130.1kb)
11	34213734	rs2473908	C	G	2	7.849e-05	0.006368	1.4369	1.503	0.1762	45.33	1.8599	1.3536	ABTB2(0)|CAPRIN1(+89.58kb)|NAT10(+45.28kb)
1	149847301	rs141494464	T	C	2	7.867e-05	7.867e-05	1.6161	1.6161	0.6701	0	1.7943	1.5752	BOLA1(-23.85kb)|FCGR1A(+83.23kb)|HIST2H2AA3(+24.14kb)|HIST2H2AA4(+24.14kb)|HIST2H2AB(-11.72kb)|HIST2H2AC(-11.22kb)|HIST2H2BC(+24.96kb)|HIST2H2BE(-8.708kb)|HIST2H2BF(+63.37kb)|HIST2H3A(+22.61kb)|HIST2H3C(+22.61kb)|HIST2H3D(+62.06kb)|HIST2H4A(+14.58kb)|HIST2H4B(+14.58kb)|LINC00869(+174.6kb)|MTMR11(-53.24kb)|OTUD7B(-64.93kb)|SF3B4(-47.91kb)|SV2A(-27.57kb)|VPS45(-192kb)
3	70877203	rs17007870	T	C	2	7.901e-05	0.0001495	1.2444	1.2467	0.3091	3.33	1.4259	1.2157	FOXP1(-126.7kb)
1	212817909	rs6674102	T	G	2	7.907e-05	7.907e-05	0.7521	0.7521	0.3876	0	0.6471	0.7718	ATF3(+23.79kb)|BATF3(-41.85kb)|C1orf227(-185.6kb)|FAM71A(+17.79kb)|NENF(+198.2kb)|NSL1(-81.58kb)|TATDN3(-147.3kb)
5	28329573	rs1582922	T	C	2	7.91e-05	7.91e-05	1.2581	1.2581	0.8703	0	1.2859	1.2529	.
13	31920778	rs117930710	G	C	2	7.944e-05	0.2939	2.0463	1.6274	0.0509	73.76	0.9366	2.4027	B3GALTL(+14.37kb)|HSPH1(+184.7kb)
15	70428662	rs61999944	A	G	2	7.951e-05	0.03866	1.5052	1.4262	0.1928	41.04	1.0933	1.5935	MIR629(+56.86kb)|TLE3(+38.41kb)
8	260283	rs56026473	G	A	2	7.957e-05	7.957e-05	1.849	1.849	0.8294	0	1.9599	1.8136	FAM87A(-65.65kb)|FBXO25(-96.52kb)|OR4F21(+143.3kb)|RPL23AP53(+77.96kb)|TDRP(-179.5kb)|ZNF596(+62.94kb)
3	165134805	rs78255053	A	G	2	7.962e-05	7.962e-05	1.8533	1.8533	0.7787	0	2.0207	1.8124	.
12	673157	rs117609526	G	A	2	7.982e-05	7.982e-05	3.1881	3.1881	0.4968	0	4.3576	2.8061	B4GALNT3(+2.099kb)|CCDC77(+121.4kb)|KDM5A(+174.5kb)|NINJ2(-0.304kb)|WNK1(-188.9kb)
2	16221966	rs73218559	G	A	2	7.992e-05	0.01998	1.9863	1.8522	0.1936	40.84	1.2606	2.2228	MYCN(+134.8kb)|MYCNOS(+140.1kb)
3	70856899	rs11128194	C	T	2	7.998e-05	0.003358	1.2453	1.2704	0.231	30.31	1.4603	1.2111	FOXP1(-147kb)
13	43076456	rs77972371	A	G	2	8.021e-05	8.021e-05	1.9046	1.9046	0.7475	0	1.6461	1.9411	AKAP11(+179.1kb)|TNFSF11(-60.42kb)
15	97184776	rs34744492	A	G	2	8.027e-05	8.027e-05	0.6538	0.6538	0.3929	0	0.5049	0.6756	SPATA8(-141.9kb)|SPATA8-AS1(-130.5kb)
2	161600587	rs270921	G	A	2	8.049e-05	0.02754	0.8009	0.7549	0.0936	64.43	0.6405	0.8335	.
15	97184223	rs67121143	C	A	2	8.057e-05	8.057e-05	0.6538	0.6538	0.3925	0	0.5047	0.6756	SPATA8(-142.5kb)|SPATA8-AS1(-131kb)
1	214706608	rs41307662	T	C	2	8.093e-05	8.093e-05	1.5637	1.5637	0.7013	0	1.6942	1.5272	CENPF(-69.92kb)|PTPN14(0)|SMYD2(+196.1kb)
12	125831606	rs61943121	C	T	2	8.098e-05	0.1889	1.716	1.4925	0.1025	62.5	1.0006	1.8829	TMEM132B(0)
13	61004611	rs111508071	C	T	2	8.099e-05	0.316	2.1222	1.6395	0.0986	63.35	0.8436	2.3638	TDRD3(0)
2	16221047	rs61745688	T	C	2	8.134e-05	0.02051	1.9847	1.85	0.1922	41.19	1.2599	2.2227	MYCN(+133.9kb)|MYCNOS(+139.2kb)
2	128749198	rs6747912	G	A	2	8.147e-05	8.147e-05	1.3071	1.3071	0.8583	0	1.345	1.3004	AMMECR1L(+105.7kb)|POLR2D(+133.5kb)|SAP130(0)|UGGT1(-99.56kb)|WDR33(+180.4kb)
6	108311994	rs909781	G	T	2	8.151e-05	8.151e-05	1.5945	1.5945	0.7716	0	1.483	1.6207	NR2E1(-175.2kb)|OSTM1(-50.62kb)|SCML4(+166.5kb)|SEC63(+32.51kb)
1	79063181	rs11162517	T	G	2	8.162e-05	8.162e-05	0.761	0.761	0.3524	0	0.6518	0.7817	IFI44(-52.3kb)|IFI44L(-22.91kb)|PTGFR(+56.8kb)
22	20099331	rs3757	A	G	2	8.166e-05	0.003922	1.29	1.3228	0.2086	36.76	1.536	1.2421	ARVCF(+95.02kb)|COMT(+141.8kb)|DGCR8(0)|LINC00896(-94.52kb)|LOC284865(-86.92kb)|LOC388849(-36.78kb)|MIR185(+78.59kb)|MIR1286(-137.3kb)|MIR1306(+25.67kb)|MIR3618(+25.98kb)|MIR4761(+148kb)|RANBP1(-4.129kb)|RTN4R(-129.6kb)|TANGO2(+45.88kb)|TRMT2A(-0.057kb)|TXNRD2(+170kb)|ZDHHC8(-20.03kb)
5	108512100	rs78476617	A	G	2	8.168e-05	8.168e-05	2.4138	2.4138	0.4939	0	1.9857	2.7214	FER(0)|PJA2(-158.3kb)
3	164558248	rs78857774	A	G	2	8.213e-05	8.213e-05	1.5544	1.5544	0.4534	0	1.8639	1.4952	SI(-138.4kb)
10	125630120	rs56387117	T	C	2	8.23e-05	8.23e-05	1.6647	1.6647	0.593	0	1.8911	1.6034	CHST15(-137.1kb)|CPXM2(0)|GPR26(+173.2kb)
5	153162482	rs72804620	A	T	2	8.235e-05	8.235e-05	1.9989	1.9989	0.6043	0	2.5186	1.9283	GRIA1(0)
5	28330511	rs1366304	A	C	2	8.25e-05	8.25e-05	1.2573	1.2573	0.8729	0	1.2845	1.2522	.
5	128084083	rs12054810	G	A	2	8.257e-05	8.257e-05	1.254	1.254	0.925	0	1.2696	1.251	.
1	214674996	rs17791024	G	A	2	8.272e-05	8.272e-05	1.5974	1.5974	0.9641	0	1.6153	1.5933	CENPF(-101.5kb)|PTPN14(0)|SMYD2(+164.5kb)
1	214823454	rs77816631	G	A	2	8.286e-05	8.286e-05	1.7761	1.7761	0.7932	0	1.9092	1.7405	CENPF(0)|PTPN14(+98.43kb)
4	120705619	rs72682825	T	G	2	8.289e-05	8.289e-05	2.0673	2.0673	0.5478	0	1.6614	2.1869	PDE5A(+155.6kb)
5	28383224	rs67192830	T	G	2	8.293e-05	0.0005167	1.2491	1.2577	0.2858	12.23	1.4346	1.2167	.
3	165126030	rs113501094	C	A	2	8.299e-05	8.299e-05	1.8443	1.8443	0.7755	0	2.0139	1.8035	.
5	61267434	rs140860856	T	C	2	8.302e-05	8.302e-05	3.2633	3.2633	0.9873	0	3.2898	3.254	.
6	41909438	rs1051129	A	G	2	8.304e-05	8.304e-05	0.504	0.504	0.6918	0	0.4251	0.5183	BYSL(+8.654kb)|C6orf132(-159.4kb)|CCND3(0)|FRS3(+161.8kb)|MED20(+20.56kb)|PGC(+194.3kb)|PRICKLE4(+154.3kb)|TAF8(-108.8kb)|TOMM6(+151.8kb)|USP49(+46.34kb)
18	59575724	rs17623667	A	T	2	8.305e-05	8.305e-05	1.3351	1.3351	0.7304	0	1.262	1.3504	LOC100996669(+153.8kb)|PIGN(-135.7kb)|RNF152(+15.42kb)
3	165124991	rs80043576	A	G	2	8.316e-05	8.316e-05	1.8443	1.8443	0.7792	0	2.011	1.8042	.
2	128753071	rs13013044	A	G	2	8.324e-05	8.324e-05	1.3066	1.3066	0.8564	0	1.345	1.2998	AMMECR1L(+109.6kb)|POLR2D(+137.3kb)|SAP130(0)|UGGT1(-95.68kb)|WDR33(+184.3kb)
18	59577122	rs56220007	A	C	2	8.33e-05	8.33e-05	1.3352	1.3352	0.7325	0	1.2627	1.3504	LOC100996669(+155.2kb)|PIGN(-134.3kb)|RNF152(+16.82kb)
10	21224986	rs7921413	A	C	2	8.332e-05	8.332e-05	1.3827	1.3827	0.6304	0	1.5108	1.3584	C10orf113(-189.7kb)|NEBL(0)
2	128753486	rs4662763	T	C	2	8.334e-05	8.334e-05	1.3066	1.3066	0.8564	0	1.345	1.2998	AMMECR1L(+110kb)|POLR2D(+137.8kb)|SAP130(0)|UGGT1(-95.27kb)|WDR33(+184.7kb)
12	52564449	rs6580862	T	C	2	8.338e-05	0.1559	1.2692	1.2001	0.1116	60.5	1.0123	1.3224	ACVR1B(+173.6kb)|C12orf44(+93.17kb)|C12orf80(-34.92kb)|GRASP(+154.8kb)|KRT7(-62.5kb)|KRT80(0)|KRT81(-115.2kb)|KRT83(-143.6kb)|KRT85(-189.3kb)|KRT86(-131.2kb)|LINC00592(-40.26kb)|NR4A1(+111.2kb)
14	87832641	rs12147698	A	G	2	8.339e-05	8.339e-05	1.2499	1.2499	0.9658	0	1.243	1.2512	.
1	214695482	rs113565833	T	C	2	8.353e-05	8.353e-05	1.5212	1.5212	0.9273	0	1.5502	1.5136	CENPF(-81.05kb)|PTPN14(0)|SMYD2(+185kb)
9	14997687	rs116888601	A	G	2	8.357e-05	0.0657	2.5636	2.2035	0.1861	42.79	1.1198	2.8929	FREM1(+86.69kb)|LOC389705(0)|TTC39B(-173.2kb)
2	161600536	rs270920	A	G	2	8.36e-05	0.02887	0.8014	0.7544	0.0908	65.04	0.6394	0.8342	.
10	124565139	rs72839711	C	T	2	8.375e-05	8.375e-05	2.3175	2.3175	0.6465	0	1.9497	2.4499	C10orf88(-125.3kb)|C10orf120(+105.8kb)|CUZD1(-26.53kb)|DMBT1(+161.9kb)|FAM24A(-105.1kb)|FAM24B(-43.47kb)|FAM24B-CUZD1(-26.53kb)|FLJ46361(+7.978kb)|IKZF5(-185.2kb)|LOC399815(-74.01kb)|PSTK(-174.4kb)
5	28330556	rs1366305	T	A	2	8.378e-05	8.378e-05	1.257	1.257	0.8725	0	1.2843	1.2519	.
11	47353899	rs11039186	T	C	2	8.383e-05	8.383e-05	1.8785	1.8785	0.3858	0	2.6233	1.7729	ACP2(+83.44kb)|ARFGAP2(+155.2kb)|C11orf49(+168kb)|CELF1(-133.6kb)|DDB2(+93.13kb)|MADD(+2.317kb)|MYBPC3(0)|NR1H3(+63.32kb)|PACSIN3(+145.9kb)|PSMC3(-86.42kb)|RAPSN(-105.4kb)|SLC39A13(-76.15kb)|SPI1(-22.51kb)
5	2282548	rs635063	A	G	2	8.396e-05	8.396e-05	0.7628	0.7628	0.3926	0	0.8757	0.7439	.
7	53050859	rs113308012	A	G	2	8.427e-05	0.000633	1.5396	1.5248	0.2948	8.87	1.1779	1.6175	POM121L12(-52.49kb)
15	97183964	rs35271721	A	G	2	8.446e-05	8.446e-05	0.6544	0.6544	0.3903	0	0.5046	0.6764	SPATA8(-142.7kb)|SPATA8-AS1(-131.3kb)
6	108312182	rs72933025	A	G	2	8.446e-05	8.446e-05	1.5966	1.5966	0.7576	0	1.4774	1.6246	NR2E1(-175kb)|OSTM1(-50.43kb)|SCML4(+166.7kb)|SEC63(+32.7kb)
16	77697750	rs7205655	C	T	2	8.447e-05	0.0795	0.7336	0.7743	0.1715	46.52	0.9656	0.7032	NUDT7(-58.64kb)|VAT1L(-124.7kb)
5	28316198	rs7700330	A	T	2	8.465e-05	8.465e-05	0.801	0.801	0.7221	0	0.7648	0.808	.
6	139176986	rs73557278	A	G	2	8.476e-05	8.476e-05	2.0204	2.0204	0.6253	0	1.7045	2.1132	ABRACL(-172.8kb)|CCDC28A(+62.53kb)|ECT2L(0)|FLJ46906(+158.6kb)|LOC100507462(+82.17kb)|REPS1(-48.63kb)
1	235026227	rs141479489	T	C	2	8.511e-05	0.006368	2.2279	2.4187	0.1522	51.22	3.6492	1.8746	LOC100506810(+158.8kb)
7	16232932	rs62440376	C	T	2	8.526e-05	8.526e-05	0.7954	0.7954	0.7483	0	0.8311	0.7891	ISPD(0)|LOC100506025(-17.18kb)
20	18222861	rs73110060	T	C	2	8.538e-05	0.00204	2.2843	2.308	0.1985	39.52	3.0767	1.7871	CSRP2BP(+53.83kb)|DZANK1(-141.1kb)|LINC00851(-136.8kb)|OVOL2(+184.3kb)|PET117(+99.05kb)|ZNF133(-46.26kb)
5	28332067	rs2468462	T	C	2	8.549e-05	8.549e-05	1.2567	1.2567	0.8826	0	1.2818	1.252	.
17	64740638	rs4303580	G	A	2	8.571e-05	0.05073	2.112	2.5724	0.0281	79.25	4.4054	1.6655	CACNG5(-132.8kb)|MIR634(-42.55kb)|PRKCA(0)
10	21210061	rs12359138	T	C	2	8.572e-05	8.572e-05	1.3768	1.3768	0.7882	0	1.4464	1.3635	NEBL(0)
1	149903609	rs12078573	A	G	2	8.576e-05	8.576e-05	1.4809	1.4809	0.4987	0	1.7342	1.4386	BOLA1(+31.26kb)|FCGR1A(+139.5kb)|HIST2H2AA3(+80.45kb)|HIST2H2AA4(+80.45kb)|HIST2H2AB(+44.14kb)|HIST2H2AC(+44.65kb)|HIST2H2BC(+81.27kb)|HIST2H2BE(+45.38kb)|HIST2H2BF(+119.7kb)|HIST2H3A(+78.92kb)|HIST2H3C(+78.92kb)|HIST2H3D(+118.4kb)|HIST2H4A(+70.88kb)|HIST2H4B(+70.88kb)|MTMR11(0)|OTUD7B(-8.619kb)|SF3B4(+3.465kb)|SV2A(+14.18kb)|VPS45(-135.7kb)
17	48373761	rs56238005	A	G	2	8.603e-05	8.603e-05	1.2774	1.2774	0.8504	0	1.244	1.2841	ACSF2(-129.8kb)|CHAD(-168.1kb)|COL1A1(+94.76kb)|EME1(-76.82kb)|HILS1(+123.9kb)|LRRC59(-84.83kb)|MRPL27(-71.47kb)|PDK2(+185kb)|PPP1R9B(+145.9kb)|RSAD1(-182.4kb)|SAMD14(+166.5kb)|SGCA(+120.5kb)|TMEM92(+14.92kb)|XYLT2(-49.63kb)
18	59576438	rs17701892	T	C	2	8.613e-05	8.613e-05	1.3343	1.3343	0.7347	0	1.2624	1.3493	LOC100996669(+154.5kb)|PIGN(-135kb)|RNF152(+16.13kb)
15	77054648	rs62028731	C	T	2	8.614e-05	0.03869	1.758	1.6326	0.1862	42.77	1.1436	1.9118	RCN2(-169.3kb)|SCAPER(0)
15	97182672	rs7180985	C	T	2	8.616e-05	8.616e-05	0.6548	0.6548	0.3915	0	0.5052	0.6767	SPATA8(-144kb)|SPATA8-AS1(-132.6kb)
2	161600498	rs4664365	C	T	2	8.633e-05	0.02714	0.8017	0.7564	0.0969	63.72	0.6422	0.8339	.
1	214704942	rs74432616	C	T	2	8.635e-05	8.635e-05	1.5607	1.5607	0.6902	0	1.6962	1.5229	CENPF(-71.59kb)|PTPN14(0)|SMYD2(+194.5kb)
2	76960366	rs56078403	G	T	2	8.664e-05	0.04494	1.2655	1.2248	0.1793	44.56	1.0545	1.3114	LRRTM4(-14.48kb)
3	142842195	rs4149496	C	G	2	8.664e-05	8.664e-05	0.7946	0.7946	0.8184	0	0.818	0.7897	CHST2(0)|LOC100289361(+121.9kb)|LOC100507389(+180.8kb)|PAQR9(+160kb)|SLC9A9(-141.9kb)|U2SURP(+62.63kb)
3	29461008	rs115408641	T	C	2	8.668e-05	8.668e-05	2.2764	2.2764	0.5126	0	2.9203	2.1106	RBMS3(0)
3	70867623	rs6810034	C	T	2	8.675e-05	0.005372	1.2443	1.2756	0.2107	36.16	1.4695	1.2085	FOXP1(-136.2kb)
11	34214965	rs7105325	A	G	2	8.701e-05	0.008971	1.4378	1.5145	0.1573	49.99	1.8856	1.3498	ABTB2(0)|CAPRIN1(+90.81kb)|NAT10(+46.51kb)
7	16297381	rs11769530	G	A	2	8.703e-05	0.01029	1.2898	1.3422	0.1588	49.65	1.5782	1.2375	ISPD(0)|LOC100506025(0)
18	59586116	rs59723157	G	A	2	8.733e-05	8.733e-05	1.3141	1.3141	0.3402	0	1.1383	1.3551	LOC100996669(+164.2kb)|PIGN(-125.3kb)|RNF152(+25.81kb)
8	28582622	rs118190171	G	A	2	8.744e-05	0.2887	3.0319	2.1144	0.0931	64.53	0.8334	3.61	EXTL3(0)|FZD3(+150.8kb)|HMBOX1(-165.3kb)|INTS9(-42.55kb)
2	128748256	rs11680182	T	G	2	8.755e-05	8.755e-05	1.3057	1.3057	0.852	0	1.3453	1.2987	AMMECR1L(+104.7kb)|POLR2D(+132.5kb)|SAP130(0)|UGGT1(-100.5kb)|WDR33(+179.5kb)
2	161605426	rs1026236	T	C	2	8.781e-05	0.01746	0.802	0.7661	0.1336	55.55	0.6564	0.831	.
10	7770994	rs4338436	C	T	2	8.785e-05	8.785e-05	0.5774	0.5774	0.6254	0	0.6738	0.5602	ATP5C1(-59.1kb)|ITIH2(0)|ITIH5(+62.03kb)|KIN(-21.93kb)|TAF3(-89.47kb)
7	53049684	rs76956440	C	T	2	8.797e-05	0.0002339	1.5384	1.5319	0.3075	3.97	1.1857	1.6144	POM121L12(-53.66kb)
2	128746525	rs2438031	A	G	2	8.81e-05	8.81e-05	1.3055	1.3055	0.8513	0	1.3453	1.2985	AMMECR1L(+103kb)|POLR2D(+130.8kb)|SAP130(0)|UGGT1(-102.2kb)|WDR33(+177.8kb)
14	51562581	rs12436365	G	A	2	8.821e-05	8.821e-05	1.2614	1.2614	0.7286	0	1.3236	1.2504	ABHD12B(+190.9kb)|PYGL(+151.3kb)|TMX1(-144.3kb)|TRIM9(+0.159kb)
3	70876858	rs17007864	C	T	2	8.839e-05	0.0002876	1.2406	1.2453	0.3009	6.58	1.4252	1.212	FOXP1(-127kb)
5	28330169	rs1582926	T	C	2	8.843e-05	8.843e-05	1.2565	1.2565	0.8812	0	1.282	1.2518	.
17	48375832	rs12938101	T	A	2	8.868e-05	8.868e-05	1.2761	1.2761	0.8613	0	1.2452	1.2823	ACSF2(-127.7kb)|CHAD(-166kb)|COL1A1(+96.83kb)|EME1(-74.75kb)|HILS1(+126kb)|LRRC59(-82.76kb)|MRPL27(-69.4kb)|PDK2(+187.1kb)|PPP1R9B(+148kb)|RSAD1(-180.4kb)|SAMD14(+168.6kb)|SGCA(+122.5kb)|TMEM92(+16.99kb)|XYLT2(-47.56kb)
17	70392186	rs7212633	T	C	2	8.877e-05	0.6552	1.6173	1.2186	0.0238	80.43	0.7267	1.7804	LINC00673(-7.276kb)
2	71269843	rs34017685	T	C	2	8.89e-05	0.03047	1.5438	1.7183	0.0661	70.39	2.3176	1.394	ANKRD53(+57.21kb)|ATP6V1B1(+77.28kb)|MCEE(-66.96kb)|MPHOSPH10(-87.6kb)|NAGK(-25.56kb)|OR7E91P(+12.78kb)|PAIP2B(-140kb)|TEX261(+47.84kb)|VAX2(+109.3kb)
8	482190	rs113541014	A	G	2	8.904e-05	8.904e-05	1.489	1.489	0.4645	0	1.2585	1.5387	ERICH1(-132kb)|FAM87A(+149kb)|FBXO25(+62.32kb)|TDRP(0)
2	16223551	rs28477832	T	G	2	8.913e-05	0.01849	1.977	1.8492	0.1993	39.31	1.2598	2.2083	MYCN(+136.4kb)|MYCNOS(+141.7kb)
3	165139153	rs79596598	A	C	2	8.913e-05	8.913e-05	1.8462	1.8462	0.763	0	2.0259	1.8025	.
2	169089920	rs16855160	C	T	2	8.921e-05	0.02119	1.4181	1.3676	0.2029	38.32	1.1126	1.4955	STK39(0)
2	5288240	rs10202896	C	G	2	8.925e-05	0.4274	0.7221	0.8259	0.0426	75.68	1.1016	0.6751	.
4	120629081	rs116048124	T	G	2	8.93e-05	8.93e-05	1.6181	1.6181	0.3257	0	1.2147	1.7025	PDE5A(+79.1kb)
19	50380858	rs731826	G	T	2	8.934e-05	8.934e-05	1.2477	1.2477	0.4547	0	1.3806	1.2259	ADM5(+186.6kb)|AKT1S1(0)|AP2A1(+70.49kb)|ATF5(-51.1kb)|CPT1C(+163.9kb)|FLJ26850(-173.1kb)|FUZ(+64.29kb)|IL4I1(-12.05kb)|MED25(+40.62kb)|MIR4749(+22.95kb)|MIR4750(-10.57kb)|MIR4751(-55.46kb)|MIR5088(+195.4kb)|NUP62(-29.22kb)|PNKP(+10.04kb)|PRMT1(+189.2kb)|PTOV1(+16.86kb)|PTOV1-AS1(+25.92kb)|SIGLEC11(-71.39kb)|SIGLEC16(-92.05kb)|TBC1D17(0)|TSKS(+114.3kb)|VRK3(-98.86kb)|ZNF473(-148.4kb)
1	149891028	rs72692804	C	G	2	8.936e-05	8.936e-05	1.4815	1.4815	0.4552	0	1.7567	1.4335	BOLA1(+18.68kb)|FCGR1A(+127kb)|HIST2H2AA3(+67.87kb)|HIST2H2AA4(+67.87kb)|HIST2H2AB(+31.56kb)|HIST2H2AC(+32.07kb)|HIST2H2BC(+68.69kb)|HIST2H2BE(+32.8kb)|HIST2H2BF(+107.1kb)|HIST2H3A(+66.34kb)|HIST2H3C(+66.34kb)|HIST2H3D(+105.8kb)|HIST2H4A(+58.3kb)|HIST2H4B(+58.3kb)|MTMR11(-9.514kb)|OTUD7B(-21.2kb)|SF3B4(-4.18kb)|SV2A(+1.594kb)|VPS45(-148.3kb)
14	24300213	rs57384506	T	C	2	8.946e-05	8.946e-05	1.3134	1.3134	0.4643	0	1.1819	1.3461	DHRS2(+185.4kb)|DHRS4(-122.8kb)|DHRS4-AS1(-107.7kb)|DHRS4L1(-176kb)|DHRS4L2(-138.9kb)
15	76692136	rs62028388	G	A	2	8.974e-05	0.002192	1.7456	1.705	0.2728	16.84	1.2312	1.8716	C15orf27(+194.8kb)|ETFA(+88.33kb)|ISL2(+57.32kb)|SCAPER(0)|TYRO3P(+139.6kb)
8	1435989	rs36104724	A	G	2	9.013e-05	9.013e-05	1.4436	1.4436	0.9484	0	1.4235	1.4474	DLGAP2(-13.54kb)|LOC286083(+185.2kb)|LOC100507435(-77.69kb)
15	97180681	rs8028427	T	G	2	9.029e-05	9.029e-05	0.6547	0.6547	0.4373	0	0.5176	0.6747	SPATA8(-146kb)|SPATA8-AS1(-134.6kb)
7	43512183	rs9639876	A	G	2	9.04e-05	9.04e-05	1.6131	1.6131	0.9221	0	1.5692	1.6215	COA1(-158.6kb)|HECW1(0)|LOC100506895(-36.14kb)|STK17A(-110.5kb)
5	28331059	rs2434556	A	G	2	9.048e-05	9.048e-05	1.2557	1.2557	0.8729	0	1.2829	1.2506	.
13	42963724	rs9525618	T	G	2	9.05e-05	9.05e-05	1.7125	1.7125	0.3794	0	2.3277	1.633	AKAP11(+66.32kb)|DGKH(+159.8kb)|TNFSF11(-173.1kb)
11	34214502	rs7924755	A	G	2	9.059e-05	0.008875	1.4359	1.5114	0.1592	49.55	1.8804	1.3485	ABTB2(0)|CAPRIN1(+90.34kb)|NAT10(+46.04kb)
5	2282445	rs540674	G	A	2	9.075e-05	9.075e-05	0.7625	0.7625	0.4199	0	0.8684	0.7444	.
2	128756907	rs1992111	C	T	2	9.133e-05	9.133e-05	1.3048	1.3048	0.8488	0	1.3452	1.2976	AMMECR1L(+113.4kb)|POLR2D(+141.2kb)|SAP130(0)|UGGT1(-91.85kb)|WDR33(+188.1kb)
5	108514307	rs75874842	G	A	2	9.135e-05	9.135e-05	2.3989	2.3989	0.4855	0	1.9648	2.7099	FER(0)|PJA2(-156.1kb)
12	10524821	rs17549124	G	A	2	9.136e-05	0.002103	1.7057	1.6685	0.2737	16.53	1.2218	1.8237	GABARAPL1(+149.1kb)|KLRC1(-73.82kb)|KLRC2(-58.38kb)|KLRC3(-40.09kb)|KLRC4(-35.16kb)|KLRC4-KLRK1(-0.13kb)|KLRD1(+54.97kb)|KLRK1(-0.13kb)|TMEM52B(+180.4kb)
6	93665366	rs148177449	G	T	2	9.136e-05	9.136e-05	1.8706	1.8706	0.8746	0	1.9637	1.8462	.
10	69087775	rs117062496	T	C	2	9.137e-05	9.137e-05	1.7027	1.7027	0.9049	0	1.761	1.6894	CTNNA3(0)
2	76960160	rs58242146	T	A	2	9.153e-05	0.04549	1.2648	1.2242	0.1795	44.5	1.0539	1.3107	LRRTM4(-14.69kb)
8	262945	rs145686582	C	G	2	9.171e-05	9.171e-05	1.9627	1.9627	0.9714	0	1.9421	1.9698	FAM87A(-62.98kb)|FBXO25(-93.86kb)|OR4F21(+145.9kb)|RPL23AP53(+80.63kb)|TDRP(-176.8kb)|ZNF596(+65.61kb)
2	80253819	rs17040687	A	G	2	9.178e-05	0.000938	2.1223	2.1937	0.2563	22.41	3.2021	1.8899	CTNNA2(0)
10	21220826	rs7902325	C	A	2	9.202e-05	9.202e-05	1.3803	1.3803	0.6633	0	1.4953	1.3583	C10orf113(-193.9kb)|NEBL(0)
18	59578493	rs55825877	T	G	2	9.23e-05	9.23e-05	1.3329	1.3329	0.7507	0	1.2654	1.347	LOC100996669(+156.6kb)|PIGN(-133kb)|RNF152(+18.19kb)
8	41941395	rs12541808	A	G	2	9.294e-05	9.294e-05	0.774	0.774	0.7509	0	0.8143	0.7674	ANK1(+187.1kb)|AP3M2(-69.07kb)|IKBKB(-187.4kb)|KAT6A(+31.89kb)|PLAT(-90.84kb)
14	85949072	rs17121151	C	T	2	9.3e-05	9.3e-05	1.2801	1.2801	0.6887	0	1.2088	1.2945	FLRT2(-47.42kb)|LINC00911(+62.65kb)
10	34584680	rs2582859	C	T	2	9.312e-05	9.312e-05	0.5326	0.5326	0.8664	0	0.5654	0.5261	PARD3(0)
17	64739548	rs61761558	A	G	2	9.317e-05	0.06274	2.0986	2.6221	0.0195	81.68	4.638	1.6381	CACNG5(-133.8kb)|MIR634(-43.64kb)|PRKCA(0)
4	121392902	rs144929261	T	C	2	9.317e-05	9.317e-05	2.8295	2.8295	0.6701	0	2.2685	2.999	.
5	28331934	rs2468460	G	A	2	9.323e-05	9.323e-05	1.2549	1.2549	0.8728	0	1.2822	1.2499	.
5	28333972	rs2115180	G	A	2	9.336e-05	9.336e-05	1.255	1.255	0.8958	0	1.2773	1.2509	.
19	50379053	rs3810267	G	A	2	9.355e-05	9.355e-05	1.2466	1.2466	0.7847	0	1.2928	1.2385	ADM5(+184.8kb)|AKT1S1(0)|AP2A1(+68.68kb)|ATF5(-52.9kb)|CPT1C(+162.1kb)|FLJ26850(-174.9kb)|FUZ(+62.49kb)|IL4I1(-13.86kb)|MED25(+38.82kb)|MIR4749(+21.14kb)|MIR4750(-12.38kb)|MIR4751(-57.27kb)|MIR5088(+193.6kb)|NUP62(-31.03kb)|PNKP(+8.231kb)|PRMT1(+187.3kb)|PTOV1(+15.05kb)|PTOV1-AS1(+24.12kb)|SIGLEC11(-73.2kb)|SIGLEC16(-93.86kb)|TBC1D17(-1.628kb)|TSKS(+112.5kb)|VRK3(-100.7kb)|ZNF473(-150.2kb)
8	76632003	rs117212676	A	G	2	9.377e-05	0.02203	2.3656	2.1616	0.1993	39.31	1.3064	2.7071	HNF4G(+152.9kb)
9	10960011	rs74719175	G	C	2	9.388e-05	9.388e-05	1.5427	1.5427	0.7466	0	1.68	1.5196	.
5	28334402	rs2468470	G	T	2	9.396e-05	9.396e-05	1.2551	1.2551	0.8468	0	1.288	1.249	.
3	165118100	rs75158129	C	T	2	9.418e-05	9.418e-05	1.847	1.847	0.7948	0	2.0011	1.8089	.
17	48373429	rs34474717	T	A	2	9.421e-05	9.421e-05	1.2757	1.2757	0.8336	0	1.2386	1.2831	ACSF2(-130.1kb)|CHAD(-168.4kb)|COL1A1(+94.43kb)|EME1(-77.15kb)|HILS1(+123.6kb)|LRRC59(-85.16kb)|MRPL27(-71.8kb)|PDK2(+184.7kb)|PPP1R9B(+145.6kb)|RSAD1(-182.8kb)|SAMD14(+166.2kb)|SGCA(+120.1kb)|TMEM92(+14.58kb)|XYLT2(-49.96kb)
15	97189563	rs34169909	C	T	2	9.432e-05	9.432e-05	0.6582	0.6582	0.3876	0	0.5074	0.6802	SPATA8(-137.1kb)|SPATA8-AS1(-125.7kb)
2	76972429	rs4853269	G	A	2	9.468e-05	0.0006345	1.286	1.279	0.2936	9.35	1.1093	1.3265	LRRTM4(-2.42kb)
14	49892233	rs9635219	T	C	2	9.483e-05	9.483e-05	1.8792	1.8792	0.4468	0	2.4078	1.768	DNAAF2(-199.7kb)|LRR1(-173.2kb)|MGAT2(-195.3kb)|RPL36AL(-193.2kb)|RPS29(-151.2kb)
7	22705298	rs1004225	T	C	2	9.484e-05	9.484e-05	0.7981	0.7981	0.6795	0	0.8439	0.79	IL6(-61.47kb)|LOC100506178(+91.68kb)|SNORD93(-190.9kb)|STEAP1B(+165.4kb)|TOMM7(-147kb)
1	212825316	rs12143644	T	G	2	9.494e-05	0.01071	0.7623	0.7301	0.1767	45.21	0.6061	0.7922	ATF3(+31.2kb)|BATF3(-34.44kb)|C1orf227(-178.2kb)|FAM71A(+25.2kb)|NSL1(-74.18kb)|TATDN3(-139.9kb)
11	34210968	rs113469541	T	C	2	9.5e-05	0.00644	1.4306	1.494	0.1809	44.15	1.8469	1.3486	ABTB2(0)|CAPRIN1(+86.81kb)|NAT10(+42.51kb)
17	70391429	rs6501539	G	C	2	9.504e-05	0.6544	1.6105	1.2172	0.0236	80.48	0.7293	1.7735	LINC00673(-8.033kb)
15	97189925	rs12903849	G	A	2	9.508e-05	9.508e-05	0.6583	0.6583	0.3868	0	0.5073	0.6804	SPATA8(-136.8kb)|SPATA8-AS1(-125.3kb)
11	34212829	rs7124025	A	G	2	9.511e-05	0.007254	1.4297	1.4966	0.1733	46.06	1.852	1.3463	ABTB2(0)|CAPRIN1(+88.67kb)|NAT10(+44.37kb)
19	50377835	rs8110265	A	G	2	9.529e-05	9.529e-05	1.2466	1.2466	0.3706	0	1.4066	1.2205	ADM5(+183.6kb)|AKT1S1(0)|AP2A1(+67.47kb)|ATF5(-54.12kb)|CPT1C(+160.8kb)|FLJ26850(-176.1kb)|FUZ(+61.27kb)|IL4I1(-15.08kb)|MED25(+37.6kb)|MIR4749(+19.93kb)|MIR4750(-13.6kb)|MIR4751(-58.48kb)|MIR5088(+192.4kb)|NUP62(-32.25kb)|PNKP(+7.013kb)|PRMT1(+186.1kb)|PTOV1(+13.84kb)|PTOV1-AS1(+22.9kb)|SIGLEC11(-74.41kb)|SIGLEC16(-95.08kb)|TBC1D17(-2.846kb)|TSKS(+111.3kb)|VRK3(-101.9kb)|ZNF473(-151.4kb)
18	59464254	rs78502386	C	A	2	9.534e-05	9.534e-05	1.6519	1.6519	0.7306	0	1.5113	1.6887	LOC100996669(+42.33kb)|RNF152(-18.05kb)
11	91528256	rs79039611	G	A	2	9.545e-05	0.002736	2.1229	2.2503	0.2474	25.27	3.6851	1.9396	.
2	236250341	rs76365522	C	T	2	9.57e-05	9.57e-05	1.4221	1.4221	0.4313	0	1.6819	1.38	AGAP1(-152.4kb)
18	49690871	rs62082848	T	G	2	9.601e-05	0.002457	1.329	1.3577	0.2298	30.66	1.5939	1.2741	DCC(-175.7kb)
5	61251945	rs139416134	G	A	2	9.612e-05	9.612e-05	3.2026	3.2026	0.8281	0	2.8731	3.3289	.
5	28332792	rs1593901	G	T	2	9.615e-05	9.615e-05	1.2547	1.2547	0.8825	0	1.2798	1.25	.
12	674706	rs77250292	T	C	2	9.63e-05	0.06686	2.0894	2.6424	0.0173	82.36	4.733	1.6313	B4GALNT3(+3.648kb)|CCDC77(+122.9kb)|KDM5A(+176.1kb)|NINJ2(0)|WNK1(-187.4kb)
15	87892607	rs16940197	T	C	2	9.651e-05	0.003556	1.8305	1.7747	0.2649	19.53	1.2358	1.9751	.
4	148632990	rs7673393	C	G	2	9.659e-05	0.02503	1.4799	1.606	0.0763	68.18	2.0682	1.3459	ARHGAP10(-20.46kb)|EDNRA(+166.9kb)|MIR4799(-70.76kb)|PRMT10(+27.71kb)|TMEM184C(+76.32kb)
7	105188996	rs113947297	A	G	2	9.66e-05	9.66e-05	1.7902	1.7902	0.8433	0	1.6472	1.809	ATXN7L1(-56.22kb)|EFCAB10(-16.58kb)|PUS7(+26.31kb)|RINT1(0)|SRPK2(+159.6kb)
2	128763977	rs13404474	G	A	2	9.688e-05	9.688e-05	0.7672	0.7672	0.8692	0	0.7473	0.7709	AMMECR1L(+120.5kb)|POLR2D(+148.2kb)|SAP130(0)|UGGT1(-84.78kb)|WDR33(+195.2kb)
2	128764368	rs4578802	C	T	2	9.688e-05	9.688e-05	0.7672	0.7672	0.8692	0	0.7473	0.7709	AMMECR1L(+120.9kb)|POLR2D(+148.6kb)|SAP130(0)|UGGT1(-84.38kb)|WDR33(+195.6kb)
7	128497	rs4916962	G	T	2	9.722e-05	9.722e-05	0.6061	0.6061	0.7976	0	0.6521	0.5972	FAM20C(-64.47kb)
2	128759100	rs6722778	A	G	2	9.723e-05	9.723e-05	1.3032	1.3032	0.8687	0	1.3381	1.297	AMMECR1L(+115.6kb)|POLR2D(+143.4kb)|SAP130(0)|UGGT1(-89.65kb)|WDR33(+190.3kb)
8	131686361	rs141928451	G	C	2	9.727e-05	9.727e-05	1.5984	1.5984	0.6618	0	1.8051	1.5624	ADCY8(-106.2kb)
5	108515362	rs80043778	G	A	2	9.749e-05	9.749e-05	2.3898	2.3898	0.4812	0	1.9528	2.702	FER(0)|PJA2(-155kb)
5	28334446	rs2468471	G	C	2	9.757e-05	9.757e-05	1.2508	1.2508	0.9911	0	1.2489	1.2511	.
15	97192214	rs34753049	C	T	2	9.764e-05	9.764e-05	0.659	0.659	0.3854	0	0.5074	0.6811	SPATA8(-134.5kb)|SPATA8-AS1(-123kb)
5	108541309	rs7729479	G	C	2	9.764e-05	9.764e-05	2.3773	2.3773	0.4295	0	1.8876	2.7173	FER(+17.94kb)|PJA2(-129.1kb)
2	161604269	rs1975999	A	C	2	9.765e-05	0.01889	0.8032	0.7664	0.1302	56.34	0.6562	0.8325	.
3	55736572	rs815442	C	T	2	9.766e-05	9.766e-05	1.2617	1.2617	0.6924	0	1.3372	1.2497	ERC2(0)|ERC2-IT1(+43.08kb)|MIR3938(-149.9kb)
16	79152310	rs114448208	G	A	2	9.79e-05	0.04578	2.6007	3.5647	0.0466	74.75	7.5598	2.0801	WWOX(0)
3	89542546	rs191190297	A	G	2	9.791e-05	9.791e-05	2.6545	2.6545	0.5699	0	3.3379	2.4296	EPHA3(+11.26kb)
3	70865248	rs1369553	G	T	2	9.801e-05	0.002865	1.2407	1.2621	0.2435	26.49	1.4504	1.208	FOXP1(-138.6kb)
5	28328236	rs890916	C	T	2	9.849e-05	9.849e-05	1.2543	1.2543	0.8491	0	1.2867	1.2483	.
6	9609264	rs855249	G	A	2	9.862e-05	0.09098	2.128	1.8523	0.1517	51.33	1.1021	2.3932	.
3	102192101	rs73148429	T	C	2	9.865e-05	9.865e-05	1.6066	1.6066	0.751	0	1.7543	1.5796	ZPLD1(0)
4	182829288	rs76871894	G	A	2	9.867e-05	9.867e-05	0.5826	0.5826	0.5954	0	0.7264	0.5684	.
15	97192674	rs36094086	G	A	2	9.887e-05	9.887e-05	0.6591	0.6591	0.3851	0	0.5075	0.6813	SPATA8(-134kb)|SPATA8-AS1(-122.6kb)
1	149889489	rs112851681	G	A	2	9.891e-05	9.891e-05	1.4786	1.4786	0.4442	0	1.7605	1.4294	BOLA1(+17.14kb)|FCGR1A(+125.4kb)|HIST2H2AA3(+66.33kb)|HIST2H2AA4(+66.33kb)|HIST2H2AB(+30.02kb)|HIST2H2AC(+30.53kb)|HIST2H2BC(+67.15kb)|HIST2H2BE(+31.26kb)|HIST2H2BF(+105.6kb)|HIST2H3A(+64.8kb)|HIST2H3C(+64.8kb)|HIST2H3D(+104.3kb)|HIST2H4A(+56.76kb)|HIST2H4B(+56.76kb)|MTMR11(-11.05kb)|OTUD7B(-22.74kb)|SF3B4(-5.719kb)|SV2A(+0.055kb)|VPS45(-149.9kb)
1	7093912	rs150371496	T	C	2	9.902e-05	0.3943	1.6347	1.348	0.092	64.79	0.8419	1.7501	CAMTA1(0)
5	128100173	rs4836401	T	C	2	9.904e-05	9.904e-05	1.2467	1.2467	0.5624	0	1.3448	1.2291	.
4	120675349	rs72680990	T	C	2	9.909e-05	9.909e-05	1.6186	1.6186	0.3343	0	1.2251	1.7036	PDE5A(+125.4kb)
5	28332415	rs2434557	G	A	2	9.914e-05	9.914e-05	1.2539	1.2539	0.8755	0	1.2806	1.249	.
3	70857460	rs10865656	C	T	2	9.917e-05	0.004531	1.2415	1.269	0.2226	32.79	1.4599	1.2068	FOXP1(-146.4kb)
2	128769601	rs68011214	T	C	2	9.921e-05	9.921e-05	0.7676	0.7676	0.867	0	0.7473	0.7713	AMMECR1L(+126.1kb)|POLR2D(+153.9kb)|SAP130(0)|UGGT1(-79.15kb)
2	128772862	rs6430965	C	T	2	9.923e-05	9.923e-05	0.7676	0.7676	0.8653	0	0.7471	0.7714	AMMECR1L(+129.3kb)|POLR2D(+157.1kb)|SAP130(0)|UGGT1(-75.89kb)
2	128773031	rs6430966	C	T	2	9.923e-05	9.923e-05	0.7676	0.7676	0.867	0	0.7473	0.7713	AMMECR1L(+129.5kb)|POLR2D(+157.3kb)|SAP130(0)|UGGT1(-75.72kb)
2	138816290	rs1455151	A	G	2	9.932e-05	9.932e-05	0.8005	0.8005	0.5921	0	0.8632	0.7906	HNMT(+42.36kb)
3	70857492	rs11128195	T	C	2	9.948e-05	0.004553	1.2415	1.2691	0.2225	32.8	1.4601	1.2068	FOXP1(-146.4kb)
21	29177637	rs243660	A	G	2	9.957e-05	9.957e-05	1.6686	1.6686	0.7546	0	1.8425	1.6404	LINC00113(+54.08kb)|MIR5009(0)
4	120691660	rs72682807	A	C	2	9.964e-05	9.964e-05	1.6161	1.6161	0.4863	0	1.324	1.677	PDE5A(+141.7kb)
1	38845971	rs76525070	G	A	2	9.971e-05	0.0006453	2.0259	2.074	0.2694	18.02	2.9305	1.8171	LOC339442(+165.5kb)
20	34101477	rs78282190	A	C	2	9.976e-05	0.1817	2.1042	1.744	0.1195	58.75	0.9876	2.3657	C20orf173(-7.092kb)|CEP250(+1.674kb)|CPNE1(-112.5kb)|ERGIC3(-28.3kb)|GDF5(+75.45kb)|NFS1(-155.1kb)|RBM12(-135.4kb)|RBM39(-190.1kb)|ROMO1(-185.8kb)|SPAG4(-102.3kb)|UQCC(+101.5kb)
1	234158514	rs4475817	G	A	2	9.998e-05	9.998e-05	0.7911	0.7911	0.7659	0	0.7592	0.7973	SLC35F3(0)
