# Supplementary material for: Multiomics integrative analysis identifies APOE allele-specific blood biomarkers associated to Alzheimer’s disease etiopathogenesis
Source: Aging (Albany NY). 2021 Apr 12;13(7):9277–329. doi: 10.18632/aging.202950 (PMC8064208; doi:10.18632/aging.202950)
Supplement: Supplementary Table 5 [file aging-13-202950-s007.xlsx]

## Sheet: Sheet1
Supplementary Table 5. Stage I-IV APOE3 stratified meta-analysis results (p<10-4).
CHR	BP	SNP	A1	A2	N	P	P(R)	OR	OR(R)	Q	I	StageIV	StageI-III	Annotation
2	127892810	rs6733839	T	C	2	1.436e-16	1.436e-16	1.2089	1.2089	0.3683	0	1.156	1.2205	BIN1(+27.91kb)|CYP27C1(-48.6kb)|ERCC3(-122.1kb)|MAP3K2(-163.4kb)
2	127891427	rs4663105	C	A	2	6.159e-15	6.159e-15	1.1942	1.1942	0.5377	0	1.1585	1.202	BIN1(+26.52kb)|CYP27C1(-49.98kb)|ERCC3(-123.4kb)|MAP3K2(-164.8kb)
2	127889637	rs7561528	A	G	2	2.816e-10	2.816e-10	1.1578	1.1578	0.7771	0	1.1417	1.1614	BIN1(+24.73kb)|CYP27C1(-51.77kb)|ERCC3(-125.2kb)|MAP3K2(-166.6kb)
2	127888757	rs11680911	C	A	2	2.829e-10	2.829e-10	1.1578	1.1578	0.7422	0	1.1391	1.162	BIN1(+23.85kb)|CYP27C1(-52.65kb)|ERCC3(-126.1kb)|MAP3K2(-167.5kb)
2	127847930	rs35114168	A	G	2	3.222e-09	3.222e-09	1.1464	1.1464	0.8893	0	1.1543	1.1447	BIN1(0)|CYP27C1(-93.48kb)|ERCC3(-166.9kb)
19	1039444	rs3795065	T	C	2	8.863e-09	1.788e-05	0.8625	0.8673	0.2459	25.74	0.9145	0.8495	ABCA7(-0.657kb)|ARID3A(+66.64kb)|C19orf26(-190.5kb)|CFD(+175.8kb)|CNN2(+0.38kb)|ELANE(+183.2kb)|GPX4(-64.49kb)|GRIN3B(+29.72kb)|HMHA1(-26.48kb)|KISS1R(+118.4kb)|MED16(+146.2kb)|POLR2E(-47.13kb)|PRTN3(+191.3kb)|R3HDM4(+126.2kb)|SBNO2(-68.19kb)|STK11(-166.4kb)|TMEM259(+18.3kb)|WDR18(+44.88kb)
11	85867875	rs10792832	G	A	2	1.285e-08	3.306e-05	1.1376	1.1315	0.2503	24.34	1.0755	1.1514	C11orf73(-145.4kb)|EED(-87.93kb)|PICALM(+86.95kb)
2	127886233	rs13025765	T	C	2	1.667e-08	1.124e-05	1.1486	1.1435	0.2652	19.46	1.0833	1.1634	BIN1(+21.33kb)|CYP27C1(-55.18kb)|ERCC3(-128.6kb)|MAP3K2(-170kb)
2	127886158	rs13025717	T	C	2	1.73e-08	9.541e-06	1.1483	1.1434	0.2674	18.7	1.0833	1.163	BIN1(+21.26kb)|CYP27C1(-55.25kb)|ERCC3(-128.7kb)|MAP3K2(-170.1kb)
2	127886371	rs12618593	C	T	2	1.737e-08	9.547e-06	1.1483	1.1434	0.2674	18.7	1.0833	1.163	BIN1(+21.47kb)|CYP27C1(-55.04kb)|ERCC3(-128.5kb)|MAP3K2(-169.9kb)
2	127886416	rs12617835	C	A	2	1.79e-08	8.797e-06	1.1482	1.1434	0.2686	18.31	1.0833	1.1628	BIN1(+21.51kb)|CYP27C1(-55kb)|ERCC3(-128.4kb)|MAP3K2(-169.8kb)
19	1040046	rs3764642	A	G	2	1.843e-08	1.843e-08	0.8693	0.8693	0.3576	0	0.9077	0.8588	ABCA7(-0.055kb)|ARID3A(+67.24kb)|C19orf26(-189.9kb)|CFD(+176.4kb)|CNN2(+0.982kb)|ELANE(+183.8kb)|GPX4(-63.89kb)|GRIN3B(+30.32kb)|HMHA1(-25.88kb)|KISS1R(+119kb)|MED16(+146.8kb)|POLR2E(-46.53kb)|PRTN3(+191.9kb)|R3HDM4(+126.8kb)|SBNO2(-67.59kb)|STK11(-165.8kb)|TMEM259(+18.9kb)|WDR18(+45.48kb)
11	85868640	rs3851179	C	T	2	1.922e-08	0.002802	1.1357	1.1217	0.1684	47.29	1.0619	1.1523	C11orf73(-144.6kb)|EED(-87.16kb)|PICALM(+87.72kb)
19	1050874	rs12151021	G	A	2	1.946e-08	1.946e-08	0.8647	0.8647	0.5748	0	0.8888	0.8581	ABCA7(0)|ARID3A(+78.07kb)|ATP5D(-190.9kb)|C19orf26(-179.1kb)|CFD(+187.3kb)|CNN2(+11.81kb)|ELANE(+194.6kb)|GPX4(-53.06kb)|GRIN3B(+41.15kb)|HMHA1(-15.05kb)|KISS1R(+129.9kb)|MED16(+157.7kb)|MIDN(-197.7kb)|POLR2E(-35.7kb)|R3HDM4(+137.6kb)|SBNO2(-56.76kb)|STK11(-154.9kb)|TMEM259(+29.73kb)|WDR18(+56.3kb)
19	1040765	rs4147904	G	A	2	1.966e-08	1.966e-08	0.8698	0.8698	0.3476	0	0.9089	0.8591	ABCA7(0)|ARID3A(+67.96kb)|C19orf26(-189.2kb)|CFD(+177.2kb)|CNN2(+1.701kb)|ELANE(+184.5kb)|GPX4(-63.17kb)|GRIN3B(+31.04kb)|HMHA1(-25.16kb)|KISS1R(+119.8kb)|MED16(+147.5kb)|POLR2E(-45.81kb)|PRTN3(+192.6kb)|R3HDM4(+127.5kb)|SBNO2(-66.87kb)|STK11(-165kb)|TMEM259(+19.62kb)|WDR18(+46.2kb)
2	127894615	rs744373	G	A	2	3.119e-08	3.119e-08	1.1451	1.1451	0.7958	0	1.1603	1.1416	BIN1(+29.71kb)|CYP27C1(-46.8kb)|ERCC3(-120.2kb)|MAP3K2(-161.6kb)
19	1042809	rs3764645	G	A	2	3.293e-08	2.029e-05	0.8489	0.8527	0.2258	31.85	0.8949	0.8284	ABCA7(0)|ARID3A(+70.01kb)|ATP5D(-198.9kb)|C19orf26(-187.1kb)|CFD(+179.2kb)|CNN2(+3.745kb)|ELANE(+186.6kb)|GPX4(-61.13kb)|GRIN3B(+33.09kb)|HMHA1(-23.11kb)|KISS1R(+121.8kb)|MED16(+149.6kb)|POLR2E(-43.77kb)|PRTN3(+194.6kb)|R3HDM4(+129.6kb)|SBNO2(-64.82kb)|STK11(-163kb)|TMEM259(+21.67kb)|WDR18(+48.24kb)
19	1039323	rs111278892	G	C	2	3.507e-08	0.006757	1.2487	1.2237	0.0878	65.68	1.1231	1.3056	ABCA7(-0.778kb)|ARID3A(+66.52kb)|C19orf26(-190.6kb)|CFD(+175.7kb)|CNN2(+0.259kb)|ELANE(+183.1kb)|GPX4(-64.61kb)|GRIN3B(+29.6kb)|HMHA1(-26.6kb)|KISS1R(+118.3kb)|MED16(+146.1kb)|POLR2E(-47.25kb)|PRTN3(+191.1kb)|R3HDM4(+126.1kb)|SBNO2(-68.31kb)|STK11(-166.5kb)|TMEM259(+18.18kb)|WDR18(+44.75kb)
2	127894484	rs730482	T	A	2	3.618e-08	3.618e-08	1.1442	1.1442	0.8204	0	1.1576	1.1412	BIN1(+29.58kb)|CYP27C1(-46.93kb)|ERCC3(-120.4kb)|MAP3K2(-161.8kb)
2	127892768	rs34779859	T	G	2	1.437e-07	1.437e-07	1.139	1.139	0.3323	0	1.0811	1.1516	BIN1(+27.86kb)|CYP27C1(-48.64kb)|ERCC3(-122.1kb)|MAP3K2(-163.5kb)
20	23601516	rs2983649	A	G	2	1.847e-07	1.847e-07	1.1299	1.1299	0.3759	0	1.0807	1.1409	CST1(-126.7kb)|CST3(-12.78kb)|CST4(-64.76kb)|CST8(+124.9kb)|CST9(+14.91kb)|CST9L(+52.13kb)|CST11(+168kb)|CST13P(+78.86kb)|CSTL1(+175.9kb)|NAPB(+199.4kb)
19	1039186	rs4807468	A	G	2	1.874e-07	0.003941	0.8732	0.8844	0.1638	48.43	0.9374	0.8572	ABCA7(-0.915kb)|ARID3A(+66.38kb)|C19orf26(-190.8kb)|CFD(+175.6kb)|CNN2(+0.122kb)|ELANE(+182.9kb)|GPX4(-64.75kb)|GRIN3B(+29.46kb)|HMHA1(-26.74kb)|KISS1R(+118.2kb)|MED16(+146kb)|POLR2E(-47.39kb)|PRTN3(+191kb)|R3HDM4(+126kb)|SBNO2(-68.45kb)|STK11(-166.6kb)|TMEM259(+18.04kb)|WDR18(+44.62kb)
2	127894098	rs56368748	A	G	2	1.902e-07	1.902e-07	1.1383	1.1383	0.3395	0	1.0812	1.1508	BIN1(+29.2kb)|CYP27C1(-47.31kb)|ERCC3(-120.8kb)|MAP3K2(-162.1kb)
2	127885247	rs58682665	G	A	2	1.97e-07	1.97e-07	0.8773	0.8773	0.6969	0	0.8954	0.8732	BIN1(+20.34kb)|CYP27C1(-56.16kb)|ERCC3(-129.6kb)|MAP3K2(-171kb)
18	77633271	rs76838079	T	C	2	2.12e-07	2.12e-07	1.2333	1.2333	0.7654	0	1.2068	1.2416	CTDP1(+118.8kb)|HSBP1L1(-91.31kb)|KCNG2(0)|PQLC1(-29.15kb)|RBFA(-161.1kb)|RBFADN(-194kb)|TXNL4A(-99.6kb)
2	127893897	rs745717	C	G	2	2.162e-07	2.162e-07	1.2272	1.2272	0.9091	0	1.2386	1.2245	BIN1(+28.99kb)|CYP27C1(-47.51kb)|ERCC3(-121kb)|MAP3K2(-162.3kb)
2	127885651	rs719054	A	G	2	2.218e-07	2.218e-07	0.8777	0.8777	0.6753	0	0.8972	0.8733	BIN1(+20.75kb)|CYP27C1(-55.76kb)|ERCC3(-129.2kb)|MAP3K2(-170.6kb)
19	1043638	rs3752231	T	C	2	2.286e-07	2.286e-07	1.1909	1.1909	0.5434	0	1.1546	1.2072	ABCA7(0)|ARID3A(+70.84kb)|ATP5D(-198.1kb)|C19orf26(-186.3kb)|CFD(+180kb)|CNN2(+4.574kb)|ELANE(+187.4kb)|GPX4(-60.3kb)|GRIN3B(+33.92kb)|HMHA1(-22.28kb)|KISS1R(+122.6kb)|MED16(+150.4kb)|POLR2E(-42.94kb)|PRTN3(+195.5kb)|R3HDM4(+130.4kb)|SBNO2(-63.99kb)|STK11(-162.2kb)|TMEM259(+22.5kb)|WDR18(+49.07kb)
19	1043864	rs4622634	C	G	2	2.609e-07	0.0003815	0.8555	0.8614	0.1887	42.12	0.9078	0.8329	ABCA7(0)|ARID3A(+71.06kb)|ATP5D(-197.9kb)|C19orf26(-186.1kb)|CFD(+180.3kb)|CNN2(+4.8kb)|ELANE(+187.6kb)|GPX4(-60.07kb)|GRIN3B(+34.14kb)|HMHA1(-22.06kb)|KISS1R(+122.8kb)|MED16(+150.6kb)|POLR2E(-42.71kb)|PRTN3(+195.7kb)|R3HDM4(+130.6kb)|SBNO2(-63.77kb)|STK11(-161.9kb)|TMEM259(+22.72kb)|WDR18(+49.3kb)
19	1036704	rs11670373	T	C	2	3.252e-07	0.03047	1.2257	1.1952	0.0589	71.97	1.0893	1.286	ABCA7(-3.397kb)|ARID3A(+63.9kb)|C19orf26(-193.2kb)|CFD(+173.1kb)|CNN2(0)|ELANE(+180.5kb)|GPX4(-67.23kb)|GRIN3B(+26.98kb)|HMHA1(-29.22kb)|KISS1R(+115.7kb)|MED16(+143.5kb)|POLR2E(-49.87kb)|PRTN3(+188.5kb)|R3HDM4(+123.5kb)|SBNO2(-70.93kb)|STK11(-169.1kb)|TMEM259(+15.56kb)|WDR18(+42.14kb)
19	1038571	rs1057874	T	C	2	3.269e-07	0.01372	0.8755	0.8899	0.1277	56.9	0.9461	0.8579	ABCA7(-1.53kb)|ARID3A(+65.77kb)|C19orf26(-191.4kb)|CFD(+175kb)|CNN2(0)|ELANE(+182.3kb)|GPX4(-65.36kb)|GRIN3B(+28.85kb)|HMHA1(-27.35kb)|KISS1R(+117.6kb)|MED16(+145.4kb)|POLR2E(-48.01kb)|PRTN3(+190.4kb)|R3HDM4(+125.3kb)|SBNO2(-69.06kb)|STK11(-167.2kb)|TMEM259(+17.43kb)|WDR18(+44kb)
19	1036691	rs11670349	T	C	2	3.634e-07	0.03134	1.2249	1.1944	0.0589	71.97	1.0884	1.2852	ABCA7(-3.41kb)|ARID3A(+63.89kb)|C19orf26(-193.3kb)|CFD(+173.1kb)|CNN2(0)|ELANE(+180.4kb)|GPX4(-67.24kb)|GRIN3B(+26.97kb)|HMHA1(-29.23kb)|KISS1R(+115.7kb)|MED16(+143.5kb)|POLR2E(-49.89kb)|PRTN3(+188.5kb)|R3HDM4(+123.5kb)|SBNO2(-70.94kb)|STK11(-169.1kb)|TMEM259(+15.55kb)|WDR18(+42.12kb)
20	54987216	rs17462136	C	G	2	4.352e-07	4.352e-07	0.8132	0.8132	0.7451	0	0.835	0.8078	AURKA(+19.86kb)|CASS4(0)|CSTF1(+7.634kb)|FAM209A(-112.6kb)|FAM209B(-121.1kb)|FAM210B(+43.5kb)|GCNT7(-79.33kb)|MC3R(+162.3kb)|RTFDC1(-56.43kb)
12	7847834	rs117402167	A	G	2	5.481e-07	5.481e-07	1.4425	1.4425	0.3325	0	1.6576	1.3913	APOBEC1(+29.33kb)|CD163(+191.4kb)|CLEC4C(-34.18kb)|DPPA3(-16.25kb)|GDF3(0)|NANOG(-94.16kb)|NANOGNB(-69.98kb)|SLC2A14(-118.6kb)
4	6129900	rs74660610	T	C	2	6.332e-07	6.332e-07	1.5756	1.5756	0.5986	0	1.7005	1.5286	JAKMIP1(0)|LOC285484(-72.56kb)|PPP2R2C(-192.4kb)|WFS1(-141.7kb)
20	54989833	rs6014722	A	T	2	6.463e-07	6.463e-07	0.8161	0.8161	0.6913	0	0.8429	0.8095	AURKA(+22.48kb)|CASS4(0)|CSTF1(+10.25kb)|FAM209A(-110kb)|FAM209B(-118.5kb)|FAM210B(+46.12kb)|GCNT7(-76.71kb)|MC3R(+165kb)|RTFDC1(-53.81kb)
20	54983075	rs6069736	T	C	2	6.683e-07	6.683e-07	0.8158	0.8158	0.7907	0	0.8337	0.8114	AURKA(+15.72kb)|CASS4(-4.092kb)|CSTF1(+3.493kb)|FAM209A(-116.7kb)|FAM209B(-125.2kb)|FAM210B(+39.36kb)|GCNT7(-83.47kb)|MC3R(+158.2kb)|RTFDC1(-60.57kb)
18	39899546	rs1461707	T	C	2	7.468e-07	7.468e-07	1.1291	1.1291	0.9352	0	1.134	1.1281	LINC00907(0)
11	47378396	rs10769256	T	C	2	8.046e-07	8.046e-07	1.1442	1.1442	0.8471	0	1.1543	1.1406	ACP2(+107.9kb)|ARFGAP2(+179.7kb)|C11orf49(+192.5kb)|CELF1(-109.1kb)|DDB2(+117.6kb)|MADD(+26.81kb)|MYBPC3(+4.143kb)|NR1H3(+87.81kb)|PACSIN3(+170.4kb)|PSMC3(-61.92kb)|RAPSN(-80.91kb)|SLC39A13(-51.65kb)|SPI1(0)
20	54988072	rs73156368	T	C	2	8.084e-07	8.084e-07	0.8177	0.8177	0.6908	0	0.8444	0.811	AURKA(+20.72kb)|CASS4(0)|CSTF1(+8.49kb)|FAM209A(-111.7kb)|FAM209B(-120.2kb)|FAM210B(+44.35kb)|GCNT7(-78.48kb)|MC3R(+163.2kb)|RTFDC1(-55.57kb)
2	127865100	rs13032148	A	G	2	8.185e-07	8.185e-07	1.123	1.123	0.4465	0	1.0805	1.1324	BIN1(+0.197kb)|CYP27C1(-76.31kb)|ERCC3(-149.8kb)|MAP3K2(-191.1kb)
20	54986274	rs6127744	T	G	2	8.334e-07	8.334e-07	0.8356	0.8356	0.4613	0	0.8805	0.8242	AURKA(+18.92kb)|CASS4(-0.893kb)|CSTF1(+6.692kb)|FAM209A(-113.5kb)|FAM209B(-122kb)|FAM210B(+42.56kb)|GCNT7(-80.27kb)|MC3R(+161.4kb)|RTFDC1(-57.37kb)
11	59940599	rs7232	A	T	2	8.557e-07	0.0007588	0.8909	0.881	0.1891	42.02	0.8331	0.9036	MS4A2(+74.66kb)|MS4A3(+102kb)|MS4A4A(-107.4kb)|MS4A6A(0)|MS4A6E(-161.8kb)|PLAC1L(+125.1kb)
20	54980606	rs6024857	C	T	2	8.68e-07	8.68e-07	0.8401	0.8401	0.5267	0	0.8775	0.8305	AURKA(+13.26kb)|CASS4(-6.561kb)|CSTF1(+1.024kb)|FAM209A(-119.2kb)|FAM209B(-127.7kb)|FAM210B(+36.89kb)|GCNT7(-85.94kb)|MC3R(+155.7kb)|RTFDC1(-63.04kb)
20	54984140	rs6024861	A	G	2	8.77e-07	8.77e-07	0.8171	0.8171	0.7334	0	0.84	0.8113	AURKA(+16.79kb)|CASS4(-3.027kb)|CSTF1(+4.558kb)|FAM209A(-115.6kb)|FAM209B(-124.2kb)|FAM210B(+40.42kb)|GCNT7(-82.41kb)|MC3R(+159.3kb)|RTFDC1(-59.51kb)
20	54982351	rs6014720	T	G	2	1.009e-06	1.009e-06	0.8345	0.8345	0.7425	0	0.8546	0.8293	AURKA(+15kb)|CASS4(-4.816kb)|CSTF1(+2.769kb)|FAM209A(-117.4kb)|FAM209B(-126kb)|FAM210B(+38.63kb)|GCNT7(-84.2kb)|MC3R(+157.5kb)|RTFDC1(-61.3kb)
18	39903930	rs62083864	A	T	2	1.047e-06	1.047e-06	1.1176	1.1176	0.7688	0	1.1017	1.1211	LINC00907(0)
17	1143549	rs62088736	T	C	2	1.072e-06	1.159e-06	0.6687	0.6688	0.3164	0.39	0.7611	0.6343	ABR(+52.93kb)|BHLHA9(-30.31kb)|CRK(-181.1kb)|TUSC5(-39.41kb)|YWHAE(-104.3kb)
2	127830219	rs17014873	C	A	2	1.083e-06	1.083e-06	1.2368	1.2368	0.8134	0	1.264	1.2308	BIN1(0)|CYP27C1(-111.2kb)|ERCC3(-184.6kb)
4	132735275	rs188012353	G	A	2	1.094e-06	1.094e-06	1.5956	1.5956	0.7294	0	1.5197	1.632	.
8	77295839	rs142956746	C	A	2	1.159e-06	0.009041	1.5443	1.6578	0.0587	72.03	2.0723	1.4014	.
20	55003465	rs718022	A	G	2	1.16e-06	1.16e-06	0.82	0.82	0.7369	0	0.8431	0.8145	AURKA(+36.11kb)|CASS4(0)|CSTF1(+23.88kb)|FAM209A(-96.32kb)|FAM209B(-104.8kb)|FAM210B(+59.75kb)|GCNT7(-63.08kb)|MC3R(+178.6kb)|RTFDC1(-40.18kb)
4	132802838	rs9685383	A	G	2	1.206e-06	1.206e-06	1.5771	1.5771	0.9915	0	1.5794	1.576	.
20	54984768	rs6064392	T	G	2	1.218e-06	1.218e-06	0.8197	0.8197	0.7281	0	0.8431	0.8138	AURKA(+17.42kb)|CASS4(-2.399kb)|CSTF1(+5.186kb)|FAM209A(-115kb)|FAM209B(-123.5kb)|FAM210B(+41.05kb)|GCNT7(-81.78kb)|MC3R(+159.9kb)|RTFDC1(-58.88kb)
16	81807032	rs67497653	T	A	2	1.295e-06	1.295e-06	0.8865	0.8865	0.6898	0	0.9054	0.8824	CMIP(+61.66kb)|LOC100129617(+106.2kb)|PLCG2(-5.866kb)
2	127895487	rs6431223	A	G	2	1.324e-06	1.324e-06	0.8774	0.8774	0.6792	0	0.8977	0.8726	BIN1(+30.58kb)|CYP27C1(-45.92kb)|ERCC3(-119.4kb)|MAP3K2(-160.8kb)
20	54997568	rs6024870	A	G	2	1.361e-06	1.361e-06	0.821	0.821	0.662	0	0.8509	0.8137	AURKA(+30.22kb)|CASS4(0)|CSTF1(+17.99kb)|FAM209A(-102.2kb)|FAM209B(-110.7kb)|FAM210B(+53.85kb)|GCNT7(-68.98kb)|MC3R(+172.7kb)|RTFDC1(-46.08kb)
18	39905301	rs7233088	T	A	2	1.363e-06	1.363e-06	1.1165	1.1165	0.7301	0	1.0978	1.1206	LINC00907(0)
11	60002935	rs718376	A	G	2	1.376e-06	0.001659	0.895	0.8835	0.1617	48.94	0.8361	0.9087	MS4A2(+137kb)|MS4A3(+164.3kb)|MS4A4A(-45.08kb)|MS4A5(-194.1kb)|MS4A6A(+50.8kb)|MS4A6E(-99.42kb)|MS4A7(-143kb)|MS4A14(-160.6kb)|PLAC1L(+187.4kb)
18	39904853	rs7228604	G	A	2	1.396e-06	1.396e-06	1.1163	1.1163	0.7331	0	1.0979	1.1204	LINC00907(0)
18	39906133	rs7238159	G	A	2	1.435e-06	1.435e-06	1.1161	1.1161	0.7619	0	1.0997	1.1197	LINC00907(0)
11	60008151	rs1019671	C	T	2	1.465e-06	0.001963	0.896	0.884	0.1561	50.29	0.8364	0.9097	MS4A2(+142.2kb)|MS4A3(+169.6kb)|MS4A4A(-39.86kb)|MS4A5(-188.9kb)|MS4A6A(+56.01kb)|MS4A6E(-94.2kb)|MS4A7(-137.8kb)|MS4A14(-155.3kb)|PLAC1L(+192.6kb)
18	39905310	rs7233219	A	C	2	1.519e-06	1.519e-06	1.116	1.116	0.7414	0	1.0981	1.1199	LINC00907(0)
20	55005224	rs56012565	A	G	2	1.609e-06	1.609e-06	0.8226	0.8226	0.7284	0	0.8465	0.8169	AURKA(+37.87kb)|CASS4(0)|CSTF1(+25.64kb)|FAM209A(-94.56kb)|FAM209B(-103.1kb)|FAM210B(+61.51kb)|GCNT7(-61.32kb)|MC3R(+180.4kb)|RTFDC1(-38.42kb)|TFAP2C(-199.1kb)
11	60016932	rs2509801	G	A	2	1.737e-06	0.001663	1.1153	1.1294	0.1665	47.76	1.1929	1.0989	MS4A2(+151kb)|MS4A3(+178.3kb)|MS4A4A(-31.08kb)|MS4A5(-180.1kb)|MS4A6A(+64.79kb)|MS4A6E(-85.42kb)|MS4A7(-129kb)|MS4A14(-146.6kb)
20	55009854	rs6099146	G	A	2	1.765e-06	1.765e-06	0.8246	0.8246	0.629	0	0.8578	0.8167	AURKA(+42.5kb)|CASS4(0)|CSTF1(+30.27kb)|FAM209A(-89.93kb)|FAM209B(-98.45kb)|FAM210B(+66.14kb)|GCNT7(-56.69kb)|MC3R(+185kb)|RTFDC1(-33.79kb)|TFAP2C(-194.5kb)
11	59965725	rs11230183	T	C	2	1.779e-06	0.004597	0.8974	0.882	0.1197	58.69	0.8322	0.9123	MS4A2(+99.78kb)|MS4A3(+127.1kb)|MS4A4A(-82.29kb)|MS4A6A(+13.59kb)|MS4A6E(-136.6kb)|MS4A7(-180.2kb)|MS4A14(-197.8kb)|PLAC1L(+150.2kb)
11	59965789	rs11230184	A	G	2	1.82e-06	0.00463	0.8975	0.8821	0.1198	58.68	0.8323	0.9124	MS4A2(+99.85kb)|MS4A3(+127.2kb)|MS4A4A(-82.22kb)|MS4A6A(+13.65kb)|MS4A6E(-136.6kb)|MS4A7(-180.2kb)|MS4A14(-197.7kb)|PLAC1L(+150.3kb)
11	59964992	rs7116190	A	G	2	1.832e-06	0.004774	0.8975	0.882	0.1183	59	0.8321	0.9125	MS4A2(+99.05kb)|MS4A3(+126.4kb)|MS4A4A(-83.02kb)|MS4A6A(+12.85kb)|MS4A6E(-137.4kb)|MS4A7(-181kb)|MS4A14(-198.5kb)|PLAC1L(+149.5kb)
11	60000574	rs7936120	A	T	2	1.846e-06	0.002016	0.897	0.8852	0.1583	49.77	0.8379	0.9107	MS4A2(+134.6kb)|MS4A3(+162kb)|MS4A4A(-47.44kb)|MS4A5(-196.5kb)|MS4A6A(+48.44kb)|MS4A6E(-101.8kb)|MS4A7(-145.4kb)|MS4A14(-162.9kb)|PLAC1L(+185.1kb)
20	54998544	rs6014724	G	A	2	1.885e-06	1.885e-06	0.8244	0.8244	0.694	0	0.8513	0.8179	AURKA(+31.19kb)|CASS4(0)|CSTF1(+18.96kb)|FAM209A(-101.2kb)|FAM209B(-109.8kb)|FAM210B(+54.83kb)|GCNT7(-68kb)|MC3R(+173.7kb)|RTFDC1(-45.1kb)
18	39898977	rs977557	T	C	2	1.929e-06	1.929e-06	1.1144	1.1144	0.6977	0	1.0936	1.119	LINC00907(0)
20	54995699	rs6069737	T	C	2	1.948e-06	1.948e-06	0.8232	0.8232	0.7523	0	0.8448	0.8179	AURKA(+28.35kb)|CASS4(0)|CSTF1(+16.12kb)|FAM209A(-104.1kb)|FAM209B(-112.6kb)|FAM210B(+51.98kb)|GCNT7(-70.85kb)|MC3R(+170.8kb)|RTFDC1(-47.95kb)
11	60001325	rs1426250	G	A	2	1.956e-06	0.00171	0.8972	0.8861	0.1668	47.69	0.8391	0.9106	MS4A2(+135.4kb)|MS4A3(+162.7kb)|MS4A4A(-46.69kb)|MS4A5(-195.7kb)|MS4A6A(+49.19kb)|MS4A6E(-101kb)|MS4A7(-144.6kb)|MS4A14(-162.2kb)|PLAC1L(+185.8kb)
11	59966295	rs2123314	C	T	2	1.973e-06	0.005573	0.8978	0.8816	0.1116	60.51	0.8312	0.9131	MS4A2(+100.4kb)|MS4A3(+127.7kb)|MS4A4A(-81.72kb)|MS4A6A(+14.16kb)|MS4A6E(-136.1kb)|MS4A7(-179.7kb)|MS4A14(-197.2kb)|PLAC1L(+150.8kb)
11	59967526	rs7933805	G	A	2	2.028e-06	0.004871	0.8979	0.8825	0.119	58.86	0.8326	0.9129	MS4A2(+101.6kb)|MS4A3(+128.9kb)|MS4A4A(-80.49kb)|MS4A6A(+15.39kb)|MS4A6E(-134.8kb)|MS4A7(-178.4kb)|MS4A14(-196kb)|PLAC1L(+152kb)
11	60012673	rs603648	T	A	2	2.038e-06	0.002195	1.1145	1.1295	0.1571	50.04	1.1938	1.0977	MS4A2(+146.7kb)|MS4A3(+174.1kb)|MS4A4A(-35.34kb)|MS4A5(-184.4kb)|MS4A6A(+60.53kb)|MS4A6E(-89.68kb)|MS4A7(-133.3kb)|MS4A14(-150.8kb)|PLAC1L(+197.2kb)
19	7853275	rs77872764	A	G	2	2.049e-06	2.049e-06	1.1418	1.1418	0.8518	0	1.1301	1.1448	C19orf59(+108.6kb)|CAMSAP3(+170.1kb)|CD209(+40.81kb)|CLEC4G(+56.22kb)|CLEC4GP1(0)|CLEC4M(+18.78kb)|CTXN1(-136.1kb)|ELAVL1(-170.2kb)|EVI5L(-41.88kb)|FCER2(+86.24kb)|FLJ22184(-80.33kb)|LOC388499(-90.24kb)|LRRC8E(-100.1kb)|MAP2K7(-115.5kb)|PCP2(+154.6kb)|PET100(+156.8kb)|RETN(+117.9kb)|SNAPC2(-131.9kb)|STXBP2(+140.5kb)|TGFBR3L(-127.8kb)|TIMM44(-138.3kb)|TRAPPC5(+105.5kb)|XAB2(+158.8kb)
11	60013674	rs654415	A	G	2	2.058e-06	0.002195	1.1145	1.1295	0.1572	50.03	1.1938	1.0977	MS4A2(+147.7kb)|MS4A3(+175.1kb)|MS4A4A(-34.34kb)|MS4A5(-183.4kb)|MS4A6A(+61.54kb)|MS4A6E(-88.68kb)|MS4A7(-132.3kb)|MS4A14(-149.8kb)|PLAC1L(+198.2kb)
11	60013857	rs655231	A	G	2	2.059e-06	0.002127	1.1144	1.1293	0.1588	49.64	1.1934	1.0977	MS4A2(+147.9kb)|MS4A3(+175.3kb)|MS4A4A(-34.16kb)|MS4A5(-183.2kb)|MS4A6A(+61.72kb)|MS4A6E(-88.5kb)|MS4A7(-132.1kb)|MS4A14(-149.6kb)|PLAC1L(+198.3kb)
11	59962189	rs7926354	A	G	2	2.063e-06	0.005252	0.898	0.8821	0.1153	59.68	0.832	0.9131	MS4A2(+96.25kb)|MS4A3(+123.6kb)|MS4A4A(-85.82kb)|MS4A6A(+10.05kb)|MS4A6E(-140.2kb)|MS4A7(-183.8kb)|PLAC1L(+146.7kb)
11	60019150	rs636317	T	C	2	2.072e-06	0.001847	1.1143	1.1285	0.1652	48.08	1.1921	1.0979	MS4A2(+153.2kb)|MS4A3(+180.6kb)|MS4A4A(-28.86kb)|MS4A5(-177.9kb)|MS4A6A(+67.01kb)|MS4A6E(-83.2kb)|MS4A7(-126.8kb)|MS4A14(-144.3kb)
11	59962166	rs7926344	A	G	2	2.092e-06	0.004575	0.8979	0.8828	0.1225	58.08	0.8332	0.9128	MS4A2(+96.23kb)|MS4A3(+123.6kb)|MS4A4A(-85.85kb)|MS4A6A(+10.03kb)|MS4A6E(-140.2kb)|MS4A7(-183.8kb)|PLAC1L(+146.6kb)
11	60016387	rs3132886	A	T	2	2.132e-06	0.001895	1.1143	1.1285	0.1644	48.28	1.1922	1.0978	MS4A2(+150.4kb)|MS4A3(+177.8kb)|MS4A4A(-31.63kb)|MS4A5(-180.7kb)|MS4A6A(+64.25kb)|MS4A6E(-85.97kb)|MS4A7(-129.6kb)|MS4A14(-147.1kb)
11	60013451	rs600064	G	A	2	2.154e-06	0.002043	1.1142	1.1288	0.1613	49.03	1.1927	1.0976	MS4A2(+147.5kb)|MS4A3(+174.9kb)|MS4A4A(-34.56kb)|MS4A5(-183.6kb)|MS4A6A(+61.31kb)|MS4A6E(-88.9kb)|MS4A7(-132.5kb)|MS4A14(-150kb)|PLAC1L(+197.9kb)
11	59961786	rs7926729	T	C	2	2.156e-06	0.00457	0.8981	0.883	0.123	57.96	0.8334	0.9129	MS4A2(+95.85kb)|MS4A3(+123.2kb)|MS4A4A(-86.23kb)|MS4A6A(+9.647kb)|MS4A6E(-140.6kb)|MS4A7(-184.2kb)|PLAC1L(+146.3kb)
11	59975165	rs7928895	A	G	2	2.164e-06	0.004241	0.8982	0.8836	0.1268	57.1	0.8343	0.9129	MS4A2(+109.2kb)|MS4A3(+136.6kb)|MS4A4A(-72.85kb)|MS4A6A(+23.03kb)|MS4A6E(-127.2kb)|MS4A7(-170.8kb)|MS4A14(-188.3kb)|PLAC1L(+159.6kb)
11	59976111	rs7932740	A	G	2	2.179e-06	0.004205	0.8982	0.8836	0.1273	56.98	0.8344	0.9129	MS4A2(+110.2kb)|MS4A3(+137.5kb)|MS4A4A(-71.9kb)|MS4A6A(+23.97kb)|MS4A6E(-126.2kb)|MS4A7(-169.8kb)|MS4A14(-187.4kb)|PLAC1L(+160.6kb)
11	59975078	rs7929589	T	C	2	2.184e-06	0.004632	0.8982	0.8832	0.1224	58.09	0.8336	0.9131	MS4A2(+109.1kb)|MS4A3(+136.5kb)|MS4A4A(-72.94kb)|MS4A6A(+22.94kb)|MS4A6E(-127.3kb)|MS4A7(-170.9kb)|MS4A14(-188.4kb)|PLAC1L(+159.6kb)
11	59961486	rs11230180	T	G	2	2.232e-06	0.004673	0.8983	0.8831	0.1226	58.06	0.8335	0.9131	MS4A2(+95.55kb)|MS4A3(+122.9kb)|MS4A4A(-86.53kb)|MS4A6A(+9.347kb)|MS4A6E(-140.9kb)|MS4A7(-184.5kb)|PLAC1L(+146kb)
2	127826533	rs1060743	G	A	2	2.238e-06	2.238e-06	1.1187	1.1187	0.9943	0	1.1191	1.1186	BIN1(0)|CYP27C1(-114.9kb)|ERCC3(-188.3kb)
11	60011013	rs611418	T	C	2	2.249e-06	0.002271	1.1139	1.129	0.1574	49.98	1.1932	1.0972	MS4A2(+145.1kb)|MS4A3(+172.4kb)|MS4A4A(-37kb)|MS4A5(-186kb)|MS4A6A(+58.87kb)|MS4A6E(-91.34kb)|MS4A7(-134.9kb)|MS4A14(-152.5kb)|PLAC1L(+195.5kb)
11	59961427	rs10897011	A	G	2	2.261e-06	0.004636	0.8983	0.8832	0.1231	57.94	0.8336	0.9131	MS4A2(+95.49kb)|MS4A3(+122.8kb)|MS4A4A(-86.59kb)|MS4A6A(+9.288kb)|MS4A6E(-140.9kb)|MS4A7(-184.5kb)|PLAC1L(+145.9kb)
11	59982470	rs11603507	A	T	2	2.295e-06	0.004098	0.8985	0.8841	0.13	56.39	0.8349	0.913	MS4A2(+116.5kb)|MS4A3(+143.9kb)|MS4A4A(-65.54kb)|MS4A6A(+30.33kb)|MS4A6E(-119.9kb)|MS4A7(-163.5kb)|MS4A14(-181kb)|PLAC1L(+167kb)
15	48715448	rs9920570	G	A	2	2.297e-06	5.163e-05	1.1294	1.1264	0.2871	11.75	1.0656	1.1441	DUT(+79.88kb)|FBN1(0)|SLC12A1(+119.2kb)
11	60019161	rs636341	C	A	2	2.307e-06	0.001832	1.1139	1.1278	0.1673	47.56	1.1912	1.0975	MS4A2(+153.2kb)|MS4A3(+180.6kb)|MS4A4A(-28.85kb)|MS4A5(-177.9kb)|MS4A6A(+67.02kb)|MS4A6E(-83.19kb)|MS4A7(-126.8kb)|MS4A14(-144.3kb)
11	60020112	rs672399	G	T	2	2.32e-06	0.001091	1.1137	1.1255	0.1889	42.06	1.1872	1.0982	MS4A2(+154.2kb)|MS4A3(+181.5kb)|MS4A4A(-27.9kb)|MS4A5(-176.9kb)|MS4A6A(+67.97kb)|MS4A6E(-82.24kb)|MS4A7(-125.8kb)|MS4A14(-143.4kb)
11	59981801	rs4939320	C	T	2	2.327e-06	0.004334	0.8985	0.8839	0.127	57.07	0.8346	0.9132	MS4A2(+115.9kb)|MS4A3(+143.2kb)|MS4A4A(-66.21kb)|MS4A6A(+29.66kb)|MS4A6E(-120.6kb)|MS4A7(-164.2kb)|MS4A14(-181.7kb)|PLAC1L(+166.3kb)
11	59981218	rs1426253	C	A	2	2.335e-06	0.004475	0.8986	0.8838	0.1255	57.41	0.8344	0.9133	MS4A2(+115.3kb)|MS4A3(+142.6kb)|MS4A4A(-66.8kb)|MS4A6A(+29.08kb)|MS4A6E(-121.1kb)|MS4A7(-164.7kb)|MS4A14(-182.3kb)|PLAC1L(+165.7kb)
15	48714838	rs1467953	G	T	2	2.343e-06	6.405e-05	1.1293	1.1261	0.2846	12.66	1.0652	1.1441	DUT(+79.27kb)|FBN1(0)|SLC12A1(+118.6kb)
11	60005424	rs72920867	C	T	2	2.347e-06	0.002083	0.8979	0.8863	0.1612	49.06	0.839	0.9115	MS4A2(+139.5kb)|MS4A3(+166.8kb)|MS4A4A(-42.59kb)|MS4A5(-191.6kb)|MS4A6A(+53.28kb)|MS4A6E(-96.93kb)|MS4A7(-140.5kb)|MS4A14(-158.1kb)|PLAC1L(+189.9kb)
6	32578285	rs9271184	C	A	2	2.371e-06	2.371e-06	0.8276	0.8276	0.8342	0	0.8389	0.8233	HLA-DQA1(-26.9kb)|HLA-DQA2(-130.9kb)|HLA-DQB1(-48.96kb)|HLA-DQB2(-145.6kb)|HLA-DRA(+165.5kb)|HLA-DRB1(+20.67kb)|HLA-DRB5(+80.28kb)|HLA-DRB6(+50.51kb)
11	59959969	rs1834551	A	G	2	2.391e-06	0.00441	0.8985	0.8838	0.1266	57.14	0.8344	0.9132	MS4A2(+94.03kb)|MS4A3(+121.4kb)|MS4A4A(-88.04kb)|MS4A6A(+7.83kb)|MS4A6E(-142.4kb)|MS4A7(-186kb)|PLAC1L(+144.5kb)
11	59986399	rs4492839	A	T	2	2.44e-06	0.003918	0.8987	0.8846	0.1332	55.66	0.8356	0.9131	MS4A2(+120.5kb)|MS4A3(+147.8kb)|MS4A4A(-61.61kb)|MS4A6A(+34.26kb)|MS4A6E(-116kb)|MS4A7(-159.6kb)|MS4A14(-177.1kb)|PLAC1L(+170.9kb)
11	59986333	rs1820428	T	A	2	2.442e-06	0.003918	0.8987	0.8846	0.1332	55.66	0.8356	0.9131	MS4A2(+120.4kb)|MS4A3(+147.7kb)|MS4A4A(-61.68kb)|MS4A6A(+34.19kb)|MS4A6E(-116kb)|MS4A7(-159.6kb)|MS4A14(-177.2kb)|PLAC1L(+170.8kb)
11	59986817	rs56357056	G	A	2	2.458e-06	0.00385	0.8987	0.8847	0.1342	55.42	0.8358	0.9131	MS4A2(+120.9kb)|MS4A3(+148.2kb)|MS4A4A(-61.2kb)|MS4A6A(+34.68kb)|MS4A6E(-115.5kb)|MS4A7(-159.1kb)|MS4A14(-176.7kb)|PLAC1L(+171.3kb)
11	59996994	rs11230201	G	C	2	2.49e-06	0.002566	0.8987	0.8865	0.1539	50.81	0.8387	0.9124	MS4A2(+131.1kb)|MS4A3(+158.4kb)|MS4A4A(-51.02kb)|MS4A6A(+44.86kb)|MS4A6E(-105.4kb)|MS4A7(-149kb)|MS4A14(-166.5kb)|PLAC1L(+181.5kb)
11	59958380	rs2081545	A	C	2	2.501e-06	0.004224	0.8987	0.8843	0.1297	56.45	0.8351	0.9133	MS4A2(+92.44kb)|MS4A3(+119.8kb)|MS4A4A(-89.63kb)|MS4A6A(+6.241kb)|MS4A6E(-144kb)|MS4A7(-187.6kb)|PLAC1L(+142.9kb)
11	59993346	rs1349667	A	T	2	2.535e-06	0.003074	0.8986	0.8856	0.1457	52.77	0.8373	0.9126	MS4A2(+127.4kb)|MS4A3(+154.8kb)|MS4A4A(-54.67kb)|MS4A6A(+41.21kb)|MS4A6E(-109kb)|MS4A7(-152.6kb)|MS4A14(-170.1kb)|PLAC1L(+177.8kb)
11	59957513	rs1834549	T	C	2	2.539e-06	0.004051	0.8987	0.8845	0.1318	55.97	0.8354	0.9132	MS4A2(+91.57kb)|MS4A3(+118.9kb)|MS4A4A(-90.5kb)|MS4A6A(+5.374kb)|MS4A6E(-144.8kb)|MS4A7(-188.4kb)|PLAC1L(+142kb)
11	59996266	rs11601689	C	G	2	2.557e-06	0.002829	0.8989	0.8863	0.15	51.75	0.8383	0.9127	MS4A2(+130.3kb)|MS4A3(+157.7kb)|MS4A4A(-51.75kb)|MS4A6A(+44.13kb)|MS4A6E(-106.1kb)|MS4A7(-149.7kb)|MS4A14(-167.2kb)|PLAC1L(+180.8kb)
11	59956938	rs56201148	T	C	2	2.582e-06	0.004046	0.8988	0.8846	0.1323	55.85	0.8356	0.9133	MS4A2(+91kb)|MS4A3(+118.4kb)|MS4A4A(-91.08kb)|MS4A6A(+4.799kb)|MS4A6E(-145.4kb)|MS4A7(-189kb)|PLAC1L(+141.4kb)
11	59980315	rs11230194	G	C	2	2.607e-06	0.004286	0.8989	0.8845	0.1297	56.44	0.8353	0.9135	MS4A2(+114.4kb)|MS4A3(+141.7kb)|MS4A4A(-67.7kb)|MS4A6A(+28.18kb)|MS4A6E(-122kb)|MS4A7(-165.6kb)|MS4A14(-183.2kb)|PLAC1L(+164.8kb)
11	60021948	rs1582763	A	G	2	2.609e-06	0.002099	0.8967	0.8851	0.164	48.38	0.837	0.9104	MS4A2(+156kb)|MS4A3(+183.4kb)|MS4A4A(-26.06kb)|MS4A5(-175.1kb)|MS4A6A(+69.81kb)|MS4A6E(-80.41kb)|MS4A7(-124kb)|MS4A14(-141.5kb)
11	59998963	rs2015475	C	A	2	2.611e-06	0.002714	0.8989	0.8866	0.1523	51.2	0.8387	0.9127	MS4A2(+133kb)|MS4A3(+160.4kb)|MS4A4A(-49.05kb)|MS4A5(-198.1kb)|MS4A6A(+46.82kb)|MS4A6E(-103.4kb)|MS4A7(-147kb)|MS4A14(-164.5kb)|PLAC1L(+183.4kb)
18	39898498	rs9966406	G	C	2	2.626e-06	2.626e-06	1.1129	1.1129	0.65	0	1.0887	1.1183	LINC00907(0)
11	59955357	rs1834557	A	G	2	2.65e-06	0.003675	0.8989	0.8852	0.1376	54.65	0.8365	0.9132	MS4A2(+89.42kb)|MS4A3(+116.8kb)|MS4A4A(-92.66kb)|MS4A6A(+3.218kb)|MS4A6E(-147kb)|MS4A7(-190.6kb)|PLAC1L(+139.8kb)
11	85800279	rs561655	A	G	2	2.703e-06	2.703e-06	1.1142	1.1142	0.3903	0	1.0678	1.1245	CCDC83(+169.2kb)|EED(-155.5kb)|PICALM(+19.36kb)
11	85828548	rs598726	A	G	2	2.711e-06	2.711e-06	1.1154	1.1154	0.3959	0	1.069	1.1257	C11orf73(-184.7kb)|CCDC83(+197.5kb)|EED(-127.3kb)|PICALM(+47.62kb)
18	39896924	rs1461706	C	T	2	2.711e-06	2.711e-06	1.1127	1.1127	0.6301	0	1.0871	1.1185	LINC00907(0)
11	60024008	rs7121656	T	C	2	2.731e-06	0.0009822	1.113	1.124	0.1954	40.35	1.1851	1.0976	MS4A1(-199.3kb)|MS4A2(+158.1kb)|MS4A3(+185.4kb)|MS4A4A(-24kb)|MS4A5(-173.1kb)|MS4A6A(+71.87kb)|MS4A6E(-78.35kb)|MS4A7(-121.9kb)|MS4A14(-139.5kb)
11	59984676	rs56273223	C	A	2	2.739e-06	0.003595	0.8992	0.8856	0.1391	54.29	0.8371	0.9134	MS4A2(+118.7kb)|MS4A3(+146.1kb)|MS4A4A(-63.34kb)|MS4A6A(+32.54kb)|MS4A6E(-117.7kb)|MS4A7(-161.3kb)|MS4A14(-178.8kb)|PLAC1L(+169.2kb)
11	60025565	rs6591559	G	A	2	2.782e-06	0.0008225	1.1129	1.1233	0.2026	38.4	1.184	1.0978	MS4A1(-197.7kb)|MS4A2(+159.6kb)|MS4A3(+187kb)|MS4A4A(-22.45kb)|MS4A5(-171.5kb)|MS4A6A(+73.43kb)|MS4A6E(-76.79kb)|MS4A7(-120.4kb)|MS4A14(-137.9kb)
14	101901068	rs9707396	T	G	2	2.81e-06	2.81e-06	1.1919	1.1919	0.8904	0	1.1796	1.195	DIO3(-126.6kb)|DIO3OS(-117.5kb)|MIR1247(-125.6kb)
11	59953313	rs1820430	G	C	2	2.818e-06	0.00353	0.8992	0.8858	0.1408	53.89	0.8373	0.9134	MS4A2(+87.37kb)|MS4A3(+114.7kb)|MS4A4A(-94.7kb)|MS4A6A(+1.174kb)|MS4A6E(-149kb)|MS4A7(-192.6kb)|PLAC1L(+137.8kb)
15	48702873	rs1042078	A	G	2	2.844e-06	2.844e-06	1.127	1.127	0.3948	0	1.0758	1.1385	DUT(+67.3kb)|FBN1(0)|SLC12A1(+106.6kb)
11	85831690	rs472486	G	A	2	2.885e-06	2.885e-06	1.114	1.114	0.3548	0	1.0641	1.1251	C11orf73(-181.6kb)|EED(-124.1kb)|PICALM(+50.77kb)
1	55608005	rs1165226	T	C	2	2.954e-06	2.954e-06	0.8986	0.8986	0.964	0	0.9006	0.8982	BSND(+133.5kb)|LOC100507634(-73.08kb)|MIR4422(-83.31kb)|PCSK9(+77.48kb)|TMEM61(+150kb)|USP24(0)
11	59959843	rs1834550	C	T	2	2.993e-06	0.005366	0.8994	0.8841	0.1202	58.58	0.8342	0.9144	MS4A2(+93.9kb)|MS4A3(+121.3kb)|MS4A4A(-88.17kb)|MS4A6A(+7.704kb)|MS4A6E(-142.5kb)|MS4A7(-186.1kb)|PLAC1L(+144.3kb)
18	39895631	rs1461705	C	T	2	3.027e-06	3.027e-06	1.1122	1.1122	0.6043	0	1.0847	1.1184	LINC00907(0)
11	76448286	rs11236918	A	C	2	3.052e-06	3.052e-06	1.1759	1.1759	0.9013	0	1.1861	1.1734	ACER3(-123.6kb)|C11orf30(+185.7kb)|GUCY2EP(+15.45kb)|LRRC32(+66.5kb)|TSKU(-45.07kb)
11	59936926	rs7933202	C	A	2	3.08e-06	0.009921	0.899	0.88	0.0871	65.84	0.8271	0.9156	MS4A2(+70.99kb)|MS4A3(+98.34kb)|MS4A4A(-111.1kb)|MS4A6A(-2.153kb)|MS4A6E(-165.4kb)|PLAC1L(+121.4kb)
11	60028940	rs1530914	T	C	2	3.137e-06	0.0008354	1.1124	1.1226	0.204	38.02	1.1832	1.0973	MS4A1(-194.3kb)|MS4A2(+163kb)|MS4A3(+190.4kb)|MS4A4A(-19.07kb)|MS4A5(-168.1kb)|MS4A6A(+76.8kb)|MS4A6E(-73.41kb)|MS4A7(-117kb)|MS4A14(-134.5kb)
11	60029931	rs1026256	A	T	2	3.15e-06	0.0008149	1.1123	1.1225	0.205	37.74	1.183	1.0973	MS4A1(-193.4kb)|MS4A2(+164kb)|MS4A3(+191.3kb)|MS4A4A(-18.08kb)|MS4A5(-167.1kb)|MS4A6A(+77.79kb)|MS4A6E(-72.42kb)|MS4A7(-116kb)|MS4A14(-133.6kb)
11	60029949	rs1026255	A	G	2	3.156e-06	0.0008149	1.1123	1.1225	0.205	37.74	1.183	1.0973	MS4A1(-193.3kb)|MS4A2(+164kb)|MS4A3(+191.4kb)|MS4A4A(-18.06kb)|MS4A5(-167.1kb)|MS4A6A(+77.81kb)|MS4A6E(-72.4kb)|MS4A7(-116kb)|MS4A14(-133.5kb)
19	1028149	rs75364577	A	G	2	3.179e-06	0.008603	1.2119	1.1922	0.1362	54.95	1.0988	1.2595	ABCA7(-11.95kb)|ARID3A(+55.35kb)|AZU1(+196.1kb)|CFD(+164.5kb)|CNN2(0)|ELANE(+171.9kb)|GPX4(-75.79kb)|GRIN3B(+18.43kb)|HMHA1(-37.77kb)|KISS1R(+107.1kb)|MED16(+134.9kb)|POLR2E(-58.43kb)|PRTN3(+180kb)|R3HDM4(+114.9kb)|SBNO2(-79.48kb)|STK11(-177.6kb)|TMEM259(+7.008kb)|WDR18(+33.58kb)
15	48740097	rs8029993	T	C	2	3.194e-06	0.0006358	1.1267	1.1202	0.252	23.78	1.0588	1.1424	DUT(+104.5kb)|FBN1(0)|SLC12A1(+143.8kb)
11	85811696	rs566975	A	C	2	3.196e-06	3.196e-06	1.1132	1.1132	0.4163	0	1.0695	1.123	CCDC83(+180.6kb)|EED(-144.1kb)|PICALM(+30.77kb)
11	59989430	rs2081547	T	C	2	3.205e-06	0.003869	0.8997	0.8861	0.1384	54.45	0.8374	0.914	MS4A2(+123.5kb)|MS4A3(+150.8kb)|MS4A4A(-58.58kb)|MS4A6A(+37.29kb)|MS4A6E(-112.9kb)|MS4A7(-156.5kb)|MS4A14(-174.1kb)|PLAC1L(+173.9kb)
11	60030556	rs1026253	A	G	2	3.213e-06	0.0008443	1.1123	1.1225	0.204	38.02	1.1831	1.0972	MS4A1(-192.7kb)|MS4A2(+164.6kb)|MS4A3(+192kb)|MS4A4A(-17.46kb)|MS4A5(-166.5kb)|MS4A6A(+78.42kb)|MS4A6E(-71.8kb)|MS4A7(-115.4kb)|MS4A14(-132.9kb)
11	59944810	rs7946992	C	T	2	3.223e-06	0.001202	0.8997	0.8905	0.1912	41.47	0.8445	0.9123	MS4A2(+78.87kb)|MS4A3(+106.2kb)|MS4A4A(-103.2kb)|MS4A6A(0)|MS4A6E(-157.5kb)|PLAC1L(+129.3kb)
11	60030559	rs1026252	T	C	2	3.246e-06	0.0008636	1.1122	1.1225	0.2034	38.18	1.1831	1.0971	MS4A1(-192.7kb)|MS4A2(+164.6kb)|MS4A3(+192kb)|MS4A4A(-17.45kb)|MS4A5(-166.5kb)|MS4A6A(+78.42kb)|MS4A6E(-71.8kb)|MS4A7(-115.4kb)|MS4A14(-132.9kb)
11	60030457	rs1026254	C	T	2	3.25e-06	0.0008636	1.1122	1.1225	0.2034	38.18	1.1831	1.0971	MS4A1(-192.8kb)|MS4A2(+164.5kb)|MS4A3(+191.9kb)|MS4A4A(-17.56kb)|MS4A5(-166.6kb)|MS4A6A(+78.32kb)|MS4A6E(-71.9kb)|MS4A7(-115.5kb)|MS4A14(-133kb)
19	1036913	rs11670441	T	C	2	3.266e-06	0.06587	1.1916	1.1624	0.0456	74.97	1.0618	1.2516	ABCA7(-3.188kb)|ARID3A(+64.11kb)|C19orf26(-193kb)|CFD(+173.3kb)|CNN2(0)|ELANE(+180.7kb)|GPX4(-67.02kb)|GRIN3B(+27.19kb)|HMHA1(-29.01kb)|KISS1R(+115.9kb)|MED16(+143.7kb)|POLR2E(-49.66kb)|PRTN3(+188.7kb)|R3HDM4(+123.7kb)|SBNO2(-70.72kb)|STK11(-168.9kb)|TMEM259(+15.77kb)|WDR18(+42.34kb)
19	1037551	rs113353568	A	G	2	3.282e-06	0.06663	1.1913	1.1621	0.0451	75.09	1.0615	1.2515	ABCA7(-2.55kb)|ARID3A(+64.75kb)|C19orf26(-192.4kb)|CFD(+173.9kb)|CNN2(0)|ELANE(+181.3kb)|GPX4(-66.38kb)|GRIN3B(+27.83kb)|HMHA1(-28.37kb)|KISS1R(+116.5kb)|MED16(+144.3kb)|POLR2E(-49.03kb)|PRTN3(+189.4kb)|R3HDM4(+124.3kb)|SBNO2(-70.08kb)|STK11(-168.2kb)|TMEM259(+16.41kb)|WDR18(+42.98kb)
15	48744489	rs2245752	A	C	2	3.305e-06	0.0009828	1.1264	1.1192	0.2438	26.38	1.0574	1.1424	DUT(+108.9kb)|FBN1(0)|SLC12A1(+148.2kb)
19	1037563	rs111525696	G	A	2	3.321e-06	0.06805	1.1913	1.1619	0.0443	75.27	1.061	1.2517	ABCA7(-2.538kb)|ARID3A(+64.76kb)|C19orf26(-192.4kb)|CFD(+174kb)|CNN2(0)|ELANE(+181.3kb)|GPX4(-66.37kb)|GRIN3B(+27.84kb)|HMHA1(-28.36kb)|KISS1R(+116.5kb)|MED16(+144.3kb)|POLR2E(-49.01kb)|PRTN3(+189.4kb)|R3HDM4(+124.3kb)|SBNO2(-70.07kb)|STK11(-168.2kb)|TMEM259(+16.42kb)|WDR18(+42.99kb)
19	1037584	rs72973561	T	C	2	3.328e-06	0.06739	1.1912	1.1619	0.0448	75.17	1.0612	1.2515	ABCA7(-2.517kb)|ARID3A(+64.78kb)|C19orf26(-192.4kb)|CFD(+174kb)|CNN2(0)|ELANE(+181.3kb)|GPX4(-66.35kb)|GRIN3B(+27.86kb)|HMHA1(-28.34kb)|KISS1R(+116.6kb)|MED16(+144.4kb)|POLR2E(-48.99kb)|PRTN3(+189.4kb)|R3HDM4(+124.4kb)|SBNO2(-70.05kb)|STK11(-168.2kb)|TMEM259(+16.44kb)|WDR18(+43.02kb)
11	76448859	rs76829346	C	T	2	3.329e-06	3.329e-06	1.1752	1.1752	0.9274	0	1.1826	1.1733	ACER3(-123.1kb)|C11orf30(+186.3kb)|GUCY2EP(+16.03kb)|LRRC32(+67.07kb)|TSKU(-44.5kb)
15	48745322	rs2725550	A	G	2	3.339e-06	0.0009091	1.1264	1.1193	0.2455	25.85	1.0576	1.1423	DUT(+109.8kb)|FBN1(0)|SLC12A1(+149kb)
11	47380340	rs3740688	T	G	2	3.359e-06	0.0007488	1.111	1.1206	0.2104	36.26	1.1807	1.0964	ACP2(+109.9kb)|ARFGAP2(+181.7kb)|C11orf49(+194.4kb)|CELF1(-107.1kb)|DDB2(+119.6kb)|MADD(+28.76kb)|MYBPC3(+6.087kb)|NR1H3(+89.76kb)|PACSIN3(+172.3kb)|PSMC3(-59.98kb)|RAPSN(-78.97kb)|SLC39A13(-49.7kb)|SPI1(0)
14	33101551	rs10140278	C	T	2	3.382e-06	3.382e-06	1.1197	1.1197	0.6123	0	1.0906	1.1262	AKAP6(0)
15	48835355	rs8041668	C	T	2	3.392e-06	0.0009338	1.1262	1.1191	0.2448	26.08	1.0576	1.1422	CEP152(-194.8kb)|DUT(+199.8kb)|FBN1(0)
19	1037170	rs11665845	A	T	2	3.407e-06	0.06827	1.191	1.1616	0.0445	75.24	1.0608	1.2513	ABCA7(-2.931kb)|ARID3A(+64.37kb)|C19orf26(-192.8kb)|CFD(+173.6kb)|CNN2(0)|ELANE(+180.9kb)|GPX4(-66.76kb)|GRIN3B(+27.45kb)|HMHA1(-28.75kb)|KISS1R(+116.2kb)|MED16(+144kb)|POLR2E(-49.41kb)|PRTN3(+189kb)|R3HDM4(+123.9kb)|SBNO2(-70.46kb)|STK11(-168.6kb)|TMEM259(+16.03kb)|WDR18(+42.6kb)
11	76448471	rs56325636	A	G	2	3.417e-06	3.417e-06	1.1751	1.1751	0.926	0	1.1827	1.1732	ACER3(-123.4kb)|C11orf30(+185.9kb)|GUCY2EP(+15.64kb)|LRRC32(+66.68kb)|TSKU(-44.88kb)
15	48706571	rs12916536	G	A	2	3.496e-06	9.223e-06	1.1273	1.1265	0.309	3.37	1.0663	1.1414	DUT(+71kb)|FBN1(0)|SLC12A1(+110.3kb)
11	59943109	rs2278867	T	A	2	3.5e-06	0.001358	0.9001	0.8907	0.188	42.31	0.8445	0.9128	MS4A2(+77.17kb)|MS4A3(+104.5kb)|MS4A4A(-104.9kb)|MS4A6A(0)|MS4A6E(-159.2kb)|PLAC1L(+127.6kb)
11	60031399	rs10736700	C	T	2	3.547e-06	0.0008275	1.1118	1.1218	0.2064	37.36	1.1822	1.0968	MS4A1(-191.9kb)|MS4A2(+165.5kb)|MS4A3(+192.8kb)|MS4A4A(-16.61kb)|MS4A5(-165.7kb)|MS4A6A(+79.26kb)|MS4A6E(-70.96kb)|MS4A7(-114.6kb)|MS4A14(-132.1kb)
15	48728634	rs2042747	T	C	2	3.576e-06	0.0003187	1.1266	1.1214	0.2655	19.36	1.0603	1.1419	DUT(+93.06kb)|FBN1(0)|SLC12A1(+132.4kb)
11	59945745	rs12453	C	T	2	3.627e-06	0.001444	0.9003	0.8907	0.1861	42.81	0.8444	0.913	MS4A2(+79.8kb)|MS4A3(+107.2kb)|MS4A4A(-102.3kb)|MS4A6A(0)|MS4A6E(-156.6kb)|PLAC1L(+130.2kb)
15	48864367	rs682938	G	A	2	3.714e-06	3.714e-06	0.8939	0.8939	0.9451	0	0.8908	0.8946	CEP152(-165.8kb)|FBN1(0)
11	59942815	rs7935829	G	A	2	3.719e-06	0.001458	0.9004	0.8908	0.1861	42.79	0.8445	0.9131	MS4A2(+76.88kb)|MS4A3(+104.2kb)|MS4A4A(-105.2kb)|MS4A6A(0)|MS4A6E(-159.5kb)|PLAC1L(+127.3kb)
19	1024106	rs8111988	A	T	2	3.725e-06	0.01042	1.2093	1.1888	0.1332	55.64	1.0947	1.2564	ABCA7(-16kb)|ARID3A(+51.3kb)|AZU1(+192.1kb)|CFD(+160.5kb)|CNN2(-2.191kb)|ELANE(+167.9kb)|GPX4(-79.83kb)|GRIN3B(+14.38kb)|HMHA1(-41.82kb)|KISS1R(+103.1kb)|MED16(+130.9kb)|POLR2E(-62.47kb)|PRTN3(+175.9kb)|R3HDM4(+110.9kb)|SBNO2(-83.53kb)|STK11(-181.7kb)|TMEM259(+2.965kb)|WDR18(+29.54kb)
11	85811364	rs526904	C	T	2	3.78e-06	3.78e-06	1.1122	1.1122	0.4256	0	1.0694	1.1218	CCDC83(+180.3kb)|EED(-144.4kb)|PICALM(+30.44kb)
11	60023087	rs1562990	A	C	2	3.792e-06	0.0009942	1.111	1.1215	0.2008	38.89	1.182	1.0959	MS4A2(+157.1kb)|MS4A3(+184.5kb)|MS4A4A(-24.93kb)|MS4A5(-174kb)|MS4A6A(+70.95kb)|MS4A6E(-79.27kb)|MS4A7(-122.9kb)|MS4A14(-140.4kb)
1	55557540	rs667353	C	T	2	3.796e-06	3.796e-06	0.8981	0.8981	0.9882	0	0.8988	0.898	BSND(+83.08kb)|LOC100507634(-123.5kb)|MIR4422(-133.8kb)|PCSK9(+27.01kb)|TMEM61(+99.57kb)|USP24(0)
6	32441679	rs7739375	G	A	2	3.806e-06	0.007679	0.8798	0.8891	0.1439	53.18	0.9387	0.8578	BTNL2(+66.78kb)|C6orf10(+102kb)|HCG23(+80.21kb)|HLA-DQA1(-163.5kb)|HLA-DQB1(-185.6kb)|HLA-DRA(+28.85kb)|HLA-DRB1(-104.9kb)|HLA-DRB5(-43.47kb)|HLA-DRB6(-78.81kb)
11	60033448	rs4938932	T	C	2	3.822e-06	0.0008523	1.1114	1.1213	0.2068	37.27	1.1817	1.0964	MS4A1(-189.8kb)|MS4A2(+167.5kb)|MS4A3(+194.9kb)|MS4A4A(-14.56kb)|MS4A5(-163.6kb)|MS4A6A(+81.31kb)|MS4A6E(-68.91kb)|MS4A7(-112.5kb)|MS4A14(-130kb)
14	33111257	rs10143113	T	C	2	3.826e-06	3.826e-06	1.1189	1.1189	0.5785	0	1.087	1.126	AKAP6(0)
15	48720526	rs363832	C	G	2	3.868e-06	0.001284	1.1299	1.122	0.239	27.87	1.0583	1.1468	DUT(+84.96kb)|FBN1(0)|SLC12A1(+124.3kb)
11	59948374	rs17602572	G	C	2	3.869e-06	0.0008593	0.9006	0.8926	0.2074	37.09	0.8472	0.9127	MS4A2(+82.43kb)|MS4A3(+109.8kb)|MS4A4A(-99.64kb)|MS4A6A(0)|MS4A6E(-154kb)|MS4A7(-197.6kb)|PLAC1L(+132.9kb)
22	25466553	rs6004423	A	G	2	3.887e-06	9.446e-06	0.8898	0.8904	0.3101	2.95	0.9409	0.8794	CRYBB2(-149.1kb)|CRYBB3(-129.3kb)|KIAA1671(0)|LOC100128531(-31.83kb)|SGSM1(+143.7kb)|TMEM211(+131.2kb)
19	7853716	rs36056976	G	C	2	3.894e-06	3.894e-06	1.1375	1.1375	0.9959	0	1.1372	1.1376	C19orf59(+109kb)|CAMSAP3(+170.5kb)|CD209(+41.25kb)|CLEC4G(+56.66kb)|CLEC4GP1(0)|CLEC4M(+19.22kb)|CTXN1(-135.7kb)|ELAVL1(-169.7kb)|EVI5L(-41.44kb)|FCER2(+86.68kb)|FLJ22184(-79.89kb)|LOC388499(-89.8kb)|LRRC8E(-99.67kb)|MAP2K7(-115kb)|PCP2(+155.1kb)|PET100(+157.2kb)|RETN(+118.4kb)|SNAPC2(-131.5kb)|STXBP2(+141kb)|TGFBR3L(-127.3kb)|TIMM44(-137.9kb)|TRAPPC5(+106kb)|XAB2(+159.3kb)
1	55556428	rs1165285	A	T	2	3.927e-06	3.927e-06	0.8983	0.8983	0.9882	0	0.899	0.8982	BSND(+81.96kb)|LOC100507634(-124.7kb)|MIR4422(-134.9kb)|PCSK9(+25.9kb)|TMEM61(+98.46kb)|USP24(0)
15	48736684	rs2303502	T	A	2	3.996e-06	0.0002579	1.1255	1.1208	0.27	17.8	1.0601	1.1406	DUT(+101.1kb)|FBN1(0)|SLC12A1(+140.4kb)
15	48739274	rs2303500	G	A	2	4.045e-06	0.0002509	1.1254	1.1208	0.2706	17.6	1.0601	1.1405	DUT(+103.7kb)|FBN1(0)|SLC12A1(+143kb)
11	59944580	rs72918674	T	C	2	4.101e-06	0.001636	0.9008	0.8909	0.1831	43.58	0.8445	0.9136	MS4A2(+78.64kb)|MS4A3(+106kb)|MS4A4A(-103.4kb)|MS4A6A(0)|MS4A6E(-157.8kb)|PLAC1L(+129.1kb)
15	48733625	rs1426718	T	C	2	4.135e-06	0.0002512	1.1255	1.1209	0.2708	17.53	1.0601	1.1406	DUT(+98.06kb)|FBN1(0)|SLC12A1(+137.4kb)
18	45961515	rs117042441	A	G	2	4.166e-06	4.166e-06	1.5522	1.5522	0.4951	0	1.7714	1.5031	CTIF(-103.9kb)
11	60031270	rs7128450	C	G	2	4.174e-06	0.0008758	1.1108	1.1207	0.2075	37.06	1.181	1.0959	MS4A1(-192kb)|MS4A2(+165.3kb)|MS4A3(+192.7kb)|MS4A4A(-16.74kb)|MS4A5(-165.8kb)|MS4A6A(+79.13kb)|MS4A6E(-71.08kb)|MS4A7(-114.7kb)|MS4A14(-132.2kb)
15	48747440	rs2555470	T	C	2	4.208e-06	0.001185	1.125	1.1176	0.2427	26.74	1.0559	1.141	DUT(+111.9kb)|FBN1(0)|SLC12A1(+151.2kb)
11	60031476	rs10736701	T	C	2	4.224e-06	0.0008651	1.1108	1.1206	0.2081	36.9	1.1809	1.0959	MS4A1(-191.8kb)|MS4A2(+165.5kb)|MS4A3(+192.9kb)|MS4A4A(-16.54kb)|MS4A5(-165.6kb)|MS4A6A(+79.34kb)|MS4A6E(-70.88kb)|MS4A7(-114.5kb)|MS4A14(-132kb)
11	76447123	rs12291515	G	A	2	4.243e-06	4.243e-06	1.1742	1.1742	0.9224	0	1.1822	1.1722	ACER3(-124.8kb)|C11orf30(+184.5kb)|GUCY2EP(+14.29kb)|LRRC32(+65.33kb)|TSKU(-46.23kb)
4	129477404	rs9991179	G	A	2	4.302e-06	4.302e-06	1.1246	1.1246	0.6981	0	1.1479	1.1192	.
3	181589727	rs116149390	A	G	2	4.432e-06	0.001126	1.46	1.4306	0.2299	30.64	1.2127	1.5392	SOX2(+157.5kb)|SOX2-OT(+129.7kb)
15	48765044	rs28730795	G	T	2	4.441e-06	4.441e-06	0.8941	0.8941	0.7365	0	0.9096	0.8906	DUT(+129.5kb)|FBN1(0)|SLC12A1(+168.8kb)
15	48754122	rs2620361	T	G	2	4.454e-06	0.001406	1.1244	1.1167	0.2399	27.6	1.0549	1.1404	DUT(+118.6kb)|FBN1(0)|SLC12A1(+157.8kb)
11	60026613	rs4938931	T	G	2	4.467e-06	0.0005363	1.1104	1.1185	0.2254	31.96	1.1776	1.096	MS4A1(-196.7kb)|MS4A2(+160.7kb)|MS4A3(+188kb)|MS4A4A(-21.4kb)|MS4A5(-170.4kb)|MS4A6A(+74.47kb)|MS4A6E(-75.74kb)|MS4A7(-119.3kb)|MS4A14(-136.9kb)
19	1039410	rs3795064	G	C	2	4.473e-06	0.05718	1.1874	1.1605	0.0536	73.15	1.0637	1.2451	ABCA7(-0.691kb)|ARID3A(+66.61kb)|C19orf26(-190.5kb)|CFD(+175.8kb)|CNN2(+0.346kb)|ELANE(+183.2kb)|GPX4(-64.52kb)|GRIN3B(+29.69kb)|HMHA1(-26.51kb)|KISS1R(+118.4kb)|MED16(+146.2kb)|POLR2E(-47.17kb)|PRTN3(+191.2kb)|R3HDM4(+126.2kb)|SBNO2(-68.22kb)|STK11(-166.4kb)|TMEM259(+18.27kb)|WDR18(+44.84kb)
11	60033371	rs7930318	T	C	2	4.501e-06	0.0008931	1.1105	1.1203	0.208	36.92	1.1806	1.0956	MS4A1(-189.9kb)|MS4A2(+167.4kb)|MS4A3(+194.8kb)|MS4A4A(-14.64kb)|MS4A5(-163.7kb)|MS4A6A(+81.23kb)|MS4A6E(-68.98kb)|MS4A7(-112.6kb)|MS4A14(-130.1kb)
15	48753624	rs2433394	A	C	2	4.512e-06	0.001179	1.1243	1.1171	0.2438	26.37	1.0554	1.1402	DUT(+118.1kb)|FBN1(0)|SLC12A1(+157.3kb)
11	85815030	rs1237999	A	G	2	4.515e-06	4.515e-06	1.1111	1.1111	0.4787	0	1.073	1.1196	C11orf73(-198.2kb)|CCDC83(+184kb)|EED(-140.8kb)|PICALM(+34.11kb)
15	48750520	rs1812873	A	C	2	4.522e-06	0.001542	1.1245	1.1166	0.2378	28.23	1.0547	1.1406	DUT(+115kb)|FBN1(0)|SLC12A1(+154.2kb)
19	1039626	rs3795066	T	C	2	4.807e-06	7.827e-05	0.8872	0.8894	0.2846	12.65	0.9369	0.8745	ABCA7(-0.475kb)|ARID3A(+66.82kb)|C19orf26(-190.3kb)|CFD(+176kb)|CNN2(+0.562kb)|ELANE(+183.4kb)|GPX4(-64.31kb)|GRIN3B(+29.9kb)|HMHA1(-26.3kb)|KISS1R(+118.6kb)|MED16(+146.4kb)|POLR2E(-46.95kb)|PRTN3(+191.5kb)|R3HDM4(+126.4kb)|SBNO2(-68.01kb)|STK11(-166.2kb)|TMEM259(+18.48kb)|WDR18(+45.06kb)
14	33110538	rs10129321	C	T	2	4.859e-06	4.859e-06	1.1174	1.1174	0.643	0	1.0908	1.1233	AKAP6(0)
14	33110441	rs10139992	T	A	2	4.86e-06	4.86e-06	1.1174	1.1174	0.6399	0	1.0905	1.1233	AKAP6(0)
16	28521721	rs153108	A	C	2	4.883e-06	4.883e-06	0.8103	0.8103	0.3514	0	0.7548	0.8316	APOBR(+11.43kb)|CCDC101(-43.53kb)|CLN3(+18.1kb)|EIF3C(+83.95kb)|EIF3CL(+106.6kb)|IL27(+3.566kb)|NUPR1(-26.94kb)|SBK1(+186.6kb)|SULT1A1(-95.19kb)|SULT1A2(-81.54kb)
4	129472178	rs28449727	G	A	2	4.914e-06	4.914e-06	1.1219	1.1219	0.8736	0	1.1126	1.1241	.
15	48843598	rs626492	T	C	2	4.925e-06	0.0004159	0.8895	0.8936	0.2642	19.78	0.9449	0.8775	CEP152(-186.5kb)|FBN1(0)
11	85812210	rs497816	T	C	2	4.957e-06	4.957e-06	1.1107	1.1107	0.4588	0	1.0709	1.1196	CCDC83(+181.2kb)|EED(-143.6kb)|PICALM(+31.29kb)
15	48705206	rs16960901	C	T	2	4.996e-06	4.996e-06	1.1253	1.1253	0.3256	0	1.0663	1.1389	DUT(+69.64kb)|FBN1(0)|SLC12A1(+108.9kb)
13	27087103	rs9512229	T	G	2	5.06e-06	5.06e-06	0.8867	0.8867	0.8677	0	0.895	0.8849	CDK8(+108.5kb)|WASF3(-44.74kb)
22	25472183	rs9612855	A	C	2	5.063e-06	5.063e-06	0.8673	0.8673	0.7897	0	0.8833	0.864	CRYBB2(-143.4kb)|CRYBB3(-123.6kb)|KIAA1671(0)|LOC100128531(-26.2kb)|SGSM1(+149.4kb)|TMEM211(+136.9kb)
18	39893746	rs11082271	G	T	2	5.083e-06	5.083e-06	1.1106	1.1106	0.5937	0	1.082	1.117	LINC00907(0)
15	48757460	rs7171359	C	T	2	5.194e-06	0.001356	0.8902	0.8961	0.2427	26.75	0.9485	0.8778	DUT(+121.9kb)|FBN1(0)|SLC12A1(+161.2kb)
15	101652189	rs60120204	T	C	2	5.224e-06	5.224e-06	0.8846	0.8846	0.787	0	0.8734	0.8883	ALDH1A3(+195.4kb)|CHSY1(-63.74kb)|LOC100507472(-195.3kb)|LRRK1(+41.87kb)|PCSK6(-191.9kb)|SNRPA1(-169.5kb)|VIMP(-159kb)
19	7843780	rs10421514	A	G	2	5.228e-06	5.228e-06	1.123	1.123	0.3454	0	1.0681	1.136	C19orf59(+99.06kb)|CAMSAP3(+160.6kb)|CD209(+31.32kb)|CLEC4G(+46.72kb)|CLEC4GP1(-8.589kb)|CLEC4M(+9.289kb)|CTXN1(-145.6kb)|ELAVL1(-179.7kb)|EVI5L(-51.38kb)|FCER2(+76.75kb)|FLJ22184(-89.82kb)|LOC388499(-99.74kb)|LRRC8E(-109.6kb)|MAP2K7(-125kb)|PCP2(+145.1kb)|PET100(+147.3kb)|RETN(+108.4kb)|SNAPC2(-141.4kb)|STXBP2(+131kb)|TGFBR3L(-137.3kb)|TIMM44(-147.8kb)|TRAPPC5(+96.03kb)|XAB2(+149.3kb)
2	127830121	rs72959016	T	C	2	5.248e-06	5.248e-06	1.2811	1.2811	0.8526	0	1.2535	1.2871	BIN1(0)|CYP27C1(-111.3kb)|ERCC3(-184.7kb)
15	48753145	rs2466792	A	C	2	5.25e-06	0.001525	1.1234	1.1158	0.24	27.55	1.054	1.1394	DUT(+117.6kb)|FBN1(0)|SLC12A1(+156.9kb)
19	1044328	rs4147909	T	C	2	5.295e-06	5.295e-06	0.8545	0.8545	0.6991	0	0.8722	0.8471	ABCA7(0)|ARID3A(+71.52kb)|ATP5D(-197.4kb)|C19orf26(-185.6kb)|CFD(+180.7kb)|CNN2(+5.264kb)|ELANE(+188.1kb)|GPX4(-59.61kb)|GRIN3B(+34.6kb)|HMHA1(-21.59kb)|KISS1R(+123.3kb)|MED16(+151.1kb)|POLR2E(-42.25kb)|PRTN3(+196.2kb)|R3HDM4(+131.1kb)|SBNO2(-63.3kb)|STK11(-161.5kb)|TMEM259(+23.19kb)|WDR18(+49.76kb)
18	39893799	rs11082273	A	G	2	5.38e-06	5.38e-06	1.1102	1.1102	0.5925	0	1.0815	1.1166	LINC00907(0)
11	59932579	rs7926954	A	G	2	5.383e-06	0.004615	0.9016	0.888	0.1386	54.41	0.8391	0.916	MS4A2(+66.64kb)|MS4A3(+93.99kb)|MS4A4A(-115.4kb)|MS4A6A(-6.5kb)|MS4A6E(-169.8kb)|PLAC1L(+117.1kb)
15	48757195	rs10519177	G	A	2	5.395e-06	0.001715	0.8904	0.8967	0.2376	28.3	0.9492	0.8778	DUT(+121.6kb)|FBN1(0)|SLC12A1(+160.9kb)
11	60028142	rs7108663	T	C	2	5.469e-06	0.000535	1.1093	1.1172	0.2289	30.91	1.176	1.0951	MS4A1(-195.1kb)|MS4A2(+162.2kb)|MS4A3(+189.6kb)|MS4A4A(-19.87kb)|MS4A5(-168.9kb)|MS4A6A(+76kb)|MS4A6E(-74.21kb)|MS4A7(-117.8kb)|MS4A14(-135.3kb)
18	39893758	rs11082272	A	C	2	5.475e-06	5.475e-06	1.1102	1.1102	0.5683	0	1.0797	1.1171	LINC00907(0)
11	59923508	rs983392	G	A	2	5.544e-06	0.0033	0.9017	0.8897	0.1563	50.24	0.8418	0.9155	MS4A2(+57.57kb)|MS4A3(+84.92kb)|MS4A4A(-124.5kb)|MS4A6A(-15.57kb)|MS4A6E(-178.8kb)|PLAC1L(+108kb)
15	48759291	rs4774517	T	G	2	5.731e-06	2.937e-05	0.8904	0.8916	0.302	6.12	0.9418	0.8794	DUT(+123.7kb)|FBN1(0)|SLC12A1(+163kb)
14	47742553	rs1571106	G	T	2	5.858e-06	5.858e-06	1.1733	1.1733	0.4901	0	1.236	1.16	MDGA2(0)
15	48751329	rs714290	G	C	2	5.859e-06	0.001401	1.1264	1.1189	0.2421	26.92	1.0559	1.143	DUT(+115.8kb)|FBN1(0)|SLC12A1(+155.1kb)
6	32594901	rs3104391	C	T	2	5.917e-06	5.917e-06	0.8205	0.8205	0.4949	0	0.782	0.8358	HLA-DOB(-185.6kb)|HLA-DQA1(-10.28kb)|HLA-DQA2(-114.3kb)|HLA-DQB1(-32.34kb)|HLA-DQB2(-129kb)|HLA-DRA(+182.1kb)|HLA-DRB1(+37.29kb)|HLA-DRB5(+96.9kb)|HLA-DRB6(+67.12kb)|TAP2(-194.7kb)
8	77330856	rs147240220	A	G	2	5.955e-06	0.02098	1.487	1.6076	0.0398	76.34	2.0259	1.3389	ZFHX4-AS1(-192.3kb)
6	32429594	rs9268852	G	A	2	6.014e-06	0.003003	0.8842	0.8911	0.1859	42.85	0.9372	0.8648	BTNL2(+54.69kb)|C6orf10(+89.94kb)|HCG23(+68.13kb)|HLA-DQA1(-175.6kb)|HLA-DQB1(-197.6kb)|HLA-DRA(+16.77kb)|HLA-DRB1(-117kb)|HLA-DRB5(-55.56kb)|HLA-DRB6(-90.9kb)
19	7844184	rs4804232	A	G	2	6.107e-06	6.107e-06	1.122	1.122	0.3457	0	1.0673	1.135	C19orf59(+99.46kb)|CAMSAP3(+161kb)|CD209(+31.72kb)|CLEC4G(+47.13kb)|CLEC4GP1(-8.185kb)|CLEC4M(+9.693kb)|CTXN1(-145.2kb)|ELAVL1(-179.3kb)|EVI5L(-50.98kb)|FCER2(+77.15kb)|FLJ22184(-89.42kb)|LOC388499(-99.33kb)|LRRC8E(-109.2kb)|MAP2K7(-124.6kb)|PCP2(+145.6kb)|PET100(+147.7kb)|RETN(+108.8kb)|SNAPC2(-141kb)|STXBP2(+131.4kb)|TGFBR3L(-136.8kb)|TIMM44(-147.4kb)|TRAPPC5(+96.44kb)|XAB2(+149.7kb)
15	48772936	rs10851468	G	A	2	6.122e-06	6.122e-06	0.896	0.896	0.8071	0	0.9072	0.8935	DUT(+137.4kb)|FBN1(0)|SLC12A1(+176.7kb)
1	68625697	rs79654635	T	C	2	6.158e-06	0.02924	1.3594	1.3044	0.1318	55.97	1.1131	1.4325	DIRAS3(+109.2kb)|GNG12-AS1(0)|MIR1262(-23.5kb)|WLS(0)
1	68615039	rs1367454	A	G	2	6.201e-06	0.01909	1.3504	1.3032	0.1505	51.62	1.1204	1.4181	DIRAS3(+98.58kb)|GNG12-AS1(0)|MIR1262(-34.16kb)|WLS(0)
6	32431147	rs9268877	G	A	2	6.203e-06	0.003931	0.8843	0.8917	0.1772	45.07	0.9384	0.8645	BTNL2(+56.25kb)|C6orf10(+91.49kb)|HCG23(+69.68kb)|HLA-DQA1(-174kb)|HLA-DQB1(-196.1kb)|HLA-DRA(+18.32kb)|HLA-DRB1(-115.4kb)|HLA-DRB5(-54.01kb)|HLA-DRB6(-89.34kb)
6	32431867	rs9268888	T	G	2	6.289e-06	0.004297	0.8843	0.8918	0.1745	45.76	0.9388	0.8643	BTNL2(+56.97kb)|C6orf10(+92.21kb)|HCG23(+70.4kb)|HLA-DQA1(-173.3kb)|HLA-DQB1(-195.4kb)|HLA-DRA(+19.04kb)|HLA-DRB1(-114.7kb)|HLA-DRB5(-53.29kb)|HLA-DRB6(-88.62kb)
14	47793099	rs34486351	G	A	2	6.363e-06	6.363e-06	0.8532	0.8532	0.4455	0	0.8053	0.8639	MDGA2(0)
6	32430289	rs9268863	G	A	2	6.396e-06	0.003047	0.8845	0.8913	0.1867	42.65	0.9375	0.8651	BTNL2(+55.39kb)|C6orf10(+90.63kb)|HCG23(+68.82kb)|HLA-DQA1(-174.9kb)|HLA-DQB1(-197kb)|HLA-DRA(+17.46kb)|HLA-DRB1(-116.3kb)|HLA-DRB5(-54.86kb)|HLA-DRB6(-90.2kb)
15	48755168	rs9806595	C	T	2	6.486e-06	0.001033	0.8885	0.8938	0.2498	24.48	0.9467	0.8758	DUT(+119.6kb)|FBN1(0)|SLC12A1(+158.9kb)
6	32431606	rs9268881	A	T	2	6.486e-06	0.002856	0.8844	0.8911	0.1887	42.13	0.9371	0.865	BTNL2(+56.71kb)|C6orf10(+91.95kb)|HCG23(+70.14kb)|HLA-DQA1(-173.6kb)|HLA-DQB1(-195.6kb)|HLA-DRA(+18.78kb)|HLA-DRB1(-114.9kb)|HLA-DRB5(-53.55kb)|HLA-DRB6(-88.88kb)
11	47409051	rs11500477	A	T	2	6.605e-06	0.0003168	1.1086	1.1147	0.2472	25.31	1.1724	1.0948	ACP2(+138.6kb)|CELF1(-78.44kb)|DDB2(+148.3kb)|FAM180B(-199.2kb)|KBTBD4(-184.7kb)|MADD(+57.47kb)|MYBPC3(+34.8kb)|NDUFS3(-191.5kb)|NR1H3(+118.5kb)|PSMC3(-31.27kb)|PTPMT1(-177.9kb)|RAPSN(-50.26kb)|SLC39A13(-20.99kb)|SPI1(+8.924kb)
19	7851580	rs62125079	T	C	2	6.618e-06	6.618e-06	1.1342	1.1342	0.8519	0	1.1226	1.1372	C19orf59(+106.9kb)|CAMSAP3(+168.4kb)|CD209(+39.12kb)|CLEC4G(+54.52kb)|CLEC4GP1(-0.789kb)|CLEC4M(+17.09kb)|CTXN1(-137.8kb)|ELAVL1(-171.9kb)|EVI5L(-43.58kb)|FCER2(+84.55kb)|FLJ22184(-82.02kb)|LOC388499(-91.94kb)|LRRC8E(-101.8kb)|MAP2K7(-117.2kb)|PCP2(+152.9kb)|PET100(+155.1kb)|RETN(+116.2kb)|SNAPC2(-133.6kb)|STXBP2(+138.8kb)|TGFBR3L(-129.5kb)|TIMM44(-140kb)|TRAPPC5(+103.8kb)|XAB2(+157.1kb)
22	25468406	rs9612851	G	A	2	6.631e-06	6.631e-06	0.869	0.869	0.855	0	0.88	0.8668	CRYBB2(-147.2kb)|CRYBB3(-127.4kb)|KIAA1671(0)|LOC100128531(-29.98kb)|SGSM1(+145.6kb)|TMEM211(+133.1kb)
22	25468830	rs17668150	G	A	2	6.631e-06	6.631e-06	0.8691	0.8691	0.8485	0	0.8806	0.8668	CRYBB2(-146.8kb)|CRYBB3(-127kb)|KIAA1671(0)|LOC100128531(-29.55kb)|SGSM1(+146kb)|TMEM211(+133.5kb)
6	32440910	rs9269079	G	T	2	6.631e-06	0.005233	0.8836	0.8915	0.1665	47.75	0.939	0.8629	BTNL2(+66.01kb)|C6orf10(+101.3kb)|HCG23(+79.44kb)|HLA-DQA1(-164.3kb)|HLA-DQB1(-186.3kb)|HLA-DRA(+28.08kb)|HLA-DRB1(-105.6kb)|HLA-DRB5(-44.24kb)|HLA-DRB6(-79.58kb)
6	32432509	rs9268912	A	C	2	6.64e-06	0.004124	0.8846	0.8919	0.1764	45.29	0.9387	0.8646	BTNL2(+57.61kb)|C6orf10(+92.85kb)|HCG23(+71.04kb)|HLA-DQA1(-172.7kb)|HLA-DQB1(-194.7kb)|HLA-DRA(+19.68kb)|HLA-DRB1(-114kb)|HLA-DRB5(-52.64kb)|HLA-DRB6(-87.98kb)
22	25467143	rs17668090	T	C	2	6.642e-06	6.642e-06	0.8688	0.8688	0.8487	0	0.8802	0.8664	CRYBB2(-148.5kb)|CRYBB3(-128.7kb)|KIAA1671(0)|LOC100128531(-31.24kb)|SGSM1(+144.3kb)|TMEM211(+131.8kb)
11	47424931	rs10838705	A	G	2	6.65e-06	0.0006844	1.1067	1.1148	0.2233	32.56	1.1725	1.0924	ACP2(+154.5kb)|C1QTNF4(-186.3kb)|CELF1(-62.56kb)|DDB2(+164.2kb)|FAM180B(-183.3kb)|KBTBD4(-168.8kb)|MADD(+73.35kb)|MYBPC3(+50.68kb)|NDUFS3(-175.6kb)|NR1H3(+134.3kb)|PSMC3(-15.39kb)|PTPMT1(-162kb)|RAPSN(-34.38kb)|SLC39A13(-5.114kb)|SPI1(+24.8kb)
6	32440805	rs9269076	A	C	2	6.781e-06	0.003748	0.8831	0.8903	0.1783	44.81	0.9371	0.8628	BTNL2(+65.9kb)|C6orf10(+101.1kb)|HCG23(+79.34kb)|HLA-DQA1(-164.4kb)|HLA-DQB1(-186.4kb)|HLA-DRA(+27.98kb)|HLA-DRB1(-105.7kb)|HLA-DRB5(-44.35kb)|HLA-DRB6(-79.68kb)
11	47419663	rs1534576	T	G	2	6.783e-06	0.001157	1.1066	1.1164	0.2047	37.84	1.1752	1.0917	ACP2(+149.2kb)|C1QTNF4(-191.6kb)|CELF1(-67.82kb)|DDB2(+158.9kb)|FAM180B(-188.6kb)|KBTBD4(-174.1kb)|MADD(+68.08kb)|MYBPC3(+45.41kb)|NDUFS3(-180.9kb)|NR1H3(+129.1kb)|PSMC3(-20.66kb)|PTPMT1(-167.3kb)|RAPSN(-39.64kb)|SLC39A13(-10.38kb)|SPI1(+19.54kb)
19	7843875	rs8110858	T	G	2	6.787e-06	6.787e-06	1.1214	1.1214	0.358	0	1.0681	1.1341	C19orf59(+99.16kb)|CAMSAP3(+160.7kb)|CD209(+31.41kb)|CLEC4G(+46.82kb)|CLEC4GP1(-8.494kb)|CLEC4M(+9.384kb)|CTXN1(-145.5kb)|ELAVL1(-179.6kb)|EVI5L(-51.28kb)|FCER2(+76.84kb)|FLJ22184(-89.73kb)|LOC388499(-99.64kb)|LRRC8E(-109.5kb)|MAP2K7(-124.9kb)|PCP2(+145.2kb)|PET100(+147.4kb)|RETN(+108.5kb)|SNAPC2(-141.3kb)|STXBP2(+131.1kb)|TGFBR3L(-137.2kb)|TIMM44(-147.7kb)|TRAPPC5(+96.13kb)|XAB2(+149.4kb)
22	25472463	rs11703834	A	G	2	6.802e-06	6.802e-06	0.8686	0.8686	0.7979	0	0.884	0.8654	CRYBB2(-143.1kb)|CRYBB3(-123.4kb)|KIAA1671(0)|LOC100128531(-25.92kb)|SGSM1(+149.6kb)|TMEM211(+137.1kb)
6	32440467	rs9269071	C	T	2	6.819e-06	0.00477	0.8838	0.8915	0.1704	46.79	0.9387	0.8633	BTNL2(+65.57kb)|C6orf10(+100.8kb)|HCG23(+79kb)|HLA-DQA1(-164.7kb)|HLA-DQB1(-186.8kb)|HLA-DRA(+27.64kb)|HLA-DRB1(-106.1kb)|HLA-DRB5(-44.69kb)|HLA-DRB6(-80.02kb)
11	47423340	rs10769264	T	C	2	6.833e-06	0.0006824	1.1066	1.1146	0.2239	32.4	1.1723	1.0923	ACP2(+152.9kb)|C1QTNF4(-187.9kb)|CELF1(-64.15kb)|DDB2(+162.6kb)|FAM180B(-184.9kb)|KBTBD4(-170.4kb)|MADD(+71.76kb)|MYBPC3(+49.09kb)|NDUFS3(-177.2kb)|NR1H3(+132.8kb)|PSMC3(-16.98kb)|PTPMT1(-163.6kb)|RAPSN(-35.97kb)|SLC39A13(-6.705kb)|SPI1(+23.21kb)
8	139669017	rs72727856	A	G	2	6.931e-06	0.01171	1.4795	1.4214	0.1727	46.22	1.1711	1.5716	COL22A1(0)|FAM135B(+160kb)
6	32439964	rs5026743	T	G	2	6.987e-06	0.004709	0.884	0.8916	0.171	46.65	0.9387	0.8635	BTNL2(+65.06kb)|C6orf10(+100.3kb)|HCG23(+78.5kb)|HLA-DQA1(-165.2kb)|HLA-DQB1(-187.3kb)|HLA-DRA(+27.14kb)|HLA-DRB1(-106.6kb)|HLA-DRB5(-45.19kb)|HLA-DRB6(-80.52kb)
6	32441555	rs7739203	G	A	2	7.002e-06	0.004805	0.8837	0.8914	0.1701	46.87	0.9386	0.8631	BTNL2(+66.66kb)|C6orf10(+101.9kb)|HCG23(+80.09kb)|HLA-DQA1(-163.6kb)|HLA-DQB1(-185.7kb)|HLA-DRA(+28.73kb)|HLA-DRB1(-105kb)|HLA-DRB5(-43.6kb)|HLA-DRB6(-78.93kb)
22	25474566	rs17668246	G	A	2	7.007e-06	7.007e-06	0.8688	0.8688	0.7929	0	0.8847	0.8656	CRYBB2(-141kb)|CRYBB3(-121.2kb)|KIAA1671(0)|LOC100128531(-23.82kb)|SGSM1(+151.8kb)|TMEM211(+139.3kb)
1	68627426	rs150861303	A	G	2	7.053e-06	0.02194	1.3585	1.3085	0.1464	52.59	1.1195	1.4292	DIRAS3(+111kb)|GNG12-AS1(0)|MIR1262(-21.77kb)|WLS(0)
6	32435044	rs9268979	C	T	2	7.147e-06	0.004275	0.8846	0.892	0.1757	45.47	0.9388	0.8645	BTNL2(+60.14kb)|C6orf10(+95.39kb)|HCG23(+73.58kb)|HLA-DQA1(-170.1kb)|HLA-DQB1(-192.2kb)|HLA-DRA(+22.22kb)|HLA-DRB1(-111.5kb)|HLA-DRB5(-50.11kb)|HLA-DRB6(-85.44kb)
6	32440879	rs9269078	T	C	2	7.173e-06	0.005124	0.884	0.8917	0.1684	47.29	0.9391	0.8633	BTNL2(+65.98kb)|C6orf10(+101.2kb)|HCG23(+79.41kb)|HLA-DQA1(-164.3kb)|HLA-DQB1(-186.4kb)|HLA-DRA(+28.05kb)|HLA-DRB1(-105.7kb)|HLA-DRB5(-44.27kb)|HLA-DRB6(-79.61kb)
11	47440758	rs2293579	A	G	2	7.268e-06	0.0008111	1.1065	1.1149	0.2191	33.79	1.173	1.092	ACP2(+170.3kb)|C1QTNF4(-170.5kb)|CELF1(-46.73kb)|DDB2(+180kb)|FAM180B(-167.5kb)|KBTBD4(-153kb)|MADD(+89.18kb)|MTCH2(-198.1kb)|MYBPC3(+66.5kb)|NDUFS3(-159.8kb)|NR1H3(+150.2kb)|PSMC3(0)|PTPMT1(-146.2kb)|RAPSN(-18.55kb)|SLC39A13(+2.707kb)|SPI1(+40.63kb)
1	68627892	rs114890255	A	G	2	7.29e-06	0.0197	1.3593	1.3108	0.1509	51.52	1.1224	1.4297	DIRAS3(+111.4kb)|GNG12-AS1(0)|MIR1262(-21.31kb)|WLS(0)
1	55652983	rs6676563	T	G	2	7.335e-06	7.335e-06	0.9022	0.9022	0.8596	0	0.91	0.9005	BSND(+178.5kb)|LOC100507634(-28.1kb)|MIR4422(-38.33kb)|PCSK9(+122.5kb)|TMEM61(+195kb)|USP24(0)
11	47462140	rs7104036	G	A	2	7.349e-06	0.0009972	1.1063	1.1154	0.2116	35.9	1.1738	1.0916	ACP2(+191.7kb)|C1QTNF4(-149.1kb)|CELF1(-25.35kb)|FAM180B(-146.1kb)|KBTBD4(-131.6kb)|MADD(+110.6kb)|MTCH2(-176.7kb)|MYBPC3(+87.89kb)|NDUFS3(-138.4kb)|NR1H3(+171.6kb)|PSMC3(+14.12kb)|PTPMT1(-124.8kb)|RAPSN(0)|SLC39A13(+24.09kb)|SPI1(+62.01kb)
11	47461783	rs7103648	G	A	2	7.361e-06	0.00101	1.1063	1.1155	0.2111	36.04	1.1739	1.0916	ACP2(+191.3kb)|C1QTNF4(-149.4kb)|CELF1(-25.7kb)|FAM180B(-146.4kb)|KBTBD4(-132kb)|MADD(+110.2kb)|MTCH2(-177.1kb)|MYBPC3(+87.53kb)|NDUFS3(-138.8kb)|NR1H3(+171.2kb)|PSMC3(+13.76kb)|PTPMT1(-125.2kb)|RAPSN(0)|SLC39A13(+23.73kb)|SPI1(+61.66kb)
11	47418953	rs874896	G	C	2	7.491e-06	0.001204	1.1061	1.1158	0.205	37.75	1.1746	1.0912	ACP2(+148.5kb)|C1QTNF4(-192.3kb)|CELF1(-68.54kb)|DDB2(+158.2kb)|FAM180B(-189.3kb)|KBTBD4(-174.8kb)|MADD(+67.37kb)|MYBPC3(+44.7kb)|NDUFS3(-181.6kb)|NR1H3(+128.4kb)|PSMC3(-21.37kb)|PTPMT1(-168kb)|RAPSN(-40.35kb)|SLC39A13(-11.09kb)|SPI1(+18.83kb)
1	68618634	rs17130533	T	C	2	7.582e-06	0.03208	1.3477	1.2937	0.1305	56.28	1.1068	1.4191	DIRAS3(+102.2kb)|GNG12-AS1(0)|MIR1262(-30.57kb)|WLS(0)
1	68620446	rs77561205	A	T	2	7.622e-06	0.01512	1.3491	1.3058	0.1614	49	1.1251	1.4159	DIRAS3(+104kb)|GNG12-AS1(0)|MIR1262(-28.75kb)|WLS(0)
1	68623009	rs12090994	A	C	2	7.667e-06	0.0329	1.3515	1.2965	0.129	56.61	1.1074	1.4243	DIRAS3(+106.5kb)|GNG12-AS1(0)|MIR1262(-26.19kb)|WLS(0)
11	47447346	rs10838709	T	C	2	7.672e-06	0.0009086	1.1061	1.1148	0.2159	34.7	1.1729	1.0915	ACP2(+176.9kb)|C1QTNF4(-163.9kb)|CELF1(-40.14kb)|DDB2(+186.6kb)|FAM180B(-160.9kb)|KBTBD4(-146.4kb)|MADD(+95.76kb)|MTCH2(-191.5kb)|MYBPC3(+73.09kb)|NDUFS3(-153.2kb)|NR1H3(+156.8kb)|PSMC3(0)|PTPMT1(-139.6kb)|RAPSN(-11.96kb)|SLC39A13(+9.295kb)|SPI1(+47.22kb)
11	60034429	rs4938933	T	C	2	7.675e-06	0.0006389	1.1076	1.1154	0.2295	30.74	1.1742	1.0934	MS4A1(-188.9kb)|MS4A2(+168.5kb)|MS4A3(+195.8kb)|MS4A4A(-13.58kb)|MS4A5(-162.6kb)|MS4A6A(+82.29kb)|MS4A6E(-67.92kb)|MS4A7(-111.5kb)|MS4A14(-129.1kb)
15	48835935	rs589668	T	C	2	7.675e-06	0.005592	0.8913	0.8999	0.21	36.37	0.9539	0.8778	CEP152(-194.2kb)|FBN1(0)
6	32440362	rs9269069	T	C	2	7.695e-06	0.006875	0.8844	0.8927	0.1588	49.64	0.9409	0.8633	BTNL2(+65.46kb)|C6orf10(+100.7kb)|HCG23(+78.89kb)|HLA-DQA1(-164.8kb)|HLA-DQB1(-186.9kb)|HLA-DRA(+27.54kb)|HLA-DRB1(-106.2kb)|HLA-DRB5(-44.79kb)|HLA-DRB6(-80.13kb)
11	59928672	rs11605427	C	G	2	7.71e-06	0.005857	0.9031	0.8888	0.1326	55.78	0.8394	0.9177	MS4A2(+62.73kb)|MS4A3(+90.08kb)|MS4A4A(-119.3kb)|MS4A6A(-10.41kb)|MS4A6E(-173.7kb)|PLAC1L(+113.2kb)
2	169541169	rs115357279	C	A	2	7.717e-06	7.717e-06	1.4433	1.4433	0.9046	0	1.4718	1.4362	CERS6(0)|CERS6-AS1(-87.29kb)|MIR4774(+101.6kb)|NOSTRIN(-101.9kb)|SPC25(-186.2kb)
2	59756854	rs2540096	C	T	2	7.726e-06	7.726e-06	0.8981	0.8981	0.41	0	0.8614	0.9066	.
14	33114659	rs1569976	G	T	2	7.737e-06	7.737e-06	1.115	1.115	0.7384	0	1.0957	1.1192	AKAP6(0)
11	47432725	rs10742802	G	T	2	7.758e-06	0.000632	1.1059	1.1135	0.2288	30.96	1.1709	1.0918	ACP2(+162.3kb)|C1QTNF4(-178.5kb)|CELF1(-54.76kb)|DDB2(+172kb)|FAM180B(-175.5kb)|KBTBD4(-161kb)|MADD(+81.14kb)|MYBPC3(+58.47kb)|NDUFS3(-167.8kb)|NR1H3(+142.1kb)|PSMC3(-7.594kb)|PTPMT1(-154.3kb)|RAPSN(-26.58kb)|SLC39A13(0)|SPI1(+32.6kb)
22	25467916	rs713848	A	G	2	7.766e-06	0.0001717	0.893	0.8956	0.2848	12.58	0.9473	0.882	CRYBB2(-147.7kb)|CRYBB3(-127.9kb)|KIAA1671(0)|LOC100128531(-30.47kb)|SGSM1(+145.1kb)|TMEM211(+132.6kb)
14	47791871	rs35529348	G	T	2	7.767e-06	7.767e-06	0.8544	0.8544	0.4695	0	0.8089	0.8646	MDGA2(0)
11	47429904	rs7947450	A	G	2	7.79e-06	0.0006321	1.1059	1.1135	0.2288	30.95	1.1709	1.0918	ACP2(+159.4kb)|C1QTNF4(-181.3kb)|CELF1(-57.58kb)|DDB2(+169.1kb)|FAM180B(-178.3kb)|KBTBD4(-163.8kb)|MADD(+78.32kb)|MYBPC3(+55.65kb)|NDUFS3(-170.7kb)|NR1H3(+139.3kb)|PSMC3(-10.42kb)|PTPMT1(-157.1kb)|RAPSN(-29.4kb)|SLC39A13(-0.141kb)|SPI1(+29.78kb)
11	59906972	rs7124974	T	G	2	7.811e-06	0.003477	0.9032	0.8915	0.16	49.36	0.8438	0.9169	MS4A2(+41.03kb)|MS4A3(+68.38kb)|MS4A4A(-141kb)|MS4A6A(-32.11kb)|MS4A6E(-195.4kb)|PLAC1L(+91.46kb)
2	127887985	rs12989701	A	C	2	7.849e-06	7.849e-06	1.1469	1.1469	0.887	0	1.1364	1.1493	BIN1(+23.08kb)|CYP27C1(-53.43kb)|ERCC3(-126.9kb)|MAP3K2(-168.3kb)
1	68619490	rs2288660	T	C	2	7.861e-06	0.01517	1.3474	1.3043	0.1619	48.88	1.1243	1.4138	DIRAS3(+103kb)|GNG12-AS1(0)|MIR1262(-29.71kb)|WLS(0)
6	32441408	rs7755212	T	C	2	7.942e-06	0.004429	0.8844	0.8917	0.1749	45.65	0.9386	0.8639	BTNL2(+66.51kb)|C6orf10(+101.8kb)|HCG23(+79.94kb)|HLA-DQA1(-163.8kb)|HLA-DQB1(-185.8kb)|HLA-DRA(+28.58kb)|HLA-DRB1(-105.1kb)|HLA-DRB5(-43.74kb)|HLA-DRB6(-79.08kb)
11	47416746	rs1377416	T	C	2	7.948e-06	0.0004085	1.1056	1.112	0.2433	26.54	1.1687	1.092	ACP2(+146.3kb)|C1QTNF4(-194.5kb)|CELF1(-70.74kb)|DDB2(+156kb)|FAM180B(-191.5kb)|KBTBD4(-177kb)|MADD(+65.16kb)|MYBPC3(+42.49kb)|NDUFS3(-183.8kb)|NR1H3(+126.2kb)|PSMC3(-23.57kb)|PTPMT1(-170.2kb)|RAPSN(-42.56kb)|SLC39A13(-13.3kb)|SPI1(+16.62kb)
19	7845110	rs62125169	G	T	2	7.97e-06	7.97e-06	1.1255	1.1255	0.4798	0	1.0832	1.1358	C19orf59(+100.4kb)|CAMSAP3(+161.9kb)|CD209(+32.65kb)|CLEC4G(+48.05kb)|CLEC4GP1(-7.259kb)|CLEC4M(+10.62kb)|CTXN1(-144.3kb)|ELAVL1(-178.3kb)|EVI5L(-50.05kb)|FCER2(+78.08kb)|FLJ22184(-88.49kb)|LOC388499(-98.41kb)|LRRC8E(-108.3kb)|MAP2K7(-123.7kb)|PCP2(+146.5kb)|PET100(+148.6kb)|RETN(+109.8kb)|SNAPC2(-140.1kb)|STXBP2(+132.4kb)|TGFBR3L(-135.9kb)|TIMM44(-146.5kb)|TRAPPC5(+97.36kb)|XAB2(+150.7kb)
20	55012992	rs76842328	C	T	2	8.017e-06	8.017e-06	0.8358	0.8358	0.5939	0	0.873	0.827	AURKA(+45.64kb)|CASS4(0)|CSTF1(+33.41kb)|FAM209A(-86.79kb)|FAM209B(-95.31kb)|FAM210B(+69.27kb)|GCNT7(-53.56kb)|MC3R(+188.1kb)|RTFDC1(-30.65kb)|TFAP2C(-191.4kb)
18	77706294	rs7238269	G	A	2	8.089e-06	0.1013	0.8934	0.913	0.0612	71.48	0.9742	0.8706	ADNP2(-160.6kb)|CTDP1(+191.8kb)|HSBP1L1(-18.29kb)|KCNG2(+46.48kb)|PARD6G-AS1(-199.5kb)|PQLC1(0)|RBFA(-88.05kb)|RBFADN(-121kb)|TXNL4A(-26.57kb)
11	47449072	rs12292911	A	G	2	8.099e-06	0.001027	1.1057	1.1147	0.2122	35.74	1.1729	1.091	ACP2(+178.6kb)|C1QTNF4(-162.1kb)|CELF1(-38.42kb)|DDB2(+188.3kb)|FAM180B(-159.2kb)|KBTBD4(-144.7kb)|MADD(+97.49kb)|MTCH2(-189.8kb)|MYBPC3(+74.82kb)|NDUFS3(-151.5kb)|NR1H3(+158.5kb)|PSMC3(+1.048kb)|PTPMT1(-137.9kb)|RAPSN(-10.24kb)|SLC39A13(+11.02kb)|SPI1(+48.94kb)
14	47787716	rs2416045	C	T	2	8.215e-06	8.215e-06	0.8546	0.8546	0.4759	0	0.8096	0.8646	MDGA2(0)
11	47417183	rs10769263	C	A	2	8.24e-06	0.0004113	1.1054	1.1117	0.2438	26.39	1.1684	1.0918	ACP2(+146.7kb)|C1QTNF4(-194kb)|CELF1(-70.3kb)|DDB2(+156.4kb)|FAM180B(-191kb)|KBTBD4(-176.6kb)|MADD(+65.6kb)|MYBPC3(+42.93kb)|NDUFS3(-183.4kb)|NR1H3(+126.6kb)|PSMC3(-23.14kb)|PTPMT1(-169.8kb)|RAPSN(-42.12kb)|SLC39A13(-12.86kb)|SPI1(+17.06kb)
8	27468503	rs867230	A	C	2	8.28e-06	8.28e-06	1.1093	1.1093	0.8688	0	1.1002	1.1113	CCDC25(-122.3kb)|CHRNA2(+131.7kb)|CLU(0)|EPHX2(+66.06kb)|ESCO2(-163.6kb)|MIR3622A(-90.69kb)|MIR3622B(-90.69kb)|PBK(-198.6kb)|PTK2B(+151.6kb)|SCARA3(-23.07kb)
14	47796142	rs35487985	C	T	2	8.386e-06	8.386e-06	0.855	0.855	0.4763	0	0.8102	0.865	MDGA2(0)
11	47430599	rs11039225	A	G	2	8.408e-06	0.0007411	1.1054	1.1134	0.2251	32.06	1.1709	1.0912	ACP2(+160.1kb)|C1QTNF4(-180.6kb)|CELF1(-56.89kb)|DDB2(+169.8kb)|FAM180B(-177.6kb)|KBTBD4(-163.1kb)|MADD(+79.02kb)|MYBPC3(+56.35kb)|NDUFS3(-170kb)|NR1H3(+140kb)|PSMC3(-9.72kb)|PTPMT1(-156.4kb)|RAPSN(-28.71kb)|SLC39A13(0)|SPI1(+30.47kb)
11	47454551	rs4434960	T	A	2	8.415e-06	0.001282	1.1055	1.1153	0.2048	37.8	1.174	1.0906	ACP2(+184.1kb)|C1QTNF4(-156.7kb)|CELF1(-32.94kb)|DDB2(+193.8kb)|FAM180B(-153.7kb)|KBTBD4(-139.2kb)|MADD(+103kb)|MTCH2(-184.3kb)|MYBPC3(+80.3kb)|NDUFS3(-146kb)|NR1H3(+164kb)|PSMC3(+6.527kb)|PTPMT1(-132.4kb)|RAPSN(-4.756kb)|SLC39A13(+16.5kb)|SPI1(+54.42kb)
14	47577945	rs8016247	G	C	2	8.432e-06	8.432e-06	1.1818	1.1818	0.7095	0	1.2166	1.1739	MDGA2(0)
14	47801437	rs12885665	A	T	2	8.435e-06	8.435e-06	0.8551	0.8551	0.4452	0	0.8071	0.8658	MDGA2(0)
16	77004328	rs74349554	C	T	2	8.439e-06	8.439e-06	1.4252	1.4252	0.8845	0	1.4578	1.4168	MIR4719(+101.4kb)
13	61457854	rs139222133	G	A	2	8.609e-06	8.609e-06	0.6911	0.6911	0.5088	0	0.779	0.6739	.
2	127862133	rs6431219	T	C	2	8.625e-06	8.625e-06	1.1051	1.1051	0.8866	0	1.0977	1.1068	BIN1(0)|CYP27C1(-79.28kb)|ERCC3(-152.7kb)|MAP3K2(-194.1kb)
15	48827144	rs7164585	C	T	2	8.653e-06	0.005041	0.892	0.9001	0.215	34.96	0.954	0.8786	DUT(+191.6kb)|FBN1(0)
22	25469198	rs9624718	A	C	2	8.759e-06	0.0002042	0.8936	0.8964	0.2837	13	0.9481	0.8826	CRYBB2(-146.4kb)|CRYBB3(-126.6kb)|KIAA1671(0)|LOC100128531(-29.18kb)|SGSM1(+146.4kb)|TMEM211(+133.9kb)
8	28808794	rs148255197	T	C	2	8.775e-06	8.775e-06	1.2023	1.2023	0.4644	0	1.1259	1.2193	EXTL3(+197.6kb)|HMBOX1(0)|INTS9(+61.1kb)|KIF13B(-116kb)
1	68628127	rs118180678	T	C	2	8.785e-06	0.02002	1.356	1.3082	0.153	51.02	1.1204	1.4258	DIRAS3(+111.7kb)|GNG12-AS1(0)|MIR1262(-21.07kb)|WLS(0)
11	47410888	rs10838702	T	G	2	8.874e-06	0.0005241	1.105	1.1118	0.2376	28.32	1.1687	1.0912	ACP2(+140.4kb)|CELF1(-76.6kb)|DDB2(+150.1kb)|FAM180B(-197.3kb)|KBTBD4(-182.9kb)|MADD(+59.31kb)|MYBPC3(+36.64kb)|NDUFS3(-189.7kb)|NR1H3(+120.3kb)|PSMC3(-29.43kb)|PTPMT1(-176.1kb)|RAPSN(-48.42kb)|SLC39A13(-19.16kb)|SPI1(+10.76kb)
1	55666477	rs7536204	A	C	2	8.907e-06	8.907e-06	0.903	0.903	0.7555	0	0.9168	0.9	BSND(+192kb)|LOC100507634(-14.6kb)|MIR4422(-24.84kb)|PCSK9(+136kb)|USP24(0)
11	47427739	rs11039221	T	C	2	8.927e-06	0.0007371	1.1052	1.113	0.2262	31.72	1.1705	1.091	ACP2(+157.3kb)|C1QTNF4(-183.5kb)|CELF1(-59.75kb)|DDB2(+167kb)|FAM180B(-180.5kb)|KBTBD4(-166kb)|MADD(+76.16kb)|MYBPC3(+53.49kb)|NDUFS3(-172.8kb)|NR1H3(+137.2kb)|PSMC3(-12.58kb)|PTPMT1(-159.2kb)|RAPSN(-31.57kb)|SLC39A13(-2.306kb)|SPI1(+27.61kb)
15	48882966	rs657635	C	A	2	8.954e-06	7.656e-05	0.8924	0.8941	0.2949	8.86	0.944	0.881	CEP152(-147.2kb)|FBN1(0)
20	55015166	rs927174	C	A	2	8.979e-06	8.979e-06	0.8386	0.8386	0.5434	0	0.881	0.8288	AURKA(+47.82kb)|CASS4(0)|CSTF1(+35.58kb)|FAM209A(-84.62kb)|FAM209B(-93.14kb)|FAM210B(+71.45kb)|GCNT7(-51.38kb)|MC3R(+190.3kb)|RTFDC1(-28.48kb)|TFAP2C(-189.2kb)
11	59902799	rs61901691	T	C	2	8.997e-06	0.003372	0.9038	0.8925	0.1644	48.28	0.845	0.9174	MS4A2(+36.86kb)|MS4A3(+64.21kb)|MS4A4A(-145.2kb)|MS4A6A(-36.28kb)|MS4A6E(-199.6kb)|PLAC1L(+87.28kb)
20	55018260	rs7274581	C	T	2	9.103e-06	9.103e-06	0.838	0.838	0.492	0	0.8864	0.8269	AURKA(+50.91kb)|CASS4(0)|CSTF1(+38.68kb)|FAM209A(-81.52kb)|FAM209B(-90.04kb)|FAM210B(+74.54kb)|GCNT7(-48.29kb)|MC3R(+193.4kb)|RTFDC1(-25.39kb)|TFAP2C(-186.1kb)
15	101651674	rs60495189	G	A	2	9.152e-06	9.152e-06	0.8872	0.8872	0.7355	0	0.8731	0.8918	ALDH1A3(+194.8kb)|CHSY1(-64.25kb)|LOC100507472(-195.8kb)|LRRK1(+41.36kb)|PCSK6(-192.5kb)|SNRPA1(-170kb)|VIMP(-159.5kb)
15	48892939	rs920184	T	C	2	9.16e-06	0.0001793	0.8924	0.895	0.2838	12.96	0.9454	0.8808	CEP152(-137.2kb)|FBN1(0)
6	32441199	rs9269084	G	A	2	9.175e-06	2.788e-05	0.8824	0.8833	0.3006	6.69	0.9244	0.8664	BTNL2(+66.3kb)|C6orf10(+101.5kb)|HCG23(+79.73kb)|HLA-DQA1(-164kb)|HLA-DQB1(-186kb)|HLA-DRA(+28.37kb)|HLA-DRB1(-105.3kb)|HLA-DRB5(-43.95kb)|HLA-DRB6(-79.29kb)
2	127887560	rs13004848	C	T	2	9.249e-06	9.249e-06	1.1458	1.1458	0.9089	0	1.1373	1.1477	BIN1(+22.66kb)|CYP27C1(-53.85kb)|ERCC3(-127.3kb)|MAP3K2(-168.7kb)
15	48701612	rs4775760	C	A	2	9.282e-06	9.282e-06	1.1245	1.1245	0.3327	0	1.0656	1.1383	DUT(+66.04kb)|FBN1(0)|SLC12A1(+105.3kb)
2	59754206	rs35410176	C	T	2	9.397e-06	9.397e-06	0.8991	0.8991	0.42	0	0.8631	0.9074	.
14	47587343	rs9806090	C	T	2	9.562e-06	9.562e-06	1.1848	1.1848	0.6049	0	1.2347	1.1736	MDGA2(0)
11	76453567	rs4644669	T	C	2	9.764e-06	9.764e-06	1.1651	1.1651	0.931	0	1.172	1.1633	ACER3(-118.3kb)|C11orf30(+191kb)|GUCY2EP(+20.73kb)|LRRC32(+71.78kb)|TSKU(-39.79kb)
22	25471962	rs5996832	T	C	2	9.782e-06	0.000545	0.8941	0.8979	0.2698	17.87	0.9503	0.8827	CRYBB2(-143.6kb)|CRYBB3(-123.9kb)|KIAA1671(0)|LOC100128531(-26.42kb)|SGSM1(+149.1kb)|TMEM211(+136.6kb)
3	197002485	rs78832902	A	G	2	9.844e-06	9.844e-06	0.7934	0.7934	0.8676	0	0.779	0.7967	DLG1(0)|DLG1-AS1(-22.63kb)|MIR4797(-18.26kb)
15	48847733	rs683282	C	T	2	9.854e-06	9.854e-06	0.8982	0.8982	0.9198	0	0.8937	0.8993	CEP152(-182.4kb)|FBN1(0)
2	59756446	rs2058590	C	T	2	9.86e-06	9.86e-06	0.8991	0.8991	0.4139	0	0.8626	0.9075	.
3	197003333	rs75595847	G	A	2	9.874e-06	9.874e-06	0.7933	0.7933	0.8698	0	0.7792	0.7966	DLG1(0)|DLG1-AS1(-21.78kb)|MIR4797(-17.42kb)
15	48949168	rs893161	C	G	2	9.88e-06	9.88e-06	1.1315	1.1315	0.6201	0	1.0986	1.1389	CEP152(-80.97kb)|FBN1(+11.18kb)|SHC4(-166.8kb)
20	55018469	rs113902203	G	A	2	9.889e-06	9.889e-06	0.8383	0.8383	0.5121	0	0.8845	0.8277	AURKA(+51.12kb)|CASS4(0)|CSTF1(+38.89kb)|FAM209A(-81.32kb)|FAM209B(-89.83kb)|FAM210B(+74.75kb)|GCNT7(-48.08kb)|MC3R(+193.6kb)|RTFDC1(-25.18kb)|TFAP2C(-185.9kb)
11	47394305	rs896817	T	C	2	1.005e-05	0.002668	1.1047	1.1172	0.1777	44.94	1.1783	1.089	ACP2(+123.8kb)|ARFGAP2(+195.6kb)|CELF1(-93.18kb)|DDB2(+133.5kb)|KBTBD4(-199.4kb)|MADD(+42.72kb)|MYBPC3(+20.05kb)|NR1H3(+103.7kb)|PACSIN3(+186.3kb)|PSMC3(-46.01kb)|PTPMT1(-192.7kb)|RAPSN(-65kb)|SLC39A13(-35.74kb)|SPI1(0)
5	33439454	rs76642289	A	G	2	1.017e-05	1.017e-05	1.5092	1.5092	0.5891	0	1.3353	1.5408	ADAMTS12(-87.83kb)|TARS(-1.347kb)
1	68612978	rs75813423	A	G	2	1.018e-05	0.01853	1.3424	1.2981	0.1583	49.77	1.1175	1.4089	DIRAS3(+96.52kb)|GNG12-AS1(0)|MIR1262(-36.22kb)|WLS(0)
14	47790580	rs34762381	T	C	2	1.03e-05	1.03e-05	0.8561	0.8561	0.4351	0	0.8069	0.8671	MDGA2(0)
2	127889118	rs13009551	T	C	2	1.038e-05	1.038e-05	1.1452	1.1452	0.8758	0	1.1336	1.1478	BIN1(+24.22kb)|CYP27C1(-52.29kb)|ERCC3(-125.7kb)|MAP3K2(-167.1kb)
1	68618586	rs59405367	C	T	2	1.04e-05	0.03029	1.3425	1.2911	0.137	54.78	1.1063	1.4128	DIRAS3(+102.1kb)|GNG12-AS1(0)|MIR1262(-30.61kb)|WLS(0)
14	92926952	rs10498633	T	G	2	1.041e-05	1.041e-05	0.8871	0.8871	0.7437	0	0.8701	0.8907	RIN3(-53.17kb)|SLC24A4(0)
14	47805378	rs72683871	C	T	2	1.052e-05	1.052e-05	0.8565	0.8565	0.464	0	0.8104	0.8668	MDGA2(0)
15	48949078	rs7166445	A	G	2	1.056e-05	1.056e-05	1.1273	1.1273	0.746	0	1.1064	1.132	CEP152(-81.06kb)|FBN1(+11.09kb)|SHC4(-166.9kb)
11	59924422	rs11600716	C	G	2	1.058e-05	0.0009034	0.9048	0.8981	0.2237	32.45	0.8531	0.9166	MS4A2(+58.48kb)|MS4A3(+85.83kb)|MS4A4A(-123.6kb)|MS4A6A(-14.66kb)|MS4A6E(-177.9kb)|PLAC1L(+108.9kb)
15	48859733	rs2448485	G	A	2	1.061e-05	0.0001858	0.8925	0.895	0.2848	12.58	0.9457	0.8808	CEP152(-170.4kb)|FBN1(0)
20	54979171	rs7806	T	C	2	1.067e-05	0.3882	0.8851	0.9247	0.0064	86.53	1.0197	0.8501	AURKA(+11.82kb)|CASS4(-7.996kb)|CSTF1(0)|FAM209A(-120.6kb)|FAM209B(-129.1kb)|FAM210B(+35.45kb)|GCNT7(-87.38kb)|MC3R(+154.3kb)|RTFDC1(-64.48kb)
8	139677595	rs72727878	C	G	2	1.067e-05	0.04276	1.4701	1.3885	0.1226	58.05	1.1272	1.5747	COL22A1(0)|FAM135B(+168.5kb)
18	77695384	rs7230837	A	T	2	1.084e-05	0.1355	0.8952	0.9167	0.0503	73.9	0.9805	0.8716	ADNP2(-171.5kb)|CTDP1(+180.9kb)|HSBP1L1(-29.2kb)|KCNG2(+35.57kb)|PQLC1(0)|RBFA(-98.96kb)|RBFADN(-131.9kb)|TXNL4A(-37.48kb)
5	149952929	rs143851029	G	T	2	1.088e-05	0.0006857	1.6543	1.7096	0.225	32.07	2.1785	1.5424	CD74(+160.4kb)|DCTN4(-135.4kb)|MYOZ3(-87.47kb)|NDST1(+15.16kb)|RBM22(-117.4kb)|RPS14(+123.6kb)|SYNPO(-27.71kb)|TCOF1(+173.1kb)
14	47806095	rs12892734	C	G	2	1.089e-05	1.089e-05	0.8566	0.8566	0.4399	0	0.808	0.8675	MDGA2(0)
2	11858913	rs4471859	C	T	2	1.09e-05	0.01502	0.8623	0.8763	0.1816	43.96	0.948	0.8441	GREB1(+76kb)|LPIN1(0)|MIR4262(-118.1kb)|MIR4429(+178.1kb)|NTSR2(+48.58kb)
15	101652454	rs1031520	C	T	2	1.091e-05	1.091e-05	0.8887	0.8887	0.8139	0	0.8789	0.8919	ALDH1A3(+195.6kb)|CHSY1(-63.47kb)|LOC100507472(-195kb)|LRRK1(+42.14kb)|PCSK6(-191.7kb)|SNRPA1(-169.3kb)|VIMP(-158.8kb)
18	39893621	rs1381346	T	A	2	1.096e-05	1.096e-05	1.1069	1.1069	0.6619	0	1.0834	1.1122	LINC00907(0)
11	76455678	rs748007	A	G	2	1.104e-05	1.104e-05	1.1645	1.1645	0.9342	0	1.1711	1.1628	ACER3(-116.2kb)|C11orf30(+193.1kb)|GUCY2EP(+22.84kb)|LRRC32(+73.89kb)|TSKU(-37.68kb)
11	60039917	rs2162254	A	T	2	1.116e-05	0.0003808	1.1062	1.112	0.252	23.81	1.1699	1.0926	MS4A1(-183.4kb)|MS4A2(+174kb)|MS4A4A(-8.096kb)|MS4A5(-157.1kb)|MS4A6A(+87.78kb)|MS4A6E(-62.44kb)|MS4A7(-106kb)|MS4A14(-123.6kb)
14	92932828	rs12881735	C	T	2	1.117e-05	1.117e-05	0.8876	0.8876	0.509	0	0.8536	0.8949	RIN3(-47.3kb)|SLC24A4(0)
18	77713494	rs11663082	T	C	2	1.135e-05	0.1644	0.8949	0.9181	0.0398	76.35	0.9846	0.8699	ADNP2(-153.4kb)|CTDP1(+199kb)|HSBP1L1(-11.09kb)|KCNG2(+53.68kb)|PARD6G-AS1(-192.3kb)|PQLC1(+1.841kb)|RBFA(-80.85kb)|RBFADN(-113.8kb)|TXNL4A(-19.37kb)
1	68606515	rs114410805	T	C	2	1.141e-05	0.04529	1.3412	1.2832	0.1203	58.56	1.0938	1.4141	DIRAS3(+90.06kb)|GNG12-AS1(0)|MIR1262(-42.68kb)|WLS(0)
18	77713591	rs11662894	A	G	2	1.142e-05	0.165	0.8949	0.9182	0.0396	76.39	0.9847	0.8699	ADNP2(-153.3kb)|CTDP1(+199.1kb)|HSBP1L1(-10.99kb)|KCNG2(+53.78kb)|PARD6G-AS1(-192.2kb)|PQLC1(+1.938kb)|RBFA(-80.75kb)|RBFADN(-113.7kb)|TXNL4A(-19.28kb)
1	171917214	rs144829749	T	C	2	1.146e-05	1.146e-05	1.8301	1.8301	0.4191	0	2.1117	1.6784	DNM3(0)|DNM3OS(-188.8kb)|METTL13(+150.4kb)|MIR199A2(-196.5kb)|MIR214(-190.7kb)|MIR3120(-190.7kb)
1	68623492	rs12070956	A	G	2	1.147e-05	0.0297	1.345	1.2937	0.1391	54.29	1.1073	1.4158	DIRAS3(+107kb)|GNG12-AS1(0)|MIR1262(-25.71kb)|WLS(0)
7	112150716	rs886852	T	C	2	1.158e-05	1.158e-05	1.1327	1.1327	0.7161	0	1.1089	1.1384	IFRD1(+33.46kb)|LSMEM1(+19.77kb)|ZNF277(+166.7kb)
9	131851710	rs11564095	G	C	2	1.17e-05	1.17e-05	1.5192	1.5192	0.7969	0	1.6123	1.5039	CRAT(-5.362kb)|DOLK(+141.7kb)|DOLPP1(0)|FAM73B(+17.36kb)|IER5L(-86.12kb)|LRRC8A(+171.4kb)|NUP188(+82.34kb)|PHYHD1(+147.4kb)|PPP2R4(-21.52kb)|SH3GLB2(+61.13kb)
3	196971462	rs75934130	C	T	2	1.172e-05	1.172e-05	0.7964	0.7964	0.7888	0	0.7734	0.8017	DLG1(0)|DLG1-AS1(-53.66kb)|MIR4797(-49.29kb)
11	85787824	rs536841	T	C	2	1.182e-05	1.182e-05	1.1088	1.1088	0.7374	0	1.0901	1.1129	CCDC83(+156.8kb)|EED(-168kb)|PICALM(+6.901kb)
11	86396188	rs142045450	T	C	2	1.201e-05	0.1633	1.4065	1.2889	0.0926	64.65	1.018	1.4833	ME3(+12.51kb)|OR7E2P(-171.8kb)|PRSS23(-115.3kb)
15	48764391	rs61364280	G	C	2	1.203e-05	0.0001006	0.8936	0.8953	0.295	8.83	0.9461	0.8823	DUT(+128.8kb)|FBN1(0)|SLC12A1(+168.1kb)
2	127844161	rs10929006	A	G	2	1.209e-05	1.209e-05	1.1034	1.1034	0.985	0	1.1044	1.1032	BIN1(0)|CYP27C1(-97.25kb)|ERCC3(-170.7kb)
8	139680531	rs72727882	C	T	2	1.212e-05	0.02422	1.4803	1.4113	0.1459	52.71	1.1536	1.5847	COL22A1(0)|FAM135B(+171.5kb)
14	92938382	rs36026988	C	T	2	1.214e-05	1.214e-05	0.8872	0.8872	0.6556	0	0.8643	0.8923	RIN3(-41.74kb)|SLC24A4(0)
15	48769044	rs35026266	T	C	2	1.216e-05	0.02179	0.8936	0.9059	0.1694	47.05	0.963	0.8788	DUT(+133.5kb)|FBN1(0)|SLC12A1(+172.8kb)
15	48944615	rs7162626	A	G	2	1.223e-05	1.223e-05	1.1153	1.1153	0.9664	0	1.1129	1.1159	CEP152(-85.52kb)|FBN1(+6.63kb)|SHC4(-171.3kb)
19	1021637	rs8100672	C	T	2	1.225e-05	1.225e-05	0.8608	0.8608	0.557	0	0.8887	0.8499	ABCA7(-18.46kb)|ARID3A(+48.83kb)|AZU1(+189.6kb)|CFD(+158kb)|CNN2(-4.66kb)|ELANE(+165.4kb)|GPX4(-82.3kb)|GRIN3B(+11.91kb)|HMHA1(-44.28kb)|KISS1R(+100.6kb)|LPPR3(+199.7kb)|MED16(+128.4kb)|POLR2E(-64.94kb)|PRTN3(+173.5kb)|R3HDM4(+108.4kb)|SBNO2(-86kb)|STK11(-184.2kb)|TMEM259(+0.496kb)|WDR18(+27.07kb)
11	59920231	rs11230161	A	C	2	1.226e-05	0.001059	0.9055	0.8986	0.221	33.23	0.8535	0.9174	MS4A2(+54.29kb)|MS4A3(+81.64kb)|MS4A4A(-127.8kb)|MS4A6A(-18.85kb)|MS4A6E(-182.1kb)|PLAC1L(+104.7kb)
15	48870456	rs7183203	T	C	2	1.23e-05	0.0006546	1.1195	1.1145	0.2654	19.39	1.0545	1.1351	CEP152(-159.7kb)|FBN1(0)
18	77716540	rs12958810	C	T	2	1.243e-05	0.1837	0.8956	0.9199	0.0356	77.35	0.9877	0.8702	ADNP2(-150.4kb)|HSBP1L1(-8.041kb)|KCNG2(+56.72kb)|PARD6G(-198.6kb)|PARD6G-AS1(-189.3kb)|PQLC1(+4.887kb)|RBFA(-77.8kb)|RBFADN(-110.7kb)|TXNL4A(-16.33kb)
14	47809930	rs12890770	T	C	2	1.246e-05	1.246e-05	0.8575	0.8575	0.5026	0	0.8152	0.867	MDGA2(0)
1	68600278	rs12062874	G	A	2	1.266e-05	0.05564	1.3385	1.2773	0.1117	60.47	1.0861	1.4128	DIRAS3(+83.82kb)|GNG12-AS1(0)|MIR1262(-48.92kb)|WLS(0)
15	48820068	rs8036173	C	T	2	1.267e-05	0.008003	0.8939	0.9028	0.206	37.47	0.9573	0.8802	DUT(+184.5kb)|FBN1(0)
8	139680867	rs72727883	T	C	2	1.269e-05	0.02393	1.4788	1.4104	0.1472	52.4	1.1533	1.5826	COL22A1(0)|FAM135B(+171.8kb)
14	47806166	rs12893855	C	T	2	1.272e-05	1.272e-05	0.8576	0.8576	0.4295	0	0.8079	0.8688	MDGA2(0)
17	19208340	rs62065871	T	C	2	1.275e-05	1.275e-05	1.921	1.921	0.4457	0	1.4938	2.023	B9D1(-32.53kb)|EPN2(0)|EPN2-AS1(0)|EPN2-IT1(+30.64kb)|GRAPL(+146.2kb)|MAPK7(-72.69kb)|MFAP4(-78.41kb)|MIR1180(-39.48kb)|RNF112(-106.2kb)
5	93902848	rs62365664	G	C	2	1.285e-05	1.285e-05	1.1157	1.1157	0.7697	0	1.0986	1.1196	ANKRD32(-51.54kb)|KIAA0825(0)|MCTP1(-139.4kb)
11	85869737	rs7113976	T	C	2	1.286e-05	0.0004239	1.1001	1.1056	0.2534	23.34	1.1613	1.0875	C11orf73(-143.5kb)|EED(-86.07kb)|PICALM(+88.81kb)
11	85824859	rs659023	G	A	2	1.289e-05	1.289e-05	1.1043	1.1043	0.3934	0	1.0595	1.1144	C11orf73(-188.4kb)|CCDC83(+193.8kb)|EED(-130.9kb)|PICALM(+43.94kb)
1	68613206	rs77167914	C	T	2	1.293e-05	0.03557	1.3383	1.2854	0.1335	55.57	1.0998	1.4086	DIRAS3(+96.75kb)|GNG12-AS1(0)|MIR1262(-35.99kb)|WLS(0)
12	121800927	rs11830481	C	A	2	1.293e-05	0.1378	1.3648	1.2875	0.0307	78.59	1.068	1.5036	ANAPC5(+8.915kb)|CAMKK2(+64.82kb)|KDM2B(-65.97kb)|P2RX4(+129kb)|P2RX7(+176.6kb)|RNF34(-36.96kb)
14	47818520	rs36045809	C	G	2	1.295e-05	1.295e-05	0.8567	0.8567	0.4728	0	0.8111	0.8669	MDGA2(0)
11	59927039	rs17529983	A	G	2	1.303e-05	0.00127	0.9057	0.8984	0.2153	34.86	0.8531	0.9178	MS4A2(+61.1kb)|MS4A3(+88.45kb)|MS4A4A(-121kb)|MS4A6A(-12.04kb)|MS4A6E(-175.3kb)|PLAC1L(+111.5kb)
1	218566878	rs12022831	G	T	2	1.305e-05	1.305e-05	1.2338	1.2338	0.7568	0	1.2711	1.2246	LOC728463(+47.86kb)|RRP15(+55.55kb)|TGFB2(0)
15	101652830	rs897486	T	C	2	1.31e-05	1.31e-05	0.8895	0.8895	0.728	0	0.8751	0.8943	ALDH1A3(+196kb)|CHSY1(-63.1kb)|LOC100507472(-194.6kb)|LRRK1(+42.51kb)|PCSK6(-191.3kb)|SNRPA1(-168.9kb)|VIMP(-158.4kb)
7	112167217	rs62475892	T	C	2	1.314e-05	1.314e-05	1.1337	1.1337	0.6451	0	1.1035	1.1411	IFRD1(+49.96kb)|LSMEM1(+36.27kb)|ZNF277(+183.2kb)
15	48699929	rs2114438	C	T	2	1.318e-05	1.318e-05	1.1142	1.1142	0.7973	0	1.0995	1.1176	DUT(+64.36kb)|FBN1(-0.573kb)|SLC12A1(+103.7kb)
15	48803839	rs9806163	C	T	2	1.331e-05	0.01574	0.8942	0.9051	0.1831	43.57	0.9611	0.8798	DUT(+168.3kb)|FBN1(0)
8	56011305	rs148101481	C	T	2	1.335e-05	1.335e-05	1.3006	1.3006	0.8928	0	1.3218	1.2953	XKR4(-3.711kb)
2	127889932	rs6710467	A	G	2	1.336e-05	1.336e-05	1.1415	1.1415	0.8575	0	1.1282	1.1444	BIN1(+25.03kb)|CYP27C1(-51.48kb)|ERCC3(-124.9kb)|MAP3K2(-166.3kb)
14	33099863	rs7160301	A	T	2	1.358e-05	1.358e-05	1.1116	1.1116	0.6268	0	1.0837	1.1177	AKAP6(0)
3	196968695	rs78927987	T	C	2	1.359e-05	1.359e-05	0.7978	0.7978	0.7787	0	0.7736	0.8033	DLG1(0)|DLG1-AS1(-56.42kb)|MIR4797(-52.05kb)
11	47391948	rs10437655	A	G	2	1.378e-05	0.003948	1.1029	1.1167	0.165	48.12	1.1787	1.0868	ACP2(+121.5kb)|ARFGAP2(+193.3kb)|CELF1(-95.54kb)|DDB2(+131.2kb)|MADD(+40.37kb)|MYBPC3(+17.7kb)|NR1H3(+101.4kb)|PACSIN3(+183.9kb)|PSMC3(-48.37kb)|PTPMT1(-195kb)|RAPSN(-67.36kb)|SLC39A13(-38.1kb)|SPI1(0)
3	196965413	rs78682737	C	T	2	1.378e-05	1.378e-05	0.798	0.798	0.7721	0	0.7731	0.8037	DLG1(0)|DLG1-AS1(-59.7kb)|MIR4797(-55.34kb)
20	54981233	rs6014718	A	G	2	1.379e-05	0.1363	0.8886	0.9119	0.0589	71.98	0.9808	0.8652	AURKA(+13.88kb)|CASS4(-5.934kb)|CSTF1(+1.651kb)|FAM209A(-118.6kb)|FAM209B(-127.1kb)|FAM210B(+37.52kb)|GCNT7(-85.31kb)|MC3R(+156.4kb)|RTFDC1(-62.41kb)
12	25107130	rs10842439	G	A	2	1.381e-05	0.002002	0.904	0.8951	0.1974	39.81	0.8483	0.9168	BCAT1(+4.737kb)|C12orf77(-39.23kb)|CASC1(-154.1kb)|LRMP(-98.05kb)
3	196958365	rs76607131	T	A	2	1.388e-05	1.388e-05	0.7982	0.7982	0.7524	0	0.7711	0.8044	DLG1(0)|DLG1-AS1(-66.75kb)|MIR4797(-62.38kb)
14	47808564	rs12884207	G	A	2	1.391e-05	1.391e-05	0.8582	0.8582	0.4909	0	0.8148	0.868	MDGA2(0)
11	59909647	rs1863472	G	C	2	1.393e-05	0.0008117	0.906	0.8999	0.2327	29.79	0.8552	0.9176	MS4A2(+43.71kb)|MS4A3(+71.06kb)|MS4A4A(-138.4kb)|MS4A6A(-29.43kb)|MS4A6E(-192.7kb)|PLAC1L(+94.13kb)
3	196947934	rs114928475	T	C	2	1.393e-05	1.393e-05	0.7981	0.7981	0.7371	0	0.7693	0.8047	DLG1(0)|DLG1-AS1(-77.18kb)|MFI2(+191.2kb)|MIR4797(-72.81kb)
15	48792444	rs9652450	G	A	2	1.394e-05	0.01159	0.8943	0.9042	0.1951	40.43	0.9595	0.8803	DUT(+156.9kb)|FBN1(0)|SLC12A1(+196.2kb)
11	85858538	rs7941541	A	G	2	1.401e-05	1.401e-05	1.1093	1.1093	0.3652	0	1.0596	1.1207	C11orf73(-154.7kb)|EED(-97.27kb)|PICALM(+77.62kb)
3	196967530	rs74702810	C	G	2	1.401e-05	1.401e-05	0.7981	0.7981	0.7744	0	0.7735	0.8038	DLG1(0)|DLG1-AS1(-57.59kb)|MIR4797(-53.22kb)
22	29822936	rs5763229	A	G	2	1.404e-05	1.404e-05	1.2022	1.2022	0.8127	0	1.227	1.1963	AP1B1(+38.36kb)|EMID1(+167.4kb)|EWSR1(+126.4kb)|GAS2L1(+114.2kb)|MIR3653(+93.68kb)|NEFH(-53.24kb)|NF2(-176.6kb)|NIPSNAP1(-127.9kb)|RASL10A(+111.2kb)|RFPL1(-11.64kb)|RFPL1S(-10.07kb)|RHBDD3(+159kb)|SNORD125(+93.69kb)|THOC5(-81.22kb)
15	48803919	rs16961062	G	T	2	1.419e-05	0.01699	0.8945	0.9057	0.1812	44.07	0.9618	0.8801	DUT(+168.3kb)|FBN1(0)
15	48805637	rs2306352	A	G	2	1.425e-05	0.01245	0.8944	0.9046	0.193	41	0.96	0.8804	DUT(+170.1kb)|FBN1(0)
2	127875660	rs10929007	G	A	2	1.425e-05	1.425e-05	1.1254	1.1254	0.4431	0	1.0777	1.1368	BIN1(+10.76kb)|CYP27C1(-65.75kb)|ERCC3(-139.2kb)|MAP3K2(-180.6kb)
2	127875389	rs3845674	G	T	2	1.43e-05	1.43e-05	1.1253	1.1253	0.443	0	1.0776	1.1367	BIN1(+10.49kb)|CYP27C1(-66.02kb)|ERCC3(-139.5kb)|MAP3K2(-180.9kb)
6	110566328	rs2334319	T	C	2	1.443e-05	0.01478	1.1271	1.1553	0.0831	66.7	1.2426	1.101	CDC40(+12.91kb)|DDO(-147.1kb)|METTL24(-0.82kb)|SLC22A16(-179.6kb)|WASF1(+65.12kb)
12	121809119	rs7955122	C	T	2	1.448e-05	0.06054	1.3543	1.2983	0.0706	69.41	1.1075	1.4663	ANAPC5(+17.11kb)|CAMKK2(+73.01kb)|KDM2B(-57.78kb)|P2RX4(+137.2kb)|P2RX7(+184.8kb)|RNF34(-28.77kb)
14	33100829	rs11627900	G	A	2	1.452e-05	1.452e-05	1.111	1.111	0.7378	0	1.0918	1.1152	AKAP6(0)
1	68601181	rs12064323	G	A	2	1.473e-05	0.05232	1.3361	1.2769	0.1167	59.36	1.0873	1.4094	DIRAS3(+84.72kb)|GNG12-AS1(0)|MIR1262(-48.02kb)|WLS(0)
8	139673442	rs72727870	T	C	2	1.473e-05	0.03232	1.476	1.4017	0.1377	54.62	1.1403	1.5814	COL22A1(0)|FAM135B(+164.4kb)
15	48784497	rs11070644	C	T	2	1.475e-05	0.01344	0.8947	0.905	0.1909	41.56	0.9606	0.8806	DUT(+148.9kb)|FBN1(0)|SLC12A1(+188.2kb)
15	48789634	rs140605	C	T	2	1.477e-05	0.01634	0.8946	0.9056	0.1834	43.49	0.9617	0.8803	DUT(+154.1kb)|FBN1(0)|SLC12A1(+193.4kb)
11	59906792	rs2165525	C	A	2	1.48e-05	0.0008389	0.9063	0.9002	0.2328	29.75	0.8555	0.9179	MS4A2(+40.85kb)|MS4A3(+68.2kb)|MS4A4A(-141.2kb)|MS4A6A(-32.29kb)|MS4A6E(-195.6kb)|PLAC1L(+91.28kb)
19	1036631	rs11672916	C	T	2	1.485e-05	0.1177	1.1743	1.1428	0.0351	77.48	1.0407	1.2353	ABCA7(-3.47kb)|ARID3A(+63.83kb)|C19orf26(-193.3kb)|CFD(+173kb)|CNN2(0)|ELANE(+180.4kb)|GPX4(-67.3kb)|GRIN3B(+26.91kb)|HMHA1(-29.29kb)|KISS1R(+115.6kb)|MED16(+143.4kb)|POLR2E(-49.95kb)|PRTN3(+188.5kb)|R3HDM4(+123.4kb)|SBNO2(-71kb)|STK11(-169.2kb)|TMEM259(+15.49kb)|WDR18(+42.06kb)
6	39111824	rs228823	A	G	2	1.487e-05	1.487e-05	0.8508	0.8508	0.348	0	0.9181	0.8372	DNAH8(+113.2kb)|GLP1R(+56.3kb)|KCNK5(-44.92kb)|KCNK16(-170.6kb)|KCNK17(-155kb)|KIF6(-191.1kb)|LOC100131047(+190.9kb)|SAYSD1(+28.96kb)
1	218570331	rs79839744	T	C	2	1.49e-05	1.49e-05	1.2318	1.2318	0.7263	0	1.2739	1.2214	LOC728463(+51.31kb)|RRP15(+59.01kb)|TGFB2(0)
10	15829608	rs4748207	G	T	2	1.493e-05	1.493e-05	1.4173	1.4173	0.4807	0	1.5886	1.3778	FAM188A(0)|ITGA8(+67.84kb)
2	127878438	rs4663100	G	C	2	1.494e-05	1.494e-05	1.1253	1.1253	0.4388	0	1.077	1.1368	BIN1(+13.54kb)|CYP27C1(-62.97kb)|ERCC3(-136.4kb)|MAP3K2(-177.8kb)
11	85795950	rs480781	G	A	2	1.495e-05	1.495e-05	1.1101	1.1101	0.6203	0	1.0819	1.1163	CCDC83(+164.9kb)|EED(-159.9kb)|PICALM(+15.03kb)
7	134542879	rs75356088	A	G	2	1.498e-05	0.01314	1.7796	1.8898	0.0677	70.04	2.5096	1.4982	AGBL3(-128.4kb)|BPGM(+178.3kb)|CALD1(0)
3	196980635	rs76421057	C	T	2	1.5e-05	1.5e-05	0.7984	0.7984	0.8113	0	0.7778	0.8031	DLG1(0)|DLG1-AS1(-44.48kb)|MIR4797(-40.11kb)
2	127878432	rs4663099	A	C	2	1.502e-05	1.502e-05	1.1253	1.1253	0.4388	0	1.077	1.1368	BIN1(+13.53kb)|CYP27C1(-62.98kb)|ERCC3(-136.4kb)|MAP3K2(-177.8kb)
2	127878839	rs10929009	C	T	2	1.507e-05	1.507e-05	1.1252	1.1252	0.4474	0	1.0778	1.1365	BIN1(+13.94kb)|CYP27C1(-62.57kb)|ERCC3(-136kb)|MAP3K2(-177.4kb)
2	127873035	rs4663098	C	T	2	1.509e-05	1.509e-05	1.1246	1.1246	0.4407	0	1.0769	1.136	BIN1(+8.132kb)|CYP27C1(-68.38kb)|ERCC3(-141.8kb)|MAP3K2(-183.2kb)
7	148672699	rs60765384	A	T	2	1.514e-05	1.514e-05	1.3412	1.3412	0.9083	0	1.3221	1.3469	CUL1(+174.5kb)|EZH2(+91.26kb)|PDIA4(-27.45kb)|ZNF398(-150.8kb)|ZNF425(-127.2kb)|ZNF786(-94.03kb)
2	127839781	rs10194375	A	C	2	1.517e-05	1.517e-05	1.1069	1.1069	0.4505	0	1.1494	1.0977	BIN1(0)|CYP27C1(-101.6kb)|ERCC3(-175.1kb)
11	59923194	rs10897009	A	G	2	1.522e-05	0.0014	0.9066	0.8992	0.2149	34.99	0.8538	0.9186	MS4A2(+57.25kb)|MS4A3(+84.61kb)|MS4A4A(-124.8kb)|MS4A6A(-15.88kb)|MS4A6E(-179.2kb)|PLAC1L(+107.7kb)
2	59756447	rs2058589	A	G	2	1.523e-05	1.523e-05	0.9009	0.9009	0.4372	0	0.8661	0.909	.
12	7757834	rs7309269	A	G	2	1.525e-05	1.525e-05	1.3255	1.3255	0.6167	0	1.4138	1.3038	APOBEC1(-44.16kb)|CD163(+101.4kb)|CD163L1(+161.1kb)|CLEC4C(-124.2kb)|DPPA3(-106.3kb)|GDF3(-84.55kb)|NANOG(-184.2kb)|NANOGNB(-160kb)
17	76529441	rs139303063	T	G	2	1.525e-05	1.715e-05	1.5375	1.5383	0.3153	0.82	1.839	1.4542	CYTH1(-140.7kb)|DNAH17(0)|DNAH17-AS1(+30.3kb)|PGS1(+108.8kb)|SOCS3(+173.3kb)
19	1036793	rs11672975	A	T	2	1.532e-05	0.1162	1.1739	1.1426	0.0359	77.29	1.041	1.2345	ABCA7(-3.308kb)|ARID3A(+63.99kb)|C19orf26(-193.2kb)|CFD(+173.2kb)|CNN2(0)|ELANE(+180.5kb)|GPX4(-67.14kb)|GRIN3B(+27.07kb)|HMHA1(-29.13kb)|KISS1R(+115.8kb)|MED16(+143.6kb)|POLR2E(-49.78kb)|PRTN3(+188.6kb)|R3HDM4(+123.6kb)|SBNO2(-70.84kb)|STK11(-169kb)|TMEM259(+15.65kb)|WDR18(+42.22kb)
19	1036575	rs2304260	A	G	2	1.548e-05	0.1205	1.174	1.1423	0.0344	77.65	1.0399	1.2352	ABCA7(-3.526kb)|ARID3A(+63.77kb)|C19orf26(-193.4kb)|CFD(+173kb)|CNN2(0)|ELANE(+180.3kb)|GPX4(-67.36kb)|GRIN3B(+26.85kb)|HMHA1(-29.35kb)|KISS1R(+115.6kb)|MED16(+143.4kb)|POLR2E(-50kb)|PRTN3(+188.4kb)|R3HDM4(+123.4kb)|SBNO2(-71.06kb)|STK11(-169.2kb)|TMEM259(+15.43kb)|WDR18(+42.01kb)
15	48799348	rs7164277	C	T	2	1.552e-05	0.01354	0.8949	0.9052	0.1909	41.54	0.9607	0.8808	DUT(+163.8kb)|FBN1(0)
11	59903793	rs55847558	G	C	2	1.561e-05	0.00082	0.9066	0.9007	0.2345	29.24	0.8561	0.9182	MS4A2(+37.85kb)|MS4A3(+65.2kb)|MS4A4A(-144.2kb)|MS4A6A(-35.29kb)|MS4A6E(-198.6kb)|PLAC1L(+88.28kb)
4	185529073	rs147581635	A	G	2	1.561e-05	1.561e-05	0.7253	0.7253	0.6982	0	0.6814	0.735	ACSL1(-147.7kb)|CASP3(-19.78kb)|CCDC111(-41.69kb)|IRF2(+133.3kb)|MLF1IP(-86.14kb)|SLED1(-190.4kb)
19	1036718	rs11667191	A	G	2	1.562e-05	0.1131	1.1743	1.1434	0.0372	76.98	1.0419	1.2348	ABCA7(-3.383kb)|ARID3A(+63.92kb)|C19orf26(-193.2kb)|CFD(+173.1kb)|CNN2(0)|ELANE(+180.5kb)|GPX4(-67.22kb)|GRIN3B(+27kb)|HMHA1(-29.2kb)|KISS1R(+115.7kb)|MED16(+143.5kb)|POLR2E(-49.86kb)|PRTN3(+188.5kb)|R3HDM4(+123.5kb)|SBNO2(-70.91kb)|STK11(-169.1kb)|TMEM259(+15.58kb)|WDR18(+42.15kb)
19	45477111	rs204480	T	C	2	1.567e-05	1.567e-05	1.1239	1.1239	0.4841	0	1.0804	1.1341	APOC1(+54.5kb)|APOC1P1(+42.47kb)|APOC2(+24.29kb)|APOC4(+28.36kb)|APOC4-APOC2(+24.29kb)|APOE(+64.46kb)|BCAM(+152.4kb)|CBLC(+173.2kb)|CLASRP(-65.19kb)|CLPTM1(0)|GEMIN7(-105.4kb)|NKPD1(-175.9kb)|PPP1R37(-119.3kb)|PVRL2(+84.63kb)|RELB(-27.6kb)|TOMM40(+70.16kb)|TRAPPC6A(-189.1kb)|ZNF296(-97.65kb)
9	106087352	rs373637	T	C	2	1.575e-05	1.575e-05	1.103	1.103	0.4547	0	1.065	1.1121	.
1	120127977	rs346668	G	C	2	1.599e-05	1.599e-05	0.8807	0.8807	0.4191	0	0.8363	0.8904	HAO2(+191.2kb)|HMGCS2(-162.6kb)|HSD3B1(+70.3kb)|HSD3B2(+162.3kb)|HSD3BP4(+12.78kb)|LINC00622(-12.35kb)|PHGDH(-126.4kb)|ZNF697(-34.02kb)
1	68593852	rs12096889	C	T	2	1.611e-05	0.04795	1.3336	1.2768	0.1226	58.04	1.0891	1.4054	DIRAS3(+77.39kb)|GNG12-AS1(0)|MIR1262(-55.35kb)|WLS(0)
6	165997775	rs73022146	C	T	2	1.611e-05	3.985e-05	1.3311	1.3348	0.3054	4.8	1.5441	1.2903	PDE10A(0)
12	121797905	rs111794294	A	G	2	1.632e-05	0.1406	1.3606	1.2842	0.0314	78.41	1.0658	1.4989	ANAPC5(+5.893kb)|CAMKK2(+61.79kb)|KDM2B(-68.99kb)|P2RX4(+126kb)|P2RX7(+173.6kb)|RNF34(-39.98kb)
15	48766250	rs56686382	C	G	2	1.642e-05	0.01472	0.895	0.9055	0.1892	41.99	0.9614	0.8808	DUT(+130.7kb)|FBN1(0)|SLC12A1(+170kb)
16	81802714	rs12931598	G	C	2	1.642e-05	1.642e-05	0.9006	0.9006	0.4442	0	0.8653	0.9084	CMIP(+57.35kb)|LOC100129617(+101.8kb)|PLCG2(-10.18kb)
15	48849728	rs2437948	T	C	2	1.643e-05	0.0002763	0.8945	0.8972	0.2838	12.95	0.9481	0.8828	CEP152(-180.4kb)|FBN1(0)
15	48770580	rs2413906	G	A	2	1.657e-05	0.01633	0.8952	0.906	0.1854	42.99	0.9621	0.8809	DUT(+135kb)|FBN1(0)|SLC12A1(+174.3kb)
11	85856187	rs7110631	G	C	2	1.68e-05	1.68e-05	1.1083	1.1083	0.3615	0	1.0582	1.1197	C11orf73(-157.1kb)|EED(-99.62kb)|PICALM(+75.26kb)
6	32605558	rs9272458	A	G	2	1.697e-05	1.697e-05	0.8395	0.8395	0.6889	0	0.8191	0.8486	HLA-DOB(-175kb)|HLA-DQA1(0)|HLA-DQA2(-103.6kb)|HLA-DQB1(-21.68kb)|HLA-DQB2(-118.3kb)|HLA-DRA(+192.7kb)|HLA-DRB1(+47.94kb)|HLA-DRB5(+107.6kb)|HLA-DRB6(+77.78kb)|TAP2(-184.1kb)
11	76453798	rs77574798	T	G	2	1.7e-05	0.001091	1.2742	1.2953	0.2034	38.19	1.446	1.2235	ACER3(-118.1kb)|C11orf30(+191.2kb)|GUCY2EP(+20.96kb)|LRRC32(+72.01kb)|TSKU(-39.56kb)
15	48906577	rs612617	G	A	2	1.707e-05	0.001066	0.8945	0.899	0.2608	20.91	0.951	0.8822	CEP152(-123.6kb)|FBN1(0)
9	131839911	rs117927057	T	C	2	1.708e-05	1.708e-05	1.5114	1.5114	0.7844	0	1.611	1.4951	CCBL1(+195.6kb)|CRAT(-17.16kb)|DOLK(+129.9kb)|DOLPP1(-3.471kb)|FAM73B(+5.56kb)|IER5L(-97.92kb)|LRRC8A(+159.6kb)|NUP188(+70.54kb)|PHYHD1(+135.6kb)|PPP2R4(-33.32kb)|SH3GLB2(+49.33kb)
11	59904959	rs11230155	T	C	2	1.715e-05	0.001181	0.907	0.9003	0.2234	32.54	0.8553	0.9189	MS4A2(+39.02kb)|MS4A3(+66.37kb)|MS4A4A(-143.1kb)|MS4A6A(-34.12kb)|MS4A6E(-197.4kb)|PLAC1L(+89.44kb)
2	127883899	rs7559175	A	G	2	1.736e-05	1.736e-05	1.1196	1.1196	0.3416	0	1.0628	1.1331	BIN1(+19kb)|CYP27C1(-57.51kb)|ERCC3(-131kb)|MAP3K2(-172.3kb)
1	218564644	rs11118097	T	C	2	1.737e-05	1.737e-05	1.2273	1.2273	0.9724	0	1.2314	1.2263	LOC728463(+45.62kb)|RRP15(+53.32kb)|TGFB2(0)
19	1036314	rs112340731	G	A	2	1.74e-05	0.1342	1.1729	1.1402	0.0307	78.59	1.0362	1.2354	ABCA7(-3.787kb)|ARID3A(+63.51kb)|C19orf26(-193.6kb)|CFD(+172.7kb)|CNN2(0)|ELANE(+180.1kb)|GPX4(-67.62kb)|GRIN3B(+26.59kb)|HMHA1(-29.61kb)|KISS1R(+115.3kb)|MED16(+143.1kb)|POLR2E(-50.26kb)|PRTN3(+188.1kb)|R3HDM4(+123.1kb)|SBNO2(-71.32kb)|STK11(-169.5kb)|TMEM259(+15.17kb)|WDR18(+41.74kb)
11	59924959	rs920573	A	G	2	1.747e-05	0.001538	0.9071	0.8996	0.2138	35.29	0.8542	0.9192	MS4A2(+59.02kb)|MS4A3(+86.37kb)|MS4A4A(-123.1kb)|MS4A6A(-14.12kb)|MS4A6E(-177.4kb)|PLAC1L(+109.4kb)
14	33098582	rs10135558	G	A	2	1.776e-05	1.776e-05	1.11	1.11	0.7013	0	1.088	1.1148	AKAP6(0)
8	28581823	rs4732651	T	C	2	1.785e-05	1.785e-05	0.8971	0.8971	0.4401	0	0.8601	0.9053	EXTL3(0)|FZD3(+150kb)|HMBOX1(-166.1kb)|INTS9(-43.35kb)
1	218564977	rs6656048	C	T	2	1.79e-05	1.79e-05	1.2267	1.2267	0.9691	0	1.2313	1.2256	LOC728463(+45.96kb)|RRP15(+53.65kb)|TGFB2(0)
19	7849321	rs79035713	A	G	2	1.797e-05	1.797e-05	1.126	1.126	0.8	0	1.1105	1.13	C19orf59(+104.6kb)|CAMSAP3(+166.1kb)|CD209(+36.86kb)|CLEC4G(+52.26kb)|CLEC4GP1(-3.048kb)|CLEC4M(+14.83kb)|CTXN1(-140.1kb)|ELAVL1(-174.1kb)|EVI5L(-45.84kb)|FCER2(+82.29kb)|FLJ22184(-84.28kb)|LOC388499(-94.2kb)|LRRC8E(-104.1kb)|MAP2K7(-119.4kb)|PCP2(+150.7kb)|PET100(+152.8kb)|RETN(+114kb)|SNAPC2(-135.9kb)|STXBP2(+136.6kb)|TGFBR3L(-131.7kb)|TIMM44(-142.3kb)|TRAPPC5(+101.6kb)|XAB2(+154.9kb)
17	76555985	rs11867901	C	T	2	1.8e-05	1.8e-05	1.1466	1.1466	0.4675	0	1.1994	1.133	CYTH1(-114.1kb)|DNAH17(0)|DNAH17-AS1(+56.85kb)|PGS1(+135.3kb)|SOCS3(+199.8kb)
11	85831541	rs471470	A	C	2	1.806e-05	0.0003914	1.1049	1.1016	0.2805	14.15	1.0473	1.118	C11orf73(-181.7kb)|EED(-124.3kb)|PICALM(+50.62kb)
14	47820310	rs34872348	C	T	2	1.807e-05	1.807e-05	0.8598	0.8598	0.4869	0	0.8159	0.8697	MDGA2(0)
14	98679071	rs12894205	T	A	2	1.808e-05	1.808e-05	0.9052	0.9052	0.7543	0	0.9197	0.9022	.
16	28516719	rs153110	A	G	2	1.809e-05	1.809e-05	0.8223	0.8223	0.3314	0	0.7643	0.8447	APOBR(+6.428kb)|CCDC101(-48.53kb)|CLN3(+13.1kb)|EIF3C(+78.94kb)|EIF3CL(+101.6kb)|IL27(0)|NUPR1(-31.94kb)|SBK1(+181.5kb)|SULT1A1(-100.2kb)|SULT1A2(-86.54kb)
19	1036468	rs1064411	G	A	2	1.809e-05	0.1349	1.1725	1.1398	0.0308	78.56	1.0359	1.2349	ABCA7(-3.633kb)|ARID3A(+63.66kb)|C19orf26(-193.5kb)|CFD(+172.9kb)|CNN2(0)|ELANE(+180.2kb)|GPX4(-67.47kb)|GRIN3B(+26.74kb)|HMHA1(-29.45kb)|KISS1R(+115.5kb)|MED16(+143.2kb)|POLR2E(-50.11kb)|PRTN3(+188.3kb)|R3HDM4(+123.2kb)|SBNO2(-71.16kb)|STK11(-169.3kb)|TMEM259(+15.33kb)|WDR18(+41.9kb)
19	7849222	rs62125173	T	C	2	1.819e-05	1.819e-05	1.1258	1.1258	0.8019	0	1.1105	1.1298	C19orf59(+104.5kb)|CAMSAP3(+166kb)|CD209(+36.76kb)|CLEC4G(+52.16kb)|CLEC4GP1(-3.147kb)|CLEC4M(+14.73kb)|CTXN1(-140.2kb)|ELAVL1(-174.2kb)|EVI5L(-45.94kb)|FCER2(+82.19kb)|FLJ22184(-84.38kb)|LOC388499(-94.29kb)|LRRC8E(-104.2kb)|MAP2K7(-119.5kb)|PCP2(+150.6kb)|PET100(+152.7kb)|RETN(+113.9kb)|SNAPC2(-136kb)|STXBP2(+136.5kb)|TGFBR3L(-131.8kb)|TIMM44(-142.4kb)|TRAPPC5(+101.5kb)|XAB2(+154.8kb)
2	59757501	rs2674041	A	G	2	1.821e-05	1.821e-05	0.9015	0.9015	0.665	0	0.8819	0.906	.
2	127887750	rs62158731	T	C	2	1.824e-05	1.824e-05	0.8897	0.8897	0.4012	0	0.9328	0.8799	BIN1(+22.85kb)|CYP27C1(-53.66kb)|ERCC3(-127.1kb)|MAP3K2(-168.5kb)
14	104643421	rs2487302	C	T	2	1.825e-05	1.825e-05	1.1491	1.1491	0.9882	0	1.1483	1.1495	ASPG(+64.38kb)|KIF26A(0)|MIR203(+59.57kb)|MIR3545(+59.58kb)|TDRD9(+124.4kb)
15	48941369	rs12101348	T	G	2	1.825e-05	1.825e-05	1.1127	1.1127	0.9584	0	1.1097	1.1134	CEP152(-88.76kb)|FBN1(+3.384kb)|SHC4(-174.6kb)
11	59900106	rs4939312	T	C	2	1.828e-05	0.0007902	0.9073	0.9017	0.2388	27.94	0.8572	0.9188	MS4A2(+34.17kb)|MS4A3(+61.52kb)|MS4A4A(-147.9kb)|MS4A6A(-38.97kb)|PLAC1L(+84.59kb)
8	28580813	rs4732650	G	C	2	1.831e-05	1.831e-05	0.8973	0.8973	0.4447	0	0.8607	0.9054	EXTL3(0)|FZD3(+149kb)|HMBOX1(-167.1kb)|INTS9(-44.36kb)
12	104116134	rs79956596	C	T	2	1.846e-05	1.846e-05	1.1889	1.1889	0.5405	0	1.1304	1.2034	GNN(-121.4kb)|NT5DC3(-49.95kb)|STAB2(0)
19	1036456	rs1064410	G	C	2	1.851e-05	0.1372	1.1723	1.1394	0.0302	78.7	1.0353	1.2349	ABCA7(-3.645kb)|ARID3A(+63.65kb)|C19orf26(-193.5kb)|CFD(+172.8kb)|CNN2(0)|ELANE(+180.2kb)|GPX4(-67.48kb)|GRIN3B(+26.73kb)|HMHA1(-29.46kb)|KISS1R(+115.4kb)|MED16(+143.2kb)|POLR2E(-50.12kb)|PRTN3(+188.3kb)|R3HDM4(+123.2kb)|SBNO2(-71.18kb)|STK11(-169.3kb)|TMEM259(+15.32kb)|WDR18(+41.89kb)
19	1043324	rs11672201	G	C	2	1.854e-05	0.1044	1.2589	1.2112	0.0468	74.69	1.0616	1.3461	ABCA7(0)|ARID3A(+70.52kb)|ATP5D(-198.4kb)|C19orf26(-186.6kb)|CFD(+179.7kb)|CNN2(+4.26kb)|ELANE(+187.1kb)|GPX4(-60.61kb)|GRIN3B(+33.6kb)|HMHA1(-22.6kb)|KISS1R(+122.3kb)|MED16(+150.1kb)|POLR2E(-43.25kb)|PRTN3(+195.1kb)|R3HDM4(+130.1kb)|SBNO2(-64.31kb)|STK11(-162.5kb)|TMEM259(+22.18kb)|WDR18(+48.76kb)
15	48834860	rs598029	G	A	2	1.856e-05	1.856e-05	0.9018	0.9018	0.9185	0	0.9064	0.9007	CEP152(-195.3kb)|DUT(+199.3kb)|FBN1(0)
6	32440451	rs9269070	A	G	2	1.857e-05	0.006971	0.8888	0.8963	0.1727	46.22	0.9437	0.8681	BTNL2(+65.55kb)|C6orf10(+100.8kb)|HCG23(+78.98kb)|HLA-DQA1(-164.7kb)|HLA-DQB1(-186.8kb)|HLA-DRA(+27.62kb)|HLA-DRB1(-106.1kb)|HLA-DRB5(-44.7kb)|HLA-DRB6(-80.04kb)
13	103570055	rs79326373	A	G	2	1.864e-05	1.864e-05	1.3502	1.3502	0.6291	0	1.2661	1.3745	BIVM(+76.17kb)|BIVM-ERCC5(+41.7kb)|CCDC168(+158.6kb)|ERCC5(+41.7kb)|KDELC1(+118.7kb)|METTL21EP(+21.67kb)|SLC10A2(-126.3kb)|TEX30(+143.9kb)
12	121808645	rs144339186	C	A	2	1.866e-05	0.06302	1.3485	1.2932	0.0717	69.17	1.104	1.4595	ANAPC5(+16.63kb)|CAMKK2(+72.53kb)|KDM2B(-58.25kb)|P2RX4(+136.7kb)|P2RX7(+184.3kb)|RNF34(-29.24kb)
9	18601460	rs10756981	A	G	2	1.868e-05	1.868e-05	0.9038	0.9038	0.4827	0	0.9367	0.8969	ADAMTSL1(0)|MIR3152(+28.08kb)
12	121786802	rs78375200	G	T	2	1.873e-05	0.1443	1.3602	1.2822	0.0328	78.06	1.0628	1.4964	ANAPC5(0)|CAMKK2(+50.69kb)|KDM2B(-80.1kb)|P2RX4(+114.9kb)|P2RX7(+162.4kb)|RNF34(-51.08kb)
19	7847736	rs1968252	A	G	2	1.876e-05	1.876e-05	1.1256	1.1256	0.7908	0	1.1094	1.1298	C19orf59(+103kb)|CAMSAP3(+164.5kb)|CD209(+35.27kb)|CLEC4G(+50.68kb)|CLEC4GP1(-4.633kb)|CLEC4M(+13.24kb)|CTXN1(-141.6kb)|ELAVL1(-175.7kb)|EVI5L(-47.42kb)|FCER2(+80.7kb)|FLJ22184(-85.87kb)|LOC388499(-95.78kb)|LRRC8E(-105.7kb)|MAP2K7(-121kb)|PCP2(+149.1kb)|PET100(+151.2kb)|RETN(+112.4kb)|SNAPC2(-137.5kb)|STXBP2(+135kb)|TGFBR3L(-133.3kb)|TIMM44(-143.9kb)|TRAPPC5(+99.99kb)|XAB2(+153.3kb)
18	30981632	rs78340060	C	T	2	1.886e-05	1.886e-05	1.1416	1.1416	0.5826	0	1.1815	1.132	ASXL3(-176.9kb)|CCDC178(0)
1	55520408	rs553741	C	G	2	1.887e-05	1.887e-05	0.9024	0.9024	0.9562	0	0.8999	0.903	BSND(+45.94kb)|DHCR24(+167.5kb)|LOC100507634(-160.7kb)|MIR4422(-170.9kb)|PCSK9(0)|TMEM61(+62.44kb)|USP24(-11.62kb)
20	39942526	rs2425461	G	A	2	1.891e-05	1.891e-05	0.7149	0.7149	0.6675	0	0.668	0.727	CHD6(-88.64kb)|EMILIN3(-46.08kb)|LPIN3(-27.03kb)|PLCG1(+138.2kb)|TOP1(+189.4kb)|ZHX3(+13.79kb)
1	68591195	rs41287844	T	C	2	1.892e-05	0.05391	1.3309	1.2727	0.1184	58.98	1.0846	1.4036	DIRAS3(+74.74kb)|GNG12-AS1(0)|MIR1262(-58kb)|WLS(0)
19	7848679	rs4239552	T	C	2	1.906e-05	1.906e-05	1.1254	1.1254	0.7864	0	1.1089	1.1297	C19orf59(+104kb)|CAMSAP3(+165.5kb)|CD209(+36.22kb)|CLEC4G(+51.62kb)|CLEC4GP1(-3.69kb)|CLEC4M(+14.19kb)|CTXN1(-140.7kb)|ELAVL1(-174.8kb)|EVI5L(-46.48kb)|FCER2(+81.65kb)|FLJ22184(-84.92kb)|LOC388499(-94.84kb)|LRRC8E(-104.7kb)|MAP2K7(-120.1kb)|PCP2(+150kb)|PET100(+152.2kb)|RETN(+113.3kb)|SNAPC2(-136.5kb)|STXBP2(+135.9kb)|TGFBR3L(-132.4kb)|TIMM44(-142.9kb)|TRAPPC5(+100.9kb)|XAB2(+154.2kb)
11	59919165	rs11230160	T	C	2	1.912e-05	0.001525	0.9076	0.9003	0.2162	34.62	0.8549	0.9196	MS4A2(+53.22kb)|MS4A3(+80.58kb)|MS4A4A(-128.8kb)|MS4A6A(-19.91kb)|MS4A6E(-183.2kb)|PLAC1L(+103.6kb)
5	11944898	rs4701928	G	A	2	1.92e-05	0.1649	1.1003	1.0747	0.0689	69.78	1.009	1.1215	CTNND2(+40.79kb)
17	76555543	rs74993700	C	A	2	1.924e-05	0.0006773	1.151	1.1604	0.2337	29.5	1.2411	1.1278	CYTH1(-114.6kb)|DNAH17(0)|DNAH17-AS1(+56.4kb)|PGS1(+134.9kb)|SOCS3(+199.4kb)
15	48774288	rs11634866	G	A	2	1.925e-05	0.01305	0.8959	0.9058	0.196	40.18	0.9613	0.8819	DUT(+138.7kb)|FBN1(0)|SLC12A1(+178kb)
14	33126543	rs12437429	A	G	2	1.929e-05	1.929e-05	1.1077	1.1077	0.9168	0	1.1017	1.109	AKAP6(0)
12	7728975	rs76846599	C	T	2	1.936e-05	1.936e-05	1.3361	1.3361	0.4511	0	1.4778	1.3019	APOBEC1(-73.02kb)|CD163(+72.56kb)|CD163L1(+132.2kb)|CLEC4C(-153kb)|DPPA3(-135.1kb)|GDF3(-113.4kb)|NANOGNB(-188.8kb)
6	118911221	rs72954879	T	C	2	1.941e-05	0.006163	1.7406	1.8268	0.1097	60.91	2.3533	1.509	BRD7P3(+86.22kb)|CEP85L(0)|LOC100287632(-192.6kb)|PLN(+29.63kb)
5	7804053	rs115247394	G	A	2	1.948e-05	1.948e-05	1.1113	1.1113	0.7472	0	1.0925	1.1154	ADCY2(0)|C5orf49(-26.44kb)|FASTKD3(-55.22kb)|MTRR(-65.16kb)
2	127867815	rs4494685	C	T	2	1.951e-05	1.951e-05	1.1232	1.1232	0.4809	0	1.0794	1.1336	BIN1(+2.912kb)|CYP27C1(-73.6kb)|ERCC3(-147kb)|MAP3K2(-188.4kb)
11	92713376	rs11020131	A	G	2	1.967e-05	1.967e-05	1.4245	1.4245	0.87	0	1.4675	1.4157	FAT3(+83.74kb)|MTNR1B(0)|SLC36A4(-167.5kb)
6	32592985	rs9271687	G	A	2	1.976e-05	1.976e-05	0.8288	0.8288	0.9211	0	0.8231	0.8311	HLA-DOB(-187.6kb)|HLA-DQA1(-12.2kb)|HLA-DQA2(-116.2kb)|HLA-DQB1(-34.26kb)|HLA-DQB2(-130.9kb)|HLA-DRA(+180.2kb)|HLA-DRB1(+35.37kb)|HLA-DRB5(+94.98kb)|HLA-DRB6(+65.21kb)|TAP2(-196.6kb)
6	32451650	rs28619202	C	T	2	1.982e-05	0.01601	0.8837	0.8936	0.1372	54.73	0.9458	0.8599	BTNL2(+76.75kb)|C6orf10(+112kb)|HCG23(+90.18kb)|HLA-DQA1(-153.5kb)|HLA-DQB1(-175.6kb)|HLA-DRA(+38.82kb)|HLA-DRB1(-94.9kb)|HLA-DRB5(-33.5kb)|HLA-DRB6(-68.84kb)
18	39915411	rs12958679	T	C	2	1.985e-05	1.985e-05	0.9018	0.9018	0.5388	0	0.8734	0.9081	LINC00907(0)
18	52587664	rs61115294	A	G	2	1.989e-05	0.001635	0.8812	0.8718	0.2192	33.76	0.8132	0.8959	CCDC68(0)|RAB27B(+24.92kb)
18	39915191	rs9959948	A	T	2	1.995e-05	1.995e-05	0.9026	0.9026	0.5517	0	0.8751	0.9086	LINC00907(0)
15	48901389	rs645509	C	T	2	1.996e-05	0.002824	0.8956	0.9016	0.2408	27.32	0.9543	0.8827	CEP152(-128.7kb)|FBN1(0)
6	32577586	rs9271155	A	G	2	2.006e-05	2.006e-05	0.8423	0.8423	0.9156	0	0.8367	0.8446	HLA-DQA1(-27.6kb)|HLA-DQA2(-131.6kb)|HLA-DQB1(-49.65kb)|HLA-DQB2(-146.3kb)|HLA-DRA(+164.8kb)|HLA-DRB1(+19.97kb)|HLA-DRB5(+79.58kb)|HLA-DRB6(+49.81kb)
16	56650474	rs12934166	T	G	2	2.011e-05	2.011e-05	0.8605	0.8605	0.4731	0	0.9121	0.8511	AMFR(+191kb)|BBS2(+96.47kb)|MT1A(-22.1kb)|MT1B(-35.34kb)|MT1DP(-27.12kb)|MT1E(-9.11kb)|MT1F(-41.38kb)|MT1G(-50.18kb)|MT1H(-53.25kb)|MT1IP(-59.17kb)|MT1JP(-19.18kb)|MT1L(-0.898kb)|MT1M(-16.06kb)|MT1X(-65.91kb)|MT2A(+7.065kb)|MT3(+25.47kb)|MT4(+47.6kb)|NUDT21(+165.2kb)|NUP93(-113.5kb)|OGFOD1(+139.1kb)
8	28586036	rs2237812	T	C	2	2.012e-05	2.012e-05	0.8972	0.8972	0.4466	0	0.8605	0.9053	EXTL3(0)|FZD3(+154.3kb)|HMBOX1(-161.9kb)|INTS9(-39.14kb)
2	127880449	rs6431220	G	A	2	2.02e-05	2.02e-05	1.1184	1.1184	0.3751	0	1.0656	1.131	BIN1(+15.55kb)|CYP27C1(-60.96kb)|ERCC3(-134.4kb)|MAP3K2(-175.8kb)
15	48812020	rs755251	G	A	2	2.03e-05	0.006845	0.8963	0.9043	0.2177	34.19	0.9583	0.883	DUT(+176.4kb)|FBN1(0)
15	48888988	rs1506524	T	A	2	2.038e-05	0.002606	0.8959	0.9018	0.2427	26.72	0.9541	0.8831	CEP152(-141.1kb)|FBN1(0)
5	7802363	rs2290910	T	C	2	2.039e-05	2.039e-05	1.1103	1.1103	0.7911	0	1.095	1.1137	ADCY2(0)|C5orf49(-28.13kb)|FASTKD3(-56.91kb)|MTRR(-66.85kb)
19	7847617	rs1477351	G	A	2	2.044e-05	2.044e-05	1.1249	1.1249	0.8108	0	1.1103	1.1287	C19orf59(+102.9kb)|CAMSAP3(+164.4kb)|CD209(+35.15kb)|CLEC4G(+50.56kb)|CLEC4GP1(-4.752kb)|CLEC4M(+13.13kb)|CTXN1(-141.8kb)|ELAVL1(-175.8kb)|EVI5L(-47.54kb)|FCER2(+80.58kb)|FLJ22184(-85.99kb)|LOC388499(-95.9kb)|LRRC8E(-105.8kb)|MAP2K7(-121.1kb)|PCP2(+149kb)|PET100(+151.1kb)|RETN(+112.3kb)|SNAPC2(-137.6kb)|STXBP2(+134.9kb)|TGFBR3L(-133.4kb)|TIMM44(-144kb)|TRAPPC5(+99.87kb)|XAB2(+153.2kb)
3	32838259	rs115988437	G	A	2	2.05e-05	2.05e-05	1.5725	1.5725	0.6882	0	1.7002	1.5363	CCR4(-154.8kb)|CNOT10(+22.89kb)|GLB1(-199.8kb)|TRIM71(-21.25kb)
5	7799598	rs12659974	C	A	2	2.05e-05	2.05e-05	1.1105	1.1105	0.819	0	1.0972	1.1134	ADCY2(0)|C5orf49(-30.89kb)|FASTKD3(-59.67kb)|MTRR(-69.62kb)
19	7845424	rs62125170	C	A	2	2.059e-05	2.059e-05	1.1252	1.1252	0.8394	0	1.1127	1.1284	C19orf59(+100.7kb)|CAMSAP3(+162.2kb)|CD209(+32.96kb)|CLEC4G(+48.37kb)|CLEC4GP1(-6.945kb)|CLEC4M(+10.93kb)|CTXN1(-144kb)|ELAVL1(-178kb)|EVI5L(-49.74kb)|FCER2(+78.39kb)|FLJ22184(-88.18kb)|LOC388499(-98.09kb)|LRRC8E(-108kb)|MAP2K7(-123.3kb)|PCP2(+146.8kb)|PET100(+148.9kb)|RETN(+110.1kb)|SNAPC2(-139.8kb)|STXBP2(+132.7kb)|TGFBR3L(-135.6kb)|TIMM44(-146.2kb)|TRAPPC5(+97.68kb)|XAB2(+151kb)
17	76555242	rs117779187	T	G	2	2.061e-05	0.0001249	1.1517	1.1555	0.2833	13.12	1.2333	1.1306	CYTH1(-114.9kb)|DNAH17(0)|DNAH17-AS1(+56.1kb)|PGS1(+134.6kb)|SOCS3(+199.1kb)
11	85828551	rs474479	G	C	2	2.07e-05	0.002218	1.1061	1.0999	0.2492	24.7	1.0435	1.1203	C11orf73(-184.7kb)|CCDC83(+197.5kb)|EED(-127.3kb)|PICALM(+47.63kb)
12	7790477	rs117266355	T	C	2	2.07e-05	2.07e-05	1.3827	1.3827	0.6687	0	1.4699	1.3589	APOBEC1(-11.52kb)|CD163(+134.1kb)|CD163L1(+193.7kb)|CLEC4C(-91.53kb)|DPPA3(-73.61kb)|GDF3(-51.9kb)|NANOG(-151.5kb)|NANOGNB(-127.3kb)|SLC2A14(-175.9kb)
19	7848449	rs1984727	C	T	2	2.081e-05	2.081e-05	1.1248	1.1248	0.7984	0	1.1092	1.1288	C19orf59(+103.7kb)|CAMSAP3(+165.3kb)|CD209(+35.98kb)|CLEC4G(+51.39kb)|CLEC4GP1(-3.92kb)|CLEC4M(+13.96kb)|CTXN1(-140.9kb)|ELAVL1(-175kb)|EVI5L(-46.71kb)|FCER2(+81.42kb)|FLJ22184(-85.16kb)|LOC388499(-95.07kb)|LRRC8E(-104.9kb)|MAP2K7(-120.3kb)|PCP2(+149.8kb)|PET100(+151.9kb)|RETN(+113.1kb)|SNAPC2(-136.7kb)|STXBP2(+135.7kb)|TGFBR3L(-132.6kb)|TIMM44(-143.2kb)|TRAPPC5(+100.7kb)|XAB2(+154kb)
11	59900575	rs4939314	C	T	2	2.099e-05	0.001153	0.9079	0.9016	0.2284	31.07	0.8567	0.9197	MS4A2(+34.64kb)|MS4A3(+61.99kb)|MS4A4A(-147.4kb)|MS4A6A(-38.5kb)|PLAC1L(+85.06kb)
19	7846287	rs62125171	A	G	2	2.106e-05	2.106e-05	1.1248	1.1248	0.8083	0	1.1099	1.1286	C19orf59(+101.6kb)|CAMSAP3(+163.1kb)|CD209(+33.82kb)|CLEC4G(+49.23kb)|CLEC4GP1(-6.082kb)|CLEC4M(+11.8kb)|CTXN1(-143.1kb)|ELAVL1(-177.2kb)|EVI5L(-48.87kb)|FCER2(+79.26kb)|FLJ22184(-87.32kb)|LOC388499(-97.23kb)|LRRC8E(-107.1kb)|MAP2K7(-122.5kb)|PCP2(+147.7kb)|PET100(+149.8kb)|RETN(+110.9kb)|SNAPC2(-138.9kb)|STXBP2(+133.5kb)|TGFBR3L(-134.7kb)|TIMM44(-145.3kb)|TRAPPC5(+98.54kb)|XAB2(+151.8kb)
1	177595128	rs1252072	G	C	2	2.107e-05	2.107e-05	1.1038	1.1038	0.4328	0	1.1466	1.0942	.
14	33131189	rs12895513	G	A	2	2.119e-05	2.119e-05	1.1075	1.1075	0.9544	0	1.1042	1.1082	AKAP6(0)
15	48926415	rs611483	A	G	2	2.12e-05	2.874e-05	1.1162	1.1159	0.3144	1.2	1.0567	1.1301	CEP152(-103.7kb)|FBN1(0)|SHC4(-189.5kb)
2	127881368	rs7564197	G	A	2	2.12e-05	2.12e-05	1.1182	1.1182	0.3596	0	1.0637	1.1312	BIN1(+16.46kb)|CYP27C1(-60.04kb)|ERCC3(-133.5kb)|MAP3K2(-174.9kb)
18	39920178	rs922266	T	C	2	2.127e-05	2.127e-05	0.9028	0.9028	0.3724	0	0.8623	0.9119	LINC00907(0)
18	39915407	rs9948169	A	G	2	2.133e-05	2.133e-05	0.9021	0.9021	0.5331	0	0.8733	0.9085	LINC00907(0)
11	59896901	rs11230153	T	G	2	2.153e-05	0.0003151	0.908	0.9045	0.2685	18.34	0.8608	0.9188	MS4A2(+30.96kb)|MS4A3(+58.31kb)|MS4A4A(-151.1kb)|MS4A6A(-42.18kb)|PLAC1L(+81.38kb)
12	104124723	rs11612532	A	G	2	2.156e-05	2.156e-05	1.1839	1.1839	0.4549	0	1.115	1.2014	GNN(-112.8kb)|HSP90B1(-199.4kb)|MIR3652(-199.5kb)|NT5DC3(-41.36kb)|STAB2(0)
18	52587751	rs11661650	G	A	2	2.159e-05	0.001833	0.8821	0.8723	0.2161	34.64	0.8138	0.8968	CCDC68(0)|RAB27B(+25kb)
15	48899745	rs585256	G	A	2	2.16e-05	0.002838	0.8961	0.902	0.2416	27.06	0.9546	0.8832	CEP152(-130.4kb)|FBN1(0)
8	139671449	rs72727862	A	C	2	2.166e-05	0.05087	1.4545	1.3734	0.1263	57.22	1.1122	1.5565	COL22A1(0)|FAM135B(+162.4kb)
15	48897416	rs924816	A	G	2	2.171e-05	0.00285	0.8963	0.9022	0.2416	27.08	0.9547	0.8834	CEP152(-132.7kb)|FBN1(0)
8	27456253	rs2279590	C	T	2	2.171e-05	2.171e-05	1.1031	1.1031	0.5092	0	1.0678	1.111	CCDC25(-134.6kb)|CHRNA2(+119.4kb)|CLU(0)|EPHX2(+53.81kb)|ESCO2(-175.8kb)|MIR3622A(-102.9kb)|MIR3622B(-102.9kb)|PTK2B(+139.3kb)|SCARA3(-35.32kb)
21	27670489	rs2211830	C	T	2	2.19e-05	2.19e-05	0.8689	0.8689	0.8335	0	0.8821	0.8661	APP(+127kb)|CYYR1(-168kb)
15	48883696	rs1354738	C	T	2	2.191e-05	0.00276	0.8962	0.902	0.2423	26.85	0.9545	0.8833	CEP152(-146.4kb)|FBN1(0)
8	139672229	rs72727866	G	C	2	2.199e-05	0.06331	1.4522	1.3656	0.1136	60.06	1.103	1.5581	COL22A1(0)|FAM135B(+163.2kb)
19	7846558	rs62125172	A	G	2	2.208e-05	2.208e-05	1.1245	1.1245	0.8032	0	1.1092	1.1284	C19orf59(+101.8kb)|CAMSAP3(+163.4kb)|CD209(+34.09kb)|CLEC4G(+49.5kb)|CLEC4GP1(-5.811kb)|CLEC4M(+12.07kb)|CTXN1(-142.8kb)|ELAVL1(-176.9kb)|EVI5L(-48.6kb)|FCER2(+79.53kb)|FLJ22184(-87.05kb)|LOC388499(-96.96kb)|LRRC8E(-106.8kb)|MAP2K7(-122.2kb)|PCP2(+147.9kb)|PET100(+150kb)|RETN(+111.2kb)|SNAPC2(-138.6kb)|STXBP2(+133.8kb)|TGFBR3L(-134.5kb)|TIMM44(-145kb)|TRAPPC5(+98.81kb)|XAB2(+152.1kb)
8	42382917	rs12676817	A	T	2	2.215e-05	8.319e-05	1.1037	1.1025	0.3039	5.41	1.0483	1.116	CHRNB3(-169.6kb)|DKK4(+148.2kb)|IKBKB(+192.7kb)|POLB(+153.6kb)|SLC20A2(0)|SMIM19(-13.38kb)|VDAC3(+119.5kb)
10	11720308	rs7920721	G	A	2	2.24e-05	0.09731	1.1033	1.0824	0.0937	64.42	1.0199	1.1247	ECHDC3(-64.05kb)|PROSER2(-145.1kb)|PROSER2-AS1(-171.3kb)|USP6NL(+66.63kb)
2	169605837	rs58890083	C	T	2	2.259e-05	2.259e-05	1.2985	1.2985	0.8695	0	1.2739	1.3055	ABCB11(-173.6kb)|CERS6(0)|CERS6-AS1(-22.62kb)|G6PC2(-151.9kb)|MIR4774(+166.3kb)|NOSTRIN(-37.21kb)|SPC25(-121.6kb)
15	48896830	rs1678979	C	T	2	2.268e-05	0.003877	0.8964	0.9029	0.2341	29.37	0.9558	0.8833	CEP152(-133.3kb)|FBN1(0)
19	7845859	rs111295089	A	C	2	2.27e-05	2.27e-05	1.1244	1.1244	0.8226	0	1.1106	1.1279	C19orf59(+101.1kb)|CAMSAP3(+162.7kb)|CD209(+33.4kb)|CLEC4G(+48.8kb)|CLEC4GP1(-6.51kb)|CLEC4M(+11.37kb)|CTXN1(-143.5kb)|ELAVL1(-177.6kb)|EVI5L(-49.3kb)|FCER2(+78.83kb)|FLJ22184(-87.74kb)|LOC388499(-97.66kb)|LRRC8E(-107.5kb)|MAP2K7(-122.9kb)|PCP2(+147.2kb)|PET100(+149.3kb)|RETN(+110.5kb)|SNAPC2(-139.3kb)|STXBP2(+133.1kb)|TGFBR3L(-135.2kb)|TIMM44(-145.7kb)|TRAPPC5(+98.11kb)|XAB2(+151.4kb)
8	139670881	rs72727860	T	C	2	2.277e-05	0.05041	1.4529	1.3725	0.1278	56.88	1.1118	1.5542	COL22A1(0)|FAM135B(+161.8kb)
11	85850243	rs3844143	T	C	2	2.287e-05	0.0001858	1.0967	1.0996	0.283	13.24	1.1536	1.0849	C11orf73(-163kb)|EED(-105.6kb)|PICALM(+69.32kb)
1	68633192	rs58584549	C	G	2	2.288e-05	0.04448	1.3411	1.2853	0.1303	56.3	1.0929	1.4151	DIRAS3(+116.7kb)|GNG12-AS1(0)|MIR1262(-16.01kb)|WLS(0)
14	47828572	rs61993125	A	G	2	2.293e-05	2.293e-05	0.8681	0.8681	0.4594	0	0.8234	0.8782	MDGA2(0)
16	58819856	rs76659395	T	C	2	2.304e-05	0.1524	1.3399	1.2479	0.0984	63.38	1.0205	1.4057	CNOT1(+156.1kb)|GOT2(+51.61kb)|SLC38A7(+101.2kb)
6	32367017	rs3117116	A	G	2	2.312e-05	9.528e-05	0.8439	0.8415	0.2866	11.95	0.7845	0.8653	BTNL2(0)|C6orf10(+27.36kb)|HCG23(+5.549kb)|HLA-DRA(-40.6kb)|HLA-DRB1(-179.5kb)|HLA-DRB5(-118.1kb)|HLA-DRB6(-153.5kb)|NOTCH4(+175.2kb)
1	218568804	rs6604610	A	G	2	2.314e-05	2.314e-05	1.2226	1.2226	0.9011	0	1.2372	1.219	LOC728463(+49.78kb)|RRP15(+57.48kb)|TGFB2(0)
12	121812274	rs138471243	T	C	2	2.316e-05	0.05282	1.3522	1.2997	0.0842	66.46	1.111	1.4607	ANAPC5(+20.26kb)|CAMKK2(+76.16kb)|KDM2B(-54.62kb)|P2RX4(+140.4kb)|P2RX7(+187.9kb)|RNF34(-25.61kb)
14	47822702	rs66881974	G	A	2	2.317e-05	2.317e-05	0.8615	0.8615	0.4965	0	0.8185	0.8712	MDGA2(0)
11	59859609	rs2847667	T	C	2	2.328e-05	0.01229	0.9086	0.8922	0.109	61.06	0.8413	0.9243	MS4A2(0)|MS4A3(+21.02kb)|MS4A4A(-188.4kb)|MS4A6A(-79.47kb)|PLAC1L(+44.09kb)
15	48939888	rs4775769	G	T	2	2.343e-05	2.343e-05	1.1734	1.1734	0.7753	0	1.1999	1.1673	CEP152(-90.25kb)|FBN1(+1.903kb)|SHC4(-176kb)
18	77614682	rs113757497	G	C	2	2.344e-05	2.344e-05	1.1156	1.1156	0.9873	0	1.1165	1.1154	CTDP1(+100.2kb)|HSBP1L1(-109.9kb)|KCNG2(-8.985kb)|PQLC1(-47.74kb)|RBFA(-179.7kb)|TXNL4A(-118.2kb)
8	121876077	rs10092683	G	A	2	2.36e-05	2.36e-05	0.7623	0.7623	0.5945	0	0.8195	0.7501	SNTB1(+51.77kb)
2	127812256	rs55636820	A	G	2	2.365e-05	2.365e-05	1.1988	1.1988	0.8427	0	1.2205	1.194	BIN1(0)|CYP27C1(-129.2kb)
18	39914522	rs16975918	T	C	2	2.381e-05	2.381e-05	0.9044	0.9044	0.6097	0	0.881	0.9095	LINC00907(0)
18	39919689	rs1993752	A	G	2	2.382e-05	2.382e-05	0.9022	0.9022	0.4406	0	0.8665	0.9101	LINC00907(0)
21	27596793	rs2830117	A	G	2	2.383e-05	2.383e-05	0.8621	0.8621	0.4167	0	0.9171	0.8508	APP(+53.35kb)
8	139670530	rs72727859	T	C	2	2.387e-05	0.05058	1.4517	1.3716	0.1286	56.69	1.111	1.5526	COL22A1(0)|FAM135B(+161.5kb)
11	59872498	rs1813217	C	G	2	2.392e-05	0.003734	0.9088	0.8988	0.1792	44.57	0.8523	0.922	MS4A2(+6.558kb)|MS4A3(+33.91kb)|MS4A4A(-175.5kb)|MS4A6A(-66.58kb)|PLAC1L(+56.98kb)
12	121792142	rs112607932	T	C	2	2.407e-05	0.1447	1.3537	1.2782	0.0339	77.78	1.0618	1.489	ANAPC5(+0.13kb)|CAMKK2(+56.03kb)|KDM2B(-74.76kb)|P2RX4(+120.2kb)|P2RX7(+167.8kb)|RNF34(-45.74kb)
11	85794761	rs534128	G	A	2	2.411e-05	2.411e-05	1.1071	1.1071	0.7691	0	1.0903	1.1107	CCDC83(+163.7kb)|EED(-161kb)|PICALM(+13.84kb)
18	39914870	rs16975921	T	A	2	2.425e-05	2.425e-05	0.9045	0.9045	0.6034	0	0.8807	0.9097	LINC00907(0)
15	48937339	rs2070768	A	G	2	2.426e-05	2.426e-05	1.1107	1.1107	0.9854	0	1.1096	1.1109	CEP152(-92.8kb)|FBN1(0)|SHC4(-178.6kb)
8	139676401	rs72727876	A	G	2	2.429e-05	0.04469	1.4446	1.3696	0.1319	55.95	1.1167	1.5446	COL22A1(0)|FAM135B(+167.3kb)
8	28568905	rs240946	T	C	2	2.441e-05	2.441e-05	0.8988	0.8988	0.434	0	0.8614	0.9071	EXTL3(0)|FZD3(+137.1kb)|HMBOX1(-179kb)|INTS9(-56.27kb)
8	139671450	rs72727864	A	C	2	2.446e-05	0.0657	1.4521	1.3645	0.1151	59.72	1.0994	1.557	COL22A1(0)|FAM135B(+162.4kb)
3	196800561	rs79615862	G	A	2	2.448e-05	2.448e-05	0.7989	0.7989	0.602	0	0.7535	0.8095	DLG1(0)|MFI2(+43.87kb)|MFI2-AS1(+68.95kb)|NCBP2(+131.1kb)|NCBP2-AS2(+129.7kb)|PIGZ(+104.8kb)|SENP5(+139kb)
4	111385905	rs74418880	A	G	2	2.45e-05	0.05076	1.3335	1.2755	0.1385	54.44	1.079	1.3994	ENPEP(-11.32kb)|PITX2(-152.7kb)
11	59859576	rs2847666	G	A	2	2.454e-05	0.01273	0.9088	0.8923	0.1078	61.33	0.8413	0.9246	MS4A2(0)|MS4A3(+20.99kb)|MS4A4A(-188.4kb)|MS4A6A(-79.5kb)|PLAC1L(+44.06kb)
14	47829796	rs12883877	A	G	2	2.462e-05	2.462e-05	0.8687	0.8687	0.4928	0	0.8271	0.878	MDGA2(0)
5	7800574	rs60576065	C	A	2	2.462e-05	2.462e-05	1.1094	1.1094	0.8266	0	1.0967	1.1122	ADCY2(0)|C5orf49(-29.92kb)|FASTKD3(-58.7kb)|MTRR(-68.64kb)
1	177610713	rs1003074	T	C	2	2.464e-05	2.464e-05	1.1025	1.1025	0.3772	0	1.1507	1.0918	.
8	42442018	rs13253502	A	G	2	2.469e-05	0.005849	1.1011	1.0931	0.2275	31.35	1.0378	1.1153	CHRNA6(-165.8kb)|CHRNB3(-110.5kb)|SLC20A2(+44.66kb)|SMIM19(+33.88kb)|VDAC3(+178.6kb)
2	169533461	rs114295337	T	C	2	2.47e-05	2.47e-05	1.4256	1.4256	0.9676	0	1.4351	1.4231	CERS6(0)|CERS6-AS1(-95kb)|MIR4774(+93.93kb)|NOSTRIN(-109.6kb)|SPC25(-193.9kb)
18	39916106	rs7237280	C	G	2	2.471e-05	2.471e-05	0.9028	0.9028	0.4152	0	0.8655	0.9112	LINC00907(0)
8	28569354	rs240947	A	G	2	2.483e-05	2.483e-05	0.8989	0.8989	0.4341	0	0.8615	0.9072	EXTL3(0)|FZD3(+137.6kb)|HMBOX1(-178.6kb)|INTS9(-55.82kb)
11	85832424	rs519961	C	T	2	2.49e-05	0.002748	1.1039	1.0976	0.2464	25.57	1.0418	1.1181	C11orf73(-180.8kb)|EED(-123.4kb)|PICALM(+51.5kb)
3	196817022	rs76311548	C	G	2	2.49e-05	2.49e-05	0.8027	0.8027	0.5679	0	0.7534	0.814	DLG1(0)|MFI2(+60.34kb)|MFI2-AS1(+85.41kb)|NCBP2(+147.6kb)|NCBP2-AS2(+146.1kb)|PIGZ(+121.3kb)|SENP5(+155.4kb)
18	39915561	rs7232594	A	G	2	2.498e-05	2.498e-05	0.9029	0.9029	0.4863	0	0.8706	0.91	LINC00907(0)
15	48931451	rs2247876	C	T	2	2.507e-05	2.507e-05	0.8963	0.8963	0.356	0	0.9428	0.8862	CEP152(-98.68kb)|FBN1(0)|SHC4(-184.5kb)
11	85831246	rs573167	A	G	2	2.526e-05	0.002778	1.1038	1.0975	0.2463	25.59	1.0417	1.118	C11orf73(-182kb)|EED(-124.6kb)|PICALM(+50.32kb)
21	27666384	rs80170353	G	C	2	2.527e-05	2.527e-05	0.8703	0.8703	0.9128	0	0.8772	0.8689	APP(+122.9kb)|CYYR1(-172.1kb)
8	139670120	rs72727858	T	C	2	2.54e-05	0.04741	1.4503	1.3724	0.1334	55.61	1.1127	1.5497	COL22A1(0)|FAM135B(+161.1kb)
11	41877900	rs113816867	C	T	2	2.542e-05	0.0164	1.4601	1.5825	0.0906	65.08	2.0104	1.3582	.
8	133038010	rs145530832	A	G	2	2.542e-05	2.542e-05	0.6668	0.6668	0.4109	0	0.5562	0.6902	EFR3A(+12.12kb)|HHLA1(-35.72kb)|KCNQ3(-95.09kb)|OC90(0)
11	85858253	rs10898438	A	G	2	2.553e-05	0.000804	1.0963	1.1023	0.246	25.68	1.1575	1.0834	C11orf73(-155kb)|EED(-97.55kb)|PICALM(+77.33kb)
18	52590037	rs62091529	A	G	2	2.562e-05	0.0007011	0.883	0.8769	0.253	23.48	0.8198	0.8967	CCDC68(0)|RAB27B(+27.29kb)
20	55020557	rs16979933	C	T	2	2.563e-05	2.563e-05	0.843	0.843	0.5683	0	0.8837	0.8335	AURKA(+53.21kb)|CASS4(0)|CSTF1(+40.98kb)|FAM209A(-79.23kb)|FAM209B(-87.74kb)|FAM210B(+76.84kb)|GCNT7(-45.99kb)|MC3R(+195.7kb)|RTFDC1(-23.09kb)|TFAP2C(-183.8kb)
2	59778176	rs2014817	A	G	2	2.564e-05	2.564e-05	1.1021	1.1021	0.5363	0	1.1359	1.0947	.
15	48876157	rs1678978	T	C	2	2.58e-05	2.58e-05	0.9034	0.9034	0.9885	0	0.904	0.9032	CEP152(-154kb)|FBN1(0)
11	59877967	rs4939311	T	C	2	2.582e-05	0.003331	0.9091	0.8997	0.1866	42.68	0.8535	0.9221	MS4A2(+12.03kb)|MS4A3(+39.38kb)|MS4A4A(-170kb)|MS4A6A(-61.11kb)|PLAC1L(+62.45kb)
11	85768968	rs77800589	C	T	2	2.587e-05	2.587e-05	1.2936	1.2936	0.479	0	1.4033	1.2641	CCDC83(+137.9kb)|EED(-186.8kb)|PICALM(0)
8	28569504	rs240948	G	A	2	2.589e-05	2.589e-05	0.8991	0.8991	0.4291	0	0.8613	0.9075	EXTL3(0)|FZD3(+137.7kb)|HMBOX1(-178.4kb)|INTS9(-55.67kb)
18	39919694	rs2335780	A	G	2	2.595e-05	2.595e-05	0.9026	0.9026	0.3791	0	0.8619	0.9116	LINC00907(0)
9	106092020	rs12683819	G	T	2	2.607e-05	2.607e-05	1.3363	1.3363	0.5675	0	1.4534	1.3118	.
1	218568482	rs6604609	A	T	2	2.624e-05	2.624e-05	1.2213	1.2213	0.9011	0	1.2359	1.2177	LOC728463(+49.46kb)|RRP15(+57.16kb)|TGFB2(0)
4	15583915	rs79867298	T	G	2	2.624e-05	2.624e-05	1.2511	1.2511	0.9454	0	1.2605	1.2489	BST1(-120.7kb)|C1QTNF7(+136.1kb)|CC2D2A(0)|CD38(-196kb)|FAM200B(-99.44kb)|FBXL5(-22.09kb)
5	7804410	rs326147	A	G	2	2.625e-05	2.625e-05	1.1095	1.1095	0.7828	0	1.0934	1.113	ADCY2(0)|C5orf49(-26.08kb)|FASTKD3(-54.86kb)|MTRR(-64.81kb)
18	39914757	rs16975919	A	C	2	2.629e-05	2.629e-05	0.9049	0.9049	0.6023	0	0.881	0.9101	LINC00907(0)
3	19559150	rs78736039	G	C	2	2.633e-05	0.1915	1.4161	1.2896	0.0868	65.91	1.0053	1.5017	KCNH8(0)
15	48697676	rs28481454	A	G	2	2.639e-05	0.04696	1.1156	1.0974	0.1439	53.19	1.03	1.136	DUT(+62.11kb)|FBN1(-2.826kb)|SLC12A1(+101.4kb)
1	55521242	rs471705	G	T	2	2.643e-05	2.643e-05	0.9049	0.9049	0.9759	0	0.9063	0.9046	BSND(+46.78kb)|DHCR24(+168.3kb)|LOC100507634(-159.8kb)|MIR4422(-170.1kb)|PCSK9(0)|TMEM61(+63.28kb)|USP24(-10.79kb)
11	59877394	rs11230147	T	C	2	2.644e-05	0.003659	0.9093	0.8996	0.1826	43.7	0.8532	0.9224	MS4A2(+11.45kb)|MS4A3(+38.81kb)|MS4A4A(-170.6kb)|MS4A6A(-61.68kb)|PLAC1L(+61.88kb)
1	218568473	rs6604608	A	G	2	2.653e-05	2.653e-05	1.2212	1.2212	0.8979	0	1.2363	1.2175	LOC728463(+49.45kb)|RRP15(+57.15kb)|TGFB2(0)
6	32202086	rs9267890	G	T	2	2.653e-05	0.008916	0.8623	0.8413	0.1359	55.04	0.7695	0.8835	AGER(+49.99kb)|AGPAT1(+56.2kb)|ATF6B(+106.1kb)|BTNL2(-160.4kb)|C4A(+198.9kb)|C4B(+198.9kb)|C4B_2(+198.9kb)|C6orf10(-58.39kb)|CYP21A2(+192.6kb)|EGFL8(+66.02kb)|FKBPL(+104kb)|GPSM3(+38.79kb)|HCG23(-156.2kb)|LOC100507547(+79.94kb)|NOTCH4(+10.24kb)|PBX2(+44.12kb)|PPT2(+70.63kb)|PPT2-EGFL8(+66.02kb)|PRRT1(+82.37kb)|RNF5(+53.52kb)|RNF5P1(+53.52kb)|TNXB(+124.9kb)
12	121810504	rs6489807	G	A	2	2.654e-05	0.06842	1.3429	1.2875	0.0727	68.95	1.0983	1.4531	ANAPC5(+18.49kb)|CAMKK2(+74.39kb)|KDM2B(-56.4kb)|P2RX4(+138.6kb)|P2RX7(+186.2kb)|RNF34(-27.38kb)
8	139679217	rs72727879	C	T	2	2.662e-05	0.04535	1.4422	1.3677	0.1324	55.82	1.1153	1.542	COL22A1(0)|FAM135B(+170.2kb)
11	85811238	rs542126	G	A	2	2.663e-05	2.663e-05	1.1005	1.1005	0.6289	0	1.0749	1.1062	CCDC83(+180.2kb)|EED(-144.6kb)|PICALM(+30.32kb)
3	196804329	rs75207502	G	A	2	2.684e-05	2.684e-05	0.8001	0.8001	0.6182	0	0.7567	0.8102	DLG1(0)|MFI2(+47.64kb)|MFI2-AS1(+72.71kb)|NCBP2(+134.9kb)|NCBP2-AS2(+133.4kb)|PIGZ(+108.6kb)|SENP5(+142.7kb)
6	20062778	rs4712447	G	T	2	2.7e-05	2.7e-05	1.1199	1.1199	0.6463	0	1.0909	1.1265	MBOAT1(-37.14kb)
11	41818092	rs80050448	G	C	2	2.703e-05	0.04671	1.2679	1.376	0.0271	79.51	1.6522	1.1953	.
18	77698967	rs7228070	T	C	2	2.717e-05	0.1031	0.8992	0.9174	0.0754	68.37	0.977	0.8775	ADNP2(-167.9kb)|CTDP1(+184.5kb)|HSBP1L1(-25.61kb)|KCNG2(+39.15kb)|PQLC1(0)|RBFA(-95.38kb)|RBFADN(-128.3kb)|TXNL4A(-33.9kb)
16	81808816	rs7203740	T	C	2	2.726e-05	2.726e-05	0.8716	0.8716	0.6149	0	0.844	0.879	CMIP(+63.45kb)|LOC100129617(+107.9kb)|PLCG2(-4.082kb)
20	55021575	rs6069749	T	C	2	2.729e-05	2.729e-05	0.8421	0.8421	0.482	0	0.8925	0.8302	AURKA(+54.22kb)|CASS4(0)|CSTF1(+41.99kb)|FAM209A(-78.21kb)|FAM209B(-86.73kb)|FAM210B(+77.86kb)|GCNT7(-44.97kb)|MC3R(+196.7kb)|RTFDC1(-22.07kb)|TFAP2C(-182.8kb)
5	33421592	rs115009272	C	T	2	2.735e-05	2.735e-05	1.4179	1.4179	0.7687	0	1.333	1.4317	ADAMTS12(-105.7kb)|TARS(-19.21kb)
11	59885493	rs1125357	C	A	2	2.745e-05	0.00373	0.9095	0.8997	0.1827	43.67	0.8532	0.9225	MS4A2(+19.55kb)|MS4A3(+46.9kb)|MS4A4A(-162.5kb)|MS4A6A(-53.59kb)|PLAC1L(+69.98kb)
2	59755664	rs2540097	G	A	2	2.748e-05	2.748e-05	0.9039	0.9039	0.4695	0	0.8713	0.9114	.
17	76522784	rs61744545	A	G	2	2.752e-05	2.752e-05	1.1761	1.1761	0.7875	0	1.1529	1.1825	CYTH1(-147.3kb)|DNAH17(0)|DNAH17-AS1(+23.65kb)|PGS1(+102.1kb)|SOCS3(+166.6kb)
8	139680987	rs72727885	A	T	2	2.753e-05	0.04638	1.4425	1.3675	0.1313	56.07	1.1147	1.5431	COL22A1(0)|FAM135B(+171.9kb)
1	218562868	rs10482766	T	C	2	2.754e-05	2.754e-05	1.2265	1.2265	0.7027	0	1.2723	1.215	LOC728463(+43.85kb)|RRP15(+51.54kb)|TGFB2(0)
5	33430237	rs114938373	A	G	2	2.755e-05	2.755e-05	1.4183	1.4183	0.7802	0	1.337	1.4314	ADAMTS12(-97.05kb)|TARS(-10.56kb)
11	85788351	rs541458	T	C	2	2.774e-05	2.774e-05	1.103	1.103	0.9435	0	1.099	1.1038	CCDC83(+157.3kb)|EED(-167.5kb)|PICALM(+7.428kb)
18	39919699	rs1841621	G	A	2	2.789e-05	2.789e-05	0.9029	0.9029	0.4124	0	0.8649	0.9113	LINC00907(0)
6	32575575	rs9271062	A	T	2	2.792e-05	2.792e-05	0.8468	0.8468	0.8371	0	0.836	0.8512	HLA-DQA1(-29.61kb)|HLA-DQA2(-133.6kb)|HLA-DQB1(-51.66kb)|HLA-DQB2(-148.3kb)|HLA-DRA(+162.7kb)|HLA-DRB1(+17.96kb)|HLA-DRB5(+77.57kb)|HLA-DRB6(+47.8kb)
20	55020689	rs6024881	G	T	2	2.793e-05	2.793e-05	0.8579	0.8579	0.5906	0	0.8923	0.8495	AURKA(+53.34kb)|CASS4(0)|CSTF1(+41.11kb)|FAM209A(-79.1kb)|FAM209B(-87.61kb)|FAM210B(+76.97kb)|GCNT7(-45.86kb)|MC3R(+195.8kb)|RTFDC1(-22.96kb)|TFAP2C(-183.7kb)
7	37227355	rs1420427	G	T	2	2.797e-05	0.03215	0.8983	0.911	0.1608	49.15	0.9677	0.8829	ELMO1(0)
11	85776544	rs867611	A	G	2	2.799e-05	2.799e-05	1.1032	1.1032	0.8753	0	1.0945	1.1051	CCDC83(+145.5kb)|EED(-179.3kb)|PICALM(0)
16	29153808	rs2244752	G	A	2	2.829e-05	2.829e-05	0.8816	0.8816	0.7336	0	0.8632	0.886	LAT(+151.7kb)|MIR4517(+183.8kb)|NFATC2IP(+176kb)|RRN3P2(+25.77kb)|SNX29P2(-159.8kb)|SPNS1(+157.9kb)
16	29153803	rs1646113	G	A	2	2.834e-05	2.834e-05	0.8816	0.8816	0.729	0	0.8629	0.8861	LAT(+151.7kb)|MIR4517(+183.8kb)|NFATC2IP(+176kb)|RRN3P2(+25.76kb)|SNX29P2(-159.8kb)|SPNS1(+157.9kb)
21	27661915	rs9975282	T	C	2	2.834e-05	2.834e-05	0.8712	0.8712	0.9831	0	0.8725	0.8709	APP(+118.5kb)|CYYR1(-176.6kb)
4	111483003	rs1448816	G	A	2	2.845e-05	0.1903	1.3491	1.2482	0.063	71.07	1.018	1.4366	ENPEP(0)|PITX2(-55.58kb)
6	32431927	rs9268893	T	C	2	2.851e-05	2.851e-05	0.8823	0.8823	0.3333	0	0.9261	0.8672	BTNL2(+57.03kb)|C6orf10(+92.27kb)|HCG23(+70.46kb)|HLA-DQA1(-173.3kb)|HLA-DQB1(-195.3kb)|HLA-DRA(+19.1kb)|HLA-DRB1(-114.6kb)|HLA-DRB5(-53.23kb)|HLA-DRB6(-88.56kb)
3	76188299	rs76726617	G	A	2	2.855e-05	3.139e-05	1.2539	1.2542	0.3159	0.58	1.3991	1.2207	.
5	94085039	rs11960129	G	A	2	2.857e-05	2.857e-05	1.1085	1.1085	0.5756	0	1.0767	1.1158	ANKRD32(+53.47kb)|KIAA0825(+130.7kb)|MCTP1(0)
11	76451038	rs7924748	C	T	2	2.867e-05	2.867e-05	1.1406	1.1406	0.5465	0	1.0975	1.1513	ACER3(-120.9kb)|C11orf30(+188.4kb)|GUCY2EP(+18.2kb)|LRRC32(+69.25kb)|TSKU(-42.32kb)
11	65979883	rs1203614	G	A	2	2.887e-05	2.887e-05	0.7847	0.7847	0.9415	0	0.7774	0.7862	B3GNT1(-133kb)|BRMS1(-124.9kb)|CATSPER1(+185.9kb)|CD248(-102.1kb)|CNIH2(-65.79kb)|CST6(+198.9kb)|GAL3ST3(+163.2kb)|KLC2(-44.88kb)|PACS1(0)|RAB1B(-56.17kb)|RIN1(-119.7kb)|SF3B2(+143.5kb)|SLC29A2(-150.1kb)|TMEM151A(-79.49kb)|YIF1A(-72.17kb)
4	12279593	rs149249649	A	G	2	2.887e-05	2.887e-05	0.6942	0.6942	0.8734	0	0.6751	0.699	.
18	39915356	rs9960132	G	T	2	2.889e-05	2.889e-05	0.9036	0.9036	0.4623	0	0.8695	0.9111	LINC00907(0)
8	28547570	rs240929	C	T	2	2.891e-05	2.891e-05	0.8991	0.8991	0.4442	0	0.8624	0.9073	EXTL3(-11.42kb)|FBXO16(+199.7kb)|FZD3(+115.8kb)|INTS9(-77.6kb)|MIR4288(+184.9kb)
1	218569208	rs111305122	A	G	2	2.894e-05	2.894e-05	1.22	1.22	0.887	0	1.2367	1.2159	LOC728463(+50.19kb)|RRP15(+57.88kb)|TGFB2(0)
17	76550434	rs115727505	C	G	2	2.897e-05	0.0002363	1.1482	1.153	0.274	16.42	1.2307	1.1268	CYTH1(-119.7kb)|DNAH17(0)|DNAH17-AS1(+51.3kb)|PGS1(+129.8kb)|SOCS3(+194.3kb)
11	59865671	rs2847655	C	T	2	2.898e-05	0.0168	0.9095	0.8912	0.0927	64.63	0.8388	0.926	MS4A2(0)|MS4A3(+27.08kb)|MS4A4A(-182.3kb)|MS4A6A(-73.41kb)|PLAC1L(+50.16kb)
15	48765033	rs28730794	C	A	2	2.901e-05	2.901e-05	0.9033	0.9033	0.788	0	0.9157	0.9005	DUT(+129.5kb)|FBN1(0)|SLC12A1(+168.8kb)
19	7735297	rs3745368	A	G	2	2.908e-05	0.01229	1.5829	1.5195	0.1739	45.92	1.2169	1.7231	ARHGEF18(+197.9kb)|C19orf45(+162kb)|C19orf59(-6.645kb)|CAMSAP3(+52.1kb)|CD209(-69.58kb)|CLEC4G(-58.54kb)|CLEC4GP1(-117.1kb)|CLEC4M(-92.74kb)|EVI5L(-159.9kb)|FCER2(-18.34kb)|FLJ22184(-198.3kb)|LOC100128573(+197kb)|MCOLN1(+136.4kb)|PCP2(+36.66kb)|PET100(+38.79kb)|PEX11G(+181.4kb)|PNPLA6(+108.6kb)|RETN(0)|STXBP2(+22.54kb)|TRAPPC5(-10.41kb)|XAB2(+40.86kb)|ZNF358(+149.4kb)
1	218569114	rs113038979	C	T	2	2.912e-05	2.912e-05	1.2199	1.2199	0.8864	0	1.2367	1.2158	LOC728463(+50.09kb)|RRP15(+57.79kb)|TGFB2(0)
11	85794542	rs535590	G	A	2	2.918e-05	2.918e-05	1.1044	1.1044	0.8371	0	1.0928	1.1069	CCDC83(+163.5kb)|EED(-161.3kb)|PICALM(+13.62kb)
3	196793213	rs74375783	A	G	2	2.922e-05	2.922e-05	0.7998	0.7998	0.5737	0	0.7504	0.8112	DLG1(0)|MFI2(+36.53kb)|MFI2-AS1(+61.6kb)|NCBP2(+123.7kb)|NCBP2-AS2(+122.3kb)|PIGZ(+97.47kb)|SENP5(+131.6kb)
3	196815248	rs77433729	C	G	2	2.922e-05	2.922e-05	0.8015	0.8015	0.67	0	0.7645	0.8102	DLG1(0)|MFI2(+58.56kb)|MFI2-AS1(+83.63kb)|NCBP2(+145.8kb)|NCBP2-AS2(+144.4kb)|PIGZ(+119.5kb)|SENP5(+153.7kb)
8	42399906	rs13273204	T	C	2	2.925e-05	0.00251	1.1002	1.0944	0.252	23.81	1.0398	1.1136	CHRNB3(-152.7kb)|DKK4(+165.2kb)|POLB(+170.6kb)|SLC20A2(+2.55kb)|SMIM19(0)|VDAC3(+136.5kb)
15	58492833	rs8035209	G	T	2	2.935e-05	2.935e-05	1.2656	1.2656	0.3625	0	1.1337	1.2963	ALDH1A2(+134.7kb)|AQP9(+14.72kb)
15	48891965	rs668842	T	C	2	2.954e-05	2.954e-05	0.9041	0.9041	0.9584	0	0.9064	0.9035	CEP152(-138.2kb)|FBN1(0)
15	48724768	rs8034591	T	C	2	2.96e-05	2.96e-05	1.1074	1.1074	0.7999	0	1.0932	1.1107	DUT(+89.2kb)|FBN1(0)|SLC12A1(+128.5kb)
15	48850657	rs12441775	G	C	2	2.961e-05	2.961e-05	1.1065	1.1065	0.9674	0	1.1088	1.106	CEP152(-179.5kb)|FBN1(0)
18	39915262	rs9947988	T	G	2	2.965e-05	2.965e-05	0.9037	0.9037	0.5385	0	0.8751	0.91	LINC00907(0)
8	42400823	rs34432089	A	G	2	2.974e-05	0.004401	1.1001	1.0931	0.2384	28.07	1.038	1.1139	CHRNB3(-151.7kb)|DKK4(+166.1kb)|POLB(+171.5kb)|SLC20A2(+3.467kb)|SMIM19(0)|VDAC3(+137.4kb)
1	232745707	rs10910575	A	G	2	2.979e-05	0.4553	0.8513	0.9093	0.008	85.8	1.0446	0.8089	MAP10(-194.9kb)|SIPA1L2(+94.46kb)
7	37231377	rs1961587	C	G	2	2.979e-05	0.0393	0.8982	0.9117	0.1526	51.12	0.9695	0.8824	ELMO1(0)
2	59753331	rs2674061	T	C	2	2.98e-05	2.98e-05	0.9045	0.9045	0.4052	0	0.8671	0.9131	.
15	48734624	rs10519174	A	G	2	2.984e-05	2.984e-05	1.1071	1.1071	0.7969	0	1.0927	1.1104	DUT(+99.05kb)|FBN1(0)|SLC12A1(+138.3kb)
18	39915112	rs12958459	A	G	2	2.984e-05	2.984e-05	0.9054	0.9054	0.5561	0	0.8784	0.9113	LINC00907(0)
2	236149884	rs77617711	C	A	2	2.995e-05	2.995e-05	1.1905	1.1905	0.9898	0	1.1919	1.1902	SH3BP4(+185.5kb)
1	218563036	rs7536600	T	C	2	2.996e-05	2.996e-05	1.2206	1.2206	0.9469	0	1.2285	1.2187	LOC728463(+44.02kb)|RRP15(+51.71kb)|TGFB2(0)
7	37224114	rs2392484	C	T	2	3.013e-05	0.02892	0.8986	0.9108	0.1669	47.65	0.9671	0.8834	ELMO1(0)
15	48926002	rs2437946	A	G	2	3.014e-05	4.409e-05	0.8976	0.8979	0.3135	1.56	0.9483	0.8865	CEP152(-104.1kb)|FBN1(0)|SHC4(-189.9kb)
20	40240867	rs117984553	T	C	2	3.015e-05	0.581	1.7964	1.3221	0.0109	84.58	0.7515	2.0801	CHD6(0)
3	196791253	rs113852988	A	G	2	3.025e-05	3.025e-05	0.7998	0.7998	0.5613	0	0.7487	0.8116	DLG1(0)|MFI2(+34.57kb)|MFI2-AS1(+59.64kb)|NCBP2(+121.8kb)|NCBP2-AS2(+120.4kb)|PIGZ(+95.51kb)|SENP5(+129.7kb)
18	39920552	rs9964453	T	C	2	3.057e-05	3.057e-05	0.9052	0.9052	0.4978	0	0.8744	0.9121	LINC00907(0)
18	52593298	rs11664828	C	G	2	3.058e-05	0.000799	0.8842	0.8781	0.2524	23.68	0.8209	0.8979	CCDC68(0)|RAB27B(+30.55kb)
8	28549625	rs240931	C	T	2	3.068e-05	3.068e-05	0.8995	0.8995	0.4614	0	0.8642	0.9074	EXTL3(-9.364kb)|FZD3(+117.8kb)|HMBOX1(-198.3kb)|INTS9(-75.55kb)|MIR4288(+186.9kb)
6	32364667	rs3117139	G	A	2	3.072e-05	0.001328	0.8423	0.8331	0.2058	37.54	0.7706	0.8684	BTNL2(0)|C6orf10(+25.01kb)|HCG23(+3.199kb)|HLA-DRA(-42.95kb)|HLA-DRB1(-181.9kb)|HLA-DRB5(-120.5kb)|HLA-DRB6(-155.8kb)|NOTCH4(+172.8kb)
5	94086368	rs10062248	A	T	2	3.093e-05	3.093e-05	1.1089	1.1089	0.5598	0	1.0755	1.1165	ANKRD32(+54.8kb)|KIAA0825(+132.1kb)|MCTP1(0)
9	138178629	rs12002506	A	G	2	3.097e-05	0.03577	1.2352	1.2716	0.0323	78.18	1.4378	1.143	C9orf62(-56.46kb)|LOC401557(+99.48kb)|OLFM1(+165.6kb)|PPP1R26(-193kb)|PPP1R26-AS1(-175.9kb)
6	125869161	rs116969303	G	A	2	3.107e-05	0.00416	1.3623	1.413	0.1842	43.29	1.6878	1.3019	LOC643623(-126.3kb)
9	106091603	rs74457645	G	T	2	3.108e-05	3.108e-05	1.3334	1.3334	0.5534	0	1.4547	1.308	.
5	93910958	rs10476612	C	T	2	3.125e-05	3.125e-05	1.1097	1.1097	0.6312	0	1.0821	1.1161	ANKRD32(-43.43kb)|KIAA0825(0)|MCTP1(-131.3kb)
11	85814486	rs586274	G	T	2	3.131e-05	0.0002876	1.1023	1.1	0.2911	10.26	1.046	1.1152	C11orf73(-198.8kb)|CCDC83(+183.4kb)|EED(-141.3kb)|PICALM(+33.56kb)
8	28542656	rs240926	A	G	2	3.131e-05	3.131e-05	0.8991	0.8991	0.4205	0	0.8604	0.9078	EXTL3(-16.33kb)|FBXO16(+194.8kb)|FZD3(+110.9kb)|INTS9(-82.52kb)|MIR4288(+180kb)
17	76553636	rs12450340	C	G	2	3.135e-05	0.000357	1.1472	1.153	0.2644	19.73	1.2312	1.1254	CYTH1(-116.5kb)|DNAH17(0)|DNAH17-AS1(+54.5kb)|PGS1(+133kb)|SOCS3(+197.5kb)
2	28833479	rs1534476	A	G	2	3.142e-05	3.142e-05	1.0969	1.0969	0.7653	0	1.0816	1.1003	FOSL2(+196kb)|PLB1(0)|PPP1CB(-141.1kb)
18	39916583	rs4621064	A	C	2	3.144e-05	3.144e-05	0.904	0.904	0.3811	0	0.8638	0.913	LINC00907(0)
2	59775168	rs887942	C	G	2	3.154e-05	3.154e-05	1.1004	1.1004	0.4232	0	1.1443	1.0909	.
8	28552376	rs240933	G	A	2	3.167e-05	3.167e-05	0.8997	0.8997	0.449	0	0.8634	0.9078	EXTL3(-6.613kb)|FZD3(+120.6kb)|HMBOX1(-195.5kb)|INTS9(-72.8kb)|MIR4288(+189.7kb)
19	48522869	rs3815908	C	T	2	3.172e-05	3.172e-05	0.8936	0.8936	0.7974	0	0.8803	0.8965	BSPH1(+27.44kb)|CABP5(-9.77kb)|CARD8(-188.5kb)|CRX(+176.3kb)|ELSPBP1(0)|LIG1(-95.83kb)|PLA2G4C(-28.23kb)|SNAR-A1(+85.31kb)|SNAR-A2(+85.31kb)|SNAR-A3(+95.71kb)|SNAR-A4(+95.71kb)|SNAR-A5(+95.71kb)|SNAR-A6(+95.71kb)|SNAR-A7(+95.71kb)|SNAR-A8(+95.71kb)|SNAR-A9(+95.71kb)|SNAR-A10(+95.71kb)|SNAR-A11(+95.71kb)|SNAR-A12(+74.57kb)|SNAR-A13(+74.57kb)|SNAR-A14(+95.71kb)|SNAR-C1(+63.81kb)|SNAR-C2(+63.81kb)|S…
11	85795524	rs565719	C	T	2	3.173e-05	3.173e-05	1.1049	1.1049	0.8028	0	1.0907	1.108	CCDC83(+164.5kb)|EED(-160.3kb)|PICALM(+14.6kb)
11	85859483	rs10898439	C	G	2	3.177e-05	0.001941	1.0937	1.102	0.221	33.23	1.1586	1.0806	C11orf73(-153.8kb)|EED(-96.32kb)|PICALM(+78.56kb)
1	177611318	rs1252083	A	G	2	3.182e-05	3.182e-05	1.1045	1.1045	0.5662	0	1.1367	1.0973	.
11	85830157	rs567075	C	T	2	3.182e-05	0.007313	1.1034	1.0948	0.2235	32.52	1.0377	1.1184	C11orf73(-183.1kb)|CCDC83(+199.1kb)|EED(-125.6kb)|PICALM(+49.23kb)
22	49534383	rs117514024	T	G	2	3.188e-05	0.004146	1.1324	1.1489	0.1785	44.76	1.2316	1.1108	.
6	164941517	rs34352529	G	A	2	3.199e-05	3.199e-05	1.5148	1.5148	0.9903	0	1.5109	1.5157	.
16	4963458	rs12444913	C	T	2	3.218e-05	3.218e-05	1.1343	1.1343	0.7246	0	1.1092	1.1401	ALG1(-158.4kb)|ANKS3(+179.1kb)|C16orf71(+164.1kb)|C16orf89(-130.7kb)|FAM86A(-170.8kb)|GLYR1(+66.16kb)|NAGPA(-111.4kb)|NAGPA-AS1(-120.2kb)|PPL(0)|ROGDI(+110.5kb)|SEC14L5(-44.86kb)|SEPT12(+124.9kb)|SMIM22(+117kb)|UBN1(+31.1kb)|ZNF500(+146.3kb)
21	27661096	rs75804598	T	A	2	3.235e-05	3.235e-05	0.8719	0.8719	0.9307	0	0.8774	0.8708	APP(+117.6kb)|CYYR1(-177.4kb)
1	55520212	rs1165287	A	G	2	3.238e-05	3.238e-05	0.9055	0.9055	0.9703	0	0.9038	0.9059	BSND(+45.75kb)|DHCR24(+167.3kb)|LOC100507634(-160.9kb)|MIR4422(-171.1kb)|PCSK9(0)|TMEM61(+62.25kb)|USP24(-11.82kb)
21	27449355	rs11701307	A	G	2	3.243e-05	3.243e-05	0.8961	0.8961	0.4777	0	0.9321	0.8881	APP(0)
10	11718331	rs2011704	C	T	2	3.248e-05	0.1416	1.1024	1.0786	0.0775	67.92	1.0129	1.125	ECHDC3(-66.02kb)|PROSER2(-147.1kb)|PROSER2-AS1(-173.3kb)|USP6NL(+64.65kb)
18	77595748	rs552957	A	G	2	3.256e-05	3.256e-05	1.1148	1.1148	0.5055	0	1.0795	1.1254	CTDP1(+81.24kb)|HSBP1L1(-128.8kb)|KCNG2(-27.92kb)|PQLC1(-66.67kb)|RBFA(-198.6kb)|TXNL4A(-137.1kb)
3	36986932	rs2276809	T	C	2	3.256e-05	0.01693	0.863	0.8363	0.0948	64.17	0.7609	0.8874	EPM2AIP1(-40.42kb)|LRRFIP2(-107.2kb)|MLH1(-47.91kb)|TRANK1(+0.384kb)
18	39917051	rs68001532	A	C	2	3.262e-05	3.262e-05	0.9041	0.9041	0.3792	0	0.8638	0.9132	LINC00907(0)
6	32575369	rs9271055	T	G	2	3.263e-05	3.263e-05	0.8499	0.8499	0.7289	0	0.8318	0.8572	HLA-DQA1(-29.81kb)|HLA-DQA2(-133.8kb)|HLA-DQB1(-51.87kb)|HLA-DQB2(-148.5kb)|HLA-DRA(+162.5kb)|HLA-DRB1(+17.76kb)|HLA-DRB5(+77.36kb)|HLA-DRB6(+47.59kb)
8	28553466	rs240935	A	G	2	3.267e-05	3.267e-05	0.8999	0.8999	0.4515	0	0.8639	0.908	EXTL3(-5.523kb)|FZD3(+121.7kb)|HMBOX1(-194.4kb)|INTS9(-71.71kb)|MIR4288(+190.8kb)
18	39915527	rs7232300	T	C	2	3.268e-05	3.268e-05	0.9042	0.9042	0.4221	0	0.867	0.9124	LINC00907(0)
2	59768141	rs2674046	T	C	2	3.288e-05	3.288e-05	0.9059	0.9059	0.3963	0	0.8681	0.9146	.
21	27605254	rs2830132	A	T	2	3.309e-05	3.309e-05	0.8997	0.8997	0.5394	0	0.8693	0.9061	APP(+61.81kb)
6	47518406	rs141930421	G	A	2	3.315e-05	3.315e-05	1.4193	1.4193	0.6139	0	1.2937	1.4473	CD2AP(0)|GPR111(-105.9kb)|GPR115(-147.9kb)
17	76552612	rs80325634	A	C	2	3.318e-05	0.0004661	1.1467	1.1533	0.2576	21.97	1.2319	1.1246	CYTH1(-117.5kb)|DNAH17(0)|DNAH17-AS1(+53.47kb)|PGS1(+132kb)|SOCS3(+196.5kb)
18	39915301	rs34642158	T	C	2	3.325e-05	3.325e-05	0.9042	0.9042	0.4922	0	0.8722	0.9112	LINC00907(0)
12	121809369	rs78191642	C	T	2	3.329e-05	0.05637	1.3387	1.2885	0.0846	66.38	1.105	1.4453	ANAPC5(+17.36kb)|CAMKK2(+73.26kb)|KDM2B(-57.53kb)|P2RX4(+137.5kb)|P2RX7(+185kb)|RNF34(-28.52kb)
17	76554443	rs76926101	A	G	2	3.332e-05	0.0004926	1.1467	1.1535	0.2561	22.47	1.2324	1.1246	CYTH1(-115.7kb)|DNAH17(0)|DNAH17-AS1(+55.3kb)|PGS1(+133.8kb)|SOCS3(+198.3kb)
8	28554266	rs240938	A	G	2	3.347e-05	3.347e-05	0.9001	0.9001	0.4505	0	0.864	0.9082	EXTL3(-4.723kb)|FZD3(+122.5kb)|HMBOX1(-193.6kb)|INTS9(-70.91kb)|MIR4288(+191.6kb)
5	82896062	rs113066179	A	G	2	3.365e-05	3.365e-05	1.1852	1.1852	0.5555	0	1.1235	1.1982	HAPLN1(-37.95kb)|VCAN(+17.94kb)
11	85859916	rs10898440	T	C	2	3.366e-05	3.366e-05	1.094	1.094	0.592	0	1.1225	1.0883	C11orf73(-153.3kb)|EED(-95.89kb)|PICALM(+78.99kb)
12	104126668	rs17034439	A	C	2	3.371e-05	3.371e-05	1.1494	1.1494	0.3912	0	1.0838	1.1657	GNN(-110.9kb)|HSP90B1(-197.4kb)|MIR3652(-197.5kb)|NT5DC3(-39.41kb)|STAB2(0)
8	28544150	rs240927	T	C	2	3.383e-05	3.383e-05	0.8996	0.8996	0.4408	0	0.8625	0.9079	EXTL3(-14.84kb)|FBXO16(+196.3kb)|FZD3(+112.4kb)|INTS9(-81.02kb)|MIR4288(+181.5kb)
10	11719074	rs11257240	G	T	2	3.386e-05	0.1386	1.1022	1.0786	0.0789	67.61	1.0133	1.1247	ECHDC3(-65.28kb)|PROSER2(-146.3kb)|PROSER2-AS1(-172.5kb)|USP6NL(+65.4kb)
15	48810499	rs7184016	T	G	2	3.403e-05	0.01896	0.8984	0.9089	0.1889	42.07	0.9648	0.884	DUT(+174.9kb)|FBN1(0)
16	29153945	rs1641911	C	T	2	3.406e-05	3.406e-05	0.8839	0.8839	0.7032	0	0.8635	0.8888	LAT(+151.8kb)|MIR4517(+184kb)|NFATC2IP(+176.2kb)|RRN3P2(+25.91kb)|SNX29P2(-159.7kb)|SPNS1(+158.1kb)
8	28574803	rs240951	A	G	2	3.424e-05	0.0002596	0.8988	0.8959	0.2823	13.49	0.8467	0.9104	EXTL3(0)|FZD3(+143kb)|HMBOX1(-173.1kb)|INTS9(-50.37kb)
21	27605590	rs139325977	A	G	2	3.439e-05	3.439e-05	0.8999	0.8999	0.5207	0	0.8681	0.9066	APP(+62.14kb)
17	76546090	rs73999121	T	A	2	3.447e-05	3.447e-05	1.1477	1.1477	0.4091	0	1.2099	1.1314	CYTH1(-124kb)|DNAH17(0)|DNAH17-AS1(+46.95kb)|PGS1(+125.5kb)|SOCS3(+189.9kb)
16	29154049	rs1646112	T	C	2	3.463e-05	3.463e-05	0.8843	0.8843	0.6556	0	0.8605	0.89	LAT(+151.9kb)|MIR4517(+184.1kb)|NFATC2IP(+176.3kb)|RRN3P2(+26.01kb)|SNX29P2(-159.6kb)|SPNS1(+158.2kb)
8	28831304	rs117976396	T	C	2	3.475e-05	3.475e-05	1.2592	1.2592	0.4827	0	1.1642	1.284	HMBOX1(0)|INTS9(+83.61kb)|KIF13B(-93.49kb)
14	104643859	rs2487300	G	A	2	3.477e-05	3.477e-05	1.1403	1.1403	0.6785	0	1.1629	1.1303	ASPG(+64.81kb)|KIF26A(0)|MIR203(+60.01kb)|MIR3545(+60.02kb)|TDRD9(+124.9kb)
5	93909599	rs6862592	C	T	2	3.478e-05	3.478e-05	1.1092	1.1092	0.6424	0	1.0825	1.1154	ANKRD32(-44.79kb)|KIAA0825(0)|MCTP1(-132.7kb)
18	39916831	rs2085909	A	C	2	3.479e-05	3.583e-05	0.9024	0.9024	0.3169	0.16	0.8556	0.9129	LINC00907(0)
17	76547634	rs16971526	C	T	2	3.504e-05	3.504e-05	1.1474	1.1474	0.4148	0	1.2089	1.1314	CYTH1(-122.5kb)|DNAH17(0)|DNAH17-AS1(+48.5kb)|PGS1(+127kb)|SOCS3(+191.5kb)
6	164969336	rs13219062	G	A	2	3.504e-05	3.504e-05	1.4934	1.4934	0.8249	0	1.4245	1.508	.
16	69718693	rs13336317	A	G	2	3.513e-05	0.004933	1.2058	1.1906	0.2292	30.82	1.0806	1.2388	MIR1538(+118.9kb)|NFAT5(0)|NOB1(-57.06kb)|NQO1(-24.61kb)|WWP2(-77.49kb)
18	52581893	rs11665320	A	G	2	3.524e-05	3.524e-05	0.8846	0.8846	0.3279	0	0.8297	0.8963	CCDC68(0)|RAB27B(+19.15kb)
2	59753972	rs56093216	C	T	2	3.529e-05	3.529e-05	0.905	0.905	0.5239	0	0.8761	0.9116	.
17	76534330	rs77844062	A	G	2	3.535e-05	3.535e-05	1.1529	1.1529	0.6876	0	1.1849	1.1449	CYTH1(-135.8kb)|DNAH17(0)|DNAH17-AS1(+35.19kb)|PGS1(+113.7kb)|SOCS3(+178.2kb)
19	48522882	rs10422382	C	A	2	3.54e-05	3.54e-05	0.8941	0.8941	0.7892	0	0.8802	0.8971	BSPH1(+27.46kb)|CABP5(-9.757kb)|CARD8(-188.5kb)|CRX(+176.3kb)|ELSPBP1(0)|LIG1(-95.82kb)|PLA2G4C(-28.22kb)|SNAR-A1(+85.32kb)|SNAR-A2(+85.32kb)|SNAR-A3(+95.73kb)|SNAR-A4(+95.73kb)|SNAR-A5(+95.73kb)|SNAR-A6(+95.73kb)|SNAR-A7(+95.73kb)|SNAR-A8(+95.73kb)|SNAR-A9(+95.73kb)|SNAR-A10(+95.73kb)|SNAR-A11(+95.73kb)|SNAR-A12(+74.58kb)|SNAR-A13(+74.58kb)|SNAR-A14(+95.73kb)|SNAR-C1(+63.82kb)|SNAR-C2(+63.82kb)|…
13	25482757	rs201793056	T	C	2	3.547e-05	3.547e-05	0.6921	0.6921	0.5361	0	0.77	0.6727	ATP12A(+196.8kb)|CENPJ(0)|PABPC3(-187.5kb)|RNF17(+28.7kb)|TPTE2P1(-20.14kb)
8	28553945	rs240936	A	C	2	3.551e-05	3.551e-05	0.9004	0.9004	0.4465	0	0.864	0.9086	EXTL3(-5.044kb)|FZD3(+122.2kb)|HMBOX1(-194kb)|INTS9(-71.23kb)|MIR4288(+191.2kb)
8	27467821	rs2070926	G	C	2	3.569e-05	3.569e-05	1.1006	1.1006	0.8339	0	1.0892	1.1031	CCDC25(-123kb)|CHRNA2(+131kb)|CLU(0)|EPHX2(+65.38kb)|ESCO2(-164.2kb)|MIR3622A(-91.37kb)|MIR3622B(-91.37kb)|PBK(-199.3kb)|PTK2B(+150.9kb)|SCARA3(-23.76kb)
15	48696730	rs28421836	C	A	2	3.583e-05	0.03083	1.1142	1.099	0.1691	47.11	1.0331	1.1335	DUT(+61.16kb)|FBN1(-3.772kb)|SLC12A1(+100.5kb)
11	59858036	rs2847663	G	C	2	3.594e-05	0.006297	0.9106	0.899	0.1606	49.21	0.8513	0.9244	MS4A2(0)|MS4A3(+19.45kb)|MS4A4A(-190kb)|MS4A6A(-81.04kb)|PLAC1L(+42.52kb)
11	85794760	rs683912	T	C	2	3.595e-05	3.595e-05	1.1022	1.1022	0.9419	0	1.1063	1.1013	CCDC83(+163.7kb)|EED(-161kb)|PICALM(+13.84kb)
11	85852979	rs10792831	A	G	2	3.595e-05	0.0006713	1.0928	1.0977	0.2606	20.98	1.1525	1.0809	C11orf73(-160.3kb)|EED(-102.8kb)|PICALM(+72.06kb)
18	39921538	rs454565	T	C	2	3.599e-05	3.599e-05	0.906	0.906	0.4581	0	0.8722	0.9135	LINC00907(0)
18	39907414	rs4243260	A	G	2	3.61e-05	3.61e-05	0.9101	0.9101	0.5008	0	0.9402	0.9035	LINC00907(0)
15	48692460	rs7171330	A	T	2	3.613e-05	0.06684	1.117	1.0964	0.1303	56.3	1.0257	1.1387	CTXN2(+196.5kb)|DUT(+56.89kb)|FBN1(-8.042kb)|SLC12A1(+96.18kb)
8	28549409	rs240930	T	C	2	3.622e-05	3.622e-05	0.9003	0.9003	0.4604	0	0.8648	0.9082	EXTL3(-9.58kb)|FZD3(+117.6kb)|HMBOX1(-198.5kb)|INTS9(-75.76kb)|MIR4288(+186.7kb)
21	27604944	rs2830129	T	C	2	3.623e-05	3.623e-05	0.9003	0.9003	0.5213	0	0.8686	0.907	APP(+61.5kb)
11	48201643	rs72905558	T	A	2	3.636e-05	0.02849	0.8467	0.8079	0.069	69.76	0.7166	0.8744	OR4B1(-36.72kb)|OR4C3(-144.8kb)|OR4C45(-165.3kb)|OR4S1(-126.1kb)|OR4X1(-83.77kb)|OR4X2(-65.01kb)|PTPRJ(+9.249kb)
17	76534780	rs78231491	A	G	2	3.639e-05	3.639e-05	1.1527	1.1527	0.6762	0	1.186	1.1444	CYTH1(-135.3kb)|DNAH17(0)|DNAH17-AS1(+35.64kb)|PGS1(+114.1kb)|SOCS3(+178.6kb)
17	48816485	rs8065485	A	G	2	3.64e-05	3.64e-05	1.0973	1.0973	0.7693	0	1.1127	1.0939	ABCC3(+47.42kb)|ANKRD40(+31.22kb)|CACNA1G(+111.7kb)|CACNA1G-AS1(+177kb)|EPN3(+195.4kb)|LINC00483(-21.91kb)|LUC7L3(0)|SPATA20(+183.3kb)|TOB1(-123.1kb)|TOB1-AS1(-127.6kb)|WFIKKN2(-96.12kb)
17	76534875	rs78180639	T	C	2	3.643e-05	3.643e-05	1.1577	1.1577	0.7419	0	1.1845	1.1508	CYTH1(-135.3kb)|DNAH17(0)|DNAH17-AS1(+35.74kb)|PGS1(+114.2kb)|SOCS3(+178.7kb)
6	165962509	rs9457101	G	C	2	3.659e-05	0.007402	1.3027	1.3542	0.1498	51.79	1.5812	1.2467	PDE10A(0)
18	39899476	rs78514876	C	A	2	3.664e-05	3.664e-05	0.8111	0.8111	0.6438	0	0.8522	0.8021	LINC00907(0)
3	196817735	rs77261739	T	A	2	3.666e-05	3.666e-05	0.8041	0.8041	0.6795	0	0.7681	0.8125	DLG1(0)|MFI2(+61.05kb)|MFI2-AS1(+86.12kb)|NCBP2(+148.3kb)|NCBP2-AS2(+146.9kb)|PIGZ(+122kb)|SENP5(+156.2kb)
20	61640656	rs186269367	A	G	2	3.676e-05	3.676e-05	0.6006	0.6006	0.4457	0	0.4976	0.6296	BHLHE23(+2.269kb)|COL9A3(+168.1kb)|DIDO1(+71.35kb)|DPH3P1(+163.1kb)|GID8(+60.83kb)|HAR1A(-91.99kb)|HAR1B(-86.19kb)|LINC00029(-24.91kb)|LOC63930(-0.078kb)|LOC100144597(-28.71kb)|MIR124-3(-169.2kb)|OGFR(+195.3kb)|SLC17A9(+40.71kb)|TCFL5(+147.5kb)|YTHDF1(-186.1kb)
18	77631198	rs59183289	G	A	2	3.698e-05	3.698e-05	1.1125	1.1125	0.4542	0	1.0735	1.1242	CTDP1(+116.7kb)|HSBP1L1(-93.38kb)|KCNG2(0)|PQLC1(-31.22kb)|RBFA(-163.1kb)|RBFADN(-196.1kb)|TXNL4A(-101.7kb)
11	59858497	rs2847664	A	G	2	3.7e-05	0.005672	0.9107	0.8996	0.1672	47.58	0.8523	0.9243	MS4A2(0)|MS4A3(+19.91kb)|MS4A4A(-189.5kb)|MS4A6A(-80.58kb)|PLAC1L(+42.98kb)
12	121812302	rs115026170	T	C	2	3.716e-05	0.04851	1.3499	1.3	0.0962	63.87	1.1122	1.456	ANAPC5(+20.29kb)|CAMKK2(+76.19kb)|KDM2B(-54.6kb)|P2RX4(+140.4kb)|P2RX7(+187.9kb)|RNF34(-25.58kb)
2	59772602	rs2418867	T	C	2	3.718e-05	5.864e-05	1.0998	1.1004	0.3107	2.69	1.1559	1.0878	.
2	114966717	rs72839127	C	T	2	3.72e-05	3.72e-05	1.3377	1.3377	0.7205	0	1.2723	1.3548	.
15	48819502	rs6493328	A	G	2	3.721e-05	3.721e-05	0.9052	0.9052	0.8572	0	0.9134	0.9033	DUT(+183.9kb)|FBN1(0)
11	59957092	rs636147	T	C	2	3.744e-05	0.0001235	1.097	1.0987	0.2981	7.63	1.1527	1.085	MS4A2(+91.15kb)|MS4A3(+118.5kb)|MS4A4A(-90.92kb)|MS4A6A(+4.953kb)|MS4A6E(-145.3kb)|MS4A7(-188.9kb)|PLAC1L(+141.6kb)
11	85820077	rs543293	G	A	2	3.749e-05	0.005818	1.1015	1.0939	0.2322	29.93	1.0378	1.1161	C11orf73(-193.2kb)|CCDC83(+189kb)|EED(-135.7kb)|PICALM(+39.15kb)
9	104714595	rs75914877	G	C	2	3.75e-05	0.001047	1.2448	1.2612	0.2301	30.57	1.4029	1.2032	.
11	41894928	rs74385678	G	A	2	3.753e-05	0.01933	1.454	1.5805	0.0874	65.78	2.017	1.3508	.
15	35051823	rs1521850	T	G	2	3.754e-05	0.406	1.309	1.1759	0.0285	79.15	0.9387	1.3921	ACTC1(-28.47kb)|AQR(-96.73kb)|GJD2(+5.041kb)|GOLGA8B(+176.1kb)
18	39925134	rs976071	A	G	2	3.755e-05	3.755e-05	0.9064	0.9064	0.5005	0	0.8757	0.9132	LINC00907(0)
3	196889252	rs61437497	T	C	2	3.757e-05	3.757e-05	0.8053	0.8053	0.796	0	0.7827	0.8105	DLG1(0)|DLG1-AS1(-135.9kb)|MFI2(+132.6kb)|MFI2-AS1(+157.6kb)|MIR4797(-131.5kb)|PIGZ(+193.5kb)
8	27467686	rs9331896	T	C	2	3.757e-05	3.757e-05	1.1003	1.1003	0.9243	0	1.0951	1.1014	CCDC25(-123.1kb)|CHRNA2(+130.9kb)|CLU(0)|EPHX2(+65.25kb)|ESCO2(-164.4kb)|MIR3622A(-91.51kb)|MIR3622B(-91.5kb)|PBK(-199.5kb)|PTK2B(+150.8kb)|SCARA3(-23.89kb)
16	78860498	rs7206468	T	A	2	3.767e-05	0.0007062	1.1153	1.1214	0.2541	23.11	1.1871	1.0991	WWOX(0)
8	42436956	rs11776348	T	A	2	3.768e-05	3.768e-05	1.1006	1.1006	0.366	0	1.0519	1.1114	CHRNA6(-170.8kb)|CHRNB3(-115.6kb)|SLC20A2(+39.6kb)|SMIM19(+28.82kb)|VDAC3(+173.5kb)
18	39926578	rs421436	C	A	2	3.776e-05	3.776e-05	0.9064	0.9064	0.4994	0	0.8756	0.9132	LINC00907(0)
15	48720271	rs3929051	T	C	2	3.785e-05	0.03243	1.1164	1.1007	0.1655	48	1.0337	1.1365	DUT(+84.7kb)|FBN1(0)|SLC12A1(+124kb)
7	112160065	rs79604473	T	C	2	3.799e-05	3.799e-05	1.1296	1.1296	0.6792	0	1.1018	1.1364	IFRD1(+42.81kb)|LSMEM1(+29.12kb)|ZNF277(+176.1kb)
11	85849411	rs11234556	C	T	2	3.803e-05	8.92e-05	1.0941	1.0952	0.3046	5.12	1.1483	1.0828	C11orf73(-163.8kb)|EED(-106.4kb)|PICALM(+68.49kb)
2	169635137	rs62175687	A	G	2	3.812e-05	3.812e-05	1.2918	1.2918	0.9306	0	1.2787	1.2955	ABCB11(-144.3kb)|CERS6(+3.493kb)|CERS6-AS1(0)|G6PC2(-122.6kb)|MIR4774(+195.6kb)|NOSTRIN(-7.911kb)|SPC25(-92.26kb)
5	93916953	rs12518034	C	T	2	3.816e-05	3.816e-05	1.1083	1.1083	0.6186	0	1.0797	1.1149	ANKRD32(-37.44kb)|KIAA0825(0)|MCTP1(-125.3kb)
14	47833643	rs34744963	G	A	2	3.821e-05	3.821e-05	0.8721	0.8721	0.5012	0	0.8315	0.8813	MDGA2(0)
18	39921351	rs413718	A	C	2	3.834e-05	3.834e-05	0.9063	0.9063	0.461	0	0.8728	0.9138	LINC00907(0)
5	93938994	rs12517866	C	G	2	3.837e-05	3.837e-05	1.1084	1.1084	0.5784	0	1.0764	1.1157	ANKRD32(-15.4kb)|KIAA0825(0)|MCTP1(-103.3kb)
8	15050813	rs146768202	C	G	2	3.839e-05	3.839e-05	1.2753	1.2753	0.6542	0	1.2088	1.2921	SGCZ(0)
1	218571066	rs7528564	G	A	2	3.84e-05	3.84e-05	1.216	1.216	0.8618	0	1.2364	1.211	LOC728463(+52.05kb)|RRP15(+59.74kb)|TGFB2(0)
2	233241575	rs73001973	A	G	2	3.84e-05	0.007822	0.845	0.8234	0.1638	48.41	0.7409	0.8661	ALPI(-79.26kb)|ALPP(-1.772kb)|ALPPL2(-29.98kb)|CHRND(-149.3kb)|CHRNG(-162.9kb)|DIS3L2(+32.9kb)|ECEL1(-103kb)|ECEL1P2(-8.884kb)|EIF4E2(-173.8kb)|MIR5001(-173.6kb)|PRSS56(-143.6kb)|TIGD1(-171.2kb)
8	28556188	rs240939	C	A	2	3.848e-05	3.848e-05	0.901	0.901	0.4517	0	0.8651	0.9091	EXTL3(-2.801kb)|FZD3(+124.4kb)|HMBOX1(-191.7kb)|INTS9(-68.99kb)|MIR4288(+193.5kb)
10	113303817	rs76819875	A	C	2	3.859e-05	0.0001211	1.3027	1.3079	0.297	8.06	1.4892	1.2597	.
8	28552806	rs240934	T	C	2	3.867e-05	3.867e-05	0.9007	0.9007	0.4448	0	0.8641	0.9089	EXTL3(-6.183kb)|FZD3(+121kb)|HMBOX1(-195.1kb)|INTS9(-72.37kb)|MIR4288(+190.1kb)
2	59770353	rs2674052	G	T	2	3.894e-05	3.894e-05	0.9073	0.9073	0.5048	0	0.8776	0.9141	.
17	76534124	rs113866151	A	G	2	3.898e-05	3.898e-05	1.152	1.152	0.7122	0	1.1812	1.1446	CYTH1(-136kb)|DNAH17(0)|DNAH17-AS1(+34.99kb)|PGS1(+113.5kb)|SOCS3(+178kb)
4	125773999	rs17008684	C	T	2	3.907e-05	3.907e-05	0.8368	0.8368	0.726	0	0.8099	0.8427	ANKRD50(+140.1kb)
14	33089282	rs12433067	G	T	2	3.936e-05	3.936e-05	1.1047	1.1047	0.6408	0	1.0784	1.1106	AKAP6(0)
11	85765298	rs493254	A	G	2	3.942e-05	3.942e-05	1.1013	1.1013	0.8692	0	1.0922	1.1033	CCDC83(+134.2kb)|EED(-190.5kb)|PICALM(0)
10	11717397	rs11257238	C	T	2	3.95e-05	0.144	1.1013	1.0777	0.0792	67.54	1.0122	1.1237	ECHDC3(-66.96kb)|PROSER2(-148kb)|PROSER2-AS1(-174.2kb)|USP6NL(+63.72kb)
5	93943877	rs10041262	G	A	2	3.952e-05	3.952e-05	1.1084	1.1084	0.5933	0	1.0775	1.1154	ANKRD32(-10.51kb)|KIAA0825(0)|MCTP1(-98.41kb)
6	32575700	rs9271069	G	A	2	3.955e-05	3.955e-05	0.8426	0.8426	0.6777	0	0.8186	0.8514	HLA-DQA1(-29.48kb)|HLA-DQA2(-133.5kb)|HLA-DQB1(-51.54kb)|HLA-DQB2(-148.2kb)|HLA-DRA(+162.9kb)|HLA-DRB1(+18.09kb)|HLA-DRB5(+77.69kb)|HLA-DRB6(+47.92kb)
19	45416741	rs438811	T	C	2	3.962e-05	0.003689	1.3556	1.4011	0.1968	39.99	1.6704	1.2976	APOC1(-1.179kb)|APOC1P1(-13.32kb)|APOC2(-32.5kb)|APOC4(-28.75kb)|APOC4-APOC2(-28.75kb)|APOE(+4.091kb)|BCAM(+92.06kb)|BCL3(+153.4kb)|CBLC(+112.8kb)|CLASRP(-125.6kb)|CLPTM1(-41.1kb)|GEMIN7(-165.8kb)|PPP1R37(-179.7kb)|PVRL2(+24.26kb)|RELB(-87.96kb)|TOMM40(+9.795kb)|ZNF296(-158kb)
2	59753741	rs2540099	T	C	2	3.964e-05	3.964e-05	0.9055	0.9055	0.5107	0	0.8758	0.9124	.
1	3418391	rs4648508	T	C	2	3.972e-05	0.07311	1.1239	1.102	0.1131	60.17	1.0287	1.15	ARHGEF16(+20.71kb)|MEGF6(0)|MIR551A(-58.87kb)|PRDM16(+63.21kb)|TP73(-150.7kb)|TPRG1L(-123.2kb)|WRAP73(-128.9kb)
16	29153526	rs1646114	G	C	2	3.973e-05	3.973e-05	0.8847	0.8847	0.6663	0	0.8615	0.8902	LAT(+151.4kb)|MIR4517(+183.5kb)|NFATC2IP(+175.8kb)|RRN3P2(+25.49kb)|SNX29P2(-160.1kb)|SPNS1(+157.7kb)
3	102372057	rs62274193	A	G	2	3.975e-05	3.975e-05	0.8189	0.8189	0.6809	0	0.7823	0.8261	ZPLD1(+173.4kb)
5	89275132	rs112082526	T	C	2	3.978e-05	0.1395	0.7608	0.8071	0.0704	69.46	0.9598	0.7148	MIR3660(-37.3kb)
20	54984064	rs1884913	C	G	2	3.985e-05	0.1854	0.8913	0.9168	0.0534	73.2	0.9899	0.8668	AURKA(+16.71kb)|CASS4(-3.103kb)|CSTF1(+4.482kb)|FAM209A(-115.7kb)|FAM209B(-124.2kb)|FAM210B(+40.35kb)|GCNT7(-82.48kb)|MC3R(+159.2kb)|RTFDC1(-59.58kb)
5	93933819	rs7737779	C	T	2	3.99e-05	3.99e-05	1.1081	1.1081	0.5842	0	1.0766	1.1153	ANKRD32(-20.57kb)|KIAA0825(0)|MCTP1(-108.5kb)
5	93935738	rs10053484	T	C	2	3.99e-05	3.99e-05	1.1081	1.1081	0.5822	0	1.0764	1.1153	ANKRD32(-18.65kb)|KIAA0825(0)|MCTP1(-106.6kb)
16	29152487	rs1611782	A	G	2	4.004e-05	4.004e-05	0.8845	0.8845	0.6481	0	0.86	0.8904	LAT(+150.4kb)|MIR4517(+182.5kb)|NFATC2IP(+174.7kb)|RRN3P2(+24.45kb)|SNX29P2(-161.1kb)|SPNS1(+156.6kb)
8	28541640	rs2856802	C	T	2	4.01e-05	4.01e-05	0.9005	0.9005	0.4541	0	0.8645	0.9086	EXTL3(-17.35kb)|FBXO16(+193.8kb)|FZD3(+109.9kb)|INTS9(-83.53kb)|MIR4288(+178.9kb)
11	65421117	rs1049728	C	G	2	4.013e-05	4.013e-05	0.8022	0.8022	0.9761	0	0.805	0.8016	AP5B1(-120.3kb)|EHBP1L1(+61kb)|FAM89B(+79.45kb)|KAT5(-58.36kb)|KCNK7(+57.65kb)|LTBP3(+95.42kb)|MALAT1(+147.2kb)|MAP3K11(+39.4kb)|MIR548AR(+138.3kb)|MIR4489(+4.393kb)|MIR4690(+17.28kb)|OVOL1(-133.4kb)|PCNXL3(+16.21kb)|RELA(0)|RNASEH2C(-64.03kb)|SCYL1(+114.9kb)|SIPA1(+2.726kb)|SNX32(-180.3kb)|SSSCA1(+81.88kb)|SSSCA1-AS1(+83.23kb)
16	29152765	rs12447715	T	C	2	4.026e-05	4.026e-05	0.8846	0.8846	0.6525	0	0.8604	0.8904	LAT(+150.7kb)|MIR4517(+182.8kb)|NFATC2IP(+175kb)|RRN3P2(+24.73kb)|SNX29P2(-160.8kb)|SPNS1(+156.9kb)
2	59789229	rs10179019	T	A	2	4.026e-05	4.026e-05	1.1006	1.1006	0.5835	0	1.131	1.094	.
11	72517180	rs146124276	C	A	2	4.031e-05	4.031e-05	1.2243	1.2243	0.8337	0	1.247	1.2172	ARAP1(+53.75kb)|ATG16L2(-8.27kb)|FCHSD2(-30.61kb)|MIR139(+191kb)|MIR4692(+22.54kb)|PDE2A(+131.7kb)|STARD10(+12.43kb)
11	59867379	rs17528859	C	T	2	4.032e-05	0.005296	0.9112	0.9006	0.1729	46.17	0.8536	0.9246	MS4A2(+1.439kb)|MS4A3(+28.79kb)|MS4A4A(-180.6kb)|MS4A6A(-71.7kb)|PLAC1L(+51.86kb)
2	59765684	rs2674067	G	A	2	4.034e-05	4.034e-05	0.9074	0.9074	0.5385	0	0.88	0.9137	.
5	93937780	rs10076461	T	C	2	4.052e-05	4.052e-05	1.1079	1.1079	0.5708	0	1.0754	1.1154	ANKRD32(-16.61kb)|KIAA0825(0)|MCTP1(-104.5kb)
2	169617714	rs16855794	A	G	2	4.074e-05	4.074e-05	1.2903	1.2903	0.9864	0	1.2877	1.291	ABCB11(-161.7kb)|CERS6(0)|CERS6-AS1(-10.75kb)|G6PC2(-140kb)|MIR4774(+178.2kb)|NOSTRIN(-25.33kb)|SPC25(-109.7kb)
10	56885639	rs113901641	G	C	2	4.084e-05	4.084e-05	1.2149	1.2149	0.6554	0	1.1578	1.2263	.
16	81804972	rs4328435	C	A	2	4.086e-05	4.086e-05	1.1002	1.1002	0.8044	0	1.0876	1.1034	CMIP(+59.6kb)|LOC100129617(+104.1kb)|PLCG2(-7.926kb)
18	39932952	rs397252	G	C	2	4.088e-05	4.088e-05	0.9066	0.9066	0.5084	0	0.8764	0.9133	LINC00907(0)
18	39921235	rs436343	T	G	2	4.094e-05	4.094e-05	0.9063	0.9063	0.3966	0	0.8678	0.915	LINC00907(0)
22	49536215	rs62221359	G	A	2	4.096e-05	0.005102	1.1284	1.1452	0.1711	46.62	1.226	1.1065	.
11	85681583	rs639012	G	A	2	4.105e-05	4.105e-05	1.1008	1.1008	0.8091	0	1.0875	1.1037	CCDC83(+50.53kb)|PICALM(0)|SYTL2(+159.4kb)
2	204659985	rs58038423	C	A	2	4.122e-05	4.122e-05	1.13	1.13	0.4748	0	1.0765	1.1406	CD28(+56.35kb)|CTLA4(-72.52kb)|ICOS(-141.5kb)
5	93937597	rs12522312	T	C	2	4.127e-05	4.127e-05	1.1077	1.1077	0.6375	0	1.0806	1.1139	ANKRD32(-16.79kb)|KIAA0825(0)|MCTP1(-104.7kb)
6	165954045	rs9459445	T	C	2	4.133e-05	0.004852	1.2967	1.3381	0.1786	44.74	1.5535	1.2456	PDE10A(0)
18	75583342	rs1876175	T	C	2	4.165e-05	4.165e-05	1.1195	1.1195	0.5431	0	1.1616	1.111	.
3	196798021	rs56106228	C	T	2	4.179e-05	4.179e-05	0.8105	0.8105	0.807	0	0.7896	0.8154	DLG1(0)|MFI2(+41.33kb)|MFI2-AS1(+66.41kb)|NCBP2(+128.6kb)|NCBP2-AS2(+127.1kb)|PIGZ(+102.3kb)|SENP5(+136.4kb)
18	39923815	rs428198	G	A	2	4.18e-05	4.18e-05	0.9069	0.9069	0.4644	0	0.8736	0.9143	LINC00907(0)
21	27658158	rs11700861	G	A	2	4.182e-05	4.182e-05	0.8738	0.8738	0.9654	0	0.8765	0.8732	APP(+114.7kb)|CYYR1(-180.4kb)
3	196986466	rs75364757	C	T	2	4.185e-05	4.185e-05	0.798	0.798	0.7647	0	0.7706	0.8042	DLG1(0)|DLG1-AS1(-38.65kb)|MIR4797(-34.28kb)
8	28984960	rs11786712	T	C	2	4.185e-05	4.185e-05	1.1507	1.1507	0.9732	0	1.1535	1.1501	HMBOX1(+74.72kb)|KIF13B(0)
7	128843169	rs2566871	T	C	2	4.199e-05	0.1592	0.9093	0.9298	0.0744	68.59	0.9902	0.8912	AHCYL2(-21.68kb)|LOC407835(+75.12kb)|SMO(0)|TNPO3(+147.9kb)|TPI1P2(+145.9kb)|TSPAN33(+33.64kb)
11	59861983	rs2070970	T	C	2	4.202e-05	0.005942	0.9114	0.9004	0.1674	47.53	0.8531	0.925	MS4A2(0)|MS4A3(+23.4kb)|MS4A4A(-186kb)|MS4A6A(-77.1kb)|PLAC1L(+46.47kb)
11	85857639	rs7952506	C	T	2	4.203e-05	0.001861	1.0916	1.0991	0.2295	30.75	1.1551	1.0789	C11orf73(-155.6kb)|EED(-98.17kb)|PICALM(+76.72kb)
7	43675045	rs150856841	A	G	2	4.203e-05	4.203e-05	1.7435	1.7435	0.5468	0	1.5459	1.8432	BLVRA(-123.2kb)|COA1(0)|HECW1(+72.11kb)|LOC100506895(+112.9kb)|STK17A(+8.067kb)
3	196916245	rs79266025	C	T	2	4.212e-05	4.212e-05	0.8068	0.8068	0.8134	0	0.7862	0.8116	DLG1(0)|DLG1-AS1(-108.9kb)|MFI2(+159.6kb)|MFI2-AS1(+184.6kb)|MIR4797(-104.5kb)
16	29152112	rs1646116	A	C	2	4.217e-05	4.217e-05	0.8849	0.8849	0.6432	0	0.8599	0.8908	LAT(+150kb)|MIR4517(+182.1kb)|NFATC2IP(+174.3kb)|RRN3P2(+24.07kb)|SNX29P2(-161.5kb)|SPNS1(+156.2kb)
11	48211290	rs142289879	G	A	2	4.22e-05	0.06894	0.7497	0.6487	0.0227	80.74	0.4927	0.797	OR4B1(-27.07kb)|OR4C3(-135.2kb)|OR4C45(-155.6kb)|OR4S1(-116.5kb)|OR4X1(-74.12kb)|OR4X2(-55.36kb)|PTPRJ(+18.9kb)
22	29846770	rs141192812	T	C	2	4.24e-05	4.24e-05	1.2179	1.2179	0.7404	0	1.2585	1.2085	AP1B1(+62.2kb)|EMID1(+191.2kb)|EWSR1(+150.3kb)|GAS2L1(+138kb)|MIR3653(+117.5kb)|NEFH(-29.41kb)|NF2(-152.8kb)|NIPSNAP1(-104kb)|RASL10A(+135kb)|RFPL1(+8.326kb)|RFPL1S(+8.652kb)|RHBDD3(+182.9kb)|SNORD125(+117.5kb)|THOC5(-57.38kb)
18	39927844	rs444835	T	C	2	4.241e-05	4.241e-05	0.9067	0.9067	0.4792	0	0.8745	0.9139	LINC00907(0)
18	39934108	rs383290	C	T	2	4.241e-05	4.241e-05	0.9067	0.9067	0.4992	0	0.8759	0.9136	LINC00907(0)
2	28831903	rs4666108	T	C	2	4.248e-05	4.248e-05	1.0953	1.0953	0.8197	0	1.0836	1.0979	FOSL2(+194.4kb)|PLB1(0)|PPP1CB(-142.7kb)
16	29154852	rs1641913	T	C	2	4.25e-05	4.25e-05	0.8855	0.8855	0.6342	0	0.8601	0.8916	LAT(+152.7kb)|MIR4517(+184.9kb)|NFATC2IP(+177.1kb)|RRN3P2(+26.81kb)|SNX29P2(-158.8kb)|SPNS1(+159kb)
6	32358286	rs3129951	C	T	2	4.254e-05	4.254e-05	0.8879	0.8879	0.8111	0	0.878	0.8917	BTNL2(-4.226kb)|C6orf10(+18.63kb)|GPSM3(+195kb)|HCG23(0)|HLA-DRA(-49.33kb)|HLA-DRB1(-188.3kb)|HLA-DRB5(-126.9kb)|HLA-DRB6(-162.2kb)|NOTCH4(+166.4kb)
2	236171268	rs77560977	T	C	2	4.265e-05	4.265e-05	0.7811	0.7811	0.5372	0	0.8481	0.768	.
15	58485773	rs6493986	G	A	2	4.267e-05	4.267e-05	1.2577	1.2577	0.3869	0	1.1336	1.2865	ALDH1A2(+127.7kb)|AQP9(+7.663kb)
16	69601930	rs111779538	T	A	2	4.272e-05	0.003752	1.2035	1.1901	0.2392	27.8	1.0816	1.2359	CYB5B(+101.8kb)|MIR1538(+2.159kb)|NFAT5(0)|NOB1(-173.8kb)|NQO1(-141.4kb)|TERF2(+182kb)|WWP2(-194.3kb)
20	55025377	rs6024883	T	G	2	4.274e-05	4.274e-05	0.8447	0.8447	0.3407	0	0.9136	0.8282	AURKA(+58.03kb)|CASS4(0)|CSTF1(+45.8kb)|FAM209A(-74.41kb)|FAM209B(-82.92kb)|FAM210B(+81.66kb)|GCNT7(-41.17kb)|RTFDC1(-18.27kb)|TFAP2C(-179kb)
19	1048393	rs67027268	A	G	2	4.277e-05	0.0001357	1.2146	1.2172	0.2844	12.73	1.303	1.1707	ABCA7(0)|ARID3A(+75.59kb)|ATP5D(-193.4kb)|C19orf26(-181.6kb)|CFD(+184.8kb)|CNN2(+9.329kb)|ELANE(+192.1kb)|GPX4(-55.54kb)|GRIN3B(+38.67kb)|HMHA1(-17.53kb)|KISS1R(+127.4kb)|MED16(+155.2kb)|POLR2E(-38.18kb)|R3HDM4(+135.2kb)|SBNO2(-59.24kb)|STK11(-157.4kb)|TMEM259(+27.25kb)|WDR18(+53.82kb)
1	55521109	rs693668	A	G	2	4.284e-05	4.284e-05	0.9069	0.9069	0.7182	0	0.8904	0.9106	BSND(+46.64kb)|DHCR24(+168.2kb)|LOC100507634(-160kb)|MIR4422(-170.2kb)|PCSK9(0)|TMEM61(+63.14kb)|USP24(-10.92kb)
3	196992904	rs116497306	A	G	2	4.287e-05	4.287e-05	0.7981	0.7981	0.7663	0	0.7709	0.8043	DLG1(0)|DLG1-AS1(-32.21kb)|MIR4797(-27.84kb)
12	89005401	rs139112196	G	A	2	4.288e-05	0.248	1.258	1.174	0.0703	69.48	0.988	1.3129	KITLG(+31.15kb)
18	39924781	rs414142	G	C	2	4.297e-05	4.297e-05	0.907	0.907	0.4656	0	0.8738	0.9144	LINC00907(0)
1	55679000	rs6669991	G	A	2	4.299e-05	4.299e-05	0.9101	0.9101	0.7769	0	0.9228	0.9073	LOC100507634(-2.08kb)|MIR4422(-12.31kb)|PCSK9(+148.5kb)|USP24(0)
11	59861814	rs2583471	A	G	2	4.308e-05	0.006146	0.9116	0.9005	0.1662	47.82	0.8531	0.9252	MS4A2(0)|MS4A3(+23.23kb)|MS4A4A(-186.2kb)|MS4A6A(-77.26kb)|PLAC1L(+46.3kb)
2	59753809	rs2540098	T	C	2	4.317e-05	4.317e-05	0.906	0.906	0.5062	0	0.8759	0.9129	.
18	39929389	rs420079	G	T	2	4.326e-05	4.326e-05	0.907	0.907	0.4928	0	0.8758	0.914	LINC00907(0)
3	196810817	rs77261930	A	G	2	4.327e-05	4.327e-05	0.7977	0.7977	0.5035	0	0.7373	0.8117	DLG1(0)|MFI2(+54.13kb)|MFI2-AS1(+79.2kb)|NCBP2(+141.4kb)|NCBP2-AS2(+139.9kb)|PIGZ(+115.1kb)|SENP5(+149.2kb)
11	59866309	rs2855017	T	C	2	4.333e-05	0.005523	0.9116	0.9009	0.1724	46.29	0.8539	0.925	MS4A2(+0.369kb)|MS4A3(+27.72kb)|MS4A4A(-181.7kb)|MS4A6A(-72.77kb)|PLAC1L(+50.79kb)
18	39929760	rs449343	T	G	2	4.351e-05	4.351e-05	0.9071	0.9071	0.4893	0	0.8756	0.9141	LINC00907(0)
6	32566011	rs9270656	A	C	2	4.354e-05	4.354e-05	0.8212	0.8212	0.5897	0	0.7864	0.8341	BTNL2(+191.1kb)|HLA-DQA1(-39.17kb)|HLA-DQA2(-143.2kb)|HLA-DQB1(-61.23kb)|HLA-DQB2(-157.9kb)|HLA-DRA(+153.2kb)|HLA-DRB1(+8.398kb)|HLA-DRB5(+68kb)|HLA-DRB6(+38.23kb)
4	13058842	rs518375	C	T	2	4.363e-05	4.363e-05	0.8949	0.8949	0.7307	0	0.913	0.891	.
8	29000059	rs11780819	T	A	2	4.368e-05	4.368e-05	1.1513	1.1513	0.9397	0	1.145	1.1527	DUSP4(-190.5kb)|HMBOX1(+89.82kb)|KIF13B(0)
5	88223420	rs190982	A	G	2	4.396e-05	4.396e-05	1.0992	1.0992	0.759	0	1.0831	1.103	MEF2C(+23.5kb)
18	39925896	rs415805	G	A	2	4.4e-05	4.4e-05	0.9071	0.9071	0.4657	0	0.8739	0.9145	LINC00907(0)
8	28543614	rs4732866	A	C	2	4.402e-05	4.402e-05	0.9008	0.9008	0.4536	0	0.8646	0.9089	EXTL3(-15.38kb)|FBXO16(+195.8kb)|FZD3(+111.8kb)|INTS9(-81.56kb)|MIR4288(+180.9kb)
18	39913363	rs34802524	A	G	2	4.421e-05	4.421e-05	0.9054	0.9054	0.4235	0	0.868	0.9136	LINC00907(0)
11	65473175	rs118088990	A	G	2	4.425e-05	4.425e-05	0.8063	0.8063	0.9453	0	0.8127	0.805	AP5B1(-68.19kb)|CCDC85B(-184.7kb)|CFL1(-149.1kb)|CTSW(-174.1kb)|EFEMP2(-160.7kb)|EHBP1L1(+113.1kb)|FAM89B(+131.5kb)|FIBP(-178kb)|FOSL1(-186.5kb)|KAT5(-6.297kb)|KCNK7(+109.7kb)|LTBP3(+147.5kb)|MALAT1(+199.2kb)|MAP3K11(+91.46kb)|MIR548AR(+190.3kb)|MIR4489(+56.45kb)|MIR4690(+69.34kb)|MUS81(-154.7kb)|OVOL1(-81.33kb)|PCNXL3(+68.26kb)|RELA(+42.73kb)|RNASEH2C(-11.97kb)|SCYL1(+167kb)|SIPA1(+54.78kb)|SNX3…
11	59862261	rs2847668	T	A	2	4.435e-05	0.005023	0.9117	0.9015	0.1781	44.85	0.8547	0.9249	MS4A2(0)|MS4A3(+23.67kb)|MS4A4A(-185.8kb)|MS4A6A(-76.82kb)|PLAC1L(+46.74kb)
15	86142632	rs79443949	T	C	2	4.442e-05	4.442e-05	1.2732	1.2732	0.3816	0	1.1246	1.301	AKAP13(0)|KLHL25(-159.9kb)|MIR1276(-171.1kb)
3	196812291	rs76509927	C	T	2	4.443e-05	4.443e-05	0.8123	0.8123	0.8731	0	0.7987	0.8155	DLG1(0)|MFI2(+55.6kb)|MFI2-AS1(+80.68kb)|NCBP2(+142.8kb)|NCBP2-AS2(+141.4kb)|PIGZ(+116.5kb)|SENP5(+150.7kb)
2	28836479	rs1997270	A	G	2	4.446e-05	4.446e-05	1.0948	1.0948	0.895	0	1.088	1.0963	FOSL2(+199kb)|PLB1(0)|PPP1CB(-138.1kb)|SPDYA(-197.2kb)
3	196847648	rs74496045	C	T	2	4.459e-05	4.459e-05	0.8071	0.8071	0.7765	0	0.7824	0.8129	DLG1(0)|DLG1-AS1(-177.5kb)|MFI2(+90.96kb)|MFI2-AS1(+116kb)|MIR4797(-173.1kb)|NCBP2(+178.2kb)|NCBP2-AS2(+176.8kb)|PIGZ(+151.9kb)|SENP5(+186.1kb)
16	58943970	rs12444410	T	C	2	4.462e-05	0.01981	1.2161	1.1908	0.1895	41.92	1.0673	1.2535	GOT2(+175.7kb)
2	305203	rs6721594	C	T	2	4.462e-05	4.462e-05	0.9096	0.9096	0.4107	0	0.8719	0.9175	ACP1(+26.92kb)|FAM150B(+16.9kb)|SH3YL1(+41.14kb)
16	77018901	rs117570994	G	T	2	4.466e-05	4.466e-05	1.5293	1.5293	0.6586	0	1.6778	1.4948	MIR4719(+116kb)
6	32572461	rs9270928	T	G	2	4.473e-05	4.473e-05	0.8492	0.8492	0.7626	0	0.8333	0.8558	BTNL2(+197.6kb)|HLA-DQA1(-32.72kb)|HLA-DQA2(-136.7kb)|HLA-DQB1(-54.78kb)|HLA-DQB2(-151.4kb)|HLA-DRA(+159.6kb)|HLA-DRB1(+14.85kb)|HLA-DRB5(+74.46kb)|HLA-DRB6(+44.68kb)
3	196997026	rs76196259	A	G	2	4.476e-05	4.476e-05	0.7985	0.7985	0.7664	0	0.7713	0.8047	DLG1(0)|DLG1-AS1(-28.09kb)|MIR4797(-23.72kb)
1	74251125	rs4147207	T	C	2	4.477e-05	4.477e-05	1.1049	1.1049	0.4386	0	1.1488	1.0948	.
15	27116314	rs7179685	C	T	2	4.482e-05	4.482e-05	1.1222	1.1222	0.5782	0	1.1668	1.1151	GABRA5(0)|GABRB3(+97.38kb)|GABRG3(-100.1kb)
16	77045350	rs143396630	T	C	2	4.488e-05	4.488e-05	1.6963	1.6963	0.8969	0	1.7421	1.6785	MIR4719(+142.4kb)|MON1B(-179.5kb)|SYCE1L(-188kb)
4	111478240	rs114901494	T	C	2	4.489e-05	0.1607	1.3366	1.2475	0.0803	67.3	1.0268	1.4173	ENPEP(0)|PITX2(-60.34kb)
11	85798020	rs631639	G	T	2	4.496e-05	4.496e-05	1.1027	1.1027	0.73	0	1.0831	1.1069	CCDC83(+167kb)|EED(-157.8kb)|PICALM(+17.1kb)
3	196826240	rs78359788	T	C	2	4.496e-05	4.496e-05	0.8065	0.8065	0.7198	0	0.7752	0.8138	DLG1(0)|DLG1-AS1(-198.9kb)|MFI2(+69.55kb)|MFI2-AS1(+94.62kb)|MIR4797(-194.5kb)|NCBP2(+156.8kb)|NCBP2-AS2(+155.4kb)|PIGZ(+130.5kb)|SENP5(+164.7kb)
18	39926899	rs407756	A	G	2	4.499e-05	4.499e-05	0.9072	0.9072	0.4658	0	0.874	0.9146	LINC00907(0)
18	39927831	rs444947	T	C	2	4.508e-05	4.508e-05	0.907	0.907	0.4637	0	0.8737	0.9145	LINC00907(0)
6	32574060	rs9270986	C	A	2	4.519e-05	4.519e-05	0.8534	0.8534	0.6822	0	0.8319	0.8619	BTNL2(+199.2kb)|HLA-DQA1(-31.12kb)|HLA-DQA2(-135.1kb)|HLA-DQB1(-53.18kb)|HLA-DQB2(-149.8kb)|HLA-DRA(+161.2kb)|HLA-DRB1(+16.45kb)|HLA-DRB5(+76.05kb)|HLA-DRB6(+46.28kb)
2	127789085	rs111906619	T	C	2	4.524e-05	4.524e-05	1.1872	1.1872	0.9309	0	1.1782	1.1893	BIN1(-16.51kb)|CYP27C1(-152.3kb)
11	85860305	rs9787874	A	G	2	4.53e-05	0.004665	1.0902	1.1014	0.1913	41.43	1.1597	1.0768	C11orf73(-152.9kb)|EED(-95.5kb)|PICALM(+79.38kb)
3	196811388	rs140266654	A	G	2	4.534e-05	4.534e-05	0.8124	0.8124	0.8776	0	0.7993	0.8155	DLG1(0)|MFI2(+54.7kb)|MFI2-AS1(+79.77kb)|NCBP2(+141.9kb)|NCBP2-AS2(+140.5kb)|PIGZ(+115.6kb)|SENP5(+149.8kb)
3	196811654	rs115130478	C	T	2	4.539e-05	4.539e-05	0.8125	0.8125	0.8649	0	0.798	0.8159	DLG1(0)|MFI2(+54.97kb)|MFI2-AS1(+80.04kb)|NCBP2(+142.2kb)|NCBP2-AS2(+140.8kb)|PIGZ(+115.9kb)|SENP5(+150.1kb)
3	196906722	rs114577544	G	A	2	4.544e-05	4.544e-05	0.8075	0.8075	0.8055	0	0.786	0.8125	DLG1(0)|DLG1-AS1(-118.4kb)|MFI2(+150kb)|MFI2-AS1(+175.1kb)|MIR4797(-114kb)
3	197019503	rs79723067	C	T	2	4.552e-05	4.552e-05	0.7979	0.7979	0.8053	0	0.7753	0.8031	DLG1(0)|DLG1-AS1(-5.614kb)|MIR4797(-1.245kb)
3	196991108	rs78290545	A	G	2	4.555e-05	4.555e-05	0.7988	0.7988	0.7581	0	0.7706	0.8052	DLG1(0)|DLG1-AS1(-34.01kb)|MIR4797(-29.64kb)
3	48644202	rs34591495	T	C	2	4.559e-05	4.559e-05	1.1459	1.1459	0.9775	0	1.1482	1.1454	ATRIP(+137.1kb)|CCDC51(+162.7kb)|CELSR3(-29.69kb)|COL7A1(+11.61kb)|IP6K2(-81.23kb)|MIR711(+27.79kb)|MIR4793(-37.42kb)|NCKIPSD(-67.07kb)|PFKFB4(+49.98kb)|PLXNB1(+172.7kb)|PRKAR2A(-143.9kb)|SHISA5(+101.9kb)|SLC26A6(-18.95kb)|TMA7(+158.7kb)|TMEM89(-14.07kb)|TREX1(+135.2kb)|UCN2(+43kb)|UQCRC1(0)
8	29019988	rs17455458	G	T	2	4.56e-05	0.05675	1.1665	1.1387	0.1432	53.33	1.0382	1.1975	DUSP4(-170.6kb)|HMBOX1(+109.7kb)|KIF13B(0)
3	197018330	rs79335037	A	T	2	4.566e-05	4.566e-05	0.7981	0.7981	0.8031	0	0.7752	0.8033	DLG1(0)|DLG1-AS1(-6.787kb)|MIR4797(-2.418kb)
3	196811948	rs113107572	T	C	2	4.567e-05	4.567e-05	0.8125	0.8125	0.8814	0	0.7998	0.8155	DLG1(0)|MFI2(+55.26kb)|MFI2-AS1(+80.33kb)|NCBP2(+142.5kb)|NCBP2-AS2(+141.1kb)|PIGZ(+116.2kb)|SENP5(+150.4kb)
3	196906320	rs116289728	A	G	2	4.585e-05	4.585e-05	0.8076	0.8076	0.8048	0	0.786	0.8126	DLG1(0)|DLG1-AS1(-118.8kb)|MFI2(+149.6kb)|MFI2-AS1(+174.7kb)|MIR4797(-114.4kb)
3	196906145	rs77459077	G	C	2	4.599e-05	4.599e-05	0.8076	0.8076	0.8085	0	0.7864	0.8125	DLG1(0)|DLG1-AS1(-119kb)|MFI2(+149.5kb)|MFI2-AS1(+174.5kb)|MIR4797(-114.6kb)
6	32580637	rs2395515	T	C	2	4.61e-05	4.61e-05	0.8541	0.8541	0.6452	0	0.8299	0.8636	HLA-DOB(-199.9kb)|HLA-DQA1(-24.54kb)|HLA-DQA2(-128.5kb)|HLA-DQB1(-46.6kb)|HLA-DQB2(-143.2kb)|HLA-DRA(+167.8kb)|HLA-DRB1(+23.02kb)|HLA-DRB5(+82.63kb)|HLA-DRB6(+52.86kb)
2	233233500	rs58994136	T	C	2	4.638e-05	4.638e-05	0.849	0.849	0.3752	0	0.7839	0.8626	ALPI(-87.33kb)|ALPP(-9.847kb)|ALPPL2(-38.05kb)|CHRND(-157.4kb)|CHRNG(-170.9kb)|DIS3L2(+24.82kb)|ECEL1(-111kb)|ECEL1P2(-16.96kb)|EIF4E2(-181.9kb)|MIR5001(-181.7kb)|PRSS56(-151.7kb)|TIGD1(-179.3kb)
16	78863998	rs61185547	C	T	2	4.658e-05	4.658e-05	1.1139	1.1139	0.4573	0	1.1605	1.1034	WWOX(0)
3	196893964	rs79225209	G	A	2	4.67e-05	4.67e-05	0.8077	0.8077	0.8012	0	0.7857	0.8128	DLG1(0)|DLG1-AS1(-131.2kb)|MFI2(+137.3kb)|MFI2-AS1(+162.3kb)|MIR4797(-126.8kb)|PIGZ(+198.2kb)
3	196828342	rs147993473	C	G	2	4.672e-05	4.672e-05	0.8071	0.8071	0.7337	0	0.7774	0.814	DLG1(0)|DLG1-AS1(-196.8kb)|MFI2(+71.66kb)|MFI2-AS1(+96.73kb)|MIR4797(-192.4kb)|NCBP2(+158.9kb)|NCBP2-AS2(+157.5kb)|PIGZ(+132.6kb)|SENP5(+166.8kb)
20	37211743	rs112818969	A	G	2	4.681e-05	4.681e-05	1.2736	1.2736	0.695	0	1.339	1.2599	ACTR5(-165.4kb)|ADIG(0)|ARHGAP40(-18.83kb)|RALGAPB(+4.239kb)|SLC32A1(-141.4kb)|SNHG11(+132.2kb)|SNHG17(+147.7kb)|SNORA39(+134.9kb)|SNORA60(+133.6kb)|SNORA71A(+155.7kb)|SNORA71B(+157.8kb)|SNORA71C(+153.3kb)|SNORA71D(+149.1kb)
3	196863243	rs75637757	G	A	2	4.687e-05	4.687e-05	0.8076	0.8076	0.7918	0	0.7846	0.813	DLG1(0)|DLG1-AS1(-161.9kb)|MFI2(+106.6kb)|MFI2-AS1(+131.6kb)|MIR4797(-157.5kb)|NCBP2(+193.8kb)|NCBP2-AS2(+192.4kb)|PIGZ(+167.5kb)
4	125772688	rs62323266	G	T	2	4.691e-05	4.691e-05	0.8383	0.8383	0.7206	0	0.8109	0.8444	ANKRD50(+138.8kb)
3	196829338	rs75936625	G	A	2	4.696e-05	4.696e-05	0.8073	0.8073	0.7448	0	0.7789	0.8139	DLG1(0)|DLG1-AS1(-195.8kb)|MFI2(+72.65kb)|MFI2-AS1(+97.72kb)|MIR4797(-191.4kb)|NCBP2(+159.9kb)|NCBP2-AS2(+158.5kb)|PIGZ(+133.6kb)|SENP5(+167.8kb)
18	39931539	rs393841	T	C	2	4.702e-05	4.702e-05	0.9075	0.9075	0.4466	0	0.8728	0.9152	LINC00907(0)
3	196920701	rs78055009	C	T	2	4.706e-05	4.706e-05	0.8008	0.8008	0.7175	0	0.768	0.8083	DLG1(0)|DLG1-AS1(-104.4kb)|MFI2(+164kb)|MFI2-AS1(+189.1kb)|MIR4797(-100kb)
8	42450170	rs7004796	G	T	2	4.707e-05	4.707e-05	1.0938	1.0938	0.7281	0	1.0762	1.0978	CHRNA6(-157.6kb)|CHRNB3(-102.4kb)|SLC20A2(+52.81kb)|SMIM19(+42.03kb)|VDAC3(+186.7kb)
11	48244160	rs78639629	A	G	2	4.715e-05	4.715e-05	0.7535	0.7535	0.67	0	0.7131	0.7656	OR4B1(+4.869kb)|OR4C3(-102.3kb)|OR4C45(-122.7kb)|OR4S1(-83.61kb)|OR4X1(-41.25kb)|OR4X2(-22.5kb)|PTPRJ(+51.77kb)
5	129560749	rs78449063	A	G	2	4.718e-05	4.718e-05	1.4013	1.4013	0.661	0	1.3003	1.4263	CHSY3(+38.42kb)
11	59996968	rs610352	C	G	2	4.726e-05	0.0001737	1.0948	1.0966	0.2954	8.68	1.1501	1.0828	MS4A2(+131kb)|MS4A3(+158.4kb)|MS4A4A(-51.04kb)|MS4A6A(+44.83kb)|MS4A6E(-105.4kb)|MS4A7(-149kb)|MS4A14(-166.5kb)|PLAC1L(+181.5kb)
6	32580411	rs9271256	G	A	2	4.728e-05	4.728e-05	0.8542	0.8542	0.6392	0	0.8296	0.8639	HLA-DQA1(-24.77kb)|HLA-DQA2(-128.8kb)|HLA-DQB1(-46.83kb)|HLA-DQB2(-143.5kb)|HLA-DRA(+167.6kb)|HLA-DRB1(+22.8kb)|HLA-DRB5(+82.4kb)|HLA-DRB6(+52.63kb)
3	196899127	rs77636454	C	T	2	4.747e-05	4.747e-05	0.8079	0.8079	0.7998	0	0.7858	0.8131	DLG1(0)|DLG1-AS1(-126kb)|MFI2(+142.4kb)|MFI2-AS1(+167.5kb)|MIR4797(-121.6kb)
3	196806622	rs79487085	C	T	2	4.753e-05	4.753e-05	0.8125	0.8125	0.8531	0	0.7967	0.8162	DLG1(0)|MFI2(+49.94kb)|MFI2-AS1(+75.01kb)|NCBP2(+137.2kb)|NCBP2-AS2(+135.7kb)|PIGZ(+110.9kb)|SENP5(+145kb)
6	32581333	rs3129749	A	G	2	4.765e-05	4.765e-05	0.8544	0.8544	0.6404	0	0.8298	0.864	HLA-DOB(-199.2kb)|HLA-DQA1(-23.85kb)|HLA-DQA2(-127.8kb)|HLA-DQB1(-45.91kb)|HLA-DQB2(-142.5kb)|HLA-DRA(+168.5kb)|HLA-DRB1(+23.72kb)|HLA-DRB5(+83.33kb)|HLA-DRB6(+53.55kb)
3	196892822	rs77578222	G	C	2	4.766e-05	4.766e-05	0.8079	0.8079	0.7984	0	0.7856	0.8131	DLG1(0)|DLG1-AS1(-132.3kb)|MFI2(+136.1kb)|MFI2-AS1(+161.2kb)|MIR4797(-127.9kb)|PIGZ(+197.1kb)
10	8027714	rs11255471	T	C	2	4.775e-05	0.01741	1.0962	1.1172	0.0975	63.59	1.1847	1.0766	ATP5C1(+178kb)|GATA3(-68.95kb)|GATA3-AS1(-64.7kb)|KIN(+197.7kb)|TAF3(0)
8	28542359	rs2856801	C	A	2	4.791e-05	4.791e-05	0.9013	0.9013	0.4403	0	0.8642	0.9097	EXTL3(-16.63kb)|FBXO16(+194.5kb)|FZD3(+110.6kb)|INTS9(-82.82kb)|MIR4288(+179.7kb)
3	196925782	rs75988322	T	C	2	4.794e-05	4.794e-05	0.8083	0.8083	0.8035	0	0.7865	0.8133	DLG1(0)|DLG1-AS1(-99.34kb)|MFI2(+169.1kb)|MFI2-AS1(+194.2kb)|MIR4797(-94.97kb)
3	196854031	rs144163399	T	C	2	4.795e-05	4.795e-05	0.8079	0.8079	0.7881	0	0.7845	0.8134	DLG1(0)|DLG1-AS1(-171.1kb)|MFI2(+97.34kb)|MFI2-AS1(+122.4kb)|MIR4797(-166.7kb)|NCBP2(+184.6kb)|NCBP2-AS2(+183.1kb)|PIGZ(+158.3kb)|SENP5(+192.4kb)
4	129470207	rs76611387	T	C	2	4.796e-05	4.796e-05	1.1386	1.1386	0.343	0	1.2096	1.1215	.
11	59857581	rs2583476	A	G	2	4.799e-05	0.006636	0.9117	0.9003	0.1644	48.27	0.8526	0.9254	MS4A2(0)|MS4A3(+18.99kb)|MS4A4A(-190.4kb)|MS4A6A(-81.5kb)|PLAC1L(+42.06kb)
6	32576764	rs9271116	G	T	2	4.804e-05	4.804e-05	0.8477	0.8477	0.7301	0	0.8667	0.8402	HLA-DQA1(-28.42kb)|HLA-DQA2(-132.4kb)|HLA-DQB1(-50.48kb)|HLA-DQB2(-147.1kb)|HLA-DRA(+163.9kb)|HLA-DRB1(+19.15kb)|HLA-DRB5(+78.76kb)|HLA-DRB6(+48.98kb)
3	196926849	rs77554489	T	C	2	4.805e-05	4.805e-05	0.8081	0.8081	0.8057	0	0.7866	0.8131	DLG1(0)|DLG1-AS1(-98.27kb)|MFI2(+170.2kb)|MFI2-AS1(+195.2kb)|MIR4797(-93.9kb)
3	196927022	rs74836167	A	G	2	4.808e-05	4.808e-05	0.8081	0.8081	0.8057	0	0.7866	0.8131	DLG1(0)|DLG1-AS1(-98.1kb)|MFI2(+170.3kb)|MFI2-AS1(+195.4kb)|MIR4797(-93.73kb)
3	196837724	rs78440206	C	T	2	4.818e-05	4.818e-05	0.808	0.808	0.7831	0	0.784	0.8136	DLG1(0)|DLG1-AS1(-187.4kb)|MFI2(+81.04kb)|MFI2-AS1(+106.1kb)|MIR4797(-183kb)|NCBP2(+168.3kb)|NCBP2-AS2(+166.8kb)|PIGZ(+142kb)|SENP5(+176.1kb)
19	1048116	rs76348507	A	G	2	4.82e-05	8.322e-05	1.2132	1.2144	0.3023	6.02	1.2983	1.1709	ABCA7(0)|ARID3A(+75.31kb)|ATP5D(-193.6kb)|C19orf26(-181.8kb)|CFD(+184.5kb)|CNN2(+9.052kb)|ELANE(+191.9kb)|GPX4(-55.82kb)|GRIN3B(+38.39kb)|HMHA1(-17.8kb)|KISS1R(+127.1kb)|MED16(+154.9kb)|POLR2E(-38.46kb)|PRTN3(+199.9kb)|R3HDM4(+134.9kb)|SBNO2(-59.52kb)|STK11(-157.7kb)|TMEM259(+26.98kb)|WDR18(+53.55kb)
16	29150344	rs1641906	T	C	2	4.826e-05	4.826e-05	0.8853	0.8853	0.6271	0	0.8591	0.8916	CD19(+199.7kb)|LAT(+148.2kb)|MIR4517(+180.4kb)|NFATC2IP(+172.6kb)|RRN3P2(+22.31kb)|SNX29P2(-163.3kb)|SPNS1(+154.5kb)
3	196838982	rs114060629	A	G	2	4.828e-05	4.828e-05	0.8079	0.8079	0.7816	0	0.7838	0.8136	DLG1(0)|DLG1-AS1(-186.1kb)|MFI2(+82.3kb)|MFI2-AS1(+107.4kb)|MIR4797(-181.8kb)|NCBP2(+169.5kb)|NCBP2-AS2(+168.1kb)|PIGZ(+143.2kb)|SENP5(+177.4kb)
6	32583653	rs28383224	G	A	2	4.829e-05	0.01938	0.8881	0.8972	0.1387	54.38	0.9487	0.8633	HLA-DOB(-196.9kb)|HLA-DQA1(-21.53kb)|HLA-DQA2(-125.5kb)|HLA-DQB1(-43.59kb)|HLA-DQB2(-140.2kb)|HLA-DRA(+170.8kb)|HLA-DRB1(+26.04kb)|HLA-DRB5(+85.65kb)|HLA-DRB6(+55.87kb)
6	39098815	rs228803	A	G	2	4.829e-05	4.829e-05	0.857	0.857	0.6415	0	0.891	0.8501	DNAH8(+100.2kb)|GLP1R(+43.3kb)|KCNK5(-57.93kb)|KCNK16(-183.7kb)|KCNK17(-168kb)|LOC100131047(+177.9kb)|SAYSD1(+15.95kb)
3	196838971	rs76199142	A	G	2	4.836e-05	4.836e-05	0.808	0.808	0.7831	0	0.784	0.8136	DLG1(0)|DLG1-AS1(-186.1kb)|MFI2(+82.28kb)|MFI2-AS1(+107.4kb)|MIR4797(-181.8kb)|NCBP2(+169.5kb)|NCBP2-AS2(+168.1kb)|PIGZ(+143.2kb)|SENP5(+177.4kb)
11	59942081	rs634475	A	G	2	4.837e-05	4.837e-05	1.0955	1.0955	0.3957	0	1.1406	1.0857	MS4A2(+76.14kb)|MS4A3(+103.5kb)|MS4A4A(-105.9kb)|MS4A6A(0)|MS4A6E(-160.3kb)|PLAC1L(+126.6kb)
6	32588877	rs9271481	G	A	2	4.854e-05	4.854e-05	0.846	0.846	0.5259	0	0.8096	0.8592	HLA-DOB(-191.7kb)|HLA-DQA1(-16.3kb)|HLA-DQA2(-120.3kb)|HLA-DQB1(-38.36kb)|HLA-DQB2(-135kb)|HLA-DRA(+176.1kb)|HLA-DRB1(+31.26kb)|HLA-DRB5(+90.87kb)|HLA-DRB6(+61.1kb)
3	196945740	rs77590026	T	C	2	4.856e-05	4.856e-05	0.8085	0.8085	0.8077	0	0.7872	0.8134	DLG1(0)|DLG1-AS1(-79.38kb)|MFI2(+189.1kb)|MIR4797(-75.01kb)
14	92359022	rs2244643	C	A	2	4.864e-05	7.792e-05	1.1004	1.0999	0.3126	1.94	1.045	1.1125	ATXN3(-165.9kb)|CATSPERB(+160.6kb)|FBLN5(0)|TC2N(+25.14kb)|TRIP11(-75.22kb)
20	55024101	rs113221226	A	G	2	4.874e-05	4.874e-05	0.8457	0.8457	0.394	0	0.9074	0.831	AURKA(+56.75kb)|CASS4(0)|CSTF1(+44.52kb)|FAM209A(-75.68kb)|FAM209B(-84.2kb)|FAM210B(+80.38kb)|GCNT7(-42.45kb)|MC3R(+199.2kb)|RTFDC1(-19.54kb)|TFAP2C(-180.3kb)
3	196845206	rs76368566	C	T	2	4.894e-05	4.894e-05	0.8081	0.8081	0.7839	0	0.7842	0.8137	DLG1(0)|DLG1-AS1(-179.9kb)|MFI2(+88.52kb)|MFI2-AS1(+113.6kb)|MIR4797(-175.5kb)|NCBP2(+175.7kb)|NCBP2-AS2(+174.3kb)|PIGZ(+149.5kb)|SENP5(+183.6kb)
16	80378003	rs2626643	G	T	2	4.896e-05	4.896e-05	0.8949	0.8949	0.3746	0	0.852	0.9057	DYNLRB2(-196.8kb)
18	52596683	rs2226879	T	G	2	4.896e-05	0.0102	0.8894	0.8722	0.1443	53.09	0.8106	0.9066	CCDC68(0)|RAB27B(+33.94kb)
6	15508110	rs2072824	A	G	2	4.899e-05	4.899e-05	0.8939	0.8939	0.7729	0	0.9091	0.8905	DTNBP1(-14.92kb)|JARID2(0)
3	196847003	rs115876966	C	T	2	4.902e-05	4.902e-05	0.8081	0.8081	0.7846	0	0.7843	0.8137	DLG1(0)|DLG1-AS1(-178.1kb)|MFI2(+90.32kb)|MFI2-AS1(+115.4kb)|MIR4797(-173.7kb)|NCBP2(+177.5kb)|NCBP2-AS2(+176.1kb)|PIGZ(+151.3kb)|SENP5(+185.4kb)
3	196920284	rs75488852	C	A	2	4.912e-05	4.912e-05	0.801	0.801	0.7123	0	0.7676	0.8087	DLG1(0)|DLG1-AS1(-104.8kb)|MFI2(+163.6kb)|MFI2-AS1(+188.7kb)|MIR4797(-100.5kb)
8	121912870	rs75336481	T	G	2	4.912e-05	4.912e-05	0.7782	0.7782	0.3695	0	0.8727	0.7576	SNTB1(+88.56kb)
6	32578885	rs9271203	C	T	2	4.913e-05	4.913e-05	0.8545	0.8545	0.6591	0	0.8313	0.8636	HLA-DQA1(-26.3kb)|HLA-DQA2(-130.3kb)|HLA-DQB1(-48.36kb)|HLA-DQB2(-145kb)|HLA-DRA(+166.1kb)|HLA-DRB1(+21.27kb)|HLA-DRB5(+80.88kb)|HLA-DRB6(+51.11kb)
3	196990086	rs75158635	G	C	2	4.914e-05	4.914e-05	0.7993	0.7993	0.756	0	0.7708	0.8058	DLG1(0)|DLG1-AS1(-35.03kb)|MIR4797(-30.66kb)
1	55521313	rs472495	T	G	2	4.916e-05	4.916e-05	0.9075	0.9075	0.6812	0	0.8887	0.9117	BSND(+46.85kb)|DHCR24(+168.4kb)|LOC100507634(-159.8kb)|MIR4422(-170kb)|PCSK9(0)|TMEM61(+63.35kb)|USP24(-10.72kb)
8	28601554	rs4732873	C	A	2	4.924e-05	4.924e-05	0.9012	0.9012	0.5089	0	0.8688	0.9083	EXTL3(0)|FZD3(+169.8kb)|HMBOX1(-146.4kb)|INTS9(-23.62kb)
3	196862964	rs76610213	C	G	2	4.933e-05	4.933e-05	0.8082	0.8082	0.7869	0	0.7846	0.8137	DLG1(0)|DLG1-AS1(-162.2kb)|MFI2(+106.3kb)|MFI2-AS1(+131.3kb)|MIR4797(-157.8kb)|NCBP2(+193.5kb)|NCBP2-AS2(+192.1kb)|PIGZ(+167.2kb)
3	196867758	rs114466825	C	T	2	4.934e-05	4.934e-05	0.8082	0.8082	0.7883	0	0.7848	0.8137	DLG1(0)|DLG1-AS1(-157.4kb)|MFI2(+111.1kb)|MFI2-AS1(+136.1kb)|MIR4797(-153kb)|NCBP2(+198.3kb)|NCBP2-AS2(+196.9kb)|PIGZ(+172kb)
3	102405478	rs55761622	T	C	2	4.94e-05	4.94e-05	0.8275	0.8275	0.7932	0	0.8048	0.832	.
3	196860875	rs79245339	A	C	2	4.95e-05	4.95e-05	0.8082	0.8082	0.7869	0	0.7846	0.8137	DLG1(0)|DLG1-AS1(-164.2kb)|MFI2(+104.2kb)|MFI2-AS1(+129.3kb)|MIR4797(-159.9kb)|NCBP2(+191.4kb)|NCBP2-AS2(+190kb)|PIGZ(+165.1kb)|SENP5(+199.3kb)
12	121802251	rs116964268	C	G	2	4.957e-05	0.0822	1.3672	1.3047	0.0717	69.18	1.0949	1.4911	ANAPC5(+10.24kb)|CAMKK2(+66.14kb)|KDM2B(-64.65kb)|P2RX4(+130.3kb)|P2RX7(+177.9kb)|RNF34(-35.63kb)
6	32429327	rs9268849	T	C	2	4.971e-05	4.971e-05	0.8892	0.8892	0.5023	0	0.9191	0.8791	BTNL2(+54.43kb)|C6orf10(+89.67kb)|HCG23(+67.86kb)|HLA-DQA1(-175.9kb)|HLA-DQB1(-197.9kb)|HLA-DRA(+16.5kb)|HLA-DRB1(-117.2kb)|HLA-DRB5(-55.83kb)|HLA-DRB6(-91.16kb)
19	1048051	rs78410552	T	G	2	4.977e-05	0.0001018	1.2125	1.214	0.2973	7.96	1.2983	1.1698	ABCA7(0)|ARID3A(+75.25kb)|ATP5D(-193.7kb)|C19orf26(-181.9kb)|CFD(+184.4kb)|CNN2(+8.987kb)|ELANE(+191.8kb)|GPX4(-55.88kb)|GRIN3B(+38.33kb)|HMHA1(-17.87kb)|KISS1R(+127kb)|MED16(+154.8kb)|POLR2E(-38.53kb)|PRTN3(+199.9kb)|R3HDM4(+134.8kb)|SBNO2(-59.58kb)|STK11(-157.7kb)|TMEM259(+26.91kb)|WDR18(+53.48kb)
9	109783890	rs117888980	G	T	2	4.977e-05	4.977e-05	1.3874	1.3874	0.8973	0	1.3617	1.3955	MIR548Q(0)|ZNF462(+10.09kb)
16	5546687	rs12925917	T	G	2	5.007e-05	5.007e-05	1.17	1.17	0.8197	0	1.1488	1.175	.
17	15398398	rs12947500	G	T	2	5.008e-05	5.008e-05	1.1329	1.1329	0.7168	0	1.1613	1.1272	CDRT1(-93.58kb)|CDRT4(+27.47kb)|TEKT3(+153.4kb)|TRIM16(-132.9kb)|TVP23C(-7.179kb)|TVP23C-CDRT4(0)
18	39929412	rs453650	A	G	2	5.01e-05	5.01e-05	0.9077	0.9077	0.4571	0	0.8739	0.9153	LINC00907(0)
3	196834372	rs141842157	A	C	2	5.011e-05	5.011e-05	0.8082	0.8082	0.7803	0	0.7839	0.8139	DLG1(0)|DLG1-AS1(-190.7kb)|MFI2(+77.68kb)|MFI2-AS1(+102.8kb)|MIR4797(-186.4kb)|NCBP2(+164.9kb)|NCBP2-AS2(+163.5kb)|PIGZ(+138.6kb)|SENP5(+172.8kb)
11	60005268	rs611267	G	A	2	5.012e-05	5.934e-05	1.0951	1.0953	0.3148	1.03	1.1481	1.0834	MS4A2(+139.3kb)|MS4A3(+166.7kb)|MS4A4A(-42.74kb)|MS4A5(-191.8kb)|MS4A6A(+53.13kb)|MS4A6E(-97.09kb)|MS4A7(-140.7kb)|MS4A14(-158.2kb)|PLAC1L(+189.8kb)
6	32428715	rs9268838	A	G	2	5.015e-05	5.015e-05	0.8854	0.8854	0.4317	0	0.9221	0.8733	BTNL2(+53.82kb)|C6orf10(+89.06kb)|HCG23(+67.25kb)|HLA-DQA1(-176.5kb)|HLA-DQB1(-198.5kb)|HLA-DRA(+15.89kb)|HLA-DRB1(-117.8kb)|HLA-DRB5(-56.44kb)|HLA-DRB6(-91.77kb)
6	32578449	rs9271191	C	T	2	5.018e-05	5.018e-05	0.8546	0.8546	0.6555	0	0.8311	0.8638	HLA-DQA1(-26.73kb)|HLA-DQA2(-130.7kb)|HLA-DQB1(-48.79kb)|HLA-DQB2(-145.4kb)|HLA-DRA(+165.6kb)|HLA-DRB1(+20.84kb)|HLA-DRB5(+80.44kb)|HLA-DRB6(+50.67kb)
2	59771479	rs2674079	C	A	2	5.02e-05	5.02e-05	0.9085	0.9085	0.5066	0	0.8789	0.9153	.
8	41723550	rs13282541	T	C	2	5.023e-05	5.023e-05	1.1113	1.1113	0.3761	0	1.1639	1.0986	ANK1(0)|KAT6A(-63.45kb)
15	48966363	rs1995620	A	G	2	5.026e-05	5.026e-05	1.1093	1.1093	0.9672	0	1.1069	1.1099	CEP152(-63.77kb)|FBN1(+28.38kb)|SHC4(-149.6kb)
18	39929493	rs447379	T	C	2	5.03e-05	5.03e-05	0.9078	0.9078	0.4549	0	0.8738	0.9154	LINC00907(0)
2	197894851	rs148232241	C	T	2	5.03e-05	5.03e-05	1.4284	1.4284	0.8294	0	1.4836	1.4149	ANKRD44(0)|PGAP1(+103.4kb)
4	12243005	rs147918119	G	A	2	5.032e-05	5.032e-05	0.7066	0.7066	0.9724	0	0.7107	0.7055	.
18	31017627	rs72949728	T	G	2	5.035e-05	5.035e-05	1.1287	1.1287	0.6973	0	1.1558	1.1223	ASXL3(-140.9kb)|CCDC178(0)
18	52600348	rs8089866	C	A	2	5.036e-05	0.01061	0.8896	0.8722	0.143	53.38	0.8103	0.9068	CCDC68(0)|RAB27B(+37.6kb)
11	65458994	rs4636677	T	G	2	5.037e-05	5.037e-05	0.8078	0.8078	0.9545	0	0.8025	0.8089	AP5B1(-82.37kb)|CCDC85B(-198.9kb)|CFL1(-163.3kb)|CTSW(-188.3kb)|EFEMP2(-174.9kb)|EHBP1L1(+98.88kb)|FAM89B(+117.3kb)|FIBP(-192.2kb)|KAT5(-20.48kb)|KCNK7(+95.53kb)|LTBP3(+133.3kb)|MALAT1(+185.1kb)|MAP3K11(+77.27kb)|MIR548AR(+176.2kb)|MIR4489(+42.27kb)|MIR4690(+55.15kb)|MUS81(-168.9kb)|OVOL1(-95.51kb)|PCNXL3(+54.08kb)|RELA(+28.55kb)|RNASEH2C(-26.15kb)|SCYL1(+152.8kb)|SIPA1(+40.6kb)|SNX32(-142.4kb)|S…
2	28841049	rs1881255	A	G	2	5.054e-05	5.054e-05	1.094	1.094	0.7807	0	1.0797	1.0972	PLB1(0)|PPP1CB(-133.6kb)|SPDYA(-192.6kb)
18	52600298	rs8094036	C	T	2	5.07e-05	0.01055	0.8896	0.8722	0.1435	53.27	0.8104	0.9068	CCDC68(0)|RAB27B(+37.55kb)
3	196818552	rs78217285	T	C	2	5.07e-05	5.07e-05	0.7998	0.7998	0.5439	0	0.7449	0.8125	DLG1(0)|MFI2(+61.86kb)|MFI2-AS1(+86.94kb)|NCBP2(+149.1kb)|NCBP2-AS2(+147.7kb)|PIGZ(+122.8kb)|SENP5(+157kb)
18	31022019	rs72949737	C	G	2	5.074e-05	5.074e-05	1.1262	1.1262	0.7352	0	1.1492	1.1207	ASXL3(-136.5kb)|CCDC178(+1.334kb)
8	42448188	rs10958723	C	T	2	5.077e-05	5.077e-05	1.0935	1.0935	0.6918	0	1.0734	1.098	CHRNA6(-159.6kb)|CHRNB3(-104.4kb)|SLC20A2(+50.83kb)|SMIM19(+40.05kb)|VDAC3(+184.7kb)
2	127862653	rs744368	G	T	2	5.085e-05	5.085e-05	1.1157	1.1157	0.536	0	1.0778	1.1248	BIN1(0)|CYP27C1(-78.76kb)|ERCC3(-152.2kb)|MAP3K2(-193.6kb)
18	31021285	rs74655546	C	A	2	5.097e-05	5.097e-05	1.1262	1.1262	0.8187	0	1.1418	1.1225	ASXL3(-137.3kb)|CCDC178(+0.6kb)
2	11862774	rs62113263	G	A	2	5.099e-05	0.205	1.1578	1.1135	0.0676	70.06	1.0044	1.194	GREB1(+79.86kb)|LPIN1(0)|MIR4262(-114.3kb)|MIR4429(+182kb)|NTSR2(+52.44kb)
3	196836814	rs60142347	G	C	2	5.099e-05	5.099e-05	0.8085	0.8085	0.7789	0	0.784	0.8142	DLG1(0)|DLG1-AS1(-188.3kb)|MFI2(+80.13kb)|MFI2-AS1(+105.2kb)|MIR4797(-183.9kb)|NCBP2(+167.4kb)|NCBP2-AS2(+165.9kb)|PIGZ(+141.1kb)|SENP5(+175.2kb)
3	156849811	rs6804404	T	C	2	5.109e-05	5.109e-05	1.158	1.158	0.5369	0	1.1038	1.1701	CCNL1(-15.77kb)|LEKR1(+85.89kb)|LINC00880(+9.02kb)|LINC00881(+30.89kb)|VEPH1(-127.7kb)
11	59942757	rs662196	T	C	2	5.111e-05	5.111e-05	1.0952	1.0952	0.4023	0	1.1396	1.0855	MS4A2(+76.82kb)|MS4A3(+104.2kb)|MS4A4A(-105.3kb)|MS4A6A(0)|MS4A6E(-159.6kb)|PLAC1L(+127.2kb)
3	196788021	rs75749909	C	T	2	5.115e-05	5.115e-05	0.7972	0.7972	0.4185	0	0.723	0.8141	DLG1(0)|MFI2(+31.33kb)|MFI2-AS1(+56.41kb)|NCBP2(+118.6kb)|NCBP2-AS2(+117.1kb)|PIGZ(+92.28kb)|SENP5(+126.4kb)
19	1048021	rs73505217	G	A	2	5.119e-05	0.0001427	1.2116	1.214	0.2878	11.5	1.2991	1.1683	ABCA7(0)|ARID3A(+75.22kb)|ATP5D(-193.7kb)|C19orf26(-181.9kb)|CFD(+184.4kb)|CNN2(+8.957kb)|ELANE(+191.8kb)|GPX4(-55.91kb)|GRIN3B(+38.3kb)|HMHA1(-17.9kb)|KISS1R(+127kb)|MED16(+154.8kb)|POLR2E(-38.56kb)|PRTN3(+199.8kb)|R3HDM4(+134.8kb)|SBNO2(-59.61kb)|STK11(-157.8kb)|TMEM259(+26.88kb)|WDR18(+53.45kb)
8	139681417	rs72727892	T	C	2	5.142e-05	0.04627	1.4247	1.3552	0.143	53.38	1.107	1.5204	COL22A1(0)|FAM135B(+172.4kb)
2	233243586	rs1130335	T	C	2	5.156e-05	0.007436	0.8475	0.8275	0.1735	46	0.7456	0.8682	ALPI(-77.25kb)|ALPP(0)|ALPPL2(-27.96kb)|CHRND(-147.3kb)|CHRNG(-160.8kb)|DIS3L2(+34.91kb)|ECEL1(-101kb)|ECEL1P2(-6.873kb)|EIF4E2(-171.8kb)|MIR5001(-171.6kb)|PRSS56(-141.6kb)|TIGD1(-169.2kb)
6	32577385	rs9271147	C	T	2	5.158e-05	5.158e-05	0.8487	0.8487	0.6885	0	0.827	0.8574	HLA-DQA1(-27.8kb)|HLA-DQA2(-131.8kb)|HLA-DQB1(-49.86kb)|HLA-DQB2(-146.5kb)|HLA-DRA(+164.6kb)|HLA-DRB1(+19.77kb)|HLA-DRB5(+79.38kb)|HLA-DRB6(+49.61kb)
5	88215594	rs304132	G	A	2	5.16e-05	5.16e-05	1.0966	1.0966	0.774	0	1.0819	1.1001	MEF2C(+15.67kb)
6	32589842	rs9271525	A	G	2	5.171e-05	5.171e-05	0.8552	0.8552	0.6041	0	0.8278	0.8658	HLA-DOB(-190.7kb)|HLA-DQA1(-15.34kb)|HLA-DQA2(-119.3kb)|HLA-DQB1(-37.4kb)|HLA-DQB2(-134kb)|HLA-DRA(+177kb)|HLA-DRB1(+32.23kb)|HLA-DRB5(+91.84kb)|HLA-DRB6(+62.06kb)|TAP2(-199.8kb)
15	101649801	rs72633250	A	C	2	5.192e-05	5.192e-05	0.8958	0.8958	0.9084	0	0.9007	0.8942	ALDH1A3(+193kb)|CHSY1(-66.13kb)|LOC100507472(-197.7kb)|LRRK1(+39.48kb)|PCSK6(-194.3kb)|SNRPA1(-171.9kb)|VIMP(-161.4kb)
5	14531186	rs56827346	T	C	2	5.21e-05	5.21e-05	0.9084	0.9084	0.3218	0	0.864	0.9185	ANKH(-173.7kb)|FAM105A(-50.7kb)|FAM105B(-133.6kb)|LOC100130744(-181.6kb)|TRIO(+21.73kb)
18	39910592	rs8096564	T	G	2	5.212e-05	5.212e-05	0.906	0.906	0.4121	0	0.8675	0.9144	LINC00907(0)
1	179789319	rs111750882	A	G	2	5.216e-05	0.182	1.2371	1.1724	0.0785	67.7	1.0116	1.2909	CEP350(-134.6kb)|FAM163A(+3.986kb)|TDRD5(+128.9kb)|TOR1AIP1(-61.86kb)|TOR1AIP2(-19.78kb)
18	31018973	rs72949730	C	T	2	5.217e-05	5.217e-05	1.1261	1.1261	0.7767	0	1.1454	1.1215	ASXL3(-139.6kb)|CCDC178(0)
3	196835488	rs77892971	C	T	2	5.218e-05	5.218e-05	0.8089	0.8089	0.8872	0	0.7965	0.8118	DLG1(0)|DLG1-AS1(-189.6kb)|MFI2(+78.8kb)|MFI2-AS1(+103.9kb)|MIR4797(-185.3kb)|NCBP2(+166kb)|NCBP2-AS2(+164.6kb)|PIGZ(+139.7kb)|SENP5(+173.9kb)
5	94065205	rs10061737	C	T	2	5.222e-05	5.222e-05	1.1034	1.1034	0.4662	0	1.0626	1.1126	ANKRD32(+33.63kb)|KIAA0825(+110.9kb)|MCTP1(0)
9	104734897	rs76171521	A	G	2	5.225e-05	5.225e-05	1.2656	1.2656	0.3561	0	1.4015	1.2303	.
8	42442238	rs2974301	G	A	2	5.233e-05	5.233e-05	1.0934	1.0934	0.6364	0	1.0695	1.0988	CHRNA6(-165.5kb)|CHRNB3(-110.3kb)|SLC20A2(+44.88kb)|SMIM19(+34.1kb)|VDAC3(+178.8kb)
11	85718231	rs602222	T	G	2	5.235e-05	5.235e-05	1.0981	1.0981	0.9714	0	1.1001	1.0977	CCDC83(+87.18kb)|PICALM(0)|SYTL2(+196.1kb)
3	196941316	rs180959405	T	C	2	5.24e-05	5.24e-05	0.8092	0.8092	0.7979	0	0.7868	0.8144	DLG1(0)|DLG1-AS1(-83.8kb)|MFI2(+184.6kb)|MIR4797(-79.43kb)
21	27651254	rs2830160	A	G	2	5.249e-05	5.249e-05	0.8755	0.8755	0.9769	0	0.8773	0.8751	APP(+107.8kb)|CYYR1(-187.3kb)
6	32581515	rs3129750	A	G	2	5.251e-05	5.251e-05	0.8548	0.8548	0.6399	0	0.8302	0.8645	HLA-DOB(-199kb)|HLA-DQA1(-23.67kb)|HLA-DQA2(-127.6kb)|HLA-DQB1(-45.72kb)|HLA-DQB2(-142.4kb)|HLA-DRA(+168.7kb)|HLA-DRB1(+23.9kb)|HLA-DRB5(+83.51kb)|HLA-DRB6(+53.74kb)
16	80377275	rs2679320	C	T	2	5.252e-05	5.252e-05	0.8953	0.8953	0.3748	0	0.8524	0.9061	DYNLRB2(-197.6kb)
19	45416178	rs483082	T	G	2	5.255e-05	0.003652	1.3519	1.3947	0.2048	37.81	1.6641	1.295	APOC1(-1.742kb)|APOC1P1(-13.88kb)|APOC2(-33.06kb)|APOC4(-29.32kb)|APOC4-APOC2(-29.32kb)|APOE(+3.528kb)|BCAM(+91.5kb)|BCL3(+152.9kb)|CBLC(+112.3kb)|CLASRP(-126.1kb)|CLPTM1(-41.66kb)|GEMIN7(-166.3kb)|PPP1R37(-180.3kb)|PVRL2(+23.69kb)|RELB(-88.53kb)|TOMM40(+9.232kb)|ZNF296(-158.6kb)
3	196836901	rs56924278	G	A	2	5.266e-05	5.266e-05	0.8088	0.8088	0.7761	0	0.784	0.8146	DLG1(0)|DLG1-AS1(-188.2kb)|MFI2(+80.21kb)|MFI2-AS1(+105.3kb)|MIR4797(-183.8kb)|NCBP2(+167.4kb)|NCBP2-AS2(+166kb)|PIGZ(+141.2kb)|SENP5(+175.3kb)
8	28598287	rs4732870	A	C	2	5.266e-05	5.266e-05	0.9017	0.9017	0.5172	0	0.8699	0.9086	EXTL3(0)|FZD3(+166.5kb)|HMBOX1(-149.6kb)|INTS9(-26.89kb)
11	106941304	rs61903020	A	C	2	5.279e-05	0.04493	1.2494	1.2104	0.1588	49.64	1.06	1.296	GUCY1A2(+52.13kb)
11	59944898	rs631853	G	T	2	5.282e-05	5.282e-05	1.0949	1.0949	0.3895	0	1.1406	1.085	MS4A2(+78.96kb)|MS4A3(+106.3kb)|MS4A4A(-103.1kb)|MS4A6A(0)|MS4A6E(-157.5kb)|PLAC1L(+129.4kb)
2	241232169	rs77665785	A	G	2	5.296e-05	5.296e-05	0.608	0.608	0.9708	0	0.6016	0.6092	ANKMY1(-186.7kb)|GPC1(-142.9kb)|MIR149(-163.2kb)|MYEOV2(+156.4kb)|OTOS(+152.1kb)|PP14571(-156.7kb)
10	8028388	rs4749442	C	T	2	5.297e-05	0.01841	1.0956	1.1168	0.0958	63.96	1.1845	1.0759	ATP5C1(+178.6kb)|GATA3(-68.28kb)|GATA3-AS1(-64.02kb)|KIN(+198.4kb)|TAF3(0)
1	232739491	rs7546863	C	T	2	5.308e-05	0.4054	0.8596	0.9101	0.0155	82.92	1.0319	0.8218	SIPA1L2(+88.25kb)
3	196837318	rs60275256	T	C	2	5.31e-05	5.31e-05	0.8085	0.8085	0.7783	0	0.784	0.8143	DLG1(0)|DLG1-AS1(-187.8kb)|MFI2(+80.63kb)|MFI2-AS1(+105.7kb)|MIR4797(-183.4kb)|NCBP2(+167.9kb)|NCBP2-AS2(+166.4kb)|PIGZ(+141.6kb)|SENP5(+175.7kb)
3	196837317	rs59827673	T	A	2	5.311e-05	5.311e-05	0.8085	0.8085	0.7783	0	0.784	0.8143	DLG1(0)|DLG1-AS1(-187.8kb)|MFI2(+80.63kb)|MFI2-AS1(+105.7kb)|MIR4797(-183.4kb)|NCBP2(+167.9kb)|NCBP2-AS2(+166.4kb)|PIGZ(+141.6kb)|SENP5(+175.7kb)
11	133091638	rs73598457	A	G	2	5.314e-05	5.314e-05	1.2553	1.2553	0.6406	0	1.1883	1.2712	OPCML(0)
8	28600572	rs2048369	C	G	2	5.315e-05	5.315e-05	0.9013	0.9013	0.5043	0	0.8685	0.9085	EXTL3(0)|FZD3(+168.8kb)|HMBOX1(-147.3kb)|INTS9(-24.6kb)
18	31020530	rs12455797	T	G	2	5.32e-05	5.32e-05	0.9111	0.9111	0.3405	0	0.8696	0.9206	ASXL3(-138kb)|CCDC178(0)
18	56956968	rs147740578	T	C	2	5.324e-05	0.008219	0.5052	0.4561	0.1619	48.88	0.2988	0.5619	CCBE1(-141.2kb)|CPLX4(-5.667kb)|GRP(+58.97kb)|LMAN1(-38.09kb)|RAX(+16.34kb)|SEC11C(+130.9kb)
6	39100651	rs412724	T	C	2	5.325e-05	5.325e-05	0.8577	0.8577	0.6531	0	0.8906	0.8511	DNAH8(+102.1kb)|GLP1R(+45.13kb)|KCNK5(-56.1kb)|KCNK16(-181.8kb)|KCNK17(-166.1kb)|LOC100131047(+179.8kb)|SAYSD1(+17.79kb)
8	120815384	rs78898975	C	T	2	5.326e-05	5.326e-05	1.5186	1.5186	0.4097	0	1.7686	1.4479	DEPTOR(-70.52kb)|DSCC1(-30.8kb)|ENPP2(+164.3kb)|TAF2(0)
15	90578453	rs4932276	A	G	2	5.343e-05	5.343e-05	0.8676	0.8676	0.7578	0	0.8481	0.8721	AP3S2(+140.8kb)|C15orf38(+122.2kb)|C15orf38-AP3S2(+122.2kb)|CIB1(-195kb)|GDPGP1(-199kb)|IDH2(-48.76kb)|MIR5094(+184.5kb)|SEMA4B(-149.7kb)|ZNF710(0)
2	233237442	rs114142302	A	G	2	5.347e-05	5.347e-05	0.7218	0.7218	0.9813	0	0.7185	0.7224	ALPI(-83.39kb)|ALPP(-5.905kb)|ALPPL2(-34.11kb)|CHRND(-153.4kb)|CHRNG(-167kb)|DIS3L2(+28.76kb)|ECEL1(-107.1kb)|ECEL1P2(-13.02kb)|EIF4E2(-177.9kb)|MIR5001(-177.7kb)|PRSS56(-147.7kb)|TIGD1(-175.3kb)
11	85762244	rs669813	T	C	2	5.35e-05	5.35e-05	1.0993	1.0993	0.897	0	1.0922	1.1009	CCDC83(+131.2kb)|EED(-193.6kb)|PICALM(0)
3	196848788	rs78883362	C	T	2	5.35e-05	5.35e-05	0.8091	0.8091	0.7747	0	0.7841	0.8149	DLG1(0)|DLG1-AS1(-176.3kb)|MFI2(+92.1kb)|MFI2-AS1(+117.2kb)|MIR4797(-172kb)|NCBP2(+179.3kb)|NCBP2-AS2(+177.9kb)|PIGZ(+153kb)|SENP5(+187.2kb)
16	5545606	rs34320358	T	C	2	5.387e-05	5.387e-05	1.1666	1.1666	0.6167	0	1.121	1.1773	.
11	85858497	rs3851178	T	G	2	5.4e-05	0.003311	1.09	1.0993	0.2107	36.17	1.1562	1.0769	C11orf73(-154.8kb)|EED(-97.31kb)|PICALM(+77.57kb)
18	31022999	rs72949740	C	T	2	5.401e-05	5.401e-05	1.1256	1.1256	0.7691	0	1.1456	1.1209	ASXL3(-135.5kb)|CCDC178(+2.314kb)
3	196978323	rs58833460	T	G	2	5.422e-05	5.422e-05	0.809	0.809	0.8761	0	0.7953	0.8122	DLG1(0)|DLG1-AS1(-46.79kb)|MIR4797(-42.42kb)
8	121896783	rs61661053	A	C	2	5.425e-05	5.425e-05	0.7797	0.7797	0.403	0	0.8677	0.7606	SNTB1(+72.47kb)
2	220686271	rs74957018	T	C	2	5.441e-05	5.441e-05	1.2971	1.2971	0.8371	0	1.2605	1.3051	MIR4268(-84.95kb)|SLC4A3(+179.6kb)
5	7798250	rs326137	G	T	2	5.445e-05	5.445e-05	0.9064	0.9064	0.7149	0	0.9238	0.9026	ADCY2(0)|C5orf49(-32.24kb)|FASTKD3(-61.02kb)|MTRR(-70.97kb)
7	147725036	rs7800075	G	A	2	5.455e-05	5.455e-05	0.8407	0.8407	0.4593	0	0.8994	0.8282	CNTNAP2(0)|MIR548F3(0)|MIR548T(0)
10	22856946	rs2296624	T	C	2	5.471e-05	5.471e-05	0.9076	0.9076	0.8572	0	0.8991	0.9094	LOC100499489(+130.1kb)|PIP4K2A(0)|SPAG6(+150.4kb)
3	196930678	rs114364631	C	T	2	5.477e-05	5.477e-05	0.8024	0.8024	0.7139	0	0.7691	0.81	DLG1(0)|DLG1-AS1(-94.44kb)|MFI2(+174kb)|MFI2-AS1(+199.1kb)|MIR4797(-90.07kb)
7	147725153	rs7781680	A	C	2	5.478e-05	5.478e-05	0.8408	0.8408	0.4605	0	0.8993	0.8283	CNTNAP2(0)|MIR548F3(0)|MIR548T(0)
11	133091476	rs59254168	A	C	2	5.489e-05	5.489e-05	1.2497	1.2497	0.7234	0	1.1983	1.2611	OPCML(0)
14	33056480	rs10483411	G	A	2	5.497e-05	5.497e-05	1.0976	1.0976	0.4914	0	1.0613	1.1059	AKAP6(0)
9	107668825	rs2575879	C	G	2	5.504e-05	5.504e-05	1.0968	1.0968	0.4592	0	1.0585	1.1057	ABCA1(0)|LOC286367(+128.8kb)|NIPSNAP3A(+146.4kb)|NIPSNAP3B(+132.5kb)
3	196788605	rs78115308	C	T	2	5.506e-05	5.506e-05	0.7981	0.7981	0.4688	0	0.7316	0.8133	DLG1(0)|MFI2(+31.92kb)|MFI2-AS1(+56.99kb)|NCBP2(+119.1kb)|NCBP2-AS2(+117.7kb)|PIGZ(+92.86kb)|SENP5(+127kb)
18	52606797	rs9953301	T	C	2	5.528e-05	0.008562	1.1232	1.1433	0.1598	49.39	1.2288	1.1029	CCDC68(0)|RAB27B(+44.05kb)
6	165933974	rs73039509	A	G	2	5.529e-05	0.0003086	1.2191	1.2256	0.2853	12.41	1.3611	1.189	PDE10A(0)
11	59951433	rs632185	G	A	2	5.533e-05	5.533e-05	1.0948	1.0948	0.4021	0	1.1393	1.0851	MS4A2(+85.49kb)|MS4A3(+112.8kb)|MS4A4A(-96.58kb)|MS4A6A(0)|MS4A6E(-150.9kb)|MS4A7(-194.5kb)|PLAC1L(+135.9kb)
11	59945065	rs624663	T	C	2	5.543e-05	5.543e-05	1.0947	1.0947	0.4013	0	1.1392	1.085	MS4A2(+79.12kb)|MS4A3(+106.5kb)|MS4A4A(-102.9kb)|MS4A6A(0)|MS4A6E(-157.3kb)|PLAC1L(+129.5kb)
5	93943859	rs10041843	A	T	2	5.55e-05	5.55e-05	1.1056	1.1056	0.7325	0	1.086	1.1101	ANKRD32(-10.53kb)|KIAA0825(0)|MCTP1(-98.43kb)
12	121812316	rs112613885	C	T	2	5.555e-05	0.06025	1.3371	1.2865	0.0904	65.12	1.1003	1.4432	ANAPC5(+20.3kb)|CAMKK2(+76.2kb)|KDM2B(-54.58kb)|P2RX4(+140.4kb)|P2RX7(+188kb)|RNF34(-25.57kb)
8	28598993	rs4732872	A	G	2	5.559e-05	5.559e-05	0.9018	0.9018	0.5345	0	0.8713	0.9085	EXTL3(0)|FZD3(+167.2kb)|HMBOX1(-148.9kb)|INTS9(-26.18kb)
7	147725317	rs7785350	T	C	2	5.562e-05	5.562e-05	0.8409	0.8409	0.4618	0	0.8992	0.8284	CNTNAP2(0)|MIR548F3(0)|MIR548T(0)
18	52599753	rs56313477	A	C	2	5.569e-05	0.009258	0.8902	0.874	0.1544	50.69	0.8129	0.9069	CCDC68(0)|RAB27B(+37.01kb)
20	21212626	rs73292194	G	C	2	5.576e-05	0.0148	1.1957	1.2327	0.0985	63.37	1.3694	1.1493	NKX2-4(-163.4kb)|PLK1S1(0)|XRN2(-71.32kb)
7	147725963	rs34842703	A	G	2	5.603e-05	5.603e-05	0.841	0.841	0.4573	0	0.9	0.8284	CNTNAP2(0)|MIR548F3(0)|MIR548T(0)
12	3163254	rs35083854	C	T	2	5.605e-05	0.01502	0.754	0.7173	0.1006	62.9	0.6057	0.801	FOXM1(+176.9kb)|LOC100507424(+194.3kb)|RHNO1(+164.6kb)|TEAD4(+13.41kb)|TSPAN9(-23.27kb)|TULP3(+112.9kb)
16	29156005	rs166152	G	A	2	5.608e-05	5.608e-05	0.8874	0.8874	0.6439	0	0.8627	0.8933	LAT(+153.9kb)|MIR4517(+186kb)|NFATC2IP(+178.2kb)|RRN3P2(+27.97kb)|SNX29P2(-157.6kb)|SPNS1(+160.1kb)
2	179377280	rs8179648	A	G	2	5.627e-05	5.627e-05	1.1342	1.1342	0.3489	0	1.0654	1.1499	DFNB59(+51.17kb)|FKBP7(+33.92kb)|MIR548N(0)|OSBPL6(+113.1kb)|PLEKHA3(+7.498kb)|PRKRA(+61.32kb)|TTN(-13.44kb)|TTN-AS1(-10.27kb)
2	11862030	rs11675463	G	C	2	5.633e-05	0.2431	1.1565	1.1089	0.0564	72.54	0.9975	1.1942	GREB1(+79.12kb)|LPIN1(0)|MIR4262(-115kb)|MIR4429(+181.2kb)|NTSR2(+51.7kb)
7	147724782	rs7779961	A	G	2	5.64e-05	5.64e-05	0.8409	0.8409	0.4625	0	0.8992	0.8285	CNTNAP2(0)|MIR548F3(0)|MIR548T(0)
17	15394256	rs7211556	G	A	2	5.678e-05	5.678e-05	1.1319	1.1319	0.6873	0	1.1634	1.1256	CDRT1(-97.72kb)|CDRT4(+23.33kb)|TEKT3(+149.3kb)|TRIM16(-137kb)|TVP23C(-11.32kb)|TVP23C-CDRT4(0)
11	85741130	rs682928	T	C	2	5.683e-05	5.683e-05	1.0989	1.0989	0.8184	0	1.0862	1.1016	CCDC83(+110.1kb)|PICALM(0)
6	32584153	rs28383233	A	G	2	5.684e-05	0.01904	0.8884	0.8973	0.1416	53.7	0.9486	0.8635	HLA-DOB(-196.4kb)|HLA-DQA1(-21.03kb)|HLA-DQA2(-125kb)|HLA-DQB1(-43.09kb)|HLA-DQB2(-139.7kb)|HLA-DRA(+171.3kb)|HLA-DRB1(+26.54kb)|HLA-DRB5(+86.15kb)|HLA-DRB6(+56.37kb)
7	112149050	rs62474613	G	C	2	5.687e-05	5.687e-05	1.11	1.11	0.3556	0	1.1662	1.0972	IFRD1(+31.79kb)|LSMEM1(+18.11kb)|ZNF277(+165.1kb)
5	7799090	rs326140	A	G	2	5.694e-05	5.694e-05	0.9069	0.9069	0.7425	0	0.9225	0.9035	ADCY2(0)|C5orf49(-31.4kb)|FASTKD3(-60.18kb)|MTRR(-70.13kb)
6	32573991	rs9270984	G	T	2	5.695e-05	5.695e-05	0.8548	0.8548	0.6947	0	0.8343	0.8631	BTNL2(+199.1kb)|HLA-DQA1(-31.19kb)|HLA-DQA2(-135.2kb)|HLA-DQB1(-53.25kb)|HLA-DQB2(-149.9kb)|HLA-DRA(+161.2kb)|HLA-DRB1(+16.38kb)|HLA-DRB5(+75.98kb)|HLA-DRB6(+46.21kb)
8	41728893	rs7826227	G	A	2	5.707e-05	5.707e-05	1.1091	1.1091	0.3896	0	1.1607	1.0972	ANK1(0)|KAT6A(-58.1kb)
8	32371016	rs117146719	C	G	2	5.713e-05	5.713e-05	1.4018	1.4018	0.5875	0	1.5147	1.3648	NRG1(0)|NRG1-IT3(+70.78kb)
3	196891738	rs114582118	G	A	2	5.727e-05	5.727e-05	0.8026	0.8026	0.6972	0	0.7673	0.8107	DLG1(0)|DLG1-AS1(-133.4kb)|MFI2(+135.1kb)|MFI2-AS1(+160.1kb)|MIR4797(-129kb)|PIGZ(+196kb)
2	169615032	rs56372916	T	C	2	5.729e-05	5.729e-05	1.2851	1.2851	0.9163	0	1.2693	1.2896	ABCB11(-164.4kb)|CERS6(0)|CERS6-AS1(-13.43kb)|G6PC2(-142.7kb)|MIR4774(+175.5kb)|NOSTRIN(-28.02kb)|SPC25(-112.4kb)
15	58474667	rs11071369	A	G	2	5.734e-05	5.734e-05	1.2512	1.2512	0.5892	0	1.1715	1.2685	ALDH1A2(+116.5kb)|AQP9(0)
3	196978549	rs57512741	A	G	2	5.737e-05	5.737e-05	0.8096	0.8096	0.8725	0	0.7955	0.8129	DLG1(0)|DLG1-AS1(-46.57kb)|MIR4797(-42.2kb)
16	78025465	rs417739	G	A	2	5.746e-05	5.746e-05	0.9018	0.9018	0.5392	0	0.932	0.895	CLEC3A(-30.98kb)|VAT1L(+11.46kb)|WWOX(-107.9kb)
15	58490392	rs7182416	G	C	2	5.753e-05	5.753e-05	1.2538	1.2538	0.3668	0	1.1242	1.2837	ALDH1A2(+132.3kb)|AQP9(+12.28kb)
8	28598680	rs4732871	A	G	2	5.757e-05	5.757e-05	0.902	0.902	0.5346	0	0.8715	0.9087	EXTL3(0)|FZD3(+166.9kb)|HMBOX1(-149.2kb)|INTS9(-26.49kb)
1	218574789	rs6703224	T	C	2	5.759e-05	5.759e-05	1.2077	1.2077	0.8728	0	1.2262	1.2032	LOC728463(+55.77kb)|RRP15(+63.46kb)|TGFB2(0)
11	85750671	rs2508691	T	A	2	5.775e-05	5.775e-05	1.0989	1.0989	0.8453	0	1.0881	1.1012	CCDC83(+119.6kb)|PICALM(0)
11	59947252	rs583791	T	C	2	5.785e-05	5.785e-05	1.0945	1.0945	0.4081	0	1.1383	1.0849	MS4A2(+81.31kb)|MS4A3(+108.7kb)|MS4A4A(-100.8kb)|MS4A6A(0)|MS4A6E(-155.1kb)|MS4A7(-198.7kb)|PLAC1L(+131.7kb)
11	85748386	rs1973630	C	T	2	5.795e-05	5.795e-05	1.099	1.099	0.8348	0	1.0875	1.1015	CCDC83(+117.3kb)|PICALM(0)
2	127793239	rs72843896	C	T	2	5.795e-05	5.795e-05	1.1842	1.1842	0.9657	0	1.1797	1.1852	BIN1(-12.36kb)|CYP27C1(-148.2kb)
5	7799627	rs326142	T	C	2	5.799e-05	5.799e-05	1.1025	1.1025	0.7206	0	1.0822	1.107	ADCY2(0)|C5orf49(-30.86kb)|FASTKD3(-59.64kb)|MTRR(-69.59kb)
21	27651008	rs2830159	T	C	2	5.8e-05	5.8e-05	0.8762	0.8762	0.9538	0	0.8798	0.8754	APP(+107.6kb)|CYYR1(-187.5kb)
2	127802704	rs72843900	T	G	2	5.807e-05	5.807e-05	1.1842	1.1842	0.9708	0	1.1804	1.1851	BIN1(-2.894kb)|CYP27C1(-138.7kb)
18	31012820	rs72949722	A	G	2	5.808e-05	5.808e-05	1.1278	1.1278	0.6954	0	1.155	1.1213	ASXL3(-145.7kb)|CCDC178(0)
2	11863579	rs62113264	T	C	2	5.824e-05	0.2105	1.157	1.1125	0.0676	70.07	1.0031	1.1932	GREB1(+80.67kb)|LPIN1(0)|MIR4262(-113.5kb)|MIR4429(+182.8kb)|NTSR2(+53.25kb)
2	233242938	rs3762526	C	A	2	5.824e-05	0.00763	0.8485	0.8287	0.1755	45.53	0.7467	0.8691	ALPI(-77.89kb)|ALPP(-0.409kb)|ALPPL2(-28.61kb)|CHRND(-147.9kb)|CHRNG(-161.5kb)|DIS3L2(+34.26kb)|ECEL1(-101.6kb)|ECEL1P2(-7.521kb)|EIF4E2(-172.4kb)|MIR5001(-172.2kb)|PRSS56(-142.2kb)|TIGD1(-169.8kb)
18	39935948	rs346459	T	C	2	5.834e-05	5.834e-05	0.9079	0.9079	0.395	0	0.869	0.9166	LINC00907(0)
18	31024610	rs9948697	G	C	2	5.842e-05	0.0001819	0.9118	0.9104	0.2982	7.6	0.8666	0.9221	ASXL3(-133.9kb)|CCDC178(+3.925kb)
4	12310198	rs147570262	C	T	2	5.856e-05	5.856e-05	0.7044	0.7044	0.9102	0	0.7181	0.7009	.
20	41978884	rs79401176	T	G	2	5.882e-05	0.4527	1.3864	1.2057	0.0263	79.74	0.9048	1.4966	L3MBTL1(-157.4kb)|PTPRT(+160.3kb)|SRSF6(-107.6kb)
6	32432969	rs9268925	C	A	2	5.885e-05	5.885e-05	0.8453	0.8453	0.385	0	0.7939	0.8633	BTNL2(+58.07kb)|C6orf10(+93.31kb)|HCG23(+71.5kb)|HLA-DQA1(-172.2kb)|HLA-DQB1(-194.3kb)|HLA-DRA(+20.14kb)|HLA-DRB1(-113.6kb)|HLA-DRB5(-52.18kb)|HLA-DRB6(-87.52kb)
3	196783092	rs77031112	G	A	2	5.888e-05	5.888e-05	0.7981	0.7981	0.397	0	0.72	0.8158	DLG1(0)|MFI2(+26.4kb)|MFI2-AS1(+51.48kb)|NCBP2(+113.6kb)|NCBP2-AS2(+112.2kb)|PIGZ(+87.35kb)|SENP5(+121.5kb)
3	196981914	rs115297051	T	C	2	5.905e-05	5.905e-05	0.8099	0.8099	0.8784	0	0.7964	0.813	DLG1(0)|DLG1-AS1(-43.2kb)|MIR4797(-38.83kb)
18	31026538	rs1119034	G	T	2	5.91e-05	5.91e-05	0.9119	0.9119	0.3437	0	0.8707	0.9213	ASXL3(-132kb)|CCDC178(+5.853kb)
18	31007074	rs9652984	A	G	2	5.919e-05	5.919e-05	1.1279	1.1279	0.6217	0	1.1623	1.1197	ASXL3(-151.5kb)|CCDC178(0)
16	78863751	rs57438221	G	T	2	5.926e-05	5.926e-05	1.1108	1.1108	0.4176	0	1.1608	1.0995	WWOX(0)
6	32583212	rs28383221	G	A	2	5.936e-05	0.01899	0.8893	0.8981	0.1426	53.49	0.949	0.8645	HLA-DOB(-197.3kb)|HLA-DQA1(-21.97kb)|HLA-DQA2(-126kb)|HLA-DQB1(-44.03kb)|HLA-DQB2(-140.7kb)|HLA-DRA(+170.4kb)|HLA-DRB1(+25.6kb)|HLA-DRB5(+85.21kb)|HLA-DRB6(+55.43kb)
15	48922360	rs689304	T	C	2	5.938e-05	5.938e-05	0.862	0.862	0.9753	0	0.86	0.8625	CEP152(-107.8kb)|FBN1(0)|SHC4(-193.6kb)
2	233247027	rs1049109	T	C	2	5.938e-05	0.01116	0.8489	0.8253	0.151	51.52	0.7418	0.8708	ALPI(-73.8kb)|ALPP(0)|ALPPL2(-24.52kb)|CHRND(-143.8kb)|CHRNG(-157.4kb)|DIS3L2(+38.35kb)|ECEL1(-97.51kb)|ECEL1P2(-3.432kb)|EIF4E2(-168.3kb)|MIR5001(-168.2kb)|PRSS56(-138.1kb)|TIGD1(-165.8kb)
15	48926202	rs625034	C	T	2	5.943e-05	5.943e-05	0.8619	0.8619	0.9644	0	0.859	0.8626	CEP152(-103.9kb)|FBN1(0)|SHC4(-189.7kb)
4	185537820	rs62338030	A	G	2	5.952e-05	5.952e-05	0.7454	0.7454	0.4969	0	0.6684	0.7625	ACSL1(-138.9kb)|CASP3(-11.03kb)|CCDC111(-32.95kb)|IRF2(+142.1kb)|MLF1IP(-77.4kb)|SLED1(-181.6kb)
2	233244843	rs55977653	A	G	2	5.953e-05	0.01	0.8488	0.8263	0.1587	49.66	0.7432	0.8702	ALPI(-75.99kb)|ALPP(0)|ALPPL2(-26.71kb)|CHRND(-146kb)|CHRNG(-159.6kb)|DIS3L2(+36.16kb)|ECEL1(-99.69kb)|ECEL1P2(-5.616kb)|EIF4E2(-170.5kb)|MIR5001(-170.3kb)|PRSS56(-140.3kb)|TIGD1(-167.9kb)
15	35055253	rs117584857	G	A	2	5.98e-05	0.4984	1.34	1.1731	0.0168	82.51	0.8994	1.4462	ACTC1(-25.04kb)|AQR(-93.3kb)|GJD2(+8.471kb)|GOLGA8B(+179.5kb)
19	1049012	rs4147912	C	A	2	5.992e-05	0.1478	0.873	0.8937	0.0336	77.84	0.9726	0.8322	ABCA7(0)|ARID3A(+76.21kb)|ATP5D(-192.7kb)|C19orf26(-180.9kb)|CFD(+185.4kb)|CNN2(+9.948kb)|ELANE(+192.8kb)|GPX4(-54.92kb)|GRIN3B(+39.29kb)|HMHA1(-16.91kb)|KISS1R(+128kb)|MED16(+155.8kb)|MIDN(-199.5kb)|POLR2E(-37.56kb)|R3HDM4(+135.8kb)|SBNO2(-58.62kb)|STK11(-156.8kb)|TMEM259(+27.87kb)|WDR18(+54.44kb)
16	48757861	rs62060316	T	C	2	6.028e-05	0.03618	1.1992	1.261	0.0485	74.32	1.4353	1.1471	N4BP1(+113.7kb)
8	42448873	rs2923406	T	G	2	6.035e-05	6.035e-05	1.0925	1.0925	0.6975	0	1.0728	1.0969	CHRNA6(-158.9kb)|CHRNB3(-103.7kb)|SLC20A2(+51.52kb)|SMIM19(+40.73kb)|VDAC3(+185.4kb)
3	196865301	rs115934144	G	A	2	6.045e-05	6.045e-05	0.8031	0.8031	0.6851	0	0.7664	0.8116	DLG1(0)|DLG1-AS1(-159.8kb)|MFI2(+108.6kb)|MFI2-AS1(+133.7kb)|MIR4797(-155.4kb)|NCBP2(+195.8kb)|NCBP2-AS2(+194.4kb)|PIGZ(+169.6kb)
12	84754684	rs7957729	T	C	2	6.047e-05	6.047e-05	1.285	1.285	0.8072	0	1.2424	1.2939	.
14	92938855	rs12590654	A	G	2	6.05e-05	6.05e-05	0.9074	0.9074	0.7981	0	0.8954	0.91	RIN3(-41.27kb)|SLC24A4(0)
9	107668886	rs2777794	T	A	2	6.054e-05	6.054e-05	1.0963	1.0963	0.3573	0	1.0489	1.1074	ABCA1(0)|LOC286367(+128.8kb)|NIPSNAP3A(+146.5kb)|NIPSNAP3B(+132.6kb)
16	8865269	rs1273415	C	T	2	6.087e-05	0.0004118	0.7266	0.7313	0.2918	10.01	0.8618	0.6972	ABAT(0)|CARHSP1(-81.53kb)|METTL22(+125.2kb)|PMM2(-26.4kb)|TMEM186(-23.77kb)|USP7(-120.7kb)
8	42376477	rs2974298	C	T	2	6.087e-05	6.087e-05	0.9151	0.9151	0.7785	0	0.9272	0.9124	CHRNB3(-176.1kb)|DKK4(+141.8kb)|IKBKB(+186.3kb)|POLB(+147.1kb)|SLC20A2(0)|SMIM19(-19.82kb)|VDAC3(+113kb)
14	47533399	rs1954244	A	G	2	6.091e-05	6.091e-05	1.1704	1.1704	0.4646	0	1.2422	1.1543	MDGA2(0)
5	7799168	rs326141	T	A	2	6.091e-05	6.091e-05	0.9073	0.9073	0.7582	0	0.9219	0.9041	ADCY2(0)|C5orf49(-31.32kb)|FASTKD3(-60.1kb)|MTRR(-70.05kb)
15	48989844	rs1478346	T	G	2	6.097e-05	6.097e-05	1.1199	1.1199	0.9416	0	1.1151	1.121	CEP152(-40.29kb)|EID1(-180.4kb)|FBN1(+51.86kb)|SHC4(-126.1kb)
12	1517799	rs118038461	A	G	2	6.098e-05	0.02039	0.618	0.648	0.1632	48.56	0.8269	0.5613	ERC1(0)|FBXL14(-157.4kb)|LINC00942(-91.86kb)
11	131694876	rs576825	C	A	2	6.122e-05	6.122e-05	0.909	0.909	0.505	0	0.8779	0.9156	NTM(0)
8	107677965	rs3101532	G	A	2	6.138e-05	6.138e-05	1.1128	1.1128	0.4059	0	1.0622	1.1246	ABRA(-93.74kb)|OXR1(0)
8	28601977	rs35497720	C	G	2	6.147e-05	6.147e-05	0.9021	0.9021	0.4929	0	0.8684	0.9095	EXTL3(0)|FZD3(+170.2kb)|HMBOX1(-145.9kb)|INTS9(-23.2kb)
6	32428062	rs9268833	T	C	2	6.157e-05	6.157e-05	0.8865	0.8865	0.4223	0	0.9241	0.8742	BTNL2(+53.16kb)|C6orf10(+88.41kb)|HCG23(+66.59kb)|HLA-DQA1(-177.1kb)|HLA-DQB1(-199.2kb)|HLA-DRA(+15.24kb)|HLA-DRB1(-118.5kb)|HLA-DRB5(-57.09kb)|HLA-DRB6(-92.43kb)
15	48744005	rs4775762	C	T	2	6.159e-05	0.05642	1.1128	1.0948	0.1452	52.88	1.0267	1.1339	DUT(+108.4kb)|FBN1(0)|SLC12A1(+147.7kb)
19	1047687	rs4147911	G	C	2	6.174e-05	6.49e-05	1.2095	1.2096	0.316	0.56	1.2919	1.1686	ABCA7(0)|ARID3A(+74.88kb)|ATP5D(-194.1kb)|C19orf26(-182.3kb)|CFD(+184.1kb)|CNN2(+8.623kb)|ELANE(+191.4kb)|GPX4(-56.25kb)|GRIN3B(+37.96kb)|HMHA1(-18.23kb)|KISS1R(+126.7kb)|MED16(+154.5kb)|POLR2E(-38.89kb)|PRTN3(+199.5kb)|R3HDM4(+134.5kb)|SBNO2(-59.94kb)|STK11(-158.1kb)|TMEM259(+26.55kb)|WDR18(+53.12kb)
6	32682429	rs9275599	T	C	2	6.181e-05	0.005652	0.8468	0.8297	0.2064	37.36	0.7436	0.8649	HLA-DOB(-98.11kb)|HLA-DQA1(+71kb)|HLA-DQA2(-26.73kb)|HLA-DQB1(+47.96kb)|HLA-DQB2(-41.44kb)|HLA-DRB1(+124.8kb)|HLA-DRB5(+184.4kb)|HLA-DRB6(+154.6kb)|LOC100294145(-179.5kb)|LOC100507463(-129.4kb)|PSMB8(-126.1kb)|PSMB9(-139.5kb)|TAP1(-130.6kb)|TAP2(-107.2kb)
4	6130303	rs73198072	T	C	2	6.196e-05	6.196e-05	1.1892	1.1892	0.8951	0	1.1994	1.1847	JAKMIP1(0)|LOC285484(-72.16kb)|PPP2R2C(-192kb)|WFS1(-141.3kb)
4	15608677	rs75836515	G	A	2	6.222e-05	6.222e-05	1.2611	1.2611	0.684	0	1.3202	1.2459	BST1(-95.9kb)|C1QTNF7(+160.9kb)|CC2D2A(+5.497kb)|CD38(-171.3kb)|FAM200B(-74.67kb)|FBXL5(0)
18	31010125	rs12327414	C	T	2	6.224e-05	6.224e-05	1.1274	1.1274	0.6903	0	1.1551	1.1208	ASXL3(-148.4kb)|CCDC178(0)
8	6926443	rs111561804	G	C	2	6.224e-05	6.224e-05	1.3331	1.3331	0.5635	0	1.4631	1.3087	DEFA1(+50.62kb)|DEFA1B(+50.62kb)|DEFA3(+50.63kb)|DEFA4(+130.7kb)|DEFA5(+12.18kb)|DEFA6(+142.8kb)|DEFA8P(+117.3kb)|DEFA9P(+108.8kb)|DEFA10P(+99.81kb)|DEFA11P(+39.43kb)|DEFB1(+190.9kb)|DEFT1P(+60.1kb)|DEFT1P2(+60.1kb)|LINC00965(-191.7kb)
6	20063180	rs551045	G	A	2	6.225e-05	6.225e-05	1.1148	1.1148	0.7585	0	1.0952	1.1192	MBOAT1(-36.74kb)
15	48910240	rs1807301	G	A	2	6.237e-05	0.001591	0.9018	0.9056	0.2692	18.07	0.9572	0.8896	CEP152(-119.9kb)|FBN1(0)
3	196871538	rs74379287	A	G	2	6.256e-05	6.256e-05	0.8035	0.8035	0.684	0	0.7666	0.812	DLG1(0)|DLG1-AS1(-153.6kb)|MFI2(+114.9kb)|MFI2-AS1(+139.9kb)|MIR4797(-149.2kb)|PIGZ(+175.8kb)
21	27525506	rs6516727	G	A	2	6.263e-05	0.2537	0.911	0.9362	0.0513	73.67	1.0024	0.8916	APP(0)
11	65485478	rs4645936	A	G	2	6.27e-05	6.27e-05	0.7865	0.7865	0.7357	0	0.8225	0.7793	AP5B1(-55.89kb)|C11orf68(-198.8kb)|CCDC85B(-172.4kb)|CFL1(-136.8kb)|CTSW(-161.8kb)|EFEMP2(-148.4kb)|EHBP1L1(+125.4kb)|FAM89B(+143.8kb)|FIBP(-165.7kb)|FOSL1(-174.2kb)|KAT5(0)|KCNK7(+122kb)|LTBP3(+159.8kb)|MAP3K11(+103.8kb)|MIR4489(+68.75kb)|MIR4690(+81.64kb)|MUS81(-142.4kb)|OVOL1(-69.03kb)|PCNXL3(+80.57kb)|RELA(+55.04kb)|RNASEH2C(0)|SCYL1(+179.3kb)|SIPA1(+67.09kb)|SNX32(-115.9kb)|SSSCA1(+146.2kb)|…
15	35072858	rs139796331	G	A	2	6.271e-05	0.4856	1.3443	1.1784	0.0183	82.05	0.9032	1.4512	ACTC1(-7.438kb)|AQR(-75.69kb)|GJD2(+26.08kb)|GOLGA8B(+197.1kb)|ZNF770(-197.7kb)
11	85689712	rs587038	T	A	2	6.275e-05	6.275e-05	1.0978	1.0978	0.9618	0	1.0952	1.0984	CCDC83(+58.66kb)|PICALM(0)|SYTL2(+167.5kb)
6	32579708	rs13207945	C	T	2	6.285e-05	0.03702	0.8893	0.9002	0.1087	61.13	0.9546	0.862	HLA-DQA1(-25.47kb)|HLA-DQA2(-129.5kb)|HLA-DQB1(-47.53kb)|HLA-DQB2(-144.2kb)|HLA-DRA(+166.9kb)|HLA-DRB1(+22.1kb)|HLA-DRB5(+81.7kb)|HLA-DRB6(+51.93kb)
2	28838403	rs1534481	A	C	2	6.287e-05	6.287e-05	1.0927	1.0927	0.8796	0	1.0849	1.0944	PLB1(0)|PPP1CB(-136.2kb)|SPDYA(-195.3kb)
14	47825133	rs61993123	A	C	2	6.294e-05	6.294e-05	0.8737	0.8737	0.4439	0	0.8267	0.8843	MDGA2(0)
10	113308151	rs1914099	A	G	2	6.297e-05	0.0005395	1.2894	1.3014	0.2694	18.01	1.4815	1.2445	.
12	22994698	rs2466973	G	C	2	6.299e-05	6.299e-05	1.1184	1.1184	0.6457	0	1.0891	1.1254	ETNK1(+151.1kb)
7	112159829	rs62474618	A	G	2	6.305e-05	6.305e-05	1.11	1.11	0.9335	0	1.1051	1.1112	IFRD1(+42.57kb)|LSMEM1(+28.89kb)|ZNF277(+175.8kb)
10	113308152	rs1914098	A	C	2	6.326e-05	0.0005275	1.2893	1.3012	0.2702	17.75	1.4811	1.2445	.
2	198012407	rs11688574	T	G	2	6.338e-05	0.004142	1.1097	1.1219	0.1946	40.58	1.1903	1.0918	ANKRD44(0)
6	32428079	rs9268834	A	C	2	6.338e-05	6.338e-05	0.8867	0.8867	0.4381	0	0.923	0.8748	BTNL2(+53.18kb)|C6orf10(+88.42kb)|HCG23(+66.61kb)|HLA-DQA1(-177.1kb)|HLA-DQB1(-199.2kb)|HLA-DRA(+15.25kb)|HLA-DRB1(-118.5kb)|HLA-DRB5(-57.07kb)|HLA-DRB6(-92.41kb)
7	37223401	rs2160430	C	T	2	6.338e-05	0.01763	0.9018	0.9112	0.1988	39.45	0.9657	0.8874	ELMO1(0)
17	15393319	rs4791624	C	T	2	6.341e-05	6.341e-05	1.131	1.131	0.6847	0	1.1627	1.1246	CDRT1(-98.66kb)|CDRT4(+22.39kb)|TEKT3(+148.4kb)|TRIM16(-138kb)|TVP23C(-12.26kb)|TVP23C-CDRT4(0)
1	218572768	rs7517802	G	T	2	6.372e-05	6.372e-05	1.2061	1.2061	0.8392	0	1.2297	1.2005	LOC728463(+53.75kb)|RRP15(+61.44kb)|TGFB2(0)
11	41696777	rs75542520	C	T	2	6.373e-05	6.373e-05	1.3757	1.3757	0.4382	0	1.5576	1.334	.
4	12271041	rs114865471	T	C	2	6.38e-05	6.38e-05	0.7092	0.7092	0.9233	0	0.7207	0.7062	.
18	31026797	rs9955470	A	G	2	6.417e-05	7.19e-05	0.9123	0.9121	0.3156	0.7	0.8686	0.9222	ASXL3(-131.7kb)|CCDC178(+6.112kb)
8	42455166	rs2974311	A	G	2	6.42e-05	6.42e-05	1.0927	1.0927	0.7124	0	1.0739	1.0969	CHRNA6(-152.6kb)|CHRNB3(-97.4kb)|SLC20A2(+57.81kb)|SMIM19(+47.03kb)|VDAC3(+191.7kb)
11	75755164	rs141968149	C	G	2	6.438e-05	6.438e-05	1.6677	1.6677	0.7517	0	1.7689	1.6219	UVRAG(0)|WNT11(-142.2kb)
4	12278206	rs142254235	A	G	2	6.449e-05	6.449e-05	0.7081	0.7081	0.9381	0	0.7174	0.7057	.
18	31026816	rs9944597	C	T	2	6.454e-05	6.454e-05	0.9124	0.9124	0.3449	0	0.8712	0.9217	ASXL3(-131.7kb)|CCDC178(+6.131kb)
2	233234727	rs115624040	A	C	2	6.46e-05	0.002564	0.848	0.8364	0.231	30.29	0.7576	0.8666	ALPI(-86.1kb)|ALPP(-8.62kb)|ALPPL2(-36.82kb)|CHRND(-156.1kb)|CHRNG(-169.7kb)|DIS3L2(+26.05kb)|ECEL1(-109.8kb)|ECEL1P2(-15.73kb)|EIF4E2(-180.6kb)|MIR5001(-180.5kb)|PRSS56(-150.4kb)|TIGD1(-178.1kb)
1	68655214	rs114283254	T	C	2	6.461e-05	0.06079	1.4468	1.3652	0.1439	53.18	1.0903	1.5432	DIRAS3(+138.8kb)|GNG12-AS1(0)|MIR1262(+5.921kb)|WLS(0)
2	233252637	rs4073596	C	T	2	6.462e-05	0.01214	0.85	0.8258	0.1473	52.38	0.742	0.872	ALPI(-68.2kb)|ALPP(+5.038kb)|ALPPL2(-18.91kb)|CHRND(-138.2kb)|CHRNG(-151.8kb)|DIS3L2(+43.96kb)|ECEL1(-91.9kb)|ECEL1P2(+0.883kb)|EIF4E2(-162.7kb)|MIR5001(-162.5kb)|PRSS56(-132.5kb)|TIGD1(-160.1kb)
15	48988044	rs2126905	T	C	2	6.463e-05	6.463e-05	1.1189	1.1189	0.9214	0	1.1125	1.1204	CEP152(-42.09kb)|EID1(-182.2kb)|FBN1(+50.06kb)|SHC4(-127.9kb)
8	42443119	rs2974302	G	C	2	6.475e-05	6.475e-05	1.0922	1.0922	0.6302	0	1.0679	1.0977	CHRNA6(-164.7kb)|CHRNB3(-109.4kb)|SLC20A2(+45.76kb)|SMIM19(+34.98kb)|VDAC3(+179.7kb)
18	30991599	rs2061360	C	T	2	6.485e-05	0.001775	0.9108	0.9049	0.2363	28.7	0.8589	0.9228	ASXL3(-166.9kb)|CCDC178(0)
18	31027527	rs9304120	T	G	2	6.485e-05	9.234e-05	0.9124	0.912	0.3119	2.21	0.8684	0.9224	ASXL3(-131kb)|CCDC178(+6.842kb)
8	107680261	rs3101533	C	A	2	6.509e-05	6.509e-05	1.1124	1.1124	0.3802	0	1.0591	1.1249	ABRA(-91.45kb)|OXR1(0)
10	22856279	rs11013051	T	C	2	6.51e-05	6.51e-05	0.9071	0.9071	0.6814	0	0.8875	0.9113	LOC100499489(+129.4kb)|PIP4K2A(0)|SPAG6(+149.7kb)
18	31024962	rs72949753	C	T	2	6.515e-05	6.515e-05	1.1242	1.1242	0.8284	0	1.1389	1.1207	ASXL3(-133.6kb)|CCDC178(+4.277kb)
3	196947373	rs74752290	T	G	2	6.523e-05	6.523e-05	0.8042	0.8042	0.6819	0	0.7669	0.8127	DLG1(0)|DLG1-AS1(-77.74kb)|MFI2(+190.7kb)|MIR4797(-73.38kb)
8	27466315	rs1532278	C	T	2	6.523e-05	6.523e-05	1.0972	1.0972	0.9976	0	1.0974	1.0972	CCDC25(-124.5kb)|CHRNA2(+129.5kb)|CLU(0)|EPHX2(+63.88kb)|ESCO2(-165.7kb)|MIR3622A(-92.88kb)|MIR3622B(-92.87kb)|PTK2B(+149.4kb)|SCARA3(-25.26kb)
15	35042906	rs78709222	A	G	2	6.527e-05	0.3166	1.3016	1.1903	0.0515	73.63	0.9659	1.3758	ACTC1(-37.39kb)|AQR(-105.6kb)|GJD2(-1.735kb)|GOLGA8B(+167.1kb)
14	47537714	rs11626468	T	C	2	6.528e-05	6.528e-05	1.1653	1.1653	0.4002	0	1.2462	1.1474	MDGA2(0)
21	45661518	rs378993	T	C	2	6.529e-05	6.529e-05	1.2939	1.2939	0.4342	0	1.1785	1.3297	AIRE(-44.2kb)|C21orf2(-87.31kb)|C21orf33(+95.91kb)|DNMT3L(-4.703kb)|ICOSLG(+0.684kb)|PFKL(-58.41kb)|PWP2(+110.5kb)|TRAPPC10(+135.1kb)|TRPM2(-112kb)
18	39911721	rs8085980	G	A	2	6.53e-05	6.53e-05	0.9096	0.9096	0.644	0	0.8882	0.9142	LINC00907(0)
8	42442067	rs2923400	G	A	2	6.536e-05	6.536e-05	1.0922	1.0922	0.6279	0	1.0677	1.0977	CHRNA6(-165.7kb)|CHRNB3(-110.5kb)|SLC20A2(+44.71kb)|SMIM19(+33.93kb)|VDAC3(+178.6kb)
8	42441374	rs62510967	G	C	2	6.54e-05	6.54e-05	1.0922	1.0922	0.6279	0	1.0677	1.0977	CHRNA6(-166.4kb)|CHRNB3(-111.2kb)|SLC20A2(+44.02kb)|SMIM19(+33.23kb)|VDAC3(+177.9kb)
11	39381178	rs111776663	T	C	2	6.556e-05	0.001819	1.4713	1.5067	0.2092	36.57	1.8022	1.3681	.
8	42455281	rs2923412	A	G	2	6.578e-05	6.578e-05	1.0925	1.0925	0.692	0	1.0723	1.097	CHRNA6(-152.5kb)|CHRNB3(-97.28kb)|SLC20A2(+57.92kb)|SMIM19(+47.14kb)|VDAC3(+191.8kb)
7	112156110	rs62474615	T	C	2	6.579e-05	6.579e-05	1.1249	1.1249	0.6375	0	1.0932	1.1325	IFRD1(+38.85kb)|LSMEM1(+25.17kb)|ZNF277(+172.1kb)
15	58479108	rs717868	C	A	2	6.588e-05	6.588e-05	1.2519	1.2519	0.579	0	1.1697	1.27	ALDH1A2(+121kb)|AQP9(+0.998kb)
2	233247873	rs7599982	A	G	2	6.594e-05	0.01192	0.8498	0.8259	0.1491	51.97	0.7421	0.8718	ALPI(-72.96kb)|ALPP(+0.274kb)|ALPPL2(-23.68kb)|CHRND(-143kb)|CHRNG(-156.6kb)|DIS3L2(+39.2kb)|ECEL1(-96.66kb)|ECEL1P2(-2.586kb)|EIF4E2(-167.5kb)|MIR5001(-167.3kb)|PRSS56(-137.3kb)|TIGD1(-164.9kb)
7	37231416	rs727189	G	A	2	6.595e-05	0.03404	0.9002	0.9122	0.1737	45.97	0.9703	0.8849	ELMO1(0)
1	218572808	rs7515588	G	A	2	6.597e-05	6.597e-05	1.2056	1.2056	0.8418	0	1.2288	1.2001	LOC728463(+53.79kb)|RRP15(+61.48kb)|TGFB2(0)
2	233248198	rs7600132	A	C	2	6.612e-05	0.01187	0.8498	0.8259	0.1494	51.88	0.7422	0.8718	ALPI(-72.63kb)|ALPP(+0.599kb)|ALPPL2(-23.35kb)|CHRND(-142.7kb)|CHRNG(-156.2kb)|DIS3L2(+39.52kb)|ECEL1(-96.34kb)|ECEL1P2(-2.261kb)|EIF4E2(-167.2kb)|MIR5001(-167kb)|PRSS56(-137kb)|TIGD1(-164.6kb)
6	32428115	rs9268835	A	G	2	6.615e-05	6.615e-05	0.887	0.887	0.4243	0	0.9244	0.8747	BTNL2(+53.22kb)|C6orf10(+88.46kb)|HCG23(+66.65kb)|HLA-DQA1(-177.1kb)|HLA-DQB1(-199.1kb)|HLA-DRA(+15.29kb)|HLA-DRB1(-118.4kb)|HLA-DRB5(-57.04kb)|HLA-DRB6(-92.37kb)
2	233247934	rs7573222	C	A	2	6.618e-05	0.01187	0.8498	0.8259	0.1494	51.88	0.7422	0.8718	ALPI(-72.9kb)|ALPP(+0.335kb)|ALPPL2(-23.62kb)|CHRND(-142.9kb)|CHRNG(-156.5kb)|DIS3L2(+39.26kb)|ECEL1(-96.6kb)|ECEL1P2(-2.525kb)|EIF4E2(-167.4kb)|MIR5001(-167.2kb)|PRSS56(-137.2kb)|TIGD1(-164.8kb)
18	31007400	rs9652985	C	A	2	6.629e-05	6.629e-05	1.1272	1.1272	0.6826	0	1.1557	1.1204	ASXL3(-151.1kb)|CCDC178(0)
12	130477116	rs79579798	T	C	2	6.642e-05	6.642e-05	1.644	1.644	0.8171	0	1.7138	1.6115	FZD10(-169.9kb)|FZD10-AS1(-159kb)|LOC100190940(-41.24kb)|TMEM132D(+88.9kb)
17	54948463	rs149795570	T	C	2	6.642e-05	0.001627	1.7744	1.8014	0.2	39.12	2.2261	1.5277	C17orf67(+37.21kb)|COIL(-67.1kb)|DGKE(+2.427kb)|MIR3614(-20.17kb)|MTVR2(-13kb)|RNF126P1(-174.4kb)|SCPEP1(-107kb)|TRIM25(-16.81kb)
2	233242937	rs3762525	C	T	2	6.645e-05	0.00873	0.8497	0.829	0.1705	46.77	0.7466	0.8705	ALPI(-77.9kb)|ALPP(-0.41kb)|ALPPL2(-28.61kb)|CHRND(-147.9kb)|CHRNG(-161.5kb)|DIS3L2(+34.26kb)|ECEL1(-101.6kb)|ECEL1P2(-7.522kb)|EIF4E2(-172.4kb)|MIR5001(-172.2kb)|PRSS56(-142.2kb)|TIGD1(-169.8kb)
20	54983786	rs6024860	G	A	2	6.65e-05	0.04382	0.8966	0.91	0.1491	51.96	0.9687	0.8787	AURKA(+16.44kb)|CASS4(-3.381kb)|CSTF1(+4.204kb)|FAM209A(-116kb)|FAM209B(-124.5kb)|FAM210B(+40.07kb)|GCNT7(-82.76kb)|MC3R(+158.9kb)|RTFDC1(-59.86kb)
2	233251866	rs73001995	T	A	2	6.655e-05	0.01199	0.8501	0.8262	0.1488	52.03	0.7425	0.8721	ALPI(-68.97kb)|ALPP(+4.267kb)|ALPPL2(-19.68kb)|CHRND(-139kb)|CHRNG(-152.6kb)|DIS3L2(+43.19kb)|ECEL1(-92.67kb)|ECEL1P2(+0.112kb)|EIF4E2(-163.5kb)|MIR5001(-163.3kb)|PRSS56(-133.3kb)|TIGD1(-160.9kb)
3	60264266	rs213358	G	T	2	6.656e-05	0.01368	0.8629	0.8744	0.2037	38.12	0.9474	0.8427	FHIT(0)
2	233252821	rs73001998	T	C	2	6.666e-05	0.01203	0.8502	0.8262	0.1485	52.1	0.7426	0.8722	ALPI(-68.01kb)|ALPP(+5.222kb)|ALPPL2(-18.73kb)|CHRND(-138kb)|CHRNG(-151.6kb)|DIS3L2(+44.14kb)|ECEL1(-91.72kb)|ECEL1P2(+1.067kb)|EIF4E2(-162.5kb)|MIR5001(-162.4kb)|PRSS56(-132.4kb)|TIGD1(-160kb)
18	31016155	rs1457890	T	C	2	6.694e-05	6.694e-05	1.1266	1.1266	0.7125	0	1.1522	1.1205	ASXL3(-142.4kb)|CCDC178(0)
22	34843691	rs80151183	T	C	2	6.703e-05	6.703e-05	1.2847	1.2847	0.577	0	1.1915	1.3058	.
18	31028236	rs1902839	C	T	2	6.725e-05	6.725e-05	0.9125	0.9125	0.3467	0	0.8714	0.9218	ASXL3(-130.3kb)|CCDC178(+7.551kb)
5	11953353	rs1379903	C	T	2	6.732e-05	0.3432	1.0931	1.0598	0.0333	77.93	0.9875	1.1177	CTNND2(+49.24kb)
8	42451526	rs2923408	G	A	2	6.734e-05	6.734e-05	1.0919	1.0919	0.7256	0	1.0741	1.0959	CHRNA6(-156.3kb)|CHRNB3(-101kb)|SLC20A2(+54.17kb)|SMIM19(+43.39kb)|VDAC3(+188.1kb)
6	32601684	rs2002779	G	T	2	6.739e-05	6.739e-05	0.8511	0.8511	0.7829	0	0.8366	0.8573	HLA-DOB(-178.9kb)|HLA-DQA1(-3.498kb)|HLA-DQA2(-107.5kb)|HLA-DQB1(-25.56kb)|HLA-DQB2(-122.2kb)|HLA-DRA(+188.9kb)|HLA-DRB1(+44.07kb)|HLA-DRB5(+103.7kb)|HLA-DRB6(+73.9kb)|TAP2(-187.9kb)
19	1047078	rs4147910	G	A	2	6.77e-05	0.0002361	1.2072	1.2101	0.2793	14.56	1.2957	1.1634	ABCA7(0)|ARID3A(+74.28kb)|ATP5D(-194.7kb)|C19orf26(-182.9kb)|CFD(+183.5kb)|CNN2(+8.014kb)|ELANE(+190.8kb)|GPX4(-56.86kb)|GRIN3B(+37.36kb)|HMHA1(-18.84kb)|KISS1R(+126.1kb)|MED16(+153.9kb)|POLR2E(-39.5kb)|PRTN3(+198.9kb)|R3HDM4(+133.9kb)|SBNO2(-60.55kb)|STK11(-158.7kb)|TMEM259(+25.94kb)|WDR18(+52.51kb)
18	31023946	rs11081809	C	G	2	6.793e-05	0.0003217	0.9126	0.9106	0.2889	11.1	0.8665	0.9231	ASXL3(-134.6kb)|CCDC178(+3.261kb)
7	37225235	rs1420423	G	A	2	6.797e-05	0.01964	0.9008	0.9106	0.1976	39.77	0.9666	0.8863	ELMO1(0)
2	233254052	rs73002000	T	C	2	6.801e-05	0.01202	0.8504	0.8265	0.1489	52	0.743	0.8724	ALPI(-66.78kb)|ALPP(+6.453kb)|ALPPL2(-17.5kb)|CHRND(-136.8kb)|CHRNG(-150.4kb)|DIS3L2(+45.37kb)|ECEL1(-90.48kb)|ECEL1P2(+2.298kb)|EIF4E2(-161.3kb)|MIR5001(-161.1kb)|PRSS56(-131.1kb)|TIGD1(-158.7kb)
8	139683189	rs13268861	T	G	2	6.801e-05	0.06335	1.416	1.3409	0.1322	55.89	1.0904	1.5129	COL22A1(0)|FAM135B(+174.1kb)
18	31023452	rs6417062	C	T	2	6.805e-05	0.0003218	0.9126	0.9106	0.2889	11.09	0.8665	0.9231	ASXL3(-135.1kb)|CCDC178(+2.767kb)
18	40034396	rs78480471	T	C	2	6.81e-05	6.81e-05	0.8625	0.8625	0.8266	0	0.8774	0.8592	LINC00907(0)
6	20059500	rs679951	C	T	2	6.814e-05	6.814e-05	1.1154	1.1154	0.5759	0	1.0797	1.1235	MBOAT1(-40.42kb)
6	32579868	rs150165719	T	G	2	6.822e-05	0.04409	0.8901	0.9015	0.1001	63.01	0.9567	0.8621	HLA-DQA1(-25.31kb)|HLA-DQA2(-129.3kb)|HLA-DQB1(-47.37kb)|HLA-DQB2(-144kb)|HLA-DRA(+167kb)|HLA-DRB1(+22.26kb)|HLA-DRB5(+81.86kb)|HLA-DRB6(+52.09kb)
3	76228308	rs72630364	G	A	2	6.824e-05	0.002282	1.2208	1.2399	0.2211	33.22	1.3817	1.1843	.
19	1046520	rs3764650	G	T	2	6.85e-05	0.0002048	1.2068	1.2094	0.2844	12.75	1.2942	1.1635	ABCA7(0)|ARID3A(+73.72kb)|ATP5D(-195.2kb)|C19orf26(-183.4kb)|CFD(+182.9kb)|CNN2(+7.456kb)|ELANE(+190.3kb)|GPX4(-57.42kb)|GRIN3B(+36.8kb)|HMHA1(-19.4kb)|KISS1R(+125.5kb)|MED16(+153.3kb)|POLR2E(-40.06kb)|PRTN3(+198.3kb)|R3HDM4(+133.3kb)|SBNO2(-61.11kb)|STK11(-159.3kb)|TMEM259(+25.38kb)|WDR18(+51.95kb)
6	32578052	rs532098	A	G	2	6.856e-05	0.04759	0.8906	0.9023	0.0974	63.59	0.958	0.8626	HLA-DQA1(-27.13kb)|HLA-DQA2(-131.1kb)|HLA-DQB1(-49.19kb)|HLA-DQB2(-145.8kb)|HLA-DRA(+165.2kb)|HLA-DRB1(+20.44kb)|HLA-DRB5(+80.05kb)|HLA-DRB6(+50.27kb)
18	31028263	rs1902840	A	G	2	6.863e-05	0.0001031	0.9126	0.9121	0.311	2.57	0.8684	0.9226	ASXL3(-130.3kb)|CCDC178(+7.578kb)
15	58485644	rs6493985	G	A	2	6.868e-05	6.868e-05	1.251	1.251	0.4672	0	1.1459	1.2751	ALDH1A2(+127.5kb)|AQP9(+7.534kb)
15	50271252	rs2413994	T	C	2	6.892e-05	6.892e-05	1.0936	1.0936	0.3242	0	1.146	1.0822	ATP8B4(0)
1	232754332	rs12118318	A	G	2	6.893e-05	0.2787	0.8671	0.9054	0.0409	76.07	1.007	0.8365	MAP10(-186.3kb)|SIPA1L2(+103.1kb)
3	196858838	rs79722548	T	C	2	6.894e-05	6.894e-05	0.8131	0.8131	0.6255	0	0.771	0.823	DLG1(0)|DLG1-AS1(-166.3kb)|MFI2(+102.2kb)|MFI2-AS1(+127.2kb)|MIR4797(-161.9kb)|NCBP2(+189.4kb)|NCBP2-AS2(+188kb)|PIGZ(+163.1kb)|SENP5(+197.3kb)
2	233253060	rs4075405	C	G	2	6.906e-05	0.01183	0.8505	0.8269	0.1506	51.6	0.7434	0.8724	ALPI(-67.77kb)|ALPP(+5.461kb)|ALPPL2(-18.49kb)|CHRND(-137.8kb)|CHRNG(-151.4kb)|DIS3L2(+44.38kb)|ECEL1(-91.48kb)|ECEL1P2(+1.306kb)|EIF4E2(-162.3kb)|MIR5001(-162.1kb)|PRSS56(-132.1kb)|TIGD1(-159.7kb)
17	8556940	rs12601080	T	C	2	6.916e-05	6.916e-05	1.1752	1.1752	0.4997	0	1.1081	1.1903	CCDC42(-76.3kb)|MFSD6L(-143.5kb)|MYH10(+22.86kb)|NDEL1(+185.4kb)|PIK3R6(-149.1kb)|SPDYE4(-99.48kb)
1	208101656	rs2473653	T	C	2	6.918e-05	6.918e-05	0.916	0.916	0.4992	0	0.9458	0.9097	CD34(+16.97kb)|CD46(+132.8kb)|LOC148696(+105.7kb)|MIR29B2(+125.8kb)|MIR29C(+126.4kb)|PLXNA2(-93.93kb)
10	113304785	rs7075801	G	A	2	6.936e-05	0.001072	1.2868	1.304	0.2502	24.38	1.4885	1.2407	.
18	30993524	rs74888851	C	A	2	6.96e-05	6.96e-05	1.1281	1.1281	0.639	0	1.1614	1.1203	ASXL3(-165kb)|CCDC178(0)
8	42364121	rs3935700	C	T	2	6.97e-05	6.97e-05	0.9155	0.9155	0.7794	0	0.9276	0.9128	CHRNB3(-188.4kb)|DKK4(+129.4kb)|IKBKB(+174kb)|POLB(+134.8kb)|SLC20A2(0)|SMIM19(-32.18kb)|VDAC3(+100.7kb)
18	52570377	rs55653518	G	A	2	6.976e-05	6.976e-05	0.8941	0.8941	0.3618	0	0.8451	0.9046	CCDC68(0)|RAB27B(+7.63kb)
4	13033330	rs2670758	G	A	2	6.976e-05	6.976e-05	1.154	1.154	0.7309	0	1.1232	1.1606	.
8	42357682	rs6474400	T	A	2	6.978e-05	6.978e-05	0.9154	0.9154	0.6876	0	0.9328	0.9115	CHRNB3(-194.9kb)|DKK4(+123kb)|IKBKB(+167.5kb)|POLB(+128.4kb)|SLC20A2(0)|SMIM19(-38.62kb)|VDAC3(+94.23kb)
13	106448471	rs75372899	T	C	2	7.012e-05	7.012e-05	1.3428	1.3428	0.9773	0	1.3361	1.344	LINC00343(+34.33kb)
18	40013642	rs78764756	C	T	2	7.034e-05	7.034e-05	0.8631	0.8631	0.8285	0	0.8778	0.8598	LINC00907(0)
10	26965158	rs118183234	A	G	2	7.04e-05	0.003559	1.5349	1.58	0.1698	46.93	1.9163	1.3907	ABI1(-70.37kb)|APBB1IP(+108.4kb)|LINC00202-2(+22.78kb)|LINC00264(+81.91kb)|PDSS1(-21.44kb)
6	32579775	rs12523808	T	A	2	7.05e-05	0.04286	0.8905	0.9017	0.103	62.38	0.9567	0.8628	HLA-DQA1(-25.41kb)|HLA-DQA2(-129.4kb)|HLA-DQB1(-47.46kb)|HLA-DQB2(-144.1kb)|HLA-DRA(+166.9kb)|HLA-DRB1(+22.16kb)|HLA-DRB5(+81.77kb)|HLA-DRB6(+52kb)
8	42455509	rs2923414	A	G	2	7.05e-05	7.05e-05	1.0922	1.0922	0.6948	0	1.0722	1.0967	CHRNA6(-152.3kb)|CHRNB3(-97.05kb)|SLC20A2(+58.15kb)|SMIM19(+47.37kb)|VDAC3(+192.1kb)
18	31029699	rs6507035	C	A	2	7.063e-05	7.063e-05	0.9127	0.9127	0.3528	0	0.8721	0.9219	ASXL3(-128.8kb)|CCDC178(+9.014kb)
15	35042999	rs75157847	T	C	2	7.067e-05	0.3185	1.3013	1.19	0.0513	73.67	0.9653	1.3761	ACTC1(-37.3kb)|AQR(-105.6kb)|GJD2(-1.642kb)|GOLGA8B(+167.2kb)
6	32579743	rs13208027	A	T	2	7.08e-05	0.04238	0.8905	0.9017	0.1037	62.23	0.9566	0.8629	HLA-DQA1(-25.44kb)|HLA-DQA2(-129.4kb)|HLA-DQB1(-47.5kb)|HLA-DQB2(-144.1kb)|HLA-DRA(+166.9kb)|HLA-DRB1(+22.13kb)|HLA-DRB5(+81.74kb)|HLA-DRB6(+51.96kb)
9	138178670	rs12004006	T	C	2	7.11e-05	7.11e-05	1.2511	1.2511	0.342	0	1.3481	1.2039	C9orf62(-56.42kb)|LOC401557(+99.52kb)|OLFM1(+165.6kb)|PPP1R26(-193kb)|PPP1R26-AS1(-175.9kb)
8	28782220	rs150972818	T	C	2	7.123e-05	7.123e-05	1.1558	1.1558	0.8405	0	1.1738	1.1518	EXTL3(+171kb)|HMBOX1(0)|INTS9(+34.52kb)|KIF13B(-142.6kb)
22	34843065	rs75610494	G	A	2	7.124e-05	7.124e-05	1.2835	1.2835	0.5818	0	1.1915	1.3043	.
17	76535424	rs76175593	T	C	2	7.126e-05	7.126e-05	1.1513	1.1513	0.6905	0	1.1836	1.143	CYTH1(-134.7kb)|DNAH17(0)|DNAH17-AS1(+36.29kb)|PGS1(+114.8kb)|SOCS3(+179.3kb)
16	8865418	rs1273417	C	T	2	7.135e-05	0.0003355	0.7321	0.7359	0.2972	7.97	0.8654	0.7034	ABAT(0)|CARHSP1(-81.38kb)|METTL22(+125.3kb)|PMM2(-26.25kb)|TMEM186(-23.62kb)|USP7(-120.5kb)
7	112172469	rs75594283	T	C	2	7.146e-05	7.146e-05	1.2001	1.2001	0.4783	0	1.1245	1.2198	IFRD1(+55.21kb)|LSMEM1(+41.53kb)|ZNF277(+188.5kb)
2	31736066	rs74451878	C	T	2	7.156e-05	7.156e-05	1.5687	1.5687	0.966	0	1.5539	1.5726	SRD5A2(-13.59kb)|XDH(+98.46kb)
17	40126187	rs35967904	A	G	2	7.162e-05	7.162e-05	1.2015	1.2015	0.8448	0	1.1777	1.2064	ACLY(+50.92kb)|CNP(0)|DHX58(-127.2kb)|DNAJC7(-2.251kb)|FKBP10(+146.7kb)|HSPB9(-148.6kb)|JUP(+183.2kb)|KAT2A(-138.9kb)|KCNH4(-182.7kb)|KLHL10(+121.6kb)|KLHL11(+104.6kb)|LEPREL4(+157.7kb)|NKIRAS2(-43.41kb)|NT5C3B(+133.7kb)|RAB5C(-150.8kb)|TTC25(+8.519kb)|ZNF385C(-51.41kb)
6	32575544	rs9271061	T	A	2	7.175e-05	7.175e-05	0.8567	0.8567	0.7257	0	0.8381	0.864	HLA-DQA1(-29.64kb)|HLA-DQA2(-133.6kb)|HLA-DQB1(-51.7kb)|HLA-DQB2(-148.3kb)|HLA-DRA(+162.7kb)|HLA-DRB1(+17.93kb)|HLA-DRB5(+77.54kb)|HLA-DRB6(+47.76kb)
8	107682661	rs3101534	T	A	2	7.188e-05	7.188e-05	1.1116	1.1116	0.3879	0	1.0592	1.1239	ABRA(-89.05kb)|OXR1(0)
15	34239415	rs115607792	A	G	2	7.193e-05	7.193e-05	0.6968	0.6968	0.8805	0	0.72	0.6928	AVEN(0)|CHRM5(-21.67kb)|EMC7(-136.8kb)|KATNBL1(-193.5kb)|PGBD4(-154.9kb)|RYR3(+81.11kb)
7	52948897	rs12718708	A	G	2	7.203e-05	0.189	0.8899	0.9167	0.0796	67.45	0.9951	0.869	POM121L12(-154.5kb)
11	85670945	rs673751	C	A	2	7.211e-05	7.211e-05	1.0968	1.0968	0.9584	0	1.0997	1.0962	CCDC83(+39.89kb)|PICALM(0)|SYTL2(+148.8kb)
14	33053563	rs34927020	G	T	2	7.229e-05	7.229e-05	1.0961	1.0961	0.487	0	1.0595	1.1045	AKAP6(0)
1	54915877	rs72897652	C	T	2	7.273e-05	7.273e-05	1.2603	1.2603	0.9378	0	1.273	1.2577	ACOT11(-97.93kb)|FAM151A(-159kb)|HEATR8-TTC4(-191.5kb)|MROH7(-191.5kb)|SSBP3(+43.81kb)
1	81466202	rs1991333	C	G	2	7.281e-05	0.03987	1.0948	1.1263	0.0524	73.42	1.2069	1.073	.
7	37229353	rs1035175	T	C	2	7.286e-05	0.02671	0.901	0.9119	0.1863	42.75	0.9689	0.8862	ELMO1(0)
3	196967635	rs116784111	C	T	2	7.29e-05	7.29e-05	0.8053	0.8053	0.6992	0	0.77	0.8133	DLG1(0)|DLG1-AS1(-57.48kb)|MIR4797(-53.11kb)
16	57828404	rs34165478	A	G	2	7.291e-05	7.291e-05	0.8466	0.8466	0.4437	0	0.9079	0.8342	CCDC135(+63.04kb)|CNGB1(-87.84kb)|GPR56(+129.5kb)|GPR97(+105.1kb)|KATNB1(+37.24kb)|KIFC3(0)|LOC388282(-16.14kb)|TEPP(-181.9kb)
8	42455846	rs2974312	T	C	2	7.301e-05	7.301e-05	1.0921	1.0921	0.708	0	1.073	1.0964	CHRNA6(-151.9kb)|CHRNB3(-96.72kb)|SLC20A2(+58.49kb)|SMIM19(+47.71kb)|VDAC3(+192.4kb)
18	31000405	rs145585329	T	C	2	7.325e-05	7.325e-05	1.1269	1.1269	0.668	0	1.157	1.1198	ASXL3(-158.1kb)|CCDC178(0)
18	31030542	rs4514756	G	A	2	7.338e-05	7.338e-05	0.9128	0.9128	0.3242	0	0.8698	0.9226	ASXL3(-128kb)|CCDC178(+9.857kb)
6	32249987	rs9268118	C	T	2	7.348e-05	0.0292	0.8722	0.8418	0.0717	69.16	0.7645	0.8981	AGER(+97.89kb)|AGPAT1(+104.1kb)|ATF6B(+154kb)|BTNL2(-112.5kb)|C6orf10(-10.49kb)|EGFL8(+113.9kb)|FKBPL(+151.9kb)|GPSM3(+86.69kb)|HCG23(-108.3kb)|HLA-DRA(-157.6kb)|LOC100507547(+127.8kb)|NOTCH4(+58.14kb)|PBX2(+92.02kb)|PPT2(+118.5kb)|PPT2-EGFL8(+113.9kb)|PRRT1(+130.3kb)|RNF5(+101.4kb)|RNF5P1(+101.4kb)|TNXB(+172.8kb)
6	32554607	rs9270101	C	T	2	7.363e-05	7.363e-05	0.8166	0.8166	0.5089	0	0.7714	0.8331	BTNL2(+179.7kb)|HCG23(+193.1kb)|HLA-DQA1(-50.58kb)|HLA-DQA2(-154.6kb)|HLA-DQB1(-72.63kb)|HLA-DQB2(-169.3kb)|HLA-DRA(+141.8kb)|HLA-DRB1(0)|HLA-DRB5(+56.6kb)|HLA-DRB6(+26.83kb)
8	42364354	rs4568607	C	T	2	7.381e-05	7.381e-05	0.9158	0.9158	0.7823	0	0.9278	0.9132	CHRNB3(-188.2kb)|DKK4(+129.7kb)|IKBKB(+174.2kb)|POLB(+135kb)|SLC20A2(0)|SMIM19(-31.94kb)|VDAC3(+100.9kb)
19	45418790	rs5117	C	T	2	7.382e-05	8.82e-05	1.3468	1.3478	0.3148	1.03	1.5921	1.3017	APOC1(0)|APOC1P1(-11.27kb)|APOC2(-30.45kb)|APOC4(-26.7kb)|APOC4-APOC2(-26.7kb)|APOE(+6.14kb)|BCAM(+94.11kb)|BCL3(+155.5kb)|CBLC(+114.9kb)|CLASRP(-123.5kb)|CLPTM1(-39.05kb)|GEMIN7(-163.7kb)|PPP1R37(-177.6kb)|PVRL2(+26.3kb)|RELB(-85.92kb)|TOMM40(+11.84kb)|ZNF296(-156kb)
7	37227699	rs17170912	A	G	2	7.382e-05	0.02332	1.1098	1.0973	0.1921	41.22	1.0331	1.1282	ELMO1(0)
8	121877222	rs78722351	T	G	2	7.389e-05	7.389e-05	0.7693	0.7693	0.7462	0	0.8052	0.7616	SNTB1(+52.91kb)
12	15914405	rs11056634	G	A	2	7.414e-05	0.02895	1.3315	1.2876	0.1759	45.42	1.0941	1.398	DERA(-149.8kb)|EPS8(0)|PTPRO(+163.1kb)|STRAP(-120.9kb)
11	85691810	rs645299	A	C	2	7.418e-05	7.418e-05	1.0967	1.0967	0.9905	0	1.096	1.0968	CCDC83(+60.76kb)|PICALM(0)|SYTL2(+169.6kb)
1	208095701	rs2745960	A	T	2	7.419e-05	7.419e-05	0.9159	0.9159	0.6354	0	0.9367	0.9114	CD34(+11.02kb)|CD46(+126.8kb)|CR1L(+198.7kb)|LOC148696(+99.76kb)|MIR29B2(+119.8kb)|MIR29C(+120.4kb)|PLXNA2(-99.89kb)
7	37226871	rs10250337	G	T	2	7.429e-05	0.01824	1.1096	1.0981	0.202	38.58	1.0347	1.1275	ELMO1(0)
16	25733851	rs56235801	T	C	2	7.438e-05	7.438e-05	0.8942	0.8942	0.8389	0	0.8829	0.8965	HS3ST4(0)
6	7673719	rs1322237	C	T	2	7.439e-05	7.439e-05	0.8943	0.8943	0.8622	0	0.9031	0.8921	BMP6(-53.29kb)|DSP(+86.77kb)|SNRNP48(+61.52kb)
14	47534529	rs10134428	C	G	2	7.441e-05	7.441e-05	1.1682	1.1682	0.4663	0	1.2395	1.1522	MDGA2(0)
18	30997426	rs72942655	C	T	2	7.446e-05	7.446e-05	1.1271	1.1271	0.6491	0	1.1591	1.1195	ASXL3(-161.1kb)|CCDC178(0)
5	43591234	rs116125702	T	C	2	7.446e-05	0.004879	1.3114	1.2899	0.2381	28.15	1.1193	1.3665	C5orf28(+107.2kb)|C5orf34(+75.96kb)|CCL28(+178.7kb)|LOC100652772(0)|NNT(-11.56kb)|PAIP1(+33.71kb)
18	31004163	rs72942662	C	T	2	7.448e-05	7.448e-05	1.1266	1.1266	0.6657	0	1.1568	1.1194	ASXL3(-154.4kb)|CCDC178(0)
1	179790060	rs73041634	T	C	2	7.449e-05	0.1782	1.2319	1.17	0.0844	66.41	1.0115	1.2846	CEP350(-133.8kb)|FAM163A(+4.727kb)|TDRD5(+129.7kb)|TOR1AIP1(-61.12kb)|TOR1AIP2(-19.04kb)
18	31005665	rs72942664	C	T	2	7.462e-05	7.462e-05	1.1263	1.1263	0.669	0	1.1561	1.1192	ASXL3(-152.9kb)|CCDC178(0)
2	59769317	rs2674050	T	C	2	7.466e-05	7.466e-05	0.9098	0.9098	0.4466	0	0.8757	0.9177	.
18	31008845	rs72942671	A	G	2	7.47e-05	7.47e-05	1.1261	1.1261	0.6735	0	1.1554	1.1191	ASXL3(-149.7kb)|CCDC178(0)
18	31029320	rs6507034	C	T	2	7.47e-05	7.47e-05	0.913	0.913	0.348	0	0.872	0.9223	ASXL3(-129.2kb)|CCDC178(+8.635kb)
6	32578958	rs502803	A	G	2	7.476e-05	0.04789	0.8909	0.9025	0.0977	63.53	0.9581	0.8628	HLA-DQA1(-26.22kb)|HLA-DQA2(-130.2kb)|HLA-DQB1(-48.28kb)|HLA-DQB2(-144.9kb)|HLA-DRA(+166.1kb)|HLA-DRB1(+21.34kb)|HLA-DRB5(+80.95kb)|HLA-DRB6(+51.18kb)
8	121868403	rs60773793	G	C	2	7.476e-05	7.476e-05	0.7748	0.7748	0.5815	0	0.8351	0.7619	SNTB1(+44.09kb)
1	86968874	rs144008039	A	C	2	7.478e-05	7.478e-05	0.613	0.613	0.6842	0	0.5596	0.6302	CLCA1(+2.9kb)|CLCA2(+46.63kb)|CLCA3P(-131.1kb)|CLCA4(-43.88kb)|ODF2L(+106.8kb)
9	903352	rs57926428	T	A	2	7.494e-05	7.494e-05	0.8673	0.8673	0.89	0	0.8765	0.8653	DMRT1(0)|DMRT2(-147kb)|DMRT3(-73.62kb)|KANK1(+157.2kb)
3	183794436	rs6443940	G	A	2	7.505e-05	7.505e-05	0.9127	0.9127	0.3638	0	0.9544	0.9038	ABCC5(+58.71kb)|ABCC5-AS1(+65.23kb)|ABCF3(-109.4kb)|ALG3(-165.7kb)|AP2M1(-98.2kb)|CAMK2N2(-182.6kb)|DVL3(-78.85kb)|ECE2(-173kb)|EIF2B5(-58.37kb)|HTR3C(+15.98kb)|HTR3D(+37.28kb)|HTR3E(-20.42kb)|MIR1224(-164.8kb)|PARL(+191.7kb)|VWA5B2(-153.9kb)
2	59769012	rs2674048	T	C	2	7.512e-05	7.512e-05	0.9099	0.9099	0.4756	0	0.8779	0.9173	.
11	85682817	rs606505	G	A	2	7.526e-05	7.526e-05	1.0965	1.0965	0.9714	0	1.0985	1.0961	CCDC83(+51.77kb)|PICALM(0)|SYTL2(+160.6kb)
6	32451361	rs12191360	A	C	2	7.529e-05	0.02451	0.8908	0.9005	0.1401	54.05	0.953	0.8666	BTNL2(+76.46kb)|C6orf10(+111.7kb)|HCG23(+89.89kb)|HLA-DQA1(-153.8kb)|HLA-DQB1(-175.9kb)|HLA-DRA(+38.54kb)|HLA-DRB1(-95.18kb)|HLA-DRB5(-33.79kb)|HLA-DRB6(-69.13kb)
6	32295419	rs533449611	C	A	2	7.545e-05	0.02798	0.8716	0.8419	0.0748	68.49	0.7649	0.8975	AGER(+143.3kb)|AGPAT1(+149.5kb)|ATF6B(+199.4kb)|BTNL2(-67.09kb)|C6orf10(0)|EGFL8(+159.4kb)|FKBPL(+197.4kb)|GPSM3(+132.1kb)|HCG23(-62.87kb)|HLA-DRA(-112.2kb)|HLA-DRB5(-189.7kb)|LOC100507547(+173.3kb)|NOTCH4(+103.6kb)|PBX2(+137.5kb)|PPT2(+164kb)|PPT2-EGFL8(+159.4kb)|PRRT1(+175.7kb)|RNF5(+146.8kb)|RNF5P1(+146.9kb)
11	85760028	rs694011	C	T	2	7.548e-05	7.548e-05	1.0965	1.0965	0.9359	0	1.101	1.0956	CCDC83(+129kb)|EED(-195.8kb)|PICALM(0)
1	232734151	rs7523501	G	C	2	7.55e-05	0.5713	1.1562	1.0778	0.0039	88.01	0.9349	1.2189	SIPA1L2(+82.91kb)
17	15383670	rs7219850	G	A	2	7.566e-05	7.566e-05	1.1285	1.1285	0.5555	0	1.1745	1.1194	CDRT1(-108.3kb)|CDRT4(+12.74kb)|TEKT3(+138.7kb)|TRIM16(-147.6kb)|TVP23C(-21.91kb)|TVP23C-CDRT4(0)
8	42369473	rs2974294	T	C	2	7.584e-05	7.584e-05	0.9161	0.9161	0.7889	0	0.9276	0.9135	CHRNB3(-183.1kb)|DKK4(+134.8kb)|IKBKB(+179.3kb)|POLB(+140.1kb)|SLC20A2(0)|SMIM19(-26.82kb)|VDAC3(+106kb)
1	54910693	rs7550275	T	C	2	7.59e-05	7.59e-05	1.2591	1.2591	0.9085	0	1.2778	1.2553	ACOT11(-103.1kb)|FAM151A(-164.2kb)|HEATR8-TTC4(-196.7kb)|MROH7(-196.7kb)|SSBP3(+38.62kb)
1	186488696	rs16825476	C	T	2	7.592e-05	7.592e-05	0.7698	0.7698	0.4526	0	0.8611	0.753	C1orf27(+98.19kb)|MIR548F1(+42.04kb)|OCLM(+118.1kb)|PDC(+58.46kb)|PTGS2(-152.2kb)|TPR(+144.2kb)
15	48701029	rs11070641	T	C	2	7.596e-05	0.01812	1.112	1.1003	0.2011	38.81	1.0359	1.1306	DUT(+65.46kb)|FBN1(0)|SLC12A1(+104.8kb)
2	59768685	rs2674047	A	T	2	7.596e-05	7.596e-05	0.91	0.91	0.4813	0	0.8784	0.9173	.
18	31006410	rs72942665	C	T	2	7.619e-05	7.619e-05	1.1261	1.1261	0.6689	0	1.1559	1.119	ASXL3(-152.1kb)|CCDC178(0)
18	31008022	rs72942669	T	C	2	7.623e-05	7.623e-05	1.1259	1.1259	0.6709	0	1.1555	1.1189	ASXL3(-150.5kb)|CCDC178(0)
8	42369929	rs2974295	C	T	2	7.629e-05	7.629e-05	0.9161	0.9161	0.7759	0	0.9284	0.9134	CHRNB3(-182.6kb)|DKK4(+135.3kb)|IKBKB(+179.8kb)|POLB(+140.6kb)|SLC20A2(0)|SMIM19(-26.37kb)|VDAC3(+106.5kb)
12	25159640	rs699038	A	G	2	7.631e-05	7.631e-05	1.0946	1.0946	0.8879	0	1.087	1.0962	BCAT1(+57.25kb)|C12orf77(+9.267kb)|CASC1(-101.6kb)|KRAS(-198.5kb)|LRMP(-45.54kb)|LYRM5(-188.5kb)
2	11855513	rs11683719	A	G	2	7.638e-05	0.1508	1.1513	1.115	0.0932	64.52	1.0135	1.1841	GREB1(+72.6kb)|LPIN1(0)|MIR4262(-121.5kb)|MIR4429(+174.7kb)|NTSR2(+45.18kb)
17	15387071	rs11655100	T	G	2	7.641e-05	7.641e-05	1.1284	1.1284	0.5576	0	1.1741	1.1193	CDRT1(-104.9kb)|CDRT4(+16.15kb)|TEKT3(+142.1kb)|TRIM16(-144.2kb)|TVP23C(-18.51kb)|TVP23C-CDRT4(0)
18	31030918	rs6507037	T	C	2	7.655e-05	7.655e-05	0.913	0.913	0.3287	0	0.8703	0.9227	ASXL3(-127.6kb)|CCDC178(+10.23kb)
17	15387225	rs9674557	G	A	2	7.661e-05	7.661e-05	1.1284	1.1284	0.5555	0	1.1744	1.1193	CDRT1(-104.8kb)|CDRT4(+16.3kb)|TEKT3(+142.3kb)|TRIM16(-144.1kb)|TVP23C(-18.35kb)|TVP23C-CDRT4(0)
16	78861356	rs8048851	C	A	2	7.668e-05	7.668e-05	1.1085	1.1085	0.431	0	1.1567	1.0976	WWOX(0)
12	25159383	rs699037	A	G	2	7.678e-05	7.678e-05	1.0945	1.0945	0.8939	0	1.0873	1.096	BCAT1(+56.99kb)|C12orf77(+9.01kb)|CASC1(-101.8kb)|KRAS(-198.8kb)|LRMP(-45.8kb)|LYRM5(-188.8kb)
1	177609159	rs1313160	G	A	2	7.68e-05	7.68e-05	1.0954	1.0954	0.5092	0	1.1309	1.0875	.
18	30989093	rs2061362	T	C	2	7.688e-05	0.001804	0.9116	0.9059	0.2397	27.65	0.8599	0.9235	ASXL3(-169.4kb)|CCDC178(0)
4	94673037	rs72659522	C	A	2	7.699e-05	0.5439	1.3131	1.1486	0.0186	81.94	0.8859	1.4038	ATOH1(-77.04kb)|GRID2(0)
7	76396376	rs7797138	A	G	2	7.699e-05	7.699e-05	1.2109	1.2109	0.8268	0	1.19	1.2187	LOC100133091(+139.1kb)|POMZP3(+139.8kb)
16	31628003	rs73524325	A	G	2	7.706e-05	7.706e-05	1.3866	1.3866	0.3576	0	1.1964	1.442	AHSP(+87.88kb)|ARMC5(+149.5kb)|C16orf58(+108.3kb)|CLUHP3(-83.93kb)|COX6A2(+188.3kb)|ITGAD(+190.2kb)|SLC5A2(+125.9kb)|TGFB1I1(+138.7kb)|YBX3P1(+47.16kb)|ZNF720(-96.55kb)|ZNF843(+173.7kb)
8	42363694	rs3935698	A	G	2	7.725e-05	7.725e-05	0.916	0.916	0.8027	0	0.9268	0.9136	CHRNB3(-188.9kb)|DKK4(+129kb)|IKBKB(+173.5kb)|POLB(+134.4kb)|SLC20A2(0)|SMIM19(-32.6kb)|VDAC3(+100.2kb)
16	57832503	rs8061387	C	T	2	7.741e-05	7.741e-05	0.8479	0.8479	0.5578	0	0.8945	0.8385	CCDC135(+67.14kb)|CNGB1(-83.74kb)|GPR56(+133.6kb)|GPR97(+109.2kb)|KATNB1(+41.34kb)|KIFC3(0)|LOC388282(-12.04kb)|TEPP(-177.8kb)|ZNF319(-196.1kb)
22	34840443	rs9621944	G	A	2	7.745e-05	7.745e-05	1.2815	1.2815	0.5471	0	1.1815	1.3042	.
17	15385932	rs9908576	C	T	2	7.755e-05	7.755e-05	1.1283	1.1283	0.5568	0	1.1741	1.1192	CDRT1(-106kb)|CDRT4(+15.01kb)|TEKT3(+141kb)|TRIM16(-145.3kb)|TVP23C(-19.64kb)|TVP23C-CDRT4(0)
16	31627899	rs75513728	C	A	2	7.758e-05	7.758e-05	1.3865	1.3865	0.3584	0	1.1965	1.4418	AHSP(+87.78kb)|ARMC5(+149.4kb)|C16orf58(+108.2kb)|CLUHP3(-84.03kb)|COX6A2(+188.2kb)|ITGAD(+190.1kb)|SLC5A2(+125.8kb)|TGFB1I1(+138.6kb)|YBX3P1(+47.05kb)|ZNF720(-96.65kb)|ZNF843(+173.6kb)
10	79989151	rs718708	A	G	2	7.78e-05	7.78e-05	1.147	1.147	0.9079	0	1.1374	1.1492	LINC00595(-37.93kb)|LINC00856(-19.23kb)|POLR3A(+199.9kb)|RPS24(+172.6kb)
14	34909808	rs55661983	G	C	2	7.78e-05	7.78e-05	1.2764	1.2764	0.9712	0	1.2703	1.2777	EAPP(-75.33kb)|SNX6(-120.8kb)|SPTSSA(0)
4	45316135	rs11722006	G	A	2	7.78e-05	7.78e-05	1.0956	1.0956	0.9174	0	1.1012	1.0944	.
11	85724661	rs636355	C	T	2	7.783e-05	7.783e-05	1.0962	1.0962	0.9821	0	1.0974	1.0959	CCDC83(+93.61kb)|PICALM(0)
10	11718713	rs7912495	G	A	2	7.796e-05	7.796e-05	1.0932	1.0932	0.6574	0	1.0709	1.0985	ECHDC3(-65.64kb)|PROSER2(-146.7kb)|PROSER2-AS1(-172.9kb)|USP6NL(+65.03kb)
15	35058220	rs16959728	A	G	2	7.799e-05	0.6257	1.2865	1.1198	0.0086	85.53	0.8663	1.3812	ACTC1(-22.08kb)|AQR(-90.33kb)|GJD2(+11.44kb)|GOLGA8B(+182.4kb)
18	77647406	rs56071379	A	G	2	7.799e-05	7.799e-05	1.1084	1.1084	0.7958	0	1.0948	1.1125	CTDP1(+132.9kb)|HSBP1L1(-77.18kb)|KCNG2(0)|PQLC1(-15.01kb)|RBFA(-146.9kb)|RBFADN(-179.8kb)|TXNL4A(-85.46kb)
11	59933492	rs56189574	G	A	2	7.833e-05	0.02281	0.9149	0.8965	0.0914	64.92	0.8442	0.9315	MS4A2(+67.55kb)|MS4A3(+94.9kb)|MS4A4A(-114.5kb)|MS4A6A(-5.587kb)|MS4A6E(-168.9kb)|PLAC1L(+118kb)
8	121867913	rs73707196	T	C	2	7.839e-05	7.839e-05	0.7754	0.7754	0.5895	0	0.8344	0.7627	SNTB1(+43.6kb)
16	57831336	rs35820612	G	C	2	7.84e-05	7.84e-05	0.8465	0.8465	0.4606	0	0.9059	0.8345	CCDC135(+65.97kb)|CNGB1(-84.91kb)|GPR56(+132.4kb)|GPR97(+108kb)|KATNB1(+40.17kb)|KIFC3(0)|LOC388282(-13.21kb)|TEPP(-179kb)|ZNF319(-197.2kb)
17	15389982	rs7219580	C	T	2	7.847e-05	7.847e-05	1.1283	1.1283	0.5485	0	1.1751	1.119	CDRT1(-102kb)|CDRT4(+19.06kb)|TEKT3(+145kb)|TRIM16(-141.3kb)|TVP23C(-15.6kb)|TVP23C-CDRT4(0)
19	1046076	rs72973584	T	C	2	7.886e-05	0.1051	1.203	1.1677	0.0636	70.94	1.0475	1.2704	ABCA7(0)|ARID3A(+73.27kb)|ATP5D(-195.7kb)|C19orf26(-183.9kb)|CFD(+182.5kb)|CNN2(+7.012kb)|ELANE(+189.8kb)|GPX4(-57.86kb)|GRIN3B(+36.35kb)|HMHA1(-19.84kb)|KISS1R(+125.1kb)|MED16(+152.9kb)|POLR2E(-40.5kb)|PRTN3(+197.9kb)|R3HDM4(+132.9kb)|SBNO2(-61.56kb)|STK11(-159.7kb)|TMEM259(+24.94kb)|WDR18(+51.51kb)
21	28065221	rs2830401	G	A	2	7.889e-05	7.889e-05	0.916	0.916	0.9377	0	0.9127	0.9168	ADAMTS1(-143.4kb)|CYYR1(+119.6kb)
6	32580136	rs3104419	T	C	2	7.89e-05	0.04661	0.8912	0.9026	0.1	63.04	0.9579	0.8632	HLA-DQA1(-25.05kb)|HLA-DQA2(-129kb)|HLA-DQB1(-47.1kb)|HLA-DQB2(-143.7kb)|HLA-DRA(+167.3kb)|HLA-DRB1(+22.52kb)|HLA-DRB5(+82.13kb)|HLA-DRB6(+52.36kb)
10	113308952	rs76457288	G	T	2	7.893e-05	0.0008049	1.2833	1.2971	0.2624	20.39	1.4773	1.2384	.
17	15400678	rs1548681	C	T	2	7.894e-05	7.894e-05	1.1313	1.1313	0.7704	0	1.1546	1.1267	CDRT1(-91.3kb)|CDRT4(+29.75kb)|TEKT3(+155.7kb)|TRIM16(-130.6kb)|TVP23C(-4.899kb)|TVP23C-CDRT4(0)
22	35822764	rs12165592	G	A	2	7.91e-05	0.03583	1.0992	1.1279	0.0539	73.08	1.2069	1.0744	HMGXB4(+131kb)|HMOX1(+32.56kb)|MB(-180kb)|MCM5(+2.269kb)|MIR3909(+91.01kb)|RASD2(-114.6kb)|TOM1(+78.78kb)
6	57103934	rs386229	A	G	2	7.916e-05	7.916e-05	0.8851	0.8851	0.3644	0	0.8365	0.8975	BAG2(+53.92kb)|KIAA1586(+183.9kb)|PRIM2(-78.49kb)|RAB23(+16.82kb)|ZNF451(+68.84kb)
18	31030946	rs6507038	T	C	2	7.92e-05	7.92e-05	0.9132	0.9132	0.3538	0	0.8726	0.9224	ASXL3(-127.6kb)|CCDC178(+10.26kb)
9	131962646	rs72760563	T	C	2	7.92e-05	7.92e-05	1.4371	1.4371	0.7587	0	1.3414	1.4538	C9orf106(-120.6kb)|CRAT(+89.58kb)|DOLPP1(+109.9kb)|FAM73B(+128.3kb)|IER5L(+22.11kb)|NUP188(+193.3kb)|PPP2R4(+51.42kb)|SH3GLB2(+172.1kb)
6	32580331	rs2858861	T	C	2	7.924e-05	0.04645	0.8912	0.9026	0.1003	62.97	0.9579	0.8633	HLA-DQA1(-24.85kb)|HLA-DQA2(-128.8kb)|HLA-DQB1(-46.91kb)|HLA-DQB2(-143.5kb)|HLA-DRA(+167.5kb)|HLA-DRB1(+22.72kb)|HLA-DRB5(+82.32kb)|HLA-DRB6(+52.55kb)
17	15384996	rs9904490	C	A	2	7.946e-05	7.946e-05	1.1282	1.1282	0.5547	0	1.1742	1.119	CDRT1(-107kb)|CDRT4(+14.07kb)|TEKT3(+140kb)|TRIM16(-146.3kb)|TVP23C(-20.58kb)|TVP23C-CDRT4(0)
11	75567383	rs141321256	C	T	2	7.966e-05	7.966e-05	1.9112	1.9112	0.5778	0	1.6822	2.0404	DGAT2(+54.8kb)|LOC283214(+87.69kb)|MAP6(+187.9kb)|MOGAT2(+125.1kb)|UVRAG(0)
8	28592568	rs2283102	G	A	2	7.966e-05	7.966e-05	0.9056	0.9056	0.6684	0	0.8848	0.9101	EXTL3(0)|FZD3(+160.8kb)|HMBOX1(-155.3kb)|INTS9(-32.61kb)
9	8371405	rs4742488	T	G	2	7.982e-05	7.982e-05	1.1254	1.1254	0.4097	0	1.1824	1.1116	PTPRD(0)
1	179790074	rs73041637	A	C	2	8.005e-05	0.1778	1.2307	1.1693	0.0857	66.14	1.0113	1.2831	CEP350(-133.8kb)|FAM163A(+4.741kb)|TDRD5(+129.7kb)|TOR1AIP1(-61.1kb)|TOR1AIP2(-19.03kb)
1	179790265	rs113921162	A	G	2	8.009e-05	0.1781	1.2307	1.1692	0.0856	66.15	1.0112	1.283	CEP350(-133.6kb)|FAM163A(+4.932kb)|TDRD5(+129.9kb)|TOR1AIP1(-60.91kb)|TOR1AIP2(-18.84kb)
1	179790348	rs112363799	G	A	2	8.027e-05	0.1786	1.2307	1.1692	0.0854	66.2	1.0111	1.2831	CEP350(-133.6kb)|FAM163A(+5.015kb)|TDRD5(+129.9kb)|TOR1AIP1(-60.83kb)|TOR1AIP2(-18.75kb)
4	13037868	rs62295182	T	C	2	8.029e-05	8.029e-05	1.1525	1.1525	0.8491	0	1.1355	1.1561	.
14	47535917	rs1539224	C	T	2	8.037e-05	8.037e-05	1.1673	1.1673	0.466	0	1.2386	1.1513	MDGA2(0)
8	42353515	rs7002277	G	A	2	8.037e-05	8.037e-05	0.916	0.916	0.6782	0	0.934	0.912	CHRNB3(-199kb)|DKK4(+118.8kb)|IKBKB(+163.3kb)|POLB(+124.2kb)|SLC20A2(0)|SMIM19(-42.78kb)|VDAC3(+90.06kb)
1	179790168	rs73041639	G	A	2	8.038e-05	0.178	1.2306	1.1692	0.0857	66.13	1.0112	1.2829	CEP350(-133.7kb)|FAM163A(+4.835kb)|TDRD5(+129.8kb)|TOR1AIP1(-61.01kb)|TOR1AIP2(-18.93kb)
11	41868575	rs117161346	G	A	2	8.04e-05	0.001682	1.3913	1.4214	0.2421	26.92	1.7085	1.3278	.
1	179790235	rs112050168	T	C	2	8.041e-05	0.1781	1.2306	1.1692	0.0856	66.15	1.0112	1.283	CEP350(-133.7kb)|FAM163A(+4.902kb)|TDRD5(+129.8kb)|TOR1AIP1(-60.94kb)|TOR1AIP2(-18.87kb)
2	64219057	rs12995137	G	A	2	8.041e-05	0.07691	1.2031	1.1652	0.1534	50.93	1.0308	1.2385	LINC00309(-193.2kb)|PELI1(-100.7kb)|UGP2(+100.4kb)|VPS54(0)
14	47531162	rs6572398	T	C	2	8.062e-05	0.003673	1.1583	1.1746	0.2088	36.71	1.2784	1.1328	MDGA2(0)
14	47536012	rs2416016	A	T	2	8.074e-05	8.074e-05	1.1672	1.1672	0.459	0	1.2397	1.151	MDGA2(0)
14	47528470	rs8009302	C	T	2	8.098e-05	8.098e-05	1.1671	1.1671	0.4413	0	1.2424	1.1502	MDGA2(0)
1	177643968	rs10913393	G	A	2	8.109e-05	8.109e-05	0.9097	0.9097	0.3417	0	0.8669	0.9196	.
1	208099183	rs2785637	T	G	2	8.11e-05	8.11e-05	0.917	0.917	0.6015	0	0.9398	0.9121	CD34(+14.5kb)|CD46(+130.3kb)|LOC148696(+103.2kb)|MIR29B2(+123.3kb)|MIR29C(+123.9kb)|PLXNA2(-96.4kb)
1	208099031	rs2724371	T	C	2	8.117e-05	8.117e-05	0.9171	0.9171	0.5543	0	0.9431	0.9116	CD34(+14.35kb)|CD46(+130.2kb)|LOC148696(+103.1kb)|MIR29B2(+123.2kb)|MIR29C(+123.7kb)|PLXNA2(-96.56kb)
1	2205581	rs12045693	A	C	2	8.126e-05	0.06075	0.9137	0.9266	0.149	51.99	0.9796	0.8995	C1orf86(+61.42kb)|LOC100129534(-76.27kb)|MORN1(-47.11kb)|PEX10(-130.7kb)|PRKCZ(+88.75kb)|RER1(-117.6kb)|SKI(0)
8	139682779	rs11989534	A	C	2	8.132e-05	0.05647	1.4114	1.341	0.141	53.85	1.0938	1.5062	COL22A1(0)|FAM135B(+173.7kb)
7	137931977	rs55642519	A	G	2	8.15e-05	8.15e-05	1.1271	1.1271	0.6067	0	1.0869	1.1347	AKR1D1(+128.9kb)|MIR4468(+123.4kb)
10	113506079	rs1337991	C	T	2	8.164e-05	8.164e-05	0.7932	0.7932	0.5206	0	0.7324	0.8075	.
8	139682782	rs11989535	G	C	2	8.169e-05	0.05679	1.4114	1.3409	0.1407	53.92	1.0936	1.5063	COL22A1(0)|FAM135B(+173.7kb)
8	121869336	rs73707197	A	C	2	8.186e-05	8.186e-05	0.7758	0.7758	0.5699	0	0.8379	0.7624	SNTB1(+45.03kb)
12	88670147	rs117811542	T	C	2	8.2e-05	0.1762	1.2203	1.1622	0.0867	65.93	1.0112	1.27	CEP290(+134.2kb)|TMTC3(+76.48kb)
11	59184282	rs79559568	T	G	2	8.211e-05	8.211e-05	1.4227	1.4227	0.8912	0	1.389	1.4316	MIR3162(-178.3kb)|OR4D6(-40.15kb)|OR4D9(-98.1kb)|OR4D10(-60.62kb)|OR4D11(-86.77kb)|OR5A1(-26.36kb)|OR5A2(-5.169kb)|OR5AN1(+51.42kb)|OSBP(-157.6kb)
8	42363587	rs7837280	T	C	2	8.217e-05	8.217e-05	0.9162	0.9162	0.8072	0	0.9268	0.9139	CHRNB3(-189kb)|DKK4(+128.9kb)|IKBKB(+173.4kb)|POLB(+134.3kb)|SLC20A2(0)|SMIM19(-32.71kb)|VDAC3(+100.1kb)
8	107691995	rs7000202	A	T	2	8.245e-05	8.245e-05	1.1105	1.1105	0.3913	0	1.0586	1.1227	ABRA(-79.72kb)|OXR1(0)
6	32429582	rs9268851	G	A	2	8.257e-05	8.257e-05	0.8491	0.8491	0.3562	0	0.7945	0.8681	BTNL2(+54.68kb)|C6orf10(+89.93kb)|HCG23(+68.11kb)|HLA-DQA1(-175.6kb)|HLA-DQB1(-197.7kb)|HLA-DRA(+16.76kb)|HLA-DRB1(-117kb)|HLA-DRB5(-55.57kb)|HLA-DRB6(-90.91kb)
8	107688229	rs3132807	C	G	2	8.259e-05	8.259e-05	1.1106	1.1106	0.395	0	1.059	1.1227	ABRA(-83.48kb)|OXR1(0)
8	107692562	rs3102432	C	T	2	8.266e-05	8.266e-05	1.1105	1.1105	0.3935	0	1.0588	1.1226	ABRA(-79.15kb)|OXR1(0)
6	32773497	rs6457681	T	G	2	8.284e-05	8.284e-05	0.8994	0.8994	0.9471	0	0.9028	0.8986	BRD2(-162.9kb)|HLA-DMA(-142.9kb)|HLA-DMB(-128.9kb)|HLA-DOA(-198.5kb)|HLA-DOB(-7.042kb)|HLA-DQA1(+162.1kb)|HLA-DQA2(+58.83kb)|HLA-DQB1(+139kb)|HLA-DQB2(+42.17kb)|LOC100294145(-88.46kb)|LOC100507463(-38.36kb)|PSMB8(-35kb)|PSMB9(-48.44kb)|TAP1(-39.49kb)|TAP2(-16.11kb)
18	30986544	rs72942646	C	T	2	8.296e-05	8.296e-05	1.1272	1.1272	0.6482	0	1.1597	1.1196	ASXL3(-172kb)|CCDC178(0)
13	91409159	rs17553833	T	G	2	8.3e-05	8.3e-05	0.8255	0.8255	0.7645	0	0.8528	0.8201	LINC00410(-134kb)
2	109447787	rs11900990	G	T	2	8.349e-05	8.349e-05	0.856	0.856	0.9674	0	0.8529	0.8566	CCDC138(0)|EDAR(-63.14kb)|LIMS1(+144.1kb)|RANBP2(+45.52kb)
1	179789946	rs73041632	T	G	2	8.354e-05	0.1819	1.2303	1.1685	0.085	66.3	1.01	1.2828	CEP350(-134kb)|FAM163A(+4.613kb)|TDRD5(+129.5kb)|TOR1AIP1(-61.23kb)|TOR1AIP2(-19.16kb)
16	57829099	rs71387196	C	A	2	8.359e-05	8.359e-05	0.8476	0.8476	0.4608	0	0.9067	0.8356	CCDC135(+63.73kb)|CNGB1(-87.14kb)|GPR56(+130.2kb)|GPR97(+105.8kb)|KATNB1(+37.94kb)|KIFC3(0)|LOC388282(-15.45kb)|TEPP(-181.2kb)|ZNF319(-199.5kb)
18	31028198	rs77883626	A	G	2	8.368e-05	8.368e-05	1.1222	1.1222	0.806	0	1.1389	1.1183	ASXL3(-130.3kb)|CCDC178(+7.513kb)
6	32600375	rs3104373	C	T	2	8.369e-05	8.369e-05	0.8372	0.8372	0.5414	0	0.8009	0.8517	HLA-DOB(-180.2kb)|HLA-DQA1(-4.807kb)|HLA-DQA2(-108.8kb)|HLA-DQB1(-26.86kb)|HLA-DQB2(-123.5kb)|HLA-DRA(+187.5kb)|HLA-DRB1(+42.76kb)|HLA-DRB5(+102.4kb)|HLA-DRB6(+72.6kb)|TAP2(-189.2kb)
4	132626862	rs180964723	C	G	2	8.373e-05	8.373e-05	1.9712	1.9712	0.7098	0	1.8052	2.0658	.
8	42369455	rs2974293	A	G	2	8.382e-05	8.382e-05	0.9166	0.9166	0.7978	0	0.9276	0.9141	CHRNB3(-183.1kb)|DKK4(+134.8kb)|IKBKB(+179.3kb)|POLB(+140.1kb)|SLC20A2(0)|SMIM19(-26.84kb)|VDAC3(+106kb)
6	32392906	rs3135352	A	C	2	8.4e-05	0.003966	0.8505	0.8388	0.18	44.38	0.7736	0.8783	BTNL2(+18.01kb)|C6orf10(+53.25kb)|HCG23(+31.44kb)|HLA-DRA(-14.71kb)|HLA-DRB1(-153.6kb)|HLA-DRB5(-92.25kb)|HLA-DRB6(-127.6kb)
5	11959930	rs1350497	T	C	2	8.406e-05	0.3272	1.092	1.0602	0.0383	76.71	0.9892	1.116	CTNND2(+55.82kb)
11	59939307	rs610932	G	T	2	8.408e-05	0.004557	1.0925	1.1028	0.1992	39.32	1.1613	1.0777	MS4A2(+73.37kb)|MS4A3(+100.7kb)|MS4A4A(-108.7kb)|MS4A6A(0)|MS4A6E(-163kb)|PLAC1L(+123.8kb)
15	35059306	rs75133717	A	G	2	8.413e-05	0.6278	1.2852	1.119	0.0086	85.5	0.8658	1.3798	ACTC1(-20.99kb)|AQR(-89.24kb)|GJD2(+12.52kb)|GOLGA8B(+183.5kb)
18	31031048	rs6507039	G	A	2	8.423e-05	8.423e-05	0.9135	0.9135	0.354	0	0.8729	0.9227	ASXL3(-127.5kb)|CCDC178(+10.36kb)
16	57828594	rs9934670	A	T	2	8.434e-05	8.434e-05	0.8493	0.8493	0.5445	0	0.8973	0.8396	CCDC135(+63.23kb)|CNGB1(-87.65kb)|GPR56(+129.6kb)|GPR97(+105.3kb)|KATNB1(+37.43kb)|KIFC3(0)|LOC388282(-15.95kb)|TEPP(-181.7kb)|ZNF319(-200kb)
1	179789989	rs76545202	C	A	2	8.441e-05	0.1823	1.2301	1.1683	0.0848	66.33	1.0099	1.2826	CEP350(-133.9kb)|FAM163A(+4.656kb)|TDRD5(+129.6kb)|TOR1AIP1(-61.19kb)|TOR1AIP2(-19.11kb)
22	35845347	rs28703075	A	G	2	8.441e-05	8.441e-05	1.1085	1.1085	0.3803	0	1.1637	1.0965	APOL6(-199.1kb)|HMGXB4(+153.5kb)|HMOX1(+55.14kb)|MB(-157.5kb)|MCM5(+24.85kb)|MIR3909(+113.6kb)|RASD2(-92kb)|TOM1(+101.4kb)
16	78860946	rs7184580	C	A	2	8.444e-05	8.444e-05	1.1079	1.1079	0.4147	0	1.1579	1.0966	WWOX(0)
1	74720746	rs75012830	T	G	2	8.45e-05	8.45e-05	1.2084	1.2084	0.5758	0	1.2812	1.1935	FPGT(+46.36kb)|FPGT-TNNI3K(0)|LRRIQ3(+56.88kb)|TNNI3K(0)
18	31009751	rs4799697	G	T	2	8.473e-05	0.00241	0.9131	0.9067	0.2296	30.72	0.8611	0.9252	ASXL3(-148.8kb)|CCDC178(0)
4	13038768	rs62295183	G	A	2	8.486e-05	8.486e-05	1.1518	1.1518	0.841	0	1.1339	1.1556	.
4	183759513	rs6845890	A	G	2	8.487e-05	8.487e-05	0.8788	0.8788	0.8908	0	0.8717	0.881	DCTD(-51.73kb)|FAM92A1P2(-199.3kb)|TENM3(+35.34kb)
11	85717923	rs2508696	C	A	2	8.492e-05	8.492e-05	1.0956	1.0956	0.9607	0	1.0983	1.095	CCDC83(+86.87kb)|PICALM(0)|SYTL2(+195.7kb)
1	179790833	rs16854795	G	A	2	8.493e-05	0.1905	1.2298	1.1668	0.0815	67.05	1.0078	1.2828	CEP350(-133.1kb)|FAM163A(+5.5kb)|TDRD5(+130.4kb)|TOR1AIP1(-60.34kb)|TOR1AIP2(-18.27kb)
8	133484261	rs2673563	C	T	2	8.511e-05	8.511e-05	0.8652	0.8652	0.736	0	0.8864	0.8597	HPYR1(-88.48kb)|KCNQ3(0)|LRRC6(-99.94kb)
8	139683144	rs11990354	A	C	2	8.518e-05	0.05965	1.4106	1.3392	0.1387	54.39	1.0913	1.5061	COL22A1(0)|FAM135B(+174.1kb)
14	47530845	rs7147741	C	G	2	8.528e-05	0.003336	1.1576	1.1729	0.2146	35.08	1.2757	1.1324	MDGA2(0)
11	72485279	rs77437595	T	A	2	8.55e-05	8.55e-05	1.2168	1.2168	0.8208	0	1.2415	1.2091	ARAP1(+21.84kb)|ATG16L2(-40.17kb)|FCHSD2(-62.51kb)|MIR139(+159.1kb)|MIR4692(-9.295kb)|PDE2A(+99.78kb)|STARD10(0)
18	31031280	rs6507040	G	A	2	8.55e-05	8.55e-05	0.9136	0.9136	0.354	0	0.873	0.9228	ASXL3(-127.3kb)|CCDC178(+10.6kb)
18	31009981	rs4799345	T	A	2	8.563e-05	0.002374	0.9131	0.9068	0.2304	30.48	0.8612	0.9252	ASXL3(-148.6kb)|CCDC178(0)
6	32393235	rs3129971	C	G	2	8.57e-05	0.004033	0.8507	0.8389	0.1796	44.47	0.7737	0.8785	BTNL2(+18.34kb)|C6orf10(+53.58kb)|HCG23(+31.77kb)|HLA-DRA(-14.38kb)|HLA-DRB1(-153.3kb)|HLA-DRB5(-91.92kb)|HLA-DRB6(-127.3kb)
18	30993242	rs6507020	T	C	2	8.58e-05	0.001335	0.9122	0.9075	0.2532	23.4	0.862	0.9238	ASXL3(-165.3kb)|CCDC178(0)
22	34836960	rs2100705	C	G	2	8.596e-05	8.596e-05	1.2793	1.2793	0.5975	0	1.1913	1.2991	.
8	19104571	rs2683305	A	G	2	8.605e-05	8.605e-05	0.9027	0.9027	0.5595	0	0.8764	0.9098	CSGALNACT1(-157.1kb)|LOC100128993(+1.539kb)|SH2D4A(-66.51kb)
6	39125575	rs2815079	T	G	2	8.62e-05	0.01962	0.8554	0.869	0.2058	37.52	0.9528	0.8355	DNAH8(+127kb)|GLP1R(+70.06kb)|KCNK5(-31.17kb)|KCNK16(-156.9kb)|KCNK17(-141.2kb)|KIF6(-177.3kb)|SAYSD1(+42.71kb)
15	58473236	rs4775018	T	A	2	8.631e-05	8.631e-05	1.2448	1.2448	0.5528	0	1.1584	1.2639	ALDH1A2(+115.1kb)|AQP9(0)
6	32665255	rs9275308	A	T	2	8.635e-05	8.635e-05	0.8307	0.8307	0.927	0	0.8375	0.8288	HLA-DOB(-115.3kb)|HLA-DQA1(+53.83kb)|HLA-DQA2(-43.91kb)|HLA-DQB1(+30.79kb)|HLA-DQB2(-58.62kb)|HLA-DRB1(+107.6kb)|HLA-DRB5(+167.2kb)|HLA-DRB6(+137.5kb)|LOC100294145(-196.7kb)|LOC100507463(-146.6kb)|PSMB8(-143.2kb)|PSMB9(-156.7kb)|TAP1(-147.7kb)|TAP2(-124.4kb)
1	179789223	rs113540146	C	T	2	8.638e-05	0.1748	1.2292	1.1688	0.0886	65.52	1.0116	1.2808	CEP350(-134.7kb)|FAM163A(+3.89kb)|TDRD5(+128.8kb)|TOR1AIP1(-61.95kb)|TOR1AIP2(-19.88kb)
22	34836721	rs9621941	C	T	2	8.648e-05	8.648e-05	1.2793	1.2793	0.5976	0	1.1913	1.2991	.
8	134625895	rs72722167	A	G	2	8.656e-05	8.656e-05	1.1602	1.1602	0.3713	0	1.0838	1.1799	ST3GAL1(+41.71kb)
18	31032092	rs34138449	G	A	2	8.665e-05	8.665e-05	1.0945	1.0945	0.358	0	1.145	1.0837	ASXL3(-126.4kb)|CCDC178(+11.41kb)
15	48919103	rs2028109	C	A	2	8.669e-05	8.669e-05	0.8651	0.8651	0.9527	0	0.8612	0.866	CEP152(-111kb)|FBN1(0)|SHC4(-196.8kb)
4	121797035	rs343201	T	C	2	8.674e-05	8.674e-05	0.915	0.915	0.4579	0	0.9481	0.9078	NDNF(-159.7kb)|PRDM5(0)
6	32392981	rs3135350	T	C	2	8.676e-05	0.003981	0.8507	0.839	0.1806	44.22	0.7739	0.8785	BTNL2(+18.08kb)|C6orf10(+53.32kb)|HCG23(+31.51kb)|HLA-DRA(-14.64kb)|HLA-DRB1(-153.6kb)|HLA-DRB5(-92.17kb)|HLA-DRB6(-127.5kb)
14	104643721	rs2487301	A	C	2	8.682e-05	8.682e-05	1.1381	1.1381	0.7642	0	1.1213	1.1456	ASPG(+64.68kb)|KIF26A(0)|MIR203(+59.87kb)|MIR3545(+59.88kb)|TDRD9(+124.7kb)
2	59769150	rs2540083	A	G	2	8.682e-05	8.682e-05	0.9106	0.9106	0.4921	0	0.8797	0.9177	.
18	31031942	rs4799698	C	T	2	8.688e-05	8.688e-05	0.9137	0.9137	0.357	0	0.8733	0.9228	ASXL3(-126.6kb)|CCDC178(+11.26kb)
14	102510098	rs17541582	T	C	2	8.689e-05	0.2041	1.4934	1.3553	0.0459	74.91	1.0304	1.6706	DYNC1H1(0)|HSP90AA1(-36.98kb)|MOK(-180.7kb)|PPP2R5C(+115.8kb)|WDR20(-96.09kb)
6	32587768	rs9271413	A	G	2	8.691e-05	8.691e-05	0.8521	0.8521	0.511	0	0.814	0.8656	HLA-DOB(-192.8kb)|HLA-DQA1(-17.41kb)|HLA-DQA2(-121.4kb)|HLA-DQB1(-39.47kb)|HLA-DQB2(-136.1kb)|HLA-DRA(+174.9kb)|HLA-DRB1(+30.16kb)|HLA-DRB5(+89.76kb)|HLA-DRB6(+59.99kb)
18	30986106	rs72942644	T	C	2	8.71e-05	8.71e-05	1.1269	1.1269	0.6871	0	1.1556	1.1202	ASXL3(-172.4kb)|CCDC178(0)
8	139683249	rs66644529	A	G	2	8.71e-05	0.06127	1.4103	1.3383	0.1375	54.67	1.0901	1.5062	COL22A1(0)|FAM135B(+174.2kb)
8	107681429	rs3110440	T	A	2	8.715e-05	8.715e-05	1.1104	1.1104	0.3713	0	1.0562	1.1231	ABRA(-90.28kb)|OXR1(0)
18	30988190	rs72942647	T	A	2	8.722e-05	8.722e-05	1.1268	1.1268	0.6461	0	1.1594	1.1191	ASXL3(-170.4kb)|CCDC178(0)
9	28260136	rs13299424	T	C	2	8.727e-05	0.01856	1.1105	1.1345	0.1085	61.19	1.2153	1.0881	LINGO2(0)
18	77630170	rs72980082	T	G	2	8.731e-05	8.731e-05	1.1066	1.1066	0.3798	0	1.0611	1.1202	CTDP1(+115.7kb)|HSBP1L1(-94.41kb)|KCNG2(0)|PQLC1(-32.25kb)|RBFA(-164.2kb)|RBFADN(-197.1kb)|TXNL4A(-102.7kb)
11	60079651	rs10792263	T	C	2	8.754e-05	0.04421	1.0945	1.1266	0.0458	74.93	1.208	1.0713	MS4A1(-143.6kb)|MS4A4A(+3.206kb)|MS4A5(-117.4kb)|MS4A6A(+127.5kb)|MS4A6E(-22.7kb)|MS4A7(-66.31kb)|MS4A12(-180.6kb)|MS4A14(-83.84kb)
4	125772563	rs62323265	A	G	2	8.762e-05	8.762e-05	0.8395	0.8395	0.6327	0	0.8025	0.848	ANKRD50(+138.7kb)
18	77694168	rs2277725	G	T	2	8.764e-05	8.764e-05	1.1041	1.1041	0.4095	0	1.0623	1.1166	ADNP2(-172.7kb)|CTDP1(+179.7kb)|HSBP1L1(-30.41kb)|KCNG2(+34.35kb)|PQLC1(0)|RBFA(-100.2kb)|RBFADN(-133.1kb)|TXNL4A(-38.7kb)
14	47537553	rs7146407	T	C	2	8.768e-05	8.768e-05	1.1623	1.1623	0.3843	0	1.2459	1.1438	MDGA2(0)
15	48950625	rs1848052	T	C	2	8.779e-05	8.779e-05	1.1065	1.1065	0.8697	0	1.1165	1.1043	CEP152(-79.51kb)|FBN1(+12.64kb)|SHC4(-165.3kb)
6	32431124	rs7747529	A	G	2	8.782e-05	8.782e-05	0.8926	0.8926	0.3653	0	0.9334	0.879	BTNL2(+56.22kb)|C6orf10(+91.47kb)|HCG23(+69.66kb)|HLA-DQA1(-174.1kb)|HLA-DQB1(-196.1kb)|HLA-DRA(+18.3kb)|HLA-DRB1(-115.4kb)|HLA-DRB5(-54.03kb)|HLA-DRB6(-89.36kb)
6	39117893	rs2162838	A	T	2	8.792e-05	0.01593	0.8553	0.8679	0.2138	35.29	0.951	0.8357	DNAH8(+119.3kb)|GLP1R(+62.37kb)|KCNK5(-38.85kb)|KCNK16(-164.6kb)|KCNK17(-148.9kb)|KIF6(-185kb)|LOC100131047(+197kb)|SAYSD1(+35.03kb)
1	179789753	rs77944721	G	A	2	8.795e-05	0.1747	1.2288	1.1686	0.0889	65.44	1.0115	1.2803	CEP350(-134.2kb)|FAM163A(+4.42kb)|TDRD5(+129.3kb)|TOR1AIP1(-61.42kb)|TOR1AIP2(-19.35kb)
8	28580962	rs7016000	T	G	2	8.812e-05	8.812e-05	0.9063	0.9063	0.5111	0	0.8749	0.9133	EXTL3(0)|FZD3(+149.2kb)|HMBOX1(-166.9kb)|INTS9(-44.21kb)
15	35040634	rs78517710	T	A	2	8.817e-05	0.3142	1.2973	1.1888	0.0549	72.85	0.9661	1.3707	ACTC1(-39.66kb)|AQR(-107.9kb)|GJD2(-4.007kb)|GOLGA8B(+164.9kb)
18	77694294	rs2277724	A	C	2	8.82e-05	8.82e-05	1.1041	1.1041	0.4103	0	1.0623	1.1165	ADNP2(-172.6kb)|CTDP1(+179.8kb)|HSBP1L1(-30.29kb)|KCNG2(+34.48kb)|PQLC1(0)|RBFA(-100.1kb)|RBFADN(-133kb)|TXNL4A(-38.57kb)
3	196906091	rs59677595	G	A	2	8.824e-05	8.824e-05	0.8213	0.8213	0.8592	0	0.8366	0.8178	DLG1(0)|DLG1-AS1(-119kb)|MFI2(+149.4kb)|MFI2-AS1(+174.5kb)|MIR4797(-114.7kb)
22	34846202	rs74809596	A	G	2	8.841e-05	8.841e-05	1.2793	1.2793	0.4615	0	1.1586	1.3072	.
2	169599670	rs58609585	G	A	2	8.849e-05	8.849e-05	1.2684	1.2684	0.7089	0	1.2161	1.2839	ABCB11(-179.8kb)|CERS6(0)|CERS6-AS1(-28.79kb)|G6PC2(-158.1kb)|MIR4774(+160.1kb)|NOSTRIN(-43.38kb)|SPC25(-127.7kb)
6	32585755	rs3129762	A	T	2	8.86e-05	8.86e-05	0.8522	0.8522	0.4996	0	0.8131	0.8661	HLA-DOB(-194.8kb)|HLA-DQA1(-19.43kb)|HLA-DQA2(-123.4kb)|HLA-DQB1(-41.48kb)|HLA-DQB2(-138.1kb)|HLA-DRA(+172.9kb)|HLA-DRB1(+28.14kb)|HLA-DRB5(+87.75kb)|HLA-DRB6(+57.98kb)
10	115357078	rs12241995	A	G	2	8.874e-05	8.874e-05	1.1065	1.1065	0.5244	0	1.1447	1.0977	CASP7(-81.84kb)|HABP2(+7.718kb)|MIR4483(-180.7kb)|NRAP(0)|PLEKHS1(-154.1kb)
6	32659838	rs3129718	C	T	2	8.882e-05	0.02452	0.868	0.8396	0.0897	65.28	0.7616	0.8933	HLA-DOB(-120.7kb)|HLA-DQA1(+48.41kb)|HLA-DQA2(-49.32kb)|HLA-DQB1(+25.37kb)|HLA-DQB2(-64.04kb)|HLA-DRB1(+102.2kb)|HLA-DRB5(+161.8kb)|HLA-DRB6(+132.1kb)|LOC100507463(-152kb)|PSMB8(-148.7kb)|PSMB9(-162.1kb)|TAP1(-153.1kb)|TAP2(-129.8kb)
6	32583860	rs9271351	G	C	2	8.906e-05	8.906e-05	0.8521	0.8521	0.5035	0	0.8134	0.8659	HLA-DOB(-196.7kb)|HLA-DQA1(-21.32kb)|HLA-DQA2(-125.3kb)|HLA-DQB1(-43.38kb)|HLA-DQB2(-140kb)|HLA-DRA(+171kb)|HLA-DRB1(+26.25kb)|HLA-DRB5(+85.85kb)|HLA-DRB6(+56.08kb)
8	107684531	rs3102431	T	C	2	8.909e-05	8.909e-05	1.1102	1.1102	0.374	0	1.0563	1.1228	ABRA(-87.18kb)|OXR1(0)
1	55518467	rs2495477	G	A	2	8.928e-05	8.928e-05	1.0994	1.0994	0.7423	0	1.1186	1.0954	BSND(+44kb)|DHCR24(+165.5kb)|LOC100507634(-162.6kb)|MIR4422(-172.8kb)|PCSK9(0)|TMEM61(+60.5kb)|USP24(-13.56kb)
3	60268842	rs17062681	T	C	2	8.935e-05	8.935e-05	1.2481	1.2481	0.7221	0	1.2027	1.2618	FHIT(0)
18	77716624	rs12953577	A	G	2	8.936e-05	0.1576	0.9061	0.9255	0.0634	70.99	0.9868	0.8832	ADNP2(-150.3kb)|HSBP1L1(-7.957kb)|KCNG2(+56.81kb)|PARD6G(-198.5kb)|PARD6G-AS1(-189.2kb)|PQLC1(+4.971kb)|RBFA(-77.72kb)|RBFADN(-110.6kb)|TXNL4A(-16.24kb)
6	32329598	rs9268321	G	A	2	8.937e-05	0.004711	0.8536	0.8416	0.1705	46.77	0.7775	0.8821	AGER(+177.5kb)|AGPAT1(+183.7kb)|BTNL2(-32.91kb)|C6orf10(0)|EGFL8(+193.5kb)|GPSM3(+166.3kb)|HCG23(-28.69kb)|HLA-DRA(-78.02kb)|HLA-DRB5(-155.6kb)|HLA-DRB6(-190.9kb)|NOTCH4(+137.8kb)|PBX2(+171.6kb)|PPT2(+198.1kb)|PPT2-EGFL8(+193.5kb)|RNF5(+181kb)|RNF5P1(+181kb)
2	127882015	rs6720234	A	T	2	8.944e-05	8.944e-05	1.124	1.124	0.9206	0	1.1311	1.1224	BIN1(+17.11kb)|CYP27C1(-59.4kb)|ERCC3(-132.8kb)|MAP3K2(-174.2kb)
18	77653508	rs55858161	T	C	2	8.951e-05	8.951e-05	1.1077	1.1077	0.8254	0	1.0961	1.1112	CTDP1(+139kb)|HSBP1L1(-71.07kb)|KCNG2(0)|PQLC1(-8.911kb)|RBFA(-140.8kb)|RBFADN(-173.7kb)|TXNL4A(-79.36kb)
8	139683444	rs11994143	G	A	2	8.951e-05	0.06315	1.4097	1.3371	0.1363	54.95	1.0886	1.5059	COL22A1(0)|FAM135B(+174.4kb)
16	6361071	rs28496008	A	G	2	8.952e-05	8.952e-05	1.2973	1.2973	0.4229	0	1.1578	1.33	RBFOX1(0)
16	12416708	rs209842	A	G	2	8.97e-05	8.97e-05	0.8613	0.8613	0.9373	0	0.8569	0.8628	SNX29(0)
11	85858887	rs10751134	A	G	2	8.971e-05	8.971e-05	1.0912	1.0912	0.965	0	1.0889	1.0917	C11orf73(-154.4kb)|EED(-96.92kb)|PICALM(+77.96kb)
2	127855392	rs34854727	T	C	2	8.975e-05	8.975e-05	1.1232	1.1232	0.9051	0	1.1148	1.1251	BIN1(0)|CYP27C1(-86.02kb)|ERCC3(-159.5kb)
18	77641902	rs11662267	G	C	2	9.024e-05	9.024e-05	1.1071	1.1071	0.7682	0	1.0916	1.1117	CTDP1(+127.4kb)|HSBP1L1(-82.68kb)|KCNG2(0)|PQLC1(-20.52kb)|RBFA(-152.4kb)|RBFADN(-185.4kb)|TXNL4A(-90.96kb)
6	47549071	rs144718866	A	G	2	9.032e-05	9.032e-05	1.3994	1.3994	0.6468	0	1.2858	1.4252	CD2AP(0)|GPR111(-75.25kb)|GPR115(-117.2kb)
6	32429643	rs9268853	C	T	2	9.037e-05	9.037e-05	0.8928	0.8928	0.4003	0	0.9306	0.8801	BTNL2(+54.74kb)|C6orf10(+89.99kb)|HCG23(+68.18kb)|HLA-DQA1(-175.5kb)|HLA-DQB1(-197.6kb)|HLA-DRA(+16.82kb)|HLA-DRB1(-116.9kb)|HLA-DRB5(-55.51kb)|HLA-DRB6(-90.85kb)
1	120099137	rs34291690	A	G	2	9.046e-05	0.02425	0.8876	0.8632	0.0908	65.04	0.7953	0.9093	HAO2(+162.4kb)|HMGCS2(-191.5kb)|HSD3B1(+41.46kb)|HSD3B2(+133.5kb)|HSD3BP4(-7.365kb)|LINC00622(-41.19kb)|PHGDH(-155.3kb)|ZNF697(-62.86kb)
15	58477507	rs1001619	G	C	2	9.047e-05	9.047e-05	1.2445	1.2445	0.5768	0	1.1627	1.2624	ALDH1A2(+119.4kb)|AQP9(0)
5	94062539	rs10076188	T	C	2	9.052e-05	9.052e-05	1.0998	1.0998	0.5165	0	1.0635	1.108	ANKRD32(+30.97kb)|KIAA0825(+108.2kb)|MCTP1(0)
3	59735746	rs78286961	C	T	2	9.053e-05	9.053e-05	0.7805	0.7805	0.9406	0	0.7725	0.7822	FHIT(0)
14	34935019	rs117683031	T	G	2	9.057e-05	9.057e-05	1.2808	1.2808	0.7636	0	1.2301	1.2923	EAPP(-50.12kb)|SNX6(-95.6kb)|SPTSSA(+3.551kb)
6	32438783	rs9269047	G	C	2	9.063e-05	9.063e-05	0.8484	0.8484	0.3751	0	0.7956	0.8669	BTNL2(+63.88kb)|C6orf10(+99.13kb)|HCG23(+77.32kb)|HLA-DQA1(-166.4kb)|HLA-DQB1(-188.5kb)|HLA-DRA(+25.96kb)|HLA-DRB1(-107.8kb)|HLA-DRB5(-46.37kb)|HLA-DRB6(-81.71kb)
7	125560713	rs59847224	T	C	2	9.071e-05	9.071e-05	1.1039	1.1039	0.7127	0	1.125	1.0989	.
6	32430326	rs9268864	A	T	2	9.073e-05	9.073e-05	0.8929	0.8929	0.3786	0	0.9325	0.8796	BTNL2(+55.43kb)|C6orf10(+90.67kb)|HCG23(+68.86kb)|HLA-DQA1(-174.9kb)|HLA-DQB1(-196.9kb)|HLA-DRA(+17.5kb)|HLA-DRB1(-116.2kb)|HLA-DRB5(-54.83kb)|HLA-DRB6(-90.16kb)
6	32587897	rs9271423	T	G	2	9.081e-05	9.081e-05	0.8521	0.8521	0.5226	0	0.815	0.8653	HLA-DOB(-192.6kb)|HLA-DQA1(-17.28kb)|HLA-DQA2(-121.3kb)|HLA-DQB1(-39.34kb)|HLA-DQB2(-136kb)|HLA-DRA(+175.1kb)|HLA-DRB1(+30.28kb)|HLA-DRB5(+89.89kb)|HLA-DRB6(+60.12kb)
8	28609769	rs9183	T	C	2	9.083e-05	9.083e-05	0.9036	0.9036	0.5208	0	0.8719	0.9106	EXTL3(0)|FZD3(+178kb)|HMBOX1(-138.1kb)|INTS9(-15.4kb)
6	32434978	rs9268978	G	A	2	9.086e-05	9.086e-05	0.8488	0.8488	0.3663	0	0.7951	0.8676	BTNL2(+60.08kb)|C6orf10(+95.32kb)|HCG23(+73.51kb)|HLA-DQA1(-170.2kb)|HLA-DQB1(-192.3kb)|HLA-DRA(+22.15kb)|HLA-DRB1(-111.6kb)|HLA-DRB5(-50.18kb)|HLA-DRB6(-85.51kb)
11	85757589	rs677909	T	C	2	9.09e-05	9.09e-05	1.0953	1.0953	0.9145	0	1.1012	1.094	CCDC83(+126.5kb)|EED(-198.2kb)|PICALM(0)
6	32584014	rs9271353	C	T	2	9.091e-05	9.091e-05	0.8523	0.8523	0.5015	0	0.8133	0.8661	HLA-DOB(-196.5kb)|HLA-DQA1(-21.17kb)|HLA-DQA2(-125.1kb)|HLA-DQB1(-43.23kb)|HLA-DQB2(-139.9kb)|HLA-DRA(+171.2kb)|HLA-DRB1(+26.4kb)|HLA-DRB5(+86.01kb)|HLA-DRB6(+56.24kb)
7	112195171	rs62475902	A	T	2	9.097e-05	9.097e-05	1.1219	1.1219	0.7192	0	1.0982	1.1278	IFRD1(+77.91kb)|LSMEM1(+64.23kb)
10	121130271	rs72837505	T	C	2	9.098e-05	9.098e-05	1.3163	1.3163	0.6176	0	1.2187	1.3375	GRK5(0)|MIR4681(-7.212kb)|PRDX3(+191.9kb)|RGS10(-129.1kb)
2	127850292	rs28434131	G	A	2	9.104e-05	9.104e-05	1.1232	1.1232	0.908	0	1.115	1.125	BIN1(0)|CYP27C1(-91.12kb)|ERCC3(-164.6kb)
7	112199429	rs62476685	T	C	2	9.123e-05	9.123e-05	1.1206	1.1206	0.7031	0	1.0958	1.1268	IFRD1(+82.17kb)|LSMEM1(+68.49kb)
14	98745557	rs7154028	A	G	2	9.124e-05	0.002673	0.909	0.913	0.2657	19.27	0.9636	0.8976	.
8	139683566	rs11990481	G	C	2	9.127e-05	0.06426	1.4094	1.3364	0.1356	55.1	1.0877	1.5057	COL22A1(0)|FAM135B(+174.5kb)
8	27464929	rs4236673	G	A	2	9.145e-05	9.145e-05	1.0945	1.0945	0.9575	0	1.0974	1.0939	CCDC25(-125.9kb)|CHRNA2(+128.1kb)|CLU(0)|EPHX2(+62.49kb)|ESCO2(-167.1kb)|MIR3622A(-94.26kb)|MIR3622B(-94.26kb)|PTK2B(+148kb)|SCARA3(-26.65kb)
10	115357179	rs885567	T	C	2	9.146e-05	9.146e-05	1.1063	1.1063	0.5235	0	1.1446	1.0975	CASP7(-81.74kb)|HABP2(+7.819kb)|MIR4483(-180.6kb)|NRAP(0)|PLEKHS1(-154kb)
18	31031831	rs72949775	G	A	2	9.147e-05	9.147e-05	1.1217	1.1217	0.8329	0	1.136	1.1183	ASXL3(-126.7kb)|CCDC178(+11.15kb)
11	48024213	rs117916244	A	G	2	9.148e-05	0.05326	0.7704	0.6941	0.0486	74.28	0.5524	0.8115	NUP160(+154.2kb)|PTPRJ(0)
6	32584609	rs3129757	C	A	2	9.149e-05	9.149e-05	0.8524	0.8524	0.4998	0	0.8133	0.8663	HLA-DOB(-195.9kb)|HLA-DQA1(-20.57kb)|HLA-DQA2(-124.6kb)|HLA-DQB1(-42.63kb)|HLA-DQB2(-139.3kb)|HLA-DRA(+171.8kb)|HLA-DRB1(+27kb)|HLA-DRB5(+86.6kb)|HLA-DRB6(+56.83kb)
6	32432077	rs9268905	C	G	2	9.16e-05	9.16e-05	0.8929	0.8929	0.3637	0	0.9338	0.8792	BTNL2(+57.18kb)|C6orf10(+92.42kb)|HCG23(+70.61kb)|HLA-DQA1(-173.1kb)|HLA-DQB1(-195.2kb)|HLA-DRA(+19.25kb)|HLA-DRB1(-114.5kb)|HLA-DRB5(-53.08kb)|HLA-DRB6(-88.41kb)
6	32432181	rs9268906	G	A	2	9.167e-05	9.167e-05	0.8929	0.8929	0.3637	0	0.9338	0.8792	BTNL2(+57.28kb)|C6orf10(+92.52kb)|HCG23(+70.71kb)|HLA-DQA1(-173kb)|HLA-DQB1(-195.1kb)|HLA-DRA(+19.36kb)|HLA-DRB1(-114.4kb)|HLA-DRB5(-52.97kb)|HLA-DRB6(-88.31kb)
1	54903630	rs56158212	A	C	2	9.177e-05	9.177e-05	1.253	1.253	0.7036	0	1.3141	1.2404	ACOT11(-110.2kb)|C1orf191(+198.9kb)|FAM151A(-171.2kb)|SSBP3(+31.56kb)
14	92358954	rs1861084	C	T	2	9.184e-05	9.184e-05	1.0979	1.0979	0.3831	0	1.0496	1.1085	ATXN3(-165.9kb)|CATSPERB(+160.5kb)|FBLN5(0)|TC2N(+25.07kb)|TRIP11(-75.29kb)
21	27530610	rs2830099	G	C	2	9.189e-05	0.3516	0.91	0.9405	0.0327	78.08	1.0145	0.8881	APP(0)
5	11962977	rs2400100	T	G	2	9.211e-05	0.3381	1.0916	1.0594	0.0366	77.12	0.988	1.1159	CTNND2(+58.87kb)
6	32433085	rs9268927	T	A	2	9.217e-05	9.217e-05	0.8493	0.8493	0.3644	0	0.7954	0.8681	BTNL2(+58.18kb)|C6orf10(+93.43kb)|HCG23(+71.62kb)|HLA-DQA1(-172.1kb)|HLA-DQB1(-194.2kb)|HLA-DRA(+20.26kb)|HLA-DRB1(-113.5kb)|HLA-DRB5(-52.07kb)|HLA-DRB6(-87.4kb)
17	15386176	rs11869273	T	C	2	9.22e-05	9.22e-05	1.1266	1.1266	0.4747	0	1.1825	1.1156	CDRT1(-105.8kb)|CDRT4(+15.25kb)|TEKT3(+141.2kb)|TRIM16(-145.1kb)|TVP23C(-19.4kb)|TVP23C-CDRT4(0)
6	32429758	rs9268858	C	T	2	9.227e-05	9.227e-05	0.8929	0.8929	0.3849	0	0.932	0.8798	BTNL2(+54.86kb)|C6orf10(+90.1kb)|HCG23(+68.29kb)|HLA-DQA1(-175.4kb)|HLA-DQB1(-197.5kb)|HLA-DRA(+16.93kb)|HLA-DRB1(-116.8kb)|HLA-DRB5(-55.4kb)|HLA-DRB6(-90.73kb)
6	32586854	rs9271366	A	G	2	9.228e-05	9.228e-05	0.8528	0.8528	0.4963	0	0.8133	0.8667	HLA-DOB(-193.7kb)|HLA-DQA1(-18.33kb)|HLA-DQA2(-122.3kb)|HLA-DQB1(-40.39kb)|HLA-DQB2(-137kb)|HLA-DRA(+174kb)|HLA-DRB1(+29.24kb)|HLA-DRB5(+88.85kb)|HLA-DRB6(+59.08kb)
1	179789556	rs73041630	C	A	2	9.23e-05	0.1793	1.2283	1.1676	0.088	65.65	1.0101	1.2799	CEP350(-134.4kb)|FAM163A(+4.223kb)|TDRD5(+129.1kb)|TOR1AIP1(-61.62kb)|TOR1AIP2(-19.54kb)
6	32439029	rs9405109	C	T	2	9.244e-05	9.244e-05	0.8923	0.8923	0.3549	0	0.9339	0.8782	BTNL2(+64.13kb)|C6orf10(+99.37kb)|HCG23(+77.56kb)|HLA-DQA1(-166.2kb)|HLA-DQB1(-188.2kb)|HLA-DRA(+26.2kb)|HLA-DRB1(-107.5kb)|HLA-DRB5(-46.12kb)|HLA-DRB6(-81.46kb)
6	32432835	rs9268923	T	C	2	9.249e-05	9.249e-05	0.8929	0.8929	0.3629	0	0.9339	0.8792	BTNL2(+57.94kb)|C6orf10(+93.18kb)|HCG23(+71.37kb)|HLA-DQA1(-172.3kb)|HLA-DQB1(-194.4kb)|HLA-DRA(+20.01kb)|HLA-DRB1(-113.7kb)|HLA-DRB5(-52.32kb)|HLA-DRB6(-87.65kb)
18	31004691	rs7228594	A	G	2	9.252e-05	0.002622	0.9133	0.9069	0.2283	31.1	0.861	0.9255	ASXL3(-153.8kb)|CCDC178(0)
11	35971750	rs263096	A	G	2	9.267e-05	0.00374	1.1557	1.1469	0.2471	25.36	1.0643	1.1817	LDLRAD3(0)|MIR3973(-59.9kb)|TRIM44(+140.8kb)
16	57828410	rs9934509	C	T	2	9.272e-05	9.272e-05	0.8502	0.8502	0.5493	0	0.8976	0.8406	CCDC135(+63.04kb)|CNGB1(-87.83kb)|GPR56(+129.5kb)|GPR97(+105.1kb)|KATNB1(+37.25kb)|KIFC3(0)|LOC388282(-16.14kb)|TEPP(-181.9kb)
3	196787049	rs113761705	T	C	2	9.279e-05	9.279e-05	0.8105	0.8105	0.6343	0	0.7676	0.8203	DLG1(0)|MFI2(+30.36kb)|MFI2-AS1(+55.43kb)|NCBP2(+117.6kb)|NCBP2-AS2(+116.2kb)|PIGZ(+91.31kb)|SENP5(+125.5kb)
7	125566977	rs1419547	C	T	2	9.279e-05	9.279e-05	0.9167	0.9167	0.6663	0	0.898	0.9208	.
6	32429825	rs9268860	T	C	2	9.281e-05	9.281e-05	0.893	0.893	0.3831	0	0.9322	0.8798	BTNL2(+54.92kb)|C6orf10(+90.17kb)|HCG23(+68.36kb)|HLA-DQA1(-175.4kb)|HLA-DQB1(-197.4kb)|HLA-DRA(+17kb)|HLA-DRB1(-116.7kb)|HLA-DRB5(-55.33kb)|HLA-DRB6(-90.66kb)
6	32433167	rs2395185	T	G	2	9.283e-05	9.283e-05	0.8929	0.8929	0.3629	0	0.9339	0.8792	BTNL2(+58.27kb)|C6orf10(+93.51kb)|HCG23(+71.7kb)|HLA-DQA1(-172kb)|HLA-DQB1(-194.1kb)|HLA-DRA(+20.34kb)|HLA-DRB1(-113.4kb)|HLA-DRB5(-51.99kb)|HLA-DRB6(-87.32kb)
2	179378548	rs12615347	C	G	2	9.288e-05	9.288e-05	1.1297	1.1297	0.4029	0	1.0682	1.1435	DFNB59(+52.44kb)|FKBP7(+35.19kb)|MIR548N(0)|OSBPL6(+114.4kb)|PLEKHA3(+8.766kb)|PRKRA(+62.59kb)|TTN(-12.17kb)|TTN-AS1(-9.005kb)
18	75240566	rs72987367	G	A	2	9.309e-05	9.309e-05	1.1181	1.1181	0.534	0	1.1593	1.1084	.
6	32441276	rs12215313	T	C	2	9.319e-05	9.319e-05	0.8921	0.8921	0.3518	0	0.9339	0.8778	BTNL2(+66.38kb)|C6orf10(+101.6kb)|HCG23(+79.81kb)|HLA-DQA1(-163.9kb)|HLA-DQB1(-186kb)|HLA-DRA(+28.45kb)|HLA-DRB1(-105.3kb)|HLA-DRB5(-43.88kb)|HLA-DRB6(-79.21kb)
22	25476064	rs73397880	A	G	2	9.325e-05	9.325e-05	0.8741	0.8741	0.782	0	0.8924	0.8703	CRYBB2(-139.5kb)|CRYBB3(-119.8kb)|KIAA1671(0)|LOC100128531(-22.32kb)|SGSM1(+153.3kb)|TMEM211(+140.8kb)
3	19539956	rs9860607	C	A	2	9.331e-05	9.331e-05	1.0954	1.0954	0.8599	0	1.1051	1.0933	KCNH8(0)|MIR4791(+183.5kb)
6	32433192	rs2395186	G	C	2	9.336e-05	9.336e-05	0.8929	0.8929	0.363	0	0.9339	0.8792	BTNL2(+58.29kb)|C6orf10(+93.54kb)|HCG23(+71.72kb)|HLA-DQA1(-172kb)|HLA-DQB1(-194kb)|HLA-DRA(+20.37kb)|HLA-DRB1(-113.4kb)|HLA-DRB5(-51.96kb)|HLA-DRB6(-87.3kb)
17	7185092	rs5418	A	G	2	9.34e-05	0.06013	0.9138	0.8837	0.0261	79.79	0.82	0.9363	ACADVL(+56.51kb)|ACAP1(-54.76kb)|ASGR1(+102.2kb)|ASGR2(+167kb)|C17orf61-PLSCR3(-108kb)|C17orf74(-143.8kb)|CHRNB1(-163.3kb)|CLDN7(+18.58kb)|CTDNEP1(+29.83kb)|DLG4(+61.72kb)|DVL2(+47.23kb)|EIF5A(-25.22kb)|ELP5(+21.83kb)|FGF11(-157.6kb)|GABARAP(+39.34kb)|GPS2(-30.88kb)|KCTD11(-70.12kb)|MIR324(+58.39kb)|NEURL4(-33.86kb)|NLGN2(-126.4kb)|PHF23(+42.27kb)|PLSCR3(-108kb)|SLC2A4(0)|SLC35G6(-199.6kb)|SPEM1(…
18	77636101	rs56328473	T	C	2	9.349e-05	9.349e-05	1.1067	1.1067	0.7557	0	1.0904	1.1116	CTDP1(+121.6kb)|HSBP1L1(-88.48kb)|KCNG2(0)|PQLC1(-26.32kb)|RBFA(-158.2kb)|RBFADN(-191.2kb)|TXNL4A(-96.76kb)
6	32441150	rs12215261	T	C	2	9.373e-05	9.373e-05	0.8921	0.8921	0.3518	0	0.9339	0.8778	BTNL2(+66.25kb)|C6orf10(+101.5kb)|HCG23(+79.68kb)|HLA-DQA1(-164kb)|HLA-DQB1(-186.1kb)|HLA-DRA(+28.32kb)|HLA-DRB1(-105.4kb)|HLA-DRB5(-44kb)|HLA-DRB6(-79.34kb)
6	32434240	rs9268965	A	G	2	9.376e-05	9.376e-05	0.8929	0.8929	0.3622	0	0.9339	0.8791	BTNL2(+59.34kb)|C6orf10(+94.58kb)|HCG23(+72.77kb)|HLA-DQA1(-170.9kb)|HLA-DQB1(-193kb)|HLA-DRA(+21.41kb)|HLA-DRB1(-112.3kb)|HLA-DRB5(-50.91kb)|HLA-DRB6(-86.25kb)
2	127859418	rs873270	C	T	2	9.38e-05	9.38e-05	1.1224	1.1224	0.9722	0	1.1199	1.1229	BIN1(0)|CYP27C1(-81.99kb)|ERCC3(-155.4kb)|MAP3K2(-196.8kb)
18	39928701	rs452105	A	G	2	9.385e-05	9.385e-05	0.9111	0.9111	0.4517	0	0.8766	0.9187	LINC00907(0)
6	32591751	rs4959030	G	A	2	9.386e-05	9.386e-05	0.844	0.844	0.4979	0	0.803	0.8588	HLA-DOB(-188.8kb)|HLA-DQA1(-13.43kb)|HLA-DQA2(-117.4kb)|HLA-DQB1(-35.49kb)|HLA-DQB2(-132.1kb)|HLA-DRA(+178.9kb)|HLA-DRB1(+34.14kb)|HLA-DRB5(+93.74kb)|HLA-DRB6(+63.97kb)|TAP2(-197.9kb)
6	32438542	rs9368726	C	T	2	9.391e-05	9.391e-05	0.8926	0.8926	0.359	0	0.9339	0.8787	BTNL2(+63.64kb)|C6orf10(+98.89kb)|HCG23(+77.07kb)|HLA-DQA1(-166.6kb)|HLA-DQB1(-188.7kb)|HLA-DRA(+25.72kb)|HLA-DRB1(-108kb)|HLA-DRB5(-46.61kb)|HLA-DRB6(-81.95kb)
6	32438298	rs9380306	G	A	2	9.397e-05	9.397e-05	0.8926	0.8926	0.359	0	0.9339	0.8787	BTNL2(+63.4kb)|C6orf10(+98.64kb)|HCG23(+76.83kb)|HLA-DQA1(-166.9kb)|HLA-DQB1(-188.9kb)|HLA-DRA(+25.47kb)|HLA-DRB1(-108.2kb)|HLA-DRB5(-46.86kb)|HLA-DRB6(-82.19kb)
6	32434349	rs9268969	T	C	2	9.403e-05	9.403e-05	0.8929	0.8929	0.3622	0	0.9339	0.8791	BTNL2(+59.45kb)|C6orf10(+94.69kb)|HCG23(+72.88kb)|HLA-DQA1(-170.8kb)|HLA-DQB1(-192.9kb)|HLA-DRA(+21.52kb)|HLA-DRB1(-112.2kb)|HLA-DRB5(-50.8kb)|HLA-DRB6(-86.14kb)
6	32438648	rs9405108	T	C	2	9.418e-05	9.418e-05	0.8926	0.8926	0.3582	0	0.9339	0.8786	BTNL2(+63.75kb)|C6orf10(+98.99kb)|HCG23(+77.18kb)|HLA-DQA1(-166.5kb)|HLA-DQB1(-188.6kb)|HLA-DRA(+25.82kb)|HLA-DRB1(-107.9kb)|HLA-DRB5(-46.5kb)|HLA-DRB6(-81.84kb)
8	139683792	rs11997487	A	G	2	9.419e-05	0.06749	1.4089	1.3348	0.1333	55.62	1.0854	1.5059	COL22A1(0)|FAM135B(+174.7kb)
6	41917110	rs150177487	G	A	2	9.423e-05	9.423e-05	1.4123	1.4123	0.5277	0	1.5742	1.3723	BYSL(+16.33kb)|C6orf132(-151.7kb)|CCND3(0)|FRS3(+169.5kb)|MED20(+28.23kb)|PRICKLE4(+162kb)|TAF8(-101.1kb)|TOMM6(+159.5kb)|USP49(+54.01kb)
6	32434850	rs9391781	C	G	2	9.437e-05	9.437e-05	0.8928	0.8928	0.3607	0	0.9339	0.8789	BTNL2(+59.95kb)|C6orf10(+95.19kb)|HCG23(+73.38kb)|HLA-DQA1(-170.3kb)|HLA-DQB1(-192.4kb)|HLA-DRA(+22.02kb)|HLA-DRB1(-111.7kb)|HLA-DRB5(-50.3kb)|HLA-DRB6(-85.64kb)
10	22857245	rs3793752	A	G	2	9.441e-05	9.441e-05	1.0933	1.0933	0.8471	0	1.1038	1.0911	LOC100499489(+130.4kb)|PIP4K2A(0)|SPAG6(+150.7kb)
6	39124195	rs2815075	T	C	2	9.446e-05	0.01415	0.8562	0.8681	0.2195	33.68	0.9507	0.8369	DNAH8(+125.6kb)|GLP1R(+68.68kb)|KCNK5(-32.55kb)|KCNK16(-158.3kb)|KCNK17(-142.6kb)|KIF6(-178.7kb)|SAYSD1(+41.33kb)
6	32438867	rs9391877	T	G	2	9.452e-05	9.452e-05	0.8925	0.8925	0.3575	0	0.9339	0.8785	BTNL2(+63.97kb)|C6orf10(+99.21kb)|HCG23(+77.4kb)|HLA-DQA1(-166.3kb)|HLA-DQB1(-188.4kb)|HLA-DRA(+26.04kb)|HLA-DRB1(-107.7kb)|HLA-DRB5(-46.29kb)|HLA-DRB6(-81.62kb)
6	32321272	rs3117117	A	C	2	9.458e-05	0.008738	0.8552	0.8401	0.1353	55.18	0.7736	0.8863	AGER(+169.2kb)|AGPAT1(+175.4kb)|BTNL2(-41.24kb)|C6orf10(0)|EGFL8(+185.2kb)|GPSM3(+158kb)|HCG23(-37.01kb)|HLA-DRA(-86.35kb)|HLA-DRB5(-163.9kb)|HLA-DRB6(-199.2kb)|LOC100507547(+199.1kb)|NOTCH4(+129.4kb)|PBX2(+163.3kb)|PPT2(+189.8kb)|PPT2-EGFL8(+185.2kb)|RNF5(+172.7kb)|RNF5P1(+172.7kb)
22	34843913	rs79243733	T	G	2	9.479e-05	9.479e-05	1.2778	1.2778	0.4669	0	1.1586	1.3053	.
5	11956633	rs1458479	G	A	2	9.488e-05	0.232	1.0914	1.0652	0.0646	70.71	0.9993	1.1128	CTNND2(+52.52kb)
6	32434361	rs9268970	A	C	2	9.489e-05	9.489e-05	0.8929	0.8929	0.3623	0	0.9339	0.8791	BTNL2(+59.46kb)|C6orf10(+94.7kb)|HCG23(+72.89kb)|HLA-DQA1(-170.8kb)|HLA-DQB1(-192.9kb)|HLA-DRA(+21.54kb)|HLA-DRB1(-112.2kb)|HLA-DRB5(-50.79kb)|HLA-DRB6(-86.13kb)
5	11956711	rs1458480	C	T	2	9.512e-05	0.2311	1.0914	1.0652	0.0649	70.65	0.9994	1.1128	CTNND2(+52.6kb)
8	27466157	rs1532276	C	T	2	9.572e-05	9.572e-05	1.0943	1.0943	0.9333	0	1.0988	1.0933	CCDC25(-124.7kb)|CHRNA2(+129.3kb)|CLU(0)|EPHX2(+63.72kb)|ESCO2(-165.9kb)|MIR3622A(-93.04kb)|MIR3622B(-93.03kb)|PTK2B(+149.2kb)|SCARA3(-25.42kb)
16	78025971	rs417050	A	G	2	9.596e-05	9.596e-05	0.9046	0.9046	0.5254	0	0.936	0.8976	CLEC3A(-30.47kb)|VAT1L(+11.97kb)|WWOX(-107.4kb)
6	32439393	rs9405040	C	A	2	9.599e-05	9.599e-05	0.8926	0.8926	0.3576	0	0.9339	0.8785	BTNL2(+64.49kb)|C6orf10(+99.74kb)|HCG23(+77.92kb)|HLA-DQA1(-165.8kb)|HLA-DQB1(-187.8kb)|HLA-DRA(+26.57kb)|HLA-DRB1(-107.2kb)|HLA-DRB5(-45.76kb)|HLA-DRB6(-81.1kb)
6	32580723	rs3997873	T	G	2	9.602e-05	9.602e-05	0.8522	0.8522	0.4999	0	0.8131	0.8662	HLA-DOB(-199.8kb)|HLA-DQA1(-24.46kb)|HLA-DQA2(-128.4kb)|HLA-DQB1(-46.52kb)|HLA-DQB2(-143.2kb)|HLA-DRA(+167.9kb)|HLA-DRB1(+23.11kb)|HLA-DRB5(+82.72kb)|HLA-DRB6(+52.94kb)
15	58532507	rs11632498	C	T	2	9.614e-05	0.2513	1.2041	1.141	0.0599	71.76	0.9938	1.2556	ALDH1A2(+174.4kb)|AQP9(+54.4kb)|LIPC(-191.7kb)
6	39123564	rs1366322	C	A	2	9.619e-05	0.01329	0.8563	0.8679	0.2219	32.98	0.9503	0.8371	DNAH8(+125kb)|GLP1R(+68.04kb)|KCNK5(-33.18kb)|KCNK16(-158.9kb)|KCNK17(-143.2kb)|KIF6(-179.3kb)|SAYSD1(+40.7kb)
6	32441008	rs9348886	T	C	2	9.635e-05	9.635e-05	0.8924	0.8924	0.3552	0	0.9339	0.8782	BTNL2(+66.11kb)|C6orf10(+101.4kb)|HCG23(+79.54kb)|HLA-DQA1(-164.2kb)|HLA-DQB1(-186.2kb)|HLA-DRA(+28.18kb)|HLA-DRB1(-105.5kb)|HLA-DRB5(-44.14kb)|HLA-DRB6(-79.48kb)
4	13056423	rs2621250	C	T	2	9.638e-05	9.638e-05	1.1499	1.1499	0.6817	0	1.1138	1.1577	.
9	28286728	rs13287765	A	G	2	9.641e-05	0.02323	1.1098	1.1362	0.0946	64.21	1.2197	1.0866	LINGO2(0)
2	127863029	rs7583814	T	C	2	9.647e-05	9.647e-05	1.1223	1.1223	0.9061	0	1.1139	1.1241	BIN1(0)|CYP27C1(-78.38kb)|ERCC3(-151.8kb)|MAP3K2(-193.2kb)
14	92358920	rs2243400	T	C	2	9.655e-05	9.655e-05	1.0976	1.0976	0.3888	0	1.0499	1.1081	ATXN3(-166kb)|CATSPERB(+160.5kb)|FBLN5(0)|TC2N(+25.04kb)|TRIP11(-75.32kb)
5	14486435	rs72730877	T	A	2	9.66e-05	0.05866	1.2146	1.3026	0.0272	79.51	1.5271	1.1519	FAM105A(-95.46kb)|FAM105B(-178.3kb)|TRIO(0)
2	127861906	rs4663097	C	G	2	9.661e-05	9.661e-05	1.1202	1.1202	0.9376	0	1.1257	1.119	BIN1(0)|CYP27C1(-79.5kb)|ERCC3(-153kb)|MAP3K2(-194.3kb)
14	47543284	rs10146235	A	G	2	9.67e-05	9.67e-05	1.1609	1.1609	0.4003	0	1.2413	1.1431	MDGA2(0)
18	40103062	rs17621853	G	A	2	9.675e-05	9.675e-05	0.8681	0.8681	0.7504	0	0.8896	0.8634	LINC00907(0)
4	42197378	rs111501395	G	A	2	9.679e-05	9.679e-05	0.7836	0.7836	0.3384	0	0.8691	0.7569	BEND4(+42.48kb)|SLC30A9(+107.8kb)
8	107688137	rs3132806	A	G	2	9.681e-05	9.681e-05	1.1096	1.1096	0.3767	0	1.056	1.1221	ABRA(-83.57kb)|OXR1(0)
15	58532291	rs2414554	G	C	2	9.7e-05	0.2532	1.2042	1.1408	0.0593	71.89	0.9934	1.2558	ALDH1A2(+174.2kb)|AQP9(+54.18kb)|LIPC(-191.9kb)
22	19796856	rs147781562	T	C	2	9.707e-05	9.707e-05	0.6608	0.6608	0.5875	0	0.75	0.6437	ARVCF(-160.5kb)|C22orf29(-36.8kb)|COMT(-132.4kb)|GNB1L(0)|GP1BB(+84.56kb)|MIR4761(-154.4kb)|SEPT5(+86.01kb)|SEPT5-GP1BB(+84.56kb)|TBX1(+25.74kb)|TXNRD2(-66.18kb)
10	22839628	rs2230469	C	T	2	9.714e-05	9.714e-05	0.9104	0.9104	0.3588	0	0.8667	0.9195	LOC100499489(+112.8kb)|PIP4K2A(0)|SPAG6(+133.1kb)
12	95353605	rs78223670	A	T	2	9.718e-05	0.3544	0.886	0.9243	0.0315	78.38	1.0189	0.8582	FGD6(-116.9kb)|KRT19P2(+124.8kb)|MIR492(+125.3kb)|NDUFA12(-11.5kb)|NR2C1(-60.4kb)
6	32439108	rs9405110	C	A	2	9.738e-05	9.738e-05	0.8927	0.8927	0.3593	0	0.9339	0.8787	BTNL2(+64.21kb)|C6orf10(+99.45kb)|HCG23(+77.64kb)|HLA-DQA1(-166.1kb)|HLA-DQB1(-188.1kb)|HLA-DRA(+26.28kb)|HLA-DRB1(-107.4kb)|HLA-DRB5(-46.04kb)|HLA-DRB6(-81.38kb)
4	12430160	rs183916571	T	C	2	9.759e-05	9.759e-05	0.7579	0.7579	0.9326	0	0.7669	0.7556	.
15	58532584	rs12908890	T	G	2	9.778e-05	0.2503	1.2039	1.141	0.0604	71.65	0.994	1.2553	ALDH1A2(+174.5kb)|AQP9(+54.47kb)|LIPC(-191.6kb)
6	32453191	rs527369852	C	T	2	9.782e-05	0.03344	0.8946	0.905	0.1305	56.25	0.9578	0.8705	BTNL2(+78.29kb)|C6orf10(+113.5kb)|HCG23(+91.72kb)|HLA-DQA1(-152kb)|HLA-DQB1(-174kb)|HLA-DRA(+40.36kb)|HLA-DRB1(-93.36kb)|HLA-DRB5(-31.96kb)|HLA-DRB6(-67.3kb)
14	47523525	rs1977815	T	C	2	9.796e-05	9.796e-05	1.165	1.165	0.4738	0	1.2347	1.1493	MDGA2(0)
8	27466181	rs1532277	C	T	2	9.801e-05	9.801e-05	1.0943	1.0943	0.9818	0	1.0955	1.094	CCDC25(-124.7kb)|CHRNA2(+129.4kb)|CLU(0)|EPHX2(+63.74kb)|ESCO2(-165.9kb)|MIR3622A(-93.01kb)|MIR3622B(-93.01kb)|PTK2B(+149.3kb)|SCARA3(-25.4kb)
6	32439828	rs9286790	A	G	2	9.821e-05	9.821e-05	0.8926	0.8926	0.3578	0	0.9339	0.8785	BTNL2(+64.93kb)|C6orf10(+100.2kb)|HCG23(+78.36kb)|HLA-DQA1(-165.4kb)|HLA-DQB1(-187.4kb)|HLA-DRA(+27kb)|HLA-DRB1(-106.7kb)|HLA-DRB5(-45.32kb)|HLA-DRB6(-80.66kb)
6	32423915	rs9268807	G	C	2	9.822e-05	0.0007853	0.8528	0.8479	0.257	22.15	0.7878	0.8762	BTNL2(+49.02kb)|C6orf10(+84.26kb)|HCG23(+62.45kb)|HLA-DQA1(-181.3kb)|HLA-DRA(+11.09kb)|HLA-DRB1(-122.6kb)|HLA-DRB5(-61.24kb)|HLA-DRB6(-96.57kb)
8	28569907	rs240949	A	C	2	9.823e-05	9.823e-05	0.9071	0.9071	0.493	0	0.8745	0.9144	EXTL3(0)|FZD3(+138.1kb)|HMBOX1(-178kb)|INTS9(-55.27kb)
6	32324055	rs3117115	C	A	2	9.855e-05	0.004047	0.8543	0.8433	0.1816	43.95	0.7799	0.8821	AGER(+172kb)|AGPAT1(+178.2kb)|BTNL2(-38.46kb)|C6orf10(0)|EGFL8(+188kb)|GPSM3(+160.8kb)|HCG23(-34.23kb)|HLA-DRA(-83.56kb)|HLA-DRB5(-161.1kb)|HLA-DRB6(-196.4kb)|NOTCH4(+132.2kb)|PBX2(+166.1kb)|PPT2(+192.6kb)|PPT2-EGFL8(+188kb)|RNF5(+175.5kb)|RNF5P1(+175.5kb)
13	91413968	rs74103138	T	G	2	9.862e-05	9.862e-05	0.8279	0.8279	0.7291	0	0.8594	0.8217	LINC00410(-129.2kb)
7	125560110	rs59604354	A	G	2	9.887e-05	9.887e-05	1.1034	1.1034	0.7329	0	1.1229	1.0987	.
4	125773528	rs62323267	T	G	2	9.891e-05	9.891e-05	0.8404	0.8404	0.6344	0	0.8035	0.8489	ANKRD50(+139.6kb)
18	40088617	rs17621438	G	A	2	9.925e-05	9.925e-05	0.8682	0.8682	0.6984	0	0.8945	0.8625	LINC00907(0)
6	41918042	rs148624763	T	C	2	9.927e-05	9.927e-05	1.4107	1.4107	0.5336	0	1.5702	1.3714	BYSL(+17.26kb)|C6orf132(-150.8kb)|CCND3(0)|FRS3(+170.4kb)|MED20(+29.16kb)|PRICKLE4(+162.9kb)|TAF8(-100.2kb)|TOMM6(+160.4kb)|USP49(+54.94kb)
11	72264064	rs76809168	A	T	2	9.936e-05	0.07174	1.2321	1.3194	0.0147	83.2	1.5613	1.1462	ARAP1(-132kb)|CLPB(+118.3kb)|MIR139(-62.04kb)|PDE2A(-23.12kb)
18	40149534	rs112579857	C	T	2	9.936e-05	9.936e-05	0.8676	0.8676	0.8104	0	0.8838	0.864	LINC00907(0)|RIT2(-173.6kb)
6	32439490	rs9391878	A	T	2	9.939e-05	9.939e-05	0.8927	0.8927	0.3451	0	0.9351	0.8782	BTNL2(+64.59kb)|C6orf10(+99.83kb)|HCG23(+78.02kb)|HLA-DQA1(-165.7kb)|HLA-DQB1(-187.8kb)|HLA-DRA(+26.66kb)|HLA-DRB1(-107.1kb)|HLA-DRB5(-45.66kb)|HLA-DRB6(-81kb)
21	27588195	rs13049968	T	A	2	9.94e-05	9.94e-05	0.9047	0.9047	0.9935	0	0.9043	0.9048	APP(+44.75kb)
13	106451219	rs117619710	A	G	2	9.943e-05	9.943e-05	1.332	1.332	0.9479	0	1.3472	1.3293	LINC00343(+37.08kb)
12	26087017	rs1691902	C	T	2	9.945e-05	9.945e-05	0.8772	0.8772	0.471	0	0.8319	0.887	BHLHE41(-185.9kb)|MIR4302(+60kb)|RASSF8(-24.95kb)|RASSF8-AS1(-20.57kb)
1	162169268	rs10918859	A	G	2	9.957e-05	0.002857	0.8954	0.9	0.2636	19.98	0.9572	0.882	C1orf111(-174.2kb)|C1orf226(-179.4kb)|MIR556(-143.1kb)|MIR4654(+42.3kb)|NOS1AP(0)|OLFML2B(+175.6kb)|SH2D1B(-195.8kb)
6	39119628	rs1366324	T	G	2	9.962e-05	0.01712	0.8564	0.8691	0.2132	35.47	0.9523	0.8368	DNAH8(+121.1kb)|GLP1R(+64.11kb)|KCNK5(-37.12kb)|KCNK16(-162.8kb)|KCNK17(-147.1kb)|KIF6(-183.2kb)|LOC100131047(+198.7kb)|SAYSD1(+36.76kb)
19	1032689	rs1141534	T	G	2	9.973e-05	0.03424	1.1584	1.141	0.1286	56.71	1.0586	1.2016	ABCA7(-7.412kb)|ARID3A(+59.89kb)|C19orf26(-197.3kb)|CFD(+169.1kb)|CNN2(0)|ELANE(+176.4kb)|GPX4(-71.25kb)|GRIN3B(+22.97kb)|HMHA1(-33.23kb)|KISS1R(+111.7kb)|MED16(+139.5kb)|POLR2E(-53.89kb)|PRTN3(+184.5kb)|R3HDM4(+119.5kb)|SBNO2(-74.94kb)|STK11(-173.1kb)|TMEM259(+11.55kb)|WDR18(+38.12kb)
11	131694037	rs547566	C	T	2	9.983e-05	9.983e-05	0.9117	0.9117	0.531	0	0.8823	0.9179	NTM(0)
8	28972259	rs77544679	T	G	2	9.991e-05	9.991e-05	1.1427	1.1427	0.9669	0	1.1393	1.1435	HMBOX1(+62.02kb)|KIF13B(0)
12	88675668	rs73192939	C	T	2	9.995e-05	0.1697	1.219	1.1626	0.0925	64.67	1.0121	1.268	CEP290(+139.7kb)|TMTC3(+82kb)
15	48862043	rs1848050	A	G	2	9.995e-05	9.995e-05	0.8669	0.8669	0.9595	0	0.8636	0.8677	CEP152(-168.1kb)|FBN1(0)
