# Supplementary material for: Multiomics integrative analysis identifies APOE allele-specific blood biomarkers associated to Alzheimer’s disease etiopathogenesis
Source: Aging (Albany NY). 2021 Apr 12;13(7):9277–329. doi: 10.18632/aging.202950 (PMC8064208; doi:10.18632/aging.202950)
Supplement: Supplementary Table 6 [file aging-13-202950-s008.xlsx]

## Sheet: Sheet1
Supplementary Table 6. Stage I-IV APOE4 stratified meta-analysis results (p<10-4).
CHR	BP	SNP	A1	A2	N	P	P(R)	OR	OR(R)	Q	I	StageIV	StageI-III	Annotation
19	45416741	rs438811	T	C	2	3.153e-75	1.14e-07	2.4569	2.2516	0.0253	80.03	1.8875	2.5714	APOC1(-1.179kb)|APOC1P1(-13.32kb)|APOC2(-32.5kb)|APOC4(-28.75kb)|APOC4-APOC2(-28.75kb)|APOE(+4.091kb)|BCAM(+92.06kb)|BCL3(+153.4kb)|CBLC(+112.8kb)|CLASRP(-125.6kb)|CLPTM1(-41.1kb)|GEMIN7(-165.8kb)|PPP1R37(-179.7kb)|PVRL2(+24.26kb)|RELB(-87.96kb)|TOMM40(+9.795kb)|ZNF296(-158kb)
19	45411941	rs429358	C	T	2	4.12e-75	5.919e-13	2.4038	2.2751	0.077	68.03	1.9722	2.4923	APOC1(-5.979kb)|APOC1P1(-18.12kb)|APOC2(-37.3kb)|APOC4(-33.55kb)|APOC4-APOC2(-33.55kb)|APOE(0)|BCAM(+87.26kb)|BCL3(+148.6kb)|CBLC(+108kb)|CEACAM16(+198kb)|CLASRP(-130.4kb)|CLPTM1(-45.9kb)|GEMIN7(-170.6kb)|PPP1R37(-184.5kb)|PVRL2(+19.46kb)|RELB(-92.76kb)|TOMM40(+4.995kb)|ZNF296(-162.8kb)
19	45416178	rs483082	T	G	2	1.214e-74	8.754e-07	2.4426	2.2218	0.0173	82.34	1.8485	2.564	APOC1(-1.742kb)|APOC1P1(-13.88kb)|APOC2(-33.06kb)|APOC4(-29.32kb)|APOC4-APOC2(-29.32kb)|APOE(+3.528kb)|BCAM(+91.5kb)|BCL3(+152.9kb)|CBLC(+112.3kb)|CLASRP(-126.1kb)|CLPTM1(-41.66kb)|GEMIN7(-166.3kb)|PPP1R37(-180.3kb)|PVRL2(+23.69kb)|RELB(-88.53kb)|TOMM40(+9.232kb)|ZNF296(-158.6kb)
19	45418790	rs5117	C	T	2	9.383e-71	5.727e-08	2.3586	2.1766	0.035	77.5	1.8391	2.4588	APOC1(0)|APOC1P1(-11.27kb)|APOC2(-30.45kb)|APOC4(-26.7kb)|APOC4-APOC2(-26.7kb)|APOE(+6.14kb)|BCAM(+94.11kb)|BCL3(+155.5kb)|CBLC(+114.9kb)|CLASRP(-123.5kb)|CLPTM1(-39.05kb)|GEMIN7(-163.7kb)|PPP1R37(-177.6kb)|PVRL2(+26.3kb)|RELB(-85.92kb)|TOMM40(+11.84kb)|ZNF296(-156kb)
19	45422160	rs12721051	G	C	2	6.971e-58	5.629e-15	2.0202	1.9523	0.1503	51.67	1.7257	2.0719	APOC1(0)|APOC1P1(-7.899kb)|APOC2(-27.08kb)|APOC4(-23.33kb)|APOC4-APOC2(-23.33kb)|APOE(+9.51kb)|BCAM(+97.48kb)|BCL3(+158.9kb)|CBLC(+118.3kb)|CLASRP(-120.1kb)|CLPTM1(-35.68kb)|GEMIN7(-160.4kb)|PPP1R37(-174.3kb)|PVRL2(+29.68kb)|RELB(-82.55kb)|TOMM40(+15.21kb)|ZNF296(-152.6kb)
19	45422846	rs56131196	A	G	2	8.599e-58	6.282e-15	2.0148	1.9471	0.1507	51.57	1.7212	2.0659	APOC1(+0.24kb)|APOC1P1(-7.213kb)|APOC2(-26.39kb)|APOC4(-22.65kb)|APOC4-APOC2(-22.65kb)|APOE(+10.2kb)|BCAM(+98.17kb)|BCL3(+159.5kb)|CBLC(+118.9kb)|CLASRP(-119.5kb)|CLPTM1(-35kb)|GEMIN7(-159.7kb)|PPP1R37(-173.6kb)|PVRL2(+30.36kb)|RELB(-81.86kb)|TOMM40(+15.9kb)|ZNF296(-151.9kb)
19	45422946	rs4420638	G	A	2	1.031e-57	3.023e-15	2.0139	1.9479	0.1547	50.63	1.7225	2.0644	APOC1(+0.34kb)|APOC1P1(-7.113kb)|APOC2(-26.29kb)|APOC4(-22.55kb)|APOC4-APOC2(-22.55kb)|APOE(+10.3kb)|BCAM(+98.27kb)|BCL3(+159.6kb)|CBLC(+119kb)|CLASRP(-119.4kb)|CLPTM1(-34.9kb)|GEMIN7(-159.6kb)|PPP1R37(-173.5kb)|PVRL2(+30.46kb)|RELB(-81.76kb)|TOMM40(+16kb)|ZNF296(-151.8kb)
19	45396665	rs59007384	T	G	2	1.386e-48	3.003e-09	1.8558	1.7736	0.0928	64.61	1.5659	1.9116	APOC1(-21.26kb)|APOC1P1(-33.39kb)|APOC2(-52.57kb)|APOC4(-48.83kb)|APOC4-APOC2(-48.83kb)|APOE(-12.37kb)|BCAM(+71.99kb)|BCL3(+133.4kb)|CBLC(+92.76kb)|CEACAM16(+182.7kb)|CLASRP(-145.6kb)|CLPTM1(-61.18kb)|GEMIN7(-185.9kb)|PPP1R37(-199.8kb)|PVRL2(+4.18kb)|RELB(-108kb)|TOMM40(0)|ZNF296(-178.1kb)
19	45396219	rs157582	T	C	2	1.249e-46	3.24e-17	1.8111	1.7736	0.1981	39.62	1.5938	1.8518	APOC1(-21.7kb)|APOC1P1(-33.84kb)|APOC2(-53.02kb)|APOC4(-49.28kb)|APOC4-APOC2(-49.28kb)|APOE(-12.82kb)|BCAM(+71.54kb)|BCL3(+132.9kb)|CBLC(+92.32kb)|CEACAM16(+182.2kb)|CLASRP(-146.1kb)|CLPTM1(-61.62kb)|GEMIN7(-186.3kb)|PVRL2(+3.734kb)|RELB(-108.5kb)|TOMM40(0)|ZNF296(-178.5kb)
19	45392254	rs6857	T	C	2	6.834e-46	1.022e-15	1.7933	1.7526	0.1833	43.53	1.5765	1.8354	APOC1(-25.67kb)|APOC1P1(-37.8kb)|APOC2(-56.98kb)|APOC4(-53.24kb)|APOC4-APOC2(-53.24kb)|APOE(-16.78kb)|BCAM(+67.58kb)|BCL3(+129kb)|CBLC(+88.35kb)|CEACAM16(+178.3kb)|CLASRP(-150kb)|CLPTM1(-65.59kb)|GEMIN7(-190.3kb)|PVRL2(0)|RELB(-112.5kb)|TOMM40(-2.222kb)|ZNF296(-182.5kb)
19	45395714	rs157581	C	T	2	1.516e-45	5.01e-15	1.795	1.7519	0.1793	44.54	1.5726	1.8372	APOC1(-22.21kb)|APOC1P1(-34.34kb)|APOC2(-53.52kb)|APOC4(-49.78kb)|APOC4-APOC2(-49.78kb)|APOE(-13.32kb)|BCAM(+71.04kb)|BCL3(+132.4kb)|CBLC(+91.81kb)|CEACAM16(+181.7kb)|CLASRP(-146.6kb)|CLPTM1(-62.13kb)|GEMIN7(-186.8kb)|PVRL2(+3.229kb)|RELB(-109kb)|TOMM40(0)|ZNF296(-179kb)
19	45390333	rs283815	G	A	2	1.548e-44	2.676e-10	1.7796	1.7158	0.1203	58.57	1.5293	1.8283	APOC1(-27.59kb)|APOC1P1(-39.73kb)|APOC2(-58.9kb)|APOC4(-55.16kb)|APOC4-APOC2(-55.16kb)|APOE(-18.7kb)|BCAM(+65.66kb)|BCL3(+127kb)|CBLC(+86.43kb)|CEACAM16(+176.3kb)|CLASRP(-152kb)|CLPTM1(-67.51kb)|GEMIN7(-192.2kb)|PVRL2(0)|RELB(-114.4kb)|TOMM40(-4.143kb)|ZNF296(-184.4kb)
19	45394969	rs184017	G	T	2	9.303e-44	3.998e-16	1.768	1.7315	0.195	40.47	1.5592	1.8083	APOC1(-22.95kb)|APOC1P1(-35.09kb)|APOC2(-54.27kb)|APOC4(-50.52kb)|APOC4-APOC2(-50.52kb)|APOE(-14.07kb)|BCAM(+70.29kb)|BCL3(+131.7kb)|CBLC(+91.07kb)|CEACAM16(+181kb)|CLASRP(-147.3kb)|CLPTM1(-62.87kb)|GEMIN7(-187.5kb)|PVRL2(+2.484kb)|RELB(-109.7kb)|TOMM40(0)|ZNF296(-179.8kb)
19	45415713	rs10414043	A	G	2	1.445e-38	2.139e-12	1.627	1.5903	0.1606	49.2	1.4481	1.6661	APOC1(-2.207kb)|APOC1P1(-14.35kb)|APOC2(-33.52kb)|APOC4(-29.78kb)|APOC4-APOC2(-29.78kb)|APOE(+3.063kb)|BCAM(+91.04kb)|BCL3(+152.4kb)|CBLC(+111.8kb)|CLASRP(-126.6kb)|CLPTM1(-42.13kb)|GEMIN7(-166.8kb)|PPP1R37(-180.7kb)|PVRL2(+23.23kb)|RELB(-88.99kb)|TOMM40(+8.767kb)|ZNF296(-159kb)
19	45415935	rs7256200	T	G	2	1.477e-38	1.382e-12	1.6275	1.5915	0.1635	48.49	1.4493	1.6663	APOC1(-1.985kb)|APOC1P1(-14.12kb)|APOC2(-33.3kb)|APOC4(-29.56kb)|APOC4-APOC2(-29.56kb)|APOE(+3.285kb)|BCAM(+91.26kb)|BCL3(+152.6kb)|CBLC(+112kb)|CLASRP(-126.4kb)|CLPTM1(-41.91kb)|GEMIN7(-166.6kb)|PPP1R37(-180.5kb)|PVRL2(+23.45kb)|RELB(-88.77kb)|TOMM40(+8.989kb)|ZNF296(-158.8kb)
19	45413576	rs75627662	T	C	2	5.717e-38	4.175e-10	1.6361	1.5892	0.131	56.15	1.4376	1.6788	APOC1(-4.344kb)|APOC1P1(-16.48kb)|APOC2(-35.66kb)|APOC4(-31.92kb)|APOC4-APOC2(-31.92kb)|APOE(+0.926kb)|BCAM(+88.9kb)|BCL3(+150.3kb)|CBLC(+109.7kb)|CEACAM16(+199.6kb)|CLASRP(-128.7kb)|CLPTM1(-44.26kb)|GEMIN7(-168.9kb)|PPP1R37(-182.9kb)|PVRL2(+21.09kb)|RELB(-91.13kb)|TOMM40(+6.63kb)|ZNF296(-161.2kb)
19	45410002	rs769449	A	G	2	8.668e-38	1.683e-14	1.6144	1.5856	0.1891	42.03	1.4495	1.6507	APOC1(-7.918kb)|APOC1P1(-20.06kb)|APOC2(-39.24kb)|APOC4(-35.49kb)|APOC4-APOC2(-35.49kb)|APOE(0)|BCAM(+85.32kb)|BCL3(+146.7kb)|CBLC(+106.1kb)|CEACAM16(+196kb)|CLASRP(-132.3kb)|CLPTM1(-47.84kb)|GEMIN7(-172.5kb)|PPP1R37(-186.4kb)|PVRL2(+17.52kb)|RELB(-94.7kb)|TOMM40(+3.056kb)|ZNF296(-164.8kb)
19	45406673	rs10119	A	G	2	1.978e-37	4.185e-10	1.685	1.634	0.1389	54.33	1.4659	1.7297	APOC1(-11.25kb)|APOC1P1(-23.39kb)|APOC2(-42.56kb)|APOC4(-38.82kb)|APOC4-APOC2(-38.82kb)|APOE(-2.365kb)|BCAM(+82kb)|BCL3(+143.4kb)|CBLC(+102.8kb)|CEACAM16(+192.7kb)|CLASRP(-135.6kb)|CLPTM1(-51.17kb)|GEMIN7(-175.8kb)|PPP1R37(-189.8kb)|PVRL2(+14.19kb)|RELB(-98.03kb)|TOMM40(0)|ZNF296(-168.1kb)
19	45421254	rs12721046	A	G	2	3.518e-32	8.562e-30	1.5411	1.5396	0.3103	2.86	1.4148	1.5662	APOC1(0)|APOC1P1(-8.805kb)|APOC2(-27.98kb)|APOC4(-24.24kb)|APOC4-APOC2(-24.24kb)|APOE(+8.604kb)|BCAM(+96.58kb)|BCL3(+158kb)|CBLC(+117.4kb)|CLASRP(-121kb)|CLPTM1(-36.59kb)|GEMIN7(-161.3kb)|PPP1R37(-175.2kb)|PVRL2(+28.77kb)|RELB(-83.45kb)|TOMM40(+14.31kb)|ZNF296(-153.5kb)
19	45427125	rs111789331	A	T	2	1.219e-31	1.219e-31	1.5456	1.5456	0.3457	0	1.4254	1.5693	APOC1(+4.519kb)|APOC1P1(-2.934kb)|APOC2(-22.11kb)|APOC4(-18.37kb)|APOC4-APOC2(-18.37kb)|APOE(+14.48kb)|BCAM(+102.4kb)|BCL3(+163.8kb)|CBLC(+123.2kb)|CLASRP(-115.2kb)|CLPTM1(-30.72kb)|GEMIN7(-155.4kb)|PPP1R37(-169.3kb)|PVRL2(+34.64kb)|RELB(-77.58kb)|TOMM40(+20.18kb)|ZNF296(-147.6kb)
19	45428234	rs66626994	A	G	2	3.713e-31	3.713e-31	1.5438	1.5438	0.375	0	1.4298	1.5661	APOC1(+5.628kb)|APOC1P1(-1.825kb)|APOC2(-21kb)|APOC4(-17.26kb)|APOC4-APOC2(-17.26kb)|APOE(+15.58kb)|BCAM(+103.6kb)|BCL3(+164.9kb)|CBLC(+124.3kb)|CLASRP(-114.1kb)|CLPTM1(-29.61kb)|GEMIN7(-154.3kb)|PPP1R37(-168.2kb)|PVRL2(+35.75kb)|RELB(-76.47kb)|TOMM40(+21.29kb)|ZNF296(-146.5kb)
19	45396144	rs11556505	T	C	2	1.113e-28	1.415e-24	1.481	1.478	0.3015	6.32	1.3667	1.5058	APOC1(-21.78kb)|APOC1P1(-33.92kb)|APOC2(-53.09kb)|APOC4(-49.35kb)|APOC4-APOC2(-49.35kb)|APOE(-12.89kb)|BCAM(+71.47kb)|BCL3(+132.8kb)|CBLC(+92.24kb)|CEACAM16(+182.2kb)|CLASRP(-146.2kb)|CLPTM1(-61.7kb)|GEMIN7(-186.4kb)|PVRL2(+3.659kb)|RELB(-108.6kb)|TOMM40(0)|ZNF296(-178.6kb)
19	45395909	rs34404554	G	C	2	1.584e-28	1.271e-24	1.4792	1.4764	0.3023	6.03	1.3654	1.504	APOC1(-22.01kb)|APOC1P1(-34.15kb)|APOC2(-53.33kb)|APOC4(-49.58kb)|APOC4-APOC2(-49.58kb)|APOE(-13.13kb)|BCAM(+71.23kb)|BCL3(+132.6kb)|CBLC(+92.01kb)|CEACAM16(+181.9kb)|CLASRP(-146.4kb)|CLPTM1(-61.93kb)|GEMIN7(-186.6kb)|PVRL2(+3.424kb)|RELB(-108.8kb)|TOMM40(0)|ZNF296(-178.8kb)
19	45395619	rs2075650	G	A	2	1.715e-28	3.708e-23	1.4782	1.4741	0.2956	8.59	1.363	1.5032	APOC1(-22.3kb)|APOC1P1(-34.44kb)|APOC2(-53.62kb)|APOC4(-49.88kb)|APOC4-APOC2(-49.88kb)|APOE(-13.42kb)|BCAM(+70.94kb)|BCL3(+132.3kb)|CBLC(+91.72kb)|CEACAM16(+181.6kb)|CLASRP(-146.7kb)|CLPTM1(-62.22kb)|GEMIN7(-186.9kb)|PVRL2(+3.134kb)|RELB(-109.1kb)|TOMM40(0)|ZNF296(-179.1kb)
19	45387459	rs12972156	G	C	2	4.709e-28	4.609e-21	1.4766	1.4708	0.287	11.79	1.3575	1.5019	APOC1(-30.46kb)|APOC1P1(-42.6kb)|APOC2(-61.78kb)|APOC4(-58.04kb)|APOC4-APOC2(-58.04kb)|APOE(-21.58kb)|BCAM(+62.78kb)|BCL3(+124.2kb)|CBLC(+83.56kb)|CEACAM16(+173.5kb)|CEACAM19(+199.8kb)|CLASRP(-154.8kb)|CLPTM1(-70.38kb)|GEMIN7(-195.1kb)|PVRL2(0)|RELB(-117.2kb)|TOMM40(-7.017kb)|ZNF296(-187.3kb)
19	45387596	rs12972970	A	G	2	6.746e-28	1.176e-18	1.4748	1.4662	0.2727	16.9	1.3525	1.5008	APOC1(-30.32kb)|APOC1P1(-42.46kb)|APOC2(-61.64kb)|APOC4(-57.9kb)|APOC4-APOC2(-57.9kb)|APOE(-21.44kb)|BCAM(+62.92kb)|BCL3(+124.3kb)|CBLC(+83.69kb)|CEACAM16(+173.6kb)|CEACAM19(+200kb)|CLASRP(-154.7kb)|CLPTM1(-70.24kb)|GEMIN7(-194.9kb)|PVRL2(0)|RELB(-117.1kb)|TOMM40(-6.88kb)|ZNF296(-187.2kb)
19	45388130	rs34342646	A	G	2	1.297e-27	1.845e-17	1.4702	1.4602	0.2652	19.44	1.3469	1.4965	APOC1(-29.79kb)|APOC1P1(-41.93kb)|APOC2(-61.11kb)|APOC4(-57.36kb)|APOC4-APOC2(-57.36kb)|APOE(-20.91kb)|BCAM(+63.45kb)|BCL3(+124.8kb)|CBLC(+84.23kb)|CEACAM16(+174.1kb)|CLASRP(-154.2kb)|CLPTM1(-69.71kb)|GEMIN7(-194.4kb)|PVRL2(0)|RELB(-116.6kb)|TOMM40(-6.346kb)|ZNF296(-186.6kb)
19	45394336	rs71352238	C	T	2	4.219e-27	1.071e-22	1.4628	1.4594	0.299	7.31	1.3496	1.4874	APOC1(-23.58kb)|APOC1P1(-35.72kb)|APOC2(-54.9kb)|APOC4(-51.16kb)|APOC4-APOC2(-51.16kb)|APOE(-14.7kb)|BCAM(+69.66kb)|BCL3(+131kb)|CBLC(+90.43kb)|CEACAM16(+180.4kb)|CLASRP(-148kb)|CLPTM1(-63.5kb)|GEMIN7(-188.2kb)|PVRL2(+1.851kb)|RELB(-110.4kb)|TOMM40(-0.14kb)|ZNF296(-180.4kb)
19	45395844	rs34095326	A	G	2	2.767e-17	2.767e-17	1.3464	1.3464	0.3785	0	1.2581	1.3656	APOC1(-22.08kb)|APOC1P1(-34.22kb)|APOC2(-53.39kb)|APOC4(-49.65kb)|APOC4-APOC2(-49.65kb)|APOE(-13.19kb)|BCAM(+71.17kb)|BCL3(+132.5kb)|CBLC(+91.94kb)|CEACAM16(+181.9kb)|CLASRP(-146.5kb)|CLPTM1(-62kb)|GEMIN7(-186.7kb)|PVRL2(+3.359kb)|RELB(-108.9kb)|TOMM40(0)|ZNF296(-178.9kb)
8	27466157	rs1532276	C	T	2	1.776e-15	1.776e-15	1.2533	1.2533	0.5951	0	1.2115	1.2617	CCDC25(-124.7kb)|CHRNA2(+129.3kb)|CLU(0)|EPHX2(+63.72kb)|ESCO2(-165.9kb)|MIR3622A(-93.04kb)|MIR3622B(-93.03kb)|PTK2B(+149.2kb)|SCARA3(-25.42kb)
8	27465312	rs11787077	C	T	2	2.545e-15	2.545e-15	1.251	1.251	0.6308	0	1.2134	1.2586	CCDC25(-125.5kb)|CHRNA2(+128.5kb)|CLU(0)|EPHX2(+62.87kb)|ESCO2(-166.7kb)|MIR3622A(-93.88kb)|MIR3622B(-93.88kb)|PTK2B(+148.4kb)|SCARA3(-26.26kb)
8	27464519	rs11136000	C	T	2	3.274e-15	3.274e-15	1.2498	1.2498	0.5435	0	1.2025	1.2594	CCDC25(-126.3kb)|CHRNA2(+127.7kb)|CLU(0)|EPHX2(+62.08kb)|ESCO2(-167.5kb)|MIR3622A(-94.67kb)|MIR3622B(-94.67kb)|PTK2B(+147.6kb)|SCARA3(-27.06kb)
8	27464929	rs4236673	G	A	2	3.509e-15	3.509e-15	1.2498	1.2498	0.6374	0	1.213	1.2573	CCDC25(-125.9kb)|CHRNA2(+128.1kb)|CLU(0)|EPHX2(+62.49kb)|ESCO2(-167.1kb)|MIR3622A(-94.26kb)|MIR3622B(-94.26kb)|PTK2B(+148kb)|SCARA3(-26.65kb)
8	27466181	rs1532277	C	T	2	3.958e-15	3.958e-15	1.2503	1.2503	0.6011	0	1.2093	1.2586	CCDC25(-124.7kb)|CHRNA2(+129.4kb)|CLU(0)|EPHX2(+63.74kb)|ESCO2(-165.9kb)|MIR3622A(-93.01kb)|MIR3622B(-93.01kb)|PTK2B(+149.3kb)|SCARA3(-25.4kb)
8	27466315	rs1532278	C	T	2	5.193e-15	5.193e-15	1.2504	1.2504	0.5964	0	1.2088	1.2589	CCDC25(-124.5kb)|CHRNA2(+129.5kb)|CLU(0)|EPHX2(+63.88kb)|ESCO2(-165.7kb)|MIR3622A(-92.88kb)|MIR3622B(-92.87kb)|PTK2B(+149.4kb)|SCARA3(-25.26kb)
8	27462481	rs7982	G	A	2	7.13e-15	7.13e-15	1.2472	1.2472	0.5803	0	1.2041	1.256	CCDC25(-128.4kb)|CHRNA2(+125.7kb)|CLU(0)|EPHX2(+60.04kb)|ESCO2(-169.6kb)|MIR3622A(-96.71kb)|MIR3622B(-96.71kb)|PTK2B(+145.6kb)|SCARA3(-29.1kb)
8	27468503	rs867230	A	C	2	1.264e-14	1.264e-14	1.2475	1.2475	0.8328	0	1.2305	1.2508	CCDC25(-122.3kb)|CHRNA2(+131.7kb)|CLU(0)|EPHX2(+66.06kb)|ESCO2(-163.6kb)|MIR3622A(-90.69kb)|MIR3622B(-90.69kb)|PBK(-198.6kb)|PTK2B(+151.6kb)|SCARA3(-23.07kb)
19	45425460	rs157595	G	A	2	2.055e-14	2.055e-14	1.3633	1.3633	0.4943	0	1.2822	1.3805	APOC1(+2.854kb)|APOC1P1(-4.599kb)|APOC2(-23.78kb)|APOC4(-20.03kb)|APOC4-APOC2(-20.03kb)|APOE(+12.81kb)|BCAM(+100.8kb)|BCL3(+162.2kb)|CBLC(+121.6kb)|CLASRP(-116.8kb)|CLPTM1(-32.38kb)|GEMIN7(-157.1kb)|PPP1R37(-171kb)|PVRL2(+32.98kb)|RELB(-79.25kb)|TOMM40(+18.51kb)|ZNF296(-149.3kb)
8	27467686	rs9331896	T	C	2	5.169e-14	5.169e-14	1.2399	1.2399	0.7333	0	1.213	1.2453	CCDC25(-123.1kb)|CHRNA2(+130.9kb)|CLU(0)|EPHX2(+65.25kb)|ESCO2(-164.4kb)|MIR3622A(-91.51kb)|MIR3622B(-91.5kb)|PBK(-199.5kb)|PTK2B(+150.8kb)|SCARA3(-23.89kb)
8	27467821	rs2070926	G	C	2	6.797e-14	6.797e-14	1.2396	1.2396	0.7321	0	1.2125	1.245	CCDC25(-123kb)|CHRNA2(+131kb)|CLU(0)|EPHX2(+65.38kb)|ESCO2(-164.2kb)|MIR3622A(-91.37kb)|MIR3622B(-91.37kb)|PBK(-199.3kb)|PTK2B(+150.9kb)|SCARA3(-23.76kb)
19	45414451	rs439401	C	T	2	7.883e-14	7.883e-14	1.3442	1.3442	0.3416	0	1.2405	1.3681	APOC1(-3.469kb)|APOC1P1(-15.61kb)|APOC2(-34.79kb)|APOC4(-31.04kb)|APOC4-APOC2(-31.04kb)|APOE(+1.801kb)|BCAM(+89.77kb)|BCL3(+151.2kb)|CBLC(+110.5kb)|CLASRP(-127.8kb)|CLPTM1(-43.39kb)|GEMIN7(-168.1kb)|PPP1R37(-182kb)|PVRL2(+21.97kb)|RELB(-90.26kb)|TOMM40(+7.505kb)|ZNF296(-160.3kb)
19	45416478	rs584007	G	A	2	1.018e-13	1.874e-13	1.3453	1.3449	0.3153	0.83	1.2345	1.3706	APOC1(-1.442kb)|APOC1P1(-13.58kb)|APOC2(-32.76kb)|APOC4(-29.02kb)|APOC4-APOC2(-29.02kb)|APOE(+3.828kb)|BCAM(+91.8kb)|BCL3(+153.2kb)|CBLC(+112.6kb)|CLASRP(-125.8kb)|CLPTM1(-41.36kb)|GEMIN7(-166kb)|PPP1R37(-180kb)|PVRL2(+23.99kb)|RELB(-88.23kb)|TOMM40(+9.532kb)|ZNF296(-158.3kb)
8	27456253	rs2279590	C	T	2	1.469e-13	1.469e-13	1.233	1.233	0.7079	0	1.2041	1.2389	CCDC25(-134.6kb)|CHRNA2(+119.4kb)|CLU(0)|EPHX2(+53.81kb)|ESCO2(-175.8kb)|MIR3622A(-102.9kb)|MIR3622B(-102.9kb)|PTK2B(+139.3kb)|SCARA3(-35.32kb)
2	127892810	rs6733839	T	C	2	2.31e-13	2.31e-13	1.2374	1.2374	0.9866	0	1.2361	1.2377	BIN1(+27.91kb)|CYP27C1(-48.6kb)|ERCC3(-122.1kb)|MAP3K2(-163.4kb)
2	127891427	rs4663105	C	A	2	2.472e-11	2.472e-11	1.2119	1.2119	0.8012	0	1.231	1.2078	BIN1(+26.52kb)|CYP27C1(-49.98kb)|ERCC3(-123.4kb)|MAP3K2(-164.8kb)
19	45409167	rs440446	G	C	2	3.221e-11	3.221e-11	1.2943	1.2943	0.4252	0	1.2099	1.3129	APOC1(-8.753kb)|APOC1P1(-20.89kb)|APOC2(-40.07kb)|APOC4(-36.33kb)|APOC4-APOC2(-36.33kb)|APOE(0)|BCAM(+84.49kb)|BCL3(+145.9kb)|CBLC(+105.3kb)|CEACAM16(+195.2kb)|CLASRP(-133.1kb)|CLPTM1(-48.67kb)|GEMIN7(-173.4kb)|PPP1R37(-187.3kb)|PVRL2(+16.68kb)|RELB(-95.54kb)|TOMM40(+2.221kb)|ZNF296(-165.6kb)
11	85831541	rs471470	A	C	2	3.641e-11	3.641e-11	1.2093	1.2093	0.3217	0	1.1348	1.2248	C11orf73(-181.7kb)|EED(-124.3kb)|PICALM(+50.62kb)
11	85814486	rs586274	G	T	2	1.208e-10	0.001391	1.2039	1.1815	0.1549	50.57	1.0976	1.226	C11orf73(-198.8kb)|CCDC83(+183.4kb)|EED(-141.3kb)|PICALM(+33.56kb)
11	85831246	rs573167	A	G	2	1.698e-10	6e-05	1.2029	1.1896	0.2165	34.52	1.11	1.2222	C11orf73(-182kb)|EED(-124.6kb)|PICALM(+50.32kb)
11	85832424	rs519961	C	T	2	1.796e-10	5.022e-05	1.2027	1.1898	0.2195	33.67	1.1104	1.2219	C11orf73(-180.8kb)|EED(-123.4kb)|PICALM(+51.5kb)
11	85820077	rs543293	G	A	2	2.727e-10	1.324e-05	1.2004	1.1903	0.24	27.55	1.1122	1.2187	C11orf73(-193.2kb)|CCDC83(+189kb)|EED(-135.7kb)|PICALM(+39.15kb)
11	85809825	rs645293	C	T	2	3.307e-10	3.307e-10	1.1956	1.1956	0.3451	0	1.1253	1.2099	CCDC83(+178.8kb)|EED(-146kb)|PICALM(+28.9kb)
11	85828551	rs474479	G	C	2	6.538e-10	0.002813	1.1984	1.1748	0.1472	52.39	1.0901	1.2214	C11orf73(-184.7kb)|CCDC83(+197.5kb)|EED(-127.3kb)|PICALM(+47.63kb)
11	85830157	rs567075	C	T	2	7.211e-10	0.003963	1.1975	1.1726	0.1384	54.45	1.0873	1.221	C11orf73(-183.1kb)|CCDC83(+199.1kb)|EED(-125.6kb)|PICALM(+49.23kb)
19	45395266	rs157580	A	G	2	1.027e-09	3.244e-06	1.2638	1.2541	0.2619	20.57	1.15	1.2888	APOC1(-22.65kb)|APOC1P1(-34.79kb)|APOC2(-53.97kb)|APOC4(-50.23kb)|APOC4-APOC2(-50.23kb)|APOE(-13.77kb)|BCAM(+70.59kb)|BCL3(+132kb)|CBLC(+91.36kb)|CEACAM16(+181.3kb)|CLASRP(-147kb)|CLPTM1(-62.58kb)|GEMIN7(-187.3kb)|PVRL2(+2.781kb)|RELB(-109.4kb)|TOMM40(0)|ZNF296(-179.5kb)
11	85800279	rs561655	A	G	2	1.777e-09	0.01718	1.1882	1.1572	0.0979	63.49	1.07	1.214	CCDC83(+169.2kb)|EED(-155.5kb)|PICALM(+19.36kb)
11	85811364	rs526904	C	T	2	3.372e-09	0.06325	1.1836	1.1425	0.0574	72.31	1.0478	1.2125	CCDC83(+180.3kb)|EED(-144.4kb)|PICALM(+30.44kb)
11	85811696	rs566975	A	C	2	3.394e-09	0.06345	1.1838	1.1426	0.0571	72.36	1.0478	1.2127	CCDC83(+180.6kb)|EED(-144.1kb)|PICALM(+30.77kb)
11	85831690	rs472486	G	A	2	3.651e-09	0.02422	1.1839	1.1515	0.0943	64.29	1.0631	1.2094	C11orf73(-181.6kb)|EED(-124.1kb)|PICALM(+50.77kb)
11	85811238	rs542126	G	A	2	7.482e-09	0.004937	1.177	1.1553	0.1525	51.16	1.0749	1.1983	CCDC83(+180.2kb)|EED(-144.6kb)|PICALM(+30.32kb)
11	85856187	rs7110631	G	C	2	8.612e-09	0.002912	1.186	1.1655	0.1654	48.02	1.0828	1.2082	C11orf73(-157.1kb)|EED(-99.62kb)|PICALM(+75.26kb)
11	85828548	rs598726	A	G	2	9.185e-09	0.06764	1.1809	1.1403	0.0588	72	1.0456	1.2103	C11orf73(-184.7kb)|CCDC83(+197.5kb)|EED(-127.3kb)|PICALM(+47.62kb)
11	85812210	rs497816	T	C	2	9.438e-09	0.05723	1.1781	1.1399	0.0674	70.11	1.0477	1.2058	CCDC83(+181.2kb)|EED(-143.6kb)|PICALM(+31.29kb)
11	85815030	rs1237999	A	G	2	9.45e-09	0.05587	1.178	1.1401	0.0685	69.88	1.0481	1.2056	C11orf73(-198.2kb)|CCDC83(+184kb)|EED(-140.8kb)|PICALM(+34.11kb)
11	85858538	rs7941541	A	G	2	1.021e-08	0.004959	1.1849	1.1624	0.1517	51.34	1.0787	1.2079	C11orf73(-154.7kb)|EED(-97.27kb)|PICALM(+77.62kb)
2	127888757	rs11680911	C	A	2	1.551e-08	1.551e-08	1.1794	1.1794	0.8376	0	1.1951	1.1762	BIN1(+23.85kb)|CYP27C1(-52.65kb)|ERCC3(-126.1kb)|MAP3K2(-167.5kb)
2	127889637	rs7561528	A	G	2	2.418e-08	2.418e-08	1.1766	1.1766	0.8694	0	1.1892	1.1741	BIN1(+24.73kb)|CYP27C1(-51.77kb)|ERCC3(-125.2kb)|MAP3K2(-166.6kb)
11	85776544	rs867611	A	G	2	3.858e-08	3.858e-08	1.1757	1.1757	0.7131	0	1.1479	1.1815	CCDC83(+145.5kb)|EED(-179.3kb)|PICALM(0)
11	85798020	rs631639	G	T	2	4.024e-08	4.024e-08	1.1798	1.1798	0.6558	0	1.1449	1.1869	CCDC83(+167kb)|EED(-157.8kb)|PICALM(+17.1kb)
11	85760028	rs694011	C	T	2	4.388e-08	4.388e-08	1.1745	1.1745	0.6946	0	1.1448	1.1806	CCDC83(+129kb)|EED(-195.8kb)|PICALM(0)
11	85794760	rs683912	T	C	2	6.175e-08	6.175e-08	1.1752	1.1752	0.6904	0	1.1447	1.1815	CCDC83(+163.7kb)|EED(-161kb)|PICALM(+13.84kb)
11	85724661	rs636355	C	T	2	6.463e-08	6.463e-08	1.1723	1.1723	0.6745	0	1.1406	1.1788	CCDC83(+93.61kb)|PICALM(0)
11	85717923	rs2508696	C	A	2	6.583e-08	6.583e-08	1.1722	1.1722	0.7007	0	1.1432	1.1782	CCDC83(+86.87kb)|PICALM(0)|SYTL2(+195.7kb)
11	85795950	rs480781	G	A	2	7.481e-08	7.481e-08	1.1763	1.1763	0.7944	0	1.1559	1.1805	CCDC83(+164.9kb)|EED(-159.9kb)|PICALM(+15.03kb)
11	85787824	rs536841	T	C	2	7.557e-08	7.557e-08	1.1729	1.1729	0.9291	0	1.1661	1.1743	CCDC83(+156.8kb)|EED(-168kb)|PICALM(+6.901kb)
11	85757613	rs659863	G	C	2	7.851e-08	7.851e-08	1.172	1.172	0.5416	0	1.126	1.1816	CCDC83(+126.6kb)|EED(-198.2kb)|PICALM(0)
11	85757617	rs677869	T	C	2	7.888e-08	7.888e-08	1.172	1.172	0.5416	0	1.126	1.1816	CCDC83(+126.6kb)|EED(-198.2kb)|PICALM(0)
11	85794542	rs535590	G	A	2	8.238e-08	8.238e-08	1.1737	1.1737	0.5145	0	1.1239	1.184	CCDC83(+163.5kb)|EED(-161.3kb)|PICALM(+13.62kb)
11	85795524	rs565719	C	T	2	8.443e-08	8.443e-08	1.1751	1.1751	0.675	0	1.1425	1.1818	CCDC83(+164.5kb)|EED(-160.3kb)|PICALM(+14.6kb)
11	85794761	rs534128	G	A	2	9.055e-08	9.055e-08	1.175	1.175	0.6169	0	1.1361	1.183	CCDC83(+163.7kb)|EED(-161kb)|PICALM(+13.84kb)
11	85765298	rs493254	A	G	2	9.151e-08	9.151e-08	1.1705	1.1705	0.8149	0	1.1528	1.1742	CCDC83(+134.2kb)|EED(-190.5kb)|PICALM(0)
11	85762244	rs669813	T	C	2	9.432e-08	9.432e-08	1.1704	1.1704	0.8569	0	1.1567	1.1732	CCDC83(+131.2kb)|EED(-193.6kb)|PICALM(0)
11	85748386	rs1973630	C	T	2	9.487e-08	9.487e-08	1.1703	1.1703	0.888	0	1.1596	1.1725	CCDC83(+117.3kb)|PICALM(0)
11	85740409	rs609903	G	A	2	9.952e-08	9.952e-08	1.1696	1.1696	0.8143	0	1.1519	1.1733	CCDC83(+109.4kb)|PICALM(0)
11	85788351	rs541458	T	C	2	1.012e-07	1.012e-07	1.1707	1.1707	0.8151	0	1.153	1.1744	CCDC83(+157.3kb)|EED(-167.5kb)|PICALM(+7.428kb)
11	85746037	rs561646	T	C	2	1.058e-07	1.058e-07	1.1692	1.1692	0.7979	0	1.1499	1.1732	CCDC83(+115kb)|PICALM(0)
11	85750671	rs2508691	T	A	2	1.104e-07	1.104e-07	1.1694	1.1694	0.8923	0	1.1591	1.1715	CCDC83(+119.6kb)|PICALM(0)
11	85741130	rs682928	T	C	2	1.211e-07	1.211e-07	1.1689	1.1689	0.9131	0	1.1606	1.1706	CCDC83(+110.1kb)|PICALM(0)
11	85757589	rs677909	T	C	2	1.213e-07	1.213e-07	1.1684	1.1684	0.7329	0	1.1427	1.1737	CCDC83(+126.5kb)|EED(-198.2kb)|PICALM(0)
11	85718231	rs602222	T	G	2	1.47e-07	1.47e-07	1.1669	1.1669	0.8313	0	1.1509	1.1702	CCDC83(+87.18kb)|PICALM(0)|SYTL2(+196.1kb)
11	85689712	rs587038	T	A	2	1.511e-07	1.511e-07	1.167	1.167	0.8367	0	1.1515	1.1702	CCDC83(+58.66kb)|PICALM(0)|SYTL2(+167.5kb)
11	85734010	rs676733	T	C	2	1.609e-07	1.609e-07	1.1667	1.1667	0.7385	0	1.1416	1.1719	CCDC83(+103kb)|PICALM(0)
11	85691810	rs645299	A	C	2	1.627e-07	1.627e-07	1.1664	1.1664	0.8342	0	1.1507	1.1697	CCDC83(+60.76kb)|PICALM(0)|SYTL2(+169.6kb)
11	85681583	rs639012	G	A	2	1.628e-07	1.628e-07	1.1668	1.1668	0.9659	0	1.1636	1.1675	CCDC83(+50.53kb)|PICALM(0)|SYTL2(+159.4kb)
2	127886416	rs12617835	C	A	2	1.754e-07	1.754e-07	1.174	1.174	0.5891	0	1.2167	1.165	BIN1(+21.51kb)|CYP27C1(-55kb)|ERCC3(-128.4kb)|MAP3K2(-169.8kb)
11	85682817	rs606505	G	A	2	1.764e-07	1.764e-07	1.1659	1.1659	0.84	0	1.1507	1.169	CCDC83(+51.77kb)|PICALM(0)|SYTL2(+160.6kb)
11	85670945	rs673751	C	A	2	1.811e-07	1.811e-07	1.1658	1.1658	0.8279	0	1.1495	1.1692	CCDC83(+39.89kb)|PICALM(0)|SYTL2(+148.8kb)
2	127886158	rs13025717	T	C	2	1.814e-07	1.814e-07	1.1738	1.1738	0.5911	0	1.2162	1.1648	BIN1(+21.26kb)|CYP27C1(-55.25kb)|ERCC3(-128.7kb)|MAP3K2(-170.1kb)
2	127886371	rs12618593	C	T	2	1.814e-07	1.814e-07	1.1738	1.1738	0.5883	0	1.2166	1.1648	BIN1(+21.47kb)|CYP27C1(-55.04kb)|ERCC3(-128.5kb)|MAP3K2(-169.9kb)
2	127886233	rs13025765	T	C	2	1.857e-07	1.857e-07	1.1736	1.1736	0.5875	0	1.2165	1.1646	BIN1(+21.33kb)|CYP27C1(-55.18kb)|ERCC3(-128.6kb)|MAP3K2(-170kb)
11	85845473	rs7938634	G	A	2	1.968e-07	0.0001798	1.1585	1.1505	0.2519	23.83	1.0776	1.1754	C11orf73(-167.8kb)|EED(-110.3kb)|PICALM(+64.55kb)
11	85824859	rs659023	G	A	2	2.113e-07	0.1686	1.1574	1.112	0.0397	76.36	1.0158	1.1875	C11orf73(-188.4kb)|CCDC83(+193.8kb)|EED(-130.9kb)|PICALM(+43.94kb)
11	85868640	rs3851179	C	T	2	4.012e-07	4.012e-07	1.1553	1.1553	0.328	0	1.087	1.1701	C11orf73(-144.6kb)|EED(-87.16kb)|PICALM(+87.72kb)
2	127894484	rs730482	T	A	2	5.024e-07	5.024e-07	1.1673	1.1673	0.7746	0	1.1455	1.1721	BIN1(+29.58kb)|CYP27C1(-46.93kb)|ERCC3(-120.4kb)|MAP3K2(-161.8kb)
2	127847930	rs35114168	A	G	2	5.141e-07	5.141e-07	1.1562	1.1562	0.8532	0	1.1699	1.1534	BIN1(0)|CYP27C1(-93.48kb)|ERCC3(-166.9kb)
2	127894615	rs744373	G	A	2	6.9e-07	6.9e-07	1.1653	1.1653	0.791	0	1.1452	1.1698	BIN1(+29.71kb)|CYP27C1(-46.8kb)|ERCC3(-120.2kb)|MAP3K2(-161.6kb)
20	4613814	rs78186890	G	A	2	8.836e-07	8.836e-07	1.4065	1.4065	0.3188	0	1.2057	1.4509	PRND(-88.74kb)|PRNP(-52.98kb)|PRNT(-98.11kb)|RASSF2(-146.9kb)
11	85867875	rs10792832	G	A	2	1.025e-06	6.482e-05	1.1496	1.1451	0.2786	14.8	1.0746	1.166	C11orf73(-145.4kb)|EED(-87.93kb)|PICALM(+86.95kb)
2	127865100	rs13032148	A	G	2	1.571e-06	1.571e-06	1.1516	1.1516	0.8924	0	1.1417	1.1537	BIN1(+0.197kb)|CYP27C1(-76.31kb)|ERCC3(-149.8kb)|MAP3K2(-191.1kb)
2	127892768	rs34779859	T	G	2	1.586e-06	1.586e-06	1.1618	1.1618	0.9574	0	1.1576	1.1627	BIN1(+27.86kb)|CYP27C1(-48.64kb)|ERCC3(-122.1kb)|MAP3K2(-163.5kb)
8	27434722	rs10780145	T	C	2	1.682e-06	0.0005861	1.1425	1.1348	0.2515	23.94	1.0644	1.159	CCDC25(-156.1kb)|CHRNA2(+97.91kb)|CLU(-19.71kb)|EPHX2(+32.28kb)|ESCO2(-197.3kb)|MIR3622A(-124.5kb)|MIR3622B(-124.5kb)|PTK2B(+117.8kb)|SCARA3(-56.85kb)
10	98101262	rs34561415	T	G	2	1.91e-06	1.91e-06	1.1675	1.1675	0.3413	0	1.2482	1.1509	BLNK(+69.93kb)|DNTT(+2.941kb)|OPALIN(-1.712kb)|TLL2(-23.1kb)|TM9SF3(-176.6kb)|ZNF518A(+177.7kb)
8	27477509	rs484377	T	C	2	2.032e-06	0.4812	1.1399	1.0745	0.0055	87.01	0.9614	1.1798	CCDC25(-113.3kb)|CHRNA2(+140.7kb)|CLU(+5.181kb)|EPHX2(+75.07kb)|ESCO2(-154.5kb)|MIR3622A(-81.68kb)|MIR3622B(-81.68kb)|PBK(-189.6kb)|PTK2B(+160.6kb)|SCARA3(-14.07kb)
8	27441521	rs4732728	G	C	2	2.081e-06	0.007891	1.1411	1.126	0.191	41.52	1.0529	1.16	CCDC25(-149.3kb)|CHRNA2(+104.7kb)|CLU(-12.91kb)|EPHX2(+39.08kb)|ESCO2(-190.5kb)|MIR3622A(-117.7kb)|MIR3622B(-117.7kb)|PTK2B(+124.6kb)|SCARA3(-50.06kb)
8	27448028	rs6983452	T	C	2	2.149e-06	0.02274	1.1413	1.1211	0.1532	50.97	1.0451	1.1621	CCDC25(-142.8kb)|CHRNA2(+111.2kb)|CLU(-6.405kb)|EPHX2(+45.59kb)|ESCO2(-184kb)|MIR3622A(-111.2kb)|MIR3622B(-111.2kb)|PTK2B(+131.1kb)|SCARA3(-43.55kb)
8	27475767	rs536332	A	G	2	2.211e-06	0.4792	1.14	1.0747	0.0057	86.9	0.9617	1.1799	CCDC25(-115.1kb)|CHRNA2(+139kb)|CLU(+3.439kb)|EPHX2(+73.33kb)|ESCO2(-156.3kb)|MIR3622A(-83.43kb)|MIR3622B(-83.42kb)|PBK(-191.4kb)|PTK2B(+158.9kb)|SCARA3(-15.81kb)
8	27480025	rs2582367	T	C	2	2.409e-06	0.4242	1.1386	1.0788	0.0094	85.18	0.9715	1.1758	CCDC25(-110.8kb)|CHRNA2(+143.2kb)|CLU(+7.697kb)|EPHX2(+77.59kb)|ESCO2(-152kb)|MIR3622A(-79.17kb)|MIR3622B(-79.16kb)|PBK(-187.1kb)|PTK2B(+163.1kb)|SCARA3(-11.55kb)
8	27476815	rs538181	A	G	2	2.474e-06	0.4724	1.1387	1.0747	0.0064	86.57	0.9631	1.1779	CCDC25(-114kb)|CHRNA2(+140kb)|CLU(+4.487kb)|EPHX2(+74.38kb)|ESCO2(-155.2kb)|MIR3622A(-82.38kb)|MIR3622B(-82.37kb)|PBK(-190.3kb)|PTK2B(+159.9kb)|SCARA3(-14.76kb)
8	27430506	rs7831810	G	A	2	2.499e-06	0.008841	1.1395	1.1243	0.1895	41.92	1.0514	1.1584	CCDC25(-160.3kb)|CHRNA2(+93.69kb)|CLU(-23.93kb)|EPHX2(+28.07kb)|MIR3622A(-128.7kb)|MIR3622B(-128.7kb)|PTK2B(+113.6kb)|SCARA3(-61.07kb)
8	27429228	rs1316801	T	C	2	2.711e-06	0.0005544	1.1393	1.1324	0.2574	22.03	1.0624	1.1556	CCDC25(-161.6kb)|CHRNA2(+92.42kb)|CLU(-25.2kb)|EPHX2(+26.79kb)|MIR3622A(-130kb)|MIR3622B(-130kb)|PTK2B(+112.3kb)|SCARA3(-62.35kb)
8	27480455	rs1073742	T	A	2	2.79e-06	0.486	1.1376	1.073	0.0057	86.91	0.9609	1.1773	CCDC25(-110.4kb)|CHRNA2(+143.6kb)|CLU(+8.127kb)|EPHX2(+78.02kb)|ESCO2(-151.6kb)|MIR3622A(-78.74kb)|MIR3622B(-78.73kb)|PBK(-186.7kb)|PTK2B(+163.5kb)|SCARA3(-11.12kb)
8	27479103	rs520186	G	A	2	2.798e-06	0.4831	1.1377	1.0733	0.0059	86.79	0.9614	1.1771	CCDC25(-111.7kb)|CHRNA2(+142.3kb)|CLU(+6.775kb)|EPHX2(+76.66kb)|ESCO2(-153kb)|MIR3622A(-80.09kb)|MIR3622B(-80.09kb)|PBK(-188kb)|PTK2B(+162.2kb)|SCARA3(-12.47kb)
8	27480210	rs1073743	G	A	2	2.859e-06	0.482	1.1375	1.0733	0.0061	86.73	0.9616	1.1768	CCDC25(-110.6kb)|CHRNA2(+143.4kb)|CLU(+7.882kb)|EPHX2(+77.77kb)|ESCO2(-151.8kb)|MIR3622A(-78.98kb)|MIR3622B(-78.98kb)|PBK(-186.9kb)|PTK2B(+163.3kb)|SCARA3(-11.37kb)
8	27479745	rs518317	C	G	2	3.327e-06	0.4838	1.1365	1.0727	0.0062	86.63	0.9614	1.1757	CCDC25(-111.1kb)|CHRNA2(+142.9kb)|CLU(+7.417kb)|EPHX2(+77.31kb)|ESCO2(-152.3kb)|MIR3622A(-79.45kb)|MIR3622B(-79.44kb)|PBK(-187.4kb)|PTK2B(+162.8kb)|SCARA3(-11.83kb)
2	127893897	rs745717	C	G	2	3.664e-06	3.664e-06	1.2548	1.2548	0.9073	0	1.2399	1.2582	BIN1(+28.99kb)|CYP27C1(-47.51kb)|ERCC3(-121kb)|MAP3K2(-162.3kb)
20	4615056	rs118035623	G	T	2	4.148e-06	4.148e-06	1.3561	1.3561	0.3932	0	1.194	1.3905	PRND(-87.5kb)|PRNP(-51.74kb)|PRNT(-96.87kb)|RASSF2(-145.6kb)
8	27463618	rs9331908	T	C	2	4.832e-06	4.832e-06	1.1467	1.1467	0.5741	0	1.1895	1.1379	CCDC25(-127.2kb)|CHRNA2(+126.8kb)|CLU(0)|EPHX2(+61.18kb)|ESCO2(-168.4kb)|MIR3622A(-95.58kb)|MIR3622B(-95.57kb)|PTK2B(+146.7kb)|SCARA3(-27.96kb)
20	4645538	rs2181020	T	C	2	5.333e-06	5.333e-06	1.4274	1.4274	0.5164	0	1.2672	1.4586	PRND(-57.02kb)|PRNP(-21.26kb)|PRNT(-66.39kb)|RASSF2(-115.1kb)|SLC23A2(-187.5kb)
8	27460368	rs9331928	C	G	2	5.4e-06	5.4e-06	1.146	1.146	0.7368	0	1.1714	1.1407	CCDC25(-130.5kb)|CHRNA2(+123.6kb)|CLU(0)|EPHX2(+57.93kb)|ESCO2(-171.7kb)|MIR3622A(-98.82kb)|MIR3622B(-98.82kb)|PTK2B(+143.5kb)|SCARA3(-31.21kb)
8	27461492	rs4732729	A	C	2	5.574e-06	5.574e-06	1.1457	1.1457	0.709	0	1.1739	1.1398	CCDC25(-129.3kb)|CHRNA2(+124.7kb)|CLU(0)|EPHX2(+59.05kb)|ESCO2(-170.6kb)|MIR3622A(-97.7kb)|MIR3622B(-97.7kb)|PTK2B(+144.6kb)|SCARA3(-30.08kb)
1	243090419	rs71652450	A	G	2	6.141e-06	0.003355	1.2217	1.2542	0.1646	48.23	1.4007	1.1883	CEP170(-197.3kb)|LOC731275(-129.2kb)
1	243091365	rs35524051	C	T	2	6.718e-06	0.001826	1.2203	1.2458	0.195	40.44	1.3869	1.1894	CEP170(-196.4kb)|LOC731275(-128.2kb)
11	85839935	rs7114401	T	C	2	7.287e-06	7.287e-06	1.1337	1.1337	0.6247	0	1.1	1.1408	C11orf73(-173.3kb)|EED(-115.9kb)|PICALM(+59.01kb)
3	13831874	rs877305	C	T	2	7.396e-06	7.396e-06	2.314	2.314	0.49	0	2.7522	2.1016	FBLN2(+152kb)|FGD5P1(-142.7kb)|LINC00620(+43.74kb)|TPRXL(-146.9kb)|WNT7A(-28.21kb)
4	76515504	rs116128088	G	A	2	7.631e-06	7.631e-06	1.6004	1.6004	0.3702	0	1.3107	1.6731	C4orf26(+24.4kb)|CDKL2(0)|G3BP2(-52.45kb)|RCHY1(+75.86kb)|THAP6(+60.27kb)|USO1(-134.3kb)
1	243091386	rs79773388	A	T	2	7.821e-06	0.002317	1.2181	1.2452	0.188	42.3	1.3873	1.1869	CEP170(-196.3kb)|LOC731275(-128.2kb)
1	243088653	rs34416956	A	G	2	8.51e-06	0.004839	1.2175	1.253	0.1528	51.07	1.4019	1.1835	CEP170(-199.1kb)|LOC731275(-131kb)
6	77947430	rs79916911	G	C	2	9.072e-06	9.072e-06	1.4234	1.4234	0.4216	0	1.6128	1.3776	.
1	243091301	rs71652451	C	G	2	9.21e-06	0.002817	1.2161	1.2445	0.1824	43.77	1.3874	1.1846	CEP170(-196.4kb)|LOC731275(-128.3kb)
11	85823324	rs631611	T	C	2	9.254e-06	9.254e-06	1.1301	1.1301	0.7041	0	1.1043	1.1355	C11orf73(-189.9kb)|CCDC83(+192.3kb)|EED(-132.5kb)|PICALM(+42.4kb)
11	85849094	rs11234554	G	C	2	9.544e-06	9.544e-06	1.1302	1.1302	0.636	0	1.098	1.1369	C11orf73(-164.2kb)|EED(-106.7kb)|PICALM(+68.17kb)
22	30224141	rs1071962	A	G	2	9.559e-06	0.02031	1.1984	1.1724	0.1726	46.24	1.0624	1.2297	ASCC2(0)|CABP7(+96.32kb)|MTMR3(-55.02kb)|NF2(+129.6kb)|UQCR10(+57.74kb)|ZMAT5(+61.17kb)
18	56297826	rs7239507	T	C	2	9.589e-06	0.002544	1.148	1.1379	0.2381	28.15	1.0599	1.1676	ALPK2(+1.637kb)|MALT1(-40.79kb)|MIR122(+179.4kb)|MIR3591(+179.4kb)
1	243089529	rs35620910	A	G	2	9.698e-06	0.00523	1.2163	1.2523	0.1505	51.63	1.4012	1.182	CEP170(-198.2kb)|LOC731275(-130.1kb)
18	56301851	rs4940416	G	C	2	1.031e-05	0.0007551	1.1467	1.14	0.264	19.84	1.0638	1.1652	ALPK2(+5.662kb)|MALT1(-36.77kb)|MIR122(+183.5kb)|MIR3591(+183.5kb)
18	56302375	rs56191568	C	T	2	1.039e-05	0.0007	1.1466	1.1401	0.2655	19.35	1.064	1.1651	ALPK2(+6.186kb)|MALT1(-36.24kb)|MIR122(+184kb)|MIR3591(+184kb)
6	125919450	rs6569431	C	G	2	1.045e-05	1.045e-05	1.1319	1.1319	0.6878	0	1.1602	1.1261	HEY2(-151.3kb)|LOC643623(-76.05kb)|NCOA7(-182.9kb)
18	56301610	rs6566993	G	T	2	1.073e-05	0.0007014	1.1464	1.1399	0.2658	19.23	1.0638	1.1648	ALPK2(+5.421kb)|MALT1(-37.01kb)|MIR122(+183.2kb)|MIR3591(+183.2kb)
1	243084928	rs77268054	A	C	2	1.081e-05	0.01249	1.2164	1.267	0.0998	63.08	1.4307	1.1768	LOC731275(-134.7kb)
2	161837324	rs12620689	A	G	2	1.086e-05	1.086e-05	1.6938	1.6938	0.952	0	1.7254	1.689	TANK(-156.1kb)
20	4639156	rs59606031	C	T	2	1.101e-05	0.0008746	1.3933	1.3731	0.2683	18.38	1.1469	1.4441	PRND(-63.4kb)|PRNP(-27.64kb)|PRNT(-72.77kb)|RASSF2(-121.5kb)|SLC23A2(-193.8kb)
18	56303070	rs8097776	A	T	2	1.132e-05	0.0009173	1.1461	1.1391	0.2614	20.71	1.0628	1.1647	ALPK2(+6.881kb)|MALT1(-35.55kb)|MIR122(+184.7kb)|MIR3591(+184.7kb)
4	76639357	rs148172014	C	T	2	1.157e-05	1.157e-05	1.574	1.574	0.4281	0	1.3293	1.6379	C4orf26(+148.3kb)|CDKL2(+83.64kb)|G3BP2(+40.69kb)|NAAA(-192.4kb)|PPEF2(-141.7kb)|RCHY1(+199.7kb)|THAP6(+184.1kb)|USO1(-10.47kb)
6	125919535	rs6569432	C	G	2	1.212e-05	1.212e-05	1.131	1.131	0.6595	0	1.162	1.1246	HEY2(-151.2kb)|LOC643623(-75.96kb)|NCOA7(-182.8kb)
20	4637712	rs77945340	G	A	2	1.218e-05	1.218e-05	1.4178	1.4178	0.372	0	1.1981	1.4612	PRND(-64.84kb)|PRNP(-29.08kb)|PRNT(-74.22kb)|RASSF2(-123kb)|SLC23A2(-195.3kb)
8	934539	rs2654014	A	G	2	1.284e-05	1.284e-05	1.1481	1.1481	0.5083	0	1.0969	1.1592	ERICH1-AS1(0)
4	113252176	rs34699840	A	G	2	1.308e-05	1.308e-05	1.2133	1.2133	0.9522	0	1.2207	1.2119	ALPK1(0)|AP1AR(+60.96kb)|C4orf32(+141.9kb)|NEUROG2(-182.5kb)|TIFA(+45.12kb)
20	4628458	rs57172108	T	C	2	1.321e-05	1.321e-05	1.3734	1.3734	0.318	0	1.1609	1.4173	PRND(-74.1kb)|PRNP(-38.34kb)|PRNT(-83.47kb)|RASSF2(-132.2kb)
20	4626630	rs1966244	G	A	2	1.352e-05	1.352e-05	1.3738	1.3738	0.318	0	1.1601	1.4177	PRND(-75.92kb)|PRNP(-40.17kb)|PRNT(-85.3kb)|RASSF2(-134kb)
18	56299078	rs55772181	G	A	2	1.36e-05	0.001085	1.1449	1.1377	0.2606	20.97	1.0612	1.1635	ALPK2(+2.889kb)|MALT1(-39.54kb)|MIR122(+180.7kb)|MIR3591(+180.7kb)
6	125918763	rs12202920	C	A	2	1.467e-05	1.467e-05	1.1291	1.1291	0.8007	0	1.1118	1.1328	HEY2(-152kb)|LOC643623(-76.74kb)|NCOA7(-183.5kb)
22	30216174	rs249402	T	C	2	1.554e-05	0.01653	1.1937	1.1707	0.1873	42.48	1.0623	1.224	ASCC2(0)|CABP7(+88.35kb)|MTMR3(-62.98kb)|NF2(+121.6kb)|UQCR10(+49.77kb)|ZMAT5(+53.2kb)
18	56298180	rs6566992	G	A	2	1.56e-05	0.001116	1.1439	1.1369	0.2618	20.6	1.0604	1.1625	ALPK2(+1.991kb)|MALT1(-40.44kb)|MIR122(+179.8kb)|MIR3591(+179.8kb)
18	56304801	rs57287567	C	T	2	1.584e-05	0.00118	1.1437	1.1365	0.2605	21	1.0603	1.1623	ALPK2(+8.612kb)|MALT1(-33.82kb)|MIR122(+186.4kb)|MIR3591(+186.4kb)
20	4635221	rs11697826	T	C	2	1.604e-05	0.0005181	1.3678	1.3534	0.2801	14.28	1.1404	1.4148	PRND(-67.33kb)|PRNP(-31.58kb)|PRNT(-76.71kb)|RASSF2(-125.4kb)|SLC23A2(-197.8kb)
20	4635366	rs6139510	T	G	2	1.613e-05	0.0005876	1.3677	1.3527	0.2783	14.94	1.1396	1.415	PRND(-67.19kb)|PRNP(-31.43kb)|PRNT(-76.56kb)|RASSF2(-125.3kb)|SLC23A2(-197.6kb)
6	56197961	rs62412405	T	C	2	1.633e-05	1.633e-05	1.3059	1.3059	0.7682	0	1.2549	1.3169	COL21A1(+85.58kb)|DST(-124.8kb)|RNU6-71P(0)
8	27874668	rs57301893	T	G	2	1.665e-05	0.02839	1.1775	1.234	0.0525	73.41	1.3835	1.1386	ELP3(-75.92kb)|MIR4287(+131kb)|NUGGC(-4.812kb)|PBK(+179.3kb)|SCARA5(+24.3kb)
4	42906061	rs1450905	C	T	2	1.677e-05	1.677e-05	1.1465	1.1465	0.6828	0	1.1795	1.1397	GRXCR1(0)
6	89268598	rs1923413	A	G	2	1.687e-05	1.687e-05	1.1279	1.1279	0.7506	0	1.1499	1.1233	RNGTT(-51.39kb)
20	55942689	rs117727471	A	G	2	1.777e-05	1.777e-05	1.2856	1.2856	0.519	0	1.3986	1.264	BMP7(+101kb)|CTCFL(-128.3kb)|MIR4325(+46.04kb)|MIR5095(0)|MTRNR2L3(+7.811kb)|PCK1(-193.4kb)|RAE1(0)|RBM38(-23.76kb)|SPO11(+23.64kb)
11	85845045	rs4944560	G	A	2	1.787e-05	1.787e-05	1.126	1.126	0.4643	0	1.0767	1.1364	C11orf73(-168.2kb)|EED(-110.8kb)|PICALM(+64.12kb)
4	43319727	rs115470739	A	C	2	1.81e-05	0.01031	1.4205	1.3747	0.2018	38.61	1.1408	1.493	.
3	6763835	rs11714530	A	G	2	1.909e-05	1.909e-05	1.4162	1.4162	0.9753	0	1.4076	1.4177	GRM7(-139kb)
20	4641650	rs11698202	T	G	2	1.915e-05	1.915e-05	1.3793	1.3793	0.3758	0	1.1817	1.4195	PRND(-60.9kb)|PRNP(-25.15kb)|PRNT(-70.28kb)|RASSF2(-119kb)|SLC23A2(-191.4kb)
4	175887859	rs13143836	A	G	2	1.917e-05	1.917e-05	1.1489	1.1489	0.5792	0	1.1961	1.1397	ADAM29(0)|GLRA3(+137.4kb)
1	243082674	rs6680828	G	A	2	1.964e-05	0.01785	1.2083	1.263	0.0888	65.48	1.4307	1.1683	LOC731275(-136.9kb)
6	56199161	rs11968872	T	C	2	1.982e-05	1.982e-05	1.3027	1.3027	0.7273	0	1.2425	1.3156	COL21A1(+86.78kb)|DST(-123.6kb)|RNU6-71P(0)
4	42922046	rs977695	T	C	2	1.999e-05	1.999e-05	1.145	1.145	0.8039	0	1.165	1.1409	GRXCR1(0)
8	27475320	rs504038	G	T	2	2.036e-05	0.4122	1.1282	1.0751	0.0186	81.94	0.9732	1.1626	CCDC25(-115.5kb)|CHRNA2(+138.5kb)|CLU(+2.992kb)|EPHX2(+72.88kb)|ESCO2(-156.7kb)|MIR3622A(-83.87kb)|MIR3622B(-83.87kb)|PBK(-191.8kb)|PTK2B(+158.4kb)|SCARA3(-16.26kb)
10	98122596	rs10882781	G	C	2	2.043e-05	0.00289	1.1418	1.1582	0.1944	40.61	1.2477	1.121	BLNK(+91.26kb)|DNTT(+24.28kb)|OPALIN(+3.504kb)|TLL2(-1.766kb)|TM9SF3(-155.3kb)|ZNF518A(+199.1kb)
20	4627047	rs11700363	T	C	2	2.064e-05	2.064e-05	1.3636	1.3636	0.3216	0	1.1547	1.407	PRND(-75.51kb)|PRNP(-39.75kb)|PRNT(-84.88kb)|RASSF2(-133.6kb)
3	124773675	rs34598459	A	G	2	2.075e-05	2.075e-05	1.128	1.128	0.8578	0	1.1155	1.1306	HEG1(0)|ITGB5(+167.5kb)|MIR5092(-96.63kb)|MUC13(+120.1kb)|SLC12A8(-27.8kb)|ZNF148(-170.8kb)
4	42919640	rs6830507	A	G	2	2.117e-05	2.117e-05	1.1445	1.1445	0.788	0	1.1662	1.1401	GRXCR1(0)
22	30215177	rs249399	C	T	2	2.145e-05	0.01971	1.1901	1.1668	0.1853	43.01	1.0585	1.2204	ASCC2(0)|CABP7(+87.36kb)|MTMR3(-63.98kb)|NF2(+120.6kb)|UQCR10(+48.78kb)|ZMAT5(+52.21kb)
8	27477019	rs569205	A	T	2	2.181e-05	0.4419	1.1268	1.0719	0.0154	82.97	0.9688	1.162	CCDC25(-113.8kb)|CHRNA2(+140.2kb)|CLU(+4.691kb)|EPHX2(+74.58kb)|ESCO2(-155kb)|MIR3622A(-82.17kb)|MIR3622B(-82.17kb)|PBK(-190.1kb)|PTK2B(+160.1kb)|SCARA3(-14.56kb)
4	43393351	rs71610065	T	C	2	2.186e-05	2.186e-05	1.3792	1.3792	0.3898	0	1.1999	1.4219	.
8	27422740	rs17466060	A	G	2	2.236e-05	0.04418	1.1266	1.1067	0.1535	50.92	1.0315	1.1474	CCDC25(-168.1kb)|CHRNA2(+85.93kb)|CLU(-31.69kb)|EPHX2(+20.3kb)|MIR3622A(-136.5kb)|MIR3622B(-136.4kb)|PTK2B(+105.8kb)|SCARA3(-68.84kb)
10	98122788	rs77288766	C	T	2	2.253e-05	2.253e-05	1.1667	1.1667	0.4067	0	1.2467	1.1508	BLNK(+91.46kb)|DNTT(+24.47kb)|OPALIN(+3.696kb)|TLL2(-1.574kb)|TM9SF3(-155.1kb)|ZNF518A(+199.3kb)
4	76596574	rs116061213	C	G	2	2.255e-05	2.255e-05	1.6176	1.6176	0.3775	0	1.3139	1.6975	C4orf26(+105.5kb)|CDKL2(+40.85kb)|G3BP2(0)|PPEF2(-184.5kb)|RCHY1(+156.9kb)|THAP6(+141.3kb)|USO1(-53.25kb)
10	98129657	rs12268819	G	C	2	2.268e-05	2.268e-05	1.1427	1.1427	0.4293	0	1.2048	1.1294	BLNK(+98.32kb)|DNTT(+31.34kb)|OPALIN(+10.56kb)|TLL2(0)|TM9SF3(-148.2kb)
4	42924197	rs1868792	C	T	2	2.29e-05	2.29e-05	1.1441	1.1441	0.8047	0	1.164	1.14	GRXCR1(0)
4	42924287	rs1868791	G	T	2	2.303e-05	2.303e-05	1.144	1.144	0.8061	0	1.1637	1.1399	GRXCR1(0)
4	175892732	rs10014801	T	G	2	2.329e-05	2.329e-05	1.1469	1.1469	0.6044	0	1.1905	1.1383	ADAM29(0)|GLRA3(+142.3kb)
6	92942447	rs2325434	C	T	2	2.359e-05	2.359e-05	1.1292	1.1292	0.6126	0	1.0938	1.1367	.
20	4642180	rs11696732	G	A	2	2.367e-05	2.367e-05	1.3749	1.3749	0.3455	0	1.1668	1.4179	PRND(-60.38kb)|PRNP(-24.62kb)|PRNT(-69.75kb)|RASSF2(-118.5kb)|SLC23A2(-190.8kb)
6	92953536	rs1444142	G	C	2	2.379e-05	2.379e-05	1.1294	1.1294	0.6133	0	1.0941	1.137	.
18	5302866	rs7242574	T	C	2	2.391e-05	0.012	1.4179	1.5185	0.1287	56.68	1.905	1.3442	C18orf42(+105.6kb)|EPB41L3(-89.52kb)|LINC00526(+64.84kb)|LINC00667(+56.36kb)|ZBTB14(+5.814kb)
17	26267074	rs72847280	T	C	2	2.459e-05	2.459e-05	1.1898	1.1898	0.9465	0	1.1826	1.1913	LYRM9(+46.66kb)|NLK(-102.6kb)|NOS2(+139.5kb)
4	42912512	rs12640603	A	G	2	2.481e-05	2.481e-05	1.1437	1.1437	0.7461	0	1.17	1.1384	GRXCR1(0)
2	127894098	rs56368748	A	G	2	2.482e-05	2.482e-05	1.1412	1.1412	0.9198	0	1.149	1.1395	BIN1(+29.2kb)|CYP27C1(-47.31kb)|ERCC3(-120.8kb)|MAP3K2(-162.1kb)
4	42914640	rs4861237	C	T	2	2.488e-05	2.488e-05	1.1435	1.1435	0.7589	0	1.1683	1.1384	GRXCR1(0)
11	78249478	rs12419623	T	A	2	2.496e-05	2.496e-05	1.1465	1.1465	0.8394	0	1.1627	1.143	GAB2(+120.6kb)|NARS2(0)|TENM4(-114.8kb)
8	27479227	rs492638	G	T	2	2.545e-05	0.379	1.1335	1.0807	0.0273	79.48	0.9765	1.1668	CCDC25(-111.6kb)|CHRNA2(+142.4kb)|CLU(+6.899kb)|EPHX2(+76.79kb)|ESCO2(-152.8kb)|MIR3622A(-79.97kb)|MIR3622B(-79.96kb)|PBK(-187.9kb)|PTK2B(+162.3kb)|SCARA3(-12.35kb)
6	92950534	rs7765501	G	A	2	2.56e-05	2.56e-05	1.1288	1.1288	0.6031	0	1.0925	1.1366	.
4	175894986	rs35159384	T	C	2	2.58e-05	2.58e-05	1.1461	1.1461	0.598	0	1.1904	1.1373	ADAM29(0)|GLRA3(+144.5kb)
6	56197696	rs56400248	C	T	2	2.684e-05	2.684e-05	1.2972	1.2972	0.7078	0	1.233	1.3111	COL21A1(+85.32kb)|DST(-125.1kb)|RNU6-71P(0)
6	125907489	rs4997859	C	T	2	2.719e-05	2.719e-05	1.1247	1.1247	0.8115	0	1.1085	1.1282	HEY2(-163.2kb)|LOC643623(-88.01kb)|NCOA7(-194.8kb)
6	23716153	rs2181938	T	C	2	2.741e-05	2.741e-05	1.1397	1.1397	0.5847	0	1.1836	1.131	.
20	55932221	rs77354807	A	G	2	2.745e-05	2.745e-05	1.2781	1.2781	0.4131	0	1.4225	1.251	BMP7(+90.51kb)|CTCFL(-138.8kb)|MIR4325(+35.57kb)|MIR5095(0)|MTRNR2L3(-1.274kb)|RAE1(0)|RBM38(-34.23kb)|SPO11(+13.17kb)
6	23716485	rs1325020	G	A	2	2.761e-05	2.761e-05	1.1396	1.1396	0.5839	0	1.1836	1.1309	.
8	940157	rs11137119	C	G	2	2.761e-05	2.761e-05	1.1377	1.1377	0.5674	0	1.0947	1.1469	ERICH1-AS1(0)
4	42906653	rs11734715	G	A	2	2.784e-05	2.784e-05	1.1432	1.1432	0.7248	0	1.1719	1.1374	GRXCR1(0)
20	4616911	rs11697146	T	C	2	2.826e-05	2.826e-05	1.2578	1.2578	0.5854	0	1.1763	1.2747	PRND(-85.64kb)|PRNP(-49.88kb)|PRNT(-95.02kb)|RASSF2(-143.8kb)
11	85850243	rs3844143	T	C	2	2.892e-05	2.892e-05	1.122	1.122	0.3312	0	1.0577	1.1357	C11orf73(-163kb)|EED(-105.6kb)|PICALM(+69.32kb)
20	4641163	rs11698114	C	G	2	2.915e-05	2.915e-05	1.3948	1.3948	0.5449	0	1.2458	1.4238	PRND(-61.39kb)|PRNP(-25.63kb)|PRNT(-70.76kb)|RASSF2(-119.5kb)|SLC23A2(-191.8kb)
7	40602105	rs17435152	G	T	2	2.95e-05	0.01565	1.2125	1.2643	0.1123	60.33	1.4375	1.1749	C7orf10(0)
6	125899476	rs7769272	G	T	2	3.029e-05	3.029e-05	1.1239	1.1239	0.8251	0	1.1089	1.1271	HEY2(-171.3kb)|LOC643623(-96.02kb)
20	4631476	rs11699537	A	G	2	3.093e-05	3.823e-05	1.3564	1.3557	0.3155	0.74	1.1458	1.4004	PRND(-71.08kb)|PRNP(-35.32kb)|PRNT(-80.45kb)|RASSF2(-129.2kb)
20	16067030	rs13036336	T	C	2	3.113e-05	0.001932	1.3747	1.4118	0.233	29.71	1.7087	1.3232	KIF16B(-185.7kb)|MACROD2(+33.19kb)
4	175902284	rs28897194	A	T	2	3.137e-05	3.137e-05	1.1443	1.1443	0.5963	0	1.1888	1.1355	ADAM29(+2.953kb)|GLRA3(+151.8kb)
4	175904324	rs6828863	T	C	2	3.15e-05	3.15e-05	1.1443	1.1443	0.5964	0	1.1888	1.1355	ADAM29(+4.993kb)|GLRA3(+153.9kb)
5	32145957	rs161524	T	C	2	3.215e-05	3.215e-05	1.1313	1.1313	0.7502	0	1.1552	1.1265	GOLPH3(0)|MTMR12(-81.15kb)|PDZD2(+34.92kb)
18	56297110	rs4940733	C	T	2	3.257e-05	3.257e-05	1.124	1.124	0.6411	0	1.0925	1.1308	ALPK2(+0.921kb)|MALT1(-41.51kb)|MIR122(+178.7kb)|MIR3591(+178.7kb)
11	74391679	rs34474423	T	C	2	3.266e-05	3.266e-05	1.1572	1.1572	0.5101	0	1.1027	1.1701	CHRDL2(-15.79kb)|LIPT2(+186.9kb)|MIR4696(-39.63kb)|POLD3(+37.57kb)|RNF169(-68.23kb)|XRRA1(-160.3kb)
1	64238155	rs139194654	G	A	2	3.322e-05	0.07017	1.5313	1.8838	0.0156	82.91	2.7964	1.3822	EFCAB7(+199.8kb)|PGM1(+112.2kb)|ROR1(-1.534kb)
4	175905542	rs4695994	C	T	2	3.377e-05	3.377e-05	1.1436	1.1436	0.607	0	1.1868	1.1351	ADAM29(+6.211kb)|GLRA3(+155.1kb)
8	140297199	rs56147663	A	T	2	3.377e-05	3.377e-05	1.2305	1.2305	0.9312	0	1.2402	1.2276	.
4	175902123	rs28782523	A	G	2	3.384e-05	3.384e-05	1.1437	1.1437	0.5881	0	1.1892	1.1347	ADAM29(+2.792kb)|GLRA3(+151.7kb)
4	175917595	rs1382792	T	C	2	3.42e-05	3.42e-05	1.1438	1.1438	0.5836	0	1.19	1.1347	ADAM29(+18.26kb)|GLRA3(+167.1kb)
2	127862653	rs744368	G	T	2	3.436e-05	3.436e-05	1.1486	1.1486	0.5094	0	1.0942	1.1602	BIN1(0)|CYP27C1(-78.76kb)|ERCC3(-152.2kb)|MAP3K2(-193.6kb)
6	56188218	rs11964876	T	C	2	3.445e-05	3.445e-05	1.2914	1.2914	0.5242	0	1.1855	1.315	COL21A1(+75.84kb)|DST(-134.6kb)|RNU6-71P(0)
17	26598575	rs76538025	C	G	2	3.521e-05	3.521e-05	1.3376	1.3376	0.3372	0	1.1638	1.3821	IFT20(-56.78kb)|KRT18P55(-4.436kb)|MIR4723(-89.1kb)|NLK(+75.17kb)|POLDIP2(-75.08kb)|PPY2(+23.26kb)|PYY2(+43.49kb)|SARM1(-100.4kb)|SEBOX(-92.71kb)|SLC46A1(-123.1kb)|TMEM97(-47.54kb)|TMEM199(-86.11kb)|TNFAIP1(-63.97kb)|VTN(-95.72kb)
11	74332664	rs12287097	G	A	2	3.522e-05	3.522e-05	1.2046	1.2046	0.5845	0	1.1448	1.219	CHRDL2(-74.81kb)|KCNE3(+154.1kb)|LIPT2(+127.9kb)|MIR4696(-98.65kb)|POLD3(0)|RNF169(-127.2kb)
7	40615578	rs62451207	T	A	2	3.524e-05	0.01321	1.2108	1.2575	0.1301	56.35	1.4268	1.1752	C7orf10(0)
8	27481984	rs507341	T	C	2	3.535e-05	0.256	1.1312	1.0896	0.0562	72.58	0.9948	1.1601	CCDC25(-108.8kb)|CHRNA2(+145.2kb)|CLU(+9.656kb)|EPHX2(+79.54kb)|ESCO2(-150.1kb)|MIR3622A(-77.21kb)|MIR3622B(-77.2kb)|PBK(-185.2kb)|PTK2B(+165.1kb)|SCARA3(-9.592kb)
6	125893304	rs6569428	C	G	2	3.54e-05	3.54e-05	1.1234	1.1234	0.9608	0	1.12	1.1241	HEY2(-177.4kb)|LOC643623(-102.2kb)
8	140297210	rs55966155	T	C	2	3.549e-05	3.549e-05	1.2296	1.2296	0.9295	0	1.2395	1.2266	.
6	56193982	rs9382619	G	A	2	3.556e-05	3.556e-05	1.2909	1.2909	0.5625	0	1.1938	1.3122	COL21A1(+81.6kb)|DST(-128.8kb)|RNU6-71P(0)
4	175916899	rs6832377	G	C	2	3.565e-05	3.565e-05	1.1433	1.1433	0.5796	0	1.1899	1.1341	ADAM29(+17.57kb)|GLRA3(+166.4kb)
6	22268346	rs2655444	G	A	2	3.591e-05	3.591e-05	1.8319	1.8319	0.4739	0	1.5303	1.9475	LINC00340(+73.73kb)|LOC729177(+120.9kb)|PRL(-19.13kb)
8	27476426	rs4732732	A	G	2	3.592e-05	0.45	1.1213	1.0684	0.0174	82.32	0.9681	1.1549	CCDC25(-114.4kb)|CHRNA2(+139.6kb)|CLU(+4.098kb)|EPHX2(+73.99kb)|ESCO2(-155.6kb)|MIR3622A(-82.77kb)|MIR3622B(-82.76kb)|PBK(-190.7kb)|PTK2B(+159.5kb)|SCARA3(-15.15kb)
11	74334201	rs11236174	A	G	2	3.594e-05	3.594e-05	1.2044	1.2044	0.5881	0	1.1452	1.2187	CHRDL2(-73.27kb)|KCNE3(+155.6kb)|LIPT2(+129.4kb)|MIR4696(-97.11kb)|POLD3(0)|RNF169(-125.7kb)
20	32464933	rs6141426	T	C	2	3.599e-05	3.599e-05	1.1667	1.1667	0.6087	0	1.1211	1.1774	CHMP4B(+22.76kb)|E2F1(+190.7kb)|MIR4755(-172kb)|PXMP4(+156.8kb)|RALY(-116.5kb)|ZNF341(+84.86kb)
8	27425117	rs9632863	T	C	2	3.603e-05	0.1044	1.1292	1.1019	0.1129	60.2	1.0191	1.1534	CCDC25(-165.7kb)|CHRNA2(+88.3kb)|CLU(-29.32kb)|EPHX2(+22.68kb)|MIR3622A(-134.1kb)|MIR3622B(-134.1kb)|PTK2B(+108.2kb)|SCARA3(-66.46kb)
4	175916120	rs2068305	T	C	2	3.652e-05	3.652e-05	1.1431	1.1431	0.565	0	1.1916	1.1336	ADAM29(+16.79kb)|GLRA3(+165.7kb)
6	56184859	rs62411945	G	A	2	3.656e-05	3.656e-05	1.2898	1.2898	0.468	0	1.1705	1.3167	COL21A1(+72.48kb)|DST(-137.9kb)|RNU6-71P(0)
11	74330888	rs11236172	A	G	2	3.659e-05	3.659e-05	1.2041	1.2041	0.5854	0	1.1445	1.2185	CHRDL2(-76.58kb)|KCNE3(+152.3kb)|LIPT2(+126.1kb)|MIR4696(-100.4kb)|POLD3(0)|RNF169(-129kb)
11	74348426	rs7112664	C	T	2	3.68e-05	3.68e-05	1.2042	1.2042	0.611	0	1.1485	1.2176	CHRDL2(-59.05kb)|KCNE3(+169.8kb)|LIPT2(+143.7kb)|MIR4696(-82.89kb)|POLD3(0)|RNF169(-111.5kb)
2	119273569	rs113878592	G	C	2	3.699e-05	3.699e-05	1.2298	1.2298	0.7043	0	1.1757	1.2397	.
11	74348205	rs7112384	G	T	2	3.706e-05	3.706e-05	1.2041	1.2041	0.612	0	1.1486	1.2175	CHRDL2(-59.27kb)|KCNE3(+169.6kb)|LIPT2(+143.4kb)|MIR4696(-83.11kb)|POLD3(0)|RNF169(-111.7kb)
3	2725785	rs1878181	C	T	2	3.723e-05	3.723e-05	1.1534	1.1534	0.5663	0	1.1029	1.1636	CNTN4(0)
4	175914966	rs10029212	T	C	2	3.725e-05	3.725e-05	1.1429	1.1429	0.5603	0	1.192	1.1333	ADAM29(+15.64kb)|GLRA3(+164.5kb)
11	74338054	rs10899021	G	A	2	3.739e-05	3.739e-05	1.2038	1.2038	0.6103	0	1.148	1.2172	CHRDL2(-69.42kb)|KCNE3(+159.5kb)|LIPT2(+133.3kb)|MIR4696(-93.26kb)|POLD3(0)|RNF169(-121.9kb)
11	74317985	rs61901541	C	T	2	3.781e-05	3.781e-05	1.2042	1.2042	0.5789	0	1.1436	1.2189	CHRDL2(-89.49kb)|KCNE3(+139.4kb)|LIPT2(+113.2kb)|MIR4696(-113.3kb)|POLD3(0)|RNF169(-141.9kb)
5	16704806	rs3860136	A	G	2	3.786e-05	0.002938	1.1419	1.1335	0.2524	23.66	1.0541	1.1615	FAM134B(+87.64kb)|MYO10(0)
8	27476347	rs11136001	T	G	2	3.806e-05	0.4535	1.1209	1.068	0.0173	82.36	0.9676	1.1546	CCDC25(-114.5kb)|CHRNA2(+139.5kb)|CLU(+4.019kb)|EPHX2(+73.91kb)|ESCO2(-155.7kb)|MIR3622A(-82.85kb)|MIR3622B(-82.84kb)|PBK(-190.8kb)|PTK2B(+159.4kb)|SCARA3(-15.23kb)
2	119238506	rs111339122	T	A	2	3.885e-05	3.885e-05	1.2218	1.2218	0.9628	0	1.2152	1.223	.
8	124165850	rs10481150	T	G	2	3.92e-05	0.001413	1.1283	1.1226	0.2699	17.86	1.0504	1.145	ATAD2(-166.2kb)|C8orf76(-66.34kb)|DERL1(+111.2kb)|FAM83A(-28.9kb)|FAM83A-AS1(-47.56kb)|MIR4663(-62.18kb)|TBC1D31(+1.458kb)|ZHX1(-94.84kb)|ZHX1-C8ORF76(-72.58kb)|ZHX2(+179.1kb)
11	85854176	rs2888903	T	G	2	3.94e-05	3.94e-05	1.1212	1.1212	0.6131	0	1.087	1.1284	C11orf73(-159.1kb)|EED(-101.6kb)|PICALM(+73.25kb)
11	74323175	rs7122710	T	C	2	3.953e-05	3.953e-05	1.2035	1.2035	0.5916	0	1.1449	1.2177	CHRDL2(-84.3kb)|KCNE3(+144.6kb)|LIPT2(+118.4kb)|MIR4696(-108.1kb)|POLD3(0)|RNF169(-136.7kb)
8	48153130	rs74876030	A	G	2	3.994e-05	3.994e-05	2.279	2.279	0.48	0	1.8355	2.5003	LOC100287846(+48.69kb)|SPIDR(-20.36kb)
8	27432174	rs1532279	G	C	2	4.008e-05	0.05607	1.128	1.1068	0.1497	51.82	1.0282	1.15	CCDC25(-158.7kb)|CHRNA2(+95.36kb)|CLU(-22.26kb)|EPHX2(+29.74kb)|ESCO2(-199.9kb)|MIR3622A(-127kb)|MIR3622B(-127kb)|PTK2B(+115.3kb)|SCARA3(-59.4kb)
10	49578487	rs2590381	C	A	2	4.011e-05	4.011e-05	1.1214	1.1214	0.4072	0	1.0656	1.1332	ARHGAP22(-75.58kb)|FRMPD2(+95.55kb)|FRMPD2P1(+195.2kb)|MAPK8(0)
6	23711545	rs729297	C	T	2	4.043e-05	4.043e-05	1.1374	1.1374	0.6897	0	1.1694	1.131	.
10	49562574	rs1345103	T	A	2	4.047e-05	4.047e-05	1.1214	1.1214	0.3994	0	1.0646	1.1334	ARHGAP22(-91.49kb)|FRMPD2(+79.63kb)|FRMPD2P1(+179.3kb)|MAPK8(0)
11	85849411	rs11234556	C	T	2	4.06e-05	4.06e-05	1.1196	1.1196	0.3621	0	1.0593	1.1324	C11orf73(-163.8kb)|EED(-106.4kb)|PICALM(+68.49kb)
5	104722916	rs76482840	A	T	2	4.106e-05	4.106e-05	1.2429	1.2429	0.5344	0	1.1505	1.2605	.
3	155231112	rs66856514	C	T	2	4.121e-05	4.121e-05	1.1899	1.1899	0.7115	0	1.1517	1.1989	PLCH1(0)
6	23710920	rs729295	A	G	2	4.121e-05	4.121e-05	1.137	1.137	0.6823	0	1.1697	1.1304	.
10	49549254	rs867631	A	G	2	4.139e-05	4.139e-05	1.1213	1.1213	0.391	0	1.0635	1.1335	ARHGAP22(-104.8kb)|FRMPD2(+66.31kb)|FRMPD2P1(+166kb)|MAPK8(0)
20	4619461	rs4813710	G	A	2	4.151e-05	4.151e-05	1.3598	1.3598	0.364	0	1.1602	1.4001	PRND(-83.09kb)|PRNP(-47.34kb)|PRNT(-92.47kb)|RASSF2(-141.2kb)
10	49550694	rs6537561	T	A	2	4.178e-05	4.178e-05	1.1211	1.1211	0.3923	0	1.0635	1.1333	ARHGAP22(-103.4kb)|FRMPD2(+67.75kb)|FRMPD2P1(+167.5kb)|MAPK8(0)
3	6841357	rs11706912	T	G	2	4.179e-05	4.179e-05	1.4303	1.4303	0.9707	0	1.4408	1.4283	GRM7(-61.44kb)
11	74345823	rs11236181	G	T	2	4.194e-05	4.194e-05	1.2026	1.2026	0.629	0	1.1497	1.2153	CHRDL2(-61.65kb)|KCNE3(+167.2kb)|LIPT2(+141.1kb)|MIR4696(-85.49kb)|POLD3(0)|RNF169(-114.1kb)
10	49549403	rs1919708	G	A	2	4.204e-05	4.204e-05	1.1211	1.1211	0.3916	0	1.0634	1.1333	ARHGAP22(-104.7kb)|FRMPD2(+66.46kb)|FRMPD2P1(+166.2kb)|MAPK8(0)
17	72500302	rs138848646	T	C	2	4.223e-05	4.223e-05	1.7451	1.7451	0.6178	0	2.005	1.6882	BTBD17(+142.3kb)|C17orf77(-80.75kb)|CD300A(+19.36kb)|CD300C(-36.9kb)|CD300E(-105.7kb)|CD300LB(-17.01kb)|CD300LD(-75.81kb)|CD300LF(-190.1kb)|DNAI2(+189.3kb)|GPR142(+131.6kb)|GPRC5C(+56.73kb)|KIF19(+148.3kb)|RAB37(-167kb)
6	23712063	rs6928886	A	G	2	4.231e-05	4.231e-05	1.1368	1.1368	0.6412	0	1.1741	1.1293	.
8	1490065	rs2019514	G	A	2	4.262e-05	0.0003395	1.262	1.256	0.2973	7.94	1.0936	1.2933	DLGAP2(0)|LOC100507435(-23.61kb)
6	23713874	rs1325021	G	A	2	4.266e-05	4.266e-05	1.1365	1.1365	0.6701	0	1.1706	1.1297	.
8	27429649	rs1000108	T	C	2	4.3e-05	0.05557	1.1274	1.1064	0.1514	51.41	1.028	1.1492	CCDC25(-161.2kb)|CHRNA2(+92.84kb)|CLU(-24.78kb)|EPHX2(+27.21kb)|MIR3622A(-129.5kb)|MIR3622B(-129.5kb)|PTK2B(+112.7kb)|SCARA3(-61.93kb)
4	175920168	rs9997657	C	T	2	4.33e-05	4.33e-05	1.1418	1.1418	0.5813	0	1.1883	1.1327	ADAM29(+20.84kb)|GLRA3(+169.7kb)
4	42939692	rs2345759	T	C	2	4.35e-05	4.35e-05	1.1378	1.1378	0.9438	0	1.1323	1.139	GRXCR1(0)
4	190103259	rs6553285	T	G	2	4.403e-05	0.239	1.265	1.1833	0.0486	74.29	1.0004	1.3364	.
20	32466177	rs6119411	T	C	2	4.408e-05	4.408e-05	1.1612	1.1612	0.3483	0	1.0808	1.1804	CHMP4B(+24kb)|E2F1(+192kb)|MIR4755(-170.7kb)|PXMP4(+158kb)|RALY(-115.3kb)|ZNF341(+86.1kb)
1	20814522	rs1152984	G	A	2	4.425e-05	0.08672	1.156	1.1254	0.1245	57.63	1.027	1.1854	CAMK2N1(+1.794kb)|CDA(-100.9kb)|DDOST(-163.7kb)|FAM43B(-64.41kb)|KIF17(-176kb)|LOC339505(+59.24kb)|MUL1(-11.42kb)|PINK1(-145.4kb)|VWA5B1(+133.1kb)
16	87269044	rs11117263	G	T	2	4.441e-05	4.441e-05	1.1977	1.1977	0.6649	0	1.2468	1.1868	C16orf95(-67.36kb)|FBXO31(-93.9kb)|MAP1LC3B(-156.8kb)|ZCCHC14(-170.8kb)
10	49575993	rs734371	C	G	2	4.451e-05	4.451e-05	1.1207	1.1207	0.4027	0	1.0644	1.1326	ARHGAP22(-78.07kb)|FRMPD2(+93.05kb)|FRMPD2P1(+192.8kb)|MAPK8(0)
11	74317518	rs11236171	T	C	2	4.474e-05	4.474e-05	1.2023	1.2023	0.5872	0	1.1431	1.2167	CHRDL2(-89.96kb)|KCNE3(+138.9kb)|LIPT2(+112.8kb)|MIR4696(-113.8kb)|POLD3(0)|RNF169(-142.4kb)
2	127887560	rs13004848	C	T	2	4.507e-05	4.507e-05	1.1675	1.1675	0.6562	0	1.2113	1.1585	BIN1(+22.66kb)|CYP27C1(-53.85kb)|ERCC3(-127.3kb)|MAP3K2(-168.7kb)
1	162644167	rs4656379	G	A	2	4.51e-05	4.51e-05	1.2163	1.2163	0.4513	0	1.3145	1.196	C1orf110(-179.9kb)|DDR2(0)|HSD17B7(-116.3kb)|UAP1(+74.53kb)|UHMK1(+144.7kb)
5	32111716	rs283117	G	A	2	4.538e-05	4.538e-05	1.1306	1.1306	0.7147	0	1.1036	1.1363	GOLPH3(-13.11kb)|MIR4279(+175.5kb)|MTMR12(-115.4kb)|PDZD2(+0.678kb)
11	74314865	rs61901540	G	A	2	4.544e-05	4.544e-05	1.2019	1.2019	0.5844	0	1.1423	1.2164	CHRDL2(-92.61kb)|KCNE3(+136.3kb)|LIPT2(+110.1kb)|MIR4696(-116.4kb)|POLD3(0)|RNF169(-145kb)
15	55384349	rs75282705	C	A	2	4.546e-05	0.006094	1.3456	1.3175	0.2421	26.92	1.1083	1.3968	RAB27A(-110.8kb)|RSL24D1(-89.16kb)
11	74325109	rs10899014	G	A	2	4.559e-05	4.559e-05	1.2015	1.2015	0.572	0	1.14	1.2164	CHRDL2(-82.36kb)|KCNE3(+146.5kb)|LIPT2(+120.4kb)|MIR4696(-106.2kb)|POLD3(0)|RNF169(-134.8kb)
10	98125397	rs4917734	G	C	2	4.588e-05	0.0165	1.1361	1.1669	0.1086	61.15	1.2685	1.1104	BLNK(+94.06kb)|DNTT(+27.08kb)|OPALIN(+6.305kb)|TLL2(0)|TM9SF3(-152.5kb)
10	49583234	rs2263102	A	C	2	4.598e-05	4.598e-05	1.1206	1.1206	0.4916	0	1.074	1.1304	ARHGAP22(-70.83kb)|FRMPD2(+100.3kb)|FRMPD2P1(+200kb)|MAPK8(0)
20	32465070	rs6141427	T	C	2	4.621e-05	4.621e-05	1.1612	1.1612	0.3554	0	1.0816	1.1801	CHMP4B(+22.9kb)|E2F1(+190.9kb)|MIR4755(-171.9kb)|PXMP4(+156.9kb)|RALY(-116.4kb)|ZNF341(+85kb)
2	127887985	rs12989701	A	C	2	4.623e-05	4.623e-05	1.1671	1.1671	0.6504	0	1.2116	1.1579	BIN1(+23.08kb)|CYP27C1(-53.43kb)|ERCC3(-126.9kb)|MAP3K2(-168.3kb)
6	23712630	rs1324673	A	T	2	4.649e-05	4.649e-05	1.1359	1.1359	0.6745	0	1.1695	1.1292	.
2	127889118	rs13009551	T	C	2	4.661e-05	4.661e-05	1.1673	1.1673	0.6529	0	1.2116	1.1582	BIN1(+24.22kb)|CYP27C1(-52.29kb)|ERCC3(-125.7kb)|MAP3K2(-167.1kb)
4	190102609	rs4241862	A	G	2	4.696e-05	0.2007	1.2647	1.1896	0.0613	71.44	1.0113	1.3324	.
4	190104939	rs4452510	G	T	2	4.726e-05	0.2037	1.2644	1.189	0.0594	71.86	1.0108	1.3329	.
4	190104957	rs4241866	A	T	2	4.733e-05	0.2037	1.2644	1.189	0.0594	71.86	1.0108	1.3329	.
4	190100925	rs9312392	A	T	2	4.738e-05	0.1988	1.2652	1.1902	0.0628	71.12	1.0116	1.3324	.
11	85853251	rs3915642	G	T	2	4.746e-05	4.746e-05	1.1198	1.1198	0.6252	0	1.0867	1.1267	C11orf73(-160kb)|EED(-102.6kb)|PICALM(+72.33kb)
4	190105157	rs4273547	G	A	2	4.75e-05	0.2038	1.2642	1.1889	0.0593	71.88	1.0108	1.3328	.
4	190101262	rs9312393	C	A	2	4.775e-05	0.1992	1.2648	1.1899	0.0625	71.17	1.0115	1.3321	.
4	190101462	rs34527746	A	G	2	4.794e-05	0.1992	1.2648	1.1898	0.0626	71.15	1.0115	1.332	.
4	190102503	rs4241861	G	A	2	4.804e-05	0.2015	1.2643	1.1892	0.0614	71.43	1.011	1.3319	.
4	190102390	rs4241860	G	A	2	4.807e-05	0.201	1.2644	1.1893	0.0616	71.37	1.0111	1.3319	.
5	176986424	rs335473	A	G	2	4.814e-05	0.0674	1.4182	1.357	0.0703	69.48	1.1251	1.5745	B4GALT7(-40.69kb)|DBN1(+85.73kb)|DDX41(+42.46kb)|DOK3(+49kb)|F12(+149.8kb)|FAM153A(-163.9kb)|FAM193B(+4.876kb)|GRK6(+116.6kb)|LOC202181(-59.08kb)|PDLIM7(+61.82kb)|PFN3(+158.8kb)|PRR7(+103.1kb)|PRR7-AS1(+111.5kb)|RGS14(+186.8kb)|SLC34A1(+160.6kb)|TMED9(-32.79kb)
4	190102360	rs4241859	T	G	2	4.817e-05	0.2009	1.2643	1.1893	0.0617	71.36	1.0111	1.3318	.
6	23718184	rs9358657	A	G	2	4.854e-05	4.854e-05	1.1351	1.1351	0.6402	0	1.1725	1.1277	.
4	190101832	rs7689338	G	A	2	4.862e-05	0.1996	1.2644	1.1895	0.0624	71.2	1.0114	1.3317	.
1	20818115	rs1152985	G	A	2	4.899e-05	0.02586	1.1537	1.1345	0.1864	42.72	1.0436	1.1789	CAMK2N1(+5.387kb)|CDA(-97.33kb)|DDOST(-160.1kb)|FAM43B(-60.82kb)|KIF17(-172.4kb)|LOC339505(+62.83kb)|MUL1(-7.825kb)|PINK1(-141.8kb)|VWA5B1(+136.7kb)
6	23707072	rs7765647	G	A	2	4.905e-05	4.905e-05	1.1358	1.1358	0.6764	0	1.1692	1.1291	.
7	12159827	rs35572431	A	G	2	4.907e-05	0.05319	1.1877	1.1567	0.1618	48.9	1.0385	1.2192	TMEM106B(-91.02kb)
19	48739590	rs112854952	A	G	2	4.914e-05	4.914e-05	1.1319	1.1319	0.3193	0	1.0597	1.1479	CABP5(+192.3kb)|CARD8(0)|CCDC114(-60.12kb)|EMP3(-89.04kb)|GRIN2D(-158.5kb)|KDELR1(-146.2kb)|LIG1(+66.03kb)|LOC100505812(-19.34kb)|PLA2G4C(+125.5kb)|SYNGR4(-128.1kb)|TMEM143(-96.02kb)|ZNF114(-35.06kb)
5	176984163	rs335472	C	A	2	4.985e-05	0.08008	1.4179	1.3538	0.0605	71.63	1.1169	1.5819	B4GALT7(-42.96kb)|DBN1(+83.47kb)|DDX41(+40.2kb)|DOK3(+46.74kb)|F12(+147.6kb)|FAM153A(-166.2kb)|FAM193B(+2.615kb)|GRK6(+114.3kb)|LOC202181(-61.34kb)|PDLIM7(+59.56kb)|PFN3(+156.5kb)|PRR7(+100.9kb)|PRR7-AS1(+109.2kb)|RGS14(+184.6kb)|SLC34A1(+158.3kb)|TMED9(-35.05kb)
10	49591456	rs2463960	A	G	2	4.989e-05	4.989e-05	1.1197	1.1197	0.4199	0	1.0654	1.1311	ARHGAP22(-62.61kb)|FRMPD2(+108.5kb)|MAPK8(0)
6	33817929	rs4713693	C	T	2	4.99e-05	0.05811	1.1195	1.0998	0.1488	52.04	1.0262	1.1405	GRM4(-171.7kb)|IP6K3(+103.2kb)|ITPR3(+153.6kb)|LEMD2(+61.02kb)|LOC100507584(-39.36kb)|MIR1275(-149.8kb)|MLN(+46.14kb)|MNF1(+138.4kb)
7	12157175	rs34213872	G	T	2	5.005e-05	0.05342	1.1874	1.1565	0.162	48.87	1.0383	1.2189	TMEM106B(-93.67kb)
6	89268935	rs2757728	T	C	2	5.014e-05	5.014e-05	1.1203	1.1203	0.9322	0	1.1261	1.1191	RNGTT(-51.05kb)
4	42937085	rs13112737	T	C	2	5.056e-05	5.056e-05	1.1367	1.1367	0.901	0	1.1269	1.1387	GRXCR1(0)
10	49591718	rs2698761	T	C	2	5.072e-05	5.072e-05	1.1195	1.1195	0.4213	0	1.0654	1.1309	ARHGAP22(-62.35kb)|FRMPD2(+108.8kb)|MAPK8(0)
6	23708523	rs1555758	T	G	2	5.085e-05	5.085e-05	1.1355	1.1355	0.6725	0	1.1693	1.1287	.
12	103889728	rs78143608	A	G	2	5.092e-05	0.2799	1.295	1.1964	0.0384	76.67	0.9876	1.3811	C12orf42(0)|STAB2(-91.34kb)
8	27448888	rs7012217	C	T	2	5.094e-05	0.1469	1.1262	1.0958	0.0958	63.95	1.0112	1.1514	CCDC25(-141.9kb)|CHRNA2(+112.1kb)|CLU(-5.545kb)|EPHX2(+46.45kb)|ESCO2(-183.2kb)|MIR3622A(-110.3kb)|MIR3622B(-110.3kb)|PTK2B(+132kb)|SCARA3(-42.69kb)
10	49568078	rs2698766	T	C	2	5.11e-05	5.11e-05	1.1197	1.1197	0.4095	0	1.0643	1.1315	ARHGAP22(-85.99kb)|FRMPD2(+85.14kb)|FRMPD2P1(+184.8kb)|MAPK8(0)
4	190104165	rs4241865	T	A	2	5.134e-05	0.2011	1.2635	1.189	0.0613	71.43	1.0113	1.3316	.
4	190106567	rs12644872	T	A	2	5.174e-05	0.2001	1.2628	1.1888	0.0611	71.5	1.0118	1.331	.
11	74363890	rs7935426	T	C	2	5.18e-05	5.18e-05	1.1994	1.1994	0.4478	0	1.1183	1.2195	CHRDL2(-43.58kb)|KCNE3(+185.3kb)|LIPT2(+159.1kb)|MIR4696(-67.42kb)|POLD3(+9.785kb)|RNF169(-96.02kb)|XRRA1(-188.1kb)
10	49542733	rs10776596	C	A	2	5.191e-05	5.191e-05	1.1197	1.1197	0.4015	0	1.0632	1.1316	ARHGAP22(-111.3kb)|FRMPD2(+59.79kb)|FRMPD2P1(+159.5kb)|MAPK8(0)
11	47820241	rs34228231	A	G	2	5.209e-05	5.209e-05	1.1392	1.1392	0.6675	0	1.1724	1.1316	AGBL2(+83.31kb)|FNBP4(+31.25kb)|MTCH2(+156kb)|NUP160(0)|PTPRJ(-181.9kb)
4	190106519	rs12651001	T	G	2	5.216e-05	0.2046	1.2627	1.1879	0.0598	71.78	1.0104	1.3312	.
4	190106471	rs4282263	T	A	2	5.22e-05	0.2043	1.2627	1.188	0.0599	71.76	1.0105	1.3312	.
11	74367040	rs10899025	A	G	2	5.261e-05	5.261e-05	1.1995	1.1995	0.4319	0	1.1156	1.2204	CHRDL2(-40.43kb)|KCNE3(+188.4kb)|LIPT2(+162.3kb)|MIR4696(-64.27kb)|POLD3(+12.94kb)|RNF169(-92.87kb)|XRRA1(-184.9kb)
4	190106915	rs7676106	T	C	2	5.288e-05	0.2062	1.2622	1.1875	0.0589	71.96	1.0101	1.3311	.
7	40587619	rs17525892	A	G	2	5.294e-05	0.01459	1.2065	1.2523	0.129	56.62	1.419	1.1701	C7orf10(0)
4	190106968	rs6553287	T	A	2	5.298e-05	0.2062	1.2622	1.1875	0.0589	71.96	1.0101	1.3311	.
1	20816568	rs1144966	C	T	2	5.301e-05	0.09523	1.1541	1.123	0.1212	58.37	1.0246	1.1838	CAMK2N1(+3.84kb)|CDA(-98.88kb)|DDOST(-161.7kb)|FAM43B(-62.36kb)|KIF17(-173.9kb)|LOC339505(+61.28kb)|MUL1(-9.372kb)|PINK1(-143.4kb)|VWA5B1(+135.2kb)
8	27430572	rs7814146	A	C	2	5.317e-05	0.1357	1.124	1.0953	0.0993	63.19	1.0132	1.1489	CCDC25(-160.3kb)|CHRNA2(+93.76kb)|CLU(-23.86kb)|EPHX2(+28.13kb)|MIR3622A(-128.6kb)|MIR3622B(-128.6kb)|PTK2B(+113.7kb)|SCARA3(-61kb)
5	104668046	rs78533343	C	T	2	5.322e-05	5.322e-05	1.2397	1.2397	0.5508	0	1.1512	1.2567	.
5	176987724	rs335480	A	G	2	5.324e-05	0.06369	1.4171	1.3573	0.075	68.45	1.1272	1.5709	B4GALT7(-39.39kb)|DBN1(+87.03kb)|DDX41(+43.76kb)|DOK3(+50.3kb)|F12(+151.1kb)|FAM153A(-162.6kb)|FAM193B(+6.176kb)|GRK6(+117.9kb)|LOC202181(-57.78kb)|PDLIM7(+63.12kb)|PFN3(+160.1kb)|PRR7(+104.4kb)|PRR7-AS1(+112.8kb)|RGS14(+188.1kb)|SLC34A1(+161.9kb)|TMED9(-31.49kb)
11	74354614	rs59958321	A	G	2	5.329e-05	5.329e-05	1.1953	1.1953	0.9629	0	1.1902	1.1965	CHRDL2(-52.86kb)|KCNE3(+176kb)|LIPT2(+149.9kb)|MIR4696(-76.7kb)|POLD3(+0.509kb)|RNF169(-105.3kb)|XRRA1(-197.3kb)
8	27426229	rs1565736	G	A	2	5.367e-05	0.202	1.1241	1.0898	0.0725	68.99	1.0032	1.1512	CCDC25(-164.6kb)|CHRNA2(+89.42kb)|CLU(-28.2kb)|EPHX2(+23.79kb)|MIR3622A(-133kb)|MIR3622B(-133kb)|PTK2B(+109.3kb)|SCARA3(-65.35kb)
5	32157088	rs4282332	C	T	2	5.39e-05	5.39e-05	1.1269	1.1269	0.929	0	1.1335	1.1256	GOLPH3(0)|MTMR12(-70.02kb)|PDZD2(+46.05kb)|ZFR(-197.4kb)
5	104795474	rs76657283	C	T	2	5.421e-05	5.421e-05	1.2482	1.2482	0.7316	0	1.1937	1.2582	.
10	49540940	rs10776595	G	A	2	5.426e-05	5.426e-05	1.1194	1.1194	0.4028	0	1.0631	1.1313	ARHGAP22(-113.1kb)|FRMPD2(+58kb)|FRMPD2P1(+157.7kb)|MAPK8(0)
12	40886954	rs1444219	T	C	2	5.436e-05	5.436e-05	1.136	1.136	0.9346	0	1.1298	1.1374	CNTN1(-199.3kb)|LRRK2(+123.9kb)
5	32109122	rs32800	A	C	2	5.462e-05	5.462e-05	1.1284	1.1284	0.5818	0	1.0884	1.1369	GOLPH3(-15.7kb)|MIR4279(+172.9kb)|MTMR12(-118kb)|PDZD2(0)
5	104797216	rs114662118	C	T	2	5.502e-05	5.502e-05	1.2481	1.2481	0.7047	0	1.188	1.2591	.
11	74362865	rs11236186	A	G	2	5.512e-05	5.512e-05	1.1986	1.1986	0.4567	0	1.1191	1.2183	CHRDL2(-44.61kb)|KCNE3(+184.3kb)|LIPT2(+158.1kb)|MIR4696(-68.45kb)|POLD3(+8.76kb)|RNF169(-97.05kb)|XRRA1(-189.1kb)
6	28518316	rs437691	A	G	2	5.52e-05	0.0181	1.1363	1.1676	0.1028	62.42	1.2698	1.1093	GPX5(+15.59kb)|GPX6(+34.75kb)|SCAND3(-21.09kb)|ZKSCAN3(+181.4kb)|ZSCAN12(+150.8kb)|ZSCAN23(+107kb)
5	176982662	rs28510818	T	C	2	5.571e-05	0.09442	1.4166	1.3494	0.0528	73.33	1.1073	1.5872	B4GALT7(-44.46kb)|DBN1(+81.97kb)|DDX41(+38.7kb)|DOK3(+45.24kb)|F12(+146.1kb)|FAM153A(-167.7kb)|FAM193B(+1.114kb)|GRK6(+112.8kb)|LOC202181(-62.84kb)|PDLIM7(+58.06kb)|PFN3(+155kb)|PRR7(+99.38kb)|PRR7-AS1(+107.7kb)|RGS14(+183.1kb)|SLC34A1(+156.8kb)|TMED9(-36.55kb)
12	40890685	rs10878664	T	C	2	5.594e-05	5.594e-05	1.1358	1.1358	0.9699	0	1.1329	1.1364	CNTN1(-195.6kb)|LRRK2(+127.6kb)
12	40890951	rs2638880	T	A	2	5.594e-05	5.594e-05	1.1357	1.1357	0.9707	0	1.1329	1.1363	CNTN1(-195.3kb)|LRRK2(+127.9kb)
3	155223306	rs934591	C	A	2	5.612e-05	5.612e-05	1.1869	1.1869	0.7432	0	1.153	1.1949	PLCH1(0)
12	40889662	rs4768281	A	G	2	5.621e-05	5.621e-05	1.1357	1.1357	0.9707	0	1.1329	1.1363	CNTN1(-196.6kb)|LRRK2(+126.6kb)
4	190108408	rs6553291	G	A	2	5.646e-05	0.1982	1.2616	1.1885	0.0625	71.18	1.0122	1.3296	.
20	32467139	rs6120401	T	C	2	5.665e-05	0.000139	1.1589	1.1575	0.3071	4.12	1.0715	1.1798	CHMP4B(+24.97kb)|E2F1(+192.9kb)|MIR4755(-169.8kb)|PXMP4(+159kb)|RALY(-114.3kb)|ZNF341(+87.06kb)
13	101840510	rs61456777	C	T	2	5.667e-05	0.4265	1.2453	1.1394	0.0236	80.49	0.945	1.3159	NALCN(0)|NALCN-AS1(+128.9kb)
12	40893066	rs1352939	T	C	2	5.709e-05	5.709e-05	1.1356	1.1356	0.9699	0	1.1327	1.1362	CNTN1(-193.2kb)|LRRK2(+130kb)
16	24857773	rs2161440	C	T	2	5.712e-05	0.008462	1.9026	1.8273	0.1755	45.51	1.3778	2.2001	ARHGAP17(-72.94kb)|LOC554206(-185.3kb)|SLC5A11(0)|TNRC6A(+20.23kb)
19	48881876	rs111354716	T	C	2	5.743e-05	5.743e-05	1.3615	1.3615	0.3463	0	1.1545	1.4053	CARD8(+122.7kb)|CCDC114(+58.54kb)|CYTH2(-90.59kb)|EMP3(+48.07kb)|GRIN2D(-16.26kb)|GRWD1(-67.15kb)|KCNJ14(-77.09kb)|KDELR1(-3.95kb)|LMTK3(-106.7kb)|LOC100505812(+120.4kb)|SULT2B1(-173.6kb)|SYNGR4(+2.242kb)|TMEM143(+14.69kb)|ZNF114(+91.01kb)
21	21043172	rs2825726	T	C	2	5.782e-05	5.782e-05	1.1241	1.1241	0.5965	0	1.087	1.1321	.
21	21983065	rs229385	C	T	2	5.81e-05	5.81e-05	1.1579	1.1579	0.8458	0	1.1441	1.1628	LINC00320(-131.8kb)
4	190107088	rs6553288	G	A	2	5.864e-05	0.2082	1.2607	1.1863	0.0595	71.84	1.0092	1.3294	.
4	190107375	rs6553289	C	G	2	5.894e-05	0.2068	1.2606	1.1865	0.06	71.73	1.0096	1.3292	.
10	49521863	rs11101290	G	A	2	5.902e-05	5.902e-05	1.1188	1.1188	0.3902	0	1.0612	1.1311	ARHGAP22(-132.2kb)|FRMPD2(+38.92kb)|FRMPD2P1(+138.6kb)|MAPK8(0)
4	190107538	rs6553290	C	T	2	5.908e-05	0.2038	1.2607	1.187	0.0611	71.48	1.0104	1.3289	.
5	176988487	rs72494547	G	C	2	5.917e-05	0.06065	1.4156	1.3574	0.0791	67.56	1.129	1.5677	B4GALT7(-38.63kb)|DBN1(+87.79kb)|DDX41(+44.52kb)|DOK3(+51.06kb)|F12(+151.9kb)|FAM153A(-161.9kb)|FAM193B(+6.939kb)|GRK6(+118.6kb)|LOC202181(-57.01kb)|PDLIM7(+63.88kb)|PFN3(+160.8kb)|PRR7(+105.2kb)|PRR7-AS1(+113.5kb)|RGS14(+188.9kb)|SLC34A1(+162.6kb)|TMED9(-30.72kb)
4	190107822	rs10013538	C	A	2	5.936e-05	0.2035	1.2606	1.187	0.0613	71.45	1.0105	1.3288	.
16	24858657	rs2431775	C	A	2	5.945e-05	0.003864	1.9015	1.844	0.2073	37.1	1.4075	2.1772	ARHGAP17(-72.05kb)|LOC554206(-184.4kb)|SLC5A11(0)|TNRC6A(+21.11kb)
21	21047801	rs2825729	T	C	2	6.048e-05	6.048e-05	1.1234	1.1234	0.6164	0	1.0882	1.1309	.
11	74372200	rs11236198	T	G	2	6.05e-05	6.05e-05	1.1982	1.1982	0.4068	0	1.1099	1.2203	CHRDL2(-35.27kb)|KCNE3(+193.6kb)|LIPT2(+167.4kb)|MIR4696(-59.11kb)|POLD3(+18.1kb)|RNF169(-87.71kb)|XRRA1(-179.8kb)
11	74332827	rs12280434	T	C	2	6.111e-05	6.111e-05	1.193	1.193	0.9675	0	1.1885	1.194	CHRDL2(-74.65kb)|KCNE3(+154.2kb)|LIPT2(+128.1kb)|MIR4696(-98.48kb)|POLD3(0)|RNF169(-127.1kb)
1	49184962	rs12405507	G	A	2	6.116e-05	6.116e-05	1.122	1.122	0.747	0	1.0998	1.1268	AGBL4(0)|BEND5(-8.577kb)
4	190109991	rs4863113	A	G	2	6.175e-05	0.1946	1.2608	1.1886	0.065	70.62	1.0129	1.3281	.
7	12154419	rs62433253	A	G	2	6.175e-05	0.03673	1.1848	1.1586	0.1831	43.58	1.043	1.2147	TMEM106B(-96.43kb)
11	74335162	rs10899019	G	A	2	6.188e-05	6.188e-05	1.1929	1.1929	0.9734	0	1.1892	1.1937	CHRDL2(-72.31kb)|KCNE3(+156.6kb)|LIPT2(+130.4kb)|MIR4696(-96.15kb)|POLD3(0)|RNF169(-124.8kb)
20	12086053	rs6134453	T	C	2	6.207e-05	6.207e-05	1.1194	1.1194	0.6169	0	1.0857	1.1267	BTBD3(+178.8kb)
4	190109990	rs4863112	C	T	2	6.213e-05	0.1945	1.2606	1.1886	0.0652	70.59	1.0129	1.3279	.
7	12154227	rs35170219	C	T	2	6.217e-05	0.03567	1.1848	1.1589	0.1845	43.22	1.0434	1.2146	TMEM106B(-96.62kb)
11	74358132	rs7102084	C	T	2	6.235e-05	6.235e-05	1.197	1.197	0.4811	0	1.1217	1.2156	CHRDL2(-49.34kb)|KCNE3(+179.5kb)|LIPT2(+153.4kb)|MIR4696(-73.18kb)|POLD3(+4.027kb)|RNF169(-101.8kb)|XRRA1(-193.8kb)
17	26460976	rs17719191	A	C	2	6.258e-05	6.258e-05	1.2984	1.2984	0.9315	0	1.3145	1.2951	IFT20(-194.4kb)|KRT18P55(-142kb)|NLK(0)|PPY2(-113.5kb)|PYY2(-92.61kb)|TMEM97(-185.1kb)
4	190108426	rs6553292	C	G	2	6.285e-05	0.2011	1.2598	1.1869	0.0628	71.11	1.011	1.3276	.
4	190107897	rs10013615	C	A	2	6.32e-05	0.2021	1.2596	1.1866	0.0625	71.18	1.0107	1.3274	.
4	190107942	rs10013635	C	A	2	6.325e-05	0.2021	1.2596	1.1866	0.0625	71.18	1.0107	1.3274	.
4	190108621	rs7699929	C	A	2	6.331e-05	0.2007	1.2597	1.187	0.063	71.07	1.0111	1.3275	.
5	16711780	rs58989958	G	A	2	6.335e-05	6.335e-05	1.135	1.135	0.4278	0	1.075	1.1482	FAM134B(+94.61kb)|MYO10(0)
4	190108135	rs7683011	T	C	2	6.343e-05	0.2013	1.2596	1.1868	0.0629	71.08	1.0109	1.3273	.
11	74327378	rs7932194	G	C	2	6.35e-05	6.35e-05	1.1927	1.1927	0.9669	0	1.1881	1.1937	CHRDL2(-80.1kb)|KCNE3(+148.8kb)|LIPT2(+122.6kb)|MIR4696(-103.9kb)|POLD3(0)|RNF169(-132.5kb)
11	74342928	rs11236180	G	A	2	6.36e-05	6.36e-05	1.1924	1.1924	0.9923	0	1.1935	1.1922	CHRDL2(-64.54kb)|KCNE3(+164.3kb)|LIPT2(+138.2kb)|MIR4696(-88.38kb)|POLD3(0)|RNF169(-117kb)
20	32465159	rs6142039	T	C	2	6.365e-05	6.365e-05	1.1578	1.1578	0.3563	0	1.0786	1.1766	CHMP4B(+22.99kb)|E2F1(+190.9kb)|MIR4755(-171.8kb)|PXMP4(+157kb)|RALY(-116.3kb)|ZNF341(+85.08kb)
1	49185833	rs12121925	T	G	2	6.371e-05	6.371e-05	1.1365	1.1365	0.7564	0	1.1122	1.1417	AGBL4(0)|BEND5(-7.706kb)
19	45404691	rs405697	G	A	2	6.391e-05	6.391e-05	1.1876	1.1876	0.6178	0	1.1334	1.1994	APOC1(-13.23kb)|APOC1P1(-25.37kb)|APOC2(-44.55kb)|APOC4(-40.8kb)|APOC4-APOC2(-40.8kb)|APOE(-4.347kb)|BCAM(+80.01kb)|BCL3(+141.4kb)|CBLC(+100.8kb)|CEACAM16(+190.7kb)|CLASRP(-137.6kb)|CLPTM1(-53.15kb)|GEMIN7(-177.8kb)|PPP1R37(-191.7kb)|PVRL2(+12.21kb)|RELB(-100kb)|TOMM40(0)|ZNF296(-170.1kb)
2	127793239	rs72843896	C	T	2	6.428e-05	6.428e-05	1.231	1.231	0.9646	0	1.2248	1.2323	BIN1(-12.36kb)|CYP27C1(-148.2kb)
4	190109220	rs12651495	C	T	2	6.447e-05	0.1984	1.2596	1.1873	0.0641	70.84	1.0117	1.3271	.
10	60615161	rs3125445	G	A	2	6.457e-05	6.457e-05	1.1578	1.1578	0.3953	0	1.0795	1.174	BICC1(+26.32kb)|FAM133CP(+137.9kb)
11	74339386	rs10899022	T	C	2	6.461e-05	6.461e-05	1.1922	1.1922	0.9982	0	1.192	1.1923	CHRDL2(-68.09kb)|KCNE3(+160.8kb)|LIPT2(+134.6kb)|MIR4696(-91.93kb)|POLD3(0)|RNF169(-120.5kb)
11	74339067	rs11236177	C	T	2	6.465e-05	6.465e-05	1.1922	1.1922	0.9976	0	1.1919	1.1923	CHRDL2(-68.41kb)|KCNE3(+160.5kb)|LIPT2(+134.3kb)|MIR4696(-92.24kb)|POLD3(0)|RNF169(-120.8kb)
4	190109266	rs4862949	T	C	2	6.477e-05	0.1974	1.2595	1.1874	0.0646	70.71	1.0119	1.3268	.
4	190109540	rs4863109	A	G	2	6.519e-05	0.1963	1.2596	1.1876	0.0651	70.6	1.0122	1.3268	.
13	101840470	rs59088048	G	T	2	6.544e-05	0.4207	1.2426	1.139	0.0258	79.88	0.9466	1.3116	NALCN(0)|NALCN-AS1(+128.8kb)
12	40880831	rs2933364	T	A	2	6.603e-05	6.603e-05	1.1344	1.1344	0.9603	0	1.1306	1.1352	LRRK2(+117.7kb)
4	190109717	rs4863110	T	C	2	6.605e-05	0.195	1.2592	1.1876	0.0659	70.43	1.0125	1.3261	.
13	101839083	rs17621925	T	C	2	6.627e-05	0.4147	1.2433	1.1403	0.0272	79.51	0.9479	1.3118	NALCN(0)|NALCN-AS1(+127.4kb)
5	176988223	rs113051847	T	A	2	6.645e-05	0.04301	1.4193	1.3671	0.1002	63	1.1441	1.5633	B4GALT7(-38.9kb)|DBN1(+87.53kb)|DDX41(+44.26kb)|DOK3(+50.8kb)|F12(+151.6kb)|FAM153A(-162.1kb)|FAM193B(+6.675kb)|GRK6(+118.4kb)|LOC202181(-57.28kb)|PDLIM7(+63.62kb)|PFN3(+160.6kb)|PRR7(+104.9kb)|PRR7-AS1(+113.3kb)|RGS14(+188.6kb)|SLC34A1(+162.4kb)|TMED9(-30.99kb)
19	45324138	rs28399637	A	G	2	6.659e-05	6.659e-05	1.1399	1.1399	0.609	0	1.1836	1.1314	APOC1(-93.78kb)|APOC1P1(-105.9kb)|APOC2(-125.1kb)|APOC4(-121.4kb)|APOC4-APOC2(-121.4kb)|APOE(-84.9kb)|BCAM(0)|BCL3(+60.84kb)|CBLC(+20.24kb)|CEACAM16(+110.2kb)|CEACAM19(+136.5kb)|CLPTM1(-133.7kb)|IGSF23(+184.1kb)|MIR4531(+167.1kb)|PVR(+154.7kb)|PVRL2(-25.25kb)|RELB(-180.6kb)|TOMM40(-70.34kb)
1	49190234	rs1484406	G	A	2	6.675e-05	6.675e-05	1.1342	1.1342	0.9677	0	1.1311	1.1349	AGBL4(0)|BEND5(-3.305kb)
5	176985515	rs1001530	G	A	2	6.71e-05	0.0832	1.4094	1.3464	0.0626	71.17	1.1121	1.5709	B4GALT7(-41.6kb)|DBN1(+84.82kb)|DDX41(+41.55kb)|DOK3(+48.09kb)|F12(+148.9kb)|FAM153A(-164.8kb)|FAM193B(+3.967kb)|GRK6(+115.7kb)|LOC202181(-59.98kb)|PDLIM7(+60.91kb)|PFN3(+157.9kb)|PRR7(+102.2kb)|PRR7-AS1(+110.6kb)|RGS14(+185.9kb)|SLC34A1(+159.7kb)|TMED9(-33.7kb)
12	40880060	rs2638868	A	G	2	6.717e-05	6.717e-05	1.1341	1.1341	0.9595	0	1.1303	1.135	LRRK2(+117kb)
12	40867333	rs2933346	G	T	2	6.733e-05	6.733e-05	1.1341	1.1341	0.9595	0	1.1303	1.135	LRRK2(+104.2kb)
2	127789085	rs111906619	T	C	2	6.74e-05	6.74e-05	1.2309	1.2309	0.9571	0	1.2234	1.2325	BIN1(-16.51kb)|CYP27C1(-152.3kb)
1	49187582	rs752599	G	A	2	6.773e-05	6.773e-05	1.1349	1.1349	0.6767	0	1.1027	1.1418	AGBL4(0)|BEND5(-5.957kb)
12	40878869	rs2588413	G	C	2	6.802e-05	6.802e-05	1.1341	1.1341	0.9603	0	1.1303	1.1349	LRRK2(+115.8kb)
20	32465926	rs6120400	T	C	2	6.815e-05	6.815e-05	1.1567	1.1567	0.3468	0	1.0764	1.1759	CHMP4B(+23.75kb)|E2F1(+191.7kb)|MIR4755(-171kb)|PXMP4(+157.8kb)|RALY(-115.5kb)|ZNF341(+85.85kb)
5	32151119	rs367556	T	C	2	6.842e-05	6.842e-05	1.1249	1.1249	0.9164	0	1.1326	1.1233	GOLPH3(0)|MTMR12(-75.99kb)|PDZD2(+40.08kb)
8	27450073	rs17057438	A	G	2	6.856e-05	0.1233	1.1241	1.0967	0.112	60.41	1.0142	1.1482	CCDC25(-140.8kb)|CHRNA2(+113.3kb)|CLU(-4.36kb)|EPHX2(+47.63kb)|ESCO2(-182kb)|MIR3622A(-109.1kb)|MIR3622B(-109.1kb)|PTK2B(+133.2kb)|SCARA3(-41.5kb)
6	125945251	rs4144549	G	C	2	6.906e-05	6.906e-05	1.1185	1.1185	0.5585	0	1.0793	1.127	HEY2(-125.5kb)|LOC643623(-50.25kb)|NCOA7(-157.1kb)
2	127802704	rs72843900	T	G	2	6.917e-05	6.917e-05	1.2295	1.2295	0.9939	0	1.2284	1.2297	BIN1(-2.894kb)|CYP27C1(-138.7kb)
12	40867737	rs2920813	A	G	2	6.924e-05	6.924e-05	1.1338	1.1338	0.9638	0	1.1304	1.1346	LRRK2(+104.7kb)
12	40867824	rs1388782	C	T	2	6.928e-05	6.928e-05	1.1338	1.1338	0.9629	0	1.1303	1.1346	LRRK2(+104.7kb)
13	101840253	rs7982111	T	C	2	6.938e-05	0.4347	1.2416	1.1363	0.0241	80.35	0.9428	1.3114	NALCN(0)|NALCN-AS1(+128.6kb)
12	40876817	rs2933354	G	A	2	6.985e-05	6.985e-05	1.1338	1.1338	0.9629	0	1.1303	1.1346	LRRK2(+113.7kb)
5	176986300	rs7734910	T	C	2	7.035e-05	0.07186	1.4086	1.3486	0.0722	69.06	1.1188	1.5633	B4GALT7(-40.82kb)|DBN1(+85.61kb)|DDX41(+42.33kb)|DOK3(+48.87kb)|F12(+149.7kb)|FAM153A(-164.1kb)|FAM193B(+4.752kb)|GRK6(+116.4kb)|LOC202181(-59.2kb)|PDLIM7(+61.69kb)|PFN3(+158.7kb)|PRR7(+103kb)|PRR7-AS1(+111.4kb)|RGS14(+186.7kb)|SLC34A1(+160.5kb)|TMED9(-32.91kb)
5	32136530	rs640305	T	C	2	7.13e-05	7.13e-05	1.1244	1.1244	0.9414	0	1.1298	1.1233	GOLPH3(0)|MTMR12(-90.58kb)|PDZD2(+25.49kb)
20	4619919	rs117881101	T	C	2	7.172e-05	7.172e-05	1.3477	1.3477	0.399	0	1.163	1.3849	PRND(-82.64kb)|PRNP(-46.88kb)|PRNT(-92.01kb)|RASSF2(-140.7kb)
5	54068792	rs80074253	A	G	2	7.198e-05	0.008492	1.2892	1.3382	0.1692	47.08	1.5708	1.2397	.
11	74321700	rs12296094	T	C	2	7.207e-05	7.207e-05	1.1913	1.1913	0.9775	0	1.1882	1.192	CHRDL2(-85.77kb)|KCNE3(+143.1kb)|LIPT2(+116.9kb)|MIR4696(-109.6kb)|POLD3(0)|RNF169(-138.2kb)
5	176983463	rs61142792	T	C	2	7.208e-05	0.08679	1.4096	1.3461	0.0607	71.59	1.1101	1.5738	B4GALT7(-43.66kb)|DBN1(+82.77kb)|DDX41(+39.5kb)|DOK3(+46.04kb)|F12(+146.9kb)|FAM153A(-166.9kb)|FAM193B(+1.915kb)|GRK6(+113.6kb)|LOC202181(-62.04kb)|PDLIM7(+58.86kb)|PFN3(+155.8kb)|PRR7(+100.2kb)|PRR7-AS1(+108.5kb)|RGS14(+183.9kb)|SLC34A1(+157.6kb)|TMED9(-35.75kb)
7	37872650	rs17171172	C	T	2	7.246e-05	7.246e-05	1.1502	1.1502	0.6595	0	1.1109	1.1582	EPDR1(-87.51kb)|GPR141(+91.74kb)|NME8(-15.55kb)|SFRP4(-72.88kb)
13	101841944	rs17678470	A	G	2	7.248e-05	0.4397	1.2413	1.1355	0.0231	80.62	0.9416	1.312	NALCN(0)|NALCN-AS1(+130.3kb)
18	44300078	rs11659770	A	G	2	7.248e-05	0.004819	1.1913	1.1786	0.2535	23.3	1.0631	1.2181	LOXHD1(+63.08kb)|PIAS2(-89.94kb)|ST8SIA5(0)
12	40879387	rs2588414	G	A	2	7.327e-05	7.327e-05	1.1335	1.1335	0.975	0	1.1311	1.134	LRRK2(+116.3kb)
11	74289755	rs142073382	T	C	2	7.408e-05	7.408e-05	1.1992	1.1992	0.5294	0	1.1301	1.2161	CHRDL2(-117.7kb)|KCNE3(+111.2kb)|LIPT2(+85kb)|MIR4696(-141.6kb)|PGM2L1(+180.3kb)|POLD3(-13.82kb)|RNF169(-170.2kb)
5	176982391	rs61505517	T	C	2	7.471e-05	0.08958	1.4092	1.3453	0.0592	71.9	1.1083	1.5749	B4GALT7(-44.73kb)|DBN1(+81.7kb)|DDX41(+38.42kb)|DOK3(+44.96kb)|F12(+145.8kb)|FAM153A(-168kb)|FAM193B(+0.843kb)|GRK6(+112.5kb)|LOC202181(-63.11kb)|PDLIM7(+57.78kb)|PFN3(+154.8kb)|PRR7(+99.1kb)|PRR7-AS1(+107.4kb)|RGS14(+182.8kb)|SLC34A1(+156.5kb)|TMED9(-36.82kb)
7	48651404	rs117544739	C	A	2	7.49e-05	7.49e-05	1.5277	1.5277	0.8505	0	1.4577	1.541	ABCA13(0)
12	40881509	rs2588417	G	T	2	7.492e-05	7.492e-05	1.1332	1.1332	0.9689	0	1.1303	1.1339	LRRK2(+118.4kb)
6	56158115	rs34105976	A	C	2	7.5e-05	7.5e-05	1.3158	1.3158	0.9351	0	1.3315	1.3123	COL21A1(+45.74kb)|DST(-164.7kb)|RNU6-71P(0)
8	1493195	rs6995384	C	A	2	7.557e-05	7.557e-05	1.2603	1.2603	0.5273	0	1.1546	1.2801	DLGAP2(0)|LOC100507435(-20.48kb)
6	47606029	rs9357551	T	C	2	7.628e-05	7.628e-05	1.131	1.131	0.7762	0	1.1093	1.1356	CD2AP(+11.03kb)|GPR111(-18.3kb)|GPR115(-60.26kb)|OPN5(-143.7kb)
17	35207037	rs8067860	A	G	2	7.638e-05	7.638e-05	1.1442	1.1442	0.8995	0	1.1547	1.1419	AATF(-99.14kb)|LHX1(-87.73kb)|MIR2909(-184kb)
11	74357167	rs12293317	A	G	2	7.659e-05	7.659e-05	1.1947	1.1947	0.4856	0	1.1202	1.2131	CHRDL2(-50.31kb)|KCNE3(+178.6kb)|LIPT2(+152.4kb)|MIR4696(-74.14kb)|POLD3(+3.062kb)|RNF169(-102.7kb)|XRRA1(-194.8kb)
2	127812256	rs55636820	A	G	2	7.663e-05	7.663e-05	1.2344	1.2344	0.9089	0	1.2508	1.2309	BIN1(0)|CYP27C1(-129.2kb)
13	101840407	rs72652930	G	C	2	7.705e-05	0.4619	1.2417	1.1322	0.0206	81.34	0.9351	1.3141	NALCN(0)|NALCN-AS1(+128.8kb)
8	27451727	rs7817366	G	A	2	7.778e-05	0.1952	1.1236	1.0903	0.0807	67.21	1.0034	1.1503	CCDC25(-139.1kb)|CHRNA2(+114.9kb)|CLU(-2.706kb)|EPHX2(+49.29kb)|ESCO2(-180.3kb)|MIR3622A(-107.5kb)|MIR3622B(-107.5kb)|PTK2B(+134.8kb)|SCARA3(-39.85kb)
11	85858887	rs10751134	A	G	2	7.79e-05	7.79e-05	1.1179	1.1179	0.7251	0	1.0939	1.123	C11orf73(-154.4kb)|EED(-96.92kb)|PICALM(+77.96kb)
11	74359010	rs61900635	G	C	2	7.875e-05	7.875e-05	1.1947	1.1947	0.4831	0	1.1197	1.2132	CHRDL2(-48.46kb)|KCNE3(+180.4kb)|LIPT2(+154.3kb)|MIR4696(-72.3kb)|POLD3(+4.905kb)|RNF169(-100.9kb)|XRRA1(-192.9kb)
11	74302317	rs12362729	T	C	2	7.917e-05	7.917e-05	1.1965	1.1965	0.6135	0	1.1415	1.21	CHRDL2(-105.2kb)|KCNE3(+123.7kb)|LIPT2(+97.56kb)|MIR4696(-129kb)|PGM2L1(+192.8kb)|POLD3(-1.257kb)|RNF169(-157.6kb)
13	101839820	rs7981101	C	A	2	7.972e-05	0.3872	1.2349	1.1398	0.0345	77.63	0.9557	1.2981	NALCN(0)|NALCN-AS1(+128.2kb)
6	23692873	rs6899971	G	T	2	8.004e-05	8.004e-05	1.1335	1.1335	0.4591	0	1.194	1.1215	.
12	40907691	rs2131201	G	A	2	8.053e-05	8.053e-05	1.13	1.13	0.7992	0	1.149	1.1258	CNTN1(-178.6kb)|LRRK2(+144.6kb)
11	74359591	rs61900636	T	G	2	8.136e-05	8.136e-05	1.1941	1.1941	0.4849	0	1.1195	1.2125	CHRDL2(-47.88kb)|KCNE3(+181kb)|LIPT2(+154.8kb)|MIR4696(-71.72kb)|POLD3(+5.486kb)|RNF169(-100.3kb)|XRRA1(-192.4kb)
4	43060156	rs35940220	A	G	2	8.158e-05	8.397e-05	1.2664	1.2663	0.317	0.14	1.121	1.3043	GRXCR1(+27.48kb)
13	101840416	rs59229434	A	T	2	8.203e-05	0.4415	1.2403	1.1347	0.0243	80.28	0.9407	1.3102	NALCN(0)|NALCN-AS1(+128.8kb)
5	1473113	rs2962065	G	T	2	8.216e-05	8.216e-05	1.1477	1.1477	0.3292	0	1.0662	1.166	CLPTM1L(+128.1kb)|LOC728613(-124.6kb)|LPCAT1(0)|MIR4457(+163.6kb)|SDHAP3(-98.96kb)|SLC6A3(+27.57kb)|TERT(+178kb)
5	32135599	rs161539	A	G	2	8.222e-05	8.222e-05	1.1232	1.1232	0.9792	0	1.1251	1.1228	GOLPH3(0)|MIR4279(+199.3kb)|MTMR12(-91.51kb)|PDZD2(+24.56kb)
12	40896549	rs2920832	C	T	2	8.255e-05	8.255e-05	1.1327	1.1327	0.9612	0	1.129	1.1335	CNTN1(-189.7kb)|LRRK2(+133.5kb)
13	101839909	rs7982751	A	T	2	8.271e-05	0.406	1.2344	1.1367	0.0315	78.39	0.9508	1.2986	NALCN(0)|NALCN-AS1(+128.3kb)
19	45438554	rs7254133	T	C	2	8.33e-05	8.33e-05	1.186	1.186	0.7149	0	1.2196	1.1754	APOC1(+15.95kb)|APOC1P1(+3.911kb)|APOC2(-10.68kb)|APOC4(-6.94kb)|APOC4-APOC2(-6.94kb)|APOE(+25.9kb)|BCAM(+113.9kb)|BCL3(+175.3kb)|CBLC(+134.7kb)|CLASRP(-103.7kb)|CLPTM1(-19.29kb)|GEMIN7(-144kb)|PPP1R37(-157.9kb)|PVRL2(+46.07kb)|RELB(-66.15kb)|TOMM40(+31.61kb)|ZNF296(-136.2kb)
6	74527043	rs41307147	G	T	2	8.355e-05	8.355e-05	1.3418	1.3418	0.4467	0	1.5309	1.3093	CD109(0)|SLC17A5(+163.3kb)
1	49196334	rs10888618	T	C	2	8.387e-05	8.387e-05	1.1329	1.1329	0.8005	0	1.1133	1.1371	AGBL4(0)|BEND5(0)
6	23689249	rs6928669	T	C	2	8.413e-05	8.413e-05	1.133	1.133	0.4535	0	1.1943	1.1209	.
4	69492419	rs4443356	C	A	2	8.425e-05	8.425e-05	1.196	1.196	0.6264	0	1.2419	1.1805	TMPRSS11E(+129.1kb)|UGT2B10(-189.3kb)|UGT2B15(-19.9kb)|UGT2B17(+58.17kb)
6	23692466	rs1408573	C	A	2	8.466e-05	8.466e-05	1.133	1.133	0.4522	0	1.1944	1.1208	.
8	1490055	rs2019513	A	C	2	8.469e-05	8.469e-05	1.2583	1.2583	0.529	0	1.1534	1.278	DLGAP2(0)|LOC100507435(-23.62kb)
6	47606712	rs4711890	G	C	2	8.471e-05	8.471e-05	1.1301	1.1301	0.7456	0	1.1054	1.1353	CD2AP(+11.72kb)|GPR111(-17.61kb)|GPR115(-59.58kb)|OPN5(-143.1kb)
2	127840867	rs6754293	G	T	2	8.497e-05	8.497e-05	1.1357	1.1357	0.8493	0	1.1514	1.1326	BIN1(0)|CYP27C1(-100.5kb)|ERCC3(-174kb)
8	27435201	rs4352801	C	T	2	8.522e-05	0.09562	1.1161	1.0933	0.1315	56.05	1.0173	1.1377	CCDC25(-155.6kb)|CHRNA2(+98.39kb)|CLU(-19.23kb)|EPHX2(+32.76kb)|ESCO2(-196.9kb)|MIR3622A(-124kb)|MIR3622B(-124kb)|PTK2B(+118.3kb)|SCARA3(-56.38kb)
13	101839135	rs16958539	G	A	2	8.55e-05	0.4084	1.2388	1.139	0.0304	78.65	0.9496	1.3054	NALCN(0)|NALCN-AS1(+127.5kb)
11	74368307	rs11236193	C	T	2	8.585e-05	8.585e-05	1.194	1.194	0.4446	0	1.1126	1.2143	CHRDL2(-39.17kb)|KCNE3(+189.7kb)|LIPT2(+163.6kb)|MIR4696(-63kb)|POLD3(+14.2kb)|RNF169(-91.6kb)|XRRA1(-183.6kb)
7	37829045	rs74454798	A	G	2	8.657e-05	8.657e-05	1.1464	1.1464	0.5017	0	1.0878	1.1584	EPDR1(-131.1kb)|GPR141(+48.13kb)|NME8(-59.15kb)|SFRP4(-116.5kb)
2	127889932	rs6710467	A	G	2	8.71e-05	8.71e-05	1.1594	1.1594	0.6172	0	1.2085	1.1495	BIN1(+25.03kb)|CYP27C1(-51.48kb)|ERCC3(-124.9kb)|MAP3K2(-166.3kb)
6	22268829	rs1417721	C	A	2	8.716e-05	8.716e-05	1.7766	1.7766	0.5076	0	1.5071	1.8813	LINC00340(+74.21kb)|LOC729177(+121.4kb)|PRL(-18.64kb)
12	40856489	rs7488520	G	C	2	8.811e-05	8.811e-05	1.1317	1.1317	0.9152	0	1.1237	1.1335	LRRK2(+93.4kb)
1	49188636	rs6704212	C	G	2	8.856e-05	8.856e-05	1.1275	1.1275	0.9523	0	1.1319	1.1265	AGBL4(0)|BEND5(-4.903kb)
6	23722517	rs1276812	T	C	2	8.897e-05	8.897e-05	1.1305	1.1305	0.6461	0	1.1671	1.1232	.
8	87635451	rs986633	A	G	2	8.925e-05	8.925e-05	1.2233	1.2233	0.6395	0	1.2884	1.2097	CNGB3(0)|CPNE3(+61.72kb)|RMDN1(+114.4kb)|WWP1(+155.3kb)
13	101839589	rs60863524	G	T	2	8.943e-05	0.4045	1.2333	1.1364	0.0325	78.13	0.9511	1.2971	NALCN(0)|NALCN-AS1(+128kb)
20	12088965	rs6074383	G	A	2	8.944e-05	8.944e-05	1.1164	1.1164	0.564	0	1.0778	1.1248	BTBD3(+181.7kb)
19	6653557	rs397191	A	G	2	8.952e-05	8.952e-05	1.1254	1.1254	0.4085	0	1.1883	1.1126	C3(-24.29kb)|CD70(+62.39kb)|CRB3(+186.3kb)|DENND1C(+171.8kb)|GPR108(-76.37kb)|SH2D3A(-98.62kb)|SLC25A23(+193.8kb)|TNFSF9(+117.6kb)|TNFSF14(-9.59kb)|TRIP10(-86.15kb)|TUBB4A(+151.2kb)|VAV1(-119.1kb)
1	49190982	rs11205530	G	C	2	9.051e-05	9.051e-05	1.1319	1.1319	0.9601	0	1.128	1.1327	AGBL4(0)|BEND5(-2.557kb)
10	12616233	rs2815615	C	A	2	9.114e-05	0.1488	1.1183	1.0903	0.1041	62.14	1.0092	1.142	CAMK1D(0)|MIR4480(-4.518kb)
6	23695343	rs6912828	G	T	2	9.153e-05	9.153e-05	1.1323	1.1323	0.4765	0	1.1904	1.1208	.
3	44539183	rs7617515	C	A	2	9.198e-05	9.198e-05	1.1286	1.1286	0.7508	0	1.1533	1.1236	TCAIM(+88.24kb)|TOPAZ1(+165.6kb)|ZKSCAN7(-57.53kb)|ZNF35(-151kb)|ZNF197(-127.3kb)|ZNF445(+20.02kb)|ZNF660(-87.27kb)
9	27249533	rs6475978	T	C	2	9.21e-05	0.02765	1.1172	1.1031	0.2018	38.63	1.0294	1.1352	EQTN(-35.12kb)|IFT74(+186.6kb)|LINC00032(0)|MOB3B(-75.67kb)|TEK(+19.36kb)
20	2406755	rs62192920	G	A	2	9.396e-05	9.396e-05	1.4556	1.4556	0.9229	0	1.4829	1.4488	SNORD119(-36.84kb)|SNRPB(-35.52kb)|TGM3(+85.03kb)|TGM6(0)|TMC2(-110.5kb)|ZNF343(-55.71kb)
19	45429708	rs60049679	C	G	2	9.406e-05	9.406e-05	1.2065	1.2065	0.909	0	1.2217	1.2036	APOC1(+7.102kb)|APOC1P1(-0.351kb)|APOC2(-19.53kb)|APOC4(-15.79kb)|APOC4-APOC2(-15.79kb)|APOE(+17.06kb)|BCAM(+105kb)|BCL3(+166.4kb)|CBLC(+125.8kb)|CLASRP(-112.6kb)|CLPTM1(-28.13kb)|GEMIN7(-152.8kb)|PPP1R37(-166.7kb)|PVRL2(+37.22kb)|RELB(-75kb)|TOMM40(+22.76kb)|ZNF296(-145kb)
6	12519274	rs12210635	A	G	2	9.418e-05	0.003433	1.1716	1.1883	0.2238	32.42	1.3076	1.1459	PHACTR1(-197.8kb)|RNU6-48P(+126.7kb)
8	27452044	rs7821500	G	T	2	9.437e-05	0.1928	1.1222	1.0896	0.0843	66.44	1.0034	1.1485	CCDC25(-138.8kb)|CHRNA2(+115.2kb)|CLU(-2.389kb)|EPHX2(+49.6kb)|ESCO2(-180kb)|MIR3622A(-107.1kb)|MIR3622B(-107.1kb)|PTK2B(+135.1kb)|SCARA3(-39.53kb)
21	21049344	rs8131703	G	C	2	9.455e-05	9.455e-05	1.1232	1.1232	0.5482	0	1.08	1.1324	.
17	35206324	rs62071081	T	G	2	9.543e-05	9.543e-05	1.1611	1.1611	0.7943	0	1.1356	1.1663	AATF(-99.85kb)|LHX1(-88.45kb)|MIR2909(-184.7kb)
2	127841769	rs10200967	T	C	2	9.545e-05	9.545e-05	1.1344	1.1344	0.8789	0	1.1469	1.1319	BIN1(0)|CYP27C1(-99.64kb)|ERCC3(-173.1kb)
6	47447041	rs4715019	A	T	2	9.567e-05	0.3518	1.1272	1.0807	0.0366	77.12	0.981	1.1611	CD2AP(0)|GPR111(-177.3kb)|TNFRSF21(+169.4kb)
17	26686445	rs17802736	G	A	2	9.576e-05	9.576e-05	1.266	1.266	0.8056	0	1.2243	1.2744	FOXN1(-164.5kb)|IFT20(+23.93kb)|KRT18P55(+52.04kb)|MIR4723(-1.231kb)|NLK(+163kb)|PIGS(-194kb)|POLDIP2(+1.842kb)|PPY2(+111.1kb)|PYY2(+131.4kb)|SARM1(-12.54kb)|SEBOX(-4.844kb)|SLC13A2(-114.2kb)|SLC46A1(-35.22kb)|TMEM97(+30.73kb)|TMEM199(0)|TNFAIP1(+12.41kb)|UNC119(-187.3kb)|VTN(-7.853kb)
6	47609592	rs9473147	G	A	2	9.588e-05	9.588e-05	1.1288	1.1288	0.7441	0	1.104	1.134	CD2AP(+14.6kb)|GPR111(-14.73kb)|GPR115(-56.7kb)|OPN5(-140.2kb)
5	104616562	rs149307321	T	C	2	9.644e-05	9.644e-05	1.2418	1.2418	0.5356	0	1.1451	1.2601	RAB9BP1(+180.8kb)
9	96523224	rs10125195	C	T	2	9.67e-05	9.67e-05	1.1135	1.1135	0.7043	0	1.1394	1.1082	BARX1(-190.7kb)|FAM120A(+194.8kb)|MIR4291(-58.41kb)|PHF2(+81.36kb)
9	96523104	rs9299411	A	C	2	9.693e-05	9.693e-05	1.1135	1.1135	0.7043	0	1.1394	1.1082	BARX1(-190.8kb)|FAM120A(+194.7kb)|MIR4291(-58.53kb)|PHF2(+81.24kb)
6	47448336	rs9367279	G	A	2	9.701e-05	0.3588	1.127	1.0801	0.0351	77.47	0.98	1.1612	CD2AP(0)|GPR111(-176kb)|TNFRSF21(+170.7kb)
9	139051959	rs77485333	C	T	2	9.77e-05	9.77e-05	1.4665	1.4665	0.4146	0	1.6873	1.4008	C9orf69(+41.23kb)|DKFZP434A062(-165kb)|GPSM1(-170kb)|LHX3(-36.14kb)|NACC2(+64.83kb)|QSOX2(-46.22kb)|UBAC1(+198.7kb)
8	133361917	rs62520380	T	C	2	9.783e-05	0.2542	1.1299	1.0898	0.0691	69.73	0.9933	1.1587	KCNQ3(0)
6	158575345	rs1559849	C	T	2	9.852e-05	9.852e-05	1.1719	1.1719	0.4623	0	1.0934	1.1872	GTF2H5(-14.03kb)|SERAC1(0)|SYNJ2(+55.14kb)|SYNJ2-IT1(+151.9kb)|TULP4(-158.3kb)
19	6653278	rs404410	T	C	2	9.864e-05	9.864e-05	1.1245	1.1245	0.4045	0	1.1878	1.1116	C3(-24.57kb)|CD70(+62.12kb)|CRB3(+186kb)|DENND1C(+171.5kb)|GPR108(-76.65kb)|SH2D3A(-98.89kb)|SLC25A23(+193.5kb)|TNFSF9(+117.3kb)|TNFSF14(-9.869kb)|TRIP10(-86.43kb)|TUBB4A(+150.9kb)|VAV1(-119.4kb)
9	96520723	rs2244395	G	A	2	9.88e-05	9.88e-05	1.1135	1.1135	0.7087	0	1.1391	1.1083	BARX1(-193.2kb)|FAM120A(+192.3kb)|MIR4291(-60.92kb)|PHF2(+78.85kb)
9	96522109	rs2490997	T	C	2	9.889e-05	9.889e-05	1.1134	1.1134	0.7035	0	1.1394	1.1081	BARX1(-191.8kb)|FAM120A(+193.7kb)|MIR4291(-59.53kb)|PHF2(+80.24kb)
11	85780448	rs3016327	C	T	2	9.955e-05	9.955e-05	1.1462	1.1462	0.7427	0	1.1754	1.1402	CCDC83(+149.4kb)|EED(-175.4kb)|PICALM(0)
