# Supplementary material for: Multiomics integrative analysis identifies APOE allele-specific blood biomarkers associated to Alzheimer’s disease etiopathogenesis
Source: Aging (Albany NY). 2021 Apr 12;13(7):9277–329. doi: 10.18632/aging.202950 (PMC8064208; doi:10.18632/aging.202950)
Supplement: Supplementary Table 7 [file aging-13-202950-s009.xlsx]

## Sheet: Sheet1
Supplementary Table 7. Sex stratified meta-analysis (males).
CHR	BP	A1	A2	MinFreq	MaxFreq	Beta	OR	LCI	UCI	SE	P	Direction	HetISq	HetChiSq	HetDf	HetPVal	RS	Annot
2	127892810	t	c	0.3365	0.4164	0.245	1.27762	1.16633	1.39953	0.0465	1.346e-07	++-+++--+	53.1	17.04	8	0.0297	rs6733839	BIN1(+27.91kb)|CYP27C1(-48.6kb)|ERCC3(-122.1kb)|MAP3K2(-163.4kb)
19	45411941	t	c	0.6903	0.8501	-0.5869	0.556048	0.445667	0.693769	0.1129	1.987e-07	+----+?--	42.6	12.2	7	0.09418	rs429358	APOC1(-5.979kb)|APOC1P1(-18.12kb)|APOC2(-37.3kb)|APOC4(-33.55kb)|APOC4-APOC2(-33.55kb)|APOE(0)|BCAM(+87.26kb)|BCL3(+148.6kb)|CBLC(+108kb)|CEACAM16(+198kb)|CLASRP(-130.4kb)|CLPTM1(-45.9kb)|GEMIN7(-170.6kb)|PPP1R37(-184.5kb)|PVRL2(+19.46kb)|RELB(-92.76kb)|TOMM40(+4.995kb)|ZNF296(-162.8kb)
18	60240352	a	c	0.4077	0.5093	0.2197	1.2457	1.14434	1.35604	0.0433	3.829e-07	+++++++++	0	4.596	8	0.7998	rs11152350	PHLPP1(-142.3kb)|TNFRSF11A(+185.4kb)|ZCCHC2(0)
3	100818693	a	g	0.7294	0.7828	0.2562	1.29201	1.17002	1.42672	0.0506	4.027e-07	-+++++-++	5.4	8.454	8	0.3904	rs7610265	ABI3BP(+106.4kb)|IMPG2(-122.7kb)
2	127891427	a	c	0.5567	0.6283	-0.2297	0.794772	0.726678	0.869247	0.0457	5.021e-07	--+---++-	62.4	21.279	8	0.006441	rs4663105	BIN1(+26.52kb)|CYP27C1(-49.98kb)|ERCC3(-123.4kb)|MAP3K2(-164.8kb)
18	60238668	t	c	0.4897	0.5923	-0.2166	0.805252	0.739876	0.876404	0.0432	5.49e-07	---------	0	4.363	8	0.823	rs56076457	PHLPP1(-144kb)|TNFRSF11A(+183.7kb)|ZCCHC2(0)
3	100819495	t	c	0.2174	0.2706	-0.2525	0.776856	0.703646	0.857684	0.0505	5.695e-07	+-----+--	4.9	8.408	8	0.3947	rs4518100	ABI3BP(+107.2kb)|IMPG2(-121.9kb)
3	100819829	a	t	0.7294	0.7826	0.2524	1.28711	1.16581	1.42103	0.0505	5.744e-07	-+++++-++	4.8	8.407	8	0.3947	rs13064054	ABI3BP(+107.5kb)|IMPG2(-121.6kb)
3	100819687	t	c	0.7294	0.7826	0.2524	1.28711	1.16581	1.42103	0.0505	5.78e-07	-+++++-++	4.9	8.409	8	0.3946	rs13068296	ABI3BP(+107.4kb)|IMPG2(-121.7kb)
18	60246154	t	c	0.3804	0.499	0.2124	1.23664	1.1358	1.34644	0.0434	9.835e-07	+++++++++	0	6.059	8	0.6406	rs4941144	PHLPP1(-136.5kb)|TNFRSF11A(+191.2kb)|ZCCHC2(+0.336kb)
18	60246006	t	c	0.5009	0.6196	-0.2123	0.808722	0.742774	0.880526	0.0434	9.967e-07	---------	0	6.058	8	0.6407	rs4941143	PHLPP1(-136.7kb)|TNFRSF11A(+191.1kb)|ZCCHC2(+0.188kb)
14	76823129	a	g	0.0184	0.0291	-0.6867	0.503234	0.381648	0.663555	0.1411	1.138e-06	+------+-	0	5.763	8	0.6737	rs74069816	ESRRB(-14.56kb)|GPATCH2L(+154kb)|RNU6-19P(+85.65kb)|RNU6-31P(+85.65kb)
2	127894615	a	g	0.6857	0.7446	-0.2348	0.790729	0.718883	0.869755	0.0486	1.386e-06	--+---++-	57.8	18.977	8	0.01498	rs744373	BIN1(+29.71kb)|CYP27C1(-46.8kb)|ERCC3(-120.2kb)|MAP3K2(-161.6kb)
14	76824918	a	g	0.0186	0.0291	-0.6744	0.509462	0.387054	0.670583	0.1402	1.511e-06	+------+-	0	5.089	8	0.7481	rs74069822	ESRRB(-12.77kb)|GPATCH2L(+155.8kb)|RNU6-19P(+87.44kb)|RNU6-31P(+87.44kb)
14	76825961	a	g	0.9709	0.9814	0.6736	1.96129	1.49005	2.58156	0.1402	1.558e-06	-++++++-+	0	5.087	8	0.7483	rs56047971	ESRRB(-11.73kb)|GPATCH2L(+156.8kb)|RNU6-19P(+88.48kb)|RNU6-31P(+88.48kb)
2	127894484	a	t	0.6856	0.7447	-0.2332	0.791995	0.720035	0.871147	0.0486	1.635e-06	--+---++-	58.2	19.116	8	0.01425	rs730482	BIN1(+29.58kb)|CYP27C1(-46.93kb)|ERCC3(-120.4kb)|MAP3K2(-161.8kb)
14	76829602	a	g	0.9709	0.9813	0.6654	1.94527	1.47846	2.55947	0.14	1.999e-06	-++++++-+	0	5.068	8	0.7503	rs58833347	ESRRB(-8.087kb)|GPATCH2L(+160.5kb)|RNU6-19P(+92.13kb)|RNU6-31P(+92.13kb)
14	76823647	a	g	0.9709	0.9815	0.6702	1.95463	1.48266	2.57683	0.141	2.003e-06	-++++++-+	0	6.025	8	0.6444	rs74069819	ESRRB(-14.04kb)|GPATCH2L(+154.5kb)|RNU6-19P(+86.17kb)|RNU6-31P(+86.17kb)
15	56222873	a	g	0.0124	0.0176	-0.9233	0.397206	0.27125	0.581651	0.1946	2.096e-06	?--------	0	5.683	7	0.5772	rs139021051	NEDD4(0)|PRTG(+187.7kb)|RFX7(-159.9kb)
14	76831868	t	c	0.9709	0.9812	0.6658	1.94605	1.47789	2.5625	0.1404	2.102e-06	-++++++-+	0	5.088	8	0.7481	rs58318264	ESRRB(-5.821kb)|GPATCH2L(+162.7kb)|RNU6-19P(+94.39kb)|RNU6-31P(+94.39kb)
14	76832143	c	g	0.0188	0.0291	-0.6656	0.513965	0.390322	0.676775	0.1404	2.111e-06	+------+-	0	5.059	8	0.7512	rs60772130	ESRRB(-5.546kb)|GPATCH2L(+163kb)|RNU6-19P(+94.67kb)|RNU6-31P(+94.67kb)
14	76842371	t	c	0.0193	0.0308	-0.6609	0.516386	0.39293	0.678632	0.1394	2.143e-06	+------+-	0	6.552	8	0.5857	rs58936468	ESRRB(0)|GPATCH2L(+173.2kb)|RNU6-19P(+104.9kb)|RNU6-31P(+104.9kb)
14	76832759	a	g	0.9709	0.9812	0.6647	1.94391	1.47627	2.55968	0.1404	2.18e-06	-++++++-+	0	5.06	8	0.7511	rs57285266	ESRRB(-4.93kb)|GPATCH2L(+163.6kb)|RNU6-19P(+95.28kb)|RNU6-31P(+95.28kb)
14	76826115	a	g	0.0186	0.0291	-0.6678	0.512836	0.38893	0.676215	0.1411	2.208e-06	+------+-	0	6.038	8	0.643	rs58909044	ESRRB(-11.57kb)|GPATCH2L(+157kb)|RNU6-19P(+88.64kb)|RNU6-31P(+88.64kb)
14	76834761	t	c	0.9709	0.9812	0.6622	1.93905	1.47287	2.55279	0.1403	2.379e-06	-++++++-+	0	5.043	8	0.753	rs17104385	ESRRB(-2.928kb)|GPATCH2L(+165.6kb)|RNU6-19P(+97.28kb)|RNU6-31P(+97.28kb)
14	76820418	t	c	0.019	0.0308	-0.6446	0.524872	0.401192	0.686682	0.1371	2.591e-06	+------+-	0	5.366	8	0.7178	rs73316308	ESRRB(-17.27kb)|GPATCH2L(+151.3kb)|RNU6-19P(+82.94kb)|RNU6-31P(+82.94kb)
4	107613166	t	g	0.096	0.1216	-0.3372	0.713766	0.619945	0.821785	0.0719	2.774e-06	--------+	50.6	16.196	8	0.03966	rs68116215	.
14	76848224	t	c	0.0196	0.0311	-0.6519	0.521055	0.396482	0.684767	0.1394	2.912e-06	+------+-	0	6.651	8	0.5747	rs55713861	ESRRB(0)|GPATCH2L(+179.1kb)|RNU6-19P(+110.7kb)|RNU6-31P(+110.7kb)
14	76833373	a	t	0.0187	0.0291	-0.6603	0.516696	0.391781	0.681439	0.1412	2.914e-06	+------+-	0	5.941	8	0.6539	rs7156267	ESRRB(-4.316kb)|GPATCH2L(+164.2kb)|RNU6-19P(+95.9kb)|RNU6-31P(+95.9kb)
14	76848676	c	g	0.0196	0.0312	-0.6516	0.521211	0.396601	0.684973	0.1394	2.945e-06	+------+-	0	6.627	8	0.5773	rs59437468	ESRRB(0)|GPATCH2L(+179.5kb)|RNU6-19P(+111.2kb)|RNU6-31P(+111.2kb)
2	127847930	a	g	0.287	0.3715	0.2155	1.24048	1.13309	1.35805	0.0462	3.07e-06	++-+++--+	58	19.062	8	0.01453	rs35114168	BIN1(0)|CYP27C1(-93.48kb)|ERCC3(-166.9kb)
14	76838306	t	g	0.019	0.0291	-0.6547	0.519598	0.394677	0.684058	0.1403	3.086e-06	+------+-	0	5.072	8	0.7499	rs2278686	ESRRB(0)|GPATCH2L(+169.2kb)|RNU6-19P(+100.8kb)|RNU6-31P(+100.8kb)
14	76835403	a	g	0.0188	0.0291	-0.6583	0.517731	0.392565	0.682804	0.1412	3.115e-06	+------+-	0	5.933	8	0.6547	rs79661745	ESRRB(-2.286kb)|GPATCH2L(+166.3kb)|RNU6-19P(+97.93kb)|RNU6-31P(+97.93kb)
14	76850261	a	g	0.0197	0.0313	-0.6496	0.522255	0.397395	0.686344	0.1394	3.17e-06	+------+-	0	6.682	8	0.5713	rs74069859	ESRRB(0)|GPATCH2L(+181.1kb)|RNU6-19P(+112.8kb)|RNU6-31P(+112.8kb)
14	76836151	a	g	0.0188	0.0291	-0.6569	0.518456	0.393192	0.683626	0.1411	3.255e-06	+------+-	0	5.933	8	0.6548	rs60970617	ESRRB(-1.538kb)|GPATCH2L(+167kb)|RNU6-19P(+98.68kb)|RNU6-31P(+98.68kb)
14	76863682	a	g	0.0215	0.0393	-0.627	0.534192	0.409437	0.696959	0.1357	3.819e-06	+------+-	6.7	8.573	8	0.3796	rs74068604	ESRRB(0)|GPATCH2L(+194.5kb)|RNU6-19P(+126.2kb)|RNU6-31P(+126.2kb)
14	76852410	t	c	0.0197	0.0314	-0.6432	0.525608	0.399868	0.690886	0.1395	4.007e-06	+------+-	0	6.585	8	0.582	rs74069862	ESRRB(0)|GPATCH2L(+183.3kb)|RNU6-19P(+114.9kb)|RNU6-31P(+114.9kb)
14	76854602	t	c	0.0198	0.0318	-0.6449	0.524715	0.398798	0.690389	0.14	4.077e-06	+------+-	0	7.015	8	0.535	rs60006407	ESRRB(0)|GPATCH2L(+185.5kb)|RNU6-19P(+117.1kb)|RNU6-31P(+117.1kb)
2	127888757	a	c	0.6363	0.7184	-0.2148	0.806703	0.736142	0.884027	0.0467	4.161e-06	--+---++-	47.8	15.332	8	0.053	rs11680911	BIN1(+23.85kb)|CYP27C1(-52.65kb)|ERCC3(-126.1kb)|MAP3K2(-167.5kb)
3	100813456	t	c	0.1072	0.1701	-0.2877	0.749987	0.663518	0.847724	0.0625	4.204e-06	+--------	12.1	9.1	8	0.334	rs62274078	ABI3BP(+101.1kb)|IMPG2(-127.9kb)
2	127889637	a	g	0.2816	0.3638	0.2137	1.23825	1.13017	1.35667	0.0466	4.587e-06	++-+++--+	47.5	15.249	8	0.05447	rs7561528	BIN1(+24.73kb)|CYP27C1(-51.77kb)|ERCC3(-125.2kb)|MAP3K2(-166.6kb)
3	100811048	t	c	0.8297	0.8928	0.2852	1.33003	1.17691	1.50306	0.0624	4.848e-06	-++++++++	15.4	9.459	8	0.3051	rs35337386	ABI3BP(+98.71kb)|IMPG2(-130.3kb)
4	107596018	a	g	0.8765	0.9031	0.3278	1.38791	1.20524	1.59827	0.072	5.23e-06	++++++++-	42.7	13.962	8	0.08277	rs71601027	.
3	100811667	t	c	0.1072	0.1703	-0.2839	0.752842	0.666174	0.850785	0.0624	5.306e-06	+--------	15	9.411	8	0.3089	rs35573711	ABI3BP(+99.33kb)|IMPG2(-129.7kb)
3	100811289	a	c	0.8296	0.8928	0.2838	1.32817	1.17527	1.50096	0.0624	5.342e-06	-++++++++	15.2	9.436	8	0.3069	rs35252712	ABI3BP(+98.96kb)|IMPG2(-130.1kb)
4	107597259	a	t	0.0965	0.1217	-0.3286	0.719931	0.624932	0.829371	0.0722	5.356e-06	--------+	45.8	14.768	8	0.06381	rs7673570	.
14	76867078	a	g	0.0218	0.0397	-0.6192	0.538375	0.41232	0.702968	0.1361	5.399e-06	+------+-	7.3	8.628	8	0.3747	rs74068606	ESRRB(0)|GPATCH2L(+197.9kb)|RNU6-19P(+129.6kb)|RNU6-31P(+129.6kb)
4	107591650	t	g	0.8768	0.903	0.3274	1.38736	1.20476	1.59763	0.072	5.503e-06	++++++++-	42.4	13.885	8	0.08482	rs4956263	.
14	76860246	c	g	0.9613	0.9804	0.6396	1.89572	1.43826	2.49868	0.1409	5.676e-06	-++++++-+	0	6.741	8	0.5648	rs142110369	ESRRB(0)|GPATCH2L(+191.1kb)|RNU6-19P(+122.8kb)|RNU6-31P(+122.8kb)
14	76858313	a	g	0.0197	0.0381	-0.6392	0.527714	0.400292	0.695698	0.141	5.803e-06	+------+-	0	6.615	8	0.5787	rs74069865	ESRRB(0)|GPATCH2L(+189.2kb)|RNU6-19P(+120.8kb)|RNU6-31P(+120.8kb)
14	76861088	a	g	0.0196	0.0388	-0.6402	0.527187	0.399266	0.696093	0.1418	6.305e-06	+------+-	0	6.615	8	0.5787	rs17104410	ESRRB(0)|GPATCH2L(+192kb)|RNU6-19P(+123.6kb)|RNU6-31P(+123.6kb)
3	100810130	a	g	0.1074	0.1704	-0.2813	0.754802	0.668039	0.852833	0.0623	6.31e-06	+--------	15.9	9.517	8	0.3006	rs73145363	ABI3BP(+97.8kb)|IMPG2(-131.3kb)
4	40379061	t	g	0.4775	0.5373	0.201	1.22262	1.12051	1.33405	0.0445	6.341e-06	++++++-++	0	5.552	8	0.6973	rs10026108	CHRNA9(+21.83kb)|MIR4802(-125kb)|RBM47(-46.21kb)|RHOH(+132.7kb)
15	56273635	t	c	0.011	0.0176	-0.872	0.418114	0.2862	0.61083	0.1934	6.53e-06	?--------	0	5.426	7	0.6081	rs139514549	NEDD4(0)|RFX7(-109.1kb)
9	100870501	c	g	0.2035	0.2337	0.2512	1.28557	1.15261	1.43386	0.0557	6.561e-06	+++++++++	35.4	12.384	8	0.1349	rs1359105	ANP32B(+92.28kb)|C9orf156(+185.6kb)|CORO2A(-12.76kb)|GABBR2(-179.9kb)|HEMGN(+163.3kb)|NANS(+25.14kb)|TBC1D2(-90.78kb)|TRIM14(0)
14	66207753	t	c	0.9243	0.942	0.3956	1.48528	1.25046	1.76418	0.0878	6.583e-06	+++++++++	0	3.864	8	0.8692	rs12435971	FUT8(0)
4	40379690	a	g	0.4651	0.5249	-0.2	0.818731	0.750347	0.893347	0.0445	6.938e-06	------+--	0	5.726	8	0.6779	rs9994894	CHRNA9(+22.46kb)|MIR4802(-124.4kb)|RBM47(-45.58kb)|RHOH(+133.3kb)
3	100808676	a	g	0.1068	0.1705	-0.279	0.75654	0.669578	0.854796	0.0623	7.407e-06	+--------	16.9	9.63	8	0.292	rs1839298	ABI3BP(+96.34kb)|IMPG2(-132.7kb)
4	107634793	t	c	0.1002	0.1264	-0.3111	0.732641	0.639214	0.839722	0.0696	7.798e-06	--------+	46.2	14.883	8	0.06145	rs4364336	.
5	35442322	a	g	0.9513	0.9744	0.5636	1.75699	1.37036	2.2527	0.1268	8.838e-06	++++++-++	0	5.557	8	0.6967	rs7444050	SPEF2(-175.7kb)
14	76865871	a	g	0.0218	0.0398	-0.5982	0.5498	0.422062	0.7162	0.1349	9.204e-06	+-----++-	8.7	8.762	8	0.3627	rs58853114	ESRRB(0)|GPATCH2L(+196.7kb)|RNU6-19P(+128.4kb)|RNU6-31P(+128.4kb)
7	55046473	t	c	0.9446	0.9685	-0.4759	0.621326	0.503186	0.767203	0.1076	9.719e-06	----+----	47.1	15.119	8	0.05687	rs111776517	EGFR(-40.25kb)
6	71271450	t	c	0.1005	0.1356	0.3007	1.3508	1.18202	1.54369	0.0681	9.917e-06	-++++++-+	0	6.827	8	0.5554	rs74733138	C6orf57(-5.174kb)|FAM135A(+0.573kb)|SMAP1(-106kb)
4	107632322	a	g	0.1007	0.1261	-0.3067	0.735871	0.642159	0.84326	0.0695	1.036e-05	--------+	47.9	15.349	8	0.05271	rs115067971	.
4	107648070	a	g	0.872	0.8989	0.3045	1.35595	1.1842	1.55261	0.0691	1.039e-05	++++++++-	45	14.532	8	0.0689	rs13104769	DKK2(-194.9kb)
2	33335120	a	g	0.1632	0.2336	-0.2387	0.787651	0.70813	0.876103	0.0543	1.102e-05	+--------	0	7.698	8	0.4635	rs218225	LINC00486(+172.8kb)|LOC100271832(+163.9kb)|LTBP1(0)
11	95709990	t	c	0.2785	0.3479	-0.2092	0.811233	0.738971	0.890561	0.0476	1.131e-05	+-----+--	0	6.833	8	0.5548	rs1053815	CEP57(+144.1kb)|FAM76B(+187kb)|MAML2(-1.449kb)|MTMR2(+52.62kb)
3	109559671	t	g	0.0115	0.0254	-0.8681	0.419748	0.284795	0.61865	0.1979	1.153e-05	+--------	0	5.212	8	0.7347	rs139183237	.
13	111200284	a	g	0.0863	0.1129	-0.3244	0.722961	0.625352	0.835805	0.074	1.179e-05	---------	0	4.511	8	0.8083	rs9555717	CARKD(-67.52kb)|CARS2(-93.47kb)|COL4A2(+34.91kb)|COL4A2-AS1(+39.76kb)|ING1(-164.7kb)|RAB20(0)
15	33196294	t	c	0.0454	0.0771	0.4248	1.52928	1.2645	1.84951	0.097	1.183e-05	+++++++++	0	2.497	8	0.9619	rs12912842	FMN1(0)|GREM1(+169.4kb)
4	40377986	t	c	0.5674	0.6219	-0.1968	0.821355	0.752162	0.896913	0.0449	1.185e-05	----+-+--	0	6.089	8	0.6372	rs7658182	CHRNA9(+20.75kb)|MIR4802(-126.1kb)|RBM47(-47.28kb)|RHOH(+131.6kb)
6	2055932	t	c	0.0219	0.0708	0.4538	1.57428	1.28498	1.92872	0.1036	1.189e-05	-++-+++++	0	7.514	8	0.4823	rs11242736	GMDS(0)|LOC100508120(-190.1kb)
21	27129093	a	g	0.3424	0.4752	-0.1944	0.823329	0.754708	0.898188	0.0444	1.218e-05	---------	0	7.169	8	0.5185	rs1015004	APP(-123.8kb)|ATP5J(+21.13kb)|GABPA(0)|JAM2(+39.22kb)|LINC00515(+173.6kb)|MIR155(+182.7kb)|MIR155HG(+181.6kb)|MRPL39(+149.3kb)
3	100811000	t	g	0.1073	0.1702	-0.2702	0.763227	0.676158	0.861507	0.0618	1.237e-05	+--------	14.8	9.388	8	0.3106	rs13065583	ABI3BP(+98.67kb)|IMPG2(-130.4kb)
15	33198928	a	g	0.9236	0.9553	-0.4239	0.654489	0.541171	0.791536	0.097	1.247e-05	---------	0	2.265	8	0.9718	rs8027369	FMN1(0)|GREM1(+172.1kb)
3	100796879	t	c	0.0859	0.1627	-0.2751	0.759496	0.671273	0.859315	0.063	1.265e-05	+--------	31.8	11.732	8	0.1636	rs16843216	ABI3BP(+84.54kb)|IMPG2(-144.5kb)
2	77928874	c	g	0.9538	0.9658	0.5254	1.69114	1.33565	2.14124	0.1204	1.269e-05	-+++++-++	0	4.755	8	0.7834	rs114165356	LRRTM4(+179.4kb)
15	33195003	t	c	0.0452	0.0769	0.4249	1.52944	1.26364	1.85114	0.0974	1.29e-05	+++++++++	0	2.614	8	0.9562	rs2034478	FMN1(0)|GREM1(+168.1kb)
21	27103614	t	c	0.3705	0.4768	-0.1925	0.824894	0.756588	0.899367	0.0441	1.292e-05	---------	13.4	9.238	8	0.3226	rs2829887	APP(-149.2kb)|ATP5J(0)|GABPA(-3.643kb)|JAM2(+13.74kb)|LINC00515(+148.1kb)|MIR155(+157.3kb)|MIR155HG(+156.1kb)|MRPL39(+123.8kb)
14	76815889	c	g	0.9695	0.9816	0.6229	1.86433	1.40891	2.46695	0.1429	1.3e-05	-++++++-+	0	6.26	8	0.6181	rs58394842	ESRRB(-21.8kb)|GPATCH2L(+146.8kb)|RNU6-19P(+78.41kb)|RNU6-31P(+78.41kb)
4	107776529	a	t	0.8699	0.9013	0.3009	1.35107	1.17994	1.54703	0.0691	1.338e-05	+++++++++	29.9	11.42	8	0.179	rs34723654	DKK2(-66.43kb)
4	107702098	c	g	0.8732	0.8981	0.2985	1.34784	1.17827	1.54181	0.0686	1.35e-05	++++++++-	47.7	15.295	8	0.05365	rs1593328	DKK2(-140.9kb)
3	100812984	c	g	0.1072	0.1701	-0.2697	0.763609	0.676231	0.862276	0.062	1.359e-05	+--------	13.2	9.212	8	0.3248	rs67144487	ABI3BP(+100.6kb)|IMPG2(-128.4kb)
3	100813880	t	c	0.1072	0.1702	-0.2701	0.763303	0.675828	0.8621	0.0621	1.359e-05	+--------	10	8.886	8	0.352	rs58427219	ABI3BP(+101.5kb)|IMPG2(-127.5kb)
8	76059927	c	g	0.9347	0.9574	0.4177	1.51847	1.25777	1.83319	0.0961	1.389e-05	-++++++++	0	3.716	8	0.8818	rs2383931	CASC9(-75.42kb)|CRISPLD1(+113.1kb)
3	100812857	t	c	0.8298	0.8927	0.2687	1.30826	1.15879	1.47702	0.0619	1.399e-05	-++++++++	13.7	9.267	8	0.3203	rs62274076	ABI3BP(+100.5kb)|IMPG2(-128.5kb)
3	100812955	a	g	0.1072	0.1701	-0.2693	0.763914	0.676502	0.862621	0.062	1.41e-05	+--------	13.5	9.251	8	0.3216	rs62274077	ABI3BP(+100.6kb)|IMPG2(-128.4kb)
2	97346403	a	g	0.0212	0.0344	-0.5802	0.559786	0.430739	0.727495	0.1337	1.424e-05	----+++--	40.9	13.534	8	0.09475	rs10196554	ANKRD23(-157.2kb)|ANKRD39(-167.3kb)|ARID5A(+128kb)|CNNM3(-135.6kb)|CNNM4(-80.24kb)|FAM178B(-195.2kb)|FER1L5(0)|KANSL3(+42.29kb)|LMAN2L(-25.26kb)|MIR3127(-117.6kb)|NEURL3(+172.6kb)|SEMA4C(-179.1kb)
3	100787061	t	c	0.8353	0.9172	0.2747	1.31614	1.16257	1.48999	0.0633	1.434e-05	-++++++++	26.8	10.931	8	0.2057	rs35333915	ABI3BP(+74.73kb)|IMPG2(-154.3kb)
10	15023546	a	g	0.9127	0.9497	-0.3983	0.671461	0.560781	0.803984	0.0919	1.467e-05	+--------	0	3.136	8	0.9255	rs192237534	ACBD7(-93.93kb)|C10orf111(-113.8kb)|CDNF(+143.6kb)|DCLRE1C(+27.45kb)|HSPA14(+109.8kb)|MEIG1(+8.696kb)|NMT2(-124.2kb)|OLAH(-62.35kb)|PPIAP30(-173.2kb)|RPP38(-115.6kb)|SUV39H2(+77.24kb)
21	27122321	a	g	0.5266	0.6517	0.1922	1.21191	1.11091	1.3221	0.0444	1.482e-05	+++++++++	0	7.828	8	0.4505	rs12627621	APP(-130.5kb)|ATP5J(+14.36kb)|GABPA(0)|JAM2(+32.45kb)|LINC00515(+166.8kb)|MIR155(+176kb)|MIR155HG(+174.8kb)|MRPL39(+142.5kb)
3	109549300	a	g	0.0113	0.0241	-0.8639	0.421515	0.285099	0.623205	0.1995	1.486e-05	+--------	0	4.811	8	0.7776	rs182172473	.
15	33198265	a	g	0.0447	0.0766	0.4202	1.52227	1.2587	1.84102	0.097	1.49e-05	+++++++++	0	2.454	8	0.9639	rs10519763	FMN1(0)|GREM1(+171.4kb)
15	33198639	t	c	0.0454	0.0767	0.419	1.52044	1.25768	1.83809	0.0968	1.492e-05	+++++++++	0	2.268	8	0.9717	rs8026200	FMN1(0)|GREM1(+171.8kb)
4	40382327	t	c	0.4647	0.5252	-0.1935	0.82407	0.754944	0.899525	0.0447	1.522e-05	------+--	0	6.114	8	0.6344	rs10028664	CHRNA9(+25.09kb)|MIR4802(-121.7kb)|RBM47(-42.94kb)|RHOH(+135.9kb)
21	27054612	a	g	0.519	0.6195	0.1903	1.20961	1.10967	1.31856	0.044	1.532e-05	+++++++++	0	3.806	8	0.8742	rs2829862	APP(-198.2kb)|ATP5J(-42.18kb)|GABPA(-52.64kb)|JAM2(0)|LINC00515(+99.08kb)|MIR155(+108.3kb)|MIR155HG(+107.1kb)|MRPL39(+74.81kb)
22	43894599	t	c	0.3641	0.6889	0.208	1.23121	1.12044	1.35293	0.0481	1.535e-05	-++++++++	0	1.948	8	0.9826	rs141075713	EFCAB6(-30.02kb)|EFCAB6-AS1(-17.53kb)|MPPED1(0)|SCUBE1(+155.2kb)
15	33197411	a	g	0.0447	0.0768	0.4195	1.5212	1.25757	1.84009	0.0971	1.552e-05	+++++++++	0	2.471	8	0.9631	rs1122090	FMN1(0)|GREM1(+170.5kb)
3	100797234	a	g	0.0861	0.1627	-0.2719	0.76193	0.673424	0.862069	0.063	1.581e-05	+--------	30.2	11.456	8	0.1772	rs13085839	ABI3BP(+84.9kb)|IMPG2(-144.2kb)
8	76060425	t	c	0.0376	0.0652	-0.4156	0.659944	0.546431	0.797039	0.0963	1.583e-05	+-----+--	0	3.999	8	0.8572	rs75367490	CASC9(-74.93kb)|CRISPLD1(+113.6kb)
21	27174716	a	g	0.4223	0.517	-0.1968	0.821355	0.75113	0.898145	0.0456	1.595e-05	------+--	18.5	9.812	8	0.2785	rs4817059	APP(-78.14kb)|ATP5J(+66.75kb)|GABPA(+29.94kb)|JAM2(+84.84kb)|MRPL39(+194.9kb)
2	127862133	t	c	0.3645	0.4348	0.1914	1.21094	1.11002	1.32105	0.0444	1.613e-05	++-+++--+	41.5	13.684	8	0.09038	rs6431219	BIN1(0)|CYP27C1(-79.28kb)|ERCC3(-152.7kb)|MAP3K2(-194.1kb)
13	83728740	t	c	0.8968	0.9216	-0.3353	0.715124	0.613983	0.832925	0.0778	1.628e-05	---------	0	6.931	8	0.5441	rs7992194	.
16	79964561	t	c	0.263	0.2948	-0.2085	0.811801	0.73833	0.892583	0.0484	1.652e-05	---------	0	3.073	8	0.9297	rs28505112	.
3	100783075	t	g	0.0816	0.1651	-0.2725	0.761473	0.672625	0.862059	0.0633	1.663e-05	+--------	25.7	10.761	8	0.2156	rs16843198	ABI3BP(+70.74kb)|IMPG2(-158.3kb)
22	43159609	t	c	0.6623	0.8337	0.2258	1.25332	1.13077	1.38916	0.0525	1.679e-05	++++++--+	29.2	11.306	8	0.185	rs7292914	A4GALT(+42.73kb)|ARFGAP3(-32.92kb)|ATP5L2(+123kb)|CYB5R3(+114.2kb)|PACSIN2(-106.2kb)|POLDIP3(+148.6kb)|RNU12(+148.2kb)|RRP7B(+181.6kb)|SERHL2(+189.2kb)
3	100790767	a	g	0.084	0.1638	-0.2728	0.761245	0.672159	0.862138	0.0635	1.749e-05	+--------	28.1	11.12	8	0.195	rs34281790	ABI3BP(+78.43kb)|IMPG2(-150.6kb)
2	141338819	a	g	0.5104	0.5652	-0.1864	0.829942	0.762113	0.903806	0.0435	1.797e-05	-------+-	0	7.97	8	0.4364	rs12467852	LRP1B(0)
3	100791262	a	g	0.0842	0.1627	-0.2711	0.76254	0.673699	0.863097	0.0632	1.804e-05	+--------	29.4	11.323	8	0.184	rs13081830	ABI3BP(+78.93kb)|IMPG2(-150.1kb)
2	141338860	a	c	0.5104	0.5651	-0.1863	0.830025	0.76219	0.903897	0.0435	1.814e-05	-------+-	0	7.974	8	0.436	rs12476202	LRP1B(0)
3	100803750	a	g	0.0885	0.163	-0.2716	0.762159	0.672966	0.863173	0.0635	1.893e-05	+--------	29.5	11.35	8	0.1826	rs36082674	ABI3BP(+91.42kb)|IMPG2(-137.6kb)
8	76059570	t	c	0.0377	0.0652	-0.4114	0.662722	0.548838	0.800236	0.0962	1.908e-05	+-----+--	0	4.042	8	0.8533	rs17299110	CASC9(-75.78kb)|CRISPLD1(+112.8kb)
21	27077849	a	g	0.512	0.6268	0.1882	1.20707	1.10712	1.31605	0.0441	1.941e-05	+++++++++	0	4.677	8	0.7914	rs34482392	APP(-175kb)|ATP5J(-18.94kb)|GABPA(-29.41kb)|JAM2(0)|LINC00515(+122.3kb)|MIR155(+131.5kb)|MIR155HG(+130.4kb)|MRPL39(+98.05kb)
22	43160404	t	c	0.1665	0.3376	-0.2243	0.799075	0.72094	0.88568	0.0525	1.949e-05	------++-	28.3	11.16	8	0.1928	rs9611887	A4GALT(+43.53kb)|ARFGAP3(-32.13kb)|ATP5L2(+123.8kb)|CYB5R3(+115kb)|PACSIN2(-105.4kb)|POLDIP3(+149.4kb)|RNU12(+149kb)|RRP7B(+182.4kb)|SERHL2(+190kb)
3	100803474	t	c	0.837	0.9117	0.271	1.31128	1.15782	1.48507	0.0635	1.951e-05	-++++++++	29.5	11.34	8	0.1832	rs62274067	ABI3BP(+91.14kb)|IMPG2(-137.9kb)
8	76056744	c	g	0.0427	0.0654	-0.409	0.664314	0.550588	0.801531	0.0958	1.952e-05	+--------	0	3.819	8	0.8731	rs60052648	CASC9(-78.61kb)|CRISPLD1(+110kb)
22	43160637	a	g	0.6642	0.8336	0.2242	1.25132	1.12896	1.38694	0.0525	1.973e-05	++++++--+	28.1	11.13	8	0.1944	rs9611888	A4GALT(+43.76kb)|ARFGAP3(-31.89kb)|ATP5L2(+124kb)|CYB5R3(+115.2kb)|PACSIN2(-105.1kb)|POLDIP3(+149.7kb)|RNU12(+149.2kb)|RRP7B(+182.6kb)|SERHL2(+190.2kb)
3	100772835	c	g	0.8353	0.9185	0.2702	1.31023	1.15735	1.4833	0.0633	1.992e-05	-+++++-++	27.2	10.99	8	0.2023	rs10511182	ABI3BP(+60.5kb)|IMPG2(-168.6kb)
3	100799670	a	g	0.087	0.1627	-0.2684	0.764602	0.675918	0.864922	0.0629	2.003e-05	+--------	29.7	11.384	8	0.1809	rs17219986	ABI3BP(+87.34kb)|IMPG2(-141.7kb)
19	45416741	t	c	0.2054	0.3424	0.2988	1.34824	1.17516	1.54681	0.0701	2.023e-05	-++++-?++	50.1	14.029	7	0.05067	rs438811	APOC1(-1.179kb)|APOC1P1(-13.32kb)|APOC2(-32.5kb)|APOC4(-28.75kb)|APOC4-APOC2(-28.75kb)|APOE(+4.091kb)|BCAM(+92.06kb)|BCL3(+153.4kb)|CBLC(+112.8kb)|CLASRP(-125.6kb)|CLPTM1(-41.1kb)|GEMIN7(-165.8kb)|PPP1R37(-179.7kb)|PVRL2(+24.26kb)|RELB(-87.96kb)|TOMM40(+9.795kb)|ZNF296(-158kb)
22	43159948	t	c	0.1663	0.3376	-0.2235	0.799715	0.721658	0.886215	0.0524	2.033e-05	------++-	27.5	11.031	8	0.1999	rs9611885	A4GALT(+43.07kb)|ARFGAP3(-32.58kb)|ATP5L2(+123.3kb)|CYB5R3(+114.5kb)|PACSIN2(-105.8kb)|POLDIP3(+149kb)|RNU12(+148.5kb)|RRP7B(+181.9kb)|SERHL2(+189.6kb)
3	100797104	a	g	0.0859	0.1627	-0.2683	0.764678	0.67572	0.865348	0.0631	2.096e-05	+--------	29.7	11.387	8	0.1807	rs13085636	ABI3BP(+84.77kb)|IMPG2(-144.3kb)
22	43160145	a	c	0.1664	0.3376	-0.2231	0.800035	0.721805	0.886743	0.0525	2.114e-05	------++-	27.4	11.018	8	0.2007	rs5996233	A4GALT(+43.27kb)|ARFGAP3(-32.39kb)|ATP5L2(+123.5kb)|CYB5R3(+114.7kb)|PACSIN2(-105.6kb)|POLDIP3(+149.2kb)|RNU12(+148.7kb)|RRP7B(+182.1kb)|SERHL2(+189.8kb)
3	100809020	a	g	0.1074	0.1705	-0.2621	0.769434	0.681791	0.868343	0.0617	2.126e-05	+--------	17.4	9.682	8	0.2881	rs36077661	ABI3BP(+96.69kb)|IMPG2(-132.4kb)
21	27056099	a	c	0.3468	0.4007	0.1917	1.21131	1.10883	1.32326	0.0451	2.142e-05	-+++++-++	0	3.752	8	0.8788	rs2829863	APP(-196.8kb)|ATP5J(-40.69kb)|GABPA(-51.16kb)|JAM2(0)|LINC00515(+100.6kb)|MIR155(+109.7kb)|MIR155HG(+108.6kb)|MRPL39(+76.3kb)
5	79089528	t	c	0.2864	0.3457	-0.2031	0.816197	0.743202	0.896361	0.0478	2.147e-05	---+-----	0	7.324	8	0.5021	rs2287672	CMYA5(0)|MTX3(-183kb)|PAPD4(+107.1kb)
21	27065046	a	c	0.5116	0.6304	0.1861	1.20454	1.10545	1.31252	0.0438	2.152e-05	++++++-++	0	4.584	8	0.801	rs2829868	APP(-187.8kb)|ATP5J(-31.74kb)|GABPA(-42.21kb)|JAM2(0)|LINC00515(+109.5kb)|MIR155(+118.7kb)|MIR155HG(+117.6kb)|MRPL39(+85.24kb)
15	64775935	a	g	0.8288	0.8754	0.2642	1.30239	1.15291	1.47125	0.0622	2.176e-05	-+++++-+-	15.8	9.502	8	0.3017	rs80265779	CSNK1G1(+127.5kb)|KIAA0101(+102.2kb)|TRIP4(+28.43kb)|ZNF609(-15.68kb)
22	43155449	a	g	0.9241	0.9656	0.4508	1.56957	1.27462	1.93277	0.1062	2.178e-05	++++++?-+	0	6.507	7	0.4819	rs114083755	A4GALT(+38.57kb)|ARFGAP3(-37.08kb)|ATP5L2(+118.8kb)|CYB5R3(+110kb)|PACSIN2(-110.3kb)|POLDIP3(+144.5kb)|RNU12(+144kb)|RRP7B(+177.4kb)|SERHL2(+185.1kb)
8	76057300	t	c	0.0377	0.0652	-0.4067	0.665844	0.551748	0.803534	0.0959	2.211e-05	+-----+--	0	4.05	8	0.8526	rs79633365	CASC9(-78.05kb)|CRISPLD1(+110.5kb)
19	45416178	t	g	0.2041	0.3419	0.2972	1.34608	1.17328	1.54434	0.0701	2.212e-05	-++++-?++	50.2	14.063	7	0.05008	rs483082	APOC1(-1.742kb)|APOC1P1(-13.88kb)|APOC2(-33.06kb)|APOC4(-29.32kb)|APOC4-APOC2(-29.32kb)|APOE(+3.528kb)|BCAM(+91.5kb)|BCL3(+152.9kb)|CBLC(+112.3kb)|CLASRP(-126.1kb)|CLPTM1(-41.66kb)|GEMIN7(-166.3kb)|PPP1R37(-180.3kb)|PVRL2(+23.69kb)|RELB(-88.53kb)|TOMM40(+9.232kb)|ZNF296(-158.6kb)
15	64710827	t	c	0.8293	0.8859	0.2586	1.29512	1.14917	1.4596	0.061	2.216e-05	-+++++-+-	18.9	9.87	8	0.2743	rs4776494	CSNK1G1(+62.38kb)|KIAA0101(+37.12kb)|TRIP4(0)|ZNF609(-80.79kb)
22	43158867	t	c	0.1606	0.335	-0.2237	0.799555	0.720948	0.886732	0.0528	2.253e-05	------++-	23	10.387	8	0.2389	rs9611883	A4GALT(+41.99kb)|ARFGAP3(-33.66kb)|ATP5L2(+122.3kb)|CYB5R3(+113.5kb)|PACSIN2(-106.9kb)|POLDIP3(+147.9kb)|RNU12(+147.5kb)|RRP7B(+180.8kb)|SERHL2(+188.5kb)
5	29779618	t	c	0.2114	0.2865	0.2157	1.24073	1.12292	1.3709	0.0509	2.27e-05	++++++-++	0	4.86	8	0.7724	rs12520342	.
5	29780960	a	t	0.2116	0.2866	0.2155	1.24048	1.1227	1.37062	0.0509	2.296e-05	++++++-++	0	4.859	8	0.7725	rs16899381	.
3	100779435	t	c	0.835	0.9185	0.2684	1.30787	1.15504	1.48092	0.0634	2.299e-05	-++++++++	25.4	10.719	8	0.2181	rs66598219	ABI3BP(+67.1kb)|IMPG2(-162kb)
14	78408803	c	g	0.287	0.3533	0.1962	1.21677	1.11099	1.33262	0.0464	2.304e-05	-++++++++	0	4.065	8	0.8512	rs10135809	ADCK1(+8.506kb)|C14orf178(+172.7kb)|SNW1(+181.3kb)
22	43888228	a	g	0.4269	0.7174	0.201	1.22262	1.11394	1.34192	0.0475	2.327e-05	-++++++++	0	1.688	8	0.9891	rs144373948	EFCAB6(-36.4kb)|EFCAB6-AS1(-23.9kb)|MPPED1(0)|SCUBE1(+148.8kb)
5	29786938	t	c	0.7155	0.789	-0.2154	0.806219	0.729669	0.890799	0.0509	2.329e-05	------+--	0	4.771	8	0.7817	rs62348709	.
7	66926303	t	c	0.8101	0.8421	-0.2458	0.782079	0.697902	0.876408	0.0581	2.359e-05	-------+-	24.8	10.635	8	0.2233	rs73371081	PMS2P4(+158.9kb)|STAG3L4(+139.8kb)
5	29783759	a	g	0.2112	0.2867	0.2152	1.24011	1.12236	1.37021	0.0509	2.376e-05	++++++-++	0	4.794	8	0.7794	rs58802063	.
2	141340626	a	c	0.5061	0.5608	-0.1831	0.832685	0.764932	0.906439	0.0433	2.382e-05	-------+-	0.3	8.026	8	0.431	rs1564933	LRP1B(0)
9	111051751	t	c	0.9513	0.9749	0.511	1.66696	1.315	2.11311	0.121	2.4e-05	-++-++--+	0	6.68	8	0.5716	rs73653749	.
8	76067440	t	c	0.9345	0.9574	0.4052	1.4996	1.24215	1.81041	0.0961	2.459e-05	-++++++++	0	3.155	8	0.9242	rs55747216	CASC9(-67.91kb)|CRISPLD1(+120.6kb)
22	43893952	a	g	0.4073	0.706	0.2012	1.22287	1.11372	1.34271	0.0477	2.46e-05	-++++++++	0	1.985	8	0.9815	rs149669758	EFCAB6(-30.67kb)|EFCAB6-AS1(-18.18kb)|MPPED1(0)|SCUBE1(+154.6kb)
5	29791346	a	t	0.2107	0.2823	0.2148	1.23961	1.12169	1.36993	0.051	2.497e-05	++++++-++	0	4.695	8	0.7897	rs62348714	.
9	7545181	a	c	0.6621	0.7239	0.1956	1.21604	1.11033	1.33182	0.0464	2.499e-05	+++++++++	0	5.302	8	0.7249	rs4742372	.
1	244312459	a	c	0.6713	0.7445	-0.2101	0.810503	0.73513	0.893604	0.0498	2.502e-05	--+------	30.7	11.551	8	0.1724	rs10803180	LOC339529(+101.8kb)|ZBTB18(+91.68kb)
5	29791787	t	g	0.7175	0.7893	-0.2149	0.806622	0.729891	0.89142	0.051	2.508e-05	------+--	0	4.69	8	0.7901	rs62348728	.
3	100773483	a	c	0.8353	0.9185	0.267	1.30604	1.15343	1.47885	0.0634	2.521e-05	-+++++-++	26.3	10.856	8	0.21	rs13060849	ABI3BP(+61.15kb)|IMPG2(-167.9kb)
3	100773738	t	c	0.8353	0.9185	0.267	1.30604	1.15343	1.47885	0.0634	2.525e-05	-+++++-++	26.3	10.858	8	0.2099	rs13065684	ABI3BP(+61.4kb)|IMPG2(-167.7kb)
8	76066187	a	g	0.9345	0.9574	0.4041	1.49795	1.24103	1.80807	0.096	2.533e-05	-++++++++	0	3.196	8	0.9215	rs112916134	CASC9(-69.16kb)|CRISPLD1(+119.4kb)
5	29774817	a	t	0.7137	0.7885	-0.2143	0.807106	0.730472	0.89178	0.0509	2.551e-05	------+--	0	4.838	8	0.7747	rs11950499	.
4	930404	t	c	0.014	0.0307	-0.6616	0.516025	0.379192	0.702234	0.1572	2.565e-05	------?+-	0	5.613	7	0.5855	rs149261175	CPLX1(+110.5kb)|DGKQ(-22.27kb)|FGFRL1(-75.2kb)|GAK(+4.23kb)|IDUA(-50.38kb)|LOC100129917(+154.8kb)|PCGF3(+166kb)|RNF212(-134.9kb)|SLC26A1(-42.46kb)|TMED11P(-178.6kb)|TMEM175(0)
6	71290123	t	c	0.0981	0.1342	0.2858	1.33083	1.16499	1.52026	0.0679	2.588e-05	-+++++--+	0	7.984	8	0.4351	rs12525408	C6orf57(0)|FAM135A(+19.25kb)|SMAP1(-87.36kb)
3	100801257	t	g	0.8373	0.913	0.2645	1.30278	1.15167	1.47371	0.0629	2.608e-05	-++++++++	27.9	11.094	8	0.1965	rs16843225	ABI3BP(+88.92kb)|IMPG2(-140.1kb)
18	60264354	a	t	0.353	0.4539	0.1871	1.20575	1.10482	1.31589	0.0446	2.698e-05	+++++++++	9.3	8.824	8	0.3573	rs695059	PHLPP1(-118.3kb)|ZCCHC2(+18.54kb)
5	29771525	a	g	0.2119	0.2862	0.2137	1.23825	1.12068	1.36816	0.0509	2.699e-05	++++++-++	0	5.407	8	0.7134	rs748479	.
3	100775080	a	t	0.0816	0.1649	-0.266	0.766439	0.676878	0.86785	0.0634	2.718e-05	+-----+--	26.2	10.838	8	0.2111	rs35850913	ABI3BP(+62.75kb)|IMPG2(-166.3kb)
5	79088975	t	c	0.2869	0.3454	-0.2014	0.817585	0.744174	0.898238	0.048	2.721e-05	---+-----	1.8	8.144	8	0.4195	rs2287674	CMYA5(0)|MTX3(-183.6kb)|PAPD4(+106.5kb)
17	3759476	t	c	0.2188	0.2515	0.2278	1.25583	1.12904	1.39686	0.0543	2.755e-05	-+++++?++	0	4.853	7	0.6779	rs75141585	ATP2A3(-67.69kb)|C17orf85(+9.931kb)|CAMKK1(-4.14kb)|CTNS(+193.1kb)|EMC6(+186.5kb)|GSG2(+129.5kb)|ITGAE(+54.94kb)|P2RX1(-40.41kb)|P2RX5(+159.8kb)|P2RX5-TAX1BP3(+159.8kb)|TAX1BP3(+187.5kb)|ZZEF1(-148.3kb)
11	70900043	a	g	0.0142	0.0343	-0.6798	0.506718	0.368722	0.69636	0.1622	2.77e-05	?-----+?-	0	5.697	6	0.4579	rs12290227	MIR3664(+181.6kb)|SHANK2(0)|SHANK2-AS3(+188.8kb)
5	178662302	t	g	0.9527	0.9717	0.4966	1.64313	1.30257	2.07272	0.1185	2.779e-05	-+++++?++	0	5.123	7	0.6449	rs113960013	ADAMTS2(0)|ZNF354C(+154.6kb)
17	3760174	a	t	0.7488	0.7815	-0.2264	0.797399	0.717315	0.886424	0.054	2.783e-05	+-----?--	0	4.801	7	0.6843	rs79015800	ATP2A3(-66.99kb)|C17orf85(+10.63kb)|CAMKK1(-3.442kb)|CTNS(+193.8kb)|EMC6(+187.2kb)|GSG2(+130.2kb)|ITGAE(+55.64kb)|P2RX1(-39.71kb)|P2RX5(+160.5kb)|P2RX5-TAX1BP3(+160.5kb)|TAX1BP3(+188.2kb)|ZZEF1(-147.6kb)
14	78413938	t	c	0.647	0.7226	-0.1946	0.823164	0.751605	0.901535	0.0464	2.79e-05	+--------	0	3.985	8	0.8585	rs4537951	ADCK1(+13.64kb)|C14orf178(+177.9kb)|SNW1(+186.4kb)
3	100802220	a	g	0.0874	0.1628	-0.2629	0.768819	0.679779	0.869522	0.0628	2.792e-05	+--------	26.9	10.948	8	0.2047	rs16843229	ABI3BP(+89.89kb)|IMPG2(-139.2kb)
5	29769428	c	g	0.212	0.2861	0.2133	1.23776	1.12023	1.36761	0.0509	2.794e-05	++++++-++	0	5.462	8	0.7073	rs12654595	.
7	114682852	a	g	0.4416	0.5072	0.1805	1.19782	1.10079	1.3034	0.0431	2.797e-05	-++++++++	0	2.413	8	0.9657	rs2157948	MDFIC(+22.88kb)
7	114682603	t	g	0.4417	0.5072	0.1804	1.1977	1.10068	1.30327	0.0431	2.808e-05	-++++++++	0	2.414	8	0.9656	rs1978097	MDFIC(+22.63kb)
3	100793726	t	c	0.9243	0.9427	0.3805	1.46302	1.22426	1.74834	0.0909	2.819e-05	?++++++++	0	2.82	7	0.9012	rs77709628	ABI3BP(+81.39kb)|IMPG2(-147.7kb)
8	76058231	t	g	0.9346	0.9573	0.4002	1.49212	1.23692	1.79997	0.0957	2.868e-05	-++++++++	0	3.287	8	0.9151	rs16939036	CASC9(-77.12kb)|CRISPLD1(+111.4kb)
5	4015565	a	g	0.019	0.0483	-0.7178	0.487824	0.348493	0.682861	0.1716	2.876e-05	-----+?--	0	5.809	7	0.5622	rs141610661	.
5	29766040	t	g	0.2118	0.286	0.213	1.23738	1.1199	1.3672	0.0509	2.887e-05	++++++-++	0	5.256	8	0.7299	rs12518469	.
22	43890056	c	g	0.4248	0.7164	0.1986	1.21969	1.11127	1.3387	0.0475	2.903e-05	-++++++++	0	2.153	8	0.976	rs142806587	EFCAB6(-34.57kb)|EFCAB6-AS1(-22.08kb)|MPPED1(0)|SCUBE1(+150.7kb)
8	32633365	a	g	0.9336	0.9719	-0.501	0.605924	0.479118	0.766292	0.1198	2.911e-05	----+----	0	7.171	8	0.5183	rs117606275	NRG1(+10.81kb)
6	125654441	t	c	0.0114	0.0208	-0.8192	0.440784	0.300184	0.647239	0.196	2.927e-05	+-?------	0	2.462	7	0.9299	rs6927336	HDDC2(+31.16kb)|TPD52L1(+69.8kb)
5	29761811	t	c	0.2119	0.2859	0.2128	1.23714	1.11967	1.36693	0.0509	2.959e-05	++++++-++	0	5.323	8	0.7226	rs10940814	.
2	17139289	a	c	0.0208	0.0442	-0.5585	0.572067	0.440102	0.7436	0.1338	2.976e-05	--+---+--	5.6	8.471	8	0.3889	rs10495652	.
5	29760138	t	c	0.7143	0.788	-0.2126	0.808479	0.731715	0.893297	0.0509	2.997e-05	------+--	0	5.349	8	0.7197	rs1379053	.
7	114679703	a	g	0.4925	0.5583	-0.1797	0.835521	0.767838	0.909169	0.0431	3.011e-05	+--------	0	2.39	8	0.9667	rs12706006	MDFIC(+19.73kb)
17	3758900	t	g	0.2213	0.2529	0.2271	1.25496	1.12781	1.39643	0.0545	3.042e-05	++++++?++	0	4.996	7	0.6604	rs12450241	ATP2A3(-68.26kb)|C17orf85(+9.355kb)|CAMKK1(-4.716kb)|CTNS(+192.5kb)|EMC6(+185.9kb)|GSG2(+128.9kb)|ITGAE(+54.36kb)|P2RX1(-40.98kb)|P2RX5(+159.2kb)|P2RX5-TAX1BP3(+159.2kb)|TAX1BP3(+186.9kb)|ZZEF1(-148.8kb)
5	29763885	t	c	0.2119	0.2859	0.2125	1.23677	1.11912	1.36678	0.051	3.052e-05	++++++-++	0	5.233	8	0.7324	rs57707995	.
8	76067293	a	g	0.9348	0.9625	0.401	1.49332	1.2367	1.80318	0.0962	3.063e-05	-+++++-++	0	3.464	8	0.902	rs17299376	CASC9(-68.06kb)|CRISPLD1(+120.5kb)
5	29753138	t	c	0.7149	0.7877	-0.2126	0.808479	0.731572	0.893472	0.051	3.066e-05	------+--	0	5.391	8	0.715	rs62348666	.
13	83726211	t	c	0.8535	0.8966	-0.2789	0.756616	0.663634	0.862624	0.0669	3.096e-05	---+-----	0	4.193	8	0.8393	rs9805820	.
2	127844161	a	g	0.3588	0.4417	0.1847	1.20286	1.10282	1.31197	0.0443	3.096e-05	++-+++--+	51.9	16.618	8	0.03434	rs10929006	BIN1(0)|CYP27C1(-97.25kb)|ERCC3(-170.7kb)
16	74894976	t	c	0.152	0.1898	0.2458	1.27864	1.13901	1.43539	0.059	3.106e-05	-+++++-++	0	4.408	8	0.8185	rs56009261	FA2H(+86.25kb)|MLKL(+160.2kb)|RFWD3(+194.2kb)|WDR59(-12.49kb)|ZNRF1(-137.9kb)
3	109535474	a	c	0.9759	0.9889	0.8453	2.32868	1.56427	3.46662	0.203	3.121e-05	-++++++++	0	4.751	8	0.7838	rs76865580	.
3	100805726	t	c	0.8347	0.9072	0.2641	1.30226	1.15009	1.47457	0.0634	3.122e-05	-++++++++	27.9	11.093	8	0.1965	rs35856427	ABI3BP(+93.39kb)|IMPG2(-135.7kb)
16	74895671	t	c	0.152	0.19	0.2454	1.27813	1.13878	1.43454	0.0589	3.129e-05	-+++++-++	0	4.406	8	0.8188	rs72796671	FA2H(+86.94kb)|MLKL(+160.9kb)|RFWD3(+194.9kb)|WDR59(-11.8kb)|ZNRF1(-137.2kb)
22	43888239	a	g	0.3179	0.6486	-0.2012	0.817749	0.743886	0.898946	0.0483	3.165e-05	+--------	0	1.643	8	0.9901	rs147855710	EFCAB6(-36.38kb)|EFCAB6-AS1(-23.89kb)|MPPED1(0)|SCUBE1(+148.8kb)
4	131615634	a	t	0.6061	0.7337	-0.1983	0.820124	0.746924	0.900497	0.0477	3.214e-05	+-+---+--	0	3.165	8	0.9236	rs73851920	.
5	173567237	a	g	0.3717	0.471	-0.1842	0.831769	0.762595	0.907218	0.0443	3.232e-05	+-----+--	0	4.657	8	0.7936	rs6882322	C5orf47(+134.1kb)|CPEB4(+179.9kb)|HMP19(+31.06kb)
18	60239967	a	c	0.288	0.4244	0.19	1.20925	1.10564	1.32256	0.0457	3.242e-05	+++++++++	18.2	9.779	8	0.2809	rs5009257	PHLPP1(-142.7kb)|TNFRSF11A(+185kb)|ZCCHC2(0)
5	35508210	t	c	0.0218	0.0489	-0.5255	0.59126	0.461423	0.75763	0.1265	3.268e-05	------+--	0	4.482	8	0.8112	rs149488791	SPEF2(-109.8kb)
1	207850539	t	c	0.7666	0.8254	-0.225	0.798516	0.718039	0.888014	0.0542	3.278e-05	+--------	0	5.209	8	0.735	rs11118328	CD46(-74.84kb)|CR1(+35.43kb)|CR1L(0)|CR2(+187.3kb)|LOC148696(-141.2kb)|MIR29B2(-125.2kb)|MIR29C(-124.7kb)
22	43160257	c	g	0.6371	0.8265	0.2165	1.24172	1.12118	1.37522	0.0521	3.279e-05	++++++--+	25.4	10.724	8	0.2178	rs9611886	A4GALT(+43.38kb)|ARFGAP3(-32.27kb)|ATP5L2(+123.6kb)|CYB5R3(+114.9kb)|PACSIN2(-105.5kb)|POLDIP3(+149.3kb)|RNU12(+148.9kb)|RRP7B(+182.2kb)|SERHL2(+189.9kb)
5	29754825	a	c	0.7148	0.7878	-0.2117	0.809207	0.73223	0.894277	0.051	3.292e-05	------+--	0	5.423	8	0.7116	rs143262639	.
5	29791162	a	g	0.2125	0.2823	0.2106	1.23442	1.11765	1.36339	0.0507	3.303e-05	++++++-++	0	5.01	8	0.7565	rs73753227	.
5	29754867	t	c	0.2121	0.2852	0.2117	1.23578	1.11822	1.36569	0.051	3.309e-05	++++++-++	0	5.423	8	0.7116	rs62348669	.
13	100369916	a	g	0.9357	0.9666	0.4174	1.51801	1.24636	1.84887	0.1006	3.358e-05	-++++++++	0	5.983	8	0.6491	rs9517855	CLYBL(0)|MIR4306(+74.51kb)|TM9SF2(+153.6kb)
7	114682117	a	g	0.4944	0.5591	-0.1787	0.836357	0.768607	0.910079	0.0431	3.365e-05	+--------	0	2.399	8	0.9663	rs12113289	MDFIC(+22.15kb)
8	76052837	t	c	0.9345	0.9624	0.398	1.48884	1.23348	1.79707	0.096	3.365e-05	-+++++-++	0	3.517	8	0.8979	rs17371081	CASC9(-82.51kb)|CRISPLD1(+106kb)
18	60253930	a	g	0.6135	0.7125	-0.1884	0.828283	0.757763	0.905366	0.0454	3.367e-05	------+--	0	7.294	8	0.5052	rs3178105	PHLPP1(-128.7kb)|TNFRSF11A(+199kb)|ZCCHC2(+8.112kb)
12	132996345	a	g	0.147	0.1874	0.3323	1.39417	1.19161	1.63117	0.0801	3.378e-05	++++++?+?	48.3	11.595	6	0.07163	rs55744153	FBRSL1(-70.81kb)|GALNT9(+90.44kb)|LOC100130238(+138.9kb)|LRCOL1(-183.4kb)|P2RX2(-199.1kb)
5	29753761	t	c	0.7149	0.7878	-0.2115	0.809369	0.732377	0.894456	0.051	3.384e-05	------+--	0	5.354	8	0.7192	rs1379056	.
14	76856525	a	g	0.0207	0.0378	-0.5679	0.566714	0.433259	0.741278	0.137	3.41e-05	+----+-+-	18.4	9.805	8	0.279	rs7144834	ESRRB(0)|GPATCH2L(+187.4kb)|RNU6-19P(+119kb)|RNU6-31P(+119kb)
13	83763528	a	g	0.9027	0.9217	-0.3249	0.7226	0.619551	0.842788	0.0785	3.494e-05	---------	0	7.042	8	0.5321	rs75142229	.
3	100801179	a	c	0.8373	0.913	0.2608	1.29797	1.1472	1.46856	0.063	3.5e-05	-++++++++	27.5	11.04	8	0.1994	rs62274066	ABI3BP(+88.84kb)|IMPG2(-140.2kb)
6	40609393	a	g	0.5578	0.632	-0.2166	0.805252	0.726797	0.892176	0.0523	3.502e-05	------+--	0	6.703	8	0.569	rs35248939	LRFN2(+54.27kb)
13	83760081	a	g	0.9027	0.9218	-0.3246	0.722816	0.619737	0.843041	0.0785	3.55e-05	---------	0	7.087	8	0.5273	rs75117573	.
16	74915337	c	g	0.1523	0.1851	0.2423	1.27418	1.13592	1.42926	0.0586	3.555e-05	-+-+++--+	6.2	8.526	8	0.3838	rs72796696	FA2H(+106.6kb)|MLKL(+180.5kb)|WDR59(0)|ZNRF1(-117.6kb)
21	27061565	t	c	0.3469	0.4023	0.187	1.20563	1.10341	1.31731	0.0452	3.563e-05	-+++++-++	0	3.446	8	0.9033	rs2829867	APP(-191.3kb)|ATP5J(-35.22kb)|GABPA(-45.69kb)|JAM2(0)|LINC00515(+106kb)|MIR155(+115.2kb)|MIR155HG(+114.1kb)|MRPL39(+81.76kb)
22	43888353	a	g	0.3514	0.6823	0.1998	1.22116	1.11086	1.34241	0.0483	3.576e-05	-++++++++	0	1.645	8	0.99	rs141389097	EFCAB6(-36.27kb)|EFCAB6-AS1(-23.78kb)|MPPED1(0)|SCUBE1(+149kb)
14	78405980	t	g	0.6448	0.7264	-0.1913	0.825885	0.754237	0.904338	0.0463	3.578e-05	+--------	0	3.673	8	0.8854	rs28524502	ADCK1(+5.683kb)|C14orf178(+169.9kb)|SNW1(+178.5kb)
13	83756973	c	g	0.9027	0.9219	-0.3243	0.723033	0.619923	0.843294	0.0785	3.605e-05	---------	0	7.132	8	0.5225	rs1473841	.
2	17138796	t	c	0.956	0.9791	0.5524	1.73742	1.33689	2.25794	0.1337	3.619e-05	++-+++-++	4.4	8.366	8	0.3986	rs2341501	.
16	74916505	a	c	0.1522	0.1846	0.2419	1.27367	1.13547	1.42869	0.0586	3.627e-05	-+-+++--+	5.4	8.46	8	0.3899	rs12446147	FA2H(+107.8kb)|MLKL(+181.7kb)|WDR59(0)|ZNRF1(-116.4kb)
11	65867370	a	c	0.9736	0.9839	0.67	1.95424	1.42203	2.68562	0.1622	3.632e-05	+++++-+?+	0	3.213	7	0.8646	rs145828205	BANF1(+95.75kb)|C11orf68(+180.8kb)|CATSPER1(+73.38kb)|CNIH2(-178.3kb)|CST6(+86.39kb)|DRAP1(+178.3kb)|EIF1AD(+97.73kb)|FOSL1(+199.4kb)|GAL3ST3(+50.72kb)|KLC2(-157.4kb)|PACS1(0)|RAB1B(-168.7kb)|SART1(+119.8kb)|SF3B2(+30.99kb)|TMEM151A(-192kb)|TSGA10IP(+139.9kb)|YIF1A(-184.7kb)
16	74902848	a	g	0.8061	0.8496	-0.2413	0.785606	0.700638	0.880878	0.0584	3.652e-05	+-+---+--	0	5.285	8	0.7268	rs72796678	FA2H(+94.12kb)|MLKL(+168.1kb)|WDR59(-4.622kb)|ZNRF1(-130.1kb)
6	75394245	t	g	0.0208	0.0435	-0.5856	0.556772	0.421589	0.735301	0.1419	3.669e-05	-------+-	0	7.414	8	0.4927	rs80058635	.
5	29768041	a	c	0.212	0.2861	0.2101	1.2338	1.11665	1.36324	0.0509	3.714e-05	++++++-++	0	5.156	8	0.7408	rs16899339	.
18	60253836	a	g	0.6134	0.7122	-0.1871	0.829361	0.758749	0.906544	0.0454	3.757e-05	------+--	0	7.322	8	0.5024	rs1052317	PHLPP1(-128.8kb)|TNFRSF11A(+198.9kb)|ZCCHC2(+8.018kb)
3	28887146	a	c	0.42	0.4771	0.1878	1.20659	1.10343	1.3194	0.0456	3.786e-05	-++++++++	0	3.422	8	0.9052	rs7614435	LINC00693(+87.32kb)
5	132799163	t	c	0.0144	0.0551	0.449	1.56674	1.26536	1.93991	0.109	3.808e-05	++-+++--+	31.7	11.715	8	0.1644	rs31340	FSTL4(0)|MIR1289-2(+35.76kb)
22	18418276	t	c	0.4664	0.5757	0.1787	1.19566	1.09816	1.30182	0.0434	3.838e-05	+++++++++	19.8	9.98	8	0.2664	rs9605436	BID(+160.8kb)|FLJ41941(-93.87kb)|LINC00528(+156kb)|MICAL3(0)|MIR648(-45.36kb)|MIR3198-1(+171.3kb)|PEX26(-142.4kb)|TUBA8(-175.2kb)
22	43898315	a	g	0.6511	0.8509	0.2223	1.24895	1.12351	1.38838	0.054	3.845e-05	+++++++++	0	6.822	8	0.556	rs28485670	EFCAB6(-26.31kb)|EFCAB6-AS1(-13.82kb)|MPPED1(0)|SCUBE1(+158.9kb)
18	60253788	a	g	0.6134	0.7122	-0.1869	0.829527	0.758901	0.906725	0.0454	3.851e-05	------+--	0	7.33	8	0.5015	rs1052316	PHLPP1(-128.9kb)|TNFRSF11A(+198.8kb)|ZCCHC2(+7.97kb)
13	83749327	a	c	0.9027	0.9221	-0.3228	0.724119	0.620975	0.844394	0.0784	3.873e-05	---------	0	7.233	8	0.5117	rs77956737	.
5	29731561	a	g	0.7166	0.7845	-0.2115	0.809369	0.731803	0.895157	0.0514	3.902e-05	------+--	0	4.341	8	0.8251	rs34070811	.
13	83737249	t	c	0.0781	0.0981	0.3215	1.3792	1.18321	1.60765	0.0782	3.92e-05	+++++++++	0	7.302	8	0.5044	rs4558289	.
4	869446	c	g	0.0153	0.0327	-0.6234	0.536119	0.398305	0.721615	0.1516	3.935e-05	----+-?+-	0	5.721	7	0.5726	rs17165126	CPLX1(+49.5kb)|DGKQ(-83.22kb)|FGFRL1(-136.2kb)|GAK(0)|IDUA(-111.3kb)|LOC100129917(+93.81kb)|MFSD7(+186.5kb)|MYL5(+193.6kb)|PCGF3(+105kb)|RNF212(-195.8kb)|SLC26A1(-103.4kb)|TMEM175(-56.82kb)
5	29734080	a	c	0.2152	0.2833	0.2112	1.23516	1.11679	1.36608	0.0514	3.953e-05	++++++-++	0	4.434	8	0.816	rs2124720	.
11	70901471	t	c	0.9316	0.9816	0.4769	1.61107	1.28318	2.02275	0.1161	3.989e-05	++++++--+	0	4.075	8	0.8503	rs3934692	MIR3664(+183kb)|SHANK2(0)|SHANK2-AS3(+190.3kb)
18	60255396	a	g	0.2874	0.384	0.1869	1.20551	1.10265	1.31795	0.0455	3.99e-05	++++++-++	0	7.192	8	0.516	rs8098366	PHLPP1(-127.3kb)|ZCCHC2(+9.578kb)
4	77455181	a	g	0.8069	0.8587	-0.2398	0.786785	0.70169	0.8822	0.0584	4.013e-05	---------	0	7.817	8	0.4516	rs10024176	CCDC158(+126.7kb)|MIR4450(-39.54kb)|SHROOM3(0)
1	82982713	t	g	0.014	0.0271	0.7358	2.08715	1.46898	2.96546	0.1792	4.02e-05	?+-+++-?+	9	6.596	6	0.3598	rs2148639	.
7	152807645	a	t	0.9429	0.974	0.6924	1.99851	1.43612	2.78113	0.1686	4.021e-05	++++++?-+	0	3.718	7	0.8117	rs4999091	.
18	60253371	a	g	0.6135	0.7124	-0.1865	0.829859	0.759205	0.907088	0.0454	4.035e-05	------+--	0	7.151	8	0.5205	rs7231250	PHLPP1(-129.3kb)|TNFRSF11A(+198.4kb)|ZCCHC2(+7.553kb)
5	29845489	a	g	0.7825	0.8193	-0.2254	0.798197	0.716767	0.888877	0.0549	4.044e-05	---+--+--	0	5.97	8	0.6506	rs12656630	.
5	29848809	t	c	0.7825	0.8195	-0.2253	0.798277	0.716839	0.888966	0.0549	4.055e-05	---+--+--	0	5.995	8	0.6478	rs72745293	.
11	70913841	t	c	0.9642	0.9872	0.6781	1.97013	1.42519	2.72343	0.1652	4.062e-05	?+++++-?+	12	6.821	6	0.3377	rs11232537	MIR3664(+195.4kb)|SHANK2(0)
5	29848798	a	t	0.1806	0.2175	0.2252	1.25257	1.12479	1.39487	0.0549	4.083e-05	+++-++-++	0	5.988	8	0.6486	rs16899572	.
5	29817837	t	g	0.1827	0.2228	0.2255	1.25295	1.12491	1.39557	0.055	4.093e-05	+++-++-++	0	6.427	8	0.5995	rs2045347	.
5	29849609	t	c	0.1805	0.2175	0.225	1.25232	1.12456	1.39459	0.0549	4.131e-05	+++-++-++	0	5.998	8	0.6474	rs10940827	.
16	74915686	a	g	0.1541	0.1912	0.2381	1.26884	1.13227	1.42187	0.0581	4.145e-05	-+-+++-++	0	6.612	8	0.579	rs12445200	FA2H(+107kb)|MLKL(+180.9kb)|WDR59(0)|ZNRF1(-117.2kb)
9	1672013	a	g	0.626	0.6906	-0.1874	0.829112	0.758076	0.906805	0.0457	4.15e-05	---------	0	4.474	8	0.8121	rs4457385	.
16	79980410	a	c	0.1338	0.2119	-0.225	0.798516	0.717054	0.889233	0.0549	4.153e-05	-------+-	0	3.542	8	0.8959	rs4555167	.
16	74913544	c	g	0.1504	0.1918	0.2389	1.26985	1.13273	1.42357	0.0583	4.167e-05	-+-+++-++	0	5.587	8	0.6934	rs8062012	FA2H(+104.8kb)|MLKL(+178.8kb)|WDR59(0)|ZNRF1(-119.4kb)
4	40338720	a	g	0.5195	0.5587	-0.1802	0.835103	0.766102	0.910319	0.044	4.184e-05	--+---+--	26.1	10.821	8	0.212	rs6812832	CHRNA9(0)|MIR4802(-165.3kb)|N4BP2(+178.8kb)|RBM47(-86.55kb)|RHOH(+92.34kb)
16	74897248	t	g	0.81	0.8481	-0.241	0.785842	0.700299	0.881834	0.0588	4.195e-05	+-----+--	0	5.07	8	0.7501	rs12447968	FA2H(+88.52kb)|MLKL(+162.5kb)|RFWD3(+196.5kb)|WDR59(-10.22kb)|ZNRF1(-135.7kb)
5	29848293	a	g	0.7825	0.8194	-0.2249	0.798596	0.717126	0.889322	0.0549	4.2e-05	---+--+--	0	5.895	8	0.659	rs1961285	.
16	74920191	a	g	0.1524	0.1902	0.2369	1.26731	1.13158	1.41933	0.0578	4.221e-05	-+-+++-++	0	6.474	8	0.5943	rs14308	FA2H(+111.5kb)|MLKL(+185.4kb)|WDR59(0)|ZNRF1(-112.7kb)
5	29851944	c	g	0.1806	0.2175	0.2247	1.25195	1.12423	1.39418	0.0549	4.276e-05	+++-++-++	0	6.02	8	0.645	rs59404281	.
16	74921123	t	g	0.8103	0.8458	-0.2376	0.788518	0.703649	0.883624	0.0581	4.281e-05	+-+---+--	0	6.782	8	0.5603	rs72798613	FA2H(+112.4kb)|MLKL(+186.3kb)|WDR59(0)|ZNRF1(-111.8kb)
19	55007638	a	g	0.0816	0.1576	-0.2699	0.763456	0.670816	0.868889	0.066	4.285e-05	------?--	0	0.832	7	0.9971	rs8100179	CDC42EP5(+23.22kb)|KIR3DX1(-36.27kb)|LAIR1(+130.9kb)|LAIR2(-6.374kb)|LENG8(+34.44kb)|LENG9(+32.74kb)|LILRA1(-97.4kb)|LILRA2(-77.62kb)|LILRA4(+157.2kb)|LILRA5(+183.2kb)|LILRB1(-120.7kb)|LILRB4(-166.5kb)|TTYH1(+59.74kb)
16	74896957	c	g	0.81	0.8481	-0.2406	0.786156	0.700579	0.882186	0.0588	4.311e-05	+-----+--	0	4.968	8	0.761	rs72796672	FA2H(+88.23kb)|MLKL(+162.2kb)|RFWD3(+196.2kb)|WDR59(-10.51kb)|ZNRF1(-136kb)
22	18421899	a	g	0.4242	0.5314	-0.1771	0.837696	0.769536	0.911894	0.0433	4.349e-05	---------	18.7	9.835	8	0.2768	rs5992907	BID(+164.5kb)|FLJ41941(-90.25kb)|LINC00528(+159.7kb)|MICAL3(0)|MIR648(-41.73kb)|MIR3198-1(+174.9kb)|PEX26(-138.8kb)|TUBA8(-171.6kb)
5	29855564	t	g	0.1809	0.2176	0.2245	1.2517	1.124	1.3939	0.0549	4.351e-05	+++-++-++	0	6.057	8	0.6408	rs12514208	.
5	29853071	a	c	0.1808	0.2176	0.2244	1.25157	1.12389	1.39376	0.0549	4.373e-05	+++-++-++	0	6.04	8	0.6427	rs1428312	.
5	29743086	a	g	0.7161	0.7858	-0.2094	0.811071	0.733485	0.896863	0.0513	4.397e-05	------+--	0	4.671	8	0.7921	rs10940812	.
2	17140452	a	t	0.9556	0.979	0.5449	1.72444	1.32768	2.23975	0.1334	4.398e-05	++-+++-++	2.1	8.171	8	0.417	rs11096711	.
3	100804841	t	g	0.0893	0.1634	-0.2591	0.771746	0.681565	0.873859	0.0634	4.422e-05	+--------	30.5	11.513	8	0.1743	rs13086519	ABI3BP(+92.51kb)|IMPG2(-136.5kb)
6	2053131	a	c	0.0223	0.0397	0.5539	1.74003	1.33392	2.26976	0.1356	4.425e-05	?++-++-++	0	5.957	7	0.5448	rs12202115	GMDS(0)|LOC100508120(-192.9kb)
18	60251980	t	c	0.6153	0.7123	-0.1855	0.830689	0.759964	0.907995	0.0454	4.427e-05	------+--	0	6.99	8	0.5377	rs8096512	PHLPP1(-130.7kb)|TNFRSF11A(+197kb)|ZCCHC2(+6.162kb)
5	29821235	t	c	0.1815	0.2228	0.225	1.25232	1.12412	1.39514	0.0551	4.435e-05	+++-++-++	0	5.918	8	0.6564	rs72745258	.
5	29841519	a	g	0.1809	0.2175	0.2239	1.25095	1.12355	1.39279	0.0548	4.439e-05	+++-++-++	0	5.925	8	0.6556	rs11748565	.
5	173567955	c	g	0.3568	0.4489	-0.1819	0.833685	0.763902	0.909842	0.0446	4.458e-05	+-----+--	0	5.484	8	0.7048	rs7726844	C5orf47(+134.8kb)|CPEB4(+180.6kb)|HMP19(+31.77kb)
18	60228138	t	c	0.6113	0.7108	-0.1849	0.831187	0.760569	0.908362	0.0453	4.53e-05	------+--	0	7.217	8	0.5134	rs1515681	PHLPP1(-154.5kb)|TNFRSF11A(+173.2kb)|ZCCHC2(0)
5	29816239	a	t	0.1818	0.2228	0.224	1.25107	1.12344	1.3932	0.0549	4.547e-05	+++-++-++	0	5.688	8	0.6821	rs72745253	.
18	60226545	a	g	0.6112	0.7107	-0.1849	0.831187	0.76042	0.90854	0.0454	4.557e-05	------+--	0	7.184	8	0.5169	rs8084879	PHLPP1(-156.1kb)|TNFRSF11A(+171.6kb)|ZCCHC2(0)
5	29818614	t	c	0.1817	0.2228	0.2243	1.25145	1.12356	1.39389	0.055	4.56e-05	+++-++-++	0	5.718	8	0.6788	rs72745256	.
9	1706565	c	g	0.6408	0.7027	-0.1878	0.82878	0.757179	0.907153	0.0461	4.56e-05	---------	0	6.054	8	0.6411	rs2485164	.
5	29841276	t	g	0.7825	0.8192	-0.2236	0.799635	0.718199	0.890304	0.0548	4.578e-05	---+--+--	0	5.821	8	0.6673	rs10940826	.
5	29817539	c	g	0.7772	0.8184	-0.2243	0.799075	0.717416	0.89003	0.055	4.591e-05	---+--+--	0	5.872	8	0.6615	rs58169451	.
16	79981129	t	g	0.2999	0.3292	-0.1904	0.826628	0.754325	0.905862	0.0467	4.605e-05	+--------	0	2.608	8	0.9565	rs4243188	.
1	244309952	t	c	0.6683	0.7435	-0.1997	0.818976	0.743835	0.901708	0.0491	4.735e-05	--+------	26.4	10.868	8	0.2093	rs1011913	LOC339529(+99.33kb)|ZBTB18(+89.17kb)
18	60247706	t	c	0.2879	0.3855	0.1845	1.20262	1.10023	1.31454	0.0454	4.76e-05	++++++-++	0	6.866	8	0.5512	rs11152351	PHLPP1(-135kb)|TNFRSF11A(+192.8kb)|ZCCHC2(+1.888kb)
5	29838192	a	g	0.7825	0.819	-0.2234	0.799795	0.718202	0.890657	0.0549	4.76e-05	---+--+--	0	5.846	8	0.6645	rs11949026	.
5	29835906	t	c	0.7825	0.8189	-0.2241	0.799235	0.717418	0.890383	0.0551	4.773e-05	---+--+--	0	5.871	8	0.6617	rs12514235	.
7	114684099	t	c	0.4795	0.5326	-0.1748	0.839625	0.771761	0.913456	0.043	4.792e-05	+------+-	0	3.379	8	0.9084	rs2520596	MDFIC(+24.13kb)
15	56218685	c	g	0.9774	0.985	0.6968	2.00732	1.43456	2.80876	0.1714	4.799e-05	?++++-+++	0	6.439	7	0.4896	rs144699173	NEDD4(0)|PRTG(+183.5kb)|RFX7(-164kb)
5	29839458	a	g	0.1809	0.2175	0.2229	1.2497	1.12243	1.3914	0.0548	4.816e-05	+++-++-++	0	5.735	8	0.6769	rs11956675	.
18	59154121	a	g	0.0104	0.0162	0.9905	2.69258	1.67004	4.34121	0.2437	4.827e-05	?++-++-++	0	6.15	7	0.5223	rs117170814	CDH20(-3.653kb)
1	244309299	a	g	0.2554	0.3281	0.1991	1.2203	1.10856	1.34331	0.049	4.827e-05	++-+-++++	26.9	10.94	8	0.2051	rs6695226	LOC339529(+98.68kb)|ZBTB18(+88.52kb)
9	1646654	t	c	0.6257	0.6793	-0.1842	0.831769	0.761102	0.908998	0.0453	4.829e-05	---------	0	3.317	8	0.9129	rs702192	.
5	29740530	c	g	0.2145	0.2837	0.2085	1.23183	1.11399	1.36213	0.0513	4.856e-05	++++++-++	0	4.743	8	0.7847	rs56140101	.
2	17141196	a	g	0.0209	0.0445	-0.5418	0.5817	0.447865	0.75553	0.1334	4.882e-05	--+---+--	3.1	8.254	8	0.4091	rs112718113	.
22	43889116	t	c	0.2578	0.5165	-0.1931	0.8244	0.751112	0.904837	0.0475	4.883e-05	+-----+--	0	4.034	8	0.854	rs4073965	EFCAB6(-35.51kb)|EFCAB6-AS1(-23.02kb)|MPPED1(0)|SCUBE1(+149.7kb)
16	74917952	t	c	0.8096	0.8461	-0.2353	0.790334	0.705546	0.885311	0.0579	4.892e-05	+-+---+--	0	6.505	8	0.5908	rs72798603	FA2H(+109.2kb)|MLKL(+183.2kb)|WDR59(0)|ZNRF1(-115kb)
5	29829931	c	g	0.7825	0.8187	-0.2244	0.798995	0.716922	0.890465	0.0553	4.916e-05	---+--+--	0	5.848	8	0.6643	rs12655040	.
5	29836755	a	g	0.181	0.2175	0.2235	1.25045	1.12266	1.39278	0.055	4.925e-05	+++-++-++	0	5.837	8	0.6655	rs12522029	.
5	29828447	t	c	0.7772	0.8186	-0.2242	0.799155	0.717206	0.890468	0.0552	4.926e-05	---+--+--	0	5.9	8	0.6584	rs2124716	.
16	74918564	a	g	0.1538	0.1903	0.2351	1.26504	1.12932	1.41706	0.0579	4.942e-05	-+-+++-++	0	6.504	8	0.591	rs72798608	FA2H(+109.8kb)|MLKL(+183.8kb)|WDR59(0)|ZNRF1(-114.4kb)
11	95719056	t	c	0.3066	0.3586	-0.1923	0.825059	0.751861	0.905384	0.0474	4.945e-05	+--------	0	7.943	8	0.4391	rs2509080	CEP57(+153.2kb)|FAM76B(+196.1kb)|MAML2(0)|MTMR2(+61.68kb)
5	29831694	a	g	0.7825	0.8188	-0.2242	0.799155	0.717066	0.890643	0.0553	4.965e-05	---+--+--	0	5.86	8	0.663	rs10940824	.
9	1673163	c	g	0.3083	0.3744	0.1857	1.20406	1.10068	1.31715	0.0458	4.971e-05	+++++++++	0	4.253	8	0.8336	rs1923922	.
7	137490722	a	g	0.923	0.9462	-0.4219	0.6558	0.534865	0.804077	0.104	4.98e-05	------?--	0	4.754	7	0.69	rs73152547	CREB3L2(-69kb)|DGKI(0)|LOC100130880(-147.4kb)
6	75398835	c	g	0.0208	0.0435	-0.5732	0.563719	0.427352	0.7436	0.1413	4.993e-05	-------+-	0	7.313	8	0.5033	rs56285624	.
15	70845589	a	g	0.0153	0.0323	-0.7053	0.49396	0.35129	0.694574	0.1739	5.005e-05	---+-+-+-	12.7	9.163	8	0.3287	rs117468301	UACA(-101.3kb)
13	108673981	a	g	0.2592	0.4241	-0.1849	0.831187	0.760122	0.908897	0.0456	5.03e-05	+-----+--	0	3.973	8	0.8596	rs9520717	ABHD13(-196.8kb)|FAM155A(+154.5kb)|LIG4(-185.8kb)
16	74918298	a	g	0.1539	0.1904	0.2348	1.26466	1.12898	1.41663	0.0579	5.077e-05	-+-+++-++	0	6.485	8	0.5931	rs113321191	FA2H(+109.6kb)|MLKL(+183.5kb)|WDR59(0)|ZNRF1(-114.6kb)
18	60238201	t	c	0.288	0.3865	0.1833	1.20117	1.09912	1.3127	0.0453	5.17e-05	++++++-++	0	7.24	8	0.511	rs7232024	PHLPP1(-144.5kb)|TNFRSF11A(+183.3kb)|ZCCHC2(0)
6	105079348	a	c	0.0885	0.1402	-0.2686	0.764449	0.671162	0.870702	0.0664	5.175e-05	------+--	0	4.176	8	0.8409	rs67435421	HACE1(-96.62kb)
14	93132080	c	g	0.2914	0.3968	-0.2126	0.808479	0.729424	0.896103	0.0525	5.202e-05	---------	0	3.456	8	0.9026	rs12590630	GOLGA5(-128.6kb)|LGMN(-38.07kb)|RIN3(0)|SLC24A4(+164.3kb)
4	1011811	t	c	0.961	0.9829	0.6248	1.86787	1.38013	2.52799	0.1544	5.206e-05	++++++?-+	0	4.351	7	0.7386	rs114958149	CPLX1(+191.9kb)|CTBP1(-193.4kb)|DGKQ(+44.46kb)|FGFRL1(0)|GAK(+85.64kb)|IDUA(+13.49kb)|LOC100130872(-177.8kb)|RNF212(-53.45kb)|SLC26A1(+24.58kb)|SPON2(-148.9kb)|TMED11P(-97.17kb)|TMEM175(+59.37kb)
16	79968844	c	g	0.6615	0.6895	0.1876	1.20635	1.10148	1.3212	0.0464	5.207e-05	+++++++++	0	2.526	8	0.9605	rs4506912	.
19	55008503	t	g	0.0812	0.1575	-0.2697	0.763609	0.670031	0.870256	0.0667	5.208e-05	------?--	0	0.902	7	0.9963	rs111555481	CDC42EP5(+24.08kb)|KIR3DX1(-35.4kb)|LAIR1(+131.8kb)|LAIR2(-5.509kb)|LENG8(+35.31kb)|LENG9(+33.61kb)|LILRA1(-96.54kb)|LILRA2(-76.75kb)|LILRA4(+158.1kb)|LILRA5(+184.1kb)|LILRB1(-119.9kb)|LILRB4(-165.6kb)|TTYH1(+60.6kb)
13	83735474	a	c	0.1033	0.1425	0.2713	1.31167	1.15003	1.49603	0.0671	5.217e-05	+++-+++++	0	4.701	8	0.789	rs57878701	.
16	79975168	c	g	0.6639	0.6917	0.1883	1.2072	1.10204	1.32239	0.0465	5.228e-05	-++++++++	0	2.462	8	0.9635	rs7192042	.
9	1672167	t	g	0.309	0.3755	0.1849	1.2031	1.10002	1.31584	0.0457	5.284e-05	+++++++++	0	4.542	8	0.8053	rs2485180	.
16	79979968	t	c	0.671	0.6999	0.1888	1.2078	1.10216	1.32357	0.0467	5.291e-05	-++++++++	0	2.699	8	0.9518	rs4243187	.
12	26595988	a	g	0.1242	0.1806	0.2602	1.29719	1.14337	1.47171	0.0644	5.3e-05	++-++++++	0	7.695	8	0.4639	rs7974048	ITPR2(0)
9	1663754	a	g	0.3062	0.3715	0.1846	1.20274	1.09969	1.31544	0.0457	5.33e-05	+++++++++	0	4.512	8	0.8082	rs515112	.
18	60237388	a	g	0.288	0.3866	0.1829	1.20069	1.09868	1.31218	0.0453	5.367e-05	++++++-++	0	7.353	8	0.499	rs8096750	PHLPP1(-145.3kb)|TNFRSF11A(+182.4kb)|ZCCHC2(0)
16	79980425	a	t	0.2986	0.3276	-0.1889	0.827869	0.755309	0.9074	0.0468	5.41e-05	+--------	0	2.513	8	0.9611	rs4258627	.
2	212963295	c	g	0.798	0.8274	0.2283	1.25646	1.12475	1.4036	0.0565	5.41e-05	+++++++++	0	6.735	8	0.5655	rs4319888	ERBB4(0)
16	79979756	a	t	0.2638	0.3085	-0.1939	0.82374	0.749777	0.905	0.048	5.414e-05	---------	0	2.296	8	0.9706	rs16951730	.
5	29820723	a	g	0.7772	0.8184	-0.2222	0.800755	0.718783	0.892076	0.0551	5.447e-05	---+--+--	0	5.878	8	0.6609	rs12519359	.
18	60240333	t	c	0.2881	0.3862	0.1827	1.20045	1.09846	1.31192	0.0453	5.459e-05	++++++-++	0	7.061	8	0.53	rs10503075	PHLPP1(-142.3kb)|TNFRSF11A(+185.4kb)|ZCCHC2(0)
2	17159208	a	g	0.0207	0.0464	-0.5378	0.584032	0.449748	0.758409	0.1333	5.503e-05	--+---+--	3.1	8.258	8	0.4087	rs11096714	.
9	1672817	a	c	0.3082	0.3745	0.1845	1.20262	1.09936	1.31557	0.0458	5.564e-05	+++++++++	0	4.423	8	0.8171	rs2485181	.
1	244313495	a	g	0.2554	0.3267	0.202	1.22385	1.10938	1.35012	0.0501	5.59e-05	++-++++++	36	12.505	8	0.1301	rs6690999	LOC339529(+102.9kb)|ZBTB18(+92.72kb)
9	30090390	t	c	0.8613	0.8973	-0.2886	0.749312	0.651202	0.862203	0.0716	5.622e-05	------+--	0	6.113	8	0.6345	rs72720773	.
8	76045002	a	c	0.9334	0.9622	0.3854	1.4702	1.21875	1.77353	0.0957	5.643e-05	-+++++-++	0	3.488	8	0.9001	rs11781828	CASC9(-90.35kb)|CRISPLD1(+98.21kb)
1	244312747	a	g	0.2554	0.3266	0.2012	1.22287	1.10871	1.34878	0.05	5.647e-05	++-++++++	31.7	11.718	8	0.1642	rs12735907	LOC339529(+102.1kb)|ZBTB18(+91.97kb)
16	79977250	t	c	0.2661	0.3145	-0.1924	0.824977	0.751197	0.906004	0.0478	5.65e-05	---------	0	2.152	8	0.976	rs6564718	.
11	65349037	a	g	0.014	0.0281	-0.5875	0.555715	0.417503	0.739681	0.1459	5.668e-05	-----+?+-	40	11.663	7	0.1122	rs74684453	AP5B1(-192.3kb)|EHBP1L1(0)|FAM89B(+7.368kb)|FRMD8(+168kb)|KAT5(-130.4kb)|KCNK7(-11.29kb)|LTBP3(+23.34kb)|MALAT1(+75.1kb)|MAP3K11(-16.19kb)|MIR548AR(+66.21kb)|MIR612(+137kb)|MIR4489(-67.62kb)|MIR4690(-54.74kb)|NEAT1(+155kb)|PCNXL3(-34.74kb)|RELA(-72.03kb)|RNASEH2C(-136.1kb)|SCYL1(+42.86kb)|SIPA1(-56.54kb)|SLC25A45(+197.9kb)|SSSCA1(+9.798kb)|SSSCA1-AS1(+11.15kb)
5	29807165	a	t	0.1821	0.2224	0.2207	1.24695	1.11996	1.38834	0.0548	5.674e-05	+++-++-++	0	6.063	8	0.6402	rs10940821	.
9	1709769	c	g	0.6376	0.6995	-0.1852	0.830938	0.759299	0.909337	0.046	5.699e-05	---------	0	6.53	8	0.5881	rs476623	.
6	147242290	a	g	0.5876	0.7025	0.1849	1.2031	1.09959	1.31635	0.0459	5.704e-05	+++-+-+++	43.8	14.226	8	0.07607	rs6928486	ADGB(+105.7kb)|LOC729176(+117.3kb)|STXBP5-AS1(0)
5	173569955	t	c	0.5634	0.6416	0.179	1.19602	1.09612	1.30502	0.0445	5.715e-05	-+++++-++	0	6.271	8	0.6169	rs6879648	C5orf47(+136.8kb)|CPEB4(+182.6kb)|HMP19(+33.77kb)
9	1672928	c	g	0.6253	0.6913	-0.1841	0.831853	0.760432	0.909981	0.0458	5.715e-05	---------	0	4.402	8	0.8192	rs4412414	.
5	29828882	t	c	0.7773	0.8201	-0.2225	0.800515	0.718286	0.892158	0.0553	5.824e-05	---+--+--	0	5.721	8	0.6784	rs12518960	.
2	187202077	c	g	0.9274	0.9703	0.4692	1.59871	1.27159	2.00999	0.1168	5.861e-05	+++++++++	0	2.775	8	0.9477	rs76601940	ZC3H15(-148.8kb)
2	17161093	a	g	0.0207	0.0465	-0.536	0.585084	0.45047	0.759925	0.1334	5.865e-05	--+---+--	2.7	8.221	8	0.4122	rs4832690	.
16	79977386	a	t	0.1312	0.2196	-0.219	0.803322	0.721935	0.893883	0.0545	5.867e-05	---------	0	3.219	8	0.9199	rs6564719	.
5	29857857	a	g	0.1816	0.2227	0.2203	1.24645	1.11951	1.38778	0.0548	5.911e-05	+++-++-++	0	6.009	8	0.6462	rs10755243	.
1	244312727	t	c	0.2554	0.3268	0.2006	1.22214	1.10827	1.34771	0.0499	5.92e-05	++-+-++++	32.1	11.783	8	0.1611	rs1890664	LOC339529(+102.1kb)|ZBTB18(+91.95kb)
16	88810355	t	c	0.0147	0.0294	-0.6839	0.504645	0.36143	0.704609	0.1703	5.928e-05	--+---?--	0	3.816	7	0.8007	rs117960991	APRT(-65.52kb)|CBFA2T3(-130.9kb)|CDT1(-59.83kb)|CTU2(+28.57kb)|CYBA(+92.86kb)|GALNS(-69.79kb)|IL17C(+103.5kb)|LOC100289580(+2.522kb)|MIR4722(+27.61kb)|MVD(+80.86kb)|PABPN1L(-119.4kb)|PIEZO1(0)|RNF166(+37.53kb)|SNAI3(+57.47kb)|SNAI3-AS1(+56.76kb)|TRAPPC2L(-113.2kb)|ZC3H18(+112kb)
5	29856964	t	c	0.1816	0.2226	0.2202	1.24633	1.1194	1.38764	0.0548	5.935e-05	+++-++-++	0	6.028	8	0.6441	rs75462900	.
16	79975391	t	g	0.3092	0.3369	-0.1862	0.830108	0.757945	0.90914	0.0464	5.948e-05	+--------	0	2.283	8	0.9711	rs9319545	.
1	244312762	t	c	0.2555	0.3272	0.2006	1.22214	1.10805	1.34797	0.05	5.951e-05	++-++++++	32.6	11.873	8	0.1569	rs1890665	LOC339529(+102.1kb)|ZBTB18(+91.98kb)
5	29858008	t	c	0.7773	0.8183	-0.2202	0.802358	0.720645	0.893336	0.0548	5.954e-05	---+--+--	0	6.025	8	0.6444	rs10940830	.
5	29858432	t	c	0.1817	0.2227	0.2201	1.2462	1.11929	1.38751	0.0548	5.968e-05	+++-++-++	0	6.026	8	0.6443	rs60259528	.
5	29858452	c	g	0.7773	0.8183	-0.2201	0.802439	0.720718	0.893426	0.0548	5.975e-05	---+--+--	0	6.027	8	0.6442	rs60610145	.
2	212959767	t	c	0.1743	0.2027	-0.2262	0.797559	0.714092	0.890782	0.0564	5.979e-05	---------	0	6.648	8	0.5751	rs12618100	ERBB4(0)
2	212959330	c	g	0.7974	0.8257	0.2262	1.25383	1.12261	1.40038	0.0564	5.988e-05	+++++++++	0	6.653	8	0.5745	rs1851260	ERBB4(0)
2	212959784	a	g	0.7973	0.8257	0.2262	1.25383	1.12261	1.40038	0.0564	5.991e-05	+++++++++	0	6.651	8	0.5747	rs13395352	ERBB4(0)
2	212959164	a	g	0.1743	0.2027	-0.2262	0.797559	0.714092	0.890782	0.0564	5.993e-05	---------	0	6.653	8	0.5744	rs1521548	ERBB4(0)
2	212959927	t	c	0.1743	0.2027	-0.2262	0.797559	0.714092	0.890782	0.0564	5.994e-05	---------	0	6.649	8	0.5749	rs12618158	ERBB4(0)
6	105077029	t	c	0.0889	0.1431	-0.2664	0.766133	0.672641	0.872619	0.0664	6.003e-05	------+--	0	4.346	8	0.8246	rs9499902	HACE1(-98.94kb)
5	29858890	a	g	0.7772	0.8183	-0.2201	0.802439	0.720718	0.893426	0.0548	6.011e-05	---+--+--	0	6.02	8	0.645	rs57285889	.
5	29859392	a	t	0.7772	0.8182	-0.2201	0.802439	0.720718	0.893426	0.0548	6.012e-05	---+--+--	0	6.02	8	0.645	rs1896676	.
19	45418790	t	c	0.6594	0.8051	-0.2829	0.753595	0.656338	0.865265	0.0705	6.016e-05	+----+?--	48.5	13.584	7	0.05909	rs5117	APOC1(0)|APOC1P1(-11.27kb)|APOC2(-30.45kb)|APOC4(-26.7kb)|APOC4-APOC2(-26.7kb)|APOE(+6.14kb)|BCAM(+94.11kb)|BCL3(+155.5kb)|CBLC(+114.9kb)|CLASRP(-123.5kb)|CLPTM1(-39.05kb)|GEMIN7(-163.7kb)|PPP1R37(-177.6kb)|PVRL2(+26.3kb)|RELB(-85.92kb)|TOMM40(+11.84kb)|ZNF296(-156kb)
16	79978234	a	g	0.6852	0.7337	0.1913	1.21082	1.10275	1.32949	0.0477	6.027e-05	+++++++++	0	2.088	8	0.9782	rs4627367	.
5	29864782	a	c	0.1818	0.2226	0.2203	1.24645	1.11929	1.38806	0.0549	6.027e-05	+++-++-++	0	6.107	8	0.6352	rs10461874	.
5	29859532	a	g	0.1818	0.2228	0.22	1.24608	1.11918	1.38737	0.0548	6.03e-05	+++-++-++	0	6.028	8	0.6441	rs10520954	.
5	29862103	a	g	0.7772	0.8181	-0.2201	0.802439	0.720576	0.893601	0.0549	6.038e-05	---+--+--	0	6.041	8	0.6426	rs1428351	.
5	29860731	a	t	0.7772	0.8182	-0.22	0.802519	0.720648	0.89369	0.0549	6.04e-05	---+--+--	0	6.009	8	0.6463	rs12519183	.
5	29862270	a	c	0.7772	0.818	-0.22	0.802519	0.720648	0.89369	0.0549	6.054e-05	---+--+--	0	6.041	8	0.6426	rs11956910	.
5	29864785	t	c	0.7774	0.8182	-0.2202	0.802358	0.720504	0.893512	0.0549	6.055e-05	---+--+--	0	6.107	8	0.6352	rs10461683	.
5	29861512	a	g	0.1819	0.2228	0.22	1.24608	1.11896	1.38764	0.0549	6.057e-05	+++-++-++	0	6.029	8	0.6439	rs1428353	.
5	29860154	t	c	0.1818	0.2228	0.22	1.24608	1.11918	1.38737	0.0548	6.058e-05	+++-++-++	0	6.022	8	0.6448	rs11948545	.
9	1658347	t	c	0.3042	0.3689	0.1834	1.20129	1.09837	1.31386	0.0457	6.058e-05	+++++++++	0	4.404	8	0.8189	rs2476246	.
5	29861038	t	c	0.7772	0.8181	-0.22	0.802519	0.720648	0.89369	0.0549	6.067e-05	---+--+--	0	6.032	8	0.6437	rs10940833	.
5	29863566	a	g	0.1821	0.2228	0.22	1.24608	1.11896	1.38764	0.0549	6.086e-05	+++-++-++	0	6.064	8	0.6401	rs1428342	.
5	29864068	t	c	0.7772	0.8179	-0.22	0.802519	0.720648	0.89369	0.0549	6.087e-05	---+--+--	0	6.074	8	0.639	rs16899638	.
11	45373346	c	g	0.0401	0.07	0.4306	1.53818	1.2462	1.89858	0.1074	6.09e-05	++++++--+	18.2	9.785	8	0.2805	rs61882560	PRDM11(+116.7kb)|SYT13(+65.46kb)
5	29863619	a	g	0.7772	0.8179	-0.22	0.802519	0.720648	0.89369	0.0549	6.099e-05	---+--+--	0	6.062	8	0.6402	rs4501354	.
5	29860988	a	g	0.1819	0.2228	0.2199	1.24595	1.11884	1.3875	0.0549	6.107e-05	+++-++-++	0	6.038	8	0.643	rs10940832	.
8	79590479	a	g	0.0288	0.0508	-0.4599	0.631347	0.504235	0.790501	0.1147	6.109e-05	--+---++-	0	6.232	8	0.6213	rs79374792	IL7(-54.53kb)|LOC101241902(-44.6kb)|PKIA(+72.98kb)|ZC2HC1A(0)
5	29865110	c	g	0.1821	0.2228	0.2199	1.24595	1.11884	1.3875	0.0549	6.129e-05	+++-++-++	0	6.101	8	0.636	rs10940835	.
5	29865141	a	g	0.7772	0.8179	-0.2199	0.802599	0.72072	0.89378	0.0549	6.134e-05	---+--+--	0	6.102	8	0.6358	rs10940836	.
5	29859740	a	t	0.1815	0.2228	0.2199	1.24595	1.11884	1.3875	0.0549	6.137e-05	+++-++-++	0	5.916	8	0.6567	rs1428307	.
18	60243876	a	g	0.2413	0.3321	-0.1924	0.824977	0.750902	0.906359	0.048	6.144e-05	------+--	0	5.513	8	0.7016	rs11557713	PHLPP1(-138.8kb)|TNFRSF11A(+188.9kb)|ZCCHC2(0)
16	79991016	t	g	0.1869	0.2353	-0.2084	0.811882	0.733212	0.898993	0.052	6.146e-05	-------+-	0	2.737	8	0.9497	rs4461087	.
5	29864952	t	c	0.1821	0.2228	0.2199	1.24595	1.11884	1.3875	0.0549	6.15e-05	+++-++-++	0	6.094	8	0.6367	rs56862213	.
4	77831507	a	g	0.9617	0.9875	-0.8544	0.425538	0.280194	0.646276	0.2132	6.156e-05	+-----?-?	4.6	6.286	6	0.3919	rs78425768	CCNI(-137.7kb)|SEPT11(-39.39kb)|SHROOM3(+127.1kb)|SOWAHB(+12.5kb)
5	29864914	t	g	0.1821	0.2228	0.2199	1.24595	1.11884	1.3875	0.0549	6.157e-05	+++-++-++	0	6.09	8	0.6371	rs60420413	.
16	79969432	t	c	0.6605	0.6878	0.1859	1.2043	1.09961	1.31896	0.0464	6.162e-05	+++++++++	0	2.358	8	0.968	rs10871381	.
5	29865421	a	g	0.1821	0.2228	0.2198	1.24583	1.11873	1.38736	0.0549	6.22e-05	+++-++-++	0	6.102	8	0.6358	rs10940837	.
22	18421926	t	c	0.4352	0.5314	-0.1734	0.840801	0.772388	0.915274	0.0433	6.249e-05	---------	13.8	9.282	8	0.319	rs5992908	BID(+164.5kb)|FLJ41941(-90.22kb)|LINC00528(+159.7kb)|MICAL3(0)|MIR648(-41.71kb)|MIR3198-1(+174.9kb)|PEX26(-138.8kb)|TUBA8(-171.5kb)
1	222003908	t	c	0.2734	0.3373	0.1932	1.21313	1.10355	1.33358	0.0483	6.254e-05	++++++-++	5.5	8.466	8	0.3893	rs4846728	DUSP10(+88.39kb)
5	29865925	t	c	0.1821	0.2228	0.2197	1.2457	1.11862	1.38722	0.0549	6.27e-05	+++-++-++	0	6.107	8	0.6353	rs10940838	.
5	29866640	a	g	0.7772	0.8179	-0.2197	0.80276	0.720865	0.893958	0.0549	6.284e-05	---+--+--	0	6.101	8	0.6359	rs1428338	.
6	105075505	t	c	0.0893	0.1433	-0.2657	0.766669	0.673112	0.87323	0.0664	6.294e-05	------+--	0	4.434	8	0.816	rs11758992	HACE1(-100.5kb)
6	2048523	t	c	0.9599	0.9776	-0.543	0.581003	0.445316	0.758033	0.1357	6.305e-05	?--+--+--	0	5.786	7	0.565	rs12211261	GMDS(0)|LOC100508120(-197.5kb)
8	41403444	a	g	0.231	0.2938	0.2021	1.22397	1.10862	1.35132	0.0505	6.316e-05	-+-+++-++	0	3.251	8	0.9177	rs16890683	AGPAT6(-32.26kb)|ANK1(-107.3kb)|GINS4(+0.879kb)|GOLGA7(+34.94kb)|MIR486(-114.5kb)|NKX6-3(-100.4kb)
4	832962	t	c	0.9578	0.9827	0.6014	1.82467	1.35909	2.44975	0.1503	6.321e-05	++++-+?-+	6.4	7.479	7	0.3808	rs150714394	ATP5I(+164.8kb)|CPLX1(+13.02kb)|DGKQ(-119.7kb)|FGFRL1(-172.6kb)|GAK(-10.1kb)|IDUA(-147.8kb)|LOC100129917(+57.33kb)|MFSD7(+150kb)|MYL5(+157.1kb)|PCGF3(+68.54kb)|PDE6B(+168.3kb)|SLC26A1(-139.9kb)|TMEM175(-93.3kb)
5	29867999	a	g	0.1821	0.2223	0.2196	1.24558	1.11851	1.38708	0.0549	6.338e-05	+++-++-++	0	6.175	8	0.6276	rs59857318	.
16	79965489	a	g	0.6824	0.7343	0.1908	1.21022	1.1022	1.32882	0.0477	6.36e-05	+++++++++	0	1.915	8	0.9835	rs4264404	.
6	71143076	c	g	0.8707	0.8999	-0.278	0.757297	0.660856	0.867812	0.0695	6.365e-05	+-----++-	0	7.139	8	0.5218	rs113350471	C6orf57(-133.5kb)|COL9A1(+130.3kb)|FAM135A(0)
5	29869587	t	c	0.1822	0.2228	0.2196	1.24558	1.11851	1.38708	0.0549	6.368e-05	+++-++-++	0	6.131	8	0.6325	rs12654415	.
5	29885605	t	c	0.7826	0.8175	-0.2203	0.802278	0.72015	0.893773	0.0551	6.37e-05	---+--+--	0	7.009	8	0.5356	rs2330316	.
13	23425419	a	g	0.7142	0.7671	-0.2026	0.816605	0.739359	0.901921	0.0507	6.391e-05	+--------	0	4.278	8	0.8312	rs2878396	BASP1P1(-45.75kb)
10	85598877	t	c	0.6322	0.6926	0.1837	1.20166	1.09805	1.31503	0.046	6.397e-05	++-+++--+	41.6	13.7	8	0.08994	rs654951	.
5	29867821	a	g	0.7772	0.8179	-0.2194	0.803	0.721081	0.894227	0.0549	6.416e-05	---+--+--	0	6.133	8	0.6323	rs12513961	.
8	41402932	c	g	0.7062	0.769	-0.2019	0.817177	0.740167	0.902199	0.0505	6.427e-05	+-+---+--	0	3.248	8	0.9178	rs7012533	AGPAT6(-32.77kb)|ANK1(-107.8kb)|GINS4(+0.367kb)|GOLGA7(+34.43kb)|MIR486(-115kb)|NKX6-3(-100.9kb)
5	29863003	t	c	0.1805	0.2221	0.2207	1.24695	1.11908	1.38943	0.0552	6.433e-05	+++-++-++	0	5.627	8	0.6889	rs10461873	.
13	83796028	t	c	0.903	0.9212	-0.3143	0.7303	0.626031	0.851936	0.0786	6.44e-05	---------	4.6	8.385	8	0.3968	rs925535	.
5	29865050	a	t	0.7772	0.8179	-0.2194	0.803	0.721081	0.894227	0.0549	6.449e-05	---+--+--	0	6.305	8	0.6131	rs10940834	.
1	151014134	c	g	0.1914	0.2218	0.2163	1.24147	1.11657	1.38035	0.0541	6.459e-05	++++++-++	0	4.516	8	0.8078	rs6694158	ANXA9(+46.02kb)|ARNT(+164.9kb)|BNIPL(0)|C1orf56(-6.124kb)|CDC42SE1(-9.312kb)|CERS2(+66.66kb)|FAM63A(+33.28kb)|GABPB2(-28.94kb)|LYSMD1(-118.1kb)|MLLT11(-18.02kb)|PIP5K1A(-156.9kb)|PRUNE(+5.945kb)|SCNM1(-124.4kb)|SEMA6C(-90.03kb)|SETDB1(+76.91kb)|TMOD4(-128.3kb)|TNFAIP8L2(-115kb)|TNFAIP8L2-SCNM1(-115kb)|VPS72(-134.6kb)
9	1745917	a	c	0.3248	0.375	0.1824	1.20009	1.09749	1.31229	0.0456	6.473e-05	+++++++++	0	4.844	8	0.7741	rs530301	.
8	41402775	a	g	0.231	0.2938	0.2018	1.2236	1.10829	1.35091	0.0505	6.48e-05	-+-+++-++	0	3.247	8	0.9179	rs3739369	AGPAT6(-32.93kb)|ANK1(-108kb)|GINS4(+0.21kb)|GOLGA7(+34.28kb)|MIR486(-115.2kb)|NKX6-3(-101.1kb)
4	40376757	a	g	0.5001	0.591	-0.1772	0.837612	0.767802	0.91377	0.0444	6.494e-05	------+--	11.2	9.014	8	0.3411	rs10938523	CHRNA9(+19.52kb)|MIR4802(-127.3kb)|RBM47(-48.51kb)|RHOH(+130.4kb)
5	29868444	a	c	0.7772	0.8179	-0.2193	0.803081	0.721153	0.894316	0.0549	6.511e-05	---+--+--	0	6.144	8	0.6311	rs7713246	.
16	79979938	a	g	0.2644	0.3073	-0.1919	0.825389	0.751278	0.906812	0.048	6.512e-05	---------	0	2.215	8	0.9737	rs4454989	.
1	222002455	a	c	0.2734	0.3373	0.1927	1.21252	1.103	1.33291	0.0483	6.518e-05	++++++-++	5	8.419	8	0.3937	rs4846727	DUSP10(+86.94kb)
5	29868937	t	c	0.1821	0.2228	0.2192	1.24508	1.11806	1.38653	0.0549	6.527e-05	+++-++-++	0	6.152	8	0.6302	rs1834996	.
7	55156419	a	t	0.4417	0.5457	-0.1761	0.838534	0.769099	0.914238	0.0441	6.542e-05	---+-----	0	3.319	8	0.9128	rs12535226	EGFR(0)|EGFR-AS1(-91.02kb)
8	41400313	a	g	0.2311	0.2938	0.2021	1.22397	1.10841	1.35158	0.0506	6.553e-05	-+-+++-++	0	3.262	8	0.9169	rs7817629	AGPAT6(-35.39kb)|ANK1(-110.4kb)|GINS4(0)|GOLGA7(+31.81kb)|MIR486(-117.6kb)|NKX6-3(-103.5kb)
16	79976222	a	g	0.3091	0.3366	-0.1851	0.831021	0.75878	0.910141	0.0464	6.568e-05	+--------	0	2.238	8	0.9728	rs4888055	.
5	29890192	a	c	0.1903	0.2174	0.2181	1.24371	1.11749	1.38419	0.0546	6.569e-05	+++-++-++	11.8	9.068	8	0.3366	rs7709732	.
13	24362678	t	c	0.9755	0.9893	0.8762	2.40176	1.56171	3.69365	0.2196	6.579e-05	?++++++++	0	4.593	7	0.7095	rs140819410	ANKRD20A19P(-118.7kb)|C1QTNF9B(-102.7kb)|C1QTNF9B-AS1(-100.3kb)|MIPEP(0)|TNFRSF19(+112.4kb)
5	29863001	a	c	0.1805	0.2221	0.2204	1.24658	1.11875	1.38901	0.0552	6.582e-05	+++-++-++	0	5.63	8	0.6886	rs10461872	.
15	33273489	c	g	0.0354	0.0859	0.4069	1.50215	1.22996	1.83459	0.102	6.583e-05	++++++--+	0	5.247	8	0.7309	rs36097433	FMN1(0)
7	67342653	a	c	0.7677	0.8042	-0.2231	0.800035	0.717011	0.892672	0.0559	6.631e-05	------+--	0	1.729	8	0.9882	rs61293545	.
5	29860987	a	g	0.1816	0.2226	0.2191	1.24496	1.11795	1.38639	0.0549	6.634e-05	+++-++-++	0	6.038	8	0.6429	rs10940831	.
5	29870786	a	g	0.7772	0.8179	-0.2191	0.803241	0.721297	0.894495	0.0549	6.634e-05	---+--+--	0	6.155	8	0.6298	rs11959555	.
9	30090620	t	c	0.1582	0.1901	0.2409	1.27239	1.13034	1.4323	0.0604	6.645e-05	++++++-++	5.2	8.441	8	0.3916	rs68147517	.
19	55008490	t	c	0.8426	0.9188	0.2659	1.3046	1.14473	1.48681	0.0667	6.649e-05	++++++?++	0	0.843	7	0.997	rs111973201	CDC42EP5(+24.07kb)|KIR3DX1(-35.42kb)|LAIR1(+131.8kb)|LAIR2(-5.522kb)|LENG8(+35.29kb)|LENG9(+33.6kb)|LILRA1(-96.55kb)|LILRA2(-76.77kb)|LILRA4(+158.1kb)|LILRA5(+184.1kb)|LILRB1(-119.9kb)|LILRB4(-165.6kb)|TTYH1(+60.59kb)
9	1677474	t	c	0.3013	0.3667	0.1833	1.20117	1.09762	1.3145	0.046	6.656e-05	+++++++++	0	4.293	8	0.8298	rs2093648	.
18	67286974	t	g	0.0314	0.083	-0.3693	0.691218	0.576491	0.828777	0.0926	6.687e-05	-----+---	0	3.039	8	0.9319	rs10513969	DOK6(0)
5	29871058	t	c	0.1821	0.2228	0.2189	1.24471	1.11773	1.38611	0.0549	6.708e-05	+++-++-++	0	6.181	8	0.627	rs11953774	.
11	5490182	t	c	0.2842	0.3745	0.1811	1.19854	1.09649	1.31007	0.0454	6.73e-05	+++++++++	11.8	9.067	8	0.3367	rs17297010	HBE1(+198.8kb)|OR51B2(+144.6kb)|OR51B4(+167kb)|OR51B5(0)|OR51B6(+116.5kb)|OR51I1(+27.4kb)|OR51I2(+14.48kb)|OR51M1(+78.52kb)|OR51Q1(+45.75kb)|OR52B6(-111.9kb)|OR52D1(-19.73kb)|OR52H1(-75.61kb)|TRIM5(-194.2kb)|TRIM6(-127.1kb)|TRIM6-TRIM34(-127.7kb)|TRIM34(-151kb)|UBQLN3(-38.35kb)|UBQLNL(-45.44kb)
16	74894261	t	c	0.1313	0.1668	0.253	1.28788	1.13717	1.45858	0.0635	6.751e-05	++++++-++	0	0.872	8	0.9989	rs55859029	FA2H(+85.53kb)|MLKL(+159.5kb)|RFWD3(+193.5kb)|WDR59(-13.21kb)|ZNRF1(-138.7kb)
9	16060746	a	g	0.6441	0.7006	-0.1879	0.828698	0.755472	0.90902	0.0472	6.768e-05	------+--	0	7.063	8	0.5298	rs2026662	C9orf92(-143.2kb)|CCDC171(+88.85kb)
5	29871553	t	c	0.1822	0.2228	0.2189	1.24471	1.11773	1.38611	0.0549	6.772e-05	+++-++-++	0	6.167	8	0.6285	rs4867220	.
5	29871770	t	c	0.1822	0.2228	0.2188	1.24458	1.11761	1.38598	0.0549	6.787e-05	+++-++-++	0	6.187	8	0.6263	rs4867221	.
9	1709472	t	c	0.2954	0.36	0.1833	1.20117	1.09762	1.3145	0.046	6.788e-05	+++++++++	0	6.013	8	0.6458	rs479365	.
5	29793173	t	c	0.1814	0.2279	0.2177	1.24321	1.11682	1.38391	0.0547	6.796e-05	+++-++-++	0	5.661	8	0.6851	rs72743256	.
8	41400913	a	g	0.2311	0.2938	0.2014	1.22311	1.10763	1.35064	0.0506	6.821e-05	-+-+++-++	0	3.237	8	0.9186	rs11783920	AGPAT6(-34.79kb)|ANK1(-109.8kb)|GINS4(0)|GOLGA7(+32.41kb)|MIR486(-117kb)|NKX6-3(-102.9kb)
5	29872047	a	t	0.7772	0.8178	-0.2188	0.803482	0.721514	0.894763	0.0549	6.822e-05	---+--+--	0	6.193	8	0.6256	rs55781549	.
5	29794001	t	c	0.7721	0.8186	-0.2176	0.804447	0.722805	0.895311	0.0546	6.843e-05	---+--+--	0	5.664	8	0.6849	rs16899407	.
21	27056820	t	c	0.4312	0.4894	0.1751	1.19137	1.09293	1.29867	0.044	6.855e-05	++++++-++	0	5.926	8	0.6556	rs11087971	APP(-196kb)|ATP5J(-39.97kb)|GABPA(-50.44kb)|JAM2(0)|LINC00515(+101.3kb)|MIR155(+110.5kb)|MIR155HG(+109.3kb)|MRPL39(+77.02kb)
5	29794237	a	g	0.1814	0.2279	0.2176	1.24309	1.11693	1.3835	0.0546	6.855e-05	+++-++-++	0	5.659	8	0.6854	rs10520952	.
16	79995504	a	t	0.3399	0.3783	-0.18	0.83527	0.764455	0.912645	0.0452	6.867e-05	---------	0	3.721	8	0.8814	rs7205264	.
11	5489665	t	c	0.2839	0.3748	0.181	1.19842	1.09617	1.3102	0.0455	6.888e-05	+++++++++	11.6	9.054	8	0.3378	rs11606416	HBE1(+198.3kb)|OR51B2(+144.1kb)|OR51B4(+166.5kb)|OR51B5(0)|OR51B6(+116kb)|OR51I1(+26.88kb)|OR51I2(+13.96kb)|OR51M1(+78kb)|OR51Q1(+45.23kb)|OR52B6(-112.4kb)|OR52D1(-20.25kb)|OR52H1(-76.12kb)|TRIM5(-194.8kb)|TRIM6(-127.7kb)|TRIM6-TRIM34(-128.2kb)|TRIM34(-151.5kb)|UBQLN3(-38.86kb)|UBQLNL(-45.96kb)
5	29872677	t	c	0.1822	0.2228	0.2186	1.24433	1.11739	1.3857	0.0549	6.899e-05	+++-++-++	0	6.2	8	0.6248	rs1366311	.
15	92008325	a	g	0.2461	0.2874	-0.2301	0.794454	0.709363	0.889752	0.0578	6.904e-05	+-----?--	0	3.096	7	0.876	rs10852148	SV2B(+163.8kb)
5	29873591	a	g	0.1822	0.2229	0.2186	1.24433	1.11739	1.3857	0.0549	6.93e-05	+++-++-++	0	6.209	8	0.6239	rs987396	.
19	55006103	t	c	0.0815	0.1586	-0.2597	0.771283	0.678624	0.876593	0.0653	6.932e-05	------?--	0	0.558	7	0.9992	rs10418813	CDC42EP5(+21.68kb)|KIR3DX1(-37.8kb)|LAIR1(+129.4kb)|LAIR2(-7.909kb)|LENG8(+32.91kb)|LENG9(+31.21kb)|LILRA1(-98.94kb)|LILRA2(-79.15kb)|LILRA4(+155.7kb)|LILRA5(+181.7kb)|LILRB1(-122.3kb)|LILRB4(-168kb)|TTYH1(+58.2kb)
3	100815198	t	c	0.9204	0.9631	0.3514	1.42106	1.19522	1.68956	0.0883	6.947e-05	-++++++++	0	4.587	8	0.8007	rs77081388	ABI3BP(+102.9kb)|IMPG2(-126.2kb)
8	41401263	a	g	0.7062	0.7688	-0.2011	0.817831	0.740614	0.903098	0.0506	6.953e-05	+-+---+--	0	3.239	8	0.9184	rs11780839	AGPAT6(-34.44kb)|ANK1(-109.5kb)|GINS4(0)|GOLGA7(+32.76kb)|MIR486(-116.7kb)|NKX6-3(-102.6kb)
16	12746528	t	c	0.1456	0.1848	0.2845	1.3291	1.15507	1.52934	0.0716	6.994e-05	+++++++++	0	7.074	8	0.5286	rs7186877	CPPED1(-7.127kb)|MIR4718(-67.65kb)|SNX29(+78.38kb)
5	29875241	t	c	0.1822	0.2229	0.2185	1.24421	1.11728	1.38556	0.0549	6.994e-05	+++-++-++	0	6.23	8	0.6215	rs72747027	.
8	41400996	a	c	0.7061	0.7688	-0.2011	0.817831	0.740614	0.903098	0.0506	6.999e-05	+-+---+--	0	3.24	8	0.9184	rs11780755	AGPAT6(-34.71kb)|ANK1(-109.7kb)|GINS4(0)|GOLGA7(+32.5kb)|MIR486(-117kb)|NKX6-3(-102.8kb)
16	79970078	a	t	0.3126	0.3394	-0.1845	0.83152	0.759235	0.910687	0.0464	7.005e-05	---------	0	2.358	8	0.968	rs8043932	.
22	18416487	c	g	0.4663	0.5647	0.1725	1.18827	1.09137	1.29377	0.0434	7.005e-05	+++++++++	15.4	9.459	8	0.3051	rs4819476	BID(+159.1kb)|FLJ41941(-95.66kb)|LINC00528(+154.2kb)|MICAL3(0)|MIR648(-47.15kb)|MIR3198-1(+169.5kb)|PEX26(-144.2kb)|TUBA8(-177kb)
5	29871352	a	t	0.7772	0.8183	-0.2185	0.803723	0.721589	0.895207	0.055	7.018e-05	---+--+--	0	6.264	8	0.6176	rs72747022	.
14	27768467	a	c	0.3966	0.4676	-0.2104	0.81026	0.730458	0.898781	0.0529	7.034e-05	+--------	0	7.688	8	0.4645	rs61973620	.
5	29878767	a	c	0.7771	0.8176	-0.2183	0.803884	0.721733	0.895386	0.055	7.087e-05	---+--+--	0	6.261	8	0.618	rs11948959	.
11	5489614	t	c	0.2839	0.3745	0.1807	1.19806	1.09584	1.30981	0.0455	7.09e-05	+++++++++	11.4	9.024	8	0.3402	rs11606399	HBE1(+198.2kb)|OR51B2(+144kb)|OR51B4(+166.4kb)|OR51B5(0)|OR51B6(+115.9kb)|OR51I1(+26.83kb)|OR51I2(+13.91kb)|OR51M1(+77.95kb)|OR51Q1(+45.18kb)|OR52B6(-112.5kb)|OR52D1(-20.3kb)|OR52H1(-76.18kb)|TRIM5(-194.8kb)|TRIM6(-127.7kb)|TRIM6-TRIM34(-128.2kb)|TRIM34(-151.6kb)|UBQLN3(-38.92kb)|UBQLNL(-46.01kb)
16	79975174	a	g	0.1307	0.221	-0.217	0.80493	0.723239	0.895848	0.0546	7.121e-05	---------	0	3.138	8	0.9254	rs9926613	.
11	95716539	a	g	0.6406	0.6867	0.1866	1.20515	1.09909	1.32144	0.047	7.131e-05	-++++++++	12.2	9.109	8	0.3332	rs509665	CEP57(+150.7kb)|FAM76B(+193.6kb)|MAML2(0)|MTMR2(+59.17kb)
13	114516003	c	g	0.8287	0.8636	0.299	1.34851	1.16348	1.56297	0.0753	7.132e-05	++-+++--?	48.4	13.555	7	0.05969	rs11619369	GAS6(-7.518kb)|GAS6-AS1(-2.579kb)|GAS6-AS2(-51.15kb)|GRK1(+77.37kb)|LINC00452(-82.07kb)|LINC00552(+61.94kb)|LINC00565(-113.5kb)|TMEM255B(+1.104kb)
21	27055402	t	g	0.4302	0.4875	0.1747	1.19089	1.09249	1.29815	0.044	7.136e-05	++++++-++	0	6.028	8	0.6441	rs4817054	APP(-197.5kb)|ATP5J(-41.39kb)|GABPA(-51.86kb)|JAM2(0)|LINC00515(+99.87kb)|MIR155(+109kb)|MIR155HG(+107.9kb)|MRPL39(+75.6kb)
6	8955720	t	c	0.0554	0.0904	0.3481	1.41637	1.19269	1.68201	0.0877	7.145e-05	++++++-++	0	4.354	8	0.8238	rs9379269	LOC100506207(+170kb)
5	29875728	a	g	0.7771	0.8177	-0.2183	0.803884	0.721733	0.895386	0.055	7.146e-05	---+--+--	0	6.152	8	0.6302	rs12515941	.
17	3755324	t	c	0.7482	0.7814	-0.2255	0.798117	0.714032	0.892105	0.0568	7.151e-05	+-+---?--	0	5.026	7	0.6568	rs12451170	ATP2A3(-71.84kb)|C17orf85(+5.779kb)|CAMKK1(-8.292kb)|CTNS(+188.9kb)|EMC6(+182.4kb)|GSG2(+125.3kb)|ITGAE(+50.79kb)|P2RX1(-44.56kb)|P2RX5(+155.6kb)|P2RX5-TAX1BP3(+155.6kb)|TAX1BP3(+183.4kb)|ZZEF1(-152.4kb)
16	79978455	a	t	0.665	0.6925	0.1848	1.20298	1.09819	1.31777	0.0465	7.174e-05	-++++++++	0	1.993	8	0.9812	rs4444353	.
16	79956801	t	g	0.2498	0.3106	-0.193	0.824482	0.74957	0.906881	0.0486	7.181e-05	---------	0	2.106	8	0.9776	rs56012409	.
20	35988018	a	g	0.8892	0.9209	0.3085	1.36138	1.16907	1.58533	0.0777	7.186e-05	+++++++-+	0	6.885	8	0.5491	rs11905079	BLCAP(-157.8kb)|GHRH(+102.7kb)|MANBAL(+42.36kb)|MROH8(+180kb)|NNAT(-161.6kb)|RPN2(+118kb)|SRC(0)
6	105073166	a	g	0.0899	0.143	-0.2629	0.768819	0.675264	0.875336	0.0662	7.192e-05	------+--	0	4.341	8	0.8251	rs9373775	HACE1(-102.8kb)
6	170423894	t	c	0.0123	0.0288	-0.7398	0.477209	0.331163	0.687663	0.1864	7.193e-05	+-----?--	42.9	12.251	7	0.09261	rs142125153	DLL1(-167.4kb)|FAM120B(-191.9kb)|LOC154449(-139.5kb)
2	187305723	t	c	0.9266	0.9702	0.4642	1.59074	1.265	2.00035	0.1169	7.2e-05	+++++-+++	0	3.637	8	0.8883	rs111777706	ITGAV(-149.1kb)|ZC3H15(-45.16kb)
12	104108180	a	g	0.9562	0.9878	0.6313	1.88005	1.37639	2.56802	0.1591	7.216e-05	++++++++-	0	6.919	8	0.5455	rs115292245	GNN(-129.3kb)|NT5DC3(-57.9kb)|STAB2(0)
14	78410670	a	g	0.7316	0.7933	-0.2001	0.818649	0.741645	0.903647	0.0504	7.251e-05	+--------	0	6.909	8	0.5465	rs8015549	ADCK1(+10.37kb)|C14orf178(+174.6kb)|SNW1(+183.2kb)
16	79973432	a	g	0.66	0.6884	0.184	1.20202	1.09752	1.31646	0.0464	7.265e-05	+++++++++	0	2.276	8	0.9714	rs4888053	.
9	129473473	a	c	0.0119	0.0212	-0.8213	0.439859	0.293107	0.660087	0.2071	7.285e-05	-----?---	0	2.89	7	0.895	rs76953678	LMX1B(+10.16kb)|ZBTB34(-149.5kb)|ZBTB43(-93.81kb)
1	175890776	t	c	0.589	0.6152	-0.2135	0.807752	0.726771	0.897757	0.0539	7.347e-05	---------	20.6	10.08	8	0.2595	rs35306505	RFWD2(-23.19kb)|SCARNA3(-46.76kb)|TNR(+178kb)
5	29872848	t	c	0.1822	0.2251	0.2178	1.24334	1.1165	1.38459	0.0549	7.352e-05	+++-++-++	0	6.128	8	0.6329	rs10940840	.
4	77827549	t	g	0.0124	0.0383	0.8422	2.32147	1.53096	3.52015	0.2124	7.357e-05	-+++++?+?	0	5.995	6	0.4238	rs75713643	CCNI(-141.6kb)|SEPT11(-43.34kb)|SHROOM3(+123.1kb)|SOWAHB(+8.547kb)
1	221997604	a	g	0.2734	0.3373	0.1911	1.21058	1.10145	1.33052	0.0482	7.407e-05	++++++-++	2.5	8.209	8	0.4133	rs6668395	DUSP10(+82.09kb)
19	55006297	t	c	0.8414	0.9184	0.2588	1.29537	1.13975	1.47224	0.0653	7.443e-05	++++++?++	0	0.575	7	0.9991	rs78292585	CDC42EP5(+21.88kb)|KIR3DX1(-37.61kb)|LAIR1(+129.6kb)|LAIR2(-7.715kb)|LENG8(+33.1kb)|LENG9(+31.4kb)|LILRA1(-98.74kb)|LILRA2(-78.96kb)|LILRA4(+155.9kb)|LILRA5(+181.9kb)|LILRB1(-122.1kb)|LILRB4(-167.8kb)|TTYH1(+58.4kb)
1	244307229	c	g	0.2119	0.2714	0.2086	1.23195	1.11105	1.36601	0.0527	7.45e-05	++-++++++	45.3	14.619	8	0.06699	rs4658412	LOC339529(+96.61kb)|ZBTB18(+86.45kb)
16	79984037	t	c	0.2996	0.3292	-0.1854	0.830772	0.757957	0.910581	0.0468	7.465e-05	+--------	0	2.717	8	0.9509	rs4275866	.
5	29889004	a	g	0.1828	0.2174	0.2185	1.24421	1.11662	1.38637	0.0552	7.499e-05	+++-++-++	0	7.175	8	0.5179	rs16899687	.
5	173569135	a	g	0.3573	0.451	-0.1759	0.838702	0.7688	0.914959	0.0444	7.515e-05	+-----+--	0	7.274	8	0.5074	rs2250771	C5orf47(+136kb)|CPEB4(+181.8kb)|HMP19(+32.95kb)
19	55006415	t	c	0.8414	0.9179	0.2588	1.29537	1.13953	1.47253	0.0654	7.535e-05	++++++?++	0	0.594	7	0.999	rs113800884	CDC42EP5(+21.99kb)|KIR3DX1(-37.49kb)|LAIR1(+129.7kb)|LAIR2(-7.597kb)|LENG8(+33.22kb)|LENG9(+31.52kb)|LILRA1(-98.62kb)|LILRA2(-78.84kb)|LILRA4(+156kb)|LILRA5(+182kb)|LILRB1(-122kb)|LILRB4(-167.7kb)|TTYH1(+58.52kb)
14	62024579	a	g	0.9411	0.9698	-0.4854	0.615451	0.483988	0.782623	0.1226	7.542e-05	--------+	0	5.327	8	0.7221	rs78452085	FLJ22447(-12.68kb)|HIF1A(-137.5kb)|HIF1A-AS2(-189.2kb)|PRKCH(+6.881kb)
5	29881255	t	c	0.7772	0.8174	-0.2178	0.804286	0.722094	0.895834	0.055	7.543e-05	---+--+--	0	6.224	8	0.6222	rs4867226	.
18	67278202	c	g	0.9239	0.9701	0.3832	1.46697	1.21346	1.77345	0.0968	7.544e-05	+++++-+++	0	4.414	8	0.818	rs9956643	DOK6(0)
19	55006496	a	g	0.8413	0.9179	0.2588	1.29537	1.13953	1.47253	0.0654	7.546e-05	++++++?++	0	0.599	7	0.999	rs112861535	CDC42EP5(+22.07kb)|KIR3DX1(-37.41kb)|LAIR1(+129.8kb)|LAIR2(-7.516kb)|LENG8(+33.3kb)|LENG9(+31.6kb)|LILRA1(-98.54kb)|LILRA2(-78.76kb)|LILRA4(+156.1kb)|LILRA5(+182.1kb)|LILRB1(-121.9kb)|LILRB4(-167.6kb)|TTYH1(+58.6kb)
6	8957055	a	t	0.0378	0.0571	0.413	1.51135	1.23192	1.85415	0.1043	7.557e-05	++++++-++	0	3.086	8	0.9289	rs7450592	LOC100506207(+171.4kb)
9	1669625	a	g	0.4527	0.506	0.1725	1.18827	1.09094	1.29428	0.0436	7.577e-05	+++++-+++	0	7.11	8	0.5249	rs1359055	.
21	27051206	t	c	0.4813	0.5354	-0.1723	0.841727	0.772935	0.91664	0.0435	7.579e-05	------+--	0	3.073	8	0.9297	rs3787615	ATP5J(-45.58kb)|GABPA(-56.05kb)|JAM2(0)|LINC00515(+95.67kb)|MIR155(+104.8kb)|MIR155HG(+103.7kb)|MRPL39(+71.4kb)
19	55007719	t	c	0.0824	0.1588	-0.26	0.771052	0.677889	0.877018	0.0657	7.587e-05	------?--	0	0.654	7	0.9987	rs8100090	CDC42EP5(+23.3kb)|KIR3DX1(-36.19kb)|LAIR1(+131kb)|LAIR2(-6.293kb)|LENG8(+34.52kb)|LENG9(+32.82kb)|LILRA1(-97.32kb)|LILRA2(-77.54kb)|LILRA4(+157.3kb)|LILRA5(+183.3kb)|LILRB1(-120.7kb)|LILRB4(-166.4kb)|TTYH1(+59.82kb)
3	100765584	t	g	0.0773	0.1647	-0.252	0.777245	0.686018	0.880603	0.0637	7.603e-05	+--------	30.4	11.487	8	0.1756	rs13074729	ABI3BP(+53.25kb)|IMPG2(-175.8kb)
16	79969099	t	c	0.2661	0.3176	-0.1887	0.828035	0.754129	0.909184	0.0477	7.605e-05	---------	0	1.872	8	0.9847	rs4506913	.
10	26318901	a	g	0.0296	0.0427	-0.522	0.593333	0.458076	0.768527	0.132	7.634e-05	---+-----	26.2	10.84	8	0.2109	rs17666162	GAD2(-186.3kb)|MYO3A(0)
3	28967869	a	g	0.3887	0.4825	0.1765	1.19303	1.09317	1.30202	0.0446	7.684e-05	-++++++++	0	2.92	8	0.9393	rs9871861	LINC00693(+168kb)
5	29881209	a	c	0.182	0.2228	0.2175	1.24297	1.11594	1.38445	0.055	7.695e-05	+++-++-++	0	6.237	8	0.6208	rs4867225	.
8	41404327	a	g	0.2309	0.2935	0.1996	1.22091	1.10586	1.34794	0.0505	7.709e-05	-+-+++-++	0	3.243	8	0.9182	rs11786897	AGPAT6(-31.38kb)|ANK1(-106.4kb)|GINS4(+1.762kb)|GOLGA7(+35.83kb)|MIR486(-113.6kb)|NKX6-3(-99.5kb)
6	8955787	a	g	0.0379	0.057	0.4117	1.50938	1.2308	1.85102	0.1041	7.71e-05	++++++-++	0	3.137	8	0.9254	rs28593265	LOC100506207(+170.1kb)
19	55007030	t	c	0.0822	0.1587	-0.2589	0.7719	0.678901	0.877639	0.0655	7.714e-05	------?--	0	0.618	7	0.9989	rs28735289	CDC42EP5(+22.61kb)|KIR3DX1(-36.88kb)|LAIR1(+130.3kb)|LAIR2(-6.982kb)|LENG8(+33.83kb)|LENG9(+32.14kb)|LILRA1(-98.01kb)|LILRA2(-78.23kb)|LILRA4(+156.6kb)|LILRA5(+182.6kb)|LILRB1(-121.4kb)|LILRB4(-167.1kb)|TTYH1(+59.13kb)
11	95718000	a	g	0.6404	0.6879	0.1861	1.20454	1.09832	1.32104	0.0471	7.725e-05	-++++-+++	12.9	9.183	8	0.3271	rs2509092	CEP57(+152.1kb)|FAM76B(+195kb)|MAML2(0)|MTMR2(+60.63kb)
12	104116565	t	g	0.9569	0.9878	0.6294	1.87648	1.37351	2.56365	0.1592	7.739e-05	++++++++-	0	7.04	8	0.5323	rs11837927	GNN(-121kb)|NT5DC3(-49.52kb)|STAB2(0)
19	55007223	a	c	0.0823	0.1588	-0.2592	0.771669	0.678564	0.877548	0.0656	7.747e-05	------?--	0	0.624	7	0.9989	rs8113519	CDC42EP5(+22.8kb)|KIR3DX1(-36.68kb)|LAIR1(+130.5kb)|LAIR2(-6.789kb)|LENG8(+34.03kb)|LENG9(+32.33kb)|LILRA1(-97.82kb)|LILRA2(-78.03kb)|LILRA4(+156.8kb)|LILRA5(+182.8kb)|LILRB1(-121.2kb)|LILRB4(-166.9kb)|TTYH1(+59.32kb)
6	8952787	t	c	0.0381	0.0568	0.4102	1.50712	1.22968	1.84716	0.1038	7.747e-05	++++++-++	0	3.261	8	0.917	rs79522211	LOC100506207(+167.1kb)
4	967558	a	c	0.0136	0.0324	-0.6109	0.542862	0.400951	0.735001	0.1546	7.754e-05	------?+-	0	5.685	7	0.577	rs561385071	CPLX1(+147.6kb)|DGKQ(+0.21kb)|FGFRL1(-38.05kb)|GAK(+41.38kb)|IDUA(-13.23kb)|LOC100129917(+191.9kb)|RNF212(-97.71kb)|SLC26A1(-5.302kb)|SPON2(-193.2kb)|TMED11P(-141.4kb)|TMEM175(+15.12kb)
16	79956229	a	c	0.2566	0.3157	-0.1889	0.827869	0.75383	0.90918	0.0478	7.77e-05	---------	0	2.037	8	0.9799	rs11150231	.
5	173570847	t	c	0.3587	0.451	-0.1752	0.839289	0.769489	0.91542	0.0443	7.77e-05	+-----+--	0	7.566	8	0.477	rs2436321	C5orf47(+137.7kb)|CPEB4(+183.5kb)|HMP19(+34.66kb)
3	70534184	c	g	0.7112	0.772	-0.2051	0.814566	0.73578	0.901788	0.0519	7.781e-05	+--------	50.8	16.272	8	0.03865	rs6785970	.
2	176305688	a	g	0.6334	0.7445	-0.1867	0.829693	0.756231	0.91029	0.0473	7.812e-05	---------	3.7	8.307	8	0.4041	rs1986035	.
5	29816673	t	c	0.7717	0.8155	-0.2149	0.806622	0.725043	0.89738	0.0544	7.833e-05	---+--+--	0	6.858	8	0.552	rs6870155	.
5	29886514	t	g	0.7826	0.8173	-0.2176	0.804447	0.722097	0.896189	0.0551	7.838e-05	---+--+--	0	6.801	8	0.5582	rs10805538	.
16	79970265	a	g	0.6595	0.6873	0.183	1.20081	1.09664	1.31488	0.0463	7.839e-05	+++++++++	0	2.298	8	0.9705	rs8063142	.
5	29802708	a	g	0.1818	0.2278	0.216	1.2411	1.11493	1.38156	0.0547	7.839e-05	+++-++-++	0	5.977	8	0.6499	rs12519180	.
5	29817025	t	c	0.7717	0.8156	-0.215	0.806541	0.724971	0.89729	0.0544	7.852e-05	---+--+--	0	6.869	8	0.5509	rs6874810	.
7	114731349	a	g	0.7287	0.7989	-0.1997	0.818976	0.741651	0.904363	0.0506	7.872e-05	+--+--+--	0	6.247	8	0.6196	rs11984253	MDFIC(+71.38kb)
13	114513674	t	c	0.1391	0.1776	-0.292	0.746769	0.645946	0.863329	0.074	7.881e-05	--+---++?	53.5	15.058	7	0.03526	rs7332546	GAS6(-9.847kb)|GAS6-AS1(-4.908kb)|GAS6-AS2(-53.48kb)|GRK1(+75.04kb)|LINC00452(-84.4kb)|LINC00552(+59.61kb)|LINC00565(-115.8kb)|TMEM255B(0)
4	77455032	c	g	0.8117	0.8587	-0.233	0.792154	0.705647	0.889265	0.059	7.884e-05	---------	0	7.174	8	0.518	rs10012630	CCDC158(+126.6kb)|MIR4450(-39.69kb)|SHROOM3(0)
1	151013553	t	c	0.1913	0.222	0.2157	1.24073	1.11481	1.38087	0.0546	7.916e-05	++++++-++	0	4.413	8	0.818	rs6657593	ANXA9(+45.44kb)|ARNT(+164.3kb)|BNIPL(0)|C1orf56(-6.705kb)|CDC42SE1(-9.893kb)|CERS2(+66.07kb)|FAM63A(+32.7kb)|GABPB2(-29.53kb)|LYSMD1(-118.7kb)|MLLT11(-18.6kb)|PIP5K1A(-157.5kb)|PRUNE(+5.364kb)|SCNM1(-124.9kb)|SEMA6C(-90.61kb)|SETDB1(+76.33kb)|TMOD4(-128.9kb)|TNFAIP8L2(-115.6kb)|TNFAIP8L2-SCNM1(-115.6kb)|VPS72(-135.2kb)
7	114732071	t	c	0.2013	0.2713	0.1997	1.22104	1.10575	1.34834	0.0506	7.927e-05	-++-++-++	0	6.265	8	0.6176	rs73196019	MDFIC(+72.1kb)
16	79972948	a	c	0.7784	0.8696	0.2138	1.23837	1.11357	1.37717	0.0542	7.936e-05	+++++++++	0	3.084	8	0.929	rs8060741	.
12	128154670	a	t	0.8739	0.926	0.3045	1.35595	1.16554	1.57745	0.0772	7.947e-05	+++++++++	0	3.601	8	0.8912	rs11059310	.
4	77832903	a	g	0.9616	0.9873	-0.8364	0.433267	0.285955	0.656469	0.212	7.961e-05	+-----?-?	0	5.812	6	0.4445	rs147351336	CCNI(-136.3kb)|SEPT11(-37.99kb)|SHROOM3(+128.5kb)|SOWAHB(+13.9kb)
12	104118595	t	c	0.9575	0.988	0.6269	1.8718	1.37088	2.55575	0.1589	7.975e-05	++++++++-	0	6.993	8	0.5374	rs17034422	GNN(-118.9kb)|NT5DC3(-47.48kb)|STAB2(0)
2	17179283	t	c	0.0193	0.0475	-0.5299	0.588664	0.452339	0.766074	0.1344	8.03e-05	--+---+--	1.5	8.119	8	0.4219	rs4464276	.
4	77454831	a	t	0.7961	0.847	-0.2255	0.798117	0.713472	0.892804	0.0572	8.067e-05	---------	0	6.946	8	0.5424	rs7442104	CCDC158(+126.4kb)|MIR4450(-39.89kb)|SHROOM3(0)
16	79955534	a	g	0.6868	0.7437	0.189	1.20804	1.09979	1.32695	0.0479	8.071e-05	+++++++++	0	1.411	8	0.9941	rs6564716	.
10	85586979	t	c	0.6317	0.6933	0.1805	1.19782	1.09498	1.31032	0.0458	8.092e-05	++-+++--+	44.2	14.329	8	0.07358	rs647441	.
16	79966189	c	g	0.2658	0.3176	-0.1879	0.828698	0.754732	0.909911	0.0477	8.133e-05	---------	0	1.886	8	0.9843	rs9925844	.
6	244846	t	g	0.0382	0.0698	0.3614	1.43534	1.19922	1.71795	0.0917	8.149e-05	++-++++++	0	7.662	8	0.4671	rs79905420	DUSP22(-47.25kb)|IRF4(-146.9kb)
16	79966096	a	g	0.3125	0.3381	-0.1829	0.832851	0.760451	0.912145	0.0464	8.19e-05	---------	0	2.255	8	0.9722	rs9936254	.
15	33281733	a	t	0.0374	0.0858	0.4004	1.49242	1.22271	1.82163	0.1017	8.199e-05	++++++--+	0	5.647	8	0.6867	rs34058116	FMN1(0)
1	59675690	t	c	0.0219	0.036	-0.5461	0.579204	0.441335	0.760144	0.1387	8.216e-05	?--------	0	4.971	7	0.6635	rs61788267	FGGY(-86.93kb)|HSD52(+63.21kb)
16	79961330	a	g	0.2634	0.3142	-0.1888	0.827952	0.75361	0.909628	0.048	8.239e-05	---------	0	2.103	8	0.9777	rs4889046	.
16	79981630	t	c	0.6913	0.7337	0.189	1.20804	1.09957	1.32721	0.048	8.258e-05	+++++++++	0	2.139	8	0.9764	rs4889049	.
19	55007857	a	g	0.0824	0.1588	-0.2593	0.771592	0.678098	0.877976	0.0659	8.265e-05	------?--	0	0.629	7	0.9988	rs8103128	CDC42EP5(+23.44kb)|KIR3DX1(-36.05kb)|LAIR1(+131.1kb)|LAIR2(-6.155kb)|LENG8(+34.66kb)|LENG9(+32.96kb)|LILRA1(-97.18kb)|LILRA2(-77.4kb)|LILRA4(+157.4kb)|LILRA5(+183.4kb)|LILRB1(-120.5kb)|LILRB4(-166.3kb)|TTYH1(+59.96kb)
9	108708881	t	c	0.0123	0.0211	-0.9274	0.395581	0.249281	0.627743	0.2356	8.295e-05	-----?--?	0	1.352	6	0.9687	rs2997733	TMEM38B(+170kb)
16	79957143	t	g	0.2569	0.3169	-0.1882	0.828449	0.754358	0.909817	0.0478	8.312e-05	---------	0	2.221	8	0.9735	rs12445463	.
9	1675428	a	g	0.3092	0.3731	0.1801	1.19734	1.09454	1.30979	0.0458	8.315e-05	+++++++++	0	4.187	8	0.8399	rs4237142	.
1	244305707	t	c	0.7275	0.7873	-0.207	0.81302	0.733377	0.901312	0.0526	8.342e-05	--+------	46.4	14.926	8	0.06059	rs4347197	LOC339529(+95.09kb)|ZBTB18(+84.93kb)
13	23411611	a	g	0.2436	0.296	0.1963	1.21689	1.10351	1.34192	0.0499	8.353e-05	-++++++++	0	3.678	8	0.8849	rs9510373	BASP1P1(-59.56kb)
6	8936505	a	g	0.038	0.0564	0.4031	1.49646	1.22409	1.82942	0.1025	8.37e-05	++++++-++	0	3.859	8	0.8697	rs9379263	LOC100506207(+150.8kb)
6	119565387	a	g	0.0175	0.0225	-0.7114	0.490956	0.344396	0.699887	0.1809	8.393e-05	--+---?+?	23.2	7.815	6	0.252	rs74324217	FAM184A(+95.03kb)|MAN1A1(0)|MIR548B(+175.1kb)
5	29888270	t	g	0.1829	0.2174	0.2169	1.24222	1.11484	1.38416	0.0552	8.429e-05	+++-++-++	0	6.959	8	0.541	rs1366313	.
9	1683781	c	g	0.3021	0.3674	0.1811	1.19854	1.09499	1.31187	0.0461	8.43e-05	+++++++++	0	4.356	8	0.8237	rs652703	.
2	141358864	a	g	0.7061	0.794	-0.1986	0.819878	0.742613	0.905181	0.0505	8.456e-05	---------	0	2.31	8	0.97	rs11689750	LRP1B(0)
15	64479402	t	g	0.7306	0.7837	0.2082	1.23146	1.10996	1.36626	0.053	8.461e-05	-+++++++-	51	16.328	8	0.03792	rs28735188	CSNK1G1(0)|DAPK2(+140.9kb)|FAM96A(+93.2kb)|KIAA0101(-177.8kb)|PPIB(+24.05kb)|SNX1(+42.97kb)|SNX22(+29.72kb)
2	237230009	t	g	0.5477	0.5955	0.1863	1.20478	1.0979	1.32208	0.0474	8.465e-05	++++---++	50	15.987	8	0.04257	rs6735079	AGAP1(+189.6kb)|ASB18(+57.02kb)|GBX2(+153.4kb)|IQCA1(-2.78kb)
2	237231762	c	g	0.4103	0.4493	-0.184	0.831936	0.759019	0.911857	0.0468	8.499e-05	----+++--	40.6	13.458	8	0.09704	rs6752800	AGAP1(+191.3kb)|ASB18(+58.77kb)|GBX2(+155.1kb)|IQCA1(-1.027kb)
15	33258739	a	t	0.9591	0.9813	-0.5447	0.580016	0.44204	0.761059	0.1386	8.504e-05	------++-	0	6.833	8	0.5548	rs17816567	FMN1(0)
13	23427922	t	g	0.7189	0.7674	-0.1996	0.819058	0.741435	0.904808	0.0508	8.517e-05	---------	0	3.977	8	0.8592	rs11841116	BASP1P1(-43.25kb)
2	212957306	t	c	0.1808	0.2183	-0.2172	0.804769	0.722103	0.896899	0.0553	8.526e-05	+--------	0	6.942	8	0.5429	rs10179617	ERBB4(0)
14	62014825	a	g	0.0296	0.052	0.4835	1.62174	1.27408	2.06427	0.1231	8.532e-05	++++++++-	0	7.038	8	0.5326	rs79723025	FLJ22447(-22.43kb)|HIF1A(-147.3kb)|HIF1A-AS2(-198.9kb)|PRKCH(0)
1	221992803	t	g	0.2722	0.3375	0.1893	1.2084	1.09947	1.32813	0.0482	8.557e-05	++++++-++	0.2	8.018	8	0.4317	rs4506459	DUSP10(+77.29kb)
6	71271516	t	c	0.8115	0.8524	-0.2266	0.79724	0.71199	0.892697	0.0577	8.6e-05	------++-	0	3.485	8	0.9003	rs73489091	C6orf57(-5.108kb)|FAM135A(+0.639kb)|SMAP1(-106kb)
6	8958035	t	c	0.9385	0.9589	-0.3982	0.671528	0.550491	0.819176	0.1014	8.621e-05	------+--	0	2.431	8	0.9649	rs9393081	LOC100506207(+172.4kb)
6	75386615	c	g	0.0217	0.0435	-0.5511	0.576316	0.437673	0.758877	0.1404	8.627e-05	-------+-	11.2	9.009	8	0.3415	rs77695737	.
2	158540971	a	g	0.9845	0.9898	1.1241	3.07745	1.75585	5.39379	0.2863	8.632e-05	-+?+++-+?	0	3.341	6	0.765	rs72921007	ACVR1(-51.99kb)|ACVR1C(+55.57kb)
13	23428990	t	c	0.2326	0.2809	0.1995	1.22079	1.1051	1.3486	0.0508	8.651e-05	+++++++++	0	3.961	8	0.8606	rs12853227	BASP1P1(-42.18kb)
16	79967324	t	c	0.6598	0.687	0.1817	1.19925	1.09522	1.31318	0.0463	8.652e-05	+++++++++	0	2.37	8	0.9675	rs4132185	.
16	79968790	t	c	0.2661	0.3176	-0.1871	0.829361	0.755336	0.91064	0.0477	8.653e-05	---------	0	2.031	8	0.98	rs10514470	.
3	100762644	a	g	0.0772	0.1645	-0.2504	0.778489	0.686981	0.882186	0.0638	8.655e-05	+--------	30.6	11.524	8	0.1737	rs62275826	ABI3BP(+50.31kb)|IMPG2(-178.7kb)
16	79957048	t	c	0.2568	0.3158	-0.1877	0.828863	0.754735	0.910272	0.0478	8.665e-05	---------	0	2.09	8	0.9781	rs12445439	.
12	70645867	t	c	0.2592	0.3412	0.189	1.20804	1.09914	1.32773	0.0482	8.679e-05	+++++++++	0	2.199	8	0.9743	rs7969013	CNOT2(0)|KCNMB4(-114.2kb)
21	27065860	t	c	0.5103	0.5685	-0.1726	0.841474	0.771947	0.917264	0.044	8.694e-05	------+--	0	5.965	8	0.6512	rs9984260	APP(-187kb)|ATP5J(-30.93kb)|GABPA(-41.4kb)|JAM2(0)|LINC00515(+110.3kb)|MIR155(+119.5kb)|MIR155HG(+118.4kb)|MRPL39(+86.06kb)
18	60233646	a	g	0.26	0.3587	-0.1834	0.832435	0.759475	0.912404	0.0468	8.729e-05	------+--	0	5.139	8	0.7426	rs11152349	PHLPP1(-149kb)|TNFRSF11A(+178.7kb)|ZCCHC2(0)
16	79983835	t	c	0.6916	0.7341	0.1887	1.20768	1.09903	1.32707	0.0481	8.757e-05	+++++++++	0	2.256	8	0.9721	rs12445070	.
13	83614836	a	g	0.9027	0.9221	-0.307	0.735651	0.630988	0.857673	0.0783	8.766e-05	---------	4	8.335	8	0.4014	rs2807405	.
16	85068762	a	g	0.9294	0.9757	-0.464	0.628764	0.498641	0.792841	0.1183	8.797e-05	---++----	40.6	13.46	8	0.09696	rs9921176	CRISPLD2(+125.6kb)|FAM92B(-63.2kb)|KIAA0513(0)|LOC400548(-102kb)|ZDHHC7(+23.62kb)
2	212961992	a	g	0.8106	0.8387	0.2278	1.25583	1.12067	1.4073	0.0581	8.806e-05	+++++++++	0	5.419	8	0.712	rs7564926	ERBB4(0)
16	79987278	a	g	0.2992	0.3294	-0.184	0.831936	0.758871	0.912036	0.0469	8.808e-05	+--------	0	2.813	8	0.9455	rs4436791	.
13	23423593	a	g	0.2327	0.2823	0.1992	1.22043	1.10476	1.3482	0.0508	8.828e-05	+++++++++	0	3.591	8	0.892	rs9510384	BASP1P1(-47.58kb)
13	83726061	a	t	0.8439	0.8858	-0.2581	0.772518	0.679045	0.878858	0.0658	8.828e-05	---------	0	4.984	8	0.7592	rs11149258	.
22	43155722	t	c	0.15	0.3113	-0.2122	0.808803	0.727431	0.899277	0.0541	8.851e-05	------++-	19.1	9.884	8	0.2732	rs6519337	A4GALT(+38.85kb)|ARFGAP3(-36.81kb)|ATP5L2(+119.1kb)|CYB5R3(+110.3kb)|PACSIN2(-110kb)|POLDIP3(+144.8kb)|RNU12(+144.3kb)|RRP7B(+177.7kb)|SERHL2(+185.3kb)
13	83783870	t	c	0.0799	0.0972	0.3065	1.35866	1.16559	1.58371	0.0782	8.852e-05	+++++++++	0	7.26	8	0.5088	rs78483730	.
13	83783858	a	t	0.0799	0.0972	0.3065	1.35866	1.16559	1.58371	0.0782	8.856e-05	+++++++++	0	7.261	8	0.5087	rs74562314	.
9	108731066	a	g	0.9674	0.9858	0.627	1.87199	1.36807	2.56152	0.16	8.874e-05	+++++++++	0	6.9	8	0.5475	rs2417679	TMEM38B(+192.2kb)
11	98561383	a	g	0.013	0.0177	-0.8031	0.447938	0.299781	0.669318	0.2049	8.877e-05	+-----?-?	0	5.732	6	0.4539	rs1663433	.
13	83617000	t	c	0.9027	0.9221	-0.3067	0.735871	0.631178	0.857931	0.0783	8.896e-05	---------	4	8.332	8	0.4018	rs1532233	.
2	212957144	c	g	0.7938	0.8332	0.2245	1.2517	1.11873	1.40047	0.0573	8.897e-05	+++++++++	0	6.226	8	0.6219	rs10166993	ERBB4(0)
13	23422522	t	g	0.7018	0.7484	-0.1941	0.823576	0.747426	0.907483	0.0495	8.913e-05	---------	0	3.743	8	0.8796	rs11616753	BASP1P1(-48.65kb)
16	79956126	a	g	0.6854	0.7434	0.1873	1.20599	1.09813	1.32444	0.0478	8.958e-05	+++++++++	0	2.077	8	0.9786	rs11150230	.
16	79986550	c	g	0.6696	0.6995	0.1831	1.20093	1.09589	1.31605	0.0467	8.969e-05	-++++++++	0	2.525	8	0.9606	rs4243190	.
1	221991428	a	g	0.2709	0.3365	0.1889	1.20792	1.09903	1.3276	0.0482	8.973e-05	++++++-++	0	7.811	8	0.4521	rs12042853	DUSP10(+75.91kb)
16	79963895	t	c	0.6664	0.6921	0.1822	1.19985	1.09533	1.31435	0.0465	8.979e-05	+++++++++	0	1.599	8	0.9909	rs4243186	.
13	23410639	t	g	0.2441	0.2961	0.1952	1.21555	1.10251	1.34019	0.0498	8.994e-05	-++++++++	0	3.672	8	0.8855	rs9510372	BASP1P1(-60.53kb)
16	79984705	t	g	0.3001	0.3287	-0.1833	0.832518	0.759551	0.912496	0.0468	9.003e-05	+--------	0	2.742	8	0.9495	rs7205599	.
4	25044216	a	t	0.2487	0.3092	0.1932	1.21313	1.10139	1.3362	0.0493	9.009e-05	-+-++++++	9.5	8.839	8	0.3561	rs741201	CCDC149(+62.39kb)|LGI2(+11.8kb)|LOC285540(-118.1kb)|PI4K2B(-191.4kb)|SEPSECS(-77.41kb)
6	96452654	t	c	0.969	0.9818	0.6202	1.8593	1.36307	2.53619	0.1584	9.033e-05	+++-+++++	19.3	9.909	8	0.2714	rs151097208	FUT9(-11.19kb)
4	57703644	a	g	0.0277	0.0491	-0.5012	0.605803	0.471385	0.778552	0.128	9.039e-05	+--+-----	0	7.179	8	0.5174	rs7688450	HOPX(+155.8kb)|IGFBP7(-193.6kb)|NOA1(-125.9kb)|POLR2B(-141.5kb)|REST(-70.4kb)|SPINK2(+15.61kb)
5	29855087	a	g	0.1828	0.2284	0.213	1.23738	1.11224	1.37661	0.0544	9.044e-05	+++-++-++	0	6.668	8	0.5729	rs72745302	.
6	8947659	a	g	0.0381	0.0557	0.4042	1.4981	1.22376	1.83395	0.1032	9.048e-05	++++++-++	0	3.365	8	0.9094	rs78515315	LOC100506207(+162kb)
3	35686596	a	g	0.9674	0.9814	-0.6012	0.548153	0.405653	0.740712	0.1536	9.054e-05	---------	0	3.61	8	0.8905	rs139946667	ARPP21(0)|MIR128-2(-99.37kb)
9	36242043	a	g	0.013	0.045	0.6133	1.84651	1.35821	2.51037	0.1567	9.055e-05	-+++++-++	0	6.379	8	0.6049	rs144864932	CCIN(+70.71kb)|CLTA(+29.98kb)|GLIPR2(+78.14kb)|GNE(0)|RECK(+117.6kb)|RNF38(-94.36kb)
9	129474409	t	c	0.0119	0.021	-0.8097	0.444992	0.296702	0.667396	0.2068	9.058e-05	-----?---	0	3.053	7	0.88	rs75772563	LMX1B(+11.1kb)|ZBTB34(-148.5kb)|ZBTB43(-92.88kb)
16	79981536	c	g	0.6708	0.7002	0.1827	1.20045	1.09545	1.31552	0.0467	9.061e-05	-++++++++	0	2.76	8	0.9485	rs11866704	.
7	7828348	c	g	0.0519	0.0812	-0.3511	0.703913	0.590425	0.839215	0.0897	9.081e-05	----+----	0	6.752	8	0.5636	rs79778562	GLCCI1(-180kb)|LOC729852(0)|MIOS(+181.2kb)|RPA3(+70.11kb)
2	17148004	a	c	0.9548	0.9793	0.5221	1.68556	1.29776	2.18926	0.1334	9.086e-05	++-+++-++	10.6	8.948	8	0.3467	rs12620194	.
2	67642303	c	g	0.0612	0.1182	-0.3301	0.718852	0.609252	0.848168	0.0844	9.095e-05	---------	14.8	9.395	8	0.3101	rs72835810	ETAA1(+4.77kb)|LOC644838(+199.9kb)
8	41410771	t	c	0.7066	0.7694	-0.1973	0.820944	0.743725	0.906181	0.0504	9.095e-05	+-+---+--	0	3.245	8	0.9181	rs34072175	AGPAT6(-24.94kb)|ANK1(-99.97kb)|GINS4(+8.206kb)|GOLGA7(+42.27kb)|MIR486(-107.2kb)|NKX6-3(-93.06kb)
16	79973539	a	g	0.7784	0.8694	0.2122	1.2364	1.11179	1.37497	0.0542	9.104e-05	+++++++++	0	3.09	8	0.9286	rs13335346	.
13	23433910	t	c	0.2329	0.2805	0.1991	1.2203	1.10444	1.34833	0.0509	9.111e-05	+++++++++	0	3.704	8	0.8828	rs9580450	BASP1P1(-37.26kb)
19	55004396	t	c	0.0824	0.1589	-0.2563	0.77391	0.680668	0.879924	0.0655	9.136e-05	------?--	0	0.714	7	0.9982	rs138868066	CDC42EP5(+19.97kb)|KIR3DX1(-39.51kb)|LAIR1(+127.7kb)|LAIR2(-9.616kb)|LENG8(+31.2kb)|LENG9(+29.5kb)|LILRA1(-100.6kb)|LILRA2(-80.86kb)|LILRA4(+154kb)|LILRA5(+180kb)|LILRB1(-124kb)|LILRB4(-169.7kb)|TTYH1(+56.5kb)
15	58527957	c	g	0.0435	0.0647	-0.396	0.673007	0.55192	0.820659	0.1012	9.179e-05	------+--	0	4.026	8	0.8548	rs28510553	ALDH1A2(+169.8kb)|AQP9(+49.85kb)|LIPC(-196.2kb)
14	65727888	t	g	0.6734	0.7067	0.1865	1.20502	1.09747	1.32312	0.0477	9.188e-05	++++--+-+	31.8	11.737	8	0.1633	rs2411916	CHURC1-FNTB(+198.5kb)|FNTB(+198.5kb)|FUT8(-149.4kb)|FUT8-AS1(-149.4kb)|LOC100128233(+38.82kb)|LOC100506321(+166.9kb)|MAX(+158.5kb)|MIR4708(-73.95kb)
9	111044289	a	g	0.9388	0.9682	0.4239	1.52791	1.23545	1.8896	0.1084	9.191e-05	-++-++--+	22.6	10.34	8	0.242	rs7025748	.
13	23406519	a	t	0.7037	0.7557	-0.1948	0.822999	0.746464	0.907382	0.0498	9.193e-05	+--------	0	3.802	8	0.8745	rs9506941	BASP1P1(-64.65kb)
8	41411931	a	c	0.2305	0.2934	0.1971	1.21787	1.10331	1.34431	0.0504	9.194e-05	-+-+++-++	0	3.244	8	0.9181	rs13268546	AGPAT6(-23.78kb)|ANK1(-98.81kb)|GINS4(+9.366kb)|GOLGA7(+43.43kb)|MIR486(-106kb)|NKX6-3(-91.9kb)
1	222013290	t	c	0.2725	0.3345	0.1898	1.20901	1.09937	1.32958	0.0485	9.195e-05	++++++-++	0	6.378	8	0.605	rs34411394	DUSP10(+97.77kb)
8	41412075	t	c	0.2305	0.2934	0.1971	1.21787	1.10331	1.34431	0.0504	9.21e-05	-+-+++-++	0	3.244	8	0.9181	rs13269106	AGPAT6(-23.63kb)|ANK1(-98.67kb)|GINS4(+9.51kb)|GOLGA7(+43.58kb)|MIR486(-105.9kb)|NKX6-3(-91.75kb)
13	83781759	t	c	0.0799	0.0972	0.3057	1.35757	1.16466	1.58245	0.0782	9.216e-05	+++++++++	0	7.339	8	0.5005	rs11843143	.
14	66213465	a	g	0.0508	0.073	-0.3468	0.706947	0.594133	0.841181	0.0887	9.221e-05	---------	0	4.225	8	0.8362	rs730127	FUT8(+2.626kb)
13	23430756	a	g	0.2351	0.2824	0.1993	1.22055	1.10444	1.34886	0.051	9.251e-05	+++++++++	0	4.247	8	0.8342	rs1556270	BASP1P1(-40.41kb)
4	40384525	a	c	0.7174	0.7826	-0.199	0.81955	0.741734	0.905529	0.0509	9.258e-05	----+-+--	0	7.948	8	0.4385	rs1955259	CHRNA9(+27.29kb)|MIR4802(-119.5kb)|RBM47(-40.75kb)|RHOH(+138.1kb)
1	221996085	a	g	0.6627	0.727	-0.1885	0.828201	0.753541	0.910257	0.0482	9.275e-05	------+--	0.5	8.04	8	0.4295	rs12048761	DUSP10(+80.57kb)
11	95719471	t	c	0.6409	0.6887	0.185	1.20322	1.09669	1.3201	0.0473	9.277e-05	-++++-+++	14.4	9.343	8	0.3142	rs480834	CEP57(+153.6kb)|FAM76B(+196.5kb)|MAML2(0)|MTMR2(+62.1kb)
3	28965532	a	g	0.517	0.609	-0.1739	0.840381	0.770188	0.91697	0.0445	9.304e-05	+--------	0	3.083	8	0.9291	rs9822508	LINC00693(+165.7kb)
5	29853500	t	g	0.1828	0.2284	0.2126	1.23689	1.1118	1.37606	0.0544	9.308e-05	+++-++-++	0	6.671	8	0.5726	rs12523035	.
1	4890255	a	g	0.0274	0.0615	0.5648	1.7591	1.32522	2.33502	0.1445	9.318e-05	++++++?++	0	2.235	7	0.9457	rs61766788	AJAP1(+46.4kb)
12	70690188	a	g	0.2588	0.3427	0.1878	1.20659	1.09804	1.32588	0.0481	9.325e-05	+++++++++	0	2.19	8	0.9746	rs80037325	CNOT2(0)|KCNMB4(-69.87kb)
5	29836700	t	c	0.183	0.2283	0.2131	1.23751	1.11192	1.37729	0.0546	9.352e-05	+++-++-++	0	6.529	8	0.5882	rs12521986	.
16	79957289	a	t	0.684	0.743	0.1867	1.20527	1.09747	1.32364	0.0478	9.376e-05	+++++++++	0	2.092	8	0.9781	rs12445495	.
14	98679169	a	g	0.19	0.2184	0.2098	1.23343	1.11021	1.37033	0.0537	9.401e-05	-++++++++	0	4.793	8	0.7794	rs1257906	.
6	114812852	a	g	0.9803	0.988	0.8113	2.25083	1.49782	3.38241	0.2078	9.422e-05	?++++?--+	0	4.789	6	0.5711	rs117245681	.
1	151016999	a	g	0.7782	0.8084	-0.2133	0.807914	0.72592	0.899169	0.0546	9.435e-05	------+--	0	4.624	8	0.7969	rs7366148	ANXA9(+48.88kb)|ARNT(+167.8kb)|BNIPL(0)|C1orf56(-3.259kb)|CDC42SE1(-6.447kb)|CERS2(+69.52kb)|FAM63A(+36.14kb)|GABPB2(-26.08kb)|LYSMD1(-115.2kb)|MLLT11(-15.15kb)|PIP5K1A(-154kb)|PRUNE(+8.81kb)|SCNM1(-121.5kb)|SEMA6C(-87.16kb)|SETDB1(+79.78kb)|TMOD4(-125.5kb)|TNFAIP8L2(-112.1kb)|TNFAIP8L2-SCNM1(-112.1kb)|VPS72(-131.8kb)
13	83671810	t	c	0.0776	0.0972	0.3067	1.35893	1.16514	1.58496	0.0785	9.437e-05	+++++++++	0	7.971	8	0.4363	rs9805205	.
11	7524025	t	c	0.9774	0.9862	0.7625	2.14363	1.46186	3.14335	0.1953	9.456e-05	-++?++?++	0	2.912	6	0.8199	rs572075752	CYB5R2(-162.3kb)|LOC100506258(+36.96kb)|OLFML1(0)|OVCH2(-186.6kb)|PPFIBP2(-10.97kb)|SYT9(+33.75kb)
9	1676825	a	g	0.3123	0.3745	0.1783	1.19518	1.09278	1.30718	0.0457	9.465e-05	+++++++++	0	4.569	8	0.8025	rs4741576	.
2	67633067	t	c	0.0611	0.1182	-0.3299	0.718996	0.609254	0.848504	0.0845	9.478e-05	---------	14.9	9.403	8	0.3094	rs72835806	ETAA1(0)|LOC644838(+190.6kb)
16	79982099	t	g	0.2662	0.3075	-0.1876	0.828946	0.754367	0.910898	0.0481	9.487e-05	---------	0	2.036	8	0.9799	rs4243189	.
16	79993792	t	c	0.1243	0.207	-0.2164	0.805413	0.722539	0.897793	0.0554	9.5e-05	-------+-	0	3.542	8	0.8959	rs4243192	.
16	78165353	a	c	0.3631	0.3961	0.1743	1.19041	1.09056	1.29941	0.0447	9.518e-05	-+-++++-+	0	7.355	8	0.4989	rs9933217	CLEC3A(+99.35kb)|VAT1L(+151.4kb)|WWOX(0)
6	71285378	a	g	0.8235	0.8595	-0.2291	0.795249	0.708821	0.892215	0.0587	9.551e-05	------++-	0	2.85	8	0.9434	rs7741265	C6orf57(0)|FAM135A(+14.5kb)|SMAP1(-92.1kb)
4	25040676	a	g	0.6885	0.7527	-0.1922	0.825142	0.749141	0.908853	0.0493	9.554e-05	+-+------	10.3	8.915	8	0.3495	rs4235328	CCDC149(+58.85kb)|LGI2(+8.262kb)|LOC285540(-121.6kb)|PI4K2B(-195kb)|SEPSECS(-80.95kb)
6	105081510	a	t	0.0977	0.1625	-0.2464	0.78161	0.690546	0.884681	0.0632	9.565e-05	------+--	0	4.177	8	0.8408	rs946134	HACE1(-94.46kb)
13	83729748	t	c	0.8429	0.8858	-0.2566	0.773678	0.680064	0.880177	0.0658	9.568e-05	---------	0	4.994	8	0.7582	rs1873770	.
11	98152953	t	c	0.0116	0.0272	0.7751	2.17081	1.47057	3.20449	0.1987	9.597e-05	+++?+++++	0	3.899	7	0.7913	rs61908203	.
11	19915103	t	c	0.38	0.4295	-0.2029	0.81636	0.737256	0.903951	0.052	9.607e-05	-------+-	0	2.93	8	0.9387	rs4757854	LOC100126784(+178.9kb)|MIR4694(+133.5kb)|NAV2(0)
4	120522579	t	c	0.5743	0.6014	-0.1792	0.835939	0.763868	0.914809	0.046	9.613e-05	------+--	0	4.281	8	0.831	rs62319649	FLJ14186(+190.8kb)|LOC645513(+101.8kb)|PDE5A(0)
4	77454808	a	t	0.1529	0.2039	0.2233	1.2502	1.11739	1.39879	0.0573	9.637e-05	+++++++++	0	6.969	8	0.54	rs7434628	CCDC158(+126.4kb)|MIR4450(-39.91kb)|SHROOM3(0)
4	77455314	c	g	0.8078	0.8576	-0.2302	0.794375	0.707626	0.891758	0.059	9.673e-05	---------	0	7.361	8	0.4982	rs7690648	CCDC158(+126.9kb)|MIR4450(-39.41kb)|SHROOM3(0)
1	244307774	a	c	0.2109	0.2686	0.2055	1.22814	1.10761	1.36178	0.0527	9.684e-05	++-++++++	44.4	14.395	8	0.07204	rs1330695	LOC339529(+97.16kb)|ZBTB18(+86.99kb)
13	83651659	t	c	0.9028	0.9223	-0.3058	0.736534	0.631498	0.85904	0.0785	9.742e-05	---------	0.2	8.015	8	0.432	rs9602065	.
13	83730949	t	c	0.8429	0.8858	-0.2562	0.773987	0.680336	0.880529	0.0658	9.771e-05	---------	0	4.869	8	0.7715	rs7983181	.
12	70665217	a	g	0.6592	0.7409	-0.1875	0.829029	0.754443	0.910989	0.0481	9.775e-05	---------	0	2.229	8	0.9732	rs10879118	CNOT2(0)|KCNMB4(-94.84kb)
12	70672600	t	c	0.6592	0.741	-0.1875	0.829029	0.754443	0.910989	0.0481	9.788e-05	---------	0	2.206	8	0.974	rs4761192	CNOT2(0)|KCNMB4(-87.46kb)
13	23416203	a	g	0.2834	0.322	0.1868	1.20539	1.09737	1.32404	0.0479	9.792e-05	+++++++-+	0	4.745	8	0.7844	rs9580448	BASP1P1(-54.96kb)
16	79973709	c	g	0.3095	0.3363	-0.1808	0.834602	0.762049	0.914063	0.0464	9.792e-05	---------	0	2.294	8	0.9706	rs10459867	.
16	79965446	c	g	0.6971	0.7657	0.189	1.20804	1.09849	1.32851	0.0485	9.813e-05	+++++++++	0	2.463	8	0.9634	rs4550466	.
1	244306471	t	c	0.2103	0.2681	0.2056	1.22826	1.10751	1.36218	0.0528	9.817e-05	++-++++++	45.7	14.738	8	0.06444	rs7541167	LOC339529(+95.85kb)|ZBTB18(+85.69kb)
5	29852839	t	c	0.7716	0.8173	-0.2121	0.808884	0.727076	0.899896	0.0544	9.829e-05	---+--+--	0	6.874	8	0.5503	rs1428314	.
12	70672149	a	t	0.259	0.3408	0.1874	1.20611	1.0976	1.32535	0.0481	9.83e-05	+++++++++	0	2.208	8	0.974	rs11611635	CNOT2(0)|KCNMB4(-87.91kb)
3	56695924	a	g	0.1152	0.1783	-0.2457	0.782157	0.691165	0.885127	0.0631	9.844e-05	---------	0	4.566	8	0.8028	rs9826788	ARHGEF3(-65.52kb)|CCDC66(+40.08kb)|ERC2(+193.5kb)|FAM208A(0)
1	244305170	t	c	0.2128	0.2692	0.2052	1.22777	1.10728	1.36137	0.0527	9.858e-05	++-++++++	47.4	15.205	8	0.05529	rs7537701	LOC339529(+94.55kb)|ZBTB18(+84.39kb)
2	141354994	a	g	0.6033	0.6478	0.1746	1.19077	1.09067	1.30006	0.0448	9.87e-05	+++++++++	0	1.817	8	0.9861	rs491269	LRP1B(0)
3	100815757	a	g	0.4273	0.4519	-0.1717	0.842232	0.77249	0.91827	0.0441	9.894e-05	+-----+--	0	5.974	8	0.6501	rs35902618	ABI3BP(+103.4kb)|IMPG2(-125.6kb)
4	40381489	t	c	0.7173	0.7731	-0.198	0.82037	0.742477	0.906435	0.0509	9.904e-05	----+-+--	6.8	8.586	8	0.3784	rs7695121	CHRNA9(+24.26kb)|MIR4802(-122.6kb)|RBM47(-43.78kb)|RHOH(+135.1kb)
13	83663017	t	c	0.0777	0.0972	0.3056	1.35744	1.16386	1.58322	0.0785	9.933e-05	+++++++++	0.2	8.013	8	0.4322	rs9602076	.
12	70703697	a	g	0.6571	0.7417	-0.1871	0.829361	0.754744	0.911354	0.0481	9.943e-05	---------	0	2.135	8	0.9766	rs12317233	CNOT2(0)|KCNMB4(-56.36kb)
5	29822323	a	t	0.7717	0.8167	-0.2125	0.80856	0.726501	0.899889	0.0546	9.947e-05	---+--+--	0	6.257	8	0.6184	rs12520733	.
16	79978200	a	g	0.2663	0.3136	-0.1858	0.83044	0.756319	0.911824	0.0477	9.979e-05	---------	0	1.848	8	0.9853	rs4445915	.
15	33199424	a	t	0.0353	0.0652	0.4166	1.5168	1.22959	1.87108	0.1071	9.994e-05	+++++++++	0	1.038	8	0.998	rs28415939	FMN1(0)|GREM1(+172.6kb)
6	8947676	a	g	0.9432	0.9619	-0.4006	0.669918	0.547452	0.819779	0.103	9.994e-05	------+--	0	3.358	8	0.9099	rs78712483	LOC100506207(+162kb)
