# Supplementary material for: Multiomics integrative analysis identifies APOE allele-specific blood biomarkers associated to Alzheimer’s disease etiopathogenesis
Source: Aging (Albany NY). 2021 Apr 12;13(7):9277–329. doi: 10.18632/aging.202950 (PMC8064208; doi:10.18632/aging.202950)
Supplement: Supplementary Table 8 [file aging-13-202950-s010.xlsx]

## Sheet: Sheet1
Supplementary Table 8. Sex stratified meta-analysis (females).
SNP	CHR	BP	A1	A2	MinFreq	MaxFreq	Beta	OR	LCI	UCI	SE	P	Direction	HetISq	HetChiSq	HetDf	HetPVal	RS	Annot
19:45382675_A	19	45382675	a	g	0.0176	0.0479	0.8868	2.42735	1.83512	3.21071	0.1427	5.1e-10	++-+++?++	0	5.809	7	0.5622	rs41290120	APOC1(-35.24kb)|APOC1P1(-47.38kb)|APOC2(-66.56kb)|APOC4(-62.82kb)|APOC4-APOC2(-62.82kb)|APOE(-26.36kb)|BCAM(+58kb)|BCL3(+119.4kb)|CBLC(+78.77kb)|CEACAM16(+168.7kb)|CEACAM19(+195kb)|CLASRP(-159.6kb)|CLPTM1(-75.17kb)|GEMIN7(-199.8kb)|PVRL2(0)|RELB(-122kb)|TOMM40(-11.8kb)|ZNF296(-192.1kb)
19:45413576_T	19	45413576	t	c	0.1638	0.3111	0.3673	1.44383	1.27661	1.63295	0.0628	4.862e-09	+++-++?++	0	6.34	7	0.5006	rs75627662	APOC1(-4.344kb)|APOC1P1(-16.48kb)|APOC2(-35.66kb)|APOC4(-31.92kb)|APOC4-APOC2(-31.92kb)|APOE(+0.926kb)|BCAM(+88.9kb)|BCL3(+150.3kb)|CBLC(+109.7kb)|CEACAM16(+199.6kb)|CLASRP(-128.7kb)|CLPTM1(-44.26kb)|GEMIN7(-168.9kb)|PPP1R37(-182.9kb)|PVRL2(+21.09kb)|RELB(-91.13kb)|TOMM40(+6.63kb)|ZNF296(-161.2kb)
19:45416741_T	19	45416741	t	c	0.2258	0.3693	0.3755	1.45572	1.28335	1.65124	0.0643	5.164e-09	++++++?++	0	5.38	7	0.6137	rs438811	APOC1(-1.179kb)|APOC1P1(-13.32kb)|APOC2(-32.5kb)|APOC4(-28.75kb)|APOC4-APOC2(-28.75kb)|APOE(+4.091kb)|BCAM(+92.06kb)|BCL3(+153.4kb)|CBLC(+112.8kb)|CLASRP(-125.6kb)|CLPTM1(-41.1kb)|GEMIN7(-165.8kb)|PPP1R37(-179.7kb)|PVRL2(+24.26kb)|RELB(-87.96kb)|TOMM40(+9.795kb)|ZNF296(-158kb)
19:45416178_T	19	45416178	t	g	0.2256	0.3693	0.3738	1.45325	1.28167	1.64779	0.0641	5.563e-09	++++++?++	0	5.659	7	0.5801	rs483082	APOC1(-1.742kb)|APOC1P1(-13.88kb)|APOC2(-33.06kb)|APOC4(-29.32kb)|APOC4-APOC2(-29.32kb)|APOE(+3.528kb)|BCAM(+91.5kb)|BCL3(+152.9kb)|CBLC(+112.3kb)|CLASRP(-126.1kb)|CLPTM1(-41.66kb)|GEMIN7(-166.3kb)|PPP1R37(-180.3kb)|PVRL2(+23.69kb)|RELB(-88.53kb)|TOMM40(+9.232kb)|ZNF296(-158.6kb)
19:45418790_C	19	45418790	t	c	0.6338	0.7825	-0.3715	0.689699	0.607913	0.782489	0.0644	7.975e-09	------?--	0	6.209	7	0.5156	rs5117	APOC1(0)|APOC1P1(-11.27kb)|APOC2(-30.45kb)|APOC4(-26.7kb)|APOC4-APOC2(-26.7kb)|APOE(+6.14kb)|BCAM(+94.11kb)|BCL3(+155.5kb)|CBLC(+114.9kb)|CLASRP(-123.5kb)|CLPTM1(-39.05kb)|GEMIN7(-163.7kb)|PPP1R37(-177.6kb)|PVRL2(+26.3kb)|RELB(-85.92kb)|TOMM40(+11.84kb)|ZNF296(-156kb)
19:45319631_A	19	45319631	a	g	0.0164	0.0457	0.8759	2.40104	1.78139	3.23623	0.1523	8.877e-09	++-+++?++	0	3.336	7	0.8523	rs118147862	APOC1(-98.29kb)|APOC1P1(-110.4kb)|APOC2(-129.6kb)|APOC4(-125.9kb)|APOC4-APOC2(-125.9kb)|APOE(-89.41kb)|BCAM(0)|BCL3(+56.33kb)|CBLC(+15.73kb)|CEACAM16(+105.6kb)|CEACAM19(+132kb)|CLPTM1(-138.2kb)|IGSF23(+179.6kb)|MIR4531(+162.6kb)|PVR(+150.2kb)|PVRL2(-29.76kb)|RELB(-185.1kb)|TOMM40(-74.84kb)
2:127892810_T	2	127892810	t	c	0.3444	0.4343	0.2456	1.27839	1.17483	1.39107	0.0431	1.18e-08	+++++++++	0	5.935	8	0.6545	rs6733839	BIN1(+27.91kb)|CYP27C1(-48.6kb)|ERCC3(-122.1kb)|MAP3K2(-163.4kb)
12:60787794_G	12	60787794	c	g	0.7017	0.773	-0.2473	0.780906	0.711486	0.857101	0.0475	1.887e-07	---------	0	5.47	8	0.7064	rs17123748	.
2:127891427_C	2	127891427	a	c	0.5376	0.6261	-0.217	0.80493	0.740596	0.874852	0.0425	3.184e-07	---------	0	5.114	8	0.7454	rs4663105	BIN1(+26.52kb)|CYP27C1(-49.98kb)|ERCC3(-123.4kb)|MAP3K2(-164.8kb)
16:20060063_T	16	20060063	t	g	0.468	0.5403	-0.2111	0.809693	0.746294	0.878478	0.0416	3.935e-07	------+--	0	6.111	8	0.6348	rs1925500	GPR139(0)|GPRC5B(+163.9kb)|IQCK(+191.2kb)
19:45412079_T	19	45412079	t	c	0.0364	0.0769	0.6359	1.88872	1.47686	2.41544	0.1255	4.012e-07	++-+++?-+	0	6.244	7	0.5116	rs7412	APOC1(-5.841kb)|APOC1P1(-17.98kb)|APOC2(-37.16kb)|APOC4(-33.42kb)|APOC4-APOC2(-33.42kb)|APOE(0)|BCAM(+87.4kb)|BCL3(+148.8kb)|CBLC(+108.2kb)|CEACAM16(+198.1kb)|CLASRP(-130.2kb)|CLPTM1(-45.76kb)|GEMIN7(-170.4kb)|PPP1R37(-184.4kb)|PVRL2(+19.59kb)|RELB(-92.63kb)|TOMM40(+5.133kb)|ZNF296(-162.7kb)
3:123518388_C	3	123518388	t	c	0.6559	0.7152	-0.2267	0.79716	0.730005	0.870493	0.0449	4.444e-07	------+--	0	6.793	8	0.5591	rs6783605	CCDC14(-113.9kb)|MYLK(0)|MYLK-AS1(+168.7kb)|ROPN1(-169.5kb)
2:127894098_A	2	127894098	a	g	0.2531	0.3431	0.2252	1.25257	1.1457	1.36941	0.0455	7.545e-07	-+-++++++	35.9	12.487	8	0.1307	rs56368748	BIN1(+29.2kb)|CYP27C1(-47.31kb)|ERCC3(-120.8kb)|MAP3K2(-162.1kb)
19:45411941_C	19	45411941	t	c	0.6676	0.8506	-0.5317	0.587605	0.474945	0.726989	0.1086	9.75e-07	---+--?--	34	10.613	7	0.1564	rs429358	APOC1(-5.979kb)|APOC1P1(-18.12kb)|APOC2(-37.3kb)|APOC4(-33.55kb)|APOC4-APOC2(-33.55kb)|APOE(0)|BCAM(+87.26kb)|BCL3(+148.6kb)|CBLC(+108kb)|CEACAM16(+198kb)|CLASRP(-130.4kb)|CLPTM1(-45.9kb)|GEMIN7(-170.6kb)|PPP1R37(-184.5kb)|PVRL2(+19.46kb)|RELB(-92.76kb)|TOMM40(+4.995kb)|ZNF296(-162.8kb)
3:123524036_G	3	123524036	a	g	0.3212	0.3997	0.204	1.2263	1.12829	1.33282	0.0425	1.611e-06	+++++++-+	0	6.367	8	0.6062	rs6797095	CCDC14(-108.2kb)|MYLK(0)|MYLK-AS1(+174.4kb)|ROPN1(-163.8kb)
3:123526911_C	3	123526911	a	c	0.6679	0.727	-0.2096	0.810909	0.744052	0.883772	0.0439	1.763e-06	------+--	6.2	8.525	8	0.384	rs2124508	CCDC14(-105.4kb)|MYLK(0)|MYLK-AS1(+177.2kb)|ROPN1(-161kb)
22:45885224_C	22	45885224	t	c	0.7337	0.9032	-0.2509	0.7781	0.701878	0.8626	0.0526	1.802e-06	---------	0	5.969	8	0.6507	rs6007060	ATXN10(-182.5kb)|FAM118A(+147.4kb)|FBLN1(-13.49kb)|RIBC2(+56.92kb)|SMC1B(+75.72kb)|UPK3A(+193.5kb)
2:127892768_T	2	127892768	t	g	0.2584	0.3419	0.216	1.2411	1.13566	1.35634	0.0453	1.868e-06	++++++-++	7	8.606	8	0.3766	rs34779859	BIN1(+27.86kb)|CYP27C1(-48.64kb)|ERCC3(-122.1kb)|MAP3K2(-163.5kb)
17:52298659_C	17	52298659	a	c	0.3542	0.4183	0.1978	1.21872	1.12329	1.32225	0.0416	2.026e-06	-++-+++++	28.8	11.236	8	0.1887	rs1508017	.
16:80161092_G	16	80161092	a	g	0.9836	0.9889	0.9028	2.4665	1.69495	3.58925	0.1914	2.385e-06	+++++?-++	0	4.904	7	0.6717	rs113980389	.
3:123521004_T	3	123521004	t	c	0.2736	0.3299	0.2086	1.23195	1.12972	1.34344	0.0442	2.418e-06	++++++-++	1.5	8.121	8	0.4217	rs4678061	CCDC14(-111.3kb)|MYLK(0)|MYLK-AS1(+171.3kb)|ROPN1(-166.9kb)
13:78295914_A	13	78295914	a	g	0.0442	0.0886	0.3908	1.47816	1.25624	1.7393	0.083	2.474e-06	++++++--+	44.8	14.5	8	0.06963	rs7332458	EDNRB(-173.7kb)|LOC100505518(-97.16kb)|MIR3665(+23.66kb)|SCEL(+76.52kb)|SLAIN1(0)
3:123534870_A	3	123534870	a	g	0.5985	0.6793	-0.1978	0.820534	0.755397	0.891288	0.0422	2.847e-06	------++-	0	6.758	8	0.5629	rs13094938	CCDC14(-97.4kb)|MYLK(0)|MYLK-AS1(+185.2kb)|ROPN1(-153kb)
3:123537397_T	3	123537397	a	t	0.6615	0.7266	-0.2047	0.814892	0.747707	0.888113	0.0439	3.052e-06	------+--	13.5	9.253	8	0.3214	rs4678063	CCDC14(-94.88kb)|MYLK(0)|MYLK-AS1(+187.7kb)|ROPN1(-150.5kb)
13:78296090_C	13	78296090	t	c	0.9113	0.9558	-0.3868	0.679227	0.57725	0.799219	0.083	3.151e-06	------++-	46.9	15.074	8	0.05773	rs7333763	EDNRB(-173.5kb)|LOC100505518(-96.98kb)|MIR3665(+23.84kb)|SCEL(+76.69kb)|SLAIN1(0)
13:78296637_G	13	78296637	a	g	0.9113	0.9558	-0.3863	0.679567	0.577539	0.799619	0.083	3.252e-06	------++-	46.8	15.039	8	0.05839	rs1146913	EDNRB(-173kb)|LOC100505518(-96.43kb)|MIR3665(+24.39kb)|SCEL(+77.24kb)|SLAIN1(0)
6:889966_A	6	889966	a	c	0.0183	0.0443	-0.5871	0.555937	0.434027	0.712089	0.1263	3.328e-06	------+--	0	5.962	8	0.6515	rs113330361	EXOC2(+196.8kb)|LOC285768(-71.27kb)
13:78297986_G	13	78297986	a	g	0.9112	0.9558	-0.3854	0.680179	0.578059	0.800339	0.083	3.408e-06	------++-	46.6	14.987	8	0.0594	rs1146914	EDNRB(-171.6kb)|LOC100505518(-95.08kb)|MIR3665(+25.74kb)|SCEL(+78.59kb)|SLAIN1(0)
13:78298112_G	13	78298112	t	g	0.9112	0.9558	-0.3853	0.680247	0.578116	0.800419	0.083	3.423e-06	------++-	46.5	14.961	8	0.05991	rs1146915	EDNRB(-171.5kb)|LOC100505518(-94.96kb)|MIR3665(+25.86kb)|SCEL(+78.71kb)|SLAIN1(0)
13:78298175_A	13	78298175	a	g	0.0442	0.0888	0.3852	1.46991	1.24922	1.72958	0.083	3.438e-06	++++++--+	46.5	14.956	8	0.06001	rs1146916	EDNRB(-171.4kb)|LOC100505518(-94.9kb)|MIR3665(+25.92kb)|SCEL(+78.78kb)|SLAIN1(0)
13:78298455_A	13	78298455	a	g	0.0442	0.0888	0.3849	1.46947	1.24885	1.72906	0.083	3.498e-06	++++++--+	46.5	14.951	8	0.06011	rs1144372	EDNRB(-171.2kb)|LOC100505518(-94.62kb)|MIR3665(+26.2kb)|SCEL(+79.06kb)|SLAIN1(0)
20:16158298_C	20	16158298	a	c	0.7882	0.8148	0.2294	1.25785	1.14154	1.386	0.0495	3.526e-06	++++++-++	0	5.403	8	0.7138	rs6135693	KIF16B(-94.45kb)|MACROD2(+124.5kb)
13:78300367_T	13	78300367	t	c	0.0441	0.0888	0.3847	1.46917	1.2486	1.72872	0.083	3.566e-06	++++++--+	46	14.807	8	0.063	rs1144376	EDNRB(-169.2kb)|LOC100505518(-92.7kb)|MIR3665(+28.12kb)|SCEL(+80.97kb)|SLAIN1(0)
13:78299737_T	13	78299737	t	g	0.0441	0.0888	0.384	1.46815	1.24772	1.72751	0.083	3.678e-06	++++++--+	46.1	14.853	8	0.06206	rs1144375	EDNRB(-169.9kb)|LOC100505518(-93.33kb)|MIR3665(+27.49kb)|SCEL(+80.34kb)|SLAIN1(0)
11:85859916_T	11	85859916	t	c	0.5655	0.6053	0.1861	1.20454	1.11328	1.30329	0.0402	3.695e-06	+++++++++	0	4.346	8	0.8246	rs10898440	C11orf73(-153.3kb)|EED(-95.89kb)|PICALM(+78.99kb)
13:78295952_C	13	78295952	a	c	0.9113	0.9558	-0.3835	0.681472	0.579158	0.801861	0.083	3.857e-06	------++-	46.2	14.856	8	0.062	rs7331961	EDNRB(-173.7kb)|LOC100505518(-97.12kb)|MIR3665(+23.7kb)|SCEL(+76.55kb)|SLAIN1(0)
20:16171308_C	20	16171308	t	c	0.8782	0.9139	0.2998	1.34959	1.18769	1.53356	0.0652	4.239e-06	++++++-++	0	3.21	8	0.9205	rs57926689	KIF16B(-81.44kb)|MACROD2(+137.5kb)
3:112942269_A	3	112942269	a	c	0.3338	0.3747	0.1974	1.21823	1.11977	1.32535	0.043	4.36e-06	++++++-++	0	4.215	8	0.8372	rs9859731	BOC(0)|WDR52(-63.51kb)|WDR52-AS1(-180.6kb)
13:78329866_A	13	78329866	a	g	0.044	0.0869	0.3901	1.47713	1.2502	1.74525	0.0851	4.568e-06	++++++--+	47	15.09	8	0.05743	rs1279677	EDNRB(-139.7kb)|LOC100505518(-63.2kb)|MIR3665(+57.62kb)|SCEL(+110.5kb)|SLAIN1(0)
13:78296042_A	13	78296042	a	g	0.0442	0.0871	0.3834	1.46726	1.24478	1.72952	0.0839	4.824e-06	++++++--+	47.1	15.127	8	0.05672	rs7332658	EDNRB(-173.6kb)|LOC100505518(-97.03kb)|MIR3665(+23.79kb)|SCEL(+76.64kb)|SLAIN1(0)
11:85850243_T	11	85850243	t	c	0.501	0.5417	0.182	1.19961	1.10959	1.29694	0.0398	4.871e-06	+++++++++	0	4.977	8	0.76	rs3844143	C11orf73(-163kb)|EED(-105.6kb)|PICALM(+69.32kb)
13:78334223_C	13	78334223	c	g	0.044	0.0867	0.3893	1.47595	1.24871	1.74453	0.0853	5.025e-06	++++++--+	44.1	14.322	8	0.07376	rs74570860	EDNRB(-135.4kb)|LOC100505518(-58.85kb)|MIR3665(+61.97kb)|SCEL(+114.8kb)|SLAIN1(0)
11:85839935_T	11	85839935	t	c	0.5733	0.6229	0.1847	1.20286	1.11085	1.30249	0.0406	5.305e-06	+++++++++	0	5.315	8	0.7234	rs7114401	C11orf73(-173.3kb)|EED(-115.9kb)|PICALM(+59.01kb)
13:78315135_A	13	78315135	a	g	0.0438	0.0872	0.3857	1.47064	1.2452	1.7369	0.0849	5.502e-06	++++++--+	46.8	15.028	8	0.0586	rs9544591	EDNRB(-154.5kb)|LOC100505518(-77.94kb)|MIR3665(+42.88kb)|SCEL(+95.74kb)|SLAIN1(0)
13:78348140_C	13	78348140	t	c	0.9145	0.9558	-0.387	0.679091	0.574539	0.80267	0.0853	5.743e-06	------++-	44.5	14.404	8	0.07183	rs1146921	EDNRB(-121.5kb)|LOC100505518(-44.93kb)|MIR3665(+75.89kb)|SCEL(+128.7kb)|SLAIN1(+9.763kb)
13:78346313_A	13	78346313	a	t	0.0441	0.0857	0.3874	1.47315	1.2461	1.74156	0.0854	5.769e-06	++++++--+	42.6	13.938	8	0.0834	rs9544599	EDNRB(-123.3kb)|LOC100505518(-46.76kb)|MIR3665(+74.06kb)|SCEL(+126.9kb)|SLAIN1(+7.936kb)
20:6100088_G	20	6100088	a	g	0.4169	0.4903	0.1866	1.20515	1.11144	1.30676	0.0413	6.176e-06	-++++-+++	37.2	12.739	8	0.1212	rs10373	CHGB(+194.1kb)|CRLS1(+79.39kb)|FERMT1(0)|LRRN4(+65.36kb)|MCM8(+124.3kb)|TRMT6(+168.9kb)
2:79535193_G	2	79535193	t	g	0.8042	0.8367	-0.2399	0.786707	0.708807	0.873167	0.0532	6.517e-06	--+------	0	7.896	8	0.4437	rs56268562	REG1A(+184.6kb)|REG1P(+169.6kb)|REG3A(+148.3kb)
2:79535220_G	2	79535220	c	g	0.8045	0.8368	-0.2394	0.7871	0.709161	0.873604	0.0532	6.846e-06	--+------	0	7.909	8	0.4424	rs55968246	REG1A(+184.7kb)|REG1P(+169.7kb)|REG3A(+148.3kb)
11:85800279_A	11	85800279	a	g	0.6486	0.6814	0.1896	1.20877	1.11281	1.313	0.0422	6.879e-06	+++++++++	0	0.93	8	0.9987	rs561655	CCDC83(+169.2kb)|EED(-155.5kb)|PICALM(+19.36kb)
11:85828548_A	11	85828548	a	g	0.6663	0.6887	0.1906	1.20998	1.11349	1.31483	0.0424	7.075e-06	+++++++++	0	0.74	8	0.9994	rs598726	C11orf73(-184.7kb)|CCDC83(+197.5kb)|EED(-127.3kb)|PICALM(+47.62kb)
11:85798020_G	11	85798020	t	g	0.2814	0.3213	-0.1965	0.821601	0.754011	0.89525	0.0438	7.129e-06	---------	0	1.661	8	0.9897	rs631639	CCDC83(+167kb)|EED(-157.8kb)|PICALM(+17.1kb)
8:27468503_A	8	27468503	a	c	0.5829	0.6487	0.1894	1.20852	1.11259	1.31273	0.0422	7.134e-06	+++-+++-+	30.2	11.462	8	0.1769	rs867230	CCDC25(-122.3kb)|CHRNA2(+131.7kb)|CLU(0)|EPHX2(+66.06kb)|ESCO2(-163.6kb)|MIR3622A(-90.69kb)|MIR3622B(-90.69kb)|PBK(-198.6kb)|PTK2B(+151.6kb)|SCARA3(-23.07kb)
8:58329481_T	8	58329481	t	c	0.0822	0.1085	0.3695	1.44701	1.23097	1.70097	0.0825	7.496e-06	++++++-++	0	7.873	8	0.446	rs75359710	LINC00588(+132.2kb)|LOC286177(+150.3kb)|LOC100507651(+184.1kb)
11:85849411_C	11	85849411	t	c	0.4558	0.495	-0.178	0.836942	0.774136	0.904845	0.0398	7.681e-06	---------	0	5.372	8	0.7172	rs11234556	C11orf73(-163.8kb)|EED(-106.4kb)|PICALM(+68.49kb)
13:78326761_A	13	78326761	a	g	0.044	0.0869	0.3785	1.46009	1.23675	1.72377	0.0847	7.855e-06	++++++--+	47.3	15.187	8	0.0556	rs1279676	EDNRB(-142.9kb)|LOC100505518(-66.31kb)|MIR3665(+54.51kb)|SCEL(+107.4kb)|SLAIN1(0)
2:127753697_A	2	127753697	a	g	0.0478	0.0822	0.3989	1.49018	1.25067	1.77557	0.0894	8.1e-06	-+++++--+	22.1	10.269	8	0.2466	rs3992945	BIN1(-51.9kb)|CYP27C1(-187.7kb)
7:150362448_G	7	150362448	a	g	0.9734	0.984	-0.7356	0.479218	0.346667	0.662451	0.1652	8.45e-06	+--------	41.6	13.701	8	0.0899	rs55747135	AOC1(-187.1kb)|GIMAP1(-51.2kb)|GIMAP1-GIMAP5(-51.2kb)|GIMAP2(-20.34kb)|GIMAP4(+91.41kb)|GIMAP5(-71.99kb)|GIMAP6(+32.71kb)|GIMAP7(+144.3kb)|GIMAP8(+186kb)|TMEM176A(-135.4kb)|TMEM176B(-125.9kb)
11:85794761_G	11	85794761	a	g	0.2804	0.3243	-0.1956	0.822341	0.754394	0.896408	0.044	8.822e-06	---------	0	1.31	8	0.9954	rs534128	CCDC83(+163.7kb)|EED(-161kb)|PICALM(+13.84kb)
13:78291088_A	13	78291088	a	g	0.0468	0.0852	0.3724	1.45121	1.2314	1.71026	0.0838	8.864e-06	++++++--+	45.4	14.649	8	0.06634	rs78770258	EDNRB(-178.5kb)|LOC100505518(-102kb)|MIR3665(+18.84kb)|SCEL(+71.69kb)|SLAIN1(0)
2:79540272_C	2	79540272	c	g	0.1609	0.1927	0.2373	1.26782	1.14161	1.40799	0.0535	9.05e-06	++-++++++	0	7.222	8	0.5129	rs17707159	CTNNA2(-199.8kb)|REG1A(+189.7kb)|REG1P(+174.7kb)|REG3A(+153.4kb)
12:60785381_A	12	60785381	a	t	0.2878	0.3545	0.1971	1.21787	1.11636	1.3286	0.0444	9.1e-06	+++++++++	0	5	8	0.7576	rs11173441	.
19:45415935_T	19	45415935	t	g	0.1266	0.2761	0.3807	1.46331	1.23632	1.73197	0.086	9.446e-06	+++-++?++	32	10.292	7	0.1726	rs7256200	APOC1(-1.985kb)|APOC1P1(-14.12kb)|APOC2(-33.3kb)|APOC4(-29.56kb)|APOC4-APOC2(-29.56kb)|APOE(+3.285kb)|BCAM(+91.26kb)|BCL3(+152.6kb)|CBLC(+112kb)|CLASRP(-126.4kb)|CLPTM1(-41.91kb)|GEMIN7(-166.6kb)|PPP1R37(-180.5kb)|PVRL2(+23.45kb)|RELB(-88.77kb)|TOMM40(+8.989kb)|ZNF296(-158.8kb)
3:112943667_G	3	112943667	a	g	0.6154	0.6492	-0.1886	0.828118	0.761632	0.900407	0.0427	1.011e-05	------+--	0	6.803	8	0.558	rs9827831	BOC(0)|WDR52(-62.11kb)|WDR52-AS1(-179.2kb)
19:45415713_A	19	45415713	a	g	0.1265	0.2762	0.3793	1.46126	1.23483	1.72921	0.0859	1.015e-05	+++-++?++	32.1	10.304	7	0.172	rs10414043	APOC1(-2.207kb)|APOC1P1(-14.35kb)|APOC2(-33.52kb)|APOC4(-29.78kb)|APOC4-APOC2(-29.78kb)|APOE(+3.063kb)|BCAM(+91.04kb)|BCL3(+152.4kb)|CBLC(+111.8kb)|CLASRP(-126.6kb)|CLPTM1(-42.13kb)|GEMIN7(-166.8kb)|PPP1R37(-180.7kb)|PVRL2(+23.23kb)|RELB(-88.99kb)|TOMM40(+8.767kb)|ZNF296(-159kb)
13:78305881_T	13	78305881	a	t	0.9128	0.956	-0.3699	0.690803	0.585824	0.814595	0.0841	1.082e-05	------++-	48.8	15.618	8	0.04819	rs1144378	EDNRB(-163.7kb)|LOC100505518(-87.19kb)|MIR3665(+33.63kb)|SCEL(+86.48kb)|SLAIN1(0)
17:52303311_A	17	52303311	a	c	0.5779	0.641	-0.182	0.833601	0.768631	0.904063	0.0414	1.118e-05	+--+-----	23.4	10.441	8	0.2354	rs995340	.
11:85858887_A	11	85858887	a	g	0.5876	0.6332	0.1789	1.1959	1.10421	1.29521	0.0407	1.127e-05	+++++++++	0	6.967	8	0.5402	rs10751134	C11orf73(-154.4kb)|EED(-96.92kb)|PICALM(+77.96kb)
17:52305285_A	17	52305285	a	g	0.5778	0.6406	-0.1818	0.833768	0.768785	0.904244	0.0414	1.152e-05	+--+-----	23.5	10.453	8	0.2347	rs2196225	.
17:52305782_A	17	52305782	a	t	0.5779	0.6407	-0.1817	0.833851	0.768862	0.904334	0.0414	1.161e-05	+--+-----	23.3	10.425	8	0.2365	rs9915250	.
2:159250362_G	2	159250362	a	g	0.2835	0.3085	0.1934	1.21337	1.11268	1.32317	0.0442	1.19e-05	-++-+++++	0	5.679	8	0.6832	rs2602205	CCDC148(0)|CCDC148-AS1(+157.7kb)|PKP4(-63.11kb)
15:88154108_G	15	88154108	a	g	0.9833	0.9897	0.8288	2.29057	1.58024	3.3202	0.1894	1.214e-05	?+-++?+++	0	4.869	6	0.5607	rs149172641	LINC00052(+31.19kb)
11:85795524_C	11	85795524	t	c	0.2815	0.3248	-0.1912	0.825967	0.758018	0.900008	0.0438	1.279e-05	---------	0	1.505	8	0.9926	rs565719	CCDC83(+164.5kb)|EED(-160.3kb)|PICALM(+14.6kb)
19:45410002_A	19	45410002	a	g	0.1227	0.2763	0.3809	1.4636	1.23342	1.73674	0.0873	1.283e-05	+++-++?++	31.4	10.203	7	0.1774	rs769449	APOC1(-7.918kb)|APOC1P1(-20.06kb)|APOC2(-39.24kb)|APOC4(-35.49kb)|APOC4-APOC2(-35.49kb)|APOE(0)|BCAM(+85.32kb)|BCL3(+146.7kb)|CBLC(+106.1kb)|CEACAM16(+196kb)|CLASRP(-132.3kb)|CLPTM1(-47.84kb)|GEMIN7(-172.5kb)|PPP1R37(-186.4kb)|PVRL2(+17.52kb)|RELB(-94.7kb)|TOMM40(+3.056kb)|ZNF296(-164.8kb)
12:74998798_T	12	74998798	t	c	0.0864	0.1051	-0.3125	0.731616	0.635698	0.842006	0.0717	1.314e-05	+--------	33.7	12.062	8	0.1485	rs12821462	ATXN7L3B(+63.57kb)
11:85794760_T	11	85794760	t	c	0.6608	0.712	0.19	1.20925	1.1102	1.31713	0.0436	1.323e-05	++-++++++	0	3.804	8	0.8743	rs683912	CCDC83(+163.7kb)|EED(-161kb)|PICALM(+13.84kb)
11:85795950_G	11	85795950	a	g	0.2791	0.3175	-0.1913	0.825885	0.757794	0.900094	0.0439	1.336e-05	---------	0	1.724	8	0.9883	rs480781	CCDC83(+164.9kb)|EED(-159.9kb)|PICALM(+15.03kb)
20:41951650_T	20	41951650	t	g	0.0642	0.0862	-0.3266	0.721372	0.622634	0.835768	0.0751	1.356e-05	--+---+--	0	7.498	8	0.484	rs78961588	L3MBTL1(-184.7kb)|PTPRT(+133.1kb)|SRSF6(-134.9kb)
20:41950588_C	20	41950588	c	g	0.0643	0.0866	-0.3263	0.721589	0.622943	0.835855	0.075	1.365e-05	--+---+--	0	7.328	8	0.5017	rs6030787	L3MBTL1(-185.7kb)|PTPRT(+132kb)|SRSF6(-135.9kb)
10:13049885_A	10	13049885	a	g	0.0479	0.0732	-0.3633	0.695378	0.590281	0.819186	0.0836	1.388e-05	---------	0	2.217	8	0.9736	rs7921121	CAMK1D(+178.2kb)|CCDC3(+6.181kb)|LOC283070(+172.3kb)|MCM10(-153.7kb)|OPTN(-92.2kb)
20:41955533_C	20	41955533	t	c	0.9139	0.9361	0.3259	1.38528	1.19567	1.60496	0.0751	1.412e-05	++-+++-++	0	7.432	8	0.4908	rs117857814	L3MBTL1(-180.8kb)|PTPRT(+137kb)|SRSF6(-131kb)
20:41953430_T	20	41953430	t	g	0.064	0.0861	-0.3257	0.722022	0.623317	0.836357	0.075	1.423e-05	--+---+--	0	7.533	8	0.4804	rs117156177	L3MBTL1(-182.9kb)|PTPRT(+134.9kb)|SRSF6(-133.1kb)
8:27467686_T	8	27467686	t	c	0.594	0.6501	0.1822	1.19985	1.10504	1.30281	0.042	1.451e-05	+++-+++-+	34.6	12.24	8	0.1408	rs9331896	CCDC25(-123.1kb)|CHRNA2(+130.9kb)|CLU(0)|EPHX2(+65.25kb)|ESCO2(-164.4kb)|MIR3622A(-91.51kb)|MIR3622B(-91.5kb)|PBK(-199.5kb)|PTK2B(+150.8kb)|SCARA3(-23.89kb)
20:41952584_G	20	41952584	t	g	0.9138	0.9359	0.3253	1.38445	1.19495	1.60399	0.0751	1.464e-05	++-+++-++	0	7.454	8	0.4885	rs78545570	L3MBTL1(-183.7kb)|PTPRT(+134kb)|SRSF6(-133.9kb)
20:41950541_C	20	41950541	a	c	0.9135	0.9357	0.3255	1.38472	1.19519	1.60431	0.0751	1.479e-05	++-+++-++	0	7.413	8	0.4928	rs6030786	L3MBTL1(-185.8kb)|PTPRT(+132kb)|SRSF6(-136kb)
8:27467821_G	8	27467821	c	g	0.3438	0.4037	-0.1829	0.832851	0.766737	0.904667	0.0422	1.479e-05	---+---+-	26.1	10.828	8	0.2117	rs2070926	CCDC25(-123kb)|CHRNA2(+131kb)|CLU(0)|EPHX2(+65.38kb)|ESCO2(-164.2kb)|MIR3622A(-91.37kb)|MIR3622B(-91.37kb)|PBK(-199.3kb)|PTK2B(+150.9kb)|SCARA3(-23.76kb)
20:41957146_T	20	41957146	t	c	0.0639	0.086	-0.3252	0.722383	0.623507	0.836939	0.0751	1.488e-05	--+---+--	0	7.454	8	0.4885	rs79194695	L3MBTL1(-179.2kb)|PTPRT(+138.6kb)|SRSF6(-129.4kb)
20:41957143_T	20	41957143	t	g	0.0639	0.086	-0.3251	0.722455	0.623569	0.837023	0.0751	1.491e-05	--+---+--	0	7.446	8	0.4894	rs79827494	L3MBTL1(-179.2kb)|PTPRT(+138.6kb)|SRSF6(-129.4kb)
11:85794542_G	11	85794542	a	g	0.2845	0.3351	-0.1884	0.828283	0.760442	0.902177	0.0436	1.533e-05	---------	0	2.079	8	0.9785	rs535590	CCDC83(+163.5kb)|EED(-161.3kb)|PICALM(+13.62kb)
11:85788351_T	11	85788351	t	c	0.6533	0.7098	0.1867	1.20527	1.1072	1.31202	0.0433	1.585e-05	++-++++++	0	3.773	8	0.877	rs541458	CCDC83(+157.3kb)|EED(-167.5kb)|PICALM(+7.428kb)
8:27464519_C	8	27464519	t	c	0.3517	0.404	-0.1803	0.83502	0.769336	0.906312	0.0418	1.588e-05	---+---+-	21.7	10.211	8	0.2505	rs11136000	CCDC25(-126.3kb)|CHRNA2(+127.7kb)|CLU(0)|EPHX2(+62.08kb)|ESCO2(-167.5kb)|MIR3622A(-94.67kb)|MIR3622B(-94.67kb)|PTK2B(+147.6kb)|SCARA3(-27.06kb)
10:13049566_G	10	13049566	c	g	0.9272	0.9525	0.3629	1.43749	1.21904	1.69509	0.0841	1.592e-05	+++++++++	0	2.182	8	0.9749	rs12357275	CAMK1D(+177.8kb)|CCDC3(+5.862kb)|LOC283070(+172kb)|MCM10(-154kb)|OPTN(-92.52kb)
11:85849094_G	11	85849094	c	g	0.4263	0.4636	-0.1726	0.841474	0.778022	0.910101	0.04	1.619e-05	---------	0	7.065	8	0.5296	rs11234554	C11orf73(-164.2kb)|EED(-106.7kb)|PICALM(+68.17kb)
4:183007008_G	4	183007008	a	g	0.6142	0.6665	0.1814	1.19889	1.10394	1.30202	0.0421	1.627e-05	++++-++++	25.6	10.756	8	0.2159	rs13127679	MGC45800(-53.15kb)|MIR1305(-83.44kb)
11:85787824_T	11	85787824	t	c	0.6606	0.7103	0.1863	1.20478	1.10675	1.3115	0.0433	1.719e-05	++-++++++	0	4.032	8	0.8542	rs536841	CCDC83(+156.8kb)|EED(-168kb)|PICALM(+6.901kb)
8:27466157_C	8	27466157	t	c	0.352	0.4044	-0.1799	0.835354	0.769493	0.906852	0.0419	1.748e-05	---+---+-	24.4	10.584	8	0.2264	rs1532276	CCDC25(-124.7kb)|CHRNA2(+129.3kb)|CLU(0)|EPHX2(+63.72kb)|ESCO2(-165.9kb)|MIR3622A(-93.04kb)|MIR3622B(-93.03kb)|PTK2B(+149.2kb)|SCARA3(-25.42kb)
20:41954369_T	20	41954369	t	g	0.064	0.0872	-0.3222	0.724553	0.62538	0.839454	0.0751	1.757e-05	--+---+--	0	7.477	8	0.4861	rs144933137	L3MBTL1(-182kb)|PTPRT(+135.8kb)|SRSF6(-132.1kb)
7:147205228_A	7	147205228	a	g	0.0274	0.0442	0.5524	1.73742	1.34979	2.23636	0.1288	1.795e-05	++-++++-+	30.4	11.493	8	0.1753	rs757741	CNTNAP2(0)|MIR548F4(+130kb)|MIR548I4(0)
8:27456253_C	8	27456253	t	c	0.373	0.4213	-0.1796	0.835604	0.769723	0.907124	0.0419	1.814e-05	---+---+-	7.6	8.657	8	0.372	rs2279590	CCDC25(-134.6kb)|CHRNA2(+119.4kb)|CLU(0)|EPHX2(+53.81kb)|ESCO2(-175.8kb)|MIR3622A(-102.9kb)|MIR3622B(-102.9kb)|PTK2B(+139.3kb)|SCARA3(-35.32kb)
10:126168780_C	10	126168780	c	g	0.1392	0.1682	-0.2545	0.775304	0.690096	0.871032	0.0594	1.846e-05	------?--	0	5.837	7	0.559	rs2361615	FAM53B(-139.1kb)|LHPP(0)|NKX1-2(+30.23kb)|OAT(+61.24kb)
2:127826533_G	2	127826533	a	g	0.668	0.731	-0.1874	0.829112	0.760904	0.903434	0.0438	1.864e-05	---------	0.4	8.031	8	0.4304	rs1060743	BIN1(0)|CYP27C1(-114.9kb)|ERCC3(-188.3kb)
11:85852979_A	11	85852979	a	g	0.5224	0.5582	0.1701	1.18542	1.09647	1.2816	0.0398	1.88e-05	+++++++++	0	5.229	8	0.7328	rs10792831	C11orf73(-160.3kb)|EED(-102.8kb)|PICALM(+72.06kb)
8:27465312_C	8	27465312	t	c	0.3532	0.4044	-0.1786	0.83644	0.770645	0.907854	0.0418	1.928e-05	---+---+-	25.5	10.734	8	0.2173	rs11787077	CCDC25(-125.5kb)|CHRNA2(+128.5kb)|CLU(0)|EPHX2(+62.87kb)|ESCO2(-166.7kb)|MIR3622A(-93.88kb)|MIR3622B(-93.88kb)|PTK2B(+148.4kb)|SCARA3(-26.26kb)
10:11322197_T	10	11322197	t	c	0.0229	0.0471	-0.5026	0.604956	0.480325	0.761924	0.1177	1.963e-05	---------	0	7.723	8	0.461	rs2890079	CELF2(0)|CELF2-AS2(+174.7kb)|USP6NL(-180.3kb)
11:85760028_C	11	85760028	t	c	0.2977	0.3352	-0.1834	0.832435	0.765153	0.905634	0.043	1.992e-05	---------	0	2.036	8	0.9799	rs694011	CCDC83(+129kb)|EED(-195.8kb)|PICALM(0)
11:85828551_G	11	85828551	c	g	0.2938	0.3232	-0.1831	0.832685	0.765532	0.905728	0.0429	2.001e-05	---------	0	2.388	8	0.9668	rs474479	C11orf73(-184.7kb)|CCDC83(+197.5kb)|EED(-127.3kb)|PICALM(+47.63kb)
10:126168869_A	10	126168869	a	c	0.1391	0.1677	-0.2531	0.77639	0.691063	0.872253	0.0594	2.037e-05	------?--	0	5.781	7	0.5655	rs2361616	FAM53B(-139kb)|LHPP(0)|NKX1-2(+30.32kb)|OAT(+61.32kb)
2:159302112_T	2	159302112	t	c	0.2354	0.2688	0.2	1.2214	1.11391	1.33926	0.047	2.104e-05	-++++++++	24.6	10.607	8	0.225	rs77748196	CCDC148(0)|PKP4(-11.36kb)
12:60862212_A	12	60862212	a	t	0.1834	0.2594	0.208	1.23121	1.11869	1.35506	0.0489	2.106e-05	+++++++-+	0	5.593	8	0.6927	rs17123837	.
5:8406022_G	5	8406022	c	g	0.9689	0.9843	0.57	1.76827	1.35983	2.29938	0.134	2.106e-05	+++++++++	0	7.517	8	0.482	rs115500787	LOC729506(0)|LOC100505738(-51.78kb)|MIR4458(-55.02kb)
8:80663182_G	8	80663182	a	g	0.8372	0.8807	0.249	1.28274	1.14378	1.43859	0.0585	2.115e-05	+++++++++	0	4.733	8	0.7857	rs2956254	HEY1(-13.06kb)|MRPS28(-167.9kb)|STMN2(+84.77kb)
12:60863497_T	12	60863497	t	c	0.1834	0.2586	0.2078	1.23097	1.11846	1.35479	0.0489	2.127e-05	+++++++-+	0	5.61	8	0.6909	rs11173481	.
11:85776544_A	11	85776544	a	g	0.6668	0.7034	0.183	1.20081	1.10354	1.30666	0.0431	2.166e-05	+++++++++	0	2.657	8	0.954	rs867611	CCDC83(+145.5kb)|EED(-179.3kb)|PICALM(0)
8:27462481_G	8	27462481	a	g	0.3489	0.4025	-0.1779	0.837026	0.771033	0.908668	0.0419	2.213e-05	---+---+-	21.4	10.175	8	0.2529	rs7982	CCDC25(-128.4kb)|CHRNA2(+125.7kb)|CLU(0)|EPHX2(+60.04kb)|ESCO2(-169.6kb)|MIR3622A(-96.71kb)|MIR3622B(-96.71kb)|PTK2B(+145.6kb)|SCARA3(-29.1kb)
6:29930939_A	6	29930939	a	g	0.0406	0.1201	-0.3061	0.736313	0.639153	0.848243	0.0722	2.24e-05	+--------	0	4.949	8	0.7631	rs56262516	HCG4(+170.1kb)|HCG4B(+37.51kb)|HCG8(-48.94kb)|HCG9(-11.95kb)|HLA-A(+17.28kb)|HLA-G(+132kb)|HLA-H(+72.08kb)|HLA-J(-42.81kb)|LOC554223(+165.4kb)|PPP1R11(-104kb)|RNF39(-107.1kb)|TRIM10(-188.8kb)|TRIM31(-139.7kb)|TRIM40(-173.6kb)|ZNRD1(-98.08kb)|ZNRD1-AS1(-37.85kb)
11:1662138_C	11	1662138	t	c	0.7658	0.7986	0.2074	1.23047	1.1178	1.35451	0.049	2.261e-05	++++++-++	33	11.949	8	0.1535	rs35071479	BRSK2(+178.2kb)|CTSD(-111.8kb)|DUSP8(+68.99kb)|FAM99A(-24.69kb)|FAM99B(-42.36kb)|IFITM10(-91.5kb)|KRTAP5-1(+55.62kb)|KRTAP5-2(+42.61kb)|KRTAP5-3(+32.44kb)|KRTAP5-4(+18.77kb)|KRTAP5-5(+9.979kb)|KRTAP5-6(-56.29kb)|KRTAP5-AS1(+41.72kb)|MOB2(0)|SYT8(-193.5kb)|TNNI2(-198.1kb)
2:159273472_G	2	159273472	a	g	0.7322	0.7628	-0.1969	0.821273	0.749732	0.899641	0.0465	2.314e-05	+--------	25.9	10.802	8	0.2132	rs113330028	CCDC148(0)|CCDC148-AS1(+180.8kb)|PKP4(-40kb)
10:13914117_C	10	13914117	t	c	0.9752	0.9858	0.6293	1.8763	1.40165	2.51167	0.1488	2.344e-05	++++-++++	23.3	10.436	8	0.2357	rs111682555	FRMD4A(0)
11:1662399_C	11	1662399	t	c	0.6723	0.7526	0.1914	1.21094	1.10806	1.32338	0.0453	2.38e-05	-+++++-++	0	6.552	8	0.5856	rs72847974	BRSK2(+178.5kb)|CTSD(-111.6kb)|DUSP8(+69.25kb)|FAM99A(-24.43kb)|FAM99B(-42.1kb)|IFITM10(-91.24kb)|KRTAP5-1(+55.89kb)|KRTAP5-2(+42.88kb)|KRTAP5-3(+32.71kb)|KRTAP5-4(+19.03kb)|KRTAP5-5(+10.24kb)|KRTAP5-6(-56.02kb)|KRTAP5-AS1(+41.98kb)|MOB2(0)|SYT8(-193.3kb)|TNNI2(-197.8kb)
6:40760878_A	6	40760878	a	g	0.0894	0.1328	0.3042	1.35554	1.17713	1.56099	0.072	2.391e-05	-++++++++	0	6.985	8	0.5383	rs72864436	.
2:159278573_A	2	159278573	a	g	0.2369	0.2677	0.1967	1.21738	1.11111	1.33381	0.0466	2.434e-05	-++++++++	26.7	10.91	8	0.2068	rs145563530	CCDC148(0)|CCDC148-AS1(+185.9kb)|PKP4(-34.9kb)
2:159284526_T	2	159284526	t	g	0.2365	0.2677	0.1971	1.21787	1.11134	1.3346	0.0467	2.449e-05	-++++++++	26.2	10.84	8	0.2109	rs76251234	CCDC148(0)|CCDC148-AS1(+191.8kb)|PKP4(-28.95kb)
2:159288179_A	2	159288179	a	g	0.2364	0.268	0.1973	1.21811	1.11135	1.33513	0.0468	2.466e-05	-++++++++	25.9	10.801	8	0.2133	rs79928267	CCDC148(0)|CCDC148-AS1(+195.5kb)|PKP4(-25.3kb)
2:159294314_T	2	159294314	t	g	0.2361	0.2685	0.1978	1.21872	1.11168	1.33606	0.0469	2.48e-05	-++++++++	25.8	10.78	8	0.2145	rs146646145	CCDC148(0)|PKP4(-19.16kb)
11:85857639_C	11	85857639	t	c	0.4407	0.4711	-0.1674	0.845861	0.782539	0.914308	0.0397	2.486e-05	---------	0	6.312	8	0.6123	rs7952506	C11orf73(-155.6kb)|EED(-98.17kb)|PICALM(+76.72kb)
11:85717923_C	11	85717923	a	c	0.2966	0.3357	-0.1812	0.834268	0.766838	0.907629	0.043	2.488e-05	---------	0	2.006	8	0.9808	rs2508696	CCDC83(+86.87kb)|PICALM(0)|SYTL2(+195.7kb)
2:159274969_C	2	159274969	c	g	0.2371	0.2677	0.1962	1.21677	1.11078	1.33288	0.0465	2.493e-05	-++++++++	26.9	10.943	8	0.2049	rs76136261	CCDC148(0)|CCDC148-AS1(+182.3kb)|PKP4(-38.51kb)
2:159295692_C	2	159295692	t	c	0.7314	0.764	-0.1977	0.820616	0.748545	0.899626	0.0469	2.495e-05	+--------	25.6	10.751	8	0.2162	rs144210753	CCDC148(0)|PKP4(-17.78kb)
2:159274227_C	2	159274227	t	c	0.7323	0.7628	-0.196	0.822012	0.750407	0.900451	0.0465	2.505e-05	+--------	26.9	10.937	8	0.2053	rs2193701	CCDC148(0)|CCDC148-AS1(+181.5kb)|PKP4(-39.25kb)
1:31968208_A	1	31968208	a	g	0.0207	0.0361	0.5663	1.76174	1.35375	2.29269	0.1344	2.516e-05	-++++++++	0	7.243	8	0.5107	rs186761762	COL16A1(-149.6kb)|FABP3(+122.3kb)|HCRTR1(-115.1kb)|LOC149086(-3.63kb)|LOC284551(-15.83kb)|PEF1(-127.3kb)|SERINC2(+60.68kb)|SNRNP40(+198.6kb)|TINAGL1(-73.88kb)|ZCCHC17(+130.4kb)
2:159291278_T	2	159291278	t	g	0.2362	0.2683	0.1973	1.21811	1.11113	1.33539	0.0469	2.543e-05	-++++++++	25.3	10.711	8	0.2186	rs115894713	CCDC148(0)|CCDC148-AS1(+198.6kb)|PKP4(-22.2kb)
5:8403454_A	5	8403454	a	c	0.0159	0.0312	-0.5543	0.574474	0.443777	0.743662	0.1317	2.559e-05	---------	0	7.58	8	0.4755	rs16880515	LOC729506(0)|LOC100505738(-54.34kb)|MIR4458(-57.58kb)
2:159290486_T	2	159290486	t	g	0.2363	0.2681	0.1971	1.21787	1.11112	1.33486	0.0468	2.56e-05	-++++++++	25.5	10.741	8	0.2168	rs113144913	CCDC148(0)|CCDC148-AS1(+197.8kb)|PKP4(-22.99kb)
12:60846155_T	12	60846155	t	c	0.1749	0.2324	0.2218	1.24832	1.12582	1.38416	0.0527	2.565e-05	-++++++++	0	1.688	8	0.9891	rs12228176	.
11:85860305_A	11	85860305	a	g	0.5261	0.5583	0.1673	1.18211	1.0934	1.27801	0.0398	2.582e-05	+++++++++	0	6.736	8	0.5653	rs9787874	C11orf73(-152.9kb)|EED(-95.5kb)|PICALM(+79.38kb)
11:85858253_A	11	85858253	a	g	0.5281	0.5594	0.167	1.18175	1.09329	1.27738	0.0397	2.597e-05	+++++++++	0	6.894	8	0.5481	rs10898438	C11orf73(-155kb)|EED(-97.55kb)|PICALM(+77.33kb)
11:85859483_C	11	85859483	c	g	0.5271	0.5586	0.1671	1.18187	1.0934	1.27751	0.0397	2.612e-05	+++++++++	0	6.269	8	0.6171	rs10898439	C11orf73(-153.8kb)|EED(-96.32kb)|PICALM(+78.56kb)
2:159265263_G	2	159265263	t	g	0.731	0.7625	-0.1949	0.822917	0.75138	0.901265	0.0464	2.654e-05	+--------	26.6	10.899	8	0.2075	rs76714700	CCDC148(0)|CCDC148-AS1(+172.6kb)|PKP4(-48.21kb)
2:159266371_A	2	159266371	a	g	0.2375	0.2687	0.195	1.21531	1.10966	1.33102	0.0464	2.665e-05	-++++++++	26.8	10.922	8	0.2061	rs112805856	CCDC148(0)|CCDC148-AS1(+173.7kb)|PKP4(-47.1kb)
19:45232161_A	19	45232161	a	g	0.0159	0.0441	0.5852	1.79535	1.36612	2.35944	0.1394	2.692e-05	++-+++?++	0	5.229	7	0.6321	rs62117160	APOC1(-185.8kb)|APOC1P1(-197.9kb)|APOE(-176.9kb)|BCAM(-80.15kb)|BCL3(-19.82kb)|CBLC(-48.96kb)|CEACAM16(+18.18kb)|CEACAM19(+44.53kb)|CEACAM20(+198.6kb)|CEACAM22P(+172kb)|IGSF23(+92.08kb)|MIR4531(+75.16kb)|PVR(+62.73kb)|PVRL2(-117.2kb)|TOMM40(-162.3kb)
2:159267928_C	2	159267928	a	c	0.7316	0.7626	-0.1949	0.822917	0.75138	0.901265	0.0464	2.699e-05	+--------	26.1	10.819	8	0.2121	rs6711808	CCDC148(0)|CCDC148-AS1(+175.2kb)|PKP4(-45.55kb)
2:159263874_A	2	159263874	a	c	0.2376	0.2688	0.1947	1.21495	1.10933	1.33062	0.0464	2.712e-05	-++++++++	26.6	10.9	8	0.2074	rs75006818	CCDC148(0)|CCDC148-AS1(+171.2kb)|PKP4(-49.6kb)
1:4853910_T	1	4853910	t	c	0.6584	0.7104	0.1865	1.20502	1.10459	1.31459	0.0444	2.716e-05	+++++++++	0	7.946	8	0.4388	rs7519688	AJAP1(+10.06kb)
2:159300402_C	2	159300402	t	c	0.7311	0.7645	-0.1972	0.821026	0.748773	0.900252	0.047	2.72e-05	+--------	24.5	10.601	8	0.2253	rs77571593	CCDC148(0)|PKP4(-13.07kb)
8:27466315_C	8	27466315	t	c	0.3469	0.3972	-0.177	0.83778	0.771274	0.910021	0.0422	2.724e-05	---+---+-	17.4	9.681	8	0.2881	rs1532278	CCDC25(-124.5kb)|CHRNA2(+129.5kb)|CLU(0)|EPHX2(+63.88kb)|ESCO2(-165.7kb)|MIR3622A(-92.88kb)|MIR3622B(-92.87kb)|PTK2B(+149.4kb)|SCARA3(-25.26kb)
7:149940062_A	7	149940062	a	g	0.021	0.0296	0.6416	1.89952	1.40737	2.56377	0.153	2.756e-05	+++++++++	0	3.025	8	0.9328	rs145704358	ACTR3C(-4.238kb)|LOC285972(-190.7kb)|LOC728743(-162.8kb)|LRRC61(-80.23kb)|RARRES2(-95.34kb)|REPIN1(-125.8kb)|RNU6-33P(-124kb)|RNU6-34P(-124kb)|ZBED6CL(-86.88kb)|ZNF775(-136.3kb)
12:60794942_A	12	60794942	a	g	0.3906	0.4724	0.1728	1.18863	1.09642	1.28859	0.0412	2.761e-05	+++++-+++	12.8	9.179	8	0.3274	rs1910677	.
2:37556864_G	2	37556864	a	g	0.8731	0.9069	0.2735	1.31456	1.15663	1.49405	0.0653	2.776e-05	++++++--+	19.9	9.981	8	0.2663	rs6751012	CEBPZ(+98.12kb)|EIF2AK2(+172.7kb)|LOC100505876(+125kb)|NDUFAF7(+80.56kb)|PRKD3(+12.64kb)|QPCT(-14.89kb)|SULT6B1(+141.2kb)
20:41957559_T	20	41957559	t	c	0.0639	0.0854	-0.3173	0.728112	0.62759	0.844735	0.0758	2.845e-05	--+---+--	0	7.238	8	0.5112	rs75017285	L3MBTL1(-178.8kb)|PTPRT(+139kb)|SRSF6(-128.9kb)
13:78224556_A	13	78224556	a	c	0.0509	0.0818	0.3468	1.41453	1.2024	1.6641	0.0829	2.861e-05	+++++++-+	44.2	14.345	8	0.0732	rs77381751	LOC100505518(-168.5kb)|MIR3665(-47.59kb)|SCEL(+5.158kb)|SLAIN1(-47.43kb)
20:6087162_G	20	6087162	a	g	0.3303	0.4323	0.1748	1.19101	1.09732	1.29269	0.0418	2.868e-05	-++++--++	49.9	15.962	8	0.04292	rs6053909	CHGB(+181.2kb)|CRLS1(+66.46kb)|FERMT1(0)|LRRN4(+52.44kb)|MCM8(+111.3kb)|TRMT6(+156kb)
11:74886858_G	11	74886858	a	g	0.3273	0.7395	-0.1838	0.832102	0.763349	0.907048	0.044	2.888e-05	---------	35.5	12.396	8	0.1344	rs1676881	ARRB1(-84.31kb)|MIR326(-159.3kb)|NEU3(+168.1kb)|OR2AT4(+86.1kb)|SLCO2B1(0)|SPCS2(+196.8kb)|TPBGL(-65.09kb)
11:85858497_T	11	85858497	t	g	0.528	0.5586	0.166	1.18057	1.09219	1.2761	0.0397	2.919e-05	+++++++++	0	6.873	8	0.5504	rs3851178	C11orf73(-154.8kb)|EED(-97.31kb)|PICALM(+77.57kb)
20:16153250_C	20	16153250	t	c	0.7673	0.7986	0.2013	1.22299	1.11274	1.34416	0.0482	2.99e-05	+++++--++	0	5.141	8	0.7424	rs6131787	KIF16B(-99.5kb)|MACROD2(+119.4kb)
8:27466181_C	8	27466181	t	c	0.3471	0.3991	-0.1756	0.838953	0.772506	0.911117	0.0421	2.993e-05	---+---+-	23.6	10.474	8	0.2333	rs1532277	CCDC25(-124.7kb)|CHRNA2(+129.4kb)|CLU(0)|EPHX2(+63.74kb)|ESCO2(-165.9kb)|MIR3622A(-93.01kb)|MIR3622B(-93.01kb)|PTK2B(+149.3kb)|SCARA3(-25.4kb)
2:159255637_G	2	159255637	c	g	0.7311	0.762	-0.1935	0.82407	0.752432	0.902528	0.0464	2.997e-05	+--------	26.2	10.844	8	0.2107	rs11681049	CCDC148(0)|CCDC148-AS1(+163kb)|PKP4(-57.84kb)
2:159255658_T	2	159255658	t	c	0.238	0.2689	0.1935	1.21349	1.108	1.32902	0.0464	3.002e-05	-++++++++	26.2	10.846	8	0.2106	rs11681050	CCDC148(0)|CCDC148-AS1(+163kb)|PKP4(-57.82kb)
13:78092364_C	13	78092364	a	c	0.8544	0.9112	-0.2665	0.766056	0.675877	0.868267	0.0639	3.008e-05	------++-	37.1	12.713	8	0.1221	rs9544527	MIR3665(-179.8kb)|MYCBP2(+191.2kb)|SCEL(-17.44kb)|SLAIN1(-179.6kb)
7:149945025_G	7	149945025	c	g	0.9706	0.9785	-0.6385	0.528084	0.391108	0.713033	0.1532	3.068e-05	---------	0	3.305	8	0.9138	rs74621454	ACTR3C(0)|LOC285972(-185.7kb)|LOC728743(-157.8kb)|LRRC61(-75.27kb)|RARRES2(-90.38kb)|REPIN1(-120.9kb)|RNU6-33P(-119kb)|RNU6-34P(-119kb)|ZBED6CL(-81.91kb)|ZNF775(-131.4kb)
3:2926235_G	3	2926235	a	g	0.5922	0.6503	0.1819	1.19949	1.10103	1.30676	0.0437	3.087e-05	++-++++++	16.5	9.579	8	0.2958	rs17646423	CNTN4(0)|IL5RA(-181.8kb)
5:8406001_C	5	8406001	t	c	0.9689	0.9823	0.5536	1.7395	1.3406	2.25711	0.1329	3.089e-05	+++++++++	0.6	8.051	8	0.4285	rs75555977	LOC729506(0)|LOC100505738(-51.8kb)|MIR4458(-55.04kb)
2:212364807_G	2	212364807	t	g	0.6929	0.8246	0.1951	1.21543	1.1089	1.3322	0.0468	3.101e-05	+++++++-+	19.2	9.897	8	0.2723	rs4672617	ERBB4(0)
2:159251210_T	2	159251210	t	c	0.2384	0.2689	0.1931	1.213	1.10756	1.32849	0.0464	3.104e-05	-++++++++	25.9	10.802	8	0.2132	rs74970153	CCDC148(0)|CCDC148-AS1(+158.5kb)|PKP4(-62.26kb)
12:60794991_T	12	60794991	t	c	0.3906	0.4708	0.1716	1.1872	1.0951	1.28705	0.0412	3.109e-05	+++++-+++	13.6	9.261	8	0.3208	rs2655879	.
13:78290031_G	13	78290031	a	g	0.9069	0.9471	-0.3359	0.714695	0.610137	0.83717	0.0807	3.116e-05	------++-	24.5	10.599	8	0.2255	rs9574102	EDNRB(-179.6kb)|LOC100505518(-103kb)|MIR3665(+17.78kb)|SCEL(+70.63kb)|SLAIN1(0)
13:78077814_T	13	78077814	t	c	0.0877	0.1438	0.2666	1.30552	1.15161	1.48	0.064	3.154e-05	++++++--+	36.3	12.567	8	0.1277	rs2181615	MIR3665(-194.3kb)|MYCBP2(+176.6kb)|SCEL(-31.99kb)|SLAIN1(-194.2kb)
22:45828776_G	22	45828776	t	g	0.0424	0.5668	-0.3598	0.697816	0.588994	0.826744	0.0865	3.183e-05	+--+--?--	0	6.483	7	0.4847	rs738228	FAM118A(+90.94kb)|FBLN1(-69.94kb)|KIAA0930(+192.1kb)|RIBC2(+0.474kb)|SMC1B(+19.28kb)|UPK3A(+137kb)
2:240670713_A	2	240670713	a	g	0.0857	0.1175	-0.2767	0.758282	0.665487	0.864016	0.0666	3.243e-05	---------	0	5.024	8	0.755	rs113840616	LOC150935(-13.84kb)
2:212366830_A	2	212366830	a	c	0.1751	0.3021	-0.1952	0.82267	0.750272	0.902055	0.047	3.271e-05	-------+-	21.5	10.189	8	0.252	rs12989448	ERBB4(0)
13:78283502_T	13	78283502	t	c	0.0532	0.0927	0.3348	1.39766	1.19342	1.63685	0.0806	3.281e-05	++++++--+	24.3	10.574	8	0.227	rs9530686	EDNRB(-186.1kb)|LOC100505518(-109.6kb)|MIR3665(+11.25kb)|SCEL(+64.1kb)|SLAIN1(0)
11:85740409_G	11	85740409	a	g	0.2992	0.3356	-0.1781	0.836859	0.769369	0.910268	0.0429	3.292e-05	---------	0	2.722	8	0.9506	rs609903	CCDC83(+109.4kb)|PICALM(0)
20:16160141_A	20	16160141	a	g	0.198	0.2312	-0.2006	0.81824	0.744332	0.899486	0.0483	3.316e-05	------+--	0	4.259	8	0.8331	rs1329820	KIF16B(-92.61kb)|MACROD2(+126.3kb)
11:85762244_T	11	85762244	t	c	0.6687	0.7032	0.1785	1.19542	1.0988	1.30054	0.043	3.336e-05	+++++++++	0	2.881	8	0.9416	rs669813	CCDC83(+131.2kb)|EED(-193.6kb)|PICALM(0)
8:27909476_A	8	27909476	a	c	0.3628	0.4114	-0.1718	0.842148	0.776511	0.913332	0.0414	3.358e-05	---------	0	2.85	8	0.9434	rs11777791	ELP3(-41.11kb)|MIR4287(+165.8kb)|NUGGC(0)|SCARA5(+59.11kb)
11:85718231_T	11	85718231	t	g	0.6565	0.6961	0.1772	1.19387	1.09802	1.29809	0.0427	3.36e-05	+++++++++	0	2.283	8	0.9711	rs602222	CCDC83(+87.18kb)|PICALM(0)|SYTL2(+196.1kb)
13:78095300_T	13	78095300	t	c	0.0888	0.1455	0.265	1.30343	1.14999	1.47734	0.0639	3.375e-05	++++++--+	38.8	13.071	8	0.1094	rs9544529	MIR3665(-176.8kb)|MYCBP2(+194.1kb)|SCEL(-14.51kb)|SLAIN1(-176.7kb)
5:141115842_C	5	141115842	c	g	0.4195	0.4729	-0.1687	0.844762	0.779992	0.914911	0.0407	3.392e-05	--+---+--	1.8	8.148	8	0.4192	rs7702151	ARAP3(+54.04kb)|DIAPH1(+117.2kb)|FCHSD1(+84.86kb)|HDAC3(+99.42kb)|KIAA0141(-187.5kb)|LOC729080(-159.3kb)|LOC100505658(+171kb)|PCDH1(-116.8kb)|RELL2(+95.21kb)
7:149947014_G	7	149947014	a	g	0.9706	0.9783	-0.6337	0.530625	0.393067	0.716323	0.1531	3.471e-05	---------	0	3.438	8	0.904	rs79351526	ACTR3C(0)|LOC285972(-183.7kb)|LOC728743(-155.8kb)|LRRC61(-73.28kb)|RARRES2(-88.39kb)|REPIN1(-118.9kb)|RNU6-33P(-117kb)|RNU6-34P(-117kb)|ZBED6CL(-79.92kb)|ZNF775(-129.4kb)
13:78073791_G	13	78073791	a	g	0.8562	0.9124	-0.2654	0.766899	0.676356	0.869563	0.0641	3.491e-05	------++-	36.6	12.62	8	0.1256	rs9544518	MIR3665(-198.4kb)|MYCBP2(+172.6kb)|SCEL(-36.02kb)|SLAIN1(-198.2kb)
8:27464929_G	8	27464929	a	g	0.3472	0.3991	-0.1736	0.840633	0.774356	0.912583	0.0419	3.5e-05	---+---+-	29.2	11.307	8	0.1849	rs4236673	CCDC25(-125.9kb)|CHRNA2(+128.1kb)|CLU(0)|EPHX2(+62.49kb)|ESCO2(-167.1kb)|MIR3622A(-94.26kb)|MIR3622B(-94.26kb)|PTK2B(+148kb)|SCARA3(-26.65kb)
5:155907487_G	5	155907487	a	g	0.3759	0.4829	-0.1674	0.845861	0.781313	0.915743	0.0405	3.522e-05	----+----	26.1	10.83	8	0.2115	rs4704804	SGCD(0)
11:98662544_G	11	98662544	c	g	0.934	0.9586	0.3682	1.44513	1.21357	1.72088	0.0891	3.569e-05	++-++++++	0	6.781	8	0.5604	rs334232	.
11:85830157_C	11	85830157	t	c	0.2935	0.3233	-0.1769	0.837864	0.770444	0.911183	0.0428	3.619e-05	---------	0	2.633	8	0.9552	rs567075	C11orf73(-183.1kb)|CCDC83(+199.1kb)|EED(-125.6kb)|PICALM(+49.23kb)
11:85682817_G	11	85682817	a	g	0.3013	0.3362	-0.1764	0.838283	0.770981	0.91146	0.0427	3.621e-05	---------	0	1.928	8	0.9831	rs606505	CCDC83(+51.77kb)|PICALM(0)|SYTL2(+160.6kb)
2:212362352_T	2	212362352	t	c	0.1742	0.3101	-0.193	0.824482	0.752366	0.90351	0.0467	3.626e-05	-------+-	17	9.633	8	0.2918	rs13005140	ERBB4(0)
2:212362328_T	2	212362328	t	c	0.1742	0.3101	-0.193	0.824482	0.752366	0.90351	0.0467	3.63e-05	-------+-	16.9	9.629	8	0.2921	rs12620169	ERBB4(0)
22:45853724_C	22	45853724	t	c	0.0412	0.5682	-0.3666	0.693087	0.582371	0.824851	0.0888	3.642e-05	---+--?--	0	5.309	7	0.6224	rs1883187	FAM118A(+115.9kb)|FBLN1(-44.99kb)|RIBC2(+25.42kb)|SMC1B(+44.22kb)|UPK3A(+162kb)
14:99472932_G	14	99472932	a	g	0.8458	0.8785	0.2442	1.2766	1.13674	1.43366	0.0592	3.66e-05	+++++++++	0	3.007	8	0.9339	rs2638833	BCL11B(-162.7kb)
14:99472710_A	14	99472710	a	g	0.1216	0.155	-0.244	0.783488	0.697791	0.879709	0.0591	3.69e-05	---------	0	3.011	8	0.9336	rs1257632	BCL11B(-162.9kb)
14:99472989_C	14	99472989	t	c	0.8449	0.8773	0.2438	1.27609	1.13651	1.43281	0.0591	3.699e-05	+++++++++	0	3.574	8	0.8934	rs1257633	BCL11B(-162.6kb)
2:212363969_C	2	212363969	c	g	0.1743	0.303	-0.1935	0.82407	0.751695	0.903413	0.0469	3.699e-05	-------+-	19.3	9.911	8	0.2713	rs5028311	ERBB4(0)
12:60790598_T	12	60790598	t	c	0.3908	0.4721	0.17	1.1853	1.09335	1.28499	0.0412	3.729e-05	+++++-+++	13.9	9.291	8	0.3183	rs2731465	.
11:85765298_A	11	85765298	a	g	0.6653	0.7032	0.1774	1.19411	1.09759	1.29911	0.043	3.742e-05	+++++++++	0	2.825	8	0.9449	rs493254	CCDC83(+134.2kb)|EED(-190.5kb)|PICALM(0)
2:159250229_A	2	159250229	a	g	0.2374	0.2683	0.1913	1.21082	1.10556	1.3261	0.0464	3.761e-05	-++++++++	25.9	10.793	8	0.2137	rs77276698	CCDC148(0)|CCDC148-AS1(+157.5kb)|PKP4(-63.25kb)
11:85724661_C	11	85724661	t	c	0.2968	0.3396	-0.1768	0.837947	0.770219	0.911631	0.043	3.861e-05	---------	0	2.054	8	0.9793	rs636355	CCDC83(+93.61kb)|PICALM(0)
11:2464025_A	11	2464025	a	c	0.277	0.3299	-0.2113	0.809531	0.731949	0.895336	0.0514	3.893e-05	---?--?--	10.1	6.675	6	0.352	rs12277647	ASCL2(+171.8kb)|C11orf21(+140.9kb)|CD81(+45.38kb)|KCNQ1(-2.195kb)|KCNQ1OT1(-165.5kb)|TRPM5(+19.75kb)|TSPAN32(+124.6kb)|TSSC4(+38.92kb)
12:60788392_G	12	60788392	a	g	0.5282	0.6091	-0.1695	0.844087	0.778605	0.915076	0.0412	3.899e-05	-----+---	14.1	9.311	8	0.3167	rs2655871	.
2:159172652_A	2	159172652	a	g	0.2795	0.3073	0.1819	1.19949	1.09995	1.30804	0.0442	3.913e-05	-++++++++	0	6.391	8	0.6035	rs17808559	CCDC148(0)|CCDC148-AS1(+79.97kb)|PKP4(-140.8kb)|UPP2(+180kb)
2:240686296_T	2	240686296	t	c	0.0872	0.1204	-0.2708	0.762769	0.670344	0.867937	0.0659	3.914e-05	---------	0	4.771	8	0.7817	rs62181449	LOC150935(0)|MIR4786(-196.1kb)
2:159172557_A	2	159172557	a	t	0.2795	0.3073	0.1819	1.19949	1.09995	1.30804	0.0442	3.923e-05	-++++++++	0	6.39	8	0.6036	rs73968915	CCDC148(0)|CCDC148-AS1(+79.88kb)|PKP4(-140.9kb)|UPP2(+179.9kb)
22:45785068_G	22	45785068	a	g	0.0328	0.5647	-0.3743	0.687771	0.575417	0.822062	0.091	3.936e-05	+--+--?--	40.8	11.828	7	0.1064	rs6006740	FAM118A(+47.23kb)|FBLN1(-113.6kb)|KIAA0930(+148.4kb)|MIR1249(+188.2kb)|RIBC2(-24.5kb)|SMC1B(0)|UPK3A(+93.31kb)
12:60787165_C	12	60787165	t	c	0.5282	0.609	-0.1693	0.844256	0.77876	0.915259	0.0412	3.989e-05	-----+---	14.3	9.333	8	0.315	rs1119988	.
11:85757617_T	11	85757617	t	c	0.6618	0.7056	0.1775	1.19423	1.09727	1.29975	0.0432	3.991e-05	+++++++++	0	2.789	8	0.9469	rs677869	CCDC83(+126.6kb)|EED(-198.2kb)|PICALM(0)
11:85750671_T	11	85750671	a	t	0.2963	0.3286	-0.1766	0.838115	0.770373	0.911813	0.043	3.997e-05	---------	0	3.129	8	0.926	rs2508691	CCDC83(+119.6kb)|PICALM(0)
11:85757613_G	11	85757613	c	g	0.2945	0.3381	-0.1775	0.837361	0.769379	0.91135	0.0432	4.002e-05	---------	0	2.784	8	0.9472	rs659863	CCDC83(+126.6kb)|EED(-198.2kb)|PICALM(0)
11:85746037_T	11	85746037	t	c	0.6644	0.7009	0.176	1.19244	1.09627	1.29704	0.0429	4.017e-05	+++++++++	0	2.979	8	0.9357	rs561646	CCDC83(+115kb)|PICALM(0)
2:240688725_A	2	240688725	a	c	0.0871	0.1204	-0.2707	0.762845	0.670411	0.868024	0.0659	4.039e-05	---------	0	4.829	8	0.7757	rs62181451	LOC150935(0)|MIR4786(-193.7kb)
5:155905133_G	5	155905133	a	g	0.3759	0.4835	-0.1663	0.846792	0.782172	0.91675	0.0405	4.046e-05	----+----	25.6	10.752	8	0.2162	rs1354564	SGCD(0)
2:240688868_A	2	240688868	a	g	0.0871	0.1204	-0.2706	0.762922	0.670478	0.868111	0.0659	4.069e-05	---------	0	4.822	8	0.7764	rs62181452	LOC150935(0)|MIR4786(-193.6kb)
13:78037733_T	13	78037733	a	t	0.8534	0.9037	-0.2684	0.764602	0.672614	0.86917	0.0654	4.077e-05	------++-	37.7	12.844	8	0.1173	rs73227311	MYCBP2(+136.6kb)|SCEL(-72.08kb)
13:78115345_C	13	78115345	t	c	0.8569	0.9104	-0.2639	0.76805	0.677106	0.87121	0.0643	4.082e-05	------++-	35	12.298	8	0.1384	rs4583108	MIR3665(-156.8kb)|SCEL(0)|SLAIN1(-156.6kb)
11:21620948_T	11	21620948	a	t	0.5524	0.6149	-0.166	0.847046	0.782407	0.917025	0.0405	4.095e-05	---------	0	4.761	8	0.7827	rs1573535	NELL1(+23.72kb)
11:85748386_C	11	85748386	t	c	0.2963	0.3286	-0.1763	0.838366	0.770605	0.912087	0.043	4.117e-05	---------	0	3.15	8	0.9246	rs1973630	CCDC83(+117.3kb)|PICALM(0)
7:149931383_C	7	149931383	t	c	0.9702	0.9796	-0.6293	0.532965	0.394491	0.720046	0.1535	4.127e-05	---------	0	3.212	8	0.9203	rs75130027	ACTR3C(-12.92kb)|LOC285972(-199.4kb)|LOC728743(-171.5kb)|LRRC61(-88.91kb)|RARRES2(-104kb)|REPIN1(-134.5kb)|RNU6-33P(-132.7kb)|RNU6-34P(-132.7kb)|ZBED6CL(-95.55kb)|ZNF775(-145kb)
11:85689712_T	11	85689712	a	t	0.2996	0.3321	-0.1751	0.839373	0.771984	0.912645	0.0427	4.172e-05	---------	0	1.809	8	0.9863	rs587038	CCDC83(+58.66kb)|PICALM(0)|SYTL2(+167.5kb)
2:212371404_G	2	212371404	a	g	0.7221	0.8329	0.2009	1.2225	1.11056	1.34573	0.049	4.178e-05	+++++++-+	25.9	10.799	8	0.2133	rs4640327	ERBB4(0)
3:123457517_G	3	123457517	a	g	0.9434	0.9598	-0.4951	0.60951	0.48101	0.772339	0.1208	4.185e-05	--+---?--	35.6	10.869	7	0.1445	rs111597442	CCDC14(-174.8kb)|MYLK(0)|MYLK-AS1(+107.9kb)|PTPLB(+153.6kb)
12:60813982_A	12	60813982	a	c	0.1573	0.2139	0.2204	1.24658	1.12182	1.3852	0.0538	4.203e-05	-++++++++	0	2.865	8	0.9425	rs59654269	.
20:41959407_T	20	41959407	t	c	0.0608	0.0844	-0.3103	0.733227	0.631999	0.850669	0.0758	4.212e-05	--+---+--	0	5.978	8	0.6496	rs76914898	L3MBTL1(-176.9kb)|PTPRT(+140.8kb)|SRSF6(-127.1kb)
12:24322930_G	12	24322930	a	g	0.0118	0.0469	-0.6345	0.530201	0.391292	0.718421	0.155	4.231e-05	------+--	0	7.177	8	0.5177	rs9805099	MIR920(-42.42kb)|SOX5(0)
7:149926704_T	7	149926704	t	g	0.0204	0.0299	0.629	1.87573	1.38784	2.53515	0.1537	4.245e-05	+++++++++	0	3.179	8	0.9226	rs78547327	ACTR3C(-17.6kb)|LOC728743(-176.1kb)|LRRC61(-93.59kb)|RARRES2(-108.7kb)|REPIN1(-139.2kb)|RNU6-33P(-137.3kb)|RNU6-34P(-137.3kb)|ZBED6CL(-100.2kb)|ZNF775(-149.7kb)
21:35974574_C	21	35974574	t	c	0.7825	0.8244	-0.2056	0.814159	0.737867	0.898339	0.0502	4.261e-05	--+------	0	5.29	8	0.7262	rs743341	CLIC6(-67.11kb)|KCNE1(+90kb)|LINC00160(-121.5kb)|LOC100506385(-143.5kb)|RCAN1(0)|RUNX1(-185.5kb)
2:240693519_C	2	240693519	t	c	0.8802	0.9113	0.2704	1.31049	1.15125	1.49176	0.0661	4.274e-05	+++++++++	0	4.923	8	0.7658	rs80292719	LOC150935(0)|MIR4786(-188.9kb)
11:98673295_T	11	98673295	t	c	0.0413	0.0659	-0.3639	0.694961	0.583831	0.827244	0.0889	4.286e-05	--+------	0	6.861	8	0.5517	rs2126247	.
11:85670945_C	11	85670945	a	c	0.3014	0.3399	-0.1751	0.839373	0.771832	0.912824	0.0428	4.289e-05	---------	0	1.622	8	0.9905	rs673751	CCDC83(+39.89kb)|PICALM(0)|SYTL2(+148.8kb)
5:95645126_C	5	95645126	t	c	0.0711	0.0907	0.3085	1.36138	1.17435	1.5782	0.0754	4.3e-05	-++++++++	0	7.467	8	0.4872	rs10476669	PCSK1(-80.91kb)
17:30557331_C	17	30557331	t	c	0.4519	0.519	0.1731	1.18898	1.09438	1.29176	0.0423	4.335e-05	++++++-++	0	5.125	8	0.7441	rs10468587	ARGFXP2(+78.74kb)|C17orf75(-98.13kb)|LRRC37B(+176.8kb)|MIR632(-119.8kb)|RHBDL3(-35.86kb)|RHOT1(+4.585kb)|SH3GL1P1(+187.5kb)|ZNF207(-119.8kb)
2:240690511_A	2	240690511	a	g	0.0871	0.1201	-0.27	0.763379	0.670749	0.868802	0.066	4.338e-05	---------	0	4.874	8	0.771	rs62181458	LOC150935(0)|MIR4786(-191.9kb)
14:99472096_C	14	99472096	a	c	0.8438	0.8773	0.241	1.27252	1.13378	1.42824	0.0589	4.353e-05	+++++++++	0	3.529	8	0.8969	rs1257631	BCL11B(-163.5kb)
11:21623474_C	11	21623474	t	c	0.5389	0.6075	-0.1651	0.847809	0.783265	0.917671	0.0404	4.363e-05	---------	0	4.099	8	0.848	rs1459882	NELL1(+26.24kb)
6:144274210_C	6	144274210	t	c	0.8015	0.8496	-0.2289	0.795408	0.712725	0.887684	0.056	4.371e-05	---------	0	4.065	8	0.8512	rs12528876	HYMAI(-49.82kb)|LTV1(+89.27kb)|PHACTR2(+121.9kb)|PLAGL1(0)|SF3B5(-141.8kb)|STX11(-197.4kb)|ZC2HC1B(+14.73kb)
11:85811364_C	11	85811364	t	c	0.3185	0.3479	-0.1717	0.842232	0.775676	0.914498	0.042	4.375e-05	---------	0	1.979	8	0.9816	rs526904	CCDC83(+180.3kb)|EED(-144.4kb)|PICALM(+30.44kb)
7:149921668_A	7	149921668	a	g	0.0204	0.0299	0.6284	1.87461	1.38673	2.53412	0.1538	4.386e-05	+++++++++	0	3.148	8	0.9247	rs80299671	ACTR3C(-22.63kb)|LOC728743(-181.2kb)|LRRC61(-98.63kb)|RARRES2(-113.7kb)|REPIN1(-144.2kb)|RNU6-33P(-142.4kb)|RNU6-34P(-142.4kb)|ZBED6CL(-105.3kb)|ZNF775(-154.7kb)
12:60791859_T	12	60791859	t	c	0.145	0.1833	0.2543	1.28956	1.14133	1.45704	0.0623	4.42e-05	-++++++++	0	3.796	8	0.8751	rs200240577	.
10:34255388_C	10	34255388	t	c	0.9061	0.9359	0.3375	1.40144	1.19173	1.64805	0.0827	4.439e-05	++-+++-++	2.9	8.238	8	0.4106	rs76611619	LINC00838(+193.8kb)|PARD3(-143.1kb)
2:240691238_T	2	240691238	t	g	0.0871	0.12	-0.2697	0.763609	0.67095	0.869063	0.066	4.447e-05	---------	0	4.876	8	0.7708	rs77795366	LOC150935(0)|MIR4786(-191.2kb)
2:240685636_G	2	240685636	a	g	0.8796	0.9128	0.2687	1.30826	1.14997	1.48835	0.0658	4.461e-05	+++++++++	0	4.544	8	0.8051	rs872766	LOC150935(0)|MIR4786(-196.8kb)
12:60852698_G	12	60852698	a	g	0.7885	0.8426	-0.2212	0.801556	0.720772	0.891395	0.0542	4.483e-05	---------	0	2.504	8	0.9616	rs59335135	.
11:85757589_T	11	85757589	t	c	0.657	0.7023	0.1753	1.1916	1.09529	1.29639	0.043	4.493e-05	+++++++++	0	2.351	8	0.9683	rs677909	CCDC83(+126.5kb)|EED(-198.2kb)|PICALM(0)
8:27905861_T	8	27905861	t	c	0.3657	0.4136	-0.1676	0.845692	0.780238	0.916637	0.0411	4.5e-05	---------	0	3.105	8	0.9276	rs1984880	ELP3(-44.72kb)|MIR4287(+162.2kb)|NUGGC(0)|SCARA5(+55.49kb)
12:60830874_A	12	60830874	a	g	0.1573	0.2116	0.2208	1.24707	1.12161	1.38657	0.0541	4.503e-05	-++++++++	0	2.779	8	0.9475	rs11173463	.
12:60830817_T	12	60830817	t	c	0.1573	0.2116	0.2208	1.24707	1.12161	1.38657	0.0541	4.521e-05	-++++++++	0	2.778	8	0.9475	rs11173462	.
8:27907138_T	8	27907138	t	c	0.3671	0.413	-0.1678	0.845523	0.779929	0.916633	0.0412	4.542e-05	---------	0	2.671	8	0.9533	rs3857876	ELP3(-43.44kb)|MIR4287(+163.5kb)|NUGGC(0)|SCARA5(+56.77kb)
12:60830295_G	12	60830295	a	g	0.7884	0.8427	-0.2207	0.801957	0.721274	0.891666	0.0541	4.55e-05	+--------	0	2.774	8	0.9477	rs11173461	.
10:44490004_T	10	44490004	t	c	0.0274	0.0439	-0.5817	0.558947	0.422573	0.739332	0.1427	4.581e-05	---------	0	6.376	8	0.6052	rs111359792	LINC00619(+143.9kb)|LINC00840(+99.12kb)|LINC00841(+24.65kb)
11:1661327_T	11	1661327	t	c	0.1134	0.1546	-0.2456	0.782235	0.695175	0.880198	0.0602	4.587e-05	+-----++-	0	7.215	8	0.5137	rs78651552	BRSK2(+177.4kb)|CTSD(-112.7kb)|DUSP8(+68.18kb)|FAM99A(-25.5kb)|FAM99B(-43.17kb)|IFITM10(-92.31kb)|KRTAP5-1(+54.81kb)|KRTAP5-2(+41.8kb)|KRTAP5-3(+31.63kb)|KRTAP5-4(+17.96kb)|KRTAP5-5(+9.168kb)|KRTAP5-6(-57.1kb)|KRTAP5-AS1(+40.91kb)|MOB2(0)|SYT8(-194.3kb)|TNNI2(-198.9kb)
12:60820944_T	12	60820944	a	t	0.787	0.8427	-0.2205	0.802118	0.721418	0.891844	0.0541	4.617e-05	+--------	0	2.7	8	0.9517	rs11173457	.
14:99474492_T	14	99474492	t	c	0.0923	0.1202	-0.2691	0.764067	0.671222	0.869755	0.0661	4.637e-05	---------	0	2.619	8	0.956	rs1873660	BCL11B(-161.1kb)
5:8402274_A	5	8402274	a	g	0.0177	0.0312	-0.5351	0.585611	0.452558	0.757782	0.1315	4.711e-05	---------	0	5.861	8	0.6628	rs16880513	LOC729506(0)|LOC100505738(-55.52kb)|MIR4458(-58.76kb)
12:60850484_G	12	60850484	a	g	0.7885	0.8427	-0.2204	0.802198	0.721349	0.892108	0.0542	4.725e-05	+--------	0	2.584	8	0.9577	rs74990579	.
5:8402235_C	5	8402235	t	c	0.9688	0.9823	0.5351	1.70762	1.31964	2.20966	0.1315	4.725e-05	+++++++++	0	5.858	8	0.6632	rs16880512	LOC729506(0)|LOC100505738(-55.56kb)|MIR4458(-58.8kb)
5:156555686_A	5	156555686	a	g	0.0262	0.0352	-0.4858	0.615205	0.486838	0.777419	0.1194	4.74e-05	------+--	5.5	8.466	8	0.3893	rs141866682	CYFIP2(-137.4kb)|FAM71B(-33.66kb)|HAVCR1(+69.72kb)|HAVCR2(+19.44kb)|ITK(-52.22kb)|MED7(-9.764kb)|TIMD4(+165.4kb)
12:60819044_G	12	60819044	t	g	0.7869	0.8427	-0.2201	0.802439	0.721707	0.892201	0.0541	4.745e-05	+--------	0	2.706	8	0.9514	rs11173452	.
11:21624612_T	11	21624612	a	t	0.5386	0.6067	-0.1642	0.848572	0.78397	0.918498	0.0404	4.779e-05	---------	0	4.149	8	0.8434	rs1599202	NELL1(+27.38kb)
11:85831690_G	11	85831690	a	g	0.3157	0.3465	-0.1708	0.84299	0.776375	0.915321	0.042	4.783e-05	---------	0	1.378	8	0.9945	rs472486	C11orf73(-181.6kb)|EED(-124.1kb)|PICALM(+50.77kb)
12:60849222_T	12	60849222	t	c	0.1573	0.2115	0.2201	1.2462	1.1206	1.38588	0.0542	4.815e-05	-++++++++	0	2.615	8	0.9561	rs61923344	.
11:85845045_G	11	85845045	a	g	0.4208	0.454	-0.1626	0.849931	0.785842	0.919247	0.04	4.823e-05	---------	0	7.427	8	0.4914	rs4944560	C11orf73(-168.2kb)|EED(-110.8kb)|PICALM(+64.12kb)
11:21628183_T	11	21628183	t	c	0.3927	0.4644	0.1638	1.17798	1.08851	1.2748	0.0403	4.835e-05	+++++++++	0	4.413	8	0.8181	rs1380526	NELL1(+30.95kb)
12:60825487_T	12	60825487	t	c	0.1573	0.2118	0.22	1.24608	1.12071	1.38547	0.0541	4.848e-05	-++++++++	0	2.776	8	0.9476	rs61923307	.
14:34041778_A	14	34041778	a	g	0.1409	0.1775	0.2367	1.26706	1.13024	1.42044	0.0583	4.856e-05	++-++++++	57.8	18.965	8	0.01505	rs58281377	NPAS3(0)
11:21629653_A	11	21629653	a	g	0.3927	0.4641	0.1638	1.17798	1.08851	1.2748	0.0403	4.892e-05	+++++++++	0	4.54	8	0.8054	rs4597064	NELL1(+32.42kb)
11:21617550_G	11	21617550	t	g	0.5546	0.6152	-0.1644	0.848403	0.78366	0.918494	0.0405	4.907e-05	---------	0	4.659	8	0.7933	rs1459892	NELL1(+20.32kb)
9:122545827_G	9	122545827	t	g	0.6598	0.7071	-0.1807	0.834686	0.764969	0.910756	0.0445	4.925e-05	+-+------	0	4.032	8	0.8542	rs10984698	.
20:54981233_A	20	54981233	a	g	0.2518	0.2952	-0.1962	0.821848	0.747614	0.903452	0.0483	4.929e-05	-------+-	0	5.804	8	0.6692	rs6014718	AURKA(+13.88kb)|CASS4(-5.934kb)|CSTF1(+1.651kb)|FAM209A(-118.6kb)|FAM209B(-127.1kb)|FAM210B(+37.52kb)|GCNT7(-85.31kb)|MC3R(+156.4kb)|RTFDC1(-62.41kb)
12:60846830_G	12	60846830	a	g	0.7885	0.8427	-0.2197	0.80276	0.721996	0.892558	0.0541	4.936e-05	+--------	0	2.639	8	0.9549	rs61923341	.
14:99468968_T	14	99468968	t	g	0.1081	0.1369	-0.2524	0.776934	0.687762	0.877667	0.0622	4.97e-05	---------	0	3.045	8	0.9315	rs1257625	BCL11B(-166.7kb)
11:21629808_T	11	21629808	t	g	0.3727	0.4432	0.164	1.17821	1.08852	1.2753	0.0404	4.972e-05	+++++++++	0	5.071	8	0.75	rs4623902	NELL1(+32.58kb)
2:240689791_A	2	240689791	a	c	0.1012	0.1283	-0.253	0.776468	0.68708	0.877484	0.0624	4.997e-05	---------	0	5.756	8	0.6746	rs56407474	LOC150935(0)|MIR4786(-192.6kb)
7:149900915_T	7	149900915	t	c	0.0204	0.0299	0.6274	1.87274	1.38291	2.53606	0.1547	4.997e-05	+++++++++	0	3.106	8	0.9275	rs139362910	ACTR3C(-43.38kb)|LRRC61(-119.4kb)|RARRES2(-134.5kb)|REPIN1(-165kb)|RNU6-33P(-163.1kb)|RNU6-34P(-163.1kb)|ZBED6CL(-126kb)|ZNF775(-175.5kb)
1:216296390_C	1	216296390	t	c	0.6349	0.6817	-0.1736	0.840633	0.772991	0.914194	0.0428	5.008e-05	-----+---	0	5.38	8	0.7163	rs9660493	USH2A(0)
11:21616465_G	11	21616465	a	g	0.5389	0.6079	-0.1638	0.848912	0.784284	0.918865	0.0404	5.057e-05	---------	0	4.154	8	0.843	rs2199234	NELL1(+19.24kb)
12:60836857_T	12	60836857	t	c	0.1573	0.2116	0.2194	1.24533	1.12004	1.38463	0.0541	5.069e-05	-++++++++	0	2.68	8	0.9528	rs12229989	.
17:52297620_C	17	52297620	t	c	0.3756	0.4207	0.1678	1.1827	1.09052	1.28267	0.0414	5.081e-05	-++-+++++	40.5	13.454	8	0.09715	rs11079111	.
7:149899628_A	7	149899628	a	t	0.0203	0.0299	0.6296	1.87686	1.38405	2.54514	0.1554	5.108e-05	+++++++++	0	3.162	8	0.9238	rs118181657	ACTR3C(-44.67kb)|LRRC61(-120.7kb)|RARRES2(-135.8kb)|REPIN1(-166.2kb)|RNU6-33P(-164.4kb)|RNU6-34P(-164.4kb)|ZBED6CL(-127.3kb)|ZNF775(-176.8kb)
11:85681583_G	11	85681583	a	g	0.3005	0.3295	-0.1733	0.840885	0.773223	0.914469	0.0428	5.12e-05	---------	0	2.474	8	0.963	rs639012	CCDC83(+50.53kb)|PICALM(0)|SYTL2(+159.4kb)
2:212373007_A	2	212373007	a	g	0.1692	0.295	-0.1974	0.820862	0.746133	0.903077	0.0487	5.132e-05	------++-	35.9	12.471	8	0.1314	rs34303637	ERBB4(0)
11:1664516_A	11	1664516	a	g	0.1136	0.1557	-0.2432	0.784115	0.696982	0.88214	0.0601	5.149e-05	+-----++-	0	7.76	8	0.4573	rs77994030	BRSK2(+180.6kb)|CTSD(-109.5kb)|DUSP8(+71.37kb)|FAM99A(-22.31kb)|FAM99B(-39.98kb)|IFITM10(-89.12kb)|KRTAP5-1(+58kb)|KRTAP5-2(+44.99kb)|KRTAP5-3(+34.82kb)|KRTAP5-4(+21.15kb)|KRTAP5-5(+12.36kb)|KRTAP5-6(-53.91kb)|KRTAP5-AS1(+44.1kb)|MOB2(0)|SYT8(-191.2kb)|TNNI2(-195.7kb)
11:21619937_T	11	21619937	t	c	0.3849	0.4452	0.1638	1.17798	1.08809	1.2753	0.0405	5.161e-05	+++++++++	0	4.687	8	0.7904	rs11826171	NELL1(+22.71kb)
2:37540441_C	2	37540441	t	c	0.833	0.8741	-0.2289	0.795408	0.712027	0.888554	0.0565	5.162e-05	-------+-	0	5.203	8	0.7356	rs59262093	CEBPZ(+81.7kb)|EIF2AK2(+156.3kb)|LOC100505876(+108.6kb)|NDUFAF7(+64.14kb)|PRKD3(0)|QPCT(-31.31kb)|SULT6B1(+124.8kb)
12:60840802_T	12	60840802	t	c	0.1573	0.2116	0.2191	1.24496	1.1197	1.38422	0.0541	5.197e-05	-++++++++	0	2.689	8	0.9523	rs11173469	.
5:95590583_A	5	95590583	a	g	0.0684	0.0929	0.3094	1.36261	1.17288	1.58303	0.0765	5.218e-05	+++++++++	0	6.387	8	0.604	rs6877002	MIR583(+175.7kb)|PCSK1(-135.5kb)
3:125698590_T	3	125698590	t	c	0.0229	0.0442	0.5032	1.65401	1.29587	2.11112	0.1245	5.311e-05	+++++++++	0	4.521	8	0.8073	rs35648524	ALDH1L1(-123.8kb)|ALDH1L1-AS1(-123.9kb)|ALG1L(+42.7kb)|FAM86JP(+49.72kb)|MIR548I1(+189.2kb)|ROPN1B(0)|SLC41A3(-26.61kb)
1:9014923_T	1	9014923	t	c	0.1726	0.2393	0.2304	1.2591	1.12601	1.40793	0.057	5.316e-05	++++++?++	0	2.655	7	0.915	rs34392565	CA6(0)|ENO1(+75.77kb)|ENO1-AS1(+74.98kb)|GPR157(-149.6kb)|MIR34A(-196.8kb)|RERE(+137.2kb)|SLC2A5(-82.08kb)|SLC2A7(-48.44kb)
5:155908785_G	5	155908785	a	g	0.4197	0.5125	-0.1619	0.850526	0.786238	0.920071	0.0401	5.342e-05	----+----	0	6.839	8	0.5541	rs980149	SGCD(0)
5:8391639_C	5	8391639	a	c	0.9689	0.9823	0.5278	1.6952	1.3121	2.19015	0.1307	5.346e-05	+++++++++	0	6.13	8	0.6327	rs17212791	LOC729506(0)|LOC100505738(-66.16kb)|MIR4458(-69.4kb)
19:45447221_A	19	45447221	a	g	0.0112	0.0222	0.9356	2.54874	1.61877	4.01299	0.2316	5.359e-05	++-+++?+?	18.1	7.322	6	0.2921	rs12721109	APOC1(+24.62kb)|APOC1P1(+12.58kb)|APOC2(-2.017kb)|APOC4(0)|APOC4-APOC2(0)|APOE(+34.57kb)|BCAM(+122.5kb)|BCL3(+183.9kb)|CBLC(+143.3kb)|CLASRP(-95.08kb)|CLPTM1(-10.62kb)|GEMIN7(-135.3kb)|PPP1R37(-149.2kb)|PVRL2(+54.74kb)|RELB(-57.48kb)|TOMM40(+40.28kb)|ZNF296(-127.5kb)
19:1050874_G	19	1050874	a	g	0.3289	0.6081	0.1948	1.21507	1.10553	1.33545	0.0482	5.363e-05	-++?++?-+	37	9.523	6	0.1462	rs12151021	ABCA7(0)|ARID3A(+78.07kb)|ATP5D(-190.9kb)|C19orf26(-179.1kb)|CFD(+187.3kb)|CNN2(+11.81kb)|ELANE(+194.6kb)|GPX4(-53.06kb)|GRIN3B(+41.15kb)|HMHA1(-15.05kb)|KISS1R(+129.9kb)|MED16(+157.7kb)|MIDN(-197.7kb)|POLR2E(-35.7kb)|R3HDM4(+137.6kb)|SBNO2(-56.76kb)|STK11(-154.9kb)|TMEM259(+29.73kb)|WDR18(+56.3kb)
2:209705159_T	2	209705159	t	c	0.449	0.5173	0.1637	1.17786	1.08798	1.27517	0.0405	5.39e-05	-++++++-+	0	6.092	8	0.6369	rs4309520	.
7:29981561_G	7	29981561	a	g	0.9478	0.9859	0.6717	1.95756	1.41305	2.7119	0.1663	5.392e-05	-+?++++++	34.1	10.626	7	0.1558	rs74912058	C7orf41(-193kb)|FKBP14(-68.64kb)|PLEKHA8(-86.42kb)|SCRN1(0)|WIPF3(+24.88kb)
11:85811696_A	11	85811696	a	c	0.6521	0.6815	0.1695	1.18471	1.09109	1.28636	0.042	5.406e-05	+++++++++	0	2.231	8	0.9731	rs566975	CCDC83(+180.6kb)|EED(-144.1kb)|PICALM(+30.77kb)
1:4839048_G	1	4839048	a	g	0.4261	0.5172	-0.1634	0.849251	0.784444	0.919413	0.0405	5.44e-05	------+--	0	3.948	8	0.8618	rs381304	AJAP1(0)
5:8399125_A	5	8399125	a	g	0.0177	0.0312	-0.5286	0.58943	0.455956	0.761976	0.131	5.44e-05	---------	0	5.938	8	0.6542	rs1868283	LOC729506(0)|LOC100505738(-58.67kb)|MIR4458(-61.91kb)
11:21624396_T	11	21624396	t	c	0.3926	0.4611	0.1629	1.17692	1.08732	1.2739	0.0404	5.456e-05	+++++++++	0	4.155	8	0.8428	rs1599204	NELL1(+27.17kb)
11:21624588_T	11	21624588	t	g	0.3927	0.4611	0.1629	1.17692	1.08732	1.2739	0.0404	5.483e-05	+++++++++	0	4.152	8	0.8432	rs1599203	NELL1(+27.36kb)
14:99467677_C	14	99467677	t	c	0.8633	0.8921	0.2504	1.28454	1.13733	1.4508	0.0621	5.496e-05	+++++++++	0	3.039	8	0.9319	rs2772509	BCL11B(-167.9kb)
14:99467884_A	14	99467884	a	g	0.1078	0.1367	-0.2504	0.778489	0.689274	0.879252	0.0621	5.517e-05	---------	0	3.043	8	0.9316	rs1257623	BCL11B(-167.7kb)
14:99467956_C	14	99467956	t	c	0.8633	0.8922	0.2505	1.28467	1.13744	1.45095	0.0621	5.518e-05	+++++++++	0	3.047	8	0.9314	rs902811	BCL11B(-167.7kb)
14:99467441_G	14	99467441	t	g	0.8632	0.8921	0.2503	1.28441	1.13722	1.45066	0.0621	5.523e-05	+++++++++	0	3.042	8	0.9317	rs2131193	BCL11B(-168.2kb)
5:157403198_G	5	157403198	a	g	0.427	0.5098	0.1615	1.17527	1.08644	1.27137	0.0401	5.538e-05	++-++++++	0	6.516	8	0.5896	rs3095983	CLINT1(+117kb)
11:85741130_T	11	85741130	t	c	0.6643	0.7037	0.1733	1.18922	1.0931	1.2938	0.043	5.548e-05	+++++++++	0	3.039	8	0.9319	rs682928	CCDC83(+110.1kb)|PICALM(0)
2:68951638_G	2	68951638	a	g	0.501	0.5381	0.1635	1.17763	1.08776	1.27492	0.0405	5.553e-05	++++++-++	0	4.367	8	0.8226	rs6546430	APLF(+144.3kb)|ARHGAP25(-10.27kb)|BMP10(-141kb)|PROKR1(+68.93kb)
11:1665317_T	11	1665317	t	g	0.1132	0.1555	-0.2422	0.784899	0.697679	0.883023	0.0601	5.575e-05	+------+-	0	7.685	8	0.4648	rs117042425	BRSK2(+181.4kb)|CTSD(-108.7kb)|DUSP8(+72.17kb)|FAM99A(-21.51kb)|FAM99B(-39.18kb)|IFITM10(-88.32kb)|KRTAP5-1(+58.8kb)|KRTAP5-2(+45.79kb)|KRTAP5-3(+35.62kb)|KRTAP5-4(+21.95kb)|KRTAP5-5(+13.16kb)|KRTAP5-6(-53.11kb)|KRTAP5-AS1(+44.9kb)|MOB2(0)|SYT8(-190.4kb)|TNNI2(-194.9kb)
13:78117510_A	13	78117510	a	g	0.0898	0.1425	0.2592	1.29589	1.14245	1.46995	0.0643	5.606e-05	++++++--+	36.9	12.675	8	0.1235	rs150861503	MIR3665(-154.6kb)|SCEL(0)|SLAIN1(-154.5kb)
16:81665389_G	16	81665389	a	g	0.2901	0.3489	0.1738	1.18982	1.09343	1.2947	0.0431	5.607e-05	++++++-++	0	6.652	8	0.5746	rs6564904	CMIP(0)|LOC100129617(-33.57kb)|PLCG2(-147.5kb)
5:155904804_G	5	155904804	a	g	0.4197	0.5126	-0.1617	0.850696	0.786395	0.920255	0.0401	5.612e-05	----+----	0	6.771	8	0.5615	rs1354563	SGCD(0)
17:52330986_A	17	52330986	a	g	0.577	0.6432	-0.1696	0.844002	0.777155	0.9166	0.0421	5.617e-05	+--+-----	25.4	10.724	8	0.2178	rs9902756	.
13:78040445_C	13	78040445	t	c	0.8524	0.9037	-0.261	0.770281	0.678407	0.874597	0.0648	5.623e-05	------++-	34.5	12.222	8	0.1416	rs55959175	MYCBP2(+139.3kb)|SCEL(-69.36kb)
5:84115826_C	5	84115826	t	c	0.6458	0.7215	-0.1807	0.834686	0.764369	0.911471	0.0449	5.638e-05	------+--	0	5.941	8	0.6538	rs13188898	.
14:99469213_G	14	99469213	a	g	0.8634	0.8922	0.2504	1.28454	1.13711	1.45109	0.0622	5.645e-05	+++++++++	0	3.054	8	0.9309	rs1257627	BCL11B(-166.4kb)
22:45884487_G	22	45884487	a	g	0.8861	0.9578	-0.3174	0.728039	0.623848	0.849632	0.0788	5.651e-05	---------	0	3.842	8	0.8711	rs6006756	ATXN10(-183.2kb)|FAM118A(+146.7kb)|FBLN1(-14.23kb)|RIBC2(+56.18kb)|SMC1B(+74.99kb)|UPK3A(+192.7kb)
7:149944152_C	7	149944152	t	c	0.9698	0.9779	-0.6129	0.541777	0.402037	0.73009	0.1522	5.651e-05	---------	0	3.145	8	0.9249	rs77699603	ACTR3C(-0.148kb)|LOC285972(-186.6kb)|LOC728743(-158.7kb)|LRRC61(-76.14kb)|RARRES2(-91.25kb)|REPIN1(-121.7kb)|RNU6-33P(-119.9kb)|RNU6-34P(-119.9kb)|ZBED6CL(-82.78kb)|ZNF775(-132.3kb)
12:60828737_A	12	60828737	a	g	0.1573	0.2117	0.2181	1.24371	1.11837	1.38311	0.0542	5.66e-05	-++++++++	0	2.683	8	0.9527	rs61923308	.
12:24326287_T	12	24326287	t	c	0.9531	0.9881	0.6227	1.86395	1.37642	2.52417	0.1547	5.677e-05	++++++-++	0	7.558	8	0.4778	rs6487375	MIR920(-39.07kb)|SOX5(0)
11:133296790_G	11	133296790	a	g	0.9093	0.9633	-0.3772	0.685779	0.570723	0.82403	0.0937	5.711e-05	+-----+--	27.6	11.043	8	0.1993	rs7938100	OPCML(0)
11:21624901_T	11	21624901	t	c	0.3901	0.46	0.1624	1.17633	1.08678	1.27326	0.0404	5.725e-05	+++++++++	0	3.976	8	0.8593	rs1031694	NELL1(+27.67kb)
16:20056053_G	16	20056053	a	g	0.3199	0.3596	0.1803	1.19758	1.0969	1.30749	0.0448	5.741e-05	++++++-++	0	7.72	8	0.4613	rs2608176	GPR139(0)|GPRC5B(+159.9kb)|IQCK(+187.2kb)
5:84115306_G	5	84115306	a	g	0.6401	0.7055	-0.1758	0.838786	0.769933	0.913796	0.0437	5.747e-05	------+--	24.4	10.582	8	0.2266	rs13167898	.
12:60802585_T	12	60802585	t	c	0.1573	0.2143	0.2161	1.24123	1.11723	1.37899	0.0537	5.754e-05	-++++++++	0	2.852	8	0.9433	rs61923298	.
19:45406673_A	19	45406673	a	g	0.2871	0.4313	0.2232	1.25007	1.12122	1.39372	0.0555	5.764e-05	-++-++?++	15	8.239	7	0.312	rs10119	APOC1(-11.25kb)|APOC1P1(-23.39kb)|APOC2(-42.56kb)|APOC4(-38.82kb)|APOC4-APOC2(-38.82kb)|APOE(-2.365kb)|BCAM(+82kb)|BCL3(+143.4kb)|CBLC(+102.8kb)|CEACAM16(+192.7kb)|CLASRP(-135.6kb)|CLPTM1(-51.17kb)|GEMIN7(-175.8kb)|PPP1R37(-189.8kb)|PVRL2(+14.19kb)|RELB(-98.03kb)|TOMM40(0)|ZNF296(-168.1kb)
3:123530334_C	3	123530334	t	c	0.7391	0.7702	-0.1885	0.828201	0.755463	0.907941	0.0469	5.786e-05	--+---++-	24.2	10.554	8	0.2282	rs11709057	CCDC14(-101.9kb)|MYLK(0)|MYLK-AS1(+180.7kb)|ROPN1(-157.5kb)
12:60801035_T	12	60801035	t	c	0.162	0.2237	0.2148	1.23961	1.11643	1.37639	0.0534	5.804e-05	-++++++++	0	2.162	8	0.9757	rs7957175	.
1:216293259_T	1	216293259	t	g	0.3332	0.3717	0.1695	1.18471	1.09067	1.28687	0.0422	5.818e-05	+++++-+++	0	5.992	8	0.6481	rs4971264	USH2A(0)
11:85691810_A	11	85691810	a	c	0.6604	0.6996	0.1717	1.18732	1.092	1.29097	0.0427	5.825e-05	+++++++++	0	1.776	8	0.9871	rs645299	CCDC83(+60.76kb)|PICALM(0)|SYTL2(+169.6kb)
2:8030029_T	2	8030029	t	g	0.0116	0.0268	0.7408	2.09761	1.46166	3.01026	0.1843	5.83e-05	-++++++++	0	4.85	8	0.7735	rs114373332	LINC00299(-117.9kb)|LOC339788(-32.53kb)
16:81662106_G	16	81662106	c	g	0.3163	0.4192	0.1683	1.18329	1.09	1.28457	0.0419	5.833e-05	+++++++++	0	3.629	8	0.889	rs12599630	CMIP(0)|LOC100129617(-36.85kb)|PLCG2(-150.8kb)
3:123527730_C	3	123527730	a	c	0.7393	0.7702	-0.1884	0.828283	0.755539	0.908032	0.0469	5.891e-05	--+---++-	23.1	10.409	8	0.2375	rs9827237	CCDC14(-104.5kb)|MYLK(0)|MYLK-AS1(+178.1kb)|ROPN1(-160.1kb)
5:95637312_T	5	95637312	t	c	0.9095	0.9291	-0.3027	0.738821	0.63732	0.856487	0.0754	5.903e-05	+--------	0	7.108	8	0.525	rs7714065	PCSK1(-88.73kb)
12:60841895_G	12	60841895	a	g	0.7889	0.8437	-0.218	0.804125	0.722941	0.894427	0.0543	5.911e-05	+--------	0	2.627	8	0.9555	rs11173471	.
11:99096479_G	11	99096479	a	g	0.795	0.8419	-0.2137	0.807591	0.727623	0.896347	0.0532	5.922e-05	-------+-	0	7.889	8	0.4444	rs1461684	CNTN5(0)
3:123530145_G	3	123530145	a	g	0.739	0.7702	-0.1883	0.828366	0.755614	0.908122	0.0469	5.925e-05	--+---++-	24.2	10.555	8	0.2282	rs11712609	CCDC14(-102.1kb)|MYLK(0)|MYLK-AS1(+180.5kb)|ROPN1(-157.7kb)
12:60807983_G	12	60807983	t	g	0.7859	0.8427	-0.2157	0.805977	0.725458	0.895433	0.0537	5.953e-05	+--------	0	2.79	8	0.9468	rs61923302	.
3:123532520_G	3	123532520	a	g	0.7388	0.7702	-0.1882	0.828449	0.75569	0.908213	0.0469	5.957e-05	--+---++-	25.4	10.727	8	0.2176	rs11714890	CCDC14(-99.75kb)|MYLK(0)|MYLK-AS1(+182.9kb)|ROPN1(-155.4kb)
20:6071947_G	20	6071947	t	g	0.338	0.4299	0.168	1.18294	1.08967	1.28418	0.0419	5.992e-05	-++++--++	47	15.082	8	0.05757	rs6053900	CHGB(+165.9kb)|CRLS1(+51.25kb)|FERMT1(0)|LRRN4(+37.22kb)|MCM8(+96.12kb)|TRMT6(+140.8kb)
10:14290295_C	10	14290295	a	c	0.973	0.9822	-0.5901	0.554272	0.415522	0.739353	0.147	5.994e-05	+----+---	0	5.189	8	0.7372	rs17250220	FRMD4A(0)|MIR1265(-188.3kb)
5:109466081_A	5	109466081	a	g	0.0248	0.037	-0.6599	0.516903	0.374515	0.713426	0.1644	5.995e-05	---?--?--	0	3.414	6	0.7554	rs143370266	.
5:155899473_G	5	155899473	t	g	0.4197	0.5128	-0.1612	0.851122	0.786634	0.920896	0.0402	6.004e-05	----+----	0	6.065	8	0.6399	rs55820495	SGCD(0)
5:8399759_T	5	8399759	t	c	0.0178	0.0313	-0.5242	0.592029	0.458325	0.764736	0.1306	6.015e-05	---------	0	6.08	8	0.6383	rs148799373	LOC729506(0)|LOC100505738(-58.04kb)|MIR4458(-61.28kb)
11:21627901_T	11	21627901	t	g	0.3927	0.4644	0.1618	1.17563	1.08634	1.27225	0.0403	6.026e-05	+++++++++	0	4.32	8	0.8271	rs1380527	NELL1(+30.67kb)
12:60809657_T	12	60809657	t	c	0.1573	0.214	0.2156	1.24061	1.11645	1.37857	0.0538	6.031e-05	-++++++++	0	2.797	8	0.9464	rs61923303	.
13:78046218_C	13	78046218	a	c	0.8524	0.904	-0.2554	0.774607	0.683689	0.877614	0.0637	6.038e-05	------++-	36.9	12.676	8	0.1235	rs12583994	MYCBP2(+145kb)|SCEL(-63.59kb)
5:95643532_A	5	95643532	a	g	0.9092	0.9291	-0.3024	0.739042	0.637511	0.856744	0.0754	6.046e-05	+--------	0	7.102	8	0.5257	rs4559022	PCSK1(-82.51kb)
3:123533702_C	3	123533702	t	c	0.7396	0.7709	-0.1884	0.828283	0.755391	0.90821	0.047	6.059e-05	--+---++-	25.8	10.784	8	0.2142	rs1824061	CCDC14(-98.57kb)|MYLK(0)|MYLK-AS1(+184kb)|ROPN1(-154.2kb)
12:60810085_C	12	60810085	t	c	0.786	0.8427	-0.2156	0.806058	0.725388	0.895698	0.0538	6.061e-05	+--------	0	2.801	8	0.9462	rs76668235	.
1:32018105_T	1	32018105	t	g	0.0233	0.0385	0.5186	1.67967	1.30366	2.16415	0.1293	6.068e-05	-++++++++	14.6	9.367	8	0.3123	rs74378365	BAI2(-174.6kb)|COL16A1(-99.74kb)|FABP3(+172.2kb)|HCRTR1(-65.2kb)|LOC149086(+43.94kb)|LOC284551(+28.26kb)|PEF1(-77.36kb)|SERINC2(+110.6kb)|TINAGL1(-23.98kb)|ZCCHC17(+180.3kb)
3:123524834_A	3	123524834	a	t	0.2301	0.2604	0.1883	1.2072	1.10096	1.32369	0.047	6.106e-05	++-+++--+	24.7	10.62	8	0.2242	rs4677905	CCDC14(-107.4kb)|MYLK(0)|MYLK-AS1(+175.2kb)|ROPN1(-163kb)
3:123529108_T	3	123529108	t	c	0.2298	0.2601	0.1879	1.20671	1.10073	1.3229	0.0469	6.11e-05	++-+++--+	23.6	10.469	8	0.2337	rs4678062	CCDC14(-103.2kb)|MYLK(0)|MYLK-AS1(+179.4kb)|ROPN1(-158.8kb)
12:60803114_T	12	60803114	t	c	0.1573	0.2142	0.2153	1.24023	1.11633	1.37789	0.0537	6.111e-05	-++++++++	0	2.811	8	0.9457	rs61923299	.
3:123530098_T	3	123530098	t	c	0.2298	0.2602	0.1879	1.20671	1.10073	1.3229	0.0469	6.127e-05	++-+++--+	24	10.523	8	0.2302	rs11720528	CCDC14(-102.2kb)|MYLK(0)|MYLK-AS1(+180.4kb)|ROPN1(-157.8kb)
11:85734010_T	11	85734010	t	c	0.6628	0.703	0.1718	1.18744	1.09168	1.2916	0.0429	6.131e-05	+++++++++	0	2.697	8	0.9519	rs676733	CCDC83(+103kb)|PICALM(0)
1:216292338_T	1	216292338	t	c	0.3328	0.3715	0.1691	1.18424	1.09023	1.28635	0.0422	6.133e-05	+++++-+++	0	5.94	8	0.6539	rs1359290	USH2A(0)
11:21617059_G	11	21617059	a	g	0.5411	0.6079	-0.1619	0.850526	0.785776	0.920613	0.0404	6.157e-05	---------	0	4.186	8	0.84	rs11608012	NELL1(+19.83kb)
17:52315711_A	17	52315711	a	g	0.5544	0.6059	-0.1649	0.847978	0.782194	0.919295	0.0412	6.188e-05	+--+-----	29.1	11.287	8	0.186	rs12451623	.
14:99471042_G	14	99471042	a	g	0.8635	0.8923	0.2496	1.28351	1.13598	1.45021	0.0623	6.189e-05	+++++++++	0	3.152	8	0.9245	rs1257629	BCL11B(-164.6kb)
1:216292272_A	1	216292272	a	t	0.3328	0.3714	0.169	1.18412	1.09012	1.28623	0.0422	6.212e-05	+++++-+++	0	5.945	8	0.6534	rs12759474	USH2A(0)
1:216293673_C	1	216293673	t	c	0.6282	0.6671	-0.1688	0.844678	0.777624	0.917513	0.0422	6.222e-05	-----+---	0	5.905	8	0.6579	rs12029418	USH2A(0)
1:216292802_T	1	216292802	a	t	0.6284	0.6671	-0.1689	0.844593	0.777546	0.917422	0.0422	6.223e-05	-----+---	0	5.906	8	0.6577	rs1359291	USH2A(0)
1:216295188_C	1	216295188	t	c	0.6279	0.6671	-0.1687	0.844762	0.777854	0.917425	0.0421	6.228e-05	-----+---	0	5.834	8	0.6658	rs10864233	USH2A(0)
1:216294107_T	1	216294107	t	c	0.3329	0.3719	0.1688	1.18388	1.0899	1.28597	0.0422	6.242e-05	+++++-+++	0	5.885	8	0.6601	rs12755871	USH2A(0)
1:216294050_T	1	216294050	t	c	0.3329	0.3719	0.1688	1.18388	1.0899	1.28597	0.0422	6.243e-05	+++++-+++	0	5.886	8	0.66	rs12742246	USH2A(0)
1:216295756_G	1	216295756	c	g	0.6277	0.6671	-0.1686	0.844847	0.777932	0.917517	0.0421	6.268e-05	-----+---	0	5.797	8	0.67	rs1811901	USH2A(0)
1:216295719_G	1	216295719	a	g	0.6277	0.6671	-0.1686	0.844847	0.777932	0.917517	0.0421	6.273e-05	-----+---	0	5.798	8	0.6698	rs1811900	USH2A(0)
3:123532820_T	3	123532820	t	c	0.2298	0.2605	0.1875	1.20623	1.10029	1.32237	0.0469	6.323e-05	++-+++--+	25.5	10.735	8	0.2172	rs74788982	CCDC14(-99.45kb)|MYLK(0)|MYLK-AS1(+183.2kb)|ROPN1(-155.1kb)
2:209696786_A	2	209696786	a	g	0.4505	0.5181	0.1626	1.17657	1.08635	1.27427	0.0407	6.328e-05	-++++++-+	0	6.028	8	0.6441	rs4490115	.
5:8391715_A	5	8391715	a	g	0.0177	0.0312	-0.523	0.59274	0.458786	0.765805	0.1307	6.33e-05	---------	0	5.977	8	0.6498	rs17278758	LOC729506(0)|LOC100505738(-66.08kb)|MIR4458(-69.32kb)
1:216296115_T	1	216296115	a	t	0.6278	0.6671	-0.1685	0.844931	0.77801	0.917609	0.0421	6.335e-05	-----+---	0	5.794	8	0.6703	rs4971265	USH2A(0)
1:216296528_A	1	216296528	a	c	0.3329	0.3721	0.1685	1.18353	1.08979	1.28533	0.0421	6.338e-05	+++++-+++	0	5.792	8	0.6705	rs9659188	USH2A(0)
1:216296844_G	1	216296844	a	g	0.6279	0.6669	-0.1685	0.844931	0.77801	0.917609	0.0421	6.346e-05	-----+---	0	5.792	8	0.6706	rs9660325	USH2A(0)
11:85854176_T	11	85854176	t	g	0.5555	0.5882	0.1604	1.17398	1.08524	1.26997	0.0401	6.359e-05	+++++++++	0	7.397	8	0.4945	rs2888903	C11orf73(-159.1kb)|EED(-101.6kb)|PICALM(+73.25kb)
11:85815030_A	11	85815030	a	g	0.648	0.6813	0.1677	1.18258	1.08934	1.2838	0.0419	6.366e-05	+++++++++	0	1.807	8	0.9864	rs1237999	C11orf73(-198.2kb)|CCDC83(+184kb)|EED(-140.8kb)|PICALM(+34.11kb)
12:75037561_A	12	75037561	a	g	0.0901	0.1067	-0.2925	0.746395	0.646636	0.861545	0.0732	6.367e-05	++-------	47.5	15.227	8	0.05488	rs35995752	ATXN7L3B(+102.3kb)
4:183000925_T	4	183000925	t	c	0.3279	0.3807	-0.1681	0.845269	0.778474	0.917796	0.042	6.406e-05	----+----	27.4	11.016	8	0.2008	rs13135549	MGC45800(-59.23kb)|MIR1305(-89.52kb)
3:123526107_G	3	123526107	c	g	0.7402	0.7703	-0.1876	0.828946	0.756144	0.908758	0.0469	6.421e-05	--+---++-	23.9	10.509	8	0.2311	rs111614820	CCDC14(-106.2kb)|MYLK(0)|MYLK-AS1(+176.4kb)|ROPN1(-161.8kb)
11:85812210_T	11	85812210	t	c	0.6482	0.6813	0.1676	1.18246	1.08924	1.28367	0.0419	6.424e-05	+++++++++	0	1.786	8	0.9869	rs497816	CCDC83(+181.2kb)|EED(-143.6kb)|PICALM(+31.29kb)
12:60791165_A	12	60791165	a	t	0.3683	0.4338	0.1666	1.18128	1.08857	1.28189	0.0417	6.426e-05	+++++-+++	0	6.989	8	0.5378	rs2363585	.
3:8724005_A	3	8724005	a	g	0.3418	0.397	-0.1988	0.819714	0.743484	0.903759	0.0498	6.454e-05	------?--	0	6.849	7	0.4448	rs35317940	CAV3(-51.48kb)|LINC00312(+107.7kb)|LMCD1(+114.2kb)|LMCD1-AS1(+180.7kb)|OXTR(-68.09kb)|RAD18(-194.9kb)|SSUH2(+30.24kb)
10:72138823_T	10	72138823	t	g	0.0309	0.0561	-0.4303	0.650314	0.526559	0.803155	0.1077	6.465e-05	-+----+--	40.7	13.487	8	0.09617	rs79436270	EIF4EBP2(-25.04kb)|LRRC20(0)|NODAL(-52.87kb)|NPFFR1(+95.37kb)|PALD1(-99.74kb)|PPA1(+145.6kb)
3:123526079_T	3	123526079	t	c	0.2297	0.2598	0.1875	1.20623	1.10029	1.32237	0.0469	6.475e-05	++-+++--+	23.9	10.519	8	0.2305	rs111284266	CCDC14(-106.2kb)|MYLK(0)|MYLK-AS1(+176.4kb)|ROPN1(-161.8kb)
22:45891115_T	22	45891115	t	c	0.0408	0.115	0.3191	1.37589	1.17644	1.60915	0.0799	6.523e-05	+++++++++	0	3.211	8	0.9204	rs56880398	ATXN10(-176.6kb)|FAM118A(+153.3kb)|FBLN1(-7.603kb)|RIBC2(+62.81kb)|SMC1B(+81.62kb)|UPK3A(+199.4kb)
11:21619743_G	11	21619743	c	g	0.5393	0.6078	-0.1613	0.851037	0.786247	0.921165	0.0404	6.528e-05	---------	0	4.323	8	0.8268	rs11826133	NELL1(+22.51kb)
7:111390039_C	7	111390039	t	c	0.9769	0.9859	-0.626	0.534726	0.393243	0.727114	0.1568	6.54e-05	?------?-	0	2.635	6	0.8531	rs77652686	DOCK4(0)|IMMP2L(+187.5kb)|LOC100506413(-58.52kb)
3:123534283_T	3	123534283	t	c	0.2297	0.2605	0.1872	1.20587	1.09996	1.32197	0.0469	6.554e-05	++-+++--+	26	10.81	8	0.2127	rs17373884	CCDC14(-97.99kb)|MYLK(0)|MYLK-AS1(+184.6kb)|ROPN1(-153.6kb)
2:159098024_C	2	159098024	t	c	0.7565	0.811	-0.1967	0.821437	0.745777	0.904772	0.0493	6.571e-05	---+-----	18.4	9.802	8	0.2792	rs17194382	CCDC148(0)|CCDC148-AS1(+5.343kb)|UPP2(+105.4kb)
2:21477012_G	2	21477012	t	g	0.6122	0.6866	-0.1722	0.841811	0.773619	0.916014	0.0431	6.574e-05	--+--+---	1.5	8.119	8	0.4219	rs58298631	.
1:216297468_T	1	216297468	t	g	0.3329	0.372	0.1683	1.18329	1.08936	1.28533	0.0422	6.585e-05	+++++-+++	0	5.78	8	0.6719	rs9728510	USH2A(0)
1:216297621_G	1	216297621	a	g	0.6281	0.6671	-0.1683	0.8451	0.778013	0.917972	0.0422	6.59e-05	-----+---	0	5.776	8	0.6723	rs9727182	USH2A(0)
14:35843785_T	14	35843785	a	t	0.8537	0.8857	-0.249	0.77958	0.689834	0.881001	0.0624	6.602e-05	---------	0	3.208	8	0.9207	rs8007950	INSM2(-159.5kb)|KIAA0391(+100.5kb)|NFKBIA(-26.93kb)|PSMA6(+57.1kb)|RALGAPA1(-163.8kb)
3:123525579_A	3	123525579	a	g	0.2298	0.2605	0.1873	1.20599	1.09986	1.32236	0.047	6.641e-05	++-+++--+	24.3	10.57	8	0.2273	rs113559065	CCDC14(-106.7kb)|MYLK(0)|MYLK-AS1(+175.9kb)|ROPN1(-162.3kb)
11:85858538_A	11	85858538	a	g	0.6888	0.7168	0.1728	1.18863	1.09191	1.29391	0.0433	6.655e-05	+++++++++	0	4.054	8	0.8522	rs7941541	C11orf73(-154.7kb)|EED(-97.27kb)|PICALM(+77.62kb)
6:88885686_G	6	88885686	a	g	0.7487	0.8156	-0.2004	0.818403	0.741714	0.903022	0.0502	6.656e-05	--+---++-	45.8	14.772	8	0.06374	rs12214973	CNR1(+9.919kb)|SPACA1(+109.1kb)
11:85856187_G	11	85856187	c	g	0.2829	0.3109	-0.1729	0.841222	0.772623	0.915911	0.0434	6.672e-05	---------	0	3.715	8	0.8819	rs7110631	C11orf73(-157.1kb)|EED(-99.62kb)|PICALM(+75.26kb)
14:35843816_A	14	35843816	a	g	0.1143	0.1463	0.2488	1.28249	1.13484	1.44933	0.0624	6.698e-05	+++++++++	0	3.206	8	0.9208	rs8008408	INSM2(-159.4kb)|KIAA0391(+100.5kb)|NFKBIA(-26.9kb)|PSMA6(+57.13kb)|RALGAPA1(-163.7kb)
2:209697123_A	2	209697123	a	g	0.4516	0.5181	0.162	1.17586	1.08592	1.27325	0.0406	6.71e-05	-++++++-+	0	6.058	8	0.6408	rs113529879	.
3:144582171_A	3	144582171	a	g	0.0108	0.0176	0.9932	2.69986	1.6566	4.40012	0.2492	6.714e-05	++++?++++	16.3	8.361	7	0.3018	rs114691744	.
7:111390814_C	7	111390814	t	c	0.9768	0.9859	-0.6249	0.535315	0.393676	0.727914	0.1568	6.728e-05	?------?-	0	2.63	6	0.8536	rs78664117	DOCK4(0)|IMMP2L(+188.2kb)|LOC100506413(-57.75kb)
3:123533708_T	3	123533708	t	c	0.2291	0.2597	0.1871	1.20575	1.09964	1.3221	0.047	6.764e-05	++-+++--+	24.4	10.578	8	0.2268	rs1824060	CCDC14(-98.56kb)|MYLK(0)|MYLK-AS1(+184kb)|ROPN1(-154.2kb)
3:123518876_T	3	123518876	t	g	0.2297	0.2589	0.1895	1.20865	1.10098	1.32683	0.0476	6.785e-05	++-+++--+	21.7	10.22	8	0.2499	rs78891934	CCDC14(-113.4kb)|MYLK(0)|MYLK-AS1(+169.2kb)|ROPN1(-169kb)
2:66576129_C	2	66576129	c	g	0.0263	0.0504	0.5195	1.68119	1.30202	2.17077	0.1304	6.818e-05	+++++-?++	0	4.957	7	0.6652	rs62146220	MEIS1(-86.4kb)|MEIS1-AS3(-74.34kb)|MIR4778(-9.251kb)
7:111331454_T	7	111331454	t	c	0.0116	0.0234	0.6211	1.86097	1.37073	2.52656	0.156	6.862e-05	?++++++++	0	3.42	7	0.8436	rs78271429	DOCK4(-34.71kb)|IMMP2L(+128.9kb)|LOC100506413(-117.1kb)
3:123523646_G	3	123523646	t	g	0.7405	0.7702	-0.1873	0.829195	0.756074	0.909387	0.0471	6.876e-05	--+---++-	25	10.662	8	0.2216	rs9816400	CCDC14(-108.6kb)|MYLK(0)|MYLK-AS1(+174kb)|ROPN1(-164.2kb)
3:173635810_A	3	173635810	a	g	0.01	0.0199	-0.8625	0.422105	0.276034	0.645476	0.2167	6.899e-05	--+---?--	0	5.82	7	0.5609	rs138626864	NLGN1(0)
10:3711939_G	10	3711939	t	g	0.612	0.672	-0.1716	0.842316	0.774083	0.916563	0.0431	6.9e-05	+-+------	40.5	13.453	8	0.0972	rs61831073	KLF6(-106.2kb)
11:21627884_C	11	21627884	t	c	0.5432	0.6198	-0.1605	0.851718	0.786876	0.921902	0.0404	6.948e-05	---------	0	3.958	8	0.8609	rs1380528	NELL1(+30.66kb)
3:123536182_C	3	123536182	t	c	0.7386	0.7703	-0.1866	0.829776	0.7569	0.909668	0.0469	6.962e-05	--+---++-	27	10.963	8	0.2038	rs7652269	CCDC14(-96.09kb)|MYLK(0)|MYLK-AS1(+186.5kb)|ROPN1(-151.7kb)
3:123536043_C	3	123536043	t	c	0.7386	0.7703	-0.1866	0.829776	0.7569	0.909668	0.0469	6.981e-05	--+---++-	27	10.956	8	0.2042	rs9289225	CCDC14(-96.23kb)|MYLK(0)|MYLK-AS1(+186.4kb)|ROPN1(-151.8kb)
12:60800614_T	12	60800614	t	c	0.1574	0.2142	0.2138	1.23837	1.11444	1.37609	0.0538	7.005e-05	-++++++++	0	2.756	8	0.9487	rs17123801	.
1:216297936_A	1	216297936	a	g	0.3329	0.3718	0.1679	1.18282	1.08892	1.28481	0.0422	7.024e-05	+++++-+++	0	5.547	8	0.6979	rs2199101	USH2A(0)
10:126171690_T	10	126171690	t	c	0.1188	0.1375	-0.2561	0.774065	0.682274	0.878204	0.0644	7.06e-05	+-----?--	0	4.277	7	0.7473	rs2361619	FAM53B(-136.2kb)|LHPP(0)|NKX1-2(+33.14kb)|OAT(+64.14kb)
1:68580382_G	1	68580382	a	g	0.9478	0.9734	0.4101	1.50697	1.231	1.8448	0.1032	7.115e-05	-++++++++	53.8	17.306	8	0.02708	rs72668877	DIRAS3(+63.92kb)|GNG12-AS1(0)|MIR1262(-68.82kb)|WLS(0)
12:60806309_C	12	60806309	a	c	0.7857	0.8426	-0.2132	0.807995	0.727274	0.897674	0.0537	7.144e-05	+--------	0	2.937	8	0.9383	rs77013454	.
3:144556298_G	3	144556298	t	g	0.9824	0.9887	-0.9979	0.368653	0.225272	0.603293	0.2513	7.147e-05	----?+---	25.7	9.419	7	0.224	rs116416084	.
5:8395303_T	5	8395303	t	c	0.0177	0.0312	-0.5177	0.59589	0.461585	0.769271	0.1303	7.147e-05	---------	0	6.208	8	0.6239	rs2100163	LOC729506(0)|LOC100505738(-62.5kb)|MIR4458(-65.73kb)
2:8294778_A	2	8294778	a	g	0.4214	0.4927	-0.1658	0.847216	0.780572	0.919549	0.0418	7.219e-05	---------	0	4.086	8	0.8493	rs181136	LINC00299(0)|LOC339788(+177.8kb)
7:111340210_C	7	111340210	t	c	0.9764	0.986	-0.6193	0.538321	0.39643	0.730998	0.1561	7.255e-05	?------?-	0	3.022	6	0.8061	rs142134702	DOCK4(-25.95kb)|IMMP2L(+137.6kb)|LOC100506413(-108.4kb)
1:216297849_A	1	216297849	a	c	0.3329	0.3718	0.1674	1.18223	1.08838	1.28417	0.0422	7.3e-05	+++++-+++	0	5.671	8	0.6841	rs2199102	USH2A(0)
14:35838893_G	14	35838893	a	g	0.8541	0.8857	-0.2466	0.781453	0.691763	0.882772	0.0622	7.304e-05	---------	0	3.367	8	0.9093	rs57607234	INSM2(-164.4kb)|KIAA0391(+95.61kb)|NFKBIA(-31.82kb)|PSMA6(+52.21kb)|RALGAPA1(-168.7kb)
2:57847754_A	2	57847754	a	c	0.014	0.0286	-0.5955	0.551287	0.410781	0.739853	0.1501	7.312e-05	-------+-	0	5.53	8	0.6998	rs150216004	.
2:57854443_G	2	57854443	a	g	0.9706	0.9859	0.5958	1.81448	1.3515	2.43607	0.1503	7.336e-05	+++++++-+	0	5.867	8	0.6621	rs151003370	.
5:8397298_T	5	8397298	t	c	0.0177	0.0312	-0.511	0.599895	0.465965	0.77232	0.1289	7.348e-05	---------	0	6.497	8	0.5917	rs116510045	LOC729506(0)|LOC100505738(-60.5kb)|MIR4458(-63.74kb)
4:21250060_C	4	21250060	t	c	0.8658	0.9382	-0.2619	0.769588	0.676072	0.87604	0.0661	7.395e-05	--+------	39.8	13.295	8	0.1021	rs2162081	KCNIP4(0)
3:123519579_T	3	123519579	t	c	0.2296	0.2596	0.188	1.20683	1.09976	1.32433	0.0474	7.398e-05	++-+++--+	22.5	10.32	8	0.2433	rs11714297	CCDC14(-112.7kb)|MYLK(0)|MYLK-AS1(+169.9kb)|ROPN1(-168.3kb)
2:159239443_C	2	159239443	a	c	0.7335	0.7633	-0.1852	0.830938	0.758258	0.910585	0.0467	7.4e-05	+--+-----	29.4	11.327	8	0.1838	rs2356091	CCDC148(0)|CCDC148-AS1(+146.8kb)|PKP4(-74.03kb)
6:167660542_T	6	167660542	t	c	0.2664	0.3469	-0.1745	0.839877	0.770481	0.915523	0.044	7.404e-05	--+------	0	7.14	8	0.5216	rs35480315	CCR6(+107.9kb)|GPR31(+89.22kb)|TCP10(-126kb)|TCP10L2(+64.15kb)|TTLL2(-78.03kb)|UNC93A(-44.26kb)
6:167660024_A	6	167660024	a	c	0.2661	0.3594	-0.1737	0.840549	0.7714	0.915896	0.0438	7.412e-05	--+------	0	7.995	8	0.434	rs9348247	CCR6(+107.4kb)|GPR31(+88.7kb)|TCP10(-126.6kb)|TCP10L2(+63.63kb)|TTLL2(-78.55kb)|UNC93A(-44.78kb)
7:111396171_G	7	111396171	a	g	0.977	0.9884	-0.6256	0.53494	0.392553	0.728975	0.1579	7.413e-05	?--------	0	3.881	7	0.7934	rs111511517	DOCK4(0)|IMMP2L(+193.6kb)|LOC100506413(-52.39kb)
1:4834202_C	1	4834202	c	g	0.7606	0.8194	0.1953	1.21568	1.1037	1.33901	0.0493	7.426e-05	-++++++++	19.8	9.97	8	0.2671	rs451162	AJAP1(0)
3:123521580_T	3	123521580	t	c	0.2296	0.259	0.1872	1.20587	1.0991	1.32301	0.0473	7.474e-05	++-+++--+	25.3	10.715	8	0.2184	rs77717129	CCDC14(-110.7kb)|MYLK(0)|MYLK-AS1(+171.9kb)|ROPN1(-166.3kb)
17:76367182_G	17	76367182	a	g	0.7776	0.8271	0.2113	1.23528	1.11253	1.37158	0.0534	7.535e-05	++-++++++	8.8	8.772	8	0.3619	rs34949061	AFMID(+163.4kb)|BIRC5(+145.5kb)|DNAH17(-52.6kb)|DNAH17-AS1(-113.8kb)|LOC100996291(+92.61kb)|PGS1(-7.552kb)|SOCS3(+11.02kb)|SYNGR2(+198.2kb)|TK1(+183.9kb)|TMEM235(+130.1kb)
11:17572028_A	11	17572028	a	g	0.5074	0.569	-0.164	0.848742	0.782592	0.920484	0.0414	7.55e-05	-----+++-	22.1	10.271	8	0.2465	rs2214944	ABCC8(+73.58kb)|KCNC1(-185.5kb)|KCNJ11(+161.2kb)|MYOD1(-169.1kb)|NCR3LG1(+173.2kb)|OTOG(0)|USH1C(+6.065kb)
3:8723855_T	3	8723855	t	g	0.3424	0.3972	-0.1971	0.821109	0.744749	0.905297	0.0498	7.58e-05	------?--	0	6.92	7	0.4373	rs55882349	CAV3(-51.63kb)|LINC00312(+107.5kb)|LMCD1(+114kb)|LMCD1-AS1(+180.5kb)|OXTR(-68.24kb)|RAD18(-195kb)|SSUH2(+30.09kb)
11:21631528_G	11	21631528	t	g	0.5358	0.6073	-0.1596	0.852485	0.787739	0.922552	0.0403	7.589e-05	---------	0	4.554	8	0.804	rs7123021	NELL1(+34.3kb)
17:52322149_T	17	52322149	t	c	0.5566	0.6075	-0.1641	0.848657	0.78236	0.920572	0.0415	7.629e-05	+--+-----	28.3	11.164	8	0.1926	rs7225204	.
9:12535703_G	9	12535703	c	g	0.7932	0.8261	0.2039	1.22618	1.10823	1.35667	0.0516	7.637e-05	-++++++++	3.5	8.291	8	0.4056	rs112007284	TYRP1(-157.7kb)
15:49222751_C	15	49222751	t	c	0.79	0.8371	0.2052	1.22777	1.10902	1.35924	0.0519	7.654e-05	++++-++++	0	7.771	8	0.4562	rs4775786	CEP152(+119.4kb)|COPS2(-194.7kb)|EID1(+50.37kb)|SECISBP2L(-58.08kb)|SHC4(0)
2:240671669_A	2	240671669	a	g	0.0818	0.1131	-0.2735	0.760712	0.664227	0.871214	0.0692	7.66e-05	---------	0	6.566	8	0.5841	rs80334556	LOC150935(-12.88kb)
2:159213758_T	2	159213758	t	g	0.2368	0.2667	0.185	1.20322	1.09776	1.31881	0.0468	7.663e-05	-++++++++	24.8	10.64	8	0.2229	rs77150481	CCDC148(0)|CCDC148-AS1(+121.1kb)|PKP4(-99.72kb)
11:85831541_A	11	85831541	a	c	0.657	0.6974	0.1676	1.18246	1.08817	1.28493	0.0424	7.67e-05	+++++++++	0	1.816	8	0.9861	rs471470	C11orf73(-181.7kb)|EED(-124.3kb)|PICALM(+50.62kb)
20:16167859_T	20	16167859	a	t	0.7706	0.8035	0.1939	1.21397	1.10281	1.33635	0.049	7.678e-05	++++++-++	0	3.313	8	0.9132	rs932906	KIF16B(-84.89kb)|MACROD2(+134kb)
16:5537598_G	16	5537598	c	g	0.4773	0.5334	0.1656	1.1801	1.08706	1.28111	0.0419	7.679e-05	+++++++++	0	7.483	8	0.4855	rs12447665	.
7:149888856_T	7	149888856	t	c	0.0197	0.0295	0.6325	1.88231	1.37561	2.57565	0.16	7.69e-05	+++++++++	0	3.599	8	0.8913	rs141259952	ACTR3C(-55.44kb)|LRRC61(-131.4kb)|RARRES2(-146.6kb)|REPIN1(-177kb)|RNU6-33P(-175.2kb)|RNU6-34P(-175.2kb)|ZBED6CL(-138.1kb)|ZNF775(-187.5kb)
10:7489750_A	10	7489750	a	t	0.5592	0.6581	-0.1638	0.848912	0.782748	0.920668	0.0414	7.694e-05	---------	0	4.076	8	0.8502	rs2244357	ITIH5(-111.5kb)|SFMBT2(+36.3kb)
12:60794289_A	12	60794289	a	g	0.3767	0.4459	0.1639	1.1781	1.08606	1.27793	0.0415	7.711e-05	+++++-+++	0	7.436	8	0.4904	rs67884160	.
2:127888757_C	2	127888757	a	c	0.6385	0.6995	-0.1706	0.843159	0.774706	0.91766	0.0432	7.726e-05	---------	14	9.307	8	0.317	rs11680911	BIN1(+23.85kb)|CYP27C1(-52.65kb)|ERCC3(-126.1kb)|MAP3K2(-167.5kb)
2:37424123_G	2	37424123	c	g	0.9117	0.9409	-0.3126	0.731542	0.626482	0.854222	0.0791	7.74e-05	+--------	0	3.326	8	0.9122	rs72792811	CEBPZ(-4.651kb)|EIF2AK2(+39.93kb)|GPATCH11(+97.74kb)|HEATR5B(+112.6kb)|LOC100505876(0)|NDUFAF7(-34.65kb)|PRKD3(-53.52kb)|QPCT(-147.6kb)|SULT6B1(+8.433kb)
3:154289946_C	3	154289946	a	c	0.9622	0.9809	-0.5644	0.568701	0.429863	0.752381	0.1428	7.748e-05	------+--	0	6.63	8	0.577	rs13078967	GPR149(+142.4kb)
5:8396149_C	5	8396149	a	c	0.9688	0.9823	0.5121	1.66879	1.29445	2.15139	0.1296	7.751e-05	+++++++++	0	6.193	8	0.6257	rs74718879	LOC729506(0)|LOC100505738(-61.65kb)|MIR4458(-64.89kb)
3:8723852_G	3	8723852	c	g	0.6029	0.6576	0.1968	1.2175	1.10428	1.34233	0.0498	7.769e-05	++++++?++	0	6.925	7	0.4367	rs56197851	CAV3(-51.63kb)|LINC00312(+107.5kb)|LMCD1(+114kb)|LMCD1-AS1(+180.5kb)|OXTR(-68.24kb)|RAD18(-195kb)|SSUH2(+30.09kb)
16:81665402_C	16	81665402	t	c	0.2872	0.348	0.1706	1.18602	1.08973	1.29081	0.0432	7.778e-05	++++++-++	0	6.492	8	0.5922	rs6564905	CMIP(0)|LOC100129617(-33.56kb)|PLCG2(-147.5kb)
3:154263175_C	3	154263175	t	c	0.9639	0.9811	-0.5762	0.56203	0.42233	0.74794	0.1458	7.798e-05	------+--	0	6.53	8	0.5881	rs34097149	GPR149(+115.7kb)
2:103132071_G	2	103132071	a	g	0.9659	0.9829	0.5731	1.77376	1.3347	2.35725	0.1451	7.809e-05	+++++++++	26	10.804	8	0.2131	rs62153112	IL1RL1(+163.6kb)|IL18R1(+116.9kb)|IL18RAP(+63.05kb)|MIR4772(+83.24kb)|SLC9A2(-104.1kb)|SLC9A4(0)
11:133297155_G	11	133297155	t	g	0.906	0.9589	-0.3626	0.695865	0.581277	0.833041	0.0918	7.817e-05	+-----+--	17.2	9.659	8	0.2898	rs79421202	OPCML(0)
20:6093498_A	20	6093498	a	g	0.5573	0.6439	-0.1643	0.848487	0.78205	0.920568	0.0416	7.828e-05	+----++--	44.7	14.468	8	0.07035	rs6085407	CHGB(+187.5kb)|CRLS1(+72.8kb)|FERMT1(0)|LRRN4(+58.77kb)|MCM8(+117.7kb)|TRMT6(+162.3kb)
11:99107017_A	11	99107017	a	g	0.792	0.8427	-0.2097	0.810827	0.730683	0.899763	0.0531	7.845e-05	------++-	25.8	10.779	8	0.2145	rs4350331	CNTN5(0)
2:209741535_G	2	209741535	t	g	0.4821	0.5472	-0.1607	0.851547	0.786257	0.92226	0.0407	7.879e-05	+------+-	0	6.839	8	0.5541	rs12694141	.
4:33330965_A	4	33330965	a	g	0.0436	0.0585	0.4416	1.55519	1.24892	1.93658	0.1119	7.884e-05	++-++++++	0	5.057	8	0.7515	rs116384620	.
16:52750598_A	16	52750598	a	g	0.0214	0.0436	-0.5037	0.604291	0.470577	0.775999	0.1276	7.893e-05	+----+---	0	6.561	8	0.5847	rs74383889	LINC00918(+109.7kb)|TOX3(+168.9kb)
11:99106990_T	11	99106990	t	c	0.792	0.8427	-0.2096	0.810909	0.730756	0.899853	0.0531	7.905e-05	------++-	25.7	10.773	8	0.2149	rs4475888	CNTN5(0)
11:99107104_G	11	99107104	a	g	0.1573	0.208	0.2096	1.23318	1.11129	1.36845	0.0531	7.909e-05	++++++--+	25.8	10.787	8	0.2141	rs7125605	CNTN5(0)
7:27751652_T	7	27751652	t	g	0.0454	0.0811	0.5301	1.6991	1.30587	2.21074	0.1343	7.952e-05	++++++?++	24.3	9.245	7	0.2355	.	HIBADH(+49.03kb)|JAZF1(-118.5kb)|TAX1BP1(-27.34kb)
3:123520733_T	3	123520733	t	c	0.2297	0.2594	0.1868	1.20539	1.09866	1.32248	0.0473	7.958e-05	++-+++--+	25.3	10.705	8	0.219	rs4677904	CCDC14(-111.5kb)|MYLK(0)|MYLK-AS1(+171.1kb)|ROPN1(-167.1kb)
17:5535209_C	17	5535209	t	c	0.1594	0.2021	-0.2023	0.81685	0.738711	0.903254	0.0513	7.969e-05	------+--	0	3.781	8	0.8763	rs2137721	C1QBP(+192.7kb)|DERL2(+145.7kb)|DHX33(+162.8kb)|LOC339166(-140.3kb)|LOC728392(+130.9kb)|MIS12(+141.1kb)|NLRP1(+47.38kb)|RPAIN(+198.9kb)
16:52320775_A	16	52320775	a	g	0.3269	0.3513	0.1681	1.18305	1.08829	1.28608	0.0426	8.017e-05	+++++-+++	0	4.891	8	0.7691	rs1075800	TOX3(-151.1kb)
3:123539882_C	3	123539882	a	c	0.7453	0.7902	-0.201	0.817912	0.740107	0.903897	0.051	8.017e-05	------++-	42.5	13.91	8	0.08415	rs80078555	CCDC14(-92.39kb)|MYLK(0)|MYLK-AS1(+190.2kb)|ROPN1(-148kb)
17:5515098_G	17	5515098	a	g	0.1581	0.1964	-0.2053	0.814403	0.735345	0.901961	0.0521	8.047e-05	------+--	0	4.683	8	0.7909	rs2716921	C1QBP(+172.6kb)|DERL2(+125.6kb)|DHX33(+142.7kb)|LOC339166(-160.5kb)|LOC728392(+110.8kb)|MIS12(+121kb)|NLRP1(+27.27kb)|NUP88(+192kb)|RPAIN(+178.8kb)
11:1679163_A	11	1679163	a	g	0.5815	0.6459	-0.1634	0.849251	0.783062	0.921036	0.0414	8.067e-05	------+--	10.5	8.942	8	0.3472	rs10838486	BRSK2(+195.2kb)|CTSD(-94.82kb)|DUSP8(+86.01kb)|FAM99A(-7.665kb)|FAM99B(-25.34kb)|IFITM10(-74.48kb)|KRTAP5-1(+72.65kb)|KRTAP5-2(+59.64kb)|KRTAP5-3(+49.47kb)|KRTAP5-4(+35.8kb)|KRTAP5-5(+27kb)|KRTAP5-6(-39.26kb)|KRTAP5-AS1(+58.75kb)|LSP1(-195kb)|MOB2(0)|SYT8(-176.5kb)|TNNI2(-181.1kb)
3:144572862_T	3	144572862	t	c	0.011	0.0177	0.9921	2.69689	1.64637	4.41774	0.2518	8.13e-05	++++?-+++	22.7	9.061	7	0.2483	rs115769511	.
16:52313507_A	16	52313507	a	t	0.3281	0.3513	0.1681	1.18305	1.08807	1.28633	0.0427	8.142e-05	+++++-+++	0	4.725	8	0.7865	rs1894879	LINC00919(+194.5kb)|TOX3(-158.4kb)
4:21248901_C	4	21248901	c	g	0.0636	0.1347	0.2599	1.2968	1.13944	1.47589	0.066	8.158e-05	++-++++++	30.8	11.559	8	0.172	rs1425334	KCNIP4(0)
4:21249719_G	4	21249719	a	g	0.8657	0.9365	-0.2603	0.77082	0.677154	0.877442	0.0661	8.188e-05	--+------	32.6	11.866	8	0.1573	rs11943777	KCNIP4(0)
14:22876678_G	14	22876678	c	g	0.3139	0.4162	0.1653	1.17975	1.08652	1.28097	0.042	8.238e-05	+++++++++	43.1	14.063	8	0.08015	rs2014767	ABHD4(-190.5kb)|DAD1(-157.1kb)
21:44436177_A	21	44436177	a	g	0.5162	0.5779	-0.1591	0.852911	0.787979	0.923194	0.0404	8.26e-05	--+------	0	5.965	8	0.6511	rs2839619	CBS(-37.12kb)|CRYAA(-153kb)|NDUFV3(+106.4kb)|PKNOX1(0)|U2AF1(-76.89kb)|WDR4(+136.5kb)
7:146374000_C	7	146374000	c	g	0.0145	0.0223	-0.5769	0.561637	0.421373	0.74859	0.1466	8.281e-05	------++-	0	6.263	8	0.6178	rs140610963	CNTNAP2(0)
6:37318182_T	6	37318182	t	c	0.7799	0.8128	-0.2067	0.813264	0.73374	0.901406	0.0525	8.288e-05	---------	0	3.579	8	0.893	rs4714058	CCDC167(-132.5kb)|FTSJD2(-82.72kb)|PIM1(+175kb)|RNF8(-3.565kb)|TBC1D22B(+17.44kb)|TMEM217(+92.25kb)
1:4839850_C	1	4839850	c	g	0.7338	0.8006	0.1895	1.20865	1.09991	1.32814	0.0481	8.298e-05	-++++++-+	33.6	12.054	8	0.1488	rs2802718	AJAP1(0)
4:33268072_C	4	33268072	c	g	0.0237	0.0383	0.4822	1.61963	1.27367	2.05957	0.1226	8.382e-05	+++++++++	0	2.691	8	0.9522	rs73220711	.
3:112946691_A	3	112946691	a	g	0.4188	0.481	0.1614	1.17515	1.08441	1.27349	0.041	8.388e-05	++++++-++	0	6.487	8	0.5929	rs9853740	BOC(0)|WDR52(-59.08kb)|WDR52-AS1(-176.2kb)
3:123521977_A	3	123521977	a	g	0.2298	0.2592	0.1856	1.20394	1.09756	1.32063	0.0472	8.39e-05	++-+++--+	25.2	10.699	8	0.2193	rs12186069	CCDC14(-110.3kb)|MYLK(0)|MYLK-AS1(+172.3kb)|ROPN1(-165.9kb)
4:21247995_C	4	21247995	a	c	0.8653	0.9364	-0.2593	0.771592	0.678098	0.877976	0.0659	8.4e-05	--+------	30.8	11.559	8	0.172	rs6823638	KCNIP4(0)
9:4670525_G	9	4670525	a	g	0.6273	0.6823	-0.1683	0.8451	0.777099	0.919053	0.0428	8.405e-05	+-----++-	19	9.875	8	0.2739	rs16921778	AK3(-39.03kb)|CDC37L1(-9.04kb)|MIR101-2(-179.8kb)|PPAPDC2(+5.253kb)|RCL1(-122.3kb)|SLC1A1(+83.06kb)|SPATA6L(+3.851kb)
7:111389557_T	7	111389557	t	c	0.0115	0.0231	0.6174	1.8541	1.36299	2.52217	0.157	8.407e-05	?++++++++	0	2.651	7	0.9153	rs113904484	DOCK4(0)|IMMP2L(+187kb)|LOC100506413(-59kb)
11:1665671_C	11	1665671	t	c	0.8433	0.8866	0.236	1.26617	1.12569	1.42419	0.06	8.431e-05	-+++++0-+	0	7.732	8	0.4601	rs4288711	BRSK2(+181.8kb)|CTSD(-108.3kb)|DUSP8(+72.52kb)|FAM99A(-21.16kb)|FAM99B(-38.83kb)|IFITM10(-87.97kb)|KRTAP5-1(+59.16kb)|KRTAP5-2(+46.15kb)|KRTAP5-3(+35.98kb)|KRTAP5-4(+22.3kb)|KRTAP5-5(+13.51kb)|KRTAP5-6(-52.75kb)|KRTAP5-AS1(+45.26kb)|MOB2(0)|SYT8(-190kb)|TNNI2(-194.6kb)
11:85814486_G	11	85814486	t	g	0.3006	0.3356	-0.1669	0.846284	0.778645	0.919799	0.0425	8.434e-05	---------	0	2.895	8	0.9408	rs586274	C11orf73(-198.8kb)|CCDC83(+183.4kb)|EED(-141.3kb)|PICALM(+33.56kb)
7:149894493_G	7	149894493	a	g	0.9686	0.9787	-0.6079	0.544493	0.402077	0.737353	0.1547	8.475e-05	---------	0	3.691	8	0.8839	rs58680849	ACTR3C(-49.81kb)|LRRC61(-125.8kb)|RARRES2(-140.9kb)|REPIN1(-171.4kb)|RNU6-33P(-169.5kb)|RNU6-34P(-169.5kb)|ZBED6CL(-132.4kb)|ZNF775(-181.9kb)
11:21632174_C	11	21632174	t	c	0.5355	0.6072	-0.1585	0.853423	0.788606	0.923567	0.0403	8.486e-05	---------	0	4.444	8	0.815	rs4565893	NELL1(+34.94kb)
7:111388889_G	7	111388889	c	g	0.9769	0.9885	-0.6175	0.539291	0.396366	0.733752	0.1571	8.509e-05	?--------	0	2.656	7	0.9149	rs78836139	DOCK4(0)|IMMP2L(+186.3kb)|LOC100506413(-59.67kb)
17:43000297_C	17	43000297	a	c	0.6869	0.7614	0.1762	1.19268	1.09242	1.30214	0.0448	8.547e-05	-++++++++	46.9	15.058	8	0.05802	rs12150314	ADAM11(+141.1kb)|C1QL1(-36.76kb)|CCDC103(+19.25kb)|DBF4B(+170.7kb)|DCAKD(-100.4kb)|EFTUD2(+23.3kb)|GFAP(+7.377kb)|GJC1(+92.12kb)|HIGD1B(+72.45kb)|KIF18B(-1.781kb)|NMT1(-138.4kb)|PLCD3(-188.7kb)
11:21632680_C	11	21632680	t	c	0.5359	0.6072	-0.1586	0.853338	0.788373	0.923656	0.0404	8.589e-05	---------	0	4.576	8	0.8018	rs7948743	NELL1(+35.45kb)
1:4834229_C	1	4834229	t	c	0.1806	0.2395	-0.1936	0.823987	0.748093	0.907581	0.0493	8.595e-05	+--------	19.9	9.985	8	0.2661	rs388631	AJAP1(0)
11:85823324_T	11	85823324	t	c	0.5302	0.5715	0.1577	1.17081	1.0821	1.2668	0.0402	8.617e-05	+++++++++	0	7.084	8	0.5276	rs631611	C11orf73(-189.9kb)|CCDC83(+192.3kb)|EED(-132.5kb)|PICALM(+42.4kb)
15:49223897_A	15	49223897	a	t	0.163	0.2103	-0.2043	0.815218	0.736225	0.902686	0.052	8.631e-05	----+----	0	7.473	8	0.4866	rs12909610	CEP152(+120.6kb)|COPS2(-193.6kb)|EID1(+51.52kb)|SECISBP2L(-56.94kb)|SHC4(0)
2:159099466_A	2	159099466	a	c	0.1869	0.2366	0.1951	1.21543	1.10262	1.33979	0.0497	8.638e-05	+++-+++++	5.7	8.48	8	0.388	rs79994563	CCDC148(0)|CCDC148-AS1(+6.785kb)|UPP2(+106.8kb)
22:45893010_A	22	45893010	a	g	0.0404	0.1153	0.3145	1.36957	1.17059	1.60239	0.0801	8.661e-05	+++++++++	0	3.369	8	0.9091	rs11913098	ATXN10(-174.7kb)|FAM118A(+155.2kb)|FBLN1(-5.708kb)|RIBC2(+64.71kb)|SMC1B(+83.51kb)
11:68846578_A	11	68846578	a	g	0.0175	0.0508	-0.4743	0.622321	0.491119	0.788572	0.1208	8.666e-05	--+----+-	0	4.968	8	0.761	rs74685061	IGHMBP2(+138.5kb)|MRGPRD(+98.12kb)|MRGPRF(+65.73kb)|MRPL21(+175.3kb)|TPCN2(0)
12:103461443_A	12	103461443	a	g	0.0147	0.0285	-0.674	0.509666	0.364025	0.713575	0.1717	8.67e-05	--+--+?--	17.8	8.515	7	0.2894	rs148525448	ASCL1(+107.1kb)|C12orf42(-169.9kb)|PAH(+150.1kb)
12:60805494_C	12	60805494	t	c	0.7857	0.8426	-0.2108	0.809936	0.729022	0.899831	0.0537	8.689e-05	+--------	0	2.848	8	0.9435	rs61923300	.
2:141818657_C	2	141818657	t	c	0.9587	0.9755	0.4276	1.53357	1.23857	1.89883	0.109	8.689e-05	++++++-++	0	5.463	8	0.7072	rs16845255	LRP1B(0)
1:238628684_T	1	238628684	a	t	0.4402	0.5086	0.1596	1.17304	1.0831	1.27045	0.0407	8.695e-05	++++++-++	1.4	8.112	8	0.4226	rs6702521	LOC339535(-15kb)
11:1679201_A	11	1679201	a	g	0.5811	0.6459	-0.1627	0.849846	0.783456	0.921862	0.0415	8.697e-05	------+--	10.5	8.934	8	0.3479	rs12146613	BRSK2(+195.3kb)|CTSD(-94.78kb)|DUSP8(+86.05kb)|FAM99A(-7.627kb)|FAM99B(-25.3kb)|IFITM10(-74.44kb)|KRTAP5-1(+72.69kb)|KRTAP5-2(+59.68kb)|KRTAP5-3(+49.51kb)|KRTAP5-4(+35.83kb)|KRTAP5-5(+27.04kb)|KRTAP5-6(-39.22kb)|KRTAP5-AS1(+58.79kb)|LSP1(-195kb)|MOB2(0)|SYT8(-176.5kb)|TNNI2(-181kb)
10:72153883_T	10	72153883	t	c	0.03	0.0561	-0.4256	0.653378	0.528211	0.808205	0.1085	8.716e-05	-+----+--	47.1	15.121	8	0.05684	rs11597921	EIF4EBP2(-9.977kb)|LRRC20(+11.48kb)|NODAL(-37.81kb)|NPFFR1(+110.4kb)|PALD1(-84.68kb)|PPA1(+160.7kb)
11:21630096_G	11	21630096	c	g	0.5428	0.6178	-0.1582	0.853679	0.788843	0.923844	0.0403	8.724e-05	---------	0	3.971	8	0.8597	rs4922567	NELL1(+32.87kb)
2:209743073_C	2	209743073	t	c	0.4819	0.5468	-0.16	0.852144	0.786653	0.923087	0.0408	8.735e-05	+------+-	0	6.529	8	0.5882	rs4362499	.
3:143143570_G	3	143143570	c	g	0.9594	0.9795	-0.4909	0.612075	0.47898	0.782154	0.1251	8.735e-05	-------+-	0	7.009	8	0.5357	rs115096488	SLC9A9(0)|SLC9A9-AS1(+77.66kb)
1:190576217_T	1	190576217	t	c	0.0217	0.0366	0.5435	1.72202	1.31238	2.25953	0.1386	8.743e-05	+++++++++	0	4.211	8	0.8376	rs144036954	FAM5C(+129.5kb)|LOC440704(-17.8kb)
2:159244427_C	2	159244427	t	c	0.7337	0.7634	-0.1831	0.832685	0.759852	0.912499	0.0467	8.745e-05	+--+-----	32	11.772	8	0.1617	rs79560306	CCDC148(0)|CCDC148-AS1(+151.7kb)|PKP4(-69.05kb)
2:159106259_G	2	159106259	a	g	0.7562	0.81	-0.1924	0.824977	0.749285	0.908315	0.0491	8.758e-05	---+-----	16.4	9.567	8	0.2967	rs10209732	CCDC148(0)|CCDC148-AS1(+13.58kb)|UPP2(+113.6kb)
2:159245985_C	2	159245985	t	c	0.734	0.7634	-0.1831	0.832685	0.759852	0.912499	0.0467	8.763e-05	+--+-----	32.4	11.839	8	0.1585	rs11680774	CCDC148(0)|CCDC148-AS1(+153.3kb)|PKP4(-67.49kb)
22:49663445_A	22	49663445	a	g	0.4517	0.9818	0.5097	1.66479	1.29033	2.14792	0.13	8.779e-05	-++-++?+?	41	10.168	6	0.1178	rs2688127	.
13:78366055_G	13	78366055	a	g	0.8504	0.9187	-0.2461	0.781844	0.691431	0.88408	0.0627	8.784e-05	-+---+++-	67.4	24.551	8	0.001851	rs7993629	EDNRB(-103.6kb)|LOC100505518(-27.02kb)|MIR3665(+93.8kb)|SCEL(+146.7kb)|SLAIN1(+27.68kb)
2:212373727_T	2	212373727	t	c	0.2445	0.3823	-0.1717	0.842232	0.772945	0.91773	0.0438	8.79e-05	------++-	0	6.52	8	0.5892	rs60178054	ERBB4(0)
12:77366928_T	12	77366928	t	c	0.0298	0.059	-0.3686	0.691702	0.575314	0.831636	0.094	8.804e-05	------+--	0	6.573	8	0.5833	rs76089637	CSRP2(+94.13kb)|E2F7(-48.1kb)|ZDHHC17(+119.5kb)
7:149900715_T	7	149900715	t	c	0.0216	0.0314	0.5996	1.82139	1.34975	2.45784	0.1529	8.82e-05	+++++++++	0	3.441	8	0.9037	rs60809834	ACTR3C(-43.58kb)|LRRC61(-119.6kb)|RARRES2(-134.7kb)|REPIN1(-165.2kb)|RNU6-33P(-163.3kb)|RNU6-34P(-163.3kb)|ZBED6CL(-126.2kb)|ZNF775(-175.7kb)
2:240727783_A	2	240727783	a	g	0.0856	0.1152	-0.2656	0.766746	0.671466	0.875546	0.0677	8.843e-05	---------	0	4.581	8	0.8012	rs62183195	LOC150935(+5.427kb)|MIR4786(-154.6kb)|NDUFA10(-169kb)
9:4670642_A	9	4670642	a	g	0.3182	0.3746	0.1675	1.18235	1.08742	1.28556	0.0427	8.852e-05	-+++++--+	19.1	9.891	8	0.2727	rs1385454	AK3(-38.91kb)|CDC37L1(-8.923kb)|MIR101-2(-179.7kb)|PPAPDC2(+5.37kb)|RCL1(-122.2kb)|SLC1A1(+83.17kb)|SPATA6L(+3.968kb)
10:72137038_C	10	72137038	t	c	0.9439	0.969	0.4137	1.5124	1.22988	1.85982	0.1055	8.854e-05	+-++++-++	40.5	13.454	8	0.09717	rs113624632	EIF4EBP2(-26.82kb)|LRRC20(0)|NODAL(-54.65kb)|NPFFR1(+93.59kb)|PALD1(-101.5kb)|PPA1(+143.8kb)
2:159234529_A	2	159234529	a	t	0.2367	0.2667	0.1831	1.20093	1.09589	1.31605	0.0467	8.862e-05	-++-+++++	28.2	11.144	8	0.1937	rs77432849	CCDC148(0)|CCDC148-AS1(+141.8kb)|PKP4(-78.95kb)
2:238639420_T	2	238639420	t	g	0.0264	0.0457	-0.4111	0.662921	0.53972	0.814243	0.1049	8.875e-05	+------+-	0	3.057	8	0.9307	rs115546307	LRRFIP1(0)|MLPH(+175.5kb)|PRLH(+163.6kb)|RAB17(+139.7kb)|RAMP1(-128.8kb)|RBM44(-67.97kb)
7:149900960_G	7	149900960	c	g	0.9688	0.9785	-0.5992	0.549251	0.407024	0.741177	0.1529	8.889e-05	---------	0	3.401	8	0.9068	rs56076554	ACTR3C(-43.34kb)|LRRC61(-119.3kb)|RARRES2(-134.4kb)|REPIN1(-164.9kb)|RNU6-33P(-163.1kb)|RNU6-34P(-163.1kb)|ZBED6CL(-126kb)|ZNF775(-175.4kb)
7:149900365_G	7	149900365	a	g	0.9687	0.9784	-0.5998	0.548921	0.40662	0.741023	0.1531	8.892e-05	---------	0	3.455	8	0.9027	rs61698132	ACTR3C(-43.94kb)|LRRC61(-119.9kb)|RARRES2(-135kb)|REPIN1(-165.5kb)|RNU6-33P(-163.7kb)|RNU6-34P(-163.7kb)|ZBED6CL(-126.6kb)|ZNF775(-176kb)
5:95663238_A	5	95663238	a	g	0.9104	0.9292	-0.2967	0.743267	0.640778	0.862148	0.0757	8.9e-05	+--------	0	6.461	8	0.5958	rs6879773	PCSK1(-62.8kb)
2:28303713_T	2	28303713	t	c	0.495	0.5539	0.1594	1.17281	1.08288	1.2702	0.0407	8.911e-05	-++++++++	0	2.487	8	0.9624	rs2337699	BRE(0)|BRE-AS1(+189.7kb)|MIR4263(+84.4kb)|RBKS(+190.5kb)
5:94191458_T	5	94191458	t	g	0.0182	0.0712	0.7593	2.13678	1.46148	3.12411	0.1938	8.92e-05	-+-?++?++	0	3.19	6	0.7846	rs199668205	ANKRD32(+159.9kb)|MCTP1(0)
9:4671409_A	9	4671409	a	c	0.3182	0.374	0.1676	1.18246	1.08732	1.28594	0.0428	8.947e-05	-+++++--+	20.7	10.094	8	0.2585	rs6476893	AK3(-38.15kb)|CDC37L1(-8.156kb)|MIR101-2(-178.9kb)|PPAPDC2(+6.137kb)|RCL1(-121.4kb)|SLC1A1(+83.94kb)|SPATA6L(+4.735kb)
6:167660562_G	6	167660562	a	g	0.5016	0.5982	0.1615	1.17527	1.0841	1.27412	0.0412	8.962e-05	++++++?++	0	1.937	7	0.9632	rs9347189	CCR6(+107.9kb)|GPR31(+89.24kb)|TCP10(-126kb)|TCP10L2(+64.17kb)|TTLL2(-78.01kb)|UNC93A(-44.24kb)
7:149901206_T	7	149901206	t	c	0.0215	0.0312	0.5987	1.81975	1.34853	2.45563	0.1529	8.966e-05	+++++++++	0	3.392	8	0.9074	rs148104462	ACTR3C(-43.09kb)|LRRC61(-119.1kb)|RARRES2(-134.2kb)|REPIN1(-164.7kb)|RNU6-33P(-162.8kb)|RNU6-34P(-162.8kb)|ZBED6CL(-125.7kb)|ZNF775(-175.2kb)
13:92982538_T	13	92982538	t	c	0.1128	0.1893	-0.2344	0.791045	0.703556	0.889414	0.0598	9.003e-05	+--------	0	5.925	8	0.6557	rs72638652	GPC5(0)
7:149900287_A	7	149900287	a	c	0.0216	0.0313	0.5993	1.82084	1.34881	2.45807	0.1531	9.033e-05	+++++++++	0	3.453	8	0.9028	rs55922333	ACTR3C(-44.01kb)|LRRC61(-120kb)|RARRES2(-135.1kb)|REPIN1(-165.6kb)|RNU6-33P(-163.7kb)|RNU6-34P(-163.7kb)|ZBED6CL(-126.6kb)|ZNF775(-176.1kb)
2:214160170_G	2	214160170	a	g	0.9729	0.9883	0.5897	1.80345	1.34249	2.42268	0.1506	9.049e-05	+++++-+++	24.7	10.63	8	0.2236	rs116315370	IKZF2(+143.8kb)|LOC100130451(+11.24kb)|SPAG16(0)
11:1657987_T	11	1657987	t	c	0.1207	0.1578	-0.234	0.791362	0.703837	0.88977	0.0598	9.097e-05	+------+-	0	6.867	8	0.5511	rs115277959	BRSK2(+174.1kb)|CTSD(-116kb)|DUSP8(+64.84kb)|FAM99A(-28.84kb)|FAM99B(-46.51kb)|IFITM10(-95.65kb)|KRTAP5-1(+51.47kb)|KRTAP5-2(+38.46kb)|KRTAP5-3(+28.29kb)|KRTAP5-4(+14.62kb)|KRTAP5-5(+5.828kb)|KRTAP5-6(-60.44kb)|KRTAP5-AS1(+37.57kb)|MOB2(0)|SYT8(-197.7kb)
22:45888594_G	22	45888594	t	g	0.5166	0.7993	-0.1688	0.844678	0.776254	0.919133	0.0431	9.103e-05	---------	0	3.98	8	0.8589	rs1009598	ATXN10(-179.1kb)|FAM118A(+150.8kb)|FBLN1(-10.12kb)|RIBC2(+60.29kb)|SMC1B(+79.09kb)|UPK3A(+196.8kb)
1:4839168_C	1	4839168	t	c	0.1837	0.2448	-0.1937	0.823905	0.747725	0.907846	0.0495	9.13e-05	+------+-	26.7	10.908	8	0.207	rs392984	AJAP1(0)
2:8288322_T	2	8288322	t	c	0.417	0.5114	0.1615	1.17527	1.08389	1.27436	0.0413	9.139e-05	+++++++++	0	2.134	8	0.9766	rs72779155	LINC00299(0)|LOC339788(+171.4kb)
17:68070810_G	17	68070810	c	g	0.1822	0.2256	-0.1934	0.824152	0.748096	0.907941	0.0494	9.152e-05	-------+-	0	6.404	8	0.6021	rs9903462	KCNJ2(-94.86kb)|KCNJ2-AS1(-92.29kb)|KCNJ16(-0.555kb)
22:45878439_A	22	45878439	a	c	0.0417	0.1132	0.3109	1.36465	1.16775	1.59475	0.0795	9.156e-05	+++++++++	0	3.482	8	0.9006	rs77629847	ATXN10(-189.2kb)|FAM118A(+140.6kb)|FBLN1(-20.28kb)|RIBC2(+50.14kb)|SMC1B(+68.94kb)|UPK3A(+186.7kb)
7:149956814_T	7	149956814	t	g	0.0234	0.0281	0.6132	1.84633	1.35781	2.51062	0.1568	9.168e-05	+++-+++++	0	3.932	8	0.8632	rs79145971	ACTR3C(0)|GIMAP8(-191.1kb)|LOC285972(-173.9kb)|LOC728743(-146kb)|LRRC61(-63.48kb)|RARRES2(-78.59kb)|REPIN1(-109.1kb)|RNU6-33P(-107.2kb)|RNU6-34P(-107.2kb)|ZBED6CL(-70.12kb)|ZNF775(-119.6kb)
1:189638375_T	1	189638375	t	g	0.0103	0.0279	1.0094	2.74395	1.65454	4.55068	0.2581	9.188e-05	+++?++?++	22.1	7.704	6	0.2606	rs113923174	.
2:159215951_A	2	159215951	a	g	0.2368	0.2667	0.1829	1.20069	1.09546	1.31604	0.0468	9.248e-05	-++++++++	24.4	10.582	8	0.2265	rs113658628	CCDC148(0)|CCDC148-AS1(+123.3kb)|PKP4(-97.52kb)
2:159217724_C	2	159217724	a	c	0.7333	0.7631	-0.183	0.832768	0.759779	0.912769	0.0468	9.251e-05	+--------	24.9	10.651	8	0.2223	rs140541701	CCDC148(0)|CCDC148-AS1(+125kb)|PKP4(-95.75kb)
9:96909288_G	9	96909288	a	g	0.9427	0.9653	-0.3919	0.675772	0.555166	0.822578	0.1003	9.269e-05	--+------	0	6.643	8	0.5756	rs113761573	BARX1(+191.7kb)|LOC100132077(-185.5kb)|MIRLET7A1(-28.95kb)|MIRLET7D(-31.83kb)|MIRLET7DHG(-29.56kb)|MIRLET7F1(-29.34kb)|NUTM2F(-171.2kb)|PTPDC1(+37.15kb)|ZNF169(-112.3kb)
2:159218324_A	2	159218324	a	t	0.2368	0.2667	0.1829	1.20069	1.09546	1.31604	0.0468	9.293e-05	-++++++++	24.7	10.631	8	0.2235	rs112063764	CCDC148(0)|CCDC148-AS1(+125.6kb)|PKP4(-95.15kb)
12:60875691_A	12	60875691	a	g	0.1798	0.2414	0.1903	1.20961	1.09949	1.33076	0.0487	9.3e-05	+++++++-+	0	5.403	8	0.7137	rs11173488	.
18:8585096_C	18	8585096	t	c	0.7746	0.812	-0.1988	0.819714	0.741883	0.90571	0.0509	9.31e-05	+---+----	0	5.759	8	0.6742	rs17498343	PTPRM(+178.2kb)|RAB12(-24.35kb)|SOGA2(-132.3kb)
3:4520732_G	3	4520732	c	g	0.9786	0.9899	0.7073	2.02851	1.4224	2.89289	0.1811	9.366e-05	-+?-+++++	42.1	12.085	7	0.09778	rs146070635	ITPR1(-14.3kb)|SETMAR(+161.8kb)|SUMF1(+11.77kb)
17:49894599_A	17	49894599	a	c	0.2109	0.2446	0.1927	1.21252	1.10084	1.33553	0.0493	9.367e-05	+++++++++	0	5.828	8	0.6664	rs12451068	CA10(0)
2:127889637_A	2	127889637	a	g	0.3003	0.3616	0.1686	1.18365	1.08755	1.28823	0.0432	9.374e-05	+++++++++	16.9	9.632	8	0.2918	rs7561528	BIN1(+24.73kb)|CYP27C1(-51.77kb)|ERCC3(-125.2kb)|MAP3K2(-166.6kb)
9:4670573_T	9	4670573	t	c	0.3165	0.3703	0.1674	1.18223	1.08689	1.28593	0.0429	9.396e-05	-+++++--+	19.3	9.908	8	0.2716	rs16921782	AK3(-38.98kb)|CDC37L1(-8.992kb)|MIR101-2(-179.7kb)|PPAPDC2(+5.301kb)|RCL1(-122.3kb)|SLC1A1(+83.1kb)|SPATA6L(+3.899kb)
12:60789609_A	12	60789609	a	g	0.3683	0.4361	0.1628	1.1768	1.08444	1.27702	0.0417	9.421e-05	+++++-+++	1.1	8.089	8	0.4248	rs1995514	.
12:60876219_A	12	60876219	a	g	0.1798	0.2414	0.1901	1.20937	1.09927	1.3305	0.0487	9.438e-05	+++++++-+	0	5.452	8	0.7084	rs7975412	.
4:133973035_A	4	133973035	a	g	0.3836	0.4353	-0.1612	0.851122	0.78494	0.922884	0.0413	9.44e-05	--+------	0	7.203	8	0.5149	rs7681419	PCDH10(-97.43kb)
3:123540136_T	3	123540136	t	c	0.2124	0.2481	0.1909	1.21034	1.09972	1.33208	0.0489	9.442e-05	++-+++-++	30.6	11.528	8	0.1736	rs9829784	CCDC14(-92.14kb)|MYLK(0)|MYLK-AS1(+190.5kb)|ROPN1(-147.7kb)
2:225597350_T	2	225597350	t	c	0.0101	0.0182	0.8286	2.29011	1.51087	3.47124	0.2122	9.443e-05	?+++++-?+	0	5.378	6	0.4964	rs138840542	CUL3(+147.2kb)|DOCK10(-32.46kb)
14:92893880_G	14	92893880	a	g	0.4898	0.5396	-0.1578	0.854021	0.789004	0.924395	0.0404	9.492e-05	------+--	0	5.212	8	0.7347	rs12588761	RIN3(-86.24kb)|SLC24A4(0)
1:9386008_C	1	9386008	c	g	0.0379	0.0535	0.435	1.54496	1.24167	1.92233	0.1115	9.507e-05	-+++++?++	29	9.862	7	0.1965	rs11585353	GPR157(+196.8kb)|H6PD(+54.61kb)|MIR34A(+174.2kb)|SPSB1(0)
8:27904702_G	8	27904702	t	g	0.4933	0.5835	0.1564	1.16929	1.08091	1.2649	0.0401	9.51e-05	-+++++-++	0	4.433	8	0.8161	rs11782419	ELP3(-45.88kb)|MIR4287(+161.1kb)|NUGGC(0)|SCARA5(+54.33kb)
7:149898981_A	7	149898981	a	g	0.0213	0.0312	0.6003	1.82267	1.34831	2.46391	0.1538	9.54e-05	+++++++++	0	3.532	8	0.8967	rs73725992	ACTR3C(-45.32kb)|LRRC61(-121.3kb)|RARRES2(-136.4kb)|REPIN1(-166.9kb)|RNU6-33P(-165.1kb)|RNU6-34P(-165.1kb)|ZBED6CL(-128kb)|ZNF775(-177.4kb)
3:173649169_A	3	173649169	a	g	0.0356	0.0521	-0.379	0.684546	0.565912	0.828048	0.0971	9.556e-05	--+---+--	0	7.012	8	0.5354	rs73182698	NLGN1(0)
5:95561462_C	5	95561462	t	c	0.9087	0.9334	-0.2966	0.743341	0.640466	0.862742	0.076	9.588e-05	---------	0	5.745	8	0.6758	rs73138348	MIR583(+146.5kb)|PCSK1(-164.6kb)
2:57754204_G	2	57754204	c	g	0.9722	0.9826	0.5286	1.69656	1.30085	2.21263	0.1355	9.598e-05	+++++++-+	0	4.784	8	0.7804	rs1609170	.
2:57751780_C	2	57751780	a	c	0.9724	0.9826	0.5283	1.69605	1.30046	2.21196	0.1355	9.609e-05	+++++++-+	0	4.725	8	0.7865	rs820981	.
7:111385789_A	7	111385789	a	g	0.0115	0.0231	0.6133	1.84651	1.35661	2.51333	0.1573	9.624e-05	?++++++++	0	2.448	7	0.9309	rs78757587	DOCK4(0)|IMMP2L(+183.2kb)|LOC100506413(-62.77kb)
11:85820077_G	11	85820077	a	g	0.297	0.3335	-0.166	0.847046	0.779193	0.920808	0.0426	9.651e-05	---------	0	2.907	8	0.9401	rs543293	C11orf73(-193.2kb)|CCDC83(+189kb)|EED(-135.7kb)|PICALM(+39.15kb)
12:60874776_G	12	60874776	a	g	0.7585	0.8201	-0.1899	0.827042	0.75175	0.909875	0.0487	9.722e-05	-------+-	0	5.378	8	0.7165	rs11173487	.
2:57746633_T	2	57746633	t	c	0.0173	0.0276	-0.5293	0.589017	0.45137	0.76864	0.1358	9.734e-05	-------+-	0	4.656	8	0.7937	rs820974	.
12:60806101_C	12	60806101	t	c	0.7827	0.8397	-0.2083	0.811963	0.731276	0.901553	0.0534	9.74e-05	+--------	0	3.104	8	0.9276	rs61923301	.
3:174027195_T	3	174027195	t	c	0.0374	0.0621	-0.3588	0.698514	0.583147	0.836705	0.0921	9.761e-05	--+---+--	0	3.695	8	0.8836	rs17328346	NLGN1(+26.06kb)
2:238640131_T	2	238640131	t	c	0.0264	0.0457	-0.4086	0.66458	0.541071	0.816282	0.1049	9.768e-05	+------+-	0	3.063	8	0.9303	rs114758075	LRRFIP1(0)|MLPH(+176.2kb)|PRLH(+164.3kb)|RAB17(+140.4kb)|RAMP1(-128.1kb)|RBM44(-67.26kb)
1:4839652_G	1	4839652	a	g	0.1837	0.2452	-0.1929	0.824564	0.748323	0.908573	0.0495	9.773e-05	+------+-	27	10.96	8	0.204	rs2802719	AJAP1(0)
2:212373330_G	2	212373330	a	g	0.613	0.7554	0.1701	1.18542	1.08812	1.29143	0.0437	9.778e-05	++++++--+	0	5.889	8	0.6597	rs34155527	ERBB4(0)
10:7486663_G	10	7486663	a	g	0.3447	0.4366	0.1624	1.17633	1.08401	1.27651	0.0417	9.814e-05	++++++-++	0	4.097	8	0.8482	rs2244016	ITIH5(-114.6kb)|SFMBT2(+33.22kb)
19:3802935_C	19	3802935	t	c	0.5373	0.719	0.1907	1.2101	1.09929	1.33208	0.049	9.826e-05	-++?+-?++	48.9	11.745	6	0.06789	rs6510770	APBA3(+41.26kb)|ATCAY(-77.68kb)|CACTIN(+176.1kb)|CACTIN-AS1(+189kb)|DAPK3(-155.5kb)|EEF2(-173.1kb)|MATK(+1.125kb)|MIR637(-158.5kb)|MRPL54(+35.37kb)|NMRK2(-130.2kb)|PIP5K1C(+102.5kb)|RAX2(+30.72kb)|SNORD37(-179.6kb)|TBXA2R(+196.1kb)|TJP3(+52.12kb)|ZFR2(-1.086kb)
2:159227919_A	2	159227919	a	g	0.2368	0.2669	0.182	1.19961	1.09447	1.31486	0.0468	9.864e-05	-++++++++	25.6	10.752	8	0.2162	rs77920408	CCDC148(0)|CCDC148-AS1(+135.2kb)|PKP4(-85.56kb)
2:159221018_C	2	159221018	a	c	0.7332	0.7632	-0.1821	0.833518	0.760463	0.913591	0.0468	9.89e-05	+--+-----	25.7	10.767	8	0.2153	rs141509232	CCDC148(0)|CCDC148-AS1(+128.3kb)|PKP4(-92.46kb)
12:60874017_T	12	60874017	t	c	0.1799	0.2416	0.1898	1.20901	1.09873	1.33036	0.0488	9.905e-05	+++++++-+	0	5.355	8	0.7191	rs4421778	.
8:27904500_T	8	27904500	t	g	0.415	0.5066	-0.156	0.855559	0.79089	0.925516	0.0401	9.908e-05	+-----+--	0	4.473	8	0.8122	rs13253785	ELP3(-46.08kb)|MIR4287(+160.9kb)|NUGGC(0)|SCARA5(+54.13kb)
7:21774492_A	7	21774492	a	c	0.096	0.1056	-0.2614	0.769973	0.674953	0.878369	0.0672	9.951e-05	---------	0	6.304	8	0.6132	rs73275654	CDCA7L(-166kb)|DNAH11(0)
4:133962175_T	4	133962175	t	c	0.3849	0.4377	-0.1615	0.850867	0.784397	0.922969	0.0415	9.964e-05	--+------	0	7.153	8	0.5202	rs62313600	PCDH10(-108.3kb)
2:57741088_G	2	57741088	t	g	0.9715	0.9827	0.5207	1.68321	1.29492	2.18791	0.1338	9.973e-05	+++++++-+	0	4.276	8	0.8314	rs820970	.
11:78979645_T	11	78979645	t	c	0.2677	0.7074	-0.1742	0.840129	0.769505	0.917235	0.0448	9.978e-05	---------	0	6.006	8	0.6465	rs961424	MIR708(-133.4kb)|MIR5579(-153.6kb)|TENM4(0)
