# Supplementary material for: Multiomics integrative analysis identifies APOE allele-specific blood biomarkers associated to Alzheimer’s disease etiopathogenesis
Source: Aging (Albany NY). 2021 Apr 12;13(7):9277–329. doi: 10.18632/aging.202950 (PMC8064208; doi:10.18632/aging.202950)
Supplement: Supplementary Table 9 [file aging-13-202950-s011.xlsx]

## Sheet: Sheet1
Supplementary Table 9. APOE and sex stratified analysis: APOE2 males meta-analysis results (p<10-4).
SNP	CHR	BP	A1	A2	N	P	P.R.	OR	OR.R.	Q	I	F0	F1	F2	F3	F4	F5	F6	F7	RS	ANNOT
9:81872880	9	81872880	G	?	7	2.933e-06	2.933e-06	3.0538	3.0538	0.6935	0	2.592	3.274	0	1.847	2.352	NA	0.7584	8.463	rs10746589	.
8:13224832	8	13224832	C	?	6	3.127e-06	3.127e-06	2.3831	2.3831	0.5085	0	NA	2.971	21.29	2.34	1.127	NA	3.195	1.891	rs1671411	C8orf48(-199.5kb)|DLC1(0)
2:216255526	2	216255526	C	?	7	3.787e-06	3.787e-06	3.2737	3.2737	0.5297	0	0.8347	2.757	0.3258	6.677	5.87	NA	3.282	4.208	rs17456054	ATIC(+41.03kb)|FN1(0)
8:28345438	8	28345438	C	?	6	4.868e-06	4.868e-06	3.3016	3.3016	0.429	0	NA	5.272	1.514	0.9989	4.224	NA	3.75	2.403	rs7845989	FBXO16(0)|FZD3(-6.283kb)|MIR4288(-17.19kb)|PNOC(+144.6kb)|ZNF395(+101.5kb)
6:696282	6	696282	T	?	7	5.304e-06	5.304e-06	3.4594	3.4594	0.7344	0	1.575	2.718	1.387	3.512	5.411	NA	0	11.89	rs9504807	EXOC2(+3.141kb)|HUS1B(+39.32kb)
8:28344891	8	28344891	C	?	6	5.379e-06	0.0002211	3.5656	3.3056	0.3045	16.91	NA	6.449	1.514	0.8592	4.359	NA	3.75	2.173	rs13248834	FBXO16(0)|FZD3(-6.83kb)|MIR4288(-17.74kb)|PNOC(+144kb)|ZNF395(+100.9kb)
8:13224672	8	13224672	A	?	6	5.907e-06	6.908e-05	2.3273	2.2784	0.3506	10.19	NA	2.971	21.29	2.34	0.8937	NA	3.195	1.915	rs897265	C8orf48(-199.7kb)|DLC1(0)
8:13224771	8	13224771	A	?	6	5.907e-06	6.908e-05	2.3273	2.2784	0.3506	10.19	NA	2.971	21.29	2.34	0.8937	NA	3.195	1.915	rs1671410	C8orf48(-199.6kb)|DLC1(0)
8:28347283	8	28347283	T	?	6	6.428e-06	0.004067	3.5303	2.9819	0.1704	35.5	NA	7.12	0.7381	0.8592	4.359	NA	3.75	1.984	rs1908916	FBXO16(0)|FZD3(-4.438kb)|MIR4288(-15.35kb)|PNOC(+146.4kb)|ZNF395(+103.3kb)
8:28345400	8	28345400	T	?	6	7.609e-06	7.609e-06	3.2223	3.2223	0.47	0	NA	4.98	1.514	0.9989	4.224	NA	3.75	2.403	rs7832970	FBXO16(0)|FZD3(-6.321kb)|MIR4288(-17.23kb)|PNOC(+144.5kb)|ZNF395(+101.4kb)
8:28346102	8	28346102	G	?	6	9.613e-06	0.0002042	3.1699	2.9982	0.3228	14.28	NA	5.272	0.7381	0.9989	4.224	NA	3.75	2.227	rs6992823	FBXO16(0)|FZD3(-5.619kb)|MIR4288(-16.53kb)|PNOC(+145.2kb)|ZNF395(+102.1kb)
21:45246326	21	45246326	G	?	6	1.074e-05	1.074e-05	2.9411	2.9411	0.6542	0	NA	3.133	2.254	8.785	1.85	NA	7.301	2.211	rs2838407	AGPAT3(-38.79kb)|CSTB(+50.07kb)|HSF2BP(+167kb)|LOC284837(+13.88kb)|PDXK(+64.14kb)|RRP1(+22.34kb)|RRP1B(+130.4kb)|TRAPPC10(-185.9kb)
7:32007106	7	32007106	G	?	6	1.229e-05	1.229e-05	0.3594	0.3594	0.9738	0	NA	0.391	0.342	0.3835	0.3888	NA	0.0866	0.286	rs11486831	PDE1C(0)
8:28347508	8	28347508	A	?	6	1.455e-05	1.455e-05	3.1668	3.1668	0.4924	0	NA	4.518	1.514	0.8592	4.359	NA	3.75	2.094	rs977971	FBXO16(0)|FZD3(-4.213kb)|MIR4288(-15.12kb)|PNOC(+146.6kb)|ZNF395(+103.5kb)
6:159165480	6	159165480	G	?	6	1.984e-05	1.984e-05	4.3248	4.3248	0.877	0	NA	3.858	2618	5.484	4.838	NA	0	3.329	rs112884268	C6orf99(-144.1kb)|DYNLT1(+99.68kb)|EZR(-21.29kb)|EZR-AS1(-73.53kb)|MIR3918(-20.21kb)|OSTCP1(-96.68kb)|SYTL3(0)|TMEM181(+109kb)
6:159168255	6	159168255	T	?	6	1.984e-05	1.984e-05	4.3248	4.3248	0.877	0	NA	3.858	2618	5.484	4.838	NA	0	3.329	rs113247107	C6orf99(-141.4kb)|DYNLT1(+102.5kb)|EZR(-18.52kb)|EZR-AS1(-70.76kb)|MIR3918(-17.44kb)|OSTCP1(-93.9kb)|SYTL3(0)|TMEM181(+111.8kb)
6:159168572	6	159168572	C	?	6	1.984e-05	1.984e-05	4.3248	4.3248	0.877	0	NA	3.858	2618	5.484	4.838	NA	0	3.329	rs79670615	C6orf99(-141kb)|DYNLT1(+102.8kb)|EZR(-18.2kb)|EZR-AS1(-70.44kb)|MIR3918(-17.12kb)|OSTCP1(-93.58kb)|SYTL3(0)|TMEM181(+112.1kb)
6:159168939	6	159168939	G	?	6	1.984e-05	1.984e-05	4.3248	4.3248	0.877	0	NA	3.858	2618	5.484	4.838	NA	0	3.329	rs75463489	C6orf99(-140.7kb)|DYNLT1(+103.1kb)|EZR(-17.83kb)|EZR-AS1(-70.07kb)|MIR3918(-16.75kb)|OSTCP1(-93.22kb)|SYTL3(0)|TMEM181(+112.5kb)
6:159174366	6	159174366	T	?	6	1.984e-05	1.984e-05	4.3248	4.3248	0.877	0	NA	3.858	2618	5.484	4.838	NA	0	3.329	rs113459452	C6orf99(-135.3kb)|DYNLT1(+108.6kb)|EZR(-12.41kb)|EZR-AS1(-64.64kb)|MIR3918(-11.33kb)|OSTCP1(-87.79kb)|SYTL3(0)|TMEM181(+117.9kb)
6:159175317	6	159175317	C	?	6	1.984e-05	1.984e-05	4.3248	4.3248	0.877	0	NA	3.858	2618	5.484	4.838	NA	0	3.329	rs78406092	C6orf99(-134.3kb)|DYNLT1(+109.5kb)|EZR(-11.46kb)|EZR-AS1(-63.69kb)|MIR3918(-10.38kb)|OSTCP1(-86.84kb)|SYTL3(0)|TMEM181(+118.8kb)
4:158793663	4	158793663	G	?	6	3.067e-05	0.0001093	2.3579	2.3261	0.3735	6.73	NA	3.719	0.9891	1.938	1.469	NA	17.63	1.729	rs1481223	.
6:159153331	6	159153331	T	?	6	3.118e-05	3.118e-05	4.2809	4.2809	0.7948	0	NA	3.609	2618	7.7	4.276	NA	0	2.959	rs77599895	C6orf99(-156.3kb)|DYNLT1(+87.53kb)|EZR(-33.44kb)|EZR-AS1(-85.68kb)|MIR3918(-32.36kb)|OSTCP1(-108.8kb)|SYTL3(0)|TMEM181(+96.86kb)
6:159153627	6	159153627	A	?	6	3.118e-05	3.118e-05	4.2809	4.2809	0.7948	0	NA	3.609	2618	7.7	4.276	NA	0	2.959	rs76431014	C6orf99(-156kb)|DYNLT1(+87.82kb)|EZR(-33.14kb)|EZR-AS1(-85.38kb)|MIR3918(-32.06kb)|OSTCP1(-108.5kb)|SYTL3(0)|TMEM181(+97.16kb)
10:25998924	10	25998924	C	?	7	3.545e-05	3.545e-05	2.2153	2.2153	0.6248	0	2817	2.634	24.33	1.421	2.106	NA	7.471	2.099	rs10828856	GPR158(+107.8kb)
5:154981548	5	154981548	T	?	6	3.727e-05	3.727e-05	3.5514	3.5514	0.5603	0	NA	2.101	0.8665	5.746	7.472	NA	9.173	5.455	rs7734371	.
5:154983027	5	154983027	G	?	6	3.727e-05	3.727e-05	3.5514	3.5514	0.5603	0	NA	2.101	0.8665	5.746	7.472	NA	9.173	5.455	rs7356689	.
5:154983248	5	154983248	C	?	6	3.727e-05	3.727e-05	3.5514	3.5514	0.5603	0	NA	2.101	0.8665	5.746	7.472	NA	9.173	5.455	rs28783990	.
5:154986292	5	154986292	A	?	6	3.727e-05	3.727e-05	3.5514	3.5514	0.5603	0	NA	2.101	0.8665	5.746	7.472	NA	9.173	5.455	rs10051752	.
5:154987098	5	154987098	T	?	6	3.727e-05	3.727e-05	3.5514	3.5514	0.5603	0	NA	2.101	0.8665	5.746	7.472	NA	9.173	5.455	rs10079465	.
5:154997873	5	154997873	T	?	6	3.727e-05	3.727e-05	3.5514	3.5514	0.5603	0	NA	2.101	0.8665	5.746	7.472	NA	9.173	5.455	rs10074994	.
5:154998315	5	154998315	A	?	6	3.727e-05	3.727e-05	3.5514	3.5514	0.5603	0	NA	2.101	0.8665	5.746	7.472	NA	9.173	5.455	rs75966387	.
5:155001087	5	155001087	A	?	6	3.727e-05	3.727e-05	3.5514	3.5514	0.5603	0	NA	2.101	0.8665	5.746	7.472	NA	9.173	5.455	rs77321946	.
11:120002727	11	120002727	G	?	6	3.84e-05	0.0004052	2.3833	2.3298	0.3348	12.53	NA	3.207	0.3385	4.424	2.116	NA	1.984	1.37	rs550164	LOC649133(-117.7kb)|OAF(-79.02kb)|POU2F3(-104.6kb)|TMEM136(-193.1kb)|TRIM29(0)
11:120002927	11	120002927	C	?	6	3.84e-05	0.0004052	2.3833	2.3298	0.3348	12.53	NA	3.207	0.3385	4.424	2.116	NA	1.984	1.37	rs561498	LOC649133(-117.5kb)|OAF(-78.82kb)|POU2F3(-104.4kb)|TMEM136(-192.9kb)|TRIM29(0)
4:164681642	4	164681642	A	?	6	4.079e-05	0.003013	4.0364	4.2016	0.1365	40.33	NA	4.294	2.618	0.8745	4.563	NA	10.79	32.38	rs113291165	MARCH1(0)
6:10148033	6	10148033	A	?	7	4.27e-05	4.27e-05	2.1014	2.1014	0.9857	0	1.386	2.395	2.893	1.776	2.351	NA	1.265	1.906	rs9366277	.
14:107221499	14	107221499	A	?	6	4.335e-05	4.335e-05	3.0411	3.0411	0.767	0	0.0142	2.878	29.68	4.113	3.835	NA	1.273	NA	rs60388345	.
8:96789829	8	96789829	T	?	6	4.425e-05	0.0001937	3.8819	3.8643	0.3606	8.69	0.2502	5.035	22.77	13.83	1.328	NA	NA	4.188	rs72669868	LOC100500773(-169.4kb)|LOC100616530(0)
5:154770393	5	154770393	A	?	6	4.564e-05	4.564e-05	3.2515	3.2515	0.8094	0	NA	2.665	0.8665	1.722	4.577	NA	1.759	5.219	rs10068213	.
11:125895397	11	125895397	A	?	7	4.565e-05	4.565e-05	2.3609	2.3609	0.8763	0	1.817	2.464	2.944	2.549	2.874	NA	0.1489	2.049	rs10458992	CDON(0)|DDX25(+102.4kb)|FAM118B(-186.2kb)|HYLS1(+124.9kb)|PATE4(+185.4kb)|PUS3(+122.3kb)|RPUSD4(-176.6kb)
4:126842080	4	126842080	T	?	7	4.74e-05	4.74e-05	2.2422	2.2422	0.7369	0	0.0246	2.528	3.092	2.138	0.9475	NA	4.512	2.506	rs1506165	.
4:158798177	4	158798177	T	?	6	4.832e-05	0.0004213	2.2998	2.2454	0.3317	12.98	NA	3.719	0.9891	1.938	1.469	NA	17.63	1.574	rs6852915	.
4:158799122	4	158799122	C	?	6	4.832e-05	0.0004213	2.2998	2.2454	0.3317	12.98	NA	3.719	0.9891	1.938	1.469	NA	17.63	1.574	rs1992903	.
7:14301924	7	14301924	C	?	7	4.959e-05	4.959e-05	2.4194	2.4194	0.6021	0	0.9058	3.908	1.592	1.187	1.503	NA	2.765	2.255	rs28533448	DGKB(0)
2:192405740	2	192405740	T	?	6	5.342e-05	5.342e-05	4.1472	4.1472	0.6506	0	NA	4.043	1.41	6.63	12.79	NA	7.53	1.788	rs76999005	MYO1B(+115.6kb)|NABP1(-137.1kb)
11:119997599	11	119997599	T	?	6	5.367e-05	5.367e-05	2.3241	2.3241	0.4625	0	NA	3.086	1.689	4.424	2.213	NA	0.9209	1.337	rs470725	LOC649133(-122.9kb)|OAF(-84.15kb)|POU2F3(-109.7kb)|TMEM136(-198.2kb)|TRIM29(0)
1:234728276	1	234728276	T	?	6	5.413e-05	5.413e-05	4.0838	4.0838	0.9243	0	NA	4.01	0	1.218	5.884	NA	6.044	5.228	rs10910471	IRF2BP2(-11.74kb)|LINC00184(-36.78kb)|LOC100506795(+60.75kb)|LOC100506810(-131.5kb)|TARBP1(+113.4kb)
5:154769276	5	154769276	T	?	6	5.437e-05	5.437e-05	3.2633	3.2633	0.81	0	NA	2.654	0.8665	1.722	4.577	NA	1.759	5.219	rs10065884	.
19:54131155	19	54131155	A	?	6	5.469e-05	5.469e-05	2.7631	2.7631	0.6649	0	NA	3.362	1.155	1.512	3.497	NA	0.0109	3.095	rs74180715	DPRX(-4.154kb)|LOC284379(+24.4kb)|MIR371A(-159.8kb)|MIR371B(-159.8kb)|MIR372(-160kb)|MIR373(-160.8kb)|MIR498(-46.3kb)|MIR512-1(-38.78kb)|MIR512-2(-38.77kb)|MIR515-1(-51.1kb)|MIR515-2(-51.1kb)|MIR516A1(-128.8kb)|MIR516A2(-133.2kb)|MIR516B1(-108.9kb)|MIR516B2(-97.54kb)|MIR517A(-84.37kb)|MIR517B(-93.17kb)|MIR517C(-113.4kb)|MIR518A1(-103.1kb)|MIR518A2(-111.4kb)|MIR518B(-74.84kb)|MIR518C(-80.83kb)|MIR…
12:18728331	12	18728331	T	?	6	5.493e-05	5.493e-05	0.3705	0.3705	0.9298	0	NA	0.4116	1.043	0.3964	0.3729	NA	0.458	0.2217	rs11044200	CAPZA3(-162.7kb)|PIK3C2G(0)|PLCZ1(-107.8kb)
14:32626805	14	32626805	A	?	6	5.528e-05	0.03105	3.1752	2.9923	0.0568	53.43	NA	4.442	0	1.808	1.503	NA	0.1839	26.57	rs7152756	AKAP6(-171.7kb)|ARHGAP5(0)|ARHGAP5-AS1(+80.9kb)
11:17610053	11	17610053	C	?	6	5.581e-05	5.581e-05	2.4845	2.4845	0.8256	0	NA	2.616	1.732	4.747	1.303	NA	1.946	2.466	rs11024330	ABCC8(+111.6kb)|KCNC1(-147.4kb)|KCNJ11(+199.2kb)|MYOD1(-131.1kb)|OTOG(0)|SERGEF(-199.5kb)|USH1C(+44.09kb)
5:154766141	5	154766141	T	?	6	5.602e-05	5.602e-05	3.2996	3.2996	0.7797	0	NA	2.654	0.8665	1.722	4.52	NA	1.759	5.706	rs10070661	.
5:154769495	5	154769495	C	?	6	5.634e-05	5.634e-05	3.2558	3.2558	0.8126	0	NA	2.654	0.8665	1.722	4.52	NA	1.759	5.219	rs10066147	.
4:158815510	4	158815510	T	?	6	5.662e-05	0.0009128	2.3116	2.235	0.2989	17.71	NA	3.842	0.9891	1.938	1.412	NA	17.63	1.548	rs1448451	.
4:158816109	4	158816109	T	?	6	5.662e-05	0.0009128	2.3116	2.235	0.2989	17.71	NA	3.842	0.9891	1.938	1.412	NA	17.63	1.548	rs11730960	.
4:158788553	4	158788553	G	?	6	5.684e-05	5.684e-05	2.2724	2.2724	0.4728	0	NA	3.314	0.9891	1.938	1.469	NA	17.63	1.729	rs13150286	.
11:120012390	11	120012390	G	?	7	5.932e-05	0.000429	2.2505	2.2259	0.3556	9.61	2.49	2.653	0.0168	4.225	2.315	NA	1.909	1.346	rs470411	ARHGEF12(-195.2kb)|LOC649133(-108.1kb)|OAF(-69.36kb)|POU2F3(-94.96kb)|TMEM136(-183.4kb)|TRIM29(+3.527kb)
15:93750953	15	93750953	A	?	6	5.939e-05	5.939e-05	2.8947	2.8947	0.8225	0	NA	2.989	0.2608	3.498	3.756	NA	3.45	2.68	rs145649205	CHD2(+179.7kb)|RGMA(+118.5kb)
11:17605441	11	17605441	G	?	6	6.075e-05	6.075e-05	2.4735	2.4735	0.8251	0	NA	2.616	1.732	4.747	1.303	NA	1.946	2.396	rs10832810	ABCC8(+107kb)|KCNC1(-152.1kb)|KCNJ11(+194.6kb)|MYOD1(-135.7kb)|OTOG(0)|USH1C(+39.48kb)
5:72454520	5	72454520	C	?	7	6.085e-05	6.085e-05	3.995	3.995	0.8785	0	5.593	2.584	0	10.31	4.776	NA	0.0702	6.258	rs7720612	FCHO2(+68.17kb)|TMEM171(+26.88kb)|TMEM174(-14.5kb)
5:72454880	5	72454880	G	?	7	6.085e-05	6.085e-05	3.995	3.995	0.8785	0	5.593	2.584	0	10.31	4.776	NA	0.0702	6.258	rs7705585	FCHO2(+68.53kb)|TMEM171(+27.24kb)|TMEM174(-14.14kb)
5:72457839	5	72457839	C	?	7	6.085e-05	6.085e-05	3.995	3.995	0.8785	0	5.593	2.584	0	10.31	4.776	NA	0.0702	6.258	rs62361360	FCHO2(+71.49kb)|TMEM171(+30.2kb)|TMEM174(-11.18kb)
11:125892207	11	125892207	C	?	7	6.137e-05	6.137e-05	2.3242	2.3242	0.8789	0	1.817	2.378	2.944	2.549	2.874	NA	0.1489	2.049	rs11220316	CDON(0)|DDX25(+99.2kb)|FAM118B(-189.4kb)|HYLS1(+121.7kb)|PATE4(+182.2kb)|PUS3(+119.1kb)|RPUSD4(-179.8kb)
5:154891822	5	154891822	G	?	6	6.15e-05	6.15e-05	3.2321	3.2321	0.7065	0	NA	2.101	0.8665	5.746	4.47	NA	2.205	5.534	rs6884002	.
7:32001658	7	32001658	G	?	6	6.161e-05	6.161e-05	0.4779	0.4779	0.6824	0	NA	0.5668	1.04	0.4033	0.4952	NA	0.3376	0.2488	rs6952633	PDE1C(0)
7:32001710	7	32001710	G	?	6	6.161e-05	6.161e-05	0.4779	0.4779	0.6824	0	NA	0.5668	1.04	0.4033	0.4952	NA	0.3376	0.2488	rs6952765	PDE1C(0)
11:125892069	11	125892069	C	?	7	6.174e-05	6.174e-05	2.3231	2.3231	0.8786	0	1.817	2.378	2.944	2.549	2.874	NA	0.1489	2.044	rs57547788	CDON(0)|DDX25(+99.06kb)|FAM118B(-189.5kb)|HYLS1(+121.5kb)|PATE4(+182.1kb)|PUS3(+119kb)|RPUSD4(-179.9kb)
12:25407726	12	25407726	G	?	6	6.232e-05	6.969e-05	3.5556	3.5587	0.4126	0.53	NA	3.353	37.7	0.9506	5.699	NA	52.85	6.181	rs12318598	CASC1(+59.63kb)|KRAS(+3.872kb)|LRMP(+146.5kb)|LYRM5(+49.78kb)
7:122896963	7	122896963	G	?	7	6.327e-05	6.327e-05	2.1077	2.1077	0.7288	0	0.4949	1.751	1.971	3.806	2.777	NA	0.3991	2.552	rs10247712	IQUB(-195.3kb)|SLC13A1(+56.94kb)
7:122895308	7	122895308	A	?	6	6.382e-05	6.382e-05	2.2302	2.2302	0.9382	0	NA	2.135	1.971	3.21	2.086	NA	0.539	2.2	rs10953976	IQUB(-196.9kb)|SLC13A1(+55.28kb)
13:83802295	13	83802295	T	?	6	6.638e-05	0.00925	2.1599	2.0688	0.1859	33.35	NA	2.152	0.0393	2.553	0.9945	NA	1.921	3.94	rs2063578	.
15:93751175	15	93751175	G	?	6	6.641e-05	6.641e-05	2.8751	2.8751	0.829	0	NA	2.989	0.2608	3.498	3.54	NA	3.45	2.68	rs73449859	CHD2(+179.9kb)|RGMA(+118.7kb)
4:158804986	4	158804986	T	?	6	6.685e-05	0.0009299	2.2754	2.2039	0.3055	16.76	NA	3.719	0.9891	1.938	1.412	NA	17.63	1.505	rs13119669	.
4:158805338	4	158805338	A	?	6	6.685e-05	0.0009299	2.2754	2.2039	0.3055	16.76	NA	3.719	0.9891	1.938	1.412	NA	17.63	1.505	rs13144241	.
4:158807146	4	158807146	G	?	6	6.685e-05	0.0009299	2.2754	2.2039	0.3055	16.76	NA	3.719	0.9891	1.938	1.412	NA	17.63	1.505	rs13107688	.
4:158810429	4	158810429	A	?	6	6.685e-05	0.0009299	2.2754	2.2039	0.3055	16.76	NA	3.719	0.9891	1.938	1.412	NA	17.63	1.505	rs2197791	.
4:158811161	4	158811161	G	?	6	6.685e-05	0.0009299	2.2754	2.2039	0.3055	16.76	NA	3.719	0.9891	1.938	1.412	NA	17.63	1.505	rs10005904	.
4:158813871	4	158813871	C	?	6	6.685e-05	0.0009299	2.2754	2.2039	0.3055	16.76	NA	3.719	0.9891	1.938	1.412	NA	17.63	1.505	rs9995955	.
4:158817087	4	158817087	G	?	6	6.685e-05	0.0009299	2.2754	2.2039	0.3055	16.76	NA	3.719	0.9891	1.938	1.412	NA	17.63	1.505	rs7678950	.
2:70749729	2	70749729	G	?	6	6.72e-05	0.02417	2.6774	2.4133	0.1083	44.56	NA	4.016	8.896	4.064	0.3722	NA	2.995	1.056	rs449409	ADD2(-139.5kb)|TGFA(0)
5:72444515	5	72444515	C	?	7	6.735e-05	6.735e-05	3.9508	3.9508	0.8844	0	5.593	2.584	0	10.31	4.525	NA	0.0702	6.138	rs56987659	FCHO2(+58.17kb)|TMEM171(+16.87kb)|TMEM174(-24.51kb)
5:72445951	5	72445951	C	?	7	6.735e-05	6.735e-05	3.9508	3.9508	0.8844	0	5.593	2.584	0	10.31	4.525	NA	0.0702	6.138	rs11955304	FCHO2(+59.6kb)|TMEM171(+18.31kb)|TMEM174(-23.07kb)
17:55124600	17	55124600	T	?	6	6.767e-05	0.001308	3.1908	3.0507	0.3011	17.39	NA	3.707	147.1	1.359	3.018	NA	0.1095	4.84	rs34458955	AKAP1(-37.95kb)|COIL(+86.19kb)|DGKE(+178.6kb)|MIR3614(+155.9kb)|MTVR2(+162.3kb)|RNF126P1(+0.444kb)|SCPEP1(+40.47kb)|TRIM25(+133.2kb)
11:17604300	11	17604300	A	?	6	7.13e-05	7.13e-05	2.4559	2.4559	0.8272	0	NA	2.58	1.732	4.747	1.303	NA	1.946	2.396	rs10832807	ABCC8(+105.9kb)|KCNC1(-153.2kb)|KCNJ11(+193.4kb)|MYOD1(-136.8kb)|OTOG(0)|USH1C(+38.34kb)
13:83796768	13	83796768	G	?	6	7.162e-05	0.007804	2.1475	2.0601	0.2032	30.97	NA	2.158	0.0393	2.553	0.9945	NA	1.921	3.74	rs2048566	.
13:83797786	13	83797786	G	?	6	7.162e-05	0.007804	2.1475	2.0601	0.2032	30.97	NA	2.158	0.0393	2.553	0.9945	NA	1.921	3.74	rs2800351	.
13:83798757	13	83798757	C	?	6	7.162e-05	0.007804	2.1475	2.0601	0.2032	30.97	NA	2.158	0.0393	2.553	0.9945	NA	1.921	3.74	rs2819223	.
22:27416523	22	27416523	A	?	6	7.207e-05	7.207e-05	3.0011	3.0011	0.8873	0	NA	3.018	0.7765	7.635	2.664	NA	3.283	2.479	rs61438424	.
2:70750531	2	70750531	C	?	6	7.479e-05	0.02372	2.6549	2.4011	0.1133	43.8	NA	3.933	8.896	4.064	0.3722	NA	2.995	1.056	rs426081	ADD2(-138.7kb)|TGFA(0)
15:93733409	15	93733409	G	?	6	7.548e-05	7.548e-05	2.9311	2.9311	0.5374	0	NA	3.406	0.2608	3.714	3.783	NA	36.5	2	rs4586375	CHD2(+162.2kb)|RGMA(+101kb)
4:107777138	4	107777138	G	?	6	7.56e-05	7.953e-05	6.9059	6.9202	0.414	0.31	NA	5.351	2522000000	9.237	3.035	NA	0	165	rs7700031	DKK2(-65.82kb)
5:154766239	5	154766239	T	?	6	7.646e-05	7.646e-05	3.1935	3.1935	0.6084	0	NA	2.654	0.3893	1.722	4.52	NA	1.759	5.539	rs10070727	.
20:49051640	20	49051640	A	?	6	7.729e-05	7.729e-05	2.0727	2.0727	0.4445	0	NA	2.292	1.477	2.66	2.613	NA	17.94	1.003	rs6020502	FAM65C(-151kb)|LOC284751(+120.2kb)|LOC100506115(+155.3kb)|MIR645(-150.7kb)|PTPN1(-75.22kb)
7:122908079	7	122908079	G	?	7	7.768e-05	7.768e-05	2.1811	2.1811	0.9242	0	0.4949	2.101	1.971	3.424	2.06	NA	0.539	2.077	rs4236617	IQUB(-184.2kb)|SLC13A1(+68.05kb)
7:122911807	7	122911807	G	?	7	7.768e-05	7.768e-05	2.1811	2.1811	0.9242	0	0.4949	2.101	1.971	3.424	2.06	NA	0.539	2.077	rs17145689	IQUB(-180.4kb)|SLC13A1(+71.78kb)
4:158817442	4	158817442	T	?	6	7.837e-05	0.00104	2.2731	2.2016	0.3054	16.78	NA	3.738	0.9891	1.914	1.42	NA	17.63	1.505	rs2053817	.
4:158817948	4	158817948	T	?	6	7.837e-05	0.00104	2.2731	2.2016	0.3054	16.78	NA	3.738	0.9891	1.914	1.42	NA	17.63	1.505	rs1481224	.
20:47102206	20	47102206	C	?	6	8.074e-05	8.074e-05	0.417	0.417	0.6524	0	0	0.3236	0.599	0.7181	0.4039	NA	0.0812	NA	rs6019221	LINC00494(+102.8kb)|PREX1(-138.6kb)
20:47105271	20	47105271	C	?	6	8.074e-05	8.074e-05	0.417	0.417	0.6524	0	0	0.3236	0.599	0.7181	0.4039	NA	0.0812	NA	rs6012443	LINC00494(+105.9kb)|PREX1(-135.5kb)
5:154770779	5	154770779	T	?	6	8.098e-05	8.098e-05	3.1361	3.1361	0.7813	0	NA	2.442	0.8665	1.722	4.577	NA	1.759	5.212	rs10068386	.
13:65999591	13	65999591	A	?	6	8.169e-05	8.169e-05	3.3232	3.3232	0.9279	0	NA	2.434	5.335	3.904	2.959	NA	39.51	3.992	rs974151	.
6:159259696	6	159259696	G	?	7	8.501e-05	8.501e-05	2.5308	2.5308	0.7202	0	4.556	2.047	3.256	3.364	2.58	NA	0.0178	3.583	rs3127162	C6orf99(-49.92kb)|DYNLT1(+193.9kb)|EZR(+19.24kb)|EZR-AS1(+16.42kb)|MIR3918(+73.91kb)|OSTCP1(-2.461kb)|RSPH3(-138.6kb)|SYTL3(+73.79kb)|TAGAP(-195.8kb)
12:18683911	12	18683911	T	?	6	8.559e-05	8.559e-05	0.3734	0.3734	0.8399	0	NA	0.4375	1.043	0.4851	0.3735	NA	0.1771	0.2189	rs12812099	PIK3C2G(0)|PLCZ1(-152.2kb)
12:18684863	12	18684863	C	?	6	8.559e-05	8.559e-05	0.3734	0.3734	0.8399	0	NA	0.4375	1.043	0.4851	0.3735	NA	0.1771	0.2189	rs12818686	PIK3C2G(0)|PLCZ1(-151.2kb)
12:25408464	12	25408464	G	?	6	8.635e-05	0.0001109	3.436	3.4453	0.408	1.28	NA	3.16	37.7	0.9506	5.699	NA	52.85	6.141	rs12320328	CASC1(+60.37kb)|KRAS(+4.61kb)|LRMP(+147.2kb)|LYRM5(+50.52kb)
12:18698876	12	18698876	T	?	6	8.694e-05	8.694e-05	0.3885	0.3885	0.9776	0	NA	0.4177	1.043	0.3964	0.386	NA	0.4563	0.279	rs12301772	CAPZA3(-192.2kb)|PIK3C2G(0)|PLCZ1(-137.2kb)
12:18701427	12	18701427	G	?	6	8.694e-05	8.694e-05	0.3885	0.3885	0.9776	0	NA	0.4177	1.043	0.3964	0.386	NA	0.4563	0.279	rs11829471	CAPZA3(-189.6kb)|PIK3C2G(0)|PLCZ1(-134.7kb)
12:18701924	12	18701924	A	?	6	8.694e-05	8.694e-05	0.3885	0.3885	0.9776	0	NA	0.4177	1.043	0.3964	0.386	NA	0.4563	0.279	rs10770370	CAPZA3(-189.1kb)|PIK3C2G(0)|PLCZ1(-134.2kb)
5:154767911	5	154767911	T	?	6	8.742e-05	8.742e-05	3.1511	3.1511	0.6365	0	NA	2.654	0.3893	1.722	4.52	NA	1.759	5.212	rs10062038	.
1:242086319	1	242086319	G	?	6	8.797e-05	0.00337	4.2259	3.8082	0.2535	24.05	NA	6.892	2.594	0.7639	1.659	NA	3.622	10.38	rs6689502	EXO1(+33.08kb)|MAP1LC3C(-72.47kb)|PLD5(-165.4kb)|WDR64(+120.9kb)
1:242087176	1	242087176	A	?	6	8.797e-05	0.00337	4.2259	3.8082	0.2535	24.05	NA	6.892	2.594	0.7639	1.659	NA	3.622	10.38	rs6663588	EXO1(+33.94kb)|MAP1LC3C(-71.62kb)|PLD5(-164.5kb)|WDR64(+121.7kb)
1:242087854	1	242087854	T	?	6	8.797e-05	0.00337	4.2259	3.8082	0.2535	24.05	NA	6.892	2.594	0.7639	1.659	NA	3.622	10.38	rs3863735	EXO1(+34.61kb)|MAP1LC3C(-70.94kb)|PLD5(-163.8kb)|WDR64(+122.4kb)
8:13206215	8	13206215	A	?	6	8.914e-05	8.914e-05	3.6808	3.6808	0.5237	0	0.0028	3.305	237.3	2.802	NA	NA	9.919	4.666	rs72496273	DLC1(0)
8:13206258	8	13206258	A	?	6	8.914e-05	8.914e-05	3.6808	3.6808	0.5237	0	0.0028	3.305	237.3	2.802	NA	NA	9.919	4.666	rs73566453	DLC1(0)
5:155013689	5	155013689	T	?	6	8.947e-05	8.947e-05	3.4485	3.4485	0.583	0	NA	2.101	0.8665	5.746	7.472	NA	9.173	5.335	rs79508337	.
4:126885708	4	126885708	A	?	7	9.068e-05	9.068e-05	2.1765	2.1765	0.7708	0	0.0246	2.599	3.102	2.295	0.9863	NA	1.561	2.055	rs35401612	.
4:126886959	4	126886959	G	?	7	9.068e-05	9.068e-05	2.1765	2.1765	0.7708	0	0.0246	2.599	3.102	2.295	0.9863	NA	1.561	2.055	rs34657569	.
21:39130381	21	39130381	A	?	6	9.097e-05	9.097e-05	0.4192	0.4192	0.4837	0	NA	0.2729	1.07	0.3498	0.2878	NA	0.9839	0.6022	rs35142630	KCNJ6(0)
15:93754090	15	93754090	A	?	6	9.099e-05	9.099e-05	2.789	2.789	0.8425	0	NA	2.989	0.2608	3.498	2.97	NA	2.638	2.674	rs4777795	CHD2(+182.9kb)|RGMA(+121.6kb)
6:159142592	6	159142592	T	?	6	9.218e-05	9.218e-05	3.9991	3.9991	0.7588	0	NA	3.125	2618	7.7	4.276	NA	0	2.959	rs55924442	C6orf99(-167kb)|DYNLT1(+76.79kb)|EZR(-44.18kb)|EZR-AS1(-96.42kb)|MIR3918(-43.1kb)|OSTCP1(-119.6kb)|SYTL3(0)|TMEM181(+86.12kb)
6:159145172	6	159145172	T	?	6	9.218e-05	9.218e-05	3.9991	3.9991	0.7588	0	NA	3.125	2618	7.7	4.276	NA	0	2.959	rs55756401	C6orf99(-164.4kb)|DYNLT1(+79.37kb)|EZR(-41.6kb)|EZR-AS1(-93.84kb)|MIR3918(-40.52kb)|OSTCP1(-117kb)|SYTL3(0)|TMEM181(+88.7kb)
6:159148226	6	159148226	G	?	6	9.218e-05	9.218e-05	3.9991	3.9991	0.7588	0	NA	3.125	2618	7.7	4.276	NA	0	2.959	rs113430886	C6orf99(-161.4kb)|DYNLT1(+82.42kb)|EZR(-38.55kb)|EZR-AS1(-90.78kb)|MIR3918(-37.47kb)|OSTCP1(-113.9kb)|SYTL3(0)|TMEM181(+91.76kb)
6:159148293	6	159148293	A	?	6	9.218e-05	9.218e-05	3.9991	3.9991	0.7588	0	NA	3.125	2618	7.7	4.276	NA	0	2.959	rs55883407	C6orf99(-161.3kb)|DYNLT1(+82.49kb)|EZR(-38.48kb)|EZR-AS1(-90.72kb)|MIR3918(-37.4kb)|OSTCP1(-113.9kb)|SYTL3(0)|TMEM181(+91.83kb)
6:159148492	6	159148492	T	?	6	9.218e-05	9.218e-05	3.9991	3.9991	0.7588	0	NA	3.125	2618	7.7	4.276	NA	0	2.959	rs56116336	C6orf99(-161.1kb)|DYNLT1(+82.69kb)|EZR(-38.28kb)|EZR-AS1(-90.52kb)|MIR3918(-37.2kb)|OSTCP1(-113.7kb)|SYTL3(0)|TMEM181(+92.02kb)
5:155045323	5	155045323	T	?	6	9.248e-05	9.248e-05	3.4411	3.4411	0.5882	0	NA	2.101	0.8665	5.746	7.472	NA	8.829	5.335	rs112549833	.
20:47104894	20	47104894	T	?	6	9.273e-05	9.273e-05	0.4178	0.4178	0.6411	0	0	0.3236	0.6628	0.7181	0.4039	NA	0.0812	NA	rs6019227	LINC00494(+105.5kb)|PREX1(-135.9kb)
20:49064237	20	49064237	T	?	6	9.373e-05	0.0003278	2.0867	2.07	0.3765	6.26	NA	2.36	1.106	2.66	2.583	NA	18.28	0.9413	rs2869991	FAM65C(-138.4kb)|LOC284751(+132.8kb)|LOC100506115(+167.9kb)|MIR645(-138.1kb)|PTPN1(-62.62kb)
16:8308281	16	8308281	A	?	7	9.42e-05	9.42e-05	0.4927	0.4927	0.9275	0	0	0.4962	0.1445	0.6796	0.5302	NA	0.4796	0.3395	rs7201841	.
4:126862782	4	126862782	A	?	7	9.474e-05	9.474e-05	2.1682	2.1682	0.7468	0	0.0246	2.534	3.102	2.138	0.9598	NA	4.512	2.059	rs13136576	.
14:76627919	14	76627919	C	?	6	9.526e-05	0.0006835	2.9656	2.8358	0.3566	9.3	NA	4.492	4.334	0.795	1.559	NA	0.6446	4.175	rs76263326	GPATCH2L(0)|IFT43(+77.5kb)|RNU6-19P(-109.5kb)|RNU6-31P(-109.5kb)|TGFB3(+179.8kb)
14:76628814	14	76628814	T	?	6	9.526e-05	0.0006835	2.9656	2.8358	0.3566	9.3	NA	4.492	4.334	0.795	1.559	NA	0.6446	4.175	rs12100883	GPATCH2L(0)|IFT43(+78.4kb)|RNU6-19P(-108.6kb)|RNU6-31P(-108.6kb)|TGFB3(+180.7kb)
14:76629481	14	76629481	T	?	6	9.526e-05	0.0006835	2.9656	2.8358	0.3566	9.3	NA	4.492	4.334	0.795	1.559	NA	0.6446	4.175	rs1900121	GPATCH2L(0)|IFT43(+79.06kb)|RNU6-19P(-108kb)|RNU6-31P(-108kb)|TGFB3(+181.4kb)
14:76632781	14	76632781	G	?	6	9.526e-05	0.0006835	2.9656	2.8358	0.3566	9.3	NA	4.492	4.334	0.795	1.559	NA	0.6446	4.175	rs3783998	GPATCH2L(0)|IFT43(+82.36kb)|RNU6-19P(-104.7kb)|RNU6-31P(-104.7kb)|TGFB3(+184.7kb)
14:76635675	14	76635675	C	?	6	9.526e-05	0.0006835	2.9656	2.8358	0.3566	9.3	NA	4.492	4.334	0.795	1.559	NA	0.6446	4.175	rs4903381	GPATCH2L(0)|IFT43(+85.26kb)|RNU6-19P(-101.8kb)|RNU6-31P(-101.8kb)|TGFB3(+187.6kb)
14:76641704	14	76641704	A	?	6	9.526e-05	0.0006835	2.9656	2.8358	0.3566	9.3	NA	4.492	4.334	0.795	1.559	NA	0.6446	4.175	rs7154673	ESRRB(-196kb)|GPATCH2L(0)|IFT43(+91.29kb)|RNU6-19P(-95.74kb)|RNU6-31P(-95.74kb)|TGFB3(+193.6kb)
14:76656503	14	76656503	G	?	6	9.526e-05	0.0006835	2.9656	2.8358	0.3566	9.3	NA	4.492	4.334	0.795	1.559	NA	0.6446	4.175	rs60951491	ESRRB(-181.2kb)|GPATCH2L(0)|IFT43(+106.1kb)|RNU6-19P(-80.95kb)|RNU6-31P(-80.95kb)
14:76665740	14	76665740	T	?	6	9.526e-05	0.0006835	2.9656	2.8358	0.3566	9.3	NA	4.492	4.334	0.795	1.559	NA	0.6446	4.175	rs2121073	ESRRB(-171.9kb)|GPATCH2L(0)|IFT43(+115.3kb)|RNU6-19P(-71.71kb)|RNU6-31P(-71.71kb)
7:122914243	7	122914243	A	?	7	9.544e-05	9.544e-05	2.1697	2.1697	0.9226	0	0.4949	2.101	1.971	3.424	2.06	NA	0.539	2.003	rs4142046	IQUB(-178kb)|SLC13A1(+74.22kb)
5:154766247	5	154766247	A	?	6	9.568e-05	9.568e-05	3.1368	3.1368	0.6275	0	NA	2.654	0.3893	1.722	4.047	NA	1.759	5.547	rs10070821	.
13:83780062	13	83780062	T	?	6	9.62e-05	0.008473	2.1184	2.0403	0.205	30.72	NA	2.106	0.0393	2.553	0.9945	NA	1.921	3.718	rs9546328	.
13:83780607	13	83780607	G	?	6	9.62e-05	0.008473	2.1184	2.0403	0.205	30.72	NA	2.106	0.0393	2.553	0.9945	NA	1.921	3.718	rs990444	.
13:83784252	13	83784252	G	?	6	9.62e-05	0.008473	2.1184	2.0403	0.205	30.72	NA	2.106	0.0393	2.553	0.9945	NA	1.921	3.718	rs2669260	.
13:83784581	13	83784581	T	?	6	9.62e-05	0.008473	2.1184	2.0403	0.205	30.72	NA	2.106	0.0393	2.553	0.9945	NA	1.921	3.718	rs989596	.
13:83784605	13	83784605	G	?	6	9.62e-05	0.008473	2.1184	2.0403	0.205	30.72	NA	2.106	0.0393	2.553	0.9945	NA	1.921	3.718	rs989597	.
13:83792808	13	83792808	T	?	6	9.62e-05	0.008473	2.1184	2.0403	0.205	30.72	NA	2.106	0.0393	2.553	0.9945	NA	1.921	3.718	rs1616004	.
11:119999755	11	119999755	C	?	6	9.702e-05	0.0005794	2.2373	2.1907	0.3523	9.94	NA	2.991	0.648	4.424	2.116	NA	0.9209	1.333	rs470941	LOC649133(-120.7kb)|OAF(-81.99kb)|POU2F3(-107.6kb)|TMEM136(-196.1kb)|TRIM29(0)
22:27411322	22	27411322	A	?	6	9.815e-05	9.815e-05	3.0295	3.0295	0.9837	0	NA	3.256	6.09	3.31	2.114	NA	1.47	3.22	rs112966882	.
13:83795999	13	83795999	C	?	6	9.986e-05	0.009749	2.117	2.033	0.1973	31.78	NA	2.106	0.0393	2.553	0.9705	NA	1.921	3.74	rs925534	.
