# Supplementary material for: Multiomics integrative analysis identifies APOE allele-specific blood biomarkers associated to Alzheimer’s disease etiopathogenesis
Source: Aging (Albany NY). 2021 Apr 12;13(7):9277–329. doi: 10.18632/aging.202950 (PMC8064208; doi:10.18632/aging.202950)
Supplement: Supplementary Table 10 [file aging-13-202950-s012.xlsx]

## Sheet: Sheet1
Supplementary Table 10. APOE and sex stratified analysis: APOE3 males meta-analysis results (p<10-4).
SNP	CHR	BP	A1	A2	N	P	P.R.	OR	OR.R.	Q	I	F0	F1	F2	F3	F4	F5	F6	F7	F8	RS	ANNOT
13:83717241	13	83717241	T	?	9	4.171e-08	1.532e-06	1.5994	1.6188	0.3227	13.39	2.964	1.53	2.065	1.06	2.207	4.333	0.8782	1.741	1.347	rs9602110	.
13:83726211	13	83726211	C	?	9	4.214e-08	5.112e-07	1.6594	1.6761	0.3585	9.2	4.539	1.562	1.598	1.205	2.212	6.663	1.34	1.845	1.451	rs9805820	.
13:83714254	13	83714254	T	?	9	5.169e-08	6.64e-07	1.5925	1.6044	0.3616	8.83	2.964	1.53	2.065	1.06	2.122	4.333	0.8782	1.741	1.35	rs9593762	.
13:83735474	13	83735474	A	?	9	6.437e-08	6.862e-07	1.6494	1.6648	0.3614	8.86	4.539	1.562	1.598	1.205	2.176	6.66	1.34	1.845	1.418	rs57878701	.
13:83728740	13	83728740	C	?	9	9.871e-08	7.866e-07	1.763	1.773	0.373	7.47	5.525	1.74	1.601	1.431	2.368	8.689	1.656	1.567	1.328	rs7992194	.
13:83749327	13	83749327	C	?	9	9.986e-08	8.448e-07	1.765	1.7786	0.3688	7.98	5.525	1.696	1.601	1.431	2.419	8.841	1.656	1.567	1.373	rs77956737	.
13:83756973	13	83756973	G	?	9	1.025e-07	9.2e-07	1.7639	1.778	0.3665	8.25	5.525	1.696	1.601	1.431	2.419	8.842	1.656	1.567	1.369	rs1473841	.
13:83712829	13	83712829	C	?	9	1.232e-07	4.859e-07	1.6601	1.6629	0.3997	4.23	2.891	1.656	2.152	1.205	2.291	5.003	1.025	1.44	1.194	rs10507933	.
13:83760081	13	83760081	G	?	9	1.431e-07	4.494e-07	1.7515	1.7578	0.4013	4.04	5.525	1.696	1.601	1.431	2.302	8.842	1.656	1.567	1.369	rs75117573	.
13:83705558	13	83705558	G	?	9	1.569e-07	5.482e-06	1.561	1.5851	0.3069	15.22	2.572	1.473	1.952	1.087	2.269	4.348	0.8782	1.741	1.286	rs9602103	.
13:83716228	13	83716228	G	?	9	1.634e-07	1.438e-05	1.5544	1.5912	0.2542	21.24	2.964	1.446	1.932	1.078	2.286	4.114	0.793	1.741	1.291	rs17071643	.
13:83721683	13	83721683	T	?	9	1.635e-07	1.437e-05	1.5545	1.5913	0.2543	21.22	2.964	1.446	1.932	1.078	2.286	4.114	0.793	1.741	1.291	rs13378416	.
13:83708064	13	83708064	A	?	9	1.64e-07	4.52e-06	1.56	1.5818	0.3181	13.93	2.572	1.473	1.952	1.087	2.269	4.233	0.8782	1.741	1.286	rs67264092	.
13:83717209	13	83717209	T	?	9	1.678e-07	1.502e-05	1.5538	1.5908	0.2528	21.4	2.964	1.446	1.932	1.078	2.286	4.114	0.793	1.741	1.288	rs9602109	.
13:83719228	13	83719228	G	?	9	1.678e-07	1.502e-05	1.5538	1.5908	0.2528	21.4	2.964	1.446	1.932	1.078	2.286	4.114	0.793	1.741	1.288	rs9602111	.
13:83726061	13	83726061	T	?	9	1.829e-07	6.224e-06	1.6072	1.6447	0.2911	17.03	3.287	1.452	1.493	1.23	2.451	6.383	1.179	1.845	1.398	rs11149258	.
13:83729748	13	83729748	C	?	9	1.886e-07	6.535e-06	1.6063	1.6441	0.2897	17.19	3.287	1.452	1.493	1.23	2.451	6.383	1.179	1.845	1.394	rs1873770	.
13:83730949	13	83730949	C	?	9	1.886e-07	6.535e-06	1.6063	1.6441	0.2897	17.19	3.287	1.452	1.493	1.23	2.451	6.383	1.179	1.845	1.394	rs7983181	.
13:83733189	13	83733189	T	?	9	1.886e-07	6.535e-06	1.6063	1.6441	0.2897	17.19	3.287	1.452	1.493	1.23	2.451	6.383	1.179	1.845	1.394	rs73521047	.
13:83763528	13	83763528	G	?	9	1.897e-07	3.642e-07	1.7417	1.7453	0.4155	2.27	5.525	1.685	1.601	1.431	2.255	8.816	1.656	1.567	1.369	rs75142229	.
13:83737249	13	83737249	T	?	9	2.006e-07	3.378e-06	1.7406	1.759	0.3373	11.69	5.525	1.696	1.601	1.431	2.368	8.841	1.656	1.567	1.29	rs4558289	.
13:83714944	13	83714944	G	?	9	2.033e-07	8.515e-06	1.5477	1.5757	0.2924	16.87	2.964	1.446	1.932	1.078	2.201	4.114	0.793	1.741	1.291	rs6563325	.
13:83706327	13	83706327	T	?	9	2.295e-07	8.158e-06	1.5508	1.5745	0.3027	15.7	2.572	1.473	1.952	1.087	2.269	4.101	0.8782	1.741	1.25	rs1024014	.
13:83712639	13	83712639	A	?	9	2.301e-07	3.328e-06	1.5431	1.5605	0.3424	11.1	2.344	1.446	1.932	1.078	2.201	4.114	0.793	1.741	1.291	rs1388985	.
13:83712790	13	83712790	A	?	9	2.301e-07	3.328e-06	1.5431	1.5605	0.3424	11.1	2.344	1.446	1.932	1.078	2.201	4.114	0.793	1.741	1.291	rs34380183	.
13:83796028	13	83796028	C	?	9	4.208e-07	1.206e-05	1.7168	1.7604	0.2906	17.09	5.575	1.602	1.704	1.337	2.228	10.51	1.656	2.131	1.328	rs925535	.
13:83697427	13	83697427	G	?	9	4.232e-07	4.284e-05	1.5356	1.5685	0.2355	23.37	2.572	1.473	1.952	1.05	2.269	4.215	0.8782	1.741	1.204	rs7326435	.
13:83697935	13	83697935	A	?	9	4.232e-07	4.284e-05	1.5356	1.5685	0.2355	23.37	2.572	1.473	1.952	1.05	2.269	4.215	0.8782	1.741	1.204	rs9602100	.
13:83698885	13	83698885	C	?	9	4.232e-07	4.284e-05	1.5356	1.5685	0.2355	23.37	2.572	1.473	1.952	1.05	2.269	4.215	0.8782	1.741	1.204	rs9602101	.
13:83685478	13	83685478	T	?	9	4.312e-07	4.432e-05	1.5351	1.5682	0.2342	23.52	2.572	1.473	1.952	1.05	2.269	4.215	0.8782	1.741	1.202	rs8002049	.
13:83686116	13	83686116	T	?	9	4.312e-07	4.432e-05	1.5351	1.5682	0.2342	23.52	2.572	1.473	1.952	1.05	2.269	4.215	0.8782	1.741	1.202	rs7333267	.
13:83686801	13	83686801	C	?	9	4.312e-07	4.432e-05	1.5351	1.5682	0.2342	23.52	2.572	1.473	1.952	1.05	2.269	4.215	0.8782	1.741	1.202	rs13378783	.
13:83686891	13	83686891	T	?	9	4.312e-07	4.432e-05	1.5351	1.5682	0.2342	23.52	2.572	1.473	1.952	1.05	2.269	4.215	0.8782	1.741	1.202	rs13378322	.
13:83688361	13	83688361	T	?	9	4.312e-07	4.432e-05	1.5351	1.5682	0.2342	23.52	2.572	1.473	1.952	1.05	2.269	4.215	0.8782	1.741	1.202	rs1948413	.
13:83688503	13	83688503	A	?	9	4.312e-07	4.432e-05	1.5351	1.5682	0.2342	23.52	2.572	1.473	1.952	1.05	2.269	4.215	0.8782	1.741	1.202	rs1948414	.
13:83691606	13	83691606	C	?	9	4.312e-07	4.432e-05	1.5351	1.5682	0.2342	23.52	2.572	1.473	1.952	1.05	2.269	4.215	0.8782	1.741	1.202	rs6563324	.
13:83695620	13	83695620	C	?	9	4.312e-07	4.432e-05	1.5351	1.5682	0.2342	23.52	2.572	1.473	1.952	1.05	2.269	4.215	0.8782	1.741	1.202	rs9602099	.
13:83695867	13	83695867	T	?	9	4.312e-07	4.432e-05	1.5351	1.5682	0.2342	23.52	2.572	1.473	1.952	1.05	2.269	4.215	0.8782	1.741	1.202	rs7981498	.
13:83696045	13	83696045	T	?	9	4.312e-07	4.432e-05	1.5351	1.5682	0.2342	23.52	2.572	1.473	1.952	1.05	2.269	4.215	0.8782	1.741	1.202	rs7981694	.
13:83696906	13	83696906	C	?	9	4.312e-07	4.432e-05	1.5351	1.5682	0.2342	23.52	2.572	1.473	1.952	1.05	2.269	4.215	0.8782	1.741	1.202	rs7325219	.
13:83697172	13	83697172	T	?	9	4.312e-07	4.432e-05	1.5351	1.5682	0.2342	23.52	2.572	1.473	1.952	1.05	2.269	4.215	0.8782	1.741	1.202	rs7324773	.
13:83699807	13	83699807	G	?	9	4.312e-07	4.432e-05	1.5351	1.5682	0.2342	23.52	2.572	1.473	1.952	1.05	2.269	4.215	0.8782	1.741	1.202	rs1492721	.
13:83701598	13	83701598	G	?	9	4.312e-07	4.432e-05	1.5351	1.5682	0.2342	23.52	2.572	1.473	1.952	1.05	2.269	4.215	0.8782	1.741	1.202	rs10219803	.
13:83702567	13	83702567	C	?	9	4.312e-07	4.432e-05	1.5351	1.5682	0.2342	23.52	2.572	1.473	1.952	1.05	2.269	4.215	0.8782	1.741	1.202	rs1873767	.
13:83702766	13	83702766	G	?	9	4.312e-07	4.432e-05	1.5351	1.5682	0.2342	23.52	2.572	1.473	1.952	1.05	2.269	4.215	0.8782	1.741	1.202	rs12583318	.
13:83703348	13	83703348	C	?	9	4.312e-07	4.432e-05	1.5351	1.5682	0.2342	23.52	2.572	1.473	1.952	1.05	2.269	4.215	0.8782	1.741	1.202	rs12184917	.
13:83692844	13	83692844	T	?	9	4.721e-07	2.108e-06	1.6199	1.6257	0.3898	5.45	2.436	1.573	2.144	1.19	2.325	5.116	1.025	1.44	1.19	rs2220713	.
13:83701966	13	83701966	C	?	9	4.87e-07	2.413e-06	1.6189	1.6251	0.3861	5.89	2.436	1.573	2.144	1.19	2.325	5.116	1.025	1.44	1.186	rs12184853	.
13:83643451	13	83643451	T	?	9	6.481e-07	8.714e-06	1.5752	1.6018	0.3261	13	3.871	1.469	1.569	1.21	2.223	6.322	1.34	1.845	1.306	rs7318331	.
13:83709933	13	83709933	A	?	9	6.864e-07	3.14e-05	1.5144	1.5474	0.2639	20.13	2.064	1.398	1.828	1.106	2.347	4.025	0.793	1.741	1.232	rs5016676	.
13:83711065	13	83711065	A	?	9	7.305e-07	1.341e-05	1.5133	1.535	0.3177	13.98	2.064	1.412	1.828	1.106	2.268	4.025	0.793	1.741	1.232	rs2014992	.
13:83781759	13	83781759	T	?	9	7.891e-07	3.475e-06	1.6876	1.6995	0.3815	6.45	5.525	1.61	1.601	1.433	2.187	8.805	1.656	1.567	1.294	rs11843143	.
13:83783858	13	83783858	A	?	9	7.891e-07	3.475e-06	1.6876	1.6995	0.3815	6.45	5.525	1.61	1.601	1.433	2.187	8.805	1.656	1.567	1.294	rs74562314	.
13:83783870	13	83783870	T	?	9	7.891e-07	3.475e-06	1.6876	1.6995	0.3815	6.45	5.525	1.61	1.601	1.433	2.187	8.805	1.656	1.567	1.294	rs78483730	.
13:83697179	13	83697179	A	?	9	8.016e-07	8.056e-05	1.5153	1.5501	0.2222	24.89	2.572	1.456	1.857	1.05	2.269	4.215	0.8782	1.741	1.173	rs7324779	.
13:83792528	13	83792528	T	?	9	8.048e-07	3.698e-06	1.6869	1.6991	0.3797	6.67	5.525	1.61	1.601	1.433	2.187	8.805	1.656	1.567	1.291	rs77309902	.
1:120524331	1	120524331	A	?	6	8.184e-07	8.184e-07	2.7929	2.7929	0.8172	0	NA	2.305	2.614	NA	3.119	NA	9.32	1.133	4.072	rs116567297	ADAM30(+85.18kb)|NBPF7(+136.8kb)|NOTCH2(0)|REG4(+170.1kb)
13:83642981	13	83642981	T	?	9	8.293e-07	2.74e-05	1.5691	1.6083	0.2701	19.43	4.159	1.478	1.569	1.21	2.223	6.322	1.34	1.845	1.25	rs7317527	.
14:76858313	14	76858313	A	?	8	9.187e-07	9.187e-07	0.3725	0.3725	0.9999	0	0.3924	0.3479	0.391	0.3543	0.3078	NA	0	0.4113	0.4416	rs74069865	ESRRB(0)|GPATCH2L(+189.2kb)|RNU6-19P(+120.8kb)|RNU6-31P(+120.8kb)
14:76860246	14	76860246	G	?	8	9.207e-07	9.207e-07	0.3725	0.3725	0.9999	0	0.3924	0.3479	0.391	0.3543	0.3078	NA	0	0.4113	0.4417	rs142110369	ESRRB(0)|GPATCH2L(+191.1kb)|RNU6-19P(+122.8kb)|RNU6-31P(+122.8kb)
13:83643144	13	83643144	T	?	9	9.561e-07	3.07e-05	1.5653	1.606	0.2675	19.72	4.159	1.469	1.569	1.21	2.223	6.322	1.34	1.845	1.25	rs7317912	.
13:83678661	13	83678661	T	?	9	9.863e-07	2.18e-06	1.6918	1.6991	0.4063	3.41	4.536	1.585	1.685	1.409	2.342	8.774	1.656	1.567	1.306	rs9669900	.
13:83615472	13	83615472	G	?	9	9.874e-07	4.008e-05	1.5635	1.6099	0.2488	21.85	4.159	1.472	1.569	1.256	2.223	6.566	1.34	1.845	1.215	rs1873769	.
13:83663017	13	83663017	T	?	9	9.989e-07	4.44e-06	1.6897	1.7025	0.3791	6.74	4.536	1.614	1.685	1.409	2.342	8.774	1.656	1.567	1.26	rs9602076	.
13:83671810	13	83671810	T	?	9	9.989e-07	4.44e-06	1.6897	1.7025	0.3791	6.74	4.536	1.614	1.685	1.409	2.342	8.774	1.656	1.567	1.26	rs9805205	.
14:76850261	14	76850261	A	?	8	1.003e-06	1.003e-06	0.3824	0.3824	0.9999	0	0.3389	0.3883	0.3514	0.3543	0.2786	NA	0	0.4113	0.4398	rs74069859	ESRRB(0)|GPATCH2L(+181.1kb)|RNU6-19P(+112.8kb)|RNU6-31P(+112.8kb)
14:76852410	14	76852410	T	?	8	1.003e-06	1.003e-06	0.3824	0.3824	0.9999	0	0.3389	0.3883	0.3514	0.3543	0.2786	NA	0	0.4113	0.4398	rs74069862	ESRRB(0)|GPATCH2L(+183.3kb)|RNU6-19P(+114.9kb)|RNU6-31P(+114.9kb)
14:76854602	14	76854602	T	?	8	1.003e-06	1.003e-06	0.3824	0.3824	0.9999	0	0.3389	0.3883	0.3514	0.3543	0.2786	NA	0	0.4113	0.4398	rs60006407	ESRRB(0)|GPATCH2L(+185.5kb)|RNU6-19P(+117.1kb)|RNU6-31P(+117.1kb)
14:76861088	14	76861088	A	?	8	1.005e-06	1.005e-06	0.3742	0.3742	0.9997	0	0.3276	0.3479	0.4438	0.3543	0.3078	NA	0	0.4113	0.445	rs17104410	ESRRB(0)|GPATCH2L(+192kb)|RNU6-19P(+123.6kb)|RNU6-31P(+123.6kb)
13:83795732	13	83795732	C	?	9	1.028e-06	1.028e-06	1.675	1.675	0.4605	0	3.637	1.589	1.704	1.383	2.187	8.805	1.656	1.567	1.291	rs78730138	.
14:76848224	14	76848224	T	?	8	1.029e-06	1.029e-06	0.3826	0.3826	0.9998	0	0.3389	0.3883	0.3514	0.3543	0.2786	NA	0	0.4113	0.4414	rs55713861	ESRRB(0)|GPATCH2L(+179.1kb)|RNU6-19P(+110.7kb)|RNU6-31P(+110.7kb)
14:76848676	14	76848676	C	?	8	1.029e-06	1.029e-06	0.3826	0.3826	0.9998	0	0.3389	0.3883	0.3514	0.3543	0.2786	NA	0	0.4113	0.4414	rs59437468	ESRRB(0)|GPATCH2L(+179.5kb)|RNU6-19P(+111.2kb)|RNU6-31P(+111.2kb)
13:83797940	13	83797940	C	?	9	1.061e-06	5.033e-06	1.6764	1.6915	0.3752	7.21	9.625	1.578	1.766	1.388	2.187	5.496	1.656	1.567	1.287	rs11843299	.
13:83625727	13	83625727	G	?	9	1.062e-06	3.806e-05	1.5617	1.6082	0.2536	21.3	4.159	1.46	1.569	1.256	2.223	6.566	1.34	1.845	1.227	rs1018010	.
13:83636518	13	83636518	A	?	9	1.089e-06	7.517e-06	1.5597	1.5777	0.3562	9.47	2.992	1.47	1.569	1.225	2.223	6.322	1.34	1.845	1.25	rs9318931	.
13:83627744	13	83627744	G	?	9	1.104e-06	2.737e-05	1.56	1.6027	0.2753	18.83	4.159	1.443	1.569	1.256	2.223	6.322	1.34	1.845	1.253	rs9602053	.
13:83631100	13	83631100	T	?	9	1.104e-06	2.737e-05	1.56	1.6027	0.2753	18.83	4.159	1.443	1.569	1.256	2.223	6.322	1.34	1.845	1.253	rs9318930	.
13:83647554	13	83647554	A	?	9	1.125e-06	2.363e-05	1.5625	1.5985	0.2908	17.06	3.871	1.451	1.569	1.21	2.223	6.566	1.34	1.845	1.273	rs9602062	.
14:76863682	14	76863682	A	?	8	1.13e-06	1.13e-06	0.3843	0.3843	0.9899	0	0.3276	0.3279	0.3958	0.3543	0.3224	NA	0	0.4113	0.5509	rs74068604	ESRRB(0)|GPATCH2L(+194.5kb)|RNU6-19P(+126.2kb)|RNU6-31P(+126.2kb)
13:83614836	13	83614836	G	?	9	1.194e-06	4.954e-05	1.6776	1.7224	0.2518	21.5	4.933	1.644	1.685	1.566	2.342	8.774	1.656	1.567	1.113	rs2807405	.
13:83617000	13	83617000	C	?	9	1.194e-06	4.954e-05	1.6776	1.7224	0.2518	21.5	4.933	1.644	1.685	1.566	2.342	8.774	1.656	1.567	1.113	rs1532233	.
13:83797405	13	83797405	T	?	9	1.198e-06	9.76e-06	1.6698	1.6928	0.3469	10.57	5.295	1.565	1.766	1.342	2.187	8.805	1.656	1.567	1.288	rs1355654	.
13:83652514	13	83652514	C	?	9	1.28e-06	1.716e-05	1.5572	1.5854	0.3175	13.99	3.871	1.451	1.569	1.21	2.151	6.566	1.34	1.845	1.273	rs9602069	.
13:83655133	13	83655133	T	?	9	1.284e-06	4.012e-06	1.5495	1.5578	0.3933	5.02	3.189	1.474	1.496	1.21	2.113	6.322	1.34	1.845	1.262	rs1857666	.
13:83687359	13	83687359	T	?	9	1.284e-06	1.284e-06	1.6429	1.6429	0.514	0	1.413	1.611	2.234	1.184	2.52	3.228	1.49	1.629	1.154	rs11839942	.
13:83645281	13	83645281	T	?	9	1.39e-06	2.903e-05	1.5543	1.5908	0.2877	17.41	3.871	1.45	1.569	1.21	2.223	6.322	1.34	1.845	1.251	rs7331083	.
13:83645447	13	83645447	T	?	9	1.39e-06	2.903e-05	1.5543	1.5908	0.2877	17.41	3.871	1.45	1.569	1.21	2.223	6.322	1.34	1.845	1.251	rs7331845	.
13:83645589	13	83645589	C	?	9	1.39e-06	2.903e-05	1.5543	1.5908	0.2877	17.41	3.871	1.45	1.569	1.21	2.223	6.322	1.34	1.845	1.251	rs34460766	.
13:83645694	13	83645694	A	?	9	1.39e-06	2.903e-05	1.5543	1.5908	0.2877	17.41	3.871	1.45	1.569	1.21	2.223	6.322	1.34	1.845	1.251	rs1492723	.
13:83645965	13	83645965	C	?	9	1.39e-06	2.903e-05	1.5543	1.5908	0.2877	17.41	3.871	1.45	1.569	1.21	2.223	6.322	1.34	1.845	1.251	rs1492724	.
13:83645967	13	83645967	C	?	9	1.39e-06	2.903e-05	1.5543	1.5908	0.2877	17.41	3.871	1.45	1.569	1.21	2.223	6.322	1.34	1.845	1.251	rs1492725	.
13:83647137	13	83647137	T	?	9	1.39e-06	2.903e-05	1.5543	1.5908	0.2877	17.41	3.871	1.45	1.569	1.21	2.223	6.322	1.34	1.845	1.251	rs1907810	.
13:83647269	13	83647269	T	?	9	1.39e-06	2.903e-05	1.5543	1.5908	0.2877	17.41	3.871	1.45	1.569	1.21	2.223	6.322	1.34	1.845	1.251	rs1112410	.
13:83675689	13	83675689	G	?	9	1.405e-06	3.285e-05	1.5557	1.5916	0.283	17.95	3.871	1.45	1.569	1.153	2.223	6.322	1.34	1.845	1.282	rs73519049	.
13:83675741	13	83675741	A	?	9	1.405e-06	3.285e-05	1.5557	1.5916	0.283	17.95	3.871	1.45	1.569	1.153	2.223	6.322	1.34	1.845	1.282	rs7325227	.
13:83676043	13	83676043	A	?	9	1.405e-06	3.285e-05	1.5557	1.5916	0.283	17.95	3.871	1.45	1.569	1.153	2.223	6.322	1.34	1.845	1.282	rs76820017	.
14:76867078	14	76867078	A	?	8	1.446e-06	1.446e-06	0.3879	0.3879	0.9898	0	0.3276	0.3279	0.3958	0.4036	0.3224	NA	0	0.4113	0.553	rs74068606	ESRRB(0)|GPATCH2L(+197.9kb)|RNU6-19P(+129.6kb)|RNU6-31P(+129.6kb)
14:76842371	14	76842371	T	?	8	1.478e-06	1.478e-06	0.3868	0.3868	0.9996	0	0.3389	0.3883	0.3514	0.3543	0.2786	NA	0	0.4113	0.4674	rs58936468	ESRRB(0)|GPATCH2L(+173.2kb)|RNU6-19P(+104.9kb)|RNU6-31P(+104.9kb)
13:83625965	13	83625965	G	?	9	1.515e-06	4.803e-05	1.5494	1.5981	0.2512	21.58	4.159	1.443	1.569	1.256	2.223	6.322	1.34	1.845	1.218	rs2807407	.
13:83626063	13	83626063	T	?	9	1.515e-06	4.803e-05	1.5494	1.5981	0.2512	21.58	4.159	1.443	1.569	1.256	2.223	6.322	1.34	1.845	1.218	rs2639500	.
13:83684896	13	83684896	T	?	9	1.536e-06	3.599e-05	1.5524	1.5896	0.2804	18.25	3.871	1.443	1.569	1.153	2.223	6.322	1.34	1.845	1.282	rs9602094	.
13:83684949	13	83684949	G	?	9	1.536e-06	3.599e-05	1.5524	1.5896	0.2804	18.25	3.871	1.443	1.569	1.153	2.223	6.322	1.34	1.845	1.282	rs9602095	.
13:83665579	13	83665579	A	?	9	1.538e-06	2.013e-05	1.5499	1.5781	0.3166	14.1	3.871	1.45	1.569	1.21	2.151	6.322	1.34	1.845	1.254	rs9602085	.
13:83668884	13	83668884	T	?	9	1.538e-06	2.013e-05	1.5499	1.5781	0.3166	14.1	3.871	1.45	1.569	1.21	2.151	6.322	1.34	1.845	1.254	rs11842304	.
13:83669063	13	83669063	A	?	9	1.538e-06	2.013e-05	1.5499	1.5781	0.3166	14.1	3.871	1.45	1.569	1.21	2.151	6.322	1.34	1.845	1.254	rs9602088	.
13:83665329	13	83665329	G	?	9	1.565e-06	2.086e-05	1.5494	1.5779	0.3153	14.25	3.871	1.45	1.569	1.21	2.151	6.322	1.34	1.845	1.252	rs9602084	.
13:83668244	13	83668244	G	?	9	1.565e-06	2.086e-05	1.5494	1.5779	0.3153	14.25	3.871	1.45	1.569	1.21	2.151	6.322	1.34	1.845	1.252	rs9602087	.
13:83668473	13	83668473	G	?	9	1.565e-06	2.086e-05	1.5494	1.5779	0.3153	14.25	3.871	1.45	1.569	1.21	2.151	6.322	1.34	1.845	1.252	rs11839423	.
13:83668559	13	83668559	A	?	9	1.565e-06	2.086e-05	1.5494	1.5779	0.3153	14.25	3.871	1.45	1.569	1.21	2.151	6.322	1.34	1.845	1.252	rs11842290	.
13:83669091	13	83669091	C	?	9	1.565e-06	2.086e-05	1.5494	1.5779	0.3153	14.25	3.871	1.45	1.569	1.21	2.151	6.322	1.34	1.845	1.252	rs9602089	.
13:83651690	13	83651690	C	?	9	1.578e-06	2.125e-05	1.5491	1.5777	0.3145	14.33	3.871	1.45	1.569	1.21	2.151	6.322	1.34	1.845	1.251	rs7981917	.
13:83652013	13	83652013	T	?	9	1.578e-06	2.125e-05	1.5491	1.5777	0.3145	14.33	3.871	1.45	1.569	1.21	2.151	6.322	1.34	1.845	1.251	rs9602066	.
13:83652368	13	83652368	C	?	9	1.578e-06	2.125e-05	1.5491	1.5777	0.3145	14.33	3.871	1.45	1.569	1.21	2.151	6.322	1.34	1.845	1.251	rs9602068	.
13:83652860	13	83652860	C	?	9	1.578e-06	2.125e-05	1.5491	1.5777	0.3145	14.33	3.871	1.45	1.569	1.21	2.151	6.322	1.34	1.845	1.251	rs6563323	.
13:83654458	13	83654458	A	?	9	1.578e-06	2.125e-05	1.5491	1.5777	0.3145	14.33	3.871	1.45	1.569	1.21	2.151	6.322	1.34	1.845	1.251	rs1592356	.
13:83654624	13	83654624	T	?	9	1.578e-06	2.125e-05	1.5491	1.5777	0.3145	14.33	3.871	1.45	1.569	1.21	2.151	6.322	1.34	1.845	1.251	rs1592355	.
13:83656057	13	83656057	T	?	9	1.578e-06	2.125e-05	1.5491	1.5777	0.3145	14.33	3.871	1.45	1.569	1.21	2.151	6.322	1.34	1.845	1.251	rs7996750	.
13:83656436	13	83656436	A	?	9	1.578e-06	2.125e-05	1.5491	1.5777	0.3145	14.33	3.871	1.45	1.569	1.21	2.151	6.322	1.34	1.845	1.251	rs7997485	.
13:83656498	13	83656498	T	?	9	1.578e-06	2.125e-05	1.5491	1.5777	0.3145	14.33	3.871	1.45	1.569	1.21	2.151	6.322	1.34	1.845	1.251	rs7997370	.
13:83657607	13	83657607	G	?	9	1.578e-06	2.125e-05	1.5491	1.5777	0.3145	14.33	3.871	1.45	1.569	1.21	2.151	6.322	1.34	1.845	1.251	rs7986148	.
13:83658441	13	83658441	G	?	9	1.578e-06	2.125e-05	1.5491	1.5777	0.3145	14.33	3.871	1.45	1.569	1.21	2.151	6.322	1.34	1.845	1.251	rs9602073	.
13:83658624	13	83658624	G	?	9	1.578e-06	2.125e-05	1.5491	1.5777	0.3145	14.33	3.871	1.45	1.569	1.21	2.151	6.322	1.34	1.845	1.251	rs11843240	.
13:83660989	13	83660989	T	?	9	1.578e-06	2.125e-05	1.5491	1.5777	0.3145	14.33	3.871	1.45	1.569	1.21	2.151	6.322	1.34	1.845	1.251	rs1492728	.
13:83661402	13	83661402	G	?	9	1.578e-06	2.125e-05	1.5491	1.5777	0.3145	14.33	3.871	1.45	1.569	1.21	2.151	6.322	1.34	1.845	1.251	rs7321853	.
13:83661455	13	83661455	C	?	9	1.578e-06	2.125e-05	1.5491	1.5777	0.3145	14.33	3.871	1.45	1.569	1.21	2.151	6.322	1.34	1.845	1.251	rs1492730	.
13:83661794	13	83661794	G	?	9	1.578e-06	2.125e-05	1.5491	1.5777	0.3145	14.33	3.871	1.45	1.569	1.21	2.151	6.322	1.34	1.845	1.251	rs1492731	.
13:83662665	13	83662665	G	?	9	1.578e-06	2.125e-05	1.5491	1.5777	0.3145	14.33	3.871	1.45	1.569	1.21	2.151	6.322	1.34	1.845	1.251	rs9602075	.
13:83664418	13	83664418	T	?	9	1.578e-06	2.125e-05	1.5491	1.5777	0.3145	14.33	3.871	1.45	1.569	1.21	2.151	6.322	1.34	1.845	1.251	rs9602078	.
13:83664502	13	83664502	T	?	9	1.578e-06	2.125e-05	1.5491	1.5777	0.3145	14.33	3.871	1.45	1.569	1.21	2.151	6.322	1.34	1.845	1.251	rs9602080	.
13:83664908	13	83664908	G	?	9	1.578e-06	2.125e-05	1.5491	1.5777	0.3145	14.33	3.871	1.45	1.569	1.21	2.151	6.322	1.34	1.845	1.251	rs9602081	.
13:83665031	13	83665031	C	?	9	1.578e-06	2.125e-05	1.5491	1.5777	0.3145	14.33	3.871	1.45	1.569	1.21	2.151	6.322	1.34	1.845	1.251	rs9602082	.
13:83665315	13	83665315	A	?	9	1.59e-06	2.268e-05	1.5471	1.5782	0.3077	15.12	3.871	1.434	1.569	1.21	2.193	4.938	1.04	1.845	1.246	rs9602083	.
14:76865871	14	76865871	A	?	8	1.669e-06	1.669e-06	0.3901	0.3901	0.9878	0	0.3924	0.3279	0.3958	0.3543	0.3224	NA	0	0.4113	0.563	rs58853114	ESRRB(0)|GPATCH2L(+196.7kb)|RNU6-19P(+128.4kb)|RNU6-31P(+128.4kb)
13:83651659	13	83651659	C	?	9	1.72e-06	2.187e-05	1.6692	1.694	0.323	13.36	4.536	1.614	1.685	1.409	2.342	8.774	1.656	1.567	1.186	rs9602065	.
13:83652245	13	83652245	T	?	9	1.72e-06	2.187e-05	1.6692	1.694	0.323	13.36	4.536	1.614	1.685	1.409	2.342	8.774	1.656	1.567	1.186	rs9602067	.
13:83679819	13	83679819	T	?	9	1.756e-06	3.977e-05	1.5488	1.5875	0.2783	18.49	3.871	1.433	1.569	1.153	2.223	6.322	1.34	1.845	1.285	rs7991632	.
13:83677316	13	83677316	A	?	9	1.799e-06	4.141e-05	1.5481	1.5871	0.2767	18.66	3.871	1.433	1.569	1.153	2.223	6.322	1.34	1.845	1.282	rs10162228	.
13:83677372	13	83677372	C	?	9	1.799e-06	4.141e-05	1.5481	1.5871	0.2767	18.66	3.871	1.433	1.569	1.153	2.223	6.322	1.34	1.845	1.282	rs10161856	.
13:83680325	13	83680325	G	?	9	1.799e-06	4.141e-05	1.5481	1.5871	0.2767	18.66	3.871	1.433	1.569	1.153	2.223	6.322	1.34	1.845	1.282	rs7992414	.
13:83673416	13	83673416	T	?	9	1.804e-06	5.11e-05	1.5468	1.5866	0.2649	20.01	3.871	1.45	1.569	1.153	2.223	6.322	1.34	1.845	1.252	rs58083946	.
13:83672386	13	83672386	A	?	9	1.901e-06	1.901e-06	1.753	1.753	0.6528	0	2.4	1.679	1.607	1.425	2.618	5.385	2.713	1.949	1.247	rs76306209	.
13:83799764	13	83799764	A	?	9	1.974e-06	1.974e-06	1.6503	1.6503	0.5404	0	5.295	1.565	1.766	1.342	2.09	5.496	1.656	1.567	1.287	rs11842579	.
13:83800510	13	83800510	C	?	9	1.974e-06	1.974e-06	1.6503	1.6503	0.5404	0	5.295	1.565	1.766	1.342	2.09	5.496	1.656	1.567	1.287	rs1355656	.
13:83800546	13	83800546	G	?	9	1.974e-06	1.974e-06	1.6503	1.6503	0.5404	0	5.295	1.565	1.766	1.342	2.09	5.496	1.656	1.567	1.287	rs1355657	.
13:83669747	13	83669747	T	?	9	2.044e-06	3.928e-05	1.5416	1.574	0.2905	17.09	3.871	1.45	1.569	1.153	2.151	6.322	1.34	1.845	1.252	rs9602091	.
13:83669983	13	83669983	G	?	9	2.044e-06	3.928e-05	1.5416	1.574	0.2905	17.09	3.871	1.45	1.569	1.153	2.151	6.322	1.34	1.845	1.252	rs9602092	.
13:83670296	13	83670296	C	?	9	2.044e-06	3.928e-05	1.5416	1.574	0.2905	17.09	3.871	1.45	1.569	1.153	2.151	6.322	1.34	1.845	1.252	rs73519039	.
14:76820418	14	76820418	T	?	7	2.068e-06	2.068e-06	0.3917	0.3917	0.9685	0	0.199	0.4072	0.3514	0.3873	0.1882	NA	NA	0.4113	0.4878	rs73316308	ESRRB(-17.27kb)|GPATCH2L(+151.3kb)|RNU6-19P(+82.94kb)|RNU6-31P(+82.94kb)
14:76825961	14	76825961	G	?	8	2.171e-06	2.171e-06	0.3801	0.3801	0.9746	0	0.199	0.3883	0.3514	0.3543	0.1385	NA	0	0.4113	0.5061	rs56047971	ESRRB(-11.73kb)|GPATCH2L(+156.8kb)|RNU6-19P(+88.48kb)|RNU6-31P(+88.48kb)
14:76826115	14	76826115	A	?	8	2.171e-06	2.171e-06	0.3801	0.3801	0.9746	0	0.199	0.3883	0.3514	0.3543	0.1385	NA	0	0.4113	0.5061	rs58909044	ESRRB(-11.57kb)|GPATCH2L(+157kb)|RNU6-19P(+88.64kb)|RNU6-31P(+88.64kb)
6:105073166	6	105073166	A	?	9	2.176e-06	0.0009664	0.6344	0.6432	0.1725	30.73	1.018	0.5848	0.5868	0.9822	0.4988	1.489	0.4289	0.211	0.7653	rs9373775	HACE1(-102.8kb)
14:76856525	14	76856525	A	?	7	2.413e-06	2.413e-06	0.4001	0.4001	0.9986	0	0.3389	0.4263	0.3514	0.3543	0.2786	NA	NA	0.4113	0.4365	rs7144834	ESRRB(0)|GPATCH2L(+187.4kb)|RNU6-19P(+119kb)|RNU6-31P(+119kb)
18:26697689	18	26697689	C	?	8	2.473e-06	5.159e-06	0.6457	0.6362	0.3888	5.36	0.8718	0.7698	0.3079	0.6749	0.4972	0.546	NA	0.4401	0.603	rs1362855	.
14:76835403	14	76835403	A	?	8	2.492e-06	2.492e-06	0.3797	0.3797	0.974	0	0.199	0.3883	0.3514	0.3543	0.1385	NA	0	0.4113	0.514	rs79661745	ESRRB(-2.286kb)|GPATCH2L(+166.3kb)|RNU6-19P(+97.93kb)|RNU6-31P(+97.93kb)
14:76836151	14	76836151	A	?	8	2.492e-06	2.492e-06	0.3797	0.3797	0.974	0	0.199	0.3883	0.3514	0.3543	0.1385	NA	0	0.4113	0.514	rs60970617	ESRRB(-1.538kb)|GPATCH2L(+167kb)|RNU6-19P(+98.68kb)|RNU6-31P(+98.68kb)
14:76838306	14	76838306	T	?	8	2.492e-06	2.492e-06	0.3797	0.3797	0.974	0	0.199	0.3883	0.3514	0.3543	0.1385	NA	0	0.4113	0.514	rs2278686	ESRRB(0)|GPATCH2L(+169.2kb)|RNU6-19P(+100.8kb)|RNU6-31P(+100.8kb)
14:76833373	14	76833373	A	?	8	2.5e-06	2.5e-06	0.3797	0.3797	0.9739	0	0.199	0.3883	0.3514	0.3543	0.1385	NA	0	0.4113	0.5143	rs7156267	ESRRB(-4.316kb)|GPATCH2L(+164.2kb)|RNU6-19P(+95.9kb)|RNU6-31P(+95.9kb)
14:76834761	14	76834761	C	?	8	2.5e-06	2.5e-06	0.3797	0.3797	0.9739	0	0.199	0.3883	0.3514	0.3543	0.1385	NA	0	0.4113	0.5143	rs17104385	ESRRB(-2.928kb)|GPATCH2L(+165.6kb)|RNU6-19P(+97.28kb)|RNU6-31P(+97.28kb)
14:76824918	14	76824918	A	?	8	2.54e-06	2.54e-06	0.3825	0.3825	0.975	0	0.199	0.3883	0.3514	0.3873	0.1385	NA	0	0.4113	0.5061	rs74069822	ESRRB(-12.77kb)|GPATCH2L(+155.8kb)|RNU6-19P(+87.44kb)|RNU6-31P(+87.44kb)
14:76823129	14	76823129	A	?	8	2.543e-06	2.543e-06	0.3825	0.3825	0.9749	0	0.199	0.3883	0.3514	0.3873	0.1385	NA	0	0.4113	0.5062	rs74069816	ESRRB(-14.56kb)|GPATCH2L(+154kb)|RNU6-19P(+85.65kb)|RNU6-31P(+85.65kb)
14:76823647	14	76823647	G	?	8	2.543e-06	2.543e-06	0.3825	0.3825	0.9749	0	0.199	0.3883	0.3514	0.3873	0.1385	NA	0	0.4113	0.5062	rs74069819	ESRRB(-14.04kb)|GPATCH2L(+154.5kb)|RNU6-19P(+86.17kb)|RNU6-31P(+86.17kb)
13:83613912	13	83613912	T	?	9	2.629e-06	2.568e-05	1.5356	1.5558	0.3319	12.32	2.992	1.482	1.569	1.168	2.147	6.322	1.34	1.845	1.201	rs2807500	.
6:105075505	6	105075505	T	?	9	2.659e-06	0.0009615	0.6358	0.643	0.1748	30.45	1.018	0.5891	0.5573	0.9822	0.5083	1.495	0.4289	0.211	0.7657	rs11758992	HACE1(-100.5kb)
6:105077029	6	105077029	T	?	9	2.659e-06	0.0009615	0.6358	0.643	0.1748	30.45	1.018	0.5891	0.5573	0.9822	0.5083	1.495	0.4289	0.211	0.7657	rs9499902	HACE1(-98.94kb)
6:105079348	6	105079348	A	?	9	2.878e-06	0.001063	0.6367	0.6446	0.1723	30.76	1.018	0.5891	0.5573	0.9822	0.5006	1.495	0.532	0.211	0.7727	rs67435421	HACE1(-96.62kb)
13:83722485	13	83722485	T	?	9	2.945e-06	0.0001176	1.3777	1.411	0.2265	24.41	1.476	1.265	1.674	1.138	1.864	5.268	0.6573	1.505	1.24	rs265644	.
13:83804330	13	83804330	T	?	9	3.176e-06	3.176e-06	1.6387	1.6387	0.4617	0	9.625	1.565	1.766	1.388	1.906	5.496	1.656	1.567	1.305	rs80263311	.
13:83705140	13	83705140	T	?	9	3.233e-06	0.0001356	1.3739	1.4028	0.2282	24.21	1.339	1.296	1.656	1.123	1.766	7.783	1.238	1.505	1.217	rs2819222	.
13:83705268	13	83705268	C	?	9	3.233e-06	0.0001356	1.3739	1.4028	0.2282	24.21	1.339	1.296	1.656	1.123	1.766	7.783	1.238	1.505	1.217	rs2819224	.
13:83705444	13	83705444	A	?	9	3.233e-06	0.0001356	1.3739	1.4028	0.2282	24.21	1.339	1.296	1.656	1.123	1.766	7.783	1.238	1.505	1.217	rs2800361	.
13:83705801	13	83705801	T	?	9	3.233e-06	0.0001356	1.3739	1.4028	0.2282	24.21	1.339	1.296	1.656	1.123	1.766	7.783	1.238	1.505	1.217	rs2819225	.
13:83719807	13	83719807	G	?	9	3.329e-06	0.0001463	1.3753	1.4091	0.2175	25.44	1.476	1.265	1.674	1.119	1.864	5.268	0.6573	1.505	1.24	rs2819254	.
13:83720107	13	83720107	C	?	9	3.329e-06	0.0001463	1.3753	1.4091	0.2175	25.44	1.476	1.265	1.674	1.119	1.864	5.268	0.6573	1.505	1.24	rs2669212	.
13:83707600	13	83707600	A	?	9	3.336e-06	0.0001169	1.3734	1.4001	0.2417	22.66	1.339	1.296	1.656	1.123	1.766	7.658	1.238	1.505	1.217	rs2639478	.
13:83707616	13	83707616	A	?	9	3.336e-06	0.0001169	1.3734	1.4001	0.2417	22.66	1.339	1.296	1.656	1.123	1.766	7.658	1.238	1.505	1.217	rs2800362	.
13:83707638	13	83707638	T	?	9	3.336e-06	0.0001169	1.3734	1.4001	0.2417	22.66	1.339	1.296	1.656	1.123	1.766	7.658	1.238	1.505	1.217	rs2669203	.
13:83705856	13	83705856	T	?	9	3.342e-06	0.0001158	1.3733	1.4	0.2425	22.57	1.339	1.296	1.656	1.123	1.766	7.648	1.238	1.505	1.217	rs2819227	.
13:83706014	13	83706014	G	?	9	3.342e-06	0.0001158	1.3733	1.4	0.2425	22.57	1.339	1.296	1.656	1.123	1.766	7.648	1.238	1.505	1.217	rs2669200	.
13:83706247	13	83706247	A	?	9	3.342e-06	0.0001158	1.3733	1.4	0.2425	22.57	1.339	1.296	1.656	1.123	1.766	7.648	1.238	1.505	1.217	rs2175642	.
13:83706606	13	83706606	A	?	9	3.342e-06	0.0001158	1.3733	1.4	0.2425	22.57	1.339	1.296	1.656	1.123	1.766	7.648	1.238	1.505	1.217	rs2137438	.
13:83707174	13	83707174	T	?	9	3.342e-06	0.0001158	1.3733	1.4	0.2425	22.57	1.339	1.296	1.656	1.123	1.766	7.648	1.238	1.505	1.217	rs2175643	.
13:83707335	13	83707335	G	?	9	3.342e-06	0.0001158	1.3733	1.4	0.2425	22.57	1.339	1.296	1.656	1.123	1.766	7.648	1.238	1.505	1.217	rs2669202	.
13:83707803	13	83707803	A	?	9	3.372e-06	0.0001186	1.3731	1.4	0.2411	22.73	1.339	1.296	1.656	1.123	1.766	7.658	1.238	1.505	1.216	rs2800363	.
13:83713894	13	83713894	C	?	9	3.744e-06	0.0001199	1.3725	1.4025	0.2396	22.9	1.476	1.265	1.674	1.119	1.828	5.268	0.6573	1.505	1.242	rs2131319	.
13:83714342	13	83714342	A	?	9	3.744e-06	0.0001199	1.3725	1.4025	0.2396	22.9	1.476	1.265	1.674	1.119	1.828	5.268	0.6573	1.505	1.242	rs2669208	.
13:83715592	13	83715592	G	?	9	3.744e-06	0.0001199	1.3725	1.4025	0.2396	22.9	1.476	1.265	1.674	1.119	1.828	5.268	0.6573	1.505	1.242	rs1398462	.
18:26690501	18	26690501	G	?	8	3.792e-06	1.305e-05	0.6512	0.6343	0.352	10.07	0.8718	0.7782	0.3079	0.7082	0.4907	0.546	NA	0.4401	0.6025	rs2212695	.
18:26690998	18	26690998	G	?	8	3.792e-06	1.305e-05	0.6512	0.6343	0.352	10.07	0.8718	0.7782	0.3079	0.7082	0.4907	0.546	NA	0.4401	0.6025	rs9957299	.
13:83704599	13	83704599	T	?	9	3.796e-06	0.0001817	1.3708	1.4005	0.2156	25.65	1.339	1.296	1.656	1.099	1.766	7.783	1.238	1.505	1.217	rs2819303	.
13:83712773	13	83712773	A	?	9	4.162e-06	0.0001286	1.3699	1.3982	0.2419	22.63	1.391	1.265	1.674	1.119	1.828	5.268	0.6573	1.505	1.242	rs2800367	.
13:83713129	13	83713129	A	?	9	4.162e-06	0.0001286	1.3699	1.3982	0.2419	22.63	1.391	1.265	1.674	1.119	1.828	5.268	0.6573	1.505	1.242	rs1979683	.
13:83704216	13	83704216	T	?	9	4.22e-06	0.0002053	1.3693	1.3993	0.2117	26.11	1.339	1.296	1.656	1.099	1.766	7.783	1.238	1.505	1.208	rs7987839	.
13:53042785	13	53042785	T	?	6	4.314e-06	4.314e-06	2.4529	2.4529	0.5109	0	9.323	2.492	0.9936	NA	3.595	NA	NA	4.031	1.839	rs117692094	CKAP2(0)|HNRNPA1L2(-148.8kb)|SUGT1(-184kb)|THSD1(+62.16kb)|TPTE2P3(-20.34kb)|VPS36(+18.02kb)
13:83804004	13	83804004	A	?	9	4.393e-06	4.393e-06	1.624	1.624	0.6083	0	5.295	1.552	1.766	1.342	1.906	5.496	1.656	1.567	1.305	rs77921403	.
13:83711815	13	83711815	G	?	9	4.5e-06	0.0001302	1.3687	1.3961	0.2461	22.15	1.391	1.265	1.657	1.119	1.828	5.268	0.6573	1.505	1.242	rs2175645	.
13:83711943	13	83711943	T	?	9	4.5e-06	0.0001302	1.3687	1.3961	0.2461	22.15	1.391	1.265	1.657	1.119	1.828	5.268	0.6573	1.505	1.242	rs2819248	.
15:88384081	15	88384081	C	?	8	4.604e-06	4.604e-06	0.5035	0.5035	0.8322	0	0.2325	0.5411	0.377	0.4057	0.4523	2.658	NA	0.4434	0.5426	rs78405621	NTRK3(-35.91kb)
20:4138899	20	4138899	A	?	7	4.688e-06	4.688e-06	1.3577	1.3577	0.6145	0	2.403	1.301	1.754	1.248	1.325	NA	1.442	1.238	NA	rs1617572	ADRA1D(-62.38kb)|LOC728228(-34.84kb)|RNF24(+142.7kb)|SMOX(0)
13:83685736	13	83685736	C	?	9	4.707e-06	0.0002503	1.3663	1.3969	0.2028	27.14	1.339	1.3	1.656	1.099	1.766	7.783	1.238	1.505	1.189	rs265665	.
13:83686854	13	83686854	C	?	9	4.707e-06	0.0002503	1.3663	1.3969	0.2028	27.14	1.339	1.3	1.656	1.099	1.766	7.783	1.238	1.505	1.189	rs2996569	.
13:83687722	13	83687722	C	?	9	4.707e-06	0.0002503	1.3663	1.3969	0.2028	27.14	1.339	1.3	1.656	1.099	1.766	7.783	1.238	1.505	1.189	rs265675	.
13:83689738	13	83689738	G	?	9	4.707e-06	0.0002503	1.3663	1.3969	0.2028	27.14	1.339	1.3	1.656	1.099	1.766	7.783	1.238	1.505	1.189	rs174731	.
13:83692185	13	83692185	C	?	9	4.707e-06	0.0002503	1.3663	1.3969	0.2028	27.14	1.339	1.3	1.656	1.099	1.766	7.783	1.238	1.505	1.189	rs265686	.
13:83694165	13	83694165	A	?	9	4.707e-06	0.0002503	1.3663	1.3969	0.2028	27.14	1.339	1.3	1.656	1.099	1.766	7.783	1.238	1.505	1.189	rs265688	.
13:83694854	13	83694854	C	?	9	4.707e-06	0.0002503	1.3663	1.3969	0.2028	27.14	1.339	1.3	1.656	1.099	1.766	7.783	1.238	1.505	1.189	rs265691	.
13:83694962	13	83694962	T	?	9	4.707e-06	0.0002503	1.3663	1.3969	0.2028	27.14	1.339	1.3	1.656	1.099	1.766	7.783	1.238	1.505	1.189	rs265692	.
13:83695022	13	83695022	T	?	9	4.707e-06	0.0002503	1.3663	1.3969	0.2028	27.14	1.339	1.3	1.656	1.099	1.766	7.783	1.238	1.505	1.189	rs265693	.
13:83695448	13	83695448	G	?	9	4.707e-06	0.0002503	1.3663	1.3969	0.2028	27.14	1.339	1.3	1.656	1.099	1.766	7.783	1.238	1.505	1.189	rs265695	.
13:83695889	13	83695889	G	?	9	4.707e-06	0.0002503	1.3663	1.3969	0.2028	27.14	1.339	1.3	1.656	1.099	1.766	7.783	1.238	1.505	1.189	rs265696	.
13:83697215	13	83697215	T	?	9	4.707e-06	0.0002503	1.3663	1.3969	0.2028	27.14	1.339	1.3	1.656	1.099	1.766	7.783	1.238	1.505	1.189	rs2800374	.
13:83699198	13	83699198	T	?	9	4.707e-06	0.0002503	1.3663	1.3969	0.2028	27.14	1.339	1.3	1.656	1.099	1.766	7.783	1.238	1.505	1.189	rs197283	.
13:83699719	13	83699719	G	?	9	4.707e-06	0.0002503	1.3663	1.3969	0.2028	27.14	1.339	1.3	1.656	1.099	1.766	7.783	1.238	1.505	1.189	rs265701	.
13:83700698	13	83700698	C	?	9	4.707e-06	0.0002503	1.3663	1.3969	0.2028	27.14	1.339	1.3	1.656	1.099	1.766	7.783	1.238	1.505	1.189	rs265703	.
13:83701650	13	83701650	A	?	9	4.707e-06	0.0002503	1.3663	1.3969	0.2028	27.14	1.339	1.3	1.656	1.099	1.766	7.783	1.238	1.505	1.189	rs2669197	.
13:83702369	13	83702369	G	?	9	4.707e-06	0.0002503	1.3663	1.3969	0.2028	27.14	1.339	1.3	1.656	1.099	1.766	7.783	1.238	1.505	1.189	rs2247180	.
13:83702469	13	83702469	T	?	9	4.707e-06	0.0002503	1.3663	1.3969	0.2028	27.14	1.339	1.3	1.656	1.099	1.766	7.783	1.238	1.505	1.189	rs1877488	.
13:83703275	13	83703275	A	?	9	4.707e-06	0.0002503	1.3663	1.3969	0.2028	27.14	1.339	1.3	1.656	1.099	1.766	7.783	1.238	1.505	1.189	rs2669198	.
13:83703363	13	83703363	C	?	9	4.707e-06	0.0002503	1.3663	1.3969	0.2028	27.14	1.339	1.3	1.656	1.099	1.766	7.783	1.238	1.505	1.189	rs2819297	.
13:83703841	13	83703841	C	?	9	4.707e-06	0.0002503	1.3663	1.3969	0.2028	27.14	1.339	1.3	1.656	1.099	1.766	7.783	1.238	1.505	1.189	rs2639474	.
13:83704031	13	83704031	G	?	9	4.707e-06	0.0002503	1.3663	1.3969	0.2028	27.14	1.339	1.3	1.656	1.099	1.766	7.783	1.238	1.505	1.189	rs2819300	.
13:83721315	13	83721315	T	?	9	4.722e-06	0.0002144	1.3686	1.401	0.2105	26.25	1.36	1.262	1.674	1.104	1.864	5.268	0.6573	1.505	1.24	rs182047	.
14:76829602	14	76829602	G	?	8	4.789e-06	4.789e-06	0.3923	0.3923	0.9452	0	0.199	0.3883	0.3514	0.3543	0.1385	NA	0	0.4113	0.5956	rs58833347	ESRRB(-8.087kb)|GPATCH2L(+160.5kb)|RNU6-19P(+92.13kb)|RNU6-31P(+92.13kb)
14:76831868	14	76831868	C	?	8	4.789e-06	4.789e-06	0.3923	0.3923	0.9452	0	0.199	0.3883	0.3514	0.3543	0.1385	NA	0	0.4113	0.5956	rs58318264	ESRRB(-5.821kb)|GPATCH2L(+162.7kb)|RNU6-19P(+94.39kb)|RNU6-31P(+94.39kb)
14:76832143	14	76832143	C	?	8	4.789e-06	4.789e-06	0.3923	0.3923	0.9452	0	0.199	0.3883	0.3514	0.3543	0.1385	NA	0	0.4113	0.5956	rs60772130	ESRRB(-5.546kb)|GPATCH2L(+163kb)|RNU6-19P(+94.67kb)|RNU6-31P(+94.67kb)
14:76832759	14	76832759	G	?	8	4.789e-06	4.789e-06	0.3923	0.3923	0.9452	0	0.199	0.3883	0.3514	0.3543	0.1385	NA	0	0.4113	0.5956	rs57285266	ESRRB(-4.93kb)|GPATCH2L(+163.6kb)|RNU6-19P(+95.28kb)|RNU6-31P(+95.28kb)
13:53166727	13	53166727	T	?	6	4.904e-06	4.904e-06	2.3424	2.3424	0.7135	0	4.702	2.614	0.9912	NA	2.961	NA	NA	2.833	1.847	rs117381667	CKAP2(+116kb)|HNRNPA1L2(-24.88kb)|LECT1(-110.7kb)|SUGT1(-60.1kb)|THSD1(+186.1kb)|TPTE2P3(+5.502kb)|VPS36(+142kb)
21:42954903	21	42954903	C	?	8	4.915e-06	4.915e-06	1.3965	1.3965	0.7835	0	1.606	1.33	1.596	1.332	1.647	NA	0.2006	1.306	1.354	rs28675193	LINC00111(-144.6kb)|LINC00112(-181.7kb)|LINC00479(-176.8kb)|MX1(+123.8kb)|MX2(+174kb)|TMPRSS2(+74.82kb)
18:26687371	18	26687371	G	?	8	5.155e-06	2.153e-05	0.6555	0.6365	0.3368	11.98	0.8718	0.7782	0.3079	0.7513	0.4907	0.5426	NA	0.4401	0.6025	rs9961895	.
13:83686039	13	83686039	G	?	9	5.195e-06	0.0002654	1.3647	1.3959	0.2013	27.32	1.339	1.296	1.656	1.099	1.766	7.783	1.238	1.505	1.189	rs265664	.
13:83704104	13	83704104	A	?	9	5.195e-06	0.0002654	1.3647	1.3959	0.2013	27.32	1.339	1.296	1.656	1.099	1.766	7.783	1.238	1.505	1.189	rs2819301	.
18:26702633	18	26702633	T	?	8	5.431e-06	1.681e-05	0.6561	0.6393	0.3543	9.78	0.8718	0.7847	0.3079	0.6959	0.4972	0.546	NA	0.4401	0.6162	rs1942256	.
18:26730357	18	26730357	G	?	8	5.584e-06	1.145e-05	0.6559	0.6434	0.3799	6.51	0.728	0.7907	0.3079	0.6959	0.4972	0.546	NA	0.4401	0.6354	rs2032725	.
13:83708119	13	83708119	C	?	9	5.732e-06	0.0002553	1.3605	1.3982	0.1951	28.04	1.339	1.255	1.59	1.136	1.835	6.923	1.186	1.505	1.207	rs2800364	.
14:76815889	14	76815889	G	?	8	5.981e-06	5.981e-06	0.4016	0.4016	0.9946	0	0.199	0.4052	0.3514	0.3873	0.2843	NA	0	0.4113	0.5276	rs58394842	ESRRB(-21.8kb)|GPATCH2L(+146.8kb)|RNU6-19P(+78.41kb)|RNU6-31P(+78.41kb)
3:56695924	3	56695924	A	?	9	6.004e-06	6.004e-06	0.6709	0.6709	0.8823	0	0.6195	0.6852	0.7315	0.4733	0.7588	0.3926	0.2658	0.46	0.7422	rs9826788	ARHGEF3(-65.52kb)|CCDC66(+40.08kb)|ERC2(+193.5kb)|FAM208A(0)
13:83613179	13	83613179	T	?	9	6.035e-06	6.168e-05	1.4988	1.5237	0.3147	14.32	2.454	1.43	1.663	1.15	2.174	6.088	1.34	1.659	1.169	rs2807498	.
2:237230009	2	237230009	G	?	9	6.162e-06	9.223e-05	0.7606	0.7498	0.2895	17.21	0.6997	0.8545	0.6014	0.6458	0.7757	1.65	0.713	0.9146	0.6097	rs6735079	AGAP1(+189.6kb)|ASB18(+57.02kb)|GBX2(+153.4kb)|IQCA1(-2.78kb)
18:26697905	18	26697905	A	?	8	6.202e-06	1.3e-05	0.6548	0.6448	0.3861	5.71	0.8718	0.7698	0.3079	0.6749	0.4832	0.6951	NA	0.4401	0.6545	rs8085698	.
18:26694211	18	26694211	C	?	8	6.486e-06	1.773e-05	0.6558	0.6426	0.3689	7.93	0.8718	0.7698	0.3079	0.7082	0.4766	0.6951	NA	0.4401	0.6451	rs62084895	.
18:26689022	18	26689022	T	?	8	6.851e-06	4.237e-05	0.662	0.6334	0.2915	17.54	0.8718	0.7987	0.3079	0.7513	0.5098	0.5412	NA	0.4401	0.5713	rs2160865	.
18:26694872	18	26694872	T	?	8	6.852e-06	4.81e-05	0.6615	0.6292	0.275	19.53	0.916	0.8059	0.3079	0.7082	0.5098	0.5412	NA	0.4401	0.5696	rs2155933	.
15:68167326	15	68167326	T	?	6	6.979e-06	6.979e-06	3.2826	3.2826	0.637	0	NA	2.264	5.026	1.737	5.084	NA	NA	1.764	5.593	rs151286384	MAP2K5(+67.87kb)|PIAS1(-179.2kb)|SKOR1(+41.15kb)
22:34269526	22	34269526	T	?	9	7.037e-06	7.037e-06	1.535	1.535	0.5208	0	0.8698	1.462	2.436	1.396	1.612	2.055	5.953	1.008	1.484	rs5754732	LARGE(0)|LARGE-AS1(+122.7kb)
18:26736018	18	26736018	T	?	8	7.222e-06	7.222e-06	0.657	0.657	0.4533	0	0.728	0.7728	0.3079	0.6723	0.4911	0.6951	NA	0.4762	0.681	rs1833439	.
18:26732927	18	26732927	A	?	8	7.428e-06	9.964e-06	0.658	0.653	0.4107	2.46	0.728	0.7847	0.3079	0.6959	0.5033	0.6951	NA	0.4401	0.6406	rs11083323	.
18:26692229	18	26692229	C	?	8	7.429e-06	2.483e-05	0.6576	0.6421	0.3551	9.69	0.916	0.7698	0.3079	0.7082	0.4766	0.6951	NA	0.4401	0.6479	rs1362856	.
3:29995322	3	29995322	C	?	8	7.508e-06	7.508e-06	3.0204	3.0204	0.9966	0	3.296	2.776	2.683	1.943	3.932	NA	0	1.837	3.846	rs1449296	RBMS3(0)
18:26735411	18	26735411	G	?	8	8.048e-06	1.322e-05	0.658	0.6501	0.3981	4.14	0.728	0.7785	0.3079	0.6959	0.4832	0.6951	NA	0.4401	0.6765	rs11083324	.
18:26735905	18	26735905	C	?	8	8.048e-06	1.322e-05	0.658	0.6501	0.3981	4.14	0.728	0.7785	0.3079	0.6959	0.4832	0.6951	NA	0.4401	0.6765	rs1819948	.
18:26712723	18	26712723	G	?	8	8.611e-06	2.171e-05	0.6594	0.6461	0.3705	7.73	0.8718	0.7762	0.3079	0.6862	0.4832	0.6951	NA	0.4401	0.6593	rs2009337	.
18:26713991	18	26713991	C	?	8	8.611e-06	2.171e-05	0.6594	0.6461	0.3705	7.73	0.8718	0.7762	0.3079	0.6862	0.4832	0.6951	NA	0.4401	0.6593	rs6508576	.
18:26701793	18	26701793	G	?	8	8.667e-06	2.242e-05	0.6597	0.6462	0.3688	7.94	0.8718	0.7762	0.3079	0.6959	0.4832	0.6951	NA	0.4401	0.6545	rs1833438	.
18:26717472	18	26717472	C	?	8	9.304e-06	2.391e-05	0.6605	0.6469	0.369	7.92	0.8718	0.7762	0.3079	0.6959	0.4832	0.6951	NA	0.4401	0.6593	rs4800909	.
5:172792098	5	172792098	A	?	9	9.447e-06	9.447e-06	1.9145	1.9145	0.5951	0	2.992	1.703	3.715	1.875	2.815	0.2337	0	1.216	1.578	rs79863196	NKX2-5(+129.8kb)|STC2(+35.59kb)
18:26711467	18	26711467	T	?	8	9.945e-06	3.033e-05	0.6612	0.6455	0.3566	9.49	0.916	0.7762	0.3079	0.6862	0.4832	0.6951	NA	0.4401	0.6622	rs1833433	.
13:83712209	13	83712209	G	?	9	1.014e-05	1.014e-05	1.6143	1.6143	0.6396	0	1.464	1.604	2.569	1.194	2.529	2.026	1.586	1.234	1.17	rs73244265	.
13:83710444	13	83710444	A	?	9	1.05e-05	0.0003178	1.3501	1.3792	0.2199	25.16	1.271	1.245	1.58	1.137	1.853	5.211	0.6573	1.505	1.207	rs2669205	.
13:83710490	13	83710490	A	?	9	1.05e-05	0.0003178	1.3501	1.3792	0.2199	25.16	1.271	1.245	1.58	1.137	1.853	5.211	0.6573	1.505	1.207	rs2819243	.
13:83710915	13	83710915	G	?	9	1.05e-05	0.0003178	1.3501	1.3792	0.2199	25.16	1.271	1.245	1.58	1.137	1.853	5.211	0.6573	1.505	1.207	rs968679	.
2:237231762	2	237231762	C	?	9	1.067e-05	3.787e-05	0.7657	0.7565	0.3588	9.17	0.6997	0.8737	0.5936	0.6659	0.7757	1.423	0.529	0.8524	0.6146	rs6752800	AGAP1(+191.3kb)|ASB18(+58.77kb)|GBX2(+155.1kb)|IQCA1(-1.027kb)
13:53268688	13	53268688	A	?	7	1.077e-05	1.077e-05	2.3284	2.3284	0.5646	0	9.323	2.168	0.787	NA	3.595	0.6582	NA	2.833	2.126	rs139138250	HNRNPA1L2(+50.77kb)|LECT1(-8.711kb)|MIR759(-115.5kb)|PCDH8(-149.4kb)|SUGT1(+6.255kb)|TPTE2P3(+107.5kb)
18:26733646	18	26733646	C	?	8	1.093e-05	2.472e-05	0.6625	0.6476	0.3697	7.82	0.728	0.7907	0.3079	0.6959	0.4832	0.6951	NA	0.4401	0.6719	rs8094993	.
18:26722892	18	26722892	T	?	8	1.101e-05	2.832e-05	0.663	0.6495	0.3682	8.02	0.8718	0.7762	0.3079	0.6959	0.4832	0.6951	NA	0.4401	0.6765	rs12959830	.
13:83453167	13	83453167	C	?	9	1.136e-05	0.0002882	1.4843	1.4784	0.2958	16.48	1.841	1.621	2.093	1.137	1.796	4.934	0.5849	1.184	1.015	rs6563319	.
13:83708745	13	83708745	T	?	9	1.205e-05	0.0003468	1.3476	1.3804	0.2136	25.89	1.339	1.234	1.58	1.137	1.853	5.211	0.6573	1.505	1.207	rs2819238	.
6:105081510	6	105081510	A	?	9	1.223e-05	1.223e-05	0.675	0.675	0.5002	0	0.8203	0.603	0.6522	0.931	0.5927	1.339	1.043	0.3363	0.8199	rs946134	HACE1(-94.46kb)
13:83710266	13	83710266	C	?	9	1.225e-05	0.0003612	1.3471	1.3775	0.2151	25.72	1.271	1.238	1.58	1.137	1.853	5.211	0.6573	1.505	1.207	rs9546302	.
13:83439824	13	83439824	T	?	9	1.275e-05	8.208e-05	1.4804	1.4757	0.3667	8.23	1.841	1.621	2.093	1.083	1.796	4.218	1.46	1.184	1.015	rs1976140	.
13:83440248	13	83440248	G	?	9	1.286e-05	8.539e-05	1.4802	1.4754	0.3653	8.4	1.841	1.621	2.093	1.083	1.796	4.218	1.46	1.184	1.014	rs9546245	.
1:218404565	1	218404565	C	?	8	1.289e-05	1.289e-05	1.7682	1.7682	0.5584	0	0.954	1.98	1.823	1.972	1.116	1.923	NA	12.82	1.837	rs55799751	LOC728463(-113kb)|RRP15(-54.06kb)|TGFB2(-114.1kb)
6:105045324	6	105045324	T	?	9	1.291e-05	0.008335	0.6472	0.6617	0.0788	43.33	1.181	0.6006	0.6303	0.9793	0.4654	2.411	0.4292	0.1928	0.736	rs56036809	HACE1(-130.6kb)
13:83710289	13	83710289	G	?	9	1.308e-05	0.0003815	1.3457	1.3768	0.2129	25.97	1.271	1.235	1.58	1.137	1.853	5.211	0.6573	1.505	1.207	rs9546303	.
13:83449358	13	83449358	C	?	9	1.322e-05	0.0004137	1.4798	1.4732	0.2805	18.24	1.841	1.621	2.093	1.107	1.796	4.934	0.5849	1.184	1.015	rs9531393	.
22:49793940	22	49793940	A	?	7	1.322e-05	2.25e-05	1.4309	1.4274	0.4061	2.51	1.113	1.689	1.098	1.215	1.623	NA	0.591	1.642	NA	rs9616609	.
13:83709212	13	83709212	A	?	9	1.333e-05	0.0003883	1.3452	1.3765	0.2121	26.06	1.271	1.234	1.58	1.137	1.853	5.211	0.6573	1.505	1.207	rs2800365	.
13:83709471	13	83709471	C	?	9	1.333e-05	0.0003883	1.3452	1.3765	0.2121	26.06	1.271	1.234	1.58	1.137	1.853	5.211	0.6573	1.505	1.207	rs2819240	.
2:237234510	2	237234510	T	?	9	1.346e-05	4.614e-05	0.7687	0.7597	0.3594	9.1	0.6997	0.8783	0.6285	0.6659	0.7783	1.423	0.5276	0.8524	0.6086	rs7609398	AGAP1(+194.1kb)|ASB18(+61.52kb)|GBX2(+157.9kb)|IQCA1(0)
12:124950060	12	124950060	A	?	8	1.466e-05	0.0001079	1.924	1.9411	0.3517	10.11	1.456	1.932	5.633	4.771	2.135	NA	18.98	0.5715	1.679	rs3782281	FAM101A(+149.5kb)|NCOR2(0)|ZNF664-FAM101A(+149.5kb)
13:83602749	13	83602749	T	?	9	1.494e-05	1.494e-05	1.4593	1.4593	0.438	0	2.63	1.46	1.501	1.161	1.815	6.296	0.7134	1.508	1.166	rs2639507	.
12:124948568	12	124948568	G	?	8	1.521e-05	0.0001135	1.9222	1.9396	0.3507	10.24	1.456	1.932	5.633	4.771	2.135	NA	18.98	0.5715	1.673	rs74757820	FAM101A(+148kb)|NCOR2(0)|ZNF664-FAM101A(+148kb)
13:83444059	13	83444059	C	?	9	1.524e-05	0.0002011	1.4758	1.4685	0.3321	12.3	1.841	1.621	2.093	1.107	1.796	4.217	0.5849	1.184	1.015	rs1906322	.
13:83445592	13	83445592	G	?	9	1.524e-05	0.0002011	1.4758	1.4685	0.3321	12.3	1.841	1.621	2.093	1.107	1.796	4.217	0.5849	1.184	1.015	rs4885852	.
12:124948054	12	124948054	A	?	8	1.577e-05	0.0001021	1.9229	1.9398	0.3565	9.51	1.456	1.906	5.633	4.771	2.135	NA	18.98	0.5715	1.705	rs73225437	FAM101A(+147.5kb)|NCOR2(0)|ZNF664-FAM101A(+147.5kb)
2:237234084	2	237234084	C	?	9	1.608e-05	4.191e-05	0.7706	0.7634	0.3766	7.04	0.6997	0.8789	0.6479	0.6625	0.7726	1.423	0.5276	0.8731	0.6109	rs7596805	AGAP1(+193.6kb)|ASB18(+61.1kb)|GBX2(+157.4kb)|IQCA1(0)
6:105086591	6	105086591	G	?	9	1.648e-05	1.648e-05	0.6793	0.6793	0.5033	0	0.8203	0.6094	0.6522	0.931	0.5927	1.339	1.043	0.3363	0.8278	rs9499906	HACE1(-89.38kb)
6:105086125	6	105086125	T	?	9	1.663e-05	1.663e-05	0.6794	0.6794	0.5024	0	0.8203	0.6094	0.6522	0.931	0.5927	1.339	1.043	0.3363	0.8286	rs6940468	HACE1(-89.84kb)
6:105086155	6	105086155	A	?	9	1.663e-05	1.663e-05	0.6794	0.6794	0.5024	0	0.8203	0.6094	0.6522	0.931	0.5927	1.339	1.043	0.3363	0.8286	rs6939186	HACE1(-89.81kb)
6:105087258	6	105087258	T	?	9	1.663e-05	1.663e-05	0.6794	0.6794	0.5024	0	0.8203	0.6094	0.6522	0.931	0.5927	1.339	1.043	0.3363	0.8286	rs7741979	HACE1(-88.71kb)
13:83600152	13	83600152	C	?	9	1.677e-05	1.677e-05	1.4395	1.4395	0.6624	0	1.804	1.402	1.53	1.423	1.753	6.033	1.488	1.3	1.168	rs2262462	.
13:83440305	13	83440305	C	?	9	1.695e-05	0.0002761	1.4735	1.4652	0.3201	13.7	1.841	1.621	2.093	1.083	1.796	4.218	0.5849	1.184	1.015	rs9531388	.
13:83440350	13	83440350	A	?	9	1.695e-05	0.0002761	1.4735	1.4652	0.3201	13.7	1.841	1.621	2.093	1.083	1.796	4.218	0.5849	1.184	1.015	rs9546246	.
13:83440933	13	83440933	A	?	9	1.695e-05	0.0002761	1.4735	1.4652	0.3201	13.7	1.841	1.621	2.093	1.083	1.796	4.218	0.5849	1.184	1.015	rs9546247	.
13:83441536	13	83441536	T	?	9	1.695e-05	0.0002761	1.4735	1.4652	0.3201	13.7	1.841	1.621	2.093	1.083	1.796	4.218	0.5849	1.184	1.015	rs9531389	.
13:83441554	13	83441554	T	?	9	1.695e-05	0.0002761	1.4735	1.4652	0.3201	13.7	1.841	1.621	2.093	1.083	1.796	4.218	0.5849	1.184	1.015	rs9546248	.
13:83441689	13	83441689	A	?	9	1.695e-05	0.0002761	1.4735	1.4652	0.3201	13.7	1.841	1.621	2.093	1.083	1.796	4.218	0.5849	1.184	1.015	rs9531390	.
13:83441767	13	83441767	C	?	9	1.695e-05	0.0002761	1.4735	1.4652	0.3201	13.7	1.841	1.621	2.093	1.083	1.796	4.218	0.5849	1.184	1.015	rs9546249	.
13:83441971	13	83441971	C	?	9	1.695e-05	0.0002761	1.4735	1.4652	0.3201	13.7	1.841	1.621	2.093	1.083	1.796	4.218	0.5849	1.184	1.015	rs9546250	.
13:83442204	13	83442204	G	?	9	1.695e-05	0.0002761	1.4735	1.4652	0.3201	13.7	1.841	1.621	2.093	1.083	1.796	4.218	0.5849	1.184	1.015	rs9546251	.
13:83442423	13	83442423	T	?	9	1.695e-05	0.0002761	1.4735	1.4652	0.3201	13.7	1.841	1.621	2.093	1.083	1.796	4.218	0.5849	1.184	1.015	rs9531391	.
12:91973366	12	91973366	T	?	8	1.74e-05	1.74e-05	2.2609	2.2609	0.7815	0	0.7332	1.72	2.385	4.126	3.933	2.566	NA	2.272	2	rs73218614	.
15:68133243	15	68133243	C	?	6	1.805e-05	1.805e-05	3.1799	3.1799	0.5769	0	NA	1.919	5.026	1.653	5.084	NA	NA	1.764	5.486	rs540172052	MAP2K5(+33.79kb)|SKOR1(+7.069kb)
13:83505743	13	83505743	C	?	9	1.809e-05	1.825e-05	1.4527	1.4527	0.4331	0.04	2.63	1.456	1.501	1.161	1.88	5.338	0.7134	1.508	1.134	rs1471932	.
3:101719198	3	101719198	G	?	9	1.829e-05	1.829e-05	1.3006	1.3006	0.8862	0	1.481	1.263	1.623	1.307	1.324	1.018	1.522	1.987	1.169	rs771796	LOC152225(+2.428kb)|NFKBIZ(+139.3kb)|NXPE3(+172.1kb)
3:101719584	3	101719584	G	?	9	1.829e-05	1.829e-05	1.3006	1.3006	0.8862	0	1.481	1.263	1.623	1.307	1.324	1.018	1.522	1.987	1.169	rs771799	LOC152225(+2.814kb)|NFKBIZ(+139.7kb)|NXPE3(+172.5kb)
3:101719825	3	101719825	T	?	9	1.829e-05	1.829e-05	1.3006	1.3006	0.8862	0	1.481	1.263	1.623	1.307	1.324	1.018	1.522	1.987	1.169	rs771800	LOC152225(+3.055kb)|NFKBIZ(+140kb)|NXPE3(+172.8kb)
13:83535971	13	83535971	G	?	9	1.874e-05	2.724e-05	1.5315	1.5318	0.4196	1.76	2.54	1.618	1.574	1.391	1.816	8.122	0.8122	1.227	1.096	rs2255391	.
13:83536018	13	83536018	G	?	9	1.874e-05	2.724e-05	1.5315	1.5318	0.4196	1.76	2.54	1.618	1.574	1.391	1.816	8.122	0.8122	1.227	1.096	rs2633027	.
13:83537533	13	83537533	C	?	9	1.874e-05	2.724e-05	1.5315	1.5318	0.4196	1.76	2.54	1.618	1.574	1.391	1.816	8.122	0.8122	1.227	1.096	rs976078	.
13:83538950	13	83538950	T	?	9	1.874e-05	2.724e-05	1.5315	1.5318	0.4196	1.76	2.54	1.618	1.574	1.391	1.816	8.122	0.8122	1.227	1.096	rs2633030	.
9:6507598	9	6507598	G	?	9	1.888e-05	1.888e-05	1.462	1.462	0.5316	0	1.213	1.294	2.454	1.444	1.608	4.156	0.7681	0.958	1.574	rs7847675	GLDC(-24.86kb)|TPD52L3(+175.7kb)|UHRF2(+0.547kb)
13:83507261	13	83507261	C	?	9	1.939e-05	3.089e-05	1.5306	1.5309	0.416	2.21	2.54	1.618	1.574	1.391	1.816	8.583	0.8122	1.227	1.096	rs9531404	.
13:83513894	13	83513894	T	?	9	1.939e-05	3.089e-05	1.5306	1.5309	0.416	2.21	2.54	1.618	1.574	1.391	1.816	8.583	0.8122	1.227	1.096	rs1386702	.
13:83514492	13	83514492	C	?	9	1.939e-05	3.089e-05	1.5306	1.5309	0.416	2.21	2.54	1.618	1.574	1.391	1.816	8.583	0.8122	1.227	1.096	rs2329261	.
13:83516210	13	83516210	A	?	9	1.939e-05	3.089e-05	1.5306	1.5309	0.416	2.21	2.54	1.618	1.574	1.391	1.816	8.583	0.8122	1.227	1.096	rs1906325	.
13:83518761	13	83518761	T	?	9	1.939e-05	3.089e-05	1.5306	1.5309	0.416	2.21	2.54	1.618	1.574	1.391	1.816	8.583	0.8122	1.227	1.096	rs2633024	.
13:83528238	13	83528238	C	?	9	1.939e-05	3.089e-05	1.5306	1.5309	0.416	2.21	2.54	1.618	1.574	1.391	1.816	8.583	0.8122	1.227	1.096	rs1843970	.
13:83492956	13	83492956	T	?	9	1.946e-05	1.946e-05	1.4515	1.4515	0.5551	0	2.056	1.464	1.501	1.134	1.82	5.518	0.7134	1.508	1.18	rs1473483	.
13:83708451	13	83708451	G	?	9	1.957e-05	0.0006435	1.3381	1.3701	0.1935	28.23	1.234	1.23	1.58	1.101	1.853	5.211	0.6573	1.505	1.207	rs2131317	.
3:133236968	3	133236968	A	?	8	1.993e-05	1.993e-05	2.1648	2.1648	0.5266	0	5.769	1.794	0.5109	2.309	2.814	NA	9.378	4.271	2.079	rs62280381	BFSP2(+42.91kb)|CDV3(-55.46kb)|TMEM108(+120.3kb)|TOPBP1(-82.48kb)
14:78278886	14	78278886	G	?	9	1.994e-05	0.001651	1.3043	1.2694	0.2794	18.36	0.8657	1.469	1.249	1.331	1.046	1.626	1.547	0.6489	1.407	rs4903646	ADCK1(0)|ALKBH1(+104.5kb)|C14orf178(+42.8kb)|SLIRP(+94.94kb)|SNW1(+51.39kb)|SPTLC2(+195.8kb)
12:124947177	12	124947177	A	?	8	1.998e-05	0.0001207	1.9075	1.9262	0.3565	9.51	1.456	1.863	5.633	4.771	2.135	NA	18.98	0.5715	1.713	rs112593776	FAM101A(+146.6kb)|NCOR2(0)|ZNF664-FAM101A(+146.6kb)
7:67762354	7	67762354	C	?	9	2.022e-05	2.022e-05	1.3555	1.3555	0.4769	0	0.8063	1.198	1.541	1.287	1.512	0.8353	0.9898	1.789	1.805	rs3108077	.
13:83442839	13	83442839	G	?	9	2.034e-05	0.0004686	1.4679	1.4583	0.2972	16.33	1.841	1.621	2.093	1.048	1.796	4.218	0.5849	1.184	1.015	rs9546252	.
13:83443235	13	83443235	T	?	9	2.034e-05	0.0004686	1.4679	1.4583	0.2972	16.33	1.841	1.621	2.093	1.048	1.796	4.218	0.5849	1.184	1.015	rs2050581	.
13:83443465	13	83443465	A	?	9	2.034e-05	0.0004686	1.4679	1.4583	0.2972	16.33	1.841	1.621	2.093	1.048	1.796	4.218	0.5849	1.184	1.015	rs2876785	.
13:83443507	13	83443507	C	?	9	2.034e-05	0.0004686	1.4679	1.4583	0.2972	16.33	1.841	1.621	2.093	1.048	1.796	4.218	0.5849	1.184	1.015	rs2876786	.
13:83443532	13	83443532	A	?	9	2.034e-05	0.0004686	1.4679	1.4583	0.2972	16.33	1.841	1.621	2.093	1.048	1.796	4.218	0.5849	1.184	1.015	rs2046673	.
13:83458832	13	83458832	G	?	9	2.07e-05	0.0003675	1.4669	1.4617	0.3065	15.25	1.499	1.585	2.093	1.148	1.818	4.993	0.5849	1.184	1.006	rs1118131	.
13:83458884	13	83458884	C	?	9	2.07e-05	0.0003675	1.4669	1.4617	0.3065	15.25	1.499	1.585	2.093	1.148	1.818	4.993	0.5849	1.184	1.006	rs4885855	.
9:6477350	9	6477350	A	?	9	2.074e-05	6.009e-05	1.4711	1.4867	0.3792	6.73	1.107	1.307	2.304	1.309	1.774	5.936	0.7682	0.958	1.576	rs7034328	GLDC(-55.11kb)|TPD52L3(+145.4kb)|UHRF2(0)
13:83541688	13	83541688	T	?	9	2.078e-05	2.078e-05	1.448	1.448	0.4592	0	2.056	1.461	1.501	1.134	1.857	6.079	0.7134	1.508	1.148	rs1487776	.
13:83551268	13	83551268	T	?	9	2.078e-05	2.078e-05	1.448	1.448	0.4592	0	2.056	1.461	1.501	1.134	1.857	6.079	0.7134	1.508	1.148	rs2859761	.
13:83555902	13	83555902	A	?	9	2.078e-05	2.078e-05	1.448	1.448	0.4592	0	2.056	1.461	1.501	1.134	1.857	6.079	0.7134	1.508	1.148	rs1012691	.
13:83563167	13	83563167	A	?	9	2.078e-05	2.078e-05	1.448	1.448	0.4592	0	2.056	1.461	1.501	1.134	1.857	6.079	0.7134	1.508	1.148	rs1906321	.
13:83581428	13	83581428	T	?	9	2.078e-05	2.078e-05	1.448	1.448	0.4592	0	2.056	1.461	1.501	1.134	1.857	6.079	0.7134	1.508	1.148	rs2807473	.
12:124946961	12	124946961	A	?	8	2.096e-05	0.0001283	1.9052	1.9241	0.3554	9.65	1.456	1.863	5.633	4.771	2.135	NA	18.98	0.5715	1.705	rs151004874	FAM101A(+146.4kb)|NCOR2(0)|ZNF664-FAM101A(+146.4kb)
13:83541523	13	83541523	C	?	9	2.14e-05	2.379e-05	1.5257	1.5257	0.4296	0.49	2.54	1.612	1.574	1.391	1.786	8.122	0.8122	1.227	1.096	rs1487775	.
13:83547187	13	83547187	A	?	9	2.14e-05	2.379e-05	1.5257	1.5257	0.4296	0.49	2.54	1.612	1.574	1.391	1.786	8.122	0.8122	1.227	1.096	rs2087207	.
13:83495370	13	83495370	A	?	9	2.164e-05	2.164e-05	1.4483	1.4483	0.5422	0	2.056	1.464	1.501	1.134	1.82	5.518	0.7134	1.508	1.168	rs9531399	.
5:172785040	5	172785040	T	?	9	2.171e-05	2.171e-05	1.5268	1.5268	0.6634	0	0.8921	1.275	2.005	2.275	1.566	1.601	0	1.345	1.94	rs10065457	BNIP1(+193.6kb)|NKX2-5(+122.7kb)|STC2(+28.53kb)
6:105060188	6	105060188	A	?	9	2.191e-05	0.002952	0.6788	0.6908	0.1849	29.25	0.9711	0.6207	0.6667	1.134	0.5485	1.406	0.4054	0.2472	0.7715	rs6920587	HACE1(-115.8kb)
6:105060930	6	105060930	T	?	9	2.191e-05	0.002952	0.6788	0.6908	0.1849	29.25	0.9711	0.6207	0.6667	1.134	0.5485	1.406	0.4054	0.2472	0.7715	rs7771800	HACE1(-115kb)
15:33274162	15	33274162	G	?	9	2.199e-05	2.199e-05	2.1216	2.1216	0.695	0	10.26	1.813	4.371	2.93	3.18	0.9226	0	0.3777	1.867	rs34176885	FMN1(0)
15:33274535	15	33274535	C	?	9	2.199e-05	2.199e-05	2.1216	2.1216	0.695	0	10.26	1.813	4.371	2.93	3.18	0.9226	0	0.3777	1.867	rs71462833	FMN1(0)
15:33276215	15	33276215	T	?	9	2.199e-05	2.199e-05	2.1216	2.1216	0.695	0	10.26	1.813	4.371	2.93	3.18	0.9226	0	0.3777	1.867	rs76546227	FMN1(0)
15:33267950	15	33267950	T	?	9	2.202e-05	2.202e-05	2.1215	2.1215	0.6946	0	10.26	1.813	4.371	2.93	3.18	0.9206	0	0.3777	1.867	rs12900790	FMN1(0)
6:8932246	6	8932246	T	?	9	2.208e-05	2.208e-05	1.7825	1.7825	0.8501	0	2.101	1.796	3.412	2.254	1.361	1.127	0	0.6349	2.133	rs9328511	LOC100506207(+146.6kb)
3:101720536	3	101720536	A	?	9	2.232e-05	2.232e-05	1.2972	1.2972	0.8874	0	1.481	1.263	1.623	1.307	1.3	1.018	1.522	1.987	1.169	rs1081617	LOC152225(+3.766kb)|NFKBIZ(+140.7kb)|NXPE3(+173.5kb)
21:40451612	21	40451612	A	?	9	2.249e-05	2.249e-05	1.3222	1.3222	0.7918	0	1.098	1.306	1.087	1.081	1.398	1.774	2.4	2.104	1.429	rs2836875	BRWD1(-105.8kb)|PSMG1(-95.76kb)
6:8936505	6	8936505	A	?	9	2.25e-05	2.25e-05	1.7852	1.7852	0.8492	0	2.101	1.796	3.412	2.254	1.361	1.148	0	0.6349	2.161	rs9379263	LOC100506207(+150.8kb)
3:148085522	3	148085522	A	?	8	2.27e-05	2.27e-05	1.2899	1.2899	0.8892	0	1.24	1.244	1.222	1.354	1.21	2.592	NA	1.771	1.329	rs4528908	.
13:83672039	13	83672039	C	?	9	2.279e-05	0.0002814	1.3485	1.3751	0.2659	19.89	1.405	1.256	1.448	1.168	1.629	10.54	1.444	1.594	1.236	rs2807418	.
14:78280608	14	78280608	G	?	9	2.295e-05	0.002239	1.3018	1.2637	0.2699	19.44	0.8657	1.482	1.249	1.294	1.046	1.626	1.547	0.6489	1.391	rs12590356	ADCK1(0)|ALKBH1(+106.3kb)|C14orf178(+44.52kb)|SLIRP(+96.67kb)|SNW1(+53.11kb)|SPTLC2(+197.5kb)
6:8932296	6	8932296	C	?	9	2.305e-05	2.305e-05	1.7799	1.7799	0.8528	0	2.101	1.796	3.412	2.254	1.361	1.127	0	0.6349	2.114	rs9328512	LOC100506207(+146.6kb)
13:83618131	13	83618131	C	?	9	2.314e-05	0.0003419	1.3481	1.3766	0.2512	21.58	1.357	1.267	1.448	1.213	1.65	10.52	1.444	1.594	1.187	rs1492732	.
6:105059335	6	105059335	G	?	9	2.317e-05	0.003116	0.6797	0.6917	0.1828	29.49	0.9711	0.6207	0.6667	1.134	0.5485	1.406	0.4054	0.2472	0.7768	rs9499894	HACE1(-116.6kb)
3:148048835	3	148048835	A	?	8	2.336e-05	2.336e-05	1.2895	1.2895	0.8958	0	1.24	1.248	1.222	1.354	1.21	2.575	NA	1.771	1.318	rs9874416	.
6:8936897	6	8936897	A	?	9	2.366e-05	2.366e-05	1.7862	1.7862	0.845	0	2.101	1.79	3.412	2.254	1.361	1.148	0	0.6349	2.19	rs4407749	LOC100506207(+151.2kb)
6:8937023	6	8937023	G	?	9	2.366e-05	2.366e-05	1.7862	1.7862	0.845	0	2.101	1.79	3.412	2.254	1.361	1.148	0	0.6349	2.19	rs4573129	LOC100506207(+151.3kb)
13:83502205	13	83502205	C	?	9	2.386e-05	2.386e-05	1.4451	1.4451	0.4663	0	2.63	1.456	1.501	1.161	1.82	5.338	0.7134	1.508	1.134	rs9546275	.
13:83504634	13	83504634	C	?	9	2.386e-05	2.386e-05	1.4451	1.4451	0.4663	0	2.63	1.456	1.501	1.161	1.82	5.338	0.7134	1.508	1.134	rs9546276	.
7:67696924	7	67696924	C	?	9	2.393e-05	3.215e-05	1.369	1.3749	0.4165	2.15	0.7836	1.171	2.097	1.313	1.488	1.568	1.216	1.973	1.742	rs11980310	.
7:67697765	7	67697765	A	?	9	2.393e-05	3.215e-05	1.369	1.3749	0.4165	2.15	0.7836	1.171	2.097	1.313	1.488	1.568	1.216	1.973	1.742	rs13308446	.
7:67697887	7	67697887	A	?	9	2.393e-05	3.215e-05	1.369	1.3749	0.4165	2.15	0.7836	1.171	2.097	1.313	1.488	1.568	1.216	1.973	1.742	rs3113093	.
15:33265956	15	33265956	T	?	9	2.397e-05	2.397e-05	2.1152	2.1152	0.7168	0	9.651	1.813	4.371	2.93	3.18	0.9206	0	0.3777	1.867	rs17228999	FMN1(0)
13:83435972	13	83435972	A	?	9	2.4e-05	0.0001394	1.4598	1.4541	0.3677	8.11	1.689	1.61	1.979	1.083	1.788	4.117	1.46	1.184	0.984	rs9531387	.
10:15023546	10	15023546	G	?	8	2.402e-05	2.402e-05	1.6665	1.6665	0.6317	0	2.029	1.635	1.793	1.439	2.227	1.287	NA	9.825	1.119	rs192237534	ACBD7(-93.93kb)|C10orf111(-113.8kb)|CDNF(+143.6kb)|DCLRE1C(+27.45kb)|HSPA14(+109.8kb)|MEIG1(+8.696kb)|NMT2(-124.2kb)|OLAH(-62.35kb)|PPIAP30(-173.2kb)|RPP38(-115.6kb)|SUV39H2(+77.24kb)
15:33267971	15	33267971	A	?	8	2.404e-05	2.404e-05	2.0783	2.0783	0.618	0	10.26	1.813	4.371	2.93	2.794	0.8828	NA	0.3777	1.859	rs12899690	FMN1(0)
13:83562302	13	83562302	A	?	9	2.441e-05	4.366e-05	1.5218	1.5222	0.4109	2.84	2.54	1.612	1.574	1.391	1.786	8.122	0.8122	1.227	1.078	rs2633012	.
13:83563369	13	83563369	A	?	9	2.441e-05	4.366e-05	1.5218	1.5222	0.4109	2.84	2.54	1.612	1.574	1.391	1.786	8.122	0.8122	1.227	1.078	rs2633014	.
13:83569920	13	83569920	T	?	9	2.441e-05	4.366e-05	1.5218	1.5222	0.4109	2.84	2.54	1.612	1.574	1.391	1.786	8.122	0.8122	1.227	1.078	rs2329262	.
13:83578763	13	83578763	G	?	9	2.441e-05	4.366e-05	1.5218	1.5222	0.4109	2.84	2.54	1.612	1.574	1.391	1.786	8.122	0.8122	1.227	1.078	rs2807470	.
13:83582971	13	83582971	T	?	9	2.441e-05	4.366e-05	1.5218	1.5222	0.4109	2.84	2.54	1.612	1.574	1.391	1.786	8.122	0.8122	1.227	1.078	rs2807474	.
13:83587734	13	83587734	C	?	9	2.441e-05	4.366e-05	1.5218	1.5222	0.4109	2.84	2.54	1.612	1.574	1.391	1.786	8.122	0.8122	1.227	1.078	rs13378392	.
13:83589570	13	83589570	C	?	9	2.441e-05	4.366e-05	1.5218	1.5222	0.4109	2.84	2.54	1.612	1.574	1.391	1.786	8.122	0.8122	1.227	1.078	rs2639498	.
13:83591643	13	83591643	G	?	9	2.441e-05	4.366e-05	1.5218	1.5222	0.4109	2.84	2.54	1.612	1.574	1.391	1.786	8.122	0.8122	1.227	1.078	rs2807475	.
17:31322254	17	31322254	G	?	8	2.455e-05	2.455e-05	1.3611	1.3611	0.8829	0	1.127	1.338	1.22	1.389	1.751	0.9283	NA	1.085	1.317	rs28964	ASIC2(-17.85kb)|MYO1D(+118.4kb)|SPACA3(0)|TMEM98(+53.59kb)
3:101715509	3	101715509	A	?	9	2.465e-05	2.465e-05	1.2954	1.2954	0.894	0	1.422	1.263	1.623	1.307	1.3	1.018	1.522	1.987	1.169	rs771792	LOC152225(0)|NFKBIZ(+135.6kb)|NXPE3(+168.4kb)
20:23628728	20	23628728	C	?	9	2.493e-05	2.493e-05	1.6292	1.6292	0.943	0	0.5438	1.685	1.495	1.934	1.511	2.42	2.396	1.522	1.616	rs113193905	CST1(-99.46kb)|CST2(-175.7kb)|CST3(+10.15kb)|CST4(-37.55kb)|CST8(+152.1kb)|CST9(+42.12kb)|CST9L(+79.34kb)|CST11(+195.2kb)|CST13P(+106.1kb)
3:148061483	3	148061483	G	?	8	2.502e-05	2.502e-05	1.2883	1.2883	0.9029	0	1.24	1.244	1.222	1.354	1.21	2.575	NA	1.734	1.326	rs6796063	.
13:83459857	13	83459857	G	?	9	2.522e-05	0.0006566	1.4615	1.4557	0.2777	18.55	1.499	1.585	2.093	1.148	1.818	4.993	0.5849	1.184	0.9822	rs9546255	.
14:78278910	14	78278910	C	?	9	2.534e-05	0.001251	1.2897	1.2558	0.3138	14.42	1.106	1.534	1.123	1.095	1.102	1.556	1.525	0.7318	1.302	rs4903647	ADCK1(0)|ALKBH1(+104.6kb)|C14orf178(+42.82kb)|SLIRP(+94.97kb)|SNW1(+51.41kb)|SPTLC2(+195.8kb)
13:83459926	13	83459926	C	?	9	2.538e-05	0.0006679	1.4613	1.4556	0.2768	18.65	1.499	1.585	2.093	1.148	1.818	4.993	0.5849	1.184	0.9815	rs9546256	.
13:83603166	13	83603166	T	?	9	2.547e-05	2.547e-05	1.4422	1.4422	0.4922	0	2.056	1.452	1.501	1.134	1.815	6.079	0.7134	1.508	1.157	rs2807485	.
13:83539201	13	83539201	C	?	9	2.552e-05	2.552e-05	1.4421	1.4421	0.4598	0	2.056	1.446	1.501	1.134	1.857	6.079	0.7134	1.508	1.148	rs1487774	.
13:83542197	13	83542197	T	?	9	2.552e-05	2.552e-05	1.4421	1.4421	0.4598	0	2.056	1.446	1.501	1.134	1.857	6.079	0.7134	1.508	1.148	rs9602023	.
13:83543092	13	83543092	T	?	9	2.552e-05	2.552e-05	1.4421	1.4421	0.4598	0	2.056	1.446	1.501	1.134	1.857	6.079	0.7134	1.508	1.148	rs2807428	.
13:83559945	13	83559945	T	?	9	2.552e-05	2.552e-05	1.4421	1.4421	0.4598	0	2.056	1.446	1.501	1.134	1.857	6.079	0.7134	1.508	1.148	rs1038617	.
13:83575125	13	83575125	T	?	9	2.552e-05	2.552e-05	1.4421	1.4421	0.4598	0	2.056	1.446	1.501	1.134	1.857	6.079	0.7134	1.508	1.148	rs2633049	.
13:83577864	13	83577864	C	?	9	2.552e-05	2.552e-05	1.4421	1.4421	0.4598	0	2.056	1.446	1.501	1.134	1.857	6.079	0.7134	1.508	1.148	rs972175	.
13:83534691	13	83534691	A	?	9	2.569e-05	2.569e-05	1.4424	1.4424	0.4349	0	2.056	1.448	1.501	1.134	1.88	6.079	0.7134	1.508	1.137	rs1487773	.
13:83537146	13	83537146	A	?	9	2.569e-05	2.569e-05	1.4424	1.4424	0.4349	0	2.056	1.448	1.501	1.134	1.88	6.079	0.7134	1.508	1.137	rs2255257	.
13:83530927	13	83530927	A	?	9	2.6e-05	2.714e-05	1.4422	1.4423	0.4318	0.21	2.056	1.448	1.501	1.134	1.88	6.242	0.7134	1.508	1.137	rs2633025	.
13:83531249	13	83531249	T	?	9	2.6e-05	2.714e-05	1.4422	1.4423	0.4318	0.21	2.056	1.448	1.501	1.134	1.88	6.242	0.7134	1.508	1.137	rs2200640	.
6:105045863	6	105045863	T	?	9	2.6e-05	0.004844	0.6791	0.6881	0.1381	34.99	0.9711	0.6307	0.6667	1.189	0.49	1.379	0.405	0.2472	0.7657	rs2066015	HACE1(-130.1kb)
13:83604505	13	83604505	T	?	9	2.617e-05	2.617e-05	1.4414	1.4414	0.4889	0	2.056	1.452	1.501	1.134	1.815	6.079	0.7134	1.508	1.154	rs2201207	.
13:83604686	13	83604686	T	?	9	2.617e-05	2.617e-05	1.4414	1.4414	0.4889	0	2.056	1.452	1.501	1.134	1.815	6.079	0.7134	1.508	1.154	rs2807487	.
8:29063172	8	29063172	T	?	9	2.672e-05	2.672e-05	1.2908	1.2908	0.6434	0	1.292	1.389	1.05	1.355	1.519	0.6555	0.8652	1.154	1.118	rs6991271	DUSP4(-127.4kb)|HMBOX1(+152.9kb)|KIF13B(0)
8:29063483	8	29063483	T	?	9	2.672e-05	2.672e-05	1.2908	1.2908	0.6434	0	1.292	1.389	1.05	1.355	1.519	0.6555	0.8652	1.154	1.118	rs11990580	DUSP4(-127.1kb)|HMBOX1(+153.2kb)|KIF13B(0)
13:83511545	13	83511545	T	?	9	2.679e-05	2.679e-05	1.4413	1.4413	0.4884	0	2.056	1.448	1.501	1.134	1.88	5.339	0.7134	1.508	1.138	rs9285327	.
6:105065533	6	105065533	T	?	9	2.699e-05	0.002004	0.6823	0.6911	0.22	25.15	0.9711	0.6331	0.6667	1.092	0.5485	1.406	0.4054	0.2472	0.7764	rs9499897	HACE1(-110.4kb)
6:105066276	6	105066276	T	?	9	2.699e-05	0.002004	0.6823	0.6911	0.22	25.15	0.9711	0.6331	0.6667	1.092	0.5485	1.406	0.4054	0.2472	0.7764	rs7762301	HACE1(-109.7kb)
13:83487914	13	83487914	G	?	9	2.723e-05	2.723e-05	1.5197	1.5197	0.434	0	2.54	1.618	1.574	1.391	1.746	8.583	0.8122	1.227	1.094	rs9546266	.
13:83496977	13	83496977	G	?	9	2.723e-05	2.723e-05	1.5197	1.5197	0.434	0	2.54	1.618	1.574	1.391	1.746	8.583	0.8122	1.227	1.094	rs9602009	.
6:8930820	6	8930820	G	?	9	2.728e-05	2.728e-05	1.783	1.783	0.8512	0	1.25	1.836	3.412	2.254	1.396	1.148	0	0.6349	2.133	rs7773312	LOC100506207(+145.1kb)
6:8930821	6	8930821	C	?	9	2.728e-05	2.728e-05	1.783	1.783	0.8512	0	1.25	1.836	3.412	2.254	1.396	1.148	0	0.6349	2.133	rs7748407	LOC100506207(+145.1kb)
6:105055044	6	105055044	T	?	9	2.733e-05	0.002935	0.6822	0.6928	0.192	28.41	0.9711	0.6268	0.6667	1.134	0.5485	1.379	0.4054	0.2472	0.7768	rs9399892	HACE1(-120.9kb)
6:105057115	6	105057115	A	?	9	2.733e-05	0.002935	0.6822	0.6928	0.192	28.41	0.9711	0.6268	0.6667	1.134	0.5485	1.379	0.4054	0.2472	0.7768	rs9391216	HACE1(-118.9kb)
6:105057791	6	105057791	C	?	9	2.733e-05	0.002935	0.6822	0.6928	0.192	28.41	0.9711	0.6268	0.6667	1.134	0.5485	1.379	0.4054	0.2472	0.7768	rs6931261	HACE1(-118.2kb)
6:105058198	6	105058198	T	?	9	2.733e-05	0.002935	0.6822	0.6928	0.192	28.41	0.9711	0.6268	0.6667	1.134	0.5485	1.379	0.4054	0.2472	0.7768	rs6909870	HACE1(-117.8kb)
7:67693746	7	67693746	A	?	9	2.742e-05	3.937e-05	1.3659	1.373	0.4125	2.65	0.7836	1.171	2.097	1.284	1.488	1.568	1.216	1.973	1.742	rs3108042	.
7:67693873	7	67693873	T	?	9	2.742e-05	3.937e-05	1.3659	1.373	0.4125	2.65	0.7836	1.171	2.097	1.284	1.488	1.568	1.216	1.973	1.742	rs3113069	.
7:67694052	7	67694052	C	?	9	2.742e-05	3.937e-05	1.3659	1.373	0.4125	2.65	0.7836	1.171	2.097	1.284	1.488	1.568	1.216	1.973	1.742	rs3113074	.
7:67695137	7	67695137	A	?	9	2.742e-05	3.937e-05	1.3659	1.373	0.4125	2.65	0.7836	1.171	2.097	1.284	1.488	1.568	1.216	1.973	1.742	rs3113083	.
7:67695593	7	67695593	T	?	9	2.742e-05	3.937e-05	1.3659	1.373	0.4125	2.65	0.7836	1.171	2.097	1.284	1.488	1.568	1.216	1.973	1.742	rs3113085	.
7:67695640	7	67695640	G	?	9	2.742e-05	3.937e-05	1.3659	1.373	0.4125	2.65	0.7836	1.171	2.097	1.284	1.488	1.568	1.216	1.973	1.742	rs3108057	.
7:67695824	7	67695824	G	?	9	2.742e-05	3.937e-05	1.3659	1.373	0.4125	2.65	0.7836	1.171	2.097	1.284	1.488	1.568	1.216	1.973	1.742	rs3108064	.
7:67696973	7	67696973	G	?	9	2.742e-05	3.937e-05	1.3659	1.373	0.4125	2.65	0.7836	1.171	2.097	1.284	1.488	1.568	1.216	1.973	1.742	rs11976217	.
7:67697061	7	67697061	G	?	9	2.742e-05	3.937e-05	1.3659	1.373	0.4125	2.65	0.7836	1.171	2.097	1.284	1.488	1.568	1.216	1.973	1.742	rs113865491	.
7:67697285	7	67697285	A	?	9	2.742e-05	3.937e-05	1.3659	1.373	0.4125	2.65	0.7836	1.171	2.097	1.284	1.488	1.568	1.216	1.973	1.742	rs75849809	.
7:67697466	7	67697466	A	?	9	2.742e-05	3.937e-05	1.3659	1.373	0.4125	2.65	0.7836	1.171	2.097	1.284	1.488	1.568	1.216	1.973	1.742	rs111523974	.
7:67758840	7	67758840	G	?	9	2.77e-05	2.77e-05	1.3487	1.3487	0.5476	0	0.8063	1.188	1.496	1.287	1.512	1.037	0.9898	1.789	1.767	rs3108073	.
13:83600572	13	83600572	T	?	9	2.813e-05	4.592e-05	1.5171	1.5176	0.4142	2.44	2.54	1.599	1.574	1.391	1.786	8.122	0.8122	1.227	1.078	rs1586890	.
7:67693256	7	67693256	G	?	9	2.864e-05	3.858e-05	1.3652	1.3711	0.4162	2.19	0.7836	1.171	2.097	1.284	1.488	1.568	1.216	1.973	1.739	rs3113057	.
7:67760561	7	67760561	C	?	9	2.868e-05	2.868e-05	1.3478	1.3478	0.5037	0	0.8063	1.18	1.496	1.287	1.512	1.037	0.9898	1.789	1.79	rs3108075	.
6:8930555	6	8930555	G	?	9	2.97e-05	2.97e-05	1.7622	1.7622	0.8502	0	2.101	1.759	3.412	2.254	1.361	1.101	0	0.6349	2.114	rs9379262	LOC100506207(+144.9kb)
13:83680481	13	83680481	G	?	9	2.989e-05	0.0003951	1.3431	1.3726	0.2511	21.59	1.405	1.247	1.41	1.168	1.65	10.54	1.444	1.594	1.231	rs265657	.
13:83681695	13	83681695	A	?	9	2.989e-05	0.0003951	1.3431	1.3726	0.2511	21.59	1.405	1.247	1.41	1.168	1.65	10.54	1.444	1.594	1.231	rs265672	.
13:83682438	13	83682438	G	?	9	2.989e-05	0.0003951	1.3431	1.3726	0.2511	21.59	1.405	1.247	1.41	1.168	1.65	10.54	1.444	1.594	1.231	rs265670	.
3:121966156	3	121966156	G	?	9	2.996e-05	0.002308	0.6953	0.722	0.2759	18.76	2.077	0.5872	0.8619	0.8875	0.7839	0.4952	0.304	0.6311	0.6417	rs7635112	CASR(0)|CCDC58(-112.3kb)|CD86(+126.2kb)|CSTA(-77.85kb)|FAM162A(-136.9kb)|KPNA1(-174.6kb)|WDR5B(-164.5kb)
3:121966233	3	121966233	G	?	9	2.996e-05	0.002308	0.6953	0.722	0.2759	18.76	2.077	0.5872	0.8619	0.8875	0.7839	0.4952	0.304	0.6311	0.6417	rs7635128	CASR(0)|CCDC58(-112.2kb)|CD86(+126.2kb)|CSTA(-77.78kb)|FAM162A(-136.8kb)|KPNA1(-174.5kb)|WDR5B(-164.5kb)
3:121967297	3	121967297	G	?	9	2.996e-05	0.002308	0.6953	0.722	0.2759	18.76	2.077	0.5872	0.8619	0.8875	0.7839	0.4952	0.304	0.6311	0.6417	rs4678065	CASR(0)|CCDC58(-111.1kb)|CD86(+127.3kb)|CSTA(-76.71kb)|FAM162A(-135.7kb)|KPNA1(-173.4kb)|WDR5B(-163.4kb)
3:121968552	3	121968552	C	?	9	2.996e-05	0.002308	0.6953	0.722	0.2759	18.76	2.077	0.5872	0.8619	0.8875	0.7839	0.4952	0.304	0.6311	0.6417	rs1965357	CASR(0)|CCDC58(-109.9kb)|CD86(+128.6kb)|CSTA(-75.46kb)|FAM162A(-134.5kb)|KPNA1(-172.2kb)|WDR5B(-162.1kb)
3:121969712	3	121969712	G	?	9	2.996e-05	0.002308	0.6953	0.722	0.2759	18.76	2.077	0.5872	0.8619	0.8875	0.7839	0.4952	0.304	0.6311	0.6417	rs7644981	CASR(0)|CCDC58(-108.7kb)|CD86(+129.7kb)|CSTA(-74.3kb)|FAM162A(-133.3kb)|KPNA1(-171kb)|WDR5B(-161kb)
3:121961573	3	121961573	T	?	9	3.004e-05	0.002309	0.6953	0.722	0.276	18.75	2.077	0.5872	0.8619	0.8875	0.7839	0.4952	0.304	0.6311	0.6419	rs2877614	CASR(0)|CCDC58(-116.9kb)|CD86(+121.6kb)|CSTA(-82.44kb)|FAM162A(-141.4kb)|KPNA1(-179.2kb)|WDR5B(-169.1kb)
3:121963025	3	121963025	A	?	9	3.004e-05	0.002309	0.6953	0.722	0.276	18.75	2.077	0.5872	0.8619	0.8875	0.7839	0.4952	0.304	0.6311	0.6419	rs4678059	CASR(0)|CCDC58(-115.4kb)|CD86(+123kb)|CSTA(-80.98kb)|FAM162A(-140kb)|KPNA1(-177.7kb)|WDR5B(-167.7kb)
3:121965199	3	121965199	T	?	9	3.004e-05	0.002309	0.6953	0.722	0.276	18.75	2.077	0.5872	0.8619	0.8875	0.7839	0.4952	0.304	0.6311	0.6419	rs9859381	CASR(0)|CCDC58(-113.2kb)|CD86(+125.2kb)|CSTA(-78.81kb)|FAM162A(-137.8kb)|KPNA1(-175.5kb)|WDR5B(-165.5kb)
3:121969937	3	121969937	C	?	9	3.004e-05	0.002309	0.6953	0.722	0.276	18.75	2.077	0.5872	0.8619	0.8875	0.7839	0.4952	0.304	0.6311	0.6419	rs1463890	CASR(0)|CCDC58(-108.5kb)|CD86(+129.9kb)|CSTA(-74.07kb)|FAM162A(-133.1kb)|KPNA1(-170.8kb)|WDR5B(-160.8kb)
3:121971070	3	121971070	T	?	9	3.004e-05	0.002309	0.6953	0.722	0.276	18.75	2.077	0.5872	0.8619	0.8875	0.7839	0.4952	0.304	0.6311	0.6419	rs9815813	CASR(0)|CCDC58(-107.4kb)|CD86(+131.1kb)|CSTA(-72.94kb)|FAM162A(-132kb)|KPNA1(-169.7kb)|WDR5B(-159.6kb)
18:26682259	18	26682259	T	?	8	3.072e-05	0.0003108	0.7128	0.6735	0.1946	29.25	0.7599	0.8378	0.3205	0.7512	0.4749	0.7635	NA	0.6467	0.7483	rs1833422	.
13:83435094	13	83435094	A	?	9	3.078e-05	0.0001008	1.4519	1.4473	0.3923	5.15	1.689	1.613	1.979	1.083	1.716	4.117	1.46	1.184	0.984	rs9546243	.
13:23738116	13	23738116	C	?	9	3.083e-05	0.003823	0.7725	0.7909	0.2285	24.18	1.761	0.7402	0.8045	0.917	0.8761	0.492	1.56	0.7521	0.6148	rs496659	SACS(-164.8kb)|SGCG(-16.94kb)
6:105032279	6	105032279	G	?	9	3.106e-05	0.002952	0.6842	0.6941	0.1957	27.97	0.9711	0.6315	0.6667	1.134	0.5485	1.379	0.4054	0.2472	0.7763	rs9485990	HACE1(-143.7kb)
6:105043001	6	105043001	A	?	9	3.121e-05	0.002966	0.6843	0.6942	0.1955	28	0.9711	0.6315	0.6667	1.134	0.5485	1.379	0.4054	0.2472	0.7768	rs9499888	HACE1(-133kb)
6:105048784	6	105048784	A	?	9	3.121e-05	0.002966	0.6843	0.6942	0.1955	28	0.9711	0.6315	0.6667	1.134	0.5485	1.379	0.4054	0.2472	0.7768	rs9404565	HACE1(-127.2kb)
6:105049910	6	105049910	C	?	9	3.121e-05	0.002966	0.6843	0.6942	0.1955	28	0.9711	0.6315	0.6667	1.134	0.5485	1.379	0.4054	0.2472	0.7768	rs9391215	HACE1(-126.1kb)
6:105054542	6	105054542	C	?	9	3.121e-05	0.002966	0.6843	0.6942	0.1955	28	0.9711	0.6315	0.6667	1.134	0.5485	1.379	0.4054	0.2472	0.7768	rs9404566	HACE1(-121.4kb)
6:105042497	6	105042497	C	?	9	3.123e-05	0.002967	0.6843	0.6942	0.1955	28	0.9711	0.6315	0.6667	1.134	0.5485	1.379	0.4054	0.2472	0.7768	rs9391214	HACE1(-133.5kb)
10:61385006	10	61385006	A	?	8	3.136e-05	3.136e-05	1.795	1.795	0.5597	0	2.362	1.592	1.014	1.558	3.284	2.532	5.174	NA	1.675	rs7916086	CCDC6(-163.5kb)|LINC00948(-111.7kb)|SLC16A9(-25.52kb)
14:78283728	14	78283728	G	?	9	3.137e-05	0.0004541	1.2949	1.275	0.3542	9.71	0.9158	1.462	1.208	1.311	1.053	1.602	1.547	0.6614	1.373	rs12889788	ADCK1(0)|ALKBH1(+109.4kb)|C14orf178(+47.64kb)|SLIRP(+99.79kb)|SNW1(+56.23kb)
6:105039934	6	105039934	C	?	9	3.143e-05	0.002986	0.6844	0.6943	0.1953	28.02	0.9711	0.6315	0.6667	1.134	0.5485	1.379	0.4054	0.2472	0.7774	rs9391213	HACE1(-136kb)
13:83481580	13	83481580	C	?	9	3.153e-05	5.344e-05	1.5143	1.5145	0.4126	2.64	2.54	1.618	1.574	1.391	1.746	8.405	0.8122	1.227	1.075	rs1336905	.
7:67690997	7	67690997	G	?	9	3.153e-05	3.153e-05	1.363	1.363	0.4381	0	0.7836	1.171	2.04	1.284	1.488	1.568	1.216	1.973	1.739	rs3108022	.
6:105030133	6	105030133	G	?	9	3.165e-05	0.003006	0.6845	0.6943	0.1951	28.05	0.9711	0.6315	0.6667	1.134	0.5485	1.379	0.4054	0.2472	0.778	rs9386423	HACE1(-145.8kb)
13:83464235	13	83464235	A	?	9	3.186e-05	5.655e-05	1.514	1.5143	0.4106	2.88	2.54	1.618	1.574	1.391	1.746	8.583	0.8122	1.227	1.075	rs1466617	.
13:83467245	13	83467245	A	?	9	3.186e-05	5.655e-05	1.514	1.5143	0.4106	2.88	2.54	1.618	1.574	1.391	1.746	8.583	0.8122	1.227	1.075	rs9531398	.
1:26284884	1	26284884	C	?	9	3.197e-05	0.0008457	0.7721	0.7373	0.1291	36.15	0.5302	0.821	0.3727	1.037	0.8242	0.5573	0.6196	0.6211	0.7748	rs10751731	AUNIP(+99.04kb)|EXTL1(-63.39kb)|LOC646471(+134.8kb)|MAN1C1(+173.6kb)|MIR3917(+51.94kb)|MTFR1L(+125.5kb)|PAFAH2(-1.373kb)|PAQR7(+87.14kb)|PDIK1L(-152.8kb)|SEPN1(+140.2kb)|SLC30A2(-79.63kb)|STMN1(+51.52kb)|TRIM63(-92.91kb)
18:26683606	18	26683606	C	?	8	3.202e-05	0.0001052	0.7164	0.6965	0.323	13.69	0.7845	0.8379	0.3681	0.7453	0.4949	0.7388	NA	0.67	0.7307	rs12185332	.
13:83827861	13	83827861	C	?	9	3.204e-05	3.204e-05	1.6804	1.6804	0.8389	0	11.11	1.592	2.323	1.516	2.024	1.911	2.713	1.469	1.322	rs60357864	.
3:29982303	3	29982303	G	?	7	3.204e-05	3.204e-05	2.8302	2.8302	0.9919	0	1.879	2.94	2.683	1.943	3.47	NA	NA	1.386	3.274	rs9838276	RBMS3(0)
6:105029853	6	105029853	T	?	9	3.227e-05	0.002528	0.685	0.6934	0.2067	26.69	0.9173	0.6357	0.6667	1.134	0.5485	1.379	0.4054	0.2472	0.778	rs9499884	HACE1(-146.1kb)
6:8932815	6	8932815	T	?	9	3.255e-05	3.255e-05	1.7579	1.7579	0.8529	0	2.101	1.747	3.412	2.254	1.361	1.127	0	0.6349	2.114	rs9406225	LOC100506207(+147.1kb)
8:90064425	8	90064425	C	?	9	3.258e-05	3.258e-05	1.294	1.294	0.838	0	2.289	1.298	1.112	1.4	1.153	1.565	2.322	1.31	1.259	rs62532228	.
13:83518309	13	83518309	C	?	9	3.295e-05	3.295e-05	1.4354	1.4354	0.4615	0	2.056	1.448	1.501	1.134	1.88	5.339	0.7134	1.508	1.115	rs1565144	.
13:83525172	13	83525172	C	?	9	3.295e-05	3.295e-05	1.4354	1.4354	0.4615	0	2.056	1.448	1.501	1.134	1.88	5.339	0.7134	1.508	1.115	rs2785805	.
13:83527934	13	83527934	C	?	9	3.295e-05	3.295e-05	1.4354	1.4354	0.4615	0	2.056	1.448	1.501	1.134	1.88	5.339	0.7134	1.508	1.115	rs1843969	.
7:67698075	7	67698075	T	?	9	3.311e-05	5.403e-05	1.3617	1.3704	0.4052	3.56	0.7836	1.171	2.097	1.313	1.488	1.047	1.216	1.973	1.742	rs3113096	.
7:67698090	7	67698090	A	?	9	3.311e-05	5.403e-05	1.3617	1.3704	0.4052	3.56	0.7836	1.171	2.097	1.313	1.488	1.047	1.216	1.973	1.742	rs3108085	.
6:8931895	6	8931895	C	?	9	3.335e-05	3.335e-05	1.7606	1.7606	0.8491	0	2.101	1.74	3.412	2.254	1.361	1.148	0	0.6349	2.153	rs9328510	LOC100506207(+146.2kb)
13:83602700	13	83602700	C	?	9	3.348e-05	3.348e-05	1.4346	1.4346	0.4846	0	2.056	1.437	1.501	1.134	1.815	6.079	0.7134	1.508	1.149	rs2639508	.
13:83678294	13	83678294	A	?	9	3.368e-05	0.0004372	1.3405	1.3712	0.2472	22.04	1.405	1.241	1.41	1.168	1.65	10.54	1.444	1.594	1.231	rs265660	.
13:83604633	13	83604633	T	?	9	3.375e-05	3.375e-05	1.4328	1.4328	0.4893	0	2.056	1.43	1.501	1.134	1.815	6.079	0.7134	1.508	1.154	rs2807486	.
13:83604666	13	83604666	A	?	9	3.375e-05	3.375e-05	1.4328	1.4328	0.4893	0	2.056	1.43	1.501	1.134	1.815	6.079	0.7134	1.508	1.154	rs2639504	.
13:83604771	13	83604771	A	?	9	3.375e-05	3.375e-05	1.4328	1.4328	0.4893	0	2.056	1.43	1.501	1.134	1.815	6.079	0.7134	1.508	1.154	rs2639503	.
13:83605204	13	83605204	T	?	9	3.375e-05	3.375e-05	1.4328	1.4328	0.4893	0	2.056	1.43	1.501	1.134	1.815	6.079	0.7134	1.508	1.154	rs4403931	.
13:83605902	13	83605902	T	?	9	3.375e-05	3.375e-05	1.4328	1.4328	0.4893	0	2.056	1.43	1.501	1.134	1.815	6.079	0.7134	1.508	1.154	rs2248549	.
13:83606980	13	83606980	A	?	9	3.375e-05	3.375e-05	1.4328	1.4328	0.4893	0	2.056	1.43	1.501	1.134	1.815	6.079	0.7134	1.508	1.154	rs2807490	.
6:105029484	6	105029484	A	?	9	3.384e-05	0.002547	0.6855	0.6936	0.2073	26.62	0.9173	0.6364	0.6667	1.134	0.5485	1.379	0.4054	0.2472	0.778	rs9377658	HACE1(-146.5kb)
13:83517868	13	83517868	T	?	9	3.386e-05	7.941e-05	1.5101	1.5113	0.3973	4.53	2.54	1.594	1.574	1.391	1.816	8.097	0.8122	1.227	1.058	rs1038619	.
9:6459121	9	6459121	T	?	9	3.404e-05	6.949e-05	1.4553	1.4635	0.3995	4.26	1.041	1.316	2.105	1.309	1.714	5.935	0.7682	0.8503	1.578	rs55960819	GLDC(-73.34kb)|TPD52L3(+127.2kb)|UHRF2(0)
20:42634379	20	42634379	G	?	8	3.415e-05	3.415e-05	1.9601	1.9601	0.5965	0	0.4276	1.679	1.488	1.747	3.49	5.903	NA	1.846	2.02	rs35048520	JPH2(-106kb)|OSER1(-190.2kb)|TOX2(0)
3:101788688	3	101788688	C	?	9	3.432e-05	3.432e-05	1.3109	1.3109	0.6685	0	2.166	1.391	1.068	1.369	1.39	0.6491	1.674	1.303	1.103	rs2175928	LOC152225(+71.92kb)
9:6480726	9	6480726	C	?	9	3.441e-05	3.441e-05	1.4086	1.4086	0.7422	0	1.197	1.269	1.783	1.417	1.571	3.727	1.293	0.9317	1.53	rs16924626	GLDC(-51.74kb)|TPD52L3(+148.8kb)|UHRF2(0)
13:83841987	13	83841987	G	?	9	3.467e-05	3.467e-05	1.493	1.493	0.6176	0	1.43	1.192	1.545	1.442	2.287	2.703	2.749	1.619	1.656	rs73522819	.
13:83837840	13	83837840	G	?	9	3.479e-05	3.479e-05	1.4959	1.4959	0.6136	0	1.43	1.195	1.545	1.388	2.287	2.703	2.749	1.619	1.688	rs61959944	.
7:67704349	7	67704349	G	?	9	3.497e-05	4.608e-05	1.3604	1.3653	0.4179	1.97	0.7836	1.171	2.097	1.313	1.488	1.047	1.216	1.875	1.745	rs3108017	.
7:67704730	7	67704730	A	?	9	3.497e-05	4.608e-05	1.3604	1.3653	0.4179	1.97	0.7836	1.171	2.097	1.313	1.488	1.047	1.216	1.875	1.745	rs3113109	.
7:67704732	7	67704732	C	?	9	3.497e-05	4.608e-05	1.3604	1.3653	0.4179	1.97	0.7836	1.171	2.097	1.313	1.488	1.047	1.216	1.875	1.745	rs3113110	.
7:67705702	7	67705702	G	?	9	3.497e-05	4.608e-05	1.3604	1.3653	0.4179	1.97	0.7836	1.171	2.097	1.313	1.488	1.047	1.216	1.875	1.745	rs3113115	.
7:67705737	7	67705737	G	?	9	3.497e-05	4.608e-05	1.3604	1.3653	0.4179	1.97	0.7836	1.171	2.097	1.313	1.488	1.047	1.216	1.875	1.745	rs3113116	.
7:67705858	7	67705858	G	?	9	3.497e-05	4.608e-05	1.3604	1.3653	0.4179	1.97	0.7836	1.171	2.097	1.313	1.488	1.047	1.216	1.875	1.745	rs3113117	.
7:67706197	7	67706197	T	?	9	3.497e-05	4.608e-05	1.3604	1.3653	0.4179	1.97	0.7836	1.171	2.097	1.313	1.488	1.047	1.216	1.875	1.745	rs3113119	.
13:83838992	13	83838992	C	?	9	3.5e-05	3.5e-05	1.4953	1.4953	0.6148	0	1.43	1.195	1.545	1.388	2.287	2.703	2.749	1.619	1.683	rs7334862	.
16:88881635	16	88881635	T	?	7	3.506e-05	3.506e-05	0.6617	0.6617	0.8691	0	0.4235	0.6544	0.7338	0.6634	0.7001	NA	1.96	0.6469	NA	rs550269	APRT(+3.293kb)|CBFA2T3(-59.63kb)|CDT1(+5.969kb)|CTU2(+99.85kb)|CYBA(+164.1kb)|GALNS(0)|IL17C(+174.8kb)|LOC100289580(+73.8kb)|MIR4722(+98.89kb)|MVD(+152.1kb)|PABPN1L(-48.11kb)|PIEZO1(+30.26kb)|RNF166(+108.8kb)|SNAI3(+128.8kb)|SNAI3-AS1(+128kb)|TRAPPC2L(-41.87kb)|ZC3H18(+183.3kb)
7:67707345	7	67707345	A	?	9	3.523e-05	3.523e-05	1.3611	1.3611	0.4466	0	0.7836	1.181	2.097	1.313	1.457	1.047	1.216	1.875	1.745	rs56661821	.
1:218388924	1	218388924	A	?	8	3.549e-05	3.549e-05	1.7426	1.7426	0.5329	0	0.954	1.991	1.823	2.29	1.116	1.964	NA	11.88	1.516	rs76580585	LOC728463(-128.6kb)|RRP15(-69.7kb)|TGFB2(-129.8kb)
7:67702443	7	67702443	T	?	9	3.562e-05	4.477e-05	1.3599	1.364	0.4206	1.63	0.7836	1.171	2.097	1.313	1.488	1.047	1.216	1.875	1.742	rs3108010	.
7:67702740	7	67702740	G	?	9	3.562e-05	4.477e-05	1.3599	1.364	0.4206	1.63	0.7836	1.171	2.097	1.313	1.488	1.047	1.216	1.875	1.742	rs3108011	.
7:67702904	7	67702904	A	?	9	3.562e-05	4.477e-05	1.3599	1.364	0.4206	1.63	0.7836	1.171	2.097	1.313	1.488	1.047	1.216	1.875	1.742	rs3108012	.
7:100649132	7	100649132	C	?	7	3.592e-05	3.592e-05	1.64	1.64	0.9021	0	2.37	1.518	1.318	1.395	1.555	NA	NA	1.144	2.119	rs4729637	ACHE(+155.6kb)|AP1S1(-148.6kb)|MIR4653(-153.6kb)|MOGAT3(-189.9kb)|MUC12(0)|MUC17(-14.23kb)|NAT16(-164.6kb)|SERPINE1(-121.2kb)|SLC12A9(+184.5kb)|SRRT(+162.8kb)|TRIM56(-79.65kb)|TRIP6(+178.1kb)|UFSP1(+161.8kb)|VGF(-156.7kb)
1:26329063	1	26329063	T	?	9	3.596e-05	3.596e-05	0.7112	0.7112	0.5796	0	0.5174	0.8139	0.3604	0.6985	0.8567	0.4638	0	0.6982	0.6358	rs3008412	AUNIP(+143.2kb)|CATSPER4(-188.1kb)|CNKSR1(-174.9kb)|EXTL1(-19.21kb)|FAM110D(-156.4kb)|LOC646471(+179kb)|MIR3917(+96.12kb)|MTFR1L(+169.6kb)|PAFAH2(+4.415kb)|PAQR7(+131.3kb)|PDIK1L(-108.6kb)|SEPN1(+184.4kb)|SLC30A2(-35.45kb)|STMN1(+95.7kb)|TRIM63(-48.73kb)|ZNF593(-167.3kb)
12:124938373	12	124938373	T	?	8	3.614e-05	3.614e-05	1.8986	1.8986	0.4525	0	1.963	1.875	3.61	4.771	2.264	NA	18.98	0.5715	1.637	rs115775504	FAM101A(+137.8kb)|NCOR2(0)|ZNF664-FAM101A(+137.8kb)
12:124940762	12	124940762	A	?	8	3.628e-05	3.628e-05	1.8484	1.8484	0.4314	0	1.456	1.818	3.585	4.771	2.135	NA	18.98	0.5715	1.643	rs73225435	FAM101A(+140.2kb)|NCOR2(0)|ZNF664-FAM101A(+140.2kb)
15:33289327	15	33289327	C	?	9	3.657e-05	3.657e-05	2.0774	2.0774	0.764	0	10.26	1.838	4.371	2.556	2.802	0.9226	0	0.3777	1.883	rs17816609	FMN1(0)
6:105033904	6	105033904	T	?	9	3.669e-05	0.003146	0.6872	0.6977	0.2	27.48	0.9711	0.6315	0.6667	1.134	0.5657	1.386	0.4054	0.2472	0.7831	rs9404564	HACE1(-142.1kb)
13:83497658	13	83497658	T	?	9	3.709e-05	3.709e-05	1.5068	1.5068	0.482	0	1.881	1.618	1.574	1.343	1.746	8.583	0.8122	1.227	1.1	rs2876787	.
7:67690432	7	67690432	T	?	9	3.712e-05	5.774e-05	1.3576	1.3666	0.4064	3.41	0.7836	1.163	1.999	1.24	1.533	1.568	1.216	1.973	1.739	rs3113153	.
6:105029891	6	105029891	A	?	9	3.722e-05	0.00306	0.6868	0.6958	0.1986	27.63	0.9711	0.6364	0.6667	1.134	0.5485	1.379	0.4054	0.2472	0.778	rs9499885	HACE1(-146.1kb)
13:83836591	13	83836591	G	?	9	3.749e-05	3.749e-05	1.4935	1.4935	0.6026	0	1.43	1.189	1.545	1.388	2.287	2.703	2.749	1.619	1.689	rs7319388	.
13:83837098	13	83837098	T	?	9	3.749e-05	3.749e-05	1.4935	1.4935	0.6026	0	1.43	1.189	1.545	1.388	2.287	2.703	2.749	1.619	1.689	rs6563336	.
7:67690955	7	67690955	A	?	9	3.759e-05	4.58e-05	1.3588	1.3629	0.4215	1.52	0.7836	1.163	2.04	1.284	1.488	1.568	1.216	1.973	1.739	rs3113156	.
16:27378053	16	27378053	T	?	9	3.772e-05	3.772e-05	1.5709	1.5709	0.6075	0	2.513	1.429	1.004	1.377	1.768	0.94	0.86	5.3	1.779	rs12102586	FLJ21408(+76.26kb)|GTF3C1(-93.88kb)|IL4R(+1.954kb)|IL21R(-35.43kb)|IL21R-AS1(-80.94kb)|KDM8(+145kb)|KIAA0556(-183.4kb)|NSMCE1(+97.94kb)
7:47980291	7	47980291	A	?	7	3.772e-05	3.772e-05	2.744	2.744	0.8167	0	NA	2.329	1.931	5.119	2.306	13.65	10.15	NA	2.596	rs78941411	C7orf57(-94.82kb)|C7orf69(+120.8kb)|HUS1(-22.59kb)|LINC00525(+173.9kb)|PKD1L1(0)|SUN3(-46.45kb)|UPP1(-148.1kb)
7:67698604	7	67698604	T	?	9	3.787e-05	6.535e-05	1.3586	1.3681	0.4016	4	0.7836	1.171	2.097	1.284	1.488	1.047	1.216	1.973	1.742	rs12532122	.
6:105027703	6	105027703	A	?	9	3.792e-05	0.003433	0.687	0.696	0.1885	28.82	0.9173	0.6364	0.6667	1.168	0.5485	1.379	0.4054	0.2472	0.7765	rs7772424	HACE1(-148.3kb)
9:6480538	9	6480538	C	?	9	3.805e-05	3.805e-05	1.4055	1.4055	0.72	0	1.197	1.267	1.783	1.417	1.571	3.727	1.293	0.8806	1.53	rs16924624	GLDC(-51.92kb)|TPD52L3(+148.6kb)|UHRF2(0)
10:61383034	10	61383034	T	?	8	3.825e-05	3.825e-05	1.7831	1.7831	0.5441	0	2.785	1.552	1.014	1.558	3.189	2.532	5.174	NA	1.675	rs7083932	CCDC6(-165.5kb)|LINC00948(-113.7kb)|SLC16A9(-27.49kb)
9:6465342	9	6465342	G	?	9	3.843e-05	3.843e-05	1.4501	1.4501	0.4453	0	1.041	1.316	2.105	1.309	1.687	5.935	0.7682	0.958	1.541	rs76552338	GLDC(-67.12kb)|TPD52L3(+133.4kb)|UHRF2(0)
1:175839834	1	175839834	T	?	9	3.862e-05	4.553e-05	0.7784	0.7774	0.4249	1.09	0.5921	0.8464	0.9073	0.93	0.629	0.334	0.4637	0.8592	0.7083	rs10798418	RFWD2(-74.13kb)|SCARNA3(-97.7kb)|TNR(+127.1kb)
8:90064707	8	90064707	C	?	9	3.866e-05	3.866e-05	1.2907	1.2907	0.8333	0	2.289	1.287	1.112	1.416	1.153	1.565	2.322	1.31	1.258	rs62532229	.
3:29992651	3	29992651	T	?	6	3.873e-05	3.873e-05	3.5243	3.5243	0.941	0	2.256	5.032	2.09	NA	2.775	NA	0	NA	4.315	rs1449297	RBMS3(0)
7:67697343	7	67697343	T	?	9	3.884e-05	3.884e-05	1.3572	1.3572	0.4456	0	0.7836	1.171	2.114	1.252	1.488	1.568	1.216	1.687	1.73	rs117161386	.
13:83451878	13	83451878	A	?	9	3.89e-05	0.002567	1.3365	1.349	0.1574	32.56	1.282	1.366	1.779	1.116	1.522	10.49	1.02	1.076	1.089	rs1906326	.
14:98679169	14	98679169	A	?	9	3.906e-05	3.932e-05	1.3515	1.3515	0.4332	0.03	1.552	1.405	1.128	2.1	1.114	1.456	0.1962	1.568	1.232	rs1257906	.
17:31322238	17	31322238	A	?	8	3.916e-05	3.916e-05	1.3521	1.3521	0.9037	0	1.127	1.341	1.22	1.389	1.718	0.9283	NA	1.085	1.287	rs28965	ASIC2(-17.87kb)|MYO1D(+118.3kb)|SPACA3(0)|TMEM98(+53.57kb)
13:83608025	13	83608025	C	?	9	3.945e-05	3.945e-05	1.4281	1.4281	0.4889	0	2.056	1.418	1.501	1.134	1.815	6.079	0.7134	1.508	1.154	rs2807493	.
13:83608451	13	83608451	G	?	9	3.945e-05	3.945e-05	1.4281	1.4281	0.4889	0	2.056	1.418	1.501	1.134	1.815	6.079	0.7134	1.508	1.154	rs2807494	.
13:83608698	13	83608698	C	?	9	3.945e-05	3.945e-05	1.4281	1.4281	0.4889	0	2.056	1.418	1.501	1.134	1.815	6.079	0.7134	1.508	1.154	rs2807495	.
13:83608700	13	83608700	T	?	9	3.945e-05	3.945e-05	1.4281	1.4281	0.4889	0	2.056	1.418	1.501	1.134	1.815	6.079	0.7134	1.508	1.154	rs2807496	.
7:67703862	7	67703862	G	?	9	3.998e-05	5.592e-05	1.3573	1.3631	0.4144	2.41	0.7836	1.171	2.097	1.284	1.488	1.047	1.216	1.875	1.745	rs3108014	.
7:67704132	7	67704132	T	?	9	3.998e-05	5.592e-05	1.3573	1.3631	0.4144	2.41	0.7836	1.171	2.097	1.284	1.488	1.047	1.216	1.875	1.745	rs3108016	.
7:67705115	7	67705115	C	?	9	3.998e-05	5.592e-05	1.3573	1.3631	0.4144	2.41	0.7836	1.171	2.097	1.284	1.488	1.047	1.216	1.875	1.745	rs3113112	.
7:67705446	7	67705446	T	?	9	3.998e-05	5.592e-05	1.3573	1.3631	0.4144	2.41	0.7836	1.171	2.097	1.284	1.488	1.047	1.216	1.875	1.745	rs3108021	.
7:67706145	7	67706145	A	?	9	3.998e-05	5.592e-05	1.3573	1.3631	0.4144	2.41	0.7836	1.171	2.097	1.284	1.488	1.047	1.216	1.875	1.745	rs3113118	.
7:67706490	7	67706490	G	?	9	3.998e-05	5.592e-05	1.3573	1.3631	0.4144	2.41	0.7836	1.171	2.097	1.284	1.488	1.047	1.216	1.875	1.745	rs74480749	.
7:67707556	7	67707556	A	?	9	3.998e-05	5.592e-05	1.3573	1.3631	0.4144	2.41	0.7836	1.171	2.097	1.284	1.488	1.047	1.216	1.875	1.745	rs3113122	.
7:67707634	7	67707634	T	?	9	3.998e-05	5.592e-05	1.3573	1.3631	0.4144	2.41	0.7836	1.171	2.097	1.284	1.488	1.047	1.216	1.875	1.745	rs3108023	.
7:67707688	7	67707688	T	?	9	3.998e-05	5.592e-05	1.3573	1.3631	0.4144	2.41	0.7836	1.171	2.097	1.284	1.488	1.047	1.216	1.875	1.745	rs3108024	.
7:67696839	7	67696839	C	?	9	4.013e-05	0.0001775	1.3575	1.3829	0.3335	12.14	0.7836	1.163	2.114	1.28	1.488	1.568	0.542	1.973	1.733	rs11980302	.
7:67707346	7	67707346	T	?	9	4.029e-05	4.029e-05	1.3581	1.3581	0.4429	0	0.7836	1.181	2.097	1.284	1.457	1.047	1.216	1.875	1.745	rs75256716	.
9:6479215	9	6479215	T	?	9	4.055e-05	4.055e-05	1.4038	1.4038	0.7284	0	1.197	1.269	1.783	1.417	1.571	3.727	1.293	0.8806	1.51	rs10122116	GLDC(-53.25kb)|TPD52L3(+147.3kb)|UHRF2(0)
9:6479626	9	6479626	A	?	9	4.055e-05	4.055e-05	1.4038	1.4038	0.7284	0	1.197	1.269	1.783	1.417	1.571	3.727	1.293	0.8806	1.51	rs10115883	GLDC(-52.84kb)|TPD52L3(+147.7kb)|UHRF2(0)
7:67699723	7	67699723	T	?	9	4.072e-05	5.434e-05	1.3569	1.3619	0.4171	2.07	0.7836	1.171	2.097	1.284	1.488	1.047	1.216	1.875	1.742	rs3113097	.
7:67699941	7	67699941	C	?	9	4.072e-05	5.434e-05	1.3569	1.3619	0.4171	2.07	0.7836	1.171	2.097	1.284	1.488	1.047	1.216	1.875	1.742	rs3113098	.
7:67700796	7	67700796	T	?	9	4.072e-05	5.434e-05	1.3569	1.3619	0.4171	2.07	0.7836	1.171	2.097	1.284	1.488	1.047	1.216	1.875	1.742	rs3108008	.
7:67700862	7	67700862	T	?	9	4.072e-05	5.434e-05	1.3569	1.3619	0.4171	2.07	0.7836	1.171	2.097	1.284	1.488	1.047	1.216	1.875	1.742	rs3113101	.
7:67701367	7	67701367	G	?	9	4.072e-05	5.434e-05	1.3569	1.3619	0.4171	2.07	0.7836	1.171	2.097	1.284	1.488	1.047	1.216	1.875	1.742	rs3113103	.
7:67702432	7	67702432	C	?	9	4.072e-05	5.434e-05	1.3569	1.3619	0.4171	2.07	0.7836	1.171	2.097	1.284	1.488	1.047	1.216	1.875	1.742	rs3113104	.
6:8933100	6	8933100	T	?	9	4.073e-05	4.073e-05	1.7454	1.7454	0.8413	0	2.101	1.711	3.412	2.254	1.361	1.101	0	0.6349	2.168	rs9392244	LOC100506207(+147.4kb)
6:8933373	6	8933373	G	?	9	4.073e-05	4.073e-05	1.7454	1.7454	0.8413	0	2.101	1.711	3.412	2.254	1.361	1.101	0	0.6349	2.168	rs4607479	LOC100506207(+147.7kb)
6:8933375	6	8933375	C	?	9	4.073e-05	4.073e-05	1.7454	1.7454	0.8413	0	2.101	1.711	3.412	2.254	1.361	1.101	0	0.6349	2.168	rs4327732	LOC100506207(+147.7kb)
6:8947659	6	8947659	A	?	9	4.075e-05	4.075e-05	1.7575	1.7575	0.825	0	1.25	1.783	3.412	2.254	1.34	1.148	0	0.6349	2.203	rs78515315	LOC100506207(+162kb)
7:67704075	7	67704075	A	?	9	4.075e-05	6.652e-05	1.3566	1.3657	0.404	3.7	0.7836	1.164	2.097	1.313	1.488	1.047	1.216	1.875	1.745	rs74299853	.
9:28324379	9	28324379	T	?	9	4.091e-05	4.091e-05	0.7347	0.7347	0.9093	0	0.502	0.7563	0.9227	0.6108	0.6835	0.7893	0.3359	0.9831	0.7414	rs10968507	LINGO2(0)
18:72518013	18	72518013	C	?	6	4.109e-05	4.109e-05	2.5569	2.5569	0.8514	0	NA	1.943	2.128	2.006	2.871	NA	3.127	NA	4.39	rs146883192	ZNF407(0)
6:8934992	6	8934992	T	?	9	4.124e-05	4.124e-05	1.745	1.745	0.8449	0	2.101	1.711	3.412	2.254	1.361	1.121	0	0.6349	2.161	rs7771317	LOC100506207(+149.3kb)
6:8936605	6	8936605	C	?	9	4.124e-05	4.124e-05	1.745	1.745	0.8449	0	2.101	1.711	3.412	2.254	1.361	1.121	0	0.6349	2.161	rs9393080	LOC100506207(+150.9kb)
14:107198718	14	107198718	C	?	8	4.141e-05	4.141e-05	0.6734	0.6734	0.448	0	1.276	0.5963	0.4908	0.9101	0.6882	0.7952	1.855	0.5171	NA	rs7153964	.
14:107198874	14	107198874	G	?	8	4.141e-05	4.141e-05	0.6734	0.6734	0.448	0	1.276	0.5963	0.4908	0.9101	0.6882	0.7952	1.855	0.5171	NA	rs2301536	.
14:107198901	14	107198901	T	?	8	4.141e-05	4.141e-05	0.6734	0.6734	0.448	0	1.276	0.5963	0.4908	0.9101	0.6882	0.7952	1.855	0.5171	NA	rs2301535	.
14:107201303	14	107201303	T	?	8	4.141e-05	4.141e-05	0.6734	0.6734	0.448	0	1.276	0.5963	0.4908	0.9101	0.6882	0.7952	1.855	0.5171	NA	rs7144369	.
22:49791853	22	49791853	A	?	7	4.142e-05	4.142e-05	1.3993	1.3993	0.4457	0	1.113	1.639	1.098	1.175	1.573	NA	0.591	1.642	NA	rs9616608	.
7:67701885	7	67701885	A	?	9	4.147e-05	5.28e-05	1.3565	1.3607	0.4198	1.73	0.7836	1.171	2.097	1.284	1.488	1.047	1.216	1.875	1.739	rs3108009	.
14:107218563	14	107218563	A	?	8	4.151e-05	0.0001773	0.6729	0.6802	0.3981	4.14	1.335	0.5886	0.4908	0.9101	0.708	0.7952	1.855	0.5171	NA	rs112027230	.
9:6462585	9	6462585	T	?	9	4.157e-05	4.157e-05	1.4478	1.4478	0.4385	0	1.041	1.309	2.105	1.309	1.687	5.935	0.7682	0.958	1.548	rs16924591	GLDC(-69.88kb)|TPD52L3(+130.7kb)|UHRF2(0)
7:67703209	7	67703209	T	?	9	4.173e-05	5.455e-05	1.3565	1.3613	0.4182	1.93	0.7836	1.171	2.097	1.284	1.488	1.047	1.216	1.875	1.742	rs3113105	.
7:67704328	7	67704328	T	?	9	4.173e-05	5.455e-05	1.3565	1.3613	0.4182	1.93	0.7836	1.171	2.097	1.284	1.488	1.047	1.216	1.875	1.742	rs3113108	.
7:67705234	7	67705234	T	?	9	4.173e-05	5.455e-05	1.3565	1.3613	0.4182	1.93	0.7836	1.171	2.097	1.284	1.488	1.047	1.216	1.875	1.742	rs3108020	.
7:67707741	7	67707741	T	?	9	4.173e-05	5.455e-05	1.3565	1.3613	0.4182	1.93	0.7836	1.171	2.097	1.284	1.488	1.047	1.216	1.875	1.742	rs3108025	.
1:26327751	1	26327751	A	?	9	4.193e-05	4.193e-05	0.7134	0.7134	0.5905	0	0.5174	0.8139	0.3604	0.6985	0.8567	0.4638	0	0.6982	0.6459	rs3008241	AUNIP(+141.9kb)|CATSPER4(-189.4kb)|CNKSR1(-176.2kb)|EXTL1(-20.52kb)|FAM110D(-157.8kb)|LOC646471(+177.7kb)|MIR3917(+94.81kb)|MTFR1L(+168.3kb)|PAFAH2(+3.103kb)|PAQR7(+130kb)|PDIK1L(-109.9kb)|SEPN1(+183kb)|SLC30A2(-36.76kb)|STMN1(+94.38kb)|TRIM63(-50.04kb)|ZNF593(-168.6kb)
6:8932890	6	8932890	G	?	9	4.207e-05	4.207e-05	1.7402	1.7402	0.849	0	2.101	1.711	3.412	2.254	1.361	1.101	0	0.6349	2.114	rs9405429	LOC100506207(+147.2kb)
14:107184357	14	107184357	A	?	8	4.213e-05	4.213e-05	0.6736	0.6736	0.4465	0	1.276	0.5963	0.4908	0.9101	0.6882	0.8068	1.855	0.5171	NA	rs7161739	.
14:107188181	14	107188181	T	?	8	4.213e-05	4.213e-05	0.6736	0.6736	0.4465	0	1.276	0.5963	0.4908	0.9101	0.6882	0.8068	1.855	0.5171	NA	rs78462736	.
14:107188814	14	107188814	G	?	8	4.213e-05	4.213e-05	0.6736	0.6736	0.4465	0	1.276	0.5963	0.4908	0.9101	0.6882	0.8068	1.855	0.5171	NA	rs8016203	.
7:67700504	7	67700504	T	?	9	4.224e-05	5.352e-05	1.3562	1.3604	0.42	1.7	0.7836	1.171	2.097	1.284	1.488	1.047	1.216	1.875	1.74	rs3113099	.
7:67701259	7	67701259	C	?	9	4.224e-05	5.352e-05	1.3562	1.3604	0.42	1.7	0.7836	1.171	2.097	1.284	1.488	1.047	1.216	1.875	1.74	rs3113102	.
7:67702174	7	67702174	T	?	9	4.224e-05	5.352e-05	1.3562	1.3604	0.42	1.7	0.7836	1.171	2.097	1.284	1.488	1.047	1.216	1.875	1.74	rs78868419	.
8:90054296	8	90054296	A	?	9	4.243e-05	4.243e-05	1.2884	1.2884	0.8413	0	2.289	1.278	1.086	1.416	1.184	1.582	2.225	1.344	1.247	rs11986450	.
1:26278141	1	26278141	T	?	9	4.246e-05	0.000111	0.7009	0.6818	0.3457	10.71	0.592	0.8475	0.3057	0.815	0.7512	0.4791	0	0.475	0.5553	rs3120157	AUNIP(+92.29kb)|EXTL1(-70.13kb)|LOC646471(+128kb)|MAN1C1(+166.9kb)|MIR3917(+45.2kb)|MTFR1L(+118.7kb)|PAFAH2(-8.116kb)|PAQR7(+80.4kb)|PDIK1L(-159.5kb)|SEPN1(+133.4kb)|SLC30A2(-86.37kb)|STMN1(+44.77kb)|TRIM63(-99.65kb)
1:26278867	1	26278867	T	?	8	4.246e-05	0.0002286	0.7009	0.6692	0.2556	21.86	0.592	0.8475	0.3057	0.815	0.7512	0.4791	NA	0.475	0.5553	rs2565041	AUNIP(+93.02kb)|EXTL1(-69.4kb)|LOC646471(+128.8kb)|MAN1C1(+167.6kb)|MIR3917(+45.92kb)|MTFR1L(+119.4kb)|PAFAH2(-7.39kb)|PAQR7(+81.12kb)|PDIK1L(-158.8kb)|SEPN1(+134.2kb)|SLC30A2(-85.65kb)|STMN1(+45.5kb)|TRIM63(-98.93kb)
1:26278868	1	26278868	G	?	8	4.246e-05	0.0002286	0.7009	0.6692	0.2556	21.86	0.592	0.8475	0.3057	0.815	0.7512	0.4791	NA	0.475	0.5553	rs2782812	AUNIP(+93.02kb)|EXTL1(-69.4kb)|LOC646471(+128.8kb)|MAN1C1(+167.6kb)|MIR3917(+45.92kb)|MTFR1L(+119.4kb)|PAFAH2(-7.389kb)|PAQR7(+81.12kb)|PDIK1L(-158.8kb)|SEPN1(+134.2kb)|SLC30A2(-85.64kb)|STMN1(+45.5kb)|TRIM63(-98.93kb)
6:8929557	6	8929557	C	?	9	4.316e-05	4.316e-05	1.7428	1.7428	0.8447	0	2.101	1.704	3.412	2.254	1.361	1.121	0	0.6349	2.153	rs28479098	LOC100506207(+143.9kb)
13:83456706	13	83456706	G	?	9	4.321e-05	0.002342	1.3346	1.3488	0.1659	31.52	1.282	1.354	1.779	1.135	1.522	10.49	1.02	1.076	1.091	rs1856043	.
6:8928796	6	8928796	G	?	9	4.327e-05	4.327e-05	1.7426	1.7426	0.8448	0	2.101	1.704	3.412	2.254	1.361	1.121	0	0.6349	2.152	rs9379261	LOC100506207(+143.1kb)
6:8933983	6	8933983	G	?	9	4.347e-05	4.347e-05	1.7455	1.7455	0.8396	0	2.101	1.704	3.412	2.254	1.361	1.121	0	0.6349	2.19	rs4421243	LOC100506207(+148.3kb)
13:83497970	13	83497970	T	?	9	4.363e-05	4.363e-05	1.5016	1.5016	0.4819	0	1.881	1.606	1.574	1.343	1.746	8.583	0.8122	1.227	1.096	rs9546271	.
13:83498130	13	83498130	G	?	9	4.363e-05	4.363e-05	1.5016	1.5016	0.4819	0	1.881	1.606	1.574	1.343	1.746	8.583	0.8122	1.227	1.096	rs9546272	.
13:83498673	13	83498673	T	?	9	4.363e-05	4.363e-05	1.5016	1.5016	0.4819	0	1.881	1.606	1.574	1.343	1.746	8.583	0.8122	1.227	1.096	rs973151	.
13:83498848	13	83498848	T	?	9	4.363e-05	4.363e-05	1.5016	1.5016	0.4819	0	1.881	1.606	1.574	1.343	1.746	8.583	0.8122	1.227	1.096	rs9546273	.
13:83499924	13	83499924	A	?	9	4.363e-05	4.363e-05	1.5016	1.5016	0.4819	0	1.881	1.606	1.574	1.343	1.746	8.583	0.8122	1.227	1.096	rs9531400	.
9:6479464	9	6479464	C	?	9	4.416e-05	4.416e-05	1.4013	1.4013	0.7228	0	1.197	1.264	1.783	1.417	1.571	3.727	1.293	0.8806	1.51	rs10125914	GLDC(-53kb)|TPD52L3(+147.6kb)|UHRF2(0)
9:6480005	9	6480005	A	?	9	4.416e-05	4.416e-05	1.4013	1.4013	0.7228	0	1.197	1.264	1.783	1.417	1.571	3.727	1.293	0.8806	1.51	rs10975605	GLDC(-52.46kb)|TPD52L3(+148.1kb)|UHRF2(0)
13:83455516	13	83455516	C	?	9	4.421e-05	0.003065	1.3342	1.3465	0.149	33.6	1.169	1.358	1.779	1.12	1.552	10.49	1.02	1.076	1.091	rs1601778	.
13:83486092	13	83486092	T	?	9	4.427e-05	4.427e-05	1.5011	1.5011	0.4797	0	1.881	1.606	1.574	1.343	1.746	8.583	0.8122	1.227	1.094	rs1415156	.
13:83486857	13	83486857	C	?	9	4.427e-05	4.427e-05	1.5011	1.5011	0.4797	0	1.881	1.606	1.574	1.343	1.746	8.583	0.8122	1.227	1.094	rs2029293	.
13:83488818	13	83488818	G	?	9	4.427e-05	4.427e-05	1.5011	1.5011	0.4797	0	1.881	1.606	1.574	1.343	1.746	8.583	0.8122	1.227	1.094	rs7997084	.
13:83490153	13	83490153	C	?	9	4.427e-05	4.427e-05	1.5011	1.5011	0.4797	0	1.881	1.606	1.574	1.343	1.746	8.583	0.8122	1.227	1.094	rs7981630	.
13:83490504	13	83490504	T	?	9	4.427e-05	4.427e-05	1.5011	1.5011	0.4797	0	1.881	1.606	1.574	1.343	1.746	8.583	0.8122	1.227	1.094	rs1832257	.
13:83491554	13	83491554	T	?	9	4.427e-05	4.427e-05	1.5011	1.5011	0.4797	0	1.881	1.606	1.574	1.343	1.746	8.583	0.8122	1.227	1.094	rs2329257	.
13:83492133	13	83492133	C	?	9	4.427e-05	4.427e-05	1.5011	1.5011	0.4797	0	1.881	1.606	1.574	1.343	1.746	8.583	0.8122	1.227	1.094	rs9318918	.
13:83492946	13	83492946	C	?	9	4.427e-05	4.427e-05	1.5011	1.5011	0.4797	0	1.881	1.606	1.574	1.343	1.746	8.583	0.8122	1.227	1.094	rs1473484	.
13:83494247	13	83494247	A	?	9	4.427e-05	4.427e-05	1.5011	1.5011	0.4797	0	1.881	1.606	1.574	1.343	1.746	8.583	0.8122	1.227	1.094	rs9546269	.
13:83495157	13	83495157	G	?	9	4.427e-05	4.427e-05	1.5011	1.5011	0.4797	0	1.881	1.606	1.574	1.343	1.746	8.583	0.8122	1.227	1.094	rs9546270	.
13:83497369	13	83497369	C	?	9	4.427e-05	4.427e-05	1.5011	1.5011	0.4797	0	1.881	1.606	1.574	1.343	1.746	8.583	0.8122	1.227	1.094	rs1960489	.
13:83497431	13	83497431	C	?	9	4.427e-05	4.427e-05	1.5011	1.5011	0.4797	0	1.881	1.606	1.574	1.343	1.746	8.583	0.8122	1.227	1.094	rs2329258	.
13:83497458	13	83497458	A	?	9	4.427e-05	4.427e-05	1.5011	1.5011	0.4797	0	1.881	1.606	1.574	1.343	1.746	8.583	0.8122	1.227	1.094	rs2329259	.
13:83497710	13	83497710	A	?	9	4.427e-05	4.427e-05	1.5011	1.5011	0.4797	0	1.881	1.606	1.574	1.343	1.746	8.583	0.8122	1.227	1.094	rs2876788	.
4:115296674	4	115296674	C	?	9	4.466e-05	4.466e-05	0.7804	0.7804	0.7626	0	1.18	0.837	0.6881	0.8493	0.7215	0.4892	0.6769	0.6719	0.6884	rs7656442	.
7:67696893	7	67696893	T	?	9	4.467e-05	0.0002384	1.3551	1.3846	0.3149	14.29	0.7836	1.156	2.114	1.28	1.488	1.568	0.542	1.973	1.742	rs11982692	.
3:121963858	3	121963858	G	?	9	4.477e-05	0.0007333	0.7028	0.7183	0.3437	10.95	2.077	0.5997	0.7638	0.8875	0.7839	0.4952	0.304	0.6616	0.6773	rs6438714	CASR(0)|CCDC58(-114.6kb)|CD86(+123.9kb)|CSTA(-80.15kb)|FAM162A(-139.2kb)|KPNA1(-176.9kb)|WDR5B(-166.8kb)
3:121963877	3	121963877	T	?	9	4.477e-05	0.0007333	0.7028	0.7183	0.3437	10.95	2.077	0.5997	0.7638	0.8875	0.7839	0.4952	0.304	0.6616	0.6773	rs6438715	CASR(0)|CCDC58(-114.6kb)|CD86(+123.9kb)|CSTA(-80.13kb)|FAM162A(-139.1kb)|KPNA1(-176.9kb)|WDR5B(-166.8kb)
3:121964374	3	121964374	A	?	9	4.477e-05	0.0007333	0.7028	0.7183	0.3437	10.95	2.077	0.5997	0.7638	0.8875	0.7839	0.4952	0.304	0.6616	0.6773	rs3851982	CASR(0)|CCDC58(-114.1kb)|CD86(+124.4kb)|CSTA(-79.64kb)|FAM162A(-138.6kb)|KPNA1(-176.4kb)|WDR5B(-166.3kb)
6:8944667	6	8944667	G	?	9	4.477e-05	4.477e-05	1.7422	1.7422	0.8093	0	2.101	1.704	3.412	2.254	1.307	1.121	0	0.6349	2.243	rs9379266	LOC100506207(+159kb)
3:121961880	3	121961880	T	?	9	4.483e-05	0.0007336	0.7028	0.7183	0.3437	10.94	2.077	0.5997	0.7638	0.8875	0.7839	0.4952	0.304	0.6616	0.6774	rs2877615	CASR(0)|CCDC58(-116.6kb)|CD86(+121.9kb)|CSTA(-82.13kb)|FAM162A(-141.1kb)|KPNA1(-178.9kb)|WDR5B(-168.8kb)
3:121961931	3	121961931	C	?	9	4.483e-05	0.0007336	0.7028	0.7183	0.3437	10.94	2.077	0.5997	0.7638	0.8875	0.7839	0.4952	0.304	0.6616	0.6774	rs2173960	CASR(0)|CCDC58(-116.5kb)|CD86(+121.9kb)|CSTA(-82.08kb)|FAM162A(-141.1kb)|KPNA1(-178.8kb)|WDR5B(-168.8kb)
1:91632641	1	91632641	A	?	8	4.513e-05	4.513e-05	1.3633	1.3633	0.5781	0	1.019	1.481	0.7291	1.322	1.47	1.516	NA	0.936	1.455	rs635408	HFM1(-93.68kb)|ZNF644(+144.8kb)
14:107184421	14	107184421	T	?	8	4.539e-05	4.569e-05	0.6767	0.6768	0.4288	0.02	1.242	0.6017	0.4635	0.9101	0.699	0.8446	1.855	0.5171	NA	rs7161496	.
14:107184887	14	107184887	A	?	8	4.539e-05	4.569e-05	0.6767	0.6768	0.4288	0.02	1.242	0.6017	0.4635	0.9101	0.699	0.8446	1.855	0.5171	NA	rs8003852	.
14:107185072	14	107185072	C	?	8	4.539e-05	4.569e-05	0.6767	0.6768	0.4288	0.02	1.242	0.6017	0.4635	0.9101	0.699	0.8446	1.855	0.5171	NA	rs988131	.
14:107185248	14	107185248	G	?	8	4.539e-05	4.569e-05	0.6767	0.6768	0.4288	0.02	1.242	0.6017	0.4635	0.9101	0.699	0.8446	1.855	0.5171	NA	rs8005518	.
14:107185393	14	107185393	C	?	8	4.539e-05	4.569e-05	0.6767	0.6768	0.4288	0.02	1.242	0.6017	0.4635	0.9101	0.699	0.8446	1.855	0.5171	NA	rs988130	.
14:107185502	14	107185502	T	?	8	4.539e-05	4.569e-05	0.6767	0.6768	0.4288	0.02	1.242	0.6017	0.4635	0.9101	0.699	0.8446	1.855	0.5171	NA	rs57684263	.
14:107185682	14	107185682	A	?	8	4.539e-05	4.569e-05	0.6767	0.6768	0.4288	0.02	1.242	0.6017	0.4635	0.9101	0.699	0.8446	1.855	0.5171	NA	rs74090068	.
14:107185862	14	107185862	T	?	8	4.539e-05	4.569e-05	0.6767	0.6768	0.4288	0.02	1.242	0.6017	0.4635	0.9101	0.699	0.8446	1.855	0.5171	NA	rs79901786	.
14:107186117	14	107186117	C	?	8	4.539e-05	4.569e-05	0.6767	0.6768	0.4288	0.02	1.242	0.6017	0.4635	0.9101	0.699	0.8446	1.855	0.5171	NA	rs112482675	.
14:107186469	14	107186469	T	?	8	4.539e-05	4.569e-05	0.6767	0.6768	0.4288	0.02	1.242	0.6017	0.4635	0.9101	0.699	0.8446	1.855	0.5171	NA	rs7152038	.
14:107186624	14	107186624	A	?	8	4.539e-05	4.569e-05	0.6767	0.6768	0.4288	0.02	1.242	0.6017	0.4635	0.9101	0.699	0.8446	1.855	0.5171	NA	rs7152809	.
14:107186666	14	107186666	T	?	8	4.539e-05	4.569e-05	0.6767	0.6768	0.4288	0.02	1.242	0.6017	0.4635	0.9101	0.699	0.8446	1.855	0.5171	NA	rs7152832	.
14:107186941	14	107186941	G	?	8	4.539e-05	4.569e-05	0.6767	0.6768	0.4288	0.02	1.242	0.6017	0.4635	0.9101	0.699	0.8446	1.855	0.5171	NA	rs7152934	.
14:107187312	14	107187312	A	?	8	4.539e-05	4.569e-05	0.6767	0.6768	0.4288	0.02	1.242	0.6017	0.4635	0.9101	0.699	0.8446	1.855	0.5171	NA	rs12050392	.
14:107187402	14	107187402	T	?	8	4.539e-05	4.569e-05	0.6767	0.6768	0.4288	0.02	1.242	0.6017	0.4635	0.9101	0.699	0.8446	1.855	0.5171	NA	rs74092505	.
14:107187413	14	107187413	G	?	8	4.539e-05	4.569e-05	0.6767	0.6768	0.4288	0.02	1.242	0.6017	0.4635	0.9101	0.699	0.8446	1.855	0.5171	NA	rs74092507	.
14:107187473	14	107187473	A	?	8	4.539e-05	4.569e-05	0.6767	0.6768	0.4288	0.02	1.242	0.6017	0.4635	0.9101	0.699	0.8446	1.855	0.5171	NA	rs74092511	.
14:107187545	14	107187545	C	?	8	4.539e-05	4.569e-05	0.6767	0.6768	0.4288	0.02	1.242	0.6017	0.4635	0.9101	0.699	0.8446	1.855	0.5171	NA	rs74092512	.
14:107187624	14	107187624	C	?	8	4.539e-05	4.569e-05	0.6767	0.6768	0.4288	0.02	1.242	0.6017	0.4635	0.9101	0.699	0.8446	1.855	0.5171	NA	rs74092514	.
14:107187871	14	107187871	C	?	8	4.539e-05	4.569e-05	0.6767	0.6768	0.4288	0.02	1.242	0.6017	0.4635	0.9101	0.699	0.8446	1.855	0.5171	NA	rs74092520	.
14:107188715	14	107188715	A	?	8	4.539e-05	4.569e-05	0.6767	0.6768	0.4288	0.02	1.242	0.6017	0.4635	0.9101	0.699	0.8446	1.855	0.5171	NA	rs4280141	.
14:107189016	14	107189016	T	?	8	4.539e-05	4.569e-05	0.6767	0.6768	0.4288	0.02	1.242	0.6017	0.4635	0.9101	0.699	0.8446	1.855	0.5171	NA	rs4456403	.
14:107189220	14	107189220	T	?	8	4.539e-05	4.569e-05	0.6767	0.6768	0.4288	0.02	1.242	0.6017	0.4635	0.9101	0.699	0.8446	1.855	0.5171	NA	rs12050200	.
14:107189360	14	107189360	G	?	8	4.539e-05	4.569e-05	0.6767	0.6768	0.4288	0.02	1.242	0.6017	0.4635	0.9101	0.699	0.8446	1.855	0.5171	NA	rs12050233	.
14:107189368	14	107189368	C	?	8	4.539e-05	4.569e-05	0.6767	0.6768	0.4288	0.02	1.242	0.6017	0.4635	0.9101	0.699	0.8446	1.855	0.5171	NA	rs12050466	.
14:107189369	14	107189369	A	?	8	4.539e-05	4.569e-05	0.6767	0.6768	0.4288	0.02	1.242	0.6017	0.4635	0.9101	0.699	0.8446	1.855	0.5171	NA	rs12050239	.
14:107189420	14	107189420	C	?	8	4.539e-05	4.569e-05	0.6767	0.6768	0.4288	0.02	1.242	0.6017	0.4635	0.9101	0.699	0.8446	1.855	0.5171	NA	rs59263250	.
14:107189493	14	107189493	T	?	8	4.539e-05	4.569e-05	0.6767	0.6768	0.4288	0.02	1.242	0.6017	0.4635	0.9101	0.699	0.8446	1.855	0.5171	NA	rs58083017	.
14:107189564	14	107189564	C	?	8	4.539e-05	4.569e-05	0.6767	0.6768	0.4288	0.02	1.242	0.6017	0.4635	0.9101	0.699	0.8446	1.855	0.5171	NA	rs60390024	.
14:107189600	14	107189600	A	?	8	4.539e-05	4.569e-05	0.6767	0.6768	0.4288	0.02	1.242	0.6017	0.4635	0.9101	0.699	0.8446	1.855	0.5171	NA	rs74092532	.
14:107189959	14	107189959	A	?	8	4.539e-05	4.569e-05	0.6767	0.6768	0.4288	0.02	1.242	0.6017	0.4635	0.9101	0.699	0.8446	1.855	0.5171	NA	rs74092535	.
14:107190120	14	107190120	T	?	8	4.539e-05	4.569e-05	0.6767	0.6768	0.4288	0.02	1.242	0.6017	0.4635	0.9101	0.699	0.8446	1.855	0.5171	NA	rs74092537	.
14:107190179	14	107190179	G	?	8	4.539e-05	4.569e-05	0.6767	0.6768	0.4288	0.02	1.242	0.6017	0.4635	0.9101	0.699	0.8446	1.855	0.5171	NA	rs74092538	.
12:91969845	12	91969845	C	?	8	4.54e-05	4.54e-05	2.1774	2.1774	0.7081	0	0.7332	1.72	2.043	4.126	3.933	0.8874	NA	2.272	2	rs73218613	.
9:6480382	9	6480382	T	?	9	4.551e-05	4.551e-05	1.4009	1.4009	0.7085	0	1.197	1.257	1.783	1.417	1.571	3.727	1.293	0.8806	1.53	rs4463484	GLDC(-52.08kb)|TPD52L3(+148.5kb)|UHRF2(0)
14:107213624	14	107213624	G	?	8	4.577e-05	0.0001424	0.6745	0.6802	0.4055	3.16	1.335	0.5917	0.4908	0.9101	0.708	0.7952	1.855	0.5171	NA	rs4774019	.
14:107214421	14	107214421	A	?	8	4.577e-05	0.0001424	0.6745	0.6802	0.4055	3.16	1.335	0.5917	0.4908	0.9101	0.708	0.7952	1.855	0.5171	NA	rs58850145	.
14:107215400	14	107215400	C	?	8	4.577e-05	0.0001424	0.6745	0.6802	0.4055	3.16	1.335	0.5917	0.4908	0.9101	0.708	0.7952	1.855	0.5171	NA	rs2027901	.
14:107218161	14	107218161	T	?	8	4.577e-05	0.0001424	0.6745	0.6802	0.4055	3.16	1.335	0.5917	0.4908	0.9101	0.708	0.7952	1.855	0.5171	NA	rs4774021	.
1:91633395	1	91633395	G	?	8	4.584e-05	4.584e-05	1.363	1.363	0.5788	0	1.019	1.481	0.7291	1.322	1.47	1.516	NA	0.936	1.453	rs428132	HFM1(-92.93kb)|ZNF644(+145.6kb)
1:91633434	1	91633434	C	?	8	4.584e-05	4.584e-05	1.363	1.363	0.5788	0	1.019	1.481	0.7291	1.322	1.47	1.516	NA	0.936	1.453	rs620760	HFM1(-92.89kb)|ZNF644(+145.6kb)
1:91633491	1	91633491	A	?	8	4.584e-05	4.584e-05	1.363	1.363	0.5788	0	1.019	1.481	0.7291	1.322	1.47	1.516	NA	0.936	1.453	rs369395	HFM1(-92.83kb)|ZNF644(+145.7kb)
1:91633695	1	91633695	A	?	8	4.584e-05	4.584e-05	1.363	1.363	0.5788	0	1.019	1.481	0.7291	1.322	1.47	1.516	NA	0.936	1.453	rs368954	HFM1(-92.63kb)|ZNF644(+145.9kb)
1:91635414	1	91635414	A	?	8	4.584e-05	4.584e-05	1.363	1.363	0.5788	0	1.019	1.481	0.7291	1.322	1.47	1.516	NA	0.936	1.453	rs404115	HFM1(-90.91kb)|ZNF644(+147.6kb)
7:67713943	7	67713943	T	?	9	4.587e-05	4.587e-05	1.3544	1.3544	0.4405	0	0.7836	1.171	2.04	1.284	1.488	1.047	1.216	1.875	1.742	rs3108028	.
17:39883276	17	39883276	C	?	7	4.6e-05	4.6e-05	0.4467	0.4467	0.9504	0	0.8793	0.3885	0.5574	0.5055	0.5045	NA	NA	0.1968	0.4608	rs7211719	ACLY(-139.9kb)|EIF1(+35.38kb)|FKBP10(-85.68kb)|GAST(+11.06kb)|HAP1(0)|JUP(-27.58kb)|KLHL10(-110.8kb)|KLHL11(-126.5kb)|KRT9(+155kb)|KRT14(+140.1kb)|KRT16(+114.2kb)|KRT17(+102.4kb)|KRT19(+198.6kb)|KRT42P(+86.82kb)|LEPREL4(-74.93kb)|LINC00974(+172.5kb)|NT5C3B(-98.06kb)
17:39887662	17	39887662	T	?	7	4.632e-05	4.632e-05	0.4308	0.4308	0.9437	0	1.098	0.4159	0.5574	0.324	0.4094	NA	NA	0.3504	0.3528	rs41312301	ACLY(-135.5kb)|EIF1(+39.76kb)|FKBP10(-81.3kb)|GAST(+15.44kb)|HAP1(0)|JUP(-23.2kb)|KLHL10(-106.4kb)|KLHL11(-122.1kb)|KRT9(+159.4kb)|KRT14(+144.5kb)|KRT16(+118.6kb)|KRT17(+106.8kb)|KRT42P(+91.21kb)|LEPREL4(-70.54kb)|LINC00974(+176.9kb)|NT5C3B(-93.67kb)|TTC25(-199.2kb)
17:39892360	17	39892360	T	?	7	4.632e-05	4.632e-05	0.4308	0.4308	0.9437	0	1.098	0.4159	0.5574	0.324	0.4094	NA	NA	0.3504	0.3528	rs78582841	ACLY(-130.8kb)|EIF1(+44.46kb)|FKBP10(-76.6kb)|GAST(+20.14kb)|HAP1(+1.462kb)|JUP(-18.5kb)|KLHL10(-101.7kb)|KLHL11(-117.4kb)|KRT9(+164kb)|KRT14(+149.2kb)|KRT16(+123.3kb)|KRT17(+111.5kb)|KRT42P(+95.91kb)|LEPREL4(-65.84kb)|LINC00974(+181.6kb)|NT5C3B(-88.97kb)|TTC25(-194.5kb)
17:39893493	17	39893493	C	?	7	4.632e-05	4.632e-05	0.4308	0.4308	0.9437	0	1.098	0.4159	0.5574	0.324	0.4094	NA	NA	0.3504	0.3528	rs117246866	ACLY(-129.7kb)|EIF1(+45.6kb)|FKBP10(-75.47kb)|GAST(+21.27kb)|HAP1(+2.595kb)|JUP(-17.36kb)|KLHL10(-100.5kb)|KLHL11(-116.3kb)|KRT9(+165.2kb)|KRT14(+150.3kb)|KRT16(+124.4kb)|KRT17(+112.6kb)|KRT42P(+97.04kb)|LEPREL4(-64.71kb)|LINC00974(+182.7kb)|NT5C3B(-87.84kb)|TTC25(-193.4kb)
14:107203881	14	107203881	G	?	8	4.642e-05	4.642e-05	0.6751	0.6751	0.4463	0	1.276	0.5963	0.4908	0.9101	0.6995	0.7952	1.855	0.5171	NA	rs78525520	.
14:107204214	14	107204214	T	?	8	4.642e-05	4.642e-05	0.6751	0.6751	0.4463	0	1.276	0.5963	0.4908	0.9101	0.6995	0.7952	1.855	0.5171	NA	rs7140974	.
1:26277088	1	26277088	C	?	9	4.645e-05	0.0001426	0.7027	0.6791	0.3242	13.21	0.592	0.8535	0.3057	0.815	0.7512	0.4791	0	0.475	0.5517	rs2782811	AUNIP(+91.24kb)|EXTL1(-71.18kb)|LOC646471(+127kb)|MAN1C1(+165.8kb)|MIR3917(+44.14kb)|MTFR1L(+117.7kb)|PAFAH2(-9.169kb)|PAQR7(+79.34kb)|PDIK1L(-160.6kb)|SEPN1(+132.4kb)|SLC30A2(-87.42kb)|STMN1(+43.72kb)|TRIM63(-100.7kb)
7:67704081	7	67704081	C	?	9	4.654e-05	7.98e-05	1.3536	1.3634	0.4007	4.11	0.7836	1.164	2.097	1.284	1.488	1.047	1.216	1.875	1.745	rs75044462	.
7:67696871	7	67696871	C	?	9	4.673e-05	0.0002285	1.354	1.3822	0.3214	13.55	0.7836	1.156	2.114	1.28	1.488	1.568	0.542	1.973	1.733	rs11982686	.
8:90047427	8	90047427	C	?	9	4.686e-05	4.686e-05	1.2864	1.2864	0.8328	0	2.289	1.279	1.085	1.417	1.155	1.57	2.096	1.344	1.259	rs1240117	.
16:79993792	16	79993792	T	?	9	4.727e-05	4.727e-05	0.7298	0.7298	0.8398	0	0.488	0.7404	0.7665	0.5709	0.6662	0.8899	1.204	1.203	0.7322	rs4243192	.
13:83608768	13	83608768	A	?	9	4.731e-05	4.731e-05	1.4229	1.4229	0.4908	0	2.056	1.403	1.501	1.134	1.815	6.079	0.7134	1.508	1.157	rs2807497	.
13:83611964	13	83611964	T	?	9	4.731e-05	4.731e-05	1.4229	1.4229	0.4908	0	2.056	1.403	1.501	1.134	1.815	6.079	0.7134	1.508	1.157	rs13378948	.
3:121956953	3	121956953	G	?	9	4.752e-05	0.004949	0.7025	0.7339	0.2463	22.13	2.077	0.5872	0.8619	0.9161	0.814	0.4952	0.304	0.6311	0.6449	rs2134223	CASR(0)|CCDC58(-121.5kb)|CD86(+117kb)|CSTA(-87.06kb)|FAM162A(-146.1kb)|KPNA1(-183.8kb)|WDR5B(-173.7kb)
15:68292792	15	68292792	A	?	6	4.779e-05	0.0007148	3.0941	3.1957	0.2337	26.79	NA	1.918	5.026	0.9806	8.577	NA	NA	2.958	5.777	rs141936876	CALML4(-190.2kb)|MAP2K5(+193.3kb)|PIAS1(-53.78kb)|SKOR1(+166.6kb)
1:247517270	1	247517270	C	?	8	4.796e-05	4.796e-05	1.9024	1.9024	0.7855	0	3.721	2.072	1.282	1.059	2.391	1.406	3.849	2.031	NA	rs112561474	GCSAML(-195.2kb)|GCSAML-AS1(-170.7kb)|MIR3916(+151.9kb)|NLRP3(-62.19kb)|OR2B11(-97.06kb)|OR2C3(-176.2kb)|OR2W5(-137.1kb)|VN1R5(+96.82kb)|ZNF124(+182kb)|ZNF496(+22.22kb)
13:83832609	13	83832609	A	?	9	4.805e-05	4.805e-05	1.4853	1.4853	0.5903	0	1.668	1.17	1.545	1.388	2.247	2.702	2.749	1.619	1.673	rs1960743	.
18:26682963	18	26682963	G	?	8	4.811e-05	0.0006103	0.7169	0.675	0.1641	33.07	0.7599	0.8305	0.3205	0.7512	0.4575	0.8473	NA	0.6467	0.8003	rs1833421	.
12:30434196	12	30434196	A	?	8	4.834e-05	4.834e-05	0.6996	0.6996	0.5224	0	1.285	0.7343	0.8526	0.8077	0.4845	0.6924	NA	0.9734	0.5506	rs2195538	.
6:105014550	6	105014550	T	?	9	4.848e-05	0.002726	0.6812	0.6736	0.1676	31.32	0.928	0.6873	0.5967	1.127	0.4784	1.3	0.5159	0.2245	0.7176	rs67933546	HACE1(-161.4kb)
8:90047848	8	90047848	A	?	9	4.854e-05	4.854e-05	1.2854	1.2854	0.8317	0	2.289	1.283	1.085	1.392	1.155	1.511	2.227	1.344	1.256	rs1240115	.
6:8925809	6	8925809	T	?	9	4.88e-05	4.88e-05	1.7311	1.7311	0.8721	0	2.101	1.745	3.412	1.823	1.361	1.121	0	0.6349	2.156	rs9406224	LOC100506207(+140.1kb)
17:31322234	17	31322234	C	?	8	4.884e-05	4.884e-05	1.3477	1.3477	0.8951	0	1.127	1.341	1.191	1.389	1.718	0.9283	NA	1.085	1.273	rs28966	ASIC2(-17.87kb)|MYO1D(+118.3kb)|SPACA3(0)|TMEM98(+53.57kb)
18:26681784	18	26681784	C	?	8	4.91e-05	0.0006252	0.7172	0.6752	0.1633	33.16	0.7599	0.8305	0.3205	0.7512	0.4575	0.8541	NA	0.6467	0.8014	rs10502522	.
1:91635676	1	91635676	C	?	8	4.933e-05	4.933e-05	1.3612	1.3612	0.5827	0	1.019	1.481	0.7291	1.322	1.456	1.516	NA	0.936	1.453	rs6692888	HFM1(-90.65kb)|ZNF644(+147.9kb)
1:91635862	1	91635862	A	?	8	4.933e-05	4.933e-05	1.3612	1.3612	0.5827	0	1.019	1.481	0.7291	1.322	1.456	1.516	NA	0.936	1.453	rs10801841	HFM1(-90.46kb)|ZNF644(+148kb)
1:91635925	1	91635925	A	?	8	4.933e-05	4.933e-05	1.3612	1.3612	0.5827	0	1.019	1.481	0.7291	1.322	1.456	1.516	NA	0.936	1.453	rs10801842	HFM1(-90.4kb)|ZNF644(+148.1kb)
1:26275683	1	26275683	A	?	9	4.94e-05	0.0001421	0.7035	0.681	0.3301	12.53	0.592	0.8535	0.3057	0.815	0.7512	0.4791	0	0.475	0.5548	rs2992067	AUNIP(+89.84kb)|EXTL1(-72.59kb)|LOC646471(+125.6kb)|MAN1C1(+164.4kb)|MIR3917(+42.74kb)|MTFR1L(+116.2kb)|PAFAH2(-10.57kb)|PAQR7(+77.94kb)|PDIK1L(-162kb)|SEPN1(+131kb)|SLC30A2(-88.83kb)|STMN1(+42.32kb)|TRIM63(-102.1kb)
6:104982520	6	104982520	T	?	9	4.945e-05	0.002212	0.6827	0.6782	0.1982	27.69	0.928	0.6801	0.5967	1.127	0.5139	1.248	0.5159	0.2245	0.7291	rs6918624	HACE1(-193.4kb)
6:104983641	6	104983641	A	?	9	4.945e-05	0.002212	0.6827	0.6782	0.1982	27.69	0.928	0.6801	0.5967	1.127	0.5139	1.248	0.5159	0.2245	0.7291	rs9404556	HACE1(-192.3kb)
9:6452927	9	6452927	C	?	9	4.954e-05	0.0002328	1.4419	1.4613	0.3442	10.89	0.9938	1.3	2.304	1.309	1.694	5.935	0.7682	0.8503	1.534	rs1870696	GLDC(-79.54kb)|IL33(+194.9kb)|TPD52L3(+121kb)|UHRF2(0)
2:237237602	2	237237602	T	?	9	4.973e-05	4.973e-05	0.7829	0.7829	0.4382	0	0.7493	0.905	0.7467	0.6795	0.7161	1.3	0.4185	0.7921	0.6313	rs7570322	AGAP1(+197.2kb)|ASB18(+64.61kb)|GBX2(+161kb)|IQCA1(0)
7:152311029	7	152311029	A	?	7	4.993e-05	4.993e-05	2.2262	2.2262	0.554	0	1.592	1.666	2.584	1.961	4.964	NA	NA	6.964	1.766	rs182985935	ACTR3B(-145.8kb)|FABP5P3(+170.9kb)|KMT2C(+177.9kb)|LOC100128822(+148.4kb)|XRCC2(-32.56kb)
12:124934109	12	124934109	G	?	8	5.009e-05	0.0003604	1.8313	1.8612	0.333	12.45	1.456	1.777	5.633	4.771	2.135	NA	18.98	0.5715	1.607	rs73225433	FAM101A(+133.5kb)|NCOR2(0)|ZNF664-FAM101A(+133.5kb)
14:107185913	14	107185913	A	?	8	5.02e-05	0.01907	0.6424	0.6903	0.1727	31.98	1.264	0.5512	0.3467	0.8298	0.7228	1.338	3.461	0.4735	NA	rs113957724	.
6:8952787	6	8952787	T	?	9	5.043e-05	5.043e-05	1.7421	1.7421	0.8188	0	1.25	1.745	3.412	2.254	1.34	1.121	0	0.6349	2.225	rs79522211	LOC100506207(+167.1kb)
14:78126626	14	78126626	T	?	9	5.067e-05	5.067e-05	1.2852	1.2852	0.4666	0	1.037	1.395	1.415	1.242	1.079	1.621	2.035	0.6489	1.357	rs4899667	ADCK1(-139.8kb)|AHSA1(+190.8kb)|ALKBH1(-12.12kb)|C14orf178(-100.5kb)|ISM2(+161.4kb)|SLIRP(-47.79kb)|SNW1(-57.32kb)|SPTLC2(+43.52kb)
12:91983572	12	91983572	T	?	8	5.093e-05	5.093e-05	2.1349	2.1349	0.7028	0	0.7332	1.594	1.622	4.126	3.933	2.55	NA	2.272	2	rs73202546	.
14:21042460	14	21042460	A	?	9	5.094e-05	5.094e-05	2.1721	2.1721	0.7718	0	1.811	2.105	1.279	3.139	2.71	0.8256	28.48	8.636	1.827	rs1243633	ANG(-109.9kb)|APEX1(+116.5kb)|EDDM3A(-171.6kb)|EDDM3B(-194.1kb)|KLHL33(+138.7kb)|OR6S1(-66.39kb)|OSGEP(+119.2kb)|PNP(+96.3kb)|RNASE4(-109.9kb)|RNASE9(+13.37kb)|RNASE10(+63.18kb)|RNASE11(-8.591kb)|RNASE12(-15.78kb)|TEP1(+160.9kb)|TMEM55B(+112.8kb)
21:24407361	21	24407361	G	?	9	5.098e-05	0.02571	1.4445	1.3579	0.1051	39.4	1.815	1.751	0.6726	1.28	1.394	6.174	1.836	0.5313	1.366	rs62208529	.
13:83472184	13	83472184	A	?	9	5.104e-05	5.104e-05	1.4958	1.4958	0.458	0	1.881	1.606	1.574	1.343	1.746	8.405	0.8122	1.227	1.075	rs2015370	.
13:83472384	13	83472384	A	?	9	5.104e-05	5.104e-05	1.4958	1.4958	0.458	0	1.881	1.606	1.574	1.343	1.746	8.405	0.8122	1.227	1.075	rs1011544	.
13:83473176	13	83473176	T	?	9	5.104e-05	5.104e-05	1.4958	1.4958	0.458	0	1.881	1.606	1.574	1.343	1.746	8.405	0.8122	1.227	1.075	rs1601779	.
13:83474301	13	83474301	C	?	9	5.104e-05	5.104e-05	1.4958	1.4958	0.458	0	1.881	1.606	1.574	1.343	1.746	8.405	0.8122	1.227	1.075	rs1948118	.
13:83474475	13	83474475	C	?	9	5.104e-05	5.104e-05	1.4958	1.4958	0.458	0	1.881	1.606	1.574	1.343	1.746	8.405	0.8122	1.227	1.075	rs1948119	.
13:83475653	13	83475653	C	?	9	5.104e-05	5.104e-05	1.4958	1.4958	0.458	0	1.881	1.606	1.574	1.343	1.746	8.405	0.8122	1.227	1.075	rs1487782	.
13:83476126	13	83476126	A	?	9	5.104e-05	5.104e-05	1.4958	1.4958	0.458	0	1.881	1.606	1.574	1.343	1.746	8.405	0.8122	1.227	1.075	rs990228	.
13:83476335	13	83476335	T	?	9	5.104e-05	5.104e-05	1.4958	1.4958	0.458	0	1.881	1.606	1.574	1.343	1.746	8.405	0.8122	1.227	1.075	rs990229	.
13:83479609	13	83479609	A	?	9	5.104e-05	5.104e-05	1.4958	1.4958	0.458	0	1.881	1.606	1.574	1.343	1.746	8.405	0.8122	1.227	1.075	rs7995155	.
13:83479703	13	83479703	A	?	9	5.104e-05	5.104e-05	1.4958	1.4958	0.458	0	1.881	1.606	1.574	1.343	1.746	8.405	0.8122	1.227	1.075	rs7995210	.
13:83479784	13	83479784	T	?	9	5.104e-05	5.104e-05	1.4958	1.4958	0.458	0	1.881	1.606	1.574	1.343	1.746	8.405	0.8122	1.227	1.075	rs7996902	.
13:83480196	13	83480196	T	?	9	5.104e-05	5.104e-05	1.4958	1.4958	0.458	0	1.881	1.606	1.574	1.343	1.746	8.405	0.8122	1.227	1.075	rs985334	.
13:83480871	13	83480871	A	?	9	5.104e-05	5.104e-05	1.4958	1.4958	0.458	0	1.881	1.606	1.574	1.343	1.746	8.405	0.8122	1.227	1.075	rs1336908	.
13:83481377	13	83481377	C	?	9	5.104e-05	5.104e-05	1.4958	1.4958	0.458	0	1.881	1.606	1.574	1.343	1.746	8.405	0.8122	1.227	1.075	rs1336907	.
13:83481510	13	83481510	G	?	9	5.104e-05	5.104e-05	1.4958	1.4958	0.458	0	1.881	1.606	1.574	1.343	1.746	8.405	0.8122	1.227	1.075	rs1336906	.
13:83482217	13	83482217	A	?	9	5.104e-05	5.104e-05	1.4958	1.4958	0.458	0	1.881	1.606	1.574	1.343	1.746	8.405	0.8122	1.227	1.075	rs2011466	.
13:83482883	13	83482883	T	?	9	5.104e-05	5.104e-05	1.4958	1.4958	0.458	0	1.881	1.606	1.574	1.343	1.746	8.405	0.8122	1.227	1.075	rs7993643	.
13:83484398	13	83484398	C	?	9	5.104e-05	5.104e-05	1.4958	1.4958	0.458	0	1.881	1.606	1.574	1.343	1.746	8.405	0.8122	1.227	1.075	rs1336915	.
13:83484470	13	83484470	A	?	9	5.104e-05	5.104e-05	1.4958	1.4958	0.458	0	1.881	1.606	1.574	1.343	1.746	8.405	0.8122	1.227	1.075	rs1336914	.
13:83484832	13	83484832	G	?	9	5.104e-05	5.104e-05	1.4958	1.4958	0.458	0	1.881	1.606	1.574	1.343	1.746	8.405	0.8122	1.227	1.075	rs1352298	.
13:83485060	13	83485060	A	?	9	5.104e-05	5.104e-05	1.4958	1.4958	0.458	0	1.881	1.606	1.574	1.343	1.746	8.405	0.8122	1.227	1.075	rs1336912	.
13:83485146	13	83485146	T	?	9	5.104e-05	5.104e-05	1.4958	1.4958	0.458	0	1.881	1.606	1.574	1.343	1.746	8.405	0.8122	1.227	1.075	rs1336911	.
13:83485224	13	83485224	T	?	9	5.104e-05	5.104e-05	1.4958	1.4958	0.458	0	1.881	1.606	1.574	1.343	1.746	8.405	0.8122	1.227	1.075	rs1336910	.
17:39883520	17	39883520	A	?	7	5.147e-05	5.147e-05	0.4324	0.4324	0.922	0	1.098	0.4159	0.5574	0.324	0.4094	NA	NA	0.1968	0.4055	rs41312300	ACLY(-139.7kb)|EIF1(+35.62kb)|FKBP10(-85.44kb)|GAST(+11.3kb)|HAP1(0)|JUP(-27.34kb)|KLHL10(-110.5kb)|KLHL11(-126.3kb)|KRT9(+155.2kb)|KRT14(+140.4kb)|KRT16(+114.4kb)|KRT17(+102.6kb)|KRT19(+198.9kb)|KRT42P(+87.07kb)|LEPREL4(-74.68kb)|LINC00974(+172.8kb)|NT5C3B(-97.81kb)
3:172349882	3	172349882	C	?	8	5.152e-05	5.152e-05	0.7334	0.7334	0.6481	0	0.8276	0.6589	0.7701	0.8818	0.6468	0.2624	NA	1.034	0.8639	rs71310518	ECT2(-118.6kb)|GHSR(+183.6kb)|NCEH1(0)|TNFSF10(+108.6kb)
7:67731788	7	67731788	T	?	9	5.153e-05	5.153e-05	1.3515	1.3515	0.4807	0	0.7836	1.174	1.971	1.314	1.528	0.8548	1.217	1.848	1.689	rs3113131	.
13:83460589	13	83460589	A	?	9	5.156e-05	5.156e-05	1.4955	1.4955	0.4559	0	1.881	1.606	1.574	1.343	1.746	8.583	0.8122	1.227	1.075	rs1386707	.
13:83460769	13	83460769	G	?	9	5.156e-05	5.156e-05	1.4955	1.4955	0.4559	0	1.881	1.606	1.574	1.343	1.746	8.583	0.8122	1.227	1.075	rs4884206	.
13:83460857	13	83460857	T	?	9	5.156e-05	5.156e-05	1.4955	1.4955	0.4559	0	1.881	1.606	1.574	1.343	1.746	8.583	0.8122	1.227	1.075	rs9546257	.
13:83462232	13	83462232	C	?	9	5.156e-05	5.156e-05	1.4955	1.4955	0.4559	0	1.881	1.606	1.574	1.343	1.746	8.583	0.8122	1.227	1.075	rs2029290	.
13:83463604	13	83463604	T	?	9	5.156e-05	5.156e-05	1.4955	1.4955	0.4559	0	1.881	1.606	1.574	1.343	1.746	8.583	0.8122	1.227	1.075	rs2046671	.
13:83464491	13	83464491	C	?	9	5.156e-05	5.156e-05	1.4955	1.4955	0.4559	0	1.881	1.606	1.574	1.343	1.746	8.583	0.8122	1.227	1.075	rs1466618	.
13:83464901	13	83464901	C	?	9	5.156e-05	5.156e-05	1.4955	1.4955	0.4559	0	1.881	1.606	1.574	1.343	1.746	8.583	0.8122	1.227	1.075	rs9531396	.
13:83465009	13	83465009	C	?	9	5.156e-05	5.156e-05	1.4955	1.4955	0.4559	0	1.881	1.606	1.574	1.343	1.746	8.583	0.8122	1.227	1.075	rs9546260	.
13:83465636	13	83465636	T	?	9	5.156e-05	5.156e-05	1.4955	1.4955	0.4559	0	1.881	1.606	1.574	1.343	1.746	8.583	0.8122	1.227	1.075	rs1965951	.
13:83465714	13	83465714	G	?	9	5.156e-05	5.156e-05	1.4955	1.4955	0.4559	0	1.881	1.606	1.574	1.343	1.746	8.583	0.8122	1.227	1.075	rs1466619	.
13:83465959	13	83465959	A	?	9	5.156e-05	5.156e-05	1.4955	1.4955	0.4559	0	1.881	1.606	1.574	1.343	1.746	8.583	0.8122	1.227	1.075	rs7321742	.
13:83467686	13	83467686	A	?	9	5.156e-05	5.156e-05	1.4955	1.4955	0.4559	0	1.881	1.606	1.574	1.343	1.746	8.583	0.8122	1.227	1.075	rs7334304	.
13:83468772	13	83468772	T	?	9	5.156e-05	5.156e-05	1.4955	1.4955	0.4559	0	1.881	1.606	1.574	1.343	1.746	8.583	0.8122	1.227	1.075	rs7983406	.
13:83468865	13	83468865	T	?	9	5.156e-05	5.156e-05	1.4955	1.4955	0.4559	0	1.881	1.606	1.574	1.343	1.746	8.583	0.8122	1.227	1.075	rs7983576	.
13:83470463	13	83470463	T	?	9	5.156e-05	5.156e-05	1.4955	1.4955	0.4559	0	1.881	1.606	1.574	1.343	1.746	8.583	0.8122	1.227	1.075	rs5000819	.
13:83470722	13	83470722	G	?	9	5.156e-05	5.156e-05	1.4955	1.4955	0.4559	0	1.881	1.606	1.574	1.343	1.746	8.583	0.8122	1.227	1.075	rs1487781	.
13:83471185	13	83471185	T	?	9	5.156e-05	5.156e-05	1.4955	1.4955	0.4559	0	1.881	1.606	1.574	1.343	1.746	8.583	0.8122	1.227	1.075	rs7491457	.
13:83485716	13	83485716	A	?	9	5.156e-05	5.156e-05	1.4955	1.4955	0.4559	0	1.881	1.606	1.574	1.343	1.746	8.583	0.8122	1.227	1.075	rs1487779	.
9:6467989	9	6467989	C	?	9	5.161e-05	5.161e-05	1.3953	1.3953	0.7748	0	1.142	1.274	1.668	1.417	1.512	3.727	1.293	0.9317	1.53	rs11791651	GLDC(-64.47kb)|TPD52L3(+136.1kb)|UHRF2(0)
9:6470639	9	6470639	G	?	9	5.163e-05	5.163e-05	1.3958	1.3958	0.7733	0	1.197	1.265	1.668	1.417	1.551	3.727	1.293	0.9317	1.51	rs4380997	GLDC(-61.82kb)|TPD52L3(+138.7kb)|UHRF2(0)
5:173553760	5	173553760	C	?	9	5.193e-05	5.193e-05	0.7482	0.7482	0.4368	0	0.5707	0.8102	1.03	0.6252	0.5859	1.588	0.1873	0.6403	0.7346	rs6877384	C5orf47(+120.6kb)|CPEB4(+166.4kb)|HMP19(+17.58kb)
8:90054434	8	90054434	C	?	9	5.216e-05	5.216e-05	1.2846	1.2846	0.8312	0	2.289	1.278	1.086	1.416	1.162	1.565	2.225	1.344	1.247	rs28715566	.
8:90055829	8	90055829	C	?	9	5.216e-05	5.216e-05	1.2846	1.2846	0.8312	0	2.289	1.278	1.086	1.416	1.162	1.565	2.225	1.344	1.247	rs12114264	.
6:8947676	6	8947676	G	?	9	5.25e-05	5.25e-05	1.7394	1.7394	0.8229	0	1.25	1.745	3.412	2.254	1.34	1.121	0	0.6349	2.203	rs78712483	LOC100506207(+162kb)
6:8955787	6	8955787	A	?	9	5.25e-05	5.25e-05	1.7394	1.7394	0.8229	0	1.25	1.745	3.412	2.254	1.34	1.121	0	0.6349	2.203	rs28593265	LOC100506207(+170.1kb)
6:8957055	6	8957055	A	?	9	5.25e-05	5.25e-05	1.7394	1.7394	0.8229	0	1.25	1.745	3.412	2.254	1.34	1.121	0	0.6349	2.203	rs7450592	LOC100506207(+171.4kb)
1:26287563	1	26287563	T	?	9	5.268e-05	5.268e-05	0.7179	0.7179	0.5725	0	0.5174	0.8108	0.3967	0.7365	0.9115	0.4638	0	0.7104	0.6097	rs2012311	AUNIP(+101.7kb)|EXTL1(-60.71kb)|FAM110D(-197.9kb)|LOC646471(+137.5kb)|MAN1C1(+176.3kb)|MIR3917(+54.62kb)|MTFR1L(+128.1kb)|PAFAH2(0)|PAQR7(+89.82kb)|PDIK1L(-150.1kb)|SEPN1(+142.8kb)|SLC30A2(-76.95kb)|STMN1(+54.2kb)|TRIM63(-90.23kb)
7:100635205	7	100635205	T	?	7	5.332e-05	5.332e-05	1.6264	1.6264	0.8781	0	2.37	1.48	1.318	1.395	1.555	NA	NA	1.144	2.159	rs4729631	ACHE(+141.7kb)|AP1S1(-162.5kb)|MIR4653(-167.5kb)|MUC12(0)|MUC17(-28.16kb)|NAT16(-178.6kb)|SERPINE1(-135.2kb)|SLC12A9(+170.6kb)|SRRT(+148.9kb)|TRIM56(-93.58kb)|TRIP6(+164.1kb)|UFSP1(+147.9kb)|VGF(-170.6kb)
7:100649364	7	100649364	T	?	7	5.332e-05	5.332e-05	1.6264	1.6264	0.8781	0	2.37	1.48	1.318	1.395	1.555	NA	NA	1.144	2.159	rs4729638	ACHE(+155.8kb)|AP1S1(-148.3kb)|MIR4653(-153.4kb)|MOGAT3(-189.6kb)|MUC12(0)|MUC17(-14kb)|NAT16(-164.4kb)|PLOD3(-199.9kb)|SERPINE1(-121kb)|SLC12A9(+184.7kb)|SRRT(+163.1kb)|TRIM56(-79.42kb)|TRIP6(+178.3kb)|UFSP1(+162kb)|VGF(-156.4kb)
7:100649371	7	100649371	T	?	7	5.332e-05	5.332e-05	1.6264	1.6264	0.8781	0	2.37	1.48	1.318	1.395	1.555	NA	NA	1.144	2.159	rs4729639	ACHE(+155.8kb)|AP1S1(-148.3kb)|MIR4653(-153.4kb)|MOGAT3(-189.6kb)|MUC12(0)|MUC17(-13.99kb)|NAT16(-164.4kb)|PLOD3(-199.9kb)|SERPINE1(-121kb)|SLC12A9(+184.7kb)|SRRT(+163.1kb)|TRIM56(-79.41kb)|TRIP6(+178.3kb)|UFSP1(+162kb)|VGF(-156.4kb)
18:584724	18	584724	A	?	8	5.354e-05	5.354e-05	2.0527	2.0527	0.6219	0	2.434	1.573	1.203	1.621	3.284	15.48	NA	1.987	1.729	rs117936445	C18orf56(-64.9kb)|CETN1(+3.2kb)|CLUL1(-12.27kb)|COLEC12(+84kb)|ENOSF1(-85.6kb)|TYMS(-72.88kb)|YES1(-136.9kb)
6:8941693	6	8941693	G	?	9	5.357e-05	5.357e-05	1.7337	1.7337	0.8211	0	2.101	1.704	3.412	2.254	1.307	1.121	0	0.6349	2.19	rs74186116	LOC100506207(+156kb)
8:90047329	8	90047329	G	?	9	5.357e-05	5.357e-05	1.2835	1.2835	0.8468	0	2.289	1.279	1.085	1.392	1.155	1.511	2.096	1.344	1.259	rs1240118	.
4:178470496	4	178470496	C	?	9	5.383e-05	5.383e-05	0.7802	0.7802	0.504	0	1.382	0.7218	0.5636	0.7267	0.9018	0.7975	0.6625	0.7685	0.8944	rs4414903	AGA(+106.8kb)|LOC285501(-179.4kb)|NEIL3(+186.4kb)
14:107206459	14	107206459	T	?	8	5.468e-05	5.468e-05	0.6778	0.6778	0.4578	0	1.276	0.6012	0.4908	0.9101	0.6995	0.7952	1.855	0.5171	NA	rs6576234	.
14:107207960	14	107207960	C	?	8	5.468e-05	5.468e-05	0.6778	0.6778	0.4578	0	1.276	0.6012	0.4908	0.9101	0.6995	0.7952	1.855	0.5171	NA	rs76871148	.
13:83851345	13	83851345	C	?	9	5.476e-05	5.476e-05	1.478	1.478	0.7066	0	1.43	1.195	1.545	1.388	2.134	2.703	2.749	1.619	1.64	rs58905215	.
13:83522203	13	83522203	G	?	9	5.482e-05	5.482e-05	1.4917	1.4917	0.4416	0	1.881	1.582	1.574	1.343	1.816	8.097	0.8122	1.227	1.058	rs1361013	.
7:67737779	7	67737779	G	?	9	5.507e-05	5.507e-05	1.3487	1.3487	0.5175	0	0.8461	1.167	1.985	1.344	1.496	0.8534	1.217	2.008	1.649	rs7805567	.
7:67738116	7	67738116	T	?	9	5.507e-05	5.507e-05	1.3487	1.3487	0.5175	0	0.8461	1.167	1.985	1.344	1.496	0.8534	1.217	2.008	1.649	rs6460442	.
13:83556654	13	83556654	A	?	9	5.52e-05	5.52e-05	1.5487	1.5487	0.7189	0	1.455	1.649	1.473	1.336	1.978	5.033	1.126	1.304	1.091	rs2633056	.
6:105021095	6	105021095	T	?	9	5.536e-05	0.002937	0.6837	0.6761	0.1674	31.34	0.928	0.6877	0.5967	1.127	0.4794	1.3	0.5159	0.2245	0.7283	rs67017910	HACE1(-154.9kb)
7:67725066	7	67725066	A	?	9	5.539e-05	5.539e-05	1.3493	1.3493	0.4594	0	0.7836	1.171	1.971	1.313	1.488	0.8548	1.216	1.875	1.715	rs3113128	.
4:183759513	4	183759513	A	?	8	5.559e-05	5.559e-05	0.7795	0.7795	0.8115	0	0.7354	0.7439	0.8009	1.069	0.7422	NA	0.6617	0.9954	0.7329	rs6845890	DCTD(-51.73kb)|FAM92A1P2(-199.3kb)|TENM3(+35.34kb)
15:33201641	15	33201641	A	?	8	5.561e-05	5.561e-05	1.9068	1.9068	0.5496	0	2.456	1.734	1.266	3.46	2.799	2.24	NA	0.2881	1.843	rs28508587	FMN1(0)|GREM1(+174.8kb)
15:68309490	15	68309490	T	?	6	5.581e-05	0.0006178	3.0601	3.1485	0.2548	23.87	NA	1.918	5.026	0.9806	8.168	NA	NA	2.958	5.674	rs138486265	CALML4(-173.6kb)|CLN6(-189.8kb)|PIAS1(-37.08kb)|SKOR1(+183.3kb)
4:156558695	4	156558695	A	?	9	5.585e-05	0.005902	0.7695	0.776	0.1718	30.81	0.3048	0.7262	0.6839	0.9906	0.9752	1.734	0.4801	0.6822	0.7875	rs2705434	ASIC5(-192.2kb)|GUCY1A3(-29.17kb)|GUCY1B3(-121.4kb)
6:8912672	6	8912672	T	?	9	5.603e-05	5.603e-05	1.74	1.74	0.8568	0	1.25	1.836	3.412	1.823	1.342	1.148	0	0.6349	2.157	rs9392243	LOC100506207(+127kb)
14:94283438	14	94283438	A	?	9	5.619e-05	0.001947	1.2774	1.3107	0.1413	34.58	1.474	1.283	1.023	1.481	1.533	3.19	1.741	1.687	0.9346	rs7147221	ASB2(-117.1kb)|FAM181A(-101.8kb)|FAM181A-AS1(-87.64kb)|LINC00521(-180.2kb)|PRIMA1(+28.67kb)|UNC79(+109.7kb)
8:135509642	8	135509642	T	?	9	5.625e-05	0.0009992	1.3601	1.3749	0.24	22.86	1.82	1.429	1.222	2.174	1.367	2.307	1.521	1.147	0.93	rs13252520	ZFAT(0)|ZFAT-AS1(-100.7kb)
22:49060987	22	49060987	A	?	9	5.642e-05	0.0004171	0.7542	0.7276	0.2023	27.21	0.3575	0.7748	0.6389	0.6609	0.7715	1.049	0.5396	0.3914	0.9545	rs4925399	FAM19A5(0)|LOC284933(+117.8kb)|MIR4535(-115.1kb)
8:90047496	8	90047496	C	?	9	5.708e-05	5.708e-05	1.2826	1.2826	0.8471	0	2.289	1.274	1.085	1.392	1.155	1.511	2.096	1.344	1.265	rs1240116	.
6:104986467	6	104986467	A	?	9	5.753e-05	0.002317	0.685	0.6796	0.1987	27.63	0.928	0.6863	0.5967	1.127	0.5139	1.248	0.5159	0.2245	0.7266	rs9377650	HACE1(-189.5kb)
7:67733661	7	67733661	T	?	9	5.756e-05	5.756e-05	1.349	1.349	0.4692	0	0.7836	1.174	1.971	1.314	1.488	0.8548	1.217	2.008	1.689	rs3108043	.
14:107209329	14	107209329	G	?	8	5.763e-05	5.763e-05	0.6782	0.6782	0.4573	0	1.276	0.6012	0.4908	0.9101	0.7028	0.7952	1.855	0.5171	NA	rs61521632	.
13:83839737	13	83839737	A	?	9	5.765e-05	5.765e-05	1.4772	1.4772	0.5752	0	1.176	1.188	1.545	1.345	2.287	2.703	2.749	1.619	1.683	rs61959947	.
3:160094987	3	160094987	A	?	8	5.794e-05	5.794e-05	0.5089	0.5089	0.885	0	0.9833	0.4936	0.4016	0.4222	0.6375	0.0465	NA	0.3334	0.5582	rs73154564	C3orf80(+149kb)|IFT80(0)|KPNA4(-117.8kb)|MIR15B(-27.39kb)|MIR16-2(-27.54kb)|SCARNA7(-137.7kb)|SMC4(-22.44kb)|TRIM59(-58.3kb)
6:8913849	6	8913849	A	?	9	5.836e-05	5.836e-05	1.738	1.738	0.8589	0	1.25	1.836	3.412	1.823	1.342	1.148	0	0.6349	2.145	rs56682811	LOC100506207(+128.2kb)
6:104993712	6	104993712	C	?	9	5.922e-05	0.002619	0.6856	0.6804	0.19	28.64	0.928	0.6863	0.5967	1.127	0.5139	1.3	0.5159	0.2245	0.7243	rs17521744	HACE1(-182.3kb)
6:105000568	6	105000568	G	?	9	5.922e-05	0.002619	0.6856	0.6804	0.19	28.64	0.928	0.6863	0.5967	1.127	0.5139	1.3	0.5159	0.2245	0.7243	rs9404562	HACE1(-175.4kb)
6:105001328	6	105001328	T	?	9	5.922e-05	0.002619	0.6856	0.6804	0.19	28.64	0.928	0.6863	0.5967	1.127	0.5139	1.3	0.5159	0.2245	0.7243	rs67875873	HACE1(-174.6kb)
6:105001543	6	105001543	T	?	9	5.922e-05	0.002619	0.6856	0.6804	0.19	28.64	0.928	0.6863	0.5967	1.127	0.5139	1.3	0.5159	0.2245	0.7243	rs9377655	HACE1(-174.4kb)
11:32085341	11	32085341	T	?	8	5.926e-05	5.926e-05	0.3919	0.3919	0.8692	0	NA	0.4419	0.0989	0.2089	0.1849	0.4782	0	0.4171	0.5217	rs117083834	DKFZp686K1684(+176.8kb)|RCN1(-27.14kb)
20:42640504	20	42640504	T	?	8	5.934e-05	5.934e-05	1.89	1.89	0.4981	0	0.4276	1.644	1.488	1.747	3.855	4.44	NA	1.846	1.54	rs4437026	JPH2(-99.83kb)|OSER1(-184.1kb)|OSER1-AS1(-199.1kb)|TOX2(0)
6:104990694	6	104990694	T	?	9	5.934e-05	0.002623	0.6856	0.6805	0.19	28.64	0.928	0.6863	0.5967	1.127	0.5139	1.3	0.5159	0.2245	0.7245	rs67780931	HACE1(-185.3kb)
1:26275548	1	26275548	G	?	9	5.935e-05	0.0001289	0.7068	0.6897	0.359	9.14	0.592	0.8519	0.3057	0.815	0.7512	0.4791	0	0.475	0.5707	rs2992068	AUNIP(+89.7kb)|EXTL1(-72.72kb)|LOC646471(+125.5kb)|MAN1C1(+164.3kb)|MIR3917(+42.6kb)|MTFR1L(+116.1kb)|PAFAH2(-10.71kb)|PAQR7(+77.8kb)|PDIK1L(-162.1kb)|SEPN1(+130.8kb)|SLC30A2(-88.96kb)|STMN1(+42.18kb)|TRIM63(-102.2kb)
6:8944529	6	8944529	G	?	9	5.967e-05	5.967e-05	1.7317	1.7317	0.8106	0	1.25	1.745	3.412	2.254	1.307	1.121	0	0.6349	2.203	rs7739228	LOC100506207(+158.9kb)
6:105004614	6	105004614	A	?	9	5.978e-05	0.002638	0.6857	0.6806	0.1899	28.66	0.928	0.6863	0.5967	1.127	0.5139	1.3	0.5159	0.2245	0.7252	rs9399891	HACE1(-171.4kb)
6:105004779	6	105004779	A	?	9	5.978e-05	0.002638	0.6857	0.6806	0.1899	28.66	0.928	0.6863	0.5967	1.127	0.5139	1.3	0.5159	0.2245	0.7252	rs4457193	HACE1(-171.2kb)
6:8932629	6	8932629	T	?	9	5.981e-05	5.981e-05	1.7299	1.7299	0.8474	0	1.25	1.745	3.412	2.254	1.361	1.121	0	0.6349	2.096	rs9405428	LOC100506207(+147kb)
6:8958035	6	8958035	C	?	9	6.002e-05	6.002e-05	1.7055	1.7055	0.9249	0	1.25	1.655	2.62	2.02	1.302	1.121	0	0.9691	2.319	rs9393081	LOC100506207(+172.4kb)
20:42637954	20	42637954	T	?	8	6.01e-05	6.01e-05	1.9113	1.9113	0.5991	0	0.4276	1.605	1.488	1.747	3.49	4.962	NA	1.846	2.007	rs34184945	JPH2(-102.4kb)|OSER1(-186.6kb)|TOX2(0)
13:83575053	13	83575053	G	?	9	6.022e-05	6.022e-05	1.4121	1.4121	0.4447	0	2.163	1.43	1.501	1.101	1.733	6.078	0.713	1.538	1.114	rs2633048	.
1:91632461	1	91632461	G	?	8	6.023e-05	0.00995	1.344	1.2888	0.1955	29.15	1.044	1.443	0.6132	1.27	1.53	1.437	NA	0.6801	1.536	rs683263	HFM1(-93.86kb)|ZNF644(+144.6kb)
7:67743968	7	67743968	C	?	9	6.04e-05	6.04e-05	1.3465	1.3465	0.5237	0	0.8461	1.167	1.985	1.344	1.48	0.8534	1.217	2.008	1.649	rs6972622	.
3:160146522	3	160146522	A	?	8	6.062e-05	6.062e-05	0.5097	0.5097	0.9034	0	0.9833	0.4936	0.4016	0.4222	0.6375	0.0509	NA	0.3334	0.5582	rs62272243	IFT80(+29.2kb)|KPNA4(-66.26kb)|MIR15B(+24.05kb)|MIR16-2(+23.91kb)|SCARNA7(-86.17kb)|SMC4(0)|TRIM59(-6.768kb)
17:39895385	17	39895385	A	?	7	6.111e-05	6.111e-05	0.4359	0.4359	0.945	0	1.098	0.4255	0.5574	0.324	0.4094	NA	NA	0.3504	0.3528	rs147799337	ACLY(-127.8kb)|EIF1(+47.49kb)|FKBP10(-73.58kb)|GAST(+23.16kb)|HAP1(+4.487kb)|JUP(-15.47kb)|KLHL10(-98.66kb)|KLHL11(-114.4kb)|KRT9(+167.1kb)|KRT14(+152.2kb)|KRT16(+126.3kb)|KRT17(+114.5kb)|KRT42P(+98.93kb)|LEPREL4(-62.82kb)|LINC00974(+184.6kb)|NT5C3B(-85.95kb)|TTC25(-191.5kb)
3:72159035	3	72159035	G	?	9	6.145e-05	6.145e-05	1.2827	1.2827	0.4858	0	1.896	1.241	1.176	1.421	1.524	2.755	1.369	1.102	1.065	rs9836943	LINC00870(-41.37kb)
1:91647199	1	91647199	T	?	8	6.189e-05	6.189e-05	1.3562	1.3562	0.4776	0	1.019	1.494	0.6851	1.322	1.472	1.162	NA	0.936	1.453	rs650893	HFM1(-79.12kb)|ZNF644(+159.4kb)
1:91647454	1	91647454	T	?	8	6.189e-05	6.189e-05	1.3562	1.3562	0.4776	0	1.019	1.494	0.6851	1.322	1.472	1.162	NA	0.936	1.453	rs640040	HFM1(-78.87kb)|ZNF644(+159.6kb)
1:91647546	1	91647546	G	?	8	6.189e-05	6.189e-05	1.3562	1.3562	0.4776	0	1.019	1.494	0.6851	1.322	1.472	1.162	NA	0.936	1.453	rs649132	HFM1(-78.78kb)|ZNF644(+159.7kb)
1:91648452	1	91648452	T	?	8	6.189e-05	6.189e-05	1.3562	1.3562	0.4776	0	1.019	1.494	0.6851	1.322	1.472	1.162	NA	0.936	1.453	rs618429	HFM1(-77.87kb)|ZNF644(+160.6kb)
1:91648719	1	91648719	A	?	8	6.189e-05	6.189e-05	1.3562	1.3562	0.4776	0	1.019	1.494	0.6851	1.322	1.472	1.162	NA	0.936	1.453	rs656178	HFM1(-77.6kb)|ZNF644(+160.9kb)
1:218411020	1	218411020	T	?	8	6.221e-05	6.221e-05	1.6956	1.6956	0.5986	0	0.954	1.917	1.69	1.972	1.148	1.964	NA	12.82	1.526	rs111739741	LOC728463(-106.5kb)|RRP15(-47.61kb)|TGFB2(-107.7kb)
13:83471138	13	83471138	T	?	9	6.266e-05	6.266e-05	1.4876	1.4876	0.4582	0	1.881	1.606	1.475	1.343	1.746	8.583	0.8122	1.227	1.075	rs2329252	.
8:90048522	8	90048522	G	?	9	6.289e-05	6.289e-05	1.2804	1.2804	0.8166	0	2.289	1.278	1.059	1.417	1.144	1.57	2.016	1.344	1.253	rs10955882	.
1:91637456	1	91637456	A	?	8	6.31e-05	6.31e-05	1.3555	1.3555	0.5724	0	1.019	1.481	0.7291	1.322	1.472	1.156	NA	0.936	1.453	rs383460	HFM1(-88.87kb)|ZNF644(+149.6kb)
1:91637529	1	91637529	T	?	8	6.31e-05	6.31e-05	1.3555	1.3555	0.5724	0	1.019	1.481	0.7291	1.322	1.472	1.156	NA	0.936	1.453	rs366841	HFM1(-88.79kb)|ZNF644(+149.7kb)
1:91638696	1	91638696	C	?	8	6.31e-05	6.31e-05	1.3555	1.3555	0.5724	0	1.019	1.481	0.7291	1.322	1.472	1.156	NA	0.936	1.453	rs452129	HFM1(-87.63kb)|ZNF644(+150.9kb)
1:91639276	1	91639276	C	?	8	6.31e-05	6.31e-05	1.3555	1.3555	0.5724	0	1.019	1.481	0.7291	1.322	1.472	1.156	NA	0.936	1.453	rs673660	HFM1(-87.05kb)|ZNF644(+151.5kb)
1:91639613	1	91639613	T	?	8	6.31e-05	6.31e-05	1.3555	1.3555	0.5724	0	1.019	1.481	0.7291	1.322	1.472	1.156	NA	0.936	1.453	rs452393	HFM1(-86.71kb)|ZNF644(+151.8kb)
1:91640159	1	91640159	T	?	8	6.31e-05	6.31e-05	1.3555	1.3555	0.5724	0	1.019	1.481	0.7291	1.322	1.472	1.156	NA	0.936	1.453	rs411431	HFM1(-86.16kb)|ZNF644(+152.3kb)
1:91640289	1	91640289	G	?	8	6.31e-05	6.31e-05	1.3555	1.3555	0.5724	0	1.019	1.481	0.7291	1.322	1.472	1.156	NA	0.936	1.453	rs427066	HFM1(-86.03kb)|ZNF644(+152.5kb)
1:91640834	1	91640834	T	?	8	6.31e-05	6.31e-05	1.3555	1.3555	0.5724	0	1.019	1.481	0.7291	1.322	1.472	1.156	NA	0.936	1.453	rs435529	HFM1(-85.49kb)|ZNF644(+153kb)
1:91641764	1	91641764	G	?	8	6.31e-05	6.31e-05	1.3555	1.3555	0.5724	0	1.019	1.481	0.7291	1.322	1.472	1.156	NA	0.936	1.453	rs346963	HFM1(-84.56kb)|ZNF644(+154kb)
12:2894419	12	2894419	C	?	8	6.319e-05	6.319e-05	1.88	1.88	0.9124	0	1.938	1.933	1.401	1.044	2.282	NA	0	6.656	1.786	rs34915583	CACNA1C(+87.3kb)|CACNA1C-AS1(+94.1kb)|FKBP4(-9.688kb)|FOXM1(-72.43kb)|ITFG2(-27.37kb)|LOC283440(+13.58kb)|LOC100507424(-51.56kb)|NRIP2(-40.09kb)|RHNO1(-91kb)|TEAD4(-174.1kb)|TULP3(-105.6kb)
1:91655544	1	91655544	C	?	8	6.357e-05	6.357e-05	1.3553	1.3553	0.5264	0	1.019	1.483	0.6851	1.322	1.46	1.327	NA	1.004	1.445	rs596846	HFM1(-70.78kb)|ZNF644(+167.7kb)
1:91655805	1	91655805	C	?	8	6.357e-05	6.357e-05	1.3558	1.3558	0.5272	0	1.019	1.483	0.6851	1.327	1.46	1.327	NA	1.004	1.444	rs585167	HFM1(-70.52kb)|ZNF644(+168kb)
9:6523548	9	6523548	G	?	9	6.368e-05	6.368e-05	1.4339	1.4339	0.5634	0	0.9705	1.271	2.001	1.433	1.521	4.045	0.6179	1.092	1.699	rs78940084	GLDC(-8.915kb)|KDM4C(-197.3kb)|TPD52L3(+191.6kb)|UHRF2(+16.5kb)
10:53818156	10	53818156	T	?	9	6.37e-05	0.00017	0.7836	0.7873	0.4067	3.37	0.5797	0.7065	0.9624	1.196	0.7693	0.6652	0.6714	0.8605	0.7895	rs10824006	PRKG1(0)
13:83843222	13	83843222	A	?	9	6.391e-05	6.391e-05	1.4734	1.4734	0.5829	0	1.176	1.188	1.545	1.345	2.287	2.703	2.749	1.619	1.657	rs2876792	.
3:29213620	3	29213620	A	?	9	6.441e-05	0.008392	0.7212	0.7352	0.1542	32.96	1.383	0.6772	0.7126	0.7749	0.469	0.5461	5.708	0.5531	0.8921	rs9857637	RBMS3(-109.2kb)
1:26280140	1	26280140	C	?	8	6.508e-05	0.0003655	0.7065	0.6689	0.2257	25.47	0.592	0.8648	0.3057	0.815	0.7512	0.4791	NA	0.475	0.5553	rs2782813	AUNIP(+94.29kb)|EXTL1(-68.13kb)|LOC646471(+130kb)|MAN1C1(+168.9kb)|MIR3917(+47.2kb)|MTFR1L(+120.7kb)|PAFAH2(-6.117kb)|PAQR7(+82.4kb)|PDIK1L(-157.5kb)|SEPN1(+135.4kb)|SLC30A2(-84.37kb)|STMN1(+46.77kb)|TRIM63(-97.66kb)
1:26280191	1	26280191	G	?	8	6.508e-05	0.0003655	0.7065	0.6689	0.2257	25.47	0.592	0.8648	0.3057	0.815	0.7512	0.4791	NA	0.475	0.5553	rs1257164	AUNIP(+94.34kb)|EXTL1(-68.08kb)|LOC646471(+130.1kb)|MAN1C1(+168.9kb)|MIR3917(+47.25kb)|MTFR1L(+120.8kb)|PAFAH2(-6.066kb)|PAQR7(+82.45kb)|PDIK1L(-157.5kb)|SEPN1(+135.5kb)|SLC30A2(-84.32kb)|STMN1(+46.82kb)|TRIM63(-97.6kb)
7:67730364	7	67730364	G	?	9	6.522e-05	6.522e-05	1.346	1.346	0.4975	0	0.7836	1.174	1.971	1.314	1.488	0.8548	1.217	1.848	1.689	rs3113129	.
6:104980160	6	104980160	A	?	9	6.524e-05	0.002431	0.6862	0.6804	0.1982	27.68	0.928	0.6881	0.5967	1.127	0.5139	1.248	0.5159	0.2245	0.7288	rs6936793	HACE1(-195.8kb)
7:67735840	7	67735840	A	?	9	6.551e-05	6.551e-05	1.3453	1.3453	0.4699	0	0.8461	1.159	1.985	1.314	1.488	0.8548	1.217	2.008	1.689	rs3108045	.
7:67736822	7	67736822	C	?	9	6.551e-05	6.551e-05	1.3453	1.3453	0.4699	0	0.8461	1.159	1.985	1.314	1.488	0.8548	1.217	2.008	1.689	rs3113133	.
7:67742720	7	67742720	T	?	9	6.551e-05	6.551e-05	1.3453	1.3453	0.4699	0	0.8461	1.159	1.985	1.314	1.488	0.8548	1.217	2.008	1.689	rs3108049	.
1:26280571	1	26280571	G	?	8	6.566e-05	0.0003201	0.7066	0.6726	0.247	22.91	0.592	0.8648	0.32	0.815	0.7512	0.4791	NA	0.475	0.5497	rs298452	AUNIP(+94.72kb)|EXTL1(-67.7kb)|LOC646471(+130.5kb)|MAN1C1(+169.3kb)|MIR3917(+47.63kb)|MTFR1L(+121.1kb)|PAFAH2(-5.686kb)|PAQR7(+82.83kb)|PDIK1L(-157.1kb)|SEPN1(+135.9kb)|SLC30A2(-83.94kb)|STMN1(+47.2kb)|TRIM63(-97.22kb)
18:26682892	18	26682892	T	?	8	6.572e-05	0.0002721	0.7265	0.7	0.2818	18.71	0.8165	0.8501	0.3681	0.7453	0.4927	0.8275	NA	0.67	0.7411	rs4800319	.
7:67724026	7	67724026	C	?	9	6.575e-05	6.575e-05	1.3455	1.3455	0.4596	0	0.7836	1.171	1.971	1.284	1.488	0.8548	1.216	1.875	1.713	rs3108036	.
7:67693472	7	67693472	C	?	9	6.599e-05	9.002e-05	1.3358	1.3395	0.4172	2.06	0.6324	1.186	1.846	1.246	1.485	1.33	1.095	1.697	1.698	rs3113059	.
22:49791263	22	49791263	A	?	7	6.643e-05	0.0001657	1.3794	1.3728	0.3885	5.03	1.017	1.59	1.15	1.162	1.555	NA	0.4487	1.612	NA	rs8138971	.
1:91651189	1	91651189	G	?	8	6.656e-05	6.656e-05	1.354	1.354	0.4843	0	1.019	1.485	0.6851	1.322	1.472	1.162	NA	0.936	1.458	rs687635	HFM1(-75.13kb)|ZNF644(+163.4kb)
3:101791812	3	101791812	C	?	9	6.663e-05	6.663e-05	1.3168	1.3168	0.8742	0	2.078	1.413	1.259	1.129	1.331	1.089	1.552	1.495	1.1	rs4380394	LOC152225(+75.04kb)
2:44254204	2	44254204	T	?	9	6.675e-05	0.0148	1.3617	1.3025	0.1648	31.66	1.9	1.596	1.155	0.9881	1.42	0.2537	1.149	2.009	1.216	rs10171614	ABCG5(+188.2kb)|ABCG8(+148.6kb)|LRPPRC(+31.06kb)|PPM1B(-141.8kb)
1:91651161	1	91651161	T	?	8	6.708e-05	6.708e-05	1.3538	1.3538	0.4847	0	1.019	1.485	0.6851	1.322	1.472	1.162	NA	0.936	1.457	rs683239	HFM1(-75.16kb)|ZNF644(+163.3kb)
1:91652259	1	91652259	A	?	8	6.708e-05	6.708e-05	1.3538	1.3538	0.4847	0	1.019	1.485	0.6851	1.322	1.472	1.162	NA	0.936	1.457	rs111988870	HFM1(-74.06kb)|ZNF644(+164.4kb)
8:1910763	8	1910763	A	?	8	6.716e-05	0.0004208	1.3617	1.3652	0.3382	11.8	2.498	1.32	1.521	1.195	0.9745	1.02	NA	1.184	1.856	rs62476264	ARHGEF10(+3.956kb)|CLN8(+176kb)|KBTBD11(-11.28kb)|MIR596(+145.3kb)|MYOM2(-82.39kb)
13:83456700	13	83456700	G	?	9	6.719e-05	0.0037	1.3249	1.3374	0.1507	33.4	1.169	1.35	1.779	1.12	1.522	10.49	1.02	1.076	1.08	rs1577739	.
6:105017811	6	105017811	A	?	9	6.767e-05	0.003178	0.6871	0.6779	0.1653	31.6	0.928	0.6962	0.5967	1.127	0.4784	1.3	0.5159	0.2245	0.7283	rs9391211	HACE1(-158.2kb)
1:91631941	1	91631941	A	?	8	6.797e-05	0.00977	1.3412	1.2874	0.2013	28.43	1.044	1.443	0.6132	1.27	1.53	1.444	NA	0.6801	1.519	rs371809	HFM1(-94.38kb)|ZNF644(+144.1kb)
1:91632172	1	91632172	T	?	8	6.797e-05	0.00977	1.3412	1.2874	0.2013	28.43	1.044	1.443	0.6132	1.27	1.53	1.444	NA	0.6801	1.519	rs445014	HFM1(-94.15kb)|ZNF644(+144.4kb)
14:107190696	14	107190696	T	?	8	6.801e-05	0.0009595	0.6834	0.6985	0.3563	9.53	1.242	0.6017	0.4635	0.9101	0.699	1.136	1.855	0.5171	NA	rs60000589	.
14:107191611	14	107191611	C	?	8	6.801e-05	0.0009595	0.6834	0.6985	0.3563	9.53	1.242	0.6017	0.4635	0.9101	0.699	1.136	1.855	0.5171	NA	rs61419485	.
14:107192228	14	107192228	C	?	8	6.801e-05	0.0009595	0.6834	0.6985	0.3563	9.53	1.242	0.6017	0.4635	0.9101	0.699	1.136	1.855	0.5171	NA	rs8015361	.
14:107193615	14	107193615	A	?	8	6.801e-05	0.0009595	0.6834	0.6985	0.3563	9.53	1.242	0.6017	0.4635	0.9101	0.699	1.136	1.855	0.5171	NA	rs74090151	.
14:107194335	14	107194335	A	?	8	6.801e-05	0.0009595	0.6834	0.6985	0.3563	9.53	1.242	0.6017	0.4635	0.9101	0.699	1.136	1.855	0.5171	NA	rs11488879	.
14:107202145	14	107202145	G	?	8	6.801e-05	0.0009595	0.6834	0.6985	0.3563	9.53	1.242	0.6017	0.4635	0.9101	0.699	1.136	1.855	0.5171	NA	rs8012619	.
1:91649237	1	91649237	A	?	8	6.816e-05	6.816e-05	1.3538	1.3538	0.4845	0	1.019	1.485	0.6851	1.322	1.472	1.162	NA	0.936	1.458	rs595437	HFM1(-77.08kb)|ZNF644(+161.4kb)
1:91649255	1	91649255	T	?	8	6.816e-05	6.816e-05	1.3538	1.3538	0.4845	0	1.019	1.485	0.6851	1.322	1.472	1.162	NA	0.936	1.458	rs604581	HFM1(-77.07kb)|ZNF644(+161.4kb)
1:91649521	1	91649521	T	?	8	6.816e-05	6.816e-05	1.3538	1.3538	0.4845	0	1.019	1.485	0.6851	1.322	1.472	1.162	NA	0.936	1.458	rs603282	HFM1(-76.8kb)|ZNF644(+161.7kb)
1:91649597	1	91649597	A	?	8	6.816e-05	6.816e-05	1.3538	1.3538	0.4845	0	1.019	1.485	0.6851	1.322	1.472	1.162	NA	0.936	1.458	rs112193465	HFM1(-76.72kb)|ZNF644(+161.8kb)
6:163772096	6	163772096	A	?	9	6.841e-05	0.0008984	0.7772	0.7808	0.3144	14.35	1.073	0.7395	0.8939	1.044	0.645	0.5318	1.221	0.4343	0.8379	rs13203110	CAHM(-62kb)|DKFZp451B082(+4.031kb)|PACRG(+35.57kb)|PACRG-AS1(+26.59kb)|QKI(-63.58kb)
16:80005095	16	80005095	A	?	9	6.852e-05	6.852e-05	0.7345	0.7345	0.9066	0	0.5115	0.7328	0.7836	0.6469	0.6705	0.8899	1.204	1.203	0.7173	rs4344763	.
1:26281561	1	26281561	A	?	8	6.88e-05	0.0001235	0.7228	0.716	0.3854	5.8	0.5174	0.821	0.3901	0.8414	0.8776	0.5755	NA	0.4806	0.5992	rs298454	AUNIP(+95.71kb)|EXTL1(-66.71kb)|LOC646471(+131.5kb)|MAN1C1(+170.3kb)|MIR3917(+48.62kb)|MTFR1L(+122.1kb)|PAFAH2(-4.696kb)|PAQR7(+83.82kb)|PDIK1L(-156.1kb)|SEPN1(+136.8kb)|SLC30A2(-82.95kb)|STMN1(+48.19kb)|TRIM63(-96.23kb)
12:30430339	12	30430339	C	?	8	6.891e-05	6.891e-05	0.7051	0.7051	0.4965	0	1.285	0.739	0.9019	0.8077	0.4845	0.6924	NA	0.9734	0.5515	rs78154417	.
10:53824612	10	53824612	T	?	9	6.899e-05	0.0001942	0.7845	0.7883	0.4045	3.64	0.5797	0.7109	0.9624	1.205	0.7558	0.6652	0.6714	0.8605	0.7911	rs11000657	PRKG1(0)
3:148094740	3	148094740	T	?	8	6.905e-05	0.0006992	1.3077	1.2998	0.3248	13.47	0.7781	1.351	0.8372	1.429	1.213	2.346	NA	2.001	1.397	rs60583550	.
9:6509454	9	6509454	G	?	9	6.906e-05	6.906e-05	1.4294	1.4294	0.557	0	1.145	1.26	2.001	1.417	1.662	4.156	0.7682	0.8674	1.581	rs75824339	GLDC(-23.01kb)|TPD52L3(+177.6kb)|UHRF2(+2.403kb)
14:94284320	14	94284320	C	?	9	6.93e-05	0.001967	1.2726	1.3018	0.1589	32.38	1.474	1.286	1.051	1.443	1.503	3.193	1.741	1.687	0.9281	rs12433176	ASB2(-116.2kb)|FAM181A(-100.9kb)|FAM181A-AS1(-86.76kb)|LINC00521(-179.3kb)|PRIMA1(+29.55kb)|UNC79(+110.6kb)
7:67750755	7	67750755	A	?	9	6.933e-05	0.0001225	1.3438	1.3546	0.3963	4.65	0.7819	1.152	1.985	1.314	1.527	0.8548	1.217	2.008	1.689	rs3113143	.
7:67751514	7	67751514	T	?	9	6.933e-05	0.0001225	1.3438	1.3546	0.3963	4.65	0.7819	1.152	1.985	1.314	1.527	0.8548	1.217	2.008	1.689	rs3108055	.
7:67752672	7	67752672	G	?	9	6.933e-05	0.0001225	1.3438	1.3546	0.3963	4.65	0.7819	1.152	1.985	1.314	1.527	0.8548	1.217	2.008	1.689	rs3108059	.
7:67755830	7	67755830	T	?	9	6.933e-05	0.0001225	1.3438	1.3546	0.3963	4.65	0.7819	1.152	1.985	1.314	1.527	0.8548	1.217	2.008	1.689	rs3108066	.
7:67757237	7	67757237	A	?	9	6.933e-05	0.0001225	1.3438	1.3546	0.3963	4.65	0.7819	1.152	1.985	1.314	1.527	0.8548	1.217	2.008	1.689	rs3108068	.
9:6521107	9	6521107	A	?	9	6.942e-05	6.942e-05	1.4345	1.4345	0.5523	0	1.047	1.252	2.001	1.386	1.554	4.045	0.6179	1.092	1.735	rs78705183	GLDC(-11.36kb)|KDM4C(-199.8kb)|TPD52L3(+189.2kb)|UHRF2(+14.06kb)
1:91653274	1	91653274	A	?	8	6.954e-05	0.0005379	1.3444	1.3268	0.3631	8.67	1.044	1.46	0.6797	1.309	1.474	1.162	NA	0.7402	1.494	rs476030	HFM1(-73.05kb)|ZNF644(+165.5kb)
9:6495789	9	6495789	A	?	9	6.979e-05	6.979e-05	1.4278	1.4278	0.5327	0	1.109	1.26	2.304	1.412	1.652	4.065	0.7681	0.958	1.518	rs16924634	GLDC(-36.67kb)|TPD52L3(+163.9kb)|UHRF2(0)
1:26314564	1	26314564	T	?	9	6.986e-05	6.986e-05	0.7209	0.7209	0.5147	0	0.5174	0.8149	0.3604	0.7365	0.9115	0.4638	0	0.6982	0.6312	rs2245979	AUNIP(+128.7kb)|CNKSR1(-189.4kb)|EXTL1(-33.71kb)|FAM110D(-170.9kb)|LOC646471(+164.5kb)|MIR3917(+81.62kb)|MTFR1L(+155.1kb)|PAFAH2(0)|PAQR7(+116.8kb)|PDIK1L(-123.1kb)|SEPN1(+169.9kb)|SLC30A2(-49.95kb)|STMN1(+81.2kb)|TRIM63(-63.23kb)|ZNF593(-181.8kb)
5:6783498	5	6783498	C	?	7	7.032e-05	7.032e-05	2.3361	2.3361	0.563	0	1.235	2.873	0.6711	5.576	2.033	16.62	NA	NA	2.516	rs116684043	LOC255167(+194.9kb)|LOC100505625(+75.67kb)|MIR4278(-44.47kb)|NSUN2(+150kb)|PAPD7(+26.34kb)|SRD5A1(+113.8kb)
1:91653474	1	91653474	G	?	8	7.044e-05	7.044e-05	1.3527	1.3527	0.4871	0	1.019	1.485	0.6851	1.322	1.472	1.162	NA	0.936	1.451	rs499184	HFM1(-72.85kb)|ZNF644(+165.7kb)
12:2895397	12	2895397	G	?	8	7.084e-05	7.084e-05	1.8731	1.8731	0.9131	0	1.938	1.912	1.401	1.044	2.282	NA	0	6.656	1.787	rs12830342	CACNA1C(+88.28kb)|CACNA1C-AS1(+95.07kb)|FKBP4(-8.71kb)|FOXM1(-71.45kb)|ITFG2(-26.39kb)|LOC283440(+14.56kb)|LOC100507424(-50.58kb)|NRIP2(-39.12kb)|RHNO1(-90.03kb)|TEAD4(-173.1kb)|TULP3(-104.6kb)
3:64627872	3	64627872	C	?	8	7.092e-05	7.092e-05	0.5682	0.5682	0.6338	0	NA	0.5982	0.4955	0.5762	0.7722	1.786	0	0.2272	0.4008	rs73124226	ADAMTS9(0)|ADAMTS9-AS2(-42.67kb)|MIR548A2(-77.81kb)
12:2895076	12	2895076	T	?	8	7.106e-05	7.106e-05	1.8728	1.8728	0.913	0	1.938	1.912	1.401	1.044	2.282	NA	0	6.656	1.786	rs12828903	CACNA1C(+87.96kb)|CACNA1C-AS1(+94.75kb)|FKBP4(-9.031kb)|FOXM1(-71.77kb)|ITFG2(-26.71kb)|LOC283440(+14.24kb)|LOC100507424(-50.9kb)|NRIP2(-39.44kb)|RHNO1(-90.35kb)|TEAD4(-173.4kb)|TULP3(-105kb)
1:12255360	1	12255360	C	?	8	7.123e-05	0.04159	1.3717	1.3185	0.0372	53.05	0.6727	1.355	1.049	0.776	2.058	0.9119	NA	2.428	1.659	rs590977	MFN2(+181.8kb)|MIIP(+163.3kb)|MIR4632(+3.521kb)|TNFRSF1B(0)|TNFRSF8(+51.1kb)|VPS13D(-34.75kb)
3:101795889	3	101795889	C	?	9	7.141e-05	7.141e-05	1.315	1.315	0.8561	0	2.078	1.421	1.302	1.129	1.331	1.089	1.552	1.389	1.079	rs12495898	LOC152225(+79.12kb)
3:101796502	3	101796502	A	?	9	7.141e-05	7.141e-05	1.315	1.315	0.8561	0	2.078	1.421	1.302	1.129	1.331	1.089	1.552	1.389	1.079	rs6804041	LOC152225(+79.73kb)
21:43404351	21	43404351	G	?	7	7.165e-05	0.0004566	1.902	1.9014	0.341	11.59	NA	1.863	1.287	3.452	2.368	15.23	NA	0.488	1.497	rs114469564	C2CD2(+30.35kb)|C21orf128(-117.9kb)|PRDM15(+104.8kb)|UMODL1(-78.72kb)|ZBTB21(-2.588kb)|ZNF295-AS1(-37.76kb)
8:135509584	8	135509584	A	?	9	7.188e-05	0.001588	1.3589	1.3741	0.2122	26.05	1.82	1.444	1.222	2.189	1.362	2.315	1.524	1.07	0.9221	rs13268940	ZFAT(0)|ZFAT-AS1(-100.7kb)
7:67759251	7	67759251	G	?	9	7.196e-05	0.0001179	1.3429	1.3524	0.4014	4.03	0.7819	1.152	1.985	1.314	1.527	0.8548	1.217	2.008	1.683	rs3113148	.
6:8937501	6	8937501	G	?	8	7.201e-05	7.201e-05	1.7141	1.7141	0.7595	0	1.318	1.759	3.412	2.254	1.307	1.121	NA	0.6349	2.032	rs112016807	LOC100506207(+151.8kb)
1:91652756	1	91652756	G	?	8	7.229e-05	7.229e-05	1.3521	1.3521	0.4882	0	1.019	1.485	0.6851	1.322	1.472	1.162	NA	0.936	1.448	rs607595	HFM1(-73.57kb)|ZNF644(+164.9kb)
1:91652934	1	91652934	T	?	8	7.229e-05	7.229e-05	1.3521	1.3521	0.4882	0	1.019	1.485	0.6851	1.322	1.472	1.162	NA	0.936	1.448	rs473099	HFM1(-73.39kb)|ZNF644(+165.1kb)
1:26281948	1	26281948	A	?	8	7.291e-05	0.0005169	0.721	0.6999	0.2608	21.25	0.5174	0.8088	0.3182	0.7832	0.955	0.4638	NA	0.7104	0.597	rs212926	AUNIP(+96.1kb)|EXTL1(-66.32kb)|LOC646471(+131.9kb)|MAN1C1(+170.7kb)|MIR3917(+49kb)|MTFR1L(+122.5kb)|PAFAH2(-4.309kb)|PAQR7(+84.2kb)|PDIK1L(-155.7kb)|SEPN1(+137.2kb)|SLC30A2(-82.56kb)|STMN1(+48.58kb)|TRIM63(-95.85kb)
10:53823220	10	53823220	G	?	9	7.313e-05	0.0002697	0.7853	0.7901	0.3953	4.77	0.5797	0.7109	0.9624	1.209	0.7517	0.6652	0.6714	0.8605	0.7974	rs11000655	PRKG1(0)
1:26280292	1	26280292	C	?	8	7.314e-05	0.0006813	0.7051	0.6538	0.1472	35.23	0.5401	0.879	0.2996	0.815	0.793	0.4791	NA	0.475	0.5184	rs167233	AUNIP(+94.44kb)|EXTL1(-67.98kb)|LOC646471(+130.2kb)|MAN1C1(+169kb)|MIR3917(+47.35kb)|MTFR1L(+120.9kb)|PAFAH2(-5.965kb)|PAQR7(+82.55kb)|PDIK1L(-157.4kb)|SEPN1(+135.6kb)|SLC30A2(-84.22kb)|STMN1(+46.92kb)|TRIM63(-97.5kb)
3:101795138	3	101795138	A	?	9	7.329e-05	7.329e-05	1.3148	1.3148	0.8474	0	2.078	1.428	1.259	1.129	1.331	1.089	1.552	1.389	1.079	rs974059	LOC152225(+78.37kb)
6:8922190	6	8922190	A	?	9	7.337e-05	7.337e-05	1.7221	1.7221	0.8682	0	1.25	1.783	3.412	1.823	1.361	1.148	0	0.6349	2.155	rs9393078	LOC100506207(+136.5kb)
1:218416841	1	218416841	G	?	8	7.348e-05	7.348e-05	1.6878	1.6878	0.554	0	0.8283	1.917	1.69	1.972	1.148	1.964	NA	12.82	1.521	rs75538287	LOC728463(-100.7kb)|RRP15(-41.79kb)|TGFB2(-101.8kb)
1:218419821	1	218419821	C	?	8	7.367e-05	7.367e-05	1.6876	1.6876	0.5544	0	0.8283	1.917	1.69	1.972	1.148	1.942	NA	12.82	1.521	rs78912864	LOC728463(-97.72kb)|RRP15(-38.81kb)|TGFB2(-98.85kb)
4:95371072	4	95371072	T	?	9	7.37e-05	0.006599	1.8941	1.7728	0.2231	24.8	2.161	2.386	1.667	3.828	1.542	1.657	0	0.3777	1.069	rs62321992	HPGDS(+107kb)|PDLIM5(-1.935kb)|SMARCAD1(+158.6kb)
6:8912365	6	8912365	A	?	9	7.407e-05	7.407e-05	1.7268	1.7268	0.8893	0	1.25	1.836	3.412	1.823	1.384	1.148	0	0.6349	2.008	rs9379258	LOC100506207(+126.7kb)
15:93658767	15	93658767	C	?	8	7.448e-05	7.448e-05	1.3424	1.3424	0.8962	0	1.527	1.334	1.111	1.555	1.431	NA	1.472	0.73	1.384	rs77452076	CHD2(+87.53kb)|RGMA(+26.32kb)
1:91642478	1	91642478	T	?	8	7.449e-05	7.449e-05	1.3515	1.3515	0.4902	0	1.019	1.481	0.6851	1.322	1.472	1.162	NA	0.936	1.453	rs346960	HFM1(-83.84kb)|ZNF644(+154.7kb)
1:91643142	1	91643142	G	?	8	7.449e-05	7.449e-05	1.3515	1.3515	0.4902	0	1.019	1.481	0.6851	1.322	1.472	1.162	NA	0.936	1.453	rs626916	HFM1(-83.18kb)|ZNF644(+155.3kb)
1:91643617	1	91643617	A	?	8	7.449e-05	7.449e-05	1.3515	1.3515	0.4902	0	1.019	1.481	0.6851	1.322	1.472	1.162	NA	0.936	1.453	rs671964	HFM1(-82.7kb)|ZNF644(+155.8kb)
1:91643736	1	91643736	T	?	8	7.449e-05	7.449e-05	1.3515	1.3515	0.4902	0	1.019	1.481	0.6851	1.322	1.472	1.162	NA	0.936	1.453	rs599681	HFM1(-82.59kb)|ZNF644(+155.9kb)
1:91643880	1	91643880	C	?	8	7.449e-05	7.449e-05	1.3515	1.3515	0.4902	0	1.019	1.481	0.6851	1.322	1.472	1.162	NA	0.936	1.453	rs599159	HFM1(-82.44kb)|ZNF644(+156.1kb)
1:91644418	1	91644418	G	?	8	7.449e-05	7.449e-05	1.3515	1.3515	0.4902	0	1.019	1.481	0.6851	1.322	1.472	1.162	NA	0.936	1.453	rs600851	HFM1(-81.9kb)|ZNF644(+156.6kb)
1:91644481	1	91644481	A	?	8	7.449e-05	7.449e-05	1.3515	1.3515	0.4902	0	1.019	1.481	0.6851	1.322	1.472	1.162	NA	0.936	1.453	rs668318	HFM1(-81.84kb)|ZNF644(+156.7kb)
1:91644665	1	91644665	A	?	8	7.449e-05	7.449e-05	1.3515	1.3515	0.4902	0	1.019	1.481	0.6851	1.322	1.472	1.162	NA	0.936	1.453	rs657281	HFM1(-81.66kb)|ZNF644(+156.9kb)
1:91644909	1	91644909	C	?	8	7.449e-05	7.449e-05	1.3515	1.3515	0.4902	0	1.019	1.481	0.6851	1.322	1.472	1.162	NA	0.936	1.453	rs598634	HFM1(-81.41kb)|ZNF644(+157.1kb)
1:91644932	1	91644932	G	?	8	7.449e-05	7.449e-05	1.3515	1.3515	0.4902	0	1.019	1.481	0.6851	1.322	1.472	1.162	NA	0.936	1.453	rs655976	HFM1(-81.39kb)|ZNF644(+157.1kb)
1:91645251	1	91645251	A	?	8	7.449e-05	7.449e-05	1.3515	1.3515	0.4902	0	1.019	1.481	0.6851	1.322	1.472	1.162	NA	0.936	1.453	rs35372917	HFM1(-81.07kb)|ZNF644(+157.4kb)
1:91645258	1	91645258	G	?	8	7.449e-05	7.449e-05	1.3515	1.3515	0.4902	0	1.019	1.481	0.6851	1.322	1.472	1.162	NA	0.936	1.453	rs35641262	HFM1(-81.06kb)|ZNF644(+157.4kb)
1:91645271	1	91645271	G	?	8	7.449e-05	7.449e-05	1.3515	1.3515	0.4902	0	1.019	1.481	0.6851	1.322	1.472	1.162	NA	0.936	1.453	rs34747344	HFM1(-81.05kb)|ZNF644(+157.5kb)
1:91645797	1	91645797	G	?	8	7.449e-05	7.449e-05	1.3515	1.3515	0.4902	0	1.019	1.481	0.6851	1.322	1.472	1.162	NA	0.936	1.453	rs677781	HFM1(-80.52kb)|ZNF644(+158kb)
1:91646199	1	91646199	C	?	8	7.449e-05	7.449e-05	1.3515	1.3515	0.4902	0	1.019	1.481	0.6851	1.322	1.472	1.162	NA	0.936	1.453	rs613713	HFM1(-80.12kb)|ZNF644(+158.4kb)
1:91646600	1	91646600	C	?	8	7.449e-05	7.449e-05	1.3515	1.3515	0.4902	0	1.019	1.481	0.6851	1.322	1.472	1.162	NA	0.936	1.453	rs627831	HFM1(-79.72kb)|ZNF644(+158.8kb)
1:91647068	1	91647068	T	?	8	7.449e-05	7.449e-05	1.3515	1.3515	0.4902	0	1.019	1.481	0.6851	1.322	1.472	1.162	NA	0.936	1.453	rs628050	HFM1(-79.25kb)|ZNF644(+159.3kb)
15:66188317	15	66188317	T	?	9	7.519e-05	7.519e-05	0.7398	0.7398	0.543	0	0.8843	0.8062	0.562	0.8929	0.4792	1.665	0.7785	0.7926	0.7167	rs72742822	DENND4A(+103.7kb)|MEGF11(0)|MIR4311(-144.3kb)|MIR4511(+176.6kb)|RAB11A(+3.988kb)
9:6458236	9	6458236	T	?	9	7.522e-05	7.522e-05	1.3905	1.3905	0.7277	0	1.142	1.288	1.783	1.368	1.453	3.869	1.293	0.829	1.515	rs7027302	GLDC(-74.23kb)|TPD52L3(+126.3kb)|UHRF2(0)
5:173543741	5	173543741	A	?	9	7.524e-05	7.524e-05	0.7556	0.7556	0.4399	0	0.531	0.834	1.061	0.6021	0.583	1.516	0.4414	0.6954	0.7185	rs2043266	C5orf47(+110.6kb)|CPEB4(+156.4kb)|HMP19(+7.559kb)
10:53821741	10	53821741	T	?	9	7.539e-05	0.0001441	0.7857	0.788	0.4161	2.2	0.5797	0.7109	0.9624	1.196	0.7568	0.6652	0.6714	0.8605	0.7989	rs7070173	PRKG1(0)
1:218398285	1	218398285	G	?	8	7.608e-05	7.608e-05	1.6882	1.6882	0.5536	0	0.954	1.875	1.823	2.153	1.116	1.964	NA	12.82	1.469	rs76821600	LOC728463(-119.3kb)|RRP15(-60.34kb)|TGFB2(-120.4kb)
3:148098534	3	148098534	C	?	8	7.612e-05	0.0006847	1.3056	1.2984	0.3296	12.87	0.7781	1.345	0.8372	1.429	1.218	2.346	NA	2.001	1.394	rs56387025	.
3:148699065	3	148699065	C	?	8	7.615e-05	7.615e-05	1.3406	1.3406	0.7038	0	1.494	1.233	1.795	1.26	1.499	2.121	NA	0.8422	1.377	rs12497329	CP(-181.1kb)|CPA3(+84.19kb)|CPB1(+121.1kb)|GYG1(-10.13kb)|HLTF(-48.84kb)|HLTF-AS1(-105.1kb)|HPS3(-148.3kb)
3:72158910	3	72158910	G	?	9	7.622e-05	7.622e-05	1.2784	1.2784	0.4528	0	1.896	1.241	1.176	1.421	1.524	2.755	1.369	1.102	1.047	rs9832693	LINC00870(-41.5kb)
1:91653730	1	91653730	T	?	8	7.65e-05	7.65e-05	1.3502	1.3502	0.4919	0	1.019	1.485	0.6851	1.322	1.472	1.162	NA	0.936	1.437	rs501848	HFM1(-72.59kb)|ZNF644(+165.9kb)
10:53824007	10	53824007	T	?	9	7.66e-05	0.0004655	0.7857	0.7926	0.3767	7.03	0.5797	0.7109	0.9624	1.222	0.7517	0.6652	0.6714	0.8605	0.797	rs73342904	PRKG1(0)
10:123504920	10	123504920	C	?	9	7.686e-05	7.686e-05	1.2674	1.2674	0.9772	0	1.077	1.261	1.276	1.387	1.365	1.214	0.6199	1.313	1.223	rs7897273	ATE1(0)|FGFR2(+146.9kb)
1:26289422	1	26289422	C	?	9	7.73e-05	0.0007333	0.7844	0.7755	0.2801	18.28	0.4296	0.7987	0.5247	1.103	0.8678	0.5839	0.7658	0.7329	0.7731	rs12030759	AUNIP(+103.6kb)|EXTL1(-58.85kb)|FAM110D(-196.1kb)|LOC646471(+139.3kb)|MAN1C1(+178.2kb)|MIR3917(+56.48kb)|MTFR1L(+130kb)|PAFAH2(0)|PAQR7(+91.68kb)|PDIK1L(-148.2kb)|SEPN1(+144.7kb)|SLC30A2(-75.09kb)|STMN1(+56.05kb)|TRIM63(-88.37kb)
9:6539256	9	6539256	C	?	9	7.733e-05	7.733e-05	1.4265	1.4265	0.4592	0	0.9428	1.252	1.701	1.494	1.567	5.7	0.5975	1.092	1.694	rs2013966	GLDC(0)|KDM4C(-181.6kb)|UHRF2(+32.2kb)
1:91656014	1	91656014	G	?	8	7.8e-05	7.8e-05	1.3514	1.3514	0.5334	0	1.019	1.483	0.6851	1.327	1.408	1.327	NA	1.004	1.458	rs614170	HFM1(-70.31kb)|ZNF644(+168.2kb)
7:67741459	7	67741459	A	?	9	7.8e-05	7.8e-05	1.3421	1.3421	0.5306	0	0.8461	1.162	1.88	1.314	1.501	0.8548	1.217	1.92	1.69	rs3108048	.
9:6524850	9	6524850	T	?	9	7.809e-05	7.809e-05	1.4287	1.4287	0.5746	0	1.047	1.263	2.001	1.344	1.5	4.045	0.6179	1.092	1.721	rs149509293	GLDC(-7.613kb)|KDM4C(-196kb)|TPD52L3(+193kb)|UHRF2(+17.8kb)
1:218402990	1	218402990	A	?	8	7.823e-05	7.823e-05	1.6821	1.6821	0.5714	0	0.954	1.841	1.823	2.153	1.116	1.964	NA	12.82	1.52	rs74761430	LOC728463(-114.5kb)|RRP15(-55.64kb)|TGFB2(-115.7kb)
1:218403429	1	218403429	C	?	8	7.823e-05	7.823e-05	1.6821	1.6821	0.5714	0	0.954	1.841	1.823	2.153	1.116	1.964	NA	12.82	1.52	rs80070912	LOC728463(-114.1kb)|RRP15(-55.2kb)|TGFB2(-115.2kb)
14:55216257	14	55216257	G	?	9	7.869e-05	7.869e-05	1.3397	1.3397	0.9705	0	0.9712	1.394	1.773	1.228	1.424	1.059	1.31	1.234	1.256	rs17127880	GCH1(-92.47kb)|MIR4308(-128.6kb)|SAMD4A(0)|WDHD1(-189.4kb)
9:6446919	9	6446919	C	?	9	7.943e-05	0.0001676	1.4261	1.4344	0.3947	4.85	0.9938	1.303	2.157	1.276	1.623	5.935	0.7682	0.8503	1.541	rs145329042	GLDC(-85.54kb)|IL33(+188.9kb)|TPD52L3(+115kb)|UHRF2(0)
4:47411384	4	47411384	C	?	9	7.957e-05	7.957e-05	0.7596	0.7596	0.9873	0	0.8105	0.8007	0.6735	0.7785	0.7787	0.4464	0.5178	0.6707	0.7365	rs34015438	ATP10D(-76.02kb)|COMMD8(-41.43kb)|CORIN(-184.6kb)|GABRB1(0)
7:67761576	7	67761576	A	?	9	8.065e-05	0.0001829	1.3398	1.3561	0.3759	7.13	0.7819	1.144	1.985	1.314	1.527	0.8548	1.217	2.008	1.694	rs3108076	.
9:6455277	9	6455277	G	?	9	8.077e-05	8.077e-05	1.3881	1.3881	0.6764	0	1.142	1.268	1.783	1.396	1.513	3.871	1.293	0.7726	1.5	rs111822258	GLDC(-77.19kb)|IL33(+197.3kb)|TPD52L3(+123.4kb)|UHRF2(0)
15:33258739	15	33258739	T	?	8	8.08e-05	0.0007319	2.0086	2.0892	0.2759	19.43	3.895	1.643	4.429	5.487	2.838	0.687	NA	0.3263	1.798	rs17816567	FMN1(0)
18:26763725	18	26763725	T	?	7	8.098e-05	0.0002812	0.525	0.509	0.3445	11.12	0.1971	0.6258	0.5755	0.8367	0.5204	NA	NA	0.4254	0.1946	rs57938237	.
18:26763766	18	26763766	G	?	7	8.098e-05	0.0002812	0.525	0.509	0.3445	11.12	0.1971	0.6258	0.5755	0.8367	0.5204	NA	NA	0.4254	0.1946	rs57943885	.
19:7412560	19	7412560	A	?	6	8.1e-05	8.1e-05	0.5291	0.5291	0.9404	0	0.3893	0.5096	0.4985	0.3763	0.7373	NA	NA	NA	0.6232	rs12327892	ARHGEF18(-47.44kb)|C19orf45(-149.9kb)|INSR(+118.5kb)|LOC100128573(-125.2kb)|MCOLN1(-174.9kb)|PEX11G(-129.2kb)|PNPLA6(-186.5kb)|ZNF358(-168.4kb)
6:104963380	6	104963380	C	?	9	8.118e-05	0.002745	0.6976	0.6906	0.1955	28	1.032	0.7068	0.6924	1.027	0.4602	1.233	0.5119	0.2322	0.7373	rs271842	.
1:91655251	1	91655251	T	?	8	8.202e-05	8.202e-05	1.3491	1.3491	0.5347	0	1.019	1.483	0.6851	1.322	1.472	1.327	NA	1.004	1.405	rs536643	HFM1(-71.07kb)|ZNF644(+167.4kb)
1:91655398	1	91655398	G	?	8	8.202e-05	8.202e-05	1.3491	1.3491	0.5347	0	1.019	1.483	0.6851	1.322	1.472	1.327	NA	1.004	1.405	rs650049	HFM1(-70.92kb)|ZNF644(+167.6kb)
1:91655401	1	91655401	G	?	8	8.202e-05	8.202e-05	1.3491	1.3491	0.5347	0	1.019	1.483	0.6851	1.322	1.472	1.327	NA	1.004	1.405	rs650053	HFM1(-70.92kb)|ZNF644(+167.6kb)
6:57103440	6	57103440	T	?	9	8.212e-05	8.212e-05	0.7126	0.7126	0.9598	0	0.8936	0.7186	0.6542	0.6906	0.7868	1.42	0.4938	0.6803	0.6325	rs62415940	BAG2(+53.43kb)|KIAA1586(+183.4kb)|PRIM2(-78.98kb)|RAB23(+16.33kb)|ZNF451(+68.34kb)
9:6510713	9	6510713	G	?	9	8.227e-05	8.227e-05	1.4239	1.4239	0.574	0	1.145	1.266	2.001	1.374	1.625	4.156	0.7682	0.8674	1.582	rs80021381	GLDC(-21.75kb)|TPD52L3(+178.8kb)|UHRF2(+3.662kb)
1:12262298	1	12262298	A	?	8	8.229e-05	0.0331	1.3566	1.2931	0.0796	44.91	0.7169	1.425	0.9363	0.8398	2.036	0.9104	NA	1.759	1.501	rs5746053	MFN2(+188.7kb)|MIIP(+170.2kb)|MIR4632(+10.46kb)|TNFRSF1B(0)|TNFRSF8(+58.03kb)|VPS13D(-27.81kb)
9:100870501	9	100870501	C	?	9	8.303e-05	8.303e-05	1.3295	1.3295	0.511	0	1.463	1.32	1.178	1	1.421	4.628	1.633	0.7714	1.516	rs1359105	ANP32B(+92.28kb)|C9orf156(+185.6kb)|CORO2A(-12.76kb)|GABBR2(-179.9kb)|HEMGN(+163.3kb)|NANS(+25.14kb)|TBC1D2(-90.78kb)|TRIM14(0)
10:47636169	10	47636169	A	?	6	8.333e-05	0.007281	2.0574	1.9476	0.2048	30.74	0.4176	2.326	3.616	2.735	1.759	0.2915	NA	NA	NA	rs72786502	ANTXRL(-22.06kb)|ANTXRLP1(0)|ANXA8L1(-110.7kb)|ANXA8L2(-110.8kb)
6:72908367	6	72908367	A	?	7	8.391e-05	8.391e-05	2.5463	2.5463	0.7108	0	NA	1.963	1.809	7.921	2.486	0.9697	NA	1.619	5.043	rs116852723	RIMS1(0)
7:67721143	7	67721143	G	?	9	8.393e-05	8.393e-05	1.3185	1.3185	0.7273	0	0.9137	1.19	1.784	1.242	1.454	0.8107	1.161	1.343	1.624	rs1815146	.
1:91653916	1	91653916	C	?	8	8.455e-05	8.455e-05	1.3481	1.3481	0.5106	0	1.019	1.483	0.6851	1.322	1.472	1.327	NA	0.936	1.412	rs502985	HFM1(-72.41kb)|ZNF644(+166.1kb)
8:135519080	8	135519080	C	?	9	8.46e-05	0.001444	1.3553	1.3662	0.2377	23.12	1.82	1.446	1.222	2.189	1.362	2.076	1.524	1.07	0.9209	rs6577950	ZFAT(0)|ZFAT-AS1(-91.23kb)
15:33207436	15	33207436	G	?	9	8.471e-05	8.471e-05	1.8806	1.8806	0.6934	0	2.456	1.734	1.266	3.46	2.433	2.193	0	0.2881	1.847	rs28456225	FMN1(0)|GREM1(+180.6kb)
13:23348308	13	23348308	G	?	9	8.479e-05	0.0003764	1.2754	1.2788	0.3571	9.37	0.8227	1.209	0.8351	1.749	1.455	1.297	1.894	1.282	1.367	rs1365244	BASP1P1(-122.9kb)
5:88223420	5	88223420	G	?	9	8.493e-05	8.493e-05	0.7853	0.7853	0.8715	0	0.5589	0.8582	0.6782	0.7925	0.7018	1.157	0.5438	0.633	0.7693	rs190982	MEF2C(+23.5kb)
1:91656231	1	91656231	C	?	8	8.546e-05	8.546e-05	1.3487	1.3487	0.5385	0	1.019	1.483	0.6851	1.327	1.408	1.31	NA	1.004	1.444	rs608904	HFM1(-70.09kb)|ZNF644(+168.4kb)
15:33202823	15	33202823	G	?	9	8.568e-05	8.568e-05	1.8796	1.8796	0.6933	0	2.456	1.734	1.266	3.46	2.433	2.193	0	0.2881	1.843	rs34953485	FMN1(0)|GREM1(+176kb)
15:33203138	15	33203138	G	?	9	8.568e-05	8.568e-05	1.8796	1.8796	0.6933	0	2.456	1.734	1.266	3.46	2.433	2.193	0	0.2881	1.843	rs28740941	FMN1(0)|GREM1(+176.3kb)
15:33204095	15	33204095	T	?	9	8.568e-05	8.568e-05	1.8796	1.8796	0.6933	0	2.456	1.734	1.266	3.46	2.433	2.193	0	0.2881	1.843	rs8025966	FMN1(0)|GREM1(+177.2kb)
15:33205649	15	33205649	A	?	9	8.568e-05	8.568e-05	1.8796	1.8796	0.6933	0	2.456	1.734	1.266	3.46	2.433	2.193	0	0.2881	1.843	rs28544912	FMN1(0)|GREM1(+178.8kb)
15:33206021	15	33206021	G	?	9	8.568e-05	8.568e-05	1.8796	1.8796	0.6933	0	2.456	1.734	1.266	3.46	2.433	2.193	0	0.2881	1.843	rs28591666	FMN1(0)|GREM1(+179.2kb)
12:30416901	12	30416901	A	?	8	8.633e-05	8.633e-05	0.7097	0.7097	0.6041	0	1.285	0.7262	0.9459	0.8077	0.5163	0.7198	NA	0.9341	0.5749	rs12317825	.
10:14737365	10	14737365	T	?	9	8.73e-05	8.73e-05	1.3586	1.3586	0.789	0	1.743	1.456	1.605	0.9229	1.216	1.937	2.056	1.104	1.374	rs11259278	CDNF(-123.9kb)|FAM107B(0)|HSPA14(-142.8kb)|SUV39H2(-183.4kb)
1:26300320	1	26300320	A	?	9	8.746e-05	8.746e-05	0.724	0.724	0.4968	0	0.5174	0.8237	0.3604	0.7365	0.9115	0.4638	0	0.6982	0.6309	rs298441	AUNIP(+114.5kb)|EXTL1(-47.95kb)|FAM110D(-185.2kb)|LOC646471(+150.2kb)|MAN1C1(+189.1kb)|MIR3917(+67.38kb)|MTFR1L(+140.9kb)|PAFAH2(0)|PAQR7(+102.6kb)|PDIK1L(-137.3kb)|SEPN1(+155.6kb)|SLC30A2(-64.19kb)|STMN1(+66.95kb)|TRIM63(-77.48kb)|ZNF593(-196.1kb)
1:91654334	1	91654334	T	?	8	8.748e-05	8.748e-05	1.3473	1.3473	0.5116	0	1.019	1.483	0.6851	1.322	1.472	1.327	NA	0.936	1.408	rs637865	HFM1(-71.99kb)|ZNF644(+166.5kb)
1:26305933	1	26305933	A	?	9	8.789e-05	8.789e-05	0.7241	0.7241	0.4972	0	0.5174	0.8237	0.3604	0.7365	0.9115	0.4638	0	0.6982	0.6312	rs298446	AUNIP(+120.1kb)|CNKSR1(-198kb)|EXTL1(-42.34kb)|FAM110D(-179.6kb)|LOC646471(+155.8kb)|MAN1C1(+194.7kb)|MIR3917(+72.99kb)|MTFR1L(+146.5kb)|PAFAH2(0)|PAQR7(+108.2kb)|PDIK1L(-131.7kb)|SEPN1(+161.2kb)|SLC30A2(-58.58kb)|STMN1(+72.56kb)|TRIM63(-71.86kb)|ZNF593(-190.5kb)
1:26309629	1	26309629	T	?	9	8.789e-05	8.789e-05	0.7241	0.7241	0.4972	0	0.5174	0.8237	0.3604	0.7365	0.9115	0.4638	0	0.6982	0.6312	rs298448	AUNIP(+123.8kb)|CNKSR1(-194.4kb)|EXTL1(-38.64kb)|FAM110D(-175.9kb)|LOC646471(+159.5kb)|MAN1C1(+198.4kb)|MIR3917(+76.68kb)|MTFR1L(+150.2kb)|PAFAH2(0)|PAQR7(+111.9kb)|PDIK1L(-128kb)|SEPN1(+164.9kb)|SLC30A2(-54.88kb)|STMN1(+76.26kb)|TRIM63(-68.17kb)|ZNF593(-186.8kb)
8:29033916	8	29033916	A	?	9	8.823e-05	8.823e-05	1.2712	1.2712	0.6444	0	1.292	1.359	1.051	1.446	1.46	0.6609	0.9585	0.9846	1.1	rs13274215	DUSP4(-156.7kb)|HMBOX1(+123.7kb)|KIF13B(0)
9:6519797	9	6519797	C	?	9	8.825e-05	0.000151	1.4279	1.4373	0.4025	3.89	0.9705	1.267	2.001	1.315	1.559	5.823	0.6179	1.092	1.703	rs138040755	GLDC(-12.67kb)|TPD52L3(+187.9kb)|UHRF2(+12.75kb)
1:26293550	1	26293550	A	?	9	8.898e-05	8.898e-05	0.7245	0.7245	0.5682	0	0.5174	0.8237	0.3967	0.7365	0.9115	0.4638	0	0.6982	0.6224	rs1257152	AUNIP(+107.7kb)|EXTL1(-54.72kb)|FAM110D(-192kb)|LOC646471(+143.5kb)|MAN1C1(+182.3kb)|MIR3917(+60.6kb)|MTFR1L(+134.1kb)|PAFAH2(0)|PAQR7(+95.81kb)|PDIK1L(-144.1kb)|SEPN1(+148.8kb)|SLC30A2(-70.96kb)|STMN1(+60.18kb)|TRIM63(-84.24kb)
15:33229933	15	33229933	A	?	9	8.915e-05	8.915e-05	1.8645	1.8645	0.6658	0	1.958	1.774	1.266	3.46	2.799	2.24	0	0.2881	1.706	rs12914123	FMN1(0)
1:244312459	1	244312459	C	?	9	8.944e-05	0.002085	1.3014	1.3034	0.2459	22.18	1.783	1.318	0.7526	1.715	1.105	2.046	0.4744	2.04	1.24	rs10803180	LOC339529(+101.8kb)|ZBTB18(+91.68kb)
3:148106951	3	148106951	G	?	8	8.971e-05	0.0002001	1.3022	1.2994	0.3989	4.03	0.7781	1.345	0.8372	1.429	1.224	1.921	NA	2.001	1.398	rs12490815	.
1:91654798	1	91654798	A	?	8	8.979e-05	8.979e-05	1.3467	1.3467	0.5124	0	1.019	1.483	0.6851	1.322	1.472	1.327	NA	0.936	1.405	rs647339	HFM1(-71.52kb)|ZNF644(+167kb)
1:91654826	1	91654826	A	?	8	8.979e-05	8.979e-05	1.3467	1.3467	0.5124	0	1.019	1.483	0.6851	1.322	1.472	1.327	NA	0.936	1.405	rs647687	HFM1(-71.5kb)|ZNF644(+167kb)
1:26276335	1	26276335	T	?	9	9.075e-05	0.0002265	0.7119	0.6918	0.3393	11.46	0.592	0.8601	0.3057	0.815	0.7794	0.5871	0	0.475	0.5557	rs2782810	AUNIP(+90.49kb)|EXTL1(-71.94kb)|LOC646471(+126.2kb)|MAN1C1(+165.1kb)|MIR3917(+43.39kb)|MTFR1L(+116.9kb)|PAFAH2(-9.922kb)|PAQR7(+78.59kb)|PDIK1L(-161.3kb)|SEPN1(+131.6kb)|SLC30A2(-88.18kb)|STMN1(+42.97kb)|TRIM63(-101.5kb)
4:126536975	4	126536975	T	?	7	9.08e-05	9.08e-05	0.5435	0.5435	0.8892	0	0.6033	0.5727	0.7378	0.3374	0.646	NA	NA	1.127	0.4326	rs6825967	FAT4(+122.9kb)|MIR2054(+108.5kb)
13:96715298	13	96715298	T	?	9	9.126e-05	9.126e-05	2.305	2.305	0.5925	0	2.72	2.342	1.913	0.902	1.506	5.03	9.386	9.867	4.099	rs78486717	HS6ST3(-27.79kb)|UGGT2(+9.562kb)
1:236525568	1	236525568	T	?	8	9.162e-05	9.162e-05	1.5923	1.5923	0.7475	0	1.477	1.725	0.9587	0.8769	1.773	0.9861	NA	1.207	1.925	rs667325	EDARADD(-32.11kb)|ERO1LB(+80.23kb)|GPR137B(+153.4kb)|HEATR1(-186.7kb)|LGALS8(-155.9kb)|LGALS8-AS1(-160.8kb)
1:26276038	1	26276038	A	?	9	9.186e-05	0.0002266	0.7121	0.6921	0.3404	11.33	0.592	0.8601	0.3057	0.815	0.7794	0.5871	0	0.475	0.5562	rs2782809	AUNIP(+90.19kb)|EXTL1(-72.23kb)|LOC646471(+125.9kb)|MAN1C1(+164.8kb)|MIR3917(+43.09kb)|MTFR1L(+116.6kb)|PAFAH2(-10.22kb)|PAQR7(+78.29kb)|PDIK1L(-161.6kb)|SEPN1(+131.3kb)|SLC30A2(-88.48kb)|STMN1(+42.67kb)|TRIM63(-101.8kb)
8:76060425	8	76060425	T	?	8	9.203e-05	9.203e-05	0.5933	0.5933	0.8238	0	0.3713	0.6433	0.8418	0.3978	0.602	1.692	NA	0.4255	0.4897	rs75367490	CASC9(-74.93kb)|CRISPLD1(+113.6kb)
3:160179825	3	160179825	T	?	8	9.263e-05	9.263e-05	0.5172	0.5172	0.9279	0	0.9833	0.505	0.4016	0.4834	0.6375	0.0509	NA	0.4243	0.5383	rs62272253	IFT80(+62.5kb)|KPNA4(-32.96kb)|MIR15B(+57.35kb)|MIR16-2(+57.21kb)|SCARNA7(-52.87kb)|SMC4(+27.08kb)|TRIM59(+12.2kb)
1:91653949	1	91653949	C	?	8	9.287e-05	9.287e-05	1.3453	1.3453	0.5502	0	1.019	1.483	0.7022	1.306	1.472	1.331	NA	0.9819	1.397	rs503719	HFM1(-72.37kb)|ZNF644(+166.1kb)
13:52577625	13	52577625	A	?	7	9.304e-05	0.0002205	2.0816	2.0779	0.3862	5.37	8.582	2.311	0.8454	0.8849	2.772	8.246	NA	NA	1.67	rs117890201	ALG11(-8.897kb)|ATP7B(0)|CCDC70(+137.3kb)|DHRS12(+199.3kb)|LINC00282(+158.3kb)|MRPS31P5(-164.2kb)|NEK3(-129.2kb)|NEK5(-61.27kb)|UTP14C(-21.2kb)
16:8829953	16	8829953	T	?	9	9.32e-05	0.004803	0.7928	0.8098	0.2509	21.61	0.6252	0.7396	0.6453	1.08	0.8568	1.111	2.275	1.221	0.7165	rs1731086	ABAT(0)|CARHSP1(-116.8kb)|METTL22(+89.87kb)|PMM2(-61.72kb)|TMEM186(-59.08kb)|USP7(-156kb)
9:6476496	9	6476496	C	?	9	9.404e-05	9.404e-05	1.3835	1.3835	0.7226	0	1.197	1.249	1.783	1.396	1.467	3.87	1.293	0.9317	1.53	rs7876000	GLDC(-55.97kb)|TPD52L3(+144.6kb)|UHRF2(0)
13:83460927	13	83460927	T	?	9	9.472e-05	9.472e-05	1.5272	1.5272	0.7403	0	1.455	1.636	1.473	1.336	1.895	5.229	1.126	1.304	1.084	rs9546258	.
8:142296064	8	142296064	A	?	6	9.474e-05	9.474e-05	2.1316	2.1316	0.8437	0	NA	2.456	1.848	2.766	2.682	NA	NA	1.751	1.277	rs141648213	DENND3(+90.16kb)|GPR20(-70.52kb)|LOC731779(-54.58kb)|MROH5(-147.9kb)|PTP4A3(-135.9kb)|SLC45A4(+57.39kb)
12:30422235	12	30422235	A	?	8	9.558e-05	9.558e-05	0.71	0.71	0.5261	0	1.285	0.739	0.9019	0.8077	0.4723	0.7198	NA	0.9734	0.5767	rs17522293	.
5:172737467	5	172737467	C	?	9	9.564e-05	9.564e-05	1.5527	1.5527	0.6957	0	1.365	1.373	1.189	0.9667	2.304	1.711	1.654	2.406	1.96	rs111749581	BNIP1(+146.1kb)|CREBRF(+171.2kb)|NKX2-5(+75.15kb)|STC2(-4.258kb)
12:30426904	12	30426904	T	?	8	9.598e-05	9.598e-05	0.7101	0.7101	0.5457	0	1.285	0.739	0.9019	0.8077	0.4845	0.6924	NA	0.9734	0.5726	rs78949865	.
12:11797628	12	11797628	A	?	8	9.6e-05	9.6e-05	1.8069	1.8069	0.7374	0	NA	1.609	1.336	1.638	1.754	13.02	2.558	1.336	2.258	rs147738182	ETV6(-5.159kb)|LOC338817(+80.29kb)|RNU6-19P(-147.2kb)
6:104966574	6	104966574	T	?	9	9.628e-05	0.003778	0.7002	0.6935	0.176	30.31	1.032	0.7068	0.6924	1.069	0.4602	1.233	0.5119	0.2322	0.7371	rs1341120	.
11:21647457	11	21647457	C	?	9	9.661e-05	9.661e-05	1.2713	1.2713	0.7206	0	1.111	1.391	1.327	1.246	1.09	1.464	0.274	1.172	1.23	rs34489984	NELL1(+50.23kb)
4:25753247	4	25753247	G	?	8	9.692e-05	9.692e-05	1.7544	1.7544	0.6006	0	1.248	1.955	1.955	0.6835	2.415	NA	1.61	0.853	1.893	rs60146230	SEL1L3(0)|SLC34A2(+72.88kb)|SMIM20(-162.6kb)
8:53460767	8	53460767	T	?	9	9.743e-05	0.004752	1.5256	1.5362	0.1623	31.96	1.352	1.525	2.534	1.551	1.916	1.553	97.06	0.5066	1.287	rs111457142	FAM150A(0)|RB1CC1(-74.25kb)|ST18(+138.3kb)
14:107217362	14	107217362	G	?	8	9.746e-05	0.001427	0.6808	0.6982	0.3569	9.46	1.28	0.5856	0.5727	0.9551	0.7333	0.6366	3.009	0.5171	NA	rs142032916	.
15:68042897	15	68042897	T	?	6	9.761e-05	9.761e-05	2.9999	2.9999	0.4776	0	NA	1.812	3.025	1.653	8.514	NA	NA	1.764	4.5	rs148954499	MAP2K5(0)|SKOR1(-69.14kb)
1:91656503	1	91656503	A	?	8	9.777e-05	9.777e-05	1.3455	1.3455	0.5419	0	1.019	1.483	0.6851	1.327	1.384	1.31	NA	1.004	1.444	rs607966	HFM1(-69.82kb)|ZNF644(+168.7kb)
3:29211691	3	29211691	A	?	9	9.887e-05	0.009779	0.7262	0.7395	0.1557	32.78	1.383	0.6824	0.7064	0.7749	0.4765	0.5391	5.708	0.5531	0.9093	rs12152478	RBMS3(-111.1kb)
13:85599144	13	85599144	T	?	8	9.905e-05	0.007167	0.6688	0.6853	0.1762	31.53	0.3882	0.6567	0.5487	0.8753	0.5834	0.6921	NA	3.512	0.5781	rs35903463	.
9:28337989	9	28337989	G	?	9	9.917e-05	9.917e-05	0.7415	0.7415	0.9144	0	0.513	0.7861	0.976	0.6507	0.6252	0.822	0.7033	0.9164	0.7123	rs1953004	LINGO2(0)
3:101784058	3	101784058	T	?	9	9.936e-05	9.936e-05	1.3041	1.3041	0.6461	0	1.842	1.435	1.189	1.074	1.29	1.299	3.314	1.423	1.059	rs1707571	LOC152225(+67.29kb)
3:101784297	3	101784297	T	?	9	9.945e-05	9.945e-05	1.3041	1.3041	0.6459	0	1.842	1.435	1.189	1.074	1.29	1.299	3.314	1.423	1.059	rs959602	LOC152225(+67.53kb)
6:8912899	6	8912899	T	?	9	9.989e-05	9.989e-05	1.7007	1.7007	0.8626	0	1.25	1.745	3.412	1.823	1.342	1.121	0	0.6349	2.157	rs9379259	LOC100506207(+127.2kb)
