# Supplementary material for: Multiomics integrative analysis identifies APOE allele-specific blood biomarkers associated to Alzheimer’s disease etiopathogenesis
Source: Aging (Albany NY). 2021 Apr 12;13(7):9277–329. doi: 10.18632/aging.202950 (PMC8064208; doi:10.18632/aging.202950)
Supplement: Supplementary Table 11 [file aging-13-202950-s013.xlsx]

## Sheet: Sheet1
Supplementary Table 11. APOE and sex stratified analysis: APOE4 males meta-analysis results (p<10-4).
SNP	CHR	BP	A1	A2	N	P	P.R.	OR	OR.R.	Q	I	F0	F1	F2	F3	F4	F5	F6	F7	F8	RS	ANNOT
19:45416741	19	45416741	C	?	6	3.184e-21	1.917e-10	0.2539	0.2828	0.1861	33.32	0.7866	0.177	0.256	NA	0.3416	NA	0.4096	NA	0.3099	rs438811	APOC1(-1.179kb)|APOC1P1(-13.32kb)|APOC2(-32.5kb)|APOC4(-28.75kb)|APOC4-APOC2(-28.75kb)|APOE(+4.091kb)|BCAM(+92.06kb)|BCL3(+153.4kb)|CBLC(+112.8kb)|CLASRP(-125.6kb)|CLPTM1(-41.1kb)|GEMIN7(-165.8kb)|PPP1R37(-179.7kb)|PVRL2(+24.26kb)|RELB(-87.96kb)|TOMM40(+9.795kb)|ZNF296(-158kb)
19:45416178	19	45416178	G	?	6	3.72e-21	5.849e-11	0.2536	0.2799	0.2041	30.84	0.7866	0.1788	0.256	NA	0.3416	NA	0.4096	NA	0.2958	rs483082	APOC1(-1.742kb)|APOC1P1(-13.88kb)|APOC2(-33.06kb)|APOC4(-29.32kb)|APOC4-APOC2(-29.32kb)|APOE(+3.528kb)|BCAM(+91.5kb)|BCL3(+152.9kb)|CBLC(+112.3kb)|CLASRP(-126.1kb)|CLPTM1(-41.66kb)|GEMIN7(-166.3kb)|PPP1R37(-180.3kb)|PVRL2(+23.69kb)|RELB(-88.53kb)|TOMM40(+9.232kb)|ZNF296(-158.6kb)
19:45411941	19	45411941	T	?	6	2.505e-20	5.344e-06	0.2776	0.33	0.0376	57.63	0.6161	0.169	0.2648	NA	0.4309	NA	0.5279	NA	0.3799	rs429358	APOC1(-5.979kb)|APOC1P1(-18.12kb)|APOC2(-37.3kb)|APOC4(-33.55kb)|APOC4-APOC2(-33.55kb)|APOE(0)|BCAM(+87.26kb)|BCL3(+148.6kb)|CBLC(+108kb)|CEACAM16(+198kb)|CLASRP(-130.4kb)|CLPTM1(-45.9kb)|GEMIN7(-170.6kb)|PPP1R37(-184.5kb)|PVRL2(+19.46kb)|RELB(-92.76kb)|TOMM40(+4.995kb)|ZNF296(-162.8kb)
19:45418790	19	45418790	T	?	6	1.019e-18	9.841e-06	0.2938	0.3436	0.0374	57.69	0.6161	0.1852	0.256	NA	0.3591	NA	0.4096	NA	0.6177	rs5117	APOC1(0)|APOC1P1(-11.27kb)|APOC2(-30.45kb)|APOC4(-26.7kb)|APOC4-APOC2(-26.7kb)|APOE(+6.14kb)|BCAM(+94.11kb)|BCL3(+155.5kb)|CBLC(+114.9kb)|CLASRP(-123.5kb)|CLPTM1(-39.05kb)|GEMIN7(-163.7kb)|PPP1R37(-177.6kb)|PVRL2(+26.3kb)|RELB(-85.92kb)|TOMM40(+11.84kb)|ZNF296(-156kb)
19:45396219	19	45396219	C	?	6	4.601e-17	1.105e-07	0.3844	0.4203	0.1457	39.01	0.6006	0.2795	0.4427	NA	0.4107	NA	0.4718	NA	0.6606	rs157582	APOC1(-21.7kb)|APOC1P1(-33.84kb)|APOC2(-53.02kb)|APOC4(-49.28kb)|APOC4-APOC2(-49.28kb)|APOE(-12.82kb)|BCAM(+71.54kb)|BCL3(+132.9kb)|CBLC(+92.32kb)|CEACAM16(+182.2kb)|CLASRP(-146.1kb)|CLPTM1(-61.62kb)|GEMIN7(-186.3kb)|PVRL2(+3.734kb)|RELB(-108.5kb)|TOMM40(0)|ZNF296(-178.5kb)
19:45395714	19	45395714	T	?	6	8.083e-17	1.788e-07	0.3888	0.4249	0.1403	39.79	0.6006	0.2838	0.4427	NA	0.4107	NA	0.4718	NA	0.6762	rs157581	APOC1(-22.21kb)|APOC1P1(-34.34kb)|APOC2(-53.52kb)|APOC4(-49.78kb)|APOC4-APOC2(-49.78kb)|APOE(-13.32kb)|BCAM(+71.04kb)|BCL3(+132.4kb)|CBLC(+91.81kb)|CEACAM16(+181.7kb)|CLASRP(-146.6kb)|CLPTM1(-62.13kb)|GEMIN7(-186.8kb)|PVRL2(+3.229kb)|RELB(-109kb)|TOMM40(0)|ZNF296(-179kb)
19:45390333	19	45390333	A	?	6	1.838e-16	1.376e-07	0.3944	0.4288	0.1521	38.09	0.6006	0.2871	0.4427	NA	0.4299	NA	0.4718	NA	0.6648	rs283815	APOC1(-27.59kb)|APOC1P1(-39.73kb)|APOC2(-58.9kb)|APOC4(-55.16kb)|APOC4-APOC2(-55.16kb)|APOE(-18.7kb)|BCAM(+65.66kb)|BCL3(+127kb)|CBLC(+86.43kb)|CEACAM16(+176.3kb)|CLASRP(-152kb)|CLPTM1(-67.51kb)|GEMIN7(-192.2kb)|PVRL2(0)|RELB(-114.4kb)|TOMM40(-4.143kb)|ZNF296(-184.4kb)
19:45396665	19	45396665	G	?	7	1.875e-16	3.835e-05	0.3894	0.4345	0.0467	53.03	0.3723	0.3051	0.3882	NA	0.3802	NA	0.4148	27.07	0.7369	rs59007384	APOC1(-21.26kb)|APOC1P1(-33.39kb)|APOC2(-52.57kb)|APOC4(-48.83kb)|APOC4-APOC2(-48.83kb)|APOE(-12.37kb)|BCAM(+71.99kb)|BCL3(+133.4kb)|CBLC(+92.76kb)|CEACAM16(+182.7kb)|CLASRP(-145.6kb)|CLPTM1(-61.18kb)|GEMIN7(-185.9kb)|PPP1R37(-199.8kb)|PVRL2(+4.18kb)|RELB(-108kb)|TOMM40(0)|ZNF296(-178.1kb)
19:45394969	19	45394969	T	?	6	5.813e-16	9.479e-06	0.4002	0.4444	0.0699	50.96	0.532	0.286	0.4427	NA	0.4235	NA	0.4718	NA	0.7816	rs184017	APOC1(-22.95kb)|APOC1P1(-35.09kb)|APOC2(-54.27kb)|APOC4(-50.52kb)|APOC4-APOC2(-50.52kb)|APOE(-14.07kb)|BCAM(+70.29kb)|BCL3(+131.7kb)|CBLC(+91.07kb)|CEACAM16(+181kb)|CLASRP(-147.3kb)|CLPTM1(-62.87kb)|GEMIN7(-187.5kb)|PVRL2(+2.484kb)|RELB(-109.7kb)|TOMM40(0)|ZNF296(-179.8kb)
19:45422846	19	45422846	G	?	6	3.324e-14	0.002532	0.3941	0.4427	0.0024	72.89	0.4912	0.2379	0.2961	NA	0.557	NA	0.4124	NA	0.9496	rs56131196	APOC1(+0.24kb)|APOC1P1(-7.213kb)|APOC2(-26.39kb)|APOC4(-22.65kb)|APOC4-APOC2(-22.65kb)|APOE(+10.2kb)|BCAM(+98.17kb)|BCL3(+159.5kb)|CBLC(+118.9kb)|CLASRP(-119.5kb)|CLPTM1(-35kb)|GEMIN7(-159.7kb)|PPP1R37(-173.6kb)|PVRL2(+30.36kb)|RELB(-81.86kb)|TOMM40(+15.9kb)|ZNF296(-151.9kb)
19:45422946	19	45422946	A	?	6	3.324e-14	0.002532	0.3941	0.4427	0.0024	72.89	0.4912	0.2379	0.2961	NA	0.557	NA	0.4124	NA	0.9496	rs4420638	APOC1(+0.34kb)|APOC1P1(-7.113kb)|APOC2(-26.29kb)|APOC4(-22.55kb)|APOC4-APOC2(-22.55kb)|APOE(+10.3kb)|BCAM(+98.27kb)|BCL3(+159.6kb)|CBLC(+119kb)|CLASRP(-119.4kb)|CLPTM1(-34.9kb)|GEMIN7(-159.6kb)|PPP1R37(-173.5kb)|PVRL2(+30.46kb)|RELB(-81.76kb)|TOMM40(+16kb)|ZNF296(-151.8kb)
19:45392254	19	45392254	C	?	6	1.015e-13	0.001272	0.4395	0.5088	0.0175	63.56	0.7374	0.2945	0.4109	NA	0.5185	NA	0.6232	NA	0.8432	rs6857	APOC1(-25.67kb)|APOC1P1(-37.8kb)|APOC2(-56.98kb)|APOC4(-53.24kb)|APOC4-APOC2(-53.24kb)|APOE(-16.78kb)|BCAM(+67.58kb)|BCL3(+129kb)|CBLC(+88.35kb)|CEACAM16(+178.3kb)|CLASRP(-150kb)|CLPTM1(-65.59kb)|GEMIN7(-190.3kb)|PVRL2(0)|RELB(-112.5kb)|TOMM40(-2.222kb)|ZNF296(-182.5kb)
19:45422160	19	45422160	C	?	6	1.015e-13	0.004072	0.402	0.451	0.0015	74.48	0.4912	0.2372	0.3013	NA	0.5955	NA	0.4124	NA	0.9588	rs12721051	APOC1(0)|APOC1P1(-7.899kb)|APOC2(-27.08kb)|APOC4(-23.33kb)|APOC4-APOC2(-23.33kb)|APOE(+9.51kb)|BCAM(+97.48kb)|BCL3(+158.9kb)|CBLC(+118.3kb)|CLASRP(-120.1kb)|CLPTM1(-35.68kb)|GEMIN7(-160.4kb)|PPP1R37(-174.3kb)|PVRL2(+29.68kb)|RELB(-82.55kb)|TOMM40(+15.21kb)|ZNF296(-152.6kb)
19:45415713	19	45415713	A	?	8	1.004e-10	0.008815	1.8562	1.6715	0.0037	66.78	0.977	2.672	1.71	2.417	1.137	NA	3.78	0.1735	1.344	rs10414043	APOC1(-2.207kb)|APOC1P1(-14.35kb)|APOC2(-33.52kb)|APOC4(-29.78kb)|APOC4-APOC2(-29.78kb)|APOE(+3.063kb)|BCAM(+91.04kb)|BCL3(+152.4kb)|CBLC(+111.8kb)|CLASRP(-126.6kb)|CLPTM1(-42.13kb)|GEMIN7(-166.8kb)|PPP1R37(-180.7kb)|PVRL2(+23.23kb)|RELB(-88.99kb)|TOMM40(+8.767kb)|ZNF296(-159kb)
19:45410002	19	45410002	A	?	8	1.336e-10	0.008571	1.8399	1.6461	0.0052	65.34	1.171	2.709	1.516	2.39	1.169	NA	2.922	0.1735	1.304	rs769449	APOC1(-7.918kb)|APOC1P1(-20.06kb)|APOC2(-39.24kb)|APOC4(-35.49kb)|APOC4-APOC2(-35.49kb)|APOE(0)|BCAM(+85.32kb)|BCL3(+146.7kb)|CBLC(+106.1kb)|CEACAM16(+196kb)|CLASRP(-132.3kb)|CLPTM1(-47.84kb)|GEMIN7(-172.5kb)|PPP1R37(-186.4kb)|PVRL2(+17.52kb)|RELB(-94.7kb)|TOMM40(+3.056kb)|ZNF296(-164.8kb)
19:45413576	19	45413576	T	?	8	1.408e-10	0.001999	1.8377	1.6731	0.0262	55.92	1.171	2.55	1.6	2.18	1.245	NA	2.87	0.1735	1.354	rs75627662	APOC1(-4.344kb)|APOC1P1(-16.48kb)|APOC2(-35.66kb)|APOC4(-31.92kb)|APOC4-APOC2(-31.92kb)|APOE(+0.926kb)|BCAM(+88.9kb)|BCL3(+150.3kb)|CBLC(+109.7kb)|CEACAM16(+199.6kb)|CLASRP(-128.7kb)|CLPTM1(-44.26kb)|GEMIN7(-168.9kb)|PPP1R37(-182.9kb)|PVRL2(+21.09kb)|RELB(-91.13kb)|TOMM40(+6.63kb)|ZNF296(-161.2kb)
19:45415935	19	45415935	T	?	8	1.621e-10	0.008093	1.8417	1.6671	0.0047	65.72	0.977	2.616	1.71	2.417	1.137	NA	3.78	0.1735	1.344	rs7256200	APOC1(-1.985kb)|APOC1P1(-14.12kb)|APOC2(-33.3kb)|APOC4(-29.56kb)|APOC4-APOC2(-29.56kb)|APOE(+3.285kb)|BCAM(+91.26kb)|BCL3(+152.6kb)|CBLC(+112kb)|CLASRP(-126.4kb)|CLPTM1(-41.91kb)|GEMIN7(-166.6kb)|PPP1R37(-180.5kb)|PVRL2(+23.45kb)|RELB(-88.77kb)|TOMM40(+8.989kb)|ZNF296(-158.8kb)
19:45396144	19	45396144	T	?	8	3.13e-10	0.00276	1.7546	1.6259	0.0199	57.92	1.128	2.338	1.55	2.327	1.265	NA	2.774	0.0992	1.258	rs11556505	APOC1(-21.78kb)|APOC1P1(-33.92kb)|APOC2(-53.09kb)|APOC4(-49.35kb)|APOC4-APOC2(-49.35kb)|APOE(-12.89kb)|BCAM(+71.47kb)|BCL3(+132.8kb)|CBLC(+92.24kb)|CEACAM16(+182.2kb)|CLASRP(-146.2kb)|CLPTM1(-61.7kb)|GEMIN7(-186.4kb)|PVRL2(+3.659kb)|RELB(-108.6kb)|TOMM40(0)|ZNF296(-178.6kb)
19:45406673	19	45406673	G	?	7	4.055e-10	0.008236	0.51	0.5942	0.0337	56.06	0.8445	0.3843	0.3726	NA	0.5888	NA	0.823	9.483	0.7022	rs10119	APOC1(-11.25kb)|APOC1P1(-23.39kb)|APOC2(-42.56kb)|APOC4(-38.82kb)|APOC4-APOC2(-38.82kb)|APOE(-2.365kb)|BCAM(+82kb)|BCL3(+143.4kb)|CBLC(+102.8kb)|CEACAM16(+192.7kb)|CLASRP(-135.6kb)|CLPTM1(-51.17kb)|GEMIN7(-175.8kb)|PPP1R37(-189.8kb)|PVRL2(+14.19kb)|RELB(-98.03kb)|TOMM40(0)|ZNF296(-168.1kb)
19:45395619	19	45395619	G	?	8	4.121e-10	0.003342	1.7464	1.6177	0.0175	58.8	1.128	2.338	1.55	2.327	1.265	NA	2.774	0.0992	1.229	rs2075650	APOC1(-22.3kb)|APOC1P1(-34.44kb)|APOC2(-53.62kb)|APOC4(-49.88kb)|APOC4-APOC2(-49.88kb)|APOE(-13.42kb)|BCAM(+70.94kb)|BCL3(+132.3kb)|CBLC(+91.72kb)|CEACAM16(+181.6kb)|CLASRP(-146.7kb)|CLPTM1(-62.22kb)|GEMIN7(-186.9kb)|PVRL2(+3.134kb)|RELB(-109.1kb)|TOMM40(0)|ZNF296(-179.1kb)
19:45395909	19	45395909	G	?	8	4.405e-10	0.003501	1.7446	1.6157	0.0169	59.01	1.128	2.338	1.55	2.327	1.265	NA	2.774	0.0992	1.222	rs34404554	APOC1(-22.01kb)|APOC1P1(-34.15kb)|APOC2(-53.33kb)|APOC4(-49.58kb)|APOC4-APOC2(-49.58kb)|APOE(-13.13kb)|BCAM(+71.23kb)|BCL3(+132.6kb)|CBLC(+92.01kb)|CEACAM16(+181.9kb)|CLASRP(-146.4kb)|CLPTM1(-61.93kb)|GEMIN7(-186.6kb)|PVRL2(+3.424kb)|RELB(-108.8kb)|TOMM40(0)|ZNF296(-178.8kb)
19:45387459	19	45387459	G	?	8	2.156e-09	0.01089	1.7005	1.5721	0.0054	65.16	1.128	2.345	1.602	2.438	1.18	NA	2.651	0.0897	1.144	rs12972156	APOC1(-30.46kb)|APOC1P1(-42.6kb)|APOC2(-61.78kb)|APOC4(-58.04kb)|APOC4-APOC2(-58.04kb)|APOE(-21.58kb)|BCAM(+62.78kb)|BCL3(+124.2kb)|CBLC(+83.56kb)|CEACAM16(+173.5kb)|CEACAM19(+199.8kb)|CLASRP(-154.8kb)|CLPTM1(-70.38kb)|GEMIN7(-195.1kb)|PVRL2(0)|RELB(-117.2kb)|TOMM40(-7.017kb)|ZNF296(-187.3kb)
19:45387596	19	45387596	A	?	8	2.557e-09	0.01051	1.6952	1.5701	0.006	64.66	1.128	2.323	1.602	2.438	1.18	NA	2.651	0.0897	1.144	rs12972970	APOC1(-30.32kb)|APOC1P1(-42.46kb)|APOC2(-61.64kb)|APOC4(-57.9kb)|APOC4-APOC2(-57.9kb)|APOE(-21.44kb)|BCAM(+62.92kb)|BCL3(+124.3kb)|CBLC(+83.69kb)|CEACAM16(+173.6kb)|CEACAM19(+200kb)|CLASRP(-154.7kb)|CLPTM1(-70.24kb)|GEMIN7(-194.9kb)|PVRL2(0)|RELB(-117.1kb)|TOMM40(-6.88kb)|ZNF296(-187.2kb)
19:45388130	19	45388130	A	?	8	3.111e-09	0.009054	1.688	1.5663	0.0085	62.95	1.128	2.274	1.562	2.438	1.21	NA	2.651	0.0897	1.134	rs34342646	APOC1(-29.79kb)|APOC1P1(-41.93kb)|APOC2(-61.11kb)|APOC4(-57.36kb)|APOC4-APOC2(-57.36kb)|APOE(-20.91kb)|BCAM(+63.45kb)|BCL3(+124.8kb)|CBLC(+84.23kb)|CEACAM16(+174.1kb)|CLASRP(-154.2kb)|CLPTM1(-69.71kb)|GEMIN7(-194.4kb)|PVRL2(0)|RELB(-116.6kb)|TOMM40(-6.346kb)|ZNF296(-186.6kb)
19:45394336	19	45394336	C	?	8	3.22e-09	0.006395	1.6903	1.5744	0.0136	60.36	1.128	2.246	1.55	2.327	1.21	NA	2.774	0.0897	1.181	rs71352238	APOC1(-23.58kb)|APOC1P1(-35.72kb)|APOC2(-54.9kb)|APOC4(-51.16kb)|APOC4-APOC2(-51.16kb)|APOE(-14.7kb)|BCAM(+69.66kb)|BCL3(+131kb)|CBLC(+90.43kb)|CEACAM16(+180.4kb)|CLASRP(-148kb)|CLPTM1(-63.5kb)|GEMIN7(-188.2kb)|PVRL2(+1.851kb)|RELB(-110.4kb)|TOMM40(-0.14kb)|ZNF296(-180.4kb)
19:45402477	19	45402477	T	?	8	1.374e-07	2.534e-05	0.6054	0.6235	0.2935	17.29	0.6655	0.4516	0.7535	0.5478	0.8906	NA	0.5122	1.024	0.7829	rs34878901	APOC1(-15.44kb)|APOC1P1(-27.58kb)|APOC2(-46.76kb)|APOC4(-43.02kb)|APOC4-APOC2(-43.02kb)|APOE(-6.561kb)|BCAM(+77.8kb)|BCL3(+139.2kb)|CBLC(+98.57kb)|CEACAM16(+188.5kb)|CLASRP(-139.8kb)|CLPTM1(-55.36kb)|GEMIN7(-180kb)|PPP1R37(-194kb)|PVRL2(+9.992kb)|RELB(-102.2kb)|TOMM40(0)|ZNF296(-172.3kb)
19:45405521	19	45405521	C	?	8	3.069e-07	3.697e-05	0.6138	0.6311	0.2989	16.64	0.6655	0.4602	0.7535	0.5478	0.8906	NA	0.5122	1.024	0.8183	rs1305062	APOC1(-12.4kb)|APOC1P1(-24.54kb)|APOC2(-43.72kb)|APOC4(-39.97kb)|APOC4-APOC2(-39.97kb)|APOE(-3.517kb)|BCAM(+80.84kb)|BCL3(+142.2kb)|CBLC(+101.6kb)|CEACAM16(+191.5kb)|CLASRP(-136.8kb)|CLPTM1(-52.32kb)|GEMIN7(-177kb)|PPP1R37(-190.9kb)|PVRL2(+13.04kb)|RELB(-99.18kb)|TOMM40(0)|ZNF296(-169.2kb)
19:45401666	19	45401666	G	?	8	3.349e-07	0.0001265	0.6154	0.6387	0.2559	21.83	0.7702	0.4562	0.7992	0.5478	0.9082	NA	0.5122	1.024	0.7829	rs8106922	APOC1(-16.25kb)|APOC1P1(-28.39kb)|APOC2(-47.57kb)|APOC4(-43.83kb)|APOC4-APOC2(-43.83kb)|APOE(-7.372kb)|BCAM(+76.99kb)|BCL3(+138.4kb)|CBLC(+97.76kb)|CEACAM16(+187.7kb)|CLASRP(-140.6kb)|CLPTM1(-56.18kb)|GEMIN7(-180.9kb)|PPP1R37(-194.8kb)|PVRL2(+9.181kb)|RELB(-103kb)|TOMM40(0)|ZNF296(-173.1kb)
19:45410444	19	45410444	A	?	8	4.604e-07	4.649e-06	0.6208	0.6304	0.3792	6.6	0.7453	0.4539	0.7625	0.6135	0.819	NA	0.8741	1.024	0.7686	rs769450	APOC1(-7.476kb)|APOC1P1(-19.62kb)|APOC2(-38.79kb)|APOC4(-35.05kb)|APOC4-APOC2(-35.05kb)|APOE(0)|BCAM(+85.77kb)|BCL3(+147.1kb)|CBLC(+106.5kb)|CEACAM16(+196.5kb)|CLASRP(-131.9kb)|CLPTM1(-47.4kb)|GEMIN7(-172.1kb)|PPP1R37(-186kb)|PVRL2(+17.96kb)|RELB(-94.26kb)|TOMM40(+3.498kb)|ZNF296(-164.3kb)
19:45398817	19	45398817	T	?	8	6.225e-07	0.000294	0.6267	0.6535	0.238	23.99	0.7702	0.4568	0.8655	0.5934	0.9177	NA	0.5122	1.024	0.7663	rs2238681	APOC1(-19.1kb)|APOC1P1(-31.24kb)|APOC2(-50.42kb)|APOC4(-46.68kb)|APOC4-APOC2(-46.68kb)|APOE(-10.22kb)|BCAM(+74.14kb)|BCL3(+135.5kb)|CBLC(+94.91kb)|CEACAM16(+184.8kb)|CLASRP(-143.5kb)|CLPTM1(-59.02kb)|GEMIN7(-183.7kb)|PPP1R37(-197.6kb)|PVRL2(+6.332kb)|RELB(-105.9kb)|TOMM40(0)|ZNF296(-175.9kb)
19:45416291	19	45416291	T	?	8	6.373e-07	6.373e-07	0.6177	0.6177	0.6909	0	0.79	0.4911	0.6001	0.6779	0.8479	NA	0.5881	0.9311	0.6321	rs59325138	APOC1(-1.629kb)|APOC1P1(-13.77kb)|APOC2(-32.95kb)|APOC4(-29.2kb)|APOC4-APOC2(-29.2kb)|APOE(+3.641kb)|BCAM(+91.61kb)|BCL3(+153kb)|CBLC(+112.4kb)|CLASRP(-126kb)|CLPTM1(-41.55kb)|GEMIN7(-166.2kb)|PPP1R37(-180.1kb)|PVRL2(+23.81kb)|RELB(-88.42kb)|TOMM40(+9.345kb)|ZNF296(-158.5kb)
19:45385759	19	45385759	C	?	8	9.335e-07	0.0001479	0.6466	0.6691	0.2849	18.33	0.672	0.4833	1.026	0.6156	0.778	NA	0.6409	1.217	0.8475	rs3745150	APOC1(-32.16kb)|APOC1P1(-44.3kb)|APOC2(-63.48kb)|APOC4(-59.74kb)|APOC4-APOC2(-59.74kb)|APOE(-23.28kb)|BCAM(+61.08kb)|BCL3(+122.5kb)|CBLC(+81.86kb)|CEACAM16(+171.8kb)|CEACAM19(+198.1kb)|CLASRP(-156.5kb)|CLPTM1(-72.08kb)|GEMIN7(-196.8kb)|PVRL2(0)|RELB(-118.9kb)|TOMM40(-8.717kb)|ZNF296(-189kb)
6:10108495	6	10108495	G	?	9	1.72e-06	4.601e-06	0.5513	0.5513	0.4111	2.82	0.0854	0.5456	0.431	0.3922	0.5787	0.9896	0.3493	1.991	1.11	rs112644714	.
20:14529657	20	14529657	G	?	9	1.815e-06	4.873e-06	0.5783	0.5796	0.4086	3.13	0.2845	0.5457	0.5625	0.8321	0.581	4.963	0.1938	1.559	0.5755	rs13039768	MACROD2(0)
19:45403412	19	45403412	T	?	8	2.206e-06	0.003043	0.6434	0.6812	0.1447	35.56	0.8263	0.4568	0.7177	0.5975	1.03	NA	0.7109	1.024	0.771	rs1160985	APOC1(-14.51kb)|APOC1P1(-26.65kb)|APOC2(-45.83kb)|APOC4(-42.08kb)|APOC4-APOC2(-42.08kb)|APOE(-5.626kb)|BCAM(+78.73kb)|BCL3(+140.1kb)|CBLC(+99.51kb)|CEACAM16(+189.4kb)|CLASRP(-138.9kb)|CLPTM1(-54.43kb)|GEMIN7(-179.1kb)|PPP1R37(-193kb)|PVRL2(+10.93kb)|RELB(-101.3kb)|TOMM40(0)|ZNF296(-171.3kb)
19:45403858	19	45403858	G	?	8	2.206e-06	0.003043	0.6434	0.6812	0.1447	35.56	0.8263	0.4568	0.7177	0.5975	1.03	NA	0.7109	1.024	0.771	rs760136	APOC1(-14.06kb)|APOC1P1(-26.2kb)|APOC2(-45.38kb)|APOC4(-41.64kb)|APOC4-APOC2(-41.64kb)|APOE(-5.18kb)|BCAM(+79.18kb)|BCL3(+140.6kb)|CBLC(+99.96kb)|CEACAM16(+189.9kb)|CLASRP(-138.4kb)|CLPTM1(-53.98kb)|GEMIN7(-178.7kb)|PPP1R37(-192.6kb)|PVRL2(+11.37kb)|RELB(-100.8kb)|TOMM40(0)|ZNF296(-170.9kb)
19:45404431	19	45404431	C	?	8	2.373e-06	0.002583	0.6447	0.6809	0.1569	33.98	0.8263	0.4636	0.7177	0.5872	1.03	NA	0.7109	1.024	0.7754	rs741780	APOC1(-13.49kb)|APOC1P1(-25.63kb)|APOC2(-44.81kb)|APOC4(-41.06kb)|APOC4-APOC2(-41.06kb)|APOE(-4.607kb)|BCAM(+79.75kb)|BCL3(+141.1kb)|CBLC(+100.5kb)|CEACAM16(+190.4kb)|CLASRP(-137.9kb)|CLPTM1(-53.41kb)|GEMIN7(-178.1kb)|PPP1R37(-192kb)|PVRL2(+11.95kb)|RELB(-100.3kb)|TOMM40(0)|ZNF296(-170.3kb)
14:90442063	14	90442063	C	?	7	2.451e-06	2.451e-06	0.3756	0.3756	0.9615	0	0.1161	0.3326	2492000	0.516	0.4576	NA	0.3708	NA	0.4099	rs17126517	EFCAB11(+20.97kb)|KCNK13(-86.04kb)|TDP1(0)
19:45405062	19	45405062	G	?	8	3.079e-06	0.001511	0.6485	0.68	0.197	28.96	0.8263	0.4714	0.7296	0.6098	1.03	NA	0.7109	1.024	0.7416	rs1038026	APOC1(-12.86kb)|APOC1P1(-25kb)|APOC2(-44.18kb)|APOC4(-40.43kb)|APOC4-APOC2(-40.43kb)|APOE(-3.976kb)|BCAM(+80.38kb)|BCL3(+141.8kb)|CBLC(+101.2kb)|CEACAM16(+191.1kb)|CLASRP(-137.2kb)|CLPTM1(-52.78kb)|GEMIN7(-177.5kb)|PPP1R37(-191.4kb)|PVRL2(+12.58kb)|RELB(-99.64kb)|TOMM40(0)|ZNF296(-169.7kb)
9:100563828	9	100563828	A	?	9	3.101e-06	3.101e-06	0.675	0.675	0.6197	0	0.9641	0.6698	0.607	0.7647	0.6241	0.1939	0.2901	2.86	0.7348	rs10818094	ANP32B(-181.7kb)|C9orf156(-102.9kb)|FOXE1(-51.71kb)|HEMGN(-125.2kb)|NCBP1(+127.8kb)|TMOD1(+199.8kb)|TSTD2(+167.9kb)|XPA(+104.1kb)
19:45407788	19	45407788	A	?	8	3.214e-06	0.001694	0.6495	0.6861	0.2074	27.69	0.9703	0.4711	0.8084	0.5965	0.9567	NA	0.8654	1.024	0.7561	rs7259620	APOC1(-10.13kb)|APOC1P1(-22.27kb)|APOC2(-41.45kb)|APOC4(-37.71kb)|APOC4-APOC2(-37.71kb)|APOE(-1.25kb)|BCAM(+83.11kb)|BCL3(+144.5kb)|CBLC(+103.9kb)|CEACAM16(+193.8kb)|CLASRP(-134.5kb)|CLPTM1(-50.05kb)|GEMIN7(-174.7kb)|PPP1R37(-188.6kb)|PVRL2(+15.3kb)|RELB(-96.92kb)|TOMM40(+0.842kb)|ZNF296(-167kb)
19:45404972	19	45404972	C	?	8	3.246e-06	0.002793	0.6487	0.685	0.1631	33.19	0.8263	0.4636	0.7296	0.6098	1.03	NA	0.7109	1.024	0.771	rs1038025	APOC1(-12.95kb)|APOC1P1(-25.09kb)|APOC2(-44.27kb)|APOC4(-40.52kb)|APOC4-APOC2(-40.52kb)|APOE(-4.066kb)|BCAM(+80.29kb)|BCL3(+141.7kb)|CBLC(+101.1kb)|CEACAM16(+191kb)|CLASRP(-137.3kb)|CLPTM1(-52.87kb)|GEMIN7(-177.5kb)|PPP1R37(-191.5kb)|PVRL2(+12.49kb)|RELB(-99.73kb)|TOMM40(0)|ZNF296(-169.8kb)
8:57814112	8	57814112	C	?	6	3.384e-06	0.07066	0.3232	0.4348	0.0332	58.73	NA	0.2068	0.2076	2.373	0.2643	0.2038	NA	NA	1.639	rs71519471	IMPAD1(-56.38kb)
4:3999112	4	3999112	T	?	8	3.676e-06	3.676e-06	0.5887	0.5887	0.9947	0	0.7543	0.6326	0.5319	0.6723	0.5408	NA	0.5475	0.4632	0.5072	rs7669931	FAM86EP(+41.96kb)|OTOP1(-191.4kb)
8:57897420	8	57897420	T	?	8	3.778e-06	0.03497	0.3936	0.4836	0.0805	44.77	1.931	0.3593	0.1469	4.63	0.2873	0.2085	NA	1.097	0.8227	rs13258952	IMPAD1(0)
4:3997244	4	3997244	G	?	8	4.485e-06	4.485e-06	0.5929	0.5929	0.9943	0	0.7543	0.6318	0.5319	0.6723	0.5408	NA	0.6642	0.4632	0.5072	rs73206803	FAM86EP(+40.1kb)|OTOP1(-193.3kb)
9:100622564	9	100622564	G	?	9	4.545e-06	4.545e-06	0.523	0.523	0.921	0	0.5674	0.4418	0.4412	0.8128	0.6319	0.1087	0.4413	0.3046	0.6272	rs72753511	ANP32B(-122.9kb)|C9orf156(-44.21kb)|FOXE1(+3.567kb)|HEMGN(-66.51kb)|NANS(-196.4kb)|NCBP1(+186.5kb)|XPA(+162.9kb)
3:101400988	3	101400988	A	?	8	5.095e-06	5.095e-06	0.5109	0.5109	0.6082	0	NA	0.7429	0.3308	0.3537	0.3941	0.3212	0.3586	0.2299	0.5251	rs41273607	CEP97(-42.5kb)|FAM172BP(+158.3kb)|NFKBIZ(-145.8kb)|NXPE3(-97.04kb)|PCNP(+87.71kb)|PDCL3P4(-30.29kb)|RPL24(0)|SENP7(+168.9kb)|TRMT10C(+115.7kb)|ZBTB11(+5kb)|ZBTB11-AS1(+2.931kb)
4:185397086	4	185397086	C	?	8	5.179e-06	0.003541	0.4512	0.4651	0.1235	38.4	0.795	0.3385	0.1224	0.7289	0.9723	0.0146	0.496	NA	0.579	rs11731458	CASP3(-151.8kb)|CCDC111(-173.7kb)|IRF2(+1.36kb)|LOC728175(+122kb)
3:99466531	3	99466531	G	?	8	5.614e-06	5.614e-06	0.6425	0.6425	0.7833	0	0.8339	0.5614	0.9515	0.9562	0.6112	0.7233	0.6109	NA	0.6229	rs56339461	CMSS1(-70.15kb)|COL8A1(0)|FILIP1L(-85.46kb)|MIR548G(0)
9:100653329	9	100653329	T	?	9	6.608e-06	6.608e-06	0.5275	0.5275	0.9462	0	0.5674	0.4452	0.5633	0.7649	0.6319	0.1089	0.4348	0.3046	0.6196	rs139518094	ANP32B(-92.16kb)|C9orf156(-13.44kb)|FOXE1(+34.33kb)|HEMGN(-35.74kb)|NANS(-165.6kb)|TRIM14(-178.2kb)|XPA(+193.6kb)
18:401660	18	401660	G	?	8	7.404e-06	7.404e-06	0.5848	0.5848	0.4777	0	0.7727	0.6641	0.4761	0.5956	0.4158	0.0422	2.108	NA	0.5652	rs4798136	CETN1(-178.7kb)|CLUL1(-195.3kb)|COLEC12(0)|THOC1(+133.6kb)|USP14(+187.9kb)
1:64820370	1	64820370	A	?	9	7.664e-06	3.024e-05	1.4102	1.4061	0.3893	5.51	0.5948	1.39	1.478	1.433	1.974	0.995	1.237	0.7943	1.309	rs61784487	CACHD1(-116.1kb)|ROR1(+173.2kb)|UBE2U(+110.3kb)
8:58344032	8	58344032	A	?	8	8.169e-06	8.4e-05	0.5898	0.5994	0.3647	8.47	NA	0.502	0.5517	0.8692	0.4976	1.116	1.041	0.2708	1.107	rs13267137	LINC00588(+146.7kb)|LOC286177(+164.9kb)|LOC100507651(+198.6kb)
1:64822249	1	64822249	C	?	9	8.277e-06	3.28e-05	1.4081	1.404	0.3888	5.56	0.5948	1.388	1.469	1.433	1.974	0.995	1.237	0.7943	1.306	rs12043901	CACHD1(-114.2kb)|ROR1(+175.1kb)|UBE2U(+112.2kb)
18:404777	18	404777	T	?	8	8.308e-06	8.308e-06	0.5874	0.5874	0.6496	0	0.7727	0.6641	0.4761	0.5956	0.4158	0.3783	2.108	NA	0.5652	rs4099522	CETN1(-175.6kb)|CLUL1(-192.2kb)|COLEC12(0)|THOC1(+136.7kb)|USP14(+191kb)
9:100477195	9	100477195	A	?	8	8.314e-06	8.314e-06	0.4995	0.4995	0.9809	0	0.5619	0.488	0.874	0.5248	0.4253	0.9247	NA	0.1975	0.5261	rs72751554	C9orf156(-189.6kb)|FOXE1(-138.3kb)|NCBP1(+41.17kb)|TMOD1(+113.2kb)|TSTD2(+81.23kb)|XPA(+17.5kb)
16:78692220	16	78692220	A	?	9	8.357e-06	8.357e-06	1.3891	1.3891	0.4473	0	2.804	1.324	1.698	1.708	1.393	0.3395	1.18	0.8859	1.276	rs2738606	WWOX(0)
18:403968	18	403968	G	?	8	8.67e-06	8.67e-06	0.5882	0.5882	0.6504	0	0.7727	0.6641	0.4761	0.5956	0.4158	0.3783	2.108	NA	0.5707	rs7240997	CETN1(-176.4kb)|CLUL1(-193kb)|COLEC12(0)|THOC1(+135.9kb)|USP14(+190.2kb)
14:45955207	14	45955207	G	?	7	9.158e-06	0.09373	0.6983	0.7742	0.0336	56.09	0.9677	0.6313	0.7056	1.371	0.5683	2.689	NA	0.5084	NA	rs2225366	.
4:185393807	4	185393807	C	?	8	9.278e-06	0.001489	0.4673	0.4906	0.2357	24.26	0.436	0.3483	0.1621	0.7478	1.054	0.5753	0.493	NA	0.6396	rs13114727	CASP3(-155kb)|CCDC111(-177kb)|IRF2(0)|LOC728175(+118.7kb)
9:100468142	9	100468142	A	?	8	9.31e-06	9.31e-06	0.5014	0.5014	0.9909	0	0.5619	0.486	0.874	0.5248	0.4253	0.9247	NA	0.3142	0.5261	rs72751549	C9orf156(-198.6kb)|FOXE1(-147.4kb)|NCBP1(+32.11kb)|TMOD1(+104.1kb)|TSTD2(+72.18kb)|XPA(+8.451kb)
7:114760513	7	114760513	A	?	9	9.398e-06	9.398e-06	0.7247	0.7247	0.7415	0	0.8958	0.7016	0.7732	0.4718	0.8203	0.7872	0.6755	1.113	0.8023	rs10953774	MDFIC(+100.5kb)
18:408055	18	408055	G	?	8	9.442e-06	9.442e-06	0.5895	0.5895	0.6481	0	0.7727	0.6641	0.4761	0.6112	0.4158	0.3783	2.108	NA	0.5652	rs75904203	CETN1(-172.3kb)|CLUL1(-188.9kb)|COLEC12(0)|THOC1(+140kb)|USP14(+194.3kb)
18:408373	18	408373	G	?	8	9.442e-06	9.442e-06	0.5895	0.5895	0.6481	0	0.7727	0.6641	0.4761	0.6112	0.4158	0.3783	2.108	NA	0.5652	rs58371092	CETN1(-172kb)|CLUL1(-188.6kb)|COLEC12(0)|THOC1(+140.3kb)|USP14(+194.6kb)
19:45395266	19	45395266	G	?	8	9.484e-06	0.0003548	0.6497	0.6607	0.2949	17.13	0.4696	0.6013	0.5597	0.9051	0.4719	NA	0.7007	2.781	0.9164	rs157580	APOC1(-22.65kb)|APOC1P1(-34.79kb)|APOC2(-53.97kb)|APOC4(-50.23kb)|APOC4-APOC2(-50.23kb)|APOE(-13.77kb)|BCAM(+70.59kb)|BCL3(+132kb)|CBLC(+91.36kb)|CEACAM16(+181.3kb)|CLASRP(-147kb)|CLPTM1(-62.58kb)|GEMIN7(-187.3kb)|PVRL2(+2.781kb)|RELB(-109.4kb)|TOMM40(0)|ZNF296(-179.5kb)
18:400450	18	400450	A	?	8	9.885e-06	9.885e-06	0.589	0.589	0.5139	0	0.7727	0.6641	0.4761	0.5956	0.4319	0.0422	2.108	NA	0.5652	rs77980114	CETN1(-179.9kb)|CLUL1(-196.5kb)|COLEC12(0)|THOC1(+132.4kb)|USP14(+186.7kb)
4:185407113	4	185407113	G	?	8	1.005e-05	0.005161	0.4602	0.473	0.1138	39.75	0.795	0.3531	0.1224	0.9063	0.9723	0.0146	0.496	NA	0.5096	rs74581982	CASP3(-141.7kb)|CCDC111(-163.7kb)|IRF2(+11.39kb)|LOC728175(+132kb)
16:78690349	16	78690349	C	?	9	1.012e-05	1.012e-05	1.3811	1.3811	0.7511	0	2.576	1.369	1.615	1.484	1.405	0.4738	1.167	1.073	1.234	rs1125675	WWOX(0)
1:64806293	1	64806293	C	?	9	1.016e-05	1.016e-05	0.5101	0.5101	0.6472	0	0.247	0.5181	0.8968	0.3009	0.6514	1.48	1.837	0.1635	0.4596	rs17394275	CACHD1(-130.2kb)|ROR1(+159.1kb)|UBE2U(+96.27kb)
18:410046	18	410046	T	?	8	1.028e-05	1.028e-05	0.5909	0.5909	0.6464	0	0.7727	0.6641	0.4761	0.6217	0.4158	0.3783	2.108	NA	0.5652	rs80092553	CETN1(-170.3kb)|CLUL1(-187kb)|COLEC12(0)|THOC1(+142kb)|USP14(+196.3kb)
11:122739636	11	122739636	A	?	6	1.031e-05	1.031e-05	0.295	0.295	0.7206	0	0.288	0.2456	0.362	NA	0.5237	NA	2.79	NA	0.2135	rs185431291	BSX(-108.7kb)|C11orf63(-13.6kb)|CRTAM(0)|HSPA8(-188.6kb)|LOC341056(-148.6kb)|UBASH3B(+54.45kb)
12:11532051	12	11532051	A	?	7	1.041e-05	0.0451	0.3829	0.4839	0.1231	40.22	1.334	0.3468	2.341	3.31	0.3019	0.2934	NA	NA	0.209	rs138843673	LOC338817(-168.9kb)|PRB1(+23.53kb)|PRB2(-12.42kb)|PRB3(+109.4kb)|PRB4(+68.68kb)|TAS2R42(+192.5kb)
7:114702127	7	114702127	A	?	9	1.064e-05	1.064e-05	0.7266	0.7266	0.9146	0	0.5635	0.7289	0.9776	0.6343	0.8329	0.5731	0.594	0.7112	0.6426	rs2709475	MDFIC(+42.16kb)
7:114702557	7	114702557	T	?	9	1.064e-05	1.064e-05	0.7266	0.7266	0.9146	0	0.5635	0.7289	0.9776	0.6343	0.8329	0.5731	0.594	0.7112	0.6426	rs1623973	MDFIC(+42.59kb)
7:114778640	7	114778640	G	?	9	1.087e-05	1.087e-05	0.7271	0.7271	0.5986	0	1.1	0.7035	0.77	0.4557	0.8151	0.6807	0.6755	1.113	0.8193	rs10249920	MDFIC(+118.7kb)
1:64815570	1	64815570	A	?	9	1.094e-05	1.776e-05	1.402	1.4009	0.4185	1.9	0.569	1.376	1.478	1.433	1.937	0.995	1.237	0.7943	1.309	rs12138439	CACHD1(-120.9kb)|ROR1(+168.4kb)|UBE2U(+105.5kb)
1:64814649	1	64814649	A	?	9	1.127e-05	1.827e-05	1.4011	1.4	0.4185	1.9	0.569	1.373	1.478	1.433	1.937	0.995	1.237	0.7943	1.311	rs1496009	CACHD1(-121.8kb)|ROR1(+167.5kb)|UBE2U(+104.6kb)
18:412048	18	412048	C	?	8	1.131e-05	1.131e-05	0.5932	0.5932	0.6391	0	0.7727	0.6693	0.4761	0.6217	0.4158	0.3783	2.108	NA	0.5652	rs57320584	CETN1(-168.3kb)|CLUL1(-184.9kb)|COLEC12(0)|THOC1(+144kb)|USP14(+198.3kb)
18:412064	18	412064	A	?	8	1.131e-05	1.131e-05	0.5932	0.5932	0.6391	0	0.7727	0.6693	0.4761	0.6217	0.4158	0.3783	2.108	NA	0.5652	rs60821693	CETN1(-168.3kb)|CLUL1(-184.9kb)|COLEC12(0)|THOC1(+144kb)|USP14(+198.3kb)
17:31428130	17	31428130	G	?	9	1.148e-05	1.148e-05	0.6035	0.6035	0.897	0	1.394	0.613	2519000	0.4713	0.6609	0.2665	0.4434	0.2118	0.6184	rs8070997	ASIC2(0)|SPACA3(+103.2kb)|TMEM98(+159.5kb)
9:100738266	9	100738266	C	?	8	1.152e-05	1.152e-05	0.5185	0.5185	0.9522	0	0.4483	0.4399	0.4928	0.7284	0.5994	0.1226	0.6596	NA	0.6139	rs62575561	ANP32B(-7.222kb)|C9orf156(+53.41kb)|CORO2A(-145kb)|FOXE1(+119.3kb)|HEMGN(+31.07kb)|NANS(-80.69kb)|TRIM14(-93.3kb)
7:114761401	7	114761401	A	?	9	1.159e-05	1.159e-05	0.7269	0.7269	0.7251	0	0.8958	0.7016	0.7732	0.4718	0.8327	0.7872	0.6755	1.113	0.8039	rs12670173	MDFIC(+101.4kb)
7:114698654	7	114698654	T	?	9	1.161e-05	1.161e-05	0.7276	0.7276	0.9226	0	0.5967	0.7289	0.9776	0.6343	0.8329	0.5731	0.594	0.7112	0.6426	rs2520586	MDFIC(+38.68kb)
4:185389035	4	185389035	G	?	8	1.185e-05	0.0003311	0.4704	0.4871	0.3295	12.89	0.436	0.3483	0.1872	0.6985	1.054	0.5753	0.493	NA	0.6396	rs35626284	CASP3(-159.8kb)|CCDC111(-181.7kb)|IRF2(0)|LOC728175(+113.9kb)
4:185389560	4	185389560	G	?	8	1.185e-05	0.0003311	0.4704	0.4871	0.3295	12.89	0.436	0.3483	0.1872	0.6985	1.054	0.5753	0.493	NA	0.6396	rs35087616	CASP3(-159.3kb)|CCDC111(-181.2kb)|IRF2(0)|LOC728175(+114.4kb)
1:167299335	1	167299335	C	?	7	1.211e-05	1.211e-05	0.4891	0.4891	0.7632	0	1.174	0.4868	0.6024	0.4041	0.306	NA	0.3952	NA	0.7509	rs17344593	CD247(-100.5kb)|POU2F1(0)
3:100811289	3	100811289	C	?	9	1.217e-05	0.000801	0.6418	0.6293	0.1971	27.81	1.515	0.7608	0.4673	0.5756	0.5524	12.35	0.7235	0.9964	0.4219	rs35252712	ABI3BP(+98.96kb)|IMPG2(-130.1kb)
1:64817170	1	64817170	A	?	9	1.237e-05	0.0003842	1.3987	1.3838	0.2942	16.67	0.5168	1.375	1.478	1.433	1.97	0.995	1.237	0.7943	1.304	rs61784483	CACHD1(-119.3kb)|ROR1(+170kb)|UBE2U(+107.1kb)
7:114745678	7	114745678	T	?	9	1.248e-05	1.248e-05	0.7283	0.7283	0.9756	0	0.8277	0.6955	0.8521	0.6091	0.8308	0.7814	0.5982	0.8591	0.728	rs10282722	MDFIC(+85.71kb)
19:45421100	19	45421100	A	?	8	1.25e-05	1.25e-05	0.6578	0.6578	0.8516	0	0.6219	0.5714	0.745	0.6632	0.7685	NA	0.4784	2.039	0.7287	rs3925681	APOC1(0)|APOC1P1(-8.959kb)|APOC2(-28.14kb)|APOC4(-24.39kb)|APOC4-APOC2(-24.39kb)|APOE(+8.45kb)|BCAM(+96.42kb)|BCL3(+157.8kb)|CBLC(+117.2kb)|CLASRP(-121.2kb)|CLPTM1(-36.74kb)|GEMIN7(-161.4kb)|PPP1R37(-175.3kb)|PVRL2(+28.62kb)|RELB(-83.61kb)|TOMM40(+14.15kb)|ZNF296(-153.7kb)
14:95684364	14	95684364	C	?	8	1.251e-05	1.251e-05	0.5577	0.5577	0.6039	0	1.608	0.5035	0.3406	0.5476	0.6131	NA	1.002	0.2705	0.8326	rs76502709	CLMN(0)|DICER1(+60.6kb)|DICER1-AS1(+38.09kb)|LINC00341(-189.2kb)|MIR3173(+80.04kb)|SYNE3(-199.5kb)
16:78685180	16	78685180	C	?	9	1.255e-05	1.255e-05	1.3798	1.3798	0.6934	0	3.589	1.393	1.61	1.404	1.398	0.9569	1.322	0.9529	1.121	rs1424162	WWOX(0)
9:100776664	9	100776664	A	?	8	1.257e-05	1.257e-05	0.5285	0.5285	0.9184	0	0.4483	0.4524	0.6489	0.6709	0.5381	0.1226	0.3097	NA	0.7233	rs117013889	ANP32B(0)|C9orf156(+91.81kb)|CORO2A(-106.6kb)|FOXE1(+157.7kb)|HEMGN(+69.47kb)|NANS(-42.29kb)|TBC1D2(-184.6kb)|TRIM14(-54.9kb)
9:100784550	9	100784550	A	?	8	1.257e-05	1.257e-05	0.5285	0.5285	0.9184	0	0.4483	0.4524	0.6489	0.6709	0.5381	0.1226	0.3097	NA	0.7233	rs62575566	ANP32B(+6.326kb)|C9orf156(+99.7kb)|CORO2A(-98.71kb)|FOXE1(+165.6kb)|HEMGN(+77.35kb)|NANS(-34.41kb)|TBC1D2(-176.7kb)|TRIM14(-47.02kb)
7:114746968	7	114746968	T	?	9	1.264e-05	1.264e-05	0.7283	0.7283	0.976	0	0.8277	0.6931	0.8452	0.6091	0.8308	0.7814	0.5982	0.8591	0.7372	rs12531336	MDFIC(+87kb)
3:100813456	3	100813456	T	?	9	1.268e-05	0.0008408	0.6432	0.6338	0.2068	26.68	1.515	0.7477	0.4673	0.6546	0.5365	12.35	0.7217	0.9964	0.4219	rs62274078	ABI3BP(+101.1kb)|IMPG2(-127.9kb)
7:114709443	7	114709443	T	?	9	1.285e-05	1.285e-05	0.7289	0.7289	0.9228	0	0.5635	0.7289	0.9776	0.6343	0.8329	0.7598	0.594	0.7112	0.6426	rs10441335	MDFIC(+49.47kb)
7:114714282	7	114714282	G	?	9	1.285e-05	1.285e-05	0.7289	0.7289	0.9228	0	0.5635	0.7289	0.9776	0.6343	0.8329	0.7598	0.594	0.7112	0.6426	rs639470	MDFIC(+54.31kb)
1:64815249	1	64815249	G	?	9	1.287e-05	1.287e-05	1.3982	1.3982	0.4446	0	0.569	1.371	1.478	1.433	1.907	0.995	1.237	0.7943	1.316	rs66572408	CACHD1(-121.2kb)|ROR1(+168.1kb)|UBE2U(+105.2kb)
7:114736232	7	114736232	T	?	9	1.291e-05	1.291e-05	0.7285	0.7285	0.9816	0	0.8277	0.6939	0.8388	0.6236	0.8308	0.7814	0.5982	0.9001	0.7246	rs2460485	MDFIC(+76.26kb)
1:64822943	1	64822943	G	?	9	1.303e-05	5.84e-05	1.397	1.393	0.381	6.51	0.5948	1.367	1.469	1.433	1.974	0.995	1.237	0.7943	1.291	rs55736654	CACHD1(-113.5kb)|ROR1(+175.8kb)|UBE2U(+112.9kb)
3:99813622	3	99813622	A	?	8	1.306e-05	1.306e-05	0.6775	0.6775	0.4646	0	1.194	0.6076	1.002	0.9728	0.6615	1.402	0.8055	NA	0.5163	rs28870092	CMSS1(0)|FILIP1L(0)|MIR548G(+96.56kb)|MIR3921(+130.4kb)|TBC1D23(-166kb)|TMEM30C(-91.04kb)
7:83276868	7	83276868	G	?	7	1.312e-05	1.312e-05	0.3831	0.3831	0.4794	0	NA	0.253	0.5034	0.7437	0.4606	25.77	1.992	NA	0.41	rs118126619	SEMA3E(0)
4:185416278	4	185416278	G	?	8	1.318e-05	0.0005671	0.4741	0.4908	0.2954	17.07	0.795	0.3484	0.261	0.8474	0.8599	0.0146	0.3195	NA	0.6031	rs28866635	CASP3(-132.6kb)|CCDC111(-154.5kb)|IRF2(+20.55kb)|LOC728175(+141.1kb)|MLF1IP(-198.9kb)
18:400819	18	400819	A	?	8	1.338e-05	1.338e-05	0.5933	0.5933	0.5159	0	0.7727	0.6641	0.4761	0.5956	0.4319	0.0422	2.108	NA	0.5974	rs78862132	CETN1(-179.5kb)|CLUL1(-196.2kb)|COLEC12(0)|THOC1(+132.8kb)|USP14(+187.1kb)
18:401869	18	401869	A	?	8	1.338e-05	1.338e-05	0.5933	0.5933	0.5159	0	0.7727	0.6641	0.4761	0.5956	0.4319	0.0422	2.108	NA	0.5974	rs12605749	CETN1(-178.5kb)|CLUL1(-195.1kb)|COLEC12(0)|THOC1(+133.8kb)|USP14(+188.1kb)
18:402312	18	402312	C	?	8	1.338e-05	1.338e-05	0.5933	0.5933	0.5159	0	0.7727	0.6641	0.4761	0.5956	0.4319	0.0422	2.108	NA	0.5974	rs76163863	CETN1(-178.1kb)|CLUL1(-194.7kb)|COLEC12(0)|THOC1(+134.3kb)|USP14(+188.6kb)
16:78691286	16	78691286	G	?	9	1.378e-05	1.378e-05	1.3729	1.3729	0.8643	0	2.096	1.372	1.701	1.569	1.35	0.6869	1.167	1.011	1.186	rs1125671	WWOX(0)
9:100754243	9	100754243	G	?	8	1.378e-05	1.378e-05	0.5302	0.5302	0.9126	0	0.4483	0.4524	0.6489	0.6879	0.5381	0.1226	0.3097	NA	0.7233	rs17760622	ANP32B(0)|C9orf156(+69.39kb)|CORO2A(-129kb)|FOXE1(+135.2kb)|HEMGN(+47.05kb)|NANS(-64.72kb)|TRIM14(-77.32kb)
7:114747766	7	114747766	A	?	9	1.391e-05	1.391e-05	0.7295	0.7295	0.9729	0	0.8277	0.6915	0.8679	0.6131	0.8308	0.7814	0.5982	0.8591	0.7361	rs7788565	MDFIC(+87.8kb)
7:114750436	7	114750436	C	?	9	1.391e-05	1.391e-05	0.7295	0.7295	0.9729	0	0.8277	0.6915	0.8679	0.6131	0.8308	0.7814	0.5982	0.8591	0.7361	rs12706009	MDFIC(+90.47kb)
16:78681855	16	78681855	C	?	9	1.417e-05	1.417e-05	1.3776	1.3776	0.6965	0	3.683	1.4	1.554	1.404	1.421	0.9569	1.322	0.9529	1.104	rs2738591	WWOX(0)
7:114720096	7	114720096	T	?	9	1.43e-05	1.43e-05	0.7304	0.7304	0.9435	0	0.6626	0.7291	0.9776	0.6343	0.8254	0.7598	0.594	0.7112	0.6426	rs427623	MDFIC(+60.13kb)
7:114721177	7	114721177	C	?	9	1.43e-05	1.43e-05	0.7304	0.7304	0.9435	0	0.6626	0.7291	0.9776	0.6343	0.8254	0.7598	0.594	0.7112	0.6426	rs2709474	MDFIC(+61.21kb)
7:114721780	7	114721780	G	?	9	1.43e-05	1.43e-05	0.7304	0.7304	0.9435	0	0.6626	0.7291	0.9776	0.6343	0.8254	0.7598	0.594	0.7112	0.6426	rs388879	MDFIC(+61.81kb)
7:114722105	7	114722105	A	?	9	1.43e-05	1.43e-05	0.7304	0.7304	0.9435	0	0.6626	0.7291	0.9776	0.6343	0.8254	0.7598	0.594	0.7112	0.6426	rs602664	MDFIC(+62.14kb)
11:121426207	11	121426207	T	?	9	1.489e-05	1.489e-05	1.4082	1.4082	0.6948	0	2.053	1.47	1.188	1.696	1.483	3.318	0.8433	0.6478	1.263	rs556349	SORL1(0)
14:45887991	14	45887991	G	?	7	1.492e-05	0.06012	0.7061	0.7691	0.0646	49.51	1.074	0.6416	0.7031	1.238	0.5805	2.692	NA	0.5084	NA	rs10134626	MIS18BP1(+165.4kb)
1:64823304	1	64823304	G	?	9	1.509e-05	0.0001589	1.3932	1.3832	0.3467	10.59	0.5948	1.388	1.469	1.433	1.974	0.9863	1.089	0.7943	1.261	rs61209637	CACHD1(-113.2kb)|ROR1(+176.1kb)|UBE2U(+113.3kb)
18:42913592	18	42913592	C	?	9	1.514e-05	1.514e-05	0.5365	0.5365	0.9679	0	0.3522	0.588	0.7546	0.5857	0.3633	0.549	0.7099	0.8244	0.4866	rs17743292	SLC14A2(0)
1:64817189	1	64817189	T	?	9	1.532e-05	0.0006837	1.3935	1.3737	0.2739	18.99	0.5168	1.377	1.478	1.433	1.97	0.995	1.089	0.7943	1.307	rs61784484	CACHD1(-119.3kb)|ROR1(+170kb)|UBE2U(+107.2kb)
16:78690988	16	78690988	A	?	9	1.549e-05	2.083e-05	1.3756	1.3766	0.4222	1.43	2.804	1.325	1.719	1.704	1.362	0.3395	1.18	0.8859	1.226	rs1125668	WWOX(0)
19:45395844	19	45395844	A	?	8	1.557e-05	0.003692	1.4541	1.4334	0.1421	35.9	1.638	1.717	1.138	2.209	1.235	NA	2.676	0.2982	1.068	rs34095326	APOC1(-22.08kb)|APOC1P1(-34.22kb)|APOC2(-53.39kb)|APOC4(-49.65kb)|APOC4-APOC2(-49.65kb)|APOE(-13.19kb)|BCAM(+71.17kb)|BCL3(+132.5kb)|CBLC(+91.94kb)|CEACAM16(+181.9kb)|CLASRP(-146.5kb)|CLPTM1(-62kb)|GEMIN7(-186.7kb)|PVRL2(+3.359kb)|RELB(-108.9kb)|TOMM40(0)|ZNF296(-178.9kb)
1:64806811	1	64806811	A	?	9	1.568e-05	1.568e-05	1.3924	1.3924	0.4926	0	0.569	1.368	1.478	1.427	1.864	1.055	1.267	0.7943	1.312	rs56021800	CACHD1(-129.7kb)|ROR1(+159.6kb)|UBE2U(+96.78kb)
3:100811048	3	100811048	C	?	9	1.569e-05	0.001192	0.6464	0.6366	0.1838	29.38	1.515	0.7615	0.4673	0.5756	0.5524	12.35	0.8427	0.9964	0.4219	rs35337386	ABI3BP(+98.71kb)|IMPG2(-130.3kb)
1:64806684	1	64806684	T	?	9	1.577e-05	1.577e-05	1.3924	1.3924	0.4927	0	0.569	1.368	1.478	1.427	1.864	1.055	1.267	0.7943	1.312	rs11208425	CACHD1(-129.8kb)|ROR1(+159.5kb)|UBE2U(+96.66kb)
1:64807197	1	64807197	T	?	9	1.577e-05	1.577e-05	1.3924	1.3924	0.4927	0	0.569	1.368	1.478	1.427	1.864	1.055	1.267	0.7943	1.312	rs11208426	CACHD1(-129.3kb)|ROR1(+160kb)|UBE2U(+97.17kb)
1:64807829	1	64807829	A	?	9	1.577e-05	1.577e-05	1.3924	1.3924	0.4927	0	0.569	1.368	1.478	1.427	1.864	1.055	1.267	0.7943	1.312	rs1496012	CACHD1(-128.6kb)|ROR1(+160.6kb)|UBE2U(+97.8kb)
1:64808640	1	64808640	C	?	9	1.577e-05	1.577e-05	1.3924	1.3924	0.4927	0	0.569	1.368	1.478	1.427	1.864	1.055	1.267	0.7943	1.312	rs2047285	CACHD1(-127.8kb)|ROR1(+161.5kb)|UBE2U(+98.61kb)
1:64807789	1	64807789	A	?	9	1.586e-05	1.586e-05	1.3923	1.3923	0.4917	0	0.569	1.368	1.478	1.427	1.864	1.043	1.267	0.7943	1.312	rs1496013	CACHD1(-128.7kb)|ROR1(+160.6kb)|UBE2U(+97.76kb)
16:78681511	16	78681511	C	?	9	1.61e-05	1.61e-05	1.3744	1.3744	0.7008	0	3.683	1.399	1.538	1.389	1.421	0.9569	1.322	0.9529	1.104	rs1124433	WWOX(0)
4:185413421	4	185413421	C	?	8	1.63e-05	0.00297	0.4818	0.5082	0.205	27.98	0.795	0.3397	0.261	0.9833	0.8599	0.0152	0.3195	NA	0.6401	rs28478335	CASP3(-135.4kb)|CCDC111(-157.3kb)|IRF2(+17.7kb)|LOC728175(+138.3kb)
1:64810826	1	64810826	G	?	9	1.636e-05	1.636e-05	1.3918	1.3918	0.4465	0	0.569	1.354	1.478	1.433	1.907	1.043	1.237	0.7943	1.314	rs1496010	CACHD1(-125.6kb)|ROR1(+163.6kb)|UBE2U(+100.8kb)
3:100811667	3	100811667	T	?	9	1.653e-05	0.0009248	0.6459	0.6344	0.2029	27.14	1.515	0.7608	0.4673	0.61	0.5524	12.35	0.7235	0.9964	0.4219	rs35573711	ABI3BP(+99.33kb)|IMPG2(-129.7kb)
4:4007949	4	4007949	G	?	8	1.699e-05	1.699e-05	0.6144	0.6144	0.9839	0	0.7543	0.6698	0.5554	0.7285	0.5408	NA	0.3987	0.5585	0.5713	rs140970927	FAM86EP(+50.8kb)|OTOP1(-182.6kb)
1:64776212	1	64776212	A	?	9	1.738e-05	1.738e-05	1.3913	1.3913	0.5331	0	0.6226	1.319	1.504	1.611	1.822	1.008	1.1	0.8436	1.373	rs705573	CACHD1(-160.3kb)|ROR1(+129kb)|UBE2U(+66.18kb)
9:100796571	9	100796571	C	?	8	1.746e-05	1.746e-05	0.5339	0.5339	0.9475	0	0.4483	0.4785	0.6879	0.6709	0.5077	0.1226	0.3097	NA	0.6936	rs72755419	ANP32B(+18.35kb)|C9orf156(+111.7kb)|CORO2A(-86.68kb)|FOXE1(+177.6kb)|HEMGN(+89.37kb)|NANS(-22.39kb)|TBC1D2(-164.7kb)|TRIM14(-35kb)
1:64786404	1	64786404	T	?	9	1.753e-05	1.753e-05	1.3897	1.3897	0.5254	0	0.569	1.36	1.462	1.437	1.814	1.053	1.163	0.7792	1.386	rs11208417	CACHD1(-150.1kb)|ROR1(+139.2kb)|UBE2U(+76.38kb)
1:64774779	1	64774779	A	?	9	1.791e-05	1.791e-05	1.3905	1.3905	0.5328	0	0.6226	1.319	1.504	1.611	1.822	1.008	1.1	0.8436	1.368	rs2175989	CACHD1(-161.7kb)|ROR1(+127.6kb)|UBE2U(+64.75kb)
1:64775138	1	64775138	T	?	9	1.791e-05	1.791e-05	1.3905	1.3905	0.5328	0	0.6226	1.319	1.504	1.611	1.822	1.008	1.1	0.8436	1.368	rs1536908	CACHD1(-161.3kb)|ROR1(+128kb)|UBE2U(+65.11kb)
2:240736419	2	240736419	G	?	8	1.798e-05	0.02439	0.7118	0.7438	0.0759	45.51	0.8208	0.7055	1.015	0.8896	0.5117	3.784	0.3849	1.134	NA	rs12612507	LOC150935(+14.06kb)|MIR4786(-146kb)|NDUFA10(-160.4kb)
1:64815637	1	64815637	T	?	9	1.811e-05	2.518e-05	1.3897	1.389	0.423	1.34	0.569	1.36	1.478	1.433	1.907	1.043	1.089	0.7943	1.325	rs111832667	CACHD1(-120.8kb)|ROR1(+168.5kb)|UBE2U(+105.6kb)
16:78680755	16	78680755	G	?	9	1.824e-05	1.824e-05	1.3713	1.3713	0.6988	0	3.683	1.398	1.538	1.401	1.403	0.9569	1.322	0.9529	1.1	rs2738588	WWOX(0)
16:78680760	16	78680760	A	?	9	1.824e-05	1.824e-05	1.3713	1.3713	0.6988	0	3.683	1.398	1.538	1.401	1.403	0.9569	1.322	0.9529	1.1	rs2738589	WWOX(0)
4:185385650	4	185385650	C	?	8	1.829e-05	0.0002667	0.4763	0.4896	0.3487	10.49	0.436	0.3555	0.1872	0.6985	1.054	0.5753	0.493	NA	0.6396	rs71622963	CASP3(-163.2kb)|CCDC111(-185.1kb)|IRF2(0)|LOC728175(+110.5kb)
12:28935923	12	28935923	C	?	9	1.864e-05	1.864e-05	1.4618	1.4618	0.9737	0	2.152	1.466	1.537	1.385	1.581	2.148	1.727	2.136	1.17	rs309041	.
1:64788319	1	64788319	A	?	9	1.868e-05	1.868e-05	1.3893	1.3893	0.4822	0	0.569	1.37	1.455	1.465	1.853	1.057	1.163	0.7792	1.316	rs6687900	CACHD1(-148.2kb)|ROR1(+141.1kb)|UBE2U(+78.29kb)
4:185404568	4	185404568	C	?	8	1.874e-05	0.007645	0.4701	0.4841	0.1061	40.85	0.795	0.3531	0.1224	0.9063	0.9723	0.0146	0.496	NA	0.579	rs34463449	CASP3(-144.3kb)|CCDC111(-166.2kb)|IRF2(+8.842kb)|LOC728175(+129.4kb)
14:95687503	14	95687503	A	?	8	1.879e-05	1.879e-05	0.5625	0.5625	0.5757	0	1.608	0.5074	0.3406	0.5476	0.6131	NA	1.058	0.2705	0.8899	rs11844585	CLMN(0)|DICER1(+63.74kb)|DICER1-AS1(+41.23kb)|LINC00341(-186.1kb)|MIR3173(+83.18kb)|SYNE3(-196.3kb)
14:95687504	14	95687504	T	?	8	1.879e-05	1.879e-05	0.5625	0.5625	0.5757	0	1.608	0.5074	0.3406	0.5476	0.6131	NA	1.058	0.2705	0.8899	rs11844495	CLMN(0)|DICER1(+63.74kb)|DICER1-AS1(+41.23kb)|LINC00341(-186.1kb)|MIR3173(+83.18kb)|SYNE3(-196.3kb)
1:64793091	1	64793091	T	?	9	1.919e-05	1.919e-05	1.3886	1.3886	0.483	0	0.569	1.37	1.446	1.465	1.853	1.057	1.163	0.7792	1.316	rs1002253	CACHD1(-143.4kb)|ROR1(+145.9kb)|UBE2U(+83.06kb)
1:64793858	1	64793858	A	?	9	1.919e-05	1.919e-05	1.3886	1.3886	0.483	0	0.569	1.37	1.446	1.465	1.853	1.057	1.163	0.7792	1.316	rs12126620	CACHD1(-142.6kb)|ROR1(+146.7kb)|UBE2U(+83.83kb)
20:14528513	20	14528513	A	?	9	1.937e-05	1.937e-05	0.6323	0.6323	0.5318	0	0.4506	0.5943	0.7361	1.182	0.6045	1.662	0.2258	0.4776	0.6088	rs6131592	MACROD2(0)
16:78683312	16	78683312	C	?	9	1.959e-05	1.959e-05	1.3802	1.3802	0.6125	0	2.121	1.548	1.221	1.692	1.343	0.7882	1.173	0.9268	1.03	rs9936057	WWOX(0)
9:83156777	9	83156777	C	?	9	1.97e-05	0.005818	0.6429	0.6435	0.0967	40.6	0.7348	0.6676	0.9635	1.051	0.3743	0.8688	0.1537	0.4614	0.8277	rs13288097	.
1:64804859	1	64804859	T	?	9	1.985e-05	1.985e-05	1.3865	1.3865	0.4966	0	0.569	1.378	1.478	1.427	1.832	1.055	1.118	0.7943	1.312	rs10889477	CACHD1(-131.6kb)|ROR1(+157.7kb)|UBE2U(+94.83kb)
9:100540209	9	100540209	A	?	9	2.013e-05	2.013e-05	0.6329	0.6329	0.8718	0	0.8179	0.6568	0.6662	0.7732	0.4901	2.029	0.9753	1.2	0.5364	rs72751578	C9orf156(-126.6kb)|FOXE1(-75.33kb)|HEMGN(-148.9kb)|NCBP1(+104.2kb)|TMOD1(+176.2kb)|TSTD2(+144.2kb)|XPA(+80.52kb)
7:114698733	7	114698733	A	?	9	2.02e-05	2.02e-05	1.3653	1.3653	0.9898	0	1.507	1.369	1.431	1.281	1.224	2.304	1.705	1.103	1.483	rs2520585	MDFIC(+38.76kb)
2:148963930	2	148963930	T	?	8	2.027e-05	2.027e-05	0.4185	0.4185	0.856	0	0.9235	0.3541	0.5035	0.5379	0.6363	13.07	1.126	NA	0.2599	rs113558031	MBD5(0)|ORC4(+184.8kb)
1:64800305	1	64800305	C	?	9	2.046e-05	2.046e-05	1.386	1.386	0.4672	0	0.569	1.368	1.478	1.427	1.864	1.043	1.118	0.7943	1.312	rs5004242	CACHD1(-136.2kb)|ROR1(+153.1kb)|UBE2U(+90.28kb)
1:64803177	1	64803177	A	?	9	2.046e-05	2.046e-05	1.386	1.386	0.4672	0	0.569	1.368	1.478	1.427	1.864	1.043	1.118	0.7943	1.312	rs7555173	CACHD1(-133.3kb)|ROR1(+156kb)|UBE2U(+93.15kb)
16:78681333	16	78681333	C	?	9	2.05e-05	2.05e-05	1.3686	1.3686	0.7053	0	3.683	1.398	1.538	1.389	1.394	0.9569	1.322	0.9529	1.104	rs1124434	WWOX(0)
1:64802490	1	64802490	T	?	9	2.081e-05	2.081e-05	1.3856	1.3856	0.4671	0	0.569	1.367	1.478	1.427	1.864	1.043	1.118	0.7943	1.312	rs56115991	CACHD1(-134kb)|ROR1(+155.3kb)|UBE2U(+92.46kb)
11:121442189	11	121442189	A	?	9	2.09e-05	0.0006585	1.3745	1.349	0.3089	14.99	2.134	1.554	1.213	1.205	1.527	2	0.4821	0.8344	1.174	rs1790213	SORL1(0)
7:114681206	7	114681206	A	?	9	2.12e-05	2.12e-05	0.734	0.734	0.9126	0	0.538	0.7412	0.9772	0.6501	0.8396	0.5731	0.594	0.7112	0.6428	rs2520598	MDFIC(+21.24kb)
7:114680304	7	114680304	G	?	9	2.121e-05	2.121e-05	0.7341	0.7341	0.9132	0	0.538	0.743	0.9713	0.6457	0.8396	0.5731	0.594	0.7112	0.6435	rs2709493	MDFIC(+20.33kb)
7:114684293	7	114684293	G	?	9	2.121e-05	2.121e-05	0.7341	0.7341	0.9132	0	0.538	0.743	0.9713	0.6457	0.8396	0.5731	0.594	0.7112	0.6435	rs2520595	MDFIC(+24.32kb)
7:114686066	7	114686066	C	?	9	2.121e-05	2.121e-05	0.7341	0.7341	0.9132	0	0.538	0.743	0.9713	0.6457	0.8396	0.5731	0.594	0.7112	0.6435	rs2709489	MDFIC(+26.1kb)
7:114689271	7	114689271	G	?	9	2.121e-05	2.121e-05	0.7341	0.7341	0.9132	0	0.538	0.743	0.9713	0.6457	0.8396	0.5731	0.594	0.7112	0.6435	rs2520593	MDFIC(+29.3kb)
7:114692016	7	114692016	C	?	9	2.121e-05	2.121e-05	0.7341	0.7341	0.9132	0	0.538	0.743	0.9713	0.6457	0.8396	0.5731	0.594	0.7112	0.6435	rs2709487	MDFIC(+32.05kb)
1:64773570	1	64773570	T	?	9	2.151e-05	2.151e-05	1.3862	1.3862	0.5306	0	0.6226	1.323	1.504	1.611	1.822	1.008	1.1	0.8436	1.332	rs825201	CACHD1(-162.9kb)|ROR1(+126.4kb)|UBE2U(+63.54kb)
10:101664345	10	101664345	A	?	9	2.157e-05	2.157e-05	0.4543	0.4543	0.9054	0	0.3666	0.3723	0.9131	0.7982	0.4484	0.1556	1.555	0.303	0.6521	rs149636439	ABCC2(+52.68kb)|COX15(+171.9kb)|CPN1(-137.7kb)|CUTC(+148.5kb)|DNMBP(0)|DNMBP-AS1(-22.62kb)|ENTPD7(+193.3kb)
4:57703644	4	57703644	A	?	8	2.169e-05	2.169e-05	0.4425	0.4425	0.5384	0	0.7922	0.3813	0.4128	1.044	0.429	0.1476	NA	0.0393	0.5633	rs7688450	HOPX(+155.8kb)|IGFBP7(-193.6kb)|NOA1(-125.9kb)|POLR2B(-141.5kb)|REST(-70.4kb)|SPINK2(+15.61kb)
11:133589300	11	133589300	T	?	9	2.206e-05	0.0004688	0.5774	0.5531	0.2395	22.91	0.6158	0.5711	0.3988	0.6367	0.9597	0.2455	0.4721	0.0548	0.3689	rs76888054	IGSF9B(-189.2kb)|MIR4697(-179.1kb)|MIR4697HG(-177kb)|OPCML(+186.9kb)|SPATA19(-121.2kb)
11:121456962	11	121456962	C	?	9	2.209e-05	2.209e-05	1.3948	1.3948	0.5208	0	1.888	1.479	1.009	1.85	1.463	3.318	0.8087	0.6881	1.231	rs1699102	SORL1(0)
7:114697896	7	114697896	A	?	9	2.21e-05	2.21e-05	0.7346	0.7346	0.9152	0	0.538	0.743	0.9713	0.649	0.8396	0.5731	0.594	0.7112	0.6435	rs2520588	MDFIC(+37.93kb)
1:64758448	1	64758448	T	?	9	2.232e-05	2.232e-05	1.3852	1.3852	0.499	0	0.6226	1.323	1.499	1.611	1.851	1.008	1.1	0.8343	1.313	rs825215	CACHD1(-178kb)|ROR1(+111.3kb)|UBE2U(+48.42kb)
12:28939527	12	28939527	T	?	9	2.244e-05	2.244e-05	1.456	1.456	0.9736	0	2.152	1.451	1.537	1.385	1.581	2.148	1.727	2.141	1.17	rs2622273	.
1:64756290	1	64756290	A	?	9	2.266e-05	2.266e-05	1.3848	1.3848	0.5052	0	0.6226	1.323	1.526	1.581	1.851	1.008	1.1	0.8343	1.315	rs825221	CACHD1(-180.2kb)|ROR1(+109.1kb)|UBE2U(+46.26kb)
10:8112143	10	8112143	T	?	9	2.279e-05	0.001302	0.692	0.7062	0.2695	19.49	0.8032	0.6411	1.33	0.5429	0.7287	0.0097	0.7733	2.489	0.7334	rs528778	GATA3(0)|GATA3-AS1(+16.7kb)|TAF3(+55.13kb)
9:110383340	9	110383340	A	?	9	2.286e-05	2.286e-05	1.4246	1.4246	0.4431	0	2.917	1.182	1.994	1.523	1.703	0.5768	1.97	6.81	1.32	rs12340796	KLF4(+131.3kb)
3:100810130	3	100810130	A	?	9	2.297e-05	0.001432	0.6513	0.6425	0.1904	28.6	1.515	0.7615	0.4673	0.6155	0.5524	12.35	0.8427	0.9964	0.4219	rs73145363	ABI3BP(+97.8kb)|IMPG2(-131.3kb)
7:68696333	7	68696333	G	?	9	2.323e-05	0.0001103	0.7194	0.6998	0.3074	15.16	0.4464	0.8438	0.4795	0.4875	0.7868	1.676	0.6495	1.447	0.6622	rs11769000	.
12:28909590	12	28909590	T	?	9	2.332e-05	2.332e-05	1.4557	1.4557	0.9654	0	2.152	1.43	1.701	1.385	1.581	2.17	1.727	2.136	1.167	rs1086019	.
10:101667792	10	101667792	T	?	8	2.347e-05	2.347e-05	0.4506	0.4506	0.7174	0	0.3666	0.3421	0.9131	0.7982	0.4909	NA	1.555	0.303	0.793	rs17854135	ABCC2(+56.13kb)|COX15(+175.4kb)|CPN1(-134.3kb)|CUTC(+151.9kb)|DNMBP(0)|DNMBP-AS1(-19.17kb)|ENTPD7(+196.8kb)
10:59598974	10	59598974	T	?	8	2.354e-05	2.354e-05	0.4377	0.4377	0.7109	0	0.0511	0.4155	0.4408	0.3677	0.529	0.4898	0.463	NA	0.7537	rs190593997	.
7:68691749	7	68691749	T	?	9	2.354e-05	2.853e-05	0.7188	0.7163	0.4203	1.67	0.4464	0.8435	0.501	0.5161	0.749	1.676	0.6495	1.447	0.6646	rs12668995	.
7:114672366	7	114672366	T	?	9	2.358e-05	2.358e-05	0.7357	0.7357	0.9415	0	0.538	0.7546	0.9066	0.6494	0.8396	0.5731	0.594	0.7112	0.6435	rs7790935	MDFIC(+12.4kb)
12:28897707	12	28897707	A	?	9	2.365e-05	2.365e-05	1.4553	1.4553	0.9647	0	2.152	1.43	1.701	1.385	1.581	2.17	1.727	2.136	1.165	rs309030	CCDC91(+194.6kb)
12:28899225	12	28899225	T	?	9	2.365e-05	2.365e-05	1.4553	1.4553	0.9647	0	2.152	1.43	1.701	1.385	1.581	2.17	1.727	2.136	1.165	rs309027	CCDC91(+196.1kb)
12:28905653	12	28905653	C	?	9	2.365e-05	2.365e-05	1.4553	1.4553	0.9647	0	2.152	1.43	1.701	1.385	1.581	2.17	1.727	2.136	1.165	rs789112	.
12:28907976	12	28907976	T	?	9	2.365e-05	2.365e-05	1.4553	1.4553	0.9647	0	2.152	1.43	1.701	1.385	1.581	2.17	1.727	2.136	1.165	rs1086018	.
1:6118869	1	6118869	A	?	7	2.373e-05	6.734e-05	0.5631	0.5578	0.3678	7.93	0.2143	0.6679	0.4198	1.14	0.3698	NA	0.7402	NA	0.5125	rs6698692	CHD5(-42.98kb)|GPR153(-188.5kb)|HES3(-185.4kb)|ICMT(-162.4kb)|KCNAB2(0)|LINC00337(-177.4kb)|MIR4689(+196.1kb)|NPHP4(+66.34kb)|RNF207(-147.3kb)|RPL22(-126.2kb)
14:60012308	14	60012308	T	?	7	2.413e-05	2.413e-05	0.5155	0.5155	0.4633	0	0.4768	0.4058	0.8854	0.4099	0.5377	0.1299	NA	NA	1.101	rs75658627	CCDC175(0)|DAAM1(+174.2kb)|GPR135(+80.25kb)|JKAMP(+40.23kb)|L3HYPDH(+61.24kb)|RTN1(-50.38kb)
11:121432287	11	121432287	C	?	9	2.459e-05	0.0007672	1.4586	1.4561	0.2459	22.18	5.05	1.562	1.514	1.47	1.78	1.46	1.408	0.6466	0.9592	rs677078	SORL1(0)
3:178051744	3	178051744	T	?	7	2.473e-05	2.473e-05	0.3808	0.3808	0.7874	0	0.4364	0.4927	0.369	NA	0.3525	0.929	NA	0.2261	0.1257	rs1961018	KCNMB2-IT1(-85.24kb)
8:70965468	8	70965468	T	?	6	2.492e-05	2.492e-05	0.3614	0.3614	0.5078	0	1.16	0.3428	0.0773	NA	0.4677	0.3572	NA	NA	0.3548	rs117379691	NCOA2(-58.8kb)|PRDM14(0)
14:60055533	14	60055533	G	?	7	2.521e-05	2.521e-05	0.4519	0.4519	0.6945	0	0.2774	0.3605	1.374	0.4392	0.5236	0.1299	NA	NA	0.6204	rs149561766	CCDC175(+11.98kb)|GPR135(+123.5kb)|JKAMP(+83.45kb)|L3HYPDH(+104.5kb)|RTN1(-7.16kb)
12:28933684	12	28933684	G	?	9	2.527e-05	2.527e-05	1.4521	1.4521	0.9771	0	2.152	1.433	1.537	1.385	1.581	2.17	1.727	2.136	1.185	rs789136	.
12:69510182	12	69510182	T	?	9	2.556e-05	0.002907	0.5246	0.5059	0.1196	37.4	6.262	0.5959	0.158	0.5143	0.5338	0.5864	0.4763	0.1296	0.6899	rs112461764	CPM(+153.2kb)|CPSF6(-123.1kb)|MIR1279(-156.8kb)
12:69510219	12	69510219	T	?	9	2.556e-05	0.002907	0.5246	0.5059	0.1196	37.4	6.262	0.5959	0.158	0.5143	0.5338	0.5864	0.4763	0.1296	0.6899	rs111586538	CPM(+153.2kb)|CPSF6(-123.1kb)|MIR1279(-156.7kb)
7:114672367	7	114672367	T	?	9	2.557e-05	2.557e-05	0.7367	0.7367	0.9504	0	0.538	0.7512	0.9066	0.6494	0.8396	0.5731	0.594	0.7112	0.6557	rs7790936	MDFIC(+12.4kb)
1:198629336	1	198629336	C	?	8	2.562e-05	0.0001465	0.5158	0.5197	0.3572	9.42	0.3535	0.4321	0.176	0.9358	0.4792	NA	0.5841	0.7265	0.9091	rs72738024	ATP6V1G3(+119.3kb)|MIR181A1(-198.8kb)|MIR181A1HG(-147.8kb)|MIR181B1(-198.7kb)|PTPRC(0)
3:100808676	3	100808676	A	?	9	2.574e-05	0.001328	0.6529	0.6438	0.2004	27.43	1.515	0.7595	0.4673	0.5984	0.5726	12.35	0.8427	0.9964	0.4219	rs1839298	ABI3BP(+96.34kb)|IMPG2(-132.7kb)
9:100810626	9	100810626	A	?	8	2.59e-05	2.59e-05	0.5316	0.5316	0.8648	0	1.608	0.4543	0.6918	0.5899	0.4683	0.423	0.3097	NA	0.8134	rs62575573	ANP32B(+32.4kb)|C9orf156(+125.8kb)|CORO2A(-72.63kb)|FOXE1(+191.6kb)|HEMGN(+103.4kb)|NANS(-8.332kb)|TBC1D2(-150.7kb)|TRIM14(-20.94kb)
14:59952991	14	59952991	G	?	7	2.612e-05	2.644e-05	0.5195	0.5195	0.4229	0.04	0.4768	0.4047	0.9185	0.3866	0.5377	0.2558	NA	NA	1.141	rs17255794	CCDC175(-18.79kb)|DAAM1(+114.9kb)|GPR135(+20.93kb)|JKAMP(0)|L3HYPDH(+1.918kb)|RTN1(-109.7kb)
9:100537763	9	100537763	T	?	9	2.66e-05	2.66e-05	0.637	0.637	0.8944	0	0.8179	0.6568	0.6662	0.7732	0.5066	2.029	0.9753	1.2	0.5359	rs1588636	C9orf156(-129kb)|FOXE1(-77.77kb)|HEMGN(-151.3kb)|NCBP1(+101.7kb)|TMOD1(+173.7kb)|TSTD2(+141.8kb)|XPA(+78.07kb)
4:185381797	4	185381797	G	?	8	2.68e-05	0.003934	0.4854	0.5177	0.2252	25.54	0.436	0.3483	0.1872	0.6985	1.192	0.5753	0.9841	NA	0.6396	rs36098178	CASP3(-167.1kb)|CCDC111(-189kb)|IRF2(0)|LOC728175(+106.7kb)
1:64779806	1	64779806	G	?	9	2.689e-05	2.689e-05	1.3796	1.3796	0.5573	0	0.6226	1.315	1.473	1.611	1.773	1.017	1.1	0.7792	1.361	rs11208415	CACHD1(-156.7kb)|ROR1(+132.6kb)|UBE2U(+69.78kb)
1:64780637	1	64780637	T	?	9	2.689e-05	2.689e-05	1.3796	1.3796	0.5573	0	0.6226	1.315	1.473	1.611	1.773	1.017	1.1	0.7792	1.361	rs12037494	CACHD1(-155.8kb)|ROR1(+133.5kb)|UBE2U(+70.61kb)
1:64781824	1	64781824	T	?	9	2.689e-05	2.689e-05	1.3796	1.3796	0.5573	0	0.6226	1.315	1.473	1.611	1.773	1.017	1.1	0.7792	1.361	rs12038490	CACHD1(-154.7kb)|ROR1(+134.6kb)|UBE2U(+71.8kb)
1:64782241	1	64782241	T	?	9	2.689e-05	2.689e-05	1.3796	1.3796	0.5573	0	0.6226	1.315	1.473	1.611	1.773	1.017	1.1	0.7792	1.361	rs1961573	CACHD1(-154.2kb)|ROR1(+135.1kb)|UBE2U(+72.21kb)
16:78680120	16	78680120	A	?	9	2.744e-05	2.744e-05	1.3621	1.3621	0.6275	0	3.589	1.394	1.598	1.389	1.381	0.9569	1.322	0.9529	1.063	rs7197623	WWOX(0)
7:114804186	7	114804186	C	?	9	2.757e-05	2.757e-05	0.7374	0.7374	0.6957	0	0.9847	0.7194	0.775	0.4994	0.8231	0.6806	0.547	1.407	0.8331	rs9691498	MDFIC(+144.2kb)
13:100990112	13	100990112	T	?	6	2.788e-05	0.003834	0.4379	0.4531	0.1755	34.79	NA	0.3845	0.1378	0.94	0.4991	NA	2.513	NA	0.7111	rs118086778	GGACT(-192.3kb)|PCCA(0)|PCCA-AS1(-126.6kb)
7:114677961	7	114677961	A	?	9	2.792e-05	2.792e-05	0.7374	0.7374	0.911	0	0.538	0.7499	0.9772	0.6501	0.8396	0.5731	0.594	0.7112	0.6428	rs10247481	MDFIC(+17.99kb)
7:114683661	7	114683661	C	?	9	2.795e-05	2.795e-05	0.7377	0.7377	0.8818	0	0.538	0.738	0.9772	0.6501	0.8694	0.5731	0.594	0.6953	0.6428	rs2709492	MDFIC(+23.69kb)
3:99738219	3	99738219	A	?	8	2.796e-05	6.583e-05	0.6875	0.6913	0.4082	2.8	1.194	0.6158	1.001	1.05	0.6781	1.403	0.8055	NA	0.5108	rs34996634	CMSS1(0)|FILIP1L(0)|MIR548G(+21.16kb)|MIR3921(+54.98kb)|TMEM30C(-166.4kb)
3:99738230	3	99738230	A	?	8	2.796e-05	6.583e-05	0.6875	0.6913	0.4082	2.8	1.194	0.6158	1.001	1.05	0.6781	1.403	0.8055	NA	0.5108	rs35154249	CMSS1(0)|FILIP1L(0)|MIR548G(+21.17kb)|MIR3921(+54.99kb)|TMEM30C(-166.4kb)
7:114675968	7	114675968	G	?	9	2.801e-05	2.801e-05	0.7375	0.7375	0.9112	0	0.538	0.7518	0.9713	0.6457	0.8396	0.5731	0.594	0.7112	0.6435	rs2520601	MDFIC(+16kb)
7:114677437	7	114677437	A	?	9	2.801e-05	2.801e-05	0.7375	0.7375	0.9112	0	0.538	0.7518	0.9713	0.6457	0.8396	0.5731	0.594	0.7112	0.6435	rs2520599	MDFIC(+17.47kb)
16:78686851	16	78686851	G	?	9	2.802e-05	2.802e-05	1.3683	1.3683	0.6827	0	1.759	1.576	1.224	1.585	1.345	0.8369	1.19	0.9268	1.02	rs6564573	WWOX(0)
10:134133739	10	134133739	C	?	9	2.848e-05	2.848e-05	1.4826	1.4826	0.9369	0	1.73	1.311	1.576	1.394	1.767	3.977	2.175	1.681	1.394	rs72856785	C10orf91(-125kb)|DPYSL4(+114.5kb)|JAKMIP3(+135.4kb)|LRRC27(-11.87kb)|PWWP2B(-76.96kb)|STK32C(+12.26kb)
12:28926563	12	28926563	C	?	9	2.848e-05	2.848e-05	1.4487	1.4487	0.9725	0	2.152	1.433	1.537	1.385	1.581	2.17	1.727	2.136	1.168	rs218158	.
12:28932355	12	28932355	G	?	9	2.848e-05	2.848e-05	1.4487	1.4487	0.9725	0	2.152	1.433	1.537	1.385	1.581	2.17	1.727	2.136	1.168	rs789134	.
12:28934271	12	28934271	T	?	9	2.848e-05	2.848e-05	1.4487	1.4487	0.9725	0	2.152	1.433	1.537	1.385	1.581	2.17	1.727	2.136	1.168	rs309042	.
3:124594955	3	124594955	T	?	9	2.853e-05	0.0007141	1.373	1.3599	0.2844	17.79	0.7538	1.466	1.88	1.011	1.293	7.825	1.051	1.385	1.621	rs1948696	HEG1(-89.6kb)|ITGB5(0)|KALRN(+154.9kb)|MUC13(-29.33kb)|UMPS(+126.8kb)
9:100790453	9	100790453	G	?	8	2.861e-05	2.861e-05	0.547	0.547	0.8863	0	0.4483	0.4808	0.5475	0.6709	0.539	0.1226	0.278	NA	0.8096	rs56160217	ANP32B(+12.23kb)|C9orf156(+105.6kb)|CORO2A(-92.8kb)|FOXE1(+171.5kb)|HEMGN(+83.26kb)|NANS(-28.5kb)|TBC1D2(-170.8kb)|TRIM14(-41.12kb)
16:78683464	16	78683464	G	?	9	2.862e-05	2.862e-05	1.3709	1.3709	0.671	0	2.121	1.533	1.229	1.63	1.343	0.7882	1.173	0.9268	1.035	rs9931114	WWOX(0)
9:100865842	9	100865842	G	?	8	2.873e-05	2.873e-05	0.5349	0.5349	0.9013	0	1.608	0.4649	0.7501	0.5922	0.473	0.4238	0.3099	NA	0.7499	rs62575602	ANP32B(+87.62kb)|C9orf156(+181kb)|CORO2A(-17.41kb)|GABBR2(-184.5kb)|HEMGN(+158.6kb)|NANS(+20.48kb)|TBC1D2(-95.44kb)|TRIM14(0)
9:100862339	9	100862339	A	?	8	2.887e-05	2.887e-05	0.5326	0.5326	0.9045	0	1.608	0.4507	0.7501	0.6224	0.5075	0.4238	0.3099	NA	0.713	rs35830621	ANP32B(+84.12kb)|C9orf156(+177.5kb)|CORO2A(-20.92kb)|GABBR2(-188kb)|HEMGN(+155.1kb)|NANS(+16.97kb)|TBC1D2(-98.94kb)|TRIM14(0)
13:23427922	13	23427922	G	?	9	2.969e-05	2.969e-05	1.4294	1.4294	0.4916	0	1.119	1.327	2.218	1.247	1.198	1.826	3.49	1.683	1.724	rs11841116	BASP1P1(-43.25kb)
7:82845313	7	82845313	A	?	8	3.022e-05	0.08961	0.4263	0.5175	0.0304	54.75	NA	0.2475	1.576	0.5564	1.001	9.182	0.776	0.0427	1.045	rs117083153	PCLO(+53.12kb)|SEMA3E(-147.9kb)
4:60004623	4	60004623	T	?	8	3.054e-05	3.054e-05	0.5391	0.5391	0.7398	0	0.0607	0.5012	0.6659	0.6047	0.6757	1.503	0.5407	NA	0.5101	rs114142749	.
7:114672627	7	114672627	T	?	9	3.074e-05	3.074e-05	0.7388	0.7388	0.9491	0	0.538	0.7568	0.9066	0.6494	0.8396	0.5731	0.594	0.7112	0.6557	rs7791536	MDFIC(+12.66kb)
7:114672720	7	114672720	G	?	9	3.074e-05	3.074e-05	0.7388	0.7388	0.9491	0	0.538	0.7568	0.9066	0.6494	0.8396	0.5731	0.594	0.7112	0.6557	rs7791565	MDFIC(+12.75kb)
7:114673180	7	114673180	T	?	9	3.074e-05	3.074e-05	0.7388	0.7388	0.9491	0	0.538	0.7568	0.9066	0.6494	0.8396	0.5731	0.594	0.7112	0.6557	rs7792333	MDFIC(+13.21kb)
9:100535004	9	100535004	C	?	9	3.083e-05	3.083e-05	0.638	0.638	0.8925	0	0.8179	0.6553	0.6662	0.7732	0.4934	2.029	0.9753	1.2	0.5594	rs72751573	C9orf156(-131.8kb)|FOXE1(-80.53kb)|HEMGN(-154.1kb)|NCBP1(+98.98kb)|TMOD1(+171kb)|TSTD2(+139kb)|XPA(+75.31kb)
7:114818842	7	114818842	T	?	9	3.085e-05	3.085e-05	0.7396	0.7396	0.5445	0	0.9847	0.7147	0.7712	0.4765	0.8421	0.6806	0.5469	1.441	0.8624	rs35612060	MDFIC(+158.9kb)
2:148964849	2	148964849	A	?	8	3.101e-05	3.101e-05	0.4283	0.4283	0.8566	0	0.9235	0.3675	0.5879	0.5379	0.6363	13.07	1.126	NA	0.2599	rs74698289	MBD5(0)|ORC4(+185.7kb)
2:148970009	2	148970009	G	?	8	3.101e-05	3.101e-05	0.4283	0.4283	0.8566	0	0.9235	0.3675	0.5879	0.5379	0.6363	13.07	1.126	NA	0.2599	rs80281142	MBD5(0)|ORC4(+190.8kb)
2:148971434	2	148971434	A	?	8	3.101e-05	3.101e-05	0.4283	0.4283	0.8566	0	0.9235	0.3675	0.5879	0.5379	0.6363	13.07	1.126	NA	0.2599	rs74939730	MBD5(0)|ORC4(+192.3kb)
14:59934703	14	59934703	C	?	7	3.12e-05	3.12e-05	0.5228	0.5228	0.4683	0	0.4768	0.4043	0.8774	0.4278	0.5377	0.2558	NA	NA	1.134	rs76836600	CCDC175(-37.08kb)|DAAM1(+96.58kb)|GPR135(+2.644kb)|JKAMP(-16.46kb)|L3HYPDH(-4.702kb)|RTN1(-128kb)
3:99754305	3	99754305	T	?	8	3.132e-05	0.000139	0.6892	0.696	0.3899	5.22	1.194	0.6182	1.023	1.05	0.6781	1.403	0.8055	NA	0.5076	rs13093838	CMSS1(0)|FILIP1L(0)|MIR548G(+37.25kb)|MIR3921(+71.06kb)|TMEM30C(-150.4kb)
3:99754498	3	99754498	G	?	8	3.132e-05	0.000139	0.6892	0.696	0.3899	5.22	1.194	0.6182	1.023	1.05	0.6781	1.403	0.8055	NA	0.5076	rs17392948	CMSS1(0)|FILIP1L(0)|MIR548G(+37.44kb)|MIR3921(+71.26kb)|TMEM30C(-150.2kb)
4:94392039	4	94392039	G	?	9	3.136e-05	0.6895	0.7236	0.9279	0.0001	74.1	4.675	0.6869	0.8389	1.368	0.5355	1.839	2.359	1.1	0.4663	rs4692983	GRID2(0)
14:86266934	14	86266934	T	?	9	3.156e-05	3.156e-05	0.7367	0.7367	0.883	0	0.8665	0.7492	0.6908	0.6248	0.7344	0.5822	0.747	3.487	0.755	rs1125597	FLRT2(+172.7kb)
13:23437856	13	23437856	A	?	9	3.164e-05	3.164e-05	1.4297	1.4297	0.5669	0	1.189	1.321	2.215	1.321	1.21	1.938	3.49	1.601	1.643	rs9510394	BASP1P1(-33.31kb)
4:182221916	4	182221916	T	?	9	3.189e-05	3.189e-05	1.3811	1.3811	0.47	0	0.7354	1.444	1.373	1.365	1.538	0.2572	2.617	1.017	1.243	rs973468	LINC00290(+141.6kb)
13:23425419	13	23425419	G	?	9	3.203e-05	3.203e-05	1.4273	1.4273	0.6031	0	1.227	1.332	2.193	1.243	1.242	1.83	3.49	1.712	1.603	rs2878396	BASP1P1(-45.75kb)
9:100550227	9	100550227	C	?	9	3.203e-05	3.203e-05	0.7004	0.7004	0.8493	0	1.132	0.7116	0.6811	0.736	0.611	0.4381	0.422	2.612	0.7228	rs12347079	ANP32B(-195.3kb)|C9orf156(-116.5kb)|FOXE1(-65.31kb)|HEMGN(-138.8kb)|NCBP1(+114.2kb)|TMOD1(+186.2kb)|TSTD2(+154.3kb)|XPA(+90.54kb)
20:5305367	20	5305367	A	?	7	3.211e-05	3.211e-05	0.4375	0.4375	0.9574	0	NA	0.3763	0.2888	0.4352	0.5377	3.269	0.852	NA	0.566	rs6085100	CDS2(+126.8kb)|LINC00654(-173.8kb)|LINC00658(-107.2kb)|LOC643406(-146.5kb)|PCNA(+198.1kb)|PROKR2(+10.35kb)
20:5305464	20	5305464	A	?	7	3.211e-05	3.211e-05	0.4375	0.4375	0.9574	0	NA	0.3763	0.2888	0.4352	0.5377	3.269	0.852	NA	0.566	rs35557631	CDS2(+126.9kb)|LINC00654(-173.8kb)|LINC00658(-107.1kb)|LOC643406(-146.4kb)|PCNA(+198.2kb)|PROKR2(+10.45kb)
20:5305541	20	5305541	A	?	7	3.211e-05	3.211e-05	0.4375	0.4375	0.9574	0	NA	0.3763	0.2888	0.4352	0.5377	3.269	0.852	NA	0.566	rs35619256	CDS2(+127kb)|LINC00654(-173.7kb)|LINC00658(-107.1kb)|LOC643406(-146.3kb)|PCNA(+198.3kb)|PROKR2(+10.53kb)
3:100790767	3	100790767	A	?	9	3.237e-05	0.005517	0.6483	0.6265	0.0736	44.17	2.236	0.7698	0.4088	0.6287	0.6955	12.75	0.3039	0.8754	0.4003	rs34281790	ABI3BP(+78.43kb)|IMPG2(-150.6kb)
4:94386763	4	94386763	G	?	9	3.251e-05	0.6126	0.7241	0.912	0.0003	72.59	4.675	0.69	0.8389	1.368	0.5305	1.839	2.021	1.1	0.4764	rs9997032	GRID2(0)
8:12834365	8	12834365	G	?	9	3.295e-05	3.295e-05	0.4244	0.4244	0.9099	0	0.1988	0.4817	0.637	0.4483	0.5188	0.3545	0.8383	0.2545	0.1943	rs75021555	DLC1(-106.5kb)|KIAA1456(0)|LINC00681(+158.6kb)|LOC340357(+165.5kb)
8:12835737	8	12835737	A	?	9	3.295e-05	3.295e-05	0.4244	0.4244	0.9099	0	0.1988	0.4817	0.637	0.4483	0.5188	0.3545	0.8383	0.2545	0.1943	rs74766045	DLC1(-105.1kb)|KIAA1456(0)|LINC00681(+159.9kb)|LOC340357(+166.8kb)
13:23428990	13	23428990	T	?	9	3.346e-05	3.346e-05	1.4262	1.4262	0.4967	0	1.119	1.326	2.215	1.241	1.198	1.826	3.49	1.683	1.713	rs12853227	BASP1P1(-42.18kb)
4:185418002	4	185418002	G	?	8	3.381e-05	0.004359	0.4834	0.4992	0.1765	31.5	0.795	0.3592	0.166	0.8803	0.9255	0.0146	0.496	NA	0.604	rs71622970	CASP3(-130.8kb)|CCDC111(-152.8kb)|IRF2(+22.28kb)|LOC728175(+142.9kb)|MLF1IP(-197.2kb)
4:185416602	4	185416602	T	?	8	3.387e-05	0.003546	0.4835	0.498	0.1928	29.48	0.795	0.3643	0.166	0.8474	0.9255	0.0146	0.496	NA	0.604	rs71622969	CASP3(-132.2kb)|CCDC111(-154.2kb)|IRF2(+20.88kb)|LOC728175(+141.5kb)|MLF1IP(-198.6kb)
4:185416755	4	185416755	G	?	8	3.387e-05	0.003546	0.4835	0.498	0.1928	29.48	0.795	0.3643	0.166	0.8474	0.9255	0.0146	0.496	NA	0.604	rs34920424	CASP3(-132.1kb)|CCDC111(-154kb)|IRF2(+21.03kb)|LOC728175(+141.6kb)|MLF1IP(-198.5kb)
13:23433910	13	23433910	T	?	9	3.405e-05	3.405e-05	1.4265	1.4265	0.5231	0	1.189	1.32	2.215	1.321	1.181	1.826	3.49	1.683	1.685	rs9580450	BASP1P1(-37.26kb)
3:32441558	3	32441558	C	?	9	3.415e-05	3.415e-05	1.4313	1.4313	0.8867	0	0.8951	1.297	2.082	1.66	1.511	1.402	2.392	1.513	1.369	rs12492557	CMTM6(-81.24kb)|CMTM7(0)|CMTM8(+29.74kb)|DYNC1LI1(-125.9kb)
17:12579132	17	12579132	T	?	8	3.462e-05	3.462e-05	0.5988	0.5988	0.8508	0	0.5348	0.5479	0.6442	0.6261	0.7622	0.8864	0.0975	NA	0.6135	rs148907705	ARHGAP44(-113.7kb)|LINC00670(+38.63kb)|MYOCD(0)
15:35083800	15	35083800	T	?	8	3.471e-05	5.292e-05	0.6988	0.7008	0.4193	1.3	0.8807	0.5802	0.8024	0.7358	1.084	NA	0.7033	1.03	0.6262	rs62006139	ACTC1(0)|AQR(-64.75kb)|GJD2(+37.02kb)|ZNF770(-186.7kb)
19:45425460	19	45425460	A	?	8	3.516e-05	0.02787	0.6661	0.7265	0.1146	39.64	1.159	0.5166	0.6371	1.069	0.5333	NA	0.7858	2.633	0.959	rs157595	APOC1(+2.854kb)|APOC1P1(-4.599kb)|APOC2(-23.78kb)|APOC4(-20.03kb)|APOC4-APOC2(-20.03kb)|APOE(+12.81kb)|BCAM(+100.8kb)|BCL3(+162.2kb)|CBLC(+121.6kb)|CLASRP(-116.8kb)|CLPTM1(-32.38kb)|GEMIN7(-157.1kb)|PPP1R37(-171kb)|PVRL2(+32.98kb)|RELB(-79.25kb)|TOMM40(+18.51kb)|ZNF296(-149.3kb)
13:23430756	13	23430756	A	?	9	3.597e-05	0.0001002	1.4232	1.4391	0.369	7.95	1.119	1.313	2.035	1.286	1.168	1.826	4.305	1.683	1.749	rs1556270	BASP1P1(-40.41kb)
3:100812955	3	100812955	A	?	9	3.612e-05	0.0009144	0.661	0.653	0.2495	21.77	1.515	0.7634	0.52	0.6202	0.5574	12.34	0.8317	0.9964	0.4468	rs62274077	ABI3BP(+100.6kb)|IMPG2(-128.4kb)
3:100812984	3	100812984	C	?	9	3.612e-05	0.0009144	0.661	0.653	0.2495	21.77	1.515	0.7634	0.52	0.6202	0.5574	12.34	0.8317	0.9964	0.4468	rs67144487	ABI3BP(+100.6kb)|IMPG2(-128.4kb)
3:99821679	3	99821679	G	?	8	3.689e-05	0.0001399	0.6813	0.687	0.3939	4.69	1.28	0.6355	0.9253	1.096	0.5731	1.496	0.9923	NA	0.5256	rs56233205	CMSS1(0)|FILIP1L(0)|MIR548G(+104.6kb)|MIR3921(+138.4kb)|TBC1D23(-158kb)|TMEM30C(-82.99kb)
9:100538717	9	100538717	G	?	9	3.693e-05	3.693e-05	0.7013	0.7013	0.8641	0	1.132	0.7099	0.7283	0.7273	0.6238	0.4382	0.422	2.612	0.6952	rs10818048	C9orf156(-128.1kb)|FOXE1(-76.82kb)|HEMGN(-150.4kb)|NCBP1(+102.7kb)|TMOD1(+174.7kb)|TSTD2(+142.8kb)|XPA(+79.03kb)
10:101624770	10	101624770	A	?	9	3.711e-05	3.711e-05	0.4685	0.4685	0.8045	0	0.2961	0.3621	0.9131	0.4776	0.6626	0.1556	1.555	0.303	0.7944	rs181264813	ABCC2(+13.11kb)|COX15(+132.3kb)|CPN1(-177.3kb)|CUTC(+108.9kb)|DNMBP(-10.56kb)|DNMBP-AS1(-62.2kb)|ENTPD7(+153.8kb)
3:100813880	3	100813880	T	?	9	3.718e-05	0.0004007	0.6613	0.653	0.3048	15.45	1.341	0.7625	0.5359	0.6202	0.5708	12.34	0.7705	0.9964	0.4475	rs58427219	ABI3BP(+101.5kb)|IMPG2(-127.5kb)
21:24683397	21	24683397	T	?	9	3.744e-05	0.0007174	1.361	1.4056	0.1975	27.76	1.937	1.192	1.788	1.156	1.431	5.489	0.6267	1.613	1.764	rs8132879	D21S2088E(-50.03kb)
1:64826592	1	64826592	G	?	9	3.759e-05	0.0005402	1.3699	1.3578	0.3204	13.66	0.5948	1.34	1.432	1.333	1.978	0.9951	1.016	0.745	1.326	rs11208432	CACHD1(-109.9kb)|ROR1(+179.4kb)|UBE2U(+116.6kb)
6:43958606	6	43958606	A	?	6	3.759e-05	3.759e-05	0.3727	0.3727	0.6339	0	NA	0.5884	0.1971	0.2008	0.2727	0.2101	NA	NA	0.4237	rs76417580	C6orf223(-9.73kb)|CAPN11(-167.9kb)|LOC100132354(+52.66kb)|MRPL14(-122.8kb)|TMEM63B(-136.8kb)
4:94392209	4	94392209	A	?	9	3.761e-05	0.6935	0.726	0.929	0.0002	74.05	4.675	0.6924	0.8389	1.368	0.5355	1.839	2.359	1.1	0.4663	rs4692984	GRID2(0)
9:100740922	9	100740922	C	?	8	3.761e-05	3.761e-05	0.5489	0.5489	0.7836	0	0.4483	0.4556	0.5173	0.8068	0.5381	0.1226	0.3305	NA	0.85	rs62575562	ANP32B(-4.566kb)|C9orf156(+56.07kb)|CORO2A(-142.3kb)|FOXE1(+121.9kb)|HEMGN(+33.72kb)|NANS(-78.04kb)|TRIM14(-90.65kb)
10:8110024	10	8110024	C	?	9	3.767e-05	0.003209	0.7012	0.7183	0.2276	24.27	0.911	0.656	1.392	0.5429	0.7444	0.0097	0.7679	2.492	0.6932	rs444929	GATA3(0)|GATA3-AS1(+14.58kb)|TAF3(+53.01kb)
4:182221918	4	182221918	T	?	9	3.786e-05	4.501e-05	1.3768	1.3761	0.4283	0.67	0.6834	1.446	1.373	1.365	1.52	0.2572	2.617	1.017	1.243	rs1378111	LINC00290(+141.6kb)
3:124281980	3	124281980	C	?	8	3.787e-05	3.787e-05	0.7259	0.7259	0.482	0	0.7112	0.8325	0.5645	0.7765	0.5606	0.5782	1.098	0.4461	NA	rs2256831	ITGB5(-199.8kb)|KALRN(0)|UMPS(-167.2kb)
16:78672598	16	78672598	A	?	9	3.791e-05	3.791e-05	1.3514	1.3514	0.7112	0	3.3	1.342	1.702	1.464	1.323	0.9501	1.322	1.046	1.114	rs2550620	WWOX(0)
9:100530289	9	100530289	T	?	9	3.8e-05	3.8e-05	0.6887	0.6887	0.7248	0	1.155	0.6976	0.6847	0.7672	0.5315	0.2167	0.6788	2.378	0.7488	rs4743129	C9orf156(-136.5kb)|FOXE1(-85.25kb)|HEMGN(-158.8kb)|NCBP1(+94.26kb)|TMOD1(+166.3kb)|TSTD2(+134.3kb)|XPA(+70.6kb)
3:143966062	3	143966062	A	?	9	3.83e-05	3.83e-05	1.3664	1.3664	0.5233	0	1.169	1.253	1.764	1.133	1.49	0.9813	0.8035	1.271	1.892	rs67210052	.
11:121447188	11	121447188	C	?	9	3.89e-05	0.001543	1.4433	1.4303	0.2309	23.9	3.711	1.581	1.164	1.576	1.84	1.922	1.398	0.6466	0.9233	rs4936637	SORL1(0)
7:114644457	7	114644457	C	?	9	3.919e-05	3.919e-05	0.7442	0.7442	0.6563	0	0.5121	0.7277	0.997	0.85	0.7955	0.7946	0.3237	1.112	0.6416	rs6978349	MDFIC(0)
14:60025648	14	60025648	A	?	7	3.932e-05	3.932e-05	0.5235	0.5235	0.4626	0	0.4768	0.4144	0.9376	0.4099	0.5377	0.1299	NA	NA	1.101	rs78145948	CCDC175(0)|DAAM1(+187.5kb)|GPR135(+93.59kb)|JKAMP(+53.57kb)|L3HYPDH(+74.58kb)|RTN1(-37.04kb)
3:100787061	3	100787061	C	?	9	3.997e-05	0.005172	0.651	0.6309	0.0896	41.66	2.236	0.7635	0.4351	0.6287	0.6955	12.75	0.3039	0.8754	0.4003	rs35333915	ABI3BP(+74.73kb)|IMPG2(-154.3kb)
3:99839106	3	99839106	A	?	8	4.009e-05	4.009e-05	0.6926	0.6926	0.589	0	1.194	0.6418	0.9056	1.036	0.6596	1.402	0.7078	NA	0.5361	rs9860290	CMSS1(0)|FILIP1L(+5.757kb)|MIR548G(+122kb)|MIR3921(+155.9kb)|TBC1D23(-140.6kb)|TMEM30C(-65.56kb)
10:115797947	10	115797947	A	?	9	4.013e-05	4.013e-05	0.6476	0.6476	0.6138	0	0.4971	0.7434	1.166	0.6163	0.4917	1.479	0.8416	0.4055	0.4783	rs72823020	ADRB1(-5.858kb)|C10orf118(-84.03kb)|DCLRE1A(+183.8kb)|MIR2110(-135.9kb)|NHLRC2(+125.7kb)|TDRD1(-141.1kb)
3:99584630	3	99584630	T	?	8	4.039e-05	0.0009403	0.6831	0.7006	0.3305	12.76	1.28	0.6239	0.9843	1.127	0.5767	1.497	0.9923	NA	0.5343	rs13320057	CMSS1(0)|COL8A1(+69.05kb)|FILIP1L(0)|MIR548G(0)|MIR3921(-98.53kb)
16:78679131	16	78679131	T	?	9	4.055e-05	4.055e-05	1.3967	1.3967	0.5351	0	2.56	1.445	1.181	1.78	1.53	0.6537	1.665	0.7995	1.022	rs7190546	WWOX(0)
4:94404973	4	94404973	A	?	9	4.062e-05	0.6269	0.7271	0.9165	0.0004	71.89	4.787	0.6826	0.852	1.368	0.5355	1.839	2.021	1.13	0.495	rs1905712	GRID2(0)
17:12576704	17	12576704	T	?	8	4.086e-05	4.086e-05	0.6167	0.6167	0.5987	0	1.111	0.561	0.7668	0.4991	0.7917	0.8872	0.0778	NA	0.6279	rs72811264	ARHGAP44(-116.1kb)|LINC00670(+36.2kb)|MYOCD(0)
17:12578066	17	12578066	T	?	8	4.086e-05	4.086e-05	0.6167	0.6167	0.5987	0	1.111	0.561	0.7668	0.4991	0.7917	0.8872	0.0778	NA	0.6279	rs72811265	ARHGAP44(-114.8kb)|LINC00670(+37.56kb)|MYOCD(0)
11:121486552	11	121486552	C	?	9	4.114e-05	4.114e-05	1.3878	1.3878	0.5975	0	1.784	1.524	0.9819	1.525	1.647	1.14	1.009	0.572	1.14	rs1503415	SORL1(0)
5:172248800	5	172248800	A	?	9	4.117e-05	4.117e-05	0.7134	0.7134	0.7828	0	0.9766	0.6905	0.9241	0.8472	0.6798	0.338	0.3808	1.403	0.7074	rs1473399	ATP6V0E1(-162kb)|DUSP1(+50.6kb)|ERGIC1(-12.42kb)|LOC100268168(-133kb)|NEURL1B(+130.3kb)|RPL26L1(-137.6kb)|SNORA74B(-198.9kb)
16:78679063	16	78679063	T	?	9	4.151e-05	4.151e-05	1.3661	1.3661	0.6436	0	2.606	1.52	1.137	1.498	1.384	0.7882	1.288	0.8511	1.054	rs7189040	WWOX(0)
3:186110804	3	186110804	A	?	9	4.188e-05	4.188e-05	0.6753	0.6753	0.7637	0	0.6537	0.6774	0.6773	0.8295	0.65	0.0921	0.2251	0.5827	0.7395	rs6768375	CRYGS(-145.4kb)|DGKG(+30.78kb)|DNAJB11(-177.7kb)|LOC253573(-61.96kb)|TBCCD1(-153.1kb)
3:186114373	3	186114373	T	?	9	4.188e-05	4.188e-05	0.6753	0.6753	0.7637	0	0.6537	0.6774	0.6773	0.8295	0.65	0.0921	0.2251	0.5827	0.7395	rs7615027	CRYGS(-141.9kb)|DGKG(+34.35kb)|DNAJB11(-174.1kb)|LOC253573(-58.4kb)|TBCCD1(-149.5kb)
13:23423593	13	23423593	A	?	9	4.2e-05	4.2e-05	1.4189	1.4189	0.5925	0	1.227	1.333	2.193	1.235	1.225	1.826	3.49	1.96	1.561	rs9510384	BASP1P1(-47.58kb)
8:12829519	8	12829519	G	?	9	4.203e-05	4.203e-05	0.4266	0.4266	0.9564	0	0.1988	0.4752	0.637	0.4068	0.5188	0.3545	0.8383	0.2545	0.2235	rs74813259	DLC1(-111.4kb)|KIAA1456(0)|LINC00681(+153.7kb)|LOC340357(+160.6kb)
8:12831271	8	12831271	A	?	9	4.203e-05	4.203e-05	0.4266	0.4266	0.9564	0	0.1988	0.4752	0.637	0.4068	0.5188	0.3545	0.8383	0.2545	0.2235	rs6993976	DLC1(-109.6kb)|KIAA1456(0)|LINC00681(+155.5kb)|LOC340357(+162.4kb)
1:64826739	1	64826739	C	?	9	4.21e-05	0.0003676	1.3669	1.3576	0.3451	10.78	0.5948	1.34	1.432	1.333	1.947	0.9951	1.016	0.745	1.326	rs60332768	CACHD1(-109.7kb)|ROR1(+179.6kb)|UBE2U(+116.7kb)
11:129072555	11	129072555	G	?	8	4.212e-05	4.212e-05	0.3352	0.3352	0.8671	0	NA	0.3653	0.2072	0.4282	0.1354	10.75	0.5281	0.2703	0.7049	rs80177332	ARHGAP32(+10.46kb)|BARX2(-173.3kb)
3:100811000	3	100811000	T	?	9	4.277e-05	0.001653	0.6636	0.6556	0.2073	26.62	1.515	0.7757	0.52	0.547	0.5739	12.34	0.945	0.9964	0.4475	rs13065583	ABI3BP(+98.67kb)|IMPG2(-130.4kb)
1:64825866	1	64825866	A	?	9	4.278e-05	0.0004579	1.367	1.3566	0.3343	12.04	0.5948	1.34	1.432	1.333	1.964	0.9951	1.016	0.745	1.322	rs7547142	CACHD1(-110.6kb)|ROR1(+178.7kb)|UBE2U(+115.8kb)
20:5305638	20	5305638	G	?	7	4.294e-05	4.294e-05	0.4441	0.4441	0.9595	0	NA	0.3856	0.2888	0.4352	0.5485	3.269	0.852	NA	0.566	rs6076810	CDS2(+127.1kb)|LINC00654(-173.6kb)|LINC00658(-107kb)|LOC643406(-146.2kb)|PCNA(+198.4kb)|PROKR2(+10.62kb)
11:121448090	11	121448090	G	?	9	4.333e-05	0.001204	1.4396	1.4271	0.2562	21.01	3.711	1.586	1.164	1.576	1.793	1.922	1.398	0.6466	0.9286	rs2070045	SORL1(0)
11:121448183	11	121448183	G	?	9	4.333e-05	0.001204	1.4396	1.4271	0.2562	21.01	3.711	1.586	1.164	1.576	1.793	1.922	1.398	0.6466	0.9286	rs3824966	SORL1(0)
1:64824132	1	64824132	A	?	9	4.354e-05	0.0002847	1.3664	1.3592	0.3581	9.25	0.5948	1.336	1.432	1.37	1.935	0.9951	1.016	0.745	1.321	rs7543353	CACHD1(-112.3kb)|ROR1(+177kb)|UBE2U(+114.1kb)
5:167680932	5	167680932	A	?	9	4.354e-05	4.354e-05	1.3461	1.3461	0.5426	0	1.101	1.38	0.9491	1.299	1.398	0.3675	1.372	4.059	1.519	rs11743769	TENM2(0)|WWC1(-38.13kb)
17:12569442	17	12569442	A	?	8	4.361e-05	4.361e-05	0.6175	0.6175	0.6342	0	1.111	0.5576	0.785	0.513	0.7248	0.8872	0.0778	NA	0.7095	rs76148496	ARHGAP44(-123.4kb)|LINC00670(+28.94kb)|MYOCD(0)
4:185413891	4	185413891	C	?	8	4.398e-05	0.003397	0.4894	0.5025	0.2063	27.82	0.795	0.3758	0.166	0.8474	0.9255	0.0146	0.496	NA	0.604	rs11722395	CASP3(-135kb)|CCDC111(-156.9kb)|IRF2(+18.16kb)|LOC728175(+138.8kb)
22:43155449	22	43155449	G	?	8	4.417e-05	0.001224	0.5135	0.5176	0.2127	27.04	0.5594	0.5645	0.6568	0.3443	0.5944	NA	3.729	0.1963	0.324	rs114083755	A4GALT(+38.57kb)|ARFGAP3(-37.08kb)|ATP5L2(+118.8kb)|CYB5R3(+110kb)|PACSIN2(-110.3kb)|POLDIP3(+144.5kb)|RNU12(+144kb)|RRP7B(+177.4kb)|SERHL2(+185.1kb)
4:185383827	4	185383827	G	?	8	4.437e-05	0.001498	0.4985	0.5174	0.2924	17.42	0.436	0.3697	0.1872	0.6985	1.135	0.5753	0.493	NA	0.6859	rs71622962	CASP3(-165kb)|CCDC111(-186.9kb)|IRF2(0)|LOC728175(+108.7kb)
3:100812857	3	100812857	C	?	9	4.553e-05	0.0009154	0.6645	0.6566	0.2608	20.48	1.515	0.7634	0.52	0.6202	0.5739	12.34	0.8317	0.9964	0.4468	rs62274076	ABI3BP(+100.5kb)|IMPG2(-128.5kb)
21:25246402	21	25246402	C	?	9	4.588e-05	4.588e-05	0.4701	0.4701	0.8362	0	0.4191	0.7344	0.2826	0.379	0.4968	0.3582	0.1982	0.1705	0.4328	rs117750071	.
1:64826042	1	64826042	G	?	9	4.598e-05	0.0003038	1.3646	1.3567	0.358	9.26	0.5948	1.34	1.432	1.333	1.931	0.9951	1.016	0.745	1.322	rs2375123	CACHD1(-110.4kb)|ROR1(+178.9kb)|UBE2U(+116kb)
12:69501641	12	69501641	C	?	9	4.599e-05	0.00548	0.5333	0.5169	0.0993	40.22	6.262	0.6097	0.158	0.6701	0.4838	0.2264	0.4763	0.1296	0.7174	rs11177494	CPM(+144.6kb)|CPSF6(-131.7kb)|MIR1279(-165.3kb)
3:32454905	3	32454905	T	?	9	4.608e-05	4.608e-05	1.4218	1.4218	0.8596	0	0.8951	1.265	2.082	1.672	1.511	1.402	2.392	1.513	1.405	rs4955289	CMTM6(-67.9kb)|CMTM7(0)|CMTM8(+43.09kb)|DYNC1LI1(-112.6kb)
11:14612971	11	14612971	G	?	8	4.625e-05	4.625e-05	0.4588	0.4588	0.8836	0	NA	0.4008	0.2879	0.6291	0.7797	0.4028	0.6249	0.6008	0.3473	rs112723443	COPB1(+91.53kb)|PDE3B(-52.3kb)|PSMA1(0)
8:57860239	8	57860239	A	?	8	4.626e-05	0.0008802	0.4957	0.5179	0.3538	9.85	0.8392	0.4139	0.3014	2.002	0.4583	0.614	NA	1.537	0.7819	rs34029034	IMPAD1(-10.25kb)
9:100750994	9	100750994	A	?	7	4.637e-05	0.001066	0.4476	0.448	0.2873	18.67	NA	0.4694	0.63	0.5465	0.1437	6.639	3.054	NA	0.4191	rs62575563	ANP32B(0)|C9orf156(+66.14kb)|CORO2A(-132.3kb)|FOXE1(+132kb)|HEMGN(+43.8kb)|NANS(-67.96kb)|TRIM14(-80.57kb)
1:64827486	1	64827486	T	?	9	4.646e-05	0.0007867	1.3647	1.3507	0.3088	15	0.5948	1.34	1.432	1.333	1.983	0.9951	1.016	0.745	1.289	rs7553060	CACHD1(-109kb)|ROR1(+180.3kb)|UBE2U(+117.5kb)
13:23423353	13	23423353	G	?	9	4.656e-05	0.0002442	1.3602	1.3883	0.3042	15.52	1.511	1.163	1.396	1.222	1.511	1.045	3.094	0.6367	1.731	rs3847999	BASP1P1(-47.82kb)
2:45717161	2	45717161	C	?	9	4.67e-05	4.67e-05	1.5316	1.5316	0.6819	0	1.295	1.757	1.555	1.189	1.596	17.02	1.038	2.69	1.339	rs3770273	PRKCE(-161.9kb)|SRBD1(0)
6:136989243	6	136989243	C	?	9	4.686e-05	4.686e-05	1.3508	1.3508	0.7411	0	1.774	1.342	1.314	1.137	1.457	0.3065	1.69	0.7862	1.466	rs9389421	MAP3K5(0)|MAP7(+117.3kb)|PEX7(-154.5kb)
4:15317246	4	15317246	C	?	7	4.697e-05	0.001	0.3927	0.3813	0.2676	21.23	0.3491	0.4114	0.0463	0.7442	0.4416	1.956	NA	NA	0.5644	rs138016810	C1QTNF7(-24.31kb)|CC2D2A(-154.2kb)
2:173009412	2	173009412	G	?	8	4.704e-05	0.0001527	0.3545	0.3493	0.381	6.37	0.135	0.4424	0.2982	2.991	0.0994	0.6925	0.4539	NA	0.1759	rs114409718	DLX1(+55.01kb)|DLX2(+41.93kb)|HAT1(+160.8kb)|METAP1D(+63.82kb)
8:130008204	8	130008204	A	?	9	4.731e-05	4.731e-05	1.3947	1.3947	0.6795	0	0.9247	1.217	1.468	1.931	1.408	0.4782	1.755	1.744	1.602	rs7003201	.
16:78678820	16	78678820	T	?	9	4.738e-05	4.738e-05	1.3491	1.3491	0.6187	0	3.589	1.352	1.606	1.389	1.397	0.9569	1.322	0.9529	1.056	rs2548873	WWOX(0)
16:78683142	16	78683142	A	?	9	4.762e-05	4.762e-05	1.3584	1.3584	0.6833	0	2.121	1.513	1.203	1.63	1.323	0.7882	1.173	0.9268	1.037	rs9935953	WWOX(0)
3:100783075	3	100783075	T	?	9	4.764e-05	0.005769	0.6529	0.6331	0.0883	41.85	2.236	0.7635	0.4351	0.6287	0.7093	12.75	0.3039	0.8754	0.4003	rs16843198	ABI3BP(+70.74kb)|IMPG2(-158.3kb)
9:110384379	9	110384379	T	?	9	4.765e-05	4.765e-05	1.4056	1.4056	0.4688	0	2.917	1.221	1.752	1.327	1.761	0.5767	1.892	9.11	1.232	rs10759245	KLF4(+132.3kb)
3:100791262	3	100791262	A	?	9	4.792e-05	0.006787	0.654	0.63	0.0669	45.3	2.236	0.7865	0.4088	0.6287	0.6955	12.75	0.3039	0.8754	0.4003	rs13081830	ABI3BP(+78.93kb)|IMPG2(-150.1kb)
3:99495567	3	99495567	T	?	8	4.851e-05	4.851e-05	0.693	0.693	0.7502	0	1.017	0.6053	0.8618	0.9775	0.6725	0.6857	0.4268	NA	0.7554	rs793488	CMSS1(-41.11kb)|COL8A1(0)|FILIP1L(-56.42kb)|MIR548G(0)|MIR3921(-187.6kb)
7:114732071	7	114732071	T	?	9	4.873e-05	4.873e-05	1.4162	1.4162	0.602	0	1.466	1.413	1.467	0.8925	1.522	0.6397	1.26	2.318	1.902	rs73196019	MDFIC(+72.1kb)
14:98484122	14	98484122	G	?	8	4.911e-05	0.02779	0.5392	0.5867	0.0877	43.62	0.5803	0.4125	0.4101	1.009	1.713	0.4696	0.1297	NA	0.4336	rs78676228	C14orf64(+39.66kb)
19:45395330	19	45395330	G	?	8	4.917e-05	0.001587	0.6986	0.7213	0.2994	16.57	1.115	0.5246	0.9681	0.6622	0.9073	NA	0.6226	1.113	0.8363	rs2075649	APOC1(-22.59kb)|APOC1P1(-34.73kb)|APOC2(-53.91kb)|APOC4(-50.16kb)|APOC4-APOC2(-50.16kb)|APOE(-13.71kb)|BCAM(+70.65kb)|BCL3(+132kb)|CBLC(+91.43kb)|CEACAM16(+181.3kb)|CLASRP(-147kb)|CLPTM1(-62.51kb)|GEMIN7(-187.2kb)|PVRL2(+2.845kb)|RELB(-109.4kb)|TOMM40(0)|ZNF296(-179.4kb)
9:83121664	9	83121664	C	?	6	4.921e-05	4.921e-05	1.3998	1.3998	0.8823	0	1.284	1.363	NA	1.314	1.434	2.243	2.346	NA	NA	rs10867558	.
10:85917764	10	85917764	G	?	6	4.945e-05	4.945e-05	0.3591	0.3591	0.4452	0	NA	0.3088	0.3197	NA	0.233	1.257	0.4978	NA	2.007	rs77880655	C10orf99(-15.79kb)|CCSER2(-170.6kb)|CDHR1(-36.63kb)|GHITM(+4.453kb)|LINC00858(-122kb)|LRIT1(-73.51kb)|LRIT2(-62.48kb)|RGR(-87.04kb)
5:167680109	5	167680109	C	?	9	4.95e-05	4.95e-05	1.352	1.352	0.55	0	1.124	1.466	0.9083	1.299	1.41	0.5258	1.177	6.949	1.402	rs35200122	TENM2(0)|WWC1(-38.96kb)
3:99685686	3	99685686	T	?	8	4.952e-05	9.647e-05	0.6961	0.6992	0.4121	2.27	1.194	0.6229	1.023	1.065	0.6781	1.403	0.8055	NA	0.5241	rs4928149	CMSS1(0)|COL8A1(+170.1kb)|FILIP1L(0)|MIR548G(0)|MIR3921(+2.444kb)
4:7119514	4	7119514	A	?	8	4.966e-05	4.966e-05	0.6507	0.6507	0.8558	0	0.4675	0.6208	0.8383	0.6271	0.6704	2.056	1.148	NA	0.5693	rs60597272	CCDC96(+74.79kb)|FLJ36777(+14.41kb)|GRPEL1(+49.71kb)|LOC100129931(+71.56kb)|MIR4798(-192.7kb)|SORCS2(-74.86kb)|TADA2B(+59.84kb)|TBC1D14(+84.67kb)
4:7119516	4	7119516	T	?	8	4.966e-05	4.966e-05	0.6507	0.6507	0.8558	0	0.4675	0.6208	0.8383	0.6271	0.6704	2.056	1.148	NA	0.5693	rs56396760	CCDC96(+74.79kb)|FLJ36777(+14.41kb)|GRPEL1(+49.72kb)|LOC100129931(+71.56kb)|MIR4798(-192.7kb)|SORCS2(-74.86kb)|TADA2B(+59.84kb)|TBC1D14(+84.67kb)
11:13206576	11	13206576	A	?	9	5.007e-05	5.007e-05	0.5919	0.5919	0.7556	0	0.4113	0.6341	0.4784	0.5307	0.7015	9.46	0.1557	0.8419	0.4679	rs7121993	ARNTL(-92.75kb)|LINC00958(+195.5kb)|RASSF10(+172.9kb)
11:68981066	11	68981066	T	?	8	5.013e-05	0.0005027	1.361	1.3717	0.2944	17.18	0.5809	1.272	1.615	1.683	1.473	12.76	1.381	NA	1.306	rs4265599	MYEOV(-80.56kb)|TPCN2(+123kb)
14:45789181	14	45789181	T	?	9	5.042e-05	0.02069	1.344	1.3002	0.0784	43.38	1.271	1.422	1.402	0.7106	1.807	1.056	1.138	4.409	1.306	rs11624439	FANCM(+119.1kb)|FKBP3(+185.4kb)|MIS18BP1(+66.58kb)
5:120200187	5	120200187	C	?	6	5.081e-05	5.081e-05	0.3494	0.3494	0.6058	0	NA	0.2643	3807000	0.3197	0.268	NA	1.745	NA	0.7114	rs77634683	PRR16(+177.2kb)
5:120200268	5	120200268	C	?	6	5.081e-05	5.081e-05	0.3494	0.3494	0.6058	0	NA	0.2643	3807000	0.3197	0.268	NA	1.745	NA	0.7114	rs75289603	PRR16(+177.3kb)
3:99476121	3	99476121	C	?	8	5.083e-05	5.083e-05	0.6938	0.6938	0.7472	0	1.017	0.6053	0.8618	0.9775	0.6725	0.6857	0.4268	NA	0.7615	rs792834	CMSS1(-60.56kb)|COL8A1(0)|FILIP1L(-75.87kb)|MIR548G(0)
1:4750013	1	4750013	C	?	9	5.092e-05	5.092e-05	0.748	0.748	0.444	0	0.9263	0.7155	0.8472	1.173	0.583	0.5342	0.7195	0.3995	0.7864	rs187148	AJAP1(0)
2:36175101	2	36175101	C	?	6	5.133e-05	0.001103	0.404	0.353	0.1841	33.6	NA	0.5963	1.84	0.2416	0.1582	NA	NA	0.2139	0.2191	rs78004032	.
11:68980828	11	68980828	T	?	8	5.146e-05	0.0005173	1.3603	1.371	0.2938	17.25	0.5809	1.272	1.615	1.683	1.473	12.76	1.381	NA	1.302	rs4930668	MRGPRF(+200kb)|MYEOV(-80.79kb)|TPCN2(+122.8kb)
5:77195331	5	77195331	T	?	7	5.146e-05	0.003755	0.4118	0.4335	0.2298	26.07	0.2261	0.283	0.1566	0.7202	1.121	2.43	NA	NA	0.4134	rs76261014	AP3B1(-102.8kb)|TBCA(+123.1kb)
3:100809020	3	100809020	A	?	9	5.151e-05	0.001697	0.6658	0.6584	0.217	25.5	1.515	0.7737	0.52	0.5669	0.5739	12.34	0.945	0.9964	0.4468	rs36077661	ABI3BP(+96.69kb)|IMPG2(-132.4kb)
22:43886756	22	43886756	T	?	7	5.162e-05	0.01485	0.5172	0.5269	0.0307	56.85	0.636	1.099	0.4903	0.6018	0.3258	NA	1.734	NA	0.2225	rs148521375	EFCAB6(-37.87kb)|EFCAB6-AS1(-25.38kb)|MPPED1(0)|SCUBE1(+147.4kb)
16:78670994	16	78670994	A	?	9	5.199e-05	5.199e-05	1.3428	1.3428	0.9026	0	2.37	1.351	1.535	1.498	1.339	0.9501	1.161	1.046	1.119	rs1981882	WWOX(0)
7:114679703	7	114679703	G	?	7	5.2e-05	5.2e-05	1.502	1.502	0.6713	0	2.039	NA	NA	1.286	1.338	1.643	3.259	1.88	1.613	rs12706006	MDFIC(+19.73kb)
17:12568437	17	12568437	G	?	8	5.207e-05	5.207e-05	0.6223	0.6223	0.4862	0	1.111	0.5291	0.801	0.5236	0.75	0.8872	0.0778	NA	0.824	rs72811260	ARHGAP44(-124.4kb)|LINC00670(+27.93kb)|MYOCD(-0.769kb)
9:80205948	9	80205948	C	?	9	5.221e-05	0.05233	0.7399	0.7991	0.0766	43.67	0.882	0.6686	1.007	0.7417	0.7269	0.7719	2.8	1.426	0.5915	rs1144434	GNA14(0)|GNAQ(-129.2kb)|VPS13A(+173.5kb)
3:99499736	3	99499736	T	?	8	5.279e-05	5.279e-05	0.6939	0.6939	0.699	0	1.017	0.6023	0.9606	0.9633	0.6725	0.6857	0.4268	NA	0.7386	rs793492	CMSS1(-36.94kb)|COL8A1(0)|FILIP1L(-52.25kb)|MIR548G(0)|MIR3921(-183.4kb)
7:114682603	7	114682603	T	?	7	5.287e-05	5.287e-05	1.5014	1.5014	0.672	0	2.039	NA	NA	1.286	1.338	1.643	3.259	1.88	1.611	rs1978097	MDFIC(+22.63kb)
7:114682852	7	114682852	A	?	7	5.287e-05	5.287e-05	1.5014	1.5014	0.672	0	2.039	NA	NA	1.286	1.338	1.643	3.259	1.88	1.611	rs2157948	MDFIC(+22.88kb)
3:100797104	3	100797104	A	?	9	5.294e-05	0.005032	0.6572	0.6357	0.0945	40.92	2.236	0.7889	0.4135	0.5858	0.6955	12.75	0.4258	0.8754	0.4101	rs13085636	ABI3BP(+84.77kb)|IMPG2(-144.3kb)
3:100797234	3	100797234	A	?	9	5.294e-05	0.005032	0.6572	0.6357	0.0945	40.92	2.236	0.7889	0.4135	0.5858	0.6955	12.75	0.4258	0.8754	0.4101	rs13085839	ABI3BP(+84.9kb)|IMPG2(-144.2kb)
2:45717702	2	45717702	G	?	9	5.298e-05	5.298e-05	1.5301	1.5301	0.704	0	1.508	1.725	1.533	1.189	1.614	17.08	1.038	2.69	1.327	rs3770274	PRKCE(-161.3kb)|SRBD1(0)
10:115798184	10	115798184	T	?	9	5.346e-05	5.346e-05	0.6515	0.6515	0.625	0	0.4971	0.7525	1.144	0.6163	0.5085	1.479	0.8416	0.4055	0.4657	rs55720524	ADRB1(-5.621kb)|C10orf118(-83.79kb)|DCLRE1A(+184kb)|MIR2110(-135.7kb)|NHLRC2(+125.9kb)|TDRD1(-140.8kb)
11:121447011	11	121447011	T	?	9	5.363e-05	0.00319	1.4337	1.4194	0.1861	29.11	3.711	1.581	1.164	1.576	1.84	1.922	1.398	0.6466	0.8903	rs4936636	SORL1(0)
4:185408434	4	185408434	G	?	8	5.365e-05	0.004734	0.4938	0.5079	0.188	30.07	0.795	0.3758	0.166	0.9063	0.9255	0.0146	0.496	NA	0.604	rs34991065	CASP3(-140.4kb)|CCDC111(-162.3kb)|IRF2(+12.71kb)|LOC728175(+133.3kb)
4:185412752	4	185412752	A	?	8	5.365e-05	0.004734	0.4938	0.5079	0.188	30.07	0.795	0.3758	0.166	0.9063	0.9255	0.0146	0.496	NA	0.604	rs11733325	CASP3(-136.1kb)|CCDC111(-158kb)|IRF2(+17.03kb)|LOC728175(+137.6kb)
4:185413201	4	185413201	A	?	8	5.365e-05	0.004734	0.4938	0.5079	0.188	30.07	0.795	0.3758	0.166	0.9063	0.9255	0.0146	0.496	NA	0.604	rs11733535	CASP3(-135.6kb)|CCDC111(-157.6kb)|IRF2(+17.48kb)|LOC728175(+138.1kb)
5:167681010	5	167681010	T	?	9	5.391e-05	5.391e-05	1.3414	1.3414	0.5458	0	1.101	1.367	0.9491	1.299	1.398	0.3675	1.372	4.059	1.519	rs11740804	TENM2(0)|WWC1(-38.05kb)
22:43156313	22	43156313	T	?	8	5.419e-05	5.419e-05	0.676	0.676	0.9034	0	0.7817	0.7183	0.9404	0.5432	0.6695	NA	0.692	0.3139	0.629	rs113265231	A4GALT(+39.44kb)|ARFGAP3(-36.22kb)|ATP5L2(+119.7kb)|CYB5R3(+110.9kb)|PACSIN2(-109.5kb)|POLDIP3(+145.3kb)|RNU12(+144.9kb)|RRP7B(+178.3kb)|SERHL2(+185.9kb)
2:108800580	2	108800580	T	?	6	5.438e-05	5.438e-05	0.2873	0.2873	0.7231	0	NA	0.3504	0.8666	0.109	0.245	1.169	NA	0.079	NA	rs77062971	SLC5A7(+170.1kb)|SULT1C2(-104.5kb)|SULT1C2P1(-138.1kb)|SULT1C3(-63.07kb)|SULT1C4(-193.8kb)
2:108823497	2	108823497	A	?	6	5.438e-05	5.438e-05	0.2873	0.2873	0.7231	0	NA	0.3504	0.8666	0.109	0.245	1.169	NA	0.079	NA	rs147010613	SLC5A7(+193.1kb)|SULT1C2(-81.6kb)|SULT1C2P1(-115.2kb)|SULT1C3(-40.15kb)|SULT1C4(-170.9kb)
4:185398356	4	185398356	A	?	8	5.446e-05	0.00616	0.6147	0.6426	0.2112	27.23	5.44	0.5117	0.3961	1.071	0.8104	0.3809	0.3192	NA	0.7224	rs6831315	CASP3(-150.5kb)|CCDC111(-172.4kb)|IRF2(+2.63kb)|LOC728175(+123.2kb)
1:64827193	1	64827193	G	?	9	5.462e-05	0.0005083	1.3607	1.3504	0.3395	11.44	0.5948	1.34	1.432	1.333	1.947	0.9951	1.016	0.745	1.289	rs11208433	CACHD1(-109.3kb)|ROR1(+180kb)|UBE2U(+117.2kb)
20:5302632	20	5302632	G	?	7	5.48e-05	5.48e-05	0.4481	0.4481	0.962	0	NA	0.3663	0.3708	0.4685	0.5377	3.269	0.852	NA	0.6181	rs6053310	CDS2(+124.1kb)|LINC00654(-176.6kb)|LINC00658(-110kb)|LOC643406(-149.2kb)|PCNA(+195.4kb)|PROKR2(+7.617kb)
1:64827430	1	64827430	A	?	9	5.493e-05	0.0005851	1.3602	1.3493	0.3319	12.32	0.5948	1.336	1.432	1.333	1.953	0.9951	1.016	0.745	1.289	rs7552876	CACHD1(-109kb)|ROR1(+180.3kb)|UBE2U(+117.4kb)
1:64827134	1	64827134	C	?	9	5.506e-05	0.0005136	1.3605	1.3502	0.3393	11.46	0.5948	1.34	1.432	1.333	1.947	0.9951	1.016	0.745	1.288	rs10889480	CACHD1(-109.3kb)|ROR1(+180kb)|UBE2U(+117.1kb)
1:64749809	1	64749809	A	?	9	5.513e-05	5.513e-05	1.3622	1.3622	0.5171	0	0.6226	1.292	1.464	1.541	1.837	0.9619	1.1	0.8343	1.315	rs825239	CACHD1(-186.7kb)|ROR1(+102.6kb)|UBE2U(+39.78kb)
1:64739306	1	64739306	T	?	9	5.516e-05	5.516e-05	1.3621	1.3621	0.5952	0	0.6624	1.291	1.464	1.563	1.8	0.9619	1.1	0.8343	1.315	rs705552	CACHD1(-197.2kb)|ROR1(+92.13kb)|UBE2U(+29.28kb)
11:68976119	11	68976119	T	?	8	5.528e-05	0.0008031	1.3585	1.3695	0.2652	20.72	0.5448	1.263	1.566	1.635	1.497	12.76	1.381	NA	1.341	rs4495900	MRGPRF(+195.3kb)|MYEOV(-85.5kb)|TPCN2(+118kb)
16:78678727	16	78678727	C	?	9	5.528e-05	5.528e-05	1.3457	1.3457	0.6174	0	3.589	1.358	1.617	1.341	1.397	0.9569	1.322	0.9529	1.056	rs2550626	WWOX(0)
4:184990777	4	184990777	C	?	9	5.529e-05	5.529e-05	1.3502	1.3502	0.7787	0	1.345	1.336	1.323	1.355	1.375	3.485	0.5907	1.171	1.557	rs62342794	ENPP6(-19.08kb)|STOX2(+51.9kb)
3:185259585	3	185259585	C	?	9	5.531e-05	0.0002793	1.3475	1.3419	0.3665	8.25	0.8271	1.393	1.206	1.147	1.375	0.1379	2.047	2.447	1.469	rs59952379	C3orf65(-171.5kb)|IGF2BP2(-101.9kb)|LIPH(0)|MAP3K13(+52.7kb)|SENP2(-44.44kb)|TMEM41A(+42.74kb)
3:100796879	3	100796879	T	?	9	5.559e-05	0.006728	0.6571	0.6326	0.0715	44.51	2.236	0.7889	0.4088	0.6287	0.6955	12.75	0.3039	0.8754	0.4101	rs16843216	ABI3BP(+84.54kb)|IMPG2(-144.5kb)
5:167681984	5	167681984	A	?	9	5.578e-05	5.578e-05	1.3405	1.3405	0.6473	0	1.163	1.376	1.009	1.269	1.398	0.3696	1.372	4.059	1.46	rs62385591	TENM2(0)|WWC1(-37.08kb)
13:114035862	13	114035862	G	?	7	5.632e-05	5.632e-05	3.1581	3.1581	0.956	0	2.603	3.816	3.037	2.47	2.59	NA	14.24	NA	2.76	rs79438439	ADPRHL1(-40.4kb)|CUL4A(+116.5kb)|DCUN1D2(-74.27kb)|GRTP1(+17.4kb)|LAMP1(+58.12kb)|PCID2(+172.8kb)|TMCO3(-109.4kb)
13:35006326	13	35006326	A	?	8	5.653e-05	0.02735	0.6003	0.6566	0.1201	38.88	7.295	0.4855	0.4898	0.4826	0.592	0.8048	3.105	NA	0.9613	rs74408671	LINC00457(-3.264kb)
11:121445274	11	121445274	T	?	9	5.661e-05	0.002122	1.4392	1.4299	0.2165	25.56	3.711	1.592	1.45	1.433	1.814	1.922	1.398	0.6466	0.8826	rs17092943	SORL1(0)
3:100804323	3	100804323	T	?	9	5.673e-05	5.673e-05	0.6846	0.6846	0.4853	0	1.396	0.7825	0.3315	0.5885	0.726	1.145	0.6066	0.9875	0.5994	rs6768528	ABI3BP(+91.99kb)|IMPG2(-137.1kb)
11:121443663	11	121443663	C	?	9	5.68e-05	7.164e-05	1.3458	1.3444	0.4268	0.86	1.537	1.479	1.195	1.358	1.436	3.192	0.4818	0.9638	1.162	rs1792125	SORL1(0)
5:167680252	5	167680252	G	?	9	5.71e-05	5.71e-05	1.3398	1.3398	0.5622	0	1.101	1.362	0.9666	1.313	1.385	0.3651	1.372	4.059	1.519	rs112465595	TENM2(0)|WWC1(-38.81kb)
8:79766627	8	79766627	A	?	7	5.719e-05	5.719e-05	0.5031	0.5031	0.5169	0	NA	0.3615	0.7905	0.9191	0.7052	0.0645	1.039	NA	0.5651	rs79421168	IL7(+48.87kb)|LOC101241902(+130kb)|ZC2HC1A(+134.6kb)
3:14108146	3	14108146	G	?	8	5.735e-05	5.735e-05	0.4399	0.4399	0.8521	0	0.2173	0.5106	2481000	0.5037	0.4694	1.891	NA	0.0793	0.4063	rs114176875	CHCHD4(-45.43kb)|FGD5P1(+129.7kb)|LSM3(-112.1kb)|TMEM43(-58.29kb)|TPRXL(+0.665kb)|WNT7A(+186.5kb)|XPC(-78.5kb)
8:58341938	8	58341938	G	?	8	5.741e-05	6.809e-05	0.5414	0.5417	0.4243	0.63	NA	0.5199	0.9587	0.6506	0.3797	2.252	1.777	0.1063	0.7942	rs79499261	LINC00588(+144.6kb)|LOC286177(+162.8kb)|LOC100507651(+196.6kb)
14:45997923	14	45997923	G	?	7	5.742e-05	0.1987	0.7247	0.8197	0.0269	57.91	1.538	0.6435	0.6477	1.282	0.6244	2.905	NA	0.5613	NA	rs2415892	.
5:167679824	5	167679824	T	?	9	5.766e-05	5.766e-05	1.3485	1.3485	0.5523	0	1.124	1.465	0.9083	1.299	1.404	0.5243	1.177	6.949	1.391	rs62385563	TENM2(0)|WWC1(-39.24kb)
5:167676736	5	167676736	T	?	9	5.795e-05	5.795e-05	1.3482	1.3482	0.561	0	1.124	1.453	0.9083	1.322	1.41	0.5243	1.177	7.024	1.391	rs2337158	TENM2(0)|WWC1(-42.33kb)
14:73143457	14	73143457	A	?	8	5.815e-05	0.0002888	1.3759	1.3985	0.3408	11.47	1.786	1.309	1.842	1.43	1.246	0.5032	3.926	2.233	NA	rs768840	DPF3(0)|RGS6(+110.2kb)
3:100802220	3	100802220	A	?	9	5.816e-05	0.00203	0.66	0.6453	0.1911	28.51	2.236	0.7557	0.459	0.6032	0.679	12.74	0.4231	0.8754	0.4505	rs16843229	ABI3BP(+89.89kb)|IMPG2(-139.2kb)
14:64137690	14	64137690	G	?	7	5.832e-05	0.006101	0.4428	0.4638	0.2221	27.06	NA	0.4021	0.3792	0.7679	0.1562	NA	7.374	0.1823	0.5265	rs79914430	PPP2R5E(+127.6kb)|SGPP1(-13.24kb)|SYNE2(-182kb)|WDR89(+29.05kb)
12:103842906	12	103842906	C	?	8	5.835e-05	0.001778	1.5714	1.5309	0.2653	20.71	0.5735	1.856	0.912	1.397	1.314	1.744	0.8949	NA	2.61	rs34518374	C12orf42(0)|STAB2(-138.2kb)
16:78678550	16	78678550	G	?	9	5.842e-05	5.842e-05	1.3438	1.3438	0.5937	0	3.589	1.353	1.606	1.341	1.415	0.9569	1.322	0.9529	1.041	rs2548874	WWOX(0)
13:23420326	13	23420326	A	?	9	5.853e-05	5.853e-05	1.4069	1.4069	0.7134	0	1.227	1.315	1.964	1.296	1.198	1.819	3.073	2.065	1.583	rs12716704	BASP1P1(-50.84kb)
14:73143227	14	73143227	T	?	8	5.855e-05	0.0003384	1.3758	1.403	0.3266	13.24	1.858	1.303	1.842	1.437	1.245	0.5032	3.926	2.233	NA	rs2803981	DPF3(0)|RGS6(+110kb)
3:185258104	3	185258104	A	?	9	5.856e-05	0.0001512	1.3459	1.3426	0.3971	4.55	0.8271	1.39	1.206	1.147	1.375	0.1379	1.857	2.447	1.489	rs3849568	C3orf65(-172.9kb)|IGF2BP2(-103.4kb)|LIPH(0)|MAP3K13(+51.22kb)|SENP2(-45.93kb)|TMEM41A(+41.26kb)
3:185258170	3	185258170	C	?	9	5.856e-05	0.0001512	1.3459	1.3426	0.3971	4.55	0.8271	1.39	1.206	1.147	1.375	0.1379	1.857	2.447	1.489	rs3849569	C3orf65(-172.9kb)|IGF2BP2(-103.4kb)|LIPH(0)|MAP3K13(+51.29kb)|SENP2(-45.86kb)|TMEM41A(+41.32kb)
17:53628145	17	53628145	C	?	8	5.891e-05	5.891e-05	2.1121	2.1121	0.8583	0	3.803	2.821	1.79	2.05	1.382	5.652	1.022	NA	2.112	rs12452525	MMD(+128.8kb)|TMEM100(-168.8kb)
10:101525037	10	101525037	T	?	9	5.916e-05	5.916e-05	0.4767	0.4767	0.8444	0	0.2961	0.3701	0.6567	0.6973	0.6352	0.1556	1.673	0.303	0.7944	rs143176769	ABCC2(-17.42kb)|COX15(+32.61kb)|CUTC(+9.143kb)|DNMBP(-110.3kb)|DNMBP-AS1(-161.9kb)|ENTPD7(+54.04kb)|SLC25A28(+144.8kb)
16:78676865	16	78676865	A	?	9	5.929e-05	5.929e-05	1.3802	1.3802	0.4784	0	2.56	1.408	1.177	1.807	1.512	0.6461	1.872	0.8834	0.9999	rs1107454	WWOX(0)
21:24682797	21	24682797	T	?	9	5.963e-05	0.0009429	1.3506	1.3951	0.199	27.59	1.937	1.186	1.788	1.14	1.419	5.489	0.6267	1.613	1.741	rs2828045	D21S2088E(-50.63kb)
4:185426663	4	185426663	T	?	8	5.967e-05	0.01093	0.4902	0.5109	0.1234	38.42	0.2931	0.3583	0.166	1.064	0.9255	0.0146	1.052	NA	0.5845	rs34292644	CASP3(-122.2kb)|CCDC111(-144.1kb)|IRF2(+30.94kb)|LOC728175(+151.5kb)|MLF1IP(-188.6kb)
17:12126613	17	12126613	T	?	6	5.99e-05	0.0009617	0.3998	0.4186	0.3259	13.84	1.262	0.341	0.9111	NA	0.9766	NA	NA	0.1815	0.2354	rs59039154	MAP2K4(+79.56kb)|MIR744(+141.3kb)
2:242446340	2	242446340	A	?	8	5.996e-05	0.01092	1.892	1.8149	0.0984	41.98	0.5832	2.712	1.196	0.9857	3.166	13.77	7.107	NA	1.305	rs73008141	ATG4B(-130.7kb)|BOK(-51.8kb)|BOK-AS1(-37.46kb)|DTYMK(-168.8kb)|FARP2(+12.08kb)|HDLBP(+191.2kb)|ING5(-195.1kb)|SEPT2(+152.9kb)|STK25(0)|THAP4(-77.48kb)
13:35004246	13	35004246	A	?	8	6.036e-05	0.03464	0.6153	0.6717	0.1026	41.37	7.295	0.5057	0.4603	0.487	0.6218	0.6774	3.028	NA	1.028	rs78943289	LINC00457(-5.344kb)
8:137650262	8	137650262	G	?	9	6.091e-05	6.091e-05	0.5858	0.5858	0.6268	0	0.6983	0.4932	0.2253	0.7426	0.7441	0.7005	0.8654	0.9113	0.6973	rs111730113	.
10:115794898	10	115794898	G	?	9	6.092e-05	6.092e-05	0.6543	0.6543	0.6284	0	0.4971	0.7525	1.144	0.6387	0.5085	1.479	0.8416	0.4055	0.4657	rs7079542	ADRB1(-8.907kb)|C10orf118(-87.08kb)|DCLRE1A(+180.7kb)|MIR2110(-139kb)|NHLRC2(+122.6kb)|TDRD1(-144.1kb)
10:115795225	10	115795225	A	?	9	6.092e-05	6.092e-05	0.6543	0.6543	0.6284	0	0.4971	0.7525	1.144	0.6387	0.5085	1.479	0.8416	0.4055	0.4657	rs72823017	ADRB1(-8.58kb)|C10orf118(-86.75kb)|DCLRE1A(+181.1kb)|MIR2110(-138.6kb)|NHLRC2(+123kb)|TDRD1(-143.8kb)
10:115795236	10	115795236	A	?	9	6.092e-05	6.092e-05	0.6543	0.6543	0.6284	0	0.4971	0.7525	1.144	0.6387	0.5085	1.479	0.8416	0.4055	0.4657	rs4619105	ADRB1(-8.569kb)|C10orf118(-86.74kb)|DCLRE1A(+181.1kb)|MIR2110(-138.6kb)|NHLRC2(+123kb)|TDRD1(-143.8kb)
10:115796337	10	115796337	G	?	9	6.092e-05	6.092e-05	0.6543	0.6543	0.6284	0	0.4971	0.7525	1.144	0.6387	0.5085	1.479	0.8416	0.4055	0.4657	rs17875416	ADRB1(-7.468kb)|C10orf118(-85.64kb)|DCLRE1A(+182.2kb)|MIR2110(-137.5kb)|NHLRC2(+124.1kb)|TDRD1(-142.7kb)
2:99569470	2	99569470	A	?	9	6.104e-05	6.104e-05	0.62	0.62	0.8471	0	0.5869	0.6298	0.4906	0.6827	0.626	2.289	1.636	0.4142	0.5264	rs77115466	C2orf15(-188.7kb)|KIAA1211L(+16.79kb)|TSGA10(-44.25kb)
1:64745664	1	64745664	C	?	9	6.118e-05	6.118e-05	1.3595	1.3595	0.5439	0	0.6226	1.291	1.464	1.563	1.8	0.9619	1.1	0.8343	1.315	rs705554	CACHD1(-190.8kb)|ROR1(+98.48kb)|UBE2U(+35.64kb)
11:93871246	11	93871246	T	?	8	6.137e-05	6.137e-05	0.5269	0.5269	0.4961	0	0.3837	0.5102	0.4254	0.8126	0.7887	0.0058	0.5667	NA	0.326	rs117829210	FOLR4(-167.6kb)|HEPHL1(+23.87kb)|PANX1(0)
3:100793726	3	100793726	C	?	8	6.137e-05	0.0001284	0.5653	0.5499	0.3639	8.57	NA	0.724	0.2496	0.5323	0.7089	0.419	0.1961	0.1974	0.5743	rs77709628	ABI3BP(+81.39kb)|IMPG2(-147.7kb)
2:45721137	2	45721137	C	?	9	6.174e-05	6.174e-05	1.524	1.524	0.7079	0	1.508	1.724	1.533	1.189	1.585	17.08	1.038	2.69	1.327	rs6718941	PRKCE(-157.9kb)|SRBD1(0)
2:156752588	2	156752588	A	?	9	6.208e-05	0.007348	1.3441	1.3417	0.1123	38.4	1.364	1.371	1.127	2.192	1.589	1.507	1.834	0.6318	0.8792	rs7594921	.
9:100807929	9	100807929	G	?	8	6.224e-05	6.224e-05	0.5481	0.5481	0.9005	0	1.608	0.4759	0.6303	0.5899	0.4985	0.449	0.3097	NA	0.8233	rs62575572	ANP32B(+29.7kb)|C9orf156(+123.1kb)|CORO2A(-75.33kb)|FOXE1(+188.9kb)|HEMGN(+100.7kb)|NANS(-11.03kb)|TBC1D2(-153.4kb)|TRIM14(-23.64kb)
3:100779435	3	100779435	C	?	9	6.255e-05	0.006853	0.6573	0.635	0.0796	43.19	2.236	0.7747	0.4351	0.6016	0.7301	12.75	0.3039	0.8754	0.4003	rs66598219	ABI3BP(+67.1kb)|IMPG2(-162kb)
9:100420336	9	100420336	T	?	8	6.272e-05	6.272e-05	0.5358	0.5358	0.9847	0	0.5619	0.5334	0.7799	0.6496	0.3997	0.9244	NA	0.3142	0.5929	rs72751547	FOXE1(-195.2kb)|NCBP1(0)|TDRD7(+161.9kb)|TMOD1(+56.31kb)|TSTD2(+24.37kb)|XPA(-16.85kb)
8:61789924	8	61789924	A	?	8	6.333e-05	6.333e-05	0.5553	0.5553	0.9565	0	0.5936	0.5112	0.5638	0.8995	0.554	NA	1.05	0.7245	0.4378	rs34877903	CHD7(+9.338kb)|LOC100130298(-88.76kb)
21:24690776	21	24690776	C	?	9	6.364e-05	0.001228	1.3498	1.4034	0.1656	31.56	1.937	1.169	1.804	1.156	1.407	5.489	0.6267	1.613	1.794	rs67854865	D21S2088E(-42.65kb)
11:69002632	11	69002632	T	?	8	6.375e-05	0.0005451	1.3563	1.3627	0.3098	15.31	0.5809	1.287	1.583	1.683	1.453	12.76	1.217	NA	1.3	rs7925434	MYEOV(-58.99kb)|TPCN2(+144.6kb)
2:242446339	2	242446339	A	?	8	6.395e-05	0.01089	1.8876	1.8121	0.1005	41.68	0.5832	2.691	1.196	0.9857	3.166	13.77	7.107	NA	1.305	rs73008138	ATG4B(-130.7kb)|BOK(-51.81kb)|BOK-AS1(-37.46kb)|DTYMK(-168.8kb)|FARP2(+12.08kb)|HDLBP(+191.2kb)|ING5(-195.1kb)|SEPT2(+152.9kb)|STK25(0)|THAP4(-77.48kb)
11:121475922	11	121475922	A	?	9	6.438e-05	6.438e-05	1.3762	1.3762	0.5743	0	2.176	1.474	0.9712	1.469	1.643	1.14	1.009	0.5274	1.171	rs3824968	SORL1(0)
1:64799147	1	64799147	C	?	9	6.495e-05	6.495e-05	0.7454	0.7454	0.5307	0	1.216	0.8621	0.6762	0.5357	0.6189	0.7394	0.5498	1.001	0.7578	rs12739069	CACHD1(-137.3kb)|ROR1(+152kb)|UBE2U(+89.12kb)
1:64800134	1	64800134	G	?	9	6.495e-05	6.495e-05	0.7454	0.7454	0.5307	0	1.216	0.8621	0.6762	0.5357	0.6189	0.7394	0.5498	1.001	0.7578	rs12405224	CACHD1(-136.3kb)|ROR1(+153kb)|UBE2U(+90.11kb)
1:64800510	1	64800510	C	?	9	6.495e-05	6.495e-05	0.7454	0.7454	0.5307	0	1.216	0.8621	0.6762	0.5357	0.6189	0.7394	0.5498	1.001	0.7578	rs1390480	CACHD1(-136kb)|ROR1(+153.3kb)|UBE2U(+90.48kb)
1:64800809	1	64800809	T	?	9	6.495e-05	6.495e-05	0.7454	0.7454	0.5307	0	1.216	0.8621	0.6762	0.5357	0.6189	0.7394	0.5498	1.001	0.7578	rs1390475	CACHD1(-135.7kb)|ROR1(+153.6kb)|UBE2U(+90.78kb)
1:64800957	1	64800957	C	?	9	6.495e-05	6.495e-05	0.7454	0.7454	0.5307	0	1.216	0.8621	0.6762	0.5357	0.6189	0.7394	0.5498	1.001	0.7578	rs56409536	CACHD1(-135.5kb)|ROR1(+153.8kb)|UBE2U(+90.93kb)
13:23416479	13	23416479	T	?	9	6.51e-05	6.51e-05	1.4041	1.4041	0.7312	0	1.227	1.297	1.941	1.296	1.224	1.819	3.073	2.021	1.583	rs9506944	BASP1P1(-54.69kb)
13:23416672	13	23416672	T	?	9	6.51e-05	6.51e-05	1.4041	1.4041	0.7312	0	1.227	1.297	1.941	1.296	1.224	1.819	3.073	2.021	1.583	rs9510375	BASP1P1(-54.5kb)
16:78675531	16	78675531	C	?	9	6.53e-05	6.53e-05	1.3383	1.3383	0.8015	0	2.296	1.346	1.721	1.463	1.351	0.9501	1.322	1.046	1.04	rs2550621	WWOX(0)
13:95995391	13	95995391	C	?	9	6.551e-05	0.007374	0.7356	0.7431	0.144	34.24	0.9917	0.7423	0.8043	1.416	0.6117	0.1818	0.5868	0.6657	0.6233	rs2992882	ABCC4(+41.7kb)|CLDN10(-90.46kb)|CLDN10-AS1(-136.3kb)
14:98472857	14	98472857	G	?	8	6.556e-05	0.02458	0.5499	0.5989	0.1127	39.92	0.5803	0.4126	0.4724	0.8686	1.737	0.5361	0.1297	NA	0.4886	rs12586279	C14orf64(+28.4kb)
3:185258933	3	185258933	C	?	9	6.583e-05	0.0001425	1.3428	1.3401	0.4041	3.69	0.8271	1.389	1.206	1.147	1.375	0.1379	1.858	2.447	1.469	rs4626118	C3orf65(-172.1kb)|IGF2BP2(-102.6kb)|LIPH(0)|MAP3K13(+52.05kb)|SENP2(-45.1kb)|TMEM41A(+42.09kb)
17:21777884	17	21777884	A	?	8	6.59e-05	0.0002125	0.5238	0.5177	0.3606	8.99	1.078	0.6269	0.9714	0.3046	0.6271	1.221	NA	0.1427	0.2697	rs139682857	FAM27L(-47.48kb)|FLJ36000(-126.2kb)
3:185259436	3	185259436	T	?	9	6.597e-05	0.0001418	1.3428	1.3401	0.4044	3.66	0.8271	1.389	1.206	1.147	1.375	0.1379	1.857	2.447	1.469	rs59765744	C3orf65(-171.6kb)|IGF2BP2(-102.1kb)|LIPH(0)|MAP3K13(+52.55kb)|SENP2(-44.59kb)|TMEM41A(+42.59kb)
3:185259696	3	185259696	G	?	9	6.597e-05	0.0001418	1.3428	1.3401	0.4044	3.66	0.8271	1.389	1.206	1.147	1.375	0.1379	1.857	2.447	1.469	rs57977126	C3orf65(-171.3kb)|IGF2BP2(-101.8kb)|LIPH(0)|MAP3K13(+52.81kb)|SENP2(-44.33kb)|TMEM41A(+42.85kb)
5:172245572	5	172245572	T	?	9	6.602e-05	6.602e-05	0.7295	0.7295	0.9282	0	0.816	0.699	0.6749	0.9452	0.7308	0.347	0.4878	0.8099	0.7789	rs11134760	ATP6V0E1(-165.2kb)|DUSP1(+47.37kb)|ERGIC1(-15.65kb)|LOC100268168(-136.2kb)|NEURL1B(+127kb)|RPL26L1(-140.9kb)
11:121463430	11	121463430	G	?	9	6.668e-05	0.001073	1.3733	1.353	0.3167	14.08	2.663	1.499	1.031	1.504	1.606	1.134	0.6649	0.563	1.143	rs10892758	SORL1(0)
13:23420924	13	23420924	T	?	9	6.67e-05	6.67e-05	1.4032	1.4032	0.7226	0	1.227	1.315	1.964	1.296	1.198	1.819	3.073	2.065	1.558	rs11148583	BASP1P1(-50.24kb)
9:100529701	9	100529701	A	?	9	6.684e-05	6.684e-05	0.6968	0.6968	0.7091	0	1.155	0.709	0.6847	0.7672	0.5315	0.2167	0.6788	2.378	0.7767	rs4319207	C9orf156(-137.1kb)|FOXE1(-85.84kb)|HEMGN(-159.4kb)|NCBP1(+93.67kb)|TMOD1(+165.7kb)|TSTD2(+133.7kb)|XPA(+70.01kb)
4:7121014	4	7121014	A	?	8	6.693e-05	6.693e-05	0.6571	0.6571	0.8932	0	0.5716	0.6199	0.8383	0.6271	0.6704	2.056	1.148	NA	0.5831	rs11945234	CCDC96(+76.29kb)|FLJ36777(+15.91kb)|GRPEL1(+51.21kb)|LOC100129931(+73.06kb)|MIR4798(-191.2kb)|SORCS2(-73.36kb)|TADA2B(+61.34kb)|TBC1D14(+86.17kb)
13:35004668	13	35004668	T	?	8	6.702e-05	0.03423	0.6173	0.6725	0.1056	40.92	7.295	0.5101	0.4603	0.487	0.6218	0.6774	3.028	NA	1.028	rs79761665	LINC00457(-4.922kb)
9:100569455	9	100569455	G	?	9	6.708e-05	6.708e-05	0.6841	0.6841	0.938	0	0.7053	0.6133	1.065	0.785	0.7312	0.707	0.5825	1.427	0.6202	rs55976673	ANP32B(-176kb)|C9orf156(-97.32kb)|FOXE1(-46.08kb)|HEMGN(-119.6kb)|NCBP1(+133.4kb)|TSTD2(+173.5kb)|XPA(+109.8kb)
5:167681183	5	167681183	A	?	9	6.754e-05	6.754e-05	1.3359	1.3359	0.5678	0	1.101	1.37	0.9491	1.299	1.398	0.3675	1.372	4.059	1.474	rs11743857	TENM2(0)|WWC1(-37.88kb)
5:167681191	5	167681191	A	?	9	6.754e-05	6.754e-05	1.3359	1.3359	0.5678	0	1.101	1.37	0.9491	1.299	1.398	0.3675	1.372	4.059	1.474	rs11743859	TENM2(0)|WWC1(-37.87kb)
6:25669183	6	25669183	T	?	9	6.775e-05	0.0008695	0.6758	0.6911	0.357	9.38	0.8301	0.5502	1.029	0.912	0.7703	0.1204	0.281	2.745	0.6856	rs2092161	HIST1H2AA(-57.11kb)|HIST1H2APS1(-63.48kb)|HIST1H2BA(-57.95kb)|LRRC16A(+48.42kb)|SCGN(0)|SLC17A1(-113.9kb)|SLC17A3(-176.1kb)|SLC17A4(-85.74kb)
2:45717018	2	45717018	C	?	9	6.798e-05	6.798e-05	1.5204	1.5204	0.6705	0	1.508	1.736	1.533	1.189	1.614	17.08	1.038	2.69	1.262	rs719441	PRKCE(-162kb)|SRBD1(0)
3:100799670	3	100799670	A	?	9	6.826e-05	0.005618	0.662	0.642	0.098	40.41	2.236	0.7889	0.4135	0.6286	0.6955	12.75	0.4258	0.8754	0.4101	rs17219986	ABI3BP(+87.34kb)|IMPG2(-141.7kb)
3:185259843	3	185259843	A	?	9	6.834e-05	0.0001441	1.3421	1.3395	0.405	3.58	0.8271	1.387	1.206	1.147	1.375	0.1379	1.857	2.447	1.469	rs4362741	C3orf65(-171.2kb)|IGF2BP2(-101.7kb)|LIPH(0)|MAP3K13(+52.96kb)|SENP2(-44.19kb)|TMEM41A(+43kb)
4:5254658	4	5254658	T	?	7	6.863e-05	0.05848	0.4854	0.5248	0.0433	53.78	NA	0.3921	0.3385	0.3126	0.9821	1.245	NA	0.0853	2.058	rs11942948	STK32B(0)
13:23423654	13	23423654	G	?	9	6.864e-05	0.0004333	1.3502	1.3845	0.2736	19.03	1.511	1.146	1.396	1.209	1.511	1.04	3.094	0.6367	1.733	rs7336774	BASP1P1(-47.51kb)
3:100772835	3	100772835	G	?	9	6.866e-05	0.008836	0.6591	0.6363	0.064	45.79	2.236	0.7775	0.441	0.6016	0.7535	12.75	0.3039	0.8754	0.3817	rs10511182	ABI3BP(+60.5kb)|IMPG2(-168.6kb)
3:100773483	3	100773483	C	?	9	6.866e-05	0.008836	0.6591	0.6363	0.064	45.79	2.236	0.7775	0.441	0.6016	0.7535	12.75	0.3039	0.8754	0.3817	rs13060849	ABI3BP(+61.15kb)|IMPG2(-167.9kb)
3:100773738	3	100773738	C	?	9	6.866e-05	0.008836	0.6591	0.6363	0.064	45.79	2.236	0.7775	0.441	0.6016	0.7535	12.75	0.3039	0.8754	0.3817	rs13065684	ABI3BP(+61.4kb)|IMPG2(-167.7kb)
13:111103598	13	111103598	G	?	9	6.885e-05	6.885e-05	0.7233	0.7233	0.9873	0	0.5992	0.7865	0.8456	0.6701	0.6598	0.3666	0.6117	0.8961	0.6929	rs9521770	CARKD(-164.2kb)|CARS2(-190.2kb)|COL4A1(+144.1kb)|COL4A2(0)|COL4A2-AS1(-51.32kb)|RAB20(-71.81kb)
16:78177225	16	78177225	A	?	9	6.893e-05	6.893e-05	1.3307	1.3307	0.9881	0	1.158	1.234	1.316	1.539	1.452	2.191	1.209	1.434	1.329	rs11150043	CLEC3A(+111.2kb)|VAT1L(+163.2kb)|WWOX(0)
9:100858609	9	100858609	T	?	8	6.899e-05	6.899e-05	0.5461	0.5461	0.9481	0	1.608	0.482	0.7501	0.6224	0.5075	0.4238	0.3099	NA	0.6779	rs62575600	ANP32B(+80.38kb)|C9orf156(+173.8kb)|CORO2A(-24.65kb)|GABBR2(-191.8kb)|HEMGN(+151.4kb)|NANS(+13.24kb)|TBC1D2(-102.7kb)|TRIM14(0)
4:7118415	4	7118415	T	?	8	6.938e-05	6.938e-05	0.6531	0.6531	0.8492	0	0.4675	0.6454	0.766	0.5973	0.6994	2.056	1.148	NA	0.5339	rs35320981	CCDC96(+73.69kb)|FLJ36777(+13.31kb)|GRPEL1(+48.62kb)|LOC100129931(+70.46kb)|MIR4798(-193.8kb)|SORCS2(-75.96kb)|TADA2B(+58.74kb)|TBC1D14(+83.57kb)
13:114023677	13	114023677	T	?	6	6.953e-05	6.953e-05	3.1431	3.1431	0.925	0	NA	3.153	3.168	2.089	2.793	NA	14.24	NA	2.981	rs74569572	ADPRHL1(-52.58kb)|CUL4A(+104.3kb)|DCUN1D2(-86.46kb)|GRTP1(+5.214kb)|LAMP1(+45.94kb)|PCID2(+160.6kb)|PROZ(+197kb)|TMCO3(-121.6kb)
13:114028903	13	114028903	A	?	6	6.953e-05	6.953e-05	3.1431	3.1431	0.925	0	NA	3.153	3.168	2.089	2.793	NA	14.24	NA	2.981	rs60995395	ADPRHL1(-47.36kb)|CUL4A(+109.5kb)|DCUN1D2(-81.23kb)|GRTP1(+10.44kb)|LAMP1(+51.16kb)|PCID2(+165.9kb)|TMCO3(-116.4kb)
13:114029314	13	114029314	A	?	6	6.953e-05	6.953e-05	3.1431	3.1431	0.925	0	NA	3.153	3.168	2.089	2.793	NA	14.24	NA	2.981	rs9577521	ADPRHL1(-46.94kb)|CUL4A(+109.9kb)|DCUN1D2(-80.82kb)|GRTP1(+10.85kb)|LAMP1(+51.57kb)|PCID2(+166.3kb)|TMCO3(-116kb)
13:114031521	13	114031521	G	?	6	6.953e-05	6.953e-05	3.1431	3.1431	0.925	0	NA	3.153	3.168	2.089	2.793	NA	14.24	NA	2.981	rs9577523	ADPRHL1(-44.74kb)|CUL4A(+112.1kb)|DCUN1D2(-78.61kb)|GRTP1(+13.06kb)|LAMP1(+53.78kb)|PCID2(+168.5kb)|TMCO3(-113.8kb)
5:167677870	5	167677870	T	?	9	6.969e-05	6.969e-05	1.3441	1.3441	0.5614	0	1.124	1.452	0.9083	1.299	1.404	0.5243	1.177	7.024	1.391	rs6889555	TENM2(0)|WWC1(-41.19kb)
5:167678938	5	167678938	A	?	9	6.969e-05	6.969e-05	1.3441	1.3441	0.5614	0	1.124	1.452	0.9083	1.299	1.404	0.5243	1.177	7.024	1.391	rs10447203	TENM2(0)|WWC1(-40.13kb)
7:114682117	7	114682117	G	?	7	6.976e-05	6.976e-05	1.4905	1.4905	0.6491	0	2.039	NA	NA	1.286	1.313	1.643	3.259	1.88	1.611	rs12113289	MDFIC(+22.15kb)
7:114842099	7	114842099	G	?	9	7.014e-05	7.014e-05	0.7508	0.7508	0.6642	0	0.9584	0.7347	0.7649	0.4976	0.8791	0.7059	0.6503	1.543	0.8031	rs7795551	MDFIC(+182.1kb)
13:23416004	13	23416004	T	?	9	7.034e-05	7.034e-05	1.4022	1.4022	0.7357	0	1.227	1.297	1.941	1.296	1.224	1.819	3.073	2.021	1.572	rs9580447	BASP1P1(-55.16kb)
7:114747072	7	114747072	G	?	9	7.07e-05	7.07e-05	0.7417	0.7417	0.8837	0	0.8083	0.6757	0.8683	0.655	0.9069	1.434	0.7125	0.9607	0.6843	rs6950725	MDFIC(+87.1kb)
2:111675114	2	111675114	C	?	7	7.072e-05	7.072e-05	0.4707	0.4707	0.4915	0	0.1949	0.4858	0.3484	0.6087	0.8392	NA	0.2981	NA	0.1739	rs149270869	ACOXL(0)
9:83157716	9	83157716	T	?	9	7.09e-05	0.01141	0.7128	0.7183	0.0918	41.33	0.863	0.7299	0.6715	1.02	0.4432	2.475	0.3326	0.6355	0.9368	rs34181939	.
3:99796626	3	99796626	C	?	8	7.113e-05	7.113e-05	0.709	0.709	0.5469	0	1.197	0.6367	0.9662	1.057	0.6318	1.396	0.6613	NA	0.6333	rs35844878	CMSS1(0)|FILIP1L(0)|MIR548G(+79.57kb)|MIR3921(+113.4kb)|TBC1D23(-183kb)|TMEM30C(-108kb)
3:99801628	3	99801628	C	?	8	7.113e-05	7.113e-05	0.709	0.709	0.5469	0	1.197	0.6367	0.9662	1.057	0.6318	1.396	0.6613	NA	0.6333	rs13069311	CMSS1(0)|FILIP1L(0)|MIR548G(+84.57kb)|MIR3921(+118.4kb)|TBC1D23(-178kb)|TMEM30C(-103kb)
3:99806645	3	99806645	G	?	8	7.113e-05	7.113e-05	0.709	0.709	0.5469	0	1.197	0.6367	0.9662	1.057	0.6318	1.396	0.6613	NA	0.6333	rs9828079	CMSS1(0)|FILIP1L(0)|MIR548G(+89.59kb)|MIR3921(+123.4kb)|TBC1D23(-173kb)|TMEM30C(-98.02kb)
3:99806949	3	99806949	G	?	8	7.113e-05	7.113e-05	0.709	0.709	0.5469	0	1.197	0.6367	0.9662	1.057	0.6318	1.396	0.6613	NA	0.6333	rs62285471	CMSS1(0)|FILIP1L(0)|MIR548G(+89.89kb)|MIR3921(+123.7kb)|TBC1D23(-172.7kb)|TMEM30C(-97.72kb)
3:99808338	3	99808338	G	?	8	7.113e-05	7.113e-05	0.709	0.709	0.5469	0	1.197	0.6367	0.9662	1.057	0.6318	1.396	0.6613	NA	0.6333	rs7627991	CMSS1(0)|FILIP1L(0)|MIR548G(+91.28kb)|MIR3921(+125.1kb)|TBC1D23(-171.3kb)|TMEM30C(-96.33kb)
3:99809955	3	99809955	T	?	8	7.113e-05	7.113e-05	0.709	0.709	0.5469	0	1.197	0.6367	0.9662	1.057	0.6318	1.396	0.6613	NA	0.6333	rs62285473	CMSS1(0)|FILIP1L(0)|MIR548G(+92.9kb)|MIR3921(+126.7kb)|TBC1D23(-169.7kb)|TMEM30C(-94.71kb)
3:99811553	3	99811553	C	?	8	7.113e-05	7.113e-05	0.709	0.709	0.5469	0	1.197	0.6367	0.9662	1.057	0.6318	1.396	0.6613	NA	0.6333	rs13323143	CMSS1(0)|FILIP1L(0)|MIR548G(+94.49kb)|MIR3921(+128.3kb)|TBC1D23(-168.1kb)|TMEM30C(-93.11kb)
3:99813218	3	99813218	G	?	8	7.113e-05	7.113e-05	0.709	0.709	0.5469	0	1.197	0.6367	0.9662	1.057	0.6318	1.396	0.6613	NA	0.6333	rs35885423	CMSS1(0)|FILIP1L(0)|MIR548G(+96.16kb)|MIR3921(+130kb)|TBC1D23(-166.4kb)|TMEM30C(-91.45kb)
7:155694535	7	155694535	G	?	6	7.119e-05	7.119e-05	0.4628	0.4628	0.4631	0	NA	0.4385	0.256	0.9791	0.2199	NA	0.6972	NA	0.7776	rs73169190	RBM33(+120.4kb)|SHH(+89.57kb)
14:98474763	14	98474763	C	?	8	7.204e-05	0.0254	0.552	0.6017	0.114	39.72	0.5803	0.4126	0.4724	0.8686	1.737	0.5361	0.1297	NA	0.5026	rs76338846	C14orf64(+30.3kb)
14:98478564	14	98478564	A	?	8	7.204e-05	0.0254	0.552	0.6017	0.114	39.72	0.5803	0.4126	0.4724	0.8686	1.737	0.5361	0.1297	NA	0.5026	rs876187	C14orf64(+34.1kb)
4:7116025	4	7116025	C	?	8	7.205e-05	7.205e-05	0.6531	0.6531	0.9271	0	0.5716	0.6408	0.7621	0.6098	0.6994	2.056	0.9789	NA	0.5313	rs4689601	CCDC96(+71.3kb)|FLJ36777(+10.92kb)|GRPEL1(+46.22kb)|LOC100129931(+68.07kb)|MIR4798(-196.2kb)|SORCS2(-78.35kb)|TADA2B(+56.35kb)|TBC1D14(+81.18kb)
7:114834683	7	114834683	C	?	9	7.253e-05	7.253e-05	0.7502	0.7502	0.5584	0	1.052	0.7411	0.757	0.4801	0.8421	0.6822	0.5469	1.441	0.8589	rs28391310	MDFIC(+174.7kb)
6:25658580	6	25658580	C	?	9	7.261e-05	0.001203	0.6766	0.6937	0.3452	10.77	0.8301	0.5502	1.029	0.912	0.7892	0.1204	0.281	2.745	0.6665	rs56034365	HIST1H2AA(-67.71kb)|HIST1H2APS1(-74.08kb)|HIST1H2BA(-68.56kb)|LRRC16A(+37.82kb)|SCGN(0)|SLC17A1(-124.5kb)|SLC17A3(-186.7kb)|SLC17A4(-96.35kb)
6:25659172	6	25659172	A	?	9	7.261e-05	0.001203	0.6766	0.6937	0.3452	10.77	0.8301	0.5502	1.029	0.912	0.7892	0.1204	0.281	2.745	0.6665	rs1003688	HIST1H2AA(-67.12kb)|HIST1H2APS1(-73.49kb)|HIST1H2BA(-67.96kb)|LRRC16A(+38.41kb)|SCGN(0)|SLC17A1(-124kb)|SLC17A3(-186.2kb)|SLC17A4(-95.75kb)
8:61823218	8	61823218	A	?	9	7.288e-05	0.001192	0.642	0.631	0.2536	21.3	0.25	0.6809	0.3706	1.338	0.6416	0.1501	0.332	2.118	0.6193	rs62525901	CHD7(+42.63kb)|LOC100130298(-55.46kb)
2:209033138	2	209033138	C	?	9	7.34e-05	7.34e-05	0.7428	0.7428	0.8331	0	0.651	0.7073	0.6089	0.9986	0.779	1.456	0.6903	0.3857	0.7462	rs7589065	C2orf80(0)|CRYGA(+4.841kb)|CRYGB(+22.26kb)|CRYGC(+38.58kb)|CRYGD(+43.82kb)|IDH1(-67.81kb)|IDH1-AS1(-86.82kb)|LOC100507443(+11.65kb)|PIKFYVE(-97.85kb)|PLEKHM3(+142.9kb)|PTH2R(-191.4kb)
4:185377923	4	185377923	A	?	8	7.349e-05	0.009925	0.5115	0.5481	0.1945	29.27	0.9307	0.3737	0.1872	0.6232	1.295	1.565	0.9841	NA	0.6581	rs13112029	CASP3(-170.9kb)|CCDC111(-192.8kb)|IRF2(0)|LOC728175(+102.8kb)
3:100818693	3	100818693	G	?	9	7.355e-05	0.02206	0.7172	0.7295	0.0553	47.38	1.955	0.8205	0.5556	0.5302	0.5791	5.302	1.296	0.4233	0.6157	rs7610265	ABI3BP(+106.4kb)|IMPG2(-122.7kb)
3:99690970	3	99690970	T	?	8	7.388e-05	0.0004892	0.6922	0.7017	0.3727	7.45	1.28	0.6389	0.9843	1.112	0.6062	1.497	0.9923	NA	0.515	rs35777905	CMSS1(0)|COL8A1(+175.4kb)|FILIP1L(0)|MIR548G(0)|MIR3921(+7.728kb)
4:184990335	4	184990335	A	?	9	7.401e-05	7.401e-05	1.3436	1.3436	0.8615	0	1.501	1.313	1.316	1.355	1.37	1.439	0.6318	1.09	1.579	rs6552741	ENPP6(-19.52kb)|STOX2(+51.46kb)
7:4258755	7	4258755	G	?	9	7.426e-05	7.426e-05	0.6055	0.6055	0.6688	0	1.214	0.6097	0.8303	0.6715	0.637	0.0803	0.1098	0.5707	0.4177	rs76339261	SDK1(0)
11:121478495	11	121478495	T	?	9	7.437e-05	7.437e-05	1.3705	1.3705	0.6125	0	1.906	1.446	0.9836	1.521	1.656	1.14	0.9352	0.5517	1.186	rs2282648	SORL1(0)
16:78672494	16	78672494	C	?	9	7.464e-05	7.464e-05	1.3355	1.3355	0.6947	0	3.3	1.328	1.648	1.442	1.329	0.9501	1.322	1.046	1.078	rs2550619	WWOX(0)
9:100557291	9	100557291	T	?	9	7.464e-05	7.464e-05	0.7121	0.7121	0.8749	0	1.132	0.7095	0.7426	0.7295	0.6422	0.4381	0.422	2.612	0.7324	rs16924274	ANP32B(-188.2kb)|C9orf156(-109.5kb)|FOXE1(-58.24kb)|HEMGN(-131.8kb)|NCBP1(+121.3kb)|TMOD1(+193.3kb)|TSTD2(+161.3kb)|XPA(+97.6kb)
16:79741569	16	79741569	T	?	9	7.499e-05	7.499e-05	0.722	0.722	0.8247	0	0.7285	0.7022	0.682	0.8325	0.6704	2.49	0.3842	0.7695	0.8475	rs11150192	MAF(+106.9kb)
3:99795651	3	99795651	C	?	8	7.508e-05	7.508e-05	0.7097	0.7097	0.5327	0	1.197	0.6367	0.9662	1.069	0.6318	1.396	0.6613	NA	0.6333	rs9841186	CMSS1(0)|FILIP1L(0)|MIR548G(+78.59kb)|MIR3921(+112.4kb)|TBC1D23(-184kb)|TMEM30C(-109kb)
5:167679427	5	167679427	A	?	9	7.531e-05	7.531e-05	1.3333	1.3333	0.5664	0	1.101	1.345	0.9666	1.313	1.385	0.3651	1.372	4.073	1.518	rs11747056	TENM2(0)|WWC1(-39.64kb)
2:72303267	2	72303267	T	?	7	7.585e-05	7.585e-05	0.3435	0.3435	0.6725	0	NA	0.3238	0.6288	0.8051	0.184	NA	0.3758	0.0504	0.4991	rs140220548	CYP26B1(-53.1kb)|EXOC6B(-103.2kb)
9:83155239	9	83155239	A	?	9	7.607e-05	0.01018	0.7137	0.7182	0.1023	39.8	0.863	0.7329	0.6772	1.02	0.4439	2.337	0.3326	0.6419	0.9312	rs13286593	.
14:45966845	14	45966845	A	?	9	7.613e-05	0.0992	0.75	0.807	0.0236	54.79	0.9433	0.637	0.7401	1.386	0.5507	1.635	0.7325	0.5084	1.074	rs1952722	.
11:68972657	11	68972657	C	?	6	7.626e-05	0.004993	1.3902	1.4534	0.1175	43.16	0.7746	1.283	1.657	2.163	NA	7.324	NA	NA	1.258	rs7930375	MRGPRF(+191.8kb)|MYEOV(-88.96kb)|TPCN2(+114.6kb)
13:35014823	13	35014823	C	?	8	7.631e-05	0.02217	0.6201	0.6642	0.1362	36.69	7.295	0.527	0.4503	0.487	0.6218	0.6774	3.028	NA	0.9693	rs17081275	LINC00457(0)
5:120192459	5	120192459	A	?	6	7.633e-05	7.633e-05	0.3632	0.3632	0.6306	0	NA	0.2643	3807000	0.3197	0.3578	NA	1.745	NA	0.7114	rs10041438	PRR16(+169.5kb)
5:120194256	5	120194256	C	?	6	7.633e-05	7.633e-05	0.3632	0.3632	0.6306	0	NA	0.2643	3807000	0.3197	0.3578	NA	1.745	NA	0.7114	rs78023549	PRR16(+171.3kb)
5:120194466	5	120194466	C	?	6	7.633e-05	7.633e-05	0.3632	0.3632	0.6306	0	NA	0.2643	3807000	0.3197	0.3578	NA	1.745	NA	0.7114	rs13328230	PRR16(+171.5kb)
5:120195380	5	120195380	G	?	6	7.633e-05	7.633e-05	0.3632	0.3632	0.6306	0	NA	0.2643	3807000	0.3197	0.3578	NA	1.745	NA	0.7114	rs10077418	PRR16(+172.4kb)
5:120196292	5	120196292	T	?	6	7.633e-05	7.633e-05	0.3632	0.3632	0.6306	0	NA	0.2643	3807000	0.3197	0.3578	NA	1.745	NA	0.7114	rs28729806	PRR16(+173.3kb)
5:120198074	5	120198074	C	?	6	7.633e-05	7.633e-05	0.3632	0.3632	0.6306	0	NA	0.2643	3807000	0.3197	0.3578	NA	1.745	NA	0.7114	rs28412190	PRR16(+175.1kb)
3:99822135	3	99822135	T	?	8	7.656e-05	7.656e-05	0.7098	0.7098	0.5505	0	1.197	0.6382	0.9662	1.057	0.6318	1.396	0.6613	NA	0.6331	rs62285478	CMSS1(0)|FILIP1L(0)|MIR548G(+105.1kb)|MIR3921(+138.9kb)|TBC1D23(-157.5kb)|TMEM30C(-82.53kb)
19:45409167	19	45409167	C	?	8	7.701e-05	7.701e-05	0.6798	0.6798	0.7341	0	0.9362	0.622	0.5979	0.7966	0.6112	NA	0.653	2.89	0.783	rs440446	APOC1(-8.753kb)|APOC1P1(-20.89kb)|APOC2(-40.07kb)|APOC4(-36.33kb)|APOC4-APOC2(-36.33kb)|APOE(0)|BCAM(+84.49kb)|BCL3(+145.9kb)|CBLC(+105.3kb)|CEACAM16(+195.2kb)|CLASRP(-133.1kb)|CLPTM1(-48.67kb)|GEMIN7(-173.4kb)|PPP1R37(-187.3kb)|PVRL2(+16.68kb)|RELB(-95.54kb)|TOMM40(+2.221kb)|ZNF296(-165.6kb)
20:5306640	20	5306640	T	?	7	7.709e-05	7.709e-05	0.4538	0.4538	0.9718	0	NA	0.4075	0.2888	0.4352	0.5377	3.269	0.852	NA	0.5656	rs28566143	CDS2(+128.1kb)|LINC00654(-172.6kb)|LINC00658(-106kb)|LOC643406(-145.2kb)|PCNA(+199.4kb)|PROKR2(+11.62kb)
20:5306656	20	5306656	T	?	7	7.709e-05	7.709e-05	0.4538	0.4538	0.9718	0	NA	0.4075	0.2888	0.4352	0.5377	3.269	0.852	NA	0.5656	rs28616149	CDS2(+128.1kb)|LINC00654(-172.6kb)|LINC00658(-105.9kb)|LOC643406(-145.2kb)|PCNA(+199.4kb)|PROKR2(+11.64kb)
15:44225717	15	44225717	T	?	6	7.766e-05	0.007452	0.4084	0.4494	0.2052	30.69	NA	0.3125	0.6964	1.063	1.057	NA	0.3935	NA	0.1944	rs151068381	CATSPER2P1(+187.2kb)|ELL3(+156.2kb)|FRMD5(0)|HYPK(+130.9kb)|MFAP1(+108.8kb)|MIR1282(+139.8kb)|PDIA3(+160.9kb)|PIN4P1(+55.35kb)|SERF2(+137.4kb)|SERF2-C15ORF63(+130.9kb)|SERINC4(+133.4kb)|WDR76(+65.1kb)
1:64786736	1	64786736	T	?	9	7.817e-05	7.817e-05	0.7424	0.7424	0.5883	0	1.346	0.7626	0.7066	0.5335	0.7404	0.6921	0.4944	1.746	0.7924	rs12033119	CACHD1(-149.7kb)|ROR1(+139.6kb)|UBE2U(+76.71kb)
5:167683511	5	167683511	G	?	9	7.818e-05	7.818e-05	1.3323	1.3323	0.5939	0	1.163	1.378	0.9502	1.269	1.383	0.3696	1.372	4.059	1.46	rs11740056	TENM2(0)|WWC1(-35.55kb)
10:115793237	10	115793237	G	?	9	7.824e-05	7.824e-05	0.6583	0.6583	0.6577	0	0.4971	0.7525	1.144	0.6387	0.5263	1.479	0.8416	0.4055	0.4657	rs56012176	ADRB1(-10.57kb)|C10orf118(-88.74kb)|DCLRE1A(+179.1kb)|MIR2110(-140.6kb)|NHLRC2(+121kb)|TDRD1(-145.8kb)
2:45710097	2	45710097	C	?	9	7.833e-05	7.833e-05	1.5153	1.5153	0.7093	0	1.508	1.71	1.555	1.189	1.601	17.08	1.17	2.69	1.245	rs6752909	PRKCE(-168.9kb)|SRBD1(0)
9:100527551	9	100527551	C	?	9	7.87e-05	7.87e-05	0.6987	0.6987	0.6606	0	1.155	0.7146	0.657	0.7672	0.523	0.2167	0.6788	2.378	0.8128	rs4304440	C9orf156(-139.2kb)|FOXE1(-87.98kb)|HEMGN(-161.5kb)|NCBP1(+91.52kb)|TMOD1(+163.5kb)|TSTD2(+131.6kb)|XPA(+67.86kb)
3:185238783	3	185238783	A	?	9	7.873e-05	7.873e-05	1.3368	1.3368	0.4346	0	0.8111	1.35	1.309	1.138	1.403	0.1378	1.874	2.013	1.454	rs56191117	C3orf65(-192.3kb)|IGF2BP2(-122.7kb)|LIPH(0)|MAP3K13(+31.9kb)|SENP2(-65.25kb)|TMEM41A(+21.94kb)
3:185239965	3	185239965	T	?	9	7.873e-05	7.873e-05	1.3368	1.3368	0.4346	0	0.8111	1.35	1.309	1.138	1.403	0.1378	1.874	2.013	1.454	rs55797844	C3orf65(-191.1kb)|IGF2BP2(-121.6kb)|LIPH(0)|MAP3K13(+33.08kb)|SENP2(-64.06kb)|TMEM41A(+23.12kb)
2:108736151	2	108736151	A	?	6	7.878e-05	7.878e-05	0.3019	0.3019	0.7878	0	NA	0.3674	0.8666	0.1534	0.245	1.169	NA	0.079	NA	rs74666742	SLC5A7(+105.7kb)|SULT1C2(-168.9kb)|SULT1C3(-127.5kb)
5:167675926	5	167675926	T	?	9	7.881e-05	7.881e-05	1.3409	1.3409	0.5679	0	1.124	1.444	0.9083	1.299	1.404	0.5243	1.177	7.024	1.388	rs2112553	TENM2(0)|WWC1(-43.14kb)
5:167677699	5	167677699	G	?	9	7.884e-05	7.884e-05	1.332	1.332	0.5718	0	1.101	1.345	0.9666	1.313	1.385	0.3651	1.372	4.073	1.508	rs6868169	TENM2(0)|WWC1(-41.36kb)
3:99795507	3	99795507	G	?	8	7.912e-05	7.912e-05	0.7105	0.7105	0.5364	0	1.197	0.6383	0.9662	1.069	0.6318	1.396	0.6613	NA	0.6333	rs9823908	CMSS1(0)|FILIP1L(0)|MIR548G(+78.45kb)|MIR3921(+112.3kb)|TBC1D23(-184.2kb)|TMEM30C(-109.2kb)
3:185259942	3	185259942	G	?	9	8.005e-05	8.005e-05	1.3382	1.3382	0.4348	0	0.8271	1.387	1.206	1.147	1.375	0.1379	1.708	2.447	1.469	rs62291861	C3orf65(-171.1kb)|IGF2BP2(-101.6kb)|LIPH(0)|MAP3K13(+53.06kb)|SENP2(-44.09kb)|TMEM41A(+43.1kb)
3:185260229	3	185260229	T	?	9	8.005e-05	8.005e-05	1.3382	1.3382	0.4348	0	0.8271	1.387	1.206	1.147	1.375	0.1379	1.708	2.447	1.469	rs113651041	C3orf65(-170.8kb)|IGF2BP2(-101.3kb)|LIPH(0)|MAP3K13(+53.35kb)|SENP2(-43.8kb)|TMEM41A(+43.38kb)
3:185260315	3	185260315	G	?	9	8.005e-05	8.005e-05	1.3382	1.3382	0.4348	0	0.8271	1.387	1.206	1.147	1.375	0.1379	1.708	2.447	1.469	rs7651959	C3orf65(-170.7kb)|IGF2BP2(-101.2kb)|LIPH(0)|MAP3K13(+53.43kb)|SENP2(-43.72kb)|TMEM41A(+43.47kb)
5:169554202	5	169554202	C	?	9	8.013e-05	0.0009178	0.5529	0.5695	0.3571	9.37	0.3542	0.4492	0.8498	1.828	0.4922	0.227	0.6968	0.3092	0.6129	rs56138634	C5orf58(-105.7kb)|DOCK2(+43.82kb)|FAM196B(+146.5kb)|FOXI1(+17.47kb)|LCP2(-120.9kb)|MIR378E(+98.63kb)
5:172242266	5	172242266	C	?	9	8.045e-05	8.045e-05	0.7322	0.7322	0.9493	0	0.816	0.7113	0.6749	0.9206	0.7308	0.3471	0.4916	0.8099	0.7739	rs4868210	ATP6V0E1(-168.5kb)|DUSP1(+44.06kb)|ERGIC1(-18.96kb)|LOC100268168(-139.5kb)|NEURL1B(+123.7kb)|RPL26L1(-144.2kb)
3:100775080	3	100775080	A	?	9	8.05e-05	0.009536	0.6617	0.6378	0.0616	46.23	2.236	0.7845	0.441	0.6016	0.7535	12.75	0.3039	0.8754	0.3817	rs35850913	ABI3BP(+62.75kb)|IMPG2(-166.3kb)
3:99824685	3	99824685	A	?	8	8.05e-05	8.05e-05	0.7107	0.7107	0.5549	0	1.197	0.6397	0.9662	1.057	0.6318	1.396	0.6613	NA	0.6347	rs9837602	CMSS1(0)|FILIP1L(0)|MIR548G(+107.6kb)|MIR3921(+141.4kb)|TBC1D23(-155kb)|TMEM30C(-79.98kb)
13:34994045	13	34994045	A	?	8	8.073e-05	0.03285	0.622	0.6743	0.1132	39.84	7.295	0.5205	0.4603	0.487	0.6218	0.6774	2.927	NA	1.032	rs942594	LINC00457(-15.54kb)
4:182219430	4	182219430	A	?	9	8.095e-05	8.095e-05	0.711	0.711	0.5865	0	0.825	0.6686	0.9768	0.734	0.7397	0.0225	1.021	1.807	0.6107	rs62340923	LINC00290(+139.1kb)
8:12847127	8	12847127	A	?	9	8.101e-05	8.101e-05	0.4395	0.4395	0.8541	0	0.1988	0.5146	0.7435	0.4483	0.5188	0.3545	0.8383	0.2545	0.1834	rs7013393	DLC1(-93.74kb)|KIAA1456(0)|LINC00681(+171.3kb)|LOC340357(+178.2kb)
8:12848085	8	12848085	T	?	9	8.101e-05	8.101e-05	0.4395	0.4395	0.8541	0	0.1988	0.5146	0.7435	0.4483	0.5188	0.3545	0.8383	0.2545	0.1834	rs78594142	DLC1(-92.79kb)|KIAA1456(0)|LINC00681(+172.3kb)|LOC340357(+179.2kb)
12:68425985	12	68425985	T	?	7	8.124e-05	0.0003106	0.4618	0.4719	0.3924	4.48	NA	0.3355	1.372	0.3431	0.5273	0.1832	4.051	NA	0.8881	rs77928745	IFNG(-122.6kb)|IL26(-169.1kb)
12:32363669	12	32363669	C	?	9	8.126e-05	8.126e-05	1.462	1.462	0.8544	0	1.583	1.569	1.631	1.117	1.647	0.5545	0.9351	3.924	1.414	rs7965981	BICD1(0)
1:163768768	1	163768768	C	?	9	8.177e-05	0.007742	0.7468	0.7728	0.2199	25.16	0.6075	0.6107	1.423	0.7739	0.7806	0.431	0.6512	0.6455	0.9563	rs1866893	.
9:100456761	9	100456761	A	?	8	8.189e-05	8.189e-05	0.539	0.539	0.9611	0	0.5619	0.516	1.214	0.6496	0.4253	0.9244	NA	0.3142	0.5929	rs3176646	FOXE1(-158.8kb)|NCBP1(+20.73kb)|TDRD7(+198.4kb)|TMOD1(+92.74kb)|TSTD2(+60.8kb)|XPA(0)
3:100819829	3	100819829	T	?	9	8.191e-05	0.02244	0.7188	0.7307	0.0565	47.16	1.955	0.8217	0.5556	0.5302	0.5791	5.302	1.29	0.4233	0.6221	rs13064054	ABI3BP(+107.5kb)|IMPG2(-121.6kb)
8:61824309	8	61824309	A	?	9	8.195e-05	0.0003445	0.6453	0.639	0.3528	9.88	0.2881	0.6924	0.3706	1.202	0.6416	0.136	0.332	2.118	0.6219	rs6994028	CHD7(+43.72kb)|LOC100130298(-54.37kb)
3:100819495	3	100819495	T	?	9	8.201e-05	0.02251	0.7188	0.7308	0.0563	47.19	1.955	0.8217	0.5556	0.5302	0.5791	5.299	1.29	0.4233	0.6221	rs4518100	ABI3BP(+107.2kb)|IMPG2(-121.9kb)
3:100819687	3	100819687	C	?	9	8.201e-05	0.02251	0.7188	0.7308	0.0563	47.19	1.955	0.8217	0.5556	0.5302	0.5791	5.299	1.29	0.4233	0.6221	rs13068296	ABI3BP(+107.4kb)|IMPG2(-121.7kb)
3:99427552	3	99427552	A	?	8	8.202e-05	8.202e-05	0.7102	0.7102	0.7377	0	0.7351	0.6501	0.9238	1.078	0.7184	0.5395	0.5642	NA	0.6032	rs1606481	CMSS1(-109.1kb)|COL8A1(0)|FILIP1L(-124.4kb)|MIR548G(0)
6:152279667	6	152279667	G	?	9	8.225e-05	8.225e-05	1.4479	1.4479	0.7672	0	1.883	1.273	2.556	1.353	1.62	3.207	0.8495	3.094	1.495	rs3003922	ESR1(0)|SYNE1(-163.2kb)
8:61824202	8	61824202	A	?	9	8.297e-05	0.001471	0.6442	0.631	0.2382	23.07	0.25	0.6894	0.3623	1.338	0.6416	0.136	0.332	2.118	0.6193	rs6993866	CHD7(+43.62kb)|LOC100130298(-54.48kb)
14:22914747	14	22914747	G	?	9	8.3e-05	8.3e-05	0.7424	0.7424	0.5058	0	1.279	0.762	0.8396	0.624	0.6555	0.3373	1.259	0.2963	0.7533	rs10137305	ABHD4(-152.4kb)|DAD1(-119.1kb)
6:25666814	6	25666814	T	?	9	8.309e-05	0.001336	0.6789	0.6964	0.3453	10.75	0.8301	0.5502	1.029	0.912	0.7892	0.1204	0.281	2.745	0.6856	rs56026359	HIST1H2AA(-59.48kb)|HIST1H2APS1(-65.85kb)|HIST1H2BA(-60.32kb)|LRRC16A(+46.06kb)|SCGN(0)|SLC17A1(-116.3kb)|SLC17A3(-178.5kb)|SLC17A4(-88.11kb)
4:4030248	4	4030248	A	?	8	8.314e-05	8.314e-05	0.678	0.678	0.9802	0	0.5974	0.6886	0.6907	0.7442	0.5416	NA	0.8663	0.7309	0.7566	rs4974797	FAM86EP(+73.1kb)|OTOP1(-160.3kb)
11:14863087	11	14863087	T	?	8	8.319e-05	8.319e-05	0.4554	0.4554	0.8735	0	NA	0.4331	0.2046	0.6408	0.6686	0.341	0.6249	0.4138	0.4761	rs113255079	CALCA(-125.1kb)|CYP2R1(-36.47kb)|PDE3B(0)|PSMA1(+197.9kb)
1:64778399	1	64778399	G	?	9	8.32e-05	8.32e-05	1.3419	1.3419	0.5494	0	0.5909	1.464	1.358	1.573	1.375	0.9915	1.231	0.6157	1.236	rs1496023	CACHD1(-158.1kb)|ROR1(+131.2kb)|UBE2U(+68.37kb)
7:114731349	7	114731349	G	?	9	8.332e-05	8.332e-05	1.3993	1.3993	0.6016	0	1.466	1.39	1.358	0.8925	1.522	0.6397	1.26	2.318	1.902	rs11984253	MDFIC(+71.38kb)
1:64804909	1	64804909	G	?	9	8.365e-05	0.0001724	1.3411	1.3351	0.4124	2.66	0.5467	1.52	1.308	1.411	1.41	0.9792	1.439	0.5746	1.174	rs12036911	CACHD1(-131.6kb)|ROR1(+157.7kb)|UBE2U(+94.88kb)
13:81217849	13	81217849	T	?	6	8.384e-05	8.384e-05	0.3506	0.3506	0.8935	0	0.236	0.3631	NA	0.5106	0.1509	15.83	NA	NA	0.3907	rs113216930	.
3:143907609	3	143907609	G	?	9	8.385e-05	8.385e-05	1.3461	1.3461	0.4724	0	1.144	1.219	1.843	1.059	1.512	0.9756	0.8535	1.271	1.833	rs34050535	C3orf58(+196.4kb)
17:79473805	17	79473805	C	?	7	8.391e-05	8.391e-05	0.6758	0.6758	0.799	0	0.6013	0.642	0.6698	0.7794	0.7607	NA	0.9575	0.2169	NA	rs11871871	ACTG1(-3.191kb)|ARL16(-174.4kb)|BAHCC1(+40.45kb)|C17orf70(-33.1kb)|CCDC137(-160kb)|FSCN2(-21.61kb)|HGS(-177.2kb)|LINC00482(+190.8kb)|LOC100130370(+114.6kb)|MIR3186(+55.59kb)|MIR4740(+99.23kb)|MRPL12(-196.6kb)|NPLOC4(-50.11kb)|OXLD1(-158.3kb)|PDE6G(-143.7kb)|TMEM105(+169.3kb)|TSPAN10(-135.5kb)
17:79473833	17	79473833	G	?	7	8.391e-05	8.391e-05	0.6758	0.6758	0.799	0	0.6013	0.642	0.6698	0.7794	0.7607	NA	0.9575	0.2169	NA	rs11871727	ACTG1(-3.163kb)|ARL16(-174.4kb)|BAHCC1(+40.48kb)|C17orf70(-33.08kb)|CCDC137(-159.9kb)|FSCN2(-21.58kb)|HGS(-177.1kb)|LINC00482(+190.8kb)|LOC100130370(+114.7kb)|MIR3186(+55.62kb)|MIR4740(+99.26kb)|MRPL12(-196.6kb)|NPLOC4(-50.08kb)|OXLD1(-158.2kb)|PDE6G(-143.7kb)|TMEM105(+169.4kb)|TSPAN10(-135.5kb)
10:70381554	10	70381554	A	?	8	8.404e-05	0.0001316	0.7461	0.7473	0.4145	1.95	0.332	0.6756	0.9988	0.9125	0.875	0.6688	NA	0.3329	0.6955	rs34023346	CCAR1(-99.42kb)|DNA2(+149.7kb)|SLC25A16(+94.27kb)|SNORD98(-133.4kb)|TET1(0)
12:28911856	12	28911856	C	?	9	8.411e-05	8.411e-05	0.7493	0.7493	0.6129	0	0.9456	0.6806	1.25	0.8626	0.7191	0.8226	0.6188	0.2408	0.7659	rs6487701	.
5:167680532	5	167680532	A	?	9	8.424e-05	8.424e-05	1.3402	1.3402	0.5307	0	1.124	1.486	0.9083	1.298	1.414	0.5252	1.177	6.949	1.292	rs35960642	TENM2(0)|WWC1(-38.53kb)
3:188459856	3	188459856	C	?	9	8.428e-05	8.428e-05	0.6142	0.6142	0.6855	0	0.2695	0.5952	0.4166	0.5569	0.6387	1.726	1.323	1.458	0.8171	rs9880140	LPP(0)
16:78682036	16	78682036	C	?	9	8.436e-05	8.436e-05	1.335	1.335	0.5602	0	3.683	1.314	1.576	1.385	1.429	0.643	1.322	0.9772	1.079	rs2548843	WWOX(0)
3:35973181	3	35973181	A	?	6	8.438e-05	8.438e-05	0.4409	0.4409	0.6876	0	NA	0.62	0.3163	0.242	0.3786	0.0814	NA	NA	0.3849	rs76486833	ARPP21(+137.2kb)|MIR128-2(+187.1kb)
6:25669525	6	25669525	A	?	9	8.487e-05	0.001532	0.6795	0.6978	0.3397	11.41	0.8301	0.5502	1.029	0.9222	0.7858	0.1204	0.281	2.745	0.6856	rs2876691	HIST1H2AA(-56.76kb)|HIST1H2APS1(-63.14kb)|HIST1H2BA(-57.61kb)|LRRC16A(+48.77kb)|SCGN(0)|SLC17A1(-113.6kb)|SLC17A3(-175.8kb)|SLC17A4(-85.4kb)
6:25669669	6	25669669	A	?	9	8.487e-05	0.001532	0.6795	0.6978	0.3397	11.41	0.8301	0.5502	1.029	0.9222	0.7858	0.1204	0.281	2.745	0.6856	rs2328891	HIST1H2AA(-56.62kb)|HIST1H2APS1(-62.99kb)|HIST1H2BA(-57.47kb)|LRRC16A(+48.91kb)|SCGN(0)|SLC17A1(-113.5kb)|SLC17A3(-175.7kb)|SLC17A4(-85.26kb)
11:131069405	11	131069405	A	?	7	8.496e-05	0.0004645	0.4927	0.4598	0.2499	23.49	0.1549	0.7416	0.2791	0.4957	0.7808	NA	0.2673	NA	0.2917	rs77400604	NTM(-171kb)
7:90112455	7	90112455	T	?	8	8.504e-05	8.504e-05	0.6056	0.6056	0.8779	0	0.2535	0.6902	0.5143	0.6474	0.6432	0.3302	0.2411	NA	0.5298	rs17867676	C7orf63(+172.1kb)|CLDN12(+67.19kb)|GTPBP10(+91.69kb)|LOC101409256(+84.9kb)
14:95723296	14	95723296	G	?	8	8.506e-05	8.506e-05	0.5967	0.5967	0.7992	0	1.266	0.4906	0.716	0.584	0.6862	NA	0.3174	0.3459	0.7528	rs10132494	CLMN(0)|DICER1(+99.54kb)|DICER1-AS1(+77.03kb)|LINC00341(-150.3kb)|MIR3173(+119kb)|SYNE3(-160.5kb)
13:35005448	13	35005448	A	?	8	8.522e-05	0.03275	0.6218	0.6737	0.1137	39.77	7.295	0.5198	0.4603	0.487	0.6218	0.6774	3.028	NA	1.024	rs74048731	LINC00457(-4.142kb)
11:121452651	11	121452651	A	?	9	8.533e-05	0.002186	1.4186	1.4036	0.2477	21.97	3.711	1.579	1.13	1.545	1.752	1.922	1.353	0.6245	0.9216	rs11218350	SORL1(0)
20:9486835	20	9486835	G	?	6	8.537e-05	8.537e-05	0.4993	0.4993	0.6676	0	NA	0.4956	0.5573	0.2976	0.5208	0.086	NA	NA	0.8034	rs57439205	LAMP5(-8.169kb)|PAK7(-31.2kb)|PLCB4(+25.37kb)
2:186408664	2	186408664	C	?	8	8.538e-05	0.008006	0.5411	0.549	0.1856	30.37	0.2032	0.4088	2029000	0.6681	0.6598	0.1858	0.1101	NA	1.16	rs72904250	FSIP2(-194.7kb)
17:79479808	17	79479808	C	?	7	8.644e-05	8.644e-05	0.6782	0.6782	0.8013	0	0.6724	0.6433	0.6603	0.8042	0.7459	NA	0.9575	0.2169	NA	rs7503278	ACTG1(0)|ARL16(-168.4kb)|BAHCC1(+46.45kb)|C17orf70(-27.1kb)|CCDC137(-154kb)|FSCN2(-15.61kb)|HGS(-171.2kb)|LINC00482(+196.8kb)|LOC100130370(+120.6kb)|MIR3186(+61.59kb)|MIR4740(+105.2kb)|MRPL12(-190.6kb)|NPLOC4(-44.1kb)|OXLD1(-152.3kb)|PDE6G(-137.7kb)|SLC25A10(-199.5kb)|TMEM105(+175.3kb)|TSPAN10(-129.5kb)
2:178036218	2	178036218	A	?	8	8.656e-05	0.001241	0.4688	0.4724	0.2933	17.32	0.2097	0.433	0.2249	0.4512	0.9949	NA	22.07	0.217	0.6316	rs79112004	HNRNPA3(-41.2kb)|LOC100130691(-112kb)|MIR3128(-84.45kb)|MIR4444-1(-41.24kb)|NFE2L2(-58.81kb)
1:64828015	1	64828015	A	?	9	8.662e-05	0.003254	1.3488	1.3228	0.2529	21.39	0.5948	1.36	1.422	1.224	2.016	0.9951	1.016	0.745	1.218	rs1496028	CACHD1(-108.5kb)|ROR1(+180.8kb)|UBE2U(+118kb)
10:115786611	10	115786611	T	?	9	8.744e-05	8.744e-05	0.6609	0.6609	0.696	0	0.4971	0.7516	1.144	0.6387	0.5492	1.425	0.8416	0.4055	0.4637	rs72823015	ADRB1(-17.19kb)|C10orf118(-95.36kb)|DCLRE1A(+172.4kb)|MIR2110(-147.3kb)|NHLRC2(+114.3kb)|TDRD1(-152.4kb)
10:115788111	10	115788111	C	?	9	8.744e-05	8.744e-05	0.6609	0.6609	0.696	0	0.4971	0.7516	1.144	0.6387	0.5492	1.425	0.8416	0.4055	0.4637	rs72823016	ADRB1(-15.69kb)|C10orf118(-93.86kb)|DCLRE1A(+173.9kb)|MIR2110(-145.8kb)|NHLRC2(+115.8kb)|TDRD1(-150.9kb)
5:172246241	5	172246241	A	?	9	8.752e-05	8.752e-05	0.7335	0.7335	0.9354	0	0.816	0.7102	0.6749	0.9402	0.7308	0.347	0.4878	0.8099	0.7789	rs793003	ATP6V0E1(-164.5kb)|DUSP1(+48.04kb)|ERGIC1(-14.98kb)|LOC100268168(-135.5kb)|NEURL1B(+127.7kb)|RPL26L1(-140.2kb)
5:172246457	5	172246457	T	?	9	8.752e-05	8.752e-05	0.7335	0.7335	0.9354	0	0.816	0.7102	0.6749	0.9402	0.7308	0.347	0.4878	0.8099	0.7789	rs2291044	ATP6V0E1(-164.3kb)|DUSP1(+48.25kb)|ERGIC1(-14.76kb)|LOC100268168(-135.3kb)|NEURL1B(+127.9kb)|RPL26L1(-140kb)
15:44243773	15	44243773	C	?	6	8.761e-05	0.01585	0.4088	0.4646	0.1562	37.5	NA	0.2778	0.6562	1.063	1.207	NA	0.3935	NA	0.2227	rs115782822	ELL3(+174.3kb)|FRMD5(0)|HYPK(+149kb)|MFAP1(+126.8kb)|MIR1282(+157.8kb)|PDIA3(+179kb)|PIN4P1(+73.4kb)|SERF2(+155.5kb)|SERF2-C15ORF63(+149kb)|SERINC4(+151.5kb)|WDR76(+83.16kb)
9:108154824	9	108154824	T	?	6	8.804e-05	8.804e-05	3.0934	3.0934	0.6874	0	NA	2.113	2.159	2.576	2.9	16.04	NA	NA	7.19	rs2771029	FKTN(-165.6kb)|FSD1L(-55.49kb)|SLC44A1(+1.142kb)
1:64800026	1	64800026	A	?	9	8.815e-05	8.815e-05	0.7499	0.7499	0.5513	0	1.216	0.8675	0.6762	0.5357	0.6189	0.6951	0.6582	1.001	0.7562	rs12407651	CACHD1(-136.4kb)|ROR1(+152.8kb)|UBE2U(+90kb)
1:64800345	1	64800345	T	?	9	8.815e-05	8.815e-05	0.7499	0.7499	0.5513	0	1.216	0.8675	0.6762	0.5357	0.6189	0.6951	0.6582	1.001	0.7562	rs5004243	CACHD1(-136.1kb)|ROR1(+153.2kb)|UBE2U(+90.32kb)
1:64800456	1	64800456	C	?	9	8.815e-05	8.815e-05	0.7499	0.7499	0.5513	0	1.216	0.8675	0.6762	0.5357	0.6189	0.6951	0.6582	1.001	0.7562	rs5004244	CACHD1(-136kb)|ROR1(+153.3kb)|UBE2U(+90.43kb)
1:64800486	1	64800486	G	?	9	8.815e-05	8.815e-05	0.7499	0.7499	0.5513	0	1.216	0.8675	0.6762	0.5357	0.6189	0.6951	0.6582	1.001	0.7562	rs5004245	CACHD1(-136kb)|ROR1(+153.3kb)|UBE2U(+90.46kb)
1:64800585	1	64800585	C	?	9	8.815e-05	8.815e-05	0.7499	0.7499	0.5513	0	1.216	0.8675	0.6762	0.5357	0.6189	0.6951	0.6582	1.001	0.7562	rs1390479	CACHD1(-135.9kb)|ROR1(+153.4kb)|UBE2U(+90.56kb)
1:64800647	1	64800647	C	?	9	8.815e-05	8.815e-05	0.7499	0.7499	0.5513	0	1.216	0.8675	0.6762	0.5357	0.6189	0.6951	0.6582	1.001	0.7562	rs1390477	CACHD1(-135.8kb)|ROR1(+153.5kb)|UBE2U(+90.62kb)
1:64800659	1	64800659	C	?	9	8.815e-05	8.815e-05	0.7499	0.7499	0.5513	0	1.216	0.8675	0.6762	0.5357	0.6189	0.6951	0.6582	1.001	0.7562	rs1390476	CACHD1(-135.8kb)|ROR1(+153.5kb)|UBE2U(+90.63kb)
4:7125190	4	7125190	T	?	8	8.828e-05	8.828e-05	0.6286	0.6286	0.6713	0	0.5708	0.6292	0.8965	0.5213	0.507	0.0205	0.8036	NA	0.838	rs78683877	CCDC96(+80.46kb)|FLJ36777(+20.09kb)|GRPEL1(+55.39kb)|LOC100129931(+77.23kb)|MIR4798(-187kb)|SORCS2(-69.18kb)|TADA2B(+65.51kb)|TBC1D14(+90.34kb)
4:7116330	4	7116330	A	?	8	8.847e-05	8.847e-05	0.6604	0.6604	0.8971	0	0.5716	0.6308	0.8226	0.6397	0.6704	2.056	1.148	NA	0.5667	rs62291199	CCDC96(+71.6kb)|FLJ36777(+11.23kb)|GRPEL1(+46.53kb)|LOC100129931(+68.37kb)|MIR4798(-195.8kb)|SORCS2(-78.04kb)|TADA2B(+56.65kb)|TBC1D14(+81.48kb)
3:99683653	3	99683653	G	?	8	8.866e-05	0.0005892	0.6951	0.705	0.3712	7.63	1.28	0.6407	0.9843	1.127	0.5932	1.497	0.9923	NA	0.5343	rs73138610	CMSS1(0)|COL8A1(+168.1kb)|FILIP1L(0)|MIR548G(0)|MIR3921(+0.411kb)
16:17207606	16	17207606	C	?	7	8.881e-05	8.881e-05	0.4921	0.4921	0.4366	0	NA	0.567	0.7938	0.31	0.6558	0.1095	NA	0.0032	0.3305	rs75875949	XYLT1(0)
3:187814477	3	187814477	G	?	9	8.895e-05	8.895e-05	0.724	0.724	0.8235	0	0.9467	0.6781	1.04	0.9553	0.6225	0.392	0.7896	0.7361	0.7118	rs7651169	FLJ42393(-81.85kb)|LPP(-57.18kb)|LPP-AS2(-54.52kb)
12:103851111	12	103851111	C	?	8	8.901e-05	0.004711	1.548	1.502	0.2104	27.33	0.5735	1.813	0.912	1.434	1.232	1.744	0.8949	NA	2.708	rs1879619	C12orf42(0)|STAB2(-130kb)
12:103851528	12	103851528	C	?	8	8.901e-05	0.004711	1.548	1.502	0.2104	27.33	0.5735	1.813	0.912	1.434	1.232	1.744	0.8949	NA	2.708	rs11111589	C12orf42(0)|STAB2(-129.5kb)
6:25647354	6	25647354	T	?	9	8.919e-05	8.919e-05	0.6825	0.6825	0.6192	0	0.8301	0.5883	0.9064	0.8036	0.7832	0.131	0.281	2.521	0.7058	rs1923027	HIST1H2AA(-78.94kb)|HIST1H2APS1(-85.31kb)|HIST1H2BA(-79.78kb)|LRRC16A(+26.6kb)|SCGN(-5.074kb)|SLC17A1(-135.8kb)|SLC17A3(-198kb)|SLC17A4(-107.6kb)
12:132401338	12	132401338	T	?	7	8.93e-05	8.93e-05	0.4927	0.4927	0.9838	0	0.5741	0.4831	0.423	0.4836	0.509	0.2176	1.085	NA	NA	rs116159234	EP400(-33.13kb)|EP400NL(-167.5kb)|MMP17(+65.02kb)|PUS1(-12.41kb)|SFSWAP(+117.1kb)|SNORA49(-114.4kb)|ULK1(0)
15:64313031	15	64313031	C	?	8	8.954e-05	8.954e-05	0.4409	0.4409	0.6908	0	0.1287	0.461	0.2638	0.5429	0.3893	NA	0.4264	0.2991	1.307	rs72755013	CSNK1G1(-144.7kb)|DAPK2(0)|FAM96A(-51.73kb)|HERC1(+186.9kb)|PPIB(-135kb)|SNX1(-75.05kb)|SNX22(-130.9kb)
12:28908390	12	28908390	T	?	9	8.959e-05	8.959e-05	0.7501	0.7501	0.5872	0	0.9456	0.6806	1.279	0.8626	0.7191	0.8226	0.6188	0.2408	0.7659	rs34143264	.
1:64797745	1	64797745	A	?	9	8.979e-05	8.979e-05	0.7502	0.7502	0.5469	0	1.216	0.8675	0.6762	0.5357	0.6189	0.6933	0.6582	1.026	0.7562	rs1496015	CACHD1(-138.7kb)|ROR1(+150.6kb)|UBE2U(+87.72kb)
13:34993991	13	34993991	C	?	8	9.033e-05	0.03801	0.6242	0.6786	0.1051	41	7.295	0.5205	0.4603	0.487	0.6218	0.6774	2.927	NA	1.053	rs942593	LINC00457(-15.6kb)
4:175884818	4	175884818	A	?	9	9.041e-05	9.041e-05	1.3498	1.3498	0.5778	0	0.9887	1.269	1.995	1.051	1.595	3.305	1.629	0.8059	1.31	rs3924572	ADAM29(0)|GLRA3(+134.4kb)
7:114846807	7	114846807	T	?	9	9.043e-05	9.043e-05	0.7542	0.7542	0.663	0	0.9584	0.7409	0.7649	0.4976	0.8791	0.7059	0.6503	1.543	0.8096	rs57077008	MDFIC(+186.8kb)
6:114584799	6	114584799	T	?	8	9.062e-05	9.062e-05	0.4827	0.4827	0.4656	0	0.1108	0.4336	0.1418	0.829	0.5383	0.4856	NA	0.3002	0.6844	rs74760381	.
7:157130424	7	157130424	A	?	6	9.079e-05	0.001372	0.4452	0.4486	0.2711	21.61	NA	0.3698	0.2092	0.3284	1.016	2.027	NA	NA	0.3267	rs117192636	DNAJB6(0)|UBE3C(+68.36kb)
7:157132169	7	157132169	C	?	6	9.079e-05	0.001372	0.4452	0.4486	0.2711	21.61	NA	0.3698	0.2092	0.3284	1.016	2.027	NA	NA	0.3267	rs145095126	DNAJB6(0)|PTPRN2(-199.6kb)|UBE3C(+70.1kb)
2:99739203	2	99739203	A	?	9	9.086e-05	9.086e-05	0.6278	0.6278	0.8093	0	0.6829	0.6249	0.5063	0.6827	0.6521	2.289	1.643	0.2956	0.5414	rs75139387	C2orf15(-18.98kb)|KIAA1211L(+186.5kb)|LIPT1(-32.21kb)|LYG1(-161.5kb)|LYG2(-119.5kb)|MITD1(-46.52kb)|MRPL30(-58.34kb)|TSGA10(0)|TXNDC9(-196.3kb)
4:4032338	4	4032338	A	?	8	9.112e-05	9.112e-05	0.6793	0.6793	0.9817	0	0.6796	0.6817	0.6548	0.7581	0.5454	NA	0.8663	0.7937	0.7588	rs60786742	FAM86EP(+75.19kb)|OTOP1(-158.2kb)
12:103837056	12	103837056	T	?	8	9.118e-05	0.005067	1.5481	1.5017	0.2049	27.99	0.5735	1.812	0.912	1.434	1.232	1.744	0.8949	NA	2.739	rs7139422	C12orf42(0)|STAB2(-144kb)
12:103837154	12	103837154	C	?	8	9.118e-05	0.005067	1.5481	1.5017	0.2049	27.99	0.5735	1.812	0.912	1.434	1.232	1.744	0.8949	NA	2.739	rs7310675	C12orf42(0)|STAB2(-143.9kb)
3:68336895	3	68336895	T	?	9	9.19e-05	9.19e-05	0.4229	0.4229	0.8051	0	1.129	0.3323	0.4664	0.1656	0.6602	0.2267	1.854	0.1125	0.4758	rs115994329	FAM19A1(0)
1:64787990	1	64787990	G	?	9	9.202e-05	9.202e-05	0.7508	0.7508	0.5494	0	1.216	0.8692	0.6716	0.5415	0.6189	0.6933	0.6582	1.026	0.7562	rs12025846	CACHD1(-148.5kb)|ROR1(+140.8kb)|UBE2U(+77.96kb)
13:35000887	13	35000887	T	?	8	9.213e-05	0.0377	0.6245	0.6784	0.1057	40.91	7.295	0.5207	0.4603	0.487	0.6218	0.6774	2.927	NA	1.051	rs12428278	LINC00457(-8.703kb)
4:7125109	4	7125109	A	?	8	9.24e-05	9.24e-05	0.6179	0.6179	0.9071	0	0.5708	0.6277	0.7588	0.4608	0.4949	0.2193	0.8036	NA	0.8571	rs115739257	CCDC96(+80.38kb)|FLJ36777(+20.01kb)|GRPEL1(+55.31kb)|LOC100129931(+77.15kb)|MIR4798(-187.1kb)|SORCS2(-69.26kb)|TADA2B(+65.43kb)|TBC1D14(+90.26kb)
6:25605840	6	25605840	A	?	6	9.265e-05	9.265e-05	0.4557	0.4557	0.9064	0	NA	0.392	0.4918	0.9817	0.4724	0.2867	NA	NA	0.4644	rs62393679	HIST1H2AA(-120.4kb)|HIST1H2APS1(-126.8kb)|HIST1H2BA(-121.3kb)|LRRC16A(0)|SCGN(-46.59kb)|SLC17A1(-177.3kb)|SLC17A4(-149.1kb)
12:103799099	12	103799099	G	?	8	9.278e-05	0.001313	1.5459	1.5184	0.3025	16.2	0.5735	1.783	0.912	1.434	1.289	1.872	0.8949	NA	2.553	rs10860994	C12orf42(0)|STAB2(-182kb)
12:103799467	12	103799467	C	?	8	9.278e-05	0.001313	1.5459	1.5184	0.3025	16.2	0.5735	1.783	0.912	1.434	1.289	1.872	0.8949	NA	2.553	rs2374066	C12orf42(0)|STAB2(-181.6kb)
4:7116787	4	7116787	G	?	8	9.286e-05	9.286e-05	0.6612	0.6612	0.8927	0	0.5716	0.6308	0.8383	0.6397	0.6704	2.056	1.148	NA	0.5667	rs28569016	CCDC96(+72.06kb)|FLJ36777(+11.68kb)|GRPEL1(+46.99kb)|LOC100129931(+68.83kb)|MIR4798(-195.4kb)|SORCS2(-77.59kb)|TADA2B(+57.11kb)|TBC1D14(+81.94kb)
3:188451890	3	188451890	G	?	8	9.288e-05	9.288e-05	0.5726	0.5726	0.7342	0	0.2861	0.52	0.4283	0.6502	0.6022	NA	1.435	0.7861	0.7414	rs55687235	LPP(0)
5:163420722	5	163420722	G	?	9	9.304e-05	9.304e-05	0.698	0.698	0.4887	0	0.3355	0.7816	0.5307	0.682	0.8024	0.1242	0.3288	0.4899	0.7352	rs6867656	.
11:121483651	11	121483651	G	?	9	9.319e-05	9.319e-05	1.3652	1.3652	0.5898	0	2.06	1.468	0.9759	1.547	1.594	1.14	0.9352	0.572	1.151	rs1010158	SORL1(0)
2:45718322	2	45718322	A	?	9	9.322e-05	9.322e-05	1.5117	1.5117	0.6631	0	1.508	1.73	1.517	1.126	1.59	17.08	1.038	2.69	1.307	rs7584995	PRKCE(-160.7kb)|SRBD1(0)
13:94161019	13	94161019	A	?	8	9.334e-05	0.001489	1.9587	2.2287	0.1603	33.54	2.339	1.346	8.139	2.659	2.512	31.95	0.3261	NA	2.738	rs77256648	GPC6(0)
9:83112682	9	83112682	A	?	9	9.351e-05	9.351e-05	0.7249	0.7249	0.705	0	0.9352	0.7714	0.5365	0.8128	0.6414	2.188	0.3374	1.22	0.7496	rs13295958	.
10:128139066	10	128139066	G	?	9	9.382e-05	0.002058	1.422	1.4814	0.1653	31.6	0.9084	1.403	3.274	2.106	1.002	2.799	1.322	6.133	1.563	rs6597770	ADAM12(+61.94kb)|C10orf90(0)|LINC00601(+28.62kb)
1:64789617	1	64789617	A	?	9	9.4e-05	9.4e-05	0.7509	0.7509	0.5418	0	1.216	0.8692	0.6762	0.5357	0.6189	0.6933	0.6582	1.026	0.7562	rs10493356	CACHD1(-146.9kb)|ROR1(+142.4kb)|UBE2U(+79.59kb)
1:64789908	1	64789908	G	?	9	9.4e-05	9.4e-05	0.7509	0.7509	0.5418	0	1.216	0.8692	0.6762	0.5357	0.6189	0.6933	0.6582	1.026	0.7562	rs10493357	CACHD1(-146.6kb)|ROR1(+142.7kb)|UBE2U(+79.88kb)
1:64793422	1	64793422	C	?	9	9.4e-05	9.4e-05	0.7509	0.7509	0.5418	0	1.216	0.8692	0.6762	0.5357	0.6189	0.6933	0.6582	1.026	0.7562	rs11208422	CACHD1(-143.1kb)|ROR1(+146.2kb)|UBE2U(+83.4kb)
1:64794749	1	64794749	C	?	9	9.4e-05	9.4e-05	0.7509	0.7509	0.5418	0	1.216	0.8692	0.6762	0.5357	0.6189	0.6933	0.6582	1.026	0.7562	rs10889476	CACHD1(-141.7kb)|ROR1(+147.6kb)|UBE2U(+84.72kb)
1:64796202	1	64796202	G	?	9	9.4e-05	9.4e-05	0.7509	0.7509	0.5418	0	1.216	0.8692	0.6762	0.5357	0.6189	0.6933	0.6582	1.026	0.7562	rs61784470	CACHD1(-140.3kb)|ROR1(+149kb)|UBE2U(+86.18kb)
1:64796824	1	64796824	G	?	9	9.4e-05	9.4e-05	0.7509	0.7509	0.5418	0	1.216	0.8692	0.6762	0.5357	0.6189	0.6933	0.6582	1.026	0.7562	rs2029869	CACHD1(-139.7kb)|ROR1(+149.6kb)|UBE2U(+86.8kb)
11:68998788	11	68998788	T	?	8	9.425e-05	0.0006212	1.3463	1.3516	0.3226	13.74	0.5809	1.28	1.593	1.604	1.469	12.76	1.217	NA	1.275	rs7950547	MYEOV(-62.83kb)|TPCN2(+140.7kb)
5:167675922	5	167675922	A	?	9	9.436e-05	9.436e-05	1.3361	1.3361	0.5736	0	1.124	1.444	0.9083	1.299	1.378	0.5243	1.177	7.024	1.389	rs2112554	TENM2(0)|WWC1(-43.14kb)
3:99850212	3	99850212	T	?	8	9.446e-05	9.446e-05	0.7062	0.7062	0.7675	0	1.007	0.6574	1.022	0.9749	0.6967	0.6528	0.7551	NA	0.5587	rs9854260	CMSS1(0)|FILIP1L(+16.86kb)|MIR548G(+133.2kb)|MIR3921(+167kb)|TBC1D23(-129.4kb)|TMEM30C(-54.46kb)
3:99787011	3	99787011	C	?	8	9.474e-05	9.474e-05	0.7126	0.7126	0.4662	0	1.197	0.6367	0.9662	1.135	0.6318	1.396	0.6613	NA	0.6333	rs1017968	CMSS1(0)|FILIP1L(0)|MIR548G(+69.95kb)|MIR3921(+103.8kb)|TBC1D23(-192.6kb)|TMEM30C(-117.7kb)
3:99790332	3	99790332	C	?	8	9.474e-05	9.474e-05	0.7126	0.7126	0.4662	0	1.197	0.6367	0.9662	1.135	0.6318	1.396	0.6613	NA	0.6333	rs7620228	CMSS1(0)|FILIP1L(0)|MIR548G(+73.27kb)|MIR3921(+107.1kb)|TBC1D23(-189.3kb)|TMEM30C(-114.3kb)
8:123149668	8	123149668	T	?	6	9.499e-05	9.499e-05	0.4013	0.4013	0.64	0	NA	0.4864	2775000	NA	0.2498	135.4	NA	0.1172	0.3884	rs117396871	.
19:45078381	19	45078381	T	?	9	9.511e-05	9.511e-05	0.6905	0.6905	0.813	0	0.4477	0.706	0.9131	0.6184	0.7291	1.135	0.7749	3.141	0.5682	rs12978619	BCL3(-173.6kb)|CEACAM16(-124kb)|CEACAM19(-96.34kb)|CEACAM20(+44.83kb)|CEACAM22P(+18.23kb)|IGSF23(-38.56kb)|MIR4531(-78.57kb)|PVR(-68.72kb)|ZNF180(+73.81kb)|ZNF229(+125.6kb)|ZNF285(+172.6kb)
10:59536096	10	59536096	C	?	6	9.58e-05	0.01106	0.3806	0.4257	0.1945	32.16	NA	0.2793	0.2629	0.2674	0.3961	NA	1.045	NA	2.065	rs117339906	.
11:68975524	11	68975524	T	?	8	9.584e-05	0.0009449	1.3451	1.3547	0.284	18.44	0.5448	1.26	1.551	1.635	1.434	12.76	1.381	NA	1.341	rs7926098	MRGPRF(+194.7kb)|MYEOV(-86.1kb)|TPCN2(+117.5kb)
11:121443037	11	121443037	G	?	9	9.631e-05	9.631e-05	1.338	1.338	0.7158	0	1.478	1.455	1.168	1.387	1.411	3.185	0.6886	0.9179	1.164	rs924746	SORL1(0)
3:68443065	3	68443065	A	?	9	9.638e-05	9.638e-05	0.4516	0.4516	0.6013	0	0.3461	0.3126	0.3321	0.403	0.9168	0.129	3.819	0.2514	0.5008	rs9868923	FAM19A1(0)
14:95723892	14	95723892	C	?	8	9.658e-05	9.658e-05	0.5984	0.5984	0.7733	0	1.266	0.4906	0.716	0.5559	0.7312	NA	0.3174	0.3459	0.7528	rs111919456	CLMN(0)|DICER1(+100.1kb)|DICER1-AS1(+77.62kb)|LINC00341(-149.7kb)|MIR3173(+119.6kb)|SYNE3(-159.9kb)
20:59686849	20	59686849	C	?	6	9.705e-05	9.705e-05	3.2412	3.2412	0.8896	0	NA	2.668	2241000	2.177	NA	2.752	13.27	NA	4.518	rs117066246	CDH4(-140.6kb)
20:59686850	20	59686850	T	?	6	9.705e-05	9.705e-05	3.2412	3.2412	0.8896	0	NA	2.668	2241000	2.177	NA	2.752	13.27	NA	4.518	rs118028810	CDH4(-140.6kb)
1:64787327	1	64787327	A	?	9	9.737e-05	9.737e-05	0.7516	0.7516	0.5432	0	1.216	0.8713	0.6716	0.5415	0.6189	0.6933	0.6582	1.026	0.7562	rs12127472	CACHD1(-149.1kb)|ROR1(+140.1kb)|UBE2U(+77.3kb)
12:103800360	12	103800360	G	?	8	9.743e-05	0.001316	1.5439	1.5164	0.3052	15.87	0.5735	1.783	0.912	1.434	1.289	1.749	0.8949	NA	2.553	rs1317388	C12orf42(0)|STAB2(-180.7kb)
3:68479852	3	68479852	C	?	9	9.756e-05	9.756e-05	0.4391	0.4391	0.6254	0	0.3461	0.3917	0.5666	0.1581	0.5243	0.129	3.885	0.1851	0.537	rs1510357	FAM19A1(0)
3:52844733	3	52844733	T	?	9	9.78e-05	0.01002	0.6516	0.6835	0.1978	27.73	3.849	0.6554	0.7817	0.6776	0.6267	3.203	1.465	0.9508	0.4018	rs11717749	GLT8D1(+104.6kb)|GNL3(+116.2kb)|ITIH1(+18.65kb)|ITIH3(+1.708kb)|ITIH4(-2.272kb)|MUSTN1(-22.4kb)|NEK4(+39.77kb)|PBRM1(+124.9kb)|SFMBT1(-92.85kb)|SNORD19(+121.4kb)|SNORD19B(+119.9kb)|SNORD69(+117.9kb)|SPCS1(+102.5kb)|TMEM110(-26.04kb)|TMEM110-MUSTN1(-22.4kb)
5:120175795	5	120175795	A	?	6	9.844e-05	9.844e-05	0.3716	0.3716	0.6662	0	NA	0.2783	3807000	0.3197	0.3578	NA	1.745	NA	0.7114	rs13436012	PRR16(+152.8kb)
5:120177313	5	120177313	A	?	6	9.844e-05	9.844e-05	0.3716	0.3716	0.6662	0	NA	0.2783	3807000	0.3197	0.3578	NA	1.745	NA	0.7114	rs76809546	PRR16(+154.3kb)
5:120177396	5	120177396	T	?	6	9.844e-05	9.844e-05	0.3716	0.3716	0.6662	0	NA	0.2783	3807000	0.3197	0.3578	NA	1.745	NA	0.7114	rs80164965	PRR16(+154.4kb)
5:120178349	5	120178349	C	?	6	9.844e-05	9.844e-05	0.3716	0.3716	0.6662	0	NA	0.2783	3807000	0.3197	0.3578	NA	1.745	NA	0.7114	rs10067493	PRR16(+155.4kb)
5:120178351	5	120178351	T	?	6	9.844e-05	9.844e-05	0.3716	0.3716	0.6662	0	NA	0.2783	3807000	0.3197	0.3578	NA	1.745	NA	0.7114	rs10074366	PRR16(+155.4kb)
5:120180382	5	120180382	A	?	6	9.844e-05	9.844e-05	0.3716	0.3716	0.6662	0	NA	0.2783	3807000	0.3197	0.3578	NA	1.745	NA	0.7114	rs10063730	PRR16(+157.4kb)
5:120181946	5	120181946	G	?	6	9.844e-05	9.844e-05	0.3716	0.3716	0.6662	0	NA	0.2783	3807000	0.3197	0.3578	NA	1.745	NA	0.7114	rs28404957	PRR16(+159kb)
5:120184838	5	120184838	T	?	6	9.844e-05	9.844e-05	0.3716	0.3716	0.6662	0	NA	0.2783	3807000	0.3197	0.3578	NA	1.745	NA	0.7114	rs10072603	PRR16(+161.9kb)
5:120185523	5	120185523	T	?	6	9.844e-05	9.844e-05	0.3716	0.3716	0.6662	0	NA	0.2783	3807000	0.3197	0.3578	NA	1.745	NA	0.7114	rs10052726	PRR16(+162.6kb)
5:120185993	5	120185993	C	?	6	9.844e-05	9.844e-05	0.3716	0.3716	0.6662	0	NA	0.2783	3807000	0.3197	0.3578	NA	1.745	NA	0.7114	rs115221301	PRR16(+163kb)
5:120188424	5	120188424	C	?	6	9.844e-05	9.844e-05	0.3716	0.3716	0.6662	0	NA	0.2783	3807000	0.3197	0.3578	NA	1.745	NA	0.7114	rs76041273	PRR16(+165.5kb)
5:120189918	5	120189918	G	?	6	9.844e-05	9.844e-05	0.3716	0.3716	0.6662	0	NA	0.2783	3807000	0.3197	0.3578	NA	1.745	NA	0.7114	rs79518397	PRR16(+167kb)
14:45965098	14	45965098	A	?	9	9.846e-05	0.1337	0.753	0.8163	0.0148	57.92	0.9433	0.6359	0.7401	1.465	0.5507	1.726	0.7325	0.5084	1.078	rs10132155	.
9:108158268	9	108158268	A	?	6	9.85e-05	9.85e-05	3.0031	3.0031	0.4941	0	NA	1.828	2.659	2.694	3.129	2.896	NA	NA	8.236	rs76786444	FKTN(-162.1kb)|FSD1L(-52.05kb)|SLC44A1(+4.586kb)
4:87780943	4	87780943	A	?	6	9.918e-05	9.918e-05	0.3224	0.3224	0.7593	0	0.0974	0.2568	2213000	NA	0.4924	1.198	NA	NA	0.4605	rs111297928	AFF1(-75.21kb)|C4orf36(-16.41kb)|LOC100506746(-65.1kb)|PTPN13(+44.62kb)|SLC10A6(+10.53kb)
12:103840541	12	103840541	G	?	8	9.92e-05	0.00487	1.5448	1.5008	0.2107	27.29	0.5735	1.798	0.912	1.434	1.232	1.744	0.9007	NA	2.739	rs11111584	C12orf42(0)|STAB2(-140.5kb)
12:103850017	12	103850017	A	?	8	9.92e-05	0.00487	1.5448	1.5008	0.2107	27.29	0.5735	1.798	0.912	1.434	1.232	1.744	0.9007	NA	2.739	rs12304113	C12orf42(0)|STAB2(-131.1kb)
3:143904930	3	143904930	A	?	9	9.92e-05	9.92e-05	1.3415	1.3415	0.5074	0	1.144	1.219	1.843	1.055	1.512	0.9756	0.8535	1.271	1.787	rs35752283	C3orf58(+193.7kb)
