# Supplementary material for: Multiomics integrative analysis identifies APOE allele-specific blood biomarkers associated to Alzheimer’s disease etiopathogenesis
Source: Aging (Albany NY). 2021 Apr 12;13(7):9277–329. doi: 10.18632/aging.202950 (PMC8064208; doi:10.18632/aging.202950)
Supplement: Supplementary Table 12 [file aging-13-202950-s014.xlsx]

## Sheet: Sheet1
Supplementary Table 12. APOE and sex stratified analysis: APOE2 females meta-analysis results (p<10-4).
SNP	CHR	BP	A1	A2	N	P	P.R.	OR	OR.R.	Q	I	F0	F1	F2	F3	F4	F5	F6	F7	F8	RS	ANNOT
14:73703747	14	73703747	C	?	6	1.773e-06	1.773e-06	2.2024	2.2024	0.9703	0	NA	NA	2.582	NA	2.492	1.674	1.693	1.847	2.15	rs177408	NUMB(-38.17kb)|PAPLN(-0.457kb)|PSEN1(+13.35kb)|RBM25(+115.7kb)
14:73708754	14	73708754	T	?	6	2.036e-06	2.036e-06	2.1904	2.1904	0.9635	0	NA	NA	2.61	NA	2.492	1.674	1.633	1.847	2.079	rs177407	NUMB(-33.16kb)|PAPLN(0)|PSEN1(+18.36kb)|RBM25(+120.7kb)
14:73683194	14	73683194	T	?	6	4.974e-06	1.407e-05	2.236	2.2276	0.3775	6.11	NA	NA	3.291	NA	3.423	1.142	5.387	1.454	2.115	rs177413	NUMB(-58.72kb)|PAPLN(-21.01kb)|PSEN1(0)|RBM25(+95.12kb)|ZFYVE1(+189.3kb)
14:73577012	14	73577012	G	?	6	6.086e-06	1.409e-05	2.2041	2.1988	0.384	5.09	NA	NA	3.291	NA	3.375	1.142	5.387	1.516	2.007	rs214290	DCAF4(+150.7kb)|NUMB(-164.9kb)|PAPLN(-127.2kb)|PSEN1(-26.13kb)|RBM25(0)|ZFYVE1(+83.09kb)
14:73581736	14	73581736	G	?	6	6.086e-06	1.409e-05	2.2041	2.1988	0.384	5.09	NA	NA	3.291	NA	3.375	1.142	5.387	1.516	2.007	rs165937	DCAF4(+155.4kb)|NUMB(-160.2kb)|PAPLN(-122.5kb)|PSEN1(-21.41kb)|RBM25(0)|ZFYVE1(+87.82kb)
14:73640638	14	73640638	A	?	6	6.218e-06	1.575e-05	2.2051	2.1993	0.3804	5.66	NA	NA	3.291	NA	3.423	1.142	5.387	1.516	2.007	rs214269	NUMB(-101.3kb)|PAPLN(-63.57kb)|PSEN1(0)|RBM25(+52.56kb)|ZFYVE1(+146.7kb)
14:73526613	14	73526613	A	?	6	7.365e-06	7.365e-06	2.1943	2.1943	0.4236	0	NA	NA	3.261	NA	3.331	1.179	5.387	1.516	2.007	rs2806049	DCAF4(+100.3kb)|DPF3(+165.8kb)|PAPLN(-177.6kb)|PSEN1(-76.53kb)|RBM25(0)|ZFYVE1(+32.69kb)
14:73532676	14	73532676	G	?	6	7.365e-06	7.365e-06	2.1943	2.1943	0.4236	0	NA	NA	3.261	NA	3.331	1.179	5.387	1.516	2.007	rs2806047	DCAF4(+106.3kb)|DPF3(+171.9kb)|PAPLN(-171.5kb)|PSEN1(-70.47kb)|RBM25(0)|ZFYVE1(+38.76kb)
14:73632670	14	73632670	G	?	6	7.401e-06	1.113e-05	2.191	2.1882	0.4007	2.45	NA	NA	3.291	NA	3.255	1.142	5.387	1.516	2.007	rs214271	NUMB(-109.2kb)|PAPLN(-71.53kb)|PSEN1(0)|RBM25(+44.59kb)|ZFYVE1(+138.8kb)
14:73662165	14	73662165	A	?	6	7.499e-06	2.022e-05	2.1954	2.1893	0.3769	6.2	NA	NA	3.291	NA	3.423	1.142	5.387	1.516	1.975	rs214262	NUMB(-79.75kb)|PAPLN(-42.04kb)|PSEN1(0)|RBM25(+74.09kb)|ZFYVE1(+168.2kb)
14:73586076	14	73586076	T	?	6	8.277e-06	2.159e-05	2.1873	2.1812	0.3777	6.07	NA	NA	3.291	NA	3.375	1.142	5.387	1.516	1.952	rs214287	DCAF4(+159.7kb)|NUMB(-155.8kb)|PAPLN(-118.1kb)|PSEN1(-17.07kb)|RBM25(0)|ZFYVE1(+92.16kb)
14:73604578	14	73604578	G	?	6	8.277e-06	2.159e-05	2.1873	2.1812	0.3777	6.07	NA	NA	3.291	NA	3.375	1.142	5.387	1.516	1.952	rs214279	DCAF4(+178.2kb)|NUMB(-137.3kb)|PAPLN(-99.63kb)|PSEN1(0)|RBM25(+16.5kb)|ZFYVE1(+110.7kb)
14:73615610	14	73615610	C	?	6	8.277e-06	2.159e-05	2.1873	2.1812	0.3777	6.07	NA	NA	3.291	NA	3.375	1.142	5.387	1.516	1.952	rs214274	DCAF4(+189.3kb)|NUMB(-126.3kb)|PAPLN(-88.59kb)|PSEN1(0)|RBM25(+27.53kb)|ZFYVE1(+121.7kb)
14:73616124	14	73616124	A	?	6	8.277e-06	2.159e-05	2.1873	2.1812	0.3777	6.07	NA	NA	3.291	NA	3.375	1.142	5.387	1.516	1.952	rs214273	DCAF4(+189.8kb)|NUMB(-125.8kb)|PAPLN(-88.08kb)|PSEN1(0)|RBM25(+28.05kb)|ZFYVE1(+122.2kb)
14:73662469	14	73662469	T	?	6	8.316e-06	3.467e-05	2.1833	2.1745	0.357	9.23	NA	NA	3.291	NA	3.423	1.122	5.387	1.516	1.975	rs214261	NUMB(-79.45kb)|PAPLN(-41.74kb)|PSEN1(0)|RBM25(+74.39kb)|ZFYVE1(+168.5kb)
14:73529094	14	73529094	G	?	8	8.542e-06	3.065e-05	2.1295	2.1287	0.3805	6.44	29.12	29.12	2.744	NA	3.008	1.047	5.387	1.516	1.968	rs2806048	DCAF4(+102.7kb)|DPF3(+168.3kb)|PAPLN(-175.1kb)|PSEN1(-74.05kb)|RBM25(0)|ZFYVE1(+35.17kb)
6:2365878	6	2365878	G	?	8	9.041e-06	0.001388	2.0614	1.9941	0.175	31.69	2.064	2.064	4.41	NA	2.342	1.988	0.2731	1.177	1.752	rs11242759	GMDS(+120kb)|LOC100508120(0)
16:88992195	16	88992195	C	?	6	1.313e-05	1.313e-05	2.3826	2.3826	0.8969	0	1.405	1.405	2.455	NA	2.482	3.976	NA	1.954	NA	rs2636950	ACSF3(-168kb)|APRT(+113.9kb)|CBFA2T3(0)|CDT1(+116.5kb)|GALNS(+68.82kb)|LOC100289580(+184.4kb)|PABPN1L(+59.13kb)|PIEZO1(+140.8kb)|TRAPPC2L(+64.68kb)
14:73523162	14	73523162	T	?	6	1.419e-05	3.817e-05	2.1371	2.133	0.3729	6.81	NA	NA	3.243	NA	3.331	1.121	5.387	1.516	1.952	rs2535911	DCAF4(+96.8kb)|DPF3(+162.4kb)|PAPLN(-181kb)|PSEN1(-79.98kb)|RBM25(-2.058kb)|ZFYVE1(+29.24kb)
16:88995432	16	88995432	G	?	6	1.628e-05	1.628e-05	2.3759	2.3759	0.891	0	1.13	1.13	2.242	NA	2.622	3.104	NA	3.022	NA	rs7197177	ACSF3(-164.8kb)|APRT(+117.1kb)|CBFA2T3(0)|CDT1(+119.8kb)|GALNS(+72.06kb)|LOC100289580(+187.6kb)|PABPN1L(+62.36kb)|PIEZO1(+144.1kb)|TRAPPC2L(+67.91kb)
17:6247948	17	6247948	T	?	8	1.687e-05	1.687e-05	2.2698	2.2698	0.8198	0	6.789	6.789	2.179	NA	1.92	2.635	0.0489	3.344	2.119	rs4796469	ACKR6(-106.6kb)|AIPL1(-79.11kb)|FAM64A(-99.79kb)|PITPNM3(-106.6kb)
17:6227903	17	6227903	G	?	8	1.735e-05	1.735e-05	2.2565	2.2565	0.7862	0	6.789	6.789	2.006	NA	3.027	2.635	0.0491	3.148	1.951	rs7223171	ACKR6(-126.7kb)|AIPL1(-99.16kb)|FAM64A(-119.8kb)|PITPNM3(-126.7kb)
14:73710734	14	73710734	G	?	6	1.741e-05	1.741e-05	2.0219	2.0219	0.7607	0	NA	NA	2.294	NA	2.616	1.446	0.5981	1.6	2.196	rs177406	NUMB(-31.18kb)|PAPLN(0)|PSEN1(+20.34kb)|RBM25(+122.7kb)
17:6247796	17	6247796	A	?	8	1.783e-05	0.001393	2.4204	2.3881	0.2119	27.14	0	0	2.51	NA	2.577	3.318	0.0447	3.058	2.065	rs73343227	ACKR6(-106.8kb)|AIPL1(-79.26kb)|FAM64A(-99.94kb)|PITPNM3(-106.8kb)
17:6248025	17	6248025	A	?	8	1.783e-05	0.001393	2.4204	2.3881	0.2119	27.14	0	0	2.51	NA	2.577	3.318	0.0447	3.058	2.065	rs4796470	ACKR6(-106.6kb)|AIPL1(-79.03kb)|FAM64A(-99.71kb)|PITPNM3(-106.6kb)
17:6249301	17	6249301	T	?	8	1.783e-05	0.001393	2.4204	2.3881	0.2119	27.14	0	0	2.51	NA	2.577	3.318	0.0447	3.058	2.065	rs12601438	ACKR6(-105.3kb)|AIPL1(-77.76kb)|FAM64A(-98.43kb)|PITPNM3(-105.3kb)
17:6250115	17	6250115	T	?	8	1.823e-05	1.823e-05	2.3536	2.3536	0.7246	0	0.393	0.393	2.34	NA	2.072	3.361	0.0447	3.058	2.286	rs34523965	ACKR6(-104.5kb)|AIPL1(-76.94kb)|FAM64A(-97.62kb)|PITPNM3(-104.5kb)
14:73672831	14	73672831	C	?	6	1.942e-05	0.004012	2.032	1.9457	0.141	39.69	NA	NA	2.324	NA	3.298	0.7444	8.953	1.191	2.521	rs165934	NUMB(-69.09kb)|PAPLN(-31.37kb)|PSEN1(0)|RBM25(+84.76kb)|ZFYVE1(+178.9kb)
14:73677963	14	73677963	T	?	6	1.942e-05	0.004012	2.032	1.9457	0.141	39.69	NA	NA	2.324	NA	3.298	0.7444	8.953	1.191	2.521	rs177415	NUMB(-63.95kb)|PAPLN(-26.24kb)|PSEN1(0)|RBM25(+89.89kb)|ZFYVE1(+184kb)
14:73687144	14	73687144	C	?	6	2.001e-05	0.00403	2.0306	1.9449	0.1414	39.63	NA	NA	2.324	NA	3.298	0.7444	8.953	1.191	2.518	rs165935	NUMB(-54.77kb)|PAPLN(-17.06kb)|PSEN1(0)|RBM25(+99.07kb)|ZFYVE1(+193.2kb)
17:6250459	17	6250459	G	?	8	2.027e-05	0.001416	2.4075	2.3747	0.2165	26.58	0	0	2.51	NA	2.577	3.206	0.0447	3.058	2.065	rs12601953	ACKR6(-104.1kb)|AIPL1(-76.6kb)|FAM64A(-97.28kb)|PITPNM3(-104.1kb)
17:6250575	17	6250575	G	?	8	2.027e-05	0.001416	2.4075	2.3747	0.2165	26.58	0	0	2.51	NA	2.577	3.206	0.0447	3.058	2.065	rs12603984	ACKR6(-104kb)|AIPL1(-76.48kb)|FAM64A(-97.16kb)|PITPNM3(-104kb)
17:6251394	17	6251394	T	?	8	2.058e-05	2.058e-05	2.3422	2.3422	0.7342	0	0.393	0.393	2.34	NA	2.072	3.257	0.0447	3.058	2.286	rs34974833	ACKR6(-103.2kb)|AIPL1(-75.66kb)|FAM64A(-96.34kb)|PITPNM3(-103.2kb)
6:2373843	6	2373843	T	?	8	2.265e-05	3.394e-05	0.4847	0.4837	0.4121	2.27	0.4146	0.4146	0.3118	NA	0.6832	0.2246	1.816	0.5156	0.6969	rs11752965	GMDS(+128kb)|LOC100508120(0)
17:6240615	17	6240615	T	?	8	2.294e-05	0.001719	2.3965	2.3648	0.2068	27.77	0	0	2.51	NA	2.577	3.318	0.0447	3.058	1.989	rs34136447	ACKR6(-114kb)|AIPL1(-86.44kb)|FAM64A(-107.1kb)|PITPNM3(-114kb)
17:6243358	17	6243358	A	?	8	2.294e-05	0.001719	2.3965	2.3648	0.2068	27.77	0	0	2.51	NA	2.577	3.318	0.0447	3.058	1.989	rs12948026	ACKR6(-111.2kb)|AIPL1(-83.7kb)|FAM64A(-104.4kb)|PITPNM3(-111.2kb)
17:6243643	17	6243643	G	?	8	2.294e-05	0.001719	2.3965	2.3648	0.2068	27.77	0	0	2.51	NA	2.577	3.318	0.0447	3.058	1.989	rs12952162	ACKR6(-110.9kb)|AIPL1(-83.42kb)|FAM64A(-104.1kb)|PITPNM3(-110.9kb)
17:6243958	17	6243958	G	?	8	2.734e-05	2.734e-05	2.3063	2.3063	0.7179	0	0.393	0.393	2.34	NA	2.072	3.361	0.0447	3.058	2.129	rs12953036	ACKR6(-110.6kb)|AIPL1(-83.1kb)|FAM64A(-103.8kb)|PITPNM3(-110.6kb)
17:6244490	17	6244490	A	?	8	2.754e-05	0.002062	2.3662	2.3391	0.2001	28.58	0	0	2.51	NA	2.577	3.318	0.0447	3.058	1.915	rs12942806	ACKR6(-110.1kb)|AIPL1(-82.57kb)|FAM64A(-103.2kb)|PITPNM3(-110.1kb)
16:88991500	16	88991500	G	?	6	2.842e-05	2.842e-05	2.2801	2.2801	0.8216	0	1.13	1.13	2.309	NA	2.521	3.976	NA	1.954	NA	rs533679	ACSF3(-168.7kb)|APRT(+113.2kb)|CBFA2T3(0)|CDT1(+115.8kb)|GALNS(+68.13kb)|LOC100289580(+183.7kb)|PABPN1L(+58.43kb)|PIEZO1(+140.1kb)|TRAPPC2L(+63.98kb)
14:73664853	14	73664853	G	?	6	2.86e-05	0.004022	2.0008	1.9235	0.1528	37.99	NA	NA	2.324	NA	3.298	0.7444	8.953	1.191	2.398	rs165932	NUMB(-77.06kb)|PAPLN(-39.35kb)|PSEN1(0)|RBM25(+76.78kb)|ZFYVE1(+170.9kb)
1:57271815	1	57271815	G	?	6	3.026e-05	3.026e-05	1.971	1.971	0.8293	0	NA	NA	1.906	NA	1.359	2.911	8.383	2.342	1.843	rs6687762	C1orf168(0)|C8A(-48.63kb)|C8B(-123.1kb)|DAB1(-191.8kb)|PRKAA2(+90.81kb)
14:73520136	14	73520136	A	?	6	3.031e-05	3.507e-05	2.0554	2.055	0.4095	1.04	NA	NA	2.987	NA	3.331	1.121	5.387	1.516	1.814	rs113004125	DCAF4(+93.78kb)|DPF3(+159.3kb)|PAPLN(-184.1kb)|PSEN1(-83.01kb)|RBM25(-5.084kb)|ZFYVE1(+26.22kb)
14:73485957	14	73485957	A	?	6	3.108e-05	3.108e-05	2.0422	2.0422	0.6729	0	NA	NA	2.659	NA	2.634	1.148	5.381	1.648	2.017	rs2535917	DCAF4(+59.6kb)|DPF3(+125.1kb)|PSEN1(-117.2kb)|RBM25(-39.26kb)|ZFYVE1(0)
14:73497027	14	73497027	G	?	6	3.108e-05	3.108e-05	2.0422	2.0422	0.6729	0	NA	NA	2.659	NA	2.634	1.148	5.381	1.648	2.017	rs2806055	DCAF4(+70.67kb)|DPF3(+136.2kb)|PSEN1(-106.1kb)|RBM25(-28.19kb)|ZFYVE1(+3.107kb)
14:73501615	14	73501615	G	?	6	3.108e-05	3.108e-05	2.0422	2.0422	0.6729	0	NA	NA	2.659	NA	2.634	1.148	5.381	1.648	2.017	rs111830508	DCAF4(+75.26kb)|DPF3(+140.8kb)|PSEN1(-101.5kb)|RBM25(-23.6kb)|ZFYVE1(+7.695kb)
14:73502993	14	73502993	A	?	6	3.108e-05	3.108e-05	2.0422	2.0422	0.6729	0	NA	NA	2.659	NA	2.634	1.148	5.381	1.648	2.017	rs72734433	DCAF4(+76.64kb)|DPF3(+142.2kb)|PSEN1(-100.1kb)|RBM25(-22.23kb)|ZFYVE1(+9.073kb)
2:147837328	2	147837328	A	?	8	3.323e-05	3.323e-05	1.9931	1.9931	0.743	0	1.677	1.677	3.196	NA	1.012	2.025	2.292	2.358	1.786	rs2598511	.
17:6238618	17	6238618	A	?	8	3.349e-05	0.002019	2.3511	2.3283	0.2082	27.59	0	0	2.367	NA	2.577	3.318	0.0447	3.058	1.989	rs35394792	ACKR6(-116kb)|AIPL1(-88.44kb)|FAM64A(-109.1kb)|PITPNM3(-116kb)
17:6239927	17	6239927	T	?	8	3.349e-05	0.002019	2.3511	2.3283	0.2082	27.59	0	0	2.367	NA	2.577	3.318	0.0447	3.058	1.989	rs4796468	ACKR6(-114.7kb)|AIPL1(-87.13kb)|FAM64A(-107.8kb)|PITPNM3(-114.7kb)
14:73630270	14	73630270	G	?	6	3.576e-05	0.004027	1.9882	1.913	0.1614	36.77	NA	NA	2.324	NA	3.219	0.7444	8.953	1.191	2.389	rs165931	NUMB(-111.6kb)|PAPLN(-73.93kb)|PSEN1(0)|RBM25(+42.19kb)|ZFYVE1(+136.4kb)
14:95278266	14	95278266	C	?	8	3.708e-05	3.708e-05	2.2158	2.2158	0.5658	0	12.08	12.08	2.734	NA	2.502	1.266	0.0385	2.483	2.115	rs17091448	GSC(+41.77kb)|SERPINA3(+187.9kb)|SERPINA13P(+164.9kb)
2:147818992	2	147818992	C	?	8	3.887e-05	3.887e-05	1.994	1.994	0.7789	0	1.677	1.677	3.097	NA	1.012	2.025	1.465	2.358	1.864	rs965940	.
2:147819031	2	147819031	T	?	8	3.887e-05	3.887e-05	1.994	1.994	0.7789	0	1.677	1.677	3.097	NA	1.012	2.025	1.465	2.358	1.864	rs965939	.
14:73525265	14	73525265	T	?	6	4.065e-05	0.0002781	2.0446	2.0458	0.3088	16.3	NA	NA	3.243	NA	3.432	1.121	5.387	1.516	1.675	rs2535923	DCAF4(+98.91kb)|DPF3(+164.5kb)|PAPLN(-178.9kb)|PSEN1(-77.88kb)|RBM25(0)|ZFYVE1(+31.34kb)
2:147823843	2	147823843	C	?	8	4.118e-05	4.118e-05	1.9779	1.9779	0.7715	0	1.677	1.677	3.097	NA	1.012	2.025	2.292	2.358	1.786	rs2598506	.
17:6233600	17	6233600	T	?	8	4.238e-05	0.002262	2.3261	2.3078	0.2081	27.61	0	0	2.291	NA	2.577	3.318	0.0447	3.058	1.989	rs12602337	ACKR6(-121kb)|AIPL1(-93.46kb)|FAM64A(-114.1kb)|PITPNM3(-121kb)
1:1210963	1	1210963	C	?	6	4.347e-05	4.347e-05	6.225	6.225	0.9969	0	8.316	8.316	9.064	NA	4.075	5.357	NA	NA	6.821	rs6689813	ACAP3(-16.8kb)|ANKRD65(-142.8kb)|ATAD3B(-196.2kb)|ATAD3C(-174.1kb)|AURKAIP1(-98.15kb)|B3GALT6(+40.54kb)|C1orf159(+159.2kb)|CCNL2(-110.1kb)|CPSF3L(-36kb)|DVL1(-59.69kb)|FAM132A(+28.86kb)|GLTPD1(-49.18kb)|LOC148413(-123.9kb)|LOC254099(+131.5kb)|MIR200A(+107.6kb)|MIR200B(+108.4kb)|MIR429(+106.5kb)|MRPL20(-126.3kb)|MXRA8(-77.11kb)|PUSL1(-33.03kb)|SCNN1D(-4.852kb)|SDF4(+43.52kb)|TAS1R3(-55.76kb)|TMEM8…
1:1212795	1	1212795	A	?	6	4.347e-05	4.347e-05	6.225	6.225	0.9969	0	8.316	8.316	9.064	NA	4.075	5.357	NA	NA	6.821	rs56210437	ACAP3(-14.97kb)|ANKRD65(-141kb)|ATAD3B(-194.4kb)|ATAD3C(-172.3kb)|AURKAIP1(-96.31kb)|B3GALT6(+42.38kb)|C1orf159(+161.1kb)|CCNL2(-108.3kb)|CPSF3L(-34.17kb)|DVL1(-57.86kb)|FAM132A(+30.69kb)|GLTPD1(-47.35kb)|LOC148413(-122.1kb)|LOC254099(+133.4kb)|MIR200A(+109.5kb)|MIR200B(+110.2kb)|MIR429(+108.3kb)|MRPL20(-124.5kb)|MXRA8(-75.28kb)|PUSL1(-31.2kb)|SCNN1D(-3.02kb)|SDF4(+45.35kb)|TAS1R3(-53.93kb)|TMEM8…
1:1213936	1	1213936	A	?	6	4.347e-05	4.347e-05	6.225	6.225	0.9969	0	8.316	8.316	9.064	NA	4.075	5.357	NA	NA	6.821	rs6665791	ACAP3(-13.83kb)|ANKRD65(-139.9kb)|ATAD3B(-193.2kb)|ATAD3C(-171.1kb)|AURKAIP1(-95.17kb)|B3GALT6(+43.52kb)|C1orf159(+162.2kb)|CCNL2(-107.2kb)|CPSF3L(-33.03kb)|DVL1(-56.72kb)|FAM132A(+31.83kb)|GLTPD1(-46.21kb)|LOC148413(-121kb)|LOC254099(+134.5kb)|MIR200A(+110.6kb)|MIR200B(+111.4kb)|MIR429(+109.5kb)|MRPL20(-123.3kb)|MXRA8(-74.13kb)|PUSL1(-30.06kb)|SCNN1D(-1.879kb)|SDF4(+46.49kb)|TAS1R3(-52.79kb)|TME…
10:108262213	10	108262213	G	?	6	4.486e-05	4.486e-05	0.4172	0.4172	0.468	0	NA	NA	0.3366	NA	0.5874	1.07	0.7421	0.2683	0.329	rs17177040	SORCS1(-71.21kb)
2:147808963	2	147808963	T	?	8	5.134e-05	5.134e-05	1.9693	1.9693	0.8233	0	1.677	1.677	2.905	NA	1.012	2.025	1.465	2.358	1.864	rs2254296	.
2:147811353	2	147811353	A	?	8	5.134e-05	5.134e-05	1.9693	1.9693	0.8233	0	1.677	1.677	2.905	NA	1.012	2.025	1.465	2.358	1.864	rs2706057	.
2:147812704	2	147812704	A	?	8	5.134e-05	5.134e-05	1.9693	1.9693	0.8233	0	1.677	1.677	2.905	NA	1.012	2.025	1.465	2.358	1.864	rs2706035	.
2:147817148	2	147817148	T	?	8	5.134e-05	5.134e-05	1.9693	1.9693	0.8233	0	1.677	1.677	2.905	NA	1.012	2.025	1.465	2.358	1.864	rs1451083	.
3:190851936	3	190851936	C	?	8	5.238e-05	5.238e-05	2.6104	2.6104	0.9128	0	5.849	5.849	3.719	NA	3.541	1.286	1.838	3.54	2.054	rs67922543	CCDC50(-194.9kb)|OSTN(-78.38kb)|UTS2B(-133kb)
17:6233223	17	6233223	T	?	8	5.24e-05	0.002389	2.3005	2.277	0.2155	26.7	0	0	2.291	NA	2.577	3.318	0.0447	2.748	1.989	rs12938192	ACKR6(-121.4kb)|AIPL1(-93.84kb)|FAM64A(-114.5kb)|PITPNM3(-121.4kb)
2:147824271	2	147824271	T	?	8	5.266e-05	5.266e-05	1.9582	1.9582	0.6975	0	1.677	1.677	2.955	NA	0.9337	2.025	1.465	2.652	1.775	rs2706042	.
7:134785741	7	134785741	C	?	8	5.401e-05	5.401e-05	2.9022	2.9022	0.8296	0	1.883	1.883	2.573	NA	13.38	4.877	1.345	2.017	2.67	rs17231212	AGBL3(0)|C7orf49(-64.79kb)|CALD1(+130.3kb)|STRA8(-131kb)|TMEM140(-47.02kb)|WDR91(-82.85kb)
17:6231392	17	6231392	C	?	8	5.511e-05	0.002491	2.2945	2.2715	0.2144	26.84	0	0	2.291	NA	2.577	3.318	0.0447	2.748	1.971	rs1987837	ACKR6(-123.2kb)|AIPL1(-95.67kb)|FAM64A(-116.3kb)|PITPNM3(-123.2kb)
17:6232520	17	6232520	T	?	8	5.511e-05	0.002491	2.2945	2.2715	0.2144	26.84	0	0	2.291	NA	2.577	3.318	0.0447	2.748	1.971	rs16955805	ACKR6(-122.1kb)|AIPL1(-94.54kb)|FAM64A(-115.2kb)|PITPNM3(-122.1kb)
6:2371304	6	2371304	C	?	8	5.777e-05	0.00158	0.5122	0.5249	0.2547	21.98	0.8677	0.8677	0.2837	NA	0.6663	0.2573	1.866	0.7716	0.6787	rs9503159	GMDS(+125.4kb)|LOC100508120(0)
6:2369670	6	2369670	G	?	8	5.794e-05	0.001585	0.5122	0.525	0.2546	21.99	0.8677	0.8677	0.2837	NA	0.6663	0.2573	1.866	0.7716	0.6789	rs9503157	GMDS(+123.8kb)|LOC100508120(0)
6:2369733	6	2369733	G	?	8	5.794e-05	0.001585	0.5122	0.525	0.2546	21.99	0.8677	0.8677	0.2837	NA	0.6663	0.2573	1.866	0.7716	0.6789	rs4296927	GMDS(+123.9kb)|LOC100508120(0)
2:147827306	2	147827306	G	?	8	5.884e-05	5.884e-05	1.946	1.946	0.7558	0	1.677	1.677	3.097	NA	1.012	2.025	2.292	2.358	1.707	rs2598508	.
2:147829416	2	147829416	A	?	8	5.884e-05	5.884e-05	1.946	1.946	0.7558	0	1.677	1.677	3.097	NA	1.012	2.025	2.292	2.358	1.707	rs1376383	.
2:147829713	2	147829713	T	?	8	5.884e-05	5.884e-05	1.946	1.946	0.7558	0	1.677	1.677	3.097	NA	1.012	2.025	2.292	2.358	1.707	rs2706043	.
2:147813388	2	147813388	C	?	8	5.95e-05	5.95e-05	1.9588	1.9588	0.8207	0	1.677	1.677	2.905	NA	1.012	2.025	1.465	2.358	1.834	rs2706037	.
11:94057376	11	94057376	C	?	8	6.339e-05	0.08497	1.9994	1.6876	0.0296	54.98	2.175	2.175	2.721	NA	1.172	0.3609	0.1455	3.959	2.457	rs617227	ANKRD49(-169.8kb)|FOLR4(+16.52kb)|GPR83(-53.1kb)|LOC643037(-188.3kb)|MRE11A(-93.09kb)|PANX1(+142.2kb)
2:147819791	2	147819791	G	?	8	6.447e-05	6.447e-05	1.9508	1.9508	0.7631	0	1.677	1.677	3.097	NA	1.012	2.025	1.465	2.358	1.75	rs2598505	.
2:147819980	2	147819980	G	?	8	6.447e-05	6.447e-05	1.9508	1.9508	0.7631	0	1.677	1.677	3.097	NA	1.012	2.025	1.465	2.358	1.75	rs2706040	.
2:147818806	2	147818806	C	?	8	6.596e-05	6.596e-05	1.9483	1.9483	0.762	0	1.677	1.677	3.097	NA	1.012	2.025	1.465	2.358	1.744	rs12465961	.
2:147812036	2	147812036	A	?	8	6.687e-05	6.687e-05	1.9433	1.9433	0.8164	0	1.677	1.677	2.905	NA	1.012	2.025	1.465	2.358	1.795	rs2706058	.
6:52524337	6	52524337	G	?	8	7.002e-05	0.01362	1.9101	1.9032	0.0768	45.37	105.5	105.5	2.914	NA	2.492	1.031	7.03	0.8217	1.933	rs6899396	EFHC1(+163.8kb)|GSTA1(-131.8kb)|GSTA2(-90.55kb)|GSTA5(-172.2kb)|GSTA7P(-79.92kb)|LOC730101(-4.861kb)|TMEM14A(-11.55kb)|TRAM2(+82.48kb)|TRAM2-AS1(+75.55kb)
12:94379060	12	94379060	G	?	8	7.1e-05	0.0001854	2.7144	2.6776	0.3929	4.83	0.0391	0.0391	3.532	NA	1.156	3.247	32.65	1.632	3.985	rs4761761	CRADD(+134.5kb)|PLXNC1(-163.4kb)
11:4587676	11	4587676	C	?	8	7.102e-05	0.002547	0.4911	0.3388	0.0096	62.34	0.0516	0.0516	0.4229	NA	0.3552	0.207	0.0351	0.2234	1.24	rs11032832	C11orf40(-4.976kb)|OR51D1(-73.27kb)|OR51E1(-77.48kb)|OR51E2(-113.7kb)|OR52B4(+198.1kb)|OR52I1(-27.59kb)|OR52I2(-20.34kb)|OR52K1(+76.54kb)|OR52K2(+116.1kb)|OR52M1(+20.3kb)|TRIM21(+172.8kb)|TRIM68(-32.22kb)
3:190845010	3	190845010	G	?	8	7.212e-05	7.212e-05	2.4999	2.4999	0.9857	0	5.849	5.849	2.841	NA	3.375	2.031	1.834	3.54	1.967	rs6775129	OSTN(-85.31kb)|UTS2B(-139.9kb)
1:57269521	1	57269521	G	?	6	7.354e-05	7.354e-05	1.9078	1.9078	0.8116	0	NA	NA	1.729	NA	1.398	3.118	8.382	2.059	1.87	rs6662617	C1orf168(0)|C8A(-50.92kb)|C8B(-125.4kb)|DAB1(-194.1kb)|PRKAA2(+88.51kb)
2:147826910	2	147826910	A	?	8	7.607e-05	7.607e-05	1.9321	1.9321	0.7542	0	1.677	1.677	3.097	NA	1.012	2.025	1.465	2.358	1.707	rs1349432	.
6:2427414	6	2427414	A	?	8	7.741e-05	0.001435	0.5047	0.5004	0.2414	23.57	0.2026	0.2026	0.255	NA	0.703	0.3494	1.726	0.8647	0.6875	rs9328098	C6orf195(-195.6kb)|GMDS(+181.5kb)|LOC100508120(+13.59kb)
6:2428540	6	2428540	T	?	8	7.741e-05	0.001435	0.5047	0.5004	0.2414	23.57	0.2026	0.2026	0.255	NA	0.703	0.3494	1.726	0.8647	0.6875	rs2325876	C6orf195(-194.4kb)|GMDS(+182.7kb)|LOC100508120(+14.72kb)
1:57259632	1	57259632	G	?	6	7.781e-05	7.781e-05	1.8776	1.8776	0.8473	0	NA	NA	1.797	NA	1.328	2.604	8.492	2.19	1.833	rs10889017	C1orf168(0)|C8A(-60.81kb)|C8B(-135.2kb)|PRKAA2(+78.62kb)
11:7770988	11	7770988	G	?	8	7.85e-05	7.85e-05	3.758	3.758	0.931	0	1.883	1.883	5.85	NA	2.442	5.906	112.5	3.357	2.869	rs7112371	CYB5R2(+76.17kb)|LOC283299(-101.3kb)|OR5E1P(-99.61kb)|OR5P2(-46.53kb)|OR5P3(-75.6kb)|OR10A3(-189.1kb)|OR10A6(-178.3kb)|OVCH2(+43.05kb)|PPFIBP2(+95.99kb)
7:32066091	7	32066091	G	?	7	7.967e-05	7.967e-05	2.112	2.112	0.7674	0	0.3205	0.3205	2.26	NA	2.937	2.017	1.985	1.921	NA	rs7781544	PDE1C(0)
15:61347062	15	61347062	A	?	7	8.094e-05	0.008493	0.3531	0.3572	0.1609	35.01	210	210	0.2463	NA	0.3724	NA	0.0744	0.2229	0.514	rs62005639	RORA(0)
2:147817914	2	147817914	A	?	8	8.625e-05	8.625e-05	1.9246	1.9246	0.8095	0	1.677	1.677	2.905	NA	1.012	2.025	1.465	2.358	1.744	rs2060737	.
6:52527380	6	52527380	T	?	8	8.76e-05	0.01354	1.8916	1.8836	0.0855	43.97	105.5	105.5	2.807	NA	2.492	1.031	7.03	0.8217	1.933	rs13219366	EFHC1(+166.8kb)|GSTA1(-128.8kb)|GSTA2(-87.5kb)|GSTA5(-169.2kb)|GSTA7P(-76.88kb)|LOC730101(-1.818kb)|TMEM14A(-8.503kb)|TRAM2(+85.52kb)|TRAM2-AS1(+78.59kb)
6:52527559	6	52527559	A	?	8	8.76e-05	0.01354	1.8916	1.8836	0.0855	43.97	105.5	105.5	2.807	NA	2.492	1.031	7.03	0.8217	1.933	rs10948712	EFHC1(+167kb)|GSTA1(-128.6kb)|GSTA2(-87.32kb)|GSTA5(-169kb)|GSTA7P(-76.7kb)|LOC730101(-1.639kb)|TMEM14A(-8.324kb)|TRAM2(+85.7kb)|TRAM2-AS1(+78.77kb)
6:52527613	6	52527613	C	?	8	8.76e-05	0.01354	1.8916	1.8836	0.0855	43.97	105.5	105.5	2.807	NA	2.492	1.031	7.03	0.8217	1.933	rs6917792	EFHC1(+167kb)|GSTA1(-128.6kb)|GSTA2(-87.27kb)|GSTA5(-168.9kb)|GSTA7P(-76.65kb)|LOC730101(-1.585kb)|TMEM14A(-8.27kb)|TRAM2(+85.75kb)|TRAM2-AS1(+78.82kb)
6:52527667	6	52527667	T	?	8	8.76e-05	0.01354	1.8916	1.8836	0.0855	43.97	105.5	105.5	2.807	NA	2.492	1.031	7.03	0.8217	1.933	rs6940753	EFHC1(+167.1kb)|GSTA1(-128.5kb)|GSTA2(-87.22kb)|GSTA5(-168.9kb)|GSTA7P(-76.59kb)|LOC730101(-1.531kb)|TMEM14A(-8.216kb)|TRAM2(+85.8kb)|TRAM2-AS1(+78.88kb)
5:156626683	5	156626683	T	?	6	8.889e-05	8.889e-05	1.9694	1.9694	0.6345	0	NA	NA	3.08	NA	1.498	1.717	0.7238	1.579	2.005	rs10070951	CYFIP2(-66.41kb)|FAM71B(+33.4kb)|FNDC9(-141.9kb)|HAVCR1(+140.7kb)|HAVCR2(+90.44kb)|ITK(0)|MED7(+56.76kb)
6:52529904	6	52529904	T	?	8	9.384e-05	0.01383	1.8865	1.8798	0.0856	43.95	105.5	105.5	2.807	NA	2.492	1.031	7.03	0.8217	1.917	rs2670125	EFHC1(+169.3kb)|GSTA1(-126.3kb)|GSTA2(-84.98kb)|GSTA5(-166.6kb)|GSTA7P(-74.36kb)|LOC730101(0)|TMEM14A(-5.979kb)|TRAM2(+88.04kb)|TRAM2-AS1(+81.11kb)
3:190848369	3	190848369	G	?	8	9.639e-05	9.639e-05	2.3219	2.3219	0.9743	0	5.849	5.849	3.055	NA	2.968	1.494	1.904	2.465	1.949	rs9855788	CCDC50(-198.5kb)|OSTN(-81.95kb)|UTS2B(-136.6kb)
6:40787278	6	40787278	A	?	8	9.871e-05	9.871e-05	2.6808	2.6808	0.8426	0	1.315	1.315	3.366	NA	3.692	1.363	3.376	5.742	2.053	rs75964702	.
6:52530505	6	52530505	G	?	8	9.9e-05	0.01404	1.8839	1.878	0.0856	43.94	105.5	105.5	2.807	NA	2.492	1.031	7.03	0.8217	1.909	rs2144701	EFHC1(+169.9kb)|GSTA1(-125.7kb)|GSTA2(-84.38kb)|GSTA5(-166kb)|GSTA7P(-73.76kb)|LOC730101(0)|TMEM14A(-5.378kb)|TRAM2(+88.64kb)|TRAM2-AS1(+81.71kb)
7:132318535	7	132318535	T	?	8	9.962e-05	9.962e-05	1.8646	1.8646	0.577	0	9.271	9.271	1.693	NA	3.808	2.229	4.373	0.9741	1.817	rs869321	CHCHD3(-151.1kb)|FLJ40288(-15.02kb)|PLXNA4(0)
2:147806204	2	147806204	C	?	8	9.965e-05	9.965e-05	1.8727	1.8727	0.6301	0	2.202	2.202	2.67	NA	0.8604	1.614	1.314	2.878	1.791	rs2598503	.
