# Supplementary material for: Multiomics integrative analysis identifies APOE allele-specific blood biomarkers associated to Alzheimer’s disease etiopathogenesis
Source: Aging (Albany NY). 2021 Apr 12;13(7):9277–329. doi: 10.18632/aging.202950 (PMC8064208; doi:10.18632/aging.202950)
Supplement: Supplementary Table 13 [file aging-13-202950-s015.xlsx]

## Sheet: Sheet1
Supplementary Table 13. APOE and sex stratified analysis: APOE3 females meta-analysis results (p<10-4).
SNP	CHR	BP	A1	A2	N	P	P.R.	OR	OR.R.	Q	I	F0	F1	F2	F3	F4	F5	F6	F7	F8	RS	ANNOT
7:145961301	7	145961301	T	?	9	3.472e-07	1.408e-06	0.3601	0.3629	0.3982	4.42	0.2007	0.2007	0.508	0.506	0.694	0.8666	1.425	0.1758	0.1922	rs139172043	CNTNAP2(0)
15:42388615	15	42388615	G	?	9	8.227e-07	3.645e-05	0.7139	0.7172	0.2936	16.73	0.9569	0.9569	0.5789	0.4169	0.632	0.8839	0.4683	0.866	0.8022	rs776724	EHD4(+123.9kb)|GANC(-177.8kb)|MIR627(-103.2kb)|PLA2G4D(+1.863kb)|PLA2G4E(+45.71kb)|PLA2G4F(-44.72kb)|TMEM87A(-114.1kb)|VPS39(-62.28kb)
17:74885889	17	74885889	G	?	9	1.019e-06	1.665e-05	1.3939	1.4016	0.3078	15.11	1.966	1.966	1.322	2.055	1.363	1.015	0.58	1.759	1.467	rs557394	JMJD6(+163kb)|LINC00338(-198.8kb)|METTL23(+155.9kb)|MFSD11(+110.6kb)|MGAT5B(0)|MIR636(+153.3kb)|MXRA7(+178.8kb)|SCARNA16(-199.5kb)|SEC14L1(-198.8kb)|SRSF2(+152.4kb)
17:74886238	17	74886238	A	?	9	1.044e-06	1.684e-05	1.3937	1.4016	0.3079	15.1	1.966	1.966	1.322	2.055	1.363	1.015	0.58	1.759	1.467	rs554012	JMJD6(+163.4kb)|LINC00338(-198.5kb)|METTL23(+156.3kb)|MFSD11(+110.9kb)|MGAT5B(0)|MIR636(+153.6kb)|MXRA7(+179.2kb)|SCARNA16(-199.2kb)|SEC14L1(-198.5kb)|SRSF2(+152.7kb)
17:74885136	17	74885136	A	?	9	1.161e-06	1.934e-05	1.3913	1.3996	0.3045	15.49	1.966	1.966	1.313	2.055	1.363	1.015	0.58	1.759	1.467	rs474589	JMJD6(+162.3kb)|LINC00338(-199.6kb)|METTL23(+155.2kb)|MFSD11(+109.8kb)|MGAT5B(0)|MIR636(+152.5kb)|MXRA7(+178.1kb)|SEC14L1(-199.6kb)|SRSF2(+151.6kb)
2:159250362	2	159250362	A	?	9	1.198e-06	1.198e-06	1.3411	1.3411	0.8892	0	1.91	1.91	1.247	1.556	1.261	1.492	1.175	1.154	1.319	rs2602205	CCDC148(0)|CCDC148-AS1(+157.7kb)|PKP4(-63.11kb)
17:74877308	17	74877308	T	?	9	1.355e-06	1.183e-05	1.3887	1.3955	0.3377	11.64	1.966	1.966	1.309	2.055	1.323	1.047	0.5804	1.837	1.446	rs656024	JMJD6(+154.4kb)|METTL23(+147.3kb)|MFSD11(+102kb)|MGAT5B(0)|MIR636(+144.7kb)|MXRA7(+170.3kb)|SRSF2(+143.8kb)
17:74877354	17	74877354	T	?	9	1.444e-06	1.211e-05	1.3875	1.3944	0.339	11.5	1.966	1.966	1.309	2.055	1.323	1.047	0.5804	1.837	1.442	rs655638	JMJD6(+154.5kb)|METTL23(+147.4kb)|MFSD11(+102kb)|MGAT5B(0)|MIR636(+144.7kb)|MXRA7(+170.3kb)|SRSF2(+143.9kb)
17:74877473	17	74877473	C	?	9	1.444e-06	1.211e-05	1.3875	1.3944	0.339	11.5	1.966	1.966	1.309	2.055	1.323	1.047	0.5804	1.837	1.442	rs655149	JMJD6(+154.6kb)|METTL23(+147.5kb)|MFSD11(+102.1kb)|MGAT5B(0)|MIR636(+144.8kb)|MXRA7(+170.4kb)|SRSF2(+144kb)
17:74877600	17	74877600	A	?	9	1.444e-06	1.211e-05	1.3875	1.3944	0.339	11.5	1.966	1.966	1.309	2.055	1.323	1.047	0.5804	1.837	1.442	rs654711	JMJD6(+154.7kb)|METTL23(+147.6kb)|MFSD11(+102.3kb)|MGAT5B(0)|MIR636(+145kb)|MXRA7(+170.5kb)|SRSF2(+144.1kb)
17:74877825	17	74877825	C	?	9	1.715e-06	1.304e-05	1.3847	1.3917	0.3416	11.19	1.966	1.966	1.309	2.055	1.323	1.047	0.5804	1.837	1.433	rs653770	JMJD6(+154.9kb)|METTL23(+147.9kb)|MFSD11(+102.5kb)|MGAT5B(0)|MIR636(+145.2kb)|MXRA7(+170.8kb)|SRSF2(+144.3kb)
17:74878070	17	74878070	G	?	9	1.715e-06	1.304e-05	1.3847	1.3917	0.3416	11.19	1.966	1.966	1.309	2.055	1.323	1.047	0.5804	1.837	1.433	rs573085	JMJD6(+155.2kb)|METTL23(+148.1kb)|MFSD11(+102.7kb)|MGAT5B(0)|MIR636(+145.4kb)|MXRA7(+171kb)|SRSF2(+144.6kb)
17:74878420	17	74878420	T	?	9	1.715e-06	1.304e-05	1.3847	1.3917	0.3416	11.19	1.966	1.966	1.309	2.055	1.323	1.047	0.5804	1.837	1.433	rs1663456	JMJD6(+155.5kb)|METTL23(+148.5kb)|MFSD11(+103.1kb)|MGAT5B(0)|MIR636(+145.8kb)|MXRA7(+171.4kb)|SRSF2(+144.9kb)
17:74878609	17	74878609	G	?	9	1.715e-06	1.304e-05	1.3847	1.3917	0.3416	11.19	1.966	1.966	1.309	2.055	1.323	1.047	0.5804	1.837	1.433	rs547205	JMJD6(+155.7kb)|METTL23(+148.6kb)|MFSD11(+103.3kb)|MGAT5B(0)|MIR636(+146kb)|MXRA7(+171.6kb)|SRSF2(+145.1kb)
17:74878853	17	74878853	A	?	9	1.717e-06	1.313e-05	1.3847	1.3917	0.3413	11.23	1.966	1.966	1.309	2.055	1.323	1.047	0.58	1.837	1.433	rs638856	JMJD6(+156kb)|METTL23(+148.9kb)|MFSD11(+103.5kb)|MGAT5B(0)|MIR636(+146.2kb)|MXRA7(+171.8kb)|SRSF2(+145.4kb)
17:74879482	17	74879482	G	?	9	1.862e-06	1.148e-05	1.3828	1.3889	0.352	9.98	1.966	1.966	1.309	2.055	1.323	1.047	0.5804	1.79	1.43	rs539128	JMJD6(+156.6kb)|METTL23(+149.5kb)|MFSD11(+104.1kb)|MGAT5B(0)|MIR636(+146.9kb)|MXRA7(+172.4kb)|SRSF2(+146kb)
17:74879637	17	74879637	G	?	9	1.862e-06	1.148e-05	1.3828	1.3889	0.352	9.98	1.966	1.966	1.309	2.055	1.323	1.047	0.5804	1.79	1.43	rs516898	JMJD6(+156.8kb)|METTL23(+149.7kb)|MFSD11(+104.3kb)|MGAT5B(0)|MIR636(+147kb)|MXRA7(+172.6kb)|SRSF2(+146.1kb)
17:74879657	17	74879657	G	?	9	1.862e-06	1.148e-05	1.3828	1.3889	0.352	9.98	1.966	1.966	1.309	2.055	1.323	1.047	0.5804	1.79	1.43	rs516217	JMJD6(+156.8kb)|METTL23(+149.7kb)|MFSD11(+104.3kb)|MGAT5B(0)|MIR636(+147kb)|MXRA7(+172.6kb)|SRSF2(+146.2kb)
17:74880527	17	74880527	A	?	9	1.982e-06	1.181e-05	1.3816	1.3877	0.353	9.85	1.966	1.966	1.309	2.055	1.323	1.047	0.5804	1.79	1.426	rs508793	JMJD6(+157.6kb)|METTL23(+150.6kb)|MFSD11(+105.2kb)|MGAT5B(0)|MIR636(+147.9kb)|MXRA7(+173.5kb)|SRSF2(+147kb)
17:74880615	17	74880615	A	?	9	1.982e-06	1.181e-05	1.3816	1.3877	0.353	9.85	1.966	1.966	1.309	2.055	1.323	1.047	0.5804	1.79	1.426	rs771723	JMJD6(+157.7kb)|METTL23(+150.7kb)|MFSD11(+105.3kb)|MGAT5B(0)|MIR636(+148kb)|MXRA7(+173.6kb)|SRSF2(+147.1kb)
17:74879717	17	74879717	T	?	9	2.007e-06	1.493e-05	1.3814	1.3882	0.3412	11.24	1.966	1.966	1.309	2.055	1.323	1.039	0.5804	1.79	1.43	rs516063	JMJD6(+156.8kb)|METTL23(+149.8kb)|MFSD11(+104.4kb)|MGAT5B(0)|MIR636(+147.1kb)|MXRA7(+172.7kb)|SRSF2(+146.2kb)
16:82651428	16	82651428	A	?	9	2.28e-06	0.001101	1.2935	1.2937	0.1001	40.12	1.897	1.897	1.217	1.312	1.359	1.316	1.108	0.6266	1.347	rs4783242	CDH13(-8.97kb)
17:74879963	17	74879963	C	?	9	2.371e-06	1.595e-05	1.378	1.385	0.3443	10.88	1.966	1.966	1.292	2.055	1.323	1.047	0.5804	1.79	1.43	rs613075	JMJD6(+157.1kb)|METTL23(+150kb)|MFSD11(+104.6kb)|MGAT5B(0)|MIR636(+147.3kb)|MXRA7(+172.9kb)|SRSF2(+146.5kb)
16:82651898	16	82651898	G	?	9	2.491e-06	0.001908	1.2922	1.2954	0.0653	45.57	1.965	1.965	1.23	1.312	1.359	1.323	1.11	0.6	1.317	rs3865190	CDH13(-8.5kb)
16:82812242	16	82812242	A	?	9	2.745e-06	2.745e-06	0.5925	0.5925	0.9072	0	0.5101	0.5101	0.5472	0.5052	0.4938	0.9926	0.3911	0.5923	0.6111	rs74525750	CDH13(0)
3:173649169	3	173649169	A	?	9	2.78e-06	2.78e-06	0.5303	0.5303	0.8158	0	0.435	0.435	0.599	0.5391	0.4658	0.3148	2.167	0.3542	0.6136	rs73182698	NLGN1(0)
2:159273472	2	159273472	G	?	9	2.798e-06	2.798e-06	1.3452	1.3452	0.8594	0	1.521	1.521	1.177	1.582	1.335	1.59	2.362	1.209	1.32	rs113330028	CCDC148(0)|CCDC148-AS1(+180.8kb)|PKP4(-40kb)
16:82813623	16	82813623	C	?	9	2.863e-06	2.863e-06	0.5927	0.5927	0.8368	0	0.5101	0.5101	0.5318	0.5052	0.4938	1.044	0.3911	0.5923	0.6111	rs73604825	CDH13(0)
16:82654584	16	82654584	T	?	9	2.881e-06	0.001174	1.2907	1.291	0.1025	39.77	1.897	1.897	1.22	1.312	1.365	1.288	1.132	0.6266	1.343	rs17175622	CDH13(-5.814kb)
16:82656995	16	82656995	T	?	9	2.901e-06	0.0006073	1.2912	1.2963	0.1348	35.42	1.897	1.897	1.213	1.418	1.341	1.309	1.132	0.6511	1.331	rs4782721	CDH13(-3.403kb)
2:159284526	2	159284526	T	?	9	3.112e-06	3.112e-06	1.3437	1.3437	0.7618	0	1.521	1.521	1.177	1.582	1.318	1.59	3.077	1.209	1.313	rs76251234	CCDC148(0)|CCDC148-AS1(+191.8kb)|PKP4(-28.95kb)
2:159274227	2	159274227	C	?	9	3.174e-06	3.174e-06	1.343	1.343	0.8585	0	1.521	1.521	1.177	1.582	1.318	1.59	2.362	1.209	1.32	rs2193701	CCDC148(0)|CCDC148-AS1(+181.5kb)|PKP4(-39.25kb)
2:159274969	2	159274969	C	?	9	3.174e-06	3.174e-06	1.343	1.343	0.8585	0	1.521	1.521	1.177	1.582	1.318	1.59	2.362	1.209	1.32	rs76136261	CCDC148(0)|CCDC148-AS1(+182.3kb)|PKP4(-38.51kb)
16:82653548	16	82653548	T	?	9	3.279e-06	0.001157	1.2882	1.29	0.1049	39.42	1.897	1.897	1.22	1.312	1.365	1.303	1.132	0.6266	1.327	rs9940266	CDH13(-6.85kb)
16:82814057	16	82814057	C	?	9	3.291e-06	3.291e-06	0.5945	0.5945	0.8078	0	0.5101	0.5101	0.5318	0.5052	0.4938	1.072	0.3911	0.5923	0.6111	rs78086113	CDH13(0)
2:159263874	2	159263874	A	?	9	3.293e-06	3.293e-06	1.3421	1.3421	0.8579	0	1.521	1.521	1.177	1.582	1.318	1.59	2.362	1.209	1.317	rs75006818	CCDC148(0)|CCDC148-AS1(+171.2kb)|PKP4(-49.6kb)
2:159265263	2	159265263	G	?	9	3.293e-06	3.293e-06	1.3421	1.3421	0.8579	0	1.521	1.521	1.177	1.582	1.318	1.59	2.362	1.209	1.317	rs76714700	CCDC148(0)|CCDC148-AS1(+172.6kb)|PKP4(-48.21kb)
2:159266371	2	159266371	A	?	9	3.293e-06	3.293e-06	1.3421	1.3421	0.8579	0	1.521	1.521	1.177	1.582	1.318	1.59	2.362	1.209	1.317	rs112805856	CCDC148(0)|CCDC148-AS1(+173.7kb)|PKP4(-47.1kb)
2:159267928	2	159267928	C	?	9	3.293e-06	3.293e-06	1.3421	1.3421	0.8579	0	1.521	1.521	1.177	1.582	1.318	1.59	2.362	1.209	1.317	rs6711808	CCDC148(0)|CCDC148-AS1(+175.2kb)|PKP4(-45.55kb)
2:159251210	2	159251210	T	?	9	3.337e-06	3.337e-06	1.3419	1.3419	0.8498	0	1.592	1.592	1.17	1.582	1.318	1.573	2.309	1.209	1.32	rs74970153	CCDC148(0)|CCDC148-AS1(+158.5kb)|PKP4(-62.26kb)
16:82647971	16	82647971	T	?	9	3.346e-06	0.002772	1.2885	1.2905	0.055	47.44	1.99	1.99	1.213	1.341	1.328	1.317	1.09	0.5941	1.344	rs7198176	CDH13(-12.43kb)
2:159255637	2	159255637	G	?	9	3.376e-06	3.376e-06	1.3417	1.3417	0.8434	0	1.592	1.592	1.17	1.582	1.318	1.581	2.309	1.209	1.316	rs11681049	CCDC148(0)|CCDC148-AS1(+163kb)|PKP4(-57.84kb)
2:159255658	2	159255658	T	?	9	3.376e-06	3.376e-06	1.3417	1.3417	0.8434	0	1.592	1.592	1.17	1.582	1.318	1.581	2.309	1.209	1.316	rs11681050	CCDC148(0)|CCDC148-AS1(+163kb)|PKP4(-57.82kb)
1:187066405	1	187066405	C	?	9	3.425e-06	3.425e-06	0.7741	0.7741	0.5234	0	0.4766	0.4766	0.7482	0.9472	0.8711	0.7763	0.9935	0.821	0.8025	rs2207723	PLA2G4A(+108.3kb)
2:159288179	2	159288179	A	?	9	3.458e-06	3.458e-06	1.3421	1.3421	0.7549	0	1.521	1.521	1.172	1.582	1.318	1.59	3.076	1.209	1.312	rs79928267	CCDC148(0)|CCDC148-AS1(+195.5kb)|PKP4(-25.3kb)
1:187064038	1	187064038	T	?	9	3.548e-06	3.548e-06	0.7747	0.7747	0.5821	0	0.4766	0.4766	0.7517	0.9025	0.8628	0.7915	0.8548	0.821	0.8101	rs12097703	PLA2G4A(+105.9kb)
1:187062807	1	187062807	A	?	9	3.603e-06	3.603e-06	0.7754	0.7754	0.5833	0	0.4841	0.4841	0.74	0.9445	0.8613	0.8013	0.8619	0.821	0.8092	rs1008407	PLA2G4A(+104.7kb)
2:159290486	2	159290486	T	?	9	3.681e-06	3.681e-06	1.3409	1.3409	0.7773	0	1.521	1.521	1.177	1.495	1.318	1.59	3.076	1.209	1.312	rs113144913	CCDC148(0)|CCDC148-AS1(+197.8kb)|PKP4(-22.99kb)
2:159291278	2	159291278	T	?	9	3.681e-06	3.681e-06	1.3409	1.3409	0.7773	0	1.521	1.521	1.177	1.495	1.318	1.59	3.076	1.209	1.312	rs115894713	CCDC148(0)|CCDC148-AS1(+198.6kb)|PKP4(-22.2kb)
1:187064419	1	187064419	T	?	9	3.705e-06	3.705e-06	0.7757	0.7757	0.7957	0	0.5177	0.5177	0.7693	0.9025	0.8362	0.7787	0.8573	0.8296	0.7992	rs10798084	PLA2G4A(+106.3kb)
1:187059665	1	187059665	A	?	9	3.713e-06	3.713e-06	0.7752	0.7752	0.536	0	0.4766	0.4766	0.754	0.9025	0.8891	0.7763	0.9762	0.821	0.7995	rs6425074	PLA2G4A(+101.6kb)
2:159278573	2	159278573	A	?	9	3.76e-06	3.76e-06	1.34	1.34	0.8564	0	1.521	1.521	1.177	1.582	1.318	1.59	2.362	1.209	1.31	rs145563530	CCDC148(0)|CCDC148-AS1(+185.9kb)|PKP4(-34.9kb)
16:82663936	16	82663936	C	?	9	3.804e-06	0.0001688	1.2852	1.2962	0.2143	25.81	1.806	1.806	1.196	1.4	1.401	1.419	1.193	0.6837	1.256	rs8051657	CDH13(0)
14:42719498	14	42719498	T	?	9	3.941e-06	0.0002281	0.7679	0.7421	0.1315	35.84	0.4446	0.4446	0.7263	0.4683	0.8335	0.7725	0.7505	1.05	0.8742	rs11157276	.
11:76448249	11	76448249	A	?	8	4.005e-06	4.005e-06	0.7244	0.7244	0.566	0	0.8568	0.8568	0.6745	0.6042	0.5929	0.8304	0.2526	NA	0.7927	rs7944011	ACER3(-123.7kb)|C11orf30(+185.7kb)|GUCY2EP(+15.42kb)|LRRC32(+66.46kb)|TSKU(-45.11kb)
14:42720281	14	42720281	G	?	9	4.095e-06	0.0001981	0.7681	0.7421	0.1405	34.69	0.4446	0.4446	0.7336	0.4683	0.8426	0.7561	0.7505	1.034	0.8734	rs4905482	.
14:42734764	14	42734764	C	?	9	4.229e-06	0.0001574	0.7687	0.7446	0.1617	32.04	0.4446	0.4446	0.7336	0.4881	0.8405	0.755	0.7075	1.018	0.8753	rs1484084	.
14:42733220	14	42733220	T	?	9	4.235e-06	0.0001576	0.7687	0.7446	0.1617	32.03	0.4446	0.4446	0.7336	0.4881	0.8405	0.755	0.7088	1.018	0.8753	rs2054697	.
14:42733838	14	42733838	T	?	9	4.235e-06	0.0001576	0.7687	0.7446	0.1617	32.03	0.4446	0.4446	0.7336	0.4881	0.8405	0.755	0.7088	1.018	0.8753	rs11847618	.
14:42732187	14	42732187	C	?	9	4.236e-06	0.0001576	0.7687	0.7446	0.1617	32.03	0.4446	0.4446	0.7336	0.4881	0.8405	0.755	0.7091	1.018	0.8753	rs8014193	.
14:42732449	14	42732449	C	?	9	4.236e-06	0.0001576	0.7687	0.7446	0.1617	32.03	0.4446	0.4446	0.7336	0.4881	0.8405	0.755	0.7091	1.018	0.8753	rs56219717	.
14:42723870	14	42723870	T	?	9	4.241e-06	0.0001901	0.7686	0.7452	0.1537	33.03	0.4446	0.4446	0.7336	0.4804	0.8426	0.759	0.7505	1.048	0.8679	rs11157278	.
14:42723949	14	42723949	T	?	9	4.241e-06	0.0001901	0.7686	0.7452	0.1537	33.03	0.4446	0.4446	0.7336	0.4804	0.8426	0.759	0.7505	1.048	0.8679	rs11157279	.
14:42733689	14	42733689	C	?	9	4.248e-06	0.000158	0.7687	0.7446	0.1616	32.05	0.4446	0.4446	0.7336	0.4881	0.8405	0.755	0.7088	1.018	0.8754	rs11847545	.
16:82654035	16	82654035	T	?	9	4.355e-06	0.001285	1.2847	1.2879	0.1038	39.59	1.897	1.897	1.213	1.312	1.365	1.311	1.13	0.6266	1.319	rs17260630	CDH13(-6.363kb)
9:77795200	9	77795200	T	?	9	4.516e-06	4.516e-06	0.6394	0.6394	0.9413	0	0.4635	0.4635	0.6537	0.7018	0.5536	0.7184	0.3865	1.155	0.6299	rs67122277	C9orf41(+151.9kb)|NMRK1(+92.07kb)|OSTF1(+33.09kb)
2:159295692	2	159295692	C	?	9	4.565e-06	4.565e-06	1.3371	1.3371	0.7731	0	1.521	1.521	1.177	1.495	1.289	1.59	3.085	1.209	1.312	rs144210753	CCDC148(0)|PKP4(-17.78kb)
1:216268104	1	216268104	C	?	9	4.6e-06	4.6e-06	1.2963	1.2963	0.6968	0	1.059	1.059	1.565	1.163	1.213	1.135	1.93	1.179	1.31	rs12119670	USH2A(0)
14:42722813	14	42722813	C	?	9	4.715e-06	0.0002067	0.7695	0.7457	0.1515	33.3	0.4446	0.4446	0.7336	0.4804	0.8426	0.7621	0.7505	1.048	0.8698	rs112342355	.
2:159250229	2	159250229	A	?	9	4.776e-06	4.776e-06	1.3353	1.3353	0.8399	0	1.592	1.592	1.166	1.582	1.318	1.573	2.309	1.209	1.303	rs77276698	CCDC148(0)|CCDC148-AS1(+157.5kb)|PKP4(-63.25kb)
2:159294314	2	159294314	T	?	9	4.809e-06	4.809e-06	1.3362	1.3362	0.7724	0	1.521	1.521	1.177	1.495	1.289	1.59	3.085	1.209	1.309	rs146646145	CCDC148(0)|PKP4(-19.16kb)
14:42808815	14	42808815	G	?	8	4.983e-06	4.983e-06	0.7431	0.7431	0.7218	0	0.5264	0.5264	0.7385	0.8557	0.7978	0.7508	0.6438	0.9523	NA	rs1157341	.
14:42719754	14	42719754	T	?	9	4.994e-06	0.0002044	0.7699	0.745	0.1502	33.46	0.4446	0.4446	0.7336	0.4804	0.8426	0.7561	0.7505	1.034	0.8764	rs4905481	.
14:42727734	14	42727734	G	?	9	5e-06	0.0002586	0.7701	0.7434	0.1293	36.12	0.4446	0.4446	0.7336	0.4683	0.8524	0.7555	0.7505	1.048	0.8745	rs55798627	.
1:216296390	1	216296390	C	?	9	5.146e-06	5.146e-06	1.2975	1.2975	0.5285	0	1.086	1.086	1.562	1.236	1.278	1.023	2.064	1.076	1.33	rs9660493	USH2A(0)
14:42734438	14	42734438	T	?	9	5.156e-06	0.0001682	0.7706	0.7464	0.1648	31.66	0.4446	0.4446	0.7401	0.4881	0.8405	0.755	0.7088	1.018	0.8753	rs8005329	.
1:216264388	1	216264388	C	?	9	5.207e-06	5.207e-06	1.2942	1.2942	0.6383	0	1.059	1.059	1.572	1.163	1.235	1.094	1.93	1.179	1.311	rs1544299	USH2A(0)
14:42720825	14	42720825	C	?	9	5.213e-06	0.0002091	0.7702	0.7457	0.1518	33.26	0.4446	0.4446	0.7336	0.4804	0.8426	0.7621	0.7505	1.034	0.8755	rs10872962	.
1:216252742	1	216252742	G	?	9	5.223e-06	5.223e-06	1.2943	1.2943	0.6643	0	1.059	1.059	1.564	1.163	1.235	1.104	1.939	1.163	1.312	rs2068721	USH2A(0)
1:216268597	1	216268597	A	?	9	5.333e-06	5.333e-06	1.2942	1.2942	0.709	0	1.059	1.059	1.56	1.163	1.213	1.135	1.927	1.179	1.307	rs12759921	USH2A(0)
16:82659933	16	82659933	A	?	9	5.482e-06	0.0003327	1.2813	1.2834	0.2096	26.36	1.747	1.747	1.215	1.405	1.363	1.329	1.13	0.648	1.305	rs12443878	CDH13(-0.465kb)
2:159234529	2	159234529	A	?	9	5.568e-06	5.568e-06	1.3342	1.3342	0.8328	0	1.74	1.74	1.178	1.396	1.296	1.586	2.089	1.166	1.301	rs77432849	CCDC148(0)|CCDC148-AS1(+141.8kb)|PKP4(-78.95kb)
2:159239443	2	159239443	C	?	9	5.568e-06	5.568e-06	1.3342	1.3342	0.8328	0	1.74	1.74	1.178	1.396	1.296	1.586	2.089	1.166	1.301	rs2356091	CCDC148(0)|CCDC148-AS1(+146.8kb)|PKP4(-74.03kb)
1:216293259	1	216293259	T	?	9	5.77e-06	5.77e-06	1.2942	1.2942	0.5115	0	1.056	1.056	1.546	1.37	1.26	0.9982	2.064	1.17	1.32	rs4971264	USH2A(0)
16:82656425	16	82656425	T	?	9	5.771e-06	0.001474	1.2814	1.2844	0.1048	39.44	1.897	1.897	1.208	1.311	1.334	1.322	1.13	0.6266	1.321	rs736718	CDH13(-3.973kb)
11:76448067	11	76448067	A	?	8	5.8e-06	5.8e-06	0.728	0.728	0.6152	0	0.824	0.824	0.6745	0.6609	0.6025	0.8379	0.2526	NA	0.7994	rs7943760	ACER3(-123.8kb)|C11orf30(+185.5kb)|GUCY2EP(+15.23kb)|LRRC32(+66.28kb)|TSKU(-45.29kb)
14:42736079	14	42736079	C	?	9	5.815e-06	0.0002344	0.7716	0.7471	0.149	33.61	0.4446	0.4446	0.7336	0.4881	0.8405	0.7705	0.7073	1.051	0.8753	rs4905499	.
14:42735822	14	42735822	A	?	9	5.817e-06	0.0002345	0.7716	0.7471	0.149	33.61	0.4446	0.4446	0.7336	0.4881	0.8405	0.7705	0.7075	1.051	0.8753	rs11849939	.
14:42736041	14	42736041	C	?	9	5.835e-06	0.0002351	0.7716	0.7471	0.1489	33.62	0.4446	0.4446	0.7336	0.4881	0.8405	0.7705	0.7076	1.051	0.8754	rs4905498	.
14:42725879	14	42725879	A	?	9	5.887e-06	0.0002953	0.7716	0.7439	0.1234	36.91	0.4446	0.4446	0.7336	0.4683	0.8524	0.7555	0.7505	1.048	0.8799	rs149591881	.
14:42734253	14	42734253	C	?	9	5.992e-06	0.0001992	0.7712	0.7451	0.1539	33	0.4446	0.4446	0.739	0.476	0.8255	0.7598	0.7088	1.018	0.8842	rs8006242	.
14:42738950	14	42738950	A	?	9	6.007e-06	0.000193	0.772	0.7482	0.1641	31.74	0.4446	0.4446	0.7372	0.4881	0.8405	0.7745	0.7073	1.018	0.8753	rs2415719	.
14:42739210	14	42739210	G	?	9	6.007e-06	0.000193	0.772	0.7482	0.1641	31.74	0.4446	0.4446	0.7372	0.4881	0.8405	0.7745	0.7073	1.018	0.8753	rs11846119	.
14:42736427	14	42736427	T	?	9	6.117e-06	0.0002433	0.7721	0.7477	0.149	33.61	0.4446	0.4446	0.7336	0.4881	0.8405	0.7749	0.7073	1.051	0.8753	rs4905501	.
14:42736515	14	42736515	C	?	9	6.117e-06	0.0002433	0.7721	0.7477	0.149	33.61	0.4446	0.4446	0.7336	0.4881	0.8405	0.7749	0.7073	1.051	0.8753	rs4905502	.
14:42736780	14	42736780	A	?	9	6.117e-06	0.0002433	0.7721	0.7477	0.149	33.61	0.4446	0.4446	0.7336	0.4881	0.8405	0.7749	0.7073	1.051	0.8753	rs11851142	.
14:42736234	14	42736234	T	?	9	6.137e-06	0.000244	0.7721	0.7477	0.1488	33.63	0.4446	0.4446	0.7336	0.4881	0.8405	0.7749	0.7075	1.051	0.8754	rs4905500	.
1:216292802	1	216292802	T	?	9	6.158e-06	6.158e-06	1.2934	1.2934	0.5196	0	1.056	1.056	1.542	1.37	1.26	0.9982	2.064	1.17	1.321	rs1359291	USH2A(0)
14:42728452	14	42728452	A	?	9	6.179e-06	0.0002995	0.7723	0.7455	0.1281	36.28	0.4446	0.4446	0.7336	0.4683	0.8524	0.7705	0.7448	1.048	0.8758	rs766582	.
1:216293673	1	216293673	C	?	9	6.23e-06	6.23e-06	1.2931	1.2931	0.5199	0	1.056	1.056	1.542	1.37	1.26	0.9982	2.064	1.17	1.32	rs12029418	USH2A(0)
1:216294050	1	216294050	T	?	9	6.23e-06	6.23e-06	1.2931	1.2931	0.5199	0	1.056	1.056	1.542	1.37	1.26	0.9982	2.064	1.17	1.32	rs12742246	USH2A(0)
1:216294107	1	216294107	T	?	9	6.23e-06	6.23e-06	1.2931	1.2931	0.5199	0	1.056	1.056	1.542	1.37	1.26	0.9982	2.064	1.17	1.32	rs12755871	USH2A(0)
1:216295188	1	216295188	C	?	9	6.23e-06	6.23e-06	1.2931	1.2931	0.5199	0	1.056	1.056	1.542	1.37	1.26	0.9982	2.064	1.17	1.32	rs10864233	USH2A(0)
1:216295719	1	216295719	G	?	9	6.23e-06	6.23e-06	1.2931	1.2931	0.5199	0	1.056	1.056	1.542	1.37	1.26	0.9982	2.064	1.17	1.32	rs1811900	USH2A(0)
1:216295756	1	216295756	G	?	9	6.23e-06	6.23e-06	1.2931	1.2931	0.5199	0	1.056	1.056	1.542	1.37	1.26	0.9982	2.064	1.17	1.32	rs1811901	USH2A(0)
1:216296115	1	216296115	T	?	9	6.23e-06	6.23e-06	1.2931	1.2931	0.5199	0	1.056	1.056	1.542	1.37	1.26	0.9982	2.064	1.17	1.32	rs4971265	USH2A(0)
1:216296528	1	216296528	A	?	9	6.23e-06	6.23e-06	1.2931	1.2931	0.5199	0	1.056	1.056	1.542	1.37	1.26	0.9982	2.064	1.17	1.32	rs9659188	USH2A(0)
1:216296844	1	216296844	G	?	9	6.23e-06	6.23e-06	1.2931	1.2931	0.5199	0	1.056	1.056	1.542	1.37	1.26	0.9982	2.064	1.17	1.32	rs9660325	USH2A(0)
1:216297468	1	216297468	T	?	9	6.23e-06	6.23e-06	1.2931	1.2931	0.5199	0	1.056	1.056	1.542	1.37	1.26	0.9982	2.064	1.17	1.32	rs9728510	USH2A(0)
1:216297621	1	216297621	G	?	9	6.23e-06	6.23e-06	1.2931	1.2931	0.5199	0	1.056	1.056	1.542	1.37	1.26	0.9982	2.064	1.17	1.32	rs9727182	USH2A(0)
2:159223180	2	159223180	A	?	9	6.238e-06	6.238e-06	1.3329	1.3329	0.8742	0	1.74	1.74	1.183	1.396	1.296	1.538	2.089	1.166	1.309	rs7601440	CCDC148(0)|CCDC148-AS1(+130.5kb)|PKP4(-90.3kb)
14:42740350	14	42740350	T	?	9	6.589e-06	0.0003228	0.7702	0.7364	0.1047	39.46	0.4425	0.4425	0.7227	0.4311	0.7871	0.8458	0.7021	0.9696	0.8972	rs55750829	.
2:159227919	2	159227919	A	?	9	6.633e-06	6.633e-06	1.3312	1.3312	0.8615	0	1.74	1.74	1.172	1.396	1.296	1.538	2.089	1.166	1.315	rs77920408	CCDC148(0)|CCDC148-AS1(+135.2kb)|PKP4(-85.56kb)
11:76446916	11	76446916	A	?	8	6.675e-06	6.675e-06	0.73	0.73	0.6304	0	0.824	0.824	0.6745	0.7089	0.6048	0.8428	0.2526	NA	0.7951	rs34885552	ACER3(-125kb)|C11orf30(+184.3kb)|GUCY2EP(+14.08kb)|LRRC32(+65.12kb)|TSKU(-46.44kb)
2:159245985	2	159245985	C	?	9	6.686e-06	6.686e-06	1.3305	1.3305	0.796	0	1.74	1.74	1.168	1.396	1.296	1.606	2.092	1.166	1.289	rs11680774	CCDC148(0)|CCDC148-AS1(+153.3kb)|PKP4(-67.49kb)
2:159244427	2	159244427	C	?	9	6.704e-06	6.704e-06	1.3304	1.3304	0.7966	0	1.74	1.74	1.168	1.396	1.296	1.606	2.089	1.166	1.289	rs79560306	CCDC148(0)|CCDC148-AS1(+151.7kb)|PKP4(-69.05kb)
3:56523913	3	56523913	A	?	6	6.738e-06	0.001287	3.1479	2.9004	0.2343	26.69	NA	NA	1.826	2.607	1.498	NA	2.277	2.337	6.943	rs116665366	CCDC66(-67.27kb)|ERC2(+21.52kb)|FAM208A(-130.2kb)
5:129560749	5	129560749	A	?	8	6.765e-06	0.02013	2.5639	2.553	0.0147	59.89	16.81	16.81	4.101	0	2.304	1.242	NA	0.027	2.883	rs78449063	CHSY3(+38.42kb)
2:159302112	2	159302112	T	?	9	6.848e-06	6.848e-06	1.3291	1.3291	0.7567	0	1.521	1.521	1.17	1.495	1.279	1.59	3.085	1.216	1.298	rs77748196	CCDC148(0)|PKP4(-11.36kb)
2:159300402	2	159300402	C	?	9	6.849e-06	6.849e-06	1.3292	1.3292	0.7547	0	1.521	1.521	1.17	1.495	1.263	1.59	3.085	1.216	1.305	rs77571593	CCDC148(0)|PKP4(-13.07kb)
14:42728603	14	42728603	C	?	9	6.906e-06	0.0002742	0.7733	0.7491	0.1469	33.87	0.4446	0.4446	0.7336	0.4881	0.8524	0.7705	0.7448	1.048	0.8753	rs766580	.
4:26174921	4	26174921	A	?	9	6.972e-06	6.972e-06	0.7335	0.7335	0.728	0	0.57	0.57	0.8633	0.7417	0.8071	0.6235	1.325	0.5361	0.7111	rs10000896	RBPJ(-146.4kb)
14:42728740	14	42728740	C	?	9	6.99e-06	0.0002809	0.7734	0.7492	0.1457	34.02	0.4446	0.4446	0.7336	0.4881	0.8524	0.7705	0.7448	1.051	0.8753	rs60410680	.
14:42729134	14	42729134	C	?	9	6.99e-06	0.0002809	0.7734	0.7492	0.1457	34.02	0.4446	0.4446	0.7336	0.4881	0.8524	0.7705	0.7448	1.051	0.8753	rs2306634	.
14:42729340	14	42729340	A	?	9	6.99e-06	0.0002809	0.7734	0.7492	0.1457	34.02	0.4446	0.4446	0.7336	0.4881	0.8524	0.7705	0.7448	1.051	0.8753	rs61993359	.
14:42728468	14	42728468	T	?	9	7.011e-06	0.0002778	0.7734	0.7492	0.1463	33.95	0.4446	0.4446	0.7336	0.4881	0.8524	0.7705	0.7448	1.048	0.8758	rs766581	.
14:42736720	14	42736720	G	?	9	7.047e-06	0.0002545	0.7735	0.749	0.1512	33.34	0.4446	0.4446	0.7383	0.4881	0.8405	0.7749	0.7075	1.051	0.8754	rs61991060	.
14:42730357	14	42730357	A	?	9	7.349e-06	0.0002496	0.7737	0.7509	0.1606	32.17	0.4446	0.4446	0.7336	0.5021	0.8405	0.7705	0.7448	1.051	0.878	rs8023041	.
14:42730404	14	42730404	T	?	9	7.349e-06	0.0002496	0.7737	0.7509	0.1606	32.17	0.4446	0.4446	0.7336	0.5021	0.8405	0.7705	0.7448	1.051	0.878	rs8023176	.
14:42748421	14	42748421	G	?	9	7.381e-06	0.0007383	0.77	0.7272	0.0482	48.78	0.4056	0.4056	0.7185	0.4326	0.7692	0.854	0.7021	1.079	0.8978	rs56085603	.
14:42737596	14	42737596	C	?	9	7.389e-06	0.0002496	0.7737	0.7506	0.1595	32.3	0.4446	0.4446	0.7336	0.5021	0.8405	0.7749	0.7073	1.051	0.878	rs1825395	.
11:76438610	11	76438610	A	?	8	7.466e-06	7.466e-06	0.7316	0.7316	0.5522	0	0.824	0.824	0.6886	0.7697	0.6001	0.8376	0.2048	NA	0.7872	rs55933713	ACER3(-133.3kb)|C11orf30(+176kb)|GUCY2EP(+5.777kb)|LRRC32(+56.82kb)|TSKU(-54.75kb)
1:216297849	1	216297849	A	?	9	7.48e-06	7.48e-06	1.2905	1.2905	0.5224	0	1.056	1.056	1.542	1.37	1.26	0.9982	2.064	1.17	1.311	rs2199102	USH2A(0)
1:216297936	1	216297936	A	?	9	7.48e-06	7.48e-06	1.2905	1.2905	0.5224	0	1.056	1.056	1.542	1.37	1.26	0.9982	2.064	1.17	1.311	rs2199101	USH2A(0)
16:82656804	16	82656804	T	?	9	7.638e-06	0.001655	1.2771	1.2805	0.1057	39.32	1.897	1.897	1.206	1.311	1.341	1.301	1.13	0.6266	1.314	rs1541928	CDH13(-3.594kb)
2:159221018	2	159221018	C	?	9	7.691e-06	7.691e-06	1.3295	1.3295	0.8882	0	1.74	1.74	1.183	1.396	1.296	1.514	2.089	1.166	1.309	rs141509232	CCDC148(0)|CCDC148-AS1(+128.3kb)|PKP4(-92.46kb)
1:216292272	1	216292272	A	?	9	7.695e-06	7.695e-06	1.2897	1.2897	0.5209	0	1.056	1.056	1.542	1.37	1.252	0.9982	2.063	1.17	1.312	rs12759474	USH2A(0)
1:216292338	1	216292338	T	?	9	7.695e-06	7.695e-06	1.2897	1.2897	0.5209	0	1.056	1.056	1.542	1.37	1.252	0.9982	2.063	1.17	1.312	rs1359290	USH2A(0)
2:159215951	2	159215951	A	?	9	7.785e-06	7.785e-06	1.3289	1.3289	0.8802	0	1.74	1.74	1.183	1.396	1.281	1.525	2.089	1.166	1.309	rs113658628	CCDC148(0)|CCDC148-AS1(+123.3kb)|PKP4(-97.52kb)
9:81737796	9	81737796	C	?	9	7.864e-06	7.864e-06	1.2903	1.2903	0.567	0	1.622	1.622	1.273	2.383	1.207	1.149	0.8864	1.477	1.235	rs72746114	.
1:216278680	1	216278680	C	?	9	8.017e-06	8.017e-06	1.2898	1.2898	0.7638	0	1.068	1.068	1.499	1.236	1.268	1.111	2.479	1.228	1.289	rs12751218	USH2A(0)
14:42728705	14	42728705	A	?	9	8.069e-06	0.0002936	0.7748	0.7505	0.148	33.74	0.4446	0.4446	0.7384	0.4881	0.8524	0.7705	0.7448	1.051	0.8754	rs766579	.
11:76452946	11	76452946	G	?	8	8.074e-06	8.074e-06	0.7308	0.7308	0.5792	0	0.8336	0.8336	0.6751	0.7224	0.5928	0.8731	0.2526	NA	0.7893	rs7103917	ACER3(-119kb)|C11orf30(+190.4kb)|GUCY2EP(+20.11kb)|LRRC32(+71.16kb)|TSKU(-40.41kb)
17:74878259	17	74878259	A	?	9	8.094e-06	8.094e-06	1.4524	1.4524	0.751	0	1.859	1.859	1.58	2.196	1.299	1.02	1.964	1.734	1.407	rs571264	JMJD6(+155.4kb)|METTL23(+148.3kb)|MFSD11(+102.9kb)|MGAT5B(0)|MIR636(+145.6kb)|MXRA7(+171.2kb)|SRSF2(+144.8kb)
14:42747321	14	42747321	G	?	9	8.264e-06	0.0007902	0.7711	0.7288	0.0485	48.7	0.4056	0.4056	0.7185	0.4326	0.781	0.854	0.7021	1.079	0.8969	rs7146027	.
11:76453985	11	76453985	A	?	8	8.299e-06	8.299e-06	0.7311	0.7311	0.5733	0	0.8336	0.8336	0.6751	0.7224	0.5928	0.8792	0.2526	NA	0.7882	rs12801851	ACER3(-117.9kb)|C11orf30(+191.4kb)|GUCY2EP(+21.15kb)|LRRC32(+72.19kb)|TSKU(-39.37kb)
14:42729746	14	42729746	C	?	9	8.435e-06	0.0002882	0.7751	0.7521	0.1562	32.72	0.4446	0.4446	0.7336	0.5021	0.8524	0.7705	0.7448	1.051	0.878	rs2415718	.
2:159217724	2	159217724	C	?	9	8.462e-06	8.462e-06	1.3274	1.3274	0.8863	0	1.74	1.74	1.183	1.396	1.281	1.514	2.089	1.166	1.309	rs140541701	CCDC148(0)|CCDC148-AS1(+125kb)|PKP4(-95.75kb)
2:159218324	2	159218324	A	?	9	8.462e-06	8.462e-06	1.3274	1.3274	0.8863	0	1.74	1.74	1.183	1.396	1.281	1.514	2.089	1.166	1.309	rs112063764	CCDC148(0)|CCDC148-AS1(+125.6kb)|PKP4(-95.15kb)
14:42740752	14	42740752	A	?	9	8.488e-06	0.0004686	0.772	0.7376	0.0909	41.46	0.4425	0.4425	0.7229	0.4326	0.781	0.836	0.7021	1.04	0.8992	rs56265079	.
1:216286427	1	216286427	A	?	9	8.489e-06	8.489e-06	1.2905	1.2905	0.7098	0	1.091	1.091	1.502	1.371	1.204	1.127	2.849	1.193	1.285	rs12562620	USH2A(0)
2:10562462	2	10562462	A	?	8	8.517e-06	8.517e-06	1.6343	1.6343	0.7524	0	1.316	1.316	2.216	1.101	1.701	2.063	NA	1.488	1.378	rs3732120	HPCAL1(0)|NOL10(-148.4kb)|ODC1(-18.04kb)|SNORA80B(-24.38kb)
14:42747239	14	42747239	A	?	9	8.663e-06	0.000812	0.7717	0.7289	0.0477	48.89	0.4056	0.4056	0.7185	0.4326	0.781	0.854	0.7021	1.079	0.8985	rs7146304	.
1:245630062	1	245630062	C	?	9	8.678e-06	8.678e-06	1.3572	1.3572	0.8669	0	1.648	1.648	1.422	0.8036	1.264	1.399	1.088	1.616	1.311	rs1093928	KIF26B(0)
1:245630130	1	245630130	C	?	9	8.678e-06	8.678e-06	1.3572	1.3572	0.8669	0	1.648	1.648	1.422	0.8036	1.264	1.399	1.088	1.616	1.311	rs1093927	KIF26B(0)
1:245630156	1	245630156	G	?	9	8.678e-06	8.678e-06	1.3572	1.3572	0.8669	0	1.648	1.648	1.422	0.8036	1.264	1.399	1.088	1.616	1.311	rs1093926	KIF26B(0)
14:42741371	14	42741371	A	?	9	8.701e-06	0.0008032	0.7717	0.7288	0.0479	48.84	0.4056	0.4056	0.7185	0.4326	0.781	0.8539	0.7021	1.075	0.8992	rs4415941	.
14:42741592	14	42741592	G	?	9	8.701e-06	0.0008032	0.7717	0.7288	0.0479	48.84	0.4056	0.4056	0.7185	0.4326	0.781	0.8539	0.7021	1.075	0.8992	rs11850635	.
14:42741673	14	42741673	G	?	9	8.701e-06	0.0008032	0.7717	0.7288	0.0479	48.84	0.4056	0.4056	0.7185	0.4326	0.781	0.8539	0.7021	1.075	0.8992	rs11846862	.
14:42748390	14	42748390	A	?	9	8.706e-06	0.0008069	0.7717	0.7291	0.0484	48.74	0.4056	0.4056	0.7196	0.4326	0.781	0.854	0.7021	1.079	0.8978	rs56305729	.
14:42747181	14	42747181	G	?	9	8.738e-06	0.000816	0.7717	0.7289	0.0475	48.92	0.4056	0.4056	0.7185	0.4326	0.781	0.854	0.7021	1.079	0.8988	rs7145825	.
1:245630414	1	245630414	T	?	9	8.806e-06	8.806e-06	1.3569	1.3569	0.8666	0	1.648	1.648	1.422	0.8036	1.264	1.399	1.088	1.616	1.31	rs523744	KIF26B(0)
3:173699301	3	173699301	G	?	9	9.052e-06	9.052e-06	0.5517	0.5517	0.835	0	0.4948	0.4948	0.597	0.4875	0.4837	0.3026	2.167	0.4453	0.656	rs76435655	NLGN1(0)
3:173725409	3	173725409	A	?	9	9.063e-06	9.063e-06	0.5518	0.5518	0.8344	0	0.4948	0.4948	0.6277	0.4875	0.4605	0.3026	2.196	0.4582	0.6106	rs17259117	NLGN1(0)
20:44663475	20	44663475	C	?	9	9.097e-06	0.0001426	0.7844	0.785	0.2984	16.19	0.6252	0.6252	0.7069	0.9319	1.086	0.6365	0.7758	0.9031	0.819	rs11699481	ACOT8(+177.4kb)|CD40(-83.43kb)|CDH22(-138.9kb)|CTSA(+136kb)|MMP9(+18.28kb)|NCOA5(-26.15kb)|NEURL2(+143.5kb)|PCIF1(+86.81kb)|PLTP(+122.5kb)|SLC12A5(0)|SNX21(+191.6kb)|SPATA25(+147.2kb)|ZNF335(+62.64kb)|ZSWIM1(+149.6kb)|ZSWIM3(+155.7kb)
14:42742968	14	42742968	C	?	9	9.104e-06	0.0008376	0.7722	0.7294	0.0474	48.94	0.4056	0.4056	0.7185	0.4326	0.781	0.8619	0.6981	1.075	0.898	rs8006854	.
14:42743438	14	42743438	T	?	9	9.104e-06	0.0008376	0.7722	0.7294	0.0474	48.94	0.4056	0.4056	0.7185	0.4326	0.781	0.8619	0.6981	1.075	0.898	rs2415721	.
14:42743586	14	42743586	C	?	9	9.104e-06	0.0008376	0.7722	0.7294	0.0474	48.94	0.4056	0.4056	0.7185	0.4326	0.781	0.8619	0.6981	1.075	0.898	rs2415722	.
14:42743640	14	42743640	A	?	9	9.104e-06	0.0008376	0.7722	0.7294	0.0474	48.94	0.4056	0.4056	0.7185	0.4326	0.781	0.8619	0.6981	1.075	0.898	rs8007019	.
14:42743714	14	42743714	G	?	9	9.104e-06	0.0008376	0.7722	0.7294	0.0474	48.94	0.4056	0.4056	0.7185	0.4326	0.781	0.8619	0.6981	1.075	0.898	rs8008092	.
14:42743807	14	42743807	G	?	9	9.104e-06	0.0008376	0.7722	0.7294	0.0474	48.94	0.4056	0.4056	0.7185	0.4326	0.781	0.8619	0.6981	1.075	0.898	rs8006917	.
14:42745388	14	42745388	C	?	9	9.15e-06	0.0008415	0.7722	0.7295	0.0474	48.93	0.4056	0.4056	0.7185	0.4326	0.781	0.8619	0.7021	1.075	0.898	rs58442119	.
14:42746004	14	42746004	G	?	9	9.15e-06	0.0008415	0.7722	0.7295	0.0474	48.93	0.4056	0.4056	0.7185	0.4326	0.781	0.8619	0.7021	1.075	0.898	rs7161075	.
22:48409068	22	48409068	C	?	9	9.27e-06	9.27e-06	1.4424	1.4424	0.8653	0	1.662	1.662	1.514	1.007	1.606	1.126	1.904	2.088	1.435	rs5768271	.
14:42746269	14	42746269	G	?	9	9.285e-06	0.0008599	0.7723	0.7296	0.0469	49.05	0.4056	0.4056	0.7185	0.4326	0.781	0.8619	0.7021	1.079	0.898	rs56069857	.
4:26177356	4	26177356	G	?	9	9.39e-06	9.39e-06	0.7368	0.7368	0.7266	0	0.57	0.57	0.8633	0.7417	0.8071	0.6235	1.362	0.5361	0.7206	rs6847390	RBPJ(-144kb)
11:76450908	11	76450908	A	?	8	9.493e-06	9.493e-06	0.7325	0.7325	0.566	0	0.8336	0.8336	0.6751	0.7224	0.5928	0.8792	0.2526	NA	0.793	rs12362105	ACER3(-121kb)|C11orf30(+188.3kb)|GUCY2EP(+18.08kb)|LRRC32(+69.12kb)|TSKU(-42.45kb)
2:159213758	2	159213758	T	?	9	9.495e-06	9.495e-06	1.3252	1.3252	0.8781	0	1.74	1.74	1.183	1.396	1.281	1.525	2.089	1.166	1.297	rs77150481	CCDC148(0)|CCDC148-AS1(+121.1kb)|PKP4(-99.72kb)
19:44098903	19	44098903	T	?	9	9.6e-06	0.0003066	1.3002	1.307	0.2292	24.1	1.509	1.509	1.156	1.283	1.312	1.038	0.6073	2.29	1.452	rs304726	CADM4(-27.62kb)|ETHE1(+67.51kb)|IRGC(-121.3kb)|IRGQ(0)|KCNN4(-171.8kb)|LYPD3(+129.1kb)|PHLDB3(+89.92kb)|PINLYP(+12.65kb)|PLAUR(-51.34kb)|SMG9(-136.4kb)|SRRM5(-17.35kb)|TEX101(+176.1kb)|XRCC1(+19.17kb)|ZNF428(-12.47kb)|ZNF575(+58.62kb)|ZNF576(-1.64kb)
2:159207367	2	159207367	T	?	9	9.657e-06	9.657e-06	1.3249	1.3249	0.8779	0	1.74	1.74	1.183	1.396	1.281	1.525	2.089	1.166	1.296	rs78219577	CCDC148(0)|CCDC148-AS1(+114.7kb)|PKP4(-106.1kb)
2:159207713	2	159207713	G	?	9	9.657e-06	9.657e-06	1.3249	1.3249	0.8779	0	1.74	1.74	1.183	1.396	1.281	1.525	2.089	1.166	1.296	rs113558390	CCDC148(0)|CCDC148-AS1(+115kb)|PKP4(-105.8kb)
3:145164348	3	145164348	G	?	9	9.784e-06	0.005348	1.3605	1.4568	0.0043	64.22	4.037	4.037	1.26	1.449	1.755	1.242	0.3535	0.8297	1.26	rs4681097	.
3:173789865	3	173789865	A	?	9	9.87e-06	9.87e-06	0.5537	0.5537	0.9238	0	0.4948	0.4948	0.6051	0.2954	0.5217	0.4282	2.196	0.4799	0.6042	rs115148113	NLGN1(0)
11:76445728	11	76445728	T	?	8	9.911e-06	9.911e-06	0.7347	0.7347	0.6402	0	0.824	0.824	0.6815	0.7697	0.6044	0.8376	0.2526	NA	0.7978	rs28428842	ACER3(-126.2kb)|C11orf30(+183.1kb)|GUCY2EP(+12.9kb)|LRRC32(+63.94kb)|TSKU(-47.63kb)
19:44098197	19	44098197	A	?	9	9.919e-06	0.0001689	1.299	1.3032	0.2773	18.6	1.509	1.509	1.156	1.283	1.321	1.038	0.6073	2.147	1.451	rs427115	CADM4(-28.32kb)|ETHE1(+66.8kb)|IRGC(-122kb)|IRGQ(0)|KCNN4(-172.5kb)|LYPD3(+128.4kb)|PHLDB3(+89.21kb)|PINLYP(+11.94kb)|PLAUR(-52.05kb)|SMG9(-137.1kb)|SRRM5(-18.06kb)|TEX101(+175.4kb)|XRCC1(+18.47kb)|ZNF428(-13.18kb)|ZNF575(+57.91kb)|ZNF576(-2.346kb)
14:42738441	14	42738441	C	?	9	9.924e-06	0.0002964	0.7766	0.7536	0.161	32.12	0.4446	0.4446	0.7372	0.5021	0.8405	0.7903	0.7073	1.051	0.878	rs8008365	.
14:42738514	14	42738514	G	?	9	9.924e-06	0.0002964	0.7766	0.7536	0.161	32.12	0.4446	0.4446	0.7372	0.5021	0.8405	0.7903	0.7073	1.051	0.878	rs8008074	.
1:245629277	1	245629277	A	?	9	1.002e-05	1.002e-05	1.3543	1.3543	0.8638	0	1.648	1.648	1.422	0.8036	1.264	1.399	1.088	1.616	1.301	rs1100095	KIF26B(0)
1:245629331	1	245629331	A	?	9	1.002e-05	1.002e-05	1.3543	1.3543	0.8638	0	1.648	1.648	1.422	0.8036	1.264	1.399	1.088	1.616	1.301	rs1093929	KIF26B(0)
7:21774492	7	21774492	A	?	9	1.012e-05	1.012e-05	0.6639	0.6639	0.7559	0	0.4775	0.4775	0.8226	0.8034	0.5284	0.5757	0.4057	0.9355	0.6304	rs73275654	CDCA7L(-166kb)|DNAH11(0)
2:37556864	2	37556864	G	?	9	1.016e-05	7.317e-05	0.6774	0.6666	0.3035	15.6	0.3461	0.3461	0.8036	0.5429	0.4851	0.8818	0.5732	1.062	0.6402	rs6751012	CEBPZ(+98.12kb)|EIF2AK2(+172.7kb)|LOC100505876(+125kb)|NDUFAF7(+80.56kb)|PRKD3(+12.64kb)|QPCT(-14.89kb)|SULT6B1(+141.2kb)
1:216281381	1	216281381	C	?	9	1.027e-05	1.027e-05	1.2856	1.2856	0.7686	0	1.068	1.068	1.499	1.236	1.255	1.117	2.478	1.228	1.278	rs35963782	USH2A(0)
8:29821320	8	29821320	T	?	9	1.033e-05	1.033e-05	1.5427	1.5427	0.6093	0	1.172	1.172	1.741	2.066	0.9648	1.559	0.8821	2.592	1.722	rs3847129	DCTN6(-192.5kb)|FAM183CP(+10.2kb)|LEPROTL1(-131.6kb)|MBOAT4(-167.9kb)|MIR548O2(-98.94kb)|MIR3148(+6.456kb)|TMEM66(-99.31kb)
22:48410660	22	48410660	G	?	9	1.034e-05	1.034e-05	1.4345	1.4345	0.9293	0	1.542	1.542	1.541	1.073	1.56	1.175	1.904	2.145	1.406	rs5768273	.
14:89685881	14	89685881	A	?	9	1.044e-05	1.044e-05	1.893	1.893	0.5815	0	2.033	2.033	1.812	2.41	0.775	3.156	6.65	1.636	1.81	rs76266980	FOXN3(0)|FOXN3-AS1(-197.8kb)
3:74321141	3	74321141	T	?	9	1.068e-05	1.068e-05	1.2687	1.2687	0.9412	0	1.555	1.555	1.298	1.184	1.338	1.249	0.9835	0.9747	1.245	rs541653	CNTN3(0)
11:76444669	11	76444669	C	?	8	1.07e-05	1.07e-05	0.7359	0.7359	0.6548	0	0.824	0.824	0.6886	0.7697	0.6044	0.8376	0.2526	NA	0.7951	rs56335423	ACER3(-127.2kb)|C11orf30(+182.1kb)|GUCY2EP(+11.84kb)|LRRC32(+62.88kb)|TSKU(-48.69kb)
18:11042162	18	11042162	G	?	9	1.074e-05	1.074e-05	1.6831	1.6831	0.93	0	3.1	3.1	1.486	2.878	1.693	1.891	1.239	1.924	1.506	rs76105557	PIEZO2(0)
11:76439068	11	76439068	G	?	8	1.077e-05	1.077e-05	0.7595	0.7595	0.8392	0	0.6385	0.6385	0.7327	0.7787	0.662	0.7735	0.4935	NA	0.8664	rs11236909	ACER3(-132.8kb)|C11orf30(+176.5kb)|GUCY2EP(+6.235kb)|LRRC32(+57.28kb)|TSKU(-54.29kb)
22:34162371	22	34162371	G	?	9	1.077e-05	1.077e-05	1.9205	1.9205	0.7648	0	3.681	3.681	2.164	6.716	1.869	1.953	1.489	1.454	1.534	rs117752182	LARGE(0)|LARGE-AS1(+15.57kb)
14:42743101	14	42743101	G	?	9	1.093e-05	0.0008695	0.7739	0.7328	0.053	47.83	0.4056	0.4056	0.7185	0.449	0.781	0.8619	0.6981	1.075	0.9008	rs8005646	.
11:76440427	11	76440427	G	?	8	1.106e-05	1.106e-05	0.7363	0.7363	0.6393	0	0.824	0.824	0.6886	0.7697	0.6001	0.8376	0.2526	NA	0.799	rs17812296	ACER3(-131.5kb)|C11orf30(+177.8kb)|GUCY2EP(+7.594kb)|LRRC32(+58.64kb)|TSKU(-52.93kb)
3:173754230	3	173754230	C	?	9	1.106e-05	1.106e-05	0.5569	0.5569	0.8833	0	0.4948	0.4948	0.6337	0.4875	0.4187	0.3575	2.196	0.5046	0.6106	rs76328678	NLGN1(0)
11:76438971	11	76438971	A	?	8	1.108e-05	1.108e-05	0.7598	0.7598	0.8364	0	0.6385	0.6385	0.7327	0.7787	0.662	0.7735	0.4935	NA	0.8674	rs11236908	ACER3(-132.9kb)|C11orf30(+176.4kb)|GUCY2EP(+6.138kb)|LRRC32(+57.18kb)|TSKU(-54.38kb)
11:76438212	11	76438212	T	?	8	1.111e-05	1.111e-05	0.7595	0.7595	0.8421	0	0.6385	0.6385	0.7327	0.7787	0.662	0.7784	0.4935	NA	0.8652	rs4945110	ACER3(-133.7kb)|C11orf30(+175.6kb)|GUCY2EP(+5.379kb)|LRRC32(+56.42kb)|TSKU(-55.14kb)
11:76440642	11	76440642	T	?	8	1.112e-05	1.112e-05	0.7363	0.7363	0.6389	0	0.824	0.824	0.6886	0.7697	0.6001	0.8376	0.2526	NA	0.7992	rs56203693	ACER3(-131.3kb)|C11orf30(+178.1kb)|GUCY2EP(+7.809kb)|LRRC32(+58.85kb)|TSKU(-52.71kb)
16:82661744	16	82661744	A	?	9	1.136e-05	0.001704	1.2689	1.2727	0.1183	37.58	1.806	1.806	1.194	1.197	1.348	1.409	1.192	0.6052	1.272	rs8060301	CDH13(0)
11:76437365	11	76437365	C	?	8	1.143e-05	1.143e-05	0.76	0.76	0.8112	0	0.6385	0.6385	0.7327	0.7787	0.6556	0.7674	0.4935	NA	0.8735	rs10899269	ACER3(-134.6kb)|C11orf30(+174.8kb)|GUCY2EP(+4.532kb)|LRRC32(+55.57kb)|TSKU(-55.99kb)
11:76444616	11	76444616	C	?	8	1.153e-05	1.153e-05	0.7367	0.7367	0.6527	0	0.824	0.824	0.6886	0.7697	0.6044	0.8376	0.254	NA	0.7978	rs55698208	ACER3(-127.3kb)|C11orf30(+182kb)|GUCY2EP(+11.78kb)|LRRC32(+62.82kb)|TSKU(-48.74kb)
11:76444687	11	76444687	T	?	8	1.153e-05	1.153e-05	0.7367	0.7367	0.6527	0	0.824	0.824	0.6886	0.7697	0.6044	0.8376	0.254	NA	0.7978	rs55920167	ACER3(-127.2kb)|C11orf30(+182.1kb)|GUCY2EP(+11.85kb)|LRRC32(+62.9kb)|TSKU(-48.67kb)
20:60997040	20	60997040	A	?	7	1.176e-05	1.176e-05	0.7829	0.7829	0.5197	0	0.6072	0.6072	0.9088	0.767	0.8431	0.6754	NA	NA	0.7627	rs6121588	ADRM1(+113.1kb)|C20orf166(-150.6kb)|C20orf166-AS1(-144.4kb)|CABLES2(+14.7kb)|GATA5(-41.51kb)|LAMA5(+54.67kb)|MIR1-1(-154.5kb)|MIR133A2(-165.1kb)|MIR4758(+89.43kb)|OSBPL2(+125.8kb)|RBBP8NL(0)|RPS21(+33.46kb)
1:245630595	1	245630595	T	?	9	1.178e-05	1.178e-05	1.351	1.351	0.8599	0	1.648	1.648	1.422	0.8036	1.264	1.399	1.088	1.616	1.29	rs608295	KIF26B(0)
1:245630934	1	245630934	T	?	9	1.178e-05	1.178e-05	1.351	1.351	0.8599	0	1.648	1.648	1.422	0.8036	1.264	1.399	1.088	1.616	1.29	rs1093925	KIF26B(0)
1:245631065	1	245631065	T	?	9	1.178e-05	1.178e-05	1.351	1.351	0.8599	0	1.648	1.648	1.422	0.8036	1.264	1.399	1.088	1.616	1.29	rs1093924	KIF26B(0)
1:245631331	1	245631331	T	?	9	1.178e-05	1.178e-05	1.351	1.351	0.8599	0	1.648	1.648	1.422	0.8036	1.264	1.399	1.088	1.616	1.29	rs1093923	KIF26B(0)
11:76439652	11	76439652	G	?	8	1.184e-05	1.184e-05	0.7605	0.7605	0.8353	0	0.6385	0.6385	0.7327	0.7787	0.662	0.7796	0.4935	NA	0.8674	rs11236910	ACER3(-132.3kb)|C11orf30(+177.1kb)|GUCY2EP(+6.819kb)|LRRC32(+57.86kb)|TSKU(-53.7kb)
10:7513822	10	7513822	T	?	9	1.203e-05	0.002391	1.2793	1.3087	0.0502	48.38	1.18	1.18	1.435	1.316	1.128	1.977	0.9532	1.678	1.018	rs2243628	ITIH5(-87.41kb)|SFMBT2(+60.37kb)
3:59280644	3	59280644	C	?	9	1.204e-05	1.204e-05	1.8958	1.8958	0.4951	0	7.569	7.569	1.343	2.951	2.903	2.374	3.841	1.323	1.569	rs114103767	.
1:245631778	1	245631778	G	?	9	1.21e-05	1.21e-05	1.3505	1.3505	0.8472	0	1.648	1.648	1.436	0.8036	1.244	1.399	1.088	1.616	1.286	rs1093922	KIF26B(0)
11:76441077	11	76441077	T	?	8	1.225e-05	1.225e-05	0.7609	0.7609	0.8805	0	0.6385	0.6385	0.7327	0.7787	0.662	0.7796	0.5811	NA	0.8638	rs10899271	ACER3(-130.8kb)|C11orf30(+178.5kb)|GUCY2EP(+8.244kb)|LRRC32(+59.29kb)|TSKU(-52.28kb)
22:48409785	22	48409785	T	?	9	1.231e-05	1.231e-05	1.4302	1.4302	0.9064	0	1.542	1.542	1.541	1.007	1.567	1.175	1.904	2.145	1.403	rs9627215	.
18:69599354	18	69599354	C	?	9	1.232e-05	1.232e-05	0.6976	0.6976	0.9158	0	0.7991	0.7991	0.6712	0.5996	0.5254	0.799	1.457	0.8822	0.6785	rs72968847	.
14:72553710	14	72553710	A	?	9	1.237e-05	1.237e-05	1.3489	1.3489	0.74	0	1.229	1.229	1.344	1.512	1.458	1.031	1.03	2.28	1.393	rs11158946	RGS6(0)
1:216271251	1	216271251	T	?	9	1.251e-05	1.251e-05	1.2836	1.2836	0.7918	0	1.029	1.029	1.522	1.265	1.218	1.196	1.997	1.119	1.271	rs12093058	USH2A(0)
1:216272054	1	216272054	A	?	9	1.251e-05	1.251e-05	1.2836	1.2836	0.7918	0	1.029	1.029	1.522	1.265	1.218	1.196	1.997	1.119	1.271	rs2147477	USH2A(0)
21:35974574	21	35974574	C	?	9	1.266e-05	0.0003629	1.3359	1.3231	0.274	18.98	1.802	1.802	1.295	0.8686	1.109	1.157	0.5488	1.297	1.677	rs743341	CLIC6(-67.11kb)|KCNE1(+90kb)|LINC00160(-121.5kb)|LOC100506385(-143.5kb)|RCAN1(0)|RUNX1(-185.5kb)
2:19854935	2	19854935	A	?	9	1.284e-05	0.0004746	1.3891	1.4479	0.1244	36.77	3.113	3.113	1.28	0.7934	1.376	1.493	1.503	1.374	1.247	rs10179104	.
19:44108635	19	44108635	G	?	9	1.289e-05	0.0004469	1.2947	1.3021	0.2149	25.74	1.509	1.509	1.141	1.216	1.322	1.044	0.6073	2.29	1.453	rs304719	CADM4(-17.89kb)|ETHE1(+77.24kb)|IRGC(-111.6kb)|IRGQ(+8.348kb)|KCNN4(-162kb)|LYPD3(+138.8kb)|LYPD5(-191.4kb)|PHLDB3(+99.65kb)|PINLYP(+22.38kb)|PLAUR(-41.61kb)|SMG9(-126.7kb)|SRRM5(-7.617kb)|TEX101(+185.9kb)|XRCC1(+28.9kb)|ZNF428(-2.74kb)|ZNF575(+68.35kb)|ZNF576(+4.048kb)
16:82663421	16	82663421	C	?	9	1.294e-05	0.001586	1.267	1.2734	0.1219	37.11	1.806	1.806	1.192	1.269	1.362	1.388	1.192	0.6052	1.262	rs9925671	CDH13(0)
16:82663101	16	82663101	T	?	9	1.318e-05	0.000948	1.2673	1.2735	0.1609	32.14	1.806	1.806	1.192	1.197	1.362	1.399	1.192	0.64	1.26	rs12051213	CDH13(0)
16:82662463	16	82662463	T	?	9	1.344e-05	0.00179	1.2667	1.2707	0.1207	37.27	1.806	1.806	1.192	1.197	1.361	1.388	1.192	0.6052	1.27	rs7202931	CDH13(0)
9:81725240	9	81725240	A	?	9	1.347e-05	1.347e-05	1.2806	1.2806	0.7108	0	1.608	1.608	1.227	2.06	1.219	1.197	0.7928	1.477	1.243	rs10867344	.
1:216315149	1	216315149	T	?	9	1.357e-05	2.119e-05	1.2861	1.2839	0.4204	1.67	1.034	1.034	1.546	1.266	1.279	0.9333	1.43	1.17	1.364	rs369731	USH2A(0)
14:72554343	14	72554343	G	?	9	1.381e-05	1.381e-05	1.3463	1.3463	0.7619	0	1.342	1.342	1.351	1.512	1.453	1.031	1.03	2.28	1.353	rs72719807	RGS6(0)
14:72554453	14	72554453	G	?	9	1.381e-05	1.381e-05	1.3463	1.3463	0.7619	0	1.342	1.342	1.351	1.512	1.453	1.031	1.03	2.28	1.353	rs17768636	RGS6(0)
10:7513876	10	7513876	A	?	9	1.386e-05	0.002284	1.2768	1.3059	0.0562	47.22	1.18	1.18	1.429	1.316	1.128	1.961	0.9532	1.678	1.018	rs2243629	ITIH5(-87.36kb)|SFMBT2(+60.43kb)
2:19854537	2	19854537	C	?	9	1.414e-05	0.0005285	1.3878	1.4464	0.1205	37.28	3.113	3.113	1.302	0.7934	1.426	1.467	1.502	1.323	1.22	rs10211339	.
4:93352723	4	93352723	A	?	9	1.444e-05	0.001452	1.3555	1.4425	0.0351	51.67	2.94	2.94	1.407	1.85	1.359	0.9598	0.4738	1.655	1.217	rs115653709	GRID2(0)
3:145157591	3	145157591	C	?	9	1.455e-05	0.006364	1.3521	1.4549	0.0032	65.45	4.037	4.037	1.26	1.449	1.796	1.242	0.3535	0.8185	1.227	rs1117544	.
18:11046545	18	11046545	A	?	9	1.46e-05	1.46e-05	1.6702	1.6702	0.9256	0	3.1	3.1	1.463	2.878	1.693	1.891	1.239	1.788	1.499	rs75724518	PIEZO2(0)
14:72557495	14	72557495	A	?	9	1.465e-05	1.465e-05	1.3454	1.3454	0.7963	0	1.342	1.342	1.358	1.512	1.432	1.021	1.028	2.158	1.366	rs7154337	RGS6(0)
3:56515618	3	56515618	C	?	6	1.469e-05	0.001722	3.0721	2.852	0.2362	26.43	NA	NA	1.826	2.607	1.498	NA	2.277	1.963	7.082	rs139646681	CCDC66(-75.56kb)|ERC2(+13.23kb)|FAM208A(-138.5kb)
2:159172557	2	159172557	A	?	9	1.501e-05	1.501e-05	1.2976	1.2976	0.9144	0	1.592	1.592	1.142	1.571	1.272	1.364	1.979	1.192	1.328	rs73968915	CCDC148(0)|CCDC148-AS1(+79.88kb)|PKP4(-140.9kb)|UPP2(+179.9kb)
2:159172652	2	159172652	A	?	9	1.501e-05	1.501e-05	1.2976	1.2976	0.9144	0	1.592	1.592	1.142	1.571	1.272	1.364	1.979	1.192	1.328	rs17808559	CCDC148(0)|CCDC148-AS1(+79.97kb)|PKP4(-140.8kb)|UPP2(+180kb)
2:159199835	2	159199835	T	?	9	1.502e-05	1.502e-05	1.3168	1.3168	0.8613	0	1.74	1.74	1.177	1.396	1.234	1.525	2.089	1.166	1.296	rs80319144	CCDC148(0)|CCDC148-AS1(+107.2kb)|PKP4(-113.6kb)
2:159202835	2	159202835	C	?	9	1.502e-05	1.502e-05	1.3168	1.3168	0.8613	0	1.74	1.74	1.177	1.396	1.234	1.525	2.089	1.166	1.296	rs2883853	CCDC148(0)|CCDC148-AS1(+110.2kb)|PKP4(-110.6kb)
18:11039346	18	11039346	A	?	9	1.538e-05	1.538e-05	1.6647	1.6647	0.9263	0	3.1	3.1	1.486	2.878	1.693	1.891	1.283	1.341	1.509	rs76580155	PIEZO2(0)
4:93354765	4	93354765	A	?	9	1.538e-05	0.001495	1.354	1.4419	0.0346	51.8	2.94	2.94	1.407	1.85	1.359	0.9598	0.4738	1.655	1.213	rs12641104	GRID2(0)
4:26174563	4	26174563	T	?	9	1.564e-05	1.564e-05	0.7415	0.7415	0.734	0	0.57	0.57	0.871	0.7417	0.8126	0.6376	1.325	0.5361	0.7255	rs11730491	RBPJ(-146.8kb)
16:82666139	16	82666139	A	?	9	1.578e-05	0.0007641	1.2687	1.2645	0.22	25.15	1.416	1.416	1.167	1.113	1.57	1.439	1.17	0.6394	1.307	rs2116971	CDH13(0)
14:72557073	14	72557073	A	?	9	1.581e-05	1.581e-05	1.3437	1.3437	0.774	0	1.342	1.342	1.358	1.512	1.432	1.007	1.028	2.158	1.368	rs56340051	RGS6(0)
14:89692233	14	89692233	T	?	9	1.589e-05	1.589e-05	1.8745	1.8745	0.436	0	2.033	2.033	1.778	2.41	0.7154	3.469	6.587	1.636	1.777	rs55984749	FOXN3(0)|FOXN3-AS1(-191.5kb)
1:172803005	1	172803005	A	?	9	1.611e-05	1.611e-05	1.2672	1.2672	0.4867	0	1.402	1.402	1.078	1.151	1.352	1.569	2.866	1.227	1.231	rs12118404	FASLG(+167kb)
2:159195225	2	159195225	G	?	9	1.635e-05	1.635e-05	1.3154	1.3154	0.882	0	1.74	1.74	1.186	1.396	1.227	1.502	2.089	1.166	1.296	rs11686762	CCDC148(0)|CCDC148-AS1(+102.5kb)|PKP4(-118.2kb)
1:245626590	1	245626590	G	?	9	1.647e-05	1.647e-05	1.3436	1.3436	0.8187	0	1.585	1.585	1.44	0.7961	1.245	1.37	1.061	1.745	1.277	rs819743	KIF26B(0)
17:14937667	17	14937667	T	?	9	1.649e-05	0.0002953	0.6841	0.6941	0.317	14.06	1.275	1.275	0.57	1.044	0.4898	0.5524	0.7573	0.8402	0.7092	rs72637338	CDRT7(+2.393kb)|CDRT8(-70.63kb)|PMP22(-195.4kb)
4:26174799	4	26174799	T	?	9	1.66e-05	1.66e-05	0.7422	0.7422	0.7348	0	0.57	0.57	0.871	0.7417	0.8126	0.6376	1.325	0.5361	0.7275	rs10000798	RBPJ(-146.5kb)
4:26177372	4	26177372	C	?	9	1.675e-05	1.675e-05	0.7441	0.7441	0.7319	0	0.57	0.57	0.8708	0.7417	0.8071	0.6401	1.362	0.5361	0.732	rs6824647	RBPJ(-144kb)
16:82664670	16	82664670	C	?	9	1.682e-05	0.001725	1.2631	1.2727	0.1172	37.73	1.775	1.775	1.148	1.213	1.388	1.475	1.175	0.6373	1.264	rs10871434	CDH13(0)
2:7581220	2	7581220	T	?	9	1.682e-05	1.682e-05	1.4372	1.4372	0.7805	0	1.04	1.04	1.531	1.759	1.419	1.892	1.236	0.968	1.371	rs10181784	LOC100506274(0)
3:145148935	3	145148935	C	?	9	1.682e-05	0.006654	1.3484	1.4522	0.0031	65.56	4.037	4.037	1.229	1.449	1.796	1.242	0.3535	0.8185	1.244	rs73157229	.
19:44102338	19	44102338	T	?	9	1.687e-05	0.0006621	1.2904	1.2981	0.1983	27.67	1.509	1.509	1.141	1.216	1.315	1.024	0.6073	2.29	1.452	rs304723	CADM4(-24.18kb)|ETHE1(+70.94kb)|IRGC(-117.9kb)|IRGQ(+2.051kb)|KCNN4(-168.3kb)|LYPD3(+132.5kb)|LYPD5(-197.7kb)|PHLDB3(+93.35kb)|PINLYP(+16.08kb)|PLAUR(-47.91kb)|SMG9(-133kb)|SRRM5(-13.91kb)|TEX101(+179.6kb)|XRCC1(+22.61kb)|ZNF428(-9.037kb)|ZNF575(+62.05kb)|ZNF576(0)
4:93342759	4	93342759	T	?	9	1.689e-05	0.001461	1.3515	1.4307	0.0437	49.7	2.942	2.942	1.39	1.717	1.367	0.9598	0.4738	1.666	1.23	rs12647443	GRID2(0)
2:7581451	2	7581451	A	?	9	1.697e-05	1.697e-05	1.4368	1.4368	0.7802	0	1.04	1.04	1.531	1.759	1.419	1.892	1.235	0.968	1.37	rs13425721	LOC100506274(0)
17:74885649	17	74885649	A	?	9	1.703e-05	0.0006316	1.3642	1.3989	0.1551	32.84	2.115	2.115	1.179	2.117	1.433	1.069	0.4163	1.909	1.441	rs1622075	JMJD6(+162.8kb)|LINC00338(-199.1kb)|METTL23(+155.7kb)|MFSD11(+110.3kb)|MGAT5B(0)|MIR636(+153kb)|MXRA7(+178.6kb)|SCARNA16(-199.7kb)|SEC14L1(-199.1kb)|SRSF2(+152.2kb)
11:76442059	11	76442059	C	?	8	1.704e-05	1.704e-05	0.765	0.765	0.9076	0	0.676	0.676	0.7327	0.7787	0.6594	0.7796	0.5823	NA	0.8662	rs4421767	ACER3(-129.9kb)|C11orf30(+179.5kb)|GUCY2EP(+9.226kb)|LRRC32(+60.27kb)|TSKU(-51.3kb)
11:76459504	11	76459504	G	?	8	1.708e-05	1.708e-05	0.7431	0.7431	0.5764	0	0.8879	0.8879	0.6779	0.6926	0.6409	0.8339	0.2414	NA	0.8113	rs11822653	ACER3(-112.4kb)|C11orf30(+196.9kb)|GUCY2EP(+26.67kb)|LRRC32(+77.71kb)|TSKU(-33.85kb)
11:76448553	11	76448553	T	?	8	1.712e-05	1.712e-05	0.7429	0.7429	0.4842	0	0.8827	0.8827	0.6667	0.7221	0.5994	0.8322	0.2526	NA	0.8323	rs7122848	ACER3(-123.4kb)|C11orf30(+186kb)|GUCY2EP(+15.72kb)|LRRC32(+66.76kb)|TSKU(-44.8kb)
19:44109856	19	44109856	C	?	9	1.748e-05	0.000385	1.2885	1.2933	0.2479	21.95	1.479	1.479	1.139	1.216	1.285	1.065	0.5886	2.234	1.452	rs304720	CADM4(-16.66kb)|ETHE1(+78.46kb)|IRGC(-110.4kb)|IRGQ(+9.569kb)|KCNN4(-160.8kb)|LYPD3(+140kb)|LYPD5(-190.2kb)|PHLDB3(+100.9kb)|PINLYP(+23.6kb)|PLAUR(-40.39kb)|SMG9(-125.4kb)|SRRM5(-6.396kb)|TEX101(+187.1kb)|XRCC1(+30.13kb)|ZNF428(-1.519kb)|ZNF575(+69.57kb)|ZNF576(+5.269kb)
15:67249951	15	67249951	A	?	9	1.75e-05	1.75e-05	0.6491	0.6491	0.6092	0	0.6251	0.6251	0.7151	1.085	0.4684	0.7367	0.368	1.286	0.5564	rs56368938	SMAD3(-108.2kb)|SMAD6(+175.6kb)
15:67250491	15	67250491	A	?	9	1.75e-05	1.75e-05	0.6491	0.6491	0.6092	0	0.6251	0.6251	0.7151	1.085	0.4684	0.7367	0.368	1.286	0.5564	rs57147322	SMAD3(-107.7kb)|SMAD6(+176.2kb)
15:67250510	15	67250510	C	?	9	1.75e-05	1.75e-05	0.6491	0.6491	0.6092	0	0.6251	0.6251	0.7151	1.085	0.4684	0.7367	0.368	1.286	0.5564	rs56364706	SMAD3(-107.7kb)|SMAD6(+176.2kb)
11:76434820	11	76434820	G	?	8	1.761e-05	1.761e-05	0.7653	0.7653	0.8686	0	0.6833	0.6833	0.7203	0.7783	0.7029	0.7375	0.4947	NA	0.8814	rs1893306	ACER3(-137.1kb)|C11orf30(+172.2kb)|GUCY2EP(+1.987kb)|LRRC32(+53.03kb)|TSKU(-58.54kb)
2:159165286	2	159165286	C	?	9	1.774e-05	1.774e-05	1.3139	1.3139	0.9312	0	1.605	1.605	1.186	1.396	1.241	1.502	2.069	1.166	1.305	rs74504705	CCDC148(0)|CCDC148-AS1(+72.6kb)|PKP4(-148.2kb)|UPP2(+172.6kb)
2:159167162	2	159167162	C	?	9	1.774e-05	1.774e-05	1.3139	1.3139	0.9312	0	1.605	1.605	1.186	1.396	1.241	1.502	2.069	1.166	1.305	rs191570886	CCDC148(0)|CCDC148-AS1(+74.48kb)|PKP4(-146.3kb)|UPP2(+174.5kb)
15:67250876	15	67250876	T	?	9	1.788e-05	1.788e-05	0.6487	0.6487	0.6122	0	0.6251	0.6251	0.7033	1.085	0.4684	0.7367	0.3316	1.286	0.5664	rs12593018	SMAD3(-107.3kb)|SMAD6(+176.5kb)
7:21772753	7	21772753	T	?	9	1.793e-05	1.793e-05	0.6776	0.6776	0.8685	0	0.5191	0.5191	0.805	0.7576	0.5436	0.5946	0.4057	0.9431	0.6697	rs36105386	CDCA7L(-167.8kb)|DNAH11(0)
14:94050966	14	94050966	T	?	8	1.801e-05	1.801e-05	0.5715	0.5715	0.444	0	2.456	2.456	0.5861	0.5906	0.5129	0.5108	0.2463	NA	0.4952	rs71431603	PRIMA1(-133.7kb)|UNC79(0)
2:159159073	2	159159073	A	?	9	1.806e-05	1.806e-05	1.3131	1.3131	0.9213	0	1.605	1.605	1.183	1.396	1.232	1.514	2.069	1.166	1.305	rs113647454	CCDC148(0)|CCDC148-AS1(+66.39kb)|PKP4(-154.4kb)|UPP2(+166.4kb)
14:72553985	14	72553985	C	?	9	1.82e-05	1.82e-05	1.3405	1.3405	0.7479	0	1.229	1.229	1.356	1.512	1.458	1.031	1.03	2.28	1.353	rs72737869	RGS6(0)
8:29814414	8	29814414	A	?	9	1.822e-05	1.822e-05	1.5226	1.5226	0.656	0	1.172	1.172	1.692	1.702	0.9723	1.559	0.8568	2.592	1.72	rs755926	DCTN6(-199.4kb)|FAM183CP(+3.291kb)|LEPROTL1(-138.5kb)|MBOAT4(-174.8kb)|MIR548O2(-105.8kb)|MIR3148(-0.373kb)|TMEM66(-106.2kb)
10:7514518	10	7514518	T	?	9	1.823e-05	0.002316	1.2724	1.3011	0.0631	45.95	1.18	1.18	1.415	1.369	1.091	1.954	0.9522	1.663	1.027	rs2255570	ITIH5(-86.71kb)|SFMBT2(+61.07kb)
14:72553387	14	72553387	C	?	9	1.858e-05	1.858e-05	1.3402	1.3402	0.7474	0	1.229	1.229	1.344	1.512	1.458	1.031	1.03	2.28	1.363	rs11158944	RGS6(0)
14:72553421	14	72553421	T	?	9	1.858e-05	1.858e-05	1.3402	1.3402	0.7474	0	1.229	1.229	1.344	1.512	1.458	1.031	1.03	2.28	1.363	rs11158945	RGS6(0)
9:77806643	9	77806643	G	?	9	1.869e-05	1.869e-05	0.6629	0.6629	0.9056	0	0.475	0.475	0.6754	0.7495	0.6384	0.7014	0.3831	1.351	0.6412	rs12341208	C9orf41(+163.3kb)|NMRK1(+103.5kb)|OSTF1(+44.53kb)
5:67337200	5	67337200	T	?	9	1.896e-05	1.896e-05	0.6268	0.6268	0.5364	0	0.5494	0.5494	0.5493	1.406	0.6285	0.4178	1.102	0.4088	0.8186	rs150118	PIK3R1(-174.4kb)
9:81740654	9	81740654	A	?	9	1.9e-05	1.9e-05	1.276	1.276	0.7261	0	1.53	1.53	1.246	2.19	1.208	1.137	0.8864	1.477	1.245	rs10867347	.
8:138953015	8	138953015	T	?	9	1.911e-05	1.911e-05	1.9873	1.9873	0.7036	0	3.691	3.691	1.517	0.6913	3.582	1.475	3.074	2.823	2.117	rs62531748	FAM135B(-189.2kb)
16:57077094	16	57077094	T	?	8	1.917e-05	0.0006953	0.7896	0.7788	0.1645	33.01	0.4648	0.4648	0.7733	0.8261	0.7661	0.9652	NA	1.009	0.8151	rs8062446	CETP(+59.34kb)|CPNE2(-49.36kb)|FAM192A(-109.3kb)|HERPUD1(+99.3kb)|MIR138-2(+184.6kb)|NLRC5(0)|NUP93(+198.2kb)|RSPRY1(-143.1kb)|SLC12A3(+127.3kb)
2:159187366	2	159187366	G	?	9	1.918e-05	1.918e-05	1.3122	1.3122	0.9321	0	1.605	1.605	1.186	1.396	1.25	1.502	2.069	1.166	1.296	rs145834406	CCDC148(0)|CCDC148-AS1(+94.68kb)|PKP4(-126.1kb)|UPP2(+194.7kb)
2:159189341	2	159189341	C	?	9	1.918e-05	1.918e-05	1.3122	1.3122	0.9321	0	1.605	1.605	1.186	1.396	1.25	1.502	2.069	1.166	1.296	rs144393110	CCDC148(0)|CCDC148-AS1(+96.66kb)|PKP4(-124.1kb)|UPP2(+196.7kb)
15:67242508	15	67242508	G	?	9	1.923e-05	1.923e-05	0.6524	0.6524	0.5874	0	0.6251	0.6251	0.7363	1.085	0.4674	0.7232	0.3681	1.286	0.5538	rs74612339	SMAD3(-115.7kb)|SMAD6(+168.2kb)
19:44114014	19	44114014	G	?	9	1.924e-05	0.0003138	1.2867	1.2888	0.2747	18.9	1.398	1.398	1.146	1.216	1.296	1.065	0.5886	2.234	1.452	rs365063	CADM4(-12.51kb)|ETHE1(+82.62kb)|IRGC(-106.2kb)|IRGQ(+13.73kb)|KCNN4(-156.7kb)|LYPD3(+144.2kb)|LYPD5(-186.1kb)|PHLDB3(+105kb)|PINLYP(+27.76kb)|PLAUR(-36.23kb)|SMG9(-121.3kb)|SRRM5(-2.238kb)|TEX101(+191.2kb)|XRCC1(+34.28kb)|ZNF428(0)|ZNF575(+73.73kb)|ZNF576(+9.427kb)
15:67249276	15	67249276	G	?	9	1.944e-05	1.944e-05	0.6506	0.6506	0.6024	0	0.6251	0.6251	0.7151	1.085	0.4684	0.7514	0.368	1.286	0.5564	rs1381545	SMAD3(-108.9kb)|SMAD6(+174.9kb)
15:67249297	15	67249297	G	?	9	1.944e-05	1.944e-05	0.6506	0.6506	0.6024	0	0.6251	0.6251	0.7151	1.085	0.4684	0.7514	0.368	1.286	0.5564	rs2899721	SMAD3(-108.9kb)|SMAD6(+175kb)
15:67249470	15	67249470	A	?	9	1.944e-05	1.944e-05	0.6506	0.6506	0.6024	0	0.6251	0.6251	0.7151	1.085	0.4684	0.7514	0.368	1.286	0.5564	rs74019851	SMAD3(-108.7kb)|SMAD6(+175.1kb)
15:67249473	15	67249473	A	?	9	1.944e-05	1.944e-05	0.6506	0.6506	0.6024	0	0.6251	0.6251	0.7151	1.085	0.4684	0.7514	0.368	1.286	0.5564	rs74019852	SMAD3(-108.7kb)|SMAD6(+175.1kb)
16:82662268	16	82662268	T	?	9	1.967e-05	0.0008034	1.2611	1.2671	0.1921	28.4	1.806	1.806	1.171	1.191	1.363	1.366	1.134	0.6664	1.27	rs4783244	CDH13(0)
9:680905	9	680905	T	?	9	1.973e-05	0.005104	1.2693	1.2675	0.067	45.27	0.9305	0.9305	1.363	1.262	1.608	0.8994	2.018	2.007	1.237	rs1323263	DMRT1(-160.8kb)|KANK1(0)
7:21772838	7	21772838	C	?	9	1.986e-05	1.986e-05	0.6769	0.6769	0.8352	0	0.5191	0.5191	0.8067	0.7576	0.5145	0.5946	0.4057	0.9431	0.6795	rs73275646	CDCA7L(-167.7kb)|DNAH11(0)
16:82811951	16	82811951	G	?	9	2e-05	2e-05	0.6292	0.6292	0.8073	0	0.5101	0.5101	0.5946	0.5824	0.5051	1.118	0.3911	0.5923	0.6277	rs17191427	CDH13(0)
11:76436948	11	76436948	G	?	8	2.006e-05	2.006e-05	0.7674	0.7674	0.8094	0	0.6833	0.6833	0.723	0.8209	0.6599	0.7626	0.4946	NA	0.8862	rs4944120	ACER3(-135kb)|C11orf30(+174.4kb)|GUCY2EP(+4.115kb)|LRRC32(+55.16kb)|TSKU(-56.41kb)
10:7512358	10	7512358	C	?	9	2.018e-05	0.001849	1.2701	1.2947	0.0873	42.01	1.142	1.142	1.412	1.403	1.125	1.889	0.9532	1.644	1.025	rs2255237	ITIH5(-88.87kb)|SFMBT2(+58.91kb)
1:216248392	1	216248392	A	?	9	2.025e-05	2.025e-05	1.2733	1.2733	0.6007	0	1.015	1.015	1.556	1.2	1.215	1.072	1.901	1.179	1.282	rs11585423	USH2A(0)
14:42791903	14	42791903	A	?	9	2.035e-05	5.608e-05	0.7815	0.7769	0.3705	7.77	0.537	0.537	0.7366	0.5177	0.81	0.8015	0.5141	1.084	0.8805	rs4559834	.
16:27729524	16	27729524	T	?	8	2.057e-05	0.001517	1.4647	1.5689	0.0577	48.74	3.85	3.85	1.322	2.287	0.8662	1.425	NA	1.315	1.424	rs11648558	GSG1L(-69.32kb)|GTF3C1(+168.3kb)|KIAA0556(0)
1:207750568	1	207750568	T	?	9	2.073e-05	6.023e-05	1.3376	1.3508	0.3524	9.92	1.974	1.974	1.181	1.191	1.394	1.268	0.6975	2.664	1.281	rs679515	CD46(-174.8kb)|CR1(0)|CR1L(-67.89kb)|CR2(+87.33kb)
14:79407954	14	79407954	G	?	8	2.088e-05	2.088e-05	0.526	0.526	0.7667	0	0.2308	0.2308	0.5242	0.4618	1.026	0.4354	NA	1.001	0.5421	rs75427577	NRXN3(0)
11:76446795	11	76446795	G	?	8	2.103e-05	2.103e-05	0.7456	0.7456	0.5529	0	0.8827	0.8827	0.6733	0.7701	0.6157	0.837	0.2526	NA	0.8175	rs11826943	ACER3(-125.1kb)|C11orf30(+184.2kb)|GUCY2EP(+13.96kb)|LRRC32(+65kb)|TSKU(-46.56kb)
11:76447062	11	76447062	G	?	8	2.103e-05	2.103e-05	0.7456	0.7456	0.553	0	0.8827	0.8827	0.6733	0.7701	0.6157	0.837	0.2526	NA	0.8175	rs12792283	ACER3(-124.9kb)|C11orf30(+184.5kb)|GUCY2EP(+14.23kb)|LRRC32(+65.27kb)|TSKU(-46.29kb)
16:82823946	16	82823946	G	?	9	2.189e-05	2.189e-05	0.6353	0.6353	0.7914	0	0.4755	0.4755	0.5577	0.6685	0.5598	1.085	0.8107	0.5611	0.6741	rs146159956	CDH13(0)
14:42777547	14	42777547	T	?	9	2.197e-05	0.0003269	0.7835	0.7604	0.1877	28.91	0.4651	0.4651	0.7712	0.4893	0.8002	0.771	0.5981	1.104	0.8844	rs4564489	.
16:5592980	16	5592980	G	?	9	2.208e-05	0.0009819	1.303	1.3273	0.1495	33.55	1.937	1.937	1.151	0.6388	1.427	1.691	1.001	1.468	1.256	rs4643320	.
6:145678563	6	145678563	C	?	9	2.208e-05	2.208e-05	1.263	1.263	0.6007	0	1.357	1.357	1.348	1.409	1.103	1.259	1.576	2.109	1.131	rs9403691	.
14:42814628	14	42814628	T	?	9	2.226e-05	0.0004849	0.7849	0.7556	0.1378	35.02	0.4443	0.4443	0.7632	0.4978	0.8152	0.8051	0.5266	1.09	0.8863	rs61991143	.
14:42815100	14	42815100	G	?	9	2.226e-05	0.0004849	0.7849	0.7556	0.1378	35.02	0.4443	0.4443	0.7632	0.4978	0.8152	0.8051	0.5266	1.09	0.8863	rs12184982	.
21:35970346	21	35970346	C	?	9	2.227e-05	0.001474	1.3186	1.3016	0.2039	27.01	1.769	1.769	1.212	0.9085	1.066	1.225	0.6327	1.13	1.732	rs2300392	CLIC6(-71.34kb)|KCNE1(+85.77kb)|LINC00160(-125.8kb)|LOC100506385(-147.8kb)|RCAN1(0)|RUNX1(-189.8kb)
2:159190841	2	159190841	A	?	9	2.227e-05	2.227e-05	1.3092	1.3092	0.9122	0	1.605	1.605	1.167	1.396	1.257	1.514	2.069	1.166	1.296	rs11684127	CCDC148(0)|CCDC148-AS1(+98.16kb)|PKP4(-122.6kb)|UPP2(+198.2kb)
14:42774115	14	42774115	A	?	9	2.234e-05	0.0003212	0.7839	0.7601	0.1866	29.05	0.4651	0.4651	0.7676	0.4893	0.8002	0.771	0.5981	1.082	0.891	rs55812609	.
16:82666923	16	82666923	T	?	9	2.282e-05	0.0007285	1.2591	1.264	0.2109	26.21	1.659	1.659	1.144	1.166	1.364	1.499	1.174	0.6757	1.277	rs10514548	CDH13(0)
3:173799505	3	173799505	G	?	9	2.282e-05	2.282e-05	0.5715	0.5715	0.9571	0	0.4948	0.4948	0.6272	0.4306	0.5217	0.439	2.196	0.4799	0.6124	rs150703753	NLGN1(0)
15:67243654	15	67243654	G	?	9	2.292e-05	2.292e-05	0.654	0.654	0.5701	0	0.6251	0.6251	0.7491	1.085	0.4674	0.7232	0.3681	1.286	0.5514	rs8028858	SMAD3(-114.5kb)|SMAD6(+169.3kb)
6:145671457	6	145671457	T	?	9	2.295e-05	2.295e-05	1.2624	1.2624	0.603	0	1.357	1.357	1.348	1.409	1.1	1.251	1.576	2.109	1.134	rs1856274	.
6:145671990	6	145671990	T	?	9	2.295e-05	2.295e-05	1.2624	1.2624	0.603	0	1.357	1.357	1.348	1.409	1.1	1.251	1.576	2.109	1.134	rs9322022	.
14:42778426	14	42778426	C	?	9	2.298e-05	0.0003407	0.7839	0.7605	0.1856	29.16	0.4651	0.4651	0.7712	0.4893	0.8002	0.771	0.5981	1.104	0.886	rs7152630	.
11:106754237	11	106754237	A	?	9	2.318e-05	2.318e-05	0.7573	0.7573	0.53	0	0.4448	0.4448	0.8036	0.7072	0.745	0.9886	0.9726	0.8283	0.7312	rs11211958	GUCY1A2(0)
1:216304106	1	216304106	A	?	9	2.325e-05	2.325e-05	1.2769	1.2769	0.4379	0	1.034	1.034	1.554	1.266	1.287	0.9378	1.427	1.158	1.321	rs442384	USH2A(0)
3:173786100	3	173786100	C	?	9	2.349e-05	2.349e-05	0.5738	0.5738	0.9671	0	0.4948	0.4948	0.6272	0.4306	0.5217	0.4736	2.196	0.4799	0.607	rs116293312	NLGN1(0)
11:133289056	11	133289056	G	?	9	2.351e-05	2.351e-05	1.8217	1.8217	0.9641	0	1.872	1.872	1.764	1.486	1.264	2.464	0.7204	2.809	1.844	rs76608581	OPCML(0)
11:133292162	11	133292162	T	?	9	2.355e-05	2.355e-05	1.8243	1.8243	0.9724	0	1.872	1.872	1.764	1.486	1.316	2.464	0.7204	2.809	1.806	rs75153790	OPCML(0)
2:159280501	2	159280501	G	?	9	2.356e-05	2.356e-05	1.3311	1.3311	0.7308	0	1.417	1.417	1.131	1.275	1.442	1.684	2.783	1.164	1.288	rs140436566	CCDC148(0)|CCDC148-AS1(+187.8kb)|PKP4(-32.97kb)
6:70377693	6	70377693	A	?	9	2.364e-05	2.364e-05	0.7863	0.7863	0.7064	0	0.7019	0.7019	0.7659	0.8343	0.9293	0.9625	0.7378	0.9086	0.6793	rs9354874	COL19A1(-198.8kb)|LMBRD1(-7.947kb)
14:42801325	14	42801325	T	?	9	2.365e-05	0.0004555	0.7854	0.7594	0.1579	32.51	0.4449	0.4449	0.7647	0.481	0.8234	0.7991	0.6342	1.078	0.8807	rs61991140	.
4:160169372	4	160169372	G	?	9	2.372e-05	2.372e-05	0.7911	0.7911	0.8351	0	0.6272	0.6272	0.7751	0.7224	0.7861	0.9204	0.7054	0.6253	0.8593	rs9992208	MIR3688-1(+119.3kb)|MIR3688-2(+119.3kb)|RAPGEF2(-19.62kb)
17:74877032	17	74877032	C	?	9	2.398e-05	2.398e-05	1.4359	1.4359	0.7052	0	2.27	2.27	1.547	2.032	1.193	1.065	1.577	1.734	1.37	rs9890632	JMJD6(+154.2kb)|METTL23(+147.1kb)|MFSD11(+101.7kb)|MGAT5B(0)|MIR636(+144.4kb)|MXRA7(+170kb)|SRSF2(+143.5kb)
17:74877107	17	74877107	T	?	9	2.398e-05	2.398e-05	1.4359	1.4359	0.7052	0	2.27	2.27	1.547	2.032	1.193	1.065	1.577	1.734	1.37	rs9910060	JMJD6(+154.2kb)|METTL23(+147.1kb)|MFSD11(+101.8kb)|MGAT5B(0)|MIR636(+144.5kb)|MXRA7(+170.1kb)|SRSF2(+143.6kb)
11:76457194	11	76457194	A	?	8	2.4e-05	2.4e-05	0.7455	0.7455	0.5069	0	0.8879	0.8879	0.6585	0.7151	0.6409	0.8677	0.2469	NA	0.8211	rs7108890	ACER3(-114.7kb)|C11orf30(+194.6kb)|GUCY2EP(+24.36kb)|LRRC32(+75.4kb)|TSKU(-36.16kb)
20:60998081	20	60998081	C	?	7	2.405e-05	2.405e-05	0.79	0.79	0.5212	0	0.6072	0.6072	0.9088	0.7829	0.8533	0.6754	NA	NA	0.7786	rs4925233	ADRM1(+114.2kb)|C20orf166(-149.6kb)|C20orf166-AS1(-143.4kb)|CABLES2(+15.74kb)|GATA5(-40.47kb)|LAMA5(+55.71kb)|MIR1-1(-153.4kb)|MIR133A2(-164kb)|MIR4758(+90.47kb)|OSBPL2(+126.8kb)|RBBP8NL(0)|RPS21(+34.5kb)
5:67323351	5	67323351	A	?	9	2.429e-05	8.727e-05	0.678	0.68	0.3824	6.35	0.3988	0.3988	0.6046	2.017	0.7973	0.6129	0.7968	0.5735	0.7147	rs538562	PIK3R1(-188.2kb)
1:207850539	1	207850539	C	?	9	2.447e-05	0.001273	1.3254	1.4283	0.0326	52.3	2.407	2.407	1.215	1.21	1.384	1.379	0.3967	2.897	1.117	rs11118328	CD46(-74.84kb)|CR1(+35.43kb)|CR1L(0)|CR2(+187.3kb)|LOC148696(-141.2kb)|MIR29B2(-125.2kb)|MIR29C(-124.7kb)
2:159286301	2	159286301	G	?	9	2.46e-05	2.46e-05	1.3302	1.3302	0.7537	0	1.417	1.417	1.131	1.275	1.442	1.684	2.613	1.164	1.288	rs74606352	CCDC148(0)|CCDC148-AS1(+193.6kb)|PKP4(-27.17kb)
9:81728464	9	81728464	C	?	9	2.47e-05	3.056e-05	1.2707	1.2719	0.422	1.46	1.622	1.622	1.228	2.343	1.18	1.151	0.6611	1.477	1.234	rs11138073	.
2:19850359	2	19850359	G	?	9	2.472e-05	0.001007	1.3617	1.3972	0.1293	36.13	2.806	2.806	1.309	0.7394	1.317	1.523	1.472	1.093	1.234	rs4666528	.
20:44666595	20	44666595	T	?	9	2.474e-05	2.474e-05	0.7895	0.7895	0.7982	0	0.5646	0.5646	0.7365	0.858	0.8834	0.8066	0.6651	0.8731	0.849	rs3848726	ACOT8(+180.5kb)|CD40(-80.31kb)|CDH22(-135.8kb)|CTSA(+139.1kb)|MMP9(+21.4kb)|NCOA5(-23.03kb)|NEURL2(+146.7kb)|PCIF1(+89.93kb)|PLTP(+125.6kb)|SLC12A5(0)|SNX21(+194.7kb)|SPATA25(+150.4kb)|ZNF335(+65.76kb)|ZSWIM1(+152.7kb)|ZSWIM3(+158.8kb)
3:144968124	3	144968124	T	?	9	2.481e-05	0.00672	1.3382	1.511	0.0002	72.97	4.471	4.471	1.041	1.231	1.819	1.251	0.5311	0.9529	1.299	rs13082104	.
3:144968284	3	144968284	C	?	9	2.481e-05	0.00672	1.3382	1.511	0.0002	72.97	4.471	4.471	1.041	1.231	1.819	1.251	0.5311	0.9529	1.299	rs13062422	.
3:144968643	3	144968643	A	?	9	2.481e-05	0.00672	1.3382	1.511	0.0002	72.97	4.471	4.471	1.041	1.231	1.819	1.251	0.5311	0.9529	1.299	rs13083242	.
2:169974671	2	169974671	T	?	9	2.494e-05	0.0006786	0.77	0.7472	0.1387	34.9	0.4313	0.4313	0.8248	0.5603	0.9821	0.8216	1.733	0.5807	0.7707	rs6433105	ABCB11(+86.84kb)|DHRS9(+21.99kb)|LRP2(-8.947kb)
6:889966	6	889966	A	?	8	2.5e-05	3.305e-05	0.4388	0.4403	0.4232	0.77	1.416	1.416	0.242	0	0.6173	0.7855	0.9456	NA	0.4689	rs113330361	EXOC2(+196.8kb)|LOC285768(-71.27kb)
14:42751746	14	42751746	A	?	9	2.511e-05	0.0006631	0.7826	0.7439	0.0938	41.03	0.4428	0.4428	0.7484	0.4404	0.7628	0.8488	0.5918	1.035	0.9136	rs7161049	.
15:67251332	15	67251332	C	?	9	2.512e-05	2.512e-05	0.653	0.653	0.6072	0	0.6251	0.6251	0.7033	1.085	0.4684	0.7622	0.3316	1.286	0.5702	rs74019853	SMAD3(-106.9kb)|SMAD6(+177kb)
15:67251345	15	67251345	G	?	9	2.512e-05	2.512e-05	0.653	0.653	0.6072	0	0.6251	0.6251	0.7033	1.085	0.4684	0.7622	0.3316	1.286	0.5702	rs74019854	SMAD3(-106.8kb)|SMAD6(+177kb)
17:74876873	17	74876873	T	?	9	2.512e-05	2.512e-05	1.434	1.434	0.7033	0	2.27	2.27	1.547	2.032	1.193	1.065	1.577	1.734	1.364	rs9911209	JMJD6(+154kb)|METTL23(+146.9kb)|MFSD11(+101.5kb)|MGAT5B(0)|MIR636(+144.2kb)|MXRA7(+169.8kb)|SRSF2(+143.4kb)
17:74876894	17	74876894	A	?	9	2.512e-05	2.512e-05	1.434	1.434	0.7033	0	2.27	2.27	1.547	2.032	1.193	1.065	1.577	1.734	1.364	rs9909585	JMJD6(+154kb)|METTL23(+146.9kb)|MFSD11(+101.6kb)|MGAT5B(0)|MIR636(+144.3kb)|MXRA7(+169.8kb)|SRSF2(+143.4kb)
14:42756383	14	42756383	A	?	9	2.525e-05	0.0006318	0.7824	0.7427	0.0938	41.03	0.4428	0.4428	0.7538	0.4404	0.7469	0.8488	0.5924	1.035	0.9136	rs1484083	.
14:42756426	14	42756426	T	?	9	2.525e-05	0.0006318	0.7824	0.7427	0.0938	41.03	0.4428	0.4428	0.7538	0.4404	0.7469	0.8488	0.5924	1.035	0.9136	rs1484082	.
5:106845955	5	106845955	C	?	9	2.545e-05	2.545e-05	1.2714	1.2714	0.5745	0	1.453	1.453	1.056	1.394	1.443	1.428	0.9404	1.794	1.234	rs152559	EFNA5(0)
14:42815365	14	42815365	T	?	9	2.582e-05	0.0005496	0.7865	0.7572	0.1356	35.31	0.4443	0.4443	0.7632	0.4978	0.8285	0.8051	0.5266	1.09	0.8863	rs12184984	.
14:42802844	14	42802844	C	?	9	2.591e-05	0.0004905	0.7863	0.7597	0.1542	32.97	0.4449	0.4449	0.7647	0.481	0.8234	0.7991	0.6342	1.078	0.8839	rs61991141	.
14:42816341	14	42816341	A	?	9	2.596e-05	0.000552	0.7865	0.7572	0.1354	35.34	0.4443	0.4443	0.7632	0.4978	0.8285	0.8051	0.5266	1.09	0.8865	rs6572151	.
15:67251649	15	67251649	A	?	9	2.599e-05	2.599e-05	0.6525	0.6525	0.6378	0	0.6251	0.6251	0.7175	1.085	0.4801	0.7109	0.3316	1.286	0.5702	rs11855258	SMAD3(-106.5kb)|SMAD6(+177.3kb)
11:76456739	11	76456739	T	?	8	2.602e-05	2.602e-05	0.7464	0.7464	0.4994	0	0.8879	0.8879	0.6585	0.7151	0.6409	0.8761	0.2471	NA	0.8211	rs12794131	ACER3(-115.2kb)|C11orf30(+194.2kb)|GUCY2EP(+23.91kb)|LRRC32(+74.95kb)|TSKU(-36.62kb)
4:26166830	4	26166830	C	?	9	2.603e-05	2.603e-05	0.7456	0.7456	0.714	0	0.57	0.57	0.8877	0.7037	0.838	0.6471	1.101	0.5232	0.7272	rs10004084	RBPJ(-154.5kb)
16:84835110	16	84835110	A	?	8	2.608e-05	0.01336	0.7905	0.8038	0.0518	49.87	0.9158	0.9158	0.8949	1.198	0.4904	0.7581	NA	1.056	0.7323	rs12928874	COTL1(+183.4kb)|CRISPLD2(-18.48kb)|KLHL36(+139.2kb)|USP10(+21.58kb)|ZDHHC7(-173kb)
9:77806762	9	77806762	A	?	9	2.611e-05	2.611e-05	0.6676	0.6676	0.8766	0	0.475	0.475	0.6979	0.7495	0.6384	0.7014	0.3047	1.351	0.6391	rs12345423	C9orf41(+163.5kb)|NMRK1(+103.6kb)|OSTF1(+44.65kb)
2:159193005	2	159193005	T	?	9	2.635e-05	2.635e-05	1.3292	1.3292	0.88	0	1.619	1.619	1.164	1.202	1.431	1.572	1.803	1.047	1.312	rs78216340	CCDC148(0)|CCDC148-AS1(+100.3kb)|PKP4(-120.5kb)
20:60996368	20	60996368	T	?	7	2.637e-05	2.637e-05	0.7912	0.7912	0.6375	0	0.6209	0.6209	0.8919	0.7505	0.8446	0.6776	NA	NA	0.797	rs2427328	ADRM1(+112.4kb)|C20orf166(-151.3kb)|C20orf166-AS1(-145.1kb)|CABLES2(+14.03kb)|GATA5(-42.18kb)|LAMA5(+54kb)|MIR1-1(-155.1kb)|MIR133A2(-165.8kb)|MIR4758(+88.76kb)|OSBPL2(+125.1kb)|RBBP8NL(0)|RPS21(+32.79kb)
4:115361830	4	115361830	G	?	9	2.655e-05	0.0001409	0.5495	0.5426	0.3517	10.01	0.2756	0.2756	0.7598	0.4787	0.7055	0.2549	0.9116	1.914	0.5133	rs112127678	UGT8(-157.8kb)
9:81727942	9	81727942	G	?	9	2.659e-05	2.659e-05	1.2913	1.2913	0.5873	0	1.641	1.641	1.291	2.223	1.186	1.134	0.623	1.407	1.271	rs76973475	.
14:42813843	14	42813843	G	?	9	2.663e-05	0.0007121	0.7866	0.751	0.0999	40.14	0.4164	0.4164	0.7659	0.4978	0.8152	0.7984	0.6342	1.09	0.8939	rs17621437	.
5:67335843	5	67335843	A	?	9	2.672e-05	2.672e-05	0.6319	0.6319	0.5919	0	0.5494	0.5494	0.5493	1.406	0.6285	0.4178	1.102	0.4495	0.8186	rs39994	PIK3R1(-175.7kb)
2:159254282	2	159254282	A	?	9	2.677e-05	2.677e-05	1.3279	1.3279	0.7345	0	1.481	1.481	1.123	1.275	1.442	1.648	2.61	1.087	1.305	rs56039467	CCDC148(0)|CCDC148-AS1(+161.6kb)|PKP4(-59.19kb)
11:76448811	11	76448811	A	?	8	2.685e-05	2.685e-05	0.7577	0.7577	0.7327	0	0.8775	0.8775	0.7218	0.7548	0.5943	0.8323	0.366	NA	0.8209	rs7123238	ACER3(-123.1kb)|C11orf30(+186.2kb)|GUCY2EP(+15.98kb)|LRRC32(+67.02kb)|TSKU(-44.54kb)
4:160147159	4	160147159	T	?	9	2.688e-05	2.688e-05	0.7926	0.7926	0.8058	0	0.6076	0.6076	0.777	0.7839	0.7756	0.9204	0.7542	0.6241	0.8622	rs11730876	C4orf45(+190.8kb)|MIR3688-1(+97.11kb)|MIR3688-2(+97.12kb)|RAPGEF2(-41.84kb)
7:141125976	7	141125976	A	?	8	2.696e-05	2.696e-05	0.6057	0.6057	0.5251	0	0.5077	0.5077	0.525	0.8981	1.107	0.8265	NA	0.7942	0.4793	rs76960025	AGK(-125.1kb)|TMEM178B(0)
4:160153441	4	160153441	T	?	9	2.7e-05	2.7e-05	0.7926	0.7926	0.8325	0	0.6272	0.6272	0.7751	0.7224	0.7861	0.9204	0.7532	0.6241	0.8624	rs7659528	C4orf45(+197.1kb)|MIR3688-1(+103.4kb)|MIR3688-2(+103.4kb)|RAPGEF2(-35.56kb)
14:42755214	14	42755214	A	?	9	2.71e-05	0.0006466	0.7831	0.7433	0.0943	40.96	0.4428	0.4428	0.7564	0.4404	0.7469	0.8488	0.5909	1.035	0.9136	rs11844232	.
9:126426307	9	126426307	T	?	9	2.711e-05	2.711e-05	0.5012	0.5012	0.4786	0	1.2	1.2	0.3813	1.491	0.5371	0.5817	0.4836	0.4424	0.3657	rs17215740	DENND1A(0)
14:42754254	14	42754254	C	?	9	2.717e-05	0.0006476	0.7831	0.7433	0.0944	40.94	0.4428	0.4428	0.7564	0.4404	0.7469	0.8488	0.5922	1.035	0.9136	rs61991098	.
14:42754280	14	42754280	T	?	9	2.717e-05	0.0006476	0.7831	0.7433	0.0944	40.94	0.4428	0.4428	0.7564	0.4404	0.7469	0.8488	0.5922	1.035	0.9136	rs72674374	.
14:42754312	14	42754312	A	?	9	2.717e-05	0.0006476	0.7831	0.7433	0.0944	40.94	0.4428	0.4428	0.7564	0.4404	0.7469	0.8488	0.5922	1.035	0.9136	rs61991099	.
14:42754434	14	42754434	A	?	9	2.717e-05	0.0006476	0.7831	0.7433	0.0944	40.94	0.4428	0.4428	0.7564	0.4404	0.7469	0.8488	0.5922	1.035	0.9136	rs61991100	.
14:42754537	14	42754537	T	?	9	2.717e-05	0.0006476	0.7831	0.7433	0.0944	40.94	0.4428	0.4428	0.7564	0.4404	0.7469	0.8488	0.5922	1.035	0.9136	rs61991101	.
14:42754709	14	42754709	C	?	9	2.717e-05	0.0006476	0.7831	0.7433	0.0944	40.94	0.4428	0.4428	0.7564	0.4404	0.7469	0.8488	0.5922	1.035	0.9136	rs61991102	.
14:42754852	14	42754852	T	?	9	2.717e-05	0.0006476	0.7831	0.7433	0.0944	40.94	0.4428	0.4428	0.7564	0.4404	0.7469	0.8488	0.5922	1.035	0.9136	rs61991103	.
14:42754896	14	42754896	C	?	9	2.717e-05	0.0006476	0.7831	0.7433	0.0944	40.94	0.4428	0.4428	0.7564	0.4404	0.7469	0.8488	0.5922	1.035	0.9136	rs36026786	.
14:42755023	14	42755023	G	?	9	2.717e-05	0.0006476	0.7831	0.7433	0.0944	40.94	0.4428	0.4428	0.7564	0.4404	0.7469	0.8488	0.5922	1.035	0.9136	rs11844082	.
14:42755027	14	42755027	C	?	9	2.717e-05	0.0006476	0.7831	0.7433	0.0944	40.94	0.4428	0.4428	0.7564	0.4404	0.7469	0.8488	0.5922	1.035	0.9136	rs11844083	.
14:42755393	14	42755393	C	?	9	2.717e-05	0.0006474	0.7831	0.7433	0.0944	40.94	0.4428	0.4428	0.7564	0.4404	0.7469	0.8488	0.5924	1.035	0.9136	rs11844306	.
14:42755500	14	42755500	G	?	9	2.717e-05	0.0006474	0.7831	0.7433	0.0944	40.94	0.4428	0.4428	0.7564	0.4404	0.7469	0.8488	0.5924	1.035	0.9136	rs59205127	.
14:42755515	14	42755515	G	?	9	2.717e-05	0.0006474	0.7831	0.7433	0.0944	40.94	0.4428	0.4428	0.7564	0.4404	0.7469	0.8488	0.5924	1.035	0.9136	rs59372208	.
14:42781884	14	42781884	T	?	9	2.719e-05	0.0003949	0.7858	0.7624	0.1834	29.42	0.4651	0.4651	0.7712	0.4893	0.8157	0.771	0.5981	1.104	0.886	rs61991138	.
16:5590625	16	5590625	C	?	9	2.747e-05	0.001122	1.2989	1.3242	0.1466	33.91	1.937	1.937	1.151	0.6388	1.427	1.691	1.001	1.468	1.242	rs4427802	.
16:5591406	16	5591406	A	?	9	2.747e-05	0.001122	1.2989	1.3242	0.1466	33.91	1.937	1.937	1.151	0.6388	1.427	1.691	1.001	1.468	1.242	rs9932809	.
3:195603634	3	195603634	G	?	8	2.749e-05	0.004559	0.7959	0.7657	0.0169	59.02	0.5191	0.5191	0.6978	1.284	0.8261	0.9226	NA	0.4849	0.9171	rs11185487	MIR570(+177.3kb)|MUC4(+64.79kb)|MUC20(+139.1kb)|SDHAP1(-83.16kb)|SDHAP2(+187.9kb)|TFRC(-172.5kb)|TNK2(0)
15:67250977	15	67250977	T	?	9	2.75e-05	2.75e-05	0.6548	0.6548	0.6376	0	0.6251	0.6251	0.7033	1.085	0.4684	0.7367	0.3316	1.286	0.5828	rs35475106	SMAD3(-107.2kb)|SMAD6(+176.6kb)
9:77809517	9	77809517	T	?	9	2.758e-05	2.758e-05	0.6639	0.6639	0.9617	0	0.476	0.476	0.6738	0.7495	0.5981	0.7331	0.384	1.124	0.6628	rs17704904	C9orf41(+166.2kb)|NMRK1(+106.4kb)|OSTF1(+47.4kb)
14:42776655	14	42776655	A	?	9	2.759e-05	0.0004044	0.7858	0.7609	0.1762	30.29	0.4651	0.4651	0.7712	0.4893	0.8002	0.771	0.5981	1.104	0.8926	rs55896498	.
10:7512309	10	7512309	C	?	9	2.768e-05	0.002182	1.2652	1.2901	0.0861	42.19	1.142	1.142	1.408	1.331	1.125	1.875	0.9532	1.707	1.021	rs2255234	ITIH5(-88.92kb)|SFMBT2(+58.86kb)
10:7512403	10	7512403	C	?	9	2.768e-05	0.002182	1.2652	1.2901	0.0861	42.19	1.142	1.142	1.408	1.331	1.125	1.875	0.9532	1.707	1.021	rs2255239	ITIH5(-88.83kb)|SFMBT2(+58.96kb)
7:21774343	7	21774343	T	?	9	2.776e-05	2.776e-05	0.6823	0.6823	0.819	0	0.5191	0.5191	0.8278	0.7576	0.523	0.5946	0.4057	0.9355	0.677	rs76162749	CDCA7L(-166.2kb)|DNAH11(0)
14:42811740	14	42811740	G	?	9	2.784e-05	0.000734	0.787	0.7511	0.0986	40.32	0.4164	0.4164	0.7659	0.4978	0.8152	0.7984	0.6343	1.09	0.8955	rs1483919	.
6:78872705	6	78872705	C	?	9	2.786e-05	2.786e-05	0.7927	0.7927	0.9368	0	0.8371	0.8371	0.8148	0.6016	0.8439	0.7981	0.4206	0.7571	0.7943	rs4473822	.
1:245626278	1	245626278	T	?	9	2.79e-05	2.79e-05	1.3333	1.3333	0.8837	0	1.376	1.376	1.43	0.7961	1.264	1.37	1.061	1.745	1.299	rs1093932	KIF26B(0)
16:19366622	16	19366622	G	?	9	2.803e-05	2.803e-05	0.794	0.794	0.6303	0	1.104	1.104	0.7278	0.7253	0.8416	0.7452	1.095	1.098	0.7506	rs4782235	CCP110(-168.6kb)|CLEC19A(+44.35kb)|GDE1(-146.4kb)|SYT17(+88.07kb)|TMC5(-55.43kb)
14:42796495	14	42796495	G	?	9	2.807e-05	0.0005744	0.7872	0.7572	0.1329	35.65	0.4415	0.4415	0.7647	0.481	0.8188	0.7991	0.6342	1.078	0.8924	rs4999971	.
14:42796675	14	42796675	T	?	9	2.807e-05	0.0005744	0.7872	0.7572	0.1329	35.65	0.4415	0.4415	0.7647	0.481	0.8188	0.7991	0.6342	1.078	0.8924	rs1872154	.
14:42796970	14	42796970	T	?	9	2.807e-05	0.0005744	0.7872	0.7572	0.1329	35.65	0.4415	0.4415	0.7647	0.481	0.8188	0.7991	0.6342	1.078	0.8924	rs1872153	.
14:42798099	14	42798099	G	?	9	2.807e-05	0.0005744	0.7872	0.7572	0.1329	35.65	0.4415	0.4415	0.7647	0.481	0.8188	0.7991	0.6342	1.078	0.8924	rs72676303	.
11:76453262	11	76453262	C	?	8	2.816e-05	2.816e-05	0.7478	0.7478	0.4607	0	0.8934	0.8934	0.6738	0.7851	0.59	0.8684	0.2526	NA	0.8215	rs12802806	ACER3(-118.7kb)|C11orf30(+190.7kb)|GUCY2EP(+20.43kb)|LRRC32(+71.47kb)|TSKU(-40.09kb)
11:76453439	11	76453439	C	?	8	2.816e-05	2.816e-05	0.7478	0.7478	0.4607	0	0.8934	0.8934	0.6738	0.7851	0.59	0.8684	0.2526	NA	0.8215	rs12798095	ACER3(-118.5kb)|C11orf30(+190.8kb)|GUCY2EP(+20.61kb)|LRRC32(+71.65kb)|TSKU(-39.92kb)
2:159250501	2	159250501	A	?	9	2.835e-05	2.835e-05	1.3268	1.3268	0.7434	0	1.481	1.481	1.123	1.275	1.442	1.639	2.61	1.087	1.305	rs79260998	CCDC148(0)|CCDC148-AS1(+157.8kb)|PKP4(-62.97kb)
2:159251840	2	159251840	C	?	9	2.835e-05	2.835e-05	1.3268	1.3268	0.7434	0	1.481	1.481	1.123	1.275	1.442	1.639	2.61	1.087	1.305	rs78858841	CCDC148(0)|CCDC148-AS1(+159.2kb)|PKP4(-61.64kb)
14:42750171	14	42750171	T	?	9	2.838e-05	0.0009545	0.7838	0.7405	0.066	45.46	0.4056	0.4056	0.7522	0.457	0.7628	0.8488	0.7751	1.038	0.9136	rs4905509	.
14:42750786	14	42750786	C	?	9	2.838e-05	0.0009545	0.7838	0.7405	0.066	45.46	0.4056	0.4056	0.7522	0.457	0.7628	0.8488	0.7751	1.038	0.9136	rs7154615	.
1:241287246	1	241287246	G	?	9	2.852e-05	2.852e-05	1.305	1.305	0.5969	0	2.138	2.138	1.387	1.37	1.08	1.224	1.207	1.175	1.243	rs10926415	MIR3123(-8.325kb)|RGS7(0)
9:126408955	9	126408955	T	?	9	2.852e-05	2.852e-05	0.5022	0.5022	0.4719	0	1.2	1.2	0.3813	1.491	0.5581	0.5817	0.4836	0.4424	0.364	rs77279938	DENND1A(0)
10:7497722	10	7497722	T	?	9	2.862e-05	0.005767	1.2686	1.2923	0.0347	51.77	1.127	1.127	1.443	1.284	1.165	2.055	0.9784	1.475	0.9978	rs2247931	ITIH5(-103.5kb)|SFMBT2(+44.27kb)
10:7497817	10	7497817	T	?	9	2.862e-05	0.005767	1.2686	1.2923	0.0347	51.77	1.127	1.127	1.443	1.284	1.165	2.055	0.9784	1.475	0.9978	rs2247936	ITIH5(-103.4kb)|SFMBT2(+44.37kb)
16:82778787	16	82778787	A	?	9	2.878e-05	2.878e-05	0.6283	0.6283	0.8951	0	0.5101	0.5101	0.5598	0.5337	0.6669	1.066	0.6598	0.5685	0.6359	rs77839428	CDH13(0)
12:64898262	12	64898262	C	?	9	2.892e-05	2.892e-05	0.543	0.543	0.5663	0	0.1653	0.1653	0.3905	0.6286	0.5268	0.5374	0.8105	0.5116	0.8455	rs145386017	C12orf56(+113.9kb)|MIR548C(-118kb)|MIR548Z(-118kb)|RASSF3(-106kb)|TBK1(+2.363kb)|XPOT(+55.8kb)
11:106841081	11	106841081	A	?	9	2.91e-05	2.91e-05	0.7587	0.7587	0.4418	0	0.483	0.483	0.7991	0.6917	0.7412	1.104	0.9289	0.6375	0.732	rs1455600	GUCY1A2(0)
4:115361826	4	115361826	A	?	9	2.931e-05	0.0006409	0.5447	0.5212	0.2196	25.19	0.2371	0.2371	0.7835	0.2714	0.7462	0.2622	0.9117	1.914	0.5002	rs113083266	UGT8(-157.8kb)
7:16412625	7	16412625	A	?	9	2.957e-05	2.957e-05	1.2618	1.2618	0.9286	0	1.489	1.489	1.303	1.226	1.245	1.179	2.594	1.18	1.213	rs10253784	ISPD(0)|LOC100506025(+102.4kb)|LRRC72(-153.9kb)|SOSTDC1(-88.48kb)
9:81723667	9	81723667	T	?	9	2.957e-05	2.957e-05	1.2683	1.2683	0.566	0	1.788	1.788	1.207	1.89	1.202	1.165	0.7287	1.471	1.224	rs11138072	.
10:7515379	10	7515379	C	?	9	2.959e-05	0.002013	1.2643	1.2876	0.0973	40.52	1.142	1.142	1.403	1.385	1.088	1.867	0.9523	1.692	1.034	rs2255603	ITIH5(-85.85kb)|SFMBT2(+61.93kb)
20:44668401	20	44668401	G	?	9	2.961e-05	2.961e-05	0.7931	0.7931	0.7998	0	0.5531	0.5531	0.7978	1.008	0.8212	0.764	0.6636	0.874	0.8257	rs57236847	ACOT8(+182.4kb)|CD40(-78.5kb)|CDH22(-134kb)|CTSA(+140.9kb)|MMP9(+23.2kb)|NCOA5(-21.22kb)|NEURL2(+148.5kb)|PCIF1(+91.74kb)|PLTP(+127.4kb)|SLC12A5(0)|SNX21(+196.5kb)|SPATA25(+152.2kb)|ZNF335(+67.57kb)|ZSWIM1(+154.5kb)|ZSWIM3(+160.6kb)
14:42767272	14	42767272	G	?	9	2.977e-05	0.0003406	0.7867	0.7645	0.2026	27.17	0.4651	0.4651	0.7714	0.5068	0.8002	0.771	0.5981	1.082	0.8937	rs59850834	.
14:42769076	14	42769076	C	?	9	2.977e-05	0.0003406	0.7867	0.7645	0.2026	27.17	0.4651	0.4651	0.7714	0.5068	0.8002	0.771	0.5981	1.082	0.8937	rs6572146	.
14:42772078	14	42772078	A	?	9	2.977e-05	0.0003406	0.7867	0.7645	0.2026	27.17	0.4651	0.4651	0.7714	0.5068	0.8002	0.771	0.5981	1.082	0.8937	rs12147953	.
14:42772429	14	42772429	C	?	9	2.977e-05	0.0003406	0.7867	0.7645	0.2026	27.17	0.4651	0.4651	0.7714	0.5068	0.8002	0.771	0.5981	1.082	0.8937	rs1483906	.
14:42772530	14	42772530	G	?	9	2.977e-05	0.0003406	0.7867	0.7645	0.2026	27.17	0.4651	0.4651	0.7714	0.5068	0.8002	0.771	0.5981	1.082	0.8937	rs1483907	.
14:42773175	14	42773175	C	?	9	2.977e-05	0.0003406	0.7867	0.7645	0.2026	27.17	0.4651	0.4651	0.7714	0.5068	0.8002	0.771	0.5981	1.082	0.8937	rs2415725	.
4:160143615	4	160143615	T	?	9	2.988e-05	2.988e-05	0.7937	0.7937	0.7469	0	0.5915	0.5915	0.7793	0.7896	0.7756	0.9204	0.7574	0.6241	0.8709	rs12502799	C4orf45(+187.3kb)|MIR3688-1(+93.57kb)|MIR3688-2(+93.57kb)|RAPGEF2(-45.38kb)
16:82666823	16	82666823	C	?	9	3.003e-05	0.001903	1.2545	1.2581	0.1512	33.34	1.659	1.659	1.137	1.137	1.369	1.499	1.175	0.6402	1.279	rs7205148	CDH13(0)
1:242243558	1	242243558	T	?	9	3.007e-05	3.007e-05	0.6081	0.6081	0.9255	0	0.4088	0.4088	0.6139	0.9198	0.4387	0.6059	0.2668	0.9057	0.6424	rs72761212	EXO1(+190.3kb)|MAP1LC3C(+81.17kb)|PLD5(-8.13kb)
22:48910397	22	48910397	T	?	8	3.018e-05	3.018e-05	1.2944	1.2944	0.8465	0	1.491	1.491	1.296	1.415	1.435	1.01	NA	1.221	1.324	rs5768694	FAM19A5(0)|LOC284933(-24.31kb)
3:59251771	3	59251771	A	?	9	3.02e-05	3.02e-05	1.8639	1.8639	0.6301	0	7.569	7.569	1.418	2.951	2.936	2.067	1.912	1.323	1.555	rs114535462	.
3:59252028	3	59252028	A	?	9	3.02e-05	3.02e-05	1.8639	1.8639	0.6301	0	7.569	7.569	1.418	2.951	2.936	2.067	1.912	1.323	1.555	rs114223582	.
21:35989125	21	35989125	G	?	9	3.036e-05	0.00014	1.3115	1.3066	0.3637	8.59	1.694	1.694	1.191	1.047	1.125	1.204	0.6328	1.097	1.691	rs36012405	CLIC6(-52.56kb)|KCNE1(+104.6kb)|LINC00160(-107kb)|LOC100506385(-129kb)|RCAN1(+1.743kb)|RUNX1(-171kb)
8:29811762	8	29811762	G	?	9	3.039e-05	3.922e-05	1.3464	1.3453	0.4237	1.24	1.094	1.094	1.684	1.11	1.207	1.028	3.136	1.709	1.353	rs7839200	FAM183CP(+0.639kb)|LEPROTL1(-141.2kb)|MBOAT4(-177.4kb)|MIR548O2(-108.5kb)|MIR3148(-3.025kb)|TMEM66(-108.9kb)
9:126424536	9	126424536	A	?	9	3.044e-05	3.044e-05	0.5031	0.5031	0.4761	0	1.2	1.2	0.3813	1.491	0.5581	0.5817	0.4836	0.4424	0.3657	rs78541220	DENND1A(0)
9:126428820	9	126428820	T	?	9	3.044e-05	3.044e-05	0.5031	0.5031	0.4761	0	1.2	1.2	0.3813	1.491	0.5581	0.5817	0.4836	0.4424	0.3657	rs75855397	DENND1A(0)
4:93326357	4	93326357	T	?	9	3.053e-05	0.002359	1.3392	1.4345	0.0253	54.3	3.12	3.12	1.356	1.717	1.332	0.9433	0.4739	1.673	1.226	rs12650260	GRID2(0)
16:82759367	16	82759367	C	?	9	3.057e-05	3.057e-05	0.6278	0.6278	0.798	0	0.5647	0.5647	0.5189	0.4611	0.6552	1.088	0.6603	0.563	0.6858	rs77642198	CDH13(0)
21:35993937	21	35993937	G	?	9	3.07e-05	0.0001978	1.3116	1.3052	0.3464	10.63	1.694	1.694	1.196	1.014	1.125	1.204	0.6217	1.097	1.694	rs4816496	CLIC6(-47.75kb)|KCNE1(+109.4kb)|LINC00160(-102.2kb)|LOC100506385(-124.2kb)|RCAN1(+6.555kb)|RUNX1(-166.2kb)
8:29811542	8	29811542	T	?	9	3.076e-05	3.076e-05	1.4577	1.4577	0.6662	0	1.036	1.036	1.715	1.359	1.108	1.513	0.7378	2.502	1.527	rs6997575	FAM183CP(+0.419kb)|LEPROTL1(-141.4kb)|MBOAT4(-177.6kb)|MIR548O2(-108.7kb)|MIR3148(-3.245kb)|TMEM66(-109.1kb)
4:115361835	4	115361835	T	?	9	3.08e-05	0.0002484	0.5558	0.5493	0.3256	13.06	0.2756	0.2756	0.7319	0.4787	0.8574	0.2549	0.9116	1.914	0.5133	rs113907619	UGT8(-157.8kb)
15:67251031	15	67251031	T	?	9	3.081e-05	3.081e-05	0.6565	0.6565	0.6304	0	0.6251	0.6251	0.7033	1.085	0.4684	0.753	0.3316	1.286	0.5828	rs12593057	SMAD3(-107.2kb)|SMAD6(+176.7kb)
4:160171509	4	160171509	G	?	9	3.102e-05	3.102e-05	0.794	0.794	0.8192	0	0.6272	0.6272	0.7783	0.7224	0.7823	0.9204	0.7053	0.6253	0.8688	rs12508599	MIR3688-1(+121.5kb)|MIR3688-2(+121.5kb)|RAPGEF2(-17.49kb)
11:117500323	11	117500323	G	?	9	3.12e-05	0.0006562	1.5171	1.5185	0.2524	21.44	1.704	1.704	2.792	0.6198	1.256	1.228	1.861	1.701	1.444	rs78470936	DSCAML1(0)|FXYD2(-190.5kb)|FXYD6-FXYD2(-190.5kb)
11:76434121	11	76434121	C	?	8	3.133e-05	3.133e-05	0.7715	0.7715	0.8544	0	0.6995	0.6995	0.7199	0.7783	0.7029	0.7503	0.4952	NA	0.8928	rs10899268	ACER3(-137.8kb)|C11orf30(+171.5kb)|GUCY2EP(+1.288kb)|LRRC32(+52.33kb)|TSKU(-59.24kb)
6:166863565	6	166863565	T	?	8	3.136e-05	3.136e-05	0.7963	0.7963	0.7738	0	0.676	0.676	0.8144	0.69	0.7759	0.6848	NA	1.06	0.856	rs28491147	LOC100289495(+98.61kb)|MIR1913(-59.28kb)|MPC1(+67.06kb)|PRR18(+141.7kb)|RPS6KA2(0)|RPS6KA2-IT1(-10.58kb)|SFT2D1(+107.6kb)
20:41952584	20	41952584	G	?	9	3.155e-05	3.155e-05	0.6541	0.6541	0.7489	0	0.5053	0.5053	0.7087	1.69	0.6532	0.7429	0.92	0.5178	0.5723	rs78545570	L3MBTL1(-183.7kb)|PTPRT(+134kb)|SRSF6(-133.9kb)
20:41954369	20	41954369	T	?	9	3.163e-05	3.163e-05	0.6541	0.6541	0.7482	0	0.5053	0.5053	0.7087	1.69	0.6547	0.7429	0.9186	0.5178	0.5718	rs144933137	L3MBTL1(-182kb)|PTPRT(+135.8kb)|SRSF6(-132.1kb)
14:42752706	14	42752706	T	?	9	3.208e-05	0.0007164	0.785	0.7459	0.096	40.7	0.4428	0.4428	0.7564	0.4404	0.7628	0.8488	0.5922	1.035	0.9136	rs112385090	.
14:42752812	14	42752812	T	?	9	3.208e-05	0.0007164	0.785	0.7459	0.096	40.7	0.4428	0.4428	0.7564	0.4404	0.7628	0.8488	0.5922	1.035	0.9136	rs61991095	.
14:42753221	14	42753221	C	?	9	3.208e-05	0.0007164	0.785	0.7459	0.096	40.7	0.4428	0.4428	0.7564	0.4404	0.7628	0.8488	0.5922	1.035	0.9136	rs56395254	.
14:42753602	14	42753602	T	?	9	3.208e-05	0.0007164	0.785	0.7459	0.096	40.7	0.4428	0.4428	0.7564	0.4404	0.7628	0.8488	0.5922	1.035	0.9136	rs7151081	.
14:42753904	14	42753904	G	?	9	3.208e-05	0.0007164	0.785	0.7459	0.096	40.7	0.4428	0.4428	0.7564	0.4404	0.7628	0.8488	0.5922	1.035	0.9136	rs61991097	.
10:7514689	10	7514689	G	?	9	3.209e-05	0.002022	1.263	1.2864	0.0995	40.19	1.142	1.142	1.397	1.385	1.088	1.867	0.9522	1.692	1.034	rs2255581	ITIH5(-86.54kb)|SFMBT2(+61.24kb)
15:67247802	15	67247802	C	?	9	3.221e-05	3.221e-05	0.6588	0.6588	0.5718	0	0.6251	0.6251	0.7373	1.085	0.467	0.7685	0.368	1.286	0.5574	rs7169633	SMAD3(-110.4kb)|SMAD6(+173.5kb)
20:41953430	20	41953430	T	?	9	3.225e-05	3.225e-05	0.6543	0.6543	0.7489	0	0.5053	0.5053	0.7087	1.69	0.6547	0.7429	0.92	0.5178	0.5723	rs117156177	L3MBTL1(-182.9kb)|PTPRT(+134.9kb)|SRSF6(-133.1kb)
20:41955533	20	41955533	C	?	9	3.225e-05	3.225e-05	0.6543	0.6543	0.7489	0	0.5053	0.5053	0.7087	1.69	0.6547	0.7429	0.92	0.5178	0.5723	rs117857814	L3MBTL1(-180.8kb)|PTPRT(+137kb)|SRSF6(-131kb)
20:41957143	20	41957143	T	?	9	3.225e-05	3.225e-05	0.6543	0.6543	0.7489	0	0.5053	0.5053	0.7087	1.69	0.6547	0.7429	0.92	0.5178	0.5723	rs79827494	L3MBTL1(-179.2kb)|PTPRT(+138.6kb)|SRSF6(-129.4kb)
20:41957146	20	41957146	T	?	9	3.225e-05	3.225e-05	0.6543	0.6543	0.7489	0	0.5053	0.5053	0.7087	1.69	0.6547	0.7429	0.92	0.5178	0.5723	rs79194695	L3MBTL1(-179.2kb)|PTPRT(+138.6kb)|SRSF6(-129.4kb)
22:48911999	22	48911999	A	?	8	3.229e-05	3.229e-05	1.2922	1.2922	0.8253	0	1.44	1.44	1.272	1.488	1.501	1.021	NA	1.221	1.302	rs5767181	FAM19A5(0)|LOC284933(-22.71kb)
11:76450439	11	76450439	T	?	8	3.233e-05	3.233e-05	0.7493	0.7493	0.4506	0	0.8934	0.8934	0.6738	0.7851	0.59	0.8731	0.2526	NA	0.8253	rs35714835	ACER3(-121.5kb)|C11orf30(+187.8kb)|GUCY2EP(+17.61kb)|LRRC32(+68.65kb)|TSKU(-42.92kb)
14:42820579	14	42820579	A	?	9	3.241e-05	0.0007671	0.7887	0.7513	0.0957	40.75	0.4164	0.4164	0.7659	0.4978	0.8285	0.7984	0.598	1.065	0.9003	rs61991144	.
6:70377155	6	70377155	G	?	9	3.245e-05	3.245e-05	0.7895	0.7895	0.731	0	0.7225	0.7225	0.7659	0.8343	0.9293	0.9652	0.7378	0.9086	0.683	rs9342765	COL19A1(-199.3kb)|LMBRD1(-8.485kb)
3:144968527	3	144968527	C	?	9	3.246e-05	0.006519	1.3369	1.5132	0.0003	72.28	4.471	4.471	1.031	1.185	1.768	1.272	0.5528	0.9999	1.294	rs13062774	.
14:42785198	14	42785198	T	?	9	3.253e-05	0.0004542	0.7878	0.7645	0.1817	29.62	0.4651	0.4651	0.7712	0.4893	0.8157	0.7838	0.5981	1.104	0.8877	rs11846738	.
11:106745194	11	106745194	A	?	9	3.259e-05	3.259e-05	0.761	0.761	0.5789	0	0.4651	0.4651	0.8078	0.7072	0.745	0.9886	1.102	0.8168	0.7312	rs11211956	GUCY1A2(0)
21:35990986	21	35990986	T	?	9	3.259e-05	0.0002068	1.3102	1.3039	0.3462	10.65	1.694	1.694	1.191	1.014	1.125	1.204	0.6328	1.097	1.694	rs2012748	CLIC6(-50.7kb)|KCNE1(+106.4kb)|LINC00160(-105.1kb)|LOC100506385(-127.1kb)|RCAN1(+3.604kb)|RUNX1(-169.1kb)
9:4851008	9	4851008	C	?	9	3.272e-05	3.272e-05	0.5597	0.5597	0.8254	0	0.6029	0.6029	0.6117	0.6251	0.6636	0.1488	1.697	0.6891	0.5118	rs75565599	AK3(+109kb)|CDC37L1(+144.4kb)|JAK2(-134.2kb)|MIR101-2(+0.633kb)|PPAPDC2(+185.7kb)|RCL1(0)|SPATA6L(+184.3kb)
9:4851588	9	4851588	G	?	9	3.272e-05	3.272e-05	0.5597	0.5597	0.8254	0	0.6029	0.6029	0.6117	0.6251	0.6636	0.1488	1.697	0.6891	0.5118	rs7865656	AK3(+109.5kb)|CDC37L1(+145kb)|JAK2(-133.7kb)|MIR101-2(+1.213kb)|PPAPDC2(+186.3kb)|RCL1(0)|SPATA6L(+184.9kb)
9:77809097	9	77809097	G	?	9	3.273e-05	3.273e-05	0.7487	0.7487	0.5431	0	0.5873	0.5873	0.6894	0.6466	0.9479	0.9203	0.6104	1.266	0.6861	rs7030431	C9orf41(+165.8kb)|NMRK1(+106kb)|OSTF1(+46.98kb)
16:5594798	16	5594798	G	?	9	3.284e-05	0.001021	1.2959	1.317	0.1718	30.81	1.853	1.853	1.143	0.6388	1.427	1.691	1.001	1.468	1.256	rs2341743	.
8:29811412	8	29811412	T	?	9	3.284e-05	3.284e-05	1.3447	1.3447	0.4431	0	1.094	1.094	1.668	1.11	1.207	1.028	3.136	1.709	1.358	rs6997275	FAM183CP(+0.289kb)|LEPROTL1(-141.5kb)|MBOAT4(-177.8kb)|MIR548O2(-108.8kb)|MIR3148(-3.375kb)|TMEM66(-109.2kb)
6:78882209	6	78882209	G	?	9	3.338e-05	3.338e-05	0.7918	0.7918	0.8747	0	0.9259	0.9259	0.8472	0.6178	0.7867	0.7276	0.4569	0.6483	0.8126	rs4129963	.
14:42774215	14	42774215	C	?	9	3.34e-05	0.0004062	0.7879	0.764	0.1883	28.84	0.4651	0.4651	0.7675	0.5068	0.8002	0.771	0.5981	1.082	0.9021	rs56104966	.
8:131865742	8	131865742	A	?	9	3.351e-05	0.0002407	1.3111	1.3479	0.2445	22.34	1.799	1.799	1.575	1.248	1.271	1.334	1.308	2.208	1.03	rs448852	ADCY8(0)
14:42757139	14	42757139	G	?	9	3.357e-05	0.0006435	0.7852	0.7475	0.1085	38.92	0.4428	0.4428	0.7603	0.4598	0.7469	0.8415	0.5933	1.035	0.9164	rs57024418	.
14:42757781	14	42757781	G	?	9	3.357e-05	0.0006435	0.7852	0.7475	0.1085	38.92	0.4428	0.4428	0.7603	0.4598	0.7469	0.8415	0.5933	1.035	0.9164	rs61991109	.
20:41951650	20	41951650	T	?	9	3.371e-05	3.371e-05	0.6551	0.6551	0.7488	0	0.5053	0.5053	0.7087	1.69	0.661	0.7429	0.92	0.5178	0.5723	rs78961588	L3MBTL1(-184.7kb)|PTPRT(+133.1kb)|SRSF6(-134.9kb)
15:91491692	15	91491692	T	?	8	3.376e-05	3.376e-05	0.4252	0.4252	0.6673	0	0.3518	0.3518	0.3386	4.679	0.5248	0.4801	NA	0.3393	0.4325	rs117918230	BLM(+133kb)|FES(+52.69kb)|FURIN(+65kb)|HDDC3(+15.92kb)|MAN2A2(+25.88kb)|PRC1(-17.58kb)|PRC1-AS1(-17.91kb)|RCCD1(-6.413kb)|SV2B(-151.5kb)|UNC45A(0)|VPS33B(-50.08kb)
19:44129616	19	44129616	C	?	9	3.408e-05	0.0005621	1.2792	1.2871	0.2456	22.22	1.411	1.411	1.173	1.512	1.288	0.9993	0.6018	2.357	1.385	rs3803910	CADM4(0)|ETHE1(+98.22kb)|IRGC(-90.6kb)|IRGQ(+29.33kb)|KCNN4(-141.1kb)|LYPD3(+159.8kb)|LYPD5(-170.5kb)|PHLDB3(+120.6kb)|PINLYP(+43.36kb)|PLAUR(-20.63kb)|SMG9(-105.7kb)|SRRM5(+10.97kb)|XRCC1(+49.89kb)|ZNF428(+5.602kb)|ZNF575(+89.33kb)|ZNF576(+25.03kb)
2:205818886	2	205818886	T	?	8	3.416e-05	3.416e-05	1.2749	1.2749	0.8273	0	1.352	1.352	1.3	1.084	1.261	NA	2.472	1.648	1.187	rs236829	PARD3B(0)
4:160152565	4	160152565	G	?	9	3.424e-05	3.424e-05	0.7953	0.7953	0.839	0	0.6272	0.6272	0.782	0.7658	0.7756	0.9204	0.7521	0.6241	0.864	rs6536402	C4orf45(+196.2kb)|MIR3688-1(+102.5kb)|MIR3688-2(+102.5kb)|RAPGEF2(-36.43kb)
8:29811596	8	29811596	C	?	9	3.438e-05	3.438e-05	1.3436	1.3436	0.4434	0	1.094	1.094	1.668	1.11	1.207	1.028	3.136	1.709	1.354	rs6468017	FAM183CP(+0.473kb)|LEPROTL1(-141.3kb)|MBOAT4(-177.6kb)|MIR548O2(-108.7kb)|MIR3148(-3.191kb)|TMEM66(-109kb)
8:29811720	8	29811720	T	?	9	3.438e-05	3.438e-05	1.3436	1.3436	0.4434	0	1.094	1.094	1.668	1.11	1.207	1.028	3.136	1.709	1.354	rs6468018	FAM183CP(+0.597kb)|LEPROTL1(-141.2kb)|MBOAT4(-177.5kb)|MIR548O2(-108.5kb)|MIR3148(-3.067kb)|TMEM66(-108.9kb)
8:29811785	8	29811785	T	?	9	3.438e-05	3.438e-05	1.3436	1.3436	0.4434	0	1.094	1.094	1.668	1.11	1.207	1.028	3.136	1.709	1.354	rs6468019	FAM183CP(+0.662kb)|LEPROTL1(-141.1kb)|MBOAT4(-177.4kb)|MIR548O2(-108.5kb)|MIR3148(-3.002kb)|TMEM66(-108.8kb)
14:42762283	14	42762283	C	?	9	3.453e-05	0.0003845	0.7882	0.7658	0.2002	27.45	0.4651	0.4651	0.7714	0.5068	0.8002	0.779	0.5981	1.082	0.8954	rs55807913	.
19:44132218	19	44132218	C	?	9	3.456e-05	0.0005847	1.2793	1.2874	0.2437	22.43	1.492	1.492	1.169	1.395	1.252	1.012	0.6023	2.357	1.396	rs8101956	CADM4(0)|ETHE1(+100.8kb)|IRGC(-88kb)|IRGQ(+31.93kb)|KCNN4(-138.5kb)|LYPD3(+162.4kb)|LYPD5(-167.9kb)|PHLDB3(+123.2kb)|PINLYP(+45.96kb)|PLAUR(-18.03kb)|SMG9(-103.1kb)|SRRM5(+13.57kb)|XRCC1(+52.49kb)|ZNF283(-199.3kb)|ZNF428(+8.204kb)|ZNF575(+91.93kb)|ZNF576(+27.63kb)
22:48904896	22	48904896	G	?	8	3.469e-05	3.469e-05	1.2916	1.2916	0.8558	0	1.491	1.491	1.292	1.376	1.462	1.017	NA	1.291	1.297	rs4823792	FAM19A5(0)|LOC284933(-29.82kb)
11:133285593	11	133285593	T	?	9	3.504e-05	3.504e-05	1.8019	1.8019	0.9672	0	1.691	1.691	1.812	1.486	1.264	2.464	0.7204	2.692	1.81	rs79441057	OPCML(0)
4:78987357	4	78987357	C	?	9	3.507e-05	3.507e-05	1.3206	1.3206	0.7407	0	1.713	1.713	1.248	0.9895	1.372	1.732	1.353	1.168	1.209	rs67045362	FRAS1(0)|MRPL1(+113.4kb)
2:19855082	2	19855082	T	?	9	3.534e-05	0.001379	1.3675	1.4164	0.1052	39.39	2.965	2.965	1.369	0.7147	1.279	1.492	1.499	1.308	1.174	rs6725609	.
4:78979141	4	78979141	T	?	9	3.546e-05	3.546e-05	1.3198	1.3198	0.7168	0	1.732	1.732	1.229	0.9295	1.383	1.696	1.464	1.129	1.248	rs34237418	FRAS1(0)|MRPL1(+105.2kb)
22:48908647	22	48908647	G	?	8	3.565e-05	3.565e-05	1.2915	1.2915	0.8032	0	1.491	1.491	1.257	1.406	1.475	1.004	NA	1.221	1.326	rs9627367	FAM19A5(0)|LOC284933(-26.06kb)
4:160170661	4	160170661	G	?	9	3.566e-05	3.566e-05	0.7952	0.7952	0.8135	0	0.6272	0.6272	0.7795	0.7224	0.7823	0.9204	0.7063	0.6253	0.8723	rs12507531	MIR3688-1(+120.6kb)|MIR3688-2(+120.6kb)|RAPGEF2(-18.34kb)
16:82757422	16	82757422	T	?	9	3.573e-05	3.573e-05	0.6302	0.6302	0.8068	0	0.5647	0.5647	0.5189	0.4611	0.6316	1.088	0.6603	0.6316	0.6858	rs75807361	CDH13(0)
14:42755844	14	42755844	G	?	9	3.606e-05	0.0006857	0.786	0.7482	0.107	39.14	0.4428	0.4428	0.7603	0.4598	0.7469	0.8488	0.5924	1.035	0.9164	rs17621058	.
6:78872756	6	78872756	C	?	9	3.607e-05	3.607e-05	0.7955	0.7955	0.9359	0	0.8371	0.8371	0.8148	0.6016	0.8439	0.7981	0.4206	0.7571	0.8036	rs4476788	.
20:41950588	20	41950588	C	?	9	3.614e-05	3.614e-05	0.6569	0.6569	0.8171	0	0.5053	0.5053	0.7235	1.48	0.661	0.7297	0.92	0.5178	0.5756	rs6030787	L3MBTL1(-185.7kb)|PTPRT(+132kb)|SRSF6(-135.9kb)
1:207684192	1	207684192	T	?	9	3.616e-05	0.0002644	1.3272	1.3586	0.2464	22.12	2.255	2.255	1.195	1.22	1.324	1.199	0.6964	2.492	1.266	rs12037841	CD55(+149.9kb)|CR1(0)|CR1L(-134.3kb)|CR2(+20.95kb)
11:106714909	11	106714909	A	?	9	3.625e-05	3.625e-05	0.7624	0.7624	0.5862	0	0.4651	0.4651	0.8131	0.7072	0.7339	0.9754	1.102	0.84	0.735	rs11211944	GUCY1A2(0)
1:202302232	1	202302232	G	?	9	3.643e-05	3.643e-05	0.7053	0.7053	0.8334	0	0.4844	0.4844	0.7673	0.6471	0.8442	0.6391	0.2751	0.7849	0.7027	rs17490864	ARL8A(+188.4kb)|LGR6(+13.34kb)|PPP1R12B(-15.6kb)|PTPN7(+171.5kb)|PTPRVP(+143.7kb)|UBE2T(0)
3:173612201	3	173612201	G	?	9	3.66e-05	3.66e-05	0.6843	0.6843	0.9132	0	1.037	1.037	0.6017	0.8329	0.6782	0.6453	1.112	0.513	0.7421	rs73182688	NLGN1(0)
3:59267531	3	59267531	T	?	9	3.696e-05	3.696e-05	1.857	1.857	0.5335	0	7.569	7.569	1.418	2.951	3.146	2.179	1.912	1.323	1.463	rs116192055	.
11:1672907	11	1672907	T	?	9	3.711e-05	3.711e-05	1.4942	1.4942	0.6908	0	1.298	1.298	1.592	3.576	1.996	1.541	0.5934	1.894	1.288	rs12363655	BRSK2(+189kb)|CTSD(-101.1kb)|DUSP8(+79.76kb)|FAM99A(-13.92kb)|FAM99B(-31.59kb)|IFITM10(-80.73kb)|KRTAP5-1(+66.39kb)|KRTAP5-2(+53.38kb)|KRTAP5-3(+43.21kb)|KRTAP5-4(+29.54kb)|KRTAP5-5(+20.75kb)|KRTAP5-6(-45.52kb)|KRTAP5-AS1(+52.49kb)|MOB2(0)|SYT8(-182.8kb)|TNNI2(-187.3kb)
10:15798477	10	15798477	G	?	9	3.729e-05	3.729e-05	1.3545	1.3545	0.9772	0	1.08	1.08	1.476	1.393	1.336	1.482	0.8604	1.465	1.273	rs7070312	FAM188A(-21.7kb)|ITGA8(+36.71kb)
3:123345911	3	123345911	T	?	8	3.747e-05	3.747e-05	0.7583	0.7583	0.5299	0	0.4964	0.4964	0.7874	0.7259	0.7023	0.9841	NA	0.891	0.7232	rs41271431	ADCY5(+178.5kb)|MYLK(0)|MYLK-AS1(0)|PTPLB(+41.99kb)
11:106652278	11	106652278	G	?	9	3.778e-05	3.778e-05	0.786	0.786	0.6402	0	0.5717	0.5717	0.7998	0.9377	0.7444	0.7028	1.672	0.895	0.821	rs7951283	GUCY1A2(0)
2:19852646	2	19852646	C	?	9	3.78e-05	0.001295	1.3524	1.392	0.1205	37.29	2.806	2.806	1.29	0.7394	1.339	1.523	1.464	1.093	1.212	rs6753583	.
2:19854280	2	19854280	T	?	9	3.78e-05	0.001295	1.3524	1.392	0.1205	37.29	2.806	2.806	1.29	0.7394	1.339	1.523	1.464	1.093	1.212	rs6721815	.
3:144966507	3	144966507	C	?	9	3.792e-05	0.007827	1.3303	1.504	0.0002	73.27	4.471	4.471	1.033	1.231	1.819	1.221	0.5273	0.9529	1.293	rs6800765	.
16:5590958	16	5590958	G	?	9	3.794e-05	0.0003851	1.2958	1.3114	0.2637	20.15	1.795	1.795	1.154	0.6641	1.445	1.666	1.252	1.393	1.248	rs5012828	.
16:5591353	16	5591353	T	?	9	3.794e-05	0.0003851	1.2958	1.3114	0.2637	20.15	1.795	1.795	1.154	0.6641	1.445	1.666	1.252	1.393	1.248	rs8051318	.
3:144965412	3	144965412	C	?	9	3.795e-05	0.007839	1.3303	1.5039	0.0002	73.28	4.471	4.471	1.033	1.231	1.819	1.221	0.5262	0.9529	1.293	rs6783417	.
22:48907806	22	48907806	T	?	8	3.806e-05	3.806e-05	1.2903	1.2903	0.7892	0	1.491	1.491	1.257	1.406	1.475	0.9973	NA	1.221	1.326	rs11090850	FAM19A5(0)|LOC284933(-26.9kb)
1:207685965	1	207685965	A	?	9	3.807e-05	0.0003602	1.3263	1.3643	0.2126	26	2.314	2.314	1.193	1.22	1.324	1.183	0.6964	2.492	1.266	rs4562624	CD55(+151.7kb)|CR1(0)|CR1L(-132.5kb)|CR2(+22.72kb)
8:693060	8	693060	C	?	9	3.81e-05	3.81e-05	0.7874	0.7874	0.5867	0	0.7684	0.7684	0.7926	0.4565	0.6557	0.9855	1.043	0.779	0.8113	rs6559172	ERICH1(+11.83kb)|ERICH1-AS1(0)|TDRP(+197.3kb)
4:160155746	4	160155746	T	?	9	3.812e-05	3.812e-05	0.7963	0.7963	0.8362	0	0.6272	0.6272	0.782	0.7658	0.7795	0.9204	0.7522	0.6241	0.8663	rs11100211	C4orf45(+199.4kb)|MIR3688-1(+105.7kb)|MIR3688-2(+105.7kb)|RAPGEF2(-33.25kb)
9:126410671	9	126410671	G	?	9	3.854e-05	3.854e-05	0.5105	0.5105	0.5081	0	1.2	1.2	0.4097	1.491	0.5515	0.5817	0.4836	0.4424	0.3654	rs75212853	DENND1A(0)
9:126420249	9	126420249	C	?	9	3.854e-05	3.854e-05	0.5105	0.5105	0.5081	0	1.2	1.2	0.4097	1.491	0.5515	0.5817	0.4836	0.4424	0.3654	rs114573529	DENND1A(0)
3:3418759	3	3418759	T	?	9	3.865e-05	3.865e-05	1.263	1.263	0.7736	0	1.329	1.329	1.409	1.164	1.241	1.439	0.7327	1.306	1.098	rs67208387	CRBN(+197.4kb)
11:133285312	11	133285312	G	?	9	3.902e-05	3.902e-05	1.7968	1.7968	0.9672	0	1.691	1.691	1.812	1.486	1.264	2.464	0.7204	2.692	1.787	rs77892682	OPCML(0)
15:67251694	15	67251694	G	?	9	3.906e-05	3.906e-05	0.6598	0.6598	0.6542	0	0.6251	0.6251	0.7175	1.085	0.4771	0.7272	0.3316	1.286	0.589	rs11855908	SMAD3(-106.5kb)|SMAD6(+177.4kb)
9:126476410	9	126476410	A	?	9	3.911e-05	3.911e-05	0.5084	0.5084	0.4599	0	1.2	1.2	0.3813	1.491	0.4509	0.5573	0.871	0.7176	0.3713	rs17288360	DENND1A(0)
18:6600114	18	6600114	T	?	9	3.914e-05	0.002721	1.2568	1.2808	0.0814	42.92	1.095	1.095	1.161	1.477	1.266	1.853	4.105	0.9561	1.16	rs8086588	L3MBTL4(+185.2kb)|LOC100130480(+9.462kb)
4:160176918	4	160176918	A	?	9	3.916e-05	3.916e-05	0.7961	0.7961	0.8308	0	0.6335	0.6335	0.7821	0.7029	0.7976	0.9204	0.7064	0.6253	0.8663	rs13119443	MIR3688-1(+126.9kb)|MIR3688-2(+126.9kb)|RAPGEF2(-12.08kb)
9:81739552	9	81739552	C	?	9	3.917e-05	3.917e-05	1.2635	1.2635	0.5579	0	1.53	1.53	1.232	2.262	1.153	1.115	0.7308	1.477	1.252	rs12379226	.
1:207692049	1	207692049	A	?	9	3.926e-05	6.131e-05	1.3247	1.3299	0.4002	4.18	2.014	2.014	1.201	1.191	1.324	1.259	0.6964	2.492	1.258	rs6656401	CD55(+157.7kb)|CR1(0)|CR1L(-126.4kb)|CR2(+28.81kb)
10:7503600	10	7503600	A	?	9	3.932e-05	0.00181	1.2585	1.2818	0.1159	37.91	1.151	1.151	1.39	1.373	1.103	1.891	1.037	1.554	1.029	rs2251386	ITIH5(-97.63kb)|SFMBT2(+50.15kb)
1:241287348	1	241287348	G	?	9	3.982e-05	3.982e-05	1.2985	1.2985	0.5727	0	2.138	2.138	1.394	1.37	1.08	1.234	1.223	1.175	1.213	rs9787056	MIR3123(-8.223kb)|RGS7(0)
4:93378874	4	93378874	A	?	9	3.991e-05	0.001455	1.3016	1.3332	0.1247	36.73	2.307	2.307	1.378	1.871	1.134	0.9245	0.8187	1.399	1.27	rs4482730	GRID2(0)
7:47792614	7	47792614	A	?	9	4e-05	0.01198	0.7986	0.7987	0.0337	52.02	0.8015	0.8015	0.7392	0.6317	0.5396	0.8594	0.7076	1.548	0.9174	rs6966685	C7orf65(+91.37kb)|C7orf69(-42.27kb)|LINC00525(-8.459kb)|PKD1L1(-21.64kb)|TNS3(+170.9kb)
7:47792701	7	47792701	T	?	9	4e-05	0.01198	0.7986	0.7987	0.0337	52.02	0.8015	0.8015	0.7392	0.6317	0.5396	0.8594	0.7076	1.548	0.9174	rs6966590	C7orf65(+91.46kb)|C7orf69(-42.19kb)|LINC00525(-8.372kb)|PKD1L1(-21.55kb)|TNS3(+171kb)
2:159148425	2	159148425	C	?	9	4.004e-05	4.004e-05	1.3209	1.3209	0.9435	0	1.498	1.498	1.179	1.202	1.387	1.552	1.803	1.065	1.316	rs79875649	CCDC148(0)|CCDC148-AS1(+55.74kb)|PKP4(-165kb)|UPP2(+155.8kb)
16:5590567	16	5590567	T	?	9	4.038e-05	0.001573	1.2916	1.3197	0.1315	35.84	1.937	1.937	1.13	0.6388	1.427	1.691	1.001	1.468	1.242	rs4482285	.
15:74715602	15	74715602	A	?	8	4.048e-05	4.048e-05	0.6244	0.6244	0.8583	0	0.5968	0.5968	0.5515	0.7573	0.406	0.6673	NA	0.8783	0.7504	rs28362891	ARID3B(-117.9kb)|CCDC33(+87.12kb)|CLK3(-185.1kb)|CYP11A1(+55.52kb)|LOC729739(+61.22kb)|SEMA7A(0)|UBL7(-22.72kb)|UBL7-AS1(-38kb)
4:160179113	4	160179113	A	?	9	4.052e-05	4.052e-05	0.7966	0.7966	0.8196	0	0.6335	0.6335	0.784	0.7029	0.7882	0.9258	0.7054	0.6253	0.8683	rs12503790	MIR3688-1(+129.1kb)|MIR3688-2(+129.1kb)|RAPGEF2(-9.884kb)
6:78847520	6	78847520	T	?	9	4.06e-05	4.06e-05	0.7963	0.7963	0.9423	0	0.7751	0.7751	0.816	0.6169	0.8491	0.7976	0.4198	0.7551	0.8152	rs7767159	.
6:78845314	6	78845314	A	?	9	4.065e-05	4.065e-05	0.7962	0.7962	0.9508	0	0.7751	0.7751	0.816	0.6336	0.8593	0.7883	0.4272	0.7551	0.8115	rs6454042	.
11:133287693	11	133287693	C	?	9	4.074e-05	4.074e-05	1.7931	1.7931	0.9635	0	1.691	1.691	1.764	1.486	1.264	2.464	0.7204	2.809	1.81	rs7113319	OPCML(0)
16:82775722	16	82775722	C	?	9	4.085e-05	4.085e-05	0.6344	0.6344	0.8915	0	0.5101	0.5101	0.5598	0.5337	0.6669	1.066	0.6598	0.5685	0.6643	rs75361326	CDH13(0)
4:160158723	4	160158723	C	?	9	4.09e-05	4.09e-05	0.797	0.797	0.82	0	0.6272	0.6272	0.782	0.7658	0.7756	0.9204	0.7053	0.6253	0.8731	rs13116575	MIR3688-1(+108.7kb)|MIR3688-2(+108.7kb)|RAPGEF2(-30.27kb)
2:19933680	2	19933680	A	?	8	4.096e-05	4.096e-05	0.7974	0.7974	0.9704	0	0.7768	0.7768	0.8635	0.9523	0.7326	0.8248	NA	0.7411	0.7521	rs873683	LINC00954(-134.9kb)|TTC32(-162.8kb)|WDR35(-176.3kb)
1:10669098	1	10669098	C	?	9	4.1e-05	4.1e-05	1.3126	1.3126	0.6321	0	1.589	1.589	1.444	2.064	1.014	1.144	1.098	1.117	1.36	rs6666075	APITD1(+166.2kb)|APITD1-CORT(+157kb)|CASZ1(-27.57kb)|CORT(+157kb)|DFFA(+136.5kb)|PEX14(0)|PGD(+188.9kb)
6:8257839	6	8257839	C	?	9	4.124e-05	4.124e-05	0.7939	0.7939	0.5711	0	0.6596	0.6596	0.88	0.9323	0.7937	0.7083	2.143	0.7447	0.7603	rs12195756	BLOC1S5(+193.2kb)|BLOC1S5-TXNDC5(+193.2kb)|EEF1E1(+155kb)|EEF1E1-MUTED(+155kb)|LOC100506207(-178kb)|SCARNA27(+171.1kb)|SLC35B3(-155.5kb)
16:82759037	16	82759037	T	?	9	4.165e-05	4.165e-05	0.6333	0.6333	0.7836	0	0.5647	0.5647	0.5189	0.4611	0.6552	1.088	0.6603	0.563	0.7122	rs76002740	CDH13(0)
20:41950541	20	41950541	C	?	9	4.188e-05	4.188e-05	0.6587	0.6587	0.7391	0	0.5053	0.5053	0.7235	1.69	0.661	0.7429	0.92	0.5178	0.5723	rs6030786	L3MBTL1(-185.8kb)|PTPRT(+132kb)|SRSF6(-136kb)
4:188153918	4	188153918	T	?	9	4.194e-05	4.194e-05	1.3462	1.3462	0.9839	0	1.293	1.293	1.471	1.126	1.33	1.173	1.187	1.796	1.344	rs56101819	LOC339975(-71.32kb)
2:19838380	2	19838380	G	?	9	4.196e-05	0.001495	1.3498	1.3935	0.1087	38.89	2.806	2.806	1.312	0.7394	1.367	1.523	1.464	1.093	1.176	rs11689702	.
22:46919906	22	46919906	C	?	8	4.21e-05	4.21e-05	0.6705	0.6705	0.5396	0	0.5889	0.5889	0.6958	0.3396	0.9368	0.6136	NA	0.4253	0.7563	rs5767240	CELSR1(0)|CERK(-160.4kb)|GRAMD4(-102.8kb)|GTSE1(+193.2kb)|TRMU(+166.7kb)
2:19935033	2	19935033	G	?	8	4.225e-05	4.225e-05	0.7975	0.7975	0.9751	0	0.7768	0.7768	0.863	0.9523	0.7326	0.8133	NA	0.7284	0.7596	rs12710727	LINC00954(-133.6kb)|TTC32(-161.5kb)|WDR35(-175kb)
2:159185536	2	159185536	A	?	9	4.279e-05	4.279e-05	1.319	1.319	0.9151	0	1.498	1.498	1.164	1.202	1.403	1.572	1.803	1.047	1.312	rs75699868	CCDC148(0)|CCDC148-AS1(+92.86kb)|PKP4(-127.9kb)|UPP2(+192.9kb)
9:81723982	9	81723982	C	?	9	4.299e-05	4.299e-05	1.2611	1.2611	0.7539	0	1.608	1.608	1.212	1.915	1.2	1.176	0.7928	1.477	1.223	rs10867343	.
14:42806482	14	42806482	C	?	9	4.307e-05	0.0007437	0.7915	0.7621	0.1371	35.12	0.4449	0.4449	0.7647	0.481	0.8383	0.7991	0.6342	1.078	0.8959	rs11157283	.
1:216254908	1	216254908	A	?	9	4.307e-05	4.307e-05	1.2627	1.2627	0.7465	0	0.9875	0.9875	1.497	1.265	1.209	1.146	1.993	1.126	1.261	rs4308954	USH2A(0)
19:4550628	19	4550628	A	?	6	4.314e-05	0.0009801	0.7752	0.7346	0.1228	42.36	0.4344	0.4344	0.8415	0.832	NA	0.704	NA	NA	0.8417	rs4361052	C19orf10(-106.9kb)|CHAF1A(+107.2kb)|DPP9(-124.6kb)|HDGFRP2(+48.41kb)|LOC100131094(-128.7kb)|LRG1(+10.59kb)|MIR4746(+104.6kb)|MPND(+190.5kb)|PLIN4(+32.91kb)|PLIN5(+15.42kb)|SEMA6B(0)|SH3GL1(+150.1kb)|TNFAIP8L1(-88.9kb)|UBXN6(+92.84kb)
22:48912830	22	48912830	C	?	8	4.324e-05	4.324e-05	1.2855	1.2855	0.7679	0	1.398	1.398	1.302	1.443	1.46	0.9806	NA	1.17	1.331	rs11090851	FAM19A5(0)|LOC284933(-21.88kb)
14:42776977	14	42776977	T	?	9	4.343e-05	0.0007178	1.2576	1.2681	0.2287	24.15	2.09	2.09	1.284	0.9152	1.168	1.415	1.278	0.8695	1.178	rs1988185	.
9:126470968	9	126470968	C	?	9	4.348e-05	7.89e-05	0.5076	0.5123	0.4165	2.15	1.2	1.2	0.3706	1.659	0.4509	0.5573	0.871	0.7176	0.3713	rs76429941	DENND1A(0)
2:19933380	2	19933380	T	?	8	4.354e-05	4.354e-05	0.7981	0.7981	0.9637	0	0.7768	0.7768	0.8635	0.9752	0.7326	0.8248	NA	0.7411	0.7516	rs873684	LINC00954(-135.2kb)|TTC32(-163.1kb)|WDR35(-176.6kb)
14:42823338	14	42823338	G	?	9	4.356e-05	0.0009339	0.792	0.7543	0.0931	41.13	0.4164	0.4164	0.7693	0.4978	0.8473	0.7984	0.598	1.065	0.9006	rs1484079	.
20:57278022	20	57278022	A	?	9	4.386e-05	0.0001459	0.7141	0.6866	0.2679	19.67	0.5053	0.5053	0.8509	0.3223	0.7994	0.713	0.2481	0.4364	0.7972	rs77212705	APCDD1L(+188.1kb)|APCDD1L-AS1(+83.07kb)|GNAS(-136.8kb)|GNAS-AS1(-116kb)|MIR296(-114.6kb)|MIR298(-115.3kb)|NPEPL1(0)|STX16(+23.44kb)|STX16-NPEPL1(0)
16:27494877	16	27494877	C	?	9	4.453e-05	0.0001564	1.2841	1.2938	0.3439	10.93	2.011	2.011	1.199	1.627	1.423	1.226	0.511	1.044	1.23	rs4787963	FLJ21408(+193.1kb)|GTF3C1(0)|IL4R(+118.8kb)|IL21R(+31.51kb)|IL21R-AS1(+30.16kb)|KIAA0556(-66.59kb)
18:11032618	18	11032618	G	?	9	4.46e-05	4.46e-05	1.3173	1.3173	0.5768	0	1.985	1.985	1.061	1.441	1.315	1.232	1.159	1.53	1.455	rs34853451	PIEZO2(0)
22:46921772	22	46921772	A	?	8	4.475e-05	4.475e-05	0.6708	0.6708	0.4301	0	0.5889	0.5889	0.7266	0.3396	0.9368	0.6395	NA	0.3703	0.7502	rs4823844	CELSR1(0)|CERK(-158.5kb)|GRAMD4(-100.9kb)|GTSE1(+195.1kb)|TRMU(+168.5kb)
11:106665509	11	106665509	G	?	9	4.492e-05	4.492e-05	0.7877	0.7877	0.6473	0	0.5053	0.5053	0.779	0.898	0.7846	0.8184	1.011	0.9332	0.8354	rs1344328	GUCY1A2(0)
11:76462811	11	76462811	A	?	8	4.52e-05	4.52e-05	0.7936	0.7936	0.6055	0	0.6301	0.6301	0.8636	1.057	0.6951	0.8911	0.484	NA	0.7651	rs10899277	ACER3(-109.1kb)|GUCY2EP(+29.98kb)|LRRC32(+81.02kb)|TSKU(-30.54kb)
11:87644758	11	87644758	A	?	9	4.544e-05	4.544e-05	1.7665	1.7665	0.6089	0	2.611	2.611	1.355	0.9571	2.067	2.064	11.61	5.107	1.506	rs10898803	.
11:87644865	11	87644865	A	?	9	4.544e-05	4.544e-05	1.7665	1.7665	0.6089	0	2.611	2.611	1.355	0.9571	2.067	2.064	11.61	5.107	1.506	rs10898804	.
2:177035491	2	177035491	T	?	8	4.554e-05	4.554e-05	2.2303	2.2303	0.4433	0	4.558	4.558	1.407	4.338	1.668	1.078	NA	6.979	2.988	rs114705158	EVX2(+86.8kb)|HOXD-AS1(-2.432kb)|HOXD-AS2(+33.66kb)|HOXD1(-17.82kb)|HOXD3(0)|HOXD4(+17.54kb)|HOXD8(+38.07kb)|HOXD9(+45.85kb)|HOXD10(+50.82kb)|HOXD11(+61.18kb)|HOXD12(+70kb)|HOXD13(+74.82kb)|KIAA1715(+168.5kb)|MIR10B(+20.35kb)|MTX2(-98.63kb)
4:153589712	4	153589712	A	?	8	4.566e-05	4.566e-05	1.5517	1.5517	0.4488	0	1.013	1.013	1.316	2.198	1.215	2.523	NA	1.195	1.688	rs115989197	ARFIP1(-111.4kb)|DKFZP434I0714(+129.3kb)|FBXW7(+133.3kb)|MIR3140(+179.1kb)|MIR4453(+132kb)|TIGD4(-100.8kb)|TMEM154(0)
4:78984871	4	78984871	G	?	9	4.607e-05	4.607e-05	1.3153	1.3153	0.8148	0	1.594	1.594	1.248	0.9895	1.372	1.715	1.353	1.168	1.218	rs57455423	FRAS1(0)|MRPL1(+110.9kb)
1:187057284	1	187057284	G	?	9	4.626e-05	8.045e-05	0.7998	0.7987	0.4014	4.03	0.4766	0.4766	0.7549	0.9663	0.9254	0.793	0.8376	0.8688	0.8509	rs56258814	PLA2G4A(+99.17kb)
13:36403914	13	36403914	C	?	9	4.673e-05	4.673e-05	0.7858	0.7858	0.654	0	1.076	1.076	0.7486	0.6513	0.6812	0.9757	0.4869	0.7572	0.7709	rs7331739	DCLK1(0)|MIR548F5(0)|NBEA(+157kb)
8:29818439	8	29818439	T	?	9	4.692e-05	4.692e-05	1.3563	1.3563	0.5998	0	1.209	1.209	1.651	0.9943	1.155	1.111	3.176	1.727	1.381	rs58557974	DCTN6(-195.4kb)|FAM183CP(+7.316kb)|LEPROTL1(-134.5kb)|MBOAT4(-170.7kb)|MIR548O2(-101.8kb)|MIR3148(+3.575kb)|TMEM66(-102.2kb)
19:44126279	19	44126279	T	?	9	4.705e-05	0.0005699	1.275	1.282	0.2646	20.05	1.44	1.44	1.152	1.432	1.281	1.004	0.6206	2.3	1.399	rs34637472	CADM4(-0.242kb)|ETHE1(+94.88kb)|IRGC(-93.93kb)|IRGQ(+25.99kb)|KCNN4(-144.4kb)|LYPD3(+156.4kb)|LYPD5(-173.8kb)|PHLDB3(+117.3kb)|PINLYP(+40.02kb)|PLAUR(-23.97kb)|SMG9(-109kb)|SRRM5(+7.629kb)|XRCC1(+46.55kb)|ZNF428(+2.265kb)|ZNF575(+86kb)|ZNF576(+21.69kb)
9:126389060	9	126389060	A	?	9	4.715e-05	4.715e-05	0.5064	0.5064	0.4575	0	1.2	1.2	0.3733	1.659	0.5581	0.5609	0.2857	0.4424	0.374	rs117054613	DENND1A(0)
15:74893850	15	74893850	C	?	8	4.72e-05	4.72e-05	0.6248	0.6248	0.9782	0	0.5516	0.5516	0.5785	0.6525	0.4717	0.6347	NA	0.7544	0.7352	rs138649734	ARID3B(+3.378kb)|CLK3(-6.862kb)|CSK(-180.6kb)|CYP1A1(-118kb)|CYP1A2(-147.3kb)|EDC3(-29.05kb)|MIR4513(-187.2kb)|SEMA7A(+167.6kb)|UBL7(+140.3kb)|UBL7-AS1(+120.2kb)
2:19839671	2	19839671	A	?	9	4.725e-05	0.001614	1.3477	1.3911	0.1088	38.88	2.806	2.806	1.312	0.7394	1.348	1.523	1.464	1.093	1.176	rs7586653	.
11:1674092	11	1674092	T	?	9	4.734e-05	4.734e-05	1.4856	1.4856	0.7013	0	1.298	1.298	1.535	3.576	1.996	1.541	0.5934	1.894	1.29	rs112693843	BRSK2(+190.2kb)|CTSD(-99.89kb)|DUSP8(+80.94kb)|FAM99A(-12.74kb)|FAM99B(-30.41kb)|IFITM10(-79.55kb)|KRTAP5-1(+67.58kb)|KRTAP5-2(+54.57kb)|KRTAP5-3(+44.4kb)|KRTAP5-4(+30.72kb)|KRTAP5-5(+21.93kb)|KRTAP5-6(-44.33kb)|KRTAP5-AS1(+53.68kb)|MOB2(0)|SYT8(-181.6kb)|TNNI2(-186.1kb)
14:74996222	14	74996222	T	?	9	4.752e-05	0.00441	1.6324	1.7113	0.084	42.51	4.698	4.698	1.7	0.1962	1.095	2.206	2.147	3.163	1.465	rs117826491	AREL1(-131.7kb)|FCF1(-183.6kb)|ISCA2(+33.95kb)|LTBP2(0)|MIR4709(+49.32kb)|NPC2(+36.14kb)|SYNDIG1L(+103.4kb)|VRTN(+169.5kb)
9:81749354	9	81749354	C	?	9	4.754e-05	0.0008471	1.2479	1.2686	0.1899	28.66	1.82	1.82	1.171	2.021	1.074	1.286	0.5303	1.128	1.243	rs6559454	.
9:126469651	9	126469651	A	?	9	4.774e-05	5.636e-05	0.5105	0.5118	0.4289	0.58	1.2	1.2	0.3908	1.659	0.4509	0.5573	0.871	0.7176	0.3654	rs117279017	DENND1A(0)
22:48396298	22	48396298	T	?	9	4.775e-05	4.775e-05	1.6521	1.6521	0.4747	0	2.497	2.497	1.301	0.8175	1.631	1.239	1.622	1.24	2.428	rs145694309	.
22:48396716	22	48396716	G	?	9	4.775e-05	4.775e-05	1.6521	1.6521	0.4747	0	2.497	2.497	1.301	0.8175	1.631	1.239	1.622	1.24	2.428	rs12169549	.
22:48396779	22	48396779	G	?	9	4.775e-05	4.775e-05	1.6521	1.6521	0.4747	0	2.497	2.497	1.301	0.8175	1.631	1.239	1.622	1.24	2.428	rs5766970	.
14:42769284	14	42769284	A	?	9	4.777e-05	0.0008376	0.7891	0.7479	0.0943	40.95	0.4428	0.4428	0.7603	0.4598	0.7469	0.8415	0.5933	1.035	0.9298	rs7151396	.
8:29807552	8	29807552	A	?	9	4.78e-05	4.78e-05	1.3353	1.3353	0.5118	0	1.094	1.094	1.607	1.11	1.234	1.017	3.136	1.709	1.357	rs59177447	FAM183CP(0)|LEPROTL1(-145.4kb)|MBOAT4(-181.6kb)|MIR548O2(-112.7kb)|MIR3148(-7.235kb)|TMEM66(-113.1kb)
22:48404634	22	48404634	A	?	9	4.781e-05	4.781e-05	1.6321	1.6321	0.619	0	1.797	1.797	1.359	0.8865	1.713	1.209	1.622	1.24	2.401	rs5768263	.
2:159174724	2	159174724	T	?	9	4.792e-05	4.792e-05	1.3171	1.3171	0.945	0	1.498	1.498	1.173	1.202	1.386	1.527	1.803	1.047	1.326	rs78536365	CCDC148(0)|CCDC148-AS1(+82.04kb)|PKP4(-138.8kb)|UPP2(+182.1kb)
7:21781807	7	21781807	C	?	9	4.798e-05	0.0003516	0.7301	0.7111	0.24	22.85	0.3638	0.3638	0.9237	0.591	0.7227	0.7425	0.4138	1.008	0.6886	rs1029598	CDCA7L(-158.7kb)|DNAH11(0)
11:133283016	11	133283016	A	?	9	4.801e-05	4.801e-05	1.7918	1.7918	0.9639	0	1.575	1.575	1.812	1.486	1.264	2.464	0.7204	2.692	1.827	rs78784821	OPCML(0)
1:10668379	1	10668379	A	?	9	4.801e-05	4.801e-05	1.309	1.309	0.6456	0	1.589	1.589	1.427	2.064	1.014	1.144	1.098	1.117	1.36	rs12722934	APITD1(+165.5kb)|APITD1-CORT(+156.3kb)|CASZ1(-28.29kb)|CORT(+156.3kb)|DFFA(+135.8kb)|PEX14(0)|PGD(+188.2kb)
2:19936116	2	19936116	T	?	8	4.804e-05	4.804e-05	0.7988	0.7988	0.9815	0	0.7768	0.7768	0.8583	0.9523	0.7326	0.8133	NA	0.7284	0.7673	rs735024	LINC00954(-132.5kb)|TTC32(-160.4kb)|WDR35(-173.9kb)
19:44125325	19	44125325	G	?	9	4.81e-05	0.0007559	1.2728	1.2845	0.2311	23.88	1.492	1.492	1.143	1.432	1.262	1.024	0.6023	2.375	1.385	rs7245651	CADM4(-1.196kb)|ETHE1(+93.93kb)|IRGC(-94.89kb)|IRGQ(+25.04kb)|KCNN4(-145.4kb)|LYPD3(+155.5kb)|LYPD5(-174.8kb)|PHLDB3(+116.3kb)|PINLYP(+39.07kb)|PLAUR(-24.92kb)|SMG9(-110kb)|SRRM5(+6.675kb)|XRCC1(+45.6kb)|ZNF428(+1.311kb)|ZNF575(+85.04kb)|ZNF576(+20.74kb)
4:12371650	4	12371650	G	?	9	4.813e-05	4.813e-05	1.8372	1.8372	0.6152	0	2.788	2.788	1.295	2.037	1.073	2.519	11.88	2.094	2.123	rs144727066	.
12:100959017	12	100959017	T	?	9	4.814e-05	4.814e-05	1.4604	1.4604	0.7988	0	2.458	2.458	1.597	1.652	1.374	1.06	1.146	1.801	1.361	rs12810780	GAS2L3(-8.471kb)|NR1H4(+1.372kb)|SLC17A8(+143.2kb)
2:159111937	2	159111937	G	?	9	4.814e-05	4.814e-05	1.3104	1.3104	0.6836	0	2.142	2.142	1.248	1.517	1.083	1.349	2.056	1.501	1.24	rs1000855	CCDC148(0)|CCDC148-AS1(+19.26kb)|UPP2(+119.3kb)
8:29827473	8	29827473	A	?	9	4.818e-05	4.818e-05	1.3556	1.3556	0.7266	0	1.255	1.255	1.579	1.098	1.14	1.124	3.348	1.727	1.39	rs10101834	DCTN6(-186.3kb)|FAM183CP(+16.35kb)|LEPROTL1(-125.4kb)|MBOAT4(-161.7kb)|MIR548O2(-92.78kb)|MIR3148(+12.61kb)|TMEM66(-93.16kb)
9:126467744	9	126467744	C	?	9	4.823e-05	7.182e-05	0.5096	0.5127	0.4223	1.42	1.2	1.2	0.3908	1.659	0.4513	0.5573	0.871	0.7176	0.3618	rs77533880	DENND1A(0)
2:159168143	2	159168143	T	?	9	4.838e-05	4.838e-05	1.3169	1.3169	0.945	0	1.498	1.498	1.173	1.202	1.386	1.527	1.803	1.047	1.325	rs79671796	CCDC148(0)|CCDC148-AS1(+75.46kb)|PKP4(-145.3kb)|UPP2(+175.5kb)
3:76742046	3	76742046	A	?	7	4.847e-05	4.847e-05	2.3123	2.3123	0.9925	0	NA	NA	2.375	0	1.694	2.825	0.9766	3.177	2.353	rs74876716	.
10:7489750	10	7489750	T	?	9	4.85e-05	0.001136	1.25	1.2389	0.2735	19.04	1.105	1.105	1.35	0.9228	1.077	1.779	0.6943	1.131	1.198	rs2244357	ITIH5(-111.5kb)|SFMBT2(+36.3kb)
11:76462540	11	76462540	T	?	8	4.851e-05	4.851e-05	0.7945	0.7945	0.6249	0	0.6301	0.6301	0.8636	1.057	0.6951	0.881	0.484	NA	0.7713	rs10793193	ACER3(-109.4kb)|C11orf30(+200kb)|GUCY2EP(+29.71kb)|LRRC32(+80.75kb)|TSKU(-30.82kb)
14:54804163	14	54804163	C	?	7	4.864e-05	4.864e-05	1.3129	1.3129	0.9348	0	1.458	1.458	1.227	NA	1.449	1.366	1.393	1.083	NA	rs11625167	CDKN3(-59.51kb)|CGRRF1(-172.4kb)|CNIH(-89.48kb)|GMFB(-137kb)
10:7499528	10	7499528	G	?	9	4.878e-05	0.001626	1.2549	1.2751	0.1425	34.43	1.153	1.153	1.363	1.325	1.093	1.921	1.033	1.498	1.046	rs2248165	ITIH5(-101.7kb)|SFMBT2(+46.08kb)
10:7499574	10	7499574	C	?	9	4.878e-05	0.001626	1.2549	1.2751	0.1425	34.43	1.153	1.153	1.363	1.325	1.093	1.921	1.033	1.498	1.046	rs2248170	ITIH5(-101.7kb)|SFMBT2(+46.13kb)
10:7499595	10	7499595	A	?	9	4.878e-05	0.001626	1.2549	1.2751	0.1425	34.43	1.153	1.153	1.363	1.325	1.093	1.921	1.033	1.498	1.046	rs2248171	ITIH5(-101.6kb)|SFMBT2(+46.15kb)
10:7499754	10	7499754	G	?	9	4.878e-05	0.001626	1.2549	1.2751	0.1425	34.43	1.153	1.153	1.363	1.325	1.093	1.921	1.033	1.498	1.046	rs2248176	ITIH5(-101.5kb)|SFMBT2(+46.31kb)
3:174027195	3	174027195	T	?	9	4.899e-05	4.899e-05	0.5881	0.5881	0.4766	0	0.7466	0.7466	0.5771	0.753	0.5083	0.1015	0.9445	0.4609	0.7317	rs17328346	NLGN1(+26.06kb)
11:5877029	11	5877029	C	?	9	4.912e-05	4.912e-05	2.1612	2.1612	0.5662	0	14.92	14.92	2.2	4.784	2.23	2.478	3.021	0.7297	1.571	rs148691327	OR52E4(-28.49kb)|OR52E6(+13.9kb)|OR52E8(-0.949kb)|OR52L1(-130.1kb)|OR52N1(+66.98kb)|OR52N2(+34.5kb)|OR52N4(+100.1kb)|OR52N5(+77.13kb)|OR56A1(-170.9kb)|OR56A3(-91.55kb)|OR56A4(-146.3kb)|OR56A5(-111.8kb)|OR56B1(+118.3kb)|TRIM5(+170.7kb)|TRIM22(+144.9kb)
9:126457512	9	126457512	G	?	9	4.941e-05	4.941e-05	0.5133	0.5133	0.4746	0	1.2	1.2	0.4097	1.491	0.4509	0.5817	0.4842	0.7176	0.3615	rs74349113	DENND1A(0)
4:115355138	4	115355138	A	?	9	4.945e-05	0.001043	0.5639	0.5444	0.2182	25.36	0.2371	0.2371	0.7588	0.2714	0.9385	0.3055	0.9116	1.914	0.5247	rs80137839	UGT8(-164.5kb)
18:11033371	18	11033371	C	?	9	4.948e-05	4.948e-05	1.3146	1.3146	0.6751	0	1.848	1.848	1.061	1.441	1.315	1.26	1.159	1.53	1.453	rs1473444	PIEZO2(0)
10:7504508	10	7504508	C	?	9	4.965e-05	0.001349	1.2551	1.2713	0.1693	31.12	1.112	1.112	1.396	1.385	1.091	1.774	0.9535	1.654	1.043	rs4748934	ITIH5(-96.72kb)|SFMBT2(+51.06kb)
10:7504810	10	7504810	C	?	9	4.965e-05	0.001349	1.2551	1.2713	0.1693	31.12	1.112	1.112	1.396	1.385	1.091	1.774	0.9535	1.654	1.043	rs2477539	ITIH5(-96.42kb)|SFMBT2(+51.36kb)
10:7504824	10	7504824	A	?	9	4.965e-05	0.001349	1.2551	1.2713	0.1693	31.12	1.112	1.112	1.396	1.385	1.091	1.774	0.9535	1.654	1.043	rs2491056	ITIH5(-96.41kb)|SFMBT2(+51.38kb)
6:7949209	6	7949209	T	?	9	4.972e-05	4.972e-05	1.2935	1.2935	0.9429	0	1.189	1.189	1.185	1.297	1.486	1.544	1.415	1.421	1.205	rs155501	BLOC1S5(-64.59kb)|BLOC1S5-TXNDC5(0)|BMP6(+67.25kb)|EEF1E1(-124.4kb)|EEF1E1-MUTED(-64.59kb)|PIP5K1P1(-37.12kb)|SCARNA27(-137.4kb)|TXNDC5(+38.16kb)
9:81747584	9	81747584	A	?	9	4.98e-05	0.0004255	1.2472	1.2639	0.2577	20.83	1.856	1.856	1.173	1.961	1.041	1.293	0.6782	1.175	1.238	rs10780292	.
10:7499945	10	7499945	T	?	9	4.989e-05	0.001668	1.2545	1.2749	0.141	34.61	1.153	1.153	1.363	1.325	1.093	1.921	1.033	1.498	1.045	rs2265049	ITIH5(-101.3kb)|SFMBT2(+46.5kb)
11:106842319	11	106842319	T	?	9	4.998e-05	5.58e-05	0.7648	0.7646	0.4279	0.71	0.483	0.483	0.8032	0.6917	0.7412	1.115	0.9289	0.6375	0.7452	rs66521669	GUCY1A2(0)
22:47047749	22	47047749	A	?	9	5.02e-05	5.02e-05	0.688	0.688	0.9926	0	0.5803	0.5803	0.7169	0.5185	0.6038	0.7888	0.7537	0.646	0.7292	rs5769056	CELSR1(+114.7kb)|CERK(-32.56kb)|GRAMD4(0)|TBC1D22A(-110.8kb)
2:169971141	2	169971141	G	?	9	5.05e-05	5.05e-05	0.7905	0.7905	0.5324	0	0.6186	0.6186	0.8574	0.543	0.9377	0.8853	1.217	0.6109	0.7542	rs1861609	ABCB11(+83.31kb)|DHRS9(+18.46kb)|LRP2(-12.48kb)
15:91478306	15	91478306	A	?	8	5.072e-05	5.072e-05	0.4725	0.4725	0.7732	0	0.4048	0.4048	0.4097	2.366	0.5335	0.5747	NA	0.3668	0.4388	rs113028104	BLM(+119.6kb)|FES(+39.3kb)|FURIN(+51.62kb)|HDDC3(+2.532kb)|MAN2A2(+12.49kb)|PRC1(-30.96kb)|PRC1-AS1(-31.29kb)|RCCD1(-19.8kb)|SV2B(-164.9kb)|UNC45A(0)|VPS33B(-63.47kb)
2:19934511	2	19934511	A	?	8	5.093e-05	5.093e-05	0.7996	0.7996	0.9725	0	0.7768	0.7768	0.8635	0.9523	0.7326	0.8288	NA	0.7284	0.7593	rs4666550	LINC00954(-134.1kb)|TTC32(-162kb)|WDR35(-175.5kb)
2:19934661	2	19934661	A	?	8	5.093e-05	5.093e-05	0.7996	0.7996	0.9725	0	0.7768	0.7768	0.8635	0.9523	0.7326	0.8288	NA	0.7284	0.7593	rs4666551	LINC00954(-134kb)|TTC32(-161.9kb)|WDR35(-175.4kb)
3:56615207	3	56615207	A	?	7	5.101e-05	0.09445	2.4689	1.8874	0.0388	54.81	NA	NA	2.091	1.038	2.963	0.3085	1.254	1.535	5.469	rs146064191	ARHGEF3(-146.2kb)|CCDC66(0)|ERC2(+112.8kb)|FAM208A(-38.95kb)
22:27578701	22	27578701	C	?	9	5.113e-05	5.113e-05	0.4219	0.4219	0.9866	0	0.3235	0.3235	0.3027	0.2579	0.4013	0.2585	0.7063	0.6706	0.5319	rs76999489	.
1:10666735	1	10666735	A	?	9	5.124e-05	5.124e-05	1.3082	1.3082	0.6576	0	1.589	1.589	1.427	2.064	1.014	1.154	1.098	1.117	1.351	rs11121599	APITD1(+163.9kb)|APITD1-CORT(+154.7kb)|CASZ1(-29.93kb)|CORT(+154.7kb)|DFFA(+134.1kb)|PEX14(0)|PGD(+186.5kb)
22:48405852	22	48405852	T	?	9	5.142e-05	5.142e-05	1.6299	1.6299	0.555	0	1.797	1.797	1.301	0.8175	1.775	1.209	1.622	1.24	2.401	rs5768266	.
22:48406218	22	48406218	A	?	9	5.142e-05	5.142e-05	1.6299	1.6299	0.555	0	1.797	1.797	1.301	0.8175	1.775	1.209	1.622	1.24	2.401	rs4373015	.
22:48406440	22	48406440	G	?	9	5.142e-05	5.142e-05	1.6299	1.6299	0.555	0	1.797	1.797	1.301	0.8175	1.775	1.209	1.622	1.24	2.401	rs5766979	.
22:48406571	22	48406571	T	?	9	5.142e-05	5.142e-05	1.6299	1.6299	0.555	0	1.797	1.797	1.301	0.8175	1.775	1.209	1.622	1.24	2.401	rs5766980	.
22:48406760	22	48406760	G	?	9	5.142e-05	5.142e-05	1.6299	1.6299	0.555	0	1.797	1.797	1.301	0.8175	1.775	1.209	1.622	1.24	2.401	rs2157158	.
22:48407439	22	48407439	C	?	9	5.142e-05	5.142e-05	1.6299	1.6299	0.555	0	1.797	1.797	1.301	0.8175	1.775	1.209	1.622	1.24	2.401	rs5768268	.
19:44128437	19	44128437	G	?	9	5.167e-05	0.0008001	1.2724	1.2825	0.235	23.43	1.492	1.492	1.15	1.395	1.263	1.012	0.6023	2.357	1.386	rs2240633	CADM4(0)|ETHE1(+97.04kb)|IRGC(-91.78kb)|IRGQ(+28.15kb)|KCNN4(-142.2kb)|LYPD3(+158.6kb)|LYPD5(-171.6kb)|PHLDB3(+119.5kb)|PINLYP(+42.18kb)|PLAUR(-21.81kb)|SMG9(-106.9kb)|SRRM5(+9.787kb)|XRCC1(+48.71kb)|ZNF428(+4.423kb)|ZNF575(+88.15kb)|ZNF576(+23.85kb)
11:106638468	11	106638468	T	?	9	5.177e-05	5.177e-05	0.7256	0.7256	0.7868	0	0.5546	0.5546	0.9182	0.7727	0.6183	0.7741	0.8862	0.5907	0.6679	rs11211900	GUCY1A2(0)
3:68107415	3	68107415	A	?	9	5.186e-05	0.004808	1.2508	1.2238	0.197	27.82	0.9433	0.9433	1.283	1.853	1.004	1.5	0.7179	0.9174	1.368	rs7433087	FAM19A1(0)
21:35995072	21	35995072	G	?	9	5.196e-05	0.0006379	1.3007	1.2903	0.3028	15.68	1.639	1.639	1.178	1.014	1.116	1.236	0.6234	1.001	1.702	rs35804630	CLIC6(-46.62kb)|KCNE1(+110.5kb)|LINC00160(-101kb)|LOC100506385(-123kb)|RCAN1(+7.69kb)|RUNX1(-165kb)
21:36000762	21	36000762	T	?	9	5.208e-05	5.208e-05	1.3044	1.3044	0.4448	0	1.596	1.596	1.176	1.028	1.142	1.183	0.6237	1.209	1.684	rs66632134	CLIC6(-40.92kb)|KCNE1(+116.2kb)|LINC00160(-95.34kb)|LOC100506385(-117.4kb)|RCAN1(+13.38kb)|RUNX1(-159.3kb)
5:67343391	5	67343391	A	?	9	5.244e-05	0.0002708	0.7474	0.7522	0.3666	8.24	0.8042	0.8042	0.7126	1.537	0.9652	0.6606	1.487	0.524	0.6968	rs2444984	PIK3R1(-168.2kb)
10:7499085	10	7499085	G	?	9	5.265e-05	0.001644	1.2538	1.2742	0.1444	34.19	1.153	1.153	1.359	1.325	1.093	1.921	1.033	1.498	1.046	rs10905160	ITIH5(-102.1kb)|SFMBT2(+45.64kb)
11:133283454	11	133283454	T	?	9	5.275e-05	5.275e-05	1.8033	1.8033	0.9694	0	1.575	1.575	1.764	1.486	1.264	2.464	0.9667	2.692	1.937	rs74338458	OPCML(0)
20:41957559	20	41957559	T	?	9	5.307e-05	5.307e-05	0.6598	0.6598	0.8016	0	0.5053	0.5053	0.6801	1.69	0.6547	0.7429	0.92	0.5178	0.6034	rs75017285	L3MBTL1(-178.8kb)|PTPRT(+139kb)|SRSF6(-128.9kb)
4:93349320	4	93349320	A	?	9	5.336e-05	0.002678	1.3241	1.4001	0.042	50.09	2.835	2.835	1.353	1.721	1.332	0.9267	0.4737	1.588	1.221	rs62311043	GRID2(0)
1:10673094	1	10673094	C	?	9	5.357e-05	5.357e-05	1.304	1.304	0.5312	0	1.78	1.78	1.413	2.071	1.027	1.111	1.098	1.083	1.333	rs3790630	APITD1(+170.2kb)|APITD1-CORT(+161kb)|CASZ1(-23.57kb)|CORT(+161kb)|DFFA(+140.5kb)|PEX14(0)|PGD(+192.9kb)
7:16426414	7	16426414	G	?	9	5.386e-05	5.386e-05	1.2519	1.2519	0.9032	0	1.528	1.528	1.291	1.226	1.261	1.196	2.587	1.174	1.174	rs6944820	ISPD(0)|LOC100506025(+116.2kb)|LRRC72(-140.1kb)|SOSTDC1(-74.69kb)
2:19934220	2	19934220	A	?	8	5.404e-05	5.404e-05	0.8002	0.8002	0.9746	0	0.7768	0.7768	0.8635	0.9523	0.7326	0.8288	NA	0.7411	0.7593	rs1078149	LINC00954(-134.4kb)|TTC32(-162.3kb)|WDR35(-175.8kb)
11:76462181	11	76462181	C	?	8	5.408e-05	5.408e-05	0.7957	0.7957	0.6196	0	0.6301	0.6301	0.8636	1.057	0.6951	0.8861	0.484	NA	0.773	rs10899276	ACER3(-109.7kb)|C11orf30(+199.6kb)|GUCY2EP(+29.35kb)|LRRC32(+80.39kb)|TSKU(-31.18kb)
11:76462403	11	76462403	A	?	8	5.408e-05	5.408e-05	0.7957	0.7957	0.6196	0	0.6301	0.6301	0.8636	1.057	0.6951	0.8861	0.484	NA	0.773	rs10793192	ACER3(-109.5kb)|C11orf30(+199.8kb)|GUCY2EP(+29.57kb)|LRRC32(+80.61kb)|TSKU(-30.95kb)
2:159145379	2	159145379	C	?	9	5.408e-05	5.408e-05	1.2926	1.2926	0.9096	0	1.605	1.605	1.163	1.396	1.216	1.492	2.069	1.16	1.275	rs113692953	CCDC148(0)|CCDC148-AS1(+52.7kb)|PKP4(-168.1kb)|UPP2(+152.7kb)
20:50496977	20	50496977	T	?	9	5.412e-05	5.412e-05	1.4339	1.4339	0.7016	0	1.603	1.603	1.154	1.265	1.864	1.779	0.5556	0.854	1.501	rs16996300	ATP9A(+112.1kb)|SALL4(+77.93kb)
10:7500015	10	7500015	C	?	9	5.414e-05	0.002085	1.2528	1.2714	0.131	35.9	1.123	1.123	1.369	1.325	1.093	1.921	1.033	1.498	1.044	rs2248190	ITIH5(-101.2kb)|SFMBT2(+46.57kb)
6:78874656	6	78874656	C	?	9	5.415e-05	5.415e-05	0.7977	0.7977	0.924	0	0.9257	0.9257	0.8265	0.6178	0.7798	0.778	0.5264	0.6292	0.8321	rs9343746	.
19:2042745	19	2042745	T	?	6	5.449e-05	5.449e-05	2.3365	2.3365	0.7995	0	5.127	5.127	1.841	1.979	NA	2.059	NA	NA	2.363	rs72981432	ABHD17A(+157.2kb)|ADAT3(+129.3kb)|AP3D1(-58.24kb)|BTBD2(+27.04kb)|CSNK1G2(+61.41kb)|CSNK1G2-AS1(+88.2kb)|DOT1L(-121.4kb)|IZUMO4(-54.12kb)|KLF16(+179.2kb)|MIR1227(-191.3kb)|MKNK2(0)|MOB3A(-28.29kb)|PLEKHJ1(-190.4kb)|REXO1(+194.3kb)|SCAMP4(+116.7kb)|SF3A2(-194.1kb)
11:106737241	11	106737241	A	?	9	5.456e-05	5.456e-05	0.7672	0.7672	0.5876	0	0.4651	0.4651	0.8188	0.7072	0.745	0.9754	1.102	0.84	0.741	rs11211951	GUCY1A2(0)
1:74206667	1	74206667	G	?	6	5.465e-05	5.465e-05	2.3168	2.3168	0.7681	0	NA	NA	1.838	2.102	1.798	4.284	NA	1.787	2.381	rs181168639	.
6:41166310	6	41166310	A	?	9	5.494e-05	0.00133	0.7932	0.7664	0.109	38.86	0.4043	0.4043	0.7399	0.7712	0.9278	0.7384	0.6929	1.001	0.9016	rs34346157	ADCY10P1(+57.74kb)|APOBEC2(+133.7kb)|NCR2(-137.2kb)|NFYA(+96.16kb)|OARD1(+126.1kb)|TREM1(-76.69kb)|TREM2(+35.39kb)|TREML1(+44.22kb)|TREML2(0)|TREML3P(-9.981kb)|TREML4(-29.75kb)|TREML5P(-50.8kb)|TSPO2(+154.2kb)|UNC5CL(+159.4kb)
1:245628253	1	245628253	C	?	9	5.498e-05	5.498e-05	1.3245	1.3245	0.7782	0	1.972	1.972	1.37	0.8134	1.228	1.357	1.083	1.368	1.28	rs1104427	KIF26B(0)
22:48913186	22	48913186	A	?	9	5.503e-05	0.0002828	1.2781	1.2715	0.3597	9.06	1.426	1.426	1.303	1.486	1.389	1.008	0.3629	1.105	1.378	rs4823798	FAM19A5(0)|LOC284933(-21.52kb)
19:44098963	19	44098963	C	?	9	5.51e-05	5.51e-05	1.2411	1.2411	0.8251	0	1.403	1.403	1.081	1.332	1.224	1.246	1.206	1.723	1.3	rs304725	CADM4(-27.56kb)|ETHE1(+67.57kb)|IRGC(-121.2kb)|IRGQ(0)|KCNN4(-171.7kb)|LYPD3(+129.1kb)|PHLDB3(+89.98kb)|PINLYP(+12.71kb)|PLAUR(-51.28kb)|SMG9(-136.3kb)|SRRM5(-17.29kb)|TEX101(+176.2kb)|XRCC1(+19.23kb)|ZNF428(-12.41kb)|ZNF575(+58.68kb)|ZNF576(-1.58kb)
16:82776696	16	82776696	C	?	9	5.517e-05	5.517e-05	0.6396	0.6396	0.8758	0	0.5002	0.5002	0.5598	0.5337	0.6669	1.066	0.6598	0.5685	0.6967	rs75792684	CDH13(0)
7:16411771	7	16411771	G	?	9	5.523e-05	5.523e-05	1.2718	1.2718	0.7437	0	1.448	1.448	1.27	1.216	1.174	1.081	3.105	1.098	1.373	rs7457079	ISPD(0)|LOC100506025(+101.5kb)|LRRC72(-154.7kb)|SOSTDC1(-89.33kb)
8:29806311	8	29806311	A	?	9	5.547e-05	5.547e-05	1.3315	1.3315	0.4748	0	1.059	1.059	1.605	1.11	1.234	1.009	3.136	1.709	1.364	rs6468014	FAM183CP(0)|LEPROTL1(-146.6kb)|MBOAT4(-182.9kb)|MIR548O2(-113.9kb)|MIR3148(-8.476kb)|TMEM66(-114.3kb)
4:186047870	4	186047870	T	?	9	5.558e-05	5.558e-05	0.7409	0.7409	0.8875	0	0.8448	0.8448	0.6811	0.986	0.8574	0.809	1.395	0.706	0.6644	rs67597526	HELT(+105.9kb)|KIAA1430(-32.95kb)|SLC25A4(-16.55kb)|SNX25(-83.41kb)
12:53044336	12	53044336	C	?	7	5.565e-05	5.565e-05	2.3835	2.3835	0.8699	0	4.581	4.581	3.722	1.949	NA	1.298	2.047	NA	2.221	rs202095349	KRT1(-24.18kb)|KRT2(0)|KRT3(-139.1kb)|KRT4(-156kb)|KRT5(+130.1kb)|KRT6A(+157.2kb)|KRT6B(+198.4kb)|KRT6C(+176.8kb)|KRT71(+97.4kb)|KRT72(+49.01kb)|KRT73(+31.99kb)|KRT74(+76.73kb)|KRT76(-117.6kb)|KRT77(-39.07kb)|KRT78(-188.4kb)|KRT79(-170.9kb)
1:229851315	1	229851315	G	?	7	5.568e-05	5.568e-05	2.575	2.575	0.62	0	4.465	4.465	1.936	NA	2.208	6.962	NA	1.957	1.822	rs34019060	ABCB10(+156.9kb)|TAF5L(+89.52kb)|URB2(+55.37kb)
1:245632801	1	245632801	A	?	9	5.575e-05	5.575e-05	1.3133	1.3133	0.8801	0	1.488	1.488	1.346	0.7757	1.239	1.433	1.09	1.616	1.262	rs1093921	KIF26B(0)
11:106843220	11	106843220	C	?	9	5.578e-05	5.578e-05	0.7662	0.7662	0.4927	0	0.4969	0.4969	0.8032	0.7209	0.7412	1.104	0.9286	0.6375	0.7435	rs7127697	GUCY1A2(0)
13:73844327	13	73844327	T	?	9	5.607e-05	5.607e-05	0.8041	0.8041	0.6813	0	0.7224	0.7224	0.7806	0.9649	0.8032	0.6334	0.5783	0.9164	0.9082	rs9600111	KLF5(+192.7kb)
21:19657334	21	19657334	G	?	9	5.61e-05	5.61e-05	1.5073	1.5073	0.9991	0	1.723	1.723	1.513	1.496	1.231	1.688	1.449	1.466	1.503	rs73320164	CHODL(+17.65kb)|TMPRSS15(0)
3:145105344	3	145105344	A	?	9	5.616e-05	0.01211	1.3134	1.4198	0.0012	68.79	4.041	4.041	1.096	1.155	1.735	1.224	0.3627	0.8705	1.296	rs73155254	.
3:145108690	3	145108690	G	?	9	5.616e-05	0.01211	1.3134	1.4198	0.0012	68.79	4.041	4.041	1.096	1.155	1.735	1.224	0.3627	0.8705	1.296	rs3855578	.
4:115339525	4	115339525	T	?	9	5.635e-05	0.0001472	0.5678	0.5641	0.3843	6.11	0.3293	0.3293	0.7266	0.2714	0.8993	0.2903	0.8767	1.914	0.5372	rs78137671	UGT8(-180.1kb)
4:115339684	4	115339684	A	?	9	5.635e-05	0.0001472	0.5678	0.5641	0.3843	6.11	0.3293	0.3293	0.7266	0.2714	0.8993	0.2903	0.8767	1.914	0.5372	rs79645910	UGT8(-179.9kb)
4:115339772	4	115339772	T	?	9	5.635e-05	0.0001472	0.5678	0.5641	0.3843	6.11	0.3293	0.3293	0.7266	0.2714	0.8993	0.2903	0.8767	1.914	0.5372	rs74900901	UGT8(-179.8kb)
11:106805948	11	106805948	A	?	9	5.646e-05	5.646e-05	0.7638	0.7638	0.7131	0	0.4851	0.4851	0.8309	0.7501	0.7592	0.9352	1.094	0.7358	0.735	rs11211982	GUCY1A2(0)
11:106806291	11	106806291	C	?	9	5.646e-05	5.646e-05	0.7638	0.7638	0.7131	0	0.4851	0.4851	0.8309	0.7501	0.7592	0.9352	1.094	0.7358	0.735	rs1944211	GUCY1A2(0)
11:106806820	11	106806820	A	?	9	5.646e-05	5.646e-05	0.7638	0.7638	0.7131	0	0.4851	0.4851	0.8309	0.7501	0.7592	0.9352	1.094	0.7358	0.735	rs11211983	GUCY1A2(0)
2:29446701	2	29446701	C	?	9	5.662e-05	0.0001875	0.8044	0.8076	0.3872	5.77	0.7827	0.7827	0.8008	0.7828	0.795	0.9403	0.4708	1.329	0.716	rs12619049	ALK(0)|C2orf71(+149.6kb)|CLIP4(+40.02kb)|FAM179A(+171.6kb)
10:34255388	10	34255388	C	?	9	5.673e-05	5.673e-05	0.658	0.658	0.9919	0	0.638	0.638	0.5597	0.8123	0.767	0.6557	1.332	0.6245	0.7091	rs76611619	LINC00838(+193.8kb)|PARD3(-143.1kb)
14:69254294	14	69254294	A	?	9	5.697e-05	5.697e-05	0.7859	0.7859	0.8488	0	0.8393	0.8393	0.8631	0.7056	0.7343	0.8513	1.154	0.5349	0.7634	rs7146491	ACTN1(-86.54kb)|ACTN1-AS1(-192.1kb)|RAD51B(+191.6kb)|ZFP36L1(-0.077kb)
2:127892810	2	127892810	T	?	9	5.71e-05	5.71e-05	1.2488	1.2488	0.5281	0	1.696	1.696	1.123	1.534	1.26	1.356	2.33	0.935	1.237	rs6733839	BIN1(+27.91kb)|CYP27C1(-48.6kb)|ERCC3(-122.1kb)|MAP3K2(-163.4kb)
19:44099763	19	44099763	C	?	9	5.743e-05	5.743e-05	1.2405	1.2405	0.8246	0	1.381	1.381	1.088	1.332	1.2	1.264	1.175	1.765	1.294	rs304724	CADM4(-26.76kb)|ETHE1(+68.37kb)|IRGC(-120.4kb)|IRGQ(0)|KCNN4(-170.9kb)|LYPD3(+129.9kb)|PHLDB3(+90.78kb)|PINLYP(+13.51kb)|PLAUR(-50.48kb)|SMG9(-135.5kb)|SRRM5(-16.49kb)|TEX101(+177kb)|XRCC1(+20.03kb)|ZNF428(-11.61kb)|ZNF575(+59.48kb)|ZNF576(-0.78kb)
10:7500985	10	7500985	A	?	9	5.752e-05	0.0021	1.252	1.2719	0.1304	35.97	1.123	1.123	1.361	1.373	1.086	1.921	1.032	1.498	1.045	rs2248292	ITIH5(-100.2kb)|SFMBT2(+47.54kb)
22:48905588	22	48905588	T	?	8	5.794e-05	5.794e-05	1.2824	1.2824	0.7838	0	1.491	1.491	1.271	1.467	1.46	0.9897	NA	1.302	1.283	rs9627366	FAM19A5(0)|LOC284933(-29.12kb)
2:127891427	2	127891427	C	?	9	5.8e-05	5.8e-05	1.2465	1.2465	0.5566	0	1.621	1.621	1.12	1.489	1.272	1.411	2.019	0.8837	1.243	rs4663105	BIN1(+26.52kb)|CYP27C1(-49.98kb)|ERCC3(-123.4kb)|MAP3K2(-164.8kb)
3:144985725	3	144985725	T	?	9	5.814e-05	0.01107	1.3213	1.5238	0	76.98	5.704	5.704	1.033	1.137	1.748	1.152	0.521	0.9545	1.314	rs35932935	.
6:7948700	6	7948700	G	?	9	5.827e-05	5.827e-05	1.2901	1.2901	0.936	0	1.189	1.189	1.174	1.297	1.486	1.544	1.415	1.421	1.205	rs155499	BLOC1S5(-65.1kb)|BLOC1S5-TXNDC5(0)|BMP6(+66.74kb)|EEF1E1(-124.9kb)|EEF1E1-MUTED(-65.1kb)|PIP5K1P1(-37.63kb)|SCARNA27(-137.9kb)|TXNDC5(+37.65kb)
11:83903057	11	83903057	T	?	6	5.863e-05	5.863e-05	0.3862	0.3862	0.5194	0	0.1663	0.1663	0.6455	NA	NA	0.2275	NA	0.088	0.3811	rs139656942	DLG2(0)
6:78874114	6	78874114	C	?	9	5.874e-05	5.874e-05	0.7986	0.7986	0.9246	0	0.9257	0.9257	0.8265	0.6178	0.7798	0.7842	0.5264	0.6292	0.8325	rs9343745	.
1:42360713	1	42360713	A	?	9	5.888e-05	5.888e-05	1.33	1.33	0.5352	0	1.716	1.716	1.291	1.229	1.02	1.814	1.345	1.693	1.188	rs811461	HIVEP3(0)
4:160142011	4	160142011	C	?	9	5.888e-05	5.888e-05	0.8018	0.8018	0.7818	0	0.5803	0.5803	0.7933	0.7965	0.7993	0.8824	0.9372	0.6499	0.8775	rs12509165	C4orf45(+185.7kb)|MIR3688-1(+91.96kb)|MIR3688-2(+91.97kb)|RAPGEF2(-46.99kb)
10:7486663	10	7486663	A	?	9	5.909e-05	0.001169	1.2463	1.236	0.2801	18.28	1.105	1.105	1.345	0.9768	1.108	1.779	0.679	1.024	1.189	rs2244016	ITIH5(-114.6kb)|SFMBT2(+33.22kb)
1:3442422	1	3442422	A	?	8	5.926e-05	0.003078	1.2729	1.2639	0.1689	32.46	1.482	1.482	1.578	1.195	0.8883	1.057	NA	1.56	1.248	rs12094565	ARHGEF16(+44.74kb)|MEGF6(0)|MIR551A(-34.84kb)|PRDM16(+87.24kb)|TP73(-126.7kb)|TPRG1L(-99.13kb)|WRAP73(-104.9kb)
4:115350451	4	115350451	T	?	9	5.96e-05	0.001223	0.5664	0.5434	0.2046	26.94	0.2371	0.2371	0.7588	0.2714	0.9385	0.2903	0.9116	1.914	0.5372	rs77745663	UGT8(-169.2kb)
4:115353670	4	115353670	T	?	9	5.96e-05	0.001223	0.5664	0.5434	0.2046	26.94	0.2371	0.2371	0.7588	0.2714	0.9385	0.2903	0.9116	1.914	0.5372	rs75019196	UGT8(-165.9kb)
10:7495574	10	7495574	C	?	9	5.967e-05	0.0009199	1.2463	1.2392	0.2881	17.37	1.077	1.077	1.367	1.15	1.054	1.773	0.6939	1.129	1.164	rs2265048	ITIH5(-105.7kb)|SFMBT2(+42.13kb)
2:133256725	2	133256725	C	?	9	5.971e-05	5.971e-05	1.3858	1.3858	0.8066	0	2.484	2.484	1.418	1.388	1.381	1.058	0.8396	1.526	1.36	rs62167450	GPR39(0)|LYPD1(-145.6kb)|NCKAP5(-172.6kb)
11:133280231	11	133280231	T	?	9	5.978e-05	5.978e-05	1.7791	1.7791	0.964	0	1.575	1.575	1.764	1.486	1.264	2.464	0.7204	2.692	1.827	rs74700085	OPCML(0)
11:133281652	11	133281652	T	?	9	5.978e-05	5.978e-05	1.7791	1.7791	0.964	0	1.575	1.575	1.764	1.486	1.264	2.464	0.7204	2.692	1.827	rs76401244	OPCML(0)
11:133282597	11	133282597	C	?	9	5.978e-05	5.978e-05	1.7791	1.7791	0.964	0	1.575	1.575	1.764	1.486	1.264	2.464	0.7204	2.692	1.827	rs74810893	OPCML(0)
11:106752464	11	106752464	G	?	9	5.995e-05	5.995e-05	0.7693	0.7693	0.8299	0	0.552	0.552	0.8036	0.7072	0.7576	0.9695	1.102	0.8518	0.7332	rs1944196	GUCY1A2(0)
18:31246244	18	31246244	G	?	9	5.999e-05	5.999e-05	0.5677	0.5677	0.7387	0	0.152	0.152	0.5566	0.3058	0.4339	0.5527	0.2977	0.5255	0.7561	rs55916387	ASXL3(0)|NOL4(-184.8kb)
2:159106259	2	159106259	G	?	9	6.007e-05	6.007e-05	1.303	1.303	0.8048	0	1.889	1.889	1.268	1.557	1.064	1.349	2.059	1.419	1.242	rs10209732	CCDC148(0)|CCDC148-AS1(+13.58kb)|UPP2(+113.6kb)
17:74890033	17	74890033	A	?	9	6.009e-05	6.009e-05	1.4119	1.4119	0.6188	0	2.27	2.27	1.518	2.147	1.157	0.9948	1.577	1.557	1.381	rs4788952	JMJD6(+167.2kb)|LINC00338(-194.7kb)|METTL23(+160.1kb)|MFSD11(+114.7kb)|MGAT5B(0)|MIR636(+157.4kb)|MXRA7(+183kb)|SCARNA16(-195.4kb)|SEC14L1(-194.7kb)|SRSF2(+156.5kb)
2:19812104	2	19812104	G	?	9	6.013e-05	0.001862	1.3422	1.3856	0.1074	39.08	2.806	2.806	1.305	0.7394	1.321	1.523	1.464	1.093	1.174	rs11696024	.
2:19812531	2	19812531	C	?	9	6.013e-05	0.001862	1.3422	1.3856	0.1074	39.08	2.806	2.806	1.305	0.7394	1.321	1.523	1.464	1.093	1.174	rs11096603	.
2:19812934	2	19812934	C	?	9	6.013e-05	0.001862	1.3422	1.3856	0.1074	39.08	2.806	2.806	1.305	0.7394	1.321	1.523	1.464	1.093	1.174	rs11096605	.
2:19813197	2	19813197	T	?	9	6.013e-05	0.001862	1.3422	1.3856	0.1074	39.08	2.806	2.806	1.305	0.7394	1.321	1.523	1.464	1.093	1.174	rs1118207	.
2:19813335	2	19813335	A	?	9	6.013e-05	0.001862	1.3422	1.3856	0.1074	39.08	2.806	2.806	1.305	0.7394	1.321	1.523	1.464	1.093	1.174	rs1946444	.
2:19813526	2	19813526	A	?	9	6.013e-05	0.001862	1.3422	1.3856	0.1074	39.08	2.806	2.806	1.305	0.7394	1.321	1.523	1.464	1.093	1.174	rs6753316	.
2:19813731	2	19813731	C	?	9	6.013e-05	0.001862	1.3422	1.3856	0.1074	39.08	2.806	2.806	1.305	0.7394	1.321	1.523	1.464	1.093	1.174	rs4666514	.
2:19814402	2	19814402	T	?	9	6.013e-05	0.001862	1.3422	1.3856	0.1074	39.08	2.806	2.806	1.305	0.7394	1.321	1.523	1.464	1.093	1.174	rs2081772	.
11:2464025	11	2464025	A	?	7	6.017e-05	6.017e-05	0.7694	0.7694	0.6395	0	0.8388	0.8388	0.7309	0.9325	NA	0.5958	NA	0.7173	0.8639	rs12277647	ASCL2(+171.8kb)|C11orf21(+140.9kb)|CD81(+45.38kb)|KCNQ1(-2.195kb)|KCNQ1OT1(-165.5kb)|TRPM5(+19.75kb)|TSPAN32(+124.6kb)|TSSC4(+38.92kb)
14:42771064	14	42771064	G	?	9	6.021e-05	0.000531	0.7962	0.7692	0.1836	29.4	0.4564	0.4564	0.791	0.5491	0.7974	0.7726	0.5779	1.045	0.9147	rs56323224	.
1:245633544	1	245633544	A	?	9	6.079e-05	6.079e-05	1.3115	1.3115	0.8781	0	1.488	1.488	1.346	0.7757	1.239	1.433	1.09	1.616	1.256	rs10924202	KIF26B(0)
13:80656803	13	80656803	A	?	9	6.119e-05	6.119e-05	0.6637	0.6637	0.9094	0	0.4312	0.4312	0.7475	0.7156	0.6185	0.7871	0.3109	0.5252	0.684	rs11618221	.
13:80657129	13	80657129	T	?	9	6.119e-05	6.119e-05	0.6637	0.6637	0.9094	0	0.4312	0.4312	0.7475	0.7156	0.6185	0.7871	0.3109	0.5252	0.684	rs17072282	.
4:160142203	4	160142203	T	?	9	6.145e-05	6.145e-05	0.8022	0.8022	0.7726	0	0.5803	0.5803	0.7909	0.7965	0.7993	0.8824	0.936	0.6499	0.8819	rs13124646	C4orf45(+185.9kb)|MIR3688-1(+92.16kb)|MIR3688-2(+92.16kb)|RAPGEF2(-46.79kb)
1:245633002	1	245633002	A	?	9	6.149e-05	6.149e-05	1.3112	1.3112	0.8777	0	1.488	1.488	1.346	0.7757	1.239	1.433	1.09	1.616	1.255	rs1093920	KIF26B(0)
4:161634266	4	161634266	C	?	9	6.174e-05	6.174e-05	1.8318	1.8318	0.4624	0	2.765	2.765	1.442	3.602	3.178	2.652	1.413	1.175	1.214	rs71609098	.
12:85019560	12	85019560	A	?	9	6.224e-05	6.224e-05	0.7572	0.7572	0.5047	0	0.622	0.622	0.6503	0.6095	0.9078	0.7662	0.7267	1.388	0.7703	rs73365443	.
11:106743888	11	106743888	C	?	9	6.243e-05	6.243e-05	0.7699	0.7699	0.8886	0	0.575	0.575	0.8078	0.7072	0.7576	0.9567	1.102	0.8168	0.7331	rs112486905	GUCY1A2(0)
1:120418844	1	120418844	A	?	9	6.275e-05	6.275e-05	0.6329	0.6329	0.7821	0	0.4723	0.4723	0.6026	0.6269	0.5791	0.7772	6.003	0.5897	0.6415	rs11802076	ADAM30(-17.31kb)|HMGCS2(+107.3kb)|NBPF7(+31.34kb)|NOTCH2(-35.33kb)|PHGDH(+132kb)|REG4(+64.64kb)
2:19819539	2	19819539	C	?	9	6.278e-05	0.001924	1.3405	1.3833	0.1071	39.13	2.806	2.806	1.305	0.7394	1.307	1.523	1.464	1.093	1.174	rs10194809	.
2:19819881	2	19819881	A	?	9	6.278e-05	0.001924	1.3405	1.3833	0.1071	39.13	2.806	2.806	1.305	0.7394	1.307	1.523	1.464	1.093	1.174	rs6756600	.
2:19820562	2	19820562	T	?	9	6.278e-05	0.001924	1.3405	1.3833	0.1071	39.13	2.806	2.806	1.305	0.7394	1.307	1.523	1.464	1.093	1.174	rs10165582	.
8:138985880	8	138985880	C	?	9	6.279e-05	6.279e-05	1.906	1.906	0.5269	0	6.673	6.673	1.29	1.364	2.733	1.472	3.066	3.418	1.982	rs62530762	FAM135B(-156.4kb)
22:27573794	22	27573794	A	?	9	6.281e-05	6.281e-05	0.4336	0.4336	0.9936	0	0.3235	0.3235	0.3671	0.2579	0.4013	0.2585	0.7063	0.6706	0.5319	rs77573146	.
22:27574134	22	27574134	T	?	9	6.281e-05	6.281e-05	0.4336	0.4336	0.9936	0	0.3235	0.3235	0.3671	0.2579	0.4013	0.2585	0.7063	0.6706	0.5319	rs117072474	.
22:27576186	22	27576186	G	?	9	6.281e-05	6.281e-05	0.4336	0.4336	0.9936	0	0.3235	0.3235	0.3671	0.2579	0.4013	0.2585	0.7063	0.6706	0.5319	rs80018592	.
6:78853402	6	78853402	A	?	9	6.289e-05	6.289e-05	0.8008	0.8008	0.9398	0	0.8371	0.8371	0.8232	0.6169	0.8491	0.8026	0.4198	0.7551	0.8079	rs9343739	.
12:7826705	12	7826705	C	?	9	6.295e-05	0.0002259	1.3267	1.3518	0.2992	16.09	1.263	1.263	1.078	2.223	1.742	1.516	0.7974	2.097	1.202	rs10845680	APOBEC1(+8.203kb)|CD163(+170.3kb)|CLEC4C(-55.3kb)|DPPA3(-37.38kb)|GDF3(-15.68kb)|NANOG(-115.3kb)|NANOGNB(-91.11kb)|SLC2A14(-139.7kb)
12:7827072	12	7827072	C	?	9	6.295e-05	0.0002259	1.3267	1.3518	0.2992	16.09	1.263	1.263	1.078	2.223	1.742	1.516	0.7974	2.097	1.202	rs11055171	APOBEC1(+8.57kb)|CD163(+170.7kb)|CLEC4C(-54.94kb)|DPPA3(-37.02kb)|GDF3(-15.31kb)|NANOG(-114.9kb)|NANOGNB(-90.74kb)|SLC2A14(-139.3kb)
21:35996472	21	35996472	G	?	9	6.296e-05	0.002623	1.295	1.281	0.2003	27.44	1.767	1.767	1.169	1.065	1.061	1.236	0.6268	0.9593	1.696	rs61573905	CLIC6(-45.22kb)|KCNE1(+111.9kb)|LINC00160(-99.63kb)|LOC100506385(-121.6kb)|RCAN1(+9.09kb)|RUNX1(-163.6kb)
8:135518209	8	135518209	G	?	9	6.332e-05	6.332e-05	0.6285	0.6285	0.4366	0	0.3499	0.3499	0.9448	0.6101	0.4395	0.6913	0.1092	0.6632	0.5681	rs72735770	ZFAT(0)|ZFAT-AS1(-92.1kb)
6:11709097	6	11709097	G	?	9	6.352e-05	6.352e-05	0.7997	0.7997	0.8314	0	0.6358	0.6358	0.8336	0.9846	0.7081	0.8712	1.363	0.7176	0.8119	rs9366874	ADTRP(-4.79kb)|TMEM170B(+125.3kb)
11:2450804	11	2450804	G	?	7	6.354e-05	0.0007236	0.7653	0.733	0.1679	34.08	0.5677	0.5677	0.6755	0.7153	NA	0.6506	NA	0.7055	0.9871	rs74848824	ASCL2(+158.6kb)|C11orf21(+127.7kb)|CD81(+32.16kb)|KCNQ1(-15.42kb)|KCNQ1OT1(-178.8kb)|TRPM5(+6.529kb)|TSPAN32(+111.4kb)|TSSC4(+25.7kb)
13:80653014	13	80653014	T	?	9	6.367e-05	6.367e-05	0.6644	0.6644	0.9088	0	0.4312	0.4312	0.7475	0.7156	0.6185	0.7871	0.3109	0.5252	0.6871	rs61965138	.
4:115353779	4	115353779	A	?	9	6.377e-05	0.001194	0.5677	0.5457	0.2127	25.99	0.2371	0.2371	0.7588	0.2714	0.9385	0.2974	0.9116	1.914	0.5372	rs79861719	UGT8(-165.8kb)
4:115354417	4	115354417	A	?	9	6.377e-05	0.001194	0.5677	0.5457	0.2127	25.99	0.2371	0.2371	0.7588	0.2714	0.9385	0.2974	0.9116	1.914	0.5372	rs78201609	UGT8(-165.2kb)
4:115354499	4	115354499	G	?	9	6.377e-05	0.001194	0.5677	0.5457	0.2127	25.99	0.2371	0.2371	0.7588	0.2714	0.9385	0.2974	0.9116	1.914	0.5372	rs74926658	UGT8(-165.1kb)
7:3150001	7	3150001	A	?	6	6.38e-05	0.0003478	2.2382	2.2999	0.2904	18.91	NA	NA	2.198	2.444	7.121	1.507	NA	4.096	1.607	rs79670429	CARD11(+66.49kb)|SDK1(-191.1kb)
10:7500906	10	7500906	T	?	9	6.389e-05	0.002568	1.2504	1.2719	0.1148	38.06	1.123	1.123	1.358	1.373	1.086	1.936	1.036	1.498	1.039	rs2248286	ITIH5(-100.3kb)|SFMBT2(+47.46kb)
5:29531612	5	29531612	G	?	9	6.397e-05	0.0003635	0.7756	0.7623	0.2735	19.03	0.4657	0.4657	0.7085	0.6372	0.8789	0.6583	0.9693	0.8501	0.956	rs62354931	.
16:82749056	16	82749056	G	?	9	6.408e-05	6.408e-05	0.6419	0.6419	0.6923	0	0.5647	0.5647	0.5527	0.4164	0.614	1.203	0.6603	0.551	0.6829	rs4578640	CDH13(0)
13:98645580	13	98645580	A	?	7	6.411e-05	0.0003442	0.7784	0.7506	0.2594	22.28	0.5266	0.5266	0.9015	0.5711	NA	NA	0.6443	0.7692	0.8026	rs56411106	FARP1(-149.9kb)|IPO5(0)|RNF113B(-182.5kb)
6:147367206	6	147367206	T	?	9	6.431e-05	6.431e-05	2.2514	2.2514	0.8859	0	4.075	4.075	1.804	2.301	1.86	2.682	10.9	1.209	2.375	rs147413589	STXBP5(-158.3kb)|STXBP5-AS1(0)
8:29839434	8	29839434	G	?	9	6.437e-05	6.437e-05	1.4664	1.4664	0.8238	0	1.317	1.317	1.557	1.635	1.098	1.437	0.703	3.045	1.523	rs10090368	DCTN6(-174.4kb)|FAM183CP(+28.31kb)|LEPROTL1(-113.5kb)|MBOAT4(-149.8kb)|MIR548O2(-80.82kb)|MIR3148(+24.57kb)|TMEM66(-81.2kb)
4:161646233	4	161646233	T	?	9	6.452e-05	6.452e-05	1.8297	1.8297	0.4571	0	2.765	2.765	1.442	3.602	3.178	2.652	1.413	1.175	1.208	rs115613993	.
13:73844164	13	73844164	T	?	9	6.458e-05	6.458e-05	0.8057	0.8057	0.666	0	0.7224	0.7224	0.7806	0.9649	0.8045	0.6334	0.5784	0.9164	0.9129	rs9600110	KLF5(+192.5kb)
10:7516515	10	7516515	C	?	9	6.461e-05	0.002617	1.2515	1.2737	0.1125	38.37	1.124	1.124	1.38	1.36	1.089	1.858	0.9773	1.629	1.027	rs2255804	ITIH5(-84.72kb)|SFMBT2(+63.07kb)
4:157563501	4	157563501	T	?	9	6.48e-05	6.48e-05	0.4969	0.4969	0.6418	0	0.1039	0.1039	0.5261	0.2108	0.6141	0.4389	1.017	1.151	0.5321	rs62331461	PDGFC(-119.3kb)
6:78875167	6	78875167	T	?	9	6.483e-05	6.483e-05	0.7996	0.7996	0.9448	0	0.9257	0.9257	0.8198	0.641	0.7735	0.7899	0.544	0.6292	0.8373	rs4706690	.
20:60992224	20	60992224	C	?	7	6.504e-05	6.504e-05	0.8014	0.8014	0.7716	0	0.6821	0.6821	0.881	0.8138	0.8868	0.6771	NA	NA	0.7903	rs2427325	ADRM1(+108.3kb)|C20orf166(-155.4kb)|C20orf166-AS1(-149.2kb)|CABLES2(+9.885kb)|GATA5(-46.33kb)|HRH3(+196.9kb)|LAMA5(+49.86kb)|MIR1-1(-159.3kb)|MIR133A2(-169.9kb)|MIR4758(+84.61kb)|OSBPL2(+121kb)|RBBP8NL(0)|RPS21(+28.65kb)
12:7825560	12	7825560	G	?	9	6.54e-05	0.0001019	1.3258	1.3338	0.3917	5.21	1.263	1.263	1.091	2.223	1.72	1.516	0.7974	1.9	1.205	rs10845675	APOBEC1(+7.058kb)|CD163(+169.1kb)|CLEC4C(-56.45kb)|DPPA3(-38.53kb)|GDF3(-16.82kb)|NANOG(-116.4kb)|NANOGNB(-92.25kb)|SLC2A14(-140.8kb)
16:5585072	16	5585072	T	?	9	6.54e-05	0.0004154	1.266	1.2724	0.3066	15.24	1.784	1.784	1.158	0.6536	1.331	1.391	0.9199	1.561	1.275	rs1386071	.
3:3408670	3	3408670	T	?	9	6.583e-05	6.583e-05	1.2738	1.2738	0.7304	0	1.526	1.526	1.268	1	1.426	1.589	1.066	1.089	1.125	rs12715220	CRBN(+187.3kb)
14:42702585	14	42702585	A	?	9	6.593e-05	6.593e-05	1.237	1.237	0.7338	0	1.662	1.662	1.344	1.23	1.242	1.177	1.648	1.11	1.092	rs7152293	.
2:159099466	2	159099466	A	?	9	6.598e-05	6.598e-05	1.3057	1.3057	0.7363	0	2.084	2.084	1.289	1.557	1.075	1.328	2.063	1.44	1.224	rs79994563	CCDC148(0)|CCDC148-AS1(+6.785kb)|UPP2(+106.8kb)
2:159114394	2	159114394	A	?	9	6.601e-05	6.601e-05	1.3039	1.3039	0.6665	0	2.142	2.142	1.248	1.517	1.083	1.338	2.047	1.53	1.222	rs10497198	CCDC148(0)|CCDC148-AS1(+21.71kb)|PKP4(-199.1kb)|UPP2(+121.7kb)
12:100959022	12	100959022	C	?	9	6.607e-05	6.607e-05	1.4509	1.4509	0.7862	0	2.458	2.458	1.597	1.652	1.311	1.06	1.146	1.801	1.361	rs12812174	GAS2L3(-8.466kb)|NR1H4(+1.377kb)|SLC17A8(+143.2kb)
10:7502095	10	7502095	T	?	9	6.61e-05	0.0024	1.2495	1.2694	0.1261	36.55	1.123	1.123	1.364	1.373	1.08	1.907	1.036	1.498	1.039	rs2251208	ITIH5(-99.14kb)|SFMBT2(+48.65kb)
1:233717958	1	233717958	A	?	6	6.613e-05	6.613e-05	2.6463	2.6463	0.8436	0	1.272	1.272	2.275	NA	3.629	2.305	NA	NA	3.837	rs142619391	KCNK1(-31.79kb)|KIAA1804(+197.1kb)|MIR4427(-41.94kb)
21:35999995	21	35999995	C	?	9	6.613e-05	6.613e-05	1.3009	1.3009	0.5152	0	1.692	1.692	1.194	0.975	1.163	1.203	0.6236	1.129	1.613	rs12626543	CLIC6(-41.69kb)|KCNE1(+115.4kb)|LINC00160(-96.11kb)|LOC100506385(-118.1kb)|RCAN1(+12.61kb)|RUNX1(-160.1kb)
11:1663810	11	1663810	G	?	9	6.614e-05	6.614e-05	1.4775	1.4775	0.5495	0	1.209	1.209	1.592	5.48	1.895	1.507	0.5859	1.894	1.286	rs111510951	BRSK2(+179.9kb)|CTSD(-110.2kb)|DUSP8(+70.66kb)|FAM99A(-23.02kb)|FAM99B(-40.69kb)|IFITM10(-89.83kb)|KRTAP5-1(+57.3kb)|KRTAP5-2(+44.29kb)|KRTAP5-3(+34.12kb)|KRTAP5-4(+20.44kb)|KRTAP5-5(+11.65kb)|KRTAP5-6(-54.61kb)|KRTAP5-AS1(+43.4kb)|MOB2(0)|SYT8(-191.9kb)|TNNI2(-196.4kb)
5:29515152	5	29515152	A	?	9	6.617e-05	0.0002225	0.7804	0.773	0.3327	12.23	0.5575	0.5575	0.6954	0.6064	0.8288	0.6756	0.9432	0.8921	0.9891	rs35096872	.
11:106907475	11	106907475	A	?	9	6.64e-05	0.0003436	0.7909	0.7696	0.2307	23.93	0.5327	0.5327	1.01	0.6103	0.7807	0.7448	0.5574	0.8644	0.7587	rs2445100	GUCY1A2(+18.3kb)
21:35994764	21	35994764	A	?	9	6.667e-05	0.0006837	1.2949	1.2857	0.3088	14.99	1.639	1.639	1.162	1.014	1.116	1.246	0.6217	1.001	1.688	rs34338302	CLIC6(-46.92kb)|KCNE1(+110.2kb)|LINC00160(-101.3kb)|LOC100506385(-123.4kb)|RCAN1(+7.382kb)|RUNX1(-165.3kb)
10:126903288	10	126903288	T	?	9	6.703e-05	6.703e-05	1.411	1.411	0.9266	0	1.323	1.323	1.51	1.727	1.415	1.552	3.132	0.9489	1.311	rs11245547	CTBP2(+53.66kb)|MIR4296(+181.8kb)
6:78863599	6	78863599	A	?	9	6.705e-05	6.705e-05	0.8016	0.8016	0.9372	0	0.8371	0.8371	0.8181	0.6169	0.8491	0.8026	0.4198	0.7439	0.8176	rs6454046	.
1:42357008	1	42357008	G	?	9	6.721e-05	6.721e-05	1.3261	1.3261	0.5257	0	1.716	1.716	1.283	1.175	1.017	1.814	1.345	1.693	1.195	rs2764835	HIVEP3(0)
16:82758437	16	82758437	G	?	9	6.726e-05	6.726e-05	0.6421	0.6421	0.8156	0	0.5647	0.5647	0.5305	0.4611	0.6316	1.088	0.6603	0.6582	0.7122	rs75558463	CDH13(0)
22:48401274	22	48401274	C	?	9	6.731e-05	6.731e-05	1.6183	1.6183	0.5626	0	1.797	1.797	1.301	0.8175	1.713	1.209	1.622	1.24	2.401	rs5766976	.
22:48401619	22	48401619	T	?	9	6.731e-05	6.731e-05	1.6183	1.6183	0.5626	0	1.797	1.797	1.301	0.8175	1.713	1.209	1.622	1.24	2.401	rs5768262	.
8:29812540	8	29812540	T	?	9	6.74e-05	6.74e-05	1.4488	1.4488	0.759	0	1.036	1.036	1.595	1.384	1.054	1.548	0.9109	2.341	1.607	rs16876238	FAM183CP(+1.417kb)|LEPROTL1(-140.4kb)|MBOAT4(-176.6kb)|MIR548O2(-107.7kb)|MIR3148(-2.247kb)|TMEM66(-108.1kb)
4:26165165	4	26165165	G	?	9	6.754e-05	6.754e-05	0.7561	0.7561	0.636	0	0.57	0.57	0.9175	0.7258	0.8516	0.6407	1.1	0.5232	0.7372	rs11724167	RBPJ(-156.2kb)
6:78872928	6	78872928	A	?	9	6.757e-05	6.757e-05	0.8014	0.8014	0.9305	0	0.8842	0.8842	0.8181	0.6169	0.8439	0.8026	0.4198	0.7439	0.8096	rs4321793	.
11:106664812	11	106664812	T	?	9	6.769e-05	6.769e-05	0.7898	0.7898	0.7909	0	0.5425	0.5425	0.8247	0.8835	0.7274	0.7713	0.9768	0.8671	0.8418	rs3912582	GUCY1A2(0)
3:145114811	3	145114811	T	?	9	6.782e-05	0.0127	1.3095	1.4147	0.0013	68.55	4.041	4.041	1.096	1.155	1.709	1.214	0.3627	0.8705	1.296	rs11716171	.
16:5588869	16	5588869	T	?	9	6.822e-05	0.005411	1.283	1.3069	0.0705	44.68	1.937	1.937	1.153	0.5243	1.423	1.661	0.9928	1.468	1.219	rs2129251	.
16:5588923	16	5588923	T	?	9	6.822e-05	0.005411	1.283	1.3069	0.0705	44.68	1.937	1.937	1.153	0.5243	1.423	1.661	0.9928	1.468	1.219	rs2171227	.
16:5589150	16	5589150	A	?	9	6.822e-05	0.005411	1.283	1.3069	0.0705	44.68	1.937	1.937	1.153	0.5243	1.423	1.661	0.9928	1.468	1.219	rs2342431	.
16:5589597	16	5589597	C	?	9	6.822e-05	0.005411	1.283	1.3069	0.0705	44.68	1.937	1.937	1.153	0.5243	1.423	1.661	0.9928	1.468	1.219	rs1968904	.
16:5589876	16	5589876	A	?	9	6.822e-05	0.005411	1.283	1.3069	0.0705	44.68	1.937	1.937	1.153	0.5243	1.423	1.661	0.9928	1.468	1.219	rs1531976	.
16:5590434	16	5590434	A	?	9	6.825e-05	0.005416	1.283	1.3069	0.0705	44.68	1.937	1.937	1.153	0.5243	1.423	1.661	0.9922	1.468	1.219	rs4511536	.
17:74888679	17	74888679	G	?	9	6.846e-05	6.846e-05	1.4055	1.4055	0.6386	0	2.27	2.27	1.547	2.032	1.157	1.016	1.577	1.557	1.351	rs4789363	JMJD6(+165.8kb)|LINC00338(-196kb)|METTL23(+158.7kb)|MFSD11(+113.3kb)|MGAT5B(0)|MIR636(+156kb)|MXRA7(+181.6kb)|SCARNA16(-196.7kb)|SEC14L1(-196kb)|SRSF2(+155.2kb)
4:115355215	4	115355215	C	?	9	6.854e-05	0.001164	0.569	0.5481	0.2216	24.96	0.2371	0.2371	0.7588	0.2714	0.9385	0.3055	0.9116	1.914	0.5372	rs78445409	UGT8(-164.4kb)
1:3440824	1	3440824	A	?	8	6.866e-05	0.005344	1.2722	1.2634	0.1257	38.1	1.471	1.471	1.598	1.298	0.8742	1.035	NA	1.56	1.238	rs10797399	ARHGEF16(+43.15kb)|MEGF6(0)|MIR551A(-36.44kb)|PRDM16(+85.64kb)|TP73(-128.3kb)|TPRG1L(-100.7kb)|WRAP73(-106.5kb)
16:5593770	16	5593770	T	?	9	6.889e-05	6.889e-05	1.2531	1.2531	0.885	0	1.503	1.503	1.188	0.8794	1.358	1.246	1.42	1.073	1.31	rs7188049	.
3:77099218	3	77099218	G	?	9	6.894e-05	6.894e-05	1.5959	1.5959	0.8661	0	1.596	1.596	1.892	0.595	1.551	1.704	2.464	1.32	1.609	rs3884526	ROBO2(0)
7:16415019	7	16415019	G	?	9	6.895e-05	6.895e-05	1.2475	1.2475	0.9403	0	1.383	1.383	1.299	1.226	1.245	1.179	2.594	1.18	1.187	rs60155393	ISPD(0)|LOC100506025(+104.8kb)|LRRC72(-151.5kb)|SOSTDC1(-86.09kb)
13:80674711	13	80674711	C	?	9	6.897e-05	6.897e-05	0.654	0.654	0.993	0	0.484	0.484	0.6798	0.7962	0.6533	0.6297	0.4309	0.8568	0.6409	rs61966767	.
9:81745871	9	81745871	T	?	9	6.9e-05	6.9e-05	1.2581	1.2581	0.6775	0	1.452	1.452	1.213	2.306	1.17	1.134	0.8506	1.467	1.251	rs12552083	.
4:93346620	4	93346620	C	?	9	6.904e-05	0.002988	1.3187	1.388	0.0491	48.59	2.836	2.836	1.353	1.6	1.332	0.9267	0.4737	1.588	1.221	rs12649496	GRID2(0)
13:108466887	13	108466887	C	?	9	6.912e-05	6.912e-05	1.2778	1.2778	0.5135	0	1.455	1.455	1.284	1.055	0.9646	1.147	1.335	1.025	1.536	rs9301260	FAM155A(0)
6:78875660	6	78875660	C	?	9	6.912e-05	6.912e-05	0.8005	0.8005	0.8701	0	0.9257	0.9257	0.8328	0.6178	0.7818	0.7731	0.4604	0.6292	0.842	rs9359321	.
11:106806989	11	106806989	T	?	9	6.917e-05	0.0001858	0.7588	0.7566	0.3751	7.23	0.4372	0.4372	0.8835	0.8331	0.7418	1.001	0.8779	0.651	0.6981	rs72992500	GUCY1A2(0)
13:95985962	13	95985962	C	?	9	6.927e-05	0.007164	0.4401	0.4802	0.2195	25.2	0.3562	0.3562	0.357	7.961	0.1359	0.6848	0.9743	1.395	0.337	rs144381920	ABCC4(+32.28kb)|CLDN10(-99.89kb)|CLDN10-AS1(-145.7kb)
2:9546805	2	9546805	T	?	9	6.929e-05	0.02424	0.7661	0.7989	0.0934	41.08	0.5848	0.5848	0.739	1.061	1.225	0.7933	0.6118	1.249	0.6283	rs4798	ADAM17(-82.6kb)|ASAP2(+0.993kb)|CPSF3(-16.86kb)|IAH1(-67.86kb)|ITGB1BP1(0)|YWHAQ(-177.3kb)
2:9551919	2	9551919	C	?	9	6.934e-05	0.007813	0.7666	0.7883	0.178	30.07	0.5848	0.5848	0.7763	1.013	1.183	0.7966	0.6182	1.083	0.6249	rs62118844	ADAM17(-77.49kb)|ASAP2(+6.107kb)|CPSF3(-11.75kb)|IAH1(-62.75kb)|ITGB1BP1(0)|YWHAQ(-172.2kb)
11:1665645	11	1665645	A	?	9	6.939e-05	6.939e-05	1.475	1.475	0.7137	0	1.209	1.209	1.592	3.576	1.895	1.541	0.5858	1.894	1.286	rs12417694	BRSK2(+181.7kb)|CTSD(-108.3kb)|DUSP8(+72.5kb)|FAM99A(-21.18kb)|FAM99B(-38.85kb)|IFITM10(-87.99kb)|KRTAP5-1(+59.13kb)|KRTAP5-2(+46.12kb)|KRTAP5-3(+35.95kb)|KRTAP5-4(+22.28kb)|KRTAP5-5(+13.49kb)|KRTAP5-6(-52.78kb)|KRTAP5-AS1(+45.23kb)|MOB2(0)|SYT8(-190kb)|TNNI2(-194.6kb)
11:1665870	11	1665870	T	?	9	6.939e-05	6.939e-05	1.475	1.475	0.7137	0	1.209	1.209	1.592	3.576	1.895	1.541	0.5858	1.894	1.286	rs77294135	BRSK2(+182kb)|CTSD(-108.1kb)|DUSP8(+72.72kb)|FAM99A(-20.96kb)|FAM99B(-38.63kb)|IFITM10(-87.77kb)|KRTAP5-1(+59.36kb)|KRTAP5-2(+46.35kb)|KRTAP5-3(+36.18kb)|KRTAP5-4(+22.5kb)|KRTAP5-5(+13.71kb)|KRTAP5-6(-52.55kb)|KRTAP5-AS1(+45.46kb)|MOB2(0)|SYT8(-189.8kb)|TNNI2(-194.4kb)
11:1666665	11	1666665	T	?	9	6.939e-05	6.939e-05	1.475	1.475	0.7137	0	1.209	1.209	1.592	3.576	1.895	1.541	0.5858	1.894	1.286	rs12417108	BRSK2(+182.7kb)|CTSD(-107.3kb)|DUSP8(+73.52kb)|FAM99A(-20.16kb)|FAM99B(-37.83kb)|IFITM10(-86.97kb)|KRTAP5-1(+60.15kb)|KRTAP5-2(+47.14kb)|KRTAP5-3(+36.97kb)|KRTAP5-4(+23.3kb)|KRTAP5-5(+14.51kb)|KRTAP5-6(-51.76kb)|KRTAP5-AS1(+46.25kb)|MOB2(0)|SYT8(-189kb)|TNNI2(-193.6kb)
4:115351120	4	115351120	A	?	9	6.942e-05	0.001297	0.5698	0.546	0.2062	26.74	0.2371	0.2371	0.7588	0.2714	0.9385	0.2903	0.9116	1.914	0.5464	rs76891546	UGT8(-168.5kb)
4:115351240	4	115351240	A	?	9	6.942e-05	0.001297	0.5698	0.546	0.2062	26.74	0.2371	0.2371	0.7588	0.2714	0.9385	0.2903	0.9116	1.914	0.5464	rs78252712	UGT8(-168.4kb)
4:115351870	4	115351870	T	?	9	6.942e-05	0.001297	0.5698	0.546	0.2062	26.74	0.2371	0.2371	0.7588	0.2714	0.9385	0.2903	0.9116	1.914	0.5464	rs74639037	UGT8(-167.7kb)
4:115352063	4	115352063	G	?	9	6.942e-05	0.001297	0.5698	0.546	0.2062	26.74	0.2371	0.2371	0.7588	0.2714	0.9385	0.2903	0.9116	1.914	0.5464	rs111315707	UGT8(-167.5kb)
2:159098024	2	159098024	C	?	9	6.943e-05	6.943e-05	1.3	1.3	0.8848	0	1.677	1.677	1.27	1.557	1.057	1.355	2.052	1.499	1.252	rs17194382	CCDC148(0)|CCDC148-AS1(+5.343kb)|UPP2(+105.4kb)
4:160141976	4	160141976	G	?	9	6.946e-05	6.946e-05	0.8033	0.8033	0.7681	0	0.5803	0.5803	0.7933	0.7965	0.7993	0.8933	0.936	0.6499	0.8789	rs12509160	C4orf45(+185.6kb)|MIR3688-1(+91.93kb)|MIR3688-2(+91.93kb)|RAPGEF2(-47.02kb)
2:159113653	2	159113653	T	?	9	6.973e-05	6.973e-05	1.303	1.303	0.6641	0	2.142	2.142	1.248	1.517	1.083	1.338	2.047	1.53	1.219	rs78384759	CCDC148(0)|CCDC148-AS1(+20.97kb)|PKP4(-199.8kb)|UPP2(+121kb)
6:8256964	6	8256964	G	?	9	6.975e-05	0.001997	0.8032	0.7974	0.1716	30.84	0.5164	0.5164	0.8461	1.313	0.7567	0.7171	1.737	0.8304	0.8292	rs1413904	BLOC1S5(+192.3kb)|BLOC1S5-TXNDC5(+192.3kb)|EEF1E1(+154.1kb)|EEF1E1-MUTED(+154.1kb)|LOC100506207(-178.9kb)|SCARNA27(+170.2kb)|SLC35B3(-156.3kb)
4:93356690	4	93356690	C	?	9	6.976e-05	0.003084	1.3185	1.3976	0.0383	50.91	2.835	2.835	1.368	1.721	1.324	0.9267	0.4737	1.588	1.196	rs62312194	GRID2(0)
4:32169623	4	32169623	A	?	8	6.978e-05	7.57e-05	2.2254	2.2364	0.4221	0.93	5.365	5.365	1.513	8.63	3.647	4.046	1.505	NA	1.523	rs115071312	.
10:7495865	10	7495865	G	?	9	6.979e-05	0.001295	1.2439	1.2364	0.2701	19.43	1.077	1.077	1.363	1.15	1.054	1.785	0.6939	1.129	1.156	rs2265811	ITIH5(-105.4kb)|SFMBT2(+42.42kb)
4:93338863	4	93338863	C	?	9	6.993e-05	0.002991	1.3181	1.3889	0.0477	48.87	2.836	2.836	1.353	1.6	1.332	0.9267	0.4737	1.607	1.217	rs12647218	GRID2(0)
4:93342064	4	93342064	G	?	9	6.993e-05	0.002991	1.3181	1.3889	0.0477	48.87	2.836	2.836	1.353	1.6	1.332	0.9267	0.4737	1.607	1.217	rs12640559	GRID2(0)
21:35995167	21	35995167	A	?	9	7e-05	0.0006318	1.2939	1.2854	0.3163	14.13	1.639	1.639	1.162	1.014	1.116	1.246	0.6217	1.001	1.683	rs13049832	CLIC6(-46.52kb)|KCNE1(+110.6kb)|LINC00160(-100.9kb)|LOC100506385(-123kb)|RCAN1(+7.785kb)|RUNX1(-164.9kb)
21:36000039	21	36000039	T	?	9	7.009e-05	7.009e-05	1.2994	1.2994	0.5631	0	1.692	1.692	1.201	1.015	1.163	1.19	0.6237	1.129	1.597	rs12626455	CLIC6(-41.65kb)|KCNE1(+115.5kb)|LINC00160(-96.06kb)|LOC100506385(-118.1kb)|RCAN1(+12.66kb)|RUNX1(-160.1kb)
10:7501600	10	7501600	C	?	9	7.028e-05	0.0003383	1.2427	1.2414	0.351	10.09	1.134	1.134	1.318	1.337	0.9931	1.744	0.7447	1.197	1.172	rs2251183	ITIH5(-99.63kb)|SFMBT2(+48.15kb)
18:31259796	18	31259796	T	?	9	7.039e-05	7.039e-05	0.5686	0.5686	0.7428	0	0.152	0.152	0.5566	0.3058	0.4435	0.5319	0.2977	0.5255	0.7578	rs72961990	ASXL3(0)|NOL4(-171.3kb)
15:74907946	15	74907946	G	?	8	7.049e-05	7.049e-05	0.631	0.631	0.9825	0	0.5516	0.5516	0.5927	0.6525	0.4792	0.6347	NA	0.7544	0.7385	rs139096840	ARID3B(+17.47kb)|CLK3(0)|CSK(-166.5kb)|CYP1A1(-103.9kb)|CYP1A2(-133.2kb)|EDC3(-14.95kb)|LMAN1L(-197.2kb)|MIR4513(-173.1kb)|SEMA7A(+181.6kb)|UBL7(+154.4kb)|UBL7-AS1(+134.3kb)
10:36722357	10	36722357	C	?	7	7.055e-05	7.055e-05	2.6378	2.6378	0.9998	0	2.56	2.56	3.478	0	NA	2.594	NA	2.39	2.481	rs16937008	.
16:27757219	16	27757219	G	?	9	7.071e-05	0.0007405	1.2765	1.3035	0.2135	25.9	2.221	2.221	1.157	1.498	1.541	1.179	0.6743	0.9922	1.223	rs1149425	GSG1L(-41.63kb)|GTF3C1(+196kb)|KIAA0556(0)
11:106725302	11	106725302	A	?	9	7.074e-05	7.074e-05	0.7711	0.7711	0.648	0	0.5012	0.5012	0.8142	0.7072	0.7339	1.006	1.102	0.84	0.7455	rs11211946	GUCY1A2(0)
2:19818536	2	19818536	A	?	9	7.087e-05	0.0021	1.3383	1.3809	0.1064	39.22	2.806	2.806	1.305	0.7394	1.287	1.523	1.464	1.093	1.174	rs1115370	.
4:160165225	4	160165225	T	?	9	7.097e-05	7.097e-05	0.8045	0.8045	0.6132	0	0.6235	0.6235	0.8123	0.8731	0.7416	0.964	0.6349	0.5769	0.8662	rs67377365	MIR3688-1(+115.2kb)|MIR3688-2(+115.2kb)|RAPGEF2(-23.77kb)
16:19060499	16	19060499	A	?	8	7.109e-05	7.109e-05	0.685	0.685	0.6269	0	0.605	0.605	0.5422	0.3498	0.6917	0.7383	NA	0.8464	0.8216	rs113756254	COQ7(-18.42kb)|ITPRIPL2(-64.75kb)|SMG1(+122.8kb)|SYT17(-119.1kb)|TMC7(0)
10:7494290	10	7494290	C	?	9	7.111e-05	0.000977	1.2434	1.2369	0.2913	17.01	1.077	1.077	1.361	1.15	1.054	1.773	0.6957	1.129	1.16	rs2247502	ITIH5(-106.9kb)|SFMBT2(+40.84kb)
12:76720320	12	76720320	A	?	9	7.12e-05	0.001206	0.8051	0.7921	0.1833	29.44	0.4993	0.4993	0.789	1.025	0.6718	0.9906	1.359	0.6998	0.8651	rs10860027	BBS10(-17.94kb)|OSBPL8(-25.26kb)
11:106645018	11	106645018	T	?	9	7.123e-05	0.0005548	0.7935	0.7958	0.3245	13.19	0.9934	0.9934	0.8648	0.8943	0.5487	0.9868	0.8999	0.6249	0.7202	rs4512789	GUCY1A2(0)
4:93370095	4	93370095	G	?	9	7.139e-05	0.003474	1.3174	1.3941	0.0359	51.47	2.835	2.835	1.38	1.721	1.298	0.9267	0.4552	1.575	1.199	rs4522831	GRID2(0)
1:3441764	1	3441764	A	?	8	7.145e-05	0.003164	1.2694	1.2584	0.1821	30.81	1.428	1.428	1.579	1.195	0.9027	1.031	NA	1.56	1.254	rs12097309	ARHGEF16(+44.09kb)|MEGF6(0)|MIR551A(-35.5kb)|PRDM16(+86.58kb)|TP73(-127.4kb)|TPRG1L(-99.79kb)|WRAP73(-105.6kb)
12:99267926	12	99267926	G	?	9	7.15e-05	7.15e-05	1.6738	1.6738	0.5958	0	1.565	1.565	1.622	1.14	1.476	2.204	13.27	0.7671	1.733	rs61933630	ANKS1B(0)|APAF1(+138.7kb)
4:182892644	4	182892644	A	?	9	7.174e-05	7.174e-05	1.3082	1.3082	0.54	0	1.166	1.166	1.513	1.305	1.427	1.468	0.4538	0.9556	1.185	rs12512227	MGC45800(-167.5kb)|MIR1305(-197.8kb)
8:29836592	8	29836592	C	?	9	7.175e-05	7.175e-05	1.4575	1.4575	0.7719	0	1.317	1.317	1.539	2.449	1.062	1.396	0.7642	2.764	1.5	rs10108668	DCTN6(-177.2kb)|FAM183CP(+25.47kb)|LEPROTL1(-116.3kb)|MBOAT4(-152.6kb)|MIR548O2(-83.66kb)|MIR3148(+21.73kb)|TMEM66(-84.04kb)
13:80650361	13	80650361	T	?	9	7.191e-05	7.191e-05	0.6667	0.6667	0.9009	0	0.4312	0.4312	0.7378	0.8108	0.6185	0.7871	0.3109	0.5252	0.6871	rs17072246	.
3:3408794	3	3408794	T	?	9	7.195e-05	7.195e-05	1.2722	1.2722	0.7649	0	1.526	1.526	1.275	1	1.426	1.556	1.066	1.089	1.125	rs6442796	CRBN(+187.4kb)
13:98646437	13	98646437	T	?	7	7.212e-05	0.0002813	0.7798	0.7588	0.2999	17.04	0.5412	0.5412	0.9018	0.5711	NA	NA	0.6064	0.7679	0.8018	rs61970443	FARP1(-149kb)|IPO5(0)|RNF113B(-181.6kb)
10:7501662	10	7501662	C	?	9	7.222e-05	0.0003964	1.2423	1.2408	0.3424	11.1	1.134	1.134	1.323	1.337	0.9931	1.744	0.7456	1.197	1.166	rs2251185	ITIH5(-99.57kb)|SFMBT2(+48.21kb)
14:33111257	14	33111257	T	?	9	7.227e-05	7.227e-05	1.2679	1.2679	0.8719	0	1.703	1.703	1.191	1.446	1.234	1.262	0.7209	1.259	1.25	rs10143113	AKAP6(0)
13:98650476	13	98650476	A	?	7	7.233e-05	0.000282	0.7798	0.7588	0.2998	17.05	0.5412	0.5412	0.9018	0.5711	NA	NA	0.6064	0.7679	0.8019	rs61970444	FARP1(-145kb)|IPO5(0)|RNF113B(-177.6kb)
11:106757132	11	106757132	G	?	9	7.257e-05	7.257e-05	0.7721	0.7721	0.8083	0	0.552	0.552	0.8162	0.7072	0.7576	0.998	0.9726	0.8283	0.7303	rs11211959	GUCY1A2(0)
6:78853987	6	78853987	T	?	9	7.258e-05	7.258e-05	0.8024	0.8024	0.9392	0	0.8371	0.8371	0.8206	0.6169	0.8491	0.8026	0.4198	0.7551	0.8155	rs9359318	.
6:78854062	6	78854062	A	?	9	7.258e-05	7.258e-05	0.8024	0.8024	0.9392	0	0.8371	0.8371	0.8206	0.6169	0.8491	0.8026	0.4198	0.7551	0.8155	rs9343740	.
2:133262853	2	133262853	G	?	9	7.264e-05	7.264e-05	1.3802	1.3802	0.8003	0	2.484	2.484	1.432	1.388	1.363	1.058	0.8396	1.526	1.34	rs62167453	GPR39(0)|LYPD1(-139.5kb)|NCKAP5(-166.5kb)
2:133263007	2	133263007	G	?	9	7.264e-05	7.264e-05	1.3802	1.3802	0.8003	0	2.484	2.484	1.432	1.388	1.363	1.058	0.8396	1.526	1.34	rs62167454	GPR39(0)|LYPD1(-139.3kb)|NCKAP5(-166.4kb)
1:187111460	1	187111460	T	?	9	7.276e-05	0.0002096	1.2824	1.3329	0.2467	22.09	1.872	1.872	1.173	1.581	1.622	1.514	1.159	1.547	1.036	rs6698401	PLA2G4A(+153.3kb)
4:93343395	4	93343395	T	?	9	7.298e-05	0.003062	1.3172	1.3872	0.0485	48.7	2.836	2.836	1.353	1.6	1.332	0.9267	0.4737	1.588	1.217	rs62311041	GRID2(0)
8:18312199	8	18312199	T	?	9	7.31e-05	7.31e-05	1.2406	1.2406	0.8767	0	1.392	1.392	1.128	1.295	1.436	1.324	1.142	0.918	1.26	rs28733274	NAT2(+53.48kb)|PSD3(-72.61kb)
11:1674673	11	1674673	C	?	9	7.313e-05	7.313e-05	1.4713	1.4713	0.6924	0	1.298	1.298	1.535	3.576	1.996	1.471	0.5934	1.894	1.279	rs113834701	BRSK2(+190.8kb)|CTSD(-99.31kb)|DUSP8(+81.52kb)|FAM99A(-12.16kb)|FAM99B(-29.83kb)|IFITM10(-78.97kb)|KRTAP5-1(+68.16kb)|KRTAP5-2(+55.15kb)|KRTAP5-3(+44.98kb)|KRTAP5-4(+31.3kb)|KRTAP5-5(+22.51kb)|KRTAP5-6(-43.75kb)|KRTAP5-AS1(+54.26kb)|LSP1(-199.5kb)|MOB2(0)|SYT8(-181kb)|TNNI2(-185.6kb)
2:240682045	2	240682045	A	?	9	7.324e-05	7.324e-05	0.7301	0.7301	0.5755	0	0.4481	0.4481	0.6469	0.8054	0.8658	0.5483	0.9664	0.9768	0.8373	rs7566286	LOC150935(-2.508kb)
15:39991608	15	39991608	A	?	9	7.328e-05	7.328e-05	1.4243	1.4243	0.6981	0	1.508	1.508	1.539	1.019	1.253	1.215	2.567	3.278	1.399	rs72727029	FSIP1(0)|GPR176(-99.61kb)|THBS1(+101.9kb)
22:27588590	22	27588590	T	?	9	7.331e-05	7.331e-05	0.426	0.426	0.9698	0	0.1527	0.1527	0.3866	0.6255	0.4209	0.2837	0.7063	0.6706	0.4858	rs117920541	.
22:27588671	22	27588671	G	?	9	7.331e-05	7.331e-05	0.426	0.426	0.9698	0	0.1527	0.1527	0.3866	0.6255	0.4209	0.2837	0.7063	0.6706	0.4858	rs16983900	.
16:5597690	16	5597690	G	?	9	7.337e-05	7.337e-05	1.2708	1.2708	0.4502	0	1.671	1.671	1.142	0.7526	1.494	1.491	1.698	1.159	1.243	rs4786705	.
7:16437059	7	16437059	T	?	9	7.348e-05	7.348e-05	1.2684	1.2684	0.681	0	1.694	1.694	1.264	1.189	1.184	1.105	3.138	1.052	1.318	rs56335840	ISPD(0)|LOC100506025(+126.8kb)|LRRC72(-129.4kb)|SOSTDC1(-64.05kb)
6:7948588	6	7948588	C	?	9	7.358e-05	7.358e-05	1.2855	1.2855	0.9293	0	1.189	1.189	1.165	1.249	1.486	1.544	1.415	1.421	1.205	rs155498	BLOC1S5(-65.21kb)|BLOC1S5-TXNDC5(0)|BMP6(+66.63kb)|EEF1E1(-125kb)|EEF1E1-MUTED(-65.21kb)|PIP5K1P1(-37.75kb)|SCARNA27(-138.1kb)|TXNDC5(+37.54kb)
13:98646106	13	98646106	A	?	7	7.364e-05	0.0002864	0.7801	0.759	0.2994	17.1	0.5412	0.5412	0.9018	0.5711	NA	NA	0.6064	0.7679	0.8025	rs61970442	FARP1(-149.3kb)|IPO5(0)|RNF113B(-181.9kb)
1:216288277	1	216288277	G	?	9	7.366e-05	7.366e-05	0.8096	0.8096	0.9554	0	0.8136	0.8136	0.725	0.8014	0.8704	0.9131	0.5839	0.8475	0.8279	rs301731	USH2A(0)
9:126415461	9	126415461	G	?	9	7.44e-05	7.44e-05	0.5272	0.5272	0.6017	0	1.2	1.2	0.4273	1.491	0.5264	0.5817	0.5029	0.4424	0.4038	rs59637710	DENND1A(0)
5:94635391	5	94635391	A	?	9	7.449e-05	7.449e-05	1.6144	1.6144	0.8581	0	2.072	2.072	1.145	1.789	1.34	1.922	2.906	1.543	1.903	rs74837003	FAM81B(-91.66kb)|MCTP1(+15.11kb)|TTC37(-164.2kb)
2:19858440	2	19858440	T	?	9	7.486e-05	0.0006825	1.3354	1.3544	0.2408	22.76	2.385	2.385	1.334	0.7067	1.296	1.387	1.531	1.308	1.188	rs4666529	.
6:99396735	6	99396735	C	?	6	7.486e-05	0.0002265	0.768	0.763	0.3477	10.62	0.5059	0.5059	0.7965	0.9069	0.7705	0.8506	NA	NA	NA	rs6921694	FBXL4(+0.853kb)|POU3F2(+110.1kb)
16:82642651	16	82642651	A	?	9	7.487e-05	0.007534	0.8044	0.7924	0.0498	48.45	0.5143	0.5143	0.8303	0.5907	0.8356	0.7472	0.9544	1.692	0.8165	rs11646213	CDH13(-17.75kb)
22:34133758	22	34133758	A	?	9	7.498e-05	7.498e-05	1.7554	1.7554	0.9387	0	1.338	1.338	1.713	5.191	1.9	1.931	2.246	1.83	1.513	rs9619373	LARGE(0)|LARGE-AS1(0)
12:7825135	12	7825135	A	?	9	7.499e-05	0.0001409	1.3227	1.3345	0.3709	7.72	1.263	1.263	1.078	2.223	1.72	1.516	0.7974	1.9	1.21	rs11055158	APOBEC1(+6.633kb)|CD163(+168.7kb)|CLEC4C(-56.88kb)|DPPA3(-38.95kb)|GDF3(-17.24kb)|NANOG(-116.9kb)|NANOGNB(-92.68kb)|SLC2A14(-141.3kb)
12:108645351	12	108645351	T	?	7	7.529e-05	7.529e-05	1.9616	1.9616	0.9762	0	1.652	1.652	2.675	1.351	2.004	2.122	NA	NA	1.861	rs77531962	CMKLR1(-36.47kb)|WSCD2(+1.038kb)
14:62536948	14	62536948	A	?	9	7.562e-05	0.000126	1.2555	1.2589	0.3977	4.49	1.138	1.138	1.465	1.251	1.182	1.403	1.444	1.853	1.036	rs9323381	LINC00643(-47.13kb)|SYT16(0)
4:115335235	4	115335235	T	?	9	7.567e-05	7.567e-05	0.5739	0.5739	0.4487	0	0.3293	0.3293	0.7266	0.4787	0.8993	0.2903	0.8767	1.914	0.5319	rs78359714	UGT8(-184.4kb)
4:115336201	4	115336201	C	?	9	7.567e-05	7.567e-05	0.5739	0.5739	0.4487	0	0.3293	0.3293	0.7266	0.4787	0.8993	0.2903	0.8767	1.914	0.5319	rs145736828	UGT8(-183.4kb)
9:126407742	9	126407742	C	?	9	7.569e-05	7.569e-05	0.5252	0.5252	0.4447	0	1.2	1.2	0.4372	1.675	0.5581	0.5817	0.4836	0.4424	0.3654	rs115363352	DENND1A(0)
22:34140434	22	34140434	A	?	9	7.571e-05	7.571e-05	1.7625	1.7625	0.9059	0	1.338	1.338	1.713	5.191	1.9	2.087	2.778	1.83	1.467	rs16992938	LARGE(0)|LARGE-AS1(0)
11:12470469	11	12470469	T	?	8	7.581e-05	0.009655	1.3009	1.4427	0.0011	70.83	3.649	3.649	1.123	0.9806	1.432	1.224	0.5957	1.404	NA	rs10831826	MICAL2(+185.1kb)|MICALCL(+89.78kb)|PARVA(0)
4:141664192	4	141664192	G	?	9	7.593e-05	7.593e-05	0.7839	0.7839	0.7236	0	0.6538	0.6538	0.8292	0.7417	0.8171	0.7431	0.4374	1.188	0.7459	rs4956332	ELMOD2(+189.3kb)|RNF150(-122.5kb)|TBC1D9(0)|TNRC18P1(+99.96kb)|UCP1(+174.2kb)
10:4859669	10	4859669	T	?	6	7.609e-05	7.609e-05	0.4129	0.4129	0.8948	0	NA	NA	0.3711	0.4072	NA	0.6018	0.1119	0.8205	0.4021	rs150519760	AKR1C1(-145.8kb)|AKR1C2(-170.3kb)|AKR1C6P(-54.19kb)|AKR1E2(-8.699kb)|LINC00704(+139.4kb)|LINC00705(+155.1kb)
11:34216012	11	34216012	G	?	8	7.622e-05	0.001168	1.255	1.3332	0.0623	47.87	2.612	2.612	1.107	1.411	1.212	1.355	NA	1.138	1.175	rs2473903	ABTB2(0)|CAPRIN1(+91.86kb)|NAT10(+47.55kb)
14:42753634	14	42753634	A	?	9	7.65e-05	0.001033	0.7965	0.7666	0.1376	35.05	0.5022	0.5022	0.7523	0.4338	0.8044	0.8197	0.591	1.071	0.9312	rs7151393	.
9:674789	9	674789	T	?	9	7.652e-05	7.652e-05	1.2928	1.2928	0.5045	0	1.589	1.589	1.205	1.132	1.74	1.02	0.8048	1.663	1.275	rs55680746	DMRT1(-166.9kb)|KANK1(0)
13:98647112	13	98647112	A	?	7	7.656e-05	0.0002567	0.7805	0.7623	0.3169	14.8	0.5412	0.5412	0.9037	0.5873	NA	NA	0.6158	0.7562	0.8011	rs3930650	FARP1(-148.3kb)|IPO5(0)|RNF113B(-180.9kb)
9:81725351	9	81725351	C	?	9	7.685e-05	7.685e-05	1.2504	1.2504	0.8128	0	1.52	1.52	1.216	1.911	1.141	1.197	0.7928	1.418	1.225	rs10867345	.
3:56667213	3	56667213	C	?	7	7.687e-05	0.1081	2.4017	1.8265	0.0401	54.51	NA	NA	2.096	1.038	2.312	0.3085	1.254	1.535	5.467	rs34828128	ARHGEF3(-94.23kb)|CCDC66(+11.36kb)|ERC2(+164.8kb)|FAM208A(0)
1:120412019	1	120412019	G	?	9	7.722e-05	7.722e-05	0.6373	0.6373	0.7847	0	0.4723	0.4723	0.6135	0.6269	0.5791	0.7772	6.003	0.5897	0.6461	rs74710428	ADAM30(-24.14kb)|HMGCS2(+100.5kb)|NBPF7(+24.52kb)|NOTCH2(-42.16kb)|PHGDH(+125.2kb)|REG4(+57.82kb)
1:120414678	1	120414678	G	?	9	7.722e-05	7.722e-05	0.6373	0.6373	0.7847	0	0.4723	0.4723	0.6135	0.6269	0.5791	0.7772	6.003	0.5897	0.6461	rs74115381	ADAM30(-21.48kb)|HMGCS2(+103.1kb)|NBPF7(+27.18kb)|NOTCH2(-39.5kb)|PHGDH(+127.8kb)|REG4(+60.48kb)
15:74760421	15	74760421	T	?	8	7.726e-05	7.726e-05	0.6349	0.6349	0.9915	0	0.5968	0.5968	0.5694	0.6525	0.5371	0.6347	NA	0.7544	0.7407	rs146777912	ARID3B(-73.13kb)|CCDC33(+131.9kb)|CLK3(-140.3kb)|CYP11A1(+100.3kb)|EDC3(-162.5kb)|LOC729739(+106kb)|SEMA7A(+34.12kb)|UBL7(+6.892kb)|UBL7-AS1(0)
5:29515143	5	29515143	T	?	9	7.727e-05	0.0002683	0.7823	0.7742	0.3254	13.08	0.5575	0.5575	0.6979	0.6064	0.8288	0.6756	0.9432	0.8921	0.9927	rs35115884	.
3:64729892	3	64729892	G	?	9	7.737e-05	0.0002225	0.7866	0.7866	0.376	7.11	0.713	0.713	0.6297	0.9906	0.9339	0.9337	0.6295	0.6009	0.8861	rs7638389	ADAMTS9(+56.53kb)|ADAMTS9-AS2(0)|MIR548A2(0)
15:91537820	15	91537820	A	?	7	7.742e-05	7.742e-05	0.4602	0.4602	0.9666	0	0.286	0.286	0.4345	0.9035	NA	0.4927	NA	0.4299	0.5209	rs113028686	BLM(+179.1kb)|FES(+98.81kb)|FURIN(+111.1kb)|HDDC3(+62.05kb)|MAN2A2(+72kb)|PRC1(0)|PRC1-AS1(+5.966kb)|RCCD1(+31.46kb)|SV2B(-105.4kb)|UNC45A(+40.5kb)|VPS33B(-3.953kb)
2:207434258	2	207434258	G	?	9	7.754e-05	0.000341	0.6437	0.6478	0.372	7.6	0.2063	0.2063	0.6931	0.6033	0.5645	1.115	0.9762	0.886	0.486	rs72956621	ADAM23(0)|DYTN(-82.09kb)|FASTKD2(-195.9kb)|LOC200726(-72.88kb)|MDH1B(-168.2kb)
19:42481725	19	42481725	T	?	8	7.762e-05	7.762e-05	1.5872	1.5872	0.8805	0	1.397	1.397	1.695	1.834	1.153	1.107	NA	3.027	1.804	rs139293701	ARHGEF1(+70.12kb)|ATP1A3(0)|CD79A(+96.29kb)|CEACAM3(+166.1kb)|DMRTC2(+125.3kb)|GRIK5(-20.74kb)|LOC100505622(-155.1kb)|LYPD4(+133.2kb)|MIR4323(-155.9kb)|POU2F2(-108.5kb)|RABAC1(+18.2kb)|RPS19(+106.2kb)|ZNF574(-98.56kb)
11:1669264	11	1669264	T	?	9	7.77e-05	7.77e-05	1.4694	1.4694	0.7055	0	1.209	1.209	1.592	3.576	1.895	1.541	0.5934	1.894	1.276	rs118117839	BRSK2(+185.3kb)|CTSD(-104.7kb)|DUSP8(+76.11kb)|FAM99A(-17.56kb)|FAM99B(-35.24kb)|IFITM10(-84.38kb)|KRTAP5-1(+62.75kb)|KRTAP5-2(+49.74kb)|KRTAP5-3(+39.57kb)|KRTAP5-4(+25.9kb)|KRTAP5-5(+17.1kb)|KRTAP5-6(-49.16kb)|KRTAP5-AS1(+48.85kb)|MOB2(0)|SYT8(-186.4kb)|TNNI2(-191kb)
11:1670736	11	1670736	A	?	9	7.77e-05	7.77e-05	1.4694	1.4694	0.7055	0	1.209	1.209	1.592	3.576	1.895	1.541	0.5934	1.894	1.276	rs10838340	BRSK2(+186.8kb)|CTSD(-103.2kb)|DUSP8(+77.59kb)|FAM99A(-16.09kb)|FAM99B(-33.76kb)|IFITM10(-82.9kb)|KRTAP5-1(+64.22kb)|KRTAP5-2(+51.21kb)|KRTAP5-3(+41.04kb)|KRTAP5-4(+27.37kb)|KRTAP5-5(+18.58kb)|KRTAP5-6(-47.69kb)|KRTAP5-AS1(+50.32kb)|MOB2(0)|SYT8(-184.9kb)|TNNI2(-189.5kb)
11:1671508	11	1671508	G	?	9	7.77e-05	7.77e-05	1.4694	1.4694	0.7055	0	1.209	1.209	1.592	3.576	1.895	1.541	0.5934	1.894	1.276	rs112332487	BRSK2(+187.6kb)|CTSD(-102.5kb)|DUSP8(+78.36kb)|FAM99A(-15.32kb)|FAM99B(-32.99kb)|IFITM10(-82.13kb)|KRTAP5-1(+65kb)|KRTAP5-2(+51.98kb)|KRTAP5-3(+41.82kb)|KRTAP5-4(+28.14kb)|KRTAP5-5(+19.35kb)|KRTAP5-6(-46.92kb)|KRTAP5-AS1(+51.09kb)|MOB2(0)|SYT8(-184.2kb)|TNNI2(-188.7kb)
1:42357003	1	42357003	G	?	9	7.777e-05	7.777e-05	1.3075	1.3075	0.6097	0	1.677	1.677	1.363	0.9573	0.9775	1.601	1.967	1.33	1.231	rs2764834	HIVEP3(0)
8:29809526	8	29809526	T	?	9	7.805e-05	7.805e-05	1.3225	1.3225	0.4632	0	1.059	1.059	1.629	1.11	1.247	1.018	3.136	1.709	1.304	rs13273591	FAM183CP(0)|LEPROTL1(-143.4kb)|MBOAT4(-179.7kb)|MIR548O2(-110.7kb)|MIR3148(-5.261kb)|TMEM66(-111.1kb)
11:1668283	11	1668283	T	?	9	7.816e-05	7.816e-05	1.4692	1.4692	0.7022	0	1.209	1.209	1.592	3.576	1.895	1.541	0.5858	1.894	1.276	rs112310971	BRSK2(+184.4kb)|CTSD(-105.7kb)|DUSP8(+75.13kb)|FAM99A(-18.54kb)|FAM99B(-36.22kb)|IFITM10(-85.36kb)|KRTAP5-1(+61.77kb)|KRTAP5-2(+48.76kb)|KRTAP5-3(+38.59kb)|KRTAP5-4(+24.92kb)|KRTAP5-5(+16.12kb)|KRTAP5-6(-50.14kb)|KRTAP5-AS1(+47.87kb)|MOB2(0)|SYT8(-187.4kb)|TNNI2(-191.9kb)
6:144274210	6	144274210	C	?	9	7.87e-05	7.87e-05	1.3355	1.3355	0.6228	0	1.535	1.535	1.71	1.496	1.183	1.241	2.196	0.9383	1.168	rs12528876	HYMAI(-49.82kb)|LTV1(+89.27kb)|PHACTR2(+121.9kb)|PLAGL1(0)|SF3B5(-141.8kb)|STX11(-197.4kb)|ZC2HC1B(+14.73kb)
3:68108094	3	68108094	C	?	9	7.887e-05	0.007155	1.2442	1.2159	0.1846	29.29	0.9253	0.9253	1.283	1.853	0.9962	1.5	0.7165	0.9174	1.354	rs6798030	FAM19A1(0)
2:207353794	2	207353794	C	?	9	7.904e-05	8.68e-05	0.6415	0.6417	0.43	0.45	0.2063	0.2063	0.7099	0.5813	0.5121	1.048	0.8454	1.045	0.4976	rs72933264	ADAM23(0)|DYTN(-162.6kb)|LOC200726(-153.3kb)|ZDBF2(+174.6kb)
13:98647941	13	98647941	G	?	7	7.905e-05	0.0002684	0.7809	0.7628	0.3159	14.94	0.5412	0.5412	0.9037	0.5873	NA	NA	0.6062	0.7679	0.8005	rs3858773	FARP1(-147.5kb)|IPO5(0)|RNF113B(-180.1kb)
3:144998804	3	144998804	A	?	9	7.905e-05	0.01135	1.3142	1.5018	0.0001	75.38	5.469	5.469	1.04	1.141	1.754	1.137	0.521	0.9545	1.314	rs35813810	.
1:187107760	1	187107760	C	?	9	7.916e-05	0.0002336	1.2808	1.3337	0.2377	23.12	1.872	1.872	1.173	1.581	1.622	1.514	1.159	1.547	1.032	rs10465479	PLA2G4A(+149.6kb)
19:44132559	19	44132559	C	?	9	7.925e-05	7.925e-05	1.2338	1.2338	0.8825	0	1.467	1.467	1.109	1.5	1.228	1.247	1.009	1.6	1.237	rs8101721	CADM4(0)|ETHE1(+101.2kb)|IRGC(-87.65kb)|IRGQ(+32.27kb)|KCNN4(-138.1kb)|LYPD3(+162.7kb)|LYPD5(-167.5kb)|PHLDB3(+123.6kb)|PINLYP(+46.3kb)|PLAUR(-17.69kb)|SMG9(-102.7kb)|SRRM5(+13.91kb)|XRCC1(+52.83kb)|ZNF283(-198.9kb)|ZNF428(+8.545kb)|ZNF575(+92.28kb)|ZNF576(+27.97kb)
11:106734159	11	106734159	G	?	9	7.943e-05	7.943e-05	0.7729	0.7729	0.8761	0	0.575	0.575	0.8188	0.7072	0.7466	0.9567	1.102	0.84	0.7342	rs111878824	GUCY1A2(0)
16:82771901	16	82771901	C	?	9	7.974e-05	7.974e-05	0.6435	0.6435	0.8709	0	0.5101	0.5101	0.5684	0.5447	0.6546	1.109	0.6598	0.5759	0.6788	rs78329060	CDH13(0)
14:102325936	14	102325936	G	?	8	7.98e-05	7.98e-05	0.4869	0.4869	0.504	0	0.8219	0.8219	0.5813	0.4686	0.5919	0.5968	NA	1.4	0.2674	rs61995291	DYNC1H1(-104.9kb)|LINC00239(+127.1kb)|PPP2R5C(0)
14:42770207	14	42770207	A	?	9	7.98e-05	0.0005925	0.7991	0.7737	0.197	27.82	0.4564	0.4564	0.7948	0.5674	0.7974	0.7765	0.5779	1.045	0.9161	rs11845428	.
6:78874073	6	78874073	T	?	9	7.997e-05	7.997e-05	0.8018	0.8018	0.923	0	0.9257	0.9257	0.8328	0.6178	0.7917	0.7842	0.5264	0.6292	0.8325	rs9343744	.
21:19656267	21	19656267	G	?	9	8.033e-05	8.033e-05	1.4873	1.4873	0.9985	0	1.723	1.723	1.404	1.496	1.231	1.694	1.449	1.466	1.529	rs66480111	CHODL(+16.58kb)|TMPRSS15(0)
17:17593284	17	17593284	C	?	9	8.035e-05	8.035e-05	2.0515	2.0515	0.9604	0	1.916	1.916	1.843	0.7523	2.609	1.439	0.5019	2.53	2.559	rs9897150	MED9(+196.8kb)|MIR33B(-123.9kb)|PEMT(+98.27kb)|RAI1(0)|RASD1(+193.6kb)|SMCR5(-86.72kb)|SREBF1(-121.4kb)|TOM1L2(-153.5kb)
15:39993509	15	39993509	C	?	9	8.078e-05	8.078e-05	1.4222	1.4222	0.5762	0	1.508	1.508	1.539	1.019	1.222	1.215	2.567	3.896	1.399	rs28735552	FSIP1(0)|GPR176(-97.71kb)|THBS1(+103.8kb)
12:7818444	12	7818444	A	?	9	8.099e-05	0.0001912	1.32	1.3368	0.3439	10.92	1.263	1.263	1.085	2.223	1.746	1.516	0.7974	1.9	1.185	rs7294364	APOBEC1(0)|CD163(+162kb)|CLEC4C(-63.57kb)|DPPA3(-45.64kb)|GDF3(-23.94kb)|NANOG(-123.6kb)|NANOGNB(-99.37kb)|SLC2A14(-148kb)
3:64729712	3	64729712	G	?	9	8.106e-05	0.0002102	0.7872	0.7873	0.3824	6.34	0.7215	0.7215	0.6297	0.9906	0.9339	0.9337	0.6295	0.6009	0.8851	rs6793651	ADAMTS9(+56.35kb)|ADAMTS9-AS2(0)|MIR548A2(0)
1:6196943	1	6196943	G	?	9	8.107e-05	0.0006718	1.2446	1.3135	0.1096	38.77	2.116	2.116	1.139	1.622	1.335	1.12	0.755	1.926	1.123	rs2746066	ACOT7(-127.4kb)|CHD5(0)|GPR153(-110.5kb)|HES3(-107.3kb)|ICMT(-84.31kb)|KCNAB2(+35.69kb)|LINC00337(-99.36kb)|NPHP4(+144.4kb)|RNF207(-69.24kb)|RPL22(-48.14kb)
2:240715811	2	240715811	G	?	9	8.121e-05	0.0007121	1.2568	1.2692	0.2643	20.09	1.722	1.722	1.247	0.8643	1.632	1.417	0.7075	1.073	1.09	rs1996513	LOC150935(0)|MIR4786(-166.6kb)|NDUFA10(-181kb)
4:160528601	4	160528601	A	?	9	8.125e-05	8.125e-05	0.5571	0.5571	0.7573	0	0.4496	0.4496	0.5617	0.5796	0.3087	0.404	0.223	1.584	0.5638	rs77598909	.
1:79495100	1	79495100	C	?	9	8.205e-05	8.205e-05	0.8069	0.8069	0.5721	0	0.6586	0.6586	0.7231	0.612	0.7876	0.9875	0.8922	0.7647	0.9092	rs9659230	ELTD1(+22.6kb)
1:3440028	1	3440028	G	?	8	8.209e-05	0.005602	1.2684	1.2563	0.1389	36.33	1.397	1.397	1.594	1.298	0.8713	1.036	NA	1.56	1.249	rs10797398	ARHGEF16(+42.35kb)|MEGF6(0)|MIR551A(-37.23kb)|PRDM16(+84.84kb)|TP73(-129.1kb)|TPRG1L(-101.5kb)|WRAP73(-107.3kb)
8:29833305	8	29833305	C	?	9	8.226e-05	8.226e-05	1.4636	1.4636	0.7211	0	1.172	1.172	1.574	2.449	1.089	1.416	0.5436	2.465	1.569	rs10104405	DCTN6(-180.5kb)|FAM183CP(+22.18kb)|LEPROTL1(-119.6kb)|MBOAT4(-155.9kb)|MIR548O2(-86.95kb)|MIR3148(+18.44kb)|TMEM66(-87.32kb)
16:27504886	16	27504886	A	?	8	8.24e-05	0.001692	1.4018	1.5633	0.0368	53.14	4.38	4.38	1.283	2.118	1.076	1.363	NA	1.393	1.241	rs11648096	GTF3C1(0)|IL4R(+128.8kb)|IL21R(+41.52kb)|IL21R-AS1(+40.17kb)|KIAA0556(-56.58kb)
22:48905024	22	48905024	A	?	8	8.242e-05	8.242e-05	1.2763	1.2763	0.8387	0	1.443	1.443	1.257	1.406	1.474	1.005	NA	1.281	1.282	rs4823794	FAM19A5(0)|LOC284933(-29.69kb)
13:98652353	13	98652353	G	?	7	8.244e-05	0.0002338	0.7814	0.7672	0.3373	12.09	0.5523	0.5523	0.9015	0.5711	NA	NA	0.6224	0.7794	0.8	rs7997339	FARP1(-143.1kb)|IPO5(0)|RNF113B(-175.7kb)
14:42721734	14	42721734	A	?	9	8.266e-05	8.266e-05	1.2512	1.2512	0.8073	0	1.36	1.36	1.391	1.077	1.072	1.45	1.476	1.005	1.166	rs28414857	.
1:6196869	1	6196869	G	?	9	8.271e-05	0.0006809	1.2444	1.3135	0.1091	38.84	2.116	2.116	1.139	1.622	1.335	1.12	0.755	1.926	1.122	rs2250358	ACOT7(-127.5kb)|CHD5(0)|GPR153(-110.5kb)|HES3(-107.4kb)|ICMT(-84.38kb)|KCNAB2(+35.62kb)|LINC00337(-99.43kb)|NPHP4(+144.3kb)|RNF207(-69.32kb)|RPL22(-48.21kb)
10:131025505	10	131025505	T	?	9	8.274e-05	0.02494	0.7139	0.7639	0.1132	38.27	1.083	1.083	0.6676	1.448	0.4699	0.9004	1.236	0.8788	0.543	rs72831420	.
6:78852516	6	78852516	T	?	9	8.282e-05	8.282e-05	0.8038	0.8038	0.9379	0	0.8371	0.8371	0.8206	0.6169	0.8491	0.8026	0.4198	0.7551	0.8203	rs6454044	.
6:78854425	6	78854425	T	?	9	8.282e-05	8.282e-05	0.8038	0.8038	0.9379	0	0.8371	0.8371	0.8206	0.6169	0.8491	0.8026	0.4198	0.7551	0.8203	rs9361370	.
11:106803058	11	106803058	C	?	9	8.287e-05	8.287e-05	0.7685	0.7685	0.7508	0	0.4986	0.4986	0.8373	0.7501	0.7592	0.9352	1.094	0.7358	0.7401	rs11211980	GUCY1A2(0)
16:82648514	16	82648514	G	?	9	8.292e-05	0.01419	0.8056	0.8073	0.0527	47.89	0.4744	0.4744	0.8639	1.073	0.7665	0.8363	0.8513	1.555	0.7459	rs11647188	CDH13(-11.88kb)
8:135508893	8	135508893	A	?	9	8.295e-05	8.295e-05	0.6335	0.6335	0.4473	0	0.3499	0.3499	0.9448	0.6101	0.4395	0.6913	0.1092	0.6632	0.5844	rs72735758	ZFAT(0)|ZFAT-AS1(-101.4kb)
8:135513186	8	135513186	C	?	9	8.295e-05	8.295e-05	0.6335	0.6335	0.4473	0	0.3499	0.3499	0.9448	0.6101	0.4395	0.6913	0.1092	0.6632	0.5844	rs754233	ZFAT(0)|ZFAT-AS1(-97.13kb)
8:135514414	8	135514414	T	?	9	8.295e-05	8.295e-05	0.6335	0.6335	0.4473	0	0.3499	0.3499	0.9448	0.6101	0.4395	0.6913	0.1092	0.6632	0.5844	rs72735765	ZFAT(0)|ZFAT-AS1(-95.9kb)
21:19656836	21	19656836	A	?	9	8.296e-05	8.296e-05	1.4889	1.4889	0.9993	0	1.723	1.723	1.426	1.496	1.231	1.62	1.449	1.466	1.554	rs67895516	CHODL(+17.15kb)|TMPRSS15(0)
6:33058190	6	33058190	G	?	7	8.34e-05	8.34e-05	0.4279	0.4279	0.8321	0	NA	NA	0.4366	0.166	0.5138	0.264	0.0622	0.5909	0.4783	rs141591096	B3GALT4(-186.7kb)|BRD2(+108.9kb)|COL11A2(-72.28kb)|HCG25(-159.1kb)|HLA-DMA(+137.3kb)|HLA-DMB(+149.3kb)|HLA-DOA(+80.8kb)|HLA-DPA1(+9.635kb)|HLA-DPB1(+0.717kb)|HLA-DPB2(-22.1kb)|HSD17B8(-114.2kb)|LOC100294145(+186.7kb)|MIR219-1(-117.4kb)|PFDN6(-199.2kb)|RING1(-118.1kb)|RPS18(-181.7kb)|RXRB(-103.2kb)|SLC39A7(-110.4kb)|VPS52(-159.9kb)|WDR46(-188.7kb)
21:36000801	21	36000801	A	?	8	8.345e-05	0.0001891	1.3504	1.344	0.4001	3.87	1.596	1.596	NA	1.028	1.142	1.183	0.6289	1.149	1.69	NA	CLIC6(-40.89kb)|KCNE1(+116.2kb)|LINC00160(-95.3kb)|LOC100506385(-117.3kb)|RCAN1(+13.42kb)|RUNX1(-159.3kb)
11:5980543	11	5980543	A	?	9	8.354e-05	8.354e-05	2.0628	2.0628	0.5316	0	10.6	10.6	1.832	6.737	1.608	2.413	4.132	4.115	1.532	rs138607557	OR52E4(+74.08kb)|OR52E6(+117.4kb)|OR52E8(+101.6kb)|OR52L1(-26.58kb)|OR52N1(+170.5kb)|OR52N2(+138kb)|OR52N5(+180.6kb)|OR56A1(-67.36kb)|OR56A3(+11.02kb)|OR56A4(-42.74kb)|OR56A5(-8.239kb)|OR56B4(-148.5kb)
11:133278113	11	133278113	A	?	9	8.357e-05	8.357e-05	1.7422	1.7422	0.9004	0	1.254	1.254	1.764	1.486	1.264	2.464	0.7204	3.124	1.878	rs78817088	OPCML(0)
17:14939302	17	14939302	G	?	9	8.367e-05	8.367e-05	0.7311	0.7311	0.7572	0	1.105	1.105	0.6797	0.7297	0.5627	0.7123	1.395	0.9659	0.7207	rs72637339	CDRT7(+4.028kb)|CDRT8(-69kb)|PMP22(-193.8kb)
20:6106982	20	6106982	G	?	9	8.38e-05	0.0003767	0.619	0.6275	0.374	7.36	0.5642	0.5642	0.4765	1.908	0.9118	0.6764	2.057	0.3833	0.6014	rs55957507	CRLS1(+86.28kb)|FERMT1(+2.791kb)|LRRN4(+72.26kb)|MCM8(+131.2kb)|TRMT6(+175.8kb)
20:6107020	20	6107020	T	?	9	8.38e-05	0.0003767	0.619	0.6275	0.374	7.36	0.5642	0.5642	0.4765	1.908	0.9118	0.6764	2.057	0.3833	0.6014	rs6085415	CRLS1(+86.32kb)|FERMT1(+2.829kb)|LRRN4(+72.29kb)|MCM8(+131.2kb)|TRMT6(+175.8kb)
4:157591420	4	157591420	C	?	9	8.382e-05	0.0001295	1.8174	1.8396	0.3879	5.67	5.471	5.471	1.68	3.417	1.4	2.112	1.31	1.458	1.25	rs147698207	PDGFC(-91.34kb)
4:157592336	4	157592336	T	?	9	8.382e-05	0.0001295	1.8174	1.8396	0.3879	5.67	5.471	5.471	1.68	3.417	1.4	2.112	1.31	1.458	1.25	rs116052563	PDGFC(-90.43kb)
17:14938789	17	14938789	T	?	9	8.393e-05	8.393e-05	0.7327	0.7327	0.7488	0	1.105	1.105	0.674	0.7297	0.5627	0.7123	1.394	0.9731	0.7308	rs28875190	CDRT7(+3.515kb)|CDRT8(-69.51kb)|PMP22(-194.3kb)
11:1664834	11	1664834	T	?	9	8.4e-05	8.4e-05	1.4643	1.4643	0.6819	0	1.209	1.209	1.622	3.576	1.895	1.518	0.5859	1.894	1.264	rs902213	BRSK2(+180.9kb)|CTSD(-109.1kb)|DUSP8(+71.68kb)|FAM99A(-21.99kb)|FAM99B(-39.66kb)|IFITM10(-88.8kb)|KRTAP5-1(+58.32kb)|KRTAP5-2(+45.31kb)|KRTAP5-3(+35.14kb)|KRTAP5-4(+21.47kb)|KRTAP5-5(+12.68kb)|KRTAP5-6(-53.59kb)|KRTAP5-AS1(+44.42kb)|MOB2(0)|SYT8(-190.8kb)|TNNI2(-195.4kb)
3:3408754	3	3408754	A	?	9	8.412e-05	8.412e-05	1.2692	1.2692	0.7648	0	1.526	1.526	1.264	1	1.426	1.556	1.066	1.089	1.125	rs6442795	CRBN(+187.4kb)
5:29532605	5	29532605	C	?	9	8.437e-05	0.0003455	0.7791	0.7683	0.3044	15.5	0.4848	0.4848	0.7085	0.6372	0.8789	0.6583	0.9692	0.8501	0.9613	rs13183185	.
22:34144424	22	34144424	T	?	9	8.462e-05	8.462e-05	1.7551	1.7551	0.9091	0	1.338	1.338	1.805	5.191	1.9	1.931	2.778	1.83	1.452	rs113221695	LARGE(0)|LARGE-AS1(0)
22:34144960	22	34144960	A	?	9	8.462e-05	8.462e-05	1.7551	1.7551	0.9091	0	1.338	1.338	1.805	5.191	1.9	1.931	2.778	1.83	1.452	rs114306299	LARGE(0)|LARGE-AS1(0)
22:34145542	22	34145542	A	?	9	8.462e-05	8.462e-05	1.7551	1.7551	0.9091	0	1.338	1.338	1.805	5.191	1.9	1.931	2.778	1.83	1.452	rs116318797	LARGE(0)|LARGE-AS1(0)
1:108378074	1	108378074	G	?	9	8.473e-05	8.473e-05	0.4391	0.4391	0.8646	0	0.1746	0.1746	0.3402	0.3966	0.8361	0.5516	0.0233	0.6422	0.4876	rs28674923	VAV3(0)|VAV3-AS1(-129kb)
2:45923537	2	45923537	G	?	9	8.519e-05	8.519e-05	0.5981	0.5981	0.7143	0	0.6648	0.6648	0.6198	0.7818	0.367	0.8808	0.6677	1.078	0.4431	rs17323302	PRKCE(0)|SRBD1(+85.1kb)
1:6196951	1	6196951	A	?	9	8.563e-05	0.0006967	1.2438	1.3132	0.1083	38.96	2.116	2.116	1.136	1.622	1.335	1.12	0.755	1.926	1.123	rs2785582	ACOT7(-127.4kb)|CHD5(0)|GPR153(-110.5kb)|HES3(-107.3kb)|ICMT(-84.3kb)|KCNAB2(+35.7kb)|LINC00337(-99.35kb)|NPHP4(+144.4kb)|RNF207(-69.24kb)|RPL22(-48.13kb)
12:7821692	12	7821692	T	?	9	8.568e-05	0.0002151	1.3191	1.3374	0.3357	11.88	1.263	1.263	1.078	2.223	1.746	1.516	0.7974	1.9	1.189	rs6488567	APOBEC1(+3.19kb)|CD163(+165.3kb)|CLEC4C(-60.32kb)|DPPA3(-42.4kb)|GDF3(-20.69kb)|NANOG(-120.3kb)|NANOGNB(-96.12kb)|SLC2A14(-144.7kb)
21:35996817	21	35996817	T	?	9	8.573e-05	0.0007563	1.2898	1.2815	0.3137	14.43	1.639	1.639	1.153	1.014	1.102	1.262	0.6222	1.001	1.674	rs11088291	CLIC6(-44.87kb)|KCNE1(+112.2kb)|LINC00160(-99.29kb)|LOC100506385(-121.3kb)|RCAN1(+9.435kb)|RUNX1(-163.3kb)
5:4121368	5	4121368	A	?	9	8.629e-05	8.629e-05	0.6249	0.6249	0.8244	0	0.367	0.367	0.5064	0.4089	0.7508	0.7549	1.009	0.516	0.7844	rs17664513	.
1:108377115	1	108377115	A	?	9	8.631e-05	8.631e-05	0.4418	0.4418	0.833	0	0.1746	0.1746	0.3231	0.3966	0.8361	0.5516	0.0233	0.6422	0.5186	rs75303797	VAV3(0)|VAV3-AS1(-129.9kb)
13:73846446	13	73846446	T	?	9	8.632e-05	8.632e-05	0.8086	0.8086	0.7594	0	0.7224	0.7224	0.7887	0.9158	0.8117	0.6497	0.5785	0.9164	0.9106	rs9573149	KLF5(+194.8kb)
22:46917389	22	46917389	A	?	8	8.634e-05	8.634e-05	0.6787	0.6787	0.5517	0	0.6118	0.6118	0.6704	0.3869	0.9633	0.6861	NA	0.385	0.7456	rs5768883	CELSR1(0)|CERK(-162.9kb)|GRAMD4(-105.3kb)|GTSE1(+190.7kb)|TRMU(+164.2kb)
2:133256610	2	133256610	C	?	9	8.651e-05	8.651e-05	1.3941	1.3941	0.6746	0	2.891	2.891	1.537	1.383	1.333	1.067	0.7739	1.311	1.338	rs61260852	GPR39(0)|LYPD1(-145.7kb)|NCKAP5(-172.8kb)
10:49696945	10	49696945	C	?	9	8.657e-05	0.01783	1.5004	1.4649	0.0469	49.05	3.162	3.162	1.33	0.4908	1.279	1.688	0.3512	1.131	1.922	rs79948838	ARHGAP22(0)|MAPK8(+49.54kb)|WDFY4(-196.6kb)
11:106799439	11	106799439	T	?	9	8.709e-05	8.709e-05	0.7693	0.7693	0.6716	0	0.4691	0.4691	0.8309	0.7501	0.7592	0.9352	1.096	0.7358	0.7558	rs11211979	GUCY1A2(0)
12:76712538	12	76712538	G	?	9	8.715e-05	0.00137	0.8076	0.7929	0.1753	30.4	0.4993	0.4993	0.7927	1.025	0.6808	0.9906	1.359	0.67	0.8714	rs4761419	BBS10(-25.73kb)|OSBPL8(-33.04kb)
11:106909049	11	106909049	C	?	9	8.753e-05	0.0004955	0.7939	0.7704	0.2082	26.51	0.5327	0.5327	1.015	0.5976	0.7942	0.7448	0.5568	0.8843	0.7589	rs2513112	GUCY1A2(+19.88kb)
11:106913920	11	106913920	A	?	9	8.774e-05	0.0006605	0.794	0.7703	0.1855	29.17	0.5415	0.5415	1.031	0.6133	0.7992	0.7751	0.5441	0.8644	0.7327	rs2465764	GUCY1A2(+24.75kb)
4:93367437	4	93367437	C	?	9	8.817e-05	0.003496	1.3131	1.3914	0.0382	50.93	2.835	2.835	1.368	1.721	1.298	0.9267	0.4737	1.575	1.192	rs62312218	GRID2(0)
4:93368081	4	93368081	A	?	9	8.817e-05	0.003496	1.3131	1.3914	0.0382	50.93	2.835	2.835	1.368	1.721	1.298	0.9267	0.4737	1.575	1.192	rs62312220	GRID2(0)
4:93364911	4	93364911	T	?	9	8.828e-05	0.003497	1.3131	1.3914	0.0383	50.93	2.835	2.835	1.368	1.721	1.298	0.9267	0.4737	1.575	1.192	rs62312210	GRID2(0)
4:93364920	4	93364920	C	?	9	8.828e-05	0.003497	1.3131	1.3914	0.0383	50.93	2.835	2.835	1.368	1.721	1.298	0.9267	0.4737	1.575	1.192	rs62312211	GRID2(0)
4:93365020	4	93365020	C	?	9	8.828e-05	0.003497	1.3131	1.3914	0.0383	50.93	2.835	2.835	1.368	1.721	1.298	0.9267	0.4737	1.575	1.192	rs62312212	GRID2(0)
4:93367232	4	93367232	A	?	9	8.828e-05	0.003497	1.3131	1.3914	0.0383	50.93	2.835	2.835	1.368	1.721	1.298	0.9267	0.4737	1.575	1.192	rs62312215	GRID2(0)
4:93367286	4	93367286	T	?	9	8.828e-05	0.003497	1.3131	1.3914	0.0383	50.93	2.835	2.835	1.368	1.721	1.298	0.9267	0.4737	1.575	1.192	rs62312216	GRID2(0)
4:93367396	4	93367396	T	?	9	8.828e-05	0.003497	1.3131	1.3914	0.0383	50.93	2.835	2.835	1.368	1.721	1.298	0.9267	0.4737	1.575	1.192	rs62312217	GRID2(0)
4:93368844	4	93368844	G	?	9	8.828e-05	0.003497	1.3131	1.3914	0.0383	50.93	2.835	2.835	1.368	1.721	1.298	0.9267	0.4737	1.575	1.192	rs62312221	GRID2(0)
4:93370610	4	93370610	G	?	9	8.828e-05	0.003497	1.3131	1.3914	0.0383	50.93	2.835	2.835	1.368	1.721	1.298	0.9267	0.4737	1.575	1.192	rs78433014	GRID2(0)
4:93372969	4	93372969	G	?	9	8.828e-05	0.003497	1.3131	1.3914	0.0383	50.93	2.835	2.835	1.368	1.721	1.298	0.9267	0.4737	1.575	1.192	rs4629410	GRID2(0)
4:93375158	4	93375158	C	?	9	8.828e-05	0.003497	1.3131	1.3914	0.0383	50.93	2.835	2.835	1.368	1.721	1.298	0.9267	0.4737	1.575	1.192	rs62312224	GRID2(0)
6:78872898	6	78872898	A	?	9	8.834e-05	8.834e-05	0.8046	0.8046	0.8714	0	0.8842	0.8842	0.8181	0.6169	0.8439	0.7961	0.3717	0.7439	0.8269	rs4560604	.
16:27450701	16	27450701	C	?	9	8.837e-05	8.837e-05	0.8012	0.8012	0.6437	0	0.7265	0.7265	0.903	0.8931	0.7781	0.9864	0.7289	0.5905	0.7198	rs3093347	FLJ21408(+148.9kb)|GTF3C1(-21.23kb)|IL4R(+74.6kb)|IL21R(0)|IL21R-AS1(-8.289kb)|KIAA0556(-110.8kb)|NSMCE1(+170.6kb)
1:6197092	1	6197092	G	?	9	8.838e-05	0.0006922	1.243	1.307	0.1212	37.19	2.116	2.116	1.128	1.622	1.289	1.125	0.755	1.926	1.142	rs17436753	ACOT7(-127.2kb)|CHD5(0)|GPR153(-110.3kb)|HES3(-107.2kb)|ICMT(-84.16kb)|KCNAB2(+35.84kb)|LINC00337(-99.21kb)|NPHP4(+144.6kb)|RNF207(-69.1kb)|RPL22(-47.99kb)
3:145139661	3	145139661	A	?	9	8.851e-05	0.01287	1.3035	1.4052	0.0018	67.44	3.931	3.931	1.096	1.155	1.707	1.226	0.3627	0.8705	1.28	rs3843357	.
19:5517405	19	5517405	A	?	7	8.854e-05	0.0009239	0.725	0.6777	0.1341	38.66	0.4363	0.4363	0.9709	0.4832	0.7438	0.5047	NA	NA	0.7342	rs380332	C19orf70(-161kb)|HSD11B1L(-163.4kb)|LONP1(-174.4kb)|PTPRS(+176.6kb)|RPL36(-172.9kb)|SAFB(-105.6kb)|SAFB2(-69.6kb)|TINCR(-40.77kb)|ZNRF4(+60.54kb)
2:200739370	2	200739370	A	?	9	8.868e-05	8.868e-05	0.6258	0.6258	0.6378	0	0.186	0.186	0.7693	0.5778	0.4659	0.4395	0.5592	1.127	0.6213	rs74450459	C2orf47(-80.67kb)|C2orf69(-36.61kb)|FTCDNL1(+23.47kb)|TYW5(-54.26kb)
4:115331024	4	115331024	A	?	9	8.894e-05	8.894e-05	0.5761	0.5761	0.4702	0	0.3293	0.3293	0.7469	0.4787	0.8993	0.2903	0.8767	1.732	0.5329	rs113694807	UGT8(-188.6kb)
2:133253928	2	133253928	A	?	9	8.898e-05	8.898e-05	1.3752	1.3752	0.7309	0	2.658	2.658	1.37	1.265	1.405	1.058	0.84	1.526	1.36	rs10803532	GPR39(0)|LYPD1(-148.4kb)|NCKAP5(-175.4kb)
4:7490764	4	7490764	T	?	9	8.908e-05	8.908e-05	0.806	0.806	0.7877	0	0.6029	0.6029	0.858	0.9443	0.6913	0.7734	0.6577	0.8295	0.872	rs4096	MIR4274(+28.92kb)|MIR4798(+178.5kb)|PSAPL1(+54.06kb)|SORCS2(0)
2:159228591	2	159228591	G	?	9	8.912e-05	8.912e-05	1.2546	1.2546	0.6607	0	1.825	1.825	1.111	1.768	1.151	1.313	1.17	1.167	1.266	rs7564839	CCDC148(0)|CCDC148-AS1(+135.9kb)|PKP4(-84.88kb)
15:40000954	15	40000954	C	?	9	8.916e-05	8.916e-05	1.4205	1.4205	0.5681	0	1.508	1.508	1.531	1.019	1.22	1.195	2.567	3.896	1.414	rs28625134	FSIP1(0)|GPR176(-90.27kb)|THBS1(+111.3kb)
11:34122057	11	34122057	G	?	7	8.936e-05	8.936e-05	3.3099	3.3099	0.6315	0	16.5	16.5	10.37	2.584	NA	2.076	NA	4.024	2.583	rs11032512	ABTB2(-50.48kb)|CAPRIN1(0)|NAT10(-5.053kb)
3:123518388	3	123518388	C	?	9	8.936e-05	0.007318	1.2562	1.2806	0.0497	48.47	1.807	1.807	1.055	1.18	1.876	0.9463	1.02	1.006	1.343	rs6783605	CCDC14(-113.9kb)|MYLK(0)|MYLK-AS1(+168.7kb)|ROPN1(-169.5kb)
2:133262843	2	133262843	C	?	9	8.941e-05	8.941e-05	1.3735	1.3735	0.8048	0	2.484	2.484	1.406	1.388	1.363	1.058	0.8396	1.526	1.34	rs62167452	GPR39(0)|LYPD1(-139.5kb)|NCKAP5(-166.5kb)
4:7489746	4	7489746	A	?	9	8.941e-05	8.941e-05	0.8063	0.8063	0.8285	0	0.6198	0.6198	0.8535	0.9443	0.6913	0.7734	0.6577	0.8295	0.8718	rs10937825	MIR4274(+27.9kb)|MIR4798(+177.5kb)|PSAPL1(+53.05kb)|SORCS2(0)
4:93359846	4	93359846	A	?	9	8.964e-05	0.003521	1.3128	1.3913	0.0381	50.96	2.835	2.835	1.368	1.721	1.298	0.9267	0.4737	1.575	1.191	rs80356235	GRID2(0)
4:93360062	4	93360062	C	?	9	8.964e-05	0.003521	1.3128	1.3913	0.0381	50.96	2.835	2.835	1.368	1.721	1.298	0.9267	0.4737	1.575	1.191	rs62312197	GRID2(0)
1:118139053	1	118139053	C	?	9	8.975e-05	0.0002403	1.2475	1.2554	0.3542	9.72	1.657	1.657	1.195	1.599	0.8963	1.292	1.916	1.59	1.239	rs320370	FAM46C(-9.55kb)|MAN1A2(+70.73kb)
13:73845820	13	73845820	A	?	9	9.021e-05	9.021e-05	0.8093	0.8093	0.7102	0	0.7224	0.7224	0.7831	1.017	0.8095	0.6497	0.5785	0.9164	0.9065	rs985740	KLF5(+194.1kb)
12:76719624	12	76719624	C	?	9	9.057e-05	0.001284	0.8077	0.7951	0.193	28.29	0.4993	0.4993	0.7927	1.025	0.6808	0.9906	1.359	0.6998	0.8663	rs11108459	BBS10(-18.64kb)|OSBPL8(-25.95kb)
3:59334320	3	59334320	A	?	9	9.064e-05	9.064e-05	0.7302	0.7302	0.759	0	0.6087	0.6087	0.7817	0.361	0.8615	0.7945	1.001	0.5314	0.7304	rs57821000	.
2:200984032	2	200984032	C	?	9	9.105e-05	9.105e-05	0.6336	0.6336	0.7947	0	0.186	0.186	0.6635	0.4124	0.5032	0.6552	0.5614	1.135	0.6513	rs74868518	C2orf47(+155.2kb)|C2orf69(+191kb)|SPATS2L(-186.6kb)|TYW5(+163.6kb)
19:44120569	19	44120569	T	?	9	9.12e-05	0.000989	1.2616	1.2684	0.2597	20.6	1.411	1.411	1.139	1.314	1.262	1.024	0.6023	2.375	1.384	rs35346236	CADM4(-5.952kb)|ETHE1(+89.17kb)|IRGC(-99.64kb)|IRGQ(+20.28kb)|KCNN4(-150.1kb)|LYPD3(+150.7kb)|LYPD5(-179.5kb)|PHLDB3(+111.6kb)|PINLYP(+34.31kb)|PLAUR(-29.68kb)|SMG9(-114.7kb)|SRRM5(+1.919kb)|TEX101(+197.8kb)|XRCC1(+40.84kb)|ZNF428(0)|ZNF575(+80.28kb)|ZNF576(+15.98kb)
15:42388314	15	42388314	T	?	9	9.14e-05	0.0005823	0.7537	0.7612	0.354	9.74	1.071	1.071	0.5965	0.5375	0.7269	0.9487	0.4936	1.079	0.7816	rs74011712	EHD4(+123.6kb)|GANC(-178.1kb)|MIR627(-103.5kb)|PLA2G4D(+1.562kb)|PLA2G4E(+45.41kb)|PLA2G4F(-45.02kb)|TMEM87A(-114.4kb)|VPS39(-62.58kb)
7:16411970	7	16411970	C	?	9	9.144e-05	9.144e-05	1.257	1.257	0.6909	0	1.32	1.32	1.229	1.45	1.159	1.076	2.743	0.9818	1.388	rs11976934	ISPD(0)|LOC100506025(+101.7kb)|LRRC72(-154.5kb)|SOSTDC1(-89.14kb)
14:33080265	14	33080265	G	?	9	9.145e-05	9.145e-05	1.261	1.261	0.7427	0	1.716	1.716	1.095	1.58	1.232	1.226	0.929	1.407	1.29	rs10782379	AKAP6(0)
8:29802727	8	29802727	T	?	9	9.153e-05	9.153e-05	1.3186	1.3186	0.4436	0	1.059	1.059	1.623	1.11	1.252	0.9994	3.138	1.709	1.303	rs10101117	FAM183CP(0)|LEPROTL1(-150.2kb)|LINC00589(+197.1kb)|MBOAT4(-186.5kb)|MIR548O2(-117.5kb)|MIR3148(-12.06kb)|TMEM66(-117.9kb)
2:159568215	2	159568215	C	?	9	9.16e-05	9.16e-05	2.1107	2.1107	0.7124	0	3.193	3.193	1.934	6.538	2.223	4.286	7.053	1.555	1.486	rs185959034	DAPL1(-83.61kb)|PKP4(+30.28kb)
8:18312150	8	18312150	G	?	9	9.163e-05	9.163e-05	1.2368	1.2368	0.8661	0	1.392	1.392	1.12	1.295	1.436	1.324	1.142	0.918	1.256	rs28608012	NAT2(+53.43kb)|PSD3(-72.66kb)
1:6195682	1	6195682	T	?	9	9.165e-05	0.0004727	1.2423	1.2864	0.198	27.7	1.949	1.949	1.147	1.622	1.349	1.113	0.755	1.856	1.128	rs9435079	ACOT7(-128.6kb)|CHD5(0)|GPR153(-111.7kb)|HES3(-108.6kb)|ICMT(-85.57kb)|KCNAB2(+34.43kb)|LINC00337(-100.6kb)|NPHP4(+143.1kb)|RNF207(-70.51kb)|RPL22(-49.4kb)
1:6195598	1	6195598	C	?	9	9.167e-05	0.000473	1.2423	1.2864	0.198	27.71	1.949	1.949	1.147	1.622	1.349	1.113	0.7548	1.856	1.128	rs9434673	ACOT7(-128.7kb)|CHD5(0)|GPR153(-111.8kb)|HES3(-108.7kb)|ICMT(-85.65kb)|KCNAB2(+34.34kb)|LINC00337(-100.7kb)|NPHP4(+143.1kb)|RNF207(-70.59kb)|RPL22(-49.48kb)
11:1664474	11	1664474	T	?	9	9.181e-05	9.181e-05	1.4637	1.4637	0.6896	0	1.209	1.209	1.592	3.576	1.895	1.541	0.5859	1.894	1.264	rs4752766	BRSK2(+180.6kb)|CTSD(-109.5kb)|DUSP8(+71.32kb)|FAM99A(-22.35kb)|FAM99B(-40.02kb)|IFITM10(-89.16kb)|KRTAP5-1(+57.96kb)|KRTAP5-2(+44.95kb)|KRTAP5-3(+34.78kb)|KRTAP5-4(+21.11kb)|KRTAP5-5(+12.32kb)|KRTAP5-6(-53.95kb)|KRTAP5-AS1(+44.06kb)|MOB2(0)|SYT8(-191.2kb)|TNNI2(-195.8kb)
11:1665537	11	1665537	T	?	9	9.183e-05	9.183e-05	1.4637	1.4637	0.6895	0	1.209	1.209	1.592	3.576	1.895	1.541	0.5858	1.894	1.264	rs2334490	BRSK2(+181.6kb)|CTSD(-108.4kb)|DUSP8(+72.39kb)|FAM99A(-21.29kb)|FAM99B(-38.96kb)|IFITM10(-88.1kb)|KRTAP5-1(+59.02kb)|KRTAP5-2(+46.01kb)|KRTAP5-3(+35.84kb)|KRTAP5-4(+22.17kb)|KRTAP5-5(+13.38kb)|KRTAP5-6(-52.89kb)|KRTAP5-AS1(+45.12kb)|MOB2(0)|SYT8(-190.1kb)|TNNI2(-194.7kb)
11:106797881	11	106797881	G	?	9	9.22e-05	9.22e-05	0.77	0.77	0.6723	0	0.4691	0.4691	0.8309	0.7501	0.7592	0.9352	1.096	0.7358	0.7579	rs11211977	GUCY1A2(0)
1:234142964	1	234142964	A	?	6	9.268e-05	0.01448	3.0517	2.8447	0.1232	42.3	0.6805	0.6805	5.195	NA	NA	1.355	41	NA	3.757	rs139167555	SLC35F3(0)
15:67242162	15	67242162	G	?	9	9.273e-05	9.273e-05	0.6846	0.6846	0.6563	0	0.6251	0.6251	0.7639	1.215	0.5275	0.7289	0.3681	1.286	0.5982	rs56183531	SMAD3(-116kb)|SMAD6(+167.8kb)
22:34140284	22	34140284	G	?	9	9.282e-05	9.282e-05	1.738	1.738	0.9121	0	1.133	1.133	1.713	5.191	1.808	2.087	2.246	1.83	1.521	rs28587018	LARGE(0)|LARGE-AS1(0)
10:126901930	10	126901930	T	?	9	9.285e-05	9.285e-05	1.402	1.402	0.9256	0	1.323	1.323	1.483	1.808	1.469	1.423	3.132	0.9198	1.331	rs10128157	CTBP2(+52.31kb)|MIR4296(+180.5kb)
2:200803931	2	200803931	T	?	9	9.305e-05	9.305e-05	0.6313	0.6313	0.6252	0	0.1463	0.1463	0.7488	0.4616	0.4732	0.5387	0.4034	1.027	0.6506	rs192918495	C2orf47(-16.11kb)|C2orf69(+10.94kb)|FTCDNL1(+88.04kb)|TYW5(0)
4:11418005	4	11418005	T	?	9	9.338e-05	0.002345	1.6842	1.6562	0.1968	27.85	2.813	2.813	1.972	1.566	1.528	0.8015	0.1755	1.973	1.812	rs1072192	HS3ST1(0)|MIR572(+47.46kb)
4:11418257	4	11418257	A	?	9	9.338e-05	0.002345	1.6842	1.6562	0.1968	27.85	2.813	2.813	1.972	1.566	1.528	0.8015	0.1755	1.973	1.812	rs76957432	HS3ST1(0)|MIR572(+47.71kb)
4:11418534	4	11418534	T	?	9	9.338e-05	0.002345	1.6842	1.6562	0.1968	27.85	2.813	2.813	1.972	1.566	1.528	0.8015	0.1755	1.973	1.812	rs16881554	HS3ST1(0)|MIR572(+47.99kb)
5:29533895	5	29533895	A	?	9	9.345e-05	0.0003155	0.7804	0.7714	0.3243	13.21	0.4848	0.4848	0.7157	0.6372	0.8875	0.6583	0.9693	0.8501	0.9553	rs35402160	.
2:19796626	2	19796626	A	?	9	9.374e-05	0.04539	1.8231	1.6515	0.0252	54.33	3.056	3.056	3.829	0.8313	1.308	2.012	0.0517	0.889	1.534	rs79987696	.
16:5597000	16	5597000	T	?	9	9.394e-05	0.001065	1.2753	1.2908	0.2356	23.36	1.738	1.738	1.129	0.6388	1.371	1.628	1.001	1.548	1.254	rs1601582	.
11:76501557	11	76501557	G	?	8	9.396e-05	9.396e-05	0.7787	0.7787	0.9594	0	0.703	0.703	0.8513	0.819	0.7161	0.7522	0.47	NA	0.7891	rs1837679	ACER3(-70.36kb)|GUCY2EP(+68.72kb)|LRRC32(+119.8kb)|TSKU(0)
11:106770639	11	106770639	T	?	9	9.422e-05	9.422e-05	0.7764	0.7764	0.7271	0	0.5671	0.5671	0.8168	0.6926	0.7567	1.041	1.099	0.8442	0.7234	rs12223216	GUCY1A2(0)
20:60992402	20	60992402	A	?	7	9.437e-05	9.437e-05	0.8053	0.8053	0.7196	0	0.6821	0.6821	0.899	0.8138	0.8868	0.6771	NA	NA	0.7881	rs6061521	ADRM1(+108.5kb)|C20orf166(-155.3kb)|C20orf166-AS1(-149kb)|CABLES2(+10.06kb)|GATA5(-46.15kb)|HRH3(+197.1kb)|LAMA5(+50.03kb)|MIR1-1(-159.1kb)|MIR133A2(-169.7kb)|MIR4758(+84.79kb)|OSBPL2(+121.1kb)|RBBP8NL(0)|RPS21(+28.83kb)
2:159137557	2	159137557	C	?	9	9.441e-05	9.441e-05	1.2819	1.2819	0.8779	0	1.605	1.605	1.163	1.396	1.161	1.492	2.069	1.103	1.275	rs116466468	CCDC148(0)|CCDC148-AS1(+44.88kb)|PKP4(-175.9kb)|UPP2(+144.9kb)
6:8181177	6	8181177	G	?	9	9.452e-05	0.004738	1.2433	1.2622	0.0852	42.32	2.377	2.377	1.177	1.018	1.02	1.312	0.7018	1.093	1.291	rs9502688	BLOC1S5(+116.5kb)|BLOC1S5-TXNDC5(+116.5kb)|EEF1E1(+78.35kb)|EEF1E1-MUTED(+78.35kb)|PIP5K1P1(+190.6kb)|SCARNA27(+94.41kb)
17:14944672	17	14944672	A	?	9	9.453e-05	9.453e-05	0.7318	0.7318	0.8212	0	1.105	1.105	0.6935	0.7297	0.5585	0.7167	1.383	0.723	0.7405	rs112421119	CDRT7(+9.398kb)|CDRT8(-63.63kb)|PMP22(-188.4kb)
6:8247159	6	8247159	C	?	9	9.461e-05	0.00568	1.2678	1.3401	0.016	57.42	3.296	3.296	1.144	1.012	1.298	1.508	0.7267	1.067	1.15	rs9379177	BLOC1S5(+182.5kb)|BLOC1S5-TXNDC5(+182.5kb)|EEF1E1(+144.3kb)|EEF1E1-MUTED(+144.3kb)|LOC100506207(-188.7kb)|SCARNA27(+160.4kb)|SLC35B3(-166.1kb)
14:79346136	14	79346136	G	?	9	9.489e-05	9.489e-05	0.5903	0.5903	0.8418	0	0.3315	0.3315	0.5706	0.3627	0.7015	0.4505	1.102	2.153	0.7027	rs2370876	NRXN3(0)
4:160239445	4	160239445	C	?	9	9.536e-05	0.001806	0.8049	0.7729	0.0816	42.89	0.6718	0.6718	0.7839	0.6735	0.7092	1.086	0.8343	0.4216	0.9116	rs6816396	MIR3688-1(+189.4kb)|MIR3688-2(+189.4kb)|RAPGEF2(0)
2:159110158	2	159110158	A	?	9	9.543e-05	9.543e-05	1.2979	1.2979	0.6984	0	2.167	2.167	1.277	1.557	1.074	1.308	2.043	1.335	1.224	rs1402869	CCDC148(0)|CCDC148-AS1(+17.48kb)|UPP2(+117.5kb)
8:18312365	8	18312365	T	?	9	9.56e-05	9.56e-05	1.236	1.236	0.8953	0	1.392	1.392	1.128	1.295	1.413	1.314	1.142	0.918	1.256	rs28776800	NAT2(+53.64kb)|PSD3(-72.45kb)
14:72561199	14	72561199	G	?	9	9.564e-05	9.564e-05	1.3142	1.3142	0.8962	0	1.193	1.193	1.284	1.532	1.396	1.088	1.194	2.189	1.34	rs56220001	RGS6(0)
1:120415361	1	120415361	G	?	9	9.578e-05	9.578e-05	0.6416	0.6416	0.7626	0	0.4723	0.4723	0.6135	0.6269	0.5791	0.817	6.003	0.5897	0.6464	rs11808443	ADAM30(-20.79kb)|HMGCS2(+103.8kb)|NBPF7(+27.86kb)|NOTCH2(-38.81kb)|PHGDH(+128.5kb)|REG4(+61.16kb)
3:64702275	3	64702275	G	?	9	9.578e-05	0.002384	0.7978	0.797	0.1987	27.63	0.6179	0.6179	0.6691	0.8494	1.123	0.9539	0.4902	0.7212	0.8455	rs4616635	ADAMTS9(+28.91kb)|ADAMTS9-AS2(0)|MIR548A2(-3.407kb)
9:669852	9	669852	G	?	9	9.578e-05	0.002987	1.2423	1.2568	0.1312	35.88	1.041	1.041	1.273	1.332	1.548	0.903	2.262	1.999	1.189	rs9407351	DMRT1(-171.8kb)|KANK1(0)
20:59332313	20	59332313	G	?	8	9.582e-05	9.582e-05	2.3431	2.3431	0.9002	0	2.342	2.342	1.951	0.5047	2.933	2.54	NA	1.918	2.994	rs1202050	.
13:98659156	13	98659156	G	?	7	9.586e-05	9.586e-05	0.7829	0.7829	0.4258	0	0.5703	0.5703	0.8988	0.5873	NA	NA	0.6157	0.7428	0.8031	rs3858774	FARP1(-136.3kb)|IPO5(0)|RNF113B(-168.9kb)
11:106740407	11	106740407	C	?	9	9.605e-05	9.605e-05	0.7751	0.7751	0.8971	0	0.575	0.575	0.8128	0.7072	0.7576	0.9478	1.102	0.84	0.7437	rs7116508	GUCY1A2(0)
2:79140963	2	79140963	A	?	9	9.617e-05	0.0003745	1.2532	1.2639	0.3205	13.64	1.878	1.878	1.05	0.8887	1.14	1.323	1.532	1.64	1.337	rs4853423	REG1B(-171.2kb)|REG3G(-111.8kb)
3:76659574	3	76659574	A	?	7	9.655e-05	9.655e-05	2.2745	2.2745	0.6454	0	NA	NA	3.11	0	2.757	3.331	0.2737	2.857	1.786	rs73114447	.
2:54797113	2	54797113	A	?	9	9.657e-05	9.657e-05	1.2976	1.2976	0.458	0	2.511	2.511	1.284	1.087	1.204	1.332	1.692	1.992	1.176	rs74884762	EML6(-155kb)|RPL23AP32(+40.14kb)|SPTBN1(0)
3:56724271	3	56724271	T	?	6	9.659e-05	0.1045	2.3676	1.8338	0.0331	58.78	NA	NA	2.091	1.038	1.893	0.3588	NA	1.689	5.468	rs149914319	ARHGEF3(-37.17kb)|CCDC66(+68.42kb)|FAM208A(+7.136kb)
1:187083454	1	187083454	C	?	9	9.68e-05	9.68e-05	0.8019	0.8019	0.7617	0	0.6015	0.6015	0.7901	0.9969	0.9535	0.7374	0.7634	0.6759	0.848	rs230617	PLA2G4A(+125.3kb)
2:9550880	2	9550880	C	?	9	9.707e-05	0.006323	0.7708	0.7898	0.2093	26.38	0.5848	0.5848	0.7738	1.013	1.183	0.7966	0.6184	1.083	0.6377	rs11685612	ADAM17(-78.53kb)|ASAP2(+5.068kb)|CPSF3(-12.78kb)|IAH1(-63.79kb)|ITGB1BP1(0)|YWHAQ(-173.2kb)
4:93428415	4	93428415	C	?	9	9.707e-05	0.0005301	1.2672	1.272	0.3172	14.02	1.94	1.94	1.277	1.697	1.328	0.9204	0.8825	1.048	1.282	rs7659338	GRID2(0)
7:16439651	7	16439651	G	?	9	9.707e-05	9.707e-05	1.2622	1.2622	0.6332	0	1.694	1.694	1.29	1.216	1.161	1.07	3.133	1.042	1.301	rs6948660	ANKMY2(-199.7kb)|ISPD(0)|LOC100506025(+129.4kb)|LRRC72(-126.9kb)|SOSTDC1(-61.45kb)
7:16439891	7	16439891	A	?	9	9.707e-05	9.707e-05	1.2622	1.2622	0.6332	0	1.694	1.694	1.29	1.216	1.161	1.07	3.133	1.042	1.301	rs6949112	ANKMY2(-199.5kb)|ISPD(0)|LOC100506025(+129.7kb)|LRRC72(-126.6kb)|SOSTDC1(-61.21kb)
5:29514559	5	29514559	G	?	9	9.711e-05	0.0004359	0.7847	0.7743	0.2929	16.81	0.5575	0.5575	0.6966	0.6064	0.8288	0.6756	0.9431	0.9084	1.002	rs62354923	.
1:202374181	1	202374181	C	?	9	9.715e-05	9.715e-05	0.7193	0.7193	0.8196	0	0.4844	0.4844	0.7857	0.6797	0.8442	0.6737	0.273	0.8258	0.7039	rs1852643	LGR6(+85.29kb)|PPP1R12B(0)|SYT2(-185.5kb)|UBE2T(+63.09kb)
16:82761368	16	82761368	C	?	9	9.752e-05	9.752e-05	0.6494	0.6494	0.8116	0	0.5647	0.5647	0.5305	0.4611	0.6761	1.088	0.6603	0.6918	0.7119	rs76789636	CDH13(0)
14:33089282	14	33089282	G	?	9	9.755e-05	9.755e-05	1.2608	1.2608	0.6388	0	1.762	1.762	1.1	1.58	1.247	1.25	0.7105	1.347	1.277	rs12433067	AKAP6(0)
6:78893438	6	78893438	G	?	9	9.781e-05	9.781e-05	0.8068	0.8068	0.9419	0	0.8783	0.8783	0.8564	0.6812	0.7418	0.8518	0.5699	0.6193	0.8201	rs7749209	.
4:92200866	4	92200866	T	?	9	9.8e-05	0.0006312	1.4118	1.4019	0.3349	11.98	0.973	0.973	1.671	1.97	0.9317	1.946	2.762	0.9996	1.336	rs10003471	CCSER1(0)
19:56083577	19	56083577	A	?	8	9.804e-05	0.0004397	0.8078	0.7984	0.2841	18.43	0.4918	0.4918	0.8999	0.7551	0.9356	0.8304	NA	0.7891	0.7897	rs4801428	CCDC106(-75.38kb)|EPN1(-103kb)|FIZ1(-19.16kb)|ISOC2(+110.5kb)|NAT14(+84.64kb)|NLRP9(-136.2kb)|RFPL4A(-186.9kb)|RFPL4AL1(-199.6kb)|RPL28(+180.1kb)|SBK2(+35.14kb)|SGK110(+26.67kb)|SHISA7(+129.3kb)|SSC5D(+53.11kb)|TMEM190(+194kb)|TMEM238(+188kb)|U2AF2(-81.84kb)|UBE2S(+164.3kb)|ZNF524(-28.15kb)|ZNF579(-5.313kb)|ZNF580(-68.81kb)|ZNF581(-71.41kb)|ZNF628(+87.72kb)|ZNF784(-48.53kb)|ZNF865(-41.38kb)
7:36788246	7	36788246	G	?	8	9.807e-05	9.807e-05	0.5858	0.5858	0.6936	0	0.2864	0.2864	0.5854	0.8614	0.4266	0.35	NA	0.668	0.7758	rs77993941	AOAH(+24.09kb)|AOAH-IT1(+148.5kb)|ELMO1(-104.3kb)|MIR1200(-170.7kb)
9:81768060	9	81768060	C	?	9	9.819e-05	0.001089	1.2439	1.2558	0.2419	22.64	1.519	1.519	1.216	1.958	1.05	1.084	0.4862	1.846	1.258	rs11138102	.
18:11032975	18	11032975	A	?	9	9.83e-05	9.83e-05	1.2792	1.2792	0.9637	0	1.484	1.484	1.103	1.196	1.358	1.372	1.597	1.315	1.323	rs2584738	PIEZO2(0)
11:106798550	11	106798550	G	?	9	9.836e-05	9.836e-05	0.7709	0.7709	0.7188	0	0.4827	0.4827	0.8309	0.7501	0.7592	0.9352	1.096	0.7358	0.7565	rs140008704	GUCY1A2(0)
1:216287038	1	216287038	C	?	9	9.842e-05	9.842e-05	0.8126	0.8126	0.9514	0	0.8136	0.8136	0.7287	0.8014	0.8704	0.9251	0.5817	0.8475	0.8304	rs301730	USH2A(0)
19:56065534	19	56065534	C	?	9	9.853e-05	9.853e-05	1.2508	1.2508	0.7906	0	1.629	1.629	1.303	1.02	1.251	1.378	0.7308	0.9969	1.188	rs186329	CCDC106(-93.42kb)|COX6B2(+199.4kb)|EPN1(-121kb)|FAM71E2(+190.9kb)|FIZ1(-37.2kb)|IL11(+183.7kb)|ISOC2(+92.48kb)|NAT14(+66.6kb)|NLRP9(-154.3kb)|RPL28(+162.1kb)|SBK2(+17.1kb)|SGK110(+8.625kb)|SHISA7(+111.3kb)|SSC5D(+35.07kb)|TMEM190(+175.9kb)|TMEM238(+169.9kb)|U2AF2(-99.88kb)|UBE2S(+146.2kb)|ZNF524(-46.2kb)|ZNF579(-23.36kb)|ZNF580(-86.86kb)|ZNF581(-89.45kb)|ZNF628(+69.68kb)|ZNF784(-66.57kb)|ZNF865(-…
14:42714188	14	42714188	A	?	9	9.856e-05	9.856e-05	1.2306	1.2306	0.7844	0	1.583	1.583	1.34	1.23	1.253	1.177	1.648	1.11	1.084	rs61636540	.
1:6196517	1	6196517	A	?	9	9.878e-05	0.0005154	1.241	1.2871	0.1897	28.68	1.949	1.949	1.139	1.622	1.35	1.113	0.755	1.863	1.13	rs7513548	ACOT7(-127.8kb)|CHD5(0)|GPR153(-110.9kb)|HES3(-107.7kb)|ICMT(-84.74kb)|KCNAB2(+35.26kb)|LINC00337(-99.78kb)|NPHP4(+144kb)|RNF207(-69.67kb)|RPL22(-48.56kb)
4:115326102	4	115326102	G	?	9	9.879e-05	9.879e-05	0.5776	0.5776	0.5286	0	0.3293	0.3293	0.7214	0.4787	0.9325	0.3001	0.6109	1.732	0.5562	rs74824845	UGT8(-193.5kb)
1:6197107	1	6197107	A	?	9	9.887e-05	0.0007431	1.2413	1.3048	0.1222	37.06	2.116	2.116	1.128	1.622	1.275	1.125	0.755	1.926	1.142	rs58155258	ACOT7(-127.2kb)|CHD5(0)|GPR153(-110.3kb)|HES3(-107.1kb)|ICMT(-84.14kb)|KCNAB2(+35.85kb)|LINC00337(-99.19kb)|NPHP4(+144.6kb)|RNF207(-69.08kb)|RPL22(-47.97kb)
14:30339554	14	30339554	A	?	9	9.901e-05	0.0001417	1.4031	1.4024	0.4163	2.17	2.221	2.221	1.097	1.905	1.217	1.151	2.327	1.15	1.767	rs8021375	MIR548AI(+164.9kb)|PRKD1(0)
11:106738048	11	106738048	T	?	9	9.904e-05	9.904e-05	0.7757	0.7757	0.8884	0	0.575	0.575	0.8188	0.7072	0.7576	0.9567	1.102	0.8168	0.7422	rs11211952	GUCY1A2(0)
4:115325701	4	115325701	A	?	9	9.943e-05	9.943e-05	0.5777	0.5777	0.5286	0	0.3293	0.3293	0.7214	0.4787	0.9325	0.3001	0.6109	1.732	0.5564	rs74970072	UGT8(-193.9kb)
10:36662893	10	36662893	G	?	7	9.945e-05	9.945e-05	2.6434	2.6434	0.9447	0	1.785	1.785	3.065	0	NA	3.001	41.02	NA	2.834	rs79198924	.
16:5588689	16	5588689	T	?	9	9.992e-05	0.006769	1.2756	1.3021	0.0632	45.93	1.937	1.937	1.131	0.5243	1.423	1.661	0.9928	1.468	1.219	rs4602043	.
