# Supplementary material for: Multiomics integrative analysis identifies APOE allele-specific blood biomarkers associated to Alzheimer’s disease etiopathogenesis
Source: Aging (Albany NY). 2021 Apr 12;13(7):9277–329. doi: 10.18632/aging.202950 (PMC8064208; doi:10.18632/aging.202950)
Supplement: Supplementary Table 14 [file aging-13-202950-s016.xlsx]

## Sheet: Sheet1
Supplementary Table 14. APOE and sex stratified analysis: APOE4 females meta-analysis results (p<10-4).
SNP	CHR	BP	A1	A2	N	P	P.R.	OR	OR.R.	Q	I	F0	F1	F2	F3	F4	F5	F6	F7	F8	RS	ANNOT
19:45411941	19	45411941	T	?	7	2.305e-21	2.305e-21	0.2521	0.2521	0.8869	0	0.263	0.263	0.2206	0.3477	NA	0.3182	NA	0.4764	0.1866	rs429358	APOC1(-5.979kb)|APOC1P1(-18.12kb)|APOC2(-37.3kb)|APOC4(-33.55kb)|APOC4-APOC2(-33.55kb)|APOE(0)|BCAM(+87.26kb)|BCL3(+148.6kb)|CBLC(+108kb)|CEACAM16(+198kb)|CLASRP(-130.4kb)|CLPTM1(-45.9kb)|GEMIN7(-170.6kb)|PPP1R37(-184.5kb)|PVRL2(+19.46kb)|RELB(-92.76kb)|TOMM40(+4.995kb)|ZNF296(-162.8kb)
19:45418790	19	45418790	T	?	7	2.694e-20	2.501e-10	0.2726	0.293	0.156	35.68	0.332	0.332	0.2017	0.3905	NA	0.2303	NA	3.687	0.3006	rs5117	APOC1(0)|APOC1P1(-11.27kb)|APOC2(-30.45kb)|APOC4(-26.7kb)|APOC4-APOC2(-26.7kb)|APOE(+6.14kb)|BCAM(+94.11kb)|BCL3(+155.5kb)|CBLC(+114.9kb)|CLASRP(-123.5kb)|CLPTM1(-39.05kb)|GEMIN7(-163.7kb)|PPP1R37(-177.6kb)|PVRL2(+26.3kb)|RELB(-85.92kb)|TOMM40(+11.84kb)|ZNF296(-156kb)
19:45396665	19	45396665	G	?	7	6.66e-17	6.66e-17	0.3748	0.3748	0.6209	0	0.288	0.288	0.3282	0.5282	NA	0.3894	NA	1.436	0.3769	rs59007384	APOC1(-21.26kb)|APOC1P1(-33.39kb)|APOC2(-52.57kb)|APOC4(-48.83kb)|APOC4-APOC2(-48.83kb)|APOE(-12.37kb)|BCAM(+71.99kb)|BCL3(+133.4kb)|CBLC(+92.76kb)|CEACAM16(+182.7kb)|CLASRP(-145.6kb)|CLPTM1(-61.18kb)|GEMIN7(-185.9kb)|PPP1R37(-199.8kb)|PVRL2(+4.18kb)|RELB(-108kb)|TOMM40(0)|ZNF296(-178.1kb)
19:45392254	19	45392254	C	?	7	2.114e-14	2.114e-14	0.4395	0.4395	0.8479	0	0.4665	0.4665	0.3656	0.5945	NA	0.51	NA	0.8559	0.4112	rs6857	APOC1(-25.67kb)|APOC1P1(-37.8kb)|APOC2(-56.98kb)|APOC4(-53.24kb)|APOC4-APOC2(-53.24kb)|APOE(-16.78kb)|BCAM(+67.58kb)|BCL3(+129kb)|CBLC(+88.35kb)|CEACAM16(+178.3kb)|CLASRP(-150kb)|CLPTM1(-65.59kb)|GEMIN7(-190.3kb)|PVRL2(0)|RELB(-112.5kb)|TOMM40(-2.222kb)|ZNF296(-182.5kb)
19:45396219	19	45396219	C	?	7	8.861e-14	8.861e-14	0.4275	0.4275	0.882	0	0.4603	0.4603	0.4023	0.5597	NA	0.4199	NA	1.258	0.3853	rs157582	APOC1(-21.7kb)|APOC1P1(-33.84kb)|APOC2(-53.02kb)|APOC4(-49.28kb)|APOC4-APOC2(-49.28kb)|APOE(-12.82kb)|BCAM(+71.54kb)|BCL3(+132.9kb)|CBLC(+92.32kb)|CEACAM16(+182.2kb)|CLASRP(-146.1kb)|CLPTM1(-61.62kb)|GEMIN7(-186.3kb)|PVRL2(+3.734kb)|RELB(-108.5kb)|TOMM40(0)|ZNF296(-178.5kb)
19:45422160	19	45422160	C	?	7	1.335e-13	2.87e-05	0.4171	0.4712	0.0781	47.14	0.7596	0.7596	0.2866	0.6045	NA	0.3793	NA	2.512	0.402	rs12721051	APOC1(0)|APOC1P1(-7.899kb)|APOC2(-27.08kb)|APOC4(-23.33kb)|APOC4-APOC2(-23.33kb)|APOE(+9.51kb)|BCAM(+97.48kb)|BCL3(+158.9kb)|CBLC(+118.3kb)|CLASRP(-120.1kb)|CLPTM1(-35.68kb)|GEMIN7(-160.4kb)|PPP1R37(-174.3kb)|PVRL2(+29.68kb)|RELB(-82.55kb)|TOMM40(+15.21kb)|ZNF296(-152.6kb)
19:45395714	19	45395714	T	?	7	1.756e-13	1.756e-13	0.434	0.434	0.8997	0	0.4521	0.4521	0.4018	0.5597	NA	0.4333	NA	1.258	0.4041	rs157581	APOC1(-22.21kb)|APOC1P1(-34.34kb)|APOC2(-53.52kb)|APOC4(-49.78kb)|APOC4-APOC2(-49.78kb)|APOE(-13.32kb)|BCAM(+71.04kb)|BCL3(+132.4kb)|CBLC(+91.81kb)|CEACAM16(+181.7kb)|CLASRP(-146.6kb)|CLPTM1(-62.13kb)|GEMIN7(-186.8kb)|PVRL2(+3.229kb)|RELB(-109kb)|TOMM40(0)|ZNF296(-179kb)
19:45390333	19	45390333	A	?	7	4.453e-13	4.453e-13	0.4493	0.4493	0.8067	0	0.4104	0.4104	0.4194	0.5597	NA	0.4666	NA	1.462	0.4206	rs283815	APOC1(-27.59kb)|APOC1P1(-39.73kb)|APOC2(-58.9kb)|APOC4(-55.16kb)|APOC4-APOC2(-55.16kb)|APOE(-18.7kb)|BCAM(+65.66kb)|BCL3(+127kb)|CBLC(+86.43kb)|CEACAM16(+176.3kb)|CLASRP(-152kb)|CLPTM1(-67.51kb)|GEMIN7(-192.2kb)|PVRL2(0)|RELB(-114.4kb)|TOMM40(-4.143kb)|ZNF296(-184.4kb)
19:45394969	19	45394969	T	?	7	5.185e-13	5.185e-13	0.4505	0.4505	0.8281	0	0.4521	0.4521	0.3754	0.5597	NA	0.4645	NA	1.347	0.481	rs184017	APOC1(-22.95kb)|APOC1P1(-35.09kb)|APOC2(-54.27kb)|APOC4(-50.52kb)|APOC4-APOC2(-50.52kb)|APOE(-14.07kb)|BCAM(+70.29kb)|BCL3(+131.7kb)|CBLC(+91.07kb)|CEACAM16(+181kb)|CLASRP(-147.3kb)|CLPTM1(-62.87kb)|GEMIN7(-187.5kb)|PVRL2(+2.484kb)|RELB(-109.7kb)|TOMM40(0)|ZNF296(-179.8kb)
19:45406673	19	45406673	G	?	7	7.372e-13	7e-07	0.4536	0.4653	0.1428	37.47	0.7301	0.7301	0.2972	0.3968	NA	0.6148	NA	0.1822	0.4073	rs10119	APOC1(-11.25kb)|APOC1P1(-23.39kb)|APOC2(-42.56kb)|APOC4(-38.82kb)|APOC4-APOC2(-38.82kb)|APOE(-2.365kb)|BCAM(+82kb)|BCL3(+143.4kb)|CBLC(+102.8kb)|CEACAM16(+192.7kb)|CLASRP(-135.6kb)|CLPTM1(-51.17kb)|GEMIN7(-175.8kb)|PPP1R37(-189.8kb)|PVRL2(+14.19kb)|RELB(-98.03kb)|TOMM40(0)|ZNF296(-168.1kb)
19:45410002	19	45410002	A	?	8	2.1e-10	1.302e-05	1.7827	1.7868	0.0937	42.7	3.154	3.154	2.338	1.571	1.103	1.865	NA	0.4982	1.626	rs769449	APOC1(-7.918kb)|APOC1P1(-20.06kb)|APOC2(-39.24kb)|APOC4(-35.49kb)|APOC4-APOC2(-35.49kb)|APOE(0)|BCAM(+85.32kb)|BCL3(+146.7kb)|CBLC(+106.1kb)|CEACAM16(+196kb)|CLASRP(-132.3kb)|CLPTM1(-47.84kb)|GEMIN7(-172.5kb)|PPP1R37(-186.4kb)|PVRL2(+17.52kb)|RELB(-94.7kb)|TOMM40(+3.056kb)|ZNF296(-164.8kb)
20:649050	20	649050	G	?	8	1.237e-07	1.746e-07	0.5555	0.5545	0.4156	1.81	0.3886	0.3886	0.5543	0.2802	0.6103	0.4404	NA	1.363	0.8032	rs117874469	CSNK2A1(+124.6kb)|FAM110A(-165.3kb)|SCRT2(0)|SLC52A3(-91.67kb)|SRXN1(+15.04kb)|TCF15(+58.14kb)
19:45395909	19	45395909	G	?	8	5.7e-07	0.0005782	1.5278	1.5334	0.0839	44.21	2.479	2.479	1.787	1.473	0.9111	1.58	NA	0.5215	1.623	rs34404554	APOC1(-22.01kb)|APOC1P1(-34.15kb)|APOC2(-53.33kb)|APOC4(-49.58kb)|APOC4-APOC2(-49.58kb)|APOE(-13.13kb)|BCAM(+71.23kb)|BCL3(+132.6kb)|CBLC(+92.01kb)|CEACAM16(+181.9kb)|CLASRP(-146.4kb)|CLPTM1(-61.93kb)|GEMIN7(-186.6kb)|PVRL2(+3.424kb)|RELB(-108.8kb)|TOMM40(0)|ZNF296(-178.8kb)
19:45396144	19	45396144	T	?	8	5.934e-07	0.0005844	1.5271	1.5328	0.0841	44.18	2.479	2.479	1.787	1.473	0.9111	1.58	NA	0.5215	1.62	rs11556505	APOC1(-21.78kb)|APOC1P1(-33.92kb)|APOC2(-53.09kb)|APOC4(-49.35kb)|APOC4-APOC2(-49.35kb)|APOE(-12.89kb)|BCAM(+71.47kb)|BCL3(+132.8kb)|CBLC(+92.24kb)|CEACAM16(+182.2kb)|CLASRP(-146.2kb)|CLPTM1(-61.7kb)|GEMIN7(-186.4kb)|PVRL2(+3.659kb)|RELB(-108.6kb)|TOMM40(0)|ZNF296(-178.6kb)
19:45395619	19	45395619	G	?	8	6.341e-07	0.0005767	1.5248	1.5307	0.0864	43.82	2.479	2.479	1.771	1.473	0.9111	1.58	NA	0.5215	1.623	rs2075650	APOC1(-22.3kb)|APOC1P1(-34.44kb)|APOC2(-53.62kb)|APOC4(-49.88kb)|APOC4-APOC2(-49.88kb)|APOE(-13.42kb)|BCAM(+70.94kb)|BCL3(+132.3kb)|CBLC(+91.72kb)|CEACAM16(+181.6kb)|CLASRP(-146.7kb)|CLPTM1(-62.22kb)|GEMIN7(-186.9kb)|PVRL2(+3.134kb)|RELB(-109.1kb)|TOMM40(0)|ZNF296(-179.1kb)
17:80615788	17	80615788	C	?	6	6.363e-07	4.145e-06	0.3004	0.3089	0.3889	4.32	0.5339	0.5339	0.1851	1.6	NA	0.4201	NA	0.3522	NA	rs34189304	FN3K(-77.66kb)|FN3KRP(-58.79kb)|FOXK2(+53.3kb)|NARF(+169.6kb)|RAB40B(0)|TBCD(-94.15kb)|WDR45B(+9.377kb)|ZNF750(-171.5kb)
19:45388130	19	45388130	A	?	8	6.386e-07	0.0001795	1.5174	1.5179	0.1566	34.02	2.338	2.338	1.761	1.473	0.9685	1.57	NA	0.5013	1.569	rs34342646	APOC1(-29.79kb)|APOC1P1(-41.93kb)|APOC2(-61.11kb)|APOC4(-57.36kb)|APOC4-APOC2(-57.36kb)|APOE(-20.91kb)|BCAM(+63.45kb)|BCL3(+124.8kb)|CBLC(+84.23kb)|CEACAM16(+174.1kb)|CLASRP(-154.2kb)|CLPTM1(-69.71kb)|GEMIN7(-194.4kb)|PVRL2(0)|RELB(-116.6kb)|TOMM40(-6.346kb)|ZNF296(-186.6kb)
17:78162959	17	78162959	C	?	9	7.346e-07	1.338e-06	0.7005	0.6997	0.4102	2.94	0.5384	0.5384	0.6946	1.156	0.564	0.6424	0.3993	0.8333	0.8914	rs8065364	CARD14(0)|CCDC40(+88.55kb)|EIF4A3(+41.98kb)|GAA(+69.28kb)|LOC100294362(-162.7kb)|RNF213(-71.7kb)|SGSH(-20.12kb)|SLC26A11(-31.24kb)|TBC1D16(+153.3kb)
7:36296983	7	36296983	T	?	8	1.233e-06	0.001048	0.5681	0.5113	0.03	54.86	0.158	0.158	NA	1.216	0.4853	0.7922	0.8044	0.3489	0.6107	NA	ANLN(-132.4kb)|EEPD1(0)|KIAA0895(-66.78kb)
19:45421254	19	45421254	A	?	8	1.289e-06	0.001127	1.513	1.4839	0.106	40.87	1.806	1.806	2.001	1.404	1.039	1.729	NA	0.2573	1.383	rs12721046	APOC1(0)|APOC1P1(-8.805kb)|APOC2(-27.98kb)|APOC4(-24.24kb)|APOC4-APOC2(-24.24kb)|APOE(+8.604kb)|BCAM(+96.58kb)|BCL3(+158kb)|CBLC(+117.4kb)|CLASRP(-121kb)|CLPTM1(-36.59kb)|GEMIN7(-161.3kb)|PPP1R37(-175.2kb)|PVRL2(+28.77kb)|RELB(-83.45kb)|TOMM40(+14.31kb)|ZNF296(-153.5kb)
19:45387596	19	45387596	A	?	8	1.343e-06	0.0002567	1.501	1.5027	0.1591	33.7	2.33	2.33	1.728	1.492	0.9532	1.564	NA	0.5013	1.543	rs12972970	APOC1(-30.32kb)|APOC1P1(-42.46kb)|APOC2(-61.64kb)|APOC4(-57.9kb)|APOC4-APOC2(-57.9kb)|APOE(-21.44kb)|BCAM(+62.92kb)|BCL3(+124.3kb)|CBLC(+83.69kb)|CEACAM16(+173.6kb)|CEACAM19(+200kb)|CLASRP(-154.7kb)|CLPTM1(-70.24kb)|GEMIN7(-194.9kb)|PVRL2(0)|RELB(-117.1kb)|TOMM40(-6.88kb)|ZNF296(-187.2kb)
2:242573211	2	242573211	C	?	8	1.432e-06	1.106e-05	0.7114	0.7048	0.3201	14.04	0.4011	0.4011	0.7896	0.5768	0.896	0.6753	NA	0.932	0.7078	rs7424328	ATG4B(-3.815kb)|BOK(+59.66kb)|BOK-AS1(+74.65kb)|D2HGDH(-100.8kb)|DTYMK(-41.94kb)|FARP2(+139kb)|GAL3ST2(-143kb)|ING5(-68.24kb)|NEU4(-176.9kb)|STK25(+124.2kb)|THAP4(0)
19:45387459	19	45387459	G	?	8	1.53e-06	0.0002169	1.4973	1.4968	0.1767	31.47	2.254	2.254	1.728	1.492	0.9532	1.564	NA	0.5013	1.543	rs12972156	APOC1(-30.46kb)|APOC1P1(-42.6kb)|APOC2(-61.78kb)|APOC4(-58.04kb)|APOC4-APOC2(-58.04kb)|APOE(-21.58kb)|BCAM(+62.78kb)|BCL3(+124.2kb)|CBLC(+83.56kb)|CEACAM16(+173.5kb)|CEACAM19(+199.8kb)|CLASRP(-154.8kb)|CLPTM1(-70.38kb)|GEMIN7(-195.1kb)|PVRL2(0)|RELB(-117.2kb)|TOMM40(-7.017kb)|ZNF296(-187.3kb)
10:71640050	10	71640050	C	?	8	1.602e-06	1.602e-06	0.5921	0.5921	0.4296	0	0.5734	0.5734	0.5333	1.203	0.8769	0.7207	0.2887	NA	0.4138	rs3858158	COL13A1(0)|H2AFY2(-172.3kb)
8:27466157	8	27466157	T	?	9	1.929e-06	0.001066	0.7132	0.6634	0.0165	57.23	0.3392	0.3392	0.6888	0.7402	1.087	0.793	0.2238	1.089	0.6112	rs1532276	CCDC25(-124.7kb)|CHRNA2(+129.3kb)|CLU(0)|EPHX2(+63.72kb)|ESCO2(-165.9kb)|MIR3622A(-93.04kb)|MIR3622B(-93.03kb)|PTK2B(+149.2kb)|SCARA3(-25.42kb)
3:163003974	3	163003974	T	?	9	2.035e-06	0.000181	0.4855	0.4682	0.1586	32.41	0.161	0.161	0.4562	1.712	0.8451	0.3732	0.5304	0.739	0.6265	rs34592244	CT64(0)
8:27464929	8	27464929	A	?	9	2.075e-06	0.001006	0.7133	0.6559	0.0135	58.49	0.3088	0.3088	0.6934	0.7179	1.082	0.7731	0.2237	1.089	0.638	rs4236673	CCDC25(-125.9kb)|CHRNA2(+128.1kb)|CLU(0)|EPHX2(+62.49kb)|ESCO2(-167.1kb)|MIR3622A(-94.26kb)|MIR3622B(-94.26kb)|PTK2B(+148kb)|SCARA3(-26.65kb)
17:80556833	17	80556833	A	?	6	2.12e-06	0.002032	0.3074	0.3555	0.2493	24.63	0.7443	0.7443	0.169	1.584	NA	0.4618	NA	0.3522	NA	rs115979407	C17orf62(+148.1kb)|FN3K(-136.6kb)|FN3KRP(-117.7kb)|FOXK2(0)|HEXDC(+156.3kb)|NARF(+110.7kb)|OGFOD3(+180.3kb)|RAB40B(-58.11kb)|TBCD(-153.1kb)|WDR45B(-15.6kb)
3:162987426	3	162987426	A	?	9	2.259e-06	0.0002444	0.4869	0.469	0.1432	34.34	0.161	0.161	0.4562	1.712	0.8921	0.3732	0.5085	0.739	0.6106	rs11920847	CT64(0)
8:27466181	8	27466181	T	?	9	2.314e-06	0.0009727	0.7142	0.6572	0.015	57.84	0.3088	0.3088	0.705	0.7179	1.071	0.7731	0.2238	1.089	0.6357	rs1532277	CCDC25(-124.7kb)|CHRNA2(+129.4kb)|CLU(0)|EPHX2(+63.74kb)|ESCO2(-165.9kb)|MIR3622A(-93.01kb)|MIR3622B(-93.01kb)|PTK2B(+149.3kb)|SCARA3(-25.4kb)
8:27466315	8	27466315	T	?	9	2.35e-06	0.0009216	0.7122	0.6495	0.0128	58.81	0.2887	0.2887	0.7135	0.6939	1.05	0.7851	0.2238	1.089	0.6349	rs1532278	CCDC25(-124.5kb)|CHRNA2(+129.5kb)|CLU(0)|EPHX2(+63.88kb)|ESCO2(-165.7kb)|MIR3622A(-92.88kb)|MIR3622B(-92.87kb)|PTK2B(+149.4kb)|SCARA3(-25.26kb)
17:78160002	17	78160002	G	?	9	2.496e-06	9.701e-05	0.7027	0.7013	0.2551	21.13	0.5509	0.5509	0.6451	1.28	0.5538	0.653	0.4113	1.42	0.9019	rs59586205	CARD14(0)|CCDC40(+85.59kb)|EIF4A3(+39.02kb)|GAA(+66.32kb)|LOC100294362(-165.6kb)|RNF213(-74.66kb)|SGSH(-23.08kb)|SLC26A11(-34.2kb)|TBC1D16(+150.3kb)
8:27465312	8	27465312	T	?	9	2.715e-06	0.001201	0.717	0.6667	0.0166	57.19	0.3392	0.3392	0.6888	0.7402	1.095	0.793	0.2237	1.089	0.6235	rs11787077	CCDC25(-125.5kb)|CHRNA2(+128.5kb)|CLU(0)|EPHX2(+62.87kb)|ESCO2(-166.7kb)|MIR3622A(-93.88kb)|MIR3622B(-93.88kb)|PTK2B(+148.4kb)|SCARA3(-26.26kb)
12:107725814	12	107725814	G	?	9	2.936e-06	2.936e-06	0.6879	0.6879	0.9532	0	0.6634	0.6634	0.6172	0.7032	0.8191	0.7373	0.4395	0.3692	0.688	rs856887	BTBD11(0)
3:101134327	3	101134327	A	?	8	3.306e-06	0.0008383	0.483	0.4767	0.1046	41.07	0.1519	0.1519	0.375	0.8282	1.141	0.5678	0.7829	NA	0.4713	rs12152522	FAM172BP(-103.4kb)|IMPG2(+94.91kb)|PCNP(-158.7kb)|SENP7(0)|TRMT10C(-146.4kb)
8:27467686	8	27467686	C	?	9	3.34e-06	0.001345	0.7196	0.6646	0.0131	58.67	0.3364	0.3364	0.69	0.6828	1.078	0.8352	0.2233	1.182	0.6126	rs9331896	CCDC25(-123.1kb)|CHRNA2(+130.9kb)|CLU(0)|EPHX2(+65.25kb)|ESCO2(-164.4kb)|MIR3622A(-91.51kb)|MIR3622B(-91.5kb)|PBK(-199.5kb)|PTK2B(+150.8kb)|SCARA3(-23.89kb)
8:27467821	8	27467821	C	?	9	3.765e-06	0.001136	0.7197	0.66	0.0141	58.21	0.3049	0.3049	0.7135	0.6907	1.043	0.8143	0.2233	1.182	0.6277	rs2070926	CCDC25(-123kb)|CHRNA2(+131kb)|CLU(0)|EPHX2(+65.38kb)|ESCO2(-164.2kb)|MIR3622A(-91.37kb)|MIR3622B(-91.37kb)|PBK(-199.3kb)|PTK2B(+150.9kb)|SCARA3(-23.76kb)
7:151044591	7	151044591	T	?	9	3.825e-06	3.871e-06	1.4125	1.4125	0.4329	0.07	2.096	2.096	1.26	0.954	1.841	1.279	1.578	3.414	1.356	rs408091	ABCF2(+120.3kb)|ASB10(+159.7kb)|CHPF2(+108.7kb)|CRYGN(-82.46kb)|GBX1(+179.7kb)|MIR671(+109kb)|MIR3907(-85.98kb)|NUB1(0)|RHEB(-118.5kb)|SMARCD3(+70.36kb)|WDR86(-33.62kb)|WDR86-AS1(-61.73kb)
2:178979569	2	178979569	G	?	9	3.859e-06	0.0001124	0.6177	0.6082	0.2248	24.6	0.3255	0.3255	0.8463	0.9963	0.5848	0.4405	0.8829	0.9973	0.7503	rs66558684	OSBPL6(-79.64kb)|PDE11A(+6.503kb)|RBM45(0)
8:27468503	8	27468503	C	?	9	3.864e-06	0.001183	0.7221	0.6726	0.0208	55.7	0.3421	0.3421	0.6885	0.6982	1.051	0.8418	0.2233	1.182	0.6238	rs867230	CCDC25(-122.3kb)|CHRNA2(+131.7kb)|CLU(0)|EPHX2(+66.06kb)|ESCO2(-163.6kb)|MIR3622A(-90.69kb)|MIR3622B(-90.69kb)|PBK(-198.6kb)|PTK2B(+151.6kb)|SCARA3(-23.07kb)
10:33237153	10	33237153	C	?	6	4.066e-06	4.066e-06	0.2383	0.2383	0.5768	0	1.036	1.036	0.1678	0.3321	NA	NA	0.3841	NA	0.1865	rs148113467	C10orf68(+65.36kb)|ITGB1(0)
12:73011183	12	73011183	A	?	9	4.626e-06	0.0005707	0.572	0.5493	0.1215	37.16	0.3471	0.3471	0.7117	3.593	0.471	0.4675	0.397	0.1056	0.6955	rs11179283	TRHDE(0)
8:27464519	8	27464519	T	?	9	4.87e-06	0.001408	0.7232	0.6711	0.0172	56.96	0.3392	0.3392	0.6858	0.7402	1.095	0.8044	0.2201	1.089	0.6406	rs11136000	CCDC25(-126.3kb)|CHRNA2(+127.7kb)|CLU(0)|EPHX2(+62.08kb)|ESCO2(-167.5kb)|MIR3622A(-94.67kb)|MIR3622B(-94.67kb)|PTK2B(+147.6kb)|SCARA3(-27.06kb)
16:74973734	16	74973734	A	?	6	5.268e-06	0.0004245	0.2357	0.2216	0.1568	37.42	0.0654	0.0654	NA	2335000	0.3638	0.7639	NA	NA	0.2838	rs191422508	FA2H(+165kb)|LDHD(-172kb)|WDR59(0)|ZNRF1(-59.18kb)
7:155307530	7	155307530	A	?	8	5.292e-06	5.292e-06	0.4708	0.4708	0.541	0	0.5063	0.5063	0.3138	2.342	0.5246	0.5456	NA	0.7114	0.7569	rs138574591	BLACE(+146.9kb)|CNPY1(0)|EN2(+50kb)|RBM33(-129.7kb)
5:169903219	5	169903219	C	?	8	5.658e-06	0.001855	0.4689	0.3727	0.0152	59.7	0.0286	0.0286	0.4389	1.01	0.4058	0.4701	0.0005	NA	0.7274	rs114582108	KCNIP1(0)|KCNMB1(+86.54kb)|LCP2(+178.4kb)|LOC257358(+141.1kb)
13:100360104	13	100360104	A	?	8	6.582e-06	6.582e-06	0.5248	0.5248	0.6641	0	0.6777	0.6777	0.5017	1.239	0.3201	0.5641	0.1112	NA	0.6829	rs12323058	CLYBL(0)|MIR4306(+64.7kb)|TM9SF2(+143.8kb)
16:77990401	16	77990401	A	?	9	6.804e-06	6.804e-06	0.7241	0.7241	0.7881	0	0.614	0.614	0.8135	0.6665	0.8697	0.62	0.6576	0.3619	0.7565	rs183723	CLEC3A(-66.04kb)|VAT1L(0)|WWOX(-142.9kb)
8:27462481	8	27462481	A	?	9	6.824e-06	0.001412	0.7259	0.665	0.0142	58.18	0.3088	0.3088	0.7019	0.7179	1.078	0.7975	0.2201	1.089	0.6614	rs7982	CCDC25(-128.4kb)|CHRNA2(+125.7kb)|CLU(0)|EPHX2(+60.04kb)|ESCO2(-169.6kb)|MIR3622A(-96.71kb)|MIR3622B(-96.71kb)|PTK2B(+145.6kb)|SCARA3(-29.1kb)
16:77990100	16	77990100	G	?	9	7.337e-06	7.337e-06	0.725	0.725	0.7839	0	0.614	0.614	0.8162	0.6665	0.8697	0.62	0.6576	0.3619	0.7579	rs254818	CLEC3A(-66.34kb)|VAT1L(0)|WWOX(-143.2kb)
16:77991420	16	77991420	A	?	9	7.391e-06	7.391e-06	0.7249	0.7249	0.7566	0	0.608	0.608	0.8111	0.6665	0.8863	0.6177	0.6576	0.3619	0.7566	rs254817	CLEC3A(-65.02kb)|VAT1L(0)|WWOX(-141.9kb)
13:100356141	13	100356141	G	?	8	7.509e-06	7.509e-06	0.5194	0.5194	0.8052	0	0.6504	0.6504	0.4723	1.18	0.3613	0.5701	0.1074	NA	0.6409	rs76223471	CLYBL(0)|MIR4306(+60.74kb)|TM9SF2(+139.8kb)
16:85949271	16	85949271	A	?	9	7.553e-06	6.357e-05	0.6352	0.6252	0.297	16.34	0.3207	0.3207	0.5975	0.4316	0.6752	0.7241	1.515	2.854	0.8546	rs305071	C16orf74(+164.6kb)|COX4I1(+108.7kb)|EMC8(+116.1kb)|IRF8(0)|MIR1910(+174kb)
18:19062326	18	19062326	T	?	9	7.983e-06	7.983e-06	0.4469	0.4469	0.7759	0	0.2891	0.2891	0.3399	0.2785	0.701	0.6016	10.22	0.1776	0.4898	rs117713986	ABHD3(-168.5kb)|ESCO1(-46.94kb)|GREB1L(0)|SNRPD1(-129.9kb)
16:77987140	16	77987140	G	?	9	8.476e-06	8.476e-06	0.728	0.728	0.69	0	0.628	0.628	0.8233	0.6408	0.8815	0.6335	0.658	0.2868	0.7514	rs596034	CLEC3A(-69.3kb)|VAT1L(0)|WWOX(-146.2kb)
16:77987163	16	77987163	T	?	9	8.476e-06	8.476e-06	0.728	0.728	0.69	0	0.628	0.628	0.8233	0.6408	0.8815	0.6335	0.658	0.2868	0.7514	rs596061	CLEC3A(-69.28kb)|VAT1L(0)|WWOX(-146.2kb)
13:100361432	13	100361432	T	?	8	8.509e-06	8.509e-06	0.5203	0.5203	0.7518	0	0.6504	0.6504	0.499	1.18	0.3273	0.5701	0.1074	NA	0.6386	rs75915025	CLYBL(0)|MIR4306(+66.03kb)|TM9SF2(+145.1kb)
12:73023957	12	73023957	G	?	9	8.813e-06	0.0004515	0.5816	0.5634	0.1699	31.04	0.3471	0.3471	0.7318	3.593	0.4894	0.4842	0.397	0.1483	0.6834	rs10161472	TRHDE(0)
12:73027461	12	73027461	A	?	9	8.813e-06	0.0004515	0.5816	0.5634	0.1699	31.04	0.3471	0.3471	0.7318	3.593	0.4894	0.4842	0.397	0.1483	0.6834	rs74958732	TRHDE(0)
12:73013806	12	73013806	A	?	9	8.817e-06	0.0008341	0.5798	0.5562	0.1177	37.66	0.3471	0.3471	0.7318	3.593	0.4894	0.4675	0.397	0.1056	0.7016	rs11179285	TRHDE(0)
12:73038439	12	73038439	G	?	9	8.987e-06	0.0004592	0.5819	0.5636	0.1694	31.11	0.3471	0.3471	0.7318	3.593	0.4894	0.4842	0.397	0.1483	0.6848	rs12370471	TRHDE(0)
12:73041679	12	73041679	T	?	9	8.987e-06	0.0004592	0.5819	0.5636	0.1694	31.11	0.3471	0.3471	0.7318	3.593	0.4894	0.4842	0.397	0.1483	0.6848	rs11179301	TRHDE(0)
12:73012599	12	73012599	T	?	9	8.991e-06	0.0008467	0.5802	0.5564	0.1172	37.73	0.3471	0.3471	0.7318	3.593	0.4894	0.4675	0.397	0.1056	0.7031	rs112881013	TRHDE(0)
13:100358254	13	100358254	T	?	8	9.088e-06	9.088e-06	0.5215	0.5215	0.7527	0	0.6504	0.6504	0.5023	1.18	0.3273	0.5701	0.1074	NA	0.6386	rs149100618	CLYBL(0)|MIR4306(+62.85kb)|TM9SF2(+142kb)
3:101105268	3	101105268	C	?	9	9.156e-06	9.156e-06	0.5661	0.5661	0.537	0	0.3296	0.3296	0.3996	0.8446	0.7874	0.6205	0.9683	0.5309	0.784	rs2176887	FAM172BP(-132.4kb)|IMPG2(+65.85kb)|PCNP(-187.8kb)|SENP7(0)|TRMT10C(-175.4kb)
10:103378309	10	103378309	A	?	9	9.555e-06	0.002939	0.6962	0.6721	0.0331	52.17	0.3126	0.3126	0.7244	0.8377	1.178	0.5429	1.189	0.6712	0.7449	rs74926559	BTRC(+61.23kb)|DPCD(+8.899kb)|FBXW4(0)|FGF8(-151.6kb)|MGEA5(-165.9kb)|MIR3158-1(+17.06kb)|MIR3158-2(+17.06kb)|NPM3(-162.8kb)|POLL(+30.28kb)
17:17467506	17	17467506	A	?	6	9.592e-06	9.592e-06	0.343	0.343	0.7462	0	NA	NA	0.262	3570000	0.1668	0.5136	NA	0.3998	0.4789	rs144117473	MED9(+70.97kb)|PEMT(0)|RAI1(-117.3kb)|RASD1(+67.8kb)|SMCR9(+140.8kb)
16:77992246	16	77992246	G	?	9	9.822e-06	9.822e-06	0.7295	0.7295	0.6928	0	0.619	0.619	0.8196	0.6408	0.876	0.6374	0.658	0.2868	0.7647	rs450550	CLEC3A(-64.2kb)|VAT1L(0)|WWOX(-141.1kb)
17:39912145	17	39912145	T	?	9	1.007e-05	2.025e-05	0.7147	0.7123	0.3945	4.87	0.4759	0.4759	0.6969	0.9622	0.7636	0.92	0.7383	0.2928	0.6486	rs1126821	ACLY(-111kb)|EIF1(+64.25kb)|FKBP10(-56.82kb)|GAST(+39.92kb)|HAP1(+21.25kb)|JUP(0)|KLHL10(-81.9kb)|KLHL11(-97.65kb)|KRT9(+183.8kb)|KRT14(+169kb)|KRT16(+143.1kb)|KRT17(+131.3kb)|KRT42P(+115.7kb)|LEPREL4(-46.06kb)|NT5C3B(-69.19kb)|TTC25(-174.7kb)
16:77993546	16	77993546	G	?	9	1.022e-05	1.022e-05	0.7288	0.7288	0.8096	0	0.614	0.614	0.8162	0.6665	0.8697	0.6339	0.657	0.3619	0.7601	rs365062	CLEC3A(-62.9kb)|VAT1L(0)|WWOX(-139.8kb)
12:73047637	12	73047637	A	?	9	1.038e-05	0.0005115	0.5835	0.5649	0.1669	31.41	0.3471	0.3471	0.7213	3.593	0.4894	0.4842	0.397	0.1483	0.7045	rs11179306	TRHDE(0)
16:77990219	16	77990219	G	?	9	1.073e-05	1.073e-05	0.7126	0.7126	0.8579	0	0.637	0.637	0.8153	0.6296	0.8161	0.596	0.9586	0.3607	0.7525	rs423254	CLEC3A(-66.22kb)|VAT1L(0)|WWOX(-143.1kb)
12:58141787	12	58141787	T	?	9	1.083e-05	0.001405	0.4717	0.4424	0.1192	37.47	0.0621	0.0621	0.5242	3.262	0.2895	0.8843	0.1303	0.3317	0.4124	rs113625101	AGAP2(+5.843kb)|AGAP2-AS1(+19.65kb)|ARHGEF25(+130.8kb)|AVIL(-49.37kb)|B4GALNT1(+114.8kb)|CDK4(0)|CTDSP2(-71.92kb)|CYP27B1(-14.33kb)|DTX3(+138.2kb)|KIF5A(+163.2kb)|LOC100506844(-183.4kb)|MARCH9(-7.093kb)|METTL1(-20.56kb)|METTL21B(-24.6kb)|MIR26A2(-76.6kb)|OS9(+26.45kb)|PIP4K2C(+144.6kb)|SLC26A10(+121.9kb)|TSFM(-34.74kb)|TSPAN31(0)|XRCC6BP1(-193.7kb)
2:203657211	2	203657211	G	?	6	1.089e-05	3.288e-05	0.3693	0.3632	0.3504	10.22	NA	NA	0.7011	0.3023	0.2452	0.1765	NA	0.3698	0.4389	rs34022184	CARF(-119.8kb)|FAM117B(+22.73kb)|ICA1L(0)|WDR12(-88.11kb)
3:101082644	3	101082644	C	?	9	1.11e-05	9.912e-05	0.5942	0.5945	0.3252	13.11	0.3865	0.3865	0.4764	0.8446	0.9113	0.4125	1.271	0.5644	0.8794	rs2682389	FAM172BP(-155.1kb)|IMPG2(+43.22kb)|SENP7(0)|TRMT10C(-198kb)
16:77994753	16	77994753	A	?	9	1.192e-05	1.192e-05	0.7304	0.7304	0.8001	0	0.614	0.614	0.8236	0.6665	0.8697	0.6339	0.657	0.3619	0.7611	rs446695	CLEC3A(-61.69kb)|VAT1L(0)|WWOX(-138.6kb)
11:44884874	11	44884874	A	?	6	1.208e-05	0.0003639	0.3029	0.2907	0.1974	31.76	0.1871	0.1871	0.2149	0.0663	NA	0.4264	NA	NA	0.9199	rs835751	LOC221122(-110.6kb)|TP53I11(-69.02kb)|TSPAN18(0)
10:84047599	10	84047599	G	?	9	1.237e-05	1.237e-05	0.4673	0.4673	0.8511	0	0.2713	0.2713	0.3401	0.6572	0.5756	0.6484	0.6085	0.3108	0.6585	rs73306643	NRG3(0)
12:73044622	12	73044622	T	?	9	1.259e-05	0.000615	0.5865	0.5668	0.1597	32.29	0.3471	0.3471	0.7362	3.593	0.4894	0.4842	0.397	0.1483	0.7045	rs12370001	TRHDE(0)
9:115024971	9	115024971	A	?	9	1.267e-05	1.267e-05	1.3537	1.3537	0.5531	0	1.604	1.604	1.19	0.7882	1.539	1.345	0.7722	1.351	1.553	rs3843823	HSDL2(-117.2kb)|MIR3134(0)|PTBP3(0)|SUSD1(+87.42kb)
4:149142485	4	149142485	G	?	9	1.27e-05	0.0003521	0.6261	0.6162	0.1989	27.6	0.384	0.384	0.737	0.4203	0.6898	0.4896	5.827	2.032	0.919	rs17581115	ARHGAP10(+148.6kb)|NR3C2(0)
12:73021340	12	73021340	T	?	9	1.3e-05	0.00118	0.5897	0.5656	0.1089	38.87	0.3471	0.3471	0.7123	3.584	0.4894	0.4842	0.4335	0.1056	0.7249	rs1387977	TRHDE(0)
12:73021661	12	73021661	G	?	9	1.3e-05	0.00118	0.5897	0.5656	0.1089	38.87	0.3471	0.3471	0.7123	3.584	0.4894	0.4842	0.4335	0.1056	0.7249	rs10784980	TRHDE(0)
2:203754554	2	203754554	T	?	6	1.316e-05	5.169e-05	0.3734	0.3656	0.3316	13.01	NA	NA	0.7135	0.3023	0.2452	0.1765	NA	0.3698	0.4504	rs7573064	CARF(-22.42kb)|FAM117B(+120.1kb)|ICA1L(+18.18kb)|NBEAL1(-125kb)|WDR12(0)
16:85949896	16	85949896	G	?	9	1.325e-05	0.0001925	0.6576	0.6443	0.2456	22.22	0.3184	0.3184	0.6259	0.481	0.7563	0.657	2.681	2.783	0.8396	rs305068	C16orf74(+165.2kb)|COX4I1(+109.3kb)|EMC8(+116.7kb)|IRF8(0)|MIR1910(+174.6kb)
2:204322164	2	204322164	T	?	6	1.37e-05	3.021e-05	0.3799	0.3756	0.369	7.42	NA	NA	0.718	0.3023	0.2847	0.1765	NA	0.3698	0.4302	rs35468920	ABI2(+25.27kb)|CYP20A1(+151.6kb)|RAPH1(0)
6:34362141	6	34362141	G	?	7	1.446e-05	1.446e-05	0.3673	0.3673	0.5055	0	1.143	1.143	0.327	NA	0.3613	0.4376	NA	0.1037	0.1824	rs147323275	C6orf1(+145.2kb)|C6orf106(-192.9kb)|HMGA1(+148.1kb)|NUDT3(+1.684kb)|PACSIN1(-71.7kb)|RPS10(-23.09kb)|RPS10-NUDT3(0)|SPDEF(-143.4kb)
8:27456253	8	27456253	T	?	9	1.496e-05	0.001019	0.7363	0.7087	0.0889	41.76	0.3677	0.3677	0.6565	0.8135	1.053	0.7783	0.3699	1.089	0.743	rs2279590	CCDC25(-134.6kb)|CHRNA2(+119.4kb)|CLU(0)|EPHX2(+53.81kb)|ESCO2(-175.8kb)|MIR3622A(-102.9kb)|MIR3622B(-102.9kb)|PTK2B(+139.3kb)|SCARA3(-35.32kb)
10:84049480	10	84049480	A	?	9	1.531e-05	1.531e-05	0.4558	0.4558	0.8012	0	0.2713	0.2713	0.3157	0.6572	0.657	0.6094	0.2154	0.3108	0.6801	rs1414758	NRG3(0)
10:84049537	10	84049537	T	?	9	1.531e-05	1.531e-05	0.4558	0.4558	0.8012	0	0.2713	0.2713	0.3157	0.6572	0.657	0.6094	0.2154	0.3108	0.6801	rs1414759	NRG3(0)
10:84049828	10	84049828	G	?	9	1.531e-05	1.531e-05	0.4558	0.4558	0.8012	0	0.2713	0.2713	0.3157	0.6572	0.657	0.6094	0.2154	0.3108	0.6801	rs11193507	NRG3(0)
10:84050476	10	84050476	T	?	9	1.531e-05	1.531e-05	0.4558	0.4558	0.8012	0	0.2713	0.2713	0.3157	0.6572	0.657	0.6094	0.2154	0.3108	0.6801	rs6421340	NRG3(0)
10:84050634	10	84050634	T	?	9	1.531e-05	1.531e-05	0.4558	0.4558	0.8012	0	0.2713	0.2713	0.3157	0.6572	0.657	0.6094	0.2154	0.3108	0.6801	rs6584625	NRG3(0)
10:84052533	10	84052533	A	?	9	1.531e-05	1.531e-05	0.4558	0.4558	0.8012	0	0.2713	0.2713	0.3157	0.6572	0.657	0.6094	0.2154	0.3108	0.6801	rs6584626	NRG3(0)
7:36271422	7	36271422	A	?	9	1.532e-05	0.001376	0.6418	0.5902	0.043	49.87	0.2166	0.2166	0.9838	0.9023	0.4609	0.8573	0.5558	0.3568	0.6175	rs1477010	ANLN(-158kb)|EEPD1(0)|KIAA0895(-92.34kb)
9:114982549	9	114982549	T	?	8	1.532e-05	1.532e-05	1.3535	1.3535	0.4671	0	1.444	1.444	1.2	0.8042	1.601	1.394	0.6346	NA	1.513	rs7869523	HSDL2(-159.6kb)|MIR3134(0)|PTBP3(0)|SUSD1(+44.99kb)
17:71619324	17	71619324	G	?	7	1.583e-05	0.0001128	0.3464	0.3493	0.3098	15.74	0.3536	0.3536	0.6854	0.2309	1.327	0.1892	NA	NA	0.1921	rs150829597	LINC00469(-126.1kb)|LOC400620(-163.6kb)|LOC100134391(-114.7kb)|SDK2(0)
12:73020302	12	73020302	A	?	9	1.599e-05	0.001253	0.5935	0.5692	0.1123	38.4	0.3471	0.3471	0.716	3.584	0.4894	0.4966	0.4335	0.1056	0.7249	rs1821311	TRHDE(0)
12:73020432	12	73020432	A	?	9	1.599e-05	0.001253	0.5935	0.5692	0.1123	38.4	0.3471	0.3471	0.716	3.584	0.4894	0.4966	0.4335	0.1056	0.7249	rs1821310	TRHDE(0)
12:73020617	12	73020617	A	?	9	1.599e-05	0.001253	0.5935	0.5692	0.1123	38.4	0.3471	0.3471	0.716	3.584	0.4894	0.4966	0.4335	0.1056	0.7249	rs10879471	TRHDE(0)
12:73021059	12	73021059	G	?	9	1.599e-05	0.001253	0.5935	0.5692	0.1123	38.4	0.3471	0.3471	0.716	3.584	0.4894	0.4966	0.4335	0.1056	0.7249	rs11179291	TRHDE(0)
17:78708702	17	78708702	T	?	6	1.624e-05	0.0003006	0.3283	0.34	0.3399	11.78	NA	NA	0.2843	0.2123	0.3126	0.2753	NA	0.2601	3.175	rs12940631	RPTOR(0)
12:73011638	12	73011638	C	?	9	1.627e-05	0.001268	0.5937	0.5695	0.112	38.44	0.3471	0.3471	0.716	3.584	0.4894	0.4966	0.4348	0.1056	0.7261	rs7308664	TRHDE(0)
12:73014917	12	73014917	G	?	9	1.627e-05	0.001268	0.5937	0.5695	0.112	38.44	0.3471	0.3471	0.716	3.584	0.4894	0.4966	0.4348	0.1056	0.7261	rs7139238	TRHDE(0)
12:73015115	12	73015115	A	?	9	1.627e-05	0.001268	0.5937	0.5695	0.112	38.44	0.3471	0.3471	0.716	3.584	0.4894	0.4966	0.4348	0.1056	0.7261	rs74105937	TRHDE(0)
12:73015662	12	73015662	A	?	9	1.627e-05	0.001268	0.5937	0.5695	0.112	38.44	0.3471	0.3471	0.716	3.584	0.4894	0.4966	0.4348	0.1056	0.7261	rs2217678	TRHDE(0)
12:73016564	12	73016564	A	?	9	1.627e-05	0.001268	0.5937	0.5695	0.112	38.44	0.3471	0.3471	0.716	3.584	0.4894	0.4966	0.4348	0.1056	0.7261	rs10879468	TRHDE(0)
12:73016740	12	73016740	C	?	9	1.627e-05	0.001268	0.5937	0.5695	0.112	38.44	0.3471	0.3471	0.716	3.584	0.4894	0.4966	0.4348	0.1056	0.7261	rs10879469	TRHDE(0)
12:73019828	12	73019828	G	?	9	1.627e-05	0.001268	0.5937	0.5695	0.112	38.44	0.3471	0.3471	0.716	3.584	0.4894	0.4966	0.4348	0.1056	0.7261	rs10879470	TRHDE(0)
4:148441139	4	148441139	A	?	8	1.641e-05	0.005743	0.611	0.5595	0.0072	63.77	0.1722	0.1722	0.9133	1.114	0.5226	0.4921	2.161	NA	0.7391	rs4835412	EDNRA(0)|PRMT10(-118.4kb)|TMEM184C(-97.4kb)
12:62784097	12	62784097	A	?	6	1.671e-05	3.552e-05	0.3851	0.3818	0.3726	6.86	0.3078	0.3078	0.6369	NA	0.1878	0.5941	NA	NA	0.247	rs117609626	FAM19A2(+197.5kb)|MON2(-76.5kb)|USP15(0)
10:84040545	10	84040545	T	?	9	1.673e-05	1.673e-05	0.4521	0.4521	0.7676	0	0.2454	0.2454	0.3157	0.6572	0.657	0.6094	0.2154	0.2366	0.6721	rs12245485	NRG3(0)
10:84041453	10	84041453	T	?	9	1.673e-05	1.673e-05	0.4521	0.4521	0.7676	0	0.2454	0.2454	0.3157	0.6572	0.657	0.6094	0.2154	0.2366	0.6721	rs17099718	NRG3(0)
12:73011367	12	73011367	A	?	9	1.715e-05	0.001502	0.5935	0.5678	0.0993	40.22	0.3471	0.3471	0.716	3.584	0.4894	0.4799	0.4348	0.1056	0.747	rs10879467	TRHDE(0)
17:39911771	17	39911771	A	?	9	1.719e-05	3.268e-05	0.721	0.7187	0.3956	4.74	0.4759	0.4759	0.6969	0.9622	0.7883	0.9198	0.737	0.2928	0.6608	rs4627408	ACLY(-111.4kb)|EIF1(+63.87kb)|FKBP10(-57.19kb)|GAST(+39.55kb)|HAP1(+20.87kb)|JUP(0)|KLHL10(-82.27kb)|KLHL11(-98.03kb)|KRT9(+183.5kb)|KRT14(+168.6kb)|KRT16(+142.7kb)|KRT17(+130.9kb)|KRT42P(+115.3kb)|LEPREL4(-46.43kb)|NT5C3B(-69.56kb)|TTC25(-175.1kb)
12:62978095	12	62978095	A	?	7	1.782e-05	0.001684	0.3359	0.3041	0.0934	44.65	0.2249	0.2249	0.7901	2309000	0.09	0.6474	NA	NA	0.1844	rs117366596	C12orf61(-17.44kb)|MIRLET7I(-19.37kb)|MON2(0)|PPM1H(-59.67kb)|USP15(+174.6kb)
6:44248646	6	44248646	G	?	9	1.789e-05	1.789e-05	0.7005	0.7005	0.5092	0	0.3913	0.3913	0.7903	0.5311	0.6849	0.7333	1.271	0.792	0.7896	rs844315	AARS2(-17.82kb)|CAPN11(+96.51kb)|CDC5L(-106.6kb)|HSP90AB1(+27.02kb)|MIR4642(-154.7kb)|MIR4647(+26.62kb)|MRPL14(+153.5kb)|NFKBIE(+15.12kb)|SLC29A1(+46.76kb)|SLC35B2(+23.36kb)|SPATS1(-61.75kb)|TCTE1(0)|TMEM63B(+125.4kb)|TMEM151B(+1.464kb)
8:63580054	8	63580054	T	?	6	1.798e-05	1.798e-05	0.1527	0.1527	0.5968	0	0.0766	0.0766	NA	3050000	0.161	NA	0.0072	NA	0.2764	rs74986494	NKAIN3(0)
4:148443006	4	148443006	T	?	8	1.809e-05	0.005991	0.6126	0.5606	0.007	63.92	0.1722	0.1722	0.9133	1.114	0.5226	0.4921	2.161	NA	0.748	rs908581	EDNRA(0)|PRMT10(-116.5kb)|TMEM184C(-95.53kb)
6:44248262	6	44248262	A	?	9	1.826e-05	1.826e-05	0.7007	0.7007	0.508	0	0.3913	0.3913	0.7915	0.5311	0.6849	0.7333	1.271	0.792	0.7896	rs694349	AARS2(-18.2kb)|CAPN11(+96.12kb)|CDC5L(-107kb)|HSP90AB1(+26.64kb)|MIR4642(-155.1kb)|MIR4647(+26.24kb)|MRPL14(+153.1kb)|NFKBIE(+14.74kb)|SLC29A1(+46.37kb)|SLC35B2(+22.98kb)|SPATS1(-62.13kb)|TCTE1(0)|TMEM63B(+125kb)|TMEM151B(+1.08kb)
6:44248364	6	44248364	A	?	9	1.826e-05	1.826e-05	0.7007	0.7007	0.508	0	0.3913	0.3913	0.7915	0.5311	0.6849	0.7333	1.271	0.792	0.7896	rs570469	AARS2(-18.1kb)|CAPN11(+96.22kb)|CDC5L(-106.9kb)|HSP90AB1(+26.74kb)|MIR4642(-155kb)|MIR4647(+26.34kb)|MRPL14(+153.2kb)|NFKBIE(+14.84kb)|SLC29A1(+46.48kb)|SLC35B2(+23.08kb)|SPATS1(-62.03kb)|TCTE1(0)|TMEM63B(+125.1kb)|TMEM151B(+1.182kb)
6:44250165	6	44250165	A	?	9	1.832e-05	1.832e-05	0.7007	0.7007	0.5077	0	0.3913	0.3913	0.7917	0.5311	0.6849	0.7333	1.271	0.792	0.7896	rs516582	AARS2(-16.3kb)|CAPN11(+98.03kb)|CDC5L(-105.1kb)|HSP90AB1(+28.54kb)|MIR4642(-153.2kb)|MIR4647(+28.14kb)|MRPL14(+155kb)|NFKBIE(+16.64kb)|SLC29A1(+48.28kb)|SLC35B2(+24.88kb)|SPATS1(-60.23kb)|TCTE1(0)|TMEM63B(+126.9kb)|TMEM151B(+2.983kb)
6:44250853	6	44250853	C	?	9	1.832e-05	1.832e-05	0.7007	0.7007	0.5077	0	0.3913	0.3913	0.7917	0.5311	0.6849	0.7333	1.271	0.792	0.7896	rs324139	AARS2(-15.61kb)|CAPN11(+98.71kb)|CDC5L(-104.4kb)|HSP90AB1(+29.23kb)|MIR4642(-152.5kb)|MIR4647(+28.83kb)|MRPL14(+155.7kb)|NFKBIE(+17.33kb)|SLC29A1(+48.96kb)|SLC35B2(+25.57kb)|SPATS1(-59.54kb)|TCTE1(0)|TMEM63B(+127.6kb)|TMEM151B(+3.671kb)
5:58036400	5	58036400	A	?	9	1.846e-05	2.653e-05	0.7368	0.7363	0.4155	2.28	0.7124	0.7124	0.6105	0.9374	0.735	0.8929	0.3043	0.2672	0.7899	rs1962829	RAB3C(0)
7:36263068	7	36263068	A	?	9	1.853e-05	0.001693	0.6441	0.5866	0.032	52.46	0.2166	0.2166	0.9757	0.8413	0.4434	0.9283	0.5554	0.3568	0.6228	rs10281772	ANLN(-166.4kb)|EEPD1(0)|KIAA0895(-100.7kb)
18:19154233	18	19154233	C	?	9	1.872e-05	1.872e-05	0.4646	0.4646	0.6975	0	0.2891	0.2891	0.347	0.2785	0.778	0.6427	6.319	0.1776	0.4898	rs35087820	ABHD3(-76.62kb)|ESCO1(0)|GREB1L(+51.44kb)|MIB1(-167.1kb)|MIR320C1(-109.2kb)|SNRPD1(-38.03kb)
17:26094596	17	26094596	T	?	8	1.885e-05	1.885e-05	0.4405	0.4405	0.6686	0	0.2931	0.2931	0.5788	0.1722	0.2765	0.6309	0.3734	NA	0.5864	rs28944169	KSR1(+143.9kb)|LGALS9(+118kb)|LYRM9(-110.7kb)|NOS2(0)
6:44250838	6	44250838	C	?	9	1.891e-05	1.891e-05	0.7012	0.7012	0.5052	0	0.3913	0.3913	0.7938	0.5311	0.6849	0.7333	1.271	0.792	0.7896	rs324138	AARS2(-15.62kb)|CAPN11(+98.7kb)|CDC5L(-104.4kb)|HSP90AB1(+29.21kb)|MIR4642(-152.5kb)|MIR4647(+28.82kb)|MRPL14(+155.6kb)|NFKBIE(+17.31kb)|SLC29A1(+48.95kb)|SLC35B2(+25.56kb)|SPATS1(-59.56kb)|TCTE1(0)|TMEM63B(+127.6kb)|TMEM151B(+3.656kb)
6:44252628	6	44252628	C	?	9	1.891e-05	1.891e-05	0.7012	0.7012	0.5052	0	0.3913	0.3913	0.7938	0.5311	0.6849	0.7333	1.271	0.792	0.7896	rs324140	AARS2(-13.83kb)|CAPN11(+100.5kb)|CDC5L(-102.6kb)|HSP90AB1(+31kb)|MIR4642(-150.7kb)|MIR4647(+30.61kb)|MRPL14(+157.4kb)|NFKBIE(+19.1kb)|SLC29A1(+50.74kb)|SLC35B2(+27.34kb)|SPATS1(-57.77kb)|TCTE1(0)|TMEM63B(+129.4kb)|TMEM151B(+5.446kb)
6:44254687	6	44254687	C	?	9	1.929e-05	1.929e-05	0.7015	0.7015	0.5038	0	0.3913	0.3913	0.795	0.5311	0.6849	0.7333	1.271	0.792	0.7896	rs324144	AARS2(-11.78kb)|CAPN11(+102.5kb)|CDC5L(-100.6kb)|HSP90AB1(+33.06kb)|MIR4642(-148.7kb)|MIR4647(+32.66kb)|MRPL14(+159.5kb)|NFKBIE(+21.16kb)|SLC29A1(+52.8kb)|SLC35B2(+29.4kb)|SPATS1(-55.71kb)|TCTE1(0)|TMEM63B(+131.4kb)|TMEM151B(+7.505kb)
6:44256020	6	44256020	T	?	9	1.929e-05	1.929e-05	0.7015	0.7015	0.5038	0	0.3913	0.3913	0.795	0.5311	0.6849	0.7333	1.271	0.792	0.7896	rs324147	AARS2(-10.44kb)|CAPN11(+103.9kb)|CDC5L(-99.23kb)|HSP90AB1(+34.4kb)|MIR4642(-147.4kb)|MIR4647(+34kb)|MRPL14(+160.8kb)|NFKBIE(+22.5kb)|SLC29A1(+54.13kb)|SLC35B2(+30.74kb)|SPATS1(-54.38kb)|TCTE1(0)|TMEM63B(+132.8kb)|TMEM151B(+8.838kb)
16:75011178	16	75011178	A	?	8	1.963e-05	1.963e-05	0.4241	0.4241	0.5784	0	0.2632	0.2632	0.4686	3928000	1.012	0.751	NA	0.3825	0.2812	rs150473370	LDHD(-134.6kb)|WDR59(0)|ZFP1(-171.2kb)|ZNRF1(-21.74kb)
10:103353439	10	103353439	A	?	9	1.995e-05	0.001185	0.731	0.6961	0.0638	45.83	0.378	0.378	0.8472	0.5771	1.095	0.6084	0.9209	0.6108	0.7699	rs12263235	BTRC(+36.36kb)|DPCD(0)|FBXW4(-16.98kb)|FGF8(-176.4kb)|MGEA5(-190.8kb)|MIR3158-1(-7.734kb)|MIR3158-2(-7.734kb)|NPM3(-187.6kb)|POLL(+5.412kb)
10:103354182	10	103354182	T	?	9	1.995e-05	0.001185	0.731	0.6961	0.0638	45.83	0.378	0.378	0.8472	0.5771	1.095	0.6084	0.9209	0.6108	0.7699	rs11191055	BTRC(+37.1kb)|DPCD(0)|FBXW4(-16.24kb)|FGF8(-175.7kb)|MGEA5(-190kb)|MIR3158-1(-6.991kb)|MIR3158-2(-6.991kb)|NPM3(-186.9kb)|POLL(+6.155kb)
10:103354554	10	103354554	G	?	9	1.995e-05	0.001185	0.731	0.6961	0.0638	45.83	0.378	0.378	0.8472	0.5771	1.095	0.6084	0.9209	0.6108	0.7699	rs7911520	BTRC(+37.48kb)|DPCD(0)|FBXW4(-15.87kb)|FGF8(-175.3kb)|MGEA5(-189.6kb)|MIR3158-1(-6.619kb)|MIR3158-2(-6.619kb)|NPM3(-186.5kb)|POLL(+6.527kb)
10:103354672	10	103354672	G	?	9	1.995e-05	0.001185	0.731	0.6961	0.0638	45.83	0.378	0.378	0.8472	0.5771	1.095	0.6084	0.9209	0.6108	0.7699	rs7911663	BTRC(+37.59kb)|DPCD(0)|FBXW4(-15.75kb)|FGF8(-175.2kb)|MGEA5(-189.5kb)|MIR3158-1(-6.501kb)|MIR3158-2(-6.501kb)|NPM3(-186.4kb)|POLL(+6.645kb)
10:103374233	10	103374233	A	?	9	2.011e-05	0.00399	0.7111	0.6703	0.0173	56.95	0.2901	0.2901	0.8142	0.701	1.187	0.5635	1.197	0.6712	0.7251	rs10883665	BTRC(+57.16kb)|DPCD(+4.823kb)|FBXW4(0)|FGF8(-155.7kb)|MGEA5(-170kb)|MIR3158-1(+12.98kb)|MIR3158-2(+12.98kb)|NPM3(-166.8kb)|POLL(+26.21kb)
9:114988668	9	114988668	T	?	8	2.047e-05	2.047e-05	1.3475	1.3475	0.5021	0	1.444	1.444	1.215	0.7973	1.574	1.384	0.6346	NA	1.496	rs7048773	HSDL2(-153.5kb)|MIR3134(0)|PTBP3(0)|SUSD1(+51.11kb)
18:19260977	18	19260977	T	?	9	2.048e-05	2.048e-05	0.4632	0.4632	0.6955	0	0.2891	0.2891	0.353	0.2785	0.7595	0.6571	5.601	0.1776	0.4632	rs78119642	ABHD3(0)|ESCO1(+80.28kb)|GREB1L(+158.2kb)|MIB1(-60.31kb)|MIR1-2(-148kb)|MIR133A1(-144.7kb)|MIR320C1(-2.493kb)|SNRPD1(+50.77kb)
2:178169301	2	178169301	G	?	9	2.056e-05	0.003325	0.6274	0.6122	0.0747	43.98	0.2301	0.2301	0.7418	2.353	0.5268	0.6287	1.228	1.902	0.7243	rs58088783	AGPS(-88.17kb)|HNRNPA3(+80.62kb)|LOC100130691(0)|MIR3128(+48.56kb)|MIR4444-1(+91.78kb)|NFE2L2(+39.44kb)
5:58032485	5	58032485	G	?	9	2.097e-05	3.025e-05	0.7387	0.7383	0.4155	2.28	0.7467	0.7467	0.6106	0.9679	0.7294	0.8864	0.3043	0.2672	0.7909	rs292998	RAB3C(0)
10:56465776	10	56465776	C	?	9	2.148e-05	2.148e-05	0.3991	0.3991	0.8632	0	0.9235	0.9235	0.5279	0.6049	0.2636	0.4846	0.2515	0.1407	0.2527	rs117698038	PCDH15(0)
3:108160936	3	108160936	A	?	6	2.162e-05	0.00199	0.3362	0.3251	0.1275	41.65	0.0961	0.0961	0.2871	NA	1.68	0.2261	NA	NA	0.5791	rs79500928	DZIP3(-147.4kb)|HHLA2(+63.81kb)|KIAA1524(-107.8kb)|MYH15(0)
16:75008653	16	75008653	C	?	8	2.175e-05	2.175e-05	0.4263	0.4263	0.5751	0	0.2632	0.2632	0.4803	3928000	1.012	0.751	NA	0.3825	0.2812	rs117366998	FA2H(+199.9kb)|LDHD(-137.1kb)|WDR59(0)|ZFP1(-173.8kb)|ZNRF1(-24.26kb)
18:18884494	18	18884494	A	?	9	2.186e-05	2.186e-05	0.4629	0.4629	0.8788	0	0.2891	0.2891	0.347	0.3725	1.036	0.6016	2.239	0.1776	0.5065	rs76364694	GREB1L(0)|ROCK1(+192.7kb)
14:81457257	14	81457257	C	?	9	2.218e-05	0.0004488	0.7394	0.7257	0.1939	28.18	0.5511	0.5511	0.6314	0.948	0.6569	1.025	0.8674	0.2842	0.7667	rs28414437	CEP128(+51.37kb)|GTF2A1(-184.5kb)|TSHR(0)
10:103383836	10	103383836	C	?	9	2.224e-05	0.005455	0.7116	0.6794	0.0174	56.88	0.2901	0.2901	0.7653	0.8356	1.231	0.5819	1.197	0.6526	0.7149	rs3095791	BTRC(+66.76kb)|DPCD(+14.43kb)|FBXW4(0)|FGF8(-146kb)|KCNIP2-AS1(-195kb)|MGEA5(-160.4kb)|MIR3158-1(+22.58kb)|MIR3158-2(+22.58kb)|NPM3(-157.2kb)|POLL(+35.81kb)
9:114976870	9	114976870	G	?	8	2.284e-05	2.284e-05	1.3452	1.3452	0.5038	0	1.444	1.444	1.2	0.8042	1.574	1.394	0.6346	NA	1.49	rs7847972	HSDL2(-165.3kb)|MIR3134(0)|PTBP3(-3.124kb)|SUSD1(+39.31kb)
9:114982463	9	114982463	C	?	8	2.284e-05	2.284e-05	1.3452	1.3452	0.5038	0	1.444	1.444	1.2	0.8042	1.574	1.394	0.6346	NA	1.49	rs7855745	HSDL2(-159.7kb)|MIR3134(0)|PTBP3(0)|SUSD1(+44.91kb)
9:114982798	9	114982798	G	?	8	2.284e-05	2.284e-05	1.3452	1.3452	0.5038	0	1.444	1.444	1.2	0.8042	1.574	1.394	0.6346	NA	1.49	rs7859107	HSDL2(-159.4kb)|MIR3134(0)|PTBP3(0)|SUSD1(+45.24kb)
9:114986714	9	114986714	C	?	8	2.284e-05	2.284e-05	1.3452	1.3452	0.5038	0	1.444	1.444	1.2	0.8042	1.574	1.394	0.6346	NA	1.49	rs7025680	HSDL2(-155.5kb)|MIR3134(0)|PTBP3(0)|SUSD1(+49.16kb)
9:114987364	9	114987364	T	?	8	2.284e-05	2.284e-05	1.3452	1.3452	0.5038	0	1.444	1.444	1.2	0.8042	1.574	1.394	0.6346	NA	1.49	rs7041185	HSDL2(-154.8kb)|MIR3134(0)|PTBP3(0)|SUSD1(+49.81kb)
9:114987854	9	114987854	C	?	8	2.284e-05	2.284e-05	1.3452	1.3452	0.5038	0	1.444	1.444	1.2	0.8042	1.574	1.394	0.6346	NA	1.49	rs7871559	HSDL2(-154.3kb)|MIR3134(0)|PTBP3(0)|SUSD1(+50.3kb)
9:114988331	9	114988331	T	?	8	2.284e-05	2.284e-05	1.3452	1.3452	0.5038	0	1.444	1.444	1.2	0.8042	1.574	1.394	0.6346	NA	1.49	rs3780514	HSDL2(-153.9kb)|MIR3134(0)|PTBP3(0)|SUSD1(+50.78kb)
9:114990373	9	114990373	G	?	8	2.284e-05	2.284e-05	1.3452	1.3452	0.5038	0	1.444	1.444	1.2	0.8042	1.574	1.394	0.6346	NA	1.49	rs3736985	HSDL2(-151.8kb)|MIR3134(0)|PTBP3(0)|SUSD1(+52.82kb)
12:20789876	12	20789876	A	?	7	2.304e-05	2.304e-05	0.4615	0.4615	0.5776	0	0.3546	0.3546	0.4024	4.044	0.3519	0.5768	NA	NA	0.5293	rs75695742	PDE3A(0)|SLCO1B3(-173.8kb)|SLCO1C1(-58.41kb)
3:114196123	3	114196123	C	?	9	2.307e-05	2.307e-05	1.5851	1.5851	0.7749	0	1.953	1.953	1.399	0.7802	1.872	2.084	1.074	2.802	1.48	rs2718424	MIR568(+160.7kb)|TIGIT(+167kb)|ZBTB20(0)|ZBTB20-AS1(+88.3kb)
9:114978181	9	114978181	A	?	8	2.307e-05	2.307e-05	1.345	1.345	0.5045	0	1.444	1.444	1.2	0.8042	1.574	1.394	0.6346	NA	1.489	rs3849123	HSDL2(-164kb)|MIR3134(0)|PTBP3(-1.813kb)|SUSD1(+40.62kb)
9:114980967	9	114980967	C	?	8	2.307e-05	2.307e-05	1.345	1.345	0.5045	0	1.444	1.444	1.2	0.8042	1.574	1.394	0.6346	NA	1.489	rs6575	HSDL2(-161.2kb)|MIR3134(0)|PTBP3(0)|SUSD1(+43.41kb)
16:77995232	16	77995232	C	?	9	2.311e-05	2.311e-05	0.7379	0.7379	0.7624	0	0.6229	0.6229	0.8485	0.6665	0.8806	0.6339	0.657	0.3619	0.7607	rs451872	CLEC3A(-61.21kb)|VAT1L(0)|WWOX(-138.1kb)
3:192037486	3	192037486	A	?	6	2.311e-05	2.311e-05	0.4435	0.4435	0.6483	0	NA	NA	0.3548	0.7323	0.5154	0.232	0.3294	NA	0.5958	rs74732557	FGF12(0)
12:108956695	12	108956695	T	?	6	2.338e-05	2.338e-05	0.2979	0.2979	0.8691	0	0.1211	0.1211	0.2838	0.8735	0.3562	0.3094	NA	NA	NA	rs186093048	CORO1C(-82.19kb)|FICD(+43.32kb)|ISCU(0)|SART3(+1.53kb)|SELPLG(-58.98kb)|TMEM119(-26.93kb)
20:15497234	20	15497234	A	?	7	2.364e-05	0.0001004	0.3035	0.2855	0.3369	12.15	0.0624	0.0624	0.2838	2089000	0.4256	0.5783	NA	0.0614	NA	rs147670884	MACROD2(0)
16:77995572	16	77995572	A	?	9	2.37e-05	2.37e-05	0.7382	0.7382	0.7625	0	0.6229	0.6229	0.8479	0.6665	0.8806	0.6339	0.657	0.3619	0.7624	rs419362	CLEC3A(-60.87kb)|VAT1L(0)|WWOX(-137.8kb)
10:103360824	10	103360824	T	?	9	2.382e-05	0.001289	0.7331	0.6975	0.0628	46	0.378	0.378	0.8457	0.5771	1.095	0.6084	0.9209	0.6108	0.7807	rs11191059	BTRC(+43.75kb)|DPCD(0)|FBXW4(-9.596kb)|FGF8(-169.1kb)|MGEA5(-183.4kb)|MIR3158-1(-0.349kb)|MIR3158-2(-0.349kb)|NPM3(-180.3kb)|POLL(+12.8kb)
6:44246766	6	44246766	C	?	9	2.404e-05	2.404e-05	0.7044	0.7044	0.4419	0	0.3835	0.3835	0.7936	0.5311	0.6849	0.7333	1.271	0.792	0.8124	rs12943	AARS2(-19.7kb)|CAPN11(+94.63kb)|CDC5L(-108.5kb)|HSP90AB1(+25.14kb)|MIR4642(-156.6kb)|MIR4647(+24.74kb)|MRPL14(+151.6kb)|NFKBIE(+13.24kb)|SLC29A1(+44.88kb)|SLC35B2(+21.48kb)|SPATS1(-63.63kb)|TCTE1(-1.13kb)|TMEM63B(+123.5kb)|TMEM151B(0)
2:204390214	2	204390214	G	?	6	2.425e-05	2.425e-05	0.3882	0.3882	0.4444	0	NA	NA	0.718	0.3023	0.3021	0.1896	NA	0.3698	0.4129	rs13030374	ABI2(+93.32kb)|CD28(-181kb)|RAPH1(0)
7:151047001	7	151047001	C	?	9	2.428e-05	0.0002874	1.362	1.3911	0.233	23.66	2.355	2.355	1.155	0.9508	1.644	1.2	1.574	4.232	1.391	rs390052	ABCF2(+122.7kb)|ASB10(+162.1kb)|CHPF2(+111.1kb)|CRYGN(-80.05kb)|GBX1(+182.1kb)|MIR671(+111.4kb)|MIR3907(-83.57kb)|NUB1(0)|RHEB(-116.1kb)|SMARCD3(+72.77kb)|WDR86(-31.2kb)|WDR86-AS1(-59.32kb)
21:22765806	21	22765806	A	?	7	2.435e-05	2.435e-05	0.3743	0.3743	0.9996	0	0.4422	0.4422	0.3767	0.3269	0.3168	0.3599	NA	0.5336	NA	rs148330044	NCAM2(0)|RNU6-67P(+107.7kb)
15:43813387	15	43813387	C	?	6	2.445e-05	2.445e-05	0.582	0.582	0.9881	0	0.5416	0.5416	NA	NA	NA	0.6634	0.468	0.6314	0.5449	NA	ADAL(+167.3kb)|CATSPER2(-109.4kb)|CKMT1A(-171.7kb)|CKMT1B(-71.86kb)|LCMT2(+190.6kb)|MAP1A(0)|PPIP5K1(-12.27kb)|RNU6-28P(0)|STRC(-78.37kb)|TP53BP1(+10.68kb)|TUBGCP4(+115.1kb)|ZSCAN29(+151.1kb)
10:103363236	10	103363236	C	?	9	2.473e-05	0.001319	0.7336	0.6978	0.0623	46.1	0.378	0.378	0.8472	0.5771	1.095	0.6084	0.9209	0.6108	0.7815	rs75456113	BTRC(+46.16kb)|DPCD(0)|FBXW4(-7.184kb)|FGF8(-166.6kb)|MGEA5(-181kb)|MIR3158-1(+1.982kb)|MIR3158-2(+1.982kb)|NPM3(-177.8kb)|POLL(+15.21kb)
7:151047142	7	151047142	G	?	9	2.473e-05	4.631e-05	1.351	1.3577	0.3884	5.61	2.239	2.239	1.234	0.9897	1.631	1.209	1.428	2.609	1.262	rs450947	ABCF2(+122.8kb)|ASB10(+162.2kb)|CHPF2(+111.2kb)|CRYGN(-79.91kb)|GBX1(+182.3kb)|MIR671(+111.5kb)|MIR3907(-83.43kb)|NUB1(0)|RHEB(-116kb)|SMARCD3(+72.91kb)|WDR86(-31.06kb)|WDR86-AS1(-59.18kb)
17:20798992	17	20798992	T	?	8	2.511e-05	0.001928	0.668	0.6446	0.0841	44.18	0.3134	0.3134	0.8077	0.7123	0.9319	0.8478	0.5787	NA	0.472	rs8073465	CCDC144NL(0)|LOC100287072(+157.8kb)|USP22(-103.9kb)
10:103352452	10	103352452	C	?	9	2.513e-05	0.001522	0.7337	0.6971	0.0543	47.57	0.378	0.378	0.8493	0.5771	1.117	0.6084	0.9209	0.6108	0.771	rs10466137	BTRC(+35.37kb)|DPCD(0)|FBXW4(-17.97kb)|FGF8(-177.4kb)|MGEA5(-191.7kb)|MIR3158-1(-8.721kb)|MIR3158-2(-8.721kb)|NPM3(-188.6kb)|POLL(+4.425kb)
7:107711351	7	107711351	G	?	6	2.544e-05	2.544e-05	0.3833	0.3833	0.9847	0	0.2947	0.2947	0.4473	0.3688	0.2865	NA	NA	NA	0.4225	rs79286156	DLD(+149.7kb)|LAMB1(+67.55kb)|LAMB4(0)|NRCAM(-76.72kb)
10:103352698	10	103352698	A	?	9	2.568e-05	0.001529	0.7339	0.6973	0.0545	47.53	0.378	0.378	0.8472	0.5771	1.117	0.6084	0.9209	0.6108	0.7738	rs3924011	BTRC(+35.62kb)|DPCD(0)|FBXW4(-17.72kb)|FGF8(-177.2kb)|MGEA5(-191.5kb)|MIR3158-1(-8.475kb)|MIR3158-2(-8.475kb)|NPM3(-188.4kb)|POLL(+4.671kb)
10:103359558	10	103359558	A	?	9	2.616e-05	0.001364	0.7342	0.6982	0.0615	46.24	0.378	0.378	0.8493	0.5771	1.095	0.6084	0.9209	0.6108	0.7827	rs7902701	BTRC(+42.48kb)|DPCD(0)|FBXW4(-10.86kb)|FGF8(-170.3kb)|MGEA5(-184.6kb)|MIR3158-1(-1.615kb)|MIR3158-2(-1.615kb)|NPM3(-181.5kb)|POLL(+11.53kb)
9:101328989	9	101328989	A	?	9	2.649e-05	2.649e-05	0.6585	0.6585	0.6199	0	0.5239	0.5239	0.7684	0.6313	0.6852	0.8936	0.6636	0.6141	0.4405	rs62576025	ANKS6(-165.3kb)|GABBR2(0)
4:148438619	4	148438619	C	?	8	2.656e-05	0.005871	0.6197	0.5673	0.0095	62.39	0.1722	0.1722	0.8724	1.099	0.5373	0.515	2.161	NA	0.7797	rs4835411	EDNRA(0)|PRMT10(-120.9kb)|TMEM184C(-99.92kb)
3:4842231	3	4842231	T	?	9	2.658e-05	2.658e-05	0.7287	0.7287	0.7882	0	0.519	0.519	0.6981	0.6747	0.8136	0.7331	0.4158	0.4939	0.8763	rs2291862	BHLHE40(-178.9kb)|BHLHE40-AS1(-97.68kb)|EGOT(+48.96kb)|ITPR1(0)
20:361716	20	361716	G	?	6	2.676e-05	2.676e-05	0.2989	0.2989	0.9774	0	0.1929	0.1929	0.2751	0.2022	NA	0.2937	NA	NA	0.4406	rs183708134	C20orf96(+90.3kb)|CSNK2A1(-101.6kb)|DEFB128(+191.5kb)|DEFB129(+151.2kb)|DEFB132(+120kb)|NRSN2(+26.2kb)|RBCK1(-26.99kb)|SOX12(+50.84kb)|TBC1D20(-54.41kb)|TRIB3(0)|ZCCHC3(+80.75kb)
16:77997115	16	77997115	G	?	9	2.713e-05	2.713e-05	0.7405	0.7405	0.7838	0	0.6229	0.6229	0.8399	0.6213	0.866	0.6427	0.8857	0.3665	0.7768	rs383161	CLEC3A(-59.33kb)|VAT1L(0)|WWOX(-136.2kb)
7:151048012	7	151048012	A	?	9	2.756e-05	0.0001309	1.3593	1.3754	0.3178	13.96	2.24	2.24	1.155	1	1.644	1.201	1.573	4.232	1.382	rs404919	ABCF2(+123.7kb)|ASB10(+163.1kb)|CHPF2(+112.1kb)|CRYGN(-79.04kb)|GBX1(+183.1kb)|MIR671(+112.4kb)|MIR3907(-82.56kb)|NUB1(0)|RHEB(-115.1kb)|SMARCD3(+73.78kb)|WDR86(-30.19kb)|WDR86-AS1(-58.31kb)
14:81461472	14	81461472	C	?	9	2.765e-05	0.0004753	0.7423	0.7292	0.2028	27.15	0.5511	0.5511	0.6314	0.948	0.6724	1.025	0.8674	0.2842	0.7673	rs2160215	CEP128(+55.59kb)|GTF2A1(-180.3kb)|TSHR(0)
7:151047947	7	151047947	A	?	9	2.788e-05	0.0001331	1.3591	1.3753	0.3171	14.04	2.24	2.24	1.155	1	1.644	1.2	1.573	4.232	1.382	rs405166	ABCF2(+123.6kb)|ASB10(+163kb)|CHPF2(+112kb)|CRYGN(-79.11kb)|GBX1(+183.1kb)|MIR671(+112.3kb)|MIR3907(-82.63kb)|NUB1(0)|RHEB(-115.2kb)|SMARCD3(+73.72kb)|WDR86(-30.26kb)|WDR86-AS1(-58.37kb)
7:151055558	7	151055558	A	?	9	2.814e-05	2.814e-05	1.4281	1.4281	0.4727	0	2.192	2.192	1.123	2.193	1.778	1.42	2.293	2.17	1.214	rs387859	ABCF2(+131.2kb)|ASB10(+170.6kb)|CHPF2(+119.7kb)|CRYGN(-71.5kb)|GBX1(+190.7kb)|MIR671(+119.9kb)|MIR3907(-75.02kb)|NUB1(0)|PRKAG2(-197.6kb)|RHEB(-107.5kb)|SMARCD3(+81.33kb)|WDR86(-22.65kb)|WDR86-AS1(-50.76kb)
17:39912581	17	39912581	A	?	9	2.815e-05	0.000277	0.7187	0.7089	0.2699	19.44	0.4782	0.4782	0.6993	1.014	0.7311	1.006	0.6933	0.3053	0.6045	rs9890858	ACLY(-110.6kb)|EIF1(+64.68kb)|FKBP10(-56.38kb)|GAST(+40.36kb)|HAP1(+21.68kb)|JUP(0)|KLHL10(-81.46kb)|KLHL11(-97.22kb)|KRT9(+184.3kb)|KRT14(+169.4kb)|KRT16(+143.5kb)|KRT17(+131.7kb)|KRT42P(+116.1kb)|LEPREL4(-45.62kb)|NT5C3B(-68.75kb)|TTC25(-174.3kb)
15:38788881	15	38788881	C	?	9	2.818e-05	2.818e-05	0.6882	0.6882	0.4521	0	0.4158	0.4158	0.802	1.109	0.738	0.6741	0.1228	1.416	0.6383	rs78040654	C15orf53(-199.9kb)|FAM98B(+11.82kb)|RASGRP1(0)|SPRED1(+139.4kb)
13:100355149	13	100355149	C	?	9	2.823e-05	2.823e-05	0.5391	0.5391	0.7603	0	0.5473	0.5473	0.5113	2.366	0.3476	0.6618	0.1119	0.9832	0.5778	rs75850527	CLYBL(0)|MIR4306(+59.75kb)|TM9SF2(+138.8kb)
16:77996227	16	77996227	G	?	9	2.834e-05	2.834e-05	0.7408	0.7408	0.7622	0	0.614	0.614	0.8454	0.6665	0.8751	0.6379	0.8637	0.3619	0.7716	rs400635	CLEC3A(-60.22kb)|VAT1L(0)|WWOX(-137.1kb)
13:100390755	13	100390755	G	?	6	2.853e-05	2.853e-05	0.4524	0.4524	0.6229	0	NA	NA	0.3767	1.198	0.4181	0.3988	0.1109	NA	0.7599	rs117936557	CLYBL(0)|MIR4306(+95.35kb)|TM9SF2(+174.5kb)
6:44253617	6	44253617	C	?	9	2.863e-05	2.863e-05	0.7066	0.7066	0.531	0	0.3913	0.3913	0.7917	0.5776	0.6849	0.7333	1.271	0.792	0.8011	rs324142	AARS2(-12.84kb)|CAPN11(+101.5kb)|CDC5L(-101.6kb)|HSP90AB1(+31.99kb)|MIR4642(-149.8kb)|MIR4647(+31.6kb)|MRPL14(+158.4kb)|NFKBIE(+20.09kb)|SLC29A1(+51.73kb)|SLC35B2(+28.33kb)|SPATS1(-56.78kb)|TCTE1(0)|TMEM63B(+130.4kb)|TMEM151B(+6.435kb)
7:36290460	7	36290460	C	?	9	2.872e-05	0.004048	0.6476	0.5734	0.0076	61.63	0.158	0.158	1.028	1.216	0.4853	0.7922	0.8044	0.3406	0.6302	rs17274258	ANLN(-139kb)|EEPD1(0)|KIAA0895(-73.3kb)
13:100327029	13	100327029	G	?	9	2.884e-05	2.884e-05	0.5457	0.5457	0.7606	0	0.5473	0.5473	0.5106	2.366	0.3609	0.6661	0.1084	0.9832	0.5932	rs9585178	CLYBL(0)|MIR4306(+31.63kb)|TM9SF2(+110.7kb)
3:101045907	3	101045907	G	?	9	2.902e-05	0.0001112	0.6105	0.6098	0.3625	8.73	0.3865	0.3865	0.4831	0.8446	0.91	0.4429	1.271	0.5644	0.8967	rs63482	FAM172BP(-191.8kb)|IMPG2(+6.488kb)|SENP7(0)
6:44246049	6	44246049	A	?	9	2.913e-05	2.913e-05	0.7064	0.7064	0.4588	0	0.3835	0.3835	0.7875	0.5513	0.6849	0.7323	1.271	0.7652	0.8208	rs325017	AARS2(-20.41kb)|CAPN11(+93.91kb)|CDC5L(-109.2kb)|HSP90AB1(+24.42kb)|MIR4642(-157.3kb)|MIR4647(+24.03kb)|MRPL14(+150.9kb)|NFKBIE(+12.52kb)|SLC29A1(+44.16kb)|SLC35B2(+20.77kb)|SPATS1(-64.35kb)|TCTE1(-1.847kb)|TMEM63B(+122.8kb)|TMEM151B(0)
6:44254793	6	44254793	T	?	9	2.918e-05	2.918e-05	0.7068	0.7068	0.5297	0	0.3913	0.3913	0.7929	0.5776	0.6849	0.7333	1.271	0.792	0.8011	rs324145	AARS2(-11.67kb)|CAPN11(+102.7kb)|CDC5L(-100.5kb)|HSP90AB1(+33.17kb)|MIR4642(-148.6kb)|MIR4647(+32.77kb)|MRPL14(+159.6kb)|NFKBIE(+21.27kb)|SLC29A1(+52.9kb)|SLC35B2(+29.51kb)|SPATS1(-55.6kb)|TCTE1(0)|TMEM63B(+131.5kb)|TMEM151B(+7.611kb)
6:44255459	6	44255459	G	?	9	2.918e-05	2.918e-05	0.7068	0.7068	0.5297	0	0.3913	0.3913	0.7929	0.5776	0.6849	0.7333	1.271	0.792	0.8011	rs324146	AARS2(-11kb)|CAPN11(+103.3kb)|CDC5L(-99.79kb)|HSP90AB1(+33.83kb)|MIR4642(-147.9kb)|MIR4647(+33.44kb)|MRPL14(+160.3kb)|NFKBIE(+21.93kb)|SLC29A1(+53.57kb)|SLC35B2(+30.18kb)|SPATS1(-54.94kb)|TCTE1(0)|TMEM63B(+132.2kb)|TMEM151B(+8.277kb)
15:102220444	15	102220444	T	?	7	2.919e-05	0.006525	0.5075	0.3867	0.001	73.42	0.1244	0.1244	1.026	0.2852	0.3694	0.8092	1.798	NA	NA	rs72761651	OR4F6(-125.5kb)|OR4F13P(-161.9kb)|OR4F15(-137.9kb)|PCSK6(+190.3kb)|TARSL2(0)|TM2D3(+27.85kb)
10:103382463	10	103382463	T	?	9	2.924e-05	0.00608	0.715	0.6816	0.0166	57.19	0.2901	0.2901	0.7835	0.8356	1.231	0.5819	1.197	0.6526	0.7136	rs12261004	BTRC(+65.38kb)|DPCD(+13.05kb)|FBXW4(0)|FGF8(-147.4kb)|KCNIP2-AS1(-196.4kb)|MGEA5(-161.7kb)|MIR3158-1(+21.21kb)|MIR3158-2(+21.21kb)|NPM3(-158.6kb)|POLL(+34.44kb)
10:103384849	10	103384849	T	?	9	2.924e-05	0.00608	0.715	0.6816	0.0166	57.19	0.2901	0.2901	0.7835	0.8356	1.231	0.5819	1.197	0.6526	0.7136	rs10883667	BTRC(+67.77kb)|DPCD(+15.44kb)|FBXW4(0)|FGF8(-145kb)|KCNIP2-AS1(-194kb)|MGEA5(-159.4kb)|MIR3158-1(+23.6kb)|MIR3158-2(+23.6kb)|NPM3(-156.2kb)|POLL(+36.82kb)
9:115011317	9	115011317	A	?	8	2.935e-05	2.935e-05	1.3392	1.3392	0.5859	0	1.444	1.444	1.196	0.8042	1.564	1.384	0.7732	NA	1.472	rs1359878	HSDL2(-130.9kb)|MIR3134(0)|PTBP3(0)|SUSD1(+73.76kb)
12:72864985	12	72864985	A	?	9	2.954e-05	0.002353	0.6177	0.6152	0.154	32.99	0.5921	0.5921	0.6963	5.195	0.5297	0.5507	0.1091	0.2268	0.6419	rs10879431	TRHDE(0)|TRHDE-AS1(+197.7kb)
10:84048346	10	84048346	G	?	9	2.957e-05	2.957e-05	0.4663	0.4663	0.7288	0	0.2713	0.2713	0.3157	0.6572	0.657	0.6094	0.2154	0.3108	0.7698	rs7070560	NRG3(0)
2:204160034	2	204160034	A	?	8	2.972e-05	2.972e-05	0.4109	0.4109	0.4738	0	0.829	0.829	0.7365	0.3023	0.2847	0.1765	NA	0.3698	0.4538	rs13035339	ABI2(-32.97kb)|CYP20A1(0)|NBEAL1(+77.32kb)|RAPH1(-138.5kb)
7:148431467	7	148431467	T	?	6	2.991e-05	2.991e-05	0.3807	0.3807	0.7517	0	NA	NA	0.3695	1.373	0.413	0.524	0.0553	NA	0.26	rs78860462	C7orf33(+118.5kb)|CUL1(0)|EZH2(-73kb)
6:5336213	6	5336213	A	?	8	3.01e-05	0.0002591	0.5152	0.5269	0.3415	11.39	0.5041	0.5041	0.3309	1.584	0.9262	0.5382	1.663	NA	0.4093	rs72815641	FARS2(0)|LYRM4(+75.04kb)|MIR3691(+187.7kb)
1:99751185	1	99751185	A	?	9	3.014e-05	0.01828	1.3342	1.2895	0.0544	47.56	1.649	1.649	1.439	0.4515	1.066	1.586	1.021	1.689	1.354	rs712887	LOC100129620(+136.8kb)|LPPR4(0)
6:44245930	6	44245930	C	?	9	3.033e-05	3.033e-05	0.7071	0.7071	0.4564	0	0.3835	0.3835	0.7911	0.5513	0.6849	0.7323	1.271	0.7652	0.8198	rs325018	AARS2(-20.53kb)|CAPN11(+93.79kb)|CDC5L(-109.3kb)|HSP90AB1(+24.3kb)|MIR4642(-157.4kb)|MIR4647(+23.91kb)|MRPL14(+150.7kb)|NFKBIE(+12.4kb)|SLC29A1(+44.04kb)|SLC35B2(+20.65kb)|SPATS1(-64.47kb)|TCTE1(-1.966kb)|TMEM63B(+122.7kb)|TMEM151B(0)
10:103386775	10	103386775	A	?	9	3.048e-05	0.006151	0.7156	0.682	0.0166	57.19	0.2901	0.2901	0.7835	0.8356	1.231	0.5819	1.197	0.6526	0.7161	rs12354716	BTRC(+69.7kb)|DPCD(+17.36kb)|FBXW4(0)|FGF8(-143.1kb)|KCNIP2(-199kb)|KCNIP2-AS1(-192kb)|MGEA5(-157.4kb)|MIR3158-1(+25.52kb)|MIR3158-2(+25.52kb)|NPM3(-154.3kb)|POLL(+38.75kb)
14:81462283	14	81462283	C	?	9	3.055e-05	0.0004658	0.7433	0.7305	0.2112	26.16	0.5565	0.5565	0.6314	0.948	0.6724	1.025	0.8339	0.2842	0.7704	rs1023586	CEP128(+56.4kb)|GTF2A1(-179.5kb)|TSHR(0)
9:115010307	9	115010307	A	?	8	3.061e-05	3.061e-05	1.3384	1.3384	0.5869	0	1.444	1.444	1.196	0.8042	1.564	1.384	0.7697	NA	1.469	rs7033486	HSDL2(-131.9kb)|MIR3134(0)|PTBP3(0)|SUSD1(+72.75kb)
9:115010440	9	115010440	C	?	8	3.061e-05	3.061e-05	1.3384	1.3384	0.5869	0	1.444	1.444	1.196	0.8042	1.564	1.384	0.7697	NA	1.469	rs7019056	HSDL2(-131.7kb)|MIR3134(0)|PTBP3(0)|SUSD1(+72.88kb)
10:126402100	10	126402100	T	?	9	3.077e-05	3.077e-05	0.7386	0.7386	0.7495	0	0.7157	0.7157	0.7719	0.5844	0.6544	0.883	0.9021	0.2889	0.7209	rs2272005	FAM53B(0)|FAM175B(-88.25kb)|LHPP(+99.39kb)|METTL10(-45.3kb)
4:101339134	4	101339134	C	?	8	3.092e-05	0.0004251	0.4639	0.4401	0.2172	26.5	0.0803	0.0803	0.694	1.235	0.4035	0.6227	0.1733	NA	0.3607	rs75944035	EMCN(0)
10:126398927	10	126398927	G	?	9	3.114e-05	3.114e-05	0.7387	0.7387	0.7478	0	0.7157	0.7157	0.7719	0.5844	0.6544	0.883	0.9217	0.2889	0.7209	rs17152232	FAM53B(0)|FAM175B(-91.43kb)|LHPP(+96.22kb)|METTL10(-48.48kb)
10:126400357	10	126400357	T	?	9	3.114e-05	3.114e-05	0.7387	0.7387	0.7478	0	0.7157	0.7157	0.7719	0.5844	0.6544	0.883	0.9217	0.2889	0.7209	rs4465331	FAM53B(0)|FAM175B(-90kb)|LHPP(+97.65kb)|METTL10(-47.05kb)
13:109658983	13	109658983	A	?	9	3.136e-05	0.001955	0.6431	0.6579	0.2042	26.99	0.9693	0.9693	0.4279	0.5556	0.6578	1.05	0.5191	0.3431	0.664	rs80032059	MYO16(0)|MYO16-AS1(-157.3kb)
13:109659244	13	109659244	C	?	9	3.136e-05	0.001955	0.6431	0.6579	0.2042	26.99	0.9693	0.9693	0.4279	0.5556	0.6578	1.05	0.5191	0.3431	0.664	rs78977988	MYO16(0)|MYO16-AS1(-157kb)
13:109658691	13	109658691	A	?	9	3.157e-05	0.001964	0.6432	0.658	0.2041	26.99	0.9693	0.9693	0.4279	0.5556	0.6578	1.05	0.5191	0.3431	0.6645	rs112617513	MYO16(0)|MYO16-AS1(-157.6kb)
17:20791317	17	20791317	T	?	8	3.165e-05	0.002835	0.6703	0.6389	0.0549	49.26	0.2894	0.2894	0.8358	0.7123	0.9319	0.8478	0.5787	NA	0.472	rs66474760	CCDC144NL(0)|LOC100287072(+150.1kb)|USP22(-111.6kb)
3:21447407	3	21447407	T	?	9	3.165e-05	0.0002949	0.5068	0.4699	0.1928	28.32	0.1246	0.1246	0.7294	0.3023	0.696	0.516	0.305	0.8936	0.6067	rs35986875	VENTXP7(0)|ZNF385D(-15.08kb)
16:77996543	16	77996543	A	?	9	3.188e-05	3.188e-05	0.7422	0.7422	0.7738	0	0.614	0.614	0.8454	0.6665	0.8751	0.6438	0.8637	0.3619	0.7716	rs452806	CLEC3A(-59.9kb)|VAT1L(0)|WWOX(-136.8kb)
3:101307042	3	101307042	T	?	8	3.205e-05	0.0002416	0.5119	0.5144	0.321	13.93	0.1892	0.1892	0.3659	0.6856	1.062	0.6815	0.7819	NA	0.5336	rs141677339	CEP97(-136.5kb)|FAM172BP(+64.31kb)|NXPE3(-191kb)|PCNP(0)|PDCL3P4(-124.2kb)|RPL24(-92.89kb)|SENP7(+74.96kb)|TRMT10C(+21.75kb)|ZBTB11(-61.24kb)|ZBTB11-AS1(-88.23kb)
10:103349596	10	103349596	G	?	9	3.21e-05	0.001895	0.7357	0.6946	0.0427	49.92	0.378	0.378	0.8572	0.5492	1.132	0.6064	0.9209	0.6108	0.7736	rs7089088	BTRC(+32.52kb)|DPCD(0)|FBXW4(-20.82kb)|FGF8(-180.3kb)|MGEA5(-194.6kb)|MIR3158-1(-11.58kb)|MIR3158-2(-11.58kb)|NPM3(-191.5kb)|POLL(+1.569kb)
16:77997364	16	77997364	T	?	9	3.241e-05	3.241e-05	0.7427	0.7427	0.6992	0	0.6229	0.6229	0.8375	0.628	0.8997	0.6235	0.8637	0.3665	0.786	rs4887926	CLEC3A(-59.08kb)|VAT1L(0)|WWOX(-136kb)
2:204038230	2	204038230	A	?	8	3.243e-05	3.688e-05	0.4078	0.4073	0.4213	1.04	0.829	0.829	0.7365	0.3023	0.2452	0.1765	NA	0.3698	0.4852	rs13033443	ABI2(-154.8kb)|CARF(+187.2kb)|CYP20A1(-64.93kb)|NBEAL1(0)
16:77996617	16	77996617	G	?	9	3.262e-05	3.262e-05	0.7425	0.7425	0.7719	0	0.614	0.614	0.8468	0.6665	0.8751	0.6438	0.8637	0.3619	0.7716	rs403003	CLEC3A(-59.82kb)|VAT1L(0)|WWOX(-136.7kb)
13:100198416	13	100198416	A	?	8	3.304e-05	3.304e-05	0.5338	0.5338	0.9813	0	0.6889	0.6889	0.5279	3521000	0.4103	0.5029	1.916	NA	0.5716	rs78153465	CLYBL(-60.5kb)|FKSG29(+194.1kb)|MIR548AN(+139.9kb)|MIR623(+189.9kb)|MIR4306(-96.9kb)|TM9SF2(0)|UBAC2(+159.7kb)
9:114973802	9	114973802	C	?	8	3.316e-05	3.316e-05	1.3365	1.3365	0.5936	0	1.444	1.444	1.196	0.8042	1.564	1.384	0.7697	NA	1.459	rs10981316	HSDL2(-168.4kb)|MIR3134(0)|PTBP3(-6.192kb)|SUSD1(+36.25kb)
17:78169955	17	78169955	T	?	9	3.317e-05	3.317e-05	0.7343	0.7343	0.8336	0	0.641	0.641	0.7287	1.048	0.6567	0.6704	0.3963	1.353	0.8444	rs72852589	CARD14(0)|CCDC40(+95.54kb)|EIF4A3(+48.97kb)|GAA(+76.28kb)|LOC100294362(-155.7kb)|RNF213(-64.7kb)|SGSH(-13.12kb)|SLC26A11(-24.24kb)|TBC1D16(+160.3kb)
9:114991220	9	114991220	G	?	8	3.338e-05	3.338e-05	1.3364	1.3364	0.588	0	1.444	1.444	1.196	0.8042	1.579	1.384	0.7697	NA	1.449	rs3908938	HSDL2(-151kb)|MIR3134(0)|PTBP3(0)|SUSD1(+53.66kb)
3:101394291	3	101394291	A	?	8	3.379e-05	0.0002718	0.5111	0.5125	0.3124	14.99	0.1892	0.1892	0.3589	0.6724	1.088	0.5782	0.7819	NA	0.5999	rs139969996	CEP97(-49.2kb)|FAM172BP(+151.6kb)|NFKBIZ(-152.5kb)|NXPE3(-103.7kb)|PCNP(+81.01kb)|PDCL3P4(-36.99kb)|RPL24(-5.642kb)|SENP7(+162.2kb)|TRMT10C(+109kb)|ZBTB11(0)|ZBTB11-AS1(-0.982kb)
10:126415795	10	126415795	C	?	9	3.407e-05	3.407e-05	0.7399	0.7399	0.8065	0	0.7054	0.7054	0.7713	0.5844	0.6544	0.8762	0.9219	0.3304	0.7357	rs11245343	FAM53B(0)|FAM175B(-74.56kb)|LHPP(+113.1kb)|METTL10(-31.61kb)
9:114991313	9	114991313	T	?	8	3.422e-05	3.422e-05	1.336	1.336	0.5861	0	1.444	1.444	1.194	0.8042	1.579	1.384	0.7697	NA	1.449	rs1417111	HSDL2(-150.9kb)|MIR3134(0)|PTBP3(0)|SUSD1(+53.76kb)
17:20792837	17	20792837	G	?	8	3.423e-05	0.002432	0.6687	0.6411	0.072	46.17	0.3134	0.3134	0.8757	0.6654	0.9044	0.833	0.5787	NA	0.4683	rs113761835	CCDC144NL(0)|LOC100287072(+151.7kb)|USP22(-110.1kb)
10:103388129	10	103388129	T	?	9	3.454e-05	0.006387	0.717	0.6831	0.0166	57.2	0.2901	0.2901	0.7805	0.8356	1.231	0.5819	1.208	0.6526	0.7233	rs11191069	BTRC(+71.05kb)|DPCD(+18.72kb)|FBXW4(0)|FGF8(-141.8kb)|KCNIP2(-197.6kb)|KCNIP2-AS1(-190.7kb)|MGEA5(-156.1kb)|MIR3158-1(+26.88kb)|MIR3158-2(+26.88kb)|NPM3(-153kb)|POLL(+40.1kb)
16:85949071	16	85949071	A	?	9	3.467e-05	0.0001332	0.6704	0.6646	0.3416	11.2	0.3379	0.3379	0.6484	0.5388	0.7563	0.6739	2.68	2.961	0.82	rs403038	C16orf74(+164.4kb)|COX4I1(+108.5kb)|EMC8(+115.9kb)|IRF8(0)|MIR1910(+173.8kb)
16:77997815	16	77997815	A	?	9	3.483e-05	3.483e-05	0.7425	0.7425	0.8104	0	0.6653	0.6653	0.8301	0.6213	0.8734	0.6336	0.8857	0.3665	0.7768	rs16946919	CLEC3A(-58.63kb)|VAT1L(0)|WWOX(-135.5kb)
9:115020134	9	115020134	C	?	8	3.509e-05	3.509e-05	1.3353	1.3353	0.5864	0	1.444	1.444	1.196	0.8042	1.564	1.363	0.7697	NA	1.476	rs4978479	HSDL2(-122.1kb)|MIR3134(0)|PTBP3(0)|SUSD1(+82.58kb)
9:115020271	9	115020271	A	?	8	3.509e-05	3.509e-05	1.3353	1.3353	0.5864	0	1.444	1.444	1.196	0.8042	1.564	1.363	0.7697	NA	1.476	rs4979090	HSDL2(-121.9kb)|MIR3134(0)|PTBP3(0)|SUSD1(+82.72kb)
9:115021013	9	115021013	A	?	8	3.509e-05	3.509e-05	1.3353	1.3353	0.5864	0	1.444	1.444	1.196	0.8042	1.564	1.363	0.7697	NA	1.476	rs7027240	HSDL2(-121.2kb)|MIR3134(0)|PTBP3(0)|SUSD1(+83.46kb)
9:115021286	9	115021286	T	?	8	3.509e-05	3.509e-05	1.3353	1.3353	0.5864	0	1.444	1.444	1.196	0.8042	1.564	1.363	0.7697	NA	1.476	rs10817304	HSDL2(-120.9kb)|MIR3134(0)|PTBP3(0)|SUSD1(+83.73kb)
9:115021400	9	115021400	T	?	8	3.509e-05	3.509e-05	1.3353	1.3353	0.5864	0	1.444	1.444	1.196	0.8042	1.564	1.363	0.7697	NA	1.476	rs10817305	HSDL2(-120.8kb)|MIR3134(0)|PTBP3(0)|SUSD1(+83.84kb)
9:115023340	9	115023340	C	?	8	3.509e-05	3.509e-05	1.3353	1.3353	0.5864	0	1.444	1.444	1.196	0.8042	1.564	1.363	0.7697	NA	1.476	rs3849126	HSDL2(-118.8kb)|MIR3134(0)|PTBP3(0)|SUSD1(+85.78kb)
9:115023661	9	115023661	T	?	8	3.509e-05	3.509e-05	1.3353	1.3353	0.5864	0	1.444	1.444	1.196	0.8042	1.564	1.363	0.7697	NA	1.476	rs6477905	HSDL2(-118.5kb)|MIR3134(0)|PTBP3(0)|SUSD1(+86.1kb)
9:115024695	9	115024695	A	?	8	3.509e-05	3.509e-05	1.3353	1.3353	0.5864	0	1.444	1.444	1.196	0.8042	1.564	1.363	0.7697	NA	1.476	rs10981334	HSDL2(-117.5kb)|MIR3134(0)|PTBP3(0)|SUSD1(+87.14kb)
10:103368208	10	103368208	T	?	9	3.515e-05	0.003521	0.7188	0.6895	0.0433	49.79	0.3328	0.3328	0.8114	0.701	1.187	0.5743	1.205	0.6712	0.7269	rs10883664	BTRC(+51.13kb)|DPCD(0)|FBXW4(-2.212kb)|FGF8(-161.7kb)|MGEA5(-176kb)|MIR3158-1(+6.954kb)|MIR3158-2(+6.954kb)|NPM3(-172.9kb)|POLL(+20.18kb)
3:101108061	3	101108061	G	?	9	3.549e-05	0.0001744	0.6127	0.6113	0.3436	10.96	0.3865	0.3865	0.4831	0.8446	0.9313	0.4429	0.8006	0.5644	0.9273	rs2553428	FAM172BP(-129.6kb)|IMPG2(+68.64kb)|PCNP(-185kb)|SENP7(0)|TRMT10C(-172.6kb)
7:36330107	7	36330107	A	?	9	3.559e-05	0.0005471	0.6353	0.6257	0.2408	22.76	0.2989	0.2989	0.9621	1.103	0.4395	0.7531	0.9598	0.4333	0.6094	rs77730096	ANLN(-99.32kb)|EEPD1(0)|KIAA0895(-33.65kb)
3:45469799	3	45469799	A	?	7	3.563e-05	3.563e-05	0.3755	0.3755	0.5651	0	0.1613	0.1613	0.3173	1.789	0.2936	0.6598	NA	NA	0.4257	rs191982140	LARS2(0)|LARS2-AS1(-54.39kb)|LIMD1(-166.5kb)
2:228778565	2	228778565	T	?	9	3.571e-05	0.01044	0.7315	0.7488	0.0786	43.36	0.6592	0.6592	0.606	1.256	1.055	0.5228	0.7911	0.6348	0.9272	rs17251109	CCL20(+96.28kb)|DAW1(0)|SLC19A3(+195.8kb)|SPHKAP(-66.1kb)
9:115015839	9	115015839	G	?	8	3.604e-05	3.604e-05	1.3345	1.3345	0.5912	0	1.444	1.444	1.196	0.8042	1.564	1.363	0.7732	NA	1.471	rs7863117	HSDL2(-126.3kb)|MIR3134(0)|PTBP3(0)|SUSD1(+78.28kb)
9:115016861	9	115016861	C	?	8	3.604e-05	3.604e-05	1.3345	1.3345	0.5912	0	1.444	1.444	1.196	0.8042	1.564	1.363	0.7732	NA	1.471	rs6477903	HSDL2(-125.3kb)|MIR3134(0)|PTBP3(0)|SUSD1(+79.3kb)
9:115017660	9	115017660	G	?	8	3.604e-05	3.604e-05	1.3345	1.3345	0.5912	0	1.444	1.444	1.196	0.8042	1.564	1.363	0.7732	NA	1.471	rs940593	HSDL2(-124.5kb)|MIR3134(0)|PTBP3(0)|SUSD1(+80.1kb)
7:36276671	7	36276671	G	?	9	3.609e-05	0.00406	0.6532	0.5986	0.0208	55.69	0.1965	0.1965	0.9787	1.216	0.4683	0.8504	0.9723	0.3406	0.6236	rs10258284	ANLN(-152.8kb)|EEPD1(0)|KIAA0895(-87.09kb)
9:115023534	9	115023534	G	?	8	3.634e-05	3.634e-05	1.3345	1.3345	0.5831	0	1.444	1.444	1.193	0.8042	1.564	1.363	0.7697	NA	1.476	rs6477904	HSDL2(-118.7kb)|MIR3134(0)|PTBP3(0)|SUSD1(+85.98kb)
16:77998122	16	77998122	T	?	9	3.655e-05	3.655e-05	0.7432	0.7432	0.8016	0	0.6653	0.6653	0.8312	0.6213	0.8786	0.6325	0.8637	0.3665	0.7768	rs667132	CLEC3A(-58.32kb)|VAT1L(0)|WWOX(-135.2kb)
19:45410444	19	45410444	A	?	8	3.696e-05	0.002384	0.6854	0.6338	0.036	53.33	0.32	0.32	0.5116	0.4857	0.9552	1.017	NA	0.6806	0.6104	rs769450	APOC1(-7.476kb)|APOC1P1(-19.62kb)|APOC2(-38.79kb)|APOC4(-35.05kb)|APOC4-APOC2(-35.05kb)|APOE(0)|BCAM(+85.77kb)|BCL3(+147.1kb)|CBLC(+106.5kb)|CEACAM16(+196.5kb)|CLASRP(-131.9kb)|CLPTM1(-47.4kb)|GEMIN7(-172.1kb)|PPP1R37(-186kb)|PVRL2(+17.96kb)|RELB(-94.26kb)|TOMM40(+3.498kb)|ZNF296(-164.3kb)
12:72895948	12	72895948	C	?	9	3.699e-05	0.0003457	0.6083	0.6033	0.2902	17.13	0.5548	0.5548	0.7627	3.593	0.4927	0.5245	0.3219	0.1899	0.6526	rs10879435	TRHDE(0)
9:115002832	9	115002832	C	?	8	3.714e-05	3.714e-05	1.3342	1.3342	0.6213	0	1.444	1.444	1.196	0.8166	1.564	1.384	0.7697	NA	1.445	rs1831118	HSDL2(-139.4kb)|MIR3134(0)|PTBP3(0)|SUSD1(+65.28kb)
9:115008031	9	115008031	C	?	8	3.722e-05	3.722e-05	1.3341	1.3341	0.6024	0	1.444	1.444	1.196	0.8042	1.564	1.384	0.7732	NA	1.448	rs7852473	HSDL2(-134.2kb)|MIR3134(0)|PTBP3(0)|SUSD1(+70.48kb)
9:115008093	9	115008093	C	?	8	3.722e-05	3.722e-05	1.3341	1.3341	0.6024	0	1.444	1.444	1.196	0.8042	1.564	1.384	0.7732	NA	1.448	rs7867823	HSDL2(-134.1kb)|MIR3134(0)|PTBP3(0)|SUSD1(+70.54kb)
2:228775720	2	228775720	T	?	9	3.739e-05	0.0122	0.7332	0.7521	0.0709	44.61	0.6842	0.6842	0.5982	1.256	1.028	0.5207	0.8142	0.6348	0.9497	rs13393851	CCL20(+93.44kb)|DAW1(0)|SLC19A3(+193kb)|SPHKAP(-68.95kb)
2:228778539	2	228778539	C	?	9	3.739e-05	0.0122	0.7332	0.7521	0.0709	44.61	0.6842	0.6842	0.5982	1.256	1.028	0.5207	0.8142	0.6348	0.9497	rs17251074	CCL20(+96.26kb)|DAW1(0)|SLC19A3(+195.8kb)|SPHKAP(-66.13kb)
2:178540023	2	178540023	G	?	9	3.743e-05	0.04691	0.7036	0.7389	0.0139	58.29	0.4399	0.4399	0.7495	3.742	0.7524	0.8883	1.135	1.041	0.5112	rs3770015	AGPS(+131.5kb)|PDE11A(0)|TTC30A(+56.33kb)|TTC30B(+122.5kb)
10:103377022	10	103377022	A	?	9	3.748e-05	0.005318	0.7153	0.6706	0.0142	58.18	0.2795	0.2795	0.8498	0.6975	1.16	0.5819	1.576	0.6387	0.7106	rs75972556	BTRC(+59.94kb)|DPCD(+7.612kb)|FBXW4(0)|FGF8(-152.9kb)|MGEA5(-167.2kb)|MIR3158-1(+15.77kb)|MIR3158-2(+15.77kb)|NPM3(-164.1kb)|POLL(+29kb)
14:81462649	14	81462649	G	?	9	3.757e-05	0.0004808	0.746	0.7342	0.2232	24.78	0.5565	0.5565	0.6413	0.948	0.6752	1.025	0.8674	0.2842	0.7673	rs4903961	CEP128(+56.76kb)|GTF2A1(-179.1kb)|TSHR(0)
9:115015964	9	115015964	A	?	8	3.776e-05	3.776e-05	1.3335	1.3335	0.5929	0	1.444	1.444	1.196	0.8042	1.564	1.363	0.7697	NA	1.467	rs11792718	HSDL2(-126.2kb)|MIR3134(0)|PTBP3(0)|SUSD1(+78.41kb)
9:115016283	9	115016283	A	?	8	3.776e-05	3.776e-05	1.3335	1.3335	0.5929	0	1.444	1.444	1.196	0.8042	1.564	1.363	0.7697	NA	1.467	rs10981332	HSDL2(-125.9kb)|MIR3134(0)|PTBP3(0)|SUSD1(+78.73kb)
9:115017321	9	115017321	C	?	8	3.776e-05	3.776e-05	1.3335	1.3335	0.5929	0	1.444	1.444	1.196	0.8042	1.564	1.363	0.7697	NA	1.467	rs7040713	HSDL2(-124.9kb)|MIR3134(0)|PTBP3(0)|SUSD1(+79.76kb)
9:115018065	9	115018065	T	?	8	3.776e-05	3.776e-05	1.3335	1.3335	0.5929	0	1.444	1.444	1.196	0.8042	1.564	1.363	0.7697	NA	1.467	rs940592	HSDL2(-124.1kb)|MIR3134(0)|PTBP3(0)|SUSD1(+80.51kb)
9:115018955	9	115018955	T	?	8	3.776e-05	3.776e-05	1.3335	1.3335	0.5929	0	1.444	1.444	1.196	0.8042	1.564	1.363	0.7697	NA	1.467	rs7875843	HSDL2(-123.2kb)|MIR3134(0)|PTBP3(0)|SUSD1(+81.4kb)
3:101131651	3	101131651	C	?	9	3.818e-05	0.0002139	0.6144	0.6125	0.3331	12.19	0.3865	0.3865	0.4831	0.8446	0.9313	0.4429	0.8006	0.5644	0.9326	rs76199180	FAM172BP(-106.1kb)|IMPG2(+92.23kb)|PCNP(-161.4kb)|SENP7(0)|TRMT10C(-149kb)
6:69611665	6	69611665	G	?	9	3.829e-05	3.829e-05	1.467	1.467	0.9161	0	1.583	1.583	1.392	0.9438	1.627	1.43	2.332	4.734	1.52	rs9689807	BAI3(0)
6:69608492	6	69608492	A	?	9	3.833e-05	3.833e-05	1.467	1.467	0.9162	0	1.583	1.583	1.392	0.9438	1.627	1.43	2.329	4.734	1.52	rs1523938	BAI3(0)
9:114991502	9	114991502	T	?	8	3.841e-05	3.841e-05	1.3336	1.3336	0.6025	0	1.444	1.444	1.196	0.8042	1.564	1.384	0.7697	NA	1.446	rs10759536	HSDL2(-150.7kb)|MIR3134(0)|PTBP3(0)|SUSD1(+53.95kb)
9:114992183	9	114992183	G	?	8	3.841e-05	3.841e-05	1.3336	1.3336	0.6025	0	1.444	1.444	1.196	0.8042	1.564	1.384	0.7697	NA	1.446	rs10733586	HSDL2(-150kb)|MIR3134(0)|PTBP3(0)|SUSD1(+54.63kb)
9:114996327	9	114996327	C	?	8	3.841e-05	3.841e-05	1.3336	1.3336	0.6025	0	1.444	1.444	1.196	0.8042	1.564	1.384	0.7697	NA	1.446	rs10759538	HSDL2(-145.9kb)|MIR3134(0)|PTBP3(0)|SUSD1(+58.77kb)
9:114997590	9	114997590	A	?	8	3.841e-05	3.841e-05	1.3336	1.3336	0.6025	0	1.444	1.444	1.196	0.8042	1.564	1.384	0.7697	NA	1.446	rs10817295	HSDL2(-144.6kb)|MIR3134(0)|PTBP3(0)|SUSD1(+60.03kb)
9:114998396	9	114998396	G	?	8	3.841e-05	3.841e-05	1.3336	1.3336	0.6025	0	1.444	1.444	1.196	0.8042	1.564	1.384	0.7697	NA	1.446	rs10118422	HSDL2(-143.8kb)|MIR3134(0)|PTBP3(0)|SUSD1(+60.84kb)
9:114999096	9	114999096	T	?	8	3.841e-05	3.841e-05	1.3336	1.3336	0.6025	0	1.444	1.444	1.196	0.8042	1.564	1.384	0.7697	NA	1.446	rs4979089	HSDL2(-143.1kb)|MIR3134(0)|PTBP3(0)|SUSD1(+61.54kb)
9:115001674	9	115001674	T	?	8	3.841e-05	3.841e-05	1.3336	1.3336	0.6025	0	1.444	1.444	1.196	0.8042	1.564	1.384	0.7697	NA	1.446	rs10759540	HSDL2(-140.5kb)|MIR3134(0)|PTBP3(0)|SUSD1(+64.12kb)
9:115002314	9	115002314	A	?	8	3.841e-05	3.841e-05	1.3336	1.3336	0.6025	0	1.444	1.444	1.196	0.8042	1.564	1.384	0.7697	NA	1.446	rs7021564	HSDL2(-139.9kb)|MIR3134(0)|PTBP3(0)|SUSD1(+64.76kb)
9:115003509	9	115003509	G	?	8	3.841e-05	3.841e-05	1.3336	1.3336	0.6025	0	1.444	1.444	1.196	0.8042	1.564	1.384	0.7697	NA	1.446	rs4263841	HSDL2(-138.7kb)|MIR3134(0)|PTBP3(0)|SUSD1(+65.95kb)
9:115008959	9	115008959	T	?	8	3.841e-05	3.841e-05	1.3336	1.3336	0.6025	0	1.444	1.444	1.196	0.8042	1.564	1.384	0.7697	NA	1.446	rs10981327	HSDL2(-133.2kb)|MIR3134(0)|PTBP3(0)|SUSD1(+71.4kb)
10:103366069	10	103366069	C	?	9	3.866e-05	0.004031	0.7195	0.6887	0.0369	51.25	0.3328	0.3328	0.8313	0.701	1.187	0.5635	1.197	0.6712	0.726	rs11191061	BTRC(+48.99kb)|DPCD(0)|FBXW4(-4.351kb)|FGF8(-163.8kb)|MGEA5(-178.1kb)|MIR3158-1(+4.815kb)|MIR3158-2(+4.815kb)|NPM3(-175kb)|POLL(+18.04kb)
9:114997288	9	114997288	T	?	8	3.879e-05	3.879e-05	1.3334	1.3334	0.6031	0	1.444	1.444	1.196	0.8042	1.564	1.384	0.7697	NA	1.445	rs2274519	HSDL2(-144.9kb)|MIR3134(0)|PTBP3(0)|SUSD1(+59.73kb)
9:115000234	9	115000234	A	?	8	3.879e-05	3.879e-05	1.3334	1.3334	0.6031	0	1.444	1.444	1.196	0.8042	1.564	1.384	0.7697	NA	1.445	rs2027384	HSDL2(-142kb)|MIR3134(0)|PTBP3(0)|SUSD1(+62.68kb)
9:115002818	9	115002818	A	?	8	3.879e-05	3.879e-05	1.3334	1.3334	0.6031	0	1.444	1.444	1.196	0.8042	1.564	1.384	0.7697	NA	1.445	rs7041663	HSDL2(-139.4kb)|MIR3134(0)|PTBP3(0)|SUSD1(+65.26kb)
9:115003292	9	115003292	A	?	8	3.879e-05	3.879e-05	1.3334	1.3334	0.6031	0	1.444	1.444	1.196	0.8042	1.564	1.384	0.7697	NA	1.445	rs12351043	HSDL2(-138.9kb)|MIR3134(0)|PTBP3(0)|SUSD1(+65.74kb)
9:115005168	9	115005168	C	?	8	3.879e-05	3.879e-05	1.3334	1.3334	0.6031	0	1.444	1.444	1.196	0.8042	1.564	1.384	0.7697	NA	1.445	rs2418199	HSDL2(-137kb)|MIR3134(0)|PTBP3(0)|SUSD1(+67.61kb)
9:115005557	9	115005557	G	?	8	3.879e-05	3.879e-05	1.3334	1.3334	0.6031	0	1.444	1.444	1.196	0.8042	1.564	1.384	0.7697	NA	1.445	rs10759541	HSDL2(-136.6kb)|MIR3134(0)|PTBP3(0)|SUSD1(+68kb)
9:115006145	9	115006145	C	?	8	3.879e-05	3.879e-05	1.3334	1.3334	0.6031	0	1.444	1.444	1.196	0.8042	1.564	1.384	0.7697	NA	1.445	rs7032120	HSDL2(-136kb)|MIR3134(0)|PTBP3(0)|SUSD1(+68.59kb)
9:115006676	9	115006676	T	?	8	3.879e-05	3.879e-05	1.3334	1.3334	0.6031	0	1.444	1.444	1.196	0.8042	1.564	1.384	0.7697	NA	1.445	rs10817298	HSDL2(-135.5kb)|MIR3134(0)|PTBP3(0)|SUSD1(+69.12kb)
6:44258324	6	44258324	G	?	9	3.888e-05	3.888e-05	0.7135	0.7135	0.4896	0	0.3913	0.3913	0.795	0.5311	0.76	0.7333	1.271	0.792	0.7933	rs557373	AARS2(-8.138kb)|CAPN11(+106.2kb)|CDC5L(-96.93kb)|HSP90AB1(+36.7kb)|MIR4642(-145.1kb)|MIR4647(+36.3kb)|MRPL14(+163.1kb)|NFKBIE(+24.8kb)|SLC29A1(+56.44kb)|SLC35B2(+33.04kb)|SPATS1(-52.07kb)|TCTE1(0)|TMEM63B(+135.1kb)|TMEM151B(+11.14kb)
9:114990872	9	114990872	T	?	8	3.889e-05	3.889e-05	1.3334	1.3334	0.6015	0	1.444	1.444	1.195	0.8042	1.564	1.384	0.7697	NA	1.446	rs7026917	HSDL2(-151.3kb)|MIR3134(0)|PTBP3(0)|SUSD1(+53.32kb)
17:20794744	17	20794744	G	?	8	3.895e-05	0.002702	0.6739	0.6478	0.0721	46.16	0.3134	0.3134	0.8414	0.7123	0.9319	0.8478	0.5787	NA	0.4714	rs112333363	CCDC144NL(0)|LOC100287072(+153.6kb)|USP22(-108.2kb)
2:228773287	2	228773287	C	?	9	3.898e-05	0.01273	0.7338	0.7527	0.0691	44.92	0.6842	0.6842	0.5982	1.256	1.031	0.5207	0.8142	0.6348	0.9508	rs11680252	CCL20(+91.01kb)|DAW1(0)|SLC19A3(+190.5kb)|SPHKAP(-71.38kb)
2:228773297	2	228773297	C	?	9	3.898e-05	0.01273	0.7338	0.7527	0.0691	44.92	0.6842	0.6842	0.5982	1.256	1.031	0.5207	0.8142	0.6348	0.9508	rs11685422	CCL20(+91.02kb)|DAW1(0)|SLC19A3(+190.6kb)|SPHKAP(-71.37kb)
6:155513482	6	155513482	C	?	9	3.923e-05	3.923e-05	0.7463	0.7463	0.7354	0	0.6186	0.6186	0.6308	0.924	0.7814	0.7343	0.7802	1.682	0.8381	rs9478620	CLDN20(-71.66kb)|TFB1M(-63.78kb)|TIAM2(0)
10:103454402	10	103454402	T	?	9	3.927e-05	0.001553	0.71	0.6943	0.1262	36.53	0.3349	0.3349	0.7959	0.9528	0.9934	0.5843	1.186	0.643	0.7387	rs61382490	BTRC(+137.3kb)|C10orf76(-151kb)|DPCD(+84.99kb)|FBXW4(0)|FGF8(-75.48kb)|KCNIP2(-131.3kb)|KCNIP2-AS1(-124.4kb)|MGEA5(-89.8kb)|MIR3158-1(+93.15kb)|MIR3158-2(+93.15kb)|NPM3(-86.68kb)|POLL(+106.4kb)
7:36254575	7	36254575	A	?	9	3.935e-05	0.002742	0.6668	0.6163	0.0386	50.85	0.2564	0.2564	0.969	0.8919	0.4413	0.9928	0.5478	0.362	0.6386	rs4723496	ANLN(-174.9kb)|EEPD1(0)|KIAA0895(-109.2kb)
9:114991338	9	114991338	C	?	8	3.938e-05	3.938e-05	1.3332	1.3332	0.6006	0	1.444	1.444	1.194	0.8042	1.564	1.384	0.7697	NA	1.446	rs3908939	HSDL2(-150.8kb)|MIR3134(0)|PTBP3(0)|SUSD1(+53.78kb)
6:62633482	6	62633482	T	?	9	4.003e-05	4.003e-05	0.6251	0.6251	0.9987	0	0.601	0.601	0.5582	0.6141	0.6078	0.648	0.5168	0.6015	0.7633	rs73489417	KHDRBS2(0)
6:62633497	6	62633497	T	?	9	4.003e-05	4.003e-05	0.6251	0.6251	0.9987	0	0.601	0.601	0.5582	0.6141	0.6078	0.648	0.5168	0.6015	0.7633	rs78196345	KHDRBS2(0)
6:62633533	6	62633533	C	?	9	4.003e-05	4.003e-05	0.6251	0.6251	0.9987	0	0.601	0.601	0.5582	0.6141	0.6078	0.648	0.5168	0.6015	0.7633	rs79951247	KHDRBS2(0)
6:62633536	6	62633536	C	?	9	4.003e-05	4.003e-05	0.6251	0.6251	0.9987	0	0.601	0.601	0.5582	0.6141	0.6078	0.648	0.5168	0.6015	0.7633	rs73489418	KHDRBS2(0)
10:103343533	10	103343533	G	?	9	4.006e-05	0.002004	0.7385	0.6998	0.0496	48.5	0.384	0.384	0.8603	0.5612	1.132	0.6064	0.9209	0.6108	0.7736	rs3730465	BTRC(+26.46kb)|DPCD(-4.555kb)|FBXW4(-26.89kb)|FGF8(-186.4kb)|MIR3158-1(-17.64kb)|MIR3158-2(-17.64kb)|NPM3(-197.5kb)|POLL(0)
2:203908368	2	203908368	G	?	8	4.016e-05	6.406e-05	0.4136	0.4116	0.3996	3.94	0.829	0.829	0.7507	0.3023	0.2452	0.1765	NA	0.3698	0.502	rs35953789	CARF(+57.31kb)|CYP20A1(-194.8kb)|ICA1L(+172kb)|NBEAL1(0)|WDR12(+131.4kb)
2:203932994	2	203932994	G	?	8	4.016e-05	6.406e-05	0.4136	0.4116	0.3996	3.94	0.829	0.829	0.7507	0.3023	0.2452	0.1765	NA	0.3698	0.502	rs35018756	CARF(+81.93kb)|CYP20A1(-170.2kb)|ICA1L(+196.6kb)|NBEAL1(0)|WDR12(+156kb)
11:134337305	11	134337305	T	?	9	4.096e-05	0.1188	0.6933	0.7735	0.0112	59.56	0.7281	0.7281	0.5969	1.559	0.8345	0.9611	12.47	0.5818	0.4697	rs12272687	B3GAT1(+55.49kb)|GLB1L2(+91.09kb)|GLB1L3(+147.8kb)|LOC283177(0)
5:94448959	5	94448959	G	?	9	4.105e-05	0.03914	0.7005	0.7584	0.068	45.11	1.673	1.673	0.4943	0.8608	0.5548	0.8493	0.4758	1.143	0.7827	rs1159514	MCTP1(0)
5:94449320	5	94449320	T	?	9	4.105e-05	0.03914	0.7005	0.7584	0.068	45.11	1.673	1.673	0.4943	0.8608	0.5548	0.8493	0.4758	1.143	0.7827	rs7719509	MCTP1(0)
5:94449704	5	94449704	T	?	9	4.105e-05	0.03914	0.7005	0.7584	0.068	45.11	1.673	1.673	0.4943	0.8608	0.5548	0.8493	0.4758	1.143	0.7827	rs1593463	MCTP1(0)
7:36241335	7	36241335	A	?	9	4.13e-05	0.002589	0.6526	0.5862	0.0232	54.92	0.2166	0.2166	1.026	0.8344	0.4407	0.9359	0.5524	0.3336	0.6443	rs10234535	ANLN(-188.1kb)|EEPD1(0)|KIAA0895(-122.4kb)
21:39204514	21	39204514	T	?	9	4.133e-05	4.133e-05	0.7526	0.7526	0.9938	0	0.6436	0.6436	0.7725	0.7838	0.7685	0.7069	0.493	0.764	0.8145	rs2836001	KCNJ6(0)
18:74794097	18	74794097	T	?	8	4.15e-05	4.15e-05	0.454	0.454	0.715	0	0.1549	0.1549	0.5644	0.1708	0.3579	0.4977	1.78	NA	0.564	rs2406710	GALR1(-167.9kb)|MBP(0)|ZNF236(+111.4kb)
16:77996328	16	77996328	G	?	9	4.162e-05	4.162e-05	0.7457	0.7457	0.7995	0	0.614	0.614	0.8454	0.6665	0.8751	0.6591	0.8637	0.3619	0.7716	rs365454	CLEC3A(-60.11kb)|VAT1L(0)|WWOX(-137kb)
10:103366645	10	103366645	C	?	9	4.166e-05	0.004637	0.7205	0.6905	0.0338	52	0.3328	0.3328	0.8082	0.701	1.232	0.5743	1.205	0.6712	0.7251	rs11191062	BTRC(+49.57kb)|DPCD(0)|FBXW4(-3.775kb)|FGF8(-163.2kb)|MGEA5(-177.6kb)|MIR3158-1(+5.391kb)|MIR3158-2(+5.391kb)|NPM3(-174.4kb)|POLL(+18.62kb)
3:101053344	3	101053344	T	?	9	4.167e-05	0.001166	0.617	0.6136	0.2067	26.69	0.3865	0.3865	0.4856	0.8446	0.9313	0.4125	1.271	0.5644	0.9766	rs485037	FAM172BP(-184.4kb)|IMPG2(+13.92kb)|SENP7(0)
6:69621406	6	69621406	G	?	9	4.191e-05	4.191e-05	1.4648	1.4648	0.9179	0	1.583	1.583	1.392	0.9438	1.618	1.43	2.33	4.734	1.516	rs9446070	BAI3(0)
20:10647951	20	10647951	A	?	9	4.216e-05	4.216e-05	0.7059	0.7059	0.5691	0	0.4686	0.4686	0.7655	0.4903	0.6299	0.8619	1.743	1.342	0.7354	rs3790163	JAG1(0)|SLX4IP(+43.92kb)
19:45404972	19	45404972	C	?	8	4.223e-05	0.004734	0.6944	0.629	0.0091	62.64	0.3296	0.3296	0.5021	0.5974	0.9778	1.117	NA	0.4076	0.5757	rs1038025	APOC1(-12.95kb)|APOC1P1(-25.09kb)|APOC2(-44.27kb)|APOC4(-40.52kb)|APOC4-APOC2(-40.52kb)|APOE(-4.066kb)|BCAM(+80.29kb)|BCL3(+141.7kb)|CBLC(+101.1kb)|CEACAM16(+191kb)|CLASRP(-137.3kb)|CLPTM1(-52.87kb)|GEMIN7(-177.5kb)|PPP1R37(-191.5kb)|PVRL2(+12.49kb)|RELB(-99.73kb)|TOMM40(0)|ZNF296(-169.8kb)
16:77982355	16	77982355	T	?	9	4.235e-05	0.0004363	0.7503	0.7348	0.22	25.15	0.5716	0.5716	0.9104	0.7038	0.9339	0.6709	0.5867	0.1384	0.7407	rs374458	CLEC3A(-74.09kb)|VAT1L(0)|WWOX(-151kb)
15:48766015	15	48766015	A	?	9	4.241e-05	6.723e-05	1.4821	1.4935	0.4001	4.18	1.522	1.522	2.104	1.923	2.278	1.227	0.6228	2.288	1.221	rs9806323	DUT(+130.4kb)|FBN1(0)|SLC12A1(+169.7kb)
2:228780072	2	228780072	C	?	9	4.246e-05	0.009993	0.7335	0.7499	0.0858	42.23	0.6592	0.6592	0.606	1.256	1.055	0.5275	0.7911	0.6348	0.9272	rs11691153	CCL20(+97.79kb)|DAW1(0)|SLC19A3(+197.3kb)|SPHKAP(-64.6kb)
16:77983488	16	77983488	G	?	9	4.271e-05	0.0003872	0.7509	0.7371	0.2359	23.32	0.5716	0.5716	0.8998	0.7241	0.9339	0.6709	0.5867	0.1395	0.7458	rs371422	CLEC3A(-72.95kb)|VAT1L(0)|WWOX(-149.8kb)
9:115023853	9	115023853	A	?	9	4.281e-05	4.281e-05	1.3285	1.3285	0.5128	0	1.533	1.533	1.207	0.7223	1.546	1.281	0.7999	1.301	1.528	rs7874660	HSDL2(-118.3kb)|MIR3134(0)|PTBP3(0)|SUSD1(+86.3kb)
7:36258923	7	36258923	A	?	9	4.285e-05	0.003017	0.6682	0.6164	0.0349	51.71	0.2564	0.2564	0.9595	0.8919	0.4413	1.022	0.5478	0.3568	0.6379	rs17273471	ANLN(-170.5kb)|EEPD1(0)|KIAA0895(-104.8kb)
2:204108527	2	204108527	T	?	9	4.329e-05	4.329e-05	0.4208	0.4208	0.5067	0	0.829	0.829	0.7507	0.3023	0.2847	0.1765	5.322	0.3698	0.4724	rs71425990	ABI2(-84.48kb)|CYP20A1(0)|NBEAL1(+25.81kb)|RAPH1(-190kb)
7:36260180	7	36260180	T	?	9	4.331e-05	0.003036	0.6684	0.6165	0.0347	51.77	0.2564	0.2564	0.9603	0.8919	0.4413	1.022	0.5478	0.3568	0.6379	rs7780846	ANLN(-169.3kb)|EEPD1(0)|KIAA0895(-103.6kb)
7:36260294	7	36260294	G	?	9	4.331e-05	0.003036	0.6684	0.6165	0.0347	51.77	0.2564	0.2564	0.9603	0.8919	0.4413	1.022	0.5478	0.3568	0.6379	rs7781004	ANLN(-169.1kb)|EEPD1(0)|KIAA0895(-103.5kb)
3:101053366	3	101053366	T	?	9	4.345e-05	0.001254	0.6177	0.6141	0.2024	27.19	0.3865	0.3865	0.4856	0.8446	0.9313	0.4125	1.271	0.5644	0.9809	rs485793	FAM172BP(-184.3kb)|IMPG2(+13.95kb)|SENP7(0)
3:101067450	3	101067450	A	?	9	4.345e-05	0.001254	0.6177	0.6141	0.2024	27.19	0.3865	0.3865	0.4856	0.8446	0.9313	0.4125	1.271	0.5644	0.9809	rs2553420	FAM172BP(-170.3kb)|IMPG2(+28.03kb)|SENP7(0)
3:101094488	3	101094488	T	?	9	4.345e-05	0.001254	0.6177	0.6141	0.2024	27.19	0.3865	0.3865	0.4856	0.8446	0.9313	0.4125	1.271	0.5644	0.9809	rs2553414	FAM172BP(-143.2kb)|IMPG2(+55.07kb)|PCNP(-198.6kb)|SENP7(0)|TRMT10C(-186.2kb)
1:48607979	1	48607979	T	?	9	4.347e-05	4.347e-05	0.4396	0.4396	0.9737	0	0.4931	0.4931	0.4079	3243000	0.4575	0.4822	0.1062	0.114	0.5292	rs80220524	SKINTL(0)|SLC5A9(-80.38kb)|SPATA6(-153.1kb)|TRABD2B(+145.4kb)
19:45405062	19	45405062	G	?	8	4.354e-05	0.004742	0.6948	0.6295	0.0092	62.54	0.3296	0.3296	0.5035	0.5974	0.9778	1.117	NA	0.4076	0.5757	rs1038026	APOC1(-12.86kb)|APOC1P1(-25kb)|APOC2(-44.18kb)|APOC4(-40.43kb)|APOC4-APOC2(-40.43kb)|APOE(-3.976kb)|BCAM(+80.38kb)|BCL3(+141.8kb)|CBLC(+101.2kb)|CEACAM16(+191.1kb)|CLASRP(-137.2kb)|CLPTM1(-52.78kb)|GEMIN7(-177.5kb)|PPP1R37(-191.4kb)|PVRL2(+12.58kb)|RELB(-99.64kb)|TOMM40(0)|ZNF296(-169.7kb)
3:7191042	3	7191042	T	?	6	4.362e-05	4.362e-05	0.3082	0.3082	0.7225	0	0.1257	0.1257	0.3169	0.1275	NA	NA	0.2439	NA	0.4806	rs28404457	GRM7(0)
3:7195492	3	7195492	G	?	6	4.362e-05	4.362e-05	0.3082	0.3082	0.7225	0	0.1257	0.1257	0.3169	0.1275	NA	NA	0.2439	NA	0.4806	rs79541426	GRM7(0)
3:7197063	3	7197063	A	?	6	4.362e-05	4.362e-05	0.3082	0.3082	0.7225	0	0.1257	0.1257	0.3169	0.1275	NA	NA	0.2439	NA	0.4806	rs995718	GRM7(0)
3:7198320	3	7198320	G	?	6	4.362e-05	4.362e-05	0.3082	0.3082	0.7225	0	0.1257	0.1257	0.3169	0.1275	NA	NA	0.2439	NA	0.4806	rs17046912	GRM7(0)
3:7198430	3	7198430	T	?	6	4.362e-05	4.362e-05	0.3082	0.3082	0.7225	0	0.1257	0.1257	0.3169	0.1275	NA	NA	0.2439	NA	0.4806	rs59050017	GRM7(0)
3:7199445	3	7199445	G	?	6	4.362e-05	4.362e-05	0.3082	0.3082	0.7225	0	0.1257	0.1257	0.3169	0.1275	NA	NA	0.2439	NA	0.4806	rs10510349	GRM7(0)
2:203915363	2	203915363	C	?	8	4.375e-05	0.0005958	0.4041	0.4012	0.2672	20.47	2.556	2.556	0.7255	0.3023	0.2452	0.1765	NA	0.3698	0.4389	rs35733810	CARF(+64.3kb)|CYP20A1(-187.8kb)|ICA1L(+179kb)|NBEAL1(0)|WDR12(+138.4kb)
3:101033277	3	101033277	C	?	9	4.39e-05	0.0006961	0.6174	0.6145	0.2527	21.4	0.3865	0.3865	0.4863	0.8446	0.91	0.4256	1.271	0.5644	0.9659	rs504482	IMPG2(0)|SENP7(-9.84kb)
12:72887463	12	72887463	T	?	9	4.425e-05	0.0005499	0.611	0.6058	0.2656	19.94	0.5548	0.5548	0.735	4.082	0.4927	0.5308	0.3251	0.1932	0.6676	rs17111240	TRHDE(0)
13:109655054	13	109655054	A	?	9	4.426e-05	0.00381	0.6487	0.6661	0.1684	31.22	1.012	1.012	0.4279	0.5556	0.6578	1.071	0.5191	0.3431	0.6645	rs78610021	MYO16(0)|MYO16-AS1(-161.2kb)
19:45398817	19	45398817	T	?	8	4.435e-05	0.001623	0.6928	0.6583	0.0864	43.82	0.3639	0.3639	0.505	0.5135	0.9205	0.9915	NA	0.6635	0.6719	rs2238681	APOC1(-19.1kb)|APOC1P1(-31.24kb)|APOC2(-50.42kb)|APOC4(-46.68kb)|APOC4-APOC2(-46.68kb)|APOE(-10.22kb)|BCAM(+74.14kb)|BCL3(+135.5kb)|CBLC(+94.91kb)|CEACAM16(+184.8kb)|CLASRP(-143.5kb)|CLPTM1(-59.02kb)|GEMIN7(-183.7kb)|PPP1R37(-197.6kb)|PVRL2(+6.332kb)|RELB(-105.9kb)|TOMM40(0)|ZNF296(-175.9kb)
13:100329087	13	100329087	A	?	9	4.472e-05	4.472e-05	0.5485	0.5485	0.7639	0	0.5473	0.5473	0.5498	2.366	0.3476	0.644	0.1074	0.9832	0.5747	rs149196587	CLYBL(0)|MIR4306(+33.68kb)|TM9SF2(+112.8kb)
2:204201042	2	204201042	A	?	9	4.482e-05	4.482e-05	0.4255	0.4255	0.5258	0	0.829	0.829	0.7507	0.3023	0.3071	0.1765	5.348	0.3698	0.4738	rs7590439	ABI2(0)|CYP20A1(+30.48kb)|NBEAL1(+118.3kb)|RAPH1(-97.5kb)
2:204201283	2	204201283	A	?	9	4.482e-05	4.482e-05	0.4255	0.4255	0.5258	0	0.829	0.829	0.7507	0.3023	0.3071	0.1765	5.348	0.3698	0.4738	rs10172500	ABI2(0)|CYP20A1(+30.72kb)|NBEAL1(+118.6kb)|RAPH1(-97.26kb)
2:204216559	2	204216559	G	?	9	4.482e-05	4.482e-05	0.4255	0.4255	0.5258	0	0.829	0.829	0.7507	0.3023	0.3071	0.1765	5.348	0.3698	0.4738	rs4675336	ABI2(0)|CYP20A1(+46kb)|NBEAL1(+133.8kb)|RAPH1(-81.98kb)
2:204234315	2	204234315	G	?	9	4.482e-05	4.482e-05	0.4255	0.4255	0.5258	0	0.829	0.829	0.7507	0.3023	0.3071	0.1765	5.348	0.3698	0.4738	rs4261696	ABI2(0)|CYP20A1(+63.75kb)|NBEAL1(+151.6kb)|RAPH1(-64.22kb)
4:148429483	4	148429483	T	?	8	4.498e-05	0.005748	0.6283	0.5837	0.0183	58.48	0.1928	0.1928	0.872	1.099	0.5792	0.515	2.161	NA	0.7718	rs139452637	EDNRA(0)|PRMT10(-130kb)|TMEM184C(-109.1kb)
2:204272440	2	204272440	G	?	9	4.551e-05	4.551e-05	0.426	0.426	0.5252	0	0.829	0.829	0.7507	0.3023	0.3071	0.1765	5.348	0.3698	0.4762	rs2469966	ABI2(0)|CYP20A1(+101.9kb)|NBEAL1(+189.7kb)|RAPH1(-26.1kb)
15:44312787	15	44312787	T	?	8	4.556e-05	4.556e-05	0.5531	0.5531	0.9954	0	0.3797	0.3797	0.5241	0.8017	0.6372	0.6012	0.5078	NA	0.5373	rs28529668	FRMD5(0)|MFAP1(+195.8kb)|PIN4P1(+142.4kb)|WDR76(+152.2kb)
7:36257793	7	36257793	A	?	9	4.558e-05	0.003112	0.6692	0.6186	0.0364	51.36	0.2564	0.2564	0.9603	0.8919	0.4413	1.022	0.5478	0.3763	0.6379	rs72622358	ANLN(-171.6kb)|EEPD1(0)|KIAA0895(-106kb)
7:36258079	7	36258079	T	?	9	4.558e-05	0.003112	0.6692	0.6186	0.0364	51.36	0.2564	0.2564	0.9603	0.8919	0.4413	1.022	0.5478	0.3763	0.6379	rs10260648	ANLN(-171.4kb)|EEPD1(0)|KIAA0895(-105.7kb)
2:24403458	2	24403458	C	?	6	4.564e-05	4.564e-05	0.4265	0.4265	0.7928	0	NA	NA	0.5291	0.0947	0.3509	0.5547	0.8371	NA	0.3637	rs79417569	C2orf44(+133.2kb)|FAM228A(0)|FAM228B(+10.95kb)|FKBP1B(+116.9kb)|ITSN2(-22.28kb)|MFSD2B(+156.3kb)|PFN4(+57.31kb)|SF3B14(+104.1kb)|TP53I3(+95.37kb)|UBXN2A(+179.8kb)
9:115014131	9	115014131	T	?	9	4.602e-05	4.602e-05	1.3268	1.3268	0.5786	0	1.413	1.413	1.179	0.7406	1.581	1.397	0.7764	1.4	1.442	rs7855376	HSDL2(-128.1kb)|MIR3134(0)|PTBP3(0)|SUSD1(+76.58kb)
2:228783479	2	228783479	A	?	9	4.606e-05	0.01003	0.7345	0.7507	0.088	41.9	0.6592	0.6592	0.606	1.256	1.055	0.5298	0.7911	0.6348	0.9291	rs1533960	CCL20(+101.2kb)|DAW1(0)|SPHKAP(-61.19kb)
3:101220400	3	101220400	T	?	9	4.613e-05	0.001376	0.6191	0.6149	0.1961	27.92	0.3865	0.3865	0.4856	0.8446	0.9313	0.4125	1.271	0.5644	0.9849	rs3846092	FAM172BP(-17.31kb)|IMPG2(+181kb)|PCNP(-72.64kb)|RPL24(-179.5kb)|SENP7(0)|TRMT10C(-60.28kb)|ZBTB11(-147.9kb)|ZBTB11-AS1(-174.9kb)
19:45403858	19	45403858	G	?	8	4.635e-05	0.004829	0.6962	0.6324	0.0102	62.03	0.3296	0.3296	0.5107	0.5974	0.9778	1.117	NA	0.425	0.5735	rs760136	APOC1(-14.06kb)|APOC1P1(-26.2kb)|APOC2(-45.38kb)|APOC4(-41.64kb)|APOC4-APOC2(-41.64kb)|APOE(-5.18kb)|BCAM(+79.18kb)|BCL3(+140.6kb)|CBLC(+99.96kb)|CEACAM16(+189.9kb)|CLASRP(-138.4kb)|CLPTM1(-53.98kb)|GEMIN7(-178.7kb)|PPP1R37(-192.6kb)|PVRL2(+11.37kb)|RELB(-100.8kb)|TOMM40(0)|ZNF296(-170.9kb)
2:203970578	2	203970578	G	?	8	4.672e-05	0.0006359	0.4061	0.4033	0.2658	20.64	2.556	2.556	0.7255	0.3023	0.2452	0.1765	NA	0.3698	0.4504	rs74524723	CARF(+119.5kb)|CYP20A1(-132.6kb)|NBEAL1(0)|WDR12(+193.6kb)
3:101121398	3	101121398	A	?	9	4.674e-05	0.001407	0.6194	0.6151	0.1948	28.08	0.3865	0.3865	0.4856	0.8446	0.9313	0.4125	1.271	0.5644	0.9863	rs9917699	FAM172BP(-116.3kb)|IMPG2(+81.98kb)|PCNP(-171.6kb)|SENP7(0)|TRMT10C(-159.3kb)
3:101129620	3	101129620	T	?	9	4.674e-05	0.001407	0.6194	0.6151	0.1948	28.08	0.3865	0.3865	0.4856	0.8446	0.9313	0.4125	1.271	0.5644	0.9863	rs113499897	FAM172BP(-108.1kb)|IMPG2(+90.2kb)|PCNP(-163.4kb)|SENP7(0)|TRMT10C(-151.1kb)
9:4088131	9	4088131	T	?	9	4.68e-05	4.68e-05	0.7479	0.7479	0.9388	0	0.6929	0.6929	0.6924	0.8061	0.7622	0.7752	0.256	0.4652	0.8223	rs2380935	GLIS3(0)|GLIS3-AS1(+186.9kb)
9:114993508	9	114993508	T	?	8	4.688e-05	4.688e-05	1.3294	1.3294	0.6006	0	1.444	1.444	1.191	0.8042	1.554	1.364	0.7697	NA	1.459	rs943620	HSDL2(-148.7kb)|MIR3134(0)|PTBP3(0)|SUSD1(+55.95kb)
2:204170215	2	204170215	A	?	9	4.717e-05	4.717e-05	0.4248	0.4248	0.5263	0	0.829	0.829	0.7507	0.3023	0.3071	0.1765	5.348	0.3698	0.4724	rs35203139	ABI2(-22.79kb)|CYP20A1(0)|NBEAL1(+87.5kb)|RAPH1(-128.3kb)
7:36304691	7	36304691	A	?	9	4.721e-05	0.004696	0.6606	0.6209	0.0366	51.31	0.2334	0.2334	0.9424	1.451	0.4703	0.8823	0.8055	0.3388	0.6192	rs17208592	ANLN(-124.7kb)|EEPD1(0)|KIAA0895(-59.07kb)
7:36304786	7	36304786	T	?	9	4.721e-05	0.004696	0.6606	0.6209	0.0366	51.31	0.2334	0.2334	0.9424	1.451	0.4703	0.8823	0.8055	0.3388	0.6192	rs17274411	ANLN(-124.6kb)|EEPD1(0)|KIAA0895(-58.97kb)
10:84016070	10	84016070	C	?	9	4.725e-05	4.725e-05	0.4671	0.4671	0.5717	0	0.2454	0.2454	0.3054	0.6206	0.7095	0.5801	0.1582	0.2366	0.8589	rs17099664	NRG3(0)
4:148432862	4	148432862	G	?	8	4.728e-05	0.005866	0.6296	0.5844	0.0181	58.58	0.1928	0.1928	0.8686	1.099	0.5792	0.515	2.161	NA	0.7797	rs75736224	EDNRA(0)|PRMT10(-126.7kb)|TMEM184C(-105.7kb)
2:204027750	2	204027750	A	?	9	4.741e-05	4.741e-05	0.4223	0.4223	0.4791	0	0.829	0.829	0.7507	0.3023	0.2686	0.1765	5.322	0.3698	0.5046	rs7600937	ABI2(-165.3kb)|CARF(+176.7kb)|CYP20A1(-75.41kb)|NBEAL1(0)
13:100338361	13	100338361	C	?	9	4.743e-05	4.743e-05	0.5496	0.5496	0.7638	0	0.5473	0.5473	0.5536	2.366	0.3476	0.644	0.1074	0.9832	0.5747	rs17473570	CLYBL(0)|MIR4306(+42.96kb)|TM9SF2(+122.1kb)
2:204041066	2	204041066	C	?	9	4.752e-05	4.752e-05	0.4179	0.4179	0.453	0	0.829	0.829	0.7507	0.3023	0.2452	0.1765	5.322	0.3698	0.5047	rs71425983	ABI2(-151.9kb)|CARF(+190kb)|CYP20A1(-62.1kb)|NBEAL1(0)
10:84049221	10	84049221	A	?	9	4.773e-05	4.773e-05	0.4796	0.4796	0.8087	0	0.2713	0.2713	0.3481	0.713	0.657	0.6094	0.2154	0.3108	0.7316	rs1414757	NRG3(0)
10:84060221	10	84060221	G	?	9	4.775e-05	4.775e-05	0.4793	0.4793	0.8252	0	0.2713	0.2713	0.3483	0.6941	0.7273	0.6094	0.2154	0.3302	0.6885	rs17099749	NRG3(0)
2:204212832	2	204212832	T	?	8	4.787e-05	0.000454	0.4118	0.4092	0.292	17.47	2.556	2.556	0.7365	0.3023	0.2847	0.1765	NA	0.3698	0.4238	rs35485952	ABI2(0)|CYP20A1(+42.27kb)|NBEAL1(+130.1kb)|RAPH1(-85.71kb)
10:84020765	10	84020765	A	?	9	4.79e-05	4.79e-05	0.4675	0.4675	0.5705	0	0.2454	0.2454	0.3054	0.6206	0.7095	0.5801	0.1836	0.2366	0.8614	rs60128715	NRG3(0)
5:94446243	5	94446243	C	?	9	4.822e-05	0.04316	0.7026	0.7613	0.0651	45.61	1.673	1.673	0.4943	0.8608	0.5536	0.8493	0.4758	1.143	0.7962	rs1426094	MCTP1(0)
7:36310065	7	36310065	C	?	9	4.836e-05	0.004557	0.661	0.6224	0.0398	50.58	0.2334	0.2334	0.9367	1.451	0.4778	0.8823	0.8055	0.3388	0.6182	rs28469221	ANLN(-119.4kb)|EEPD1(0)|KIAA0895(-53.69kb)
19:45403412	19	45403412	T	?	8	4.847e-05	0.004922	0.6969	0.6315	0.0094	62.45	0.3296	0.3296	0.5107	0.5974	0.9834	1.117	NA	0.4076	0.5735	rs1160985	APOC1(-14.51kb)|APOC1P1(-26.65kb)|APOC2(-45.83kb)|APOC4(-42.08kb)|APOC4-APOC2(-42.08kb)|APOE(-5.626kb)|BCAM(+78.73kb)|BCL3(+140.1kb)|CBLC(+99.51kb)|CEACAM16(+189.4kb)|CLASRP(-138.9kb)|CLPTM1(-54.43kb)|GEMIN7(-179.1kb)|PPP1R37(-193kb)|PVRL2(+10.93kb)|RELB(-101.3kb)|TOMM40(0)|ZNF296(-171.3kb)
2:178545403	2	178545403	T	?	9	4.854e-05	0.04469	0.7061	0.7383	0.0164	57.27	0.4399	0.4399	0.7517	4.131	0.7407	0.8762	1.198	1.007	0.5234	rs2886423	AGPS(+136.8kb)|PDE11A(0)|TTC30A(+61.71kb)|TTC30B(+127.9kb)
10:103359285	10	103359285	A	?	9	4.866e-05	0.004305	0.7226	0.6908	0.0372	51.17	0.3328	0.3328	0.8265	0.701	1.187	0.5635	1.197	0.6712	0.7418	rs7899178	BTRC(+42.21kb)|DPCD(0)|FBXW4(-11.14kb)|FGF8(-170.6kb)|MGEA5(-184.9kb)|MIR3158-1(-1.888kb)|MIR3158-2(-1.888kb)|NPM3(-181.8kb)|POLL(+11.26kb)
10:103361088	10	103361088	T	?	9	4.866e-05	0.004305	0.7226	0.6908	0.0372	51.17	0.3328	0.3328	0.8265	0.701	1.187	0.5635	1.197	0.6712	0.7418	rs7874	BTRC(+44.01kb)|DPCD(0)|FBXW4(-9.332kb)|FGF8(-168.8kb)|MGEA5(-183.1kb)|MIR3158-1(-0.085kb)|MIR3158-2(-0.085kb)|NPM3(-180kb)|POLL(+13.06kb)
3:101143128	3	101143128	T	?	9	4.887e-05	0.001513	0.6202	0.6156	0.1903	28.61	0.3865	0.3865	0.4856	0.8446	0.9313	0.4125	1.271	0.5644	0.9907	rs61379928	FAM172BP(-94.58kb)|IMPG2(+103.7kb)|PCNP(-149.9kb)|SENP7(0)|TRMT10C(-137.6kb)
3:101177382	3	101177382	T	?	9	4.887e-05	0.001513	0.6202	0.6156	0.1903	28.61	0.3865	0.3865	0.4856	0.8446	0.9313	0.4125	1.271	0.5644	0.9907	rs72942264	FAM172BP(-60.33kb)|IMPG2(+138kb)|PCNP(-115.7kb)|SENP7(0)|TRMT10C(-103.3kb)|ZBTB11(-190.9kb)
5:58035702	5	58035702	A	?	9	4.891e-05	0.006134	0.6959	0.6874	0.0753	43.89	0.714	0.714	0.5965	1.402	0.5946	1.007	0.0469	0.2622	0.6981	rs10070606	RAB3C(0)
6:62630852	6	62630852	A	?	9	4.9e-05	4.9e-05	0.6288	0.6288	0.9992	0	0.601	0.601	0.5704	0.6141	0.6078	0.648	0.5168	0.6015	0.7633	rs76177082	KHDRBS2(0)
6:62631881	6	62631881	A	?	9	4.9e-05	4.9e-05	0.6288	0.6288	0.9992	0	0.601	0.601	0.5704	0.6141	0.6078	0.648	0.5168	0.6015	0.7633	rs73489410	KHDRBS2(0)
6:62632102	6	62632102	A	?	9	4.9e-05	4.9e-05	0.6288	0.6288	0.9992	0	0.601	0.601	0.5704	0.6141	0.6078	0.648	0.5168	0.6015	0.7633	rs76402155	KHDRBS2(0)
6:62632276	6	62632276	G	?	9	4.9e-05	4.9e-05	0.6288	0.6288	0.9992	0	0.601	0.601	0.5704	0.6141	0.6078	0.648	0.5168	0.6015	0.7633	rs4302653	KHDRBS2(0)
6:62633178	6	62633178	C	?	9	4.9e-05	4.9e-05	0.6288	0.6288	0.9992	0	0.601	0.601	0.5704	0.6141	0.6078	0.648	0.5168	0.6015	0.7633	rs73489415	KHDRBS2(0)
6:62633187	6	62633187	C	?	9	4.9e-05	4.9e-05	0.6288	0.6288	0.9992	0	0.601	0.601	0.5704	0.6141	0.6078	0.648	0.5168	0.6015	0.7633	rs74696330	KHDRBS2(0)
6:62633739	6	62633739	A	?	9	4.9e-05	4.9e-05	0.6288	0.6288	0.9992	0	0.601	0.601	0.5704	0.6141	0.6078	0.648	0.5168	0.6015	0.7633	rs78495855	KHDRBS2(0)
6:62634441	6	62634441	C	?	9	4.9e-05	4.9e-05	0.6288	0.6288	0.9992	0	0.601	0.601	0.5704	0.6141	0.6078	0.648	0.5168	0.6015	0.7633	rs16900651	KHDRBS2(0)
6:62634686	6	62634686	T	?	9	4.9e-05	4.9e-05	0.6288	0.6288	0.9992	0	0.601	0.601	0.5704	0.6141	0.6078	0.648	0.5168	0.6015	0.7633	rs113337133	KHDRBS2(0)
6:62634820	6	62634820	C	?	9	4.9e-05	4.9e-05	0.6288	0.6288	0.9992	0	0.601	0.601	0.5704	0.6141	0.6078	0.648	0.5168	0.6015	0.7633	rs16880462	KHDRBS2(0)
6:62635287	6	62635287	T	?	9	4.9e-05	4.9e-05	0.6288	0.6288	0.9992	0	0.601	0.601	0.5704	0.6141	0.6078	0.648	0.5168	0.6015	0.7633	rs16900658	KHDRBS2(0)
6:62636693	6	62636693	G	?	9	4.9e-05	4.9e-05	0.6288	0.6288	0.9992	0	0.601	0.601	0.5704	0.6141	0.6078	0.648	0.5168	0.6015	0.7633	rs16880464	KHDRBS2(0)
6:62636769	6	62636769	C	?	9	4.9e-05	4.9e-05	0.6288	0.6288	0.9992	0	0.601	0.601	0.5704	0.6141	0.6078	0.648	0.5168	0.6015	0.7633	rs73489428	KHDRBS2(0)
13:100344735	13	100344735	G	?	9	4.914e-05	4.914e-05	0.5501	0.5501	0.7634	0	0.5473	0.5473	0.5536	2.366	0.3476	0.644	0.1074	0.9832	0.5778	rs141278699	CLYBL(0)|MIR4306(+49.33kb)|TM9SF2(+128.4kb)
10:103338730	10	103338730	A	?	9	4.944e-05	0.002105	0.7413	0.7032	0.0536	47.7	0.384	0.384	0.8603	0.5612	1.132	0.6155	0.9209	0.6262	0.7747	rs1055364	BTRC(+21.65kb)|DPCD(-9.358kb)|FBXW4(-31.69kb)|FGF8(-191.2kb)|MIR3158-1(-22.44kb)|MIR3158-2(-22.44kb)|POLL(0)
10:103338733	10	103338733	G	?	9	4.944e-05	0.002105	0.7413	0.7032	0.0536	47.7	0.384	0.384	0.8603	0.5612	1.132	0.6155	0.9209	0.6262	0.7747	rs1055362	BTRC(+21.66kb)|DPCD(-9.355kb)|FBXW4(-31.69kb)|FGF8(-191.2kb)|MIR3158-1(-22.44kb)|MIR3158-2(-22.44kb)|POLL(0)
10:103340144	10	103340144	G	?	9	4.944e-05	0.002105	0.7413	0.7032	0.0536	47.7	0.384	0.384	0.8603	0.5612	1.132	0.6155	0.9209	0.6262	0.7747	rs3730476	BTRC(+23.07kb)|DPCD(-7.944kb)|FBXW4(-30.28kb)|FGF8(-189.7kb)|MIR3158-1(-21.03kb)|MIR3158-2(-21.03kb)|POLL(0)
10:103340179	10	103340179	G	?	9	4.944e-05	0.002105	0.7413	0.7032	0.0536	47.7	0.384	0.384	0.8603	0.5612	1.132	0.6155	0.9209	0.6262	0.7747	rs3730475	BTRC(+23.1kb)|DPCD(-7.909kb)|FBXW4(-30.24kb)|FGF8(-189.7kb)|MIR3158-1(-20.99kb)|MIR3158-2(-20.99kb)|POLL(0)
10:103340235	10	103340235	C	?	9	4.944e-05	0.002105	0.7413	0.7032	0.0536	47.7	0.384	0.384	0.8603	0.5612	1.132	0.6155	0.9209	0.6262	0.7747	rs3730474	BTRC(+23.16kb)|DPCD(-7.853kb)|FBXW4(-30.18kb)|FGF8(-189.7kb)|MIR3158-1(-20.94kb)|MIR3158-2(-20.94kb)|POLL(0)
10:103340714	10	103340714	G	?	9	4.944e-05	0.002105	0.7413	0.7032	0.0536	47.7	0.384	0.384	0.8603	0.5612	1.132	0.6155	0.9209	0.6262	0.7747	rs3730472	BTRC(+23.64kb)|DPCD(-7.374kb)|FBXW4(-29.71kb)|FGF8(-189.2kb)|MIR3158-1(-20.46kb)|MIR3158-2(-20.46kb)|POLL(0)
10:103445325	10	103445325	A	?	9	4.974e-05	0.003608	0.7121	0.6861	0.0544	47.55	0.3095	0.3095	0.8308	0.9528	1.027	0.5579	1.186	0.621	0.7413	rs10883676	BTRC(+128.2kb)|C10orf76(-160kb)|DPCD(+75.92kb)|FBXW4(0)|FGF8(-84.56kb)|KCNIP2(-140.4kb)|KCNIP2-AS1(-133.5kb)|MGEA5(-98.87kb)|MIR3158-1(+84.07kb)|MIR3158-2(+84.07kb)|NPM3(-95.76kb)|POLL(+97.3kb)
10:103448649	10	103448649	A	?	9	4.974e-05	0.003608	0.7121	0.6861	0.0544	47.55	0.3095	0.3095	0.8308	0.9528	1.027	0.5579	1.186	0.621	0.7413	rs11191091	BTRC(+131.6kb)|C10orf76(-156.7kb)|DPCD(+79.24kb)|FBXW4(0)|FGF8(-81.24kb)|KCNIP2(-137.1kb)|KCNIP2-AS1(-130.2kb)|MGEA5(-95.55kb)|MIR3158-1(+87.4kb)|MIR3158-2(+87.4kb)|NPM3(-92.43kb)|POLL(+100.6kb)
10:103449251	10	103449251	C	?	9	4.974e-05	0.003608	0.7121	0.6861	0.0544	47.55	0.3095	0.3095	0.8308	0.9528	1.027	0.5579	1.186	0.621	0.7413	rs11191092	BTRC(+132.2kb)|C10orf76(-156.1kb)|DPCD(+79.84kb)|FBXW4(0)|FGF8(-80.64kb)|KCNIP2(-136.5kb)|KCNIP2-AS1(-129.6kb)|MGEA5(-94.95kb)|MIR3158-1(+88kb)|MIR3158-2(+88kb)|NPM3(-91.83kb)|POLL(+101.2kb)
10:103437266	10	103437266	G	?	9	4.999e-05	0.003641	0.7122	0.6862	0.0542	47.6	0.3095	0.3095	0.8308	0.9528	1.027	0.5579	1.194	0.621	0.7413	rs11191088	BTRC(+120.2kb)|C10orf76(-168.1kb)|DPCD(+67.86kb)|FBXW4(0)|FGF8(-92.62kb)|KCNIP2(-148.5kb)|KCNIP2-AS1(-141.6kb)|MGEA5(-106.9kb)|MIR3158-1(+76.01kb)|MIR3158-2(+76.01kb)|NPM3(-103.8kb)|POLL(+89.24kb)
6:62628066	6	62628066	C	?	9	5.005e-05	5.005e-05	0.6412	0.6412	0.9899	0	0.6094	0.6094	0.568	0.786	0.6228	0.6072	0.5388	0.8404	0.8254	rs16900612	KHDRBS2(0)
6:62638023	6	62638023	G	?	9	5.032e-05	5.032e-05	0.6293	0.6293	0.9991	0	0.601	0.601	0.5704	0.6141	0.6078	0.648	0.5168	0.6015	0.7663	rs16900669	KHDRBS2(0)
6:62638176	6	62638176	G	?	9	5.032e-05	5.032e-05	0.6293	0.6293	0.9991	0	0.601	0.601	0.5704	0.6141	0.6078	0.648	0.5168	0.6015	0.7663	rs16900673	KHDRBS2(0)
6:62638493	6	62638493	G	?	9	5.032e-05	5.032e-05	0.6293	0.6293	0.9991	0	0.601	0.601	0.5704	0.6141	0.6078	0.648	0.5168	0.6015	0.7663	rs16900674	KHDRBS2(0)
6:62638712	6	62638712	A	?	9	5.032e-05	5.032e-05	0.6293	0.6293	0.9991	0	0.601	0.601	0.5704	0.6141	0.6078	0.648	0.5168	0.6015	0.7663	rs79149528	KHDRBS2(0)
6:62638986	6	62638986	C	?	9	5.032e-05	5.032e-05	0.6293	0.6293	0.9991	0	0.601	0.601	0.5704	0.6141	0.6078	0.648	0.5168	0.6015	0.7663	rs16900679	KHDRBS2(0)
6:62639962	6	62639962	C	?	9	5.032e-05	5.032e-05	0.6293	0.6293	0.9991	0	0.601	0.601	0.5704	0.6141	0.6078	0.648	0.5168	0.6015	0.7663	rs112298096	KHDRBS2(0)
10:103426754	10	103426754	T	?	9	5.039e-05	0.003638	0.7123	0.6862	0.0542	47.59	0.3095	0.3095	0.8318	0.9528	1.027	0.5579	1.186	0.621	0.7413	rs12356764	BTRC(+109.7kb)|C10orf76(-178.6kb)|DPCD(+57.34kb)|FBXW4(0)|FGF8(-103.1kb)|KCNIP2(-159kb)|KCNIP2-AS1(-152.1kb)|MGEA5(-117.4kb)|MIR3158-1(+65.5kb)|MIR3158-2(+65.5kb)|NPM3(-114.3kb)|POLL(+78.73kb)
8:12999187	8	12999187	T	?	9	5.045e-05	5.045e-05	0.496	0.496	0.7747	0	0.6502	0.6502	0.5965	1.437	0.8589	0.316	0.4954	0.2589	0.3636	rs76447284	DLC1(0)|KIAA1456(+111.9kb)
1:6138942	1	6138942	G	?	8	5.055e-05	5.055e-05	0.7293	0.7293	0.7149	0	0.74	0.74	0.7616	0.5511	0.8683	0.7194	NA	0.2256	0.7267	rs6685018	ACOT7(-185.4kb)|CHD5(-22.9kb)|GPR153(-168.5kb)|HES3(-165.3kb)|ICMT(-142.3kb)|KCNAB2(0)|LINC00337(-157.4kb)|NPHP4(+86.41kb)|RNF207(-127.2kb)|RPL22(-106.1kb)
3:7202909	3	7202909	T	?	6	5.056e-05	5.056e-05	0.3128	0.3128	0.6662	0	0.1257	0.1257	0.3013	0.1275	NA	NA	0.2439	NA	0.5168	rs9864350	GRM7(0)
3:7203771	3	7203771	T	?	6	5.056e-05	5.056e-05	0.3128	0.3128	0.6662	0	0.1257	0.1257	0.3013	0.1275	NA	NA	0.2439	NA	0.5168	rs73811619	GRM7(0)
3:7204041	3	7204041	A	?	6	5.056e-05	5.056e-05	0.3128	0.3128	0.6662	0	0.1257	0.1257	0.3013	0.1275	NA	NA	0.2439	NA	0.5168	rs73811620	GRM7(0)
3:7205872	3	7205872	T	?	6	5.056e-05	5.056e-05	0.3128	0.3128	0.6662	0	0.1257	0.1257	0.3013	0.1275	NA	NA	0.2439	NA	0.5168	rs2048855	GRM7(0)
6:62628482	6	62628482	T	?	9	5.062e-05	5.062e-05	0.6292	0.6292	0.9991	0	0.601	0.601	0.5704	0.6141	0.6078	0.648	0.5168	0.6015	0.7668	rs78634305	KHDRBS2(0)
6:62630645	6	62630645	G	?	9	5.062e-05	5.062e-05	0.6292	0.6292	0.9991	0	0.601	0.601	0.5704	0.6141	0.6078	0.648	0.5168	0.6015	0.7668	rs16900631	KHDRBS2(0)
6:62625979	6	62625979	T	?	9	5.118e-05	5.118e-05	0.6416	0.6416	0.9894	0	0.6094	0.6094	0.568	0.786	0.6228	0.6072	0.5388	0.8404	0.828	rs16900602	KHDRBS2(0)
1:202196119	1	202196119	T	?	7	5.131e-05	8.234e-05	0.3487	0.3494	0.3987	3.58	0.1384	0.1384	1.168	0.6523	0.2332	0.3369	NA	NA	0.242	rs78649964	ARL8A(+82.25kb)|GPR37L1(+97.48kb)|LGR6(0)|PPP1R12B(-121.7kb)|PTPN7(+65.4kb)|PTPRVP(+37.54kb)|UBE2T(-104.7kb)
19:45404431	19	45404431	C	?	8	5.141e-05	0.004861	0.6977	0.6332	0.0104	61.91	0.3296	0.3296	0.5107	0.5974	0.9778	1.117	NA	0.4076	0.5818	rs741780	APOC1(-13.49kb)|APOC1P1(-25.63kb)|APOC2(-44.81kb)|APOC4(-41.06kb)|APOC4-APOC2(-41.06kb)|APOE(-4.607kb)|BCAM(+79.75kb)|BCL3(+141.1kb)|CBLC(+100.5kb)|CEACAM16(+190.4kb)|CLASRP(-137.9kb)|CLPTM1(-53.41kb)|GEMIN7(-178.1kb)|PPP1R37(-192kb)|PVRL2(+11.95kb)|RELB(-100.3kb)|TOMM40(0)|ZNF296(-170.3kb)
2:103123133	2	103123133	C	?	7	5.151e-05	0.0005146	0.408	0.411	0.2889	18.47	0.3069	0.3069	0.2452	0.1882	0.5901	0.3922	NA	NA	1.139	rs62153064	IL1RL1(+154.6kb)|IL18R1(+107.9kb)|IL18RAP(+54.11kb)|MIR4772(+74.31kb)|SLC9A2(-113kb)|SLC9A4(0)
17:39917802	17	39917802	A	?	9	5.189e-05	5.189e-05	0.7325	0.7325	0.5395	0	0.4893	0.4893	0.7425	0.8199	0.774	0.8677	0.7556	0.2304	0.7275	rs7503842	ACLY(-105.4kb)|EIF1(+69.9kb)|FKBP10(-51.16kb)|GAST(+45.58kb)|HAP1(+26.9kb)|JUP(0)|KLHL10(-76.24kb)|KLHL11(-92kb)|KRT9(+189.5kb)|KRT14(+174.7kb)|KRT16(+148.7kb)|KRT17(+136.9kb)|KRT42P(+121.4kb)|LEPREL4(-40.4kb)|NT5C3B(-63.53kb)|TTC25(-169.1kb)
2:178540293	2	178540293	A	?	9	5.231e-05	0.06203	0.7069	0.7493	0.0133	58.59	0.4664	0.4664	0.7417	4.473	0.7097	0.9155	1.199	1.007	0.5151	rs3770016	AGPS(+131.7kb)|PDE11A(0)|TTC30A(+56.6kb)|TTC30B(+122.8kb)
7:36262013	7	36262013	T	?	9	5.242e-05	0.003089	0.6716	0.6215	0.0401	50.51	0.2564	0.2564	0.9603	0.8919	0.4561	1.022	0.5478	0.3568	0.6382	rs10277543	ANLN(-167.4kb)|EEPD1(0)|KIAA0895(-101.7kb)
8:96627453	8	96627453	A	?	8	5.25e-05	5.25e-05	0.4532	0.4532	0.4943	0	0.2557	0.2557	0.4526	0.5837	0.4269	1.7	0.6062	NA	0.3581	rs35523499	LOC100616530(0)
3:101240059	3	101240059	G	?	9	5.256e-05	0.0005261	0.6204	0.6183	0.2866	17.54	0.3865	0.3865	0.4831	0.8446	0.9313	0.4429	1.278	0.5644	0.9454	rs76146991	FAM172BP(0)|PCNP(-52.98kb)|PDCL3P4(-191.2kb)|RPL24(-159.9kb)|SENP7(+7.974kb)|TRMT10C(-40.62kb)|ZBTB11(-128.2kb)|ZBTB11-AS1(-155.2kb)
6:62642074	6	62642074	G	?	9	5.262e-05	5.262e-05	0.6301	0.6301	0.9991	0	0.601	0.601	0.5722	0.6141	0.6078	0.648	0.5186	0.6015	0.7678	rs78671963	KHDRBS2(0)
6:62643232	6	62643232	C	?	9	5.262e-05	5.262e-05	0.6301	0.6301	0.9991	0	0.601	0.601	0.5722	0.6141	0.6078	0.648	0.5186	0.6015	0.7678	rs75542780	KHDRBS2(0)
6:102349333	6	102349333	T	?	9	5.315e-05	0.0005874	0.7528	0.7333	0.1977	27.74	0.4919	0.4919	0.8294	1.041	0.5634	0.7605	0.7295	0.3474	0.9402	rs1417178	GRIK2(0)
6:31475763	6	31475763	A	?	6	5.329e-05	5.329e-05	0.306	0.306	0.905	0	0.1605	0.1605	0.3247	0.351	NA	NA	NA	0.0562	0.3714	rs71552062	ABHD16A(-179kb)|AIF1(-107.2kb)|APOM(-144.4kb)|ATP6V1G2(-36.46kb)|ATP6V1G2-DDX39B(-22.23kb)|BAG6(-131kb)|C6orf47(-150.3kb)|CSNK2B(-157.9kb)|DDX39B(-22.23kb)|GPANK1(-153.2kb)|HCG26(+35.58kb)|HCP5(+42.18kb)|HLA-B(+150.8kb)|LST1(-78.19kb)|LTA(-64.11kb)|LTB(-72.57kb)|LY6G5B(-163kb)|LY6G5C(-168.7kb)|LY6G6F(-198.9kb)|MCCD1(-20.98kb)|MICA(+92.67kb)|MICB(0)|MIR4646(-193kb)|NCR3(-80.9kb)|NFKBIL1(-38.86kb)|…
6:62450479	6	62450479	T	?	9	5.339e-05	5.339e-05	0.5582	0.5582	0.6521	0	1.301	1.301	0.4915	1.215	0.4101	0.5755	0.088	0.726	0.6011	rs78703793	KHDRBS2(0)|MTRNR2L9(+165.9kb)
6:62458862	6	62458862	C	?	9	5.339e-05	5.339e-05	0.5582	0.5582	0.6521	0	1.301	1.301	0.4915	1.215	0.4101	0.5755	0.088	0.726	0.6011	rs114883074	KHDRBS2(0)|MTRNR2L9(+174.3kb)
6:62462446	6	62462446	T	?	9	5.339e-05	5.339e-05	0.5582	0.5582	0.6521	0	1.301	1.301	0.4915	1.215	0.4101	0.5755	0.088	0.726	0.6011	rs79622312	KHDRBS2(0)|MTRNR2L9(+177.9kb)
13:100352571	13	100352571	T	?	9	5.361e-05	5.361e-05	0.5495	0.5495	0.7553	0	0.5473	0.5473	0.5449	2.366	0.3476	0.6618	0.1074	0.9832	0.5778	rs117283587	CLYBL(0)|MIR4306(+57.17kb)|TM9SF2(+136.3kb)
1:151803889	1	151803889	A	?	8	5.403e-05	5.403e-05	0.5766	0.5766	0.7462	0	0.3906	0.3906	0.5482	1.221	0.7998	0.6304	0.7393	NA	0.4621	rs74948431	C2CD4D(-6.449kb)|CELF3(+114.6kb)|LINGO4(+26.01kb)|LOC100132111(-7.055kb)|MRPL9(+67.85kb)|NBPF18P(-186.9kb)|OAZ3(+60.08kb)|RIIAD1(+101.8kb)|RORC(0)|S100A10(-151.5kb)|SNX27(+132.3kb)|TDRKH(+40.88kb)|THEM4(-39.45kb)|THEM5(-15.69kb)
10:103386681	10	103386681	G	?	9	5.419e-05	0.004201	0.7431	0.7017	0.0235	54.84	0.3357	0.3357	0.8215	0.6769	1.197	0.6328	1.016	0.6847	0.7589	rs3095790	BTRC(+69.6kb)|DPCD(+17.27kb)|FBXW4(0)|FGF8(-143.2kb)|KCNIP2(-199kb)|KCNIP2-AS1(-192.1kb)|MGEA5(-157.5kb)|MIR3158-1(+25.43kb)|MIR3158-2(+25.43kb)|NPM3(-154.4kb)|POLL(+38.65kb)
16:77984086	16	77984086	C	?	9	5.42e-05	0.0006709	0.7541	0.7381	0.198	27.71	0.5679	0.5679	0.906	0.7772	0.9511	0.662	0.5868	0.1384	0.7447	rs8051730	CLEC3A(-72.36kb)|VAT1L(0)|WWOX(-149.2kb)
2:202902857	2	202902857	T	?	8	5.426e-05	5.426e-05	0.4576	0.4576	0.9164	0	0.4928	0.4928	0.619	0.1952	0.3593	0.4024	NA	0.4761	0.5822	rs33976811	CDK15(+142.6kb)|FZD7(0)|LOC100652824(-35.12kb)|SUMO1(-168kb)
3:159493195	3	159493195	A	?	9	5.447e-05	5.447e-05	0.6346	0.6346	0.8002	0	1.069	1.069	0.6276	0.8628	0.6904	0.5367	1.554	1.108	0.5062	rs34586932	IQCJ-SCHIP1(0)|SCHIP1(0)
10:98105618	10	98105618	C	?	9	5.454e-05	0.0002909	0.6409	0.6426	0.3396	11.42	0.7293	0.7293	0.4811	0.5335	0.5028	1.043	0.0642	0.792	0.7148	rs56148171	BLNK(+74.28kb)|DNTT(+7.297kb)|OPALIN(0)|TLL2(-18.74kb)|TM9SF3(-172.2kb)|ZNF518A(+182.1kb)
10:103383160	10	103383160	C	?	9	5.457e-05	0.004212	0.7432	0.7018	0.0235	54.84	0.3357	0.3357	0.8215	0.6769	1.197	0.6328	1.016	0.6847	0.7594	rs3127258	BTRC(+66.08kb)|DPCD(+13.75kb)|FBXW4(0)|FGF8(-146.7kb)|KCNIP2-AS1(-195.7kb)|MGEA5(-161kb)|MIR3158-1(+21.91kb)|MIR3158-2(+21.91kb)|NPM3(-157.9kb)|POLL(+35.13kb)
9:71781983	9	71781983	T	?	9	5.459e-05	5.459e-05	0.7511	0.7511	0.4758	0	0.6894	0.6894	0.9045	1.095	0.5544	0.8182	0.8829	0.3952	0.6868	rs10869956	BANCR(-129.6kb)|FAM189A2(-157.5kb)|FXN(+66.89kb)|PIP5K1B(+157.9kb)|PRKACG(+152.9kb)|TJP2(0)
16:78008920	16	78008920	G	?	9	5.49e-05	0.001706	1.3287	1.3843	0.0894	41.68	2.195	2.195	0.9982	1.38	1.16	1.406	0.4975	3.727	1.453	rs441749	CLEC3A(-47.52kb)|VAT1L(0)|WWOX(-124.4kb)
17:39917325	17	39917325	A	?	9	5.547e-05	5.547e-05	0.7335	0.7335	0.5381	0	0.4893	0.4893	0.7486	0.8199	0.774	0.8677	0.7393	0.2304	0.7258	rs4606765	ACLY(-105.9kb)|EIF1(+69.43kb)|FKBP10(-51.64kb)|GAST(+45.1kb)|HAP1(+26.43kb)|JUP(0)|KLHL10(-76.72kb)|KLHL11(-92.47kb)|KRT9(+189kb)|KRT14(+174.2kb)|KRT16(+148.2kb)|KRT17(+136.4kb)|KRT42P(+120.9kb)|LEPREL4(-40.88kb)|NT5C3B(-64.01kb)|TTC25(-169.6kb)
10:103422107	10	103422107	C	?	9	5.553e-05	0.003904	0.7139	0.6876	0.0527	47.88	0.3095	0.3095	0.8318	0.9528	1.027	0.5579	1.217	0.621	0.746	rs12255825	BTRC(+105kb)|C10orf76(-183.2kb)|DPCD(+52.7kb)|FBXW4(0)|FGF8(-107.8kb)|KCNIP2(-163.6kb)|KCNIP2-AS1(-156.7kb)|MGEA5(-122.1kb)|MIR3158-1(+60.85kb)|MIR3158-2(+60.85kb)|NPM3(-119kb)|POLL(+74.08kb)
3:101120367	3	101120367	T	?	9	5.561e-05	0.0005948	0.6215	0.6191	0.2797	18.33	0.3865	0.3865	0.4831	0.8446	0.9313	0.4429	1.271	0.5644	0.9511	rs114423240	FAM172BP(-117.3kb)|IMPG2(+80.95kb)|PCNP(-172.7kb)|SENP7(0)|TRMT10C(-160.3kb)
3:101169308	3	101169308	C	?	9	5.561e-05	0.0005948	0.6215	0.6191	0.2797	18.33	0.3865	0.3865	0.4831	0.8446	0.9313	0.4429	1.271	0.5644	0.9511	rs138564110	FAM172BP(-68.4kb)|IMPG2(+129.9kb)|PCNP(-123.7kb)|SENP7(0)|TRMT10C(-111.4kb)|ZBTB11(-199kb)
6:62462981	6	62462981	C	?	9	5.58e-05	5.58e-05	0.5592	0.5592	0.6544	0	1.301	1.301	0.4946	1.215	0.4101	0.5755	0.088	0.726	0.6011	rs76758966	KHDRBS2(0)|MTRNR2L9(+178.4kb)
10:126413773	10	126413773	A	?	9	5.606e-05	5.606e-05	0.7461	0.7461	0.733	0	0.7157	0.7157	0.7756	0.6027	0.6478	0.8956	0.904	0.2889	0.7422	rs6597851	FAM53B(0)|FAM175B(-76.58kb)|LHPP(+111.1kb)|METTL10(-33.63kb)
19:18850110	19	18850110	A	?	7	5.611e-05	0.006954	0.516	0.4707	0.0388	54.82	0.1041	0.1041	0.4824	0.4741	2.17	0.7384	NA	NA	0.6491	rs62137140	C19orf60(+147kb)|CERS1(-129.2kb)|COMP(-43.47kb)|COPE(-160.2kb)|CRLF1(+132.4kb)|CRTC1(0)|DDX49(-180.4kb)|FKBP8(+195.7kb)|GDF1(-129.2kb)|HOMER3(-189.9kb)|KLHL26(+68.81kb)|KXD1(+169.9kb)|TMEM59L(+118.3kb)|UBA52(+161.8kb)|UPF1(-92.63kb)
3:7208482	3	7208482	C	?	6	5.676e-05	5.676e-05	0.316	0.316	0.6675	0	0.1257	0.1257	0.309	0.1275	NA	NA	0.2503	NA	0.5168	rs73811622	GRM7(0)
3:7209563	3	7209563	A	?	6	5.676e-05	5.676e-05	0.316	0.316	0.6675	0	0.1257	0.1257	0.309	0.1275	NA	NA	0.2503	NA	0.5168	rs6776304	GRM7(0)
3:7211693	3	7211693	A	?	6	5.676e-05	5.676e-05	0.316	0.316	0.6675	0	0.1257	0.1257	0.309	0.1275	NA	NA	0.2503	NA	0.5168	rs10212367	GRM7(0)
10:84045863	10	84045863	A	?	6	5.708e-05	5.708e-05	0.2974	0.2974	0.7393	0	0.1976	0.1976	0.1751	0.7672	NA	NA	3.132	NA	0.3886	rs11193429	NRG3(0)
10:84047124	10	84047124	T	?	6	5.708e-05	5.708e-05	0.2974	0.2974	0.7393	0	0.1976	0.1976	0.1751	0.7672	NA	NA	3.132	NA	0.3886	rs58642873	NRG3(0)
10:84047246	10	84047246	T	?	6	5.708e-05	5.708e-05	0.2974	0.2974	0.7393	0	0.1976	0.1976	0.1751	0.7672	NA	NA	3.132	NA	0.3886	rs12262500	NRG3(0)
17:78158875	17	78158875	A	?	9	5.713e-05	5.713e-05	0.7548	0.7548	0.6118	0	0.5899	0.5899	0.811	1.133	0.6604	0.6847	0.2903	1.068	0.8539	rs67769660	CARD14(0)|CCDC40(+84.46kb)|EIF4A3(+37.89kb)|GAA(+65.2kb)|LOC100294362(-166.8kb)|RNF213(-75.78kb)|SGSH(-24.2kb)|SLC26A11(-35.32kb)|TBC1D16(+149.2kb)
6:44258034	6	44258034	A	?	9	5.713e-05	5.713e-05	0.7179	0.7179	0.523	0	0.3913	0.3913	0.7917	0.5776	0.7628	0.7333	1.271	0.792	0.8011	rs614715	AARS2(-8.428kb)|CAPN11(+105.9kb)|CDC5L(-97.22kb)|HSP90AB1(+36.41kb)|MIR4642(-145.3kb)|MIR4647(+36.01kb)|MRPL14(+162.8kb)|NFKBIE(+24.51kb)|SLC29A1(+56.15kb)|SLC35B2(+32.75kb)|SPATS1(-52.36kb)|TCTE1(0)|TMEM63B(+134.8kb)|TMEM151B(+10.85kb)
4:71265428	4	71265428	C	?	7	5.726e-05	0.008983	0.4202	0.4365	0.114	41.53	0.2265	0.2265	0.526	0.8523	NA	0.4891	211.8	NA	0.4175	rs114703529	AMBN(-192.5kb)|AMTN(-118.9kb)|CABS1(+62.6kb)|CSN3(+148.3kb)|FDCSP(+164.5kb)|MUC7(-30.78kb)|ODAM(+195.1kb)|PROL1(0)|SMR3A(+32.6kb)|SMR3B(+9.467kb)
3:101037089	3	101037089	C	?	9	5.741e-05	0.0005523	0.6216	0.6192	0.2868	17.52	0.3865	0.3865	0.4863	0.8446	0.91	0.4429	1.271	0.5644	0.9615	rs513283	IMPG2(0)|SENP7(-6.028kb)
9:114922067	9	114922067	T	?	9	5.742e-05	5.742e-05	1.3248	1.3248	0.5748	0	1.061	1.061	1.396	0.9138	1.396	1.247	0.5729	1.308	1.647	rs9886804	MIR3134(0)|PTBP3(-57.93kb)|SUSD1(0)
12:110261767	12	110261767	T	?	9	5.743e-05	0.002305	0.6552	0.6176	0.0847	42.4	0.2255	0.2255	0.6298	1.554	0.6915	0.7445	0.9706	0.1962	0.7564	rs117187014	ANKRD13A(-175.5kb)|FAM222A(+53.46kb)|FAM222A-AS1(+50.48kb)|GIT2(-105.8kb)|GLTP(-26.98kb)|MIR4497(-9.385kb)|TCHP(-76.31kb)|TRPV4(0)
4:169430513	4	169430513	A	?	8	5.756e-05	5.756e-05	0.467	0.467	0.5212	0	0.1571	0.1571	0.6276	0.2087	0.5333	0.5327	2.991	NA	0.5633	rs57006399	DDX60(+190.6kb)|DDX60L(+28.88kb)|PALLD(0)
17:78159091	17	78159091	C	?	9	5.794e-05	5.794e-05	0.755	0.755	0.6079	0	0.5899	0.5899	0.811	1.133	0.6604	0.6847	0.2903	1.084	0.8539	rs7225248	CARD14(0)|CCDC40(+84.68kb)|EIF4A3(+38.11kb)|GAA(+65.41kb)|LOC100294362(-166.5kb)|RNF213(-75.57kb)|SGSH(-23.99kb)|SLC26A11(-35.11kb)|TBC1D16(+149.4kb)
2:175079953	2	175079953	C	?	9	5.797e-05	0.0002665	0.6436	0.6355	0.3166	14.1	0.3134	0.3134	0.7249	0.862	0.7077	0.9104	1.221	0.7	0.4946	rs76316987	CIR1(-132.9kb)|LOC285084(-110.8kb)|OLA1(0)|SCRN3(-180.5kb)|SP9(-119.9kb)
8:70732910	8	70732910	G	?	8	5.82e-05	0.003995	0.4692	0.4789	0.191	29.7	0.1157	0.1157	0.6671	0.6527	1.559	0.2774	NA	0.1481	0.582	rs55797554	SLCO5A1(0)|SULF1(+159.8kb)
8:13001922	8	13001922	A	?	9	5.839e-05	5.839e-05	0.5013	0.5013	0.8841	0	0.6502	0.6502	0.6175	1.437	0.7062	0.3583	0.4954	0.3167	0.3636	rs79846645	DLC1(0)|KIAA1456(+114.6kb)
8:13002440	8	13002440	G	?	9	5.839e-05	5.839e-05	0.5013	0.5013	0.8841	0	0.6502	0.6502	0.6175	1.437	0.7062	0.3583	0.4954	0.3167	0.3636	rs117483796	DLC1(0)|KIAA1456(+115.2kb)
16:85949107	16	85949107	G	?	9	5.891e-05	5.891e-05	0.6772	0.6772	0.4737	0	0.3724	0.3724	0.6634	0.5349	0.7563	0.6676	2.68	2.961	0.8074	rs8054513	C16orf74(+164.4kb)|COX4I1(+108.5kb)|EMC8(+116kb)|IRF8(0)|MIR1910(+173.8kb)
7:151046832	7	151046832	A	?	8	5.947e-05	0.001476	1.3702	1.3906	0.1708	32.22	2.266	2.266	1.366	0.717	1.872	1.228	1.665	NA	1.266	rs414168	ABCF2(+122.5kb)|ASB10(+161.9kb)|CHPF2(+110.9kb)|CRYGN(-80.22kb)|GBX1(+182kb)|MIR671(+111.2kb)|MIR3907(-83.74kb)|NUB1(0)|RHEB(-116.3kb)|SMARCD3(+72.6kb)|WDR86(-31.37kb)|WDR86-AS1(-59.49kb)
13:100346818	13	100346818	A	?	9	5.978e-05	5.978e-05	0.5515	0.5515	0.7665	0	0.5473	0.5473	0.5498	2.366	0.3476	0.6618	0.1119	0.9832	0.5778	rs80101787	CLYBL(0)|MIR4306(+51.42kb)|TM9SF2(+130.5kb)
6:36983192	6	36983192	T	?	9	6.025e-05	6.025e-05	0.7552	0.7552	0.6554	0	0.6002	0.6002	0.6611	0.5115	0.9223	0.739	0.9184	0.8437	0.8952	rs12199978	C6orf89(+86.45kb)|CPNE5(+176kb)|FGD2(0)|MTCH1(+28.86kb)|PI16(+50.58kb)|PIM1(-154.7kb)|PPIL1(+140.4kb)|TMEM217(-196.8kb)
12:129074144	12	129074144	A	?	8	6.032e-05	6.032e-05	0.6142	0.6142	0.696	0	0.4819	0.4819	0.8348	0.8051	0.3508	0.6267	NA	0.6835	0.5667	rs11612075	TMEM132C(0)
13:100381591	13	100381591	G	?	6	6.044e-05	6.044e-05	0.4642	0.4642	0.6904	0	NA	NA	0.3767	1.198	0.4891	0.4272	0.1109	NA	0.7196	rs61748971	CLYBL(0)|MIR4306(+86.19kb)|TM9SF2(+165.3kb)
6:62611579	6	62611579	C	?	9	6.07e-05	6.07e-05	0.6447	0.6447	0.9902	0	0.6094	0.6094	0.568	0.786	0.6228	0.6221	0.5386	0.8404	0.828	rs16900514	KHDRBS2(0)
6:62612120	6	62612120	T	?	9	6.07e-05	6.07e-05	0.6447	0.6447	0.9902	0	0.6094	0.6094	0.568	0.786	0.6228	0.6221	0.5386	0.8404	0.828	rs61383502	KHDRBS2(0)
6:62613902	6	62613902	A	?	9	6.07e-05	6.07e-05	0.6447	0.6447	0.9902	0	0.6094	0.6094	0.568	0.786	0.6228	0.6221	0.5386	0.8404	0.828	rs79695386	KHDRBS2(0)
6:62615916	6	62615916	C	?	9	6.07e-05	6.07e-05	0.6447	0.6447	0.9902	0	0.6094	0.6094	0.568	0.786	0.6228	0.6221	0.5386	0.8404	0.828	rs7741857	KHDRBS2(0)
6:62616515	6	62616515	G	?	9	6.07e-05	6.07e-05	0.6447	0.6447	0.9902	0	0.6094	0.6094	0.568	0.786	0.6228	0.6221	0.5386	0.8404	0.828	rs73487385	KHDRBS2(0)
6:62620610	6	62620610	T	?	9	6.07e-05	6.07e-05	0.6447	0.6447	0.9902	0	0.6094	0.6094	0.568	0.786	0.6228	0.6221	0.5386	0.8404	0.828	rs73487391	KHDRBS2(0)
10:84073159	10	84073159	T	?	9	6.094e-05	6.094e-05	0.4864	0.4864	0.911	0	0.3351	0.3351	0.3541	0.6941	0.657	0.6094	0.2154	0.3302	0.6919	rs7897939	NRG3(0)
16:67349228	16	67349228	G	?	8	6.114e-05	0.0008638	0.394	0.3461	0.1501	34.86	0.0283	0.0283	0.4792	0.4958	0.2918	0.3376	NA	0.2807	0.8965	rs548329326	AGRP(-167.2kb)|ATP6V0D1(-122.7kb)|B3GNT9(+164.3kb)|C16orf70(+166.8kb)|E2F4(+116.4kb)|ELMO3(+111.3kb)|EXOC3L1(+125.1kb)|FBXL8(+151.2kb)|FHOD1(+67.8kb)|HSD11B2(-115.8kb)|HSF4(+145.4kb)|KCTD19(0)|KIAA0895L(+131.3kb)|LRRC29(+88.33kb)|LRRC36(-11.52kb)|MIR328(+112.9kb)|NOL3(+139.6kb)|PLEKHG4(+25.82kb)|SLC9A5(+43.13kb)|TMEM208(+86.05kb)|TPPP3(-74.48kb)|TRADD(+155.4kb)|ZDHHC1(-79.09kb)
2:203888708	2	203888708	G	?	8	6.123e-05	0.0008526	0.414	0.4111	0.2579	21.59	2.556	2.556	0.7255	0.3023	0.2452	0.1765	NA	0.3698	0.495	rs34769248	CARF(+37.65kb)|ICA1L(+152.3kb)|NBEAL1(0)|WDR12(+111.8kb)
6:62622719	6	62622719	T	?	9	6.13e-05	6.13e-05	0.6336	0.6336	0.9984	0	0.601	0.601	0.5704	0.6141	0.5953	0.6799	0.5166	0.6015	0.7694	rs78870248	KHDRBS2(0)
7:151046022	7	151046022	A	?	8	6.134e-05	0.0006562	1.3704	1.3839	0.2509	22.44	2.166	2.166	1.365	0.7513	1.872	1.228	1.633	NA	1.268	rs421635	ABCF2(+121.7kb)|ASB10(+161.1kb)|CHPF2(+110.1kb)|CRYGN(-81.03kb)|GBX1(+181.2kb)|MIR671(+110.4kb)|MIR3907(-84.55kb)|NUB1(0)|RHEB(-117.1kb)|SMARCD3(+71.79kb)|WDR86(-32.18kb)|WDR86-AS1(-60.3kb)
13:100346220	13	100346220	A	?	9	6.137e-05	6.137e-05	0.5521	0.5521	0.7554	0	0.5473	0.5473	0.5536	2.366	0.3476	0.6618	0.1074	0.9832	0.5778	rs74337291	CLYBL(0)|MIR4306(+50.82kb)|TM9SF2(+129.9kb)
10:32777214	10	32777214	T	?	9	6.149e-05	6.149e-05	0.4123	0.4123	0.655	0	1.087	1.087	0.2184	0.5723	0.782	0.7076	0.3872	0.4949	0.348	rs9971074	C10orf68(-79.44kb)|CCDC7(0)|EPC1(+109.5kb)
16:85948329	16	85948329	C	?	9	6.15e-05	6.15e-05	0.6782	0.6782	0.4809	0	0.3776	0.3776	0.6596	0.5349	0.7782	0.6601	2.68	2.961	0.7979	rs11649271	C16orf74(+163.6kb)|COX4I1(+107.7kb)|EMC8(+115.2kb)|IRF8(0)|MIR1910(+173kb)
10:103346315	10	103346315	A	?	9	6.169e-05	0.00252	0.7443	0.7059	0.0503	48.34	0.384	0.384	0.8679	0.5612	1.132	0.6192	1.016	0.6108	0.7761	rs3127253	BTRC(+29.24kb)|DPCD(-1.773kb)|FBXW4(-24.1kb)|FGF8(-183.6kb)|MGEA5(-197.9kb)|MIR3158-1(-14.86kb)|MIR3158-2(-14.86kb)|NPM3(-194.8kb)|POLL(0)
2:228787357	2	228787357	G	?	9	6.181e-05	0.01359	0.7393	0.7566	0.0752	43.9	0.6842	0.6842	0.6055	1.256	1.045	0.5254	0.8142	0.6243	0.9497	rs10194973	CCL20(+105.1kb)|DAW1(0)|SPHKAP(-57.31kb)
2:103132071	2	103132071	G	?	7	6.199e-05	0.0004554	0.4178	0.4213	0.3054	16.31	0.3069	0.3069	0.2452	0.3002	0.5151	0.3922	NA	NA	1.183	rs62153112	IL1RL1(+163.6kb)|IL18R1(+116.9kb)|IL18RAP(+63.05kb)|MIR4772(+83.24kb)|SLC9A2(-104.1kb)|SLC9A4(0)
6:62615617	6	62615617	G	?	9	6.201e-05	6.201e-05	0.633	0.633	0.9988	0	0.601	0.601	0.5704	0.6141	0.6078	0.6647	0.5166	0.6015	0.7694	rs80051508	KHDRBS2(0)
6:62615912	6	62615912	G	?	9	6.201e-05	6.201e-05	0.633	0.633	0.9988	0	0.601	0.601	0.5704	0.6141	0.6078	0.6647	0.5166	0.6015	0.7694	rs113438856	KHDRBS2(0)
6:62622804	6	62622804	A	?	9	6.201e-05	6.201e-05	0.633	0.633	0.9988	0	0.601	0.601	0.5704	0.6141	0.6078	0.6647	0.5166	0.6015	0.7694	rs35951800	KHDRBS2(0)
19:45402477	19	45402477	T	?	8	6.224e-05	0.001757	0.6945	0.6639	0.1028	41.33	0.3639	0.3639	0.5093	0.5473	0.9157	0.9987	NA	0.6635	0.67	rs34878901	APOC1(-15.44kb)|APOC1P1(-27.58kb)|APOC2(-46.76kb)|APOC4(-43.02kb)|APOC4-APOC2(-43.02kb)|APOE(-6.561kb)|BCAM(+77.8kb)|BCL3(+139.2kb)|CBLC(+98.57kb)|CEACAM16(+188.5kb)|CLASRP(-139.8kb)|CLPTM1(-55.36kb)|GEMIN7(-180kb)|PPP1R37(-194kb)|PVRL2(+9.992kb)|RELB(-102.2kb)|TOMM40(0)|ZNF296(-172.3kb)
2:204001724	2	204001724	G	?	9	6.256e-05	6.256e-05	0.4284	0.4284	0.4675	0	0.829	0.829	0.7602	0.3023	0.2686	0.1765	5.322	0.5209	0.5046	rs10932006	ABI2(-191.3kb)|CARF(+150.7kb)|CYP20A1(-101.4kb)|NBEAL1(0)
20:41010564	20	41010564	T	?	9	6.268e-05	6.268e-05	0.5871	0.5871	0.5406	0	0.7838	0.7838	0.9182	0.6205	0.4151	0.6356	0.1619	0.9756	0.403	rs10485692	PTPRT(0)
21:39206100	21	39206100	A	?	9	6.287e-05	6.287e-05	0.7578	0.7578	0.9842	0	0.6349	0.6349	0.7616	0.7695	0.8106	0.701	0.4941	0.8016	0.8322	rs991984	KCNJ6(0)
13:100325591	13	100325591	T	?	9	6.308e-05	6.308e-05	0.5529	0.5529	0.7557	0	0.5473	0.5473	0.5577	2.366	0.3476	0.6618	0.1074	0.9832	0.5747	rs150280819	CLYBL(0)|MIR4306(+30.19kb)|TM9SF2(+109.3kb)
3:101058030	3	101058030	C	?	9	6.309e-05	0.0007821	0.6234	0.6207	0.2643	20.08	0.3865	0.3865	0.4831	0.8446	0.9313	0.4429	1.271	0.5644	0.9658	rs2553422	FAM172BP(-179.7kb)|IMPG2(+18.61kb)|SENP7(0)
3:101061702	3	101061702	A	?	9	6.309e-05	0.0007821	0.6234	0.6207	0.2643	20.08	0.3865	0.3865	0.4831	0.8446	0.9313	0.4429	1.271	0.5644	0.9658	rs2449824	FAM172BP(-176kb)|IMPG2(+22.28kb)|SENP7(0)
3:101063482	3	101063482	C	?	9	6.309e-05	0.0007821	0.6234	0.6207	0.2643	20.08	0.3865	0.3865	0.4831	0.8446	0.9313	0.4429	1.271	0.5644	0.9658	rs2433032	FAM172BP(-174.2kb)|IMPG2(+24.06kb)|SENP7(0)
3:101072751	3	101072751	A	?	9	6.309e-05	0.0007821	0.6234	0.6207	0.2643	20.08	0.3865	0.3865	0.4831	0.8446	0.9313	0.4429	1.271	0.5644	0.9658	rs2460721	FAM172BP(-165kb)|IMPG2(+33.33kb)|SENP7(0)
3:101073550	3	101073550	T	?	9	6.309e-05	0.0007821	0.6234	0.6207	0.2643	20.08	0.3865	0.3865	0.4831	0.8446	0.9313	0.4429	1.271	0.5644	0.9658	rs1464361	FAM172BP(-164.2kb)|IMPG2(+34.13kb)|SENP7(0)
3:101085998	3	101085998	C	?	9	6.309e-05	0.0007821	0.6234	0.6207	0.2643	20.08	0.3865	0.3865	0.4831	0.8446	0.9313	0.4429	1.271	0.5644	0.9658	rs2553423	FAM172BP(-151.7kb)|IMPG2(+46.58kb)|SENP7(0)|TRMT10C(-194.7kb)
3:101088601	3	101088601	T	?	9	6.309e-05	0.0007821	0.6234	0.6207	0.2643	20.08	0.3865	0.3865	0.4831	0.8446	0.9313	0.4429	1.271	0.5644	0.9658	rs2682387	FAM172BP(-149.1kb)|IMPG2(+49.18kb)|SENP7(0)|TRMT10C(-192.1kb)
3:7173614	3	7173614	T	?	6	6.311e-05	6.311e-05	0.2908	0.2908	0.5581	0	0.0642	0.0642	0.3671	0.1275	NA	NA	0.7667	NA	0.3923	rs871715	GRM7(0)
13:109649826	13	109649826	A	?	9	6.347e-05	0.004763	0.6542	0.6707	0.1629	31.89	0.9693	0.9693	0.4279	0.5556	0.6866	1.095	0.5191	0.3431	0.6728	rs112691931	MYO16(0)|MYO16-AS1(-166.4kb)
6:1761004	6	1761004	A	?	8	6.358e-05	6.358e-05	0.4889	0.4889	0.8893	0	0.298	0.298	0.4933	0.8674	0.6861	0.5922	NA	0.1741	0.5005	rs80161193	FOXC1(+146.9kb)|GMDS(0)
9:4078995	9	4078995	C	?	9	6.382e-05	6.382e-05	0.7555	0.7555	0.9762	0	0.8164	0.8164	0.7026	0.7371	0.6947	0.8333	0.5228	0.4452	0.7909	rs2153440	GLIS3(0)|GLIS3-AS1(+177.7kb)
17:35987417	17	35987417	G	?	9	6.387e-05	6.387e-05	0.755	0.755	0.8818	0	0.5977	0.5977	0.7211	0.5673	0.8123	0.9224	0.8022	0.7086	0.7284	rs9903940	DDX52(0)|DUSP14(+113.8kb)|HNF1B(-59.02kb)|SYNRG(+17.93kb)|TADA2A(+150.2kb)
3:101183876	3	101183876	A	?	9	6.391e-05	0.0007957	0.6243	0.6211	0.2624	20.3	0.3865	0.3865	0.4831	0.8446	0.9313	0.4429	1.271	0.5644	0.9639	rs7618600	FAM172BP(-53.83kb)|IMPG2(+144.5kb)|PCNP(-109.2kb)|SENP7(0)|TRMT10C(-96.8kb)|ZBTB11(-184.4kb)
20:41008210	20	41008210	A	?	9	6.404e-05	6.409e-05	0.5882	0.5882	0.4334	0	0.8647	0.8647	0.9182	0.6333	0.4151	0.6356	0.1619	0.9756	0.3861	rs79217304	PTPRT(0)
20:41008508	20	41008508	A	?	9	6.404e-05	6.409e-05	0.5882	0.5882	0.4334	0	0.8647	0.8647	0.9182	0.6333	0.4151	0.6356	0.1619	0.9756	0.3861	rs78570746	PTPRT(0)
20:41008986	20	41008986	C	?	9	6.404e-05	6.409e-05	0.5882	0.5882	0.4334	0	0.8647	0.8647	0.9182	0.6333	0.4151	0.6356	0.1619	0.9756	0.3861	rs1155382	PTPRT(0)
20:41009662	20	41009662	A	?	9	6.404e-05	6.409e-05	0.5882	0.5882	0.4334	0	0.8647	0.8647	0.9182	0.6333	0.4151	0.6356	0.1619	0.9756	0.3861	rs80037305	PTPRT(0)
3:101210970	3	101210970	A	?	9	6.404e-05	0.0008026	0.624	0.621	0.2623	20.31	0.3865	0.3865	0.4831	0.8446	0.9313	0.4429	1.271	0.5644	0.9656	rs11929578	FAM172BP(-26.74kb)|IMPG2(+171.6kb)|PCNP(-82.07kb)|RPL24(-189kb)|SENP7(0)|TRMT10C(-69.71kb)|ZBTB11(-157.3kb)|ZBTB11-AS1(-184.3kb)
3:101212855	3	101212855	C	?	9	6.404e-05	0.0008026	0.624	0.621	0.2623	20.31	0.3865	0.3865	0.4831	0.8446	0.9313	0.4429	1.271	0.5644	0.9656	rs6791803	FAM172BP(-24.86kb)|IMPG2(+173.4kb)|PCNP(-80.19kb)|RPL24(-187.1kb)|SENP7(0)|TRMT10C(-67.82kb)|ZBTB11(-155.4kb)|ZBTB11-AS1(-182.4kb)
3:101229425	3	101229425	A	?	9	6.404e-05	0.0008026	0.624	0.621	0.2623	20.31	0.3865	0.3865	0.4831	0.8446	0.9313	0.4429	1.271	0.5644	0.9656	rs113745255	FAM172BP(-8.285kb)|IMPG2(+190kb)|PCNP(-63.62kb)|RPL24(-170.5kb)|SENP7(0)|TRMT10C(-51.25kb)|ZBTB11(-138.9kb)|ZBTB11-AS1(-165.8kb)
6:62556392	6	62556392	A	?	9	6.433e-05	6.433e-05	0.632	0.632	0.9998	0	0.601	0.601	0.5823	0.6141	0.6117	0.6647	0.5166	0.6015	0.7342	rs76924807	KHDRBS2(0)
6:62563185	6	62563185	C	?	9	6.433e-05	6.433e-05	0.632	0.632	0.9998	0	0.601	0.601	0.5823	0.6141	0.6117	0.6647	0.5166	0.6015	0.7342	rs59117711	KHDRBS2(0)
6:62565722	6	62565722	C	?	9	6.433e-05	6.433e-05	0.632	0.632	0.9998	0	0.601	0.601	0.5823	0.6141	0.6117	0.6647	0.5166	0.6015	0.7342	rs79216630	KHDRBS2(0)
2:218216220	2	218216220	C	?	9	6.489e-05	6.489e-05	0.7232	0.7232	0.909	0	0.5604	0.5604	0.7996	0.6703	0.7649	0.7015	0.2541	1.326	0.7212	rs1863193	DIRC3(0)
6:62568630	6	62568630	G	?	9	6.495e-05	6.495e-05	0.6322	0.6322	0.9998	0	0.601	0.601	0.5823	0.6141	0.6117	0.6647	0.5166	0.6015	0.7353	rs75924278	KHDRBS2(0)
17:39914070	17	39914070	G	?	9	6.51e-05	0.000271	0.7353	0.7198	0.2912	17.01	0.4281	0.4281	0.7819	0.7175	0.774	0.9152	0.737	0.2304	0.7136	rs8067890	ACLY(-109.1kb)|EIF1(+66.17kb)|FKBP10(-54.89kb)|GAST(+41.85kb)|HAP1(+23.17kb)|JUP(0)|KLHL10(-79.97kb)|KLHL11(-95.73kb)|KRT9(+185.8kb)|KRT14(+170.9kb)|KRT16(+145kb)|KRT17(+133.2kb)|KRT42P(+117.6kb)|LEPREL4(-44.13kb)|NT5C3B(-67.26kb)|TTC25(-172.8kb)
2:203619455	2	203619455	A	?	8	6.519e-05	6.519e-05	0.4525	0.4525	0.7929	0	0.829	0.829	0.6975	0.3798	0.3993	0.2458	NA	0.3698	0.4822	rs34349435	BMPR2(+187kb)|CARF(-157.5kb)|FAM117B(0)|ICA1L(-18.42kb)|WDR12(-125.9kb)
6:62428573	6	62428573	A	?	9	6.547e-05	6.547e-05	0.561	0.561	0.6226	0	1.301	1.301	0.4915	1.215	0.394	0.6059	0.088	0.726	0.6011	rs75835289	KHDRBS2(0)|MTRNR2L9(+144kb)
16:78007470	16	78007470	A	?	9	6.596e-05	0.002259	1.3242	1.3872	0.0687	44.98	2.195	2.195	0.9679	1.38	1.181	1.416	0.4975	3.727	1.455	rs429921	CLEC3A(-48.97kb)|VAT1L(0)|WWOX(-125.9kb)
10:84022458	10	84022458	A	?	9	6.597e-05	6.597e-05	0.4747	0.4747	0.6121	0	0.2454	0.2454	0.3214	0.6206	0.7095	0.5801	0.1836	0.2366	0.8614	rs10509449	NRG3(0)
7:16576978	7	16576978	T	?	9	6.646e-05	0.0002827	1.4527	1.4648	0.3259	13.02	2.456	2.456	1.886	1.783	1.377	1.434	1.337	0.5125	1.122	rs12669350	ANKMY2(-62.42kb)|BZW2(-108.8kb)|ISPD(+116kb)|LRRC72(0)|SOSTDC1(+71.5kb)
6:62393098	6	62393098	A	?	9	6.649e-05	6.649e-05	0.5613	0.5613	0.6323	0	1.301	1.301	0.4915	1.215	0.394	0.6059	0.0926	0.726	0.6011	rs79598403	KHDRBS2(0)|MTRNR2L9(+108.6kb)
6:62399931	6	62399931	G	?	9	6.649e-05	6.649e-05	0.5613	0.5613	0.6323	0	1.301	1.301	0.4915	1.215	0.394	0.6059	0.0926	0.726	0.6011	rs76374082	KHDRBS2(0)|MTRNR2L9(+115.4kb)
6:62408451	6	62408451	T	?	9	6.649e-05	6.649e-05	0.5613	0.5613	0.6323	0	1.301	1.301	0.4915	1.215	0.394	0.6059	0.0926	0.726	0.6011	rs79249941	KHDRBS2(0)|MTRNR2L9(+123.9kb)
6:62410012	6	62410012	A	?	9	6.649e-05	6.649e-05	0.5613	0.5613	0.6323	0	1.301	1.301	0.4915	1.215	0.394	0.6059	0.0926	0.726	0.6011	rs77089428	KHDRBS2(0)|MTRNR2L9(+125.5kb)
6:62410823	6	62410823	A	?	9	6.649e-05	6.649e-05	0.5613	0.5613	0.6323	0	1.301	1.301	0.4915	1.215	0.394	0.6059	0.0926	0.726	0.6011	rs76312515	KHDRBS2(0)|MTRNR2L9(+126.3kb)
6:62419281	6	62419281	A	?	9	6.649e-05	6.649e-05	0.5613	0.5613	0.6323	0	1.301	1.301	0.4915	1.215	0.394	0.6059	0.0926	0.726	0.6011	rs75728456	KHDRBS2(0)|MTRNR2L9(+134.7kb)
6:62425645	6	62425645	C	?	9	6.649e-05	6.649e-05	0.5613	0.5613	0.6323	0	1.301	1.301	0.4915	1.215	0.394	0.6059	0.0926	0.726	0.6011	rs79186060	KHDRBS2(0)|MTRNR2L9(+141.1kb)
16:90038522	16	90038522	C	?	7	6.661e-05	6.661e-05	0.2728	0.2728	0.6787	0	0.0926	0.0926	0.2454	3007000	NA	0.6421	6.216	0.0947	NA	rs13334308	AFG3L1P(-0.465kb)|C16orf3(-56.79kb)|CENPBD1(0)|DBNDD1(-32.76kb)|DEF8(+4.054kb)|FANCA(+155.5kb)|GAS8(-50.48kb)|MC1R(+51.14kb)|PRDM7(-84.45kb)|SPIRE2(+100.8kb)|TCF25(+60.73kb)|TUBB3(+36.02kb)|URAHP(-67.65kb)
16:90038896	16	90038896	C	?	7	6.661e-05	6.661e-05	0.2728	0.2728	0.6787	0	0.0926	0.0926	0.2454	3007000	NA	0.6421	6.216	0.0947	NA	rs13337911	AFG3L1P(-0.091kb)|C16orf3(-56.42kb)|CENPBD1(0)|DBNDD1(-32.38kb)|DEF8(+4.428kb)|FANCA(+155.8kb)|GAS8(-50.11kb)|MC1R(+51.51kb)|PRDM7(-84.08kb)|SPIRE2(+101.2kb)|TCF25(+61.1kb)|TUBB3(+36.39kb)|URAHP(-67.27kb)
16:90039428	16	90039428	C	?	7	6.661e-05	6.661e-05	0.2728	0.2728	0.6787	0	0.0926	0.0926	0.2454	3007000	NA	0.6421	6.216	0.0947	NA	rs111821724	AFG3L1P(0)|C16orf3(-55.89kb)|CENPBD1(+0.188kb)|DBNDD1(-31.85kb)|DEF8(+4.96kb)|FANCA(+156.4kb)|GAS8(-49.58kb)|MC1R(+52.04kb)|PRDM7(-83.54kb)|SPIRE2(+101.7kb)|TCF25(+61.64kb)|TUBB3(+36.92kb)|URAHP(-66.74kb)
16:90048558	16	90048558	G	?	7	6.661e-05	6.661e-05	0.2728	0.2728	0.6787	0	0.0926	0.0926	0.2454	3007000	NA	0.6421	6.216	0.0947	NA	rs9927525	AFG3L1P(0)|C16orf3(-46.76kb)|CENPBD1(+9.318kb)|DBNDD1(-22.72kb)|DEF8(+14.09kb)|FANCA(+165.5kb)|GAS8(-40.45kb)|MC1R(+61.17kb)|PRDM7(-74.42kb)|SPIRE2(+110.8kb)|TCF25(+70.77kb)|TUBB3(+46.05kb)|URAHP(-57.61kb)
7:151044035	7	151044035	G	?	8	6.668e-05	0.0006489	1.368	1.381	0.2573	21.67	2.166	2.166	1.365	0.7513	1.859	1.228	1.63	NA	1.265	rs439218	ABCF2(+119.7kb)|ASB10(+159.1kb)|CHPF2(+108.1kb)|CRYGN(-83.02kb)|GBX1(+179.2kb)|MIR671(+108.4kb)|MIR3907(-86.54kb)|NUB1(0)|RHEB(-119.1kb)|SMARCD3(+69.8kb)|WDR86(-34.17kb)|WDR86-AS1(-62.29kb)
4:149159191	4	149159191	A	?	9	6.708e-05	6.708e-05	0.7133	0.7133	0.9398	0	0.579	0.579	0.7563	0.8603	0.7497	0.703	0.4468	2.034	0.6767	rs62332029	ARHGAP10(+165.3kb)|NR3C2(0)
19:45401666	19	45401666	G	?	8	6.721e-05	0.002018	0.6951	0.6567	0.0788	45.03	0.3487	0.3487	0.5095	0.5197	0.8992	1.026	NA	0.6635	0.6775	rs8106922	APOC1(-16.25kb)|APOC1P1(-28.39kb)|APOC2(-47.57kb)|APOC4(-43.83kb)|APOC4-APOC2(-43.83kb)|APOE(-7.372kb)|BCAM(+76.99kb)|BCL3(+138.4kb)|CBLC(+97.76kb)|CEACAM16(+187.7kb)|CLASRP(-140.6kb)|CLPTM1(-56.18kb)|GEMIN7(-180.9kb)|PPP1R37(-194.8kb)|PVRL2(+9.181kb)|RELB(-103kb)|TOMM40(0)|ZNF296(-173.1kb)
2:133467574	2	133467574	T	?	7	6.721e-05	0.009361	1.3515	1.3613	0.0709	48.39	1.071	1.071	1.87	2.355	NA	1.285	NA	1.117	1.076	rs2566524	GPR39(+63.4kb)|LYPD1(+38.5kb)|NCKAP5(0)
17:78161402	17	78161402	T	?	9	6.764e-05	6.764e-05	0.7569	0.7569	0.6396	0	0.5899	0.5899	0.8196	1.084	0.6537	0.6946	0.2903	1.068	0.8551	rs3829612	CARD14(0)|CCDC40(+86.99kb)|EIF4A3(+40.42kb)|GAA(+67.72kb)|LOC100294362(-164.2kb)|RNF213(-73.26kb)|SGSH(-21.68kb)|SLC26A11(-32.8kb)|TBC1D16(+151.7kb)
3:101122096	3	101122096	C	?	9	6.773e-05	0.0008993	0.6251	0.6218	0.2554	21.09	0.3865	0.3865	0.4831	0.8446	0.9313	0.4429	1.271	0.5644	0.9713	rs76293754	FAM172BP(-115.6kb)|IMPG2(+82.68kb)|PCNP(-170.9kb)|SENP7(0)|TRMT10C(-158.6kb)
3:101125607	3	101125607	C	?	9	6.773e-05	0.0008993	0.6251	0.6218	0.2554	21.09	0.3865	0.3865	0.4831	0.8446	0.9313	0.4429	1.271	0.5644	0.9713	rs113751944	FAM172BP(-112.1kb)|IMPG2(+86.19kb)|PCNP(-167.4kb)|SENP7(0)|TRMT10C(-155.1kb)
3:101130695	3	101130695	A	?	9	6.773e-05	0.0008993	0.6251	0.6218	0.2554	21.09	0.3865	0.3865	0.4831	0.8446	0.9313	0.4429	1.271	0.5644	0.9713	rs7638284	FAM172BP(-107kb)|IMPG2(+91.28kb)|PCNP(-162.3kb)|SENP7(0)|TRMT10C(-150kb)
3:101138184	3	101138184	A	?	9	6.773e-05	0.0008993	0.6251	0.6218	0.2554	21.09	0.3865	0.3865	0.4831	0.8446	0.9313	0.4429	1.271	0.5644	0.9713	rs72942230	FAM172BP(-99.53kb)|IMPG2(+98.76kb)|PCNP(-154.9kb)|SENP7(0)|TRMT10C(-142.5kb)
3:101140339	3	101140339	C	?	9	6.773e-05	0.0008993	0.6251	0.6218	0.2554	21.09	0.3865	0.3865	0.4831	0.8446	0.9313	0.4429	1.271	0.5644	0.9713	rs74707843	FAM172BP(-97.37kb)|IMPG2(+100.9kb)|PCNP(-152.7kb)|SENP7(0)|TRMT10C(-140.3kb)
3:101145274	3	101145274	A	?	9	6.773e-05	0.0008993	0.6251	0.6218	0.2554	21.09	0.3865	0.3865	0.4831	0.8446	0.9313	0.4429	1.271	0.5644	0.9713	rs77211010	FAM172BP(-92.44kb)|IMPG2(+105.9kb)|PCNP(-147.8kb)|SENP7(0)|TRMT10C(-135.4kb)
3:101145853	3	101145853	G	?	9	6.773e-05	0.0008993	0.6251	0.6218	0.2554	21.09	0.3865	0.3865	0.4831	0.8446	0.9313	0.4429	1.271	0.5644	0.9713	rs112980883	FAM172BP(-91.86kb)|IMPG2(+106.4kb)|PCNP(-147.2kb)|SENP7(0)|TRMT10C(-134.8kb)
3:101164542	3	101164542	G	?	9	6.773e-05	0.0008993	0.6251	0.6218	0.2554	21.09	0.3865	0.3865	0.4831	0.8446	0.9313	0.4429	1.271	0.5644	0.9713	rs76941326	FAM172BP(-73.17kb)|IMPG2(+125.1kb)|PCNP(-128.5kb)|SENP7(0)|TRMT10C(-116.1kb)
3:101177848	3	101177848	G	?	9	6.773e-05	0.0008993	0.6251	0.6218	0.2554	21.09	0.3865	0.3865	0.4831	0.8446	0.9313	0.4429	1.271	0.5644	0.9713	rs6809436	FAM172BP(-59.86kb)|IMPG2(+138.4kb)|PCNP(-115.2kb)|SENP7(0)|TRMT10C(-102.8kb)|ZBTB11(-190.4kb)
3:101186658	3	101186658	C	?	9	6.773e-05	0.0008993	0.6251	0.6218	0.2554	21.09	0.3865	0.3865	0.4831	0.8446	0.9313	0.4429	1.271	0.5644	0.9713	rs112179950	FAM172BP(-51.05kb)|IMPG2(+147.2kb)|PCNP(-106.4kb)|SENP7(0)|TRMT10C(-94.02kb)|ZBTB11(-181.6kb)
3:101189599	3	101189599	C	?	9	6.773e-05	0.0008993	0.6251	0.6218	0.2554	21.09	0.3865	0.3865	0.4831	0.8446	0.9313	0.4429	1.271	0.5644	0.9713	rs111681973	FAM172BP(-48.11kb)|IMPG2(+150.2kb)|PCNP(-103.4kb)|SENP7(0)|TRMT10C(-91.08kb)|ZBTB11(-178.7kb)
10:103340449	10	103340449	C	?	9	6.78e-05	0.002727	0.7453	0.7064	0.048	48.81	0.384	0.384	0.8743	0.5612	1.132	0.6155	1.016	0.6262	0.7772	rs3095795	BTRC(+23.37kb)|DPCD(-7.639kb)|FBXW4(-29.97kb)|FGF8(-189.4kb)|MIR3158-1(-20.72kb)|MIR3158-2(-20.72kb)|POLL(0)
10:103340918	10	103340918	G	?	9	6.78e-05	0.002727	0.7453	0.7064	0.048	48.81	0.384	0.384	0.8743	0.5612	1.132	0.6155	1.016	0.6262	0.7772	rs1549067	BTRC(+23.84kb)|DPCD(-7.17kb)|FBXW4(-29.5kb)|FGF8(-189kb)|MIR3158-1(-20.26kb)|MIR3158-2(-20.26kb)|POLL(0)
10:103413862	10	103413862	T	?	9	6.789e-05	0.004008	0.7168	0.6904	0.0566	47.15	0.3095	0.3095	0.828	0.9528	1.027	0.5666	1.217	0.621	0.7521	rs10883671	BTRC(+96.78kb)|C10orf76(-191.5kb)|DPCD(+44.45kb)|FBXW4(0)|FGF8(-116kb)|KCNIP2(-171.9kb)|KCNIP2-AS1(-165kb)|MGEA5(-130.3kb)|MIR3158-1(+52.61kb)|MIR3158-2(+52.61kb)|NPM3(-127.2kb)|POLL(+65.84kb)
16:85949424	16	85949424	G	?	9	6.805e-05	0.0005983	0.6823	0.6688	0.2494	21.78	0.3184	0.3184	0.6622	0.5388	0.7563	0.6986	2.68	3.039	0.8536	rs305070	C16orf74(+164.7kb)|COX4I1(+108.8kb)|EMC8(+116.3kb)|IRF8(0)|MIR1910(+174.1kb)
12:72874729	12	72874729	G	?	9	6.832e-05	0.002661	0.6138	0.6016	0.1454	34.05	0.5548	0.5548	0.7631	4.082	0.4816	0.5308	0.0699	0.1932	0.6752	rs10879432	TRHDE(0)
7:47581866	7	47581866	G	?	7	6.886e-05	6.886e-05	0.384	0.384	0.6609	0	0.4578	0.4578	0.4183	0.1242	NA	0.4446	NA	0.0814	0.524	rs78682449	C7orf65(-113kb)|TNS3(0)
1:15419066	1	15419066	A	?	9	6.937e-05	0.004426	0.6325	0.6056	0.0769	43.62	1.978	1.978	0.6845	0.2492	0.7587	0.7305	0.368	0.1225	0.5773	rs76042850	C1orf195(-71.62kb)|FHAD1(-154.7kb)|KAZN(0)|TMEM51(-59.96kb)|TMEM51-AS1(-19.24kb)
17:20779712	17	20779712	G	?	8	6.951e-05	0.004615	0.6806	0.6443	0.0423	51.86	0.2894	0.2894	0.8862	0.7123	0.9319	0.8576	0.5787	NA	0.4723	rs73298064	CCDC144NL(0)|LOC100287072(+138.5kb)|USP22(-123.2kb)
9:114955380	9	114955380	C	?	8	6.961e-05	6.961e-05	1.3208	1.3208	0.6605	0	1.304	1.304	1.231	0.7749	1.475	1.384	0.7981	NA	1.469	rs7851034	HSDL2(-186.8kb)|MIR3134(0)|PTBP3(-24.61kb)|SUSD1(+17.82kb)
10:126371957	10	126371957	T	?	9	6.999e-05	6.999e-05	0.7467	0.7467	0.8642	0	0.7397	0.7397	0.7694	0.5462	0.6571	0.8156	0.6865	0.3347	0.8226	rs4962683	FAM53B(0)|FAM175B(-118.4kb)|LHPP(+69.25kb)|METTL10(-75.45kb)
6:62527508	6	62527508	G	?	9	7.025e-05	7.025e-05	0.633	0.633	0.9997	0	0.601	0.601	0.5757	0.6141	0.6117	0.687	0.5314	0.6015	0.7256	rs79622919	KHDRBS2(0)
6:62528278	6	62528278	C	?	9	7.025e-05	7.025e-05	0.633	0.633	0.9997	0	0.601	0.601	0.5757	0.6141	0.6117	0.687	0.5314	0.6015	0.7256	rs75177680	KHDRBS2(0)
6:62529390	6	62529390	T	?	9	7.025e-05	7.025e-05	0.633	0.633	0.9997	0	0.601	0.601	0.5757	0.6141	0.6117	0.687	0.5314	0.6015	0.7256	rs79418110	KHDRBS2(0)
6:62530070	6	62530070	A	?	9	7.025e-05	7.025e-05	0.633	0.633	0.9997	0	0.601	0.601	0.5757	0.6141	0.6117	0.687	0.5314	0.6015	0.7256	rs79909560	KHDRBS2(0)
6:62530320	6	62530320	A	?	9	7.025e-05	7.025e-05	0.633	0.633	0.9997	0	0.601	0.601	0.5757	0.6141	0.6117	0.687	0.5314	0.6015	0.7256	rs77810017	KHDRBS2(0)
6:62532420	6	62532420	C	?	9	7.025e-05	7.025e-05	0.633	0.633	0.9997	0	0.601	0.601	0.5757	0.6141	0.6117	0.687	0.5314	0.6015	0.7256	rs77459621	KHDRBS2(0)
6:62532422	6	62532422	C	?	9	7.025e-05	7.025e-05	0.633	0.633	0.9997	0	0.601	0.601	0.5757	0.6141	0.6117	0.687	0.5314	0.6015	0.7256	rs79758240	KHDRBS2(0)
6:62532953	6	62532953	C	?	9	7.025e-05	7.025e-05	0.633	0.633	0.9997	0	0.601	0.601	0.5757	0.6141	0.6117	0.687	0.5314	0.6015	0.7256	rs75008868	KHDRBS2(0)
12:72888389	12	72888389	G	?	9	7.03e-05	0.0005094	0.621	0.6154	0.2963	16.43	0.5548	0.5548	0.7529	3.648	0.4927	0.5431	0.3251	0.1932	0.689	rs12322905	TRHDE(0)
1:204104495	1	204104495	A	?	8	7.046e-05	0.0002891	0.3838	0.3621	0.2838	18.47	0.0656	0.0656	0.4884	4087000	0.2584	0.7158	NA	0.2208	0.6188	rs116191274	ETNK2(0)|GOLT1A(-62.79kb)|KISS1(-54.97kb)|LINC00303(+94.1kb)|PLEKHA6(-83.48kb)|REN(-19.45kb)|SOX13(+7.624kb)
11:106627719	11	106627719	A	?	8	7.049e-05	0.002394	0.4773	0.4963	0.2612	21.19	0.6525	0.6525	0.4605	NA	0.4701	1.129	4.652	0.1164	0.3181	rs149457246	GUCY1A2(0)
6:62569218	6	62569218	T	?	9	7.05e-05	7.05e-05	0.6337	0.6337	0.9997	0	0.601	0.601	0.5823	0.6141	0.6117	0.6647	0.5166	0.6015	0.7447	rs79971276	KHDRBS2(0)
6:62571526	6	62571526	A	?	9	7.05e-05	7.05e-05	0.6337	0.6337	0.9997	0	0.601	0.601	0.5823	0.6141	0.6117	0.6647	0.5166	0.6015	0.7447	rs79163702	KHDRBS2(0)
6:62571712	6	62571712	G	?	9	7.05e-05	7.05e-05	0.6337	0.6337	0.9997	0	0.601	0.601	0.5823	0.6141	0.6117	0.6647	0.5166	0.6015	0.7447	rs76716592	KHDRBS2(0)
5:58035184	5	58035184	T	?	9	7.075e-05	0.00819	0.7008	0.6953	0.0752	43.91	0.7717	0.7717	0.5965	1.402	0.6017	1.007	0.0469	0.2622	0.6979	rs10038836	RAB3C(0)
9:115034899	9	115034899	T	?	9	7.075e-05	7.075e-05	1.3179	1.3179	0.6437	0	1.444	1.444	1.171	0.7677	1.539	1.357	0.7697	1.372	1.455	rs7041688	HSDL2(-107.3kb)|MIR3134(0)|PTBP3(0)|SUSD1(+97.34kb)
9:115035865	9	115035865	T	?	9	7.075e-05	7.075e-05	1.3179	1.3179	0.6437	0	1.444	1.444	1.171	0.7677	1.539	1.357	0.7697	1.372	1.455	rs10817308	HSDL2(-106.3kb)|MIR3134(0)|PTBP3(0)|SUSD1(+98.31kb)
16:78004390	16	78004390	C	?	9	7.111e-05	7.111e-05	0.7391	0.7391	0.8645	0	0.7096	0.7096	0.8373	0.5872	0.7721	0.6173	1.182	0.4408	0.8178	rs396100	CLEC3A(-52.05kb)|VAT1L(0)|WWOX(-128.9kb)
10:56502217	10	56502217	C	?	9	7.116e-05	7.116e-05	0.4264	0.4264	0.8529	0	1.114	1.114	0.556	0.6049	0.3243	0.4846	0.2515	0.1515	0.2527	rs55689219	PCDH15(0)
7:151043700	7	151043700	G	?	9	7.119e-05	0.0003266	1.3925	1.4604	0.2214	24.99	2.152	2.152	1.097	2.602	1.893	1.344	2.175	2.175	1.132	rs438559	ABCF2(+119.4kb)|ASB10(+158.8kb)|CHPF2(+107.8kb)|CRYGN(-83.36kb)|GBX1(+178.8kb)|MIR671(+108.1kb)|MIR3907(-86.87kb)|NUB1(0)|RHEB(-119.4kb)|SMARCD3(+69.47kb)|WDR86(-34.51kb)|WDR86-AS1(-62.62kb)
13:100375483	13	100375483	G	?	6	7.122e-05	7.122e-05	0.4682	0.4682	0.6602	0	NA	NA	0.3767	1.198	0.4891	0.4272	0.1109	NA	0.7445	rs79849260	CLYBL(0)|MIR4306(+80.08kb)|TM9SF2(+159.2kb)
6:62609874	6	62609874	T	?	9	7.123e-05	7.123e-05	0.6472	0.6472	0.9917	0	0.6094	0.6094	0.5756	0.786	0.6228	0.6221	0.5386	0.8404	0.828	rs73487368	KHDRBS2(0)
8:3229647	8	3229647	C	?	9	7.125e-05	0.005039	0.7215	0.7187	0.1107	38.63	0.4099	0.4099	0.6554	1.032	0.6475	0.9413	1.363	6.645	0.7338	rs62503469	CSMD1(0)
10:103418987	10	103418987	A	?	9	7.128e-05	0.004129	0.7175	0.6909	0.0558	47.29	0.3095	0.3095	0.8318	0.9528	1.027	0.5666	1.217	0.621	0.7521	rs75299772	BTRC(+101.9kb)|C10orf76(-186.4kb)|DPCD(+49.58kb)|FBXW4(0)|FGF8(-110.9kb)|KCNIP2(-166.7kb)|KCNIP2-AS1(-159.8kb)|MGEA5(-125.2kb)|MIR3158-1(+57.73kb)|MIR3158-2(+57.73kb)|NPM3(-122.1kb)|POLL(+70.96kb)
10:126382431	10	126382431	C	?	9	7.133e-05	7.133e-05	0.7464	0.7464	0.8208	0	0.7911	0.7911	0.7595	0.5106	0.6571	0.824	0.6815	0.3291	0.8109	rs61870535	FAM53B(0)|FAM175B(-107.9kb)|LHPP(+79.72kb)|METTL10(-64.97kb)
1:158643037	1	158643037	C	?	9	7.148e-05	0.0002911	0.7523	0.7481	0.3303	12.51	0.5011	0.5011	0.778	1.373	0.6678	0.8499	0.6852	0.3758	0.7568	rs703115	MNDA(-158.1kb)|OR6K2(-26.43kb)|OR6K3(-43.92kb)|OR6K6(-81.57kb)|OR6N1(-92.5kb)|OR6N2(-103.4kb)|OR6P1(+109.6kb)|OR6Y1(+125.1kb)|OR10R2(+192.4kb)|OR10X1(+93.35kb)|OR10Z1(+65.87kb)|SPTA1(0)
2:47231674	2	47231674	G	?	9	7.17e-05	7.17e-05	0.7597	0.7597	0.7765	0	0.5798	0.5798	0.685	0.7871	0.7111	0.7838	0.8674	1.425	0.8902	rs10779934	C2orf61(-82.46kb)|CALM2(-155.5kb)|LOC388948(+181.9kb)|LOC100134259(+145.5kb)|MCFD2(+62.68kb)|TTC7A(0)
10:84021023	10	84021023	A	?	9	7.179e-05	7.179e-05	0.478	0.478	0.6537	0	0.3221	0.3221	0.3054	0.6206	0.7095	0.5801	0.1836	0.2366	0.8614	rs34694668	NRG3(0)
2:218214057	2	218214057	C	?	9	7.214e-05	7.214e-05	0.7249	0.7249	0.9102	0	0.5604	0.5604	0.7996	0.6703	0.7649	0.7091	0.2539	1.326	0.7212	rs13008830	DIRC3(0)
10:103367256	10	103367256	C	?	9	7.243e-05	0.001713	0.7486	0.7183	0.0958	40.73	0.378	0.378	0.8335	0.5804	1.094	0.6732	1.016	0.698	0.7777	rs10883663	BTRC(+50.18kb)|DPCD(0)|FBXW4(-3.164kb)|FGF8(-162.6kb)|MGEA5(-176.9kb)|MIR3158-1(+6.002kb)|MIR3158-2(+6.002kb)|NPM3(-173.8kb)|POLL(+19.23kb)
18:14758926	18	14758926	T	?	8	7.249e-05	7.249e-05	0.7544	0.7544	0.9685	0	0.6618	0.6618	0.6656	0.7612	0.8816	0.7764	0.7573	NA	0.7828	rs9675858	ANKRD30B(0)|MIR3156-2(-71.24kb)
6:62537469	6	62537469	G	?	9	7.254e-05	7.254e-05	0.6336	0.6336	0.9997	0	0.601	0.601	0.5784	0.6141	0.6117	0.687	0.5166	0.6015	0.7256	rs76035313	KHDRBS2(0)
20:5285087	20	5285087	T	?	8	7.256e-05	7.256e-05	0.4508	0.4508	0.645	0	0.3188	0.3188	1.029	0.9587	0.3188	0.4907	NA	0.3854	0.3056	rs116997253	CDS2(+106.6kb)|LINC00654(-194.1kb)|LINC00658(-127.5kb)|LOC643406(-166.8kb)|PCNA(+177.8kb)|PCNA-AS1(+184.5kb)|PROKR2(0)|TMEM230(+191.4kb)
12:72879805	12	72879805	T	?	9	7.277e-05	0.0009969	0.6165	0.6098	0.2412	22.72	0.5548	0.5548	0.7631	4.082	0.4816	0.5308	0.3209	0.1932	0.6772	rs10879433	TRHDE(0)
13:100384236	13	100384236	T	?	6	7.278e-05	7.278e-05	0.4454	0.4454	0.7286	0	NA	NA	0.3449	1.198	0.445	0.4768	0.1109	NA	0.6411	rs76466073	CLYBL(0)|MIR4306(+88.83kb)|TM9SF2(+167.9kb)
3:101204750	3	101204750	C	?	9	7.282e-05	0.001162	0.6257	0.6228	0.2402	22.83	0.3865	0.3865	0.4831	0.8446	0.995	0.4429	1.271	0.5228	0.9557	rs6779775	FAM172BP(-32.96kb)|IMPG2(+165.3kb)|PCNP(-88.29kb)|RPL24(-195.2kb)|SENP7(0)|TRMT10C(-75.93kb)|ZBTB11(-163.5kb)|ZBTB11-AS1(-190.5kb)
14:81451052	14	81451052	T	?	9	7.3e-05	0.0001477	0.7548	0.7525	0.3835	6.22	0.5968	0.5968	0.6647	0.9366	0.6687	1.017	0.9195	0.3419	0.773	rs12101255	CEP128(+45.17kb)|GTF2A1(-190.7kb)|TSHR(0)
14:81451229	14	81451229	T	?	9	7.3e-05	0.0001477	0.7548	0.7525	0.3835	6.22	0.5968	0.5968	0.6647	0.9366	0.6687	1.017	0.9195	0.3419	0.773	rs12101261	CEP128(+45.34kb)|GTF2A1(-190.6kb)|TSHR(0)
14:81451956	14	81451956	A	?	9	7.3e-05	0.0001477	0.7548	0.7525	0.3835	6.22	0.5968	0.5968	0.6647	0.9366	0.6687	1.017	0.9195	0.3419	0.773	rs8003061	CEP128(+46.07kb)|GTF2A1(-189.8kb)|TSHR(0)
14:81452172	14	81452172	A	?	9	7.3e-05	0.0001477	0.7548	0.7525	0.3835	6.22	0.5968	0.5968	0.6647	0.9366	0.6687	1.017	0.9195	0.3419	0.773	rs17111346	CEP128(+46.29kb)|GTF2A1(-189.6kb)|TSHR(0)
6:44259780	6	44259780	C	?	9	7.302e-05	0.0004626	0.7366	0.7126	0.2194	25.22	0.3602	0.3602	0.7127	0.5929	0.815	0.7831	1.221	0.4536	0.9059	rs7772949	AARS2(-6.682kb)|CAPN11(+107.6kb)|CDC5L(-95.47kb)|HSP90AB1(+38.16kb)|MIR4642(-143.6kb)|MIR4647(+37.76kb)|MRPL14(+164.6kb)|NFKBIE(+26.26kb)|SLC29A1(+57.89kb)|SLC35B2(+34.5kb)|SPATS1(-50.62kb)|TCTE1(0)|TMEM63B(+136.5kb)|TMEM151B(+12.6kb)
10:134525981	10	134525981	G	?	7	7.318e-05	0.002347	0.4677	0.4616	0.2068	29.02	0.1	0.1	0.396	0.7658	0.5687	0.4387	NA	NA	1.017	rs77751972	INPP5A(0)|NKX6-2(-72.34kb)|TTC40(-95.91kb)
6:62603988	6	62603988	T	?	9	7.327e-05	7.327e-05	0.6357	0.6357	0.9991	0	0.601	0.601	0.5786	0.6141	0.6078	0.6647	0.5166	0.6015	0.7694	rs78776388	KHDRBS2(0)
6:62609509	6	62609509	G	?	9	7.327e-05	7.327e-05	0.6357	0.6357	0.9991	0	0.601	0.601	0.5786	0.6141	0.6078	0.6647	0.5166	0.6015	0.7694	rs77687032	KHDRBS2(0)
17:20782613	17	20782613	G	?	8	7.333e-05	0.004643	0.6814	0.6449	0.0431	51.71	0.2894	0.2894	0.8871	0.7123	0.9319	0.8576	0.5787	NA	0.4736	rs75620265	CCDC144NL(0)|LOC100287072(+141.4kb)|USP22(-120.3kb)
1:158641441	1	158641441	C	?	9	7.369e-05	0.0002986	0.7527	0.7484	0.3302	12.52	0.5011	0.5011	0.778	1.373	0.6678	0.8499	0.6852	0.3758	0.7586	rs857932	MNDA(-159.7kb)|OR6K2(-28.03kb)|OR6K3(-45.52kb)|OR6K6(-83.16kb)|OR6N1(-94.09kb)|OR6N2(-105kb)|OR6P1(+108kb)|OR6Y1(+123.5kb)|OR10R2(+190.8kb)|OR10X1(+91.75kb)|OR10Z1(+64.27kb)|SPTA1(0)
12:72870962	12	72870962	T	?	9	7.377e-05	0.002966	0.6148	0.6017	0.1374	35.07	0.5548	0.5548	0.778	4.082	0.4716	0.5308	0.0719	0.1932	0.6742	rs12297047	TRHDE(0)
16:78174233	16	78174233	A	?	9	7.378e-05	0.005265	0.6925	0.6104	0.0051	63.46	0.233	0.233	0.7258	1.916	0.7763	0.6824	0.1607	0.3155	0.887	rs72803000	CLEC3A(+108.2kb)|VAT1L(+160.2kb)|WWOX(0)
6:62648229	6	62648229	T	?	9	7.378e-05	7.378e-05	0.6351	0.6351	0.9994	0	0.601	0.601	0.5704	0.6141	0.6311	0.6659	0.5168	0.6015	0.7529	rs79448504	KHDRBS2(0)
6:62650334	6	62650334	A	?	9	7.378e-05	7.378e-05	0.6351	0.6351	0.9994	0	0.601	0.601	0.5704	0.6141	0.6311	0.6659	0.5168	0.6015	0.7529	rs1114027	KHDRBS2(0)
10:126479989	10	126479989	G	?	9	7.383e-05	7.383e-05	0.7485	0.7485	0.896	0	0.7679	0.7679	0.7857	0.5462	0.6672	0.7906	0.8738	0.3662	0.8125	rs4962700	CTBP2(-196.4kb)|FAM53B(+47.06kb)|FAM175B(-10.36kb)|LHPP(+177.3kb)|METTL10(0)|ZRANB1(-150.7kb)
10:62681920	10	62681920	G	?	6	7.396e-05	0.0001868	0.4262	0.4266	0.367	7.71	0.4099	0.4099	0.4804	0.1543	NA	0.3281	NA	NA	1.349	rs75072181	ANK3(+188.6kb)|CDK1(+127.3kb)|RHOBTB1(0)
13:100368547	13	100368547	T	?	6	7.396e-05	7.396e-05	0.4543	0.4543	0.9245	0	NA	NA	0.3632	2416000	0.4891	0.4305	0.891	NA	0.6455	rs80065463	CLYBL(0)|MIR4306(+73.14kb)|TM9SF2(+152.2kb)
9:114974249	9	114974249	G	?	9	7.402e-05	7.402e-05	1.3162	1.3162	0.6394	0	1.375	1.375	1.212	0.7362	1.571	1.318	0.8011	1.347	1.456	rs7865225	HSDL2(-167.9kb)|MIR3134(0)|PTBP3(-5.745kb)|SUSD1(+36.69kb)
7:36298597	7	36298597	C	?	9	7.422e-05	0.006289	0.676	0.614	0.0132	58.61	0.205	0.205	1.005	1.293	0.486	0.9005	0.7897	0.3489	0.6481	rs28634634	ANLN(-130.8kb)|EEPD1(0)|KIAA0895(-65.16kb)
6:69600691	6	69600691	T	?	9	7.44e-05	7.44e-05	1.4383	1.4383	0.9463	0	1.509	1.509	1.346	1.001	1.487	1.463	2.319	4.734	1.505	rs9454636	BAI3(0)
1:15419217	1	15419217	T	?	9	7.448e-05	0.004574	0.6337	0.6064	0.0764	43.71	1.978	1.978	0.6892	0.2492	0.7587	0.7305	0.368	0.1225	0.5773	rs77770133	C1orf195(-71.47kb)|FHAD1(-154.6kb)|KAZN(0)|TMEM51(-59.81kb)|TMEM51-AS1(-19.09kb)
1:15414775	1	15414775	A	?	9	7.457e-05	0.007367	0.6318	0.598	0.0387	50.83	2.001	2.001	0.6831	0.1961	0.7509	0.7484	0.368	0.1225	0.5645	rs79604384	C1orf195(-75.92kb)|FHAD1(-159kb)|KAZN(0)|TMEM51(-64.25kb)|TMEM51-AS1(-23.54kb)
2:228859748	2	228859748	A	?	9	7.49e-05	7.49e-05	0.6391	0.6391	0.6691	0	0.3747	0.3747	0.796	1.018	0.5813	0.8096	0.8949	0.4366	0.5472	rs16824285	CCL20(+177.5kb)|DAW1(+70.72kb)|SPHKAP(0)
15:74421010	15	74421010	G	?	8	7.628e-05	7.628e-05	0.7357	0.7357	0.9568	0	0.881	0.881	0.7382	1.054	0.6761	0.6722	NA	1.169	0.7444	rs2279379	CCDC33(-107.6kb)|GOLGA6A(+46.12kb)|ISLR(-45.08kb)|ISLR2(-0.704kb)|LOC283731(0)|LOXL1(+176.5kb)|PML(+80.86kb)|STOML1(+134kb)|STRA6(-50.8kb)
6:62580364	6	62580364	C	?	9	7.65e-05	7.65e-05	0.6349	0.6349	0.9994	0	0.601	0.601	0.5786	0.6141	0.6117	0.6647	0.5166	0.6015	0.7582	rs112385484	KHDRBS2(0)
6:62582274	6	62582274	C	?	9	7.65e-05	7.65e-05	0.6349	0.6349	0.9994	0	0.601	0.601	0.5786	0.6141	0.6117	0.6647	0.5166	0.6015	0.7582	rs113908255	KHDRBS2(0)
6:62584711	6	62584711	C	?	9	7.65e-05	7.65e-05	0.6349	0.6349	0.9994	0	0.601	0.601	0.5786	0.6141	0.6117	0.6647	0.5166	0.6015	0.7582	rs16900268	KHDRBS2(0)
10:103445459	10	103445459	A	?	9	7.656e-05	0.001925	0.7416	0.7156	0.1002	40.09	0.3607	0.3607	0.845	0.7526	1.044	0.6314	1.001	0.6645	0.7892	rs10883677	BTRC(+128.4kb)|C10orf76(-159.9kb)|DPCD(+76.05kb)|FBXW4(0)|FGF8(-84.43kb)|KCNIP2(-140.3kb)|KCNIP2-AS1(-133.4kb)|MGEA5(-98.74kb)|MIR3158-1(+84.2kb)|MIR3158-2(+84.2kb)|NPM3(-95.62kb)|POLL(+97.43kb)
7:44266811	7	44266811	G	?	8	7.667e-05	0.03828	0.4014	0.4578	0.0274	55.58	0.2545	0.2545	0.1793	1.416	0.7429	1.981	NA	0.0915	0.8363	7:44266811	AEBP1(+112.6kb)|CAMK2B(0)|DBNL(+165.5kb)|GCK(+37.79kb)|LINC00957(+182.9kb)|MIR4649(+116.3kb)|MYL7(+85.9kb)|NUDCD3(-155.2kb)|PGAM2(+161.6kb)|POLD2(+103.6kb)|POLM(+144.7kb)|RASA4CP(+186.6kb)|YKT6(+12.92kb)
1:64089432	1	64089432	A	?	6	7.682e-05	7.682e-05	0.3219	0.3219	0.9277	0	0.748	0.748	0.285	0.4543	0.3094	0.2305	NA	NA	NA	rs77043134	ALG6(+185.2kb)|DLEU2L(+73.12kb)|EFCAB7(+51.07kb)|ITGB3BP(+100.5kb)|PGM1(0)|ROR1(-150.3kb)
9:115036021	9	115036021	T	?	9	7.715e-05	7.715e-05	1.3158	1.3158	0.6457	0	1.444	1.444	1.171	0.7677	1.539	1.347	0.7697	1.372	1.455	rs10981338	HSDL2(-106.2kb)|MIR3134(0)|PTBP3(0)|SUSD1(+98.46kb)
10:103445232	10	103445232	T	?	9	7.729e-05	0.001941	0.7417	0.7156	0.0999	40.14	0.3607	0.3607	0.8463	0.7526	1.044	0.6314	1.001	0.6645	0.7887	rs3758559	BTRC(+128.2kb)|C10orf76(-160.1kb)|DPCD(+75.82kb)|FBXW4(0)|FGF8(-84.65kb)|KCNIP2(-140.5kb)|KCNIP2-AS1(-133.6kb)|MGEA5(-98.97kb)|MIR3158-1(+83.98kb)|MIR3158-2(+83.98kb)|NPM3(-95.85kb)|POLL(+97.2kb)
18:6237422	18	6237422	G	?	7	7.739e-05	0.0002044	0.513	0.5112	0.3625	8.67	0.1763	0.1763	0.4217	0.76	0.6456	0.7368	NA	NA	0.657	rs72875721	L3MBTL4(0)|MIR4317(-136.9kb)
10:84068967	10	84068967	A	?	9	7.759e-05	7.759e-05	0.4916	0.4916	0.8939	0	0.3351	0.3351	0.3541	0.6941	0.7273	0.6094	0.2154	0.3302	0.6885	rs7902490	NRG3(0)
10:84069524	10	84069524	T	?	9	7.759e-05	7.759e-05	0.4916	0.4916	0.8939	0	0.3351	0.3351	0.3541	0.6941	0.7273	0.6094	0.2154	0.3302	0.6885	rs7907222	NRG3(0)
10:126355477	10	126355477	A	?	9	7.774e-05	7.774e-05	0.7485	0.7485	0.8504	0	0.7397	0.7397	0.7751	0.5462	0.6571	0.8152	0.6743	0.3291	0.8262	rs3781451	FAM53B(0)|FAM175B(-134.9kb)|LHPP(+52.77kb)|METTL10(-91.93kb)
10:126355662	10	126355662	T	?	9	7.774e-05	7.774e-05	0.7485	0.7485	0.8504	0	0.7397	0.7397	0.7751	0.5462	0.6571	0.8152	0.6743	0.3291	0.8262	rs34336231	FAM53B(0)|FAM175B(-134.7kb)|LHPP(+52.95kb)|METTL10(-91.74kb)
6:69600967	6	69600967	A	?	9	7.808e-05	7.808e-05	1.4373	1.4373	0.9468	0	1.509	1.509	1.346	1.001	1.487	1.463	2.317	4.734	1.501	rs6927848	BAI3(0)
6:69601104	6	69601104	C	?	9	7.808e-05	7.808e-05	1.4373	1.4373	0.9468	0	1.509	1.509	1.346	1.001	1.487	1.463	2.317	4.734	1.501	rs6906092	BAI3(0)
6:69605682	6	69605682	C	?	9	7.808e-05	7.808e-05	1.4373	1.4373	0.9468	0	1.509	1.509	1.346	1.001	1.487	1.463	2.317	4.734	1.501	rs1523936	BAI3(0)
6:69605817	6	69605817	A	?	9	7.808e-05	7.808e-05	1.4373	1.4373	0.9468	0	1.509	1.509	1.346	1.001	1.487	1.463	2.317	4.734	1.501	rs9454639	BAI3(0)
10:103428898	10	103428898	T	?	9	7.843e-05	0.001963	0.742	0.7158	0.0995	40.2	0.3607	0.3607	0.8474	0.7526	1.044	0.6314	1.001	0.6645	0.7887	rs3901642	BTRC(+111.8kb)|C10orf76(-176.5kb)|DPCD(+59.49kb)|FBXW4(0)|FGF8(-101kb)|KCNIP2(-156.8kb)|KCNIP2-AS1(-149.9kb)|MGEA5(-115.3kb)|MIR3158-1(+67.64kb)|MIR3158-2(+67.64kb)|NPM3(-112.2kb)|POLL(+80.87kb)
8:3216190	8	3216190	C	?	9	7.847e-05	0.02986	0.7606	0.7681	0.0151	57.82	0.4378	0.4378	0.7758	1.189	0.7019	0.9726	2.273	2.42	0.6277	rs9773103	CSMD1(0)
19:2843935	19	2843935	T	?	8	7.879e-05	7.879e-05	0.557	0.557	0.9688	0	0.3244	0.3244	0.6538	0.6717	0.5217	0.5685	0.9406	NA	0.5848	rs116948235	DIRAS1(+122.5kb)|GNG7(+141.2kb)|SGTA(+60.58kb)|SLC39A3(+103.9kb)|THOP1(+30.34kb)|TLE2(-153.7kb)|TLE6(-133.6kb)|ZNF57(-56.96kb)|ZNF77(-89.28kb)|ZNF554(+7.202kb)|ZNF555(0)|ZNF556(-23.4kb)
6:69571461	6	69571461	T	?	9	7.894e-05	7.894e-05	1.4346	1.4346	0.945	0	1.372	1.372	1.357	1.001	1.477	1.487	2.317	4.734	1.524	rs530244	BAI3(0)
9:115030590	9	115030590	A	?	9	7.914e-05	7.914e-05	1.3148	1.3148	0.6118	0	1.413	1.413	1.18	0.7406	1.567	1.365	0.7764	1.372	1.426	rs4500150	HSDL2(-111.6kb)|MIR3134(0)|PTBP3(0)|SUSD1(+93.03kb)
7:151053043	7	151053043	A	?	9	7.936e-05	0.0004801	1.3333	1.3567	0.2679	19.68	2.355	2.355	1.18	0.9362	1.546	1.18	1.582	4.232	1.325	rs446886	ABCF2(+128.7kb)|ASB10(+168.1kb)|CHPF2(+117.1kb)|CRYGN(-74.01kb)|GBX1(+188.2kb)|MIR671(+117.4kb)|MIR3907(-77.53kb)|NUB1(0)|RHEB(-110.1kb)|SMARCD3(+78.81kb)|WDR86(-25.16kb)|WDR86-AS1(-53.28kb)
8:3220513	8	3220513	A	?	9	7.962e-05	0.01879	0.7263	0.7194	0.0208	55.7	0.3551	0.3551	0.6536	1.122	0.649	1.009	1.342	7.985	0.7273	rs4457352	CSMD1(0)
9:14792016	9	14792016	T	?	9	7.982e-05	0.008497	0.6206	0.6305	0.1017	39.88	0.3833	0.3833	0.5331	0.3313	1.686	0.6441	6.311	0.7204	0.5369	rs56371878	CER1(+69.3kb)|FREM1(0)|ZDHHC21(+98.54kb)
16:81988111	16	81988111	A	?	9	7.989e-05	0.0006418	0.7093	0.6801	0.1699	31.04	0.3781	0.3781	0.705	0.701	0.9093	0.8328	0.8375	0.312	0.8373	rs55696133	HSD17B2(-80.75kb)|MPHOSPH6(-193.7kb)|PLCG2(0)|SDR42E1(-43.14kb)
10:126314735	10	126314735	T	?	8	7.993e-05	0.001603	0.62	0.617	0.2083	27.58	0.4091	0.4091	0.5198	0.9055	0.8059	0.9991	0.028	NA	0.5603	rs3781475	FAM53B(0)|FAM175B(-175.6kb)|LHPP(+12.02kb)|METTL10(-132.7kb)|NKX1-2(+176.2kb)
6:62583935	6	62583935	A	?	9	7.999e-05	7.999e-05	0.6357	0.6357	0.9994	0	0.601	0.601	0.5805	0.6141	0.6117	0.6647	0.5184	0.6015	0.7596	rs116397454	KHDRBS2(0)
5:176929519	5	176929519	C	?	7	8.009e-05	8.009e-05	0.4379	0.4379	0.4821	0	0.5068	0.5068	0.4595	0.472	NA	0.2165	NA	0.1317	0.7355	rs163011	B4GALT7(-97.6kb)|DBN1(+28.82kb)|DDX41(-9.058kb)|DOK3(0)|F12(+92.94kb)|FAM193B(-17.27kb)|GRK6(+59.67kb)|LMAN2(+150.6kb)|LOC202181(-116kb)|MXD3(+190.2kb)|PDLIM7(+4.913kb)|PFN3(+101.9kb)|PRELID1(+195.6kb)|PRR7(+46.23kb)|PRR7-AS1(+54.57kb)|RAB24(+198.8kb)|RGS14(+129.9kb)|SLC34A1(+103.7kb)|TMED9(-89.69kb)
7:36316916	7	36316916	T	?	9	8.009e-05	0.005252	0.6698	0.6284	0.0409	50.33	0.2334	0.2334	0.9394	1.451	0.4778	0.8827	0.8128	0.3388	0.6441	rs72622379	ANLN(-112.5kb)|EEPD1(0)|KIAA0895(-46.84kb)
3:32156005	3	32156005	G	?	9	8.02e-05	0.001713	0.7461	0.74	0.1866	29.05	0.5071	0.5071	0.9333	0.6514	0.9442	0.6204	0.7563	2.406	0.6921	rs34005278	CMTM8(-124.2kb)|GPD1L(0)|OSBPL10(+132.7kb)|ZNF860(+122.8kb)
2:144090212	2	144090212	A	?	9	8.041e-05	0.001207	0.6988	0.694	0.2242	24.66	0.5994	0.5994	0.6641	0.4664	0.8344	0.9852	2.972	0.1949	0.5964	rs62170423	ARHGAP15(0)
4:169457303	4	169457303	G	?	8	8.049e-05	8.049e-05	0.4631	0.4631	0.499	0	0.1571	0.1571	0.6896	0.2087	0.5613	0.502	2.99	NA	0.5318	rs57052738	DDX60L(+55.66kb)|PALLD(0)
9:115022944	9	115022944	C	?	9	8.052e-05	8.052e-05	1.3138	1.3138	0.6344	0	1.375	1.375	1.212	0.7362	1.577	1.304	0.8011	1.347	1.455	rs10759546	HSDL2(-119.2kb)|MIR3134(0)|PTBP3(0)|SUSD1(+85.39kb)
10:13669062	10	13669062	G	?	6	8.058e-05	8.058e-05	0.4254	0.4254	0.8293	0	NA	NA	0.3352	0.2704	0.5947	0.3713	0.9378	NA	0.7129	rs117536628	BEND7(+124.1kb)|FRMD4A(-16.64kb)|PRPF18(0)
12:72878720	12	72878720	T	?	9	8.061e-05	0.001116	0.6204	0.6133	0.2374	23.15	0.5548	0.5548	0.7831	4.082	0.4816	0.5431	0.3209	0.1932	0.6626	rs1444602	TRHDE(0)
9:115002634	9	115002634	A	?	9	8.063e-05	8.063e-05	1.3146	1.3146	0.6534	0	1.375	1.375	1.212	0.7362	1.571	1.331	0.8011	1.347	1.435	rs10124118	HSDL2(-139.6kb)|MIR3134(0)|PTBP3(0)|SUSD1(+65.08kb)
2:178736366	2	178736366	T	?	9	8.068e-05	0.002186	0.6374	0.6352	0.1837	29.39	0.3078	0.3078	0.7916	1.473	0.7565	0.4685	2.159	1.539	0.6257	rs114270922	PDE11A(0)
9:114992079	9	114992079	T	?	9	8.076e-05	8.076e-05	0.7612	0.7612	0.788	0	0.818	0.818	0.7968	1.296	0.6209	0.7375	0.9832	0.8392	0.7402	rs10759537	HSDL2(-150.1kb)|MIR3134(0)|PTBP3(0)|SUSD1(+54.52kb)
10:103424712	10	103424712	C	?	9	8.085e-05	0.002008	0.7425	0.716	0.0986	40.33	0.3607	0.3607	0.8497	0.7526	1.044	0.6314	1.001	0.6645	0.7887	rs10883673	BTRC(+107.6kb)|C10orf76(-180.6kb)|DPCD(+55.3kb)|FBXW4(0)|FGF8(-105.2kb)|KCNIP2(-161kb)|KCNIP2-AS1(-154.1kb)|MGEA5(-119.5kb)|MIR3158-1(+63.46kb)|MIR3158-2(+63.46kb)|NPM3(-116.4kb)|POLL(+76.68kb)
13:100366002	13	100366002	G	?	6	8.142e-05	8.142e-05	0.4714	0.4714	0.6574	0	NA	NA	0.3808	1.198	0.4891	0.4272	0.1109	NA	0.7525	rs143155813	CLYBL(0)|MIR4306(+70.6kb)|TM9SF2(+149.7kb)
1:158643375	1	158643375	A	?	9	8.166e-05	0.0003501	0.7539	0.7493	0.3235	13.3	0.5011	0.5011	0.7801	1.373	0.6678	0.8565	0.6852	0.3758	0.7567	rs1652301	MNDA(-157.8kb)|OR6K2(-26.09kb)|OR6K3(-43.58kb)|OR6K6(-81.23kb)|OR6N1(-92.16kb)|OR6N2(-103.1kb)|OR6P1(+110kb)|OR6Y1(+125.5kb)|OR10R2(+192.7kb)|OR10X1(+93.69kb)|OR10Z1(+66.2kb)|SPTA1(0)
1:158643380	1	158643380	G	?	9	8.166e-05	0.0003501	0.7539	0.7493	0.3235	13.3	0.5011	0.5011	0.7801	1.373	0.6678	0.8565	0.6852	0.3758	0.7567	rs1791672	MNDA(-157.8kb)|OR6K2(-26.09kb)|OR6K3(-43.58kb)|OR6K6(-81.22kb)|OR6N1(-92.15kb)|OR6N2(-103.1kb)|OR6P1(+110kb)|OR6Y1(+125.5kb)|OR10R2(+192.7kb)|OR10X1(+93.69kb)|OR10Z1(+66.21kb)|SPTA1(0)
9:114970803	9	114970803	G	?	9	8.169e-05	8.169e-05	1.3142	1.3142	0.6399	0	1.375	1.375	1.213	0.7362	1.571	1.308	0.8011	1.347	1.456	rs7038215	HSDL2(-171.4kb)|MIR3134(0)|PTBP3(-9.191kb)|SUSD1(+33.25kb)
9:114972419	9	114972419	G	?	9	8.169e-05	8.169e-05	1.3142	1.3142	0.6399	0	1.375	1.375	1.213	0.7362	1.571	1.308	0.8011	1.347	1.456	rs10981315	HSDL2(-169.8kb)|MIR3134(0)|PTBP3(-7.575kb)|SUSD1(+34.86kb)
17:78162170	17	78162170	A	?	9	8.171e-05	8.171e-05	0.7594	0.7594	0.6224	0	0.5899	0.5899	0.8196	1.077	0.6537	0.693	0.2903	1.043	0.8703	rs28674001	CARD14(0)|CCDC40(+87.76kb)|EIF4A3(+41.19kb)|GAA(+68.49kb)|LOC100294362(-163.5kb)|RNF213(-72.49kb)|SGSH(-20.91kb)|SLC26A11(-32.03kb)|TBC1D16(+152.5kb)
11:117712887	11	117712887	G	?	6	8.195e-05	0.0004789	1.4328	1.451	0.3239	14.12	1.664	1.664	1.242	1.277	NA	NA	NA	6.796	1.516	rs473057	DSCAML1(+44.91kb)|FXYD2(+14.08kb)|FXYD6(0)|FXYD6-FXYD2(0)|IL10RA(-144.2kb)|TMPRSS4-AS1(-173.6kb)|TMPRSS13(-58.47kb)
9:115030570	9	115030570	T	?	9	8.208e-05	8.208e-05	1.3141	1.3141	0.6125	0	1.413	1.413	1.18	0.7406	1.567	1.365	0.7728	1.372	1.423	rs7870866	HSDL2(-111.6kb)|MIR3134(0)|PTBP3(0)|SUSD1(+93.01kb)
9:114957457	9	114957457	G	?	8	8.269e-05	8.269e-05	1.3159	1.3159	0.699	0	1.304	1.304	1.217	0.8042	1.475	1.373	0.7981	NA	1.464	rs1887518	HSDL2(-184.7kb)|MIR3134(0)|PTBP3(-22.54kb)|SUSD1(+19.9kb)
6:62540917	6	62540917	T	?	9	8.28e-05	8.28e-05	0.6361	0.6361	0.9997	0	0.601	0.601	0.5823	0.6141	0.6117	0.687	0.5166	0.6015	0.7327	rs75827848	KHDRBS2(0)
6:62543572	6	62543572	C	?	9	8.28e-05	8.28e-05	0.6361	0.6361	0.9997	0	0.601	0.601	0.5823	0.6141	0.6117	0.687	0.5166	0.6015	0.7327	rs78215307	KHDRBS2(0)
6:62543844	6	62543844	C	?	9	8.28e-05	8.28e-05	0.6361	0.6361	0.9997	0	0.601	0.601	0.5823	0.6141	0.6117	0.687	0.5166	0.6015	0.7327	rs80160930	KHDRBS2(0)
6:62548972	6	62548972	G	?	9	8.28e-05	8.28e-05	0.6361	0.6361	0.9997	0	0.601	0.601	0.5823	0.6141	0.6117	0.687	0.5166	0.6015	0.7327	rs112265000	KHDRBS2(0)
19:45405521	19	45405521	C	?	8	8.297e-05	0.00204	0.6973	0.6635	0.096	42.35	0.3639	0.3639	0.5049	0.5473	0.9275	0.9987	NA	0.6635	0.6676	rs1305062	APOC1(-12.4kb)|APOC1P1(-24.54kb)|APOC2(-43.72kb)|APOC4(-39.97kb)|APOC4-APOC2(-39.97kb)|APOE(-3.517kb)|BCAM(+80.84kb)|BCL3(+142.2kb)|CBLC(+101.6kb)|CEACAM16(+191.5kb)|CLASRP(-136.8kb)|CLPTM1(-52.32kb)|GEMIN7(-177kb)|PPP1R37(-190.9kb)|PVRL2(+13.04kb)|RELB(-99.18kb)|TOMM40(0)|ZNF296(-169.2kb)
18:14757632	18	14757632	T	?	8	8.318e-05	8.318e-05	0.7565	0.7565	0.9734	0	0.6618	0.6618	0.6735	0.7451	0.8816	0.7764	0.7536	NA	0.787	rs9748507	ANKRD30B(0)|MIR3156-2(-72.53kb)
7:145862531	7	145862531	G	?	8	8.357e-05	8.357e-05	0.4316	0.4316	0.6359	0	0.2085	0.2085	0.4665	3.054	0.5146	0.3667	NA	0.1949	0.477	rs113374577	CNTNAP2(0)
10:103394041	10	103394041	G	?	9	8.366e-05	0.005417	0.7263	0.691	0.0336	52.04	0.2863	0.2863	0.8863	0.8779	1.047	0.6018	1.23	0.621	0.7152	rs10786643	BTRC(+76.96kb)|DPCD(+24.63kb)|FBXW4(0)|FGF8(-135.8kb)|KCNIP2(-191.7kb)|KCNIP2-AS1(-184.8kb)|MGEA5(-150.2kb)|MIR3158-1(+32.79kb)|MIR3158-2(+32.79kb)|NPM3(-147kb)|POLL(+46.01kb)
6:62550081	6	62550081	T	?	9	8.385e-05	8.385e-05	0.6363	0.6363	0.9997	0	0.601	0.601	0.5823	0.6141	0.6117	0.687	0.5166	0.6015	0.7342	rs77504110	KHDRBS2(0)
6:62550534	6	62550534	A	?	9	8.385e-05	8.385e-05	0.6363	0.6363	0.9997	0	0.601	0.601	0.5823	0.6141	0.6117	0.687	0.5166	0.6015	0.7342	rs77013367	KHDRBS2(0)
6:62551436	6	62551436	A	?	9	8.385e-05	8.385e-05	0.6363	0.6363	0.9997	0	0.601	0.601	0.5823	0.6141	0.6117	0.687	0.5166	0.6015	0.7342	rs79666564	KHDRBS2(0)
15:100741480	15	100741480	T	?	8	8.392e-05	8.392e-05	1.6134	1.6134	0.4724	0	2.265	2.265	1.26	1.181	1.299	2.235	3.48	3.683	NA	rs2127845	ADAMTS17(0)|CERS3(-199.1kb)|SPATA41(-143.2kb)
4:169438889	4	169438889	T	?	8	8.421e-05	8.421e-05	0.4648	0.4648	0.4867	0	0.1571	0.1571	0.7122	0.2087	0.5613	0.502	2.374	NA	0.5211	rs11939299	DDX60(+198.9kb)|DDX60L(+37.25kb)|PALLD(0)
9:114959205	9	114959205	G	?	8	8.424e-05	8.424e-05	1.3155	1.3155	0.7007	0	1.304	1.304	1.217	0.8042	1.475	1.373	0.7981	NA	1.462	rs7867328	HSDL2(-183kb)|MIR3134(0)|PTBP3(-20.79kb)|SUSD1(+21.65kb)
10:126314475	10	126314475	T	?	9	8.438e-05	8.438e-05	0.7419	0.7419	0.7401	0	0.8902	0.8902	0.6449	0.5884	0.7138	0.8598	0.4259	0.3021	0.7898	rs3781476	FAM53B(0)|FAM175B(-175.9kb)|LHPP(+11.76kb)|METTL10(-132.9kb)|NKX1-2(+175.9kb)
10:103425568	10	103425568	A	?	9	8.498e-05	0.002084	0.7431	0.7164	0.0973	40.51	0.3607	0.3607	0.8534	0.7526	1.044	0.6314	1.001	0.6645	0.7887	rs10883674	BTRC(+108.5kb)|C10orf76(-179.8kb)|DPCD(+56.16kb)|FBXW4(0)|FGF8(-104.3kb)|KCNIP2(-160.2kb)|KCNIP2-AS1(-153.3kb)|MGEA5(-118.6kb)|MIR3158-1(+64.31kb)|MIR3158-2(+64.31kb)|NPM3(-115.5kb)|POLL(+77.54kb)
21:39196399	21	39196399	G	?	9	8.511e-05	8.511e-05	0.7634	0.7634	0.9591	0	0.6236	0.6236	0.7484	0.775	0.7967	0.7157	0.4456	0.7498	0.8686	rs4817894	KCNJ6(0)
6:69588979	6	69588979	G	?	9	8.527e-05	8.527e-05	1.434	1.434	0.948	0	1.509	1.509	1.346	1.001	1.487	1.463	2.319	4.734	1.486	rs12174093	BAI3(0)
6:69589587	6	69589587	A	?	9	8.527e-05	8.527e-05	1.434	1.434	0.948	0	1.509	1.509	1.346	1.001	1.487	1.463	2.319	4.734	1.486	rs558452	BAI3(0)
6:69597897	6	69597897	T	?	9	8.527e-05	8.527e-05	1.434	1.434	0.948	0	1.509	1.509	1.346	1.001	1.487	1.463	2.319	4.734	1.486	rs4706712	BAI3(0)
21:41761502	21	41761502	T	?	9	8.532e-05	0.001621	1.8419	1.8601	0.2215	24.98	2.863	2.863	1.506	0.7368	6.224	1.561	2.411	0.6277	2.35	rs74519274	DSCAM(0)|DSCAM-AS1(+4.217kb)|MIR4760(+177.1kb)
6:62515716	6	62515716	T	?	9	8.539e-05	8.539e-05	0.6365	0.6365	0.9765	0	0.7735	0.7735	0.5713	0.6617	0.6117	0.687	0.1087	0.6015	0.7051	rs74634774	KHDRBS2(0)
10:126368119	10	126368119	G	?	9	8.541e-05	8.541e-05	0.7494	0.7494	0.8562	0	0.7397	0.7397	0.7751	0.5462	0.6571	0.8156	0.6876	0.3347	0.8296	rs35645049	FAM53B(0)|FAM175B(-122.2kb)|LHPP(+65.41kb)|METTL10(-79.29kb)
20:46387122	20	46387122	T	?	9	8.575e-05	8.575e-05	0.7367	0.7367	0.9903	0	0.695	0.695	0.782	0.6311	0.6793	0.6981	0.4007	0.7359	0.8311	rs6066457	NCOA3(+101.5kb)|SULF2(0)
10:103423924	10	103423924	G	?	9	8.593e-05	0.002081	0.7435	0.7167	0.0978	40.45	0.3607	0.3607	0.8497	0.7526	1.044	0.6314	1.001	0.6645	0.7928	rs4919572	BTRC(+106.8kb)|C10orf76(-181.4kb)|DPCD(+54.51kb)|FBXW4(0)|FGF8(-106kb)|KCNIP2(-161.8kb)|KCNIP2-AS1(-154.9kb)|MGEA5(-120.3kb)|MIR3158-1(+62.67kb)|MIR3158-2(+62.67kb)|NPM3(-117.2kb)|POLL(+75.9kb)
4:169459118	4	169459118	G	?	8	8.633e-05	0.0004331	0.4668	0.4362	0.2427	23.43	0.1027	0.1027	0.6766	0.2087	0.6404	0.502	2.99	NA	0.5367	rs11933360	DDX60L(+57.48kb)|PALLD(0)
9:114965356	9	114965356	G	?	9	8.654e-05	8.654e-05	1.3129	1.3129	0.65	0	1.375	1.375	1.213	0.7362	1.551	1.307	0.8011	1.347	1.462	rs10981311	HSDL2(-176.8kb)|MIR3134(0)|PTBP3(-14.64kb)|SUSD1(+27.8kb)
9:114965385	9	114965385	C	?	9	8.654e-05	8.654e-05	1.3129	1.3129	0.65	0	1.375	1.375	1.213	0.7362	1.551	1.307	0.8011	1.347	1.462	rs10981312	HSDL2(-176.8kb)|MIR3134(0)|PTBP3(-14.61kb)|SUSD1(+27.83kb)
9:114966449	9	114966449	A	?	9	8.654e-05	8.654e-05	1.3129	1.3129	0.65	0	1.375	1.375	1.213	0.7362	1.551	1.307	0.8011	1.347	1.462	rs2182810	HSDL2(-175.7kb)|MIR3134(0)|PTBP3(-13.54kb)|SUSD1(+28.89kb)
9:114966657	9	114966657	C	?	9	8.654e-05	8.654e-05	1.3129	1.3129	0.65	0	1.375	1.375	1.213	0.7362	1.551	1.307	0.8011	1.347	1.462	rs10114558	HSDL2(-175.5kb)|MIR3134(0)|PTBP3(-13.34kb)|SUSD1(+29.1kb)
9:114967375	9	114967375	G	?	9	8.654e-05	8.654e-05	1.3129	1.3129	0.65	0	1.375	1.375	1.213	0.7362	1.551	1.307	0.8011	1.347	1.462	rs7021460	HSDL2(-174.8kb)|MIR3134(0)|PTBP3(-12.62kb)|SUSD1(+29.82kb)
9:114967423	9	114967423	C	?	9	8.654e-05	8.654e-05	1.3129	1.3129	0.65	0	1.375	1.375	1.213	0.7362	1.551	1.307	0.8011	1.347	1.462	rs7037927	HSDL2(-174.8kb)|MIR3134(0)|PTBP3(-12.57kb)|SUSD1(+29.87kb)
9:114967778	9	114967778	C	?	9	8.654e-05	8.654e-05	1.3129	1.3129	0.65	0	1.375	1.375	1.213	0.7362	1.551	1.307	0.8011	1.347	1.462	rs6477896	HSDL2(-174.4kb)|MIR3134(0)|PTBP3(-12.22kb)|SUSD1(+30.22kb)
9:114967938	9	114967938	C	?	9	8.654e-05	8.654e-05	1.3129	1.3129	0.65	0	1.375	1.375	1.213	0.7362	1.551	1.307	0.8011	1.347	1.462	rs6477897	HSDL2(-174.2kb)|MIR3134(0)|PTBP3(-12.06kb)|SUSD1(+30.38kb)
6:62641266	6	62641266	A	?	9	8.659e-05	8.659e-05	0.6381	0.6381	0.9991	0	0.601	0.601	0.5722	0.6141	0.6311	0.6659	0.5186	0.6015	0.7678	rs16900689	KHDRBS2(0)
6:62642877	6	62642877	T	?	9	8.659e-05	8.659e-05	0.6381	0.6381	0.9991	0	0.601	0.601	0.5722	0.6141	0.6311	0.6659	0.5186	0.6015	0.7678	rs75405800	KHDRBS2(0)
13:100347294	13	100347294	T	?	9	8.67e-05	8.67e-05	0.5623	0.5623	0.8045	0	0.5473	0.5473	0.5705	1.334	0.3476	0.6618	0.1074	0.9832	0.5907	rs17473598	CLYBL(0)|MIR4306(+51.89kb)|TM9SF2(+131kb)
12:72864946	12	72864946	T	?	9	8.696e-05	0.004796	0.6337	0.6289	0.1354	35.34	0.5921	0.5921	0.747	5.195	0.5297	0.5507	0.1091	0.2268	0.6657	rs10879430	TRHDE(0)|TRHDE-AS1(+197.7kb)
9:114962309	9	114962309	A	?	9	8.714e-05	8.714e-05	1.3128	1.3128	0.6508	0	1.375	1.375	1.213	0.7362	1.551	1.307	0.8011	1.347	1.461	rs6477891	HSDL2(-179.9kb)|MIR3134(0)|PTBP3(-17.68kb)|SUSD1(+24.75kb)
15:43831923	15	43831923	T	?	9	8.76e-05	8.76e-05	0.6696	0.6696	0.5263	0	0.5416	0.5416	0.6572	1.592	1.132	0.6634	0.468	0.6314	0.5449	rs496584	ADAL(+185.8kb)|CATSPER2(-90.85kb)|CATSPER2P1(-196.2kb)|CKMT1A(-153.2kb)|CKMT1B(-53.33kb)|MAP1A(+8.105kb)|PPIP5K1(0)|RNU6-28P(0)|STRC(-59.84kb)|TP53BP1(+29.22kb)|TUBGCP4(+133.7kb)|ZSCAN29(+169.7kb)
9:114964332	9	114964332	A	?	9	8.76e-05	8.76e-05	1.3127	1.3127	0.6494	0	1.375	1.375	1.212	0.7362	1.551	1.307	0.8011	1.347	1.462	rs7866603	HSDL2(-177.9kb)|MIR3134(0)|PTBP3(-15.66kb)|SUSD1(+26.78kb)
5:169891523	5	169891523	C	?	8	8.806e-05	0.001703	0.5123	0.4776	0.1674	32.65	0.2512	0.2512	0.416	1.059	0.4369	0.3483	0.0005	NA	0.8503	rs3898657	KCNIP1(0)|KCNMB1(+74.84kb)|LCP2(+166.7kb)|LOC257358(+129.4kb)
21:39152669	21	39152669	T	?	8	8.892e-05	0.0004629	0.3551	0.3462	0.322	13.81	0.5785	0.5785	0.3211	0.1044	NA	0.1587	0.0787	0.0632	0.9736	rs192060553	KCNJ6(0)
6:119012202	6	119012202	G	?	9	8.904e-05	0.01194	0.7515	0.6966	0.0018	67.46	0.4014	0.4014	1.079	0.6938	0.47	0.6677	1.692	0.7998	1.017	rs62423996	BRD7P3(+187.2kb)|CEP85L(0)|LOC100287632(-91.67kb)|MCM9(-122.4kb)|PLN(+130.6kb)
13:100322758	13	100322758	C	?	9	8.927e-05	8.927e-05	0.5585	0.5585	0.863	0	0.4956	0.4956	0.5532	2.366	0.3476	0.6618	0.8338	0.9832	0.5829	rs80097389	CLYBL(0)|MIR4306(+27.36kb)|TM9SF2(+106.5kb)
9:114969716	9	114969716	G	?	9	8.936e-05	8.936e-05	1.3125	1.3125	0.6394	0	1.375	1.375	1.213	0.7362	1.571	1.3	0.8011	1.347	1.456	rs7861162	HSDL2(-172.5kb)|MIR3134(0)|PTBP3(-10.28kb)|SUSD1(+32.16kb)
9:114969773	9	114969773	A	?	9	8.936e-05	8.936e-05	1.3125	1.3125	0.6394	0	1.375	1.375	1.213	0.7362	1.571	1.3	0.8011	1.347	1.456	rs7861447	HSDL2(-172.4kb)|MIR3134(0)|PTBP3(-10.22kb)|SUSD1(+32.22kb)
9:114969989	9	114969989	C	?	9	8.936e-05	8.936e-05	1.3125	1.3125	0.6394	0	1.375	1.375	1.213	0.7362	1.571	1.3	0.8011	1.347	1.456	rs7861788	HSDL2(-172.2kb)|MIR3134(0)|PTBP3(-10kb)|SUSD1(+32.43kb)
9:114969993	9	114969993	T	?	9	8.936e-05	8.936e-05	1.3125	1.3125	0.6394	0	1.375	1.375	1.213	0.7362	1.571	1.3	0.8011	1.347	1.456	rs4644329	HSDL2(-172.2kb)|MIR3134(0)|PTBP3(-10kb)|SUSD1(+32.44kb)
6:69587849	6	69587849	G	?	9	8.941e-05	8.941e-05	1.4329	1.4329	0.9483	0	1.509	1.509	1.346	1.001	1.487	1.463	2.317	4.734	1.482	rs504160	BAI3(0)
6:69592536	6	69592536	A	?	9	8.941e-05	8.941e-05	1.4329	1.4329	0.9483	0	1.509	1.509	1.346	1.001	1.487	1.463	2.317	4.734	1.482	rs478789	BAI3(0)
6:69593525	6	69593525	G	?	9	8.941e-05	8.941e-05	1.4329	1.4329	0.9483	0	1.509	1.509	1.346	1.001	1.487	1.463	2.317	4.734	1.482	rs491833	BAI3(0)
6:69593540	6	69593540	T	?	9	8.941e-05	8.941e-05	1.4329	1.4329	0.9483	0	1.509	1.509	1.346	1.001	1.487	1.463	2.317	4.734	1.482	rs509304	BAI3(0)
6:69596592	6	69596592	T	?	9	8.941e-05	8.941e-05	1.4329	1.4329	0.9483	0	1.509	1.509	1.346	1.001	1.487	1.463	2.317	4.734	1.482	rs4706061	BAI3(0)
6:69598297	6	69598297	A	?	9	8.941e-05	8.941e-05	1.4329	1.4329	0.9483	0	1.509	1.509	1.346	1.001	1.487	1.463	2.317	4.734	1.482	rs1403926	BAI3(0)
5:159720780	5	159720780	A	?	9	8.989e-05	0.0007577	1.4114	1.4418	0.2258	24.48	2.162	2.162	1.946	2.304	1.026	1.099	1.19	1.043	1.355	rs6899125	C1QTNF2(-53.99kb)|C5orf54(-99.37kb)|CCNJL(0)|FABP6(+55.05kb)|MIR146A(-191.6kb)|MIR3142(-180.6kb)|PTTG1(-128.1kb)|PWWP2A(+174.3kb)|SLU7(-107.9kb)
10:103340056	10	103340056	A	?	9	8.995e-05	0.004728	0.73	0.698	0.0467	49.08	0.3414	0.3414	0.8359	0.6695	1.187	0.5753	1.205	0.6972	0.7484	rs3730477	BTRC(+22.98kb)|DPCD(-8.032kb)|FBXW4(-30.36kb)|FGF8(-189.8kb)|MIR3158-1(-21.12kb)|MIR3158-2(-21.12kb)|POLL(0)
8:3219744	8	3219744	T	?	9	8.997e-05	0.0179	0.7286	0.7237	0.0265	53.94	0.3749	0.3749	0.6536	1.122	0.649	1.009	1.342	7.985	0.7321	rs34615157	CSMD1(0)
12:72845679	12	72845679	A	?	9	9.003e-05	0.004947	0.6392	0.6356	0.1405	34.68	0.5921	0.5921	0.7198	5.557	0.5626	0.5949	0.1091	0.222	0.6384	rs12301567	TRHDE(0)|TRHDE-AS1(+178.4kb)
9:18674055	9	18674055	G	?	9	9.016e-05	0.001164	0.7439	0.6761	0.0442	49.6	0.3701	0.3701	0.9036	0.6506	0.7128	0.8081	0.8436	0.1807	0.8725	rs776766	ADAMTSL1(0)|MIR3152(+100.7kb)
8:13007928	8	13007928	A	?	9	9.07e-05	9.07e-05	0.5053	0.5053	0.8659	0	0.6502	0.6502	0.6559	1.437	0.7062	0.3583	0.4954	0.3167	0.3623	rs78599126	DLC1(0)|KIAA1456(+120.6kb)
9:114984266	9	114984266	A	?	9	9.084e-05	9.084e-05	1.3118	1.3118	0.6542	0	1.375	1.375	1.212	0.7362	1.571	1.318	0.8011	1.347	1.435	rs11542205	HSDL2(-157.9kb)|MIR3134(0)|PTBP3(0)|SUSD1(+46.71kb)
6:62589325	6	62589325	A	?	9	9.099e-05	9.099e-05	0.6503	0.6503	0.9937	0	0.6094	0.6094	0.5756	0.786	0.6494	0.6221	0.5386	0.8404	0.8172	rs10498817	KHDRBS2(0)
6:62593758	6	62593758	G	?	9	9.099e-05	9.099e-05	0.6503	0.6503	0.9937	0	0.6094	0.6094	0.5756	0.786	0.6494	0.6221	0.5386	0.8404	0.8172	rs16900366	KHDRBS2(0)
8:3223127	8	3223127	T	?	9	9.143e-05	0.02075	0.728	0.7212	0.019	56.33	0.3551	0.3551	0.6536	1.122	0.649	1.02	1.363	7.985	0.7272	rs10089434	CSMD1(0)
10:98111897	10	98111897	A	?	9	9.146e-05	0.0002111	0.649	0.6496	0.3865	5.85	0.7293	0.7293	0.5019	0.5335	0.5028	1.043	0.0642	0.792	0.7148	rs17387939	BLNK(+80.56kb)|DNTT(+13.58kb)|OPALIN(0)|TLL2(-12.46kb)|TM9SF3(-166kb)|ZNF518A(+188.4kb)
10:98112162	10	98112162	G	?	9	9.146e-05	0.0002111	0.649	0.6496	0.3865	5.85	0.7293	0.7293	0.5019	0.5335	0.5028	1.043	0.0642	0.792	0.7148	rs72829509	BLNK(+80.83kb)|DNTT(+13.84kb)|OPALIN(0)|TLL2(-12.2kb)|TM9SF3(-165.7kb)|ZNF518A(+188.6kb)
10:98114251	10	98114251	G	?	9	9.146e-05	0.0002111	0.649	0.6496	0.3865	5.85	0.7293	0.7293	0.5019	0.5335	0.5028	1.043	0.0642	0.792	0.7148	rs72829512	BLNK(+82.92kb)|DNTT(+15.93kb)|OPALIN(0)|TLL2(-10.11kb)|TM9SF3(-163.6kb)|ZNF518A(+190.7kb)
9:114993790	9	114993790	A	?	9	9.172e-05	9.172e-05	1.3116	1.3116	0.6549	0	1.375	1.375	1.212	0.7362	1.571	1.318	0.8011	1.347	1.434	rs943621	HSDL2(-148.4kb)|MIR3134(0)|PTBP3(0)|SUSD1(+56.23kb)
6:62519368	6	62519368	C	?	9	9.209e-05	9.209e-05	0.6379	0.6379	0.9721	0	0.7735	0.7735	0.5713	0.6617	0.6117	0.687	0.1033	0.6015	0.7149	rs75303242	KHDRBS2(0)
7:151049025	7	151049025	T	?	8	9.241e-05	0.001145	1.3589	1.3738	0.2267	25.35	2.122	2.122	1.363	0.733	1.883	1.228	1.669	NA	1.244	rs379931	ABCF2(+124.7kb)|ASB10(+164.1kb)|CHPF2(+113.1kb)|CRYGN(-78.03kb)|GBX1(+184.2kb)|MIR671(+113.4kb)|MIR3907(-81.55kb)|NUB1(0)|RHEB(-114.1kb)|SMARCD3(+74.79kb)|WDR86(-29.18kb)|WDR86-AS1(-57.3kb)
8:13003810	8	13003810	A	?	9	9.242e-05	9.242e-05	0.5058	0.5058	0.8678	0	0.6502	0.6502	0.6559	1.437	0.7062	0.3583	0.4954	0.3167	0.3636	rs117764483	DLC1(0)|KIAA1456(+116.5kb)
8:13004048	8	13004048	G	?	9	9.242e-05	9.242e-05	0.5058	0.5058	0.8678	0	0.6502	0.6502	0.6559	1.437	0.7062	0.3583	0.4954	0.3167	0.3636	rs117915675	DLC1(0)|KIAA1456(+116.8kb)
19:2842370	19	2842370	G	?	8	9.248e-05	9.248e-05	0.5639	0.5639	0.934	0	0.3244	0.3244	0.7065	0.761	0.5546	0.5784	0.9406	NA	0.5001	rs77764540	DIRAS1(+121kb)|GNG7(+139.6kb)|SGTA(+59.02kb)|SLC39A3(+102.3kb)|THOP1(+28.77kb)|TLE2(-155.3kb)|TLE6(-135.2kb)|ZNF57(-58.52kb)|ZNF77(-90.84kb)|ZNF554(+5.637kb)|ZNF555(0)|ZNF556(-24.96kb)
9:18676798	9	18676798	C	?	9	9.292e-05	0.001376	0.7468	0.6738	0.0312	52.67	0.3645	0.3645	0.8943	0.5891	0.68	0.8369	1.258	0.2252	0.8971	rs776762	ADAMTSL1(0)|MIR3152(+103.4kb)
2:178176203	2	178176203	A	?	8	9.307e-05	0.002481	0.5897	0.5866	0.1782	31.29	0.3498	0.3498	0.7393	1.317	0.385	0.4626	2.863	NA	0.9704	rs150807985	AGPS(-81.27kb)|HNRNPA3(+87.52kb)|LOC100130691(0)|MIR3128(+55.46kb)|MIR4444-1(+98.68kb)|NFE2L2(+46.34kb)
16:78472762	16	78472762	T	?	9	9.367e-05	9.367e-05	0.6297	0.6297	0.571	0	0.2995	0.2995	0.5748	0.5318	0.8684	0.6497	3.39	0.3836	0.7231	rs80240771	WWOX(0)
15:43812596	15	43812596	C	?	9	9.388e-05	9.388e-05	0.6708	0.6708	0.5269	0	0.5416	0.5416	0.6629	1.592	1.132	0.6634	0.468	0.6314	0.5449	rs689883	ADAL(+166.5kb)|CATSPER2(-110.2kb)|CKMT1A(-172.5kb)|CKMT1B(-72.66kb)|LCMT2(+189.8kb)|MAP1A(0)|PPIP5K1(-13.06kb)|RNU6-28P(0)|STRC(-79.16kb)|TP53BP1(+9.889kb)|TUBGCP4(+114.4kb)|ZSCAN29(+150.3kb)
15:43818052	15	43818052	A	?	9	9.388e-05	9.388e-05	0.6708	0.6708	0.5269	0	0.5416	0.5416	0.6629	1.592	1.132	0.6634	0.468	0.6314	0.5449	rs2245715	ADAL(+172kb)|CATSPER2(-104.7kb)|CKMT1A(-167kb)|CKMT1B(-67.2kb)|LCMT2(+195.2kb)|MAP1A(0)|PPIP5K1(-7.607kb)|RNU6-28P(0)|STRC(-73.71kb)|TP53BP1(+15.34kb)|TUBGCP4(+119.8kb)|ZSCAN29(+155.8kb)
15:43824751	15	43824751	C	?	9	9.388e-05	9.388e-05	0.6708	0.6708	0.5269	0	0.5416	0.5416	0.6629	1.592	1.132	0.6634	0.468	0.6314	0.5449	rs2444244	ADAL(+178.7kb)|CATSPER2(-98.02kb)|CKMT1A(-160.3kb)|CKMT1B(-60.5kb)|MAP1A(+0.933kb)|PPIP5K1(-0.908kb)|RNU6-28P(0)|STRC(-67.01kb)|TP53BP1(+22.04kb)|TUBGCP4(+126.5kb)|ZSCAN29(+162.5kb)
15:43829615	15	43829615	A	?	9	9.388e-05	9.388e-05	0.6708	0.6708	0.5269	0	0.5416	0.5416	0.6629	1.592	1.132	0.6634	0.468	0.6314	0.5449	rs2470130	ADAL(+183.5kb)|CATSPER2(-93.16kb)|CATSPER2P1(-198.5kb)|CKMT1A(-155.5kb)|CKMT1B(-55.64kb)|MAP1A(+5.797kb)|PPIP5K1(0)|RNU6-28P(0)|STRC(-62.14kb)|TP53BP1(+26.91kb)|TUBGCP4(+131.4kb)|ZSCAN29(+167.4kb)
15:43830467	15	43830467	C	?	9	9.388e-05	9.388e-05	0.6708	0.6708	0.5269	0	0.5416	0.5416	0.6629	1.592	1.132	0.6634	0.468	0.6314	0.5449	rs2255440	ADAL(+184.4kb)|CATSPER2(-92.3kb)|CATSPER2P1(-197.7kb)|CKMT1A(-154.6kb)|CKMT1B(-54.78kb)|MAP1A(+6.649kb)|PPIP5K1(0)|RNU6-28P(0)|STRC(-61.29kb)|TP53BP1(+27.76kb)|TUBGCP4(+132.2kb)|ZSCAN29(+168.2kb)
15:43833833	15	43833833	G	?	9	9.388e-05	9.388e-05	0.6708	0.6708	0.5269	0	0.5416	0.5416	0.6629	1.592	1.132	0.6634	0.468	0.6314	0.5449	rs2470131	ADAL(+187.7kb)|CATSPER2(-88.94kb)|CATSPER2P1(-194.3kb)|CKMT1A(-151.2kb)|CKMT1B(-51.42kb)|MAP1A(+10.02kb)|PPIP5K1(0)|RNU6-28P(0)|STRC(-57.93kb)|TP53BP1(+31.13kb)|TUBGCP4(+135.6kb)|ZSCAN29(+171.6kb)
15:43834318	15	43834318	T	?	9	9.388e-05	9.388e-05	0.6708	0.6708	0.5269	0	0.5416	0.5416	0.6629	1.592	1.132	0.6634	0.468	0.6314	0.5449	rs2255042	ADAL(+188.2kb)|CATSPER2(-88.45kb)|CATSPER2P1(-193.8kb)|CKMT1A(-150.8kb)|CKMT1B(-50.93kb)|MAP1A(+10.5kb)|PPIP5K1(0)|RNU6-28P(0)|STRC(-57.44kb)|TP53BP1(+31.61kb)|TUBGCP4(+136.1kb)|ZSCAN29(+172.1kb)
2:133466651	2	133466651	C	?	7	9.406e-05	0.01159	1.3437	1.355	0.0643	49.57	1.071	1.071	1.871	2.355	NA	1.268	NA	1.117	1.067	rs1006312	GPR39(+62.48kb)|LYPD1(+37.58kb)|NCKAP5(0)
6:62588093	6	62588093	T	?	9	9.425e-05	9.425e-05	0.6389	0.6389	0.9995	0	0.601	0.601	0.5786	0.6141	0.6338	0.6647	0.5166	0.6015	0.7582	rs16900287	KHDRBS2(0)
6:62588444	6	62588444	T	?	9	9.425e-05	9.425e-05	0.6389	0.6389	0.9995	0	0.601	0.601	0.5786	0.6141	0.6338	0.6647	0.5166	0.6015	0.7582	rs16900290	KHDRBS2(0)
2:115413975	2	115413975	G	?	9	9.47e-05	9.47e-05	1.4306	1.4306	0.49	0	2.359	2.359	1.287	1.355	1.063	1.381	5.342	2.719	1.609	rs7607402	DPP10(0)
8:3220635	8	3220635	G	?	9	9.486e-05	0.02069	0.7288	0.7215	0.0192	56.25	0.3551	0.3551	0.6536	1.122	0.649	1.02	1.342	7.985	0.7308	rs12675247	CSMD1(0)
3:58623903	3	58623903	G	?	9	9.509e-05	9.509e-05	1.3602	1.3602	0.9045	0	1.64	1.64	1.208	1.045	1.674	1.389	1.865	0.9153	1.305	rs2364303	ACOX2(+101kb)|C3orf67(-103.8kb)|FAM3D(0)|FAM107A(+60.41kb)|KCTD6(+135.8kb)
13:109681763	13	109681763	C	?	9	9.511e-05	0.003191	0.6616	0.6776	0.2221	24.91	1.003	1.003	0.436	0.6724	0.662	1.043	0.5183	0.3751	0.6748	rs56968659	MYO16(0)|MYO16-AS1(-134.5kb)
6:69557496	6	69557496	A	?	9	9.515e-05	9.515e-05	1.431	1.431	0.9419	0	1.509	1.509	1.348	0.9821	1.459	1.463	2.317	4.734	1.498	rs553613	BAI3(0)
10:98110250	10	98110250	T	?	9	9.519e-05	0.0005722	0.6492	0.6506	0.3217	13.51	0.7293	0.7293	0.4924	0.5335	0.5028	1.087	0.0642	0.792	0.714	rs4919003	BLNK(+78.92kb)|DNTT(+11.93kb)|OPALIN(0)|TLL2(-14.11kb)|TM9SF3(-167.6kb)|ZNF518A(+186.7kb)
4:77031352	4	77031352	A	?	9	9.527e-05	0.01059	0.4876	0.4589	0.0225	55.14	0.1462	0.1462	0.5266	0.4262	2.586	0.3694	4.923	0.1865	0.7673	rs4859424	ART3(0)|CXCL9(+102.7kb)|CXCL10(+86.66kb)|CXCL11(+74kb)|FAM47E(-103.8kb)|FAM47E-STBD1(-141.5kb)|NAAA(+169.2kb)|NUP54(-4.459kb)|SCARB2(-48.54kb)|SDAD1(+119.2kb)|STBD1(-195.8kb)
15:43789613	15	43789613	C	?	8	9.556e-05	9.556e-05	0.5246	0.5246	0.9176	0	0.8253	0.8253	0.4083	1.923	0.5048	0.5758	0.7555	NA	0.487	rs28717706	ADAL(+143.5kb)|CATSPER2(-133.2kb)|CKMT1A(-195.5kb)|CKMT1B(-95.64kb)|LCMT2(+166.8kb)|MAP1A(-20.19kb)|PPIP5K1(-36.05kb)|RNU6-28P(0)|STRC(-102.1kb)|TGM7(+195.2kb)|TP53BP1(0)|TUBGCP4(+91.37kb)|ZSCAN29(+127.4kb)
8:12999656	8	12999656	T	?	9	9.607e-05	9.607e-05	0.5104	0.5104	0.8175	0	0.6502	0.6502	0.6175	1.437	0.8589	0.3583	0.4954	0.2589	0.3636	rs78890306	DLC1(0)|KIAA1456(+112.4kb)
8:13000171	8	13000171	C	?	9	9.607e-05	9.607e-05	0.5104	0.5104	0.8175	0	0.6502	0.6502	0.6175	1.437	0.8589	0.3583	0.4954	0.2589	0.3636	rs117041439	DLC1(0)|KIAA1456(+112.9kb)
8:13000935	8	13000935	G	?	9	9.607e-05	9.607e-05	0.5104	0.5104	0.8175	0	0.6502	0.6502	0.6175	1.437	0.8589	0.3583	0.4954	0.2589	0.3636	rs80131028	DLC1(0)|KIAA1456(+113.7kb)
1:158654852	1	158654852	A	?	9	9.626e-05	0.0003935	0.7561	0.7515	0.3246	13.17	0.5011	0.5011	0.7798	1.36	0.6678	0.8687	0.6892	0.3799	0.7565	rs857937	MNDA(-146.3kb)|OR6K2(-14.62kb)|OR6K3(-32.1kb)|OR6K6(-69.75kb)|OR6N1(-80.68kb)|OR6N2(-91.62kb)|OR6P1(+121.5kb)|OR6Y1(+137kb)|OR10X1(+105.2kb)|OR10Z1(+77.68kb)|SPTA1(0)
6:69585308	6	69585308	T	?	9	9.64e-05	9.64e-05	1.4301	1.4301	0.9489	0	1.509	1.509	1.346	1.001	1.459	1.463	2.319	4.734	1.487	rs545085	BAI3(0)
14:81424136	14	81424136	A	?	9	9.666e-05	9.666e-05	0.7392	0.7392	0.4686	0	0.4212	0.4212	0.6313	0.8775	0.7433	0.9248	0.6371	0.7929	0.8184	rs2268452	CEP128(+18.25kb)|TSHR(0)
13:109673902	13	109673902	A	?	9	9.67e-05	0.004521	0.6642	0.6816	0.1932	28.27	1.003	1.003	0.4375	0.6724	0.662	1.083	0.5183	0.3751	0.6642	rs79320207	MYO16(0)|MYO16-AS1(-142.4kb)
19:45395844	19	45395844	A	?	8	9.683e-05	0.002618	1.3815	1.3676	0.2052	27.96	1.98	1.98	1.617	0.9651	0.9139	1.418	NA	0.5003	1.462	rs34095326	APOC1(-22.08kb)|APOC1P1(-34.22kb)|APOC2(-53.39kb)|APOC4(-49.65kb)|APOC4-APOC2(-49.65kb)|APOE(-13.19kb)|BCAM(+71.17kb)|BCL3(+132.5kb)|CBLC(+91.94kb)|CEACAM16(+181.9kb)|CLASRP(-146.5kb)|CLPTM1(-62kb)|GEMIN7(-186.7kb)|PVRL2(+3.359kb)|RELB(-108.9kb)|TOMM40(0)|ZNF296(-178.9kb)
16:77999813	16	77999813	C	?	9	9.686e-05	9.686e-05	0.7416	0.7416	0.8584	0	0.7096	0.7096	0.8321	0.5872	0.8111	0.6141	1.178	0.4387	0.8096	rs373114	CLEC3A(-56.63kb)|VAT1L(0)|WWOX(-133.5kb)
10:126344624	10	126344624	T	?	9	9.706e-05	9.706e-05	0.7517	0.7517	0.8285	0	0.7397	0.7397	0.7751	0.5462	0.6571	0.8561	0.6743	0.3291	0.8017	rs11245323	FAM53B(0)|FAM175B(-145.7kb)|LHPP(+41.91kb)|METTL10(-102.8kb)
4:145057120	4	145057120	C	?	8	9.736e-05	0.0005262	0.412	0.3874	0.2715	19.95	0.0392	0.0392	0.3863	0.2339	0.4598	0.4431	0.1705	NA	0.832	rs116138813	GYPA(0)|GYPB(+116.6kb)
13:100364736	13	100364736	A	?	6	9.771e-05	9.771e-05	0.4729	0.4729	0.6593	0	NA	NA	0.3808	1.198	0.4891	0.4305	0.1109	NA	0.7525	rs150486964	CLYBL(0)|MIR4306(+69.33kb)|TM9SF2(+148.4kb)
2:203796988	2	203796988	T	?	8	9.797e-05	0.00181	0.4321	0.4324	0.2293	25.04	2.556	2.556	0.7496	0.4345	0.245	0.1765	NA	0.3698	0.5453	rs12622313	CARF(0)|FAM117B(+162.5kb)|ICA1L(+60.62kb)|NBEAL1(-82.61kb)|WDR12(+20.04kb)
14:81422257	14	81422257	C	?	9	9.823e-05	9.823e-05	0.7394	0.7394	0.4675	0	0.4212	0.4212	0.6313	0.8775	0.7433	0.9248	0.6371	0.7929	0.8195	rs2239610	CEP128(+16.37kb)|TSHR(0)
20:46387795	20	46387795	A	?	9	9.833e-05	9.833e-05	0.7378	0.7378	0.9842	0	0.695	0.695	0.7984	0.6311	0.6819	0.6818	0.4007	0.751	0.8379	rs12625574	NCOA3(+102.2kb)|SULF2(0)
6:69564830	6	69564830	A	?	9	9.841e-05	9.841e-05	1.4299	1.4299	0.95	0	1.509	1.509	1.351	1.001	1.459	1.463	2.317	4.734	1.482	rs547423	BAI3(0)
8:13003332	8	13003332	G	?	9	9.859e-05	9.859e-05	0.5073	0.5073	0.8634	0	0.6502	0.6502	0.6632	1.437	0.7062	0.3583	0.4954	0.3167	0.3636	rs77572487	DLC1(0)|KIAA1456(+116kb)
8:13003579	8	13003579	T	?	9	9.859e-05	9.859e-05	0.5073	0.5073	0.8634	0	0.6502	0.6502	0.6632	1.437	0.7062	0.3583	0.4954	0.3167	0.3636	rs118138275	DLC1(0)|KIAA1456(+116.3kb)
20:30972969	20	30972969	G	?	9	9.872e-05	9.872e-05	0.5399	0.5399	0.9726	0	0.3253	0.3253	0.6772	0.4454	0.6801	0.5591	0.2585	0.2496	0.507	rs62206880	ASXL1(0)|C20orf112(-57.89kb)|KIF3B(+50.16kb)|PLAGL2(+177.4kb)|POFUT1(+146.5kb)|TSPY26P(+194.8kb)
9:114961406	9	114961406	C	?	9	9.884e-05	9.884e-05	1.3099	1.3099	0.6475	0	1.375	1.375	1.205	0.7362	1.551	1.307	0.8011	1.347	1.458	rs10981308	HSDL2(-180.8kb)|MIR3134(0)|PTBP3(-18.59kb)|SUSD1(+23.85kb)
3:32394588	3	32394588	G	?	8	9.909e-05	0.0004733	0.5985	0.5869	0.2992	16.6	0.211	0.211	0.5598	0.599	0.8314	0.804	1.115	NA	0.6695	rs11288057	CMTM6(-128.2kb)|CMTM7(-38.57kb)|CMTM8(0)|DYNC1LI1(-172.9kb)|GPD1L(+184.4kb)
2:26158963	2	26158963	C	?	9	9.921e-05	0.002456	1.3205	1.3042	0.2397	22.89	1.358	1.358	1.503	1.041	1.093	1.787	1.663	0.5742	1.117	rs3856395	ASXL2(+57.65kb)|KIF3C(0)|RAB10(-97.76kb)
3:132988414	3	132988414	A	?	6	9.943e-05	9.943e-05	0.396	0.396	0.6126	0	0.1935	0.1935	0.3392	0.5021	NA	0.7317	NA	0.7285	NA	rs75742992	BFSP2(-130.4kb)|TMEM108(0)
7:111171318	7	111171318	A	?	6	9.945e-05	0.0002376	0.3742	0.3626	0.3561	9.36	0.0592	0.0592	0.3379	0.185	0.3842	NA	NA	NA	0.6517	rs79470474	DOCK4(-194.8kb)|IMMP2L(0)
