# Supplementary material for: Multiomics integrative analysis identifies APOE allele-specific blood biomarkers associated to Alzheimer’s disease etiopathogenesis
Source: Aging (Albany NY). 2021 Apr 12;13(7):9277–329. doi: 10.18632/aging.202950 (PMC8064208; doi:10.18632/aging.202950)
Supplement: Supplementary Table 15 [file aging-13-202950-s017.xlsx]

## Sheet: Sheet1
Supplementary Table 15. Stage I-III APOE2 stratified meta-analysis gene level results.
RANK	GENE	CHR	START	STOP	NSNPS	NPARAM	ZSTAT	P_JOINT	P_SNPWISE_MEAN	P_SNPWISE_TOP1	STRAND	HUGO
1	220441	18	59425300	59611634	609	65	4.6225	1.8961e-06	4.5924e-07	0.00046308	-	RNF152
2	50506	15	45334851	45456537	150	26	3.9742	3.5315e-05	4.7232e-06	0.0051204	-	DUOX2
3	79006	16	715173	819655	140	18	3.877	5.2874e-05	2.4076e-05	0.0009427	+	METRN
4	84219	16	684622	790608	197	18	3.8337	6.3107e-05	2.7121e-05	0.0012089	-	WDR24
5	146330	16	692500	805825	196	18	3.8449	6.0298e-05	2.8523e-05	0.0011063	-	FBXL16
6	65990	16	720581	822655	120	17	3.8346	6.2876e-05	2.9931e-05	0.0011438	+	FAM173A
7	339123	16	681667	784440	193	18	3.788	7.5932e-05	3.3371e-05	0.00132	-	JMJD8
8	124093	16	722582	826880	115	17	3.8084	6.9934e-05	3.6767e-05	0.0011377	-	CCDC78
9	405753	15	45356523	45460304	145	23	3.6311	0.00014108	3.677e-05	0.0060516	+	DUOXA2
10	84264	16	726958	829715	107	15	3.8292	6.4281e-05	3.8839e-05	0.00090801	+	HAGHL
11	64428	16	729753	840997	105	15	3.8261	6.5091e-05	3.9959e-05	0.00089202	-	NARFL
12	10273	16	680115	782768	193	18	3.7176	0.00010057	4.6066e-05	0.0015629	+	STUB1
13	5244	7	86981361	87155019	344	35	3.8855	5.1062e-05	5.2694e-05	0.0055943	-	ABCB4
14	341	19	45367577	45472606	209	32	3.4176	0.00031587	5.3974e-05	0.041282	+	APOC1
15	56269	19	44170214	44274173	300	45	4.547	2.7203e-06	5.5214e-05	3.3574e-05	+	IRGC
16	285195	3	142934063	143617373	1758	190	3.6689	0.00012179	6.3482e-05	0.013365	-	SLC9A9
17	7976	8	28301722	28481785	365	45	3.7053	0.00010555	6.7488e-05	0.029014	+	FZD3
18	79029	15	45644514	45763617	172	15	4.1466	1.6873e-05	7.2903e-05	0.0011461	+	SPATA5L1
19	9028	16	675666	778268	197	18	3.6861	0.00011384	7.3039e-05	0.0012658	+	RHBDL1
20	5329	19	44100247	44224498	362	62	4.4017	5.3704e-06	7.7099e-05	0.00011613	-	PLAUR
21	90527	15	45359564	45472075	163	25	3.5822	0.00017038	7.7379e-05	0.0053009	-	DUOXA1
22	84419	15	45672727	45775647	113	17	4.013	2.9976e-05	8.9429e-05	0.0013178	+	C15orf48
23	2628	15	45603322	45720980	220	13	3.9475	3.9481e-05	0.00011651	0.0019116	-	GATM
24	89941	16	668083	774174	211	19	3.5809	0.00017122	0.0001252	0.001446	+	RHOT2
25	10452	19	45344477	45456946	255	39	2.999	0.0013544	0.00013387	0.10383	+	TOMM40
26	348	19	45359039	45462650	234	34	3.0839	0.0010215	0.00014904	0.074464	+	APOE
27	26259	12	117298756	117518953	391	35	3.4172	0.00031638	0.00015714	0.0067907	+	FBXW8
28	26235	6	99271601	99445882	294	30	3.7336	9.44e-05	0.00015884	0.003857	-	FBXL4
29	53635	19	50303667	50413999	152	24	3.413	0.00032129	0.00016554	0.0048471	+	PTOV1
30	157574	8	28235925	28397835	253	46	3.3215	0.00044768	0.00017525	0.036543	-	FBXO16
31	5454	6	99232580	99336666	259	31	3.5315	0.0002066	0.00019337	0.0089178	+	POU3F2
32	23544	22	26515440	26829563	917	115	2.9516	0.0015807	0.00021743	0.054352	+	SEZ6L
33	11284	19	50314460	50420840	158	27	3.3381	0.00042175	0.00022226	0.0050131	-	PNKP
34	53905	15	45372192	45507776	208	28	3.4261	0.00030616	0.0002297	0.0060119	+	DUOX1
35	161176	14	95833831	96033000	816	127	3.2211	0.00063859	0.00023146	0.07546	-	SYNE3
36	5105	20	56086137	56191515	366	59	2.9793	0.0014444	0.00029623	0.056907	+	PCK1
37	8792	18	59942520	60104943	523	62	3.3035	0.00047748	0.00033123	0.0081647	+	TNFRSF11A
38	197335	16	649363	767833	243	20	3.4376	0.00029346	0.00040921	0.0012743	+	WDR90
39	6652	15	45265302	45417287	192	17	3.1237	0.00089297	0.00046556	0.0066864	+	SORD
40	80164	19	7883605	7989326	232	30	3.3921	0.00034678	0.00050053	0.0041392	-	PRR36
41	54997	12	117426728	117587251	374	47	3.2102	0.00066325	0.00050542	0.009176	-	TESC
42	84335	19	50322290	50431613	160	26	3.1678	0.00076803	0.00058565	0.0053741	-	AKT1S1
43	3426	4	110611848	110773381	302	37	3.4762	0.00025425	0.00061246	0.0038475	-	CFI
44	346	19	45395495	45498753	195	23	3.0608	0.0011037	0.00062642	0.021453	+	APOC4
45	64762	18	29793484	30100447	626	58	2.9597	0.0015395	0.00067387	0.049727	-	GAREM
46	56006	19	44182851	44309142	408	56	3.901	4.789e-05	0.00072186	0.00018662	-	SMG9
47	55353	8	98737809	98914830	565	49	2.8594	0.0021224	0.00080872	0.067071	+	LAPTM4B
48	340024	5	1151710	1275232	220	36	3.5315	0.00020658	0.00085295	0.00032105	+	SLC6A19
49	54106	3	52205096	52310179	130	24	3.2876	0.00050526	0.00085519	0.0061572	-	TLR9
50	996	17	45145310	45316665	369	45	2.6325	0.0042385	0.00086957	0.061982	-	CDC27
51	81857	19	50271319	50390237	178	24	3.1028	0.00095842	0.00089755	0.0047198	+	MED25
52	104	21	46444493	46696478	675	53	2.7431	0.0030434	0.0009097	0.052073	+	ADARB1
53	115704	19	7845161	7979862	353	45	3.2913	0.00049857	0.00093326	0.0046319	+	EVI5L
54	55317	20	3751171	3855954	233	42	3.1079	0.00094216	0.00096647	0.024594	+	AP5S1
55	8643	1	45235516	45359226	190	19	3.1882	0.00071581	0.0010013	0.00655	-	PTCH2
56	25876	20	3708151	3812113	258	46	2.8097	0.0024795	0.0010114	0.049252	-	SPEF1
57	5520	8	26099007	26280196	413	49	2.5574	0.0052726	0.0010285	0.094955	+	PPP2R2A
58	291	4	186014417	186121538	263	31	2.6924	0.0035472	0.0010419	0.080453	+	SLC25A4
59	344	19	45399239	45502822	187	22	2.9579	0.0015486	0.0010757	0.02026	+	APOC2
60	259307	19	50342911	50482796	290	38	3.2739	0.00053041	0.0011267	0.0034234	-	IL4I1
61	1209	19	45407842	45546604	221	29	2.9256	0.001719	0.0011289	0.028582	+	CLPTM1
62	55161	4	41887137	42012824	227	15	2.9954	0.0013704	0.001146	0.0090075	+	TMEM33
63	338917	14	74656175	74779441	294	39	3.0036	0.001334	0.0011492	0.012411	+	VSX2
64	80184	12	88392790	88585993	224	22	2.726	0.0032051	0.0011758	0.096477	-	CEP290
65	11344	3	52212626	52323183	128	21	3.0829	0.001025	0.0011856	0.0079795	-	TWF2
66	1059	20	3714498	3817337	261	46	2.8265	0.002353	0.0011859	0.037661	-	CENPB
67	8891	1	45266194	45502394	474	27	3.3201	0.00044991	0.0011882	0.0061968	-	EIF2B3
68	7424	4	177554689	177763899	452	40	3.2191	0.00064301	0.0011941	0.010544	-	VEGFC
69	5971	19	45454707	45591456	220	28	2.8828	0.001971	0.001211	0.023435	+	RELB
70	23193	11	62342298	62464198	106	15	2.7599	0.0028906	0.0012164	0.030155	-	GANAB
71	5250	12	98937403	99045778	235	39	2.4754	0.0066543	0.0012497	0.15109	+	SLC25A3
72	6444	5	155412147	156244799	1686	102	2.9338	0.0016741	0.0012583	0.022247	+	SGCD
73	5243	7	87083179	87392639	526	48	3.318	0.0004534	0.0012914	0.0031449	-	ABCB1
74	26229	11	62332768	62439647	92	14	2.729	0.0031766	0.0013035	0.036608	-	B3GAT3
75	79595	2	128648791	128835667	367	37	3.2157	0.00065068	0.001334	0.0022119	-	SAP130
76	132160	3	52229782	52334615	124	18	3.1014	0.00096299	0.0013456	0.00605	+	PPM1M
77	80789	11	62364320	62470774	103	14	2.6989	0.0034788	0.0013847	0.028934	-	INTS5
78	654463	8	124814227	125182412	752	75	4.0635	2.4169e-05	0.0013865	3.4441e-05	+	FER1L6
79	6094	11	62330213	62432592	83	13	2.7451	0.0030248	0.0013899	0.0288	+	ROM1
80	27122	11	11934543	12081373	400	68	2.4128	0.0079155	0.0014266	0.23407	-	DKK3
81	57684	9	125627845	125743792	130	21	2.6536	0.0039822	0.0014364	0.074079	-	ZBTB26
82	994	20	3717419	3836765	273	47	2.8178	0.002418	0.0014427	0.031073	+	CDC25B
83	101928991	17	2577204	2701794	253	50	2.5409	0.0055286	0.0014443	0.094608	-	LOC101928991
84	80335	3	52238438	52362659	155	20	3.1331	0.00086492	0.0014531	0.0061846	-	WDR82
85	80131	19	7903390	8016908	277	39	3.2313	0.00061613	0.001483	0.0037895	+	LRRC8E
86	100130097	1	246884900	247053474	465	49	3.5009	0.00023187	0.001488	0.00051093	-	KIF28P
87	255231	1	85341266	85512796	492	49	2.5054	0.0061163	0.001506	0.095394	-	MCOLN2
88	29124	19	40043169	40148114	303	31	3.06	0.0011066	0.0015101	0.0047746	+	LGALS13
89	140690	20	56021021	56150708	466	69	2.599	0.0046754	0.0015339	0.059361	-	CTCFL
90	114905	4	15291560	15497791	548	49	3.1229	0.00089548	0.0015385	0.0046952	+	C1QTNF7
91	10773	9	125620335	125726365	117	18	2.6262	0.0043171	0.0015489	0.07166	-	ZBTB6
92	10903	1	149850543	149958791	111	12	3.0313	0.0012176	0.0015667	0.011274	-	MTMR11
93	84331	16	641849	748474	236	18	2.9791	0.0014455	0.0015797	0.0053702	+	FAM195A
94	22944	10	7742925	7879990	431	48	3.1535	0.00080674	0.001581	0.0041283	-	KIN
95	10262	1	149845209	149951449	108	12	3.0293	0.0012255	0.0015865	0.011134	-	SF3B4
96	389072	2	208636012	208940284	530	60	2.6807	0.003673	0.0015933	0.071578	-	PLEKHM3
97	221458	6	39252876	39743181	1260	83	2.6686	0.0038088	0.0016154	0.040385	-	KIF6
98	9900	1	149824870	149939434	100	11	3.0388	0.0011877	0.0016248	0.010127	-	SV2A
99	92344	1	170451263	170572974	169	27	2.7784	0.002731	0.0016481	0.018018	+	GORAB
100	158055	9	139327947	139430519	200	27	2.9448	0.0016158	0.0016492	0.0065509	+	C9orf163
101	29945	4	25328848	25470120	379	44	2.4196	0.0077698	0.0016545	0.13022	+	ANAPC4
102	9908	4	76517953	76699709	389	28	3.1644	0.00077711	0.0016637	0.0039615	-	G3BP2
103	51027	1	149821110	149922348	90	10	3.0316	0.0012162	0.0016669	0.01064	+	BOLA1
104	6441	10	81647496	81758861	616	36	2.4816	0.0065403	0.0016769	0.10289	-	SFTPD
105	29063	4	25264396	25424190	416	35	2.4112	0.0079492	0.0017044	0.091797	+	ZCCHC4
106	5826	14	74701980	74819767	243	31	2.9494	0.0015919	0.0017216	0.010367	-	ABCD4
107	256364	11	62319690	62430492	90	13	2.6677	0.0038184	0.0017959	0.033062	-	EML3
108	23637	9	125653288	125917147	245	27	2.5301	0.0057018	0.0018145	0.090338	+	RABGAP1
109	8338	1	149808525	149908961	87	11	3.0472	0.0011549	0.001817	0.0081262	+	HIST2H2AC
109	8349	1	149806010	149908232	87	11	3.0472	0.0011549	0.001817	0.0081262	-	HIST2H2BE
109	317772	1	149809019	149909466	87	11	3.0472	0.0011549	0.001817	0.0081262	-	HIST2H2AB
112	160492	12	25579016	25851496	795	75	2.5623	0.0051989	0.0018881	0.10905	-	LMNTD1
113	5819	19	45299393	45442485	318	45	2.1393	0.016204	0.0018931	0.34642	+	PVRL2
114	149478	1	45223373	45329801	174	18	3.0742	0.0010553	0.0019163	0.006086	+	BTBD19
115	79735	19	50330682	50442007	178	28	2.9374	0.0016548	0.0019484	0.0056949	+	TBC1D17
116	6202	1	45191213	45294427	167	19	3.0639	0.0010923	0.0019841	0.0060434	+	RPS8
117	8739	12	117248225	117369232	197	28	2.978	0.0014508	0.0020301	0.0050483	-	HRK
118	211	3	52182099	52298343	142	27	2.9798	0.001442	0.0020355	0.010003	+	ALAS1
119	91298	12	88379268	88493937	140	19	2.5362	0.0056038	0.0020818	0.094927	+	C12orf29
120	9919	9	139284548	139429297	362	35	2.8601	0.0021176	0.0022501	0.010016	-	SEC16A
121	115727	19	38849695	38966945	291	34	3.1258	0.00088676	0.0022508	0.0057437	-	RASGRP4
122	8749	8	39392087	39637583	454	45	2.5581	0.0052629	0.0022706	0.037961	+	ADAM18
123	1063	1	214726522	214887914	455	36	3.0444	0.0011656	0.002279	0.0036105	+	CENPF
124	152926	4	89128761	89255983	271	44	2.4332	0.0074821	0.0022918	0.11973	-	PPM1K
125	343521	1	45221580	45323378	170	18	3.0387	0.0011882	0.0023067	0.0060705	-	TCTEX1D4
126	132158	3	52271836	52379272	137	17	3.2346	0.00060911	0.0023618	0.0044432	+	GLYCTK
127	121457	12	98957182	99088829	273	35	2.3531	0.0093096	0.0023766	0.13768	-	IKBIP
128	51097	1	246837378	246981439	480	43	3.3256	0.00044112	0.0024074	0.0004738	+	SCCPDH
129	55342	9	125828338	126080855	251	40	2.25	0.012223	0.0024147	0.17224	-	STRBP
130	57645	1	166758681	166873709	254	30	2.7821	0.0027005	0.0024277	0.016774	+	POGK
131	11004	1	45155396	45283439	189	25	2.981	0.0014363	0.0024671	0.0070857	+	KIF2C
132	7200	3	129643236	129746781	314	31	2.5237	0.0058069	0.0024677	0.048843	+	TRH
133	165082	2	26481041	26619685	241	30	2.6567	0.003946	0.0024876	0.028349	-	ADGRF3
134	54542	9	125556835	125717562	192	29	2.3775	0.0087153	0.0025381	0.10776	-	RC3H2
135	64852	11	62291431	62409109	97	14	2.5859	0.0048559	0.002547	0.034572	-	TUT1
136	221786	7	99093923	99206115	84	15	2.9945	0.0013744	0.0025543	0.0074342	-	FAM200A
137	28965	5	128250951	128419335	691	35	2.75	0.0029797	0.0025845	0.036706	+	SLC27A6
138	9153	15	45494428	45618132	295	18	3.3457	0.00041042	0.0025994	0.0031567	+	SLC28A2
139	25981	3	52300335	52484513	197	22	3.1827	0.00072952	0.0026065	0.005877	+	DNAH1
140	56953	17	17156680	17300977	359	48	3.0569	0.0011182	0.0026216	0.0049551	+	NT5M
141	2587	18	74912008	75032098	642	58	2.5561	0.005292	0.0026247	0.046814	+	GALR1
142	5912	3	152830001	152938413	151	26	2.5832	0.0048941	0.0026433	0.056928	+	RAP2B
143	54976	20	3684146	3799035	289	53	2.5887	0.0048176	0.0026956	0.048532	-	C20orf27
144	3698	10	7695236	7841483	483	68	3.0147	0.0012862	0.002711	0.0063985	+	ITIH2
145	9219	11	62310675	62419312	84	11	2.6397	0.0041488	0.0027123	0.024452	-	MTA2
146	8320	3	27707440	27814206	297	33	2.9987	0.0013557	0.0027408	0.0050278	-	EOMES
147	1263	1	45215638	45321667	177	19	2.9874	0.0014066	0.0027585	0.0065476	+	PLK3
148	1522	20	57520242	57632309	228	36	2.4772	0.0066214	0.0028009	0.05492	-	CTSZ
149	8314	3	52385020	52494121	103	18	2.8219	0.002387	0.0028715	0.019869	-	BAP1
150	133584	5	38208511	38515582	719	78	2.2977	0.010789	0.002983	0.14507	+	EGFLAM
151	5784	1	214471640	214775024	964	90	3.1092	0.00093791	0.0029967	0.0077966	-	PTPN14
152	7421	12	48185320	48348814	385	64	2.5787	0.0049581	0.0030468	0.05628	-	VDR
153	4311	3	154747436	154951518	377	61	2.0857	0.018503	0.0030852	0.44549	+	MME
154	344787	3	31973266	32083228	252	30	2.8494	0.0021903	0.0030859	0.0070853	+	ZNF860
155	3047	11	5219502	5321087	267	33	2.3595	0.0091496	0.0031251	0.082935	-	HBG1
156	2844	9	125745916	125851380	97	15	2.5598	0.0052374	0.00322	0.044346	+	GPR21
157	23556	18	59661457	59904289	814	38	2.6461	0.0040713	0.0032424	0.039001	-	PIGN
158	23636	19	50360082	50482988	266	35	2.9511	0.0015832	0.003394	0.0070427	-	NUP62
159	11188	3	52439524	52577088	178	25	2.5658	0.0051475	0.0034823	0.037661	+	NISCH
160	81579	4	110581145	110701242	192	31	2.9971	0.0013629	0.0035304	0.0038294	-	PLA2G12A
161	51533	3	52394577	52507657	119	17	2.7614	0.0028776	0.0036008	0.019376	+	PHF7
162	11099	14	88882122	89071123	272	23	2.7535	0.0029477	0.0036063	0.024563	-	PTPN21
163	9320	2	230581098	230836763	297	29	2.8875	0.0019417	0.0036243	0.012775	-	TRIP12
164	56920	3	52417268	52529112	121	17	2.7473	0.0030048	0.003631	0.019682	-	SEMA3G
165	1937	11	62277073	62391460	91	13	2.494	0.0063155	0.0036473	0.029644	-	EEF1G
166	51497	20	57506263	57620400	226	36	2.4487	0.0071695	0.003658	0.045562	+	NELFCD
167	161142	14	67606110	67745493	323	22	2.493	0.0063342	0.0036956	0.050981	+	FAM71D
168	266675	1	45197831	45303648	166	18	2.9427	0.0016269	0.0037688	0.0060546	-	BEST4
169	23194	5	15450305	15989905	941	79	2.3759	0.0087523	0.0037939	0.10323	+	FBXL7
170	3663	7	128527976	128640089	202	33	2.4754	0.0066541	0.0038924	0.033741	+	IRF5
171	79027	7	99106034	99224076	86	15	2.9162	0.0017718	0.0038948	0.0070744	+	ZNF655
172	84293	10	82117585	82242753	430	31	2.3772	0.0087225	0.0039	0.059677	+	FAM213A
173	128602	20	56675983	56786186	216	43	2.1746	0.014832	0.0039153	0.18474	+	C20orf85
174	729920	7	16077152	16510947	1176	63	2.7009	0.0034574	0.0039754	0.011239	-	ISPD
175	202333	5	78935659	79146049	542	81	2.2039	0.013765	0.0039762	0.1974	+	CMYA5
176	118788	10	98303069	98530279	463	61	2.2994	0.010742	0.0040682	0.15345	-	PIK3AP1
177	23460	17	67024847	67188015	273	24	2.3522	0.0093323	0.0041062	0.075942	-	ABCA6
178	4155	18	74640789	74894774	967	137	2.2172	0.013306	0.0041387	0.14641	-	MBP
179	5737	1	78906728	79056386	286	33	2.6167	0.0044392	0.004139	0.023751	+	PTGFR
180	56979	5	23457724	23578706	194	32	2.0458	0.020387	0.0042092	0.24209	+	PRDM9
181	134	1	203046833	203186533	318	53	2.3108	0.010423	0.0042409	0.090483	+	ADORA1
182	554313	1	149780749	149882776	50	8	2.8416	0.0022442	0.0042529	0.0067476	-	HIST2H4B
183	2160	4	187137099	187260835	337	49	2.1145	0.017235	0.0043161	0.15343	+	F11
184	285877	7	53053349	53154618	345	40	3.023	0.0012514	0.0043363	0.0012706	+	POM121L12
185	3048	11	5224421	5326011	267	35	2.2203	0.013201	0.0043687	0.11357	-	HBG2
186	51599	19	35689290	35808867	338	42	2.8818	0.0019769	0.004413	0.0065092	+	LSR
187	3045	11	5204059	5305858	337	42	2.1975	0.013994	0.0044232	0.10718	-	HBD
188	57614	18	59804506	60024355	663	40	2.6156	0.0044542	0.0044297	0.039623	+	KIAA1468
189	59343	3	185250284	185398889	276	24	2.2816	0.011256	0.0044481	0.081426	+	SENP2
190	3977	5	38425065	38645507	295	45	2.1261	0.016748	0.0044818	0.22108	-	LIFR
191	55283	1	85433765	85564585	353	28	2.3824	0.0085993	0.0045255	0.039043	-	MCOLN3
192	644524	20	21326005	21428047	176	21	2.2685	0.011651	0.0045548	0.076729	-	NKX2-4
193	56889	10	98227867	98396809	413	42	2.3383	0.009686	0.0045809	0.08891	-	TM9SF3
194	117143	1	166775747	166895654	240	30	2.7314	0.0031533	0.0045876	0.012559	-	TADA1
195	55300	4	25185653	25330831	353	32	2.1592	0.015418	0.0046383	0.11993	+	PI4K2B
196	84326	16	634429	736371	226	17	2.7687	0.0028144	0.0047669	0.0049242	-	C16orf13
197	54207	14	88596452	88843256	695	79	2.3899	0.0084267	0.0048153	0.076995	-	KCNK10
198	56623	9	139273067	139384305	284	24	2.8163	0.0024287	0.0048748	0.0050268	-	INPP5E
199	22803	20	21233942	21420463	305	26	2.3851	0.0085375	0.004915	0.043012	+	XRN2
200	10232	16	760765	868865	59	10	2.685	0.0036264	0.0050319	0.0059066	+	MSLN
201	57451	5	166356083	167741162	2732	263	2.8913	0.001918	0.0050374	0.0082799	+	TENM2
202	7134	3	52435107	52538057	118	18	2.6792	0.0036895	0.0050392	0.019769	-	TNNC1
203	317701	19	53711545	53812855	316	39	2.1851	0.01444	0.0050403	0.13451	+	VN1R2
204	79081	11	62380289	62489241	93	15	2.3591	0.0091595	0.0050652	0.050175	-	LBHD1
205	2515	8	39551254	39745808	435	41	2.7568	0.0029182	0.0050833	0.00808	-	ADAM2
206	22998	4	41312802	41752061	1047	95	2.2146	0.013392	0.0050892	0.12051	+	LIMCH1
207	160418	12	88486073	88643664	182	15	2.4943	0.0063097	0.0051259	0.074182	+	TMTC3
208	57466	21	32993313	33154431	352	36	2.0897	0.018324	0.005233	0.20969	-	SCAF4
209	151636	3	122233085	122344050	286	34	2.4285	0.007581	0.0052527	0.027694	+	DTX3L
210	140803	9	77287411	77553010	522	79	2.1066	0.017577	0.0052801	0.19735	-	TRPM6
211	9521	6	8023593	8152828	372	38	2.4132	0.0079059	0.0053041	0.040319	-	EEF1E1
212	83666	3	122196757	122333523	327	34	2.3792	0.008675	0.0053695	0.027539	-	PARP9
213	751071	11	62382725	62484923	85	14	2.3744	0.0087898	0.0054	0.04588	+	METTL12
214	57587	4	186030815	186175182	385	31	2.2721	0.011539	0.0054039	0.10132	-	CFAP97
215	6299	16	51119886	51235183	230	44	2.4553	0.0070387	0.0054074	0.032711	-	SALL1
216	54101	21	43109529	43237249	557	86	2.4675	0.0068025	0.0054399	0.028455	-	RIPK4
217	93107	16	84204741	84323356	670	105	1.8614	0.031346	0.0054886	0.36746	-	KCNG4
218	259230	10	52015345	52433737	895	70	2.6721	0.0037684	0.0056141	0.01395	-	SGMS1
219	594	6	80766344	81105987	831	46	2.1829	0.01452	0.0056648	0.083368	+	BCKDHB
220	317703	19	53720013	53820918	318	42	2.1261	0.016746	0.005679	0.1461	-	VN1R4
221	64399	4	145517148	145712542	249	27	2.0028	0.022598	0.0057389	0.17802	+	HHIP
222	256006	5	74314122	74582703	559	34	1.9058	0.028337	0.0057748	0.31838	-	ANKRD31
223	3696	7	20320345	20505382	565	64	2.0434	0.020508	0.0057811	0.19429	+	ITGB8
224	92291	2	30895637	31080383	515	74	3.0699	0.0010708	0.0057987	0.0037946	-	CAPN13
225	7881	3	155788337	156306927	1053	93	1.9334	0.026595	0.0059016	0.3404	+	KCNAB1
226	133686	5	36142694	36292258	269	33	2.7122	0.0033422	0.005919	0.01217	-	NADK2
227	196513	12	2005214	2163677	551	61	2.686	0.0036161	0.0059406	0.018567	-	DCP1B
228	51070	19	50008725	50133845	76	11	2.0235	0.02151	0.0059649	0.1738	-	NOSIP
229	196074	11	28079798	28405054	344	26	2.1047	0.017657	0.0061286	0.12868	+	METTL15
230	2782	1	1666725	1872552	262	14	2.1596	0.015403	0.0061372	0.05817	-	GNB1
231	1130	1	235774331	236097008	488	47	2.3	0.010725	0.0061436	0.050486	-	LYST
232	9133	15	59347284	59467244	219	25	2.2862	0.011123	0.0062654	0.084392	+	CCNB2
233	55812	14	88801982	88954804	236	23	2.5514	0.0053648	0.0062997	0.037703	+	SPATA7
234	375616	7	128466919	128600773	310	48	2.2304	0.012861	0.0063418	0.065289	-	KCP
235	285489	4	3415033	3553203	533	59	1.932	0.026678	0.0063614	0.21758	+	DOK7
236	23660	7	99052273	99181445	106	16	2.9009	0.0018602	0.0063636	0.0052666	+	ZKSCAN5
237	51542	2	64069280	64296526	357	34	2.406	0.0080647	0.0063718	0.029679	-	VPS54
238	221188	16	57526333	57661101	331	51	2.5489	0.0054032	0.0064013	0.0228	+	ADGRG5
239	100506217	5	21431416	21535033	75	8	2.4662	0.0068274	0.0064045	0.011229	-	LOC100506217
240	333932	1	149774181	149874687	39	5	2.4209	0.007741	0.0065753	0.028849	+	HIST2H3A
241	3032	2	26417616	26563333	246	24	2.5592	0.0052457	0.0065948	0.023167	+	HADHB
242	723790	1	149772628	149873161	37	5	2.4191	0.0077795	0.006682	0.02821	+	HIST2H2AA4
243	150946	2	26345960	26462532	179	17	2.9417	0.0016319	0.0067731	0.0047548	+	GAREML
244	790955	11	62389126	62491162	93	15	2.2517	0.012172	0.0067781	0.060007	+	UQCC3
245	8698	19	3128250	3230335	198	26	2.1171	0.017124	0.0068104	0.082966	+	S1PR4
246	4043	4	3455324	3584224	440	45	1.979	0.023907	0.0069272	0.1662	-	LRPAP1
247	80199	19	50260123	50366567	152	21	2.6661	0.0038365	0.007026	0.0054679	-	FUZ
248	147965	19	38843775	38949728	270	33	2.8535	0.0021619	0.0070931	0.0067387	+	FAM98C
249	9641	1	206593586	206720223	270	41	2.6709	0.0037828	0.0071138	0.0076779	+	IKBKE
250	63978	8	70913886	71033562	326	43	2.1712	0.014958	0.0071407	0.063586	-	PRDM14
251	26156	16	11878053	11995442	262	31	2.8122	0.0024598	0.0072545	0.0072731	-	RSL1D1
252	135112	6	126052307	126303176	359	44	2.2008	0.013875	0.0072849	0.086338	+	NCOA7
253	56957	1	149862229	150032686	222	19	2.6256	0.0043242	0.0072901	0.014771	-	OTUD7B
254	8999	4	76451704	76605721	327	36	2.8575	0.0021352	0.0073159	0.005403	-	CDKL2
255	8940	22	22261397	22387219	295	35	2.3588	0.0091664	0.0073187	0.040371	-	TOP3B
256	160	19	50220180	50360369	146	22	2.7227	0.0032375	0.0073479	0.005126	+	AP2A1
257	391059	1	100124206	100282186	444	34	2.4243	0.0076692	0.0074081	0.029303	-	FRRS1
258	57670	7	138466126	138716064	700	77	2.2238	0.013081	0.0074722	0.094558	-	KIAA1549
259	122953	14	75844509	75989404	320	62	1.8558	0.031743	0.007491	0.30768	+	JDP2
260	22936	5	95170802	95347775	304	35	1.9015	0.028617	0.0075464	0.31849	-	ELL2
261	117166	16	631012	734116	244	18	2.6732	0.003756	0.0075488	0.0053133	+	WFIKKN1
262	283403	12	52549365	52654639	375	58	2.9101	0.0018068	0.0075491	0.0042085	-	C12orf80
263	3043	11	5196696	5298301	366	44	2.0509	0.020138	0.0076321	0.11356	-	HBB
264	10349	17	67094148	67290956	367	31	2.1015	0.017799	0.0076367	0.10921	-	ABCA10
265	342926	19	53688638	53808219	359	38	2.0598	0.019707	0.0076775	0.14062	-	ZNF677
266	8193	19	38651649	38770317	265	46	2.2094	0.013575	0.0076847	0.066871	-	DPF1
267	116113	6	41464164	41620122	364	56	2.1164	0.017155	0.0077981	0.10079	+	FOXP4
268	5073	16	14479557	14774128	313	27	1.9361	0.026427	0.0078042	0.20842	-	PARN
269	54433	4	110686666	110795893	234	23	2.1989	0.013944	0.0078106	0.077495	+	GAR1
270	846	3	121852530	122055350	652	52	2.141	0.016136	0.0078229	0.065632	+	CASR
271	10057	3	183587722	183785803	533	43	2.0992	0.017901	0.0078477	0.083229	-	ABCC5
272	23166	3	52479354	52608512	191	26	2.3625	0.0090755	0.00785	0.036385	+	STAB1
273	114088	14	51391979	51612422	748	82	2.412	0.0079332	0.0079116	0.031677	-	TRIM9
274	26272	5	41875352	41991672	179	20	1.8762	0.030315	0.0079683	0.31219	+	FBXO4
275	5128	12	96622039	96844366	475	59	1.9546	0.025317	0.0080599	0.25386	-	CDK17
276	7112	12	98859351	98994157	328	39	1.9976	0.022878	0.0081313	0.15631	+	TMPO
277	168433	7	122287766	122389208	224	31	2.4946	0.0063057	0.0081834	0.021954	-	RNF133
278	10243	14	66924125	67698525	1406	31	2.1563	0.015532	0.008259	0.10882	+	GPHN
279	285429	4	41933713	42038484	252	15	2.6618	0.0038867	0.0083201	0.0079626	+	DCAF4L1
280	122742	14	20478204	20579142	439	35	2.7701	0.0028023	0.0084398	0.0031892	+	OR4L1
281	7020	6	10343419	10469797	346	60	2.8316	0.0023161	0.0085065	0.0089892	-	TFAP2A
282	58533	14	34980615	35149366	395	36	2.1159	0.017175	0.0085719	0.086976	-	SNX6
283	79695	9	101519981	101662363	413	51	1.7623	0.03901	0.0085972	0.38426	+	GALNT12
284	148003	19	40096558	40201287	250	33	2.7987	0.0025654	0.0086007	0.0051218	+	LGALS16
285	202915	7	1531871	1646066	212	15	2.169	0.01504	0.0087064	0.05643	-	TMEM184A
286	149603	1	228624277	228747598	217	31	1.8603	0.031418	0.0087352	0.22568	+	RNF187
287	386724	3	49704267	49807238	113	15	2.0106	0.022184	0.0087616	0.14204	-	AMIGO3
288	10890	2	26206729	26410323	334	32	2.68	0.0036808	0.0087983	0.01326	+	RAB10
289	3030	2	26363504	26517665	236	19	2.5994	0.0046695	0.0088033	0.017831	-	HADHA
290	973	19	42331190	42435439	94	12	2.4443	0.007257	0.0088406	0.027465	+	CD79A
291	5609	19	7918665	8029363	251	36	2.4495	0.0071527	0.0088895	0.022933	+	MAP2K7
292	29925	3	49708909	49811407	119	16	2.0309	0.021133	0.0089061	0.14122	-	GMPPB
293	401067	3	51810899	51914874	139	18	1.951	0.025526	0.0089205	0.19785	+	IQCF3
294	84332	10	82054501	82177829	373	25	2.3415	0.0096027	0.0089559	0.042292	+	DYDC2
295	92255	5	36053414	36202015	264	34	2.6798	0.0036838	0.0089992	0.0069034	-	LMBRD2
296	25888	19	50478786	50602033	223	18	2.4817	0.0065385	0.0090386	0.013434	+	ZNF473
297	79660	8	8943764	9059152	304	45	1.7248	0.042281	0.0091103	0.36684	-	PPP1R3B
298	23670	9	74248282	74434373	503	52	1.7986	0.036042	0.0091184	0.33242	-	TMEM2
299	1875	8	86039619	86176753	148	16	2.3691	0.0089149	0.0091486	0.040037	+	E2F5
300	7975	7	1520368	1632679	238	14	2.1452	0.015967	0.0091491	0.057627	+	MAFK
301	79882	14	88979253	89129853	199	22	2.3812	0.0086288	0.0091928	0.022823	+	ZC3H14
302	1901	1	101652305	101757076	299	53	2.882	0.0019758	0.0092804	0.0031704	+	S1PR1
303	23169	1	67415015	67570080	446	36	1.964	0.024764	0.0093544	0.15963	-	SLC35D1
304	4975	11	76763886	76864377	253	48	1.7817	0.037398	0.0094281	0.26037	+	OMP
305	29066	16	11794442	11941114	365	42	2.5044	0.0061338	0.0094355	0.015595	-	ZC3H7A
306	57162	2	64269786	64421605	298	35	2.6505	0.0040192	0.0094533	0.0060441	-	PELI1
307	238	2	29365640	30194477	2298	171	2.5583	0.0052593	0.0095764	0.016665	-	ALK
308	731220	2	101963823	102141165	475	41	2.185	0.014444	0.0095901	0.060176	-	RFX8
309	683	4	15654573	15791121	434	43	2.687	0.0036045	0.0095987	0.0068244	+	BST1
310	7392	19	35709896	35820724	295	37	2.2161	0.013342	0.009602	0.055693	+	USF2
311	6647	21	32981935	33091244	233	32	1.9101	0.028061	0.0096482	0.1868	+	SOD1
312	54873	1	100061431	100210097	388	47	2.1852	0.014436	0.0096672	0.05636	+	PALMD
313	845	1	116192624	116361426	590	55	2.0269	0.021339	0.0097131	0.16257	-	CASQ2
314	6502	5	36102091	36234143	199	31	2.5981	0.0046876	0.0097171	0.0071647	+	SKP2
315	223082	7	30273923	30457308	183	33	2.3512	0.0093554	0.0097297	0.039848	+	ZNRF2
316	653643	15	75525182	75638148	54	9	1.9689	0.024481	0.0097598	0.15245	+	GOLGA6D
317	285636	5	41854423	41971738	175	20	1.9693	0.024462	0.0097887	0.17552	+	C5orf51
318	348932	5	1175470	1296304	158	29	3.1845	0.00072498	0.0098019	0.00029168	+	SLC6A18
319	126526	19	40776967	40904434	229	29	2.8295	0.002331	0.0098536	0.0022704	-	C19orf47
320	9508	4	73096686	73484516	538	47	1.8724	0.030573	0.0099041	0.22552	-	ADAMTS3
321	390433	14	20452003	20552917	444	38	2.7081	0.0033833	0.0099401	0.0047153	-	OR4K13
322	57817	19	35723410	35826046	265	36	2.2808	0.01128	0.009975	0.049814	+	HAMP
323	56147	5	140115876	140441929	576	42	1.9558	0.025244	0.010069	0.17591	+	PCDHA1
324	8615	4	76599829	76785366	379	31	2.5085	0.0060624	0.010079	0.016963	+	USO1
325	9524	19	14590379	14726792	236	36	1.9788	0.023919	0.010086	0.15523	+	TECR
326	10694	21	30378647	30496010	203	17	1.9215	0.027334	0.010147	0.11018	-	CCT8
327	57222	5	172211223	172429688	579	87	2.7431	0.0030431	0.010183	0.0056537	+	ERGIC1
328	317	12	98989078	99179211	372	46	1.8199	0.034385	0.010247	0.29316	+	APAF1
329	378925	7	122291720	122393021	224	31	2.3599	0.0091392	0.010288	0.029334	-	RNF148
330	783	10	18379373	18880688	1700	139	1.778	0.0377	0.010345	0.29942	+	CACNB2
331	56145	5	140130783	140441929	527	40	1.93	0.026804	0.010405	0.18363	+	PCDHA3
332	64784	15	91023118	91238577	536	39	2.0453	0.020411	0.01041	0.082959	+	CRTC3
333	51035	11	62393972	62496554	99	16	2.1243	0.016822	0.010417	0.067289	-	UBXN1
334	51231	19	50429724	50579274	333	28	2.4905	0.0063783	0.010461	0.018716	-	VRK3
335	54495	18	66290925	66432535	201	25	1.9557	0.025251	0.010498	0.15675	-	TMX3
336	56144	5	140136672	140441929	502	37	1.9205	0.027395	0.010521	0.18461	+	PCDHA4
337	23203	9	139255110	139368213	305	26	2.6548	0.0039681	0.010523	0.0053193	+	PMPCA
338	56146	5	140124444	140441929	549	40	1.9578	0.025128	0.010529	0.16551	+	PCDHA2
339	9847	12	22551511	22747452	234	20	2.0461	0.020375	0.010555	0.16687	-	C2CD5
340	9842	17	43463266	43618146	209	15	2.1364	0.016324	0.01062	0.073071	-	PLEKHM1
341	256227	7	22409063	22589901	611	58	2.7921	0.0026185	0.010637	0.0048516	-	STEAP1B
342	63915	6	7963800	8114647	522	44	2.2901	0.011008	0.010876	0.039564	-	BLOC1S5
343	56648	3	170556204	170676426	251	29	1.9232	0.027226	0.010922	0.11503	-	EIF5A2
344	163126	19	39979446	40080838	282	33	1.8256	0.033953	0.010924	0.17643	-	EID2
345	56143	5	140151361	140441929	473	37	1.965	0.024708	0.010976	0.14689	+	PCDHA5
346	3337	19	14575581	14690087	178	30	1.9399	0.026195	0.010986	0.13512	-	DNAJB1
347	84262	7	1556968	1659668	163	14	2.1475	0.015877	0.011041	0.05503	-	PSMG3
348	4608	1	203086939	203194969	294	49	2.2324	0.012794	0.011046	0.041157	-	MYBPH
349	4905	17	44618035	44884830	144	21	1.946	0.02583	0.011088	0.17804	+	NSF
350	54939	15	75578352	75684268	82	12	1.8562	0.031711	0.011117	0.18844	+	COMMD4
351	7473	17	44789872	44946126	238	36	1.7569	0.03947	0.011139	0.31537	-	WNT3
352	3184	4	83224467	83345149	262	27	1.8744	0.030435	0.011304	0.22607	-	HNRNPD
353	56142	5	140157650	140441929	460	38	1.9396	0.026212	0.011373	0.15343	+	PCDHA6
354	7360	2	64018084	64168696	202	30	2.1371	0.016294	0.011427	0.049621	+	UGP2
355	200909	3	183699332	183807157	288	35	2.053	0.020038	0.01145	0.065813	+	HTR3D
356	341405	12	52231745	52335505	267	47	2.7731	0.0027764	0.011495	0.0029704	+	ANKRD33
357	9609	22	23437513	23556531	242	22	1.8204	0.034349	0.011616	0.21713	+	RAB36
358	9807	3	49711728	49873973	188	20	1.8916	0.029274	0.011637	0.18128	-	IP6K1
359	8337	1	149763785	149864318	22	5	2.217	0.013312	0.011701	0.032099	-	HIST2H2AA3
360	54014	21	40506102	40735745	637	36	2.8988	0.0018728	0.011706	0.0021751	-	BRWD1
361	143241	10	82045858	82166523	359	25	2.3397	0.0096495	0.011719	0.041168	-	DYDC1
362	56141	5	140163969	140441929	449	38	1.9246	0.027141	0.011737	0.15574	+	PCDHA7
363	6223	19	42313988	42425484	117	12	2.4438	0.0072666	0.011811	0.023587	+	RPS19
364	4059	19	45262316	45374678	224	32	1.5982	0.055	0.011814	0.392	+	BCAM
365	23061	5	179239071	179384879	261	35	2.4362	0.0074221	0.011822	0.025332	-	TBC1D9B
366	26059	3	55492336	56552391	2506	134	2.5364	0.0055993	0.011955	0.015485	-	ERC2
367	4609	8	128698315	128803680	233	47	2.3422	0.0095842	0.012015	0.025962	+	MYC
368	408029	2	132502534	132609234	183	13	2.189	0.014298	0.012037	0.023131	-	C2orf27B
369	51313	4	158995732	159144202	254	22	1.9761	0.024074	0.012139	0.1054	-	FAM198B
370	440956	3	51762577	51863256	83	20	1.7752	0.037929	0.01218	0.28735	-	IQCF6
371	3818	4	187098502	187229625	399	45	1.8703	0.030722	0.012185	0.14625	+	KLKB1
372	1394	17	43647710	43963194	1229	21	2.2185	0.013261	0.012196	0.069203	+	CRHR1
373	9403	1	87278128	87430107	306	24	2.0704	0.019206	0.012258	0.064466	-	SEP15
374	1801	17	1883431	1997183	244	42	1.9813	0.023776	0.01227	0.11297	+	DPH1
375	79042	19	54644112	54748394	168	24	2.5994	0.00467	0.012386	0.010551	+	TSEN34
376	201176	17	43421268	43560282	249	23	1.9875	0.023434	0.012399	0.1277	-	ARHGAP27
377	9723	7	82943222	83328479	1127	63	2.1066	0.017578	0.012402	0.081002	-	SEMA3E
378	114960	7	130303486	130422268	264	27	1.832	0.033474	0.012409	0.14857	-	TSGA13
379	83667	1	28535963	28659002	265	27	1.8874	0.029555	0.012422	0.14199	+	SESN2
380	160419	12	88323816	88473176	201	26	1.9488	0.025659	0.012423	0.13915	-	C12orf50
381	101927581	17	55771846	55872713	329	56	1.7257	0.042203	0.012469	0.2779	-	CCDC182
382	199731	19	44076519	44193991	271	51	3.7771	7.9342e-05	0.012547	3.2104e-05	-	CADM4
383	339456	1	1799029	1900740	169	12	2.0182	0.021786	0.012553	0.054201	-	TMEM52
384	653641	15	75500899	75615796	33	6	1.9571	0.025168	0.012584	0.095963	+	GOLGA6C
385	121355	12	54799736	54917386	223	32	1.8676	0.030908	0.012696	0.19777	-	GTSF1
386	92400	9	124951834	125077143	182	40	2.7357	0.003112	0.012723	0.0044179	-	RBM18
387	56140	5	140170907	140441929	433	37	1.9035	0.028487	0.012744	0.15323	+	PCDHA8
388	1281	2	189789099	189927472	270	40	1.9793	0.02389	0.012805	0.092198	+	COL3A1
389	126961	1	149762259	149862765	21	5	2.1816	0.014569	0.012847	0.033447	-	HIST2H3C
390	162	22	29673669	29834754	273	34	2.0448	0.020438	0.012876	0.081043	-	AP1B1
391	221927	7	2527444	2645392	368	49	1.9992	0.022792	0.012899	0.092399	-	BRAT1
392	389118	3	49778165	49887254	126	16	1.8909	0.02932	0.012933	0.1628	-	CDHR4
393	163688	1	1796266	1898733	171	12	1.9846	0.023596	0.012996	0.062425	+	CALML6
394	79661	15	75589331	75697592	97	13	1.796	0.036251	0.013066	0.19682	+	NEIL1
395	4920	9	94434878	94762444	980	83	2.0653	0.019447	0.013225	0.077003	-	ROR2
396	5724	1	28423677	28570447	248	28	1.7965	0.036205	0.013243	0.19538	-	PTAFR
397	11130	10	58067016	58171063	166	20	1.9936	0.023098	0.013245	0.087852	-	ZWINT
398	9752	5	140177357	140441929	423	37	1.8513	0.032064	0.01327	0.17648	+	PCDHA9
399	90525	15	45409412	45543373	302	22	2.6322	0.0042414	0.013285	0.013717	-	SHF
400	100129094	1	228648060	228749699	176	25	1.7767	0.03781	0.013346	0.18369	-	BTNL10
401	81027	20	57544309	57651709	216	30	2.1444	0.016	0.013379	0.051976	+	TUBB1
402	2151	5	75861307	75969259	409	42	1.5437	0.061333	0.0134	0.47784	-	F2RL2
403	1965	14	67777034	67903233	286	27	2.2435	0.012431	0.013466	0.049438	+	EIF2S1
404	85452	1	1803390	1985276	165	12	2.0061	0.022424	0.013477	0.053417	-	CFAP74
405	4851	9	139338896	139490238	258	33	2.4814	0.006543	0.013529	0.0083259	-	NOTCH1
406	130814	2	11245498	11369000	345	40	1.8447	0.03254	0.013564	0.1564	+	PQLC3
407	10600	21	30346938	30476809	209	18	1.8462	0.032434	0.013566	0.12145	+	USP16
408	7410	9	136577016	136907496	953	107	1.8132	0.0349	0.013583	0.2114	-	VAV2
409	84280	11	13359555	13534838	356	32	1.8843	0.029764	0.013626	0.11825	-	BTBD10
410	57799	16	589357	729273	281	20	2.5431	0.0054934	0.013777	0.0064808	+	RAB40C
411	63891	3	49676950	49808962	150	17	1.8884	0.029489	0.013796	0.14903	+	RNF123
412	10807	9	139246374	139355054	307	26	2.4959	0.0062812	0.013907	0.0077092	-	SDCCAG3
413	221078	10	18784264	18998180	678	44	2.0287	0.021247	0.013944	0.073921	-	NSUN6
414	26499	14	67803700	67928828	288	35	2.101	0.01782	0.013975	0.059447	-	PLEK2
415	79177	19	44050544	44154587	198	30	1.8494	0.0322	0.014096	0.15058	+	ZNF576
416	140731	20	56743510	56854039	240	46	2.6318	0.0042472	0.014105	0.005888	-	ANKRD60
417	55734	20	50650550	50858524	641	66	1.5639	0.058921	0.014214	0.42233	-	ZFP64
418	23428	14	23544504	23702869	330	63	2.1103	0.017415	0.014261	0.048907	-	SLC7A8
419	54733	11	107611717	107779914	557	45	2.0949	0.018092	0.014265	0.071985	-	SLC35F2
420	26173	7	1459913	1594018	300	17	2.0132	0.022047	0.014277	0.061703	-	INTS1
421	22809	19	50381959	50487193	245	32	2.7216	0.0032485	0.014283	0.0059896	+	ATF5
422	4123	15	75598133	75711455	104	13	1.7854	0.037096	0.014344	0.19065	-	MAN2C1
423	222255	7	105194932	105567046	892	129	2.2929	0.010926	0.014355	0.027921	-	ATXN7L1
424	147991	19	32846655	33026799	357	47	2.0366	0.020847	0.014374	0.079578	+	DPY19L3
425	728661	1	1541486	1674243	18	3	2.3057	0.010563	0.014418	0.0086784	-	SLC35E2B
426	65979	1	28646093	28876881	512	22	1.9243	0.027156	0.014433	0.11909	+	PHACTR4
427	65998	11	63477364	63586113	126	12	1.9293	0.026844	0.014528	0.086053	-	C11orf95
428	85465	2	26518954	26668759	271	32	1.8351	0.033246	0.014543	0.17862	+	EPT1
429	83593	1	206630866	206812616	442	61	2.4058	0.0080687	0.014614	0.019147	+	RASSF5
430	146760	17	1787971	1978178	465	78	1.8466	0.032404	0.014762	0.16003	-	RTN4RL1
431	26032	3	33141537	33310707	450	53	1.9712	0.024349	0.014773	0.1059	-	SUSD5
432	5858	12	9251436	9410966	423	42	2.4655	0.0068406	0.014806	0.012504	-	PZP
433	665	8	26189894	26320644	327	54	1.8	0.035929	0.014814	0.18887	+	BNIP3L
434	285550	4	15633352	15742070	331	30	2.6745	0.0037423	0.014821	0.0045833	+	FAM200B
435	509	10	7780093	7899764	359	37	1.9608	0.02495	0.01483	0.10652	+	ATP5C1
436	11145	11	63291934	63431941	128	20	1.7923	0.036544	0.014852	0.15497	-	PLA2G16
437	401466	8	86076288	86182643	116	14	2.1956	0.01406	0.014897	0.045295	-	C8orf59
438	56256	1	210356195	210470252	258	30	2.0345	0.020951	0.015039	0.051686	+	SERTAD4
439	79143	19	54627106	54743733	192	30	2.498	0.006244	0.01509	0.013994	-	MBOAT7
440	126298	19	44038519	44150287	211	29	1.818	0.03453	0.015116	0.15193	-	IRGQ
441	406	11	13249325	13458813	472	50	1.747	0.04032	0.015193	0.21753	+	ARNTL
442	10780	19	44595710	44714462	164	19	2.2699	0.011606	0.015249	0.024132	+	ZNF234
443	199221	3	137730827	137884451	297	28	1.8388	0.032973	0.015251	0.16162	-	DZIP1L
444	65220	1	1632671	1761508	108	9	2.0926	0.018194	0.015382	0.030066	-	NADK
445	1880	13	99896789	100009749	209	24	2.4055	0.0080759	0.015383	0.0081743	-	GPR183
446	1084	19	42250522	42365591	163	19	2.1893	0.014289	0.015386	0.048344	+	CEACAM3
447	26958	7	130096079	130403598	379	33	1.685	0.045995	0.015441	0.20824	-	COPG2
448	3150	21	40664241	40771047	290	28	2.8491	0.0021918	0.015453	0.0020906	-	HMGN1
449	390940	19	44030952	44136256	213	29	1.8681	0.030876	0.015484	0.12843	+	PINLYP
450	1828	18	28848052	28987394	443	31	2.5931	0.0047554	0.015551	0.0064567	+	DSG1
451	6340	16	23144040	23278201	373	35	1.9579	0.025122	0.01568	0.10976	+	SCNN1G
452	284346	19	43987244	44090290	246	28	1.8372	0.033094	0.015727	0.13456	+	ZNF575
453	9653	1	87330335	87625681	522	29	1.891	0.029315	0.015785	0.10603	+	HS2ST1
454	81619	10	82164038	82332394	409	41	1.8582	0.03157	0.015849	0.11822	+	TSPAN14
455	51283	16	14676668	14813093	93	14	2.0202	0.021683	0.015927	0.095025	+	BFAR
456	4635	17	45216728	45351045	344	44	2.0505	0.020156	0.015956	0.053287	+	MYL4
457	124641	17	1895277	1996725	222	38	2.013	0.022059	0.015967	0.073686	+	OVCA2
458	63977	21	43168385	43349591	782	86	2.1449	0.015982	0.016078	0.036234	-	PRDM15
459	55837	14	34935135	35058943	314	31	1.8725	0.030567	0.016088	0.10401	-	EAPP
460	7515	19	43997464	44129730	278	32	1.8117	0.035013	0.016092	0.14993	-	XRCC1
461	56139	5	140185634	140441929	399	36	1.8136	0.034872	0.016104	0.16788	+	PCDHA10
462	23136	18	5342380	5680662	839	108	1.4519	0.07326	0.016226	0.53654	-	EPB41L3
463	151246	2	201340865	201498818	337	36	2.1602	0.015378	0.016256	0.040507	+	SGOL2
464	10914	14	96918713	97083453	297	49	1.7586	0.039326	0.016301	0.25126	+	PAPOLA
465	389119	3	49790687	49892463	120	16	1.8089	0.035237	0.016337	0.16957	+	FAM212A
466	349149	7	99470892	99581833	221	20	1.8958	0.028992	0.016346	0.10738	-	GJC3
467	55486	3	183493522	183652693	423	37	2.006	0.022427	0.016392	0.066578	-	PARL
468	6514	3	170664137	170794768	283	30	1.6953	0.045006	0.016423	0.21349	-	SLC2A2
469	57708	1	67340578	67504302	357	28	1.8811	0.029981	0.016429	0.16434	+	MIER1
470	114884	3	31652317	32073342	1062	124	2.1584	0.015449	0.016523	0.058158	-	OSBPL10
471	11018	19	10892743	10996983	119	20	1.7415	0.0408	0.016632	0.15869	-	TMED1
472	10073	15	75840424	75968719	172	25	1.4356	0.075562	0.016655	0.49113	-	SNUPN
473	839	4	110559785	110679814	234	28	2.6772	0.0037121	0.016754	0.003792	-	CASP6
474	5800	12	15425191	15801265	625	65	1.441	0.074789	0.016755	0.54681	+	PTPRO
475	54797	1	28605513	28712478	221	19	1.9139	0.027819	0.016825	0.10053	+	MED18
476	635	5	78357604	78478113	221	27	1.8637	0.031183	0.01687	0.12207	+	BHMT
477	339976	4	189010598	189118649	563	58	1.8582	0.031574	0.016891	0.10289	+	TRIML1
478	6621	9	139220021	139344655	323	27	2.3397	0.0096502	0.01691	0.012573	-	SNAPC4
479	5639	19	50034574	50144272	62	8	1.8177	0.034554	0.016937	0.13421	+	PRRG2
480	51091	4	25071627	25212204	293	40	2.187	0.014371	0.016971	0.042239	-	SEPSECS
481	1104	1	28782455	28915708	234	19	1.7239	0.042359	0.016975	0.22447	+	RCC1
482	164781	2	228686325	228839131	492	46	1.4624	0.07182	0.017015	0.53018	+	DAW1
483	57620	4	26809329	27077003	422	52	2.1726	0.014907	0.017075	0.03933	+	STIM2
484	23646	19	40804302	40934392	209	32	2.718	0.0032835	0.017112	0.0021342	+	PLD3
485	23288	7	2548617	2704368	484	61	1.9036	0.028479	0.017179	0.13206	+	IQCE
486	728642	1	1583822	1705999	64	5	2.1666	0.015134	0.017326	0.017656	-	CDK11A
487	23023	3	129316635	129662419	438	29	1.8374	0.033078	0.01735	0.13685	-	TMCC1
488	3909	18	21219562	21585030	440	35	1.8431	0.032659	0.017548	0.15689	+	LAMA3
489	7318	3	49792638	49901391	130	17	1.725	0.04226	0.017549	0.19887	-	UBA7
490	400359	15	38938799	39042239	372	52	1.8705	0.030709	0.017594	0.1253	+	C15orf53
491	9258	8	8590864	8801131	969	69	1.5115	0.065333	0.017664	0.42065	-	MFHAS1
492	130813	2	11223179	11336916	362	50	1.702	0.044377	0.017707	0.19694	+	C2orf50
493	4306	4	148949915	149415850	990	106	1.9455	0.025855	0.017755	0.10053	-	NR3C2
494	8543	1	87744151	87864606	300	50	1.9508	0.02554	0.017784	0.094955	+	LMO4
495	4677	18	55217888	55339177	370	50	1.8003	0.03591	0.017842	0.11645	-	NARS
496	57506	20	3777446	3906770	295	48	2.1992	0.013933	0.017859	0.051451	+	MAVS
497	56138	5	140197149	140441932	384	35	1.8078	0.035322	0.017927	0.1569	+	PCDHA11
498	2769	19	3086191	3213766	251	34	1.8045	0.035577	0.017953	0.12106	+	GNA15
499	169026	8	117912512	118238953	644	67	1.9567	0.025193	0.017959	0.09469	+	SLC30A8
500	10692	4	110699150	110815863	279	26	1.89	0.029381	0.01797	0.10439	+	RRH
501	54677	7	86924951	87079112	259	30	2.5494	0.0053951	0.017979	0.0091537	+	CROT
502	5225	6	41654449	41765139	242	44	1.9844	0.023608	0.017993	0.065825	-	PGC
503	6936	2	75839831	75988482	361	39	1.6783	0.046646	0.018003	0.21113	-	GCFC2
504	10240	13	41253432	41395347	203	20	1.697	0.044852	0.01807	0.2067	-	MRPS31
505	147719	19	42289356	42398774	144	14	2.2228	0.013114	0.018088	0.034291	-	LYPD4
506	4713	19	14626890	14732889	187	30	1.496	0.067322	0.018108	0.40965	-	NDUFB7
507	63946	19	42298806	42406398	139	13	2.2061	0.013689	0.018119	0.03836	+	DMRTC2
508	283209	11	73991361	74159502	301	25	1.8688	0.030822	0.018169	0.10788	-	PGM2L1
509	221091	11	62403874	62507371	101	15	2.0076	0.022344	0.018205	0.062963	-	LRRN4CL
510	7164	6	125424876	125634644	503	48	1.8533	0.031921	0.018224	0.13333	+	TPD52L1
511	6203	19	54654608	54761515	188	29	2.3565	0.0092238	0.018283	0.02038	+	RPS9
512	2841	13	99856967	99960682	173	21	2.4531	0.0070811	0.018363	0.0068224	-	GPR18
513	115106	18	43634298	43758299	300	25	2.7228	0.0032361	0.018458	0.0027631	+	HAUS1
514	23624	19	45231126	45353903	215	37	1.5418	0.061559	0.018563	0.32576	+	CBLC
515	5780	15	75709462	75921625	213	18	1.5609	0.059274	0.018595	0.30113	-	PTPN9
516	148109	19	35665704	35769628	401	43	2.6548	0.0039678	0.018596	0.0041024	-	FAM187B
517	23767	20	14254639	14368313	196	24	1.8354	0.033223	0.018619	0.11629	-	FLRT3
518	56952	10	25087536	25292680	500	60	1.491	0.067983	0.018664	0.42891	-	PRTFDC1
519	54778	15	59229865	59439618	365	32	2.0174	0.021829	0.018695	0.066662	+	RNF111
520	283927	16	77706389	77859332	724	85	1.7724	0.03816	0.018839	0.18938	+	NUDT7
521	162540	17	43872256	43974438	545	17	1.9039	0.028459	0.018902	0.1266	+	SPPL2C
522	7942	6	41601716	41753997	442	75	1.7797	0.037563	0.018912	0.1399	-	TFEB
523	126204	19	56353058	56493702	527	72	2.0344	0.020957	0.018982	0.062256	-	NLRP13
524	2935	16	11911985	12060519	264	30	1.8171	0.034599	0.019074	0.14953	-	GSPT1
525	154150	6	22519678	22620750	308	27	2.0386	0.020747	0.019162	0.053109	+	HDGFL1
526	285989	7	99020476	99135408	123	14	2.6836	0.0036413	0.019223	0.0054371	+	ZNF789
527	4137	17	43921702	44155700	1183	18	1.8693	0.030793	0.019303	0.12807	+	MAPT
528	25923	11	63341554	63489533	125	14	1.7692	0.038432	0.019449	0.13108	-	ATL3
529	8398	22	38457502	38627857	428	34	2.0498	0.020191	0.019488	0.052397	-	PLA2G6
530	5166	7	95162809	95275925	353	36	1.6966	0.044881	0.019496	0.23143	-	PDK4
531	126272	19	39971630	40073494	241	32	1.6649	0.047962	0.019579	0.17339	-	EID2B
532	389123	3	51845645	51947440	175	20	1.8061	0.035453	0.019592	0.12983	+	IQCF2
533	9906	1	1606277	1727438	83	7	2.0864	0.018471	0.019607	0.025097	-	SLC35E2
534	23158	4	141491936	141727471	522	61	1.6961	0.044933	0.019735	0.20136	-	TBC1D9
535	467	1	212688676	212844119	403	63	1.8265	0.033887	0.019793	0.095164	+	ATF3
536	100507588	19	7931032	8033980	236	34	2.0261	0.021375	0.019828	0.060135	+	TGFBR3L
537	54726	4	146004802	146151768	102	22	2.1517	0.015712	0.019839	0.047054	-	OTUD4
538	9923	1	22728344	22907650	326	53	2.7776	0.0027382	0.019867	0.0026592	+	ZBTB40
539	10069	21	30328080	30441685	151	17	1.7969	0.036173	0.019899	0.11512	-	RWDD2B
540	9884	17	44266744	44465160	116	7	1.8729	0.03054	0.01992	0.099781	+	LRRC37A
541	79971	1	68514142	68748284	705	100	1.4817	0.069213	0.019979	0.37605	-	WLS
542	23309	19	16890209	17041166	259	36	2.4631	0.0068869	0.020027	0.0075084	+	SIN3B
543	55117	12	85203267	85356608	285	38	1.8559	0.031731	0.020061	0.11604	-	SLC6A15
544	51603	1	171700761	171816856	379	28	2.0427	0.02054	0.020066	0.050905	+	METTL13
545	122740	14	20432420	20533352	463	38	2.4969	0.0062649	0.020143	0.0056046	-	OR4K14
546	23129	3	129224056	129375582	332	31	1.6613	0.048323	0.020197	0.18077	-	PLXND1
547	1669	8	6743345	6845786	470	67	1.7645	0.038821	0.02024	0.14618	-	DEFA4
548	84124	7	99034142	99147925	107	14	2.6299	0.0042709	0.020298	0.0066497	-	ZNF394
549	100316904	7	100119851	100221487	110	19	1.67	0.047456	0.020314	0.22233	-	SAP25
550	245939	20	118527	220264	318	28	1.974	0.02419	0.020352	0.063312	-	DEFB128
551	56137	5	140204931	140441929	372	35	1.8036	0.035643	0.020383	0.139	+	PCDHA12
552	144501	12	52512780	52635798	432	60	2.7518	0.0029635	0.020414	0.0038916	-	KRT80
553	101927655	7	100121654	100222705	113	19	1.6603	0.048424	0.020618	0.22396	-	ZASP
554	8533	17	17099938	17234617	326	32	2.188	0.014334	0.020624	0.026772	-	COPS3
555	58489	15	80937635	81097962	413	52	2.0387	0.020741	0.020641	0.051945	+	ABHD17C
556	147798	19	54613833	54726944	212	32	2.3681	0.0089399	0.02067	0.018188	-	TMC4
557	55017	14	23514683	23619665	204	40	2.1241	0.01683	0.020699	0.02973	+	C14orf119
558	57608	10	30251729	30398488	294	42	1.7594	0.039252	0.020883	0.15455	-	KIAA1462
559	9728	15	49230835	49388760	255	36	1.5498	0.060597	0.020982	0.25397	-	SECISBP2L
560	10017	15	52351490	52454972	194	30	1.6014	0.054644	0.020996	0.19582	-	BCL2L10
561	100506084	17	44301550	44489416	38	3	1.9706	0.024385	0.021136	0.058414	-	ARL17B
562	205860	4	188962427	189080416	625	65	1.756	0.039543	0.021168	0.11874	-	TRIML2
563	377677	8	86107716	86246302	158	16	2.0791	0.018804	0.021187	0.049711	+	CA13
564	114132	19	50402250	50514439	267	28	2.0488	0.020243	0.021242	0.06464	-	SIGLEC11
565	9138	19	42337240	42461604	108	14	2.17	0.015004	0.021463	0.037288	+	ARHGEF1
566	160428	12	105363562	105528341	479	44	1.9555	0.02526	0.021492	0.073732	-	ALDH1L2
567	10641	3	50334918	50438486	70	17	1.7544	0.039683	0.021589	0.16169	-	NPRL2
568	79719	15	67443013	67597536	301	31	1.8001	0.03592	0.0216	0.15108	-	AAGAB
569	255809	19	10897304	11030466	157	23	1.6569	0.048766	0.021608	0.1782	+	C19orf38
570	3569	7	22716766	22821621	400	44	1.7136	0.043298	0.021625	0.15257	+	IL6
571	759	8	86190458	86340342	174	23	1.8362	0.033162	0.021629	0.10951	-	CA1
572	149076	1	33671908	33816321	235	29	1.4096	0.079335	0.021748	0.41748	+	ZNF362
573	6602	12	50428760	50544494	147	19	2.1663	0.015146	0.021874	0.027523	+	SMARCD1
574	56136	5	140211854	140441929	366	34	1.7732	0.0381	0.022107	0.14456	+	PCDHA13
575	51534	6	142418372	142592085	334	27	1.9646	0.024733	0.022178	0.085504	+	VTA1
576	2638	4	72557410	72721237	403	40	1.7432	0.040654	0.02219	0.12868	-	GC
577	10313	11	63398922	63577363	178	12	1.6741	0.047054	0.022303	0.14628	+	RTN3
578	23743	5	78315547	78435897	268	27	1.8067	0.035404	0.022329	0.11352	+	BHMT2
579	337867	13	99802679	100088753	657	47	2.2034	0.013784	0.022341	0.021555	+	UBAC2
580	7579	1	33888232	34012105	303	37	1.9392	0.026237	0.022349	0.06492	+	ZSCAN20
581	152110	3	27207097	27460912	627	31	1.9779	0.023968	0.022468	0.063635	-	NEK10
582	29798	2	132429973	132574977	249	16	2.2266	0.012987	0.022572	0.016448	+	C2orf27A
583	204	1	33423541	33552512	144	18	1.6921	0.045311	0.022611	0.22412	-	AK2
584	170572	3	183720835	183828461	286	38	1.8647	0.031113	0.0227	0.073402	+	HTR3C
585	284058	17	44057282	44352740	973	20	1.6282	0.051741	0.022703	0.23889	-	KANSL1
586	55314	4	159072749	159226439	237	36	1.5803	0.057022	0.022704	0.28599	+	TMEM144
587	1053	14	23536515	23638820	205	41	2.0712	0.019168	0.022721	0.034127	-	CEBPE
588	4034	7	100121634	100233806	122	20	1.5999	0.05481	0.02273	0.24091	-	LRCH4
589	246269	6	108566098	108896751	437	39	2.3981	0.0082412	0.022783	0.0078689	+	LACE1
590	10477	2	181795112	181978154	552	32	2.2746	0.011465	0.0228	0.023593	+	UBE2E3
591	7520	2	216922381	217121016	403	45	1.5854	0.056436	0.022849	0.20067	+	XRCC5
592	23350	3	142670366	142829567	263	28	1.6731	0.047158	0.022986	0.2249	+	U2SURP
593	122011	13	37627397	37729801	244	22	2.1881	0.014332	0.023037	0.023821	-	CSNK1A1L
594	55071	9	77511499	77617802	203	32	1.9913	0.023225	0.023042	0.065062	-	C9orf40
595	5451	1	167140066	167446582	444	66	1.4156	0.07845	0.023076	0.47327	+	POU2F1
596	2620	11	22638160	22884547	506	54	1.6776	0.04671	0.023103	0.16365	+	GAS2
597	642778	16	14752835	14870195	22	6	1.7559	0.039553	0.02314	0.12437	+	NPIPA3
598	474354	10	50067528	50197980	322	42	1.8138	0.034858	0.023431	0.12868	-	LRRC18
599	9801	2	75823909	75939334	299	34	1.6215	0.052451	0.023436	0.18092	+	MRPL19
600	5994	13	37343339	37453740	237	41	2.7266	0.0031996	0.023437	0.0023311	+	RFXAP
601	167410	5	96377574	96528520	356	50	2.2808	0.01128	0.023467	0.01628	-	LIX1
602	1909	4	148352069	148516106	359	40	1.793	0.036487	0.023549	0.11838	+	EDNRA
603	100652777	16	14746854	14877253	25	7	1.7433	0.040639	0.023567	0.11686	-	LOC100652777
604	2444	6	116212691	116447360	396	36	1.699	0.044663	0.023637	0.14968	-	FRK
605	27299	8	24191798	24313526	282	35	1.8464	0.032417	0.023648	0.087831	+	ADAMDEC1
606	81532	11	1440685	1557948	322	31	2.2424	0.012466	0.023755	0.021071	-	MOB2
607	79929	3	183483664	183593393	250	27	2.159	0.015423	0.023757	0.031138	-	MAP6D1
608	284252	18	23984874	24287365	739	111	1.7707	0.038303	0.023821	0.12723	-	KCTD1
609	26580	11	62407734	62527091	113	16	1.9191	0.027485	0.023852	0.068941	-	BSCL2
610	57624	2	226214426	226568734	592	61	2.3736	0.0088076	0.023903	0.014995	+	NYAP2
611	23390	12	77107854	77297481	522	44	2.0249	0.021436	0.023988	0.075856	+	ZDHHC17
612	571	21	30621151	30784257	138	20	1.4724	0.070451	0.024005	0.29745	+	BACH1
613	25891	11	35403374	35601848	612	78	1.8188	0.034469	0.024036	0.12108	-	PAMR1
614	93974	1	28512602	28614616	245	22	1.6806	0.046416	0.024182	0.14815	+	ATPIF1
615	246744	17	44026616	44127060	455	15	1.5711	0.058084	0.024187	0.2821	+	STH
616	4991	17	2945352	3046290	181	22	1.8122	0.034975	0.024333	0.092043	-	OR1D2
617	126306	19	2202250	2306422	65	19	1.4988	0.066961	0.024373	0.24487	-	JSRP1
618	779	1	200958635	201131694	470	72	2.2148	0.013387	0.024377	0.032088	-	CACNA1S
619	26052	1	171760618	172437606	1430	93	1.6416	0.050341	0.02458	0.19578	+	DNM3
620	55038	14	105425910	105537425	245	18	2.2451	0.012382	0.02459	0.012304	-	CDCA4
621	503834	19	54085310	54190263	182	39	1.5139	0.065028	0.024634	0.28213	+	DPRX
622	2905	17	72788162	72906966	221	25	1.4483	0.073769	0.024648	0.32653	-	GRIN2C
623	26260	8	306808	469876	673	64	2.033	0.021026	0.024656	0.043408	+	FBXO25
624	4232	7	130076016	130196138	135	23	1.458	0.072423	0.024664	0.28328	+	MEST
625	23534	7	128544234	128745227	494	50	1.8984	0.028824	0.024729	0.075231	-	TNPO3
626	11068	3	50338265	50441500	71	16	1.7299	0.041827	0.024752	0.16501	+	CYB561D2
627	7461	7	73653805	73870273	225	22	2.4947	0.0063039	0.024855	0.0081456	+	CLIP2
628	1116	1	203098059	203205978	311	53	2.0148	0.021964	0.025003	0.048991	-	CHI3L1
629	26468	9	124914856	125041166	237	49	2.611	0.004514	0.025008	0.0051261	-	LHX6
630	51382	14	67754581	67876720	289	19	2.2179	0.01328	0.025176	0.030294	-	ATP6V1D
631	2819	12	50447602	50555103	137	16	2.1697	0.015016	0.025212	0.018884	+	GPD1
632	339327	19	40452943	40573514	141	9	1.5473	0.06089	0.025419	0.20865	+	ZNF546
633	253943	8	64031112	64175346	326	34	1.4794	0.069513	0.025681	0.33379	+	YTHDF3
634	9267	17	76620130	76828376	358	41	1.8037	0.035641	0.025751	0.099732	-	CYTH1
635	255631	1	86144916	86672121	1581	88	2.2571	0.012	0.025841	0.015708	-	COL24A1
636	84101	12	95860336	95995278	434	54	2.4205	0.0077487	0.02586	0.0085638	-	USP44
637	89122	7	99438030	99567223	262	26	1.7393	0.040992	0.025969	0.12103	-	TRIM4
638	122786	14	51905819	52247445	953	119	2.0512	0.020123	0.026046	0.036881	+	FRMD6
639	8624	21	40399076	40605440	585	62	2.6637	0.0038639	0.026075	0.0038699	-	PSMG1
640	5352	3	145737225	145929282	471	39	1.7675	0.038568	0.026096	0.11959	-	PLOD2
641	26000	16	30318422	30431522	68	11	1.6708	0.047383	0.026156	0.12694	-	TBC1D10B
642	8399	16	14716405	14838526	39	9	1.6723	0.047235	0.026183	0.13484	-	PLA2G10
643	118429	4	80772771	81044626	611	48	1.9401	0.026183	0.026225	0.057804	-	ANTXR2
644	2922	18	56837400	56948003	334	46	1.816	0.034683	0.026235	0.1162	+	GRP
645	56926	19	3135875	3259573	276	30	1.7677	0.038553	0.026406	0.092465	+	NCLN
646	81930	11	27992163	28179746	229	22	1.6159	0.053062	0.026564	0.19056	-	KIF18A
647	2232	17	72808619	72919156	191	25	1.4354	0.075586	0.026574	0.30429	-	FDXR
648	23063	10	88145013	88331541	469	39	1.8761	0.03032	0.026639	0.087952	-	WAPAL
649	7769	19	44619215	44732534	116	16	2.1776	0.014717	0.026746	0.019732	+	ZNF226
650	56135	5	140256302	140441929	303	31	1.3691	0.085483	0.026799	0.42589	+	PCDHAC1
651	11025	19	54670147	54776997	217	33	2.2484	0.012275	0.026853	0.019916	-	LILRB3
652	57333	19	49980875	50096891	86	10	1.6338	0.05115	0.026894	0.14346	+	RCN3
653	8756	8	24248509	24420273	413	38	1.7476	0.040262	0.026897	0.10096	+	ADAM7
654	9563	1	9244822	9381396	448	63	1.5277	0.06329	0.026957	0.23218	+	H6PD
655	25942	15	75611720	75798181	155	16	1.5466	0.060974	0.027006	0.22263	-	SIN3A
656	64398	14	67658012	67852778	462	25	2.0867	0.018457	0.027029	0.050389	+	MPP5
657	6618	19	7935194	8038136	232	34	2.0173	0.021831	0.027111	0.047564	+	SNAPC2
658	5019	5	41680167	41920791	362	25	1.6582	0.048641	0.027237	0.17607	-	OXCT1
659	27156	22	23351593	23545807	382	30	1.4221	0.0775	0.027308	0.33337	-	RSPH14
660	55111	19	2183149	2287703	87	18	1.3226	0.09298	0.02734	0.40589	-	PLEKHJ1
661	22826	1	28476789	28609542	256	24	1.6291	0.051644	0.02737	0.16428	-	DNAJC8
662	1950	4	110784040	110984118	401	40	1.5789	0.057182	0.027525	0.18763	+	EGF
663	57479	19	50044912	50179696	86	11	1.6105	0.053641	0.027531	0.18244	+	PRR12
664	221416	6	43918337	44023695	360	55	1.6016	0.05462	0.027675	0.18285	+	C6orf223
665	7484	17	44878952	45014096	238	38	1.4643	0.071562	0.027696	0.31891	+	WNT9B
666	94	12	52250657	52367145	267	48	1.7926	0.036515	0.027794	0.086424	+	ACVRL1
667	5741	11	13463601	13567567	234	16	1.849	0.032226	0.027843	0.057874	-	PTH
668	387914	13	26568735	26675198	385	45	1.5967	0.055167	0.027886	0.18097	-	SHISA2
669	910	1	158247740	158351321	156	21	1.444	0.074369	0.027937	0.29332	-	CD1B
670	2565	4	45987786	46176082	332	28	1.5434	0.061367	0.028013	0.24097	-	GABRG1
671	84987	12	50453418	50564240	146	16	1.9376	0.026337	0.028034	0.044563	+	COX14
672	28987	16	69725757	69838871	200	20	1.993	0.02313	0.028117	0.041543	-	NOB1
673	760	8	86326131	86443721	138	19	1.5927	0.055619	0.028176	0.17449	+	CA2
674	132864	4	14954298	15121777	374	31	1.4663	0.071288	0.028219	0.24251	+	CPEB2
675	8731	18	13676659	13814555	277	28	2.4516	0.0071115	0.028234	0.0047269	+	RNMT
676	23474	19	43960871	44081408	266	28	1.6403	0.050468	0.028389	0.14337	-	ETHE1
677	23583	12	54524142	54632778	187	33	1.2879	0.098886	0.028498	0.47598	-	SMUG1
678	28990	3	130682721	130795698	158	17	1.5105	0.065456	0.028572	0.25403	-	ASTE1
679	1731	16	30339454	30444171	68	10	1.7419	0.040762	0.028603	0.093454	-	SEPT1
680	10990	19	54704270	54811167	220	28	2.1871	0.014368	0.028822	0.022025	-	LILRB5
681	151647	3	68730915	69031761	604	42	1.9307	0.026761	0.028828	0.061543	-	FAM19A4
682	91	12	52295451	52440863	242	48	1.795	0.036327	0.028834	0.080367	+	ACVR1B
683	22914	12	10474952	10592653	263	32	2.8826	0.0019718	0.028839	0.00054531	-	KLRK1
684	55076	3	100161463	100346297	386	30	1.7796	0.037568	0.028881	0.12607	+	TMEM45A
685	26261	7	100133840	100248740	124	22	1.498	0.067067	0.028932	0.26132	+	FBXO24
686	29895	16	30336123	30439310	67	10	1.7128	0.043373	0.028967	0.10133	+	MYLPF
687	81392	7	99423685	99524656	195	21	1.8195	0.034416	0.029069	0.087719	-	OR2AE1
688	138009	8	88832971	88936296	147	27	1.9022	0.02857	0.029108	0.052749	-	DCAF4L2
689	10421	16	30312087	30416682	61	9	1.6964	0.044908	0.029123	0.10629	-	CD2BP2
690	3268	7	100086834	100215843	137	21	1.8194	0.034424	0.029132	0.088328	+	AGFG2
691	11278	13	74210149	74758400	1343	151	1.5821	0.056819	0.029158	0.26528	-	KLF12
692	56899	12	99078569	100428512	2777	194	1.221	0.11103	0.029163	0.60223	-	ANKS1B
693	23175	2	11767705	12017535	665	99	1.548	0.060812	0.029171	0.24149	+	LPIN1
694	9411	1	94584463	94763251	282	37	2.2782	0.011359	0.029215	0.013776	-	ARHGAP29
695	23098	17	26648683	26778062	161	27	1.2353	0.10836	0.029278	0.5595	+	SARM1
696	9477	6	41823092	41938877	152	22	2.193	0.014152	0.029309	0.018602	-	MED20
697	23038	1	27511007	27685124	205	24	1.1688	0.12125	0.029446	0.59398	+	WDTC1
698	222484	13	28070048	28244720	528	59	1.4348	0.07567	0.029503	0.27472	-	LNX2
699	113829	5	139894420	139998683	111	17	1.6118	0.053505	0.029505	0.18465	+	SLC35A4
700	54734	11	107749277	107884208	296	44	1.8963	0.028958	0.029558	0.061555	+	RAB39A
701	2596	3	115292151	115490334	479	85	1.5416	0.061583	0.029676	0.22445	+	GAP43
702	2069	4	75180860	75304477	360	29	1.3486	0.088739	0.029848	0.41818	+	EREG
703	23059	16	3500945	3639048	325	32	1.3939	0.08167	0.029851	0.31733	+	CLUAP1
704	140850	20	88111	189804	270	25	1.3751	0.084553	0.029879	0.34086	+	DEFB127
705	84033	1	228345740	228616577	532	39	1.3573	0.087338	0.02988	0.40256	+	OBSCN
706	51108	16	21558543	21718792	113	20	1.6755	0.046923	0.029925	0.11289	+	METTL9
707	55900	19	35118553	35227302	335	31	1.3894	0.082352	0.029964	0.31972	+	ZNF302
708	57609	12	50848768	51192450	481	33	1.914	0.027808	0.030054	0.062235	+	DIP2B
709	10261	16	21602605	21713987	104	18	1.715	0.043174	0.030077	0.098556	-	IGSF6
710	10644	3	185311527	185592827	424	53	1.5379	0.062037	0.030119	0.22337	-	IGF2BP2
711	4485	3	49671380	49776196	125	16	1.6601	0.048444	0.030208	0.1413	-	MST1
712	90701	18	56756709	56876069	397	48	1.9845	0.0236	0.030418	0.056165	+	SEC11C
713	113235	17	26671661	26783230	143	25	1.2378	0.1079	0.030443	0.52914	-	SLC46A1
714	8370	1	149754170	149856197	13	5	1.9005	0.028684	0.030457	0.037999	+	HIST2H4A
715	6229	10	79743518	79866571	131	19	1.4549	0.072849	0.030507	0.33322	+	RPS24
716	929	5	139961313	140063286	167	17	1.324	0.092747	0.030512	0.38642	-	CD14
717	23471	8	71435453	71570694	290	31	1.8706	0.030699	0.030548	0.084207	-	TRAM1
718	221079	10	18898264	19020568	416	48	1.841	0.032812	0.030758	0.067834	+	ARL5B
719	8175	19	2186816	2298678	86	19	1.259	0.10402	0.030823	0.43466	+	SF3A2
720	91442	19	33413140	33518401	385	46	2.0791	0.018802	0.030838	0.029036	+	C19orf40
721	26115	17	60993913	61555067	771	40	2.267	0.011694	0.030848	0.021062	+	TANC2
722	222256	7	105467251	105726877	757	115	2.2858	0.011134	0.030858	0.024654	+	CDHR3
723	6865	10	71113958	71226674	389	44	1.6906	0.045458	0.030878	0.13056	-	TACR2
724	7768	19	44567528	44687255	191	21	1.9946	0.023041	0.030957	0.035293	+	ZNF225
725	84333	10	92872769	93094088	410	47	1.2765	0.10089	0.031005	0.477	+	PCGF5
726	197407	16	30339633	30461429	81	14	1.5961	0.055234	0.031102	0.15636	+	ZNF48
727	283953	16	8569502	8672226	416	45	1.3972	0.081172	0.031142	0.28754	-	TMEM114
728	11262	2	231040445	231227930	536	51	2.1497	0.015788	0.031185	0.026271	+	SP140
729	127247	1	76334558	76448116	350	30	2.0967	0.018009	0.031296	0.022923	-	ASB17
730	9682	1	44065797	44221189	278	25	1.832	0.033473	0.03146	0.070631	+	KDM4A
731	4695	5	139974948	140077370	184	18	1.3074	0.095537	0.031477	0.39557	-	NDUFA2
732	55374	5	139969012	140074989	189	18	1.291	0.098345	0.031478	0.41541	+	TMCO6
733	117608	5	178236954	178361424	696	46	2.1401	0.016172	0.031495	0.020599	+	ZNF354B
734	10755	19	14538571	14656961	187	30	1.6412	0.050381	0.031518	0.11997	-	GIPC1
735	51364	3	50328537	50433459	70	17	1.586	0.056365	0.031702	0.17919	-	ZMYND10
736	92691	2	216896589	217017506	246	36	1.5969	0.055142	0.031818	0.15339	+	TMEM169
737	200205	1	228303429	228419958	168	19	1.5078	0.065798	0.032076	0.22484	+	IBA57
738	60680	19	3174701	3347074	326	36	1.633	0.051235	0.032077	0.13057	+	CELF5
739	56134	5	140295747	140441929	250	27	1.3544	0.08781	0.032106	0.37263	+	PCDHAC2
740	55656	8	95785518	95942721	397	33	1.5238	0.063776	0.032144	0.19703	+	INTS8
741	5118	7	100149882	100255798	113	21	1.4659	0.071331	0.032211	0.25239	+	PCOLCE
742	321	15	29161570	29460518	487	35	1.3014	0.096553	0.032354	0.39974	+	APBA2
743	23046	1	200888514	201042828	320	35	1.7126	0.043396	0.032394	0.097021	-	KIF21B
744	146183	16	21639835	21822050	144	24	1.5438	0.061313	0.032479	0.14669	+	OTOA
745	6059	4	145969156	146100676	96	21	2.0422	0.020567	0.03249	0.042433	+	ABCE1
746	775	12	2029952	2857115	1956	195	1.8933	0.029162	0.032516	0.073393	+	CACNA1C
747	29968	9	80861991	80995009	378	47	1.3775	0.084182	0.032558	0.30601	+	PSAT1
748	2235	18	55162073	55303969	396	55	1.6118	0.053505	0.03257	0.14542	-	FECH
749	57140	2	241457952	241568149	342	48	1.2811	0.10008	0.032582	0.42292	+	RNPEPL1
750	10681	15	52363123	52533565	331	39	1.3927	0.08186	0.03264	0.28027	-	GNB5
751	498	18	43614110	43734199	295	25	2.5622	0.0052009	0.03266	0.0035229	-	ATP5A1
752	127550	1	33722367	33836699	215	28	1.3166	0.093993	0.032721	0.37618	-	A3GALT2
753	31	17	35391927	35816902	533	55	1.2279	0.10974	0.032757	0.5512	-	ACACA
754	10011	5	139879652	139987678	109	16	1.7169	0.043	0.032778	0.11859	-	SRA1
755	79168	19	54690469	54796724	238	32	2.1575	0.015484	0.032957	0.021788	-	LILRA6
756	7273	2	179340716	179722150	404	45	1.3769	0.084267	0.032977	0.30875	-	TTN
757	51333	16	30368735	30479916	92	17	1.5323	0.06272	0.032988	0.16793	+	ZNF771
758	168667	7	33894523	34245484	640	78	1.0989	0.13591	0.032998	0.75875	+	BMPER
759	729	5	41092248	41311588	563	53	1.578	0.057282	0.033052	0.18283	-	C6
760	122616	14	105402125	105516056	281	20	2.1644	0.015218	0.033167	0.01251	+	C14orf79
761	1954	19	42779730	42932921	93	7	1.756	0.03954	0.033175	0.085455	+	MEGF8
762	55780	6	170101718	170231680	339	25	1.6009	0.0547	0.033196	0.15731	+	ERMARD
763	23239	18	60332672	60697676	631	51	1.3709	0.085205	0.033274	0.31031	+	PHLPP1
764	54868	17	72722622	72885922	267	31	1.3187	0.093633	0.033428	0.37648	+	TMEM104
765	9829	1	65670133	65931552	585	62	1.3085	0.095348	0.033465	0.39214	+	DNAJC6
766	10307	5	139887853	139994189	112	16	1.609	0.053803	0.033509	0.16093	-	APBB3
767	4915	9	87233417	87691985	1013	92	1.5037	0.066328	0.033636	0.21441	+	NTRK2
768	9472	14	32748479	33352268	1722	179	1.6209	0.052523	0.033683	0.12821	+	AKAP6
769	3550	5	139977384	140092065	195	18	1.2976	0.097209	0.033706	0.38339	+	IK
770	208	19	40686224	40841443	221	25	1.5502	0.060544	0.033717	0.16228	-	AKT2
771	118663	10	123980811	124147676	461	53	1.8432	0.032647	0.033759	0.063157	+	BTBD16
772	81623	20	73194	176392	251	24	1.3315	0.091511	0.033798	0.33811	+	DEFB126
773	150677	2	241028446	241130073	407	46	2.0315	0.021102	0.033809	0.041671	-	OTOS
774	2785	11	62425066	62526678	100	14	1.6712	0.047342	0.03381	0.1177	+	GNG3
775	23764	22	38547939	38662518	309	26	1.9723	0.024286	0.033825	0.034459	+	MAFF
776	285605	5	118122569	118374240	445	48	1.3451	0.089295	0.033826	0.33658	-	DTWD2
777	11176	12	56939380	57080600	144	28	1.7609	0.039129	0.03383	0.10186	-	BAZ2A
778	11070	3	50342180	50446939	73	16	1.6458	0.049907	0.033846	0.16247	-	TMEM115
779	155	8	37770513	37874184	1	1	1.8269	0.03386	0.03386	0.03386	-	ADRB3
780	8390	17	2979904	3080845	233	30	1.6258	0.051993	0.033862	0.14595	-	OR1G1
781	9939	1	145457557	145563536	68	16	1.7047	0.044122	0.033867	0.088387	+	RBM8A
782	705	6	41838965	41950784	156	24	1.5837	0.056635	0.033942	0.15206	+	BYSL
783	79077	16	30385019	30491373	93	18	1.4924	0.067799	0.034003	0.1795	-	DCTPP1
784	92749	2	26574784	26729579	280	37	1.4638	0.071624	0.034027	0.23163	+	DRC1
785	55272	15	75881426	75991047	165	25	1.202	0.11468	0.034051	0.46705	-	IMP3
786	4808	1	116328998	116433747	310	44	1.3917	0.082013	0.034181	0.30878	-	NHLH2
787	23152	19	42738734	42849949	84	7	1.5371	0.062137	0.034185	0.1718	+	CIC
788	145645	15	45198900	45321421	236	10	1.5313	0.062843	0.034308	0.13736	+	C15orf43
789	11060	16	69746187	70025644	518	38	1.7389	0.041022	0.034313	0.088692	+	WWP2
790	54806	6	135554670	135868903	385	47	1.5835	0.056653	0.034321	0.17511	-	AHI1
791	23286	5	167669065	167949308	832	99	2.6852	0.0036244	0.034327	0.0021941	+	WWC1
792	3755	20	49570193	49689675	239	45	2.6572	0.0039397	0.034396	0.0019074	-	KCNG1
793	1728	16	69693304	69810849	208	21	1.9427	0.026027	0.034412	0.037699	-	NQO1
794	23493	6	126016211	126132415	169	19	2.3781	0.0087001	0.034439	0.0082468	+	HEY2
795	57604	8	12753183	12937286	913	76	1.1103	0.13344	0.03453	0.63262	+	KIAA1456
796	4147	8	98831284	99098948	723	73	1.6572	0.048743	0.034592	0.10767	+	MATN2
797	8500	11	70066806	70280607	366	29	1.8621	0.031295	0.034746	0.063147	+	PPFIA1
798	64598	7	100159725	100263003	110	20	1.4358	0.075529	0.034805	0.25249	+	MOSPD3
799	54855	1	118098604	118221011	322	44	1.7708	0.038301	0.034824	0.074335	+	FAM46C
800	51440	1	40094320	40207382	304	51	1.2814	0.10002	0.034869	0.36132	-	HPCAL4
801	337	11	116641418	116744011	291	43	1.4678	0.071077	0.03488	0.18433	-	APOA4
802	113146	14	105353590	105494694	365	26	1.4133	0.078786	0.034928	0.22039	-	AHNAK2
803	4207	19	19206376	19353400	342	40	1.1637	0.12227	0.035031	0.52373	-	MEF2BNB-MEF2B
804	200916	3	170532664	170638045	235	26	1.6508	0.049385	0.035216	0.10625	-	RPL22L1
805	3557	2	113818693	113941593	496	48	1.7184	0.042859	0.035353	0.097418	+	IL1RN
806	389124	3	51857737	51959600	176	23	1.576	0.057518	0.035411	0.15847	-	IQCF5
807	345193	4	110719340	110843471	272	29	1.6205	0.052568	0.035414	0.12693	+	LRIT3
808	7474	3	55449743	55571670	326	46	1.8821	0.029914	0.035514	0.043337	-	WNT5A
809	3678	12	54739045	54863050	139	24	1.6532	0.049147	0.035744	0.13689	-	ITGA5
810	126382	19	19262223	19364238	252	30	1.259	0.10402	0.035872	0.39278	-	NR2C2AP
811	7264	8	144644788	144750358	261	30	1.9207	0.027382	0.0359	0.039265	-	TSTA3
812	55237	14	74765166	74876711	229	39	1.3257	0.092472	0.03592	0.33806	+	VRTN
813	639	6	106484195	106607814	265	43	1.1804	0.11892	0.035947	0.53636	+	PRDM1
814	85444	8	85969323	86108315	216	19	1.9428	0.026019	0.035972	0.04806	+	LRRCC1
815	285193	2	241449471	241553431	326	46	1.2711	0.10185	0.036255	0.39639	+	DUSP28
816	34	1	76140043	76279355	431	30	2.058	0.019794	0.036274	0.024756	+	ACADM
817	3274	5	175034847	175186239	181	31	1.9627	0.024843	0.036295	0.039473	+	HRH2
818	79290	10	45748102	45861056	383	22	1.7351	0.041366	0.036364	0.11141	-	OR13A1
819	387778	11	64887707	64990688	158	27	1.3881	0.082548	0.036367	0.23622	+	SPDYC
820	9647	22	22223792	22357250	296	31	2.0114	0.022139	0.036411	0.031445	-	PPM1F
821	79165	19	54609377	54713446	192	31	1.2631	0.10328	0.03643	0.43143	-	LENG1
822	9730	3	51383298	51584018	201	22	1.918	0.027558	0.036514	0.058812	-	VPRBP
823	9551	7	99005784	99113824	126	15	2.5289	0.0057217	0.036576	0.0050362	-	ATP5J2
824	171024	4	119759996	120032402	892	81	1.6902	0.045491	0.036592	0.11094	+	SYNPO2
825	219595	11	89320675	89481886	383	12	1.4794	0.069511	0.036596	0.22515	+	FOLH1B
826	26534	14	22052066	22152998	420	50	2.3214	0.010133	0.036623	0.0086159	-	OR10G2
827	2130	22	29613998	29746515	234	39	1.7659	0.038706	0.036694	0.092652	+	EWSR1
828	11132	2	241476133	241588526	383	57	1.1801	0.11898	0.036733	0.49583	+	CAPN10
829	1811	7	107355912	107493678	359	59	1.5716	0.058016	0.03676	0.17906	-	SLC26A3
830	345	11	116650624	116753787	296	42	1.5493	0.060659	0.036888	0.12801	+	APOC3
831	54751	1	16033107	16163089	376	50	1.4734	0.070326	0.036923	0.25418	+	FBLIM1
832	84444	19	2114148	2282577	242	26	1.2613	0.10361	0.036972	0.37304	+	DOT1L
833	5050	19	42751185	42856952	76	6	1.5265	0.063445	0.037039	0.15911	-	PAFAH1B3
834	726	11	76727992	76887201	389	62	1.4363	0.075459	0.037042	0.23085	+	CAPN5
835	2020	7	155200824	155307526	362	76	1.1937	0.11629	0.037047	0.49478	+	EN2
836	100528032	12	10474952	10612745	314	34	2.8151	0.0024383	0.037101	0.00064595	-	KLRC4-KLRK1
837	23277	17	2542680	2665053	231	41	1.787	0.036966	0.037159	0.079121	-	CLUH
838	84239	3	193069866	193322810	673	77	1.617	0.052943	0.037285	0.1419	-	ATP13A4
839	404217	19	7939381	8041051	228	32	1.6998	0.044583	0.037309	0.10596	-	CTXN1
840	4946	19	2219520	2323487	92	22	1.3315	0.091508	0.037338	0.29101	+	OAZ1
841	5470	4	76731025	76873681	332	45	1.5879	0.056154	0.037339	0.13967	-	PPEF2
842	81788	1	205221191	205340883	336	39	1.09	0.13786	0.03736	0.6209	-	NUAK2
843	316	2	201400731	201586218	433	52	1.5107	0.065433	0.037437	0.17661	+	AOX1
844	100289187	7	99145702	99258456	85	16	2.1203	0.01699	0.037468	0.023147	+	GS1-259H13.2
845	79026	11	62151014	62364332	360	58	1.2617	0.10353	0.037518	0.39105	-	AHNAK
846	145957	15	76184314	76354785	203	18	1.2742	0.1013	0.037597	0.3531	-	NRG4
847	116519	11	116610086	116713136	307	43	1.4599	0.072161	0.037609	0.19495	-	APOA5
848	100507027	10	61446748	61563203	310	41	1.7888	0.036825	0.037612	0.079086	-	MRLN
849	66036	8	11092000	11235655	430	31	2.1441	0.016011	0.037639	0.015886	+	MTMR9
850	23052	11	94772974	94915815	363	53	1.5027	0.066457	0.037667	0.16893	+	ENDOD1
851	552889	12	74881551	74985232	343	29	1.5384	0.06197	0.037697	0.16624	+	ATXN7L3B
852	255324	4	75124187	75232520	244	21	1.3449	0.089333	0.037761	0.31471	+	EPGN
853	51208	3	137667658	137802494	272	32	1.5616	0.059192	0.037805	0.15147	+	CLDN18
854	6487	1	44123204	44446837	572	40	1.5996	0.054847	0.037812	0.12315	+	ST3GAL3
855	10817	6	41687914	41797643	176	31	1.6145	0.053212	0.037862	0.13134	-	FRS3
856	134187	5	93026015	93127309	113	17	1.9342	0.026545	0.038265	0.057449	-	POU5F2
857	3836	3	122090748	122283786	359	27	2.0532	0.020028	0.038282	0.016544	-	KPNA1
858	1938	19	3926054	4035477	132	15	1.3571	0.087376	0.038309	0.24026	-	EEF2
859	642658	8	145271517	145373045	9	2	1.6891	0.045596	0.038384	0.05529	+	SCX
860	126068	19	11827815	11944893	244	23	1.8651	0.031085	0.038485	0.053078	+	ZNF441
861	200879	3	185175570	185320369	281	27	1.5122	0.065245	0.038552	0.18414	-	LIPH
862	729991	19	19237713	19353400	288	34	1.1663	0.12174	0.038705	0.47236	-	MEF2BNB
863	5704	19	40426912	40537671	163	14	1.3113	0.094872	0.038749	0.30706	+	PSMC4
864	2033	22	41438614	41626081	308	22	1.3393	0.090241	0.038769	0.28111	+	EP300
865	81578	6	55871388	56162544	1089	47	1.8629	0.031237	0.038914	0.060161	-	COL21A1
866	64170	9	139208408	139318133	252	23	1.9688	0.024487	0.038938	0.024595	-	CARD9
866	728489	9	139206352	139318111	252	23	1.9688	0.024487	0.038938	0.024595	-	DNLZ
868	84620	2	107368056	107553563	467	45	1.9926	0.023151	0.039013	0.025527	-	ST6GAL2
869	514	20	57553733	57657422	203	27	1.6937	0.045157	0.039135	0.10126	-	ATP5E
870	7994	8	41736997	41959506	288	29	2.3682	0.0089379	0.039151	0.006493	-	KAT6A
871	91012	12	50473581	50611154	173	18	1.834	0.033329	0.039221	0.046842	-	CERS5
872	219770	10	35844338	35947863	163	28	1.3166	0.09398	0.039245	0.32305	+	GJD4
873	55825	2	216853111	216996539	352	52	1.3952	0.081471	0.039246	0.26157	-	PECR
874	9024	11	1361129	1533919	625	59	1.9053	0.028371	0.039259	0.046075	+	BRSK2
875	197358	16	3539033	3677392	258	22	1.3039	0.096131	0.039303	0.36277	-	NLRC3
876	10929	11	94750041	94854387	272	40	1.5915	0.055743	0.039343	0.11535	+	SRSF8
877	9695	3	5179359	5311650	278	40	1.3379	0.090463	0.039373	0.31739	+	EDEM1
878	3824	12	10407050	10519850	295	39	2.4174	0.0078164	0.039467	0.0067614	+	KLRD1
879	7448	17	26644298	26747373	140	20	1.1921	0.11662	0.03955	0.46895	-	VTN
880	161436	14	89029241	89309096	406	31	1.9525	0.025441	0.039596	0.0341	-	EML5
881	116443	9	104281634	104550862	784	48	1.1787	0.11926	0.03961	0.41341	-	GRIN3A
882	55615	22	45014427	45183561	677	102	1.2231	0.11065	0.03968	0.44659	+	PRR5
883	85363	11	5626740	5756339	531	71	1.2285	0.10963	0.039696	0.37485	-	TRIM5
884	6237	19	50088552	50193400	82	11	1.4504	0.073471	0.039717	0.1985	-	RRAS
885	221092	11	62430097	62544857	103	15	1.601	0.054687	0.039837	0.12716	-	HNRNPUL2
886	5792	1	43941708	44139343	389	33	2.0858	0.018498	0.039839	0.024054	+	PTPRF
887	65263	8	144636083	144741784	287	34	1.9053	0.028369	0.039861	0.037522	-	PYCRL
888	549	9	93926097	94174215	470	42	1.7031	0.044277	0.039972	0.089463	-	AUH
889	149647	1	212747789	212850120	259	50	1.6971	0.044838	0.039992	0.077099	+	FAM71A
890	8637	5	139877251	139979163	95	16	1.6133	0.053341	0.040005	0.13542	+	EIF4EBP3
891	126070	19	11875099	11996016	288	22	2.091	0.018264	0.040055	0.021201	+	ZNF440
892	374882	19	11403452	11507065	178	23	1.5916	0.055738	0.040091	0.13302	-	TMEM205
893	5318	12	32893680	33099780	616	64	2.2623	0.01184	0.040128	0.014168	-	PKP2
893	23262	5	102405958	102589224	257	18	1.3101	0.095075	0.040128	0.37946	+	PPIP5K2
895	84948	8	144630074	144732485	295	35	1.9021	0.028581	0.040164	0.03753	+	TIGD5
896	170690	5	5090443	5370412	1030	128	2.0152	0.021942	0.040293	0.040017	+	ADAMTS16
897	3083	4	3393702	3501214	388	58	1.3358	0.090814	0.040419	0.26448	+	HGFAC
898	390431	14	20294427	20395371	3	2	1.6176	0.052874	0.040423	0.073242	+	OR4K2
899	63935	20	44513313	44626732	190	28	1.8772	0.030244	0.040437	0.042585	+	PCIF1
900	8625	19	19253008	19362678	274	32	1.1857	0.11787	0.040467	0.42647	+	RFXANK
901	5937	2	161078662	161400366	608	55	1.7192	0.042785	0.040549	0.083736	-	RBMS1
902	22985	14	23477773	23614823	240	46	1.8553	0.031779	0.040767	0.048249	-	ACIN1
903	4161	18	13775543	13876861	350	37	2.2314	0.012829	0.040841	0.0097661	+	MC5R
904	54853	5	139994384	140101930	177	17	1.2219	0.11087	0.040861	0.39639	+	WDR55
905	284338	19	42756284	42864973	76	6	1.4924	0.067803	0.040966	0.16899	+	PRR19
906	55773	3	99929661	100094096	244	27	1.3041	0.096104	0.041049	0.28769	+	TBC1D23
907	128025	1	241765580	242015435	746	86	1.7019	0.044383	0.041086	0.11947	+	WDR64
908	27032	3	130519327	130785556	373	36	1.3514	0.088284	0.041122	0.26987	+	ATP2C1
909	1671	8	6732216	6833598	569	78	1.5029	0.066433	0.041156	0.17808	-	DEFA6
910	84518	19	42841171	42944444	71	7	1.7366	0.041232	0.041239	0.072157	-	CNFN
911	51666	7	95065213	95219543	389	48	1.5755	0.057566	0.041362	0.15812	+	ASB4
912	112401	19	53742854	53844875	364	50	1.4945	0.067517	0.041482	0.15686	-	BIRC8
913	2054	12	131224145	131373819	543	45	1.2005	0.11497	0.04149	0.39048	-	STX2
914	5876	1	76201879	76310775	353	27	1.8182	0.034517	0.041732	0.046046	+	RABGGTB
915	84873	3	100278433	100464323	351	25	1.7564	0.039506	0.041749	0.067527	+	ADGRG7
916	10954	3	122735856	122930953	489	63	1.6218	0.052419	0.041789	0.13186	+	PDIA5
917	27247	2	69573245	69714760	235	17	1.5788	0.057189	0.04179	0.16755	-	NFU1
918	8924	15	28306183	28617313	176	14	1.5655	0.05873	0.04208	0.13575	-	HERC2
919	7840	2	73562886	73887047	515	25	1.3204	0.093346	0.042235	0.30859	+	ALMS1
920	5901	12	131306617	131412220	311	30	1.3405	0.090048	0.042307	0.27994	+	RAN
921	256691	9	72608435	72891899	729	39	1.3398	0.090151	0.042325	0.31514	+	MAMDC2
922	3071	12	54841495	54986899	315	53	1.3136	0.094493	0.042343	0.32137	+	NCKAP1L
923	80760	10	7551232	7758961	688	95	2.6653	0.0038455	0.042382	0.0044991	-	ITIH5
924	29890	3	51378699	51485339	105	17	1.5068	0.065928	0.04245	0.18327	+	RBM15B
925	57545	4	15421489	15653594	495	46	1.611	0.05359	0.042459	0.094071	+	CC2D2A
926	1068	18	530369	631524	304	59	1.1857	0.11787	0.042473	0.42181	+	CETN1
927	79654	1	45418220	45527027	233	19	2.367	0.0089674	0.042478	0.0097163	-	HECTD3
928	94033	5	121137650	121238528	207	29	1.6143	0.053231	0.042566	0.11345	+	FTMT
929	10293	3	49816028	49943992	142	19	1.394	0.081658	0.042591	0.21566	-	TRAIP
930	8302	12	10491529	10612370	282	28	2.7514	0.0029669	0.042648	0.00066642	-	KLRC4
931	28956	1	155974517	156078301	108	25	1.1436	0.1264	0.042655	0.45201	+	LAMTOR2
932	998	1	22329120	22469439	379	35	2.1267	0.016724	0.042667	0.018964	+	CDC42
933	342538	17	59617794	59718563	216	31	1.4382	0.075192	0.042671	0.2043	-	NACA2
934	5626	5	177369236	177473243	217	30	1.3438	0.089514	0.042672	0.26181	-	PROP1
935	9772	17	73402664	73546533	408	33	1.3693	0.085459	0.042725	0.2011	+	KIAA0195
936	7036	7	100168039	100290332	140	23	1.3135	0.09451	0.042793	0.30032	-	TFR2
937	5411	14	39594387	39702422	277	31	1.5464	0.061004	0.042794	0.1294	+	PNN
938	59348	19	52417593	52540079	317	30	1.6085	0.053858	0.042863	0.11195	-	ZNF350
939	373863	5	140000381	140103171	170	16	1.2322	0.10893	0.043008	0.35235	-	DND1
940	734	8	90864096	90990096	242	31	1.5194	0.064332	0.043024	0.19006	+	OSGIN2
941	123591	15	76302299	76547304	461	53	1.728	0.041993	0.04305	0.061108	+	C15orf27
942	151112	2	187642207	187763897	314	29	1.6191	0.05271	0.043052	0.10582	-	ZSWIM2
943	9771	7	22107908	22446751	989	112	1.7138	0.043279	0.043104	0.092931	-	RAPGEF5
944	26230	6	155266488	155628857	1092	118	2.238	0.012611	0.043128	0.017902	+	TIAM2
945	51020	6	125546496	125673287	319	35	1.6726	0.047201	0.043141	0.1097	-	HDDC2
946	327	3	49661427	49770936	132	18	1.5133	0.065108	0.04315	0.16303	+	APEH
947	136895	7	25114819	25269966	494	46	1.8746	0.030423	0.043195	0.04663	-	C7orf31
948	11020	22	37104246	37222177	274	38	1.3652	0.086099	0.04329	0.2517	-	IFT27
949	79317	14	20338766	20439737	98	10	1.3151	0.09423	0.043312	0.26233	+	OR4K5
950	9869	1	150848815	150987389	208	26	1.6625	0.048206	0.043317	0.075582	+	SETDB1
951	57602	17	76733463	76886980	243	30	1.5682	0.058413	0.043357	0.12713	-	USP36
952	26525	2	113766215	113872321	433	37	1.749	0.040144	0.043389	0.068281	+	IL36RN
953	400713	19	52823170	52939048	376	50	1.4296	0.07642	0.043396	0.18371	+	ZNF880
954	5122	5	95676040	95818985	282	39	1.6425	0.050244	0.043485	0.10733	-	PCSK1
955	2766	6	16188811	16345780	346	42	1.4123	0.078929	0.043509	0.19802	+	GMPR
956	283985	17	72823451	72939737	207	30	1.1985	0.11537	0.043571	0.39548	-	FADS6
957	6261	19	38874340	39128204	555	66	2.3595	0.0091505	0.043642	0.0092734	+	RYR1
958	56911	21	30399659	30598210	451	29	1.3591	0.087052	0.043698	0.20439	+	MAP3K7CL
959	2673	2	69496901	69664386	286	21	2.3849	0.0085416	0.043726	0.011045	-	GFPT1
960	6850	9	93514012	93710842	665	81	1.567	0.058563	0.043734	0.13529	+	SYK
961	83872	1	185653683	186210085	688	59	1.8718	0.030618	0.043858	0.054106	+	HMCN1
962	3035	5	140003490	140121681	216	17	1.3201	0.093406	0.043906	0.27112	-	HARS
963	150678	2	241015980	241125764	452	46	1.9397	0.026208	0.043931	0.043019	-	MYEOV2
964	7272	6	80664322	80802244	336	24	1.0596	0.14467	0.043978	0.57099	+	TTK
965	126820	1	85477993	85648821	449	46	1.6994	0.044623	0.043981	0.075535	+	WDR63
966	55501	7	2393195	2524242	323	39	1.4378	0.075243	0.043988	0.19948	+	CHST12
967	26048	16	4750815	4867219	340	39	2.0317	0.021092	0.044052	0.027208	-	ZNF500
968	83891	4	186080773	186335120	564	45	1.6254	0.052034	0.044109	0.11957	+	SNX25
969	146562	16	4734289	4849397	342	37	2.0377	0.020791	0.044169	0.027282	+	C16orf71
970	10938	11	64570206	64697181	164	32	1.7358	0.041297	0.04418	0.077529	-	EHD1
971	29933	14	105465726	105581887	283	20	2.0737	0.019053	0.044256	0.014147	-	GPR132
972	339210	17	54819274	54961256	309	36	1.1711	0.12078	0.044318	0.49489	-	C17orf67
973	10633	22	29658922	29761745	120	22	1.889	0.029448	0.044455	0.042684	-	RASL10A
974	219995	11	60474340	60594204	223	46	1.4959	0.067345	0.044528	0.18131	+	MS4A15
975	94081	5	174855514	175006745	432	55	1.1588	0.12327	0.044643	0.48872	+	SFXN1
976	161931	16	84174723	84280772	504	74	1.3108	0.094963	0.044673	0.26749	+	ADAD2
977	440567	1	16083657	16184194	286	36	1.5281	0.063238	0.044683	0.19009	-	UQCRHL
978	84464	16	3581182	3711585	274	20	1.259	0.10402	0.044689	0.35336	-	SLX4
979	143458	11	35915537	36303688	1082	122	1.4849	0.068791	0.044706	0.18446	+	LDLRAD3
980	257364	15	75891348	76000968	163	26	1.0996	0.13575	0.044737	0.46992	+	SNX33
981	163131	19	40484167	40612125	199	9	1.4102	0.079238	0.044773	0.18932	-	ZNF780B
982	1017	12	56310556	56416573	102	19	2.1561	0.015539	0.044813	0.01376	+	CDK2
982	116039	8	99906631	100014338	117	18	1.1917	0.11668	0.044813	0.38725	+	OSR2
984	580	2	215540370	215724428	603	54	2.0149	0.021957	0.044831	0.02304	-	BARD1
985	57630	4	169965407	170242249	571	62	1.1973	0.1156	0.044894	0.43012	-	SH3RF1
986	25943	20	3179948	3438587	649	39	1.2141	0.11235	0.044912	0.35611	-	C20orf194
987	1475	3	121994011	122110816	323	33	1.4195	0.07788	0.04496	0.16772	+	CSTA
988	2781	22	23362669	23517224	295	26	1.33	0.091766	0.044974	0.26291	+	GNAZ
989	126069	19	11859391	11969470	277	21	1.1406	0.12703	0.044981	0.44796	+	ZNF491
990	302	15	60589350	60740185	444	48	1.4656	0.071373	0.044987	0.15656	-	ANXA2
991	84083	2	135904539	136338806	430	17	1.3095	0.095178	0.045078	0.3074	-	ZRANB3
992	147339	18	43703519	43896955	280	29	1.4898	0.06814	0.045107	0.18459	+	C18orf25
993	6991	6	170090215	170201638	273	22	1.3387	0.090336	0.045178	0.26191	-	TCTE3
993	90410	17	26605351	26712515	126	20	0.98985	0.16112	0.045178	0.68998	-	IFT20
995	8030	10	61498505	61716414	581	44	1.6248	0.052105	0.045179	0.1013	-	CCDC6
996	399473	19	38830840	38940524	270	32	2.4343	0.0074598	0.045237	0.007078	+	SPRED3
997	9986	11	66560883	66664003	128	18	1.1921	0.11661	0.045308	0.40007	+	RCE1
998	5463	12	51530719	51661477	284	37	1.5794	0.057126	0.045318	0.12516	-	POU6F1
999	25807	22	29605844	29714147	220	39	1.7208	0.042646	0.045344	0.088083	-	RHBDD3
1000	147007	17	26634687	26739089	133	18	1.0045	0.15758	0.045347	0.64995	+	TMEM199
1001	54826	5	102371704	102505842	226	15	1.2664	0.10269	0.045397	0.35439	-	GIN1
1002	3955	7	2502163	2618811	347	47	1.6714	0.04732	0.04547	0.081208	+	LFNG
1003	79872	7	107333942	107452112	238	36	1.6523	0.049237	0.045501	0.099832	+	CBLL1
1004	5988	22	29784572	29888444	236	33	1.6681	0.04765	0.045521	0.089467	+	RFPL1
1005	1605	3	49456136	49623051	192	19	1.1789	0.11922	0.045618	0.47442	+	DAG1
1006	5787	12	70860630	71081220	686	79	1.7194	0.042775	0.045627	0.086683	-	PTPRB
1007	79788	19	53616552	53746619	333	45	1.3193	0.093534	0.045717	0.30099	-	ZNF665
1008	51006	20	44928167	45043097	164	34	2.0124	0.022087	0.045723	0.022846	-	SLC35C2
1009	79898	19	52380688	52499011	330	31	1.5838	0.056616	0.045729	0.10728	+	ZNF613
1010	4438	1	76212556	76429581	705	40	1.9325	0.026651	0.04579	0.029613	+	MSH4
1011	3895	14	55996925	56201302	564	31	2.3645	0.0090264	0.045857	0.0053326	+	KTN1
1012	942	3	121724209	121889990	294	47	2.0433	0.020513	0.045926	0.016375	+	CD86
1013	144097	11	63530846	63645190	177	23	1.4613	0.071969	0.045937	0.14691	+	C11orf84
1014	7873	3	51372692	51476828	101	17	1.4813	0.06926	0.045955	0.18186	+	MANF
1015	153364	5	89704020	89820585	159	28	1.1985	0.11535	0.045991	0.35893	-	MBLAC2
1016	22887	1	42592210	42851548	370	31	1.0678	0.14281	0.046008	0.55739	-	FOXJ3
1017	117245	11	63178876	63308680	207	21	1.1417	0.12678	0.046021	0.44237	-	HRASLS5
1018	54942	9	111646673	111753238	288	28	1.06	0.14457	0.046082	0.52591	+	FAM206A
1019	10634	22	29652985	29758778	125	23	1.8841	0.029776	0.046112	0.041766	+	GAS2L1
1020	339318	19	35175103	35283774	252	31	1.2416	0.10719	0.046179	0.31258	+	ZNF181
1021	5770	20	49076858	49251299	358	40	1.5223	0.063969	0.0462	0.15509	+	PTPN1
1022	100506718	14	85965983	86079396	362	51	1.0909	0.13766	0.046241	0.46174	+	LOC100506718
1023	80727	7	2621603	2754436	463	69	1.4821	0.069152	0.046248	0.16999	+	TTYH3
1024	64943	3	52508385	52619093	161	21	1.6993	0.044635	0.046329	0.077805	-	NT5DC2
1025	284434	19	16780787	16978774	289	38	2.4533	0.0070781	0.046359	0.003361	+	NWD1
1026	64699	21	43741996	43866955	512	70	1.2335	0.10869	0.046388	0.31704	-	TMPRSS3
1027	27339	11	60608019	60724061	240	26	1.6904	0.045479	0.046397	0.10018	-	PRPF19
1028	10098	4	99341518	99629812	641	84	2.4315	0.0075175	0.046412	0.0073087	-	TSPAN5
1029	26046	21	30250466	30415277	360	24	1.4475	0.073885	0.046474	0.15616	-	LTN1
1030	7260	2	3142741	3431653	794	62	1.6099	0.053714	0.046484	0.1121	-	TSSC1
1031	26512	13	51877678	52077275	339	29	1.2496	0.10571	0.046497	0.34549	-	INTS6
1032	6894	1	234477059	234664863	680	91	1.1659	0.12183	0.046518	0.43188	-	TARBP1
1033	122618	14	105341153	105449573	280	23	1.3776	0.084167	0.046561	0.19328	+	PLD4
1034	7879	3	128394975	128583641	454	37	1.1868	0.11765	0.046582	0.43805	+	RAB7A
1035	128312	1	228595808	228696259	146	24	1.1896	0.1171	0.046697	0.39118	+	HIST3H2BB
1036	9318	15	49367471	49497854	209	22	1.4494	0.073619	0.0468	0.15854	-	COPS2
1037	405	1	150732181	150899244	181	18	1.9403	0.02617	0.046834	0.025024	-	ARNT
1038	5345	17	1596015	1708562	255	32	1.4574	0.07251	0.04684	0.15411	+	SERPINF2
1039	9927	1	11990238	12123572	274	31	1.3856	0.082929	0.0469	0.23796	+	MFN2
1040	8416	1	150904499	151018114	204	33	1.6061	0.054122	0.046909	0.09056	+	ANXA9
1041	51301	5	74273246	74400743	272	32	1.3035	0.096205	0.046969	0.26961	-	GCNT4
1042	146845	17	9429944	9596776	214	26	1.589	0.056029	0.046984	0.098475	+	CFAP52
1043	9475	2	11269894	11534711	689	48	1.4439	0.074381	0.047039	0.19462	-	ROCK2
1044	121053	12	105330098	105438505	339	26	2.4673	0.0068067	0.047128	0.0039557	+	C12orf45
1045	79791	16	87312942	87475708	419	52	1.2267	0.10997	0.047261	0.30795	-	FBXO31
1046	57522	12	64188276	64591643	611	82	1.736	0.041282	0.047289	0.074629	+	SRGAP1
1047	275	3	49404211	49510111	144	16	1.1967	0.11571	0.047292	0.42329	-	AMT
1048	10871	17	72487204	72592310	334	41	2.0037	0.02255	0.0473	0.021466	-	CD300C
1049	54952	1	28829529	28955057	179	21	1.3296	0.091817	0.047303	0.24178	+	TRNAU1AP
1050	23293	17	1913133	2257069	712	54	1.3597	0.086955	0.047334	0.24485	-	SMG6
1051	7126	17	26612548	26724035	142	18	0.98769	0.16165	0.047335	0.65132	+	TNFAIP1
1052	64799	15	67497138	67844142	536	38	1.4836	0.068952	0.047425	0.19255	+	IQCH
1053	140890	5	65390046	65529444	201	25	1.4386	0.075126	0.047463	0.16343	+	SREK1
1054	284254	18	52208390	52316724	228	23	1.6012	0.054664	0.047498	0.11816	+	DYNAP
1055	390445	14	21573096	21674184	268	49	1.745	0.040495	0.047527	0.061907	-	OR5AU1
1056	823	11	64898686	65029477	203	29	1.2826	0.099824	0.047533	0.26456	+	CAPN1
1057	23673	1	28049694	28200963	149	16	1.3445	0.089394	0.047559	0.26465	+	STX12
1058	91179	22	20728874	20842146	307	33	1.7078	0.043834	0.047624	0.072926	-	SCARF2
1059	284323	19	40525059	40646845	232	10	1.3497	0.088558	0.04769	0.21666	-	ZNF780A
1060	6534	5	149519520	149640635	318	47	1.2048	0.11414	0.047794	0.3192	+	SLC6A7
1061	10463	4	41942516	42139551	494	20	2.2573	0.011995	0.047799	0.0085807	+	SLC30A9
1062	28984	13	41981542	42095013	301	42	1.3849	0.083037	0.047804	0.20682	+	RGCC
1063	728358	8	6804288	6906724	308	43	1.7574	0.039429	0.047846	0.073047	-	DEFA1B
1064	83746	22	41551312	41677276	215	18	1.3211	0.093241	0.047958	0.24716	+	L3MBTL2
1065	7767	19	44548482	44663997	216	22	1.863	0.031228	0.048006	0.038336	+	ZNF224
1066	8882	11	116599276	116708739	327	44	1.3907	0.082163	0.048016	0.19154	-	ZPR1
1067	563	7	99514350	99623735	193	23	1.3153	0.094206	0.048135	0.24988	-	AZGP1
1068	147746	19	40835178	40946094	194	33	2.446	0.0072224	0.048143	0.0023733	-	HIPK4
1069	7223	13	38160773	38493939	932	80	1.1537	0.12431	0.048268	0.41855	-	TRPC4
1070	10964	1	79036067	79161830	239	36	1.8408	0.032827	0.048286	0.05429	+	IFI44L
1070	124599	17	72466894	72577613	370	48	1.9661	0.024643	0.048286	0.026216	-	CD300LB
1072	22897	11	117134792	117333982	497	66	1.2934	0.09794	0.048384	0.28263	+	CEP164
1073	2077	19	42701717	42809309	81	6	1.465	0.071462	0.048385	0.14711	-	ERF
1074	92815	1	228595065	228695560	145	24	1.1783	0.11935	0.048404	0.39029	-	HIST3H2A
1075	153527	5	140028265	140136248	215	16	1.3393	0.090237	0.048525	0.23921	+	ZMAT2
1076	6490	12	56297889	56410523	107	20	2.1485	0.015837	0.04856	0.014761	-	PMEL
1077	267	16	56345364	56509450	334	37	1.1818	0.11865	0.048576	0.4052	-	AMFR
1078	148170	19	54926210	55034422	373	52	1.3467	0.089038	0.04873	0.24494	-	CDC42EP5
1079	100130705	7	128456464	128562101	232	34	1.1112	0.13324	0.048995	0.43692	+	LOC100130705
1080	284339	19	42767477	42879214	70	6	1.461	0.072009	0.049172	0.15974	+	TMEM145
1081	1129	7	136503399	136753720	634	64	2.4833	0.0065092	0.049253	0.0052666	+	CHRM2
1082	64816	7	99375636	99513727	190	21	1.5973	0.055099	0.049373	0.10324	+	CYP3A43
1083	143888	11	108292832	108419169	181	22	1.1555	0.12393	0.049378	0.39997	-	KDELC2
1084	84618	1	40074793	40187710	324	54	1.1579	0.12345	0.049389	0.36225	-	NT5C1A
1085	10725	16	69549869	69788569	458	31	1.7169	0.043002	0.049423	0.067106	+	NFAT5
1086	26073	17	26623659	26734603	145	19	0.95717	0.16924	0.049448	0.67114	-	POLDIP2
1087	84299	17	37835409	37936792	89	14	1.2461	0.10636	0.049497	0.28545	-	MIEN1
1088	335	11	116656467	116758338	298	42	1.4474	0.073892	0.049517	0.13787	-	APOA1
1089	25825	21	42489728	42704461	575	91	1.3514	0.088278	0.049519	0.23043	+	BACE2
1090	78999	11	66574558	66677946	144	21	1.1242	0.13047	0.049526	0.44212	+	LRFN4
1091	2017	11	70194612	70332690	194	23	1.8976	0.028877	0.049541	0.035953	+	CTTN
1092	130888	2	230737023	230927825	277	37	2.1021	0.017774	0.049729	0.020703	+	FBXO36
1093	10886	4	72847521	73063918	251	24	1.0492	0.14705	0.049737	0.52592	+	NPFFR2
1094	3959	17	76917335	77026061	256	45	1.1096	0.13358	0.049755	0.46869	-	LGALS3BP
1095	203062	8	143243441	143534543	917	64	1.3644	0.086214	0.049908	0.21929	-	TSNARE1
1096	9627	5	121597455	121849794	374	43	1.4189	0.077968	0.049928	0.22781	+	SNCAIP
1097	84131	9	80800978	80936799	328	38	1.0251	0.15265	0.049961	0.51697	+	CEP78
1098	115361	1	89596831	89714633	189	22	2.3958	0.0082925	0.049974	0.007053	-	GBP4
1099	645832	17	26641290	26742265	135	18	0.96762	0.16662	0.050191	0.64318	-	SEBOX
1100	404734	5	139731399	139979163	183	24	1.4083	0.079522	0.050351	0.21529	+	ANKHD1-EIF4EBP3
1101	101928291	1	224571806	224697598	188	18	2.1702	0.014996	0.050363	0.012601	+	LOC101928291
1102	643155	5	60403536	60508302	213	23	1.2942	0.097795	0.05041	0.23729	-	SMIM15
1103	1513	1	150718684	150830917	118	13	2.0197	0.021706	0.050474	0.01828	-	CTSK
1104	914	1	117247057	117361851	187	33	1.2512	0.10543	0.050532	0.2825	+	CD2
1105	55793	1	150919213	151030854	193	35	1.5641	0.058893	0.050562	0.09795	-	FAM63A
1106	6612	21	46175532	46288044	367	36	2.5077	0.0060759	0.050589	0.0033699	-	SUMO3
1107	9966	9	117496915	117618408	207	33	2.2723	0.011535	0.050911	0.0067477	-	TNFSF15
1108	4323	14	23255742	23366809	306	49	1.6405	0.050446	0.051015	0.098726	+	MMP14
1109	58497	1	150930867	151058189	224	37	1.532	0.06276	0.051022	0.1161	+	PRUNE
1110	5688	20	60661783	60768514	254	27	1.1195	0.13147	0.051105	0.41605	-	PSMA7
1111	60436	20	35151876	35272355	61	20	1.2952	0.097621	0.051107	0.25632	+	TGIF2
1112	65217	10	55512531	56611051	3624	151	1.0733	0.14157	0.051149	0.51892	-	PCDH15
1113	27346	17	26596121	26705711	123	20	0.93518	0.17485	0.051203	0.69542	+	TMEM97
1114	127396	1	40947233	41063841	331	27	1.799	0.036011	0.051279	0.053023	+	ZNF684
1115	221150	13	21677734	21800741	377	43	1.841	0.032809	0.051286	0.054556	-	SKA3
1116	952	4	15729921	15900706	453	47	1.4526	0.073165	0.051341	0.16746	+	CD38
1117	112744	6	52051484	52159298	317	34	1.8828	0.029861	0.051373	0.039215	-	IL17F
1118	149986	20	60647517	60760434	250	27	1.1035	0.13491	0.051429	0.43197	+	LSM14B
1119	6529	3	10984420	11130935	379	73	1.3127	0.094637	0.051582	0.27338	+	SLC6A1
1120	2634	1	89521815	89641842	250	18	1.2281	0.10971	0.051599	0.31502	-	GBP2
1121	6929	19	1559289	1702328	38	10	1.344	0.089479	0.051604	0.19542	-	TCF3
1122	10788	5	75649131	76053957	1047	107	0.91392	0.18038	0.051612	0.7466	+	IQGAP2
1123	122704	14	23249088	23354246	289	48	1.6462	0.049865	0.051622	0.10191	+	MRPL52
1124	1016	5	19423140	20625972	2693	142	1.8511	0.032078	0.051633	0.05008	-	CDH18
1125	3620	8	39721328	39836309	410	37	1.8101	0.035137	0.051653	0.043517	+	IDO1
1126	3373	3	50287320	50399812	71	16	1.5132	0.065116	0.05169	0.13169	-	HYAL1
1127	29956	1	150887649	150997479	175	25	1.6344	0.051085	0.051707	0.070099	-	CERS2
1128	348303	19	39955753	40061326	243	33	1.3309	0.091611	0.051729	0.20752	+	SELV
1129	9545	19	11382722	11500344	237	27	1.4007	0.080648	0.051863	0.17302	-	RAB3D
1130	341116	11	60502821	60618778	287	48	1.4375	0.075284	0.051891	0.17871	+	MS4A10
1131	84639	2	113775547	113883427	460	38	1.6771	0.046762	0.051901	0.07279	+	IL1F10
1132	10392	7	30414143	30568426	292	44	1.0492	0.14705	0.051945	0.492	-	NOD1
1133	25862	6	41707634	41913099	267	30	1.9352	0.026482	0.051971	0.03313	-	USP49
1134	10254	2	152923315	153082506	276	26	1.5747	0.057665	0.052078	0.097647	-	STAM2
1135	5288	12	18345912	18851352	1414	78	1.4703	0.070734	0.052123	0.15931	+	PIK3C2G
1136	344148	2	133379361	134449118	2341	207	1.6752	0.046944	0.052159	0.094476	-	NCKAP5
1137	374872	19	2224631	2332181	105	22	1.1917	0.1167	0.052347	0.29915	-	C19orf35
1138	4857	14	26865089	27117239	359	33	2.2791	0.01133	0.052352	0.010001	-	NOVA1
1139	84276	3	49409766	49516777	144	17	1.1627	0.12248	0.052391	0.42214	-	NICN1
1140	128360	1	158318312	158419256	308	32	1.1247	0.13036	0.05241	0.38823	-	OR10T2
1141	23438	5	140021011	140128903	200	15	1.3114	0.094865	0.052432	0.23476	+	HARS2
1142	23127	1	183848988	184056904	470	60	1.3528	0.088058	0.05244	0.2392	-	COLGALT2
1143	441925	1	242071069	242172364	239	32	0.94276	0.1729	0.052447	0.63841	+	BECN2
1144	57396	5	177979664	178104093	372	42	1.5369	0.062164	0.052488	0.12191	-	CLK4
1145	27163	4	76781808	76912166	317	35	1.2695	0.10214	0.052637	0.24473	-	NAAA
1146	7782	15	45724676	45865005	113	20	2.793	0.002611	0.052657	0.0019104	-	SLC30A4
1147	3112	6	32730540	32834825	914	57	1.3459	0.089175	0.052732	0.23279	-	HLA-DOB
1148	155061	7	149119884	149244928	190	29	1.6269	0.051878	0.052834	0.08691	-	ZNF746
1149	56929	5	114806605	114930591	235	36	1.5603	0.059348	0.053	0.10363	-	FEM1C
1150	761	8	86301056	86411269	121	15	1.3456	0.089217	0.053021	0.20583	+	CA3
1151	1838	2	25550067	25946516	556	77	1.0914	0.13754	0.053157	0.46006	-	DTNB
1152	57484	4	141736708	142104630	932	95	1.002	0.15816	0.053221	0.58188	-	RNF150
1153	51227	21	38387664	38495458	316	31	1.9345	0.026524	0.053246	0.031056	-	PIGP
1154	9296	7	128452857	128555903	232	32	1.1042	0.13476	0.053325	0.4129	+	ATP6V1F
1155	29028	8	124282090	124458705	241	22	1.2575	0.10429	0.053542	0.292	-	ATAD2
1156	9672	1	31292313	31431480	313	61	1.1322	0.12878	0.053683	0.37204	-	SDC3
1157	913	1	158273486	158377343	227	27	1.1438	0.12634	0.053843	0.35664	+	CD1E
1158	127707	1	18757424	18862540	421	58	1.2761	0.10096	0.053856	0.22541	+	KLHDC7A
1159	1044	5	149496344	149614121	331	52	1.1353	0.12813	0.053939	0.35061	+	CDX1
1160	6988	3	49399639	49503909	142	16	1.1677	0.12145	0.054045	0.39521	+	TCTA
1161	1113	14	93339445	93451638	314	52	0.9534	0.17019	0.054193	0.61605	+	CHGA
1162	111	3	122951143	123217924	505	51	2.3584	0.0091765	0.054214	0.009054	-	ADCY5
1163	8727	9	111654849	111825829	438	37	0.90705	0.18219	0.054233	0.66087	-	CTNNAL1
1164	124401	16	4696500	4834378	439	40	1.9526	0.025435	0.054263	0.02869	-	ANKS3
1165	196740	10	50172333	50373559	593	45	1.5267	0.063424	0.054296	0.11989	-	VSTM4
1166	202151	5	36197950	36352011	283	30	1.2707	0.10191	0.054319	0.2589	-	RANBP3L
1167	131873	3	130186198	130445890	533	52	1.4143	0.078638	0.054384	0.20203	+	COL6A6
1168	647174	13	51865168	51989555	218	25	1.2607	0.10371	0.054471	0.30712	+	SERPINE3
1169	11186	3	50317217	50428367	66	16	1.3979	0.081065	0.054481	0.18926	-	RASSF1
1170	268	19	2199113	2302072	61	17	1.1107	0.13335	0.054685	0.37254	+	AMH
1171	140465	12	56496040	56601771	55	15	1.4117	0.079026	0.0547	0.1584	+	MYL6B
1172	4258	4	140536922	140711899	488	77	1.7291	0.041897	0.05473	0.051097	+	MGST2
1173	80232	1	224522845	224672001	236	22	1.2376	0.10793	0.054805	0.30785	-	WDR26
1174	24142	3	50283833	50386852	71	16	1.4859	0.068656	0.054809	0.13507	-	NAT6
1175	100287477	19	50511973	50697102	248	26	2.0652	0.019452	0.054812	0.015875	-	LOC100287477
1176	4985	1	29088654	29240208	349	43	1.2127	0.11262	0.054828	0.30509	+	OPRD1
1177	29964	6	41698500	41805110	163	27	1.5243	0.063719	0.054862	0.11735	+	PRICKLE4
1178	390231	11	89393467	89501040	145	8	1.407	0.079717	0.054918	0.16269	+	TRIM77
1179	79161	7	86775477	86899889	297	28	1.3205	0.093334	0.054966	0.21924	-	TMEM243
1180	266977	6	46917116	47060082	415	45	1.367	0.085808	0.054983	0.20752	-	ADGRF1
1181	5789	9	8264246	10662723	8831	584	1.5499	0.06058	0.054998	0.12194	-	PTPRD
1182	7226	21	45720046	45912964	374	39	1.3109	0.094947	0.055089	0.20926	+	TRPM2
1183	10497	9	35111976	35455334	491	42	1.1595	0.12313	0.05514	0.36411	+	UNC13B
1184	10087	5	74616928	74857806	365	30	1.0352	0.15028	0.055263	0.48034	-	COL4A3BP
1185	10136	1	22278149	22389035	347	40	2.0072	0.022362	0.055306	0.020856	+	CELA3A
1186	387694	10	82247658	82456316	612	80	1.0505	0.14674	0.055339	0.45924	+	SH2D4B
1187	8735	17	10151401	10326322	475	73	1.2068	0.11376	0.055592	0.32227	-	MYH13
1188	23461	17	67190576	67373323	357	41	0.98832	0.1615	0.055596	0.56439	-	ABCA5
1189	2308	13	41079801	41290734	381	38	1.4571	0.072541	0.055632	0.17236	-	FOXO1
1190	125228	18	13613346	13776591	308	30	2.2855	0.011141	0.055686	0.0058399	-	FAM210A
1191	56241	22	24527444	24635074	200	22	1.0685	0.14265	0.055836	0.42131	+	SUSD2
1192	64326	1	175863967	176226386	660	45	2.0063	0.022411	0.055901	0.022592	-	RFWD2
1193	5980	6	111570234	111854421	525	42	1.4561	0.072688	0.055902	0.1527	-	REV3L
1194	388646	1	89547434	89691723	267	21	1.2529	0.10512	0.055958	0.27458	-	GBP7
1195	4637	12	56502045	56605366	55	15	1.4023	0.080413	0.056	0.15884	+	MYL6
1196	57132	18	11801389	11904448	308	41	1.334	0.0911	0.056113	0.22584	+	CHMP1B
1197	9013	16	84161453	84270676	484	67	1.2282	0.10969	0.056151	0.26723	-	TAF1C
1198	150356	22	41555861	41686935	226	19	1.2514	0.10539	0.056177	0.25892	-	CHADL
1199	51149	5	179213927	179335867	236	35	1.188	0.11741	0.056213	0.34373	-	C5orf45
1200	4013	11	123936111	124067619	393	45	1.4744	0.070184	0.056322	0.13596	+	VWA5A
1201	121129	12	55918199	56019128	174	24	0.88483	0.18813	0.056456	0.68775	+	OR2AP1
1202	4099	19	35732989	35854710	298	50	1.6501	0.049465	0.056508	0.080792	+	MAG
1203	7189	11	36455317	36581863	201	31	1.5616	0.05919	0.056589	0.10368	-	TRAF6
1204	26086	9	139171932	139304057	210	21	1.8453	0.032499	0.056618	0.028007	+	GPSM1
1205	92399	9	124976882	125135743	225	41	2.397	0.0082642	0.056641	0.0050262	+	MRRF
1206	3605	6	52001185	52105436	306	40	1.8236	0.034107	0.056666	0.057302	+	IL17A
1207	25834	12	86323037	87282681	1864	61	1.7248	0.04228	0.056758	0.058256	-	MGAT4C
1208	54522	10	5853593	5981860	416	40	1.5673	0.058527	0.056845	0.10291	-	ANKRD16
1209	3651	13	28444168	28550451	329	35	2.1109	0.017391	0.05687	0.012494	+	PDX1
1210	125058	17	77856142	78059657	397	55	1.9851	0.023565	0.057295	0.030441	-	TBC1D16
1211	84811	11	116568886	116693714	361	43	1.3013	0.09658	0.057308	0.2045	-	BUD13
1212	132141	3	51878892	51987386	170	25	1.3998	0.080792	0.057466	0.16806	-	IQCF1
1213	283208	11	73908532	74072699	169	20	1.2333	0.10874	0.057502	0.28219	-	P4HA3
1214	84065	1	27598636	27712891	146	20	0.95221	0.1705	0.057516	0.54157	+	TMEM222
1215	100527943	20	35152957	35290960	75	25	1.1866	0.11769	0.057599	0.30799	+	TGIF2-C20orf24
1216	1959	10	64521756	64628927	283	27	1.1679	0.12142	0.057635	0.33144	-	EGR2
1217	79819	1	67228568	67440907	422	55	1.0886	0.13817	0.057639	0.43842	-	WDR78
1218	101927262	2	240342	342920	140	20	2.2834	0.011204	0.057645	0.0069953	+	LOC101927262
1219	8526	17	54861460	54996036	253	24	1.1235	0.13061	0.05766	0.3951	+	DGKE
1220	8372	3	50280259	50386899	73	16	1.4703	0.070734	0.057757	0.13531	-	HYAL3
1221	1602	13	71962098	72491330	630	86	1.1813	0.11875	0.057763	0.31699	-	DACH1
1222	144455	12	77365026	77509360	435	59	1.541	0.061662	0.057764	0.10316	-	E2F7
1223	10898	7	98986563	99104996	138	16	2.4077	0.0080268	0.057904	0.0052935	+	CPSF4
1224	144245	12	38660557	38773528	266	21	1.2817	0.099983	0.058131	0.26688	+	ALG10B
1225	283638	14	105281650	105413107	338	24	1.3586	0.087141	0.058135	0.16323	+	CEP170B
1226	137970	8	35042975	35704068	878	70	1.031	0.15128	0.058201	0.49771	+	UNC5D
1227	51082	13	28144880	28291559	625	53	1.2528	0.10514	0.05825	0.25561	+	POLR1D
1228	26091	10	69631656	69885103	412	30	1.8238	0.034089	0.058269	0.04017	-	HERC4
1229	4188	6	41556194	41671984	367	72	1.4984	0.067012	0.058388	0.11075	+	MDFI
1230	92737	2	230172345	230629286	1371	121	1.6363	0.050887	0.058437	0.098808	-	DNER
1231	51316	4	83961201	84085911	153	31	1.3277	0.092134	0.058489	0.21031	-	PLAC8
1232	11215	13	42796261	42947403	353	38	1.7576	0.039406	0.058567	0.049608	+	AKAP11
1233	83852	13	49968429	50119139	425	40	1.0334	0.15072	0.058661	0.44719	+	SETDB2
1234	81849	1	77283126	77583223	590	72	1.429	0.076508	0.058738	0.17348	+	ST6GALNAC5
1235	23086	11	108326158	108514492	401	51	1.2577	0.10425	0.058755	0.23835	-	EXPH5
1236	7027	13	114189003	114345788	177	12	2.0855	0.01851	0.058771	0.013481	+	TFDP1
1237	7077	17	76799059	76971472	436	55	1.3454	0.089248	0.058781	0.20474	-	TIMP2
1238	4656	1	203002257	203105166	218	36	1.428	0.076642	0.058792	0.16867	-	MYOG
1239	90594	19	11909541	12030306	255	22	1.9602	0.024985	0.058837	0.022997	+	ZNF439
1240	547	2	241603181	241809725	403	44	2.0614	0.019632	0.058898	0.017328	-	KIF1A
1241	9429	4	88961416	89202569	524	62	1.38	0.08379	0.058938	0.17492	-	ABCG2
1242	26355	3	122053023	122178961	256	27	1.1648	0.12205	0.059004	0.28266	+	FAM162A
1243	10008	11	74115886	74228600	275	33	1.7709	0.038288	0.059049	0.04889	-	KCNE3
1244	56154	8	30638939	30820512	371	28	1.5376	0.062074	0.059099	0.11198	-	TEX15
1245	53942	11	98841706	100279616	4945	261	1.538	0.06203	0.059145	0.11653	+	CNTN5
1246	2395	9	71600479	71765094	502	58	2.0542	0.019979	0.059188	0.02316	+	FXN
1247	3090	17	1907454	2012981	230	39	1.4277	0.076695	0.059235	0.14072	+	HIC1
1248	26278	13	23852962	24057867	780	76	1.3286	0.091987	0.059271	0.18256	-	SACS
1249	65251	19	52342488	52458305	406	36	1.4273	0.076741	0.059388	0.1414	-	ZNF649
1250	613	22	23472402	23710224	602	56	1.0973	0.13625	0.059458	0.37945	+	BCR
1251	9262	2	196948307	197086336	400	33	1.0861	0.13873	0.059535	0.43873	-	STK17B
1252	6506	11	35222752	35491610	707	67	1.5531	0.060203	0.059704	0.11555	-	SLC1A2
1253	919	1	167349877	167537847	529	95	1.0564	0.1454	0.059709	0.4361	-	CD247
1254	3120	6	32673837	32781330	1481	47	1.7866	0.037	0.059741	0.057179	-	HLA-DQB2
1255	219402	13	27959776	28074739	364	33	1.4519	0.07327	0.059751	0.15266	-	MTIF3
1256	3694	2	160906182	161160349	631	55	1.7516	0.039924	0.059781	0.057379	-	ITGB6
1257	339541	1	45090370	45241263	228	33	2.1281	0.016665	0.059795	0.017771	+	C1orf228
1258	57721	4	119556525	119683374	187	22	1.255	0.10473	0.059859	0.25136	+	METTL14
1259	7866	3	50275163	50380648	74	16	1.4621	0.071851	0.059892	0.1338	-	IFRD2
1260	9759	2	239919864	240373346	1236	115	1.6391	0.050601	0.059934	0.078993	-	HDAC4
1261	2358	19	52214453	52323779	431	72	1.2324	0.10891	0.060115	0.25779	+	FPR2
1262	8825	12	81141171	81381702	643	60	1.2341	0.10858	0.060123	0.261	-	LIN7A
1263	347902	12	47419490	47523734	255	42	1.042	0.14871	0.060168	0.46417	-	AMIGO2
1264	92293	12	128701948	129242460	1504	201	0.88701	0.18754	0.060188	0.67305	+	TMEM132C
1265	645202	15	28544547	28653243	1	1	1.5527	0.06025	0.06025	0.06025	-	LOC645202
1266	1606	12	56274946	56397811	114	20	2.1593	0.015413	0.060333	0.012602	+	DGKA
1267	5176	17	1615259	1730859	327	35	1.3353	0.090886	0.060467	0.17619	+	SERPINF1
1268	79022	12	48307330	48412661	321	38	1.1409	0.12696	0.060476	0.31299	+	TMEM106C
1269	64403	14	23466270	23576747	180	32	1.6743	0.047039	0.060495	0.058147	-	CDH24
1270	122553	14	39567015	39689634	302	31	1.431	0.076218	0.0605	0.14042	-	TRAPPC6B
1271	138046	8	85045453	85884079	1359	76	1.2842	0.09953	0.060674	0.23949	+	RALYL
1272	22846	14	77178235	77299363	319	47	0.98604	0.16206	0.060919	0.52113	+	VASH1
1273	83990	17	59706547	59990920	388	34	0.95135	0.17071	0.060927	0.56073	-	BRIP1
1274	313	7	36502549	36814154	869	115	1.2729	0.10152	0.06095	0.2555	-	AOAH
1275	9134	8	95842452	95959672	265	23	1.4331	0.07591	0.061069	0.13401	-	CCNE2
1276	84296	8	41336725	41452565	343	40	0.99418	0.16007	0.061111	0.46687	+	GINS4
1277	6330	11	117954092	118073630	385	48	1.3582	0.087204	0.061188	0.17278	-	SCN4B
1278	23411	10	69594427	69728147	277	21	1.9662	0.024637	0.061257	0.024519	+	SIRT1
1279	137075	8	8509666	8611617	538	43	1.1501	0.12505	0.061323	0.32189	+	CLDN23
1280	79575	19	17352940	17464282	324	33	1.1461	0.12588	0.061422	0.30646	-	ABHD8
1281	55125	18	12941352	13175052	503	34	1.0833	0.13934	0.061481	0.35036	+	CEP192
1282	126299	19	44061376	44174298	239	41	1.9888	0.02336	0.061506	0.026003	-	ZNF428
1283	9867	5	108620410	108795675	567	42	1.0502	0.14682	0.061507	0.4745	-	PJA2
1284	1418	2	208975464	209078366	403	46	1.4008	0.080632	0.061557	0.1522	-	CRYGA
1285	84376	8	42702033	42935682	147	16	1.1544	0.12416	0.061665	0.33976	+	HOOK3
1286	56893	1	155952945	156073613	127	27	0.9833	0.16273	0.061705	0.47984	-	UBQLN4
1287	54882	5	139731399	139969441	160	26	1.3266	0.092328	0.061736	0.22072	+	ANKHD1
1288	8692	3	50305221	50410281	60	15	1.5242	0.06373	0.061817	0.12084	-	HYAL2
1289	727897	11	1194295	1333406	249	21	1.2019	0.1147	0.061818	0.27155	+	MUC5B
1290	10809	11	72415774	72554750	248	27	1.9049	0.028394	0.061835	0.027585	-	STARD10
1291	10469	19	7941603	8058708	259	33	1.605	0.05425	0.06193	0.092968	-	TIMM44
1292	1378	1	207619473	207865110	448	44	1.8207	0.034325	0.062037	0.04094	+	CR1
1293	2309	6	108831026	109055972	372	42	2.2805	0.011289	0.06204	0.0056339	+	FOXO3
1294	79370	12	12173873	12302629	428	67	1.4098	0.079293	0.062131	0.14978	+	BCL2L14
1295	54937	13	36692345	36838752	514	33	1.1202	0.13132	0.062151	0.35314	-	SOHLH2
1296	101929536	1	40204654	40305843	220	35	1.075	0.14119	0.062174	0.38402	+	LOC101929536
1297	9755	17	45721441	45839429	195	25	2.319	0.010198	0.062215	0.0045343	+	TBKBP1
1298	8927	3	49541922	49758982	252	24	1.3385	0.090362	0.062232	0.21416	+	BSN
1299	131076	3	122028436	122152074	284	30	1.1378	0.1276	0.062293	0.29047	-	CCDC58
1300	7356	11	62136507	62240678	255	45	1.0495	0.14698	0.062306	0.40087	+	SCGB1A1
1301	1936	8	144611867	144729845	361	40	1.7182	0.042876	0.062309	0.048017	-	EEF1D
1302	283385	12	122039024	122160531	189	20	1.2966	0.097378	0.062325	0.1963	-	MORN3
1303	114790	2	220412593	220531173	121	25	1.429	0.076507	0.062348	0.11361	+	STK11IP
1304	55093	8	124378965	124504261	336	26	1.2766	0.10088	0.06244	0.25208	+	WDYHV1
1305	3990	15	58652953	58911073	752	106	1.2014	0.1148	0.062486	0.27725	+	LIPC
1306	54554	3	122080700	122184882	208	22	1.545	0.061176	0.062563	0.075683	-	WDR5B
1307	442247	6	112618532	112722498	257	36	2.5152	0.005948	0.062662	0.002752	+	RFPL4B
1308	283111	11	5170965	5271930	383	45	1.4587	0.07233	0.062694	0.12422	-	OR51V1
1309	1912	1	33739224	33891194	339	31	1.0723	0.14179	0.062708	0.38763	-	PHC2
1310	56928	19	2278629	2405100	254	32	1.046	0.14778	0.062793	0.39745	+	SPPL2B
1311	2971	13	27948681	28059846	370	38	1.3787	0.083989	0.062828	0.18502	+	GTF3A
1312	387	3	49346569	49499526	193	19	1.5278	0.063282	0.062884	0.13029	-	RHOA
1313	79939	19	16610648	16733193	178	18	1.5482	0.060792	0.062906	0.090348	-	SLC35E1
1314	55561	11	64541661	64662041	161	31	1.6093	0.053771	0.063026	0.075438	-	CDC42BPG
1315	94059	19	54922976	55024894	327	44	1.319	0.093583	0.063035	0.1998	-	LENG9
1316	23432	1	167998780	168156905	248	27	1.5524	0.060281	0.063087	0.086661	-	GPR161
1317	8907	19	16258665	16396156	315	20	2.1504	0.015764	0.063099	0.0086063	+	AP1M1
1318	84623	11	126243388	126920766	2029	162	1.1114	0.1332	0.063163	0.37927	-	KIRREL3
1319	11129	19	45492298	45624214	234	30	1.2754	0.10109	0.063167	0.22824	+	CLASRP
1320	342909	19	44526297	44641623	224	20	1.4046	0.080066	0.063245	0.13871	+	ZNF284
1321	731	1	57270443	57433894	485	66	1.8503	0.032132	0.063265	0.039141	+	C8A
1322	100271849	19	19206376	19331098	299	37	0.97075	0.16584	0.063426	0.4843	-	MEF2B
1323	26476	1	159359512	159460600	202	23	1.5316	0.062817	0.063435	0.096749	+	OR10J1
1324	51061	16	11722939	11886707	418	47	2.1663	0.015145	0.063448	0.0094681	-	TXNDC11
1325	90390	8	118482532	118602510	210	26	1.2166	0.11188	0.063517	0.24463	+	MED30
1326	285016	2	229561	339002	157	20	2.2225	0.013125	0.06362	0.0083129	-	FAM150B
1327	2665	10	5757186	5905512	330	37	1.6224	0.052358	0.063626	0.0775	-	GDI2
1328	83452	4	140324961	140447070	199	22	1.0725	0.14174	0.063646	0.40934	+	RAB33B
1329	51146	3	137792560	137901229	195	17	1.5542	0.060073	0.06371	0.093886	-	A4GNT
1330	3674	17	42399550	42516873	145	27	0.97297	0.16528	0.063756	0.50943	-	ITGA2B
1331	3839	13	50223443	50417057	468	37	1.0417	0.14878	0.063764	0.40868	-	KPNA3
1332	101928603	6	24747563	24849540	234	37	0.90093	0.18381	0.063768	0.6019	-	C6orf229
1333	7869	3	50255040	50364573	79	18	1.4149	0.078545	0.063777	0.14294	+	SEMA3B
1334	1419	2	208957297	209060877	436	46	1.3837	0.083223	0.063791	0.14827	-	CRYGB
1335	9099	11	119175925	119302436	195	31	1.0603	0.14451	0.064009	0.43308	-	USP2
1336	2036	20	34629426	34870721	190	23	1.1785	0.1193	0.064012	0.2777	+	EPB41L1
1337	2217	19	49965536	50079685	100	12	1.288	0.098871	0.064062	0.18799	+	FCGRT
1338	55571	2	101819345	101936778	172	28	1.1275	0.12977	0.064187	0.33992	+	CNOT11
1339	51100	1	87120253	87263867	276	34	1.0127	0.15561	0.06422	0.45569	+	SH3GLB1
1340	60560	9	88506009	88688350	237	38	1.3335	0.091183	0.064241	0.18388	+	NAA35
1341	26225	2	152607480	152735009	212	25	2.239	0.012579	0.064274	0.0074524	-	ARL5A
1342	55345	4	113410489	113608151	341	31	0.97369	0.1651	0.064324	0.50023	-	ZGRF1
1343	122481	14	96808448	97005764	359	56	1.839	0.032958	0.064342	0.033431	+	AK7
1344	9141	19	33022071	33128358	361	32	1.4061	0.079845	0.06445	0.1387	+	PDCD5
1345	162963	19	52789498	52920376	428	54	1.2693	0.10218	0.064571	0.20826	+	ZNF610
1346	92922	16	57496090	57620477	294	43	1.1072	0.1341	0.064594	0.33234	-	CCDC102A
1347	155184	1	9013359	9136404	346	62	1.1649	0.12203	0.064603	0.27825	-	SLC2A7
1348	10223	1	166972082	167109868	351	48	1.1241	0.13049	0.064892	0.31339	-	GPA33
1349	84890	10	64514516	64618239	279	29	1.0989	0.1359	0.064902	0.35696	+	ADO
1350	23495	17	16792398	16925432	465	58	0.92488	0.17751	0.065001	0.534	-	TNFRSF13B
1351	132884	4	5494531	5761275	913	100	1.0623	0.14406	0.065116	0.40873	-	EVC2
1352	54619	10	97753159	97870627	198	22	1.0099	0.15627	0.065182	0.40436	+	CCNJ
1353	11123	1	24778841	24913510	359	44	1.183	0.1184	0.065248	0.26828	+	RCAN3
1354	147945	19	56297944	56443221	615	101	1.6358	0.050936	0.065249	0.074629	+	NLRP4
1354	389073	2	208980071	209104969	420	52	1.3253	0.092537	0.065249	0.18191	-	C2orf80
1356	132228	3	50266458	50375545	75	17	1.3829	0.083348	0.065292	0.15635	+	LSMEM2
1357	84248	3	197426424	197561317	157	11	1.7518	0.039902	0.065297	0.043023	+	FYTTD1
1358	63925	20	44527292	44651560	229	31	1.6508	0.049394	0.065334	0.064704	-	ZNF335
1359	27042	1	209951312	210080910	306	28	1.1339	0.12843	0.065339	0.29441	+	DIEXF
1360	388939	2	29234556	29347127	285	43	1.5349	0.062401	0.065369	0.087843	-	C2orf71
1361	6002	4	3265874	3491640	607	74	1.1338	0.12844	0.065467	0.30396	+	RGS12
1362	80020	22	36833233	36953148	444	45	1.212	0.11275	0.065693	0.24108	-	FOXRED2
1363	57165	1	228287415	228397527	127	22	1.2204	0.11116	0.065724	0.25334	+	GJC2
1364	132430	4	135067488	135172903	245	19	1.4247	0.077126	0.065758	0.13537	-	PABPC4L
1365	343641	20	2311554	2463399	490	54	1.4908	0.068012	0.065806	0.10351	+	TGM6
1366	93100	8	144606955	144710881	334	34	1.7979	0.0361	0.065832	0.032401	-	NAPRT
1367	24141	20	9445005	9561171	265	35	1.8022	0.035759	0.065854	0.037118	+	LAMP5
1368	497189	5	134734558	134838089	251	40	1.1357	0.12805	0.065909	0.29384	-	TIFAB
1369	10947	8	41960464	42078701	186	23	1.7773	0.037761	0.065956	0.034981	+	AP3M2
1370	123016	14	89240574	89394335	264	27	1.7344	0.041427	0.06601	0.051564	+	TTC8
1371	8664	22	36856897	36975277	415	50	1.1979	0.11548	0.066043	0.26196	-	EIF3D
1372	123041	14	92738925	93017825	967	113	1.2503	0.1056	0.066049	0.24077	+	SLC24A4
1373	80854	4	140377192	140527577	318	52	1.2585	0.10411	0.066104	0.23575	-	SETD7
1374	9201	13	36292789	36755514	1361	126	0.99678	0.15944	0.066126	0.47978	-	DCLK1
1375	54929	19	19180425	19299310	287	32	0.90025	0.18399	0.066174	0.55975	-	TMEM161A
1376	84465	15	66137634	66596075	1203	124	1.2721	0.10168	0.066217	0.19388	-	MEGF11
1377	1153	19	1219267	1324809	13	3	1.5124	0.065216	0.066273	0.067213	+	CIRBP
1377	55009	19	1225520	1329243	13	3	1.5124	0.065216	0.066273	0.067213	+	C19orf24
1379	6500	5	133442082	133562724	243	25	1.1532	0.12442	0.066388	0.30533	-	SKP1
1380	6746	1	155928839	156040758	114	22	1.0092	0.15644	0.066461	0.40928	-	SSR2
1381	503542	10	135184170	135288623	195	26	1.1897	0.11708	0.066533	0.23645	-	SPRN
1382	9831	8	144668183	144785900	276	33	1.7945	0.036369	0.066552	0.03971	+	ZNF623
1383	399697	15	48420546	48545951	47	9	1.3814	0.083571	0.066846	0.13353	+	CTXN2
1384	140947	5	134729904	134833038	243	38	1.1396	0.12722	0.066905	0.29058	-	DCANP1
1385	79073	11	60631351	60740915	200	23	1.3579	0.087251	0.066947	0.20344	+	TMEM109
1386	23179	1	183555208	183947666	920	78	1.1095	0.13361	0.067087	0.3616	+	RGL1
1387	27332	2	71453729	71712191	732	53	1.5325	0.0627	0.06711	0.095118	+	ZNF638
1388	80185	8	33306027	33420703	302	26	1.057	0.14525	0.067222	0.396	-	TTI2
1389	2931	19	42684338	42796736	88	6	1.303	0.096293	0.067248	0.17088	-	GSK3A
1390	5082	9	125530376	125640935	121	28	1.2887	0.098752	0.067311	0.19928	-	PDCL
1391	2252	15	49665375	49829523	355	26	1.3023	0.0964	0.067342	0.18456	+	FGF7
1392	54097	21	42638661	42779654	405	70	1.3145	0.094332	0.067446	0.18213	+	FAM3B
1393	80195	10	81788402	81902307	495	46	2.2502	0.012218	0.06746	0.0055859	+	TMEM254
1394	51427	7	64076461	64221960	347	36	1.3203	0.093367	0.067464	0.16936	+	ZNF107
1395	81839	1	116134574	116290845	529	50	1.2536	0.10499	0.067478	0.23035	+	VANGL1
1396	440044	11	64931311	65060579	183	24	1.2238	0.11051	0.067508	0.22633	+	SLC22A20
1397	50507	11	89007521	89372779	639	48	0.89125	0.1864	0.067529	0.59823	-	NOX4
1398	948	7	80181504	80358593	375	31	1.0411	0.14891	0.067587	0.4018	+	CD36
1399	348235	17	57137308	57282800	146	19	1.054	0.14594	0.067727	0.36794	-	SKA2
1400	79012	3	49845414	49957655	119	17	1.2836	0.099633	0.067739	0.18651	-	CAMKV
1401	285641	5	150605926	150733334	421	43	0.95967	0.16861	0.067782	0.46035	-	SLC36A3
1402	2357	19	52199023	52305150	427	72	1.1567	0.12371	0.067797	0.27993	-	FPR1
1403	51351	7	64384830	64501414	302	20	0.9304	0.17608	0.06782	0.49632	-	ZNF117
1404	390142	11	55490914	55591858	519	18	1.2029	0.11451	0.068201	0.28206	+	OR5D13
1405	23731	9	111727415	111932225	560	43	0.84669	0.19858	0.068326	0.61688	-	TMEM245
1406	23436	1	22253418	22365847	333	36	0.91713	0.17954	0.068388	0.52907	+	CELA3B
1407	117153	14	39653125	39772575	264	28	1.3779	0.084118	0.068531	0.1366	+	MIA2
1408	54386	16	75631602	75741340	295	30	1.3839	0.083187	0.068536	0.16173	+	TERF2IP
1409	390436	14	20535566	20636597	229	33	2.0638	0.019521	0.068563	0.012309	+	OR4K17
1410	9698	1	31354353	31588838	441	37	1.6758	0.046888	0.068603	0.054635	-	PUM1
1411	7621	22	24033772	24143279	250	35	1.0621	0.14409	0.068637	0.37427	-	ZNF70
1412	79913	20	37326933	37451089	381	33	1.106	0.13437	0.068749	0.31902	+	ACTR5
1413	79037	7	99766147	99869113	157	19	1.3455	0.089228	0.068798	0.17807	+	PVRIG
1414	3117	6	32555169	32662152	242	21	1.338	0.090454	0.068898	0.14494	+	HLA-DQA1
1415	5869	12	56317697	56440467	116	20	2.011	0.022163	0.068918	0.01558	+	RAB5B
1416	100526740	7	98964362	99113824	189	20	2.2351	0.012706	0.068994	0.0075078	-	ATP5J2-PTCD1
1417	54809	7	92678826	92797336	274	39	0.81393	0.20784	0.068997	0.67778	-	SAMD9
1418	10398	20	35119887	35228226	39	15	1.2688	0.10225	0.069037	0.18945	+	MYL9
1419	440279	15	54220557	54970806	2655	154	2.0877	0.018412	0.06916	0.01175	+	UNC13C
1420	2814	3	194065550	194169995	391	38	1.0527	0.14623	0.069355	0.36854	-	GP5
1421	4653	1	171554557	171671773	363	39	2.0411	0.020622	0.06961	0.015524	-	MYOC
1422	51012	20	57558200	57667901	209	28	1.6061	0.054121	0.069614	0.081331	-	SLMO2
1423	92170	10	135157621	135284174	209	28	1.1507	0.12492	0.069623	0.25605	+	MTG1
1424	57663	19	57581509	57693294	370	46	1.2142	0.11233	0.069739	0.22362	+	USP29
1425	8325	10	35877177	35980362	158	26	1.0049	0.15747	0.069893	0.42914	-	FZD8
1426	26526	19	11356798	11487672	283	27	1.3017	0.096504	0.069902	0.17741	+	TSPAN16
1427	63934	19	56900693	57038770	285	33	1.029	0.15174	0.069914	0.38326	-	ZNF667
1428	79803	10	103775124	103877795	133	29	1.249	0.10583	0.069915	0.20484	+	HPS6
1429	902	5	86637310	86758850	62	15	2.3865	0.0085041	0.069979	0.0033003	-	CCNH
1430	55220	1	205255193	205376218	338	39	0.85051	0.19752	0.070116	0.61022	-	KLHDC8A
1431	387763	11	43914106	44015433	357	56	1.4744	0.070181	0.07012	0.10374	+	C11orf96
1432	114823	19	54909605	55023196	332	46	1.3178	0.093783	0.070126	0.1827	+	LENG8
1433	51341	19	3995216	4116816	173	16	1.1473	0.12563	0.070162	0.24271	-	ZBTB7A
1434	944	9	117605623	117742875	296	37	2.019	0.021744	0.07022	0.018191	-	TNFSF8
1435	81929	18	12897983	13037536	314	36	1.0229	0.15317	0.070233	0.37324	+	SEH1L
1436	79586	2	220353669	220458487	191	28	1.3018	0.096497	0.070286	0.15939	-	CHPF
1437	84708	4	54276437	54568653	815	76	1.3888	0.082448	0.0703	0.14304	-	LNX1
1438	642475	8	144598362	144704928	346	34	1.743	0.040665	0.07043	0.037227	-	MROH6
1439	9310	19	44740501	44859606	247	20	1.4706	0.070697	0.070465	0.10912	-	ZNF235
1440	30009	17	45760610	45873485	255	25	1.75	0.040059	0.070527	0.046033	+	TBX21
1441	23258	11	9110372	9336882	471	31	1.369	0.085496	0.07057	0.13568	-	DENND5A
1442	23108	17	2609050	2991035	866	144	1.4838	0.068933	0.070576	0.11751	+	RAP1GAP2
1443	23523	22	24357642	24624596	291	25	0.94192	0.17312	0.070696	0.48626	+	CABIN1
1444	100130520	17	72506674	72613673	345	38	1.9442	0.025934	0.070776	0.02179	-	LOC100130520
1445	3860	17	39607233	39711865	343	35	0.9926	0.16045	0.07081	0.4117	-	KRT13
1446	124997	17	1569817	1691893	252	33	1.3476	0.088897	0.070818	0.15119	+	WDR81
1447	84694	6	90554188	90655819	280	43	1.3413	0.089918	0.070848	0.14984	+	GJA10
1448	5802	19	5155514	5390814	640	99	1.4938	0.06762	0.070875	0.10195	-	PTPRS
1449	23677	2	235810628	236014358	495	67	0.94273	0.17291	0.070921	0.49981	+	SH3BP4
1450	53347	21	43773971	43917790	553	78	1.0483	0.14725	0.071077	0.34655	+	UBASH3A
1451	728588	11	60451077	60556416	150	36	1.4509	0.073399	0.07118	0.15428	+	MS4A18
1452	346562	7	80037987	80191242	338	43	1.1636	0.1223	0.071187	0.28683	-	GNAT3
1453	7771	19	44780706	44910856	368	38	1.1407	0.127	0.071209	0.27452	-	ZNF112
1454	2977	11	106494738	106939171	1031	76	1.1957	0.1159	0.07124	0.24779	-	GUCY1A2
1455	84984	3	196383144	196489131	282	36	1.1905	0.11692	0.071328	0.25182	-	CEP19
1456	727910	17	1556084	1663662	173	22	1.4996	0.066862	0.071338	0.09023	-	TLCD2
1457	132243	3	129212057	129320310	227	25	1.384	0.083186	0.071402	0.137	+	H1FOO
1458	23344	12	56471985	56597259	82	18	1.2729	0.10153	0.071423	0.18768	+	ESYT1
1459	10975	19	1547154	1655483	28	7	1.3474	0.088932	0.071471	0.13086	-	UQCR11
1460	1466	12	77202495	77322814	297	38	1.5892	0.056009	0.071621	0.095979	-	CSRP2
1461	3046	11	5239580	5341373	317	45	1.3643	0.086229	0.07166	0.15899	-	HBE1
1462	10763	1	156588555	156697189	156	34	1.0059	0.15722	0.071664	0.39061	-	NES
1463	9156	1	241961491	242103241	473	66	1.5634	0.058978	0.071704	0.089755	+	EXO1
1464	80115	22	38430896	38556971	259	30	1.747	0.040319	0.071764	0.037832	-	BAIAP2L2
1465	114926	8	42346298	42458140	248	20	0.91668	0.17965	0.071778	0.50794	+	SMIM19
1466	100188893	6	41705181	41807634	155	25	1.4652	0.071427	0.071808	0.10798	+	TOMM6
1467	51540	2	238919565	239058054	446	42	0.99254	0.16047	0.072058	0.42328	+	SCLY
1468	64789	1	40924391	41032228	315	27	1.2484	0.10594	0.072066	0.21355	+	EXO5
1469	113451	1	33496711	33636132	152	16	1.3054	0.095878	0.072282	0.20889	+	AZIN2
1470	2687	22	24565622	24691317	183	26	0.90341	0.18316	0.072326	0.48736	-	GGT5
1471	7402	6	144556434	145224170	1251	96	1.1976	0.11554	0.072334	0.26791	+	UTRN
1472	100506581	16	87286404	87401468	333	42	0.91469	0.18018	0.072488	0.49482	-	C16orf95
1473	28962	6	108312613	108445941	318	33	1.909	0.028133	0.072572	0.02474	-	OSTM1
1474	55889	15	72897038	73009738	102	23	1.1116	0.13316	0.072603	0.30384	+	GOLGA6B
1475	60481	6	53082196	53263977	479	40	1.4615	0.071937	0.072774	0.11867	-	ELOVL5
1476	79080	11	60559429	60668561	276	30	1.4714	0.070589	0.072781	0.097586	+	CCDC86
1477	54986	3	41238090	42106080	2105	62	1.0834	0.13933	0.072783	0.3625	-	ULK4
1478	27177	2	113729668	113860444	453	39	1.5734	0.057818	0.07297	0.075299	-	IL36B
1479	5213	12	48449656	48590187	353	26	1.3241	0.092732	0.073249	0.15961	+	PFKM
1480	2004	12	96538207	96711606	369	60	1.053	0.14618	0.073363	0.36234	+	ELK3
1481	6595	9	1965342	2243624	936	141	1.3016	0.096526	0.0736	0.19074	+	SMARCA2
1482	130733	2	39842638	39995103	276	28	1.5667	0.058593	0.073601	0.085866	+	TMEM178A
1483	57513	17	73446341	73561664	349	33	1.2122	0.11272	0.07362	0.19445	-	CASKIN2
1484	54763	3	123637862	123761017	146	21	1.868	0.030878	0.073809	0.027808	-	ROPN1
1485	23358	1	55482032	55731039	561	56	1.0258	0.15249	0.073844	0.39812	-	USP24
1486	6638	15	25018794	25273730	737	106	1.9366	0.026396	0.073876	0.029435	+	SNRPN
1487	131578	3	194025976	194140472	381	38	1.0446	0.14809	0.07392	0.34163	-	LRRC15
1488	2086	7	64400733	64517124	304	19	0.8975	0.18472	0.073946	0.49754	-	ERV3-1
1489	126549	19	17342454	17448455	290	33	1.0997	0.13573	0.07404	0.29939	+	ANKLE1
1490	463	16	72766784	73142534	697	116	1.5357	0.062306	0.074097	0.09314	-	ZFHX3
1491	84309	16	4693526	4795860	317	28	1.3879	0.082589	0.074253	0.13091	+	NUDT16L1
1492	147183	17	38854273	38961584	260	40	1.2742	0.1013	0.074327	0.18661	-	KRT25
1493	79627	6	71948477	72063267	364	38	1.1643	0.12214	0.074364	0.25075	+	OGFRL1
1494	10393	4	145865727	146069693	141	24	1.5392	0.061884	0.074393	0.091586	-	ANAPC10
1495	653657	19	7006216	7108645	152	26	1.1822	0.11857	0.074415	0.22163	-	MBD3L3
1496	387264	11	1555572	1656513	351	31	1.5357	0.062306	0.074527	0.075544	-	KRTAP5-1
1497	116835	20	3663317	3783758	296	50	1.6908	0.045439	0.074545	0.052209	+	HSPA12B
1498	5689	6	170794204	170912417	310	21	1.4017	0.080497	0.074654	0.12047	-	PSMB1
1499	52	2	214869	328283	184	22	2.1318	0.016511	0.07467	0.010572	+	ACP1
1500	149233	1	67554590	67775662	650	64	1.4881	0.068362	0.074704	0.096097	+	IL23R
1501	2099	6	151961631	152474409	1213	101	0.78226	0.21703	0.074785	0.67173	+	ESR1
1502	4090	5	135418536	135568422	304	25	0.98175	0.16311	0.074817	0.4144	+	SMAD5
1503	57569	11	110397759	110633912	573	41	1.3734	0.084811	0.074855	0.15384	-	ARHGAP20
1504	143872	11	100508407	100911656	1526	97	0.88156	0.18901	0.075031	0.52737	+	ARHGAP42
1505	3735	16	75611622	75731585	303	33	1.341	0.089961	0.075071	0.16797	-	KARS
1506	10350	17	66920773	67108442	306	32	1.4882	0.068352	0.075113	0.10988	-	ABCA9
1507	196743	10	135142741	135255198	162	20	1.2507	0.10551	0.075149	0.17939	+	PAOX
1508	147949	19	56865383	56986400	243	39	1.0186	0.1542	0.075244	0.38075	+	ZNF583
1509	79703	11	66462207	66663997	187	26	0.88588	0.18784	0.075296	0.51793	+	C11orf80
1510	283171	11	130492851	130637247	246	41	1.2816	0.099985	0.075334	0.20152	+	C11orf44
1511	26508	1	40039103	40155348	314	44	1.0962	0.13649	0.075351	0.29249	-	HEYL
1512	5159	5	149443402	149585447	375	67	0.95089	0.17083	0.075637	0.42936	-	PDGFRB
1513	9289	16	57603442	57748944	399	79	1.7604	0.039171	0.07576	0.040348	+	ADGRG1
1514	3362	1	19941780	20056055	292	42	1.1699	0.12101	0.075839	0.24039	+	HTR6
1515	54556	7	120540817	120665711	268	22	0.98395	0.16257	0.075953	0.41498	+	ING3
1516	1609	4	902672	1017348	95	13	1.1958	0.11589	0.075981	0.19461	-	DGKQ
1517	29958	5	78243387	78415497	480	44	1.2396	0.10757	0.076073	0.20201	-	DMGDH
1518	7093	10	98074363	98323683	574	59	1.2861	0.099195	0.07611	0.17304	-	TLL2
1519	130612	2	220358385	220465317	180	28	1.2853	0.099345	0.076115	0.15466	+	TMEM198
1520	26039	20	60668816	60807566	337	36	0.90797	0.18195	0.07619	0.48719	+	SS18L1
1521	7327	21	46138495	46271751	450	54	2.3356	0.0097567	0.076202	0.0058086	-	UBE2G2
1522	6513	1	43341046	43474847	348	47	1.139	0.12736	0.076255	0.28261	-	SLC2A1
1523	8667	8	117607055	117818258	428	36	1.4672	0.071155	0.076322	0.10327	-	EIF3H
1524	386677	21	45909068	46010078	145	24	1.123	0.13072	0.076587	0.26242	-	KRTAP10-1
1525	9414	9	71664875	71920124	903	75	1.8072	0.035363	0.076652	0.038086	+	TJP2
1526	23373	19	18744425	18943143	373	46	1.2376	0.10793	0.076698	0.18574	+	CRTC1
1527	9369	14	78586716	80384633	3746	278	1.2176	0.11169	0.076747	0.24897	+	NRXN3
1528	85459	11	93344816	93513524	236	26	1.0819	0.13966	0.076765	0.31635	+	CEP295
1529	4159	20	54773788	54874871	374	44	1.0516	0.14649	0.076866	0.33307	+	MC3R
1530	59336	6	100004650	100113454	357	34	1.6547	0.048991	0.076913	0.061393	+	PRDM13
1531	2590	1	230152956	230467875	984	116	1.4366	0.075411	0.076937	0.13793	+	GALNT2
1532	9441	19	16635718	16789015	252	27	1.3215	0.093166	0.076983	0.15374	-	MED26
1533	886	4	26433018	26542042	289	39	2.3875	0.0084814	0.076998	0.0031699	-	CCKAR
1534	23554	7	120377374	120548420	351	22	0.85425	0.19648	0.077056	0.5786	-	TSPAN12
1535	22917	11	60585015	60693164	245	28	1.5189	0.064396	0.077068	0.07964	+	ZP1
1536	10285	10	112002798	112114707	241	27	0.93773	0.17419	0.077163	0.43503	-	SMNDC1
1537	3886	17	39582941	39687392	421	36	0.97157	0.16563	0.077196	0.39792	-	KRT35
1538	54472	11	1245598	1380892	405	33	1.3964	0.081294	0.077286	0.1276	-	TOLLIP
1539	171389	11	228570	335388	244	28	0.98077	0.16335	0.077297	0.38003	+	NLRP6
1540	352954	7	99748276	99919855	207	25	1.6651	0.047946	0.077315	0.054769	-	GATS
1541	55515	2	220328892	220453494	222	30	1.265	0.10294	0.077417	0.16605	+	ASIC4
1542	23094	19	38347525	38749009	947	81	1.3791	0.083925	0.077472	0.1395	+	SIPA1L3
1543	656	1	40173903	40304533	295	46	0.92454	0.1776	0.077625	0.4587	-	BMP8B
1544	51741	16	78083310	79296567	6341	473	0.86922	0.19236	0.07767	0.55118	+	WWOX
1545	7024	12	51437539	51616926	400	39	1.3543	0.087813	0.077693	0.13643	-	TFCP2
1546	84893	10	5881535	6029558	542	61	1.3349	0.090949	0.077769	0.16995	+	FBXO18
1547	55800	11	123449895	123575315	466	61	1.5928	0.055603	0.07781	0.076328	-	SCN3B
1548	4600	21	42683918	42830870	447	65	1.1749	0.12003	0.077841	0.25853	+	MX2
1549	2318	7	128420436	128549328	285	35	0.92276	0.17807	0.077913	0.45848	+	FLNC
1550	51074	11	34853842	34987939	623	30	1.148	0.12548	0.077941	0.26679	-	APIP
1551	3535	22	22330474	23315085	2174	171	0.92805	0.17669	0.077943	0.47434	+	IGL
1552	23132	3	51525596	51747634	156	23	1.6588	0.048577	0.077999	0.062644	+	RAD54L2
1553	84102	12	105146331	105402476	509	38	2.2489	0.01226	0.078048	0.0076614	-	SLC41A2
1554	2859	2	241494825	241620676	471	57	0.88969	0.18682	0.078109	0.49727	+	GPR35
1555	340252	7	63930255	64073505	360	25	0.94294	0.17286	0.078155	0.43561	-	ZNF680
1556	6596	3	148697904	148854341	320	30	0.97981	0.16359	0.078421	0.40085	-	HLTF
1557	949	12	125212174	125398519	490	78	1.3079	0.095458	0.078479	0.18276	-	SCARB1
1558	78988	13	21700372	21803223	273	30	1.767	0.038617	0.078578	0.032375	+	MRPL57
1559	10486	6	17343447	17608023	587	66	0.74014	0.22961	0.078609	0.70193	+	CAP2
1560	159195	10	75207296	75385433	168	7	1.1467	0.12575	0.078675	0.28583	-	USP54
1561	101927562	11	1525746	1627687	278	20	1.0314	0.15119	0.078727	0.32794	-	LOC101927562
1562	10793	7	64313620	64441955	408	25	0.79301	0.21389	0.078766	0.61218	+	ZNF273
1563	158219	9	15120842	15357358	716	88	0.71099	0.23854	0.078809	0.74154	-	TTC39B
1564	5138	11	72237184	72435497	499	59	1.4323	0.07603	0.07885	0.10489	-	PDE2A
1565	56288	10	34348488	35154253	1557	89	1.6481	0.049667	0.078889	0.058317	-	PARD3
1566	55623	16	20682498	20803405	228	22	1.1834	0.11833	0.078948	0.23179	-	THUMPD1
1567	64224	7	35622269	35784772	319	29	1.6215	0.052456	0.07906	0.055867	-	HERPUD2
1568	29802	22	24044930	24146630	251	34	1.0487	0.14717	0.079101	0.33729	-	VPREB3
1569	221223	16	55830066	56039943	549	52	1.2786	0.10051	0.079111	0.19256	-	CES5A
1570	8689	17	39592388	39698799	409	37	0.94717	0.17178	0.079142	0.41609	-	KRT36
1571	6908	6	170813384	170931958	262	18	1.4907	0.068024	0.079174	0.089161	+	TBP
1572	10166	13	41313547	41436601	191	20	1.9119	0.027942	0.07925	0.017785	+	SLC25A15
1573	8688	17	39526809	39630822	391	27	1.0511	0.14661	0.07926	0.30682	-	KRT37
1574	129080	22	29551901	29705586	365	52	1.4245	0.077144	0.079339	0.10986	+	EMID1
1575	23539	22	38424144	38529170	183	26	1.7865	0.03701	0.079382	0.029181	-	SLC16A8
1576	258010	11	22793598	22901382	246	31	1.511	0.065397	0.079466	0.085509	-	SVIP
1577	57186	20	20320202	20743281	509	42	1.0733	0.14157	0.079592	0.35837	-	RALGAPA2
1578	84861	22	20745806	20900170	378	38	1.508	0.065781	0.079628	0.083302	-	KLHL22
1579	83697	5	139689787	139804722	119	26	1.4852	0.068749	0.079713	0.088731	+	SLC4A9
1580	51588	19	3957749	4088067	203	20	1.0448	0.14806	0.079752	0.29611	+	PIAS4
1581	440345	16	21795889	21919843	15	5	1.2279	0.10975	0.079932	0.17276	-	NPIPB4
1582	3705	14	93353259	93632263	695	76	1.0285	0.15187	0.079967	0.34918	-	ITPK1
1583	41	12	50401420	50527405	171	24	1.8404	0.032853	0.080028	0.03251	+	ASIC1
1584	51574	4	113508120	113628748	197	28	0.91341	0.18051	0.08006	0.46573	+	LARP7
1585	83698	7	71194476	71962136	1913	110	0.85692	0.19574	0.080078	0.52904	-	CALN1
1586	5191	6	137093702	137285072	387	38	1.7282	0.041978	0.080113	0.053422	+	PEX7
1587	84077	3	14666606	14864543	480	67	1.1978	0.11549	0.080116	0.21029	+	C3orf20
1588	23131	17	42422645	42630957	254	28	0.83341	0.20231	0.080173	0.57141	-	GPATCH8
1589	646174	16	3493484	3595758	266	30	1.0825	0.13951	0.080208	0.28762	-	C16orf90
1590	1650	1	20928260	21038037	394	50	1.2239	0.1105	0.080377	0.19322	-	DDOST
1591	79605	1	230407392	230611674	687	87	1.1767	0.11965	0.080415	0.24029	-	PGBD5
1592	56624	10	51897000	52058370	197	28	1.0614	0.14425	0.080455	0.3137	-	ASAH2
1593	116985	11	72346114	72513465	382	36	1.7108	0.043559	0.080496	0.040589	-	ARAP1
1594	7375	3	49264577	49427536	174	19	1.4069	0.079727	0.080571	0.13609	-	USP4
1595	135946	7	143651090	143752025	281	18	1.0961	0.13652	0.080597	0.30119	+	OR6B1
1596	114026	19	57595464	57706570	367	47	1.1873	0.11756	0.080672	0.20995	-	ZIM3
1597	3882	17	39565765	39673638	436	35	0.94764	0.17166	0.080717	0.4038	-	KRT32
1598	2355	2	28565704	28687516	318	56	1.6254	0.052039	0.080756	0.063156	+	FOSL2
1599	5939	12	56865607	57044859	208	31	1.3923	0.081919	0.080861	0.11968	+	RBMS2
1600	164832	2	100839753	100989195	386	26	1.1433	0.12645	0.080869	0.26795	-	LONRF2
1601	3396	17	72958760	73067356	219	28	0.80267	0.21108	0.08087	0.57011	+	ICT1
1602	55969	20	35184137	35290960	62	23	0.87177	0.19167	0.08089	0.50156	+	C20orf24
1603	81542	14	51656886	51774373	298	34	1.4391	0.075058	0.080893	0.11878	+	TMX1
1604	613210	8	11781446	11882108	405	32	1.3449	0.089332	0.081066	0.1281	-	DEFB136
1605	578	6	33490323	33598072	414	35	0.86898	0.19243	0.081089	0.49795	-	BAK1
1606	138050	8	42945592	43107970	158	13	1.3589	0.087091	0.081115	0.12432	+	HGSNAT
1607	80150	11	62054774	62210887	410	34	1.054	0.14595	0.081347	0.31136	+	ASRGL1
1608	3749	1	110703336	110826674	285	42	0.97648	0.16441	0.081348	0.39173	+	KCNC4
1609	2633	1	89467987	89581043	280	25	0.93513	0.17486	0.081422	0.41446	-	GBP1
1610	11201	18	51745849	51887583	378	29	1.0717	0.14193	0.081426	0.29314	+	POLI
1611	84305	12	56245197	56371697	96	18	2.1871	0.014367	0.081562	0.010717	-	WIBG
1612	8766	15	66111629	66234329	218	20	1.1335	0.12851	0.081567	0.2556	+	RAB11A
1613	10603	7	101878405	102012178	241	37	1.2668	0.10262	0.081685	0.15153	+	SH2B2
1614	100653515	17	76836577	76949299	345	39	1.3153	0.094209	0.081799	0.15185	-	CEP295NL
1615	8906	14	23978777	24088754	83	24	1.2175	0.11172	0.082329	0.19362	-	AP1G2
1616	4647	11	76789302	76976286	451	60	1.1602	0.12298	0.082355	0.23098	+	MYO7A
1617	3913	3	49108547	49220599	102	17	1.1949	0.11606	0.082425	0.22616	-	LAMB2
1618	7366	4	69462315	69586494	228	18	1.1136	0.13273	0.082433	0.25944	-	UGT2B15
1619	10284	13	21664653	21773224	365	45	0.92904	0.17643	0.082502	0.44226	+	SAP18
1620	90592	19	11985883	12111588	229	20	0.98763	0.16167	0.082547	0.36596	+	ZNF700
1621	388552	19	45632003	45735058	223	45	0.98047	0.16343	0.082557	0.36557	+	BLOC1S3
1622	440026	11	9252201	9386315	358	32	1.4213	0.077613	0.08256	0.098712	-	TMEM41B
1623	81617	13	49832786	50068221	511	50	0.82947	0.20342	0.082644	0.53966	-	CAB39L
1624	81488	15	57948901	58059753	243	48	1.4083	0.079525	0.083052	0.12011	+	POLR2M
1625	348801	3	100070037	100225170	232	30	1.1898	0.11706	0.083148	0.19208	+	LNP1
1626	10580	10	97021530	97371171	1015	99	0.98676	0.16188	0.083214	0.37329	-	SORBS1
1627	3991	19	42855664	42981578	81	8	1.4461	0.074076	0.083228	0.08908	-	LIPE
1628	5161	4	96711239	96812625	467	33	2.3531	0.0093076	0.083358	0.0046926	+	PDHA2
1629	55552	19	11782080	11899824	210	29	1.5275	0.063313	0.083443	0.070449	-	ZNF823
1630	55689	3	183365587	183580413	435	36	1.6182	0.052807	0.083464	0.06454	+	YEATS2
1631	1892	10	135125987	135236908	151	17	1.2695	0.10213	0.083535	0.14446	-	ECHS1
1632	26707	6	29091311	29192351	13	3	1.1983	0.1154	0.08361	0.20205	+	OR2J2
1633	4650	19	17136591	17374104	757	83	1.4164	0.078329	0.083672	0.11584	+	MYO9B
1634	94241	8	95888200	96011615	302	25	0.91536	0.18	0.083673	0.44119	-	TP53INP1
1635	90141	14	90211499	90471148	598	60	2.1836	0.014497	0.0837	0.0084175	-	EFCAB11
1636	284390	19	12025796	12141214	177	14	1.0048	0.1575	0.083785	0.36349	+	ZNF763
1637	84680	11	44037729	44155791	314	43	1.0463	0.14772	0.083863	0.31626	+	ACCS
1638	55188	12	107118077	107333094	362	34	0.77581	0.21893	0.084078	0.61268	+	RIC8B
1639	80059	2	76924849	77799502	2485	148	2.1775	0.014723	0.084079	0.0087652	-	LRRTM4
1640	51617	5	173422607	173586182	356	41	1.5305	0.062952	0.084197	0.099954	+	HMP19
1641	80176	1	9285202	9479591	593	94	0.71793	0.2364	0.084213	0.68242	+	SPSB1
1642	5066	5	102151527	102416809	336	25	0.76598	0.22184	0.084254	0.63267	+	PAM
1643	54490	4	70096217	70210768	111	14	0.79628	0.21293	0.084282	0.55845	+	UGT2B28
1644	11334	3	50312341	50415668	57	13	1.0928	0.13723	0.084357	0.2881	-	TUSC2
1645	2876	3	49344609	49445791	129	15	1.4571	0.072544	0.084387	0.11278	-	GPX1
1645	5493	16	4882508	5037136	587	68	1.5658	0.058701	0.084387	0.061223	-	PPL
1647	6129	8	74152874	74255869	235	33	0.93166	0.17575	0.084404	0.42127	-	RPL7
1648	7874	16	8935951	9107341	515	58	1.0282	0.15194	0.084419	0.31127	-	USP7
1649	1463	19	19272773	19413061	311	36	0.87089	0.19191	0.084451	0.47413	+	NCAN
1650	134266	5	148674364	148784146	188	30	1.4737	0.070286	0.08447	0.092049	+	GRPEL2
1651	55341	3	194311517	194443206	556	56	1.2403	0.10744	0.084477	0.17657	-	LSG1
1652	84953	11	12258447	12433687	530	69	1.0089	0.15652	0.084506	0.34137	+	MICALCL
1653	5134	6	170834660	170943780	208	15	1.5766	0.057439	0.084596	0.06281	-	PDCD2
1654	10406	20	44048229	44160172	267	39	0.80059	0.21168	0.084661	0.57536	+	WFDC2
1655	157695	8	389790	545781	614	72	2.08	0.018763	0.084822	0.0089291	-	TDRP
1656	58486	11	10824251	10929620	246	30	1.0166	0.15468	0.084896	0.32959	-	ZBED5
1657	119692	11	4819467	4920438	327	34	0.84611	0.19875	0.084915	0.51342	-	OR51S1
1658	7399	1	215746236	216646738	1895	169	1.4464	0.074026	0.08496	0.1058	-	USH2A
1659	6619	9	15372694	15516747	393	38	1.6884	0.04567	0.085073	0.053935	+	SNAPC3
1660	51412	7	100190720	100304084	141	20	1.1444	0.12622	0.085117	0.24535	-	ACTL6B
1661	120237	11	20127760	20231870	362	63	0.9296	0.17629	0.085298	0.41589	-	DBX1
1662	4680	19	42209398	42326113	187	27	1.1847	0.11808	0.08534	0.21809	+	CEACAM6
1663	3910	6	112379134	112625924	541	60	0.80708	0.20981	0.085477	0.55864	-	LAMA4
1664	54680	1	86065106	86224116	378	35	1.0152	0.155	0.085478	0.31602	-	ZNHIT6
1665	219436	11	55513032	55613976	424	19	1.1045	0.1347	0.085503	0.28476	+	OR5D14
1666	7466	4	6221577	6354992	482	52	0.95673	0.16935	0.085514	0.38347	+	WFS1
1667	63826	17	2157244	2278553	300	37	1.1933	0.11638	0.085578	0.22488	+	SRR
1668	53637	19	10573418	10678668	272	36	0.95071	0.17088	0.085653	0.38267	-	S1PR5
1669	3118	6	32659156	32764664	1655	51	1.5931	0.055569	0.085673	0.063119	+	HLA-DQA2
1670	80135	1	84894920	85014033	323	30	1.5649	0.058808	0.085708	0.062113	+	RPF1
1671	116115	19	42674492	42782353	91	7	1.2033	0.11442	0.08581	0.18107	+	ZNF526
1672	6788	8	99416859	100004799	605	52	1.5088	0.065674	0.085819	0.084367	-	STK3
1673	55502	2	239096908	239198681	320	35	0.90653	0.18233	0.085887	0.44271	-	HES6
1674	8687	17	39542621	39647596	420	28	1.005	0.15744	0.085891	0.31705	-	KRT38
1675	150350	22	40089049	40339794	264	33	1.2569	0.1044	0.085893	0.1955	-	ENTHD1
1676	100506248	12	12213949	12315090	293	46	1.4438	0.074394	0.085917	0.10088	+	LOC100506248
1677	4849	19	54591436	54709446	191	30	0.90673	0.18228	0.085935	0.44456	+	CNOT3
1678	9557	1	146664291	146817447	569	30	2.0117	0.022124	0.085954	0.01413	+	CHD1L
1679	344838	3	142630073	142732818	255	43	0.8886	0.18711	0.086002	0.46921	-	PAQR9
1680	137964	8	41385702	41532520	433	41	0.96656	0.16688	0.086009	0.35395	+	AGPAT6
1681	1773	16	3611772	3762689	330	28	1.1484	0.12539	0.086038	0.23701	+	DNASE1
1682	1943	19	1236153	1351430	24	7	1.2338	0.10865	0.086042	0.16216	+	EFNA2
1683	4887	4	156044924	156188248	456	38	1.4313	0.076167	0.086128	0.0949	+	NPY2R
1684	49854	21	43356940	43480496	424	71	1.1164	0.13213	0.08618	0.2406	-	ZBTB21
1685	393046	7	143697495	143798430	316	18	1.0698	0.14236	0.086327	0.314	+	OR2A5
1686	256987	5	79357050	79601898	799	94	0.7341	0.23144	0.086403	0.64266	-	SERINC5
1687	5859	3	49083365	49192562	78	15	1.2288	0.10957	0.086456	0.20216	-	QARS
1688	58528	6	90024335	90171995	299	50	1.2449	0.10658	0.086573	0.17359	-	RRAGD
1689	284391	19	12125546	12238626	183	21	1.2859	0.099236	0.086637	0.1756	+	ZNF844
1690	170370	10	50289199	50392065	360	32	0.98113	0.16326	0.08666	0.34354	-	FAM170B
1691	8943	19	2050987	2201556	240	21	1.0407	0.149	0.086708	0.29886	-	AP3D1
1692	10869	3	49095479	49208371	86	16	1.2249	0.11031	0.086742	0.20337	-	USP19
1692	128338	1	111609954	111732838	238	25	0.94103	0.17334	0.086742	0.40407	-	DRAM2
1694	54205	7	25108270	25214980	331	31	1.3505	0.088432	0.086825	0.12842	-	CYCS
1695	147912	19	46218043	46322497	153	19	1.3671	0.085793	0.086905	0.11765	-	SIX5
1696	285382	3	184745838	184920802	468	33	1.4606	0.072069	0.086932	0.092697	-	C3orf70
1697	7113	21	42786236	42930085	537	60	1.1884	0.11733	0.086994	0.19954	-	TMPRSS2
1698	9463	22	38403262	38521708	184	26	1.7345	0.041419	0.087071	0.0328	+	PICK1
1699	79591	10	103555356	103865932	363	37	1.1219	0.13095	0.087117	0.2326	-	C10orf76
1700	10750	17	18873969	19000336	69	16	1.4349	0.075651	0.087358	0.083321	-	GRAP
1701	203102	8	38915050	39192436	506	39	2.0455	0.020402	0.087373	0.013041	+	ADAM32
1702	9992	21	35686323	35793440	219	43	0.87827	0.1899	0.087408	0.45835	+	KCNE2
1703	10491	3	33105450	33239265	351	39	0.90266	0.18335	0.08743	0.44322	+	CRTAP
1704	10099	15	77286359	77413570	170	30	2.1602	0.015378	0.087454	0.0074175	-	TSPAN3
1705	5653	19	51411887	51522929	281	37	1.3461	0.089141	0.087518	0.12699	-	KLK6
1706	22837	2	165486695	165748678	557	44	1.5682	0.058421	0.087553	0.070199	-	COBLL1
1707	165631	3	122246435	122407894	499	58	1.6818	0.046305	0.087604	0.039419	+	PARP15
1708	8290	1	228562546	228663026	130	21	0.87896	0.18971	0.08764	0.48002	-	HIST3H3
1709	2029	1	150544599	150652098	164	22	2.2604	0.011897	0.087695	0.0049282	-	ENSA
1710	51138	4	83906239	84046971	179	23	1.3328	0.091307	0.0877	0.14515	+	COPS4
1711	387338	1	46755849	46880824	327	20	0.9603	0.16845	0.087725	0.38512	+	NSUN4
1712	6940	5	178088522	178207703	407	50	1.6474	0.049738	0.087727	0.056401	-	ZNF354A
1713	200407	2	101914816	102053965	302	34	1.6998	0.044585	0.087841	0.039353	-	CREG2
1714	57111	1	155980966	156090295	122	27	0.85846	0.19532	0.087906	0.46534	+	RAB25
1715	56302	7	142555648	142680820	253	20	2.3275	0.0099703	0.08798	0.0047736	-	TRPV5
1716	54810	1	78460646	78654129	423	35	0.95453	0.16991	0.088054	0.3782	+	GIPC2
1717	7620	19	11948633	12075366	232	25	1.746	0.040407	0.08808	0.029432	+	ZNF69
1718	93109	3	194258402	194404150	628	68	1.1768	0.11963	0.088162	0.21487	-	TMEM44
1719	7704	11	113880289	114176702	706	110	0.63358	0.26318	0.088194	0.79417	+	ZBTB16
1720	84549	8	33292685	33408778	332	26	0.94256	0.17295	0.088206	0.39797	+	MAK16
1721	5905	22	41590781	41732255	231	20	1.0649	0.14345	0.088217	0.2766	-	RANGAP1
1722	23504	12	130830681	131250828	1619	198	0.78965	0.21487	0.088263	0.57011	-	RIMBP2
1723	60672	1	12029299	12142106	212	30	1.003	0.15793	0.088492	0.32918	+	MIIP
1724	5275	18	61204431	61316433	196	17	0.94706	0.1718	0.088548	0.41849	+	SERPINB13
1725	284069	17	42381101	42491235	139	30	0.80606	0.2101	0.088606	0.53831	-	FAM171A2
1726	128989	22	19954554	20103449	445	47	1.9255	0.027085	0.08864	0.017646	+	TANGO2
1727	80117	3	160344948	160446236	254	27	1.8252	0.033989	0.088772	0.029827	+	ARL14
1728	123872	16	84128865	84261524	538	69	1.0481	0.14729	0.088824	0.28472	+	DNAAF1
1729	51629	17	42346993	42452217	163	32	0.86283	0.19412	0.08891	0.4731	-	SLC25A39
1730	8554	15	68296572	68533797	258	26	1.1258	0.13012	0.089043	0.26632	+	PIAS1
1731	55034	18	33717480	33898685	450	66	1.5158	0.064788	0.089105	0.094616	+	MOCOS
1732	162461	17	48298767	48408846	321	68	1.7632	0.038935	0.089132	0.032772	+	TMEM92
1733	353299	1	182369256	182579732	526	54	1.7188	0.042822	0.089141	0.037242	+	RGSL1
1734	1080	7	117070017	117358719	389	33	1.8159	0.03469	0.089153	0.028048	+	CFTR
1735	5563	1	57060990	57231008	542	50	0.75202	0.22602	0.089215	0.61433	+	PRKAA2
1736	149111	1	224684563	224978269	666	59	1.5212	0.064103	0.08924	0.067849	+	CNIH3
1737	388553	19	46186515	46317376	201	27	1.2252	0.11024	0.089301	0.17003	+	BHMG1
1738	80155	4	140172621	140361935	326	21	0.84091	0.2002	0.089326	0.49261	+	NAA15
1739	375287	2	152054728	152168389	248	20	1.03	0.15152	0.089408	0.32682	-	RBM43
1740	619208	6	112358674	112473993	238	20	1.0178	0.15439	0.089459	0.32719	+	FAM229B
1741	2166	1	46809939	46929520	359	28	0.72033	0.23566	0.089489	0.65213	+	FAAH
1742	84872	12	56462030	56567143	83	18	1.2267	0.10997	0.089581	0.17381	+	ZC3H10
1743	5074	12	79935745	80134877	129	19	0.81331	0.20802	0.089585	0.52724	-	PAWR
1744	84876	12	122014455	122129946	183	17	1.2137	0.11244	0.089681	0.17701	+	ORAI1
1745	10498	19	10932253	11083453	200	23	1.1959	0.11586	0.089757	0.18678	+	CARM1
1746	140739	2	238825587	239001423	456	34	0.94336	0.17275	0.089815	0.40278	+	UBE2F
1747	4821	20	21441655	21544664	181	29	0.89925	0.18426	0.089842	0.40774	-	NKX2-2
1748	272	11	10421846	10579126	530	67	1.7443	0.040556	0.089848	0.034164	+	AMPD3
1749	10739	22	32536422	32653223	374	41	1.3392	0.090249	0.090071	0.13038	-	RFPL2
1750	1280	12	48316748	48448285	383	40	0.91163	0.18098	0.090156	0.39454	-	COL2A1
1751	53820	21	38328456	38441959	376	39	1.5967	0.055162	0.090218	0.051484	+	RIPPLY3
1752	64981	19	17363616	17467652	309	32	0.89823	0.18453	0.090304	0.40921	+	MRPL34
1753	64782	15	89114527	89225512	353	43	1.1528	0.12449	0.090446	0.21113	+	AEN
1754	23779	22	45098438	45308664	1078	133	0.73703	0.23055	0.090565	0.63217	+	ARHGAP8
1755	167826	6	137763336	137865531	396	46	1.1694	0.12112	0.090569	0.20028	-	OLIG3
1756	2064	17	37794167	37934915	176	18	2.189	0.014298	0.090661	0.005517	+	ERBB2
1757	11168	9	15414064	15561003	350	31	1.6576	0.048695	0.090707	0.052869	-	PSIP1
1758	199870	1	28002490	28139426	173	14	1.162	0.12262	0.090715	0.24099	+	FAM76A
1759	391107	1	158339718	158440656	329	31	0.67198	0.2508	0.090766	0.70227	-	OR10K2
1760	433	17	6954641	7068292	348	54	0.8934	0.18582	0.090796	0.41978	-	ASGR2
1761	9802	12	51582508	51690501	204	26	1.1991	0.11525	0.090823	0.19428	+	DAZAP2
1762	3669	15	89128904	89248881	385	44	1.0717	0.14193	0.090846	0.26056	+	ISG20
1763	158434	9	98818943	98928693	310	56	1.7243	0.042328	0.090877	0.036162	-	LOC158434
1764	25854	4	186976054	187143817	507	65	1.7313	0.041698	0.09088	0.039424	+	FAM149A
1765	122258	13	112980649	113139009	541	59	1.4635	0.07167	0.090945	0.083608	+	SPACA7
1766	64411	5	140982968	141111800	325	58	0.91138	0.18105	0.090955	0.39268	-	ARAP3
1767	91860	15	68433043	68548448	124	14	1.757	0.039459	0.091147	0.044309	-	CALML4
1768	4599	21	42742520	42881141	459	57	1.1454	0.12603	0.091157	0.23656	+	MX1
1769	440957	3	52520002	52624586	156	20	1.5046	0.066216	0.091179	0.07591	+	SMIM4
1770	60526	2	20833788	21072890	480	69	1.1737	0.12026	0.091196	0.22951	-	LDAH
1771	5036	12	56448103	56557694	93	18	1.2168	0.11184	0.091254	0.17693	+	PA2G4
1772	1534	17	61459665	61573724	119	22	1.4682	0.071026	0.091273	0.092795	-	CYB561
1773	100170229	19	44066253	44168650	216	36	1.0195	0.15397	0.091356	0.32108	+	SRRM5
1774	2488	11	30202563	30306824	175	16	0.71922	0.236	0.091479	0.64777	+	FSHB
1775	55274	6	170054001	170174106	260	26	0.92702	0.17696	0.091486	0.38813	-	PHF10
1776	911	1	158209563	158314564	147	21	0.81521	0.20748	0.09152	0.50316	+	CD1C
1777	126205	19	56409198	56549995	671	76	1.5474	0.060885	0.091524	0.068567	+	NLRP8
1778	2585	15	49397974	49709955	502	31	1.1197	0.13143	0.091525	0.23106	+	GALK2
1779	54982	15	68449330	68572081	129	15	1.6056	0.054177	0.091585	0.066091	-	CLN6
1780	58506	19	50095382	50211906	115	15	1.0906	0.13772	0.091651	0.23919	+	SCAF1
1781	285440	4	187062565	187184617	382	44	0.81211	0.20836	0.091662	0.51649	+	CYP4V2
1782	6749	11	57043459	57153351	230	32	1.0854	0.13888	0.091694	0.25621	-	SSRP1
1783	25829	22	38562415	38719040	359	40	1.457	0.072563	0.091727	0.085639	-	TMEM184B
1784	150297	22	32494993	32605510	343	35	1.3808	0.083672	0.091784	0.11503	-	C22orf42
1785	5129	1	205423684	205551921	396	66	0.86918	0.19237	0.091802	0.45544	+	CDK18
1786	5816	22	37146745	37265517	274	45	0.98054	0.16341	0.091805	0.32794	-	PVALB
1787	89927	16	15478325	15732116	351	51	0.67506	0.24982	0.091815	0.6876	+	C16orf45
1788	23521	19	49940811	50045565	153	17	1.0674	0.1429	0.0919	0.25261	+	RPL13A
1789	23363	2	220365450	220486357	172	28	1.2459	0.10641	0.091946	0.14505	-	OBSL1
1790	149643	1	212953483	213070991	539	28	1.0136	0.15539	0.092022	0.31622	-	SPATA45
1791	196951	15	49568822	49963128	747	39	1.0488	0.14715	0.092284	0.27819	-	FAM227B
1792	84958	1	27618483	27730423	138	22	1.354	0.087862	0.092339	0.10173	+	SYTL1
1793	286046	8	10703654	11108875	1220	58	1.5537	0.060131	0.092341	0.061228	-	XKR6
1794	3821	12	10544863	10657215	238	22	1.1356	0.12806	0.092463	0.2138	-	KLRC1
1795	89766	21	43433068	43613105	830	98	0.80064	0.21167	0.092599	0.53356	+	UMODL1
1796	54965	3	196389234	196512878	351	41	0.99611	0.1596	0.092805	0.32036	+	PIGX
1797	122706	14	23461376	23563269	146	31	1.5371	0.062138	0.092828	0.059714	+	PSMB11
1798	136259	7	130367382	130468860	249	32	1.2182	0.11157	0.093015	0.17614	-	KLF14
1799	23192	2	242526775	242663272	371	30	1.8662	0.031008	0.093061	0.017553	+	ATG4B
1800	55205	18	56479832	56703709	535	70	1.3897	0.082302	0.093094	0.10422	+	ZNF532
1801	6171	12	56460374	56561616	82	18	1.2111	0.11292	0.093307	0.17449	+	RPL41
1802	55857	20	21056624	21277260	320	29	1.6089	0.053819	0.093321	0.04969	+	KIZ
1803	65018	1	20909948	21028004	418	46	1.1736	0.12027	0.093332	0.19314	+	PINK1
1804	79016	19	17370337	17484107	338	35	0.73968	0.22975	0.093428	0.58122	+	DDA1
1805	1370	3	194010494	194122063	376	41	0.91321	0.18057	0.093576	0.38593	-	CPN2
1806	10450	1	40154517	40279586	278	47	0.75482	0.22518	0.093583	0.57451	+	PPIE
1807	1841	2	242565157	242676383	311	28	1.9174	0.027591	0.093607	0.014171	-	DTYMK
1808	9333	15	43474793	43609055	126	17	1.679	0.046572	0.093705	0.041618	-	TGM5
1809	7568	19	12192165	12301222	143	21	1.2316	0.10904	0.093745	0.18729	-	ZNF20
1809	10369	22	36906916	37148690	628	83	0.94	0.17361	0.093745	0.37749	-	CACNG2
1811	284370	19	52444587	52561494	309	28	1.3231	0.092894	0.093788	0.12709	-	ZNF615
1812	26751	2	168136	314820	272	27	2.0253	0.021419	0.093971	0.011403	-	SH3YL1
1813	261726	1	168098171	168221352	279	36	0.99738	0.15929	0.093997	0.3251	+	TIPRL
1814	79960	4	129680779	129846379	270	44	0.91154	0.18101	0.094099	0.3919	+	JADE1
1815	2042	3	89106674	89581284	834	49	1.0612	0.1443	0.094151	0.27715	+	EPHA3
1816	11124	1	50856935	51475936	695	36	1.1297	0.1293	0.094152	0.21595	-	FAF1
1817	79631	15	82372561	82605104	509	60	1.1653	0.12195	0.094161	0.20074	-	EFTUD1
1818	2526	11	94227017	94333064	236	27	0.77529	0.21908	0.094209	0.53929	+	FUT4
1819	8626	3	189298942	189665068	1240	137	0.6282	0.26494	0.094251	0.74972	+	TP63
1820	1380	1	207577645	207713240	234	27	1.8635	0.031194	0.094342	0.023062	+	CR2
1821	54487	22	20017755	20149400	362	33	1.7507	0.039995	0.094516	0.030207	+	DGCR8
1822	9711	3	197348259	197526568	153	10	1.3759	0.084429	0.094584	0.1124	-	KIAA0226
1823	1850	11	1525281	1643150	364	27	0.87047	0.19202	0.094607	0.41981	-	DUSP8
1824	2052	1	225947797	226083264	432	54	1.8458	0.032462	0.094661	0.020743	+	EPHX1
1825	11251	11	60568398	60673444	250	29	1.4268	0.076813	0.094695	0.088384	-	PTGDR2
1826	337882	21	31802364	31902636	193	11	0.90616	0.18242	0.094702	0.40392	-	KRTAP19-1
1827	55096	3	73060810	73162488	266	20	1.5016	0.066595	0.094768	0.080257	+	EBLN2
1828	79792	8	144585383	144695232	352	35	1.6844	0.046056	0.094796	0.035065	+	GSDMD
1829	6205	19	49949622	50052969	125	14	1.1322	0.12878	0.094826	0.201	+	RPS11
1830	29880	13	37473907	37623504	195	27	0.86384	0.19384	0.09489	0.44574	-	ALG5
1831	147323	18	51801062	51930943	355	23	1.0762	0.14093	0.094971	0.24635	-	STARD6
1832	57185	1	24692245	24849473	350	35	0.88335	0.18852	0.095039	0.42804	+	NIPAL3
1833	8841	5	140950443	141066423	206	37	1.0472	0.1475	0.095158	0.25549	-	HDAC3
1834	10060	12	21900323	22144797	339	45	0.62444	0.26617	0.095203	0.74558	-	ABCC9
1835	53840	11	5591174	5715628	540	76	0.93995	0.17362	0.095278	0.36075	+	TRIM34
1836	5902	22	20053461	20164880	320	30	1.6967	0.044881	0.095334	0.03872	+	RANBP1
1837	23518	2	136239036	136532839	284	21	0.93113	0.17589	0.095363	0.35357	+	R3HDM1
1838	9725	1	225983233	226120420	397	52	1.8542	0.031853	0.095416	0.022716	-	TMEM63A
1839	6372	4	74652273	74754477	189	32	1.497	0.067195	0.09545	0.074698	+	CXCL6
1840	9570	17	44950486	45094366	363	32	1.4172	0.07821	0.095617	0.10678	+	GOSR2
1841	79230	19	7019471	7137979	187	35	0.94591	0.1721	0.095619	0.33686	+	ZNF557
1842	3098	10	70979740	71211638	736	100	1.2718	0.10171	0.095627	0.15336	+	HK1
1843	7388	1	46719324	46832448	242	19	0.97568	0.16461	0.095705	0.33688	+	UQCRH
1844	221662	6	17231739	17344102	281	42	1.3418	0.089838	0.095753	0.11302	+	RBM24
1845	64064	1	40185197	40287020	212	35	0.91681	0.17962	0.095755	0.379	-	OXCT2
1846	256223	17	20433037	20534224	11	3	1.2192	0.11138	0.095777	0.13792	+	CDRT15L2
1847	149428	1	150959029	151070076	197	34	1.3981	0.081037	0.095855	0.10648	+	BNIPL
1848	80318	9	86304336	86494431	341	28	0.63644	0.26225	0.09588	0.72783	-	GKAP1
1849	55771	17	57182860	57334070	172	19	0.92033	0.1787	0.095898	0.3724	+	PRR11
1850	56155	17	56584038	56819416	376	27	1.21	0.11315	0.0959	0.18012	-	TEX14
1851	1000	18	25480930	25807445	587	66	0.94756	0.17168	0.095945	0.34824	-	CDH2
1852	196394	12	31774071	31932108	475	58	0.98246	0.16294	0.095952	0.32273	-	AMN1
1853	29843	12	48386681	48550091	421	30	1.1694	0.12112	0.095988	0.18975	-	SENP1
1854	26024	7	98964362	99095811	174	18	2.1343	0.01641	0.096114	0.0075314	-	PTCD1
1855	553158	22	45048382	45308664	1247	152	0.72763	0.23342	0.096181	0.60601	+	PRR5-ARHGAP8
1856	8896	7	98956243	99067239	160	17	2.136	0.016341	0.096245	0.0067335	+	BUD31
1857	729458	19	6969172	7071494	222	29	0.6861	0.24633	0.096315	0.64358	-	LOC729458
1858	341418	12	55895011	55995940	211	22	0.67454	0.24998	0.096318	0.66077	+	OR6C4
1859	11128	10	79684907	79839298	221	37	0.77995	0.21771	0.096376	0.52707	-	POLR3A
1860	5649	7	103062231	103679963	2051	122	0.6146	0.26941	0.096382	0.75449	-	RELN
1861	9002	19	16949826	17052830	182	30	1.2828	0.099776	0.096396	0.13927	+	F2RL3
1862	1520	1	150652672	150788433	193	14	1.7862	0.03703	0.096432	0.026055	-	CTSS
1863	285941	7	26627490	26736924	297	43	0.80802	0.20954	0.096472	0.48883	+	C7orf71
1864	4863	11	107978117	108143365	212	26	1.5752	0.057611	0.096522	0.056614	-	NPAT
1865	81543	21	45825393	45928739	152	17	1.4716	0.070568	0.096529	0.06984	+	LRRC3
1866	9717	16	4958318	5119156	580	74	1.5133	0.065099	0.096547	0.062155	+	SEC14L5
1867	80895	2	239029043	239162343	486	55	0.71455	0.23744	0.096555	0.61097	-	ILKAP
1868	83696	8	140690324	141518678	1990	191	1.6473	0.04975	0.096649	0.058108	-	TRAPPC9
1869	94274	19	38691877	38797231	262	44	1.4502	0.073499	0.096669	0.07699	-	PPP1R14A
1870	130535	2	201303677	201424817	239	44	1.5967	0.05517	0.096765	0.061408	-	KCTD18
1871	79772	5	93988280	94670279	1393	116	2.2361	0.012674	0.096851	0.0076753	-	MCTP1
1872	240	10	45819624	45991569	496	37	0.82204	0.20553	0.097001	0.48549	+	ALOX5
1873	10861	4	922861	1037228	67	10	1.1538	0.12429	0.097014	0.17088	-	SLC26A1
1874	388753	1	234458932	234569795	298	51	0.92632	0.17714	0.097025	0.37458	+	COA6
1875	5091	11	66565993	66775847	236	31	0.82097	0.20583	0.09707	0.46868	-	PC
1876	2323	19	49927455	50039491	164	21	0.98718	0.16178	0.09713	0.3023	+	FLT3LG
1877	116028	16	11389311	11495617	517	49	0.93768	0.1742	0.097134	0.34311	+	RMI2
1878	10900	17	42335786	42446039	178	37	0.78161	0.21722	0.097321	0.526	+	RUNDC3A
1879	26353	12	119566595	119682551	257	49	0.88708	0.18752	0.097389	0.4009	+	HSPB8
1880	79845	8	33355272	33474646	293	31	0.82861	0.20366	0.09751	0.46925	-	RNF122
1881	192666	17	38804243	38910002	195	27	1.3556	0.087618	0.09785	0.11541	-	KRT24
1882	23359	15	29362455	29912927	1405	119	0.94396	0.17259	0.097852	0.37108	-	FAM189A1
1883	3592	3	159656623	159763806	318	36	1.2223	0.1108	0.09792	0.15501	+	IL12A
1884	6717	7	87784430	87906308	143	24	1.7615	0.039074	0.098056	0.030717	-	SRI
1885	56901	12	57578686	57684545	100	18	1.1785	0.11929	0.098096	0.17536	-	NDUFA4L2
1886	113000	16	784974	888383	19	7	1.9963	0.022952	0.098135	0.009074	-	RPUSD1
1887	126626	1	150992784	151141007	225	31	1.348	0.088821	0.098477	0.11949	+	GABPB2
1888	89777	18	61173393	61284336	269	23	0.78975	0.21484	0.098483	0.5261	+	SERPINB12
1889	29761	21	17052327	17302377	346	19	0.79602	0.21301	0.098502	0.48743	+	USP25
1890	154075	6	130415447	130736570	1145	56	1.4867	0.068548	0.098506	0.083788	-	SAMD3
1891	28513	18	64118320	64321375	377	37	1.8522	0.031998	0.098579	0.018892	-	CDH19
1892	496	13	114253119	114362513	37	3	1.0921	0.1374	0.098675	0.20683	-	ATP4B
1893	128077	1	145427059	145551670	67	14	1.4841	0.068894	0.098704	0.06317	+	LIX1L
1894	23468	12	54574730	54723915	150	28	0.94436	0.17249	0.098712	0.34047	-	CBX5
1895	5062	3	196416728	196609518	560	63	1.2942	0.097791	0.09886	0.14423	+	PAK2
1896	10608	4	2199160	2313739	244	34	1.5339	0.062529	0.098867	0.060481	-	MXD4
1897	3783	19	44220685	44336269	322	42	2.2019	0.013836	0.098874	0.0069314	-	KCNN4
1898	83448	12	44071828	44202620	263	26	1.2859	0.099238	0.098892	0.14011	-	PUS7L
1899	284904	22	30834877	30951698	347	35	1.1778	0.11944	0.098985	0.19353	-	SEC14L4
1900	650	20	6698745	6810910	309	61	1.0701	0.14228	0.099042	0.24282	+	BMP2
1901	1382	1	156619398	156725608	174	36	0.89741	0.18475	0.099139	0.37442	-	CRABP2
1902	6296	16	20725312	20858479	204	21	1.0058	0.15725	0.099202	0.29545	+	ACSM3
1903	51000	6	8363301	8485794	544	24	0.90436	0.1829	0.099245	0.37021	-	SLC35B3
1904	85415	19	33419498	33605824	643	55	1.568	0.058441	0.099538	0.058548	-	RHPN2
1905	89876	3	119371869	119535949	347	41	0.93887	0.1739	0.099619	0.3465	+	MAATS1
1906	2899	1	37211128	37549844	580	78	1.9381	0.026307	0.099746	0.021264	-	GRIK3
1907	7850	2	102558306	102694885	340	32	0.75191	0.22605	0.099799	0.54116	+	IL1R2
1908	23627	20	4652556	4759106	472	53	2.0661	0.019411	0.099814	0.010964	+	PRND
1909	56882	1	150973447	151082125	181	31	1.4287	0.076545	0.10007	0.094007	-	CDC42SE1
1910	387263	6	170052238	170156402	217	23	0.92098	0.17853	0.10023	0.35355	+	C6orf120
1911	1962	3	184858412	185021886	293	26	1.5267	0.06342	0.10024	0.063388	-	EHHADH
1912	56776	1	240205185	240688491	1511	126	1.6329	0.051244	0.10027	0.057452	+	FMN2
1913	51135	12	44102747	44233346	255	28	1.2414	0.10722	0.10035	0.16008	+	IRAK4
1914	5515	5	133482148	133611950	244	21	0.84423	0.19927	0.10038	0.44311	-	PPP2CA
1915	55069	7	66336203	66473538	233	18	1.4115	0.079055	0.10048	0.094969	+	TMEM248
1916	55526	10	12060916	12215227	454	46	1.1672	0.12156	0.10051	0.18204	+	DHTKD1
1917	4170	1	150497027	150602214	156	29	2.0664	0.019396	0.10055	0.0088298	-	MCL1
1918	219578	7	88338753	89016346	1954	118	1.3886	0.082479	0.10063	0.097238	+	ZNF804B
1919	51426	5	74757657	74945646	272	25	1.3267	0.09231	0.10064	0.1169	+	POLK
1920	7770	19	44666684	44791421	138	16	1.8573	0.031636	0.10067	0.020583	+	ZNF227
1921	55240	2	119931384	120073228	474	57	0.90654	0.18233	0.10068	0.35874	+	STEAP3
1922	441234	7	57459883	57583265	296	15	1.2439	0.10676	0.10084	0.1453	+	ZNF716
1923	55137	2	164411447	164642618	397	65	0.71591	0.23702	0.10085	0.58234	-	FIGN
1924	4238	5	153368519	153487014	261	18	2.1526	0.015673	0.10096	0.012544	+	MFAP3
1925	337969	21	31809509	31909667	187	11	0.8954	0.18529	0.10098	0.38235	-	KRTAP19-2
1926	26017	19	16246235	16352857	265	21	2.0647	0.019474	0.10099	0.012295	+	FAM32A
1927	54808	18	46517846	47037172	1164	56	0.92222	0.17821	0.101	0.37466	-	DYM
1928	9111	2	152076982	152196430	267	21	0.98107	0.16328	0.10107	0.32317	-	NMI
1929	727957	8	145152919	145366843	54	5	1.2652	0.1029	0.10108	0.12002	+	MROH1
1930	84970	1	34582624	34734732	391	51	0.73831	0.23016	0.10121	0.54918	+	C1orf94
1931	4976	3	193260933	193465600	538	45	2.1951	0.014079	0.10124	0.0068108	+	OPA1
1932	4194	1	204435507	204646131	379	33	1.4916	0.067899	0.10132	0.082693	+	MDM4
1933	54964	1	150970259	151073896	180	33	1.421	0.077662	0.10135	0.093312	+	C1orf56
1934	387707	10	97671331	97843496	343	38	0.74623	0.22777	0.10141	0.52398	+	CC2D2B
1935	391253	20	44300988	44404335	329	23	0.72128	0.23537	0.10142	0.57666	+	SPINT4
1936	9988	7	86731677	86875648	360	30	1.0742	0.14137	0.10144	0.23196	+	DMTF1
1937	79090	19	45616186	45731501	248	43	0.90627	0.1824	0.10148	0.36382	-	TRAPPC6A
1937	96597	17	16776948	16882856	425	43	0.84675	0.19857	0.10148	0.40646	-	TBC1D27
1939	84249	5	139125406	139274051	197	35	1.0658	0.14325	0.10149	0.25701	+	PSD2
1940	6821	12	56341043	56449309	110	17	1.9366	0.026398	0.1015	0.013815	+	SUOX
1941	9833	9	36522859	36727680	307	31	1.2739	0.10134	0.10152	0.15955	+	MELK
1942	6456	9	17528953	17847122	1095	68	0.75844	0.22409	0.10156	0.52219	+	SH3GL2
1943	65258	18	11833470	11958796	399	57	1.0106	0.15611	0.10159	0.2912	-	MPPE1
1944	255738	1	55455149	55580526	340	55	0.96143	0.16817	0.10167	0.33744	+	PCSK9
1945	11333	7	98942296	99056305	168	18	2.0821	0.018666	0.10184	0.0072509	-	PDAP1
1946	6694	2	234909346	235035776	443	60	1.2189	0.11144	0.10186	0.15919	+	SPP2
1946	26019	10	11912021	12135169	713	59	1.0368	0.14991	0.10186	0.2823	-	UPF2
1948	387837	12	10113231	10221399	341	39	1.5199	0.064266	0.1019	0.063085	+	CLEC12B
1949	284428	19	6980594	7083022	195	31	0.67253	0.25062	0.10195	0.62173	+	MBD3L5
1950	283237	11	62445545	62556110	100	16	0.97314	0.16524	0.10203	0.30656	+	TTC9C
1951	93664	7	121908478	122576813	1295	84	1.3542	0.087839	0.10213	0.11588	-	CADPS2
1952	253260	5	38888022	39124505	380	40	0.76918	0.22089	0.10215	0.49955	-	RICTOR
1953	199920	1	57134477	57335369	579	90	1.1807	0.11887	0.10221	0.19422	-	C1orf168
1954	5578	17	64248760	64856862	1943	150	0.74403	0.22843	0.10231	0.5497	+	PRKCA
1955	54482	1	100548669	100666054	130	16	1.1431	0.1265	0.10235	0.19621	+	TRMT13
1956	221914	7	99717229	99824990	167	20	1.1355	0.12808	0.10237	0.20875	-	GPC2
1957	57348	19	54876605	54997899	244	31	1.0174	0.15447	0.10249	0.27138	+	TTYH1
1958	55852	17	62174795	62390653	379	37	0.93952	0.17373	0.1026	0.34116	-	TEX2
1959	403313	9	4612294	4715274	409	45	0.65101	0.25752	0.10268	0.65532	+	PPAPDC2
1960	127833	1	202509724	202729551	410	58	0.72503	0.23422	0.10272	0.55769	-	SYT2
1961	84971	19	10604570	10714099	320	33	0.95098	0.17081	0.10275	0.31897	+	ATG4D
1962	51296	11	60654555	60769257	263	36	0.84659	0.19861	0.10279	0.43714	-	SLC15A3
1962	54972	11	60641913	60754631	222	28	0.75154	0.22616	0.10279	0.53636	+	TMEM132A
1964	127385	1	159454868	159555797	216	24	0.77441	0.21934	0.10281	0.48883	-	OR10J5
1965	11037	2	48707308	48875654	505	54	1.036	0.15009	0.10282	0.25941	+	STON1
1966	643641	7	149485464	149614568	237	28	1.3732	0.084852	0.10288	0.09507	+	ZNF862
1967	3788	8	99389250	99493025	140	29	1.7408	0.040863	0.10292	0.03267	+	KCNS2
1968	125997	19	6999351	7101746	156	27	1.0301	0.15148	0.10293	0.24994	+	MBD3L2
1969	613209	8	11789830	11892099	353	31	1.2784	0.10056	0.10294	0.12217	+	DEFB135
1970	140894	20	34506529	34668622	168	14	1.1541	0.12422	0.10298	0.17514	+	CNBD2
1971	91801	11	107323453	107486468	388	42	1.2061	0.11389	0.10313	0.17631	-	ALKBH8
1972	54586	9	27234652	27347137	386	51	1.8869	0.029589	0.10314	0.020629	-	EQTN
1973	25840	12	51267780	51376300	306	28	1.1516	0.12475	0.10319	0.19542	+	METTL7A
1974	22928	16	30404952	30507224	105	21	1.0691	0.14252	0.10322	0.21857	-	SEPHS2
1975	1233	3	32943066	33046403	192	29	0.65096	0.25754	0.10323	0.64794	+	CCR4
1976	408187	5	147498109	147605182	361	20	0.81448	0.20769	0.10332	0.45988	+	SPINK14
1977	26984	3	122870774	123042983	386	25	0.6654	0.2529	0.10337	0.63989	+	SEC22A
1978	65122	1	12866941	12971764	54	2	1.1	0.13567	0.10338	0.18199	+	PRAMEF2
1978	343069	1	12857261	12958578	54	2	1.1	0.13567	0.10338	0.18199	-	HNRNPCL1
1978	343071	1	12902727	13008094	54	2	1.1	0.13567	0.10338	0.18199	-	PRAMEF10
1978	400735	1	12889033	12996025	54	2	1.1	0.13567	0.10338	0.18199	-	PRAMEF4
1982	57178	10	80778751	81126285	963	134	1.3047	0.095999	0.10341	0.14024	+	ZMIZ1
1983	2672	1	92890318	93002433	137	15	1.1197	0.13143	0.10355	0.20459	-	GFI1
1983	8674	1	171619296	171761379	442	33	2.0491	0.020228	0.10355	0.011734	-	VAMP4
1985	29926	2	220313587	220421718	168	24	0.87314	0.19129	0.10356	0.38248	+	GMPPA
1986	1668	8	6823391	6925816	299	39	1.5499	0.060587	0.10371	0.065519	-	DEFA3
1987	8724	6	108482712	108632478	169	22	1.4711	0.07063	0.10384	0.070293	-	SNX3
1988	93432	7	141761549	141893783	314	47	0.89755	0.18471	0.10394	0.36653	+	MGAM2
1989	254950	21	31762646	31863098	180	13	0.86782	0.19275	0.10398	0.41134	+	KRTAP15-1
1990	114825	5	159452889	159596452	276	29	0.66433	0.25324	0.1041	0.62356	-	PWWP2A
1991	219938	11	133660517	133765433	305	36	1.1671	0.12158	0.10422	0.17913	-	SPATA19
1992	54870	3	49017140	49181504	101	17	1.0964	0.13645	0.10432	0.23695	-	QRICH1
1993	23085	12	1050404	1655099	1797	87	1.9353	0.02648	0.10434	0.019782	+	ERC1
1994	51053	6	24725159	24836327	263	41	0.6673	0.25229	0.10442	0.62073	+	GMNN
1995	337970	21	31813782	31914275	182	10	0.89242	0.18608	0.10452	0.37137	-	KRTAP19-3
1996	9911	1	205147038	205292471	300	30	0.68793	0.24575	0.10455	0.58931	+	TMCC2
1997	2987	1	228277668	228386656	129	22	1.0518	0.14645	0.1046	0.24362	+	GUK1
1998	58529	10	75341370	75451515	136	9	1.2707	0.10192	0.10462	0.1474	-	MYOZ1
[truncated: 15,969 more rows]
