# Supplementary material for: Multiomics integrative analysis identifies APOE allele-specific blood biomarkers associated to Alzheimer’s disease etiopathogenesis
Source: Aging (Albany NY). 2021 Apr 12;13(7):9277–329. doi: 10.18632/aging.202950 (PMC8064208; doi:10.18632/aging.202950)
Supplement: Supplementary Table 16 [file aging-13-202950-s018.xlsx]

## Sheet: Sheet1
Supplementary Table 16. Stage I-III APOE3 stratified meta-analysis gene level results.
RANK	GENE	CHR	START	STOP	NSNPS	NPARAM	ZSTAT	P_JOINT	P_SNPWISE_MEAN	P_SNPWISE_TOP1	STRAND	HUGO
1	274	2	127755599	127914903	633	70	7.0156	1.145e-12	8.9296e-07	3.5114e-12	-	BIN1
2	2200	15	48650503	48987985	533	41	4.7055	1.2664e-06	4.8178e-06	0.00027555	-	FBN1
3	7473	17	44789872	44946126	239	38	4.6931	1.3452e-06	6.8464e-06	0.00012563	-	WNT3
4	10332	19	7778035	7884491	424	68	4.0699	2.3512e-05	1.3536e-05	0.0014577	+	CLEC4M
5	4905	17	44618035	44884830	144	22	4.7642	9.482e-07	2.8785e-05	3.068e-05	+	NSF
6	57091	20	54937168	55084396	349	50	5.0043	2.8033e-07	3.4312e-05	4.5807e-05	+	CASS4
7	351	21	27202861	27593446	998	99	3.9599	3.7494e-05	3.9114e-05	0.0034267	-	APP
8	2850	3	71753201	71854328	306	47	3.2106	0.00066222	4.6318e-05	0.062939	+	GPR27
9	1394	17	43647710	43963194	1261	23	4.0665	2.3866e-05	5.4644e-05	0.0025483	+	CRHR1
10	30835	19	7754879	7862499	482	71	3.7956	7.3632e-05	6.9286e-05	0.0015464	-	CD209
11	162540	17	43872256	43974438	556	19	4.0266	2.83e-05	7.7726e-05	0.0016826	+	SPPL2C
12	284058	17	44057282	44352740	978	20	4.0142	2.9826e-05	7.7932e-05	0.0014387	-	KANSL1
13	9884	17	44266744	44465160	115	6	4.0055	3.0938e-05	7.967e-05	0.00044093	+	LRRC37A
14	246744	17	44026616	44127060	460	17	3.9443	4.0023e-05	8.3459e-05	0.0028814	+	STH
15	317649	3	71678440	71853924	516	83	3.0133	0.0012921	9.3376e-05	0.14059	-	EIF4E3
16	101060181	19	12308059	12427172	243	20	3.5994	0.0001595	0.00010412	0.005533	-	LOC101060181
17	222537	6	114326750	114713540	787	82	3.0438	0.0011681	0.00011244	0.11278	-	HS3ST5
18	4137	17	43921702	44155700	1193	18	3.8848	5.1209e-05	0.00011981	0.0019972	+	MAPT
19	100506084	17	44301550	44489416	38	3	4.0856	2.1983e-05	0.00012058	0.0001145	-	ARL17B
20	8301	11	85618214	85830923	558	43	3.7735	8.0476e-05	0.0001267	0.00074818	-	PICALM
21	643680	11	59918726	60060575	339	33	3.6975	0.00010886	0.00012823	0.0036123	-	MS4A4E
22	10671	8	29963813	30091155	299	22	3.3367	0.00042391	0.00015497	0.01165	+	DCTN6
23	80263	1	117603677	117714411	225	39	3.2578	0.00056134	0.00015527	0.025725	-	TRIM45
24	221749	6	3672836	3802246	509	64	2.8533	0.0021637	0.00016049	0.10593	-	PXDC1
25	6175	12	120584502	120689014	141	25	3.4617	0.00026838	0.00016599	0.0061504	-	RPLP0
26	829	1	113112075	113264241	237	27	3.7042	0.00010604	0.00017563	0.0032098	+	CAPZA1
27	51710	19	12308059	12455714	276	21	3.4716	0.00025872	0.00017807	0.0067784	-	ZNF44
28	921	11	60819930	60945324	277	35	3.55	0.00019259	0.00019282	0.0051233	+	CD5
29	10985	12	120515014	120682513	244	42	3.3825	0.00035913	0.00019301	0.011265	-	GCN1L1
30	54879	1	113016140	113212040	355	37	3.4811	0.0002497	0.00020278	0.0048977	-	ST7L
31	64756	1	47050711	47184099	235	23	3.932	4.2116e-05	0.00022585	0.00037891	-	ATPAF1
32	60675	3	71770806	71884357	342	60	2.8672	0.0020703	0.00022838	0.10945	-	PROK2
33	619373	8	29939187	30052200	209	26	3.2426	0.00059222	0.00023975	0.011999	-	MBOAT4
34	64231	11	59889080	60002139	260	26	3.6583	0.00012693	0.00024896	0.0036549	-	MS4A6A
35	9573	12	7792381	7898360	423	61	3.3506	0.0004032	0.00024984	0.004816	-	GDF3
36	9601	7	148650154	148775782	294	40	3.3569	0.00039417	0.00027933	0.0077752	-	PDIA4
37	4343	1	113167048	113293368	206	37	3.332	0.00043106	0.00027959	0.0086448	+	MOV10
38	2137	8	28508990	28661207	253	49	3.2818	0.00051581	0.00030702	0.023442	+	EXTL3
39	9813	1	47090831	47234792	275	26	3.8192	6.6944e-05	0.00031494	0.00059189	-	EFCAB14
40	132320	4	129755148	130064764	570	43	3.6838	0.00011488	0.0003157	0.0010351	-	SCLT1
41	4931	1	224365036	224567891	403	42	3.2289	0.00062144	0.00033488	0.014935	-	NVL
42	5311	4	88878799	89048931	411	52	3.0861	0.0010141	0.00034555	0.013158	+	PKD2
43	23484	8	29902922	30045222	261	28	3.0373	0.0011936	0.00034845	0.026042	+	LEPROTL1
44	147837	19	12378291	12494534	214	21	3.4575	0.00027258	0.00038199	0.0044686	-	ZNF563
45	51661	2	179278391	179393646	163	28	3.3688	0.00037753	0.00042954	0.0031771	-	FKBP7
46	65977	2	179295199	179419783	177	31	3.4046	0.00033127	0.00047351	0.0036793	+	PLEKHA3
47	157	22	25910861	26175259	629	60	3.0012	0.0013448	0.00048386	0.070309	+	ADRBK2
48	57687	16	77772483	78064001	1409	147	3.109	0.00093855	0.00048453	0.02901	+	VAT1L
49	226	16	30014411	30131741	80	8	3.5454	0.000196	0.0004882	0.00046538	+	ALDOA
50	5539	17	41968172	42069833	257	32	2.9867	0.0014099	0.00049581	0.013753	-	PPY
51	6622	4	90595250	90809447	717	50	3.3697	0.00037623	0.00049731	0.0050685	-	SNCA
52	114926	8	42346298	42458140	288	24	3.5948	0.00016233	0.00051358	0.001047	+	SMIM19
53	389	1	113193749	113300025	188	36	3.3023	0.00047943	0.00055687	0.0038631	-	RHOC
54	341	19	45367577	45472606	234	37	3.0183	0.0012711	0.00055876	0.038725	+	APOC1
55	346	19	45395495	45498753	221	26	3.452	0.00027827	0.00056002	0.0017644	+	APOC4
56	2029	1	150544599	150652098	196	25	3.1263	0.00088522	0.0005712	0.011435	-	ENSA
57	5575	7	538834	817313	175	14	3.1721	0.00075677	0.00057274	0.0033218	-	PRKAR1B
58	10714	11	74253575	74430386	491	54	3.0425	0.001173	0.00058367	0.030161	+	POLD3
59	57622	19	39747457	39856740	225	24	3.2933	0.00049505	0.0006009	0.0046609	-	LRFN1
60	5531	16	30037297	30146698	63	8	3.4023	0.00033415	0.00061101	0.0007311	+	PPP4C
61	9535	19	39768999	39876726	220	21	3.3426	0.00041498	0.00063634	0.0030443	-	GMFG
62	51507	20	54993641	55143942	399	48	3.8072	7.0285e-05	0.00067026	0.0012082	+	RTFDC1
63	282618	19	39736965	39839312	201	27	3.3122	0.00046282	0.00069809	0.0048651	+	IFNL1
64	1209	19	45407842	45546604	252	31	3.475	0.00025546	0.00071024	0.0018228	+	CLPTM1
65	344	19	45399239	45502822	216	25	3.4108	0.00032381	0.00071043	0.001806	+	APOC2
66	148932	1	47023387	47132563	196	24	3.6177	0.00014862	0.00072682	0.00069848	-	MOB3C
67	55048	11	60847728	60978916	246	25	3.3389	0.00042051	0.00073204	0.003879	-	VPS37C
68	6911	16	30047114	30153258	58	8	3.3126	0.00046219	0.00074717	0.00096208	-	TBX6
69	10300	16	57719623	57841162	347	51	3.1735	0.00075304	0.00076384	0.0053784	+	KATNB1
70	25987	11	76443357	76559198	306	42	3.2875	0.00050541	0.00078248	0.0026822	+	TSKU
71	6575	8	42223980	42447356	407	43	3.4521	0.00027816	0.00080449	0.0021099	-	SLC20A2
72	83723	16	29985748	30114338	94	8	3.4295	0.00030238	0.00082248	0.00065179	-	FAM57B
73	23189	9	420294	796106	1786	88	3.3314	0.00043203	0.00083802	0.0049477	+	KANK1
74	374973	1	47087497	47189266	184	17	3.8777	5.2727e-05	0.00084441	0.00012487	+	TEX38
75	4170	1	150497027	150602214	195	34	3.2624	0.0005524	0.00086369	0.0041232	-	MCL1
76	101928635	15	58455734	58592179	529	59	3.328	0.00043733	0.00086967	0.0019089	-	LOC101928635
77	57158	20	42690337	42866218	603	78	3.0508	0.0011411	0.0008988	0.015679	-	JPH2
78	389384	6	36233534	36354662	350	72	2.8528	0.0021668	0.0009561	0.021588	-	C6orf222
79	85440	1	62870397	63204039	409	30	2.8766	0.0020102	0.00097873	0.059308	-	DOCK7
80	3131	17	53292321	53452426	413	70	2.837	0.0022766	0.00098686	0.031661	+	HLF
81	54919	7	716338	876116	373	26	2.9442	0.0016191	0.00098758	0.0086551	+	DNAAF5
82	55204	1	150568701	150719672	275	23	3.0294	0.001225	0.00099016	0.016601	-	GOLPH3L
83	84441	11	95661440	96126344	1353	159	3.3171	0.00045473	0.0010474	0.0056348	-	MAML2
84	7695	19	12223872	12350064	174	22	3.318	0.00045337	0.0010609	0.0077866	+	ZNF136
85	89845	6	43345282	43468163	240	37	2.5185	0.0058922	0.0010742	0.11227	+	ABCC10
86	5697	17	41980101	42131837	357	44	2.8919	0.0019147	0.001077	0.015161	-	PYY
87	353345	7	37520212	37831888	694	65	2.6229	0.0043589	0.00108	0.16848	+	GPR141
88	1953	1	3354506	3578059	397	52	3.3279	0.00043747	0.0010874	0.0019171	-	MEGF6
89	1379	1	207768458	207947036	523	46	3.2179	0.00064566	0.0010875	0.003889	+	CR1L
90	1471	20	23558534	23668685	321	30	4.178	1.4703e-05	0.0010876	4.2435e-05	-	CST3
91	51338	11	59998014	60126445	401	36	3.1601	0.00078864	0.0011218	0.010934	+	MS4A4A
92	285172	2	201788441	201986392	290	26	2.8429	0.0022354	0.0011404	0.065758	-	FAM126B
93	4709	2	201886462	202000473	190	21	2.8651	0.0020844	0.0011733	0.054614	+	NDUFB3
94	146378	16	29984655	30086023	81	7	3.4081	0.00032712	0.0011845	0.00061204	+	C16orf92
95	154141	6	20049915	20262695	642	109	3.122	0.00089807	0.001187	0.01247	-	MBOAT1
96	8836	8	63877638	64001610	444	34	3.1304	0.00087288	0.0012068	0.004232	-	GGH
97	9693	4	159975224	160331314	573	56	2.4755	0.0066522	0.0012156	0.21083	+	RAPGEF2
98	340351	7	134621259	134870530	493	34	2.6433	0.0041047	0.0012264	0.08465	+	AGBL3
99	9783	1	41036352	41181324	328	39	3.0524	0.0011351	0.0012426	0.0042126	-	RIMS3
100	333926	1	113202616	113307950	196	38	3.136	0.00085621	0.0012596	0.0041639	-	PPM1J
101	79720	12	123299875	123430712	218	20	3.1018	0.00096168	0.0012848	0.0058728	-	VPS37B
102	8645	6	39106747	39247251	577	78	3.1369	0.0008536	0.0013024	0.0039152	-	KCNK5
103	3801	16	57742129	57946957	668	90	2.936	0.0016623	0.0013263	0.011316	-	KIFC3
104	55095	19	39783108	39926340	289	39	3.1421	0.00083864	0.001332	0.0054009	+	SAMD4B
105	56121	5	140575147	140677802	235	33	2.7982	0.0025696	0.0013342	0.036295	+	PCDHB15
106	1477	20	54917427	55029582	282	48	4.1216	1.881e-05	0.001364	5.202e-05	+	CSTF1
107	55215	15	89735634	89910362	331	36	2.9943	0.0013754	0.0014034	0.023771	+	FANCI
108	2019	2	119549747	119655759	353	48	2.5818	0.0049146	0.0014194	0.11039	-	EN1
109	84959	11	122476398	122735187	759	99	2.6701	0.003791	0.0014395	0.070314	+	UBASH3B
110	161931	16	84174723	84280772	523	78	2.4535	0.0070738	0.0014411	0.11071	+	ADAD2
111	151742	3	160423996	160838817	909	63	2.952	0.0015785	0.0014694	0.019109	+	PPM1L
112	940	2	204521198	204653635	289	32	2.9032	0.0018466	0.0015229	0.014507	+	CD28
113	55584	4	40287346	40407234	427	59	2.8972	0.0018827	0.0015375	0.023144	+	CHRNA9
114	1262	11	6206724	6317066	252	47	2.4195	0.0077707	0.0015381	0.19069	+	CNGA4
115	9871	4	119593978	119809838	703	38	2.552	0.0053559	0.0015482	0.12867	-	SEC24D
116	366	15	58380374	58528110	418	59	3.2369	0.00060408	0.001549	0.0022527	+	AQP9
116	27329	1	63013158	63121976	115	15	2.7882	0.0026501	0.001549	0.037928	+	ANGPTL3
118	22915	4	90766003	90925780	413	40	2.6329	0.0042324	0.001578	0.067635	+	MMRN1
119	359787	12	7814089	7920155	397	58	3.0639	0.0010924	0.0016265	0.0039124	+	DPPA3
120	29097	1	224494513	224617154	204	24	3.1024	0.00095985	0.0016473	0.0074197	+	CNIH4
121	728621	1	42950560	43170335	571	39	2.7315	0.0031528	0.0016737	0.058117	+	CCDC30
122	140801	14	47070213	47171041	243	27	2.8234	0.0023755	0.0017301	0.016544	-	RPL10L
123	51669	8	29870609	29990649	272	30	2.5711	0.0050692	0.0017358	0.059157	-	SARAF
124	728888	16	29342624	29471669	11	4	2.7656	0.0028411	0.0017507	0.009269	-	NPIPB11
125	339390	19	7743843	7847057	475	68	3.2823	0.00051483	0.0017587	0.0013008	-	CLEC4G
126	65989	6	43368090	43473786	197	32	2.4273	0.0076056	0.0017643	0.10793	-	DLK2
127	196415	12	25096358	25200373	425	58	2.9911	0.00139	0.0017702	0.018268	-	C12orf77
128	4060	12	91447232	91555542	290	31	2.5686	0.0051055	0.0017905	0.089802	-	LUM
129	132299	4	48837405	48958815	168	24	3.1846	0.00072476	0.0017984	0.0043469	-	OCIAD2
130	4999	2	201724894	201878424	184	24	2.6272	0.004305	0.0018235	0.058124	-	ORC2
131	84072	1	150620535	150743372	231	19	2.8377	0.0022719	0.0018247	0.020267	-	HORMAD1
132	11057	15	89581381	89795591	499	64	2.6751	0.0037359	0.0018259	0.055909	+	ABHD2
133	10516	14	92285755	92464046	469	62	3.2342	0.00060984	0.0018559	0.0029902	-	FBLN5
134	140687	20	55016548	55150981	377	49	3.5334	0.00020511	0.0018708	0.0025694	-	GCNT7
135	51715	6	57001790	57137112	190	32	2.6553	0.0039617	0.0018721	0.041416	-	RAB23
136	7539	9	115754144	115869043	238	48	2.6236	0.0043497	0.0019116	0.071912	-	ZFP37
137	52	2	214869	328283	192	23	2.7621	0.0028712	0.0019123	0.027447	+	ACP1
138	253943	8	64031112	64175346	344	35	2.8812	0.0019809	0.0019131	0.022583	+	YTHDF3
139	64090	2	242666240	242793702	88	13	2.4667	0.0068182	0.0019199	0.046554	+	GAL3ST2
140	53944	15	64407716	64715968	494	41	2.4565	0.0070141	0.0019389	0.11736	-	CSNK1G1
141	7274	8	63922047	64048612	432	35	3.0123	0.0012963	0.0019592	0.0054982	-	TTPA
142	54507	1	150471846	150583413	211	36	3.0014	0.0013439	0.0019767	0.0047064	+	ADAMTSL4
143	6497	1	2110134	2291652	406	61	2.9188	0.0017571	0.0020183	0.005277	+	SKI
144	79973	19	12410185	12526475	196	26	3.163	0.00078082	0.0020235	0.0045013	-	ZNF442
145	83719	16	30053635	30158248	55	7	3.1402	0.00084419	0.0020334	0.00081803	-	YPEL3
146	9722	1	161989581	162389813	1275	94	3.1082	0.00094112	0.00206	0.010243	+	NOS1AP
147	55612	20	6005492	6154191	479	65	2.7557	0.0029283	0.0020945	0.018779	-	FERMT1
148	101927262	2	240342	342920	148	22	2.7669	0.0028296	0.0020972	0.022281	+	LOC101927262
149	8448	16	29966835	30073424	94	7	3.1989	0.00068973	0.0021064	0.0013665	-	DOC2A
150	151056	2	28668938	28916654	842	99	2.782	0.0027014	0.0021164	0.024831	+	PLB1
151	285016	2	229561	339002	165	22	2.7326	0.0031415	0.0021913	0.025982	-	FAM150B
152	3123	6	32496546	32607613	29	6	2.7895	0.0026391	0.0021992	0.0076887	-	HLA-DRB1
153	6688	11	47326409	47450127	265	30	2.8689	0.0020596	0.0022036	0.010039	-	SPI1
154	5829	12	120598242	120753574	247	40	2.8847	0.0019587	0.0022078	0.014728	-	PXN
155	79763	19	55914345	56023070	116	25	2.624	0.0043447	0.0022431	0.022699	-	ISOC2
156	2856	14	31902150	32007151	224	31	2.6924	0.0035475	0.0022601	0.046964	-	GPR33
157	1520	1	150652672	150788433	208	19	2.7323	0.0031444	0.0022665	0.023564	-	CTSS
158	55196	12	32062353	32196041	606	80	2.7484	0.0029943	0.0022801	0.014917	+	KIAA1551
159	5428	15	89809536	89928026	211	30	2.9973	0.0013621	0.0022984	0.015327	-	POLG
160	55281	7	134782766	134900967	316	24	2.6792	0.0036899	0.0023242	0.038767	+	TMEM140
161	6304	3	18339133	18530265	373	55	2.6999	0.0034683	0.0023572	0.031082	-	SATB1
162	8569	1	46973079	47119966	310	38	3.3694	0.00037669	0.0023851	0.00098368	-	MKNK1
163	286006	7	112070908	112180943	325	47	3.0636	0.0010933	0.0024539	0.0047751	+	LSMEM1
164	494513	2	179266163	179376149	161	27	2.9521	0.0015779	0.0024643	0.0048108	+	DFNB59
165	4355	17	41902727	42037079	302	35	2.7559	0.0029267	0.0024718	0.012281	-	MPP2
166	83449	16	72102996	72256349	394	44	2.8577	0.0021337	0.0024871	0.014573	-	PMFBP1
167	3880	17	39629869	39734641	245	39	3.0608	0.0011036	0.0024907	0.0038973	-	KRT19
168	348	19	45359039	45462650	256	39	2.674	0.0037476	0.0025401	0.039698	+	APOE
169	100505877	3	23186561	23296268	402	36	2.9722	0.0014782	0.0025421	0.0046609	-	UBE2E2-AS1
170	9026	12	123269045	123397508	274	19	3.0698	0.0010708	0.0026327	0.0033154	+	HIP1R
171	55200	12	6369602	6487672	214	32	2.4729	0.0067004	0.0027214	0.066215	+	PLEKHG6
172	6017	15	89703098	89814922	243	29	2.727	0.0031955	0.0027257	0.024554	-	RLBP1
173	6638	15	25018794	25273730	844	110	2.3559	0.0092401	0.0027585	0.22118	+	SNRPN
174	56122	5	140553078	140655860	249	29	2.58	0.0049404	0.0027613	0.045195	+	PCDHB14
175	342667	17	37316789	37432040	170	27	2.2929	0.010928	0.0027677	0.1215	-	STAC2
176	5289	18	39485165	39712272	340	32	2.5001	0.0062075	0.0027918	0.094231	+	PIK3C3
177	79960	4	129680779	129846379	280	44	3.2885	0.00050359	0.0028294	0.0013125	+	JADE1
178	29933	14	105465726	105581887	286	22	2.3162	0.010273	0.0028734	0.074253	-	GPR132
179	283899	16	29957485	30067112	101	8	3.1076	0.00094322	0.002903	0.002007	+	INO80E
180	89887	19	55937699	56045854	151	26	2.5605	0.0052258	0.0029069	0.028789	+	ZNF628
181	57106	19	55946557	56048935	152	26	2.4874	0.0064338	0.0029176	0.038856	+	NAT14
182	7398	1	62851975	62967475	197	28	2.6472	0.0040584	0.0029228	0.036089	+	USP1
183	2878	5	150349999	150458554	341	42	2.4487	0.0071683	0.0029675	0.061008	+	GPX3
184	5341	2	68542322	68674585	537	40	2.7883	0.002649	0.0030046	0.012126	+	PLEK
185	57528	5	143500437	143908097	717	52	2.6168	0.0044376	0.0030688	0.053469	+	KCTD16
186	78996	7	134800532	134905578	281	22	2.6077	0.0045578	0.0030911	0.0425	-	C7orf49
187	91252	11	47378683	47488051	236	21	2.8516	0.002175	0.0030981	0.0087338	+	SLC39A13
188	386677	21	45909068	46010078	204	27	2.6099	0.0045285	0.0031178	0.028685	-	KRTAP10-1
189	57125	17	37169556	37358946	515	58	2.2709	0.011577	0.0031262	0.14093	-	PLXDC1
190	54940	4	48782599	48913834	157	27	3.0131	0.001293	0.0031282	0.0051096	+	OCIAD1
191	4160	18	57988564	58090001	255	35	3.3275	0.00043812	0.0031704	0.00053045	-	MC4R
192	90589	19	12205705	12317546	160	23	2.9578	0.0015493	0.0031799	0.01288	-	ZNF625
193	132321	4	129964829	130084487	270	27	2.9144	0.0017819	0.0031848	0.0048864	+	C4orf33
194	284297	19	55949870	56080466	192	37	2.4766	0.0066326	0.0031941	0.038365	+	SSC5D
195	23705	11	114989933	115425241	754	83	2.0205	0.021667	0.0032091	0.38199	-	CADM1
196	10229	16	19028917	19141417	224	25	3.1224	0.00089697	0.0032334	0.0011913	+	COQ7
197	100170229	19	44066253	44168650	239	43	2.4788	0.0065908	0.00324	0.080274	+	SRRM5
198	55776	6	39021840	39132865	426	55	3.0378	0.0011915	0.0032436	0.0030813	-	SAYSD1
199	2185	8	27118999	27366908	632	60	2.8591	0.0021245	0.0032569	0.010897	+	PTK2B
200	23457	12	123355498	123501056	107	20	2.6332	0.0042286	0.0032867	0.017997	-	ABCB9
201	9785	16	72077615	72196811	303	32	2.8486	0.0021958	0.003324	0.011562	+	DHX38
202	126299	19	44061376	44174298	268	49	2.4556	0.0070322	0.0033318	0.085546	-	ZNF428
203	282616	19	39709157	39810732	179	26	2.9997	0.0013513	0.0034172	0.0067769	+	IFNL2
204	9467	3	15245860	15432901	396	67	2.2882	0.011064	0.0034198	0.10748	-	SH3BP5
205	170572	3	183720835	183828461	293	40	2.9455	0.0016121	0.0034199	0.0040109	+	HTR3C
206	8479	16	29953642	30057417	97	8	3.0557	0.0011225	0.0034825	0.0018977	-	HIRIP3
207	375035	1	168145255	168262088	268	38	2.4478	0.0071863	0.0034848	0.095396	+	SFT2D2
208	54920	16	68006847	68163226	193	19	2.7112	0.0033525	0.0034998	0.026508	+	DUS2
209	284467	1	113211619	113319857	202	37	2.9439	0.0016205	0.003521	0.0044369	+	FAM19A3
210	80339	22	44269619	44393451	485	60	2.2065	0.013675	0.0035404	0.10949	+	PNPLA3
211	55794	16	68005177	68107770	124	17	2.7495	0.0029842	0.0035494	0.020378	-	DDX28
212	840	10	115388921	115540668	479	42	2.9813	0.001435	0.0035731	0.004048	+	CASP7
213	4255	10	131215454	131615783	1466	95	1.9932	0.023119	0.0035865	0.32486	+	MGMT
214	344905	3	192942831	193146514	594	64	1.9857	0.023533	0.0036141	0.33641	-	ATP13A5
215	55206	12	123723656	123899756	450	19	2.4841	0.0064933	0.00363	0.045206	-	SBNO1
216	5702	11	47390320	47498024	210	20	2.8129	0.0024549	0.003632	0.0079598	-	PSMC3
217	5121	21	41189347	41351322	717	90	2.4695	0.0067658	0.003676	0.094864	+	PCP4
218	84660	12	123209056	123361927	314	20	2.9245	0.0017249	0.0036825	0.0057885	+	CCDC62
219	5971	19	45454707	45591456	255	34	3.0982	0.00097349	0.0036876	0.0020624	+	RELB
220	8458	1	117552910	117695492	351	55	2.4893	0.006399	0.0036939	0.045982	+	TTF2
221	199731	19	44076519	44193991	292	56	2.4287	0.0075763	0.0037027	0.084451	-	CADM4
222	100293704	12	123798046	123900336	249	14	2.5455	0.0054555	0.0037439	0.033695	+	LOC100293704
223	3936	13	46650058	46806459	416	59	2.5223	0.0058303	0.003811	0.04898	-	LCP1
224	1378	1	207619473	207865110	560	51	2.9339	0.0016734	0.0038369	0.0056812	+	CR1
225	7374	12	109485399	109598798	259	35	3.015	0.0012851	0.0038541	0.0032277	+	UNG
226	54205	7	25108270	25214980	339	34	2.4519	0.0071046	0.0038741	0.050408	-	CYCS
227	199990	1	2065899	2194159	233	26	2.8679	0.0020663	0.0038857	0.0087118	-	C1orf86
228	123036	14	92196266	92383880	427	55	2.9389	0.0016468	0.0039323	0.0060263	-	TC2N
229	23353	7	805194	964557	455	32	2.6335	0.0042254	0.0039786	0.0087929	+	SUN1
230	150921	2	27321835	27426402	171	30	2.2667	0.011704	0.0040662	0.10944	+	TCF23
231	9095	1	168200278	168333664	322	45	2.3473	0.0094548	0.0041121	0.12972	+	TBX19
232	1149	18	12204318	12327594	331	46	2.5107	0.006024	0.0041664	0.042028	+	CIDEA
233	84067	11	6182564	6305941	292	46	2.1419	0.0161	0.004184	0.16599	-	FAM160A2
234	8562	12	123187371	123305953	234	22	2.6057	0.0045845	0.0041895	0.02334	+	DENR
235	387893	12	123818704	123943900	187	13	2.5354	0.0056167	0.0041961	0.027921	+	SETD8
236	26751	2	168136	314820	288	30	2.4702	0.006752	0.0041982	0.040309	-	SH3YL1
237	151258	2	165704709	165862035	386	47	2.206	0.013691	0.0041996	0.12013	-	SLC38A11
238	1071	16	56945835	57067757	406	71	2.0508	0.020143	0.0042135	0.33852	+	CETP
239	6143	17	37306536	37410980	176	31	2.1309	0.016551	0.0042344	0.14356	+	RPL19
240	60491	2	201704050	201818655	161	28	2.2427	0.012459	0.0042447	0.095601	+	NIF3L1
241	84310	7	986623	1227911	998	58	2.0003	0.022733	0.0043021	0.19083	-	C7orf50
242	115330	7	1034218	1148905	481	37	2.1535	0.01564	0.0043105	0.11394	+	GPR146
243	4607	11	47302957	47424253	256	31	2.6568	0.0039444	0.0043108	0.01207	-	MYBPC3
244	7375	3	49264577	49427536	194	27	2.9337	0.0016747	0.0043575	0.014283	-	USP4
245	57721	4	119556525	119683374	195	26	2.1464	0.015922	0.004378	0.17612	+	METTL14
246	23769	11	63753442	63936655	378	55	2.3002	0.010718	0.0044093	0.10581	+	FLRT1
247	54957	16	72068756	72178215	272	32	2.8787	0.0019964	0.0044112	0.0082257	-	TXNL4B
248	8099	12	123695517	123806863	295	17	2.2752	0.011448	0.0044512	0.066941	-	CDK2AP1
249	100130988	7	50085682	50248852	444	37	2.5702	0.0050821	0.0044531	0.046293	+	C7orf72
250	25927	2	68461303	68597183	348	45	2.6762	0.0037233	0.0044868	0.01308	-	CNRIP1
251	5913	11	47409308	47520730	181	18	2.7029	0.0034367	0.0045206	0.0082746	-	RAPSN
252	143662	11	26530579	26643815	606	50	2.3424	0.009579	0.0045494	0.07911	-	MUC15
253	285242	3	183764852	183874783	247	36	2.9532	0.0015726	0.0045702	0.0035117	+	HTR3E
254	2876	3	49344609	49445791	138	19	2.8293	0.0023321	0.0046109	0.019664	-	GPX1
255	6336	3	38688837	38885501	565	73	2.347	0.0094632	0.0046873	0.082034	-	SCN10A
256	91369	17	48720551	48835270	221	40	2.6393	0.0041538	0.0046904	0.023049	-	ANKRD40
257	11055	7	49927023	50182860	653	40	2.3198	0.010175	0.0047353	0.12978	-	ZPBP
258	57713	10	7150586	7503448	1159	114	2.6413	0.0041291	0.0047964	0.02968	-	SFMBT2
259	1795	3	50662672	51471629	1179	32	2.2918	0.010958	0.004813	0.12916	+	DOCK3
260	169834	9	115709400	115824472	374	55	2.261	0.011879	0.0049242	0.10977	-	ZNF883
261	386679	21	45920240	46021388	236	29	2.492	0.0063521	0.0049494	0.027254	-	KRTAP10-2
262	54498	20	4079426	4218394	561	89	2.1165	0.017153	0.004969	0.11744	+	SMOX
263	200909	3	183699332	183807157	295	38	2.7184	0.0032803	0.0049833	0.0071168	+	HTR3D
264	56979	5	23457724	23578706	212	38	2.1843	0.01447	0.0051542	0.12251	+	PRDM9
265	23175	2	11767705	12017535	721	108	3.1654	0.00077423	0.0051797	0.0019925	+	LPIN1
266	10114	11	33224406	33428569	386	50	2.201	0.013868	0.0051816	0.16571	+	HIPK3
267	645177	12	25107276	25234039	508	71	2.6089	0.0045417	0.0052077	0.026775	+	LOC645177
268	340348	7	128734712	128859534	372	53	3.1984	0.00069087	0.005227	0.0011176	+	TSPAN33
269	6337	12	6406009	6536896	195	44	2.4346	0.0074546	0.0052636	0.042931	-	SCNN1A
270	9344	16	29935188	30053583	107	8	2.9762	0.0014594	0.0052693	0.0020384	+	TAOK2
271	10423	16	29819678	29924801	77	10	2.0917	0.018233	0.0053047	0.10157	-	CDIPT
272	29925	3	49708909	49811407	132	21	2.4294	0.007562	0.0053215	0.060213	-	GMPPB
273	10026	1	77504666	77735132	565	57	2.4632	0.0068844	0.0053264	0.052558	-	PIGK
274	79717	1	42871968	42989088	302	24	2.9399	0.0016415	0.0053266	0.0060062	+	PPCS
275	9807	3	49711728	49873973	207	25	2.4499	0.0071453	0.0053951	0.053373	-	IP6K1
276	373863	5	140000381	140103171	179	18	2.4487	0.0071686	0.0055112	0.034236	-	DND1
277	84969	20	42493492	42748256	732	98	2.6793	0.0036887	0.0055279	0.020837	+	TOX2
278	221154	13	22016828	22228355	489	51	2.5429	0.0054968	0.0055526	0.031608	-	MICU2
279	56934	17	49657674	50287377	1403	121	1.8991	0.028773	0.0057013	0.45357	-	CA10
280	162962	19	52608039	52724896	401	61	2.099	0.017906	0.0057794	0.1724	-	ZNF836
281	388282	16	57794549	57900831	355	49	2.7837	0.0026873	0.0057814	0.0056777	+	LOC388282
282	11033	7	887537	1045208	389	51	2.0927	0.01819	0.0058213	0.10365	-	ADAP1
283	54853	5	139994384	140101930	186	20	2.4656	0.0068388	0.0058436	0.034312	+	WDR55
284	150379	22	44225558	44337893	445	58	2.2341	0.01274	0.0059032	0.088885	-	PNPLA5
285	9957	4	11349988	11481255	483	78	2.4334	0.0074783	0.0059037	0.049409	-	HS3ST1
286	84262	7	1556968	1659668	170	15	2.1536	0.015635	0.0059553	0.098959	-	PSMG3
287	57369	15	34994642	35096782	387	68	3.2218	0.0006369	0.0059752	0.00085554	-	GJD2
288	57787	19	45704516	45858541	409	55	2.1667	0.015127	0.0060584	0.074571	+	MARK4
289	3475	7	112013199	112167258	418	58	2.8211	0.0023927	0.0060633	0.006025	+	IFRD1
290	84765	19	52309056	52441229	546	45	1.9121	0.027932	0.0060984	0.26445	-	ZNF577
291	389119	3	49790687	49892463	130	19	2.4778	0.0066102	0.0061046	0.041891	+	FAM212A
292	386724	3	49704267	49807238	126	20	2.3775	0.0087159	0.0061254	0.057975	-	AMIGO3
293	24149	6	43253808	43387181	201	27	2.037	0.020827	0.0061453	0.15386	-	ZNF318
294	91574	12	123667844	123792651	301	16	2.1804	0.014614	0.0062188	0.072726	+	C12orf65
295	8843	12	123149303	123251439	188	21	2.377	0.0087267	0.0062347	0.034418	-	HCAR3
296	387	3	49346569	49499526	207	24	2.7312	0.0031552	0.006266	0.023817	-	RHOA
297	7318	3	49792638	49901391	140	20	2.3784	0.008695	0.0062779	0.054461	-	UBA7
298	202374	5	146564526	146817418	746	76	1.8936	0.029141	0.0062897	0.31206	+	STK32A
299	27198	12	123162153	123265129	174	17	2.4472	0.0071995	0.006295	0.022808	-	HCAR1
300	10452	19	45344477	45456946	277	43	2.3848	0.0085437	0.0063004	0.048793	+	TOMM40
301	2852	7	1076443	1183451	416	35	2.0493	0.020216	0.0063227	0.10823	+	GPER1
302	9709	16	56915974	57027793	412	57	2.0282	0.021268	0.0063319	0.2109	+	HERPUD1
303	6559	16	56849119	56999762	484	65	2.0999	0.01787	0.0063393	0.14339	+	SLC12A3
304	90317	19	52566344	52693191	448	56	2.102	0.017778	0.0063546	0.1546	-	ZNF616
305	79679	1	117636209	117803582	409	59	2.4936	0.0063236	0.0063613	0.039907	-	VTCN1
306	10345	6	123487484	124008428	1393	94	2.2323	0.012799	0.0063616	0.093971	-	TRDN
307	4289	7	130744855	131231398	1158	125	2.8122	0.0024599	0.0063621	0.0081491	+	MKLN1
308	285368	3	9937226	10044078	226	28	2.2093	0.013576	0.0064194	0.11798	-	PRRT3
309	338442	12	123135840	123244392	194	24	2.3646	0.0090257	0.006482	0.041011	-	HCAR2
310	389118	3	49778165	49887254	137	20	2.4555	0.0070346	0.0064864	0.044968	-	CDHR4
311	53938	2	201685630	201804048	164	31	2.122	0.016918	0.0065004	0.095796	-	PPIL3
312	3035	5	140003490	140121681	227	20	2.4179	0.0078058	0.0065096	0.036071	-	HARS
313	23370	19	7370481	7587371	575	40	2.3906	0.0084106	0.0065305	0.038207	+	ARHGEF18
314	788	3	48844356	48986426	119	20	2.0706	0.019197	0.0065778	0.22092	-	SLC25A20
315	4775	16	68068654	68313162	346	26	2.4848	0.0064816	0.006603	0.045471	+	NFATC3
316	93107	16	84204741	84323356	697	110	1.8564	0.031695	0.0066529	0.30485	-	KCNG4
317	7132	12	6387923	6501283	203	35	2.4516	0.0071105	0.0066867	0.034543	-	TNFRSF1A
318	84992	4	89392129	89494952	155	26	2.0301	0.021174	0.0066907	0.17979	-	PIGY
318	100996939	4	89392129	89494952	155	26	2.0301	0.021174	0.0066907	0.17979	-	PYURF
320	494551	7	141358153	141481071	197	22	2.6639	0.0038619	0.0067019	0.010898	+	WEE2
321	81704	9	164865	515259	1434	107	2.7253	0.0032125	0.006737	0.0088504	+	DOCK8
322	23438	5	140021011	140128903	208	18	2.482	0.0065329	0.0068026	0.02694	+	HARS2
323	201158	17	15355578	15516945	274	30	2.7059	0.0034062	0.006809	0.011022	-	TVP23C
324	646450	3	48905221	49006818	99	20	2.0277	0.021294	0.0068526	0.22249	-	ARIH2OS
325	56123	5	140543509	140646993	263	27	2.4202	0.0077556	0.0068593	0.033493	+	PCDHB13
326	81567	6	7831483	7961047	402	54	2.6796	0.0036851	0.0068742	0.015516	-	TXNDC5
327	23510	17	72993279	73111981	385	43	2.1821	0.01455	0.0068913	0.060166	+	KCTD2
328	10425	3	48906265	49072974	143	23	2.0042	0.022525	0.0069552	0.24881	+	ARIH2
329	78987	3	9925478	10037097	232	31	2.1171	0.017127	0.007048	0.13906	+	CRELD1
330	55967	12	95315104	95447489	530	56	3.1693	0.0007641	0.0070685	0.0011708	-	NDUFA12
331	7568	19	12192165	12301222	154	25	2.7715	0.00279	0.0070857	0.013847	-	ZNF20
332	9961	16	29781715	29909360	67	9	2.0268	0.02134	0.0071101	0.10058	+	MVP
333	54102	21	35991612	36140525	319	45	2.1478	0.015863	0.0071102	0.12162	+	CLIC6
334	27347	2	168760530	169154105	1072	75	2.481	0.0065503	0.0071725	0.027976	-	STK39
335	1158	19	45759671	45876302	306	43	2.2138	0.013421	0.0071924	0.044911	-	CKM
336	23392	9	114072973	114297025	395	41	2.1946	0.014095	0.0072501	0.091931	-	KIAA0368
337	79834	15	77350498	77762446	556	40	2.231	0.01284	0.0072784	0.119	-	PEAK1
338	54872	4	442989	583320	371	28	2.1828	0.014525	0.0073045	0.080665	+	PIGG
339	250	2	233193348	233297599	283	39	2.6971	0.0034972	0.0073197	0.010068	+	ALPP
340	7042	1	218468676	218667961	340	50	2.8685	0.002062	0.0073412	0.0090761	+	TGFB2
341	5479	15	64398014	64505354	162	23	2.3017	0.010676	0.0073449	0.048951	-	PPIB
342	375341	3	49256030	49364864	116	19	2.858	0.0021314	0.0074717	0.0080811	-	C3orf62
343	23358	1	55482032	55731039	589	60	2.972	0.0014794	0.0074933	0.00494	-	USP24
344	9013	16	84161453	84270676	500	73	2.0689	0.019278	0.0075042	0.10587	-	TAF1C
345	84961	17	37358897	37608530	356	16	2.2623	0.011839	0.0075297	0.064476	-	FBXL20
346	4919	1	64189690	64697181	1219	103	1.6343	0.051098	0.0075334	0.56008	+	ROR1
347	643834	11	60920984	61030350	98	18	2.7473	0.003004	0.0075653	0.011824	+	PGA3
348	79177	19	44050544	44154587	228	38	2.2832	0.01121	0.0076207	0.055346	+	ZNF576
349	25884	11	74357474	74492227	355	52	2.3624	0.0090783	0.0076317	0.032167	-	CHRDL2
350	11021	12	120482899	120604643	196	30	2.7446	0.0030291	0.0076552	0.0071653	-	RAB35
351	55038	14	105425910	105537425	253	21	2.1191	0.017043	0.0076796	0.070099	-	CDCA4
352	251	2	233221552	233325424	325	38	2.7263	0.0032027	0.0076969	0.011534	+	ALPPL2
353	28992	11	63716006	63983602	522	58	2.191	0.014227	0.0077587	0.098754	-	MACROD1
354	8884	2	27372455	27485175	226	25	2.2266	0.012988	0.0077693	0.07919	-	SLC5A6
355	148979	1	53921904	54253748	765	81	2.0496	0.020204	0.0077965	0.14034	-	GLIS1
356	63973	4	113384672	113487328	233	26	2.5766	0.0049886	0.0078994	0.018294	-	NEUROG2
357	163782	1	62651837	62835083	727	74	1.9004	0.028688	0.0079127	0.28905	-	KANK4
358	1827	21	35838782	36037382	702	65	2.6334	0.004227	0.0079211	0.012942	-	RCAN1
359	170960	4	383773	542960	475	32	2.1897	0.014275	0.0079304	0.066163	-	ZNF721
360	3354	6	87597024	87776397	401	43	2.1301	0.01658	0.0079551	0.10947	+	HTR1E
361	196383	12	123849936	123971264	99	9	2.2669	0.011699	0.00797	0.028368	-	RILPL2
362	83706	11	63924152	64041363	204	28	2.385	0.00854	0.0080263	0.027352	+	FERMT3
363	3550	5	139977384	140092065	203	20	2.3141	0.01033	0.0080349	0.044958	+	IK
364	55345	4	113410489	113608151	380	37	2.4171	0.0078231	0.0080556	0.040513	-	ZGRF1
365	5651	21	19591433	19825970	651	92	2.0332	0.021019	0.0080788	0.16338	-	TMPRSS15
366	10468	5	52726183	52832964	302	41	2.0234	0.021516	0.0080798	0.11868	+	FST
367	63948	1	53875072	53983158	281	34	2.1702	0.014997	0.0080814	0.073727	+	DMRTB1
368	64174	16	67971293	68084493	121	17	2.5122	0.0059999	0.0080832	0.026804	-	DPEP2
369	10963	11	63902206	64022020	222	27	2.3648	0.0090192	0.0080969	0.030723	+	STIP1
370	339559	1	40893043	41012015	364	44	1.9432	0.025994	0.0081604	0.20016	+	ZFP69
371	386682	21	45927906	46028643	264	30	2.4025	0.0081428	0.0082205	0.024426	-	KRTAP10-3
372	79856	15	64393899	64499680	160	23	2.3051	0.010579	0.0082257	0.042585	+	SNX22
373	2206	11	59805734	59915940	246	28	2.5762	0.0049954	0.0082355	0.021171	+	MS4A2
374	260293	1	47377036	47566423	313	29	2.1731	0.014885	0.0083159	0.083863	+	CYP4X1
375	83639	19	43842763	43972767	306	33	1.8361	0.033173	0.0083382	0.27264	+	TEX101
376	144577	12	64530098	64666076	211	31	2.071	0.019181	0.0083477	0.093768	-	C12orf66
377	54905	7	970100	1079276	353	39	1.8536	0.031897	0.0084057	0.17638	+	CYP2W1
378	8924	15	28306183	28617313	177	15	2.1426	0.016074	0.0084064	0.08592	-	HERC2
379	8553	3	4971097	5076866	331	59	2.0613	0.019638	0.0084273	0.09086	+	BHLHE40
380	79971	1	68514142	68748284	755	103	3.1624	0.00078227	0.0084986	0.00093165	-	WLS
381	284756	20	58580980	58698008	326	39	2.0527	0.020052	0.0085004	0.1609	+	C20orf197
382	29937	1	212556229	212669721	328	48	2.5563	0.0052899	0.0085025	0.018535	+	NENF
383	773	19	13267256	13667274	1197	144	1.8523	0.031988	0.0085037	0.37382	-	CACNA1A
384	7681	15	23760454	23870764	234	31	1.9395	0.02622	0.0085567	0.13588	+	MKRN3
385	54681	3	48977304	49094582	90	18	1.9745	0.024162	0.0085797	0.22096	+	P4HTM
386	8871	6	158352888	158570208	650	74	2.1474	0.01588	0.0085997	0.074371	+	SYNJ2
387	3250	16	72047125	72161145	292	32	2.7219	0.0032458	0.0086351	0.0088161	+	HPR
388	79905	16	18945256	19125264	398	36	2.9654	0.0015113	0.0086444	0.0014904	+	TMC7
389	101929578	17	37344040	37452043	149	15	2.1945	0.0141	0.0086478	0.065349	+	LOC101929578
390	2359	19	52248411	52379334	564	63	2.0187	0.02176	0.0086947	0.14766	+	FPR3
391	2865	19	35799249	35901391	338	62	2.4304	0.0075417	0.0087171	0.028209	+	FFAR3
392	87	14	69290840	69496083	725	84	2.0822	0.018664	0.0087629	0.091957	-	ACTN1
393	136051	7	148716733	148837869	286	32	2.3636	0.0090497	0.0088585	0.029467	-	ZNF786
394	136895	7	25114819	25269966	514	50	2.174	0.014854	0.0088803	0.071416	-	C7orf31
395	146223	16	66598653	66780610	345	34	2.1999	0.013907	0.0089325	0.0871	-	CMTM4
396	1361	13	46577201	46745318	436	43	2.4638	0.0068732	0.0089442	0.036516	-	CPB2
397	7416	5	133257566	133391300	280	43	2.1247	0.016806	0.0089992	0.068544	-	VDAC1
398	128822	20	23533047	23636610	356	28	3.8964	4.8807e-05	0.0090157	2.4807e-05	-	CST9
399	5576	3	48734017	48935270	168	25	2.2413	0.012504	0.0090847	0.091897	-	PRKAR2A
400	319089	14	38014941	38268563	654	55	1.7762	0.037848	0.0090855	0.34261	+	TTC6
401	3714	14	105557318	105685161	258	25	2.8845	0.0019601	0.0090917	0.0010157	-	JAG2
402	57189	7	141306528	141451953	195	29	2.5569	0.0052805	0.0091201	0.013606	-	KIAA1147
403	137735	8	107721711	107832472	236	31	2.8256	0.0023597	0.0091248	0.0046876	-	ABRA
404	2885	17	73264157	73451790	435	30	2.119	0.017044	0.0091413	0.055882	-	GRB2
405	113828	22	40340953	40476043	153	31	2.3953	0.0083031	0.0091634	0.039149	+	FAM83F
406	9472	14	32748479	33352268	1843	201	2.6435	0.0041029	0.0091819	0.007821	+	AKAP6
407	200010	1	48638339	48764316	294	30	2.1725	0.014909	0.0092032	0.066193	+	SLC5A9
408	10293	3	49816028	49943992	150	22	2.2157	0.013356	0.0092394	0.05485	-	TRAIP
409	11180	3	48994637	49103386	75	16	1.9492	0.025637	0.0092449	0.21353	+	WDR6
410	55152	3	49002832	49108504	68	16	1.9669	0.0246	0.0092671	0.20973	-	DALRD3
411	51374	2	27384899	27490046	216	23	2.1894	0.014285	0.0092828	0.079807	+	ATRAID
412	401067	3	51810899	51914874	171	21	2.0665	0.019392	0.0093615	0.13816	+	IQCF3
413	90332	19	45665879	45787469	299	50	2.1846	0.014458	0.0093859	0.058403	-	EXOC3L2
414	5469	17	37510538	37657527	200	9	2.2541	0.012094	0.0094119	0.047054	-	MED1
415	340359	8	124607743	124716041	398	63	1.9118	0.02795	0.0094659	0.19171	-	KLHL38
416	171024	4	119759996	120032402	919	83	1.878	0.03019	0.0095019	0.2293	+	SYNPO2
417	121642	12	109475993	109581436	212	33	2.3833	0.008579	0.0095334	0.02344	-	ALKBH2
418	153527	5	140028265	140136248	225	19	2.4075	0.0080321	0.0095524	0.029184	+	ZMAT2
419	414899	11	121936062	122036923	225	40	2.8654	0.0020824	0.009723	0.0032108	-	BLID
420	23413	9	132884857	133049583	568	85	1.8571	0.031651	0.0097416	0.24308	+	NCS1
421	222663	6	35131824	35270856	282	28	2.3617	0.0090961	0.0097562	0.035408	+	SCUBE3
422	160298	11	6176798	6282365	221	35	2.0184	0.021773	0.0097616	0.12849	+	C11orf42
423	23528	1	200324075	200429186	201	22	1.9614	0.024918	0.0097747	0.15493	-	ZNF281
424	26470	16	29832480	29960585	105	13	1.9817	0.023759	0.0098379	0.095456	-	SEZ6L2
425	253832	13	21896710	22083508	491	51	2.8991	0.0018709	0.0098622	0.0035493	-	ZDHHC20
426	56124	5	140537914	140642143	256	25	2.3656	0.0089994	0.0098724	0.02995	+	PCDHB12
427	25915	3	49007908	49110928	72	17	1.9486	0.025671	0.0099884	0.21034	+	NDUFAF3
428	27237	1	3321147	3447677	293	40	2.916	0.0017725	0.010054	0.0016947	+	ARHGEF16
429	123920	16	66587935	66697795	233	25	2.2678	0.011672	0.010058	0.065383	+	CMTM3
430	4759	2	233847382	233949767	294	47	2.253	0.01213	0.010061	0.053881	+	NEU2
431	4210	16	3242028	3356648	220	30	2.1916	0.014204	0.010063	0.060235	-	MEFV
432	79768	15	34382875	34552297	466	37	2.2268	0.01298	0.010135	0.04092	-	KATNBL1
433	114900	11	47561216	47665961	109	21	2.1846	0.014457	0.010142	0.050545	-	C1QTNF4
434	5590	1	1931909	2166834	302	29	2.4795	0.0065777	0.01016	0.016914	+	PRKCZ
435	83851	14	62281567	62623915	1088	99	2.3883	0.0084641	0.010169	0.036298	+	SYT16
436	7325	3	23194498	23682296	1511	55	2.6064	0.0045752	0.0102	0.011951	+	UBE2E2
437	6482	8	134417091	134634697	820	125	2.3352	0.0097663	0.010215	0.021587	-	ST3GAL1
438	8658	8	9362756	9689856	1174	44	2.005	0.022481	0.010217	0.11619	+	TNKS
439	9121	17	73033822	73152257	332	41	2.0916	0.018236	0.010285	0.058697	+	SLC16A5
440	79447	16	29777528	29883816	54	6	2.0145	0.021981	0.010298	0.073168	+	PAGR1
441	399888	11	47558230	47660746	109	22	2.1957	0.014058	0.010338	0.047643	+	FAM180B
442	51100	1	87120253	87263867	320	39	1.7663	0.038674	0.010343	0.30592	+	SH3GLB1
443	285848	6	36160945	36326372	346	70	2.2136	0.01343	0.010372	0.040181	+	PNPLA1
444	255738	1	55455149	55580526	357	60	2.8859	0.0019517	0.010377	0.0044183	+	PCSK9
445	79949	10	115461213	115592192	370	42	2.7674	0.0028249	0.01043	0.0046899	+	PLEKHS1
446	91664	19	53787002	53908122	341	59	1.8332	0.033387	0.010444	0.19373	+	ZNF845
447	8916	4	89463574	89679693	479	47	1.9922	0.023175	0.01054	0.13988	+	HERC3
448	275	3	49404211	49510111	152	19	2.2063	0.013681	0.010602	0.098615	-	AMT
449	4716	16	1959517	2061976	269	36	1.8555	0.031766	0.010618	0.17355	+	NDUFB10
450	25938	14	31710994	31939788	327	34	2.1989	0.013943	0.010651	0.059089	-	HEATR5A
451	63891	3	49676950	49808962	166	23	2.1957	0.014058	0.010677	0.070885	+	RNF123
452	887	11	6230841	6343363	279	61	1.7732	0.038101	0.010774	0.30888	+	CCKBR
453	57804	11	67068236	67171067	107	17	1.9901	0.023288	0.010792	0.14154	-	POLD4
454	84186	9	37070161	37408146	575	51	1.9108	0.028016	0.010861	0.18461	+	ZCCHC7
455	123872	16	84128865	84261524	570	77	1.9754	0.024111	0.01087	0.11468	+	DNAAF1
456	10164	16	71510023	71622493	166	28	2.0406	0.020647	0.010885	0.085354	+	CHST4
457	120787	11	6170454	6271416	221	37	1.9919	0.023189	0.010954	0.14438	+	OR52W1
458	9768	15	64607193	64729914	165	26	2.184	0.014482	0.011105	0.0589	-	KIAA0101
459	3396	17	72958760	73067356	243	34	2.2152	0.013374	0.011114	0.033854	+	ICT1
460	29062	7	134818590	134946316	297	31	2.2933	0.010917	0.011202	0.057469	-	WDR91
461	65243	1	40865774	40979390	331	50	1.8581	0.031579	0.011203	0.19025	+	ZFP69B
462	84229	16	57678713	57815367	388	71	2.4044	0.0080992	0.011224	0.020429	+	DRC7
463	253827	12	65622423	65910687	391	39	2.14	0.016176	0.011227	0.083195	+	MSRB3
464	23529	11	67081635	67191648	118	17	1.9867	0.02348	0.011272	0.14	-	CLCF1
465	58985	1	24396261	24519783	353	48	2.0396	0.020696	0.011295	0.068182	-	IL22RA1
466	8837	2	201930877	202087411	284	31	2.0521	0.020079	0.011303	0.1098	+	CFLAR
467	79629	19	17287040	17390028	362	46	2.1945	0.014098	0.011346	0.056282	+	OCEL1
468	2555	4	46196470	46442056	468	38	1.6931	0.04522	0.011358	0.39879	-	GABRA2
469	70	15	35030297	35137927	393	73	3.0784	0.0010404	0.011553	0.00094071	-	ACTC1
470	440695	1	157011835	157119600	393	39	1.9854	0.023552	0.011579	0.13344	-	ETV3L
471	84276	3	49409766	49516777	153	21	2.1906	0.014242	0.011584	0.10189	-	NICN1
472	80323	18	52518740	52676739	349	33	2.1601	0.015382	0.01166	0.050972	-	CCDC68
473	199974	1	47483160	47633992	337	18	2.2402	0.012539	0.01167	0.043003	+	CYP4Z1
474	55831	3	9955636	10079146	269	25	2.0869	0.018449	0.011717	0.12087	-	EMC3
475	146	20	4151278	4279659	411	59	2.414	0.0078901	0.011718	0.022232	-	ADRA1D
476	65251	19	52342488	52458305	491	43	1.7606	0.039156	0.01175	0.24431	-	ZNF649
477	114783	19	48938528	49066446	72	17	1.7305	0.041775	0.011763	0.26346	-	LMTK3
478	83707	11	63941271	64043726	174	26	2.2971	0.010805	0.01178	0.02533	-	TRPT1
479	6187	16	1962059	2064827	268	34	1.8221	0.03422	0.011786	0.17294	-	RPS2
480	11155	10	88376542	88545829	549	59	2.0585	0.019773	0.011793	0.086467	+	LDB3
481	214	3	105035557	105345757	853	70	2.023	0.021535	0.011796	0.087548	+	ALCAM
482	8292	3	15441640	15613277	401	43	2.0215	0.021615	0.01182	0.10204	-	COLQ
483	6696	4	88846802	88954563	348	42	1.9709	0.024366	0.011835	0.09831	+	SPP1
484	4695	5	139974948	140077370	192	20	2.2642	0.011781	0.011844	0.03617	-	NDUFA2
485	1513	1	150718684	150830917	133	19	2.257	0.012004	0.011949	0.033352	-	CTSK
486	10476	17	72984955	73093074	313	41	2.1355	0.016361	0.011968	0.044981	-	ATP5H
487	339779	2	27309715	27412332	155	29	1.9623	0.024864	0.011969	0.13262	-	PRR30
488	23499	1	39499839	40002810	890	64	1.8543	0.031846	0.012004	0.20699	+	MACF1
489	131965	3	15372782	15519054	324	37	2.0735	0.019061	0.01202	0.069046	-	METTL6
490	84617	18	12258218	12376568	316	35	2.3184	0.010215	0.012088	0.034705	+	TUBB6
491	6988	3	49399639	49503909	151	19	2.1897	0.014273	0.012099	0.09375	+	TCTA
492	6123	16	1944580	2054679	319	36	1.8549	0.031808	0.012159	0.16067	-	RPL3L
493	7204	5	14093817	14560313	1141	81	1.78	0.037542	0.012305	0.19494	+	TRIO
494	1191	8	27404434	27522328	351	47	2.7221	0.0032432	0.01236	0.0047227	-	CLU
495	657	10	88466396	88734945	634	58	2.0749	0.018997	0.012372	0.088548	+	BMPR1A
496	27076	19	43914946	44019831	271	31	1.7147	0.043202	0.012426	0.26025	-	LYPD3
497	202915	7	1531871	1646066	220	16	1.9173	0.027603	0.012497	0.10979	-	TMEM184A
498	11251	11	60568398	60673444	277	36	1.8741	0.03046	0.012586	0.17237	-	PTGDR2
499	55374	5	139969012	140074989	197	20	2.2443	0.012405	0.012597	0.037001	+	TMCO6
500	6561	7	122703588	122890025	428	42	1.8683	0.030859	0.012645	0.20473	-	SLC13A1
501	10658	11	47437489	47624792	233	27	2.3646	0.0090251	0.012679	0.014986	-	CELF1
502	100131137	19	48421303	48545427	378	52	2.3966	0.0082741	0.01284	0.025467	-	BSPH1
503	25923	11	63341554	63489533	135	17	2.2302	0.012867	0.012845	0.032401	-	ATL3
504	3615	3	49011758	49116875	77	18	1.846	0.032449	0.012949	0.23381	-	IMPDH2
505	159	1	244521794	244665436	338	48	2.1766	0.014756	0.012955	0.058473	-	ADSS
506	414318	9	132033295	132134882	205	34	1.8473	0.032355	0.013005	0.16033	+	C9orf106
507	8575	2	179246141	179365958	203	29	2.4682	0.0067892	0.01301	0.011716	-	PRKRA
508	83666	3	122196757	122333523	366	43	1.8848	0.02973	0.01309	0.099908	-	PARP9
509	10939	18	12278943	12427275	394	39	2.2788	0.01134	0.013099	0.044062	-	AFG3L2
510	83879	2	174169561	174283718	369	69	2.7721	0.0027851	0.013121	0.0043424	+	CDCA7
511	56941	3	128947680	129075029	274	25	1.7674	0.038579	0.013144	0.2487	+	HMCES
512	120425	11	118014442	118145809	374	40	2.2828	0.011221	0.013157	0.029936	-	AMICA1
513	8100	13	21090585	21315576	582	48	1.9003	0.028698	0.013254	0.16013	+	IFT88
514	51741	16	78083310	79296567	6903	512	1.8622	0.031288	0.013292	0.2257	+	WWOX
515	55706	1	54181133	54354225	326	44	2.2126	0.013461	0.01339	0.063826	-	NDC1
516	2660	2	190870426	190977455	201	37	2.1009	0.017827	0.013431	0.072545	-	MSTN
517	55709	11	47543749	47650567	113	23	2.1094	0.017455	0.01344	0.047757	-	KBTBD4
518	81559	1	228531373	228644584	217	31	1.9978	0.022868	0.013471	0.12345	-	TRIM11
519	79890	14	92930125	93205339	893	128	2.2787	0.011343	0.013535	0.046149	+	RIN3
520	386680	21	45949564	46050481	318	37	2.1955	0.014062	0.013544	0.041715	-	KRTAP10-5
521	3338	11	63947594	64051753	170	27	2.2229	0.013112	0.01358	0.029293	+	DNAJC4
522	29855	16	4846666	4982363	423	50	2.5107	0.0060253	0.013596	0.0091009	+	UBN1
523	4722	11	47550562	47656115	117	24	2.0868	0.018453	0.013627	0.053041	+	NDUFS3
524	790	2	27390258	27516660	234	25	2.109	0.017473	0.013646	0.073593	+	CAD
525	3866	17	39619997	39728033	287	39	2.7536	0.0029467	0.013679	0.0027338	-	KRT15
526	112487	14	31865242	31976680	175	28	2.1926	0.014167	0.013711	0.061135	-	DTD2
527	55421	17	3660042	3799545	281	50	1.9274	0.026966	0.013783	0.15252	-	C17orf85
528	112476	16	29773409	29877202	46	5	1.8706	0.030704	0.013849	0.10278	+	PRRT2
529	9772	17	73402664	73546533	437	37	1.9813	0.02378	0.013919	0.062357	+	KIAA0195
530	84217	1	42846000	42971938	337	26	2.6983	0.0034851	0.013929	0.008364	-	ZMYND12
531	26047	7	145763453	148168090	7870	418	2.0953	0.018072	0.014033	0.08036	+	CNTNAP2
532	7702	11	9432512	9600071	295	39	2.5792	0.004951	0.014139	0.012073	+	ZNF143
533	10198	12	123590943	123767785	366	18	1.9618	0.024891	0.014203	0.10072	-	MPHOSPH9
534	79153	16	30065977	30175264	64	9	2.8374	0.0022742	0.014209	0.00074724	-	GDPD3
535	386672	21	45943606	46044987	290	32	2.2043	0.013751	0.014218	0.036747	+	KRTAP10-4
536	5859	3	49083365	49192562	90	19	1.9607	0.024955	0.014298	0.13964	-	QARS
537	388730	1	205002257	205103588	281	32	2.1423	0.016086	0.014322	0.049647	-	TMEM81
538	84818	3	9908758	10025305	237	34	1.8673	0.03093	0.014326	0.15386	+	IL17RC
539	152006	9	36286395	36537568	432	62	2.0511	0.020129	0.014366	0.10121	-	RNF38
540	11081	12	91394268	91502131	449	37	2.0333	0.021013	0.014388	0.094318	-	KERA
541	131583	3	194356622	194459766	384	43	2.1646	0.015209	0.014399	0.041927	+	FAM43A
542	26986	8	101665144	101784969	300	39	1.8124	0.034965	0.014416	0.20219	-	PABPC1
543	9842	17	43463266	43618146	214	16	2.9365	0.0016597	0.014439	0.001741	-	PLEKHM1
544	54751	1	16033107	16163089	380	51	1.8632	0.031219	0.014492	0.20104	+	FBLIM1
545	3836	3	122090748	122283786	426	35	1.7334	0.041512	0.014535	0.16568	-	KPNA1
546	3887	12	52629697	52735299	404	47	1.7379	0.041114	0.014543	0.2583	-	KRT81
547	84153	11	65435144	65538409	218	23	2.4889	0.0064072	0.014568	0.0070492	-	RNASEH2C
548	25813	22	44301261	44442412	458	57	1.6175	0.052884	0.014579	0.29921	+	SAMM50
549	389123	3	51845645	51947440	201	23	1.8537	0.03189	0.014696	0.15629	+	IQCF2
550	1135	8	27267278	27386813	362	41	2.0321	0.021074	0.014733	0.081112	-	CHRNA2
551	2290	14	29186278	29289483	216	43	1.652	0.04927	0.014739	0.2515	+	FOXG1
552	79012	3	49845414	49957655	126	20	2.1553	0.015567	0.014755	0.03962	-	CAMKV
553	79637	17	73056047	73176360	304	39	2.0248	0.021444	0.014773	0.059397	+	ARMC7
554	643314	1	39825176	39932154	156	20	2.1726	0.014905	0.014794	0.037845	+	KIAA0754
555	80895	2	239029043	239162343	525	65	2.7113	0.0033509	0.014868	0.0059853	-	ILKAP
556	389124	3	51857737	51959600	201	25	1.8092	0.035207	0.014873	0.177	-	IQCF5
557	6742	7	141388121	141500288	173	15	2.2438	0.012421	0.014917	0.031741	+	SSBP1
558	445329	16	29421207	29526301	2	2	2.0849	0.018538	0.014931	0.024083	+	SULT1A4
559	203102	8	38915050	39192436	526	44	2.2896	0.011021	0.014932	0.034358	+	ADAM32
560	10466	7	106792189	107254959	813	43	1.5163	0.06472	0.014956	0.55657	-	COG5
561	10869	3	49095479	49208371	98	19	1.8983	0.028826	0.014962	0.16243	-	USP19
562	80004	16	68212450	68320136	153	18	2.5503	0.005382	0.01503	0.0088589	-	ESRP2
563	84304	11	63943730	64047491	173	27	2.1588	0.015433	0.015061	0.035493	+	NUDT22
564	55930	15	52434515	52637995	451	56	2.0558	0.019903	0.015077	0.066727	-	MYO5C
565	9025	6	37271748	37412514	240	43	1.473	0.070369	0.015164	0.50842	+	RNF8
566	221078	10	18784264	18998180	706	49	2.4498	0.0071471	0.015211	0.012092	-	NSUN6
567	4150	16	29767417	29872504	44	5	1.8539	0.031876	0.015315	0.10049	+	MAZ
568	127396	1	40947233	41063841	348	32	2.0046	0.022505	0.015322	0.088102	+	ZNF684
569	3240	16	72038470	72144955	266	31	1.7029	0.044292	0.015323	0.26904	+	HP
570	9413	9	71889287	72057372	521	58	2.1673	0.015104	0.015386	0.04287	+	FAM189A2
571	85403	3	15419064	15534120	244	27	2.1598	0.015395	0.015451	0.044804	+	EAF1
572	386674	21	45961149	46062386	339	38	2.1735	0.01487	0.015456	0.041409	-	KRTAP10-6
573	51734	16	1938234	2043294	298	32	1.8096	0.035179	0.015477	0.15523	-	MSRB1
574	5786	20	2794841	3069316	410	41	1.7814	0.037422	0.015485	0.18289	+	PTPRA
575	10524	11	65429473	65537077	224	23	2.597	0.0047028	0.015526	0.0036592	+	KAT5
576	7567	16	71457976	71648992	346	39	1.9307	0.02676	0.01555	0.086122	-	ZNF19
577	22917	11	60585015	60693164	276	34	1.9521	0.025464	0.015596	0.097381	+	ZP1
578	401052	3	9998102	10102779	247	15	1.826	0.033924	0.015651	0.18602	-	LOC401052
579	54870	3	49017140	49181504	121	22	1.8659	0.031029	0.015742	0.18054	-	QRICH1
580	552900	16	29402601	29516285	5	3	2.044	0.020479	0.015764	0.035735	-	BOLA2
581	945	19	51678335	51793274	288	44	2.5466	0.0054393	0.015791	0.0063768	+	CD33
581	55248	1	212487816	212638267	342	43	2.4522	0.0070988	0.015791	0.015563	-	TMEM206
583	8900	13	36955257	37067019	227	32	1.6838	0.046111	0.015863	0.30965	+	CCNA1
584	201176	17	43421268	43560282	265	26	2.7784	0.0027317	0.015872	0.0042249	-	ARHGAP27
585	64789	1	40924391	41032228	336	33	1.7927	0.036508	0.015919	0.19286	+	EXO5
586	51755	17	37567739	37771398	296	14	1.9446	0.02591	0.015938	0.093942	+	CDK12
587	84250	5	93903086	94083326	430	35	2.7267	0.003199	0.016002	0.006242	+	ANKRD32
588	57630	4	169965407	170242249	602	66	1.8736	0.030495	0.016068	0.16604	-	SH3RF1
589	90441	5	16401628	16515894	340	50	1.6376	0.05075	0.01607	0.30389	-	ZNF622
590	126298	19	44038519	44150287	246	38	2.0467	0.020344	0.016143	0.063223	-	IRGQ
591	127795	1	60406066	60589442	407	50	1.5611	0.059252	0.016181	0.35014	-	C1orf87
592	10614	17	43174684	43279468	177	36	2.5432	0.0054925	0.016238	0.0060628	+	HEXIM1
593	929	5	139961313	140063286	177	19	2.1299	0.01659	0.016245	0.04493	-	CD14
594	10363	15	77663018	77827945	323	31	2.0428	0.020536	0.016252	0.08108	+	HMG20A
595	9050	18	43513502	43702250	551	51	1.5067	0.065948	0.016352	0.49517	-	PSTPIP2
596	7423	11	63952056	64056736	166	27	1.9796	0.023872	0.016405	0.066615	+	VEGFB
597	1605	3	49456136	49623051	215	25	1.9247	0.027132	0.016414	0.16695	+	DAG1
598	54877	18	60140658	60304942	390	55	1.8157	0.034706	0.016581	0.15948	+	ZCCHC2
599	8895	8	87476656	87623726	383	40	2.1593	0.015412	0.016586	0.046053	+	CPNE3
600	10318	5	150359504	150517221	532	75	1.9616	0.024903	0.016659	0.10549	-	TNIP1
601	10935	10	120877215	120988377	253	34	1.6268	0.051891	0.016739	0.23781	-	PRDX3
602	79008	16	29415822	29519545	3	2	2.0652	0.019454	0.016799	0.023827	+	SLX1B
603	64180	16	67959566	68064452	99	15	2.352	0.0093374	0.016851	0.022971	-	DPEP3
604	164832	2	100839753	100989195	512	32	1.624	0.052183	0.016864	0.31921	-	LONRF2
605	22820	3	128918453	129046616	188	20	1.7676	0.038562	0.016867	0.20797	+	COPG1
606	10541	9	100695479	100830860	220	33	1.8037	0.03564	0.017067	0.15314	+	ANP32B
607	28511	17	40119594	40227659	146	25	2.6576	0.0039353	0.017078	0.0055703	+	NKIRAS2
608	6642	15	64336275	64486433	249	31	2.0122	0.022099	0.017133	0.086472	+	SNX1
609	6964	14	22841537	22985569	426	61	1.9665	0.024622	0.017135	0.074082	+	TRD
610	54961	11	67020919	67130078	96	17	1.9823	0.023724	0.017173	0.089845	+	SSH3
611	7629	6	35176691	35313762	254	28	1.924	0.027177	0.017207	0.10888	+	ZNF76
612	6790	20	54894445	55017351	301	47	3.6805	0.0001164	0.017271	5.8433e-05	-	AURKA
613	65080	2	224772121	224882431	304	39	1.6665	0.047809	0.017316	0.2516	+	MRPL44
614	441639	12	55473553	55574560	300	15	2.8223	0.0023837	0.01733	0.0035125	+	OR9K2
615	124790	17	43187502	43297406	184	39	2.5151	0.0059499	0.017357	0.0064453	+	HEXIM2
616	114971	11	47536888	47645013	118	24	2.0813	0.018704	0.017378	0.042962	+	PTPMT1
617	1404	5	82884017	83066896	496	61	2.7552	0.0029332	0.017446	0.0053122	-	HAPLN1
618	114793	2	153141684	153556348	1162	80	2.0607	0.019666	0.017487	0.058781	+	FMNL2
619	10788	5	75649131	76053957	1168	118	1.5485	0.060755	0.017509	0.41682	+	IQGAP2
620	7752	16	3222325	3336221	254	34	2.0565	0.019865	0.017511	0.073274	-	ZNF200
621	5051	1	26236258	26376366	261	29	1.6831	0.046179	0.017519	0.26081	-	PAFAH2
622	2760	5	150582613	150700083	431	49	2.5808	0.0049291	0.017531	0.0060264	+	GM2A
623	2286	11	63958413	64061607	156	28	1.941	0.026127	0.017584	0.071421	+	FKBP2
624	5874	18	52335097	52612747	742	59	1.9314	0.026714	0.017605	0.10877	+	RAB27B
625	8394	1	151121021	151272007	145	25	1.5955	0.055301	0.017654	0.37325	+	PIP5K1A
626	51127	1	228544858	228654583	201	29	1.9409	0.026132	0.01766	0.11626	-	TRIM17
627	10927	9	90952584	91143623	304	17	1.8187	0.034478	0.017665	0.16692	+	SPIN1
628	245802	11	60052355	60158441	335	33	1.8755	0.030363	0.017672	0.14905	+	MS4A6E
629	32	12	109504222	109756031	618	72	2.5102	0.0060338	0.017702	0.0069234	+	ACACB
630	54585	3	45814808	46007216	381	51	1.6802	0.046457	0.017713	0.22872	-	LZTFL1
631	4660	1	202267830	202607697	435	43	1.5302	0.062989	0.017777	0.43767	+	PPP1R12B
632	2702	1	147178332	147303165	370	36	1.7679	0.038535	0.017796	0.14846	-	GJA5
633	266812	4	89567066	89669023	224	31	1.9345	0.026524	0.017853	0.09828	-	NAP1L5
634	59352	1	202113118	202338889	518	69	1.7718	0.038216	0.017888	0.19881	+	LGR6
635	23440	5	76874537	76984522	292	53	1.5521	0.060321	0.017892	0.34895	-	OTP
636	148641	1	233990679	234510262	1715	162	2.3384	0.0096834	0.017895	0.033998	+	SLC35F3
637	996	17	45145310	45316665	398	49	1.7501	0.040049	0.017902	0.14233	-	CDC27
638	26119	1	25820071	25945377	95	13	2.6991	0.0034765	0.018073	0.0026945	+	LDLRAP1
639	2864	19	35791645	35894764	327	59	2.2688	0.011641	0.018107	0.02702	+	FFAR1
640	4194	1	204435507	204646131	423	40	1.6425	0.050245	0.018197	0.30342	+	MDM4
641	54704	8	94879083	94988296	304	32	1.9059	0.028332	0.018212	0.086198	+	PDP1
642	405	1	150732181	150899244	219	26	1.5612	0.05924	0.018244	0.27687	-	ARNT
643	23645	19	49325649	49429319	289	24	1.6937	0.045158	0.018254	0.17054	+	PPP1R15A
644	342850	18	12043848	12179763	360	19	2.3357	0.0097539	0.018268	0.016503	+	ANKRD62
645	2177	3	10018113	10193614	449	23	1.7854	0.037098	0.018277	0.18144	+	FANCD2
646	29089	1	202250785	202361094	161	22	1.6436	0.05013	0.018319	0.27076	-	UBE2T
647	200232	20	55049785	55151208	281	47	1.8337	0.033347	0.018347	0.17713	+	FAM209A
648	645202	15	28544547	28653243	1	1	2.0891	0.01835	0.01835	0.01835	-	LOC645202
649	55892	3	169440619	169557504	151	27	1.6028	0.054489	0.018405	0.27425	+	MYNN
650	375567	7	49763257	50011546	485	51	2.019	0.021743	0.018456	0.10547	+	VWC2
651	285386	3	188767910	189091271	735	95	2.1126	0.017317	0.018574	0.043836	+	TPRG1
652	1997	13	41456055	41685544	327	29	1.5294	0.063083	0.018596	0.324	-	ELF1
653	85453	8	98235714	98340192	270	38	1.7961	0.036235	0.018678	0.11658	-	TSPYL5
654	8971	3	128983614	129085120	255	24	1.693	0.045229	0.018704	0.21714	-	H1FX
655	124446	16	29923351	30034373	108	9	2.7018	0.0034483	0.018806	0.0026789	+	TMEM219
656	10113	2	27303624	27407542	150	28	1.6956	0.044985	0.018908	0.22267	-	PREB
657	121364	12	55564809	55665759	229	17	1.6425	0.050248	0.018913	0.27046	+	OR10A7
658	256281	14	105589274	105697660	183	20	2.8274	0.0023463	0.018926	0.00086219	-	NUDT14
659	3021	17	73722515	73825860	179	32	1.9198	0.027444	0.019129	0.077653	-	H3F3B
660	54858	19	18401397	18530763	332	57	1.6489	0.04958	0.019141	0.2409	+	PGPEP1
661	2063	19	17292692	17406744	410	48	2.0878	0.01841	0.019195	0.049029	-	NR2F6
662	83852	13	49968429	50119139	449	44	1.4605	0.072073	0.019196	0.39194	+	SETDB2
663	642636	20	1156707	1285988	347	54	1.8593	0.031491	0.019199	0.14394	+	RAD21L1
664	11145	11	63291934	63431941	143	25	2.0938	0.018137	0.019236	0.038409	-	PLA2G16
665	84068	4	147125137	147493123	712	65	1.8695	0.030776	0.019279	0.13542	-	SLC10A7
666	56903	7	4847369	4951625	387	55	1.8684	0.030854	0.019379	0.083954	-	PAPOLB
667	3889	12	52658085	52765182	416	41	1.6794	0.046536	0.019413	0.21516	-	KRT83
668	9738	16	19485179	19614730	442	35	2.5569	0.0052806	0.019535	0.0072375	+	CCP110
669	79080	11	60559429	60668561	304	37	1.7492	0.040132	0.019585	0.1662	+	CCDC86
670	23099	9	129517285	129650489	150	42	2.512	0.0060031	0.019727	0.015	+	ZBTB43
671	145946	15	97276676	97378845	333	52	1.7237	0.04238	0.019728	0.13512	+	SPATA8
672	64976	22	19369302	19473600	216	24	1.7085	0.043776	0.019734	0.16934	+	MRPL40
673	93643	6	43395261	43524294	213	32	2.2445	0.012399	0.019763	0.031231	+	TJAP1
674	220047	11	85516144	85681064	454	42	2.2392	0.012571	0.019831	0.028452	+	CCDC83
675	7290	22	19268221	19469247	418	37	1.6858	0.045913	0.019894	0.20316	-	HIRA
676	132612	4	123250121	123400957	236	31	1.7313	0.0417	0.019972	0.18931	+	ADAD1
677	4504	16	56573267	56675000	469	76	2.5702	0.005082	0.020019	0.0058307	+	MT3
678	170575	7	150363645	150471368	293	38	1.7551	0.039625	0.020045	0.14317	+	GIMAP1
679	5929	1	205005270	205141150	360	33	1.988	0.023404	0.02005	0.060166	-	RBBP5
680	440956	3	51762577	51863256	104	22	1.766	0.038696	0.020054	0.18352	-	IQCF6
681	254783	12	55591072	55692010	179	19	1.5686	0.058375	0.020115	0.30113	+	OR6C74
682	4913	16	2039816	2147931	147	27	1.7636	0.038897	0.020119	0.10766	-	NTHL1
683	55074	8	107232406	107814922	1404	88	2.4052	0.0080813	0.020133	0.01256	+	OXR1
684	10950	21	18915968	19035268	254	34	1.905	0.028389	0.020178	0.099295	-	BTG3
685	4485	3	49671380	49776196	138	21	2.0503	0.020167	0.020196	0.05901	-	MST1
686	128977	22	19378409	19485755	210	24	1.6648	0.047974	0.020357	0.174	-	C22orf39
687	220441	18	59425300	59611634	621	68	1.6537	0.049098	0.020438	0.18667	-	RNF152
688	10326	20	1495029	1650720	407	50	1.4809	0.069312	0.020439	0.33154	-	SIRPB1
689	100506504	1	2063250	2165812	168	20	2.4882	0.0064199	0.020471	0.0094267	-	LOC100506504
690	653583	19	43929255	44059073	361	40	1.4988	0.066962	0.020519	0.31466	-	PHLDB3
691	151636	3	122233085	122344050	314	41	1.8153	0.034739	0.020584	0.095545	+	DTX3L
692	11278	13	74210149	74758400	1476	171	1.6426	0.05023	0.020637	0.30045	-	KLF12
693	129807	2	242699920	242808742	26	5	1.6197	0.052647	0.020643	0.14901	+	NEU4
694	5883	11	67109423	67215883	112	18	1.7704	0.038331	0.020658	0.14213	+	RAD9A
695	80764	22	21304061	21406404	239	45	1.9887	0.023365	0.020696	0.062209	-	THAP7
696	117583	2	205360516	206534886	2567	176	1.6034	0.054429	0.020712	0.30056	+	PARD3B
697	7975	7	1520368	1632679	246	16	1.8188	0.034474	0.020727	0.094817	+	MAFK
698	256586	15	51965261	52093650	308	30	2.4984	0.0062371	0.020734	0.006875	-	LYSMD2
699	27255	3	1084342	1495278	1799	178	1.4621	0.071863	0.020739	0.42057	+	CNTN6
700	91523	12	47423386	47680446	760	91	1.5742	0.057715	0.02074	0.25321	+	PCED1B
701	50831	7	141413897	141514997	175	15	2.2323	0.012799	0.020743	0.027061	+	TAS2R3
702	64403	14	23466270	23576747	189	35	1.4282	0.076623	0.020778	0.39244	-	CDH24
703	1838	2	25550067	25946516	579	83	2.2028	0.013806	0.020784	0.044815	-	DTNB
704	29116	6	16079277	16198479	292	42	1.5783	0.057252	0.020799	0.25932	+	MYLIP
705	81127	14	20393678	20494724	384	38	2.2107	0.013528	0.02087	0.026997	+	OR4K15
706	64601	20	2771373	2897378	251	36	1.5648	0.058814	0.020874	0.26823	+	VPS16
707	101928675	7	51403716	51505203	253	34	1.4812	0.069275	0.020895	0.36675	-	LOC101928675
708	161779	15	34344274	34446591	188	24	2.3198	0.010176	0.020959	0.016762	+	PGBD4
709	1524	3	39254985	39373226	338	54	2.1887	0.014309	0.020968	0.027058	-	CX3CR1
710	283927	16	77706389	77859332	763	93	2.1908	0.014233	0.020986	0.042672	+	NUDT7
711	8825	12	81141171	81381702	681	68	1.7521	0.03988	0.021008	0.15213	-	LIN7A
712	55118	10	99574757	99840585	473	71	1.6783	0.04664	0.021016	0.25064	-	CRTAC1
713	132141	3	51878892	51987386	179	28	1.6883	0.045679	0.021021	0.18085	-	IQCF1
714	100533496	17	15289332	15516945	483	62	2.1965	0.014027	0.021022	0.031916	-	TVP23C-CDRT4
715	339	12	7751996	7873195	478	56	2.6728	0.0037611	0.021055	0.0045787	-	APOBEC1
716	22802	1	86962759	87096437	325	44	2.1179	0.017092	0.02114	0.025773	+	CLCA4
717	55276	4	37778282	37914559	552	58	1.8693	0.030788	0.021188	0.11179	+	PGM2
718	6520	11	62573484	62706355	206	27	1.6968	0.044863	0.021267	0.20432	+	SLC3A2
719	55114	16	24880710	25076695	429	48	1.7113	0.043512	0.021289	0.18161	-	ARHGAP17
720	119559	10	120850425	120975221	262	30	1.5884	0.056097	0.021337	0.22765	-	SFXN4
721	83543	9	133921863	134048539	338	41	1.8876	0.029541	0.021364	0.085481	+	AIF1L
722	7252	1	115522445	115626930	299	29	1.8078	0.035317	0.021399	0.12341	+	TSHB
723	221935	7	3291080	4358632	3981	188	1.8202	0.034365	0.021478	0.17254	+	SDK1
724	101927401	1	228499180	228604500	233	29	1.8701	0.030732	0.021481	0.10893	-	LOC101927401
725	338692	11	67006762	67119955	97	17	2.0868	0.018453	0.021518	0.049227	+	ANKRD13D
726	7781	2	27427440	27551093	206	25	1.9942	0.023065	0.021548	0.079054	-	SLC30A3
727	345275	4	88174941	88294056	372	36	1.8687	0.030832	0.021552	0.084853	-	HSD17B13
728	4179	1	207875383	208018861	303	32	2.0238	0.021495	0.02162	0.052862	+	CD46
728	7024	12	51437539	51616926	450	45	1.5997	0.054832	0.02162	0.22837	-	TFCP2
730	164045	1	91676323	91920426	496	49	1.7531	0.039793	0.02166	0.17639	-	HFM1
731	7273	2	179340716	179722150	614	58	2.6905	0.003567	0.021676	0.0047536	-	TTN
732	92126	18	65123819	65233967	206	32	1.9759	0.02408	0.021747	0.055358	-	DSEL
733	163590	1	179759102	179897867	315	34	2.938	0.0016516	0.021758	0.0008794	-	TOR1AIP2
734	26248	9	114039763	114141952	194	34	1.9017	0.028605	0.0218	0.07314	-	OR2K2
734	84281	2	190694282	191118210	913	96	1.7286	0.041937	0.0218	0.1987	+	C2orf88
736	3632	10	134301283	134646984	892	74	1.4628	0.071762	0.021849	0.41079	+	INPP5A
737	440567	1	16083657	16184194	289	38	1.8493	0.032206	0.021903	0.1505	-	UQCRHL
738	7288	19	49334222	49451996	321	29	1.5766	0.057438	0.022002	0.21326	-	TULP2
739	213	4	74219972	74337129	262	27	2.1246	0.016809	0.022082	0.031055	+	ALB
740	9266	19	48922465	49035571	101	21	1.4843	0.068861	0.022103	0.30956	+	CYTH2
741	645432	19	4840449	4952879	330	61	1.393	0.081812	0.022245	0.41929	-	ARRDC5
742	84162	4	123023488	123333914	441	42	1.6588	0.04858	0.022265	0.20862	+	KIAA1109
743	79814	1	15848194	15961605	329	25	1.5476	0.060859	0.022329	0.28225	-	AGMAT
744	57664	19	49290349	49421884	374	32	1.5749	0.057645	0.022333	0.21799	-	PLEKHA4
745	7266	17	40078439	40219715	187	27	2.574	0.005027	0.022379	0.0070224	-	DNAJC7
746	151827	3	169461216	169580574	178	26	1.528	0.063259	0.022394	0.26331	-	LRRC34
747	51329	12	123414607	123517460	60	12	1.569	0.058322	0.022583	0.22812	+	ARL6IP4
748	55003	6	10645180	10760015	130	32	1.8356	0.033209	0.022594	0.13646	+	PAK1IP1
749	54888	5	6549352	6683473	611	66	2.3613	0.0091061	0.022637	0.017007	-	NSUN2
750	56904	9	131720313	131840604	91	16	2.637	0.0041822	0.022649	0.0039521	-	SH3GLB2
751	4744	22	29826181	29937279	247	33	2.3073	0.010519	0.022653	0.016746	+	NEFH
752	115795	3	10073004	10199975	332	21	1.7671	0.038604	0.022698	0.15398	-	FANCD2OS
753	23333	7	34918491	35127653	605	44	2.5046	0.0061301	0.022757	0.0067535	-	DPY19L1
754	5378	2	190598710	190792355	340	31	1.5976	0.055064	0.022769	0.215	+	PMS1
754	5499	11	67115652	67219376	114	19	1.7358	0.0413	0.022769	0.14514	-	PPP1CA
756	9132	1	41199684	41356124	484	82	1.3662	0.085939	0.022774	0.47611	+	KCNQ4
757	90637	7	1142543	1249855	397	30	1.577	0.057395	0.022836	0.22277	-	ZFAND2A
758	55617	20	13320036	13669583	758	57	1.4762	0.06995	0.022846	0.3226	-	TASP1
759	84935	13	31430312	31549709	314	52	2.2674	0.011684	0.022868	0.013939	+	MEDAG
760	51747	17	48746926	48880072	276	45	2.2418	0.012488	0.023008	0.022592	+	LUC7L3
761	84869	4	169765774	169981468	378	42	1.6696	0.047504	0.023062	0.17446	-	CBR4
762	55512	16	68342230	68532409	371	40	1.6438	0.050109	0.023079	0.23808	-	SMPD3
763	248	2	233270833	233375455	372	50	1.5609	0.059279	0.023131	0.32455	+	ALPI
764	123970	16	49357808	49483321	280	39	1.801	0.035853	0.023138	0.10711	+	C16orf78
765	5005	9	117042069	117145536	238	53	1.6428	0.050211	0.023175	0.18797	+	ORM2
766	646643	19	55990780	56098435	261	41	2.0257	0.021396	0.023203	0.047903	-	SBK2
767	51234	15	34467214	34572357	345	27	1.7472	0.040304	0.023232	0.10087	+	EMC4
768	7867	3	50599293	50736728	145	17	1.7157	0.043106	0.023352	0.21545	+	MAPKAPK3
769	7571	16	71431500	71546295	237	33	1.8518	0.032027	0.02339	0.06932	-	ZNF23
770	55340	7	150384436	150490737	317	43	1.7229	0.042453	0.023402	0.14024	+	GIMAP5
771	162083	16	27028219	27130487	354	68	2.2113	0.013508	0.023521	0.025796	+	C16orf82
772	2563	1	1900768	2012192	27	5	1.8725	0.030572	0.023574	0.061472	+	GABRD
773	132989	4	87747358	87874820	226	27	1.5192	0.064353	0.023609	0.31237	-	C4orf36
774	2627	18	19699404	19832491	165	34	2.1661	0.015151	0.023664	0.027406	+	GATA6
775	84749	12	109440380	109575831	237	37	2.1001	0.017859	0.023718	0.028962	+	USP30
776	80896	1	182708584	182849519	224	34	1.6723	0.047232	0.023742	0.17127	+	NPL
777	101180976	19	39686954	39789496	178	27	1.7043	0.044167	0.023781	0.16046	-	IFNL4
778	23788	11	47588858	47714206	145	22	2	0.022751	0.023794	0.051295	-	MTCH2
779	51574	4	113508120	113628748	220	32	2.0909	0.018267	0.02391	0.049959	+	LARP7
780	91056	11	65491369	65598062	241	30	2.1882	0.014327	0.023923	0.018799	-	AP5B1
780	284369	19	51704332	51822582	284	43	2.5677	0.0051187	0.023923	0.0037491	+	SIGLECL1
782	3558	4	123322625	123427650	168	25	1.7771	0.03778	0.023973	0.12952	-	IL2
783	63976	1	2935565	3405185	1286	141	1.5044	0.066245	0.023985	0.38879	+	PRDM16
784	3169	14	38008757	38114325	217	28	1.5352	0.062365	0.024009	0.2679	-	FOXA1
785	79777	17	43159967	43271548	207	36	2.4717	0.0067232	0.024022	0.0065069	+	ACBD4
786	402117	2	215226292	215490774	636	55	1.7296	0.041849	0.02425	0.13748	+	VWC2L
787	1660	1	182758439	182907117	192	24	1.7479	0.040241	0.02432	0.15792	+	DHX9
788	84159	10	63611013	63906707	637	93	1.4723	0.070472	0.024336	0.31302	+	ARID5B
789	8531	12	10801676	10926047	315	47	2.1042	0.017679	0.02442	0.035087	-	YBX3
790	116969	11	3609733	3713546	354	44	1.6236	0.052231	0.024503	0.20607	-	ART5
791	1508	8	11650033	11775646	579	54	1.3227	0.092968	0.024606	0.43669	-	CTSB
792	4892	10	115298583	115473829	593	64	2.5639	0.0051755	0.024659	0.0058714	-	NRAP
793	3913	3	49108547	49220599	114	20	1.7601	0.0392	0.024691	0.14778	-	LAMB2
794	57045	18	9284765	9452424	490	57	1.5142	0.064985	0.024821	0.34059	+	TWSG1
795	1539	9	105707593	105830770	426	41	1.804	0.035619	0.024837	0.089589	+	CYLC2
796	56125	5	140528916	140632618	265	26	2.1114	0.017369	0.024839	0.03397	+	PCDHB11
797	50832	7	141428289	141529188	173	15	2.1798	0.014636	0.024856	0.029844	+	TAS2R4
798	347744	6	10621651	10745030	143	31	1.3914	0.082059	0.024911	0.46006	-	C6orf52
799	23341	1	15803343	15948228	435	27	1.436	0.075505	0.024935	0.33316	+	DNAJC16
800	127294	1	24332531	24488665	376	46	1.8931	0.029174	0.024984	0.07162	-	MYOM3
801	57605	12	123418027	123685376	256	19	1.6345	0.051077	0.024992	0.18822	-	PITPNM2
802	100527949	7	150363645	150490737	362	45	1.6446	0.050029	0.024999	0.17349	+	GIMAP1-GIMAP5
803	134121	5	7780491	7901603	403	57	2.4969	0.0062635	0.025007	0.0079633	-	C5orf49
804	84696	2	27296632	27403680	149	28	1.6234	0.052255	0.025022	0.21828	+	ABHD1
805	11020	22	37104246	37222177	283	41	1.9677	0.024554	0.025069	0.059919	-	IFT27
806	29106	15	51923550	52063223	281	33	2.3892	0.0084425	0.025145	0.0089544	+	SCG3
807	54663	11	62550380	62658044	143	17	1.8414	0.032781	0.025278	0.12128	-	WDR74
808	90639	7	954486	1065235	299	36	1.6084	0.053877	0.025281	0.15391	-	COX19
809	9402	22	40247086	40419347	199	43	1.9304	0.026777	0.025283	0.068445	+	GRAP2
810	200958	3	195366293	195517004	99	15	1.6705	0.047406	0.025298	0.11738	+	MUC20
811	54429	7	141437129	141541338	218	17	2.1595	0.015404	0.02534	0.031324	+	TAS2R5
812	386675	21	45970497	46072091	367	43	2.0255	0.021407	0.025396	0.041133	+	KRTAP10-7
813	5371	15	74237014	74390160	309	39	1.7591	0.039281	0.025504	0.11877	+	PML
814	146310	16	1966843	2068976	250	34	1.6135	0.053316	0.025583	0.17209	+	RNF151
815	400831	20	1134098	1238918	272	47	1.8083	0.03528	0.02578	0.11799	+	C20orf202
816	253982	16	29862147	29981181	94	13	2.2085	0.013605	0.0258	0.018788	+	ASPHD1
817	5331	11	63968995	64086924	153	28	1.8569	0.031662	0.025822	0.065846	+	PLCB3
818	3709	12	26438285	27036131	1870	149	1.6714	0.047318	0.025837	0.1688	-	ITPR2
819	284716	1	42796468	42939900	357	35	2.5558	0.0052967	0.025846	0.0076393	+	RIMKLA
820	683	4	15654573	15791121	453	48	2.1087	0.017486	0.025879	0.033002	+	BST1
821	6768	11	129979682	130130257	338	54	2.2547	0.012075	0.025914	0.013832	+	ST14
822	64100	19	48447908	48578410	511	74	2.1586	0.015439	0.025924	0.031828	+	ELSPBP1
823	2584	17	73704018	73811280	173	32	1.824	0.034074	0.025926	0.073812	-	GALK1
824	10083	11	17465442	17615963	502	69	1.3995	0.080839	0.025956	0.36769	-	USH1C
825	7915	6	24445197	24587435	577	58	1.5104	0.065476	0.025969	0.22093	+	ALDH5A1
826	10803	3	45877996	45994667	241	32	1.7486	0.040182	0.025973	0.10656	+	CCR9
827	2001	11	34450342	34585347	374	45	1.419	0.077951	0.026025	0.34273	-	ELF5
828	3356	13	47355677	47521211	481	68	1.7115	0.043494	0.026041	0.13732	-	HTR2A
829	7465	11	9545197	9665016	242	42	2.359	0.0091626	0.026051	0.0081104	+	WEE1
830	165631	3	122246435	122407894	524	64	1.6303	0.051518	0.026125	0.15827	+	PARP15
831	653519	1	145714595	145877103	22	8	1.5303	0.062977	0.026196	0.21579	-	GPR89A
832	156	11	66983905	67104029	112	19	2.0241	0.021481	0.026234	0.057437	+	ADRBK1
833	5710	1	151177176	151289955	113	18	1.542	0.061534	0.026239	0.27288	+	PSMD4
834	5029	11	72878735	73003472	233	48	2.1513	0.015726	0.026247	0.041839	+	P2RY2
835	1154	3	50593885	50699262	110	17	1.6978	0.044775	0.02625	0.20232	-	CISH
836	91526	2	197781741	198225521	1037	79	1.8302	0.033607	0.026334	0.087906	-	ANKRD44
836	123041	14	92738925	93017825	1033	93	2.1732	0.014882	0.026334	0.027897	+	SLC24A4
838	79676	12	123409354	123514588	63	13	1.5058	0.066058	0.026356	0.24063	+	OGFOD2
839	64759	7	47264752	47671742	989	129	1.8563	0.031705	0.026375	0.083527	-	TNS3
840	55845	3	10107333	10218874	308	27	1.5918	0.055711	0.026477	0.2147	+	BRK1
841	4880	2	232736805	232841038	258	43	1.3572	0.087356	0.0265	0.44518	-	NPPC
842	353189	5	101519690	101682253	557	46	1.7272	0.042063	0.02653	0.10984	-	SLCO4C1
843	1910	13	78419616	78599664	444	32	1.7012	0.044456	0.026556	0.17067	-	EDNRB
844	79966	4	83500690	83770010	1025	80	1.6996	0.0446	0.026585	0.14089	-	SCD5
845	782	17	37279709	37403956	250	41	1.8045	0.03558	0.026591	0.085753	-	CACNB1
846	57222	5	172211223	172429688	667	98	2.3576	0.0091978	0.026718	0.012513	+	ERGIC1
847	80222	1	150409840	150530085	293	25	2.0057	0.022443	0.026723	0.045836	+	TARS2
848	6101	8	55478627	55732524	455	41	1.422	0.077512	0.026726	0.36549	+	RP1
849	342096	15	74312198	74424891	106	24	1.784	0.037212	0.026793	0.098614	-	GOLGA6A
850	4802	1	41107242	41287275	432	49	2.1304	0.016571	0.026926	0.028525	+	NFYC
851	3770	19	48908964	49019367	126	26	1.3741	0.084702	0.026937	0.37255	+	KCNJ14
852	83878	19	17310537	17425605	395	47	1.9149	0.027756	0.026943	0.055392	-	USHBP1
853	256536	10	132840655	133159984	1460	179	1.6215	0.05246	0.02696	0.23136	-	TCERG1L
854	56900	1	109583403	109689554	337	48	1.5468	0.06096	0.026962	0.21733	+	TMEM167B
855	26959	7	106759406	106892974	231	26	1.4286	0.076558	0.026997	0.34575	+	HBP1
856	7993	8	30551690	30674522	299	28	1.4441	0.074352	0.027051	0.34446	+	UBXN8
857	246175	4	78584541	78790764	337	35	2.1814	0.014576	0.027069	0.042054	-	CNOT6L
858	94101	2	190584993	190699097	204	20	1.6534	0.049121	0.027075	0.16002	-	ORMDL1
859	1573	1	60308980	60442445	279	28	1.424	0.077218	0.027099	0.38925	-	CYP2J2
860	914	1	117247057	117361851	203	38	1.5638	0.058934	0.027349	0.20086	+	CD2
860	6900	1	204962340	205097173	409	53	1.7619	0.039041	0.027349	0.11285	+	CNTN2
862	10859	19	55078384	55199007	533	46	1.2316	0.10905	0.027402	0.60707	+	LILRB1
863	57053	11	3636817	3742614	325	41	1.5616	0.059195	0.027473	0.18898	-	CHRNA10
864	91368	5	133687756	133797598	146	22	2.1743	0.014842	0.027725	0.028247	-	CDKN2AIPNL
865	253980	16	29867657	29987545	100	12	2.1754	0.0148	0.027736	0.019689	-	KCTD13
866	4783	9	94121327	94236908	344	54	2.0897	0.018321	0.027774	0.048766	-	NFIL3
867	54948	11	59523608	59628345	172	19	1.5372	0.062124	0.027843	0.31007	-	MRPL16
868	10265	16	54915111	55018397	198	27	1.6745	0.047019	0.027873	0.14209	+	IRX5
869	84301	1	15893953	16045539	413	27	1.4244	0.07717	0.027875	0.35536	+	DDI2
870	6827	17	56372536	56479599	230	38	2.1198	0.017013	0.027881	0.026619	-	SUPT4H1
871	56172	5	14654909	14921887	642	81	1.8538	0.031882	0.027888	0.093506	-	ANKH
872	3117	6	32555169	32662152	242	21	2.0557	0.019905	0.028008	0.024171	+	HLA-DQA1
873	55756	8	28575175	28797698	330	52	2.1435	0.016036	0.028019	0.02638	-	INTS9
874	64784	15	91023118	91238577	562	47	1.7427	0.040692	0.028048	0.10572	+	CRTC3
875	388799	20	55055960	55161576	297	51	1.5192	0.064362	0.028053	0.29699	+	FAM209B
876	84179	4	619992	733257	212	21	1.3189	0.093593	0.028157	0.42873	-	MFSD7
877	10762	22	45509726	45633892	404	45	1.8167	0.034635	0.028304	0.080461	+	NUP50
878	79913	20	37326933	37451089	441	42	1.3492	0.088639	0.028308	0.39598	+	ACTR5
879	26472	11	63961951	64064413	149	28	1.8127	0.034941	0.028346	0.072741	-	PPP1R14B
880	1146	2	233354424	233461038	315	43	1.5518	0.060356	0.028435	0.22828	+	CHRNG
881	730112	9	35511827	35613896	164	27	1.6716	0.047303	0.028461	0.14326	-	FAM166B
882	3775	1	233699750	233858258	485	80	1.2705	0.10195	0.028476	0.53618	+	KCNK1
883	64172	2	190561386	190678020	203	20	1.4787	0.069616	0.028536	0.26154	-	OSGEPL1
884	26503	6	74253102	74413737	561	37	1.5495	0.060636	0.028555	0.21008	-	SLC17A5
885	8106	14	23739397	23845394	191	41	1.5326	0.062687	0.028725	0.2109	+	PABPN1
886	5595	16	30075426	30184630	65	9	2.688	0.0035942	0.028765	0.00085199	-	MAPK3
887	91304	19	959650	1071173	175	25	4.1027	2.042e-05	0.028773	6.7424e-07	-	TMEM259
888	55850	19	17276155	17380638	389	49	1.9238	0.02719	0.028776	0.059701	+	USE1
889	9306	18	67906137	68047435	485	60	1.8397	0.032909	0.028795	0.078565	+	SOCS6
890	30833	17	73076320	73177890	235	30	1.4667	0.071227	0.028803	0.24135	-	NT5C
891	79898	19	52380688	52499011	403	37	1.4592	0.072256	0.028846	0.25434	+	ZNF613
892	9148	10	105203735	105402309	466	62	2.0017	0.022656	0.028889	0.045636	+	NEURL1
893	3835	16	29751383	29866706	59	5	1.7278	0.042009	0.029163	0.077854	+	KIF22
894	145389	14	61397832	61600451	316	31	2.3198	0.010176	0.029165	0.017073	+	SLC38A6
895	26157	7	150332690	150440729	323	31	1.7081	0.043806	0.029182	0.10572	+	GIMAP2
896	390940	19	44030952	44136256	246	35	1.9433	0.025991	0.0292	0.052603	+	PINLYP
897	816	7	44206749	44415230	455	57	1.6483	0.049647	0.029241	0.14819	-	CAMK2B
898	55954	22	30076945	30213000	337	38	1.3913	0.082071	0.029346	0.36929	-	ZMAT5
899	440345	16	21795889	21919843	15	5	1.8449	0.032523	0.029386	0.051832	-	NPIPB4
900	55353	8	98737809	98914830	587	50	1.7514	0.039938	0.029482	0.13159	+	LAPTM4B
901	152573	4	42349856	42454504	350	41	1.8114	0.035043	0.02951	0.074299	+	SHISA3
902	84517	3	169434709	169537683	119	22	1.5453	0.061141	0.029595	0.21821	-	ACTRT3
903	101929728	22	31013507	31115003	341	48	2.2845	0.011172	0.029693	0.011976	+	LOC101929728
904	3018	6	25993455	26093885	243	27	1.4367	0.075403	0.029738	0.28776	-	HIST1H2BB
905	116444	19	950437	1059723	158	23	4.0807	2.2454e-05	0.029773	6.9687e-07	+	GRIN3B
906	55341	3	194311517	194443206	574	59	1.8351	0.033244	0.029863	0.074505	-	LSG1
907	2307	20	30382103	30483420	205	31	2.0047	0.022499	0.029878	0.048536	-	FOXS1
908	7181	12	95364005	95517404	466	43	2.0211	0.021632	0.029944	0.039746	-	NR2C1
909	148753	1	179646912	179835333	537	59	2.7299	0.0031675	0.029949	0.0019888	+	FAM163A
910	8689	17	39592388	39698799	421	39	2.5991	0.0046734	0.030005	0.0029052	-	KRT36
911	120775	11	6892233	6993225	344	37	2.0074	0.022356	0.030015	0.036141	+	OR2D3
912	6241	2	10212695	10321546	319	50	1.4193	0.077913	0.030033	0.30515	+	RRM2
913	3609	19	10714937	10853095	294	27	1.7601	0.039198	0.030137	0.12275	+	ILF3
914	6814	1	109239285	109402148	470	46	2.1255	0.016774	0.030157	0.027878	+	STXBP3
915	3860	17	39607233	39711865	354	38	2.5679	0.0051154	0.030197	0.0033229	-	KRT13
916	7482	1	112960040	113113910	316	40	2.5085	0.0060615	0.030228	0.0043508	+	WNT2B
917	4924	19	49353307	49476540	326	31	1.4615	0.071942	0.030249	0.23354	+	NUCB1
918	6811	11	62524332	62649563	165	20	1.7208	0.042642	0.030384	0.13902	-	STX5
919	4689	22	37207030	37324059	364	52	1.8116	0.035025	0.030494	0.085742	+	NCF4
920	122616	14	105402125	105516056	292	23	1.7487	0.040168	0.030501	0.076517	+	C14orf79
921	388394	17	45005522	45106614	306	31	1.7731	0.038104	0.030537	0.11219	-	RPRML
922	84290	16	55550584	55651592	192	26	2.0066	0.022394	0.030555	0.039512	+	CAPNS2
923	22899	17	8163556	8275834	348	42	1.1247	0.13037	0.03056	0.70142	+	ARHGEF15
924	2909	19	47371824	47558334	150	16	2.2277	0.01295	0.030591	0.014927	+	ARHGAP35
925	417	11	3613487	3735844	384	49	1.499	0.066941	0.03061	0.22666	+	ART1
926	8335	6	25983320	26083796	234	27	1.4299	0.076371	0.030628	0.28044	-	HIST1H2AB
927	1525	21	18835224	19015897	404	53	1.6208	0.052527	0.030731	0.18534	+	CXADR
928	55633	6	37175528	37350746	274	37	1.2447	0.10663	0.030784	0.49541	+	TBC1D22B
929	23101	3	182845831	183196031	999	96	1.4028	0.080337	0.030785	0.34399	-	MCF2L2
930	127003	1	109598573	109706484	338	46	1.5224	0.063954	0.030834	0.22816	-	C1orf194
931	521	4	616225	718127	197	20	1.3019	0.096476	0.030871	0.41508	-	ATP5I
932	7353	22	19387464	19516818	289	31	1.4123	0.078928	0.03088	0.26627	-	UFD1L
933	11244	8	124210690	124337781	60	21	1.4452	0.074206	0.030902	0.2807	-	ZHX1
934	3420	20	2589041	2694865	409	45	1.5023	0.066516	0.030938	0.22318	-	IDH3B
935	5158	4	569363	714681	257	22	1.2632	0.10326	0.030949	0.45926	+	PDE6B
936	85366	20	30357115	30472500	214	31	2.0554	0.01992	0.031037	0.041034	+	MYLK2
937	7988	7	148886741	149002700	326	41	1.5243	0.063723	0.031078	0.18032	+	ZNF212
938	29767	15	51993758	52158560	413	30	2.3944	0.0083243	0.031186	0.00787	+	TMOD2
939	10485	1	156324048	156476441	238	49	1.9445	0.025915	0.031196	0.044183	-	C1orf61
940	1907	1	41894446	42000348	334	55	1.6168	0.05296	0.031243	0.15977	-	EDN2
941	284371	19	52517719	52649021	423	40	1.6648	0.047978	0.031276	0.12439	-	ZNF841
942	55837	14	34935135	35058943	323	33	1.6299	0.051556	0.031293	0.13135	-	EAPP
943	6809	11	59472479	59623355	283	21	1.4268	0.076818	0.031348	0.36601	+	STX3
944	83697	5	139689787	139804722	124	28	2.2724	0.011533	0.031354	0.012753	+	SLC4A9
945	145270	14	94134644	94304766	413	77	1.5849	0.056498	0.031419	0.19517	-	PRIMA1
946	200765	2	233362779	233465226	287	38	1.5867	0.056288	0.031514	0.17955	-	TIGD1
947	201181	17	40127594	40255881	173	32	1.2938	0.09786	0.031589	0.41736	-	ZNF385C
948	25928	7	16451106	16555562	357	43	1.2962	0.097451	0.031609	0.40469	-	SOSTDC1
949	1761	9	791690	1019090	990	114	1.8636	0.031186	0.031626	0.07574	+	DMRT1
950	221079	10	18898264	19020568	433	52	2.0393	0.020711	0.031678	0.032601	+	ARL5B
951	10528	20	2583178	2689039	405	45	1.479	0.069576	0.031692	0.23841	+	NOP56
952	5409	17	37774234	37876728	168	16	1.6133	0.053338	0.031828	0.14923	+	PNMT
953	54623	19	39826269	39931835	230	36	1.9391	0.026242	0.03183	0.0478	-	PAF1
954	8557	17	37771599	37872807	170	16	1.6378	0.050735	0.031871	0.13672	+	TCAP
955	10663	3	45934973	46039845	257	28	1.6858	0.045916	0.031907	0.11408	+	CXCR6
956	51046	18	54969721	55086162	282	27	2.2025	0.013813	0.031922	0.02099	+	ST8SIA3
957	7428	3	10133319	10245354	340	39	1.4299	0.076372	0.031962	0.28892	+	VHL
958	8352	6	25995639	26096097	243	28	1.4031	0.08029	0.031975	0.29796	+	HIST1H3C
959	339834	3	49185861	49345636	171	22	2.4988	0.0062311	0.032019	0.0092838	+	CCDC36
960	51155	17	73081343	73200775	263	32	1.416	0.078391	0.032026	0.26206	-	HN1
961	343637	20	889095	1032907	563	103	1.5495	0.060629	0.032037	0.21721	-	RSPO4
962	23051	20	39757089	39978766	357	36	2.283	0.011216	0.032112	0.013007	-	ZHX3
963	9477	6	41823092	41938877	216	32	1.8531	0.031936	0.032156	0.064583	-	MED20
964	728637	5	131092683	131331391	305	25	1.4835	0.068972	0.032172	0.26041	-	MEIKIN
965	23013	1	16124359	16316951	415	37	1.6987	0.04469	0.032214	0.15083	+	SPEN
966	1893	1	150430487	150536265	235	28	2.1132	0.017291	0.032406	0.022335	+	ECM1
967	10475	6	25912917	26037557	306	29	1.3925	0.081883	0.032445	0.29816	+	TRIM38
968	23379	5	5372786	5540347	410	51	1.7392	0.040996	0.032495	0.1169	+	ICE1
969	2906	19	48848132	48998188	263	44	1.1649	0.12203	0.0325	0.56484	+	GRIN2D
970	56951	5	133241198	133354406	224	40	1.8708	0.030685	0.032508	0.057284	-	C5orf15
971	23659	16	68229240	68344965	179	23	2.2019	0.013835	0.032579	0.016463	+	PLA2G15
972	327	3	49661427	49770936	144	22	1.915	0.027746	0.032625	0.06084	+	APEH
973	11024	19	55055041	55163846	502	35	1.2201	0.11121	0.032723	0.48288	+	LILRA1
974	4992	16	3204247	3305185	264	33	1.8239	0.034082	0.032779	0.089847	+	OR1F1
975	57415	3	62254648	62371888	135	35	1.5561	0.059848	0.032818	0.20614	+	C3orf14
976	164633	22	30066344	30177822	280	35	1.377	0.084253	0.032822	0.32272	+	CABP7
977	23511	9	131659972	131819375	147	17	1.8965	0.028948	0.032846	0.055967	+	NUP188
978	4636	4	619717	725822	199	21	1.2744	0.10125	0.032852	0.42427	+	MYL5
979	51608	7	866191	986073	264	27	1.8029	0.035699	0.032987	0.057422	+	GET4
980	55739	13	111217807	111342343	27	10	1.9412	0.02612	0.032997	0.034344	+	CARKD
981	84873	3	100278433	100464323	364	29	1.3057	0.095835	0.033094	0.38356	+	ADGRG7
982	9352	18	54220053	54355920	237	31	1.8575	0.03162	0.033175	0.087998	-	TXNL1
983	5493	16	4882508	5037136	609	75	2.1999	0.013907	0.03326	0.014139	-	PPL
984	6248	1	15936364	16038217	215	20	1.3212	0.093215	0.033272	0.38985	+	RSC1A1
985	6847	1	115347455	115587991	571	36	1.6625	0.048205	0.033298	0.13637	+	SYCP1
986	81566	12	51404988	51527454	290	28	1.6382	0.050689	0.033331	0.13733	-	CSRNP2
987	56675	11	8952123	9075596	336	35	1.6589	0.048573	0.033364	0.13406	-	NRIP3
988	8358	6	25981817	26082288	230	27	1.413	0.07883	0.033371	0.27212	-	HIST1H3B
989	254268	1	109308520	109450864	435	43	2.1807	0.014603	0.033378	0.021024	-	AKNAD1
990	132112	3	186865274	186969253	283	57	1.3806	0.083704	0.033391	0.30997	+	RTP1
991	10607	16	1972064	2078751	250	34	1.5545	0.06003	0.033421	0.16151	+	TBL3
992	27332	2	71453729	71712191	769	60	1.8329	0.033411	0.033446	0.069191	+	ZNF638
993	54894	17	56381037	56544931	281	41	2.0994	0.017893	0.033451	0.025741	-	RNF43
994	284040	17	15289332	15420925	379	56	2.0667	0.019383	0.033489	0.028965	-	CDRT4
995	9325	15	64630003	64797502	244	31	1.8093	0.035203	0.033525	0.084766	+	TRIP4
996	1195	2	201667732	201779467	154	30	1.6971	0.044836	0.033534	0.087046	-	CLK1
997	10482	11	62509597	62622964	161	22	1.6538	0.049086	0.03355	0.15541	-	NXF1
998	81626	1	182819000	182972553	271	33	1.4959	0.067336	0.033567	0.26666	-	SHCBP1L
999	58480	1	228730394	228932416	378	44	2.5852	0.0048662	0.033598	0.0039324	+	RHOU
1000	7421	12	48185320	48348814	420	69	1.8835	0.029819	0.033657	0.066907	-	VDR
1001	2694	11	59546746	59662974	133	24	1.4142	0.078648	0.03377	0.35945	-	GIF
1002	9644	10	105303784	105665195	835	91	2.0744	0.019019	0.033773	0.026457	-	SH3PXD2A
1003	6560	16	67927377	68052597	119	15	2.1466	0.015914	0.033788	0.026398	-	SLC12A4
1004	122706	14	23461376	23563269	152	31	1.2892	0.098667	0.033789	0.36634	+	PSMB11
1005	64132	17	48373393	48490512	402	43	1.2743	0.10128	0.033805	0.43856	+	XYLT2
1006	57659	17	7312685	7437568	325	31	1.3229	0.09293	0.033829	0.37334	-	ZBTB4
1007	94097	2	73119165	73348965	321	31	1.2559	0.10458	0.033864	0.48861	-	SFXN5
1008	2005	1	205527071	205652971	354	52	2.8217	0.0023888	0.033882	0.0010889	-	ELK4
1009	9448	2	102264165	102561152	472	49	1.4374	0.075297	0.033906	0.28932	+	MAP4K4
1010	140679	20	37303105	37408015	384	40	1.3022	0.09642	0.03396	0.3884	+	SLC32A1
1011	54815	19	19446642	19669741	322	24	1.6022	0.054559	0.033975	0.16684	+	GATAD2A
1012	53342	13	21226222	21347239	315	34	1.7671	0.03861	0.034069	0.095351	+	IL17D
1013	8567	11	47240927	47401582	349	34	2.244	0.012418	0.034074	0.010136	+	MADD
1014	26051	20	37384348	37601667	554	63	1.3161	0.09407	0.034176	0.38052	+	PPP1R16B
1015	9712	10	11452509	11703679	648	67	1.6124	0.053435	0.034204	0.15049	-	USP6NL
1016	54554	3	122080700	122184882	254	30	1.5459	0.061059	0.03436	0.14247	-	WDR5B
1017	7323	4	103665540	103840050	286	18	1.3172	0.093885	0.034384	0.41029	-	UBE2D3
1018	5696	6	32758494	32862712	832	64	2.012	0.02211	0.034471	0.032984	-	PSMB8
1019	9990	15	34472197	34680265	686	43	1.4706	0.0707	0.034523	0.22328	-	SLC12A6
1020	84560	16	56548961	56652869	426	69	2.4125	0.0079213	0.03458	0.0060029	+	MT4
1021	9399	15	74225559	74336963	329	41	1.6792	0.046554	0.034608	0.11292	-	STOML1
1022	374403	11	67121384	67227561	120	20	1.6206	0.052547	0.034764	0.13235	+	TBC1D10C
1023	1144	2	233340870	233451375	332	51	1.3678	0.085685	0.034816	0.3214	+	CHRND
1024	11280	3	38837260	39045136	457	42	2.2249	0.013045	0.034839	0.011373	-	SCN11A
1025	2740	6	38966557	39106657	480	65	2.2889	0.011042	0.034851	0.0098327	+	GLP1R
1026	8706	3	160751671	160873160	243	28	2.2507	0.012202	0.034977	0.017533	-	B3GALNT1
1027	54947	16	55492913	55670582	471	58	1.7796	0.037572	0.035	0.07946	+	LPCAT2
1028	344657	3	169480658	169605561	204	30	1.3369	0.090633	0.035072	0.32207	+	LRRIQ4
1029	100130827	19	56002023	56106909	266	42	1.9225	0.02727	0.03509	0.048014	-	SBK3
1030	150709	2	190489018	190675919	312	31	1.419	0.077946	0.035115	0.27124	+	ANKAR
1031	10289	3	40301173	40403915	163	18	1.7451	0.040482	0.035161	0.10867	+	EIF1B
1032	55079	3	62305347	62409190	137	42	1.4622	0.07185	0.035178	0.24991	-	FEZF2
1033	5988	22	29784572	29888444	255	38	2.3236	0.010074	0.035282	0.0099759	+	RFPL1
1034	390201	11	59430389	59531318	188	16	1.4512	0.073365	0.035296	0.29808	-	OR10V1
1035	10143	16	78006443	78116003	805	47	2.3736	0.0088084	0.035387	0.0086923	+	CLEC3A
1036	341405	12	52231745	52335505	305	54	1.3584	0.087169	0.035426	0.29266	+	ANKRD33
1037	8756	8	24248509	24420273	437	43	1.5236	0.063807	0.035475	0.17486	+	ADAM7
1038	2117	1	157044459	157158383	341	46	1.5833	0.056677	0.03549	0.17205	-	ETV3
1039	9470	2	233364762	233498354	382	50	1.4404	0.074877	0.0355	0.24615	+	EIF4E2
1040	51409	3	50556583	50672422	110	17	1.5467	0.060968	0.035556	0.20721	+	HEMK1
1041	8366	6	25977124	26077480	217	25	1.4417	0.0747	0.035574	0.23157	-	HIST1H4B
1042	341116	11	60502821	60618778	311	54	1.4448	0.07426	0.03559	0.27287	+	MS4A10
1043	5174	1	145677662	145814207	59	11	1.3585	0.087151	0.035669	0.27778	+	PDZK1
1044	643664	17	7320504	7436383	309	27	1.3374	0.09054	0.035694	0.33103	+	SLC35G6
1045	10144	4	89597105	90082549	1418	77	1.3445	0.089386	0.035739	0.29819	-	FAM13A
1046	5004	9	117035303	117138759	260	57	1.4719	0.070517	0.03577	0.21465	+	ORM1
1047	23271	1	200658686	200879832	591	53	1.3185	0.093667	0.035824	0.38647	+	CAMSAP2
1048	2053	8	27298519	27452439	466	57	2.1823	0.014544	0.035912	0.017705	+	EPHX2
1049	10946	1	38372647	38506019	224	30	2.0185	0.021772	0.035954	0.045328	-	SF3A3
1050	3884	17	39469746	39576052	229	24	1.5709	0.058103	0.035962	0.15682	-	KRT33B
1051	83901	17	39344270	39445256	184	20	1.5176	0.064563	0.036071	0.1953	+	KRTAP9-8
1052	253635	2	37261594	37376387	282	31	1.6227	0.052332	0.036092	0.17527	+	GPATCH11
1053	2197	11	64838099	64939672	152	28	1.8919	0.02925	0.036096	0.049676	-	FAU
1054	9519	6	134223308	134358638	271	42	1.9845	0.023598	0.036101	0.045402	+	TBPL1
1055	11027	19	55034469	55149027	527	44	1.1394	0.12728	0.036107	0.57114	+	LILRA2
1056	5335	20	39716159	39854359	184	28	1.4218	0.077535	0.036204	0.23354	+	PLCG1
1057	83743	19	48899030	49007164	147	29	1.2348	0.10845	0.036285	0.41798	+	GRWD1
1058	25840	12	51267780	51376300	321	32	1.3355	0.09085	0.036293	0.36253	+	METTL7A
1059	740	11	64839655	64944841	153	28	1.8723	0.030581	0.036313	0.052524	+	MRPL49
1060	64949	20	2976675	3078896	141	27	1.7303	0.041788	0.036383	0.093411	+	MRPS26
1061	79064	11	62507787	62609486	138	22	1.5359	0.062276	0.036399	0.19652	-	TMEM223
1062	7043	14	76374440	76499334	186	29	1.2781	0.1006	0.036409	0.42567	-	TGFB3
1063	745	11	61470121	61605990	217	34	1.4227	0.077407	0.036427	0.20582	+	MYRF
1063	93210	17	37777375	37894310	187	19	1.5211	0.064113	0.036427	0.17977	-	PGAP3
1065	196264	11	118047405	118174135	376	29	2.05	0.020184	0.036555	0.023006	-	MPZL3
1066	2936	8	30485578	30635486	344	38	1.2378	0.10789	0.03659	0.45691	-	GSR
1067	55108	1	32780704	32910062	54	14	1.7635	0.038909	0.036615	0.087331	-	BSDC1
1068	154150	6	22519678	22620750	368	35	1.3688	0.085531	0.036646	0.2877	+	HDGFL1
1069	10908	19	7549033	7676653	385	50	1.2452	0.10653	0.036661	0.37241	+	PNPLA6
1070	54491	5	14531891	14666289	292	46	1.2534	0.10503	0.036663	0.43766	+	FAM105A
1071	3927	17	36976112	37128023	323	60	1.223	0.11066	0.036704	0.44489	+	LASP1
1072	101928991	17	2577204	2701794	259	51	1.6331	0.051221	0.036847	0.12642	-	LOC101928991
1073	56344	19	48482640	48597311	521	70	2.0442	0.020467	0.036916	0.032649	-	CABP5
1074	25898	4	76354247	76489884	299	34	1.4899	0.068125	0.036955	0.19946	-	RCHY1
1075	1534	17	61459665	61573724	135	26	1.1313	0.12897	0.036972	0.59307	-	CYB561
1076	493856	4	103699224	103863964	282	15	1.3123	0.094717	0.036999	0.38086	+	CISD2
1077	23359	15	29362455	29912927	1465	128	1.9842	0.023616	0.037076	0.051973	-	FAM189A1
1078	3006	6	26005968	26106699	260	30	1.3347	0.09099	0.037147	0.31276	-	HIST1H1C
1079	150290	22	31008039	31113874	365	49	2.249	0.012255	0.037245	0.011016	-	DUSP18
1080	85379	22	25298676	25643415	884	111	2.7301	0.0031655	0.037286	0.0017915	+	KIAA1671
1081	11190	20	33992988	34155360	294	26	1.9032	0.028509	0.037324	0.064502	+	CEP250
1082	51573	16	19463015	19583450	413	34	1.1709	0.12083	0.03733	0.52091	-	GDE1
1083	7706	17	54915270	55041409	195	31	1.0729	0.14166	0.037372	0.67501	-	TRIM25
1084	165904	3	39174706	39284112	254	44	2.1329	0.016465	0.037385	0.017927	-	XIRP1
1085	576	1	32142718	32280494	162	35	1.4644	0.071545	0.037399	0.18537	-	ADGRB2
1086	6154	17	8230834	8336565	282	36	1.3805	0.083712	0.037412	0.29109	-	RPL26
1087	85414	1	205576979	205699630	301	46	2.8058	0.0025095	0.037422	0.0007082	-	SLC45A3
1088	8676	6	144411770	144563076	300	53	1.6044	0.054311	0.037429	0.14764	+	STX11
1089	643904	17	8244022	8351144	260	37	1.3876	0.082625	0.037479	0.28087	-	RNF222
1090	9156	1	241961491	242103241	514	71	1.6425	0.050242	0.037666	0.1346	+	EXO1
1091	286183	8	63111501	63962211	2442	106	2.015	0.021952	0.037679	0.031539	+	NKAIN3
1092	3886	17	39582941	39687392	431	38	2.5044	0.0061336	0.037865	0.0034058	-	KRT35
1093	5603	6	36048261	36162301	179	32	1.7315	0.041677	0.037897	0.07921	+	MAPK13
1094	374395	11	62504281	62607872	128	20	1.5241	0.063739	0.038075	0.18366	+	TMEM179B
1095	93109	3	194258402	194404150	655	72	1.6783	0.04664	0.03814	0.11297	-	TMEM44
1096	10313	11	63398922	63577363	198	15	1.4427	0.074547	0.038185	0.18794	+	RTN3
1097	705	6	41838965	41950784	214	32	1.7468	0.040337	0.038228	0.078574	+	BYSL
1098	122046	13	31456834	31599639	382	58	2.1266	0.016727	0.038253	0.016482	+	TEX26
1099	29068	11	130046572	130234663	404	52	2.3831	0.0085838	0.038309	0.0074352	-	ZBTB44
1100	23248	1	150286624	150499042	550	29	1.4208	0.077694	0.038335	0.23005	+	RPRD2
1101	4292	3	36984841	37142337	255	23	1.7269	0.042089	0.038385	0.093751	+	MLH1
1102	8359	6	25971907	26072278	210	26	1.3908	0.082144	0.038446	0.25309	+	HIST1H4A
1103	79413	3	111261747	111364182	184	33	1.7516	0.039921	0.038567	0.069349	-	ZBED2
1104	2845	7	107060502	107166125	188	22	1.3164	0.094014	0.038592	0.35453	+	GPR22
1105	51177	1	150072170	150181825	148	16	1.3395	0.090197	0.038764	0.33809	+	PLEKHO1
1106	80216	4	113168480	113413774	611	79	1.5256	0.063551	0.038914	0.17326	+	ALPK1
1107	200159	1	244465937	244602390	493	63	1.7578	0.039388	0.039003	0.090136	+	C1orf100
1108	29796	22	30113358	30216402	265	28	1.4089	0.079435	0.039078	0.26327	+	UQCR10
1109	8714	17	48662205	48819063	319	60	2.0257	0.021399	0.039134	0.030988	+	ABCC3
1110	6944	1	151098776	151212689	140	30	1.2907	0.098397	0.039163	0.37613	-	VPS72
1111	7716	17	55998908	56115615	203	36	1.3117	0.094812	0.039193	0.3304	-	VEZF1
1112	56126	5	140521952	140625213	279	26	1.989	0.023351	0.039284	0.033802	+	PCDHB10
1113	6884	1	109556998	109668624	328	49	1.4263	0.076898	0.039332	0.21513	-	TAF13
1113	79767	16	67183014	67287932	94	15	1.3315	0.091506	0.039332	0.30094	+	ELMO3
1115	10160	13	98744893	99152023	1370	178	1.8508	0.032102	0.039388	0.060284	+	FARP1
1116	572	11	63987300	64102176	146	29	1.7097	0.043665	0.039445	0.074643	-	BAD
1117	3883	17	39452344	39557064	243	23	1.5583	0.059579	0.039491	0.15189	-	KRT33A
1118	128853	20	30385441	30508479	240	37	1.8337	0.033349	0.039554	0.059828	-	DUSP15
1119	8927	3	49541922	49758982	279	30	1.7449	0.040502	0.039628	0.1039	+	BSN
1120	3747	12	75383858	75653584	597	63	1.7825	0.037337	0.039662	0.068112	-	KCNC2
1121	375790	1	905503	1041499	86	9	1.8105	0.035112	0.039663	0.037805	+	AGRN
1122	9427	2	233294537	233402532	382	62	1.2266	0.11	0.039677	0.44407	-	ECEL1
1123	51264	17	48395228	48500562	364	34	1.3024	0.096398	0.039692	0.32549	-	MRPL27
1124	1140	17	7298406	7410932	278	34	1.2369	0.10806	0.039735	0.41245	+	CHRNB1
1125	55727	14	93653896	93849385	521	46	1.2857	0.099282	0.039815	0.4039	-	BTBD7
1126	339862	3	17954064	18360414	719	61	1.8933	0.029156	0.039911	0.039687	+	LOC339862
1127	144097	11	63530846	63645190	188	25	1.3083	0.095384	0.039937	0.27579	+	C11orf84
1128	64925	3	49149968	49253785	106	18	1.8313	0.033527	0.040003	0.073939	-	CCDC71
1129	55133	2	45565819	45888434	897	70	1.582	0.056827	0.040014	0.17274	-	SRBD1
1130	5718	17	65286619	65412721	220	41	1.7131	0.043351	0.040053	0.097978	-	PSMD12
1131	285220	3	96483425	97517786	1212	99	1.0166	0.15468	0.040145	0.75668	+	EPHA6
1132	22974	20	30276904	30439605	263	25	2.3347	0.0097798	0.040166	0.014153	+	TPX2
1133	122060	13	78221989	78388377	390	43	1.9455	0.025857	0.040179	0.043088	+	SLAIN1
1134	4615	3	38129969	38234513	126	29	1.7864	0.037018	0.040185	0.066753	+	MYD88
1135	51477	19	18495198	18599111	208	28	1.6863	0.045868	0.040219	0.099215	-	ISYNA1
1136	5923	15	79202289	79433215	631	84	2.232	0.012808	0.04025	0.012976	-	RASGRF1
1137	84166	16	56973469	57167438	686	125	1.6719	0.047275	0.040359	0.10694	+	NLRC5
1138	10948	17	37743333	37870454	204	20	1.4873	0.068471	0.040526	0.17121	+	STARD3
1139	8290	1	228562546	228663026	170	26	1.6625	0.048206	0.040529	0.13163	-	HIST3H3
1140	9209	3	37044117	37267992	375	29	1.3594	0.087004	0.040629	0.3099	-	LRRFIP2
1141	1874	16	67176068	67282821	97	15	1.2981	0.097134	0.040637	0.3148	+	E2F4
1142	26173	7	1459913	1594018	307	18	1.6426	0.050235	0.040661	0.090275	-	INTS1
1143	7143	1	175241935	175762752	1436	146	1.6524	0.049224	0.040706	0.13725	-	TNR
1144	56154	8	30638939	30820512	392	31	1.1305	0.12913	0.040743	0.53566	-	TEX15
1145	63951	9	22396840	22502472	269	32	1.558	0.059612	0.040765	0.15406	+	DMRTA1
1146	10439	9	137917089	138063030	618	89	1.8074	0.035347	0.040823	0.07851	+	OLFM1
1147	129138	22	38176862	38290353	165	24	1.5807	0.056976	0.040835	0.15144	-	ANKRD54
1148	10347	19	990102	1115571	211	39	3.9224	4.384e-05	0.04084	1.2551e-06	+	ABCA7
1149	8350	6	25970718	26071186	209	26	1.3729	0.084889	0.040902	0.25088	+	HIST1H3A
1150	2797	20	2974268	3076391	139	26	1.718	0.042901	0.040936	0.085159	+	GNRH2
1151	400961	2	71359868	71504233	488	48	1.0835	0.1393	0.040964	0.58859	-	PAIP2B
1152	51637	14	52406228	52521420	435	51	1.4019	0.080476	0.04098	0.23641	+	C14orf166
1153	471	2	216126679	216264496	382	43	1.4462	0.074063	0.040983	0.22383	+	ATIC
1154	55785	12	95420525	95661240	661	52	1.8907	0.029329	0.041031	0.050206	-	FGD6
1155	132851	4	177055725	177166822	363	50	1.7603	0.039181	0.041075	0.068164	-	SPATA4
1156	254272	17	18488738	18597740	27	6	1.578	0.057287	0.041166	0.099505	-	TBC1D28
1157	51170	4	88207691	88362455	449	46	1.6518	0.049291	0.041183	0.098666	-	HSD17B11
1158	404636	10	120813594	120947496	264	30	1.4535	0.073039	0.041217	0.20105	+	FAM45A
1159	314	17	40946609	41052724	38	19	1.2706	0.10194	0.04122	0.3261	+	AOC2
1160	27154	6	36114408	36250567	211	40	1.6982	0.044737	0.041252	0.078406	+	BRPF3
1161	57020	16	19516737	19762485	651	62	2.2881	0.011066	0.041267	0.011916	+	C16orf62
1162	51161	3	50545456	50658458	105	17	1.481	0.0693	0.041276	0.2141	-	C3orf18
1163	646498	3	49165069	49279291	127	18	1.809	0.035222	0.041281	0.080018	-	C3orf84
1164	81890	19	10762112	10874043	239	23	1.8207	0.03433	0.041323	0.069371	+	QTRT1
1165	51763	17	1347869	1470182	283	33	1.4328	0.075955	0.041329	0.20919	-	INPP5K
1166	933	19	35770069	35888264	348	67	1.976	0.024075	0.041335	0.033289	+	CD22
1167	1104	1	28782455	28915708	247	19	1.405	0.080012	0.04141	0.25964	+	RCC1
1168	25830	22	44170387	44308378	490	54	1.7332	0.041527	0.041429	0.075516	-	SULT4A1
1169	221806	7	12320509	12493852	752	48	1.1615	0.12271	0.041756	0.48156	-	VWDE
1170	374946	1	11701781	11830336	244	49	1.4577	0.072461	0.041821	0.1823	+	DRAXIN
1171	127262	1	3491556	3596695	182	30	1.5804	0.057006	0.041847	0.11913	+	TPRG1L
1172	6764	11	8664899	8982498	800	60	1.2801	0.10026	0.041888	0.36777	-	ST5
1173	2358	19	52214453	52323779	445	73	1.4598	0.072179	0.041925	0.19453	+	FPR2
1174	255426	5	179477795	179686130	680	90	2.2457	0.012361	0.041946	0.009323	-	RASGEF1C
1175	3024	6	25967260	26068040	206	26	1.3737	0.084775	0.041947	0.24407	-	HIST1H1A
1176	65998	11	63477364	63586113	141	14	1.4525	0.073177	0.041952	0.1676	-	C11orf95
1177	645840	3	126240622	126377398	391	46	1.3076	0.095502	0.042022	0.29231	-	TXNRD3NB
1178	149111	1	224684563	224978269	729	70	1.3889	0.082438	0.042057	0.23419	+	CNIH3
1179	147694	19	57851218	57963919	275	43	1.3954	0.081449	0.042176	0.24689	+	ZNF548
1180	51362	6	110451624	110603423	356	32	1.7178	0.042915	0.04228	0.092614	+	CDC40
1181	22887	1	42592210	42851548	404	35	1.3222	0.093053	0.042426	0.31084	-	FOXJ3
1182	3552	2	113481492	113592971	210	24	1.4453	0.074187	0.042455	0.17294	-	IL1A
1183	83983	19	19575028	19676469	148	16	1.4816	0.069222	0.042471	0.17777	-	TSSK6
1184	55423	20	1559522	1688425	403	42	1.2951	0.097643	0.042546	0.30067	-	SIRPG
1185	339210	17	54819274	54961256	310	35	1.8168	0.034624	0.042563	0.08694	-	C17orf67
1186	81555	5	143487723	143600278	242	26	1.2867	0.099099	0.042588	0.31146	-	YIPF5
1187	25862	6	41707634	41913099	373	41	1.5989	0.054922	0.042629	0.11736	-	USP49
1188	8846	14	78088749	78224365	556	40	2.252	0.012161	0.042661	0.010308	-	ALKBH1
1189	283849	16	67167652	67274112	97	15	1.2584	0.10412	0.042745	0.33413	-	EXOC3L1
1190	49856	1	3497331	3616671	223	37	1.4982	0.067044	0.042768	0.1593	-	WRAP73
1191	5017	11	65504505	65614690	222	31	2.1335	0.016443	0.04284	0.013876	+	OVOL1
1192	389812	9	139604086	139708965	230	20	1.4141	0.078668	0.042869	0.18808	-	LCN15
1193	741	11	64833875	64935170	151	27	1.8517	0.032032	0.04295	0.049342	-	ZNHIT2
1194	730130	7	123620970	123723523	258	30	1.5498	0.060599	0.042991	0.13899	-	TMEM229A
1195	783	10	18379373	18880688	1784	155	1.9525	0.025442	0.042998	0.039726	+	CACNB2
1196	55153	4	76821064	76962115	417	35	1.2831	0.099729	0.043014	0.28507	-	SDAD1
1197	2822	6	24376060	24545433	774	63	1.6492	0.049549	0.043078	0.083194	-	GPLD1
1198	23741	15	49120290	49222380	250	40	1.8382	0.033016	0.043079	0.05513	+	EID1
1199	23305	5	131235666	131397761	247	26	1.3728	0.084907	0.04319	0.25112	-	ACSL6
1200	341947	14	93763537	93864700	292	25	1.0373	0.14979	0.043192	0.68347	+	COX8C
1201	57590	2	224690065	224860104	408	41	1.4016	0.080524	0.043243	0.22395	-	WDFY1
1202	3394	16	85882774	86006212	566	74	1.7597	0.039232	0.043258	0.078147	+	IRF8
1203	728294	2	242624030	242758231	196	22	1.6995	0.044609	0.043343	0.072253	+	D2HGDH
1204	285126	2	27448289	27555214	156	23	1.6354	0.05098	0.043372	0.12477	+	DNAJC5G
1205	124751	17	8221973	8330027	294	35	1.0143	0.15522	0.043413	0.66417	-	KRBA2
1206	3881	17	39499976	39603844	272	24	1.5462	0.061022	0.043416	0.13211	-	KRT31
1207	5494	14	60662470	60815805	277	30	1.4512	0.073369	0.043428	0.19028	+	PPM1A
1208	57592	1	151204094	151314381	113	21	1.3508	0.088382	0.043441	0.32068	+	ZNF687
1209	114131	10	5356976	5466169	413	55	1.219	0.11143	0.043455	0.3653	+	UCN3
1210	7108	11	64829326	64933707	162	29	1.8039	0.035626	0.043464	0.057951	+	TM7SF2
1211	146956	17	48400581	48508820	361	34	1.272	0.10169	0.043513	0.31615	+	EME1
1212	5644	7	142407319	142510927	182	21	1.6229	0.052306	0.043536	0.096825	+	PRSS1
1213	64773	20	2765960	2871889	225	36	1.3418	0.089825	0.043641	0.24887	-	PCED1A
1214	30850	17	72933727	73051895	268	43	1.6161	0.053035	0.04374	0.093489	+	CDR2L
1215	114907	8	124460127	124603493	456	70	1.6792	0.046554	0.043814	0.076822	-	FBXO32
1216	54531	19	255575	394791	327	40	1.4709	0.070657	0.043823	0.19193	-	MIER2
1217	101929060	19	251450	354505	298	34	1.502	0.066542	0.043922	0.17478	-	LOC101929060
1218	84626	7	149362061	149481664	299	44	1.7037	0.044218	0.044005	0.10964	+	KRBA1
1219	79134	2	120925047	121030984	196	23	1.5416	0.061584	0.044017	0.13031	-	TMEM185B
1220	5142	1	66208193	66890262	1533	113	1.3272	0.092213	0.044041	0.28276	+	PDE4B
1221	1479	11	33056130	33233037	533	35	1.4152	0.078499	0.044086	0.22547	-	CSTF3
1222	200942	3	49158987	49263919	109	18	1.8096	0.035179	0.044125	0.072347	+	KLHDC8B
1223	80114	10	60222774	60641194	822	65	1.2429	0.10695	0.044177	0.41964	+	BICC1
1224	8945	10	103063790	103367078	595	43	1.1161	0.13218	0.044265	0.49882	+	BTRC
1225	8936	6	110371022	110551219	413	29	1.308	0.095429	0.044267	0.31098	-	WASF1
1226	586	12	24912958	25152393	915	101	2.0014	0.022676	0.044327	0.03964	-	BCAT1
1226	170482	12	7830235	7952069	418	62	2.368	0.0089431	0.044327	0.0060265	-	CLEC4C
1228	83900	17	39338715	39439706	182	19	1.4703	0.070734	0.044329	0.18698	+	KRTAP9-3
1229	115548	5	72201808	72436349	392	37	1.5345	0.062459	0.044333	0.15411	+	FCHO2
1229	284541	1	47553107	47664528	265	23	1.4089	0.079425	0.044333	0.21664	+	CYP4A22
1231	80224	14	31980591	32380430	1253	42	1.753	0.039801	0.044385	0.083173	+	NUBPL
1232	9857	1	179873908	180134015	636	44	1.9557	0.025248	0.044407	0.037099	+	CEP350
1233	7249	16	2047472	2188713	158	27	1.5732	0.057836	0.044425	0.10272	+	TSC2
1234	3753	21	35740910	35934573	660	66	2.2442	0.012411	0.044536	0.012864	-	KCNE1
1235	1993	9	23640097	23876342	613	89	1.6425	0.050244	0.044542	0.12311	-	ELAVL2
1236	26353	12	119566595	119682551	284	54	1.1569	0.12366	0.044603	0.4392	+	HSPB8
1237	170591	5	76095826	76267056	418	59	1.6787	0.046605	0.044634	0.10356	+	S100Z
1238	282617	19	39684272	39785916	186	28	1.4768	0.069859	0.044641	0.15523	-	IFNL3
1239	7484	17	44878952	45014096	274	42	2.3098	0.01045	0.044686	0.011343	+	WNT9B
1240	55669	3	179015480	179161014	242	29	1.3643	0.086243	0.04475	0.22652	+	MFN1
1241	22995	15	48980135	49154092	317	43	2.1317	0.016515	0.044783	0.01867	-	CEP152
1242	5899	2	120947646	121102287	293	30	1.4145	0.078601	0.044843	0.20276	+	RALB
1243	219988	11	59354189	59486513	169	17	1.1718	0.12063	0.044861	0.50483	-	PATL1
1244	138639	9	96743076	96922138	326	38	1.0972	0.13628	0.044928	0.49865	+	PTPDC1
1245	84910	2	112762800	112926895	464	50	1.3127	0.094644	0.04495	0.28105	+	TMEM87B
1246	389161	3	149428887	149560610	268	38	1.2379	0.10788	0.04498	0.35862	-	ANKUB1
1247	22845	9	131657809	131760012	88	11	1.9006	0.028678	0.045066	0.036389	-	DOLK
1248	5430	17	7337698	7467935	371	34	1.2015	0.11478	0.045073	0.39327	+	POLR2A
1249	4208	5	87964058	88249922	468	55	2.2541	0.012094	0.045114	0.011692	-	MEF2C
1250	8685	2	119649745	119802236	423	56	1.5623	0.059105	0.045233	0.13605	+	MARCO
1251	256297	10	23431460	23533181	143	30	1.6131	0.053361	0.045315	0.097238	+	PTF1A
1252	51265	5	133521817	133756805	371	29	1.983	0.023683	0.045469	0.043737	-	CDKL3
1253	7320	5	133656843	133777799	139	19	2.1562	0.015536	0.045518	0.023297	+	UBE2B
1254	23526	19	1015922	1136627	228	38	3.6393	0.00013669	0.0456	6.7602e-06	+	HMHA1
1255	92312	1	155991804	156101789	165	29	1.0811	0.13983	0.045605	0.53149	-	MEX3A
1256	10669	2	27272159	27391995	166	30	1.3945	0.08158	0.045619	0.24571	-	CGREF1
1257	85280	17	39355939	39456905	209	20	1.4453	0.074182	0.045727	0.19403	+	KRTAP9-4
1258	10148	19	4179540	4287525	186	18	1.222	0.11085	0.045784	0.35513	+	EBI3
1259	10629	11	62488775	62604814	146	24	1.3829	0.083342	0.045793	0.22167	+	TAF6L
1260	9194	12	59939821	60233636	724	54	1.6731	0.047157	0.045824	0.098051	+	SLC16A7
1261	200916	3	170532664	170638045	240	28	1.0119	0.1558	0.046009	0.5964	-	RPL22L1
1262	9351	16	2026869	2139027	184	28	1.4985	0.067002	0.046015	0.12677	+	SLC9A3R2
1263	9852	3	36977357	37084795	177	21	1.6891	0.045602	0.046178	0.087487	-	EPM2AIP1
1264	5970	11	65371067	65480443	185	24	2.3711	0.0088683	0.046228	0.0050114	-	RELA
1265	57182	4	125535203	125683887	351	47	1.0614	0.14424	0.046242	0.54305	-	ANKRD50
1266	3885	17	39483921	39588636	214	25	1.5261	0.06349	0.046378	0.13821	-	KRT34
1267	54558	1	48711044	48987876	516	50	1.283	0.099749	0.046418	0.31395	-	SPATA6
1268	54187	9	100768959	100895365	212	34	1.4252	0.077054	0.046433	0.18237	+	NANS
1269	10319	9	133834504	134018446	462	67	1.5432	0.061397	0.046464	0.1416	+	LAMC3
1270	60312	4	7710440	7991653	1310	86	1.5672	0.05853	0.046475	0.1253	-	AFAP1
1271	50619	6	35215595	35339548	245	27	1.604	0.054355	0.046482	0.11117	+	DEF6
1272	80329	6	150235110	150344846	363	46	1.2615	0.10357	0.046501	0.3459	+	ULBP1
1273	339500	1	227701220	227915144	472	34	1.1754	0.11992	0.046517	0.45098	+	ZNF678
1274	23015	15	34621269	34779667	149	25	1.1207	0.13121	0.046523	0.4913	-	GOLGA8A
1275	11062	7	107154402	107268968	182	21	1.3301	0.091737	0.046524	0.28893	+	DUS4L
1276	9308	6	14067487	14187149	334	52	1.3782	0.084076	0.046571	0.2307	+	CD83
1277	221424	6	43424703	43528081	171	24	2.1245	0.016816	0.046643	0.022117	-	LRRC73
1278	9869	1	150848815	150987389	272	32	1.3008	0.09666	0.046771	0.25392	+	SETDB1
1279	4486	3	49874435	49991311	134	20	1.8044	0.035587	0.046799	0.05005	-	MST1R
1280	7007	11	120923375	121112202	443	46	1.8029	0.035704	0.046819	0.056398	+	TECTA
1281	51271	9	34129003	34302521	331	30	1.4795	0.069499	0.046822	0.1615	+	UBAP1
1282	345222	4	3200766	3323465	288	35	1.2043	0.11423	0.046888	0.34478	+	MSANTD1
1283	170463	19	18479679	18595372	249	34	1.5223	0.063964	0.046933	0.14861	+	SSBP4
1284	388558	19	52980905	53109502	558	48	1.7038	0.044212	0.046934	0.076064	+	ZNF808
1285	5420	7	131135021	131291376	392	74	1.7069	0.043922	0.046937	0.079192	-	PODXL
1286	3882	17	39565765	39673638	447	37	2.4602	0.0069422	0.046944	0.0030811	-	KRT32
1287	9294	19	10282109	10391948	187	35	1.7502	0.040043	0.04697	0.05954	-	S1PR2
1288	134728	6	79527261	79764545	410	31	1.6817	0.046312	0.04702	0.090985	+	IRAK1BP1
1289	6934	10	114659978	114977437	585	93	1.7989	0.036016	0.047074	0.062723	+	TCF7L2
1289	22871	3	173065570	174054434	2479	178	1.9208	0.027378	0.047074	0.040877	+	NLGN1
1291	55734	20	50650550	50858524	679	75	1.1731	0.12037	0.047135	0.40696	-	ZFP64
1292	59345	3	179063876	179219371	272	40	1.2538	0.10495	0.047148	0.31698	-	GNB4
1293	11311	1	149989350	150167505	263	20	1.2066	0.1138	0.047152	0.40469	+	VPS45
1294	374462	12	80788126	81123968	770	73	1.1579	0.12345	0.047173	0.43805	+	PTPRQ
1295	81870	17	39361636	39462616	219	20	1.4309	0.076234	0.047176	0.19571	+	KRTAP9-9
1296	29956	1	150887649	150997479	224	31	1.3362	0.090746	0.047194	0.22603	-	CERS2
1297	79841	11	47631143	47786928	209	24	1.6821	0.046271	0.047214	0.085044	-	AGBL2
1298	267	16	56345364	56509450	378	48	1.1417	0.1268	0.047344	0.47807	-	AMFR
1299	54497	2	37158153	37361485	490	49	1.4887	0.068281	0.047361	0.18985	-	HEATR5B
1300	5824	1	160196599	160304941	137	21	1.3494	0.088597	0.047373	0.26709	-	PEX19
1301	150159	4	103756205	103997552	360	23	1.0948	0.13681	0.047469	0.52223	-	SLC9B1
1302	653319	16	67159505	67267883	94	15	1.1955	0.11595	0.047538	0.36038	-	KIAA0895L
1303	150274	22	29088008	29203506	258	34	2.1452	0.015967	0.047546	0.01104	+	HSCB
1304	54875	9	17084989	17553921	1447	62	1.468	0.07105	0.047573	0.19535	+	CNTLN
1305	1786	19	10194021	10355783	239	33	1.6698	0.047475	0.047614	0.071722	-	DNMT1
1306	80303	2	233420767	233597491	484	67	1.2861	0.099196	0.047688	0.2948	+	EFHD1
1307	842	1	15767896	15901407	360	33	1.1524	0.12457	0.047694	0.39441	-	CASP9
1308	11006	19	55124271	55231810	448	61	0.96966	0.16611	0.047775	0.68508	+	LILRB4
1309	24141	20	9445005	9561171	291	42	1.6903	0.045485	0.0478	0.077658	+	LAMP5
1310	25844	6	43429565	43534728	177	24	2.1889	0.014302	0.047995	0.016763	-	YIPF3
1311	84656	16	4803204	4947383	435	49	1.2616	0.10355	0.048007	0.29727	-	GLYR1
1312	694	12	92484054	92589673	286	41	1.2511	0.10544	0.048036	0.29376	-	BTG1
1313	9256	17	56328588	56456152	275	44	2.008	0.022324	0.048249	0.026538	-	BZRAP1
1314	117531	9	75086717	75501267	1083	46	1.4999	0.066826	0.048261	0.15171	+	TMC1
1315	84152	17	37733177	37842878	201	19	1.5052	0.06613	0.048302	0.13057	+	PPP1R1B
1316	84447	11	64844751	64952285	152	28	1.7537	0.039739	0.048353	0.059647	-	SYVN1
1317	8216	22	21286558	21403326	270	47	1.7721	0.038191	0.04851	0.066264	+	LZTR1
1318	166929	4	108695721	108886203	399	55	1.4623	0.071827	0.04852	0.17421	+	SGMS2
1319	138307	9	139598838	139702995	236	20	1.3899	0.082277	0.048524	0.17963	-	LCN8
1320	127247	1	76334558	76448116	360	33	1.7555	0.039586	0.048529	0.056296	-	ASB17
1321	200726	2	207457142	207564173	292	38	1.1666	0.12169	0.048552	0.40361	+	LOC200726
1322	152815	4	76389654	76518610	279	36	1.3571	0.087378	0.048606	0.22289	+	THAP6
1323	26355	3	122053023	122178961	311	36	1.3626	0.086498	0.048608	0.18802	+	FAM162A
1324	345062	4	152148152	152262719	285	30	1.0199	0.1539	0.048636	0.61639	+	PRSS48
1325	55321	20	1111213	1216077	267	57	1.5514	0.060405	0.048693	0.12581	-	TMEM74B
1326	55588	19	39831893	39941203	240	36	1.8063	0.035438	0.048737	0.053189	+	MED29
1327	7565	19	57872529	57983307	255	40	1.4116	0.079034	0.048751	0.1928	+	ZNF17
1328	30849	3	130347778	130515696	297	28	1.2917	0.098238	0.048856	0.30614	-	PIK3R4
1329	80019	10	99208768	99380960	331	47	1.0573	0.14519	0.048865	0.52735	+	UBTD1
1330	55349	3	53800324	53930420	335	50	1.6157	0.053077	0.048941	0.10629	-	CHDH
1331	50940	2	178437977	179023066	1881	84	1.3549	0.087721	0.048979	0.22304	-	PDE11A
1332	54529	2	190476125	190585557	188	30	1.5402	0.061757	0.049026	0.13476	+	ASNSD1
1333	641	15	91210579	91408686	510	58	1.2214	0.11098	0.049035	0.3746	+	BLM
1334	85014	9	139635777	139737769	213	16	1.4432	0.074479	0.049047	0.14473	+	TMEM141
1335	390075	11	5748864	5849897	489	42	1.0418	0.14874	0.049071	0.55124	-	OR52N5
1336	54952	1	28829529	28955057	178	21	1.2947	0.097716	0.049133	0.26063	+	TRNAU1AP
1337	94	12	52250657	52367145	314	57	1.2405	0.10739	0.049161	0.30162	+	ACVRL1
1338	8996	16	67154400	67259640	86	15	1.1111	0.13325	0.049203	0.44057	+	NOL3
1339	100533177	17	39408078	39509103	239	20	1.4152	0.078501	0.049218	0.19428	-	KRTAP29-1
1340	100507608	17	39371630	39472112	238	20	1.403	0.080313	0.04923	0.19689	+	KRTAP9-6
1341	100505724	17	39381950	39482459	241	18	1.4232	0.07734	0.049268	0.18428	+	KRTAP9-7
1342	163732	1	41276728	41378018	357	68	1.1355	0.12807	0.049353	0.42154	-	CITED4
1343	646960	2	233335173	233440426	332	51	1.2502	0.10561	0.049369	0.31637	+	PRSS56
1344	1339	16	31389052	31489749	130	26	1.2512	0.10543	0.049382	0.30741	-	COX6A2
1345	26118	17	25571106	25690659	254	36	1.2598	0.10387	0.049387	0.2955	+	WSB1
1346	79838	16	19371839	19560435	706	58	0.93261	0.17551	0.049393	0.73552	+	TMC5
1347	8612	19	231040	341435	273	31	1.4901	0.068093	0.049395	0.16317	-	PPAP2C
1348	9570	17	44950486	45094366	417	38	1.527	0.063379	0.049404	0.14871	+	GOSR2
1349	56127	5	140516893	140621111	289	28	1.8968	0.028925	0.04948	0.038172	+	PCDHB9
1350	55031	11	11812970	12030872	563	61	1.4818	0.06919	0.049493	0.17887	+	USP47
1351	8639	17	40953201	41060147	51	17	1.2167	0.11185	0.049509	0.33155	+	AOC3
1352	118472	10	135072421	135176666	143	11	1.4811	0.069293	0.049516	0.13284	+	ZNF511
1353	51386	22	38195379	38334789	187	24	1.5136	0.065068	0.049563	0.1654	+	EIF3L
1354	58533	14	34980615	35149366	403	38	1.7086	0.043759	0.049574	0.069925	-	SNX6
1355	5434	19	1036578	1145391	232	38	3.6278	0.00014291	0.049714	5.9478e-06	-	POLR2E
1356	728276	16	19247105	19372269	432	50	1.5617	0.059182	0.049724	0.11156	+	CLEC19A
1357	89882	9	6278349	6381900	232	24	1.3386	0.090353	0.04976	0.27087	+	TPD52L3
1358	57343	19	57812645	57921266	349	48	1.2672	0.10255	0.049839	0.29593	+	ZNF304
1359	79473	11	5759084	5860046	499	40	1.0578	0.14508	0.049892	0.52568	-	OR52N1
1360	25890	3	100418179	100762336	876	80	1.4398	0.074956	0.05	0.19344	-	ABI3BP
1361	84164	22	30134597	30284293	355	32	1.2808	0.10014	0.050021	0.29635	-	ASCC2
1362	401934	1	957126	1059687	122	9	1.7564	0.039509	0.050022	0.04005	-	RNF223
1363	9349	17	36956321	37060053	257	45	1.172	0.1206	0.050034	0.36442	-	RPL23
1364	7003	11	12645969	13016284	677	75	1.6227	0.052329	0.050093	0.11674	+	TEAD1
1365	56851	15	34326223	34444053	218	27	2.0916	0.018235	0.050141	0.018076	-	EMC7
1366	256764	15	53755938	54105075	1068	70	1.5395	0.061845	0.050189	0.11578	-	WDR72
1367	58158	12	55363729	55473801	259	36	1.544	0.061299	0.050191	0.13444	+	NEUROD4
1368	5007	11	59291871	59433617	184	18	1.082	0.13963	0.050192	0.54927	-	OSBP
1369	65008	4	78733805	78923944	449	31	1.5977	0.055056	0.050216	0.12254	+	MRPL1
1370	5306	17	1371283	1516110	296	39	1.3644	0.086228	0.050307	0.23345	-	PITPNA
1371	5516	8	30593126	30720352	268	29	1.1051	0.13455	0.050328	0.45835	-	PPP2CB
1372	339761	2	127891412	128027654	421	54	5.6503	8.0105e-09	0.050428	9.0676e-12	-	CYP27C1
1373	646000	18	11559557	11660611	143	24	1.2014	0.11481	0.050473	0.33005	+	SLC35G4
1374	7337	15	25532394	25734190	390	37	1.3157	0.094136	0.050512	0.28023	-	UBE3A
1375	27163	4	76781808	76912166	332	40	1.1995	0.11516	0.05066	0.31569	-	NAAA
1376	1739	3	196719431	197076171	846	71	2.1967	0.014022	0.050677	0.017669	-	DLG1
1377	51206	19	55475073	55599632	529	56	1.2284	0.10964	0.050681	0.28754	-	GP6
1378	57513	17	73446341	73561664	356	35	1.4101	0.079256	0.050805	0.15359	-	CASKIN2
1379	101928603	6	24747563	24849540	264	43	1.4359	0.07552	0.050855	0.19137	-	C6orf229
1380	55647	13	111125413	111264071	444	64	1.2323	0.10893	0.05086	0.29628	-	RAB20
1381	51053	6	24725159	24836327	309	48	1.3865	0.082796	0.050963	0.21398	+	GMNN
1382	9853	9	35440007	35611895	270	39	1.311	0.094929	0.051033	0.24808	+	RUSC2
1383	84960	9	139640033	139752364	218	17	1.388	0.082573	0.051061	0.17279	+	CCDC183
1384	2275	1	38412439	38521199	176	29	1.4284	0.076583	0.051087	0.20893	-	FHL3
1385	127343	1	46922668	47029898	248	40	1.3324	0.091361	0.051137	0.21782	+	DMBX1
1386	8484	22	38169389	38271502	154	23	1.5415	0.061592	0.051159	0.13799	+	GALR3
1387	9127	22	21319442	21432302	301	57	1.6447	0.050015	0.051162	0.084048	+	P2RX6
1388	100131378	11	33669654	33772286	295	45	1.6716	0.047303	0.051182	0.072923	-	C11orf91
1389	10127	16	3283380	3401401	215	35	1.5642	0.058882	0.051226	0.11543	+	ZNF263
1390	5031	11	72925550	73059670	272	41	1.9672	0.02458	0.051239	0.036643	+	P2RY6
1391	54549	17	71280523	71690227	1042	134	1.7084	0.043785	0.051292	0.088358	-	SDK2
1392	56977	4	184776509	184994679	601	94	1.6042	0.054336	0.051373	0.10628	+	STOX2
1393	100505753	17	39413952	39515505	235	21	1.3968	0.081236	0.051413	0.19691	-	KRTAP16-1
1394	1267	17	40068737	40179754	151	23	2.4117	0.0079394	0.051474	0.0050814	+	CNP
1395	3119	6	32577241	32684466	714	38	1.6909	0.04543	0.051485	0.063609	-	HLA-DQB1
1396	51079	19	19576550	19689858	163	17	1.3656	0.086035	0.051488	0.20334	+	NDUFA13
1397	2256	17	7291784	7398256	244	36	1.1235	0.13061	0.051547	0.41974	+	FGF11
1398	140873	20	34058569	34167481	186	18	1.5537	0.06013	0.051592	0.12987	-	C20orf173
1399	57162	2	64269786	64421605	373	43	2.0894	0.018336	0.051619	0.017131	-	PELI1
1400	51131	13	50019746	50153123	459	37	1.1498	0.12512	0.051627	0.36561	+	PHF11
1401	9061	4	108484822	108691419	507	50	1.5325	0.062695	0.051643	0.12475	-	PAPSS1
1402	8828	2	206497184	206712857	412	90	1.0648	0.14348	0.051662	0.49722	+	NRP2
1403	3299	16	67147288	67253848	85	15	1.0772	0.1407	0.051699	0.45959	+	HSF4
1404	57418	19	934328	1044569	200	25	3.7352	9.3785e-05	0.051722	2.4177e-06	+	WDR18
1405	8428	13	99052455	99279396	701	78	2.0949	0.018089	0.051738	0.021522	-	STK24
1406	285362	3	4352829	4558966	642	69	1.1806	0.11889	0.051786	0.3936	-	SUMF1
1407	6890	6	32762986	32871748	840	65	1.9077	0.028212	0.051789	0.032187	-	TAP1
1408	51513	6	36271998	36405577	388	59	2.2465	0.012335	0.051801	0.010759	-	ETV7
1409	57571	11	67133149	67243078	120	20	1.4389	0.075092	0.051817	0.15962	+	CARNS1
1410	2254	13	22195215	22328640	310	54	1.2588	0.10405	0.05186	0.301	+	FGF9
1411	23313	22	45538123	45686650	565	58	1.5063	0.065995	0.051921	0.11851	-	KIAA0930
1412	83902	17	39421169	39521947	230	20	1.397	0.081205	0.052072	0.19302	-	KRTAP17-1
1413	64711	16	1911464	2018231	366	27	1.5205	0.064188	0.052097	0.13256	-	HS3ST6
1414	4641	17	1317480	1446001	302	34	1.217	0.11181	0.052187	0.31408	-	MYO1C
1415	10205	11	118074131	118185251	306	23	1.9875	0.023431	0.052193	0.02101	-	MPZL2
1416	7762	11	6897654	7059718	508	54	1.7203	0.042688	0.05226	0.059016	+	ZNF215
1417	6419	3	4294988	4408949	348	45	1.2939	0.09785	0.052262	0.25128	+	SETMAR
1418	11200	22	29033731	29187822	306	38	2.1116	0.01736	0.052404	0.0122	-	CHEK2
1419	146183	16	21639835	21822050	148	25	1.795	0.036329	0.052406	0.036737	+	OTOA
1420	90070	12	54974623	55078663	312	38	1.1118	0.13311	0.052488	0.42474	-	LACRT
1421	10079	20	50163314	50434908	1064	68	1.8537	0.031894	0.052499	0.043696	-	ATP9A
1422	5287	1	204341756	204513943	341	48	1.9674	0.024569	0.052508	0.038321	-	PIK3C2B
1423	4938	12	113294739	113407712	271	28	1.1225	0.13081	0.052534	0.4427	+	OAS1
1424	158158	9	85544500	85728043	254	35	1.1792	0.11916	0.052561	0.38326	-	RASEF
1425	1398	17	1274647	1409561	336	43	1.1424	0.12665	0.05264	0.37728	-	CRK
1426	26231	16	67191042	67310901	108	16	1.1974	0.11558	0.053087	0.32368	-	LRRC29
1427	57192	19	7537496	7648895	366	48	1.1434	0.12643	0.053102	0.35288	+	MCOLN1
1428	64900	20	39919495	40039222	249	40	2.0177	0.02181	0.053137	0.021261	+	LPIN3
1429	22992	11	66836740	67075553	203	30	1.5849	0.056495	0.053211	0.12486	+	KDM2A
1430	9830	9	100748071	100931695	343	58	1.2121	0.11274	0.053251	0.30733	-	TRIM14
1431	65993	16	1771891	1873152	393	25	1.2223	0.11079	0.053343	0.28499	-	MRPS34
1432	4299	4	87805758	88112206	623	52	1.9695	0.02445	0.053371	0.029334	+	AFF1
1433	269	12	53767594	53875439	136	19	1.0892	0.13802	0.053444	0.45553	+	AMHR2
1434	353514	19	54768353	54874409	200	32	1.2098	0.11317	0.053616	0.30775	-	LILRA5
1435	4121	6	119448366	119721774	893	59	1.2898	0.09856	0.053636	0.29495	-	MAN1A1
1436	399512	17	8141082	8248709	318	42	0.90815	0.1819	0.053664	0.69281	-	SLC25A35
1437	11320	2	99185569	99397589	383	46	1.4316	0.076135	0.05371	0.16407	-	MGAT4A
1438	29100	16	67211006	67313182	104	16	1.1943	0.11617	0.053726	0.32489	+	TMEM208
1439	54596	1	62610474	62728000	545	57	1.3559	0.087563	0.053758	0.20124	+	L1TD1
1440	57758	11	8991047	9163150	412	58	1.5919	0.055702	0.053867	0.1134	-	SCUBE2
1441	1314	1	160208377	160363354	267	35	1.1986	0.11533	0.053874	0.35084	-	COPA
1442	23022	4	169368215	169899608	1510	153	0.94326	0.17277	0.054047	0.64292	+	PALLD
1443	55506	10	71762357	71922040	456	66	1.4624	0.07182	0.054071	0.15376	+	H2AFY2
1444	2900	11	120332465	120909514	1465	167	0.98951	0.16121	0.054085	0.60399	+	GRIK4
1445	96597	17	16776948	16882856	470	48	1.3663	0.085916	0.054135	0.17205	-	TBC1D27
1446	219899	11	120844802	121012787	342	50	1.7498	0.040078	0.054136	0.053434	+	TBCEL
1447	197342	16	1773223	1876628	405	26	1.2163	0.11194	0.054425	0.28374	+	EME2
1448	25875	12	51392082	51504207	271	27	1.5237	0.063794	0.054442	0.12991	+	LETMD1
1449	386681	21	45981996	46082871	364	39	1.8221	0.034217	0.054513	0.041862	+	KRTAP10-8
1450	10100	1	115540632	115682121	447	46	1.3607	0.086799	0.054554	0.20491	-	TSPAN2
1451	746	11	61506602	61610085	166	28	1.3566	0.087451	0.054623	0.18149	-	TMEM258
1452	26061	3	15552239	15693359	271	36	1.8049	0.035542	0.054638	0.044674	-	HACL1
1453	6693	16	29624271	29731828	98	13	1.9256	0.027077	0.054734	0.020604	+	SPN
1454	8605	19	48501100	48664109	719	82	1.8802	0.030044	0.054737	0.041368	-	PLA2G4C
1455	10396	4	42360390	42709122	1188	73	1.9939	0.023082	0.05484	0.024569	-	ATP8A1
1456	108	5	7346343	7880194	1288	125	2.0648	0.019473	0.054856	0.022504	+	ADCY2
1457	129401	2	183932247	184076408	679	41	1.3939	0.081668	0.05492	0.16681	+	NUP35
1458	4585	3	195423636	195589148	263	30	1.6134	0.05333	0.054979	0.078829	-	MUC4
1459	51702	1	17525593	17660728	554	64	1.3676	0.085725	0.055064	0.20283	+	PADI3
1460	55379	17	48408594	48524914	373	36	1.1522	0.12462	0.055111	0.36261	-	LRRC59
1461	146852	17	8193158	8299364	319	37	0.90899	0.18168	0.055225	0.66995	+	ODF4
1462	1528	18	71870527	72009251	552	52	1.0775	0.14064	0.05531	0.4411	-	CYB5A
1462	54551	15	23838696	23942993	251	32	1.1642	0.12218	0.05531	0.32115	-	MAGEL2
1464	9533	6	43434777	43547114	180	22	2.1785	0.014684	0.055458	0.014545	+	POLR1C
1465	22882	8	123742510	124036755	711	120	1.0765	0.14084	0.055478	0.4487	+	ZHX2
1466	50801	11	64008774	64117503	140	27	1.951	0.025531	0.055494	0.018657	+	KCNK4
1467	147719	19	42289356	42398774	150	16	1.1055	0.13447	0.055495	0.43197	-	LYPD4
1468	283869	16	2019521	2120756	185	27	1.4335	0.075851	0.055532	0.13224	+	NPW
1469	7150	20	39607462	39803127	331	44	1.4181	0.078082	0.055533	0.16467	+	TOP1
1470	4940	12	113326249	113461056	383	33	1.0961	0.13651	0.055575	0.43431	+	OAS3
1471	8989	8	72883486	73037819	629	66	1.0186	0.1542	0.055626	0.49285	-	TRPA1
1472	444882	19	46493006	46594274	359	43	0.9252	0.17743	0.055635	0.65626	-	IGFL4
1473	154091	6	134258719	134423789	327	52	1.7934	0.036458	0.055656	0.057399	-	SLC2A12
1474	9553	2	27944584	28052608	116	18	1.202	0.11468	0.055678	0.30951	+	MRPL33
1475	4832	16	1770321	1871743	388	27	1.2049	0.11413	0.055751	0.29006	-	NME3
1476	3691	17	73667516	73803899	191	34	1.5841	0.05659	0.055761	0.084949	+	ITGB4
1477	28232	15	92346938	92765665	1270	133	1.375	0.084561	0.055849	0.20501	+	SLCO3A1
1478	63946	19	42298806	42406398	145	15	1.105	0.13458	0.055851	0.43353	+	DMRTC2
1479	1981	3	183982283	184103146	235	45	1.0068	0.15702	0.055966	0.50912	+	EIF4G1
1480	8838	6	112325278	112440889	255	31	1.8332	0.033386	0.055973	0.052197	+	WISP3
1481	9201	13	36292789	36755514	1458	132	0.96501	0.16727	0.056093	0.62314	-	DCLK1
1482	2912	3	51691081	51802629	93	25	1.1779	0.11942	0.056113	0.34789	+	GRM2
1483	9175	3	184950729	185256882	607	45	1.3226	0.092989	0.056117	0.2132	+	MAP3K13
1484	3781	5	113648016	113882197	622	70	1.1662	0.12176	0.056166	0.3481	+	KCNN2
1485	64067	14	33354115	34323382	2957	353	1.4871	0.0685	0.056205	0.17112	+	NPAS3
1486	57510	6	43440068	43593812	222	24	2.1068	0.017565	0.056213	0.019423	-	XPO5
1487	6018	1	40577041	40756593	200	31	1.5093	0.065615	0.056215	0.12772	+	RLF
1488	51191	4	89328181	89477334	123	32	1.2753	0.10109	0.056217	0.23927	+	HERC5
1489	9899	15	91592996	91894539	877	94	2.2969	0.010812	0.05622	0.0072394	+	SV2B
1489	11283	19	15676029	15790448	719	56	1.427	0.076788	0.05622	0.14627	+	CYP4F8
1489	257194	1	71818625	72798533	1754	127	1.1892	0.11717	0.05622	0.32775	-	NEGR1
1492	1393	5	76198680	76315299	316	44	1.2008	0.11492	0.056242	0.29703	+	CRHBP
1493	60437	20	58483471	58638772	257	39	1.3991	0.08089	0.056303	0.18454	+	CDH26
1494	201266	17	70592085	71138853	1762	177	0.8973	0.18478	0.056325	0.73812	-	SLC39A11
1495	23473	3	15197733	15344423	254	38	1.3033	0.096235	0.056393	0.2509	+	CAPN7
1496	3112	6	32730540	32834825	1010	57	2.0786	0.018826	0.056402	0.015877	-	HLA-DOB
1497	1839	5	139662428	139776188	140	29	2.0888	0.018362	0.056474	0.016911	-	HBEGF
1498	83700	11	133888820	134071652	421	48	0.90558	0.18258	0.056545	0.68758	+	JAM3
1499	96459	5	130927407	131182756	321	22	1.0445	0.14813	0.056739	0.48376	-	FNIP1
1500	2099	6	151961631	152474409	1483	127	1.4682	0.071029	0.05677	0.1521	+	ESR1
1501	51058	1	43262244	43368148	194	34	1.2437	0.10681	0.056865	0.26396	+	ZNF691
1502	132625	4	188866925	188976199	405	69	0.91612	0.1798	0.056867	0.64691	+	ZFP42
1503	84830	6	11661505	11829861	529	60	1.2453	0.10651	0.056945	0.26862	-	ADTRP
1504	79581	8	145532217	145634946	22	4	1.4475	0.073881	0.057009	0.10597	+	SLC52A2
1505	7164	6	125424876	125634644	643	60	1.6733	0.047132	0.057031	0.084247	+	TPD52L1
1506	55336	16	67143891	67248077	89	15	0.997	0.15938	0.057034	0.51358	+	FBXL8
1507	23360	11	47688055	47839012	235	24	1.4311	0.0762	0.05708	0.15807	-	FNBP4
1508	10226	19	4788346	4917780	407	64	1.0793	0.14022	0.05715	0.42482	-	PLIN3
1509	5305	10	22773766	23053503	682	59	1.7629	0.038962	0.057157	0.048596	-	PIP4K2A
1510	4331	14	61151459	61485398	248	29	1.7483	0.040203	0.057225	0.07029	+	MNAT1
1511	9100	16	84683555	84863528	767	99	0.99686	0.15942	0.057328	0.55896	+	USP10
1512	84944	1	166908394	167041451	307	39	1.2789	0.10047	0.057476	0.2487	+	MAEL
1513	3556	3	190181840	190428856	663	101	1.2176	0.1117	0.057525	0.31121	+	IL1RAP
1514	8687	17	39542621	39647596	427	30	2.3957	0.0082932	0.057544	0.0027627	-	KRT38
1515	6238	20	17544323	17712934	393	55	1.4992	0.066908	0.057573	0.12408	-	RRBP1
1516	30	3	38114201	38228733	156	30	1.6249	0.052089	0.057661	0.075808	-	ACAA1
1517	1084	19	42250522	42365591	171	22	1.1363	0.12792	0.057665	0.38088	+	CEACAM3
1518	3772	21	39551837	39725043	498	48	2.3451	0.0095114	0.057668	0.0057227	+	KCNJ15
1519	56674	11	8918840	9036553	316	26	1.1458	0.12595	0.057678	0.36557	-	TMEM9B
1520	115019	1	205832176	205962588	271	40	1.226	0.11009	0.057693	0.24836	-	SLC26A9
1521	285555	4	98430025	99114391	1682	43	1.5082	0.065756	0.057789	0.14314	-	STPG2
1522	57110	3	192898030	193075102	413	42	1.1656	0.12188	0.057822	0.31159	+	HRASLS
1523	6667	12	53723979	53860230	177	23	1.0152	0.15501	0.057853	0.51158	+	SP1
1524	5957	17	9751027	9858684	406	49	1.0214	0.15354	0.057926	0.50938	-	RCVRN
1525	90268	5	14614783	14749842	275	35	1.3769	0.084272	0.057982	0.21556	+	OTULIN
1526	6327	11	117983519	118097337	333	46	1.8771	0.03025	0.058055	0.033953	-	SCN2B
1527	9340	17	9679152	9844269	625	78	1.2499	0.10566	0.058117	0.32	+	GLP2R
1528	114625	1	43232776	43360660	216	33	1.3066	0.095672	0.058136	0.21411	+	ERMAP
1529	11126	1	145645798	145765639	98	13	1.1596	0.12311	0.058193	0.31952	-	CD160
1530	85451	17	73730920	73871886	277	35	1.5517	0.060367	0.058202	0.099188	+	UNK
1531	6545	22	21332995	21437163	304	57	1.6331	0.051228	0.058214	0.079811	-	SLC7A4
1532	51642	11	73448917	73625656	480	35	1.5088	0.065676	0.058239	0.11096	+	MRPL48
1533	54458	12	53785433	53890427	125	19	1.0779	0.14055	0.05826	0.41937	+	PRR13
1534	151176	2	239010579	239127516	453	58	2.3553	0.009254	0.058362	0.0055678	+	FAM132B
1535	79443	3	45909391	46087316	467	35	1.4482	0.073782	0.058393	0.14794	-	FYCO1
1536	340146	6	137193402	137296777	267	38	0.89596	0.18514	0.058412	0.66411	+	SLC35D3
1537	54890	17	18036867	18163268	247	26	2.5019	0.0061773	0.058434	0.003062	+	ALKBH5
1538	23464	22	38153906	38263183	179	25	1.4308	0.07625	0.058449	0.1656	+	GCAT
1539	6715	5	6583500	6719675	523	61	2.2394	0.012565	0.058567	0.01101	+	SRD5A1
1540	138046	8	85045453	85884079	1794	90	1.998	0.022858	0.058751	0.023545	+	RALYL
1541	2237	11	61510109	61614716	173	29	1.3357	0.09083	0.058804	0.18454	+	FEN1
1542	11337	17	7093738	7195753	99	16	1.2502	0.10561	0.058841	0.23547	-	GABARAP
1543	112885	22	45227042	45455809	1014	109	1.8528	0.031952	0.058877	0.036686	-	PHF21B
1544	4037	19	33635599	33749773	338	58	1.2932	0.097973	0.058886	0.23603	+	LRP3
1545	79142	17	7088347	7192825	105	18	1.2129	0.11258	0.058975	0.27041	-	PHF23
1546	374887	19	19589670	19698393	156	18	1.3016	0.096519	0.058976	0.21224	+	YJEFN3
1547	10246	6	25862982	25980954	335	31	1.0949	0.13678	0.059041	0.39057	-	SLC17A2
1548	158062	9	139588469	139692980	231	19	1.3304	0.091696	0.059063	0.17768	-	LCN6
1549	4189	7	108160189	108265294	262	33	0.99414	0.16008	0.0591	0.53188	+	DNAJB9
1550	613227	12	51296200	51414668	345	30	1.1732	0.12037	0.059436	0.3455	+	HIGD1C
1551	80232	1	224522845	224672001	249	25	2.4366	0.0074124	0.059577	0.0049203	-	WDR26
1552	55758	1	211382708	211539727	402	39	1.8799	0.030059	0.059588	0.038995	+	RCOR3
1553	5329	19	44100247	44224498	378	65	1.5545	0.060034	0.059644	0.11422	-	PLAUR
1554	837	11	104763594	104889325	307	33	1.3737	0.084765	0.059688	0.18138	-	CASP4
1555	3759	17	68114757	68226189	257	43	1.5556	0.0599	0.059759	0.11159	+	KCNJ2
1556	25906	11	71770633	71873822	265	23	1.2318	0.10901	0.059821	0.27005	-	ANAPC15
1557	113026	17	43139008	43259891	255	35	2.3052	0.010579	0.059844	0.0060473	-	PLCD3
1558	5459	5	145668587	145770083	222	32	1.5774	0.05735	0.059899	0.089807	+	POU4F3
1559	4131	5	71353118	71555397	466	69	1.1203	0.13129	0.059938	0.3804	+	MAP1B
1560	26112	5	150510613	150653654	529	70	2.4192	0.0077764	0.059952	0.005518	-	CCDC69
1561	255488	6	18227602	18519105	1160	76	1.6935	0.045181	0.059986	0.074357	+	RNF144B
1562	148113	19	19599057	19707468	154	18	1.3279	0.092107	0.060097	0.19177	+	CILP2
1563	100529063	14	23725971	23845394	239	47	1.3021	0.096447	0.060123	0.20951	+	BCL2L2-PABPN1
1564	140578	21	19350190	19689687	975	115	1.3323	0.091383	0.060176	0.23773	+	CHODL
1565	947	1	208009883	208134742	380	43	2.3774	0.008718	0.06018	0.0064366	-	CD34
1566	3005	22	38151114	38253443	177	25	1.4184	0.078035	0.060222	0.16867	+	H1F0
1567	23279	11	47749670	47920057	273	27	1.4881	0.068358	0.060229	0.13657	-	NUP160
1568	8021	9	133950948	134160057	326	40	1.0375	0.14976	0.060455	0.44601	+	NUP214
1569	4594	6	49348073	49481041	308	27	1.13	0.12924	0.06051	0.33776	-	MUT
1570	8717	16	67138088	67243812	88	15	0.98063	0.16339	0.060515	0.50459	-	TRADD
1571	81501	8	105302024	105418917	392	47	1.1148	0.13247	0.060547	0.37827	+	DCSTAMP
1572	27230	3	150209780	150314428	308	43	1.394	0.081663	0.06056	0.15291	-	SERP1
1573	90326	1	6634925	6745646	199	28	1.287	0.099043	0.060594	0.23285	+	THAP3
1574	143187	10	114156756	114628503	832	117	2.005	0.022482	0.060647	0.029817	+	VTI1A
1575	283377	12	56812301	56914769	150	24	2.0432	0.020515	0.060662	0.016712	+	SPRYD4
1576	4756	15	73294056	73647547	724	55	1.1202	0.13131	0.060688	0.35486	+	NEO1
1577	79024	13	44667287	44785393	176	30	1.0327	0.15087	0.060728	0.42634	-	SMIM2
1578	8804	1	167460250	167573056	444	70	1.393	0.081808	0.060729	0.16058	-	CREG1
1579	414332	9	139582619	139687411	219	19	1.3731	0.084863	0.060817	0.1503	-	LCN10
1580	283310	12	80533151	80822870	578	53	1.1544	0.12417	0.060843	0.32853	+	OTOGL
1581	51032	1	15752596	15867895	315	34	0.91587	0.17987	0.060849	0.58121	+	CELA2B
1582	54991	1	967198	1101736	143	11	1.6419	0.050301	0.060872	0.05432	-	C1orf159
1583	4430	2	192060107	192340115	441	41	1.6029	0.054473	0.060875	0.10611	+	MYO1B
1584	4650	19	17136591	17374104	816	91	1.4829	0.069046	0.060961	0.13154	+	MYO9B
1585	6223	19	42313988	42425484	123	14	1.1223	0.13087	0.060995	0.38639	+	RPS19
1586	667	6	56272785	56869426	1126	66	0.99216	0.16056	0.061031	0.53545	-	DST
1587	1462	5	82717493	82928122	546	59	2.3945	0.0083226	0.061042	0.0044614	+	VCAN
1588	84239	3	193069866	193322810	697	81	2.0527	0.02005	0.061081	0.01988	-	ATP13A4
1589	79968	15	44069112	44210617	160	17	1.6084	0.053872	0.061143	0.088974	+	WDR76
1590	952	4	15729921	15900706	480	51	1.9312	0.026727	0.061177	0.02845	+	CD38
1591	8632	17	76369778	76623476	1089	123	1.7784	0.037671	0.061198	0.050794	-	DNAH17
1592	56834	11	64001781	64106972	126	26	1.6471	0.049765	0.061246	0.056846	+	GPR137
1593	23382	7	128814855	129120052	565	51	2.692	0.0035513	0.061309	0.0013238	+	AHCYL2
1594	136242	7	141486078	141591332	206	19	1.8289	0.033707	0.061319	0.034721	-	PRSS37
1595	84630	6	43161222	43305997	252	40	1.2892	0.09867	0.061333	0.20359	+	TTBK1
1596	4861	19	47473077	47599033	98	17	2.1696	0.015019	0.061442	0.011557	+	NPAS1
1597	9487	17	16070509	16280098	288	16	1.2436	0.10682	0.061607	0.23114	+	PIGL
1598	5698	6	32771927	32877628	785	63	1.9244	0.027151	0.061691	0.02458	+	PSMB9
1599	58495	20	17954796	18089834	460	66	2.475	0.0066616	0.061887	0.002757	-	OVOL2
1600	164312	20	5971192	6084726	361	48	1.2284	0.10964	0.061916	0.25148	-	LRRN4
1601	129684	2	124732864	125722954	2737	164	1.9259	0.027058	0.061964	0.025835	+	CNTNAP5
1602	117159	12	54988375	55092277	330	40	1.0438	0.14829	0.062129	0.41784	-	DCD
1603	26056	2	73250510	73390146	335	31	1.0425	0.1486	0.062141	0.42525	-	RAB11FIP5
1604	126364	19	18451947	18558428	253	45	1.3574	0.087331	0.062226	0.18027	-	LRRC25
1605	55149	10	30548730	30688267	423	53	1.1618	0.12266	0.062232	0.30799	-	MTPAP
1606	125919	19	57781865	57892144	405	56	1.1372	0.12772	0.062237	0.3382	+	ZNF543
1607	738	11	64813587	64929332	179	31	1.6728	0.047184	0.062345	0.064092	+	VPS51
1608	1812	5	174817675	174921163	314	53	1.1995	0.11517	0.062448	0.27773	-	DRD1
1609	56673	11	8891623	9004553	304	23	1.166	0.12181	0.062491	0.32104	-	C11orf16
1610	220074	11	71741377	71871828	308	23	1.2101	0.11312	0.062642	0.27599	+	LRTOMT
1611	2562	15	26738693	27068935	942	104	1.169	0.12121	0.06272	0.3219	-	GABRB3
1612	55004	11	71755371	71864433	256	20	1.2548	0.10478	0.062809	0.25186	-	LAMTOR1
1613	220963	10	61360522	61519649	384	61	1.3668	0.085849	0.063004	0.18543	-	SLC16A9
1614	51171	19	49266274	49389935	314	36	1.0301	0.15149	0.063145	0.41397	-	HSD17B14
1615	1848	12	89691837	89796296	260	37	1.2267	0.10996	0.063245	0.2427	-	DUSP6
1616	284306	19	57824891	57940927	345	46	1.2504	0.10558	0.063352	0.24375	+	ZNF547
1617	5870	11	73336683	73522201	433	39	1.3832	0.083304	0.063354	0.14249	-	RAB6A
1618	116448	21	34392450	34494728	272	45	1.0693	0.14246	0.063363	0.37682	+	OLIG1
1619	22895	12	113179343	113386686	448	56	0.88592	0.18783	0.063399	0.64495	+	RPH3A
1620	8200	20	33971149	34076027	201	19	1.8727	0.030558	0.063428	0.039362	-	GDF5
1621	128646	20	1464897	1589489	321	42	1.0498	0.1469	0.063569	0.40023	-	SIRPD
1622	5525	1	212408879	212585205	396	39	1.8411	0.032805	0.063687	0.035206	+	PPP2R5A
1623	5708	3	183966886	184076842	208	36	1.0196	0.15396	0.063689	0.43821	+	PSMD2
1624	2492	2	49139296	49431666	1016	64	1.6595	0.048507	0.063717	0.079039	-	FSHR
1625	30846	19	48166601	48296391	374	43	2.2125	0.013466	0.063749	0.0073567	+	EHD2
1626	155185	7	2669163	2805069	476	71	0.89587	0.18516	0.063759	0.61934	+	AMZ1
1627	84894	15	77855369	78038490	552	54	1.3673	0.085773	0.063806	0.17451	-	LINGO1
1628	27246	1	145560990	145739005	199	19	0.9887	0.16141	0.06388	0.46868	+	RNF115
1629	51776	2	173890440	174182737	937	90	1.15	0.12506	0.063883	0.30784	+	ZAK
1630	401262	6	43223211	43327005	169	31	1.2098	0.11318	0.063929	0.24417	-	CRIP3
1631	83899	17	39332900	39433904	207	20	1.3308	0.091625	0.063953	0.20061	+	KRTAP9-2
1632	114836	1	160404820	160543052	276	41	1.0801	0.14004	0.063976	0.39019	-	SLAMF6
1633	599	14	23725971	23840241	226	45	1.2335	0.10869	0.064028	0.23748	+	BCL2L2
1634	84057	4	154215801	154386247	447	44	1.2406	0.10737	0.064104	0.23085	+	MND1
1635	391112	1	158466918	158567895	379	26	0.94063	0.17345	0.064105	0.56641	-	OR6Y1
1636	56672	11	8882701	8991626	312	24	1.1444	0.12623	0.064136	0.33125	+	AKIP1
1637	29765	1	151092463	151198547	126	28	1.1316	0.1289	0.06419	0.34214	-	TMOD4
1638	140735	17	56110780	56217618	171	31	1.2045	0.1142	0.06423	0.23609	+	DYNLL2
1639	2064	17	37794167	37934915	206	21	1.294	0.09783	0.064552	0.19679	+	ERBB2
1640	1950	4	110784040	110984118	425	45	1.1846	0.11809	0.06463	0.27489	+	EGF
1641	10461	2	112606056	112847293	703	52	1.121	0.13115	0.064631	0.35289	+	MERTK
1642	64699	21	43741996	43866955	545	76	1.2252	0.11026	0.064646	0.23195	-	TMPRSS3
1643	101929141	17	18682272	18811929	231	18	1.6547	0.048995	0.064711	0.071634	+	LOC101929141
1644	3892	12	52592892	52752947	613	66	1.1211	0.13113	0.064809	0.34467	+	KRT86
1645	51175	6	112341860	112458751	242	27	1.8178	0.034549	0.064881	0.043787	-	TUBE1
1646	57717	5	140510980	140616710	278	29	1.7944	0.036377	0.064902	0.04129	+	PCDHB16
1647	27291	10	99844381	100054654	378	39	1.2692	0.10219	0.065044	0.22657	+	R3HCC1L
1648	23111	13	36825775	36994317	461	34	1.3528	0.088053	0.065292	0.18683	-	SPG20
1649	283446	12	109776439	109936176	581	42	1.2185	0.11151	0.065311	0.24565	+	MYO1H
1650	1856	17	7078661	7187867	112	19	1.1704	0.12092	0.065325	0.27491	-	DVL2
1651	728464	6	110516666	110729475	513	60	1.3108	0.094968	0.065344	0.23351	-	METTL24
1652	100188893	6	41705181	41807634	213	35	1.4424	0.074592	0.065359	0.11937	+	TOMM6
1653	1265	19	976274	1089064	180	27	3.6999	0.00010786	0.065463	3.1907e-06	+	CNN2
1654	168451	7	108152671	108260189	270	32	0.89871	0.1844	0.065609	0.59843	-	THAP5
1655	152007	9	36086730	36213910	335	50	2.0229	0.021541	0.065732	0.020927	+	GLIPR2
1656	152877	4	1591608	1735988	456	43	1.3044	0.096051	0.06579	0.21026	-	FAM53A
1657	127391	1	40663573	40767365	119	27	1.5615	0.059207	0.065804	0.096209	+	TMCO2
1658	6142	19	17920687	18024133	153	30	1.1878	0.11745	0.065852	0.28679	+	RPL18A
1659	221302	6	116906781	117039973	263	27	1.0046	0.15755	0.065857	0.4371	-	ZUFSP
1660	23081	9	6670863	7225648	2375	166	1.698	0.044755	0.065891	0.063863	+	KDM4C
1661	6898	16	71550754	71660998	199	29	1.3689	0.085508	0.0659	0.158	-	TAT
1662	949	12	125212174	125398519	521	86	1.1753	0.11994	0.065929	0.31518	-	SCARB1
1663	10071	7	100562904	100712230	225	31	1.572	0.057976	0.066041	0.081385	+	MUC12
1664	3760	2	155505093	155764864	690	81	0.75456	0.22526	0.066134	0.82691	+	KCNJ3
1665	23207	1	15960632	16111264	332	36	0.96863	0.16636	0.066137	0.49821	+	PLEKHM2
1666	25924	3	39800405	40351812	1482	94	1.0479	0.14734	0.066191	0.4132	+	MYRIP
1667	10451	1	108063782	108557545	1456	121	1.7864	0.037015	0.066331	0.045985	-	VAV3
1668	158038	9	27898084	29262998	4620	246	1.2238	0.11051	0.066376	0.25584	-	LINGO2
1669	84752	16	67132005	67234902	77	15	0.94321	0.17279	0.066388	0.5141	-	B3GNT9
1670	5229	5	114496527	114649123	320	45	1.2367	0.10809	0.066485	0.21667	-	PGGT1B
1671	165829	3	119834328	120053921	624	52	1.0532	0.14612	0.066526	0.41014	-	GPR156
1672	57089	10	101369263	101521002	250	22	2.08	0.018763	0.066689	0.016646	+	ENTPD7
1673	170961	19	4132665	4274811	255	26	1.0404	0.14909	0.066759	0.39276	+	ANKRD24
1674	29964	6	41698500	41805110	219	35	1.414	0.07868	0.06677	0.12757	+	PRICKLE4
1675	27294	19	49386939	49498226	221	29	1.2941	0.097824	0.066775	0.18927	+	DHDH
1676	10449	18	47259874	47390306	413	37	1.3991	0.080884	0.066868	0.12197	-	ACAA2
1677	25904	3	32676637	32865367	625	47	1.5749	0.057639	0.066935	0.08783	+	CNOT10
1678	23043	3	170730292	171228197	1294	139	0.90227	0.18346	0.066963	0.57525	-	TNIK
1679	100506650	17	51012879	51115012	263	28	1.0476	0.14742	0.067153	0.37892	+	C17orf112
1680	1962	3	184858412	185021886	336	33	1.1765	0.11971	0.067156	0.27365	-	EHHADH
1681	841	2	202048166	202202434	323	39	0.99334	0.16027	0.067188	0.4488	+	CASP8
1682	955	20	25126327	25257365	377	40	1.1277	0.12972	0.067192	0.33352	+	ENTPD6
1683	1053	14	23536515	23638820	222	44	0.9725	0.1654	0.067196	0.45687	-	CEBPE
1684	132014	3	9894296	10008086	238	40	1.3589	0.087084	0.06729	0.16601	+	IL17RE
1685	51368	3	51655191	51788339	102	25	1.1238	0.13055	0.067315	0.33782	+	TEX264
1686	283471	12	51186701	51331667	323	33	1.3315	0.091513	0.067345	0.19177	+	TMPRSS12
1687	79801	16	46564466	46705311	21	5	1.0974	0.13624	0.067352	0.29533	-	SHCBP1
1688	7031	21	43732391	43836644	442	69	1.2672	0.10255	0.067393	0.1922	-	TFF1
1689	347240	9	34202378	34379198	326	28	1.3669	0.085832	0.067699	0.15628	-	KIF24
1690	56676	11	8909119	9014580	286	23	1.1283	0.12959	0.067778	0.32453	-	ASCL3
1691	55973	7	107170422	107313762	226	28	1.0602	0.14452	0.067816	0.3966	+	BCAP29
1692	50618	2	24375733	24633647	591	40	1.5029	0.066436	0.068004	0.12331	-	ITSN2
1693	5542	12	11454757	11558524	218	36	1.0996	0.13576	0.068087	0.35327	-	PRB1
1694	130075	7	141568676	141669620	206	23	1.5751	0.057618	0.068101	0.07783	+	OR9A4
1695	22985	14	23477773	23614823	257	52	0.9232	0.17795	0.068172	0.5187	-	ACIN1
1696	126248	19	33572949	33717830	389	48	0.9734	0.16518	0.06821	0.47085	+	WDR88
1697	113146	14	105353590	105494694	384	29	1.4119	0.078984	0.068451	0.1143	-	AHNAK2
1698	57476	11	123275191	123548478	899	138	1.5684	0.058395	0.06855	0.10193	+	GRAMD1B
1699	4891	12	51323566	51472118	418	30	1.1022	0.1352	0.068686	0.35007	-	SLC11A2
1700	285641	5	150605926	150733334	449	47	1.5285	0.063197	0.069065	0.081947	-	SLC36A3
1701	401388	7	96060938	96182835	282	38	1.234	0.1086	0.06908	0.23062	-	C7orf76
1702	79544	14	20353767	20454842	212	23	1.1118	0.13312	0.069161	0.31287	+	OR4K1
1703	283933	16	31396885	31504348	124	24	1.1023	0.13516	0.069215	0.32489	-	ZNF843
1704	2335	2	216175177	216350890	506	55	1.2131	0.11255	0.069282	0.25108	-	FN1
1705	64066	11	102512415	102626468	480	47	0.84814	0.19818	0.069288	0.62773	-	MMP27
1706	10020	9	36164438	36327053	419	47	1.9492	0.025636	0.069295	0.020023	-	GNE
1707	56648	3	170556204	170676426	253	30	0.95651	0.16941	0.069362	0.45169	-	EIF5A2
1708	84448	4	7917037	8210559	972	139	0.85281	0.19688	0.069368	0.60826	-	ABLIM2
1709	64689	3	39088090	39199854	261	30	2.3704	0.008884	0.069527	0.0035766	-	GORASP1
1710	5937	2	161078662	161400366	676	63	1.7955	0.036286	0.069545	0.040015	-	RBMS1
1711	653145	10	48205204	48321369	26	8	1.0268	0.15225	0.069577	0.41136	+	ANXA8
1712	134285	5	72360286	72477765	334	45	1.1978	0.11549	0.069586	0.2575	+	TMEM171
1713	145553	14	24633143	24735276	153	30	1.4052	0.079975	0.069657	0.1206	-	MDP1
1714	10057	3	183587722	183785803	553	49	1.5626	0.059068	0.069692	0.075709	-	ABCC5
1715	126123	19	50605805	50716538	188	24	1.0574	0.14517	0.069714	0.36364	-	IZUMO2
1716	5437	3	184029502	184136383	267	59	0.84704	0.19849	0.069746	0.61873	+	POLR2H
1717	23217	19	3754022	3919027	279	36	1.1283	0.12959	0.06999	0.30037	-	ZFR2
1718	196513	12	2005214	2163677	577	67	1.1166	0.13208	0.070054	0.3355	-	DCP1B
1719	55655	19	55426652	55562510	587	68	1.0694	0.14244	0.070059	0.32827	+	NLRP2
1720	3718	19	17885591	18008880	254	50	0.9847	0.16239	0.070108	0.45924	-	JAK3
1721	54764	10	126555704	126726005	505	51	0.87159	0.19172	0.070112	0.5755	+	ZRANB1
1722	388289	16	73110536	73228346	360	64	1.9485	0.025679	0.070159	0.022398	-	C16orf47
1723	55714	4	183015112	183774177	2373	268	1.6857	0.045924	0.070181	0.078427	+	TENM3
1724	55435	4	113102893	113241211	224	31	0.89634	0.18503	0.070393	0.58032	+	AP1AR
1725	51318	2	86376478	86490913	327	25	1.1574	0.12356	0.070418	0.28994	+	MRPL35
1725	84275	1	9549528	9692831	188	32	0.86044	0.19477	0.070418	0.5988	+	SLC25A33
1727	3181	7	26179547	26290413	186	26	1.244	0.10676	0.070465	0.25588	-	HNRNPA2B1
1728	166647	4	22338997	22567677	809	82	1.1866	0.11769	0.070474	0.25355	-	ADGRA3
1729	5515	5	133482148	133611950	257	24	1.1855	0.1179	0.07057	0.27776	-	PPP2CA
1730	23671	2	192720615	193109645	692	94	1.2159	0.11202	0.070644	0.25128	-	TMEFF2
1731	122258	13	112980649	113139009	679	70	1.5143	0.064972	0.070694	0.097499	+	SPACA7
1732	57578	14	93749565	94224222	987	65	1.333	0.091273	0.070736	0.18649	+	UNC79
1733	223075	7	31503685	31748334	709	65	1.8676	0.030912	0.070824	0.02819	+	CCDC129
1734	221143	13	21252036	21398095	332	32	1.5903	0.055881	0.070856	0.08519	-	N6AMT2
1735	54788	10	74042588	74164907	211	22	0.76903	0.22094	0.070861	0.73331	-	DNAJB12
1736	100533106	8	124188429	124336727	141	26	1.0704	0.14221	0.070941	0.36473	-	ZHX1-C8orf76
1737	57159	2	27455297	27580307	155	25	1.4399	0.074944	0.070956	0.12751	+	TRIM54
1738	123720	15	83426959	83553613	299	38	1.7177	0.042926	0.071079	0.046301	+	WHAMM
1739	10840	3	125772404	125950029	766	62	0.99317	0.16031	0.071088	0.42439	-	ALDH1L1
1740	25858	11	64017863	64122239	130	26	1.8958	0.028996	0.07126	0.019088	+	TEX40
1741	51719	2	231527557	231735790	451	67	1.0051	0.15743	0.071279	0.41973	+	CAB39
1742	8516	10	15507711	15812328	944	79	1.778	0.037704	0.071354	0.047099	-	ITGA8
1743	223117	7	84574508	84866171	468	44	1.0807	0.13992	0.071457	0.3876	-	SEMA3D
1744	51760	16	19129541	19329656	418	72	1.3821	0.083468	0.071474	0.14845	+	SYT17
1745	729288	17	18511742	18635572	63	11	1.7603	0.039175	0.071507	0.032151	-	ZNF286B
1746	23601	7	141577157	141696783	220	30	1.4493	0.073633	0.071541	0.11491	-	CLEC5A
1747	84627	16	88443879	88557165	191	21	1.1827	0.11847	0.071619	0.2203	+	ZNF469
1748	2222	8	11603467	11746818	728	65	0.94462	0.17243	0.071725	0.4471	+	FDFT1
1749	51073	19	10312640	10420736	206	42	1.5376	0.062076	0.071839	0.085584	+	MRPL4
1750	51298	19	311750	426688	202	25	1.445	0.07423	0.071937	0.12423	-	THEG
1751	50632	10	135088928	135200482	157	14	1.5158	0.064784	0.071972	0.088685	-	CALY
1752	53981	14	92538298	92680543	521	46	1.2884	0.098811	0.072019	0.23267	+	CPSF2
1753	4711	3	179272575	179392288	205	36	1.3828	0.083365	0.072069	0.16269	+	NDUFB5
1754	390072	11	5707228	5827162	549	56	0.80402	0.21069	0.072083	0.66576	+	OR52N4
1755	3553	2	113537337	113644356	195	28	1.2052	0.11406	0.072123	0.21802	-	IL1B
1756	23762	22	31039769	31353811	721	80	1.2602	0.10379	0.072129	0.20473	+	OSBP2
1757	390790	17	37263147	37372414	280	41	1.5133	0.065103	0.072194	0.08751	-	ARL5C
1758	7710	19	58158594	58270579	242	33	0.87099	0.19188	0.072261	0.55486	-	ZNF154
1759	83894	4	147578179	147917034	723	53	0.92503	0.17747	0.072358	0.52557	-	TTC29
1760	64651	3	39133342	39246093	241	35	2.3411	0.0096137	0.072469	0.0040035	-	CSRNP1
1761	966	11	33674556	33808025	394	49	1.6349	0.051036	0.07255	0.064967	-	CD59
1762	27145	6	75954607	76253516	413	41	0.85324	0.19676	0.072677	0.5877	-	FILIP1
1763	10269	1	40673722	40809856	267	41	1.3153	0.094207	0.072715	0.18432	+	ZMPSTE24
1764	57724	18	43377574	43597305	555	57	0.90775	0.18201	0.072725	0.52533	-	EPG5
1765	51735	5	130709614	131020929	384	27	1.0793	0.14023	0.072811	0.32966	-	RAPGEF6
1766	8993	19	46472411	46576556	289	44	0.79834	0.21234	0.072847	0.65514	-	PGLYRP1
1767	23385	1	160263063	160378742	227	33	1.0762	0.14091	0.072886	0.32826	+	NCSTN
1768	754	21	46219500	46344487	435	56	0.95435	0.16995	0.072926	0.47967	-	PTTG1IP
1769	101929185	17	56015471	56116372	143	23	1.2616	0.10355	0.072975	0.19753	+	LOC101929185
1770	9831	8	144668183	144785900	293	36	1.5654	0.058748	0.073002	0.080331	+	ZNF623
1771	64418	7	112355364	112480768	184	20	1.0858	0.13879	0.073074	0.32304	-	TMEM168
1772	6891	6	32739610	32856547	1076	60	1.9132	0.02786	0.073077	0.023101	-	TAP2
1773	390066	11	5459915	5560979	409	50	1.051	0.14663	0.07309	0.32871	+	OR52D1
1774	64151	4	17762436	17896488	213	26	1.9144	0.027786	0.073102	0.029211	+	NCAPG
1775	122740	14	20432420	20533352	499	44	1.8252	0.033986	0.073139	0.027592	-	OR4K14
1776	57646	11	113618597	113796292	390	39	1.3573	0.087349	0.073229	0.14332	-	USP28
1777	81027	20	57544309	57651709	228	33	1.2803	0.10022	0.073242	0.19334	+	TUBB1
1778	23108	17	2609050	2991035	894	146	1.0854	0.13886	0.073266	0.34293	+	RAP1GAP2
1779	6558	5	127369483	127575380	298	31	1.6134	0.053324	0.073293	0.068603	+	SLC12A2
1780	2134	1	26298266	26412955	231	29	1.2202	0.11119	0.073348	0.25877	+	EXTL1
1781	23383	19	19381496	19519563	243	24	1.0472	0.14751	0.073402	0.36325	+	MAU2
1782	4055	12	6434534	6550737	193	43	1.6565	0.048814	0.073415	0.051516	+	LTBR
1783	25764	15	44042619	44144787	116	12	1.6788	0.046592	0.073436	0.054755	+	HYPK
1784	119682	11	4970213	5071160	442	42	0.85209	0.19708	0.073447	0.59692	+	OR51L1
1785	54758	16	87680239	87849603	710	82	1.3172	0.093894	0.073461	0.1812	-	KLHDC4
1786	123722	15	83376827	83524850	341	43	1.5268	0.063402	0.073466	0.085102	-	FSD2
1787	55907	12	22149108	22268608	304	41	1.0413	0.14886	0.073705	0.36718	+	CMAS
1788	114112	3	126275895	126425056	424	46	1.1131	0.13283	0.073732	0.29111	-	TXNRD3
1789	9611	17	15883408	16168874	401	15	1.2236	0.11054	0.073762	0.21165	-	NCOR1
1790	387748	11	5707678	5808768	431	50	0.82262	0.20536	0.073788	0.62827	+	OR56B1
1791	26610	11	31481297	31856073	408	32	1.3422	0.089773	0.0739	0.19144	+	ELP4
1792	6135	1	23968269	24072915	170	26	1.3984	0.081001	0.073984	0.1178	+	RPL11
1793	112724	19	55505684	55630914	440	50	1.1477	0.12554	0.074181	0.24883	-	RDH13
1794	131408	3	184003717	184114063	208	43	0.91271	0.1807	0.074214	0.48508	+	FAM131A
1795	283629	14	24624753	24727568	148	28	1.435	0.075644	0.074219	0.10108	+	TSSK4
1796	5270	2	224789765	224954036	420	54	1.0327	0.15088	0.07425	0.36586	-	SERPINE2
1797	4745	11	20641117	21647232	3101	294	0.97171	0.1656	0.074279	0.46376	+	NELL1
1798	89853	9	129039123	129319320	727	79	1.0392	0.14936	0.074283	0.33858	+	MVB12B
1799	54876	4	17752278	17862386	174	24	2.0339	0.02098	0.074421	0.020826	-	DCAF16
1800	10548	14	24608353	24716288	151	30	1.4074	0.079653	0.074437	0.1121	-	TM9SF1
1801	9021	17	76302858	76406160	313	45	1.8987	0.028804	0.074478	0.028745	-	SOCS3
1802	7066	3	184039773	184147368	284	64	0.80561	0.21023	0.074514	0.63614	-	THPO
1803	22921	10	23334427	23460942	233	42	1.3138	0.094451	0.074547	0.17296	+	MSRB2
1804	51339	14	59050786	59165039	290	52	1.0587	0.14486	0.074762	0.33282	+	DACT1
1805	29109	16	67213292	67331425	124	17	1.0569	0.14528	0.074771	0.33918	-	FHOD1
1806	84816	6	106968903	107127373	540	38	1.7401	0.040917	0.074773	0.043671	-	RTN4IP1
1807	114804	17	74088534	74286448	436	53	0.65274	0.25696	0.074874	0.89021	-	RNF157
1808	11335	7	26190831	26303227	168	24	1.256	0.10456	0.074896	0.22815	+	CBX3
1809	89978	15	35607670	35888597	524	39	1.2854	0.099327	0.07504	0.18421	-	DPH6
1810	29082	14	24628787	24733036	154	31	1.3961	0.081348	0.075064	0.11619	-	CHMP4A
1811	5601	5	179610594	179769071	581	63	0.93829	0.17405	0.075079	0.46179	-	MAPK9
1812	55278	6	107027441	107166292	441	46	1.6206	0.052549	0.075158	0.065533	+	QRSL1
1813	26533	14	21987934	22088875	447	63	1.0044	0.15759	0.075177	0.39083	-	OR10G3
1814	9801	2	75823909	75939334	325	36	1.4149	0.078546	0.075207	0.11432	+	MRPL19
1815	4086	4	146352951	146530328	309	38	0.98599	0.16207	0.075238	0.39644	+	SMAD1
1816	6660	12	23632438	24765383	3043	286	0.84473	0.19913	0.075251	0.60752	-	SOX5
1817	5862	8	61379469	61586203	381	29	0.7508	0.22639	0.075256	0.72064	+	RAB2A
1818	285527	4	48449380	48832329	481	39	2.0557	0.019906	0.075282	0.019131	-	FRYL
1819	58473	11	73307223	73423864	260	38	1.1082	0.13389	0.075441	0.27506	+	PLEKHB1
1820	119678	11	5029880	5130857	550	37	0.75705	0.22451	0.075541	0.6946	-	OR52E2
1821	26233	8	145529088	145632183	27	4	1.3654	0.086059	0.075615	0.10675	-	FBXL6
1822	55684	9	139652374	139785639	231	19	1.2365	0.10813	0.075804	0.18357	+	RABL6
1823	115106	18	43634298	43758299	318	31	1.1634	0.12233	0.075861	0.26367	+	HAUS1
1824	1439	22	37259639	37386491	506	72	1.4463	0.07404	0.075901	0.12278	+	CSF2RB
1825	10844	10	135042134	135175841	198	18	1.323	0.09292	0.075941	0.15401	-	TUBGCP2
1826	50863	11	131190371	132256716	3030	283	1.0823	0.13957	0.075971	0.32352	+	NTM
1827	10864	6	43215737	43323276	181	32	1.1296	0.12932	0.075978	0.2608	+	SLC22A7
1828	2914	6	33939623	34173399	776	95	0.7176	0.2365	0.076004	0.75834	-	GRM4
1829	29998	19	48061453	48256534	508	61	2.0873	0.018428	0.076107	0.010306	+	GLTSCR1
1830	4807	1	160286861	160392638	227	33	1.0489	0.14712	0.076179	0.33186	+	NHLH1
1831	29128	19	4859510	5012165	398	59	0.93968	0.17369	0.076232	0.43685	+	UHRF1
1832	54586	9	27234652	27347137	423	55	1.0757	0.14104	0.07626	0.32893	-	EQTN
1833	6608	7	128778713	128903386	279	41	2.7466	0.0030112	0.076298	0.00081923	+	SMO
1834	54883	17	36906687	37031603	291	41	0.88181	0.18894	0.076354	0.49861	-	CWC25
1835	81894	10	101320275	101469039	360	40	1.7866	0.036998	0.07639	0.045115	-	SLC25A28
1836	5222	11	60958644	61068929	43	16	1.0104	0.15615	0.076472	0.38015	+	PGA5
1837	7700	4	281417	420076	385	31	1.215	0.11218	0.076483	0.20573	+	ZNF141
1838	6936	2	75839831	75988482	400	44	1.3576	0.087302	0.076504	0.14197	-	GCFC2
1839	65078	22	20178938	20305816	187	39	0.95977	0.16859	0.076557	0.42148	-	RTN4R
1840	283234	11	64057690	64175006	193	30	1.8535	0.031903	0.07679	0.024028	+	CCDC88B
1841	619189	15	44036372	44142295	121	13	1.653	0.049168	0.076919	0.058153	-	SERINC4
1842	8926	15	25150070	25273729	287	43	0.74567	0.22793	0.07696	0.72847	+	SNURF
1843	23534	7	128544234	128745227	561	59	2.2913	0.010974	0.077015	0.0056682	-	TNPO3
1844	8416	1	150904499	151018114	248	39	1.0889	0.13811	0.077054	0.29083	+	ANXA9
1845	5636	17	18709612	18884600	354	33	1.7875	0.036931	0.077069	0.046914	+	PRPSAP2
1846	2352	11	71796771	71900934	242	27	1.0577	0.14509	0.077208	0.33547	+	FOLR3
1847	3891	12	52703790	52811309	484	46	1.1846	0.11809	0.077308	0.22935	-	KRT85
1848	146225	16	66563351	66672178	228	24	1.4886	0.068299	0.077366	0.11699	+	CMTM2
1849	148479	1	6623756	6734093	199	29	1.1711	0.12078	0.077376	0.24742	+	PHF13
1850	57143	14	78216426	78450297	873	69	1.5835	0.056649	0.077395	0.070081	+	ADCK1
1851	27090	9	130620165	130729326	195	32	1.7206	0.042659	0.077469	0.042774	-	ST6GALNAC4
1852	26034	6	154425618	154727900	983	117	0.96973	0.16609	0.077538	0.41402	-	IPCEF1
1853	10810	13	27081840	27313082	809	67	2.276	0.011422	0.077543	0.0048354	+	WASF3
1854	55702	19	4197111	4319085	204	23	0.81921	0.20633	0.077548	0.5941	+	CCDC94
1855	7016	9	35555281	35660038	239	34	1.2779	0.10065	0.077637	0.1803	+	TESK1
1856	54806	6	135554670	135868903	469	53	1.0566	0.14536	0.07766	0.34426	-	AHI1
1857	9518	19	18446968	18549986	249	44	1.2516	0.10535	0.077694	0.19637	+	GDF15
1858	6426	17	56028280	56134707	148	21	1.3445	0.089399	0.077755	0.13891	-	SRSF1
1859	8178	19	18503473	18682937	335	35	1.4301	0.07635	0.077773	0.13824	-	ELL
1860	83992	7	117300702	117563561	517	67	0.94753	0.17169	0.077799	0.44414	-	CTTNBP2
1861	5267	14	94977779	95086243	424	57	1.3739	0.084742	0.077842	0.13735	+	SERPINA4
1862	475	5	151072383	151188210	210	29	0.83485	0.2019	0.077854	0.55267	-	ATOX1
1863	29098	17	8141745	8243409	290	41	0.75373	0.22551	0.077929	0.68597	+	RANGRF
1864	1355	10	101405886	101542423	207	27	2.0155	0.021928	0.077996	0.016216	-	COX15
1865	23399	17	7096906	7205259	117	20	1.0982	0.13607	0.078	0.27915	-	CTDNEP1
1866	4236	15	44046733	44166951	137	13	1.6456	0.049923	0.078003	0.060166	-	MFAP1
1867	4928	11	3646240	3869022	623	59	1.2056	0.11398	0.078024	0.22445	-	NUP98
1868	55214	3	189624517	189890226	964	84	1.583	0.056714	0.07803	0.067369	-	P3H2
1869	4690	3	136531050	136720446	364	25	1.6071	0.054014	0.078122	0.091277	+	NCK1
1870	6612	21	46175532	46288044	375	40	1.0763	0.1409	0.078131	0.32211	-	SUMO3
1871	8526	17	54861460	54996036	256	25	0.89401	0.18566	0.078208	0.50987	+	DGKE
1872	51522	6	10673148	10791577	129	32	1.4065	0.079792	0.078211	0.14272	+	TMEM14C
1873	10288	19	54727675	54835033	169	24	0.92027	0.17872	0.078268	0.45277	-	LILRB2
1874	27343	10	103288639	103398027	186	26	1.0692	0.14249	0.078372	0.32028	-	POLL
1875	4761	17	37710021	37814175	149	19	1.378	0.084099	0.078409	0.12383	-	NEUROD2
1876	51094	1	202859960	202977700	252	34	0.90985	0.18145	0.078471	0.44697	-	ADIPOR1
1877	90864	16	1776713	1882582	454	27	1.0674	0.14289	0.078527	0.3017	-	SPSB3
1878	150353	22	41205553	41308130	93	20	1.0776	0.1406	0.078529	0.32366	-	DNAJB7
1879	6004	1	182517758	182623548	240	43	1.6141	0.053255	0.078602	0.060529	-	RGS16
1880	7541	18	5239018	5347052	315	36	1.7896	0.036761	0.078671	0.039541	-	ZBTB14
1881	23531	17	53419974	53549341	312	50	1.8875	0.029547	0.078678	0.023808	-	MMD
1882	3841	6	116952367	117113030	306	42	0.84836	0.19812	0.078785	0.53997	+	KPNA5
1883	148581	1	64619135	64782969	451	41	1.1416	0.12682	0.078831	0.2456	+	UBE2U
1884	2800	9	127590573	127753386	243	25	0.75191	0.22605	0.078999	0.6744	-	GOLGA1
1885	64855	9	130217618	130391268	390	46	1.3429	0.089653	0.079004	0.13488	-	FAM129B
1886	932	11	59774101	59888588	270	37	1.6391	0.050593	0.079063	0.059224	+	MS4A3
1887	5905	22	41590781	41732255	256	26	0.94324	0.17278	0.07916	0.42826	-	RANGAP1
1888	1488	10	126626418	126899624	854	108	1.4156	0.078451	0.079189	0.14126	-	CTBP2
1889	9455	15	83467729	83704905	508	52	1.5526	0.060261	0.079245	0.085766	-	HOMER2
1890	80212	12	124370955	124507373	285	33	0.9526	0.1704	0.079349	0.42119	-	CCDC92
1891	5257	16	47445047	47785434	225	22	0.69541	0.2434	0.079419	0.77273	+	PHKB
1892	84171	10	99957443	100078007	243	39	2.0318	0.021089	0.079558	0.014109	-	LOXL4
1893	6786	11	3826933	4164440	751	62	1.4884	0.06832	0.079896	0.10291	+	STIM1
1894	348093	15	64982093	65117770	314	32	0.93095	0.17594	0.079904	0.43539	-	RBPMS2
1895	1128	11	62626151	62739012	168	30	0.94886	0.17135	0.079975	0.39457	-	CHRM1
1895	148930	1	46961316	47066887	230	34	1.1561	0.12381	0.079975	0.23797	-	KNCN
1897	3633	1	38276369	38462729	305	30	2.4261	0.0076306	0.07998	0.002985	-	INPP5B
1898	388555	19	46573328	46677931	332	26	0.86485	0.19356	0.080002	0.54636	-	IGFL3
1899	199713	19	55384857	55527611	545	78	0.99695	0.15939	0.080019	0.35906	-	NLRP7
1900	340393	8	145526886	145629269	28	4	1.3503	0.08846	0.080103	0.10646	-	TMEM249
1901	719	12	8160919	8268955	173	35	0.85587	0.19603	0.08013	0.5277	-	C3AR1
1902	9732	7	111316164	111896462	1263	154	0.78078	0.21747	0.080298	0.65562	-	DOCK4
1903	10527	11	9356169	9519674	370	40	0.80931	0.20917	0.080317	0.59082	+	IPO7
1904	128366	1	158482441	158583394	373	28	0.82184	0.20558	0.080352	0.5902	-	OR6P1
1905	3903	19	54815235	54932241	149	31	1.0948	0.13681	0.08041	0.26989	-	LAIR1
1906	3592	3	159656623	159763806	364	43	1.2172	0.11176	0.080504	0.19472	+	IL12A
1907	84284	1	233036277	233164548	316	37	1.2145	0.11228	0.080572	0.2086	+	NTPCR
1908	2960	3	120411558	120552216	306	40	1.7054	0.044059	0.080595	0.052082	+	GTF2E1
1909	202309	5	57737262	57842185	338	32	1.2024	0.1146	0.080613	0.20301	+	GAPT
1910	254531	15	34601089	34709397	252	28	0.86435	0.1937	0.080657	0.53546	-	LPCAT4
1911	399694	15	49065934	49305641	507	73	1.4418	0.074673	0.080763	0.11035	-	SHC4
1912	57579	6	71073107	71320877	530	38	0.82452	0.20482	0.08081	0.61241	+	FAM135A
1913	6538	3	10807917	11030146	613	77	1.3483	0.088774	0.080946	0.15262	+	SLC6A11
1914	6240	11	4065791	4210116	455	35	1.6887	0.04564	0.080985	0.044055	+	RRM1
1915	203228	9	27496543	27623864	454	56	1.0145	0.15517	0.081073	0.37534	-	C9orf72
1916	11051	16	56413048	56535261	247	26	1.19	0.11702	0.081097	0.23702	-	NUDT21
1917	10197	17	40935159	41045777	35	18	1.038	0.14963	0.0811	0.31454	+	PSME3
1918	26154	2	215746266	216053151	649	74	0.95219	0.1705	0.081186	0.42531	-	ABCA12
1919	10817	6	41687914	41797643	229	39	1.3068	0.095647	0.081326	0.14992	-	FRS3
1920	27040	16	28946147	29052104	29	9	1.7525	0.039844	0.08133	0.026128	+	LAT
1921	4680	19	42209398	42326113	206	30	0.90976	0.18147	0.081376	0.46271	+	CEACAM6
1922	1211	9	36140853	36262059	278	39	1.9711	0.024355	0.081421	0.0188	+	CLTA
1923	23132	3	51525596	51747634	180	28	1.0812	0.13981	0.081428	0.31445	+	RAD54L2
1924	55017	14	23514683	23619665	217	44	0.89628	0.18505	0.081493	0.45684	+	C14orf119
1925	152185	3	113111565	113284034	585	39	1.144	0.12631	0.081538	0.25605	-	SPICE1
1926	55363	9	100639073	100757197	222	28	1.3705	0.085264	0.08163	0.14213	-	HEMGN
1927	112817	10	99294102	99422559	242	39	0.71495	0.23732	0.081691	0.72167	+	HOGA1
1928	89886	1	159871282	159974044	257	60	2.0586	0.019764	0.081709	0.011084	-	SLAMF9
1929	23421	1	63856441	64038944	384	30	0.93014	0.17615	0.081798	0.48038	-	ITGB3BP
1930	341392	12	7406928	7530969	248	30	1.1475	0.12558	0.081831	0.25278	+	ACSM4
1931	63943	6	32046484	32148067	206	37	1.193	0.11644	0.081846	0.21852	-	FKBPL
1932	64080	2	27954266	28163223	268	27	0.91582	0.17988	0.081861	0.46329	-	RBKS
1933	130540	2	202103147	202272101	392	42	0.98786	0.16161	0.081959	0.37433	-	ALS2CR12
1934	152503	4	151991433	152296797	637	52	1.1455	0.126	0.081978	0.26352	-	SH3D19
1935	79611	12	81421797	81700538	770	55	1.5867	0.056288	0.082093	0.072986	+	ACSS3
1936	10281	21	39376313	39543454	313	40	1.0205	0.15375	0.082125	0.34989	-	DSCR4
1937	286075	8	144716622	144827672	247	29	1.5747	0.057659	0.082149	0.063422	+	ZNF707
1938	2693	3	172111081	172216246	337	43	1.0638	0.14371	0.082266	0.29703	-	GHSR
1939	6947	11	59570281	59684041	96	28	0.97508	0.16476	0.082322	0.40352	-	TCN1
1940	2328	1	171010018	171136961	418	38	0.73978	0.22972	0.08237	0.66145	+	FMO3
1941	388667	1	117186734	117299225	168	37	1.2021	0.11467	0.082431	0.19766	+	C1orf137
1942	146664	17	74814798	74996472	721	86	0.8388	0.20079	0.082523	0.54462	+	MGAT5B
1943	150084	21	41067334	41224023	706	51	0.9385	0.17399	0.082556	0.42403	+	IGSF5
1944	387882	12	105674414	105815296	458	52	0.73116	0.23234	0.082776	0.68232	+	C12orf75
1945	90187	20	39938606	40045498	219	39	2.0441	0.020472	0.082809	0.012573	-	EMILIN3
1946	56914	20	16678998	16782809	434	66	1.0872	0.13848	0.082832	0.29912	+	OTOR
1947	10223	1	166972082	167109868	397	53	1.0216	0.15348	0.082849	0.32858	-	GPA33
1948	56997	1	227034589	227225246	502	57	1.0435	0.14836	0.082884	0.32237	+	ADCK3
1949	2101	11	64022990	64134215	145	26	1.8789	0.030129	0.082912	0.017	+	ESRRA
1950	127665	1	181973705	182080847	278	31	1.3866	0.082786	0.082945	0.13083	-	ZNF648
1951	119679	11	5017756	5118691	555	38	0.70759	0.2396	0.08296	0.71065	+	OR52J3
1952	143872	11	100508407	100911656	1635	105	1.303	0.09628	0.082981	0.15543	+	ARHGAP42
1953	100463487	6	62234008	62334534	518	25	0.86628	0.19317	0.082983	0.51622	+	MTRNR2L9
1954	3113	6	32982346	33098555	1386	62	1.8318	0.03349	0.082993	0.031633	-	HLA-DPA1
1955	6546	2	40289286	40789575	1658	143	0.93748	0.17426	0.083288	0.43277	-	SLC8A1
1956	64754	1	245862642	246720644	3194	166	0.96883	0.16632	0.083308	0.39688	-	SMYD3
1957	63929	22	41203085	41378823	144	25	0.94351	0.17271	0.08333	0.4312	+	XPNPEP3
1958	113457	2	132183580	132290507	400	11	1.0128	0.15557	0.083473	0.32574	+	TUBA3D
1959	388468	18	14461737	14593599	83	16	1.2721	0.10167	0.083555	0.14851	-	POTEC
1960	3682	17	3567919	3754537	475	64	1.2584	0.10412	0.08357	0.20689	-	ITGAE
1961	11026	19	54749854	54854625	195	32	0.80356	0.21082	0.083629	0.57639	-	LILRA3
1962	57570	14	61388159	61497888	116	14	2.2324	0.012794	0.083721	0.0072065	-	TRMT5
1963	2638	4	72557410	72721237	424	45	1.3314	0.091537	0.083806	0.13597	-	GC
1964	196294	11	31403948	31581169	178	22	1.459	0.072281	0.084084	0.10963	-	IMMP1L
1965	514	20	57553733	57657422	214	30	1.0053	0.15738	0.08424	0.3565	-	ATP5E
1966	147199	11	138101	244575	217	21	1.3246	0.092658	0.084269	0.14409	+	SCGB1C1
1967	9671	12	108473511	108694314	562	75	0.86397	0.1938	0.084317	0.50529	+	WSCD2
1968	10643	7	23299828	23559995	477	61	1.5981	0.055005	0.08434	0.074043	-	IGF2BP3
1969	57549	1	159846829	159965386	291	65	2.0877	0.018413	0.084398	0.010958	-	IGSF9
1970	23547	19	54794473	54900421	152	29	1.0925	0.13731	0.084413	0.26341	-	LILRA4
1971	115362	1	89674633	89788544	187	41	1.1858	0.11785	0.084457	0.22333	-	GBP5
1972	84985	8	124144752	124272318	234	27	0.94919	0.17126	0.084498	0.41318	+	FAM83A
1973	23495	17	16792398	16925432	521	65	1.0882	0.13826	0.084542	0.26622	-	TNFRSF13B
1974	9718	3	183917445	184060819	262	38	1.0264	0.15235	0.084592	0.32234	+	ECE2
1975	54069	21	33590530	33701376	184	32	1.6037	0.054385	0.084647	0.059119	-	MIS18A
1976	22903	20	11821377	11957243	320	33	0.88193	0.18891	0.084649	0.47003	+	BTBD3
1977	64446	17	72220386	72361023	419	54	0.77079	0.22042	0.084708	0.59731	+	DNAI2
1978	10664	16	67546310	67723088	163	21	1.0769	0.14076	0.084733	0.27558	+	CTCF
1979	23562	21	37782919	37998867	763	72	1.2062	0.11387	0.084764	0.21628	-	CLDN14
1980	11130	10	58067016	58171063	170	22	1.2684	0.10232	0.084825	0.16689	-	ZWINT
1981	126969	1	95235898	95410803	527	70	0.66399	0.25335	0.084831	0.77571	+	SLC44A3
1982	3375	12	21475802	21582914	344	44	0.93718	0.17433	0.085003	0.3949	+	IAPP
1983	60681	17	39918962	40029469	263	27	1.5078	0.065809	0.085017	0.087408	+	FKBP10
1984	149699	20	42304801	42405647	210	37	1.2621	0.10346	0.085117	0.19354	-	GTSF1L
1985	643847	11	60939821	61049179	67	17	0.95274	0.17036	0.085119	0.4164	+	PGA4
1986	123228	15	72356599	72483311	167	15	1.0985	0.13599	0.085231	0.25305	+	SENP8
1987	51465	6	89986344	90112619	301	54	0.99243	0.16049	0.085269	0.36366	-	UBE2J1
1988	57615	19	22767126	22900472	599	23	0.9405	0.17348	0.085274	0.41531	+	ZNF492
1989	388381	17	36941341	37047642	252	39	0.84878	0.198	0.085331	0.49132	-	C17orf98
1990	57662	19	7610774	7733196	384	40	1.0112	0.15596	0.085343	0.31622	+	CAMSAP3
1991	202018	4	16112128	16278161	493	49	1.0088	0.15654	0.085351	0.33681	-	TAPT1
1992	79817	9	27275207	27580223	974	112	0.81723	0.2069	0.085453	0.57525	-	MOB3B
1993	55854	2	187300885	187424088	222	24	0.84398	0.19934	0.085477	0.51849	+	ZC3H15
1994	201780	4	48435360	48541541	173	24	1.1691	0.12119	0.0855	0.22002	+	SLC10A4
1995	8644	10	5040958	5199878	740	62	0.65117	0.25747	0.085565	0.79199	+	AKR1C3
1996	116328	8	69192957	69781258	1459	114	0.94834	0.17148	0.085775	0.42607	+	C8orf34
1997	89857	3	183155319	183323499	452	63	1.1295	0.12934	0.085897	0.24832	-	KLHL6
1998	598	20	30202261	30361752	259	22	2.1864	0.014395	0.085898	0.0091877	-	BCL2L1
[truncated: 15,994 more rows]
