# Supplementary material for: Multiomics integrative analysis identifies APOE allele-specific blood biomarkers associated to Alzheimer’s disease etiopathogenesis
Source: Aging (Albany NY). 2021 Apr 12;13(7):9277–329. doi: 10.18632/aging.202950 (PMC8064208; doi:10.18632/aging.202950)
Supplement: Supplementary Table 17 [file aging-13-202950-s019.xlsx]

## Sheet: Sheet1
Supplementary Table 17. Stage I-III APOE4 stratified meta-analysis gene level results.
RANK	GENE	CHR	START	STOP	NSNPS	NPARAM	ZSTAT	P_JOINT	P_SNPWISE_MEAN	P_SNPWISE_TOP1	STRAND	HUGO
1	10452	19	45344477	45456946	293	44	14.902	1.5943e-50	1.5037e-26	1e-50	+	TOMM40
2	341	19	45367577	45472606	247	38	15.05	1.7138e-51	3.204e-26	1e-50	+	APOC1
3	348	19	45359039	45462650	270	40	14.821	5.362e-50	2.8323e-24	1e-50	+	APOE
4	5819	19	45299393	45442485	361	51	14.314	8.884e-47	1.1706e-23	1e-50	+	PVRL2
5	346	19	45395495	45498753	241	29	11.295	6.9638e-30	1.6048e-14	2.5212e-33	+	APOC4
6	344	19	45399239	45502822	232	27	13.201	4.3129e-40	8.5409e-13	1e-50	+	APOC2
7	1209	19	45407842	45546604	267	34	12.78	1.0562e-37	3.4317e-11	5.6525e-46	+	CLPTM1
8	1191	8	27404434	27522328	351	46	7.6008	1.472e-14	5.8517e-10	4.8925e-13	-	CLU
9	51435	8	27441100	27584286	426	51	7.083	7.0552e-13	7.1535e-07	3.527e-13	+	SCARA3
10	8301	11	85618214	85830923	555	43	5.5422	1.4933e-08	8.3944e-07	9.6469e-08	-	PICALM
11	11217	9	112760878	112984792	601	85	4.1247	1.8558e-05	2.2719e-06	0.005582	+	AKAP2
12	445815	9	112492577	112984792	1542	159	3.6118	0.00015204	3.7244e-05	0.014643	+	PALM2-AKAP2
13	3569	7	22716766	22821621	414	48	3.7164	0.00010103	4.3589e-05	0.0071737	+	IL6
14	2053	8	27298519	27452439	467	56	4.2343	1.1464e-05	5.2559e-05	0.00021653	+	EPHX2
15	274	2	127755599	127914903	635	70	5.7013	5.9456e-09	5.7239e-05	1.113e-08	-	BIN1
16	123041	14	92738925	93017825	1033	97	3.7241	9.8017e-05	8.7201e-05	0.0033332	+	SLC24A4
17	51082	13	28144880	28291559	632	55	3.4562	0.00027388	0.00010231	0.013066	+	POLR1D
18	55584	4	40287346	40407234	420	54	3.2973	0.00048816	0.00010401	0.044726	+	CHRNA9
19	9846	11	77876336	78178868	508	35	3.6458	0.00013329	0.00013046	0.010106	-	GAB2
20	11086	4	175789509	175949331	546	43	3.2559	0.00056517	0.00013194	0.019055	+	ADAM29
21	25802	1	201815584	201965716	364	54	3.6742	0.0001193	0.00013699	0.0031644	-	LMOD1
22	127943	1	161641598	161747933	368	52	3.2841	0.00051159	0.00013916	0.011923	+	FCRLB
23	797	11	15045143	15153888	200	24	3.357	0.00039392	0.00014408	0.032708	+	CALCB
24	2203	9	97315415	97452531	493	47	3.4511	0.00027913	0.00015997	0.012088	-	FBP1
25	10440	1	201874619	201989789	358	55	3.6935	0.00011058	0.00016048	0.0027729	+	TIMM17A
26	399	4	40142631	40296384	430	83	3.4724	0.00025791	0.00016061	0.0078139	+	RHOH
27	5599	10	49464682	49697403	487	46	3.5589	0.00018622	0.00017977	0.0050523	+	MAPK8
28	29969	7	114512169	114709971	373	49	3.7852	7.6795e-05	0.00019504	0.0020263	+	MDFIC
29	115701	18	56098479	56346189	774	92	3.7355	9.3672e-05	0.00021865	0.0021611	-	ALPK2
30	125476	18	32982194	33128110	282	51	3.5889	0.00016606	0.00021867	0.0076409	-	INO80C
31	257194	1	71818625	72798533	1745	125	3.5953	0.00016203	0.0002288	0.0027635	-	NEGR1
32	84824	1	161626762	161734142	332	49	3.2639	0.00054953	0.00024008	0.0088887	+	FCRLA
33	64231	11	59889080	60002139	257	24	3.7817	7.7894e-05	0.00024574	0.0015026	-	MS4A6A
34	26470	16	29832480	29960585	105	13	2.9258	0.0017176	0.0002652	0.035973	-	SEZ6L2
35	79731	11	78097007	78335909	392	28	3.5535	0.00019011	0.00026652	0.0042551	-	NARS2
36	8789	9	97271002	97406075	533	38	3.2873	0.00050581	0.00028138	0.011548	-	FBP2
37	9262	2	196948307	197086336	408	34	3.2965	0.00048957	0.00029343	0.041787	-	STK17B
38	8603	4	2577159	2784302	508	48	3.3999	0.00033709	0.00029577	0.0083817	+	FAM193A
39	4210	16	3242028	3356648	222	30	3.1951	0.0006989	0.00030843	0.018623	-	MEFV
40	6051	1	201901766	202025275	351	55	3.505	0.00022831	0.00033775	0.0037202	+	RNPEP
41	10741	20	18417184	18527899	322	34	3.2961	0.00049026	0.00034556	0.006096	-	RBBP9
42	3631	2	99011321	99257496	329	28	3.5225	0.00021376	0.00035385	0.0059175	+	INPP4A
43	5813	5	139443708	139549001	100	19	3.0313	0.0012177	0.00035775	0.025721	+	PURA
44	4588	11	962824	1086706	243	26	3.0876	0.0010088	0.00041072	0.013396	-	MUC6
45	253982	16	29862147	29981181	94	13	2.9676	0.0015007	0.00041781	0.032507	+	ASPHD1
46	2206	11	59805734	59915940	247	28	3.7222	9.8762e-05	0.00041959	0.0015289	+	MS4A2
47	10621	20	18398033	18515287	335	36	3.2545	0.00056806	0.00042124	0.0060251	+	POLR3F
48	79155	4	2693387	2808103	407	48	3.2854	0.00050914	0.00044136	0.0066597	-	TNIP2
49	1040	4	85454057	85622493	302	28	3.5075	0.00022618	0.00044307	0.0063964	+	CDS1
50	1999	1	201929647	202036316	333	52	3.5011	0.00023165	0.00044358	0.0032053	+	ELF3
51	135112	6	126052307	126303176	368	44	3.1029	0.00095831	0.00045573	0.023161	+	NCOA7
52	492311	5	139455521	139558391	103	19	2.9834	0.0014251	0.00046275	0.026612	+	IGIP
53	2213	1	161582905	161698444	208	38	3.1774	0.00074313	0.00046857	0.0061265	+	FCGR2B
54	11266	1	161669558	161776952	352	46	3.1072	0.0009442	0.00049076	0.0082574	+	DUSP12
55	10483	20	18438188	18592059	464	36	3.2774	0.00052392	0.00050666	0.0056035	+	SEC23B
56	5305	10	22773766	23053503	675	55	3.3469	0.00040853	0.00051427	0.0029962	-	PIP4K2A
57	253980	16	29867657	29987545	100	12	2.8956	0.0018923	0.00057235	0.033348	-	KCTD13
58	4261	16	10921055	11068840	388	62	3.107	0.00094513	0.00059305	0.014581	+	CIITA
59	4825	4	85364436	85469387	184	30	3.4527	0.00027751	0.00059933	0.0037119	-	NKX6-1
60	643680	11	59918726	60060575	335	32	3.4757	0.00025472	0.00061482	0.0023009	-	MS4A4E
61	4012	5	96221346	96415115	531	30	2.8607	0.0021137	0.0006228	0.037103	+	LNPEP
62	57480	6	150870999	151214801	1158	103	2.9859	0.0014138	0.00064367	0.028546	+	PLEKHG1
63	55316	17	48506190	48613336	252	39	2.677	0.0037141	0.00064438	0.1156	+	RSAD1
64	388553	19	46186515	46317376	216	33	2.9117	0.0017972	0.00066549	0.036649	+	BHMG1
65	51338	11	59998014	60126445	398	34	2.9935	0.0013791	0.00067466	0.038342	+	MS4A4A
66	5939	12	56865607	57044859	270	39	2.8584	0.0021288	0.00069126	0.036998	+	RBMS2
67	143244	10	81222357	81326196	241	14	3.6925	0.00011102	0.00073527	9.2706e-05	+	EIF5AL1
68	3786	8	133083105	133543004	1551	148	3.6174	0.00014877	0.00076984	0.001242	-	KCNQ3
69	6576	22	19113088	19216338	256	34	3.3649	0.0003828	0.00078271	0.0030604	-	SLC25A1
70	245802	11	60052355	60158441	334	32	2.7201	0.0032631	0.00082118	0.12411	+	MS4A6E
71	57558	11	77849858	77975757	248	33	2.8932	0.0019066	0.00083666	0.046333	+	USP35
72	3354	6	87597024	87776397	386	42	2.9495	0.0015916	0.00086509	0.022538	+	HTR1E
73	23348	13	99395741	99788660	1325	66	3.053	0.0011328	0.00088349	0.014003	-	DOCK9
74	493753	2	99165786	99274981	147	23	3.2369	0.00060415	0.0008866	0.0072464	-	COA5
75	1740	11	83116055	85388314	5636	256	3.1215	0.00089974	0.0010097	0.014971	-	DLG2
76	23607	6	47395482	47644999	642	42	3.7467	8.9593e-05	0.0010189	0.001215	+	CD2AP
77	84985	8	124144752	124272318	232	26	3.4881	0.00024327	0.0010355	0.0017966	+	FAM83A
78	101929747	5	96219784	96321855	296	16	2.9665	0.0015059	0.0010485	0.019668	-	LOC101929747
79	23266	1	82216082	82508107	803	72	3.132	0.00086804	0.0010581	0.0073755	+	ADGRL2
80	670	6	3068926	3203833	84	19	3.0476	0.0011535	0.0010714	0.0064358	+	BPHL
81	8453	10	35247479	35429570	375	23	2.9896	0.0013969	0.0011296	0.019453	-	CUL2
82	8435	12	53447274	53568323	247	34	2.719	0.0032737	0.0011944	0.057519	+	SOAT2
83	64167	5	96161644	96305420	525	35	2.7325	0.0031426	0.0012154	0.046576	+	ERAP2
84	1390	10	35365769	35551886	400	20	2.754	0.0029432	0.0012342	0.046258	+	CREM
85	3489	12	53441436	53546128	234	35	2.7104	0.0033597	0.0012558	0.057263	+	IGFBP6
86	29980	21	34887165	35011019	118	25	3.1103	0.00093443	0.0012917	0.005195	-	DONSON
87	28955	16	10972748	11086257	307	54	3.0076	0.0013166	0.0013081	0.010253	-	DEXI
88	9348	4	118905500	119229789	872	49	2.8071	0.0024998	0.0013252	0.033448	+	NDST3
89	286148	8	95682103	95856076	520	43	2.6847	0.0036296	0.0013462	0.044909	+	DPY19L4
90	55201	19	17780303	17895324	350	41	2.7241	0.0032235	0.0013493	0.035265	+	MAP1S
91	7874	16	8935951	9107341	526	61	2.4119	0.0079341	0.0013536	0.12245	-	USP7
92	400793	1	162298696	162406608	349	62	3.0402	0.001182	0.0013961	0.012117	+	C1orf226
93	401546	9	112911841	113020413	357	50	2.6968	0.0035001	0.0013987	0.032206	-	C9orf152
94	9946	21	34911647	35064160	146	30	3.0843	0.0010202	0.0014781	0.0036669	-	CRYZL1
95	57819	6	31715169	31824761	240	44	2.6836	0.0036417	0.0015223	0.04908	-	LSM2
96	3915	1	182942572	183164727	697	34	3.3606	0.00038893	0.0015267	0.004012	+	LAMC1
97	161	11	875809	1062245	417	31	2.7909	0.0026281	0.0015733	0.02609	+	AP2A2
98	10281	21	39376313	39543454	315	41	2.6247	0.0043363	0.0015887	0.070109	-	DSCR4
99	57214	15	81021712	81294112	623	91	2.6888	0.0035857	0.0016034	0.08452	+	CEMIP
100	165100	2	232407575	232508994	274	43	2.9543	0.0015668	0.0016179	0.014776	+	C2orf57
101	8724	6	108482712	108632478	215	25	3.0146	0.0012866	0.0016321	0.0050685	-	SNX3
102	55345	4	113410489	113608151	376	38	2.6153	0.0044575	0.0016702	0.081333	-	ZGRF1
103	1839	5	139662428	139776188	137	28	2.7328	0.0031398	0.0016747	0.034843	-	HBEGF
104	3062	6	54989071	55197538	637	59	3.1523	0.00081003	0.001689	0.0034544	+	HCRTR2
105	54845	8	95603364	95769694	506	45	2.6127	0.0044916	0.0016893	0.056984	+	ESRP1
106	54852	15	69541294	69749976	332	32	2.8901	0.0019256	0.0017115	0.015753	+	PAQR5
107	65249	19	13856258	13993068	174	20	3.4223	0.00031046	0.0017502	0.00046834	+	ZSWIM4
108	93594	8	124034920	124214393	484	52	3.174	0.00075187	0.0017593	0.0044535	+	TBC1D31
109	7441	22	22549200	22649926	379	43	2.407	0.0080418	0.0017938	0.089474	+	VPREB1
110	25972	2	99175032	99284978	158	24	3.0544	0.0011274	0.0017965	0.0083502	+	UNC50
111	2921	4	74852306	74954490	83	22	2.3067	0.010536	0.001809	0.20888	-	CXCL3
112	10979	14	53273989	53467856	373	37	2.591	0.0047854	0.0018655	0.061835	-	FERMT2
113	23403	19	46163887	46284151	193	32	2.3981	0.0082392	0.0018672	0.1046	-	FBXO46
114	51574	4	113508120	113628748	218	33	2.6746	0.0037409	0.0018735	0.062319	+	LARP7
115	117157	1	162315056	162431928	341	54	3.0074	0.0013175	0.0018959	0.009494	-	SH2D1B
116	93986	7	113676365	114383827	1048	79	2.4978	0.006249	0.0019023	0.081147	+	FOXP2
117	23149	19	17808527	17949377	393	56	2.6634	0.0038675	0.001945	0.062366	+	FCHO1
118	6047	4	2420795	2567586	346	46	2.7578	0.0029092	0.0019507	0.025697	+	RNF4
119	3303	6	31732952	31835719	226	41	2.5533	0.0053355	0.0019827	0.062351	+	HSPA1A
120	51380	12	53501447	53625422	237	31	2.6302	0.0042663	0.0019956	0.055266	-	CSAD
121	284680	1	162293515	162397017	346	61	3.0147	0.001286	0.0020052	0.0094388	-	C1orf111
122	54586	9	27234652	27347137	412	53	3.0865	0.0010125	0.0020209	0.0062346	-	EQTN
123	55315	10	73029010	73173147	497	69	2.7424	0.0030494	0.0020233	0.027011	+	SLC29A3
124	124152	16	19677778	19919087	458	43	3.1107	0.00093334	0.0020296	0.006824	+	IQCK
125	7407	6	31695295	31813712	249	41	2.6524	0.0039961	0.0020345	0.047373	-	VARS
126	64083	5	32074817	32224425	305	44	3.016	0.0012805	0.0020614	0.0073403	-	GOLPH3
127	3918	1	183097952	183264262	428	41	3.1088	0.00093912	0.0020706	0.0037453	+	LAMC2
128	3572	5	55180923	55340821	305	44	3.1685	0.00076614	0.0021218	0.0066008	-	IL6ST
129	259232	13	101656130	102118813	1485	110	3.2026	0.00068099	0.0021613	0.0026949	-	NALCN
130	10316	2	232337871	232445182	318	31	2.8626	0.0021007	0.0022203	0.0086477	-	NMUR1
131	221223	16	55830066	56039943	567	57	2.5188	0.0058884	0.0022823	0.087268	-	CES5A
132	729238	10	81265608	81370177	22	4	3.152	0.00081074	0.0022955	0.00068772	-	SFTPA2
133	219654	10	81092081	81255383	622	71	3.5139	0.00022079	0.0023604	0.001031	-	ZCCHC24
134	124446	16	29923351	30034373	108	9	2.6606	0.0039	0.0024038	0.025257	+	TMEM219
135	4059	19	45262316	45374678	266	38	3.2108	0.00066184	0.0024207	0.0012302	+	BCAM
136	11320	2	99185569	99397589	371	43	2.6867	0.0036076	0.0024451	0.02938	-	MGAT4A
137	152137	3	190996874	191166459	692	52	2.9377	0.0016535	0.0024787	0.005611	+	CCDC50
138	3576	4	74556223	74659433	208	24	2.6998	0.0034696	0.0025292	0.059816	+	CXCL8
139	10423	16	29819678	29924801	77	10	2.3866	0.0085031	0.0025442	0.054031	-	CDIPT
140	23493	6	126016211	126132415	172	21	2.5746	0.0050176	0.0025581	0.05213	+	HEY2
141	2928	22	19086504	19187796	272	36	3.1147	0.00092079	0.0026203	0.0034235	-	GSC2
142	7752	16	3222325	3336221	255	34	2.7848	0.0026784	0.0026276	0.025571	-	ZNF200
143	126410	19	15569336	15713128	466	69	2.3079	0.010503	0.0026534	0.13165	+	CYP4F22
144	3182	5	177581508	177688184	429	69	2.3952	0.0083061	0.0026611	0.074943	+	HNRNPAB
145	401137	4	70967793	71082326	382	46	3.2982	0.00048649	0.0026865	0.0010356	+	PRR27
146	23624	19	45231126	45353903	265	44	3.2646	0.00054806	0.0027099	0.0013227	+	CBLC
147	10096	2	114597511	114769131	517	38	2.8742	0.0020252	0.0027609	0.01235	+	ACTR3
148	147912	19	46218043	46322497	164	24	2.7466	0.0030106	0.0027662	0.024213	-	SIX5
149	9725	1	225983233	226120420	404	55	2.3019	0.010671	0.0028576	0.14215	-	TMEM63A
150	7280	6	3103900	3207783	66	12	2.774	0.0027688	0.0029038	0.0059893	-	TUBB2A
151	6452	4	2744750	2892823	429	64	2.9325	0.0016812	0.0029197	0.0081898	+	SH3BP2
152	6352	17	34148495	34257377	244	14	2.9434	0.0016232	0.0029484	0.0048896	-	CCL5
153	167	6	49751970	49894809	311	34	2.1852	0.014437	0.0029971	0.27623	-	CRISP1
154	143241	10	82045858	82166523	372	27	2.6121	0.0044996	0.0030108	0.052876	-	DYDC1
155	387680	10	51777610	51943269	62	7	2.7752	0.0027583	0.0030208	0.0083446	+	FAM21A
156	222662	6	35723071	35841852	294	30	2.223	0.013107	0.0030258	0.21043	+	LHFPL5
157	117145	1	151793342	151932361	334	34	3.3187	0.00045224	0.0030361	0.002275	-	THEM4
158	85007	5	177585475	177709823	488	76	2.3493	0.0094047	0.0030957	0.080014	-	PHYKPL
159	58489	15	80937635	81097962	436	58	2.5443	0.0054754	0.0031039	0.045308	+	ABHD17C
160	246269	6	108566098	108896751	477	43	2.6839	0.003638	0.003119	0.013247	+	LACE1
161	100191040	1	151760339	151863033	222	36	3.2071	0.00067034	0.0031266	0.0018752	-	C2CD4D
162	7743	9	104111136	104222942	358	37	2.5304	0.005697	0.0031289	0.086606	+	ZNF189
163	80221	17	48453519	48602200	365	47	2.2467	0.012331	0.0031459	0.13122	+	ACSF2
164	51809	4	174039904	174295118	431	50	2.535	0.0056226	0.0031899	0.051518	+	GALNT7
165	114882	12	76695577	77003589	532	43	3.0307	0.0012197	0.0031906	0.0071639	-	OSBPL8
166	84073	17	48535745	48658863	299	51	2.2153	0.013368	0.0031959	0.15534	+	MYCBPAP
167	79930	5	176878905	176987490	37	6	2.7303	0.0031636	0.0032478	0.011327	-	DOK3
168	80758	5	176823796	176933287	84	12	2.6583	0.0039264	0.0032725	0.025548	+	PRR7
169	1627	5	176833613	176950694	80	11	2.6733	0.0037552	0.0033087	0.021896	-	DBN1
170	84332	10	82054501	82177829	383	27	2.566	0.0051447	0.0033156	0.045661	+	DYDC2
171	8322	11	86606717	86716440	332	49	3.2567	0.00056357	0.0033636	0.0042283	-	FZD4
172	9936	2	160575139	160705115	458	40	2.5477	0.0054217	0.003383	0.035828	-	CD302
173	8614	5	172691726	172806506	332	54	2.4333	0.0074816	0.003454	0.063191	-	STC2
174	55033	7	30000199	30116417	203	21	2.4707	0.006743	0.0035065	0.084633	-	FKBP14
175	58494	21	26961594	27139874	435	39	2.2769	0.011395	0.0035189	0.10402	+	JAM2
176	29901	11	64758376	64862300	209	33	2.0481	0.020274	0.0035191	0.28026	+	SAC3D1
177	84293	10	82117585	82242753	446	36	2.3395	0.009654	0.0035371	0.084388	+	FAM213A
178	7940	6	31503956	31606686	408	59	2.8248	0.0023656	0.0035383	0.010646	+	LST1
179	932	11	59774101	59888588	271	36	3.1872	0.0007184	0.0035557	0.0017717	+	MS4A3
180	9260	5	176860395	176974606	57	6	2.7372	0.0030983	0.0035587	0.011835	-	PDLIM7
181	5626	5	177369236	177473243	215	29	2.3103	0.010436	0.0035768	0.093851	-	PROP1
182	121278	12	72282626	72476221	442	44	2.502	0.0061752	0.0035868	0.045568	+	TPH2
183	54534	9	104101096	104210919	346	35	2.501	0.0061919	0.0035941	0.08555	-	MRPL50
184	9344	16	29935188	30053583	107	8	2.5918	0.004774	0.0036126	0.02063	+	TAOK2
185	51704	16	19820293	19947049	262	32	2.8945	0.0018991	0.0036295	0.0060449	-	GPRC5B
186	414189	10	51682867	51820259	57	7	2.6949	0.0035206	0.0036825	0.010158	+	AGAP6
187	284486	1	151768220	151876173	225	35	3.1807	0.00073448	0.0037054	0.0020643	-	THEM5
188	6651	21	34865344	34999820	142	23	2.9245	0.0017253	0.0037124	0.0053001	+	SON
189	6169	17	72149795	72256019	256	50	2.2094	0.013574	0.0037352	0.16027	+	RPL38
190	63973	4	113384672	113487328	234	25	2.4932	0.0063301	0.0037571	0.052504	-	NEUROG2
191	10004	11	64762295	64876009	222	33	2.0318	0.021087	0.0037652	0.29292	-	NAALADL1
192	1208	6	35712759	35815121	261	34	2.0919	0.018225	0.0038393	0.2668	-	CLPS
193	23107	5	71465236	71666084	261	38	3.1358	0.00085701	0.0038555	0.0045792	-	MRPS27
194	29907	11	64744880	64858044	223	34	2.0238	0.021493	0.0038985	0.28926	+	SNX15
195	101927503	11	999884	1105749	178	27	2.1714	0.014949	0.0039244	0.13352	+	LOC101927503
196	54148	21	26907968	27029801	343	26	2.4184	0.0077935	0.0039432	0.049278	-	MRPL39
197	8871	6	158352888	158570208	646	73	2.7913	0.0026251	0.0040163	0.0089814	+	SYNJ2
198	259197	6	31506660	31610762	402	59	2.8101	0.0024762	0.0040938	0.0098836	-	NCR3
199	2870	5	176803687	176919850	101	16	2.5719	0.0050565	0.0040956	0.030405	+	GRK6
200	3305	6	31727396	31840093	263	43	2.3885	0.0084588	0.0040978	0.055478	-	HSPA1L
201	4050	6	31498335	31600202	401	59	2.8413	0.0022462	0.0041495	0.0090417	-	LTB
202	55208	13	114060134	114195024	450	28	2.2803	0.011296	0.0042183	0.13137	-	DCUN1D2
203	92960	19	7491756	7605884	339	36	2.1398	0.016184	0.0042511	0.19042	-	PEX11G
204	27165	12	56814728	56932198	211	26	2.5488	0.0054047	0.004274	0.022353	-	GLS2
205	100506736	17	33751942	33864758	302	54	2.5681	0.0051131	0.0043275	0.026903	-	SLFN12L
206	85021	6	139175620	139359419	417	46	2.371	0.0088705	0.0043752	0.085278	-	REPS1
207	11129	19	45492298	45624214	258	37	2.1682	0.015073	0.0043934	0.18701	+	CLASRP
208	152138	3	191128952	191229245	307	37	2.6264	0.0043147	0.004404	0.024526	+	PYDC2
209	80737	6	31683178	31795108	218	39	2.4254	0.0076456	0.0044487	0.066826	-	VWA7
210	402	11	64731585	64839657	237	33	1.9922	0.023173	0.0044512	0.29684	+	ARL2
211	9961	16	29781715	29909360	67	9	2.1014	0.017802	0.0045184	0.11432	+	MVP
212	414301	11	103857308	103959922	275	38	2.7076	0.0033889	0.0045228	0.011487	+	DDI1
213	55862	6	127559857	127715214	322	30	2.2682	0.011659	0.0045486	0.10203	-	ECHDC1
214	6453	21	34964706	35311609	551	84	2.56	0.0052339	0.0045572	0.023952	+	ITSN1
215	23130	11	64612004	64734722	220	24	2.5207	0.0058562	0.0046087	0.053852	-	ATG2A
216	23016	3	44967741	45104160	226	26	2.3886	0.0084557	0.0046422	0.051562	+	EXOSC7
217	51428	5	176888578	176993967	27	5	2.6458	0.0040748	0.0046617	0.013213	-	DDX41
218	199	6	31532969	31634798	341	53	2.2177	0.013288	0.0047147	0.092137	+	AIF1
219	113622	13	114026260	114157839	279	32	2.1967	0.01402	0.0047561	0.13979	-	ADPRHL1
220	402160	4	2370701	2514690	494	49	2.3146	0.010318	0.0047636	0.066168	+	CFAP99
221	7093	10	98074363	98323683	624	66	2.7237	0.0032278	0.004921	0.011462	-	TLL2
222	23122	3	33487737	33809705	528	46	2.2511	0.012189	0.0049468	0.075377	-	CLASP2
223	55863	11	85289617	85397583	201	26	2.3837	0.0085704	0.0049649	0.041284	+	TMEM126B
224	55667	9	19180763	19424137	597	51	2.3356	0.0097567	0.004982	0.097469	+	DENND4C
225	11176	12	56939380	57080600	209	35	2.2563	0.012027	0.0049951	0.075742	-	BAZ2A
226	400950	2	42112508	42230943	439	48	2.7564	0.0029218	0.0050233	0.013028	-	C2orf91
227	8187	10	44001792	44120066	379	42	2.3169	0.010255	0.0050395	0.095371	-	ZNF239
228	84725	7	30017977	30207961	417	43	2.12	0.017003	0.0050738	0.23816	+	PLEKHA8
229	124842	17	32857768	33016337	441	82	2.0029	0.022593	0.0051574	0.31039	+	TMEM132E
230	58475	11	60095949	60213427	331	34	2.2284	0.012926	0.0052892	0.11144	+	MS4A7
231	100507650	14	23657127	23793494	310	44	2.2644	0.011774	0.0052992	0.083066	+	RNF212B
232	4921	1	162552228	162806409	564	62	2.304	0.01061	0.0053134	0.066899	+	DDR2
233	57476	11	123275191	123548478	884	134	2.2151	0.013378	0.0053195	0.17692	+	GRAMD1B
234	8218	22	19116986	19329247	511	46	2.9025	0.0018509	0.0053321	0.004689	-	CLTCL1
235	340204	6	35698831	35805841	257	37	1.9645	0.024738	0.0053393	0.30935	+	CLPSL1
236	7124	6	31493344	31596113	419	57	2.7713	0.0027913	0.0054079	0.0099996	+	TNF
237	1261	2	98912618	99065064	358	45	2.9785	0.0014484	0.0054305	0.0050102	+	CNGA3
238	66005	11	817859	965058	259	26	2.4835	0.0065054	0.0054323	0.044957	-	CHID1
239	6732	6	35750811	35938957	343	29	2.3633	0.0090569	0.0054374	0.076932	-	SRPK1
240	5201	5	139574635	139732689	251	26	2.486	0.0064594	0.0054618	0.034238	-	PFDN1
241	10938	11	64570206	64697181	211	32	2.3677	0.0089487	0.0054943	0.067879	-	EHD1
242	8479	16	29953642	30057417	97	8	2.4063	0.0080572	0.0056538	0.030347	-	HIRIP3
243	10127	16	3283380	3401401	215	35	2.4593	0.006961	0.0056765	0.035695	+	ZNF263
244	283209	11	73991361	74159502	397	36	2.1011	0.017816	0.0056773	0.15109	-	PGM2L1
245	5923	15	79202289	79433215	628	85	3.033	0.0012107	0.0057381	0.0022137	-	RASGRF1
246	401251	6	31680773	31782627	206	37	2.3917	0.0083864	0.0058422	0.062727	+	SAPCD1
247	2052	1	225947797	226083264	441	58	2.0882	0.01839	0.0058571	0.1331	+	EPHX1
248	8030	10	61498505	61716414	763	57	2.4597	0.0069518	0.0059033	0.038168	-	CCDC6
249	101929163	6	32321234	32423967	16	2	2.4881	0.0064209	0.0059383	0.0081213	+	LOC101929163
250	64844	2	160518980	160675084	523	37	2.6072	0.0045644	0.0059429	0.025045	+	MARCH7
251	283463	12	40741677	41014632	1266	55	2.8851	0.0019565	0.0060024	0.0073087	+	MUC19
252	56244	6	32312513	32424900	18	3	2.5245	0.0057939	0.0060389	0.011134	-	BTNL2
253	256957	17	34131898	34245895	250	15	2.5659	0.0051462	0.0060876	0.014002	-	HEATR9
254	9069	7	89982648	90095268	336	37	2.6613	0.0038916	0.0061332	0.019543	+	CLDN12
255	116071	11	64705417	64815060	247	28	1.9646	0.024727	0.0061498	0.25422	-	BATF2
256	8492	4	119151193	119324053	455	41	2.3924	0.0083691	0.0061701	0.032781	-	PRSS12
257	374877	19	7512445	7623336	311	47	1.9527	0.02543	0.0061732	0.22995	+	C19orf45
258	57470	1	3646784	3763068	474	38	2.2936	0.010908	0.0062227	0.047543	-	LRRC47
259	283899	16	29957485	30067112	101	8	2.272	0.011543	0.0062404	0.055243	+	INO80E
260	5603	6	36048261	36162301	177	31	2.7578	0.0029094	0.0065209	0.0053671	+	MAPK13
261	55002	13	114095308	114254544	542	27	2.1489	0.015821	0.0065382	0.12847	+	TMCO3
262	221687	6	13874677	14030240	338	39	2.1889	0.014301	0.0065517	0.11114	+	RNF182
263	730112	9	35511827	35613896	153	26	2.2654	0.011745	0.0066383	0.074348	-	FAM166B
264	1101	17	48491853	48597242	217	36	2.0858	0.018497	0.006699	0.11915	-	CHAD
265	135398	6	49468113	49573166	274	36	1.924	0.027177	0.0068009	0.2175	+	C6orf141
266	284349	19	44281445	44403050	367	33	2.4727	0.006705	0.0068359	0.039785	+	ZNF283
267	1760	19	46222975	46335815	216	26	2.5257	0.0057739	0.0068864	0.027852	-	DMPK
268	81847	6	127537827	127659707	244	31	1.9715	0.024333	0.0069069	0.26446	+	RNF146
269	55651	5	177526464	177630961	342	50	2.2626	0.011831	0.0069467	0.05928	-	NHP2
270	8448	16	29966835	30073424	94	7	2.2943	0.010886	0.0069478	0.040859	-	DOC2A
271	120406	11	114499200	114629357	338	37	2.6143	0.0044702	0.006965	0.008931	+	NXPE2
272	5291	3	138321540	138603780	377	29	2.0217	0.021602	0.0069869	0.20846	-	PIK3CB
273	5918	3	158364892	158500642	392	34	2.0531	0.020031	0.0070225	0.16015	-	RARRES1
274	64777	5	177508002	177625567	374	53	2.2941	0.010892	0.0070452	0.046741	+	RMND5B
275	22926	1	161686034	161983860	806	64	2.9137	0.0017856	0.0070659	0.0045128	+	ATF6
276	55179	3	138277542	138402218	172	24	2.0986	0.017926	0.0070728	0.14142	+	FAIM
277	100463487	6	62234008	62334534	517	25	2.9421	0.00163	0.007139	0.0042465	+	MTRNR2L9
278	3304	6	31739964	31848032	265	45	2.2015	0.013852	0.0071481	0.070025	+	HSPA1B
279	55567	16	20894476	21220762	691	68	1.7945	0.036369	0.0072188	0.35089	-	DNAH3
280	400591	17	32851142	32956388	275	46	2.0151	0.021947	0.0073157	0.16449	-	C17orf102
281	146378	16	29984655	30086023	81	7	2.2338	0.012748	0.0073904	0.047185	+	C16orf92
282	100507027	10	61446748	61563203	323	45	2.4573	0.0069985	0.0074976	0.035448	-	MRLN
283	79447	16	29777528	29883816	54	6	2.0547	0.019956	0.0075608	0.08378	+	PAGR1
284	164127	1	223516715	223618812	219	21	2.3744	0.008789	0.0075834	0.028994	+	CCDC185
285	5516	8	30593126	30720352	264	27	1.9936	0.023097	0.007677	0.17933	-	PPP2CB
286	54540	5	176896790	177031548	15	4	2.3657	0.0089974	0.0077004	0.021799	-	FAM193B
287	51304	3	44906753	45067674	271	32	2.184	0.014481	0.0077231	0.072658	-	ZDHHC3
288	85865	7	89925341	90070769	396	36	2.6436	0.004101	0.0077991	0.019794	+	GTPBP10
289	83637	7	44738168	44859480	242	40	1.834	0.03333	0.0078972	0.32721	+	ZMIZ2
290	4049	6	31489876	31592101	432	57	2.7218	0.0032464	0.0079481	0.0091581	+	LTA
291	83723	16	29985748	30114338	94	8	2.1892	0.014291	0.0079678	0.049802	-	FAM57B
292	130013	2	135545994	135709604	282	22	2.6099	0.004529	0.0079695	0.011124	+	ACMSD
293	169693	9	71101496	71205783	203	35	2.7158	0.0033061	0.0081023	0.0050834	-	TMEM252
294	55	3	131986211	132137146	545	47	2.5749	0.0050129	0.0081108	0.035142	+	ACPP
295	81615	2	135163330	135528219	889	78	2.5133	0.0059811	0.0081185	0.032734	-	TMEM163
296	79810	5	71566200	71706544	189	30	2.9288	0.0017011	0.0082091	0.004847	+	PTCD2
297	115749	12	64610763	64834345	445	42	1.8215	0.034267	0.0083063	0.27646	-	C12orf56
298	10391	15	68801614	69070145	716	85	2.7299	0.0031676	0.0083911	0.010988	+	CORO2B
299	93377	10	98052973	98169092	343	35	2.7545	0.0029391	0.008406	0.0063772	-	OPALIN
300	27109	14	50728256	50852359	254	24	2.1367	0.016311	0.0084773	0.093014	+	ATP5S
301	84233	11	85308963	85417597	181	27	2.2355	0.012691	0.0085523	0.045233	+	TMEM126A
302	8726	11	85905586	86039785	287	30	2.1561	0.015538	0.0085746	0.075477	+	EED
303	340168	6	74012785	74113999	237	41	2.2503	0.012215	0.0085959	0.053749	-	DPPA5
304	122704	14	23249088	23354246	292	48	2.4462	0.0072181	0.0086572	0.035624	+	MRPL52
305	56925	3	158334203	158440482	333	23	2.09	0.018307	0.008666	0.10612	-	LXN
306	26123	10	97373153	97503900	351	32	2.8264	0.0023539	0.0087031	0.0045212	-	TCTN3
307	440044	11	64931311	65060579	191	27	2.0075	0.02235	0.0087693	0.12085	+	SLC22A20
308	1508	8	11650033	11775646	581	53	1.8092	0.035213	0.0089165	0.21345	-	CTSB
309	65997	4	53678495	53783002	214	26	2.0524	0.020063	0.0089198	0.098826	+	RASL11B
310	11024	19	55055041	55163846	502	36	2.1823	0.014542	0.0090511	0.059852	+	LILRA1
311	9214	1	207026630	207145378	190	29	2.0534	0.020019	0.0090533	0.14287	-	FCMR
312	8111	14	91648876	91780898	337	59	2.5478	0.0054209	0.0091552	0.022182	-	GPR68
313	79828	2	172123912	172341312	476	46	2.1201	0.016998	0.0092771	0.10438	-	METTL8
314	81619	10	82164038	82332394	433	47	2.1121	0.017339	0.0092772	0.076577	+	TSPAN14
315	387755	11	15083970	15318754	627	85	2.0554	0.019919	0.0092952	0.13277	+	INSC
316	5526	11	64642143	64751950	204	21	2.437	0.0074058	0.0092957	0.036054	+	PPP2R5B
317	200315	22	39298755	39409189	174	25	1.8737	0.030483	0.009297	0.21121	+	APOBEC3A
318	130502	2	20046514	20151747	280	45	2.1395	0.016199	0.0093302	0.092178	-	TTC32
319	6550	5	423298	574549	442	38	2.643	0.0041084	0.0093966	0.0082212	-	SLC9A3
320	10168	3	44616511	44739963	133	20	2.3171	0.010249	0.0094863	0.034948	+	ZNF197
321	221938	7	4881876	5048844	586	68	1.9391	0.026246	0.0096606	0.12598	-	MMD2
322	342618	17	33824728	33936783	331	42	2.3994	0.0082114	0.0097095	0.024029	-	SLFN14
323	389383	6	35694343	35797329	244	38	1.7913	0.036623	0.0097426	0.29646	+	CLPSL2
324	8975	3	179320933	179557189	483	73	2.0439	0.020482	0.0098319	0.13639	+	USP13
325	1232	3	46233872	46358197	351	26	1.7123	0.043423	0.0098691	0.32207	+	CCR3
326	10052	17	42825816	42958179	276	36	1.7476	0.040267	0.0098727	0.27639	-	GJC1
327	283208	11	73908532	74072699	326	34	1.8636	0.031189	0.0098794	0.22309	-	P4HA3
328	64841	14	53191911	53308386	159	20	3.2348	0.00060862	0.0099233	0.00085379	-	GNPNAT1
329	7916	6	31538450	31655554	366	54	2.0543	0.019972	0.0099325	0.086761	+	PRRC2A
330	8516	10	15507711	15812328	927	78	2.1234	0.016859	0.01015	0.091952	-	ITGA8
331	170589	11	64651943	64753360	195	20	2.3686	0.0089267	0.010189	0.045436	-	GPHA2
332	84164	22	30134597	30284293	351	31	3.3311	0.00043249	0.010207	0.00036691	-	ASCC2
333	7335	20	48647661	48782496	267	39	1.7068	0.043932	0.010229	0.40263	-	UBE2V1
333	7993	8	30551690	30674522	293	28	1.8539	0.031878	0.010229	0.24418	+	UBXN8
335	283129	11	64655702	64789565	258	26	2.2413	0.012504	0.010275	0.06751	-	C11orf85
336	79852	19	15287730	15393858	110	27	2.3862	0.0085124	0.010283	0.02613	-	EPHX3
337	7123	3	45017759	45127563	262	31	2.1307	0.016557	0.010297	0.05863	+	CLEC3B
338	57594	14	23692844	23812862	260	40	2.1436	0.016031	0.010375	0.076576	-	HOMEZ
339	23649	11	64979432	65115088	166	24	1.8326	0.033432	0.010483	0.2558	+	POLA2
340	50854	6	31752693	31857541	265	44	2.1143	0.017246	0.010531	0.066264	+	C6orf48
341	8814	14	50746122	50933179	367	41	1.9627	0.024842	0.010548	0.16304	-	CDKL1
342	1230	3	46193200	46299832	231	19	1.9335	0.026585	0.010583	0.14748	-	CCR1
343	10859	19	55078384	55199007	532	46	2.096	0.018041	0.010683	0.094589	+	LILRB1
344	84933	8	124182196	124303656	150	21	2.7279	0.0031873	0.0107	0.0071312	-	C8orf76
345	55718	16	22258696	22396424	104	18	2.4374	0.0073957	0.010723	0.020278	+	POLR3E
346	11006	19	55124271	55231810	450	61	2.6367	0.0041852	0.010735	0.010457	+	LILRB4
347	162979	19	45524758	45629688	209	27	1.796	0.036245	0.010742	0.24601	-	ZNF296
348	7584	3	44640108	44752283	119	20	2.2904	0.010999	0.010759	0.031974	+	ZNF35
349	2709	1	35170648	35274113	315	56	2.1807	0.014603	0.010791	0.041767	+	GJB5
350	84418	5	139504653	139673374	266	21	2.3842	0.0085592	0.010815	0.026306	+	CYSTM1
351	55343	11	45775623	45884568	310	38	2.4372	0.0074006	0.01082	0.013697	+	SLC35C1
351	149345	1	201807797	201911715	186	28	1.9188	0.027508	0.01082	0.14704	+	SHISA4
353	100526664	2	160575139	160811267	710	57	2.1815	0.014573	0.010823	0.055167	-	LY75-CD302
354	100130539	10	44738198	44840097	330	35	1.9647	0.024725	0.010841	0.12942	+	C10orf142
355	9047	1	156726035	156836640	241	32	1.7791	0.037609	0.010856	0.22895	-	SH2D2A
356	101927216	13	80566827	80674465	246	50	2.366	0.0089901	0.010907	0.028817	-	LOC101927216
357	400506	16	19667673	19779726	226	28	1.9225	0.027274	0.010961	0.16333	-	KNOP1
358	11027	19	55034469	55149027	529	44	2.0351	0.020918	0.010973	0.10218	+	LILRA2
359	5478	7	44786241	44892716	220	27	1.9874	0.023438	0.010974	0.14242	+	PPIA
360	91151	16	3298808	3405439	188	32	2.2327	0.012785	0.011185	0.044541	-	TIGD7
361	342908	19	44326515	44438116	299	26	1.97	0.024417	0.011212	0.19043	-	ZNF404
362	144577	12	64530098	64666076	208	30	1.8529	0.031951	0.011229	0.16151	-	C12orf66
363	64064	1	40185197	40287020	270	35	2.065	0.019464	0.011248	0.11347	-	OXCT2
364	284611	1	109052653	109231949	284	28	1.9022	0.028571	0.011263	0.17345	+	FAM102B
365	54714	8	87536163	87805903	744	80	2.0254	0.021415	0.011299	0.13119	-	CNGB3
366	387694	10	82247658	82456316	636	90	1.883	0.029849	0.011388	0.15689	+	SH2D4B
367	2587	18	74912008	75032098	703	66	2.4576	0.006994	0.011418	0.016789	+	GALR1
368	5284	1	207051867	207169814	193	25	1.9522	0.025458	0.011514	0.1302	-	PIGR
369	8148	17	34086459	34224246	255	19	2.3005	0.010709	0.011552	0.031195	+	TAF15
370	55705	1	201748288	201903422	271	36	2.0033	0.022575	0.011571	0.10114	+	IPO9
371	148930	1	46961316	47066887	223	31	2.6949	0.00352	0.011573	0.0050765	-	KNCN
372	50839	12	10927945	11028868	178	32	1.8561	0.031723	0.011603	0.19082	-	TAS2R10
373	112476	16	29773409	29877202	46	5	2.0052	0.022472	0.011672	0.069963	+	PRRT2
374	56903	7	4847369	4951625	387	53	1.9601	0.024994	0.01168	0.096847	-	PAPOLB
375	201299	17	34195084	34307780	358	30	2.6049	0.0045948	0.011688	0.0081785	-	RDM1
376	6406	20	43785605	43888414	236	19	2.3291	0.0099257	0.011816	0.061221	+	SEMG1
377	226	16	30014411	30131741	80	8	2.0657	0.019428	0.011997	0.054702	+	ALDOA
378	1791	10	98014085	98148321	364	36	2.7965	0.0025829	0.012009	0.0041526	+	DNTT
379	22974	20	30276904	30439605	262	24	1.8899	0.029388	0.01205	0.21267	+	TPX2
380	4992	16	3204247	3305185	264	34	2.4373	0.0073977	0.012187	0.025915	+	OR1F1
381	171392	19	23785583	23920036	210	20	2.0304	0.021157	0.01221	0.073013	-	ZNF675
382	148423	1	85665636	85775355	318	43	2.1421	0.016093	0.012306	0.033787	-	C1orf52
383	127534	1	35175342	35279325	309	55	2.1931	0.01415	0.012331	0.034585	+	GJB4
384	389207	4	42845283	43082675	883	55	2.6369	0.0041839	0.01241	0.0064439	+	GRXCR1
385	101929536	1	40204654	40305843	286	34	2.1082	0.017509	0.012413	0.088518	+	LOC101929536
386	282966	10	50837684	50966956	365	38	1.5408	0.06168	0.012451	0.54578	+	C10orf53
387	165829	3	119834328	120053921	618	50	2.0428	0.020538	0.012496	0.11062	-	GPR156
388	8915	1	85681459	85792604	339	46	2.1545	0.015601	0.012597	0.033173	-	BCL10
389	10331	19	17855919	17974385	299	55	2.2749	0.011455	0.012651	0.048714	+	B3GNT3
390	4439	6	31657725	31780455	250	40	2.1172	0.017122	0.012677	0.080059	+	MSH5
391	4185	17	42786405	42909214	214	32	1.5931	0.05557	0.012733	0.33468	+	ADAM11
392	84253	9	129936750	130205828	395	40	1.6016	0.054624	0.012754	0.44404	+	GARNL3
393	168850	7	126960097	127082778	344	34	1.7615	0.039079	0.012756	0.219	-	ZNF800
394	160518	12	31485157	31793952	1016	46	2.0835	0.018604	0.012795	0.070463	-	DENND5B
395	58487	11	85318608	85426182	176	27	2.1309	0.016551	0.012803	0.046558	-	CREBZF
396	10714	11	74253575	74430386	491	52	2.7859	0.0026686	0.012838	0.0045873	+	POLD3
397	92162	17	7708181	7809417	164	33	1.8423	0.032716	0.01285	0.18391	+	TMEM88
398	94239	7	44816488	44937725	251	27	1.9517	0.025489	0.012858	0.15714	-	H2AFV
399	3614	7	127982331	128100045	304	41	2.2409	0.012517	0.013037	0.032728	-	IMPDH1
400	6928	17	35996434	36155096	348	81	1.8379	0.033041	0.013051	0.18962	-	HNF1B
401	85476	3	158312286	158460361	472	30	1.8942	0.029101	0.013055	0.13105	+	GFM1
402	9731	1	3678645	3823797	682	49	2.0876	0.018418	0.013073	0.065953	-	CEP104
403	6374	4	74811359	74914446	134	21	1.8769	0.030266	0.013152	0.18358	-	CXCL5
404	81848	5	141639992	141754620	314	34	1.9047	0.028412	0.013163	0.11926	-	SPRY4
405	374470	12	103581369	103939788	772	72	2.969	0.0014937	0.013167	0.001381	-	C12orf42
406	283337	12	53524535	53634654	174	30	2.102	0.017779	0.013207	0.077133	+	ZNF740
407	51501	11	85963253	86106985	385	38	2.3431	0.0095629	0.013236	0.021571	+	C11orf73
407	168417	7	63638852	63777309	625	43	1.8837	0.029803	0.013236	0.13124	+	ZNF679
409	901	4	78028357	78141213	318	39	2.0993	0.017893	0.013242	0.045058	+	CCNG2
410	57732	4	2221324	2470370	814	84	1.943	0.02601	0.013275	0.13595	-	ZFYVE28
411	85366	20	30357115	30472500	213	28	1.7697	0.038387	0.013389	0.24879	+	MYLK2
412	84316	17	7710003	7838608	218	38	1.773	0.038112	0.013453	0.20856	-	NAA38
413	83697	5	139689787	139804722	120	26	2.1217	0.016929	0.013475	0.051347	+	SLC4A9
414	570	9	104072699	104197287	417	39	2.0782	0.018845	0.013502	0.097881	-	BAAT
415	7596	19	44366776	44489411	325	30	2.7103	0.0033615	0.013508	0.0074441	-	ZNF45
416	124637	17	7711064	7815691	167	34	1.846	0.032448	0.013514	0.17513	+	CYB5D1
417	823	11	64898686	65029477	213	33	1.842	0.032735	0.013518	0.14552	+	CAPN1
418	6346	17	32637347	32740252	402	45	1.7462	0.040392	0.013528	0.24161	-	CCL1
419	26872	7	89733689	89844141	278	21	2.2131	0.013445	0.013547	0.038906	+	STEAP1
420	79760	19	45529024	45644782	233	29	1.7358	0.041303	0.013548	0.24749	+	GEMIN7
421	4117	6	10712956	10888788	328	53	1.5887	0.056065	0.01359	0.42645	-	MAK
422	4150	16	29767417	29872504	44	5	1.9268	0.027001	0.013656	0.083932	+	MAZ
423	4323	14	23255742	23366809	311	50	2.3352	0.0097659	0.013829	0.032609	+	MMP14
424	11009	1	207020630	207127484	157	28	1.9441	0.025939	0.013966	0.13575	+	IL24
425	6407	20	43800010	43903099	263	21	2.2936	0.010908	0.014025	0.058604	+	SEMG2
426	5546	1	156687274	156820609	295	35	1.6728	0.047187	0.014033	0.25461	+	PRCC
427	26035	15	69402921	69614546	396	33	2.3664	0.0089809	0.014048	0.020118	+	GLCE
428	6815	14	53146883	53291707	221	28	3.09	0.0010007	0.014053	0.0013105	+	STYX
429	55184	20	18314011	18497995	511	50	2.5598	0.005236	0.014106	0.0051725	-	DZANK1
430	25825	21	42489728	42704461	618	106	1.4523	0.073206	0.014119	0.60005	+	BACE2
431	406	11	13249325	13458813	523	59	1.9631	0.024814	0.01412	0.10869	+	ARNTL
432	768239	4	7382021	7486700	703	91	1.5996	0.054844	0.014205	0.384	-	PSAPL1
433	30833	17	73076320	73177890	235	30	1.7256	0.042208	0.014258	0.19591	-	NT5C
434	656	1	40173903	40304533	361	45	1.9749	0.02414	0.014445	0.12023	-	BMP8B
435	661	8	22052619	22158680	185	23	1.9825	0.02371	0.01449	0.089532	+	POLR3D
436	80174	17	42735976	42879637	225	31	1.6184	0.052787	0.014501	0.27237	+	DBF4B
437	5473	4	74802156	74903907	149	21	1.8855	0.029683	0.014534	0.16608	-	PPBP
438	79870	8	104102921	104292533	654	71	1.8253	0.033974	0.014607	0.1501	+	BAALC
439	3772	21	39551837	39725043	469	45	1.7565	0.039506	0.014667	0.22017	+	KCNJ15
440	113130	11	64783772	64901635	211	29	1.6139	0.053277	0.01471	0.32785	-	CDCA5
441	6363	9	34639567	34741274	223	33	2.1269	0.016713	0.014757	0.05823	-	CCL19
442	9448	2	102264165	102561152	459	46	1.9718	0.024314	0.014783	0.11204	+	MAP4K4
443	7166	11	17992084	18112354	208	20	1.9158	0.027694	0.014799	0.14395	-	TPH1
444	23135	17	7687521	7808118	203	39	1.7289	0.041915	0.014828	0.21978	+	KDM6B
445	23138	5	177490556	177603107	318	43	1.671	0.047363	0.014965	0.22187	+	N4BP3
446	389396	6	49417671	49545777	298	36	1.8813	0.029966	0.014984	0.136	+	GLYATL3
447	1677	1	3723845	3851993	520	42	2.1382	0.016252	0.015087	0.055921	+	DFFB
448	23552	9	90531356	90639695	149	18	2.6491	0.0040355	0.015104	0.00507	-	CDK20
449	4594	6	49348073	49481041	294	24	1.9893	0.023337	0.015148	0.074235	-	MUT
450	388588	1	3639352	3742546	378	39	1.5339	0.062529	0.01515	0.36214	+	SMIM1
451	2878	5	150349999	150458554	346	44	1.9379	0.02632	0.015171	0.10142	+	GPX3
452	10637	1	226023982	226126846	283	38	2.009	0.022267	0.015184	0.10139	-	LEFTY1
453	162998	19	9246270	9349493	312	35	1.4794	0.069514	0.01528	0.44034	+	OR7D2
454	58504	10	49604068	49914310	929	99	2.7039	0.0034261	0.015311	0.0055172	-	ARHGAP22
455	6387	10	44815601	44930545	468	57	1.758	0.03937	0.01539	0.19861	-	CXCL12
455	152273	3	14802247	15026072	720	74	1.6897	0.045544	0.01539	0.29569	+	FGD5
457	10221	8	126392563	126500647	179	31	2.2722	0.011537	0.015571	0.030506	+	TRIB1
458	113174	11	18051890	18177638	297	29	1.8287	0.033724	0.015581	0.2193	-	SAAL1
459	6097	1	151728547	151854348	279	38	2.9144	0.001782	0.015609	0.0020193	-	RORC
460	84947	6	158480536	158639312	448	45	2.6241	0.0043437	0.015631	0.0066155	-	SERAC1
461	57121	12	6678001	6795297	162	26	1.7918	0.036581	0.01571	0.17012	-	LPAR5
462	366	15	58380374	58528110	388	58	1.7658	0.038713	0.015717	0.16616	+	AQP9
463	400658	18	74157477	74260045	241	52	1.5781	0.057269	0.0158	0.36632	+	C18orf65
464	81033	17	61550695	61676338	173	29	1.9405	0.026162	0.015813	0.098495	+	KCNH6
465	10369	22	36906916	37148690	700	92	2.0373	0.020809	0.015885	0.087457	-	CACNG2
466	5196	4	74796542	74897841	157	20	1.8499	0.032165	0.015933	0.17392	-	PF4
467	10982	18	32506892	32773434	560	61	1.6933	0.045198	0.015943	0.25579	+	MAPRE2
468	170680	6	31055311	31157127	1077	52	2.5318	0.0056742	0.015954	0.0070583	-	PSORS1C2
469	6531	5	1342905	1495543	439	73	2.6286	0.0042873	0.01596	0.0067175	-	SLC6A3
470	3122	6	32357619	32462823	1	1	2.1449	0.01598	0.01598	0.01598	+	HLA-DRA
471	5832	10	97315686	97466759	481	43	2.5266	0.0057587	0.015981	0.0084848	-	ALDH18A1
472	54923	20	62317480	62420460	289	27	2.0258	0.021392	0.01601	0.061438	+	LIME1
473	3105	6	29860247	29963661	345	22	2.1395	0.016198	0.016037	0.031998	+	HLA-A
474	56731	20	62321211	62425403	294	27	2.0552	0.019929	0.016054	0.051622	+	SLC2A4RG
475	647087	7	135297221	135411160	338	36	1.6992	0.044643	0.016067	0.23811	+	C7orf73
476	5232	6	49703364	49805053	231	26	1.8324	0.033443	0.016098	0.11147	-	PGK2
477	636	12	32209713	32586567	1462	93	1.8081	0.035294	0.0161	0.16788	+	BICD1
478	10089	11	65310326	65413467	146	30	1.6505	0.049425	0.016137	0.25558	-	KCNK7
479	11059	8	87304965	87530181	584	35	1.889	0.029443	0.016186	0.099683	+	WWP1
480	1762	19	46236205	46346060	245	28	2.3167	0.01026	0.016197	0.028342	-	DMWD
481	6357	17	32633471	32735629	406	45	1.7143	0.04324	0.016396	0.22501	+	CCL13
482	6964	14	22841537	22985569	428	62	2.1807	0.014602	0.016421	0.034104	+	TRD
483	1107	17	7738096	7866075	239	30	1.7201	0.042708	0.01643	0.19992	+	CHD3
484	51751	17	42873721	42977848	229	28	1.6856	0.045935	0.01645	0.21642	+	HIGD1B
485	4593	9	113380935	113616386	759	80	2.0266	0.021353	0.016452	0.069549	+	MUSK
486	26240	6	3799632	3901551	307	52	1.6557	0.048894	0.016455	0.2651	+	FAM50B
487	196415	12	25096358	25200373	423	57	2.2116	0.013498	0.016467	0.049892	-	C12orf77
488	9904	12	114204543	114454176	902	77	1.8351	0.033244	0.016493	0.13929	-	RBM19
489	57553	22	18220415	18557325	1202	107	2.0945	0.018107	0.016508	0.075907	-	MICAL3
490	10850	9	34611893	34712689	203	28	2.1573	0.015492	0.016554	0.049935	-	CCL27
491	25837	16	2148145	2254141	66	9	2.4057	0.0080714	0.016604	0.0057029	+	RAB26
492	8220	22	19067792	19182190	322	37	2.8307	0.0023225	0.016635	0.0029754	-	DGCR14
493	50835	12	10911693	11012767	172	35	1.7438	0.0406	0.01665	0.19584	-	TAS2R9
494	54622	5	53130578	53656403	1482	120	1.8561	0.031719	0.016827	0.15974	-	ARL15
495	101927322	18	56287241	56388761	211	37	2.9911	0.00139	0.016828	0.00061094	-	LOC101927322
496	10450	1	40154517	40279586	338	47	1.7689	0.038457	0.016912	0.22388	+	PPIE
497	79637	17	73056047	73176360	304	39	1.5953	0.05532	0.016934	0.26282	+	ARMC7
498	202559	6	62339865	63046100	1622	60	2.5156	0.0059422	0.016961	0.012506	-	KHDRBS2
499	100533106	8	124188429	124336727	138	25	2.5183	0.0058963	0.016996	0.01168	-	ZHX1-C8orf76
500	10435	11	65032289	65139900	107	23	1.7279	0.042008	0.017038	0.24198	+	CDC42EP2
501	81853	6	10697995	10820389	178	33	1.8303	0.0336	0.017121	0.17227	+	TMEM14B
502	3783	19	44220685	44336269	330	44	2.1116	0.017359	0.017126	0.063117	-	KCNN4
503	284348	19	44250079	44374808	416	45	2.1614	0.015334	0.01722	0.063581	-	LYPD5
504	11124	1	50856935	51475936	763	43	1.7565	0.039501	0.017226	0.17514	-	FAF1
505	3835	16	29751383	29866706	59	5	1.9018	0.028596	0.01729	0.064671	+	KIF22
506	50836	12	10908650	11009579	168	35	1.7205	0.042666	0.017408	0.21008	-	TAS2R8
507	285346	3	44489924	44602222	154	20	2.3639	0.0090411	0.017458	0.017802	-	ZNF852
508	53834	4	954712	1070686	156	15	1.935	0.026497	0.017492	0.11431	+	FGFRL1
509	10298	19	39566417	39720046	365	42	1.5359	0.062284	0.01758	0.32958	+	PAK4
510	219409	13	28316780	28418089	299	51	2.0517	0.0201	0.017675	0.060216	+	GSX1
511	65985	12	125499925	125677879	454	50	2.4359	0.0074281	0.017761	0.0069481	+	AACS
512	953	10	97421536	97687023	693	44	2.7688	0.0028129	0.017809	0.0072098	+	ENTPD1
513	7850	2	102558306	102694885	347	36	1.9618	0.024891	0.01781	0.094041	+	IL1R2
514	4628	17	8327523	8584094	371	41	1.5606	0.059314	0.017845	0.38308	-	MYH10
515	6330	11	117954092	118073630	394	50	1.5591	0.059482	0.017879	0.30657	-	SCN4B
516	101927989	18	74149915	74255874	249	52	1.5424	0.061492	0.017889	0.36575	+	LOC101927989
517	23165	7	135192662	135383501	564	43	1.65	0.049468	0.017981	0.31235	+	NUP205
518	59274	15	81243295	81346345	232	19	2.3903	0.0084171	0.017992	0.01353	+	MESDC1
519	90673	14	23714861	23822071	223	39	1.801	0.03585	0.018004	0.14356	-	PPP1R3E
520	7188	1	211449849	211598403	357	38	2.1965	0.014028	0.018056	0.035278	+	TRAF5
521	84926	12	53408100	53523204	290	39	2.026	0.021381	0.018272	0.069137	-	SPRYD3
522	342357	16	25197322	25319210	350	29	1.9681	0.024527	0.018416	0.10296	-	ZKSCAN2
523	9853	9	35440007	35611895	258	38	1.831	0.033547	0.018436	0.13891	+	RUSC2
524	54210	6	41192999	41304457	409	46	1.6762	0.046846	0.018446	0.18426	-	TREM1
525	57495	4	37196690	37501087	962	111	1.9327	0.026634	0.018474	0.099066	+	NWD2
526	2051	7	142502776	142618847	272	24	1.5142	0.06499	0.018527	0.32735	+	EPHB6
527	57151	17	34211522	34320714	368	34	2.5719	0.0050566	0.018609	0.0087631	-	LYZL6
528	54802	1	40256703	40399177	387	36	2.0081	0.022315	0.018647	0.075783	-	TRIT1
529	116064	3	119993576	120118186	352	36	1.8592	0.031499	0.018658	0.11404	-	LRRC58
530	55166	6	49381054	49510820	243	26	1.9215	0.027333	0.018716	0.082048	+	CENPQ
531	7047	3	44866098	45006093	203	31	1.8703	0.030724	0.018729	0.09973	+	TGM4
532	602	19	45196070	45313301	281	51	1.7721	0.038185	0.018759	0.16698	+	BCL3
533	25884	11	74357474	74492227	356	54	2.6836	0.0036412	0.018816	0.0029376	-	CHRDL2
534	150084	21	41067334	41224023	709	52	2.1668	0.015127	0.018854	0.037639	+	IGSF5
535	9849	10	97839472	97973517	278	31	1.7809	0.037464	0.018895	0.12993	+	ZNF518A
536	8715	18	31381064	31853515	899	88	1.998	0.02286	0.018978	0.086826	-	NOL4
537	4914	1	156735542	156901642	383	55	1.4897	0.068154	0.019086	0.40045	+	NTRK1
538	51155	17	73081343	73200775	264	32	1.6297	0.051583	0.019153	0.21267	-	HN1
539	171017	12	6725643	6848738	208	39	2.1779	0.014705	0.019171	0.032417	-	ZNF384
540	1039	16	22307257	22435938	64	15	2.3105	0.01043	0.019197	0.014849	-	CDR2
541	163071	19	48724354	48840863	450	48	2.5762	0.004995	0.019213	0.0050704	+	ZNF114
542	5157	8	17383942	17550642	973	98	1.604	0.054362	0.019313	0.24756	+	PDGFRL
543	645177	12	25107276	25234039	505	67	2.2188	0.013251	0.01932	0.03562	+	LOC645177
544	5782	7	77116773	77319388	474	34	1.6421	0.050282	0.019346	0.23027	+	PTPN12
545	57628	2	115149899	116653328	3324	176	2.3729	0.0088234	0.019399	0.0167	+	DPP10
546	50837	12	10904131	11005226	173	37	1.7038	0.044207	0.019449	0.19808	-	TAS2R7
547	8321	7	90843783	90948132	200	36	2.6052	0.0045908	0.019496	0.0059783	+	FZD1
548	23360	11	47688055	47839012	233	24	2.3422	0.0095856	0.019521	0.016816	-	FNBP4
549	2670	17	42932994	43042920	322	36	2.2039	0.013766	0.019535	0.025017	-	GFAP
550	27154	6	36114408	36250567	213	41	2.2694	0.011622	0.019624	0.016779	+	BRPF3
551	29923	7	128045884	128148472	302	34	2.2133	0.013437	0.019726	0.021119	+	HILPDA
552	9938	2	68911913	69103965	677	70	1.9099	0.028071	0.019752	0.088368	+	ARHGAP25
553	4296	11	65315226	65431720	161	32	1.5581	0.059605	0.019775	0.27705	-	MAP3K11
554	57146	16	21119703	21241937	307	40	1.7007	0.044504	0.019846	0.19916	+	TMEM159
555	7849	2	113923574	114086527	501	57	1.4719	0.070529	0.019858	0.40797	-	PAX8
556	5266	20	43753540	43855185	237	18	1.9399	0.026197	0.019905	0.12305	+	PI3
557	57539	2	20060024	20239884	458	50	2.0226	0.021559	0.019971	0.064535	-	WDR35
558	701	15	40403210	40563337	295	42	1.4518	0.073282	0.020027	0.44963	+	BUB1B
559	164832	2	100839753	100989195	482	31	1.6112	0.053573	0.020048	0.30037	-	LONRF2
560	100287290	3	158408178	158527966	302	36	1.9147	0.027764	0.020053	0.075582	+	LOC100287290
561	3590	9	34602182	34711899	220	29	2.1066	0.017575	0.020087	0.049651	+	IL11RA
562	29904	16	22167592	22350066	225	28	1.9792	0.023894	0.020114	0.059429	+	EEF2K
563	79865	6	41107552	41218925	295	35	1.7825	0.037336	0.020145	0.12958	-	TREML2
564	387763	11	43914106	44015433	361	58	2.1227	0.016889	0.020195	0.03525	+	C11orf96
565	55040	17	48560043	48671111	297	49	1.7402	0.040913	0.020319	0.152	+	EPN3
566	168975	8	87828676	88444955	1565	92	1.9091	0.028122	0.020341	0.13797	+	CNBD1
567	10665	6	32210475	32389705	429	20	1.8238	0.034091	0.020365	0.13452	-	C6orf10
568	5531	16	30037297	30146698	63	8	1.8759	0.030336	0.020391	0.065578	+	PPP4C
569	1108	12	6629248	6766551	240	34	1.6558	0.04888	0.020407	0.21159	-	CHD4
570	8001	4	175495367	175800465	1040	84	1.9302	0.026788	0.020421	0.08942	-	GLRA3
571	84458	10	98542017	98774198	283	31	1.6768	0.046795	0.020452	0.22167	+	LCOR
572	905	2	135626363	135766915	233	21	2.3386	0.0096789	0.020492	0.013332	+	CCNT2
573	401505	9	37538410	37642636	245	33	1.8504	0.032128	0.020526	0.096048	-	TOMM5
574	57020	16	19516737	19762485	651	62	1.7251	0.042255	0.02066	0.183	+	C16orf62
575	11336	5	393305	517414	421	36	2.4098	0.0079796	0.020693	0.010824	+	EXOC3
576	23279	11	47749670	47920057	269	24	2.4272	0.007607	0.020699	0.013539	-	NUP160
577	23590	10	26936353	27085727	488	40	2.7769	0.0027442	0.020711	0.0029238	+	PDSS1
578	325	1	159507616	159608661	286	38	1.8617	0.031322	0.02087	0.071567	+	APCS
579	284352	19	45546431	45700543	346	42	1.4868	0.068536	0.02088	0.38426	+	PPP1R37
580	441161	6	74028278	74129515	232	37	2.0541	0.019982	0.020902	0.046459	-	OOEP
581	5460	6	31082114	31188451	1207	57	2.2336	0.012754	0.020915	0.016548	-	POU5F1
582	441925	1	242071069	242172364	240	33	1.707	0.043913	0.021031	0.15818	+	BECN2
583	23012	12	27347078	27528892	518	48	1.517	0.064635	0.021164	0.2595	+	STK38L
584	55016	4	164395450	165355093	2681	154	2.4399	0.007346	0.021215	0.020066	-	MARCH1
585	23274	16	10988345	11326046	944	78	1.7024	0.04434	0.02123	0.16467	+	CLEC16A
586	115653	19	55185984	55298003	197	36	2.5952	0.0047267	0.021286	0.0052374	+	KIR3DL3
587	387522	20	48647661	48820335	348	44	1.4407	0.074837	0.021359	0.45277	-	TMEM189-UBE2V1
588	1662	11	108485816	108861650	698	60	1.525	0.063627	0.021369	0.47085	+	DDX10
589	154288	6	74022400	74123898	228	37	2.036	0.020877	0.021465	0.047582	+	KHDC3L
590	2947	1	110226554	110333660	227	38	1.5262	0.063474	0.02148	0.30811	-	GSTM3
591	83698	7	71194476	71962136	1980	122	1.6742	0.047042	0.021525	0.1986	-	CALN1
592	57620	4	26809329	27077003	456	59	1.7953	0.0363	0.021551	0.13169	+	STIM2
593	4790	4	103372486	103588459	450	36	2.0972	0.017989	0.021554	0.058081	+	NFKB1
594	114803	1	59070411	59215747	461	35	1.6084	0.053874	0.021567	0.23209	-	MYSM1
595	100526794	2	18685989	18820846	327	52	1.8259	0.033933	0.021599	0.12468	-	NT5C1B-RDH14
596	2551	21	27057258	27194771	275	34	2.1652	0.015185	0.021654	0.027843	+	GABPA
597	6886	1	47631962	47747938	262	35	1.7964	0.036212	0.021694	0.10255	-	TAL1
598	8913	17	48588429	48754835	413	72	2.2306	0.012853	0.021834	0.02417	+	CACNA1G
599	170679	6	31032608	31157869	1212	57	2.4878	0.0064275	0.02185	0.006701	+	PSORS1C1
600	2307	20	30382103	30483420	203	30	1.63	0.051553	0.021863	0.23765	-	FOXS1
601	285852	6	41146062	41256120	366	40	1.6318	0.051366	0.021921	0.19735	+	TREML4
602	220047	11	85516144	85681064	437	40	3.2072	0.00067007	0.02198	0.00027582	+	CCDC83
603	222484	13	28070048	28244720	546	63	1.9993	0.02279	0.022012	0.05094	-	LNX2
604	64407	1	192077592	192204945	276	35	2.3084	0.010489	0.022049	0.016	+	RGS18
605	7101	6	108437215	108560013	186	35	2.1982	0.013966	0.022061	0.021965	+	NR2E1
606	22874	1	204137979	204379057	663	76	2.7619	0.0028729	0.022092	0.0038676	-	PLEKHA6
607	79148	17	34033316	34172711	287	35	2.2051	0.013722	0.022118	0.036796	-	MMP28
608	6941	6	31076303	31184183	1232	57	2.3181	0.010223	0.022121	0.010726	+	TCF19
609	116224	9	71344964	71448609	262	39	1.4284	0.076593	0.022191	0.34291	+	FAM122A
610	114034	1	45755342	45859650	122	23	1.6839	0.0461	0.022228	0.17442	+	TOE1
611	115825	13	52108484	52390935	337	48	2.7455	0.0030209	0.022316	0.0025003	+	WDFY2
612	5203	20	52774502	52886492	435	61	1.6646	0.047999	0.022428	0.17931	+	PFDN4
613	84519	12	6697241	6806594	139	27	1.6604	0.048412	0.022512	0.17831	-	ACRBP
614	79841	11	47631143	47786928	206	24	2.1004	0.017847	0.022585	0.038362	-	AGBL2
615	89796	1	201458243	201846102	1004	120	2.2352	0.012703	0.022633	0.026559	+	NAV1
616	254102	11	65293509	65410121	157	32	1.5313	0.062843	0.022657	0.27245	+	EHBP1L1
617	353274	3	44431262	44569162	175	27	2.2069	0.013659	0.022676	0.01788	-	ZNF445
618	54535	6	31060216	31176015	1300	56	2.2274	0.01296	0.022723	0.016916	-	CCHCR1
619	4595	1	45744914	45856142	140	27	1.6427	0.050223	0.022805	0.18544	-	MUTYH
620	79657	12	48005715	48149844	375	37	1.7829	0.037301	0.022822	0.09455	-	RPAP3
621	4713	19	14626890	14732889	215	33	1.5342	0.06249	0.022834	0.28387	-	NDUFB7
622	7052	20	36706863	36844910	308	44	1.6805	0.046425	0.022895	0.18755	-	TGM2
623	55812	14	88801982	88954804	249	28	1.9004	0.028689	0.022909	0.12094	+	SPATA7
624	163702	1	24430647	24563765	376	60	1.4722	0.070487	0.022946	0.29809	-	IFNLR1
625	25988	11	118942233	119055765	208	28	1.8001	0.035921	0.023044	0.11345	+	HINFP
626	55509	1	212809759	212923327	350	47	1.5245	0.063692	0.023106	0.27741	-	BATF3
627	343035	1	211599864	211716259	465	51	2.0786	0.018827	0.023117	0.038343	-	RD3
628	92293	12	128701948	129242460	1584	206	1.8099	0.035159	0.023157	0.13126	+	TMEM132C
629	6939	20	534637	640910	294	70	1.5433	0.061377	0.023166	0.26956	-	TCF15
630	6911	16	30047114	30153258	58	8	1.8252	0.033988	0.023177	0.068785	-	TBX6
631	9121	17	73033822	73152257	330	42	1.4833	0.068995	0.023206	0.26884	+	SLC16A5
632	196500	12	6752957	6860009	234	35	2.0705	0.019205	0.023288	0.039299	-	PIANP
633	402569	7	98721197	98855089	380	32	2.2479	0.012292	0.023352	0.016653	-	KPNA7
634	93034	2	18694137	18821359	308	48	1.7827	0.03732	0.023538	0.12517	-	NT5C1B
635	80216	4	113168480	113413774	605	80	2.4748	0.0066648	0.023653	0.0084129	+	ALPK1
636	90639	7	954486	1065235	287	34	1.8764	0.0303	0.023881	0.05871	-	COX19
637	84284	1	233036277	233164548	315	37	2.1626	0.015287	0.023932	0.029002	+	NTPCR
638	5218	7	90175681	90889905	1930	109	2.0674	0.019349	0.023957	0.03867	+	CDK14
639	101928592	3	44674574	44776283	114	23	2.0962	0.018033	0.023988	0.031019	-	LOC101928592
640	91653	3	112879850	113056306	591	77	1.935	0.026492	0.024	0.059921	+	BOC
641	29760	10	97901455	98081333	495	66	1.7841	0.037202	0.024006	0.12808	-	BLNK
642	645425	1	13686907	13797803	85	14	1.7745	0.037991	0.024039	0.093815	+	PRAMEF20
643	123207	15	83607715	83731050	246	32	1.8529	0.031949	0.02404	0.090779	-	C15orf40
644	10776	15	52789384	52911436	274	30	1.6289	0.051664	0.024098	0.23791	-	ARPP19
645	56154	8	30638939	30820512	390	31	2.0203	0.021677	0.02411	0.054359	-	TEX15
646	90196	20	43938660	44055442	269	36	2.0539	0.019995	0.024121	0.064572	+	SYS1
647	728927	7	63717815	63860017	619	41	1.7526	0.039837	0.024242	0.11683	+	ZNF736
648	79603	19	8224217	8377305	164	29	2.1825	0.014536	0.024264	0.018224	+	CERS4
649	51256	6	13255183	13378787	484	43	2.062	0.019603	0.024266	0.03577	-	TBC1D7
650	9651	1	2357754	2486964	143	23	2.3152	0.0103	0.024282	0.014331	+	PLCH2
651	7010	9	27059147	27280172	972	105	2.5653	0.0051539	0.024301	0.0060579	+	TEK
652	79846	7	89824488	89990377	410	31	1.8975	0.028878	0.024347	0.087112	+	CFAP69
653	9334	20	48199482	48380421	478	48	1.4364	0.075448	0.024383	0.3795	-	B4GALT5
654	164684	22	42341607	42478935	275	26	1.6852	0.045973	0.024408	0.13228	+	WBP2NL
655	51147	12	6709704	6822311	143	32	1.5905	0.055857	0.024494	0.2079	-	ING4
656	123016	14	89240574	89394335	279	32	1.503	0.066417	0.0245	0.31789	+	TTC8
657	124274	16	19992981	20135100	388	47	2.1853	0.014434	0.024582	0.023969	-	GPR139
658	4668	22	42404338	42516852	206	20	1.7817	0.037396	0.024628	0.10431	-	NAGA
659	55601	4	169087442	169289958	538	41	2.2939	0.010899	0.024754	0.019124	-	DDX60
660	8736	18	3016805	3270106	947	117	2.0377	0.020789	0.024845	0.057957	-	MYOM1
661	55954	22	30076945	30213000	331	38	2.361	0.009113	0.02485	0.0154	-	ZMAT5
662	5078	7	127200346	127305982	174	28	1.6216	0.052442	0.024974	0.15218	-	PAX4
663	55908	19	11300295	11402619	248	26	1.8934	0.029155	0.025003	0.06323	+	C19orf80
664	29796	22	30113358	30216402	262	27	3.0723	0.0010621	0.025088	0.00057918	+	UQCR10
665	53339	15	83635175	83786106	279	35	1.7776	0.037732	0.025138	0.10735	-	BTBD1
666	83943	7	110253106	111252588	1799	112	1.9845	0.023601	0.025414	0.063291	-	IMMP2L
667	146909	17	42952079	43075079	351	45	1.9768	0.02403	0.025429	0.043178	-	KIF18B
668	55116	1	32488503	32618467	84	15	1.5179	0.064514	0.025456	0.28891	+	TMEM39B
669	258010	11	22793598	22901382	252	33	2.4256	0.0076424	0.025462	0.0095429	-	SVIP
670	3352	1	23468388	23571222	265	23	1.8597	0.031467	0.025515	0.088543	-	HTR1D
671	26127	12	27041305	27169581	302	48	1.8799	0.030058	0.025612	0.093852	+	FGFR1OP2
672	728262	3	197829039	197957728	24	5	1.8998	0.028727	0.025627	0.051356	+	FAM157A
673	23633	1	32523644	32692169	143	16	1.4943	0.067555	0.025636	0.32146	+	KPNA6
674	10534	11	65286651	65390075	130	26	1.5352	0.062362	0.025674	0.23224	+	SSSCA1
675	146857	17	33712115	33825856	314	49	2.1628	0.01528	0.025686	0.026139	-	SLFN13
676	2215	1	161542986	161651753	23	12	1.6936	0.045171	0.025698	0.11638	-	FCGR3B
677	9863	7	77596374	79133121	5217	355	1.4099	0.079288	0.025729	0.42928	-	MAGI2
678	1645	10	4955454	5070158	460	56	1.7045	0.044145	0.025733	0.14394	+	AKR1C1
679	57156	14	77598102	77775838	622	72	1.5065	0.065971	0.025761	0.25721	+	TMEM63C
680	55359	12	10721538	10876917	441	47	1.3137	0.094478	0.025775	0.50166	-	STYK1
681	79684	11	124586388	124720868	318	58	1.367	0.085806	0.025814	0.47755	-	MSANTD2
682	7804	1	53658036	53843821	379	56	2.1958	0.014055	0.025887	0.034687	-	LRP8
683	402778	11	1703640	1821824	154	21	1.7835	0.037252	0.025939	0.10342	-	IFITM10
684	9343	17	42877655	43026993	361	38	1.613	0.053373	0.026098	0.17008	-	EFTUD2
685	80821	14	53453458	53670046	450	40	1.918	0.027554	0.026181	0.083366	-	DDHD1
686	10881	9	111574603	111676035	457	51	1.7468	0.040333	0.026197	0.11279	+	ACTL7A
687	55800	11	123449895	123575315	491	68	1.784	0.037211	0.026207	0.12899	-	SCN3B
688	7917	6	31556805	31670953	340	48	1.8234	0.034118	0.026236	0.080698	-	BAG6
689	259282	4	13520362	13679334	350	36	1.6024	0.054539	0.026375	0.23527	-	BOD1L1
690	55888	3	44546667	44674975	186	18	2.3092	0.010467	0.026396	0.015533	+	ZKSCAN7
691	2222	8	11603467	11746818	734	66	1.4613	0.071968	0.026417	0.25063	+	FDFT1
692	10238	17	61577796	61721641	151	26	1.7601	0.039195	0.026418	0.11478	+	DCAF7
693	148870	1	3618965	3738209	413	46	1.3006	0.096699	0.026443	0.44755	+	CCDC27
694	23625	11	65289820	65391669	132	26	1.541	0.061654	0.02646	0.22184	+	FAM89B
695	1798	11	118917213	119023124	223	30	1.7863	0.037022	0.026502	0.1073	-	DPAGT1
696	2161	5	176779139	176886577	106	20	2.0214	0.02162	0.026584	0.039837	-	F12
697	3456	9	21027104	21127943	285	42	1.9671	0.024584	0.026585	0.037646	-	IFNB1
698	92675	20	18518556	18794561	910	54	2.1622	0.0153	0.026629	0.029372	+	DTD1
699	255877	17	6876368	6983609	268	40	1.823	0.034148	0.02663	0.085539	+	BCL6B
700	8569	1	46973079	47119966	299	36	2.5155	0.005944	0.026646	0.006325	-	MKNK1
701	84619	20	62288727	62417494	402	34	1.8087	0.035251	0.026669	0.082883	+	ZGPAT
702	261729	7	89791000	89916992	331	25	1.9731	0.024239	0.026784	0.046558	+	STEAP2
703	51104	9	74427368	74576148	115	15	1.9465	0.025798	0.026865	0.071058	-	ABHD17B
704	11164	10	12159573	12288143	303	39	1.5754	0.057578	0.026893	0.18733	-	NUDT5
705	3219	17	46648518	46753835	263	35	1.5529	0.060223	0.026913	0.21121	-	HOXB9
706	10880	9	111566868	111668275	464	52	1.7874	0.036935	0.026968	0.10386	-	ACTL7B
707	54097	21	42638661	42779654	442	77	1.3476	0.08889	0.026998	0.41255	+	FAM3B
708	135935	7	144044333	144157320	180	22	1.7498	0.040078	0.027022	0.11483	-	NOBOX
709	6491	1	47665811	47829819	392	31	1.5227	0.063922	0.027068	0.26196	-	STIL
710	79656	1	49143538	49292547	239	42	2.5604	0.0052269	0.027119	0.0078118	-	BEND5
711	285349	3	44576456	44691186	176	17	2.3513	0.0093529	0.027158	0.013012	+	ZNF660
712	9640	15	85241818	85399663	307	34	1.4486	0.073731	0.027271	0.28848	+	ZNF592
713	219539	11	57362560	57467417	153	22	1.6208	0.052532	0.027282	0.19201	-	YPEL4
714	1031	1	51384367	51490309	135	17	1.7437	0.040607	0.027284	0.10814	+	CDKN2C
715	116840	17	7785442	7903237	299	30	1.6235	0.052237	0.027297	0.16	+	CNTROB
716	5788	1	198558098	198776605	507	55	2.8258	0.0023581	0.027456	0.0014973	+	PTPRC
717	2592	9	34596586	34700595	199	23	2.0378	0.020785	0.027509	0.036043	+	GALT
718	387521	20	48690274	48820335	265	30	1.4202	0.077771	0.027601	0.33852	-	TMEM189
719	113179	19	1855371	1963446	233	29	1.5977	0.055052	0.027725	0.17719	+	ADAT3
720	200081	1	32595293	32713886	116	14	1.4798	0.06946	0.027779	0.30382	+	TXLNA
721	89874	14	37097126	37691865	1569	137	1.7481	0.040222	0.027855	0.15847	-	SLC25A21
722	3014	11	118914580	119016177	211	29	1.7977	0.03611	0.027872	0.099982	-	H2AFX
723	56649	11	117897727	118046323	508	59	1.3899	0.082286	0.027939	0.35765	+	TMPRSS4
724	116448	21	34392450	34494728	273	45	2.0276	0.0213	0.027947	0.034545	+	OLIG1
725	140578	21	19350190	19689687	973	116	1.6366	0.050856	0.027952	0.21988	+	CHODL
726	79574	1	110242702	110356644	282	50	1.3539	0.087885	0.02801	0.41051	-	EPS8L3
727	9854	11	118927771	119038304	227	30	1.743	0.040671	0.02803	0.1187	+	C2CD2L
728	6733	7	104704048	105089614	627	44	1.1988	0.11531	0.028032	0.67902	-	SRPK2
729	84916	16	69116499	69252937	209	31	1.7416	0.040792	0.028066	0.096831	+	CIRH1A
730	5976	19	18892744	19029039	168	26	1.6145	0.053211	0.028068	0.17107	+	UPF1
731	343	16	25178285	25290253	257	32	1.8042	0.0356	0.028082	0.10265	+	AQP8
732	2048	1	22987263	23291823	625	93	1.6607	0.048391	0.028159	0.17184	+	EPHB2
733	6731	4	57283370	57419847	312	32	2.0435	0.020501	0.028174	0.032117	+	SRP72
734	8909	12	48053517	48169355	296	41	1.6182	0.052809	0.028237	0.14467	-	ENDOU
735	51115	8	87429627	87576567	410	34	1.6064	0.054091	0.02824	0.18736	-	RMDN1
736	6091	3	78596388	79867059	2699	141	1.1089	0.13373	0.028249	0.81742	-	ROBO1
737	5193	17	33851814	33955656	333	35	1.6926	0.045262	0.028271	0.13096	-	PEX12
738	5737	1	78906728	79056386	364	40	1.5704	0.058165	0.028273	0.20768	+	PTGFR
739	29920	1	226057577	226162040	237	40	1.7425	0.040712	0.028275	0.12993	-	PYCR2
740	284353	19	45603008	45713408	275	42	1.3401	0.090108	0.028293	0.43122	-	NKPD1
741	389692	8	144460230	144562602	260	39	1.4305	0.076284	0.028402	0.31783	-	MAFA
742	79944	14	50654285	50828947	382	29	1.6409	0.050404	0.028526	0.13855	-	L2HGDH
743	2765	8	143866217	143978262	438	36	1.6084	0.053872	0.028562	0.16031	+	GML
744	10261	16	21602605	21713987	110	21	1.7295	0.041863	0.028727	0.096909	-	IGSF6
745	79987	9	113077528	113392160	1220	98	1.2743	0.10128	0.028728	0.47963	-	SVEP1
746	6366	9	34659002	34760164	228	31	2.0005	0.022722	0.028737	0.048037	-	CCL21
747	6327	11	117983519	118097337	333	47	1.3851	0.08301	0.02878	0.35211	-	SCN2B
748	140685	20	62325021	62513731	542	36	1.8042	0.035601	0.028836	0.078086	-	ZBTB46
749	6653	11	121272912	121554471	495	83	1.6674	0.047719	0.028952	0.1661	+	SORL1
750	3998	18	56945055	57076508	396	34	1.7035	0.044235	0.028968	0.099842	-	LMAN1
751	2993	4	144980456	145111904	333	33	1.5983	0.054993	0.028993	0.22755	-	GYPA
752	150368	22	42420255	42525445	187	17	1.7882	0.036874	0.028994	0.088891	+	FAM109B
753	79838	16	19371839	19560435	694	55	1.3739	0.084738	0.029032	0.39262	+	TMC5
754	169026	8	117912512	118238953	674	75	1.6269	0.051878	0.029058	0.18212	+	SLC30A8
755	83640	15	83604955	83709809	203	28	1.8769	0.030267	0.029201	0.072836	+	FAM103A1
756	84842	1	45742545	45844347	138	27	1.5556	0.059897	0.029292	0.19008	+	HPDL
757	1192	6	31648358	31755095	201	35	1.8132	0.034901	0.029391	0.097625	-	CLIC1
758	3455	21	34552231	34686831	460	57	1.6337	0.051156	0.02964	0.15679	+	IFNAR2
759	257313	3	190934944	191098325	632	61	2.3433	0.0095573	0.029658	0.010582	-	UTS2B
760	58490	20	36611864	36806182	347	43	1.6199	0.052622	0.029666	0.19162	+	RPRD1B
761	79140	1	32616202	32720991	108	14	1.4277	0.076687	0.029699	0.32537	+	CCDC28B
762	3672	5	52034136	52299485	915	94	1.3213	0.093206	0.029724	0.4284	+	ITGA1
763	51231	19	50429724	50579274	362	33	2.2414	0.0125	0.029732	0.020199	-	VRK3
764	353345	7	37520212	37831888	693	64	2.4015	0.0081649	0.029819	0.014448	+	GPR141
765	84144	1	85573356	85717292	414	44	1.4055	0.079931	0.02985	0.29904	-	SYDE2
766	93166	5	122374841	122579960	688	74	1.3298	0.09179	0.029998	0.37106	+	PRDM6
767	51108	16	21558543	21718792	118	22	1.6839	0.046103	0.030017	0.10819	+	METTL9
768	23788	11	47588858	47714206	142	22	1.5419	0.061544	0.030036	0.20164	-	MTCH2
769	83719	16	30053635	30158248	55	8	1.75	0.04006	0.030057	0.066835	-	YPEL3
770	113802	1	109140910	109254148	121	19	1.7288	0.041918	0.030063	0.13697	-	HENMT1
771	161502	15	81341749	81491516	322	38	2.0141	0.021998	0.030071	0.039772	+	C15orf26
772	54905	7	970100	1079276	341	37	1.8084	0.035268	0.030144	0.059619	+	CYP2W1
773	55867	11	64273098	64389002	171	26	2.4414	0.0073162	0.030241	0.0057368	+	SLC22A11
774	29896	7	23494399	23621656	249	33	1.6248	0.052107	0.030248	0.131	-	TRA2A
775	387778	11	64887707	64990688	169	30	1.6426	0.050237	0.030254	0.12469	+	SPDYC
776	114770	19	15529456	15640315	166	32	1.7492	0.040128	0.030314	0.10498	-	PGLYRP2
777	127343	1	46922668	47029898	244	39	2.5707	0.0050752	0.030462	0.0031194	+	DMBX1
778	79888	5	1411542	1575644	515	79	2.3045	0.010598	0.030528	0.011365	-	LPCAT1
779	643707	15	84854525	84964120	205	29	2.5689	0.0051016	0.030661	0.0050602	+	GOLGA6L4
780	101929301	7	44860545	44961757	208	28	1.6189	0.052737	0.030707	0.16291	+	LOC101929301
781	5155	22	39569685	39690957	427	52	1.3488	0.088701	0.030708	0.35833	-	PDGFB
782	7165	20	62446581	62572898	165	17	1.8025	0.035732	0.030763	0.0709	+	TPD52L2
783	80017	14	91476677	91741976	590	80	1.9886	0.023374	0.030831	0.055092	+	C14orf159
784	4854	19	15220444	15361792	313	39	1.877	0.030257	0.03085	0.06215	-	NOTCH3
785	10950	21	18915968	19035268	245	32	1.5615	0.059201	0.030875	0.19747	-	BTG3
786	53904	10	26173002	26551465	1492	41	1.5289	0.063142	0.030977	0.21236	+	MYO3A
787	9942	3	38338251	38506467	492	47	1.3449	0.089323	0.031071	0.37662	+	XYLB
788	388551	19	45152421	45263986	301	58	1.5776	0.057327	0.0311	0.18885	+	CEACAM16
789	5706	14	53123894	53244716	208	31	2.8701	0.0020516	0.031121	0.0012746	+	PSMC6
790	57827	6	31576075	31678549	277	35	1.9268	0.027003	0.031125	0.041254	-	C6orf47
791	339302	18	56912634	57035881	376	39	1.6701	0.047452	0.031267	0.12049	-	CPLX4
792	79781	2	237182790	237466178	441	41	1.7318	0.041651	0.031379	0.094119	-	IQCA1
793	64847	17	48574450	48683213	285	48	1.6289	0.051667	0.031457	0.14269	+	SPATA20
794	728588	11	60451077	60556416	165	40	1.4554	0.072786	0.03157	0.34783	+	MS4A18
795	191585	21	42497158	42607166	304	60	1.123	0.13073	0.031622	0.6887	-	PLAC4
796	22900	19	48661343	48809203	577	61	2.657	0.0039417	0.031631	0.0030257	-	CARD8
797	55110	12	10706364	10816208	361	30	1.3378	0.090486	0.03171	0.37011	-	MAGOHB
798	51301	5	74273246	74400743	348	38	1.9339	0.026563	0.031715	0.048085	-	GCNT4
799	100130357	6	13229527	13347314	494	34	1.9569	0.025182	0.031728	0.035045	-	LOC100130357
800	342897	19	39637604	39742522	173	29	1.2882	0.098843	0.03173	0.3953	+	NCCRP1
801	388389	17	42927080	43033541	300	35	1.5959	0.055256	0.031753	0.1519	+	CCDC103
802	552889	12	74881551	74985232	354	32	1.7748	0.037965	0.031779	0.096364	+	ATXN7L3B
803	154807	7	65288257	65474545	298	17	2.0903	0.018296	0.031847	0.01766	+	VKORC1L1
804	4758	6	31776829	31880709	265	47	1.8339	0.033337	0.031853	0.063452	-	NEU1
805	4651	5	16612016	16986385	1101	144	2.3905	0.0084133	0.032004	0.011289	-	MYO10
806	1345	8	100840223	100956242	184	28	1.3473	0.088947	0.032067	0.32773	-	COX6C
807	5420	7	131135021	131291376	372	67	1.4688	0.070939	0.032096	0.24734	-	PODXL
808	6309	11	121113388	121234119	361	42	1.4729	0.070396	0.032124	0.28572	+	SC5D
809	55503	7	142518956	142633490	274	22	1.3993	0.080865	0.032137	0.27362	-	TRPV6
810	55176	10	12121640	12261957	355	39	1.529	0.063136	0.032158	0.17453	+	SEC61A2
811	55612	20	6005492	6154191	471	62	1.5198	0.064277	0.032177	0.19233	-	FERMT1
812	9582	22	39328352	39438784	156	27	1.473	0.07038	0.032218	0.22181	+	APOBEC3B
813	89941	16	668083	774174	220	21	1.5772	0.057378	0.032298	0.14273	+	RHOT2
814	3145	11	118905587	119014259	214	30	1.7505	0.04002	0.032424	0.10199	+	HMBS
815	152579	4	53688797	54282242	1246	91	1.3201	0.0934	0.032523	0.39759	-	SCFD2
816	675	13	32839617	33023809	379	53	2.9856	0.0014151	0.032548	0.00077838	+	BRCA2
817	5621	20	4616797	4732235	519	63	2.8419	0.0022419	0.03263	0.0014399	+	PRNP
818	2250	4	81137742	81262171	346	43	1.4707	0.070688	0.032658	0.27344	+	FGF5
819	966	11	33674556	33808025	394	48	2.02	0.021694	0.032692	0.036806	-	CD59
820	2990	7	65375671	65497301	222	15	2.1391	0.016216	0.032702	0.015129	-	GUSB
821	460	1	176776441	177184024	896	84	2.3755	0.0087621	0.032939	0.0098549	-	ASTN1
822	55721	1	32621236	32724288	112	14	1.4084	0.079504	0.032943	0.31248	+	IQCC
823	116211	3	196000417	196115291	237	30	2.2082	0.013614	0.033091	0.012437	-	TM4SF19
824	9196	17	7775177	7883180	254	28	1.3282	0.092063	0.033187	0.33144	-	KCNAB3
825	6949	5	149687202	149829871	318	45	1.491	0.067985	0.033244	0.24342	+	TCOF1
826	140606	22	31450763	31553551	269	37	1.3465	0.089078	0.033265	0.33141	-	SELM
827	220963	10	61360522	61519649	380	59	1.6293	0.051626	0.033291	0.158	-	SLC16A9
828	3106	6	31271649	31374989	1504	71	1.4374	0.075305	0.033292	0.20629	-	HLA-B
829	342977	19	13938063	14041571	102	7	3.0881	0.0010072	0.033416	0.0001562	+	NANOS3
830	2707	1	35196790	35301967	324	49	1.9996	0.022772	0.033422	0.030343	+	GJB3
831	6385	20	43903928	44027064	359	44	1.9255	0.027082	0.033424	0.076249	-	SDC4
832	148213	19	23871997	23991693	174	22	1.7613	0.039092	0.033443	0.077869	-	ZNF681
833	4143	10	81981576	82099721	319	34	1.5944	0.055424	0.033502	0.14899	-	MAT1A
834	219954	11	57835972	57936916	301	30	1.6123	0.053451	0.033519	0.13611	-	OR9I1
835	26148	10	98691041	98795585	124	26	1.6323	0.051313	0.033532	0.15605	+	C10orf12
836	54814	19	46145741	46257248	245	34	1.6195	0.052671	0.033561	0.12984	+	QPCTL
837	23327	18	55661580	56118772	1282	140	1.2974	0.097244	0.033638	0.46842	+	NEDD4L
838	1103	10	50767141	50923150	396	57	1.1341	0.12837	0.033653	0.6565	+	CHAT
839	81930	11	27992163	28179746	246	27	1.4105	0.079193	0.033684	0.30177	-	KIF18A
840	55824	8	81830045	82074303	581	78	1.6334	0.051193	0.03372	0.13988	-	PAG1
841	3821	12	10544863	10657215	249	25	1.4423	0.074611	0.033722	0.24216	-	KLRC1
842	9609	22	23437513	23556531	251	24	2.581	0.0049255	0.033745	0.0043248	+	RAB36
843	100506049	7	16516505	16671114	550	74	1.6117	0.053509	0.033777	0.14055	+	LRRC72
844	91689	22	42425695	42530288	199	19	1.721	0.042621	0.03381	0.096435	+	SMDT1
845	4795	6	31464628	31576606	594	58	2.3577	0.0091941	0.033843	0.0094649	+	NFKBIL1
846	342898	19	39643562	39744906	170	28	1.28	0.10027	0.033916	0.37502	-	SYCN
847	10229	16	19028917	19141417	215	24	1.6145	0.053208	0.033925	0.11751	+	COQ7
848	3695	12	53535102	53651065	193	34	1.7424	0.040718	0.033943	0.101	-	ITGB7
849	27156	22	23351593	23545807	413	37	1.593	0.055577	0.033969	0.17083	-	RSPH14
850	114788	8	113185157	114499242	3009	93	2.1583	0.015454	0.033974	0.029678	-	CSMD3
851	3218	17	46639708	46742474	250	36	1.4548	0.072869	0.034063	0.21323	-	HOXB8
852	56204	15	52823518	53021569	431	56	1.5071	0.06589	0.034143	0.22836	-	FAM214A
853	7542	11	64801694	64905874	171	27	1.3756	0.084476	0.034149	0.29386	+	ZFPL1
854	256380	6	107973361	108195521	564	62	1.4529	0.073132	0.034178	0.27393	-	SCML4
855	4295	6	33712449	33821793	468	48	2.5622	0.0051999	0.034281	0.0024752	-	MLN
856	114132	19	50402250	50514439	297	34	2.2443	0.012406	0.034339	0.02155	-	SIGLEC11
857	3425	4	930785	1048317	85	16	1.6414	0.050361	0.034396	0.10628	+	IDUA
858	10806	1	243369307	243713393	485	48	1.3948	0.081538	0.034462	0.26949	+	SDCCAG8
859	112970	1	52447777	52549472	142	16	1.4134	0.078764	0.034477	0.28361	-	KTI12
860	26166	8	100923164	101168344	367	45	1.4105	0.079202	0.034522	0.28231	-	RGS22
861	9869	1	150848815	150987389	211	27	1.766	0.038695	0.034564	0.066981	+	SETDB1
862	4065	2	160609866	160811267	569	52	1.9678	0.024544	0.034644	0.039752	-	LY75
863	4691	2	232269459	232379208	331	43	1.3989	0.080917	0.034735	0.26794	-	NCL
864	4076	11	34023230	34174157	348	24	1.903	0.028517	0.034757	0.08098	+	CAPRIN1
865	2936	8	30485578	30635486	334	37	1.3236	0.092824	0.034779	0.37084	-	GSR
866	80331	20	62476455	62617384	64	12	1.6077	0.053952	0.034838	0.11004	+	DNAJC5
867	349667	11	57177926	57294384	155	31	1.5882	0.056122	0.034931	0.18451	+	RTN4RL2
868	150280	22	30426453	30623064	396	38	1.8094	0.035193	0.035048	0.074301	+	HORMAD2
869	55351	4	5003527	5552728	2103	152	2.0352	0.020916	0.035074	0.04397	+	STK32B
870	1512	15	79164092	79287436	365	39	2.8851	0.0019564	0.035078	0.00077846	-	CTSH
871	259215	6	31624625	31728372	220	35	1.7734	0.038078	0.035122	0.081781	+	LY6G6F
872	2620	11	22638160	22884547	527	56	2.1374	0.016284	0.035127	0.019329	+	GAS2
873	1739	3	196719431	197076171	841	71	1.8818	0.029932	0.03513	0.07646	-	DLG1
874	23491	16	66945132	67059052	99	23	1.4463	0.07404	0.035148	0.23549	+	CES3
875	10139	20	62279995	62389365	320	29	1.8065	0.035422	0.035153	0.062784	-	ARFRP1
876	2562	15	26738693	27068935	963	105	1.4199	0.077824	0.03525	0.29172	-	GABRB3
877	23564	6	31644817	31748039	195	35	1.7441	0.040575	0.035269	0.10278	-	DDAH2
878	51727	1	47749469	47894511	295	27	1.8965	0.02895	0.035297	0.063972	+	CMPK1
879	3006	6	26005968	26106699	253	27	2.0534	0.020015	0.035311	0.027693	-	HIST1H1C
880	90427	15	40330091	40451088	244	37	1.3108	0.09497	0.035331	0.36701	-	BMF
881	23151	22	46923124	47128652	824	77	1.6971	0.044836	0.035344	0.098939	+	GRAMD4
882	64137	11	118969750	119083375	181	24	1.2956	0.09756	0.035412	0.36878	+	ABCG4
883	91408	1	52471857	52606388	161	20	1.3647	0.086175	0.035457	0.32386	+	BTF3L4
884	1509	11	1723982	1835222	163	21	1.6531	0.049158	0.03548	0.11058	-	CTSD
885	128346	1	111966474	112071134	264	41	2.2914	0.01097	0.035535	0.014349	+	C1orf162
886	100127889	10	97617722	97748415	336	38	1.3063	0.095731	0.035658	0.42478	+	C10orf131
887	92270	5	81551166	81664147	209	31	1.4613	0.071973	0.035733	0.20828	+	ATP6AP1L
888	9857	1	179873908	180134015	630	41	1.7434	0.040631	0.035736	0.095362	+	CEP350
889	79695	9	101519981	101662363	433	56	1.1786	0.11927	0.035746	0.53794	+	GALNT12
890	3645	1	156760665	156878712	265	44	1.3586	0.087132	0.035768	0.3114	-	INSRR
891	79890	14	92930125	93205339	901	132	2.6716	0.0037749	0.035849	0.0034554	+	RIN3
892	2657	19	18929361	19056953	165	20	1.6125	0.053422	0.035951	0.12572	-	GDF1
892	10715	19	18929361	19057396	165	20	1.6125	0.053422	0.035951	0.12572	-	CERS1
894	101928601	6	78310302	78684476	946	53	1.4418	0.074682	0.035987	0.24458	+	MEI4
895	56242	19	19926639	20055099	288	35	2.2633	0.011809	0.036029	0.014841	+	ZNF253
896	5162	3	58363357	58469579	387	25	1.8669	0.030956	0.036085	0.06809	-	PDHB
897	9028	16	675666	778268	206	19	1.5399	0.06179	0.036093	0.14698	+	RHBDL1
898	79605	1	230407392	230611674	727	97	1.4047	0.080061	0.036115	0.29142	-	PGBD5
899	9859	1	243237730	243469284	178	19	1.5165	0.064698	0.036227	0.18257	-	CEP170
900	5800	12	15425191	15801265	663	75	2.3625	0.0090758	0.036234	0.013287	+	PTPRO
901	816	7	44206749	44415230	451	56	1.5175	0.064575	0.036315	0.1816	-	CAMK2B
902	80310	11	103727914	104085027	1013	92	1.8737	0.030485	0.036405	0.066539	-	PDGFD
903	219699	10	72922292	73112635	578	84	1.9682	0.024522	0.036489	0.040067	+	UNC5B
904	80759	6	73901037	74069938	528	56	1.8017	0.035795	0.036605	0.084165	-	KHDC1
905	55226	11	34077111	34222581	312	29	1.2552	0.10469	0.036614	0.50575	+	NAT10
906	54850	19	9870943	9980101	144	19	1.9896	0.023319	0.036624	0.032695	-	FBXL12
907	9796	8	22027216	22139851	205	27	1.7311	0.041713	0.036679	0.088483	-	PHYHIP
908	3804	19	55199974	55314504	144	27	2.4453	0.0072364	0.036738	0.0041392	+	KIR2DL3
909	7918	6	31579006	31684060	282	36	1.8461	0.032436	0.036739	0.048969	-	GPANK1
910	27296	20	43952520	44059937	243	34	1.9312	0.026732	0.036827	0.060495	-	TP53TG5
911	83661	11	60417046	60533284	168	35	1.3145	0.09434	0.036834	0.42973	+	MS4A8
912	3024	6	25967260	26068040	195	24	2.1468	0.015906	0.036856	0.018081	-	HIST1H1A
913	718	19	6627846	6770662	451	61	1.5343	0.062476	0.03686	0.15773	-	C3
914	1270	11	58340146	58443206	243	24	1.4478	0.073837	0.036869	0.26782	+	CNTF
915	8350	6	25970718	26071186	199	25	2.1367	0.016312	0.036886	0.018975	+	HIST1H3A
916	85004	12	15210716	15424411	497	54	1.2718	0.10172	0.036903	0.3865	-	RERG
917	65061	2	202605177	202810273	414	58	1.5193	0.064341	0.036956	0.18194	+	CDK15
918	343450	1	196144913	196627690	788	55	1.4068	0.079749	0.036975	0.28282	-	KCNT2
919	4843	17	26033792	26177555	384	43	1.4168	0.07827	0.036992	0.26873	-	NOS2
920	2186	17	65771644	66030494	357	20	1.3143	0.094372	0.037042	0.33304	+	BPTF
921	539	21	35225757	35338158	320	39	1.5425	0.061482	0.037147	0.15114	-	ATP5O
922	80321	3	138163186	138363187	321	30	1.283	0.099748	0.037163	0.39148	-	CEP70
923	3240	16	72038470	72144955	264	31	1.6164	0.053003	0.037182	0.14671	+	HP
924	4700	22	42431530	42536888	209	19	1.7384	0.041071	0.037213	0.082832	-	NDUFA6
925	54549	17	71280523	71690227	1042	134	1.0117	0.15583	0.03728	0.82499	-	SDK2
926	8895	8	87476656	87623726	381	40	1.441	0.074794	0.037298	0.23924	+	CPNE3
927	9056	14	23192431	23339020	462	70	1.972	0.024307	0.037339	0.046137	-	SLC7A7
928	9321	14	92384243	92556484	497	38	2.326	0.010011	0.037394	0.017642	-	TRIP11
929	3068	1	156661899	156772240	213	32	1.4087	0.079459	0.037395	0.24971	-	HDGF
930	54674	7	110681062	110815510	257	27	1.4238	0.077253	0.037407	0.25354	+	LRRN3
931	55758	1	211382708	211539727	417	42	1.4907	0.068025	0.037479	0.21567	+	RCOR3
932	7798	1	23360516	23554301	368	31	1.6976	0.044789	0.03751	0.11153	-	LUZP1
933	8366	6	25977124	26077480	208	24	2.1523	0.015685	0.037514	0.017224	-	HIST1H4B
934	8359	6	25971907	26072278	201	25	2.1535	0.015641	0.037562	0.01754	+	HIST1H4A
935	120775	11	6892233	6993225	346	37	1.4219	0.077531	0.037603	0.22786	+	OR2D3
936	51060	1	52435803	52571843	178	20	1.3255	0.092496	0.037704	0.34489	-	TXNDC12
937	23617	22	19068321	19170136	286	33	2.6435	0.0041031	0.037716	0.0033525	+	TSSK2
938	55937	6	31570187	31675987	296	38	1.8277	0.033798	0.037733	0.050261	+	APOM
939	11280	3	38837260	39045136	479	45	1.9349	0.0265	0.037742	0.03542	-	SCN11A
940	1591	20	52719985	52840516	552	70	1.4912	0.067952	0.037747	0.2059	-	CYP24A1
941	2841	13	99856967	99960682	183	24	1.4209	0.077676	0.037775	0.23617	-	GPR18
941	57665	2	18685989	18791959	271	46	1.5633	0.058996	0.037775	0.16388	-	RDH14
943	1636	17	61504422	61625741	204	34	1.6143	0.053228	0.037793	0.14801	+	ACE
944	255758	3	195968090	196095165	282	30	2.1642	0.015224	0.03786	0.013534	-	TCTEX1D2
945	127845	1	204117288	204233220	300	39	2.5588	0.0052513	0.037926	0.0040541	-	GOLT1A
946	56006	19	44182851	44309142	417	60	1.7748	0.037968	0.037947	0.081983	-	SMG9
947	730291	7	63617581	63730668	492	32	1.5287	0.063173	0.037951	0.16518	+	ZNF735
948	1311	19	18843583	18952114	160	27	1.3272	0.092223	0.038048	0.28187	-	COMP
949	4172	6	52078812	52199679	343	47	1.996	0.022969	0.038158	0.026073	-	MCM3
950	149069	1	32624695	32731797	112	15	1.3317	0.091478	0.038222	0.3347	+	DCDC2B
951	653140	2	24347471	24473718	337	33	1.9183	0.027537	0.038271	0.044214	+	FAM228A
952	50813	12	6783150	6891041	244	36	1.9142	0.027795	0.038313	0.038148	+	COPS7A
953	160492	12	25579016	25851496	861	83	1.9651	0.024703	0.038326	0.052538	-	LMNTD1
954	3077	6	26037422	26146438	296	30	2.0095	0.02224	0.038354	0.029069	+	HFE
955	218	17	19591297	19701746	191	32	1.6268	0.051889	0.038406	0.12137	-	ALDH3A1
956	64963	15	88960684	89071861	132	25	1.7463	0.040379	0.038577	0.10432	+	MRPS11
957	5175	17	62346775	62454856	171	24	1.5819	0.05684	0.038606	0.12605	-	PECAM1
958	57572	19	11259969	11423168	421	44	1.839	0.032956	0.038627	0.053297	-	DOCK6
959	113178	19	1855213	1976012	266	31	1.4817	0.069205	0.038631	0.1893	+	SCAMP4
960	58485	17	7783663	7885317	236	26	1.2946	0.097721	0.03868	0.3211	-	TRAPPC1
961	55061	1	223344161	223587564	417	42	1.7782	0.037685	0.03882	0.076067	-	SUSD4
962	163	17	33863918	34103436	685	51	1.7819	0.037379	0.038841	0.082477	+	AP2B1
963	4054	11	65256030	65375858	139	28	1.4088	0.079451	0.038848	0.23347	-	LTBP3
964	131616	3	44853408	44957156	161	28	1.7353	0.041348	0.038852	0.071337	+	TMEM42
965	55964	22	42322855	42444225	268	28	1.2736	0.10141	0.038924	0.34832	+	SEPT3
966	57834	19	15973180	16095676	658	49	1.1716	0.12069	0.038933	0.45956	-	CYP4F11
967	9524	19	14590379	14726792	314	44	1.6874	0.045767	0.039015	0.097484	+	TECR
968	1460	6	31582995	31687844	280	36	1.8363	0.033154	0.03908	0.048614	+	CSNK2B
969	8518	9	111579800	111746608	606	57	1.6258	0.051992	0.039391	0.11628	-	IKBKAP
970	25987	11	76443357	76559198	305	40	1.5635	0.058973	0.039466	0.13785	+	TSKU
971	127707	1	18757424	18862540	438	63	1.7838	0.037228	0.039477	0.05473	+	KLHDC7A
972	197335	16	649363	767833	253	21	1.5092	0.065627	0.03949	0.15014	+	WDR90
973	253725	10	46172648	46338412	59	7	1.799	0.036011	0.039495	0.066274	+	FAM21C
974	7691	19	58894181	59001589	223	22	1.6751	0.046956	0.039559	0.10278	-	ZNF132
975	10873	11	86102150	86433678	1219	80	1.9337	0.026575	0.039597	0.03384	-	ME3
976	56063	1	32630040	32737954	111	15	1.3299	0.091776	0.039622	0.32962	-	TMEM234
977	3018	6	25993455	26093885	235	27	2.1612	0.01534	0.039658	0.016505	-	HIST1H2BB
978	101060400	17	46662166	46774875	291	39	1.4137	0.078723	0.039662	0.2259	-	LOC101060400
979	8352	6	25995639	26096097	235	27	2.0586	0.019767	0.039675	0.02478	+	HIST1H3C
980	55753	10	50892687	51020425	318	30	1.3115	0.094846	0.039684	0.33464	-	OGDHL
981	252969	8	11577172	11694854	566	58	1.3565	0.087475	0.039725	0.24768	+	NEIL2
982	201232	17	6889394	6993440	257	41	1.6696	0.047499	0.039737	0.10004	+	SLC16A13
983	2880	6	28443789	28552728	200	27	1.6534	0.049125	0.039783	0.11672	+	GPX5
984	9079	4	16453164	16950424	1277	135	1.471	0.07065	0.039821	0.20705	-	LDB2
984	23478	15	85162768	85309691	275	31	1.425	0.077075	0.039821	0.22946	-	SEC11A
986	3217	17	46634594	46738383	255	35	1.4157	0.078427	0.039885	0.20256	-	HOXB7
987	55823	11	118888493	119002688	247	36	1.613	0.053376	0.04004	0.13894	+	VPS11
988	2200	15	48650503	48987985	524	41	1.4643	0.071549	0.040128	0.23391	-	FBN1
989	142910	10	90296519	90416733	141	26	1.5732	0.057834	0.040147	0.16253	+	LIPJ
990	23428	14	23544504	23702869	357	68	1.5821	0.056816	0.040153	0.12771	-	SLC7A8
991	93233	19	48749709	48875191	477	48	2.0206	0.021662	0.04018	0.026941	-	CCDC114
992	598	20	30202261	30361752	261	23	1.3285	0.092009	0.040199	0.31444	-	BCL2L1
993	54209	6	41076244	41180924	187	30	1.5284	0.063205	0.040422	0.1486	-	TREM2
994	10420	1	45759555	46006840	360	35	1.3726	0.084943	0.040451	0.25928	-	TESK2
995	10273	16	680115	782768	202	19	1.5506	0.060502	0.040476	0.12611	+	STUB1
996	126123	19	50605805	50716538	176	22	1.4719	0.070521	0.040552	0.18946	-	IZUMO2
997	64092	21	15807549	16005723	561	87	1.9005	0.028686	0.040583	0.05833	-	SAMSN1
998	491	3	10315707	10783131	1541	164	1.2043	0.11423	0.0406	0.45109	-	ATP2B2
999	126820	1	85477993	85648821	483	54	1.0795	0.14019	0.040679	0.57504	+	WDR63
1000	2558	15	27061866	27244357	319	47	1.4212	0.077635	0.040818	0.2231	+	GABRA5
1001	84689	11	60113487	60235229	294	30	1.2868	0.099082	0.040819	0.33328	+	MS4A14
1002	257202	6	28421073	28533570	220	31	1.63	0.051552	0.040848	0.13247	-	GPX6
1003	3010	6	26057640	26158364	262	31	1.9684	0.024513	0.040849	0.033218	-	HIST1H1T
1004	5121	21	41189347	41351322	717	88	1.477	0.069838	0.040858	0.23015	+	PCP4
1005	25888	19	50478786	50602033	243	22	1.6371	0.050802	0.040899	0.10279	+	ZNF473
1006	10477	2	181795112	181978154	565	34	1.9912	0.02323	0.041046	0.039871	+	UBE2E3
1007	84196	1	21954791	22159688	636	70	2.3562	0.0092304	0.04113	0.0077449	-	USP48
1008	121256	12	129506271	130438212	3054	330	1.2693	0.10217	0.041189	0.35432	-	TMEM132D
1009	345456	5	176777108	176877637	100	19	1.8749	0.030401	0.041206	0.044775	-	PFN3
1010	55798	7	128066783	128192978	415	41	1.9207	0.027384	0.041208	0.032202	+	METTL2B
1011	29999	7	127183689	127291851	191	31	1.4255	0.077005	0.041224	0.19098	+	FSCN3
1012	3814	1	204109469	204215619	294	42	2.4951	0.0062958	0.041452	0.0039111	-	KISS1
1013	143162	10	49314602	49532941	273	36	2.4819	0.006535	0.041545	0.0038228	-	FRMPD2
1014	26266	7	135315979	135462943	426	49	1.2927	0.098058	0.041559	0.30852	-	SLC13A4
1015	58530	6	31633048	31735698	209	34	1.6846	0.046029	0.041596	0.098708	+	LY6G6D
1016	128853	20	30385441	30508479	239	37	1.3492	0.088638	0.041607	0.27604	-	DUSP15
1017	4839	12	6616036	6727498	206	26	1.5454	0.061127	0.04166	0.14089	-	NOP2
1018	58496	6	31588728	31690227	260	35	1.8467	0.032398	0.041695	0.046946	+	LY6G5B
1019	10978	11	57375216	57479337	140	23	1.4711	0.070632	0.041893	0.19128	+	CLP1
1020	10923	5	32535605	32654185	265	38	1.6922	0.045301	0.041959	0.083044	+	SUB1
1021	8668	1	32637971	32747205	109	16	1.2685	0.10231	0.041993	0.36669	+	EIF3I
1022	51567	6	24600205	24717115	342	40	1.1498	0.12511	0.042072	0.46643	-	TDP2
1023	285671	5	63411671	63718704	435	30	1.5603	0.059341	0.042078	0.19161	+	RNF180
1024	30062	18	56884267	56990625	311	40	1.5401	0.061769	0.042096	0.13472	-	RAX
1025	54957	16	72068756	72178215	272	33	1.5421	0.061524	0.042118	0.16	-	TXNL4B
1026	152559	4	79786364	79910582	243	28	2.5202	0.0058647	0.042261	0.0055053	-	PAQR3
1027	79133	20	13715672	13849067	368	40	1.4567	0.072601	0.042273	0.18895	+	NDUFAF5
1028	283576	14	77547613	77658134	286	48	1.4708	0.070672	0.042282	0.16697	-	ZDHHC22
1029	8335	6	25983320	26083796	225	25	2.1138	0.017267	0.042327	0.018033	-	HIST1H2AB
1030	153222	5	172433355	172616291	398	35	1.3553	0.087654	0.042342	0.24212	+	CREBRF
1031	8358	6	25981817	26082288	221	26	2.0474	0.020311	0.042377	0.023506	-	HIST1H3B
1032	8347	6	26063389	26174266	272	34	1.9602	0.024987	0.042397	0.033068	-	HIST1H2BC
1033	51555	3	179462746	179804841	874	79	1.5008	0.066706	0.042451	0.15305	-	PEX5L
1034	64324	5	176510026	176777214	539	39	1.3918	0.081991	0.042527	0.25089	+	NSD1
1035	55589	4	79647532	79887519	334	30	2.4876	0.0064311	0.042547	0.0084935	+	BMP2K
1036	136242	7	141486078	141591332	203	18	1.5942	0.05544	0.042575	0.10983	-	PRSS37
1037	9856	6	24494332	24696383	641	74	1.0457	0.14784	0.042615	0.61595	-	KIAA0319
1038	153572	5	2696279	2801769	456	58	2.4063	0.0080568	0.042683	0.008052	-	IRX2
1039	3216	17	46623099	46732343	254	37	1.3972	0.08117	0.042797	0.20182	-	HOXB6
1040	64065	6	138359642	138478660	425	51	2.4321	0.0075058	0.042833	0.0049136	-	PERP
1041	399909	11	65333686	65454910	187	31	1.3306	0.091662	0.042969	0.26157	+	PCNXL3
1042	100129128	6	73883267	73985175	354	36	1.2862	0.099193	0.042978	0.32489	-	KHDC1L
1043	10280	9	34584719	34687805	199	24	1.9257	0.027072	0.04298	0.035104	-	SIGMAR1
1044	84231	16	2155763	2278130	96	13	2.1675	0.015099	0.042985	0.0073726	+	TRAF7
1045	8334	6	26074370	26189337	290	37	1.772	0.038195	0.043054	0.06027	+	HIST1H2AC
1046	8509	10	75511669	75621589	104	11	1.5396	0.061835	0.043087	0.14806	-	NDST2
1047	3250	16	72047125	72161145	290	31	1.5122	0.065245	0.043095	0.17115	+	HPR
1048	4953	2	10530507	10638680	312	47	1.5478	0.060837	0.043114	0.14208	-	ODC1
1049	145864	15	89370519	89488857	379	57	1.4795	0.069498	0.043131	0.16507	-	HAPLN3
1050	10983	4	77918308	78048719	233	32	1.6082	0.053899	0.043134	0.10622	-	CCNI
1051	338707	11	319795	432117	170	29	1.9878	0.023415	0.043145	0.033451	+	B4GALNT4
1052	4289	7	130744855	131231398	1151	124	1.2363	0.10817	0.04323	0.39652	+	MKLN1
1052	9805	7	29909719	30079905	410	46	1.4324	0.076009	0.04323	0.2154	-	SCRN1
1054	534	6	31462228	31564625	589	52	2.2085	0.013603	0.043238	0.013375	-	ATP6V1G2
1055	4507	9	21752635	21991040	500	54	2.5586	0.0052551	0.043287	0.0041301	+	MTAP
1056	90693	7	23586998	23734327	273	39	1.3781	0.084092	0.043288	0.19638	+	CCDC126
1057	89797	11	19322271	20193147	2393	299	1.1069	0.13417	0.043419	0.55949	+	NAV2
1058	2920	4	74912752	75014997	77	19	2.1577	0.015477	0.043539	0.018337	-	CXCL2
1059	599	14	23725971	23840241	223	44	1.5104	0.065468	0.043556	0.14946	+	BCL2L2
1060	1650	1	20928260	21038037	407	51	2.1114	0.017367	0.043708	0.01668	-	DDOST
1061	80740	6	31636425	31739511	204	34	1.6841	0.046085	0.043758	0.095068	-	LY6G6C
1062	7915	6	24445197	24587435	574	57	1.1244	0.13043	0.043829	0.44499	+	ALDH5A1
1062	101928621	4	1267222	1369906	418	28	1.1569	0.12365	0.043829	0.4274	-	LOC101928621
1064	120227	11	14849551	14963874	142	22	2.1988	0.013946	0.043964	0.013181	-	CYP2R1
1065	388289	16	73110536	73228346	350	60	1.4717	0.070547	0.044042	0.18016	-	C16orf47
1066	80739	6	31641121	31744487	199	34	1.6692	0.047536	0.044044	0.10502	+	C6orf25
1067	200845	3	58427823	58538087	222	37	1.5385	0.061963	0.044107	0.12935	+	KCTD6
1068	80829	11	58296587	58439023	283	25	1.3697	0.085391	0.044226	0.276	+	ZFP91
1069	153571	5	2702058	2805511	439	57	2.4613	0.0069224	0.044314	0.0060738	+	C5orf38
1070	5274	3	167403432	167593357	466	43	1.4376	0.07528	0.044348	0.17752	+	SERPINI1
1071	341392	12	7406928	7530969	246	30	1.3067	0.095664	0.044359	0.2998	+	ACSM4
1072	1122	1	241742166	241849232	276	57	1.247	0.10619	0.044402	0.33608	-	CHML
1073	442191	6	29224467	29325432	27	7	1.2276	0.1098	0.044417	0.33443	+	OR14J1
1074	5140	11	14615191	14943605	347	38	1.392	0.081964	0.044557	0.22521	+	PDE3B
1075	8364	6	26054176	26154565	265	30	1.9512	0.025514	0.044678	0.032314	+	HIST1H4C
1076	7363	4	70295883	70441732	751	37	1.1819	0.11862	0.044693	0.46059	-	UGT2B4
1077	2618	21	34826238	34965223	207	26	2.4144	0.0078795	0.044762	0.0037336	-	GART
1078	64784	15	91023118	91238577	557	45	2.0864	0.018472	0.044801	0.01815	+	CRTC3
1079	84331	16	641849	748474	246	20	1.5092	0.065628	0.04484	0.13254	+	FAM195A
1080	285498	4	1000039	1157352	423	25	1.6201	0.052605	0.044976	0.098307	-	RNF212
1081	100529063	14	23725971	23845394	236	45	1.4995	0.066873	0.045046	0.15216	+	BCL2L2-PABPN1
1082	280636	11	57458722	57560883	107	18	1.275	0.10115	0.045121	0.32442	+	C11orf31
1083	6564	13	99286055	99454929	748	85	2.0857	0.018503	0.045134	0.018809	-	SLC15A1
1084	10351	17	66813428	67001550	427	44	1.0254	0.15259	0.045153	0.60112	-	ABCA8
1085	7638	19	44405375	44521752	350	34	2.3035	0.010625	0.045162	0.010545	+	ZNF221
1086	101928726	5	176482822	176598835	289	35	1.4597	0.072186	0.04521	0.19164	-	LOC101928726
1087	5241	11	100850355	101050544	597	52	1.5443	0.061259	0.045222	0.14756	-	PGR
1088	10786	6	25795328	25924471	334	32	1.4749	0.070125	0.045241	0.1684	-	SLC17A3
1089	4644	15	52549480	52871247	770	46	1.2605	0.10375	0.045311	0.3966	-	MYO5A
1090	6675	1	162481296	162620379	251	40	1.8847	0.029734	0.045328	0.042136	+	UAP1
1091	126147	19	49114664	49226264	110	11	2.0126	0.02208	0.045363	0.01885	-	NTN5
1092	10063	3	119338372	119446243	356	35	1.2317	0.10903	0.045413	0.34542	-	COX17
1093	144165	12	42802140	43033572	714	73	1.0974	0.13623	0.045437	0.51936	-	PRICKLE1
1094	91608	17	34008679	34120540	263	35	1.9918	0.023199	0.045516	0.036682	+	RASL10B
1095	54886	9	103741031	104137417	1179	83	1.2201	0.11122	0.045532	0.3757	+	LPPR1
1096	7381	8	97188904	97297862	180	26	1.151	0.12487	0.045548	0.4072	-	UQCRB
1097	1586	10	104540288	104647290	275	33	2.3989	0.0082219	0.045612	0.004418	-	CYP17A1
1098	101929087	7	152791290	152891673	551	39	1.3061	0.095753	0.045617	0.28163	-	LOC101929087
1099	3741	12	5103085	5205954	308	55	1.2626	0.10336	0.045653	0.3138	+	KCNA5
1100	399818	10	126384336	126530439	235	29	1.5187	0.064421	0.046021	0.14311	-	METTL10
1101	246176	17	34021530	34129897	236	33	2.0267	0.021349	0.046036	0.032978	-	GAS2L2
1102	64091	3	119310899	119429437	403	38	1.6506	0.049414	0.046041	0.085608	-	POPDC2
1103	22978	10	104797774	105003063	449	38	2.1126	0.017319	0.046066	0.017176	-	NT5C2
1104	79090	19	45616186	45731501	283	50	1.2581	0.10418	0.046208	0.32891	-	TRAPPC6A
1105	388569	19	58912971	59019199	211	21	1.6019	0.054591	0.046218	0.10688	+	ZNF324B
1106	84959	11	122476398	122735187	742	98	1.5699	0.058215	0.046232	0.13594	+	UBASH3B
1107	55856	6	24617263	24755297	393	45	1.0935	0.13709	0.046329	0.49948	+	ACOT13
1108	7044	1	226074298	226179083	201	42	1.1875	0.11751	0.04641	0.40238	-	LEFTY2
1109	140701	20	62442566	62544341	173	18	1.6838	0.046109	0.046437	0.075525	+	ABHD16B
1110	284018	17	65937217	66039765	121	10	1.4129	0.078845	0.046498	0.18014	-	C17orf58
1111	8567	11	47240927	47401582	347	33	1.2852	0.099365	0.046577	0.26461	+	MADD
1112	9657	3	121438608	121603926	439	30	1.2933	0.097952	0.046614	0.26841	-	IQCB1
1113	259286	7	142869172	142970143	98	16	1.4019	0.08048	0.046677	0.23079	+	TAS2R40
1114	1500	11	57470756	57636652	167	20	1.2073	0.11367	0.04671	0.38213	+	CTNND1
1115	100130348	11	64805844	64906583	159	26	1.2168	0.11184	0.046799	0.34422	-	TMEM262
1116	79741	10	32685057	33221805	1611	45	1.8345	0.033292	0.04681	0.042214	+	CCDC7
1117	339123	16	681667	784440	202	19	1.481	0.069309	0.046924	0.13793	-	JMJD8
1118	100500938	11	22818468	22931972	273	29	2.3117	0.010396	0.046967	0.0094143	-	CCDC179
1119	522	21	27046791	27157965	193	27	1.4722	0.070483	0.047002	0.15249	-	ATP5J
1120	79931	4	122002563	122198624	515	56	1.4768	0.06987	0.047135	0.19391	-	TNIP3
1121	55119	1	109184932	109294425	150	36	0.93781	0.17417	0.047141	0.72778	+	PRPF38B
1122	100129543	19	23249777	23380014	302	26	1.3867	0.082763	0.047143	0.21777	+	ZNF730
1123	8022	9	139038096	139146955	210	31	1.7796	0.037567	0.047222	0.043784	-	LHX3
1124	64747	3	158469051	158597508	327	42	1.6047	0.054277	0.047245	0.089283	+	MFSD1
1125	339398	1	151722765	151827882	234	31	2.6681	0.0038144	0.047267	0.0019323	-	LINGO4
1126	3895	14	55996925	56201302	583	33	1.6519	0.049274	0.047292	0.083625	+	KTN1
1127	6525	22	31427282	31550610	335	43	1.1444	0.12622	0.047309	0.42506	+	SMTN
1128	10947	8	41960464	42078701	195	25	0.98343	0.1627	0.047335	0.62831	+	AP3M2
1129	23184	15	81189667	81332235	269	27	1.2661	0.10273	0.0474	0.2997	-	MESDC2
1130	5557	12	57075364	57196146	164	23	2.368	0.0089425	0.047482	0.005868	-	PRIM1
1131	126364	19	18451947	18558428	251	44	1.2115	0.11286	0.047642	0.35684	-	LRRC25
1132	283219	11	77832289	77950006	307	35	1.8935	0.029145	0.047673	0.051416	-	KCTD21
1133	285	8	6307172	6470784	798	85	1.8633	0.031213	0.04771	0.069975	-	ANGPT2
1134	1781	2	172493919	172656668	378	41	1.799	0.036009	0.047727	0.067979	+	DYNC1I2
1135	148932	1	47023387	47132563	185	21	1.7722	0.038179	0.047779	0.062236	-	MOB3C
1136	492307	8	49916895	50038642	231	21	1.3967	0.081254	0.047793	0.25589	+	C8orf22
1137	56171	2	196552427	196983536	768	45	1.7304	0.041779	0.047807	0.064971	-	DNAH7
1138	140767	6	24076414	24197757	392	58	1.3906	0.082179	0.047855	0.21584	+	NRSN1
1139	1041	6	31032865	31138252	981	58	2.2096	0.013566	0.047916	0.012142	-	CDSN
1140	7039	2	70624412	70831147	645	67	1.2147	0.11224	0.047974	0.35047	-	TGFA
1141	3178	12	54624480	54730871	77	17	1.137	0.12777	0.048148	0.40107	+	HNRNPA1
1142	79648	8	6214113	6551140	1655	139	2.0299	0.021184	0.048324	0.029277	+	MCPH1
1143	28982	1	212981597	213122705	596	41	1.5036	0.066348	0.048331	0.16202	+	FLVCR1
1144	653659	3	149649448	149751153	216	28	1.5182	0.064478	0.048334	0.13672	-	TMEM183B
1145	9699	8	104462426	105316656	2485	59	1.1085	0.13383	0.048361	0.48249	+	RIMS2
1146	646730	3	141331934	141476234	554	81	1.3411	0.089938	0.048369	0.27462	+	LOC646730
1147	10971	2	9674096	9821184	358	58	1.2215	0.11094	0.048386	0.38613	-	YWHAQ
1148	3295	5	118738138	118928030	400	40	1.9999	0.022755	0.048509	0.023932	+	HSD17B4
1149	259307	19	50342911	50482796	326	45	1.9566	0.0252	0.04853	0.031052	-	IL4I1
1150	127833	1	202509724	202729551	432	61	1.0674	0.14289	0.048563	0.52104	-	SYT2
1151	134285	5	72360286	72477765	330	43	1.3926	0.081864	0.048666	0.2099	+	TMEM171
1152	57576	1	20940475	21094317	499	64	1.9222	0.027293	0.048672	0.031219	-	KIF17
1153	10446	1	204536298	204704597	409	50	1.4299	0.076371	0.048796	0.20954	-	LRRN2
1154	643376	11	57460986	57569253	113	17	1.228	0.10972	0.048884	0.34347	-	BTBD18
1155	404672	6	158539379	158670376	363	42	2.3842	0.0085589	0.048902	0.0067642	+	GTF2H5
1156	55106	17	33688079	33810302	326	48	2.0548	0.019949	0.04891	0.020177	-	SLFN12
1157	762	17	58177302	58286907	102	13	1.8549	0.031803	0.048976	0.03477	+	CA4
1158	80736	6	31780969	31896823	286	47	1.7025	0.044328	0.049004	0.067799	-	SLC44A4
1159	8446	2	73939325	74057284	100	12	1.4144	0.078625	0.04908	0.20269	-	DUSP11
1160	162515	17	6894949	6997242	261	43	1.6272	0.05185	0.049288	0.092175	-	SLC16A11
1161	64781	22	47030307	47184152	557	68	1.667	0.047755	0.04929	0.081562	-	CERK
1162	51477	19	18495198	18599111	202	26	1.2279	0.10974	0.049337	0.32511	-	ISYNA1
1163	51768	12	27074503	27217360	359	50	1.6347	0.051057	0.049379	0.11719	-	TM7SF3
1164	796	11	14938214	15043879	169	18	2.4056	0.0080726	0.049385	0.0077832	-	CALCA
1165	196074	11	28079798	28405054	375	34	1.1695	0.12109	0.049392	0.3796	+	METTL15
1166	23053	10	75495334	75611556	114	12	1.4621	0.071852	0.049415	0.16542	+	ZSWIM8
1167	353189	5	101519690	101682253	557	46	1.3818	0.083519	0.049532	0.18972	-	SLCO4C1
1168	9129	1	150243928	150375704	317	25	1.4926	0.067767	0.049639	0.12753	+	PRPF3
1169	24144	22	26837893	26958462	364	47	1.1955	0.11595	0.049648	0.31975	-	TFIP11
1170	79173	19	13943168	14066909	103	9	3.0679	0.0010779	0.049659	0.000199	-	C19orf57
1171	284358	19	49165999	49272976	191	17	1.8533	0.031921	0.049695	0.037693	-	MAMSTR
1172	9350	9	14669731	14772715	404	62	1.4503	0.073485	0.049819	0.16122	-	CER1
1173	146330	16	692500	805825	205	20	1.4871	0.068494	0.049922	0.13115	-	FBXL16
1174	10318	5	150359504	150517221	538	77	1.422	0.077509	0.049923	0.20226	-	TNIP1
1175	6633	19	46140712	46245569	240	33	1.4998	0.066834	0.049971	0.1299	-	SNRPD2
1176	51575	20	13644969	13815579	408	46	1.305	0.09594	0.050002	0.26715	-	ESF1
1177	50649	2	131544489	131854826	608	57	1.6753	0.046936	0.050086	0.065633	+	ARHGEF4
1178	149643	1	212953483	213070991	553	30	1.7289	0.041918	0.050302	0.072899	-	SPATA45
1179	55915	7	55383141	55551435	440	35	1.3804	0.083729	0.050356	0.23869	+	LANCL2
1180	11272	12	10948448	11052075	199	21	1.595	0.055357	0.050359	0.099921	-	PRR4
1181	373509	15	50742759	50888902	414	35	1.6686	0.047598	0.050372	0.082609	-	USP50
1182	2014	19	48778629	48883810	333	40	2.4066	0.0080507	0.050391	0.0052915	+	EMP3
1183	9992	21	35686323	35793440	302	46	0.93757	0.17423	0.050482	0.70738	+	KCNE2
1184	30817	19	14793509	14939353	496	57	1.0449	0.14803	0.050517	0.48452	-	ADGRE2
1185	57799	16	589357	729273	292	21	1.4527	0.073151	0.05057	0.14513	+	RAB40C
1186	5646	9	33700464	33849229	359	36	1.2963	0.097441	0.050593	0.23353	+	PRSS3
1187	440093	12	31894119	31995175	404	46	1.3219	0.093099	0.050601	0.23214	-	H3F3C
1188	55070	15	88986449	89139934	275	32	1.4495	0.073593	0.050613	0.17996	-	DET1
1189	29889	1	37982413	38111586	281	35	1.2268	0.10994	0.050647	0.34339	-	GNL2
1190	9722	1	161989581	162389813	1276	95	2.0196	0.02171	0.050697	0.033794	+	NOS1AP
1191	91050	4	24757739	25031826	780	94	0.84659	0.19861	0.050867	0.88175	-	CCDC149
1192	4188	6	41556194	41671984	376	71	1.3059	0.095799	0.050932	0.24717	+	MDFI
1193	1066	16	55786763	55917098	248	47	1.3049	0.095968	0.050947	0.2726	-	CES1
1194	84219	16	684622	790608	207	20	1.4728	0.070408	0.050964	0.13291	-	WDR24
1195	9920	8	1871949	2005109	632	95	1.0307	0.15134	0.050975	0.55311	+	KBTBD11
1196	940	2	204521198	204653635	289	32	1.0129	0.15556	0.051071	0.55531	+	CD28
1197	375190	2	24296350	24442507	419	35	1.7398	0.040948	0.051332	0.061328	+	FAM228B
1198	22809	19	50381959	50487193	273	39	2.0497	0.020199	0.051358	0.026025	+	ATF5
1199	168374	7	64788752	64916049	388	21	1.7509	0.039984	0.05144	0.044737	+	ZNF92
1200	26273	11	33712490	33846071	402	41	1.9534	0.025385	0.051453	0.029162	-	FBXO3
1201	2813	16	20270896	20389684	306	41	1.8018	0.035786	0.051485	0.060459	-	GP2
1202	5101	13	66826966	67854468	2198	164	1.0107	0.15609	0.051534	0.59501	-	PCDH9
1203	84326	16	634429	736371	237	19	1.48	0.069436	0.051725	0.12349	-	C16orf13
1204	256227	7	22409063	22589901	657	63	1.0184	0.15425	0.051741	0.57674	-	STEAP1B
1205	387707	10	97671331	97843496	396	48	1.3817	0.083532	0.051908	0.17185	+	CC2D2B
1206	84734	1	32662818	32764461	96	17	1.1975	0.11555	0.051917	0.35858	+	FAM167B
1207	219738	10	71340003	71443355	476	71	1.2721	0.10167	0.052016	0.30529	+	C10orf35
1208	5977	11	65051225	65170451	121	28	1.2687	0.10227	0.052031	0.30003	+	DPF2
1209	9858	9	138321545	138430739	245	47	1.1695	0.12111	0.052054	0.38371	+	PPP1R26
1210	25799	19	58928412	59034945	188	23	1.5681	0.058426	0.052061	0.10599	+	ZNF324
1211	50939	3	100891390	101089419	407	34	1.9896	0.023318	0.052119	0.020937	-	IMPG2
1212	3822	12	10533198	10638780	225	22	1.3129	0.094617	0.052176	0.21369	-	KLRC2
1213	960	11	35110417	35303949	592	79	0.95883	0.16882	0.052184	0.6345	+	CD44
1214	6645	16	69171050	69392955	385	36	1.6298	0.05157	0.052228	0.082488	+	SNTB2
1215	27115	6	136122834	136566709	584	80	1.0947	0.13683	0.052317	0.46368	+	PDE7B
1216	27143	10	72188564	72378206	593	87	1.4139	0.078702	0.052322	0.19069	+	PALD1
1217	541468	1	46619006	46736928	131	26	1.2971	0.097299	0.052354	0.2311	+	LURAP1
1218	6726	1	225915515	226028168	356	51	1.3273	0.092211	0.052374	0.22183	+	SRP9
1219	7920	6	31604726	31721137	261	37	1.6155	0.053099	0.052395	0.088516	-	ABHD16A
1220	100131378	11	33669654	33772286	296	44	1.8671	0.030943	0.052428	0.035346	-	C11orf91
1221	83888	4	15911863	16014859	316	59	1.0676	0.14286	0.052609	0.476	-	FGFBP2
1222	51421	3	134024187	134144321	256	35	1.9087	0.028147	0.05267	0.033028	-	AMOTL2
1223	54460	1	150216262	150331414	234	23	1.2181	0.11159	0.052681	0.2932	+	MRPS21
1224	5814	7	44865892	44974960	230	31	1.4149	0.078545	0.052715	0.17779	-	PURB
1225	23636	19	50360082	50482988	296	41	1.9877	0.023424	0.052824	0.027451	-	NUP62
1226	9866	11	8583584	8754205	411	47	1.1752	0.11995	0.05285	0.36667	-	TRIM66
1227	6874	20	60499854	60690866	407	42	1.003	0.15793	0.052859	0.58145	-	TAF4
1228	7294	4	48018410	48186273	419	39	1.1963	0.11578	0.052963	0.33342	-	TXK
1229	389677	8	94692798	94803268	137	22	1.7428	0.040688	0.053162	0.0609	-	RBM12B
1230	79864	11	122703236	122880430	461	58	1.2723	0.10163	0.053194	0.29351	+	C11orf63
1231	8192	19	6311463	6418915	217	20	1.3971	0.081186	0.053244	0.16232	+	CLPP
1232	9785	16	72077615	72196811	303	33	1.4262	0.076901	0.053253	0.1766	+	DHX38
1233	80144	4	78928724	79515423	1761	93	1.2172	0.11176	0.053369	0.32873	+	FRAS1
1234	8872	10	12187961	12342589	390	51	1.2501	0.10563	0.053376	0.26392	+	CDC123
1235	4828	15	85148360	85251802	190	26	1.3587	0.087128	0.053512	0.20793	-	NMB
1236	84502	14	23987244	24098009	97	25	1.1722	0.12056	0.053546	0.37398	-	JPH4
1237	3604	1	7925931	8053225	335	44	1.8649	0.031095	0.053549	0.034675	-	TNFRSF9
1238	83953	1	207081312	207193970	199	28	1.4265	0.076862	0.053579	0.14542	-	FCAMR
1239	7783	16	21158773	21275831	261	49	1.274	0.10134	0.053595	0.25031	-	ZP2
1240	51002	2	73905744	74014765	156	12	1.563	0.059026	0.053608	0.11039	-	TPRKB
1241	23596	1	241706452	241853701	400	78	1.1024	0.13515	0.053684	0.42379	-	OPN3
1242	145814	15	99461459	99601024	505	66	1.1799	0.11902	0.053689	0.34228	-	PGPEP1L
1243	23373	19	18744425	18943143	409	50	1.0568	0.14529	0.053701	0.44613	+	CRTC1
1244	8914	12	56760157	56893200	174	32	1.5929	0.055597	0.053801	0.10021	-	TIMELESS
1245	54619	10	97753159	97870627	230	30	1.5097	0.065561	0.053815	0.10482	+	CCNJ
1246	131450	3	112591532	112743950	442	46	1.7359	0.041287	0.053887	0.074721	-	CD200R1
1247	100128731	2	27243340	27344567	103	16	2.2665	0.01171	0.053916	0.010982	-	OST4
1248	117166	16	631012	734116	255	19	1.4601	0.072138	0.054098	0.12725	+	WFIKKN1
1249	55138	12	8323856	8430214	61	9	1.2481	0.10599	0.054108	0.25946	-	FAM90A1
1250	84804	2	103281089	103403341	305	37	1.2532	0.10506	0.054172	0.31003	-	MFSD9
1251	388468	18	14461737	14593599	83	16	2.1918	0.014197	0.054211	0.0067615	-	POTEC
1252	161394	14	77793762	77907587	223	26	1.2861	0.099204	0.054265	0.26628	+	SAMD15
1253	9644	10	105303784	105665195	833	91	2.0337	0.02099	0.054289	0.019379	-	SH3PXD2A
1254	25921	11	57385223	57518659	162	23	1.3516	0.088244	0.054347	0.2068	+	ZDHHC5
1255	79157	17	74682647	74825336	272	32	1.6761	0.046857	0.054349	0.067772	+	MFSD11
1256	58516	12	31383356	31529159	304	59	1.2613	0.1036	0.054375	0.24987	-	FAM60A
1257	3215	17	46618619	46721103	241	37	1.3409	0.089979	0.054416	0.18828	-	HOXB5
1258	646799	13	32827908	32936091	247	41	2.8842	0.0019623	0.05458	0.00064091	-	ZAR1L
1259	84908	2	70473108	70579293	223	21	1.4697	0.070827	0.054598	0.13627	-	FAM136A
1260	388552	19	45632003	45735058	258	48	1.2141	0.11236	0.054618	0.30668	+	BLOC1S3
1261	4287	14	92474896	92622965	495	33	1.263	0.1033	0.054619	0.3032	-	ATXN3
1262	1203	13	77516059	77626652	279	39	1.0545	0.14583	0.054637	0.47266	+	CLN5
1263	25926	17	65663949	65790319	281	36	1.4824	0.069116	0.054765	0.1321	+	NOL11
1264	3074	5	73885547	74067113	425	61	1.5897	0.055952	0.054829	0.096512	+	HEXB
1265	54805	10	104628075	104888344	614	38	2.1253	0.016779	0.05484	0.014635	+	CNNM2
1265	81492	19	46248968	46368605	302	27	2.0048	0.022494	0.05484	0.027826	-	RSPH6A
1267	10499	8	70971997	71366062	636	51	1.1087	0.13378	0.054896	0.41891	-	NCOA2
1268	4286	3	69738586	70067488	698	60	1.6527	0.049193	0.054989	0.10236	+	MITF
1269	2524	19	49149228	49259191	189	16	1.8124	0.034959	0.055009	0.03949	+	FUT2
1270	6662	17	70067161	70172561	179	31	1.091	0.13763	0.055036	0.4245	+	SOX9
1271	119032	10	104563967	104674718	285	30	2.2528	0.012137	0.055096	0.0073451	+	C10orf32
1272	84153	11	65435144	65538409	220	23	1.3571	0.087379	0.055145	0.172	-	RNASEH2C
1273	5018	14	23185731	23290998	367	51	1.959	0.025058	0.055265	0.026421	+	OXA1L
1274	9404	11	58244344	58395688	179	22	1.0253	0.1526	0.055284	0.52553	-	LPXN
1275	11244	8	124210690	124337781	58	20	1.0495	0.14697	0.05534	0.47259	-	ZHX1
1276	100129669	9	24493193	24595889	212	22	1.7364	0.04125	0.055399	0.069743	-	IZUMO3
1277	2042	3	89106674	89581284	852	52	1.1474	0.12562	0.055553	0.38131	+	EPHA3
1278	143425	11	7223181	7540276	1107	114	1.4537	0.073017	0.055651	0.14624	+	SYT9
1279	57181	2	196427798	196652426	396	45	1.1748	0.12003	0.055704	0.33683	+	SLC39A10
1280	3313	5	137840571	137961318	202	29	1.1391	0.12732	0.055766	0.39537	-	HSPA9
1281	55624	1	46604353	46735977	143	28	1.2426	0.10701	0.05581	0.26149	-	POMGNT1
1281	221458	6	39252876	39743181	1360	91	1.7076	0.043853	0.05581	0.061732	-	KIF6
1283	9107	13	25770339	25911704	237	37	1.4187	0.077997	0.055934	0.16857	-	MTMR6
1284	4855	6	32112620	32241844	628	57	1.1817	0.11867	0.055948	0.32677	-	NOTCH4
1285	9518	19	18446968	18549986	248	43	1.1574	0.12356	0.056101	0.35245	+	GDF15
1286	84622	17	5032830	5145178	236	24	1.3915	0.082036	0.056121	0.19837	-	ZNF594
1287	388969	2	85782376	85889179	198	29	1.578	0.057284	0.056157	0.087125	-	C2orf68
1288	55356	1	116469119	116662675	393	39	1.2569	0.10439	0.05618	0.26046	+	SLC22A15
1289	84871	1	48948527	50539626	2107	104	1.9455	0.025856	0.056216	0.049428	-	AGBL4
1290	219960	11	57945354	58046390	332	24	1.0365	0.14998	0.056288	0.46652	-	OR10Q1
1291	2911	6	146236032	146808782	971	73	1.2012	0.11484	0.056291	0.31689	+	GRM1
1292	26043	3	196029745	196209411	338	43	1.9647	0.024722	0.05642	0.022744	-	UBXN7
1293	2781	22	23362669	23517224	320	32	1.3665	0.085889	0.05649	0.19955	+	GNAZ
1294	130827	2	103328490	103500948	274	31	1.376	0.084415	0.056642	0.20263	+	TMEM182
1295	148523	1	150204930	150309505	199	22	1.2152	0.11214	0.056673	0.27189	+	CIART
1296	440515	19	19846648	19982560	312	50	1.8416	0.032768	0.056703	0.041909	-	ZNF506
1297	80067	2	172240761	172391562	394	40	1.0859	0.13877	0.056732	0.41753	+	DCAF17
1298	3355	3	87791929	88093964	756	45	1.2116	0.11283	0.056733	0.32176	+	HTR1F
1299	84063	19	36292552	36408048	157	14	1.4989	0.066946	0.056764	0.12846	+	KIRREL2
1300	80003	1	233069855	233481459	1121	109	1.2139	0.1124	0.056813	0.29467	-	PCNXL2
1301	83468	12	104332762	104507961	509	58	2.0705	0.019202	0.056908	0.012757	-	GLT8D2
1302	6569	5	176761432	176875849	112	21	1.7497	0.040085	0.056952	0.05242	+	SLC34A1
1303	54993	15	85094249	85216947	228	31	2.1945	0.014101	0.05697	0.012086	+	ZSCAN2
1304	10882	17	42987061	43095644	291	47	1.8488	0.03224	0.056993	0.033551	-	C1QL1
1305	27124	22	31468893	31580683	274	40	1.6836	0.046132	0.057113	0.069214	+	INPP5J
1306	4607	11	47302957	47424253	255	31	1.232	0.10897	0.057133	0.25592	-	MYBPC3
1307	2688	17	61944560	62046206	211	26	1.3662	0.085942	0.057139	0.1992	-	GH1
1308	29113	6	31029000	31130332	952	57	2.1594	0.01541	0.057176	0.012774	-	C6orf15
1309	23584	11	124567370	124672109	166	34	1.1739	0.12022	0.057221	0.30584	-	VSIG2
1310	164633	22	30066344	30177822	275	35	1.4983	0.067032	0.057388	0.12708	+	CABP7
1311	506	12	56981959	57089852	147	23	1.8072	0.035363	0.057389	0.04182	-	ATP5B
1312	57509	8	17451303	17708729	1382	103	1.5048	0.066194	0.057402	0.12097	-	MTUS1
1313	729920	7	16077152	16510947	1249	70	1.315	0.094256	0.057548	0.21546	-	ISPD
1314	10265	16	54915111	55018397	197	26	2.4181	0.0078017	0.057556	0.0037251	+	IRX5
1314	55693	11	94656845	94782678	291	43	1.369	0.085501	0.057556	0.21324	+	KDM4D
1316	81696	6	29273007	29374054	37	8	1.0937	0.13703	0.05776	0.37554	-	OR5V1
1317	8992	5	172360763	172511900	320	46	1.1397	0.1272	0.057774	0.35164	+	ATP6V0E1
1318	2701	1	35208559	35311351	335	44	1.8064	0.035428	0.05781	0.038623	+	GJA4
1319	978	1	20865444	20995401	527	50	2.0222	0.021577	0.057916	0.017453	+	CDA
1320	51471	2	73877636	73978467	184	14	1.468	0.071051	0.057945	0.13317	-	NAT8B
1321	223117	7	84574508	84866171	462	42	1.2983	0.097097	0.057969	0.27619	-	SEMA3D
1322	22885	5	148471054	148690002	568	63	1.017	0.15459	0.057977	0.4767	+	ABLIM3
1323	167227	5	112262399	112407892	356	42	1.9981	0.022854	0.057979	0.024861	+	DCP2
1323	345930	6	139067248	139275207	559	67	1.5514	0.060398	0.057979	0.11097	+	ECT2L
1325	81926	19	1826975	1935518	206	24	1.4138	0.078715	0.058008	0.15681	-	ABHD17A
1326	1465	1	201402658	201526387	482	60	1.5789	0.057181	0.058075	0.094121	-	CSRP1
1327	10606	4	57226682	57377534	350	27	1.3034	0.096226	0.058126	0.21308	+	PAICS
1328	10888	11	94060477	94184585	382	32	1.0618	0.14417	0.058217	0.41991	-	GPR83
1329	84942	15	85135607	85247521	200	29	2.2049	0.013731	0.058229	0.010165	-	WDR73
1330	219771	10	35485953	35910848	610	53	1.408	0.079573	0.058288	0.17516	+	CCNY
1331	10509	15	90677985	90822897	432	41	1.1194	0.13149	0.058374	0.38079	+	SEMA4B
1332	10512	7	80321854	80601695	551	73	1.3854	0.082968	0.058424	0.21032	-	SEMA3C
1333	23199	16	85153152	85759812	1375	192	2.0009	0.022699	0.05843	0.02741	+	GSE1
1334	25936	1	212849495	213015139	651	39	1.4515	0.073321	0.05844	0.15083	-	NSL1
1335	8737	6	3014201	3165421	351	42	1.9967	0.022927	0.05849	0.018573	+	RIPK1
1336	57654	4	1291043	1431837	380	29	1.0312	0.15122	0.058501	0.44335	+	UVSSA
1337	381	7	127178406	127281759	179	30	1.3331	0.091246	0.058543	0.18867	+	ARF5
1338	54065	21	35697749	35811452	311	49	0.85798	0.19545	0.058553	0.73804	+	SMIM11
1339	55229	1	2389975	2508061	181	25	2.0139	0.022011	0.05865	0.018397	-	PANK4
1340	4146	1	31134124	31246432	329	40	1.0823	0.13956	0.058669	0.40943	-	MATN1
1341	124944	17	6868056	6970843	238	34	1.6238	0.05221	0.058689	0.074678	+	C17orf49
1342	56147	5	140115876	140441929	611	45	0.98887	0.16136	0.058844	0.5361	+	PCDHA1
1343	9685	5	157162751	157336183	535	49	1.2858	0.099261	0.058868	0.22633	-	CLINT1
1344	60509	2	27224291	27343490	124	18	2.1628	0.015279	0.058886	0.015801	+	AGBL5
1345	1893	1	150430487	150536265	235	28	1.3708	0.085211	0.058934	0.17203	+	ECM1
1346	405	1	150732181	150899244	193	22	1.6566	0.048804	0.058946	0.060582	-	ARNT
1347	1444	17	61936965	62038688	213	24	1.3644	0.086223	0.05913	0.18755	-	CSHL1
1348	113278	20	690724	806628	569	93	1.2735	0.10142	0.059195	0.24146	-	SLC52A3
1349	142683	1	160864810	160974589	313	31	0.90717	0.18216	0.059359	0.65398	-	ITLN2
1350	54822	15	50799351	51029012	682	38	1.9758	0.024087	0.059402	0.025667	-	TRPM7
1351	51378	20	802763	946977	647	111	0.86451	0.19366	0.059492	0.71542	-	ANGPT4
1352	5310	16	2088709	2235899	90	15	2.2441	0.012414	0.059557	0.0066724	-	PKD1
1353	80343	20	13779635	14025979	668	64	1.2811	0.10009	0.059655	0.22884	-	SEL1L2
1354	65018	1	20909948	21028004	429	49	2.0816	0.01869	0.059762	0.014129	+	PINK1
1355	23210	17	74658914	74772881	179	25	1.7335	0.041504	0.059856	0.056022	-	JMJD6
1356	10103	1	46590749	46701634	134	27	1.2314	0.10909	0.059872	0.25612	+	TSPAN1
1357	57524	16	2177184	2296479	108	15	2.1684	0.015064	0.059891	0.0058405	-	CASKIN1
1358	120425	11	118014442	118145809	376	40	1.132	0.12882	0.059894	0.34649	-	AMICA1
1359	345462	5	178400776	178511388	348	40	1.6556	0.048905	0.06005	0.078677	+	ZNF879
1360	5334	2	198619426	199064608	696	48	1.6631	0.048151	0.060074	0.086092	+	PLCL1
1361	283377	12	56812301	56914769	158	25	1.8745	0.030428	0.060101	0.031422	+	SPRYD4
1362	100506718	14	85965983	86079396	380	52	1.1188	0.13162	0.060108	0.32973	+	LOC100506718
1363	10411	12	48078453	48214846	409	57	1.2591	0.104	0.060109	0.23123	-	RAPGEF3
1364	6637	2	70458510	70570869	228	20	1.4119	0.078984	0.060212	0.154	-	SNRPG
1365	4094	16	79577745	79684622	435	78	1.1592	0.12318	0.060243	0.36357	-	MAF
1366	5223	10	99136027	99243198	239	24	1.5721	0.057965	0.060259	0.093238	+	PGAM1
1367	137209	8	125935539	126041631	344	37	1.2192	0.11138	0.06027	0.27893	+	ZNF572
1368	122060	13	78221989	78388377	380	40	0.97971	0.16362	0.060357	0.52453	+	SLAIN1
1369	23510	17	72993279	73111981	384	42	1.1766	0.11968	0.06037	0.27753	+	KCTD2
1370	9628	14	72348817	73083238	2457	156	0.87303	0.19132	0.060435	0.70428	+	RGS6
1371	114825	5	159452889	159596452	286	33	1.0133	0.15546	0.060454	0.46411	-	PWWP2A
1372	84266	19	6322444	6425261	194	18	1.3807	0.083678	0.060473	0.15129	+	ALKBH7
1373	55124	8	22082810	22265560	451	39	1.4524	0.073196	0.06053	0.1312	+	PIWIL2
1374	6713	8	125960720	126084525	381	32	1.1161	0.13219	0.060714	0.35711	+	SQLE
1375	6281	1	151905386	152016714	279	24	1.5377	0.062057	0.060746	0.10829	-	S100A10
1376	25839	16	70464472	70607457	126	18	1.4445	0.074297	0.060747	0.13061	-	COG4
1377	100287477	19	50511973	50697102	261	28	1.2044	0.11422	0.060774	0.27577	-	LOC100287477
1378	1124	7	29183991	29603944	1355	134	0.97349	0.16516	0.060839	0.52826	+	CHN2
1379	8630	12	57096237	57231574	209	26	2.2893	0.01103	0.060878	0.0065214	+	HSD17B6
1380	4284	12	56793286	56898435	166	27	1.585	0.056483	0.060917	0.086409	-	MIP
1381	4990	14	60925938	61028525	179	16	0.98515	0.16228	0.060966	0.51823	+	SIX6
1382	79047	19	34237751	34356666	439	70	1.7581	0.039366	0.060976	0.052782	+	KCTD15
1383	342538	17	59617794	59718563	223	33	1.2833	0.099685	0.06102	0.227	-	NACA2
1384	6688	11	47326409	47450127	264	30	1.2568	0.10441	0.061079	0.23089	-	SPI1
1385	10464	13	73306202	73640592	714	51	1.2749	0.10116	0.061143	0.23872	+	PIBF1
1386	1135	8	27267278	27386813	361	42	2.3363	0.0097381	0.061173	0.0057219	-	CHRNA2
1387	7072	2	70386576	70525886	242	18	0.93829	0.17405	0.061207	0.57551	-	TIA1
1388	1442	17	61922268	62024027	220	20	1.3855	0.082948	0.06133	0.17126	-	CSH1
1389	55289	2	111440150	111925799	1126	85	1.9101	0.02806	0.061396	0.027982	+	ACOXL
1390	1446	4	70746799	70862288	236	25	1.5932	0.055556	0.0614	0.086131	+	CSN1S1
1391	80741	6	31594461	31698150	251	34	1.5882	0.05612	0.061436	0.083338	-	LY6G5C
1392	400359	15	38938799	39042239	381	54	1.6063	0.054108	0.061509	0.089864	+	C15orf53
1393	3932	1	32666840	32801766	97	18	1.1328	0.12866	0.061547	0.36612	+	LCK
1394	79630	1	150194687	150303335	193	22	1.1681	0.12138	0.061572	0.28249	+	C1orf54
1395	81341	11	57984264	58085732	361	25	0.97911	0.16376	0.061763	0.49913	-	OR10W1
1396	54921	16	69101912	69216493	181	31	1.2856	0.099299	0.061847	0.19786	-	CHTF8
1397	59286	19	9888556	9990797	135	20	1.8122	0.034975	0.061864	0.035614	+	UBL5
1398	51065	15	63395539	63499741	304	34	1.3072	0.095578	0.061878	0.20696	-	RPS27L
1399	6396	3	10292613	10412872	312	46	2.0377	0.020792	0.061886	0.0141	-	SEC13
1400	7919	6	31447996	31560252	740	60	2.1574	0.015487	0.062031	0.011424	-	DDX39B
1401	283578	14	77755102	77893396	333	41	1.1162	0.13217	0.062064	0.34372	-	TMED8
1402	22802	1	86962759	87096437	327	43	1.1644	0.12213	0.06221	0.27892	+	CLCA4
1403	10524	11	65429473	65537077	226	24	1.3093	0.095211	0.062227	0.1786	+	KAT5
1404	5217	3	149632691	149738741	216	29	1.4415	0.074725	0.062293	0.13699	-	PFN2
1405	64750	17	62488400	62708386	253	12	1.0918	0.13746	0.062296	0.35506	-	SMURF2
1406	7570	10	45446273	45550777	288	34	1.1638	0.12226	0.06233	0.31593	+	ZNF22
1407	54922	19	49173842	49294136	232	26	1.6488	0.049591	0.062372	0.071798	-	RASIP1
1408	285195	3	142934063	143617373	2036	200	2.2439	0.012419	0.062458	0.0098373	-	SLC9A9
1409	2793	17	47233596	47337936	260	34	1.5034	0.066365	0.062459	0.12342	-	GNGT2
1410	64101	7	127617124	127721002	131	23	1.0213	0.15355	0.062481	0.43899	-	LRRC4
1411	55652	12	48102426	48226536	385	59	1.1735	0.1203	0.062486	0.28702	+	SLC48A1
1412	118	4	2795454	2981803	411	58	1.6196	0.052659	0.062539	0.088049	+	ADD1
1413	27010	7	144099034	144583488	1193	88	1.2963	0.097428	0.062601	0.20864	-	TPK1
1414	51322	10	28771355	28962041	396	33	1.2227	0.11073	0.062609	0.24794	+	WAC
1415	399888	11	47558230	47660746	108	22	1.2563	0.1045	0.062626	0.22372	+	FAM180B
1416	729230	3	46345235	46452413	324	26	1.0675	0.14287	0.062638	0.38212	+	CCR2
1417	221120	11	43852357	43991825	446	63	1.8909	0.029321	0.062835	0.03471	+	ALKBH3
1418	10728	12	57007125	57132138	181	22	2.3191	0.010195	0.062864	0.0051639	-	PTGES3
1419	6596	3	148697904	148854341	332	34	1.6376	0.050751	0.062926	0.07651	-	HLTF
1420	5529	14	63789838	64060095	562	53	1.0712	0.14203	0.06295	0.42255	-	PPP2R5E
1421	79816	19	2927536	3045182	178	32	1.7502	0.040041	0.062965	0.047289	+	TLE6
1422	55663	19	58935910	59042601	169	23	1.4799	0.069455	0.063064	0.11504	+	ZNF446
1423	60494	11	86035778	86184151	507	53	1.8631	0.031225	0.0631	0.032967	+	CCDC81
1424	26589	15	88952709	89060633	107	25	1.5523	0.0603	0.063129	0.1118	-	MRPL46
1425	51604	20	43994707	44104885	232	35	1.4036	0.080224	0.063147	0.16923	+	PIGT
1426	340277	7	23669231	23792269	301	37	1.2959	0.097505	0.06319	0.17663	+	FAM221A
1427	146853	17	34037890	34142098	224	30	1.9135	0.027841	0.063319	0.036646	+	C17orf50
1428	122042	13	32263679	32427009	389	42	1.3734	0.084817	0.063351	0.17308	+	RXFP2
1429	288	10	61736056	62543284	2344	123	0.82364	0.20507	0.063379	0.71756	-	ANK3
1430	143686	11	94848677	95015705	305	59	1.7857	0.037075	0.063397	0.048745	-	SESN3
1431	2962	19	6329580	6443291	201	19	1.3259	0.092436	0.063432	0.16804	-	GTF2F1
1432	170463	19	18479679	18595372	243	33	1.0595	0.14469	0.063486	0.40601	+	SSBP4
1433	23223	10	99066458	99211127	405	33	1.4493	0.07362	0.063499	0.13274	-	RRP12
1434	132946	4	57321375	57440149	334	39	1.782	0.037376	0.063664	0.036802	+	ARL9
1435	7984	7	144002489	144127725	114	16	1.0242	0.15286	0.063728	0.42996	+	ARHGEF5
1435	55510	6	74054285	74177289	254	45	1.7061	0.043996	0.063728	0.051906	+	DDX43
1437	5623	19	6325305	6425860	187	18	1.3626	0.086506	0.063733	0.15233	-	PSPN
1438	100505679	15	84791138	84904921	80	18	2.2822	0.011238	0.063739	0.0058268	+	UBE2Q2L
1439	80122	2	135672076	135832301	312	27	2.133	0.016463	0.063794	0.012034	-	MAP3K19
1440	91369	17	48720551	48835270	215	38	2.2002	0.013896	0.063826	0.010544	-	ANKRD40
1441	8079	12	6807158	6912721	289	43	1.7108	0.043559	0.064001	0.048426	-	MLF2
1442	2004	12	96538207	96711606	419	68	0.90887	0.18171	0.064063	0.58748	+	ELK3
1443	2532	1	159123803	159226290	233	41	1.2381	0.10783	0.064102	0.23425	+	ACKR1
1444	162466	17	47250728	47359009	272	39	1.498	0.067073	0.064114	0.12131	-	PHOSPHO1
1445	1175	19	47291423	47404203	128	27	0.86955	0.19227	0.064146	0.63137	-	AP2S1
1446	781	7	81525760	82123031	1679	155	1.0909	0.13765	0.064282	0.37145	-	CACNA2D1
1447	8395	9	71270188	71674092	1026	79	0.95077	0.17086	0.064454	0.52839	+	PIP5K1B
1448	9208	2	238486224	238740290	906	81	1.2967	0.097376	0.064553	0.22006	+	LRRFIP1
1449	8771	20	62278004	62380051	288	27	1.046	0.14777	0.064617	0.39365	+	TNFRSF6B
1450	2954	14	77737230	77847940	302	41	1.0975	0.13622	0.064661	0.33311	+	GSTZ1
1451	401665	11	4853049	4954113	320	45	1.2617	0.10353	0.064689	0.2257	+	OR51T1
1452	51573	16	19463015	19583450	406	33	1.3078	0.095475	0.064733	0.20557	-	GDE1
1453	5042	13	25620276	25722705	314	36	1.3141	0.094408	0.064755	0.17605	+	PABPC3
1454	57693	19	9201056	9324091	419	45	0.97041	0.16592	0.064821	0.49179	+	ZNF317
1455	56891	19	40144946	40250088	320	33	1.1641	0.12219	0.064913	0.29085	+	LGALS14
1456	7369	16	20294373	20414200	301	47	2.1642	0.015224	0.064988	0.010893	-	UMOD
1457	7265	5	159386156	159542550	293	38	0.90215	0.18349	0.065111	0.59991	+	TTC1
1458	54963	20	62521182	62637800	19	2	1.5233	0.063845	0.065136	0.068831	-	UCKL1
1459	79590	1	156657094	156760923	203	33	1.2325	0.10889	0.065137	0.23728	-	MRPL24
1460	100861519	5	37790540	37925901	486	67	1.3378	0.090477	0.065224	0.1765	+	GDNF-AS1
1461	79892	10	121538916	121683140	389	27	1.7165	0.043031	0.065244	0.076282	-	MCMBP
1462	55861	20	43984633	44089250	210	32	1.081	0.13984	0.065276	0.40042	+	DBNDD2
1463	3838	17	65981848	66092970	168	13	1.2024	0.11461	0.065414	0.25179	+	KPNA2
1464	157680	8	99975299	100940447	1458	51	1.2956	0.097565	0.065603	0.22756	+	VPS13B
1465	9984	18	164520	318059	354	38	1.6638	0.048081	0.065615	0.058065	-	THOC1
1466	29956	1	150887649	150997479	177	25	1.5681	0.058429	0.065623	0.072703	-	CERS2
1467	55722	5	562405	705807	396	27	1.4632	0.071706	0.065656	0.11154	+	CEP72
1468	2697	6	121706745	121820873	426	44	1.5584	0.059566	0.065675	0.080046	+	GJA1
1469	9679	10	126257861	126482930	635	62	1.2837	0.099617	0.065722	0.17944	-	FAM53B
1470	100130311	17	4752948	4856227	252	29	1.109	0.13372	0.065774	0.31862	+	C17orf107
1471	23037	5	31589345	32161038	1867	241	1.8067	0.035407	0.065816	0.056043	+	PDZD2
1472	56146	5	140124444	140441929	580	45	0.95386	0.17008	0.065882	0.52274	+	PCDHA2
1473	91869	3	53072499	53214480	326	36	2.1873	0.014362	0.065898	0.009938	-	RFT1
1474	131540	3	195874323	195988308	433	53	0.92492	0.17751	0.065909	0.51178	-	ZDHHC19
1475	8924	15	28306183	28617313	176	14	1.0251	0.15265	0.065972	0.41847	-	HERC2
1476	974	17	61956098	62059710	205	30	1.4848	0.068799	0.066079	0.11583	-	CD79B
1476	28999	3	126011478	126126236	344	51	1.2483	0.10597	0.066079	0.22271	-	KLF15
1478	54808	18	46517846	47037172	1267	62	1.1649	0.12203	0.066089	0.32038	-	DYM
1479	81606	2	30404397	30532899	324	52	1.0456	0.14786	0.066139	0.41706	+	LBH
1480	79905	16	18945256	19125264	391	35	1.3634	0.086374	0.066191	0.15014	+	TMC7
1481	219956	11	57741353	57999059	812	50	1.1882	0.11738	0.066215	0.25614	+	OR9Q1
1482	129303	2	85775670	85879822	202	28	1.5664	0.058629	0.066216	0.073671	-	TMEM150A
1483	10861	4	922861	1037228	67	10	1.5155	0.064823	0.066253	0.073189	-	SLC26A1
1484	57412	10	104579183	104711656	337	31	2.3792	0.0086754	0.066314	0.0039591	+	AS3MT
1485	712	1	22913118	23016175	293	39	1.8677	0.030899	0.066343	0.032251	+	C1QA
1486	85315	6	52176926	52322575	434	69	1.8214	0.034276	0.066359	0.03958	+	PAQR8
1487	29994	2	160125490	160523059	1097	75	1.3318	0.091462	0.066364	0.23075	-	BAZ2B
1488	8139	16	81298571	81463803	598	72	1.0941	0.13695	0.066485	0.36316	+	GAN
1489	29125	11	2267507	2373143	401	39	1.0949	0.13677	0.066546	0.32599	-	C11orf21
1490	259308	9	34673050	34779535	223	31	1.6896	0.045556	0.066583	0.059434	-	FAM205A
1491	8714	17	48662205	48819063	312	57	2.0567	0.019858	0.066619	0.015628	+	ABCC3
1492	100505555	19	9848088	9953862	165	17	1.3883	0.082515	0.066642	0.15742	-	LOC100505555
1493	219959	11	57932217	58033194	315	25	0.97562	0.16463	0.066645	0.45988	+	OR1S1
1494	388585	1	2410184	2511684	189	25	2.0074	0.022353	0.066655	0.016241	-	HES5
1495	4666	12	57056211	57169326	148	21	2.3178	0.010231	0.066774	0.0050184	-	NACA
1496	339145	16	85081964	85196114	527	71	0.9935	0.16023	0.066798	0.44296	-	FAM92B
1497	11117	2	27251435	27359271	114	20	2.15	0.015778	0.066866	0.013795	+	EMILIN1
1498	644974	3	129750674	129867233	83	6	1.2253	0.11023	0.06691	0.22743	+	ALG1L2
1499	5130	3	195911239	196064623	469	50	1.8529	0.03195	0.066942	0.027088	-	PCYT1A
1500	3902	12	6831670	6937621	292	43	1.6591	0.048551	0.066972	0.055205	+	LAG3
1501	2022	9	130527291	130667052	233	47	0.77894	0.21801	0.066999	0.75903	-	ENG
1502	64926	19	15512435	15625382	167	35	1.3674	0.085746	0.067024	0.1719	-	RASAL3
1503	54346	6	167654803	167779502	408	48	0.96243	0.16792	0.067037	0.4731	+	UNC93A
1504	79671	11	118989036	119104725	169	23	1.0412	0.14888	0.067229	0.40353	+	NLRX1
1505	2201	5	127543601	127923735	968	62	1.0748	0.14124	0.067257	0.39924	-	FBN2
1506	251	2	233221552	233325424	320	37	1.0074	0.15687	0.067355	0.45323	+	ALPPL2
1506	10919	6	31797536	31915464	295	46	1.6145	0.05321	0.067355	0.072707	-	EHMT2
1508	55252	2	25912253	26151312	512	39	1.0295	0.15162	0.067433	0.41472	-	ASXL2
1509	11060	16	69746187	70025644	539	43	2.2702	0.011598	0.067457	0.0066976	+	WWP2
1510	4005	11	33830122	33963836	301	56	1.7198	0.042732	0.067506	0.052659	-	LMO2
1511	1455	19	1891148	2031337	271	30	1.2556	0.10464	0.067527	0.19506	+	CSNK1G2
1512	2356	9	130515137	130626799	185	35	0.80863	0.20936	0.067577	0.708	+	FPGS
1513	101928147	21	35722204	35823947	282	44	0.80663	0.20994	0.067644	0.71509	-	C21orf140
1514	79777	17	43159967	43271548	208	37	1.4001	0.080741	0.067647	0.13702	+	ACBD4
1515	5768	1	180073968	180219430	456	56	0.88683	0.18758	0.06765	0.58193	+	QSOX1
1516	140467	19	7530169	7635911	336	47	1.1079	0.13396	0.067652	0.31244	+	ZNF358
1517	728715	12	9499658	9605776	128	17	1.4059	0.079874	0.067696	0.11179	-	LOC728715
1518	259285	7	142830512	142931528	142	16	1.2133	0.11251	0.067719	0.25015	+	TAS2R39
1519	6565	3	121563171	121713034	387	25	1.4194	0.077886	0.067816	0.13848	+	SLC15A2
1520	7356	11	62136507	62240678	318	50	1.4246	0.077133	0.067923	0.13235	+	SCGB1A1
1521	26065	19	34613352	34770420	398	48	1.0336	0.15067	0.067936	0.4183	+	LSM14A
1522	60468	6	90586247	91056627	944	126	1.1253	0.13023	0.068062	0.3214	-	BACH2
1523	25937	3	149185022	149471060	873	97	0.9184	0.1792	0.068161	0.54941	-	WWTR1
1524	284654	1	38026821	38150595	276	47	1.0274	0.15212	0.068238	0.4343	-	RSPO1
1525	1565	22	42472501	42576883	234	25	1.4893	0.068208	0.068279	0.10634	-	CYP2D6
1526	23300	16	81019458	81130955	385	24	0.78591	0.21596	0.068289	0.74384	+	ATMIN
1527	58527	6	139299819	139414439	316	47	1.654	0.049059	0.068298	0.068964	+	ABRACL
1528	161725	15	31723884	32212875	1152	60	0.97257	0.16538	0.068333	0.50058	-	OTUD7A
1529	168391	7	151603464	151767019	468	59	1.914	0.027809	0.068366	0.028023	+	GALNTL5
1530	646262	1	23229536	23349524	224	32	1.7362	0.04126	0.068477	0.057821	-	LACTBL1
1531	23007	3	155147670	155512878	949	61	2.0366	0.020847	0.068487	0.015581	-	PLCH1
1532	22852	10	27234054	27439427	627	43	1.6113	0.053552	0.068537	0.076351	-	ANKRD26
1533	51075	11	57429995	57558445	149	20	1.0641	0.14363	0.068697	0.36924	+	TMX2
1534	388799	20	55055960	55161576	294	49	1.4779	0.069716	0.068723	0.13622	+	FAM209B
1535	79738	12	76688266	76792222	184	31	2.2038	0.013768	0.068726	0.0080678	-	BBS10
1536	5763	12	6825255	6930118	304	44	1.6998	0.044588	0.068846	0.047174	+	PTMS
1537	5371	15	74237014	74390160	303	39	1.7501	0.040052	0.068851	0.045029	+	PML
1538	6801	2	37014841	37243673	600	56	1.8155	0.034727	0.068875	0.043045	-	STRN
1539	197258	16	70438498	70564177	100	20	1.3792	0.083924	0.068962	0.13311	+	FUK
1540	84125	12	85380099	85708235	383	35	1.0051	0.15741	0.069011	0.43937	+	LRRIQ1
1541	57192	19	7537496	7648895	364	48	0.87318	0.19128	0.069018	0.56621	+	MCOLN1
1542	121227	12	59215937	59364319	384	38	1.1053	0.13452	0.069053	0.33783	-	LRIG3
1543	1145	17	4751064	4856369	255	29	1.0988	0.13592	0.06908	0.31178	-	CHRNE
1544	11283	19	15676029	15790448	718	54	1.4461	0.074076	0.069149	0.11156	+	CYP4F8
1545	9512	7	102887873	103020349	178	25	1.2232	0.11063	0.069178	0.22519	+	PMPCB
1546	667	6	56272785	56869426	1122	62	2.6183	0.0044181	0.069225	0.0025351	-	DST
1547	11099	14	88882122	89071123	296	28	1.4968	0.067219	0.069286	0.12664	-	PTPN21
1548	113026	17	43139008	43259891	256	35	1.4186	0.078012	0.069334	0.13079	-	PLCD3
1549	25959	19	11224943	11358243	393	46	1.5952	0.055333	0.069348	0.070267	-	KANK2
1550	221955	7	6398747	6537837	513	55	0.91365	0.18045	0.069351	0.52943	-	DAGLB
1551	340075	5	149625909	149732525	224	43	1.1606	0.1229	0.069365	0.27184	-	ARSI
1552	58985	1	24396261	24519783	353	48	1.1415	0.12683	0.06942	0.2681	-	IL22RA1
1553	6506	11	35222752	35491610	749	71	0.86413	0.19376	0.069499	0.62162	-	SLC1A2
1553	26258	15	45829417	45951909	267	31	0.9209	0.17855	0.069499	0.54832	+	BLOC1S6
1555	91056	11	65491369	65598062	243	31	1.1671	0.12158	0.069515	0.25445	-	AP5B1
1556	11278	13	74210149	74758400	1447	167	0.84283	0.19966	0.069547	0.66559	-	KLF12
1557	90952	11	124573019	124682223	191	34	1.0864	0.13866	0.069608	0.32447	-	ESAM
1558	3000	17	7855988	7973658	397	51	1.1449	0.12612	0.06963	0.28352	+	GUCY2D
1559	64132	17	48373393	48490512	401	42	1.4787	0.069605	0.069644	0.11545	+	XYLT2
1560	25830	22	44170387	44308378	492	54	1.9874	0.023437	0.069666	0.01746	-	SULT4A1
1560	54942	9	111646673	111753238	317	31	1.71	0.043631	0.069666	0.049243	+	FAM206A
1562	10296	4	1233642	1383925	529	32	0.94051	0.17348	0.069717	0.47886	+	MAEA
1563	344807	3	112484556	112614797	518	45	1.5713	0.058062	0.06995	0.080122	-	CD200R1L
1564	283471	12	51186701	51331667	320	31	0.955	0.16979	0.069957	0.48906	+	TMPRSS12
1565	26152	20	25604744	25727515	268	20	1.1824	0.11852	0.069998	0.31936	-	ZNF337
1566	25758	11	33513877	33745648	494	61	1.6096	0.053742	0.07017	0.065921	+	KIAA1549L
1567	55379	17	48408594	48524914	372	35	1.5601	0.059373	0.0702	0.0833	-	LRRC59
1568	4868	19	36266274	36392895	202	24	1.2837	0.099626	0.070236	0.20788	-	NPHS1
1569	23001	4	85540690	85937544	375	36	1.4802	0.069412	0.07028	0.11421	-	WDFY3
1570	9101	15	50666579	50843280	493	49	1.395	0.081507	0.070369	0.14686	+	USP8
1571	79571	7	127170682	127275654	192	31	1.2727	0.10156	0.070435	0.18787	-	GCC1
1572	10911	1	7857672	7963551	431	45	1.7788	0.037639	0.070543	0.034602	-	UTS2
1573	51503	11	94645787	94756776	270	40	1.3983	0.081014	0.070613	0.16252	-	CWC15
1574	6568	6	25733125	25882287	454	35	1.5195	0.064316	0.070614	0.10395	-	SLC17A1
1575	54838	10	104453727	104626022	399	40	2.2486	0.012268	0.070627	0.0050952	+	WBP1L
1576	10631	13	38086719	38222981	465	38	1.2511	0.10545	0.070646	0.19813	-	POSTN
1577	333	19	36308806	36420699	158	12	1.448	0.073811	0.070652	0.11485	+	APLP1
1578	643226	5	145189204	145349816	357	54	1.2194	0.11134	0.070704	0.2546	-	GRXCR2
1579	220979	10	45443146	45546470	286	37	1.0764	0.14087	0.070847	0.35157	-	C10orf25
1580	435	7	65490776	65608330	237	19	1.9549	0.025297	0.070889	0.013996	+	ASL
1581	2829	3	46012291	46118979	357	26	1.2523	0.10523	0.07113	0.20543	-	XCR1
1582	8740	19	6611264	6720599	454	46	1.3805	0.08372	0.071224	0.13075	-	TNFSF14
1583	144453	12	69987334	70143196	538	54	0.92907	0.17643	0.071228	0.46858	-	BEST3
1584	4982	8	119885796	120014383	432	39	0.95296	0.17031	0.071262	0.46885	-	TNFRSF11B
1585	3213	17	46576232	46717634	347	42	1.169	0.1212	0.071337	0.24542	-	HOXB3
1586	53630	16	81222176	81374747	630	75	1.0776	0.14061	0.071376	0.35572	+	BCO1
1587	645202	15	28544547	28653243	1	1	1.4655	0.07139	0.07139	0.07139	-	LOC645202
1588	51225	17	47237589	47350587	290	38	1.4531	0.0731	0.071597	0.12723	+	ABI3
1589	6427	17	74680197	74783493	147	22	1.7189	0.042817	0.071639	0.046343	-	SRSF2
1590	90634	13	32924860	33052490	212	34	2.8655	0.0020818	0.071757	0.00052209	-	N4BP2L1
1591	6228	5	81519139	81624235	186	28	0.87206	0.19159	0.071805	0.5531	-	RPS23
1592	221191	16	58263901	58378951	414	39	0.85627	0.19592	0.071889	0.60866	-	PRSS54
1593	6590	20	43830880	43933205	306	23	1.7428	0.040687	0.071954	0.059576	-	SLPI
1594	6146	1	6195080	6309679	159	26	1.0662	0.14318	0.071958	0.36123	-	RPL22
1595	81797	6	29291200	29393068	32	7	1.0586	0.14489	0.071981	0.32668	-	OR12D3
1596	26224	13	77529389	77651331	288	39	0.93884	0.17391	0.071999	0.48095	-	FBXL3
1597	123688	15	78749906	78879715	260	27	1.887	0.029583	0.072129	0.029221	+	HYKK
1598	54507	1	150471846	150583413	182	33	1.3096	0.095158	0.072175	0.15913	+	ADAMTSL4
1599	100287387	2	239703187	239806320	140	21	1.6925	0.045276	0.072372	0.041464	-	LOC100287387
1600	174	4	74251933	74371492	231	27	0.99739	0.15929	0.072444	0.40031	+	AFP
1601	26032	3	33141537	33310707	474	60	1.1218	0.13097	0.072459	0.30852	-	SUSD5
1602	80863	6	32066140	32169720	233	40	1.276	0.10098	0.072662	0.18746	-	PRRT1
1603	114294	15	63363999	63484260	357	38	1.148	0.12548	0.072772	0.27776	+	LACTB
1604	55840	3	121504030	121655373	443	28	1.1441	0.12628	0.072818	0.26962	+	EAF2
1605	27000	7	102902921	103035320	178	26	1.1891	0.11721	0.072919	0.23653	-	DNAJC2
1606	23370	19	7370481	7587371	577	40	1.2478	0.10606	0.072948	0.20606	+	ARHGEF18
1607	51107	1	150187799	150291609	174	21	1.022	0.15338	0.072964	0.35951	-	APH1A
1608	26520	14	58825370	58944232	101	26	1.3852	0.082992	0.072969	0.14932	-	TIMM9
1609	55561	11	64541661	64662041	174	32	1.0632	0.14385	0.072995	0.34055	-	CDC42BPG
1610	124512	17	74672912	74779962	153	23	1.714	0.043263	0.073143	0.046951	+	METTL23
1611	81565	17	8266447	8421495	250	36	1.1477	0.12555	0.073162	0.30414	+	NDEL1
1612	8897	22	30229149	30476857	499	39	2.1726	0.014905	0.073323	0.011039	+	MTMR3
1613	11260	12	64748153	64892464	243	28	1.1291	0.12944	0.073334	0.26876	+	XPOT
1614	4609	8	128698315	128803680	255	53	1.4795	0.069504	0.073586	0.10152	+	MYC
1615	1646	10	4979967	5110225	544	64	1.304	0.096118	0.073839	0.17339	-	AKR1C2
1616	51426	5	74757657	74945646	299	28	0.84137	0.20007	0.073917	0.58706	+	POLK
1617	114900	11	47561216	47665961	108	21	1.1834	0.11832	0.073944	0.23385	-	C1QTNF4
1618	89876	3	119371869	119535949	422	47	1.2709	0.10188	0.074054	0.20103	+	MAATS1
1619	51093	1	156648263	156756752	218	38	1.1226	0.13079	0.07407	0.28398	+	RRNAD1
1620	347252	9	38356525	38474444	429	70	1.2143	0.11232	0.074261	0.23001	-	IGFBPL1
1621	2689	17	61907572	62010039	215	16	1.4067	0.079755	0.074312	0.12721	-	GH2
1622	56145	5	140130783	140441929	558	44	0.89304	0.18592	0.074388	0.53375	+	PCDHA3
1623	56947	2	228139867	228272552	484	50	1.2469	0.10622	0.074476	0.2054	+	MFF
1624	213	4	74219972	74337129	262	28	0.96753	0.16664	0.074485	0.42261	+	ALB
1625	4148	2	20141813	20262455	280	33	1.76	0.039206	0.074524	0.03494	-	MATN3
1626	375743	9	72274438	72424916	248	37	0.9236	0.17785	0.074586	0.48731	-	PTAR1
1627	6783	4	70656930	70775870	300	38	1.3551	0.08769	0.074666	0.13371	-	SULT1E1
1628	9372	1	52557678	52862358	283	31	1.1898	0.11706	0.074805	0.27177	+	ZFYVE9
1629	3123	6	32496546	32607613	31	6	1.5649	0.058806	0.074818	0.060413	-	HLA-DRB1
1630	282974	10	133946038	134195377	838	84	1.6275	0.051812	0.074847	0.076764	-	STK32C
1631	3214	17	46602869	46705743	233	33	1.2104	0.11306	0.074932	0.1992	-	HOXB4
1632	56977	4	184776509	184994679	593	91	2.2425	0.012465	0.074941	0.0073689	+	STOX2
1633	5452	19	42540262	42686625	96	10	0.99266	0.16044	0.075091	0.4292	-	POU2F2
1634	401250	6	31446739	31548008	711	56	2.104	0.017688	0.075098	0.011272	+	MCCD1
1635	92	2	148552086	148738396	232	22	0.83877	0.2008	0.075188	0.61434	+	ACVR2A
1636	57143	14	78216426	78450297	875	70	0.99082	0.16089	0.075253	0.40334	+	ADCK1
1637	128602	20	56675983	56786186	222	45	1.4953	0.067418	0.075391	0.10246	+	C20orf85
1638	201514	19	58869245	58979694	243	25	1.4719	0.07053	0.075465	0.10351	+	ZNF584
1639	93550	10	46061039	46218251	392	25	1.3723	0.084993	0.075476	0.16851	-	ZFAND4
1640	114821	6	28489407	28605112	203	28	1.4156	0.078447	0.075563	0.11688	-	ZBED9
1641	161003	13	39490062	39614996	545	49	1.6279	0.051775	0.075581	0.054613	-	STOML3
1642	22924	2	27143525	27300087	188	19	1.4626	0.071791	0.075738	0.12336	+	MAPRE3
1643	53358	9	91570686	91843682	691	76	0.86714	0.19293	0.075757	0.54177	-	SHC3
1644	390243	11	93988803	94090858	291	36	0.95045	0.17094	0.075819	0.46258	+	IZUMO1R
1645	8673	2	85754614	85859156	237	28	1.4857	0.068682	0.075927	0.085703	+	VAMP8
1646	91147	8	94717072	94881462	182	25	1.4737	0.070284	0.075946	0.10174	+	TMEM67
1647	7779	1	211698381	211802099	362	54	0.91296	0.18063	0.075966	0.46086	-	SLC30A1
1648	645843	3	152007487	152108779	148	22	0.86621	0.19319	0.076182	0.54399	-	TMEM14E
1649	388	2	20596835	20699201	354	55	0.7429	0.22877	0.076197	0.72378	+	RHOB
1650	23245	9	119137504	120227317	2916	231	1.6077	0.053948	0.076232	0.071522	-	ASTN2
1651	54899	3	58268617	58461815	712	36	1.5079	0.065792	0.076254	0.099376	+	PXK
1652	90871	9	7746490	7849806	340	76	1.4025	0.080379	0.07632	0.12482	-	TMEM261
1653	128387	1	212915170	213040167	561	27	1.6047	0.054281	0.076394	0.065097	+	TATDN3
1654	2842	12	12763995	12899121	263	39	1.5744	0.057694	0.076419	0.070187	-	GPR19
1655	22894	13	73279540	73406344	247	30	1.4208	0.077687	0.076477	0.11929	-	DIS3
1656	653808	16	29739561	29842969	62	6	1.4849	0.068786	0.076579	0.074296	+	ZG16
1657	128866	20	32349110	32492173	255	39	2.3165	0.010266	0.076684	0.0039188	+	CHMP4B
1658	552	12	63486539	63597971	336	31	1.6386	0.050652	0.076725	0.074379	-	AVPR1A
1659	8470	4	186456598	186927870	1730	196	2.228	0.012941	0.076765	0.0089523	-	SORBS2
1660	770	19	49091272	49199451	40	6	1.4206	0.077714	0.076777	0.10531	-	CA11
1661	9797	3	10240177	10372906	367	45	1.932	0.026678	0.076853	0.016124	+	TATDN2
1662	8131	16	85800	238697	208	34	1.6823	0.046251	0.076923	0.038563	-	NPRL3
1663	1585	8	143941975	144049259	317	18	1.5496	0.060613	0.076928	0.068183	-	CYP11B2
1664	2188	11	22594079	22697387	171	25	1.4077	0.07961	0.076936	0.13592	-	FANCF
1665	255022	10	105163144	105268648	218	38	1.0649	0.14347	0.076965	0.32073	-	CALHM1
1666	10791	2	85761531	85870511	229	30	1.5055	0.066103	0.076968	0.079658	+	VAMP5
1667	1609	4	902672	1017348	95	13	1.4471	0.073928	0.076983	0.0831	-	DGKQ
1668	9860	1	113565792	113717824	322	30	0.85585	0.19604	0.076988	0.56398	+	LRIG2
1669	50488	17	4686635	4851356	391	45	1.0011	0.1584	0.076991	0.36609	+	MINK1
1670	1178	19	40171893	40278669	363	35	0.88699	0.18754	0.077057	0.49534	-	CLC
1671	9738	16	19485179	19614730	437	35	1.192	0.11663	0.07706	0.2355	+	CCP110
1672	5327	8	41982236	42115242	189	25	1.1551	0.12402	0.077287	0.2484	-	PLAT
1673	574537	4	70404135	70555360	719	48	0.87881	0.18975	0.077289	0.51267	-	UGT2A2
1674	27092	17	64910980	65079518	476	85	0.98573	0.16213	0.077326	0.41572	+	CACNG4
1675	250	2	233193348	233297599	278	38	0.9376	0.17423	0.077374	0.45193	+	ALPP
1676	11011	17	60504447	60742842	232	30	1.4969	0.06721	0.077587	0.095273	+	TLK2
1677	50604	1	206988699	207092568	159	31	1.3702	0.085315	0.077639	0.1378	+	IL20
1678	10077	11	2273195	2389430	432	37	1.0447	0.14809	0.077649	0.31854	+	TSPAN32
1679	55328	10	89983621	90393611	793	76	0.97291	0.1653	0.077688	0.41815	-	RNLS
1680	2015	19	6837560	6990464	574	56	1.1051	0.13455	0.077696	0.28788	+	ADGRE1
1681	440077	12	8240807	8382642	153	22	0.85339	0.19672	0.07782	0.5823	+	ZNF705A
1682	2662	10	48375785	48489138	232	53	0.95973	0.1686	0.077843	0.41588	-	GDF10
1683	80816	18	31108541	31381159	598	51	1.338	0.090445	0.077854	0.15862	+	ASXL3
1684	4139	1	220651568	220887799	591	44	1.1373	0.1277	0.077856	0.28145	+	MARK1
1685	51738	3	10277434	10384631	283	41	2.0682	0.019311	0.077899	0.0094432	-	GHRL
1686	1363	4	166250097	166469482	826	64	1.3336	0.091163	0.077995	0.15139	+	CPE
1687	23281	13	29344485	30130084	2276	164	0.68787	0.24577	0.078004	0.81071	+	MTUS2
1688	3663	7	128527976	128640089	233	38	0.76378	0.2225	0.078027	0.66615	+	IRF5
1689	65078	22	20178938	20305816	183	36	1.2468	0.10624	0.078193	0.18633	-	RTN4R
1690	1443	17	61899372	62001089	215	17	1.3857	0.082915	0.078279	0.13274	-	CSH2
1691	647309	3	190520526	190660190	349	38	1.0431	0.14844	0.078317	0.3247	-	GMNC
1692	101928058	8	1870830	1972833	422	72	0.78172	0.21719	0.078397	0.64804	-	LOC101928058
1693	200232	20	55049785	55151208	275	44	1.5181	0.064499	0.0784	0.10765	+	FAM209A
1694	662	5	172521445	172641390	285	31	1.2005	0.11497	0.078401	0.20737	+	BNIP1
1695	8732	6	89269988	89723440	855	54	1.026	0.15245	0.07847	0.39865	-	RNGTT
1696	5471	4	57209528	57351802	316	26	1.1983	0.1154	0.078484	0.21303	-	PPAT
1697	55260	19	48785613	48917489	354	45	2.2388	0.012585	0.078488	0.0062325	-	TMEM143
1698	387921	13	39562448	39674246	227	25	1.5859	0.056386	0.078582	0.065093	+	NHLRC3
1699	10044	9	130450596	130591048	212	34	0.98714	0.16179	0.078592	0.40275	-	SH2D3C
1700	27040	16	28946147	29052104	28	9	1.0028	0.15797	0.078766	0.33924	+	LAT
1701	53	11	47210853	47320457	213	24	1.3788	0.083984	0.079031	0.12033	-	ACP2
1702	219	9	38342661	38448662	407	70	1.1717	0.12065	0.079091	0.23407	+	ALDH1B1
1703	729974	19	56233171	56334545	363	63	0.82734	0.20402	0.079101	0.56982	+	RFPL4AL1
1704	80755	17	41052543	41166515	125	21	1.1964	0.11578	0.079107	0.20868	-	AARSD1
1705	1843	5	172145093	172248203	353	55	0.86303	0.19406	0.079161	0.51761	-	DUSP1
1706	26512	13	51877678	52077275	359	34	2.2459	0.012356	0.079231	0.0087438	-	INTS6
1707	5971	19	45454707	45591456	258	35	1.3547	0.087759	0.079249	0.13923	+	RELB
1708	54165	3	182610153	182753731	241	33	1.2818	0.099955	0.079326	0.17724	-	DCUN1D1
1709	64431	12	100543865	100668202	246	30	0.97403	0.16502	0.079506	0.38151	+	ACTR6
1710	126	4	100207649	100323917	521	40	1.1664	0.12172	0.079528	0.2306	-	ADH1C
1711	2580	4	793065	976174	459	44	1.2397	0.10755	0.079623	0.18622	-	GAK
1712	55839	16	80990103	81116712	497	32	0.82426	0.2049	0.079635	0.57565	+	CENPN
1713	26092	1	179801177	179939212	319	31	1.5269	0.063389	0.079683	0.069231	+	TOR1AIP1
1714	84647	10	74644519	74764590	97	13	0.89772	0.18467	0.079759	0.45708	-	PLA2G12B
1715	440738	1	242108792	242214630	153	29	1.3687	0.085548	0.079783	0.13956	-	MAP1LC3C
1716	201895	4	39498917	39690481	461	57	1.2901	0.098516	0.079796	0.16427	-	SMIM14
1717	283638	14	105281650	105413107	342	24	0.90364	0.18309	0.079869	0.44828	+	CEP170B
1718	9293	1	174367212	174468683	186	20	1.1211	0.13112	0.079996	0.30172	+	GPR52
1719	137392	8	94662480	94791481	194	29	1.4285	0.076569	0.08002	0.11464	+	FAM92A1
1720	9818	13	25825222	25966561	186	33	1.3491	0.088653	0.080081	0.14205	+	NUPL1
1721	5701	7	102934852	103059842	183	29	1.0701	0.14228	0.080091	0.29809	+	PSMC2
1722	256006	5	74314122	74582703	620	41	1.6474	0.049737	0.080157	0.057312	-	ANKRD31
1723	51507	20	54993641	55143942	391	46	1.8522	0.031996	0.080173	0.039406	+	RTFDC1
1724	79634	2	175210457	175344303	276	25	1.0479	0.14734	0.080219	0.31499	+	SCRN3
1725	6781	8	23649434	23762320	352	35	1.0383	0.14956	0.080546	0.33298	-	STC1
1726	27433	9	130443803	130547628	151	28	1.0548	0.14576	0.08057	0.3252	-	TOR2A
1727	26155	1	829583	944679	4	2	1.4288	0.076529	0.080652	0.073069	-	NOC2L
1727	84069	1	851872	960488	4	2	1.4288	0.076529	0.080652	0.073069	+	PLEKHN1
1727	339451	1	845967	951099	4	2	1.4288	0.076529	0.080652	0.073069	+	KLHL17
1730	440400	17	6865736	6967852	231	33	1.5082	0.065758	0.080695	0.080897	+	RNASEK
1731	7762	11	6897654	7059718	510	55	1.0244	0.15283	0.080778	0.33272	+	ZNF215
1732	7764	20	52133610	52260801	345	55	1.1603	0.12297	0.08081	0.23855	-	ZNF217
1733	51449	2	70435231	70558317	234	18	1.3889	0.082427	0.080929	0.12463	+	PCYOX1
1734	146177	16	21969462	22218287	198	26	1.3555	0.087623	0.08093	0.12284	+	VWA3A
1735	51255	2	85772391	85874831	210	28	1.523	0.063874	0.080947	0.070059	+	RNF181
1736	8788	14	101143202	101251467	309	51	1.0476	0.14741	0.081011	0.30344	+	DLK1
1737	4131	5	71353118	71555397	463	68	2.1873	0.014361	0.081037	0.0094413	+	MAP1B
1738	79622	16	53829	157669	75	16	1.9347	0.026512	0.081212	0.01227	+	SNRNP25
1739	2868	4	2915232	3092474	501	47	1.0767	0.1408	0.081252	0.30321	+	GRK4
1740	138715	9	34571455	34678011	220	27	1.6725	0.047208	0.081257	0.04607	-	ARID3C
1741	64641	8	25649246	25952640	863	106	0.67237	0.25067	0.08133	0.79171	-	EBF2
1742	79991	10	105587316	105728045	354	37	1.2964	0.097424	0.08139	0.14932	-	OBFC1
1743	30832	5	178437607	178560022	334	32	1.6458	0.049903	0.081558	0.056931	+	ZNF354C
1744	10186	13	39867029	40227356	1108	96	2.1864	0.014394	0.081753	0.0067431	-	LHFP
1745	7122	22	19460547	19565068	293	41	2.2261	0.013002	0.081823	0.0040688	-	CLDN5
1746	1362	17	28655942	28846675	231	20	0.75701	0.22452	0.081867	0.65302	+	CPD
1747	4689	22	37207030	37324059	365	53	1.3889	0.082439	0.081977	0.1254	+	NCF4
1748	56144	5	140136672	140441929	532	44	0.86017	0.19485	0.082282	0.51958	+	PCDHA4
1749	100652807	3	28567222	28667981	178	35	1.5022	0.06652	0.082313	0.098656	-	LOC100652807
1750	4116	1	53642564	53754282	160	25	1.1707	0.12085	0.082449	0.23618	-	MAGOH
1751	119395	10	105182561	105288997	230	36	1.7074	0.043875	0.082492	0.043665	-	CALHM3
1752	84952	15	57618703	57892925	1069	131	1.1807	0.11886	0.082541	0.22834	+	CGNL1
1753	390877	19	6346362	6462415	181	18	1.2727	0.10156	0.082585	0.15011	+	LOC390877
1754	339448	1	3755697	3866857	362	37	1.4917	0.067892	0.082708	0.092129	-	C1orf174
1755	8748	14	70939078	71072756	400	35	0.95004	0.17105	0.082716	0.41054	-	ADAM20
1756	8092	12	85623713	85745562	148	18	1.1911	0.11682	0.082767	0.22063	+	ALX1
1757	152789	4	5976661	6252318	937	132	1.1292	0.12941	0.082819	0.26409	-	JAKMIP1
1758	337867	13	99802679	100088753	685	52	0.89413	0.18563	0.082841	0.46658	+	UBAC2
1759	146956	17	48400581	48508820	362	33	1.5067	0.065938	0.08304	0.078802	+	EME1
1760	387990	14	58812644	58925419	99	26	1.3569	0.087413	0.083104	0.14526	+	TOMM20L
1761	647174	13	51865168	51989555	231	28	2.6773	0.0037105	0.083137	0.0018414	+	SERPINE3
1762	22876	10	121435559	121638663	483	39	0.76048	0.22348	0.083284	0.65902	+	INPP5F
1763	64127	16	50677507	50816990	195	33	1.0811	0.13982	0.08329	0.32099	+	NOD2
1764	4883	5	32660284	32841830	483	61	1.004	0.15769	0.083399	0.35311	+	NPR3
1765	26341	3	97801542	97902483	413	20	1.88	0.030056	0.083442	0.03246	+	OR5H1
1766	376132	12	69952344	70054942	304	36	0.79817	0.21239	0.083478	0.562	-	LRRC10
1767	1956	7	55036678	55329262	731	102	1.3918	0.081987	0.083486	0.12554	+	EGFR
1768	84911	19	37046207	37169499	221	22	1.0504	0.14677	0.083506	0.31748	+	ZNF382
1769	23534	7	128544234	128745227	549	57	0.85523	0.19621	0.083527	0.51049	-	TNPO3
1770	202052	5	138695892	138830171	81	13	1.0961	0.13652	0.083541	0.27573	-	DNAJC18
1771	64284	2	238432965	238549769	572	64	1.2311	0.10915	0.083585	0.18256	-	RAB17
1772	10062	11	47219851	47340584	235	24	1.3604	0.086851	0.083605	0.12055	+	NR1H3
1773	56033	9	96663909	96767608	331	39	0.70116	0.2416	0.083787	0.72784	-	BARX1
1774	79153	16	30065977	30175264	64	9	1.4884	0.068326	0.083795	0.065605	-	GDPD3
1775	388125	15	62405734	62508359	236	38	0.9516	0.17065	0.083855	0.38521	-	C2CD4B
1776	26049	5	74023399	74213832	343	27	1.0825	0.13952	0.083894	0.27995	-	FAM169A
1777	9374	6	32071229	32181458	260	42	1.174	0.1202	0.083937	0.21544	+	PPT2
1778	54867	2	27205774	27314565	100	15	1.5985	0.054966	0.084025	0.075753	+	TMEM214
1779	83855	19	1802398	1913564	188	18	1.3763	0.084368	0.084053	0.11411	-	KLF16
1780	122618	14	105341153	105449573	294	25	0.84852	0.19807	0.084069	0.49338	+	PLD4
1781	4301	6	168177602	168422703	840	65	0.98356	0.16267	0.084143	0.39063	+	MLLT4
1782	6647	21	32981935	33091244	242	33	1.4141	0.078668	0.084155	0.11052	+	SOD1
1782	51124	18	44631390	44752745	343	27	1.205	0.11411	0.084155	0.20366	-	IER3IP1
1784	123775	16	81037102	81160872	410	37	0.61722	0.26854	0.084396	0.85743	-	C16orf46
1785	8749	8	39392087	39637583	464	49	1.3606	0.086813	0.084573	0.11895	+	ADAM18
1786	2301	1	47831744	47933724	198	26	1.6703	0.047429	0.084904	0.04914	+	FOXE3
1787	79091	16	8665497	8790079	410	47	1.0837	0.13926	0.085011	0.29259	+	METTL22
1788	221491	6	34164157	34266904	245	24	1.6023	0.054548	0.085287	0.062861	-	C6orf1
1789	817	4	114322188	114733669	926	97	0.66908	0.25172	0.085297	0.75597	-	CAMK2D
1790	11167	3	120063061	120219918	432	47	1.3008	0.09667	0.085414	0.16263	-	FSTL1
1791	80209	13	39534002	39662213	330	33	1.7548	0.039649	0.085572	0.034184	-	PROSER1
1792	3976	22	30586436	30692840	214	48	1.2802	0.10023	0.085656	0.14494	-	LIF
1792	11196	10	121602085	121754170	505	36	1.4813	0.06926	0.085656	0.10389	+	SEC23IP
1794	23469	6	64295707	64474407	262	24	0.91585	0.17987	0.085689	0.43785	+	PHF3
1795	3673	5	52235156	52440609	778	58	1.1807	0.11886	0.085962	0.20778	+	ITGA2
1796	4277	6	31412054	31528901	990	77	1.8869	0.029586	0.085968	0.021597	+	MICB
1797	7782	15	45724676	45865005	127	25	1.0403	0.1491	0.085989	0.34776	-	SLC30A4
1798	91646	19	33160679	33331714	463	42	1.5111	0.065377	0.086091	0.086726	+	TDRD12
1799	4722	11	47550562	47656115	116	23	1.1229	0.13075	0.086221	0.2349	+	NDUFS3
1800	646603	4	146551356	146703949	378	47	0.97325	0.16521	0.086233	0.3543	+	C4orf51
1801	23520	4	165068159	165168863	348	27	2.2865	0.011113	0.08632	0.00641	-	ANP32C
1802	5922	3	141155891	141384186	472	54	1.212	0.11276	0.086354	0.20086	+	RASA2
1803	219958	11	57920676	58021653	300	25	0.85633	0.19591	0.08639	0.47622	-	OR1S2
1804	5142	1	66208193	66890262	1502	109	1.2532	0.10507	0.086409	0.17457	+	PDE4B
1805	54798	4	155105527	155462930	934	85	1.4527	0.073154	0.086447	0.099312	-	DCHS2
1806	11317	20	43885483	43996464	368	38	1.6943	0.045105	0.086483	0.062455	+	RBPJL
1807	941	3	119193140	119328481	424	48	1.5181	0.064494	0.086534	0.078092	-	CD80
1808	55709	11	47543749	47650567	111	22	1.1168	0.13204	0.086563	0.23664	-	KBTBD4
1809	440193	14	91687667	91934188	618	80	1.7174	0.04295	0.086633	0.046394	-	CCDC88C
1810	90799	17	62452878	62584069	167	10	1.4126	0.078882	0.08669	0.096264	+	CEP95
1811	55258	2	88419814	88536156	245	31	1.1782	0.11936	0.086755	0.2021	+	THNSL2
1812	23609	3	12548513	12675212	313	29	0.92891	0.17647	0.086811	0.40306	+	MKRN2
1813	80864	6	32082382	32186062	258	42	1.1961	0.11584	0.086879	0.19368	+	EGFL8
1814	51300	3	119167324	119293128	402	41	1.3578	0.087264	0.086897	0.1222	+	TIMMDC1
1815	80210	2	232013294	232288606	602	63	1.4724	0.070461	0.086905	0.107	+	ARMC9
1816	116369	6	35861291	36042413	398	44	1.4408	0.074825	0.08715	0.096581	-	SLC26A8
1817	116372	2	133352337	133479070	235	30	1.5109	0.065411	0.087272	0.087781	-	LYPD1
1818	4900	11	124559829	124667102	162	33	1.0178	0.1544	0.087328	0.30777	+	NRGN
1818	57154	7	98575058	98791743	404	47	0.95381	0.17009	0.087328	0.38218	-	SMURF1
1820	57473	20	62538057	62651223	11	2	1.3399	0.090134	0.0874	0.098305	-	ZNF512B
1821	54987	1	53629771	53736289	177	31	1.0731	0.14162	0.087525	0.30183	-	C1orf123
1822	51001	8	97201645	97323796	201	29	0.87931	0.18962	0.087542	0.44658	-	MTERF3
1823	339184	17	20716708	20849453	206	27	0.76749	0.2214	0.087546	0.58661	-	CCDC144NL
1824	1447	4	70770974	70876726	203	22	1.6688	0.047579	0.08768	0.049697	-	CSN2
1825	9241	17	54621060	54722951	160	27	1.1504	0.12498	0.087726	0.21274	+	NOG
1826	66037	2	198541603	198701036	170	19	1.6965	0.044898	0.087823	0.046987	-	BOLL
1827	56983	3	119137785	119263555	364	33	1.4409	0.074801	0.087827	0.096393	+	POGLUT1
1828	55069	7	66336203	66473538	250	19	1.956	0.025232	0.087859	0.016947	+	TMEM248
1829	51264	17	48395228	48500562	363	33	1.4792	0.069543	0.087973	0.084179	-	MRPL27
1830	3351	6	78121948	78223120	249	32	1.5283	0.063218	0.088067	0.066735	-	HTR1B
1831	649	8	21972653	22119839	274	46	1.305	0.095941	0.088178	0.14942	+	BMP1
1832	4711	3	179272575	179392288	203	38	0.93947	0.17375	0.088282	0.41121	+	NDUFB5
1833	51522	6	10673148	10791577	126	32	1.3673	0.085762	0.088426	0.13889	+	TMEM14C
1834	56302	7	142555648	142680820	285	22	0.82898	0.20356	0.088453	0.52035	-	TRPV5
1835	219541	11	57421182	57529804	131	19	0.88004	0.18942	0.088479	0.45382	-	MED19
1836	84808	1	860579	967473	6	2	1.3305	0.091669	0.088509	0.099003	-	PERM1
1837	140739	2	238825587	239001423	468	38	0.68957	0.24523	0.088655	0.70947	+	UBE2F
1838	170392	10	74603339	74742787	96	13	0.85982	0.19494	0.088709	0.4578	+	OIT3
1839	23287	9	88111454	88406944	739	48	0.84875	0.19801	0.088752	0.49044	-	AGTPBP1
1840	25891	11	35403374	35601848	643	84	1.0887	0.13815	0.088893	0.29163	-	PAMR1
1841	93	3	38445790	38584633	258	21	1.924	0.027176	0.088999	0.026539	+	ACVR2B
1842	653519	1	145714595	145877103	22	8	1.1102	0.13345	0.089098	0.23368	-	GPR89A
1843	23248	1	150286624	150499042	549	29	1.3116	0.094821	0.089135	0.1378	+	RPRD2
1844	8178	19	18503473	18682937	329	33	0.9816	0.16315	0.089138	0.37294	-	ELL
1845	23546	19	48817559	48929634	280	42	2.2197	0.013218	0.089166	0.0053144	+	SYNGR4
1846	25827	3	33268934	33495505	506	40	0.86116	0.19458	0.089184	0.46831	+	FBXL2
1847	7027	13	114189003	114345788	183	14	1.0672	0.14295	0.089233	0.27183	+	TFDP1
1848	4621	17	10481843	10610626	326	39	0.61105	0.27058	0.089279	0.81628	-	MYH3
1849	29015	11	57124427	57245053	184	33	1.1915	0.11672	0.089297	0.21151	-	SLC43A3
1850	5732	14	52731016	52845324	424	47	1.0114	0.15591	0.089338	0.31516	+	PTGER2
1851	6942	22	42506019	42714768	444	46	1.1344	0.12831	0.089575	0.23444	-	TCF20
1852	2078	21	39689183	40083704	1165	132	0.89827	0.18452	0.089608	0.43703	-	ERG
1853	84064	18	44583781	44726891	385	29	1.4533	0.073072	0.089768	0.094303	-	HDHD2
1854	9663	18	2866992	3063313	600	89	1.7102	0.043611	0.08982	0.045861	-	LPIN2
1855	2523	19	49201268	49308647	255	30	1.5182	0.064487	0.090026	0.078578	-	FUT1
1856	79727	1	26687269	26806219	262	47	1.2744	0.10127	0.090133	0.17466	+	LIN28A
1857	4707	14	92532467	92638153	394	29	1.1678	0.12145	0.090151	0.2295	-	NDUFB1
1858	284546	1	51392129	51663754	404	34	1.0974	0.13623	0.090221	0.25095	+	C1orf185
1859	5495	2	44345984	44521570	404	45	1.6164	0.052999	0.090336	0.05688	+	PPM1B
1860	57129	3	179256253	179372434	164	24	0.73605	0.23085	0.090373	0.6253	-	MRPL47
1861	586	12	24912958	25152393	905	101	0.70319	0.24097	0.090379	0.67552	-	BCAT1
1862	113146	14	105353590	105494694	380	29	0.76576	0.22191	0.090389	0.55878	-	AHNAK2
1863	23025	19	17662137	17849123	491	76	1.0777	0.14059	0.09039	0.26072	-	UNC13A
1864	140838	20	25543571	25654648	241	22	1.0516	0.1465	0.090498	0.30093	-	NANP
1865	84888	15	50949730	51107910	439	36	1.8652	0.031077	0.090653	0.01893	-	SPPL2A
1866	283383	12	131388452	131676010	1011	97	1.227	0.10992	0.090826	0.18514	+	ADGRD1
1867	2949	1	110204406	110310890	210	39	0.89766	0.18468	0.090858	0.41714	+	GSTM5
1868	577	6	69295210	70149403	2193	98	0.62903	0.26467	0.091086	0.76915	+	ADGRB3
1869	9509	5	178487852	178822431	931	126	0.77068	0.22045	0.091136	0.60188	-	ADAMTS2
1870	2557	4	46870917	47046424	469	43	0.82191	0.20556	0.091206	0.50447	-	GABRA4
1871	317749	14	24389083	24525617	425	38	0.65558	0.25605	0.09123	0.73274	+	DHRS4L2
1872	9922	3	12888542	13164652	803	109	2.3027	0.010649	0.091306	0.0043225	-	IQSEC1
1873	117195	11	18092502	18210027	343	30	1.1868	0.11766	0.091342	0.23427	+	MRGPRX3
1874	55726	12	27008112	27141254	339	53	1.4045	0.080092	0.091378	0.10485	-	ASUN
1875	3898	1	201299966	201418669	363	57	1.0483	0.14725	0.09141	0.27773	-	LAD1
1876	138162	9	138337026	138441761	258	45	0.89205	0.18618	0.091429	0.42517	-	C9orf116
1877	79853	2	228176872	228294022	488	51	1.1507	0.12493	0.091431	0.22189	-	TM4SF20
1878	119692	11	4819467	4920438	346	37	1.2101	0.11311	0.091482	0.18916	-	OR51S1
1879	57520	2	197013971	197508416	1261	95	1.4451	0.07422	0.091517	0.10795	-	HECW2
1880	7942	6	41601716	41753997	480	84	1.0897	0.13793	0.09156	0.25214	-	TFEB
1881	5094	12	53795886	53924946	138	23	0.97541	0.16468	0.091574	0.33651	+	PCBP2
1882	6157	11	8653995	8761419	223	40	0.86691	0.193	0.091617	0.45886	+	RPL27A
1883	86	3	179230708	179356193	227	34	0.64269	0.26021	0.091764	0.74932	+	ACTL6A
1884	54978	2	26937131	27054099	250	27	1.5786	0.057212	0.0918	0.067204	+	SLC35F6
1885	2696	19	46121490	46235717	261	35	1.2812	0.10007	0.091818	0.13933	+	GIPR
1886	115330	7	1034218	1148905	463	36	1.0373	0.1498	0.091943	0.27301	+	GPR146
1887	10227	4	2882288	2986586	195	29	1.2483	0.10596	0.092031	0.17942	-	MFSD10
1888	818	10	75522259	75684349	184	16	1.1655	0.12191	0.092057	0.2026	-	CAMK2G
1889	8577	9	103185520	103389918	474	41	1.5767	0.057434	0.092165	0.069741	+	TMEFF1
1890	118487	10	75491808	75593406	92	10	1.284	0.099575	0.092235	0.15732	+	CHCHD1
1891	6996	12	104309593	104432656	425	48	1.8327	0.033426	0.092371	0.02086	+	TDG
1892	165904	3	39174706	39284112	259	45	1.0412	0.14889	0.092442	0.28173	-	XIRP1
1893	51728	16	46979	153632	68	15	1.9262	0.027042	0.092446	0.011293	-	POLR3K
1894	65258	18	11833470	11958796	454	64	1.1459	0.12592	0.092462	0.2283	-	MPPE1
1895	100169851	11	125608006	125711495	362	27	0.74336	0.22863	0.092469	0.58891	+	PATE3
1896	317761	14	60852674	61002764	249	18	0.77182	0.22011	0.092473	0.55521	-	C14orf39
1897	343637	20	889095	1032907	555	105	1.9411	0.026124	0.092497	0.021179	-	RSPO4
1898	101926982	2	9739437	9855837	353	61	0.95224	0.17049	0.092506	0.3846	-	LOC101926982
1899	1025	9	130498305	130603052	175	31	0.622	0.26697	0.092509	0.7734	+	CDK9
1900	4698	7	123131083	123247958	217	27	1.6381	0.050698	0.092515	0.051584	-	NDUFA5
1901	162073	16	19075254	19182952	162	29	0.84361	0.19944	0.09253	0.45897	+	ITPRIPL2
1902	53917	5	176678199	176780744	178	23	0.84724	0.19843	0.092581	0.4613	-	RAB24
1903	158248	9	130428358	130543879	159	28	0.98812	0.16155	0.092642	0.33411	+	TTC16
1904	7089	19	2947636	3097846	153	29	0.89889	0.18435	0.092673	0.41772	-	TLE2
1905	4154	3	151912120	152233569	484	51	1.1444	0.12623	0.092707	0.22471	+	MBNL1
1906	55704	2	55464978	55697057	714	57	0.83728	0.20122	0.092834	0.48141	-	CCDC88A
1907	85439	14	81676994	81952789	654	76	1.0359	0.15012	0.092852	0.30621	-	STON2
1908	10406	20	44048229	44160172	291	44	1.1838	0.11826	0.092915	0.20889	+	WFDC2
1909	7326	17	4122512	4319969	270	25	0.71302	0.23792	0.092956	0.63588	-	UBE2G1
1910	162989	19	42652745	42774304	116	7	1.3072	0.095566	0.093058	0.13232	-	DEDD2
1911	399967	11	125596025	125698714	354	26	0.75568	0.22492	0.09315	0.5667	-	PATE2
1912	51569	13	38873942	38987143	181	16	0.92477	0.17754	0.093273	0.40668	+	UFM1
1913	6329	17	61965914	62116876	234	41	1.2428	0.10697	0.093277	0.1805	-	SCN4A
1914	9690	7	156881655	157112066	605	47	0.93338	0.17531	0.093293	0.38383	+	UBE3C
1915	140707	12	125428194	125560349	554	67	2.0674	0.019351	0.093296	0.0080744	+	BRI3BP
1916	2887	7	50607760	50911159	946	79	0.77107	0.22033	0.093323	0.55972	-	GRB10
1917	200931	3	195893383	196010301	395	53	0.78744	0.21551	0.093378	0.5142	+	SLC51A
1918	23172	10	126440354	126575239	258	31	1.2415	0.10721	0.093554	0.16339	+	FAM175B
1919	100131539	11	71475091	71582593	139	9	1.0197	0.15393	0.093621	0.2783	-	ZNF705E
1920	5707	2	231871578	232087541	494	51	0.71681	0.23675	0.093661	0.62732	+	PSMD1
1921	26297	11	17759595	18084709	591	66	0.8107	0.20877	0.093701	0.52325	-	SERGEF
1922	163486	1	197423878	197794623	474	37	0.7232	0.23478	0.093729	0.62982	-	DENND1B
1923	55788	6	70335641	70557049	642	46	1.124	0.13052	0.093844	0.24071	-	LMBRD1
1924	54926	9	33767162	33970401	480	36	0.7569	0.22455	0.093886	0.57751	+	UBE2R2
1925	9499	5	137153536	137273540	118	22	1.318	0.093746	0.093923	0.14237	+	MYOT
1926	2264	5	176463906	176575143	299	37	1.1389	0.12736	0.093961	0.22035	+	FGFR4
1927	10627	18	3197472	3306234	339	42	1.9813	0.02378	0.094074	0.011849	+	MYL12A
1928	22836	5	94999181	95182071	465	65	0.85715	0.19568	0.094308	0.46376	+	RHOBTB3
1929	84340	5	73967029	74113196	320	33	0.78654	0.21577	0.09435	0.51787	-	GFM2
1930	80222	1	150409840	150530085	294	25	1.2324	0.10889	0.094355	0.16784	+	TARS2
1931	219957	11	57907906	58008990	291	29	1.0214	0.15354	0.094366	0.2871	+	OR9Q2
1932	55199	11	71448557	71562280	98	6	1.0769	0.14076	0.094389	0.24316	+	FAM86C1
1933	402055	22	26829850	26937904	298	39	1.0246	0.15279	0.0944	0.27725	+	SRRD
1934	23632	1	150179554	150287478	175	21	0.90967	0.1815	0.094481	0.37487	+	CA14
1935	93649	17	12519207	12722266	510	84	1.0477	0.14739	0.094483	0.27784	+	MYOCD
1936	25871	3	112671291	112788555	178	37	1.532	0.062766	0.094542	0.085812	-	C3orf17
1937	9098	17	4981687	5128327	311	32	1.0554	0.14563	0.094558	0.28043	+	USP6
1938	7803	6	64231917	64343493	172	18	1.2545	0.10483	0.094589	0.17901	+	PTP4A1
1939	10941	4	70404135	70568967	780	52	0.79613	0.21298	0.094628	0.50878	-	UGT2A1
1940	8602	4	2889663	3015233	275	30	1.161	0.12283	0.094703	0.21988	-	NOP14
1941	140	1	111975970	112156602	429	74	1.7419	0.040764	0.094751	0.032819	-	ADORA3
1942	346171	6	29590169	29694931	664	38	0.95531	0.16971	0.094759	0.33231	-	ZFP57
1943	54458	12	53785433	53890427	125	19	1.0276	0.15206	0.094902	0.29232	+	PRR13
1944	6194	9	19326253	19430272	192	26	1.7971	0.036162	0.094917	0.03309	-	RPS6
1945	10576	12	69929206	70060595	388	40	0.72455	0.23436	0.09494	0.59144	+	CCT2
1946	3739	11	29981288	30088577	224	29	1.7221	0.042523	0.094943	0.041826	-	KCNA4
1947	57538	15	85309911	85466713	464	65	0.81671	0.20705	0.095037	0.48667	+	ALPK3
1948	10908	19	7549033	7676653	383	49	0.74002	0.22964	0.095201	0.56778	+	PNPLA6
1949	10171	9	4742834	4911066	592	70	1.4171	0.078233	0.095207	0.094756	+	RCL1
1950	255967	13	28660997	28919475	428	45	0.91887	0.17908	0.095257	0.37699	+	PAN3
1951	63901	11	58860219	58972512	196	23	1.3875	0.082645	0.095279	0.10876	+	FAM111A
1952	84807	19	36328854	36443205	159	6	1.5618	0.059164	0.095326	0.048267	-	NFKBID
1953	7905	5	112162081	112308339	369	34	1.234	0.10861	0.095569	0.16925	-	REEP5
1954	23450	16	70507691	70661571	177	21	1.2687	0.10228	0.095689	0.14404	+	SF3B3
1955	220359	11	65072282	65175084	118	30	0.95693	0.1693	0.095803	0.35738	+	TIGD3
1956	55256	2	3451690	3573350	277	36	1.2218	0.11088	0.095811	0.16258	-	ADI1
1957	738	11	64813587	64929332	177	29	0.84502	0.19905	0.096114	0.44721	+	VPS51
1958	91392	3	44704135	44815323	121	23	1.576	0.057512	0.096142	0.055798	+	ZNF502
1959	100526694	9	103154188	103389918	540	43	1.519	0.064381	0.096164	0.079685	+	MSANTD3-TMEFF1
1960	23371	12	53390810	53508163	278	37	0.95895	0.16879	0.096202	0.35158	+	TNS2
1961	4704	12	4708264	4846720	439	44	0.90756	0.18205	0.096244	0.37505	+	NDUFA9
1962	219968	11	58224649	58325578	133	17	0.82359	0.20509	0.096347	0.47346	-	OR5B21
1963	51116	9	138342477	138446519	247	43	0.87074	0.19195	0.096365	0.42424	+	MRPS2
1964	1902	9	113585542	113851523	845	92	1.1234	0.13064	0.096419	0.22939	-	LPAR1
1965	55706	1	54181133	54354225	326	44	1.2015	0.11478	0.096518	0.19719	-	NDC1
1966	57863	1	159091377	159222932	256	47	1.0885	0.13818	0.096523	0.23464	+	CADM3
1967	79797	11	46672317	46777466	133	19	1.1387	0.12741	0.096529	0.21975	+	ZNF408
1968	100129361	12	11273780	11378619	230	17	1.4537	0.073013	0.096536	0.076871	+	SMIM10L1
1969	4004	11	8195851	8340182	637	90	1.1568	0.12367	0.096605	0.20855	-	LMO1
1970	6650	16	527816	654636	214	20	1.19	0.11703	0.096628	0.17414	+	CAPN15
1971	7802	1	37972520	38082458	228	25	0.91362	0.18046	0.096669	0.38828	+	DNALI1
1972	26291	19	49208816	49311587	229	29	1.4794	0.069519	0.096771	0.07972	+	FGF21
1973	55203	4	24950471	25082414	529	78	0.85662	0.19583	0.096855	0.43092	-	LGI2
1974	79968	15	44069112	44210617	162	18	1.7665	0.038656	0.09719	0.033436	+	WDR76
1975	9399	15	74225559	74336963	326	41	1.7612	0.039098	0.09723	0.030268	-	STOML1
1976	26037	14	71738108	72257761	603	49	0.76016	0.22358	0.097241	0.54097	+	SIPA1L1
1977	51762	15	63431728	63609975	397	44	1.0591	0.14477	0.097253	0.25197	+	RAB8B
1978	30820	5	169730491	170213636	1580	192	0.71754	0.23652	0.097425	0.60999	+	KCNIP1
1979	3688	10	33139246	33297293	393	41	1.5421	0.061519	0.097443	0.055591	-	ITGB1
1980	2147	11	46690743	46811056	159	21	1.3456	0.089214	0.09747	0.12718	+	F2
1981	3805	19	55254500	55375972	6	2	1.1503	0.12501	0.097501	0.1738	+	KIR2DL4
1982	27166	5	176680763	176783960	174	24	0.82125	0.20575	0.097582	0.46899	+	PRELID1
1983	8622	5	76426082	76774081	981	98	0.76895	0.22096	0.097614	0.52917	+	PDE8B
1984	134288	5	72414080	72521073	300	40	1.1835	0.11831	0.097645	0.18801	+	TMEM174
1985	1880	13	99896789	100009749	222	29	1.0426	0.14856	0.097651	0.26033	-	GPR183
1986	983	10	62488089	62604610	367	44	0.77525	0.2191	0.097714	0.52007	+	CDK1
1987	56889	10	98227867	98396809	426	44	1.2752	0.10112	0.097738	0.14846	-	TM9SF3
1988	55151	9	108406806	108588892	488	34	0.6958	0.24328	0.097794	0.62031	+	TMEM38B
1989	22844	9	37601052	37796901	571	70	1.0854	0.13887	0.097905	0.24243	+	FRMPD1
1990	51188	3	42573332	42686490	267	27	1.385	0.083027	0.097976	0.11476	+	SS18L2
1991	10412	5	74012816	74122737	202	20	1.1434	0.12643	0.097978	0.21153	+	NSA2
1992	153527	5	140028265	140136248	222	17	0.99309	0.16033	0.098004	0.30981	+	ZMAT2
1993	5338	17	4660396	4776727	281	47	0.92916	0.1764	0.098217	0.34959	+	PLD2
1994	114984	16	2882924	2999383	444	48	0.79574	0.21309	0.098218	0.48414	+	FLYWCH2
1995	4291	3	158238953	158374249	410	33	1.2433	0.10687	0.098227	0.15815	+	MLF1
1996	353143	1	152536287	152636574	206	19	0.78356	0.21665	0.098528	0.50633	+	LCE3B
1997	27297	7	65529805	65669555	290	18	1.3445	0.089397	0.098551	0.09675	+	CRCP
1998	10001	14	71000306	71117401	376	42	0.78861	0.21517	0.098557	0.51773	-	MED6
[truncated: 15,984 more rows]
