# Supplementary material for: Multiomics integrative analysis identifies APOE allele-specific blood biomarkers associated to Alzheimer’s disease etiopathogenesis
Source: Aging (Albany NY). 2021 Apr 12;13(7):9277–329. doi: 10.18632/aging.202950 (PMC8064208; doi:10.18632/aging.202950)
Supplement: Supplementary Table 18 [file aging-13-202950-s020.xlsx]

## Sheet: Sheet1
Supplementary Table 18. Stage I-III stratified gene level meta-analysis results (Stage I-II) for known AD genes (all strata).
HUGO	ENTREZ	CHR	START	STOP	STRAND	RANK E2	NSNPS	NPARAM	ZSTAT	P_JOINT	P_SNPWISE_MEAN	P_SNPWISE_TOP1	RANK E3	NSNPS	NPARAM	ZSTAT	P_JOINT	P_SNPWISE_MEAN	P_SNPWISE_TOP1	RANK E4	NSNPS	NPARAM	ZSTAT	P_JOINT	P_SNPWISE_MEAN	P_SNPWISE_TOP1
ABCA7	10347	19	990102	1115571	+	11415	164	32	-0.010792	0.50431	0.64738	0.34221	1148	211	39	3.9224	4.384e-05	0.04084	1.2551e-06	6017	214	40	1.3172	0.093887	0.35743	0.033892
ABI3	51225	17	47087589	47500587		11574	867	84	0.29005	0.38589	0.65228	0.20442	13447	944	98	-1.3431	0.91038	0.73142	0.96097	4937	936	93	0.44281	0.32895	0.27452	0.36879
ACE	1636	17	61504422	61625741	+	6813	187	30	0.67854	0.24871	0.39697	0.16042	4360	205	36	0.12291	0.45109	0.23596	0.74134	943	204	34	1.6143	0.053228	0.037793	0.14801
ADAM10	102	15	58837403	59092177	-	5885	396	27	-0.12475	0.54964	0.34234	0.7592	5463	472	37	0.51116	0.30462	0.30234	0.29593	16442	503	37	-0.28595	0.61254	0.89654	0.35204
ADAMTS1	9510	21	28158606	28267728	-	14616	384	52	-0.75943	0.7762	0.80018	0.61641	8633	404	57	-0.0083681	0.50334	0.48955	0.43368	15078	403	56	0.45122	0.32591	0.83356	0.11984
ADAMTS20	80070	12	43698012	43995724	-	4122	860	52	1.015	0.15505	0.23832	0.11742	3781	934	62	0.35411	0.36163	0.19675	0.6174	6958	922	60	-0.30101	0.6183	0.41032	0.79877
APOE	348	19	45359039	45462650	+	26	234	34	3.0839	0.0010215	0.00014904	0.074464	168	256	39	2.674	0.0037476	0.0025401	0.039698	3	270	40	14.821	5.362e-50	2.8323e-24	1e-50
BIN1	274	2	127755599	127914903	-	12415	597	65	-0.26092	0.60292	0.69616	0.42487	1	633	70	7.0156	1.145e-12	8.9296e-07	3.5114e-12	15	635	70	5.7013	5.9456e-09	5.7239e-05	1.113e-08
CASS4	57091	20	54937168	55084396	+	3591	303	43	0.36604	0.35717	0.20626	0.5544	6	349	50	5.0043	2.8033e-07	3.4312e-05	4.5807e-05	2011	345	49	1.8063	0.035432	0.099239	0.038897
CD2AP	23607	6	47395482	47644999	+	9055	615	36	-0.82924	0.79652	0.52569	0.94623	2001	645	41	2.5521	0.0053532	0.086114	0.0034562	76	642	42	3.7467	8.9593e-05	0.0010189	0.001215
CD33	945	19	51678335	51793274	+	4417	262	38	0.26589	0.39516	0.25673	0.56166	581	288	44	2.5466	0.0054393	0.015791	0.0063768	2208	277	42	0.88193	0.18891	0.11246	0.34511
CHRNE	1145	17	4751064	4856369	-	9860	235	24	0.24834	0.40194	0.57027	0.26436	17442	255	30	-2.0707	0.98081	0.94733	0.98258	1543	255	29	1.0988	0.13592	0.06908	0.31178
CLU	1191	8	27404434	27522328	-	7182	319	43	-0.03016	0.51203	0.41784	0.5385	494	351	47	2.7221	0.0032432	0.01236	0.0047227	8	351	46	7.6008	1.472e-14	5.8517e-10	4.8925e-13
CR1	1378	1	207619473	207865110	+	1292	448	44	1.8207	0.034325	0.062037	0.04094	224	560	51	2.9339	0.0016734	0.0038369	0.0056812	3428	557	52	1.4122	0.078941	0.19719	0.047729
DSG2	1829	18	29028027	29178814	+	15232	350	41	-0.26907	0.60606	0.82756	0.37804	16098	406	51	-1.4453	0.92581	0.87135	0.87703	11090	401	49	0.87935	0.18961	0.63979	0.062387
ECHDC3	79746	10	11734356	11856065	+	3626	434	53	0.39833	0.34519	0.20892	0.53486	5618	448	57	0.97725	0.16422	0.3111	0.10024	4151	445	55	0.93007	0.17617	0.24307	0.14433
EPHA1	2041	7	143038205	143155985	-	10970	253	55	-0.5754	0.71749	0.62657	0.68099	2680	273	60	1.2087	0.11339	0.1252	0.14113	5402	270	60	0.21598	0.4145	0.32265	0.4707
FERMT2	10979	14	53273989	53467856	-	6017	362	34	0.013675	0.49454	0.34992	0.61435	6399	370	36	-0.10521	0.5419	0.36007	0.69576	112	373	37	2.591	0.0047854	0.0018655	0.061835
FST	10468	5	52726183	52832964	+	5712	287	38	0.058707	0.47659	0.33275	0.61473	366	302	41	2.0234	0.021516	0.0080798	0.11868	7392	302	41	-0.22796	0.59016	0.4351	0.70184
HLA-DRB1	3123	6	32496546	32607613	-	6181	29	5	0.73347	0.23164	0.35872	0.15252	152	29	6	2.7895	0.0026391	0.0021992	0.0076887	1629	31	6	1.5649	0.058806	0.074818	0.060413
HS3ST1	9957	4	11349988	11481255	-	9715	414	67	-0.063552	0.52534	0.5621	0.41793	285	483	78	2.4334	0.0074783	0.0059037	0.049409	13505	448	76	-1.2982	0.90289	0.75959	0.93305
IL34	146433	16	70563798	70744585	+	2648	339	38	1.3289	0.09194	0.14808	0.087483	10548	355	42	-0.3718	0.64498	0.59211	0.56286	5567	356	42	0.49213	0.31131	0.3323	0.27813
IQCK	124152	16	19677778	19919087	+	3417	442	39	0.24883	0.40175	0.19536	0.73181	13708	459	44	-0.7317	0.76782	0.75667	0.63415	124	458	43	3.1107	0.00093334	0.0020296	0.006824
KCNH6	81033	17	61550695	61676338	+	14613	161	25	-0.66532	0.74708	0.79991	0.59732	10579	174	29	-0.79103	0.78554	0.59344	0.8879	464	173	29	1.9405	0.026162	0.015813	0.098495
MEF2C	4208	5	87964058	88249922	-	4431	405	46	0.16307	0.43523	0.25759	0.65436	1249	468	55	2.2541	0.012094	0.045114	0.011692	3024	461	54	0.68037	0.24814	0.16954	0.37303
MS4A4E	643680	11	59918726	60060575	-	4129	319	29	0.79358	0.21372	0.23872	0.20435	21	339	33	3.6975	0.00010886	0.00012823	0.0036123	60	335	32	3.4757	0.00025472	0.00061482	0.0023009
MS4A6A	64231	11	59889080	60002139	-	3502	220	21	0.56725	0.28527	0.20083	0.39811	34	260	26	3.6583	0.00012693	0.00024896	0.0036549	33	257	24	3.7817	7.7894e-05	0.00024574	0.0015026
NDUFAF6	137682	8	95987209	96165685	+	13256	414	40	-1.0184	0.84576	0.73615	0.82437	5777	435	46	0.54934	0.29139	0.32074	0.25829	16887	438	46	-0.16896	0.56708	0.92026	0.28767
NDUFAF7	55471	2	37408774	37526303	+	8935	350	32	0.79417	0.21355	0.51899	0.091377	5729	369	35	0.29489	0.38404	0.31833	0.43311	8932	375	35	-0.42214	0.66354	0.52341	0.74887
NME8	51314	7	37837930	37990003	+	15216	629	63	-1.4488	0.92631	0.82692	0.92284	2799	657	69	0.63826	0.26165	0.13396	0.51554	2114	645	67	1.8739	0.030471	0.10713	0.020131
NYAP1	222950	7	100031550	100142425	+	3672	115	15	2.2056	0.013707	0.21088	0.0026087	8963	126	19	-0.55079	0.70911	0.5073	0.81492	8764	126	19	-0.31138	0.62225	0.51465	0.62118
PICALM	8301	11	85618214	85830923	-	11350	494	36	-0.25968	0.60244	0.64436	0.494	20	558	43	3.7735	8.0476e-05	0.0001267	0.00074818	10	555	43	5.5422	1.4933e-08	8.3944e-07	9.6469e-08
PIP	5304	7	142779174	142886834	+	4666	206	18	0.08616	0.46567	0.27235	0.68876	14116	210	20	-0.75711	0.77551	0.77774	0.63656	4209	211	20	0.30525	0.38009	0.24611	0.53014
PLCG2	5336	16	81762899	82046290	+	14710	1284	129	-1.1685	0.8787	0.80378	0.79891	11044	1359	135	1.944	0.025949	0.61709	0.0033608	10507	1341	137	-0.19709	0.57812	0.60941	0.43633
PRKD3	23683	2	37427645	37601915	-	7781	470	39	0.75149	0.22618	0.45263	0.11642	4810	512	47	0.16702	0.43368	0.26335	0.65431	5241	516	46	0.20073	0.42046	0.31251	0.5228
PSMB8	5696	6	32758494	32862712	-	5114	725	57	0.54941	0.29136	0.29855	0.27786	1018	832	64	2.012	0.02211	0.034471	0.032984	17634	815	65	-1.0523	0.85368	0.96469	0.65954
PTK2B	2185	8	27118999	27366908	+	15557	559	47	-1.0962	0.86352	0.84213	0.77337	199	632	60	2.8591	0.0021245	0.0032569	0.010897	2375	630	59	2.1012	0.017812	0.12411	0.0073535
RIN3	79890	14	92930125	93205339	+	12812	853	121	-1.0156	0.84508	0.71534	0.8189	519	893	128	2.2787	0.011343	0.013535	0.046149	891	901	132	2.6716	0.0037749	0.035849	0.0034554
SHARPIN	81858	8	145103536	145209140	-	5621	87	3	0.29086	0.38558	0.3272	0.43304	15877	88	4	-0.64743	0.74132	0.86106	0.56929	5994	88	4	-0.034067	0.51359	0.35567	0.66957
SLC24A4	123041	14	92738925	93017825	+	1372	967	113	1.2503	0.1056	0.066049	0.24077	836	1033	93	2.1732	0.014882	0.026334	0.027897	16	1033	97	3.7241	9.8017e-05	8.7201e-05	0.0033332
SORL1	6653	11	121272912	121554471	+	11486	435	73	0.10512	0.45814	0.65073	0.27672	3413	500	81	1.3782	0.084075	0.17268	0.066087	749	495	83	1.6674	0.047719	0.028952	0.1661
SPI1	6688	11	47326409	47450127	-	4391	253	28	1.2998	0.096837	0.25539	0.04725	153	265	30	2.8689	0.0020596	0.0022036	0.010039	1384	264	30	1.2568	0.10441	0.061079	0.23089
SPPL2A	84888	15	50949730	51107910	-	13730	432	34	-0.084205	0.53355	0.75949	0.33429	16271	451	40	-0.93822	0.82593	0.87912	0.68748	1865	439	36	1.8652	0.031077	0.090653	0.01893
STYX	6815	14	53146883	53291707	+	16076	207	23	-1.0734	0.85845	0.86627	0.7257	4241	224	29	0.31275	0.37723	0.22799	0.55811	428	221	28	3.09	0.0010007	0.014053	0.0013105
TAP2	6891	6	32739610	32856547	-	2510	971	61	0.84088	0.20021	0.13776	0.3212	1772	1076	60	1.9132	0.02786	0.073077	0.023101	17651	1059	59	-1.1832	0.88164	0.96595	0.70852
TREM2	54209	6	41076244	41180924	-	5987	177	28	-0.13401	0.5533	0.34778	0.77277	8340	204	32	0.25561	0.39913	0.47507	0.30806	993	187	30	1.5284	0.063205	0.040422	0.1486
TREML4	285852	6	41146062	41256120	+	4562	346	38	-0.0044072	0.50176	0.26606	0.83598	9695	402	45	-0.029337	0.5117	0.54804	0.42194	601	366	40	1.6318	0.051366	0.021921	0.19735
WWOX	51741	16	78083310	79296567	+	1544	6341	473	0.86922	0.19236	0.07767	0.55118	514	6903	512	1.8622	0.031288	0.013292	0.2257	9668	6813	502	-0.74494	0.77185	0.56357	0.83675
