# Supplementary material for: Multiomics integrative analysis identifies APOE allele-specific blood biomarkers associated to Alzheimer’s disease etiopathogenesis
Source: Aging (Albany NY). 2021 Apr 12;13(7):9277–329. doi: 10.18632/aging.202950 (PMC8064208; doi:10.18632/aging.202950)
Supplement: Supplementary Table 19 [file aging-13-202950-s021.xlsx]

## Sheet: Sheet1
Supplementary Table 19. Differential expression analysis in blood: APOE2 stratum.
Symbol	Rank	logFC	Var	Fisher.Pvalue	Fisher.FDR
ISY1	1	0.0145877	0.0666351	4.52824e-06	0.049528
CPT1A	2	-0.554354	0.386492	1.32856e-05	0.049528
PLCD1	3	-0.420427	0.300057	1.35983e-05	0.049528
SRF	4	0.278806	0.00700251	1.64367e-05	0.049528
VAC14	5	-0.138779	0.101966	3.22558e-05	0.0541232
ZNF672	6	0.194079	0.020613	3.2966e-05	0.0541232
STX7	7	0.0141251	0.17789	3.38084e-05	0.0541232
MRPL51	8	-0.332031	0.0976164	3.83803e-05	0.0541232
TIRAP	9	-0.218597	0.219431	4.04139e-05	0.0541232
UBR7	10	0.281972	0.191734	6.10361e-05	0.0599134
MOGS	11	-0.120154	0.110217	8.49982e-05	0.0599134
MUM1	12	-0.243082	0.164039	8.57772e-05	0.0599134
NXF1	13	-0.0032882	0.0796593	8.75636e-05	0.0599134
FIBP	14	0.000794843	0.0955812	9.0595e-05	0.0599134
ASB6	15	-0.0940554	0.0522516	9.56975e-05	0.0599134
DNAJA1	16	-0.0187458	0.399776	9.75215e-05	0.0599134
SCFD1	17	-0.142448	0.0456944	9.92271e-05	0.0599134
PLN	18	0.140518	0.00316711	0.00010112	0.0599134
CABLES2	19	-0.241265	0.109831	0.00010705	0.0599134
HSP90AA1	20	-0.100347	0.40116	0.000116902	0.0599134
LSAMP	21	0.287966	0.0735042	0.000117976	0.0599134
SLC26A6	22	-0.145883	0.116623	0.000120398	0.0599134
RPL36AL	23	-0.460595	0.200305	0.000120631	0.0599134
RPA3	24	-0.243277	0.0817934	0.00012209	0.0599134
EIF4H	25	-0.119445	0.133636	0.000128084	0.0599134
NDST2	26	-0.0631683	0.0909406	0.000129241	0.0599134
MBD1	27	-0.0611486	0.0444394	0.000143056	0.0623392
BOK	28	0.376599	0.0573808	0.000155709	0.0623392
CISD1	29	-0.119029	0.0799916	0.000156063	0.0623392
GPR82	30	0.272915	0.109276	0.00016705	0.0623392
PMEPA1	31	-0.327506	0.349925	0.000184613	0.0623392
ENSA	32	-0.00181995	0.081932	0.000197724	0.0623392
CALM2	33	-0.147703	0.115077	0.000199963	0.0623392
COMT	34	0.097395	0.074474	0.00020091	0.0623392
SLC35A4	35	-0.0385499	0.0800556	0.000202288	0.0623392
HS2ST1	36	0.449476	0.262695	0.000202614	0.0623392
NFE2L1	37	-0.142895	0.076836	0.00020355	0.0623392
HPS6	38	0.0267915	0.0597783	0.000207914	0.0623392
TAF6	39	-0.312475	0.170411	0.000208216	0.0623392
STK11IP	40	-0.0888106	0.10049	0.000210656	0.0623392
BUD31	41	-0.172004	0.0295738	0.000218793	0.0623392
TMEM97	42	-0.326427	0.0117684	0.000219701	0.0623392
GPR137	43	-0.0503456	0.136678	0.0002224	0.0623392
APBB3	44	-0.0235715	0.12932	0.000235113	0.0634694
VPS52	45	-0.149742	0.10925	0.000239628	0.0634694
CSNK1G1	46	-0.343365	0.0634406	0.000242229	0.0634694
ASXL1	47	-0.111467	0.106076	0.000251974	0.0635171
UCHL3	48	-0.0456707	0.0710885	0.000252951	0.0635171
NGDN	49	-0.452182	0.0111208	0.000275743	0.0657967
TSPAN32	50	-0.00387899	0.158113	0.00027644	0.0657967
VPS16	51	0.0689477	0.0710743	0.000288277	0.0657967
CCDC84	52	-0.0972905	0.100647	0.000293054	0.0657967
STRADA	53	-0.15904	0.0891484	0.000295407	0.0657967
NR2C1	54	-0.24229	0.0269896	0.000296354	0.0657967
EXOC7	55	-0.0243914	0.100037	0.000300242	0.0657967
ATP5F1	56	-0.0958881	0.176386	0.000336055	0.0694319
SPG20	57	0.0635154	0.0498839	0.000338764	0.0694319
APBA3	58	0.115955	0.0308486	0.000341758	0.0694319
ARID4A	59	0.113044	0.100821	0.000342708	0.0694319
MRPL43	60	0.207902	0.00239185	0.000350388	0.0694319
SBF1	61	0.0232078	0.114721	0.000359878	0.0694319
SLC25A3	62	0.0807684	0.0526064	0.000376338	0.0694319
ZC3H15	63	0.0766425	0.204703	0.000383741	0.0694319
NRBP2	64	-0.174999	0.160401	0.000388243	0.0694319
RHOT2	65	-0.0598859	0.091068	0.000399424	0.0694319
TBCD	66	-0.083819	0.147659	0.000402074	0.0694319
PKP4	67	-0.283281	0.0606968	0.000405273	0.0694319
ELF4	68	0.166025	0.0542289	0.000406403	0.0694319
GPBP1	69	-0.0123562	0.072279	0.000406433	0.0694319
SURF4	70	0.0106833	0.0443696	0.000415198	0.0694319
HNRNPL	71	-0.0625858	0.120623	0.000421196	0.0694319
TSPAN4	72	-0.145551	0.102804	0.00042191	0.0694319
TINF2	73	0.223541	0.00263758	0.000424235	0.0694319
REPIN1	74	0.0504774	0.099755	0.000426832	0.0694319
GALT	75	-0.151052	0.0926599	0.000439143	0.0694319
SHPK	76	0.174373	0.00158297	0.000443203	0.0694319
DNAJA2	77	0.0317715	0.118285	0.000445162	0.0694319
LFNG	78	-0.0651891	0.00854148	0.000449323	0.0694319
SRP19	79	-0.290515	0.0169674	0.000462577	0.0699402
AIM2	80	0.256784	0.449074	0.000476101	0.0699402
CUTC	81	-0.0726295	0.0791533	0.000480172	0.0699402
RIT1	82	0.18824	0.183702	0.000487649	0.0699402
CHMP5	83	-0.01816	0.306873	0.000492214	0.0699402
AMT	84	-0.0671431	0.0789534	0.0004924	0.0699402
NACAP1	85	-0.0150794	0.0470809	0.000496816	0.0699402
TAF1A	86	0.365194	0.235188	0.000508242	0.0699402
RAPGEF1	87	0.059679	0.0879786	0.000511377	0.0699402
USP24	88	0.086939	0.0397448	0.000518138	0.0699402
ATXN2L	89	-0.0480616	0.0437454	0.000527444	0.0699402
POMP	90	0.0569834	0.284271	0.000538812	0.0699402
SRPR	91	-0.022748	0.064443	0.000550755	0.0699402
PJA2	92	0.0234669	0.304157	0.000551019	0.0699402
CACNA1B	93	0.0132895	0.0173723	0.000553551	0.0699402
IL18BP	94	-0.316563	0.082613	0.000556438	0.0699402
OXA1L	95	-0.128572	0.0768588	0.000556949	0.0699402
EZH2	96	-0.330831	0.0989021	0.000557061	0.0699402
CORO1C	97	0.030123	0.107894	0.000564471	0.0701399
GRAMD4	98	-0.168618	0.0975874	0.000612363	0.0753144
WDR33	99	-0.277383	0.00470375	0.000633149	0.0766321
SSBP1	100	-0.142062	0.0512526	0.00064046	0.0766321
SLC35C1	101	-0.128025	0.0889539	0.000650385	0.0766321
ARHGEF2	102	0.300188	0.0053155	0.000652006	0.0766321
KRCC1	103	0.0742137	0.193474	0.000680948	0.0766321
GPI	104	-0.0478134	0.162832	0.000691977	0.0766321
BAZ1A	105	0.092309	0.210375	0.000692895	0.0766321
HSD17B11	106	-0.0213701	0.179731	0.000694932	0.0766321
TUBGCP2	107	0.259463	0.00393747	0.00069606	0.0766321
MASP1	108	0.220467	0.0425057	0.000700314	0.0766321
ERGIC2	109	0.107562	0.138637	0.00070107	0.0766321
STAR	110	0.4322	0.232789	0.000709472	0.0766321
UBA7	111	-0.0556794	0.146387	0.000711007	0.0766321
TXN	112	-0.297811	0.372065	0.000717969	0.0766321
TAF1C	113	-0.203993	0.200904	0.000719072	0.0766321
COPS7B	114	-0.167972	0.0864763	0.000729826	0.0766321
MRPL30	115	-0.432789	0.154138	0.000731162	0.0766321
DOLPP1	116	0.0727492	0.00880172	0.000742248	0.0771234
DBI	117	-0.221238	0.395896	0.00075982	0.077516
NDUFB3	118	-0.0852832	0.584064	0.000762327	0.077516
RHBDD2	119	0.0814825	0.0864218	0.00076532	0.077516
CXXC1	120	0.0215792	0.123705	0.000779813	0.0783257
ADRM1	121	-0.073037	0.0576999	0.000821896	0.0793786
ZSCAN16	122	-0.00155616	0.041234	0.000825304	0.0793786
MSL3	123	0.263932	0.112555	0.000834932	0.0793786
TBC1D22A	124	-0.148403	0.0014704	0.000835065	0.0793786
NOL8	125	-0.197576	0.00227791	0.000841124	0.0793786
BRE	126	-0.047952	0.0663048	0.000843972	0.0793786
PSMC2	127	-0.13275	0.101469	0.000850037	0.0793786
CETN2	128	-0.165552	0.0321633	0.000850365	0.0793786
ATP6AP1	129	-0.00908718	0.101895	0.000851199	0.0793786
FBXO8	130	0.127722	0.121403	0.000868188	0.0793786
TMEM63A	131	-0.17364	0.112884	0.000877614	0.0793786
SUCLA2	132	0.0983652	0.100278	0.000877625	0.0793786
DDX51	133	-0.507484	0.0884584	0.000879321	0.0793786
LTBP4	134	-0.142073	0.0904626	0.000882496	0.0793786
EDC4	135	0.280108	0.00553765	0.000898442	0.0800374
RXRB	136	-0.0973733	0.0640939	0.000903102	0.0800374
POLE	137	-0.0848856	0.0476947	0.000920694	0.0802734
VARS2	138	-0.149697	0.179507	0.000921933	0.0802734
SEC31B	139	-0.390489	0.207066	0.000932548	0.0802734
ACADVL	140	-0.0203482	0.0775059	0.00093762	0.0802734
MAZ	141	-0.117239	0.0825246	0.000941577	0.0802734
ZFAND6	142	0.0853586	0.123112	0.000948165	0.0802734
SLC26A11	143	-0.0665349	0.0699289	0.000952384	0.0802734
ING3	144	-0.403817	0.0106014	0.000975896	0.0805069
ERBB2	145	0.320207	0.0349202	0.000981285	0.0805069
MRPL48	146	-0.0684951	0.0315928	0.000983775	0.0805069
NEDD4L	147	0.214246	0.0288906	0.000991835	0.0805069
PI4KAP2	148	0.101215	0.0169049	0.00100179	0.0805069
ACAD9	149	-0.125596	0.0800238	0.00102023	0.0805069
ARID4B	150	-0.319011	0.00632624	0.00102042	0.0805069
GMPPA	151	-0.160544	0.204807	0.00102658	0.0805069
SPHK2	152	0.240216	0.0100943	0.00103027	0.0805069
SGSH	153	-0.0211111	0.105085	0.00103775	0.0805069
SULT1A3	154	0.172713	0.0270171	0.0010434	0.0805069
DVL3	155	-0.0841451	0.0903644	0.00104649	0.0805069
ARF4	156	0.215166	0.00344502	0.00104756	0.0805069
GUSB	157	-0.0126591	0.0562311	0.00104867	0.0805069
TRAF1	158	-0.16142	0.0166675	0.00106219	0.0810292
CTDSPL2	159	0.208877	0.167126	0.00108805	0.0823289
KATNB1	160	-0.0661044	0.0756444	0.00109289	0.0823289
PCNT	161	-0.00107709	0.0776464	0.00110532	0.0827477
TMEM205	162	0.0313815	0.0964327	0.00111512	0.0829667
GTF2A2	163	-0.248739	0.00386755	0.00113705	0.0840788
MPRIP	164	-0.134881	0.0857905	0.00114639	0.0842523
PTGES2	165	0.0327454	0.0416701	0.00115558	0.0844131
HAT1	166	-0.00545793	0.200159	0.0011779	0.0846632
CSNK2B	167	-0.185465	0.202484	0.00119209	0.0846632
VASH1	168	-0.176793	0.203671	0.00119823	0.0846632
INPPL1	169	0.114782	0.0952415	0.00120742	0.0846632
NBN	170	0.0495053	0.0373501	0.00120845	0.0846632
IDH3B	171	-0.0888653	0.100728	0.00121244	0.0846632
TSC22D1	172	-0.180924	0.00643297	0.00121664	0.0846632
TXNDC17	173	-0.105571	0.232994	0.00121809	0.0846632
ARHGAP18	174	0.316082	0.171489	0.0012244	0.0846632
TCF7L2	175	-0.278426	0.0540145	0.00122924	0.0846632
RBM34	176	-0.043614	0.0766883	0.00124809	0.0848454
UQCRB	177	0.125077	0.262855	0.00126215	0.0848454
SLC25A20	178	-0.376921	0.0512349	0.00126224	0.0848454
UTP3	179	-0.230685	0.00394845	0.00126747	0.0848454
SND1	180	-0.0686589	0.105892	0.00127487	0.0848454
MFAP3	181	-0.154092	0.0581983	0.00127721	0.0848454
NT5DC3	182	-0.240601	0.118047	0.00128116	0.0848454
MPDU1	183	0.0357183	0.0281561	0.00130308	0.0848621
BANP	184	-0.100056	0.144645	0.00130722	0.0848621
MBNL1	185	-0.027639	0.210047	0.0013089	0.0848621
ANXA2P1	186	-0.0488393	0.110467	0.00131544	0.0848621
UAP1L1	187	-0.0806533	0.0749577	0.00131662	0.0848621
TUBB	188	-0.0337154	0.0688414	0.00132663	0.0850526
UBE2E1	189	0.00636827	0.0452948	0.00133886	0.0853822
MAD1L1	190	0.034333	0.0747142	0.0013482	0.0855253
CLPTM1	191	-0.112718	0.105367	0.00138031	0.0864381
PHKG2	192	-0.134045	0.0598217	0.00138219	0.0864381
MCM7	193	-0.171286	0.125824	0.00138866	0.0864381
PAQR4	194	-0.0101493	0.0325933	0.00139127	0.0864381
C1GALT1C1	195	0.115008	0.15729	0.00141026	0.087068
ATP5O	196	-0.329807	0.159538	0.00142429	0.087068
FLII	197	-0.0830346	0.0970977	0.00142924	0.087068
FKBP1A	198	0.198063	0.022945	0.00143538	0.087068
CS	199	-0.0147879	0.0439236	0.00143753	0.087068
TIAL1	200	0.2215	0.138956	0.00144705	0.0871493
AK2	201	0.0688823	0.0505022	0.00145806	0.0871493
ZFP41	202	-0.303091	0.0905485	0.00147721	0.0871493
STK25	203	-0.0194756	0.0759496	0.00147765	0.0871493
PCDHA5	204	0.148968	0.0487253	0.00147819	0.0871493
NDUFA1	205	-0.399085	0.297257	0.00148716	0.0871493
METAP2	206	-0.0974911	0.120134	0.00148948	0.0871493
TXNRD2	207	-0.0896628	0.111578	0.00150587	0.0876822
FAM78A	208	-0.147366	0.0347581	0.0015348	0.0887224
CNBP	209	-0.137151	0.157537	0.00154443	0.0887224
VRK3	210	0.0340233	0.0363048	0.00154581	0.0887224
ROCK1	211	0.0416324	0.121859	0.00156967	0.0889895
NKAIN3	212	0.192102	0.034805	0.00160281	0.0889895
RPUSD1	213	-0.015167	0.0561093	0.00160441	0.0889895
MAF	214	0.0117583	0.0724977	0.00160533	0.0889895
ATP6V1G1	215	-0.136951	0.260063	0.00161589	0.0889895
BRIX1	216	-0.0761597	0.0755817	0.00162718	0.0889895
KCTD13	217	-0.0555557	0.046962	0.00163746	0.0889895
VBP1	218	0.0136335	0.232879	0.00164019	0.0889895
DTX2	219	-0.0945055	0.112757	0.0016404	0.0889895
FANCG	220	-0.0819242	0.0709799	0.00165296	0.0889895
ILVBL	221	-0.0274033	0.0614509	0.00165436	0.0889895
ITFG3	222	-0.175574	0.0993839	0.00165591	0.0889895
SDHC	223	0.195067	0.00285305	0.00165713	0.0889895
CASP1	224	-0.157738	0.18362	0.00165923	0.0889895
CCS	225	-0.0935015	0.0867027	0.00166865	0.0889895
SCYL2	226	0.0694456	0.108126	0.00171967	0.0889895
LOXL3	227	-0.0287773	0.0196039	0.00172257	0.0889895
NMT1	228	-0.0823587	0.0668236	0.00173024	0.0889895
GSTK1	229	-0.00941169	0.0461633	0.00173836	0.0889895
PRPF3	230	-0.139302	0.0777071	0.00174283	0.0889895
TRPC4AP	231	-0.00852357	0.113678	0.00174619	0.0889895
MRPL33	232	-0.0761705	0.073538	0.0017463	0.0889895
YIPF5	233	-0.251656	0.0297094	0.00174706	0.0889895
SUOX	234	-0.106792	0.0773888	0.00175022	0.0889895
POMT1	235	-0.165227	0.0878156	0.00175267	0.0889895
ATRN	236	-0.10856	0.0532503	0.00176938	0.0889895
BOLA2	237	0.219206	0.00841522	0.00176941	0.0889895
RECQL	238	0.0623831	0.0797563	0.00177251	0.0889895
ST8SIA4	239	0.247749	0.197489	0.00177607	0.0889895
TLK1	240	0.0886412	0.102511	0.00177836	0.0889895
COPS4	241	-0.0421852	0.0749367	0.00177935	0.0889895
HYOU1	242	-0.163348	0.120776	0.00179128	0.0891185
ZNF317	243	0.18288	0.0145537	0.00181114	0.0891185
ABCC10	244	-0.031146	0.0241648	0.00181279	0.0891185
FKBP3	245	-0.10493	0.000676501	0.00182324	0.0891185
GGPS1	246	-0.217766	0.00373942	0.0018285	0.0891185
ALG12	247	-0.142003	0.0476751	0.00183232	0.0891185
CD47	248	0.0190806	0.072714	0.00184213	0.0891185
ARPC2	249	-0.0917521	0.0424206	0.00184968	0.0891185
SLC3A2	250	-0.160617	0.0901779	0.00186351	0.0891185
TELO2	251	-0.0318234	0.0659416	0.00186504	0.0891185
PRR14	252	0.00595309	0.0726854	0.00187376	0.0891185
FMNL2	253	-0.0302298	0.00357394	0.00187667	0.0891185
ICMT	254	0.0310156	0.0277648	0.00188075	0.0891185
FAM53B	255	-0.00463813	0.0730028	0.00188544	0.0891185
ARHGAP30	256	0.0813007	0.0487111	0.00190259	0.0893433
JMJD6	257	-0.228333	0.0978446	0.00190502	0.0893433
OAT	258	0.0877453	0.0791611	0.00192246	0.089644
NSL1	259	0.225785	0.0363744	0.00193453	0.089644
GNA13	260	0.0740612	0.143882	0.00193582	0.089644
IGBP1	261	-0.171289	0.0619776	0.00194118	0.089644
PPIG	262	0.00593842	0.172927	0.00195275	0.0898339
GIT1	263	-0.311485	0.111877	0.00197487	0.0901077
FAM49B	264	-0.0243161	0.126674	0.00198781	0.0901077
SEC24A	265	0.201191	0.118237	0.00198784	0.0901077
LRRC41	266	-0.0940076	0.0519358	0.00199432	0.0901077
CEBPZ	267	-0.190842	0.117141	0.00199608	0.0901077
MFSD1	268	-0.0395315	0.0762084	0.00200516	0.09018
RPS27A	269	-0.32089	0.0146112	0.00201861	0.0901923
UGP2	270	-0.0617495	0.0631906	0.0020211	0.0901923
UQCRH	271	-0.239396	0.163828	0.00202789	0.0901923
RPL35A	272	0.760077	1.32067	0.00203707	0.0902677
IDI1	273	0.128859	0.151201	0.0020562	0.0907815
NSD1	274	-0.21437	0.125348	0.00208902	0.091568
SLC39A13	275	-0.112476	0.0484757	0.00208921	0.091568
TPM2	276	0.223249	0.00706876	0.00211698	0.092449
ANAPC11	277	0.0426785	0.0340442	0.00214096	0.0929512
ENY2	278	-0.430619	0.105484	0.0021439	0.0929512
VAMP4	279	0.112734	0.0644807	0.00217431	0.0939318
ARID1A	280	-0.199617	0.155093	0.00219162	0.0939896
HIPK3	281	0.236129	0.105697	0.00220005	0.0939896
SERINC1	282	0.110437	0.151905	0.0022082	0.0939896
PCSK7	283	-0.0413374	0.0905579	0.00221158	0.0939896
TYK2	284	0.0430261	0.10209	0.00221464	0.0939896
MRPL40	285	0.0469006	0.0351599	0.00222679	0.093997
PPM1B	286	-0.206432	0.028802	0.00223573	0.093997
SPSB3	287	0.0212928	0.109114	0.00225236	0.093997
PLGLB1	288	-0.14082	0.00147115	0.00226323	0.093997
PPP2R3A	289	0.232603	0.105698	0.00227063	0.093997
ATP6V1D	290	-0.195997	0.0888889	0.00227272	0.093997
CLDN15	291	-0.115412	0.117363	0.00227848	0.093997
BRMS1	292	-0.0115311	0.0403596	0.00228583	0.093997
PLOD2	293	0.505494	0.363261	0.00229145	0.093997
NUP133	294	-0.199895	0.0111486	0.00229774	0.093997
LILRA5	295	0.462746	0.0170153	0.00230536	0.093997
IRF2BP2	296	-0.0480744	0.0503552	0.0023084	0.093997
PPAP2B	297	0.265831	0.0957311	0.00232692	0.0942873
MXD4	298	0.0878365	0.0909115	0.00233967	0.0942873
DUS3L	299	0.0106037	0.036861	0.00234296	0.0942873
GMFG	300	-0.31482	0.158644	0.00235675	0.0942873
PHC3	301	-0.328251	0.103789	0.00236545	0.0942873
L3MBTL2	302	0.0813822	0.0379718	0.00236952	0.0942873
IDH3G	303	0.0158012	0.0885703	0.00237343	0.0942873
SLC35E1	304	0.0278031	0.0862468	0.00238106	0.0942873
R3HDM1	305	-0.236964	0.051596	0.00238593	0.0942873
TWF2	306	0.186172	0.00657649	0.00241168	0.0948565
ATXN2	307	-0.204199	0.177759	0.00242581	0.0948565
RNH1	308	-0.00534103	0.0727593	0.00244027	0.0948565
NDUFS5	309	-0.314358	0.215136	0.00244225	0.0948565
HIC2	310	-0.226811	0.0982445	0.00244339	0.0948565
AIF1	311	-0.542509	0.0218814	0.00244755	0.0948565
TIMM23	312	0.00427788	0.0186671	0.00245757	0.0949394
LARGE	313	-0.783465	0.75589	0.00246936	0.0950901
SSB	314	-0.212853	0.0704408	0.0024984	0.0958443
RHBDF2	315	0.0658312	0.0752861	0.0025179	0.0958443
ETF1	316	-0.0665386	0.0353313	0.00252752	0.0958443
PMPCA	317	-0.0744054	0.0640563	0.00253024	0.0958443
IPO4	318	-0.0748972	0.0440632	0.00253713	0.0958443
HMG20B	319	0.0511824	0.0226147	0.00253923	0.0958443
SNX27	320	-0.0317394	0.051289	0.00255364	0.0958443
IKBKE	321	-0.134882	0.129325	0.00257695	0.0958443
HEATR1	322	-0.0367998	0.0708564	0.00258118	0.0958443
UPF3B	323	-0.165438	0.0148137	0.00259217	0.0958443
PHF19	324	-0.00151923	0.0266985	0.00259333	0.0958443
CDC5L	325	-0.0514489	0.0368039	0.00259755	0.0958443
PPA2	326	-0.223581	0.00425331	0.00264195	0.0958443
EAF2	327	0.0970389	0.0777126	0.00264655	0.0958443
IGFBP7	328	0.285582	0.0102721	0.00264755	0.0958443
INTS6	329	0.372345	0.260148	0.00264943	0.0958443
TMEM173	330	-0.0455277	0.0958291	0.0026495	0.0958443
GSS	331	-0.0275802	0.0457716	0.00265189	0.0958443
EXOSC9	332	-0.133212	0.00140965	0.0026526	0.0958443
REL	333	-0.301188	0.051466	0.00266143	0.0958443
RANBP3	334	-0.163062	0.0646174	0.00266794	0.0958443
LMF2	335	-0.123549	0.0946035	0.00267561	0.0958443
RNPS1	336	-0.0521453	0.049049	0.00268938	0.0958443
MRPS21	337	-0.410244	0.0141466	0.00271351	0.0958443
BIRC2	338	0.018339	0.186471	0.00273794	0.0958443
RPF1	339	-0.113392	0.0288599	0.00274844	0.0958443
ATP13A1	340	-0.170163	0.105719	0.00275615	0.0958443
TRAF7	341	-0.115039	0.0598118	0.00276589	0.0958443
CDC42	342	-0.0428426	0.0544174	0.00276613	0.0958443
GPAA1	343	0.0297578	0.0628319	0.00277091	0.0958443
CCDC53	344	-0.107102	0.0981588	0.00277228	0.0958443
CLK3	345	0.278375	0.00610453	0.00277967	0.0958443
NRK	346	0.0186207	0.0292554	0.00278893	0.0958443
WTAP	347	-0.0122314	0.0394576	0.0028006	0.0958443
PIGQ	348	0.225355	0.00439587	0.00281213	0.0958443
TSC1	349	-0.302336	0.0328253	0.00282131	0.0958443
ZNF264	350	0.140395	0.0630391	0.00282325	0.0958443
RYR2	351	0.141356	0.0139051	0.00282704	0.0958443
EIF3B	352	-0.145641	0.144536	0.00282856	0.0958443
PHF1	353	-0.0718275	0.0708422	0.00282921	0.0958443
MCCD1	354	0.197515	0.0357776	0.00283127	0.0958443
E4F1	355	0.0663208	0.044965	0.00284134	0.0958443
KHSRP	356	0.0171372	0.0487565	0.00284135	0.0958443
CPNE1	357	-0.0538476	0.138631	0.00284358	0.0958443
PMS1	358	0.200284	0.107133	0.00284709	0.0958443
NOD1	359	-0.0683859	0.0603965	0.00285567	0.0958443
ABHD13	360	0.227873	0.123295	0.00286269	0.0958443
KLK15	361	0.0391458	0.0123486	0.002874	0.095911
PLEKHM2	362	0.00911616	0.0650757	0.00289027	0.095911
ECH1	363	0.0288024	0.111618	0.00289504	0.095911
RAB8B	364	0.108397	0.257399	0.00289651	0.095911
RUVBL2	365	-0.0162433	0.0307418	0.00294069	0.0968792
CCM2	366	0.209703	0.00412737	0.00294898	0.0968792
TUBG1	367	0.165735	0.00206821	0.00294986	0.0968792
RPS20	368	-0.0519305	0.167235	0.00296034	0.0969342
TRIM26	369	0.0695455	0.058434	0.00296994	0.0969342
PSMA4	370	-0.159806	0.187361	0.00298683	0.0969342
NDUFAB1	371	-0.151335	0.0428244	0.00299372	0.0969342
TRIM11	372	0.0278801	0.0152592	0.00300555	0.0969342
ATP5D	373	-0.0467655	0.0423767	0.00302059	0.0969342
SNAPC4	374	-0.171175	0.130511	0.00302112	0.0969342
PNPLA8	375	0.218324	0.248503	0.0030453	0.0969342
SETMAR	376	-0.121568	0.00108642	0.00305963	0.0969342
MRPS18A	377	0.143676	0.00173622	0.00306811	0.0969342
MSX2	378	0.127283	0.0102263	0.00308664	0.0969342
COPS5	379	-0.026194	0.140661	0.0030868	0.0969342
MRPL42	380	0.0930727	0.0646131	0.00309193	0.0969342
PLK4	381	0.0989966	0.0281147	0.00310386	0.0969342
MAN1A1	382	0.36305	0.325484	0.00310713	0.0969342
ZNF142	383	-0.334824	0.216783	0.00311009	0.0969342
RC3H2	384	-0.236848	0.0450384	0.00312051	0.0969342
ZNF767	385	-0.136174	0.095077	0.00313262	0.0969342
NOP14	386	-0.122721	0.101039	0.00313561	0.0969342
MED24	387	-0.1238	0.0818454	0.0031465	0.0969342
TGM2	388	-0.171998	0.151394	0.00314958	0.0969342
YIPF4	389	0.0763643	0.185362	0.0031592	0.0969342
MAN2B1	390	-0.102959	0.113838	0.00316348	0.0969342
THRA	391	-0.150455	0.0752645	0.00317036	0.0969342
GRK6	392	0.233835	0.00433246	0.00317801	0.0969342
PEPD	393	0.0537923	0.0347949	0.00318142	0.0969342
SLC35C2	394	-0.114613	0.0865181	0.00318779	0.0969342
LDHB	395	-0.325073	0.0926157	0.0031997	0.0969342
TOLLIP	396	-0.0378757	0.0548689	0.00320346	0.0969342
RBM25	397	-0.445674	0.017582	0.00320848	0.0969342
SAP30BP	398	-0.206238	0.060768	0.00321095	0.0969342
NLRP1	399	-0.166498	0.0873056	0.00322034	0.0969342
RPS6KB1	400	-0.289924	0.00771858	0.00323098	0.0969342
MZF1	401	-0.0621394	0.10758	0.00323219	0.0969342
SDCCAG3	402	-0.1283	0.068594	0.00323302	0.0969342
SEC24C	403	-0.0145972	0.0558698	0.00325865	0.0974503
RNF220	404	-0.182304	0.114942	0.0032664	0.0974503
CDC26	405	-0.123635	0.0547663	0.00330378	0.0981457
NDFIP1	406	0.0657837	0.0533174	0.00330936	0.0981457
MRPL39	407	-0.121338	0.0560032	0.00332012	0.0981457
CLN3	408	-0.0704993	0.0808234	0.00332228	0.0981457
POLM	409	-0.0496124	0.0603864	0.00333675	0.0983321
RAP2B	410	0.369272	0.239697	0.00335371	0.0984341
GSTP1	411	0.0476581	0.0484098	0.00337115	0.0984341
TNFSF10	412	-0.13366	0.159656	0.00337992	0.0984341
ZNF81	413	0.170801	0.058476	0.00338312	0.0984341
POLR3H	414	-0.0262114	0.0332841	0.00339099	0.0984341
GAPDH	415	0.0942359	0.0278475	0.00339576	0.0984341
DDX59	416	0.187623	0.0976632	0.00341761	0.0984341
EXTL2	417	0.193564	0.0626847	0.00341918	0.0984341
ZNF791	418	-0.223601	0.00734828	0.00342056	0.0984341
CAPRIN1	419	0.180968	0.00535186	0.00342192	0.0984341
ZNF282	420	-0.171337	0.102712	0.00343004	0.0984341
NUCB2	421	-0.311077	0.00755771	0.00344329	0.0985794
CYP20A1	422	-0.224763	0.0257597	0.00347769	0.0993285
IKBKB	423	-0.177266	0.0177889	0.00348792	0.099385
ATP10D	424	0.289873	0.147856	0.00351661	0.0994106
CHD1	425	0.0218834	0.0870104	0.00353086	0.0994106
PLB1	426	0.391373	0.213727	0.00353142	0.0994106
TEX261	427	-0.116483	0.0501643	0.00353755	0.0994106
MATR3	428	0.0166464	0.0514459	0.00354615	0.0994106
SARM1	429	-0.337644	0.114255	0.00356178	0.0994106
CRELD1	430	-0.134952	0.0821454	0.00356211	0.0994106
KIF13B	431	-0.0521524	0.0734598	0.00357684	0.0994106
ITGB1	432	-0.37013	0.0215967	0.00358699	0.0994106
GTF3C2	433	-0.0172727	0.0374539	0.00358852	0.0994106
ZUFSP	434	-0.0849243	0.0217493	0.00359143	0.0994106
TCEAL8	435	-0.141454	0.0272232	0.0035946	0.0994106
CALM3	436	0.0550076	0.0418265	0.00359604	0.0994106
COMMD4	437	-0.0341589	0.0530853	0.00360435	0.0994125
PCBP2	438	0.0723158	0.0759858	0.00361651	0.09952
RBM14	439	-0.197136	0.136019	0.00364608	0.100105
SH3TC1	440	-0.29236	0.113744	0.00368035	0.100705
HM13	441	-0.0798958	0.0922044	0.00368463	0.100705
PSMA2	442	-0.0144333	0.0522739	0.00370801	0.101115
TRIM41	443	-0.110131	0.0751414	0.00372439	0.101332
ZFR	444	0.0380764	0.129688	0.00374624	0.101556
TBCA	445	-0.204824	0.164566	0.00374946	0.101556
IRF8	446	0.317697	0.058401	0.00377168	0.101913
CCNI	447	0.0156155	0.0778384	0.00378198	0.101913
PTGES3	448	-0.0710062	0.0895042	0.00379938	0.101913
GPN2	449	0.00703809	0.0191447	0.00380437	0.101913
P2RX1	450	-0.42486	0.311524	0.00381219	0.101913
PANK1	451	0.107649	0.0430335	0.0038182	0.101913
UBE2I	452	0.19774	0.0034073	0.00382824	0.101913
NOL12	453	-0.149742	0.134109	0.00383029	0.101913
PDE3B	454	0.327088	0.35561	0.0038652	0.102465
EML3	455	-0.0904855	0.149303	0.00386871	0.102465
ZNF189	456	0.20821	0.131008	0.00387851	0.102465
SHC1	457	-0.205111	0.137769	0.00388505	0.102465
TMEM50B	458	0.348279	0.0562116	0.00390039	0.102585
APH1A	459	0.241503	0.00480072	0.00390662	0.102585
RUSC1	460	0.0371707	0.0354074	0.00391895	0.102592
RAB27A	461	0.165435	0.0556341	0.00392391	0.102592
EIF2B1	462	0.189753	0.00281071	0.00396768	0.103037
ALAD	463	-0.0605023	0.0313122	0.00397109	0.103037
TMEM8B	464	0.0591034	0.0150521	0.00397363	0.103037
GTF2F2	465	-0.0713338	0.0715675	0.00397514	0.103037
CNOT2	466	0.208145	0.00372279	0.00399532	0.103338
FAM103A1	467	-0.0500307	0.0526405	0.00400388	0.103338
SON	468	0.186111	0.0031289	0.00401416	0.103382
USP36	469	-0.238564	0.138514	0.00403168	0.103429
XRCC6	470	0.123042	0.0639286	0.00403315	0.103429
SLC25A1	471	-0.0791104	0.0757263	0.00406428	0.103493
CD99	472	0.1697	0.00245185	0.00407262	0.103493
FAM96A	473	0.00720738	0.0960852	0.00407889	0.103493
B3GALTL	474	0.443299	0.237872	0.00408299	0.103493
ADAM15	475	0.334549	0.00966599	0.00408931	0.103493
BRWD3	476	0.093628	0.0565845	0.00409567	0.103493
SMNDC1	477	0.0696247	0.126327	0.00409575	0.103493
SEC22C	478	0.116233	0.0037362	0.00411334	0.103699
SLC26A10	479	0.271765	0.0968034	0.0041211	0.103699
ACSL3	480	0.113503	0.0768988	0.00413525	0.103838
TAGAP	481	0.267915	0.00618895	0.00416323	0.1041
COQ6	482	-0.0216609	0.0612656	0.00417696	0.1041
ATP11B	483	0.0805965	0.0831605	0.00417781	0.1041
PIGT	484	-0.177547	0.0572095	0.00418132	0.1041
AZI1	485	-0.00470222	0.0395095	0.00418889	0.1041
RANBP2	486	0.177288	0.0971881	0.00420086	0.104183
DNAJB14	487	0.131535	0.125205	0.00421346	0.10428
DBR1	488	0.151926	0.0619885	0.00422206	0.10428
TMEM104	489	-0.327261	0.130703	0.0042381	0.104462
UBL5	490	-0.0888762	0.12546	0.00426309	0.104496
CPSF1	491	0.244027	0.00539114	0.00426961	0.104496
TTC31	492	-0.0253101	0.0453843	0.00427324	0.104496
IFIT5	493	0.176397	0.180095	0.00427417	0.104496
OMA1	494	0.0260708	0.100008	0.00429407	0.10453
ABHD2	495	-0.148684	0.0942126	0.00429417	0.10453
TMPO	496	0.135908	0.056117	0.00430416	0.10453
MITD1	497	-0.142061	0.0555038	0.00431025	0.10453
FAM83H	498	-0.262681	0.141113	0.00435196	0.104971
TNK2	499	-0.100644	0.12634	0.00436872	0.104971
TBX19	500	-0.180992	0.0676174	0.0043731	0.104971
GHRHR	501	-0.108618	0.0255124	0.00437339	0.104971
ABCA9	502	0.241051	0.0830788	0.00437535	0.104971
TPST2	503	0.238031	0.00488599	0.00438067	0.104971
ADAM19	504	0.288655	0.0214869	0.00442874	0.105744
GPBAR1	505	0.0769445	0.114865	0.00443442	0.105744
MICB	506	0.0174818	0.0422922	0.00444294	0.105744
GDPD3	507	-0.0429784	0.0997549	0.00444805	0.105744
GRAMD3	508	0.017389	0.0149091	0.0044877	0.106396
ACADM	509	0.12492	0.166037	0.00449311	0.106396
TMSB10	510	-0.10559	0.0249977	0.00451088	0.106607
DCTD	511	-0.0732893	0.0918877	0.00453105	0.106874
NUP88	512	-0.28178	0.0109825	0.00454133	0.106908
RPS25	513	-0.261783	0.112554	0.00455133	0.106934
BIRC6	514	-0.269967	0.0474101	0.0045662	0.107075
ZNF30	515	-0.156595	0.00179747	0.00461884	0.107827
DGAT1	516	-0.0825542	0.0648012	0.00465764	0.107827
B2M	517	-0.124209	0.0854676	0.00465901	0.107827
ZNF558	518	0.152387	0.0604586	0.00466185	0.107827
SOX30	519	0.0890816	0.000751703	0.00466632	0.107827
PLRG1	520	-0.0219631	0.115503	0.00466916	0.107827
SRGN	521	-0.0751229	0.160306	0.00467687	0.107827
HSPD1	522	-0.0957996	0.0753322	0.00468462	0.107827
PLIN2	523	-0.106418	0.141214	0.00468924	0.107827
GPS1	524	0.0102579	0.0542576	0.00470091	0.107827
GMFB	525	0.337083	0.297477	0.00470185	0.107827
RAP1B	526	0.201303	0.196409	0.00471188	0.107827
PTP4A1	527	0.212218	0.177557	0.00471456	0.107827
DPM1	528	-0.179575	0.203982	0.00474699	0.108363
SNX17	529	-0.0026495	0.0458078	0.0047846	0.108825
SNORA62	530	-0.0689961	0.0316189	0.00478939	0.108825
COG2	531	-0.0466364	0.0505405	0.00479432	0.108825
TAX1BP1	532	-0.090731	0.353388	0.00480757	0.10892
THUMPD1	533	-0.349193	0.0178276	0.00483985	0.109312
ZNF280D	534	0.0742296	0.0341675	0.00485093	0.109312
SF3B2	535	0.0168786	0.0559296	0.00485707	0.109312
MYBPC3	536	-0.0466664	0.115002	0.0048698	0.109312
ACTR1B	537	3.72574e-06	0.0446591	0.00487315	0.109312
FAM193A	538	-0.134486	0.0811284	0.00487927	0.109312
BBS1	539	-0.217285	0.0976632	0.00489259	0.109407
ABCB7	540	-0.150691	0.00214401	0.00491175	0.10955
DICER1	541	-0.283306	0.0621112	0.0049239	0.10955
LUZP1	542	-0.152655	0.133505	0.00492627	0.10955
BPHL	543	-0.0854483	0.0578081	0.00493983	0.10965
RHOT1	544	0.201561	0.0817952	0.0049682	0.109855
REXO1	545	-0.0678859	0.037984	0.00497465	0.109855
CBX3	546	-0.119254	0.0730104	0.0049764	0.109855
TOR1AIP2	547	0.128831	0.0393399	0.00499522	0.109877
ACTR3	548	-0.157354	0.085964	0.00499564	0.109877
PUF60	549	0.116373	0.0510853	0.00500763	0.10994
LLGL1	550	0.0971553	0.0348467	0.00502136	0.110041
PTRH1	551	-0.0541667	0.0319267	0.0050345	0.110129
FUK	552	-0.155028	0.0971822	0.00507237	0.110332
PTBP1	553	0.0722059	0.0526685	0.00507474	0.110332
BCKDK	554	-0.0835909	0.109345	0.00507786	0.110332
STXBP3	555	-0.0329611	0.0810472	0.0050804	0.110332
OSGEPL1	556	-0.113288	0.00211619	0.00509451	0.110376
STAG3	557	0.491004	0.319569	0.00511186	0.110376
SPOPL	558	0.152006	0.127219	0.00511396	0.110376
DMD	559	0.458929	0.234206	0.00511905	0.110376
POFUT2	560	-0.0893186	0.0659214	0.00513361	0.110492
CLIC4	561	0.285066	0.252785	0.00515737	0.110585
MPZL2	562	-0.166308	0.0256459	0.00516244	0.110585
DAGLB	563	-0.0494373	0.0814141	0.00516547	0.110585
SLC12A5	564	0.17387	0.0252533	0.00518525	0.110662
PNN	565	-0.185597	0.046733	0.00519476	0.110662
AFTPH	566	-0.0141909	0.0402295	0.00521311	0.110662
FBXL7	567	0.0382047	0.0139457	0.00521415	0.110662
ATF1	568	-0.310502	0.100421	0.00521894	0.110662
THYN1	569	-0.158407	0.00221709	0.00522415	0.110662
ZNF480	570	0.230941	0.130133	0.00523767	0.110754
ATP1A1	571	-0.0711914	0.0688158	0.00526331	0.110953
SLC29A4	572	0.0658588	0.0159667	0.00526918	0.110953
RPS6KC1	573	-0.140394	0.00644632	0.00527471	0.110953
METTL13	574	0.0619036	0.0406671	0.00529534	0.111052
GIMAP7	575	-0.325412	0.121606	0.005309	0.111052
FBLIM1	576	0.121738	0.0084142	0.00532548	0.111052
ADRBK2	577	-0.369087	0.147945	0.00532974	0.111052
CUL4B	578	0.125298	0.0469452	0.00533171	0.111052
RPL32	579	-0.244496	0.017398	0.0053347	0.111052
TCF25	580	0.0131727	0.0416825	0.00535413	0.111131
WAC	581	0.00878633	0.0790727	0.00535694	0.111131
RPL8	582	0.0924103	0.0541943	0.0053871	0.111473
SMURF1	583	-0.130815	0.05169	0.00539191	0.111473
GDI2	584	-0.0876366	0.0850327	0.00544731	0.112425
ZDHHC16	585	0.00381406	0.0429794	0.00546586	0.112444
CD274	586	0.293872	0.093928	0.00547818	0.112444
TFG	587	0.123443	0.0121262	0.0054843	0.112444
DPP7	588	-0.0832438	0.0479908	0.00548772	0.112444
NME7	589	0.024456	0.0266067	0.00549729	0.112444
ARMC6	590	0.127338	0.00136223	0.00551046	0.112444
LMNB1	591	0.021536	0.0992621	0.00551354	0.112444
MRPL50	592	0.0390851	0.141414	0.00553812	0.112755
CPSF4	593	0.250003	0.00588938	0.00557663	0.113318
MAN1B1	594	-0.0862099	0.0729562	0.00558912	0.113318
ANKAR	595	-0.138281	0.00802107	0.00559931	0.113318
PSMA3	596	-0.13797	0.0353105	0.00560337	0.113318
OR12D2	597	-0.0889904	0.0239737	0.00561292	0.113321
CETN3	598	-0.119712	0.0740292	0.00563411	0.113351
RASAL1	599	0.0955479	0.00566536	0.00564505	0.113351
SLTM	600	-0.238151	0.00559273	0.00564694	0.113351
TMEM60	601	-0.201334	0.0151279	0.00566564	0.113351
ABR	602	0.0676106	0.0379255	0.00567016	0.113351
CHD3	603	-0.266237	0.0992603	0.00567085	0.113351
GEMIN8	604	-0.2554	0.0590688	0.00569924	0.11373
GIGYF1	605	-0.141902	0.0643777	0.00571158	0.113744
ARL8B	606	0.135904	0.148941	0.00571883	0.113744
CARD16	607	-0.0118185	0.126485	0.00574013	0.11398
SNX4	608	0.0637171	0.11938	0.00576549	0.114118
PIK3AP1	609	0.0984599	0.133638	0.00578524	0.114118
HSD17B12	610	0.0778379	0.0929798	0.00579332	0.114118
ZNF271	611	0.0585032	0.0551435	0.00579497	0.114118
EIF2B4	612	-0.0352609	0.0785601	0.00579609	0.114118
RABGGTA	613	-0.0781914	0.0430019	0.0058039	0.114118
GBF1	614	-0.127119	0.0723513	0.00581559	0.114162
CASP4	615	0.0020019	0.269071	0.00584234	0.1145
CASC4	616	0.32557	0.201655	0.00585958	0.114652
JMJD8	617	0.062318	0.0440206	0.00587566	0.114712
SGSM2	618	-0.112184	0.136206	0.00590431	0.114712
TPM1	619	0.174574	0.0564367	0.00590592	0.114712
NDUFA4	620	-0.148471	0.332513	0.00590668	0.114712
SNRPG	621	-0.114852	0.368636	0.00591481	0.114712
SHFM1	622	-0.0252073	0.0165443	0.00592721	0.114712
CCNY	623	0.30476	0.0316167	0.00592928	0.114712
H2AFZ	624	-0.138233	0.067312	0.00595005	0.114929
E2F4	625	0.0296232	0.0263408	0.00596892	0.114954
RASAL3	626	0.0101096	0.121408	0.00597037	0.114954
LY6H	627	0.13125	0.013406	0.00600513	0.115289
DSC2	628	0.371301	0.28745	0.00601117	0.115289
USP8	629	0.0814562	0.0599987	0.00601651	0.115289
MRPL13	630	0.0777785	0.153069	0.00606268	0.115482
PDXP	631	0.0133997	0.0440098	0.00606895	0.115482
KRT20	632	0.0495644	0.000237912	0.00607688	0.115482
KCNQ1	633	-0.169054	0.019309	0.00607993	0.115482
CSF1R	634	-0.096911	0.105309	0.00608374	0.115482
SLC27A3	635	-0.110603	0.142104	0.00608405	0.115482
TET2	636	0.235688	0.0989359	0.0061832	0.116949
DPP3	637	-0.132112	0.0870258	0.00619328	0.116949
ACD	638	-0.0903608	0.0626622	0.00619664	0.116949
DHX36	639	0.0522729	0.0655394	0.00620476	0.116949
TRPV2	640	0.109892	0.0551332	0.00621854	0.116949
SERPINA10	641	0.161131	0.0129657	0.00622574	0.116949
TNFRSF14	642	0.0628373	0.0504294	0.00622927	0.116949
DNAJC3	643	0.224157	0.0466387	0.00624655	0.117091
TUSC2	644	0.0593799	0.0262726	0.0062629	0.117215
HSPA14	645	0.120427	0.118715	0.00629467	0.117603
LAT	646	0.0635947	0.0397373	0.00630315	0.117603
RBM23	647	-0.0522387	0.0559777	0.00632205	0.117774
ZNF12	648	0.156255	0.1415	0.00634467	0.118013
NSA2	649	-0.210779	0.108027	0.00637844	0.118355
RMI1	650	0.259856	0.240848	0.00638269	0.118355
CLPX	651	0.0402885	0.0266238	0.00641447	0.118761
KLF11	652	-0.24161	0.1726	0.00642747	0.11882
RAB1A	653	0.0325261	0.0365356	0.00647287	0.119476
MRPL37	654	0.0212682	0.0456024	0.00649035	0.119615
STRN4	655	0.225825	0.0182098	0.00652344	0.120041
SLC37A4	656	-0.156619	0.104084	0.00654325	0.120218
EIF3M	657	-0.260845	0.00733337	0.00655297	0.120218
SNAPC3	658	0.236573	0.0653447	0.00659733	0.120456
CASZ1	659	0.143278	0.00180611	0.00663853	0.120456
IFT74	660	0.0753294	0.0667327	0.0066464	0.120456
PODN	661	0.0944516	0.000929823	0.00664841	0.120456
RIF1	662	-0.0412349	0.0366115	0.00664846	0.120456
NARS	663	-0.292959	0.00880349	0.00667165	0.120456
ALKBH5	664	0.0578736	0.0330748	0.00668095	0.120456
GNPAT	665	0.0736668	0.0461468	0.00668166	0.120456
DIABLO	666	0.136786	0.00171218	0.00668173	0.120456
ANTXR1	667	0.175538	0.0277058	0.00670492	0.120456
CREB1	668	0.153377	0.149163	0.00673677	0.120456
HMGN1	669	-0.122259	0.0400125	0.0067512	0.120456
CHORDC1	670	0.210674	0.179766	0.00676375	0.120456
ZNF586	671	0.122973	0.0683818	0.00677661	0.120456
SLC2A6	672	-0.0799953	0.0853454	0.00678008	0.120456
SOD1	673	-0.160143	0.0676229	0.00681408	0.120456
DNAJB5	674	-0.0251714	0.00842669	0.00681644	0.120456
HSPA4	675	-0.0495878	0.052489	0.00682142	0.120456
ATP5C1	676	-0.130927	0.135534	0.00682188	0.120456
SLC39A6	677	0.0163038	0.0344691	0.00682843	0.120456
SPTLC1	678	0.0771725	0.157061	0.00683235	0.120456
PLEKHA7	679	0.120467	0.0415871	0.00683392	0.120456
TGOLN2	680	-0.0213471	0.0597257	0.00684878	0.120456
ATP5SL	681	0.212627	0.00456525	0.00685078	0.120456
POLR1D	682	-0.0460464	0.0470722	0.00685433	0.120456
TRIM24	683	-0.151543	0.00207314	0.00685455	0.120456
ZMYM5	684	-0.101147	0.00106111	0.00686973	0.120456
DPYD	685	-0.301007	0.0121278	0.00688262	0.120456
PIK3R2	686	-0.0205596	0.138465	0.00688359	0.120456
TSC22D2	687	-0.0824146	0.050887	0.00689198	0.120456
PDCD2	688	0.0371064	0.0362014	0.00690555	0.120456
PXMP4	689	-0.0595172	0.0334157	0.00692648	0.120456
AGK	690	0.268789	0.0737336	0.00693218	0.120456
NISCH	691	-0.169685	0.11519	0.00694346	0.120456
EXOC3	692	-0.0356843	0.0705253	0.00695999	0.120456
NEDD9	693	-0.0049834	0.0886806	0.00696842	0.120456
ZNF692	694	-0.0880083	0.0898915	0.00696895	0.120456
TAZ	695	-0.119462	0.0778041	0.00697242	0.120456
CNKSR3	696	0.00666373	0.0129884	0.00697273	0.120456
TRADD	697	-0.0414385	0.0545928	0.00698848	0.120456
SLC7A6	698	-0.22439	0.0227203	0.0069932	0.120456
CDK2	699	0.163555	0.0142616	0.00699723	0.120456
PCM1	700	-0.300065	0.00840101	0.00700245	0.120456
ELOVL5	701	0.0405017	0.135095	0.00700596	0.120456
WNT10B	702	-0.452961	0.248044	0.00701569	0.120456
ZMYM4	703	-0.189658	0.0146163	0.00703319	0.120585
ZSCAN2	704	-0.0434001	0.0263555	0.00705211	0.120602
MTMR6	705	0.121767	0.19348	0.0070618	0.120602
ZNF473	706	-0.0556088	0.0289799	0.00706851	0.120602
TROVE2	707	0.216094	0.232758	0.00708166	0.120602
MORC2	708	-0.158404	0.09741	0.00709161	0.120602
DHX16	709	-0.0175943	0.0419646	0.00711459	0.120602
GDPD5	710	-0.0672562	0.141562	0.00711831	0.120602
ZNF772	711	0.10042	0.0331989	0.00712307	0.120602
GRIPAP1	712	-0.0301416	0.029462	0.00713542	0.120602
FRG1	713	-0.188988	0.0330636	0.00715157	0.120602
GNL2	714	-0.226823	0.00458808	0.00715522	0.120602
PLA2G6	715	-0.144152	0.0581441	0.00716588	0.120602
TICAM1	716	0.217139	0.00495198	0.00716603	0.120602
POFUT1	717	0.0722151	0.0159047	0.00717674	0.120602
DCUN1D1	718	-0.0125274	0.118392	0.007188	0.120602
PPM1D	719	0.568251	0.442602	0.00719427	0.120602
TBC1D15	720	0.200325	0.301658	0.00724684	0.121186
STK10	721	-0.00284907	0.0521667	0.0072531	0.121186
ALKBH1	722	-0.207879	0.0698346	0.00726458	0.121186
PSMG1	723	-0.0771269	0.0147706	0.00727091	0.121186
ZKSCAN1	724	-0.172558	0.0139005	0.00727942	0.121186
CAV2	725	0.42902	0.211205	0.00729756	0.121309
AKT3	726	-0.233314	0.125261	0.00730695	0.121309
DLD	727	0.0644258	0.0788067	0.00733526	0.121545
SIPA1	728	0.0845138	0.0476889	0.00734704	0.121545
MED15	729	-0.0858126	0.0469385	0.00735745	0.121545
LONP1	730	-0.0418266	0.0682076	0.007391	0.121545
HMGB2	731	-0.106055	0.133235	0.00739834	0.121545
PSMB2	732	0.0266301	0.052547	0.00739919	0.121545
SPNS1	733	-0.12068	0.0626619	0.007402	0.121545
HINFP	734	-0.078854	0.0361958	0.00741003	0.121545
SNRPB	735	0.0262623	0.0571591	0.00741188	0.121545
NGLY1	736	0.0260067	0.0897208	0.00747733	0.121908
SLBP	737	0.018065	0.0590594	0.00749097	0.121908
ELMO1	738	-0.125566	0.0584598	0.00749097	0.121908
CAPNS1	739	0.0313003	0.0567056	0.00749989	0.121908
RENBP	740	-0.0380545	0.0568688	0.0075222	0.121908
NPTN	741	0.102034	0.150526	0.00752283	0.121908
PDXK	742	0.127893	0.0186708	0.00752472	0.121908
RPS24	743	-0.51307	0.556018	0.00752478	0.121908
ATP2A3	744	-0.168168	0.0533017	0.00752787	0.121908
SPAG9	745	-0.289224	0.0179505	0.00753516	0.121908
TUBGCP6	746	-0.23528	0.0925335	0.00755463	0.122059
CORO7	747	-0.171425	0.141051	0.00758779	0.122338
ENTPD3	748	0.0880581	0.01343	0.00759859	0.122338
MORC4	749	0.0819367	0.0228176	0.00760233	0.122338
URM1	750	-0.0311196	0.0440036	0.00761677	0.122407
LHFPL2	751	0.200564	0.0654256	0.00763678	0.122562
MYPOP	752	-0.173559	0.0715349	0.00764678	0.122562
CCDC91	753	0.0979895	0.145997	0.00766656	0.122651
CLIC1	754	-0.00902871	0.0416012	0.00768172	0.122651
HNRNPCL1	755	0.162359	0.0248363	0.00768287	0.122651
DST	756	-0.250428	0.0730543	0.00771236	0.122959
S100A12	757	-0.266528	0.320237	0.00774091	0.123097
STAG2	758	0.262091	0.332753	0.00774141	0.123097
TYSND1	759	0.0537208	0.0566245	0.00777451	0.123295
ANAPC13	760	-0.0358196	0.107639	0.0077999	0.123295
SIN3B	761	-0.204516	0.0980019	0.00780245	0.123295
JAK2	762	0.0742435	0.134933	0.00781309	0.123295
ANKRD39	763	0.0759722	0.00929443	0.00781486	0.123295
CDCA5	764	0.15006	0.0173724	0.0078184	0.123295
GIPC1	765	-0.187149	0.136361	0.00782551	0.123295
CALML4	766	0.0397673	0.116772	0.00784688	0.123305
CCDC126	767	0.163392	0.154227	0.0078598	0.123305
NME4	768	-0.0999273	0.139373	0.00787327	0.123305
WDR44	769	-0.199588	0.025236	0.00787851	0.123305
P2RX4	770	0.0475909	0.0367843	0.00788566	0.123305
RCC2	771	0.0254319	0.0601164	0.00789974	0.123305
F8A1	772	0.0736863	0.0702675	0.00791082	0.123305
ANKFY1	773	-0.248455	0.135462	0.00791304	0.123305
GPA33	774	-0.060867	0.119437	0.00791819	0.123305
FAM189B	775	-0.0270796	0.0395263	0.00794034	0.12349
CPSF3L	776	-0.0399923	0.039511	0.00799698	0.124112
RBBP8	777	-0.179347	0.00272157	0.00800445	0.124112
OGG1	778	-0.123735	0.0355711	0.00801124	0.124112
CD6	779	0.00888922	0.160645	0.00803953	0.124224
CWC15	780	-0.153268	0.0608948	0.00806129	0.124224
STARD5	781	-0.0111628	0.0249475	0.00808319	0.124224
LRIT1	782	0.192034	0.0395583	0.0080922	0.124224
SEC61B	783	-0.0670962	0.0404683	0.00811787	0.124224
TRIM28	784	-0.00382535	0.0512448	0.00813131	0.124224
GNAI3	785	0.0125572	0.117746	0.00813898	0.124224
FKBP14	786	-0.28043	0.0139799	0.00813999	0.124224
SIRT1	787	0.0466998	0.0297829	0.00814505	0.124224
ARSD	788	0.00193579	0.0362246	0.00815427	0.124224
PAPOLA	789	0.0407596	0.116984	0.00816268	0.124224
ACTR6	790	-0.0986617	0.0976296	0.00816684	0.124224
SEC16A	791	-0.131323	0.11852	0.00817232	0.124224
MCL1	792	0.126433	0.20318	0.00818036	0.124224
LARP7	793	0.00984324	0.0985402	0.0081824	0.124224
STX5	794	-0.0432927	0.0590634	0.00819643	0.124224
DCTN3	795	0.1787	0.0120914	0.00820017	0.124224
MRPS22	796	-0.025842	0.0954479	0.00820393	0.124224
MOSPD2	797	0.232796	0.182407	0.00824491	0.1246
RPAP3	798	0.0749439	0.103341	0.00825218	0.1246
BET1	799	0.122842	0.0859395	0.00827327	0.1246
CBWD5	800	-0.185205	0.00297972	0.00829041	0.1246
MRPL35	801	-0.0873838	0.0781841	0.00830104	0.1246
CCDC130	802	-0.0136189	0.0979503	0.00830397	0.1246
SCARB1	803	-0.0758284	0.0565963	0.00830426	0.1246
MORC3	804	0.201545	0.141673	0.0083115	0.1246
VPS39	805	-0.0347411	0.0500193	0.00833392	0.124781
RPL7L1	806	-0.1575	0.0809116	0.00835877	0.124998
B3GAT3	807	-0.116176	0.0470569	0.00838812	0.125281
TCL6	808	0.0578492	0.000365393	0.00841225	0.125322
ENPP2	809	0.247798	0.0626542	0.00841524	0.125322
DCTN4	810	0.0124074	0.0533747	0.00845121	0.125322
FNDC3A	811	-0.0269756	0.0729087	0.0084707	0.125322
ERGIC3	812	0.0217043	0.0361078	0.00848323	0.125322
RBM18	813	0.047038	0.0523398	0.00848438	0.125322
QPCT	814	0.0381452	0.0311725	0.00848578	0.125322
GAK	815	-0.0131787	0.087107	0.00850536	0.125322
FAM177A1	816	0.0540231	0.0131869	0.0085097	0.125322
DPY30	817	-0.136399	0.179832	0.00851152	0.125322
SYF2	818	-0.0964049	0.0724808	0.00854142	0.125322
HMGCS1	819	0.079522	0.0788858	0.00854202	0.125322
PHF23	820	0.110614	0.0433604	0.00856502	0.125322
CRAMP1L	821	-0.114244	0.0443293	0.00858921	0.125322
CDKN2AIPNL	822	-0.378122	0.0153485	0.00858943	0.125322
P4HA1	823	0.152883	0.104083	0.00858955	0.125322
TAF7	824	-0.110464	0.0992608	0.00859787	0.125322
JMJD1C	825	0.162925	0.272194	0.00860462	0.125322
ALG1	826	0.0154439	0.0154963	0.00860782	0.125322
CPSF2	827	0.178242	0.0158909	0.00860882	0.125322
PDCD4	828	-0.20174	0.00387851	0.00861586	0.125322
CCDC33	829	0.133883	0.00559319	0.00861962	0.125322
NUDC	830	0.0335129	0.0261162	0.00864303	0.125511
NOP2	831	-0.0556372	0.11058	0.00865872	0.125588
KCNAB2	832	-0.12927	0.0596617	0.00868765	0.125752
MUC1	833	-0.0919248	0.03223	0.00869093	0.125752
MCRS1	834	0.024943	0.0417623	0.0087202	0.126022
MOV10	835	-0.108261	0.0791337	0.00873047	0.126022
CUL5	836	0.100842	0.167908	0.00875244	0.12614
CARKD	837	-0.0578959	0.0622342	0.00875955	0.12614
F11R	838	-0.416302	0.0417723	0.00877714	0.126242
NMI	839	-0.0676498	0.0948117	0.0088147	0.126631
RPL6	840	-0.227373	0.0323425	0.00882832	0.126676
BDKRB2	841	0.147727	0.0193305	0.00884905	0.126822
CDK5RAP1	842	-0.121664	0.0521947	0.00890278	0.127181
HERC4	843	0.0670186	0.112697	0.00892779	0.127181
AGPAT3	844	-0.246926	0.110412	0.00897139	0.127181
TRIM62	845	-0.0665376	0.0371434	0.00897591	0.127181
TAPBP	846	-0.080712	0.0927726	0.0089859	0.127181
PDGFA	847	0.138738	0.0404721	0.00898856	0.127181
SPG7	848	-0.0218359	0.0725807	0.00899205	0.127181
HDAC6	849	-0.0334205	0.0928862	0.00899645	0.127181
PRPF8	850	-0.0287666	0.105314	0.00901765	0.127181
CCDC101	851	-0.0230592	0.0274086	0.00902034	0.127181
LSM5	852	-0.216387	0.0763594	0.00902335	0.127181
KCNK10	853	0.110483	0.00484943	0.00903587	0.127181
ATMIN	854	-0.158252	0.0070413	0.00906647	0.127181
SERTAD1	855	0.204861	0.0194818	0.00908073	0.127181
CNOT7	856	0.167536	0.0782136	0.00908829	0.127181
SENP6	857	0.0322479	0.13649	0.00909304	0.127181
CCND1	858	0.223764	0.0847307	0.00911594	0.127181
IKBKG	859	-0.0568186	0.0680807	0.00912977	0.127181
NDUFS4	860	-0.126898	0.164133	0.00912978	0.127181
IMP4	861	-0.0186873	0.0446546	0.00913398	0.127181
GNPDA1	862	0.0324367	0.0275994	0.00913932	0.127181
ABCA10	863	-0.0917437	0.00601184	0.00918226	0.127181
UFM1	864	0.312627	0.276626	0.00918712	0.127181
CENPJ	865	0.0080756	0.0124189	0.00918981	0.127181
BTBD1	866	-0.0391609	0.0257725	0.00920551	0.127181
EPB41L5	867	-0.28394	0.0788556	0.00921398	0.127181
CDV3	868	-0.167932	0.0540855	0.00921752	0.127181
KLHL22	869	0.0877475	0.0273418	0.00921984	0.127181
PPP2R5E	870	0.314806	0.069262	0.00924202	0.127181
UBE2V2	871	-0.0407297	0.0681217	0.00924492	0.127181
CACNA2D4	872	-0.157067	0.0558272	0.0092583	0.127181
METTL5	873	-0.076913	0.06392	0.00925966	0.127181
POLR2B	874	0.00190775	0.0502189	0.00926139	0.127181
SQSTM1	875	0.0398645	0.0577828	0.00926582	0.127181
PHAX	876	-0.154975	0.00249416	0.00929365	0.127181
EIF4G1	877	-0.0890346	0.120364	0.00929613	0.127181
TERF1	878	-0.083941	0.0269058	0.00930525	0.127181
MAGOH	879	0.0466388	0.0998399	0.00931266	0.127181
SNX13	880	0.196115	0.141213	0.00932009	0.127181
CAPN3	881	-0.326621	0.214122	0.00932023	0.127181
SEC24B	882	0.0627691	0.0655075	0.00932165	0.127181
RGS12	883	-0.181729	0.0838629	0.00933155	0.127181
ZEB2	884	0.0527833	0.0837639	0.00933557	0.127181
GCNT2	885	0.017926	0.0124578	0.00933832	0.127181
GAPVD1	886	-0.248081	0.0280606	0.00935454	0.127258
GPR114	887	0.231961	0.00592473	0.00936515	0.127258
COPS8	888	0.0753086	0.0926669	0.00937585	0.12726
THOC2	889	-0.21975	0.00572281	0.00942471	0.12778
STAT6	890	-0.0842259	0.110437	0.00945354	0.128026
TCEB1	891	-0.0446829	0.0506347	0.0094676	0.128073
HIF1A	892	0.172821	0.122448	0.00948337	0.128142
GSTM2	893	0.133562	0.00497163	0.00950821	0.128334
NOL6	894	-0.114171	0.0590444	0.00953153	0.128441
SLC44A5	895	0.182599	0.0337383	0.00953742	0.128441
SLC11A2	896	-0.170617	0.0147727	0.00954954	0.12846
MAPKAPK3	897	0.0734693	0.0276862	0.00956622	0.128541
PAK4	898	-0.279753	0.129072	0.00961766	0.129089
RRAS2	899	0.223072	0.137612	0.00964371	0.129287
ABCF1	900	-0.0575436	0.0708998	0.00965386	0.129287
SAP130	901	-0.145952	0.114558	0.00967686	0.129377
TCF20	902	-0.0949141	0.0482303	0.0096884	0.129377
ACN9	903	0.151782	0.188127	0.00970295	0.129377
KLHL36	904	0.181926	0.00311458	0.0097101	0.129377
GBA	905	-0.0481685	0.0845533	0.00974215	0.129377
SLC22A18	906	-0.0189629	0.14054	0.00974486	0.129377
ARL15	907	0.0530202	0.0263381	0.00974596	0.129377
UGDH	908	0.231917	0.138536	0.00974648	0.129377
TRABD	909	0.0524588	0.0556558	0.00979778	0.129413
VENTX	910	-0.341346	0.266011	0.0097986	0.129413
MYO19	911	0.342944	0.129074	0.00980326	0.129413
SUV420H1	912	-0.180793	0.0037947	0.00981795	0.129413
PURG	913	0.155852	0.00583047	0.00982029	0.129413
KEAP1	914	0.0963248	0.0127387	0.0098298	0.129413
ZNF436	915	0.259591	0.131839	0.00985041	0.129413
SEMA4D	916	-0.0863439	0.0894094	0.00985057	0.129413
VPS29	917	-0.00241122	0.23132	0.00985605	0.129413
APOA2	918	0.0193904	0.00875925	0.0098586	0.129413
RFWD2	919	0.0273487	0.0891788	0.00986878	0.129413
MACROD1	920	0.0597839	0.000413296	0.00987805	0.129413
SP140L	921	-0.309619	0.102405	0.009921	0.129639
GAS7	922	-0.0935051	0.058628	0.00993461	0.129639
IL10RA	923	0.0598862	0.0376723	0.00993655	0.129639
MAP6D1	924	-0.124601	0.039647	0.00993832	0.129639
THBS3	925	-0.2727	0.129534	0.00995146	0.12967
ABI1	926	0.20436	0.12842	0.00997495	0.129836
BDKRB1	927	0.202207	0.00467237	0.00999508	0.129958
NDUFS2	928	-0.33663	0.112865	0.0100069	0.129971
CTNNB1	929	0.183406	0.0643245	0.0100471	0.130353
COPS7A	930	-0.112944	0.0349914	0.0100859	0.130715
DUS4L	931	0.328158	0.211061	0.0101092	0.130762
FBXW8	932	-0.171168	0.0031337	0.0101112	0.130762
PTGS2	933	0.198961	0.216199	0.0101258	0.130779
PLXNB2	934	-0.226665	0.181762	0.0101354	0.130779
HMGA1	935	-0.0766166	0.000614225	0.010145	0.130779
ATP6V1F	936	0.176116	0.0402288	0.0101582	0.130808
MEX3C	937	0.323513	0.329896	0.0101807	0.130887
INO80E	938	0.00824199	0.0221999	0.010186	0.130887
CKS1B	939	0.141072	0.128927	0.0102033	0.13097
ASNSD1	940	0.131183	0.175349	0.0102177	0.131015
TGFB3	941	0.142417	0.0121734	0.0102832	0.131577
TRRAP	942	-0.0168095	0.0657302	0.0102834	0.131577
MRPL15	943	-0.0254349	0.0421052	0.010336	0.13211
KLHL7	944	0.191839	0.153137	0.0103734	0.132358
COX7A2	945	-0.0494877	0.207065	0.0103799	0.132358
EED	946	0.0737379	0.0422925	0.0104051	0.132358
NVL	947	-0.110537	0.0503757	0.0104189	0.132358
USP11	948	0.0225825	0.0544872	0.0104315	0.132358
SMARCE1	949	0.270703	0.208129	0.0104395	0.132358
PTPN7	950	0.0121231	0.0742047	0.01044	0.132358
ERLIN2	951	-0.0935252	0.00101435	0.0104535	0.132358
PRKAA1	952	0.191632	0.176085	0.0104648	0.132358
ATP5B	953	0.00537633	0.0299907	0.0104688	0.132358
USP48	954	-0.144746	0.00219196	0.0104883	0.132358
LRRK2	955	-0.00915194	0.116177	0.0105056	0.132358
USP16	956	-0.207045	0.00466244	0.010508	0.132358
CCL26	957	0.178696	0.0525419	0.0105092	0.132358
PRPF18	958	-0.170151	0.00298877	0.0105548	0.132795
INTS9	959	-0.142617	0.0815781	0.0105793	0.132859
USP21	960	0.0130648	0.019967	0.0105976	0.132859
HDAC2	961	-0.13033	0.0401875	0.0106279	0.132859
TMEM126A	962	-0.034781	0.104496	0.0106313	0.132859
MICAL1	963	0.000891268	0.0875359	0.0106334	0.132859
CAST	964	-0.293274	0.00834352	0.0106407	0.132859
LARP4	965	0.265818	0.206371	0.010645	0.132859
STK36	966	-0.13401	0.0741845	0.0106609	0.132859
SLU7	967	-0.114646	0.124094	0.0106676	0.132859
DMC1	968	-0.265927	0.00809896	0.0106752	0.132859
GNL3	969	-0.0584052	0.0635075	0.0106837	0.132859
CLEC10A	970	0.16024	0.0938708	0.0107074	0.132859
DDX17	971	-0.241907	0.0334261	0.0107114	0.132859
PPP3CA	972	0.0693	0.0603475	0.0107143	0.132859
CD37	973	0.0746605	0.0790871	0.0107353	0.132884
ECD	974	-0.11122	0.00137631	0.0107399	0.132884
LIMS1	975	0.049445	0.160953	0.0107615	0.132884
HSPH1	976	-0.0339826	0.0864969	0.0107962	0.132884
TM2D3	977	-0.0429067	0.0954973	0.0108	0.132884
SPATA6	978	-0.279898	0.0841878	0.010819	0.132884
PPP1R3E	979	-0.18288	0.111697	0.0108394	0.132884
XKR6	980	0.141624	0.00950329	0.0108456	0.132884
ATP5H	981	-0.136538	0.0161582	0.0108496	0.132884
ALDH2	982	-0.159151	0.101535	0.0108614	0.132884
SUCLG1	983	-0.08352	0.0134162	0.0108622	0.132884
DOCK9	984	-0.290537	0.0883865	0.0108875	0.132884
SH2D1A	985	-0.108433	0.139292	0.0109061	0.132884
SUB1	986	0.0102672	0.101803	0.0109145	0.132884
TBC1D9B	987	-0.18106	0.0657982	0.0109349	0.132884
MRPS16	988	-0.256599	0.134181	0.0109357	0.132884
RPL41	989	-0.0287366	0.00530606	0.0109759	0.132884
BMPR2	990	0.454033	0.411136	0.010997	0.132884
PKD2	991	0.0998712	0.0315189	0.0110077	0.132884
ATP6V0E1	992	-0.00290105	0.0341079	0.0110193	0.132884
PLD3	993	0.0752784	0.0470996	0.011032	0.132884
ATP5J2	994	-0.208957	0.0127345	0.0110323	0.132884
ZSWIM1	995	-0.00252033	0.0213065	0.0110352	0.132884
UBXN8	996	0.039473	0.0196939	0.0110509	0.132884
UBE2L3	997	0.0299063	0.0684805	0.0110577	0.132884
EEF2K	998	-0.195749	0.093594	0.0110794	0.132884
ALG5	999	-0.0564699	0.0403896	0.0110799	0.132884
UBTF	1000	-0.165306	0.0530235	0.0111065	0.132884
GPR65	1001	-0.0351077	0.135327	0.0111314	0.132884
DNM1L	1002	0.0201395	0.0269637	0.0111317	0.132884
RTN4	1003	-0.010896	0.0857941	0.0111383	0.132884
YY1	1004	0.173542	0.172253	0.0111438	0.132884
KCNJ4	1005	-0.0116114	0.0172248	0.0111713	0.132884
ARID3B	1006	0.0301691	0.0237683	0.0111735	0.132884
SLC29A3	1007	0.00378583	0.015397	0.0112048	0.132884
RPF2	1008	-0.224558	0.016959	0.0112075	0.132884
ADCK5	1009	0.0878541	0.00139127	0.0112143	0.132884
MRPS18C	1010	-0.095486	0.260202	0.0112162	0.132884
SNRNP70	1011	-0.105136	0.0650817	0.0112191	0.132884
PPOX	1012	-0.0500757	0.0598384	0.0112205	0.132884
SAMSN1	1013	-0.00732062	0.0839584	0.0112269	0.132884
SKAP2	1014	-0.0722396	0.0798262	0.0112337	0.132884
CNOT1	1015	-0.131844	0.0121074	0.0112406	0.132884
NUBP1	1016	0.0737945	0.0111102	0.0112586	0.132884
ARL6IP4	1017	-0.105446	0.0582661	0.0112631	0.132884
SLC39A3	1018	0.0251018	0.0310899	0.0112644	0.132884
TMEM64	1019	0.436229	0.22576	0.0112655	0.132884
ZNF362	1020	-0.0506912	0.0411228	0.0112661	0.132884
PKN1	1021	-0.137109	0.0480124	0.0112676	0.132884
ALG3	1022	0.00706316	0.0293644	0.0112687	0.132884
AZIN1	1023	0.0887482	0.108247	0.0112893	0.132884
IRX1	1024	0.137903	0.0513192	0.0112896	0.132884
TMEM70	1025	0.132591	0.0647146	0.011302	0.1329
SLC7A5	1026	0.338223	0.0129948	0.011321	0.132925
ZNF474	1027	0.124249	0.0131067	0.0113318	0.132925
INSIG2	1028	0.158162	0.0984584	0.0113371	0.132925
ZNF146	1029	-0.222512	0.0355098	0.0113614	0.132928
KTN1	1030	0.0171102	0.16199	0.0113779	0.132928
POLR3GL	1031	-0.152991	0.0632393	0.0113827	0.132928
HECA	1032	-0.140682	0.08261	0.0113855	0.132928
TRIM68	1033	0.167472	0.0030534	0.0113926	0.132928
NAGPA	1034	0.0607834	0.0409138	0.011407	0.132968
CATSPER2	1035	-0.292349	0.00996992	0.0114211	0.133004
LETM2	1036	-0.178645	0.0342455	0.0114351	0.133005
SFI1	1037	-0.133858	0.0434763	0.0114433	0.133005
PIKFYVE	1038	-0.31215	0.107338	0.011468	0.133155
MIOS	1039	-0.137614	0.00487734	0.0114783	0.133155
DHPS	1040	-0.023432	0.034774	0.0114939	0.133207
BLZF1	1041	-0.229288	0.00670576	0.0115317	0.133482
LBR	1042	0.168076	0.00332662	0.0115468	0.133482
RNF125	1043	-0.408261	0.22735	0.0115508	0.133482
LXN	1044	-0.220437	0.0357912	0.0116035	0.133865
ABHD12	1045	0.0943071	0.000982808	0.0116294	0.133865
FAM13A	1046	-0.331446	0.128637	0.011644	0.133865
MIB2	1047	0.178712	0.0032825	0.0116535	0.133865
ANAPC10	1048	0.0908061	0.117928	0.0116551	0.133865
WDR6	1049	-0.0228153	0.0854543	0.0116601	0.133865
ITGB1BP1	1050	-0.280664	0.00794402	0.0116617	0.133865
PPM1M	1051	0.235677	0.00585517	0.0116979	0.134154
TOP3B	1052	0.0493991	0.0365679	0.0117123	0.13419
CYP2U1	1053	0.0921713	0.0467725	0.0117344	0.134316
SMARCA5	1054	0.0372193	0.0610006	0.0117928	0.134693
FAM65A	1055	-0.110879	0.102349	0.0117947	0.134693
GLTSCR1	1056	0.0830166	0.0274076	0.0118265	0.134693
ME3	1057	-0.387204	0.175468	0.0118649	0.134693
ETFB	1058	-0.0710884	0.0497418	0.0118732	0.134693
GPR132	1059	0.0596591	0.0136388	0.0118778	0.134693
UBLCP1	1060	-0.0256458	0.0905634	0.0118853	0.134693
TMEM160	1061	0.244561	0.00651116	0.0118857	0.134693
NIPA2	1062	-9.71811e-05	0.0110738	0.0118961	0.134693
FANCA	1063	0.289583	0.115	0.0118999	0.134693
RICTOR	1064	0.116775	0.0490865	0.0119045	0.134693
DPH3	1065	0.0385394	0.0783154	0.011906	0.134693
DMKN	1066	0.333175	0.135961	0.0119126	0.134693
CD58	1067	-0.108652	0.165693	0.0119377	0.13485
SLC4A2	1068	-0.150468	0.0611536	0.0119675	0.13506
NUMA1	1069	-0.0899274	0.0585211	0.0119931	0.135223
NDUFS7	1070	0.0658732	0.035374	0.0120263	0.135356
RAB37	1071	0.27962	0.00902538	0.0120274	0.135356
CENPN	1072	0.118356	0.0392607	0.0120534	0.135425
TMEM175	1073	-0.0549352	0.0718386	0.012059	0.135425
ZCCHC17	1074	0.0413853	0.0589002	0.0120717	0.135425
SLC30A5	1075	0.0943526	0.0341698	0.0120785	0.135425
FBXW2	1076	-0.155581	0.0123447	0.0121068	0.135616
RNF149	1077	-0.0506377	0.0508168	0.0121208	0.135629
ACP6	1078	-0.265226	0.106211	0.0121305	0.135629
RDX	1079	0.063812	0.0562712	0.0121814	0.136072
BTG2	1080	0.0243548	0.0611906	0.0121954	0.136103
MANEA	1081	0.130096	0.047921	0.0122234	0.136106
PSMD6	1082	-0.0693121	0.0315173	0.0122323	0.136106
MTIF3	1083	-0.171752	0.0240823	0.0122324	0.136106
TDRD9	1084	0.317851	0.225724	0.0122409	0.136106
DCUN1D5	1085	-0.0344845	0.0529703	0.0123194	0.136853
TMEM39B	1086	-0.0510371	0.0452462	0.0123694	0.137282
ZNF654	1087	0.190025	0.0970826	0.0124122	0.13763
IDS	1088	0.196497	0.00472297	0.0124283	0.137682
PGAM4	1089	0.182755	0.0512025	0.01244	0.137686
PRPF40A	1090	0.158123	0.101501	0.0124827	0.138031
CLK1	1091	0.0605784	0.06288	0.0125273	0.138397
CDKN1B	1092	0.0478622	0.109479	0.0125793	0.138844
PLCB2	1093	-0.14415	0.165055	0.012609	0.138882
PAIP2	1094	0.0501436	0.153846	0.0126155	0.138882
DNMT1	1095	-0.0104527	0.0720736	0.0126173	0.138882
MYL6	1096	-0.083525	0.0684003	0.0126428	0.13899
TASP1	1097	0.161992	0.0462349	0.0126501	0.13899
DYRK2	1098	0.296818	0.0268383	0.0126887	0.139091
GCC2	1099	0.0705315	0.0423021	0.0127126	0.139091
SMARCD1	1100	-0.0683919	0.0833134	0.0127216	0.139091
STK17B	1101	0.0671544	0.187303	0.0127236	0.139091
CIR1	1102	-0.0625541	0.0438702	0.0127276	0.139091
ZNF350	1103	0.0488203	0.0417528	0.0127286	0.139091
CLCN7	1104	0.0490313	0.0787213	0.012761	0.139206
CYB561D2	1105	0.0253017	0.0211388	0.0127622	0.139206
COASY	1106	-0.0957108	0.0489249	0.0127807	0.139216
ATXN7L2	1107	-0.117631	0.0486421	0.0127862	0.139216
TPRG1L	1108	0.0029305	0.0364937	0.0128021	0.139264
SLC6A17	1109	0.17341	0.0339036	0.0128316	0.139458
GHDC	1110	-0.0350331	0.0582863	0.0128461	0.13949
CLCN3	1111	0.0864011	0.0530783	0.0128664	0.139585
PCMT1	1112	0.0130882	0.0787693	0.0129043	0.139784
SDF2	1113	-0.00710302	0.0390214	0.0129388	0.139784
HMHA1	1114	0.0503996	0.0517336	0.0129419	0.139784
LARP1B	1115	0.390735	0.269561	0.0129523	0.139784
NDUFB6	1116	0.0536626	0.0685707	0.0129597	0.139784
MBD2	1117	-0.226104	0.0495557	0.0129676	0.139784
EXOSC10	1118	-0.0888559	0.103271	0.0129867	0.139784
COX7B	1119	0.00375814	0.296612	0.0130056	0.139784
MRI1	1120	0.124279	0.00168161	0.0130353	0.139784
ZNF862	1121	-0.0999079	0.0380891	0.0130543	0.139784
RALY	1122	0.0189268	0.0498496	0.0130574	0.139784
PPP2R3C	1123	-0.201611	0.0778753	0.0130679	0.139784
TMEM189	1124	0.0454944	0.0210805	0.0130987	0.139784
OSBPL7	1125	-0.113387	0.110797	0.013118	0.139784
MTR	1126	-0.128809	0.00205483	0.0131185	0.139784
ZNF91	1127	-0.0108271	0.181535	0.01312	0.139784
CMTM3	1128	0.179247	0.00357599	0.0131235	0.139784
TUFT1	1129	-0.154995	0.00257603	0.013144	0.139784
VPS41	1130	0.000958287	0.0109084	0.0131548	0.139784
USMG5	1131	-0.238676	0.0185863	0.0131743	0.139784
TESK1	1132	0.0132451	0.0462651	0.0131901	0.139784
WFDC10B	1133	-0.0607856	0.000417407	0.0131996	0.139784
MEF2D	1134	0.0354389	0.0255107	0.0132148	0.139784
TCEAL4	1135	0.0136799	0.0651798	0.0132208	0.139784
GALK1	1136	0.0871788	0.0255466	0.0132316	0.139784
SKIV2L	1137	0.0415505	0.0688826	0.013233	0.139784
TCF12	1138	0.207797	0.0699121	0.0132347	0.139784
MRP63	1139	0.0675974	0.0760344	0.0132412	0.139784
ANO9	1140	-0.144074	0.0693338	0.0132504	0.139784
ANXA1	1141	-0.300103	0.189636	0.0132688	0.139784
EFTUD2	1142	-0.0837579	0.0532767	0.0132712	0.139784
HDAC4	1143	0.0958916	0.0954353	0.0132812	0.139784
EHD2	1144	0.0998092	0.00804934	0.0132926	0.139784
SDHA	1145	0.0224161	0.0309827	0.0133347	0.139784
MPEG1	1146	-0.0739626	0.0272266	0.0133479	0.139784
HEPACAM2	1147	-0.0837562	0.000900892	0.0133534	0.139784
BCL7A	1148	-0.400083	0.22668	0.0133556	0.139784
PIR	1149	0.0925854	0.0210355	0.0133582	0.139784
MPP5	1150	0.131847	0.00685359	0.0133633	0.139784
ADM	1151	0.243067	0.215148	0.0133736	0.139784
NFX1	1152	-0.172011	0.00372493	0.0133775	0.139784
BYSL	1153	-0.0912293	0.0524665	0.0133864	0.139784
DHX15	1154	-0.181934	0.00490862	0.0134036	0.139784
UQCRC1	1155	0.233326	0.00635685	0.0134118	0.139784
PPP1CA	1156	0.135045	0.0370104	0.013418	0.139784
HECTD3	1157	-0.0375573	0.0394753	0.0134182	0.139784
PTCD3	1158	-0.0928923	0.03215	0.0134772	0.140236
PDPK1	1159	-0.113079	0.00920774	0.0134849	0.140236
TBCC	1160	0.138212	0.00239742	0.0135043	0.140273
ECHDC1	1161	0.0190162	0.0717095	0.0135118	0.140273
MED16	1162	0.233348	0.00679928	0.0135667	0.140722
NDRG3	1163	0.142182	0.00214163	0.0136216	0.141076
CCBL2	1164	-0.0593549	0.0215935	0.0136242	0.141076
ANXA3	1165	0.0731077	0.198499	0.0136407	0.141076
KIAA0020	1166	-0.203966	0.00469495	0.0136532	0.141076
CCT6A	1167	-0.184136	0.00338859	0.0136659	0.141076
RBM12	1168	0.0891159	0.0651726	0.0136781	0.141076
TTC32	1169	-0.219721	0.00813683	0.0136933	0.141076
SOX13	1170	0.19992	0.0176901	0.0137095	0.141076
MIF4GD	1171	0.121012	0.00442767	0.0137428	0.141076
ZMYM1	1172	-0.153016	0.00260071	0.0137456	0.141076
CD5	1173	-0.0782308	0.109363	0.0137468	0.141076
CRIPAK	1174	-0.179821	0.286308	0.0137505	0.141076
PREPL	1175	0.0757581	0.0979731	0.0137544	0.141076
G3BP2	1176	0.138557	0.106691	0.0137647	0.141076
HPGD	1177	0.26903	0.153661	0.0137785	0.141098
BOLA3	1178	0.0538625	0.00036074	0.0138077	0.141277
GPATCH4	1179	-0.102559	0.00948293	0.0138372	0.141458
PSMC6	1180	-0.315019	0.0355114	0.013876	0.141583
IL11RA	1181	-0.164076	0.132496	0.0138882	0.141583
GPR155	1182	0.0897009	0.0358541	0.0138989	0.141583
CBFA2T2	1183	-0.169734	0.0303835	0.0139071	0.141583
CCNG2	1184	0.0871406	0.12639	0.0139094	0.141583
TNFRSF25	1185	-0.123235	0.153709	0.0139222	0.141583
CDC16	1186	-0.205057	0.00474322	0.0139316	0.141583
UNC45B	1187	0.0932679	0.0200005	0.0139572	0.141712
RNF4	1188	0.0440689	0.0321484	0.0139779	0.141712
EMP3	1189	0.0853796	0.0316776	0.0139871	0.141712
CDK5	1190	-0.0481101	0.0372443	0.0140053	0.141712
CHCHD5	1191	0.114725	0.00858279	0.0140135	0.141712
MAGED1	1192	-0.0416618	0.063137	0.0140209	0.141712
SMARCC2	1193	-0.0773691	0.0885298	0.0140265	0.141712
TMBIM1	1194	0.181564	0.00410065	0.0140514	0.141843
TMLHE	1195	0.0262583	0.0255542	0.0140915	0.142073
TMEM161B	1196	0.191576	0.029917	0.0141209	0.142073
FXR1	1197	-0.145695	0.0230111	0.0141251	0.142073
NDC80	1198	-0.0895989	0.000913198	0.0141309	0.142073
TMEM150A	1199	-0.145722	0.0660673	0.014133	0.142073
REC8	1200	-0.0840687	0.108528	0.0141653	0.142278
TOMM7	1201	-0.435204	0.289144	0.0141875	0.142383
CACNB1	1202	0.126564	0.0313331	0.0142047	0.142437
ATRX	1203	0.0965712	0.0461912	0.0142167	0.142439
LCAT	1204	-0.217335	0.0493656	0.0142607	0.142616
SCARF1	1205	0.251212	0.0814028	0.0142666	0.142616
CD226	1206	0.337261	0.285981	0.0142931	0.142616
AP3D1	1207	-0.254732	0.162528	0.0142997	0.142616
RBMX2	1208	-0.0346998	0.0204636	0.0143022	0.142616
UBAP2L	1209	-0.191891	0.083341	0.0143054	0.142616
ZNF600	1210	0.149598	0.0880123	0.0143585	0.14284
AGL	1211	-0.173416	0.0217299	0.0143731	0.14284
EIF3E	1212	-0.199815	0.11909	0.0143989	0.14284
AP2M1	1213	-0.00111355	0.0862552	0.0144141	0.14284
ZNF451	1214	0.0256608	0.0394791	0.0144214	0.14284
GSDMB	1215	-0.0424898	0.102905	0.0144441	0.14284
ARMCX6	1216	-0.163237	0.0029812	0.0144613	0.14284
ZNF213	1217	-0.0414428	0.069259	0.0144663	0.14284
MMACHC	1218	-0.218583	0.0947166	0.0144715	0.14284
CTHRC1	1219	0.163345	0.0421174	0.0144763	0.14284
COX17	1220	-0.175874	0.0710523	0.0144862	0.14284
TOPORS	1221	0.0380582	0.0716899	0.014508	0.14284
CAMTA2	1222	-0.0954907	0.0411123	0.014508	0.14284
LACTB	1223	0.0220887	0.058611	0.0145118	0.14284
LYPLAL1	1224	-0.20545	0.0292565	0.0145217	0.14284
MAP2K5	1225	-0.109474	0.042431	0.0145278	0.14284
HRSP12	1226	-0.096104	0.00094931	0.0145293	0.14284
OLFM1	1227	-0.462772	0.264403	0.0145535	0.14288
SAMD1	1228	-0.132457	0.0490727	0.014567	0.14288
CRNKL1	1229	0.423838	0.219218	0.014569	0.14288
CLTCL1	1230	-0.256668	0.109686	0.0145843	0.142914
APOOL	1231	-0.255288	0.0728603	0.0146011	0.142962
ENOSF1	1232	-0.414888	0.172779	0.0146208	0.143039
GANAB	1233	-0.17376	0.096045	0.0146433	0.143143
DYNLL2	1234	-0.0739651	0.043437	0.0146908	0.143369
PPRC1	1235	-0.193321	0.094577	0.0147128	0.143369
AP1M1	1236	0.0750837	0.0443203	0.0147189	0.143369
MYLK	1237	0.20647	0.106313	0.0147485	0.143369
LETMD1	1238	-0.0485259	0.0251714	0.0147516	0.143369
YWHAZ	1239	0.0356522	0.0116317	0.0147696	0.143369
NSMAF	1240	0.0094158	0.0551064	0.014778	0.143369
DENND4A	1241	-0.2188	0.0417417	0.0147782	0.143369
ALG9	1242	-0.145779	0.0753915	0.0147826	0.143369
PDCD10	1243	-0.00686004	0.0510694	0.0147913	0.143369
PNPO	1244	-0.220239	0.0787893	0.0147973	0.143369
COLQ	1245	0.198944	0.0179036	0.0148386	0.143654
ASH1L	1246	-0.207062	0.0587056	0.014865	0.143751
BCL10	1247	0.186522	0.0963823	0.0148724	0.143751
DEK	1248	-0.416133	0.0215571	0.014905	0.14395
CFDP1	1249	-0.399023	0.127582	0.0149567	0.144193
ARAF	1250	-0.0905109	0.0779349	0.0149619	0.144193
VPS36	1251	-0.00359793	0.118308	0.014966	0.144193
TGFBR2	1252	0.0175746	0.0612546	0.0149959	0.14429
MRPS23	1253	-0.0376393	0.0194645	0.0150077	0.14429
NMD3	1254	0.145518	0.189163	0.0150197	0.14429
RPS6KA1	1255	0.0564624	0.0460731	0.015024	0.14429
ACTR10	1256	0.0618195	0.1131	0.015057	0.144356
CPNE2	1257	-0.264606	0.0732323	0.0150623	0.144356
COMMD2	1258	0.144016	0.0869148	0.0150668	0.144356
ATP5I	1259	-0.206604	0.134189	0.0151056	0.144599
QSER1	1260	0.0888935	0.039047	0.0151291	0.144599
SLC25A13	1261	-0.126555	0.00203341	0.0151344	0.144599
PHYH	1262	-0.0424363	0.0350584	0.015143	0.144599
ZNF700	1263	-0.147508	0.0168216	0.0151521	0.144599
EMG1	1264	0.0939083	0.0958807	0.0151686	0.144642
NDN	1265	-0.118148	0.0912511	0.0152029	0.144841
MAN2C1	1266	-0.14132	0.120763	0.0152136	0.144841
RFNG	1267	0.0296136	0.0611308	0.0152435	0.144945
CASP8	1268	-0.187218	0.00418675	0.0152486	0.144945
BCAP29	1269	-0.187409	0.0251795	0.0152978	0.145299
MFNG	1270	0.00683357	0.0442602	0.0153148	0.145346
SLC5A6	1271	0.0231614	0.0326395	0.0153412	0.145482
RELT	1272	-0.178827	0.0728667	0.0153672	0.145614
ZNF33A	1273	-0.0336275	0.0271623	0.0153901	0.14562
PKD1	1274	-0.0362884	0.058268	0.0153921	0.14562
RNF145	1275	0.135724	0.114963	0.0154313	0.145786
API5	1276	0.12477	0.108774	0.0154495	0.145786
SIN3A	1277	-0.104485	0.0737996	0.0154535	0.145786
ATP6V1E1	1278	-0.0533579	0.0387836	0.0154579	0.145786
VPS53	1279	-0.169563	0.0375247	0.0154812	0.145891
ZFP36L1	1280	-0.0645829	0.0720882	0.0155426	0.146168
TBK1	1281	0.0786792	0.144061	0.0155434	0.146168
KLK3	1282	0.123808	0.00610941	0.0155569	0.146168
RARG	1283	0.109839	0.0274717	0.0155652	0.146168
CEP170	1284	-0.26511	0.0777614	0.0155816	0.146168
FAM110A	1285	-0.156896	0.118055	0.015598	0.146168
MPV17	1286	0.0501844	0.026994	0.0156035	0.146168
ZNF385A	1287	-0.157498	0.114318	0.0156076	0.146168
PPP6C	1288	0.180611	0.098453	0.01562	0.146171
DDX56	1289	-0.0340336	0.0559908	0.015639	0.146215
ARFGAP1	1290	0.0221188	0.0293663	0.0156541	0.146215
EFHD2	1291	0.251625	0.00728337	0.0156612	0.146215
IL21R	1292	-0.259136	0.0731218	0.0156829	0.146305
ATAD1	1293	0.0870231	0.0853031	0.0157169	0.146508
TGFA	1294	0.338178	0.319224	0.0157523	0.146621
TBC1D20	1295	-0.0951431	0.075897	0.0157655	0.146621
ZFYVE26	1296	-0.0776427	0.0693689	0.0157795	0.146621
EPHA10	1297	0.111289	0.0028866	0.0157858	0.146621
ANKMY2	1298	-0.0586139	0.0290161	0.0157897	0.146621
MRPL55	1299	-0.176709	0.0036236	0.0158102	0.146698
PHF14	1300	-0.121765	0.00192092	0.0158657	0.146999
NCBP2	1301	0.0531319	0.0681021	0.015867	0.146999
PYCRL	1302	0.121303	0.0255651	0.0159099	0.147283
RPL37A	1303	0.042864	0.112625	0.0159471	0.147514
FBXL6	1304	-0.0553286	0.0224577	0.0159779	0.147685
SYPL1	1305	0.284956	0.0581875	0.0160619	0.148293
AP2B1	1306	-0.0469956	0.0318625	0.0160909	0.148293
CWF19L2	1307	-0.114535	0.0465838	0.0161045	0.148293
TRIM17	1308	0.138205	0.00217022	0.0161189	0.148293
PRCP	1309	0.0149155	0.0552843	0.0161214	0.148293
DNAJB12	1310	-0.10336	0.0382571	0.0161286	0.148293
ADAMTSL4	1311	-0.226147	0.126092	0.016136	0.148293
RPH3AL	1312	0.181249	0.0273527	0.016156	0.148293
YY1AP1	1313	-0.0027372	0.0787247	0.0161634	0.148293
ULK3	1314	-0.152623	0.0606275	0.0161754	0.148293
PUS3	1315	0.0132033	0.0224318	0.016179	0.148293
UBA2	1316	0.225549	0.11492	0.0162279	0.148628
KBTBD11	1317	-0.252068	0.0247479	0.0162433	0.148656
DDX19B	1318	-0.0700958	0.0419346	0.0162859	0.148866
B4GALT7	1319	0.167794	0.00321102	0.0163194	0.148866
TCEA2	1320	-0.133418	0.0853872	0.0163196	0.148866
NACA	1321	-0.2207	0.032624	0.0163552	0.148866
ACAD10	1322	-0.231493	0.0425988	0.0163594	0.148866
INTS5	1323	-0.0552152	0.0382127	0.0163692	0.148866
ERCC1	1324	0.147554	0.0158354	0.0163695	0.148866
PEX13	1325	0.130658	0.103624	0.0163759	0.148866
DHRS1	1326	-0.0596586	0.106918	0.0163773	0.148866
GTPBP8	1327	-0.0921362	0.0013166	0.016422	0.149059
NOC4L	1328	-0.116431	0.0712119	0.0164405	0.149059
MFSD9	1329	-0.0924771	0.00110258	0.0164512	0.149059
NCOA5	1330	-0.0048135	0.0341654	0.0164525	0.149059
TMCO1	1331	-0.107198	0.215519	0.0165103	0.149059
MAPRE2	1332	0.175629	0.00487738	0.0165367	0.149059
PARP3	1333	-0.0583777	0.0575033	0.0165726	0.149059
PTPRH	1334	0.0985382	0.00729012	0.0165731	0.149059
PDPR	1335	-0.198399	0.0924197	0.0165774	0.149059
MRPS14	1336	0.0743145	0.0302718	0.0165815	0.149059
ING5	1337	0.149714	0.0427559	0.0165892	0.149059
KLHDC3	1338	-0.0170594	0.032811	0.0165928	0.149059
ATF5	1339	-0.102234	0.0890474	0.0165959	0.149059
CDC42SE2	1340	-0.0703389	0.0921769	0.0166206	0.149059
SYNCRIP	1341	0.110863	0.0588885	0.0166272	0.149059
TPP1	1342	-0.00806167	0.0656287	0.0166322	0.149059
SLC25A45	1343	-0.144782	0.0838918	0.0166322	0.149059
PITRM1	1344	-0.128233	0.0643824	0.0166331	0.149059
GCN1L1	1345	-0.131369	0.0860039	0.0166416	0.149059
DYNC2LI1	1346	-0.0627093	0.00156409	0.0166459	0.149059
ZNF76	1347	-0.0126469	0.0201127	0.0167089	0.149512
CSNK1E	1348	-0.126152	0.0896318	0.0167356	0.14953
SYNM	1349	0.148639	0.0189549	0.0167357	0.14953
KLRF1	1350	0.0806281	0.316385	0.0167578	0.149616
AIMP2	1351	-0.00221139	0.0306102	0.0168128	0.149781
TMEM45A	1352	0.0497566	0.000307714	0.0168239	0.149781
NARG2	1353	0.150538	0.10217	0.0168306	0.149781
USO1	1354	-0.280565	0.00967249	0.0168322	0.149781
TTC33	1355	0.0949356	0.0972677	0.0168532	0.149781
GPATCH3	1356	-0.15635	0.0609718	0.0168699	0.149781
WRB	1357	-0.140274	0.00234145	0.0169109	0.149781
SH2D5	1358	-0.0137636	0.0596585	0.0169161	0.149781
ARPC3	1359	-0.131046	0.0517106	0.0169525	0.149781
FPGS	1360	0.0592942	0.0178786	0.0169743	0.149781
KLF13	1361	0.0151756	0.029531	0.016992	0.149781
AVEN	1362	0.0641647	0.0315712	0.0170057	0.149781
RUNX1	1363	0.107649	0.0016014	0.0170152	0.149781
CAPZA1	1364	0.00211398	0.0562994	0.0170246	0.149781
GOLGA4	1365	0.0368558	0.0163493	0.017034	0.149781
NPHP4	1366	-0.0777806	0.0376204	0.017039	0.149781
CEP250	1367	0.0169473	0.00795507	0.0170406	0.149781
CD14	1368	0.102236	0.0683305	0.0170511	0.149781
DUSP11	1369	0.0956786	0.0389649	0.0170604	0.149781
EPS8L2	1370	-0.00244333	0.00775595	0.0170613	0.149781
NICN1	1371	-0.00268638	0.0519065	0.0170744	0.149781
CTSC	1372	-0.104155	0.0590676	0.0170815	0.149781
MS4A14	1373	-0.455017	0.229031	0.017108	0.149781
ST7	1374	0.0486047	0.0385041	0.0171112	0.149781
CLK4	1375	-0.272575	0.00877192	0.0171165	0.149781
MRPS33	1376	-0.230717	0.0273377	0.0171253	0.149781
REV1	1377	-0.149962	0.00285871	0.0171256	0.149781
HTR3A	1378	-0.234654	0.0593519	0.017149	0.149781
HIP1	1379	-0.518577	0.213152	0.0171804	0.149781
TRDN	1380	-0.0385458	0.0164211	0.0171823	0.149781
SEC11A	1381	-0.0904029	0.0717005	0.0171968	0.149781
CARD8	1382	-0.0583026	0.0519271	0.0172184	0.149781
MAP3K12	1383	-0.0680829	0.0417021	0.0172362	0.149781
OSCP1	1384	0.193901	0.0426679	0.0172487	0.149781
UBL7	1385	0.00166538	0.087972	0.0172545	0.149781
PARP10	1386	-0.00505774	0.0420784	0.0172725	0.149781
NDUFAF3	1387	0.0871678	0.0341123	0.0172852	0.149781
SNX2	1388	-0.0739225	0.0702395	0.0173005	0.149781
ROR1	1389	0.217321	0.0755897	0.0173108	0.149781
PRDM9	1390	0.0348846	0.0179429	0.0173256	0.149781
SNX22	1391	-0.488012	0.269415	0.0173309	0.149781
GEMIN4	1392	-0.0852786	0.066605	0.0173346	0.149781
ACSM3	1393	-0.0926722	0.001034	0.0173543	0.149781
ZNF175	1394	0.0585491	0.0223267	0.0173647	0.149781
EEF1B2	1395	-0.0913832	0.0049134	0.0173857	0.149781
USF2	1396	0.000322438	0.0291931	0.0173943	0.149781
FOXH1	1397	-0.249301	0.0685596	0.017405	0.149781
LGALS8	1398	-0.233366	0.0279424	0.0174184	0.149781
IP6K2	1399	0.0920734	0.00105248	0.0174399	0.149781
LRMP	1400	-0.0210286	0.0870122	0.0174532	0.149781
NSMCE4A	1401	0.0185014	0.0713912	0.0174681	0.149781
SEC61G	1402	-0.242697	0.00670201	0.017479	0.149781
CCDC15	1403	0.186907	0.0704462	0.0174953	0.149781
CNOT8	1404	0.103664	0.0621428	0.017521	0.149781
SLC30A3	1405	-0.0329123	0.0499375	0.0175284	0.149781
ST13	1406	-0.0242245	0.0419344	0.0175381	0.149781
VRK1	1407	-0.122797	0.00187819	0.017539	0.149781
TP53RK	1408	0.265336	0.0400255	0.0175463	0.149781
SRBD1	1409	-0.0125806	0.0620477	0.0175471	0.149781
G6PC3	1410	0.0714674	0.02034	0.0175475	0.149781
GLE1	1411	-0.00996495	0.00968681	0.0175494	0.149781
PAK1IP1	1412	-0.00135417	0.0338382	0.0175565	0.149781
PLEKHB2	1413	0.168415	0.00342099	0.0175592	0.149781
PPHLN1	1414	-0.161372	0.00328151	0.0175897	0.14981
CYB5R4	1415	0.18177	0.208326	0.0176178	0.14981
EBNA1BP2	1416	0.0202493	0.0389005	0.0176303	0.14981
ADD3	1417	-0.0158437	0.119955	0.017646	0.14981
HVCN1	1418	0.0962723	0.0144465	0.0176466	0.14981
CCDC59	1419	-0.263464	0.00880122	0.0176597	0.14981
VAV3	1420	0.180706	0.0694463	0.0176665	0.14981
VTA1	1421	0.202438	0.132348	0.017674	0.14981
NR1H2	1422	0.0267353	0.0460997	0.0176789	0.14981
FOXN2	1423	0.0932649	0.223495	0.0176868	0.14981
KIAA1147	1424	-0.063513	0.0127537	0.0177125	0.149922
MFSD3	1425	0.0666411	0.0122116	0.0177594	0.150108
BAZ2A	1426	0.00743179	0.0279977	0.0177594	0.150108
KIF2A	1427	0.156696	0.0992245	0.0177774	0.150127
FBXL20	1428	-0.0761596	0.0442499	0.0177865	0.150127
FAM3A	1429	-0.0170597	0.0753188	0.0178521	0.150575
DUSP28	1430	0.161004	0.00309688	0.017904	0.150907
NSDHL	1431	-0.0778132	0.0345473	0.017946	0.15111
ZAP70	1432	-0.0111219	0.0885854	0.0179549	0.15111
FBXO4	1433	0.0812962	0.0655142	0.0179777	0.15111
IL7	1434	0.093781	0.018338	0.0179786	0.15111
SPC25	1435	0.180675	0.0566154	0.0179908	0.15111
RBM12B	1436	-0.180801	0.0113597	0.0180573	0.151221
SNX14	1437	-0.0237788	0.0693503	0.0180632	0.151221
PQLC1	1438	0.046731	0.0967082	0.0180648	0.151221
RINT1	1439	0.144539	0.0750782	0.0180663	0.151221
NUP37	1440	-0.189549	0.00425288	0.0180699	0.151221
HCN3	1441	0.116758	0.00953537	0.0180793	0.151221
ZNF761	1442	0.26834	0.13747	0.0181192	0.15145
ZWILCH	1443	0.145274	0.070806	0.018174	0.151802
PIK3C2B	1444	-0.25332	0.149049	0.0182202	0.15194
LMO4	1445	0.0437496	0.058638	0.0182231	0.15194
FBXO7	1446	0.0184852	0.236986	0.0182398	0.15194
PIGO	1447	0.133687	0.0019102	0.018265	0.15194
MSI2	1448	0.306538	0.0596692	0.0183037	0.15194
TCIRG1	1449	-0.058803	0.118765	0.0183207	0.15194
KCTD9	1450	0.132515	0.0691308	0.0183215	0.15194
SLC2A4RG	1451	0.131173	0.00775726	0.0183352	0.15194
PDCL3	1452	-0.143595	0.00263935	0.0183353	0.15194
SAT1	1453	-0.339262	0.0145658	0.0183482	0.15194
RFC4	1454	-0.123388	0.00194844	0.0183495	0.15194
KPNA3	1455	0.0727216	0.0713201	0.0183535	0.15194
MRPS11	1456	0.153088	0.00324102	0.018366	0.15194
BTK	1457	-0.102359	0.0178372	0.0183688	0.15194
GGA3	1458	-0.13148	0.0531028	0.0183829	0.15194
PDS5B	1459	-0.172844	0.00545683	0.0183971	0.15194
DEGS1	1460	0.140312	0.116423	0.0184047	0.15194
DDN	1461	0.0543805	0.0010908	0.0184674	0.152353
THOC1	1462	-0.184531	0.00387103	0.018481	0.152361
VSIG4	1463	0.138088	0.00205191	0.018505	0.152395
ATP6V0A1	1464	-0.17146	0.148294	0.0185178	0.152395
CEP70	1465	-0.102102	0.00780762	0.0185231	0.152395
PEX16	1466	0.0326746	0.0265954	0.018549	0.152445
PTPN6	1467	0.0467084	0.0403248	0.0185676	0.152445
EPS15	1468	-0.0124674	0.0349248	0.0185731	0.152445
PUM2	1469	-0.21776	0.0267208	0.0186121	0.152445
HAVCR2	1470	0.237042	0.0209433	0.0186211	0.152445
GCA	1471	-0.0122047	0.0912071	0.0186235	0.152445
SLAMF6	1472	0.151287	0.0254194	0.0186366	0.152445
MBLAC2	1473	0.169045	0.10421	0.0186388	0.152445
PRDM16	1474	-0.0516139	0.0110597	0.018643	0.152445
MORF4L1	1475	-0.0353063	0.0637783	0.0186684	0.152549
RIOK2	1476	0.0527763	0.100328	0.0186927	0.152604
RAB40C	1477	0.172968	0.00727715	0.0187004	0.152604
VPS37C	1478	-0.0315015	0.0705579	0.0187401	0.152783
LGALS9	1479	-0.308563	0.167764	0.0187572	0.152783
CCDC34	1480	-0.184124	0.00427408	0.0187727	0.152783
RPL5	1481	-0.243192	0.106538	0.018773	0.152783
TRAPPC6B	1482	-0.147971	0.0185244	0.0187944	0.152854
OR51D1	1483	-0.0548571	0.0175386	0.0188457	0.153063
EPN1	1484	-0.0568589	0.0920709	0.0188596	0.153063
RING1	1485	-0.0250514	0.0469337	0.0188779	0.153063
FEZ1	1486	0.240295	0.00823912	0.0188981	0.153063
PGM2	1487	0.113424	0.128096	0.0188987	0.153063
WNT5B	1488	0.114138	0.00190316	0.0189021	0.153063
ANTXR2	1489	0.131982	0.171591	0.0189265	0.153063
GART	1490	-0.0386137	0.0360725	0.018934	0.153063
DUSP15	1491	0.151467	0.0158579	0.0189345	0.153063
QRICH1	1492	-0.0636099	0.0703437	0.0189552	0.153128
TMC8	1493	-0.122073	0.0452604	0.0189907	0.153282
TMED2	1494	0.108336	0.072178	0.0189996	0.153282
CIZ1	1495	-0.209733	0.0692554	0.0190405	0.153508
GNPTAB	1496	0.12656	0.0367122	0.019096	0.153853
MYBBP1A	1497	-0.287565	0.128246	0.0191253	0.153901
RWDD1	1498	-0.102041	0.137958	0.0191315	0.153901
RGS6	1499	0.166776	0.0180565	0.0191403	0.153901
VAMP7	1500	0.0339499	0.10345	0.0191575	0.153937
CHD2	1501	-0.136674	0.00254576	0.0192426	0.154518
SNAPC2	1502	0.078218	0.0246547	0.0193006	0.154779
LRCH4	1503	0.195691	0.00727285	0.0193008	0.154779
CKLF	1504	-0.210552	0.11486	0.0193206	0.154835
ADCK2	1505	0.00992288	0.0333668	0.0193459	0.154866
NUAK2	1506	0.234242	0.00747795	0.0193503	0.154866
FANCD2	1507	-0.192414	0.0428664	0.019379	0.154994
CDK5RAP3	1508	-0.0445717	0.0888407	0.0194141	0.155076
ARG1	1509	0.217285	0.494411	0.0194151	0.155076
PLA2G15	1510	0.143572	0.00949039	0.0194358	0.155139
CLCN6	1511	-0.193635	0.0796492	0.0194939	0.15531
ZMYND8	1512	-0.223912	0.0351752	0.0195109	0.15531
PURA	1513	-0.0804927	0.000950519	0.0195563	0.15531
NHLRC3	1514	-0.0312302	0.0411213	0.0195702	0.15531
AKAP8	1515	0.184485	0.0132302	0.0195866	0.15531
FXYD5	1516	-0.083739	0.0536309	0.0196035	0.15531
TNFAIP8	1517	0.12781	0.0741538	0.0196082	0.15531
ZNF551	1518	0.184001	0.0756403	0.019639	0.15531
UTP6	1519	-0.224983	0.0107543	0.0196423	0.15531
TMTC4	1520	0.117632	0.039519	0.0196447	0.15531
EPHB6	1521	-0.148286	0.0652541	0.0196687	0.15531
ATP5J	1522	-0.0645515	0.0480367	0.0196691	0.15531
RRM2B	1523	0.0462564	0.055881	0.01969	0.15531
GTF2B	1524	-0.181188	0.0331214	0.0196965	0.15531
RPS27	1525	-0.361749	0.271813	0.0197061	0.15531
LYN	1526	0.237634	0.00769296	0.0197084	0.15531
SH3GLB2	1527	0.106531	0.0671224	0.0197239	0.15531
RNASEH2B	1528	-0.104045	0.0184992	0.0197383	0.15531
CCNH	1529	-0.0598451	0.0109208	0.0197502	0.15531
SREBF1	1530	0.124115	0.00891519	0.0197621	0.15531
UBQLN2	1531	-0.064908	0.0533985	0.0197727	0.15531
SEC61A1	1532	0.0515773	0.0445986	0.0197868	0.15531
ROBO3	1533	-0.11701	0.00677225	0.019787	0.15531
CNTLN	1534	0.130519	0.0148717	0.0197936	0.15531
MOCS1	1535	0.109358	0.00999815	0.019794	0.15531
OR4N2	1536	0.0628069	0.000541318	0.0197974	0.15531
FLI1	1537	0.141126	0.0967627	0.0198052	0.15531
SHC3	1538	0.110101	0.0104394	0.0198448	0.155436
GOLGA1	1539	-0.235378	0.0713676	0.019847	0.155436
PAFAH1B3	1540	0.14585	0.0357833	0.0199142	0.155798
DNHD1	1541	-0.220096	0.145126	0.0199246	0.155798
LSM3	1542	-0.236637	0.20832	0.0199397	0.155798
POU2F1	1543	-0.190134	0.105774	0.019945	0.155798
ZC3H14	1544	-0.176357	0.029602	0.0199714	0.155884
PNKD	1545	-0.164689	0.0830414	0.0199819	0.155884
MDM2	1546	-0.107614	0.0106365	0.0200275	0.156139
MLC1	1547	0.0908173	0.0024105	0.0200435	0.156163
RBCK1	1548	-0.0610508	0.0668614	0.020064	0.156222
ATXN7L3	1549	0.0374108	0.0287856	0.0200934	0.156305
KHNYN	1550	-0.081652	0.0742611	0.0201006	0.156305
ABHD5	1551	0.275214	0.250014	0.0201505	0.156592
PRDX1	1552	-0.15855	0.0358326	0.0201706	0.156647
SAR1B	1553	-0.0620616	0.117377	0.0201887	0.156687
TNPO2	1554	0.041059	0.045204	0.0202267	0.156784
DDHD2	1555	-0.272645	0.0833678	0.0202273	0.156784
COQ3	1556	-0.0908694	0.00120366	0.0202727	0.157035
SLC24A1	1557	-0.162532	0.0280346	0.0202866	0.157042
DMTF1	1558	-0.165592	0.0112735	0.0203183	0.157186
LAIR1	1559	0.0901324	0.0188248	0.0203411	0.157222
PRKAG2	1560	0.0329968	0.0245885	0.0203598	0.157222
GUCA2B	1561	0.0729502	0.00280539	0.0203621	0.157222
TBRG1	1562	-0.1474	0.0221375	0.0203989	0.157393
WDR37	1563	0.133607	0.00216557	0.0204143	0.157393
BTBD10	1564	0.0506354	0.0886364	0.0204294	0.157393
SAMD9	1565	0.025662	0.120857	0.0204364	0.157393
DDX41	1566	-0.0617776	0.0538113	0.0204566	0.157448
B4GALT4	1567	0.00730393	0.0353676	0.0204875	0.157549
ZBTB3	1568	0.0531118	0.00929748	0.0204959	0.157549
AFF4	1569	-0.22507	0.110906	0.0205134	0.157583
CCPG1	1570	0.108835	0.169921	0.020547	0.157617
NHP2L1	1571	0.195138	0.015905	0.0205544	0.157617
ALG13	1572	0.118277	0.121906	0.0205684	0.157617
R3HCC1	1573	-0.0143853	0.0272898	0.0205701	0.157617
NAT1	1574	0.15659	0.153027	0.0206401	0.157664
PTPRC	1575	0.15868	0.00917743	0.0206489	0.157664
XPO5	1576	-0.230581	0.0826608	0.0206496	0.157664
NAMPT	1577	-0.0183427	0.190135	0.0206732	0.157664
TSEN54	1578	-0.0829232	0.0738345	0.0206795	0.157664
COMMD3	1579	-0.289534	0.0122969	0.0206828	0.157664
PRKDC	1580	0.121927	0.0403797	0.0206921	0.157664
TSSC4	1581	0.0796822	0.029764	0.0206961	0.157664
VAT1	1582	0.185389	0.00472385	0.0207008	0.157664
CEP164	1583	-0.107624	0.0440352	0.020707	0.157664
SLC6A12	1584	-0.292403	0.154419	0.020732	0.157754
CTNS	1585	0.160996	0.0032792	0.0207767	0.157909
HK2	1586	-0.163233	0.00335638	0.0207785	0.157909
FLCN	1587	-0.105011	0.0252414	0.0208383	0.15826
RB1CC1	1588	0.0407024	0.239921	0.0208511	0.15826
NELL2	1589	-0.399877	0.144069	0.0208642	0.15826
TMC6	1590	0.227291	0.00778677	0.020878	0.158265
CEPT1	1591	-0.047956	0.0584268	0.0209006	0.158337
LIG3	1592	0.115636	0.00175268	0.0209413	0.158546
DIDO1	1593	-0.137179	0.0685791	0.0209706	0.158668
RRAS	1594	-0.0165111	0.071158	0.021001	0.158759
POF1B	1595	-0.0814646	0.00983197	0.0210213	0.158759
BCL2L13	1596	-0.0972684	0.0812802	0.0210365	0.158759
COPB1	1597	0.0742823	0.0530307	0.0210443	0.158759
FAM50A	1598	-0.142548	0.0627013	0.0210484	0.158759
IL17RD	1599	-0.205814	0.0080347	0.0210635	0.158773
ITPR3	1600	0.213085	0.00657117	0.0211151	0.159019
CDK2AP2	1601	0.0121662	0.0187387	0.0211224	0.159019
ZNF483	1602	-0.0613508	0.0420744	0.0211511	0.159039
ZNF431	1603	-0.481858	0.281885	0.0211846	0.159039
TAF1	1604	0.00684166	0.0200817	0.0211982	0.159039
NBAS	1605	-0.142987	0.0574822	0.0212021	0.159039
ZNF598	1606	0.0093755	0.0359899	0.0212144	0.159039
GSDMD	1607	0.200107	0.00548558	0.0212144	0.159039
HES1	1608	-0.257775	0.0948804	0.0212176	0.159039
GLMN	1609	-0.188484	0.00440251	0.0212391	0.159102
FOXL1	1610	0.141101	0.020918	0.0212929	0.159347
NAPB	1611	-0.156787	0.00364487	0.0213008	0.159347
ABHD14B	1612	-0.070199	0.0406334	0.0213114	0.159347
BAP1	1613	0.0229669	0.0188488	0.0213296	0.159384
BZW1	1614	0.176647	0.0745263	0.0213561	0.159483
ARMCX3	1615	0.0869757	0.0331176	0.0213855	0.159554
KIAA0195	1616	0.0476378	0.0165805	0.0213948	0.159554
RPGRIP1	1617	-0.379232	0.100291	0.0214053	0.159554
DEF6	1618	-0.031484	0.0461629	0.0214504	0.15976
SLC27A1	1619	-0.103469	0.0637149	0.0214661	0.15976
BCL2A1	1620	0.0434932	0.0448186	0.0214727	0.15976
DGKA	1621	-0.16726	0.0299782	0.0215769	0.160368
HKR1	1622	-0.0936071	0.0460188	0.021581	0.160368
CCRN4L	1623	-0.108566	0.0112357	0.0215964	0.160383
AKT1	1624	0.220521	0.00642572	0.0216631	0.160526
DEDD	1625	-0.0638173	0.0654167	0.0216676	0.160526
UPF3A	1626	0.011564	0.047735	0.021673	0.160526
TMEM131	1627	-0.0177037	0.0629185	0.0216757	0.160526
ANKRD44	1628	0.0976056	0.0552326	0.0217134	0.160526
SPATC1	1629	0.142992	0.0166817	0.0217189	0.160526
CLCC1	1630	-0.337661	0.134407	0.0217218	0.160526
ENO1	1631	0.0404975	0.0530655	0.0217298	0.160526
TMEM128	1632	-0.0550065	0.0168166	0.0217355	0.160526
EIF4A1	1633	-0.250765	0.141843	0.0217647	0.160643
DDX24	1634	-0.0288503	0.0763088	0.0217986	0.160795
MRPL32	1635	-0.0683532	0.0569606	0.0218771	0.161231
RASSF1	1636	0.0769632	0.0403408	0.0219216	0.161231
DENND1C	1637	-0.0667532	0.0788235	0.0219236	0.161231
CYB5R2	1638	0.474208	0.270792	0.0219241	0.161231
SF3B3	1639	-0.0990269	0.104812	0.0219246	0.161231
ZFAND2B	1640	-0.13118	0.0808948	0.0220178	0.161806
SLC25A39	1641	-0.0386186	0.151234	0.0220396	0.161806
TANK	1642	0.080554	0.104455	0.0220596	0.161806
PARL	1643	-0.169965	0.00376595	0.0220607	0.161806
ZNF248	1644	-0.196409	0.0326101	0.02207	0.161806
ZMYM2	1645	0.0461508	0.0974569	0.0220953	0.161893
PRRG4	1646	0.316786	0.182709	0.0221327	0.162069
PCNA	1647	-0.0812963	0.0324638	0.022155	0.162134
RABGGTB	1648	-0.0377067	0.0459618	0.0221725	0.162163
DOCK2	1649	0.0103061	0.067082	0.0222053	0.162246
PPP2R2D	1650	-0.0432609	0.0235301	0.0222149	0.162246
PEG10	1651	0.190087	0.0952242	0.0222242	0.162246
KIDINS220	1652	-0.222908	0.00731048	0.0222441	0.162284
COMMD6	1653	-0.124635	0.451945	0.0222563	0.162284
HDX	1654	0.102296	0.00569244	0.0222917	0.162443
CDADC1	1655	-0.119621	0.0133794	0.0223083	0.162466
ATP2A2	1656	0.00486232	0.0243592	0.0223592	0.162739
SRP14	1657	-0.179898	0.0774501	0.0223962	0.162797
ABCC3	1658	0.0984528	0.00120505	0.0223975	0.162797
GRIA3	1659	0.125332	0.0238081	0.0224351	0.162797
KBTBD7	1660	0.21652	0.175068	0.0224403	0.162797
RMND5B	1661	0.0611779	0.0174166	0.0224466	0.162797
PABPC1	1662	-0.222442	0.0285916	0.0224735	0.162797
UBE2W	1663	0.249585	0.0148605	0.0224939	0.162797
LRRC57	1664	0.0607053	0.0486881	0.0225003	0.162797
FES	1665	0.148777	0.0495876	0.0225297	0.162797
RNASEL	1666	-0.00305721	0.0579317	0.0225361	0.162797
SMPDL3B	1667	-0.0720207	0.000595725	0.0225415	0.162797
PHTF1	1668	-0.160476	0.00324158	0.0225546	0.162797
TRIP4	1669	-0.0488164	0.0251687	0.0225571	0.162797
LOC440337	1670	0.0802496	0.000743715	0.0225635	0.162797
LDB2	1671	0.258343	0.0768865	0.0225698	0.162797
NAPRT1	1672	-0.0520797	0.0828343	0.0225863	0.162819
FAM175B	1673	-0.243047	0.0362781	0.0226373	0.163038
FH	1674	-0.195903	0.00488246	0.0226449	0.163038
TMEM109	1675	0.0517785	0.0328549	0.0226587	0.163038
MBP	1676	0.185117	0.0159158	0.0226709	0.163038
FOXE3	1677	0.109241	0.00440387	0.0227575	0.163499
SLC43A3	1678	-0.119552	0.0556114	0.0227806	0.163499
TMUB2	1679	0.141196	0.0243707	0.0227869	0.163499
ZNF398	1680	-0.174809	0.00855357	0.0227926	0.163499
LCN8	1681	0.220575	0.0915994	0.0228089	0.163499
ALCAM	1682	0.135837	0.102649	0.0228163	0.163499
USP7	1683	-0.0487112	0.0701186	0.0228559	0.163685
DIP2A	1684	-0.0324994	0.0322945	0.0228721	0.163704
AHI1	1685	-0.094911	0.00131459	0.0228876	0.163718
SMARCA2	1686	-0.274941	0.0101401	0.0229071	0.16376
CCDC102A	1687	-0.00766867	0.0396357	0.0229586	0.164031
PAK2	1688	0.102291	0.0374576	0.0229834	0.164094
KIAA0513	1689	-0.060815	0.0750884	0.0229946	0.164094
PTRH2	1690	-0.0826794	0.0496102	0.0230151	0.164142
SPOP	1691	-0.213005	0.0507033	0.023043	0.164177
DDX19A	1692	-0.0350021	0.0267971	0.0230532	0.164177
ITIH1	1693	0.129735	0.0130286	0.0230708	0.164177
MEN1	1694	-0.130002	0.0575359	0.0230745	0.164177
CSNK1A1L	1695	0.0530559	0.000335997	0.023127	0.164454
RASA3	1696	0.00826611	0.0312652	0.0231491	0.164472
UPF1	1697	-0.0473567	0.0692094	0.0231808	0.164472
OSGIN2	1698	0.24114	0.114281	0.0231811	0.164472
CACNA1I	1699	0.195454	0.00607512	0.023184	0.164472
GALNT2	1700	0.170564	0.0251855	0.0232238	0.164514
TCEB3	1701	0.134672	0.00216889	0.0232384	0.164514
GORASP1	1702	0.19218	0.0191507	0.0232658	0.164514
GALNT3	1703	0.160429	0.174566	0.0232771	0.164514
NFASC	1704	0.129036	0.0236605	0.0232882	0.164514
ZNF613	1705	-0.177514	0.00499576	0.0232918	0.164514
MYNN	1706	-0.00683689	0.0613348	0.023293	0.164514
UNC45A	1707	0.023103	0.0430806	0.0232993	0.164514
CALCOCO1	1708	-0.14735	0.0598285	0.0233399	0.16463
ZNF212	1709	-0.15459	0.0699322	0.0233429	0.16463
COMMD10	1710	-0.0119987	0.0886342	0.0233695	0.164721
TMEM80	1711	0.134758	0.0127744	0.0233853	0.164736
DHRS9	1712	0.367687	0.197151	0.0234203	0.164834
CECR1	1713	0.0824388	0.0979567	0.0234267	0.164834
MFSD8	1714	-0.286397	0.0777022	0.0234714	0.164859
RERE	1715	-0.116879	0.0431327	0.0234995	0.164859
AP1B1	1716	-0.052449	0.0645152	0.0235181	0.164859
ESPL1	1717	-0.152484	0.0255453	0.0235537	0.164859
MLLT10	1718	0.0682565	0.039141	0.0235554	0.164859
ARL4A	1719	-0.22487	0.100077	0.0235683	0.164859
MRPL21	1720	-0.183683	0.00435451	0.0235842	0.164859
UBL4A	1721	0.154286	0.00371301	0.0235896	0.164859
GIMAP2	1722	0.0156601	0.133412	0.0236079	0.164859
AOC2	1723	0.0501096	0.000293356	0.0236278	0.164859
SLK	1724	0.00254271	0.088342	0.0236407	0.164859
ACAT1	1725	-0.102098	0.0648981	0.0236469	0.164859
HIF1AN	1726	0.152172	0.0424154	0.0236592	0.164859
ARHGAP1	1727	-0.0207266	0.0470743	0.0236632	0.164859
SNRK	1728	0.01277	0.182359	0.0236866	0.164859
RPS28	1729	-0.132418	0.0707691	0.0237093	0.164859
EHHADH	1730	0.0339347	0.0198661	0.023715	0.164859
DENR	1731	-0.0591615	0.0607266	0.0237173	0.164859
CRY2	1732	-0.137448	0.0581822	0.0237293	0.164859
SAP30	1733	0.00932174	0.0388359	0.023731	0.164859
NFE2	1734	0.221016	0.0665577	0.0237474	0.164859
CMTM2	1735	-0.275138	0.140254	0.0237483	0.164859
SHMT2	1736	-0.136731	0.106494	0.0237511	0.164859
PIGN	1737	-0.154995	0.00929892	0.0237584	0.164859
FBXO11	1738	0.0619384	0.0257897	0.023845	0.16503
NCDN	1739	-0.133967	0.0839646	0.0238574	0.16503
PKIG	1740	-0.0532154	0.037388	0.0238664	0.16503
LSM4	1741	0.00207578	0.0329945	0.0238687	0.16503
SCML4	1742	0.0287808	0.0153325	0.0238721	0.16503
SNRPB2	1743	-0.173792	0.0567577	0.0239022	0.16503
UBE2D3	1744	0.110434	0.0840043	0.0239189	0.16503
RAB21	1745	0.00677523	0.0774852	0.023921	0.16503
PANK4	1746	-0.0234092	0.0224797	0.0239221	0.16503
HDLBP	1747	-0.191639	0.0845722	0.0239314	0.16503
ATP1A3	1748	-0.0559601	0.0328313	0.0239336	0.16503
DLAT	1749	0.0466207	0.0466719	0.0240311	0.165607
CLDN10	1750	0.0561688	0.000391225	0.0240862	0.165892
RALGAPA1	1751	-0.208502	0.00643563	0.0241196	0.165928
SP140	1752	-0.170568	0.00366538	0.0241262	0.165928
RRAGC	1753	0.199391	0.019862	0.024142	0.165928
RPS6KL1	1754	0.209777	0.0211506	0.0241548	0.165928
SIAH1	1755	0.244423	0.0977063	0.0241602	0.165928
TBC1D10C	1756	0.0140272	0.0481806	0.0241954	0.166018
AHNAK	1757	0.0537508	0.0110065	0.0242096	0.166018
PDHX	1758	-0.112356	0.00760608	0.0242147	0.166018
MCM5	1759	-0.0837395	0.059343	0.0242306	0.166033
CPPED1	1760	-0.0143935	0.0634293	0.0242625	0.166059
UCKL1	1761	-0.0551537	0.0559501	0.024276	0.166059
FMNL1	1762	-0.171663	0.154789	0.0242791	0.166059
P4HB	1763	-0.00849271	0.0300853	0.0243113	0.166059
NFIC	1764	-0.271225	0.113966	0.0243128	0.166059
HERC3	1765	0.141881	0.00273359	0.0243172	0.166059
CD300LF	1766	-0.105627	0.089697	0.0243982	0.166518
GDPD1	1767	0.155772	0.0259678	0.0244943	0.166917
MIER1	1768	0.182944	0.0427885	0.0245006	0.166917
GNB4	1769	0.049652	0.0865413	0.0245033	0.166917
ABCE1	1770	-0.244293	0.00722901	0.024512	0.166917
S100A8	1771	-0.34878	0.242973	0.0245535	0.167105
EDEM3	1772	0.157345	0.142249	0.0245864	0.167235
UTP14A	1773	-0.104073	0.00671967	0.0246083	0.167263
RPS3A	1774	-0.341214	0.318267	0.0246183	0.167263
APOBEC3C	1775	-0.027555	0.0474327	0.0247169	0.167749
FAM122B	1776	-0.228376	0.00805189	0.0247176	0.167749
ARL6IP5	1777	0.0333049	0.164991	0.0247871	0.168126
DOCK8	1778	-0.29051	0.0116364	0.0248064	0.168161
MTFR1	1779	0.081902	0.0314866	0.0248311	0.168161
EAF1	1780	-0.0190151	0.0204103	0.0248341	0.168161
PSMA5	1781	-0.170444	0.00403494	0.0249525	0.168654
UQCRC2	1782	-0.0785505	0.0210089	0.0249535	0.168654
PTPRO	1783	0.101002	0.0546548	0.0249583	0.168654
EEF2	1784	0.0105837	0.0492962	0.0249822	0.168654
ANO6	1785	0.229937	0.0361591	0.0249909	0.168654
IVNS1ABP	1786	-0.123964	0.0463409	0.024991	0.168654
NXNL1	1787	-0.081166	0.0010321	0.0250125	0.168705
TTC16	1788	0.112438	0.00204971	0.02504	0.168715
UPF2	1789	-0.26199	0.00963285	0.0250616	0.168715
CLEC4A	1790	-0.129872	0.0554783	0.0250691	0.168715
LHPP	1791	0.00491208	0.060382	0.02507	0.168715
C1GALT1	1792	-0.162194	0.0029546	0.0251233	0.168979
MAGT1	1793	0.0986579	0.137532	0.0251464	0.16904
TBC1D2B	1794	-0.0131687	0.0220744	0.0251713	0.169042
IGFBP1	1795	0.0359512	0.0267748	0.0251747	0.169042
PLA2G2D	1796	0.166889	0.151961	0.0252112	0.169193
PPIL1	1797	0.268508	0.13146	0.0252275	0.169208
BAD	1798	0.049041	0.0161061	0.0252755	0.169425
ITGB2	1799	0.0937277	0.0334769	0.0252963	0.169425
P2RY8	1800	0.0179754	0.0432343	0.0253021	0.169425
PLCL2	1801	-0.0638219	0.0207747	0.0253257	0.16949
DDX23	1802	0.0865228	0.0205161	0.0253581	0.169572
TM9SF2	1803	0.058948	0.0739195	0.0253724	0.169572
TMCO6	1804	-0.0666731	0.0222265	0.0254036	0.169572
OPRL1	1805	0.0781557	0.0197177	0.0254049	0.169572
AKTIP	1806	0.0531354	0.0487854	0.0254084	0.169572
DAXX	1807	-0.0701536	0.04016	0.0254673	0.169872
AP4B1	1808	-0.187565	0.0801967	0.0255409	0.170268
SEPHS1	1809	-0.0814477	0.00101491	0.0255936	0.170444
POLDIP3	1810	-0.0384008	0.0403033	0.0255956	0.170444
VCX3A	1811	0.163041	0.0290238	0.0256361	0.17062
ZBTB39	1812	-0.133846	0.0167331	0.025653	0.170638
RNMT	1813	-0.0967123	0.0457242	0.0256753	0.170692
ANXA4	1814	-0.0714716	0.000695513	0.0257113	0.170768
TMEM134	1815	-0.100694	0.0704378	0.0257152	0.170768
PEG3	1816	0.0991454	0.0198776	0.0257965	0.171214
ZCCHC10	1817	0.243561	0.0712232	0.0259237	0.171741
ZNF74	1818	-0.182646	0.0615608	0.0259287	0.171741
ODF2	1819	-0.0663075	0.0172555	0.0259367	0.171741
PAPSS1	1820	0.0789211	0.0710197	0.0259411	0.171741
CAPZA2	1821	0.275584	0.425973	0.0259471	0.171741
HIGD1A	1822	0.0306844	0.0866206	0.0259998	0.171995
ITPA	1823	0.0746848	0.0135616	0.0260628	0.172273
HSDL1	1824	0.116113	0.0678554	0.0260821	0.172273
ALS2CL	1825	-0.126162	0.0132076	0.0260847	0.172273
ABCC1	1826	-0.11989	0.0609927	0.0262086	0.172997
ANGEL1	1827	0.134342	0.00242312	0.0262834	0.173388
TSPAN17	1828	0.0847404	0.0442344	0.0262967	0.173388
VAMP2	1829	-0.0435009	0.0360435	0.0263367	0.173557
EIF5	1830	0.0676947	0.0211534	0.0263636	0.173635
CRBN	1831	0.00770895	0.174555	0.0263773	0.173635
ATF4	1832	-0.102286	0.00152376	0.0264864	0.174258
DNAJC17	1833	-0.0940353	0.00126069	0.0265241	0.174275
MTERFD1	1834	-0.181505	0.00446277	0.0265312	0.174275
CLEC9A	1835	-0.0710088	0.00114982	0.0265323	0.174275
IFI44	1836	-0.409506	0.0240046	0.0265687	0.174315
PHC1	1837	-0.0469402	0.0303495	0.026581	0.174315
STARD3	1838	-0.10163	0.0254662	0.026584	0.174315
RBM7	1839	-0.167938	0.00786814	0.0266146	0.174315
SFXN2	1840	-0.178499	0.0730424	0.0266396	0.174315
PIK3R4	1841	-0.0783486	0.000721071	0.0266402	0.174315
FBXO38	1842	-0.134314	0.00244697	0.0266441	0.174315
ASPSCR1	1843	0.0281773	0.0471826	0.0266542	0.174315
TRIO	1844	-0.0168361	0.0174923	0.0267069	0.174485
CCR2	1845	0.242181	0.0282778	0.0267103	0.174485
SPEN	1846	-0.0733234	0.0388063	0.0267274	0.174485
GNL1	1847	0.0502308	0.0154279	0.0267498	0.174485
UBE2G1	1848	0.192092	0.0285704	0.0267526	0.174485
GRN	1849	0.0899213	0.0761483	0.0267758	0.174542
ATP2C1	1850	0.102265	0.0455274	0.0268208	0.17455
TRIM65	1851	-0.281305	0.0970454	0.0268285	0.17455
ALMS1	1852	-0.26465	0.142268	0.026833	0.17455
KIAA1199	1853	-0.0553212	0.0136341	0.0268388	0.17455
MTHFD2	1854	0.0909584	0.0951708	0.0268494	0.17455
OGFOD1	1855	-0.143097	0.110728	0.0268686	0.174556
DCTN2	1856	-0.00328178	0.0232418	0.0268793	0.174556
MOG	1857	-0.0663021	0.0093863	0.0269076	0.174646
DHX29	1858	-0.164629	0.00347908	0.0269445	0.174708
ICAM3	1859	0.0635142	0.0430761	0.0269461	0.174708
KIAA1328	1860	-0.0422653	0.00450505	0.027023	0.175008
ZNF565	1861	-0.0599416	0.000520267	0.0270373	0.175008
STX4	1862	-0.0161591	0.0345654	0.0270463	0.175008
NUDCD3	1863	-0.0323811	0.020509	0.0270505	0.175008
PLEKHF2	1864	0.562517	0.466655	0.0270723	0.175055
GLYATL2	1865	0.0861549	0.0333741	0.0270924	0.17509
H1FNT	1866	0.00386023	0.00502387	0.0271165	0.17509
ZNF211	1867	-0.186495	0.0649292	0.0271229	0.17509
RNPEP	1868	-0.133504	0.0828567	0.0271358	0.17509
SBK1	1869	0.0288251	0.0938596	0.0271628	0.17517
NDUFA10	1870	-0.153203	0.0109309	0.0272044	0.175345
SLC25A46	1871	0.159185	0.126357	0.0272357	0.175421
CD69	1872	-0.174988	0.0121432	0.0272454	0.175421
PORCN	1873	-0.0707826	0.021655	0.027313	0.175763
KLHDC2	1874	0.0401453	0.0865482	0.0273723	0.17605
ZNF302	1875	0.00840545	0.197507	0.0273997	0.176133
ABCF2	1876	-0.0362762	0.0311914	0.0274146	0.176134
MTF2	1877	0.103038	0.0946734	0.0274399	0.17616
C1R	1878	0.0145325	0.0151355	0.0274477	0.17616
SP3	1879	0.218263	0.320123	0.027527	0.176558
FBXW7	1880	0.0648827	0.000596889	0.0275458	0.176558
SETD1B	1881	-0.0294038	0.0181122	0.027558	0.176558
FOXJ2	1882	-0.0170251	0.0724316	0.0275968	0.176558
VSIG2	1883	0.131228	0.0444204	0.0275981	0.176558
PRELID1	1884	0.161627	0.00353114	0.0276019	0.176558
POLDIP2	1885	-0.0905933	0.0249805	0.0276248	0.176558
EME1	1886	-0.092837	0.0161478	0.027627	0.176558
PPM1A	1887	0.326216	0.135817	0.0276715	0.176749
SETD3	1888	-0.266115	0.115065	0.0277304	0.177015
DDX3Y	1889	-0.255979	0.0758054	0.0277426	0.177015
HSPA5	1890	-0.135719	0.0837555	0.027763	0.177051
RABL3	1891	0.113505	0.0395479	0.0278102	0.177259
PDE1B	1892	0.178034	0.028594	0.0278567	0.177364
KCTD5	1893	0.058309	0.0186737	0.0278721	0.177364
NAPSB	1894	-0.456405	0.413135	0.0278808	0.177364
SH2B1	1895	-0.1147	0.0346287	0.0278855	0.177364
USP5	1896	0.0242554	0.055369	0.0279031	0.177382
MTHFD1	1897	-0.0954879	0.0305576	0.0279756	0.177688
NQO1	1898	0.209097	0.1063	0.0279808	0.177688
MAT2B	1899	-0.00957819	0.0441073	0.0280354	0.177942
REEP4	1900	-0.126851	0.0516102	0.0280825	0.178109
RIOK3	1901	0.0781887	0.203258	0.028098	0.178109
RANGAP1	1902	-0.0519462	0.0736949	0.0281065	0.178109
KLHL26	1903	-0.0678054	0.0205297	0.0281209	0.178109
RNF216	1904	-0.114986	0.0162661	0.0281982	0.178505
CDC7	1905	-0.257756	0.0799549	0.0282578	0.178737
TTC7A	1906	-0.203398	0.0473981	0.0282646	0.178737
POLR2C	1907	0.0232615	0.0550135	0.0282922	0.178797
GPR108	1908	-0.0213416	0.0303422	0.0283038	0.178797
SLC2A8	1909	0.0627799	0.0326621	0.0283306	0.178873
PLEKHN1	1910	0.0490997	0.0181109	0.0283575	0.178916
ZZEF1	1911	-0.129849	0.0489439	0.0283703	0.178916
TNPO1	1912	0.155822	0.0741799	0.0283819	0.178916
FASTK	1913	-0.027811	0.0282062	0.0284135	0.179022
TMBIM4	1914	0.256596	0.276513	0.0284493	0.179153
ZC3H7A	1915	-0.263174	0.0637857	0.0284846	0.17922
EXOSC8	1916	-0.186278	0.00438622	0.0285176	0.17922
FAIM	1917	0.170898	0.0918295	0.0285181	0.17922
ZDHHC3	1918	-0.113769	0.00482457	0.0285194	0.17922
MRPL22	1919	-0.0521491	0.0653272	0.028584	0.179466
CNOT10	1920	-0.168493	0.0505858	0.0285883	0.179466
TBC1D23	1921	0.070285	0.0876197	0.0286846	0.179977
ABI2	1922	0.188648	0.0939271	0.0287131	0.180062
PAN3	1923	-0.324886	0.0599475	0.0287562	0.180174
BCAT2	1924	0.185374	0.0046374	0.0287609	0.180174
MFF	1925	0.0393107	0.121581	0.0287874	0.180247
PSMC4	1926	-0.00554082	0.0273312	0.0288606	0.180482
PRPF4B	1927	-0.149179	0.0143539	0.0288676	0.180482
TRIT1	1928	-0.176377	0.0149552	0.0288732	0.180482
CNIH4	1929	-0.0150031	0.167483	0.0288862	0.180482
POLH	1930	-0.233588	0.0626214	0.0288999	0.180482
FEN1	1931	-0.0834428	0.0396752	0.028952	0.180636
RALGAPB	1932	-0.161547	0.0705034	0.0289545	0.180636
TRPC4	1933	0.0604626	0.000501043	0.0289785	0.180679
ELF1	1934	0.123688	0.076076	0.0289914	0.180679
CIDEC	1935	-0.045834	0.0130369	0.029012	0.180714
RSRC2	1936	0.0738378	0.0480419	0.0290525	0.180788
SCYL3	1937	-0.107453	0.00152671	0.0290538	0.180788
IFFO1	1938	-0.0103683	0.0451015	0.0290745	0.180823
PIGU	1939	-0.169802	0.0300499	0.029143	0.180965
OGT	1940	-0.273453	0.0114965	0.0291435	0.180965
BRD2	1941	0.0128863	0.0462547	0.0291468	0.180965
GON4L	1942	-0.188752	0.0187342	0.0291575	0.180965
HDDC2	1943	-0.167491	0.0365666	0.0291873	0.181058
H3F3B	1944	-0.0263546	0.0235706	0.0292077	0.181091
COPS6	1945	0.0631195	0.00865709	0.0292566	0.181141
ZNF226	1946	0.0431352	0.0231327	0.0292782	0.181141
SCO2	1947	0.154655	0.0325204	0.0292801	0.181141
PPP1R12A	1948	0.272401	0.250101	0.0292834	0.181141
EID1	1949	-0.0664441	0.000712847	0.029291	0.181141
CYTH1	1950	0.149958	0.00377608	0.0293939	0.181685
CCDC86	1951	-0.0342433	0.0279184	0.0294376	0.181729
SAG	1952	0.121506	0.0137491	0.0294449	0.181729
CACNA1H	1953	0.00493712	0.0220674	0.0294463	0.181729
CDK8	1954	-0.0573264	0.000418265	0.0294882	0.181894
PSMD14	1955	-0.0255521	0.0331013	0.0295056	0.181909
P2RY2	1956	-0.142387	0.0638496	0.0295391	0.182022
HTRA2	1957	-0.046085	0.0285724	0.0295868	0.182205
GPR125	1958	0.208627	0.0667508	0.029599	0.182205
USP42	1959	0.120606	0.00925261	0.0296263	0.18228
USP28	1960	0.0603807	0.000535874	0.0296456	0.182305
IBTK	1961	-0.058036	0.0573994	0.0296685	0.182353
POM121	1962	-0.150542	0.0284877	0.0297199	0.182424
MON1A	1963	-0.177915	0.0623135	0.029738	0.182424
SLC39A9	1964	0.0628677	0.0273657	0.029743	0.182424
RASSF7	1965	0.00691601	0.0597966	0.0297444	0.182424
CD1E	1966	-0.224627	0.0532487	0.0297558	0.182424
TFEC	1967	0.362652	0.220298	0.0298481	0.182864
IFRD2	1968	-0.0382362	0.0521585	0.0298578	0.182864
ZFP91	1969	-0.27468	0.0632972	0.0298967	0.183009
LRFN3	1970	0.179222	0.00513579	0.0299167	0.183039
SKIL	1971	0.182273	0.0552796	0.0299412	0.183096
EVI2A	1972	0.0386281	0.369946	0.0299868	0.183194
ECHS1	1973	0.0588593	0.024407	0.0299877	0.183194
E2F3	1974	-0.0566218	0.0813779	0.0300355	0.183292
HIBCH	1975	0.077357	0.0379621	0.0300483	0.183292
NEK1	1976	-0.0939635	0.00126589	0.0300493	0.183292
RUVBL1	1977	-0.0111757	0.0249571	0.0301233	0.18358
IMPDH2	1978	-0.0956286	0.0443657	0.0301367	0.18358
MERTK	1979	0.0578445	0.00051173	0.0301423	0.18358
UBE4B	1980	-0.174071	0.0115181	0.0301718	0.183667
LTV1	1981	-0.169334	0.00405462	0.0302541	0.18375
CES2	1982	-0.0921945	0.040012	0.0302542	0.18375
CDC14A	1983	-0.295828	0.0653579	0.0302556	0.18375
ALDOA	1984	0.0595055	0.0530492	0.0302849	0.18375
TWF1	1985	0.145695	0.116877	0.0303001	0.18375
CCDC90B	1986	-0.0710265	0.0692456	0.0303083	0.18375
IFT122	1987	-0.151932	0.0943041	0.0303474	0.18375
SPIRE1	1988	0.0773699	0.0291082	0.0303476	0.18375
POLR3A	1989	-0.21841	0.133991	0.0303505	0.18375
CLPP	1990	0.120549	0.00200879	0.0303623	0.18375
ZNF805	1991	-0.0727473	0.0129342	0.0303757	0.18375
SCAF1	1992	-0.261819	0.0789226	0.0303947	0.18375
ITGAV	1993	0.288418	0.24085	0.0303947	0.18375
WSB1	1994	-0.243647	0.00954073	0.0303988	0.18375
PPM1K	1995	-0.00320681	0.0293014	0.0304376	0.183892
KIAA1279	1996	0.0295053	0.0331922	0.0305585	0.18451
POLR2G	1997	-0.0126901	0.0144619	0.0305811	0.18451
CLTC	1998	0.136274	0.0591007	0.0306253	0.18451
[truncated: 10,055 more rows]
