# Supplementary material for: Multiomics integrative analysis identifies APOE allele-specific blood biomarkers associated to Alzheimer’s disease etiopathogenesis
Source: Aging (Albany NY). 2021 Apr 12;13(7):9277–329. doi: 10.18632/aging.202950 (PMC8064208; doi:10.18632/aging.202950)
Supplement: Supplementary Table 20 [file aging-13-202950-s022.xlsx]

## Sheet: Sheet1
Supplementary Table 20. Differential expression analysis in blood: APOE3 stratum.
Symbol	Rank	logFC	Var	Fisher.Pvalue	Fisher.FDR
RPL36AL	1	-0.274069	0.100082	6.66134e-16	8.02891e-12
MRPL51	2	-0.195732	0.0498337	6.88338e-15	4.14827e-11
RPS25	3	-0.272149	0.0890411	3.94906e-13	1.5866e-09
NDUFA1	4	-0.358797	0.145883	6.57585e-13	1.97484e-09
MRPS17	5	-0.122404	0.00517511	8.19234e-13	1.97484e-09
CETN2	6	-0.137569	0.0122992	8.03224e-12	1.61354e-08
RPS27A	7	-0.192583	0.0473268	2.1686e-11	3.73402e-08
ATP6V1E1	8	-0.163475	0.0218397	3.88466e-11	5.85272e-08
UQCRH	9	-0.238755	0.101939	5.57882e-11	7.47127e-08
GNL2	10	-0.092173	0.0212057	1.02152e-10	1.23124e-07
NDUFS5	11	-0.325685	0.105564	1.24339e-10	1.2651e-07
ATP5I	12	-0.274688	0.0710508	1.25954e-10	1.2651e-07
COX17	13	-0.187802	0.0355929	1.63687e-10	1.51763e-07
RPA3	14	-0.168172	0.0302554	2.67633e-10	2.30413e-07
SHFM1	15	-0.325235	0.122666	8.48625e-10	6.81899e-07
ATP5O	16	-0.244401	0.0788808	1.05496e-09	7.94711e-07
PRDX1	17	-0.140391	0.0279791	1.16307e-09	8.2462e-07
MRPL33	18	-0.0745478	0.0367956	2.15104e-09	1.44036e-06
MRPS21	19	-0.160736	0.0494003	2.45909e-09	1.55997e-06
BRIX1	20	-0.0432286	0.0342174	4.16752e-09	2.45415e-06
SNTB2	21	0.158252	0.00453887	4.27588e-09	2.45415e-06
ARPC3	22	-0.168823	0.0428435	5.41451e-09	2.96641e-06
GIMAP7	23	-0.209221	0.0771877	5.91863e-09	3.10162e-06
AK2	24	-0.0318704	0.0155126	6.19457e-09	3.11097e-06
UFC1	25	-0.122154	0.0209912	6.50119e-09	3.13435e-06
FABP5	26	-0.119738	0.000350808	9.53038e-09	4.41806e-06
POMP	27	-0.0988256	0.0210215	1.22025e-08	5.44727e-06
HSP90AA1	28	-0.261705	0.104966	1.47961e-08	6.36919e-06
ING3	29	-0.0860697	0.0258637	2.96523e-08	1.23241e-05
ATP6V1D	30	-0.146191	0.0307184	3.64022e-08	1.46252e-05
RPL32	31	-0.120213	0.023486	4.19512e-08	1.63109e-05
GTF2A2	32	-0.0785201	0.00842488	5.79244e-08	2.14639e-05
RPL6	33	-0.156537	0.0336504	5.87661e-08	2.14639e-05
SUCLG1	34	-0.0474978	0.00793173	6.05706e-08	2.14723e-05
SNRPD2	35	-0.221016	0.0631211	6.72261e-08	2.28044e-05
DNAJC8	36	-0.150506	0.0134048	6.81125e-08	2.28044e-05
DNAJA1	37	-0.241312	0.0504578	8.03297e-08	2.61679e-05
NGDN	38	-0.156547	0.0123304	8.60662e-08	2.72989e-05
SRP19	39	-0.057631	0.0273598	9.20247e-08	2.84404e-05
SRP14	40	-0.206634	0.0327284	1.00973e-07	3.02088e-05
PWP1	41	-0.041726	0.019017	1.05248e-07	3.02088e-05
METAP2	42	-0.1315	0.0365075	1.05266e-07	3.02088e-05
SSBP1	43	-0.0948303	0.0169891	1.26158e-07	3.53624e-05
DRG1	44	-0.0582379	0.00879876	1.34603e-07	3.61083e-05
RAB37	45	0.10801	0.0245507	1.36984e-07	3.61083e-05
ENY2	46	-0.215383	0.0612124	1.37806e-07	3.61083e-05
TOMM7	47	-0.357785	0.147065	1.51824e-07	3.81488e-05
SS18	48	-0.0219129	0.0234276	1.55426e-07	3.81488e-05
SWAP70	49	-0.172049	0.000892859	1.58336e-07	3.81488e-05
WDR33	50	-0.0697036	0.0137555	1.58741e-07	3.81488e-05
RPAIN	51	-0.145465	0.0113921	1.6142e-07	3.81488e-05
EBNA1BP2	52	-0.0710841	0.00990213	1.68001e-07	3.89408e-05
SOD1	53	-0.139958	0.0265369	1.77423e-07	3.97934e-05
RPF2	54	-0.0953332	0.0279957	1.78283e-07	3.97934e-05
BOLA3	55	-0.0934503	0.0123869	1.94935e-07	4.27191e-05
SNRPB2	56	-0.132857	0.0287915	1.99221e-07	4.28787e-05
UQCRB	57	-0.0768205	0.0328174	2.58716e-07	5.41401e-05
EIF3E	58	-0.210899	0.0711418	2.63326e-07	5.41401e-05
TRAPPC4	59	-0.112836	0.004515	2.65018e-07	5.41401e-05
TCIRG1	60	0.17024	0.0194173	2.73939e-07	5.50298e-05
PSMC2	61	-0.146208	0.0294554	2.85146e-07	5.56309e-05
SSB	62	-0.157423	0.0247509	2.86162e-07	5.56309e-05
UPF3B	63	-0.0577213	0.0117255	3.16688e-07	6.05879e-05
PSMA3	64	-0.137456	0.0303055	3.46065e-07	6.51738e-05
AIF1	65	-0.194973	0.0431561	3.65666e-07	6.78058e-05
PTRH2	66	-0.0930349	0.0202817	4.00985e-07	7.26528e-05
RBM34	67	-0.0354728	0.0169359	4.03861e-07	7.26528e-05
STX8	68	-0.0598195	0.0147147	4.11954e-07	7.30188e-05
ACADM	69	-0.089798	0.0139297	5.29746e-07	9.25366e-05
RPS24	70	-0.356292	0.196207	5.39959e-07	9.29732e-05
DDX50	71	-0.10487	0.00530967	5.58352e-07	9.47862e-05
PAK1IP1	72	-0.00462046	0.0184964	5.727e-07	9.58716e-05
GTF2B	73	-0.12527	0.0192471	6.32413e-07	0.000104255
ATP5F1	74	-0.141084	0.0329037	6.4008e-07	0.000104255
ZMAT2	75	-0.201659	0.0232768	6.49817e-07	0.00010443
PLRG1	76	-0.0393394	0.0233461	7.10352e-07	0.000112332
RPL12	77	-0.104848	0.0194583	7.17629e-07	0.000112332
PPIG	78	-0.0741425	0.0249518	7.45056e-07	0.00011513
SCFD1	79	-0.0627348	0.0119239	8.46023e-07	0.000129077
MYL6	80	-0.203937	0.0223347	8.94833e-07	0.000134459
HELZ	81	0.0971616	0.00342601	9.03605e-07	0.000134459
LDHB	82	-0.15992	0.0367626	9.89211e-07	0.000145402
TBCA	83	-0.198822	0.0432453	1.00219e-06	0.000145535
CCDC53	84	-0.129968	0.0237355	1.03361e-06	0.00014653
LSM3	85	-0.215399	0.0837206	1.03628e-06	0.00014653
TCEAL4	86	-0.0990478	0.0107109	1.04551e-06	0.00014653
ATP5J	87	-0.246289	0.069569	1.06655e-06	0.00014776
RPS4X	88	-0.132601	0.0154136	1.14235e-06	0.000156463
RIOK2	89	-0.0584798	0.0201628	1.22555e-06	0.000165973
SYF2	90	-0.108331	0.0237434	1.36242e-06	0.000182458
CNBP	91	-0.106152	0.030617	1.52535e-06	0.000202033
WDR12	92	-0.103182	0.000384154	1.6059e-06	0.000210391
HSPD1	93	-0.076338	0.0248287	1.63155e-06	0.000211453
TUBGCP2	94	0.0180575	0.0135916	1.66393e-06	0.000213355
PDCL3	95	0.039392	0.0203856	1.68426e-06	0.000213688
ANKRD13D	96	0.169949	0.0278	1.78755e-06	0.000223532
MRPL39	97	-0.115104	0.00599296	1.79894e-06	0.000223532
MRPL50	98	-0.0456317	0.0218751	1.87194e-06	0.00023023
RARS	99	-0.0581279	0.0117829	1.916e-06	0.000231601
MRPS18C	100	-0.175568	0.0599268	1.92152e-06	0.000231601
KIAA0020	101	-0.0616304	0.0112988	2.05304e-06	0.000245003
ZNF319	102	0.0337299	0.00857634	2.14783e-06	0.000253802
NACA	103	-0.0764484	0.00946109	2.22456e-06	0.000260317
LSM5	104	-0.0841305	0.050738	2.26941e-06	0.000261075
IGBP1	105	-0.0960737	0.0152298	2.27436e-06	0.000261075
APOBEC3F	106	-0.017001	0.0145157	2.31587e-06	0.000263332
LARP7	107	-0.126403	0.0288949	2.44621e-06	0.000275553
GPBP1	108	-0.0915484	0.0268046	2.47059e-06	0.000275723
VDAC3	109	-0.0751827	0.0118384	2.65896e-06	0.000294023
FXR1	110	-0.0550914	0.0111684	2.69139e-06	0.000294903
MRPL22	111	-0.120387	0.0242986	2.78001e-06	0.000299312
UTP6	112	-0.0732127	0.0118988	2.78129e-06	0.000299312
MDH1	113	-0.146955	0.0305949	2.9631e-06	0.000316055
RCN1	114	0.0609253	0.0238827	3.03784e-06	0.000319808
H2AFZ	115	-0.148259	0.0198078	3.07567e-06	0.000319808
MED6	116	-0.0565348	0.00858866	3.08586e-06	0.000319808
RPL24	117	-0.166611	0.0350246	3.10442e-06	0.000319808
EEF1B2	118	-0.0186439	0.00408411	3.18695e-06	0.000323994
CCDC90B	119	-0.156087	0.00656339	3.22141e-06	0.000323994
ZCCHC7	120	-0.0527308	0.0299469	3.24549e-06	0.000323994
PIK3R1	121	0.0125469	0.0224643	3.25258e-06	0.000323994
DCTN6	122	-0.0428592	0.0176573	3.49399e-06	0.000345189
LTV1	123	-0.035558	0.00906017	3.61333e-06	0.000354077
MTIF3	124	-0.0681533	0.0117461	3.87702e-06	0.000376853
MRPS31	125	-0.0532409	0.0206388	3.98211e-06	0.000383971
ARHGAP4	126	0.117562	0.0076769	4.37298e-06	0.000418314
POLR3GL	127	-0.139243	0.0172622	4.56372e-06	0.000433122
PPHLN1	128	-0.0393441	0.00790341	4.63311e-06	0.000436272
CWC15	129	-0.105739	0.015011	4.69639e-06	0.000438803
NBEAL2	130	0.170168	0.00749806	4.86208e-06	0.000447502
SNX2	131	-0.12998	0.0159911	4.86375e-06	0.000447502
NUP133	132	-0.048146	0.00384959	5.3203e-06	0.000484047
DNAJC9	133	-0.0596668	0.00918586	5.34126e-06	0.000484047
ACTR10	134	-0.0555588	0.0202034	5.45405e-06	0.000486731
DBI	135	-0.280982	0.0907158	5.48785e-06	0.000486731
RPS20	136	-0.177381	0.016421	5.49202e-06	0.000486731
TMEM126A	137	-0.120544	0.0250216	5.54706e-06	0.000487111
CBX3	138	-0.0643267	0.0253933	5.61169e-06	0.000487111
GPN1	139	-0.0616714	0.013864	5.61756e-06	0.000487111
ESD	140	-0.0373213	0.0100743	5.67884e-06	0.000488908
RPAP3	141	-0.085213	0.0116172	5.93569e-06	0.000507397
FRAT1	142	0.0571847	0.0185736	6.54276e-06	0.000552286
ENSA	143	-0.0532153	0.00795622	6.56723e-06	0.000552286
COMMD1	144	-0.0565474	0.00785129	6.60061e-06	0.000552286
RAB24	145	0.129947	0.00735599	6.64412e-06	0.000552286
METTL5	146	-0.101692	0.0189369	6.70937e-06	0.00055389
LPP	147	0.125382	0.00260914	6.96619e-06	0.00057118
MRPL17	148	-0.0604977	0.0111182	7.09698e-06	0.000577973
MEGF9	149	0.128915	0.00340672	7.34718e-06	0.000594333
NDUFAF2	150	-0.0753799	0.0080194	7.58923e-06	0.000604917
GGPS1	151	-0.0470526	0.0120833	7.60274e-06	0.000604917
REM2	152	0.0399583	0.0146676	7.70794e-06	0.000604917
SULT1A3	153	0.0953262	0.0068072	7.72555e-06	0.000604917
SLU7	154	-0.120756	0.0235511	7.72896e-06	0.000604917
ILF2	155	-0.0706165	0.00789361	7.87404e-06	0.000610614
NDUFB3	156	-0.241486	0.0699199	7.94473e-06	0.000610614
DNAJC7	157	-0.0566563	0.00776667	7.95374e-06	0.000610614
OBFC1	158	-0.0440777	0.0106921	8.09431e-06	0.000617473
EXOSC7	159	-0.0804839	0.00322921	8.24764e-06	0.000625213
NDUFS4	160	-0.190837	0.0406705	8.60034e-06	0.000647874
LYPLAL1	161	-0.0627893	0.0142004	8.70664e-06	0.000651808
EEF1A1	162	-0.0984567	0.0199877	8.80344e-06	0.000654987
NGRN	163	-0.105146	0.00353729	9.21009e-06	0.000677917
MIOS	164	-0.0431374	0.00667846	9.22412e-06	0.000677917
NSA2	165	-0.146035	0.030435	9.33772e-06	0.000682106
TMSB10	166	-0.0843347	0.0077073	9.75065e-06	0.00070798
PSMD6	167	-0.0379672	0.00982338	1.01555e-05	0.000728405
SEC11A	168	-0.138947	0.0251543	1.02054e-05	0.000728405
ARHGAP9	169	0.15496	0.00121904	1.02452e-05	0.000728405
TCEAL8	170	-0.0860941	0.00888541	1.03323e-05	0.000728405
ERH	171	-0.138144	0.0237709	1.03341e-05	0.000728405
CFLAR	172	0.18112	0.0110888	1.08098e-05	0.000756888
ADAM8	173	0.0973696	0.0200135	1.08638e-05	0.000756888
MRPS33	174	-0.110255	0.016945	1.10956e-05	0.000768592
MRPS22	175	-0.100321	0.0208698	1.12302e-05	0.000769245
COPS5	176	-0.110257	0.0265184	1.12819e-05	0.000769245
RPL11	177	-0.173456	0.0367223	1.12999e-05	0.000769245
KIAA1143	178	0.00586375	0.00677549	1.13603e-05	0.000769245
UCHL3	179	-0.0714206	0.0109065	1.15838e-05	0.000779996
KLHDC8B	180	0.179378	0.00432586	1.27124e-05	0.000851233
DPH5	181	-0.0649305	0.0097469	1.29403e-05	0.000857551
CMTM2	182	-0.199498	0.0449784	1.2949e-05	0.000857551
PSMD14	183	-0.0408372	0.0109666	1.33187e-05	0.000872766
KLF6	184	0.0521839	0.0155565	1.33793e-05	0.000872766
PFKFB4	185	0.0344227	0.0226157	1.3396e-05	0.000872766
ZNF622	186	-0.0666357	0.00381657	1.37134e-05	0.000888646
MYBPC3	187	0.0435752	0.0115534	1.42045e-05	0.000913601
KIAA1147	188	-0.0856618	0.0148192	1.42501e-05	0.000913601
SNRPG	189	-0.294393	0.0602113	1.45358e-05	0.000926982
BCCIP	190	0.00104746	0.0116635	1.46721e-05	0.000930755
TCN2	191	0.109117	0.000976531	1.47936e-05	0.000933543
FAM73B	192	0.0751133	0.00184274	1.50794e-05	0.000946624
HACL1	193	-0.0820836	0.00442062	1.54674e-05	0.000965952
RPS27	194	-0.283817	0.0839745	1.58287e-05	0.000983418
DCAF15	195	0.0495353	0.00537682	1.59149e-05	0.000983705
PDHB	196	-0.0733994	0.00879303	1.63099e-05	0.00100298
HSPA8	197	-0.0821088	0.0202846	1.66571e-05	0.00101913
NUP88	198	-0.107763	0.00793815	1.718e-05	0.00104581
DPY30	199	-0.185498	0.0309064	1.73641e-05	0.0010517
PCM1	200	-0.103545	0.00322055	1.77553e-05	0.00106599
RPL26	201	-0.324781	0.147351	1.77768e-05	0.00106599
RPS29	202	-0.13181	0.0409606	1.80654e-05	0.00107793
PSMA4	203	-0.20204	0.0534698	1.82208e-05	0.00108185
NDST2	204	0.0997547	0.000458725	1.85652e-05	0.00109689
SDAD1	205	-0.0490538	0.0129959	1.97238e-05	0.00115966
EMG1	206	-0.0519465	0.0141606	2.02111e-05	0.00118025
ITGAM	207	0.158691	0.0101314	2.02697e-05	0.00118025
MRPL35	208	-0.078057	0.024128	2.03799e-05	0.00118054
NUP37	209	-0.0930004	0.00555902	2.04706e-05	0.00118054
NFASC	210	-0.0292062	0.00315039	2.0932e-05	0.00119637
HAT1	211	-0.0860504	0.017334	2.09437e-05	0.00119637
KIF5C	212	0.0190533	0.0111696	2.13216e-05	0.00121221
BTF3	213	-0.103305	0.0141127	2.27109e-05	0.00128235
PRIM1	214	-0.0451312	0.0064671	2.27681e-05	0.00128235
ZCCHC17	215	-0.0634013	0.0109404	2.29519e-05	0.0012845
LILRA5	216	0.163452	0.0122671	2.30194e-05	0.0012845
DPM1	217	-0.177049	0.034367	2.32642e-05	0.0012885
MTIF2	218	-0.038509	0.00883786	2.33497e-05	0.0012885
MPHOSPH10	219	-0.0685034	0.014495	2.34117e-05	0.0012885
CCDC146	220	-0.0063213	0.0120397	2.35296e-05	0.0012891
RINL	221	0.0532044	0.0114254	2.38085e-05	0.00129848
TRIP4	222	-0.0657663	0.00650456	2.43379e-05	0.00131965
TOP2B	223	-0.104725	0.00777481	2.4494e-05	0.00131965
UBE2E1	224	-0.151213	0.0114523	2.45252e-05	0.00131965
HIST1H3H	225	0.0111253	0.0216148	2.46932e-05	0.00132279
CD3D	226	-0.21218	0.0412238	2.5208e-05	0.00134439
LRP3	227	0.0551431	0.00932786	2.60139e-05	0.00138126
CKS1B	228	-0.0772604	0.00955442	2.67115e-05	0.00141208
APBB3	229	0.0533109	0.0132592	2.68588e-05	0.00141367
ABCE1	230	-0.0087158	0.0240421	2.72701e-05	0.00142907
ZFAND2B	231	0.0934245	0.000413403	2.77394e-05	0.00144737
KATNA1	232	-0.0362182	0.00882827	2.89008e-05	0.00149033
GNL3	233	-0.0790153	0.009544	2.90247e-05	0.00149033
UQCRQ	234	-0.190982	0.0630441	2.90257e-05	0.00149033
SS18L2	235	-0.161412	0.0299411	2.90573e-05	0.00149033
RPL7	236	-0.182732	0.0315261	2.95268e-05	0.00150799
TBCE	237	-0.000954835	0.0101519	3.0241e-05	0.00153296
SLC9A1	238	0.059315	0.0159555	3.03086e-05	0.00153296
PRPF38A	239	-0.0331941	0.00374071	3.03972e-05	0.00153296
ZNF559	240	-0.110442	0.000596114	3.07155e-05	0.00154256
CUTC	241	-0.105	0.00448265	3.09055e-05	0.00154566
GTF2H5	242	-0.118449	0.0100937	3.12312e-05	0.00155059
TCTEX1D2	243	-0.0792077	0.00273981	3.12613e-05	0.00155059
SLC26A6	244	0.111784	0.000584788	3.22184e-05	0.00158551
ACAT2	245	-0.0537009	0.00617915	3.23555e-05	0.00158551
GMPPA	246	0.135917	0.000915707	3.236e-05	0.00158551
BEX2	247	-0.0759075	0.0161677	3.28216e-05	0.00160162
USP32	248	0.160904	0.00122542	3.31566e-05	0.00161144
CSAD	249	0.074966	0.0168695	3.33454e-05	0.00161252
IFFO1	250	0.124894	0.000763314	3.34464e-05	0.00161252
CWF19L2	251	-0.0677979	0.0110025	3.39077e-05	0.00162221
TRABD	252	0.0642481	0.00942583	3.40064e-05	0.00162221
PRRT2	253	-0.0218668	0.00439687	3.40512e-05	0.00162221
OSCAR	254	0.139689	0.0141694	3.42555e-05	0.00162552
TRIM41	255	0.0196535	0.00929511	3.50153e-05	0.00165238
TYK2	256	0.118477	0.00989083	3.50957e-05	0.00165238
CD79B	257	-0.220801	0.00242321	3.53565e-05	0.00165818
SMC3	258	-0.0840978	0.00964103	3.57921e-05	0.00166828
METAP1	259	-0.0281005	0.0100029	3.58488e-05	0.00166828
CSNK1E	260	-0.0168424	0.00388907	3.60881e-05	0.00167296
WDR75	261	-0.0324243	0.0176203	3.65763e-05	0.0016891
RABL3	262	-0.00528916	0.00712814	3.71138e-05	0.00170738
GBA	263	0.147021	0.00180108	3.76853e-05	0.00172708
ATP6V1G1	264	-0.052844	0.083334	3.80618e-05	0.00173232
USP16	265	-0.0465341	0.0199899	3.82166e-05	0.00173232
OCIAD2	266	-0.122314	0.0082317	3.82309e-05	0.00173232
SENP6	267	-0.064059	0.0148155	3.85454e-05	0.00174003
P2RY10	268	-0.140288	0.000954714	3.8864e-05	0.00174786
LRRCC1	269	0.00351861	0.00579178	3.92393e-05	0.00175818
FBN2	270	0.0245943	0.0059492	4.02026e-05	0.00179467
CCDC12	271	-0.0800584	0.00119908	4.10425e-05	0.00182541
SETD3	272	0.0061765	0.0141894	4.29179e-05	0.0019018
ATP5L	273	-0.151922	0.0212963	4.61787e-05	0.0020388
COX7A2	274	-0.20312	0.0316937	4.68494e-05	0.00205761
CD160	275	-0.0564283	0.0199349	4.69462e-05	0.00205761
DENR	276	-0.0823344	0.0150119	4.86806e-05	0.00212542
RYBP	277	0.0762477	0.0266065	4.90118e-05	0.00212542
CEBPZ	278	-0.109425	0.0252862	4.90224e-05	0.00212542
CEBPD	279	0.108014	0.0166464	4.97203e-05	0.00214555
MAGOH	280	-0.0640906	0.0129976	4.98427e-05	0.00214555
PARP10	281	0.0626685	0.0177913	5.03234e-05	0.00215853
CRYZL1	282	-0.0776664	0.00139054	5.0554e-05	0.00216073
CD151	283	0.082974	0.000333757	5.10964e-05	0.00216127
CD99L2	284	-0.0241388	0.00608544	5.11528e-05	0.00216127
NDUFV2	285	-0.0684786	0.0074347	5.11635e-05	0.00216127
BSDC1	286	0.091847	0.00189209	5.14022e-05	0.00216127
BOLA2	287	0.0896339	0.00519893	5.14973e-05	0.00216127
ATP5J2	288	-0.0405774	0.0149867	5.20445e-05	0.00216127
GAB2	289	0.0554415	0.0172738	5.21745e-05	0.00216127
WDR61	290	-0.0901418	0.0056772	5.22056e-05	0.00216127
ZDHHC12	291	0.0546653	0.00408133	5.22597e-05	0.00216127
LMF2	292	0.0935991	0.00359566	5.23597e-05	0.00216127
TXN	293	-0.227795	0.0500203	5.36283e-05	0.00220608
KATNB1	294	0.039873	0.00714443	5.42244e-05	0.0022178
MRFAP1L1	295	-0.147472	0.0207994	5.42812e-05	0.0022178
UTP11L	296	-0.0345517	0.00588484	5.47122e-05	0.00222786
ZC3H15	297	-0.075551	0.0123035	5.60793e-05	0.00227584
SET	298	-0.107113	0.00748825	5.67792e-05	0.00228788
CBX4	299	0.0623518	0.00147782	5.68641e-05	0.00228788
TSPAN3	300	-0.113612	0.000648088	5.69454e-05	0.00228788
SEC11C	301	-0.0736624	0.0136376	5.78742e-05	0.00231747
ICT1	302	-0.0258787	0.00624971	5.83247e-05	0.00231919
CD83	303	-0.0896588	0.000390145	5.84022e-05	0.00231919
BNIPL	304	0.0101426	0.00288805	5.84945e-05	0.00231919
RPL26L1	305	-0.0650778	0.00752516	5.9125e-05	0.0023365
DEF8	306	0.0616	0.0149242	5.95712e-05	0.00234344
IWS1	307	-0.0530601	0.00284426	5.96893e-05	0.00234344
ZNF445	308	-0.0487122	0.00141437	6.00046e-05	0.00234817
WDFY2	309	0.0733951	0.00285255	6.09238e-05	0.00237642
NOP58	310	-0.061791	0.0137307	6.12548e-05	0.0023797
RPL23	311	-0.243157	0.0724339	6.14026e-05	0.0023797
RPL4	312	-0.134908	0.0228805	6.29425e-05	0.00243156
KIAA0319L	313	0.0434963	0.0146347	6.41818e-05	0.00247151
FRG1	314	-0.072591	0.0108075	6.4744e-05	0.00248522
CEP350	315	0.0581185	0.0046186	6.59316e-05	0.00252277
UPF2	316	-0.0748395	0.0114737	6.71307e-05	0.00256053
AGTRAP	317	0.12207	0.00285469	6.75759e-05	0.00256938
KLF2	318	0.0108585	0.0090356	6.87562e-05	0.00260491
NAE1	319	-0.0853829	0.0148264	6.89427e-05	0.00260491
PPP1R14B	320	0.0621105	0.00516641	7.15276e-05	0.00269413
EIF3M	321	-0.0583952	0.0121125	7.35221e-05	0.00276063
STAB1	322	0.119943	0.000729112	7.4028e-05	0.00276995
NUCB2	323	-0.0293918	0.0142991	7.42299e-05	0.00276995
DPH3	324	-0.0665807	0.00022508	7.52041e-05	0.00279764
THYN1	325	-0.0503292	0.00583632	7.595e-05	0.00281669
PPP2R5C	326	-0.0747998	0.010903	7.71876e-05	0.00285029
CTNS	327	-0.0458497	0.0229557	7.7329e-05	0.00285029
SEC61G	328	-0.0525156	0.00858941	7.96581e-05	0.00292093
LRCH4	329	0.0625607	0.0133308	7.973e-05	0.00292093
MOCS2	330	-0.0161322	0.00266578	8.13059e-05	0.00296964
ZNF613	331	-0.0764667	0.00456948	8.2555e-05	0.00300201
CYB5B	332	-0.0577568	0.00866102	8.26905e-05	0.00300201
RSL1D1	333	-0.0637854	0.013262	8.35889e-05	0.00302552
MTX1	334	0.0886028	0.0050969	8.4313e-05	0.00303658
SP1	335	0.113484	0.00236342	8.43985e-05	0.00303658
RPL28	336	0.0734694	0.000674487	8.47273e-05	0.00303934
CD163	337	0.175406	0.0016606	8.527e-05	0.00304973
PSMB1	338	-0.108568	0.016871	8.66923e-05	0.00309143
SLC25A12	339	0.040024	0.0120672	8.72044e-05	0.00310051
COX6A1	340	-0.0561827	0.00724267	8.82735e-05	0.00312716
TIMM23	341	-0.0746499	0.0088108	8.84728e-05	0.00312716
PPP2R3C	342	-0.0713299	0.0229411	9.07142e-05	0.00319701
BLCAP	343	-0.0652483	0.000233826	9.14417e-05	0.00321326
PSMC6	344	-0.127095	0.0304765	9.21089e-05	0.00322637
KIF1B	345	0.111977	0.000677613	9.23961e-05	0.00322637
CETN3	346	-0.114569	0.00609206	9.26179e-05	0.00322637
CDC26	347	-0.0872726	0.00521644	9.34911e-05	0.00323883
AKT3	348	0.061728	0.0113153	9.35131e-05	0.00323883
PPM1K	349	-0.0931599	0.000489837	9.41634e-05	0.00325201
ISY1	350	-0.065177	0.0060204	9.65779e-05	0.00331322
B3GALTL	351	-0.00696526	0.00410654	9.65798e-05	0.00331322
MTMR3	352	0.00887892	0.0102606	9.67604e-05	0.00331322
ANXA1	353	-0.209414	0.0736306	9.7691e-05	0.00333561
NDUFB2	354	-0.167252	0.0256853	9.90367e-05	0.003372
LCOR	355	0.0297973	0.0071346	9.99479e-05	0.00339344
RPF1	356	-0.0488218	0.00589541	0.000101661	0.00344191
HIST2H2BE	357	0.0083013	0.0294492	0.000102733	0.00346468
AFF3	358	-0.0968102	0.000484766	0.000102909	0.00346468
TAX1BP1	359	-0.175225	0.0251349	0.000104019	0.00348648
GDI2	360	-0.0767114	0.0225297	0.000104134	0.00348648
DENND3	361	0.139089	0.00503011	0.000104545	0.00349054
ATPAF1	362	-0.040823	0.00431692	0.000104868	0.00349164
KLRB1	363	-0.241629	0.0716048	0.000106034	0.00352072
NOL8	364	0.00665243	0.0122708	0.000106627	0.00352794
MRPL3	365	-0.117732	0.0359973	0.000106836	0.00352794
RAN	366	-0.0371433	0.00498065	0.000107424	0.00353742
TMUB2	367	0.0789772	0.00213756	0.000107781	0.00353742
FAM160A2	368	0.085481	0.00308735	0.00010826	0.00353742
RPL39	369	-0.241571	0.0754347	0.000108522	0.00353742
PHF14	370	0.00196481	0.00662728	0.000108591	0.00353742
INTS1	371	0.0308821	0.00521031	0.000111571	0.0036247
THOC1	372	0.00285478	0.0113354	0.000112095	0.00363195
CRISPLD2	373	0.112122	0.0328062	0.000113525	0.00366841
EML4	374	-0.122301	0.00331694	0.000118544	0.00382034
MAN2A2	375	0.0385254	0.00717635	0.000120268	0.00386556
TCTA	376	-0.00574102	0.013258	0.00012348	0.00394985
PNKD	377	0.0305272	0.012336	0.000123546	0.00394985
TOM1	378	0.136722	0.00314579	0.000124455	0.00395718
MCEE	379	-0.015764	0.0147037	0.000124506	0.00395718
MBD6	380	0.127149	0.00932691	0.00012476	0.00395718
VCAN	381	0.21185	0.0048024	0.000128135	0.00405358
PLEKHG1	382	-0.141547	0.017584	0.000130083	0.00408291
FGD3	383	0.11102	0.0112836	0.000130606	0.00408291
DKC1	384	-0.0471051	0.00860593	0.000131239	0.00408291
NXF1	385	0.0664233	0.005751	0.000131555	0.00408291
FLOT1	386	0.147922	0.00241755	0.000131671	0.00408291
ACAT1	387	-0.102037	0.0101301	0.00013172	0.00408291
RPS6KA4	388	0.0990936	0.000620036	0.000131748	0.00408291
PRMT1	389	-0.0787567	0.00149771	0.000131836	0.00408291
SETMAR	390	-0.0103012	0.00460508	0.000132111	0.00408291
MKNK2	391	0.0591727	0.0164552	0.000133113	0.00410334
LILRB3	392	0.151642	0.00862193	0.000133796	0.00411388
ST8SIA4	393	-0.0101101	0.00660523	0.00013439	0.00412163
RPL41	394	-0.199681	0.0528606	0.000136093	0.00416327
TMED10	395	-0.0758787	0.00928937	0.000136498	0.00416509
MRPL48	396	-0.0299857	0.00395521	0.000137104	0.00417303
SUB1	397	-0.0640965	0.0247674	0.00013813	0.00419364
ZNF132	398	-0.0403084	8.73178e-05	0.000139528	0.00420159
HDDC2	399	-0.111371	0.0115817	0.000139673	0.00420159
TMBIM6	400	0.0847396	0.00609695	0.000139762	0.00420159
PSMB6	401	-0.0525706	0.00902045	0.000139895	0.00420159
ACTL6A	402	-0.0403047	0.0108642	0.000140447	0.00420159
TSPAN32	403	0.0913465	0.00418628	0.000140483	0.00420159
HK3	404	0.125055	0.00970022	0.000140983	0.0042061
PRPF18	405	-0.0279938	0.00321259	0.000145045	0.0043166
RCAN1	406	-0.0737298	0.0003136	0.000146488	0.00434882
CALM2	407	-0.110313	0.0172976	0.000147082	0.00435572
EIF4B	408	-0.0474722	0.0135427	0.000147764	0.00435581
TAF12	409	-0.0431714	0.00534113	0.000147808	0.00435581
ZFYVE1	410	0.0305097	0.00323894	0.000148661	0.00436062
STAT5B	411	0.131416	0.00271164	0.000148694	0.00436062
HIST3H2A	412	0.0552967	0.0065684	0.00014952	0.0043742
SLC9A8	413	0.0607616	0.00857396	0.000151083	0.00440921
ABTB1	414	0.0882114	0.0129081	0.000152431	0.00443779
GTF2F2	415	-0.0712523	0.0130167	0.00015323	0.0044503
RAD51C	416	0.00369478	0.00856543	0.000153815	0.00445658
YIPF6	417	0.0619202	0.0122595	0.000155062	0.00448193
SNAPC4	418	0.0156777	0.0100498	0.000155627	0.00448749
MITD1	419	-0.0817589	0.00916048	0.000156582	0.00450425
ZNHIT3	420	-0.169085	0.0227399	0.000157417	0.00451749
CCT8	421	-0.0631097	0.00853185	0.000158139	0.00452703
LATS2	422	0.0703092	0.000288502	0.0001585	0.00452703
BRI3	423	0.0563666	0.0119196	0.00015999	0.00455876
CFDP1	424	-0.0514834	0.00412987	0.000160574	0.00456461
RPL30	425	-0.143695	0.0246782	0.000161735	0.00458681
ZNF350	426	-0.0492519	0.00285873	0.000162962	0.00460097
DOK3	427	0.0780571	0.00177052	0.000162998	0.00460097
INTS12	428	-0.0209094	0.00356156	0.00016496	0.00464548
MRPL24	429	-0.0714888	0.00357293	0.00016872	0.00473462
HEYL	430	-0.0261694	0.00287299	0.000168911	0.00473462
TROVE2	431	0.036313	0.00473897	0.000173048	0.00483931
CAPRIN1	432	0.0226398	0.00392487	0.000173961	0.00485358
ATG16L2	433	0.124122	0.00584818	0.000174864	0.00486752
POR	434	0.0427755	0.0103914	0.000175832	0.0048832
TXNDC17	435	-0.124042	0.026194	0.000180385	0.0049981
IQCG	436	0.0138966	0.00586496	0.000181827	0.00500125
ANAPC13	437	-0.086682	0.0141695	0.000181877	0.00500125
DMD	438	-0.0533369	0.00158804	0.000181919	0.00500125
COX7B	439	-0.163905	0.0209542	0.000182158	0.00500125
ERGIC1	440	0.0382872	0.0172184	0.000182804	0.00500708
PPWD1	441	-0.0597021	0.0096901	0.000183201	0.00500708
RANBP3	442	0.0944105	0.000519626	0.00018427	0.0050248
IRAK1	443	0.0914019	0.0021763	0.000185095	0.0050248
IFT88	444	-0.0430503	0.000113065	0.0001851	0.0050248
COMMD3	445	-0.146907	0.0157237	0.000185765	0.00503151
RPS12	446	-0.0725451	0.00676413	0.000186963	0.00503797
ZBTB43	447	0.023702	0.0057387	0.0001871	0.00503797
WBP4	448	-0.035465	0.0091723	0.000187257	0.00503797
PPP1R3E	449	0.0820985	0.00039774	0.000188037	0.00504768
TM9SF3	450	-0.0430865	0.0066316	0.000188992	0.00505487
BIN3	451	0.0558994	0.0067123	0.000189489	0.00505487
CASP1	452	-0.0858005	0.0267902	0.00018979	0.00505487
CHEK2	453	-0.0448907	0.000122711	0.000190089	0.00505487
ZNF146	454	-0.0845516	0.00996718	0.000190402	0.00505487
FAM46A	455	0.0505647	0.00982079	0.000191821	0.00508136
TYW3	456	-0.00648843	0.00759532	0.000192885	0.00509833
TMEM184B	457	0.0836082	0.00463413	0.000198187	0.00522702
ATP5D	458	0.0967633	0.00325407	0.000202637	0.00533271
SH3BP5L	459	0.0851336	0.00269755	0.000204503	0.00535898
ATG4C	460	-0.106846	0.000637218	0.000204524	0.00535898
TTF1	461	-0.00228033	0.00598922	0.000205415	0.0053629
NDE1	462	0.0705698	0.0217124	0.000205974	0.0053629
CRIPT	463	-0.120187	0.000877233	0.000206009	0.0053629
MKL1	464	0.0581774	0.00859889	0.000206491	0.00536387
TMUB1	465	0.0720082	0.00293156	0.000208178	0.00539606
RPL31	466	-0.351986	0.058658	0.000208807	0.00540076
DDX1	467	-0.0908189	0.00939602	0.000211644	0.00546242
MRPL1	468	-0.0976022	0.000534829	0.000212143	0.00546359
LACTB	469	0.0311463	0.0169739	0.000215123	0.00552853
PLEKHM1	470	0.0703951	0.00531426	0.000216373	0.00554881
TBCD	471	0.128893	0.00100732	0.000217276	0.00556015
RBCK1	472	0.0790335	0.0112872	0.000218044	0.00556277
AP1S1	473	-0.00405693	0.00430974	0.000218302	0.00556277
UNKL	474	0.107208	0.000693281	0.000218802	0.00556375
F12	475	-0.000253708	0.00597853	0.000221881	0.00563017
SAR1B	476	-0.0476214	0.0206681	0.00022363	0.00565197
ARID4B	477	-0.0317068	0.015956	0.000223678	0.00565197
UBE3A	478	-0.104053	0.00771673	0.000226666	0.00571033
ITPRIP	479	0.0969583	0.0117177	0.000226935	0.00571033
MRPL32	480	-0.0713363	0.00944119	0.000227686	0.00571167
LTB4R	481	0.124928	0.000929738	0.00022828	0.00571167
ANKS1A	482	0.0401133	0.00602045	0.000229281	0.00571167
UNC13D	483	0.0636342	0.00786165	0.00022931	0.00571167
PDE5A	484	-0.0260915	0.0241311	0.000230021	0.00571167
ATP6AP1	485	0.104254	0.00682132	0.000230625	0.00571167
TIMP1	486	0.11589	0.00391702	0.000230705	0.00571167
COQ5	487	-0.054673	0.0153005	0.000231129	0.00571167
COPS4	488	-0.0907733	0.00718017	0.000231253	0.00571167
ZNF385A	489	0.12816	0.000998125	0.000231751	0.00571226
RSRC1	490	-0.0389396	0.00405009	0.00023351	0.00573507
SRFBP1	491	-0.025565	0.00487996	0.000233628	0.00573507
MICAL1	492	0.1028	0.00877617	0.000234669	0.00574892
DNAJA2	493	-0.110572	0.0084598	0.0002368	0.00578198
MPDU1	494	0.080541	0.000397539	0.000236978	0.00578198
FAM162A	495	-0.0114881	0.00372698	0.000238417	0.00579558
RBMS1	496	0.106472	0.00142943	0.000238497	0.00579558
SLAMF1	497	0.0143759	0.0148817	0.00023956	0.0058097
MXD3	498	0.0966645	0.000565035	0.000243419	0.00587945
HSPH1	499	-0.0839516	0.0147317	0.000243839	0.00587945
PSMA2	500	-0.0639906	0.00635914	0.0002439	0.00587945
DDX10	501	-0.0562044	0.00210018	0.000245682	0.0059106
IL17RA	502	0.138806	0.0115943	0.00024671	0.00591153
MRPL36	503	-0.0741347	0.00742081	0.000246722	0.00591153
GHDC	504	0.0988995	0.00059397	0.000247193	0.00591153
RPL5	505	-0.118333	0.023918	0.000248176	0.0059233
SNX27	506	0.127275	0.00328314	0.000249055	0.00593253
SNRPA1	507	-0.0376806	0.0128632	0.00025199	0.00598016
LYRM2	508	-0.044839	0.00953536	0.000252047	0.00598016
ATG3	509	-0.0529843	0.0185761	0.000253178	0.00599518
SH2D1A	510	-0.0886502	0.0196428	0.000257304	0.00608096
MRPL21	511	-0.116342	0.00272417	0.000259328	0.00611679
RNF44	512	0.0200645	0.00741496	0.000259927	0.00611894
RALGAPA1	513	0.00423087	0.0149416	0.000262534	0.00616703
EBAG9	514	-0.0726367	0.0143423	0.000262993	0.00616703
ATP6V0B	515	0.0749108	0.00771878	0.000265927	0.00622373
ZNF302	516	-0.0754272	0.0227288	0.000268634	0.0062666
RWDD1	517	-0.16444	0.0355305	0.000268799	0.0062666
FAM3A	518	0.0829399	0.00360299	0.000270257	0.00627117
FANCI	519	-0.0525036	0.00259971	0.000270621	0.00627117
BACE2	520	-0.119247	0.0110598	0.000270831	0.00627117
BTBD10	521	-0.0350248	0.00754373	0.000271156	0.00627117
COPS8	522	-0.00988944	0.0049744	0.000271596	0.00627117
FASN	523	0.00187647	0.0127532	0.000273883	0.00631135
MRPS28	524	-0.0898648	0.00145928	0.000274475	0.00631135
CCDC97	525	0.0764187	0.00111504	0.000275276	0.00631135
SP140	526	-0.0417987	0.00697161	0.000275574	0.00631135
CCNI	527	0.0589279	0.00869481	0.00027628	0.00631135
ADK	528	-0.107797	0.000718293	0.000276478	0.00631135
OSBPL10	529	-0.120141	0.00280298	0.000277158	0.00631491
MRPL46	530	-0.0273691	0.00597968	0.00027913	0.00634784
TMEM60	531	-0.0641351	0.00618175	0.000282196	0.00640548
TXNDC12	532	-0.0803799	0.0192024	0.000285489	0.00646804
UQCRC2	533	-0.050773	0.00704795	0.000288256	0.00651848
PARK7	534	-0.0780564	0.00933684	0.00029001	0.00654586
EXOSC9	535	-0.0175762	0.0044491	0.000291727	0.0065723
MBOAT1	536	0.0767822	0.000375256	0.000294772	0.00662852
TSEN34	537	0.0759977	0.0115435	0.000295573	0.00663415
DENND1C	538	0.0886999	0.00588424	0.000298278	0.0066626
NIT2	539	0.0165406	0.00701981	0.000299236	0.0066626
STK11IP	540	0.0337265	0.00483564	0.000299763	0.0066626
HINT1	541	-0.188006	0.0726703	0.000299836	0.0066626
UBA7	542	0.0937225	0.00708875	0.00029987	0.0066626
LRWD1	543	0.113277	0.000954462	0.000300157	0.0066626
OMA1	544	-0.0618794	0.00664288	0.000305819	0.0067758
ABHD4	545	0.0360715	0.00450836	0.00030781	0.00678474
UPF3A	546	-0.043355	0.00707224	0.000307897	0.00678474
TMCO1	547	-0.217723	0.0143139	0.000307911	0.00678474
GDPD3	548	0.101872	0.00219989	0.000309335	0.00680367
PPA1	549	-0.122003	0.0242849	0.000316877	0.00695687
KITLG	550	-0.0188567	0.00158359	0.000318106	0.00697115
CD200	551	-0.152177	0.022514	0.000320552	0.007012
ZNF641	552	0.0243806	0.0243121	0.000332642	0.00724961
IFNAR2	553	0.121575	0.0017417	0.000332761	0.00724961
FER	554	0.059608	0.00963256	0.000333722	0.00724961
FSCN1	555	-0.00192937	0.00996906	0.00033382	0.00724961
EXOSC1	556	-0.0437257	0.0047016	0.000335283	0.00725982
PNN	557	-0.0178231	0.0149623	0.000335495	0.00725982
RPA2	558	-0.0551092	0.00851397	0.000336673	0.00727226
AKR1C3	559	-0.132677	0.01208	0.000337982	0.00728552
POFUT2	560	0.0459027	0.00440897	0.000338496	0.00728552
SUGT1	561	-0.0129444	0.00347581	0.0003397	0.00729841
SLC35A1	562	-0.0299121	0.0312281	0.000341195	0.00731748
CBX6	563	0.0253643	0.0072225	0.000342569	0.00733391
ZNF439	564	-0.0973511	0.00056411	0.000344718	0.00736681
AGPS	565	-0.0195571	0.0107189	0.000348193	0.00742724
GTF2E2	566	-0.0704699	0.00669849	0.000348796	0.00742724
ZC3H3	567	0.0432092	0.00862596	0.000350152	0.00742724
ITGAX	568	0.105713	0.0228943	0.000350465	0.00742724
GPR132	569	0.0228095	0.00388632	0.00035085	0.00742724
RGS14	570	0.0668962	0.00220189	0.000351672	0.00742724
CDC16	571	-0.0329639	0.00922076	0.000351859	0.00742724
CD226	572	-0.0375327	0.00843079	0.000355504	0.00749107
WRN	573	0.0257869	0.00932033	0.000358812	0.00754758
POLR2B	574	-0.0584328	0.0051849	0.000359883	0.00755691
HNRNPF	575	-0.00325359	0.00229855	0.000362523	0.00758013
PMPCB	576	-0.121976	0.000937995	0.000362653	0.00758013
NOL11	577	-0.0294856	0.0105046	0.000362875	0.00758013
TOMM5	578	-0.0358387	0.00995202	0.000365127	0.00761396
GATS	579	0.123632	0.000970268	0.000367512	0.00761766
SMARCE1	580	-0.0300714	0.00739185	0.000367621	0.00761766
MTA1	581	0.0772636	0.000385674	0.000367756	0.00761766
UNC50	582	-0.0947416	0.00372776	0.000367832	0.00761766
RECQL	583	-0.0519651	0.00729801	0.000375177	0.00775645
EED	584	-0.0103996	0.00189543	0.000376057	0.00776133
P4HB	585	0.0886376	0.000509491	0.000378006	0.00778821
LSM14A	586	-0.0998105	0.00494519	0.000379825	0.00781233
CCDC34	587	-0.0353084	0.00490015	0.000381648	0.00783646
MGAT1	588	0.0860787	0.00325285	0.000385357	0.00789917
PHAX	589	-0.00814273	0.00867899	0.00039099	0.00800103
RAB7L1	590	-0.0187141	0.0102939	0.000393268	0.008034
RHBDD2	591	0.066682	0.00911425	0.000396996	0.00809643
DAPK2	592	0.0547791	0.00974686	0.000398676	0.00810785
IBTK	593	-0.0234114	0.0105054	0.000398967	0.00810785
RRP15	594	-0.0176308	0.0055644	0.000399574	0.00810785
MAPKAP1	595	0.0347282	0.00524409	0.000400824	0.00811762
SPATA2L	596	0.0443391	0.00779014	0.000401402	0.00811762
DHX29	597	-0.0712261	0.00247528	0.000402565	0.00812749
CCDC14	598	-0.0326886	0.0216361	0.000404059	0.00814402
SRPRB	599	-0.0533547	0.00695798	0.000406459	0.00816671
PPIL3	600	-0.0611762	0.0323466	0.000406896	0.00816671
PDCD6	601	-0.108769	0.000758543	0.000407218	0.00816671
VIM	602	0.0909313	0.00466259	0.000409529	0.00818578
DCP1A	603	0.0325342	0.00434286	0.000409981	0.00818578
COX7C	604	-0.254153	0.0872269	0.000410206	0.00818578
PKIA	605	-0.126015	0.000990697	0.000412722	0.00822237
ZBTB20	606	0.0276962	0.00651413	0.000414609	0.00824635
ZFP37	607	-0.010421	0.000982864	0.00041938	0.0083022
TMEM175	608	0.0497409	0.00710149	0.000419825	0.0083022
SUCLA2	609	0.0287907	0.0108056	0.00042121	0.0083022
KPNA5	610	-0.0692102	0.00292708	0.000421332	0.0083022
MRPS9	611	-0.0513575	0.0033939	0.000421417	0.0083022
BTLA	612	-0.130174	0.0010428	0.00042183	0.0083022
PLOD1	613	0.0916342	0.0121309	0.000422239	0.0083022
IFT74	614	-0.0583704	0.000219521	0.00042326	0.00830871
GAPDH	615	0.0693091	0.00189059	0.000427043	0.00836934
VNN3	616	0.129859	0.00110438	0.000429237	0.00839869
BEST1	617	0.0779396	0.0116643	0.000430386	0.00840752
AKR1C4	618	-0.049701	0.00114744	0.000436099	0.00850534
GMIP	619	0.11914	0.00173767	0.000441599	0.00859044
FCER1A	620	-0.202567	0.0630364	0.000441887	0.00859044
CYTH1	621	0.0768639	0.000404019	0.000443399	0.00860178
SLC27A3	622	0.127975	0.00108494	0.000443898	0.00860178
MTF1	623	0.0475251	0.0157105	0.000446891	0.00863813
NUP35	624	0.0360519	0.00987976	0.000447207	0.00863813
MNT	625	0.0711548	0.00779846	0.000455758	0.00878919
MAP3K11	626	0.0864875	0.00933712	0.000458644	0.00883074
PFDN5	627	-0.189497	0.04254	0.000459397	0.00883111
BEX4	628	-0.0942263	0.000571519	0.000467395	0.00897056
PPM1M	629	0.0463287	0.00582275	0.000469241	0.00898873
ALDH8A1	630	-0.0213636	0.00314316	0.000469833	0.00898873
CORO7	631	0.108073	0.00733873	0.00047798	0.0091301
CDK5RAP3	632	0.086332	0.0056051	0.000481416	0.00918117
PSMD10	633	-0.117169	0.0043552	0.000486596	0.00923237
ATHL1	634	0.179417	0.0174455	0.000487019	0.00923237
LSM1	635	-0.133402	0.0159775	0.000487024	0.00923237
MAN2A1	636	0.100368	0.000674945	0.000487164	0.00923237
RPL22	637	-0.0792948	0.0135446	0.00048875	0.00924788
SHKBP1	638	0.141931	0.00978531	0.000489743	0.00925214
CHMP5	639	-0.149687	0.0109036	0.00049111	0.00926345
HIBCH	640	-0.0245724	0.00519819	0.000494303	0.00929859
SCO1	641	-0.0556024	0.00202785	0.000494516	0.00929859
KIF20B	642	-0.0908127	0.000517407	0.000496127	0.00931436
SRP54	643	-0.0551579	0.0056558	0.000497706	0.00932946
ITIH5	644	0.000476559	0.00515078	0.000499611	0.00934616
NIPA2	645	-0.0656848	0.00164703	0.000500147	0.00934616
DYNLT3	646	-0.0620258	0.0140568	0.000504016	0.00940389
SEC61A1	647	0.0582069	0.00826542	0.000505408	0.00940894
BUB3	648	-0.101921	0.0147257	0.000505849	0.00940894
ACADVL	649	0.102768	0.0027938	0.000523617	0.00972443
CD79A	650	-0.218772	0.00320022	0.000525355	0.0097417
PDCD5	651	-0.0832844	0.000475532	0.000530337	0.00980552
H2AFJ	652	0.0466872	0.0101312	0.000530879	0.00980552
FKBP3	653	-0.0432766	0.00763041	0.000531238	0.00980552
CDV3	654	-0.101602	0.00714804	0.000533361	0.00982967
CFP	655	0.112129	0.00269998	0.000535546	0.00983829
PTPRE	656	0.105302	0.000770746	0.000535611	0.00983829
FICD	657	0.0521816	0.00308504	0.000536278	0.00983829
CEPT1	658	-0.0792666	0.0123821	0.000538305	0.00984932
TSPAN13	659	-0.118568	0.000892189	0.000538917	0.00984932
TNFRSF14	660	0.0879008	0.00057203	0.000539331	0.00984932
CDKAL1	661	-0.0540207	0.00017839	0.000540295	0.00985201
DDHD2	662	-0.0286543	0.00387483	0.000543672	0.00989315
KTN1	663	-0.0572882	0.0111823	0.000544193	0.00989315
ZBTB16	664	0.120366	0.00095767	0.000548398	0.0099503
UNC13A	665	-0.0109264	0.00231384	0.000548988	0.0099503
PTPRO	666	-0.0635676	0.0017687	0.000551272	0.0099767
TCEB1	667	-0.0582484	0.00727015	0.000552283	0.00998001
UBE2V2	668	-0.040898	0.012239	0.000556915	0.0100416
ALDH3B1	669	0.0991477	0.00472612	0.000557358	0.0100416
MRPL18	670	-0.106205	0.00240445	0.000564544	0.0101559
VPS29	671	-0.106577	0.0205894	0.000566759	0.0101753
THUMPD2	672	0.0293325	0.00824113	0.000567309	0.0101753
BCL11A	673	-0.0680003	0.000526467	0.000573656	0.0102738
HMGN1	674	-0.0959741	0.00474137	0.000575217	0.0102851
NDUFB6	675	-0.0936162	0.00424851	0.000576408	0.0102851
CUEDC1	676	0.114138	0.00667966	0.000576848	0.0102851
ATG2A	677	0.0427951	0.0105103	0.000577994	0.0102903
NUP107	678	-0.0554972	0.00339442	0.000579478	0.0103016
NFU1	679	-0.0773267	0.00264735	0.000583185	0.0103522
CCND3	680	0.0597878	0.00749907	0.000592885	0.0105089
TMCO6	681	0.00323141	0.00329808	0.000596331	0.0105544
SKIV2L	682	0.0484026	0.00583186	0.000599846	0.0106011
GGCT	683	-0.0661591	0.000879487	0.000601483	0.0106145
RPL35A	684	-0.110997	0.0178026	0.000605295	0.0106661
CCM2	685	0.0268478	0.00693109	0.000610004	0.0107334
MED20	686	-0.0784951	0.00121108	0.000619199	0.0108793
EFHD2	687	0.0526797	0.00936097	0.000624081	0.0109491
UFSP2	688	-0.0233209	0.00326538	0.000629187	0.0110227
GTPBP4	689	-0.0440804	0.00775531	0.000631585	0.0110427
HDAC2	690	-0.0852876	0.00677289	0.000632166	0.0110427
LARGE	691	-0.0216777	0.00197943	0.000635105	0.011078
ATP5C1	692	-0.108114	0.0224422	0.000640689	0.0111593
INTS3	693	0.0952707	0.0015415	0.000650617	0.0113054
ZNF626	694	-0.0538014	0.000191395	0.000650952	0.0113054
DHX34	695	0.0739733	0.00862548	0.000653066	0.0113258
OGG1	696	0.0188989	0.0040993	0.000654632	0.0113366
CLECL1	697	-0.043096	0.00385528	0.000657539	0.0113601
PCMT1	698	-0.0872026	0.0169491	0.000658158	0.0113601
NT5E	699	-0.0175465	0.00142979	0.000659585	0.0113601
NDUFS8	700	0.00215655	0.00828871	0.000659757	0.0113601
MTO1	701	-0.0367192	0.00972151	0.000661092	0.0113668
HIF3A	702	-0.0349468	0.0032809	0.000666954	0.0114513
PANX2	703	0.0884045	0.0156854	0.00066823	0.0114569
EIF4A2	704	-0.0703167	0.0210482	0.000671642	0.0114964
AGER	705	0.0775931	0.000411062	0.000672444	0.0114964
CNOT4	706	-0.0217248	0.00304882	0.000679536	0.0116012
TMEM156	707	-0.0525632	0.00020275	0.000683992	0.0116608
TMEM14C	708	-0.0843125	0.0137941	0.000687038	0.0116961
HYLS1	709	0.0156453	0.00666909	0.000691464	0.0117549
GPR108	710	0.0724917	0.00224976	0.000694051	0.0117822
SNRNP27	711	-0.0666689	0.00706773	0.000698712	0.0118423
NFATC3	712	-0.0328813	7.22596e-05	0.000699551	0.0118423
GORASP1	713	0.0258498	0.00462089	0.000700942	0.0118492
CHCHD4	714	-0.0355393	0.00237358	0.00070489	0.0118992
EIF4G3	715	0.086309	0.000528693	0.000712417	0.0120095
VBP1	716	-0.0783365	0.029701	0.000719502	0.012112
AKAP11	717	-0.0255356	0.00796054	0.000720644	0.0121143
NDUFA4	718	-0.211897	0.0450093	0.000724892	0.0121537
PPIE	719	-0.0427779	0.00539716	0.000725008	0.0121537
ARV1	720	-0.0246628	0.00701782	0.000731099	0.0122365
ULK1	721	0.0972428	0.0125646	0.000731977	0.0122365
ZYG11B	722	0.101408	0.00344939	0.000733926	0.0122521
GZMA	723	-0.199733	0.046891	0.000735537	0.012262
ACSS2	724	0.103172	0.0028282	0.000739049	0.0123035
RPL34	725	-0.0012819	0.0126342	0.000746203	0.0124052
PTCRA	726	0.0041815	0.0168002	0.000747213	0.0124052
ACRBP	727	0.0574358	0.0263143	0.00074846	0.0124088
ELF4	728	0.0744129	0.00695111	0.000754267	0.0124879
GNPDA2	729	0.0240998	0.0104501	0.000755751	0.0124953
SBNO2	730	0.0951119	0.0036988	0.000759592	0.0125309
TRIM21	731	0.0854781	0.00609916	0.000759985	0.0125309
GAS7	732	0.137279	0.00135496	0.000761617	0.0125407
TAF1A	733	0.00656587	0.00203224	0.000764356	0.012555
SEL1L3	734	-0.103208	0.0049353	0.000765522	0.012555
PDCD10	735	-0.167052	0.0193123	0.000765612	0.012555
SRF	736	0.0099988	0.00666819	0.000770821	0.0126232
PPM1B	737	-0.0943245	0.019002	0.00077682	0.0127042
MTMR14	738	0.0865355	0.000513907	0.000787539	0.0128621
CCDC91	739	0.00866877	0.00900377	0.000791448	0.0128913
MTSS1	740	-0.143278	0.00696647	0.000791469	0.0128913
KIAA0556	741	0.0753359	0.00120703	0.000793916	0.0129137
NINJ2	742	0.0473085	0.0258456	0.000796789	0.012943
FRAT2	743	0.0793411	0.0156341	0.000803895	0.0130282
TMEM115	744	0.0693068	0.000918908	0.000804194	0.0130282
GM2A	745	0.122892	0.00615139	0.000805614	0.0130336
PPAPDC3	746	-0.0207059	0.00276051	0.000807114	0.0130404
HEXDC	747	0.0201781	0.00496441	0.000808198	0.0130404
SSH3	748	0.084332	0.00219086	0.000810217	0.0130555
TMBIM4	749	-0.0923274	0.0154471	0.000813628	0.013093
NDUFA9	750	-0.0559329	0.00288334	0.000819368	0.0131678
HSPA4	751	-0.0496924	0.00694172	0.000822816	0.0131732
RPS27L	752	-0.163604	0.0449187	0.000823821	0.0131732
ST6GALNAC2	753	0.102637	0.00267641	0.00082393	0.0131732
MSH6	754	-0.0678258	0.00055275	0.000824075	0.0131732
ICAM3	755	0.10462	0.00679778	0.000832793	0.0132949
MPHOSPH9	756	-0.00868406	0.00451211	0.000838609	0.01337
RGL2	757	0.0814074	0.00173192	0.000840268	0.0133788
GMFG	758	-0.119704	0.0229895	0.000842413	0.0133953
RAB1B	759	0.0781075	0.00141296	0.000851203	0.0135172
VAMP8	760	-0.0978871	0.0124649	0.000862535	0.0136791
STXBP2	761	0.113497	0.00933579	0.000867243	0.0137357
ADPRH	762	-0.0242364	0.0046972	0.000869548	0.0137542
STK25	763	0.0645899	0.000317094	0.000871552	0.0137678
GRPEL1	764	-0.00775876	0.0038693	0.000882001	0.0139146
SAR1A	765	-0.0373674	0.00809119	0.00088763	0.0139722
MPP6	766	-0.0408054	0.000128073	0.000887973	0.0139722
MTERFD1	767	-0.0413909	0.00641528	0.000891671	0.0139897
PITPNM1	768	0.0788384	0.00705421	0.000894001	0.0139897
PPM1F	769	0.0470962	0.0145004	0.00089505	0.0139897
F5	770	0.120665	0.00387123	0.000895935	0.0139897
DPP8	771	0.0337835	0.00481246	0.000896005	0.0139897
TSPO	772	0.106323	0.000960724	0.000896046	0.0139897
SHISA5	773	0.109408	0.00242673	0.000905279	0.0141156
PXN	774	0.0594755	0.00113987	0.000908154	0.0141421
PPP1R10	775	0.094979	0.000758799	0.000912284	0.0141881
DEK	776	-0.0794526	0.024202	0.000924932	0.0143662
HMGB2	777	-0.10436	0.00587123	0.000931397	0.014448
API5	778	-0.0617779	0.0126138	0.000937461	0.0145234
YME1L1	779	-0.0241943	0.00364164	0.000942057	0.0145749
DEDD2	780	0.0613375	0.00978122	0.0009432	0.0145749
MRPL27	781	-0.0381286	0.00500775	0.000953669	0.0147178
PADI4	782	0.167993	0.0119556	0.000959337	0.014785
EHD1	783	0.0391213	0.0118054	0.000960477	0.014785
CHRNA10	784	-0.00153925	0.00293526	0.000966786	0.0148631
EVX1	785	-0.0336265	0.00341606	0.000971497	0.0149126
RASGRP3	786	-0.0791717	0.00216518	0.000972481	0.0149126
ABCA7	787	0.164556	0.00199	0.000975565	0.0149409
NFAT5	788	0.0382684	0.00593909	0.000980522	0.0149978
ERGIC2	789	-0.0815201	0.000571742	0.000985163	0.0150449
GPR3	790	-0.0623207	0.00478437	0.000986102	0.0150449
MOV10	791	0.106376	0.00110016	0.000990495	0.0150928
RPL35	792	-0.13499	0.0224059	0.000995275	0.0151355
MEI1	793	-0.0641175	0.00164677	0.000995808	0.0151355
CLEC2D	794	-0.147266	0.00490905	0.00101589	0.0154196
PLCL2	795	-0.0378992	0.00271142	0.00101706	0.0154196
RHOG	796	0.105699	0.00789819	0.00101862	0.0154238
CARD14	797	-0.058424	0.000255678	0.00102352	0.0154787
DDX47	798	-0.0412828	0.00478576	0.00102662	0.0155002
PIGC	799	-0.0388873	0.00123356	0.00102751	0.0155002
CCDC59	800	-0.0547415	0.0188032	0.00104194	0.0156901
WBSCR27	801	-0.017109	0.00428263	0.00104271	0.0156901
BIRC5	802	-0.054576	0.00548112	0.00104567	0.015715
P2RX7	803	0.112029	0.00093315	0.00105169	0.0157842
SIAH1	804	-0.11305	0.00100022	0.00105289	0.0157842
APTX	805	-0.0685354	0.000337998	0.0010663	0.0159649
CCDC132	806	0.0392441	0.010034	0.00106851	0.0159649
ZNF79	807	-0.00829276	0.00222605	0.00106892	0.0159649
PLCB2	808	0.118385	0.00476163	0.00107302	0.0160063
PDS5A	809	-0.0379681	0.00720713	0.00107926	0.0160796
ARHGEF3	810	-0.0611875	0.0195346	0.00108138	0.0160912
AHSA1	811	-0.0625895	0.00135528	0.00108533	0.0161301
SHPRH	812	0.000310878	0.0028794	0.00109064	0.0161843
CLC	813	-0.263324	0.0339325	0.00109339	0.0161843
FRMD4A	814	-0.0598935	0.00251849	0.00109568	0.0161843
FCRLA	815	-0.21504	0.00343345	0.00109662	0.0161843
NUPL2	816	-0.00988573	0.00999625	0.00109778	0.0161843
ABCC3	817	-0.0294521	0.037799	0.0010988	0.0161843
STK19	818	0.0404556	0.00358753	0.00109949	0.0161843
TRIM56	819	0.0838997	0.00350412	0.00109972	0.0161843
ZNF787	820	0.0873988	0.00393086	0.00110155	0.0161914
ZNF584	821	0.0352394	0.0027339	0.00110795	0.0162457
IFT57	822	-0.0558065	0.000232823	0.0011084	0.0162457
PRKAG1	823	-0.029681	0.00217534	0.00110928	0.0162457
SELL	824	0.115962	0.0101129	0.00112102	0.0163976
TP53I11	825	0.0148061	0.00843892	0.00112657	0.0164244
TMEM9B	826	-0.0853047	0.00238569	0.0011269	0.0164244
ANKRA2	827	0.12225	0.00107683	0.00112694	0.0164244
UST	828	-0.043995	0.000135562	0.00113252	0.0164859
TMPO	829	0.00439102	0.00159004	0.00113542	0.0164953
KCNH3	830	0.0166735	0.00395289	0.00113649	0.0164953
TRIM11	831	0.0170149	0.00370032	0.00113727	0.0164953
TAS2R5	832	-0.0428552	0.000990344	0.0011399	0.0165135
NACAP1	833	-0.0535083	0.00076479	0.00114735	0.0165953
WDYHV1	834	-0.000427717	0.00427385	0.0011483	0.0165953
RDX	835	-0.0555095	0.000230999	0.00115177	0.0166157
PRKCZ	836	0.0933538	0.000656375	0.00115247	0.0166157
OSM	837	0.0583755	0.00131786	0.0011591	0.0166862
AGPAT1	838	0.0974199	0.000928009	0.00116013	0.0166862
FNDC3A	839	-0.0728734	0.00106444	0.00116495	0.0167356
CDC5L	840	-0.0144467	0.00494342	0.00117529	0.016851
DHRS12	841	0.103137	0.00078801	0.00117622	0.016851
PIK3CD	842	0.0614197	0.0115761	0.00117732	0.016851
POU2F1	843	0.0793236	0.00147031	0.00117858	0.016851
PDHX	844	0.0125078	0.0103966	0.00118267	0.0168894
BCL2	845	-0.117272	0.00297828	0.00119433	0.0170358
TBC1D2	846	0.0819648	0.00204534	0.00120043	0.0171025
SEPHS1	847	0.00504433	0.00656141	0.00120591	0.0171603
ECM1	848	-0.0131809	0.00382869	0.00120954	0.0171917
RAB6A	849	-0.0686865	0.000848612	0.0012121	0.0172078
ZNF688	850	0.00482486	0.00367463	0.00121427	0.0172184
SV2A	851	0.00312025	0.00276435	0.001223	0.0173101
NME7	852	-0.00319019	0.00419321	0.00122361	0.0173101
RFC4	853	-0.0735839	0.00039682	0.0012281	0.0173532
ASAP1	854	0.0670121	0.0178317	0.00123262	0.0173967
ANKMY1	855	0.0144742	0.00744193	0.00123544	0.0174161
ATPIF1	856	-0.0839084	0.00106028	0.00123931	0.0174503
ANKFY1	857	0.0753401	0.001848	0.00124085	0.0174516
RCN3	858	0.102054	0.000759163	0.001246	0.0174964
EXOC7	859	0.0396053	0.00697439	0.00124694	0.0174964
MATR3	860	-0.077369	0.0314903	0.00125262	0.0175556
CARS2	861	0.0862292	0.0005612	0.00125949	0.0176314
SLCO1B1	862	-0.00191099	0.00111388	0.00126317	0.0176624
ARMC8	863	-0.0337205	0.000436442	0.00126546	0.0176739
GPR27	864	-0.0313796	0.00486008	0.00126742	0.0176809
PCSK6	865	-0.0321967	0.00452989	0.0012742	0.0177373
PIAS4	866	0.0442835	0.00796157	0.00127441	0.0177373
TLR5	867	0.113635	0.00954462	0.00127869	0.0177763
REC8	868	0.106156	0.00422419	0.00128768	0.0178223
PRKD2	869	0.0618907	0.00986177	0.00128825	0.0178223
TMEM91	870	0.0964823	0.015696	0.00128994	0.0178223
CAMKK2	871	0.105187	0.00152592	0.0012903	0.0178223
ZNF17	872	-0.0395655	0.00594269	0.00129097	0.0178223
POLE4	873	-0.100148	0.00946004	0.00129167	0.0178223
MEFV	874	0.121148	0.00126355	0.00129235	0.0178223
ECHDC1	875	0.0274009	0.0149268	0.00129427	0.0178284
CISD1	876	-0.0574287	0.0102406	0.00130832	0.0180013
RPS6KB1	877	-0.00751022	0.0107257	0.00131232	0.0180358
SLC17A7	878	-0.0341722	0.00275037	0.00131449	0.0180425
SEPN1	879	0.0853143	0.000588431	0.0013158	0.0180425
RASIP1	880	0.0309575	7.06164e-05	0.00132418	0.0181075
FASTKD1	881	-0.0098621	0.00417288	0.00132514	0.0181075
R3HDM2	882	0.0464877	0.000163356	0.00132582	0.0181075
ARFGAP1	883	0.0414993	0.00415856	0.00132655	0.0181075
UTP14A	884	-0.0288424	0.002085	0.00133258	0.0181692
CEBPG	885	-0.0389441	0.00576775	0.00134485	0.0182997
ZNF615	886	-0.0291169	0.00425792	0.00134519	0.0182997
ZW10	887	-0.0308418	0.00351375	0.00134709	0.018305
TMEM120A	888	0.0371519	0.00760496	0.00135168	0.0183466
MAPK6	889	0.0349644	0.0133235	0.00135423	0.0183605
CDK5R1	890	0.0990948	0.004733	0.00136495	0.0184535
NFIC	891	0.0256118	0.00737075	0.001365	0.0184535
CTDSP1	892	0.0693803	0.00389321	0.00136568	0.0184535
CCDC58	893	-0.0751111	0.000400102	0.00136774	0.0184606
ITPRIPL2	894	0.0660036	0.0111538	0.00137074	0.0184805
GRIPAP1	895	0.0700695	0.000845309	0.00137425	0.0185071
RALGPS2	896	-0.0823175	0.00546407	0.00137676	0.0185202
SETDB2	897	-0.0117308	0.00978945	0.00138133	0.0185609
PPIL1	898	-0.0708603	0.000367361	0.00138979	0.0186538
ZNF611	899	0.0170842	0.00296473	0.00139138	0.0186544
CEBPB	900	0.0753463	0.0125759	0.00139562	0.018673
HSPA1L	901	0.0894109	0.000943873	0.00139587	0.018673
CCDC41	902	0.0254765	0.0048414	0.00140358	0.0187496
HSDL1	903	-0.0461832	0.000169918	0.0014047	0.0187496
BANK1	904	-0.143907	0.00156195	0.00140902	0.0187864
SORL1	905	0.12082	0.0197258	0.00142308	0.0189469
PSMD12	906	0.0061528	0.00833081	0.0014242	0.0189469
FGL2	907	-0.097378	0.02078	0.00143181	0.0189946
APIP	908	-0.0378158	0.00200145	0.00143201	0.0189946
RABGGTB	909	-0.015898	0.00613889	0.00143252	0.0189946
GPD1L	910	-0.00959818	0.0104492	0.00143741	0.0190386
DLD	911	-0.0160647	0.00647203	0.00144071	0.0190613
RBM17	912	-0.0291995	0.0101765	0.00144713	0.0191083
CIR1	913	-0.0278744	0.00606704	0.00144743	0.0191083
ADAR	914	0.0654892	0.00836603	0.00145167	0.0191433
MRPL42	915	-0.0641544	0.000301993	0.00145834	0.0192103
RPS6KC1	916	-0.00976724	0.00211876	0.00147044	0.0193454
SNRPF	917	-0.102201	0.00356709	0.00147181	0.0193454
AGTPBP1	918	-0.0440917	0.0125403	0.00148591	0.0195094
NR1H2	919	0.0811092	0.00156936	0.00149017	0.0195359
DUSP3	920	0.10829	0.00094548	0.00149117	0.0195359
HNMT	921	0.0170743	0.0199586	0.00149307	0.0195396
GPR18	922	-0.068658	0.00636481	0.00149647	0.0195629
MED10	923	-0.0272388	0.00634932	0.00150213	0.019571
LRRC3	924	0.0328982	0.000147358	0.00150217	0.019571
CWC22	925	-0.00215654	0.00296029	0.00150358	0.019571
UBQLN1	926	-0.105329	0.00195712	0.00150359	0.019571
PTPN5	927	-0.01789	0.0028943	0.00150588	0.0195796
NCK1	928	-0.0723767	0.00953767	0.00150896	0.0195961
IRF9	929	0.0792804	0.00824883	0.00151154	0.0195961
ZSCAN16	930	-0.0368964	0.00317645	0.00151202	0.0195961
UNC93B1	931	0.0675367	0.00902649	0.00151521	0.0196163
S100A8	932	-0.222527	0.0552039	0.00151814	0.0196332
MCTS1	933	-0.022337	0.00406742	0.00152673	0.0197232
ZNF500	934	0.034324	0.003258	0.00152877	0.0197283
APLP2	935	0.100864	0.00251829	0.00153048	0.0197292
TTC27	936	-0.0565828	0.00170354	0.00153759	0.0197998
RTN4	937	0.0738793	0.0133836	0.00154747	0.019892
SLC2A6	938	0.0150924	0.00824317	0.00154964	0.019892
EIF2A	939	0.0186892	0.0413674	0.00155123	0.019892
TMEM205	940	0.101087	0.000826341	0.00155136	0.019892
NDUFA8	941	-0.0490989	0.00477996	0.0015547	0.0198943
COMMD6	942	-0.205472	0.0938335	0.00155483	0.0198943
SBF1	943	0.0841546	0.00347195	0.00155776	0.0199106
CTGF	944	0.0209089	0.00409971	0.00156199	0.0199434
RBMX2	945	-0.0309653	0.00353398	0.00156591	0.0199724
PTK2B	946	0.0275693	0.00710723	0.00157624	0.0200828
PSEN2	947	-0.0540424	0.00223172	0.0015852	0.0201758
MEMO1	948	0.0601178	0.000286628	0.00158856	0.0201915
ETFA	949	-0.0777566	0.00558259	0.00159002	0.0201915
TRAT1	950	-0.0513933	0.019977	0.00159146	0.0201915
IQSEC1	951	0.0895139	0.00220215	0.00159348	0.0201938
ASCC1	952	0.0375319	0.00964491	0.00159499	0.0201938
BCL7C	953	-0.0380937	0.000132484	0.00159704	0.0201984
SLC37A4	954	-0.00897956	0.00369167	0.00159977	0.0202118
PSMA1	955	-0.0333933	0.0054355	0.00161691	0.020407
BCL2L2	956	-0.0185334	0.00286132	0.00162088	0.0204357
CPSF2	957	0.0829487	0.000527159	0.00162281	0.0204364
PRKACB	958	0.0052896	0.0028892	0.00162433	0.0204364
HIGD1A	959	-0.0916464	0.00734056	0.00163474	0.0205428
ADSL	960	-0.0695949	0.00251807	0.0016362	0.0205428
PEX5	961	-0.0227259	0.0078039	0.00164177	0.0205913
ZNF75A	962	0.030996	0.00617596	0.00164799	0.0206268
CTSS	963	0.0927973	0.0048082	0.00164802	0.0206268
GMEB2	964	0.0464386	0.00461359	0.00165179	0.0206525
RAB23	965	0.0118465	0.00236401	0.00165665	0.0206792
TM9SF1	966	0.0805442	0.000506792	0.00165736	0.0206792
DNM1L	967	-0.0239794	0.00540579	0.00166059	0.0206982
SENP7	968	0.0867957	0.000622612	0.00166548	0.0207376
GRAMD1A	969	0.0717867	0.0042093	0.0016675	0.0207394
SCO2	970	0.144125	0.00596619	0.00166906	0.0207394
SEMA4D	971	0.122686	0.00119969	0.00168147	0.0208721
ZNF616	972	0.00502303	0.00264733	0.00168376	0.020879
ST3GAL1	973	0.0231989	0.0113651	0.00168945	0.020928
ATRN	974	0.0164445	0.00346213	0.00170054	0.0210412
MYPOP	975	0.0534569	0.00128061	0.00170208	0.0210412
BAI1	976	-0.00585151	0.00291144	0.00171338	0.0211592
ZNF512	977	-0.0357713	0.00521378	0.00172155	0.0212383
ZDHHC17	978	-0.00444878	0.0108204	0.00174159	0.0214636
HIST2H2AC	979	0.0710987	0.0122367	0.00174383	0.0214692
FES	980	0.107233	0.00483349	0.00174958	0.021518
ASB6	981	0.0247118	0.00276446	0.00175342	0.0215224
COASY	982	0.053736	0.00372688	0.00175351	0.0215224
SRP72	983	-0.0305737	0.00593945	0.00175651	0.0215373
ZNF189	984	-0.0307659	0.00336727	0.00175922	0.0215487
SIN3B	985	0.0184639	0.00394502	0.00176427	0.0215886
CSF3R	986	0.0975167	0.0120136	0.00177817	0.0217366
ANKRD12	987	-0.015375	0.0239792	0.0017856	0.0218053
SDF4	988	-0.0202557	0.00597871	0.00179048	0.0218428
RENBP	989	0.0715679	0.00805734	0.00179901	0.0219246
CHMP1A	990	0.0274412	0.00662169	0.00180619	0.0219755
PDDC1	991	-0.00577158	0.00450891	0.00180735	0.0219755
XYLT2	992	0.0179061	0.0031307	0.00180865	0.0219755
ACTR6	993	-0.0668994	0.0129803	0.00181655	0.0220492
BBC3	994	-0.00471669	0.00578864	0.00183244	0.0221889
FANCA	995	-0.0220751	0.00266211	0.00183472	0.0221889
KIAA1407	996	-0.0461618	0.000163369	0.0018355	0.0221889
GTPBP8	997	0.0361073	0.00604558	0.00183718	0.0221889
AK3	998	-0.120248	0.00114775	0.00183726	0.0221889
POLR3C	999	-0.0326866	0.00220419	0.00183992	0.0221988
GLYCTK	1000	-0.0235554	0.0048054	0.00184441	0.0222306
BCORL1	1001	0.0726747	0.000410212	0.00184687	0.0222381
PLEKHA2	1002	-0.0376046	0.000118326	0.00185216	0.0222795
SLCO3A1	1003	0.0788005	0.000479375	0.00185788	0.022326
MSX2	1004	-0.0488723	0.00126852	0.00186127	0.0223445
STAT2	1005	0.13851	0.00307064	0.00186544	0.022348
STK39	1006	-0.0505764	0.0111431	0.0018664	0.022348
IDS	1007	0.0295239	0.0109627	0.00186712	0.022348
RFNG	1008	0.0811447	0.00531601	0.00187593	0.0224312
PIM3	1009	0.0243081	0.00460065	0.0018799	0.0224399
TAF5L	1010	-0.00765631	0.00114322	0.0018809	0.0224399
SDHC	1011	-0.00697511	0.00481079	0.00188225	0.0224399
PAN3	1012	0.0433778	0.02271	0.00188973	0.0225068
SLC5A6	1013	-0.00348524	0.0049156	0.00189217	0.0225098
CHI3L2	1014	-0.0271092	5.60414e-05	0.00189372	0.0225098
KREMEN1	1015	0.0310113	0.00527163	0.00190306	0.0225903
CCT2	1016	-0.0457577	0.0134154	0.00190631	0.0225903
TBC1D10C	1017	0.0611864	0.00568122	0.00190694	0.0225903
EEF1E1	1018	-0.104979	0.00472179	0.00190798	0.0225903
ZNF524	1019	0.0603314	0.00267992	0.00191919	0.0227007
WBP5	1020	0.00461223	0.00249336	0.00192761	0.0227779
SH3BP1	1021	0.0993516	0.00389581	0.00193773	0.0228533
CLN3	1022	0.0748263	0.000479704	0.00193912	0.0228533
ZNF7	1023	-0.0457789	0.00311648	0.00193969	0.0228533
CCDC117	1024	-0.11043	0.000987649	0.00194324	0.0228533
XRCC5	1025	-0.0200064	0.0041775	0.00194346	0.0228533
PGS1	1026	0.0831855	0.00195279	0.00194741	0.0228773
SERTAD1	1027	0.0792043	0.0041718	0.00195063	0.0228929
RPL3	1028	-0.0820291	0.0149933	0.00195987	0.0229789
PKD2	1029	-0.0618682	0.000318792	0.00196711	0.0230258
TAOK2	1030	0.0111011	0.00790547	0.0019704	0.0230258
OGN	1031	0.0573483	0.00236948	0.00197079	0.0230258
YIF1B	1032	0.0834001	0.00108999	0.00197374	0.0230258
INPPL1	1033	0.0985228	0.00267711	0.00197416	0.0230258
SNRNP70	1034	0.0621575	0.00127683	0.00197594	0.0230258
ENOPH1	1035	-0.0304733	0.00763473	0.00197724	0.0230258
ZWILCH	1036	-0.0235176	0.00471279	0.00198967	0.0231482
MAN2C1	1037	0.00535147	0.00599913	0.0020019	0.023268
AKAP13	1038	0.0429348	0.0113233	0.00200487	0.0232801
ATP1B1	1039	0.0529617	0.0107163	0.00201544	0.0233803
SIRT7	1040	0.0540823	0.000564601	0.00202183	0.0234191
SLC30A5	1041	-0.0788606	0.000512287	0.00202268	0.0234191
COX15	1042	0.0902915	0.00261284	0.00203329	0.0235195
CCR6	1043	-0.0609439	0.00860521	0.00204141	0.0235907
PPFIBP1	1044	-0.024715	4.95189e-05	0.00204907	0.0236277
GEMIN6	1045	-0.0696592	0.00240521	0.00204973	0.0236277
CKLF	1046	-0.0463314	0.0270081	0.00205049	0.0236277
MS4A1	1047	-0.106023	0.00522672	0.00205982	0.0237125
THUMPD1	1048	-0.0303896	0.011686	0.00206474	0.0237464
VPS13B	1049	0.085169	0.000620214	0.00206823	0.0237639
UGP2	1050	-0.0510134	0.00538483	0.0020812	0.0238766
ACTN1	1051	0.157356	0.0085581	0.00208209	0.0238766
NET1	1052	-0.0675462	0.000387093	0.00208398	0.0238766
ZNF213	1053	0.0110042	0.00612748	0.00209388	0.0239673
S100A13	1054	0.0663951	0.00173518	0.00209811	0.0239929
TFDP1	1055	0.00130268	0.0120392	0.00211088	0.0241161
DAB2	1056	0.0461927	0.00785712	0.00212089	0.0242074
CKAP4	1057	0.118259	0.00595893	0.00212321	0.024211
ZMYND11	1058	-0.0834346	0.0168927	0.00212654	0.0242256
TSC22D1	1059	-0.0316231	0.0185221	0.00212851	0.0242256
FAM193B	1060	0.0335372	0.00250369	0.0021308	0.0242288
LARP1B	1061	-0.0171564	0.00274182	0.00213732	0.02428
MFN2	1062	0.0577777	0.00961524	0.00216208	0.0245382
PMEPA1	1063	-0.0403577	0.000138783	0.00216664	0.0245542
VRK1	1064	-0.00461268	0.00424341	0.00216757	0.0245542
WDR73	1065	0.0789944	0.000519669	0.0021729	0.0245842
ZNF789	1066	-0.0674175	0.000512303	0.00217529	0.0245842
DLG4	1067	0.0755382	0.000470494	0.00217633	0.0245842
TAF1	1068	-0.0253416	0.0017889	0.00219005	0.0246943
DARS2	1069	0.0271078	0.00488104	0.00219332	0.0246943
B2M	1070	-0.105524	0.0098782	0.00219417	0.0246943
PIGF	1071	-0.0885879	0.00101341	0.00219696	0.0246943
ECHDC3	1072	0.131	0.00139514	0.00219706	0.0246943
PIGP	1073	-0.0695738	0.000577782	0.00219851	0.0246943
GPATCH3	1074	0.0573771	0.00026235	0.0022016	0.0246943
VPS4A	1075	0.0432039	0.000945246	0.00220247	0.0246943
PTPN2	1076	-0.0185069	0.00786101	0.00220699	0.0247086
ARHGAP18	1077	-0.036857	0.000109614	0.00220784	0.0247086
MRPL20	1078	-0.0739226	0.000465519	0.00221047	0.024715
ATG7	1079	0.0941765	0.00164297	0.00221647	0.0247542
KLC1	1080	-0.0493159	0.000197963	0.00221979	0.0247542
BRSK1	1081	0.0961701	0.00080824	0.00222013	0.0247542
SAAL1	1082	-0.0314177	0.00211291	0.00222592	0.0247957
LANCL1	1083	-0.0973725	0.000812276	0.0022281	0.0247971
ABHD2	1084	0.0268542	0.00424185	0.002253	0.0250304
ELL	1085	0.0818224	0.00235277	0.00225379	0.0250304
MRRF	1086	0.0413121	0.00828421	0.00225603	0.0250304
SKIV2L2	1087	-0.033955	0.0072531	0.00225737	0.0250304
ATP9A	1088	-0.0961835	0.029075	0.00226015	0.0250382
MINA	1089	-0.00362589	0.00202582	0.00226682	0.0250887
UCK1	1090	-0.0460907	0.000704332	0.00226887	0.0250887
TXNDC9	1091	-0.00173635	0.00975569	0.00227173	0.0250973
ABR	1092	0.0513324	0.00703368	0.00227395	0.0250988
MARK2	1093	0.0848671	0.00932363	0.00228191	0.0251585
MVP	1094	0.0984807	0.000824562	0.00228353	0.0251585
OPRL1	1095	0.048145	0.00706096	0.0022902	0.025209
PPFIA1	1096	0.099337	0.000800326	0.00229893	0.0252622
ALG13	1097	-0.106489	0.000941192	0.00229923	0.0252622
TNNC2	1098	-0.0351687	0.000255068	0.00230362	0.0252874
PHKA1	1099	-0.0151296	0.00313152	0.0023118	0.0253541
SEMG1	1100	-0.0298724	0.000167149	0.00231548	0.0253546
YTHDC1	1101	-0.0917476	0.00407444	0.00231606	0.0253546
RERE	1102	0.129449	0.00139054	0.00232605	0.0254239
DAP3	1103	-0.0192255	0.00379915	0.00232661	0.0254239
PSMA6	1104	-0.177458	0.0332908	0.00232975	0.0254352
SNX25	1105	-0.042067	0.000848864	0.002334	0.0254436
CHCHD6	1106	-0.00961367	0.00135542	0.00233474	0.0254436
TRAF3IP3	1107	-0.0360297	0.00678694	0.00234759	0.0255605
VPS37B	1108	0.0291153	0.00903025	0.00236409	0.025717
R3HDM1	1109	0.0981292	0.0140009	0.00238095	0.025877
GNS	1110	0.083902	0.00455172	0.00239209	0.0259746
ALKBH3	1111	-0.0377437	0.00276052	0.00239721	0.0260068
WDR70	1112	-0.0423172	0.00142511	0.00240543	0.0260553
GRN	1113	0.146773	0.00200151	0.00240601	0.0260553
ZNF195	1114	0.0151118	0.0076336	0.00240887	0.026063
NSMCE4A	1115	-0.099519	0.00140566	0.00241207	0.0260742
COBLL1	1116	-0.10805	0.000899621	0.00241824	0.0261174
TBXAS1	1117	0.0990411	0.00348124	0.00242173	0.0261317
ITPK1	1118	0.0654149	0.0119703	0.0024261	0.0261424
RRM1	1119	-0.0431615	0.007235	0.00242706	0.0261424
NOL7	1120	-0.0235321	0.00719279	0.00243523	0.026207
NEK1	1121	0.0066249	0.00184476	0.00244089	0.0262445
FOXO3	1122	0.0878491	0.0276273	0.00244544	0.0262699
IRX3	1123	-0.00819126	0.00349865	0.00245856	0.0263735
RAD9A	1124	0.0595094	0.00100365	0.00246024	0.0263735
TAF1C	1125	0.0919608	0.00425653	0.00246164	0.0263735
ISLR	1126	-0.0172667	0.00905988	0.00246779	0.0264159
ZNF197	1127	0.020864	0.00428808	0.00247281	0.026437
BZW2	1128	-0.00631919	0.00745062	0.00247507	0.026437
RNF31	1129	0.074776	0.00504236	0.00247634	0.026437
MAP1LC3C	1130	-0.0184293	0.00235212	0.00248025	0.0264552
SLC16A3	1131	0.105338	0.00600675	0.00252878	0.0269459
RRAGC	1132	0.0253519	0.00506093	0.00253072	0.0269459
GAPT	1133	-0.132849	0.00152785	0.00253628	0.0269575
BNIP1	1134	-0.0609537	0.00154842	0.00253628	0.0269575
ZNF598	1135	0.0544804	0.00233136	0.00254073	0.026981
IRF7	1136	0.11077	0.0126369	0.00256108	0.0271444
ASNSD1	1137	-0.0527245	0.0225571	0.0025614	0.0271444
CCDC50	1138	-0.0977439	0.000821207	0.00256287	0.0271444
ZNF407	1139	0.00175607	0.0025924	0.00256524	0.0271456
HVCN1	1140	-0.0806033	0.000571031	0.00257934	0.0272708
BCAP29	1141	-0.00559356	0.00279691	0.00259532	0.0273794
CDC23	1142	-0.0183252	0.00521303	0.00259593	0.0273794
FGFRL1	1143	0.0114721	0.00275842	0.00259642	0.0273794
ALG5	1144	-0.0500289	0.00364566	0.00260984	0.0274831
PTPN4	1145	-0.0791518	0.0102981	0.00261081	0.0274831
PRLR	1146	0.0418753	0.000428765	0.00261531	0.0275046
FMNL1	1147	0.0302224	0.00600216	0.00261742	0.0275046
TPT1	1148	-0.111659	0.0198468	0.00262658	0.0275562
BOK	1149	0.00207409	0.00482925	0.0026269	0.0275562
CLCN7	1150	0.115944	0.00123469	0.0026309	0.0275742
WWP1	1151	-0.0122187	0.0151807	0.00263498	0.0275928
SYTL3	1152	0.0848027	0.00397773	0.00263884	0.0276093
STRBP	1153	-0.0593486	0.000306073	0.0026497	0.0276989
SCNN1D	1154	-0.0322291	0.00412966	0.00265637	0.0277446
CD19	1155	-0.105498	0.00164079	0.00265972	0.0277555
MAPK8IP3	1156	0.0232225	0.00716408	0.00266422	0.0277784
LOXHD1	1157	-0.0131752	0.00324486	0.00267813	0.0278993
COMMD8	1158	-0.0998547	0.0211296	0.00270117	0.028115
TMEM167A	1159	-0.008545	0.00565437	0.00271903	0.0282765
CBL	1160	0.0791605	0.00157674	0.0027378	0.0284012
MAGI1	1161	0.0397229	0.000139175	0.00273901	0.0284012
MMP25	1162	0.138365	0.0171782	0.00274021	0.0284012
PHKA2	1163	0.0623271	0.00663381	0.00274044	0.0284012
ATP5H	1164	-0.0628124	0.0060126	0.00275589	0.0285367
HDHD2	1165	-0.0427476	0.00325275	0.00276238	0.0285434
P2RX5	1166	-0.0942988	0.00511664	0.0027629	0.0285434
RABEP1	1167	-0.0250809	0.0192777	0.00276826	0.0285434
SYN2	1168	-0.0105353	0.00249624	0.00277086	0.0285434
MAZ	1169	0.0646971	0.000369254	0.00277123	0.0285434
BCLAF1	1170	-0.143829	0.00487694	0.00277154	0.0285434
RNF170	1171	0.00968207	0.00638025	0.00277312	0.0285434
SLC30A9	1172	-0.032728	0.00870996	0.00278247	0.0285921
DMWD	1173	0.0109461	0.00495514	0.00278259	0.0285921
AKT1	1174	0.0317819	0.00714182	0.00278814	0.0286248
PEX6	1175	0.101272	0.000897983	0.00279652	0.0286864
TECPR1	1176	0.0547596	0.00453953	0.00280947	0.0287663
PSMA5	1177	-0.0397177	0.00537047	0.0028098	0.0287663
EAF2	1178	-0.0640406	0.00033197	0.00281147	0.0287663
EDEM2	1179	0.058103	0.00136425	0.00283099	0.0289392
TMEM144	1180	0.198556	0.0403047	0.00283318	0.0289392
SPA17	1181	-0.0406333	0.000130648	0.00285498	0.0291372
TCERG1	1182	0.00918952	0.0046902	0.00286112	0.0291752
CLPX	1183	-0.0130671	0.00382505	0.00286367	0.0291765
SLC35B3	1184	0.0159383	0.0067457	0.002871	0.0292265
TTC17	1185	0.0747093	0.000944292	0.00287537	0.0292463
PQLC3	1186	0.00995956	0.0147305	0.00288131	0.029282
ARHGAP24	1187	0.0327916	0.00666304	0.00289477	0.029394
KIAA1279	1188	-0.0208479	0.00306283	0.00289899	0.0294098
PTPN7	1189	0.0374064	0.000739243	0.00290495	0.0294098
LEPROT	1190	0.0830215	0.00727549	0.00290608	0.0294098
ODF2L	1191	0.0421964	0.00958343	0.00290668	0.0294098
PSMB7	1192	-0.0327416	0.00481607	0.00290853	0.0294098
DIDO1	1193	0.00225093	0.0038924	0.00291777	0.0294785
SELPLG	1194	0.103834	0.00516836	0.00292128	0.0294793
PNPLA6	1195	0.0432875	0.00655168	0.00292282	0.0294793
TSC22D3	1196	0.0695174	0.0116468	0.00292519	0.0294793
CLNS1A	1197	-0.0922565	0.00933697	0.00293233	0.0295266
SPATA13	1198	0.127467	0.00147172	0.0029376	0.029555
TLR3	1199	0.0556985	0.00537964	0.0029444	0.0295988
TMEM126B	1200	-0.0569486	0.0154828	0.00295738	0.0296853
CLDN15	1201	0.0794182	0.000554644	0.00295794	0.0296853
PCDH10	1202	-0.00123435	0.00123971	0.00296375	0.029714
UBTD1	1203	0.0596176	0.00515919	0.00296631	0.029714
STRN4	1204	0.0219236	0.00447676	0.0029682	0.029714
KRCC1	1205	-0.0659137	0.00598168	0.00297447	0.0297521
APBB1IP	1206	0.122353	0.00445653	0.00298803	0.0298608
DAGLB	1207	0.0167727	0.00555666	0.00299029	0.0298608
GPR137	1208	0.0472017	0.00725306	0.00301212	0.0300329
VPREB3	1209	-0.206636	0.00372722	0.00301251	0.0300329
TIMP2	1210	0.118294	0.00280581	0.00301979	0.0300357
VAMP2	1211	0.00783232	0.00735505	0.00302002	0.0300357
CAST	1212	0.0554044	0.000283652	0.00302027	0.0300357
GNPAT	1213	-0.0589066	0.00160089	0.00302727	0.0300806
DOK2	1214	0.0686702	0.00301178	0.00303414	0.030124
RTKN2	1215	0.132975	0.0286073	0.0030419	0.0301762
PARM1	1216	-0.0155769	0.00122833	0.00304974	0.0301801
ARID3A	1217	0.1003	0.00869741	0.00305105	0.0301801
DYRK4	1218	-0.046242	0.00218852	0.00305181	0.0301801
SQSTM1	1219	0.0232727	0.0113414	0.00305232	0.0301801
SMC2	1220	-0.0214488	0.00229023	0.00306241	0.030225
MYO1G	1221	0.0991975	0.00398349	0.00306344	0.030225
SLC26A8	1222	0.155113	0.00209154	0.00306438	0.030225
NRBP2	1223	0.000538793	0.00466624	0.00306902	0.030227
SCAP	1224	0.078891	0.011696	0.0030696	0.030227
DNAJB11	1225	-0.0552623	0.00377088	0.0030831	0.0303352
GTF3C3	1226	-0.000538927	0.00865071	0.0030876	0.0303547
VPS8	1227	0.0659515	0.00354772	0.0030943	0.0303895
RPS3A	1228	-0.19237	0.0612294	0.0030965	0.0303895
SUV420H1	1229	0.0125166	0.0071006	0.00310128	0.0303895
DYNC2LI1	1230	-0.00915173	0.0014778	0.00310219	0.0303895
F8A1	1231	0.0804447	0.00747992	0.00310375	0.0303895
RBX1	1232	-0.139365	0.0146118	0.0031166	0.0304906
DTX3L	1233	0.0781058	0.000557478	0.00313917	0.0306865
FAM103A1	1234	-0.0660017	0.00219985	0.00314335	0.0307024
ZNF324	1235	0.0409861	0.00586089	0.00314821	0.030725
ST8SIA1	1236	-0.0115817	0.00190941	0.00315626	0.0307786
RAB11A	1237	-0.051461	0.0178326	0.00316253	0.0308036
NADSYN1	1238	0.0665144	0.000853696	0.0031646	0.0308036
POLR1E	1239	-0.0340124	0.00468184	0.00316775	0.0308036
CMTM3	1240	0.074558	0.000687888	0.00316904	0.0308036
CSE1L	1241	-0.0419756	0.00557822	0.00317711	0.0308572
NUDT22	1242	0.0645442	0.000374526	0.00318345	0.0308938
LYAR	1243	-0.0479327	0.0104455	0.00319183	0.0309502
MTMR8	1244	0.0013291	0.00100296	0.00319545	0.0309524
PPP3CB	1245	-0.116518	0.00121812	0.0031972	0.0309524
PBX3	1246	0.00427898	0.00835498	0.00320608	0.0310135
FAM13A	1247	0.0903919	0.000700926	0.00320984	0.031025
CD72	1248	-0.110715	0.00110037	0.00323571	0.03125
CCDC25	1249	-0.0672559	0.000374903	0.00324768	0.0313405
ANXA11	1250	0.0475556	0.00545913	0.00325298	0.0313666
PRR14	1251	0.0404048	0.00700038	0.00325592	0.0313697
FAM53C	1252	0.0879501	0.00940623	0.00325935	0.0313778
PSMG1	1253	-0.0097916	0.00569701	0.00326317	0.0313895
LAMA5	1254	-0.0754687	0.00306884	0.00327047	0.0314346
NDC80	1255	-0.0242893	0.000911023	0.00327523	0.0314552
SETX	1256	0.0272257	0.00314354	0.00327891	0.0314655
NOL12	1257	0.0718664	0.00158494	0.00328188	0.031469
CNTNAP2	1258	-0.0337672	0.00726864	0.00329035	0.0315012
SLC16A5	1259	0.0441032	0.00307343	0.00329047	0.0315012
TIRAP	1260	0.0042335	0.00502379	0.00329775	0.0315306
FAM173B	1261	-0.0588559	0.000285284	0.00329877	0.0315306
HLX	1262	0.102088	0.00712892	0.00330604	0.0315751
TOMM20	1263	-0.0606637	0.00857002	0.0033207	0.0316899
SLC15A3	1264	0.100194	0.00643042	0.00332497	0.0317052
NIPSNAP3A	1265	-0.0564443	0.000268475	0.00332828	0.0317052
CLEC4A	1266	-0.0998358	0.00697923	0.00333282	0.0317052
RBM41	1267	-0.0396929	0.000128413	0.00333283	0.0317052
SMARCD3	1268	0.0160768	0.00305987	0.00334326	0.0317542
USP48	1269	0.00591029	0.00527255	0.00334342	0.0317542
CA4	1270	0.166936	0.00600718	0.00334588	0.0317542
HMGN3	1271	-0.0270057	6.18479e-05	0.00334867	0.0317557
GPSM3	1272	0.0698799	0.00748713	0.00335535	0.0317941
NLRP12	1273	0.0867633	0.00330766	0.00338817	0.0320705
TTC16	1274	-0.00906432	0.00344355	0.00338984	0.0320705
ZNF219	1275	0.00711884	0.00136843	0.00341122	0.0322474
THRA	1276	0.0546338	0.00024903	0.0034268	0.0323487
SLA2	1277	0.0393462	0.00441782	0.0034273	0.0323487
GIPC1	1278	0.00704829	0.00487647	0.00344339	0.0324751
FZD7	1279	0.0541688	0.0116136	0.00345362	0.0325055
VCX2	1280	-0.0128117	0.0019438	0.0034554	0.0325055
CHDH	1281	-0.0503768	0.00263211	0.00345668	0.0325055
ZDHHC6	1282	-0.0447403	0.00213357	0.00345844	0.0325055
SNAI3	1283	0.0653553	0.000364549	0.0034621	0.0325055
CKS2	1284	0.00481541	0.0105815	0.0034639	0.0325055
VPS72	1285	0.057352	0.000297407	0.0034655	0.0325055
SPSB3	1286	0.0359433	0.00732312	0.00347568	0.0325757
SLC12A9	1287	0.0551988	0.00763351	0.0034858	0.0326254
SREBF2	1288	-0.00770272	0.00451796	0.00349006	0.0326254
PIAS1	1289	0.0637833	0.00171514	0.00349122	0.0326254
OSTC	1290	-0.085409	0.00704948	0.00349493	0.0326254
DVL3	1291	0.065516	0.000403231	0.00349619	0.0326254
CNNM3	1292	0.087977	0.00405605	0.00349829	0.0326254
EXTL3	1293	0.0438007	0.00803506	0.00349993	0.0326254
XIAP	1294	0.00585149	0.00289293	0.0035083	0.0326782
STAMBPL1	1295	-0.104624	0.00363724	0.00351592	0.0327239
RRP12	1296	0.094794	0.00466069	0.00354715	0.0329722
AP1S2	1297	-0.142731	0.00297506	0.00354807	0.0329722
SLC22A4	1298	0.107196	0.00331672	0.00355962	0.033054
BICD2	1299	0.0422251	0.00644082	0.00356258	0.033056
RNF7	1300	-0.041253	0.0100472	0.00358296	0.0332196
CHRNA2	1301	-0.00886099	0.00622839	0.00360135	0.0333644
NLRX1	1302	0.0840644	0.00269998	0.00361489	0.0334609
SNAPC5	1303	0.0199989	0.00317453	0.00361732	0.0334609
SPI1	1304	0.114279	0.0065483	0.0036201	0.033461
KCNIP4	1305	0.0195557	0.0019761	0.003628	0.0335083
TOMM70A	1306	-0.0336094	0.00559808	0.00365566	0.0337166
GLA	1307	0.0590619	0.00415073	0.00365705	0.0337166
ATXN7L3	1308	0.0408426	0.00361577	0.00365895	0.0337166
GOLGA5	1309	-0.0628747	0.000956305	0.00368349	0.0339168
TALDO1	1310	0.0813989	0.000560893	0.00369054	0.0339558
TMEM170A	1311	-0.0624279	0.000336686	0.00369479	0.0339689
ASAH1	1312	0.0597395	0.000354888	0.00370876	0.0340714
ACVR1B	1313	0.0260163	0.00441415	0.00372466	0.0341453
CDIPT	1314	0.0351386	0.00516508	0.0037249	0.0341453
REXO2	1315	-0.0562571	0.00834796	0.00372531	0.0341453
ZZEF1	1316	0.0562059	0.00196157	0.00373161	0.0341771
MED28	1317	-0.0988037	0.000896437	0.00374464	0.0342534
UPF1	1318	0.0439548	0.00573951	0.0037494	0.0342534
SHISA4	1319	-0.0985024	0.0226644	0.00374944	0.0342534
GPATCH8	1320	-0.0368262	0.000119082	0.00375134	0.0342534
FKTN	1321	0.120502	0.00133724	0.00375842	0.0342534
PLCD1	1322	0.0677172	0.00040017	0.00376017	0.0342534
CDKL3	1323	-0.0258792	0.000177202	0.00376154	0.0342534
ANKRD49	1324	-0.0604628	0.012494	0.0037644	0.0342534
BCL2L12	1325	0.0250872	0.00280036	0.00376551	0.0342534
ZNF544	1326	-0.00185974	0.00622561	0.00376856	0.0342553
CSNK1G2	1327	0.137058	0.0113096	0.00377857	0.0343203
TMEM127	1328	0.0508354	0.00129471	0.00379291	0.0344064
TNFSF13B	1329	0.109467	0.0109084	0.00379502	0.0344064
ISCA2	1330	-0.0483104	0.000206855	0.00379661	0.0344064
LIPJ	1331	-0.0211285	0.00245592	0.00380004	0.0344116
SRR	1332	0.0119202	0.00275597	0.00380875	0.0344646
AIRE	1333	-0.00346756	0.00919286	0.00381692	0.034508
IL2RG	1334	0.0665817	0.000411378	0.00381927	0.034508
RNASEH2B	1335	-0.0319443	0.00229901	0.00382816	0.0345451
ZNF571	1336	0.0461568	0.00146779	0.00382951	0.0345451
VPS41	1337	-0.0339868	0.00578941	0.00383238	0.0345451
ZNF513	1338	0.0583995	0.00264656	0.00383484	0.0345451
RNF24	1339	0.14197	0.00759734	0.00383964	0.0345625
UPP1	1340	0.0413486	0.00506205	0.00385493	0.0346548
ARHGEF2	1341	0.0506136	0.00700164	0.00385564	0.0346548
SQLE	1342	-0.0532501	0.000271227	0.00386004	0.0346685
MKRN2	1343	-0.0825068	0.000667473	0.00387847	0.034808
FOXJ3	1344	-0.0825754	0.000791646	0.00388742	0.0348624
KIAA1715	1345	0.0871155	0.000678804	0.0038904	0.0348632
SMAP1	1346	-0.0111046	0.00520312	0.00391145	0.0350155
DNAJB5	1347	-0.08709	0.00799421	0.0039132	0.0350155
SMC6	1348	-0.0573288	0.000295649	0.00393649	0.0351877
CALML4	1349	-0.0949675	0.000863693	0.00393831	0.0351877
GMNN	1350	-0.0381083	0.000126936	0.00394253	0.0351877
POLE3	1351	-0.0703413	0.00157467	0.00394413	0.0351877
TPK1	1352	-0.0385463	0.00533073	0.0039524	0.0352041
SSH2	1353	0.0634293	0.0086951	0.00395648	0.0352041
RASA1	1354	0.0497924	0.0218881	0.00395914	0.0352041
UBL5	1355	-0.0885324	0.00606708	0.00396095	0.0352041
PHKG2	1356	0.0695832	0.000453618	0.00396264	0.0352041
SLC24A4	1357	0.0974277	0.000858954	0.00396349	0.0352041
ANAPC10	1358	-0.0824715	0.0005869	0.00398403	0.035355
ZNF135	1359	-0.0340311	0.00011543	0.00399002	0.035355
PHC2	1360	0.131572	0.00213958	0.00399134	0.035355
ARSA	1361	0.0969848	0.000858955	0.00399222	0.035355
ANP32B	1362	-0.0691544	0.000573589	0.00400603	0.0354513
NOXO1	1363	-0.000368063	0.00464801	0.0040101	0.0354613
NPR1	1364	-0.0255157	0.00311755	0.00401849	0.0355094
ZUFSP	1365	-0.0311484	0.00375243	0.00405037	0.0357566
COX19	1366	0.0820201	0.00101055	0.00405239	0.0357566
PKP3	1367	-0.00739933	0.00110426	0.00405818	0.0357814
CCT6A	1368	-0.0368032	0.00264854	0.00407521	0.0359054
STK40	1369	0.048795	0.00947529	0.00408475	0.0359432
UBR7	1370	-0.0337375	0.00273296	0.00408547	0.0359432
ANKMY2	1371	-0.0554938	0.00224051	0.00410288	0.03607
RRBP1	1372	0.0891826	0.000784942	0.00410758	0.0360745
RNF20	1373	-0.0601472	0.000811297	0.00410937	0.0360745
GGNBP2	1374	-0.0560428	0.00657388	0.0041313	0.0362406
ZNF692	1375	0.0710402	0.00089603	0.00414057	0.0362755
PHACTR2	1376	0.0771319	0.000570295	0.0041413	0.0362755
ITGB2	1377	0.0804137	0.00232959	0.00414952	0.0363211
SMEK2	1378	0.0382202	0.0147839	0.00415423	0.0363359
ZNF259	1379	-0.0502577	0.000231446	0.00416581	0.0364108
XPO6	1380	0.0915523	0.00900233	0.00417389	0.0364476
OCIAD1	1381	-0.0447125	0.00769177	0.00417607	0.0364476
MID1IP1	1382	0.0319509	0.00732497	0.00419291	0.0365681
PRNP	1383	-0.0487113	0.023285	0.00419679	0.0365755
ITGA5	1384	0.103109	0.00581225	0.00420101	0.0365858
KCNMB1	1385	-0.00158146	0.00533589	0.00420754	0.0366162
ALDOA	1386	0.083477	0.00294817	0.004211	0.0366199
GGA3	1387	0.0344601	0.00571039	0.00421514	0.0366295
TPST1	1388	0.160286	0.00233046	0.0042195	0.0366334
SMAD3	1389	-0.0554034	0.00030122	0.00422425	0.0366334
LRP1	1390	0.0418156	0.000175326	0.00423143	0.0366334
HCLS1	1391	0.122115	0.0014292	0.00423241	0.0366334
FXN	1392	0.0678739	0.00652203	0.00423265	0.0366334
HRSP12	1393	-0.0562814	0.000275112	0.00423383	0.0366334
EDC4	1394	0.0299028	0.00592064	0.00423951	0.0366485
SLC6A6	1395	0.0947277	0.000829917	0.00424166	0.0366485
LIN7B	1396	0.0238196	0.00351316	0.00425194	0.0367111
RHBDF2	1397	0.0638285	0.00799081	0.00427065	0.0367906
ADCY4	1398	0.0559231	0.00382721	0.00427091	0.0367906
TRNT1	1399	-0.0228643	0.00368082	0.00427329	0.0367906
VAMP7	1400	-0.0800514	0.009821	0.00427455	0.0367906
CASP4	1401	-0.0192375	0.0176572	0.00427642	0.0367906
HGS	1402	0.0838825	0.000679786	0.00429681	0.0369268
PNPLA8	1403	-0.0561483	0.00331093	0.00430031	0.0369268
ZNF408	1404	0.0372867	0.00167026	0.00430339	0.0369268
MET	1405	-0.00450218	0.00218143	0.00430546	0.0369268
ARID3B	1406	0.0739607	0.000573394	0.00431061	0.0369268
SOCS4	1407	0.0602255	0.0133947	0.00431261	0.0369268
TBX3	1408	0.0256722	6.32976e-05	0.00431369	0.0369268
PPA2	1409	-0.0391125	0.00945115	0.00432181	0.036964
SH3BGRL3	1410	0.0808469	0.006082	0.00432417	0.036964
CKB	1411	-0.0857982	0.00523646	0.0043297	0.036985
COBL	1412	-0.0475858	0.0018617	0.0043372	0.0370229
CASP3	1413	-0.0380032	0.0188477	0.00434271	0.0370436
MED24	1414	0.0748826	0.000558082	0.00435469	0.0371196
CTBS	1415	0.0740862	0.00225337	0.00437237	0.0372439
JUND	1416	0.03377	0.00970189	0.00438141	0.0372946
CLDN9	1417	0.0730625	0.00132064	0.00438912	0.0373134
SCAMP1	1418	-0.00822781	0.0135754	0.00438983	0.0373134
FAM19A2	1419	-0.0210889	4.48994e-05	0.00439389	0.0373134
VHL	1420	0.0177209	0.00771478	0.00439601	0.0373134
CRYM	1421	-0.0729239	0.0129386	0.00440265	0.0373435
CPSF3L	1422	0.0151168	0.00273447	0.00440587	0.0373445
PCDHGC3	1423	-0.0200982	0.00160265	0.00442299	0.03746
NSFL1C	1424	0.0495847	0.00439436	0.00442571	0.03746
PNKP	1425	0.0549072	0.0038174	0.00443255	0.0374916
CUL4A	1426	-0.0978017	0.00093626	0.00444282	0.0375519
AFF1	1427	0.0848917	0.000672439	0.00444668	0.0375519
LRRC40	1428	-0.0210182	0.00151427	0.00444903	0.0375519
RACGAP1	1429	-0.0584328	0.00230432	0.00445821	0.0375695
COL8A2	1430	0.0467141	0.0114103	0.00446078	0.0375695
GLUD1	1431	-0.0185775	0.00909405	0.00446267	0.0375695
CTRL	1432	0.0618713	0.000346098	0.00446702	0.0375695
SASS6	1433	0.0628407	0.00122606	0.00447245	0.0375695
PCBP2	1434	0.0468013	0.00607788	0.00447286	0.0375695
PGLS	1435	0.0680828	0.00221019	0.00447293	0.0375695
SLC26A11	1436	0.0586998	0.000311283	0.00447949	0.0375984
RHOT2	1437	0.0716047	0.000947001	0.00448522	0.0376096
ATG9A	1438	0.0415417	0.01153	0.00448707	0.0376096
DYSF	1439	0.166929	0.0133651	0.00449678	0.0376503
ZNF169	1440	0.00534712	0.00171281	0.00449817	0.0376503
CSTF3	1441	-0.0551684	0.000271249	0.00451859	0.037795
SPAG7	1442	-0.0553049	0.00194193	0.00452727	0.0378413
FGFR1OP2	1443	-0.0263475	0.00563837	0.00453478	0.0378778
CCDC77	1444	-0.0130951	0.00369131	0.00455065	0.0379784
TNFSF14	1445	0.0791469	0.00659083	0.00455582	0.0379784
PRDX3	1446	-0.00854463	0.0131917	0.00455628	0.0379784
FANCB	1447	0.0281961	0.00354854	0.00456696	0.0380411
ARF1	1448	0.0233086	0.00200012	0.00457783	0.0381054
NUAK2	1449	0.048915	0.0100625	0.0045846	0.0381354
KLHL21	1450	0.0188608	0.00464811	0.00458914	0.0381468
NDUFS3	1451	-0.0471384	0.00414823	0.00460467	0.0382445
PLAUR	1452	0.108462	0.00114003	0.00460723	0.0382445
APEX1	1453	-0.0613388	0.00168101	0.00461959	0.0383207
SNAPC3	1454	-0.0040352	0.00422014	0.00463387	0.0383926
RNF122	1455	0.0192634	0.00295045	0.00463463	0.0383926
MRPL47	1456	-0.0174877	0.00191905	0.00464314	0.0384366
THOC7	1457	-0.0544926	0.00730782	0.00465582	0.0385152
RPH3AL	1458	-0.040523	0.00454325	0.00466518	0.0385399
BRCC3	1459	-0.00352434	0.0035793	0.00466815	0.0385399
EID3	1460	-0.0411944	0.000240622	0.00467148	0.0385399
UBE2C	1461	0.0364619	0.000527504	0.0046716	0.0385399
HBP1	1462	0.0375621	0.00973971	0.00467883	0.0385731
PYHIN1	1463	-0.0243794	0.0107723	0.00468433	0.0385921
MZF1	1464	0.0150243	0.00574238	0.00469586	0.0386607
MFF	1465	0.0228839	0.00480084	0.00469932	0.0386627
PLEKHA5	1466	-0.021065	4.17368e-05	0.00470752	0.0387037
ELMO2	1467	0.0459213	0.000219062	0.004714	0.0387307
FXYD6	1468	0.0972867	0.00679183	0.00472451	0.0387906
ENOX2	1469	-0.05756	0.00129703	0.00479229	0.0393203
E2F7	1470	-0.0418525	0.00154445	0.00480515	0.0393958
CR2	1471	-0.0479112	0.000686043	0.00480804	0.0393958
HSP90B1	1472	-0.0524017	0.00845373	0.00483464	0.0395869
PIN4	1473	-0.0524572	0.000252577	0.00485795	0.0397508
MAN1A2	1474	0.00107192	0.00232064	0.00486694	0.0397973
VSNL1	1475	-0.0168139	0.00144925	0.00487564	0.0398414
TRIO	1476	-0.030582	0.00509477	0.00488296	0.0398742
ACTR8	1477	0.0345735	0.00461755	0.00488729	0.0398826
ATP6V1F	1478	0.0704065	0.00208179	0.0049045	0.0399738
KRT8	1479	-0.0505532	0.00192639	0.00490838	0.0399738
SLC27A1	1480	0.082893	0.000681952	0.00490842	0.0399738
CROT	1481	0.00396228	0.00218104	0.0049145	0.0399907
ARPC5L	1482	-0.020282	0.00433996	0.00491771	0.0399907
CSPP1	1483	0.0397192	0.0124913	0.00492045	0.0399907
CREBBP	1484	0.016736	0.00885732	0.00492526	0.0400028
CAMK4	1485	0.000864439	0.0028495	0.00493446	0.0400496
TAPBPL	1486	0.077432	0.000588162	0.00493845	0.0400496
LILRA2	1487	0.147271	0.00215735	0.00494099	0.0400496
RPS14	1488	-0.0385066	0.0101817	0.00497019	0.0402592
TMEM70	1489	-0.0169718	0.00129963	0.0049767	0.0402702
TUBA1A	1490	0.0353014	0.00638125	0.00497887	0.0402702
PILRA	1491	0.0934075	0.00438039	0.00498269	0.0402702
MAST3	1492	0.0928233	0.00822349	0.00498491	0.0402702
GDI1	1493	0.0751304	0.00203667	0.00500318	0.0403907
VPS45	1494	0.0199714	0.00566404	0.00501094	0.0404263
CPEB4	1495	0.05013	0.0120412	0.00501711	0.040449
NKAIN3	1496	-0.0142941	0.00133656	0.00504072	0.0405855
CD300A	1497	0.0745655	0.000548591	0.00504078	0.0405855
RIBC1	1498	-0.036622	0.00328206	0.00505809	0.0406977
TPD52	1499	-0.0687248	0.000432474	0.00506348	0.0407139
ZNF318	1500	-0.0291884	0.00252139	0.00507126	0.0407492
ROCK1	1501	-0.0658738	0.00203336	0.00508214	0.0408095
MRPS30	1502	-0.0552616	0.00175131	0.00509061	0.0408247
TRIM27	1503	0.0250134	0.0020801	0.00509081	0.0408247
SLC44A2	1504	0.0569579	0.00927235	0.00511842	0.0410091
EPOR	1505	0.070346	0.000465365	0.0051206	0.0410091
NUDT9	1506	-0.0424399	0.00210974	0.00512561	0.0410219
RNF180	1507	0.0221664	4.98964e-05	0.00514154	0.041097
CIDEB	1508	0.0864086	0.000742956	0.00514182	0.041097
SEBOX	1509	-0.0150406	0.0015514	0.00515826	0.0412012
ERBB2	1510	-0.0370642	0.00326574	0.00517662	0.0413059
CIAO1	1511	0.0178519	0.00676854	0.00517823	0.0413059
CANT1	1512	0.0485407	0.00741635	0.00518412	0.0413255
LSM7	1513	-0.0541581	0.00764717	0.0051906	0.0413304
CEP63	1514	-0.114153	0.00132693	0.00519285	0.0413304
EXOSC3	1515	0.00358574	0.0094079	0.00519805	0.0413304
TFB2M	1516	-0.0758155	0.00288909	0.00520099	0.0413304
CAPN2	1517	0.00817791	0.0037869	0.00520209	0.0413304
MLH1	1518	-0.0537479	0.000291616	0.0052053	0.0413304
NUBPL	1519	0.0788395	0.00179242	0.00521319	0.0413658
RALA	1520	-0.0596551	0.0077896	0.00522009	0.0413933
LILRB4	1521	0.0711635	0.000507314	0.00522559	0.0414097
RPP40	1522	-0.0541889	0.000293201	0.00523998	0.0414964
FAM175B	1523	-0.0497111	0.0015622	0.00525039	0.0415515
CECR6	1524	0.125733	0.00255739	0.00526508	0.0416405
TNK2	1525	0.0404009	0.00563586	0.00527034	0.0416547
E2F3	1526	-0.0398367	0.0112223	0.00527451	0.0416603
PCNXL3	1527	0.0743439	0.00055341	0.0052845	0.0417035
PLP2	1528	0.0755662	0.000569022	0.00528869	0.0417035
ALCAM	1529	-0.0674208	0.000452183	0.00529036	0.0417035
EIF1AX	1530	-0.0477639	0.000198444	0.00529706	0.0417117
ZER1	1531	0.00298538	0.00620551	0.00529832	0.0417117
BIK	1532	-0.014689	0.00142142	0.00534299	0.0420121
HNRNPC	1533	-0.0545766	0.00120046	0.00534407	0.0420121
TOM1L2	1534	0.0089596	0.00132622	0.00534692	0.0420121
TRDN	1535	0.036998	0.000150741	0.00536728	0.042091
SLC25A44	1536	0.0264096	0.00953364	0.00536857	0.042091
IKBKB	1537	0.0623853	0.000385744	0.00536978	0.042091
DNAH1	1538	0.0611565	0.000921624	0.00537095	0.042091
SDK1	1539	5.8844e-05	0.00077822	0.00540019	0.0422917
MRPL15	1540	-0.0578171	0.000362366	0.00540356	0.0422917
MAPT	1541	-0.014458	0.00119411	0.00541105	0.0423228
CD86	1542	0.0182078	0.00268765	0.00541715	0.042343
ZDHHC16	1543	0.0626211	0.000405392	0.00542292	0.0423607
NFKBIA	1544	0.0897414	0.00445791	0.0054352	0.042429
HSPA9	1545	-0.0318199	0.00497238	0.00544474	0.042476
SIPA1	1546	0.0780637	0.00499281	0.005457	0.0425441
SHF	1547	-0.0144857	0.00123928	0.00546848	0.042606
TKT	1548	0.0683498	0.00971284	0.00549892	0.0428155
GLOD4	1549	-0.0342891	0.00501674	0.00553288	0.0430521
AGL	1550	-0.0485336	0.00863909	0.00555475	0.0431945
BAIAP2	1551	-0.0445709	0.00137934	0.00556816	0.0432708
EMILIN2	1552	0.111693	0.00129359	0.00557552	0.0433001
CNOT7	1553	0.0187877	0.0109956	0.00558849	0.0433676
MYL12A	1554	-0.0450562	0.00460907	0.00559141	0.0433676
FHOD1	1555	0.0746905	0.000551874	0.00560991	0.0434624
PRDM9	1556	0.0693216	0.000483233	0.00561341	0.0434624
TMEM39A	1557	0.0370865	0.00443547	0.00561445	0.0434624
FANCG	1558	0.0655361	0.000410665	0.00563218	0.0435717
TBC1D20	1559	0.0476053	0.00106824	0.00563792	0.0435881
SAMD3	1560	-0.0683217	0.00902527	0.00564921	0.0436474
GFM2	1561	0.0423463	0.00602964	0.00566188	0.0437172
HIST1H2AM	1562	-0.0117551	0.00173044	0.00566701	0.0437288
UFM1	1563	-0.105291	0.00105638	0.00568864	0.0438636
KCTD12	1564	0.11708	0.0014412	0.00569631	0.0438636
NAP1L4	1565	-0.00864971	0.00803575	0.00569651	0.0438636
TNFAIP8	1566	-0.0311803	0.00900189	0.00569903	0.0438636
GADD45B	1567	0.0802034	0.000643219	0.00570271	0.0438639
RIOK1	1568	-0.00446586	0.00335672	0.00572997	0.0440455
CFH	1569	0.0361239	0.0101427	0.0057436	0.0441221
P2RX1	1570	0.0392526	0.0129361	0.00575894	0.0442118
STRN	1571	0.00257968	0.00632828	0.00576664	0.0442427
PPTC7	1572	0.0801724	0.000665265	0.00578082	0.0443233
DTX2	1573	0.0328498	0.00298406	0.00581852	0.044584
CNTN5	1574	-0.0236611	6.00248e-05	0.00583267	0.0446573
NUP54	1575	-0.00249476	0.0131449	0.0058355	0.0446573
KPNA4	1576	-0.0419648	0.0106256	0.00584171	0.0446765
ASGR1	1577	0.115018	0.0013285	0.00584736	0.0446914
NAP1L1	1578	-0.122219	0.00522216	0.0058616	0.0447718
TRMT11	1579	0.0257008	0.00816329	0.00586681	0.0447832
ZNF700	1580	-0.0734205	0.00901271	0.00587274	0.0448001
HIST1H1C	1581	-0.0276284	0.0178441	0.00588026	0.0448291
PPIH	1582	-0.0400885	0.00208608	0.00589721	0.0449299
LRRC23	1583	0.00759144	0.00127534	0.00590587	0.0449486
GCNT1	1584	0.00338223	0.00495639	0.00590713	0.0449486
NSUN2	1585	-0.00364972	0.0097924	0.00591664	0.0449926
SYT7	1586	-0.00975707	0.00182821	0.00593813	0.0451276
IGFBP4	1587	-0.046938	0.000508157	0.00594345	0.0451395
ZBED5	1588	-0.0833664	0.0114802	0.00594997	0.0451606
TMEM59	1589	-0.0853978	0.00734802	0.00596169	0.045182
SP2	1590	0.0291814	0.00701006	0.00596385	0.045182
STX10	1591	0.0829268	0.00348036	0.00596517	0.045182
PRR5	1592	0.0273931	0.0176717	0.00596778	0.045182
HDAC8	1593	0.0515845	0.00626027	0.00598093	0.0452268
BANP	1594	0.0363256	0.00612527	0.00598121	0.0452268
SLC22A18	1595	0.0981377	0.00531151	0.00601709	0.045445
KCTD13	1596	0.0290471	0.00235688	0.00602018	0.045445
CMIP	1597	-0.00227658	0.00123839	0.00602137	0.045445
RAI1	1598	0.0185201	0.00162952	0.0060305	0.0454581
VAT1	1599	0.0220603	0.0040721	0.00603392	0.0454581
ZNF558	1600	-0.0512054	0.00100847	0.00603442	0.0454581
SH3TC1	1601	-0.00199131	0.00440104	0.00604736	0.0455271
TERF2IP	1602	-0.0687547	0.000476174	0.00607558	0.045711
IL16	1603	-0.00720273	0.00568065	0.00608628	0.0457213
UBXN4	1604	-0.0334726	0.0113556	0.00608702	0.0457213
SNX32	1605	-0.0425683	0.00113971	0.00608833	0.0457213
RAB40C	1606	0.0651778	0.00445656	0.00610133	0.0457904
ZNF280D	1607	0.0155934	0.00332286	0.00610748	0.0457937
HES1	1608	-0.0780982	0.00521886	0.00610937	0.0457937
WDR13	1609	0.0767055	0.00347247	0.00611654	0.0458189
KIAA0101	1610	0.0843001	0.000716172	0.00612871	0.0458547
CSNK1D	1611	0.0536008	0.00496836	0.00612892	0.0458547
COQ2	1612	-0.007527	0.00891713	0.00615373	0.0459931
TM2D3	1613	-0.114968	0.00138436	0.00615506	0.0459931
KIF2A	1614	-0.0226569	0.00732477	0.00617737	0.0461313
STAT6	1615	0.127971	0.00168923	0.00619704	0.046234
PDGFA	1616	-0.0629783	0.0098776	0.0061988	0.046234
BCKDK	1617	0.0926832	0.00246381	0.00620351	0.0462405
ANKRD33	1618	0.0667351	0.0015974	0.00620985	0.0462592
PSD4	1619	0.00841876	0.0134835	0.00624053	0.046459
ABLIM2	1620	-0.0469591	0.00149292	0.00625159	0.0465126
RCAN2	1621	-0.0517027	0.00152997	0.00628185	0.046706
ZNHIT6	1622	-0.0191024	0.00468343	0.00628533	0.046706
INSIG1	1623	-0.0894147	0.000974592	0.00629444	0.0467314
PAK4	1624	-0.0234955	0.00524039	0.0062965	0.0467314
TSR1	1625	0.0115834	0.00446326	0.00630283	0.0467495
RTEL1	1626	-0.0219458	0.00411016	0.00631354	0.0468002
HIST1H3F	1627	0.0280537	0.00227278	0.00631781	0.0468031
TRMT12	1628	-0.00838556	0.00397284	0.00632189	0.0468045
GRK6	1629	0.0709059	0.000595372	0.00635222	0.0470002
SF3A2	1630	0.0697715	0.00635032	0.00635742	0.0470098
SLC12A2	1631	0.0339019	0.00250731	0.00637263	0.0470789
RPL10A	1632	-0.0617959	0.00714389	0.00637458	0.0470789
SHCBP1	1633	0.0976407	0.000996121	0.00638175	0.047103
MAP4K2	1634	0.0349976	0.00445801	0.00641816	0.0473428
CORO2A	1635	0.0154179	0.00551903	0.00642786	0.0473803
EXOC4	1636	0.0392793	0.00482319	0.00643111	0.0473803
ZCCHC9	1637	-0.0765131	0.000782987	0.00643791	0.0474014
CDH23	1638	0.0386671	0.00490256	0.0064492	0.0474556
CCDC7	1639	0.0377522	0.0050256	0.00645321	0.0474561
ETV3	1640	0.0508196	0.000272011	0.00647405	0.0475803
GALK1	1641	0.0375988	0.00451173	0.00649038	0.0476591
PRPS1	1642	-0.0664239	0.00155898	0.0064984	0.0476591
TMEM63A	1643	0.0773711	0.000650332	0.00650041	0.0476591
MAP1LC3A	1644	0.102664	0.012904	0.00650059	0.0476591
PNPLA2	1645	0.0783448	0.0185032	0.00650502	0.0476626
ATP2A3	1646	0.0180353	0.00548294	0.00651099	0.0476773
SEC22A	1647	-0.0620522	0.000365274	0.00651516	0.0476773
INHBB	1648	0.0353119	0.000115392	0.0065189	0.0476773
SERPINI1	1649	-0.039173	0.000153502	0.00652314	0.0476794
POLR2A	1650	0.0549854	0.0112727	0.00653638	0.0477473
HSPA14	1651	-0.0920602	0.000855158	0.00655362	0.0478442
CKAP2	1652	-0.0477399	0.000227984	0.00656548	0.0479018
IER3IP1	1653	-0.0163922	0.00337834	0.00657822	0.0479657
LPAR1	1654	-0.069083	0.000494165	0.00659058	0.0480268
CPSF1	1655	0.00448998	0.00558013	0.00661976	0.0482102
DPP10	1656	-0.000717692	0.000659354	0.00662589	0.0482257
AGRN	1657	0.0606916	0.00069105	0.00664706	0.0483507
ASB2	1658	-0.0885077	0.0089087	0.00665608	0.048387
EFTUD1	1659	-0.044442	0.000425654	0.00666318	0.0484094
DHX36	1660	-0.0319883	0.00497625	0.006671	0.0484371
CAMLG	1661	0.0361411	0.0136228	0.00667991	0.0484725
PHF1	1662	0.0572234	0.00154024	0.00668392	0.0484725
TIPRL	1663	-0.0735266	0.000553348	0.00669568	0.0485286
RCN2	1664	-0.0117194	0.0159276	0.00670149	0.0485415
VPS39	1665	0.0724271	0.000537226	0.00671454	0.0485646
ANO6	1666	0.0809472	0.000660917	0.00671492	0.0485646
ZSCAN5A	1667	-0.00100376	0.0018589	0.00671677	0.0485646
STRADA	1668	0.0587872	0.000340688	0.00672182	0.048572
MAD2L1	1669	-0.0209945	0.00115377	0.00673672	0.0486505
OPLAH	1670	0.0774542	0.00149327	0.0067465	0.048692
FSTL3	1671	0.0766385	0.00553643	0.0067818	0.0489174
CHRNA3	1672	0.0383205	0.00062087	0.0067874	0.0489286
TOR1AIP2	1673	-0.034636	0.000402345	0.00679965	0.0489875
NOL10	1674	0.10185	0.00112694	0.00680735	0.0490138
UBE2M	1675	0.0431073	0.0063274	0.006822	0.0490848
NDUFS7	1676	0.00636034	0.00653249	0.00682537	0.0490848
GPAM	1677	-0.032914	0.000114044	0.00683871	0.0491313
CRYZ	1678	-0.110922	0.00319476	0.00683998	0.0491313
GNB2	1679	0.0557491	0.00363959	0.00685453	0.0492064
ZNF529	1680	-0.00621847	0.00759954	0.00688793	0.0494168
BACE1	1681	0.0597245	0.00660705	0.00690383	0.0495014
ELK4	1682	-0.0232244	0.000188466	0.00691234	0.049533
CHD2	1683	-0.0142849	0.00257825	0.00692512	0.049595
CYP20A1	1684	0.00841791	0.00510999	0.00693675	0.0495986
TBL3	1685	0.0316287	0.00147494	0.00693733	0.0495986
ZNF22	1686	-0.0654865	0.0094159	0.00693797	0.0495986
C1GALT1C1	1687	-0.0207335	0.00795956	0.00697219	0.0497932
NNT	1688	0.0180812	0.00900312	0.00697345	0.0497932
TACC3	1689	0.115692	0.00140028	0.00698296	0.0498316
EPHB6	1690	-0.0094524	0.00742785	0.00700235	0.0499404
FGF20	1691	-0.0105572	0.000964854	0.00700687	0.0499431
LCAT	1692	0.0350369	0.000115414	0.00703886	0.050082
GAA	1693	0.093044	0.00243873	0.00704593	0.050082
PPP3CA	1694	0.0140636	0.00688871	0.00704749	0.050082
IFI35	1695	0.113934	0.00641207	0.00704775	0.050082
HMHA1	1696	0.0334471	0.00645664	0.00705029	0.050082
NOP10	1697	-0.0874258	0.00864639	0.00705531	0.050082
RFX5	1698	-0.0903772	0.000834928	0.00705544	0.050082
ITGB4	1699	-0.024129	6.12288e-05	0.00709244	0.050315
ISL2	1700	-0.0123267	0.00584742	0.00709935	0.0503344
MAP3K2	1701	0.0968487	0.00118239	0.00711989	0.0504504
EFCAB4A	1702	-0.020726	0.00355884	0.00717482	0.0507958
CLK3	1703	0.0114648	0.0067077	0.0071813	0.0507958
CCND1	1704	-0.00883727	0.000827886	0.00718342	0.0507958
PCBP1	1705	0.0419432	0.00385985	0.00718639	0.0507958
COG6	1706	-0.0150283	0.00234596	0.00719268	0.0507958
WWC3	1707	0.0388318	0.00395769	0.00719447	0.0507958
AKR1D1	1708	0.0354232	0.00445533	0.00719969	0.0507958
PDCD4	1709	-0.0396929	0.00259707	0.00720236	0.0507958
FUZ	1710	0.0328275	0.00120817	0.0072192	0.0508848
VEZT	1711	0.0138244	0.00876438	0.0072326	0.0509142
METRNL	1712	0.0389415	0.00920045	0.00723727	0.0509142
TTC13	1713	-0.0419941	0.00448653	0.00723879	0.0509142
TAGAP	1714	0.099735	0.00102453	0.00724026	0.0509142
DNAJC5	1715	0.0726882	0.000563278	0.00725442	0.0509718
RWDD3	1716	-0.0315015	0.000114868	0.00725691	0.0509718
VPS37D	1717	-0.0370223	0.000424721	0.00726436	0.0509944
PTRF	1718	0.0415036	0.000179519	0.00730338	0.0512385
E4F1	1719	0.0522919	0.00271482	0.00731129	0.0512641
ARAP3	1720	0.0558736	0.0117606	0.00732756	0.0513483
TCEAL1	1721	0.0169532	0.00245291	0.00734118	0.0514138
SFTPB	1722	-0.0333097	0.00228601	0.00735287	0.0514658
MYH6	1723	-0.012374	0.00176649	0.00735981	0.0514845
SEMA4B	1724	0.0997162	0.00113932	0.00740281	0.0517264
NLGN2	1725	-0.0407651	0.00105195	0.00740681	0.0517264
SLC39A3	1726	0.0127972	0.00480485	0.0074098	0.0517264
RNH1	1727	0.0620643	0.00176003	0.00741155	0.0517264
ZNF416	1728	-0.0435159	0.000185157	0.00744868	0.0519554
BRPF1	1729	0.0390717	0.00196819	0.00746131	0.0519936
ZFP36	1730	0.0593387	0.00697873	0.00746278	0.0519936
OSBPL2	1731	0.0405284	0.00741252	0.0074728	0.0520285
CARD16	1732	-0.0219293	0.00134848	0.00747643	0.0520285
ZNF644	1733	-0.00864794	0.00524393	0.00750911	0.0522109
CATSPER2	1734	0.0353312	0.00350101	0.00751131	0.0522109
KDELC2	1735	-0.0366009	0.00305823	0.00752995	0.0523104
KLK3	1736	-0.0288037	0.00225355	0.00753546	0.0523185
GNL1	1737	0.0235673	0.00293002	0.00754174	0.0523319
PCBP4	1738	0.0348412	0.000118195	0.0075587	0.0524096
ANKRD11	1739	0.0741319	0.000888547	0.00756163	0.0524096
BCAS4	1740	-0.0968252	0.000972626	0.00757889	0.0524991
COX6C	1741	-0.0838091	0.0145727	0.00758608	0.0525187
MRPL13	1742	-0.0931771	0.00210502	0.00759215	0.0525306
PTAFR	1743	0.0595962	0.00876619	0.00761362	0.0526489
DUSP1	1744	0.0681461	0.0161472	0.00762475	0.0526956
TMEM30A	1745	0.000379102	0.00968756	0.00762943	0.0526977
ADAM15	1746	0.0484499	0.00948554	0.00763502	0.0527021
ATXN2	1747	0.0763448	0.000612015	0.00763881	0.0527021
LCLAT1	1748	0.0089677	0.00648817	0.00766006	0.0528185
CD14	1749	0.106038	0.00696981	0.00766621	0.0528306
REEP5	1750	-0.0707875	0.0175227	0.00767449	0.0528508
IER3	1751	0.0957409	0.00130374	0.00768168	0.0528508
ZNF358	1752	0.0334181	0.00318152	0.00768229	0.0528508
MGAT4B	1753	0.0566891	0.000345856	0.0076998	0.052941
ZNF707	1754	-0.00991015	0.00194482	0.00771575	0.0530205
GDPD5	1755	0.0690765	0.00454329	0.00772058	0.0530207
DNM2	1756	0.0243077	0.0053347	0.00772457	0.0530207
DBNDD1	1757	-0.0415056	0.000203517	0.00773773	0.0530808
INTS2	1758	-0.0633507	0.00199459	0.00774806	0.0530946
HS1BP3	1759	0.0759719	0.00112288	0.00775375	0.0530946
PRKCD	1760	0.0787311	0.0046975	0.00775546	0.0530946
ZFPL1	1761	0.0358619	0.000829599	0.00776295	0.0530946
PRICKLE4	1762	-0.0696737	0.00411966	0.00776442	0.0530946
TRIOBP	1763	0.100957	0.00114572	0.00776618	0.0530946
TADA3	1764	0.0174847	0.00519132	0.00779214	0.0532419
ZNF35	1765	-0.0361867	0.000134852	0.00779942	0.0532614
DYNC1I2	1766	-0.0478102	0.00394018	0.00781954	0.0533686
SLC10A3	1767	0.0279183	0.00311732	0.00783383	0.0534303
NACC2	1768	0.0517073	0.00256548	0.00783745	0.0534303
IKBKG	1769	-0.00851417	0.00576306	0.0078512	0.0534938
TMEM154	1770	0.0485252	0.0120462	0.0078691	0.0535717
RNF145	1771	0.0501617	0.0152389	0.00787153	0.0535717
TARS	1772	-0.0327074	0.0025486	0.00788665	0.0536444
NSMCE2	1773	-0.0106199	0.00364727	0.00789492	0.0536703
ATG4D	1774	-0.011017	0.00321701	0.00790133	0.0536836
COTL1	1775	0.0546416	0.00456137	0.00791192	0.0537253
EPN1	1776	0.0795882	0.00385214	0.0079307	0.0537982
ACIN1	1777	0.0698789	0.000512717	0.00793159	0.0537982
QSOX1	1778	0.0450103	0.00571548	0.00794926	0.0538878
TMC6	1779	0.0252092	0.00593871	0.00796998	0.0539789
ELF2	1780	0.0859182	0.000761947	0.00797167	0.0539789
LRPAP1	1781	0.0587554	0.000360899	0.00798431	0.0540342
POT1	1782	0.0750413	0.00977212	0.00798953	0.0540392
CHMP4A	1783	-0.0374415	0.00292053	0.00799794	0.0540657
SDCCAG8	1784	0.0151381	0.00242951	0.00800916	0.0541112
PI4KB	1785	0.0252721	0.00282036	0.00802284	0.0541733
SLC22A18AS	1786	0.0627015	0.000392661	0.0080281	0.0541784
TAF1B	1787	0.0156603	0.00697335	0.00805029	0.0542592
SNX4	1788	-0.0259882	0.00312373	0.00805116	0.0542592
APBB1	1789	0.0369703	0.00281183	0.00805357	0.0542592
SMARCA5	1790	-0.0262568	0.00368253	0.00806379	0.0542977
TMEM88	1791	0.0847151	0.000716384	0.00807643	0.0543525
ABHD12B	1792	0.0395207	0.000534212	0.00808759	0.0543755
RAB5A	1793	0.0254498	0.0110047	0.00808888	0.0543755
SURF4	1794	0.0672892	0.000477973	0.0080951	0.054387
BCL3	1795	0.0347654	0.00672146	0.00812577	0.0545626
UBR4	1796	0.0741883	0.00354133	0.00813967	0.0546255
INSL6	1797	0.0194527	4.00285e-05	0.00815863	0.0547223
LARS	1798	-0.0695974	0.000497061	0.00817014	0.0547691
FUBP3	1799	-0.0651805	0.000746716	0.00817534	0.0547734
ATP2A2	1800	0.0569953	0.00038021	0.00819309	0.0548532
MTFMT	1801	-0.0821247	0.00320045	0.00819635	0.0548532
GPR97	1802	0.0962914	0.00390019	0.00823974	0.0551042
KIAA1199	1803	-0.0392196	0.00210656	0.00824299	0.0551042
ACAD8	1804	0.0537108	0.000308944	0.00825151	0.0551305
FAM193A	1805	0.0438579	0.000237987	0.00826581	0.0551855
PABPC5	1806	0.038408	0.000335481	0.00826945	0.0551855
TCEA1	1807	-0.08993	0.000878026	0.0082773	0.0551855
IRF8	1808	-0.0147596	0.0124433	0.00827806	0.0551855
NSF	1809	0.0572875	0.00274811	0.00828984	0.0552336
ELP2	1810	-0.0052174	0.00347906	0.00833543	0.0555066
RBM15	1811	-0.083207	0.000776627	0.00834743	0.0555233
UAP1	1812	-0.0552028	0.000291181	0.00835042	0.0555233
WDR48	1813	0.00568724	0.00789333	0.00835176	0.0555233
FPR1	1814	0.088855	0.0114946	0.0083599	0.0555468
ANKAR	1815	-0.00884621	0.00116228	0.00836906	0.0555668
GNAI2	1816	0.0819827	0.00272557	0.00837212	0.0555668
FCN1	1817	0.0937337	0.00102921	0.00838309	0.0556089
SUPT6H	1818	0.0197167	0.0033217	0.00839523	0.0556588
EHBP1	1819	-0.0484553	0.000368867	0.00840282	0.0556785
CXCR4	1820	0.0463423	0.00448567	0.00841259	0.0556929
PTP4A2	1821	-0.00863356	0.00122799	0.00841423	0.0556929
LMBR1	1822	0.0488056	0.00839621	0.00841956	0.0556976
GLTSCR1	1823	0.00646659	0.00551596	0.00842786	0.055704
MAPKAPK2	1824	0.00915452	0.00277266	0.00843416	0.055704
STAT4	1825	-0.0541701	0.00961047	0.0084344	0.055704
MSL3	1826	0.0558958	0.00033094	0.00844829	0.0557652
LIG3	1827	0.0700991	0.00239014	0.00845623	0.055787
SIRT6	1828	-0.00850753	0.00124543	0.00847131	0.055856
NAGPA	1829	0.0754892	0.000631192	0.00847658	0.0558601
TUBA4A	1830	0.0817463	0.00976876	0.00848579	0.0558861
PSTPIP1	1831	0.0840845	0.00161307	0.00848979	0.0558861
PHYH	1832	0.0135561	0.00261047	0.00849906	0.0559045
AOAH	1833	0.0701975	0.00200891	0.00850221	0.0559045
LIMA1	1834	-0.0470952	0.0002345	0.0085065	0.0559045
GTF3A	1835	-0.0522324	0.00819002	0.00852817	0.0560118
FBXO43	1836	-0.0215116	0.00176189	0.00853212	0.0560118
IGF2R	1837	0.121837	0.00685995	0.00855656	0.0561416
RDM1	1838	-0.020024	0.00183649	0.00858866	0.0563216
CYP4F3	1839	0.171492	0.00325379	0.00859912	0.0563363
ORMDL1	1840	-0.024017	0.0112572	0.00860025	0.0563363
ITGAL	1841	0.0604192	0.00943833	0.00862087	0.0564407
CENPN	1842	-0.0328938	0.000126771	0.00865127	0.0566031
TTYH3	1843	0.0264802	0.00328433	0.00865926	0.0566031
NOX1	1844	-0.0101754	0.00122324	0.00866453	0.0566031
YAF2	1845	0.0519577	0.000275851	0.00867488	0.0566031
DIO2	1846	-0.02142	5.54049e-05	0.00867661	0.0566031
AP2A1	1847	0.0382876	0.0130447	0.00867851	0.0566031
PCDHA5	1848	-0.0331588	0.000506965	0.00867855	0.0566031
ZNF701	1849	-0.0293902	0.0018148	0.0087037	0.0567095
PDE12	1850	0.0128045	0.00769135	0.00870426	0.0567095
CEACAM1	1851	0.0979859	0.00099715	0.00871761	0.0567657
D2HGDH	1852	0.10034	0.00161037	0.0087307	0.0567996
USP47	1853	-0.0451804	0.0003631	0.00873489	0.0567996
TMEM67	1854	0.0219622	0.00301638	0.00873695	0.0567996
PAG1	1855	0.0609432	0.000390014	0.00874658	0.0568316
PRELP	1856	-0.0304253	0.00166163	0.00876295	0.0568684
FNIP1	1857	0.0746033	0.000648525	0.00876315	0.0568684
PTPN12	1858	0.0618369	0.0166844	0.00876641	0.0568684
SLFN13	1859	-0.0173777	0.00478726	0.00879951	0.0570524
CHFR	1860	0.0231595	0.00335457	0.00881218	0.0571039
CCND2	1861	-0.0083745	0.00711688	0.00885957	0.0573593
RFX3	1862	0.0511938	0.00498834	0.00886112	0.0573593
NFKBID	1863	0.0480752	0.000233708	0.00889896	0.0575734
FAM109A	1864	0.0455488	0.0002426	0.00891796	0.0576653
ZNF485	1865	-0.0270821	0.000731939	0.00895906	0.0579001
STAT1	1866	0.122391	0.00562846	0.00897386	0.0579376
CASP9	1867	0.057938	0.00036197	0.00897449	0.0579376
SFXN5	1868	0.0609365	0.000403046	0.00898298	0.0579396
TMEM181	1869	-0.0952079	0.0139074	0.00898506	0.0579396
DERA	1870	-0.0748692	0.000694643	0.00898921	0.0579396
SAP18	1871	-0.017008	0.00143961	0.00900056	0.0579817
CD97	1872	0.0194995	0.00379943	0.00901402	0.0580374
WBP2	1873	0.0467989	0.00890044	0.00901981	0.0580437
DICER1	1874	0.100994	0.00112059	0.00902969	0.0580762
SIK3	1875	0.0404134	0.00521247	0.009078	0.0583558
KLHL8	1876	0.0937172	0.000966025	0.00909742	0.0584494
NMNAT1	1877	0.0581702	0.00180532	0.0091096	0.0584705
TAF6L	1878	0.00312755	0.00271177	0.0091104	0.0584705
ENO3	1879	0.0647951	0.000448129	0.00913039	0.0585676
DPP7	1880	0.0752222	0.00080066	0.00914429	0.0586256
ZNF518B	1881	0.0364999	0.00560369	0.00915649	0.0586726
MDFI	1882	0.00716335	0.00206033	0.00922433	0.0590759
BEX5	1883	-0.0395627	0.000149789	0.00923208	0.0590941
NOD2	1884	0.106951	0.00133879	0.00927904	0.0593632
CD33	1885	0.0969383	0.00428895	0.00929041	0.0594044
SERPINA1	1886	0.044689	0.000495104	0.00931314	0.0595182
PDLIM7	1887	0.0774721	0.0129373	0.00935176	0.0597188
DDX18	1888	-0.0209707	0.00659412	0.00935444	0.0597188
COMT	1889	0.0744536	0.000992963	0.00938117	0.0598578
DAD1	1890	-0.036182	0.00259704	0.0093941	0.0599049
RELB	1891	0.0727812	0.00156813	0.00940327	0.0599049
FBLN1	1892	-0.0337196	0.000136372	0.00940581	0.0599049
AMMECR1	1893	-0.0164655	0.0019871	0.00940954	0.0599049
BPNT1	1894	-0.0372891	0.000173417	0.00941342	0.0599049
RAB21	1895	-0.0783925	0.00262238	0.0094232	0.0599355
FGA	1896	0.0358357	0.000144529	0.00944158	0.0600207
FBXO46	1897	0.0324259	0.00163272	0.00946207	0.0601193
NFATC2IP	1898	0.0131507	0.00216578	0.00947203	0.060143
NOTCH1	1899	0.0449328	0.00782982	0.00947577	0.060143
SLC25A20	1900	0.0778638	0.000674622	0.00952867	0.0604469
SAMD9L	1901	0.148044	0.00249814	0.00954568	0.0605229
MFI2	1902	0.00413387	0.000512471	0.00955901	0.0605756
SNUPN	1903	-0.00943379	0.00296911	0.00957308	0.0606328
RILPL1	1904	0.00956962	0.00502772	0.00958474	0.0606748
HIST1H2BH	1905	-0.0260287	0.00661711	0.00959666	0.0607111
RAP1B	1906	-0.0238253	0.00529017	0.00960054	0.0607111
RPL38	1907	-0.0308812	0.00228298	0.00960601	0.0607138
PEX13	1908	-0.0148714	0.00184318	0.00965494	0.0609911
PARL	1909	-0.0456857	0.00304094	0.00967026	0.0610559
ATP1A3	1910	0.0243992	0.00361984	0.00969933	0.0612009
IAH1	1911	-0.0793076	0.00284313	0.00970338	0.0612009
MED15	1912	-0.00726204	0.00396896	0.00972098	0.0612798
COMMD10	1913	-0.0372284	0.00363066	0.00972954	0.0613016
HERC4	1914	0.00331119	0.0103732	0.00973461	0.0613016
LAT2	1915	0.0875102	0.000862944	0.0097553	0.0613628
GCLM	1916	0.0231006	0.00415113	0.00976183	0.0613628
RBM10	1917	0.050975	0.000283025	0.00976188	0.0613628
SLC25A45	1918	0.0483674	0.00276183	0.0097647	0.0613628
UGDH	1919	-0.0622682	0.000412056	0.00976986	0.0613633
KIAA0391	1920	-0.0540138	0.00274012	0.0097976	0.0615055
HCFC2	1921	-0.0121808	0.00293785	0.00981086	0.0615566
NEDD8	1922	-0.0282711	0.0023738	0.00983797	0.061673
TBC1D15	1923	-0.0191413	0.0141765	0.00983964	0.061673
MIDN	1924	0.0603801	0.00711122	0.00985701	0.0617335
GZMK	1925	-0.0651495	0.0350326	0.00985953	0.0617335
MYO9B	1926	0.0677394	0.00595892	0.00990857	0.0620083
SNRK	1927	-0.0624507	0.0106772	0.00992149	0.062057
NFXL1	1928	0.0314936	0.0291364	0.00993538	0.0620912
SUMO2	1929	-0.0563918	0.00543639	0.00994641	0.0620912
ZSWIM4	1930	0.0348815	0.00468604	0.00994788	0.0620912
GFOD1	1931	0.108922	0.00133092	0.00994829	0.0620912
CDCA7L	1932	-0.0640289	0.00201336	0.00995272	0.0620912
MKL2	1933	-0.0377666	0.00109654	0.00996399	0.0621293
KIAA0922	1934	0.0467881	0.00277728	0.00997402	0.0621597
ATXN7L2	1935	0.0270776	0.000855093	0.00998492	0.0621955
CHCHD7	1936	-0.0132067	0.00423881	0.0100011	0.0622641
TPCN2	1937	0.0855807	0.000800846	0.010021	0.0623489
AIM2	1938	-0.0206251	0.0208262	0.0100262	0.0623489
HIST1H4H	1939	-0.00666544	0.00660756	0.0100394	0.0623489
CXCR5	1940	-0.0504385	0.00030791	0.0100403	0.0623489
CASP2	1941	0.0516998	0.000303503	0.0100406	0.0623489
TBK1	1942	-0.0487677	0.010217	0.0100756	0.0625052
REPS2	1943	0.0661926	0.00564246	0.0100761	0.0625052
PRRC1	1944	-0.0757431	0.000608212	0.0100909	0.0625328
FGF23	1945	0.0201857	0.00585942	0.010091	0.0625328
ZNF347	1946	0.0187025	0.00239897	0.0101329	0.062746
NAV1	1947	0.0318417	0.00447451	0.0101358	0.062746
PMP22	1948	-0.0421631	0.000222499	0.0101472	0.0627844
FMO2	1949	0.0352861	0.000156361	0.0101566	0.0627889
ABCA2	1950	0.0324281	0.00168073	0.0101628	0.0627889
FAM129B	1951	0.0576122	0.000406575	0.0101635	0.0627889
EPHA10	1952	-0.0161966	0.00293718	0.0101876	0.0629052
ANKRD30B	1953	0.063326	0.000826705	0.0101939	0.0629118
SSH1	1954	0.0746776	0.000653963	0.0102481	0.0632143
LXN	1955	-0.0945061	0.000973449	0.0102781	0.0633668
ATP6V0D1	1956	0.0925865	0.0021055	0.0103333	0.0636745
IP6K1	1957	0.0370423	0.00767177	0.0103537	0.0637674
IRF2BP2	1958	0.0116666	0.00253224	0.0103695	0.063832
GOSR2	1959	-0.0088545	0.00218171	0.0104237	0.0641332
POLA1	1960	-0.0341388	0.000135662	0.0104301	0.0641397
ISG20L2	1961	0.00823451	0.00413522	0.0104624	0.0643054
HTRA1	1962	0.0424777	0.000219608	0.010473	0.0643382
SSR1	1963	-0.0205609	0.00963916	0.0104915	0.0644029
DUSP18	1964	0.0502917	0.00435062	0.0104943	0.0644029
RQCD1	1965	-0.00458472	0.00225781	0.010508	0.0644542
EGR1	1966	-0.0329214	0.0184072	0.0105259	0.0645314
RASSF5	1967	0.0143392	0.00426041	0.0105669	0.06475
TGFA	1968	-0.00621626	0.0031202	0.0105775	0.0647816
OTUD5	1969	0.00345539	0.0059375	0.0106004	0.064889
TCF25	1970	0.0654769	0.000540349	0.010613	0.064933
RAB14	1971	0.0869985	0.0144863	0.0106314	0.0649842
PTGER3	1972	-0.0234416	0.00123029	0.0106349	0.0649842
RABEPK	1973	-0.0635414	0.000454698	0.0106417	0.0649842
FAM131A	1974	-0.0333255	0.0051858	0.0106442	0.0649842
UBE2A	1975	-0.0899512	0.000967206	0.0106483	0.0649842
ANGPTL2	1976	-0.0217939	6.14164e-05	0.010667	0.0650309
ZNF282	1977	0.0216526	0.00210773	0.0106719	0.0650309
SLC2A11	1978	0.00368323	0.00700125	0.0106721	0.0650309
ZNF362	1979	0.0547792	0.000829771	0.0106898	0.0651057
FAAH	1980	0.00925397	0.00332437	0.0107025	0.0651224
SLC38A7	1981	0.00365775	0.00192788	0.0107034	0.0651224
GTF2E1	1982	-0.0351992	0.00327687	0.0107259	0.0651978
CNPY3	1983	0.0794703	0.000734108	0.0107266	0.0651978
ADCY2	1984	-0.0356008	0.00217924	0.010739	0.0652408
CEP70	1985	0.0394401	0.00408497	0.0107549	0.0653039
FYTTD1	1986	0.0114072	0.00565795	0.0107647	0.0653308
GLO1	1987	-0.0259348	0.00942702	0.0107764	0.0653689
ATL3	1988	0.0427791	0.00482026	0.0107952	0.0654498
DISC1	1989	0.0396418	0.0039322	0.0108119	0.0655183
TRERF1	1990	0.00115715	0.0051216	0.0108263	0.0655723
DHX15	1991	-0.0284129	0.00510733	0.0108448	0.0656186
CCNH	1992	-0.0224901	0.0015155	0.0108465	0.0656186
G3BP1	1993	-0.011373	0.00189692	0.0108512	0.0656186
KIFAP3	1994	-0.0226721	0.00427838	0.0108557	0.0656186
PSIP1	1995	-0.0173222	0.0123224	0.0108841	0.0657577
BNIP3	1996	-0.0506115	0.00244803	0.0108948	0.0657892
FANCL	1997	0.0052242	0.002075	0.0109133	0.0658652
STAG1	1998	-0.0256812	0.00149021	0.0109203	0.0658652
[truncated: 10,055 more rows]
