# Supplementary material for: Multiomics integrative analysis identifies APOE allele-specific blood biomarkers associated to Alzheimer’s disease etiopathogenesis
Source: Aging (Albany NY). 2021 Apr 12;13(7):9277–329. doi: 10.18632/aging.202950 (PMC8064208; doi:10.18632/aging.202950)
Supplement: Supplementary Table 21 [file aging-13-202950-s023.xlsx]

## Sheet: Sheet1
Supplementary Table 21. Differential expression analysis in blood: APOE4 stratum.
Symbol	Rank	logFC	Var	Fisher.Pvalue	Fisher.FDR
GTF2H5	1	-0.329608	0.0216029	0	0
ENY2	1	-0.45746	0.109313	0	0
PSMA3	1	-0.301122	0.0530786	0	0
SHFM1	1	-0.544267	0.18353	0	0
NDUFS5	1	-0.518544	0.19647	0	0
MRPL51	1	-0.347133	0.0932603	0	0
NDUFA1	1	-0.610308	0.336417	0	0
MRPS18C	8	-0.435639	0.0803852	1.11022e-16	1.48684e-13
ATP5I	8	-0.428696	0.13822	1.11022e-16	1.48684e-13
UQCRB	10	-0.334859	0.00724501	2.22045e-16	2.6763e-13
RPF2	11	-0.279676	0.0205686	3.33067e-16	3.34538e-13
UQCRH	11	-0.472392	0.171972	3.33067e-16	3.34538e-13
MAGOH	13	-0.231481	0.0107169	4.44089e-16	3.82329e-13
RPL36AL	13	-0.480616	0.183124	4.44089e-16	3.82329e-13
ING3	15	-0.128537	0.0524663	1.22125e-15	9.81311e-13
COX17	16	-0.351919	0.044969	1.66533e-15	1.25452e-12
LSM3	17	-0.461857	0.123096	2.10942e-15	1.49558e-12
ATP5J	18	-0.452737	0.15298	2.44249e-15	1.54944e-12
AIF1	18	-0.315737	0.203225	2.44249e-15	1.54944e-12
LSM5	20	-0.325713	0.0514661	2.88658e-15	1.7396e-12
ATP5O	21	-0.438111	0.159072	3.10862e-15	1.76393e-12
UCHL3	22	-0.19984	0.01181	3.21965e-15	1.76393e-12
CWC15	23	-0.22893	0.0315029	3.77476e-15	1.97814e-12
NGDN	24	-0.256696	0.0233287	5.10703e-15	2.56479e-12
CETN2	25	-0.248212	0.00973085	5.66214e-15	2.72983e-12
CDC26	26	-0.182098	0.0195497	6.21725e-15	2.88217e-12
MRPL33	27	-0.224978	0.0217336	9.32587e-15	4.16314e-12
SRP19	28	-0.263326	0.0220263	1.02141e-14	4.39678e-12
MRPL22	29	-0.233957	0.0162906	1.15463e-14	4.79889e-12
SYF2	30	-0.269101	0.0198591	1.4766e-14	5.93247e-12
MRPS21	31	-0.341969	0.0565859	1.66533e-14	6.47493e-12
METTL5	32	-0.232129	0.0274953	1.75415e-14	6.60712e-12
DBI	33	-0.521133	0.213694	2.74225e-14	9.91807e-12
DNAJA1	34	-0.365431	0.11777	2.79776e-14	9.91807e-12
MRPL35	35	-0.273492	0.0234225	5.973e-14	2.05693e-11
SSB	36	-0.269041	0.0315007	6.70575e-14	2.24512e-11
MRPS33	37	-0.265936	0.0281603	9.35918e-14	3.04882e-11
TMEM126A	38	-0.264957	0.0245526	1.01918e-13	3.23269e-11
NDUFS4	39	-0.36696	0.0606908	1.10356e-13	3.41057e-11
IGBP1	40	-0.223536	0.0314486	1.27343e-13	3.83715e-11
UFC1	41	-0.253675	0.0352193	1.46549e-13	4.25023e-11
NUCB2	42	-0.226749	0.00125009	1.48104e-13	4.25023e-11
RPS24	43	-0.631929	0.520323	1.803e-13	5.05386e-11
MRPL39	44	-0.200892	0.00576815	2.00284e-13	5.48642e-11
RPL34	45	-0.218899	0.00068809	2.15272e-13	5.76595e-11
COPS5	46	-0.263914	0.0317571	2.38143e-13	6.23986e-11
DCTN6	47	-0.172579	0.0144556	2.70561e-13	6.59174e-11
PSMA4	48	-0.356031	0.0525666	2.70894e-13	6.59174e-11
RPL26	48	-0.663129	0.397786	2.70894e-13	6.59174e-11
RPA3	50	-0.26253	0.0444704	2.73448e-13	6.59174e-11
CBX3	51	-0.256102	0.0245708	3.39839e-13	7.91311e-11
TCEAL8	52	-0.202272	0.0123942	3.41394e-13	7.91311e-11
ATP6V1E1	53	-0.233168	0.040788	4.11005e-13	9.34686e-11
CETN3	54	-0.236295	0.010835	4.39426e-13	9.80816e-11
RPS25	55	-0.386195	0.141467	4.6374e-13	1.00481e-10
TBCA	56	-0.331479	0.0811799	4.66849e-13	1.00481e-10
RPL26L1	57	-0.254779	0.0180996	4.80727e-13	1.01653e-10
SNRPG	58	-0.513946	0.16305	5.59441e-13	1.16258e-10
SNRPB2	59	-0.238963	0.0277323	5.90861e-13	1.20411e-10
ATP5F1	60	-0.307347	0.0567393	5.99409e-13	1.20411e-10
POMP	61	-0.210214	0.0371395	7.4829e-13	1.47855e-10
MRPS17	62	-0.191594	0.00222246	8.34222e-13	1.62175e-10
GEMIN6	63	-0.204641	0.000654747	9.33253e-13	1.78548e-10
ATP6V1D	64	-0.284603	0.0469794	9.73888e-13	1.8341e-10
GIMAP7	65	-0.410396	0.116746	1.01719e-12	1.88618e-10
TOMM7	66	-0.589666	0.285713	1.03328e-12	1.887e-10
LARP7	67	-0.268626	0.0265782	1.1855e-12	2.13265e-10
DPY30	68	-0.324631	0.0586399	1.26077e-12	2.23471e-10
TCTEX1D2	69	-0.158614	0.00483599	1.35225e-12	2.33003e-10
PTRH2	70	-0.162657	0.0396975	1.37856e-12	2.33003e-10
DPM1	71	-0.326496	0.0656949	1.38323e-12	2.33003e-10
RARS	72	-0.181029	0.00576626	1.40921e-12	2.33003e-10
GTF2B	73	-0.236775	0.0431622	1.4112e-12	2.33003e-10
TXNDC17	74	-0.319226	0.0670466	1.45228e-12	2.36545e-10
ARPC3	75	-0.245167	0.0795181	1.58218e-12	2.54267e-10
PPIG	76	-0.126166	0.0458838	1.75848e-12	2.78881e-10
RPAIN	77	-0.216521	0.0188259	2.24543e-12	3.51482e-10
TYK2	78	0.240505	0.0202949	2.6289e-12	4.06232e-10
SCFD1	79	-0.171073	0.00884694	2.69196e-12	4.10711e-10
RIOK2	80	-0.181538	0.0170008	2.7266e-12	4.10796e-10
CCDC53	81	-0.224029	0.0478036	3.77887e-12	5.62305e-10
TXN	82	-0.424763	0.16079	3.99092e-12	5.86616e-10
FXR1	83	-0.182245	0.00731234	4.26081e-12	6.18742e-10
GTF2A2	84	-0.161785	0.00572883	4.37572e-12	6.27864e-10
PSMA2	85	-0.147834	0.0106007	5.16232e-12	7.32016e-10
SEC11A	86	-0.24462	0.0301627	5.31375e-12	7.44728e-10
CASP1	87	-0.26648	0.044833	5.40301e-12	7.48534e-10
PPP2R5C	88	-0.176245	0.00942053	5.77294e-12	7.90696e-10
COX7B	89	-0.29737	0.0641563	5.91205e-12	8.00651e-10
MRPS22	90	-0.245008	0.0190226	6.41687e-12	8.50323e-10
PLRG1	91	-0.276456	0.00132573	6.46871e-12	8.50323e-10
PSMC2	92	-0.270716	0.0346773	6.49047e-12	8.50323e-10
SRP14	93	-0.331113	0.0740304	6.84408e-12	8.87008e-10
NDUFB3	94	-0.470248	0.224182	7.00218e-12	8.97843e-10
BRIX1	95	-0.187194	0.0139386	8.43203e-12	1.0698e-09
GNL2	96	-0.171898	0.0139962	9.21951e-12	1.15753e-09
PRDX1	97	-0.237471	0.0283462	1.05066e-11	1.30553e-09
PFDN5	98	-0.433795	0.181586	1.12734e-11	1.38282e-09
ERH	99	-0.278946	0.0452633	1.13581e-11	1.38282e-09
CHMP5	100	-0.21505	0.0781471	1.46603e-11	1.767e-09
RBM34	101	-0.157759	0.00865294	1.59209e-11	1.89995e-09
ZC3H15	102	-0.200612	0.00929624	1.91184e-11	2.2548e-09
PSMB1	103	-0.247166	0.0506764	1.92686e-11	2.2548e-09
METAP2	104	-0.291151	0.0137709	1.9544e-11	2.26504e-09
TCIRG1	105	0.287935	0.0122015	2.0467e-11	2.33346e-09
HSP90AA1	106	-0.422346	0.104719	2.05216e-11	2.33346e-09
SSBP1	107	-0.200296	0.022519	2.26706e-11	2.55373e-09
POLR3GL	108	-0.232264	0.0236799	2.48322e-11	2.77132e-09
RPS27L	109	-0.425589	0.123835	3.49066e-11	3.85991e-09
FRG1	110	-0.191119	0.0158572	3.62282e-11	3.96963e-09
EMG1	111	-0.207792	0.0106572	4.26504e-11	4.63122e-09
UBE2V2	112	-0.19566	0.00310512	5.25383e-11	5.65397e-09
ITGAX	113	0.297869	0.0272248	5.96408e-11	6.36151e-09
ZMAT2	114	-0.299828	0.0699788	6.03531e-11	6.38101e-09
CD3D	115	-0.412094	0.088524	7.75965e-11	8.13279e-09
PRPF18	116	-0.0831702	0.00335885	8.64788e-11	8.9856e-09
TOMM5	117	-0.169168	0.00562688	8.8714e-11	9.13906e-09
H2AFZ	118	-0.215838	0.0209854	8.98778e-11	9.18048e-09
MITD1	119	-0.161161	0.0102016	9.18917e-11	9.27053e-09
COX6A1	120	-0.168412	0.0245476	9.22976e-11	9.27053e-09
PIGF	121	-0.14211	0.00707509	9.53916e-11	9.50211e-09
FABP5	122	-0.146599	0.00166127	9.87948e-11	9.70197e-09
COX6C	123	-0.301155	0.0380258	9.90079e-11	9.70197e-09
ACAT1	124	-0.224852	0.0158265	1.01965e-10	9.91119e-09
CCDC90B	125	-0.283919	0.00162621	1.20015e-10	1.15723e-08
RPL31	126	-0.623126	0.280414	1.45846e-10	1.39514e-08
CCDC25	127	-0.143989	0.000410034	1.56381e-10	1.48414e-08
MRPL50	128	-0.19791	0.00891812	1.65213e-10	1.55572e-08
SLU7	129	-0.202128	0.0310455	1.7148e-10	1.60221e-08
EEF1B2	130	-0.399591	0.144253	1.75188e-10	1.62426e-08
ENSA	131	-0.22026	0.0014151	1.93587e-10	1.78115e-08
MRPL17	132	-0.169328	0.0112216	1.97405e-10	1.80252e-08
MDH1	133	-0.273534	0.0251383	2.06086e-10	1.86763e-08
COMMD6	134	-0.592481	0.187203	2.08637e-10	1.87664e-08
ADAM8	135	0.235547	0.0123641	2.2599e-10	2.01767e-08
RPS27A	136	-0.416285	0.0840809	2.45724e-10	2.17773e-08
ATP5J2	137	-0.189663	0.0183552	2.54307e-10	2.23735e-08
MTIF3	138	-0.168262	0.0185563	2.61428e-10	2.28333e-08
TMEM97	139	-0.212483	0.000941796	2.64511e-10	2.29363e-08
ZCCHC17	140	-0.186947	0.00488526	2.72553e-10	2.34649e-08
PSMA6	141	-0.282633	0.0611467	2.79177e-10	2.38647e-08
RPL7	142	-0.297175	0.0639555	2.9034e-10	2.46441e-08
ANAPC13	143	-0.210295	0.0334659	3.00398e-10	2.53195e-08
STX8	144	-0.158586	0.0152471	3.04689e-10	2.53705e-08
UGP2	145	-0.160055	0.0110087	3.05212e-10	2.53705e-08
WDR33	146	-0.186944	0.00312636	3.07458e-10	2.53821e-08
VPS29	147	-0.25137	0.034905	3.19031e-10	2.61584e-08
UBL5	148	-0.233976	0.0298976	3.36443e-10	2.71929e-08
HIGD1A	149	-0.166196	0.017315	3.37603e-10	2.71929e-08
MRPS28	150	-0.168021	0.00130973	3.38417e-10	2.71929e-08
CKS2	151	-0.109849	0.0030782	3.67043e-10	2.92481e-08
EIF3E	152	-0.387496	0.122024	3.68846e-10	2.92481e-08
TIMM23	153	-0.106976	0.000712639	3.82334e-10	3.01194e-08
APIP	154	-0.23894	0.00124522	3.95856e-10	3.09822e-08
TMEM126B	155	-0.254805	0.00916712	4.37382e-10	3.40114e-08
UPF3B	156	-0.150341	0.00274918	4.96613e-10	3.83697e-08
RWDD1	157	-0.356017	0.054615	5.10479e-10	3.91898e-08
UBE2E1	158	-0.258453	0.0179016	5.50192e-10	4.19713e-08
SOD1	159	-0.251376	0.0252674	5.72253e-10	4.32981e-08
MRPS23	160	-0.140429	0.00152596	5.74769e-10	4.32981e-08
RPL23	161	-0.410836	0.181489	6.27573e-10	4.69822e-08
TRIP4	162	-0.107948	0.0110834	6.46949e-10	4.81338e-08
PPP2R3C	163	-0.109065	0.0689068	6.70497e-10	4.95797e-08
MTIF2	164	-0.156069	0.00278576	7.00466e-10	5.148e-08
CEBPZ	165	-0.269341	0.015151	7.16821e-10	5.23627e-08
AK2	166	-0.142714	0.00301904	7.25461e-10	5.26746e-08
THOC7	167	-0.208533	0.0102229	8.04247e-10	5.7694e-08
VRK1	168	-0.143589	0.00044873	8.11647e-10	5.7694e-08
GMFG	169	-0.276957	0.0890484	8.13605e-10	5.7694e-08
CWF19L2	170	-0.207015	0.00094228	8.13738e-10	5.7694e-08
PPIL3	171	-0.277824	0.02139	8.44082e-10	5.94954e-08
ARHGEF2	172	0.143861	0.0124901	8.50022e-10	5.95658e-08
RPS27	173	-0.486087	0.22589	8.56035e-10	5.96404e-08
RPL11	174	-0.284293	0.096302	9.27691e-10	6.42613e-08
GNL3	175	-0.198652	0.00658486	9.63088e-10	6.6332e-08
ALG13	176	-0.192165	0.00396279	9.90195e-10	6.78115e-08
ARHGAP4	177	0.196337	0.00973253	1.0132e-09	6.8995e-08
CRYZL1	178	-0.140117	0.000444643	1.07369e-09	7.27034e-08
ATP5C1	179	-0.262566	0.0346639	1.1197e-09	7.53952e-08
HELZ	180	0.132069	0.00938897	1.1377e-09	7.61815e-08
ELF4	181	0.159646	0.0175782	1.16084e-09	7.73017e-08
DPH3	182	-0.153547	0.00470131	1.26052e-09	8.34781e-08
TATDN1	183	-0.151031	0.000505923	1.28587e-09	8.46918e-08
MRPL32	184	-0.204111	0.0059115	1.38086e-09	9.04537e-08
NSA2	185	-0.266163	0.0510409	1.53716e-09	1.00148e-07
NDUFB2	186	-0.328823	0.0646635	1.587e-09	1.02839e-07
CKS1B	187	-0.222493	0.00156731	1.64721e-09	1.0617e-07
COPS4	188	-0.167412	0.0119888	1.77269e-09	1.1365e-07
POFUT2	189	0.104292	0.00723441	1.82121e-09	1.16143e-07
UQCRQ	190	-0.39068	0.114403	1.87605e-09	1.19011e-07
SS18L2	191	-0.282423	0.0332283	1.98587e-09	1.25318e-07
APBB3	192	0.171814	0.0121368	2.021e-09	1.2687e-07
MPHOSPH10	193	-0.182642	0.00961418	2.2481e-09	1.40396e-07
PDCL3	194	-0.141454	0.00046468	2.35274e-09	1.46173e-07
ISY1	195	-0.125622	0.00573038	2.38669e-09	1.47522e-07
ALG5	196	-0.162141	0.00194859	2.43866e-09	1.49965e-07
CENPN	197	-0.103876	0.00255516	2.45779e-09	1.50374e-07
SEMA4B	198	0.223882	0.00826853	2.50147e-09	1.52274e-07
PPA2	199	-0.220813	0.00118629	2.69794e-09	1.63408e-07
NDUFA4	200	-0.415714	0.108112	2.75091e-09	1.65784e-07
PHAX	201	-0.132839	0.00164713	2.80851e-09	1.68413e-07
SNX2	202	-0.185593	0.0223581	2.8548e-09	1.69988e-07
MBD6	203	0.255631	0.0128696	2.86299e-09	1.69988e-07
ANXA1	204	-0.419167	0.126392	3.10714e-09	1.8358e-07
ZMAT3	205	0.227855	0.00320916	3.13793e-09	1.84495e-07
PSMD14	206	-0.166145	0.000654683	3.27932e-09	1.91872e-07
ZNHIT3	207	-0.285416	0.0468489	3.36127e-09	1.95717e-07
TRAPPC4	208	-0.148032	0.0102833	3.48891e-09	2.02172e-07
SIPA1	209	0.214538	0.010773	3.5862e-09	2.06815e-07
SNTB2	210	0.197017	0.00689546	3.76051e-09	2.15835e-07
NXF1	211	0.128696	0.0155362	3.84895e-09	2.19864e-07
BCCIP	212	-0.144961	0.000510079	4.01396e-09	2.28209e-07
DCUN1D5	213	-0.16059	0.00184125	4.08128e-09	2.30947e-07
ATP6AP1	214	0.195661	0.0145328	4.4834e-09	2.52516e-07
MRPS31	215	-0.178304	0.00508716	4.64274e-09	2.60274e-07
RPAP3	216	-0.223726	0.00115413	4.89505e-09	2.73149e-07
NDUFAF2	217	-0.160907	0.00441748	5.22743e-09	2.90351e-07
NFU1	218	-0.142862	0.00420351	5.46404e-09	3.01261e-07
ATP6V1G1	219	-0.299661	0.0745746	5.47989e-09	3.01261e-07
RPS7	220	-0.117797	0.000325074	5.49884e-09	3.01261e-07
TMSB10	221	-0.135646	0.022761	5.71535e-09	3.11706e-07
PSMB7	222	-0.0759027	0.0268921	5.75306e-09	3.1235e-07
ELMO2	223	0.0676181	0.0173989	6.08888e-09	3.291e-07
NDUFB6	224	-0.13555	0.0304143	6.47957e-09	3.47256e-07
COMMD3	225	-0.250766	0.0226181	6.48242e-09	3.47256e-07
PDCD10	226	-0.276985	0.0612694	6.5292e-09	3.48214e-07
PSMC6	227	-0.281121	0.0395134	6.75273e-09	3.58549e-07
DNAJC8	228	-0.195936	0.017522	6.85761e-09	3.62521e-07
COX7A2	229	-0.348301	0.0841875	6.91693e-09	3.6406e-07
SNRPD2	230	-0.369589	0.106988	7.11405e-09	3.71813e-07
TMEM60	231	-0.0807146	0.0234445	7.12594e-09	3.71813e-07
SAR1B	232	-0.22897	0.00587001	7.31413e-09	3.79988e-07
RPL32	233	-0.17759	0.0233441	7.35377e-09	3.80408e-07
MICAL1	234	0.2127	0.00360072	7.47723e-09	3.85141e-07
RBX1	235	-0.281017	0.0601106	7.69049e-09	3.9444e-07
SUB1	236	-0.214349	0.00914259	8.50445e-09	4.3434e-07
RBM5	237	0.16688	0.000729315	8.54307e-09	4.34471e-07
TPRKB	238	-0.132488	0.0018083	8.70588e-09	4.39743e-07
LDHB	239	-0.29325	0.0580864	8.7197e-09	4.39743e-07
KLRB1	240	-0.413632	0.150316	9.52083e-09	4.78144e-07
LSM1	241	-0.243231	0.0327091	9.88279e-09	4.94262e-07
TCEAL4	242	-0.174577	0.0051705	9.9919e-09	4.97655e-07
HNMT	243	-0.114061	0.0216838	1.05917e-08	5.25357e-07
COX7C	244	-0.481259	0.200409	1.06714e-08	5.27143e-07
KIAA0020	245	-0.166819	0.000765558	1.08396e-08	5.33267e-07
MRPL48	246	-0.0918868	0.00417511	1.11686e-08	5.45945e-07
RPF1	247	-0.137582	0.00282746	1.11879e-08	5.45945e-07
CKLF	248	-0.152224	0.108548	1.13126e-08	5.49804e-07
UNC13D	249	0.160221	0.00264434	1.15904e-08	5.61039e-07
ATP5L	250	-0.264369	0.048434	1.17227e-08	5.65174e-07
SLC9A1	251	0.218773	0.00622576	1.21261e-08	5.82296e-07
CBWD5	252	-0.140805	0.000495693	1.25419e-08	5.99872e-07
CUTC	253	-0.147852	0.00569195	1.26875e-08	6.04438e-07
TAF1B	254	-0.132385	0.00135155	1.29543e-08	6.14718e-07
GGPS1	255	-0.138643	0.00502521	1.31477e-08	6.21447e-07
ANAPC10	256	-0.141497	0.000512776	1.3461e-08	6.33773e-07
SH2D1A	257	-0.298039	0.00237669	1.43139e-08	6.71304e-07
NSMCE2	258	-0.106366	0.000570974	1.49319e-08	6.97574e-07
EXOSC7	259	-0.151245	0.000606137	1.50754e-08	7.01559e-07
GTF2F2	260	-0.169008	0.00770883	1.53802e-08	7.10441e-07
MRPL3	261	-0.284689	0.0301679	1.53841e-08	7.10441e-07
LYPLAL1	262	-0.111845	0.0189983	1.58588e-08	7.29565e-07
UBA7	263	0.185452	0.0161394	1.63134e-08	7.47626e-07
EEF1E1	264	-0.226684	0.00129314	1.72008e-08	7.85307e-07
S100A8	265	-0.421815	0.205705	1.73369e-08	7.88537e-07
CMTM2	266	-0.280857	0.130783	1.77378e-08	8.03735e-07
STK11IP	267	0.123291	0.00545472	1.83757e-08	8.29521e-07
SMARCC2	268	0.206175	0.00186756	1.87017e-08	8.41087e-07
TBC1D10C	269	0.152942	0.00746215	2.11734e-08	9.48711e-07
LYRM2	270	-0.192471	0.00541342	2.15668e-08	9.6276e-07
HMGB2	271	-0.210962	0.0076449	2.19382e-08	9.75723e-07
PPWD1	272	-0.189106	0.000965226	2.20642e-08	9.77722e-07
TMBIM4	273	0.0283182	0.117691	2.23633e-08	9.84865e-07
CFDP1	274	-0.0578866	0.0192433	2.23889e-08	9.84865e-07
MRPL21	275	-0.123034	0.0277993	2.38628e-08	1.04589e-06
DDX1	276	-0.181597	0.00534694	2.46312e-08	1.07565e-06
CALML4	277	-0.198544	0.00912528	2.48189e-08	1.07994e-06
MRPL40	278	-0.0937416	0.000232323	2.49235e-08	1.08029e-06
SP140	279	-0.135197	0.00139512	2.50063e-08	1.08029e-06
ANKS1A	280	0.125057	0.00696505	2.51905e-08	1.08436e-06
PTPN6	281	0.162008	0.0153524	2.6496e-08	1.13321e-06
ATPIF1	282	-0.125412	0.0086636	2.65134e-08	1.13321e-06
ARMCX6	283	-0.121904	0.0026271	2.71797e-08	1.15758e-06
SET	284	-0.179152	0.00643103	2.8249e-08	1.19889e-06
PRIM1	285	-0.146678	0.000563179	2.92111e-08	1.23538e-06
HSPA4	286	-0.145033	0.00499103	2.98712e-08	1.25887e-06
LPP	287	0.14966	0.00937472	3.03283e-08	1.27258e-06
TMCO1	288	-0.307259	0.0432067	3.04522e-08	1.27258e-06
TMEM184B	289	0.187821	0.0027181	3.05132e-08	1.27258e-06
RPL6	290	-0.211809	0.0456383	3.16556e-08	1.31567e-06
VAMP1	291	0.173844	0.00499863	3.26418e-08	1.352e-06
RPS3A	292	-0.549518	0.210606	3.27702e-08	1.35267e-06
ZNF384	293	0.0995624	0.000516134	3.35672e-08	1.38084e-06
TAF12	294	-0.101869	0.0126763	3.40981e-08	1.39791e-06
TCEB1	295	-0.137664	0.0140916	3.42326e-08	1.39866e-06
DYNLT3	296	-0.162985	0.00826202	3.54361e-08	1.44294e-06
VBP1	297	-0.240949	0.00740842	3.56535e-08	1.44691e-06
ATG3	298	-0.190835	0.0211396	3.59481e-08	1.45397e-06
NOP10	299	-0.201641	0.0472039	3.61572e-08	1.45754e-06
MED12	300	0.130201	0.00569659	3.69949e-08	1.48633e-06
NAE1	301	-0.19159	0.00366901	3.734e-08	1.49521e-06
DNM2	302	0.1414	0.00163603	3.79574e-08	1.5149e-06
ASNSD1	303	-0.190211	0.0463455	4.08582e-08	1.6253e-06
MGAT1	304	0.135646	0.0115265	4.10889e-08	1.62909e-06
MRPL27	305	-0.134851	0.00517326	4.17604e-08	1.65029e-06
MAPK8IP3	306	0.138477	0.00495798	4.19215e-08	1.65124e-06
PSD4	307	0.205105	0.00854105	4.29193e-08	1.68504e-06
ANKRD13D	308	0.236968	0.00271053	4.38608e-08	1.71641e-06
MRFAP1L1	309	-0.227767	0.0258016	4.50749e-08	1.75821e-06
RFNG	310	0.183175	0.00210234	4.59295e-08	1.78577e-06
PRKCD	311	0.227479	0.00898268	5.27856e-08	2.04574e-06
PI4KB	312	0.135167	0.000525048	5.33468e-08	2.05989e-06
HSPA1L	313	0.130782	0.00542783	5.34924e-08	2.05989e-06
DENND1C	314	0.149375	0.00817607	5.54247e-08	2.1275e-06
TAX1BP1	315	-0.262992	0.0485243	5.92265e-08	2.26621e-06
MRPL13	316	-0.188741	0.00301386	6.08435e-08	2.32072e-06
RGL2	317	0.177566	0.000920932	6.32099e-08	2.39584e-06
TAF1	318	-0.0870523	0.000204366	6.32106e-08	2.39584e-06
CSF3R	319	0.229534	0.0170692	6.70661e-08	2.53401e-06
RABL3	320	-0.132053	0.0041318	6.83474e-08	2.57435e-06
KRCC1	321	-0.149271	0.0265929	7.13757e-08	2.68003e-06
COMMD8	322	-0.293622	0.0086022	7.25869e-08	2.71705e-06
RIT1	323	-0.0472308	0.0184653	7.3857e-08	2.75603e-06
ACTR6	324	-0.232202	0.00822262	7.6001e-08	2.82729e-06
BUD31	325	-0.119323	0.0108505	7.78935e-08	2.88877e-06
PPHLN1	326	-0.0690439	0.0227727	7.81874e-08	2.89078e-06
NOL12	327	0.13122	0.00730445	7.86012e-08	2.89719e-06
RPL24	328	-0.241423	0.0644376	8.01462e-08	2.94513e-06
ZNF622	329	-0.112012	0.00579256	8.04145e-08	2.946e-06
ZNF585A	330	-0.00166376	0.0138035	8.15549e-08	2.97873e-06
ITGB2	331	0.171418	0.0153212	8.55974e-08	3.11693e-06
SBF1	332	0.167087	0.00871355	8.93693e-08	3.24448e-06
PTPRE	333	0.17344	0.00836374	9.15625e-08	3.31412e-06
MCTS1	334	-0.0882535	0.00129693	9.22646e-08	3.31941e-06
IAH1	335	-0.180462	0.00728626	9.25335e-08	3.31941e-06
CCDC59	336	-0.250915	0.00184209	9.25347e-08	3.31941e-06
PRICKLE4	337	-0.121934	0.0321495	9.5072e-08	3.39026e-06
HDDC2	338	-0.178509	0.0175131	9.50725e-08	3.39026e-06
MYL6	339	-0.234302	0.0731529	9.54887e-08	3.39506e-06
GMEB2	340	0.104094	0.0119259	9.58794e-08	3.39893e-06
VDAC3	341	-0.141565	0.00876305	9.91845e-08	3.50578e-06
HINT1	342	-0.407369	0.120599	9.97992e-08	3.51587e-06
BANP	343	0.162552	0.00585017	1.00053e-07	3.51587e-06
EXOC7	344	0.184441	0.000992725	1.01719e-07	3.564e-06
SKIV2L2	345	-0.161554	0.000771511	1.04524e-07	3.64656e-06
AXIN1	346	0.104656	0.0125669	1.0468e-07	3.64656e-06
DENR	347	-0.170193	0.00719157	1.06315e-07	3.69285e-06
UQCRC2	348	-0.134039	0.00555513	1.10432e-07	3.82481e-06
PITPNM1	349	0.149197	0.0089879	1.1108e-07	3.83622e-06
DEK	350	-0.272651	0.0113962	1.14015e-07	3.92634e-06
RPS6KA1	351	0.148775	0.00766337	1.18271e-07	4.0613e-06
PDCD4	352	-0.157041	0.000752041	1.20251e-07	4.11758e-06
SYTL3	353	0.143009	0.0152733	1.24786e-07	4.26076e-06
ZNF350	354	-0.134803	0.000537842	1.26042e-07	4.2915e-06
TMEM175	355	0.146518	0.00664221	1.28971e-07	4.36872e-06
ZNF701	356	-0.119862	0.000403941	1.29036e-07	4.36872e-06
HOXB1	357	-0.00304548	0.00758028	1.3225e-07	4.46503e-06
GBA	358	0.18519	0.0046531	1.34294e-07	4.52035e-06
CASP4	359	-0.166795	0.0450529	1.34639e-07	4.52035e-06
CCDC58	360	-0.12239	0.000420726	1.40333e-07	4.69391e-06
SEC11C	361	-0.177467	0.0145813	1.40588e-07	4.69391e-06
DPH5	362	-0.13597	0.000669567	1.41994e-07	4.72777e-06
PRPF38A	363	-0.105057	0.000338096	1.42769e-07	4.74048e-06
GAA	364	0.223882	0.00154874	1.43674e-07	4.75744e-06
ARV1	365	-0.14704	0.000641064	1.44865e-07	4.78371e-06
SCO1	366	-0.131734	0.000527869	1.46983e-07	4.8318e-06
ENOX2	367	-0.138755	0.00748164	1.47123e-07	4.8318e-06
USP16	368	-0.164039	0.00948573	1.48549e-07	4.86538e-06
COQ5	369	-0.189207	0.00299795	1.50671e-07	4.92152e-06
TLN1	370	0.247516	0.0197601	1.56147e-07	5.08659e-06
HGS	371	0.179076	0.00173488	1.57245e-07	5.10854e-06
CLPTM1	372	0.16017	0.00386446	1.58307e-07	5.11921e-06
ISCA2	373	-0.0917425	0.000250665	1.58422e-07	5.11921e-06
EPN1	374	0.198203	0.00155075	1.67001e-07	5.38199e-06
NOL8	375	-0.14958	0.000923153	1.70186e-07	5.45692e-06
WDR12	376	-0.105917	0.000344728	1.70268e-07	5.45692e-06
ARHGAP9	377	0.190024	0.0105634	1.70685e-07	5.45692e-06
MRPL55	378	-0.108723	0.0137675	1.72329e-07	5.49494e-06
ACTN4	379	0.166835	0.00910535	1.74271e-07	5.54218e-06
CCND3	380	0.141854	0.00613261	1.90055e-07	6.01556e-06
TMEM167B	381	0.0083377	0.030841	1.90154e-07	6.01556e-06
BTF3	382	-0.210184	0.0156234	1.92562e-07	6.07579e-06
SNAPC4	383	0.133809	0.00287782	1.976e-07	6.21845e-06
MYO9B	384	0.222685	0.00214527	2.00335e-07	6.28812e-06
TYW3	385	-0.126984	0.000489532	2.03944e-07	6.38479e-06
CORO7	386	0.174085	0.00663927	2.05863e-07	6.42816e-06
RPL5	387	-0.266834	0.0493005	2.12856e-07	6.62934e-06
ZNF136	388	-0.0886133	0.00157071	2.25432e-07	7.00293e-06
RAD51C	389	-0.125848	0.00046947	2.28772e-07	7.07888e-06
OBFC1	390	-0.1338	0.00884087	2.29052e-07	7.07888e-06
WBP5	391	-0.0525914	0.00099508	2.34253e-07	7.2211e-06
GPBP1	392	-0.128217	0.0333439	2.34895e-07	7.22243e-06
UPF1	393	0.146263	0.00307983	2.43681e-07	7.4735e-06
SRRM2	394	0.178563	0.0173777	2.48569e-07	7.59661e-06
BSDC1	395	0.132034	0.00153093	2.48955e-07	7.59661e-06
FLOT2	396	0.192691	0.0123365	2.55245e-07	7.76885e-06
RPS20	397	-0.270877	0.051871	2.56138e-07	7.77641e-06
ZC3H3	398	0.157081	0.00644304	2.56873e-07	7.77912e-06
PPM1M	399	0.126185	0.00346284	2.72061e-07	8.21843e-06
THYN1	400	-0.115475	0.000912975	2.83937e-07	8.55574e-06
ICAM3	401	0.179332	0.0155001	2.90322e-07	8.72631e-06
TIPRL	402	-0.0359826	0.0172714	2.93293e-07	8.7869e-06
EBAG9	403	-0.165514	0.00653746	2.94071e-07	8.7869e-06
MRPL36	404	-0.15695	0.0117718	2.94525e-07	8.7869e-06
FES	405	0.216945	0.0137283	2.9786e-07	8.86446e-06
BEX2	406	-0.161009	0.0137353	3.00089e-07	8.90881e-06
KATNB1	407	0.121634	0.00382705	3.06496e-07	9.07664e-06
IQSEC1	408	0.153962	0.00664371	3.14106e-07	9.27923e-06
NUP37	409	-0.14672	0.00289829	3.15066e-07	9.28483e-06
HAT1	410	-0.1848	0.00775237	3.17718e-07	9.34013e-06
NBEAL2	411	0.228249	0.00886413	3.31053e-07	9.70846e-06
SKIV2L	412	0.157704	0.00476927	3.46803e-07	1.01297e-05
PTOV1	413	0.163522	0.00241991	3.47098e-07	1.01297e-05
CCNH	414	-0.0644764	0.00347225	3.49954e-07	1.01884e-05
ARID4B	415	-0.221479	0.00156336	3.68814e-07	1.07116e-05
UBE3A	416	-0.185921	0.00108935	3.71512e-07	1.0764e-05
SLC11A1	417	0.400928	0.00536849	3.90733e-07	1.12938e-05
PHF1	418	0.120097	0.00302169	3.92259e-07	1.13108e-05
ETFA	419	-0.151585	0.0109148	4.0218e-07	1.15692e-05
CLEC4A	420	-0.160251	0.0299982	4.038e-07	1.15881e-05
LTV1	421	-0.140531	0.000652761	4.05556e-07	1.16108e-05
HK3	422	0.233581	0.00593092	4.08526e-07	1.16682e-05
RAVER1	423	0.132801	0.00218385	4.11832e-07	1.16976e-05
ATXN7L3	424	0.152701	0.000760145	4.12226e-07	1.16976e-05
RBMX2	425	-0.122436	0.00049434	4.1247e-07	1.16976e-05
RBM10	426	0.137783	0.0115955	4.15718e-07	1.17621e-05
MYB	427	-0.0396087	0.0139429	4.1906e-07	1.18289e-05
SS18	428	-0.175938	0.00100007	4.25592e-07	1.19852e-05
PSMD10	429	-0.147599	0.000693147	4.30207e-07	1.20869e-05
MRPL42	430	-0.105553	0.000346852	4.32323e-07	1.21181e-05
UTP11L	431	-0.122072	0.00136652	4.33406e-07	1.21203e-05
INTS1	432	0.107682	0.00154309	4.50164e-07	1.25598e-05
DHX16	433	0.117429	0.00404607	4.52461e-07	1.25947e-05
RPL39	434	-0.397726	0.127525	4.57703e-07	1.26846e-05
ZNF282	435	0.101624	0.00111033	4.57795e-07	1.26846e-05
RPP40	436	-0.114166	0.000437497	4.60996e-07	1.27291e-05
ARHGAP1	437	0.133388	0.012107	4.61512e-07	1.27291e-05
SRF	438	0.118106	0.00564718	4.74141e-07	1.30475e-05
TM9SF3	439	-0.154597	0.00076663	4.86053e-07	1.33449e-05
JUND	440	0.158065	0.0156243	4.94516e-07	1.35464e-05
MKNK2	441	0.201577	0.00510089	4.96842e-07	1.35792e-05
ZWILCH	442	-0.120822	0.000479461	5.17286e-07	1.4106e-05
ULK1	443	0.215374	0.00876983	5.43015e-07	1.47742e-05
CSAD	444	0.224634	0.00173505	5.5727e-07	1.51279e-05
RCAN1	445	-0.125437	0.000511928	5.74851e-07	1.55701e-05
DEF8	446	0.212002	0.00450513	5.77539e-07	1.56078e-05
CLN3	447	0.118264	0.00326695	5.91784e-07	1.5957e-05
PPA1	448	-0.234416	0.0162128	6.03067e-07	1.62249e-05
ARPC2	449	-0.106508	0.00885262	6.09345e-07	1.63573e-05
XAB2	450	0.115718	0.0104029	6.14116e-07	1.64488e-05
COMMD10	451	-0.112424	0.00854533	6.17805e-07	1.65109e-05
CCT8	452	-0.149342	0.00133891	6.31573e-07	1.68415e-05
HSPA14	453	-0.130757	0.00171178	6.42499e-07	1.7095e-05
CCDC34	454	-0.084869	0.010054	6.48406e-07	1.72142e-05
ITGAL	455	0.117007	0.0258814	6.50363e-07	1.72278e-05
CCT2	456	-0.190487	0.00650764	6.51776e-07	1.72278e-05
SDF4	457	-0.06815	0.0142225	6.63613e-07	1.75022e-05
ITGAM	458	0.23049	0.0219875	6.71045e-07	1.76561e-05
EHD1	459	0.107157	0.0264248	6.72376e-07	1.76561e-05
PAK1IP1	460	-0.13607	0.00219995	6.79958e-07	1.78164e-05
LMF2	461	0.117836	0.00371095	6.87112e-07	1.79648e-05
STAT5B	462	0.196136	0.00133666	6.90014e-07	1.80016e-05
DTX2	463	0.180538	0.00469612	7.22665e-07	1.88127e-05
SERTAD1	464	0.13337	0.00688175	7.25826e-07	1.88543e-05
ASB6	465	0.113661	0.000445101	7.32022e-07	1.89743e-05
WDR1	466	0.168639	0.00339006	7.41553e-07	1.91617e-05
ZNF613	467	-0.106765	0.00470629	7.42431e-07	1.91617e-05
DNAJC7	468	-0.118051	0.00620349	7.4417e-07	1.91656e-05
ICT1	469	-0.111607	0.00400939	7.46194e-07	1.91767e-05
CLEC4D	470	-0.0282205	0.028031	7.63204e-07	1.95721e-05
ZNF23	471	-0.131746	0.000606699	7.66868e-07	1.96243e-05
LLGL1	472	0.106801	0.00508612	7.84183e-07	2.00048e-05
PMPCB	473	-0.106791	0.00502975	7.85056e-07	2.00048e-05
DICER1	474	0.179567	0.00374925	7.87501e-07	2.00248e-05
UBC	475	0.0984315	0.0061692	7.96117e-07	2.02013e-05
AP1M1	476	0.108194	0.0228869	8.30681e-07	2.1034e-05
FASTK	477	0.0922204	0.00160688	8.46738e-07	2.13957e-05
FAM160A2	478	0.130507	0.00345489	8.48616e-07	2.13983e-05
PCMT1	479	-0.136211	0.0332792	8.68123e-07	2.18444e-05
FAM73B	480	0.11951	0.000484025	8.77123e-07	2.20249e-05
DRG1	481	-0.109878	0.00775378	8.82569e-07	2.21156e-05
ATG16L2	482	0.223401	0.00235852	8.91509e-07	2.22559e-05
SEC24C	483	0.120671	0.00524549	8.91862e-07	2.22559e-05
AKAP11	484	-0.139879	0.000645336	9.14354e-07	2.277e-05
TMBIM6	485	0.126775	0.00562245	9.3471e-07	2.3229e-05
HSPA8	486	-0.18029	0.0199256	9.40101e-07	2.33149e-05
RAPGEFL1	487	0.0892555	0.000282744	9.47063e-07	2.34393e-05
CCM2	488	0.0872689	0.0150489	9.74851e-07	2.40776e-05
RBCK1	489	0.184041	0.00120504	9.88456e-07	2.43637e-05
CDKN2C	490	-0.159786	0.0077954	1.00554e-06	2.47166e-05
PTPN1	491	0.140163	0.00857756	1.00687e-06	2.47166e-05
LILRB3	492	0.268288	0.00659007	1.0164e-06	2.48997e-05
VPS37B	493	0.15879	0.00653001	1.0503e-06	2.56779e-05
NSMCE4A	494	-0.171225	0.00336272	1.05599e-06	2.57649e-05
FAM107B	495	-0.165491	0.0072546	1.05863e-06	2.5777e-05
SEC61A1	496	0.0585406	0.0297346	1.06341e-06	2.58412e-05
EDC4	497	0.125598	0.00735255	1.07702e-06	2.61194e-05
THADA	498	0.0291661	0.0134822	1.11461e-06	2.69768e-05
FASN	499	0.156922	0.0078569	1.12443e-06	2.71598e-05
MRPL47	500	-0.0833032	0.000236376	1.16543e-06	2.80938e-05
FBXO4	501	-0.106823	0.000394313	1.22611e-06	2.94977e-05
ADCY4	502	0.180108	0.00115106	1.23098e-06	2.95558e-05
KIAA1143	503	-0.0805091	0.000912147	1.24924e-06	2.99118e-05
MYBPC3	504	0.199252	0.00144695	1.25077e-06	2.99118e-05
DNAJB12	505	0.128258	0.0034422	1.26046e-06	3.00837e-05
ZNF302	506	-0.267446	0.00248178	1.26306e-06	3.00862e-05
RFESD	507	-0.0883472	0.000267125	1.26613e-06	3.01e-05
LRRCC1	508	-0.108818	0.00101782	1.32425e-06	3.14196e-05
PHF14	509	-0.0975882	0.00114546	1.37337e-06	3.25212e-05
ITGA5	510	0.179442	0.00488369	1.4362e-06	3.39422e-05
ATHL1	511	0.273033	0.010444	1.45256e-06	3.42616e-05
ZCCHC7	512	-0.206565	0.00150188	1.46633e-06	3.45188e-05
SH3BP5L	513	0.167739	0.00103619	1.48397e-06	3.48661e-05
BOLA3	514	-0.182296	0.00472686	1.4914e-06	3.49725e-05
CALM2	515	-0.182416	0.0175446	1.52359e-06	3.5658e-05
ARF1	516	0.090538	0.0124691	1.53587e-06	3.58757e-05
SLC15A4	517	0.190568	0.0141289	1.5615e-06	3.63877e-05
CLNS1A	518	-0.176987	0.0105744	1.56383e-06	3.63877e-05
INPPL1	519	0.177327	0.00117098	1.57997e-06	3.66924e-05
TXNDC9	520	-0.140221	0.00070851	1.64596e-06	3.81174e-05
ABTB1	521	0.239285	0.00254017	1.65204e-06	3.81174e-05
CBX6	522	0.119865	0.00324392	1.65234e-06	3.81174e-05
ACADM	523	-0.174211	0.00108129	1.65398e-06	3.81174e-05
FHOD1	524	0.132023	0.00166916	1.67413e-06	3.85081e-05
TATDN3	525	-0.11717	0.000507761	1.71627e-06	3.94022e-05
MAP3K11	526	0.181483	0.00124339	1.7377e-06	3.98185e-05
SQSTM1	527	0.168948	0.0141099	1.74751e-06	3.99673e-05
TNRC6A	528	-0.0215357	0.0192559	1.77641e-06	4.05512e-05
DVL3	529	0.123345	0.00214624	1.78304e-06	4.06256e-05
APBB1IP	530	0.206273	0.0191914	1.82146e-06	4.13979e-05
FLII	531	0.142253	0.00196748	1.8238e-06	4.13979e-05
PIK3R1	532	-0.188109	0.00216458	1.83281e-06	4.15241e-05
ASAP1	533	0.192664	0.00508475	1.86812e-06	4.22448e-05
PSMG1	534	-0.126841	0.000577116	1.88396e-06	4.24909e-05
ZUFSP	535	-0.116511	0.000472696	1.88606e-06	4.24909e-05
VPS8	536	0.135369	0.00733564	1.93481e-06	4.3508e-05
PIAS4	537	0.130045	0.00255809	1.94412e-06	4.35994e-05
HIST1H2BJ	538	-0.131985	0.00167687	1.94611e-06	4.35994e-05
ORAI3	539	0.0680873	0.000173994	1.95167e-06	4.36429e-05
AP1S1	540	-0.0229994	0.00869713	1.96243e-06	4.38023e-05
ATP5H	541	-0.146975	0.0104164	1.97148e-06	4.39229e-05
GNS	542	0.161093	0.0186548	1.99179e-06	4.42195e-05
RSL1D1	543	-0.157036	0.0151317	1.99213e-06	4.42195e-05
NUP88	544	-0.158435	0.0022445	2.0071e-06	4.44699e-05
MKNK1	545	0.187547	0.0080681	2.06974e-06	4.57735e-05
TMEM30A	546	-0.165735	0.000978749	2.08788e-06	4.60901e-05
AGTRAP	547	0.177243	0.00119832	2.10314e-06	4.63421e-05
PIK3CD	548	0.159821	0.0131026	2.10968e-06	4.64015e-05
PFKL	549	0.125031	0.00540808	2.13162e-06	4.67985e-05
ATP2A2	550	0.0311512	0.0100304	2.16375e-06	4.74177e-05
GAK	551	0.12856	0.0205223	2.19743e-06	4.80683e-05
VCL	552	0.255785	0.00246751	2.246e-06	4.90418e-05
TBC1D15	553	-0.211321	0.00169481	2.26494e-06	4.9366e-05
TNFRSF1A	554	0.175419	0.00542729	2.27765e-06	4.95446e-05
MAP4K2	555	0.142565	0.00253762	2.28136e-06	4.95446e-05
HDHD2	556	-0.136209	0.000677486	2.29998e-06	4.9859e-05
MYADM	557	0.257422	0.0171652	2.33214e-06	5.04655e-05
TNFSF10	558	-0.140406	0.0477199	2.36351e-06	5.10527e-05
PIGP	559	-0.0701151	0.0107328	2.37285e-06	5.11628e-05
CCDC65	560	-0.100915	0.00107676	2.40667e-06	5.17994e-05
CARD8	561	0.198055	0.00272892	2.45231e-06	5.26875e-05
SH2D3C	562	0.151374	0.00798402	2.46191e-06	5.27995e-05
ATP6V0B	563	0.169238	0.00620411	2.48676e-06	5.31902e-05
GATAD2A	564	0.12742	0.00361025	2.48894e-06	5.31902e-05
KIF13B	565	0.0894069	0.00271261	2.49807e-06	5.3269e-05
NCK1	566	-0.164973	0.00271582	2.50148e-06	5.3269e-05
NOL7	567	-0.137311	0.00469103	2.53216e-06	5.37911e-05
CDK5RAP3	568	0.143766	0.00756562	2.53492e-06	5.37911e-05
PRR14	569	0.17368	0.00262533	2.60664e-06	5.51328e-05
CISD1	570	-0.177713	0.0110232	2.60729e-06	5.51328e-05
RPL12	571	-0.168754	0.0212379	2.62347e-06	5.53033e-05
LAMP1	572	0.139455	0.0115307	2.62453e-06	5.53033e-05
CDV3	573	-0.146703	0.00887611	2.64844e-06	5.57097e-05
MFSD10	574	0.132758	0.00534394	2.68146e-06	5.63059e-05
SPTLC1	575	-0.00515914	0.00376848	2.69237e-06	5.64367e-05
RPL41	576	-0.320749	0.100812	2.70734e-06	5.65546e-05
CHCHD7	577	-0.138996	0.000730656	2.70738e-06	5.65546e-05
SEMA4D	578	0.174849	0.00306041	2.72619e-06	5.68492e-05
EXOSC1	579	-0.0475487	0.013397	2.73909e-06	5.70194e-05
ABCA7	580	0.226722	0.00520899	2.75788e-06	5.73117e-05
EBNA1BP2	581	-0.145665	0.00168423	2.79663e-06	5.80168e-05
TBXAS1	582	0.174169	0.00834	2.80812e-06	5.81552e-05
CYTH1	583	0.0844271	0.00558567	2.88453e-06	5.9635e-05
CCDC104	584	-0.103481	0.000394836	2.90971e-06	6.00525e-05
RAPGEF1	585	0.171486	0.00283449	2.92181e-06	6.01994e-05
RGS14	586	0.121585	0.00201157	2.99881e-06	6.16802e-05
WBP11	587	-0.0149434	0.0144537	3.01388e-06	6.18846e-05
AKAP7	588	-0.164513	0.000990688	3.02193e-06	6.19443e-05
CLK2	589	0.0640782	0.00718918	3.03807e-06	6.20652e-05
STXBP2	590	0.18383	0.0102969	3.03812e-06	6.20652e-05
RRP15	591	-0.112318	0.000458021	3.04394e-06	6.20788e-05
CNBP	592	-0.159435	0.0164157	3.0692e-06	6.24883e-05
DCTN1	593	0.147198	0.00466924	3.1585e-06	6.41981e-05
GPN1	594	-0.160584	0.0010389	3.16649e-06	6.42521e-05
SLC30A9	595	-0.176689	0.00120585	3.17582e-06	6.4333e-05
WDR61	596	-0.125214	0.00790463	3.20014e-06	6.4717e-05
KLF2	597	0.107345	0.0218249	3.22608e-06	6.51323e-05
RABEP1	598	-0.294542	0.0149329	3.25436e-06	6.55561e-05
OCIAD2	599	-0.17237	0.0182495	3.25796e-06	6.55561e-05
SNRNP27	600	-0.0818213	0.0143104	3.29294e-06	6.61496e-05
SLC12A9	601	0.199631	0.0017251	3.30229e-06	6.62272e-05
SUCLG1	602	-0.103497	0.00315518	3.3115e-06	6.63015e-05
RAB37	603	0.158102	0.00935059	3.38036e-06	6.7568e-05
UNC93B1	604	0.155594	0.00777683	3.41748e-06	6.81968e-05
TOP3B	605	0.105459	0.00238568	3.46807e-06	6.9092e-05
FGD3	606	0.175043	0.00699024	3.48043e-06	6.92237e-05
DNAJC15	607	-0.17597	0.00115496	3.53246e-06	7.0143e-05
MNT	608	0.125178	0.00642459	3.54935e-06	7.03623e-05
WBP2	609	0.171032	0.00802622	3.59536e-06	7.11293e-05
AKT1	610	0.108624	0.0151433	3.59984e-06	7.11293e-05
SPAG7	611	-0.0812885	0.011099	3.70143e-06	7.30169e-05
EIF2A	612	-0.270325	0.00280225	3.7869e-06	7.44815e-05
POLR2A	613	0.173845	0.0191086	3.78803e-06	7.44815e-05
PPM1F	614	0.210527	0.0103873	3.81467e-06	7.48831e-05
HSPH1	615	-0.171592	0.00281367	3.85123e-06	7.54779e-05
GPR137	616	0.160069	0.00274524	3.89379e-06	7.61881e-05
ANPEP	617	0.285908	0.00328237	3.92789e-06	7.67306e-05
ZNF271	618	-0.0304299	0.0122112	3.98672e-06	7.77539e-05
ACADVL	619	0.142175	0.00823522	4.01025e-06	7.80865e-05
MAN2A2	620	0.168491	0.00111659	4.01913e-06	7.81333e-05
FAM65A	621	0.153075	0.00642975	4.05854e-06	7.87723e-05
PACSIN2	622	0.227666	0.00206905	4.10517e-06	7.95492e-05
CHD2	623	-0.0970634	0.00054043	4.12328e-06	7.9742e-05
TMUB2	624	0.119875	0.00114822	4.12835e-06	7.9742e-05
UBAP2L	625	0.0879735	0.00932424	4.15801e-06	8.00865e-05
POLR3C	626	-0.112881	0.000508859	4.15948e-06	8.00865e-05
MVP	627	0.181825	0.00190478	4.18802e-06	8.04428e-05
NCF4	628	0.169358	0.00232919	4.1945e-06	8.04428e-05
DLD	629	-0.141876	0.000785381	4.198e-06	8.04428e-05
S100A12	630	-0.231201	0.140311	4.20925e-06	8.05303e-05
GTF2E2	631	-0.128397	0.00455977	4.25483e-06	8.12583e-05
MED28	632	-0.0396792	0.0175849	4.26079e-06	8.12583e-05
DIDO1	633	0.0307886	0.0111298	4.29357e-06	8.17541e-05
DNAJA2	634	-0.147614	0.0109554	4.32843e-06	8.2288e-05
IKBKG	635	0.121877	0.00385115	4.36415e-06	8.28365e-05
REXO1	636	0.101457	0.00286284	4.44859e-06	8.43064e-05
CRBN	637	-0.249208	0.0066448	4.48432e-06	8.48501e-05
ADAM19	638	0.172035	0.0156138	4.49695e-06	8.49556e-05
NACA	639	-0.18822	0.0288337	4.5253e-06	8.53575e-05
SRP54	640	-0.109868	0.00104195	4.56254e-06	8.59255e-05
BTBD10	641	-0.125068	0.00432218	4.60865e-06	8.66406e-05
REPIN1	642	0.141323	0.00235215	4.61489e-06	8.66406e-05
SSH3	643	0.166773	0.00110724	4.63894e-06	8.69567e-05
TRABD	644	0.157597	0.00422236	4.69828e-06	8.79322e-05
CCDC97	645	0.113586	0.00314257	4.82149e-06	9.00983e-05
WBP4	646	-0.163105	0.00101902	4.86803e-06	9.08272e-05
NDST2	647	0.0710006	0.0104929	4.91033e-06	9.14749e-05
IMPDH1	648	0.239605	0.00236315	4.96625e-06	9.23739e-05
PDLIM7	649	0.067092	0.0234832	4.98574e-06	9.25934e-05
ABR	650	0.152129	0.00714051	5.02037e-06	9.30931e-05
HMHA1	651	0.151949	0.00118037	5.04328e-06	9.33743e-05
GNPAT	652	-0.102883	0.00101064	5.06383e-06	9.3611e-05
TSPO	653	0.157349	0.00103315	5.13261e-06	9.4737e-05
NDUFA8	654	-0.152103	0.00290771	5.18599e-06	9.55761e-05
RASAL3	655	0.171835	0.0214484	5.23268e-06	9.62893e-05
MFSD5	656	0.0947128	0.00246271	5.34233e-06	9.81572e-05
ZNF598	657	0.10133	0.00432157	5.44221e-06	9.98401e-05
CCDC15	658	-0.0656212	0.00707486	5.49946e-06	0.000100601
FKBP3	659	-0.0662261	0.000170726	5.50037e-06	0.000100601
EML4	660	-0.169695	0.00533563	5.56099e-06	0.000101555
SHKBP1	661	0.227824	0.00241722	5.57875e-06	0.000101726
MGAT4A	662	-0.127931	0.000628492	5.61527e-06	0.000102237
LZTR1	663	0.116298	0.00836504	5.65574e-06	0.000102818
BIN3	664	0.128821	0.000692601	5.71184e-06	0.000103682
RHOT2	665	0.119888	0.00271308	5.82009e-06	0.000105402
TAF1C	666	0.156954	0.0133756	5.82754e-06	0.000105402
SLC35A1	667	-0.0857075	0.0410323	5.83282e-06	0.000105402
FOXJ2	668	0.0792248	0.0188054	5.86829e-06	0.000105884
TTF1	669	-0.0925661	0.000334282	5.89796e-06	0.00010626
DNAJC9	670	-0.123961	0.00374319	5.92904e-06	0.000106661
RBM33	671	0.124208	0.00275021	6.02581e-06	0.00010824
IBTK	672	-0.164787	0.00107483	6.08652e-06	0.000109168
KPNA4	673	-0.0887399	0.0135269	6.15656e-06	0.000110113
MIOS	674	-0.114826	0.000534598	6.15749e-06	0.000110113
CAMK2G	675	0.171868	0.00122899	6.19574e-06	0.000110633
INPP4B	676	-0.048405	0.00615461	6.2355e-06	0.000111178
ABCE1	677	-0.150445	0.00506469	6.32965e-06	0.00011269
MYPOP	678	0.120898	0.00157613	6.35549e-06	0.000112925
MPHOSPH9	679	-0.121178	0.00366635	6.36159e-06	0.000112925
ACTR10	680	-0.119182	0.00751219	6.40853e-06	0.000113591
ALKBH3	681	-0.106958	0.00159415	6.42567e-06	0.000113593
SNX27	682	0.169204	0.00796492	6.42771e-06	0.000113593
RECQL	683	-0.119517	0.00641433	6.43688e-06	0.000113593
STK25	684	0.0928221	0.00219569	6.46472e-06	0.000113917
CTNS	685	0.105368	0.000685349	6.4849e-06	0.000114106
MAZ	686	0.0181108	0.0116545	6.51956e-06	0.000114549
NDUFS3	687	-0.129264	0.00615941	6.55572e-06	0.000115016
WAS	688	0.172547	0.00876186	6.57436e-06	0.000115176
TOM1	689	0.187215	0.00151562	6.83742e-06	0.00011961
XPO6	690	0.197902	0.00893438	6.99799e-06	0.000122077
SMC3	691	-0.140057	0.00310497	6.99869e-06	0.000122077
PARVG	692	0.116461	0.00333086	7.03855e-06	0.000122595
PISD	693	0.191226	0.00155514	7.10068e-06	0.000123498
HSDL1	694	-0.0751901	0.000218375	7.12086e-06	0.000123671
SLC25A46	695	-0.160769	0.00103011	7.2072e-06	0.00012499
PPCS	696	-0.116395	0.00292814	7.28452e-06	0.00012615
APLP2	697	0.142315	0.0111666	7.32811e-06	0.000126723
NGRN	698	-0.131843	0.00323432	7.36444e-06	0.000127169
TRIM41	699	0.0571706	0.00924153	7.37981e-06	0.000127252
BOLA2	700	-0.149055	0.0313656	7.45459e-06	0.000128357
CDC5L	701	-0.110739	0.000534175	7.48265e-06	0.000128657
HSPA1B	702	0.138825	0.0310621	7.51039e-06	0.00012895
G6PD	703	0.207805	0.00374277	7.71371e-06	0.000132252
ALKBH5	704	0.118804	0.00287635	7.75119e-06	0.000132706
AKNA	705	0.128797	0.00721241	7.90057e-06	0.000135072
PNPLA6	706	0.178542	0.00135802	7.95428e-06	0.000135797
NAP1L1	707	-0.150605	0.00778628	7.97822e-06	0.000136013
DENND3	708	0.215547	0.00199684	8.21032e-06	0.000139627
VAMP8	709	-0.201076	0.0347611	8.21335e-06	0.000139627
ARHGEF18	710	0.108908	0.0188776	8.23094e-06	0.000139729
POLE4	711	-0.144118	0.0272152	8.32271e-06	0.000141088
ARCN1	712	0.0751593	0.0132574	8.50122e-06	0.000143912
ZNF17	713	-0.121138	0.000618229	8.51584e-06	0.000143957
ALOX5	714	0.213917	0.0102767	8.55266e-06	0.000144377
RWDD3	715	-0.0530737	0.000114961	8.69626e-06	0.000146596
ZNF146	716	-0.158195	0.00108044	8.71072e-06	0.000146634
POLB	717	-0.118079	0.00852528	8.76151e-06	0.000147284
DHX34	718	0.199415	0.00170128	8.8407e-06	0.000148408
ZNF770	719	-0.0475365	0.00962375	8.88141e-06	0.000148884
MTERFD1	720	-0.126982	0.000684084	8.93615e-06	0.000149594
COL18A1	721	0.234657	0.0279871	8.96804e-06	0.000149858
RNF44	722	0.0808076	0.0118346	8.97684e-06	0.000149858
DYRK4	723	-0.115523	0.000594841	9.00298e-06	0.000150087
ZNF451	724	-0.101278	0.000443486	9.12764e-06	0.000151955
MRPL24	725	-0.109326	0.00749769	9.1757e-06	0.000152381
FAM53C	726	0.183865	0.00649894	9.18397e-06	0.000152381
RPS4X	727	-0.152347	0.0205031	9.19117e-06	0.000152381
VPS52	728	0.0939903	0.0024344	9.206e-06	0.000152418
POR	729	0.152295	0.000994272	9.23231e-06	0.000152643
NRBP2	730	0.090429	0.00254506	9.2664e-06	0.000152871
GZMA	731	-0.364877	0.0463537	9.27145e-06	0.000152871
CHFR	732	0.0980632	0.00654772	9.32801e-06	0.000153594
GPR65	733	-0.148941	0.00851616	9.35377e-06	0.000153808
KIAA0556	734	0.138407	0.000815142	9.37714e-06	0.000153982
NCSTN	735	0.151407	0.0161439	9.41026e-06	0.00015411
ARID3B	736	0.136529	0.000808791	9.41475e-06	0.00015411
KATNA1	737	-0.104109	0.00207613	9.42328e-06	0.00015411
AKAP13	738	0.216343	0.00195653	9.48455e-06	0.000154542
ZNF277	739	-0.0788724	0.0149394	9.48759e-06	0.000154542
RPL4	740	-0.185747	0.0310147	9.48815e-06	0.000154542
ZNF155	741	-0.133913	0.0258742	9.59149e-06	0.000155901
CLDN9	742	0.177685	0.00744275	9.59749e-06	0.000155901
BRPF1	743	0.12594	0.0075517	9.63283e-06	0.000156265
MYH9	744	0.246456	0.0102282	9.73138e-06	0.000157477
EEF1D	745	-0.0989219	0.0135317	9.73371e-06	0.000157477
B2M	746	-0.182686	0.0292928	9.81468e-06	0.000158445
DNM1L	747	-0.114986	0.00214685	9.81986e-06	0.000158445
DDX50	748	-0.127002	0.00208564	1.00361e-05	0.000161718
HSPD1	749	-0.158849	0.00347161	1.01031e-05	0.00016258
VAMP7	750	-0.154702	0.00875487	1.01728e-05	0.000163484
SIGLEC5	751	0.280605	0.00350751	1.02039e-05	0.000163764
RIC8A	752	0.0954785	0.00268082	1.03947e-05	0.000166551
ACVR1B	753	0.120452	0.00361969	1.04051e-05	0.000166551
TRPT1	754	0.117651	0.00312394	1.06089e-05	0.0001695
CHST7	755	0.171133	0.00319069	1.06175e-05	0.0001695
FAM96A	756	-0.107928	0.0237374	1.0632e-05	0.000169507
PARL	757	-0.109523	0.00272842	1.0665e-05	0.000169808
RAB40C	758	0.110093	0.0128626	1.07398e-05	0.000170774
NOP58	759	-0.186351	0.00153256	1.08681e-05	0.000172586
PCM1	760	-0.129809	0.00409967	1.08955e-05	0.000172794
NKRF	761	-0.14159	0.00696941	1.09217e-05	0.000172981
SUV420H1	762	-0.0870888	0.00220218	1.10242e-05	0.000174375
INTS3	763	0.147452	0.0021963	1.10629e-05	0.00017476
RSL24D1	764	-0.31721	0.0679349	1.11406e-05	0.000175756
TNFRSF14	765	0.129916	0.00476947	1.116e-05	0.000175832
PTBP1	766	0.0880681	0.017155	1.12032e-05	0.000176117
TFB2M	767	-0.153741	0.00102391	1.12073e-05	0.000176117
CCDC91	768	-0.123016	0.000623583	1.13351e-05	0.000177893
ARFGAP1	769	0.114861	0.000571957	1.13992e-05	0.000178666
PUM1	770	0.0831016	0.0189619	1.15063e-05	0.000179824
GNB4	771	-0.123712	0.000629771	1.15127e-05	0.000179824
LRWD1	772	0.169896	0.00128838	1.15178e-05	0.000179824
ZC3H12A	773	0.0650911	0.00610882	1.15511e-05	0.000179965
ALDOA	774	0.137797	0.00889411	1.15567e-05	0.000179965
UBE2L3	775	0.0444043	0.0154229	1.15779e-05	0.000180063
TIRAP	776	0.109987	0.000533808	1.18064e-05	0.000183379
COMMD1	777	-0.103812	0.00808706	1.19092e-05	0.000184687
FERMT3	778	0.133342	0.00515802	1.19212e-05	0.000184687
CSDE1	779	-0.0549662	0.000129955	1.19655e-05	0.000185135
GDI2	780	-0.173741	0.00829148	1.20648e-05	0.000186433
CYBA	781	0.144716	0.000936909	1.21101e-05	0.000186892
RABGGTB	782	-0.125347	0.000834204	1.22111e-05	0.00018821
GNAI2	783	0.155209	0.00109598	1.23179e-05	0.00018957
MZF1	784	0.122975	0.00381587	1.23308e-05	0.00018957
GLRX	785	-0.19424	0.0461296	1.23623e-05	0.000189608
CD226	786	-0.149347	0.000922011	1.23647e-05	0.000189608
GDPD3	787	0.163401	0.00145685	1.24863e-05	0.000191229
MSH6	788	-0.125979	0.000676271	1.25683e-05	0.000192241
TTC25	789	-0.147246	0.00953986	1.2716e-05	0.000194085
EEF1A1	790	-0.18289	0.0184835	1.27211e-05	0.000194085
TNNC2	791	-0.00549548	0.00331772	1.27672e-05	0.000194543
LILRA6	792	0.122233	0.00483304	1.28136e-05	0.000195003
LCOR	793	0.0917483	0.00520381	1.28529e-05	0.000195355
ADCY3	794	0.0672794	0.0121072	1.28917e-05	0.000195697
MAP3K3	795	0.161709	0.00118014	1.29143e-05	0.000195794
TMEM14B	796	-0.191789	0.00268936	1.29767e-05	0.000196493
PSTPIP1	797	0.16511	0.00122314	1.30225e-05	0.000196939
PWP1	798	-0.141063	0.000886104	1.30483e-05	0.000197082
SCAP	799	0.172133	0.00916265	1.31616e-05	0.000198544
MAPK7	800	0.0724961	0.00442656	1.32263e-05	0.000199271
ZNF213	801	0.106981	0.00168852	1.33513e-05	0.000200902
ZNF813	802	-0.0597812	0.000149161	1.33935e-05	0.000201286
ZNF280D	803	-0.062633	0.000178634	1.35274e-05	0.000203046
BNIP1	804	-0.0923686	0.00230935	1.36169e-05	0.000203896
CARD16	805	-0.13483	0.00803258	1.36179e-05	0.000203896
OCIAD1	806	-0.115571	0.00178096	1.36389e-05	0.000203958
SORL1	807	0.217766	0.0244212	1.36673e-05	0.00020407
HMGN1	808	-0.178887	0.0105933	1.36803e-05	0.00020407
PPIL1	809	-0.0935701	0.000388777	1.37093e-05	0.00020425
DTWD1	810	-0.0892999	0.000330857	1.38384e-05	0.000205919
NIF3L1	811	-0.136513	0.000852906	1.38743e-05	0.000206198
CREB5	812	0.211344	0.00202555	1.38983e-05	0.0002063
CCNI	813	0.13042	0.0081211	1.39339e-05	0.000206574
TP53I11	814	0.175097	0.00143642	1.42729e-05	0.00021134
SLC35B3	815	-0.0557294	0.00867119	1.44236e-05	0.00021331
STARD7	816	-0.153879	0.00261368	1.45781e-05	0.000215331
EIF1AY	817	-0.209222	0.0155767	1.46551e-05	0.000216203
WDR6	818	0.155616	0.0107868	1.49424e-05	0.000220172
EAF2	819	-0.0889357	0.000331211	1.51933e-05	0.000223596
RPS21	820	-0.138816	0.00564106	1.53228e-05	0.000225226
OSTC	821	-0.173149	0.00311614	1.53446e-05	0.000225272
LSM7	822	-0.13637	0.0159629	1.55051e-05	0.000227352
EIF3M	823	-0.121736	0.00766637	1.5541e-05	0.0002276
CDC42	824	-0.120459	0.0114672	1.56333e-05	0.000228675
CIR1	825	-0.0665447	0.0101352	1.58569e-05	0.000231664
MRI1	826	0.0717853	0.017171	1.59162e-05	0.000232249
SPSB3	827	0.135603	0.00316335	1.59483e-05	0.000232436
GRSF1	828	-0.122056	0.000689843	1.60917e-05	0.000234243
PLCB2	829	0.194845	0.00176035	1.61512e-05	0.000234826
RPS12	830	-0.119409	0.0116373	1.63441e-05	0.000237344
EFHD2	831	0.15926	0.00521729	1.65046e-05	0.000239168
TRPC4AP	832	0.127631	0.00458601	1.65094e-05	0.000239168
CKAP4	833	0.161225	0.00121664	1.65593e-05	0.000239603
MAST3	834	0.186925	0.00861035	1.68336e-05	0.000243279
ATXN3	835	0.0506089	0.0153172	1.70002e-05	0.000245393
KLF6	836	0.136283	0.00546373	1.70596e-05	0.000245956
WDR37	837	0.00299203	0.0118715	1.71104e-05	0.000246394
SULT1A3	838	0.110088	0.00537878	1.72565e-05	0.000248202
RPL35	839	-0.24297	0.0433015	1.72822e-05	0.000248274
HIBCH	840	-0.119097	0.00225601	1.73817e-05	0.000249407
IRAK4	841	-0.106885	0.00051251	1.76391e-05	0.0002528
RPL35A	842	-0.108909	0.0699707	1.78654e-05	0.000255739
STAT3	843	0.160522	0.0134095	1.82162e-05	0.00026045
UTP6	844	-0.11477	0.00515087	1.84743e-05	0.000263828
SAFB2	845	0.123238	0.00312567	1.86887e-05	0.000266573
SNRPF	846	-0.159778	0.00855963	1.87498e-05	0.000267129
RBM23	847	0.148378	0.00687556	1.89332e-05	0.000269423
KTN1	848	-0.169723	0.00295995	1.9047e-05	0.000270724
SEPN1	849	0.12599	0.00227198	1.90855e-05	0.000270951
REM2	850	0.149516	0.00107224	1.98993e-05	0.000282172
SLC16A5	851	0.181407	0.00154353	1.9966e-05	0.000282785
COPS3	852	-0.10234	0.00867496	2.01042e-05	0.000284408
NR1H2	853	0.127727	0.00116349	2.0132e-05	0.000284467
TRAPPC6B	854	-0.122225	0.000655361	2.01897e-05	0.000284949
ZNF426	855	-0.0781174	0.000260633	2.02236e-05	0.000285093
VPS33B	856	0.0457565	0.00738908	2.0387e-05	0.000287061
ATP6V0E1	857	-0.0741314	0.0120055	2.06178e-05	0.000289972
GLOD4	858	-0.129848	0.000811084	2.07131e-05	0.000290635
AGPS	859	-0.116154	0.000603869	2.07132e-05	0.000290635
UPF2	860	-0.121937	0.00512772	2.10054e-05	0.000294393
BEST1	861	0.231668	0.00250252	2.10904e-05	0.000295242
AP3D1	862	0.128831	0.000738466	2.14618e-05	0.000300092
TMUB1	863	0.100611	0.00279108	2.15058e-05	0.000300262
STX16	864	0.157809	0.00156042	2.15238e-05	0.000300262
RAB24	865	0.167079	0.00132104	2.17158e-05	0.00030259
MTCH1	866	0.0972573	0.00214767	2.18219e-05	0.000303718
LRCH4	867	0.17234	0.0149444	2.18586e-05	0.000303877
KCTD5	868	0.0452285	0.0090651	2.20427e-05	0.000306084
DGKQ	869	0.11408	0.0241293	2.23985e-05	0.000310666
TRIM26	870	0.0721378	0.0115584	2.24663e-05	0.000310893
MRPL15	871	-0.0555998	0.00926205	2.24664e-05	0.000310893
CRIPT	872	-0.129712	0.00274237	2.27487e-05	0.000314438
SSH2	873	0.215055	0.00397771	2.27788e-05	0.000314493
PABPN1	874	0.121746	0.000691482	2.28843e-05	0.000315589
FUNDC1	875	-0.0750464	0.0011782	2.29131e-05	0.000315624
HMGCS1	876	-0.139347	0.000849839	2.3068e-05	0.000317063
STRADA	877	0.102153	0.00409239	2.30701e-05	0.000317063
CDC42EP4	878	0.102246	0.000843452	2.34905e-05	0.000322473
EXOSC3	879	-0.135947	0.000856764	2.37759e-05	0.000326019
SNRPD1	880	-0.0797551	0.0013056	2.41194e-05	0.000330354
CRIPAK	881	0.181519	0.00823448	2.42834e-05	0.000332223
SMAP2	882	0.207571	0.00581013	2.43807e-05	0.000333175
GLMN	883	-0.123265	0.00069218	2.45473e-05	0.000334995
SIK1	884	-0.0341778	0.00980804	2.45694e-05	0.000334995
ACTN1	885	0.219263	0.0141813	2.48538e-05	0.000338489
CIDEB	886	0.138109	0.000905322	2.4994e-05	0.000340015
PHACTR2	887	0.0360177	0.0134639	2.51178e-05	0.000340966
ACIN1	888	0.11286	0.00116877	2.51205e-05	0.000340966
CASZ1	889	0.0895968	0.0010319	2.51977e-05	0.000341628
PARP4	890	0.155702	0.00145818	2.53021e-05	0.000342305
E4F1	891	0.108916	0.00604508	2.53044e-05	0.000342305
H3F3B	892	-0.109596	0.00860525	2.58237e-05	0.000348939
SMARCD1	893	0.106372	0.00370192	2.58545e-05	0.000348964
FGR	894	0.133838	0.00706484	2.59857e-05	0.000350341
USO1	895	-0.152973	0.00112818	2.68838e-05	0.000362046
ZCCHC9	896	-0.102479	0.00193154	2.71995e-05	0.000365618
SLCO3A1	897	0.14025	0.00106404	2.72097e-05	0.000365618
ACSS2	898	0.144702	0.00623539	2.72865e-05	0.000366241
CABIN1	899	0.146623	0.00376265	2.75072e-05	0.000368792
P4HB	900	0.045354	0.0163638	2.77993e-05	0.000372295
ATP6V0D1	901	0.196171	0.00184238	2.82916e-05	0.000378466
ATP6V0A1	902	0.188013	0.00172152	2.86276e-05	0.000382537
SFXN5	903	0.125747	0.000742387	2.86711e-05	0.000382695
ZNF700	904	-0.166655	0.00128513	2.88661e-05	0.000384519
RNF24	905	0.238088	0.00319543	2.88716e-05	0.000384519
THOC2	906	-0.135895	0.00158176	2.89919e-05	0.000385695
KIAA0141	907	0.0336453	0.00619276	2.90441e-05	0.000385963
AP3S1	908	-0.0633516	0.00786529	2.92459e-05	0.000388217
GORASP1	909	0.101315	0.000496489	2.99424e-05	0.000397025
PTPN2	910	-0.125955	0.000756188	3.01077e-05	0.000398688
GPR132	911	0.0892701	0.000402725	3.0134e-05	0.000398688
RPL30	912	-0.188229	0.0406315	3.02476e-05	0.000399753
RNF4	913	0.0338273	0.00769743	3.05146e-05	0.000402839
SENP6	914	-0.0821866	0.0173053	3.06698e-05	0.000404282
BCKDK	915	0.173634	0.00158163	3.06909e-05	0.000404282
UBR7	916	-0.080583	0.000299928	3.08497e-05	0.00040593
GPR108	917	0.109934	0.00102765	3.10615e-05	0.00040827
GDAP2	918	-0.0800325	0.000284134	3.1533e-05	0.000414016
RHBDF2	919	0.131503	0.0109605	3.16214e-05	0.000414725
RRBP1	920	0.0788435	0.0178312	3.16871e-05	0.000414816
ILF2	921	-0.109634	0.00433659	3.16971e-05	0.000414816
RGS19	922	0.132786	0.00585312	3.17607e-05	0.000415197
DBNL	923	0.105377	0.00480057	3.1826e-05	0.0004156
PADI4	924	0.293023	0.00427837	3.18759e-05	0.000415801
MAP4K4	925	0.144651	0.00102474	3.20009e-05	0.000416981
MAP4K5	926	-0.0563706	0.00873093	3.20577e-05	0.00041727
ACTL6A	927	-0.116699	0.00066782	3.2138e-05	0.000417864
RBBP8	928	-0.158316	0.005238	3.22792e-05	0.000419227
SLC25A29	929	0.111444	0.00227032	3.23124e-05	0.000419227
TRIM11	930	0.0812696	0.00260866	3.26392e-05	0.000423011
NEDD8	931	-0.0817638	0.00363362	3.27843e-05	0.000424435
ARHGAP27	932	0.104723	0.000539299	3.28215e-05	0.000424461
NMD3	933	-0.0988031	0.000458036	3.30021e-05	0.000426338
RAC2	934	0.0999451	0.00710339	3.32035e-05	0.000428482
KIAA0922	935	0.0935249	0.00438991	3.32795e-05	0.000429004
TM9SF1	936	0.111595	0.00165234	3.33712e-05	0.000429725
TTYH3	937	0.113542	0.0029566	3.36894e-05	0.00043336
COIL	938	-0.023609	0.00868229	3.41197e-05	0.000438427
CD160	939	-0.240053	0.00272281	3.42329e-05	0.000439119
SP1	940	0.141439	0.00318576	3.42536e-05	0.000439119
SNRNP70	941	0.135766	0.0107542	3.42828e-05	0.000439119
GLTSCR1	942	0.0758372	0.00693841	3.43967e-05	0.000439387
MCEE	943	-0.133171	0.00172141	3.4407e-05	0.000439387
ANKMY2	944	-0.107284	0.00052925	3.44332e-05	0.000439387
TRAPPC2L	945	-0.151031	0.00512447	3.44496e-05	0.000439387
EXOSC9	946	-0.0760201	0.0018964	3.45679e-05	0.00044043
RNF31	947	0.121047	0.00609377	3.495e-05	0.000444645
ZC3H4	948	0.0718003	0.0077978	3.49725e-05	0.000444645
ARID1A	949	0.142408	0.00514483	3.50552e-05	0.000445226
ACTR1A	950	0.0987017	0.00421884	3.55081e-05	0.000450498
GMIP	951	0.15257	0.00183143	3.5545e-05	0.000450498
OSBPL8	952	-0.0731496	0.027087	3.59083e-05	0.000454249
CALCOCO1	953	0.0539938	0.00786714	3.59163e-05	0.000454249
ADPGK	954	0.081092	0.00253211	3.59961e-05	0.000454781
CRYZ	955	-0.148135	0.00719441	3.60396e-05	0.000454853
MRPS9	956	-0.126705	0.000786158	3.65296e-05	0.000460556
MKL1	957	0.112417	0.00385692	3.67896e-05	0.000463036
NLRX1	958	0.0990668	0.000485048	3.68031e-05	0.000463036
NOTCH1	959	0.164674	0.0115164	3.69434e-05	0.000464316
AKR1C4	960	-0.0609636	0.00263396	3.74738e-05	0.000470491
CHMP1A	961	0.10843	0.000581996	3.75195e-05	0.000470575
USP34	962	0.0314963	0.00674557	3.78058e-05	0.000473673
ZSCAN16	963	-0.0976493	0.000583494	3.83811e-05	0.000480381
SETMAR	964	-0.0473021	0.00375531	3.84283e-05	0.00048041
OPLAH	965	0.158146	0.00123365	3.84631e-05	0.00048041
FCGRT	966	0.154004	0.00371335	3.85513e-05	0.000481014
VARS2	967	0.117729	0.00463766	3.86699e-05	0.000481994
MED22	968	0.117257	0.00367444	3.89636e-05	0.000485153
ZNF787	969	0.162556	0.00127984	3.91193e-05	0.000486589
DAG1	970	0.072307	0.000268102	3.9247e-05	0.000487378
DAPK2	971	0.168271	0.00144063	3.92636e-05	0.000487378
BRE	972	0.0940043	0.00140749	3.94172e-05	0.000488781
P2RY13	973	-0.106498	0.0208793	3.94577e-05	0.000488781
IGF2R	974	0.265959	0.00873502	3.96842e-05	0.000491081
ORMDL1	975	-0.152085	0.00435074	3.99211e-05	0.000493506
TSPAN32	976	0.125127	0.0037491	3.99973e-05	0.000493943
PCNXL3	977	0.107364	0.000858246	4.0273e-05	0.000496616
ZNF324	978	0.125562	0.000803563	4.03372e-05	0.000496616
TMX1	979	-0.21808	0.00237801	4.03374e-05	0.000496616
MRPL1	980	-0.104645	0.000509348	4.05212e-05	0.00049837
PTPN4	981	-0.1732	0.00785282	4.06232e-05	0.000499115
RNF7	982	-0.182714	0.00403843	4.11021e-05	0.000504065
STK40	983	0.166355	0.00907461	4.11097e-05	0.000504065
XYLT2	984	0.113279	0.00147819	4.12733e-05	0.000505498
TIMP1	985	0.161866	0.0201303	4.13344e-05	0.000505498
CCDC130	986	0.117331	0.00710566	4.13525e-05	0.000505498
SEC61G	987	-0.118052	0.00951927	4.16387e-05	0.000508481
TAF7	988	-0.147405	0.00701784	4.18244e-05	0.000510232
GMPPA	989	0.133093	0.00379071	4.2551e-05	0.000518571
PGK1	990	0.120797	0.003863	4.32775e-05	0.000526892
MIS12	991	-0.149652	0.00111249	4.34365e-05	0.000528294
TPP1	992	0.161187	0.0116685	4.38356e-05	0.000532611
TRRAP	993	0.0764513	0.0161541	4.41547e-05	0.000535948
HDAC2	994	-0.129743	0.00716406	4.48039e-05	0.000543031
CNOT1	995	0.0330695	0.0118994	4.48283e-05	0.000543031
MYO1F	996	0.170706	0.00379811	4.53694e-05	0.000549034
EP300	997	0.12908	0.0115178	4.55888e-05	0.000551123
BZW2	998	-0.110217	0.00060923	4.56335e-05	0.000551123
CAPN3	999	0.117633	0.000666066	4.66844e-05	0.000563251
CCDC146	1000	-0.105667	0.000554805	4.71788e-05	0.000568646
STK10	1001	0.12314	0.00333971	4.75494e-05	0.00057254
NUCB1	1002	0.14781	0.0102582	4.79304e-05	0.000576251
TBC1D10A	1003	0.0183784	0.00652225	4.79532e-05	0.000576251
SNRPD3	1004	-0.0880224	0.000483248	4.8257e-05	0.000579324
SF3B4	1005	0.1096	0.00874574	4.83661e-05	0.000580057
FRAT1	1006	0.170233	0.00202288	4.85207e-05	0.000581332
DUS4L	1007	-0.060837	0.000188772	4.85804e-05	0.00058147
RAB5B	1008	0.135414	0.000923887	4.88622e-05	0.000584262
NSFL1C	1009	0.147387	0.00110696	4.89834e-05	0.00058513
CLCN7	1010	0.143879	0.0107901	4.91059e-05	0.000586013
ANKRD11	1011	0.116795	0.0035484	4.95074e-05	0.000590221
TMEM167A	1012	-0.110781	0.000705836	5.05822e-05	0.000602438
BCLAF1	1013	-0.174098	0.00362258	5.16223e-05	0.000614219
PRMT1	1014	-0.0667253	0.0115677	5.17315e-05	0.000614911
BTBD7	1015	0.0190256	0.00854635	5.20564e-05	0.000617978
THUMPD2	1016	-0.0800424	0.000318631	5.2092e-05	0.000617978
CD3G	1017	-0.187905	0.00570487	5.22157e-05	0.000618835
ESD	1018	-0.0885782	0.00805012	5.26129e-05	0.00062293
ACAT2	1019	-0.0998235	0.00249291	5.29792e-05	0.000626652
KLRC3	1020	-0.197758	0.00187892	5.32323e-05	0.000629028
TNFRSF9	1021	0.181887	0.0209937	5.34588e-05	0.000631086
OMA1	1022	-0.11651	0.00329419	5.35633e-05	0.000631701
ZNF746	1023	0.157687	0.00351548	5.40585e-05	0.000636918
DPEP2	1024	0.165251	0.00641382	5.43745e-05	0.000639973
MICB	1025	0.0101219	0.0188547	5.44239e-05	0.000639973
UBE2Z	1026	0.0113862	0.00688524	5.47019e-05	0.000642614
TOMM20	1027	-0.120824	0.00283767	5.54428e-05	0.000650683
WWC3	1028	0.131806	0.00347105	5.55517e-05	0.000651327
CTRL	1029	0.10078	0.000974195	5.56632e-05	0.000652
RBM12	1030	-0.116595	0.00194118	5.59905e-05	0.000655198
CSTF3	1031	-0.0845364	0.00087791	5.65031e-05	0.000659975
DUSP18	1032	0.148026	0.00191374	5.65082e-05	0.000659975
SLC25A36	1033	-0.10363	0.000521588	5.71204e-05	0.000666479
HDAC3	1034	0.0428559	0.0042337	5.72896e-05	0.000667806
REEP5	1035	-0.212792	0.00580957	5.75949e-05	0.000670717
DYSF	1036	0.270978	0.0122047	5.79084e-05	0.000673716
FOXO3	1037	0.149897	0.0431091	5.82579e-05	0.000677128
APAF1	1038	0.100038	0.00296698	5.86454e-05	0.000680976
SLC9A8	1039	0.14642	0.00111314	5.89378e-05	0.000683712
ITPRIP	1040	0.177281	0.00456275	5.90653e-05	0.000684533
ROCK1	1041	-0.0401016	0.00650065	5.91547e-05	0.00068491
RGS10	1042	-0.19506	0.0147573	5.9379e-05	0.000686847
ZFP37	1043	-0.0228901	0.00114859	5.95379e-05	0.000687831
RPGR	1044	-0.0375972	0.0034602	5.95781e-05	0.000687831
FBXO8	1045	-0.106653	0.000566171	6.00743e-05	0.000692895
CHMP4A	1046	-0.110712	0.000977929	6.07304e-05	0.000699793
SETD1A	1047	0.0348855	0.00814391	6.19076e-05	0.000712676
CNIH4	1048	-0.171217	0.0145721	6.2455e-05	0.000718292
NUAK2	1049	0.127238	0.0208667	6.287e-05	0.000722375
STRN4	1050	0.104706	0.000621289	6.321e-05	0.00072559
OSCAR	1051	0.198578	0.00566977	6.37241e-05	0.000730796
MUS81	1052	0.0490805	0.00462291	6.38675e-05	0.000731744
SGSM2	1053	0.146195	0.0089368	6.42072e-05	0.000734937
NDUFAB1	1054	-0.140773	0.00974147	6.49808e-05	0.000743087
DPAGT1	1055	0.102665	0.000533498	6.51526e-05	0.000744345
RBM18	1056	-0.0907683	0.00142338	6.55716e-05	0.00074809
SLC44A2	1057	0.152325	0.00433389	6.56045e-05	0.00074809
GTF3C2	1058	0.0906228	0.00134266	6.57392e-05	0.000748917
APBA3	1059	0.0709848	0.00776346	6.64274e-05	0.000756015
SLC23A2	1060	0.0786422	0.000326499	6.65587e-05	0.000756015
TAPBP	1061	0.141875	0.00693921	6.65641e-05	0.000756015
SERPINA1	1062	0.168793	0.0176292	6.66132e-05	0.000756015
MTMR3	1063	0.198416	0.00365654	6.66998e-05	0.000756287
DSN1	1064	-0.0971294	0.00282918	6.81989e-05	0.000772558
NAGPA	1065	0.0669853	0.0104472	6.87158e-05	0.000777682
CXXC1	1066	0.134033	0.00552144	6.89112e-05	0.000779162
FBXW8	1067	-0.106176	0.000568676	6.96682e-05	0.000786983
HACL1	1068	-0.117476	0.00073742	6.99069e-05	0.00078894
EXOSC8	1069	-0.097623	0.00249796	7.02716e-05	0.000792314
SLC35A2	1070	0.087553	0.000394774	7.09634e-05	0.000799367
NMI	1071	-0.0785163	0.0285981	7.23502e-05	0.000814227
RCN3	1072	0.171389	0.0133969	7.40869e-05	0.000832994
ARHGAP24	1073	0.14952	0.00111793	7.41811e-05	0.000833276
NFYC	1074	0.0969812	0.000501559	7.45438e-05	0.000836571
NDUFA9	1075	-0.118306	0.00147126	7.47574e-05	0.000838187
GAR1	1076	-0.0647821	0.00169742	7.48685e-05	0.000838652
ACTG1	1077	0.0464452	0.00844883	7.53745e-05	0.000843536
ZNF672	1078	0.0479879	0.0100968	7.56279e-05	0.000845587
SCRIB	1079	0.0386007	0.00925539	7.60964e-05	0.000850037
CKAP5	1080	0.0214984	0.0204613	7.61936e-05	0.000850335
VPS41	1081	-0.0707189	0.000262218	7.64621e-05	0.000852542
IFFO1	1082	0.130502	0.00337314	7.65442e-05	0.000852668
NDC80	1083	-0.0876713	0.00382947	7.67474e-05	0.000854142
KLHL36	1084	0.0718124	0.00321027	7.72951e-05	0.000859444
TRAT1	1085	-0.207273	0.00253582	7.76896e-05	0.000863035
ZNF467	1086	0.232587	0.00399701	7.80476e-05	0.000865721
MTX2	1087	-0.125159	0.000805814	7.80751e-05	0.000865721
SPINT1	1088	0.0725216	0.000288573	8.02042e-05	0.000888512
CEP63	1089	-0.0726704	0.0184304	8.03252e-05	0.000889036
CHST15	1090	0.200791	0.00607615	8.05141e-05	0.000890309
SLC26A6	1091	0.11	0.00111434	8.09444e-05	0.000894247
PHF5A	1092	-0.201666	0.00209642	8.17242e-05	0.000902035
DAGLB	1093	0.0966869	0.000702378	8.24282e-05	0.000908972
ADCY7	1094	0.0344119	0.00707417	8.31666e-05	0.000915525
CHCHD4	1095	-0.101921	0.000537454	8.31743e-05	0.000915525
CNNM3	1096	0.119396	0.00746103	8.55232e-05	0.000940521
ZW10	1097	-0.120548	0.00351511	8.56081e-05	0.000940597
GTF3C3	1098	-0.139608	0.00390452	8.57204e-05	0.000940973
CLC	1099	-0.355091	0.110497	8.59296e-05	0.000942411
IRF2BP2	1100	0.00534955	0.0101594	8.74228e-05	0.000957528
SIRPA	1101	0.188827	0.00192821	8.74669e-05	0.000957528
AGTPBP1	1102	-0.139677	0.0050253	8.85832e-05	0.00096817
ZNF646	1103	0.084087	0.000368951	8.85996e-05	0.00096817
TCF25	1104	0.135286	0.0018649	8.87157e-05	0.00096856
ZBTB39	1105	0.0533933	0.000161053	9.18594e-05	0.00100197
SNRPA1	1106	-0.129199	0.000911106	9.21812e-05	0.00100458
STK4	1107	0.131866	0.000944377	9.26182e-05	0.00100843
SLC38A10	1108	0.12243	0.000789666	9.27808e-05	0.00100928
RASGRP2	1109	0.097647	0.00388146	9.30777e-05	0.0010116
FAM65B	1110	0.141187	0.00109593	9.31674e-05	0.00101166
RXRA	1111	0.12956	0.0206391	9.32696e-05	0.00101186
HERC1	1112	0.0516725	0.00897747	9.35876e-05	0.0010144
EIF4G1	1113	0.0500774	0.0140511	9.43766e-05	0.00102203
ZNF383	1114	-0.0607855	0.000195092	9.47767e-05	0.00102544
NME7	1115	-0.0731453	0.000269871	9.67766e-05	0.00104614
PPM1B	1116	-0.0462732	0.0438023	9.70296e-05	0.00104746
VPS39	1117	0.107407	0.000649358	9.70724e-05	0.00104746
USP32	1118	0.187994	0.00194726	9.73071e-05	0.00104905
TCF20	1119	0.105192	0.000608044	9.86615e-05	0.00106271
PANK4	1120	0.0228756	0.00425409	9.95025e-05	0.00107081
TAF9	1121	-0.0573241	0.000170226	9.99482e-05	0.00107464
CD97	1122	0.190797	0.00486714	0.00010037	0.00107822
ALDH3B1	1123	0.13214	0.0074516	0.000100997	0.00108399
ZBTB7B	1124	0.0777876	0.000329909	0.000101938	0.00109311
VPS16	1125	0.115231	0.0049333	0.000102263	0.00109562
ZBTB8OS	1126	-0.0801415	0.000343604	0.000102516	0.0010968
RANBP3	1127	0.0345225	0.00781628	0.000102555	0.0010968
PILRA	1128	0.172091	0.00871162	0.000103702	0.00110809
NR2C1	1129	-0.0940122	0.00351709	0.000104058	0.00111031
ZNF264	1130	-0.0440209	0.00555551	0.000104105	0.00111031
ATP5SL	1131	0.110104	0.000672948	0.000104187	0.00111031
PDCD5	1132	-0.128785	0.000892388	0.000104504	0.00111271
PLEKHM1	1133	0.12192	0.000828298	0.000105413	0.0011214
FXR2	1134	0.118586	0.00119642	0.000106147	0.00112821
USMG5	1135	-0.00601784	0.0139411	0.000106867	0.00113486
TMEM115	1136	0.0869185	0.00148785	0.000107074	0.00113606
TMED10	1137	-0.113504	0.00248856	0.00010729	0.00113644
IFT74	1138	-0.106753	0.00413167	0.000107299	0.00113644
MAFG	1139	0.0745283	0.000316268	0.000109503	0.00115877
POLRMT	1140	0.0966629	0.000846706	0.000110787	0.00117133
MED6	1141	-0.0961602	0.000524255	0.000111155	0.00117419
CSK	1142	0.125461	0.00456374	0.000111727	0.0011792
LPAR1	1143	0.00501977	0.011255	0.000112556	0.00118691
HCLS1	1144	0.124767	0.00738125	0.000112944	0.00118996
ITPK1	1145	0.200068	0.00240043	0.000113581	0.00119563
PLEKHG3	1146	0.147498	0.00582579	0.000113837	0.00119728
DCUN1D1	1147	0.158232	0.0037798	0.000113971	0.00119764
DCTN2	1148	0.0983632	0.000778988	0.000114536	0.00120253
LTB4R	1149	0.162839	0.00155069	0.000115277	0.00120926
PIGT	1150	0.0288962	0.00969343	0.000115566	0.00121123
AGER	1151	0.0871199	0.000567844	0.000115729	0.00121189
ADAR	1152	0.227391	0.00284957	0.000116049	0.00121283
LSM14A	1153	-0.106481	0.00353733	0.000116104	0.00121283
NPLOC4	1154	0.0986537	0.000539769	0.000116121	0.00121283
KIAA0513	1155	0.143825	0.00507814	0.000116261	0.00121324
NKIRAS1	1156	-0.0315259	0.00360846	0.000117738	0.00122759
CASP3	1157	-0.206582	0.00235719	0.000117894	0.00122816
SP2	1158	0.10907	0.00736366	0.000118102	0.00122926
ARL6IP5	1159	-0.19209	0.0101667	0.000118496	0.0012323
FAM19A1	1160	-0.0442246	0.000112186	0.000118943	0.00123496
COPS8	1161	-0.0923256	0.000471275	0.000118957	0.00123496
TROVE2	1162	0.0816393	0.00181709	0.000120169	0.00124647
RERE	1163	0.135089	0.00443066	0.000120583	0.00124969
RIPK3	1164	0.0976063	0.000795444	0.000121522	0.00125833
DDX23	1165	0.0607785	0.00497331	0.000122363	0.00126434
EXTL3	1166	0.153168	0.0013572	0.000122373	0.00126434
ATG2A	1167	0.183696	0.00191113	0.000122416	0.00126434
COPA	1168	0.0527507	0.0138412	0.000123147	0.0012708
NDE1	1169	0.174424	0.00172091	0.000124268	0.00128127
TGOLN2	1170	0.157618	0.0014027	0.000124613	0.00128266
TKT	1171	0.145653	0.00879968	0.000124685	0.00128266
NISCH	1172	0.0941638	0.00527965	0.000124722	0.00128266
THUMPD1	1173	-0.177452	0.00171646	0.000125159	0.00128605
SAFB	1174	0.0559679	0.011559	0.000125522	0.00128851
TNK2	1175	0.0832397	0.0106274	0.000125612	0.00128851
HCK	1176	0.144516	0.00565345	0.000126016	0.00129155
GAS7	1177	0.188637	0.00200724	0.000126575	0.00129618
SETDB1	1178	0.0722851	0.00701923	0.000126732	0.00129669
FAM193A	1179	0.0956168	0.000512312	0.000127298	0.00130137
FCHO1	1180	0.135013	0.00103214	0.000127523	0.00130257
CBL	1181	0.12788	0.00217192	0.000127833	0.00130463
PRKCZ	1182	0.128045	0.000935014	0.000128627	0.00131163
HERPUD1	1183	0.102596	0.00285029	0.000129378	0.00131817
VARS	1184	0.0507561	0.0102392	0.000130337	0.00132681
ZYX	1185	0.186198	0.00984604	0.000130914	0.00133157
SLC35C1	1186	0.0612619	0.00504806	0.000132167	0.00134318
SUCLG2	1187	-0.141801	0.00110072	0.000132861	0.00134799
CASP9	1188	0.101003	0.000564123	0.000132864	0.00134799
BCAP29	1189	-0.0728981	0.000292009	0.000133647	0.00135479
SPEN	1190	0.131565	0.00207207	0.000134033	0.00135756
AKIRIN2	1191	0.118723	0.00724644	0.00013504	0.00136661
SPA17	1192	-0.0390648	0.000679037	0.00013626	0.0013778
ZDHHC8	1193	0.109271	0.00910431	0.000136398	0.00137804
VPS36	1194	-0.182881	0.00227796	0.00013668	0.00137973
QRICH1	1195	0.105733	0.00147528	0.000137201	0.00138383
AP1B1	1196	0.0935813	0.00234939	0.000137831	0.00138903
SUGT1	1197	-0.0746955	0.000307479	0.00013805	0.00139007
ABCG1	1198	0.183968	0.00198535	0.000139379	0.00140229
NACC2	1199	0.092205	0.00193501	0.000141652	0.00142396
FPR1	1200	0.252527	0.00364757	0.000141895	0.0014248
ZNF319	1201	0.0937893	0.00171469	0.000141971	0.0014248
LY96	1202	-0.218249	0.0825551	0.000143258	0.00143651
MED15	1203	0.0900169	0.000461023	0.000146018	0.00146297
DNAJB11	1204	-0.114272	0.000749213	0.000146465	0.00146439
ATP2A3	1205	0.113743	0.000744628	0.000146504	0.00146439
WDYHV1	1206	-0.12633	0.00818498	0.00014666	0.00146439
SELPLG	1207	0.13139	0.00298508	0.000146801	0.00146439
BTD	1208	0.0761966	0.00045303	0.000146833	0.00146439
IDUA	1209	0.0889964	0.000524036	0.000146888	0.00146439
NFAM1	1210	0.0836862	0.000612396	0.000147682	0.00147109
PPP2R1A	1211	0.101964	0.00331236	0.000150837	0.00150093
PARP10	1212	0.144907	0.00543824	0.000150927	0.00150093
LPCAT3	1213	0.109426	0.00127792	0.000151389	0.00150428
FLOT1	1214	0.180535	0.00189517	0.000151753	0.00150666
WDR75	1215	-0.120703	0.00225935	0.000153904	0.00152676
GRAP	1216	0.00418674	0.00354907	0.000154426	0.00153007
TERF1	1217	-0.0850683	0.000412905	0.000154492	0.00153007
AMD1	1218	-0.174717	0.00404483	0.000155298	0.00153679
RBM17	1219	-0.103279	0.000632445	0.000156351	0.00154594
KLHDC8B	1220	0.218719	0.0027256	0.000156843	0.00154953
SCAMP1	1221	-0.169455	0.00166429	0.000157365	0.00155342
CTSD	1222	0.147412	0.00131872	0.00015832	0.00156156
SLC10A3	1223	0.0883567	0.00155444	0.000159913	0.00157484
TRNT1	1224	-0.0821338	0.000382759	0.000159927	0.00157484
FANCB	1225	-0.0290551	0.00105568	0.000161285	0.00158691
NSUN5	1226	0.0982125	0.00136424	0.000161474	0.00158719
MATR3	1227	-0.215407	0.0173521	0.000161576	0.00158719
SLC45A4	1228	0.228943	0.00310931	0.000163572	0.00160515
SRBD1	1229	-0.0946181	0.0040053	0.000163671	0.00160515
SYK	1230	0.127726	0.0016551	0.000164251	0.00160953
KIAA0319L	1231	0.152199	0.00134837	0.000164745	0.00161305
IFNAR2	1232	0.171467	0.00169512	0.000166409	0.00162802
RPL9	1233	-0.218209	0.0384992	0.000167832	0.00164062
MTA1	1234	0.0409417	0.00588996	0.000168845	0.00164918
SNAI3	1235	0.0944573	0.000540221	0.000169018	0.00164954
CECR1	1236	0.135657	0.03076	0.000169783	0.00165566
HRSP12	1237	-0.0700588	0.000264883	0.00016992	0.00165566
NEDD9	1238	0.00997165	0.00943455	0.000170106	0.00165613
PLEKHM2	1239	0.117525	0.00206025	0.0001703	0.00165668
EFTUD1	1240	-0.0761162	0.00032761	0.000170784	0.00165809
RINL	1241	0.124117	0.00101087	0.000170791	0.00165809
SH3TC1	1242	0.0939667	0.000525409	0.000170857	0.00165809
TALDO1	1243	0.235345	0.00318609	0.000171423	0.00166224
FMNL1	1244	0.136917	0.00111908	0.000171868	0.00166521
BICD2	1245	0.126476	0.00405547	0.000172693	0.00167076
ABHD4	1246	0.105021	0.000623876	0.000172718	0.00167076
CMAS	1247	-0.126319	0.000937267	0.000172994	0.00167209
CEP152	1248	-0.062537	0.000224145	0.000173157	0.00167233
SUCLA2	1249	-0.115091	0.000763071	0.000173395	0.00167329
FBXO46	1250	0.0852099	0.0022388	0.000173937	0.00167717
SBNO2	1251	0.128084	0.00412914	0.000178685	0.00172158
STAT6	1252	0.17575	0.00185385	0.000179054	0.00172375
TMEM131	1253	0.0771636	0.0141676	0.000180397	0.00173411
BRCC3	1254	-0.0813042	0.0012894	0.000180418	0.00173411
MGAM	1255	0.209018	0.00258335	0.000181261	0.00174082
LXN	1256	-0.120765	0.00197639	0.000182662	0.00175288
MXD3	1257	0.166756	0.00808553	0.000183534	0.00175985
TMEM120A	1258	0.139209	0.00126657	0.000185275	0.00177513
DNAH1	1259	0.0681596	0.00716386	0.00018693	0.00178957
DYNLT1	1260	-0.121611	0.0208015	0.000188541	0.00180356
LTBR	1261	0.142696	0.00120667	0.000188757	0.00180419
MRPL18	1262	-0.134339	0.00229443	0.000189168	0.00180669
TMEM38A	1263	0.130513	0.0192992	0.000189341	0.00180691
ZMYND11	1264	-0.181092	0.00199434	0.000189894	0.00181075
AHSA1	1265	-0.0592878	0.00525135	0.00019027	0.0018129
KIAA0040	1266	0.0936607	0.000660093	0.000190686	0.00181543
TLR8	1267	0.186854	0.00716489	0.000191552	0.00182224
FGL2	1268	-0.128732	0.0257001	0.000191879	0.00182258
LONP1	1269	0.0338578	0.00755864	0.000191891	0.00182258
GNL1	1270	0.0931619	0.000518671	0.000192368	0.00182312
CTNNA1	1271	0.134494	0.00905189	0.000192599	0.00182312
LRRN1	1272	0.0804524	0.00314356	0.000192617	0.00182312
UBE2N	1273	-0.157888	0.00152686	0.000192744	0.00182312
REC8	1274	0.209434	0.00257495	0.000192816	0.00182312
PFKFB4	1275	0.188701	0.00409432	0.000192855	0.00182312
MBOAT1	1276	0.0999015	0.000609906	0.000193276	0.00182567
TMEM14C	1277	-0.120492	0.016386	0.000194487	0.00183567
DOCK2	1278	0.157975	0.00556975	0.000195248	0.00184142
CANT1	1279	0.130281	0.00419225	0.000195568	0.00184299
TPT1	1280	-0.168534	0.0241515	0.000195916	0.00184483
NDUFB5	1281	-0.128316	0.00593532	0.000196508	0.00184895
ARID2	1282	-0.0467604	0.0129162	0.000197795	0.00185962
RCN2	1283	-0.0436337	0.0136034	0.000198882	0.00186837
IKBKB	1284	0.0438788	0.00679812	0.000199067	0.00186866
PDDC1	1285	0.0733612	0.00103554	0.000199894	0.00187496
CPSF1	1286	0.109225	0.00215315	0.000200634	0.00188043
NCKAP1L	1287	0.0620146	0.009548	0.000202874	0.00189992
PIGG	1288	0.073511	0.000307416	0.0002031	0.00189992
NUDCD2	1289	-0.0838151	0.00406645	0.000203186	0.00189992
PPTC7	1290	0.0978154	0.00463895	0.000203691	0.00190317
PPIH	1291	-0.118489	0.000848065	0.00020595	0.00192156
MRPS35	1292	-0.107687	0.000671447	0.000205978	0.00192156
PTP4A1	1293	-0.0782388	0.000381254	0.000207962	0.00193856
TIGD7	1294	-0.0780115	0.000339092	0.000209028	0.00194699
RAB3IP	1295	0.00827748	0.0172115	0.000210091	0.00195539
SETD2	1296	0.020217	0.00727448	0.000211923	0.00197092
SRPR	1297	0.126954	0.000907528	0.000212479	0.00197457
IRAK1BP1	1298	-0.0847247	0.00313154	0.000213723	0.0019846
MEGF9	1299	0.170924	0.00174456	0.000217475	0.00201651
AK3	1300	-0.141222	0.00120469	0.000217494	0.00201651
CCDC14	1301	-0.173197	0.00178479	0.00021801	0.0020184
PSMC1	1302	-0.0813267	0.00403824	0.000218034	0.0020184
FAM126B	1303	0.185251	0.00298026	0.00021882	0.00202403
POU2F1	1304	0.108182	0.000671359	0.000218978	0.00202403
YIF1B	1305	0.0998508	0.000583865	0.000219812	0.00203019
NTAN1	1306	-0.108089	0.00511253	0.00022014	0.00203166
ADSL	1307	-0.0985436	0.00186723	0.000220705	0.00203531
BAX	1308	-0.0668701	0.014449	0.000221486	0.00204096
USP33	1309	-0.0279022	0.00474691	0.000221995	0.00204408
ZDHHC7	1310	0.103511	0.00268225	0.000226393	0.00208298
RNF170	1311	-0.0878568	0.000757309	0.000226759	0.00208477
MRPL20	1312	-0.0865473	0.00253097	0.00022845	0.00209749
TNRC18	1313	0.0978217	0.000600275	0.000228491	0.00209749
ZNF22	1314	-0.126094	0.00895926	0.00022919	0.0021023
DAB2	1315	0.00026852	0.0287155	0.000230602	0.00211365
INO80	1316	-0.00548411	0.00642131	0.000231085	0.00211529
TNPO2	1317	0.0893851	0.000857178	0.000231133	0.00211529
RARA	1318	0.156194	0.00279856	0.000232379	0.00212508
LASP1	1319	0.109622	0.00654026	0.00023308	0.00212988
GPATCH4	1320	-0.100791	0.000637881	0.000235078	0.00214587
CSNK1E	1321	0.0515672	0.0113802	0.000235186	0.00214587
IRAK1	1322	0.0995412	0.00148695	0.000236016	0.00215182
AKR1C3	1323	-0.116638	0.0276317	0.000236617	0.00215567
WDR81	1324	0.0992531	0.00121882	0.000238481	0.002171
AP1S2	1325	-0.131459	0.0469857	0.000240352	0.00218639
TUBA1B	1326	0.082707	0.0139098	0.00024085	0.00218926
ZZEF1	1327	0.0874495	0.00347592	0.000241943	0.0021954
LILRA2	1328	0.204626	0.00303125	0.000242056	0.0021954
SH3BP1	1329	0.140755	0.00223102	0.000242204	0.0021954
SND1	1330	0.0768164	0.0161605	0.000242254	0.0021954
SLC3A2	1331	0.0239788	0.00896444	0.000247377	0.00223978
SMARCA5	1332	-0.0866969	0.000442156	0.000247522	0.00223978
CRISPLD2	1333	0.232615	0.00598161	0.000247795	0.00224057
MTMR14	1334	0.102425	0.00221524	0.00024894	0.00224923
RYBP	1335	0.184103	0.00596867	0.000249197	0.00224986
F11R	1336	0.0968845	0.00285136	0.00025026	0.00225696
NLRP12	1337	0.190274	0.00224977	0.000250371	0.00225696
AIFM2	1338	-0.0664232	0.00984852	0.000250545	0.00225696
OSBPL5	1339	0.114595	0.00318997	0.000251618	0.00226467
WTAP	1340	-0.129187	0.00209506	0.000251776	0.00226467
RPN1	1341	0.0996673	0.00147525	0.000253182	0.00227562
RAB11A	1342	-0.0936321	0.0152049	0.000255222	0.00229224
GALK1	1343	0.117875	0.00267473	0.000256851	0.00230516
SNX4	1344	-0.0931817	0.000514247	0.000257137	0.002306
ECHDC1	1345	-0.0497147	0.00720496	0.000257935	0.00231144
MLLT6	1346	0.053163	0.0176013	0.000258319	0.00231317
ZNF720	1347	-0.0880301	0.0138484	0.00026019	0.00232819
C1GALT1C1	1348	-0.124703	0.00135519	0.00026152	0.00233835
PPP1R14B	1349	0.0793127	0.00466891	0.000262067	0.0023415
ZFP82	1350	-0.0922089	0.00053266	0.000262712	0.00234553
IDH3G	1351	0.102015	0.00468057	0.000263536	0.00234942
DPF2	1352	0.107408	0.00201896	0.000263538	0.00234942
TNRC6B	1353	0.12128	0.000894629	0.000266469	0.0023738
CLEC2D	1354	-0.198143	0.0142404	0.000266787	0.00237487
SPIRE1	1355	-0.126543	0.00642944	0.000267824	0.00238235
ANKHD1	1356	0.0160607	0.00684257	0.000268915	0.00238857
AQR	1357	0.0018423	0.00687887	0.000269075	0.00238857
COQ2	1358	-0.0675951	0.00879516	0.000269118	0.00238857
MAML1	1359	0.0597208	0.00157998	0.000269613	0.00239121
SLC5A6	1360	0.0452162	0.00509473	0.000272377	0.00241296
DNAJC5	1361	0.111402	0.000763774	0.000272467	0.00241296
ZBED5	1362	-0.159003	0.00421939	0.000272677	0.00241305
MTHFD1L	1363	-0.126023	0.0110817	0.000275218	0.00243375
PLXNB2	1364	0.124201	0.00564642	0.000276145	0.00244016
RXRB	1365	0.0914328	0.000534651	0.000278732	0.00246121
SUPT6H	1366	0.0960458	0.000555243	0.000279395	0.00246526
HCFC2	1367	-0.0907949	0.00377523	0.000280482	0.00247161
MYO1G	1368	0.14788	0.00467143	0.000280525	0.00247161
SPG7	1369	0.111801	0.00441448	0.000282097	0.00248257
TICAM1	1370	0.0620139	0.00955114	0.000282181	0.00248257
CLK3	1371	0.10207	0.00313487	0.000283161	0.00248938
FANCG	1372	0.047759	0.00781783	0.000287449	0.00252523
PRPF40A	1373	-0.127689	0.00103485	0.000288069	0.00252884
LZIC	1374	-0.0684542	0.000265784	0.000288979	0.00253386
GPR18	1375	-0.127691	0.00352274	0.000289062	0.00253386
TNFRSF10B	1376	0.147993	0.00138216	0.000290286	0.00254274
TAZ	1377	0.0953467	0.000558863	0.000291659	0.00255291
TNS3	1378	0.0594939	0.00976918	0.000291995	0.002554
ARAF	1379	0.113759	0.000841057	0.000292482	0.00255522
CAMKK2	1380	0.112361	0.00511697	0.0002927	0.00255522
DNAJC10	1381	-0.130162	0.0010716	0.00029277	0.00255522
SMS	1382	-0.0948076	0.000932632	0.000293852	0.0025628
CCNY	1383	0.10982	0.000764221	0.000294168	0.00256371
FCER1A	1384	-0.22563	0.0715594	0.000295795	0.00257602
OPRL1	1385	0.151355	0.00148192	0.000296581	0.002581
PRKCSH	1386	0.0879847	0.00324661	0.000298344	0.00259447
NIPA2	1387	-0.095274	0.000560659	0.000299515	0.00260278
SASH3	1388	0.08743	0.00201858	0.000300132	0.00260626
CHCHD1	1389	-0.0744072	0.000329883	0.000300492	0.0026075
FAM53B	1390	0.115592	0.00365722	0.000300778	0.00260811
HPRT1	1391	-0.135668	0.00114579	0.000308072	0.00266944
SELL	1392	0.158899	0.0162034	0.000309438	0.00267935
ELMOD2	1393	-0.087579	0.000444844	0.00031152	0.00269544
TRIM25	1394	0.160476	0.00394234	0.000312226	0.00269962
IWS1	1395	-0.074116	0.000827413	0.000312981	0.0027042
MXD4	1396	0.121944	0.00654371	0.000315637	0.00272519
TTC31	1397	0.0914999	0.00181174	0.000318902	0.00275142
ABL1	1398	-0.022889	0.0109215	0.000320341	0.00276185
SRM	1399	0.0198686	0.014396	0.00032081	0.00276392
UBR4	1400	0.110176	0.00316105	0.000321264	0.00276585
SERINC3	1401	0.121581	0.000992228	0.00032201	0.0027703
LAMP2	1402	0.215465	0.00297206	0.000326271	0.00280495
MED13L	1403	-0.0295432	0.00351669	0.000327037	0.00280921
TMCO3	1404	0.136567	0.00114417	0.000327232	0.00280921
KPNA6	1405	0.12241	0.0023965	0.000328551	0.00281852
ZNF195	1406	-0.0780198	0.000400189	0.000330128	0.00282937
CRAMP1L	1407	-0.000969843	0.00590551	0.000330285	0.00282937
PGM1	1408	0.107434	0.00169511	0.000330806	0.00283182
EWSR1	1409	0.0558331	0.00730569	0.000331638	0.00283542
NUDT2	1410	-0.111989	0.00384828	0.000331696	0.00283542
RBMS1	1411	0.107789	0.00425083	0.000333339	0.00284744
NDRG1	1412	0.0412402	0.00944085	0.000334332	0.00285346
ZNF692	1413	0.102241	0.000873236	0.000334517	0.00285346
SETDB2	1414	-0.109723	0.000748539	0.00033537	0.00285871
SLC39A3	1415	0.109581	0.000773572	0.000337014	0.00287069
EML3	1416	0.128636	0.00518262	0.000337292	0.00287103
SLTM	1417	-0.0992262	0.000698019	0.000338256	0.00287721
PRPF8	1418	0.115143	0.0188105	0.000338645	0.00287848
RAB11FIP1	1419	0.200968	0.00261321	0.000339446	0.00288326
CSE1L	1420	-0.0909321	0.00104877	0.000340279	0.00288829
SF3A2	1421	0.0834333	0.0175612	0.000341204	0.00289411
CCNB1IP1	1422	-0.086324	0.000457233	0.000342934	0.00290674
CD52	1423	-0.25764	0.0313075	0.000346542	0.00293526
KCTD13	1424	0.0542509	0.00294071	0.00034705	0.0029375
NET1	1425	-0.108356	0.00069575	0.000347452	0.00293884
CXCR4	1426	0.139293	0.0161476	0.000349263	0.00295208
JAK1	1427	0.169617	0.00850914	0.000349996	0.00295548
C5AR1	1428	0.217586	0.00306281	0.000350156	0.00295548
BCAP31	1429	0.0857817	0.00224436	0.00035205	0.00296939
BLOC1S1	1430	-0.0960691	0.0195749	0.000353276	0.00297686
RHOG	1431	0.135707	0.0063277	0.00035343	0.00297686
STX7	1432	-0.0800685	0.00931142	0.000354536	0.00298409
IL17RA	1433	0.194565	0.00248966	0.000354802	0.00298425
LATS2	1434	0.0807862	0.000414379	0.000355906	0.00299145
CCNK	1435	0.0562315	0.00830563	0.000357017	0.0029987
PHKA2	1436	0.121238	0.00128903	0.000358527	0.00300928
UBE2M	1437	0.124591	0.000995355	0.000359726	0.00301568
CMTM3	1438	0.0958799	0.000614348	0.00035979	0.00301568
CD58	1439	-0.0789646	0.0241868	0.000361284	0.0030261
SLC37A4	1440	0.0770017	0.000587862	0.000365897	0.00306261
BCL6	1441	0.0689033	0.000879574	0.00036632	0.00306402
TMEM181	1442	-0.159289	0.00834076	0.000367712	0.00307353
COX5B	1443	-0.0914558	0.00688143	0.000368812	0.00307984
AMT	1444	0.0908276	0.000741994	0.000368978	0.00307984
ITPR3	1445	0.05588	0.0311668	0.000370285	0.00308861
PCSK7	1446	0.104541	0.00743166	0.000373493	0.00311322
XRCC3	1447	0.0586419	0.000208801	0.00037696	0.00313994
MTERF	1448	-0.0962743	0.00330919	0.000381089	0.00317215
CPEB3	1449	0.0827095	0.000463549	0.000381719	0.00317396
GDI1	1450	0.119307	0.000935408	0.000381834	0.00317396
CHPF2	1451	0.10418	0.000687725	0.00038372	0.00318744
TRMT12	1452	-0.0676635	0.00209834	0.000385991	0.0032041
INSIG1	1453	-0.133228	0.00461422	0.000386653	0.00320739
TRIAP1	1454	-0.0313733	0.00854492	0.000387559	0.00321159
KIF20B	1455	-0.107589	0.00070342	0.000387693	0.00321159
GMNN	1456	-0.0449972	0.00013156	0.000391803	0.00324341
RNASET2	1457	0.132557	0.0106233	0.000392872	0.00325003
FYTTD1	1458	-0.078963	0.00182219	0.000396979	0.00328175
PPP2R3B	1459	0.00727618	0.00174566	0.00039993	0.00330387
RRAGC	1460	0.00269807	0.0147767	0.000401082	0.00331112
SNW1	1461	-0.0741618	0.000377779	0.000401994	0.00331638
TAF6L	1462	0.0786984	0.000404598	0.000402274	0.00331642
KIAA0226	1463	0.0639575	0.000266962	0.000402951	0.00331938
ZNF32	1464	-0.102218	0.000643008	0.000403183	0.00331938
PCBP1	1465	0.0801315	0.011226	0.00040368	0.0033212
MCRS1	1466	0.0377365	0.0078121	0.000406647	0.00334332
METRNL	1467	0.157261	0.00162678	0.000407439	0.00334755
HECA	1468	-0.121013	0.00859138	0.000408892	0.0033572
MRPL46	1469	-0.0902078	0.00223917	0.000409973	0.00336379
SPATA2L	1470	0.104796	0.000711306	0.000410806	0.00336833
PIGS	1471	0.0537476	0.00364941	0.000411444	0.00337127
UGDH	1472	-0.0873763	0.000454392	0.000416377	0.00340937
PANX2	1473	0.235016	0.00377087	0.000417075	0.00341276
WDFY3	1474	0.129915	0.00117225	0.000418438	0.0034216
SURF4	1475	0.00132423	0.0106371	0.000420401	0.00343532
GRIPAP1	1476	0.0912226	0.000670729	0.000421134	0.00343898
PSME2	1477	-0.133321	0.00881271	0.000422389	0.00344689
NUDT22	1478	0.0790948	0.00041504	0.000424465	0.00346148
ABCC6	1479	0.0918005	0.0070564	0.00042517	0.00346489
SNX12	1480	-0.0203495	0.000962709	0.000425839	0.00346799
LRPPRC	1481	-0.0970713	0.00133004	0.000427097	0.0034759
LRP3	1482	0.0993161	0.00193838	0.000427636	0.00347689
GPSM3	1483	0.0849659	0.000592665	0.000427843	0.00347689
CNOT4	1484	-0.0806233	0.000411039	0.000428088	0.00347689
CCT6A	1485	-0.0991789	0.000644623	0.000428373	0.00347689
STAMBPL1	1486	-0.14817	0.00143749	0.000429128	0.00348068
TPCN2	1487	0.126934	0.00103074	0.00043528	0.00352819
PRKDC	1488	-0.0126666	0.005485	0.000435834	0.00353031
DEPDC5	1489	0.0626361	0.000547827	0.000437797	0.00354383
ARAP3	1490	0.205371	0.00283848	0.000438253	0.00354514
DYNC1H1	1491	0.0602711	0.0116718	0.000440083	0.00355756
SNX14	1492	-0.106598	0.00419897	0.00044431	0.00358932
KLHL21	1493	0.0940128	0.003243	0.000445166	0.00359383
DGAT1	1494	0.116757	0.000893208	0.000446243	0.00360011
CALHM2	1495	0.0506892	0.00373205	0.000452251	0.00364614
SPTLC2	1496	0.109038	0.0016532	0.000457684	0.00368748
TNFAIP8	1497	-0.122253	0.00157992	0.000458623	0.00369199
HYOU1	1498	-0.0188691	0.0110135	0.000458857	0.00369199
TBC1D20	1499	0.0453124	0.00372372	0.00045962	0.00369566
PSMD6	1500	-0.0804232	0.00447192	0.000460349	0.00369906
POLR1E	1501	-0.123603	0.00102468	0.000462434	0.00371334
ZNF189	1502	-0.0779533	0.000386107	0.0004641	0.00372423
CYP4F3	1503	0.264399	0.00877017	0.000466518	0.00373988
CHCHD2	1504	-0.140288	0.00707358	0.00046667	0.00373988
DDIT3	1505	-0.0425582	0.00563556	0.000468407	0.0037513
SLC27A3	1506	0.0858472	0.0112176	0.000473328	0.0037882
XPO4	1507	-0.069491	0.0173555	0.000474626	0.00379606
ARID3A	1508	0.151149	0.00882294	0.000475329	0.00379916
ZBTB20	1509	0.110932	0.00115629	0.000476792	0.00380833
U2AF1L4	1510	0.0872069	0.00049267	0.000479091	0.0038219
SIGLEC9	1511	0.112665	0.00255892	0.000479316	0.0038219
RABGAP1L	1512	-0.0812178	0.00043197	0.000479442	0.0038219
NUDT9	1513	-0.0879439	0.000503682	0.000484869	0.00386261
NDUFV2	1514	-0.103745	0.00433875	0.000485593	0.00386582
ATXN2	1515	0.0908464	0.00370902	0.000487285	0.00387418
CDH23	1516	0.122224	0.00103631	0.000487286	0.00387418
ZNF35	1517	-0.0652552	0.000258722	0.000490797	0.00389952
RBBP7	1518	-0.0922173	0.00119292	0.000492864	0.00391337
STX5	1519	0.0946998	0.00150419	0.00049511	0.00392861
CD69	1520	-0.103485	0.00794408	0.000496496	0.00393701
CASP2	1521	0.0920895	0.000586114	0.000497792	0.0039447
VIPR1	1522	0.143911	0.00194595	0.000500253	0.00396159
RAB33A	1523	-0.0812258	0.000437967	0.000502471	0.00397606
TMEM91	1524	0.181591	0.00227273	0.000502739	0.00397606
ZNF226	1525	-0.0894163	0.00461957	0.000503842	0.00398217
DHX29	1526	-0.0893384	0.000539016	0.00050834	0.00401509
BCL2L12	1527	0.0661515	0.00356987	0.000509119	0.00401861
DCAF7	1528	0.0122783	0.0100515	0.00051342	0.0040499
TLR9	1529	0.0531921	0.000188317	0.000514929	0.00405459
SIN3B	1530	0.0883459	0.000532646	0.000515241	0.00405459
GBA2	1531	0.0940441	0.000604535	0.000515286	0.00405459
SLC16A3	1532	0.168906	0.00240771	0.000515415	0.00405459
OXER1	1533	0.14478	0.00896587	0.0005158	0.00405459
ZNF721	1534	-0.0333196	0.007008	0.000516257	0.00405459
ZNF480	1535	-0.0876403	0.000535346	0.000516492	0.00405459
SON	1536	0.0286792	0.00745089	0.000516705	0.00405459
GBAS	1537	-0.10987	0.000792588	0.000517653	0.00405938
DPP3	1538	0.00738536	0.00935277	0.000524017	0.00410662
BTLA	1539	-0.123567	0.000976818	0.000525455	0.00411521
GRN	1540	0.190117	0.0105947	0.000525981	0.00411653
ADD1	1541	0.113464	0.00495048	0.000526307	0.00411653
ANKRD49	1542	-0.146055	0.00291401	0.00052899	0.00413483
RASSF2	1543	0.169869	0.00195532	0.00052949	0.00413606
GGCT	1544	-0.0853184	0.00047356	0.000532729	0.00415867
PSMA1	1545	-0.0857334	0.00147944	0.000533323	0.00416061
PTPN11	1546	-0.0224255	0.00657408	0.000538292	0.00419666
TRIM15	1547	0.0542634	0.00169516	0.00053944	0.00420288
TNFSF14	1548	0.151108	0.00164061	0.000539788	0.00420288
ANKFY1	1549	0.100275	0.000696513	0.00054116	0.00421058
GOLGA3	1550	0.00303095	0.0153561	0.000541742	0.00421058
ENOPH1	1551	-0.132474	0.00124543	0.000541825	0.00421058
ZZZ3	1552	-0.113765	0.000854874	0.000542482	0.00421297
RIN3	1553	0.118716	0.000949935	0.000545028	0.00423002
ZNF197	1554	-0.0638442	0.000557368	0.000546765	0.00424077
PLOD1	1555	0.16676	0.0019243	0.000551973	0.00427841
GHDC	1556	0.070159	0.00446033	0.000558483	0.00432483
BRI3	1557	0.129736	0.0026562	0.000558679	0.00432483
HNRNPD	1558	0.0507507	0.012008	0.000559189	0.004326
GSTO1	1559	-0.0872161	0.0112599	0.000559582	0.00432626
NUDT21	1560	-0.14581	0.00142834	0.000565356	0.00436608
DARS	1561	-0.146749	0.00154344	0.000565761	0.00436608
MBOAT7	1562	0.208005	0.00299133	0.000565819	0.00436608
AATK	1563	0.108997	0.00301374	0.000566212	0.00436632
CCDC66	1564	-0.0775279	0.000398938	0.000567831	0.004376
SIRT7	1565	0.0821365	0.000461306	0.000568267	0.00437656
HNRNPL	1566	0.0844907	0.0122142	0.000572572	0.00440492
CUEDC1	1567	0.159403	0.00177464	0.00057268	0.00440492
LMO4	1568	0.0872738	0.00122206	0.000573184	0.00440598
MIB2	1569	0.107003	0.000758806	0.000575875	0.00442385
PGS1	1570	0.148183	0.00153126	0.000577156	0.00443086
CEBPG	1571	-0.112609	0.00085674	0.000577564	0.00443118
F8A1	1572	0.101418	0.00747101	0.000578408	0.00443483
MED24	1573	-0.00339965	0.00675556	0.000579033	0.0044368
SNX11	1574	0.100961	0.000711986	0.000579538	0.00443785
JAK2	1575	-0.136292	0.00121418	0.000580936	0.00444573
CYB5B	1576	-0.117371	0.00101075	0.00058164	0.00444829
UPF3A	1577	-0.116006	0.00164649	0.000587572	0.00449081
ZNF33A	1578	0.0175437	0.00821418	0.00058976	0.00450468
ZNF516	1579	0.132127	0.00804957	0.000591338	0.00451387
COPS2	1580	-0.0677646	0.00180042	0.000592115	0.00451694
PTTG1	1581	-0.136454	0.00327643	0.00059261	0.00451785
TAOK2	1582	0.114789	0.000879855	0.000593645	0.00452288
VPS25	1583	-0.0448464	0.00357584	0.000594858	0.00452926
SLC35A4	1584	0.0842202	0.00391214	0.000598243	0.00455216
ATP5S	1585	-0.0631516	0.000252556	0.000601651	0.00457132
ODF2	1586	0.0319129	0.00583457	0.000601662	0.00457132
SNX5	1587	-0.099496	0.00241986	0.000601898	0.00457132
ACD	1588	0.0889191	0.00101855	0.000607244	0.00460893
MARS	1589	0.0826499	0.000470575	0.000607616	0.00460893
ANXA3	1590	0.00933469	0.0353828	0.000608645	0.00461384
PCNX	1591	0.138609	0.00138206	0.000612676	0.00464147
TNFAIP6	1592	-0.162684	0.0748079	0.000613784	0.00464695
USP1	1593	-0.15814	0.00163924	0.000615247	0.0046551
MRPL53	1594	-0.0672934	0.00601167	0.000615904	0.00465715
KLHL5	1595	-0.0863099	0.000524004	0.000617912	0.0046694
PPM1K	1596	-0.0749252	0.000381527	0.000618334	0.00466966
RNH1	1597	0.0387548	0.00868293	0.000620733	0.00468484
RABAC1	1598	0.10753	0.000865923	0.000623294	0.00470123
BRMS1	1599	-0.0171057	0.00925452	0.000625002	0.00471094
SPOCK2	1600	0.173871	0.00452792	0.000625364	0.00471094
CPNE1	1601	0.104242	0.00455605	0.000626085	0.00471254
SLA	1602	0.105619	0.00077592	0.000626357	0.00471254
SPI1	1603	0.175863	0.00440356	0.000627216	0.00471606
GATAD2B	1604	0.143737	0.00143985	0.000632615	0.00475369
FAM173B	1605	-0.0621166	0.000251299	0.000633215	0.00475523
LYSMD1	1606	0.0702419	0.00362148	0.000638835	0.00479245
CDKN3	1607	-0.0551728	0.00270984	0.000638967	0.00479245
CD300A	1608	0.107277	0.00167981	0.000643002	0.00481971
EED	1609	-0.0723518	0.000376112	0.000643803	0.00482272
NOL11	1610	-0.115018	0.000923587	0.000647521	0.00484516
PNKD	1611	-0.0184943	0.00166643	0.000647602	0.00484516
KCNH3	1612	0.0808324	0.000431772	0.000648362	0.00484783
ZFP36L2	1613	0.134274	0.00134209	0.00065481	0.00489301
CD300LB	1614	0.124165	0.00111295	0.000657682	0.00491143
TBCE	1615	-0.0950242	0.000618254	0.000659518	0.00492049
MBP	1616	0.197801	0.00286853	0.000659903	0.00492049
PLCG2	1617	0.131346	0.00336385	0.00066012	0.00492049
TFIP11	1618	0.0823341	0.00523365	0.000664173	0.00494764
PSMB6	1619	-0.112067	0.00684428	0.000666852	0.00496453
ZNF26	1620	-0.0938197	0.000598326	0.000670885	0.00499036
ZNF500	1621	0.0182576	0.00710212	0.00067115	0.00499036
SETD1B	1622	0.0849899	0.000502879	0.000671572	0.00499042
UBAP1	1623	0.090477	0.000585651	0.000673371	0.00500071
TUBA1A	1624	0.106263	0.00445884	0.000675121	0.00501061
TGFBR2	1625	-0.0649679	0.00140112	0.000675582	0.00501095
METTL6	1626	-0.0680418	0.00326907	0.000678034	0.00502604
TUBGCP6	1627	0.12347	0.0013096	0.000679893	0.00503672
KLHL26	1628	0.0054719	0.00428509	0.000680574	0.00503867
CD86	1629	-0.109815	0.00306139	0.00068395	0.00506056
PLD3	1630	0.114591	0.00283159	0.000686786	0.00507843
FUK	1631	0.111289	0.000845022	0.000687776	0.00508263
STK17B	1632	-0.144878	0.00565023	0.000690234	0.00509767
PUS3	1633	-0.0824507	0.00119052	0.000694904	0.00512738
IP6K1	1634	0.131608	0.0023498	0.000695108	0.00512738
UBE2D3	1635	-0.121575	0.00751996	0.000698018	0.00514569
CCDC17	1636	0.055108	0.000201866	0.00069916	0.00515096
RAB21	1637	-0.130029	0.00237535	0.000701312	0.00516366
CLK4	1638	-0.050858	0.00955141	0.000702071	0.0051661
SAMHD1	1639	0.00212616	0.00547426	0.000705107	0.00518527
TREML2	1640	0.1538	0.00179036	0.000706092	0.00518934
ATG9A	1641	0.12029	0.00101392	0.000707531	0.00519675
PIP4K2C	1642	0.0749141	0.00039285	0.000713055	0.00523413
BET1	1643	-0.074618	0.000410562	0.000713879	0.00523699
KIF2A	1644	-0.105203	0.000810395	0.000714317	0.00523702
OSBPL7	1645	0.0874928	0.00486025	0.000716848	0.00525238
SLC25A26	1646	-0.071173	0.000828029	0.000718149	0.00525872
CDK10	1647	0.0984279	0.00159243	0.000719442	0.00526379
WSB2	1648	-0.0929901	0.000580925	0.000719715	0.00526379
CLECL1	1649	-0.0384123	0.00461948	0.000724859	0.0052982
FICD	1650	0.102772	0.00074442	0.000726573	0.00530751
RCN1	1651	-0.0927868	0.000640906	0.000728955	0.00532168
TOX	1652	-0.0695317	0.0018378	0.000733231	0.00534965
SLC22A1	1653	0.167152	0.0258691	0.000734278	0.00535405
RRM1	1654	-0.13116	0.00124585	0.000741323	0.00540215
GGA2	1655	0.000986664	0.0138429	0.000744475	0.00542185
DOK3	1656	0.101879	0.000782182	0.000745737	0.00542769
SLC26A8	1657	0.224274	0.00355414	0.000746178	0.00542769
MOCS2	1658	-0.0647051	0.00151013	0.000752206	0.00546823
RBM42	1659	0.0545113	0.00660057	0.00075369	0.00547573
MLKL	1660	0.110402	0.00087317	0.000755373	0.00548268
RFX2	1661	0.166569	0.00200064	0.000755558	0.00548268
STRAP	1662	-0.106921	0.000818498	0.000764441	0.0055438
SVIL	1663	0.165542	0.00196224	0.000769485	0.00557615
MED10	1664	-0.090355	0.000599233	0.000769826	0.00557615
ALDOC	1665	0.128527	0.00303882	0.000772485	0.00559205
DLGAP4	1666	0.0962642	0.00168926	0.000774518	0.0056034
RALA	1667	-0.129967	0.00126341	0.000781487	0.00565043
KYNU	1668	-0.132903	0.013024	0.00078565	0.00567713
NUDT16L1	1669	0.0867159	0.000592602	0.000786725	0.00568148
ZNF559	1670	-0.107718	0.000803648	0.000790947	0.00570855
SOD2	1671	0.0104478	0.00483272	0.00079373	0.00572521
MRPS7	1672	-0.0858063	0.000914702	0.00079717	0.00574622
TMEM50B	1673	-0.00858284	0.013487	0.000797596	0.00574622
EFTUD2	1674	0.091723	0.00370967	0.000798621	0.00575017
CMC1	1675	-0.0665548	0.000308548	0.000801953	0.00576862
ARHGEF11	1676	0.0958741	0.000639241	0.000802498	0.00576862
TAP1	1677	0.12683	0.0131836	0.00080262	0.00576862
UBE2D2	1678	-0.0757022	0.00078817	0.000803906	0.00577442
CACYBP	1679	-0.0932693	0.000610251	0.000808416	0.00580336
ASXL1	1680	0.00337214	0.00702543	0.000817634	0.00586315
KLHL22	1681	0.0850553	0.00455017	0.000817718	0.00586315
MGAT2	1682	0.023234	0.00423852	0.000819466	0.00587219
MSN	1683	0.0830594	0.0200451	0.000820229	0.00587417
TESK1	1684	0.0769232	0.00260735	0.000823659	0.00589344
UFSP2	1685	-0.0661212	0.0002979	0.000823898	0.00589344
PCMTD1	1686	-0.0812087	0.0290377	0.000824543	0.00589455
RPS29	1687	-0.18393	0.0313275	0.000826975	0.00590844
PPP1R11	1688	0.11676	0.00193514	0.000828088	0.00591288
APOBEC3F	1689	-0.11066	0.000843258	0.000829085	0.0059165
ZFAND1	1690	-0.135624	0.00126202	0.000831549	0.00593057
FAIM	1691	-0.111471	0.00901234	0.000836226	0.0059604
CAPZA1	1692	-0.147594	0.00152252	0.000844276	0.00601412
RPS6	1693	-0.149101	0.0292724	0.000844761	0.00601412
UPP1	1694	0.129911	0.00126883	0.000847957	0.00603331
BNIP3	1695	-0.108821	0.000847443	0.00084907	0.00603767
CBX7	1696	0.0875277	0.00188837	0.000852749	0.00606025
APEX2	1697	0.05039	0.00434144	0.000860449	0.00611137
SRP72	1698	-0.105919	0.000796311	0.000861554	0.00611561
CAPN1	1699	0.101486	0.00607428	0.000863446	0.00612544
TMEM109	1700	0.0481286	0.00943802	0.000869931	0.00616781
ZSCAN18	1701	0.0962831	0.000710337	0.000871251	0.00617354
ABHD10	1702	-0.102234	0.000728343	0.000872709	0.00618024
RNASE6	1703	-0.0697231	0.0188676	0.000874006	0.00618579
NUP35	1704	-0.0983638	0.00514526	0.000874651	0.00618672
LEMD2	1705	0.0754492	0.000830741	0.000875597	0.00618978
ATP5G3	1706	-0.116274	0.0123771	0.000878559	0.00620708
PDHX	1707	-0.0773821	0.000416085	0.000881662	0.00622535
CIITA	1708	-0.01893	0.00595196	0.000882372	0.00622671
KIR2DL3	1709	0.227924	0.0448444	0.000883942	0.00623089
MAP3K14	1710	0.0691209	0.000348296	0.000883997	0.00623089
GGA3	1711	0.0865169	0.000555517	0.000887568	0.00625098
NLRP1	1712	0.111379	0.000888874	0.000887886	0.00625098
ANO6	1713	0.103262	0.000770627	0.000891149	0.0062703
PRDX4	1714	-0.117122	0.00183422	0.000891911	0.006272
DDX3X	1715	0.0195466	0.0188535	0.000892698	0.00627387
NEURL4	1716	0.069525	0.000331273	0.000894805	0.00628501
MCTP1	1717	0.0319361	0.02012	0.000895627	0.00628713
CTDSP1	1718	0.106077	0.000877901	0.000897422	0.00629484
CDIPT	1719	0.104542	0.000814059	0.000897771	0.00629484
RPS6KL1	1720	0.0823249	0.000502257	0.000899117	0.00630061
RPS18	1721	-0.18573	0.0415128	0.000901155	0.00631077
ANXA5	1722	0.157888	0.00716169	0.000901614	0.00631077
TM9SF4	1723	0.0600485	0.0102122	0.000903677	0.00632154
ARMC10	1724	-0.0979131	0.000709029	0.000910929	0.00636858
PDS5A	1725	-0.102238	0.000758795	0.000914819	0.00639206
CAMTA2	1726	0.0590362	0.000244027	0.000917937	0.00641014
FAM193B	1727	0.0721923	0.000402842	0.000919121	0.0064117
SNAPC3	1728	-0.0819372	0.000483153	0.000919225	0.0064117
LYRM5	1729	-0.11818	0.00350664	0.000923217	0.00643582
RNF216	1730	0.0939973	0.000835598	0.00092451	0.00644067
CAMLG	1731	-0.141692	0.00146653	0.000924981	0.00644067
TAOK1	1732	-0.109583	0.000890218	0.000925992	0.00644399
BAP1	1733	0.074324	0.000402702	0.000930717	0.00647313
USP11	1734	0.0478152	0.00594654	0.000935812	0.00650481
TXLNA	1735	0.0867721	0.00153072	0.000937907	0.00651562
AP1G2	1736	0.0934343	0.00302033	0.000942501	0.00654014
GNG7	1737	0.125687	0.00119978	0.000942522	0.00654014
DIP2B	1738	0.13278	0.0023311	0.000945054	0.00655393
RPL27	1739	-0.201406	0.0478778	0.000951806	0.00659696
PSEN2	1740	0.0642143	0.000305231	0.000958622	0.00664039
RHBDD2	1741	0.0826744	0.00574314	0.000963336	0.00666921
CEACAM3	1742	0.151808	0.00171569	0.000966612	0.00668804
GMEB1	1743	0.0826966	0.00048677	0.000967721	0.00669188
S100A6	1744	0.00365794	0.00851257	0.000968562	0.00669385
ZNF341	1745	0.08269	0.00109256	0.00097131	0.006709
CD14	1746	0.149098	0.0119871	0.000973851	0.00672013
PRKACB	1747	-0.00538561	0.00302728	0.000974037	0.00672013
ANKRA2	1748	0.0533178	0.0156543	0.000980554	0.00676122
SRI	1749	-0.0618352	0.000283877	0.000981727	0.006764
THAP1	1750	-0.0331232	0.00494933	0.000982142	0.006764
IQCG	1751	-0.0641776	0.00151272	0.000982981	0.006764
FASTKD2	1752	-0.0663262	0.00143608	0.000983202	0.006764
SAP130	1753	0.0983493	0.000694895	0.000990763	0.00681195
LYN	1754	0.139654	0.0068968	0.000991302	0.00681195
HM13	1755	0.108725	0.00141118	0.000992216	0.00681434
ZNF668	1756	0.071785	0.000379577	0.000996894	0.00684257
DNMT1	1757	0.0291636	0.0193723	0.000998921	0.00685259
ZNF417	1758	0.0628446	0.000944775	0.00100948	0.00692109
TBC1D13	1759	0.0666812	0.000533713	0.00101011	0.00692146
CLEC16A	1760	0.0852236	0.00308359	0.00101422	0.00694568
CLSTN1	1761	0.106298	0.0164874	0.00101784	0.00696652
MRPL45	1762	-0.0895357	0.000973645	0.00101902	0.00697061
KIR3DL1	1763	0.231779	0.00390904	0.00101963	0.00697086
PATL1	1764	0.083487	0.000850262	0.00102103	0.00697645
ABCA2	1765	0.071032	0.00155951	0.00102493	0.00699916
SHISA5	1766	0.109623	0.00356101	0.00102911	0.00702223
SHC1	1767	0.0940931	0.000660757	0.00102948	0.00702223
PLCH2	1768	0.0936945	0.00215408	0.00103226	0.00703317
MCM7	1769	0.0244696	0.0138906	0.00103271	0.00703317
PNPLA2	1770	0.165178	0.00246061	0.00103283	0.00703317
POLG	1771	0.0422603	0.00568265	0.00103503	0.0070442
BUB1B	1772	-0.0509075	0.00127635	0.00103979	0.00707257
ATXN2L	1773	0.0202916	0.00649927	0.00104063	0.0070743
ZNF394	1774	-0.0770661	0.000430155	0.00104618	0.00710801
SEC16A	1775	0.0639804	0.00910574	0.00104717	0.00711071
LTBP4	1776	0.096413	0.000705775	0.00105787	0.00717937
PDIK1L	1777	-0.0749062	0.000397016	0.00105855	0.00717991
ZNF410	1778	-0.0709616	0.000390101	0.00106079	0.00719108
RAP1B	1779	-0.115514	0.000962194	0.00106347	0.00720519
ZNF142	1780	-0.0100042	0.0148436	0.00106645	0.00722133
TRIOBP	1781	0.151247	0.00172321	0.00106802	0.00722601
STK35	1782	0.0728467	0.000475069	0.00106834	0.00722601
WDFY1	1783	-0.123497	0.0047727	0.00107018	0.00723437
RAD50	1784	-0.0873484	0.00261757	0.00107268	0.00724722
ZNF362	1785	0.0710333	0.00202193	0.00107664	0.00726985
SLC6A6	1786	0.0976965	0.000719013	0.00108245	0.00730502
EEF2	1787	0.1037	0.00595265	0.00108932	0.00734729
ATMIN	1788	-0.0759625	0.00152702	0.00108995	0.00734743
SIDT2	1789	0.0938768	0.0203185	0.00109191	0.00735654
SDHC	1790	-0.0671157	0.000337996	0.00109581	0.00737867
AGPAT2	1791	0.0476438	0.0110733	0.0010981	0.00738997
PHF12	1792	0.0867601	0.000561218	0.00110303	0.007419
CD93	1793	0.208256	0.00643823	0.0011058	0.00743345
EVI2A	1794	-0.217037	0.0369587	0.00110688	0.00743658
RNF219	1795	-0.0948041	0.000631906	0.00110907	0.00744716
CLTCL1	1796	0.0967306	0.00486674	0.0011132	0.00747074
SLC43A2	1797	0.139779	0.00463894	0.00111424	0.00747355
KBTBD3	1798	-0.00832986	0.00239381	0.00111598	0.00748106
NMT2	1799	-0.107916	0.000893765	0.00111801	0.00749047
ILF3	1800	0.00988	0.0119128	0.00111947	0.00749611
ADAM15	1801	0.160935	0.00203226	0.00113071	0.00756689
PIGQ	1802	0.10484	0.000858132	0.0011313	0.00756689
UNC50	1803	-0.0986948	0.00078907	0.00113709	0.00760139
SLMAP	1804	-0.0405545	0.0159598	0.00113802	0.00760342
TRIM7	1805	-0.0825846	0.00446606	0.00114104	0.00761936
NEU1	1806	0.0856393	0.000551521	0.00114322	0.00762969
SUMO2	1807	-0.064132	0.0086884	0.00114543	0.00763986
DUT	1808	-0.0809575	0.00150743	0.00114601	0.00763986
TST	1809	0.159863	0.00197288	0.00115358	0.00768609
ERGIC2	1810	-0.0266408	0.00810862	0.00115851	0.00771463
FSCN1	1811	0.111379	0.00111229	0.0011699	0.00778619
OPTN	1812	-0.175595	0.00230476	0.00117709	0.00782972
TNFAIP2	1813	0.128745	0.00127339	0.00118945	0.0079076
INPP4A	1814	-0.00992895	0.00406189	0.00119306	0.00792618
LRP10	1815	0.209395	0.00337238	0.00119356	0.00792618
AGPAT1	1816	0.0981441	0.00307657	0.00119516	0.00792817
NCBP1	1817	-0.0774056	0.000466318	0.00119564	0.00792817
ORAOV1	1818	-0.00373596	0.00824133	0.00119584	0.00792817
MON1B	1819	0.111177	0.000927083	0.00119951	0.00794813
VENTX	1820	0.0913172	0.000656698	0.00120063	0.00795065
E2F4	1821	0.0556359	0.00422324	0.00120121	0.00795065
APH1B	1822	0.121878	0.00115498	0.00120599	0.00797722
TIGD5	1823	0.0517674	0.00337019	0.00120694	0.00797722
MTBP	1824	-0.0364746	9.37945e-05	0.00120721	0.00797722
AVP	1825	0.0684126	0.000919944	0.00121562	0.00802842
CMTM7	1826	0.0882396	0.00269463	0.00121987	0.00805004
ARID4A	1827	-0.00944395	0.00732635	0.00122023	0.00805004
MOG	1828	0.049717	0.00166653	0.00122198	0.00805715
MGAT4B	1829	0.0822591	0.000515295	0.00122308	0.00805802
UNC119	1830	0.0755357	0.00125047	0.00122344	0.00805802
PIP5K1C	1831	0.0879362	0.00228744	0.00122416	0.00805834
GSPT2	1832	-0.11301	0.00952748	0.00123069	0.00809602
FBXL15	1833	0.0819322	0.00054375	0.00123127	0.00809602
PCNA	1834	-0.0799433	0.00404866	0.00123221	0.00809602
ARAP2	1835	-0.093552	0.000626281	0.00123257	0.00809602
ZNF644	1836	-0.107402	0.000845698	0.00123387	0.00810012
STAB1	1837	0.0852772	0.000555474	0.00123586	0.00810881
CHRNA2	1838	0.0876119	0.000590653	0.00124043	0.00813431
NAP1L4	1839	-0.0169434	0.0128401	0.00124276	0.00814519
FPR2	1840	0.180529	0.02158	0.00124439	0.0081514
HEMK1	1841	-0.0213278	0.00635942	0.0012479	0.00816996
DKC1	1842	-0.0927387	0.000663686	0.00125513	0.00821286
ARHGEF3	1843	-0.143853	0.00159869	0.00126283	0.00825879
POLR2B	1844	-0.0950591	0.00143197	0.00126549	0.00827164
EIF4A2	1845	-0.173527	0.00284841	0.00126767	0.00828142
TRIM38	1846	0.10155	0.00493662	0.00126991	0.00828988
SMC4	1847	-0.0937575	0.000701351	0.00127034	0.00828988
RASA4	1848	0.0374996	0.000110391	0.00127264	0.0083004
MSRA	1849	0.141461	0.00153915	0.00127337	0.00830067
OSBP	1850	-0.0251795	0.0116004	0.00127714	0.00832075
E2F3	1851	-0.0347501	0.0197322	0.00128099	0.00834132
MRPL14	1852	-0.092729	0.00487387	0.00128452	0.00835543
MTCP1	1853	-0.0736113	0.00372086	0.00128454	0.00835543
UNG	1854	-0.0242505	0.0119506	0.00128692	0.00836634
CBR4	1855	-0.011288	0.00880674	0.00128983	0.00838074
SLK	1856	-0.132287	0.00133736	0.0012909	0.00838317
PRSS21	1857	0.135354	0.012577	0.00129537	0.0084077
TUBA1C	1858	0.0584366	0.0129973	0.00129874	0.00842506
MAP3K6	1859	0.0617323	0.000299505	0.00130184	0.00844062
SOS2	1860	0.119742	0.00632771	0.00130507	0.00845166
PAK4	1861	0.059872	0.000292412	0.0013055	0.00845166
NUDT1	1862	-0.108696	0.0013432	0.00130565	0.00845166
ZFAND2B	1863	0.0886006	0.000846531	0.00130771	0.00846044
ERBB2	1864	0.0949307	0.000702711	0.00131429	0.00849848
PAF1	1865	0.115929	0.00160921	0.00131575	0.00850331
COL7A1	1866	0.0577311	0.00100072	0.00131927	0.00852153
RAB6A	1867	-0.0708844	0.00138023	0.00132454	0.00854678
CXCR1	1868	0.191115	0.00758732	0.00132484	0.00854678
GYS1	1869	0.0488752	0.000183707	0.00132531	0.00854678
MAN2C1	1870	0.0907004	0.00193322	0.00132679	0.00855175
RENBP	1871	0.102225	0.00517035	0.00132977	0.00856642
DUSP12	1872	-0.0903916	0.00119678	0.00134033	0.00862637
MTHFD2	1873	-0.138673	0.00146705	0.00134051	0.00862637
ICK	1874	-0.0912171	0.00147655	0.00134858	0.00867368
TMEM106C	1875	-0.0974445	0.000697158	0.00135645	0.00871733
CYP20A1	1876	-0.0179838	0.00531188	0.00135682	0.00871733
PPP3CA	1877	0.0278728	0.00595009	0.00135806	0.00871811
MRPS14	1878	-0.0395643	0.000137848	0.00135882	0.00871811
ZNF540	1879	-0.0565897	0.00023928	0.00135911	0.00871811
CHCHD3	1880	-0.0632881	0.000299881	0.00136421	0.00874619
TXNDC12	1881	-0.11158	0.0200493	0.00137052	0.00877968
ZNF740	1882	0.056578	0.00024568	0.00137089	0.00877968
ING2	1883	-0.0694461	0.000358161	0.00137924	0.00882844
RAP2B	1884	-0.0699693	0.0212278	0.00139023	0.00889406
U2AF1	1885	-0.0668336	0.000473808	0.00139501	0.00891568
CNOT6	1886	-0.0880018	0.000600658	0.00139509	0.00891568
ATP1B1	1887	-0.130081	0.0147346	0.00139893	0.00893552
ITLN1	1888	-0.178211	0.00242838	0.00140025	0.00893917
UFM1	1889	-0.117846	0.00104148	0.00140329	0.00894942
ZNF615	1890	-0.0835768	0.00136477	0.00140357	0.00894942
STX10	1891	0.121913	0.00116571	0.00140408	0.00894942
SLC41A3	1892	0.000464244	0.0109794	0.00140585	0.00895486
XPO5	1893	-0.00119192	0.00625548	0.00140642	0.00895486
VTI1B	1894	-0.119959	0.00115641	0.00141527	0.00900646
CXCL16	1895	0.181219	0.0026464	0.00141639	0.00900886
SF3B5	1896	-0.0760836	0.00791484	0.00142013	0.00902786
CRK	1897	0.0147236	0.0111339	0.00142462	0.00905164
ZNF101	1898	-0.0731496	0.000399926	0.00142781	0.00906709
FAM127B	1899	0.0358128	9.24634e-05	0.00143586	0.00911345
ABCB7	1900	-0.0663224	0.000837759	0.00143774	0.00912054
GAPDH	1901	0.067402	0.00570736	0.00144446	0.00915838
SLC39A1	1902	0.088001	0.000609129	0.00145171	0.00919929
MSX2	1903	0.0492597	0.000966968	0.00145244	0.00919929
TBC1D2	1904	0.116179	0.00105405	0.00145419	0.00920554
FNIP1	1905	0.129959	0.00129977	0.00145796	0.00922453
WWP1	1906	-0.156629	0.00185257	0.00146509	0.00926483
CLEC7A	1907	0.0379353	0.0341744	0.00146816	0.00927521
ZNF30	1908	-0.0741393	0.000419419	0.00146827	0.00927521
PEX19	1909	0.0810462	0.00415428	0.0014784	0.00933427
RNF14	1910	-0.13425	0.00145483	0.00148456	0.00936825
HLX	1911	0.17457	0.0024107	0.00148833	0.00938717
CLDN15	1912	0.0897906	0.00229787	0.00149001	0.00939281
NADSYN1	1913	0.0894465	0.000632115	0.00149414	0.00941397
GABARAPL1	1914	-0.0260717	0.0157676	0.00149541	0.00941702
CASP6	1915	-0.0269785	0.00163709	0.00149781	0.00942719
SAP18	1916	-0.052481	0.000413983	0.00150077	0.00944022
GAB2	1917	0.156052	0.00545495	0.00150144	0.00944022
TRADD	1918	0.0852403	0.00231579	0.00150356	0.00944862
CREBBP	1919	0.123352	0.00669414	0.00151074	0.00948878
CHST13	1920	0.240458	0.00457719	0.0015141	0.00950494
TMEM59	1921	-0.0817043	0.010294	0.00152467	0.00956627
KIR2DL4	1922	0.176653	0.0348029	0.00153088	0.00960024
TLK1	1923	-0.107216	0.000882782	0.00153384	0.00961385
TTC27	1924	-0.093624	0.00240769	0.00153676	0.00962506
ACAP1	1925	0.107714	0.000941486	0.00153783	0.00962506
DEF6	1926	0.10659	0.00217297	0.00153862	0.00962506
NFKBIA	1927	0.120435	0.00139685	0.00153883	0.00962506
CAPNS1	1928	0.0831764	0.010318	0.00154343	0.00964883
BCORL1	1929	0.0826386	0.00057354	0.00154644	0.00966265
RAB5A	1930	-0.0406414	0.0103356	0.00154904	0.0096739
NANS	1931	-0.030684	0.00309814	0.00155154	0.00968446
SEC61B	1932	-0.0985927	0.00209076	0.00155333	0.0096906
GLE1	1933	-0.0532524	0.00666179	0.0015552	0.00969726
PLA2G6	1934	0.0376094	0.000108128	0.00156055	0.00972563
PCK2	1935	0.0747528	0.00248184	0.00156429	0.0097439
NICN1	1936	0.0671774	0.00297488	0.00156821	0.00976326
TARDBP	1937	-0.0714452	0.000706188	0.00156974	0.00976492
EXT2	1938	-0.0864143	0.0102787	0.0015701	0.00976492
TOP2B	1939	-0.0915126	0.001609	0.00157375	0.00978256
GLRX2	1940	-0.0494304	0.000194993	0.00157599	0.00978871
RPS14	1941	-0.098126	0.0220103	0.00157636	0.00978871
PPP1R7	1942	-0.0713448	0.000400473	0.00158255	0.00982208
DHFRL1	1943	-0.0849089	0.000564999	0.00158884	0.00985266
TAP2	1944	0.154588	0.00187566	0.00158971	0.00985266
TRIM52	1945	-0.0382656	0.00657476	0.00158993	0.00985266
UNKL	1946	0.047764	0.000169224	0.00159109	0.00985478
CDC16	1947	-0.101755	0.000863714	0.00159416	0.00986873
CCDC12	1948	-0.0897974	0.00198469	0.0015955	0.00987197
SMARCE1	1949	-0.0927383	0.000683339	0.00160286	0.00991239
MED25	1950	0.174898	0.00248016	0.00160505	0.00992084
BEX4	1951	-0.086335	0.00151449	0.0016068	0.0099266
DLEC1	1952	0.0478422	0.000183127	0.00161222	0.00995496
PHC2	1953	0.185035	0.00276063	0.00161634	0.00997527
FAM120B	1954	0.022452	0.00965196	0.00161864	0.00998436
SAAL1	1955	-0.085244	0.000579995	0.00162496	0.0100182
FCGR1B	1956	-0.116026	0.0123636	0.00162956	0.0100414
STX4	1957	0.0719946	0.00247036	0.00164034	0.0101002
TACC3	1958	0.118534	0.00112816	0.00164076	0.0101002
LAMC2	1959	0.00950093	0.00172059	0.00164305	0.0101091
TMEM43	1960	0.1214	0.00428972	0.00164583	0.010121
MRPL11	1961	-0.0828284	0.00500308	0.00165121	0.0101489
ALDH7A1	1962	0.0566519	0.00155422	0.00165229	0.0101504
ZNFX1	1963	0.159994	0.00209496	0.00165874	0.0101848
COPB2	1964	0.0241625	0.00587741	0.00166015	0.0101883
FNBP1	1965	0.0747377	0.00915693	0.00166228	0.0101962
ATG4C	1966	-0.0876347	0.0005787	0.00166777	0.0102246
NARFL	1967	0.0648736	0.000330142	0.00167212	0.0102461
MAP1LC3A	1968	0.196678	0.00315605	0.00168581	0.0103247
PPP1R12B	1969	0.0404979	0.00851967	0.00168755	0.0103301
TBC1D2B	1970	0.105546	0.000885966	0.00169649	0.0103796
RPA2	1971	-0.0555052	0.0107747	0.00170257	0.0104115
FBXO3	1972	-0.0947286	0.00328744	0.00170565	0.0104247
DNAJA3	1973	0.0103601	0.00998822	0.00170646	0.0104247
VTA1	1974	-0.102281	0.00551757	0.00171163	0.010451
SLC25A25	1975	0.0647121	0.000343434	0.00171649	0.0104754
ZCCHC6	1976	-0.0435463	0.0129533	0.00172548	0.0105249
ACO1	1977	0.0124562	0.00750359	0.00172986	0.0105463
TOP3A	1978	0.112925	0.00154888	0.00173779	0.0105893
SRP9	1979	-0.174548	0.0130376	0.00173881	0.0105901
GIMAP2	1980	-0.103273	0.00159875	0.00174237	0.0106065
ATG10	1981	-0.00508572	0.00387764	0.00174697	0.0106291
PLOD3	1982	0.0981738	0.0012973	0.00174797	0.0106298
PEPD	1983	0.0652529	0.00795539	0.00175255	0.0106523
MS4A6A	1984	-0.111654	0.023789	0.00176368	0.0107145
DGCR2	1985	0.0867651	0.000889734	0.00177604	0.0107842
PGLYRP1	1986	0.280507	0.00643848	0.00177937	0.0107971
CDKL3	1987	0.0194892	0.00195599	0.00177996	0.0107971
PPFIA1	1988	0.1088	0.000969155	0.00178091	0.0107974
MBTPS1	1989	-0.00367438	0.00790892	0.00178223	0.0108
STMN1	1990	-0.112034	0.0196477	0.00178687	0.0108227
DDX59	1991	0.00763084	0.0130998	0.00179336	0.0108565
LRRC29	1992	0.0592911	0.000363283	0.00179488	0.0108603
GTF2H3	1993	-0.057384	0.000276557	0.00180548	0.010919
SGSH	1994	0.0779913	0.000499279	0.00181431	0.0109669
CD81	1995	0.0476302	0.0227818	0.00181791	0.0109831
CCNE1	1996	-0.158706	0.024472	0.00182203	0.0110024
WHSC1	1997	-0.072971	0.0101607	0.00182727	0.0110255
APP	1998	0.103621	0.0009529	0.00182767	0.0110255
[truncated: 10,055 more rows]
