# Supplementary material for: Multiomics integrative analysis identifies APOE allele-specific blood biomarkers associated to Alzheimer’s disease etiopathogenesis
Source: Aging (Albany NY). 2021 Apr 12;13(7):9277–329. doi: 10.18632/aging.202950 (PMC8064208; doi:10.18632/aging.202950)
Supplement: Supplementary Table 22 [file aging-13-202950-s024.xlsx]

## Sheet: Sheet1
Supplementary Table 22. Differential expression analysis in cortex: APOE2 stratum.
Symbol	Rank	logFC	Var	Fisher.Pvalue	Fisher.FDR	Nestimators
USP9Y	1	1.29872	0.179908	1.00697e-12	1.62656e-08	8
KDM5D	2	1.06204	0.527815	1.3547e-10	1.07626e-06	6
XIST	3	-2.0064	0.264196	1.99888e-10	1.07626e-06	6
HIPK2	4	0.727181	0.179415	4.76725e-10	1.92513e-06	8
ZNF254	5	-0.297419	0.0934837	9.09815e-10	2.93925e-06	8
DDX3Y	6	1.2454	0.191317	1.32005e-09	3.55379e-06	7
RPS4Y1	7	1.2039	0.138137	5.69175e-09	1.31341e-05	7
MPHOSPH8	8	-0.28534	0.0335868	2.34042e-08	4.72561e-05	8
TTTY14	9	0.537287	0.0453568	4.35768e-08	7.82107e-05	7
MALAT1	10	-0.818737	0.303597	5.96798e-08	9.40383e-05	7
EIF1AY	11	0.666835	0.0679761	6.4039e-08	9.40383e-05	7
MSI2	12	0.315667	0.0778819	1.0888e-07	0.000146562	8
NLGN4Y	13	0.667214	0.0747399	1.49079e-07	0.000185236	8
H2AFY	14	0.290536	0.0546371	2.44844e-07	0.000282497	8
MCL1	15	-0.329747	0.0628898	2.73596e-07	0.000294627	8
TNPO1	16	0.311261	0.0515601	3.47434e-07	0.000350757	8
ING3	17	0.440351	0.0245792	6.02058e-07	0.000572061	8
ATXN1	18	0.215466	0.0332727	7.65111e-07	0.000686602	8
FN1	19	-0.0905006	0.0454642	1.25599e-06	0.0010586	8
QSER1	20	0.643312	0.0660586	1.31072e-06	0.0010586	7
DLGAP4	21	-0.428652	0.0633235	1.62769e-06	0.00125201	8
ZC3H7B	22	0.289757	0.0245957	1.73374e-06	0.00127296	8
INIP	23	0.388732	0.061323	1.90624e-06	0.00133876	6
SPAG9	24	-0.204298	0.0488609	2.47003e-06	0.00166244	8
CYB5B	25	0.519335	0.0406843	2.62979e-06	0.00169916	8
AP2A1	26	-0.481401	0.025766	2.82011e-06	0.00175205	8
DCUN1D1	27	0.370474	0.0377587	3.9813e-06	0.0023298	8
CTSZ	28	0.662476	0.0751879	4.03854e-06	0.0023298	8
ZNF226	29	-0.316044	0.0377885	4.67693e-06	0.00260505	8
PURA	30	0.356213	0.0364678	5.32647e-06	0.00286795	8
SPEN	31	0.251163	0.0252363	6.57028e-06	0.00334188	8
PDIA3	32	-0.238229	0.0496477	6.7555e-06	0.00334188	8
HNRNPH1	33	-0.203498	0.0928176	6.82733e-06	0.00334188	6
CFLAR	34	-0.0664027	0.0406174	7.75498e-06	0.0036843	8
ATP7A	35	0.380989	0.0183822	8.1104e-06	0.00374307	7
ZNF264	36	-0.11116	0.0389702	9.11676e-06	0.00409064	8
SRGAP3	37	-0.29574	0.0272304	1.21003e-05	0.00528259	8
DYNC2LI1	38	0.134563	0.0204397	1.30396e-05	0.00554285	8
PPP3R1	39	0.387675	0.124814	1.53544e-05	0.00635947	8
CD44	40	0.254429	0.0827704	1.59142e-05	0.00642657	8
NMRK1	41	0.495481	0.0764088	1.66664e-05	0.00656616	6
SREK1	42	0.242787	0.0571105	1.75388e-05	0.00674535	6
SCD5	43	-0.419163	0.0363046	1.82567e-05	0.00685817	7
IDS	44	0.0723576	0.0422877	1.88221e-05	0.00690987	8
EPC1	45	0.4398	0.0357568	1.95371e-05	0.00701295	8
ATF7IP	46	0.0160627	0.0299751	2.0012e-05	0.00702726	8
AKT3	47	-0.262283	0.0237166	2.12014e-05	0.00708424	8
AKAP8L	48	0.449667	0.0215401	2.15541e-05	0.00708424	8
STAT5B	49	-0.175183	0.0191944	2.17714e-05	0.00708424	8
SLC35E2B	50	0.745556	0.13578	2.19286e-05	0.00708424	6
CMC1	51	0.142521	0.0437066	2.24931e-05	0.00712415	8
ZNF417	52	0.498881	0.0458865	2.46814e-05	0.00766688	6
POLR1E	53	-0.18429	0.0179711	2.58657e-05	0.00788319	8
HCG18	54	0.365649	0.046971	2.88582e-05	0.00863234	6
U2SURP	55	0.57754	0.0582664	3.02603e-05	0.00866979	6
TAOK1	56	-0.244202	0.0406375	3.15114e-05	0.00866979	8
TTTY15	57	0.424424	0.0628109	3.16768e-05	0.00866979	6
NKTR	58	-0.130087	0.0259351	3.27753e-05	0.00866979	8
RSBN1L	59	0.296928	0.0166809	3.30972e-05	0.00866979	8
STYX	60	0.328988	0.0108259	3.35195e-05	0.00866979	8
ARHGEF7	61	-0.175171	0.0267451	3.36238e-05	0.00866979	8
MRTO4	62	-0.31711	0.0273071	3.40813e-05	0.00866979	8
FXR1	63	0.207091	0.0179346	3.41397e-05	0.00866979	8
FKSG49	64	-0.359541	0.0432616	3.43507e-05	0.00866979	6
GANAB	65	-0.368151	0.0347233	3.86729e-05	0.00961052	8
GART	66	-0.105871	0.014488	4.05896e-05	0.00988049	8
CD46	67	-0.0814887	0.019739	4.09826e-05	0.00988049	8
RUFY3	68	-0.159861	0.0247792	4.29357e-05	0.0101294	8
FARP2	69	-0.035852	0.0235174	4.32693e-05	0.0101294	8
RBM33	70	0.337794	0.0443409	4.50958e-05	0.0104062	7
SLC25A16	71	-0.319159	0.0352389	4.67273e-05	0.0104615	8
HLA-DRA	72	0.529441	0.106071	4.68967e-05	0.0104615	8
MFAP3L	73	-0.000339039	0.0200871	4.80461e-05	0.0104615	8
WDR61	74	0.00439653	0.0310874	4.86077e-05	0.0104615	8
AFF4	75	-0.1735	0.0230062	4.90704e-05	0.0104615	7
STX16	76	-0.0730438	0.0384448	5.00425e-05	0.0104615	8
ZNF75A	77	-0.0293355	0.0216262	5.02051e-05	0.0104615	8
BCL6	78	-0.192591	0.0479883	5.05166e-05	0.0104615	8
SLAIN2	79	0.288679	0.0367311	5.2775e-05	0.0107299	6
SLC25A37	80	0.0258186	0.0290982	5.31415e-05	0.0107299	8
ATM	81	-0.0352338	0.0244385	5.58929e-05	0.0111461	8
GUCA1C	82	0.360311	0.0510153	5.85973e-05	0.0112591	7
PTH2R	83	0.0101862	0.041194	5.89819e-05	0.0112591	8
XIAP	84	-0.318269	0.0301963	5.92887e-05	0.0112591	8
PRR11	85	-0.125317	0.0284359	6.00986e-05	0.0112591	8
CRTAP	86	-0.100833	0.0253159	6.08836e-05	0.0112591	8
DST	87	0.0165171	0.0248157	6.10087e-05	0.0112591	8
ZMYM2	88	0.250444	0.0335169	6.13384e-05	0.0112591	7
CEP68	89	-0.203626	0.0186887	6.26936e-05	0.0113021	7
PDLIM5	90	-0.258326	0.0222759	6.2972e-05	0.0113021	8
FOLR1	91	-0.289526	0.0179994	6.44366e-05	0.0114379	8
COX15	92	0.253643	0.0223463	6.58405e-05	0.01156	8
ZNF207	93	-0.0387506	0.0154179	6.83167e-05	0.0118658	8
RBBP4	94	-0.300221	0.0179105	7.27356e-05	0.0124989	8
ZNF148	95	-0.0386694	0.0580661	7.59629e-05	0.0129161	8
SLC44A1	96	0.53315	0.103828	7.72884e-05	0.0130046	8
DDX59	97	0.21128	0.0146644	8.23713e-05	0.013717	7
BOLA2	98	0.225853	0.0227025	8.47183e-05	0.0139541	7
CDK13	99	0.103056	0.0467287	8.55234e-05	0.0139541	6
RSF1	100	0.220676	0.0201507	8.80545e-05	0.0142235	8
PPHLN1	101	-0.148684	0.0156447	9.04514e-05	0.0143406	8
RBM14	102	-0.21204	0.0308099	9.05552e-05	0.0143406	8
FGFR1	103	-0.419948	0.0277058	9.39399e-05	0.0147321	7
ASH1L	104	0.160031	0.0434211	9.72901e-05	0.0151108	8
HIRA	105	-0.127139	0.0271204	9.93887e-05	0.0152591	8
EFCAB6	106	-0.117786	0.0148843	0.000100134	0.0152591	8
CSNK1A1	107	0.0557925	0.0185332	0.000106997	0.0159426	8
GTDC1	108	0.0391276	0.0204691	0.000107726	0.0159426	8
DSC2	109	0.0626966	0.0114993	0.000108382	0.0159426	7
SMC1A	110	-0.331354	0.018157	0.000108567	0.0159426	8
SECISBP2L	111	0.25866	0.0356855	0.000111334	0.0159447	8
MED13L	112	-0.0797726	0.0225445	0.000112633	0.0159447	8
ESYT2	113	-0.470839	0.141248	0.000112897	0.0159447	6
CEP57	114	0.232692	0.0182422	0.000113493	0.0159447	8
KALRN	115	-0.233846	0.02288	0.000114326	0.0159447	8
SPTBN1	116	-0.0700552	0.0373163	0.000114504	0.0159447	8
G3BP1	117	0.185464	0.0251186	0.000117057	0.0160287	8
GOPC	118	0.237586	0.0169279	0.000117922	0.0160287	8
PRKAR2A	119	-0.308673	0.0206928	0.000122156	0.0160287	8
ARSD	120	-0.048183	0.014398	0.000122273	0.0160287	8
CUL3	121	0.103684	0.0241982	0.000122329	0.0160287	8
ASXL3	122	-0.00287291	0.0336731	0.00012295	0.0160287	7
ICA1	123	-0.114576	0.0119474	0.000123777	0.0160287	8
NPEPPS	124	-0.128166	0.0252985	0.000123954	0.0160287	8
TNRC6B	125	0.0479583	0.0107139	0.000124038	0.0160287	8
CSNK1G1	126	0.181032	0.0136891	0.000125975	0.0161464	7
NIPBL	127	0.269013	0.0317124	0.000126948	0.0161464	8
ARMC8	128	0.205331	0.0286317	0.000130236	0.0164352	8
DIP2A	129	-0.0699042	0.021127	0.000136045	0.0170351	8
EPAS1	130	-0.478858	0.0440503	0.000139111	0.017285	7
PSIP1	131	0.236676	0.00952017	0.000142704	0.0175962	8
ZC3H14	132	0.200098	0.00640346	0.000144907	0.0177325	8
FLCN	133	-0.0422684	0.027223	0.000151326	0.0181848	8
CCDC7	134	0.264311	0.0308366	0.000152893	0.0181848	7
NTPCR	135	0.232265	0.0324407	0.000152947	0.0181848	6
SFXN4	136	0.0342601	0.0195799	0.000153204	0.0181848	7
CRIPT	137	0.379556	0.016846	0.000154232	0.0181848	8
ARPIN	138	-0.224981	0.043349	0.000156594	0.0183294	6
USP48	139	0.376341	0.0287239	0.000159853	0.0183483	8
WTAP	140	0.0702174	0.01476	0.000159861	0.0183483	8
CEP95	141	0.187946	0.0456156	0.000161578	0.0183483	6
CSPP1	142	0.188429	0.0197877	0.000162354	0.0183483	8
SORT1	143	-0.314272	0.0235595	0.000162435	0.0183483	8
MTDH	144	0.446307	0.0246081	0.000169506	0.0190141	8
FUS	145	-0.254107	0.0255125	0.000174079	0.0192702	8
PRKG1	146	0.392314	0.0202046	0.000174275	0.0192702	8
N4BP2L2	147	-0.220942	0.118323	0.000176051	0.0192702	6
TTTY10	148	0.357399	0.0407715	0.000177216	0.0192702	7
MAVS	149	-0.431478	0.0904777	0.000177754	0.0192702	6
MYEF2	150	0.225893	0.014826	0.000179151	0.0192922	8
DNAJC7	151	-0.0793554	0.0222543	0.00018474	0.0197623	8
AAGAB	152	0.459504	0.0106305	0.000190748	0.0201582	6
CALD1	153	0.14621	0.029103	0.000190937	0.0201582	8
STAG3L4	154	0.227231	0.0449024	0.000193974	0.0203211	6
RLBP1	155	0.0355857	0.0290548	0.000194996	0.0203211	8
HP1BP3	156	-0.183275	0.02123	0.000200807	0.0207925	8
DNAJB14	157	0.033007	0.0669091	0.000202478	0.0208321	7
ORAI2	158	-0.306341	0.0386677	0.000205565	0.0210158	7
ALMS1	159	-0.142639	0.0259718	0.000208284	0.0211598	8
FAM208B	160	0.206076	0.0615288	0.000216875	0.0218948	6
SNRNP70	161	-0.04639	0.022339	0.00021937	0.0219743	8
CADM1	162	0.193638	0.0181792	0.000220383	0.0219743	8
SRSF5	163	-0.219238	0.0419026	0.000224035	0.0220336	6
TRIM4	164	-0.0855186	0.0365421	0.000225654	0.0220336	8
IVD	165	-0.21777	0.0101925	0.000226016	0.0220336	8
SSBP2	166	0.280634	0.0156039	0.000226434	0.0220336	8
CDK6	167	0.366955	0.0309202	0.000228254	0.0220778	8
KIF16B	168	0.290154	0.0146342	0.000230381	0.0221509	8
SNX12	169	0.214811	0.0422161	0.000233949	0.0223165	8
MAPK1	170	-0.136557	0.0209105	0.000234867	0.0223165	8
BMP1	171	-0.0132801	0.0138315	0.000239173	0.0225928	8
LMLN	172	0.0395418	0.0177607	0.000242189	0.0226867	7
IGF1R	173	-0.271823	0.0192066	0.000242977	0.0226867	8
OTUD7A	174	-0.224349	0.0203159	0.000246241	0.0227342	8
HNRNPM	175	-0.0298761	0.0600789	0.000247547	0.0227342	6
PAPOLA	176	0.327101	0.00729691	0.000249102	0.0227342	8
ILF3	177	-0.172856	0.0131648	0.000249115	0.0227342	8
KAT6A	178	0.312203	0.0708429	0.000254382	0.0230844	6
POSTN	179	0.285966	0.0234833	0.000255913	0.0230936	8
TAP2	180	-0.0774486	0.0210376	0.000257988	0.0231516	8
PPP1R12B	181	-0.13891	0.0458019	0.000259455	0.0231546	8
ARID4B	182	0.0779088	0.0230381	0.000261367	0.0231971	8
ABCA9	183	-0.108293	0.0214109	0.000263551	0.0232631	7
SEC61A1	184	-0.117107	0.026789	0.000271296	0.0238166	8
CSTF2T	185	0.378939	0.0348428	0.000276123	0.0240515	8
MED13	186	0.122167	0.0153226	0.000276951	0.0240515	8
SEMA3F	187	-0.233292	0.0188004	0.000278774	0.0240804	8
METTL14	188	0.0798316	0.0158227	0.000283542	0.0242148	8
UGGT2	189	-0.0387716	0.0440919	0.000285226	0.0242148	6
GSK3B	190	0.372807	0.0335847	0.000285983	0.0242148	8
PTK2	191	-0.0773902	0.0218823	0.000286554	0.0242148	8
KPNA6	192	-0.155493	0.0198636	0.000288078	0.0242148	8
PDE8B	193	-0.124831	0.0205918	0.000290213	0.0242148	8
DCLK1	194	0.414986	0.131673	0.000290823	0.0242148	8
RPL15	195	0.119892	0.0241295	0.000292798	0.0242542	7
MIA3	196	0.00327904	0.018573	0.000295663	0.0242998	8
ADD1	197	-0.180006	0.0119716	0.000296603	0.0242998	8
MPZL1	198	-0.274217	0.0186168	0.000299284	0.0242998	8
RRAGC	199	0.0407414	0.0177597	0.000299366	0.0242998	8
DCTN5	200	-0.0932374	0.0167037	0.000302736	0.0244505	8
TSHZ2	201	0.136395	0.0267819	0.000306377	0.0245219	8
GPLD1	202	-0.0800614	0.030424	0.000306657	0.0245219	8
DENND1B	203	0.300668	0.0252141	0.000311072	0.0247395	7
ENO1	204	-0.232952	0.0110485	0.000312441	0.0247395	8
RSPH1	205	0.104057	0.0179082	0.000322148	0.0252826	8
AHI1	206	0.238912	0.0151735	0.00032243	0.0252826	8
ETFBKMT	207	-0.11171	0.051865	0.000324652	0.0253338	6
DCLRE1C	208	0.021278	0.0166253	0.000329589	0.0254293	8
KCNJ16	209	0.389482	0.00554929	0.000330833	0.0254293	8
ZFY	210	0.254691	0.018447	0.000331835	0.0254293	7
CTBP2	211	-0.0792088	0.0193088	0.000332173	0.0254293	8
SP2	212	0.21082	0.0111737	0.000335104	0.0254989	8
ACOX1	213	0.184871	0.0222224	0.000337933	0.0254989	8
KDELR3	214	-0.185712	0.0281379	0.00033959	0.0254989	8
TPP2	215	0.234809	0.0240918	0.000339716	0.0254989	8
MARCH6	216	-0.270966	0.0279415	0.000341655	0.0254989	8
USP16	217	0.176989	0.0150121	0.000342553	0.0254989	8
ENAH	218	0.0195519	0.0181947	0.000346665	0.0255313	8
FRMD4A	219	0.282952	0.0130492	0.000347711	0.0255313	8
FAM169A	220	0.348847	0.0918716	0.000349102	0.0255313	6
CNOT4	221	0.0746882	0.00779685	0.000351121	0.0255313	8
DNAJC21	222	0.146536	0.0226642	0.000352579	0.0255313	8
ANK3	223	0.060571	0.0438196	0.00035633	0.0255313	8
RUNX1T1	224	0.208533	0.0210564	0.00035772	0.0255313	8
GUCY1A2	225	-0.0771578	0.106939	0.000358853	0.0255313	8
MRPL57	226	0.217005	0.0412022	0.000362374	0.0255313	6
SLC35E1	227	-0.183537	0.0340135	0.000362705	0.0255313	8
CERS5	228	-0.403528	0.0685697	0.000362987	0.0255313	6
OCIAD1	229	-0.0848342	0.0270194	0.000364853	0.0255313	8
USP2	230	-0.0395331	0.0136535	0.000367884	0.0255313	8
USP34	231	-0.0725019	0.021386	0.00036804	0.0255313	8
OAZ2	232	-0.376587	0.0123366	0.000374347	0.0255313	6
CAAP1	233	0.27311	0.0351153	0.00037467	0.0255313	6
CCNT2	234	-0.069967	0.0114335	0.000375257	0.0255313	8
PHC3	235	0.00210033	0.0357746	0.000375638	0.0255313	7
AP1AR	236	0.405582	0.0511323	0.000377659	0.0255313	6
RNF130	237	0.351531	0.0233712	0.000377864	0.0255313	8
SGCD	238	-0.00286772	0.0205358	0.00038312	0.0255313	8
RASA2	239	0.144632	0.0431779	0.00038329	0.0255313	8
LRRFIP1	240	-0.0506814	0.0493275	0.000386935	0.0255313	8
ZNF397	241	-0.0466607	0.0306796	0.000387592	0.0255313	8
ANAPC16	242	0.103634	0.0420695	0.000387816	0.0255313	6
LACTB2	243	0.149086	0.0259274	0.000387858	0.0255313	8
AK2	244	-0.268916	0.0157731	0.000389311	0.0255313	8
RABL6	245	0.406334	0.0277144	0.000390291	0.0255313	6
RANBP2	246	-0.0535259	0.0226539	0.00039093	0.0255313	8
UBA6	247	0.292923	0.0121524	0.000391843	0.0255313	7
CDC42SE1	248	-0.0345231	0.0137619	0.000391987	0.0255313	8
KANSL1	249	0.468546	0.115238	0.0003964	0.0256898	6
FOXJ3	250	-0.200739	0.0110375	0.000397601	0.0256898	8
RBBP6	251	0.0764804	0.0154226	0.000399246	0.0256933	8
P4HB	252	-0.345985	0.0370101	0.000401989	0.0257672	7
ZFYVE16	253	0.236498	0.0238707	0.000405001	0.0258421	8
ZNF160	254	0.129109	0.0292463	0.000407398	0.0258421	8
TMTC1	255	-0.188948	0.0428247	0.000407957	0.0258421	7
MYADM	256	0.118186	0.0175274	0.00041455	0.0261572	8
GOLGA4	257	0.0809322	0.0175572	0.000418787	0.0263216	8
PCM1	258	0.0733829	0.0141455	0.00042832	0.0268165	8
CCDC91	259	-0.109798	0.0333053	0.000431752	0.026927	8
CDK12	260	0.230363	0.0573487	0.000433689	0.0269438	6
KLF6	261	0.0176404	0.0223202	0.000442422	0.0272824	8
SMCR8	262	-0.151774	0.0165546	0.000442518	0.0272824	7
METTL15	263	0.223515	0.0157802	0.000445859	0.0273839	6
CDR1	264	0.72069	0.135598	0.000452038	0.0275962	7
PCDH11Y	265	0.113933	0.0253142	0.000452732	0.0275962	8
KMT2E	266	0.117279	0.134486	0.000457289	0.0276344	6
MZF1	267	-0.0461039	0.0133816	0.000457866	0.0276344	8
BTRC	268	0.0361302	0.0199076	0.000459227	0.0276344	8
TNXB	269	0.389462	0.0209527	0.000460202	0.0276344	8
CD59	270	-0.0133369	0.0167224	0.000466196	0.0278725	8
ANKRD10	271	0.213159	0.0179336	0.000468934	0.0278725	8
XRCC2	272	-0.154944	0.0191536	0.000471291	0.0278725	8
SMCHD1	273	0.39624	0.0357361	0.000472746	0.0278725	6
RDH11	274	-0.133373	0.0202352	0.000474044	0.0278725	8
CDC14B	275	0.212517	0.011909	0.00047452	0.0278725	8
WAC	276	0.0586613	0.0167123	0.000485225	0.0283031	8
DDX17	277	0.144704	0.0201438	0.000487075	0.0283031	8
ASB4	278	0.0912014	0.0112674	0.000487108	0.0283031	8
AGO1	279	0.198157	0.0226417	0.000495418	0.0286827	6
NUP54	280	0.221177	0.0183928	0.000497935	0.0287247	8
CNTNAP2	281	-0.189791	0.0343067	0.000499699	0.0287247	8
HSP90AA1	282	-0.0810679	0.0166829	0.000501945	0.0287515	8
LMO4	283	-0.0463099	0.038348	0.000505689	0.0287938	8
KDM6A	284	0.367397	0.0306207	0.000506863	0.0287938	6
COPA	285	-0.145536	0.0157346	0.000508031	0.0287938	8
AIF1	286	-0.130678	0.0297897	0.00051656	0.0290856	8
SYNGR1	287	-0.178464	0.0135948	0.000516782	0.0290856	8
ZMAT3	288	-0.143648	0.0335994	0.000522619	0.029312	8
HLA-DPB1	289	0.32232	0.0284558	0.000527794	0.0294361	8
MUC4	290	-0.000860558	0.00945075	0.000529123	0.0294361	7
NXPE3	291	-0.0689285	0.150845	0.000530722	0.0294361	6
SARDH	292	-0.120479	0.012021	0.000532121	0.0294361	8
NHS	293	0.234199	0.0224671	0.000544047	0.0299931	8
MS4A7	294	0.144767	0.0300902	0.000550342	0.030237	8
DIO2	295	0.281596	0.0408057	0.000558771	0.0304721	8
RECQL	296	0.255223	0.0163722	0.000559809	0.0304721	8
HNRNPD	297	0.200234	0.0134346	0.000561398	0.0304721	8
STK19	298	-0.261632	0.0127966	0.000562167	0.0304721	8
ERBB4	299	-0.190284	0.0229569	0.000564887	0.0305171	8
TPCN2	300	0.0588997	0.0256258	0.000567576	0.0305602	8
MGLL	301	-0.180578	0.0222379	0.00056957	0.0305657	8
BRWD1	302	0.320553	0.019611	0.00057152	0.0305688	8
LOC729966	303	-0.114543	0.0390263	0.000574566	0.0306302	6
WDR1	304	-0.262465	0.0153639	0.000578125	0.0307186	8
EIF4EBP2	305	-0.224107	0.0149678	0.000583181	0.0308856	8
FARSB	306	-0.071059	0.0342178	0.000585787	0.0309089	7
SP110	307	-0.0594683	0.0200412	0.000587447	0.0309089	8
ADD2	308	-0.100297	0.0136933	0.000592433	0.0310663	8
METTL21C	309	0.319448	0.110343	0.000594285	0.0310663	6
RIF1	310	0.094403	0.0147963	0.000598136	0.0311514	7
KLHDC9	311	-0.182594	0.0185099	0.000599948	0.0311514	8
DDX3X	312	-0.0708735	0.0165115	0.000601698	0.0311514	8
CDH8	313	-0.193717	0.0265861	0.000603772	0.0311589	8
SCRN3	314	-0.0602175	0.0192989	0.000608533	0.0313046	8
TMEM33	315	0.472068	0.0354882	0.000613629	0.0313629	7
WNK1	316	0.00243723	0.0395372	0.000615377	0.0313629	8
ZNF827	317	0.0836444	0.0220068	0.000615492	0.0313629	8
MARCH1	318	0.262893	0.0164856	0.0006249	0.0315554	8
ARID5B	319	-0.153591	0.0159251	0.000628539	0.0315554	8
MCM3AP	320	-0.0997565	0.0128886	0.000629082	0.0315554	8
MPRIP	321	0.162662	0.017179	0.000630505	0.0315554	8
ZNF138	322	-0.057009	0.0325432	0.000630754	0.0315554	7
VPS13A	323	0.0294648	0.0262448	0.000630991	0.0315554	8
FAM98B	324	0.311887	0.0127664	0.000638641	0.0318394	8
BRD4	325	-0.107506	0.0335142	0.000646166	0.0320885	8
SSH2	326	0.0898157	0.00968227	0.000649301	0.0320885	8
CDH20	327	0.401188	0.0371905	0.000649888	0.0320885	8
LPP	328	-0.0286614	0.0238373	0.000651583	0.0320885	8
USP1	329	0.330608	0.0151274	0.000655338	0.0321753	8
PTBP1	330	-0.0261584	0.0238484	0.00066813	0.0326155	7
KTN1	331	-0.213756	0.0144467	0.000668342	0.0326155	8
MGST3	332	-0.208886	0.0125291	0.000670579	0.0326261	8
MOXD1	333	0.110218	0.044251	0.000673324	0.0326613	8
F11R	334	-0.224246	0.0196258	0.000675416	0.0326646	7
TNKS2	335	-0.0939898	0.018241	0.000678559	0.0327187	8
KCNJ4	336	-0.0734856	0.0761363	0.0006825	0.0328108	8
PPP2R2B	337	-0.0293234	0.0173127	0.000687242	0.0329407	8
NAA30	338	0.365297	0.042375	0.000693384	0.0331368	6
PTGER3	339	0.0342384	0.0108442	0.000703715	0.0335064	8
SULT1C2	340	-0.115153	0.0154944	0.000705267	0.0335064	8
WDR20	341	0.301198	0.00766076	0.00072027	0.03405	8
FBXL17	342	0.228725	0.0166075	0.000720925	0.03405	7
GAREM1	343	0.452496	0.0107835	0.000725637	0.0341726	6
PSEN1	344	0.252988	0.0238208	0.000728318	0.0341992	8
TMEM50B	345	-0.215631	0.0108003	0.000731929	0.0342032	8
TBX3	346	-0.193739	0.0171059	0.000732638	0.0342032	8
OGT	347	0.0734571	0.0159352	0.000744462	0.0344864	8
DAP3	348	-0.0470756	0.0139289	0.000745601	0.0344864	8
LOC283788	349	-0.367229	0.0739894	0.000746616	0.0344864	6
RGS12	350	0.0191953	0.0125295	0.000747244	0.0344864	8
PLEKHA2	351	-0.305625	0.0436572	0.000749436	0.034489	6
NFX1	352	0.153926	0.0137882	0.000752741	0.0345427	8
TIMM8A	353	0.106201	0.0136611	0.000757521	0.0346568	8
ZNF555	354	-0.00865201	0.0150082	0.00075952	0.0346568	8
CAMK2B	355	-0.238067	0.0164004	0.000764473	0.0346883	8
IWS1	356	0.195258	0.0241369	0.000764505	0.0346883	8
RELA	357	-0.185422	0.0219859	0.000769185	0.0348029	8
CLEC5A	358	0.110219	0.0229753	0.000774077	0.0348815	8
ARHGEF12	359	0.208945	0.0110864	0.000776385	0.0348815	8
BACE1	360	0.163157	0.0260239	0.000778109	0.0348815	8
CCAR2	361	0.223269	0.0725964	0.000779559	0.0348815	6
GPR161	362	0.138561	0.0182962	0.000783452	0.0349458	8
USP25	363	0.167171	0.0133341	0.000785323	0.0349458	8
CBX2	364	-0.175945	0.00875657	0.000803875	0.0355817	7
UBE2J1	365	0.0306854	0.0100196	0.000804019	0.0355817	8
PIK3CA	366	0.149105	0.0136492	0.00081573	0.0360013	8
SRSF4	367	0.122753	0.0322384	0.000818775	0.0360373	6
EIF2AK2	368	0.361188	0.016593	0.000828278	0.0363565	7
MARCH3	369	-0.122994	0.0178654	0.000839535	0.0367507	8
MAGI1	370	-0.191417	0.0137652	0.000844052	0.0368486	8
SRD5A1	371	0.0751839	0.0313854	0.000851575	0.0369939	8
KIF9	372	0.0133803	0.0118579	0.000851961	0.0369939	7
UTY	373	0.235464	0.0218922	0.000874938	0.0378509	8
TC2N	374	0.309857	0.0227327	0.000880317	0.0378509	8
VPS13B	375	0.447274	0.0338143	0.000881067	0.0378509	8
FGFR1OP2	376	0.366175	0.0242572	0.00088107	0.0378509	8
HNRNPU	377	0.1104	0.0115752	0.000892731	0.0382501	8
CREBRF	378	0.155071	0.135041	0.000898584	0.038399	6
RTN4	379	0.158203	0.0113006	0.000903886	0.0385237	8
FBLN1	380	-0.145344	0.0238438	0.000912049	0.0387693	8
ABCC4	381	-0.116859	0.0198511	0.000925216	0.0390754	8
DLEU2	382	-0.346037	0.0283438	0.000928034	0.0390754	6
SMIM7	383	0.243407	0.0314074	0.000929253	0.0390754	6
ZNHIT2	384	-0.192371	0.0166869	0.000929435	0.0390754	8
GLIPR1	385	-0.139227	0.0359106	0.000931347	0.0390754	8
ZNF493	386	-0.165909	0.012693	0.000935751	0.0391585	7
TFRC	387	-0.593923	0.0704347	0.00094069	0.0392635	8
CUL4A	388	0.0330878	0.0204249	0.000945315	0.0393303	8
MTF2	389	0.223092	0.0149132	0.00094716	0.0393303	8
DOPEY1	390	0.0512787	0.0211916	0.000953914	0.0395091	8
ARIH2	391	-0.03394	0.0147284	0.00096314	0.0396674	8
MAST4	392	-0.163365	0.0189867	0.000963604	0.0396674	8
GOSR2	393	-0.222749	0.00840934	0.000965101	0.0396674	8
TOB2	394	-0.0457182	0.0236455	0.000968881	0.0396818	7
DCN	395	-0.221501	0.0275775	0.000970366	0.0396818	8
HSPA12B	396	-0.102809	0.0160073	0.000976926	0.0398492	8
ZBTB38	397	-0.0642267	0.0163249	0.000983899	0.0399633	7
CFDP1	398	-0.169072	0.0242198	0.000984671	0.0399633	8
OLR1	399	0.245337	0.0304285	0.00100275	0.0405014	8
MAPK8IP3	400	-0.210667	0.00784372	0.00100295	0.0405014	8
PANX1	401	0.0776299	0.0276528	0.00101029	0.0406226	8
MALSU1	402	0.22914	0.0401512	0.00101295	0.0406226	6
HS2ST1	403	0.21059	0.0154728	0.00101349	0.0406226	8
ALG13	404	0.0891675	0.0155372	0.00101824	0.040712	8
RAB3IP	405	0.0745223	0.0155677	0.00102284	0.0407948	8
NCAPH2	406	-0.147095	0.00559948	0.00103667	0.0410769	8
SON	407	0.205322	0.0143325	0.00103748	0.0410769	8
BCCIP	408	-0.0677283	0.0196141	0.00103754	0.0410769	8
LYRM7	409	0.387692	0.0243827	0.00105413	0.0414377	6
SERINC3	410	0.171418	0.0155616	0.00105425	0.0414377	8
CHD9	411	0.211341	0.0124829	0.00105435	0.0414377	8
MAFF	412	-0.201011	0.0481255	0.00105832	0.0414717	7
MOBP	413	0.536447	0.12424	0.00106035	0.0414717	8
YME1L1	414	0.119485	0.0138067	0.00106654	0.0416132	7
AKAP11	415	-0.109208	0.0197091	0.00106981	0.0416399	8
SMG7	416	0.00595931	0.00648629	0.00107312	0.0416535	7
ASB7	417	0.208959	0.0173699	0.0010764	0.0416535	8
QKI	418	0.326901	0.0492734	0.0010828	0.0416535	7
SLC30A5	419	0.0374908	0.0214095	0.00108372	0.0416535	8
KIAA1147	420	0.254058	0.0130165	0.00108482	0.0416535	7
CLK4	421	0.170682	0.0241028	0.00108662	0.0416535	8
SOX13	422	-0.264012	0.0280947	0.001091	0.0416535	8
COG8	423	-0.185976	0.0209395	0.00109101	0.0416535	8
PSD3	424	0.0194152	0.0913326	0.00109336	0.0416535	8
MRPL21	425	0.168427	0.0205024	0.00110194	0.0418814	7
RNF168	426	0.249705	0.0217978	0.00110827	0.0419596	7
FGF14	427	0.0801528	0.024485	0.00110919	0.0419596	8
WWP2	428	-0.0426734	0.0170112	0.00111253	0.0419878	8
KCMF1	429	0.205506	0.0246681	0.00113608	0.0427766	8
ATRX	430	0.0793801	0.0254935	0.00114764	0.043036	8
XPR1	431	0.102562	0.0118561	0.0011483	0.043036	8
ZFP36L2	432	-0.13852	0.0290886	0.00115495	0.0430963	8
TMEM19	433	0.232142	0.0160672	0.00115574	0.0430963	8
STK4	434	-0.122266	0.0116856	0.00116596	0.0430963	8
TTF1	435	0.104506	0.0190137	0.00116741	0.0430963	8
LIMS1	436	-0.0790814	0.0214062	0.00116795	0.0430963	8
ATP5G2	437	-0.0057814	0.0104347	0.00117013	0.0430963	7
DZIP3	438	0.119618	0.0243354	0.00117118	0.0430963	8
JMJD1C	439	0.105953	0.0116015	0.00117163	0.0430963	7
SLC5A3	440	-0.0471865	0.0551104	0.00117392	0.0430963	8
ZNF611	441	-0.16012	0.0179935	0.00117699	0.0431111	8
DPYD	442	-0.0506013	0.0150424	0.00119179	0.0435542	8
CLCN5	443	-0.0538417	0.0203007	0.0011976	0.0436678	7
DDX31	444	-0.145072	0.0128948	0.00120108	0.0436962	8
LOC145783	445	0.437316	0.0302637	0.00120511	0.0437048	6
PLCXD3	446	0.154222	0.0410272	0.00120673	0.0437048	7
TPR	447	0.0851846	0.013004	0.00120964	0.0437122	8
PRRC2C	448	-0.185465	0.0392224	0.00121337	0.0437411	6
SPP1	449	0.334618	0.0554365	0.00121586	0.0437411	8
TLK1	450	0.0984375	0.0116084	0.00122498	0.0439715	8
SF3B6	451	-0.162222	0.0492978	0.00123081	0.0440828	6
PFKFB2	452	0.206977	0.0170137	0.0012371	0.04421	7
DUT	453	0.13099	0.0197099	0.0012501	0.0443329	8
KDM2A	454	-0.192986	0.030861	0.00125248	0.0443329	6
PPM1A	455	0.197482	0.0135134	0.00125249	0.0443329	8
SOGA1	456	0.046923	0.0479961	0.00125596	0.0443329	6
LRRFIP2	457	-0.0541952	0.0113558	0.00125607	0.0443329	8
WDR26	458	0.145552	0.0144041	0.00125701	0.0443329	8
MATR3	459	-0.252945	0.0258266	0.00126527	0.044434	8
RABGAP1	460	-0.162768	0.0149772	0.00126538	0.044434	8
THUMPD3	461	0.0274616	0.010506	0.00127099	0.0445343	8
SLC7A1	462	-0.041051	0.0147278	0.00128341	0.0448151	8
PCDH18	463	0.0418603	0.0134438	0.00128455	0.0448151	8
ZMYND8	464	-0.286083	0.0183366	0.00129654	0.0450875	8
NFATC2IP	465	-0.158729	0.0098776	0.00130404	0.0450875	8
PANK2	466	0.183114	0.0201533	0.00130499	0.0450875	7
IGFBP5	467	-0.246336	0.0330722	0.00130538	0.0450875	8
ABR	468	-0.402682	0.0270869	0.00130632	0.0450875	8
DYNC1H1	469	-0.108668	0.00757535	0.00131295	0.0452197	8
DOCK10	470	0.449016	0.0636009	0.00132068	0.0452911	7
SPG11	471	0.0251071	0.0119928	0.00132414	0.0452911	8
POLR2J4	472	-0.304093	0.0258941	0.00132468	0.0452911	7
PTPRG	473	-0.422321	0.0288473	0.00132624	0.0452911	8
MAP9	474	0.135043	0.023582	0.00133275	0.0454175	7
PRKAA1	475	-0.0393589	0.0137444	0.00133612	0.0454366	8
PPFIA2	476	0.0189542	0.0196086	0.00134573	0.0456672	8
WDR4	477	0.100906	0.0173438	0.0013573	0.0459633	8
POLDIP3	478	-0.0388851	0.00919774	0.00136777	0.0459789	8
PIAS2	479	0.00256547	0.0188046	0.00137114	0.0459789	8
WLS	480	-0.492785	0.125311	0.00137163	0.0459789	6
SDCCAG8	481	0.374911	0.0294227	0.00137207	0.0459789	8
SIRT5	482	-0.143974	0.00819815	0.00137292	0.0459789	8
COA1	483	-0.0621465	0.0342076	0.00137484	0.0459789	6
SLX4IP	484	0.389956	0.0459687	0.00141604	0.0471698	6
TFE3	485	-0.11124	0.0126037	0.00141629	0.0471698	8
STIP1	486	-0.19262	0.0327263	0.00142592	0.0473928	8
NAB1	487	0.20083	0.0127988	0.00143712	0.0476205	8
XPO7	488	-0.143067	0.0171053	0.00144086	0.0476205	8
PBRM1	489	0.043702	0.00992929	0.0014446	0.0476205	7
PRDX2	490	0.107329	0.0154108	0.0014471	0.0476205	7
RBM5	491	0.261779	0.0126636	0.00144799	0.0476205	8
DOCK5	492	0.16175	0.0310611	0.00145258	0.0476205	8
COL4A3BP	493	-0.0333688	0.0230702	0.00145526	0.0476205	8
FARP1	494	-0.344487	0.0264719	0.00146017	0.0476205	8
ST6GAL1	495	-0.30105	0.017597	0.00146386	0.0476205	8
ACSL4	496	0.00695236	0.0198799	0.00146688	0.0476205	8
FAM204A	497	0.361177	0.0147794	0.00146912	0.0476205	6
TPK1	498	0.0177677	0.0175551	0.00147104	0.0476205	8
AP2B1	499	-0.0800624	0.016471	0.0014711	0.0476205	8
SRRM4	500	-0.0410361	0.0242416	0.00148078	0.0478382	8
SVEP1	501	0.106623	0.0201379	0.00148967	0.0479582	7
FITM2	502	-0.0938683	0.0127052	0.00149044	0.0479582	7
MRPS5	503	0.249014	0.0167951	0.00150289	0.0481774	8
SAMHD1	504	-0.245656	0.0290839	0.00150583	0.0481774	7
ITGB1	505	-0.0869652	0.00895508	0.0015062	0.0481774	8
DYRK1A	506	0.281492	0.0234	0.00151229	0.0482768	8
MRPL30	507	0.208643	0.020374	0.00151639	0.0483123	8
PTPN14	508	-0.384613	0.0245573	0.00153559	0.0487486	7
SMTN	509	-0.0291728	0.0278941	0.00154006	0.0487486	8
COMMD5	510	0.0144936	0.0114649	0.00154494	0.0487486	8
GRK4	511	-0.0650179	0.0174867	0.00154568	0.0487486	8
EML1	512	0.28943	0.014827	0.00154781	0.0487486	8
ATP11B	513	-0.117224	0.017246	0.0015482	0.0487486	8
NTRK2	514	-0.194415	0.100019	0.001554	0.0488028	7
GSE1	515	0.159011	0.0299152	0.00155596	0.0488028	6
SNX29	516	-0.0758817	0.0220732	0.00158353	0.0495495	6
TMEM260	517	0.362659	0.0233543	0.0015859	0.0495495	6
CIRBP	518	-0.0398788	0.042194	0.00159434	0.0497171	8
E2F7	519	0.153651	0.0115033	0.00160858	0.0500583	7
ADAM10	520	0.0897442	0.016093	0.00162305	0.0500583	8
ANKRD28	521	0.279173	0.0120889	0.00162494	0.0500583	8
NRP1	522	-0.127107	0.021963	0.0016283	0.0500583	8
ZNF562	523	-0.145878	0.0201812	0.00162959	0.0500583	8
RECK	524	-0.176434	0.014233	0.00163105	0.0500583	8
OSMR	525	-0.249045	0.0374103	0.00163292	0.0500583	7
RERE	526	-0.0369329	0.0121296	0.00163498	0.0500583	8
DNAJB6	527	0.380032	0.0258985	0.00163517	0.0500583	8
PCDHGC3	528	-0.228888	0.0228044	0.00163628	0.0500583	8
SNHG4	529	0.287147	0.0243346	0.00164306	0.0501709	6
NNT	530	0.0795001	0.0120971	0.0016525	0.050312	8
BCL2L11	531	-0.0890737	0.00597288	0.00165565	0.050312	8
TBX18	532	-0.141264	0.0117806	0.0016598	0.050312	7
TCF4	533	0.0811752	0.0400279	0.00166014	0.050312	8
ZNF33A	534	0.234497	0.0255793	0.00167627	0.0506008	8
NRF1	535	0.195401	0.0155998	0.00167869	0.0506008	8
CCDC181	536	0.334655	0.0338752	0.00167907	0.0506008	6
WSB1	537	-0.0133897	0.0285753	0.00169054	0.0508514	8
MMP28	538	0.0106798	0.0142806	0.00171603	0.0515222	8
TYMS	539	0.530874	0.140617	0.00172789	0.0517822	8
BOD1L1	540	0.46287	0.012151	0.00173677	0.0519367	6
GNAS	541	-0.00437778	0.0137712	0.00173947	0.0519367	8
PPIL3	542	-0.131175	0.0216848	0.00174502	0.0520062	8
ELF2	543	0.0858341	0.00848208	0.00174885	0.0520241	8
AZI2	544	0.226504	0.012048	0.00175556	0.0521278	8
GAS7	545	-0.0134825	0.0450161	0.00176586	0.0522405	8
METAP2	546	0.301703	0.0111671	0.00176755	0.0522405	8
SRRM2	547	-0.0755125	0.0167052	0.00177222	0.0522405	8
FGD2	548	0.0905404	0.0126495	0.00177229	0.0522405	7
GRB10	549	-0.0549633	0.00914807	0.00177564	0.0522439	8
GIT2	550	-0.123926	0.0160705	0.00178661	0.0524711	8
MTHFD1	551	0.0294967	0.0130833	0.00179293	0.0524807	8
MACF1	552	-0.117649	0.0102114	0.00179343	0.0524807	8
HERC4	553	0.294751	0.0133311	0.00180064	0.0525963	8
SSX2IP	554	0.125573	0.0286185	0.00180517	0.0526335	8
RASSF1	555	-0.104724	0.00987868	0.00181924	0.0529482	8
PRDM1	556	-0.0293292	0.0125769	0.00182756	0.0530945	8
HBS1L	557	0.179187	0.0321238	0.00183411	0.0531891	8
ANKHD1-EIF4EBP3	558	0.189945	0.0156031	0.0018386	0.053224	8
VEZF1	559	0.348069	0.0237424	0.00185541	0.0534633	8
EPG5	560	-0.190664	0.0388681	0.00185654	0.0534633	6
BICD1	561	-0.172772	0.0187876	0.00185728	0.0534633	8
DNPEP	562	-0.264674	0.0129311	0.00186011	0.0534633	8
PPP1R3C	563	0.333383	0.0159662	0.00186944	0.0536359	8
PPP1R12A	564	0.315553	0.0256772	0.00188224	0.0537183	8
GTF2H5	565	0.232579	0.016145	0.00188378	0.0537183	7
OTUD4	566	-0.0449158	0.0120528	0.00188581	0.0537183	8
SLC22A23	567	-0.0769678	0.044916	0.00188739	0.0537183	6
PLK2	568	-0.0408042	0.0653666	0.00189407	0.0537183	8
ADAMTSL1	569	-0.0890315	0.0106309	0.00189448	0.0537183	7
MFSD11	570	-0.128484	0.0171318	0.00189559	0.0537183	8
PHLDA1	571	-0.197591	0.0137005	0.00190165	0.0537958	8
KAT6B	572	0.381534	0.0294154	0.00191238	0.0540047	6
TCTEX1D1	573	0.210346	0.0314669	0.00191632	0.0540214	6
LARP1B	574	0.0613635	0.0203725	0.00192314	0.0540768	8
VPS41	575	0.0952092	0.0109848	0.00192498	0.0540768	8
FANCM	576	0.218131	0.0126944	0.00193774	0.0543242	7
PHKB	577	0.323026	0.0140772	0.00194051	0.0543242	8
LARP4	578	0.185025	0.0116018	0.00194981	0.054357	8
TTN	579	0.00529346	0.00573203	0.00195015	0.054357	8
ACSL6	580	-0.0639075	0.0203016	0.00195178	0.054357	8
TCF7	581	-0.110841	0.0123504	0.00196083	0.0545152	8
TEAD2	582	0.115448	0.0172257	0.00197759	0.0547482	8
GSPT1	583	0.068772	0.01353	0.00197925	0.0547482	8
SRGAP1	584	0.0315147	0.0214712	0.00197938	0.0547482	8
C9orf64	585	0.0243726	0.0201519	0.00198847	0.0549056	8
TM9SF1	586	-0.120059	0.0128954	0.00200032	0.0549757	8
SLITRK1	587	0.198684	0.0281823	0.00200684	0.0549757	8
MBNL1	588	-0.111614	0.0150906	0.00200755	0.0549757	8
C18orf8	589	-0.146394	0.0160154	0.00201098	0.0549757	6
PGPEP1	590	-0.18804	0.0217384	0.00201185	0.0549757	7
PDS5B	591	0.184071	0.0171201	0.00201317	0.0549757	8
CELF1	592	-0.0396348	0.0581307	0.00201483	0.0549757	6
SDC1	593	-0.15352	0.00540612	0.00202411	0.0550338	8
SLC25A23	594	-0.2594	0.011202	0.00202558	0.0550338	8
NDUFA2	595	-0.0285211	0.0232706	0.00202719	0.0550338	6
XAF1	596	0.2598	0.0249346	0.00203369	0.0550992	8
XRCC5	597	-0.166474	0.0108299	0.00203849	0.0550992	8
FNIP1	598	0.176886	0.0125429	0.00204049	0.0550992	7
CACYBP	599	0.204626	0.0153762	0.00204324	0.0550992	8
IL6ST	600	-0.0868723	0.023067	0.0020564	0.0553618	8
RFX3	601	0.109459	0.0184037	0.00206184	0.0554157	8
POP4	602	0.0397062	0.0169257	0.00207025	0.0555189	8
NFATC3	603	0.0213497	0.0110901	0.0020729	0.0555189	8
LMO3	604	0.171107	0.0150164	0.00207599	0.0555189	8
EIF5A2	605	0.213304	0.0340711	0.00208599	0.0555786	8
TMEM87A	606	0.150544	0.0191604	0.00208836	0.0555786	8
BUB3	607	0.242647	0.011497	0.00209997	0.0555786	8
ADARB1	608	0.0156552	0.00929809	0.00210505	0.0555786	7
SWAP70	609	0.103955	0.00627148	0.00210515	0.0555786	8
RIT1	610	0.198421	0.0116101	0.00211247	0.0555786	8
ZNF638	611	0.106634	0.0305803	0.00211701	0.0555786	6
PPP6R2	612	-0.222618	0.0309077	0.00211935	0.0555786	6
STIM2	613	0.0629868	0.0158711	0.00212347	0.0555786	8
NUP50	614	0.104256	0.0244367	0.00212501	0.0555786	8
BNC2	615	0.0655863	0.0145764	0.00212511	0.0555786	7
EMC1	616	-0.370087	0.0237909	0.00212786	0.0555786	6
SLMAP	617	0.157541	0.00581706	0.00212848	0.0555786	7
SOCS6	618	-0.0312196	0.0128104	0.00212948	0.0555786	7
TXNL1	619	0.268627	0.01885	0.00212983	0.0555786	8
CD99L2	620	-0.137685	0.00941456	0.00214017	0.0556962	8
HEATR5B	621	0.109078	0.0177131	0.00214432	0.0556962	8
PHF21A	622	-0.0129791	0.0151966	0.00214468	0.0556962	8
FBXW2	623	-0.164342	0.00970445	0.00214928	0.0557261	8
TFAP2A	624	-0.118628	0.00947046	0.00215797	0.0558617	7
HSD17B14	625	-0.0912956	0.0177258	0.00217644	0.0561563	8
IGSF11	626	-0.0172197	0.0350341	0.00218096	0.0561563	8
HAUS2	627	-0.126146	0.0573395	0.0021834	0.0561563	6
CRK	628	-0.0447242	0.0171861	0.00218703	0.0561563	8
SYNJ2	629	0.0373849	0.0212063	0.00218998	0.0561563	8
B4GALT1	630	-0.0413922	0.0126483	0.00219021	0.0561563	8
FBXO42	631	0.0657139	0.0097944	0.00219666	0.0562228	8
BGN	632	-0.0809547	0.0358371	0.00219976	0.0562228	8
EWSR1	633	-0.0296467	0.010299	0.00221899	0.0566151	8
ARID2	634	0.244913	0.0112907	0.00222213	0.0566151	8
DEDD	635	-0.0787968	0.00800149	0.00223093	0.0566773	8
BAG4	636	0.314492	0.0430288	0.00223158	0.0566773	8
ANKDD1A	637	0.135066	0.0170951	0.00223968	0.0567938	8
SUGT1	638	0.01693	0.0132493	0.00224764	0.0568795	8
ARNT	639	-0.0996228	0.00591551	0.00225521	0.0568795	7
DLX1	640	-0.0890525	0.0308464	0.00225947	0.0568795	8
COLGALT1	641	-0.186815	0.0374999	0.00226007	0.0568795	6
ONECUT2	642	-0.0265028	0.0136549	0.00226067	0.0568795	8
SLC20A2	643	-0.088854	0.0097495	0.00226794	0.0569737	8
PHF20L1	644	0.0974872	0.0106194	0.00227841	0.0570453	7
CEP41	645	-0.0420148	0.0451512	0.00228021	0.0570453	6
MPC2	646	0.311237	0.058752	0.00228139	0.0570453	6
CYB5A	647	-0.055834	0.00918599	0.00229066	0.0571887	8
SCUBE3	648	-0.0613195	0.00881861	0.00230452	0.0574459	7
HBP1	649	0.20479	0.0109181	0.00231664	0.0576591	8
MYO9A	650	-0.079557	0.0137637	0.00232144	0.057669	8
SPOCK3	651	0.418987	0.0613116	0.00232418	0.057669	8
SNURF	652	-0.357487	0.0285033	0.00232909	0.0577022	8
PCGF2	653	-0.0829755	0.0076528	0.00233401	0.0577246	8
FANCC	654	-0.0305763	0.0129588	0.00233714	0.0577246	8
HMGXB4	655	0.267014	0.0134353	0.0023455	0.0578426	7
DMD	656	0.111363	0.0105927	0.00235003	0.057866	8
GPD2	657	0.0105196	0.00955622	0.0023618	0.057936	8
IBA57	658	-0.32975	0.00824185	0.00236381	0.057936	6
RHOBTB3	659	-0.396275	0.0418174	0.00236497	0.057936	8
NCOA2	660	0.206411	0.0303402	0.00236801	0.057936	7
CCDC171	661	0.257045	0.0243449	0.00237754	0.057936	6
DYNLRB1	662	-0.183313	0.00896688	0.00237869	0.057936	8
NLN	663	-0.0946823	0.023411	0.0023792	0.057936	8
UBE3A	664	-0.0428248	0.0105401	0.00238157	0.057936	8
C9orf24	665	0.0107636	0.0183089	0.00239484	0.0581712	8
CLDND1	666	0.0507027	0.0127857	0.00240125	0.0581787	8
CDC42	667	0.211093	0.0377896	0.00240235	0.0581787	8
NT5DC2	668	-0.03451	0.0231095	0.00241301	0.0581996	8
HNRNPLL	669	0.386184	0.00966018	0.00241369	0.0581996	6
SSR1	670	0.17731	0.00531489	0.00241633	0.0581996	8
GRSF1	671	0.0805449	0.0094344	0.0024179	0.0581996	8
NF2	672	-0.0903288	0.013009	0.00242369	0.0581996	8
FOXN3	673	-0.136792	0.0134408	0.00242528	0.0581996	8
GSS	674	-0.088932	0.0111816	0.00242844	0.0581996	8
TGFBR2	675	-0.0655408	0.0115339	0.00244475	0.05838	7
VRK1	676	0.173018	0.0164011	0.00244559	0.05838	8
MAP4K4	677	0.260486	0.0268982	0.00244681	0.05838	8
TGOLN2	678	-0.187335	0.0169973	0.0024651	0.058609	8
RC3H2	679	0.183224	0.0136854	0.00246873	0.058609	8
NTN5	680	0.0512168	0.0141702	0.00247021	0.058609	6
CYP4V2	681	0.196317	0.0165061	0.00247092	0.058609	7
NAV2	682	0.0803928	0.00930193	0.00247628	0.0586335	8
TGFBI	683	0.244376	0.0199929	0.00247921	0.0586335	8
ZBTB44	684	0.0717929	0.0122295	0.00248303	0.0586358	8
RPAIN	685	-0.156915	0.0148272	0.00248896	0.0586358	7
IMPAD1	686	0.175393	0.0274377	0.0024902	0.0586358	8
ANGPT1	687	0.106854	0.0110076	0.00249432	0.0586474	8
PDLIM4	688	-0.00114348	0.0112114	0.00250058	0.058709	8
APBB2	689	0.127034	0.0173779	0.00251021	0.058835	8
DNASE1	690	-0.199534	0.012123	0.00251323	0.058835	7
ZRANB2	691	0.149151	0.0161974	0.00251836	0.0588698	8
TIA1	692	0.232259	0.0171671	0.00252693	0.0589454	8
GNS	693	-0.137399	0.0113023	0.00253787	0.0589454	7
ANKRD13D	694	-0.0325952	0.012528	0.00253803	0.0589454	7
ATP5S	695	0.161889	0.0203311	0.00253835	0.0589454	8
NADK	696	-0.122162	0.0204931	0.00254205	0.0589454	7
CNPY3	697	-0.200334	0.0182838	0.00254349	0.0589454	8
IDH1	698	0.149809	0.00473181	0.00256327	0.0592072	8
ZNRD1	699	-0.0978019	0.0106939	0.00256418	0.0592072	8
ISLR2	700	0.0867656	0.0354199	0.00256578	0.0592072	8
TCEAL4	701	0.0260043	0.0143892	0.00257056	0.0592329	8
EFNA5	702	-0.060906	0.0264156	0.00259474	0.0597049	7
RAD23B	703	0.328944	0.0267187	0.00260894	0.0598042	8
OSBPL10	704	-0.0708653	0.0234738	0.00261625	0.0598042	8
CGGBP1	705	0.0136276	0.0151575	0.00261728	0.0598042	8
MYL5	706	-0.0362646	0.0233861	0.00261748	0.0598042	8
LOC440434	707	-0.134524	0.0384194	0.00261757	0.0598042	6
GATC	708	-0.372785	0.0320265	0.00262715	0.0599384	7
NTN4	709	0.219895	0.033812	0.00263785	0.0600975	7
C8orf59	710	0.232503	0.0221466	0.00264513	0.0601785	6
TMEM64	711	0.09969	0.021166	0.00265283	0.0602236	8
MYCBP2	712	0.0594203	0.0201487	0.00265457	0.0602236	7
HSPD1	713	-0.0248791	0.0180372	0.0026588	0.060235	8
APOOL	714	-0.0248535	0.0233939	0.00267202	0.0604497	8
SMARCC2	715	-0.261016	0.0134109	0.00269404	0.0608624	8
ORMDL1	716	0.251176	0.032515	0.00270178	0.0608624	8
NDUFA7	717	-0.104019	0.0143982	0.00270281	0.0608624	8
GTPBP8	718	-0.00941768	0.0144721	0.00270731	0.0608624	8
USP42	719	0.133336	0.013947	0.00271432	0.0608624	7
METTL26	720	-0.107381	0.0267341	0.00272231	0.0608624	6
MIPOL1	721	0.0872665	0.0116456	0.0027228	0.0608624	8
SLC24A4	722	0.0276847	0.0137629	0.00272588	0.0608624	8
GTF2H3	723	-0.191124	0.0180636	0.00273162	0.0608624	8
BTG1	724	0.0205892	0.0120825	0.00273239	0.0608624	8
TRNAU1AP	725	-0.0187229	0.0118421	0.002735	0.0608624	8
MAPT	726	-0.215223	0.0158511	0.00273677	0.0608624	8
IRS2	727	-0.26541	0.0261604	0.00273997	0.0608624	7
TAMM41	728	-0.173468	0.0253217	0.00274301	0.0608624	6
ATG5	729	0.142119	0.0179665	0.00275912	0.0610822	8
DSEL	730	-0.0367406	0.0276738	0.0027654	0.0610822	8
LIMK1	731	-0.0523611	0.0175732	0.00276884	0.0610822	8
TNRC18	732	-0.162647	0.0137419	0.00277235	0.0610822	6
GAB1	733	0.255981	0.0159044	0.00277478	0.0610822	8
EIF3J	734	0.231777	0.0164575	0.00277561	0.0610822	8
ERGIC1	735	0.118052	0.0182717	0.00279491	0.0614234	7
STAG3L2	736	-0.126737	0.0226008	0.00280476	0.0614502	7
LRRC37A3	737	-0.191163	0.02106	0.00280603	0.0614502	8
SORBS1	738	-0.152789	0.00965432	0.00280755	0.0614502	8
MAP4	739	-0.0313365	0.0359319	0.00283213	0.0618473	8
TRPM3	740	-0.272605	0.0179878	0.0028355	0.0618473	8
CDCP1	741	5.16176e-05	0.00785906	0.00283809	0.0618473	8
UNC45A	742	-0.175075	0.0103221	0.00284903	0.0618473	8
LARP4B	743	-0.160832	0.0239468	0.00285023	0.0618473	8
AKAP12	744	0.0844421	0.0188401	0.00285068	0.0618473	8
VGF	745	-0.176831	0.0500784	0.00285254	0.0618473	7
USP47	746	0.267487	0.0122068	0.00285632	0.0618473	8
ELK4	747	-0.0244703	0.0194706	0.00286631	0.0619805	8
AR	748	0.0343953	0.0112932	0.00288188	0.062116	8
TTLL3	749	-0.0278265	0.0118705	0.0028821	0.062116	7
NPHP1	750	-0.0522798	0.0122785	0.00288411	0.062116	7
ABCF2	751	-0.192904	0.00441661	0.00289963	0.0623671	8
TERF1	752	0.0252686	0.030708	0.00290374	0.0623724	8
CR1	753	0.102337	0.0083258	0.00291742	0.0625195	8
BTBD7	754	0.182546	0.00718605	0.00291832	0.0625195	7
MFSD4B	755	-0.485838	0.0157923	0.00292298	0.0625363	6
HOOK3	756	-0.235571	0.0174382	0.00292866	0.0625455	8
GM2A	757	-0.033462	0.0260866	0.00293119	0.0625455	8
CCDC88A	758	0.0307908	0.0134701	0.00293912	0.0625455	7
WBP4	759	0.105155	0.0133983	0.00294119	0.0625455	8
WDFY3	760	0.0389159	0.0160596	0.00294277	0.0625455	8
UBLCP1	761	-0.0248981	0.0169184	0.00294829	0.0625806	8
NR2C1	762	-0.0645633	0.00683988	0.00295319	0.0626022	8
BRD7	763	0.313269	0.0214943	0.00296733	0.0627836	8
VPS13D	764	-0.235813	0.0132727	0.00297106	0.0627836	8
ZFP90	765	-0.141863	0.0209619	0.00297341	0.0627836	7
CMTM7	766	0.00891499	0.0158648	0.0029813	0.0628681	8
TMED5	767	-0.00460472	0.0145912	0.00299143	0.0629868	8
QPRT	768	0.0782001	0.0110745	0.00299536	0.0629868	8
CNOT8	769	-0.0395225	0.0102405	0.00299863	0.0629868	8
RNASET2	770	0.159749	0.0116171	0.00300371	0.0630115	8
DFFA	771	-0.14153	0.0117262	0.00301372	0.0631396	8
LRCH3	772	-0.0133289	0.0201488	0.00302396	0.06327	8
PSPH	773	0.0662881	0.00634339	0.00302778	0.06327	8
TNRC6A	774	-0.0439722	0.0153443	0.00303673	0.0633396	8
ARF6	775	0.170759	0.00897533	0.00303895	0.0633396	8
CRLF1	776	0.0762417	0.0326575	0.00304699	0.0634252	8
BCAP29	777	0.128196	0.0108953	0.00305289	0.0634663	8
LRP8	778	-0.023043	0.0115655	0.00306998	0.0637396	8
TLN2	779	-0.160404	0.00701146	0.00308861	0.0640255	8
RAP1GDS1	780	0.209615	0.0279894	0.00309663	0.0640255	8
ARL1	781	0.186632	0.0135635	0.00310614	0.0640255	8
RHOQ	782	-0.160401	0.027027	0.00311897	0.0640255	7
SRSF6	783	-0.17628	0.0870842	0.00312302	0.0640255	6
APBB1IP	784	0.0170802	0.0212249	0.00312528	0.0640255	8
ZMYM5	785	0.135834	0.0232297	0.00312944	0.0640255	7
CNOT3	786	-0.0905654	0.00823071	0.00313235	0.0640255	8
ENDOD1	787	0.382712	0.0506372	0.00313411	0.0640255	7
CASK	788	-0.111151	0.0126689	0.00313573	0.0640255	8
TEPSIN	789	-0.183631	0.0141516	0.0031369	0.0640255	6
CPNE8	790	0.0519408	0.0155293	0.00313777	0.0640255	8
SETD9	791	0.0978155	0.0759873	0.00313885	0.0640255	6
FBXW12	792	-0.0604178	0.0155777	0.00313924	0.0640255	7
SEMA3C	793	0.223884	0.0280612	0.00316031	0.0642867	8
SEC22C	794	-0.0568934	0.00962289	0.0031699	0.0642867	8
CNOT7	795	-0.134884	0.017418	0.00317156	0.0642867	8
SLC35D1	796	-0.255695	0.0237403	0.00317234	0.0642867	8
HYKK	797	0.0478486	0.0290505	0.00318001	0.0642867	6
SERBP1	798	0.11939	0.0170932	0.00318149	0.0642867	7
SKIV2L2	799	0.193123	0.00948367	0.0031833	0.0642867	8
TACC1	800	-0.0622531	0.00715471	0.00318389	0.0642867	8
PACSIN2	801	-0.0607956	0.0150725	0.00319527	0.064391	8
STAU1	802	0.103282	0.00247261	0.00319703	0.064391	8
RALGAPA2	803	-0.0314797	0.0150499	0.00320124	0.0643955	8
BNIP1	804	0.0265563	0.0128691	0.00321122	0.064516	8
DOCK7	805	0.0856672	0.0257622	0.00322122	0.0646364	8
PPP6C	806	0.0801871	0.00673003	0.00323061	0.0647446	8
MAP3K3	807	0.215615	0.014053	0.00323954	0.064843	8
SLC8A3	808	-0.193324	0.00338685	0.00324543	0.0648804	6
RAPGEF2	809	-0.0927423	0.0688924	0.00325514	0.0649783	6
SMARCA4	810	-0.077786	0.0110308	0.00325837	0.0649783	8
LARP1	811	-0.290406	0.0215427	0.0032774	0.0651281	8
NOL4L	812	-0.179047	0.0208749	0.00327792	0.0651281	6
GTF2H1	813	0.218933	0.013677	0.00327798	0.0651281	8
MLLT10	814	0.0391675	0.00687103	0.00331271	0.0657373	7
VAMP2	815	-0.234471	0.030961	0.00332699	0.0659397	8
TOX	816	0.145029	0.0245243	0.00333185	0.065955	8
TNFRSF10D	817	-0.149218	0.0151587	0.00334168	0.0660458	8
CBX5	818	0.125648	0.0350559	0.00334549	0.0660458	8
TFPI	819	-0.0209324	0.0138026	0.0033487	0.0660458	8
ECHDC1	820	0.287955	0.0271612	0.00336901	0.0663654	8
FYN	821	0.104263	0.0110421	0.00339348	0.0667661	8
NSF	822	-0.200755	0.017066	0.00340724	0.0669497	8
EXOC6	823	-0.0635906	0.0177521	0.00341111	0.0669497	8
ARHGAP32	824	-0.0661138	0.0968755	0.00341912	0.0670054	6
NCALD	825	-0.0787907	0.0461573	0.00342224	0.0670054	8
GPATCH4	826	-0.0811143	0.0105107	0.00343783	0.0671981	7
NBN	827	0.230465	0.014295	0.0034404	0.0671981	8
DR1	828	0.314792	0.0170515	0.0034493	0.0672905	8
SH3PXD2B	829	-0.0807185	0.0129985	0.00346344	0.067416	7
TMEM165	830	-0.0237835	0.0116184	0.00346408	0.067416	8
THUMPD1	831	0.223951	0.0094718	0.00346973	0.0674447	8
CUX1	832	0.12469	0.0181572	0.00348104	0.0675832	8
SLC38A10	833	-0.170286	0.0129704	0.00349405	0.0677543	7
C1orf61	834	-0.239848	0.0156971	0.00350186	0.0678244	8
SF3A1	835	-0.103978	0.012411	0.00351024	0.0679052	8
PRPF38B	836	0.212109	0.00911672	0.00351971	0.068007	8
CLIP1	837	0.0282152	0.0166703	0.00352858	0.0680969	8
CKLF	838	0.065859	0.0083161	0.00354532	0.0681774	8
TSPAN14	839	-0.103345	0.0119554	0.00354639	0.0681774	8
DHX36	840	-0.0363311	0.0159355	0.00354949	0.0681774	8
MZT2B	841	-0.103239	0.0528908	0.00355344	0.0681774	6
MTHFD2L	842	0.17194	0.00792579	0.00355385	0.0681774	7
SSH1	843	0.0237982	0.0148753	0.00358969	0.0687832	8
NR4A3	844	-0.0359761	0.0333845	0.00360448	0.0689108	7
SYNPO2	845	-0.145659	0.0288298	0.00360488	0.0689108	8
APOPT1	846	-0.00942597	0.0521968	0.0036128	0.0689598	6
LAMP1	847	-0.0898194	0.0294545	0.00361868	0.0689598	8
ACP2	848	-0.233753	0.00552628	0.00362025	0.0689598	8
SREBF2	849	-0.0845811	0.0121859	0.00363874	0.0692303	8
DUSP15	850	-0.0702707	0.0138494	0.00364646	0.0692514	8
PLGLB2	851	-0.0915707	0.100736	0.00364842	0.0692514	6
FAM126A	852	-0.130532	0.017377	0.0036538	0.0692722	7
R3HDM1	853	-0.299596	0.0185639	0.00366234	0.0692934	8
TFDP2	854	-0.0769099	0.014425	0.0036635	0.0692934	8
SPRYD7	855	0.199574	0.0491637	0.00367299	0.0693916	6
IL1R1	856	-0.232108	0.0213041	0.00367888	0.0694217	8
SH3GL3	857	0.0287521	0.0230205	0.0036886	0.0695239	8
TSEN54	858	-0.0532945	0.0122406	0.00372381	0.0700983	7
KIAA0368	859	0.106126	0.00952849	0.00372776	0.0700983	7
S1PR3	860	-0.0851538	0.0218056	0.00373998	0.0702464	7
GATAD2B	861	0.0273648	0.0196832	0.00375542	0.0702715	8
EFCAB2	862	0.25634	0.0188908	0.00376157	0.0702715	8
ZEB2	863	0.275928	0.0186843	0.00376391	0.0702715	8
SYNCRIP	864	0.172114	0.0158067	0.00377973	0.0702715	8
USP32	865	0.0355132	0.0045682	0.00378347	0.0702715	8
CBL	866	-0.0133608	0.0121648	0.00378445	0.0702715	7
COG1	867	-0.160862	0.0083668	0.00379079	0.0702715	8
RNF187	868	-0.150856	0.0125993	0.00379385	0.0702715	6
SLC17A5	869	-0.235967	0.0136073	0.00379604	0.0702715	8
COL3A1	870	-0.014962	0.0154576	0.00379815	0.0702715	8
SHC3	871	-0.0575849	0.0227249	0.00380107	0.0702715	8
DOCK9	872	0.0676058	0.0224983	0.00380583	0.0702715	8
GPR135	873	-0.120086	0.0114588	0.00380794	0.0702715	7
LMBR1	874	-0.0553629	0.0135216	0.00381758	0.0702715	8
AKAP13	875	-0.0647414	0.00806723	0.00381789	0.0702715	8
PNISR	876	-0.123108	0.0564452	0.00381939	0.0702715	6
RHEB	877	0.0216159	0.00924898	0.00382207	0.0702715	8
BCL2L1	878	-0.112865	0.0137715	0.00382327	0.0702715	8
NAP1L1	879	0.134939	0.0141408	0.00382397	0.0702715	8
SMARCE1	880	0.235114	0.0108993	0.00383453	0.0702728	8
TMED4	881	-0.0892698	0.021726	0.00383648	0.0702728	8
ZNF407	882	0.154299	0.0104197	0.00383946	0.0702728	7
CYBB	883	-0.0749729	0.00871085	0.00384145	0.0702728	8
MAPKAPK2	884	-0.175622	0.0157388	0.00384781	0.0702871	8
CPEB4	885	0.0397382	0.0342773	0.00385093	0.0702871	8
NPAS3	886	-0.17881	0.0249933	0.00386749	0.0704351	8
PDE1A	887	0.463461	0.045932	0.00386776	0.0704351	8
SNAPC3	888	0.0308232	0.0199587	0.00388154	0.0706064	7
SNX4	889	0.248493	0.0198911	0.00388929	0.0706679	8
ZNF266	890	0.268412	0.0112701	0.00389553	0.0707018	7
UBN2	891	0.295232	0.0331499	0.00390801	0.0708487	7
APOL2	892	-0.109128	0.0127966	0.00392536	0.070998	8
CLN8	893	-0.0808386	0.0261315	0.00392743	0.070998	8
EIF5	894	-0.0428416	0.0107443	0.00392944	0.070998	8
AIMP1	895	0.234733	0.0207689	0.00393675	0.0710507	6
PTCH1	896	0.133115	0.0175522	0.00395499	0.0711161	8
EPN3	897	0.118485	0.0228397	0.00395526	0.0711161	8
GSTCD	898	0.16838	0.0130366	0.00395843	0.0711161	8
RNASEL	899	0.098642	0.00670463	0.00396116	0.0711161	8
PDPK1	900	0.0493051	0.0138682	0.00396597	0.0711161	8
PLA2G16	901	0.699104	0.214392	0.00396679	0.0711161	6
CHST13	902	-0.0575042	0.011281	0.00398097	0.0712589	8
COL6A1	903	0.0650709	0.0158296	0.00399022	0.0712589	8
IFI16	904	0.191079	0.0219062	0.00399128	0.0712589	8
CELF2	905	0.0100628	0.0690712	0.0039924	0.0712589	6
CASP2	906	-0.153455	0.0147963	0.00400749	0.0714212	8
RBM12	907	0.179201	0.0158129	0.00401034	0.0714212	8
GLS	908	-0.192797	0.0114592	0.00402714	0.0715528	8
RHOB	909	-0.127606	0.0120986	0.0040281	0.0715528	7
CAMTA1	910	0.0855403	0.0156223	0.00403262	0.0715528	8
ZDHHC21	911	0.249096	0.014071	0.00403545	0.0715528	8
MEX3C	912	0.0398466	0.0117129	0.00404923	0.0716509	8
LYST	913	0.126435	0.00901181	0.00404985	0.0716509	8
PHAX	914	0.0328402	0.0234038	0.00406563	0.0718514	8
RPRD1A	915	-0.0145737	0.0255261	0.00407739	0.0719377	7
STAMBPL1	916	0.145448	0.0217848	0.00408459	0.0719377	8
AK5	917	-0.018608	0.0242379	0.00408489	0.0719377	8
FAM161A	918	0.154758	0.0407813	0.00408833	0.0719377	6
EML4	919	-0.109836	0.00663144	0.00410015	0.0719395	8
CREBBP	920	0.156388	0.00556193	0.00410142	0.0719395	8
ODF2L	921	-0.34312	0.0168644	0.00410255	0.0719395	7
JADE1	922	0.541887	0.0169566	0.00410625	0.0719395	6
FBXO21	923	-0.229154	0.0277858	0.00411238	0.0719689	8
TRIM33	924	0.0314209	0.00890506	0.00412438	0.0720684	8
SPATA2	925	-0.127933	0.00952397	0.00413098	0.0720684	8
MARC2	926	-0.105665	0.0491523	0.00413145	0.0720684	6
TXLNG	927	-0.137419	0.0391828	0.00413611	0.0720718	6
KATNB1	928	-0.049439	0.0140073	0.00415521	0.072224	8
LARP6	929	0.0777532	0.0313082	0.004157	0.072224	8
SPCS2	930	0.105885	0.0095135	0.00415826	0.072224	8
MTMR2	931	0.166932	0.0266061	0.00418285	0.0725731	8
BDP1	932	0.300364	0.028074	0.00418978	0.0726154	8
PTPRK	933	0.109978	0.0196662	0.00419497	0.0726274	8
DNAJC10	934	0.103773	0.00815695	0.00423482	0.073143	8
AGPAT1	935	-0.22615	0.0105469	0.00423701	0.073143	8
DIP2C	936	-0.0290186	0.013815	0.00423834	0.073143	8
SMPD1	937	-0.131091	0.00707525	0.00425213	0.0731971	8
UBQLN1	938	0.222813	0.020707	0.00425297	0.0731971	8
CPSF2	939	-0.210269	0.0164852	0.00425901	0.0731971	8
ZDHHC13	940	0.191165	0.0121042	0.0042596	0.0731971	8
FAM122A	941	0.117034	0.00844973	0.00426951	0.0732138	8
TMEFF2	942	-0.0614275	0.0246127	0.00426963	0.0732138	8
HHAT	943	0.23584	0.0231667	0.00427865	0.0732906	8
HECTD2	944	0.102176	0.0176888	0.00428833	0.0733596	8
GGT7	945	-0.294021	0.039328	0.00429176	0.0733596	7
NEBL	946	0.132458	0.016961	0.0042966	0.0733647	8
SEMA4C	947	-0.0305091	0.00814942	0.004313	0.0735043	8
RAB2A	948	0.0288312	0.0271657	0.00431388	0.0735043	8
SLC35G2	949	-0.210204	0.0322423	0.00433122	0.0736795	6
RUNX3	950	0.0567451	0.005981	0.00433328	0.0736795	8
TMEM144	951	0.398456	0.10397	0.0043464	0.0738249	8
ITPR2	952	0.25445	0.0143284	0.0043775	0.0742036	8
MPP7	953	0.0108778	0.0241516	0.00437789	0.0742036	7
USP33	954	-0.060301	0.040091	0.0043967	0.0744251	7
PKIB	955	0.02729	0.0266898	0.00440017	0.0744251	8
FBXO9	956	0.060647	0.020101	0.00440589	0.0744439	8
HLA-DRB4	957	0.415315	0.0146909	0.00441566	0.074502	8
VASH1	958	0.199436	0.0102681	0.00442162	0.074502	8
ATF2	959	0.133657	0.0125772	0.00442317	0.074502	8
PPFIA1	960	0.112513	0.00624708	0.00442909	0.0745241	8
CCDC110	961	0.145359	0.0183377	0.00445302	0.0748487	8
MEG3	962	-0.343317	0.0403539	0.00449014	0.075371	7
SPATA7	963	0.208031	0.0239514	0.00449342	0.075371	8
SLC16A7	964	0.169694	0.0180944	0.00450519	0.07549	7
SEC62	965	0.165462	0.0138619	0.00457148	0.0765214	8
TRIM13	966	0.150163	0.0166044	0.0045802	0.076588	8
APOC2	967	-0.0428845	0.0143214	0.00458666	0.0766167	8
ATP2A3	968	-0.103742	0.00801252	0.00460275	0.076806	8
UBE2H	969	-0.0214713	0.0163366	0.00463547	0.0772721	8
STRN	970	0.248288	0.0178318	0.00464761	0.0773948	7
ZNF75D	971	0.126464	0.0132951	0.00466146	0.0775454	8
SAV1	972	0.184349	0.00930433	0.00467833	0.0776303	8
UBE2F	973	0.130539	0.0122108	0.00467924	0.0776303	8
ZNF658	974	0.235519	0.0168457	0.00468098	0.0776303	8
SLC11A1	975	-0.0532617	0.018351	0.00469205	0.0776745	7
RASAL2	976	-0.219682	0.0122142	0.00470047	0.0776745	8
SV2B	977	0.195494	0.0269351	0.00470393	0.0776745	8
TBX1	978	0.0962272	0.00789873	0.00470613	0.0776745	8
SIAE	979	0.186033	0.0174094	0.0047156	0.0776745	8
TRIM59	980	0.688688	0.12151	0.00471829	0.0776745	8
TCF3	981	-0.0811007	0.012417	0.0047184	0.0776745	8
PHF10	982	0.0600909	0.0115985	0.00472269	0.0776745	8
EPB41L2	983	0.126198	0.0145016	0.00472693	0.0776745	8
SLCO2B1	984	-0.188119	0.0281663	0.00474459	0.0778855	8
RNF8	985	0.23065	0.0178598	0.00475235	0.077925	8
IFNGR1	986	0.210503	0.0117414	0.00475664	0.077925	8
PLCE1	987	-0.0312708	0.0108449	0.00477859	0.0781462	8
CSNK1G3	988	0.204173	0.0110099	0.00477982	0.0781462	8
ATE1	989	0.144289	0.0123699	0.00478921	0.0781926	8
PEX3	990	0.241172	0.0126058	0.00479234	0.0781926	8
ALDH7A1	991	-0.00608085	0.0181662	0.00481155	0.0784267	8
EVI2A	992	0.503284	0.194414	0.00485259	0.0790161	8
LDB3	993	0.0325351	0.00634703	0.00486761	0.0791807	8
CBX3	994	0.22819	0.0163085	0.0048931	0.0795042	8
MRPS12	995	-0.00389939	0.00968776	0.00489734	0.0795042	8
SRPK2	996	0.135468	0.0122934	0.00491047	0.0796374	8
PTPN22	997	0.0966356	0.00854334	0.00492785	0.079839	8
GEMIN2	998	0.346377	0.0132778	0.00494178	0.0799846	6
NFIB	999	-0.0456592	0.0187868	0.00494951	0.0800295	8
SUMO1	1000	0.281695	0.0199204	0.00495807	0.080054	8
GTPBP2	1001	-0.201864	0.00886729	0.00496094	0.080054	8
ASMTL	1002	0.143532	0.022972	0.00502144	0.0809494	8
SRP72	1003	0.193669	0.0102362	0.00503512	0.0810366	8
PTPN11	1004	-0.0284099	0.0140364	0.00504062	0.0810366	8
REV1	1005	0.0541441	0.0076624	0.0050419	0.0810366	8
RNPC3	1006	-0.0529186	0.0195896	0.00505975	0.0812426	8
GFM1	1007	-0.0330327	0.0114347	0.00506596	0.0812617	8
S100A10	1008	-0.0364039	0.0183489	0.00507311	0.0812955	8
ZNF585A	1009	0.0836642	0.015885	0.00508281	0.0813703	8
ANO6	1010	-0.0303272	0.0106509	0.00509281	0.0814496	8
ANKRD23	1011	0.0701773	0.010019	0.00510268	0.0814693	8
UFL1	1012	0.516023	0.0169057	0.00510972	0.0814693	6
MCF2	1013	0.178252	0.0255451	0.00511112	0.0814693	8
RORA	1014	0.228487	0.0152314	0.00511421	0.0814693	8
TMEM43	1015	0.063793	0.0106858	0.00513676	0.0817479	8
MDM2	1016	-0.116892	0.0163207	0.00515641	0.0818682	7
HNRNPC	1017	-0.0674236	0.0102873	0.00515697	0.0818682	8
HLA-DPA1	1018	0.332915	0.0728407	0.00515952	0.0818682	8
HOXB7	1019	-0.0104014	0.0062603	0.00517192	0.0819419	7
ZFP30	1020	0.238029	0.00868851	0.00517432	0.0819419	8
SMURF2	1021	0.24298	0.0185445	0.00519158	0.0821193	8
PLCL1	1022	0.261532	0.0293711	0.00520089	0.0821193	8
PDCD2	1023	0.0458335	0.00873906	0.0052065	0.0821193	8
C18orf25	1024	-0.0859462	0.00558003	0.00520926	0.0821193	7
GLRX3	1025	-0.446275	0.0169242	0.00521203	0.0821193	6
RNASEH2B	1026	-0.0430415	0.0134838	0.00521602	0.0821193	8
ATXN7L1	1027	-0.044624	0.012839	0.0052961	0.0832988	8
AMD1	1028	0.038502	0.015172	0.00531289	0.0834542	8
METTL7A	1029	-0.237457	0.0292509	0.00532657	0.0834542	8
BANP	1030	0.136478	0.0262343	0.00532682	0.0834542	8
FBXL14	1031	0.0599939	0.0206074	0.00533443	0.0834542	8
ZDHHC2	1032	0.287866	0.0129728	0.0053358	0.0834542	8
SENP6	1033	0.322124	0.0177469	0.00533698	0.0834542	8
SCYL3	1034	0.222085	0.0147201	0.00535286	0.0835552	8
RFX7	1035	0.429865	0.0131512	0.00535378	0.0835552	6
TMCC1	1036	-0.154374	0.0237468	0.00536857	0.0837051	7
ANK2	1037	0.0552113	0.0135277	0.00537408	0.0837102	8
BICD2	1038	0.170014	0.00855778	0.00540044	0.0838661	7
C17orf97	1039	0.167634	0.017937	0.00540367	0.0838661	7
CTNNA3	1040	0.273008	0.0675077	0.00540877	0.0838661	8
C18orf54	1041	0.184382	0.00629908	0.0054132	0.0838661	8
HYDIN	1042	0.00537628	0.00613594	0.00542213	0.0838661	8
PATJ	1043	0.062754	0.0346972	0.0054268	0.0838661	6
MBP	1044	-0.0813476	0.0290496	0.00542995	0.0838661	8
SLC25A45	1045	-0.023551	0.00990689	0.00543054	0.0838661	8
ATPIF1	1046	-0.209312	0.0123326	0.00543081	0.0838661	8
TMEM135	1047	0.234034	0.0103407	0.00544979	0.0839973	8
C6orf48	1048	-0.000114654	0.00891345	0.00545133	0.0839973	7
SCAF4	1049	-0.0931114	0.0246226	0.00545742	0.0839973	6
PPP2R2C	1050	-0.192507	0.0105757	0.005462	0.0839973	8
REPS1	1051	0.104634	0.0099281	0.00546549	0.0839973	8
UBE3B	1052	-0.195948	0.00890549	0.00547141	0.0839973	8
RPL37A	1053	0.0431146	0.013969	0.00547571	0.0839973	8
CD86	1054	0.215719	0.00311941	0.00549959	0.0841789	8
MS4A6A	1055	0.187822	0.0133325	0.00550004	0.0841789	8
PLD1	1056	0.0594535	0.0208789	0.00550318	0.0841789	8
SRSF1	1057	-0.0966991	0.0274132	0.00551144	0.0841817	6
ABCB9	1058	-0.191634	0.00537526	0.00552115	0.0841817	8
TMEM50A	1059	-0.0733831	0.00709651	0.00552327	0.0841817	8
EPHA8	1060	0.0879639	0.0062226	0.00552421	0.0841817	8
TCERG1	1061	0.285497	0.0237894	0.00552957	0.0841839	8
HIVEP1	1062	0.115111	0.0152861	0.00554656	0.0842996	8
ST3GAL3	1063	-0.182422	0.00640683	0.00555218	0.0842996	8
SLC33A1	1064	0.0443219	0.012477	0.00555282	0.0842996	8
ACTR6	1065	0.182321	0.0140923	0.00556035	0.0843346	8
OSBPL1A	1066	-0.0451756	0.0171165	0.00557032	0.084368	8
LDLRAD3	1067	0.1116	0.0407095	0.005573	0.084368	8
FUBP3	1068	-0.0909188	0.00822947	0.00559587	0.0845716	7
SLFN5	1069	0.200188	0.0197408	0.00559692	0.0845716	8
FBXL20	1070	-0.0610688	0.0193892	0.00560308	0.0845855	8
NAA25	1071	0.360991	0.00828195	0.00560914	0.0845914	6
SMC2	1072	0.267379	0.0156692	0.00561879	0.0845914	8
RBM25	1073	0.134944	0.0178374	0.00561918	0.0845914	8
COA7	1074	0.111548	0.0201373	0.00563797	0.0847953	6
ENC1	1075	-0.213822	0.0936258	0.00564625	0.0848408	8
NFRKB	1076	-0.224085	0.0140625	0.00569696	0.085416	7
SNRK	1077	-0.183041	0.00991802	0.0056979	0.085416	8
ANKS6	1078	0.128186	0.0149625	0.00570039	0.085416	8
CD74	1079	0.142828	0.0274324	0.00571346	0.0855325	8
ASXL2	1080	0.0961076	0.015259	0.00572235	0.0855638	8
SPG21	1081	0.0138063	0.0159959	0.00573084	0.0855638	8
PPP2R5E	1082	0.126211	0.0177415	0.00573145	0.0855638	8
C1QTNF7	1083	0.0419716	0.0101268	0.00574839	0.0857375	7
UBXN2A	1084	0.0162715	0.0168638	0.0057747	0.0860063	8
HMBOX1	1085	-0.0666172	0.0184755	0.00577706	0.0860063	8
AGBL5	1086	0.112109	0.013091	0.00578598	0.0860167	8
UQCRB	1087	0.246327	0.0129127	0.00579011	0.0860167	8
INTS12	1088	0.121946	0.00250942	0.00580497	0.0860167	8
TMEM192	1089	0.14581	0.0198932	0.00580528	0.0860167	6
CERK	1090	0.119598	0.00718228	0.00581706	0.0860167	7
IBTK	1091	-0.208448	0.0151035	0.00582236	0.0860167	7
LLGL1	1092	0.229472	0.0250843	0.00582523	0.0860167	8
CD163	1093	0.220557	0.00361465	0.0058253	0.0860167	7
KITLG	1094	-0.0311973	0.0154547	0.00582569	0.0860167	7
AVL9	1095	-0.223279	0.0110898	0.00584151	0.0861338	7
MRPS25	1096	0.147918	0.024523	0.00584428	0.0861338	7
CSNK1D	1097	-0.0541225	0.00853133	0.00585325	0.0861862	8
SEMA4D	1098	0.0908416	0.0395882	0.00586485	0.0861862	8
ALG12	1099	-0.101199	0.0134117	0.00586829	0.0861862	8
SEPT9	1100	-0.048963	0.00883238	0.00587356	0.0861862	8
ZNF440	1101	-0.186897	0.0173766	0.00587638	0.0861862	7
ARHGEF10	1102	-0.0334591	0.0175669	0.00587985	0.0861862	8
PPP2R3A	1103	0.154684	0.0145895	0.00589186	0.0862501	8
TNPO2	1104	-0.231933	0.00768858	0.00589488	0.0862501	8
POPDC2	1105	0.154743	0.0140716	0.00590915	0.0863173	8
HNRNPA2B1	1106	-0.0899552	0.0261121	0.00591169	0.0863173	6
RCL1	1107	-0.0835062	0.00697414	0.0059173	0.0863173	8
EPB41L1	1108	-0.038119	0.0193171	0.00592086	0.0863173	8
UQCRC2	1109	-0.18254	0.0165624	0.00594845	0.0864557	8
NRG1	1110	0.0785292	0.00834905	0.00594976	0.0864557	8
NFYA	1111	-0.125174	0.012011	0.00595032	0.0864557	7
SCAF11	1112	0.162665	0.0449915	0.00595352	0.0864557	6
EVI2B	1113	0.28462	0.0230389	0.00595711	0.0864557	8
C6orf62	1114	0.123154	0.0129817	0.00597159	0.086508	8
HIF1AN	1115	0.0915226	0.0101593	0.00597885	0.086508	8
PGM2L1	1116	-0.171603	0.028554	0.00597886	0.086508	8
COL27A1	1117	-0.112739	0.0132226	0.00598213	0.086508	8
REXO2	1118	0.0931373	0.00295306	0.00601052	0.0868407	8
CETN2	1119	0.0351897	0.00790393	0.00603032	0.0869887	8
FBXO3	1120	0.0700078	0.0101964	0.0060353	0.0869887	8
MMP16	1121	0.129265	0.0269709	0.00603692	0.0869887	8
TMEM131	1122	0.00207168	0.0205609	0.00604835	0.0870758	6
FAM210A	1123	0.224649	0.0207291	0.00606543	0.0872439	6
PHF14	1124	0.288011	0.014378	0.00607762	0.0873414	7
CHCHD5	1125	-0.0928186	0.0121902	0.00611551	0.0876755	8
PCCB	1126	-0.102862	0.00915661	0.00611883	0.0876755	8
PCDHA9	1127	-0.114705	0.0266399	0.00612112	0.0876755	8
FBXO24	1128	-0.012262	0.0118875	0.00612258	0.0876755	7
GFAP	1129	-0.0889083	0.0322004	0.00613683	0.0878018	8
SLC25A36	1130	-0.0835312	0.0290196	0.00616075	0.0880661	8
FAM219B	1131	-0.31723	0.0136509	0.00617916	0.0881953	6
ZNF81	1132	-0.104163	0.0127987	0.00618349	0.0881953	7
ATP6AP1L	1133	0.339113	0.0230147	0.00618654	0.0881953	8
MAP1B	1134	-0.012983	0.032143	0.00619163	0.0881953	8
LAPTM4B	1135	-0.0416146	0.0179705	0.00620734	0.0882862	8
SLC30A4	1136	0.260987	0.0152111	0.0062228	0.0882862	7
GGA2	1137	-0.118552	0.00883176	0.00622305	0.0882862	8
RNF17	1138	-0.0718533	0.00760436	0.00622422	0.0882862	7
SLC38A6	1139	0.112762	0.0147003	0.00622775	0.0882862	8
AK9	1140	0.505528	0.0291794	0.00623081	0.0882862	6
NKX3-1	1141	-0.0614871	0.0110984	0.00624118	0.088339	8
TECPR1	1142	-0.235241	0.0108371	0.00624892	0.088339	8
NANOG	1143	0.0334193	0.0069114	0.00625094	0.088339	7
SPATA1	1144	0.135587	0.0167346	0.00626626	0.0883402	7
RPRD2	1145	0.0473776	0.0339979	0.00627166	0.0883402	6
ZNF3	1146	-0.1525	0.00705166	0.00627748	0.0883402	8
UBAP2	1147	0.199997	0.0164543	0.0062781	0.0883402	7
MYO10	1148	0.165491	0.0181678	0.00627838	0.0883402	8
AHNAK	1149	-0.0533844	0.0226254	0.00628836	0.0884037	8
ANKS1B	1150	-0.0904792	0.00786128	0.00629769	0.0884579	8
KPNA1	1151	-0.0949007	0.0183509	0.00630346	0.0884621	7
XPNPEP3	1152	-0.089678	0.0147105	0.00631644	0.0885253	8
PLA2G4C	1153	0.278415	0.0160825	0.00631893	0.0885253	8
KCNMA1	1154	-0.168017	0.0142226	0.0063274	0.088559	8
MPO	1155	-0.127242	0.00760688	0.0063349	0.088559	8
ARSK	1156	0.129382	0.0139027	0.00634444	0.088559	8
CCDC113	1157	0.138456	0.0186116	0.00635498	0.088559	8
DLG1	1158	0.174828	0.010081	0.00635523	0.088559	8
VPS13C	1159	0.197865	0.0167026	0.00635753	0.088559	8
PSEN2	1160	-0.0918476	0.0109393	0.00635972	0.088559	8
ATG2B	1161	0.197346	0.00846322	0.00637557	0.088702	8
PAAF1	1162	-0.0917053	0.0129925	0.00638644	0.088702	8
CCDC14	1163	-0.0134018	0.0103381	0.00638645	0.088702	8
TSHZ1	1164	0.150346	0.0145589	0.00640677	0.0887644	8
SPAG16	1165	0.226212	0.0172183	0.00640738	0.0887644	7
ARHGAP25	1166	-0.163285	0.012086	0.00640744	0.0887644	8
ZNF800	1167	0.0957828	0.0150655	0.00642408	0.0889187	8
TRIM38	1168	-0.128119	0.0217543	0.00645996	0.0893388	8
HDLBP	1169	-0.0514059	0.0127567	0.00647722	0.0894604	8
SSBP3	1170	-0.139193	0.0722449	0.00647983	0.0894604	8
ZNF721	1171	-0.252464	0.0188571	0.00648953	0.0895179	7
FKBP3	1172	0.18002	0.0186055	0.0065	0.0895803	8
RNF115	1173	0.322318	0.00954493	0.00650515	0.0895803	6
CEP63	1174	0.114894	0.00532357	0.00652126	0.0896617	7
TP53INP1	1175	0.0286582	0.00899531	0.00652216	0.0896617	8
ERCC1	1176	-0.15105	0.0108571	0.00653983	0.0897731	8
MRPL19	1177	0.0485131	0.0231518	0.00654681	0.0897731	8
TRAPPC2L	1178	-0.0823148	0.0136917	0.00654694	0.0897731	8
PDXDC1	1179	-0.136818	0.0300145	0.00655512	0.089809	6
NUCKS1	1180	-0.0415717	0.0303274	0.00657728	0.0899756	8
PPTC7	1181	0.0896477	0.0208761	0.00659858	0.0899756	8
ENTPD1	1182	-0.0498914	0.0221978	0.00660243	0.0899756	8
GTSE1	1183	-0.09273	0.0101401	0.00660511	0.0899756	8
TRMT2B	1184	-0.344167	0.0242943	0.00660726	0.0899756	8
TARS	1185	0.157629	0.0074582	0.00661419	0.0899756	8
HPS3	1186	0.0789116	0.0090171	0.00661532	0.0899756	8
ARV1	1187	0.0308194	0.0116603	0.00661794	0.0899756	8
ERCC4	1188	-0.271004	0.0189046	0.00662279	0.0899756	7
PPM1F	1189	-0.139058	0.0107656	0.00662364	0.0899756	8
FGFR2	1190	0.0354816	0.0242957	0.00662855	0.0899756	7
DMXL1	1191	0.147928	0.0180343	0.00664069	0.0900025	8
COX7B	1192	0.063605	0.0130123	0.00664167	0.0900025	8
TMEM256	1193	-0.0642242	0.027683	0.00665143	0.0900591	6
MTHFR	1194	-0.15386	0.0106717	0.00666431	0.0900838	8
MGEA5	1195	-0.186988	0.0137762	0.0066644	0.0900838	8
SDHC	1196	-0.125142	0.00792811	0.00667309	0.0901169	8
DAB2	1197	0.14936	0.00344618	0.00667801	0.0901169	8
SIN3A	1198	0.112831	0.00838093	0.00669655	0.0901533	8
STYXL1	1199	-0.158126	0.00927061	0.00670435	0.0901533	8
GPNMB	1200	0.272376	0.043078	0.00670651	0.0901533	8
RALGDS	1201	-0.240869	0.0583766	0.00671644	0.0901533	8
NEDD4L	1202	-0.00173449	0.0135911	0.00671751	0.0901533	8
RNF135	1203	0.0960798	0.0122372	0.00672342	0.0901533	8
SERPINA5	1204	-0.00356177	0.0211387	0.00672387	0.0901533	7
UNKL	1205	-0.220228	0.00754479	0.00672839	0.0901533	7
GYG2	1206	-0.000501071	0.0175755	0.00673094	0.0901533	8
EIF1AX	1207	-0.0638676	0.0168252	0.00673711	0.0901611	8
PSG9	1208	-0.0754264	0.0045226	0.00676208	0.0904204	7
FBXW11	1209	0.074348	0.0154947	0.0067772	0.0905107	8
MARCKS	1210	0.110719	0.0216988	0.00678004	0.0905107	8
SYT12	1211	-0.168867	0.0121689	0.0067912	0.0905849	8
KIAA1217	1212	-0.0467819	0.00934695	0.0068107	0.0907052	8
ACER3	1213	-0.00262509	0.0729664	0.0068123	0.0907052	6
KDM5C	1214	0.00675613	0.0283017	0.00681729	0.0907052	6
IL13RA1	1215	0.0651289	0.0178575	0.00682269	0.0907052	8
MTO1	1216	0.204979	0.0105997	0.00683607	0.0907536	8
ZNF789	1217	-0.0247693	0.0121751	0.00683756	0.0907536	7
FIP1L1	1218	0.273258	0.0115841	0.0068456	0.0907856	8
ADPRH	1219	-0.104369	0.00839436	0.00686569	0.0909774	7
ERLEC1	1220	0.00633121	0.0402284	0.00689634	0.0913086	6
LPAR1	1221	0.379751	0.037491	0.00691066	0.0913823	8
FAM129B	1222	-0.0425642	0.0185387	0.00691651	0.0913823	8
SPACA9	1223	-0.110271	0.0353006	0.00691888	0.0913823	6
SDK2	1224	-0.0509689	0.0118464	0.00692576	0.0913985	7
CHRM3	1225	0.135503	0.247538	0.00693683	0.0914699	6
EXOC3	1226	0.0169139	0.0123284	0.00694779	0.0914873	8
ERBB3	1227	-0.15003	0.0158552	0.00694947	0.0914873	8
TRPM7	1228	0.000815414	0.0151662	0.00696748	0.0915542	7
CCDC50	1229	0.172244	0.00893684	0.00697821	0.0915542	8
DOHH	1230	0.0555865	0.0135303	0.00697898	0.0915542	8
GPALPP1	1231	0.154884	0.027678	0.00698642	0.0915542	6
NME5	1232	0.16611	0.025128	0.00699058	0.0915542	8
CLCN4	1233	0.235847	0.00981464	0.00701247	0.0915542	8
GAD1	1234	-0.25593	0.0334049	0.00701915	0.0915542	8
CTNNA1	1235	-0.109679	0.0169311	0.00702915	0.0915542	8
ARHGAP26	1236	-0.174848	0.0258519	0.00703792	0.0915542	8
SEC22A	1237	0.083939	0.00565603	0.00705334	0.0915542	8
AGPAT4	1238	0.102215	0.0117771	0.00705735	0.0915542	8
ZNF12	1239	0.154788	0.0133154	0.00705889	0.0915542	8
NFYB	1240	0.209018	0.0135521	0.00706509	0.0915542	8
KCNB1	1241	-0.32832	0.0484989	0.00708347	0.0915542	8
ZBTB20	1242	0.112262	0.0413013	0.00708349	0.0915542	8
WWP1	1243	0.166629	0.00267096	0.00709219	0.0915542	8
ZNF182	1244	0.0575447	0.00765779	0.00709297	0.0915542	7
KLF7	1245	-0.184436	0.0138597	0.00709452	0.0915542	8
MASP1	1246	-0.131497	0.00920288	0.00710283	0.0915542	8
SATB1	1247	0.0823274	0.0258679	0.00710306	0.0915542	8
PCBP2	1248	-0.136759	0.00885403	0.00710443	0.0915542	8
WIPF3	1249	-0.068578	0.0233425	0.00710993	0.0915542	7
SZRD1	1250	-0.223521	0.0137854	0.0071106	0.0915542	6
SGK2	1251	0.170151	0.0170362	0.00711081	0.0915542	7
TRIM5	1252	-0.0666775	0.00910465	0.00711738	0.0915542	7
PYROXD1	1253	0.172411	0.0517771	0.00712159	0.0915542	6
MUC1	1254	-0.043303	0.0155147	0.00712591	0.0915542	8
ADGRB3	1255	0.452327	0.0457708	0.00712647	0.0915542	6
FKBP7	1256	0.0568349	0.010645	0.00713322	0.0915542	7
TMEM107	1257	0.0958935	0.0161105	0.0071334	0.0915542	7
CNIH4	1258	0.160032	0.0049809	0.00714479	0.0915542	8
CEP104	1259	0.403481	0.0302406	0.00715065	0.0915542	6
SH3PXD2A	1260	0.173431	0.0161792	0.00715296	0.0915542	7
SPTBN4	1261	-0.107262	0.0123832	0.00715402	0.0915542	8
NMT2	1262	-0.129249	0.00816575	0.00715559	0.0915542	8
ZC3H7A	1263	0.206328	0.00904483	0.00716344	0.0915542	8
MYLIP	1264	0.13867	0.0145482	0.0071666	0.0915542	7
SCARF1	1265	-0.227759	0.010225	0.00716994	0.0915542	7
NRXN1	1266	0.0846889	0.0350779	0.00719022	0.0917406	8
SAMD4B	1267	-0.101906	0.0121619	0.00720834	0.0918368	8
HIKESHI	1268	0.105064	0.0280483	0.00720913	0.0918368	6
LOC202181	1269	0.0514779	0.0264667	0.00722967	0.091946	6
SIRPA	1270	-0.265568	0.0161866	0.00723397	0.091946	8
ACVR1B	1271	-0.185474	0.00995823	0.00723478	0.091946	8
RBMS1	1272	-0.125459	0.0150423	0.00725199	0.0919767	8
C16orf72	1273	0.148335	0.00748795	0.00725226	0.0919767	8
RUFY2	1274	-0.0518851	0.0129671	0.00725428	0.0919767	8
LRIG1	1275	0.0246543	0.0126323	0.00726069	0.0919858	8
NR5A2	1276	-0.0831256	0.00677166	0.00730058	0.0923631	7
PCSK6	1277	0.159729	0.0380903	0.0073035	0.0923631	8
RFC3	1278	0.029441	0.0134661	0.00730762	0.0923631	8
PIK3C3	1279	0.134981	0.00726605	0.00732292	0.092484	8
TRIM14	1280	-0.0516258	0.0145619	0.00735661	0.0928137	8
CNPY2	1281	-0.0883006	0.0280261	0.00736343	0.0928137	6
ALDH3A2	1282	0.0429061	0.0158104	0.00736626	0.0928137	8
MSRB3	1283	-0.0309754	0.00913456	0.0073906	0.0930038	8
ZNF717	1284	0.248185	0.0173662	0.00739523	0.0930038	6
WRNIP1	1285	-0.0398013	0.00981229	0.00740046	0.0930038	8
COLGALT2	1286	0.332446	0.0847919	0.00740684	0.0930038	6
KIAA0232	1287	0.055556	0.0123393	0.00741013	0.0930038	8
ANP32A	1288	0.0740442	0.015997	0.00741863	0.0930382	8
ZNF678	1289	0.235629	0.0269663	0.00744969	0.0933551	8
LEF1	1290	-0.0748209	0.0135863	0.00745812	0.0933884	8
UROS	1291	-0.0227551	0.0119825	0.00746435	0.093394	8
PPIG	1292	0.154135	0.0145693	0.00748282	0.0934903	8
GUCY1A3	1293	0.356867	0.0252724	0.00748362	0.0934903	8
GNAI3	1294	0.0926727	0.0102151	0.00751347	0.0937714	8
TNFRSF10B	1295	-0.0934428	0.0136783	0.00751774	0.0937714	8
CLPTM1	1296	-0.285385	0.0205626	0.00754023	0.0939794	8
PEX16	1297	-0.213831	0.00904138	0.00754869	0.0939873	8
ARMCX4	1298	0.264638	0.0249887	0.00755489	0.0939873	6
C3AR1	1299	0.123128	0.00970829	0.00756387	0.0939873	8
STAR	1300	-0.0805885	0.0267396	0.00756414	0.0939873	8
AGAP3	1301	-0.223714	0.0182882	0.00759477	0.0942573	8
CLIC4	1302	0.00869238	0.0293828	0.00759841	0.0942573	8
DUOX1	1303	-0.00483757	0.00747034	0.00760337	0.0942573	8
GALC	1304	-0.00609606	0.0189578	0.00762581	0.094424	8
GRIN1	1305	-0.34525	0.021375	0.00762851	0.094424	8
ARMT1	1306	0.558212	0.0152448	0.00763703	0.094457	6
UGGT1	1307	-0.233247	0.0307107	0.00765427	0.0945979	6
HPS1	1308	-0.11038	0.0083346	0.00767043	0.0947251	7
PRPF40A	1309	-0.127211	0.013647	0.00767667	0.0947298	6
CD96	1310	0.0358614	0.00617592	0.00768609	0.0947736	7
ENTPD6	1311	-0.193037	0.00933995	0.00770391	0.0949208	8
C6orf89	1312	-0.0665615	0.0152395	0.00772132	0.0950629	8
N6AMT1	1313	-0.130205	0.00657592	0.00778934	0.0957559	8
TMEM106A	1314	-0.304055	0.00744634	0.00780336	0.0957559	6
MED23	1315	0.136445	0.00899117	0.00781121	0.0957559	8
TCEB3	1316	-0.040249	0.0159039	0.00781164	0.0957559	6
COL8A1	1317	0.184822	0.00870682	0.00782484	0.0957559	8
POLR1B	1318	-0.0186313	0.0157121	0.00782666	0.0957559	8
TGFBR1	1319	-0.051612	0.0162393	0.00782735	0.0957559	7
TPGS2	1320	0.146903	0.0370702	0.00782827	0.0957559	6
NSUN4	1321	-0.0189036	0.00801527	0.00783096	0.0957559	8
HAVCR2	1322	0.0327096	0.0163645	0.00785217	0.0959425	8
GNA11	1323	-0.108349	0.0119788	0.00786337	0.0959603	8
MINK1	1324	-0.303704	0.0203239	0.00787023	0.0959603	7
ZADH2	1325	0.222172	0.0167648	0.00787735	0.0959603	8
WHSC1	1326	-0.00666326	0.00887777	0.00788097	0.0959603	6
C1GALT1	1327	0.231803	0.00919135	0.00788499	0.0959603	7
MEAF6	1328	-0.0205068	0.0202952	0.00789295	0.0959603	7
CCDC47	1329	0.0795296	0.0159699	0.0078952	0.0959603	8
TIAL1	1330	0.0665184	0.00791001	0.00792826	0.0962896	8
PSPC1	1331	-0.0859959	0.00780597	0.00795397	0.0965254	8
DBF4B	1332	0.0548047	0.0089832	0.00795962	0.0965254	8
SFXN5	1333	0.038802	0.0236653	0.00796629	0.0965338	8
PCDH17	1334	0.381751	0.0298326	0.00798416	0.0966586	7
MDM4	1335	-0.204665	0.0270975	0.00798856	0.0966586	8
OSCP1	1336	-0.0267303	0.0138312	0.00801876	0.0969514	8
TMEM237	1337	0.229748	0.0190926	0.0080252	0.0969567	6
GPATCH2	1338	0.00246696	0.0210822	0.00806994	0.0973869	8
H3F3A	1339	0.0849925	0.0133675	0.00807463	0.0973869	8
RAB35	1340	-0.0943427	0.00690898	0.0080789	0.0973869	8
GNL1	1341	-0.0182916	0.00960053	0.00808696	0.0974073	8
THSD7A	1342	-0.00777837	0.0355607	0.00809614	0.0974073	6
PDE4B	1343	-0.128976	0.00600887	0.00809868	0.0974073	8
ZYG11B	1344	-0.123278	0.0220629	0.00811772	0.0975636	8
C3orf38	1345	-0.0475197	0.0136089	0.00813433	0.0976906	8
SHROOM3	1346	0.113733	0.0534458	0.00815117	0.0978201	6
ARHGAP18	1347	0.146123	0.0098341	0.00816508	0.0979143	7
IPO9	1348	0.0735085	0.00993945	0.00817435	0.0979527	8
STAT3	1349	-0.190729	0.0184336	0.00818311	0.097985	8
LNPEP	1350	0.0236945	0.0168573	0.00821748	0.0981833	8
JAM3	1351	0.136872	0.0331257	0.00821841	0.0981833	8
BTF3L4	1352	0.144467	0.0129323	0.00822367	0.0981833	7
NR3C1	1353	-0.120869	0.0169638	0.00822941	0.0981833	8
PIK3R1	1354	0.0650036	0.0240484	0.00823006	0.0981833	8
RNF7	1355	-0.0249066	0.00910878	0.00823969	0.0981916	8
UGCG	1356	0.311166	0.0205508	0.00824292	0.0981916	8
TMTC4	1357	0.347319	0.0560068	0.00828274	0.0985933	8
SLC39A8	1358	0.0280594	0.0135262	0.0083135	0.0988866	8
PLCG2	1359	-0.0610606	0.0112044	0.00832457	0.0989453	8
PCDH9	1360	-0.106153	0.019276	0.0083337	0.0989636	8
TLX2	1361	-0.0355996	0.00451106	0.00833835	0.0989636	7
FPR3	1362	0.192872	0.0115746	0.00835746	0.0991175	8
TMBIM4	1363	0.093873	0.00853829	0.00838491	0.0993701	8
ANOS1	1364	0.245383	0.0395971	0.00840063	0.0994795	6
FLYWCH1	1365	-0.227297	0.0225268	0.00842247	0.0994795	8
C14orf28	1366	0.0472764	0.0119497	0.00842334	0.0994795	8
ZEB1	1367	-0.0582473	0.0261409	0.00843298	0.0994795	7
COPG1	1368	-0.166585	0.0464164	0.00844616	0.0994795	6
SQSTM1	1369	0.0800599	0.0134609	0.00844965	0.0994795	8
PGM5	1370	0.00405298	0.0109275	0.00845553	0.0994795	7
NDUFAF2	1371	0.127676	0.00612979	0.00845837	0.0994795	8
NKAIN2	1372	0.344822	0.0522683	0.00846088	0.0994795	6
SC5D	1373	-0.210459	0.0485359	0.00846178	0.0994795	6
RBM12B	1374	0.0773592	0.013165	0.00846189	0.0994795	8
ZNF483	1375	0.0628381	0.0134797	0.00851861	0.100074	7
GYS2	1376	-0.0222851	0.00395225	0.00855953	0.100481	7
SSR3	1377	-0.134475	0.0235421	0.00856973	0.100528	8
CAPRIN1	1378	0.241023	0.0198913	0.00859317	0.10073	8
RGMB	1379	0.17554	0.0107297	0.00860321	0.100774	7
RGS6	1380	-0.0741142	0.0198496	0.00861799	0.100824	8
EHMT1	1381	-0.114833	0.0175193	0.00861997	0.100824	7
ICAM2	1382	-0.316769	0.0263931	0.00864024	0.100923	8
DCAF8	1383	-0.169286	0.0208466	0.00864525	0.100923	6
BBOF1	1384	-0.00223007	0.0255211	0.0086504	0.100923	6
TRAPPC3	1385	-0.0494446	0.00987789	0.00865343	0.100923	8
TRIM2	1386	-0.321502	0.0334444	0.00866228	0.100954	8
MAPKAP1	1387	-0.150768	0.0120241	0.00867602	0.101041	8
ZC3HAV1	1388	0.0310941	0.00825133	0.00871065	0.101371	8
DYNC1LI2	1389	0.0728124	0.0125937	0.00872984	0.101521	8
ZNF7	1390	0.0554579	0.00901261	0.00874419	0.101566	8
DLC1	1391	0.0125921	0.022853	0.00875169	0.101566	8
CMTM5	1392	0.388748	0.0877443	0.00875264	0.101566	8
ZNF215	1393	0.01728	0.0108459	0.00877516	0.101566	8
TTC17	1394	-0.0631537	0.0137839	0.00878073	0.101566	8
SETD5	1395	-0.090249	0.0182106	0.00878705	0.101566	6
VCPKMT	1396	0.220986	0.0967089	0.00879377	0.101566	6
CHURC1	1397	-0.0600599	0.0503305	0.00879415	0.101566	8
DNAJB1	1398	-0.00966233	0.0441649	0.00879642	0.101566	8
TRMT10B	1399	-0.224893	0.0203703	0.00879658	0.101566	6
U2AF2	1400	-0.0984241	0.00734756	0.00881674	0.101726	8
RCHY1	1401	0.178273	0.016389	0.00883713	0.101827	8
DTNA	1402	-0.277776	0.042807	0.00884043	0.101827	8
ERG	1403	-0.0694178	0.008178	0.00884438	0.101827	7
ST8SIA4	1404	0.0787884	0.0113507	0.0088561	0.101849	8
TMEM161B	1405	0.241202	0.00865491	0.00886863	0.101849	8
SYNE1	1406	0.0827125	0.00721757	0.00887033	0.101849	8
PSMB2	1407	-0.262049	0.00957096	0.00887154	0.101849	8
HSPA4	1408	0.123306	0.0323985	0.00888336	0.101913	8
SLC4A8	1409	0.11658	0.0190046	0.00890431	0.102033	7
COX14	1410	0.13482	0.0381736	0.00890647	0.102033	6
MMD2	1411	0.042964	0.0120431	0.00893049	0.102108	8
AIF1L	1412	0.0715724	0.023308	0.00894591	0.102108	8
CD40	1413	-0.158888	0.0126495	0.0089479	0.102108	7
GINS2	1414	-0.136273	0.00996137	0.0089484	0.102108	8
MAPK14	1415	-0.0958459	0.00932415	0.00894845	0.102108	8
CCNY	1416	-0.170212	0.0165864	0.00895157	0.102108	8
TMEM169	1417	-0.0449239	0.0125339	0.00895728	0.102108	8
CALHM2	1418	-0.116423	0.00673375	0.00897906	0.102172	8
MKLN1	1419	-0.0720175	0.00912393	0.00898526	0.102172	8
ZHX1	1420	-0.000185621	0.0161463	0.00898871	0.102172	8
SNTG1	1421	0.156141	0.0399726	0.00898952	0.102172	8
KIRREL	1422	0.0395126	0.00231367	0.00899853	0.102172	6
FUCA2	1423	0.139232	0.0077469	0.00900489	0.102172	8
HEXIM1	1424	-0.0723009	0.0134746	0.00901282	0.102172	8
COG5	1425	0.144154	0.011409	0.00901513	0.102172	8
RAD1	1426	-0.0302025	0.0141921	0.00902	0.102172	7
ADAMTS9	1427	-0.253095	0.033186	0.0090283	0.102172	8
KPNB1	1428	-0.0223768	0.0113467	0.00903252	0.102172	8
SART3	1429	0.0111398	0.00744685	0.00906095	0.102354	8
OLA1	1430	0.00693858	0.0184439	0.00906124	0.102354	8
GMEB1	1431	-0.0294809	0.00850752	0.00909198	0.102574	8
OPA1	1432	-0.00607112	0.0253018	0.00910876	0.102574	8
STAT2	1433	-0.180407	0.0119968	0.00910936	0.102574	8
ERLIN1	1434	-0.0249612	0.0105761	0.00911069	0.102574	8
PELO	1435	-0.0372999	0.0107833	0.00912007	0.102574	8
CEP70	1436	0.16586	0.00674435	0.00912174	0.102574	8
COL1A1	1437	0.0104664	0.0108056	0.0091252	0.102574	8
DDX51	1438	-0.116156	0.00271225	0.00915599	0.102796	8
RAB3GAP2	1439	-0.0199353	0.0188317	0.00916121	0.102796	6
LEMD1	1440	-0.0126419	0.010535	0.00916442	0.102796	7
FAM118B	1441	0.0443838	0.00758066	0.00917034	0.102796	8
FSD1L	1442	0.318438	0.0224851	0.00921226	0.103194	8
NRG2	1443	-0.125917	0.0128858	0.00924334	0.10347	7
TNFSF13B	1444	0.133692	0.0102778	0.00925199	0.103495	8
CLMP	1445	-0.415867	0.0181253	0.00927015	0.103627	6
CBLN2	1446	-0.106418	0.0385437	0.00928557	0.103722	8
TGIF1	1447	0.0551743	0.0108656	0.0092915	0.103722	8
NGRN	1448	0.157251	0.0109261	0.00930305	0.103778	7
HELLS	1449	0.157934	0.0106879	0.00931392	0.103778	7
GABRA2	1450	-0.0549205	0.0353201	0.00932356	0.103778	8
KAZN	1451	-0.0118716	0.0904832	0.00933229	0.103778	6
ERCC6L2	1452	0.35238	0.0112263	0.00933938	0.103778	6
HLA-E	1453	-0.41645	0.0265645	0.00934112	0.103778	8
APAF1	1454	0.072659	0.00707786	0.00934781	0.103778	8
EFCAB7	1455	0.235439	0.0158879	0.00935104	0.103778	7
TBC1D8B	1456	0.0173931	0.0136432	0.00935436	0.103778	8
NEK11	1457	0.113613	0.0124123	0.00937636	0.103951	8
STK24	1458	-0.0405884	0.00416744	0.00939085	0.103993	8
XRCC6	1459	-0.210297	0.0087916	0.00940189	0.103993	8
APPBP2	1460	0.160732	0.0106796	0.00940434	0.103993	8
SOBP	1461	0.0792269	0.0088846	0.00941336	0.103993	8
ZNF500	1462	-0.168726	0.00558719	0.00941941	0.103993	7
SMAD7	1463	0.0579569	0.00908119	0.00942252	0.103993	8
POGK	1464	0.162307	0.016213	0.0094291	0.103993	8
TTL	1465	0.0233116	0.0164783	0.00943162	0.103993	8
KIF13A	1466	0.182042	0.0250764	0.00944848	0.104047	8
SYS1	1467	-0.127109	0.012728	0.00945383	0.104047	7
NUP160	1468	-0.124977	0.0087042	0.00946215	0.104047	8
RSBN1	1469	0.13939	0.00838079	0.00946231	0.104047	8
SMIM11A	1470	0.250333	0.0334376	0.00947059	0.104067	6
JARID2	1471	-0.0686144	0.00976418	0.00948101	0.104105	8
NIN	1472	-0.00946034	0.00744393	0.00948695	0.104105	8
DPY19L1	1473	0.164134	0.0202858	0.00949741	0.104149	7
FANCL	1474	0.205773	0.0376341	0.00951747	0.104298	8
PRPF4B	1475	0.152016	0.00790773	0.00953076	0.10435	8
WIPF2	1476	-0.0331406	0.00656636	0.0095424	0.10435	8
CREBZF	1477	0.0503392	0.0101974	0.00955666	0.10435	7
TNRC6C	1478	0.116961	0.0143614	0.00956262	0.10435	7
NFYC	1479	0.0634122	0.00687299	0.00956484	0.10435	8
HNRNPR	1480	0.34222	0.00956882	0.00956661	0.10435	6
CAMSAP2	1481	0.398045	0.0137633	0.00957909	0.10435	6
GREM2	1482	0.0369912	0.0355948	0.00958084	0.10435	8
SENP8	1483	-0.050958	0.0100181	0.00958592	0.10435	8
DNAJC6	1484	0.181644	0.0122224	0.0095868	0.10435	7
PAXBP1	1485	0.112322	0.0565833	0.00959756	0.104397	6
MFNG	1486	-0.0667728	0.0113459	0.00961632	0.104413	8
PDPN	1487	-0.0416871	0.0105946	0.00962024	0.104413	8
CDKL2	1488	0.271901	0.0267485	0.00962201	0.104413	7
KIN	1489	-0.00312822	0.0118261	0.00962494	0.104413	8
MSL2	1490	0.00483466	0.0126244	0.00964288	0.104538	8
USP38	1491	0.113904	0.00503024	0.00965223	0.104545	8
MARCH5	1492	-0.0494398	0.0093626	0.0096565	0.104545	8
GNL3L	1493	-0.208136	0.0255021	0.00968773	0.104749	8
TBXA2R	1494	-0.161058	0.00846603	0.00968829	0.104749	8
NAPSB	1495	-0.30292	0.0332186	0.0097007	0.104761	7
NAV1	1496	0.0579611	0.0151447	0.00970241	0.104761	8
ABCD3	1497	0.197203	0.0250131	0.00971009	0.104774	7
KLHL8	1498	0.175186	0.012115	0.00972334	0.104818	8
MAGT1	1499	-0.129217	0.0428885	0.00972711	0.104818	8
TRNT1	1500	0.145768	0.0105604	0.00974795	0.104972	8
TSPAN4	1501	-0.102446	0.0174395	0.00977419	0.105185	8
RBM8A	1502	0.107465	0.0128906	0.00978371	0.105217	7
CASC1	1503	0.0556201	0.0158206	0.00979831	0.105304	8
ZNF317	1504	-0.0182499	0.0079067	0.00981528	0.105402	8
SETD2	1505	0.142463	0.013636	0.00982241	0.105402	8
RBM26	1506	-0.141977	0.0118721	0.009831	0.105402	8
AKIP1	1507	-0.281383	0.00598484	0.00983352	0.105402	6
FANCA	1508	-0.0517229	0.00894665	0.00984408	0.105445	8
EXT1	1509	0.151907	0.0127572	0.00985234	0.105464	8
MLLT3	1510	-0.00862727	0.00323358	0.00986362	0.105515	8
DPT	1511	0.0734526	0.00888336	0.00988982	0.105725	7
ATP2B4	1512	-0.0189642	0.0150167	0.00990253	0.105791	7
MAP3K2	1513	-0.0453923	0.0141446	0.00993647	0.105869	8
ZNF568	1514	0.00910703	0.0107097	0.00993674	0.105869	6
APOL6	1515	-0.18946	0.0193274	0.00994316	0.105869	7
C11orf54	1516	0.244024	0.0134416	0.00994492	0.105869	8
RRBP1	1517	-0.0381221	0.0156583	0.0099513	0.105869	8
RUBCN	1518	-0.199624	0.0185722	0.0099565	0.105869	6
TIE1	1519	-0.20012	0.0279064	0.00995842	0.105869	8
TIMM50	1520	-0.0788271	0.0173587	0.00996229	0.105869	7
POLR2B	1521	0.182894	0.0116467	0.00999415	0.106138	8
KHSRP	1522	-0.0204526	0.00938161	0.0100008	0.106139	8
SRGAP2	1523	0.232197	0.0166225	0.0100251	0.106326	8
HNRNPDL	1524	0.167529	0.020842	0.0100361	0.106373	6
C6orf58	1525	0.00824443	0.00986962	0.010061	0.106567	7
VSX1	1526	0.0123844	0.00739614	0.0100805	0.106671	8
PPP1R7	1527	-0.174038	0.0101459	0.010084	0.106671	8
SMC3	1528	0.0107631	0.00827932	0.0101025	0.106797	8
PDSS2	1529	0.176022	0.0110327	0.0101199	0.106911	8
ACAT1	1530	0.162883	0.00950227	0.0101413	0.106999	8
SRRT	1531	-0.12392	0.0204972	0.0101492	0.106999	6
CHERP	1532	-0.0937905	0.00957799	0.0101533	0.106999	8
TSC22D1	1533	0.0302037	0.008479	0.0101547	0.106999	8
SP1	1534	0.00136213	0.0145654	0.0101808	0.107024	8
ART3	1535	0.241828	0.0231292	0.0101962	0.107024	8
DNAH14	1536	0.16743	0.0118757	0.0102114	0.107024	6
SNX5	1537	-0.0441965	0.00988022	0.0102169	0.107024	8
GATA2	1538	-0.159649	0.014091	0.0102212	0.107024	8
LAMC1	1539	0.0252805	0.016617	0.0102254	0.107024	8
COX6A1	1540	0.0262068	0.00706848	0.0102315	0.107024	8
RGS20	1541	-0.240831	0.0314443	0.0102319	0.107024	8
S100A4	1542	0.349645	0.00869339	0.0102324	0.107024	8
ATP8B1	1543	0.0707724	0.0497382	0.0102329	0.107024	7
ATP6V1H	1544	-0.113438	0.0216285	0.0102366	0.107024	8
NUPR1	1545	0.323574	0.0364225	0.010244	0.107024	8
ITGA5	1546	-0.0576966	0.0147753	0.0102473	0.107024	8
STX6	1547	0.00312742	0.00812413	0.0102523	0.107024	8
NFATC2	1548	-0.00101841	0.00429244	0.0102621	0.107024	7
MED1	1549	0.280226	0.0237314	0.0102631	0.107024	6
HIPK3	1550	-0.139973	0.0191125	0.0102735	0.107063	8
DIS3	1551	0.027435	0.00929155	0.0102879	0.107144	7
AIG1	1552	0.0499391	0.00965	0.0103031	0.107233	8
ATN1	1553	-0.0943576	0.0193609	0.0103325	0.107382	8
C4orf33	1554	0.111167	0.0117356	0.0103368	0.107382	6
YAE1D1	1555	0.0166595	0.030072	0.010339	0.107382	6
JKAMP	1556	0.118428	0.0377979	0.010344	0.107382	6
VTA1	1557	0.0269232	0.0115113	0.0103619	0.107499	8
PAK2	1558	0.108783	0.00607923	0.0103864	0.107684	8
PRKD2	1559	0.156032	0.0157031	0.0103963	0.107718	8
CSRNP3	1560	0.0518667	0.0549785	0.01043	0.107986	8
MED17	1561	-0.18526	0.0175532	0.0104356	0.107986	6
NECAB1	1562	-0.250031	0.0772159	0.0104534	0.108041	7
PPM1D	1563	0.0469847	0.0171119	0.0104543	0.108041	8
PUS10	1564	0.0728746	0.0112181	0.0104695	0.108063	7
MAST3	1565	-0.0337174	0.0277323	0.0104698	0.108063	7
C1RL	1566	-0.0368875	0.0178026	0.010482	0.10812	8
NSMCE1	1567	0.0801735	0.0153997	0.0105182	0.108228	7
GNB4	1568	0.0640745	0.0230383	0.0105222	0.108228	8
ERGIC2	1569	0.202936	0.00804722	0.0105242	0.108228	8
ATP9B	1570	-0.150774	0.00870809	0.0105413	0.108228	8
SEC14L1	1571	-0.170322	0.0214619	0.0105448	0.108228	8
CTDSP2	1572	-0.0290004	0.0112677	0.0105494	0.108228	8
TDRKH	1573	0.0449923	0.00832085	0.0105558	0.108228	8
DLGAP1	1574	0.107578	0.0109861	0.0105568	0.108228	7
OGDH	1575	-0.265696	0.0229274	0.010565	0.108228	8
ZNF655	1576	-0.190407	0.0154696	0.0105709	0.108228	8
DPP3	1577	0.05652	0.00667213	0.0105737	0.108228	8
SMARCA1	1578	0.148625	0.00350739	0.0105772	0.108228	7
HAS3	1579	-0.138806	0.00946905	0.0105796	0.108228	8
PRMT6	1580	0.0537151	0.0178558	0.0106005	0.108337	8
KIAA0930	1581	0.0229275	0.0565644	0.0106037	0.108337	6
GMPR2	1582	0.0735883	0.0120507	0.0106125	0.108359	8
ZNF362	1583	-0.114629	0.00541881	0.0106474	0.108608	8
RPL37	1584	0.14743	0.0181486	0.0106579	0.108608	8
TSR1	1585	-0.0826755	0.00863033	0.0106652	0.108608	7
SLCO1A2	1586	0.272024	0.0184114	0.0106692	0.108608	7
S100A13	1587	-0.0254171	0.0177029	0.0106705	0.108608	8
LONRF3	1588	-0.234928	0.0138585	0.0106896	0.108729	7
CLDN5	1589	-0.306948	0.0181981	0.0106988	0.108729	8
PAPPA2	1590	-0.0205125	0.00844278	0.0107026	0.108729	8
ANAPC5	1591	0.155539	0.0307296	0.0107244	0.108882	8
MYDGF	1592	-0.0933306	0.0113847	0.0107367	0.108939	6
TSPAN3	1593	0.0435406	0.00929342	0.0107538	0.109044	8
LY6H	1594	-0.0821139	0.00997045	0.0107637	0.109076	8
METRN	1595	0.0346278	0.025678	0.010773	0.109101	8
KIAA1586	1596	0.163961	0.0163767	0.0107941	0.10919	7
CMTM3	1597	0.0819223	0.0167178	0.0107953	0.10919	8
DCBLD2	1598	0.0339216	0.00898858	0.0108188	0.10936	8
STAT1	1599	-0.079626	0.0210548	0.010826	0.109364	8
IL1RAP	1600	0.0679044	0.0100586	0.0108614	0.109652	8
ANKRD50	1601	0.000493169	0.0124116	0.0109056	0.11003	8
NCS1	1602	-0.23566	0.0576734	0.0109162	0.110031	6
NRG3	1603	0.0520513	0.0225562	0.0109201	0.110031	8
VHL	1604	-0.250002	0.0106581	0.0109319	0.110031	8
FGD5	1605	-0.18559	0.012703	0.0109329	0.110031	8
IFT57	1606	0.130318	0.0118782	0.0109422	0.110056	8
MAGOHB	1607	0.00436673	0.00891811	0.0109961	0.110473	8
NDUFS4	1608	0.219708	0.0102933	0.0109974	0.110473	8
NUB1	1609	0.129919	0.00988598	0.0110098	0.110529	8
TAF15	1610	0.0508905	0.0192779	0.0110293	0.110585	8
SGSM3	1611	-0.115601	0.0136128	0.0110395	0.110585	7
USP9X	1612	-0.0992241	0.0139944	0.0110425	0.110585	7
LANCL2	1613	-0.160136	0.00838578	0.0110428	0.110585	8
IMMP1L	1614	0.334026	0.00984013	0.0110507	0.110596	6
RASSF8	1615	-0.00481469	0.0114465	0.0110885	0.110906	8
PEX26	1616	0.221878	0.0150888	0.0111003	0.110955	8
GGT1	1617	-0.205529	0.00966381	0.0111188	0.111018	8
PDE7A	1618	-0.0703705	0.0136557	0.0111204	0.111018	7
HIST1H4H	1619	-0.129099	0.0156319	0.0111387	0.111079	8
ANP32E	1620	0.0873943	0.00836884	0.0111412	0.111079	7
ATXN2L	1621	-0.139961	0.0127406	0.0111471	0.111079	8
RBFA	1622	0.296481	0.0237238	0.0111717	0.1111	6
API5	1623	-0.0549066	0.007379	0.0111741	0.1111	8
HTATIP2	1624	0.204391	0.00943236	0.0111789	0.1111	8
BHLHE41	1625	0.158742	0.0733067	0.0111794	0.1111	6
PCOLCE2	1626	0.0761289	0.0110919	0.0111867	0.1111	8
SDR16C5	1627	0.188254	0.0233055	0.0111905	0.1111	8
GBP1	1628	0.0636617	0.0137793	0.0111998	0.11111	7
DPP9	1629	-0.182608	0.0163421	0.0112068	0.11111	8
SCN10A	1630	-0.177825	0.00619686	0.0112235	0.11111	7
PDZD11	1631	-0.0363857	0.013677	0.0112237	0.11111	8
ATG10	1632	0.115101	0.0116627	0.0112321	0.11111	8
SNRPB2	1633	-0.0503663	0.00927603	0.0112328	0.11111	8
C5orf42	1634	0.182595	0.00912928	0.01125	0.111213	8
WDR89	1635	-0.00682363	0.00922638	0.0112625	0.111268	8
RPL35A	1636	0.123274	0.00971427	0.0112729	0.111303	8
CYP20A1	1637	-0.060825	0.0148049	0.0112952	0.111454	8
ZNF687	1638	-0.106681	0.00607903	0.0113128	0.111561	8
EPS15L1	1639	-0.119617	0.0080502	0.0113239	0.111602	8
VGLL3	1640	0.0889442	0.00861797	0.011341	0.111688	7
SERPINB9	1641	0.0587809	0.0165282	0.0113484	0.111688	8
PEX13	1642	0.178471	0.00870813	0.0113568	0.111688	8
ZDHHC6	1643	0.0687697	0.00658901	0.0113679	0.111688	8
ZNF214	1644	-0.0917147	0.0076563	0.0113897	0.111688	7
TRIOBP	1645	-0.0952262	0.013866	0.0113957	0.111688	8
ATP1B3	1646	0.0334319	0.0066667	0.0113979	0.111688	8
TBRG1	1647	0.185537	0.0226091	0.0113988	0.111688	8
GNB1	1648	-0.00573349	0.00561233	0.0114	0.111688	8
RNF170	1649	0.0585622	0.0117145	0.0114018	0.111688	8
ELP2	1650	-0.0653333	0.0147841	0.011414	0.1117	8
MYCN	1651	0.0570874	0.00677082	0.0114169	0.1117	8
CADM3	1652	-0.0671504	0.0168995	0.0114281	0.111742	8
CARMIL1	1653	0.262953	0.0100561	0.0114786	0.112128	6
CD99	1654	0.155129	0.0182492	0.0114825	0.112128	8
RNASEH1	1655	-0.206708	0.0164297	0.0114884	0.112128	8
PNKD	1656	-0.0531963	0.0130027	0.0115088	0.112236	8
NR2E3	1657	0.000746144	0.00797683	0.0115133	0.112236	8
EID2B	1658	0.161931	0.0328134	0.0115278	0.11231	8
CINP	1659	0.0203157	0.00976918	0.0115365	0.112327	8
C1orf116	1660	0.123196	0.0119982	0.011568	0.112397	8
GTF2I	1661	-0.231139	0.0192208	0.0115687	0.112397	7
HIST1H2BD	1662	0.238505	0.0262346	0.0115767	0.112397	8
TOX4	1663	-0.00194941	0.0135519	0.0115819	0.112397	8
DTNBP1	1664	-0.0137666	0.0136057	0.0115972	0.112397	8
OPALIN	1665	0.120178	0.0805238	0.0116006	0.112397	8
SNHG8	1666	0.135196	0.0116243	0.0116045	0.112397	7
CACNB2	1667	-0.0554071	0.0138581	0.0116129	0.112397	8
THRAP3	1668	0.0302684	0.00910718	0.0116177	0.112397	8
STAG2	1669	0.175844	0.00667404	0.0116236	0.112397	8
PPFIBP1	1670	-0.0155072	0.0356311	0.011633	0.112397	8
SYNE2	1671	-0.0708958	0.00437359	0.0116352	0.112397	7
PELI1	1672	0.175239	0.00771111	0.0116393	0.112397	8
ATG7	1673	-0.158646	0.00412415	0.011645	0.112397	8
CDC14A	1674	-0.0986112	0.0108427	0.0116482	0.112397	8
CD47	1675	0.219421	0.0131788	0.0116563	0.112397	8
SOS2	1676	0.0304704	0.0123182	0.0116621	0.112397	7
HTATSF1	1677	0.177251	0.0128366	0.0116782	0.112486	8
FDFT1	1678	-0.15362	0.0146465	0.0116876	0.112492	8
NFAT5	1679	0.00680717	0.0141172	0.0116928	0.112492	8
CLNS1A	1680	0.0988318	0.00793499	0.011707	0.112562	8
EIF4E	1681	0.3308	0.0233269	0.0117234	0.112652	8
AGPAT3	1682	0.00629967	0.0215631	0.0117359	0.112701	8
SSFA2	1683	-0.0636737	0.0134531	0.0117424	0.112701	8
GTF3C2	1684	-0.0361089	0.00569872	0.0117501	0.112708	8
UBE3C	1685	0.103528	0.00925704	0.0117643	0.11272	8
POP5	1686	-0.0321391	0.0122026	0.0117669	0.11272	8
FBXL3	1687	0.0674373	0.0172103	0.0118065	0.11272	8
MREG	1688	0.0947513	0.0117289	0.0118187	0.11272	8
UACA	1689	-0.0359406	0.0154157	0.0118208	0.11272	8
SBF2	1690	-0.0315903	0.00650375	0.0118264	0.11272	7
RAB14	1691	0.159076	0.0128735	0.0118286	0.11272	8
TBC1D24	1692	0.00592834	0.0273703	0.011833	0.11272	7
C9orf3	1693	0.196257	0.0162667	0.0118396	0.11272	8
C19orf12	1694	0.0737451	0.00495409	0.0118437	0.11272	8
MOCS2	1695	0.186957	0.0140206	0.0118507	0.11272	8
TMF1	1696	0.151289	0.0131532	0.0118539	0.11272	8
GNAI1	1697	0.217328	0.0224569	0.0118573	0.11272	8
G2E3	1698	0.26164	0.016727	0.0118586	0.11272	6
IRGQ	1699	-0.157645	0.0182323	0.0118635	0.11272	8
TSEN15	1700	0.135916	0.0273252	0.0118649	0.11272	6
GRIA3	1701	0.186549	0.0358989	0.01187	0.11272	7
DAB2IP	1702	-0.0532926	0.01279	0.0118827	0.112774	8
ZMPSTE24	1703	0.021762	0.00634819	0.0118921	0.112797	8
HLA-DOA	1704	-0.00977737	0.00975343	0.0119078	0.11288	8
DCAF10	1705	-0.188003	0.026322	0.0119245	0.112971	6
IKZF1	1706	-0.124643	0.0127072	0.0119621	0.113261	8
ADAM33	1707	-0.075558	0.0172422	0.0119879	0.113439	8
MCFD2	1708	-0.180032	0.0119571	0.0120042	0.113527	8
HLA-DQB1	1709	-0.0093702	0.0212306	0.0120226	0.113609	8
ADHFE1	1710	-0.181004	0.0149912	0.012027	0.113609	8
MAGEA11	1711	-0.00555177	0.00300537	0.0120445	0.113624	7
CRLS1	1712	0.202021	0.0141865	0.0120464	0.113624	8
ZFP2	1713	-0.00596974	0.00736813	0.0120555	0.113624	8
BPTF	1714	-0.0150013	0.017629	0.0120678	0.113624	8
CCDC15	1715	0.187887	0.0163388	0.0120682	0.113624	6
NUFIP2	1716	-0.0586017	0.0184631	0.0120707	0.113624	8
KLF12	1717	-0.139678	0.0116816	0.0120911	0.113733	8
ATG4B	1718	-0.103769	0.0138038	0.0120964	0.113733	8
SLC15A4	1719	0.0153777	0.00736907	0.0121415	0.11399	8
MRPS22	1720	-0.023875	0.00702901	0.012142	0.11399	8
ARHGAP1	1721	-0.21957	0.0149686	0.0121449	0.11399	8
USP11	1722	-0.210026	0.0194705	0.012161	0.114075	8
ATF3	1723	0.00869357	0.0127527	0.0121908	0.11427	8
FBXL18	1724	-0.170847	0.0103367	0.0122044	0.11427	7
SNX14	1725	0.217376	0.0132189	0.0122076	0.11427	8
POPDC3	1726	-0.115538	0.0285557	0.0122141	0.11427	8
IKBKB	1727	0.0320686	0.0105537	0.0122172	0.11427	8
TMPO	1728	-0.0764769	0.00754656	0.0122397	0.114415	7
LOC441155	1729	-0.0193643	0.0207923	0.0122489	0.114418	6
FAM43A	1730	-0.0483124	0.0190842	0.0122543	0.114418	8
CLCC1	1731	0.036487	0.0220644	0.0122657	0.114418	8
ZNF776	1732	0.130856	0.00937663	0.0122684	0.114418	8
JAKMIP2	1733	0.195474	0.00943966	0.0122971	0.114619	8
PRKCQ	1734	0.0411658	0.0248895	0.0123169	0.114737	8
ITGB1BP1	1735	0.0596793	0.0329487	0.0123277	0.114772	8
TMEM27	1736	0.166352	0.0173024	0.012372	0.114869	8
SRSF12	1737	-0.0808588	0.0661488	0.0123789	0.114869	6
MKL2	1738	0.129367	0.0171833	0.0123811	0.114869	7
DCAF15	1739	-0.127602	0.00588682	0.0123894	0.114869	8
WDFY2	1740	-0.151305	0.0184577	0.0123897	0.114869	8
RBMS2	1741	-0.0447871	0.00652683	0.012395	0.114869	8
ZNF302	1742	0.0684263	0.013312	0.0123984	0.114869	8
HSFY2	1743	0.122117	0.0157793	0.0124014	0.114869	8
F12	1744	-0.164211	0.011664	0.0124022	0.114869	8
PCDHGA11	1745	-0.082272	0.0247753	0.0124141	0.114914	7
BAG3	1746	-0.184284	0.075385	0.0124388	0.115076	8
EI24	1747	-0.0544536	0.0100914	0.0124568	0.115178	8
CISD2	1748	0.182534	0.0105623	0.0125238	0.115595	7
KLHL6	1749	-0.0663124	0.0130647	0.0125246	0.115595	7
KIR3DL2	1750	-0.0509021	0.00971773	0.012532	0.115595	7
ZNF532	1751	-0.0746106	0.0152413	0.0125367	0.115595	8
METTL8	1752	0.0847388	0.0101211	0.012542	0.115595	7
ACVR2B	1753	0.198382	0.0101532	0.0125501	0.115595	8
ABL2	1754	-0.0233218	0.012336	0.012552	0.115595	8
RNF216	1755	-0.192412	0.0078593	0.0125773	0.115762	7
PPP3CA	1756	-0.0198542	0.0277485	0.0125881	0.115795	8
PECAM1	1757	-0.223425	0.0288601	0.0126137	0.115833	8
XPO4	1758	0.0252491	0.00745083	0.0126137	0.115833	8
LMF1	1759	-0.0869019	0.0114344	0.0126162	0.115833	7
WWOX	1760	-0.153688	0.0195604	0.0126209	0.115833	7
PTPRO	1761	-0.0367113	0.0274629	0.0126477	0.115988	8
B4GALT5	1762	-0.0999453	0.0135392	0.0126522	0.115988	8
NUDT16	1763	0.123568	0.017789	0.012663	0.116022	8
OPA3	1764	-0.130274	0.0121126	0.0127109	0.116394	8
DHX9	1765	-0.00139886	0.0119672	0.0127433	0.116444	8
SULF2	1766	-0.0513376	0.00879435	0.0127448	0.116444	8
MRPL36	1767	0.0110179	0.0116122	0.0127482	0.116444	8
FAM133A	1768	0.203062	0.0120768	0.0127556	0.116444	8
CSDC2	1769	0.0317257	0.011758	0.0127582	0.116444	8
LRRC40	1770	-0.05924	0.0145651	0.0127596	0.116444	7
CLGN	1771	0.272178	0.0308722	0.0127748	0.116517	8
PCDHAC1	1772	0.07073	0.00686886	0.0128177	0.116748	8
ZNF496	1773	-0.153142	0.00815406	0.0128212	0.116748	8
CEP97	1774	0.0339291	0.0163174	0.0128229	0.116748	8
TLN1	1775	-0.00918033	0.00913139	0.0128359	0.116748	8
DIP2B	1776	0.145561	0.0121065	0.0128384	0.116748	8
STK36	1777	-0.0796983	0.0128722	0.0128435	0.116748	8
SHOX2	1778	-0.0716491	0.00411811	0.0129019	0.117213	8
AGFG2	1779	-0.239347	0.019187	0.0129128	0.117246	8
IREB2	1780	0.143573	0.0176267	0.0129537	0.117461	8
GALNT1	1781	0.104066	0.0123811	0.012956	0.117461	8
DPYSL5	1782	0.0852729	0.0167113	0.0129583	0.117461	8
UTP23	1783	0.21441	0.0231633	0.01298	0.117532	8
POU2F2	1784	-0.0270106	0.0119167	0.0129807	0.117532	8
RAB7A	1785	0.0454193	0.00586127	0.0130051	0.117687	8
RTFDC1	1786	-0.0179249	0.030836	0.0130235	0.117778	6
SF3B1	1787	0.111854	0.00559447	0.0130309	0.117778	8
FAM161B	1788	0.224518	0.0135741	0.013037	0.117778	8
RWDD1	1789	0.116232	0.00656358	0.0130487	0.117818	8
HOXA3	1790	-0.171619	0.00537168	0.0130735	0.117834	7
WWC2	1791	0.122168	0.0115633	0.0130867	0.117834	8
COMMD6	1792	0.0606139	0.0182926	0.0130885	0.117834	8
RAB37	1793	-0.094014	0.0129215	0.0130916	0.117834	8
WNT2B	1794	-0.0353257	0.00907121	0.0131024	0.117834	8
BCL2L2	1795	-0.0911215	0.0078346	0.0131054	0.117834	8
U2AF1	1796	-0.0953096	0.00966676	0.0131064	0.117834	8
UBE2N	1797	0.0524626	0.0142703	0.0131089	0.117834	8
H2AFV	1798	-0.0327888	0.0136418	0.0131392	0.118041	8
TMEM155	1799	0.293801	0.0534014	0.0131543	0.118089	8
B3GALT6	1800	-0.112075	0.00930195	0.0131627	0.118089	8
CSGALNACT1	1801	-0.0493684	0.0121253	0.0131665	0.118089	8
ATP5I	1802	0.150213	0.00768681	0.0131826	0.118109	8
BCL11A	1803	0.0607524	0.022652	0.0131833	0.118109	8
GFOD1	1804	-0.0380513	0.0110507	0.0131992	0.118155	8
PCYT1B	1805	-0.147298	0.0153774	0.0132074	0.118155	8
ZNF326	1806	0.186801	0.0114958	0.0132104	0.118155	8
MAU2	1807	0.294392	0.00640576	0.0132328	0.11829	6
ARIH1	1808	0.222447	0.00727178	0.0132422	0.118308	8
PLEKHA8	1809	-0.0235497	0.00966219	0.0133171	0.118912	7
SLC41A2	1810	0.0150707	0.0181961	0.0133452	0.119069	8
PKP4	1811	0.171327	0.0193809	0.0133494	0.119069	8
MAX	1812	-0.182174	0.0119003	0.0133793	0.11922	8
GPR4	1813	-0.199281	0.0222602	0.0133812	0.11922	8
RPS10	1814	0.0786166	0.00594069	0.013391	0.119242	8
EDF1	1815	-0.0204894	0.00837905	0.013408	0.119328	8
CCND2	1816	-0.0425582	0.0119762	0.0134359	0.1194	8
PDE3B	1817	0.165629	0.0159439	0.0134362	0.1194	7
UBE2L3	1818	-0.210026	0.0201177	0.0134383	0.1194	8
GABRB3	1819	-0.0558782	0.0236935	0.0134495	0.119433	8
DYRK2	1820	-0.0546706	0.0101928	0.013464	0.119496	8
PRKAA2	1821	0.071344	0.0219709	0.0134746	0.119525	7
CNOT1	1822	0.085647	0.0101879	0.0135125	0.119778	8
RGS5	1823	0.201544	0.019752	0.0135179	0.119778	8
C7orf25	1824	0.158563	0.00440789	0.0135255	0.119779	8
FNDC3A	1825	0.0906665	0.00874271	0.0135464	0.119897	8
DCP2	1826	0.0151647	0.0096516	0.0135536	0.119897	8
TOR1AIP2	1827	0.0542586	0.00784997	0.0135621	0.119907	8
TMEM14B	1828	0.0538987	0.0196812	0.0135735	0.119941	8
CAPN7	1829	0.01728	0.0084659	0.0135816	0.119948	8
TRDMT1	1830	0.182033	0.0127255	0.0135933	0.119985	7
ETV1	1831	0.119359	0.0235438	0.0136025	0.120001	8
MON2	1832	0.19337	0.0114511	0.0136327	0.120087	8
NEK3	1833	0.0907494	0.013773	0.0136355	0.120087	8
ADGRA3	1834	-0.106206	0.0256886	0.0136368	0.120087	6
PAWR	1835	-0.297602	0.0220897	0.0136423	0.120087	6
PCDHAC2	1836	0.0810524	0.0171472	0.0136495	0.120087	8
PLEKHA5	1837	-0.104443	0.0122092	0.0136969	0.120262	8
RASGRP3	1838	0.136123	0.0440066	0.0137042	0.120262	8
AGK	1839	0.0226349	0.01069	0.0137045	0.120262	8
AIPL1	1840	0.00901443	0.00503804	0.0137148	0.120262	8
NRIP1	1841	0.201025	0.0110721	0.0137229	0.120262	8
CWH43	1842	0.0655537	0.0236386	0.0137301	0.120262	6
HAUS6	1843	0.243789	0.0193306	0.0137309	0.120262	8
ADCY7	1844	0.0178206	0.0192765	0.0137346	0.120262	8
SYNRG	1845	0.0161934	0.0281376	0.0137364	0.120262	6
FAM20C	1846	-0.0802232	0.0250724	0.0137461	0.12027	8
MT1G	1847	-0.376437	0.0568966	0.0137521	0.12027	8
FAM135A	1848	-0.0694986	0.0204626	0.0138039	0.120657	7
CREB1	1849	0.121048	0.0136153	0.0138351	0.120833	8
FAF1	1850	0.0199	0.0142756	0.013839	0.120833	8
C11orf57	1851	0.145973	0.00854071	0.0138661	0.120968	6
IQGAP1	1852	0.124719	0.0117923	0.0138694	0.120968	8
ASPA	1853	0.10206	0.0716037	0.0138853	0.121041	8
TUBGCP5	1854	0.111221	0.0168675	0.013924	0.121296	8
PCDH10	1855	0.0944245	0.0173131	0.013933	0.121296	8
TIMP4	1856	-0.302762	0.0249003	0.013937	0.121296	8
SHANK2	1857	-0.144305	0.0138279	0.0139587	0.121419	8
KDELR2	1858	-0.00522431	0.0140919	0.013979	0.12153	8
KRR1	1859	0.159368	0.0158075	0.0139909	0.121568	8
ARFGEF1	1860	-0.029462	0.0138496	0.014038	0.121863	8
CHMP4A	1861	0.204533	0.0158048	0.0140556	0.121863	8
DPH5	1862	-0.055213	0.00784831	0.0140612	0.121863	8
NT5DC1	1863	0.250059	0.0253497	0.0140664	0.121863	8
THSD4	1864	0.0162001	0.0150585	0.0140685	0.121863	8
ABHD2	1865	-0.166957	0.0181721	0.0140701	0.121863	8
DPY19L2P2	1866	0.34337	0.0421289	0.0140805	0.121878	6
MCTP1	1867	-0.140969	0.0125161	0.0140976	0.121878	7
ACOT11	1868	-0.0261074	0.0117317	0.0141085	0.121878	8
SFRP4	1869	-0.0273199	0.00957574	0.0141086	0.121878	7
HHIP	1870	0.600884	0.102081	0.0141095	0.121878	7
SRPX2	1871	-0.0274291	0.00818565	0.0141389	0.122064	7
PRKD3	1872	0.0312766	0.0109601	0.0141465	0.122064	8
ZFYVE1	1873	-0.0783779	0.00561126	0.0141538	0.122064	8
CGREF1	1874	-0.0864876	0.0294435	0.0141955	0.122358	8
C1orf56	1875	-0.101792	0.010799	0.0142175	0.122431	7
UBE2D1	1876	-0.0213874	0.0106421	0.0142191	0.122431	8
NASP	1877	0.194416	0.0124242	0.0142395	0.122473	8
SOX3	1878	0.105996	0.0155522	0.0142412	0.122473	8
SAMSN1	1879	0.0974394	0.00504288	0.0142543	0.122473	7
GDF11	1880	0.119892	0.00863707	0.0142573	0.122473	8
MAT2A	1881	0.0205467	0.0107464	0.0142625	0.122473	8
ZBED4	1882	-0.10643	0.00978331	0.0142757	0.122473	8
TDRD3	1883	0.159605	0.00882652	0.014277	0.122473	8
IKBIP	1884	0.0782907	0.00611012	0.0142871	0.122495	7
GPHN	1885	-0.138906	0.00173996	0.0143352	0.122835	8
MTMR3	1886	-0.0950267	0.0125729	0.0143423	0.122835	8
DARS	1887	-0.000278709	0.0100475	0.0143497	0.122835	8
ZNF507	1888	-0.0822747	0.00645725	0.0143735	0.122974	7
BRD2	1889	-0.0190085	0.0121637	0.0144061	0.123188	8
SLC6A15	1890	0.192819	0.0190528	0.0144147	0.123196	8
PELI3	1891	-0.020832	0.0106585	0.0144354	0.123258	8
TYROBP	1892	0.28332	0.0347666	0.01444	0.123258	8
EP400NL	1893	-0.0487016	0.000202507	0.0144448	0.123258	7
TBC1D16	1894	-0.0649642	0.0142007	0.0144571	0.123298	8
SEC24A	1895	0.00968652	0.00636031	0.0144789	0.123398	7
TRMT61B	1896	0.0901908	0.0287448	0.0144851	0.123398	6
AIMP2	1897	-0.140782	0.00658639	0.0144918	0.123398	8
KDM5A	1898	0.14575	0.0167418	0.0145266	0.12358	7
MTR	1899	0.0966408	0.0118947	0.0145285	0.12358	8
N4BP2L1	1900	-0.0304703	0.00868909	0.0145682	0.123811	8
ERAP1	1901	0.0497969	0.0188483	0.0145805	0.123811	8
LY86	1902	0.159904	0.0202634	0.0145805	0.123811	8
SLC39A6	1903	0.128943	0.0180811	0.0145863	0.123811	8
NID1	1904	-0.155066	0.0109229	0.0146002	0.123859	7
LBR	1905	0.243507	0.0279937	0.0146072	0.123859	8
TMBIM6	1906	-0.185944	0.0106071	0.0146297	0.123984	8
COX11	1907	0.028584	0.0216367	0.0146559	0.124141	8
BCL11B	1908	-0.0708836	0.0178733	0.0146722	0.124156	8
CCDC65	1909	-0.000438053	0.00672576	0.014673	0.124156	6
CYP4X1	1910	0.169814	0.0292883	0.0146867	0.124207	8
PSMB4	1911	-0.0346875	0.00745092	0.0147102	0.124331	8
IFT80	1912	0.0945515	0.0135661	0.0147294	0.124331	7
CDC73	1913	0.296046	0.0152328	0.0147305	0.124331	7
CNTROB	1914	0.0370179	0.00962777	0.0147323	0.124331	8
SELE	1915	0.128057	0.015006	0.0147516	0.124366	7
UBE2V2	1916	-0.0661653	0.0280565	0.0147518	0.124366	8
SYT13	1917	0.0519556	0.0261036	0.0147607	0.124377	8
CXCL2	1918	0.0790137	0.00842959	0.014775	0.124432	7
CEP290	1919	0.0817496	0.0197099	0.0147954	0.124538	8
LAPTM5	1920	0.143062	0.0226239	0.0148152	0.124637	8
SEPT2	1921	0.0596536	0.0114941	0.0148225	0.124637	8
RFFL	1922	0.100366	0.00998412	0.0148502	0.124805	7
ZNF93	1923	-0.0976504	0.00706441	0.014862	0.124839	7
HIP1	1924	0.132813	0.0132936	0.01488	0.124925	8
NRP2	1925	-0.105976	0.00834385	0.0149116	0.125126	7
ULBP3	1926	0.00531631	0.00520235	0.0149357	0.125263	7
HECTD3	1927	0.0289293	0.00561772	0.0149436	0.125264	8
FER	1928	0.0737201	0.0132292	0.0149906	0.125593	8
BCAS4	1929	-0.108581	0.0218948	0.0150012	0.125617	8
PML	1930	-0.0958665	0.00877031	0.0150191	0.125701	8
CTSB	1931	-0.152775	0.010722	0.0150507	0.125883	8
TRIO	1932	-0.164336	0.0124571	0.0150564	0.125883	8
SRR	1933	0.134472	0.0159954	0.0150698	0.12593	8
LOC642852	1934	0.556815	0.0585547	0.0150788	0.12594	6
GNAL	1935	0.0862155	0.00710406	0.0150983	0.126037	7
KLHL24	1936	-0.122944	0.0217945	0.0151207	0.126068	7
EGFR	1937	-0.179855	0.0227339	0.0151241	0.126068	8
NONO	1938	-0.0846097	0.00727351	0.0151254	0.126068	8
DAPK1	1939	-0.138372	0.0172396	0.0151411	0.126134	8
GATAD2A	1940	-0.0492226	0.0089653	0.0152121	0.126612	8
SNX13	1941	-0.0245705	0.0106267	0.0152222	0.126612	8
SGCB	1942	0.211032	0.0107688	0.015226	0.126612	8
MUC3B	1943	-0.17957	0.00825462	0.0152298	0.126612	6
SLC10A7	1944	0.0976279	0.0080768	0.0152882	0.126893	7
GATB	1945	0.0928544	0.0375948	0.0153074	0.126893	6
CCNB1	1946	0.162751	0.0178646	0.0153164	0.126893	8
PITPNC1	1947	-0.0468372	0.020577	0.0153202	0.126893	8
NSMCE4A	1948	0.0268976	0.00845542	0.015323	0.126893	8
ITGB2	1949	0.068765	0.02268	0.0153282	0.126893	8
SARS	1950	-0.0571384	0.0132888	0.0153284	0.126893	8
RTKN2	1951	0.00609942	0.0078217	0.0153599	0.126893	7
SFPQ	1952	0.218824	0.0135823	0.0153712	0.126893	8
ATP6V1D	1953	0.0731523	0.0140814	0.0153802	0.126893	8
NFASC	1954	-0.0612767	0.0195846	0.0153897	0.126893	8
ETV5	1955	0.131678	0.0138104	0.0153917	0.126893	8
VIM	1956	-0.0425941	0.0193976	0.015398	0.126893	8
SLA	1957	0.0860387	0.00960507	0.0153995	0.126893	8
PSMA5	1958	-0.0170864	0.0135532	0.0154028	0.126893	8
YBX3	1959	-0.378596	0.0693293	0.0154036	0.126893	6
CCDC186	1960	0.275965	0.0194379	0.0154045	0.126893	6
PPP3CC	1961	-0.0957446	0.00667512	0.015405	0.126893	8
MTMR9	1962	-0.102589	0.00864352	0.0154292	0.126971	8
TRIM8	1963	-0.0954253	0.00783446	0.0154302	0.126971	8
SF1	1964	0.179638	0.0222211	0.0154444	0.126972	8
EHF	1965	-0.033027	0.00866302	0.0154461	0.126972	7
RIPK1	1966	-0.199108	0.0134364	0.0154856	0.127181	7
NR1D2	1967	0.083307	0.0432658	0.0154872	0.127181	8
PDZRN3	1968	0.153072	0.015425	0.0155009	0.127228	8
EML2	1969	-0.095645	0.0212719	0.015509	0.127231	6
PDK1	1970	-0.000824312	0.0118397	0.0155387	0.127409	8
C20orf196	1971	0.074049	0.00539482	0.0155754	0.127646	8
PHOSPHO2	1972	-0.0421644	0.0156986	0.0155893	0.127695	7
IQCH	1973	0.012048	0.00552562	0.0156054	0.127729	7
ITPRIPL2	1974	-0.0702749	0.0174892	0.0156093	0.127729	6
MORN4	1975	-0.0446792	0.00887879	0.015633	0.127835	8
CRYZL1	1976	-0.0146757	0.0177699	0.0156381	0.127835	8
DDI2	1977	-0.206851	0.0188226	0.0156686	0.12802	8
ANGPTL4	1978	-0.390425	0.0598115	0.015694	0.128107	8
DGKG	1979	-0.0455595	0.0126389	0.0156951	0.128107	8
FAM46A	1980	-0.034949	0.0129782	0.0157114	0.128175	8
IRAK2	1981	-0.0353327	0.0105039	0.0157745	0.128418	7
SH3GLB1	1982	0.083621	0.0103564	0.0157748	0.128418	8
GNB5	1983	0.198596	0.0380897	0.0157806	0.128418	8
FAM179B	1984	0.171109	0.00918611	0.0157823	0.128418	6
GPATCH2L	1985	0.244443	0.0217021	0.0157857	0.128418	6
USP24	1986	-0.0858472	0.0124843	0.0157954	0.128418	6
CDO1	1987	0.171013	0.010812	0.0158046	0.128418	8
ANKRD44	1988	0.0963356	0.0189694	0.0158048	0.128418	8
MMP14	1989	-0.226571	0.00987088	0.0158127	0.128418	8
NBPF1	1990	-0.163663	0.0256685	0.0158436	0.128543	8
GULP1	1991	-0.0853671	0.0595036	0.0158441	0.128543	8
LRRC34	1992	0.0691705	0.0203105	0.0158684	0.128676	8
TRAF5	1993	-0.051596	0.00532752	0.0159039	0.128899	8
GFM2	1994	0.153246	0.0234214	0.0159276	0.129026	8
PTBP3	1995	-0.0594842	0.0334697	0.0159484	0.12913	6
SATB2	1996	-0.188797	0.0208461	0.0159857	0.129364	8
EXTL1	1997	-0.0876623	0.00757834	0.0159948	0.129364	8
ADSS	1998	0.167091	0.0245451	0.0160044	0.129364	8
[truncated: 14,155 more rows]
