# Supplementary material for: Multiomics integrative analysis identifies APOE allele-specific blood biomarkers associated to Alzheimer’s disease etiopathogenesis
Source: Aging (Albany NY). 2021 Apr 12;13(7):9277–329. doi: 10.18632/aging.202950 (PMC8064208; doi:10.18632/aging.202950)
Supplement: Supplementary Table 23 [file aging-13-202950-s025.xlsx]

## Sheet: Sheet1
Supplementary Table 23. Differential expression analysis in cortex: APOE3 stratum.
Symbol	Rank	logFC	Var	Fisher.Pvalue	Fisher.FDR	Nestimators
VEZF1	1	0.318081	0.00541618	0	0	11
LANCL2	2	-0.0216824	0.00331469	1.8201e-12	1.70316e-08	11
AP1S1	3	-0.0668968	0.00617205	3.88967e-12	2.15009e-08	11
DYNLRB1	4	0.00865295	0.00428917	4.59544e-12	2.15009e-08	11
ZNF397	5	0.295933	0.00497068	1.31822e-11	4.93411e-08	11
ADCYAP1	6	-0.207416	0.00737001	1.99357e-11	6.21828e-08	11
C21orf62	7	0.107656	0.0033856	2.78546e-11	7.44713e-08	11
CD44	8	0.0542551	0.00407959	3.52369e-11	8.24324e-08	11
MXD4	9	0.163232	0.00104873	4.13017e-11	8.58847e-08	8
LDLR	10	0.0471202	0.0031774	4.99149e-11	9.34156e-08	11
ZBTB20	11	0.279057	0.0048761	6.58117e-11	1.1197e-07	11
OVOL2	12	-0.0772357	0.0037844	1.50568e-10	2.34823e-07	11
BDNF	13	-0.161921	0.00518538	1.64978e-10	2.37505e-07	11
STMN1	14	-0.0568691	0.00521447	1.80726e-10	2.41593e-07	11
MPPED2	15	-0.17294	0.00274187	2.93957e-10	3.57927e-07	11
IKBKB	16	0.121634	0.00232913	3.06002e-10	3.57927e-07	11
CEP135	17	0.116002	0.00134691	3.75568e-10	3.68412e-07	11
RBPMS2	18	0.113029	0.00260344	3.81561e-10	3.68412e-07	11
C1QTNF5	19	0.157898	0.00375701	3.86302e-10	3.68412e-07	11
ITPKB	20	0.127112	0.0026851	3.93708e-10	3.68412e-07	11
RBM6	21	0.193107	0.00358764	4.44134e-10	3.78831e-07	11
SST	22	-0.283778	0.0340996	4.45326e-10	3.78831e-07	11
ARHGEF9	23	0.011232	0.00509585	5.97666e-10	4.86318e-07	11
ICA1	24	-0.131418	0.000616412	6.256e-10	4.87837e-07	11
POGK	25	0.180955	0.00146896	7.35877e-10	5.3259e-07	11
MCM7	26	0.252887	0.00308257	7.64435e-10	5.3259e-07	11
LCAT	27	0.101922	0.00189036	7.87781e-10	5.3259e-07	11
CALM3	28	-0.0147255	0.00315844	8.21362e-10	5.3259e-07	11
ITGB5	29	0.100187	0.00351519	8.2528e-10	5.3259e-07	11
RBPMS	30	0.0125253	0.00309299	8.64021e-10	5.39005e-07	11
C11orf1	31	-0.0245152	0.00256339	9.17415e-10	5.53853e-07	11
IQGAP1	32	0.188901	0.00286166	9.82615e-10	5.74676e-07	11
NIPBL	33	0.146844	0.0020748	1.0506e-09	5.87491e-07	11
GFAP	34	0.220499	0.00288638	1.09216e-09	5.87491e-07	11
BMP1	35	0.0865595	0.00300159	1.10455e-09	5.87491e-07	11
NFKB1	36	0.119846	0.00130448	1.13009e-09	5.87491e-07	11
PBOV1	37	0.00424642	0.00293861	1.24714e-09	6.30816e-07	11
CREB1	38	0.136471	0.0040984	1.30638e-09	6.32908e-07	11
IDS	39	-0.00912098	0.00839577	1.31891e-09	6.32908e-07	11
CYCS	40	-0.0492048	0.00370074	1.45132e-09	6.79037e-07	11
DCLRE1C	41	0.166514	0.00357603	1.49363e-09	6.81788e-07	11
ATPIF1	42	-0.192129	0.0017933	1.60506e-09	7.04013e-07	11
PIAS2	43	-0.0517737	0.00344187	1.61755e-09	7.04013e-07	11
TNS1	44	0.114206	0.00671962	1.83556e-09	7.52423e-07	11
ACER3	45	0.346446	0.00388413	1.83803e-09	7.52423e-07	9
NIPSNAP1	46	-0.0887381	0.00216641	1.8494e-09	7.52423e-07	11
MAGI1	47	0.104772	0.00369163	1.89652e-09	7.55176e-07	11
CDC42	48	0.0965333	0.00984188	2.07663e-09	7.98238e-07	11
GTPBP10	49	-0.0626153	0.00226341	2.08996e-09	7.98238e-07	11
ACACB	50	0.0616255	0.00379389	2.27657e-09	8.47025e-07	11
POLDIP3	51	0.108501	0.00184833	2.30822e-09	8.47025e-07	11
TNRC6A	52	0.104666	0.00215773	2.72298e-09	9.66555e-07	11
DYRK2	53	0.0250043	0.00184762	2.73724e-09	9.66555e-07	11
SLC47A2	54	0.0829692	0.00434034	2.88814e-09	1.00095e-06	10
RAB2A	55	-0.0204089	0.00444722	3.01485e-09	1.02587e-06	11
LRRC1	56	0.153961	0.00193157	3.25048e-09	1.0863e-06	11
FAM3C	57	-0.0827389	0.00360957	3.3657e-09	1.10507e-06	11
HSPB3	58	-0.211181	0.00932383	3.43814e-09	1.10939e-06	11
LSS	59	0.0856529	0.00499232	3.70932e-09	1.1635e-06	11
FBXW7	60	-0.00989524	0.00545809	3.76844e-09	1.1635e-06	11
C3orf14	61	-0.0760998	0.00544649	3.84675e-09	1.1635e-06	11
ZFP64	62	-0.117455	0.00159625	3.85449e-09	1.1635e-06	11
C17orf58	63	-0.170787	0.000533908	4.66236e-09	1.38502e-06	11
GALNT11	64	-0.128322	0.000294079	4.75863e-09	1.39153e-06	11
ATP6V1D	65	-0.101428	0.00202134	4.90724e-09	1.39717e-06	11
EXOC6	66	-0.0725692	0.00301052	4.92724e-09	1.39717e-06	11
MSRB3	67	0.0870763	0.00242719	5.5172e-09	1.53212e-06	11
SCG3	68	-0.338434	0.00932846	5.56686e-09	1.53212e-06	11
CHST6	69	0.154891	0.00941107	5.77192e-09	1.56553e-06	11
ALDH5A1	70	-0.0884838	0.00419551	5.90686e-09	1.57924e-06	11
NUDT6	71	-0.12997	0.00181314	6.26183e-09	1.59644e-06	11
ARHGEF10	72	0.0651295	0.00462142	6.29149e-09	1.59644e-06	11
ANTXR1	73	0.052473	0.00248545	6.34633e-09	1.59644e-06	11
ME3	74	-0.150678	0.00274717	6.46501e-09	1.59644e-06	11
MED1	75	0.227919	0.00366045	6.47015e-09	1.59644e-06	9
CALD1	76	0.145423	0.00312883	6.48299e-09	1.59644e-06	11
FIG4	77	-0.0557564	0.0030084	6.70174e-09	1.60598e-06	11
MSH3	78	0.0894652	0.0028292	6.74497e-09	1.60598e-06	11
NDUFA7	79	-0.139464	0.00260857	6.84171e-09	1.60598e-06	11
CRH	80	-0.100857	0.00855432	6.86498e-09	1.60598e-06	11
MARCH6	81	0.206865	0.00854777	7.03974e-09	1.62653e-06	11
ETV1	82	0.0021619	0.00556094	7.27719e-09	1.66089e-06	11
PGM2L1	83	-0.0456925	0.0096871	7.83405e-09	1.76644e-06	11
NEUROD6	84	-0.154525	0.0117674	7.97193e-09	1.77613e-06	11
RERG	85	-0.219751	0.00532109	8.09267e-09	1.78181e-06	11
GLUD2	86	-0.101647	0.00392967	8.21173e-09	1.78701e-06	11
XIAP	87	0.0727853	0.00439902	8.60382e-09	1.82221e-06	11
JDP2	88	0.0664416	0.00261046	8.6175e-09	1.82221e-06	11
BCKDHB	89	-0.103293	0.00227446	8.66558e-09	1.82221e-06	11
ERAP1	90	0.00136187	0.00462319	9.07552e-09	1.8872e-06	11
DNAJC27	91	0.0159059	0.00261629	9.52197e-09	1.95828e-06	11
NIN	92	0.0800842	0.00121951	9.72423e-09	1.97814e-06	11
AEBP1	93	0.149063	0.00841827	1.06246e-08	2.11717e-06	11
SORBS1	94	0.030586	0.00509159	1.06339e-08	2.11717e-06	11
DMD	95	0.0358406	0.00252865	1.15253e-08	2.25646e-06	11
SMYD2	96	-0.0436433	0.00513624	1.15747e-08	2.25646e-06	11
EMSY	97	0.145259	0.00487107	1.17577e-08	2.26851e-06	9
RUFY3	98	-0.00943354	0.00370142	1.21907e-08	2.32805e-06	11
UBE2V1	99	0.00766246	0.00509221	1.25171e-08	2.36623e-06	8
MTHFD2	100	0.0160593	0.00731247	1.26988e-08	2.37659e-06	11
FAM129B	101	0.04044	0.00391065	1.29501e-08	2.39144e-06	11
PAK1	102	-0.0898639	0.00397145	1.30338e-08	2.39144e-06	11
ACTR2	103	0.0075937	0.00547638	1.48375e-08	2.68556e-06	11
COX18	104	-0.124808	0.00284762	1.49237e-08	2.68556e-06	11
MARVELD3	105	0.0124866	0.00214189	1.53973e-08	2.70836e-06	10
KIAA0408	106	0.129907	0.003914	1.54133e-08	2.70836e-06	11
GAREM1	107	0.230705	0.0028121	1.56158e-08	2.70836e-06	9
ZMIZ2	108	0.06344	0.00173095	1.57052e-08	2.70836e-06	11
ITGB4	109	0.0344817	0.00626678	1.5774e-08	2.70836e-06	11
NME1	110	-0.200406	0.00126681	1.59686e-08	2.71684e-06	11
ETV6	111	0.0516246	0.00174896	1.64444e-08	2.77258e-06	11
FAM49A	112	-0.0306427	0.00508427	1.76296e-08	2.93995e-06	11
RAB3C	113	-0.0118384	0.0102645	1.77512e-08	2.93995e-06	11
TCF3	114	0.0848103	0.00275037	1.82016e-08	2.97833e-06	11
ARHGEF7	115	0.0627644	0.00211337	1.85124e-08	2.97833e-06	11
TUSC3	116	-0.0783053	0.00544617	1.85567e-08	2.97833e-06	11
IGF2BP2	117	0.0636113	0.00277013	1.86195e-08	2.97833e-06	11
TUBB2A	118	-0.184711	0.00344574	1.89424e-08	3.0043e-06	11
SYDE1	119	0.0385993	0.00256173	1.94105e-08	3.05267e-06	11
TXN	120	-0.116662	0.00208715	2.09136e-08	3.26166e-06	11
SRD5A1	121	-0.104955	0.00347848	2.29728e-08	3.55319e-06	11
SLN	122	-0.166014	0.00538873	2.32449e-08	3.56574e-06	11
UBE2N	123	-0.081662	0.0054365	2.38842e-08	3.56574e-06	11
CAPS	124	0.126863	0.00509553	2.3911e-08	3.56574e-06	11
HIF3A	125	0.0744426	0.00366113	2.41199e-08	3.56574e-06	11
GSTA4	126	-0.018673	0.00470561	2.41582e-08	3.56574e-06	11
PPEF1	127	-0.176616	0.00576356	2.4302e-08	3.56574e-06	10
CRTAP	128	0.112941	0.00247378	2.43876e-08	3.56574e-06	11
EIF3M	129	-0.100795	0.00217842	2.53249e-08	3.67408e-06	11
ACSL4	130	-0.0995554	0.00532432	2.67943e-08	3.85735e-06	11
MYO9B	131	0.141456	0.00230792	2.70638e-08	3.8664e-06	11
DNAJC7	132	0.122653	0.00466395	2.79624e-08	3.94354e-06	11
ARSD	133	-0.013443	0.00249192	2.80252e-08	3.94354e-06	11
CAV1	134	0.18398	0.00269883	2.83953e-08	3.95174e-06	11
PPP3R1	135	0.00330558	0.00720323	2.85057e-08	3.95174e-06	11
RHEB	136	-0.144782	0.0010185	2.94194e-08	4.04842e-06	11
GABRA5	137	-0.108034	0.0182567	3.03466e-08	4.14552e-06	11
UCHL5	138	-0.112782	0.00150794	3.16439e-08	4.29142e-06	11
WWC3	139	0.161149	0.00304408	3.21898e-08	4.30989e-06	11
GOLGA2	140	0.0582508	0.0026573	3.22407e-08	4.30989e-06	11
ENAH	141	0.148903	0.00215146	3.27162e-08	4.34243e-06	11
ATP11C	142	0.110018	0.00271195	3.32204e-08	4.35345e-06	11
WAC	143	0.133944	0.00429025	3.32644e-08	4.35345e-06	11
BCL2L1	144	0.111983	0.00137926	3.36231e-08	4.36974e-06	11
HSPB2	145	0.116965	0.00233124	3.4004e-08	4.36974e-06	11
FBXO3	146	-0.122803	0.00213904	3.40894e-08	4.36974e-06	11
CDH23	147	0.101882	0.00501989	3.65941e-08	4.65891e-06	8
PTK2B	148	-0.190042	0.00595422	3.72026e-08	4.68127e-06	11
SUSD4	149	-0.0696386	0.00535871	3.74597e-08	4.68127e-06	11
RTN4	150	-0.0298871	0.0013175	3.75202e-08	4.68127e-06	11
NCAM1	151	0.00232367	0.00347669	3.84216e-08	4.75867e-06	11
CHCHD7	152	-0.139587	0.000715955	3.86491e-08	4.75867e-06	11
MARK2	153	0.0525243	0.00328166	4.0022e-08	4.8494e-06	11
MRGPRF	154	0.107722	0.00388358	4.01546e-08	4.8494e-06	11
TCL6	155	0.0297592	0.00283572	4.01633e-08	4.8494e-06	10
CSNK2A1	156	-0.0160891	0.00317038	4.16751e-08	4.99967e-06	11
DNAJB6	157	0.206909	0.00947849	4.27699e-08	5.09834e-06	11
FGF12	158	-0.011485	0.0168515	4.32985e-08	5.12869e-06	11
MSX1	159	0.0861164	0.00345471	4.36084e-08	5.1329e-06	11
FBLN7	160	-0.179544	0.0038208	4.40405e-08	5.15136e-06	11
CD22	161	0.160095	0.00469422	4.50459e-08	5.23624e-06	11
APOBEC3F	162	0.0737659	0.00246578	4.67741e-08	5.40356e-06	11
ANK3	163	0.0286728	0.00220497	4.73038e-08	5.43123e-06	11
VWC2	164	-0.052343	0.00306036	4.82601e-08	5.50724e-06	11
DOCK6	165	0.0518468	0.00165549	4.9484e-08	5.61269e-06	11
SPATA33	166	0.0496405	0.00585624	5.01141e-08	5.62761e-06	9
KRT5	167	-0.0885329	0.00327451	5.03789e-08	5.62761e-06	11
NDE1	168	0.150793	0.00313843	5.12161e-08	5.62761e-06	11
PDCD2	169	-0.0793682	0.00166562	5.12501e-08	5.62761e-06	11
TTC17	170	0.123322	0.00397836	5.13973e-08	5.62761e-06	11
STK38	171	0.0353267	0.00254792	5.14198e-08	5.62761e-06	11
PCYOX1L	172	-0.20055	0.00660091	5.48217e-08	5.96505e-06	11
SRSF1	173	-0.0123628	0.00526719	5.62165e-08	6.07421e-06	9
SNX20	174	0.0176376	0.00294038	5.64741e-08	6.07421e-06	11
MAP4K5	175	0.179082	0.00160745	5.69328e-08	6.08855e-06	11
SLC23A2	176	0.131097	0.00239977	5.90937e-08	6.24957e-06	10
COBLL1	177	0.0838117	0.00151648	5.91063e-08	6.24957e-06	11
BACE2	178	0.0721138	0.00329248	6.11774e-08	6.43222e-06	11
GPM6A	179	-0.133972	0.004847	6.50869e-08	6.80503e-06	11
UBE2W	180	-0.127033	0.00210608	6.65829e-08	6.90851e-06	11
SNAPC3	181	-0.0611908	0.0043221	6.69623e-08	6.90851e-06	10
FAM84B	182	0.101645	0.00105612	6.7184e-08	6.90851e-06	11
TINAG	183	-0.0940476	0.00196186	6.76612e-08	6.91955e-06	11
BCL6	184	0.116645	0.0051265	6.99853e-08	7.11834e-06	11
PPFIBP2	185	0.148081	0.00341076	7.09417e-08	7.14912e-06	11
RARA	186	0.0241122	0.00199113	7.10519e-08	7.14912e-06	11
SLC16A9	187	0.148132	0.00795971	7.34042e-08	7.34631e-06	11
ACP1	188	-0.0882599	0.00367974	7.39852e-08	7.36507e-06	11
DTNA	189	0.161339	0.0104889	7.68763e-08	7.61238e-06	11
GABRB3	190	0.0884736	0.00555096	7.77438e-08	7.65777e-06	11
SLC35E1	191	0.0789049	0.0037069	7.90113e-08	7.73474e-06	11
NDUFC2	192	0.0120225	0.00651981	7.93519e-08	7.73474e-06	8
SLC25A3	193	-0.107567	0.00335267	8.22842e-08	7.97901e-06	11
TBX3	194	0.0553728	0.0021717	8.35005e-08	8.05521e-06	11
ZMAT3	195	0.101961	0.0109913	8.4898e-08	8.14803e-06	11
MAST2	196	-0.0121878	0.00185535	8.61516e-08	8.22616e-06	11
CDC42EP4	197	0.00979283	0.00481322	8.7997e-08	8.33218e-06	11
PPP1R2	198	-0.132852	0.00369206	8.81754e-08	8.33218e-06	11
OTUB1	199	0.00055606	0.00418468	8.85976e-08	8.33218e-06	8
POP4	200	-0.0695867	0.00155889	8.96014e-08	8.38445e-06	11
SLC6A12	201	0.261364	0.0037684	9.14089e-08	8.51104e-06	11
SCG2	202	-0.256476	0.00659157	9.24315e-08	8.56364e-06	11
AKR1C2	203	0.179201	0.00320908	9.33484e-08	8.60599e-06	8
MRPL35	204	-0.0243104	0.00291875	9.43961e-08	8.65991e-06	11
PDCD6	205	-0.0490716	0.00169208	9.52202e-08	8.69291e-06	11
INPP4A	206	0.0459692	0.0035394	9.59883e-08	8.72049e-06	11
AKT3	207	0.085323	0.00624882	9.73002e-08	8.77163e-06	11
SP1	208	0.142885	0.00224989	9.74886e-08	8.77163e-06	11
SMAD5	209	0.153119	0.00147378	1.07896e-07	9.66159e-06	11
TFAP2C	210	0.0325505	0.0010327	1.1006e-07	9.80847e-06	11
SUB1	211	-0.103303	0.00531906	1.10941e-07	9.84009e-06	11
PTPRU	212	0.0756073	0.00168248	1.12271e-07	9.8723e-06	11
PDLIM5	213	-0.0031196	0.00305283	1.12668e-07	9.8723e-06	11
NRXN1	214	-0.0651217	0.00424069	1.12887e-07	9.8723e-06	11
FXR1	215	0.136163	0.00253547	1.14167e-07	9.93783e-06	11
ZDHHC23	216	-0.114106	0.00585018	1.15623e-07	1.0018e-05	11
PLXDC2	217	0.190975	0.00255839	1.16816e-07	1.0055e-05	11
DENND1B	218	0.00763234	0.00408819	1.17125e-07	1.0055e-05	10
ARL1	219	-0.0475579	0.00209856	1.1775e-07	1.00625e-05	11
RAD51C	220	-0.115112	0.00230283	1.20627e-07	1.0239e-05	11
LGALS8	221	0.0639015	0.0041823	1.2123e-07	1.0239e-05	11
INIP	222	0.200683	0.00466504	1.21456e-07	1.0239e-05	9
LETMD1	223	-0.14211	0.000833279	1.23078e-07	1.03292e-05	11
SGIP1	224	-0.145086	0.00372597	1.25625e-07	1.04959e-05	11
PDE4DIP	225	-0.0218722	0.00798078	1.26239e-07	1.05003e-05	10
GTDC1	226	-0.00203655	0.00233373	1.28634e-07	1.06161e-05	11
ACTR10	227	-0.191373	0.00253015	1.28766e-07	1.06161e-05	11
AIG1	228	-0.0980583	0.00118812	1.33533e-07	1.09608e-05	11
LRRFIP2	229	0.0124856	0.00153508	1.36568e-07	1.1161e-05	11
WDR20	230	0.111546	0.00210366	1.40196e-07	1.14077e-05	11
PFDN6	231	-0.0271696	0.00230842	1.4235e-07	1.1436e-05	8
TAF9B	232	-0.0328675	0.00269048	1.42426e-07	1.1436e-05	11
NAP1L5	233	-0.25159	0.00731586	1.42861e-07	1.1436e-05	11
SSX1	234	0.0411424	0.00281955	1.42988e-07	1.1436e-05	10
SVOP	235	-0.228647	0.00623054	1.49938e-07	1.18871e-05	11
ZBTB5	236	0.0705106	0.00116574	1.50126e-07	1.18871e-05	11
KIF1B	237	0.0495894	0.0031368	1.50755e-07	1.18871e-05	11
PHAX	238	0.0949455	0.00450933	1.51169e-07	1.18871e-05	11
SYCE1	239	-0.12814	0.00354507	1.55469e-07	1.21367e-05	11
SASH1	240	0.214047	0.00391864	1.55641e-07	1.21367e-05	11
SRPX2	241	0.032686	0.00219526	1.57043e-07	1.21953e-05	10
STON1	242	0.0519672	0.0037447	1.59286e-07	1.23183e-05	11
HOPX	243	-0.285735	0.00747075	1.61009e-07	1.23554e-05	11
WBP4	244	-0.0563638	0.00281727	1.61354e-07	1.23554e-05	11
KLK7	245	-0.223819	0.00828299	1.61746e-07	1.23554e-05	11
HIPK2	246	0.24722	0.00651329	1.63343e-07	1.24267e-05	11
GATA2	247	0.0459365	0.00240838	1.65178e-07	1.25154e-05	11
ANKRD44	248	0.176325	0.00314331	1.67016e-07	1.26037e-05	11
NR2E3	249	0.0643647	0.0019645	1.70669e-07	1.28276e-05	11
CAMK2D	250	-0.0575798	0.00526643	1.73635e-07	1.29983e-05	11
UQCRC2	251	-0.105314	0.00362652	1.75437e-07	1.30311e-05	11
ZDHHC8	252	0.0634338	0.00219803	1.75466e-07	1.30311e-05	11
F11	253	0.0122321	0.00190551	1.7801e-07	1.31678e-05	10
PRPF4B	254	0.0571043	0.00264097	1.80333e-07	1.32219e-05	11
SULT1A1	255	-0.0929205	0.00269101	1.80405e-07	1.32219e-05	11
GART	256	0.000758468	0.00203888	1.8086e-07	1.32219e-05	11
RBBP4	257	-0.00289208	0.00317951	1.81568e-07	1.3222e-05	11
SLC29A1	258	0.0615573	0.00193246	1.87031e-07	1.34824e-05	10
ELF2	259	0.0368473	0.00155049	1.87129e-07	1.34824e-05	11
FMNL3	260	0.0383047	0.00205881	1.87306e-07	1.34824e-05	10
N4BP2L1	261	-0.0901595	0.00169444	1.91708e-07	1.37464e-05	11
SDCBP2	262	-0.08655	0.00121875	1.94251e-07	1.38756e-05	8
NAPEPLD	263	0.0636972	0.003039	1.96132e-07	1.39567e-05	11
SLCO3A1	264	0.208958	0.0022442	1.97055e-07	1.39693e-05	11
SPOP	265	0.139506	0.00220567	2.0074e-07	1.41768e-05	11
ENSA	266	0.000699692	0.00622683	2.02051e-07	1.42158e-05	11
FANCA	267	-0.0344799	0.0011451	2.03333e-07	1.42523e-05	11
AGK	268	-0.0953614	0.00205259	2.0509e-07	1.43219e-05	11
TRUB1	269	-0.0926683	0.00231167	2.05971e-07	1.43299e-05	11
DDIT4	270	0.0821326	0.0105743	2.08949e-07	1.44538e-05	11
DNAJC19	271	-0.172233	0.0028089	2.09296e-07	1.44538e-05	11
RPH3A	272	-0.309988	0.0114503	2.11869e-07	1.45777e-05	11
MID1IP1	273	0.261859	0.00340005	2.14228e-07	1.4686e-05	11
PAPOLA	274	0.114675	0.00320354	2.15975e-07	1.47274e-05	11
ARF1	275	-0.0390756	0.00164183	2.16587e-07	1.47274e-05	11
PTBP1	276	0.0324679	0.00373888	2.17192e-07	1.47274e-05	10
LYRM7	277	0.207313	0.00652153	2.25762e-07	1.52532e-05	9
TRIM38	278	0.126195	0.002079	2.28444e-07	1.52767e-05	11
RBM17	279	0.145022	0.00169989	2.2848e-07	1.52767e-05	11
TAF1C	280	0.0550008	0.00125233	2.28559e-07	1.52767e-05	11
MTHFSD	281	-0.0171743	0.00102431	2.30192e-07	1.53311e-05	11
TCF4	282	0.148042	0.00504527	2.33525e-07	1.54979e-05	11
TRIM13	283	0.17237	0.00193943	2.35055e-07	1.55444e-05	11
DOPEY1	284	-0.0474988	0.00289361	2.36189e-07	1.55588e-05	11
MAP3K13	285	-0.0415969	0.00336832	2.36937e-07	1.55588e-05	11
MSH6	286	0.1061	0.00110548	2.38595e-07	1.56129e-05	11
RGS4	287	-0.101018	0.0252666	2.40873e-07	1.57071e-05	11
RHBDF1	288	0.00550347	0.00254131	2.41768e-07	1.57107e-05	11
PODN	289	0.0684848	0.00185174	2.43815e-07	1.57889e-05	11
PTPN4	290	0.142692	0.00483959	2.4754e-07	1.59749e-05	11
KANSL1L	291	0.137883	0.00600377	2.4988e-07	1.60704e-05	8
ELF4	292	0.0801331	0.00249687	2.5094e-07	1.60834e-05	11
VASH1	293	0.0775853	0.00221527	2.5233e-07	1.61173e-05	11
SUMO3	294	-0.0303855	0.00287089	2.64181e-07	1.68169e-05	11
OPA1	295	-0.128537	0.0032004	2.65965e-07	1.6873e-05	11
ACSL6	296	-0.206905	0.00377971	2.67516e-07	1.69141e-05	11
ZNF827	297	0.0909176	0.00186231	2.69145e-07	1.69597e-05	11
AGFG2	298	0.032294	0.0016928	2.7037e-07	1.69798e-05	11
SKAP2	299	-0.0858329	0.00251932	2.73846e-07	1.71406e-05	11
C14orf2	300	-0.112008	0.00171227	2.79915e-07	1.7462e-05	11
SRRT	301	0.116824	0.00417924	2.85134e-07	1.77285e-05	9
SNCA	302	-0.0800167	0.010431	2.90815e-07	1.80219e-05	11
CLDN15	303	0.116698	0.00190862	2.95283e-07	1.82383e-05	11
TBRG1	304	-0.0284694	0.00235608	2.97961e-07	1.83432e-05	11
NPM3	305	-0.109264	0.0017967	3.01421e-07	1.84954e-05	11
ATP2B3	306	0.00951163	0.00562087	3.03153e-07	1.85409e-05	11
SLC39A3	307	-0.11188	0.00169797	3.07492e-07	1.87217e-05	11
ING1	308	-0.0101852	0.00218066	3.08319e-07	1.87217e-05	11
CYLD	309	0.101266	0.00369586	3.0911e-07	1.87217e-05	11
NRCAM	310	-0.0630426	0.00371284	3.11227e-07	1.87891e-05	11
ILF3	311	0.0931998	0.00182001	3.13964e-07	1.88933e-05	11
BLZF1	312	0.0427589	0.0048309	3.21625e-07	1.92923e-05	11
ZC3H7B	313	0.0114854	0.0029734	3.24393e-07	1.93356e-05	11
OSBPL2	314	0.0671383	0.00159361	3.24412e-07	1.93356e-05	11
NR3C1	315	0.0628183	0.00563956	3.29236e-07	1.95608e-05	11
PNOC	316	-0.141065	0.00417	3.3162e-07	1.96401e-05	11
C21orf2	317	0.00871862	0.00233958	3.36748e-07	1.98673e-05	11
SNRPN	318	0.013452	0.00524002	3.3758e-07	1.98673e-05	11
F7	319	-0.0555142	0.00242084	3.40938e-07	2.00021e-05	10
SLC9A5	320	-0.0425795	0.00166005	3.44361e-07	2.01397e-05	11
KMT5B	321	0.181936	0.00945764	3.45878e-07	2.01655e-05	9
RFX2	322	0.0463211	0.00239501	3.51204e-07	2.04124e-05	11
TOMM20	323	-0.0736393	0.00687383	3.52359e-07	2.04161e-05	11
GNB5	324	-0.0594797	0.00555023	3.54065e-07	2.04516e-05	11
CARTPT	325	-0.270013	0.00607445	3.58517e-07	2.06451e-05	11
BRWD1	326	-0.023522	0.00323089	3.61643e-07	2.07612e-05	11
ANKRD50	327	-0.0411162	0.00297701	3.66078e-07	2.08885e-05	11
TDRD9	328	-0.229889	0.00359491	3.66093e-07	2.08885e-05	11
EPOR	329	0.0170441	0.00162093	3.70672e-07	2.10855e-05	11
DNM1L	330	-0.0903881	0.00270729	3.71806e-07	2.10859e-05	11
PTPN3	331	-0.15082	0.00422243	3.72966e-07	2.10878e-05	11
CMAS	332	-0.0500121	0.00280817	3.75849e-07	2.11868e-05	11
METTL9	333	0.0289439	0.00335984	3.83551e-07	2.1556e-05	11
TBL1X	334	0.100319	0.0022481	3.92344e-07	2.1937e-05	11
NAV2	335	0.149685	0.000539272	3.92674e-07	2.1937e-05	11
ISYNA1	336	0.0971522	0.00191323	3.96306e-07	2.2074e-05	11
TERF1	337	-0.0733398	0.0032132	4.00931e-07	2.22653e-05	11
ELF1	338	0.129129	0.00164232	4.03e-07	2.22846e-05	11
PHF19	339	0.0435652	0.00243049	4.03659e-07	2.22846e-05	11
STK32C	340	-0.0323091	0.00273127	4.12689e-07	2.26897e-05	11
COPS8	341	-0.092729	0.00204252	4.13422e-07	2.26897e-05	11
NKX2-2	342	0.263323	0.00332437	4.15376e-07	2.27303e-05	11
ITCH	343	0.15712	0.00232556	4.18617e-07	2.2813e-05	11
POMT2	344	0.0881221	0.00185664	4.19325e-07	2.2813e-05	11
PDE5A	345	0.074412	0.00286887	4.23154e-07	2.29546e-05	11
NDUFA10	346	-0.052182	0.00158237	4.26317e-07	2.30593e-05	11
CTDSP2	347	0.0921236	0.00171782	4.28042e-07	2.30859e-05	11
CNKSR3	348	0.125017	0.000972249	4.3971e-07	2.3647e-05	11
PTPRN2	349	-0.0947294	0.0043017	4.44105e-07	2.3815e-05	11
CLSPN	350	-0.092789	0.00163728	4.46256e-07	2.38344e-05	11
PSMF1	351	-0.0467169	0.00289371	4.47015e-07	2.38344e-05	10
PRKD2	352	0.0634025	0.00266984	4.48373e-07	2.38389e-05	11
SPTBN1	353	0.0700142	0.00535359	4.54788e-07	2.41115e-05	11
USP47	354	0.157909	0.00183461	4.56393e-07	2.41282e-05	11
GALNT3	355	0.0976687	0.00202878	4.5987e-07	2.42436e-05	11
NFKBIZ	356	0.100955	0.00435747	4.62633e-07	2.43207e-05	11
RAD17	357	-0.0218021	0.00148184	4.64643e-07	2.4358e-05	11
ZXDC	358	0.149546	0.0012197	4.70794e-07	2.46115e-05	11
FANCE	359	0.0530143	0.00138701	4.74711e-07	2.46896e-05	11
MRPL50	360	-0.0665968	0.00168887	4.74927e-07	2.46896e-05	11
ARRDC2	361	0.16056	0.0060748	4.77618e-07	2.47607e-05	11
ASCL1	362	0.210489	0.00172775	4.7945e-07	2.4787e-05	11
THYN1	363	-0.140779	0.000663996	4.86546e-07	2.50846e-05	11
ZNF667	364	0.00332814	0.00353766	4.88262e-07	2.51039e-05	11
G3BP1	365	0.116063	0.00140196	4.92139e-07	2.52339e-05	11
PIK3CG	366	0.0732795	0.00232646	4.97835e-07	2.54562e-05	11
GABARAPL1	367	-0.121024	0.00338353	5.05056e-07	2.57482e-05	11
CFLAR	368	0.109507	0.0033486	5.06296e-07	2.57482e-05	11
QSOX1	369	-0.00839352	0.00142815	5.13726e-07	2.59953e-05	11
WWP1	370	0.0961023	0.00435876	5.13932e-07	2.59953e-05	11
KANK2	371	0.110416	0.0029555	5.15558e-07	2.60072e-05	11
DENR	372	-0.10934	0.00432512	5.1922e-07	2.61205e-05	11
SARM1	373	0.0166822	0.00144951	5.23511e-07	2.61205e-05	11
AZI2	374	-0.0796768	0.00180115	5.23514e-07	2.61205e-05	11
PHF21A	375	0.0867524	0.00180527	5.23885e-07	2.61205e-05	11
SGK3	376	0.201337	0.00719535	5.25356e-07	2.61205e-05	8
GGA3	377	0.0245784	0.00147943	5.26178e-07	2.61205e-05	11
FHL1	378	-0.0707669	0.00283481	5.32303e-07	2.63546e-05	11
SREK1	379	0.0733589	0.00646104	5.38467e-07	2.65895e-05	9
MCTS1	380	-0.0831479	0.00177326	5.43461e-07	2.67655e-05	11
MRPS18A	381	-0.0249818	0.00181742	5.45058e-07	2.67736e-05	11
SYTL4	382	0.0499287	0.00320009	5.50741e-07	2.69494e-05	11
CCKBR	383	-0.139354	0.00277687	5.51517e-07	2.69494e-05	11
BCAT1	384	-0.0554264	0.0036882	5.65158e-07	2.75441e-05	11
FCRL2	385	-0.0164364	0.00153568	5.6801e-07	2.7546e-05	10
CASP2	386	0.0731882	0.000969145	5.68981e-07	2.7546e-05	11
WDR89	387	0.044509	0.00184083	5.69612e-07	2.7546e-05	11
PPFIA1	388	0.102815	0.000250948	5.73581e-07	2.76664e-05	11
PCDHGA3	389	-0.0121468	0.00175518	5.81343e-07	2.79687e-05	10
UBE2E3	390	-0.102686	0.00312858	5.86853e-07	2.81614e-05	11
HEXIM1	391	0.136965	0.00427528	5.91839e-07	2.83281e-05	11
CYB561	392	-0.0264417	0.00287237	5.98899e-07	2.85929e-05	11
ERBB2	393	-0.00650319	0.00207667	6.05749e-07	2.88463e-05	10
NUMBL	394	-0.0887468	0.00146214	6.08019e-07	2.88656e-05	11
PIK3R1	395	0.0132358	0.00391453	6.09239e-07	2.88656e-05	11
APOLD1	396	0.0786392	0.00479339	6.12513e-07	2.89474e-05	11
MEMO1	397	-0.113837	0.0039245	6.30915e-07	2.96361e-05	8
GRIK2	398	-0.0775809	0.001321	6.31071e-07	2.96361e-05	11
CAPRIN1	399	0.00639802	0.00198547	6.32756e-07	2.96361e-05	11
CDH8	400	-0.0979396	0.00435042	6.33418e-07	2.96361e-05	11
GCC1	401	0.0192146	0.00196787	6.37741e-07	2.97639e-05	11
ADH5	402	-0.0370377	0.00377673	6.5564e-07	3.04536e-05	11
GSTZ1	403	-0.131446	0.00158236	6.55773e-07	3.04536e-05	10
SLC43A3	404	0.115023	0.00229051	6.5937e-07	3.05448e-05	11
SH3RF2	405	-0.100834	0.00136481	6.64623e-07	3.07122e-05	11
CEBPD	406	-0.119483	0.0119397	6.81537e-07	3.14162e-05	11
ZNF518B	407	-0.0606008	0.00222059	6.85144e-07	3.14844e-05	11
DCAF6	408	-0.0312768	0.00166938	6.86381e-07	3.14844e-05	11
KCNIP4	409	-0.0756741	0.00731583	6.93026e-07	3.17114e-05	11
ACOT11	410	0.00758394	0.00253461	6.95283e-07	3.17371e-05	11
SMG5	411	0.0459202	0.00151628	7.00145e-07	3.18813e-05	11
SEH1L	412	-0.0793766	0.00316147	7.02833e-07	3.1926e-05	11
WFDC3	413	0.0213762	0.00185391	7.07235e-07	3.19932e-05	10
HSPD1	414	-0.0290245	0.00150647	7.07732e-07	3.19932e-05	11
MBD6	415	0.0628471	0.00314	7.10656e-07	3.20126e-05	10
TNFSF13	416	-0.240506	0.00486853	7.11582e-07	3.20126e-05	10
BCAN	417	0.0607096	0.00274482	7.22155e-07	3.24104e-05	11
CSTL1	418	-0.0170632	0.001564	7.42599e-07	3.32482e-05	11
GABRA4	419	-0.101364	0.0104927	7.46946e-07	3.33149e-05	10
NFATC3	420	0.0775749	0.00229406	7.47649e-07	3.33149e-05	11
ITPR3	421	0.0496612	0.00319098	7.50124e-07	3.33458e-05	11
HSPB7	422	0.0394421	0.00218078	7.5843e-07	3.35302e-05	11
SENP3	423	0.0928382	0.00238951	7.59095e-07	3.35302e-05	11
NARF	424	0.0347593	0.00386405	7.59694e-07	3.35302e-05	11
OLAH	425	0.000631316	0.0020594	7.61439e-07	3.35302e-05	11
CACNB2	426	-0.199191	0.00407894	7.7586e-07	3.4085e-05	11
NBN	427	-0.0578902	0.00196096	7.81517e-07	3.41749e-05	11
PAPLN	428	-0.0861484	0.00519103	7.81558e-07	3.41749e-05	11
RAPGEF1	429	0.117996	0.00234732	7.95524e-07	3.47045e-05	11
KLHL28	430	0.152549	0.00431117	8.02541e-07	3.49292e-05	11
TEAD2	431	0.0899149	0.00214837	8.08131e-07	3.50909e-05	11
GPRASP2	432	-0.195498	0.00948187	8.11885e-07	3.51723e-05	8
LSM14A	433	0.0776121	0.000937095	8.40545e-07	3.63089e-05	11
PTPRA	434	0.00565949	0.00318186	8.44112e-07	3.63089e-05	11
HIP1	435	0.124281	0.00313242	8.45609e-07	3.63089e-05	11
DNALI1	436	0.0262527	0.00287366	8.45882e-07	3.63089e-05	11
CD200	437	-0.101252	0.00768987	8.58931e-07	3.66802e-05	11
FOXN3	438	0.125287	0.00290554	8.59638e-07	3.66802e-05	11
PPP4R4	439	-0.173526	0.00613114	8.60413e-07	3.66802e-05	11
TRIP10	440	0.1329	0.00362123	8.65201e-07	3.68005e-05	11
HOMER3	441	0.187603	0.001962	8.67927e-07	3.68328e-05	11
NFIX	442	0.100973	0.00141815	8.70842e-07	3.68729e-05	11
HDAC4	443	0.113382	0.00199244	8.80856e-07	3.71511e-05	11
RELA	444	0.125801	0.00261094	8.82407e-07	3.71511e-05	11
IL17RE	445	-0.0981994	0.00138651	8.83369e-07	3.71511e-05	11
DLC1	446	0.228997	0.0045419	8.87076e-07	3.72234e-05	11
TNPO1	447	0.109712	0.00477068	8.91067e-07	3.73072e-05	11
WIF1	448	-0.450899	0.0298652	8.95738e-07	3.7419e-05	11
NSL1	449	0.0930372	0.00223715	8.9882e-07	3.74642e-05	11
MUC4	450	-0.0582661	0.00102112	9.04116e-07	3.76012e-05	10
XRN1	451	0.0968402	0.00138735	9.09194e-07	3.77285e-05	10
EEF1D	452	-0.0071944	0.00238367	9.14634e-07	3.78278e-05	11
VCAN	453	0.175436	0.00265601	9.1728e-07	3.78278e-05	11
EPB41L4B	454	0.00980211	0.00248706	9.1765e-07	3.78278e-05	11
ZNF264	455	0.125096	0.0031896	9.29205e-07	3.82199e-05	11
KLF6	456	0.0522967	0.00235207	9.33357e-07	3.83065e-05	11
STARD13	457	0.142731	0.00247606	9.43023e-07	3.84578e-05	10
SMTN	458	0.0863694	0.00235674	9.45324e-07	3.84578e-05	11
NFIC	459	0.194336	0.00346579	9.45367e-07	3.84578e-05	11
MAGED2	460	-0.0262588	0.00182355	9.46866e-07	3.84578e-05	11
LAT2	461	0.119602	0.00340952	9.47317e-07	3.84578e-05	11
BCCIP	462	-0.093417	0.00190272	9.6698e-07	3.91711e-05	11
KIAA1147	463	0.146658	0.00144746	9.69853e-07	3.92026e-05	10
MAGI2	464	-0.0445717	0.00172082	9.77018e-07	3.94071e-05	11
TXN2	465	-0.0248319	0.00187817	9.80514e-07	3.9463e-05	11
ABLIM1	466	0.115117	0.000825411	9.94565e-07	3.99427e-05	11
SPCS1	467	-0.121169	0.00214531	9.98982e-07	4.00342e-05	11
RNF144B	468	-0.00171567	0.0029563	1.00175e-06	4.00594e-05	11
ADIPOR2	469	0.113056	0.00538876	1.00511e-06	4.0108e-05	11
TNFRSF21	470	-0.102013	0.00243017	1.01278e-06	4.0328e-05	11
RBPJ	471	0.0968926	0.00386727	1.01509e-06	4.03341e-05	11
GSS	472	-0.11628	0.00123989	1.01873e-06	4.03932e-05	11
MICAL3	473	0.0889088	0.00274191	1.03522e-06	4.09602e-05	10
TSPAN7	474	-0.159662	0.00162382	1.0452e-06	4.12677e-05	11
GATAD2A	475	0.072631	0.00156576	1.08224e-06	4.25084e-05	11
CNNM2	476	-0.0079377	0.00135408	1.08324e-06	4.25084e-05	11
CNTN4	477	-0.00633529	0.00390163	1.08344e-06	4.25084e-05	11
YY1	478	0.129271	0.00252774	1.09008e-06	4.26798e-05	11
PIM2	479	-0.11619	0.00132992	1.09249e-06	4.26846e-05	11
GNRH1	480	0.0840378	0.00161069	1.09802e-06	4.27637e-05	11
UBE2V2	481	-0.105807	0.00849176	1.1012e-06	4.27637e-05	11
GYPB	482	-0.0600478	0.00221281	1.10137e-06	4.27637e-05	11
ARHGAP17	483	0.0799867	0.00185766	1.10477e-06	4.28071e-05	11
IL17RA	484	0.0463218	0.00290298	1.11228e-06	4.30088e-05	11
RRAD	485	0.110312	0.00205257	1.11701e-06	4.31028e-05	11
LST1	486	0.0190758	0.00293764	1.1209e-06	4.3164e-05	10
DYNC1H1	487	0.0218265	0.0015427	1.13547e-06	4.36353e-05	11
TAF6L	488	0.0084442	0.00162049	1.14536e-06	4.39251e-05	11
STAT4	489	-0.223753	0.00938468	1.16338e-06	4.4462e-05	11
NCF4	490	0.0602072	0.00266696	1.16529e-06	4.4462e-05	11
CREB5	491	0.106353	0.00240824	1.16797e-06	4.4462e-05	11
PDLIM4	492	0.0744406	0.00213251	1.16934e-06	4.4462e-05	11
MAP4K4	493	0.189015	0.00329667	1.17124e-06	4.4462e-05	11
PRKACB	494	-0.129189	0.00637357	1.18343e-06	4.48339e-05	11
MMD	495	0.0506935	0.00560028	1.2018e-06	4.54376e-05	11
DHX36	496	-0.0292727	0.00371195	1.20531e-06	4.54784e-05	11
SCD5	497	-0.00690921	0.00382396	1.20976e-06	4.55547e-05	10
HFE	498	-0.0305221	0.000879627	1.21477e-06	4.56516e-05	11
ASCL2	499	-0.00750354	0.00174404	1.22266e-06	4.58559e-05	11
SIPA1	500	0.0957737	0.00191367	1.22746e-06	4.59438e-05	11
ILVBL	501	0.0523284	0.00113501	1.23627e-06	4.61505e-05	11
FAM171B	502	-0.0168224	0.00346609	1.23816e-06	4.61505e-05	11
ABCE1	503	-0.0215924	0.0036285	1.24038e-06	4.61505e-05	11
BRPF1	504	0.111711	0.00102345	1.24481e-06	4.61849e-05	11
KLHDC9	505	-0.125794	0.00171221	1.24624e-06	4.61849e-05	11
B3GALNT1	506	-0.0921845	0.00454376	1.25219e-06	4.62988e-05	11
SRGAP1	507	0.167515	0.00319472	1.25426e-06	4.62988e-05	11
PBXIP1	508	0.0218996	0.00394281	1.25753e-06	4.6328e-05	11
VTA1	509	-0.0224446	0.00320499	1.2649e-06	4.6508e-05	11
BAD	510	0.0190173	0.0024544	1.26777e-06	4.65223e-05	11
TAC3	511	-0.0667521	0.00194451	1.27781e-06	4.67833e-05	11
SLC6A9	512	0.132179	0.00222319	1.27989e-06	4.67833e-05	11
CALCOCO2	513	-0.0228928	0.00305006	1.29061e-06	4.6953e-05	11
CUX1	514	0.12876	0.00265345	1.29146e-06	4.6953e-05	11
KIF5A	515	0.236709	0.00507062	1.29205e-06	4.6953e-05	11
ACSL5	516	-0.0478992	0.0045671	1.29716e-06	4.70473e-05	11
DDIT4L	517	0.16939	0.00192099	1.30996e-06	4.74194e-05	11
DNAJC21	518	0.0973801	0.00375995	1.31258e-06	4.74226e-05	11
DENND5B	519	-0.0126496	0.00338145	1.31774e-06	4.74497e-05	11
WDR61	520	-0.089274	0.00265063	1.3184e-06	4.74497e-05	11
GLRX	521	-0.064267	0.0050331	1.33826e-06	4.79968e-05	11
POLK	522	0.148731	0.0039302	1.33873e-06	4.79968e-05	11
S100A6	523	0.0663607	0.00375345	1.34436e-06	4.81066e-05	11
TRIM47	524	0.204827	0.00627344	1.36746e-06	4.87777e-05	11
PDK3	525	0.0547308	0.00406366	1.36833e-06	4.87777e-05	11
CSF1	526	0.0379273	0.00227189	1.37975e-06	4.90913e-05	11
DBF4	527	0.0502904	0.00245476	1.39217e-06	4.94391e-05	11
LAMB1	528	-0.22986	0.00383055	1.40094e-06	4.9562e-05	11
PEX19	529	-0.115018	0.00141319	1.40345e-06	4.9562e-05	11
TPM3	530	0.0292981	0.00340106	1.40357e-06	4.9562e-05	11
ADGRL3	531	-0.00999036	0.00808455	1.41373e-06	4.98267e-05	9
SMOX	532	0.104719	0.00300575	1.43802e-06	5.05876e-05	11
TIMM8B	533	-0.025629	0.00168491	1.44897e-06	5.08771e-05	11
MAX	534	0.104165	0.00229522	1.48954e-06	5.22037e-05	11
CHD9	535	0.0928462	0.00186659	1.50077e-06	5.24988e-05	11
SORCS3	536	-0.161318	0.00248356	1.50532e-06	5.25599e-05	11
ACTG1	537	-0.10498	0.00113938	1.5211e-06	5.30119e-05	11
LRCH4	538	0.0830793	0.0019088	1.52633e-06	5.30954e-05	11
GRIA3	539	0.0178146	0.00583601	1.53427e-06	5.31923e-05	10
VPS35	540	0.0441028	0.00336473	1.5348e-06	5.31923e-05	11
AKAP8	541	0.0480246	0.00101419	1.55111e-06	5.36466e-05	11
KCNAB1	542	-0.0181722	0.0024512	1.55364e-06	5.36466e-05	11
FUT6	543	0.0444884	0.00133761	1.57483e-06	5.42781e-05	11
LAMA2	544	0.0893609	0.00270908	1.5822e-06	5.44158e-05	11
OCIAD2	545	-0.104427	0.0045942	1.58662e-06	5.44158e-05	11
PTPRC	546	0.0879164	0.00634763	1.58755e-06	5.44158e-05	11
ATXN10	547	-0.110095	0.00316472	1.60073e-06	5.47471e-05	11
NCOR2	548	0.0331541	0.00152854	1.60439e-06	5.47471e-05	11
TIMM23	549	-0.0957888	0.00136571	1.60701e-06	5.47471e-05	11
RASSF6	550	-0.0185989	0.00176318	1.60892e-06	5.47471e-05	11
TRABD	551	0.0757993	0.00223082	1.61344e-06	5.47673e-05	11
APOO	552	-0.145699	0.00251691	1.61861e-06	5.47673e-05	11
RXFP1	553	-0.221015	0.0139936	1.6222e-06	5.47673e-05	11
DENND4C	554	0.093114	0.00241196	1.62226e-06	5.47673e-05	11
DIDO1	555	0.0412299	0.00170764	1.62415e-06	5.47673e-05	11
N4BP2	556	0.11853	0.00286898	1.63676e-06	5.50935e-05	11
GNPTAB	557	0.0112693	0.00249933	1.65832e-06	5.55345e-05	11
ATP5C1	558	-0.149358	0.000622722	1.65873e-06	5.55345e-05	11
ZNF609	559	0.0891275	0.00100921	1.65876e-06	5.55345e-05	11
APLNR	560	0.128243	0.0158682	1.68059e-06	5.61004e-05	11
KCNN3	561	0.153287	0.00633994	1.68166e-06	5.61004e-05	11
SP100	562	0.013884	0.00193631	1.70085e-06	5.66394e-05	11
MORN4	563	-0.117048	0.00151434	1.71806e-06	5.70738e-05	11
PPARA	564	0.0377503	0.00174422	1.71999e-06	5.70738e-05	11
PHB	565	0.0946931	0.00144434	1.724e-06	5.71057e-05	11
IAH1	566	-0.00913774	0.00249763	1.73086e-06	5.72316e-05	10
FZD9	567	0.0567111	0.00321053	1.74163e-06	5.74862e-05	11
TBL1XR1	568	0.0557981	0.0031529	1.74948e-06	5.76434e-05	11
GLO1	569	-0.0954614	0.0014745	1.75363e-06	5.76786e-05	11
AKT2	570	-0.0271054	0.00155526	1.75889e-06	5.77503e-05	10
HAVCR2	571	0.102486	0.00304749	1.76801e-06	5.78561e-05	11
EIF4G1	572	0.0816729	0.00210192	1.7683e-06	5.78561e-05	11
GTSE1	573	0.010573	0.00170119	1.77643e-06	5.80208e-05	11
HECTD2	574	-0.153889	0.00369667	1.78604e-06	5.8117e-05	11
VPS13D	575	0.0431637	0.00225597	1.78689e-06	5.8117e-05	11
RASGRF1	576	-0.0152107	0.00345492	1.78869e-06	5.8117e-05	11
HAUS2	577	-0.00843257	0.00596868	1.79375e-06	5.81802e-05	9
GSDMD	578	0.044586	0.00331561	1.80442e-06	5.8378e-05	11
DLG1	579	0.171267	0.0033904	1.80609e-06	5.8378e-05	11
ANKHD1-EIF4EBP3	580	0.102404	0.00213953	1.82693e-06	5.895e-05	11
ARL4C	581	-0.0207075	0.00502589	1.84433e-06	5.94089e-05	11
AIF1	582	0.0213298	0.00872467	1.87009e-06	6.01353e-05	11
OGFOD1	583	-0.0715005	0.00163508	1.87888e-06	6.03142e-05	11
KCNJ10	584	0.190563	0.00231594	1.89802e-06	6.08244e-05	11
NFIB	585	0.121933	0.00241594	1.91685e-06	6.12527e-05	11
CTDSPL	586	0.0101681	0.00185097	1.91793e-06	6.12527e-05	11
ATP2A2	587	-0.0397119	0.00222078	1.92305e-06	6.13115e-05	11
MED12	588	0.0904246	0.00131938	1.93407e-06	6.1558e-05	11
LRRC32	589	0.0761521	0.00607686	1.94665e-06	6.17459e-05	11
ARPC2	590	0.0161088	0.00291709	1.94681e-06	6.17459e-05	11
RNF41	591	0.00232426	0.002827	1.94987e-06	6.17459e-05	11
ATF7	592	-0.0264328	0.00171862	1.97605e-06	6.24535e-05	10
NOTCH3	593	0.0659681	0.00139492	1.98125e-06	6.24535e-05	11
LRRFIP1	594	0.0886995	0.00371548	1.98223e-06	6.24535e-05	11
CLTA	595	-0.101636	0.002111	1.98594e-06	6.24653e-05	11
VIP	596	-0.0923803	0.00559757	2.02865e-06	6.34713e-05	11
PRKCH	597	0.0407675	0.00224093	2.0333e-06	6.34713e-05	11
SLC38A2	598	0.214618	0.00315152	2.03476e-06	6.34713e-05	11
SCIN	599	0.16775	0.00597333	2.03479e-06	6.34713e-05	11
EPHA5	600	0.0206677	0.00386452	2.03488e-06	6.34713e-05	11
HMGCLL1	601	-0.152021	0.00292963	2.05852e-06	6.40107e-05	11
VPS41	602	0.0155434	0.00568822	2.05925e-06	6.40107e-05	11
ARAP1	603	0.0979541	0.00475719	2.06243e-06	6.40107e-05	9
ABCC3	604	-0.015494	0.00155138	2.06874e-06	6.41003e-05	10
VGF	605	-0.215387	0.00513693	2.07978e-06	6.43357e-05	10
CREBBP	606	0.0980719	0.00092553	2.08705e-06	6.44542e-05	11
RBP4	607	-0.183669	0.00521322	2.09149e-06	6.44848e-05	11
MTRF1L	608	0.0817431	0.00133254	2.14322e-06	6.5971e-05	11
GIMAP5	609	-0.0041665	0.0016686	2.15868e-06	6.63377e-05	11
RAB3IP	610	0.172626	0.00408866	2.16669e-06	6.64746e-05	11
PPIH	611	-0.076165	0.00150128	2.17597e-06	6.66503e-05	11
PRELP	612	0.102032	0.00127556	2.183e-06	6.67562e-05	11
RORA	613	-0.0101193	0.00160251	2.25346e-06	6.87986e-05	11
FNBP1	614	0.134313	0.00164134	2.25786e-06	6.88205e-05	11
MKLN1	615	0.109478	0.00122756	2.28914e-06	6.95375e-05	11
NDUFB5	616	-0.126341	0.00142447	2.2894e-06	6.95375e-05	11
MTMR3	617	0.0324393	0.00186898	2.29253e-06	6.95375e-05	11
XPNPEP3	618	-0.0106031	0.00233925	2.29918e-06	6.96264e-05	11
UBE2H	619	0.0136181	0.0014279	2.30877e-06	6.98039e-05	11
UTS2	620	0.0571697	0.00149448	2.33223e-06	7.03996e-05	11
AMACR	621	-0.0437749	0.00175533	2.34117e-06	7.04757e-05	11
FGR	622	0.086644	0.00453977	2.34229e-06	7.04757e-05	11
PARM1	623	-0.291028	0.00834902	2.35074e-06	7.05718e-05	11
SCARA3	624	-0.0769731	0.00667143	2.35302e-06	7.05718e-05	11
PML	625	0.00567822	0.00164736	2.40573e-06	7.19481e-05	11
CEACAM1	626	0.0133856	0.00197984	2.4066e-06	7.19481e-05	10
RRAGB	627	-0.0792004	0.00161958	2.41353e-06	7.20404e-05	11
SLC12A4	628	-0.000659018	0.00154185	2.43576e-06	7.25878e-05	11
G6PC	629	0.0109693	0.00165652	2.44065e-06	7.26182e-05	10
SUV39H2	630	0.0238043	0.0017473	2.46125e-06	7.31148e-05	11
TFIP11	631	0.0181786	0.00152306	2.48673e-06	7.37547e-05	11
B4GALT6	632	-0.0995538	0.0045005	2.49548e-06	7.38969e-05	11
SNRPA1	633	-0.132686	0.0017292	2.54898e-06	7.51789e-05	11
MCM4	634	-0.0731943	0.00160339	2.55034e-06	7.51789e-05	11
FAM163A	635	-0.0723158	0.00270881	2.55329e-06	7.51789e-05	11
H2AFY	636	-0.0369726	0.00181909	2.55484e-06	7.51789e-05	11
LGSN	637	0.0137047	0.00194379	2.57366e-06	7.56139e-05	10
PDE1A	638	-0.145516	0.00951405	2.63249e-06	7.72212e-05	11
CFB	639	-0.00207429	0.00441987	2.65901e-06	7.78684e-05	11
ZNF652	640	0.259924	0.0060208	2.6654e-06	7.78684e-05	11
MAPKAPK2	641	0.0807743	0.00215912	2.66704e-06	7.78684e-05	11
IQCK	642	0.0400642	0.00217839	2.67659e-06	7.80027e-05	11
ACSS1	643	0.140941	0.00129054	2.67998e-06	7.80027e-05	11
ENO3	644	0.0829198	0.00122351	2.72899e-06	7.93061e-05	11
ASMTL	645	-0.153956	0.00269581	2.77509e-06	8.05206e-05	11
TRA2A	646	0.0708723	0.00328156	2.79466e-06	8.08841e-05	11
RGS12	647	-0.0980139	0.0021633	2.79868e-06	8.08841e-05	11
DAPP1	648	0.0743735	0.0026287	2.80347e-06	8.08841e-05	11
STARD10	649	0.127175	0.00240144	2.80491e-06	8.08841e-05	11
KIF19	650	0.0817204	0.0024447	2.81001e-06	8.09066e-05	11
COL4A3BP	651	0.126435	0.00547609	2.83871e-06	8.15197e-05	11
TIRAP	652	-0.0772199	0.00175995	2.84001e-06	8.15197e-05	11
PLCE1	653	-0.00221895	0.00209099	2.85713e-06	8.18853e-05	11
PPP2R2C	654	-0.00478721	0.00135966	2.86793e-06	8.20692e-05	11
SLC25A36	655	0.0416458	0.00518573	2.90016e-06	8.28038e-05	11
SERF1A	656	-0.0546289	0.00938062	2.9046e-06	8.28038e-05	8
ARHGAP35	657	0.0816152	0.00654985	2.90687e-06	8.28038e-05	9
AQP1	658	0.371632	0.0197365	2.93144e-06	8.33767e-05	11
RNASEH2B	659	-0.0332793	0.00151374	2.93987e-06	8.34895e-05	11
RERE	660	0.142597	0.000863278	2.9491e-06	8.36249e-05	11
CDH2	661	0.0442704	0.00332867	2.95604e-06	8.3695e-05	11
BEX5	662	-0.177252	0.00683489	2.96487e-06	8.38182e-05	11
INTS9	663	0.020572	0.00112222	2.97878e-06	8.39384e-05	11
DNHD1	664	0.0952857	0.00199227	2.979e-06	8.39384e-05	11
HEY2	665	0.102861	0.00213205	2.98258e-06	8.39384e-05	11
AK2	666	0.0710199	0.00199271	2.9941e-06	8.4136e-05	11
CADPS	667	0.00933399	0.00710146	3.00825e-06	8.44069e-05	11
SPEN	668	0.114007	0.00161093	3.04718e-06	8.53713e-05	11
EIF5	669	0.0653575	0.0036478	3.05605e-06	8.54919e-05	11
GGTLC1	670	-0.0160088	0.0012395	3.06347e-06	8.55714e-05	11
DUSP3	671	0.132631	0.00230169	3.09438e-06	8.6306e-05	11
ATG4B	672	0.128924	0.00168028	3.10919e-06	8.65884e-05	11
ARSG	673	-0.0503743	0.00139272	3.11376e-06	8.65884e-05	11
TRIL	674	0.17771	0.00661926	3.12786e-06	8.68514e-05	11
SLC4A5	675	0.0148463	0.00264358	3.14145e-06	8.70995e-05	10
COX15	676	-0.0258398	0.00257137	3.14885e-06	8.71757e-05	11
RPL15	677	-0.114158	0.00167593	3.15438e-06	8.71997e-05	10
ETV5	678	0.0654284	0.00281344	3.16572e-06	8.73039e-05	11
ABI2	679	0.0169164	0.00258617	3.17188e-06	8.73039e-05	11
SPAG9	680	0.17299	0.00202264	3.17214e-06	8.73039e-05	11
MSH5	681	0.0400384	0.00163572	3.19437e-06	8.77865e-05	8
MBD2	682	0.0616344	0.00161889	3.21104e-06	8.80262e-05	10
NUCKS1	683	0.097403	0.00530628	3.21342e-06	8.80262e-05	11
NASP	684	0.160569	0.00314012	3.21907e-06	8.80262e-05	11
TACO1	685	-0.0735197	0.000780146	3.22552e-06	8.80262e-05	11
SIRT1	686	0.116835	0.000467084	3.22661e-06	8.80262e-05	11
CYP26B1	687	-0.121182	0.00376429	3.23631e-06	8.81622e-05	11
TPI1	688	-0.0923177	0.00220523	3.25405e-06	8.85167e-05	11
PRKAR1A	689	-0.0265803	0.00786118	3.2982e-06	8.94595e-05	11
TMED4	690	-0.0222343	0.00586844	3.29904e-06	8.94595e-05	11
AMY2A	691	-0.16823	0.00388234	3.30305e-06	8.94595e-05	8
PARVG	692	0.109175	0.00275694	3.31435e-06	8.96359e-05	11
IFI16	693	0.0608909	0.00684208	3.34934e-06	9.03421e-05	11
ABCA1	694	0.130086	0.00227696	3.35012e-06	9.03421e-05	11
GBP2	695	-0.043647	0.0158962	3.35834e-06	9.04336e-05	10
SERPINA1	696	0.0156623	0.00880794	3.42099e-06	9.19883e-05	11
RBCK1	697	-0.0311379	0.00203168	3.42705e-06	9.2019e-05	10
JAZF1	698	0.0136249	0.00502089	3.43656e-06	9.21422e-05	11
WASL	699	0.0130471	0.002659	3.44334e-06	9.21919e-05	11
CREB3L2	700	0.021136	0.00265157	3.4663e-06	9.2674e-05	10
RTN4IP1	701	-0.118504	0.00230359	3.48281e-06	9.29826e-05	11
DLK2	702	-0.0572546	0.00160634	3.49485e-06	9.31711e-05	11
TUBB3	703	-0.179289	0.000839456	3.50412e-06	9.3212e-05	11
TOP3B	704	0.0937697	0.0002726	3.50634e-06	9.3212e-05	11
BHLHE41	705	0.138024	0.00645704	3.54223e-06	9.39027e-05	9
PAM	706	-0.158969	0.0016008	3.54357e-06	9.39027e-05	11
C5orf24	707	0.08851	0.00457004	3.54738e-06	9.39027e-05	11
SLC5A3	708	0.264362	0.00787599	3.56669e-06	9.42805e-05	11
CLUAP1	709	0.0396079	0.00174267	3.59436e-06	9.47804e-05	11
MTUS1	710	0.111852	0.00465254	3.59718e-06	9.47804e-05	11
PDCD4	711	0.141202	0.00146386	3.60079e-06	9.47804e-05	11
FAAP20	712	-0.0190743	0.00252923	3.63784e-06	9.56209e-05	9
POLR1D	713	-0.10415	0.00241296	3.69689e-06	9.7037e-05	11
CIRBP	714	-0.0802284	0.00886605	3.70851e-06	9.72056e-05	11
UIMC1	715	0.0910627	0.000823146	3.73274e-06	9.77037e-05	11
KHDRBS1	716	0.00324321	0.0037899	3.73939e-06	9.77413e-05	11
MIGA1	717	0.220382	0.0207496	3.77198e-06	9.84556e-05	9
MAPK1	718	0.0282744	0.0026235	3.78223e-06	9.85854e-05	11
CHD4	719	0.142312	0.00128703	3.81181e-06	9.92183e-05	11
ALPK1	720	0.0477226	0.00213884	3.82962e-06	9.9394e-05	11
PRKCG	721	-0.0867307	0.00411964	3.82981e-06	9.9394e-05	11
PIEZO2	722	0.163793	0.0110107	3.83753e-06	9.9394e-05	9
TRIM8	723	0.100547	0.000865399	3.84304e-06	9.9394e-05	11
BAX	724	0.066869	0.00231625	3.86491e-06	9.9394e-05	11
METTL7B	725	0.0771261	0.00408282	3.87039e-06	9.9394e-05	11
WNT2B	726	-0.0695315	0.00182506	3.87142e-06	9.9394e-05	11
TMBIM4	727	0.115957	0.00295961	3.87197e-06	9.9394e-05	11
UGGT2	728	-0.140567	0.00426812	3.87478e-06	9.9394e-05	9
CASP8	729	0.113069	0.00261654	3.87627e-06	9.9394e-05	11
INPP5D	730	0.0890442	0.00184494	3.87698e-06	9.9394e-05	11
HRH3	731	0.0677547	0.00127459	3.90757e-06	0.000100041	11
SAFB2	732	0.103732	0.00216237	3.91487e-06	0.000100091	11
SLC44A1	733	0.144567	0.000577937	3.94006e-06	0.000100598	11
PRKX	734	0.0631048	0.0043983	4.00332e-06	0.000101972	11
CREB3L1	735	-0.0630948	0.0017953	4.00478e-06	0.000101972	10
MED29	736	-0.182767	0.0025703	4.02909e-06	0.000102452	11
ZNF621	737	0.120237	0.000742551	4.03784e-06	0.000102535	11
CHDH	738	-0.0196207	0.00244218	4.054e-06	0.000102806	11
TFPI	739	0.0645669	0.00208674	4.10059e-06	0.000103707	11
FAM69B	740	-0.044623	0.00236445	4.10061e-06	0.000103707	11
PTAFR	741	0.0598973	0.00231412	4.1085e-06	0.000103766	11
SERBP1	742	0.121471	0.00243409	4.13547e-06	0.00010423	10
BRD3	743	0.142437	0.00159421	4.13802e-06	0.00010423	11
CENPF	744	-0.0819438	0.00244455	4.15513e-06	0.00010452	11
CDC14B	745	0.0926048	0.00239035	4.19087e-06	0.000105081	11
CXCR4	746	0.185013	0.00322349	4.19124e-06	0.000105081	11
NPFF	747	0.0900564	0.00179769	4.19427e-06	0.000105081	11
POLR2K	748	-0.108146	0.00348322	4.20306e-06	0.000105161	11
PCDHA8	749	0.0688982	0.00703436	4.21888e-06	0.000105416	8
CORT	750	-0.0948651	0.00431251	4.24068e-06	0.000105712	11
ITGB1	751	0.0958688	0.00184161	4.24204e-06	0.000105712	11
NKTR	752	0.0278741	0.00221186	4.26714e-06	0.000106196	11
MRPS10	753	0.0243809	0.00227638	4.37307e-06	0.000108688	11
IRAK3	754	0.026673	0.00261056	4.42396e-06	0.000109807	11
LAMA5	755	0.0563883	0.0032167	4.45186e-06	0.000110353	11
MRPS33	756	-0.0811776	0.00163591	4.4585e-06	0.000110372	11
RUBCN	757	0.0119508	0.00266158	4.49081e-06	0.000111024	9
MDGA1	758	0.00569902	0.00191892	4.50763e-06	0.000111293	11
TYRP1	759	-0.134125	0.00437131	4.54963e-06	0.000112142	11
SLCO4A1	760	0.172586	0.0126973	4.55397e-06	0.000112142	11
MAT2A	761	0.114953	0.00133951	4.5647e-06	0.000112258	11
IL17RD	762	0.00971645	0.0042322	4.58125e-06	0.000112417	11
PATL1	763	0.0343999	0.00138058	4.58319e-06	0.000112417	11
RGS7	764	-0.1433	0.00345051	4.61047e-06	0.000112938	11
CXXC1	765	0.103089	0.00138222	4.6211e-06	0.000113051	11
HIST1H2BD	766	0.0632294	0.0064089	4.62823e-06	0.000113077	11
PLEKHH3	767	0.0493559	0.00129803	4.63482e-06	0.000113091	11
IL12RB1	768	0.0122524	0.00139265	4.76942e-06	0.000116224	11
HBQ1	769	-0.0645315	0.0022108	4.79053e-06	0.000116586	11
SLC7A2	770	0.0611557	0.00578413	4.8044e-06	0.000116772	10
SDC1	771	-0.0653448	0.00127906	4.82102e-06	0.000116956	11
NCALD	772	-0.120374	0.00361379	4.82448e-06	0.000116956	11
CD83	773	-0.0787526	0.00337156	4.83126e-06	0.000116969	11
CLINT1	774	-0.0225768	0.00193536	4.88626e-06	0.000118148	11
SLTM	775	0.113333	0.00062445	4.95871e-06	0.000119745	11
ANP32E	776	-0.0658376	0.00581567	4.96626e-06	0.000119773	10
EBF1	777	0.0762175	0.00220848	4.97711e-06	0.00011988	11
TPK1	778	-0.0755515	0.00170837	5.01047e-06	0.000120528	11
EIF1AX	779	-0.0225178	0.00511036	5.02267e-06	0.000120644	11
NRN1	780	-0.219351	0.0108765	5.02817e-06	0.000120644	11
USP14	781	0.0774089	0.00568574	5.06332e-06	0.00012124	11
PATZ1	782	-0.00529148	0.00136949	5.06598e-06	0.00012124	11
EXOC7	783	0.00527402	0.00184529	5.10549e-06	0.00012203	11
TLR5	784	0.178206	0.0037111	5.12271e-06	0.000122285	11
ADAM12	785	0.0211153	0.000911848	5.13845e-06	0.000122505	11
CNOT7	786	-0.0101771	0.00249157	5.15154e-06	0.00012266	11
CACNA1A	787	-0.00109555	0.00655178	5.1591e-06	0.000122684	8
RGS3	788	-0.00475358	0.00118779	5.17504e-06	0.000122907	11
COX10	789	-0.0413871	0.0016304	5.20547e-06	0.000123473	11
SMG1	790	0.122921	0.00419681	5.22606e-06	0.000123805	8
KLRC1	791	-0.178472	0.00729958	5.36451e-06	0.000126924	8
PDPN	792	0.0389999	0.00137256	5.39498e-06	0.000127369	11
FABP3	793	-0.0377201	0.00403109	5.39695e-06	0.000127369	11
FAM111A	794	0.0715904	0.00170398	5.40721e-06	0.000127451	11
PCSK1	795	-0.3601	0.015896	5.41763e-06	0.000127536	11
LRRN2	796	-0.0111551	0.0021207	5.44088e-06	0.000127922	11
ANGPT1	797	0.111378	0.00205227	5.45551e-06	0.000128105	11
ANKRD55	798	-0.0471605	0.00271841	5.46523e-06	0.000128173	10
NFATC1	799	0.0443295	0.00159988	5.48731e-06	0.000128487	11
DYNC1LI2	800	0.101893	0.00197827	5.49238e-06	0.000128487	11
TMEFF1	801	-0.0594401	0.00825305	5.53184e-06	0.000129117	8
ASB4	802	0.0159751	0.00168656	5.53707e-06	0.000129117	11
PMPCB	803	-0.0366968	0.00256225	5.53997e-06	0.000129117	11
BGN	804	0.0951484	0.00534777	5.55289e-06	0.000129257	11
CSNK1A1	805	0.0127251	0.00226646	5.56179e-06	0.000129303	11
TBX2	806	0.0515754	0.00200036	5.59957e-06	0.00013002	11
IDI2	807	0.00932777	0.00238358	5.67818e-06	0.000131563	11
KLF12	808	0.0203069	0.00232482	5.68011e-06	0.000131563	11
ZNF384	809	0.00372463	0.00106102	5.70269e-06	0.000131774	11
RPP14	810	0.0719498	0.00205302	5.70327e-06	0.000131774	11
CACYBP	811	-0.0360162	0.00561892	5.71241e-06	0.000131822	11
KMT5A	812	0.0384038	0.00615847	5.72547e-06	0.000131961	9
SLC22A23	813	0.101499	0.00517285	5.75225e-06	0.000132415	9
RWDD2A	814	-0.0949935	0.00141525	5.77414e-06	0.000132756	11
QKI	815	0.153793	0.00500351	5.82006e-06	0.000133571	10
MEF2C	816	0.0419225	0.0109856	5.82387e-06	0.000133571	11
PRICKLE4	817	-0.102058	0.000640466	5.83475e-06	0.000133657	8
LRRC17	818	0.0104503	0.00216119	5.86453e-06	0.000134114	11
VPS13A	819	-0.00701234	0.0038452	5.86904e-06	0.000134114	11
NADK	820	-0.0131594	0.00203672	5.91208e-06	0.000134593	10
USF3	821	0.134339	0.00574192	5.91422e-06	0.000134593	8
LOC388692	822	-0.0892907	0.00192926	5.92232e-06	0.000134593	10
CPM	823	0.15307	0.00255429	5.9242e-06	0.000134593	11
AKAP7	824	0.0234046	0.00238834	5.92598e-06	0.000134593	11
ARMC9	825	-0.0779947	0.00183763	5.94728e-06	0.000134884	11
PRRX1	826	0.0584742	0.00369286	5.95453e-06	0.000134884	11
LIN7B	827	-0.12821	0.00282144	5.9604e-06	0.000134884	11
IL27RA	828	0.0253564	0.0014492	5.98079e-06	0.000135026	11
RBM4	829	0.0590954	0.00171661	5.98113e-06	0.000135026	11
TRPC1	830	-0.0694925	0.000981705	5.99243e-06	0.000135118	11
STRBP	831	0.0240779	0.0039673	6.08029e-06	0.000136718	11
JUND	832	0.0843484	0.00117058	6.08519e-06	0.000136718	11
GTF2A2	833	0.00560115	0.00144112	6.08527e-06	0.000136718	11
KIF14	834	0.0317865	0.00133252	6.10946e-06	0.000137097	11
SCN2B	835	0.0702797	0.00815844	6.13551e-06	0.000137516	11
PREP	836	-0.105997	0.00132692	6.15981e-06	0.000137896	11
DZIP3	837	-0.15868	0.0046153	6.23089e-06	0.000139172	11
GPT	838	0.079475	0.000989752	6.23168e-06	0.000139172	11
TMEM14A	839	-0.16883	0.00495798	6.29371e-06	0.000140389	11
ATP5F1	840	-0.105878	0.000441002	6.41859e-06	0.000143005	11
SCN11A	841	0.0663757	0.0014947	6.43701e-06	0.000143244	11
GOSR2	842	-0.0892315	0.00116314	6.47233e-06	0.000143859	11
EID2	843	-0.0964599	0.00547292	6.49461e-06	0.000144183	11
HLA-G	844	0.0274095	0.00736633	6.50359e-06	0.000144212	10
EBNA1BP2	845	-0.118943	0.00131898	6.5321e-06	0.000144672	8
AMY1A	846	-0.037546	0.0172144	6.55026e-06	0.000144835	8
CISD1	847	-0.116253	0.00452657	6.55574e-06	0.000144835	11
BCL2L11	848	0.0741155	0.00182754	6.56267e-06	0.000144835	11
KDM4B	849	0.0558108	0.00484591	6.58678e-06	0.000145196	9
SPTBN4	850	0.0412908	0.00247425	6.60674e-06	0.000145465	11
LRRC14	851	0.0233073	0.00156109	6.61605e-06	0.000145499	11
SNCAIP	852	-0.000522551	0.00213396	6.64251e-06	0.000145887	11
YPEL1	853	-0.0582456	0.00257928	6.64931e-06	0.000145887	11
SP110	854	-0.0259535	0.00222177	6.65868e-06	0.000145922	11
DYNC2LI1	855	-0.0878072	0.00208124	6.68104e-06	0.000146241	11
MOXD1	856	-0.107825	0.00253307	6.69497e-06	0.000146283	11
SERINC3	857	-0.0833765	0.00281669	6.6986e-06	0.000146283	11
ZNF25	858	-0.104439	0.00332791	6.7164e-06	0.0001465	11
ZNF618	859	0.109997	0.00190411	6.76172e-06	0.000147317	11
PAK4	860	0.0446856	0.00128376	6.86816e-06	0.000149462	11
EDC3	861	0.0749263	0.000998929	6.93545e-06	0.000150609	11
DGKG	862	0.146194	0.002168	6.93694e-06	0.000150609	11
CSHL1	863	-0.0288931	0.000894551	6.96935e-06	0.000151137	11
RBBP5	864	0.0679381	0.00354143	7.00922e-06	0.000151826	11
SMARCA4	865	-0.0598095	0.00173497	7.03699e-06	0.000152199	11
TNFSF14	866	0.030392	0.00180697	7.05068e-06	0.000152199	11
C1S	867	-0.118628	0.00732124	7.05083e-06	0.000152199	11
MS4A6A	868	0.0489433	0.00621189	7.07797e-06	0.000152592	11
NDFIP2	869	-0.0539969	0.00423724	7.08536e-06	0.000152592	11
SLFN5	870	-0.00741021	0.00276679	7.14616e-06	0.00015356	11
CDC27	871	0.0194063	0.00180338	7.15109e-06	0.00015356	11
ZMYND11	872	0.0355517	0.00516014	7.15747e-06	0.00015356	11
N4BP2L2	873	-0.109777	0.0070437	7.16312e-06	0.00015356	9
FAM181B	874	0.115412	0.00203652	7.20927e-06	0.000154372	11
AZGP1	875	-0.0375782	0.00640104	7.26169e-06	0.000155317	11
NNT	876	0.002436	0.00355414	7.32778e-06	0.000156552	11
SFTPC	877	0.0707453	0.00148646	7.35662e-06	0.000156989	11
ATP5G3	878	-0.096332	0.00164165	7.4182e-06	0.000158012	11
RFX1	879	0.0956528	0.000996818	7.42144e-06	0.000158012	11
ASAH1	880	-0.07797	0.0023482	7.46824e-06	0.000158827	11
CHI3L2	881	-0.0571145	0.0212102	7.49182e-06	0.000159148	11
GAS7	882	0.0255775	0.00303389	7.50526e-06	0.000159253	11
SLC35F3	883	-0.0518802	0.00145235	7.52017e-06	0.000159388	11
NFIA	884	0.160383	0.00339731	7.53344e-06	0.000159489	11
CAMK2B	885	0.0876232	0.00427992	7.5773e-06	0.000160236	11
SMO	886	0.0693885	0.00205229	7.59484e-06	0.000160336	11
DDA1	887	-0.0566874	0.00136908	7.59913e-06	0.000160336	11
UGGT1	888	0.0441229	0.00324326	7.64653e-06	0.000161154	9
STAT3	889	0.0929207	0.00322995	7.67936e-06	0.000161566	11
FLCN	890	0.109217	0.00199246	7.69218e-06	0.000161566	11
SYNJ2BP	891	0.259065	0.00576498	7.69809e-06	0.000161566	8
DSE	892	0.0239452	0.00178585	7.70061e-06	0.000161566	11
PHACTR4	893	0.102112	0.00123544	7.7354e-06	0.000162114	11
PDPK1	894	0.0659212	0.00264496	7.7929e-06	0.000163137	11
SERPINB6	895	0.020423	0.00268552	7.81657e-06	0.00016329	11
SIRT5	896	-0.087483	0.000659754	7.81768e-06	0.00016329	11
COG1	897	-0.121058	0.00112852	7.82659e-06	0.000163294	11
STK4	898	0.121797	0.00160079	7.84942e-06	0.000163541	11
ZNF462	899	0.174496	0.00229587	7.86438e-06	0.000163541	11
ZSCAN2	900	0.0420184	0.00119916	7.86465e-06	0.000163541	10
RDH11	901	0.0645451	0.0022792	7.89443e-06	0.000163947	11
NXF2	902	0.0295109	0.00216974	7.90168e-06	0.000163947	8
CD79B	903	0.0844284	0.00305304	7.91963e-06	0.000164137	11
PCDHA11	904	0.105189	0.0052505	7.95309e-06	0.000164575	8
CBLN4	905	-0.0859513	0.00807793	7.96597e-06	0.000164575	11
SYNJ2	906	0.123996	0.00396882	7.96712e-06	0.000164575	11
UBE2D2	907	0.121277	0.00311572	7.99279e-06	0.000164923	11
ADORA2A	908	0.128569	0.00322288	8.02226e-06	0.000165349	8
TTC38	909	0.035078	0.00256159	8.06099e-06	0.000165964	11
APLP2	910	-0.0900554	0.00370684	8.12698e-06	0.000167139	11
FBXL2	911	-0.106597	0.00409756	8.17179e-06	0.000167876	11
TCF7L2	912	-0.0162677	0.00362636	8.20454e-06	0.000168364	11
DNAL4	913	-0.0815921	0.00258514	8.25212e-06	0.000168835	11
KLF15	914	0.0289541	0.00391391	8.25346e-06	0.000168835	11
HIGD1B	915	0.175286	0.00455249	8.25457e-06	0.000168835	11
MTPAP	916	0.056348	0.0065751	8.34235e-06	0.000170374	9
CBLB	917	0.0846375	0.00185909	8.34802e-06	0.000170374	11
PDGFRB	918	0.088939	0.00240591	8.39238e-06	0.000171093	11
HMGCR	919	-0.00657785	0.00420306	8.40388e-06	0.000171138	11
MICALL2	920	0.0892194	0.00271756	8.41289e-06	0.000171138	11
INTS7	921	0.0854352	0.00185645	8.51961e-06	0.000173121	11
TMEM189	922	0.174113	0.00314297	8.54108e-06	0.000173369	8
NKD1	923	0.0308324	0.00180666	8.63959e-06	0.000175089	11
RFFL	924	0.0626301	0.00425644	8.64452e-06	0.000175089	10
CTSC	925	-0.0291684	0.0033862	8.75481e-06	0.000177032	11
TAL1	926	0.113624	0.00128946	8.75939e-06	0.000177032	11
KAT6A	927	0.13939	0.0041149	8.81385e-06	0.000177941	9
CAP2	928	-0.123355	0.00964625	8.82575e-06	0.000177989	11
SMARCC1	929	0.126947	0.000918058	8.87493e-06	0.000178788	11
KRT222	930	-0.0177618	0.0112064	8.94371e-06	0.00017998	11
RCHY1	931	0.05933	0.00291997	9.03392e-06	0.0001816	11
ANKRD46	932	-0.0353286	0.00230119	9.0586e-06	0.000181635	11
CARS2	933	0.0125308	0.00126407	9.06336e-06	0.000181635	11
TBX10	934	-0.00821633	0.00137184	9.06477e-06	0.000181635	11
SNX10	935	-0.191549	0.00581733	9.07518e-06	0.000181649	11
GRM8	936	-0.121204	0.00238424	9.10261e-06	0.000181839	11
TNXB	937	0.0518367	0.00273936	9.10409e-06	0.000181839	11
CD84	938	0.0630039	0.00177426	9.17834e-06	0.000183127	11
ADORA3	939	-0.0188188	0.0069856	9.236e-06	0.000184081	11
PIAS4	940	0.147172	0.00166164	9.25933e-06	0.00018415	11
FAM20B	941	-0.0904037	0.00192717	9.2609e-06	0.00018415	11
CPPED1	942	0.198302	0.00340103	9.26899e-06	0.00018415	11
MEX3D	943	0.0821445	0.00184654	9.28133e-06	0.0001842	10
PSMB2	944	-0.0517914	0.00202447	9.34276e-06	0.000185222	11
BCOR	945	0.102675	0.00198915	9.49969e-06	0.000187778	11
RUNX1	946	0.0156429	0.0015026	9.50549e-06	0.000187778	8
RAB27A	947	0.016164	0.00196388	9.51172e-06	0.000187778	11
RSF1	948	0.0314668	0.00198866	9.52015e-06	0.000187778	11
ASPH	949	-0.117013	0.000829321	9.52186e-06	0.000187778	11
PACSIN2	950	0.046232	0.00116363	9.54036e-06	0.000187793	11
OSBPL10	951	-0.0204859	0.0017828	9.54266e-06	0.000187793	11
MSL2	952	0.148618	0.00269419	9.60064e-06	0.000188653	11
FCN2	953	-0.0339257	0.00143779	9.61543e-06	0.000188653	10
CELF4	954	0.0445681	0.00621709	9.61663e-06	0.000188653	9
EIF1B	955	-0.0768628	0.00128881	9.6284e-06	0.000188686	11
IGK	956	0.0138699	0.00501495	9.78245e-06	0.000191505	8
ZHX1	957	0.103211	0.00332947	9.82852e-06	0.000192206	11
GGA2	958	0.0144718	0.00123394	9.85734e-06	0.000192553	11
SPATA3	959	0.0574365	0.00174584	9.86688e-06	0.000192553	11
RUNX2	960	-0.00955426	0.00130441	9.87955e-06	0.0001926	10
DDX17	961	0.212616	0.00366239	9.94785e-06	0.00019373	11
SAMD4B	962	-0.0119562	0.0026513	9.97419e-06	0.00019404	11
CELF1	963	0.0951244	0.0030391	9.98861e-06	0.000194119	9
SRSF10	964	0.137174	0.00835448	1.00188e-05	0.000194504	9
PLEKHG5	965	-0.0744822	0.00175369	1.01071e-05	0.000196015	11
NAA15	966	0.115592	0.00620378	1.01329e-05	0.000196164	9
BCL2L14	967	0.00499789	0.00172906	1.01398e-05	0.000196164	11
LDB1	968	-0.0345159	0.00138999	1.01486e-05	0.000196164	11
KCNIP1	969	-0.0713805	0.00197879	1.01648e-05	0.000196164	11
RRBP1	970	-0.0143424	0.00151061	1.01672e-05	0.000196164	11
DPPA2	971	0.0275359	0.00194798	1.01808e-05	0.000196223	10
USP9X	972	-0.0235029	0.00241172	1.02114e-05	0.000196611	10
GUCA1C	973	-0.0723175	0.00165711	1.03185e-05	0.000198423	10
CYP2C8	974	-0.127327	0.00159869	1.03399e-05	0.000198423	11
MCM8	975	0.0979358	0.00304902	1.03517e-05	0.000198423	11
DCLK1	976	0.0030388	0.0122613	1.03532e-05	0.000198423	11
CAMSAP1	977	0.0117217	0.00173183	1.03585e-05	0.000198423	11
SLC30A5	978	-0.0434066	0.00164434	1.03715e-05	0.000198469	11
LYSMD2	979	-0.0645314	0.00393172	1.03966e-05	0.000198747	11
TADA3	980	0.00470903	0.00191752	1.05024e-05	0.000200547	11
RP9P	981	0.0744898	0.00312173	1.05123e-05	0.000200547	8
DIP2B	982	0.144965	0.00270298	1.0543e-05	0.000200929	11
CLEC5A	983	0.0609765	0.00435767	1.0758e-05	0.000204818	11
FAM46A	984	0.0817085	0.00184798	1.07961e-05	0.000205335	11
RSU1	985	0.0394897	0.00196733	1.08266e-05	0.000205705	11
COA1	986	0.0601317	0.00515495	1.10078e-05	0.000208936	9
SLC4A8	987	0.0535365	0.00397938	1.10855e-05	0.000210198	10
METTL5	988	-0.0801967	0.00181146	1.11298e-05	0.000210824	11
GALC	989	-0.0057793	0.00226116	1.1178e-05	0.000211523	11
ANGPT2	990	0.14504	0.0123483	1.12089e-05	0.000211794	11
PLEC	991	0.155987	0.00888982	1.1215e-05	0.000211794	9
PTGER3	992	-0.10599	0.00223541	1.12263e-05	0.000211794	11
USP32	993	0.0147963	0.00127935	1.1312e-05	0.000213196	11
B4GALT1	994	0.0260378	0.0020027	1.13376e-05	0.000213464	11
GAD2	995	-0.0903142	0.00301862	1.1371e-05	0.000213877	11
DGCR8	996	0.0935539	0.00211527	1.13826e-05	0.000213881	8
YME1L1	997	0.0491806	0.00185973	1.14629e-05	0.000214874	10
DTX2	998	0.0937443	0.00183727	1.14655e-05	0.000214874	8
LTBR	999	0.0447981	0.0018641	1.14703e-05	0.000214874	11
DRD2	1000	-0.0313012	0.00104231	1.14814e-05	0.000214874	11
IGKC	1001	0.0206863	0.00334663	1.14953e-05	0.000214919	8
CARD10	1002	0.0177988	0.00160353	1.15332e-05	0.000215258	11
FBXL17	1003	0.0405156	0.0020813	1.15364e-05	0.000215258	10
ARNTL2	1004	-0.0472688	0.00180605	1.16067e-05	0.000216194	11
NOMO2	1005	-0.0853622	0.00279211	1.16097e-05	0.000216194	8
SPATA18	1006	-0.105472	0.00178561	1.16294e-05	0.000216254	11
KLHL8	1007	0.147639	0.00202387	1.1636e-05	0.000216254	11
CASP1	1008	-0.0706129	0.00292089	1.16735e-05	0.000216735	10
CPXM2	1009	0.0429641	0.00219791	1.17299e-05	0.000217568	11
OCA2	1010	-0.114079	0.00263386	1.1814e-05	0.000218839	11
CDC5L	1011	-0.0158372	0.00178135	1.18218e-05	0.000218839	11
PPHLN1	1012	-0.00261191	0.00225593	1.18707e-05	0.00021939	11
TNIP1	1013	0.0412339	0.00176253	1.18863e-05	0.00021939	11
TCIRG1	1014	0.0366523	0.00275521	1.18868e-05	0.00021939	11
IVNS1ABP	1015	0.226086	0.00293484	1.19145e-05	0.000219684	11
GLS	1016	0.0228473	0.00341309	1.19947e-05	0.000220855	11
ZNHIT3	1017	-0.0879068	0.00349318	1.20016e-05	0.000220855	11
LYNX1	1018	-0.00326312	0.00235646	1.20212e-05	0.000220999	11
AHNAK	1019	0.0538439	0.00211693	1.21078e-05	0.000222372	11
COL12A1	1020	-0.0648003	0.00145396	1.21537e-05	0.000222997	11
BFSP1	1021	-0.111639	0.00146864	1.22216e-05	0.000224007	11
ZNF549	1022	-0.00360943	0.00169133	1.22327e-05	0.000224007	11
ATOH8	1023	0.0660099	0.00413441	1.22762e-05	0.000224384	11
G0S2	1024	0.156646	0.00309765	1.22773e-05	0.000224384	11
SLC4A9	1025	-0.0165756	0.00143946	1.23321e-05	0.000225165	11
CHD7	1026	0.11864	0.00200715	1.23724e-05	0.000225484	11
TDRD5	1027	-0.0642255	0.00180141	1.23746e-05	0.000225484	11
SAMD4A	1028	0.0933281	0.00251254	1.23971e-05	0.000225484	11
ANKH	1029	0.0386559	0.00201372	1.24026e-05	0.000225484	11
PLXNB1	1030	0.168105	0.00282927	1.24098e-05	0.000225484	11
MAP1LC3A	1031	-0.0630783	0.00239699	1.26012e-05	0.000228741	11
ZNF215	1032	-0.0730678	0.00151513	1.26633e-05	0.000229644	11
LMBR1	1033	0.0108947	0.00269392	1.26896e-05	0.000229899	11
MARK1	1034	-0.0858585	0.00227999	1.27139e-05	0.000230117	11
CYP3A5	1035	0.0385455	0.00181321	1.27351e-05	0.000230278	11
FST	1036	0.00893707	0.00205879	1.28152e-05	0.000231502	10
PHKA2	1037	0.0509422	0.0018052	1.29439e-05	0.000233601	11
TMEM63A	1038	0.0931211	0.00577832	1.2978e-05	0.000233992	11
TMEM107	1039	-0.100838	0.00171518	1.30706e-05	0.000235435	10
WIPF2	1040	0.0454928	0.00208365	1.31319e-05	0.000236312	11
ADAM21	1041	-0.0813781	0.0016017	1.33824e-05	0.000240539	10
PARVA	1042	-0.0254421	0.0022212	1.33926e-05	0.000240539	11
SNAP23	1043	0.125111	0.00307358	1.34524e-05	0.000241383	11
BAZ1A	1044	0.0697961	0.00359712	1.35438e-05	0.00024279	11
SARDH	1045	-0.0840407	0.00228127	1.35907e-05	0.000243397	11
CEP41	1046	-0.0657079	0.00417635	1.36527e-05	0.000244274	9
UBE3A	1047	0.025716	0.00220932	1.36892e-05	0.000244693	11
KRAS	1048	-0.0128691	0.00303264	1.37697e-05	0.000245897	11
C5orf42	1049	-0.078896	0.0011555	1.38702e-05	0.000247433	11
TAF9	1050	-0.203279	0.00601119	1.38821e-05	0.000247433	8
FOXP1	1051	0.0513672	0.00234116	1.39002e-05	0.00024752	11
NDUFAF1	1052	-0.108366	0.0028227	1.39971e-05	0.000249007	11
CNR1	1053	-0.162053	0.00480746	1.40476e-05	0.000249668	11
ADAM17	1054	0.0520681	0.00171252	1.40689e-05	0.000249687	10
TBC1D2B	1055	0.0275778	0.00178304	1.40753e-05	0.000249687	11
PDE4B	1056	-0.0929822	0.00331157	1.41302e-05	0.000250423	11
SMS	1057	-0.144204	0.000854783	1.41879e-05	0.000250978	11
FOXK2	1058	0.0586355	0.00210862	1.41939e-05	0.000250978	10
ARMC1	1059	0.055333	0.00322252	1.42017e-05	0.000250978	11
DUSP8	1060	0.214277	0.00608934	1.42348e-05	0.000251324	8
PID1	1061	-0.104305	0.00171486	1.42683e-05	0.00025168	11
GRIK1	1062	-0.0625085	0.00196597	1.43443e-05	0.000252781	11
TIA1	1063	0.0599746	0.00312907	1.43624e-05	0.000252862	11
DCN	1064	0.0309401	0.00202721	1.44393e-05	0.000253978	11
RAP2A	1065	0.0213993	0.00275481	1.4518e-05	0.000255122	11
FAM84A	1066	-0.129246	0.00281299	1.45708e-05	0.000255809	10
SETD2	1067	0.0972083	0.00166708	1.46222e-05	0.000256289	11
MLLT10	1068	0.000268074	0.00172686	1.46255e-05	0.000256289	10
ZBTB16	1069	0.108092	0.00394092	1.46525e-05	0.000256522	11
PPP2R2B	1070	-0.109378	0.00288171	1.46989e-05	0.000257093	11
POU2AF1	1071	0.0508129	0.00229577	1.47375e-05	0.000257528	10
ASXL1	1072	0.125607	0.00111987	1.47814e-05	0.000258055	11
VASP	1073	0.0263894	0.0018324	1.48112e-05	0.000258332	11
HSD17B7	1074	0.152436	0.00382324	1.48417e-05	0.000258623	10
GLRB	1075	-0.186703	0.013524	1.48892e-05	0.000259211	11
RALB	1076	0.00802269	0.00399245	1.49425e-05	0.000259896	10
SLC7A11	1077	0.10306	0.00401153	1.49791e-05	0.000260291	11
MCCC2	1078	-0.0919586	0.00181491	1.50429e-05	0.000261158	11
NBPF1	1079	0.21817	0.00478697	1.52661e-05	0.000264788	11
ZC3H15	1080	-0.0992771	0.00232007	1.52992e-05	0.000264953	11
ARF3	1081	-0.101185	0.00193901	1.5304e-05	0.000264953	11
MYOT	1082	0.268024	0.00347184	1.54444e-05	0.000267136	11
ZNF711	1083	-0.0286649	0.00526105	1.55159e-05	0.000268011	10
FAM162A	1084	-0.056058	0.00316167	1.5527e-05	0.000268011	11
ARL9	1085	-0.104749	0.00141874	1.55379e-05	0.000268011	11
STAT5B	1086	0.0930034	0.000571216	1.56034e-05	0.000268893	11
UBE2D3	1087	0.0388899	0.0017549	1.56767e-05	0.000269908	11
MDP1	1088	-0.111303	0.00314502	1.57483e-05	0.00027089	8
IL6ST	1089	-0.00280205	0.00376583	1.57968e-05	0.000271476	11
SOX13	1090	0.0943773	0.00163258	1.58505e-05	0.000272149	11
MSI2	1091	-0.0039363	0.00318958	1.59263e-05	0.000273124	11
ERBB3	1092	0.152621	0.00304162	1.59365e-05	0.000273124	11
RNF114	1093	0.104219	0.00169879	1.60617e-05	0.00027462	11
PTTG1IP	1094	0.0694675	0.00345385	1.60676e-05	0.00027462	11
FAM98B	1095	0.0268889	0.00115715	1.60678e-05	0.00027462	11
TJAP1	1096	0.110959	0.00356263	1.61231e-05	0.000275074	11
SYTL2	1097	-0.0893524	0.00299398	1.61237e-05	0.000275074	10
AGBL5	1098	0.0341261	0.00198207	1.63303e-05	0.000278304	11
GAGE2C	1099	0.0432173	0.0037973	1.63511e-05	0.000278304	8
BCL11A	1100	-0.0842254	0.00840293	1.63577e-05	0.000278304	11
PRKAG1	1101	-0.0839873	0.00106535	1.6566e-05	0.000281349	11
HSPA4	1102	0.0489464	0.00220636	1.65667e-05	0.000281349	11
NPC1	1103	0.128376	0.0017292	1.65874e-05	0.000281445	11
FCRLB	1104	-0.038434	0.00346492	1.66269e-05	0.00028186	10
ISG20	1105	0.0617087	0.00396206	1.66525e-05	0.000282038	11
ZCCHC17	1106	-0.0724779	0.00125654	1.67007e-05	0.000282598	11
EPN3	1107	-0.0333341	0.00312489	1.67323e-05	0.000282877	11
RBM15	1108	0.0776586	0.00129889	1.68262e-05	0.000284209	11
HNRNPA3	1109	0.000434929	0.00198901	1.6907e-05	0.000285058	11
ZC3H11A	1110	0.147555	0.00249313	1.69095e-05	0.000285058	8
ENOPH1	1111	-0.0881846	0.000743233	1.69222e-05	0.000285058	11
TGIF1	1112	0.0395167	0.00148516	1.69461e-05	0.000285203	11
DDX24	1113	-0.0589042	0.00241643	1.69876e-05	0.000285645	11
ASXL2	1114	0.154681	0.00164917	1.70214e-05	0.000285957	11
DBT	1115	0.0220924	0.00207617	1.7076e-05	0.000286617	11
LSM3	1116	-0.0813593	0.00122578	1.72009e-05	0.000288203	11
IL21R	1117	0.0106364	0.00130271	1.72013e-05	0.000288203	11
OXR1	1118	-0.00995869	0.00796803	1.73884e-05	0.000291077	11
TRIM24	1119	-0.0211348	0.00131708	1.74236e-05	0.000291405	11
PHF20	1120	0.0693393	0.00210866	1.74978e-05	0.000292003	11
PIK3C2B	1121	0.0692235	0.00312942	1.74988e-05	0.000292003	11
MYEF2	1122	0.0339179	0.00167029	1.75062e-05	0.000292003	11
PSMA3	1123	-0.0791644	0.00112813	1.76581e-05	0.000294276	11
KRT3	1124	-0.0563944	0.00167512	1.76739e-05	0.000294276	10
IL18	1125	0.0792704	0.00459857	1.77123e-05	0.000294655	11
POLR3K	1126	-0.0825639	0.00179139	1.77882e-05	0.000295655	11
TMLHE	1127	-0.062944	0.0015028	1.7891e-05	0.000297098	11
GLIS3	1128	0.0736254	0.00259996	1.79172e-05	0.000297269	11
AFTPH	1129	0.0330433	0.00337749	1.80117e-05	0.000298573	11
HS6ST2	1130	-0.0793052	0.0119534	1.81578e-05	0.000300702	11
LSM4	1131	-0.0780224	0.00131466	1.81723e-05	0.000300702	11
SSX2IP	1132	0.0140185	0.00532499	1.81943e-05	0.0003008	11
GRIN2A	1133	-0.0634398	0.00800132	1.8327e-05	0.000302726	11
EDNRB	1134	0.0297838	0.00494814	1.8432e-05	0.000303959	11
EMP1	1135	-0.0125622	0.00451293	1.84341e-05	0.000303959	11
ZC3H14	1136	0.0320617	0.00101073	1.85539e-05	0.000305666	11
SEC14L1	1137	-0.0375199	0.00321723	1.85793e-05	0.000305815	11
HIF1AN	1138	-0.0491472	0.00101514	1.87233e-05	0.000307914	11
BBS10	1139	-0.0477595	0.00442047	1.88563e-05	0.000309829	11
CAMKK2	1140	-0.0333031	0.00360536	1.88828e-05	0.000309993	11
ZNF91	1141	0.0761913	0.0035054	1.90289e-05	0.000312118	11
S100A4	1142	0.159309	0.00616649	1.90492e-05	0.000312176	11
ZNF430	1143	0.0827908	0.00284264	1.9106e-05	0.000312833	11
PLAGL1	1144	-0.09436	0.00237903	1.91357e-05	0.000313045	10
IL4R	1145	-0.0235057	0.00535112	1.93884e-05	0.00031685	11
CDKN2D	1146	-0.106669	0.00204383	1.94021e-05	0.00031685	11
RAB11FIP2	1147	-0.0846184	0.00178674	1.94275e-05	0.000316988	11
NIT2	1148	-0.12748	0.00170394	1.94489e-05	0.000317061	11
DLG3	1149	-0.00848557	0.00444519	1.95391e-05	0.000318185	10
KALRN	1150	-0.177245	0.00316626	1.95518e-05	0.000318185	11
PCDHGC5	1151	0.019437	0.00219236	1.96649e-05	0.000319651	10
TUBGCP4	1152	0.124665	0.00363574	1.96794e-05	0.000319651	10
PGM5	1153	0.0984184	0.00182977	1.97089e-05	0.000319651	10
CYP19A1	1154	-0.0725087	0.000679337	1.97103e-05	0.000319651	10
RAPGEF3	1155	0.125929	0.00369314	1.98224e-05	0.000320903	11
PNPLA8	1156	0.0172001	0.00367175	1.9863e-05	0.000320903	11
ARL4D	1157	-0.0932785	0.00171908	1.98642e-05	0.000320903	11
ZNF33A	1158	0.0385395	0.00198553	1.98643e-05	0.000320903	11
GSPT1	1159	0.121622	0.00216723	1.98732e-05	0.000320903	11
DIXDC1	1160	0.160667	0.00404853	1.99586e-05	0.00032175	11
SEZ6L2	1161	-0.0965862	0.00399494	1.996e-05	0.00032175	11
SFSWAP	1162	0.134815	0.0049596	2.00624e-05	0.000322912	8
HCRTR2	1163	-0.0960298	0.0027012	2.00994e-05	0.000322912	11
MFN2	1164	0.0659194	0.00167492	2.01169e-05	0.000322912	11
LILRA5	1165	0.0455733	0.00173839	2.01171e-05	0.000322912	11
SVIL	1166	0.011939	0.00138579	2.01184e-05	0.000322912	11
ATP5G1	1167	-0.0545453	0.00305207	2.01848e-05	0.000323701	11
HABP4	1168	-0.102625	0.000402191	2.02793e-05	0.000324937	11
GAD1	1169	0.0103893	0.00465072	2.03962e-05	0.000326531	11
EHD1	1170	0.0965533	0.00162004	2.0438e-05	0.000326921	11
CDC20B	1171	-0.0016145	0.00148926	2.05537e-05	0.00032849	10
UACA	1172	0.116117	0.0031393	2.07373e-05	0.000331143	11
GAB1	1173	0.161053	0.00228111	2.08944e-05	0.000333366	11
NFKBIA	1174	0.0623557	0.004652	2.10038e-05	0.000334826	10
KLK5	1175	-0.0889716	0.0014225	2.11702e-05	0.000337192	11
LOXL2	1176	0.0282082	0.00116089	2.11897e-05	0.000337215	11
MXI1	1177	0.14453	0.00425761	2.12376e-05	0.00033769	11
TPD52	1178	0.074444	0.00634609	2.13092e-05	0.000338541	11
NIT1	1179	-0.0646756	0.000945711	2.13356e-05	0.000338673	11
SOAT1	1180	0.0574775	0.00259962	2.14203e-05	0.00033973	11
PLCL2	1181	-0.0532328	0.00248329	2.14713e-05	0.00034025	11
PPP1R10	1182	0.117387	0.000779532	2.15662e-05	0.000341464	11
PCDHAC2	1183	0.0466166	0.00318692	2.1681e-05	0.000342993	11
DEDD	1184	0.0148473	0.00123309	2.17059e-05	0.000343097	11
SCN3B	1185	0.0344481	0.0149033	2.18787e-05	0.000345454	11
ZNF580	1186	-0.00733898	0.00291668	2.18965e-05	0.000345454	11
TRPM6	1187	0.018706	0.00223203	2.19238e-05	0.000345454	11
MEPCE	1188	0.0731311	0.00131981	2.19289e-05	0.000345454	11
F8	1189	-0.0665122	0.0032233	2.20414e-05	0.000346934	11
KHDC1	1190	-0.0587051	0.00149575	2.20818e-05	0.000347278	10
CTBP2	1191	0.0654195	0.00243543	2.21286e-05	0.000347721	11
MEN1	1192	0.0678818	0.00132047	2.2182e-05	0.000348268	11
PTPRF	1193	0.0167346	0.00228823	2.24614e-05	0.000352323	11
UGCG	1194	0.123886	0.0037332	2.24779e-05	0.000352323	11
TFEB	1195	0.110918	0.00320111	2.25156e-05	0.000352618	11
S100A11	1196	0.0152926	0.0100184	2.25412e-05	0.000352725	11
FGF14	1197	0.0260802	0.00569317	2.25776e-05	0.000352998	11
CBX2	1198	0.0206268	0.0015298	2.28958e-05	0.000357402	10
MACF1	1199	0.0629029	0.00156632	2.28974e-05	0.000357402	11
GPT2	1200	-0.0246488	0.00314117	2.32069e-05	0.000361709	11
SDHB	1201	-0.10321	0.00084488	2.3212e-05	0.000361709	11
ZNF148	1202	0.148227	0.00275443	2.3255e-05	0.000362078	11
ATG4D	1203	0.044742	0.00176732	2.33862e-05	0.000363819	11
MAP3K10	1204	0.00745169	0.00227788	2.34175e-05	0.000364002	11
CLCN7	1205	0.0749574	0.00110027	2.34524e-05	0.000364243	11
COX6B1	1206	-0.0823237	0.00102242	2.37071e-05	0.000367893	11
PIK3C2G	1207	-0.0715061	0.0018016	2.38982e-05	0.00037055	11
CKLF	1208	-0.0539626	0.00266305	2.40424e-05	0.000372478	11
SIRPA	1209	0.0933782	0.00250109	2.4426e-05	0.000378109	11
TCOF1	1210	-0.00907247	0.00126104	2.44489e-05	0.000378149	11
GPR22	1211	-0.182168	0.00526706	2.45842e-05	0.000379928	11
SIK3	1212	0.0839053	0.00196301	2.48097e-05	0.000383096	11
SLC26A6	1213	0.046472	0.00152862	2.48566e-05	0.000383504	11
PSME3	1214	0.00227369	0.0017825	2.49415e-05	0.000384497	11
IL13RA1	1215	0.0883918	0.0021625	2.49849e-05	0.000384629	11
PPP5C	1216	0.00261601	0.00113142	2.49911e-05	0.000384629	11
TSFM	1217	-0.0918268	0.000892525	2.50286e-05	0.000384889	11
RARB	1218	-0.0578303	0.00165916	2.51223e-05	0.000386012	11
UNC13D	1219	0.0152165	0.00169388	2.54444e-05	0.000390642	11
SMIM14	1220	0.088525	0.00644033	2.54792e-05	0.000390701	9
USP11	1221	-0.098757	0.00300968	2.549e-05	0.000390701	11
SCN2A	1222	0.0958748	0.0109316	2.55228e-05	0.000390884	11
PER1	1223	-0.0103008	0.00258546	2.55923e-05	0.000391464	8
LRP8	1224	0.153837	0.00456033	2.56158e-05	0.000391464	11
PDPR	1225	0.121842	0.0030994	2.56235e-05	0.000391464	11
HBEGF	1226	-0.0135263	0.00155524	2.56974e-05	0.000392273	11
CAST	1227	0.0553342	0.00249913	2.57502e-05	0.000392759	11
PPM1A	1228	0.0872372	0.00296139	2.57845e-05	0.000392868	11
CSTA	1229	0.00654366	0.00418777	2.57994e-05	0.000392868	11
MRTO4	1230	0.0307929	0.00199134	2.58405e-05	0.00039312	11
FRZB	1231	0.0246818	0.00280231	2.58619e-05	0.00039312	11
MBTD1	1232	0.148881	0.00212992	2.58789e-05	0.00039312	11
ITGA10	1233	0.0955559	0.00269585	2.59766e-05	0.000394284	11
CSAD	1234	-0.0272536	0.00120929	2.60677e-05	0.000395345	11
EIF3K	1235	-0.0841682	0.000545268	2.62052e-05	0.00039711	11
HPRT1	1236	-0.143917	0.00423718	2.63327e-05	0.000398719	11
PEX7	1237	-0.062223	0.00152547	2.64489e-05	0.000400154	11
HMBOX1	1238	0.210874	0.00371668	2.65292e-05	0.000401045	11
TP53INP1	1239	0.0737387	0.00206601	2.65732e-05	0.000401387	11
MAPT	1240	0.148614	0.00458659	2.66743e-05	0.000402016	11
PDE4C	1241	0.0233838	0.00354215	2.66782e-05	0.000402016	8
TNRC6B	1242	0.13996	0.00338081	2.66793e-05	0.000402016	11
TM2D1	1243	-0.101791	0.00193469	2.68177e-05	0.000403776	11
NDUFS1	1244	0.0434173	0.00357549	2.68859e-05	0.000404477	11
GSN	1245	0.142195	0.00259102	2.70737e-05	0.000406533	11
ARID3A	1246	0.0614332	0.000890935	2.70871e-05	0.000406533	11
EVI5	1247	0.0935779	0.00264039	2.70877e-05	0.000406533	10
CD8A	1248	-0.101005	0.00191992	2.72402e-05	0.000408494	11
ZBTB45	1249	0.0417771	0.00193516	2.731e-05	0.000409213	11
MLX	1250	0.00735499	0.000918462	2.7359e-05	0.000409619	11
ZFAND6	1251	-0.0312884	0.00367	2.74039e-05	0.000409963	11
PLSCR1	1252	-0.040399	0.00358783	2.74545e-05	0.000410392	11
TTC3	1253	0.0253208	0.00174791	2.74948e-05	0.000410424	8
SYN2	1254	0.111206	0.00876229	2.75005e-05	0.000410424	11
PRDX2	1255	-0.0688624	0.00175609	2.76521e-05	0.000412358	10
DDX54	1256	-0.0387557	0.00242274	2.7705e-05	0.000412817	11
LEF1	1257	0.0424033	0.00187647	2.77755e-05	0.00041354	11
TRPM3	1258	0.0515907	0.00251402	2.78789e-05	0.000414749	11
FGD2	1259	0.075417	0.00236609	2.79849e-05	0.000415995	10
ADH1B	1260	0.0243646	0.00229105	2.81277e-05	0.000417771	11
SH3BP4	1261	0.0459254	0.00188753	2.8149e-05	0.000417771	11
TFDP1	1262	-0.00478715	0.00188021	2.82349e-05	0.000418714	11
TRIM36	1263	-0.0404954	0.0013995	2.85493e-05	0.00042304	11
NECAP1	1264	-0.21704	0.00244267	2.85892e-05	0.000423297	11
MYLIP	1265	0.113417	0.000739134	2.86389e-05	0.000423698	10
SERP1	1266	-0.0885296	0.00269964	2.87153e-05	0.000424492	11
ATF6	1267	0.0200799	0.00158455	2.87881e-05	0.000425232	11
BCL2	1268	0.00900764	0.00169949	2.88836e-05	0.000426306	11
PTH1R	1269	0.137017	0.00240013	2.89695e-05	0.000427237	11
RGMA	1270	0.0727068	0.00176618	2.90085e-05	0.000427476	11
FRYL	1271	0.215496	0.00378177	2.90535e-05	0.000427802	10
BTBD11	1272	0.00495924	0.0026681	2.91194e-05	0.000428435	10
MYOF	1273	-0.0468801	0.00622973	2.91749e-05	0.000428914	9
ZNF395	1274	0.0101528	0.00189699	2.92013e-05	0.000428926	11
SNCG	1275	-0.0981034	0.0021606	2.92215e-05	0.000428926	11
PAX3	1276	0.00583932	0.00087559	2.93968e-05	0.00043116	11
RYBP	1277	0.166738	0.00402259	2.94301e-05	0.000431312	11
WNT10B	1278	-0.156627	0.00269446	2.95808e-05	0.000433181	11
SRRM2	1279	0.121294	0.00124931	2.96313e-05	0.000433524	11
ARHGAP30	1280	0.0475337	0.00261009	2.96506e-05	0.000433524	11
GLTP	1281	0.218538	0.00211564	2.9695e-05	0.000433835	11
AP2A1	1282	-0.0317406	0.00239306	2.97518e-05	0.000434325	11
MTG1	1283	0.0680327	0.00163881	2.99321e-05	0.0004363	11
RALBP1	1284	0.0545592	0.00182366	2.99337e-05	0.0004363	11
GRAP	1285	0.0189955	0.00159726	2.99715e-05	0.00043651	10
COPA	1286	0.100561	0.00202681	3.0046e-05	0.000437255	11
RP9	1287	0.0870466	0.00139571	3.02388e-05	0.000439553	11
RFPL1S	1288	-0.186701	0.00235441	3.02508e-05	0.000439553	10
SLAMF8	1289	-0.0460035	0.00127174	3.03304e-05	0.000440367	11
UBE4B	1290	0.0848104	0.00196098	3.05326e-05	0.00044296	11
GAP43	1291	-0.0511022	0.00297257	3.0658e-05	0.000444434	11
PLOD1	1292	0.0629389	0.00219717	3.07111e-05	0.000444784	11
CLN8	1293	0.158447	0.00355664	3.07297e-05	0.000444784	11
TRAP1	1294	-0.0702881	0.00155578	3.0884e-05	0.000446672	11
WWC1	1295	0.0579992	0.00143438	3.10618e-05	0.000448897	11
LLPH	1296	0.135012	0.00747839	3.11057e-05	0.000449184	9
COL17A1	1297	-0.051035	0.00137352	3.1191e-05	0.000450069	10
KIF13A	1298	0.143625	0.00269624	3.12623e-05	0.000450751	11
MARCKS	1299	0.0420259	0.00458765	3.13035e-05	0.000450818	11
ARFGEF3	1300	0.191735	0.00871975	3.13283e-05	0.000450818	9
SYT7	1301	-0.0691366	0.0028585	3.13393e-05	0.000450818	11
YKT6	1302	0.00473869	0.00108656	3.13942e-05	0.000451154	11
CFDP1	1303	-0.0218438	0.00132188	3.14325e-05	0.000451154	11
NETO2	1304	-0.037845	0.00445655	3.1435e-05	0.000451154	11
SPHK1	1305	0.063081	0.0019721	3.15041e-05	0.000451801	11
PRMT8	1306	-0.143731	0.00540418	3.15586e-05	0.000452235	11
SORBS3	1307	0.034696	0.00446002	3.16524e-05	0.000453233	11
KPNA6	1308	0.0771751	0.00152695	3.18921e-05	0.000456316	11
CPLX2	1309	-0.0828158	0.00431926	3.20446e-05	0.000457805	10
FOXA2	1310	0.0295332	0.00126187	3.20451e-05	0.000457805	10
CSRP1	1311	0.150747	0.000636052	3.22012e-05	0.000459417	11
SLC44A4	1312	0.0243614	0.00190274	3.22071e-05	0.000459417	11
EID1	1313	-0.0790349	0.00280874	3.23286e-05	0.0004608	11
SEPT9	1314	0.0229532	0.00160619	3.23833e-05	0.00046118	11
SLC22A6	1315	0.0229532	0.00178755	3.24079e-05	0.00046118	11
FMO2	1316	0.121463	0.00272214	3.24292e-05	0.00046118	11
HDAC9	1317	-0.0402736	0.00145786	3.25528e-05	0.000462586	11
VGLL4	1318	0.148185	0.00315656	3.25919e-05	0.00046279	11
HSD11B2	1319	0.058459	0.00171682	3.2642e-05	0.00046315	11
THNSL1	1320	-0.0888689	0.00179132	3.2817e-05	0.00046528	11
ADAMTS9	1321	-0.0592559	0.00314239	3.29242e-05	0.000466447	11
FOXC1	1322	0.088514	0.00550274	3.29823e-05	0.000466662	11
DCTPP1	1323	-0.0632096	0.00117693	3.29892e-05	0.000466662	11
MSI1	1324	0.0357208	0.00166409	3.31338e-05	0.000468353	11
WDR59	1325	0.0733289	0.000351567	3.32024e-05	0.000468968	11
MRPS21	1326	-0.100515	0.00107131	3.33505e-05	0.000470705	11
CPEB1	1327	0.0363412	0.00391064	3.35104e-05	0.000472605	11
KCNH2	1328	-0.0206664	0.00190041	3.36186e-05	0.000473774	11
RPS6KA1	1329	0.0872594	0.00285395	3.37525e-05	0.000475044	11
GINS1	1330	-0.00952866	0.00201231	3.37595e-05	0.000475044	11
INSIG1	1331	0.167974	0.00659218	3.38226e-05	0.000475575	11
SLC5A4	1332	0.0498098	0.00111248	3.40425e-05	0.000478307	10
TEX14	1333	0.053302	0.00156016	3.41977e-05	0.000480127	11
GREM2	1334	-0.0489602	0.00290488	3.4298e-05	0.000481174	11
PCDHGC3	1335	0.0956992	0.00316427	3.45133e-05	0.000483832	11
NUDT2	1336	-0.0963943	0.000712969	3.46567e-05	0.000485479	11
PARP2	1337	-0.115211	0.0019502	3.47834e-05	0.00048689	11
EFNA1	1338	0.0383403	0.00433925	3.48826e-05	0.000487914	11
STAG2	1339	0.0923171	0.00433541	3.49092e-05	0.000487921	11
PTPN5	1340	-0.0579056	0.00285021	3.49873e-05	0.000488648	11
MED8	1341	-0.0149035	0.0011271	3.50218e-05	0.000488764	11
TSC22D3	1342	-0.0168834	0.00303343	3.50511e-05	0.000488809	11
NCS1	1343	-0.0132565	0.00622764	3.51376e-05	0.00048936	9
GIMAP6	1344	0.101585	0.00424384	3.51499e-05	0.00048936	11
PTRH2	1345	-0.0603705	0.00153866	3.51691e-05	0.00048936	11
HP1BP3	1346	0.140529	0.00305965	3.54498e-05	0.000492899	11
VWF	1347	-0.00420334	0.00291962	3.55395e-05	0.000493779	11
RRAGC	1348	0.0902596	0.00168128	3.56898e-05	0.0004955	11
RASL12	1349	0.160814	0.00768954	3.57303e-05	0.000495695	11
TAC1	1350	-0.181907	0.0296422	3.59955e-05	0.000499005	11
DMC1	1351	0.047666	0.00229702	3.62063e-05	0.000501554	11
AHR	1352	0.112458	0.00389686	3.6235e-05	0.000501582	11
GABRA2	1353	-0.093638	0.00700296	3.643e-05	0.000503907	11
HNRNPR	1354	0.0461275	0.00467687	3.64605e-05	0.000503957	9
RREB1	1355	0.0450072	0.00111873	3.64899e-05	0.000503991	10
PIGX	1356	-0.0196474	0.0018118	3.65234e-05	0.000504083	11
RAI14	1357	0.159951	0.00140693	3.65989e-05	0.000504752	11
ATRN	1358	-0.121268	0.00240336	3.66614e-05	0.000505242	11
ZDHHC21	1359	-0.106934	0.00176325	3.68211e-05	0.00050707	11
HECTD1	1360	0.00813033	0.00185913	3.68785e-05	0.000507487	11
TMPO	1361	0.0856891	0.00243093	3.69856e-05	0.000508349	10
HLA-DOA	1362	0.0780607	0.00213233	3.69955e-05	0.000508349	11
FGG	1363	-0.0755246	0.00113907	3.71443e-05	0.000510018	11
ARMC8	1364	0.020004	0.00273782	3.72496e-05	0.000511089	11
FILIP1L	1365	-0.0763513	0.00265371	3.72772e-05	0.000511093	11
UQCRB	1366	-0.0228704	0.002411	3.73891e-05	0.000512253	11
LYZL2	1367	0.0515955	0.00146055	3.76326e-05	0.000515212	11
TPM2	1368	0.0356915	0.00331081	3.76842e-05	0.000515541	11
PAFAH1B1	1369	-0.0183933	0.00467965	3.78202e-05	0.000517023	11
NR2F2	1370	0.090499	0.0029739	3.78683e-05	0.000517304	11
ZFHX3	1371	0.0909621	0.00172	3.79101e-05	0.000517496	11
FBLN1	1372	0.139587	0.00062891	3.79488e-05	0.000517647	11
FANCB	1373	0.0643833	0.00186968	3.80678e-05	0.000518891	11
SPIRE1	1374	0.0829626	0.00247082	3.81255e-05	0.0005193	11
HIPK1	1375	0.0552486	0.00451449	3.83086e-05	0.000521414	11
VKORC1L1	1376	-0.0776278	0.00324519	3.84676e-05	0.000522913	11
ZCCHC12	1377	-0.181361	0.00700796	3.84746e-05	0.000522913	11
ATP6AP2	1378	-0.103814	0.00123881	3.85388e-05	0.000523062	11
OSBPL6	1379	-0.0280234	0.00252888	3.85414e-05	0.000523062	11
PTPN2	1380	-0.0362389	0.00184238	3.85986e-05	0.000523459	11
DDR1	1381	0.050341	0.00566784	3.86636e-05	0.00052396	8
ZIC3	1382	0.0535444	0.00173818	3.88205e-05	0.000525705	11
ATP6V1G2	1383	-0.186383	0.00707225	3.89468e-05	0.000527035	11
SMARCA2	1384	0.0418068	0.00313676	3.9033e-05	0.00052782	11
SALL4	1385	0.0355668	0.00142541	3.93212e-05	0.000531334	10
GPRC5C	1386	-0.0172202	0.00154612	3.9466e-05	0.000532904	11
PIK3IP1	1387	-0.0917333	0.00250173	3.95262e-05	0.000533123	11
TAZ	1388	0.048485	0.00156922	3.95392e-05	0.000533123	11
TTLL3	1389	-0.00720591	0.001728	3.97868e-05	0.000536077	10
PRKCE	1390	-0.0635491	0.00303632	3.99438e-05	0.000537804	11
COL6A1	1391	0.0523311	0.0025728	4.005e-05	0.000538846	11
PON1	1392	0.00784155	0.002302	4.03491e-05	0.000542481	10
DSCAM	1393	-0.0130977	0.00193876	4.04216e-05	0.000542799	11
ZNF665	1394	0.122156	0.00330199	4.04308e-05	0.000542799	11
WTAP	1395	0.0672233	0.00166593	4.07108e-05	0.000546124	11
RAB3B	1396	-0.00892709	0.00349919	4.07368e-05	0.000546124	11
AK1	1397	-0.00573696	0.00142172	4.08065e-05	0.0005465	11
BRWD3	1398	0.0971598	0.00213291	4.08368e-05	0.0005465	11
CLEC7A	1399	0.00706677	0.00179375	4.0876e-05	0.0005465	10
SNX6	1400	0.173975	0.00378838	4.08816e-05	0.0005465	11
IVD	1401	-0.0599821	0.00153826	4.09525e-05	0.000547003	11
IKBIP	1402	0.00125907	0.00136836	4.09777e-05	0.000547003	10
VHL	1403	0.0634372	0.00286423	4.10409e-05	0.000547456	11
DACT3	1404	0.0140726	0.00228905	4.11106e-05	0.000547995	11
SCN3A	1405	-0.110777	0.00350384	4.11752e-05	0.000548466	11
PALLD	1406	0.0431252	0.00329848	4.13917e-05	0.000550958	11
ZNF175	1407	0.0761432	0.000739172	4.14456e-05	0.000551282	11
WNK1	1408	0.18591	0.00411816	4.15491e-05	0.000552266	11
MAP4	1409	0.0202538	0.00725961	4.17256e-05	0.000554219	11
PPP3CA	1410	-0.106562	0.00315154	4.17924e-05	0.000554713	11
PPM1L	1411	0.0461383	0.00374981	4.18275e-05	0.000554784	10
TNK2	1412	0.0183346	0.0024005	4.19381e-05	0.000555858	11
KHK	1413	0.00144581	0.00125834	4.19753e-05	0.000555957	11
TMED2	1414	-0.0549246	0.00236898	4.20375e-05	0.000556363	11
UPB1	1415	0.0699781	0.00141139	4.20654e-05	0.000556363	11
SOBP	1416	0.00912017	0.00196264	4.21365e-05	0.00055675	11
CDH11	1417	0.0470479	0.00194311	4.21708e-05	0.00055675	10
GPR146	1418	-0.00443109	0.00412109	4.21839e-05	0.00055675	11
AKAP6	1419	-0.116766	0.0028795	4.22798e-05	0.000557173	11
ATG3	1420	-0.0530104	0.00191553	4.23284e-05	0.000557173	11
MRPS22	1421	-0.0510315	0.000952758	4.23345e-05	0.000557173	11
RBM3	1422	-0.0404146	0.00321936	4.23501e-05	0.000557173	11
RAD54L2	1423	0.137025	0.00073059	4.23648e-05	0.000557173	9
MPZL2	1424	0.0255502	0.00313815	4.2492e-05	0.000558454	11
FANCC	1425	0.0803746	0.00170654	4.25506e-05	0.000558831	11
AP2B1	1426	-0.0640193	0.00167676	4.26294e-05	0.000559	11
SHROOM1	1427	0.143676	0.00336601	4.26461e-05	0.000559	11
SLC2A3	1428	-0.0258085	0.00442411	4.2653e-05	0.000559	11
HIST1H4J	1429	0.0600456	0.0015697	4.27316e-05	0.000559637	11
PLEKHM1	1430	0.0537857	0.00122078	4.28068e-05	0.00056023	11
FCRL5	1431	-0.0283987	0.00106398	4.2926e-05	0.000561361	10
TAOK2	1432	-0.0312375	0.00165631	4.29532e-05	0.000561361	11
TMEM19	1433	0.0912046	0.00216833	4.3105e-05	0.000562951	11
RNF128	1434	-0.139753	0.00627332	4.33289e-05	0.000565156	11
FAM210B	1435	0.0917118	0.00614347	4.33448e-05	0.000565156	9
SORBS2	1436	-0.0923056	0.00315156	4.33644e-05	0.000565156	11
IGHM	1437	-0.0548819	0.0022812	4.35604e-05	0.000567316	8
CHCHD3	1438	-0.0555727	0.00150395	4.36146e-05	0.000567438	11
DCX	1439	-0.00907126	0.00480978	4.36304e-05	0.000567438	11
ATP1B1	1440	-0.0154386	0.00423249	4.37106e-05	0.000568086	11
PBRM1	1441	0.0738294	0.00141573	4.37606e-05	0.000568341	10
MIR4680	1442	0.107933	0.00529995	4.38422e-05	0.000568817	8
FKBP14	1443	0.0124565	0.0029106	4.38871e-05	0.000568817	11
ZNF70	1444	0.103969	0.0025907	4.38884e-05	0.000568817	10
DCAF7	1445	0.0662934	0.00117541	4.39712e-05	0.000569496	11
CC2D2A	1446	-0.0532322	0.00164085	4.41611e-05	0.000571559	10
NLRP3	1447	-0.0559703	0.000875553	4.43344e-05	0.000573405	11
C16orf58	1448	-0.10984	0.000971664	4.43801e-05	0.000573601	11
TRIM33	1449	0.0520329	0.00133606	4.444e-05	0.000573979	11
SEC22C	1450	0.0596731	0.00187289	4.48403e-05	0.000578464	11
BEX4	1451	-0.1436	0.000878944	4.48491e-05	0.000578464	11
GABPB2	1452	0.112505	0.00453444	4.48919e-05	0.000578616	11
PCDHA7	1453	0.114182	0.00732176	4.49251e-05	0.000578646	8
ZNF546	1454	-0.00464471	0.00169364	4.49888e-05	0.000579069	11
RELT	1455	-0.00875723	0.00107143	4.50472e-05	0.000579421	11
FYN	1456	0.0251543	0.00219335	4.51329e-05	0.000580125	11
C11orf74	1457	-0.059502	0.00239209	4.53203e-05	0.000582134	11
DOCK5	1458	0.163245	0.00475748	4.56989e-05	0.000586594	11
MCHR1	1459	-0.00874204	0.00175422	4.58671e-05	0.00058835	11
RHOQ	1460	0.177556	0.00260035	4.59694e-05	0.000589258	10
RAPGEF4	1461	-0.116419	0.00472975	4.60118e-05	0.000589398	11
SPATA7	1462	-0.10823	0.0021697	4.61685e-05	0.000590938	11
SFPQ	1463	-0.0618103	0.00262988	4.61952e-05	0.000590938	11
ASTN2	1464	0.0330525	0.00176061	4.62721e-05	0.000591186	11
CREBL2	1465	0.0393648	0.00247645	4.62777e-05	0.000591186	11
MS4A1	1466	-0.0260666	0.00115695	4.64947e-05	0.000593552	11
ZNF672	1467	0.0424663	0.00132388	4.65638e-05	0.000594029	11
SLC8A1	1468	0.0297273	0.0016556	4.67577e-05	0.000596098	10
TMEM267	1469	0.152204	0.00513786	4.68513e-05	0.000596883	9
MYH3	1470	0.0500781	0.00154509	4.69137e-05	0.000597272	11
STXBP5	1471	0.0608274	0.00586548	4.69554e-05	0.000597396	11
TUBB2B	1472	-0.254581	0.00687099	4.73425e-05	0.000601913	11
CACNB4	1473	0.047988	0.00649824	4.73846e-05	0.000602039	11
MBD1	1474	-0.00402369	0.00229542	4.77364e-05	0.000606096	11
FKBP5	1475	-0.0352612	0.00833053	4.78356e-05	0.000606689	11
CSK	1476	0.125811	0.00170946	4.78479e-05	0.000606689	11
SSH3	1477	0.0359705	0.0016829	4.7881e-05	0.000606698	10
DST	1478	0.094231	0.00285301	4.79524e-05	0.000606862	11
LTK	1479	-0.0389029	0.00129965	4.79588e-05	0.000606862	11
FMNL2	1480	0.135694	0.00246741	4.81211e-05	0.000608505	11
FBXO42	1481	0.042795	0.00121785	4.82338e-05	0.000609304	11
PSMG1	1482	-0.180808	0.00322704	4.82495e-05	0.000609304	11
API5	1483	-0.0166905	0.00108193	4.82986e-05	0.000609514	11
RAC2	1484	0.00435707	0.00297245	4.84246e-05	0.000610692	11
CLMN	1485	0.162653	0.00392983	4.8769e-05	0.000614621	11
PCSK6	1486	0.0334823	0.00270574	4.88383e-05	0.00061508	11
PEX11B	1487	-0.139279	0.0028605	4.89755e-05	0.000616393	11
IGLC1	1488	-0.0208466	0.00267364	4.90093e-05	0.000616404	8
FANCD2	1489	-0.0101193	0.00168175	4.92863e-05	0.000619471	11
LIMK2	1490	0.0273553	0.00224305	4.94502e-05	0.000621066	11
RUFY1	1491	0.0631174	0.000601128	4.94795e-05	0.000621066	11
CR1	1492	0.0542419	0.00202899	4.97328e-05	0.000623717	11
SLC30A3	1493	-0.111704	0.00600319	4.97574e-05	0.000623717	11
MYZAP	1494	0.0864818	0.00666234	5.0064e-05	0.00062714	8
NRP2	1495	0.0467139	0.00105419	5.04846e-05	0.000631987	10
HAGHL	1496	0.00848249	0.00216509	5.05706e-05	0.000632639	11
RNF213	1497	0.0812641	0.00389152	5.07726e-05	0.000634743	11
AKIRIN2	1498	-0.0334188	0.00216772	5.08066e-05	0.000634744	11
PIGR	1499	0.0315925	0.00129556	5.13823e-05	0.000641507	11
NFKB2	1500	0.0131043	0.00162389	5.14846e-05	0.000641795	11
LIMK1	1501	0.0243695	0.00231845	5.14862e-05	0.000641795	11
LOC100996792	1502	0.0163329	0.00758868	5.15082e-05	0.000641795	8
PICALM	1503	0.0926413	0.00439719	5.17881e-05	0.000644853	11
SNURF	1504	-0.0165029	0.00626068	5.18792e-05	0.000645558	11
POU2F2	1505	0.0842363	0.00163135	5.20427e-05	0.000646842	11
SESN1	1506	-0.00783728	0.00232667	5.20515e-05	0.000646842	11
GNL1	1507	0.0753462	0.00093527	5.24869e-05	0.00065182	11
MRPL30	1508	-0.0304	0.00235909	5.26181e-05	0.000652998	11
PCGF3	1509	-0.00473207	0.000973559	5.26516e-05	0.000652998	11
STK36	1510	0.102036	0.0011509	5.26924e-05	0.000653072	11
PEX16	1511	-0.0510844	0.000693144	5.29565e-05	0.000655911	11
CCDC80	1512	0.00838105	0.0025224	5.29991e-05	0.000656004	10
SLC31A1	1513	-0.0505574	0.00216441	5.32636e-05	0.00065853	10
FCGR3B	1514	-0.0200149	0.00337302	5.32735e-05	0.00065853	11
TANC1	1515	0.0102831	0.00163296	5.33639e-05	0.000659004	11
BTBD9	1516	-0.111187	0.00199421	5.33823e-05	0.000659004	10
PSIP1	1517	-0.0652848	0.00221125	5.38882e-05	0.00066481	11
FEZF2	1518	-0.0310627	0.00214682	5.39297e-05	0.000664884	11
NDUFB1	1519	-0.061997	0.00227439	5.40598e-05	0.00066605	11
CSNK1G3	1520	0.0224607	0.00231521	5.42507e-05	0.000667755	11
ELOVL3	1521	-0.066355	0.000972546	5.42696e-05	0.000667755	10
FGFR1OP2	1522	0.0835017	0.00489928	5.45158e-05	0.000670158	11
MUC1	1523	0.0272549	0.00173709	5.45486e-05	0.000670158	11
WFDC8	1524	0.0498258	0.00145546	5.45723e-05	0.000670158	11
ACOXL	1525	0.0269594	0.00135031	5.49724e-05	0.000674252	10
TTC3P1	1526	0.239176	0.027234	5.49777e-05	0.000674252	8
CCNB2	1527	0.0276764	0.00104898	5.50256e-05	0.000674397	11
FAR2	1528	-0.115931	0.00343776	5.5227e-05	0.000676054	11
WDR1	1529	0.0652994	0.00177959	5.52331e-05	0.000676054	11
S100A8	1530	-0.0786516	0.019638	5.5346e-05	0.000676698	11
SLC25A35	1531	0.0289578	0.00157182	5.5358e-05	0.000676698	10
ARHGAP9	1532	0.0543374	0.00220734	5.54464e-05	0.000677336	11
METTL3	1533	-0.0492941	0.00197027	5.55106e-05	0.000677598	11
TGIF2	1534	0.0666683	0.00151056	5.55402e-05	0.000677598	11
FAM118A	1535	0.10998	0.0032215	5.57085e-05	0.000679208	11
AASDHPPT	1536	-0.0601684	0.00347314	5.58293e-05	0.000679465	11
ATP5S	1537	-0.0417479	0.00149134	5.58568e-05	0.000679465	11
NLK	1538	-0.0195881	0.0056381	5.58702e-05	0.000679465	11
BOC	1539	0.0261725	0.00216146	5.58748e-05	0.000679465	11
BTF3L4	1540	0.0131528	0.00317569	5.59378e-05	0.000679474	10
EVC	1541	-0.0251947	0.0010567	5.59482e-05	0.000679474	11
SLC7A13	1542	0.0175697	0.00122632	5.60557e-05	0.000680115	10
SPTB	1543	-0.0527281	0.00207667	5.60736e-05	0.000680115	11
NUFIP1	1544	0.00310159	0.00136639	5.61269e-05	0.000680321	11
FOXD1	1545	0.0825343	0.00233839	5.62528e-05	0.000681269	11
EXOSC2	1546	0.037454	0.00154546	5.62918e-05	0.000681269	11
RANBP3	1547	0.0304346	0.00110468	5.63144e-05	0.000681269	11
CNTN1	1548	-0.00327849	0.00621672	5.64268e-05	0.000681852	11
SCOC	1549	-0.113031	0.00363436	5.64354e-05	0.000681852	11
EPHB2	1550	0.0337701	0.000986402	5.64771e-05	0.000681915	11
COL1A2	1551	0.0890282	0.00318607	5.65781e-05	0.000682695	11
SCAMP4	1552	0.0611983	0.00166292	5.67347e-05	0.000682894	11
KRTAP3-2	1553	0.0542648	0.00133858	5.67356e-05	0.000682894	10
CITED1	1554	-0.119614	0.00200224	5.6737e-05	0.000682894	11
E2F6	1555	0.0477328	0.00135749	5.67406e-05	0.000682894	10
CYP1A2	1556	0.00658136	0.00149137	5.68351e-05	0.000683591	11
ITPRIP	1557	0.0566092	0.00222143	5.70009e-05	0.000685145	11
OPRM1	1558	0.0577996	0.00176994	5.70934e-05	0.000685817	11
DNASE1	1559	0.0279398	0.00100725	5.73956e-05	0.000689004	10
YTHDC1	1560	0.0914763	0.000874621	5.76031e-05	0.000691016	11
RABL2A	1561	-0.0965867	0.00294936	5.7637e-05	0.000691016	11
FH	1562	-0.0586869	0.00158511	5.77612e-05	0.000692061	11
RECQL5	1563	0.012806	0.00119653	5.79524e-05	0.000693279	11
COL5A2	1564	-0.0045016	0.0101805	5.79589e-05	0.000693279	11
TCAP	1565	0.0396331	0.00246628	5.79739e-05	0.000693279	11
SEL1L	1566	-0.00555583	0.00138155	5.81546e-05	0.000694969	11
RUNX1T1	1567	0.0500094	0.00151003	5.81895e-05	0.000694969	11
FBXO18	1568	0.0133196	0.00156604	5.85278e-05	0.000697913	11
COL4A6	1569	0.0432139	0.00166098	5.85324e-05	0.000697913	11
SCP2	1570	-0.161912	0.00304684	5.85479e-05	0.000697913	11
C19orf12	1571	0.0730239	0.00271907	5.86148e-05	0.000698266	11
C2orf83	1572	0.0373293	0.00239269	5.91069e-05	0.00070368	11
VANGL2	1573	0.112978	0.00203944	5.94242e-05	0.000707008	11
FGF18	1574	-0.000834117	0.00105306	5.95534e-05	0.000707741	11
CAPZB	1575	-0.0495426	0.00184308	5.95614e-05	0.000707741	11
PPP2R5D	1576	0.0348426	0.00244507	5.96322e-05	0.000708132	11
IRF2BPL	1577	0.0755247	0.00526814	5.97684e-05	0.0007093	9
CTSS	1578	0.0324867	0.00308464	6.00863e-05	0.00071262	11
UGT8	1579	0.403235	0.0185768	6.01806e-05	0.000713076	11
EIF4E3	1580	-0.0301497	0.00294986	6.02009e-05	0.000713076	10
SLC4A11	1581	0.112399	0.0018543	6.02701e-05	0.000713444	11
SHMT2	1582	0.0707626	0.00188131	6.05834e-05	0.000716523	11
RYK	1583	0.0282133	0.00132555	6.06421e-05	0.000716523	11
GPRC5A	1584	0.0162766	0.00137895	6.06451e-05	0.000716523	10
OBSL1	1585	0.0383752	0.00171762	6.07766e-05	0.000717625	10
CSTF3	1586	-0.10566	0.000858861	6.09526e-05	0.000719248	11
ZIC2	1587	0.19866	0.00286182	6.10394e-05	0.000719428	11
TCF7	1588	0.0203477	0.00115724	6.10528e-05	0.000719428	11
BRD2	1589	0.115969	0.0016546	6.10831e-05	0.000719428	11
ARL6IP1	1590	-0.0789818	0.00183547	6.1179e-05	0.000720103	11
MED13	1591	0.0803301	0.00223154	6.12443e-05	0.000720283	11
SERPINB1	1592	-0.0508844	0.00331607	6.12712e-05	0.000720283	11
CXXC4	1593	0.0540398	0.00128685	6.13236e-05	0.000720447	11
TSSK2	1594	0.030326	0.000780821	6.14342e-05	0.000720887	11
ME2	1595	-0.0994372	0.00152184	6.14537e-05	0.000720887	11
PCDHGA1	1596	-0.0158851	0.000772622	6.14766e-05	0.000720887	10
KIAA0930	1597	0.236755	0.00238934	6.16003e-05	0.000721884	9
IL1RAP	1598	-0.0727966	0.00129739	6.17344e-05	0.000723003	11
TM9SF4	1599	-0.0737069	0.00106913	6.17907e-05	0.00072321	11
RAN	1600	-0.116895	0.00229585	6.1971e-05	0.000724737	11
SLC25A11	1601	0.0175693	0.00224752	6.19986e-05	0.000724737	11
CNOT2	1602	0.0316	0.00167951	6.24268e-05	0.000729286	11
GTPBP8	1603	-0.00608442	0.00183361	6.25641e-05	0.000730435	11
ABHD2	1604	0.0442192	0.00313078	6.26225e-05	0.000730661	11
RSPRY1	1605	0.0902964	0.00187802	6.27765e-05	0.000731614	11
ITGA2	1606	0.0745003	0.00558258	6.27824e-05	0.000731614	10
NUDT21	1607	-0.0576441	0.00389652	6.28568e-05	0.000732025	11
GTF2I	1608	-0.0474315	0.0032948	6.30025e-05	0.000733266	10
NUDT3	1609	0.0624271	0.0024233	6.3059e-05	0.000733468	11
HOXA5	1610	0.0625027	0.0018975	6.33148e-05	0.000735985	10
PSD2	1611	0.190202	0.001459	6.35497e-05	0.000738257	11
UBE2T	1612	-0.160011	0.00385746	6.36072e-05	0.000738467	11
ELMOD1	1613	-0.276687	0.0189184	6.3931e-05	0.00074134	8
HOXA13	1614	0.031649	0.00130455	6.39609e-05	0.00074134	10
SRPK2	1615	0.071366	0.00421618	6.39735e-05	0.00074134	11
GCH1	1616	-0.0122322	0.00185595	6.40839e-05	0.00074216	11
LPAR4	1617	0.118308	0.00273605	6.41705e-05	0.000742703	11
DR1	1618	-0.00910498	0.00299447	6.42429e-05	0.000742859	11
PKNOX2	1619	-0.0685146	0.00160183	6.42633e-05	0.000742859	11
CD151	1620	0.0443398	0.00179577	6.45782e-05	0.000745628	11
SOS2	1621	0.0785732	0.00195805	6.45826e-05	0.000745628	10
IRF2BP2	1622	0.12038	0.00232131	6.48435e-05	0.000748178	11
UBXN2A	1623	0.134674	0.00213993	6.49122e-05	0.00074851	11
PECAM1	1624	0.0578753	0.00500467	6.49819e-05	0.000748739	11
STAMBPL1	1625	-0.140659	0.00131933	6.50121e-05	0.000748739	11
TNFRSF10B	1626	0.0606284	0.00201805	6.51727e-05	0.000749012	11
SCPEP1	1627	-0.124313	0.00118175	6.5186e-05	0.000749012	11
CPNE6	1628	-0.0592166	0.00454249	6.51877e-05	0.000749012	11
SLC35B1	1629	-0.0935352	0.00067214	6.51959e-05	0.000749012	11
PARD6A	1630	0.0674307	0.00202775	6.53065e-05	0.000749823	11
SLC25A29	1631	0.0714948	0.00207956	6.5421e-05	0.000750677	11
ATN1	1632	0.068828	0.00215382	6.56798e-05	0.0007527	11
TMEM220	1633	0.0511205	0.00179392	6.57049e-05	0.0007527	10
ATP6V1H	1634	-0.187296	0.00374529	6.57308e-05	0.0007527	11
EDNRA	1635	0.105221	0.00216808	6.57582e-05	0.0007527	10
CLIP4	1636	-0.0586175	0.00176893	6.59462e-05	0.000754245	11
CRISPLD2	1637	-0.0822693	0.00339113	6.59737e-05	0.000754245	11
TSPAN13	1638	-0.0303075	0.00832732	6.61182e-05	0.000755215	11
RC3H1	1639	0.0315497	0.00222404	6.61393e-05	0.000755215	11
VAMP1	1640	0.0406197	0.00472686	6.62153e-05	0.000755621	11
PSD3	1641	-0.0898518	0.00538834	6.62946e-05	0.000755898	11
PURA	1642	0.148814	0.001775	6.63203e-05	0.000755898	11
GAS2L1	1643	0.100609	0.00175727	6.64942e-05	0.000757419	11
CPNE4	1644	-0.129937	0.01243	6.66694e-05	0.000758952	11
PRSS16	1645	-0.091376	0.00179616	6.68281e-05	0.000760296	11
AXIN1	1646	0.0808971	0.00106917	6.69924e-05	0.000761703	11
GNPDA2	1647	-0.113483	0.00167056	6.70942e-05	0.000762396	11
TSLP	1648	0.057281	0.00156433	6.71856e-05	0.000762834	11
NAA40	1649	0.0749729	0.00322343	6.72142e-05	0.000762834	9
PHF11	1650	-0.0318452	0.00229391	6.72733e-05	0.000763043	11
XAF1	1651	0.0306194	0.00449066	6.75538e-05	0.00076576	11
ANKFY1	1652	0.0303138	0.00194911	6.76523e-05	0.000766412	11
STK3	1653	0.049316	0.0023754	6.79053e-05	0.000768813	11
SLC5A11	1654	0.256641	0.0102384	6.81066e-05	0.000770626	11
PDHA1	1655	-0.0814816	0.000640198	6.83389e-05	0.000772354	11
DDX10	1656	-0.115603	0.000963056	6.83419e-05	0.000772354	11
RTN3	1657	-0.0852835	0.00210191	6.86929e-05	0.000775125	11
UBE2R2	1658	0.0411744	0.00151584	6.86981e-05	0.000775125	11
ZNF281	1659	0.263601	0.00631407	6.87113e-05	0.000775125	10
LUC7L3	1660	0.14757	0.0153528	6.88034e-05	0.00077545	9
HOXA10	1661	0.0650573	0.000981025	6.8823e-05	0.00077545	11
RBM8A	1662	0.0586132	0.00210971	6.88854e-05	0.000775686	10
ELMO3	1663	0.0421979	0.00134193	6.90691e-05	0.000777287	11
DPH5	1664	-0.0497407	0.00160331	6.91773e-05	0.000778037	11
TMEM183A	1665	0.0801422	0.00324114	6.92918e-05	0.000778856	8
PARD3B	1666	0.0102593	0.00119326	6.93876e-05	0.000779465	11
TFCP2	1667	-0.0695705	0.00132697	6.97164e-05	0.000782689	11
SDHC	1668	0.000232016	0.0018535	6.98063e-05	0.000783229	11
EEF2K	1669	-0.0429813	0.00315886	6.99977e-05	0.000784905	8
IGHD	1670	-0.016244	0.00236144	7.00838e-05	0.000784946	8
BTG2	1671	0.0259726	0.00312199	7.00897e-05	0.000784946	11
HTR4	1672	-0.117689	0.00228886	7.01271e-05	0.000784946	11
GUCY1B3	1673	-0.102456	0.00940597	7.01888e-05	0.000785085	11
ERG	1674	0.0148342	0.00120449	7.02235e-05	0.000785085	10
TCTEX1D2	1675	-0.0836605	0.00361525	7.03667e-05	0.000785959	11
DCTN6	1676	-0.0939451	0.00244684	7.04072e-05	0.000785959	11
NPIPA5	1677	-0.111155	0.0113293	7.04276e-05	0.000785959	8
PSD4	1678	0.0313548	0.00147837	7.0754e-05	0.00078867	11
NCAM2	1679	-0.0131764	0.00215246	7.07549e-05	0.00078867	11
PNMA2	1680	-0.0405894	0.00601107	7.08108e-05	0.000788824	11
SYNCRIP	1681	0.131153	0.00306288	7.09657e-05	0.00079008	11
RBBP9	1682	-0.0570901	0.00149477	7.11344e-05	0.000791486	10
TCP1	1683	-0.0627477	0.00502934	7.1351e-05	0.000793202	8
TRPM1	1684	0.00142629	0.00171432	7.13734e-05	0.000793202	10
SEC16B	1685	-0.0443344	0.000885409	7.15952e-05	0.000795195	11
KPNB1	1686	0.0147612	0.00215425	7.16386e-05	0.000795206	11
CHMP4B	1687	-0.0557375	0.00145801	7.181e-05	0.000796635	11
FKBP4	1688	0.119479	0.00138192	7.20934e-05	0.000799306	11
TLE1	1689	-0.0226639	0.00202743	7.23991e-05	0.000802181	11
CDIP1	1690	0.124194	0.0079263	7.24385e-05	0.000802181	9
TMEM108	1691	-0.0502674	0.00119723	7.26721e-05	0.000804292	11
ANTXR2	1692	-0.0244966	0.0014569	7.2847e-05	0.000805751	11
C1R	1693	-0.0824315	0.00939181	7.33676e-05	0.000810906	10
WDR47	1694	-0.123755	0.00897706	7.33997e-05	0.000810906	11
TMPRSS5	1695	0.0567895	0.00391348	7.35971e-05	0.000812607	11
MAP1B	1696	0.0253109	0.0102669	7.37977e-05	0.000814342	11
MARVELD2	1697	0.0311621	0.00207867	7.4071e-05	0.000816823	10
ASB6	1698	0.0719518	0.000817707	7.41098e-05	0.000816823	11
ZNF431	1699	0.0576546	0.00137404	7.41741e-05	0.00081705	11
SYT1	1700	-0.0565421	0.0249124	7.43638e-05	0.000818658	11
SERTAD3	1701	0.0750673	0.00208202	7.48451e-05	0.000823472	11
KIAA0319	1702	-0.122316	0.00207553	7.53782e-05	0.00082885	11
NRG1	1703	0.046741	0.00189837	7.55125e-05	0.00082984	11
PCDH1	1704	-0.0218673	0.00193914	7.56568e-05	0.000830937	11
GPR155	1705	0.123407	0.00632317	7.59291e-05	0.000832707	11
APOD	1706	0.119801	0.001391	7.59787e-05	0.000832707	11
LCP2	1707	0.00834207	0.00114243	7.59884e-05	0.000832707	11
BRD4	1708	-0.0505366	0.00178197	7.59959e-05	0.000832707	11
OLFML2A	1709	0.0554506	0.00237828	7.60958e-05	0.000833313	11
SELL	1710	0.0358869	0.00430466	7.62486e-05	0.000834475	11
HIVEP3	1711	0.0205525	0.00125474	7.6291e-05	0.000834475	10
CYP4A11	1712	-0.0391922	0.00126511	7.70168e-05	0.000841921	10
OPN3	1713	-0.117313	0.00751498	7.71508e-05	0.000842894	11
TRAK2	1714	0.150981	0.00247376	7.74845e-05	0.000845479	11
KLHL17	1715	0.0257109	0.00147082	7.75018e-05	0.000845479	11
FKTN	1716	-0.0760066	0.00214341	7.75229e-05	0.000845479	11
RASAL2	1717	-0.0121176	0.0019537	7.76604e-05	0.000846485	11
HYI	1718	0.0300003	0.00155248	7.77522e-05	0.000846992	11
KLK12	1719	0.00890138	0.000883596	7.80261e-05	0.000849481	11
RABEP2	1720	0.0550689	0.00177484	7.87465e-05	0.000856826	11
KCNG1	1721	-0.0900195	0.00241773	7.88109e-05	0.000857028	11
OGFR	1722	-0.0452846	0.00231524	7.91189e-05	0.000859878	11
LRRC6	1723	-0.072548	0.0017094	7.93115e-05	0.000861471	11
LRRN3	1724	0.0460776	0.00537113	7.95651e-05	0.000863724	11
GCOM1	1725	0.115501	0.0022227	8.00358e-05	0.000867915	10
ALDOA	1726	-0.146806	0.00474271	8.00439e-05	0.000867915	11
PSTK	1727	0.0397898	0.0015796	8.0566e-05	0.00087307	11
TRNP1	1728	-0.0928333	0.00208191	8.10426e-05	0.000877727	10
TNFSF15	1729	0.0434467	0.00170555	8.16156e-05	0.000883152	11
CACNB1	1730	-0.0736756	0.00300247	8.16379e-05	0.000883152	11
TROVE2	1731	0.0883609	0.00146417	8.17623e-05	0.000883872	11
TMEM115	1732	0.0517336	0.00106158	8.17989e-05	0.000883872	11
COPS4	1733	-0.105851	0.00144489	8.18922e-05	0.000884369	11
POLR3A	1734	-0.111851	0.000499578	8.20563e-05	0.000885631	10
RAC1	1735	0.0771605	0.00150549	8.21076e-05	0.000885674	11
ZRANB3	1736	-0.0782567	0.00161988	8.2245e-05	0.000886645	11
ACTB	1737	-0.0539434	0.000359457	8.23697e-05	0.000887477	11
HES2	1738	0.0693848	0.00113555	8.24406e-05	0.000887731	10
U2AF1	1739	0.0927974	0.00152068	8.26694e-05	0.000889683	11
COLGALT1	1740	0.0507408	0.00411514	8.27783e-05	0.000890343	9
CHST12	1741	0.103313	0.0011013	8.29423e-05	0.000891594	11
BMPR2	1742	0.0238149	0.00214047	8.32345e-05	0.000894221	11
ITGA1	1743	-0.00200666	0.00204921	8.35231e-05	0.000896396	10
MAPK10	1744	0.0778505	0.00202342	8.35327e-05	0.000896396	11
CNST	1745	0.204014	0.00512631	8.36706e-05	0.000897361	9
FLYWCH1	1746	0.0543354	0.00277994	8.38021e-05	0.000897395	11
L2HGDH	1747	-0.0147453	0.00232487	8.38105e-05	0.000897395	10
RASA1	1748	-0.0374705	0.00265052	8.38359e-05	0.000897395	11
ELMO1	1749	-0.115096	0.00270939	8.38655e-05	0.000897395	11
GNS	1750	0.0551074	0.00149288	8.40545e-05	0.000898903	10
RIF1	1751	-0.0259069	0.0017844	8.45165e-05	0.000903327	10
PYCR2	1752	-0.110299	0.000505663	8.48668e-05	0.000906554	8
KANK1	1753	0.0817855	0.00217038	8.51137e-05	0.000908673	11
GALNS	1754	0.0436233	0.00115145	8.51837e-05	0.000908901	11
AKAP12	1755	-0.0150983	0.0031012	8.55007e-05	0.000911403	11
MAPK6	1756	-0.0709352	0.00115106	8.55156e-05	0.000911403	11
HOXB6	1757	-0.0317518	0.001101	8.60334e-05	0.000916296	11
TGM2	1758	0.00172259	0.00379158	8.60725e-05	0.000916296	11
LATS2	1759	0.0647363	0.00198804	8.6216e-05	0.000917301	10
BPHL	1760	-0.0870661	0.00139624	8.63591e-05	0.000918278	11
MATK	1761	0.0201015	0.00237129	8.64059e-05	0.000918278	11
ELP2	1762	-0.0530026	0.000918782	8.64901e-05	0.00091865	11
UHRF1	1763	0.110736	0.00418631	8.66318e-05	0.000919633	11
ZNF577	1764	0.0972324	0.00211451	8.67543e-05	0.000920412	11
PTPN6	1765	0.0403772	0.00209409	8.68724e-05	0.000921143	11
ZNF160	1766	0.0566301	0.00270415	8.6925e-05	0.000921179	11
TTF2	1767	0.0678035	0.00178292	8.70306e-05	0.000921776	11
MTMR9	1768	0.031148	0.00241103	8.72196e-05	0.000923255	11
THUMPD1	1769	0.0773897	0.00237578	8.77511e-05	0.000928356	11
SART3	1770	0.0520907	0.00169982	8.79967e-05	0.000930428	11
GNAS	1771	0.0107936	0.000815303	8.8225e-05	0.000932315	11
TRIM7	1772	-0.0326857	0.00104135	8.83635e-05	0.000933253	11
MRPS6	1773	0.137346	0.00179868	8.84597e-05	0.000933741	11
APOL2	1774	-0.0996609	0.00165963	8.88638e-05	0.000936356	11
ESD	1775	-0.0382027	0.00144436	8.88747e-05	0.000936356	11
SERPINB2	1776	-0.066389	0.00248735	8.88867e-05	0.000936356	10
CDK13	1777	0.119458	0.00165003	8.89223e-05	0.000936356	9
NTNG1	1778	-0.0669662	0.00171176	8.89799e-05	0.000936356	11
BICD1	1779	0.100848	0.00203941	8.90076e-05	0.000936356	11
CFTR	1780	-0.0168814	0.000820142	8.9105e-05	0.000936572	11
SFT2D3	1781	0.0500213	0.00150711	8.91424e-05	0.000936572	11
DICER1	1782	0.0166295	0.00290449	8.91783e-05	0.000936572	11
STAU2	1783	-0.127655	0.00261486	8.99027e-05	0.000943651	11
SH3KBP1	1784	-0.0250992	0.00182746	9.02491e-05	0.000946302	11
CASC3	1785	0.119656	0.00138849	9.02564e-05	0.000946302	8
APOL3	1786	0.0191726	0.00448631	9.04476e-05	0.000947776	11
WDR45	1787	-0.0356593	0.0016882	9.07549e-05	0.000950463	11
RIN3	1788	0.0158449	0.00155291	9.08442e-05	0.000950867	10
PCM1	1789	0.0351584	0.00156248	9.09704e-05	0.00095111	11
RECQL	1790	0.05866	0.00149249	9.09956e-05	0.00095111	11
PCDH10	1791	-0.0328191	0.00384951	9.10199e-05	0.00095111	11
RAB5A	1792	-0.0759409	0.000874577	9.166e-05	0.000957263	11
PARP10	1793	0.017391	0.00148659	9.17281e-05	0.000957441	11
ZIC1	1794	0.0318333	0.00164105	9.18049e-05	0.000957708	11
PEX5	1795	0.103164	0.000590882	9.20782e-05	0.000960024	11
FCGBP	1796	0.0510231	0.0126664	9.21428e-05	0.000960163	11
SCAMP1	1797	0.0968428	0.00284513	9.25416e-05	0.00096322	11
RAD51B	1798	0.00539503	0.00365462	9.25497e-05	0.00096322	9
CTXN3	1799	-0.244305	0.011514	9.26085e-05	0.00096322	10
NRIP2	1800	0.114162	0.00311812	9.26421e-05	0.00096322	11
STK33	1801	0.0126383	0.00159227	9.27394e-05	0.000963256	11
UBN1	1802	0.0032349	0.00108277	9.27511e-05	0.000963256	10
FBXL14	1803	-0.000925546	0.00335315	9.27999e-05	0.000963256	11
BCAP29	1804	0.0216377	0.00513694	9.28823e-05	0.000963577	11
CLOCK	1805	0.0979731	0.00222703	9.31672e-05	0.000965997	11
TBC1D24	1806	-0.0780726	0.00673584	9.34742e-05	0.000968643	10
GTF3A	1807	0.117173	0.00183265	9.35663e-05	0.000969061	10
CCNY	1808	0.110196	0.00333091	9.38199e-05	0.00097115	11
DLGAP4	1809	0.0328927	0.00262087	9.41499e-05	0.000974027	11
ZNF268	1810	-0.0536911	0.00132684	9.44875e-05	0.00097698	11
RAP2B	1811	0.0775971	0.00391892	9.46848e-05	0.00097848	11
SULT1C2	1812	0.0213688	0.0012067	9.49751e-05	0.000980938	11
KCNIP2	1813	-0.0171772	0.00249477	9.51819e-05	0.000982532	11
CEMP1	1814	-0.0100544	0.00131695	9.55862e-05	0.000986125	10
MTF1	1815	0.0985038	0.00138634	9.56354e-05	0.000986125	11
LDLRAD3	1816	0.208088	0.00626895	9.58502e-05	0.000987796	11
MET	1817	-0.0244144	0.00202169	9.60757e-05	0.000989574	11
RTF1	1818	-0.078898	0.00170535	9.63462e-05	0.000991815	11
CD47	1819	-0.0792971	0.00237517	9.66957e-05	0.000994289	11
PCF11	1820	0.0506028	0.00259728	9.67213e-05	0.000994289	11
SSTR1	1821	-0.0973358	0.00272018	9.6746e-05	0.000994289	11
RPS6KA2	1822	0.0474104	0.00339982	9.70937e-05	0.000997316	11
ARF6	1823	0.0448846	0.00131497	9.74283e-05	0.0010002	11
REEP1	1824	-0.0553722	0.00751709	9.75788e-05	0.00100097	11
PCYOX1	1825	0.139137	0.00557008	9.76097e-05	0.00100097	11
PAG1	1826	0.135269	0.00331199	9.79651e-05	0.00100406	11
BOLA3	1827	-0.119862	0.000471	9.80918e-05	0.00100446	10
USP34	1828	0.0520257	0.00124841	9.81112e-05	0.00100446	11
POLR2H	1829	0.0525866	0.00133964	9.85275e-05	0.00100817	11
ELN	1830	0.0686972	0.00226199	9.86856e-05	0.00100924	11
AKAP11	1831	-0.0651642	0.00187891	9.88104e-05	0.00100996	11
UGP2	1832	-0.0530149	0.00196958	9.88715e-05	0.00101003	11
MEG3	1833	0.103859	0.011868	9.89631e-05	0.00101042	10
C12orf43	1834	0.0174691	0.00361895	9.93088e-05	0.00101314	11
SAFB	1835	0.0777949	0.00235292	9.93376e-05	0.00101314	11
SIDT1	1836	-0.141101	0.00576595	9.96516e-05	0.00101578	11
MAN2B1	1837	0.0756235	0.00158726	0.000100293	0.00102176	11
SQLE	1838	0.0680288	0.00230379	0.000100381	0.00102182	11
MLANA	1839	0.026365	0.0010501	0.000100407	0.00102182	10
MZF1	1840	0.0815484	0.000652558	0.000100604	0.00102316	11
HUWE1	1841	0.0420841	0.00116109	0.000100714	0.00102316	11
SLC25A2	1842	0.0560369	0.00137016	0.000100718	0.00102316	11
MUSTN1	1843	0.0635839	0.00229815	0.00010076	0.00102316	8
MEIS3	1844	-0.134575	0.001379	0.000100838	0.00102316	11
TMEM47	1845	0.123592	0.00603376	0.000100867	0.00102316	11
BAZ1B	1846	0.0767182	0.00130181	0.000101104	0.00102496	11
MRAS	1847	0.0763868	0.00293904	0.000101256	0.00102496	11
PSMD10	1848	-0.0823252	0.00137804	0.000101279	0.00102496	11
IGF1	1849	-0.0330949	0.00179202	0.000101293	0.00102496	11
TRIM56	1850	0.0989223	0.00432596	0.000101367	0.00102496	11
MATN2	1851	-0.015098	0.00173074	0.000101373	0.00102496	8
YIPF5	1852	0.0720377	0.00293551	0.000101616	0.00102678	11
GPRIN3	1853	-0.0274872	0.00152398	0.000101663	0.00102678	11
SLC4A2	1854	0.116776	0.00287603	0.000101817	0.00102778	11
IGHG1	1855	-0.0637137	0.00267299	0.000102126	0.00103033	8
CASP10	1856	0.017265	0.00143427	0.00010218	0.00103033	11
TLN2	1857	-0.102539	0.000675431	0.000102362	0.00103162	11
PTPRB	1858	0.0757849	0.00135538	0.000102459	0.00103203	11
SPN	1859	0.0220166	0.00244193	0.000102727	0.00103417	11
RAD1	1860	0.0868628	0.00196488	0.000102823	0.00103458	10
SF3B1	1861	0.134147	0.00277934	0.000102985	0.00103566	11
FAM69A	1862	0.103214	0.00255655	0.000103373	0.00103875	10
GYPE	1863	-0.0468107	0.00118328	0.000103404	0.00103875	11
TMEM30B	1864	-0.0137844	0.00192506	0.000103518	0.00103934	11
WDR6	1865	0.0916383	0.00162477	0.000103654	0.00103992	11
GFRA3	1866	0.0231169	0.00121898	0.000103687	0.00103992	10
CNIH3	1867	-0.109142	0.00286509	0.000103884	0.00104134	11
RNF34	1868	-0.0286829	0.00127727	0.000105086	0.00105283	11
EXOSC9	1869	-0.0622631	0.00101168	0.000105771	0.00105913	11
TRAPPC2L	1870	-0.0787368	0.00136938	0.000105907	0.00105971	11
EIF4E	1871	0.0344595	0.00280131	0.000105942	0.00105971	11
PDE4A	1872	0.00836895	0.00165674	0.000106081	0.00106053	11
KLRC2	1873	-0.201596	0.00815931	0.000106257	0.00106168	11
MCF2	1874	-0.0584947	0.00350324	0.000106414	0.00106168	11
ADD3	1875	0.0657091	0.00451922	0.000106421	0.00106168	11
FRMD4A	1876	-0.0305632	0.00190567	0.000106424	0.00106168	11
MOCS1	1877	-0.0328838	0.00210061	0.000106621	0.00106309	10
CNOT4	1878	0.00033744	0.00059095	0.000106691	0.00106322	11
MRPS5	1879	0.108889	0.00093205	0.000106762	0.00106335	11
KCNF1	1880	-0.160602	0.00288298	0.000107244	0.00106729	11
PYDC1	1881	-0.0921952	0.00175326	0.000107271	0.00106729	11
LAPTM5	1882	0.149606	0.00796642	0.000107475	0.00106875	11
CD86	1883	0.061653	0.00190729	0.000107551	0.00106894	11
DOCK1	1884	0.054128	0.0019101	0.000107669	0.00106954	11
KYNU	1885	-0.00257777	0.00189339	0.000107915	0.00107143	11
NPEPPS	1886	0.029746	0.00191464	0.000108039	0.00107209	11
PFDN4	1887	-0.0629364	0.00225428	0.000108123	0.00107235	11
MARCH8	1888	0.0409723	0.0014044	0.000108357	0.00107408	10
CBX3	1889	-0.00129753	0.00193112	0.000108413	0.00107408	11
GNPNAT1	1890	0.0815621	0.00257053	0.000108756	0.00107692	11
SCFD1	1891	-0.0862747	0.00061149	0.000108854	0.00107731	11
TMEM53	1892	-0.0953063	0.000963057	0.000109479	0.00108247	11
NMNAT1	1893	0.0569378	0.00206368	0.000109491	0.00108247	11
FCGR1B	1894	-0.130479	0.00616759	0.000110024	0.00108717	10
MAP2K4	1895	0.0916723	0.00652791	0.00011024	0.00108873	11
DMPK	1896	0.00598889	0.00153729	0.000110618	0.00109188	11
SPRY1	1897	-0.0192694	0.00265134	0.000110695	0.00109207	11
ENOX2	1898	0.0124946	0.00138618	0.000110922	0.00109373	11
UBXN10	1899	-0.0271944	0.00152737	0.000111094	0.00109486	11
NDUFS4	1900	-0.148469	0.00236511	0.000111299	0.0010963	11
ADCY1	1901	-0.0366846	0.00238907	0.000111518	0.00109787	11
ZFP91	1902	0.09893	0.000472229	0.000111696	0.00109905	11
SLC23A3	1903	0.0584361	0.00146026	0.000111988	0.00110056	10
TIMM17A	1904	-0.018823	0.00144707	0.00011202	0.00110056	11
PAK2	1905	0.0847212	0.001329	0.000112026	0.00110056	11
CDK2	1906	0.0514178	0.00234213	0.000112283	0.00110251	11
GNA11	1907	0.0784301	0.00233941	0.000112945	0.00110758	11
HGF	1908	-0.0423639	0.0014123	0.000112954	0.00110758	11
TBX5	1909	0.0437462	0.00137167	0.000112978	0.00110758	10
PALMD	1910	-0.0713522	0.000908128	0.000113119	0.00110839	10
TTN	1911	-0.0157665	0.000853846	0.000113578	0.00111231	11
DLX1	1912	-0.0811382	0.00776129	0.000113784	0.00111372	11
CDAN1	1913	0.0235385	0.00144533	0.000113857	0.00111372	11
TRIM2	1914	0.159537	0.00211051	0.00011393	0.00111372	11
GANAB	1915	-0.000932319	0.0021946	0.00011396	0.00111372	11
SLC39A13	1916	-0.0262661	0.00190622	0.000114254	0.001116	11
NDUFAF2	1917	-0.0316657	0.0015478	0.00011495	0.00112221	11
MAPK8	1918	-0.013615	0.00264947	0.00011548	0.0011268	10
PRPS1	1919	0.0336596	0.00320451	0.000115556	0.00112696	11
ABCA6	1920	0.0901689	0.00407153	0.000116086	0.00113153	11
CASP4	1921	0.00750408	0.00196611	0.000116195	0.00113184	11
DNM2	1922	0.0883536	0.00143873	0.000116259	0.00113184	11
TMOD3	1923	-0.00296917	0.00147812	0.000116353	0.00113184	11
YWHAZ	1924	-0.0867067	0.00662872	0.000116359	0.00113184	11
IKZF4	1925	0.0685286	0.00125838	0.000116728	0.00113483	11
MIR99AHG	1926	0.17575	0.00322575	0.000116827	0.00113484	9
ARV1	1927	-0.0981758	0.000933191	0.00011685	0.00113484	11
FRAT2	1928	0.0285478	0.00117311	0.000117013	0.00113584	11
PTPRO	1929	-0.111783	0.00313269	0.000117178	0.00113648	11
NRXN3	1930	-0.00666917	0.00390034	0.0001172	0.00113648	11
CYBB	1931	-0.00939895	0.00119346	0.000117662	0.00114037	11
TMEM27	1932	-0.0471503	0.00155412	0.00011774	0.00114053	11
SERPINA5	1933	0.0727696	0.00204043	0.000117861	0.00114111	10
MOAP1	1934	-0.124509	0.00178267	0.000118267	0.00114445	11
TRIM54	1935	0.00591277	0.0015213	0.000118865	0.00114912	11
DLG5	1936	0.0482583	0.00184769	0.000118872	0.00114912	11
NELL1	1937	-0.140224	0.00891084	0.000119435	0.00115397	11
PTCH1	1938	-0.0115014	0.00192589	0.000119781	0.00115671	11
EFEMP2	1939	0.0175575	0.00352209	0.000119996	0.00115819	11
VAMP8	1940	0.0455643	0.00630631	0.000120263	0.00116016	11
ZMYND8	1941	0.0848925	0.00225781	0.000120741	0.00116418	11
SAA1	1942	-0.0829069	0.000654795	0.000120908	0.00116519	8
ID4	1943	0.0539151	0.00279292	0.000121315	0.00116851	11
NDUFB4	1944	-0.0753955	0.00166732	0.000121429	0.0011687	11
PTP4A1	1945	-0.0708486	0.00395075	0.00012146	0.0011687	11
FXN	1946	-0.000696891	0.00168918	0.000121785	0.00117123	11
THY1	1947	0.0266229	0.0101196	0.000122217	0.00117478	11
NRSN1	1948	-0.209702	0.00676839	0.000122522	0.00117653	11
ADD2	1949	0.0131204	0.0014943	0.000122525	0.00117653	11
EML3	1950	0.0197354	0.00279062	0.000123337	0.00118372	11
ZNF641	1951	0.137546	0.00131086	0.000123414	0.00118385	11
SP8	1952	-0.0945046	0.00203309	0.000123572	0.00118472	11
RBM33	1953	0.0719313	0.00121335	0.000123631	0.00118472	10
MAGEH1	1954	-0.0762182	0.00305867	0.000123909	0.00118677	11
MRPL15	1955	-0.16255	0.00252951	0.000124099	0.00118735	11
TARBP1	1956	-0.193219	0.00267832	0.000124129	0.00118735	11
VDAC1	1957	-0.106489	0.00230635	0.000124159	0.00118735	11
CALM2	1958	0.0690558	0.00175018	0.000124288	0.00118763	8
FAM43A	1959	0.133148	0.00311202	0.000124316	0.00118763	11
JAM3	1960	0.138008	0.00163254	0.000124837	0.00119141	11
TOR1AIP2	1961	-0.0683835	0.00175986	0.000124838	0.00119141	11
ETNK1	1962	-0.0712123	0.00155163	0.000125303	0.00119505	11
DPP8	1963	-0.0435108	0.00148728	0.000125348	0.00119505	11
ILK	1964	0.0750763	0.00108327	0.000125478	0.00119568	11
ZNF326	1965	0.110933	0.00188291	0.000125739	0.00119745	11
MEGF8	1966	0.0258905	0.00200229	0.000125862	0.00119745	11
GPAA1	1967	0.017596	0.00267817	0.000125876	0.00119745	11
BIRC5	1968	0.044206	0.00124847	0.00012592	0.00119745	11
CSF3R	1969	0.0523796	0.00183177	0.000126213	0.00119932	11
HSP90AA1	1970	0.102146	0.00238482	0.000126244	0.00119932	11
USP2	1971	0.0117216	0.00137133	0.000126652	0.00120259	11
SCRIB	1972	0.0767318	0.000626227	0.000126821	0.00120358	11
ECHDC2	1973	-0.00410161	0.00287028	0.000126986	0.00120372	11
EPC2	1974	0.0258442	0.00199077	0.00012699	0.00120372	11
TFAM	1975	0.037113	0.00109287	0.000127061	0.00120372	11
NAE1	1976	-0.120167	0.00090499	0.000127093	0.00120372	11
LOC101928269	1977	0.0540505	0.0017231	0.000127457	0.00120655	8
CCDC120	1978	0.0217446	0.00124052	0.000127609	0.00120738	11
IGSF1	1979	0.0449283	0.00201249	0.000127831	0.00120834	11
C19orf25	1980	0.0286575	0.00227244	0.000127884	0.00120834	11
PSMB8	1981	0.0229798	0.00445888	0.000127955	0.00120834	11
TRAK1	1982	0.00926225	0.00199409	0.000127968	0.00120834	11
PLCB1	1983	0.0402515	0.00697407	0.00012813	0.00120918	11
UBE2C	1984	0.0437809	0.00179474	0.000128187	0.00120918	11
UBL5	1985	-0.102689	0.000915555	0.000128367	0.00121027	11
TCF12	1986	0.0905278	0.0016864	0.000128788	0.00121363	11
EMP3	1987	0.114056	0.00450748	0.000128982	0.00121463	11
POLR3H	1988	0.0749114	0.00153904	0.00012904	0.00121463	11
F11R	1989	0.0544627	0.00224755	0.00012918	0.00121463	10
PPP2CA	1990	-0.0306732	0.00372075	0.000129195	0.00121463	11
ICAM2	1991	0.106287	0.00599042	0.000129219	0.00121463	11
LRRC4C	1992	0.0354057	0.00354202	0.000129354	0.00121529	11
C7	1993	0.0842244	0.00185023	0.000129692	0.00121786	11
TOMM22	1994	-0.0169116	0.00119179	0.000130007	0.0012202	11
IER2	1995	0.0815744	0.00232595	0.000130129	0.00122022	11
SLC35D3	1996	-0.035084	0.00130772	0.000130139	0.00122022	10
RASSF4	1997	0.0238153	0.00241068	0.000131034	0.00122799	11
LRRK1	1998	-0.0348558	0.00196511	0.000131497	0.00123171	11
[truncated: 16,717 more rows]
