# Supplementary material for: Multiomics integrative analysis identifies APOE allele-specific blood biomarkers associated to Alzheimer’s disease etiopathogenesis
Source: Aging (Albany NY). 2021 Apr 12;13(7):9277–329. doi: 10.18632/aging.202950 (PMC8064208; doi:10.18632/aging.202950)
Supplement: Supplementary Table 24 [file aging-13-202950-s026.xlsx]

## Sheet: Sheet1
Supplementary Table 24. Differential expression analysis in cortex: APOE4 stratum.
Symbol	RankCx	logFC	Var	Fisher.Pvalue	Fisher.FDR	Nestimators
TNXB	1	0.165179	0.0050514	5.79256e-11	9.15108e-07	10
LSM14A	2	0.128805	0.00195734	3.80935e-09	3.00901e-05	10
ITGB5	3	0.175799	0.00393522	2.7064e-08	0.000129727	10
FAM181B	4	0.239705	0.00276909	3.4679e-08	0.000129727	10
C21orf62	5	0.226531	0.00487653	4.10582e-08	0.000129727	10
SLC7A2	6	0.387745	0.0149324	6.00593e-08	0.000158136	9
TUBB2A	7	-0.197122	0.00786275	7.57983e-08	0.000163651	10
RAPGEF4	8	-0.174739	0.00964356	8.28717e-08	0.000163651	10
CAPS	9	0.29941	0.00754228	1.18704e-07	0.000182049	10
CPM	10	0.182707	0.00773689	1.296e-07	0.000182049	10
IKBKB	11	0.149899	0.00226836	1.34566e-07	0.000182049	10
ARSG	12	-0.0820681	0.00220489	1.38562e-07	0.000182049	10
PTBP1	13	0.14972	0.00553899	1.49806e-07	0.000182049	9
BMP1	14	0.0924817	0.0035708	1.70618e-07	0.00019253	10
KANK2	15	0.263703	0.0102257	2.52803e-07	0.000266252	10
GFAP	16	0.235067	0.00534165	2.71417e-07	0.00026799	10
SNCG	17	-0.106061	0.0120699	3.30637e-07	0.000307259	10
VPS53	18	-0.042537	0.00569043	3.95862e-07	0.000347435	10
HSPB2	19	0.202108	0.00310584	4.92184e-07	0.000409238	10
CRTAP	20	0.16077	0.00466215	5.30434e-07	0.000418244	10
ITPKB	21	0.229575	0.00709106	5.55964e-07	0.000418244	10
ZDHHC23	22	-0.239874	0.00713947	6.23016e-07	0.000447382	10
DSTYK	23	-0.0212451	0.0141171	8.11164e-07	0.000543359	8
DPYSL4	24	-0.133682	0.00514636	8.25459e-07	0.000543359	10
IDS	25	-0.187421	0.00742522	9.24856e-07	0.000584435	10
KALRN	26	-0.223069	0.00931094	1.33747e-06	0.000801725	10
NFIB	27	0.141116	0.0047608	1.37021e-06	0.000801725	10
CARTPT	28	-0.283796	0.013083	1.49602e-06	0.000844075	10
SRGAP1	29	0.176464	0.00637088	1.59233e-06	0.000867434	10
HSPB3	30	-0.234145	0.0135353	1.86269e-06	0.000971956	10
GAS7	31	-0.0741516	0.00722486	1.90724e-06	0.000971956	10
PDE5A	32	0.0652348	0.00668386	2.11968e-06	0.000986095	10
KAT6A	33	0.217867	0.00940884	2.12024e-06	0.000986095	8
ABLIM1	34	0.175868	0.00392247	2.12225e-06	0.000986095	10
EMP3	35	0.282735	0.00798464	2.22373e-06	0.00098845	10
CENPF	36	-0.152094	0.00278649	2.25245e-06	0.00098845	10
PHAX	37	-0.0189567	0.0106472	2.42333e-06	0.00100906	10
LGALS8	38	-0.201163	0.0034257	2.42715e-06	0.00100906	10
ELOVL6	39	-0.182822	0.00332852	2.59105e-06	0.00101825	10
MCTS1	40	-0.0413297	0.00357065	2.59887e-06	0.00101825	10
CRH	41	-0.229264	0.0205276	2.64262e-06	0.00101825	10
GSN	42	0.245442	0.00757379	2.76977e-06	0.00104183	10
PCSK1	43	-0.51275	0.0275023	2.96422e-06	0.00108904	10
NCALD	44	-0.357851	0.0165532	3.28297e-06	0.001129	10
ZFP36L2	45	0.188838	0.00737371	3.29444e-06	0.001129	10
KRT17	46	-0.267536	0.00429774	3.4784e-06	0.001129	10
NEUROD6	47	-0.276917	0.0132734	3.50095e-06	0.001129	10
S1PR3	48	0.21909	0.00927793	3.51818e-06	0.001129	9
DST	49	0.22159	0.00656396	3.5428e-06	0.001129	10
SST	50	-0.547808	0.022845	3.57322e-06	0.001129	10
ZNF264	51	0.101291	0.00915241	3.66166e-06	0.00113425	10
MTMR3	52	0.107255	0.00143048	3.79009e-06	0.00115146	10
SCG3	53	-0.185111	0.0084934	4.37546e-06	0.00130422	10
PPEF1	54	-0.257917	0.0102891	4.62617e-06	0.00131888	9
HIST1H2BD	55	0.245899	0.0072121	4.66933e-06	0.00131888	10
CDC42EP4	56	0.261108	0.00558988	4.67509e-06	0.00131888	10
MXI1	57	0.196802	0.00682493	4.90891e-06	0.00136054	10
CALM3	58	-0.0871496	0.00425933	5.13516e-06	0.00139871	10
PHF21A	59	0.141231	0.000968092	5.45248e-06	0.00145997	10
PDLIM5	60	0.208958	0.00573497	5.55406e-06	0.00146238	10
CDC42	61	-0.138062	0.0120807	5.73685e-06	0.00148575	10
GPM6A	62	-0.184276	0.011325	6.53262e-06	0.00164511	10
NTNG1	63	-0.0753758	0.00477734	6.56046e-06	0.00164511	10
RGS4	64	-0.530981	0.0386349	6.99141e-06	0.00167845	10
ACACB	65	0.166339	0.00299314	7.00246e-06	0.00167845	10
CYCS	66	-0.0757696	0.00449187	7.01212e-06	0.00167845	10
POLDIP3	67	0.0922587	0.00239479	7.29347e-06	0.00171973	10
OPA1	68	-0.172076	0.00748251	7.75497e-06	0.00180166	10
PPFIA1	69	0.13112	0.000786342	7.93125e-06	0.00181117	10
MTMR11	70	0.0578392	0.00259812	8.21344e-06	0.00181117	10
ZHX3	71	0.135045	0.00341214	8.22274e-06	0.00181117	10
C1orf87	72	0.172819	0.00326818	8.39822e-06	0.00181117	9
PLCE1	73	0.121518	0.00521539	8.40087e-06	0.00181117	10
KLK7	74	-0.21499	0.0105546	8.51021e-06	0.00181117	10
AHNAK	75	0.284237	0.0103341	8.59842e-06	0.00181117	10
NEBL	76	0.238	0.00610768	8.78401e-06	0.00182592	10
C1QTNF5	77	0.218015	0.00345651	8.96255e-06	0.00183884	10
SPOP	78	0.0899343	0.003609	9.1273e-06	0.00184863	10
PHYHD1	79	0.36227	0.0161978	9.37532e-06	0.00187466	9
MDH2	80	-0.101795	0.0043234	9.61097e-06	0.00187466	10
CD44	81	0.166108	0.00501543	9.6118e-06	0.00187466	10
VEZF1	82	0.143836	0.006358	9.89881e-06	0.00189445	10
CDK2AP1	83	0.262584	0.00741395	9.9531e-06	0.00189445	8
GAP43	84	-0.242079	0.0102042	1.08675e-05	0.0020003	10
RHOQ	85	0.258909	0.00852887	1.09364e-05	0.0020003	9
GNB5	86	-0.0834203	0.0128791	1.09861e-05	0.0020003	10
DYRK2	87	-0.0836029	0.0020944	1.11815e-05	0.0020003	10
APC	88	-0.106529	0.00440441	1.11818e-05	0.0020003	10
TNFRSF21	89	-0.131829	0.00562864	1.13334e-05	0.0020003	10
LRRC20	90	-0.137112	0.00281136	1.13956e-05	0.0020003	10
ITGB8	91	0.155094	0.00691555	1.16639e-05	0.00200842	9
WWTR1	92	0.227262	0.0114919	1.16961e-05	0.00200842	9
WNK4	93	0.117549	0.00288398	1.2284e-05	0.00206353	10
WWOX	94	0.179577	0.0031395	1.23855e-05	0.00206353	9
SYNGR1	95	0.0229728	0.00285441	1.24089e-05	0.00206353	10
BCAT1	96	-0.217875	0.00406162	1.25661e-05	0.0020679	10
PLEKHB2	97	-0.016858	0.00595317	1.2904e-05	0.00208849	10
BDH2	98	0.166621	0.004793	1.29556e-05	0.00208849	10
EHD1	99	0.0946294	0.0044786	1.34469e-05	0.00214579	10
PNKD	100	-0.128211	0.00805779	1.35975e-05	0.00214813	10
SSFA2	101	0.20751	0.00426518	1.41051e-05	0.00220626	10
ADCYAP1	102	-0.240361	0.00833323	1.46646e-05	0.00226187	10
LTBP3	103	0.168676	0.00483718	1.4747e-05	0.00226187	10
PPP2R5C	104	0.0907779	0.00334041	1.51269e-05	0.00229229	9
SLC25A11	105	-0.0801503	0.00338058	1.52355e-05	0.00229229	10
SORBS1	106	0.116072	0.00521358	1.54839e-05	0.00230768	10
GNG3	107	-0.181012	0.00913542	1.59289e-05	0.00235182	10
SVOP	108	-0.297452	0.00779037	1.63222e-05	0.00238758	10
MSRB3	109	0.114061	0.00383608	1.70919e-05	0.0024162	10
LZTS1	110	-0.207905	0.00768019	1.74506e-05	0.0024162	10
KRT5	111	-0.148085	0.00524137	1.74636e-05	0.0024162	10
HOPX	112	-0.143237	0.00553403	1.78317e-05	0.0024162	10
SNX10	113	-0.284457	0.0159733	1.78638e-05	0.0024162	10
DBI	114	0.230779	0.0036693	1.79171e-05	0.0024162	10
HIPK1	115	0.181758	0.00872317	1.79768e-05	0.0024162	10
VAPB	116	-0.106456	0.00423043	1.82075e-05	0.0024162	10
SUB1	117	-0.135468	0.00339102	1.82247e-05	0.0024162	10
FOXN3	118	0.0889752	0.00372493	1.83716e-05	0.0024162	10
DTNA	119	0.236384	0.0147349	1.84308e-05	0.0024162	10
ATPIF1	120	-0.118329	0.00398775	1.84477e-05	0.0024162	10
SDHC	121	-0.0122685	0.00371031	1.85062e-05	0.0024162	10
TNRC6A	122	0.0958075	0.0028917	1.93524e-05	0.00250523	10
SMYD2	123	-0.175258	0.00560877	1.95787e-05	0.00250523	10
RBPMS	124	0.174053	0.00658067	1.96638e-05	0.00250523	10
SYTL2	125	-0.172048	0.00457756	1.98926e-05	0.00251411	9
AGFG2	126	0.12005	0.00230674	2.01407e-05	0.00251941	10
TRIM36	127	-0.211701	0.00731838	2.02535e-05	0.00251941	10
LCAT	128	0.137441	0.00284491	2.08333e-05	0.00256436	10
ECM2	129	0.251783	0.0183972	2.09395e-05	0.00256436	10
FMNL3	130	0.0670498	0.0036167	2.13472e-05	0.00257843	9
ILF3	131	0.105118	0.0031787	2.15393e-05	0.00257843	10
ITGB1	132	0.0517667	0.00443412	2.16838e-05	0.00257843	10
CHD4	133	0.127967	0.00182875	2.1849e-05	0.00257843	10
SYNM	134	0.239481	0.00578403	2.18705e-05	0.00257843	10
UACA	135	0.115279	0.00489961	2.20561e-05	0.00258105	10
FRMD4A	136	-0.179139	0.00180299	2.3089e-05	0.00268206	10
FAM81A	137	-0.12269	0.00494288	2.42633e-05	0.00277733	10
DIO2	138	-0.221573	0.0085346	2.43918e-05	0.00277733	10
RFX2	139	0.182685	0.00308418	2.44365e-05	0.00277733	10
TUBB3	140	-0.153989	0.0086202	2.51651e-05	0.0028328	10
CPQ	141	0.250102	0.00639621	2.54464e-05	0.0028328	8
KCNQ3	142	-0.257368	0.00665663	2.55292e-05	0.0028328	10
FYN	143	0.171064	0.00146423	2.56419e-05	0.0028328	10
CPEB1	144	-0.132719	0.00490403	2.66612e-05	0.00292496	10
TRIM8	145	0.167252	0.00204519	2.767e-05	0.00296619	10
TPD52L1	146	0.248709	0.0117926	2.77701e-05	0.00296619	10
BCL11A	147	-0.28314	0.00769601	2.77712e-05	0.00296619	10
BCAP29	148	-0.091591	0.00333063	2.7824e-05	0.00296619	10
HDGF	149	0.117231	0.000896934	2.79759e-05	0.00296619	10
GART	150	-0.123642	0.00244512	2.85314e-05	0.00300493	10
TCF3	151	0.0544123	0.00299225	2.89834e-05	0.00303232	10
TRPM3	152	0.14787	0.0034792	2.93046e-05	0.00304575	10
TBC1D2B	153	0.104826	0.00270895	2.96213e-05	0.00305854	10
NIPBL	154	0.108674	0.00222693	2.98855e-05	0.00306579	10
BDNF	155	-0.126381	0.00626663	3.03846e-05	0.00309687	10
ITGB4	156	0.153142	0.00831738	3.20767e-05	0.00322798	10
TBL1X	157	0.100265	0.00515376	3.20795e-05	0.00322798	10
SLCO3A1	158	0.110598	0.00454713	3.28132e-05	0.00326648	10
SNCAIP	159	0.0757942	0.00333525	3.30607e-05	0.00326648	10
STS	160	-0.18967	0.00554391	3.30825e-05	0.00326648	10
NDUFB8	161	-0.0741889	0.0019155	3.3393e-05	0.00327666	10
TRNT1	162	-0.0577439	0.00218212	3.39738e-05	0.00329574	10
FBXW7	163	-0.140155	0.0042023	3.41459e-05	0.00329574	10
DHRS11	164	-0.231615	0.00613913	3.42542e-05	0.00329574	10
S100A4	165	0.230296	0.00871488	3.44219e-05	0.00329574	10
ADAMTSL1	166	-0.0721568	0.000584268	3.49814e-05	0.00332913	9
IL15	167	0.130688	0.00365683	3.6097e-05	0.00341473	10
MAPKAPK2	168	0.150992	0.00260947	3.64658e-05	0.00342616	10
GRIA3	169	-0.215628	0.00953911	3.66516e-05	0.00342616	9
PCOLCE	170	0.109004	0.00426635	3.71929e-05	0.00344401	10
ADD2	171	-0.054765	0.00310807	3.72785e-05	0.00344401	10
NIPSNAP1	172	-0.105518	0.00301005	3.81059e-05	0.00347005	10
ARHGEF7	173	0.076336	0.00675663	3.83071e-05	0.00347005	10
BGN	174	0.228102	0.00698585	3.84138e-05	0.00347005	10
SLTM	175	0.119963	0.000530938	3.84389e-05	0.00347005	10
AGO1	176	-0.046315	0.00542564	3.86632e-05	0.00347046	8
PGM2L1	177	-0.274015	0.0097694	3.92429e-05	0.0035026	10
HBQ1	178	-0.14081	0.00452814	3.96371e-05	0.00351791	10
COL6A2	179	0.175432	0.00806682	3.9988e-05	0.00352922	10
ARHGEF9	180	-0.176636	0.00456409	4.03528e-05	0.00354163	10
SLC16A9	181	0.255315	0.0102353	4.08399e-05	0.00355126	10
DEK	182	0.150479	0.00149068	4.09121e-05	0.00355126	10
PILRA	183	0.133493	0.00315975	4.12179e-05	0.00355825	10
MRGPRF	184	0.21168	0.00717982	4.30705e-05	0.00367424	10
NKD2	185	-0.133975	0.00304057	4.31113e-05	0.00367424	10
RPH3A	186	-0.376969	0.0119452	4.32963e-05	0.00367424	10
LYRM7	187	-0.0874139	0.0143195	4.34918e-05	0.00367424	8
CXCR4	188	0.230279	0.0120773	4.47594e-05	0.0037573	10
HIF3A	189	0.191789	0.00677044	4.51287e-05	0.0037573	10
HIGD1A	190	-0.105845	0.00559203	4.53243e-05	0.0037573	10
XIAP	191	0.0380274	0.00259884	4.54263e-05	0.0037573	10
ATP6V1C1	192	-0.0826386	0.00501562	4.71205e-05	0.00387713	10
NFATC4	193	0.102341	0.00420638	4.8276e-05	0.00395163	10
CEP41	194	-0.199488	0.00458667	4.89795e-05	0.00395174	8
RHEB	195	0.0218563	0.0041079	4.91825e-05	0.00395174	10
USP47	196	0.130378	0.00206234	4.92838e-05	0.00395174	10
OVOL2	197	-0.0787456	0.00272999	4.98384e-05	0.00395174	10
PRKAR1A	198	-0.12158	0.00480242	4.98746e-05	0.00395174	10
PID1	199	-0.164819	0.00442477	5.00864e-05	0.00395174	10
ANKHD1-EIF4EBP3	200	0.0657951	0.00277019	5.01953e-05	0.00395174	10
BTG2	201	0.162959	0.00579871	5.04003e-05	0.00395174	10
PLEC	202	0.173657	0.00861667	5.05287e-05	0.00395174	8
NPY2R	203	-0.183918	0.00586159	5.15455e-05	0.00401141	9
NACC2	204	0.261543	0.00627966	5.20898e-05	0.00403389	9
MEGF9	205	0.1718	0.00452289	5.37372e-05	0.00414117	9
CPNE4	206	-0.32761	0.0189993	5.4608e-05	0.00418785	10
EPHA5	207	-0.194994	0.0057711	5.49073e-05	0.00419046	10
N4BP2L1	208	-0.0994717	0.0020432	5.69075e-05	0.0042926	10
STAU2	209	-0.116845	0.00411156	5.7092e-05	0.0042926	10
USP53	210	0.203845	0.00942206	5.73622e-05	0.0042926	9
FGFR2	211	0.0554172	0.0036024	5.76409e-05	0.0042926	9
NRSN1	212	-0.286554	0.00888502	5.76691e-05	0.0042926	10
METTL21A	213	0.0580107	0.00905818	5.78759e-05	0.0042926	8
PLCB1	214	-0.207447	0.00775386	5.86221e-05	0.00431245	10
ZFAND5	215	0.0981923	0.00383229	5.86896e-05	0.00431245	10
ARRB1	216	0.115973	0.00405439	6.30821e-05	0.00461376	9
HOMER3	217	0.14859	0.00430802	6.42598e-05	0.00464075	10
AGBL5	218	-0.0288343	0.00492783	6.4527e-05	0.00464075	10
NPC1	219	0.121898	0.00227629	6.47247e-05	0.00464075	10
GDPD1	220	-0.00164793	0.0119576	6.47597e-05	0.00464075	10
RNF19A	221	0.15473	0.00630457	6.50426e-05	0.00464075	10
LIPH	222	-0.0593531	0.0024648	6.53094e-05	0.00464075	9
NEXN	223	0.13989	0.00419367	6.55075e-05	0.00464075	10
RTN3	224	-0.150482	0.00334137	6.63103e-05	0.00467665	10
TTC17	225	0.0696664	0.00379956	6.84473e-05	0.00480381	10
SLC22A18	226	-0.174666	0.00317258	6.87214e-05	0.00480381	10
F12	227	-0.132813	0.00630327	6.93917e-05	0.0048293	10
MTUS1	228	0.164202	0.00690122	7.00785e-05	0.0048557	10
RIMS1	229	-0.157591	0.010408	7.05974e-05	0.00487029	10
PPP2R2C	230	-0.0706516	0.00424017	7.17342e-05	0.0049272	10
HSPB7	231	0.131107	0.00388598	7.22888e-05	0.0049438	10
TMBIM4	232	0.134126	0.00510109	7.59259e-05	0.00517016	10
TRO	233	-0.0530129	0.00439487	7.70258e-05	0.00522255	10
RNF213	234	0.0319365	0.00334607	7.85521e-05	0.00530037	10
UBE2I	235	0.0601612	0.00186057	7.88446e-05	0.00530037	10
MYO5A	236	-0.134313	0.00679642	7.98262e-05	0.00534362	10
MEST	237	-0.189728	0.00904292	8.11378e-05	0.00537156	10
CTDSP2	238	0.14862	0.00154832	8.11921e-05	0.00537156	10
MRPS18A	239	-0.128269	0.000823797	8.14474e-05	0.00537156	10
DCN	240	0.120812	0.00616132	8.16036e-05	0.00537156	10
TNS1	241	0.148723	0.00574898	8.25916e-05	0.00540782	10
SPARC	242	0.205839	0.00878909	8.28391e-05	0.00540782	10
HES4	243	-0.141002	0.00603462	8.50082e-05	0.00552658	10
SIRT5	244	-0.088171	0.00186647	8.54054e-05	0.00552965	10
DDX31	245	-0.000682165	0.00228691	8.5776e-05	0.00553098	10
BASP1	246	-0.0673316	0.00360405	8.63614e-05	0.00554609	10
ZNF397	247	0.0894357	0.00498705	8.71305e-05	0.00557282	10
C11orf1	248	-0.0195952	0.00140552	8.79931e-05	0.0056053	10
GABRB3	249	-0.0918122	0.00634815	8.92423e-05	0.00566204	10
SLC4A8	250	-0.10759	0.00529413	9.01256e-05	0.00567908	9
BHLHE41	251	0.152389	0.00701721	9.0452e-05	0.00567908	8
NIN	252	0.0565911	0.00105789	9.08455e-05	0.00567908	10
COPS8	253	-0.0742798	0.0020532	9.10292e-05	0.00567908	10
DNAJC6	254	-0.105744	0.00577098	9.13081e-05	0.00567908	9
KRT16	255	-0.022822	0.0025505	9.31331e-05	0.00576443	9
ITGA10	256	0.0722976	0.00594631	9.34102e-05	0.00576443	10
SMDT1	257	0.111833	0.00303747	9.59342e-05	0.00589715	8
SERPINB6	258	0.133868	0.00267122	9.65701e-05	0.00591323	10
TNPO1	259	0.150317	0.00498478	9.73002e-05	0.00593493	10
GNG12	260	0.244585	0.00774975	9.93656e-05	0.00602117	10
ICA1	261	-0.0986197	0.00256788	9.94762e-05	0.00602117	10
ATP6V1D	262	-0.143263	0.00153267	0.000101019	0.00608639	10
VAPA	263	-0.00613783	0.00283146	0.000101324	0.00608639	10
PARD3B	264	0.117741	0.00370013	0.000103918	0.0062077	10
PAX6	265	0.226169	0.00800082	0.00010413	0.0062077	10
SLC25A18	266	0.293537	0.00787784	0.000104609	0.00621284	10
PBOV1	267	0.00827788	0.00229787	0.000105625	0.00624186	10
PTPRN2	268	-0.177415	0.00430018	0.000106232	0.00624186	10
ITGB1BP1	269	-0.0567537	0.00638992	0.000106283	0.00624186	10
TBRG1	270	0.0185481	0.00308394	0.000107281	0.00626819	10
NAP1L5	271	-0.257862	0.0107588	0.000107525	0.00626819	10
ATAT1	272	0.0143341	0.00423399	0.000107982	0.00627171	8
PDE4DIP	273	0.111083	0.00621808	0.000108845	0.00629868	9
RRBP1	274	0.0893554	0.00283443	0.000110237	0.00633088	10
CLTA	275	-0.128969	0.00422844	0.000110451	0.00633088	10
KCNF1	276	-0.19852	0.00476246	0.000110796	0.00633088	10
ANTXR2	277	0.0835242	0.0046235	0.000111005	0.00633088	10
AGPAT1	278	-0.104491	0.00134833	0.000112242	0.00635626	10
PAK3	279	-0.326622	0.0174696	0.000112255	0.00635626	10
DOCK5	280	0.0800984	0.00486981	0.000112909	0.00636423	10
CLEC2D	281	0.0347282	0.00344951	0.000113322	0.00636423	10
BRD4	282	-0.0249116	0.00259761	0.000114287	0.00636423	10
CD58	283	0.105234	0.00483921	0.000114336	0.00636423	10
RNF144B	284	0.0857698	0.00452422	0.00011441	0.00636423	10
MET	285	-0.154242	0.00376459	0.000115004	0.00637484	10
METTL1	286	-0.0905122	0.00192859	0.00011561	0.00638088	10
AGO2	287	0.192132	0.00979925	0.000116065	0.00638088	8
SLC4A5	288	-0.0772021	0.00391729	0.000116581	0.00638088	9
TMEM163	289	-0.199369	0.00597363	0.000116743	0.00638088	10
PCYOX1L	290	-0.241081	0.00857931	0.000117364	0.00638088	10
ADGRA3	291	0.225233	0.0127156	0.000117536	0.00638088	8
SCN11A	292	0.00206767	0.00214809	0.000118505	0.00641146	10
CACNB1	293	-0.145453	0.00473217	0.000119267	0.00641857	10
CALD1	294	0.162606	0.00684788	0.000119449	0.00641857	10
GLIS3	295	0.141866	0.00389188	0.000120877	0.00647326	10
ANAPC16	296	0.237408	0.00196787	0.00012151	0.00648516	8
FRZB	297	0.120439	0.00505123	0.000122757	0.00652493	10
TUBB4B	298	-0.101279	0.00495691	0.000123081	0.00652493	8
TSC22D1	299	-0.131017	0.00363601	0.000123699	0.00653579	10
CDK14	300	-0.140358	0.00827677	0.000125832	0.00662091	8
ATP11A	301	0.108999	0.00281921	0.000126149	0.00662091	10
PAGR1	302	0.136112	0.00561887	0.000127709	0.00665913	8
F11R	303	0.0612693	0.00517776	0.00012772	0.00665913	9
GRM8	304	-0.131527	0.00463688	0.000128716	0.006689	10
MCM3	305	0.0262542	0.00204928	0.000129239	0.00669418	10
IQGAP1	306	0.0968291	0.00498685	0.000130074	0.00671537	10
MUC20	307	-0.0287037	0.00490691	0.000131064	0.00674023	10
WAC	308	0.0612836	0.00228828	0.000131507	0.00674023	10
NFKB1	309	0.0988568	0.00206383	0.000132232	0.00674023	10
MKRN1	310	0.0281542	0.003253	0.000132262	0.00674023	10
AJUBA	311	0.194552	0.00502977	0.00013289	0.00675045	8
EPS15	312	-0.0434417	0.00336307	0.000133675	0.00675648	10
PFDN4	313	-0.14107	0.00232922	0.000133864	0.00675648	10
GPATCH2	314	-0.121753	0.00271818	0.000138738	0.0069802	10
SYNRG	315	0.153481	0.00539389	0.00013939	0.00699074	8
MUC1	316	0.0937611	0.00249227	0.00013987	0.0069926	10
CAMSAP1	317	-0.0110321	0.00290925	0.000141546	0.00703766	10
AR	318	0.087473	0.00176511	0.000141662	0.00703766	10
HTR3A	319	-0.0739318	0.00145098	0.000143179	0.00709072	10
FXYD7	320	-0.320845	0.0165538	0.000144401	0.00711663	10
SORBS2	321	-0.136125	0.0031311	0.000144603	0.00711663	10
DLG5	322	0.086114	0.00272665	0.000145346	0.00712191	10
SHANK2	323	-0.153157	0.00376445	0.000145632	0.00712191	10
STMN2	324	-0.214759	0.01581	0.000146204	0.00712191	10
SV2B	325	-0.2138	0.0115453	0.000146844	0.00712191	10
GHITM	326	-0.0896426	0.00500151	0.00014706	0.00712191	10
EPOR	327	0.0343188	0.0031443	0.00014769	0.00712191	10
YBX1	328	0.185675	0.00400292	0.000147866	0.00712191	10
C6orf118	329	0.14559	0.00300552	0.000148592	0.00713514	9
DCTN1	330	-0.115041	0.00188226	0.000150248	0.00717007	10
VNN2	331	0.08156	0.00401315	0.000150834	0.00717007	10
MAST3	332	-0.243358	0.0090358	0.000151001	0.00717007	9
EIF4EBP2	333	0.0801273	0.00422872	0.000151135	0.00717007	10
NRN1	334	-0.320938	0.0180405	0.000155324	0.00733332	10
COL27A1	335	0.221177	0.00829229	0.000155505	0.00733332	10
DDA1	336	-0.105356	0.00192687	0.000157795	0.00741917	10
ELF1	337	0.129798	0.00323339	0.000158611	0.00742043	10
PDLIM4	338	0.144617	0.00678767	0.000159502	0.00742043	10
AIG1	339	-0.040896	0.001948	0.000159889	0.00742043	10
STK33	340	0.0425325	0.00326775	0.000160111	0.00742043	10
LY6G5C	341	0.0924214	0.00229396	0.00016017	0.00742043	10
OLFM1	342	-0.0927741	0.00631003	0.000161027	0.00743834	10
OSBPL2	343	0.116032	0.000634837	0.000161579	0.0074399	10
VAMP1	344	-0.0854991	0.0122948	0.000162003	0.0074399	10
TJP2	345	0.195387	0.00701452	0.000162528	0.00744238	10
COL4A6	346	0.0440051	0.00194044	0.000168274	0.00768323	10
CALN1	347	-0.0580339	0.00974967	0.000171113	0.00779034	10
FAM49A	348	-0.173598	0.00749793	0.000172565	0.00782843	10
FUT6	349	0.0286103	0.0027448	0.000173652	0.00782843	10
OGFOD1	350	-0.11423	0.00146251	0.000173748	0.00782843	10
LANCL2	351	-0.0989475	0.00220156	0.000173932	0.00782843	10
MACF1	352	0.189911	0.00645665	0.000177609	0.0079712	10
WWC3	353	0.157131	0.00196767	0.00018016	0.00806278	10
CHP1	354	-0.128994	0.00681864	0.000181009	0.00807789	8
RUFY3	355	-0.0499155	0.00554856	0.000182347	0.0081147	10
CFLAR	356	0.135039	0.00576355	0.000183108	0.00812566	10
PTGFRN	357	-0.1113	0.00311494	0.000183737	0.00813073	10
KCNRG	358	0.0824446	0.00194681	0.000185152	0.00817047	10
FANCC	359	0.110988	0.00187277	0.000186331	0.00819959	10
POGK	360	0.148762	0.000802307	0.000188404	0.0082678	10
RAB11A	361	-0.0938902	0.00031892	0.000194112	0.00843958	10
ERBB2	362	0.0188099	0.0048974	0.000194315	0.00843958	9
TBC1D7	363	-0.134779	0.00422085	0.000194358	0.00843958	10
SNHG4	364	-0.131938	0.00450666	0.000194455	0.00843958	8
FIBP	365	-0.155174	0.00360207	0.000197397	0.00854378	10
CNIH3	366	-0.141469	0.00531846	0.00020013	0.00862516	10
EPPK1	367	0.0410458	0.00392477	0.000200369	0.00862516	8
HBG2	368	-0.259874	0.00246986	0.000201833	0.00866455	10
DGKZ	369	-0.114514	0.0052642	0.000203101	0.00869536	10
CALML4	370	0.120284	0.00264813	0.000204352	0.00870236	10
EP300	371	0.101972	0.00220067	0.000204366	0.00870236	10
YWHAZ	372	-0.170585	0.004977	0.000207358	0.00879707	10
SOX6	373	-0.00694609	0.00239373	0.000207704	0.00879707	10
TCERG1L	374	-0.262918	0.00800583	0.00021039	0.008887	10
GNAS	375	-0.0514846	0.00171908	0.000211236	0.00889597	10
RREB1	376	0.105609	0.00370887	0.000211728	0.00889597	9
NRCAM	377	-0.0620192	0.00398862	0.000215141	0.00898376	10
MAF	378	0.105737	0.00732311	0.000215292	0.00898376	10
WNT10B	379	-0.171197	0.00404627	0.00021565	0.00898376	10
NT5E	380	-0.0608084	0.0033582	0.000216092	0.00898376	10
NF2	381	-0.0460902	0.00263613	0.000216744	0.00898718	10
ARPP21	382	-0.171389	0.0286654	0.000218413	0.00901102	8
REPIN1	383	0.0944587	0.000761299	0.000218459	0.00901102	10
DENND4C	384	0.109294	0.00287417	0.000219951	0.00903109	10
TUBA1B	385	-0.0965617	0.00182929	0.000220089	0.00903109	10
POLR2K	386	-0.0960312	0.00353111	0.000221366	0.00905497	10
LEPROT	387	0.108716	0.00859529	0.000221993	0.00905497	10
MS4A7	388	0.147152	0.0101759	0.00022312	0.00905497	10
STOML1	389	-0.139777	0.00391008	0.000223322	0.00905497	10
STEAP3	390	0.154467	0.00479958	0.000223537	0.00905497	10
PPP3R1	391	-0.205422	0.00692099	0.000226685	0.00910609	10
SEZ6L2	392	-0.145873	0.00527241	0.000226981	0.00910609	10
EPB41L4B	393	-0.147654	0.00478787	0.000227262	0.00910609	10
AP1S1	394	-0.137271	0.00427035	0.000227405	0.00910609	10
PLXNB1	395	0.195451	0.0041017	0.000228036	0.00910609	10
CD84	396	0.0932336	0.0030194	0.000228318	0.00910609	10
SLC13A3	397	0.0574748	0.00361706	0.000228834	0.00910609	10
CHRNA3	398	-0.0142399	0.00146577	0.00023029	0.00914102	10
RPRD2	399	-0.0562296	0.00518981	0.000231545	0.00916778	8
SHC3	400	-0.231091	0.00851382	0.000234301	0.00925373	10
DEDD	401	0.0903269	0.000486539	0.000237107	0.00934121	10
ABI3BP	402	0.0444815	0.0032031	0.000238931	0.00935991	10
STK38	403	0.0981934	0.00162267	0.000239046	0.00935991	10
GCC1	404	0.0603467	0.00243134	0.00023936	0.00935991	10
CLN8	405	0.130791	0.0030706	0.000240896	0.00939673	10
KLK10	406	-0.0243745	0.00327712	0.000243778	0.00948571	10
ZCCHC17	407	-0.100865	0.00190899	0.000245129	0.00949919	10
MAVS	408	0.25735	0.00444891	0.000245662	0.00949919	8
ABI2	409	-0.082212	0.00139952	0.000246195	0.00949919	10
NOTCH2	410	0.125923	0.00961323	0.000246529	0.00949919	10
ZFP64	411	-0.055915	0.00183885	0.000248394	0.00952902	10
ZBTB20	412	0.160541	0.00695658	0.00024851	0.00952902	10
ITSN1	413	0.148704	0.00814966	0.000250628	0.00958697	9
FAM131A	414	-0.0219162	0.0034209	0.000252248	0.00961782	10
ECHDC2	415	0.128847	0.00297018	0.000252652	0.00961782	10
AKAP6	416	-0.138919	0.00379723	0.000254122	0.00965052	10
FANCE	417	0.0651279	0.00225503	0.000254863	0.00965545	10
PRDM15	418	0.0295519	0.00157338	0.000257135	0.00971672	10
MOCS2	419	0.0176766	0.0032668	0.00025771	0.00971672	10
LENG8	420	0.0841657	0.0037271	0.00025912	0.00974662	10
ENAH	421	0.144506	0.00151902	0.000261577	0.00980344	10
CREB1	422	0.0450704	0.0029602	0.000262202	0.00980344	10
SORCS3	423	-0.169404	0.00342151	0.000262769	0.00980344	10
ZNF621	424	0.106375	0.0023146	0.000263113	0.00980344	10
SMOX	425	0.204847	0.00161016	0.000265997	0.00988759	10
AKT3	426	-0.0598483	0.00507738	0.000268749	0.00996643	10
CFDP1	427	-0.0760108	0.00115692	0.000270783	0.0100184	10
STAT4	428	-0.302866	0.00893192	0.00027189	0.0100358	10
ENSA	429	-0.138933	0.00432787	0.000274017	0.0100738	10
SEMA3E	430	-0.101598	0.0111259	0.000274814	0.0100738	10
PHKB	431	-0.0266761	0.00291796	0.000274833	0.0100738	10
PTK2B	432	-0.135539	0.00551215	0.000276245	0.0101021	10
FBXL2	433	-0.204347	0.00454435	0.000279803	0.0102086	10
GOLM1	434	0.0931377	0.0034862	0.000283155	0.0102551	10
ELAVL4	435	-0.233161	0.0090631	0.00028322	0.0102551	10
ADAM12	436	0.0431824	0.00160734	0.000284707	0.0102551	10
GRK4	437	-0.0574491	0.00329822	0.000284968	0.0102551	10
KLHDC4	438	-0.0448075	0.002492	0.000285078	0.0102551	10
TUB	439	-0.0736098	0.00165062	0.000285416	0.0102551	10
DLGAP1	440	-0.162549	0.00598488	0.000285622	0.0102551	9
BCR	441	0.0940271	0.00353625	0.000289967	0.0103671	10
TPCN1	442	0.140854	0.0026489	0.000290054	0.0103671	10
ASB8	443	-0.00656526	0.00260497	0.000292709	0.0104182	10
COL5A2	444	-0.241587	0.004089	0.000292802	0.0104182	10
NASP	445	0.0688511	0.00426064	0.000293466	0.0104184	10
DNAJC18	446	-0.039358	0.00224954	0.000294216	0.0104216	10
ZNF430	447	0.0669434	0.00267056	0.000295443	0.0104416	10
SEH1L	448	-0.135651	0.00911871	0.000296682	0.010462	10
CREB3L1	449	-0.111998	0.00208017	0.000297545	0.0104653	9
LRPPRC	450	0.00450983	0.00620668	0.000298101	0.0104653	10
MTMR9	451	-0.075193	0.00370427	0.000301134	0.0105169	10
CMTM3	452	0.165352	0.00386645	0.000302074	0.0105169	10
SLC39A3	453	-0.12041	0.00219428	0.000302223	0.0105169	10
NKD1	454	0.0573168	0.00258762	0.000302233	0.0105169	10
LDLRAD3	455	0.211385	0.00593935	0.000303461	0.0105364	10
LRIG3	456	0.0799366	0.00347161	0.000305333	0.0105782	10
CHST6	457	0.269136	0.00423595	0.0003072	0.0106062	10
TECPR1	458	-0.0790941	0.00297682	0.000308466	0.0106062	10
C16orf58	459	-0.0627219	0.00113172	0.000309034	0.0106062	10
SSTR1	460	-0.140693	0.00727627	0.00030985	0.0106062	10
LZTFL1	461	-0.090998	0.0065467	0.000310291	0.0106062	10
HNMT	462	0.078341	0.00330247	0.000310543	0.0106062	10
DENND5B	463	0.0369429	0.00553216	0.000310921	0.0106062	10
RAB27A	464	0.117055	0.00367277	0.000311513	0.0106062	10
ORAI2	465	0.142882	0.00692772	0.000312224	0.0106076	9
S100A6	466	0.190847	0.00419156	0.000314028	0.0106459	10
MSR1	467	0.121497	0.00509565	0.000316273	0.0106817	10
ALDOA	468	-0.112055	0.00226727	0.000316684	0.0106817	10
SAMD4A	469	0.170155	0.0062787	0.000317112	0.0106817	10
MAP3K13	470	-0.131516	0.0029126	0.000320514	0.0107734	10
GMPR	471	0.281662	0.00748493	0.000325433	0.0109155	10
SERBP1	472	0.145535	0.0051388	0.000326776	0.0109295	9
CCKBR	473	-0.261182	0.0078688	0.000327233	0.0109295	10
ATP5F1	474	-0.102001	0.0019519	0.000329698	0.0109695	10
PAK1	475	-0.206249	0.00547521	0.00032982	0.0109695	10
RFK	476	-0.156363	0.00717543	0.000331321	0.0109962	10
DGKB	477	-0.157772	0.00730393	0.000332449	0.0110106	10
NRXN1	478	-0.170983	0.00535259	0.000333336	0.0110168	10
MSI2	479	0.116255	0.00468644	0.000335124	0.0110528	10
NSL1	480	-0.0120497	0.00173769	0.000338124	0.0111285	10
DYNLRB1	481	-0.014597	0.00295325	0.000340468	0.0111506	10
NAV2	482	0.0723636	0.00157891	0.000341513	0.0111506	10
CRYM	483	-0.302438	0.0178668	0.000341799	0.0111506	10
RAB29	484	0.26407	0.00487827	0.000342813	0.0111506	8
RPP40	485	-0.106351	0.0025748	0.000342867	0.0111506	10
LGMN	486	-0.188734	0.00193419	0.000343294	0.0111506	10
ZMYND10	487	0.0951913	0.00277198	0.000343737	0.0111506	10
ENPP5	488	-0.176588	0.00441584	0.000345148	0.011151	10
CERS1	489	0.263951	0.003801	0.000345159	0.011151	8
TIMM17A	490	-0.0837792	0.00339698	0.000347221	0.0111916	10
TMEM158	491	-0.141223	0.0043209	0.000347835	0.0111916	10
IFNLR1	492	0.172046	0.00364067	0.000349148	0.0112043	8
FABP3	493	-0.154736	0.00749326	0.00035035	0.0112043	10
STAU1	494	0.11874	0.00112394	0.000350356	0.0112043	10
PACSIN1	495	-0.167244	0.00386005	0.000352754	0.0112582	10
FLYWCH1	496	-0.0701178	0.00278354	0.000353542	0.0112606	10
EFCAB2	497	0.0546589	0.002842	0.00035593	0.0113139	10
MPPED2	498	-0.105489	0.00269402	0.000357066	0.0113272	10
DLG2	499	-0.113928	0.00576118	0.000358263	0.0113424	10
PCDHGB7	500	0.238723	0.00751156	0.000359294	0.0113523	10
AZGP1	501	0.273292	0.00787648	0.00036092	0.0113809	10
CHDH	502	0.194194	0.00271245	0.000364415	0.0114485	10
ATP2A2	503	-0.0508709	0.00503532	0.000364514	0.0114485	10
MAGI1	504	-0.0401337	0.00332465	0.000366317	0.0114823	10
CACNB4	505	-0.168678	0.0104137	0.000367736	0.011504	10
PLCD3	506	0.184832	0.00352892	0.000370543	0.0115688	10
ILK	507	0.0925131	0.00136541	0.000372294	0.0116006	10
LAMA2	508	0.0970462	0.00298258	0.000374145	0.0116183	10
N4BP1	509	0.0496039	0.00245443	0.000374725	0.0116183	10
CMTM4	510	0.109758	0.000727554	0.00037507	0.0116183	10
ZNF215	511	-0.0883196	0.00197783	0.000379203	0.0117234	10
EBF1	512	0.0531724	0.00522386	0.000380164	0.0117301	10
VTA1	513	-0.144569	0.00237047	0.000381526	0.0117492	10
HBD	514	-0.184467	0.00652885	0.000384246	0.01178	10
GCAT	515	-0.0971282	0.00234469	0.000384876	0.01178	10
RBPJ	516	0.114742	0.00275107	0.000385214	0.01178	10
KDSR	517	0.115511	0.00543404	0.000385509	0.01178	8
CSF1	518	0.0629046	0.00290928	0.000389865	0.0118901	10
THRB	519	-0.249168	0.016677	0.000393235	0.0119698	10
CCDC150	520	0.0131243	0.0017019	0.000397573	0.0120786	9
TPD52	521	-0.0259215	0.00627603	0.000401948	0.0121876	10
SYS1	522	0.0721128	0.00310168	0.000402706	0.0121876	9
TSPAN7	523	-0.130785	0.00216765	0.000405098	0.0122366	10
MAPRE1	524	0.136153	0.00557554	0.000406865	0.0122665	10
STAG1	525	0.0568835	0.00208863	0.000409866	0.0122706	10
WEE1	526	0.0560245	0.00311421	0.00040992	0.0122706	10
CAPN2	527	0.159653	0.00389357	0.000411296	0.0122706	10
LRRC8B	528	-0.0907724	0.00688957	0.000411588	0.0122706	9
PTTG1IP	529	0.176362	0.00381146	0.00041261	0.0122706	10
SLC44A5	530	-0.190113	0.00684208	0.000412678	0.0122706	9
FLNB	531	0.0578955	0.00493959	0.000412832	0.0122706	10
DNAJC10	532	-0.113435	0.00232061	0.000413214	0.0122706	10
LSS	533	0.157044	0.00353759	0.000418355	0.0123825	10
TXNL1	534	-0.00916989	0.00448775	0.00041855	0.0123825	10
AUNIP	535	-0.123388	0.00324117	0.00041967	0.0123924	8
MRAS	536	0.204463	0.00234542	0.000420855	0.0124042	10
MCFD2	537	-0.00472962	0.00327404	0.000421843	0.0124102	10
UCHL1	538	-0.182758	0.00804579	0.00042386	0.0124463	10
CTNNA1	539	0.0864316	0.00521145	0.000427441	0.0125106	10
PPP2R2B	540	-0.131345	0.00158332	0.00042763	0.0125106	10
PSD2	541	0.241112	0.00645709	0.000428427	0.0125107	10
TUBG2	542	-0.147148	0.00311267	0.000433464	0.0126344	10
UNC5B	543	0.0848654	0.0031273	0.000434517	0.0126358	9
LARP7	544	0.0945733	0.00194464	0.000436397	0.0126358	10
HMGCR	545	-0.166298	0.00655506	0.000436931	0.0126358	10
FCGR2B	546	0.083987	0.00585937	0.000436999	0.0126358	10
APPBP2	547	0.0156343	0.00378201	0.000437508	0.0126358	10
MFAP4	548	0.102586	0.00402192	0.000439478	0.0126695	10
NKTR	549	0.0904333	0.00261895	0.000442757	0.0127407	10
RIMS2	550	-0.117135	0.00390574	0.000443806	0.0127477	10
RWDD2A	551	-0.135485	0.00140482	0.000447085	0.0128186	10
GLRB	552	-0.299017	0.0142328	0.000448249	0.0128287	10
RFFL	553	0.0030785	0.00376818	0.000449955	0.0128542	9
COA1	554	0.0383192	0.00468466	0.000451917	0.0128864	8
VASH1	555	0.0807239	0.00326371	0.000453135	0.0128864	10
SFXN5	556	0.17846	0.00286125	0.000453529	0.0128864	10
IGFBP7	557	0.107336	0.00872544	0.000456927	0.0129482	10
RRAD	558	0.154636	0.00312379	0.000457343	0.0129482	10
CDC14B	559	-0.0806286	0.00320479	0.00045888	0.0129685	10
CBLB	560	0.0314352	0.00310497	0.000461231	0.0130117	10
DNAJC21	561	0.103088	0.00160627	0.000464305	0.013075	10
BAIAP2	562	0.00180424	0.00462771	0.000468962	0.0131827	10
FAM162A	563	-0.176948	0.00522132	0.000472931	0.0132222	10
EHD3	564	-0.127301	0.0034931	0.000473219	0.0132222	10
NFATC2IP	565	-0.0142468	0.00236378	0.000474097	0.0132222	10
TTC31	566	0.10413	0.00137531	0.000474487	0.0132222	10
PPP1CB	567	0.0958211	0.00307951	0.000474552	0.0132222	10
MAX	568	-0.0055484	0.00271538	0.000477336	0.0132763	10
CHN1	569	-0.174988	0.00670442	0.000481574	0.0133551	10
SH2D5	570	-0.289411	0.0105729	0.000481857	0.0133551	9
PLPP1	571	0.231904	0.00256698	0.000483896	0.0133881	8
SWAP70	572	0.0513427	0.00482555	0.000487454	0.0134466	10
INVS	573	0.0898527	0.00323569	0.000488862	0.0134466	9
MRPL42	574	-0.0830216	0.00315911	0.0004891	0.0134466	10
ARF3	575	-0.140842	0.00304415	0.000489416	0.0134466	10
STRBP	576	-0.117676	0.00454027	0.000490796	0.0134611	10
PRPF40A	577	0.000789258	0.00460043	0.000493394	0.0134754	8
RAMP1	578	0.191487	0.00476671	0.000493673	0.0134754	10
MORN4	579	-0.138099	0.0023855	0.000494173	0.0134754	10
ETV1	580	-0.0828047	0.0083345	0.000494731	0.0134754	10
GPRASP1	581	-0.269815	0.0142349	0.000497235	0.0135204	10
MRPS35	582	-0.0659888	0.00263096	0.000498745	0.0135279	10
VCAN	583	0.177338	0.00885194	0.000499226	0.0135279	10
GRIK1	584	-0.113483	0.00382145	0.00050057	0.0135311	10
ELN	585	0.0539067	0.00384507	0.000501056	0.0135311	10
ENC1	586	-0.315692	0.028395	0.000502841	0.0135526	10
ASPH	587	0.100706	0.00474553	0.000504369	0.0135526	10
CACNG3	588	-0.310346	0.0119216	0.000504427	0.0135526	10
CD163	589	0.245974	0.0166987	0.000511795	0.0137272	9
MARK1	590	-0.134863	0.00271839	0.000519044	0.0138848	10
CINP	591	-0.099826	0.00318785	0.000521614	0.0138848	10
PDCD2	592	0.0147746	0.00297101	0.000522173	0.0138848	10
MYH11	593	0.0499763	0.00487153	0.000523716	0.0138848	10
HTR4	594	-0.0945547	0.00232301	0.00052412	0.0138848	10
BCL2L2	595	-0.0758307	0.00206476	0.000525238	0.0138848	10
RIMBP2	596	-0.211493	0.00936004	0.000526428	0.0138848	10
STX1B	597	-0.175129	0.0107676	0.000527193	0.0138848	9
EFCAB6	598	-0.0791766	0.00195693	0.000527774	0.0138848	10
PLN	599	0.0807637	0.00441283	0.00052786	0.0138848	9
NFATC1	600	0.110276	0.00237573	0.00052813	0.0138848	10
SVIL	601	0.0827081	0.00661154	0.000530953	0.0138848	10
ACTR6	602	-0.0950497	0.00213119	0.000532593	0.0138848	10
TBL1XR1	603	-0.0443863	0.00282658	0.000533295	0.0138848	10
FBLN1	604	0.115071	0.00378609	0.000533433	0.0138848	10
MRPL24	605	-0.110598	0.00303585	0.000534668	0.0138848	10
ISLR	606	0.0333048	0.00529458	0.000534788	0.0138848	10
U2AF1	607	0.0576437	0.00176948	0.000535287	0.0138848	10
C14orf2	608	-0.0902903	0.0028203	0.000536156	0.0138848	10
DLGAP2	609	-0.157742	0.00422147	0.000536734	0.0138848	10
MYOT	610	0.317494	0.00460335	0.00053681	0.0138848	10
SMARCA4	611	-0.0845189	0.0028869	0.000537004	0.0138848	10
USP14	612	0.0111602	0.00460086	0.000544473	0.0140549	10
CSRP1	613	0.224777	0.00693866	0.000545693	0.0140634	10
ADCY2	614	0.0704207	0.0103312	0.000550638	0.0141559	10
PNMA2	615	-0.187809	0.00645445	0.000551076	0.0141559	10
ARPC4	616	-0.0223867	0.00189879	0.000553483	0.0141861	10
STMN1	617	-0.144662	0.0061074	0.00055508	0.0141861	10
GGA1	618	0.0967609	0.0016481	0.000555692	0.0141861	10
PBXIP1	619	0.202267	0.00709868	0.000555843	0.0141861	10
C17orf58	620	-0.0793203	0.0032338	0.000557301	0.0142004	10
FAM84B	621	0.142622	0.000858072	0.000564799	0.0143475	10
SEPT6	622	-0.024121	0.00412443	0.000564892	0.0143475	10
DESI2	623	0.163102	0.00119865	0.000566957	0.0143769	8
SET	624	0.0958202	0.00261642	0.000570397	0.0144409	10
DLG3	625	-0.153645	0.0047759	0.000571825	0.0144444	9
CEND1	626	-0.131558	0.00414118	0.000572361	0.0144444	10
EGR4	627	-0.205516	0.00866611	0.000575053	0.0144891	10
SYT5	628	-0.241046	0.00961575	0.000580225	0.0145714	10
ZNF652	629	0.178033	0.0054901	0.000580337	0.0145714	10
RRP12	630	-0.0419059	0.00212115	0.000581085	0.0145714	10
NDUFS1	631	-0.0696496	0.00757744	0.000583526	0.0146094	10
MYNN	632	0.0438776	0.00120142	0.000584837	0.0146191	10
TFRC	633	-0.0522042	0.0052842	0.000593357	0.0147712	10
SLC2A6	634	-0.102023	0.0033084	0.000593711	0.0147712	10
PRMT8	635	-0.228637	0.00613678	0.000593729	0.0147712	10
SCAI	636	-0.191502	0.01694	0.000597527	0.0148197	8
TACC1	637	-0.0176827	0.00166995	0.000597759	0.0148197	10
RXFP1	638	-0.289653	0.0160748	0.000598873	0.0148197	10
FBXO9	639	-0.0475195	0.00474937	0.000599431	0.0148197	10
EIF1B	640	-0.0628767	0.00203803	0.000604925	0.0149322	10
ACSS1	641	0.17216	0.00149441	0.00060934	0.0149868	10
REEP1	642	-0.180455	0.00782011	0.000609772	0.0149868	10
NDFIP1	643	-0.120137	0.00287259	0.000609981	0.0149868	10
EIF4E	644	-0.127071	0.00639161	0.000612906	0.0150352	10
RYK	645	0.026959	0.00212204	0.000614196	0.0150435	10
NDE1	646	0.097472	0.00449198	0.000617571	0.0151028	10
NFASC	647	0.141636	0.00382479	0.000618848	0.0151106	10
PDE1A	648	-0.173464	0.0126072	0.000620843	0.0151359	10
HYI	649	0.113495	0.00251755	0.000623295	0.0151592	10
C16orf45	650	-0.141934	0.00361064	0.000624507	0.0151592	10
LIN7B	651	-0.180302	0.00242128	0.0006249	0.0151592	10
ITPRIP	652	0.0732979	0.00312736	0.000626629	0.0151592	10
CNR1	653	-0.205621	0.00911851	0.000627725	0.0151592	10
KRCC1	654	0.11087	0.00404986	0.000628178	0.0151592	10
ILVBL	655	0.0699628	0.00161655	0.000629004	0.0151592	10
EPHA10	656	-0.0690346	0.00260243	0.000629476	0.0151592	10
SP100	657	0.0425244	0.00294138	0.000631079	0.0151747	10
ELMO1	658	0.0263773	0.0101672	0.000635004	0.0152255	10
TMEM59L	659	-0.246071	0.00254388	0.00063512	0.0152255	8
HNRNPM	660	0.0962654	0.00406703	0.000636557	0.0152369	8
EML3	661	0.0662264	0.00469393	0.000637675	0.0152405	10
CTSZ	662	-0.0367648	0.00460675	0.00064334	0.0153527	10
RBM48	663	0.163471	0.00580856	0.000645182	0.0153734	8
TMOD3	664	0.0887943	0.00363468	0.000647141	0.0153969	10
TRABD	665	0.0933804	0.00296354	0.000654769	0.0155345	10
CNNM3	666	0.0878837	0.00288393	0.000654893	0.0155345	10
SLN	667	-0.16718	0.00597114	0.000657581	0.0155749	10
DGKH	668	-0.0742485	0.00255544	0.000659366	0.0155938	10
ANXA2	669	0.15856	0.0117596	0.000661173	0.0156103	10
PDE4B	670	-0.0502501	0.005128	0.000662038	0.0156103	10
TYRP1	671	-0.176239	0.00573105	0.00066451	0.0156441	10
PKNOX2	672	-0.137192	0.0024921	0.000666097	0.0156441	10
TRUB1	673	-0.142477	0.00351725	0.000667254	0.0156441	10
KRT222	674	-0.252881	0.0113513	0.000667434	0.0156441	10
SCN2B	675	-0.20726	0.0093626	0.000668939	0.0156561	10
ARID1A	676	0.134676	0.00126538	0.000672019	0.0156961	10
PPM1A	677	0.0185918	0.00586348	0.000673317	0.0156961	10
PRDX2	678	-0.0790636	0.00233986	0.000673626	0.0156961	9
ANTXR1	679	0.124468	0.00398192	0.000677446	0.0157619	10
PNISR	680	0.212801	0.00728752	0.000681366	0.0158297	8
LATS2	681	0.171416	0.00668074	0.000682774	0.0158392	9
MAN2C1	682	0.0293266	0.00230664	0.000684742	0.0158615	10
INSM2	683	-0.162805	0.00298975	0.000686698	0.0158835	10
MDGA1	684	0.0603492	0.00270764	0.000688094	0.0158926	10
FPR3	685	0.0899646	0.00395712	0.000690477	0.0159243	10
KLHL8	686	0.0550381	0.00342554	0.000694217	0.0159533	10
PRKAR1B	687	-0.212238	0.0093182	0.000694955	0.0159533	10
WDR59	688	0.0991977	0.000816547	0.000695091	0.0159533	10
SCFD2	689	-0.109556	0.00177758	0.000696238	0.0159533	10
SEPT8	690	0.228297	0.00971201	0.000696784	0.0159533	8
WLS	691	0.354322	0.022191	0.000698402	0.0159621	8
RAB27B	692	-0.324462	0.0248751	0.000699188	0.0159621	9
MBD2	693	0.0521045	0.00221159	0.00070275	0.0160006	9
NFATC3	694	0.109421	0.0032745	0.000702902	0.0160006	10
EZR	695	0.285779	0.0124371	0.00071065	0.0161537	8
SDAD1	696	-0.0978866	0.00060221	0.000713619	0.0161979	10
NFIC	697	0.16509	0.00340391	0.000715214	0.0162108	10
SYNCRIP	698	-0.0412978	0.00454805	0.000717309	0.016235	10
COL1A2	699	0.0803462	0.00922175	0.00072007	0.0162534	10
SHMT1	700	0.0271746	0.00196591	0.00072018	0.0162534	10
BRD3	701	0.110636	0.00189777	0.000722222	0.0162763	10
FNBP1	702	0.0744709	0.00349541	0.000723824	0.0162891	10
TNFSF15	703	0.04601	0.00277643	0.000730955	0.0164262	10
SOX2	704	0.152281	0.00873901	0.000732069	0.0164279	10
MED14	705	-0.0579839	0.00694165	0.000743101	0.0166101	8
ENTPD2	706	0.191609	0.00641861	0.000743233	0.0166101	10
NADK2	707	0.202147	0.0146388	0.000743345	0.0166101	8
MPND	708	-0.159996	0.00555916	0.000747571	0.0166651	10
AP2S1	709	-0.125659	0.00312888	0.000747914	0.0166651	10
ARHGEF10	710	0.118545	0.00463076	0.000750157	0.0166915	10
HPCAL4	711	-0.110839	0.00288701	0.000753153	0.0167059	10
B4GALT6	712	-0.168183	0.00408211	0.000754666	0.0167059	10
BNIP3	713	-0.0593	0.00239687	0.0007547	0.0167059	10
FXR1	714	0.0428723	0.00311794	0.000755032	0.0167059	10
ANXA6	715	-0.106907	0.00401907	0.00075747	0.0167364	9
IL13RA1	716	0.112136	0.00704078	0.000761594	0.0167794	10
MICALL2	717	0.193736	0.00371112	0.000761804	0.0167794	10
GFRA2	718	-0.15937	0.00387862	0.000762602	0.0167794	10
SPAG1	719	0.143634	0.00439496	0.000764897	0.0168065	10
SRRT	720	0.0497527	0.00555853	0.0007701	0.0168614	8
COL8A1	721	0.0743545	0.00707932	0.000770303	0.0168614	10
WDR1	722	0.132666	0.00337593	0.000770599	0.0168614	10
AP3S1	723	-0.092154	0.0011764	0.000774673	0.0169212	10
PGAM1	724	-0.0954178	0.00376392	0.000775476	0.0169212	10
POLR2J4	725	-0.00588362	0.00213035	0.000778186	0.0169569	9
TNKS2	726	0.0824328	0.00178701	0.000781516	0.0169944	10
RWDD1	727	0.0997424	0.0014832	0.000782605	0.0169944	10
MIGA1	728	-0.0243461	0.0215671	0.000783133	0.0169944	8
FGFR1OP2	729	-0.108607	0.00237321	0.000785265	0.016996	10
DIP2C	730	0.0544637	0.00280827	0.000785356	0.016996	10
KIAA1217	731	-0.140072	0.00247389	0.000791685	0.0171095	10
RASSF3	732	0.0733179	0.00482262	0.000794914	0.0171545	10
ERBB3	733	-0.0246236	0.00304153	0.000795938	0.0171545	10
NNT	734	-0.0829816	0.00178054	0.000799192	0.0172011	10
SLC15A3	735	0.0958851	0.0037694	0.000804646	0.0172736	10
SULT4A1	736	-0.162382	0.00698002	0.000804746	0.0172736	10
CNOT1	737	0.0817441	0.00127301	0.000811222	0.017389	10
SORT1	738	0.086094	0.00480359	0.000812694	0.0173922	10
COL1A1	739	0.123765	0.0116461	0.000813572	0.0173922	10
ZXDC	740	0.0594901	0.00286937	0.000818501	0.017472	10
B4GALT1	741	0.11881	0.00391018	0.000819943	0.017472	10
CHD5	742	-0.151361	0.00370228	0.000820623	0.017472	10
TPMT	743	-0.000352453	0.00359518	0.00082256	0.0174809	10
DDR2	744	0.123436	0.00564571	0.000823257	0.0174809	10
MBOAT7	745	-0.11439	0.00216708	0.00082556	0.0175063	10
EXO5	746	-0.0491031	0.0041762	0.00082802	0.0175141	8
ACSL6	747	-0.0868284	0.00534487	0.000828618	0.0175141	10
CABP1	748	-0.181217	0.00962889	0.000829258	0.0175141	10
LAMB2	749	0.153922	0.00574805	0.000832399	0.0175141	10
MAP3K3	750	0.0583767	0.00234423	0.000833368	0.0175141	10
C6	751	0.0912071	0.00299725	0.000833511	0.0175141	9
CTC1	752	-0.113875	0.00127204	0.000835047	0.0175141	8
MCM7	753	0.13385	0.00419314	0.000837775	0.0175141	10
LRRFIP1	754	0.0228926	0.00528825	0.000837891	0.0175141	10
MAP4	755	-0.0658277	0.0170292	0.000838071	0.0175141	10
TIMM8A	756	-0.11331	0.00118415	0.000838123	0.0175141	10
CPD	757	-0.0969986	0.00180501	0.000841406	0.0175542	10
TMEM130	758	-0.244038	0.0116477	0.000842263	0.0175542	10
RAB3A	759	-0.17454	0.00552177	0.00084719	0.0176336	10
CUX1	760	0.0787485	0.00382823	0.000853054	0.0177323	10
TLN1	761	0.0876422	0.00450129	0.000856671	0.0177841	10
ASCL1	762	0.0838038	0.00512791	0.000871027	0.0180584	10
RAB22A	763	-0.00126605	0.00318346	0.000873796	0.018092	10
MUM1	764	0.0405654	0.00350052	0.000875176	0.0180942	10
ROR1	765	0.0995483	0.00139216	0.000876819	0.0180942	10
PHKG1	766	0.080339	0.00289483	0.000877337	0.0180942	10
ADRA1A	767	0.138547	0.00259928	0.000885673	0.0182121	10
FEZF2	768	-0.113126	0.00587733	0.000886365	0.0182121	10
CHMP4B	769	-0.0859921	0.000886674	0.000886509	0.0182121	10
ANK3	770	-0.08668	0.00428408	0.000888344	0.018226	10
CDK13	771	0.0226553	0.00394249	0.000894827	0.0183352	8
ROCK1	772	0.0989082	0.00179516	0.00089807	0.0183779	9
IVNS1ABP	773	0.116382	0.00250311	0.000901216	0.0184184	10
FOXC1	774	0.146056	0.009819	0.000902827	0.0184275	10
CSNK2A1	775	-0.0613668	0.00290723	0.000905941	0.0184356	10
ENOPH1	776	0.010585	0.00238793	0.00090595	0.0184356	10
BAIAP2L2	777	-0.0640759	0.00166667	0.000906739	0.0184356	10
SP1	778	0.132451	0.00363817	0.000907895	0.0184356	10
ZHX1	779	0.125432	0.00218614	0.000909857	0.0184518	10
ARHGDIG	780	-0.0666745	0.0109752	0.000917823	0.0185615	10
ANXA5	781	0.169694	0.00658108	0.000919008	0.0185615	10
TAGLN	782	0.0325894	0.00660652	0.000919651	0.0185615	10
CNTNAP2	783	-0.18147	0.00561816	0.000919967	0.0185615	10
PTGER3	784	-0.0459284	0.00233677	0.000926028	0.0186066	10
USP11	785	-0.158338	0.00208722	0.000926689	0.0186066	10
THRA	786	0.055937	0.00213269	0.00092761	0.0186066	10
CHPT1	787	0.0990862	0.00484281	0.000929935	0.0186066	10
RRAGC	788	0.0874699	0.0015228	0.00093255	0.0186066	10
SYT13	789	-0.253247	0.0121005	0.000933831	0.0186066	10
SLC39A10	790	-0.237665	0.0111346	0.000934214	0.0186066	10
KCNIP4	791	-0.227181	0.0125969	0.000936419	0.0186066	10
SEMA4B	792	0.181691	0.00386636	0.000937722	0.0186066	10
PLEKHA7	793	0.16238	0.00400035	0.000937854	0.0186066	10
NUP43	794	0.127388	0.00514048	0.000938732	0.0186066	10
THUMPD1	795	0.0160345	0.00333021	0.0009391	0.0186066	10
TRIL	796	0.208175	0.00298766	0.000939825	0.0186066	10
DNAJC5	797	-0.0808026	0.00687011	0.000940411	0.0186066	9
PRKACA	798	-0.09324	0.00102838	0.000940679	0.0186066	10
AGK	799	-0.102989	0.00359243	0.000941048	0.0186066	10
PCDH8	800	-0.405933	0.028752	0.0009423	0.0186081	10
CD22	801	0.136738	0.00585094	0.000953668	0.0187952	10
NFAT5	802	-0.00953809	0.00262353	0.000954561	0.0187952	10
SPATS2	803	-0.118639	0.00538106	0.000955345	0.0187952	10
NUP58	804	0.00926065	0.0132251	0.000966904	0.0189989	8
SLC16A6	805	-0.104615	0.00439175	0.000974257	0.0191093	10
HLA-DOA	806	0.0672863	0.00337952	0.000975598	0.0191093	10
RAB3C	807	-0.175841	0.00769066	0.000979209	0.0191093	10
TP53INP1	808	0.0995534	0.00231911	0.000979687	0.0191093	10
DIRAS1	809	-0.166807	0.00852196	0.000979716	0.0191093	10
KIF3A	810	-0.177087	0.0136151	0.000980553	0.0191093	10
SNCA	811	-0.173532	0.00949407	0.000980987	0.0191093	10
ACOX1	812	-0.0301248	0.00243196	0.000982465	0.0191145	10
PAPOLA	813	0.0879666	0.00504713	0.000984654	0.019116	10
SERPINA5	814	0.108596	0.00450976	0.000985266	0.019116	9
RPA1	815	-0.0235159	0.00265721	0.000987223	0.019116	10
TRIM29	816	-0.0900209	0.00112475	0.000988216	0.019116	10
CALY	817	-0.452693	0.0105578	0.000989649	0.019116	8
ZNF207	818	0.0681402	0.00218938	0.000989804	0.019116	10
SUSD4	819	-0.179008	0.00347516	0.000991766	0.0191306	10
NRIP2	820	0.151011	0.00473965	0.000992988	0.0191308	10
CTPS2	821	-0.0172004	0.00153962	0.000995204	0.0191501	10
FGF12	822	-0.198194	0.0218629	0.000996831	0.0191581	10
CDK5	823	-0.1361	0.0061221	0.00100506	0.0192755	10
POMT2	824	0.109438	0.00217321	0.00100687	0.0192755	10
IL11RA	825	0.104487	0.00350887	0.00100749	0.0192755	9
TPM2	826	0.129563	0.00603341	0.00100811	0.0192755	10
LRCH4	827	0.0319091	0.00342072	0.00100904	0.0192755	10
PML	828	-0.00250256	0.00155806	0.0010128	0.0193238	10
RB1CC1	829	-0.0850685	0.00333831	0.00101424	0.0193238	10
PSMD12	830	-0.099752	0.00300996	0.00101754	0.0193238	10
STAT3	831	0.158415	0.00325297	0.00101843	0.0193238	10
SMO	832	0.0792536	0.00235666	0.00101933	0.0193238	10
NXPE3	833	0.0987635	0.0153163	0.00101999	0.0193238	8
LOC440934	834	-0.0893133	0.00500975	0.00102013	0.0193238	8
RNF175	835	-0.159766	0.0101082	0.00102535	0.0193993	10
CDK9	836	-0.0183132	0.00197909	0.00103281	0.0195171	10
WSB2	837	-0.110759	0.00317523	0.00103499	0.019535	10
CACNA1H	838	-0.058856	0.00146877	0.00103876	0.0195494	10
STX1A	839	-0.203204	0.00715493	0.00104034	0.0195494	10
WDR6	840	0.14175	0.00107109	0.00104094	0.0195494	10
ARFGEF3	841	-0.122203	0.00806782	0.00104246	0.0195494	8
MEF2C	842	-0.222585	0.0101362	0.00104362	0.0195494	10
SHROOM1	843	0.0615025	0.00392714	0.00104417	0.0195494	10
EFCAB14	844	0.0487516	0.00603497	0.00104464	0.0195494	8
CHD7	845	0.103463	0.00222997	0.00104565	0.0195494	10
TRIM38	846	0.0815759	0.00377611	0.00104964	0.0195995	10
SMAD5	847	0.0664366	0.00156749	0.001051	0.0195995	10
SMAD4	848	0.124833	0.00298452	0.00105206	0.0195995	10
MBP	849	0.082614	0.00386057	0.00105507	0.0196325	10
ISYNA1	850	0.127567	0.00502503	0.0010596	0.0196935	10
COPG1	851	-0.215279	0.00188144	0.00106613	0.0197841	8
RNF11	852	-0.0729401	0.00548695	0.00106698	0.0197841	10
CYP3A5	853	0.0203008	0.00309362	0.00107007	0.0198183	10
TBC1D8B	854	0.032579	0.00150849	0.00107477	0.019882	10
MAP1LC3A	855	-0.0898207	0.00152141	0.00108009	0.0199529	10
SARM1	856	-0.0137076	0.00190842	0.00108213	0.0199529	10
HYOU1	857	-0.126269	0.00115717	0.00108239	0.0199529	10
APLNR	858	0.341976	0.00472118	0.00108451	0.0199686	10
SOX4	859	-0.0801901	0.00168592	0.0010891	0.0199791	10
ALDH1L1	860	0.118339	0.00577664	0.00108946	0.0199791	10
MTX2	861	-0.123763	0.00377311	0.0010896	0.0199791	10
VGF	862	-0.285006	0.00376675	0.00109014	0.0199791	9
GALNT10	863	0.0663628	0.00403545	0.00109304	0.020009	10
RPN2	864	0.0943046	0.00280159	0.00109537	0.0200285	10
LRP8	865	-0.0969851	0.00433523	0.00110054	0.0200998	10
PAIP1	866	0.0718656	0.00327391	0.00110447	0.0201107	10
FOXO1	867	0.153692	0.00435754	0.00110456	0.0201107	10
NOCT	868	-0.0819398	0.0035284	0.00110496	0.0201107	8
SSPN	869	0.144073	0.0065085	0.00110938	0.0201432	10
KREMEN2	870	-0.033158	0.00160058	0.00110945	0.0201432	10
EXTL1	871	-0.122995	0.0042577	0.00111057	0.0201432	10
CNTLN	872	0.0302365	0.00221246	0.00111974	0.0202619	10
TAPBP	873	0.0760469	0.00248477	0.00112007	0.0202619	10
PPME1	874	-0.105938	0.00127937	0.00112096	0.0202619	10
FNDC5	875	-0.0967733	0.00347523	0.00112309	0.0202659	10
CES4A	876	-0.124096	0.00563218	0.00112374	0.0202659	8
TSPAN6	877	0.164902	0.00588795	0.00112629	0.020272	10
UGGT2	878	-0.127931	0.00403799	0.00112665	0.020272	8
MOB1A	879	0.0936016	0.00779799	0.00112953	0.0203007	8
POU3F2	880	0.170696	0.0014455	0.00113102	0.0203044	10
STAMBPL1	881	-0.0936248	0.00392788	0.00113412	0.0203368	10
PRKAA2	882	-0.186492	0.00512047	0.00114233	0.0204609	9
COX15	883	-0.130648	0.000753096	0.00115645	0.0206623	10
TDO2	884	-0.178936	0.00539383	0.00115667	0.0206623	10
PNRC1	885	0.181675	0.00574779	0.00115947	0.0206623	9
DCLK1	886	-0.00251507	0.0179678	0.0011601	0.0206623	10
GRTP1	887	0.13527	0.00332403	0.00116011	0.0206623	10
ST6GALNAC5	888	-0.235332	0.0152139	0.00116144	0.0206627	9
SYN2	889	-0.118448	0.00667253	0.00116286	0.0206646	10
ARPC5L	890	-0.0933417	0.00315222	0.00116503	0.02068	10
PRDM16	891	0.107033	0.00168386	0.00116875	0.0207227	9
RAB3B	892	-0.169577	0.0055686	0.00117642	0.0208354	10
AQP1	893	0.232854	0.0128924	0.00118044	0.0208804	10
NUFIP1	894	-0.0860269	0.0018783	0.00118452	0.0208804	10
KAT6B	895	0.114626	0.0058017	0.0011851	0.0208804	8
PTPN3	896	-0.166118	0.00498263	0.00118523	0.0208804	10
NEFL	897	-0.249794	0.0222293	0.00118558	0.0208804	10
PKP4	898	-0.0181774	0.00831039	0.001191	0.0209434	10
CORO2A	899	-0.0715738	0.00299642	0.00119181	0.0209434	10
METTL9	900	-0.0488876	0.00275227	0.00119481	0.0209438	10
MED12	901	0.0625613	0.0019081	0.00119578	0.0209438	10
TLN2	902	-0.13203	0.00205358	0.00119809	0.0209438	10
ATP6V1H	903	-0.177386	0.00806278	0.00119835	0.0209438	10
TGFB2	904	0.146153	0.00549162	0.00119845	0.0209438	10
ZNF688	905	0.0905155	0.00200602	0.00120181	0.0209792	10
CHML	906	-0.135746	0.00486733	0.00121114	0.0211188	9
ZNF280B	907	-0.0942004	0.0027604	0.00121541	0.0211699	10
HSPH1	908	-0.104565	0.00792831	0.00121903	0.0212095	10
PRSS23	909	-0.0609736	0.00310379	0.00123017	0.0213653	10
C9orf24	910	0.0497748	0.00678245	0.00123069	0.0213653	10
SRD5A1	911	-0.164383	0.00482752	0.00123314	0.0213656	10
USF2	912	0.0872432	0.00142717	0.00123341	0.0213656	10
FCGR2C	913	0.141853	0.00357584	0.00123492	0.0213684	10
UBE2N	914	-0.168062	0.00383883	0.00123664	0.0213746	10
ANKRD40	915	0.149493	0.00327685	0.00124193	0.0214427	10
FXYD3	916	0.0868044	0.00161601	0.00124584	0.0214866	9
HLA-F	917	0.100197	0.00645498	0.00125172	0.0215395	10
ANO6	918	0.115224	0.00785572	0.00125295	0.0215395	10
LEPR	919	-0.0603695	0.00416282	0.00125386	0.0215395	10
NFIA	920	0.172795	0.00378261	0.00125436	0.0215395	10
KCNAB1	921	-0.0394633	0.0040319	0.00127079	0.021798	10
PLPPR5	922	-0.287655	0.00887133	0.00127851	0.0219066	8
IRAK1	923	0.143329	0.00162457	0.0012871	0.0220299	10
MCHR1	924	-0.145272	0.00278259	0.00129323	0.0221109	10
NTPCR	925	-0.0708174	0.00344997	0.00129847	0.0221532	8
PLXNB2	926	0.183274	0.00451068	0.00129851	0.0221532	9
RDH5	927	0.14373	0.00237787	0.00130276	0.0222017	10
NDUFA5	928	-0.125718	0.00663797	0.00130745	0.0222577	10
GLI2	929	0.064272	0.00283389	0.00131242	0.0223183	10
PIEZO2	930	0.0145374	0.00521403	0.0013163	0.022345	8
ZMAT3	931	0.150161	0.00467641	0.00131682	0.022345	10
NLK	932	-0.175656	0.00748404	0.00132094	0.0223908	10
KLC1	933	0.117916	0.00772206	0.00132269	0.0223918	10
FGF13	934	-0.299741	0.0140901	0.00132383	0.0223918	10
ELF2	935	0.0597969	0.00166235	0.00132695	0.0224205	10
LAMA3	936	0.0352188	0.00255352	0.00133575	0.0224542	10
IQGAP3	937	-0.107792	0.00129575	0.00133796	0.0224542	10
IL20RA	938	0.133797	0.00202281	0.00133844	0.0224542	10
WDR20	939	0.0182481	0.00244824	0.00134008	0.0224542	10
ATXN3	940	-0.0829807	0.00387	0.00134247	0.0224542	10
STXBP5	941	-0.165346	0.006104	0.00134562	0.0224542	10
NFYA	942	0.0337939	0.00193193	0.00134568	0.0224542	9
LRRFIP2	943	0.0739451	0.0005259	0.0013467	0.0224542	10
PGR	944	0.0364926	0.0031664	0.00134753	0.0224542	9
CD59	945	0.103477	0.00318239	0.00134887	0.0224542	10
SULT1A1	946	0.0522424	0.00532171	0.00134903	0.0224542	10
IMMT	947	-0.101384	0.00154588	0.00135	0.0224542	10
PRPF6	948	0.0102888	0.00239221	0.0013502	0.0224542	10
PHIP	949	-0.00712699	0.00388122	0.00135025	0.0224542	10
IGF1	950	-0.123502	0.0014656	0.00135027	0.0224542	10
ACADVL	951	0.141567	0.00215002	0.0013549	0.0224926	10
SRSF4	952	0.0460612	0.00308347	0.00135663	0.0224926	8
ATP6AP2	953	-0.0742825	0.00232928	0.00135685	0.0224926	10
DDX17	954	0.116176	0.00542559	0.00135935	0.0225105	10
CD109	955	0.137408	0.00329655	0.00136368	0.0225586	10
FAM19A5	956	0.105001	0.00142296	0.00136714	0.0225921	10
CTBP2	957	0.13203	0.00416236	0.00137465	0.0226925	10
CCDC68	958	-0.0688765	0.00287976	0.00137871	0.0227357	10
DR1	959	0.011521	0.00504827	0.00138033	0.0227388	10
VWC2	960	-0.101817	0.00282945	0.00138195	0.0227388	10
RFX4	961	0.0783643	0.00365566	0.00138321	0.0227388	10
ZNF665	962	0.096967	0.0033125	0.00138704	0.022778	10
SNRNP200	963	0.0886404	0.00157489	0.00139574	0.0228971	10
ARSD	964	0.0121386	0.00299564	0.00139907	0.022928	10
ATL3	965	0.0613957	0.00336282	0.00140631	0.0229985	10
DUSP1	966	0.204956	0.00727232	0.00140774	0.0229985	10
ITCH	967	0.0770753	0.00275729	0.00140775	0.0229985	10
NBPF1	968	0.1245	0.00311653	0.00140923	0.022999	10
CREB5	969	0.0822208	0.00159046	0.00141119	0.0230072	10
OCA2	970	-0.130274	0.00366798	0.00142006	0.0231067	10
VAMP3	971	0.199704	0.00956643	0.00142022	0.0231067	10
SLC6A12	972	0.185597	0.00667645	0.00142251	0.0231202	10
MYADM	973	-0.114162	0.00170721	0.00142981	0.023215	10
VAMP2	974	-0.127647	0.00381542	0.00143373	0.0232408	10
CDC14A	975	0.073395	0.00223355	0.00143442	0.0232408	10
NCAM1	976	-0.10963	0.00153439	0.00143715	0.0232408	10
TPM3	977	-0.0397236	0.00145902	0.00143729	0.0232408	10
RASSF4	978	0.0981713	0.00314037	0.0014418	0.0232899	10
NBAS	979	-0.0834182	0.00123568	0.00144543	0.0233247	10
GNG4	980	-0.126531	0.0024097	0.0014573	0.0234807	10
C1orf115	981	-0.104074	0.00462043	0.00145908	0.0234807	10
KCNIP3	982	-0.147404	0.000947681	0.00145955	0.0234807	10
KCNK3	983	-0.00202183	0.00325988	0.0014652	0.0235271	10
SNAPC3	984	-0.0644334	0.0039934	0.0014661	0.0235271	9
ITIH4	985	-0.122925	0.000804699	0.00146691	0.0235271	10
BCL2L11	986	0.0984842	0.00151005	0.00147315	0.0235656	10
FKBP1B	987	-0.144108	0.0051737	0.00147376	0.0235656	10
ZNF184	988	-0.1403	0.00472183	0.00147378	0.0235656	10
FN1	989	-0.022321	0.00437044	0.0014821	0.0236746	10
SYNE2	990	0.114023	0.00237132	0.001485	0.0236771	9
CHST12	991	0.0997584	0.00203532	0.00148662	0.0236771	10
UBE2H	992	0.0294547	0.00160139	0.00148675	0.0236771	10
LARP4B	993	-0.0379373	0.00411815	0.00149001	0.0237007	10
ANGPT1	994	0.160047	0.00652886	0.00149123	0.0237007	10
PFKFB3	995	0.180422	0.00342636	0.00149282	0.0237021	10
SLC30A3	996	-0.198673	0.00623605	0.00149672	0.0237401	10
PLXNC1	997	-0.111698	0.00151412	0.00150035	0.0237582	10
PIEZO1	998	0.188566	0.00191046	0.00150164	0.0237582	8
BBS7	999	-0.161254	0.0144916	0.00150354	0.0237582	10
RPL10	1000	-0.0559635	0.00228435	0.00150522	0.0237582	9
CASP3	1001	0.0808304	0.00213335	0.00150538	0.0237582	10
RGS5	1002	-0.0895955	0.00421793	0.00151304	0.0238553	10
ADARB2	1003	0.187407	0.0016123	0.00151541	0.0238688	10
ESR1	1004	-0.0318004	0.0014268	0.00152077	0.0239295	10
PTPRK	1005	-0.070693	0.00403807	0.00152503	0.0239726	10
PCDHGA3	1006	0.154201	0.00472181	0.00152809	0.0239901	9
PACSIN2	1007	0.0977536	0.00184107	0.00152919	0.0239901	10
ABCA1	1008	0.034779	0.00378915	0.00153076	0.0239911	10
CAB39L	1009	0.0829671	0.00315298	0.00153448	0.0240255	10
MESP1	1010	-0.0564556	0.00210702	0.00153754	0.0240495	10
CBLN4	1011	-0.215335	0.0139145	0.00153958	0.0240576	10
ATP6V0A1	1012	-0.0819822	0.00159925	0.00154866	0.0241756	10
PBRM1	1013	-0.0364933	0.00285493	0.00155526	0.0242547	9
NAP1L1	1014	0.00626979	0.00340537	0.0015576	0.024266	10
OLAH	1015	0.124872	0.00223285	0.00155908	0.024266	10
TAF9B	1016	-0.12935	0.00175603	0.0015606	0.024266	10
RTN1	1017	-0.155521	0.00732269	0.00156309	0.0242688	10
GRIA2	1018	-0.141153	0.00346817	0.00156385	0.0242688	10
USP36	1019	-0.0618008	0.00326723	0.00157342	0.024373	8
RIMS3	1020	-0.108957	0.00162085	0.00157365	0.024373	10
CDK5RAP2	1021	0.0607844	0.00150922	0.00157561	0.0243795	10
FRS3	1022	-0.106774	0.00130975	0.00158519	0.0245038	10
COL12A1	1023	-0.0129591	0.00253626	0.00159204	0.0245855	10
GNAO1	1024	-0.0601944	0.00495684	0.00159674	0.0246341	10
ZC3H15	1025	-0.044843	0.00268305	0.00160683	0.0247433	10
ZNF618	1026	0.0755278	0.00267653	0.00160696	0.0247433	10
CACYBP	1027	-0.0258985	0.00496778	0.00160862	0.0247448	10
YWHAG	1028	-0.114785	0.00589068	0.00161633	0.0248393	10
PHF24	1029	-0.311923	0.0077184	0.00162212	0.0249041	8
PNMA6A	1030	-0.155324	0.00699814	0.0016273	0.0249594	10
NMNAT2	1031	-0.214801	0.0106726	0.00163266	0.0250173	10
SRRM2	1032	0.121447	0.00231242	0.00163702	0.0250597	10
KNG1	1033	-0.0493962	0.00162914	0.00164098	0.025096	9
APBB2	1034	0.08428	0.00257192	0.00164698	0.0251634	10
PLCG2	1035	-0.021399	0.00311346	0.00165235	0.0252195	10
ZBTB5	1036	0.0865442	0.00134067	0.00165384	0.0252195	10
LARGE1	1037	-0.0875868	0.00435031	0.00167194	0.0254515	8
ERF	1038	0.12843	0.00206637	0.00167228	0.0254515	10
DOCK1	1039	0.0813268	0.00451855	0.00167639	0.0254895	10
FXYD5	1040	0.0566317	0.00538133	0.0016949	0.0257461	10
UBE2W	1041	-0.117751	0.00223881	0.0016981	0.02577	10
FECH	1042	-0.0649582	0.00256525	0.00170308	0.0258207	10
UPB1	1043	0.0439252	0.0014637	0.00170572	0.0258242	10
EIF1	1044	0.0831398	0.00154696	0.00170657	0.0258242	10
OAS2	1045	0.0487571	0.00270309	0.0017114	0.0258725	10
FAM20B	1046	-0.0777094	0.00268822	0.00172207	0.0260089	10
NUMBL	1047	-0.0770595	0.00128839	0.00173092	0.0261176	10
ATP2C1	1048	-0.0568509	0.00235851	0.00173387	0.0261372	10
TBRG4	1049	-1.68986e-06	0.00172778	0.0017383	0.0261544	10
BLZF1	1050	0.025485	0.00389015	0.00173833	0.0261544	10
ACSBG1	1051	0.131283	0.00771807	0.00174105	0.0261705	10
CYP2C8	1052	-0.132034	0.00306116	0.00174617	0.0262224	10
ID4	1053	0.180008	0.00619944	0.00175717	0.0263625	10
PDE4A	1054	-0.114704	0.00334783	0.00176349	0.0264057	10
CRTC3	1055	0.151342	0.00551704	0.00176457	0.0264057	8
TUBA4A	1056	-0.155011	0.0046797	0.00176506	0.0264057	10
RABGAP1L	1057	-0.192375	0.0045491	0.00176699	0.0264096	9
ZFP36L1	1058	0.159547	0.0097294	0.00177762	0.0265434	10
DKK3	1059	0.0738316	0.00318864	0.00178433	0.0266183	10
GLS	1060	-0.0584023	0.00483575	0.00179082	0.02669	10
CDH6	1061	-0.0424137	0.00206625	0.00179482	0.0267243	10
USP34	1062	0.11399	0.000738123	0.00180186	0.026799	10
PRSS16	1063	-0.147585	0.00331866	0.00180369	0.026799	10
ATAD2B	1064	0.145636	0.00293039	0.00180492	0.026799	8
DCLRE1C	1065	0.0924071	0.0029157	0.0018113	0.0268685	10
NDRG4	1066	-0.0942118	0.000391361	0.00181855	0.0269508	10
ID3	1067	0.255508	0.0121194	0.00182729	0.027043	10
SYNJ1	1068	-0.0665113	0.00257443	0.0018282	0.027043	9
EBF3	1069	0.056166	0.00174058	0.00183675	0.0271033	10
CFB	1070	0.0363763	0.00705804	0.00183683	0.0271033	10
TNFRSF11B	1071	0.196161	0.00971015	0.00183827	0.0271033	10
KIF9	1072	-0.0878834	0.00151859	0.00183914	0.0271033	9
KCNJ16	1073	0.21915	0.00613321	0.00184251	0.0271277	10
YAF2	1074	-0.0907453	0.00422375	0.00185696	0.0273149	10
GPR155	1075	-0.0111915	0.00710716	0.0018759	0.0275497	10
TUBB	1076	-0.150413	0.00427861	0.00187844	0.0275497	9
THY1	1077	-0.196899	0.00839486	0.0018785	0.0275497	10
WAPL	1078	0.147945	0.0031142	0.00187989	0.0275497	8
ST8SIA2	1079	-0.0247979	0.00140555	0.00188211	0.0275566	9
POLR1D	1080	-0.0473259	0.0030571	0.00188527	0.0275773	10
PCDHB4	1081	0.0836813	0.00455529	0.0018882	0.0275899	10
ANKFY1	1082	0.0589001	0.00240787	0.00189058	0.0275899	10
PIAS2	1083	-0.130294	0.00375424	0.00189307	0.0275899	10
CD99L2	1084	-0.0529099	0.00275512	0.00189311	0.0275899	10
SDC4	1085	0.199055	0.00747177	0.00189566	0.0275939	10
ZMYM6	1086	0.0345307	0.00413731	0.00189789	0.0275939	10
PCBP2	1087	-0.0107674	0.00281643	0.00189863	0.0275939	10
CNNM2	1088	0.0220014	0.00179393	0.00191789	0.0278224	10
ADH1B	1089	0.137115	0.00525984	0.00192055	0.0278224	10
TRAM2	1090	-0.025106	0.00232906	0.00192131	0.0278224	10
HLA-DRB6	1091	0.00907413	0.00599196	0.0019214	0.0278224	9
JUP	1092	0.0875511	0.00605874	0.0019237	0.0278302	10
MBTD1	1093	0.0420852	0.00375098	0.00192875	0.0278778	10
SIGLEC1	1094	0.0989884	0.00207365	0.00193067	0.02788	10
GLUD2	1095	-0.0269029	0.00400336	0.00193257	0.0278819	10
MEAF6	1096	-0.143531	0.0031495	0.00193831	0.0279393	9
ADCY1	1097	-0.143685	0.00443528	0.00194381	0.0279929	10
CES2	1098	-0.0716098	0.00232352	0.00194821	0.0280309	10
QKI	1099	0.1536	0.0044147	0.00196423	0.0282356	9
ENTPD6	1100	-0.0545006	0.00253344	0.001968	0.0282511	10
DDHD1	1101	-0.149766	0.00360288	0.00196967	0.0282511	10
CTTN	1102	0.0847999	0.00222351	0.00197068	0.0282511	10
NOP16	1103	0.00471679	0.00492272	0.00197333	0.0282601	8
IL18	1104	0.178427	0.00187175	0.00197698	0.0282601	10
VSNL1	1105	-0.211158	0.0100038	0.00197699	0.0282601	10
RPE	1106	-0.0172504	0.00132834	0.00197845	0.0282601	10
NEK9	1107	0.102155	0.00138565	0.00198034	0.0282615	9
RAP2A	1108	-0.0698411	0.00277251	0.00199634	0.028464	10
NAPB	1109	-0.124555	0.0104252	0.00200264	0.0285281	10
KCNMB1	1110	0.00534222	0.00353803	0.0020064	0.0285559	10
MUM1L1	1111	-0.272004	0.0150181	0.00201032	0.0285859	10
BEX5	1112	-0.265985	0.00984632	0.00201362	0.0286072	10
ARMCX5	1113	-0.146637	0.00489707	0.00201675	0.0286092	10
HIP1	1114	0.0680465	0.00387368	0.00202002	0.0286092	10
LRCH1	1115	0.0869496	0.00192558	0.00202019	0.0286092	10
ME3	1116	-0.0981626	0.00192201	0.002021	0.0286092	10
JADE1	1117	-0.064531	0.00753429	0.00202551	0.0286317	8
BRWD1	1118	-0.0227829	0.00388951	0.00202622	0.0286317	10
SLC35E1	1119	0.0520043	0.00271309	0.00202909	0.0286466	10
RARA	1120	0.00929817	0.00150418	0.00203791	0.0287077	10
BEX1	1121	-0.16883	0.00474544	0.00203815	0.0287077	10
ZNF544	1122	0.0508795	0.00133041	0.00203887	0.0287077	10
STON1	1123	0.126569	0.00500987	0.00204388	0.0287527	10
CCNY	1124	-0.053485	0.00344327	0.00204745	0.0287773	10
SPTSSA	1125	0.21681	0.00219797	0.00205068	0.0287784	8
KANK1	1126	0.0777404	0.00133155	0.00205117	0.0287784	10
RBM17	1127	0.13572	0.00306602	0.00205862	0.0288572	10
AP4S1	1128	-0.0572012	0.00257171	0.00206482	0.028916	10
AEBP1	1129	0.226446	0.00885514	0.00206775	0.028916	10
HECTD2	1130	-0.0757421	0.00315909	0.00206831	0.028916	10
AGTR1	1131	-0.00928232	0.00205862	0.00207839	0.0290051	10
BCAS2	1132	-0.0863837	0.00445703	0.00207864	0.0290051	10
ELP2	1133	-0.0830228	0.000743371	0.00208158	0.0290051	10
CLUAP1	1134	-0.0812087	0.00234053	0.00208202	0.0290051	10
VKORC1L1	1135	-0.0580109	0.00290581	0.00208738	0.0290354	10
NECTIN1	1136	0.0319864	0.00496557	0.00208787	0.0290354	8
ARL4D	1137	-0.100626	0.00132777	0.00209146	0.0290597	10
PRKCZ	1138	-0.0908093	0.00262941	0.00209577	0.029094	10
NUBP1	1139	0.0592918	0.00170728	0.00210042	0.0291329	10
PIP5K1B	1140	-0.0822444	0.00328843	0.00210301	0.0291433	10
SLC25A22	1141	-0.162378	0.00141315	0.00210618	0.0291599	10
TUBG1	1142	-0.104441	0.00371349	0.0021079	0.0291599	10
GFPT2	1143	0.0900063	0.00193693	0.00211219	0.0291832	10
NRXN3	1144	-0.194946	0.0118148	0.00211328	0.0291832	10
SEPHS1	1145	0.0796605	0.00102825	0.00211661	0.0292037	10
TEAD2	1146	0.120985	0.00220474	0.00212064	0.0292338	10
GYG2	1147	0.0938732	0.00371612	0.00212392	0.0292534	10
GOSR2	1148	-0.0461591	0.00175077	0.00212853	0.0292914	10
PSIP1	1149	0.0125603	0.00307967	0.00213132	0.0293043	10
MR1	1150	-0.0411797	0.00244927	0.00214362	0.0294477	10
CACNB2	1151	-0.126987	0.00160523	0.00214822	0.0294852	10
SNAP25	1152	-0.133756	0.0083816	0.00215488	0.0295079	10
GLRX2	1153	-0.112615	0.005123	0.00215507	0.0295079	10
THOC7	1154	-0.0744588	0.00202613	0.00215772	0.0295079	10
SATB2	1155	-0.188148	0.00795432	0.00215894	0.0295079	10
PLXDC2	1156	0.129901	0.00492973	0.00215921	0.0295079	10
NT5DC3	1157	-0.134794	0.00355062	0.00216439	0.0295157	9
PHKA2	1158	0.0446689	0.00217998	0.00216526	0.0295157	10
RBP4	1159	-0.152507	0.00486722	0.00216538	0.0295157	10
SGSM2	1160	-0.0858441	0.00246732	0.0021727	0.0295821	10
LY6H	1161	-0.0947935	0.00450235	0.002174	0.0295821	10
MOB3B	1162	0.135917	0.0123472	0.00217888	0.029623	8
CMAS	1163	-0.0817022	0.00290052	0.00218214	0.0296418	10
GFM1	1164	-0.0841942	0.000756205	0.00218794	0.0296836	10
ARL8B	1165	-0.0891463	0.00163615	0.00219102	0.0296836	10
SH3BGRL	1166	0.0213017	0.00614146	0.00219129	0.0296836	10
HECW1	1167	-0.183519	0.00631168	0.00219273	0.0296836	10
PEX16	1168	-0.0709112	0.00097817	0.00219838	0.0297346	10
ALG9	1169	-0.0866462	0.00117523	0.00220434	0.0297897	10
PPP1CC	1170	0.126148	0.00179938	0.0022068	0.0297975	10
MLC1	1171	0.228773	0.00643765	0.0022152	0.0298618	10
ERG	1172	0.016064	0.00205482	0.00221535	0.0298618	9
B3GALT2	1173	-0.139161	0.00597217	0.00221959	0.0298934	10
RDX	1174	-0.0742847	0.0104705	0.00222244	0.0299045	9
TCF4	1175	-0.03599	0.00548988	0.00222419	0.0299045	10
GSE1	1176	-0.0331888	0.00615236	0.00223591	0.0300325	8
FAM129B	1177	0.143088	0.00250193	0.0022417	0.0300325	10
GUK1	1178	-0.0239224	0.00315005	0.00224195	0.0300325	10
MEF2D	1179	-0.0810413	0.00206349	0.00224207	0.0300325	10
WWC1	1180	0.086741	0.00317315	0.00224321	0.0300325	10
RAC1	1181	-0.063774	0.00120572	0.00225208	0.0301204	10
DLEC1	1182	0.143117	0.00239611	0.0022536	0.0301204	9
RAD51B	1183	-0.0143656	0.00265127	0.00225813	0.0301554	8
TCEA1	1184	0.0753431	0.000760083	0.00226537	0.0302243	10
UBE2B	1185	-0.00699514	0.00245539	0.00226711	0.0302243	10
SH3GLB2	1186	-0.0735165	0.00178911	0.00227104	0.0302511	10
SCAF11	1187	-0.105335	0.00377669	0.002276	0.0302918	8
COX5A	1188	-0.0633122	0.00349355	0.0022813	0.0303232	10
MPPED1	1189	-0.162044	0.00653276	0.00228221	0.0303232	10
BMPR1A	1190	0.161429	0.00319637	0.00228902	0.0303881	10
BNC2	1191	0.0442015	0.00347022	0.00229869	0.0304909	9
LRIG1	1192	0.111658	0.00552534	0.00230302	0.0305228	10
TMEM189-UBE2V1	1193	0.00116032	0.00307511	0.00231216	0.0306181	10
SLC38A10	1194	0.0273146	0.00266861	0.00231908	0.0306653	9
PAFAH2	1195	0.0819061	0.00199353	0.0023196	0.0306653	10
NTMT1	1196	0.0213268	0.00403247	0.00233195	0.0307837	8
GALNT1	1197	0.089974	0.00217442	0.00233245	0.0307837	10
THSD4	1198	0.0201461	0.00530499	0.0023352	0.0307942	10
NFX1	1199	0.0658729	0.00190039	0.002348	0.0309298	10
DDX11	1200	0.0847329	0.00331465	0.00235075	0.0309298	10
PARPBP	1201	-0.0832443	0.00294347	0.00235135	0.0309298	8
ATP5L	1202	-0.0757208	0.00296696	0.00235426	0.0309423	10
OSBPL1A	1203	-0.0588579	0.00179284	0.00235797	0.0309652	10
MSH3	1204	0.0665742	0.00205483	0.0023601	0.0309674	10
CUEDC1	1205	0.0886692	0.0080312	0.00236975	0.0310482	10
RASGRF1	1206	-0.101207	0.00398052	0.00237075	0.0310482	10
NR2E3	1207	-0.0259831	0.00122469	0.00237214	0.0310482	10
ZNF91	1208	0.00294088	0.00413421	0.00237442	0.0310522	10
C1orf52	1209	-0.0704984	0.00219216	0.00237986	0.0310794	10
SLC2A3	1210	-0.0751952	0.00439096	0.00238043	0.0310794	10
C21orf2	1211	0.0126099	0.00257349	0.00239617	0.0312074	10
PATZ1	1212	0.0262436	0.00201559	0.00239671	0.0312074	10
ATP6V0E1	1213	0.116427	0.00504749	0.00239837	0.0312074	10
RGS3	1214	0.089177	0.00229075	0.00240019	0.0312074	10
GIGYF1	1215	0.103978	0.00316035	0.00240221	0.0312074	10
TMEM132D	1216	-0.218357	0.00920543	0.00240323	0.0312074	10
TNFAIP8	1217	0.0749494	0.00455883	0.0024045	0.0312074	10
STMN3	1218	-0.182432	0.00315978	0.00240925	0.0312074	8
SOS2	1219	0.0482805	0.00200936	0.00240973	0.0312074	9
PLCL2	1220	-0.0577752	0.00433214	0.00240999	0.0312074	10
ATG7	1221	-0.0113011	0.00227505	0.00242121	0.031327	10
NUAK1	1222	-0.141445	0.00413615	0.002426	0.0313633	10
TSHZ3	1223	-0.159215	0.00329744	0.00243091	0.0313942	10
SNTB2	1224	-0.016982	0.00289911	0.00243236	0.0313942	10
NICN1	1225	-0.040295	0.00322127	0.00244223	0.0314958	10
FAM46A	1226	0.0880928	0.00420575	0.00244801	0.0315446	10
ANKRD44	1227	0.0446699	0.00203383	0.00245387	0.0315798	10
CYSTM1	1228	0.183932	0.00611391	0.00245474	0.0315798	8
DMPK	1229	0.12053	0.00161001	0.0024587	0.031605	10
VPS41	1230	0.0430081	0.00714782	0.00247511	0.0317567	10
IQGAP2	1231	0.04392	0.00223563	0.0024762	0.0317567	10
GATA2	1232	0.0572492	0.00223894	0.00247653	0.0317567	10
SNX5	1233	0.05208	0.0018648	0.00249908	0.0320118	10
RBL1	1234	0.0970138	0.00162818	0.00250048	0.0320118	10
R3HDM1	1235	-0.158227	0.00473562	0.00250558	0.0320511	10
FAM102B	1236	-0.14537	0.00883105	0.00250954	0.0320758	9
MARCH8	1237	0.0916293	0.00231927	0.00251593	0.0321315	9
AGPAT3	1238	0.0653364	0.00230235	0.00252658	0.032197	10
SZRD1	1239	0.103821	0.00347337	0.00252841	0.032197	8
LRRC6	1240	-0.108701	0.00278283	0.0025291	0.032197	10
KCTD13	1241	-0.127264	0.00191178	0.00252921	0.032197	10
FBXO16	1242	-0.0860187	0.00491822	0.00253358	0.0322267	10
BCCIP	1243	-0.0927308	0.00195777	0.00253997	0.0322819	10
XPO4	1244	-0.0623121	0.00125086	0.00254815	0.0323599	10
TFAP2A	1245	-0.0140492	0.00119759	0.00255807	0.0324303	9
SLC43A3	1246	0.0944471	0.00137505	0.00255924	0.0324303	10
SCP2	1247	0.0645741	0.00531941	0.00255985	0.0324303	10
BCL6	1248	0.177265	0.00345995	0.00256283	0.032442	10
TRIP10	1249	0.1872	0.00334421	0.00261425	0.0330499	10
NRGN	1250	-0.158993	0.0106453	0.00261504	0.0330499	10
NUCKS1	1251	0.0188175	0.00416539	0.00262301	0.0331242	10
CASP8AP2	1252	0.0277776	0.00374543	0.00262594	0.0331347	10
LRRC1	1253	0.107222	0.0026264	0.00263166	0.0331803	10
SPEN	1254	0.0566533	0.00322811	0.00263861	0.0332415	10
EXT1	1255	-0.127016	0.0015829	0.00264251	0.0332542	10
PRKCG	1256	-0.201882	0.00603502	0.00264383	0.0332542	10
USH1C	1257	0.083362	0.0050368	0.00264613	0.0332566	9
TGFB1I1	1258	0.120478	0.00551647	0.00265635	0.0333585	10
SELENBP1	1259	0.144091	0.00678062	0.00266334	0.0334038	10
MAPK8IP3	1260	-0.037606	0.00198252	0.00266573	0.0334038	10
LPP	1261	0.108667	0.00580708	0.0026663	0.0334038	10
RASL11B	1262	-0.0351926	0.00471346	0.00267086	0.0334344	10
BMP5	1263	0.0243752	0.00555195	0.00268517	0.0335869	10
KLC4	1264	0.0848607	0.000889307	0.00269305	0.033635	9
C22orf39	1265	-0.0261305	0.00230111	0.00269327	0.033635	10
NRIP3	1266	-0.196841	0.0129973	0.00271507	0.0338683	10
CEP68	1267	-0.074255	0.0028595	0.00271674	0.0338683	9
UBE2D4	1268	-0.0336399	0.00159875	0.00271838	0.0338683	10
FAIM2	1269	-0.106661	0.00415214	0.00273881	0.0340959	10
DIP2A	1270	0.0603867	0.00228882	0.00274807	0.0341581	10
ZNF423	1271	0.164303	0.00410879	0.00274813	0.0341581	10
BDH1	1272	-0.0153268	0.00460196	0.00275795	0.0342532	10
SLC16A7	1273	-0.217848	0.00628732	0.00276121	0.0342667	9
SH3PXD2A	1274	-0.118163	0.00482446	0.00278012	0.0344744	9
USP9X	1275	-0.075101	0.00275807	0.0027858	0.0345176	9
MAP3K9	1276	-0.146587	0.0105173	0.00279077	0.0345522	10
TCEAL2	1277	-0.0721461	0.00150979	0.00279637	0.0345944	10
FAM114A1	1278	0.132917	0.00343296	0.00279935	0.0346041	10
PSMA5	1279	-0.0792351	0.00296987	0.00280927	0.0346811	10
SOX13	1280	0.116284	0.00221178	0.00280996	0.0346811	10
WDR12	1281	-0.0756202	0.00162266	0.00281578	0.0347257	10
SYNPO2	1282	-0.0188818	0.00433145	0.00282526	0.0347957	10
CCHCR1	1283	-0.0244517	0.00141134	0.00282586	0.0347957	10
MYL9	1284	0.0757972	0.0054623	0.00283409	0.03487	10
SLC16A5	1285	0.00500948	0.001461	0.0028424	0.0349235	10
ADRA2A	1286	-0.104981	0.00442208	0.00284386	0.0349235	10
ZRANB3	1287	-0.0801199	0.00226529	0.00284592	0.0349235	10
ALDH1B1	1288	-0.060618	0.0026052	0.00284729	0.0349235	10
DHX40	1289	0.0570967	0.0013932	0.00285657	0.0350042	10
SCN2A	1290	-0.208256	0.0162932	0.00285857	0.0350042	10
FOXP1	1291	-0.0229959	0.00255096	0.00286052	0.0350042	10
BRSK2	1292	-0.0496401	0.00602983	0.00286492	0.035031	10
TRIM9	1293	-0.101547	0.00291975	0.002884	0.0352211	10
SCG2	1294	-0.212242	0.00667486	0.00288493	0.0352211	10
SYP	1295	-0.18168	0.00671409	0.00289794	0.0352988	10
STX16	1296	0.114068	0.00391837	0.00290233	0.0352988	10
PCDHA9	1297	0.0602597	0.00629402	0.00290331	0.0352988	10
SERPINI1	1298	-0.18822	0.00914292	0.00290391	0.0352988	10
SERINC3	1299	-0.0577242	0.004201	0.00290436	0.0352988	10
ZNF25	1300	-0.140888	0.00487552	0.0029047	0.0352988	10
OSBPL6	1301	-0.0901309	0.00230023	0.00290968	0.035302	10
RND2	1302	0.116558	0.00248092	0.00291023	0.035302	10
BEND5	1303	-0.129723	0.00251115	0.00291167	0.035302	8
SLC22A6	1304	0.0888443	0.00416243	0.0029151	0.0353165	10
PCDHGA10	1305	0.111675	0.00295567	0.00292767	0.0354416	10
TOR1AIP2	1306	-0.0789169	0.00225922	0.00294063	0.0355477	10
FILIP1L	1307	-0.1449	0.00203905	0.00294093	0.0355477	10
UBL3	1308	0.05245	0.00330544	0.00294998	0.0356298	10
HPRT1	1309	-0.176546	0.00911091	0.00295303	0.0356394	10
PSD3	1310	-0.0737739	0.00567054	0.00295918	0.0356864	10
LMO4	1311	-0.138467	0.00991702	0.00296527	0.0357325	10
SLC12A4	1312	0.109295	0.00118214	0.00297862	0.035866	10
RAI14	1313	0.118111	0.00314287	0.0029838	0.035901	10
ACOT7	1314	-0.138608	0.0043884	0.00299102	0.0359606	10
MRPL15	1315	-0.0912073	0.00425782	0.00300638	0.0361177	10
CPNE5	1316	-0.200678	0.00590412	0.003011	0.0361458	10
ANXA1	1317	0.0411353	0.00712695	0.00301421	0.0361568	10
ATP6V1G2	1318	-0.189291	0.00980328	0.00302312	0.0362361	10
SPHAR	1319	0.00911899	0.00384345	0.00302962	0.0362865	10
TLK1	1320	-0.0311637	0.00243609	0.00303408	0.0363124	10
SPPL2B	1321	0.00503026	0.00182273	0.00304615	0.0364128	10
RGS7	1322	-0.174074	0.00544856	0.00304708	0.0364128	10
AGAP2	1323	-0.127812	0.00311625	0.00305201	0.0364442	10
NEU3	1324	-0.0839617	0.00226593	0.00305586	0.036448	10
CLIP1	1325	0.0627637	0.00470265	0.00305695	0.036448	10
IRF2BP2	1326	0.101244	0.0029795	0.00306387	0.036503	10
SRGAP3	1327	-0.070057	0.00241841	0.00306728	0.0365161	10
GAREM1	1328	0.146193	0.00338194	0.0030736	0.0365279	8
PRKCE	1329	-0.119802	0.00283729	0.00307444	0.0365279	10
ADCYAP1R1	1330	0.201951	0.00712961	0.00307773	0.0365279	10
LYNX1	1331	-0.16419	0.00411181	0.00307774	0.0365279	10
PRCP	1332	0.134104	0.00305978	0.00307983	0.0365279	10
SLCO2B1	1333	0.0919255	0.00698236	0.00308513	0.0365515	10
LYVE1	1334	0.0169351	0.0108999	0.00308845	0.0365515	9
ATP2B3	1335	-0.175511	0.00472846	0.00308876	0.0365515	10
MLLT11	1336	-0.188148	0.00668637	0.00309635	0.0366139	10
HNRNPA1	1337	0.10928	0.00737134	0.00309873	0.0366146	10
ITPR3	1338	0.0365151	0.00425796	0.00310271	0.0366342	10
PALLD	1339	0.108663	0.00360303	0.00311019	0.0366952	10
CCDC50	1340	-0.0974393	0.00326855	0.00312409	0.0368191	10
LIG4	1341	-0.142375	0.00602241	0.0031259	0.0368191	10
PTPN7	1342	-0.0497125	0.000287735	0.00312769	0.0368191	10
SFRP1	1343	0.107799	0.00310945	0.0031345	0.0368718	10
JAG1	1344	0.0141088	0.00327307	0.00315147	0.0370223	10
HRASLS	1345	-0.105547	0.00296336	0.00315198	0.0370223	10
PARVB	1346	-0.100118	0.00368512	0.00315558	0.0370342	10
ZBTB10	1347	0.100776	0.00206503	0.00315889	0.0370342	10
CPNE7	1348	-0.0891438	0.00298018	0.00316002	0.0370342	10
TIMP3	1349	0.116523	0.00651177	0.00316907	0.0370929	10
EFHD2	1350	-0.151865	0.00441681	0.00316973	0.0370929	10
UBR5	1351	0.0797649	0.00138589	0.00317923	0.0371765	10
CREM	1352	0.0590373	0.00331623	0.00318567	0.0372243	10
PPP1R2	1353	-0.0415306	0.00341434	0.00319334	0.0372864	10
TSPAN18	1354	0.0391872	0.00383723	0.00319663	0.0372972	10
RAB5C	1355	-0.0898168	0.00306096	0.00321158	0.0374439	10
CDIPT	1356	-0.0121802	0.00206843	0.00321936	0.037507	10
PCBP4	1357	0.0745074	0.000266497	0.00322804	0.0375803	10
HFE	1358	0.0491147	0.00184475	0.0032596	0.0378867	10
FRAS1	1359	-0.0802484	0.00229738	0.00326107	0.0378867	9
CLIP3	1360	-0.0936169	0.00149947	0.00326155	0.0378867	10
ZNF160	1361	0.0999865	0.00232225	0.00327248	0.0379858	10
AHCYL2	1362	0.0961746	0.00373776	0.00327956	0.03804	10
RABL6	1363	-0.0270269	0.00413206	0.00328524	0.038078	8
AK5	1364	-0.182625	0.00908951	0.0033101	0.0383214	10
ACSL4	1365	-0.138331	0.00489599	0.00331437	0.0383214	10
NKX2-2	1366	0.130289	0.00473997	0.0033154	0.0383214	10
RABEPK	1367	-0.0576311	0.0010591	0.00331595	0.0383214	10
HS3ST2	1368	-0.228835	0.00685422	0.00332159	0.0383456	10
GEM	1369	0.22743	0.0102211	0.0033229	0.0383456	10
BTF3L4	1370	-0.105338	0.00149741	0.00333068	0.0384074	9
POLR2F	1371	0.0153715	0.00267627	0.00335167	0.0386212	10
RASL12	1372	0.225582	0.00512767	0.00335484	0.0386269	10
SCNN1A	1373	-0.00447383	0.00280645	0.00335751	0.0386269	10
PIK3C2A	1374	0.0347746	0.00415234	0.00336667	0.0386269	10
UHRF1	1375	0.177546	0.00452608	0.0033693	0.0386269	10
C15orf41	1376	0.000826192	0.00115348	0.00337254	0.0386269	10
IMP4	1377	-0.104011	0.000566332	0.00337317	0.0386269	10
CLYBL	1378	-0.0633711	0.00109125	0.0033732	0.0386269	10
TRAF3IP2	1379	0.0838078	0.00307336	0.0033738	0.0386269	10
RAP1GDS1	1380	-0.0377893	0.00638042	0.00338059	0.0386269	10
CASP2	1381	0.0830842	0.00152427	0.00338064	0.0386269	10
DDAH2	1382	0.144049	0.00342933	0.00338266	0.0386269	10
ICE2	1383	0.15915	0.00265272	0.00338335	0.0386269	8
HP1BP3	1384	0.0674264	0.00291174	0.00338394	0.0386269	10
STAT5B	1385	0.0861723	0.00127613	0.00338658	0.038629	10
FEZ1	1386	-0.00604828	0.00365777	0.00339104	0.038652	10
ACTA2	1387	-0.0220316	0.00372995	0.0033943	0.0386612	10
MTMR6	1388	-0.0968238	0.00191982	0.00340943	0.0387939	10
TPI1	1389	-0.0782067	0.00150735	0.00341085	0.0387939	10
PGP	1390	-0.0960533	0.00646399	0.0034157	0.0387968	9
FABP6	1391	-0.0950557	0.00230531	0.00341602	0.0387968	10
SGIP1	1392	-0.16239	0.00185561	0.00343028	0.0389307	10
DUT	1393	0.0664115	0.00120258	0.00344901	0.039095	10
ALOX5	1394	0.0554996	0.00365603	0.0034497	0.039095	10
CADPS	1395	-0.137943	0.00560281	0.00345444	0.0391206	10
PRDM2	1396	-0.123768	0.00203004	0.00346354	0.0391956	10
NECAP2	1397	0.104297	0.00219731	0.00347377	0.0392552	10
PIN1	1398	-0.0712459	0.00243641	0.00347378	0.0392552	10
RBM15B	1399	0.0430168	0.00132948	0.00348574	0.0393622	10
MAPT	1400	-0.0679984	0.00162883	0.00349574	0.0394327	10
IL25	1401	0.0054846	0.0015999	0.00349698	0.0394327	10
CCDC136	1402	-0.0226953	0.00304773	0.0035026	0.039442	10
EXOC6	1403	-0.100078	0.00195391	0.00350752	0.039442	10
KRT10	1404	0.0856854	0.00185707	0.00350773	0.039442	10
HVCN1	1405	0.144962	0.00412968	0.00351005	0.039442	10
ZNF274	1406	0.11619	0.00320021	0.00351029	0.039442	10
COPS7B	1407	-0.0485022	0.00154939	0.00351511	0.0394455	10
AGMAT	1408	-0.0924444	0.00282446	0.00351559	0.0394455	10
SLC6A17	1409	-0.140181	0.00571828	0.00351957	0.0394622	9
PDPN	1410	0.0466709	0.0029241	0.00352233	0.0394651	10
RTBDN	1411	-0.0855411	0.00290124	0.00352804	0.0395011	10
CCPG1	1412	-0.0779196	0.00160778	0.00355269	0.0397489	10
HECW2	1413	-0.126234	0.00318653	0.0035633	0.0398317	10
CYP26A1	1414	-0.0606697	0.00195282	0.00356513	0.0398317	10
PLK2	1415	-0.279756	0.0115416	0.00357052	0.0398637	10
RASL10A	1416	-0.141853	0.00505144	0.00357388	0.039873	10
DNAJA2	1417	-0.0541081	0.00223244	0.00358838	0.0400066	10
MAU2	1418	-0.000707416	0.00391889	0.00360479	0.040133	8
HAPLN1	1419	-0.0820293	0.00269883	0.0036048	0.040133	9
HRK	1420	-0.148017	0.00145578	0.00360915	0.040136	10
TSR2	1421	-0.0839738	0.000625214	0.00361016	0.040136	10
RIN3	1422	0.142018	0.00281835	0.00361945	0.040211	9
POU2F2	1423	-0.0536215	0.00208928	0.00363263	0.0403123	10
MPP2	1424	-0.0690307	0.00139741	0.003638	0.0403123	10
FNTB	1425	0.0899288	0.00241229	0.00363836	0.0403123	10
PAPSS2	1426	-0.00195386	0.00701774	0.00363878	0.0403123	9
MAPK8	1427	-0.13674	0.00295676	0.00364347	0.040336	9
PAK2	1428	0.100538	0.00162732	0.00365078	0.0403887	10
ADD1	1429	0.00067576	0.00219523	0.00365405	0.0403966	10
MUTYH	1430	0.116646	0.00244281	0.00367611	0.040612	10
KCNN3	1431	0.211408	0.00381922	0.00368269	0.040656	10
UHRF1BP1	1432	0.0209779	0.00423049	0.00368524	0.040656	8
CSNK1G3	1433	-0.0557575	0.00275925	0.00370917	0.0408897	10
SPTBN1	1434	-0.0393742	0.00317074	0.0037116	0.0408897	10
GAS1	1435	0.0681643	0.00871852	0.00371962	0.0409461	10
CEACAM1	1436	0.00426317	0.00154251	0.0037219	0.0409461	9
MAP1A	1437	-0.097608	0.00250889	0.003728	0.0409648	10
CAMK2A	1438	-0.160499	0.00671557	0.00372879	0.0409648	10
NME1	1439	-0.122441	0.00357807	0.00375606	0.0412316	10
TMED10	1440	0.1202	0.00282918	0.0037619	0.0412316	10
RNF128	1441	-0.217462	0.00653313	0.00376296	0.0412316	10
RBM6	1442	0.129646	0.0008895	0.00376466	0.0412316	10
HLA-DMB	1443	0.0406331	0.00631989	0.00376612	0.0412316	10
NEK2	1444	-0.038303	0.00304888	0.00376963	0.0412401	9
SLC30A9	1445	-0.0232932	0.00414277	0.00377212	0.0412401	10
LMOD1	1446	0.136935	0.00748243	0.00379418	0.0414263	10
SAV1	1447	0.118422	0.00245463	0.0037944	0.0414263	10
GOLT1B	1448	-0.10985	0.00310041	0.00379931	0.0414513	10
CCND2	1449	-0.0863855	0.00307246	0.00380873	0.0415174	10
TDRKH	1450	-0.117997	0.0014357	0.00381062	0.0415174	10
HRH1	1451	-0.118156	0.00194885	0.00381831	0.0415724	10
MARCH6	1452	-0.00240446	0.00354677	0.00382821	0.0416516	10
SLC30A5	1453	-0.0850947	0.000973227	0.00383686	0.0416846	10
NCOA1	1454	0.0953099	0.00307661	0.00383812	0.0416846	10
EXOSC3	1455	-0.0347976	0.00166228	0.00383916	0.0416846	10
KLHL24	1456	0.0966034	0.0072926	0.00384282	0.0416956	9
COX4I1	1457	-0.0521797	0.000955842	0.00386096	0.0418637	10
CCK	1458	-0.233456	0.0178811	0.00386851	0.0419168	10
ASB1	1459	0.0150749	0.0023717	0.00387241	0.0419303	9
ACSS3	1460	0.0746786	0.00458954	0.00387577	0.041938	10
PDGFRB	1461	0.0791834	0.00446439	0.00387969	0.0419517	10
SH3GLB1	1462	0.0927627	0.00507567	0.00388564	0.0419802	10
SERP1	1463	0.0243305	0.00298733	0.00388764	0.0419802	10
TM2D1	1464	-0.0108469	0.00251548	0.00389685	0.0420183	10
MS4A4A	1465	0.195449	0.0088258	0.0038973	0.0420183	10
NAP1L2	1466	-0.225416	0.0156179	0.00389915	0.0420183	10
METTL26	1467	-0.0431191	0.00244928	0.00391457	0.0421557	8
GRP	1468	-0.0705633	0.0044906	0.0039266	0.0422182	10
PARD3	1469	0.117536	0.00475547	0.00392841	0.0422182	9
C8orf46	1470	-0.0523652	0.00538746	0.00393217	0.0422182	10
C12orf49	1471	-0.0260721	0.00311303	0.00393347	0.0422182	10
DYNLT3	1472	-0.144332	0.00364804	0.00393563	0.0422182	10
GIT2	1473	-0.0360602	0.0020531	0.00393641	0.0422182	10
DGUOK	1474	-0.0333508	0.00153255	0.00394042	0.0422325	9
MAPK8IP2	1475	-0.110931	0.00573865	0.00396262	0.0424417	9
CHCHD6	1476	-0.140586	0.00507875	0.00397376	0.0425322	10
ABCC3	1477	0.119886	0.00189329	0.00398268	0.0425987	9
GLRX3	1478	0.0428308	0.010107	0.00400064	0.0427326	8
TRAP1	1479	-0.0296476	0.00256824	0.00400253	0.0427326	10
COLCA2	1480	0.166244	0.00573731	0.0040033	0.0427326	8
SEMA4F	1481	-0.106255	0.00151912	0.00400976	0.0427726	10
DTNB	1482	-0.066662	0.00224277	0.00401664	0.0428171	10
UBE2Z	1483	-0.0266818	0.00195099	0.00401969	0.0428207	10
KIF13A	1484	0.0282395	0.0015608	0.0040248	0.0428462	10
SNN	1485	0.0771515	0.00259991	0.00403362	0.0428892	10
POU3F3	1486	0.122649	0.00341272	0.00403427	0.0428892	10
TUBA3D	1487	-0.133174	0.00360815	0.00403708	0.0428903	9
NSMAF	1488	0.0420049	0.00120186	0.00404053	0.042898	10
MCF2	1489	-0.169266	0.00398436	0.00407081	0.0431904	10
MTRF1L	1490	0.0366997	0.00207583	0.00408065	0.0432109	10
RPS6KA5	1491	0.107814	0.00122146	0.00408602	0.0432109	10
AASDHPPT	1492	-0.0626747	0.0035126	0.00408669	0.0432109	10
WDR54	1493	-0.14023	0.00193706	0.00408704	0.0432109	10
MSC	1494	-0.0975067	0.00344514	0.00408884	0.0432109	10
ABHD15	1495	0.0879039	0.0014326	0.00408914	0.0432109	9
ATP5G1	1496	-0.109484	0.00180121	0.00409238	0.0432161	10
DFFA	1497	0.0828587	0.0028689	0.00410466	0.0432977	10
DACT3	1498	0.00275939	0.0029515	0.00410929	0.0432977	10
NRDE2	1499	0.0749991	0.0037738	0.00411127	0.0432977	8
SMS	1500	-0.0541284	0.00354548	0.00411464	0.0432977	10
TSPOAP1	1501	-0.180205	0.00187272	0.00411611	0.0432977	8
DNAH1	1502	0.0164278	0.00228411	0.00411827	0.0432977	9
MT1F	1503	0.337631	0.0102569	0.00411928	0.0432977	10
RNF187	1504	-0.0440939	0.00322488	0.00412386	0.043317	8
CCNC	1505	-0.0256541	0.00242437	0.00413351	0.0433895	10
RIMKLA	1506	-0.171342	0.00495666	0.00414233	0.0434532	8
GIGYF2	1507	0.0571455	0.00192101	0.0041501	0.0435058	8
CDC27	1508	-0.128873	0.00177318	0.00415355	0.0435131	10
U2AF2	1509	0.0606188	0.00139115	0.00415767	0.0435228	10
NCS1	1510	-0.156197	0.00375455	0.0041612	0.0435228	8
PRPS2	1511	-0.158888	0.00778288	0.00416274	0.0435228	10
FDX1L	1512	-0.113079	0.00299969	0.00418266	0.0437022	9
DCUN1D5	1513	-0.0395141	0.00249423	0.00418954	0.0437451	10
TOX3	1514	-0.0276284	0.00401792	0.00420136	0.0438395	10
TNRC18	1515	0.100546	0.00186143	0.00420595	0.0438584	8
PDXDC1	1516	0.0694256	0.00509208	0.00421092	0.0438601	8
ANK1	1517	-0.0587326	0.000260826	0.00421165	0.0438601	9
DCT	1518	-0.0952944	0.00228416	0.00421607	0.0438772	10
KCNB2	1519	-0.118504	0.00299872	0.00422435	0.0439343	10
FAAP20	1520	0.0757907	0.00355182	0.00422817	0.0439433	8
TEP1	1521	0.150088	0.00460431	0.00423214	0.0439433	10
BICD1	1522	0.0284702	0.00318111	0.00423355	0.0439433	10
HAS1	1523	-0.0725189	0.0025637	0.00424383	0.044021	10
CD200	1524	-0.215495	0.00816527	0.00424755	0.0440307	10
RTN4IP1	1525	-0.0821017	0.00310265	0.0042579	0.0441004	10
TRIM13	1526	0.0983585	0.000939429	0.00425986	0.0441004	10
CSF2RA	1527	0.113644	0.00337218	0.00427665	0.0442453	10
C3orf14	1528	-0.103231	0.0040678	0.0042844	0.0442965	10
ST6GALNAC2	1529	0.0793666	0.00208759	0.00429156	0.0443296	10
CSE1L	1530	-0.034338	0.00140189	0.00429569	0.0443296	10
JAM2	1531	0.0644898	0.00783047	0.00429603	0.0443296	10
ZNF440	1532	-0.00486672	0.001863	0.00429978	0.0443394	9
PRKCB	1533	-0.334069	0.0156642	0.00431776	0.0444717	8
ENKD1	1534	0.0703694	0.00413516	0.00431824	0.0444717	8
SCN8A	1535	-0.205723	0.00684791	0.00433906	0.0446569	10
HSDL1	1536	0.0302092	0.00284085	0.00434824	0.0447071	10
GFOD2	1537	-0.00246683	0.00238325	0.00434959	0.0447071	10
TOX4	1538	-0.0625029	0.00183706	0.00437267	0.0448341	10
CLEC4A	1539	-0.00778421	0.00175885	0.00437439	0.0448341	10
DNAJC30	1540	0.0373928	0.00286561	0.00437809	0.0448341	10
ZNF462	1541	0.0434556	0.00326483	0.00437824	0.0448341	10
LMTK2	1542	-0.127047	0.00271015	0.00438105	0.0448341	10
MOXD1	1543	-0.131792	0.00326985	0.00438318	0.0448341	10
CAMKK2	1544	-0.104664	0.00543993	0.00438409	0.0448341	10
CAST	1545	-0.0402038	0.00316539	0.00438465	0.0448341	10
KCNG2	1546	0.00247632	0.00184333	0.00438818	0.0448412	9
PAWR	1547	0.119904	0.00430228	0.00439646	0.0448968	8
APP	1548	-0.0651499	0.00310814	0.00440077	0.0449117	10
CCDC69	1549	0.094252	0.00208185	0.00440932	0.0449699	10
NAP1L3	1550	-0.170467	0.00498173	0.00441541	0.045003	10
DIXDC1	1551	0.045643	0.00199383	0.00443251	0.0451482	10
MAP7D2	1552	-0.261713	0.00968197	0.0044391	0.0451668	10
SUSD2	1553	0.0739746	0.00348556	0.00444005	0.0451668	9
SERTAD3	1554	0.0843971	0.00316577	0.00444541	0.0451922	10
EGFR	1555	0.0497378	0.00293252	0.00445857	0.0452968	10
GSS	1556	-0.126127	0.00121896	0.00446288	0.0453115	10
HEXIM1	1557	0.021419	0.0023877	0.00446893	0.0453437	10
LAMP2	1558	0.127478	0.00889053	0.00447235	0.0453493	10
TMEM97	1559	-0.0755437	0.00176974	0.00448238	0.0454218	10
FBXO2	1560	0.142615	0.00293313	0.00449027	0.0454273	10
TM2D3	1561	-0.106812	0.00306354	0.00449081	0.0454273	10
PBX3	1562	0.130592	0.00202227	0.00449154	0.0454273	10
LOC441155	1563	0.0757748	0.00537512	0.00449577	0.0454409	8
MITF	1564	0.0445452	0.00113246	0.00451963	0.0456488	10
GLRX	1565	-0.120584	0.00185115	0.00452212	0.0456488	10
MRPL30	1566	-0.0631336	0.00235777	0.00452674	0.0456663	10
TSPO	1567	0.0979739	0.00346647	0.00455886	0.0459296	10
PGAP1	1568	-0.10409	0.00321678	0.00456211	0.0459296	9
ATF7IP2	1569	-0.0883433	0.00105954	0.00456294	0.0459296	10
ANKS1B	1570	-0.102403	0.00375468	0.00456447	0.0459296	10
YME1L1	1571	-0.049517	0.00206782	0.0045751	0.0459662	9
NDUFB5	1572	-0.109438	0.00214214	0.00457728	0.0459662	10
ZNF395	1573	0.104122	0.00158961	0.00457829	0.0459662	10
FANCA	1574	0.00570516	0.00092277	0.00458186	0.0459662	10
UQCC1	1575	-0.103373	0.00320245	0.00458265	0.0459662	8
LOC389834	1576	0.072284	0.00405052	0.00458769	0.0459681	9
NDUFA8	1577	-0.0696924	0.000383399	0.00458867	0.0459681	10
ITPRIPL2	1578	0.130515	0.0035617	0.00459682	0.0459992	8
GZMK	1579	0.0489365	0.00266612	0.00459759	0.0459992	10
ATXN10	1580	-0.114921	0.00186055	0.0046034	0.046006	10
ACVR1B	1581	-0.0635622	0.00231268	0.00460425	0.046006	10
ZNF839	1582	-0.0310061	0.00223698	0.00460922	0.046006	9
CDH26	1583	0.0915631	0.00163109	0.00460992	0.046006	9
SRPK2	1584	-0.0328309	0.00288387	0.00461827	0.0460603	10
PPIC	1585	0.0771474	0.00297088	0.00464104	0.0462114	10
MGST3	1586	-0.0523041	0.00137195	0.00464184	0.0462114	10
SCD5	1587	0.115333	0.0018112	0.0046422	0.0462114	9
KDM1B	1588	0.110472	0.00362877	0.00464938	0.0462213	9
PTPRR	1589	-0.0920557	0.00566697	0.00465152	0.0462213	10
TRIM65	1590	0.0757743	0.00279965	0.00465197	0.0462213	9
KCNV1	1591	-0.242066	0.0142867	0.00466944	0.0463657	10
KRIT1	1592	0.00395101	0.00370043	0.00467304	0.046369	9
CAPRIN1	1593	-0.0605639	0.00200601	0.00467565	0.046369	10
KIAA0408	1594	-0.00268684	0.00588446	0.00468259	0.0464023	10
ZIC1	1595	0.139612	0.00653938	0.00468488	0.0464023	10
FBXL16	1596	-0.138769	0.00528966	0.00469555	0.0464644	10
ATP2A3	1597	0.0497182	0.00164377	0.00469764	0.0464644	10
SHD	1598	-0.163156	0.00273551	0.00469997	0.0464644	10
MYBBP1A	1599	-0.0712315	0.00162466	0.00471301	0.0465402	10
OSBPL8	1600	0.0297472	0.00306728	0.00471353	0.0465402	10
FHL5	1601	0.0563946	0.00454925	0.00471695	0.0465449	10
GPATCH2L	1602	0.054961	0.00521428	0.00473175	0.0466459	8
CYB561	1603	-0.0661208	0.00290007	0.00473511	0.0466459	10
ZNF345	1604	0.0228098	0.00163767	0.00473605	0.0466459	10
GPRC5B	1605	0.193385	0.00620163	0.00474171	0.0466726	10
SHOC2	1606	-0.109382	0.00146322	0.00475301	0.0467547	10
FBXW11	1607	0.0513134	0.00258487	0.00476214	0.0468153	10
HLA-DPB1	1608	0.0185264	0.00430455	0.00477504	0.0469129	10
LILRA5	1609	0.0625243	0.00157625	0.00478479	0.0469737	10
PHF14	1610	-0.0540315	0.00351628	0.00478717	0.0469737	9
CAMTA1	1611	0.0280117	0.00519526	0.00479106	0.0469827	10
TUBA1C	1612	-0.117058	0.0012228	0.00480855	0.0471088	10
FCGRT	1613	0.123554	0.00404503	0.00480988	0.0471088	10
IMPAD1	1614	-0.0622738	0.00425162	0.00482111	0.0471601	10
PTPRZ1	1615	0.0284315	0.00732564	0.00482133	0.0471601	10
TESPA1	1616	-0.293415	0.00825598	0.00482692	0.0471601	8
PCMT1	1617	-0.0814497	0.0042543	0.00482976	0.0471601	10
PTPN4	1618	-0.0909198	0.00477728	0.00483005	0.0471601	10
STXBP1	1619	-0.175604	0.00425823	0.0048375	0.0472037	10
FOXD1	1620	0.069792	0.00657719	0.00484764	0.0472241	10
MYH10	1621	-0.0972826	0.000915556	0.00484832	0.0472241	10
KEAP1	1622	0.109765	0.000630663	0.00485129	0.0472241	10
CP	1623	0.111988	0.0130674	0.00485154	0.0472241	10
RNASE4	1624	0.137099	0.00527293	0.00488529	0.0475233	10
KDM8	1625	-0.0158846	0.00337574	0.00489111	0.0475506	8
ADAD2	1626	-0.0725585	0.0019244	0.00490164	0.0476237	10
RUFY1	1627	0.0793375	0.000999939	0.00491044	0.0476754	10
CCL5	1628	-0.00890442	0.00341749	0.004913	0.0476754	10
GNA12	1629	0.11721	0.00229754	0.00492987	0.0477848	9
GNG2	1630	-0.163306	0.00440215	0.00493032	0.0477848	9
COX6B1	1631	-0.0930381	0.00128855	0.00493474	0.0477983	10
PDCD5	1632	0.0248178	0.0020686	0.00494015	0.0478214	10
DNAL4	1633	-0.0994194	0.001255	0.00494798	0.0478679	10
CBS	1634	0.154698	0.00381466	0.00496161	0.0479703	10
MTHFSD	1635	-0.0125712	0.00135855	0.00499028	0.0482033	10
TKFC	1636	-0.0377269	0.00409944	0.00499181	0.0482033	8
NAV1	1637	-0.0187169	0.00351405	0.00499601	0.0482144	10
ESPN	1638	0.0191357	0.00200674	0.00500172	0.04824	10
MAML2	1639	0.104353	0.00330611	0.00501313	0.0483206	10
PEX5L	1640	-0.179731	0.00536885	0.00502342	0.0483902	10
ALOX15B	1641	0.0889708	0.00256506	0.00503148	0.0484383	10
DNALI1	1642	0.150724	0.0037037	0.00503731	0.0484649	10
GANC	1643	0.0888069	0.00163977	0.00504708	0.0485294	10
ARHGAP12	1644	0.0193371	0.00342808	0.0050643	0.0486654	10
TMEM160	1645	-0.0953323	0.00498333	0.00507365	0.0487256	10
EMX2	1646	0.212897	0.0128112	0.00508176	0.0487738	10
MTERF4	1647	0.0399499	0.00329776	0.00508638	0.0487885	8
GGA2	1648	0.0390721	0.00144633	0.00509095	0.0488027	10
TTYH2	1649	0.0724282	0.00776718	0.00510853	0.0489094	10
GNL3L	1650	0.0312837	0.00379648	0.00511075	0.0489094	10
KLF6	1651	0.0851699	0.00424158	0.00511137	0.0489094	10
CXorf57	1652	-0.00319939	0.00282503	0.00512339	0.0489923	10
CDH1	1653	0.0464663	0.00549517	0.0051278	0.0489923	10
FKBP14	1654	0.0921931	0.00284595	0.00512934	0.0489923	10
ARHGAP27	1655	-0.0107133	0.00119891	0.0051348	0.0490148	10
HSP90B1	1656	-0.0216714	0.00306806	0.00515243	0.0491535	10
RASAL2	1657	-0.0864967	0.00338226	0.00516007	0.0491966	10
SLC26A9	1658	0.0430051	0.00197226	0.00516892	0.0492295	10
PLCH1	1659	-0.039134	0.00285574	0.00516976	0.0492295	9
OGFRL1	1660	0.135244	0.00551345	0.00518709	0.0493648	10
SLIT1	1661	-0.182948	0.007628	0.00520407	0.0493681	10
GSG1	1662	-0.0118925	0.00149052	0.00520664	0.0493681	9
FMO3	1663	0.0458295	0.00211413	0.00521499	0.0493681	9
DIAPH2	1664	-0.0505829	0.00186423	0.00521583	0.0493681	10
COX7B	1665	-0.0928077	0.00342827	0.00522543	0.0493681	10
MBD5	1666	0.00173611	0.00201305	0.00522786	0.0493681	10
UBE2F	1667	0.00060504	0.00245375	0.0052289	0.0493681	10
EPC1	1668	0.0721393	0.00263311	0.00523282	0.0493681	10
MXRA8	1669	0.0768465	0.00306539	0.00523383	0.0493681	10
ZNF350	1670	0.0745322	0.00177446	0.00523534	0.0493681	10
SLX4	1671	-0.048437	0.00329588	0.00524131	0.0493681	8
EIF5	1672	0.04024	0.00232551	0.00524199	0.0493681	10
TMEM74B	1673	-0.173463	0.00229522	0.0052438	0.0493681	8
MAP4K4	1674	0.117921	0.00655263	0.00524575	0.0493681	10
ARNT	1675	0.0670355	0.00141685	0.0052489	0.0493681	9
CCDC24	1676	-0.0849683	0.00226799	0.00524912	0.0493681	10
PRELID3B	1677	-0.00756981	0.00630256	0.00525355	0.0493681	8
LSM11	1678	-0.0554293	0.00509732	0.00526131	0.0493681	10
OLA1	1679	-0.132453	0.00350038	0.00526239	0.0493681	10
S100PBP	1680	0.102522	0.00146294	0.00526288	0.0493681	10
TNFAIP8L1	1681	-0.0718962	0.00835045	0.00526566	0.0493681	10
NDUFAB1	1682	-0.0502868	0.00336756	0.00526639	0.0493681	10
SETD4	1683	-0.0625609	0.00160716	0.00526707	0.0493681	10
MUC6	1684	0.00203006	0.00155125	0.00526907	0.0493681	9
TSPAN4	1685	0.0259927	0.00312058	0.00526957	0.0493681	10
NUP50	1686	-0.0898099	0.00192003	0.00527022	0.0493681	10
PAM	1687	-0.133341	0.00163574	0.00527181	0.0493681	10
KCNJ4	1688	-0.111194	0.00534927	0.00528135	0.0494282	10
IKBIP	1689	0.0761196	0.00218178	0.00528819	0.049451	9
SSH3	1690	0.0980395	0.00172217	0.00529005	0.049451	9
HMBOX1	1691	0.171158	0.00343548	0.00529945	0.0494818	10
NLN	1692	0.025993	0.00202539	0.00529961	0.0494818	10
CEP83	1693	-0.114611	0.00414824	0.00530335	0.0494875	8
LIMA1	1694	0.00387333	0.00261902	0.00531263	0.0495336	10
TOB1	1695	0.129759	0.00480222	0.00531457	0.0495336	10
HOXB7	1696	-0.0129231	0.00157619	0.00533974	0.049726	9
PRKDC	1697	-0.0837273	0.00236447	0.00534722	0.049726	10
YWHAH	1698	-0.0309624	0.00284025	0.00534798	0.049726	10
C19orf18	1699	0.126963	0.00282753	0.00534854	0.049726	10
GAB1	1700	0.0594882	0.00276755	0.00535094	0.049726	10
HNRNPC	1701	0.0755017	0.00280426	0.00536332	0.0497807	10
UIMC1	1702	0.0937402	0.000691582	0.0053684	0.0497807	10
RARS2	1703	0.0122963	0.00171295	0.00536888	0.0497807	10
PTCH1	1704	0.0689591	0.00227322	0.00537251	0.0497807	10
TPR	1705	-0.00181849	0.00308908	0.00537848	0.0497807	10
OLFML2A	1706	0.0540933	0.00626754	0.00538085	0.0497807	10
MRPS25	1707	-0.123856	0.00121122	0.00538477	0.0497807	9
ZNF710	1708	0.0675905	0.00130786	0.005385	0.0497807	9
GRK5	1709	-0.0494686	0.00137133	0.00538519	0.0497807	10
ZDHHC13	1710	-0.0414464	0.00205089	0.00540226	0.0498881	10
TCEA2	1711	-0.0451791	0.00197382	0.00540572	0.0498881	10
TMEM141	1712	-0.0677166	0.00112882	0.00540773	0.0498881	10
NRG1	1713	-0.029633	0.000764902	0.00540944	0.0498881	10
CDH10	1714	-0.0815022	0.00357188	0.00542312	0.0499631	10
ALOX12B	1715	-0.114424	0.0026893	0.0054239	0.0499631	10
COL18A1	1716	0.046082	0.00414797	0.00542941	0.0499674	10
MOAP1	1717	-0.0940381	0.00484473	0.00543069	0.0499674	10
NPC2	1718	0.146589	0.0052913	0.00545513	0.0501631	10
C5AR1	1719	0.158386	0.00908485	0.00546758	0.0502483	10
ARHGAP26	1720	0.079056	0.00879301	0.0054822	0.0503243	10
ATP8A2	1721	-0.141579	0.0114973	0.00548222	0.0503243	10
NDUFA3	1722	-0.0915165	0.000654737	0.00548856	0.0503533	10
TSPAN14	1723	0.0203611	0.00246559	0.00549992	0.0504282	10
RASAL1	1724	-0.0781868	0.00325852	0.00550805	0.0504734	10
ZNF143	1725	0.0647653	0.000964923	0.00551236	0.0504836	10
EMCN	1726	-0.0164732	0.00328141	0.00552593	0.0505066	9
PLEKHG3	1727	0.0444402	0.00546791	0.00552652	0.0505066	9
ZEB1	1728	0.0644137	0.00449696	0.00552681	0.0505066	9
SBNO1	1729	-0.096989	0.00357885	0.00552766	0.0505066	9
RAPGEF6	1730	0.0596758	0.00220778	0.00554191	0.0505828	10
LNX1	1731	-0.18448	0.0117482	0.0055424	0.0505828	10
ADAMTS2	1732	0.0557683	0.00174014	0.00555569	0.0506452	10
DIAPH3	1733	0.0395471	0.00208224	0.00555854	0.0506452	10
HSPB8	1734	0.149036	0.00547257	0.00555933	0.0506452	10
RGS17	1735	-0.0994768	0.00487369	0.00556381	0.0506452	10
IL18BP	1736	-0.017996	0.00158549	0.00556527	0.0506452	9
SMIM12	1737	0.00915305	0.00444755	0.00557918	0.0506771	8
CALU	1738	-0.0241506	0.0023632	0.00558008	0.0506771	10
FOXRED1	1739	-0.108874	0.000935402	0.00558109	0.0506771	10
HNRNPH3	1740	0.180544	0.00209895	0.00558161	0.0506771	8
PTPN5	1741	-0.15222	0.00424068	0.00558849	0.0507105	10
RBKS	1742	-0.0603022	0.0012315	0.00559266	0.0507192	10
FIG4	1743	-0.106283	0.00127609	0.00560359	0.0507892	10
ZNF217	1744	0.061159	0.00330368	0.00560787	0.0507988	10
DDX3X	1745	0.101845	0.00232082	0.00561301	0.0508162	10
BTG1	1746	0.167949	0.00649322	0.00561828	0.0508255	10
INIP	1747	-0.00997957	0.00508005	0.00562345	0.0508255	8
ICA1L	1748	-0.0572753	0.00308333	0.00562407	0.0508255	10
PFDN2	1749	-0.0893463	0.00162302	0.0056269	0.0508255	10
KAZN	1750	-0.0227781	0.00896122	0.00563738	0.0508769	8
TOMM40L	1751	-0.0865096	0.00174799	0.00563953	0.0508769	10
ANGEL2	1752	0.0476707	0.00101462	0.00564451	0.0508769	10
UBE2E2	1753	-0.119831	0.00334555	0.00564548	0.0508769	10
COL4A3BP	1754	-0.0568088	0.00547535	0.00566279	0.0509854	10
ZNF22	1755	0.0938933	0.00206084	0.00566396	0.0509854	10
SNX16	1756	-0.0995458	0.00277386	0.00566807	0.0509932	10
SMAD1	1757	0.0753254	0.00204391	0.00567369	0.0510148	10
BAG5	1758	-0.0639866	0.0021974	0.00568185	0.0510379	10
RAP1A	1759	0.135882	0.00246579	0.0056855	0.0510379	10
INPP5D	1760	0.057165	0.00310375	0.00568803	0.0510379	10
GTDC1	1761	-0.0832419	0.0012404	0.00568918	0.0510379	10
TM7SF2	1762	-0.130358	0.00236227	0.0057001	0.0511068	10
CHD9	1763	0.0193484	0.00284705	0.00570593	0.05113	10
GINM1	1764	0.189929	0.00329376	0.00571474	0.05118	8
ANKRD34A	1765	-0.190743	0.00512972	0.00572	0.051198	9
PDHA1	1766	-0.0985379	0.0012625	0.00573519	0.0513049	10
FRYL	1767	0.0788142	0.00344986	0.00574595	0.0513456	9
LST1	1768	-0.0497619	0.00183202	0.00575137	0.0513456	9
PSMB2	1769	-0.0264546	0.00233307	0.00575155	0.0513456	10
DLAT	1770	-0.146558	0.00244887	0.00575273	0.0513456	10
WDR48	1771	0.0967074	0.000602717	0.00576135	0.0513713	10
WDR7	1772	-0.14008	0.00263372	0.00576212	0.0513713	10
CLN5	1773	0.0840503	0.00274533	0.00578072	0.0514896	10
ME1	1774	-0.0395026	0.00443027	0.0057819	0.0514896	10
RASSF1	1775	0.0726272	0.000343588	0.00580416	0.0516521	10
ASXL1	1776	0.0767435	0.00119785	0.00581024	0.0516521	10
PHB	1777	0.0483144	0.00198551	0.00581263	0.0516521	10
SPRR1A	1778	-0.046891	0.000961679	0.00581323	0.0516521	10
CLDN10	1779	0.0771424	0.0126644	0.00581837	0.0516655	10
UNC13A	1780	-0.138344	0.00545228	0.00582128	0.0516655	10
CSGALNACT1	1781	0.00137552	0.00403983	0.00583886	0.0517618	10
TMEM47	1782	0.158608	0.00694505	0.00584021	0.0517618	10
MAOB	1783	0.0840994	0.00526471	0.00584196	0.0517618	10
SNAP23	1784	0.0559737	0.00400056	0.00585126	0.0518118	10
PCDHGC3	1785	0.161566	0.00388306	0.00585417	0.0518118	10
DDX25	1786	-0.108477	0.0026024	0.00586922	0.051916	10
FAT4	1787	0.0382392	0.00357112	0.00588342	0.052003	10
KIAA1958	1788	0.154158	0.00382025	0.00588588	0.052003	9
GTF3C2	1789	0.030274	0.00109896	0.00588894	0.052003	10
GULP1	1790	-0.126718	0.00155093	0.00590615	0.0520532	10
LILRA2	1791	0.0641292	0.00225044	0.00590721	0.0520532	10
ACTR10	1792	-0.111817	0.00260718	0.00590725	0.0520532	10
SLC19A3	1793	0.0287968	0.00328867	0.00590787	0.0520532	10
SCRG1	1794	0.0250934	0.00432532	0.0059119	0.0520532	10
MAP2K5	1795	-0.118129	0.00232316	0.00591439	0.0520532	9
UQCRC2	1796	-0.0442309	0.0032144	0.00591922	0.0520661	10
TNFSF11	1797	0.00891538	0.00122757	0.00592244	0.0520661	10
SLC38A1	1798	0.0615636	0.00650099	0.00593055	0.0521084	10
FHL2	1799	-0.168464	0.00519775	0.00594035	0.0521654	10
AOX1	1800	-0.0443645	0.00290234	0.00594898	0.0522122	9
SORBS3	1801	0.106626	0.00513624	0.0059618	0.0522957	10
TRIM22	1802	0.136322	0.0112561	0.00596852	0.0523001	10
DNM1	1803	-0.0981834	0.00322335	0.00597171	0.0523001	10
ST3GAL3	1804	-0.0303096	0.00159184	0.00598069	0.0523001	10
RANBP6	1805	-0.0811275	0.00497328	0.00598094	0.0523001	10
TRAM1	1806	0.0455374	0.00301131	0.00598308	0.0523001	10
MAP2	1807	-0.146528	0.00949006	0.00598436	0.0523001	10
CEP104	1808	0.0253644	0.00491778	0.00598548	0.0523001	8
CD2	1809	0.00835789	0.00203783	0.00599896	0.0523768	9
LRP4	1810	0.192255	0.00489467	0.00600373	0.0523768	10
SERTAD4	1811	-0.00118145	0.00258849	0.00600421	0.0523768	9
KLC2	1812	-0.0737552	0.00441274	0.00601979	0.0524838	10
PTPRO	1813	-0.182494	0.00954618	0.00604995	0.0526894	10
KRAS	1814	-0.0318544	0.00264449	0.00605085	0.0526894	10
HLA-DQA1	1815	0.00376017	0.00741211	0.00605338	0.0526894	10
RBMS1	1816	0.00904455	0.00433582	0.00605803	0.0527009	10
SNCB	1817	-0.20544	0.00981456	0.00607309	0.0527771	10
CHAC1	1818	-0.104795	0.00371849	0.00607371	0.0527771	10
PKD2L1	1819	-0.0903829	0.00217025	0.00607786	0.0527771	10
ASIC2	1820	-0.143104	0.00298134	0.00608016	0.0527771	8
ZBED1	1821	0.109613	0.000738966	0.00609115	0.0528435	10
BHMT2	1822	0.0593154	0.00406139	0.00611365	0.0530096	10
HIST1H2BC	1823	0.0885576	0.0028004	0.00613032	0.0531249	9
CYFIP2	1824	-0.102461	0.00370385	0.0061371	0.0531545	10
PIK3R1	1825	-0.0354572	0.00636374	0.00614342	0.0531801	10
CREBRF	1826	0.184458	0.00551976	0.00614859	0.0531957	8
UTY	1827	0.0298927	0.0018146	0.00615494	0.0532215	10
SLITRK1	1828	-0.171465	0.00501236	0.00616306	0.0532626	10
RUNX1T1	1829	-0.105926	0.00302675	0.0061688	0.053283	10
NET1	1830	0.143274	0.00453005	0.00617688	0.0533218	10
MBD6	1831	0.0394976	0.00410293	0.00618003	0.0533218	9
PIK3C3	1832	-0.0801856	0.00106424	0.00618618	0.0533457	10
GTF2IRD2	1833	0.0678635	0.0025849	0.00620027	0.053438	9
SEC14L2	1834	0.102333	0.0012085	0.0062098	0.053491	10
IL17RC	1835	0.0625472	0.0019793	0.00622463	0.0535895	10
RBM4B	1836	0.0963834	0.00218592	0.00624683	0.0537513	10
PTPN12	1837	0.068904	0.00207059	0.00625376	0.0537816	10
UBE2V2	1838	-0.150294	0.00465541	0.00627517	0.053919	10
OSBPL10	1839	-0.0766658	0.00314187	0.00627656	0.053919	10
ATP6V0E2	1840	-0.0928638	0.00144774	0.00629482	0.0540452	10
PLBD1	1841	0.177497	0.00632507	0.00629809	0.0540452	8
RNMT	1842	-0.11043	0.00131155	0.00631386	0.0541511	10
POLR3H	1843	0.0641454	0.00136368	0.00632074	0.0541807	10
ALKBH6	1844	-0.110813	0.00247088	0.00632817	0.05421	10
RPL35A	1845	-0.024512	0.00262571	0.00633102	0.05421	10
ATP11C	1846	0.102739	0.0025627	0.00636396	0.0544626	10
PCDHAC2	1847	-0.0542353	0.00488441	0.00637908	0.0545624	10
SULT1C2	1848	0.0194518	0.00135326	0.00638468	0.0545807	10
TBC1D9B	1849	0.095416	0.00144721	0.00638979	0.0545949	9
TRIM3	1850	-0.0495335	0.000766783	0.00642161	0.0548371	10
PPP2CA	1851	-0.103397	0.00273478	0.00643696	0.0549385	10
DNAJC1	1852	0.0612385	0.00226465	0.00644585	0.0549846	10
C2orf69	1853	-0.080037	0.0116147	0.00645553	0.0550091	8
TBX18	1854	0.0332689	0.00160031	0.00645568	0.0550091	9
BTN3A2	1855	0.0986404	0.00404654	0.00646048	0.0550203	10
ASS1	1856	-0.124649	0.00364361	0.00646862	0.0550406	10
CD53	1857	-0.0441773	0.00233333	0.00646984	0.0550406	10
EPHA3	1858	-0.0663361	0.00189335	0.00648115	0.0550747	10
POPDC3	1859	-0.0621826	0.00580133	0.0064812	0.0550747	10
RFC5	1860	-0.080396	0.0031423	0.0064843	0.0550747	10
OSBPL11	1861	0.13697	0.00394261	0.00650585	0.0552273	10
RHBDF1	1862	0.101706	0.00131357	0.00650926	0.0552273	10
SPTBN4	1863	-0.00519035	0.00345589	0.00652109	0.0552278	10
MCL1	1864	0.0691066	0.00556056	0.00652156	0.0552278	10
TPCN2	1865	0.0112769	0.00273851	0.0065226	0.0552278	10
FMO2	1866	0.0784657	0.00375601	0.0065233	0.0552278	10
DTX4	1867	-0.0447452	0.00544191	0.00653158	0.0552612	9
LRRC3B	1868	-0.183103	0.00576961	0.00653474	0.0552612	10
DPEP2	1869	0.070694	0.00198404	0.00653774	0.0552612	10
CCT6A	1870	-0.0464745	0.00462943	0.00654403	0.0552716	10
CDH12	1871	-0.229148	0.00879282	0.00654597	0.0552716	10
TRAK1	1872	0.112405	0.00237017	0.00655126	0.0552867	10
PDPR	1873	0.0623525	0.00341531	0.00656324	0.0553583	10
TACC2	1874	-0.0117741	0.00201904	0.0065705	0.05539	10
RFX1	1875	0.0381389	0.00240984	0.00661144	0.0556725	10
MFSD6	1876	-0.0984458	0.00519184	0.00661161	0.0556725	9
SUMO1	1877	-0.0280127	0.00210488	0.00661459	0.0556725	10
ERCC1	1878	0.0443686	0.0020982	0.00662313	0.0557147	10
ZFR	1879	0.0973379	0.00178625	0.00664051	0.0558084	10
KBTBD6	1880	-0.0708105	0.00391004	0.00664244	0.0558084	10
RUNDC3A	1881	-0.110517	0.00474727	0.00664486	0.0558084	10
KIF19	1882	0.102857	0.00268718	0.00665517	0.0558653	10
GMDS	1883	-0.0451557	0.00184893	0.00666497	0.0559178	10
RBM33	1884	0.127945	0.000949324	0.00667867	0.0560022	9
TAX1BP1	1885	-0.0403966	0.00107258	0.00668212	0.0560022	10
SCARA3	1886	0.178667	0.00621501	0.00668636	0.056008	10
PLEKHG4	1887	0.00107398	0.00162144	0.00669139	0.0560205	9
PHF20L1	1888	-0.0337232	0.00163438	0.00670556	0.0561094	9
CAP2	1889	-0.215486	0.00651106	0.00670915	0.0561096	10
BCL2L1	1890	0.0861443	0.000774316	0.00671985	0.0561694	10
UBALD2	1891	0.16198	0.00175316	0.00672422	0.0561738	8
SMAD3	1892	-0.0667288	0.00205857	0.00672749	0.0561738	10
SPAG9	1893	0.117571	0.000914989	0.00673126	0.0561756	10
ZBTB44	1894	0.084311	0.00188104	0.00674908	0.0562885	10
NEK1	1895	-0.0179618	0.0022719	0.00675191	0.0562885	10
FLII	1896	0.0952277	0.00176706	0.006758	0.0563096	10
KLHDC9	1897	-0.13434	0.00115472	0.00676604	0.0563468	10
AQP4	1898	0.208144	0.0116543	0.00677003	0.0563504	10
USP12	1899	-0.0336882	0.00174205	0.0067821	0.0564186	10
SLC39A11	1900	0.149078	0.00228644	0.00678538	0.0564186	10
IL1RL2	1901	-0.0633616	0.00190223	0.00679082	0.0564342	9
VEGFA	1902	-0.172058	0.00183222	0.00680917	0.0565301	9
TRPC1	1903	-0.0906404	0.000654309	0.00681306	0.0565301	10
HEBP1	1904	0.102007	0.00270255	0.0068131	0.0565301	10
EHF	1905	0.0466807	0.0026148	0.00683097	0.0566487	9
CEP70	1906	0.0523151	0.00134549	0.00684273	0.0567164	10
ABHD2	1907	-0.100281	0.00210542	0.00686124	0.0568263	10
REC8	1908	0.0077355	0.00176706	0.00686318	0.0568263	10
CSH2	1909	-0.0114371	0.00076022	0.00686893	0.0568357	10
CLSPN	1910	-0.0555898	0.00156488	0.00687152	0.0568357	10
APBA2	1911	-0.100277	0.00429902	0.00687564	0.05684	10
KHDRBS3	1912	-0.0684176	0.0035544	0.00688644	0.0568995	10
DNAJC27	1913	-0.0530656	0.0021618	0.00689608	0.0569495	10
CASQ2	1914	-0.0217185	0.00337036	0.00690944	0.0569897	9
ZNF791	1915	0.115046	0.00369382	0.00691357	0.0569897	10
MRPL43	1916	0.170432	0.00559856	0.00691906	0.0569897	10
RET	1917	-0.12359	0.004377	0.00691949	0.0569897	9
SLC24A4	1918	-0.0215161	0.00161804	0.00692146	0.0569897	10
ZNF789	1919	-0.0476422	0.00206839	0.0069226	0.0569897	9
SHF	1920	-0.0532621	0.0018388	0.00693093	0.0570252	10
PANX1	1921	-0.116937	0.00299695	0.00693414	0.0570252	10
HDAC9	1922	-0.0938025	0.00365839	0.00693882	0.0570341	10
TFR2	1923	-0.0546696	0.00264172	0.00695255	0.0571075	10
CYP2E1	1924	-0.062653	0.00225346	0.00695498	0.0571075	10
DNAH7	1925	-0.0727323	0.00214327	0.0069714	0.0572126	10
PI16	1926	0.122707	0.00424265	0.00697584	0.0572193	9
UGP2	1927	-0.075275	0.00111942	0.00698336	0.0572512	10
SLC9A6	1928	-0.120423	0.00332758	0.00700107	0.0573412	10
BEND4	1929	-0.0993958	0.00256385	0.0070016	0.0573412	9
MED13L	1930	0.0823393	0.00162882	0.00702485	0.0574745	10
PEX2	1931	0.117703	0.00216042	0.00702732	0.0574745	8
FAHD1	1932	-0.0844475	0.00267042	0.00702878	0.0574745	10
TFPI	1933	0.00283733	0.00366697	0.00703788	0.0575191	10
NLRP1	1934	0.0446481	0.00144243	0.00706066	0.0576754	10
IL1RN	1935	-0.02732	0.000907968	0.00707539	0.0577659	10
KIAA2026	1936	0.0705937	0.00101905	0.00709048	0.0578141	10
LTBP4	1937	0.00549095	0.00233297	0.00709373	0.0578141	10
FBXL14	1938	-0.154283	0.00228654	0.00709795	0.0578141	10
SLAIN2	1939	0.0529353	0.00303735	0.0070984	0.0578141	8
UBE2D3	1940	-0.00231356	0.00204131	0.00710213	0.0578141	10
TGFBR3	1941	0.162044	0.0107067	0.00710325	0.0578141	10
SRSF1	1942	0.130768	0.001193	0.00710815	0.0578242	8
CD8A	1943	-0.087041	0.000918098	0.00712824	0.0579577	10
ACVR2A	1944	-0.0777949	0.00220901	0.0071355	0.0579869	10
HFE2	1945	-0.0246359	0.001815	0.00714845	0.0580623	10
KLF4	1946	0.107161	0.011045	0.00715627	0.058096	10
C5orf30	1947	-0.0738274	0.00196553	0.00716494	0.0581305	10
THEM4	1948	0.00299845	0.00309153	0.00716788	0.0581305	10
ACACA	1949	-0.0628318	0.000743214	0.00718256	0.0582196	9
WDR47	1950	-0.158254	0.00752485	0.00718677	0.0582239	10
CA10	1951	-0.207994	0.010703	0.00722653	0.058516	10
DOK6	1952	-0.116823	0.00603821	0.00723764	0.0585759	10
KIF21A	1953	-0.110747	0.00316958	0.00724965	0.0586163	10
FBXO3	1954	-0.137186	0.00195985	0.00725005	0.0586163	10
NKIRAS1	1955	-0.164481	0.00330358	0.00727624	0.0587692	10
HEG1	1956	0.0861448	0.00694646	0.0072764	0.0587692	9
TIMM23	1957	-0.0509777	0.00128153	0.00728443	0.058804	10
CLDN15	1958	0.131105	0.00257946	0.00728871	0.0588085	10
DCBLD1	1959	-0.149099	0.00790109	0.00730585	0.0588932	10
TIMELESS	1960	0.0527923	0.0013213	0.00730667	0.0588932	10
ATP2B2	1961	-0.0764893	0.00443635	0.00731071	0.0588957	10
WIPF2	1962	-0.0178311	0.00217529	0.00731578	0.0589066	10
DIP2B	1963	0.118755	0.00193721	0.00732651	0.0589142	10
BUB3	1964	0.0221003	0.00224299	0.00732686	0.0589142	10
CDK16	1965	-0.139901	0.00266564	0.00733111	0.0589142	8
SPRED2	1966	-0.108587	0.00117103	0.00733334	0.0589142	10
RAB2A	1967	-0.0697777	0.00288854	0.00733988	0.0589142	10
PFN2	1968	-0.121321	0.00258494	0.00734086	0.0589142	10
PRELP	1969	0.153124	0.00393128	0.00734325	0.0589142	10
C1orf216	1970	-0.105623	0.00626239	0.00734656	0.0589142	10
SYNGR3	1971	-0.210104	0.00920832	0.0073643	0.0590052	10
CPXM2	1972	0.0684236	0.00395087	0.00736796	0.0590052	10
SPATA18	1973	-0.0752793	0.00183972	0.00736911	0.0590052	10
MPZL1	1974	0.0296015	0.00129923	0.0073733	0.0590088	10
ADAM11	1975	-0.115198	0.00279556	0.00738112	0.0590415	10
USP24	1976	0.0948427	0.00235852	0.00739242	0.0590892	8
MYO5C	1977	0.0608595	0.00449716	0.00739504	0.0590892	10
SLCO1C1	1978	-0.02578	0.00288491	0.00739831	0.0590892	10
PATL1	1979	0.0547519	0.00138955	0.00740586	0.059095	10
ZNF592	1980	0.0881602	0.00185951	0.00740651	0.059095	10
FGF9	1981	-0.0811188	0.00765482	0.00741783	0.059126	10
AK1	1982	0.107277	0.00292387	0.00741789	0.059126	10
TAF15	1983	0.051059	0.00410099	0.00743297	0.0592029	10
RMI2	1984	-0.194029	0.00264506	0.00743753	0.0592029	8
CARD8	1985	0.126783	0.00283026	0.00743974	0.0592029	10
RAB28	1986	0.0659974	0.00162255	0.00744252	0.0592029	10
NME6	1987	0.0100293	0.00229153	0.00746904	0.059384	10
BTBD9	1988	-0.102063	0.00255073	0.00747723	0.0594191	9
VPS13A	1989	-0.144912	0.00492705	0.00749424	0.0594893	10
CYB5R3	1990	0.0138867	0.00332178	0.00749523	0.0594893	10
FAM126B	1991	-0.0910001	0.0141116	0.00749907	0.0594893	10
CEP152	1992	0.0753617	0.00184055	0.00750112	0.0594893	10
TMPRSS5	1993	0.162822	0.00218735	0.00750846	0.0594911	10
ESRRG	1994	-0.0895059	0.00413364	0.00751091	0.0594911	10
EIF3M	1995	-0.0712201	0.00146956	0.00751264	0.0594911	10
GALT	1996	-0.0348859	0.00155799	0.00752308	0.0595439	10
ZNF148	1997	0.00790453	0.00419418	0.00755263	0.0597479	10
MADD	1998	-0.0441281	0.00191786	0.00756531	0.0598182	10
[truncated: 13,800 more rows]
