# Supplementary material for: Multiomics integrative analysis identifies APOE allele-specific blood biomarkers associated to Alzheimer’s disease etiopathogenesis
Source: Aging (Albany NY). 2021 Apr 12;13(7):9277–329. doi: 10.18632/aging.202950 (PMC8064208; doi:10.18632/aging.202950)
Supplement: Supplementary Table 25 [file aging-13-202950-s027.xlsx]

## Sheet: Sheet1
Supplementary Table 25. RRA integrative analysis in blood: APOE2 stratum.
Symbol	Rank	ExactP(Score)	AdjustP
SLC25A3	1	5.50401e-05	0.00011008
RHOT2	2	6.07716e-05	0.000121543
RNF152	3	0.000353741	0.000707483
ISY1	3	0.000353741	0.000707483
CLPTM1	4	0.000481735	0.000963471
METRN	5	0.000705499	0.001411
CPT1A	5	0.000705499	0.001411
VRK3	6	0.000794567	0.00158913
PCDHA5	7	0.000844513	0.00168903
UGP2	8	0.000972076	0.00194415
WDR24	9	0.00105596	0.00211192
PLCD1	9	0.00105596	0.00211192
TWF2	10	0.00124498	0.00248995
PMPCA	11	0.00134334	0.00268668
IKBKE	12	0.00138002	0.00276004
FBXL16	13	0.00140537	0.00281074
SRF	13	0.00140537	0.00281074
HS2ST1	14	0.00143596	0.00287192
UBA7	15	0.00168082	0.00336164
FAM173A	16	0.00175387	0.00350773
VAC14	16	0.00175387	0.00350773
SNAPC4	17	0.00185816	0.00371632
RC3H2	18	0.00196656	0.00393313
JMJD8	19	0.00210155	0.0042031
STX7	19	0.00210155	0.0042031
SDCCAG3	20	0.00215779	0.00431557
RAP2B	21	0.00225079	0.00450158
AK2	22	0.00229801	0.00459603
DUOXA2	23	0.00244849	0.00489698
MRPL51	23	0.00244849	0.00489698
COMMD4	24	0.00255384	0.00510768
ATP6V1D	25	0.00261671	0.00523341
PLOD2	26	0.00270598	0.00541195
EML3	27	0.00278366	0.00556732
HAGHL	28	0.00279474	0.00558948
TIRAP	28	0.00279474	0.00558948
NARFL	29	0.00314035	0.00628069
UBR7	29	0.00314035	0.00628069
SARM1	30	0.00317432	0.00634865
SLC35A4	31	0.00323018	0.00646036
TMPO	32	0.00330067	0.00660134
STUB1	33	0.00348534	0.00697068
MOGS	33	0.00348534	0.00697068
ABCB4	34	0.00382976	0.00765951
MUM1	34	0.00382976	0.00765951
TMEM104	35	0.00389136	0.00778272
APBB3	36	0.00390674	0.00781347
APOC1	37	0.00417362	0.00834724
NXF1	37	0.00417362	0.00834724
FBXL7	38	0.00431689	0.00863378
ACADM	39	0.00438177	0.00876353
METTL13	40	0.00443073	0.00886146
SLC9A9	41	0.00451695	0.0090339
FIBP	41	0.00451695	0.0090339
FBLIM1	42	0.0045626	0.0091252
FZD3	43	0.00485977	0.00971955
ASB6	43	0.00485977	0.00971955
PIK3AP1	44	0.00496952	0.00993904
TMEM205	45	0.00509139	0.0101828
SPATA5L1	46	0.00520211	0.0104042
DNAJA1	46	0.00520211	0.0104042
RHBDL1	47	0.00554396	0.0110879
SCFD1	47	0.00554396	0.0110879
CDC42	48	0.00559324	0.0111865
PNN	49	0.0056668	0.0113336
USP36	50	0.00581534	0.0116307
PLAUR	51	0.00588536	0.0117707
PLN	51	0.00588536	0.0117707
NARS	52	0.00592796	0.0118559
HMGN1	53	0.00604163	0.0120833
SOD1	54	0.006118	0.012236
ATP5C1	55	0.00617558	0.0123512
GATM	56	0.00622631	0.0124526
CABLES2	56	0.00622631	0.0124526
LFNG	57	0.00644774	0.0128955
NISCH	58	0.0064674	0.0129348
SLC35C2	59	0.0065068	0.0130136
HSP90AA1	60	0.00656682	0.0131336
CDK2	61	0.00658595	0.0131719
ZNF473	62	0.00672559	0.0134512
INTS6	63	0.0068262	0.0136524
PLA2G6	64	0.00686665	0.0137333
TOMM40	65	0.00690691	0.0138138
LSAMP	65	0.00690691	0.0138138
PSMG1	66	0.0070296	0.0140592
AMT	67	0.00707062	0.0141412
FBXW8	68	0.00724658	0.0144932
SLC26A6	68	0.00724658	0.0144932
L3MBTL2	69	0.00727748	0.014555
RPS24	70	0.00742401	0.014848
PTOV1	71	0.00758586	0.0151717
RPL36AL	71	0.00758586	0.0151717
SIN3B	72	0.00774274	0.0154855
GIPC1	73	0.00782883	0.0156577
TMEM97	74	0.00791538	0.0158308
FBXO16	75	0.00792473	0.0158495
RPA3	75	0.00792473	0.0158495
NOD1	76	0.00815577	0.0163115
PNKP	77	0.00826322	0.0165264
EIF4H	77	0.00826322	0.0165264
PAPOLA	78	0.00828835	0.0165767
SEC16A	79	0.00833278	0.0166656
DUOX1	80	0.00860134	0.0172027
NDST2	80	0.00860134	0.0172027
B3GAT3	81	0.00864695	0.0172939
RBM18	82	0.00876052	0.017521
TNFRSF11A	83	0.00893908	0.0178782
MBD1	83	0.00893908	0.0178782
TAF1C	84	0.009036	0.018072
WDR90	85	0.00927645	0.0185529
BOK	85	0.00927645	0.0185529
CPSF4	86	0.0094097	0.0188194
POLR1D	87	0.00945692	0.0189138
HERC4	88	0.00948058	0.0189612
SORD	89	0.00961347	0.0192269
CISD1	89	0.00961347	0.0192269
KCNK10	90	0.00962311	0.0192462
ABCA10	91	0.00983882	0.0196776
TESC	92	0.00995014	0.0199003
PMEPA1	92	0.00995014	0.0199003
VASH1	93	0.0102772	0.0205543
AKT1S1	94	0.0102865	0.0205729
ENSA	94	0.0102865	0.0205729
SIRT1	95	0.0104005	0.0208011
PJA2	96	0.0105246	0.0210493
CFI	97	0.0106224	0.0212449
CALM2	97	0.0106224	0.0212449
SAP130	98	0.0106996	0.0213991
STK11IP	99	0.0109265	0.021853
LAPTM4B	100	0.0109581	0.0219162
COMT	100	0.0109581	0.0219162
RFWD2	101	0.0111046	0.0222092
SLC35E1	102	0.0111302	0.0222603
MAP6D1	103	0.0112327	0.0224653
GDI2	104	0.0112841	0.0225682
TLR9	105	0.0112934	0.0225868
ATP6V1F	106	0.0115169	0.0230337
GPA33	107	0.0116211	0.0232421
MED25	108	0.0116284	0.0232568
RGS12	109	0.0118571	0.0237143
ADARB1	110	0.0119631	0.0239261
NFE2L1	110	0.0119631	0.0239261
USP16	111	0.0120158	0.0240316
EVI5L	112	0.0122974	0.0245948
HPS6	112	0.0122974	0.0245948
SPEF1	113	0.0126315	0.0252629
TAF6	113	0.0126315	0.0252629
TBC1D9B	114	0.0127968	0.0255936
PLD3	115	0.0129613	0.0259227
PPP2R2A	116	0.0129652	0.0259304
ATP5J2	117	0.0129889	0.0259777
SLC25A4	118	0.0132986	0.0265973
BUD31	118	0.0132986	0.0265973
ELOVL5	119	0.0135732	0.0271464
IL4I1	120	0.0136318	0.0272635
ZNF362	121	0.0137142	0.0274283
USP24	121	0.0137142	0.0274283
GPR137	122	0.0139646	0.0279292
KTN1	123	0.0139981	0.0279963
ABCA9	124	0.0140267	0.0280534
ING3	125	0.0141412	0.0282824
TMEM33	126	0.0142971	0.0285943
SMNDC1	127	0.0144873	0.0289746
ANAPC10	128	0.0145163	0.0290326
TOLLIP	128	0.0145163	0.0290326
PPM1M	129	0.0146035	0.0292071
CEP290	130	0.0146294	0.0292588
VPS52	130	0.0146294	0.0292588
TOP3B	131	0.0146327	0.0292654
GPR132	132	0.0148374	0.0296748
SCARB1	133	0.0148961	0.0297922
CSNK1G1	134	0.0149614	0.0299227
THUMPD1	135	0.0150435	0.0300869
KLHL22	136	0.0152212	0.0304423
CENPB	137	0.015293	0.0305861
ASXL1	137	0.015293	0.0305861
LARP7	138	0.0153104	0.0306208
MTIF3	139	0.0155195	0.0310391
RELB	140	0.0156244	0.0312489
UCHL3	140	0.0156244	0.0312489
MYL6	141	0.015851	0.0317019
GANAB	142	0.0159556	0.0319112
NGDN	142	0.0159556	0.0319112
SMARCD1	143	0.0159723	0.0319446
STK17B	144	0.0160027	0.0320054
ZNF350	145	0.0160636	0.0321272
CYB561D2	146	0.0161246	0.0322492
TSPAN32	147	0.0162864	0.0325729
TUSC2	148	0.0165856	0.0331712
ABCB1	149	0.016617	0.033234
VPS16	149	0.016617	0.033234
PDCD2	150	0.016834	0.033668
CCDC84	151	0.0169473	0.0338946
SNAPC3	152	0.0169588	0.0339177
HDAC4	153	0.0172099	0.0344198
RPF1	153	0.0172099	0.0344198
STRADA	154	0.0172774	0.0345547
MPP5	155	0.0173993	0.0347986
BYSL	156	0.0174944	0.0349888
NR2C1	157	0.0176071	0.0352143
HECTD3	158	0.0176215	0.0352431
INTS5	159	0.0179367	0.0358733
EXOC7	159	0.0179367	0.0358733
COPS4	160	0.0180056	0.0360112
G3BP2	161	0.0182315	0.036463
ROM1	162	0.0182659	0.0365318
ATP5F1	162	0.0182659	0.0365318
DKK3	163	0.0185949	0.0371899
SPG20	163	0.0185949	0.0371899
ERBB2	164	0.0187856	0.0375711
CDC25B	165	0.0189237	0.0378473
APBA3	165	0.0189237	0.0378473
CALML4	166	0.019016	0.038032
AP3D1	167	0.0191152	0.0382304
WDR82	168	0.0192522	0.0385043
ARID4A	168	0.0192522	0.0385043
XKR6	169	0.0195477	0.0390954
LRRC8E	170	0.0195804	0.0391608
MRPL43	170	0.0195804	0.0391608
RPL41	171	0.0197489	0.0394978
MCOLN2	172	0.0199084	0.0398168
AP1M1	173	0.0199848	0.0399697
ZBTB6	174	0.0202362	0.0404723
ZC3H15	174	0.0202362	0.0404723
ALG5	175	0.0204607	0.0409214
MTMR11	176	0.0205637	0.0411273
NRBP2	176	0.0205637	0.0411273
R3HDM1	177	0.0206319	0.0412638
TMEM63A	178	0.0206662	0.0413325
UQCRH	179	0.0208383	0.0416766
ZNF700	180	0.0208728	0.0417456
FAM195A	181	0.0208909	0.0417819
MAN2C1	182	0.0209764	0.0419528
SF3B4	183	0.021218	0.0424359
PKP4	183	0.021218	0.0424359
SIN3A	184	0.0213236	0.0426472
KIF6	185	0.0215447	0.0430895
GPBP1	185	0.0215447	0.0430895
RPUSD1	186	0.0218494	0.0436988
SV2A	187	0.0218713	0.0437426
SURF4	187	0.0218713	0.0437426
MXD4	188	0.0221678	0.0443355
ANAPC4	189	0.0221976	0.0443952
HNRNPL	189	0.0221976	0.0443952
PYCRL	190	0.0222033	0.0444065
TSPAN4	191	0.0225237	0.0450474
MCL1	192	0.0227032	0.0454064
MFAP3	193	0.022811	0.0456221
BOLA1	194	0.0228495	0.0456991
TINF2	194	0.0228495	0.0456991
NMI	195	0.022883	0.0457661
SUOX	196	0.0230635	0.046127
SFTPD	197	0.0231751	0.0463503
REPIN1	197	0.0231751	0.0463503
RICTOR	198	0.0233901	0.0467802
ATF5	199	0.0234265	0.046853
ZCCHC4	200	0.0235005	0.0470011
GALT	200	0.0235005	0.0470011
ZNF862	201	0.0237188	0.0474376
ABCD4	202	0.0238257	0.0476514
SHPK	202	0.0238257	0.0476514
TMEM45A	203	0.0239024	0.0478047
USO1	204	0.0239392	0.0478783
HNRNPCL1	204	0.0239392	0.0478783
VAMP4	205	0.0240866	0.0481732
GMPPA	206	0.0241235	0.048247
DNAJA2	207	0.0241506	0.0483013
CD14	208	0.024457	0.048914
RABGAP1	209	0.0244753	0.0489507
NICN1	210	0.0245687	0.0491373
CLK4	211	0.0247179	0.0494358
TSC22D2	212	0.0247553	0.0495106
HIST2H2AC	213	0.0247998	0.0495996
SRP19	213	0.0247998	0.0495996
SMARCC2	214	0.0249426	0.0498851
TYK2	215	0.0250177	0.0500353
HIST2H2BE	216	0.0251241	0.0502482
AIM2	216	0.0251241	0.0502482
PRDM9	217	0.0252813	0.0505626
ACSM3	218	0.0253947	0.0507894
HIST2H2AB	219	0.0254481	0.0508963
CUTC	219	0.0254481	0.0508963
USF2	220	0.0255084	0.0510167
PVRL2	221	0.025772	0.0515439
RIT1	221	0.025772	0.0515439
TBC1D17	222	0.0260956	0.0521912
CHMP5	222	0.0260956	0.0521912
HRK	223	0.026419	0.0528379
VTA1	224	0.0264646	0.0529291
STAG3	225	0.0266191	0.0532382
BAZ2A	226	0.0266578	0.0533156
CBX3	227	0.0267353	0.0534705
ALAS1	228	0.0267422	0.0534843
TAF1A	228	0.0267422	0.0534843
DUSP28	229	0.026774	0.0535481
FBXO4	230	0.0268517	0.0537033
AKT3	230	0.0268517	0.0537033
RAPGEF1	231	0.0270651	0.0541302
ALG3	232	0.0271242	0.0542484
LMO4	233	0.0272805	0.054561
RASGRP4	234	0.0273879	0.0547757
TRIM17	235	0.027398	0.054796
KPNA3	236	0.0276337	0.0552675
PPM1K	237	0.0277104	0.0554208
ATXN2L	237	0.0277104	0.0554208
ACAD9	238	0.027752	0.0555039
TCTEX1D4	239	0.0280328	0.0560655
POMP	239	0.0280328	0.0560655
ARL8B	240	0.0281874	0.0563749
MBLAC2	241	0.028267	0.0565339
GLYCTK	242	0.0283549	0.0567098
SRPR	242	0.0283549	0.0567098
RAB40C	243	0.0284263	0.0568526
TRAPPC6B	244	0.0286261	0.0572522
IKBIP	245	0.0286768	0.0573536
EPHA10	246	0.0287463	0.0574925
ANTXR2	247	0.0289069	0.0578138
SCCPDH	248	0.0289985	0.057997
IL18BP	248	0.0289985	0.057997
QRICH1	249	0.0290276	0.0580552
ELMO1	250	0.0291082	0.0582165
STRBP	251	0.02932	0.05864
OXA1L	251	0.02932	0.05864
SNAPC2	252	0.0293912	0.0587824
LRCH4	253	0.0294317	0.0588635
CWF19L2	254	0.0295129	0.0590257
NUAK2	255	0.0295535	0.059107
POGK	256	0.0296413	0.0592826
EZH2	256	0.0296413	0.0592826
KIF2C	257	0.0299624	0.0599248
CORO1C	257	0.0299624	0.0599248
CHORDC1	258	0.0302067	0.0604135
GRAMD4	259	0.0302833	0.0605666
CCNH	260	0.0304946	0.0609893
TUT1	261	0.030604	0.061208
WDR33	261	0.030604	0.061208
PAFAH1B3	262	0.0308667	0.0617333
DNHD1	263	0.0309081	0.0618163
SLC27A6	264	0.0309245	0.061849
SSBP1	264	0.0309245	0.061849
POU2F1	265	0.0309911	0.0619823
ZC3H14	266	0.0310327	0.0620654
DNAH1	267	0.0312448	0.0624896
SLC35C1	267	0.0312448	0.0624896
ATP5H	268	0.0315332	0.0630664
NT5M	269	0.0315649	0.0631298
ARHGEF2	269	0.0315649	0.0631298
DMTF1	270	0.0315751	0.0631502
BTBD10	271	0.0318269	0.0636538
SAMD9	272	0.031869	0.063738
GALR1	273	0.0318848	0.0637696
KRCC1	273	0.0318848	0.0637696
CBFA2T2	274	0.0319111	0.0638221
LRRC41	275	0.0319532	0.0639064
ZBTB3	276	0.0319953	0.0639906
GPI	277	0.0322045	0.0644091
IP6K2	278	0.0324605	0.0649211
WFDC10B	279	0.032503	0.065006
ITIH2	280	0.032524	0.0650481
BAZ1A	280	0.032524	0.0650481
CEP164	281	0.032588	0.0651759
MTA2	282	0.0328434	0.0656867
HSD17B11	282	0.0328434	0.0656867
RRAS	283	0.0330571	0.0661143
PKN1	284	0.0331	0.0661999
EOMES	285	0.0331625	0.066325
TUBGCP2	285	0.0331625	0.066325
PLK3	286	0.0334814	0.0669629
MASP1	286	0.0334814	0.0669629
GSDMD	287	0.0334864	0.0669728
BAP1	288	0.0337452	0.0674903
TRIM11	288	0.0337452	0.0674903
CTSZ	289	0.0338002	0.0676003
ERGIC2	289	0.0338002	0.0676003
KIAA0195	290	0.0338316	0.0676632
DGKA	291	0.0340482	0.0680965
STAR	292	0.0341187	0.0682375
PARP10	293	0.0343526	0.0687051
EGFLAM	294	0.0344371	0.0688742
RASSF1	295	0.0346581	0.0693163
VDR	296	0.0347553	0.0695105
TXN	296	0.0347553	0.0695105
SLC25A39	297	0.0348772	0.0697544
PARL	298	0.034965	0.0699299
MME	299	0.0350733	0.0701465
RABGGTB	300	0.0351849	0.0703698
SLC24A1	301	0.0352731	0.0705461
SLC11A2	302	0.0353172	0.0706343
HBG1	303	0.0353911	0.0707821
COPS7B	303	0.0353911	0.0707821
ANXA3	304	0.0354497	0.0708993
GPR21	305	0.0357087	0.0714173
MRPL30	305	0.0357087	0.0714173
SLC25A20	306	0.0357597	0.0715194
ING5	307	0.0358041	0.0716082
PIGN	308	0.0360261	0.0720522
DOLPP1	308	0.0360261	0.0720522
TMEM109	309	0.0362048	0.0724096
MBP	310	0.0362495	0.0724989
NUP62	311	0.0363433	0.0726867
DBI	311	0.0363433	0.0726867
RFC4	312	0.0364731	0.0729462
USP7	313	0.0365627	0.0731255
AHI1	314	0.0366076	0.0732152
SMARCA2	315	0.0366525	0.0733049
NDUFB3	316	0.0366604	0.0733208
CCDC102A	317	0.0366974	0.0733947
PAK2	318	0.0367423	0.0734846
PHF7	319	0.0369773	0.0739546
RHBDD2	319	0.0369773	0.0739546
MEN1	320	0.0370124	0.0740248
WDR6	320	0.0370124	0.0740248
CSNK1A1L	321	0.0370575	0.074115
OSGIN2	322	0.0371478	0.0742956
ST8SIA4	323	0.037193	0.074386
GALNT2	324	0.0372382	0.0744764
GAS7	325	0.0372834	0.0745668
TRIP12	326	0.037294	0.074588
CXXC1	326	0.037294	0.074588
ZNF613	327	0.0374646	0.0749292
SQSTM1	328	0.03751	0.0750199
EEF1G	329	0.0376105	0.075221
ADRM1	329	0.0376105	0.075221
KEAP1	330	0.0377827	0.0755653
BEST4	331	0.0379268	0.0758537
ZSCAN16	331	0.0379268	0.0758537
AP1B1	332	0.037965	0.0759299
PGM2	333	0.0382392	0.0764784
TBC1D22A	334	0.038243	0.076486
DENND4A	335	0.0383766	0.0767533
NDUFAF3	336	0.0385143	0.0770286
IRF5	337	0.038559	0.0771179
NOL8	337	0.038559	0.0771179
EHHADH	338	0.0385602	0.0771205
AP2M1	338	0.0385602	0.0771205
SHMT2	339	0.0388364	0.0776729
ZNF655	340	0.0388748	0.0777495
BRE	340	0.0388748	0.0777495
CDADC1	341	0.0390673	0.0781346
ACAT1	342	0.0391135	0.078227
PSMC2	343	0.0391904	0.0783808
ABCA6	344	0.0395058	0.0790117
FBXO8	344	0.0395058	0.0790117
SERPINA10	345	0.0395309	0.0790617
SP140	346	0.0395774	0.0791547
AHNAK	347	0.0398102	0.0796204
PDHX	348	0.0398569	0.0797137
GIGYF1	349	0.0400437	0.0800874
NFIC	350	0.0400905	0.080181
PTGFR	351	0.0401362	0.0802724
SUCLA2	351	0.0401362	0.0802724
IL7	352	0.0402309	0.0804619
MIER1	353	0.0402778	0.0805556
ABCE1	354	0.0403716	0.0807433
SMARCE1	355	0.0404186	0.0808372
LTBP4	356	0.0404511	0.0809022
ADORA1	357	0.0407658	0.0815317
EDC4	357	0.0407658	0.0815317
PTPRO	358	0.0408895	0.0817789
EEF2	359	0.0409367	0.0818734
F11	360	0.0410804	0.0821608
RXRB	360	0.0410804	0.0821608
UPF2	361	0.0411732	0.0823464
HBG2	362	0.0413948	0.0827896
VARS2	362	0.0413948	0.0827896
LSR	363	0.041709	0.0834181
SEC31B	363	0.041709	0.0834181
TMCO6	364	0.041791	0.083582
HBD	365	0.0420231	0.0840462
ACADVL	365	0.0420231	0.0840462
RNMT	366	0.0421254	0.0842509
NBN	366	0.0421254	0.0842509
KIAA1468	367	0.042337	0.0846739
MAZ	367	0.042337	0.0846739
ZNF74	368	0.0423651	0.0847301
SENP2	369	0.0426507	0.0853013
ZFAND6	369	0.0426507	0.0853013
TASP1	370	0.0427016	0.0854032
LGALS9	371	0.0428944	0.0857889
PRR14	372	0.0429427	0.0858854
MCOLN3	373	0.0429642	0.0859284
SLC26A11	373	0.0429642	0.0859284
ANGEL1	374	0.043136	0.0862721
TM9SF3	375	0.0432776	0.0865551
STK10	376	0.0433298	0.0866596
PI4K2B	377	0.0435908	0.0871815
SPEN	378	0.0436211	0.0872423
GRN	379	0.0437185	0.0874369
ATP2C1	380	0.0437672	0.0875343
TRIM65	381	0.0438159	0.0876318
ALMS1	382	0.0438646	0.0877292
MRPL48	383	0.0439038	0.0878076
RBM12	384	0.0439622	0.0879244
CACNA1I	385	0.0441576	0.0883152
CLEC9A	386	0.0442065	0.0884131
INPP5E	387	0.0442167	0.0884333
NEDD4L	387	0.0442167	0.0884333
STX4	388	0.0443045	0.0886089
XRN2	389	0.0445294	0.0890587
RIOK2	390	0.0446479	0.0892959
SLC25A46	391	0.0447463	0.0894926
MSLN	392	0.0448419	0.0896838
ARID4B	392	0.0448419	0.0896838
WAC	393	0.0448447	0.0896895
ZNF302	394	0.044894	0.089788
CLEC10A	395	0.0449433	0.0898866
TNNC1	396	0.0451543	0.0903085
ATP5B	397	0.045289	0.0905781
POLDIP2	398	0.0453385	0.090677
ZNF483	398	0.0453385	0.090677
VN1R2	399	0.0454665	0.0909329
SPHK2	399	0.0454665	0.0909329
METAP2	400	0.0455863	0.0911727
ADAM2	401	0.0457785	0.091557
SGSH	401	0.0457785	0.091557
NQO1	402	0.0458845	0.0917691
FMNL1	403	0.0459343	0.0918686
RANGAP1	404	0.0460838	0.0921676
TMTC3	405	0.0460904	0.0921808
SULT1A3	405	0.0460904	0.0921808
KLHL26	406	0.0461337	0.0922674
SNRPB2	407	0.0461836	0.0923672
DTX3L	408	0.0464021	0.0928042
DVL3	408	0.0464021	0.0928042
TRPM6	409	0.0467136	0.0934273
ARF4	409	0.0467136	0.0934273
ZC3H7A	410	0.0467342	0.0934684
EXOSC8	411	0.0467844	0.0935688
ATF1	412	0.0469855	0.093971
EEF1E1	413	0.047025	0.09405
GUSB	413	0.047025	0.09405
TBC1D23	414	0.0470358	0.0940716
PSMC4	415	0.0472878	0.0945756
PARP9	416	0.0473362	0.0946725
TRAF1	416	0.0473362	0.0946725
KATNB1	417	0.0473383	0.0946766
TRIT1	418	0.0473888	0.0947776
CNIH4	419	0.0474393	0.0948786
TRPC4	420	0.0476416	0.0952833
RIPK4	421	0.0476473	0.0952946
CTDSPL2	421	0.0476473	0.0952946
SCYL3	422	0.0478444	0.0956888
KCNG4	423	0.0479582	0.0959164
HDDC2	424	0.0480983	0.0961967
ZNF226	425	0.048251	0.096502
SGMS1	426	0.0482689	0.0965379
CYTH1	427	0.0484039	0.0968078
IFI44	427	0.0484039	0.0968078
CCDC86	428	0.0484549	0.0969098
LYN	429	0.048506	0.0970119
BCKDHB	430	0.0485795	0.097159
GTF2A2	430	0.0485795	0.097159
VN1R4	431	0.0488899	0.0977799
MPRIP	431	0.0488899	0.0977799
POM121	432	0.0489664	0.0979328
CD1E	433	0.0491717	0.0983433
HHIP	434	0.0492002	0.0984004
PTGES2	434	0.0492002	0.0984004
IFRD2	435	0.0492745	0.0985489
KCNAB1	436	0.0495103	0.0990206
HAT1	436	0.0495103	0.0990206
ECHS1	437	0.0495318	0.0990637
LETMD1	438	0.049635	0.0992699
IMPDH2	439	0.0497898	0.0995797
DCP1B	440	0.0498202	0.0996405
CSNK2B	440	0.0498202	0.0996405
UBE4B	441	0.0498932	0.0997864
NOSIP	442	0.05013	0.10026
SOX30	443	0.0502039	0.100408
NCBP2	444	0.0503077	0.100615
POLR3A	445	0.0503596	0.100719
GNB1	446	0.0504397	0.100879
INPPL1	446	0.0504397	0.100879
SCAF1	447	0.0505155	0.101031
POLR2G	448	0.0507237	0.101447
KHSRP	448	0.0507237	0.101447
LYST	449	0.0507491	0.101498
RNF20	450	0.0508801	0.10176
EIF3B	450	0.0508801	0.10176
ZDHHC8	451	0.0509845	0.101969
CCNB2	452	0.0510584	0.102117
IDH3B	452	0.0510584	0.102117
CCDC58	453	0.0511935	0.102387
TSEN54	453	0.0511935	0.102387
SPATA7	454	0.0513676	0.102735
TSC22D1	454	0.0513676	0.102735
CCDC136	455	0.051403	0.102806
STRN4	456	0.0516128	0.103226
DOK7	457	0.0516766	0.103353
TXNDC17	457	0.0516766	0.103353
OGFOD1	458	0.0517179	0.103436
ZMIZ1	459	0.0518231	0.103646
ZKSCAN5	460	0.0519855	0.103971
ARHGAP18	460	0.0519855	0.103971
GEMIN4	461	0.0521919	0.104384
VPS54	462	0.0522942	0.104588
TCF7L2	462	0.0522942	0.104588
OSBPL7	463	0.0522975	0.104595
MRRF	464	0.0524032	0.104806
CEPT1	465	0.052509	0.105018
HADHB	466	0.0526027	0.105205
RBM34	466	0.0526027	0.105205
PAM	467	0.0526679	0.105336
SPATC1	468	0.0527209	0.105442
S1PR4	469	0.0529111	0.105822
UQCRB	469	0.0529111	0.105822
SDF2	470	0.0529332	0.105866
DNAJB12	471	0.0529863	0.105973
NACC2	472	0.0530395	0.106079
TP53RK	472	0.0530395	0.106079
KLRC4	473	0.0530926	0.106185
BCL2L12	474	0.0531991	0.106398
TWF1	474	0.0531991	0.106398
LRPAP1	475	0.0532193	0.106439
GNA13	476	0.0532523	0.106505
TMEM161B	477	0.0533589	0.106718
MAPKAPK3	478	0.0535189	0.107038
FUZ	479	0.0535274	0.107055
UTP3	479	0.0535274	0.107055
TCTA	480	0.0535723	0.107145
SYNE1	481	0.0537326	0.107465
FAM98C	482	0.0538353	0.107671
SND1	482	0.0538353	0.107671
ZKSCAN1	483	0.0539467	0.107893
ATXN7L1	484	0.0541076	0.108215
KLHDC8B	485	0.0544299	0.10886
RSL1D1	486	0.0544508	0.108902
NT5DC3	486	0.0544508	0.108902
CD86	487	0.0546452	0.10929
DCUN1D5	488	0.0546991	0.109398
NCOA7	489	0.0547582	0.109516
MPDU1	489	0.0547582	0.109516
IMP4	490	0.055023	0.110046
BANP	491	0.0550656	0.110131
NMD3	492	0.0551312	0.110262
UCKL1	493	0.0552394	0.110479
AP2A1	494	0.0553727	0.110745
MBNL1	494	0.0553727	0.110745
WBP4	495	0.0555105	0.111021
CKAP5	496	0.0556191	0.111238
DCLK1	497	0.0556734	0.111347
FRRS1	498	0.0556798	0.11136
UAP1L1	498	0.0556798	0.11136
EWSR1	499	0.0557277	0.111455
JMJD1C	500	0.0557821	0.111564
JDP2	501	0.0559867	0.111973
UBE2E1	501	0.0559867	0.111973
NDRG3	502	0.0560544	0.112109
ZCCHC17	503	0.056218	0.112436
ELL2	504	0.0562934	0.112587
MAD1L1	504	0.0562934	0.112587
TBC1D9	505	0.0564365	0.112873
TAF7	506	0.0564912	0.112982
NSL1	507	0.0565459	0.113092
WFIKKN1	508	0.0566	0.1132
TTYH3	509	0.0566007	0.113201
FLCN	509	0.0566007	0.113201
CORO1B	510	0.0566554	0.113311
TECR	511	0.0568199	0.11364
HBB	512	0.0569064	0.113813
PHKG2	512	0.0569064	0.113813
BZW1	513	0.0569845	0.113969
VAV3	514	0.0570944	0.114189
GLRX	515	0.0571493	0.114299
MCM7	516	0.0572127	0.114425
DPF1	517	0.0575188	0.115038
PAQR4	517	0.0575188	0.115038
UBASH3A	518	0.05759	0.11518
TRIM62	519	0.0577556	0.115511
FOXP4	520	0.0578248	0.11565
ATP5O	520	0.0578248	0.11565
PARN	521	0.0581307	0.116261
FLII	521	0.0581307	0.116261
TBC1D10C	522	0.0584204	0.116841
GAR1	523	0.0584364	0.116873
FKBP1A	523	0.0584364	0.116873
SLC15A3	524	0.0584759	0.116952
WDR86	525	0.0585315	0.117063
PEX11B	526	0.0586427	0.117285
ABCC5	527	0.0587419	0.117484
CS	527	0.0587419	0.117484
DNAJB5	528	0.0589769	0.117954
STAB1	529	0.0590473	0.118095
TIAL1	529	0.0590473	0.118095
ICAM3	530	0.0592002	0.1184
TRIM9	531	0.0593526	0.118705
HNRNPAB	532	0.0593679	0.118736
RNF149	533	0.0594238	0.118848
ARPC5	534	0.0596479	0.119296
SAMSN1	534	0.0596479	0.119296
ZFP41	535	0.0596577	0.119315
UGDH	536	0.0597039	0.119408
SRP9	537	0.0598161	0.119632
SLC25A13	538	0.0598723	0.119745
STK25	539	0.0599627	0.119925
FBXO30	540	0.0602096	0.120419
RNF133	541	0.0602675	0.120535
SERINC1	542	0.0603786	0.120757
ANKHD1	543	0.060435	0.12087
GPHN	544	0.0605722	0.121144
LENG8	545	0.0607737	0.121547
DCAF4L1	546	0.0608768	0.121754
TXNRD2	546	0.0608768	0.121754
TM7SF2	547	0.061	0.122
FAM13A	548	0.0610567	0.122113
ABCF2	549	0.0611133	0.122227
OR4L1	550	0.0611812	0.122362
FAM78A	550	0.0611812	0.122362
TFAP2A	551	0.0614854	0.122971
CNBP	551	0.0614854	0.122971
ZNF335	552	0.0616812	0.123362
PPFIA1	553	0.0617381	0.123476
SNX6	554	0.0617896	0.123579
TMEM39B	555	0.061909	0.123818
RAB33B	556	0.0620231	0.124046
GALNT12	557	0.0620935	0.124187
ROCK1	557	0.0620935	0.124187
RNF187	558	0.0623974	0.124795
NKAIN3	558	0.0623974	0.124795
RAB10	559	0.0627011	0.125402
EREG	560	0.0627093	0.125419
TMEM175	561	0.062824	0.125648
AKAP11	562	0.0629388	0.125878
WDR81	563	0.0629963	0.125993
HADHA	564	0.0630046	0.126009
MAF	564	0.0630046	0.126009
RAB5B	565	0.0630537	0.126107
CD79A	566	0.063308	0.126616
ATP6V1G1	566	0.063308	0.126616
ROBO3	567	0.063399	0.126798
MAP2K7	568	0.0636113	0.127223
BRIX1	568	0.0636113	0.127223
NR2F6	569	0.0638028	0.127606
SLC12A5	570	0.0638606	0.127721
GMPPB	571	0.0639145	0.127829
KCTD13	571	0.0639145	0.127829
DYDC2	572	0.0642174	0.128435
DTX2	572	0.0642174	0.128435
PPP1CA	573	0.0643238	0.128648
BCL10	574	0.0644978	0.128996
LMBRD2	575	0.0645203	0.129041
FANCG	575	0.0645203	0.129041
ILVBL	576	0.064823	0.129646
ARIH2	577	0.0649048	0.12981
APIP	578	0.064963	0.129926
PPP1R3B	579	0.0651256	0.130251
ITFG3	579	0.0651256	0.130251
SGSM1	580	0.0651378	0.130276
ARV1	580	0.0651378	0.130276
TNFSF8	581	0.0653129	0.130626
TMEM160	582	0.0653713	0.130743
TMEM2	583	0.065428	0.130856
SDHC	583	0.065428	0.130856
E2F5	584	0.0657303	0.131461
CASP1	584	0.0657303	0.131461
HNRNPD	585	0.0658979	0.131796
TMEM30A	586	0.0659565	0.131913
NDUFA4	587	0.0660152	0.13203
CCS	588	0.0660325	0.132065
PPP3CA	589	0.0661325	0.132265
SLC35D1	590	0.0663345	0.132669
SCYL2	590	0.0663345	0.132669
EPM2A	591	0.0665441	0.133088
DNAJC5	592	0.0666029	0.133206
LOXL3	593	0.0666364	0.133273
GCA	594	0.0668387	0.133677
PELI1	595	0.0669382	0.133876
NMT1	595	0.0669382	0.133876
PLEKHM2	596	0.0669567	0.133913
ALK	597	0.0672398	0.13448
GSTK1	597	0.0672398	0.13448
UTP6	598	0.0673113	0.134623
BST1	599	0.0675413	0.135083
PRPF3	599	0.0675413	0.135083
DIP2B	600	0.0676075	0.135215
ZNF225	601	0.0677855	0.135571
TRPC4AP	602	0.0678426	0.135685
FBXO28	603	0.0678448	0.13569
CBX2	604	0.0679042	0.135808
EDEM1	605	0.0680825	0.136165
MRPL33	606	0.0681439	0.136288
DNASE1	607	0.0682015	0.136403
RAVER1	607	0.0682015	0.136403
GAA	608	0.0683206	0.136641
ZNF91	609	0.0683802	0.13676
PALMD	610	0.0684449	0.13689
YIPF5	610	0.0684449	0.13689
ZNF136	611	0.0685591	0.137118
MYL6B	612	0.0686784	0.137357
SKP2	613	0.0687459	0.137492
SORBS1	614	0.0688576	0.137715
ZNRF2	615	0.0690467	0.138093
POMT1	615	0.0690467	0.138093
OR4K13	616	0.0693474	0.138695
ATRN	616	0.0693474	0.138695
SIGLEC11	617	0.0696367	0.139273
BOLA2	618	0.0696479	0.139296
TRIM5	619	0.069817	0.139634
VCP	620	0.0699373	0.139875
RECQL	621	0.0699483	0.139897
CCT8	622	0.0702486	0.140497
CTSB	623	0.0703592	0.140718
SNRNP35	624	0.0705403	0.141081
ERGIC1	625	0.0705487	0.141097
TLK1	625	0.0705487	0.141097
AGFG2	626	0.0707217	0.141443
APAF1	627	0.0708487	0.141697
EXOG	628	0.0709033	0.141807
PIGO	629	0.071085	0.14217
ACACA	630	0.0711457	0.142291
CACNB2	631	0.0711486	0.142297
HYOU1	631	0.0711486	0.142297
CLPP	632	0.071267	0.142534
NDUFS8	633	0.0713277	0.142655
DOCK2	634	0.0713885	0.142777
UBXN1	635	0.0714483	0.142897
ZNF317	635	0.0714483	0.142897
ABCC10	636	0.0717479	0.143496
CPNE1	637	0.0718142	0.143628
TMX3	638	0.0720474	0.144095
FKBP3	638	0.0720474	0.144095
TPRG1L	639	0.0722411	0.144482
PCDHA4	640	0.0723468	0.144694
GGPS1	640	0.0723468	0.144694
BMP8B	641	0.0723632	0.144726
IPO5	642	0.0724243	0.144849
TTF1	643	0.0724855	0.144971
POFUT2	643	0.0724855	0.144971
PGAP3	644	0.0726078	0.145216
CD47	645	0.072646	0.145292
COX17	646	0.0727303	0.145461
ATF4	647	0.0727915	0.145583
PIAS4	648	0.0728528	0.145706
PLEKHM1	649	0.0729451	0.14589
ARPC2	649	0.0729451	0.14589
GUK1	650	0.0730368	0.146074
CACNA2D4	650	0.0730368	0.146074
EIF5A2	651	0.073244	0.146488
SLC3A2	651	0.073244	0.146488
PPP1R12C	652	0.0732824	0.146565
ALG1	652	0.0732824	0.146565
MYBPC3	653	0.0735284	0.147057
EID2	654	0.0735429	0.147086
TELO2	654	0.0735429	0.147086
FMO5	655	0.0735899	0.14718
CREB1	656	0.0738363	0.147673
DMAP1	657	0.073898	0.147796
DNAJB1	658	0.0741401	0.14828
FMNL2	658	0.0741401	0.14828
OTUD1	659	0.0741449	0.14829
BCR	660	0.0742685	0.148537
GPX1	661	0.0743303	0.148661
PSMG3	662	0.0744385	0.148877
ICMT	662	0.0744385	0.148877
PCSK7	663	0.074454	0.148908
FOXP1	664	0.0746398	0.14928
ZNF76	664	0.0746398	0.14928
ITGB2	665	0.0747017	0.149403
MYBPH	666	0.0747369	0.149474
FAM53B	666	0.0747369	0.149474
NSF	667	0.075035	0.15007
ARHGAP30	667	0.075035	0.15007
MRPS16	668	0.0751361	0.150272
RIC8A	669	0.0753226	0.150645
JMJD6	670	0.0753331	0.150666
RTN3	671	0.075447	0.150894
WNT3	672	0.075631	0.151262
OAT	672	0.075631	0.151262
DUS3L	673	0.0757585	0.151517
LRRC15	674	0.0759457	0.151891
GDPD1	675	0.0760082	0.152016
CDK2AP2	676	0.0761331	0.152266
ADAMDEC1	677	0.0761956	0.152391
ANKRD33	678	0.076524	0.153048
PPIG	678	0.076524	0.153048
RAB36	679	0.0768214	0.153643
GIT1	679	0.0768214	0.153643
UBE2L3	680	0.0768846	0.153769
EXOC6	681	0.0770102	0.15402
TEX261	681	0.0770102	0.15402
IP6K1	682	0.0771187	0.154237
FAM49B	682	0.0771187	0.154237
AP2B1	683	0.0773875	0.154775
BRWD1	684	0.0774158	0.154832
SEC24A	684	0.0774158	0.154832
DYDC1	685	0.0777129	0.155426
RPS19	686	0.0780098	0.15602
CEBPZ	686	0.0780098	0.15602
NFU1	687	0.0780181	0.156036
TIGD5	688	0.0781445	0.156289
BCAM	689	0.0783065	0.156613
MFSD1	689	0.0783065	0.156613
YY1	690	0.0784608	0.156922
RPS27A	691	0.0786032	0.157206
PRPF8	692	0.0787777	0.157555
MYC	693	0.0788997	0.157799
PDAP1	694	0.0789682	0.157936
CNFN	695	0.0790317	0.158063
ADAMTSL4	696	0.0790952	0.15819
CIC	697	0.0791588	0.158318
KLKB1	698	0.0791961	0.158392
PPP1R8	699	0.0792224	0.158445
CRHR1	700	0.0794924	0.158985
RPL35A	700	0.0794924	0.158985
APOL6	701	0.0795407	0.159081
TSEN34	702	0.0797885	0.159577
IDI1	702	0.0797885	0.159577
ARHGAP27	703	0.0800845	0.160169
NSD1	703	0.0800845	0.160169
BCKDK	704	0.080115	0.16023
CASP10	705	0.0802428	0.160486
CCND1	706	0.0803068	0.160614
SEMA3E	707	0.0803804	0.160761
SLC39A13	707	0.0803804	0.160761
DALRD3	708	0.0804348	0.16087
SESN2	709	0.0806762	0.161352
TPM2	709	0.0806762	0.161352
DBR1	710	0.0807552	0.16151
HNMT	711	0.0808835	0.161767
CADM4	712	0.0809718	0.161944
ENY2	712	0.0809718	0.161944
MRPL34	713	0.0810119	0.162024
ANKRD13D	714	0.0811404	0.162281
CDCP1	715	0.0812047	0.162409
GTSF1	716	0.0812674	0.162535
ZNF789	717	0.081269	0.162538
ARID1A	718	0.0815628	0.163126
FOXN2	719	0.0816553	0.163311
THUMPD2	720	0.0817842	0.163568
HIPK3	721	0.081858	0.163716
ARHGEF1	722	0.0819133	0.163827
STARD3	722	0.0819133	0.163827
D2HGDH	723	0.0819778	0.163956
NEIL1	724	0.0821532	0.164306
FBXO31	725	0.0821716	0.164343
FBXO2	725	0.0821716	0.164343
PON2	726	0.0823656	0.164731
PTAFR	727	0.0824482	0.164896
PAPSS1	728	0.0825598	0.16512
PCDHA9	729	0.0827431	0.165486
AMHR2	730	0.0830136	0.166027
SHF	731	0.0830379	0.166076
MRPL40	731	0.0830379	0.166076
AIP	732	0.0831435	0.166287
TUBB1	733	0.0833326	0.166665
PPM1B	733	0.0833326	0.166665
TRERF1	734	0.0834035	0.166807
NOTCH1	735	0.0834686	0.166937
LIPE	736	0.0835988	0.167198
EIF2S1	737	0.0836271	0.167254
SPSB3	737	0.0836271	0.167254
PPP2R3A	738	0.0839215	0.167843
PQLC3	739	0.0842158	0.168432
MRPL1	740	0.0843818	0.168764
NAMPT	741	0.0844472	0.168894
CLDN15	742	0.08451	0.16902
PRMT1	743	0.0845126	0.169025
PSIP1	744	0.084709	0.169418
HMGCS1	744	0.084709	0.169418
VAV2	745	0.084804	0.169608
BRMS1	745	0.084804	0.169608
SCAND1	746	0.0852336	0.170467
NUP133	747	0.0853918	0.170784
KBTBD3	748	0.0854307	0.170861
RNF123	749	0.0856855	0.171371
LILRA5	749	0.0856855	0.171371
HERPUD2	750	0.0856938	0.171388
SH2D5	751	0.0858255	0.171651
IRF2BP2	752	0.085979	0.171958
HSPA4	753	0.0860232	0.172046
AP1G2	754	0.0861552	0.17231
CAMTA2	754	0.0861552	0.17231
GOLGA1	755	0.0862212	0.172442
NSUN6	756	0.0862725	0.172545
PPAP2B	756	0.0862725	0.172545
TMEM57	757	0.0865514	0.173103
PLEK2	758	0.0865658	0.173132
ERCC1	759	0.0866176	0.173235
GMEB1	760	0.0868161	0.173632
ZNF576	761	0.086859	0.173718
ELAVL1	762	0.0868823	0.173765
ZFP64	763	0.0871521	0.174304
GMFG	763	0.0871521	0.174304
DGKG	764	0.08728	0.17456
SLC7A8	765	0.0874451	0.17489
PHC3	765	0.0874451	0.17489
SPPL2B	766	0.087612	0.175224
PTPN12	767	0.0876785	0.175357
SLC35F2	768	0.0877379	0.175476
BARD1	769	0.087745	0.17549
SPTLC1	770	0.0878115	0.175623
APLP2	771	0.0878781	0.175756
SETD5	772	0.0879446	0.175889
INTS1	773	0.0880307	0.176061
DYNLT1	774	0.0883445	0.176689
PANK1	775	0.0884112	0.176822
CIZ1	776	0.0885447	0.177089
ARHGAP1	777	0.0886114	0.177223
QTRTD1	778	0.0886783	0.177357
ATXN2	779	0.0889081	0.177816
FYTTD1	780	0.0889457	0.177891
VPS53	781	0.0890795	0.178159
DPY19L3	782	0.0892004	0.178401
RNH1	782	0.0892004	0.178401
GNL3	783	0.0893475	0.178695
PHACTR4	784	0.0894925	0.178985
NDUFS5	784	0.0894925	0.178985
EEF1D	785	0.0897501	0.1795
RASSF5	786	0.0897845	0.179569
HIC2	786	0.0897845	0.179569
KPNA6	787	0.0898845	0.179769
RTN4RL1	788	0.0900764	0.180153
AIF1	788	0.0900764	0.180153
TTC39B	789	0.0902881	0.180576
SUSD5	790	0.0903682	0.180736
TIMM23	790	0.0903682	0.180736
LSG1	791	0.0904902	0.18098
PZP	792	0.0906599	0.18132
LARGE	792	0.0906599	0.18132
CCDC28B	793	0.0906925	0.181385
BNIP3L	794	0.0909514	0.181903
SSB	794	0.0909514	0.181903
FAM76B	795	0.0911653	0.182331
HIAT1	796	0.091233	0.182466
RHBDF2	797	0.0912429	0.182486
OR10J1	798	0.091436	0.182872
MICAL1	798	0.091436	0.182872
MBOAT7	799	0.0915342	0.183068
ETF1	799	0.0915342	0.183068
ARNTL	800	0.0918254	0.183651
ROCK2	801	0.0920463	0.184093
ZNF234	802	0.0921165	0.184233
IPO4	802	0.0921165	0.184233
ATP2B1	803	0.0921821	0.184364
DZIP1L	804	0.0924074	0.184815
HMG20B	804	0.0924074	0.184815
LIN7A	805	0.0925902	0.18518
IFT122	805	0.0925902	0.18518
NADK	806	0.0926983	0.185397
SNX27	806	0.0926983	0.185397
COX7A2	807	0.0927264	0.185453
TNNC2	808	0.0928627	0.185725
VPS13B	809	0.0929309	0.185862
CEACAM3	810	0.092989	0.185978
SNX33	811	0.0929991	0.185998
COG6	812	0.0930673	0.186135
INTS8	813	0.0932038	0.186408
HOXC10	813	0.0932038	0.186408
MAFF	814	0.0932721	0.186544
COPG2	815	0.0932796	0.186559
HEATR1	815	0.0932796	0.186559
TPD52L1	816	0.0934087	0.186817
PHF19	817	0.0935701	0.18714
UQCRC1	818	0.0936138	0.187228
RAD51C	819	0.0938191	0.187638
DSG1	820	0.0938605	0.187721
CDC5L	820	0.0938605	0.187721
AMIGO2	821	0.0939561	0.187912
CNKSR3	822	0.0940932	0.188186
SCNN1G	823	0.0941508	0.188302
PPA2	823	0.0941508	0.188302
CEP250	824	0.0942989	0.188598
GYG1	825	0.0943676	0.188735
ZNF575	826	0.0944409	0.188882
EAF2	826	0.0944409	0.188882
ITGB3BP	827	0.0945049	0.18901
POLR3GL	828	0.094711	0.189422
IGFBP7	829	0.094731	0.189462
RB1CC1	830	0.0947798	0.18956
ISOC1	831	0.0948486	0.189697
TSPAN14	832	0.0950209	0.190042
COMMD8	833	0.0950551	0.19011
ITGAL	833	0.0950551	0.19011
BFAR	834	0.0953107	0.190621
TMEM173	834	0.0953107	0.190621
MBD4	835	0.0953996	0.190799
PIGQ	836	0.0954686	0.190937
LSM1	837	0.0955376	0.191075
MYL4	838	0.0956004	0.191201
GSS	838	0.0956004	0.191201
PRDM15	839	0.09589	0.19178
EXOSC9	839	0.09589	0.19178
DHRS11	840	0.095952	0.191904
ZNF557	841	0.0961595	0.192319
XRCC1	842	0.0961795	0.192359
REL	842	0.0961795	0.192359
CYB561	843	0.0962287	0.192457
CCNO	844	0.096298	0.192596
EPB41L3	845	0.0964688	0.192938
RANBP3	845	0.0964688	0.192938
SGOL2	846	0.096758	0.193516
RNPS1	846	0.096758	0.193516
SSR2	847	0.096922	0.193844
MRPS21	848	0.0970472	0.194094
OPA3	849	0.0971305	0.194261
GJC3	850	0.0973362	0.194672
BIRC2	850	0.0973362	0.194672
C2CD2	851	0.0974086	0.194817
PREPL	852	0.0975479	0.195096
ZSWIM1	853	0.0976175	0.195235
ATP13A1	854	0.0979139	0.195828
GPD1L	855	0.0981754	0.196351
TMEM134	855	0.0981754	0.196351
OSBPL10	856	0.0982026	0.196405
TRAF7	856	0.0982026	0.196405
ST6GALNAC6	857	0.0982452	0.19649
TMED1	858	0.0984911	0.196982
ORAI1	859	0.0985947	0.197189
SETD8	860	0.0987347	0.197469
RMND5B	860	0.0987347	0.197469
SNUPN	861	0.0987796	0.197559
GPAA1	861	0.0987796	0.197559
NEK10	862	0.0988747	0.197749
CASP6	863	0.0990679	0.198136
CCDC53	863	0.0990679	0.198136
FTMT	864	0.0992252	0.19845
KLF6	864	0.0992252	0.19845
CLK3	865	0.0993561	0.198712
COPS2	866	0.0994357	0.198871
FAM114A2	867	0.0995761	0.199152
MED18	868	0.0996442	0.199288
WTAP	868	0.0996442	0.199288
TRIML1	869	0.0999322	0.199864
ZDHHC17	870	0.100068	0.200137
CCNT2	871	0.100139	0.200278
TSC1	872	0.10022	0.20044
PRRG2	873	0.100508	0.201016
ZNF264	873	0.100508	0.201016
SEPSECS	874	0.100796	0.201591
RYR2	874	0.100796	0.201591
STIM2	875	0.101083	0.202166
PHF1	876	0.101371	0.202741
MRPS18A	877	0.10141	0.20282
ELMOD2	878	0.101622	0.203245
TMCC1	879	0.101658	0.203316
MCCD1	879	0.101658	0.203316
E4F1	880	0.101945	0.20389
HSD17B12	881	0.102048	0.204096
MFHAS1	882	0.102232	0.204464
AUH	883	0.102332	0.204664
ABHD4	884	0.102403	0.204806
CD151	885	0.102474	0.204949
NR3C2	886	0.102519	0.205038
CNOT1	887	0.102759	0.205518
PMS1	888	0.102806	0.205612
VSIG2	889	0.10283	0.20566
RBMS1	890	0.102973	0.205945
ART1	891	0.103044	0.206088
PCDHA11	892	0.10338	0.206759
ABHD13	892	0.10338	0.206759
SLC2A5	893	0.103401	0.206801
RPL7	894	0.103472	0.206944
BBS7	895	0.103543	0.207087
CLDN10	895	0.103543	0.207087
GNA15	896	0.103666	0.207332
KLK15	896	0.103666	0.207332
CCNJ	897	0.103758	0.207516
MYO9A	897	0.103758	0.207516
ARFIP2	898	0.103829	0.207659
TRIM41	899	0.103901	0.207802
CROT	900	0.103953	0.207905
ACTR1A	901	0.104116	0.208231
MRPS31	902	0.104239	0.208478
ECH1	902	0.104239	0.208478
PDGFRB	903	0.104259	0.208518
KCNMB1	904	0.104474	0.208948
LYPD4	905	0.104525	0.20905
RAB8B	905	0.104525	0.20905
GTF2F1	906	0.104546	0.209091
FADS6	907	0.104617	0.209235
TRAF3IP2	908	0.104761	0.209522
NDUFB7	909	0.104811	0.209623
RUVBL2	909	0.104811	0.209623
KCNAB3	910	0.104833	0.209666
APBA2	911	0.104905	0.209809
H1FNT	912	0.104976	0.209953
PGM2L1	913	0.105097	0.210195
CCM2	913	0.105097	0.210195
USP48	914	0.105264	0.210528
TUBG1	915	0.105383	0.210766
KREMEN1	916	0.10548	0.21096
MREG	917	0.105552	0.211104
KPNB1	918	0.105624	0.211248
RPS9	919	0.105669	0.211338
RPS20	919	0.105669	0.211338
TMEM199	920	0.10584	0.211681
GPR18	921	0.105955	0.211909
PSMA4	921	0.105955	0.211909
DGKQ	922	0.105985	0.211969
PIGT	922	0.105985	0.211969
GNAI2	923	0.106129	0.212258
PIAS3	924	0.106201	0.212402
PTPN9	925	0.10624	0.212481
NDUFAB1	925	0.10624	0.212481
GRAP2	926	0.106418	0.212836
VCL	926	0.106418	0.212836
ERC1	927	0.10649	0.21298
PRTFDC1	928	0.106526	0.213051
CD33	929	0.106562	0.213125
AKAP7	930	0.106707	0.213414
RUSC1	931	0.106779	0.213559
RNF111	932	0.106811	0.213622
ZBTB7A	933	0.107069	0.214138
MEF2C	933	0.107069	0.214138
TFEB	934	0.107096	0.214193
PNPLA8	934	0.107096	0.214193
BET1L	935	0.107214	0.214428
TCTEX1D2	936	0.107287	0.214573
IMPA2	937	0.107359	0.214718
GSPT1	938	0.107381	0.214763
SETMAR	938	0.107381	0.214763
AMN1	939	0.107504	0.215009
P4HA1	939	0.107504	0.215009
PTPRH	940	0.10765	0.215299
MATK	941	0.107868	0.215735
MAPT	942	0.107951	0.215903
MSX2	942	0.107951	0.215903
ATL3	943	0.108236	0.216473
COPS5	943	0.108236	0.216473
PCIF1	944	0.108304	0.216608
SS18L2	945	0.108377	0.216754
MRPL42	946	0.108521	0.217042
PDK4	947	0.108806	0.217611
PLK4	947	0.108806	0.217611
EID2B	948	0.10909	0.21818
MAN1A1	948	0.10909	0.21818
RASA1	949	0.109253	0.218505
SLC35E2	950	0.109374	0.218749
ZNF142	950	0.109374	0.218749
N6AMT1	951	0.109765	0.21953
ATF3	952	0.109943	0.219886
NOP14	952	0.109943	0.219886
BNIP2	953	0.110058	0.220116
CENPN	954	0.110131	0.220262
OTUD4	955	0.110227	0.220454
MED24	955	0.110227	0.220454
TFG	956	0.110278	0.220556
SMAGP	957	0.110351	0.220703
ZBTB40	958	0.110511	0.221022
TGM2	958	0.110511	0.221022
TNFRSF17	959	0.110645	0.22129
RWDD2B	960	0.110795	0.22159
YIPF4	960	0.110795	0.22159
RRAGC	961	0.110939	0.221879
THSD7B	962	0.111013	0.222026
MAN2B1	963	0.111079	0.222157
DNAJC7	964	0.111086	0.222173
FBXO7	965	0.11116	0.22232
THRA	966	0.111362	0.222725
FKRP	967	0.111602	0.223205
PLXND1	968	0.111646	0.223292
GRK6	968	0.111646	0.223292
REEP4	969	0.111897	0.223795
DEFA4	970	0.111929	0.223858
PEPD	970	0.111929	0.223858
CLEC1B	971	0.112045	0.22409
ZNF394	972	0.112213	0.224425
BAALC	973	0.112415	0.22483
DEFB128	974	0.112496	0.224992
LDHB	974	0.112496	0.224992
ANKRD40	975	0.112563	0.225126
PIK3R2	975	0.112563	0.225126
KRT80	976	0.112779	0.225558
TCIRG1	977	0.112785	0.22557
L1TD1	978	0.112859	0.225718
COPS3	979	0.113062	0.226124
RBM25	979	0.113062	0.226124
MED13L	980	0.113304	0.226608
CSNK1G2	980	0.113304	0.226608
TMC4	981	0.113345	0.22669
SAP30BP	981	0.113345	0.22669
PDIA5	982	0.113453	0.226905
SLC29A3	983	0.113527	0.227054
MDH1	984	0.113601	0.227202
KIAA1462	985	0.113628	0.227255
NLRP1	985	0.113628	0.227255
COX6A1	986	0.113824	0.227649
SECISBP2L	987	0.11391	0.227821
RPS6KB1	987	0.11391	0.227821
GLS2	988	0.114122	0.228244
TRIML2	989	0.114193	0.228386
MZF1	989	0.114193	0.228386
CA13	990	0.114475	0.228951
FAM160A2	991	0.114569	0.229138
RGS14	992	0.114644	0.229287
SNX2	993	0.114718	0.229437
SEC24C	994	0.114758	0.229516
RNF220	995	0.11504	0.23008
DMWD	996	0.115092	0.230183
ALDH1L2	997	0.115322	0.230645
CDC26	997	0.115322	0.230645
SLC41A3	998	0.115466	0.230931
GLMN	998	0.115466	0.230931
ANKMY1	999	0.11554	0.231081
IL6	1000	0.115604	0.231209
NDFIP1	1000	0.115604	0.231209
GOLGA2	1001	0.11569	0.23138
EPB42	1002	0.115765	0.23153
ATP1A3	1002	0.115765	0.23153
CA1	1003	0.115886	0.231773
MRPL39	1003	0.115886	0.231773
TCF20	1004	0.116065	0.23213
CLN3	1005	0.116168	0.232336
RHD	1006	0.11629	0.23258
ZNF223	1007	0.11644	0.23288
POLM	1008	0.11645	0.2329
GBF1	1009	0.116515	0.23303
ATM	1010	0.11659	0.233181
EPHB6	1010	0.11659	0.233181
NCOA5	1011	0.116741	0.233481
GSTP1	1012	0.117013	0.234026
JAKMIP1	1013	0.117192	0.234384
UBAC2	1014	0.117295	0.234589
TNFSF10	1014	0.117295	0.234589
VRK2	1015	0.117343	0.234685
POLR3H	1016	0.117576	0.235152
CDC42EP4	1017	0.117644	0.235288
ADCK4	1018	0.11772	0.235439
CHN2	1019	0.117795	0.23559
GAPDH	1020	0.117857	0.235715
HTR3C	1021	0.118138	0.236277
DDX59	1021	0.118138	0.236277
COMMD3	1022	0.118248	0.236496
TMEM144	1023	0.118419	0.236839
EXTL2	1023	0.118419	0.236839
ESYT1	1024	0.118475	0.23695
CLTCL1	1025	0.118626	0.237253
CEBPE	1026	0.1187	0.237401
ZNF791	1026	0.1187	0.237401
FPR3	1027	0.118854	0.237707
SNX25	1028	0.118929	0.237859
CCR8	1028	0.118929	0.237859
CAPRIN1	1029	0.118981	0.237962
ATMIN	1030	0.119005	0.23801
DZIP1	1031	0.119081	0.238162
ATG2A	1032	0.119157	0.238313
UBE2E3	1033	0.119262	0.238524
ZNF282	1033	0.119262	0.238524
L3MBTL3	1034	0.119384	0.238768
XRCC5	1035	0.119543	0.239085
NUCB2	1035	0.119543	0.239085
CYP20A1	1036	0.119823	0.239646
IKBKB	1037	0.120104	0.240207
SCML4	1038	0.12022	0.240441
LRRC18	1039	0.120384	0.240768
ATP10D	1039	0.120384	0.240768
USP25	1040	0.120449	0.240897
HLTF	1041	0.120601	0.241202
MFNG	1041	0.120601	0.241202
MRPL19	1042	0.120664	0.241328
CHD1	1042	0.120664	0.241328
TARS	1043	0.120677	0.241355
PPP2CA	1044	0.120906	0.241812
COPB1	1044	0.120906	0.241812
RFXAP	1045	0.120944	0.241888
PLB1	1045	0.120944	0.241888
SYTL1	1046	0.120982	0.241965
KIF2A	1046	0.120982	0.241965
METTL9	1047	0.121135	0.24227
PFKL	1048	0.121441	0.242881
MATR3	1049	0.121504	0.243008
DHX29	1050	0.121747	0.243493
ZNF439	1051	0.121823	0.243646
BACH1	1052	0.122064	0.244127
CRELD1	1052	0.122064	0.244127
PPP2R5E	1053	0.122283	0.244565
PAMR1	1054	0.122343	0.244687
KIF13B	1054	0.122343	0.244687
MPPE1	1055	0.122359	0.244719
DRG2	1056	0.122436	0.244872
TXNDC15	1057	0.122513	0.245025
ATPIF1	1058	0.122623	0.245246
ITGB1	1058	0.122623	0.245246
NCKAP1	1059	0.122666	0.245332
AP2S1	1060	0.12282	0.24564
CD74	1061	0.122897	0.245793
JSRP1	1062	0.122902	0.245805
GTF3C2	1062	0.122902	0.245805
MIB2	1063	0.12305	0.246101
PPP1R2	1064	0.123127	0.246254
CACNA1S	1065	0.123182	0.246363
ZUFSP	1065	0.123182	0.246363
TMEM167B	1066	0.123435	0.24687
DNM3	1067	0.123461	0.246922
CALM3	1067	0.123461	0.246922
PRDM1	1068	0.123589	0.247178
CDCA4	1069	0.12374	0.24748
TRIM2	1070	0.12382	0.24764
HCN3	1070	0.12382	0.24764
MIS12	1071	0.123897	0.247794
FBXO25	1072	0.124019	0.248038
PCBP2	1072	0.124019	0.248038
TNPO3	1073	0.124298	0.248596
RBM14	1073	0.124298	0.248596
SOX6	1074	0.12436	0.24872
SH3TC1	1075	0.124577	0.249153
DPF2	1076	0.124591	0.249183
HNRNPUL2	1077	0.124746	0.249492
CLIP2	1078	0.124855	0.249711
HM13	1078	0.124855	0.249711
PSMA2	1079	0.125134	0.250268
CRTAP	1080	0.12521	0.25042
YTHDF3	1081	0.125412	0.250825
NUB1	1082	0.125598	0.251195
VPRBP	1083	0.125675	0.25135
RBM39	1083	0.125675	0.25135
ZFR	1084	0.125691	0.251382
HK1	1085	0.125753	0.251505
PEX13	1086	0.12583	0.25166
USP44	1087	0.125969	0.251938
TBCA	1087	0.125969	0.251938
IRF3	1088	0.125985	0.251971
ARAP2	1089	0.126063	0.252126
DHX36	1090	0.126218	0.252437
TRIM4	1091	0.126247	0.252495
IRF8	1091	0.126247	0.252495
ZNF175	1092	0.126296	0.252592
FRMD6	1093	0.126526	0.253051
CCNI	1093	0.126526	0.253051
PDSS1	1094	0.126529	0.253059
CAPN3	1095	0.126607	0.253214
SMG6	1096	0.126685	0.25337
MEGF8	1097	0.126763	0.253525
PTGES3	1098	0.126804	0.253607
BPTF	1099	0.12684	0.253681
PDIK1L	1100	0.126918	0.253837
NDUFV1	1100	0.126918	0.253837
FCGRT	1101	0.126996	0.253992
GDPD3	1101	0.126996	0.253992
GPN2	1102	0.127081	0.254163
DDA1	1103	0.127152	0.254304
PTRH1	1103	0.127152	0.254304
CDKN2AIPNL	1104	0.12723	0.25446
TBC1D10B	1105	0.127359	0.254719
P2RX1	1105	0.127359	0.254719
KIF3C	1106	0.127386	0.254772
PPARD	1107	0.127464	0.254928
PLA2G10	1108	0.127637	0.255274
WWP2	1109	0.127698	0.255396
PTMA	1110	0.127776	0.255552
UBE2I	1111	0.127915	0.255829
FRMD5	1112	0.12801	0.256021
CD6	1113	0.128167	0.256333
FDXR	1114	0.128192	0.256384
NOL12	1114	0.128192	0.256384
RNF216	1115	0.128245	0.25649
DPM2	1116	0.128401	0.256803
PDE3B	1117	0.12847	0.256939
NFAT5	1118	0.12848	0.256959
ASTN1	1119	0.128714	0.257429
FAM168B	1119	0.128714	0.257429
LILRB3	1120	0.128747	0.257494
CRIPAK	1121	0.128871	0.257742
RCN3	1122	0.129024	0.258048
ZNF189	1122	0.129024	0.258048
H6PD	1123	0.129301	0.258602
SHC1	1123	0.129301	0.258602
NEK1	1124	0.129342	0.258683
HORMAD1	1125	0.129577	0.259154
ZNF480	1125	0.129577	0.259154
TMEM50B	1126	0.129578	0.259157
TMEM8B	1127	0.129813	0.259626
APH1A	1128	0.129855	0.25971
MGAT4B	1129	0.129891	0.259783
STEAP3	1130	0.12997	0.25994
CPEB4	1131	0.130127	0.260255
TBC1D16	1132	0.130206	0.260412
TTC16	1132	0.130206	0.260412
OXCT1	1133	0.130409	0.260818
RAB27A	1133	0.130409	0.260818
CAPN5	1134	0.130442	0.260884
PLEKHJ1	1135	0.130685	0.261371
EIF2B1	1135	0.130685	0.261371
TCEA1	1136	0.130757	0.261515
CLIC4	1137	0.130915	0.26183
DNAJC8	1138	0.130962	0.261924
ALAD	1138	0.130962	0.261924
ZNF474	1139	0.131231	0.262461
EGF	1140	0.131238	0.262477
GJC2	1141	0.13131	0.262619
PTRF	1141	0.13131	0.262619
SACM1L	1142	0.131389	0.262777
PRR12	1143	0.131515	0.263029
GTF2F2	1143	0.131515	0.263029
CCDC14	1144	0.131547	0.263093
PPP2CB	1145	0.131626	0.263251
SHISA2	1146	0.131791	0.263582
CNOT2	1146	0.131791	0.263582
CD1B	1147	0.132067	0.264134
FAM103A1	1147	0.132067	0.264134
TFCP2	1148	0.132259	0.264518
RTN4	1149	0.132338	0.264676
NOB1	1150	0.132343	0.264686
SON	1150	0.132343	0.264686
ESCO1	1151	0.132417	0.264834
CA2	1152	0.132619	0.265238
SLC16A7	1153	0.132734	0.265469
SIPA1	1154	0.132814	0.265627
CPEB2	1155	0.132895	0.26579
XRCC6	1155	0.132895	0.26579
CLEC16A	1156	0.132972	0.265945
LRRC3	1157	0.133052	0.266104
CCND3	1157	0.133052	0.266104
SLC25A1	1158	0.133171	0.266342
PITRM1	1159	0.133211	0.266421
ETHE1	1160	0.133446	0.266893
FAM96A	1160	0.133446	0.266893
CD46	1161	0.133529	0.267057
BRI3BP	1162	0.133688	0.267375
SMUG1	1163	0.133722	0.267444
B3GALTL	1163	0.133722	0.267444
MS4A6A	1164	0.133767	0.267535
RPS28	1164	0.133767	0.267535
ASTE1	1165	0.133997	0.267995
ADAM15	1165	0.133997	0.267995
LILRB5	1166	0.134273	0.268546
SLC39A10	1167	0.134405	0.268809
FAM19A4	1168	0.134548	0.269096
SEC22C	1168	0.134548	0.269096
ENTPD3	1169	0.134564	0.269128
ACVR1B	1170	0.134823	0.269647
SLC26A10	1170	0.134823	0.269647
TTC31	1171	0.134883	0.269767
CD164	1172	0.134963	0.269926
ACSL3	1173	0.135098	0.270197
PRDM16	1174	0.135123	0.270246
MTX2	1175	0.135203	0.270406
COMMD10	1175	0.135203	0.270406
MED16	1176	0.135363	0.270726
CD2BP2	1177	0.135373	0.270747
TAGAP	1177	0.135373	0.270747
ZBED5	1178	0.135443	0.270886
RPL26L1	1179	0.135603	0.271206
COQ6	1180	0.135648	0.271297
FAM102B	1181	0.135763	0.271526
RHOF	1181	0.135763	0.271526
TRNT1	1182	0.135843	0.271686
TMEM60	1182	0.135843	0.271686
KLF12	1183	0.135923	0.271846
ATP11B	1183	0.135923	0.271846
P4HTM	1184	0.135923	0.271846
INPP4B	1184	0.135923	0.271846
PLCB1	1185	0.136083	0.272167
ANKS1B	1186	0.136198	0.272396
LPIN1	1187	0.136472	0.272945
RANBP2	1187	0.136472	0.272945
INTS3	1188	0.136565	0.273129
MTSS1	1189	0.136645	0.27329
PANK3	1190	0.136725	0.27345
DNAJB14	1191	0.136747	0.273494
ITGA10	1192	0.136805	0.273611
MED20	1193	0.137021	0.274043
CSE1L	1194	0.137047	0.274093
NEFL	1195	0.137127	0.274254
EIF4G1	1196	0.137207	0.274415
WDTC1	1197	0.137296	0.274591
CER1	1198	0.137449	0.274897
ABCC9	1199	0.137529	0.275058
ARL15	1199	0.137529	0.275058
LNX2	1200	0.13757	0.27514
UBL5	1200	0.13757	0.27514
CDK5RAP1	1201	0.137771	0.275542
CPSF1	1202	0.137844	0.275688
LRWD1	1203	0.137851	0.275703
GAP43	1204	0.138118	0.276236
CDKL1	1205	0.138254	0.276509
IFIT5	1206	0.138392	0.276784
SLC7A7	1207	0.138497	0.276993
SDC3	1208	0.138577	0.277155
CLUAP1	1209	0.138666	0.277332
OMA1	1209	0.138666	0.277332
OBSCN	1210	0.13894	0.277879
ABHD2	1210	0.13894	0.277879
GADD45A	1211	0.138981	0.277963
OR12D3	1212	0.139062	0.278124
ELF1	1212	0.139062	0.278124
FAM107B	1213	0.139224	0.278448
MITD1	1214	0.139487	0.278974
TMSB10	1215	0.139548	0.279095
MRPS28	1216	0.139629	0.279257
TGFA	1217	0.13971	0.279419
FAM83H	1218	0.13976	0.279521
UBXN8	1219	0.139791	0.279581
RAB11FIP5	1220	0.139872	0.279744
IGSF6	1221	0.140034	0.280067
TNK2	1221	0.140034	0.280067
OR12D2	1222	0.140034	0.280068
EXOC4	1223	0.140115	0.28023
IGF2BP2	1224	0.140307	0.280614
TBX19	1224	0.140307	0.280614
SMC4	1225	0.140359	0.280717
AFAP1L1	1226	0.14044	0.280879
ATG4B	1227	0.140521	0.281042
LRP1	1227	0.140521	0.281042
MST1	1228	0.14058	0.28116
GHRHR	1228	0.14058	0.28116
TMIGD2	1229	0.140683	0.281367
TNPO1	1230	0.140765	0.281529
SEC11C	1231	0.140853	0.281706
SLC46A1	1232	0.141126	0.282252
TPST2	1232	0.141126	0.282252
ATG4D	1233	0.141253	0.282505
DACT3	1233	0.141253	0.282505
ADAM19	1234	0.141399	0.282798
UBE3A	1235	0.141415	0.282831
PTGS2	1236	0.141578	0.283157
GPBAR1	1237	0.141672	0.283344
RIPK1	1238	0.141741	0.283483
TRAM1	1239	0.141945	0.283889
MICB	1239	0.141945	0.283889
RARS	1240	0.142067	0.284135
BTF3	1241	0.142149	0.284298
ARL5B	1242	0.142217	0.284435
SF3A2	1243	0.14249	0.28498
GRAMD3	1243	0.14249	0.28498
TACR2	1244	0.142762	0.285524
POLH	1245	0.142802	0.285605
CCDC66	1246	0.142884	0.285769
EPHB2	1247	0.142966	0.285932
APOD	1248	0.143048	0.286096
KIAA1407	1249	0.14313	0.286259
CLEC12A	1250	0.143293	0.286587
PCGF5	1251	0.143307	0.286614
DCTD	1251	0.143307	0.286614
SMOX	1252	0.143457	0.286914
ATHL1	1253	0.143539	0.287078
NUP88	1254	0.143579	0.287158
MYL9	1255	0.143703	0.287406
RPS25	1256	0.143851	0.287702
STAM2	1257	0.143949	0.287898
BIRC6	1258	0.144123	0.288246
TMEM145	1259	0.144195	0.28839
FBXO9	1259	0.144195	0.28839
TMEM169	1260	0.144395	0.28879
ZNF30	1260	0.144395	0.28879
ATP5L	1261	0.144441	0.288883
HYAL2	1262	0.144524	0.289047
EED	1262	0.144524	0.289047
CCDC142	1263	0.144606	0.289211
PCDHAC2	1264	0.144667	0.289333
DGAT1	1264	0.144667	0.289333
RAB3IP	1265	0.144935	0.289869
B2M	1266	0.144938	0.289877
STK17A	1267	0.145099	0.290198
MPV17	1267	0.145099	0.290198
SLC44A5	1268	0.145181	0.290363
PCOLCE	1269	0.14521	0.29042
ZNF558	1269	0.14521	0.29042
GSDMB	1270	0.145346	0.290692
PSMB1	1271	0.145593	0.291186
NUAK1	1272	0.145676	0.291351
KIF21B	1273	0.145753	0.291506
PLRG1	1273	0.145753	0.291506
DDB1	1274	0.145758	0.291516
ATP6V1C1	1275	0.145923	0.291846
SRGN	1276	0.146024	0.292048
CPEB1	1277	0.146171	0.292341
CACNA1C	1278	0.146295	0.292591
HSPD1	1278	0.146295	0.292591
TRPM2	1279	0.146418	0.292836
PSAT1	1280	0.146567	0.293133
PLIN2	1280	0.146567	0.293133
PGF	1281	0.146831	0.293663
FECH	1282	0.146838	0.293675
GMFB	1282	0.146838	0.293675
RNGTT	1283	0.146997	0.293994
STOM	1284	0.14708	0.294159
CASP8	1284	0.14708	0.294159
RNPEPL1	1285	0.147109	0.294217
RAP1B	1285	0.147109	0.294217
FAM65B	1286	0.147162	0.294325
SGSM2	1286	0.147162	0.294325
GNB5	1287	0.147379	0.294759
PTP4A1	1287	0.147379	0.294759
ATP5A1	1288	0.14765	0.2953
DPM1	1288	0.14765	0.2953
HEPACAM2	1289	0.147659	0.295319
HARS2	1290	0.147825	0.29565
SNX17	1291	0.147921	0.295842
ATOX1	1292	0.147991	0.295982
PLAG1	1292	0.147991	0.295982
UMODL1	1293	0.148157	0.296314
SRA1	1294	0.148191	0.296383
COG2	1294	0.148191	0.296383
NDE1	1295	0.148323	0.296646
DOK6	1296	0.148406	0.296812
TOR1AIP2	1296	0.148406	0.296812
LILRA6	1297	0.148462	0.296924
TAX1BP1	1297	0.148462	0.296924
WDFY3	1298	0.148572	0.297144
RIMS3	1299	0.148655	0.29731
TTN	1300	0.148732	0.297465
ZNF771	1301	0.149003	0.298005
ZNF280D	1301	0.149003	0.298005
PHF20	1302	0.149154	0.298308
C6	1303	0.149273	0.298546
SF3B2	1303	0.149273	0.298546
OAS2	1304	0.149321	0.298641
PCYOX1L	1304	0.149321	0.298641
MTMR9	1305	0.149404	0.298808
NAGPA	1306	0.149654	0.299308
ASH1L	1307	0.149737	0.299474
PHLPP1	1308	0.149813	0.299626
ACTR1B	1308	0.149813	0.299626
EIF4A3	1309	0.149821	0.299641
RBMS2	1310	0.149987	0.299975
POU6F1	1311	0.150071	0.300142
ZNF772	1311	0.150071	0.300142
FAM193A	1312	0.150083	0.300166
SETD1A	1313	0.150154	0.300308
CSNK1G3	1313	0.150154	0.300308
TMEM64	1314	0.150238	0.300475
BBS1	1315	0.150353	0.300706
PURG	1316	0.150488	0.300976
IK	1317	0.150623	0.301245
DICER1	1317	0.150623	0.301245
KIAA0100	1318	0.150655	0.30131
FDFT1	1318	0.150655	0.30131
AKT2	1319	0.150892	0.301785
LUZP1	1319	0.150892	0.301785
GNG3	1320	0.151162	0.302324
BPHL	1320	0.151162	0.302324
GALNT1	1321	0.151241	0.302481
ADPRH	1322	0.151408	0.302816
RHOT1	1323	0.151431	0.302863
CTH	1324	0.151492	0.302984
ZHX1	1324	0.151492	0.302984
LETM2	1325	0.151576	0.303151
DTWD2	1326	0.151701	0.303402
REXO1	1326	0.151701	0.303402
EIF4A2	1327	0.151743	0.303486
SLC9A3R1	1327	0.151743	0.303486
EPS8L1	1328	0.151995	0.303989
RNF26	1329	0.152078	0.304157
ZNF701	1330	0.152162	0.304325
CCDC130	1330	0.152162	0.304325
TMEM115	1331	0.152239	0.304479
TMED2	1332	0.152414	0.304828
ACTR3	1333	0.152508	0.305017
GOSR2	1334	0.152582	0.305164
ZNF347	1335	0.152666	0.305332
DCTPP1	1336	0.152777	0.305555
PUF60	1336	0.152777	0.305555
ARRDC3	1337	0.152834	0.305668
IMP3	1338	0.153046	0.306093
LLGL1	1338	0.153046	0.306093
FAM3B	1339	0.153086	0.306173
MRPL55	1339	0.153086	0.306173
FGF6	1340	0.153255	0.306509
RELL2	1341	0.153339	0.306678
ECD	1342	0.153507	0.307014
FUK	1343	0.153584	0.307168
KCTD18	1344	0.153591	0.307183
GEMIN7	1345	0.15376	0.30752
PTBP1	1346	0.153853	0.307706
EIF2B2	1347	0.153928	0.307857
KCNG1	1348	0.154121	0.308243
ITPA	1349	0.154181	0.308363
SLC25A42	1350	0.15435	0.3087
STXBP3	1351	0.15439	0.30878
UBE2G2	1352	0.154519	0.309038
POLR1C	1352	0.154519	0.309038
ACADSB	1353	0.154603	0.309207
HEY2	1354	0.154658	0.309317
OSGEPL1	1354	0.154658	0.309317
LIG1	1355	0.154772	0.309544
SUCLG1	1356	0.155026	0.310052
LYRM2	1357	0.15511	0.310221
MOSPD3	1358	0.155195	0.31039
SPOPL	1358	0.155195	0.31039
STK4	1359	0.155279	0.310559
ZSWIM6	1360	0.155364	0.310728
FAM46C	1361	0.155463	0.310926
RAB11A	1362	0.155533	0.311067
MAT2B	1362	0.155533	0.311067
HPCAL4	1363	0.155731	0.311462
DLGAP4	1364	0.155957	0.311914
RPL22L1	1365	0.155999	0.311998
MPZL2	1365	0.155999	0.311998
HERPUD1	1366	0.156042	0.312083
YRDC	1367	0.156211	0.312422
ZEB2	1367	0.156211	0.312422
IL1RN	1368	0.156267	0.312534
DAGLB	1368	0.156267	0.312534
CETN3	1369	0.156296	0.312592
LRIT3	1370	0.156535	0.313069
FAM45A	1371	0.15655	0.313101
ITGA5	1372	0.156802	0.313605
FXYD5	1373	0.156805	0.31361
NDUFC1	1374	0.15689	0.31378
GALK1	1375	0.156975	0.31395
NR2C2AP	1376	0.15707	0.31414
AFTPH	1376	0.15707	0.31414
IRAK4	1377	0.157145	0.31429
SLC27A3	1378	0.15723	0.31446
RP1L1	1379	0.157315	0.31463
TSTA3	1380	0.157337	0.314675
AMMECR1L	1381	0.157485	0.31497
PPRC1	1382	0.15757	0.31514
ATXN10	1383	0.15774	0.315481
LRRCC1	1384	0.157872	0.315744
THYN1	1384	0.157872	0.315744
NEK11	1385	0.157911	0.315821
TOMM5	1386	0.157996	0.315992
RBM15	1387	0.158081	0.316162
ATP1A1	1388	0.158407	0.316813
QARS	1389	0.158593	0.317185
HRH2	1390	0.158674	0.317347
SLC29A4	1390	0.158674	0.317347
MAP4K2	1391	0.158763	0.317527
ZBTB8OS	1392	0.158849	0.317697
OR13A1	1393	0.158941	0.317881
RPS6KC1	1393	0.158941	0.317881
MADD	1394	0.159019	0.318039
STRADB	1395	0.15919	0.318381
SPDYC	1396	0.159208	0.318415
SYCE1	1397	0.159361	0.318722
PPM1F	1398	0.159474	0.318949
GIMAP7	1398	0.159474	0.318949
CUEDC1	1399	0.159532	0.319064
LENG1	1400	0.159741	0.319482
HIATL1	1401	0.159789	0.319578
DDX52	1402	0.159874	0.319749
PCNA	1402	0.159874	0.319749
ADRBK2	1403	0.160008	0.320016
SLC2A1	1404	0.160046	0.320091
SYDE2	1405	0.160217	0.320434
RPL32	1406	0.160274	0.320549
SYNPO2	1407	0.160541	0.321082
RPL8	1408	0.160807	0.321614
KIAA0226	1409	0.160817	0.321634
CAPN10	1410	0.161073	0.322147
SMURF1	1410	0.161073	0.322147
COL4A2	1411	0.16116	0.322321
SLC25A31	1412	0.161332	0.322664
DOT1L	1413	0.161606	0.323212
ZDHHC16	1413	0.161606	0.323212
DUSP11	1414	0.161676	0.323352
AKAP12	1415	0.161848	0.323696
CD274	1416	0.161872	0.323744
TAF6L	1417	0.161934	0.323868
USP14	1418	0.162106	0.324212
LSM11	1419	0.162278	0.324556
PIK3C2B	1419	0.162278	0.324556
RAPSN	1420	0.162364	0.324729
CTXN1	1421	0.162404	0.324807
DPP7	1421	0.162404	0.324807
FNTA	1422	0.162623	0.325246
USP5	1422	0.162623	0.325246
OAZ1	1423	0.162669	0.325339
NME7	1423	0.162669	0.325339
ARMC6	1424	0.162935	0.32587
ZNF644	1425	0.162968	0.325935
PCGF1	1425	0.162968	0.325935
ATP6V0E2	1426	0.163054	0.326108
LMNB1	1427	0.163201	0.326401
DAZAP1	1428	0.163399	0.326798
MRPL50	1429	0.163466	0.326932
PLTP	1430	0.163572	0.327144
ZNF181	1431	0.163658	0.327316
ENDOD1	1432	0.163731	0.327463
MPI	1433	0.163745	0.327489
WDR77	1434	0.163831	0.327662
CDCA5	1434	0.163831	0.327662
CLDN18	1435	0.163997	0.327994
MAN1B1	1435	0.163997	0.327994
TAF12	1436	0.16409	0.328181
SMG7	1437	0.164177	0.328354
SENP6	1437	0.164177	0.328354
ST3GAL3	1438	0.164262	0.328524
ANKAR	1438	0.164262	0.328524
SMAD5	1439	0.164263	0.328527
CYC1	1440	0.16435	0.3287
HSD17B7	1441	0.164523	0.329046
FRS3	1442	0.164527	0.329054
PSMA3	1442	0.164527	0.329054
MRPL52	1443	0.164696	0.329393
RASGRP1	1444	0.164783	0.329566
KPNA1	1445	0.164792	0.329585
EID1	1446	0.16487	0.329739
WDR1	1447	0.164956	0.329913
PPBP	1448	0.165303	0.330606
ZNF441	1449	0.165322	0.330644
RASAL1	1449	0.165322	0.330644
TACC1	1450	0.165477	0.330953
SLTM	1451	0.165587	0.331174
NFS1	1452	0.16565	0.3313
ANAPC13	1452	0.16565	0.3313
PSPC1	1453	0.165737	0.331474
EP300	1454	0.165852	0.331703
TMCO1	1455	0.165911	0.331822
CARD9	1456	0.166116	0.332233
ABR	1456	0.166116	0.332233
RALY	1457	0.166171	0.332343
RABL2A	1458	0.166258	0.332517
DNLZ	1459	0.166381	0.332762
CHD3	1459	0.166381	0.332762
TMEM167A	1460	0.166432	0.332865
RALGPS2	1461	0.166519	0.333039
LCN8	1462	0.166606	0.333213
PECR	1463	0.166645	0.333291
TRAP1	1464	0.16678	0.333561
SLC25A29	1465	0.167042	0.334083
RPL7L1	1466	0.167129	0.334258
KLRD1	1467	0.167174	0.334348
CARD16	1467	0.167174	0.334348
PKN2	1468	0.167303	0.334606
PRR5	1469	0.167438	0.334876
SNX4	1469	0.167438	0.334876
DDHD2	1470	0.167477	0.334955
IL3	1471	0.167565	0.335129
PIK3R4	1472	0.167739	0.335478
CTSK	1473	0.167914	0.335827
ZFHX3	1474	0.168001	0.336002
RASSF6	1475	0.168176	0.336351
EIF2B4	1476	0.16823	0.33646
FAM189B	1477	0.168263	0.336526
CHD8	1478	0.16835	0.336701
PTPRF	1479	0.168494	0.336988
RABGGTA	1479	0.168494	0.336988
MRPS11	1480	0.168525	0.33705
ZNF684	1481	0.168613	0.337225
TBC1D20	1481	0.168613	0.337225
SNX3	1482	0.1687	0.3374
CHCHD7	1483	0.168787	0.337575
CASP4	1484	0.169022	0.338043
ZC3H3	1485	0.169137	0.338275
FAM71A	1486	0.169285	0.33857
CASC4	1486	0.169285	0.33857
ZMYM5	1487	0.169313	0.338625
DACH1	1488	0.1694	0.3388
PPP2R5B	1489	0.169488	0.338976
PHLDB3	1490	0.169663	0.339326
PKP2	1491	0.169812	0.339624
ORAOV1	1492	0.169838	0.339677
CRBN	1493	0.169926	0.339852
TPM1	1494	0.170075	0.340151
MAP2K4	1495	0.170189	0.340379
MPV17L	1496	0.170277	0.340554
KIDINS220	1497	0.17054	0.341081
RFXANK	1498	0.170602	0.341204
SNRPG	1498	0.170602	0.341204
DHCR7	1499	0.170804	0.341608
SHFM1	1500	0.170865	0.34173
ACIN1	1501	0.171128	0.342256
CCNY	1501	0.171128	0.342256
POU6F2	1502	0.171156	0.342311
TCEB1	1502	0.171156	0.342311
NHLRC3	1503	0.171244	0.342487
WDR55	1504	0.171391	0.342782
H2AFZ	1504	0.171391	0.342782
SLC35B3	1505	0.171508	0.343015
PRR19	1506	0.171654	0.343307
E2F4	1506	0.171654	0.343307
PTTG2	1507	0.171772	0.343544
IL4R	1508	0.17186	0.34372
RASAL3	1509	0.171916	0.343833
TTC13	1510	0.172036	0.344072
WDR64	1511	0.172179	0.344358
LY6H	1511	0.172179	0.344358
BEND4	1512	0.172389	0.344778
DSC2	1513	0.172442	0.344883
FBXO32	1514	0.172477	0.344954
ESR1	1515	0.172565	0.345131
USP8	1516	0.172704	0.345408
SSH3	1517	0.172742	0.345484
SLMAP	1518	0.172918	0.345837
ASB4	1519	0.172967	0.345933
MRPL13	1519	0.172967	0.345933
STX2	1520	0.173229	0.346458
PDXP	1520	0.173229	0.346458
TMEM41B	1521	0.17336	0.34672
SFXN2	1521	0.17336	0.34672
KRT20	1522	0.173491	0.346982
RUNX1	1523	0.173625	0.347251
ZDHHC14	1524	0.173714	0.347428
KCNQ1	1525	0.173753	0.347507
ZNF451	1526	0.173891	0.347782
CSF1R	1527	0.174015	0.348031
NDUFS7	1528	0.174157	0.348313
DCUN1D2	1529	0.174245	0.34849
HERC2	1530	0.174277	0.348555
CLN8	1531	0.174334	0.348667
VPS39	1532	0.174511	0.349022
TET2	1533	0.174539	0.349078
OSBP2	1534	0.1746	0.349199
SF3B3	1535	0.174688	0.349376
VRK1	1536	0.174777	0.349554
RAN	1537	0.174801	0.349602
DPP3	1537	0.174801	0.349602
TIGD2	1538	0.174954	0.349909
TMEM70	1539	0.175043	0.350086
NCKAP1L	1540	0.175063	0.350126
ACD	1540	0.175063	0.350126
ITIH5	1541	0.175324	0.350649
DPH5	1542	0.175487	0.350974
NCAN	1543	0.175576	0.351152
ZMAT3	1543	0.175576	0.351152
[truncated: 9,234 more rows]
