# Supplementary material for: Multiomics integrative analysis identifies APOE allele-specific blood biomarkers associated to Alzheimer’s disease etiopathogenesis
Source: Aging (Albany NY). 2021 Apr 12;13(7):9277–329. doi: 10.18632/aging.202950 (PMC8064208; doi:10.18632/aging.202950)
Supplement: Supplementary Table 26 [file aging-13-202950-s028.xlsx]

## Sheet: Sheet1
Supplementary Table 26. RRA integrative analysis in blood: APOE3 stratum.
Symbol	Rank	ExactP(Score)	AdjustP
DCTN6	1	0.00021162	0.000423239
ENSA	2	0.000290624	0.000581248
NDUFB3	3	0.000348638	0.000697277
BIN1	4	0.00035324	0.00070648
RPL36AL	4	0.00035324	0.00070648
MYBPC3	5	0.000502493	0.00100499
WNT3	6	0.0007045	0.001409
MRPL51	6	0.0007045	0.001409
KIAA1147	7	0.000992693	0.00198539
OCIAD2	8	0.00101633	0.00203267
NSF	9	0.00105447	0.00210893
RPS25	9	0.00105447	0.00210893
ZMAT2	10	0.00106444	0.00212888
DENR	11	0.00108891	0.00217781
KATNB1	12	0.00122402	0.00244804
ZCCHC7	13	0.00125022	0.00250045
ICT1	14	0.0012945	0.00258901
CFLAR	15	0.00131243	0.00262486
CASS4	16	0.00140338	0.00280676
MRPS17	16	0.00140338	0.00280676
PRRT2	17	0.00172718	0.00345436
APP	18	0.00175139	0.00350278
RPS27A	18	0.00175139	0.00350278
ATPAF1	19	0.0018743	0.00374859
FAM160A2	20	0.00193916	0.00387831
SSBP1	21	0.001983	0.003966
TCTA	22	0.0020162	0.00403239
GPR27	23	0.00209859	0.00419717
ATP6V1E1	23	0.00209859	0.00419717
BOLA2	24	0.0021517	0.0043034
ZNF622	25	0.00220944	0.00441888
RCAN1	26	0.00235108	0.00470215
CRHR1	27	0.00244504	0.00489008
UQCRH	27	0.00244504	0.00489008
IFT88	28	0.00277582	0.00555164
CD209	29	0.0027908	0.00558161
GNL2	29	0.0027908	0.00558161
ZBTB43	30	0.00297419	0.00594839
PLEKHM1	31	0.00309644	0.00619287
EIF4E3	32	0.00313592	0.00627185
NDUFS5	32	0.00313592	0.00627185
ANKRD13D	33	0.00341978	0.00683956
HS3ST5	34	0.00348044	0.00696087
ATP5I	34	0.00348044	0.00696087
DNAJC7	35	0.00362429	0.00724858
PAK1IP1	36	0.00365398	0.00730795
FANCI	37	0.00371371	0.00742742
MAPT	38	0.00382437	0.00764874
COX17	38	0.00382437	0.00764874
LARP7	39	0.00394193	0.00788386
MBOAT1	40	0.00395738	0.00791476
UBA7	41	0.00405071	0.00810141
GDPD3	42	0.00412929	0.00825858
PICALM	43	0.00416775	0.00833551
RPA3	43	0.00416775	0.00833551
GPR132	44	0.00446738	0.00893476
SHFM1	45	0.00451061	0.00902121
ERGIC1	46	0.00456636	0.00913272
TRIM45	47	0.00485295	0.0097059
ATP5O	47	0.00485295	0.0097059
PPIL3	48	0.00492111	0.00984222
PPP1R14B	49	0.00499015	0.00998029
ZFP37	50	0.00504223	0.0100845
ZNF613	51	0.00512963	0.0102593
RPLP0	52	0.00519481	0.0103896
PRDX1	52	0.00519481	0.0103896
CAPZA1	53	0.00553619	0.0110724
MRPL33	53	0.00553619	0.0110724
CD5	54	0.00587711	0.0117542
MRPS21	54	0.00587711	0.0117542
TRIP4	55	0.00619669	0.0123934
GCN1L1	56	0.00621758	0.0124352
BRIX1	56	0.00621758	0.0124352
NXF1	57	0.00623523	0.0124705
TMCO6	58	0.00633209	0.0126642
MED20	59	0.00642967	0.0128593
ST7L	60	0.00655762	0.0131152
SNTB2	60	0.00655762	0.0131152
ARPC3	61	0.00689724	0.0137945
NFATC3	62	0.00692843	0.0138569
BSDC1	63	0.00717425	0.0143485
PROK2	64	0.00723644	0.0144729
GIMAP7	64	0.00723644	0.0144729
RPL26	65	0.00746628	0.0149326
GM2A	66	0.00757194	0.0151439
MS4A6A	67	0.00757525	0.0151505
AK2	67	0.00757525	0.0151505
SSH3	68	0.00761441	0.0152288
MPHOSPH9	69	0.00778542	0.0155708
GMFG	70	0.00782846	0.0156569
PDIA4	71	0.00791365	0.0158273
UFC1	71	0.00791365	0.0158273
PXN	72	0.00815492	0.0163098
MOV10	73	0.00825167	0.0165033
FABP5	73	0.00825167	0.0165033
MRPL27	74	0.00830947	0.0166189
INTS1	74	0.00830947	0.0166189
CHRNA10	75	0.00837614	0.0167523
ABCA7	76	0.00844306	0.0168861
EXTL3	77	0.00858932	0.0171786
POMP	77	0.00858932	0.0171786
SCLT1	78	0.00892659	0.0178532
HSP90AA1	78	0.00892659	0.0178532
SDAD1	79	0.00896468	0.0179294
ABCC3	80	0.00912642	0.0182528
NVL	81	0.0092635	0.018527
ING3	81	0.0092635	0.018527
KLHDC8B	82	0.00933643	0.0186729
TRIM11	83	0.0094541	0.0189082
TAS2R5	84	0.00947772	0.0189554
CEP350	84	0.00947772	0.0189554
PRKCZ	85	0.00954874	0.0190975
PKD2	86	0.00960006	0.0192001
ATP6V1D	86	0.00960006	0.0192001
ECM1	87	0.0098354	0.0196708
LEPROTL1	88	0.00993626	0.0198725
RPL32	88	0.00993626	0.0198725
CD83	89	0.0102485	0.0204969
ZNF563	90	0.0102721	0.0205442
GTF2A2	90	0.0102721	0.0205442
MEFV	91	0.0104209	0.0208419
PLEKHA3	92	0.0106076	0.0212153
RPL6	92	0.0106076	0.0212153
ADRBK2	93	0.0109428	0.0218856
SUCLG1	93	0.0109428	0.0218856
SETDB2	94	0.0109466	0.0218933
FAM162A	95	0.0109974	0.0219947
ZNF17	96	0.0110482	0.0220964
PSMD12	97	0.0111502	0.0223003
VAT1L	98	0.0112777	0.0225553
SNRPD2	98	0.0112777	0.0225553
ALDOA	99	0.0116122	0.0232244
DNAJC8	99	0.0116122	0.0232244
RPL23	100	0.0116669	0.0233338
MRPL1	101	0.0117192	0.0234383
UBE3A	102	0.0118241	0.0236482
SNCA	103	0.0119464	0.0238928
DNAJA1	103	0.0119464	0.0238928
PTK2B	104	0.0121149	0.0242298
RHOC	105	0.0122803	0.0245606
NGDN	105	0.0122803	0.0245606
SETMAR	106	0.012544	0.0250879
CTSS	107	0.012571	0.025142
CHEK2	107	0.012571	0.025142
APOC1	108	0.0126139	0.0252278
SRP19	108	0.0126139	0.0252278
RAB23	109	0.0126252	0.0252504
ZNF616	110	0.0127884	0.0255769
ST3GAL1	111	0.0128158	0.0256315
LILRA5	112	0.0128978	0.0257957
SRP14	113	0.0129472	0.0258943
HACL1	114	0.0132287	0.0264573
XYLT2	115	0.0132564	0.0265128
PRKAR1B	116	0.0132801	0.0265603
PWP1	116	0.0132801	0.0265603
NUP35	117	0.0133398	0.0266797
STK39	118	0.0135916	0.0271832
POLD3	119	0.0136128	0.0272256
METAP2	119	0.0136128	0.0272256
SLC5A6	120	0.0137042	0.0274084
SLCO3A1	121	0.0137607	0.0275213
TBC1D10C	122	0.0138173	0.0276345
TAOK2	123	0.0141591	0.0283182
CLPTM1	124	0.0142773	0.0285546
DRG1	124	0.0142773	0.0285546
TMEM9B	125	0.0145629	0.0291259
VPS37C	126	0.0146091	0.0292182
RAB37	126	0.0146091	0.0292182
SP1	127	0.0146211	0.0292421
CD160	128	0.0147085	0.029417
ACTN1	129	0.0147377	0.0294753
MRPL48	129	0.0147377	0.0294753
TBX6	130	0.0149406	0.0298812
ENY2	130	0.0149406	0.0298812
LRP3	131	0.0150016	0.0300033
TOMM7	132	0.0152718	0.0305436
SLC20A2	133	0.0156028	0.0312055
SS18	133	0.0156028	0.0312055
ABHD2	134	0.0156864	0.0313727
ATP9A	135	0.0158069	0.0316138
VCAN	136	0.0158371	0.0316743
KANK1	137	0.0159334	0.0318669
SWAP70	137	0.0159334	0.0318669
MVP	138	0.0159886	0.0319772
RAB6A	139	0.016263	0.0325259
MCL1	140	0.0162638	0.0325277
WDR33	140	0.0162638	0.0325277
VPS37B	141	0.0163242	0.0326485
BCL2L2	142	0.0165704	0.0331408
JPH2	143	0.016594	0.0331879
RPAIN	143	0.016594	0.0331879
RAD9A	144	0.0168184	0.0336367
TAF1C	145	0.0168495	0.0336989
DOCK7	146	0.0169238	0.0338477
EBNA1BP2	146	0.0169238	0.0338477
ASNSD1	147	0.0171935	0.0343871
GOLPH3L	148	0.0172534	0.0345069
SOD1	148	0.0172534	0.0345069
MAML2	149	0.0175828	0.0351655
RPF2	149	0.0175828	0.0351655
BCAP29	150	0.0178596	0.0357191
ZNF136	151	0.0179118	0.0358237
BOLA3	151	0.0179118	0.0358237
ATP5H	152	0.0180199	0.0360398
GORASP1	153	0.0181164	0.0362329
RBMS1	154	0.0181487	0.0362973
MAZ	155	0.0181809	0.0363619
ABCC10	156	0.0182406	0.0364813
SNRPB2	156	0.0182406	0.0364813
MRPL35	157	0.0183751	0.0367501
GPR141	158	0.0185692	0.0371384
UQCRB	158	0.0185692	0.0371384
CPSF2	159	0.0188318	0.0376636
CST3	160	0.0188975	0.037795
EIF3E	160	0.0188975	0.037795
PNPLA6	161	0.0189962	0.0379925
MS4A4A	162	0.0192255	0.0384511
TRAPPC4	162	0.0192255	0.0384511
UBTD1	163	0.0192276	0.0384551
GPR137	164	0.0193936	0.0387872
FAM126B	165	0.0195533	0.0391067
TCIRG1	165	0.0195533	0.0391067
RPL11	166	0.0197277	0.0394554
PSMC2	167	0.0198809	0.0397618
TM9SF1	168	0.0198958	0.0397916
CBX3	169	0.0201322	0.0402644
DTX3L	170	0.0202	0.0404
SSB	171	0.0202082	0.0404164
CMTM3	172	0.0204381	0.0408763
NUDT22	173	0.0205064	0.0410128
TUBGCP2	173	0.0205064	0.0410128
GGH	174	0.0205353	0.0410705
PSMA3	174	0.0205353	0.0410705
FAM13A	175	0.0206433	0.0412866
RIMS3	176	0.0208621	0.0417242
AIF1	176	0.0208621	0.0417242
CMTM2	177	0.0209528	0.0419057
CNTNAP2	178	0.0210219	0.0420439
SLC16A5	179	0.0210565	0.042113
PTRH2	180	0.0211887	0.0423773
ELL	181	0.0212298	0.0424597
COX15	182	0.0212993	0.0425987
NCK1	183	0.0214038	0.0428076
TMEM14C	184	0.0215085	0.0430171
SAMD4B	185	0.021515	0.04303
RBM34	185	0.021515	0.04303
CHDH	186	0.0217538	0.0435076
KPNA5	186	0.0217538	0.0435076
CSTF1	187	0.0218411	0.0436822
STX8	187	0.0218411	0.0436822
VPS72	188	0.0218945	0.0437891
SPSB3	189	0.0219298	0.0438596
ACADM	190	0.022167	0.044334
CHRNA2	191	0.0223905	0.044781
GAPT	191	0.0223905	0.044781
CD28	192	0.0224926	0.0449852
RPS24	192	0.0224926	0.0449852
SPI1	193	0.0224975	0.0449949
RRM1	194	0.0225332	0.0450663
CNGA4	195	0.022818	0.045636
DDX50	195	0.022818	0.045636
CDIPT	196	0.0228198	0.0456396
SEC24D	197	0.0231432	0.0462864
CDKL3	198	0.0231443	0.0462885
AQP9	199	0.0234681	0.0469363
GTF2B	199	0.0234681	0.0469363
ANGPTL3	200	0.0237929	0.0475857
ATP5F1	200	0.0237929	0.0475857
FOXJ3	201	0.023873	0.0477461
ZC3H15	202	0.0240569	0.0481138
GMNN	203	0.0240937	0.0481875
AKR1C3	203	0.0240937	0.0481875
MMRN1	204	0.0241174	0.0482347
SLC24A4	205	0.0243524	0.0487048
CNIH4	206	0.0244416	0.0488833
PLRG1	206	0.0244416	0.0488833
ANP32B	207	0.0245008	0.0490017
PPM1K	207	0.0245008	0.0490017
ZUFSP	208	0.0246124	0.0492248
COX19	209	0.0246497	0.0492993
PEX5	210	0.0247242	0.0494485
RPL10L	211	0.0247657	0.0495314
RPL12	211	0.0247657	0.0495314
RRBP1	212	0.0248737	0.0497474
SMEK2	213	0.0250611	0.0501223
CLEC4G	214	0.0250895	0.050179
PPIG	214	0.0250895	0.050179
OCIAD1	215	0.0251363	0.0502726
RPS6KA4	215	0.0251363	0.0502726
NOXO1	216	0.0252869	0.0505738
CD79A	217	0.0253624	0.0507248
DLK2	218	0.0254131	0.0508262
SCFD1	218	0.0254131	0.0508262
MYL6	219	0.0257365	0.051473
CASP4	220	0.0258174	0.0516349
EEF1A1	220	0.0258174	0.0516349
HORMAD1	221	0.0260597	0.0521194
HELZ	221	0.0260597	0.0521194
LDHB	222	0.0263826	0.0527653
SCAMP1	223	0.0264301	0.0528601
VHL	224	0.0265071	0.0530142
FBLN5	225	0.0267054	0.0534108
TBCA	225	0.0267054	0.0534108
HNMT	226	0.0267389	0.0534778
AFF1	227	0.0267776	0.0535552
MAPK8IP3	228	0.0268939	0.0537879
CCDC53	229	0.0270279	0.0540558
CYTH1	230	0.0270883	0.0541767
CSTF3	231	0.0273225	0.054645
LSM3	232	0.0273502	0.0547005
POLR3C	233	0.0273616	0.0547232
HIST3H2A	234	0.0274399	0.0548798
PRDX3	235	0.0275183	0.0550367
ITPRIPL2	236	0.0275969	0.0551937
ACP1	237	0.0276723	0.0553447
ATP5J	237	0.0276723	0.0553447
NDUFS3	238	0.0276755	0.055351
PLAUR	239	0.0277148	0.0554297
RECQL	240	0.0277936	0.0555872
ZNF598	241	0.0278725	0.055745
YTHDF3	242	0.0279942	0.0559885
RIOK2	242	0.0279942	0.0559885
HBP1	243	0.0280702	0.0561403
MRPL47	244	0.0281494	0.0562988
CD72	245	0.0282685	0.056537
CSNK1G1	246	0.0283159	0.0566319
SYF2	246	0.0283159	0.0566319
TRIO	247	0.0285472	0.0570945
ADAMTSL4	248	0.0286374	0.0572749
CNBP	248	0.0286374	0.0572749
CCND3	249	0.0287872	0.0575744
CR2	250	0.0288273	0.0576545
GHDC	251	0.0289477	0.0578953
SKI	252	0.0289587	0.0579174
WDR12	252	0.0289587	0.0579174
LILRA2	253	0.0289879	0.0579757
COQ5	253	0.0289879	0.0579757
VPS45	254	0.0292295	0.058459
ZNF442	255	0.0292798	0.0585596
HSPD1	255	0.0292798	0.0585596
NKAIN3	256	0.0293103	0.0586206
ZNF318	257	0.0294316	0.0588632
YPEL3	258	0.0296007	0.0592013
RBX1	259	0.029675	0.05935
ERBB2	260	0.0298378	0.0596755
NOS1AP	261	0.0299213	0.0598426
PDCL3	261	0.0299213	0.0598426
MLH1	262	0.0301646	0.0603291
NUBPL	263	0.0302055	0.060411
DOC2A	264	0.0302418	0.0604836
LILRB4	265	0.0302875	0.0605751
UPF2	266	0.0304519	0.0609037
PLB1	267	0.0305621	0.0611241
MRPL39	267	0.0305621	0.0611241
ALCAM	268	0.0305754	0.0611508
TRDN	269	0.0307818	0.0615635
MRPL50	270	0.0308821	0.0617643
SDK1	271	0.0309473	0.0618946
RARS	272	0.031202	0.062404
SIPA1	273	0.0312381	0.0624761
ISOC2	274	0.0315217	0.0630433
MRPS18C	274	0.0315217	0.0630433
FHOD1	275	0.0315719	0.0631438
PRDM9	276	0.0316137	0.0632275
PCBP2	277	0.0318233	0.0636467
KIAA0020	278	0.0318411	0.0636823
RIOK1	279	0.0321179	0.0642357
POLG	280	0.0321604	0.0643209
ZNF319	280	0.0321604	0.0643209
ARPC5L	281	0.0324137	0.0648273
TMEM140	282	0.0324795	0.064959
NACA	282	0.0324795	0.064959
PRKAG1	283	0.0325408	0.0650816
HIST1H1C	284	0.0326682	0.0653364
PPIH	285	0.0327107	0.0654214
GPR108	286	0.0327532	0.0655065
SATB1	287	0.0327984	0.0655968
LSM5	287	0.0327984	0.0655968
NSUN2	288	0.0328384	0.0656768
MKNK1	289	0.0331171	0.0662342
APOBEC3F	289	0.0331171	0.0662342
UTP11L	290	0.0332229	0.0664457
KCTD13	291	0.0332657	0.0665314
DFNB59	292	0.0334356	0.0668712
GNPDA2	293	0.0335233	0.0670466
ACADVL	294	0.0335663	0.0671327
ATG9A	295	0.0336525	0.067305
HIP1R	296	0.0337539	0.0675079
GPBP1	296	0.0337539	0.0675079
KIAA0101	297	0.033825	0.0676501
ATG4C	297	0.033825	0.0676501
ANKRD33	298	0.0340413	0.0680826
PCDHB14	299	0.0340721	0.0681441
VDAC3	299	0.0340721	0.0681441
ABLIM2	300	0.034128	0.068256
APEX1	301	0.0342148	0.0684296
STAC2	302	0.03439	0.06878
FXR1	302	0.03439	0.06878
CCDC14	303	0.034563	0.069126
SLC12A2	304	0.0346066	0.0692133
SHCBP1	305	0.034694	0.069388
PIK3C3	306	0.0347078	0.0694155
MRPL22	306	0.0347078	0.0694155
RPL35	307	0.0347814	0.0695629
ETV3	308	0.0350005	0.0700011
UTP6	309	0.0350253	0.0700506
GALK1	310	0.0350444	0.0700889
INO80E	311	0.0353427	0.0706854
MDH1	311	0.0353427	0.0706854
POLR2A	312	0.0353965	0.070793
WBP4	313	0.0355289	0.0710579
ZNF628	314	0.0356599	0.0713198
RCN1	314	0.0356599	0.0713198
AGRN	315	0.0357059	0.0714118
NAT14	316	0.0359769	0.0719538
H2AFZ	316	0.0359769	0.0719538
APBB3	317	0.0362838	0.0725676
USP1	318	0.0362937	0.0725874
MED6	318	0.0362937	0.0725874
TOR1AIP2	319	0.0364178	0.0728355
UNC50	320	0.0365519	0.0731039
GPX3	321	0.0366104	0.0732207
RPL24	321	0.0366104	0.0732207
ELK4	322	0.036821	0.0736421
PLEK	323	0.0369268	0.0738536
EEF1B2	323	0.0369268	0.0738536
TBL3	324	0.0369559	0.0739118
ENOPH1	325	0.037046	0.0740919
LCAT	326	0.0372264	0.0744527
KCTD16	327	0.0372431	0.0744862
CCDC90B	327	0.0372431	0.0744862
HMHA1	328	0.0374072	0.0748143
NOP10	329	0.0374524	0.0749048
TRMT12	330	0.0374977	0.0749954
ITGB4	331	0.037543	0.075086
SLC39A13	332	0.0375592	0.0751184
MAP3K2	333	0.0376337	0.0752675
PLXDC1	334	0.0378751	0.0757502
PIK3R1	334	0.0378751	0.0757502
RGS14	335	0.0384088	0.0768176
CADM1	336	0.0385064	0.0770128
LTV1	336	0.0385064	0.0770128
SLC22A4	337	0.0385922	0.0771844
COQ7	338	0.0388218	0.0776435
MTIF3	338	0.0388218	0.0776435
RSL1D1	339	0.0390987	0.0781974
MRPS31	340	0.039137	0.0782739
MRPL13	341	0.0392837	0.0785673
SETX	341	0.0392837	0.0785673
ABCB9	342	0.039452	0.078904
POLR3GL	342	0.039452	0.078904
CD14	343	0.0396083	0.0792165
ZNF358	344	0.0397477	0.0794955
DHX38	345	0.0397668	0.0795337
PPHLN1	345	0.0397668	0.0795337
ZNF707	346	0.0398409	0.0796817
UBR7	346	0.0398409	0.0796817
VRK1	347	0.0399341	0.0798682
ZNF428	348	0.0400815	0.080163
CWC15	348	0.0400815	0.080163
PRICKLE4	349	0.0401676	0.0803352
TRIOBP	350	0.0402144	0.0804287
UNC13D	350	0.0402144	0.0804287
SH3BP5	351	0.040396	0.080792
NBEAL2	351	0.040396	0.080792
TMCO1	352	0.0406364	0.0812729
HTR3C	353	0.0407103	0.0814207
SNX2	353	0.0407103	0.0814207
ACIN1	354	0.0407776	0.0815552
HIRIP3	355	0.0410245	0.082049
NUP133	355	0.0410245	0.082049
CHMP4A	356	0.0410605	0.0821211
SFT2D2	357	0.0413385	0.0826769
DNAJC9	357	0.0413385	0.0826769
DDX28	358	0.0416523	0.0833045
ACTR10	358	0.0416523	0.0833045
DNM2	359	0.0416767	0.0833534
CASP7	360	0.0419659	0.0839318
DBI	360	0.0419659	0.0839318
IRF8	361	0.0421058	0.0842115
MGMT	362	0.0422794	0.0845587
RPS20	362	0.0422794	0.0845587
WDR48	363	0.042345	0.08469
FPR1	364	0.0423929	0.0847858
NDUFS4	364	0.0423929	0.0847858
ANKAR	365	0.0424409	0.0848817
SBNO1	366	0.0425927	0.0851853
TMEM126A	366	0.0425927	0.0851853
MTO1	367	0.0426329	0.0852658
GLTSCR1	368	0.0428253	0.0856506
PSMC3	369	0.0429058	0.0858116
STAT4	370	0.0429217	0.0858434
TUBA4A	371	0.0431147	0.0862294
RELB	372	0.0432187	0.0864375
GPN1	372	0.0432187	0.0864375
TTF2	373	0.0435315	0.0870631
ESD	373	0.0435315	0.0870631
CYP4F3	374	0.0435505	0.0871009
ORMDL1	375	0.043599	0.087198
CCDC58	376	0.0437934	0.0875868
NOL11	377	0.0438421	0.0876842
CADM4	378	0.0438442	0.0876883
RPAP3	378	0.0438442	0.0876883
PI4KB	379	0.0438908	0.0877815
ZNF701	380	0.0439882	0.0879765
D2HGDH	381	0.0441346	0.0882692
LCP1	382	0.0441566	0.0883132
FRAT1	382	0.0441566	0.0883132
USP47	383	0.0441834	0.0883669
KIAA1715	383	0.0441834	0.0883669
FNIP1	384	0.044379	0.0887581
MRPL3	385	0.044428	0.088856
CR1	386	0.0444689	0.0889378
HCLS1	387	0.044477	0.088954
NNT	388	0.0447714	0.0895428
UNG	389	0.044781	0.089562
COMMD1	389	0.044781	0.089562
CASP9	390	0.0448206	0.0896412
HES1	390	0.0448206	0.0896412
SFXN5	391	0.0448698	0.0897395
CYCS	392	0.045093	0.0901859
RAB24	392	0.045093	0.0901859
TAF6L	393	0.0453135	0.0906271
TC2N	394	0.0454048	0.0908095
METTL5	394	0.0454048	0.0908095
REC8	395	0.0455609	0.0911219
CD33	396	0.0456105	0.091221
TBX19	397	0.0457164	0.0914328
LPP	397	0.0457164	0.0914328
CTRL	398	0.0460078	0.0920156
CIDEA	399	0.0460278	0.0920557
MRPL17	399	0.0460278	0.0920557
VEZT	400	0.0461074	0.0922147
SLC25A20	401	0.0463068	0.0926136
MEGF9	402	0.0463391	0.0926783
CUTC	403	0.0464567	0.0929133
ANKRD12	404	0.0466067	0.0932134
NDUFAF2	405	0.0466503	0.0933005
SETD8	406	0.0469612	0.0939225
GGPS1	406	0.0469612	0.0939225
PRPF18	407	0.0471085	0.094217
HDAC2	408	0.0472595	0.0945191
SH3YL1	409	0.0472721	0.0945441
REM2	409	0.0472721	0.0945441
CAMK4	410	0.0473099	0.0946198
NEDD8	411	0.0473603	0.0947207
EDC4	412	0.0474108	0.0948215
MYO9B	413	0.0475117	0.0950234
SLC38A11	414	0.0475827	0.0951654
SULT1A3	414	0.0475827	0.0951654
ZNF558	415	0.0476128	0.0952255
RHOG	416	0.0477645	0.095529
CETP	417	0.0478932	0.0957864
SLU7	417	0.0478932	0.0957864
RPL19	418	0.0482035	0.0964071
ILF2	418	0.0482035	0.0964071
NIF3L1	419	0.0485137	0.0970274
FAM129B	420	0.0487307	0.0974614
GPR146	421	0.0488237	0.0976474
IP6K1	422	0.0490377	0.0980753
OBFC1	423	0.0491336	0.0982671
GOSR2	424	0.0491402	0.0982804
WBP2	425	0.0492428	0.0984856
DUSP18	426	0.0493455	0.098691
USP4	427	0.0494433	0.0988865
EXOSC7	427	0.0494433	0.0988865
TPT1	428	0.0495512	0.0991024
DICER1	429	0.0496542	0.0993084
METTL14	430	0.0497528	0.0995056
FAM131A	431	0.0497573	0.0995146
ZNF282	432	0.0498605	0.099721
SLC2A11	433	0.0499121	0.0998242
TXNL4B	434	0.0500622	0.100124
LYPLAL1	434	0.0500622	0.100124
SLC38A7	435	0.0500672	0.100134
ZNF626	435	0.0500672	0.100134
GTF2E1	436	0.0501189	0.100238
ADCY2	437	0.0502224	0.100445
RAPSN	438	0.0503714	0.100743
ATL3	439	0.0504298	0.10086
GPX1	440	0.0506805	0.101361
NGRN	440	0.0506805	0.101361
G3BP1	441	0.0506895	0.101379
SHISA4	442	0.0507936	0.101587
ANKRD40	443	0.0509894	0.101979
MIOS	443	0.0509894	0.101979
MARK2	444	0.0511586	0.102317
FBXL6	445	0.0512108	0.102422
SEC11A	446	0.0512631	0.102526
SFMBT2	447	0.0512981	0.102596
NSA2	447	0.0512981	0.102596
N6AMT2	448	0.05142	0.10284
SNX25	448	0.05142	0.10284
ZFPL1	449	0.0515247	0.103049
DOCK3	450	0.0516067	0.103213
TMSB10	450	0.0516067	0.103213
NFAT5	451	0.0517345	0.103469
HEXIM2	452	0.051787	0.103574
SMOX	453	0.0519152	0.10383
PSMD6	453	0.0519152	0.10383
PPAP2C	454	0.0519447	0.103889
TTC19	455	0.0519973	0.103995
BPNT1	455	0.0519973	0.103995
GFPT2	456	0.0521552	0.10431
OSGEPL1	457	0.0522606	0.104521
TRIM38	458	0.0523662	0.104732
METTL6	459	0.052419	0.104838
EIF2A	460	0.0524718	0.104944
LPIN1	461	0.0525316	0.105063
ARHGAP9	461	0.0525316	0.105063
FAM69B	462	0.0526304	0.105261
TAGLN2	463	0.0527892	0.105578
HIPK3	464	0.0528396	0.105679
ERH	464	0.0528396	0.105679
PPP2CA	465	0.0529482	0.105896
MRPL15	466	0.0530013	0.106003
TSPAN33	467	0.0531474	0.106295
FAM73B	468	0.0533201	0.10664
SCNN1A	469	0.0534551	0.10691
ADAM8	469	0.0534551	0.10691
IMPA2	470	0.0536399	0.10728
EPRS	471	0.0537466	0.107493
PPP2R5C	471	0.0537466	0.107493
MRPS33	472	0.0537627	0.107525
MRPS22	473	0.05407	0.10814
AGER	474	0.0541747	0.108349
PADI4	475	0.0542283	0.108457
CDR2L	476	0.0542819	0.108564
GMPPB	477	0.0543773	0.108755
COPS5	477	0.0543773	0.108755
ICK	478	0.0546042	0.109208
PIGK	479	0.0546843	0.109369
HSDL1	480	0.0547119	0.109424
CATSPER2	481	0.0549813	0.109963
PPCS	482	0.0549913	0.109983
KIAA1143	482	0.0549913	0.109983
NFATC2IP	483	0.0550893	0.110179
IRF9	484	0.0551974	0.110395
UCHL3	485	0.055298	0.110596
MGAT4B	486	0.0554138	0.110828
DND1	487	0.0556047	0.111209
TOMM5	488	0.0556848	0.11137
PGS1	489	0.0558478	0.111696
WDR55	490	0.0559112	0.111822
DPH5	490	0.0559112	0.111822
TRMT112	491	0.0560109	0.112022
IMPDH1	492	0.0560653	0.112131
NKIRAS2	493	0.0561742	0.112348
HS3ST1	494	0.0562175	0.112435
MPHOSPH10	495	0.0562832	0.112566
SPNS1	496	0.0563378	0.112676
PSMG3	497	0.0565237	0.113047
PSMD14	497	0.0565237	0.113047
ZNF195	498	0.0565562	0.113112
MARK4	499	0.0568297	0.113659
KLF6	499	0.0568297	0.113659
ANKZF1	500	0.0568298	0.11366
LYPD3	501	0.0568845	0.113769
SYVN1	502	0.057049	0.114098
IFRD1	503	0.0571356	0.114271
PFKFB4	503	0.0571356	0.114271
TSPAN3	504	0.0574337	0.114867
ZNF577	505	0.0574413	0.114883
RHOA	506	0.0580524	0.116105
FURIN	507	0.0580958	0.116192
MTMR3	508	0.0581511	0.116302
COIL	509	0.0583172	0.116634
SNRPG	510	0.0583577	0.116715
TXNDC17	511	0.0584281	0.116856
TOMM40	512	0.0586628	0.117326
BCCIP	512	0.0586628	0.117326
DLD	513	0.0587613	0.117523
HERPUD1	514	0.0589679	0.117936
TCN2	514	0.0589679	0.117936
FRMD4A	515	0.0590396	0.118079
MCF2L2	516	0.0591511	0.118302
CMIP	517	0.0592068	0.118414
ENTPD6	518	0.059542	0.119084
PIP5K1B	519	0.0596539	0.119308
SNX32	520	0.0597099	0.11942
WDR73	521	0.059822	0.119644
CASP3	522	0.059878	0.119756
MKLN1	523	0.059882	0.119764
RPS27	523	0.059882	0.119764
PCNXL3	524	0.0599341	0.119868
PRRT3	525	0.0601865	0.120373
DCAF15	525	0.0601865	0.120373
OGFOD1	526	0.0602711	0.120542
LTBR	527	0.0604399	0.12088
PDHB	528	0.0604908	0.120982
LLGL1	529	0.0607218	0.121444
HARS	530	0.0607949	0.12159
HSPA8	530	0.0607949	0.12159
DGAT1	531	0.0610608	0.122122
ARHGEF18	532	0.0610989	0.122198
NUP88	532	0.0610989	0.122198
IL7R	533	0.0612872	0.122574
CCDC91	534	0.0613439	0.122688
DPY30	535	0.0614028	0.122806
PCM1	536	0.0617065	0.123413
RRP15	537	0.0619689	0.123938
KCNG4	538	0.0620101	0.12402
GTF3C2	539	0.0621398	0.12428
TNFRSF1A	540	0.0623135	0.124627
RPS29	540	0.0623135	0.124627
ASB2	541	0.0623681	0.124736
HIST1H2AM	542	0.0624252	0.12485
DOCK8	543	0.0626168	0.125234
PSMA4	543	0.0626168	0.125234
MYD88	544	0.0626539	0.125308
IBTK	545	0.062883	0.125766
HARS2	546	0.06292	0.12584
NDST2	546	0.06292	0.12584
KIF2A	547	0.0629403	0.125881
SLC12A6	548	0.0629977	0.125995
ITGB2	549	0.0631699	0.12634
KCTD2	550	0.063223	0.126446
OLIG2	551	0.0634573	0.126915
INSL6	551	0.0634573	0.126915
CCDC117	552	0.0635149	0.12703
ARIH2	553	0.0635259	0.127052
EMG1	553	0.0635259	0.127052
NUCB1	554	0.0635725	0.127145
CRELD1	555	0.0638287	0.127657
ITGAM	555	0.0638287	0.127657
ZFAND2B	556	0.0639763	0.127953
NDUFA12	557	0.0641313	0.128263
NUP37	558	0.0644337	0.128867
UBC	559	0.0644391	0.128878
LILRB1	560	0.0644971	0.128994
DIS3L2	561	0.0647292	0.129458
MED28	561	0.0647292	0.129458
CLIC6	562	0.0647361	0.129472
NFASC	562	0.0647361	0.129472
SH3PXD2A	563	0.0647872	0.129574
ZW10	564	0.0648453	0.129691
HAT1	565	0.0650382	0.130076
AGPAT1	566	0.0651362	0.130272
CDCP1	567	0.0651944	0.130389
PTRF	567	0.0651944	0.130389
PON2	568	0.0652527	0.130505
KIAA0368	569	0.0653403	0.130681
BTF3	569	0.0653403	0.130681
PHACTR2	570	0.0655444	0.131089
PIGG	571	0.0656422	0.131284
PRIM1	571	0.0656422	0.131284
TPD52L1	572	0.0656612	0.131322
POR	573	0.0658366	0.131673
ALPP	574	0.065944	0.131888
ZCCHC17	574	0.065944	0.131888
HIST3H2BB	575	0.0660122	0.132024
SORL1	576	0.0660708	0.132142
TGFB2	577	0.0662456	0.132491
ZNF281	578	0.0663641	0.132728
RPL22	579	0.0664816	0.132963
PPIB	580	0.0665471	0.133094
DPM1	580	0.0665471	0.133094
USP24	581	0.0668485	0.133697
MTIF2	581	0.0668485	0.133697
SOCS1	582	0.0669524	0.133905
TXNL1	583	0.0673656	0.134731
FBXL20	584	0.0674508	0.134902
CCDC146	584	0.0674508	0.134902
SQSTM1	585	0.0675431	0.135086
ROR1	586	0.0677518	0.135504
RINL	586	0.0677518	0.135504
RNF13	587	0.0678393	0.135679
MAN2A2	588	0.0680172	0.136034
ZNF576	589	0.0680526	0.136105
HEYL	590	0.068136	0.136272
NF2	591	0.0681954	0.136391
ACTL6A	592	0.0683143	0.136629
CHRDL2	593	0.0683533	0.136707
TOP2B	593	0.0683533	0.136707
RABGGTB	594	0.0683738	0.136748
IL16	595	0.0684333	0.136867
RNF122	596	0.0684929	0.136986
RAB35	597	0.0686538	0.137308
UBE2E1	597	0.0686538	0.137308
RNF24	598	0.0687313	0.137463
ZYX	599	0.0688506	0.137701
CDCA4	600	0.0689543	0.137909
HIST1H3H	600	0.0689543	0.137909
TAF5	601	0.06897	0.13794
MED10	601	0.06897	0.13794
PEX13	602	0.0690297	0.138059
MYNN	603	0.0691493	0.138299
CEBPG	603	0.0691493	0.138299
ALPPL2	604	0.0692546	0.138509
CD3D	604	0.0692546	0.138509
PRPF38B	605	0.069269	0.138538
RNF44	605	0.069269	0.138538
MACROD1	606	0.0695547	0.139109
CKS1B	607	0.0698547	0.139709
NCF4	608	0.0699888	0.139978
RNF38	609	0.0700489	0.140098
AMACR	610	0.0701091	0.140218
NEUROG2	611	0.0701546	0.140309
MRPL42	612	0.0702897	0.140579
ABCE1	613	0.0704544	0.140909
TAC3	614	0.0707119	0.141424
ZNF721	615	0.070754	0.141508
ZFP36	616	0.0708932	0.141786
HTR1E	617	0.0710535	0.142107
KATNA1	617	0.0710535	0.142107
ATXN3	618	0.0712564	0.142513
RNF185	619	0.071317	0.142634
RILPL2	620	0.0713528	0.142706
GNL3	620	0.0713528	0.142706
RIN3	621	0.0716204	0.143241
FERMT3	622	0.0716521	0.143304
UQCRQ	622	0.0716521	0.143304
IK	623	0.0719512	0.143902
SS18L2	623	0.0719512	0.143902
AK1	624	0.072168	0.144336
CCDC36	625	0.072229	0.144458
FST	626	0.0722501	0.1445
RPL7	626	0.0722501	0.1445
DMRTB1	627	0.072549	0.145098
TBCE	627	0.072549	0.145098
PIK3CA	628	0.0726563	0.145313
DPEP2	629	0.0728477	0.145695
SLC9A1	629	0.0728477	0.145695
CITED4	630	0.0729623	0.145925
STIP1	631	0.0731462	0.146292
PRPF38A	631	0.0731462	0.146292
RIC8A	632	0.0732688	0.146538
DEK	633	0.0733915	0.146783
SNX22	634	0.0734447	0.146889
ZNF559	634	0.0734447	0.146889
STX10	635	0.0735144	0.147029
SLC35A4	636	0.0735758	0.147152
DLG4	636	0.0735758	0.147152
RNF20	637	0.0736373	0.147275
MS4A2	638	0.073743	0.147486
CYP4X1	639	0.0740412	0.148082
GTF2H5	639	0.0740412	0.148082
TEX101	640	0.0743392	0.148678
TCTEX1D2	640	0.0743392	0.148678
VPS28	641	0.0744386	0.148877
HSBP1	642	0.0745622	0.149124
MYO1B	643	0.0746241	0.149248
HERC2	644	0.0746371	0.149274
SLC26A6	644	0.0746371	0.149274
RTN4IP1	645	0.0748717	0.149743
NENF	646	0.0749349	0.14987
ACAT2	646	0.0749349	0.14987
STAT5B	647	0.0751197	0.150239
CACNA1A	648	0.0752326	0.150465
GMPPA	648	0.0752326	0.150465
PCDHA5	649	0.075368	0.150736
MKRN3	650	0.0755302	0.15106
USP32	650	0.0755302	0.15106
PLEKHG1	651	0.0755545	0.151109
FES	652	0.0756167	0.151233
TNPO3	653	0.0758034	0.151607
P4HTM	654	0.0758276	0.151655
CSAD	654	0.0758276	0.151655
TPCN2	655	0.0758657	0.151731
SYNJ2	656	0.0761248	0.15225
IFFO1	656	0.0761248	0.15225
EBAG9	657	0.0763649	0.15273
HPR	658	0.076422	0.152844
CWF19L2	658	0.076422	0.152844
CACNA1E	659	0.0764899	0.15298
AP1B1	660	0.0766776	0.153355
FPR3	661	0.076719	0.153438
EP300	662	0.0768029	0.153606
NIT2	662	0.0768029	0.153606
FFAR3	663	0.0770159	0.154032
OSCAR	663	0.0770159	0.154032
RNF31	664	0.0770537	0.154107
FMNL1	665	0.0771792	0.154358
BOP1	666	0.0773048	0.15461
TRIM41	667	0.0773127	0.154625
ZNF786	668	0.0776094	0.155219
TYK2	668	0.0776094	0.155219
ISY1	669	0.0776192	0.155238
CMTM4	670	0.0779059	0.155812
CD79B	670	0.0779059	0.155812
H3F3B	671	0.0779342	0.155868
DIDO1	672	0.0781866	0.156373
CPB2	673	0.0782023	0.156405
SMC3	673	0.0782023	0.156405
VDAC1	674	0.0784985	0.156997
METAP1	674	0.0784985	0.156997
GNAQ	675	0.0785025	0.157005
AKT1	675	0.0785025	0.157005
CST9	676	0.0787947	0.157589
CSNK1E	676	0.0787947	0.157589
GCHFR	677	0.0788191	0.157638
PRKAR2A	678	0.0790907	0.158181
WDR75	678	0.0790907	0.158181
ST6GALNAC4	679	0.0791362	0.158272
SUPT6H	679	0.0791362	0.158272
JAG2	680	0.0793866	0.158773
RABL3	680	0.0793866	0.158773
HAL	681	0.0794539	0.158908
MNAT1	682	0.0795175	0.159035
DUSP8	683	0.0795811	0.159162
FARP1	684	0.0796447	0.159289
GBA	685	0.0796824	0.159365
FGF18	686	0.0797084	0.159417
SLC22A17	687	0.0798358	0.159672
AIM1	688	0.0799633	0.159927
GRB2	689	0.079978	0.159956
ATP6V1G1	689	0.079978	0.159956
GATAD2A	690	0.0802185	0.160437
FAM83F	691	0.0802735	0.160547
USP16	691	0.0802735	0.160547
ALOX5	692	0.0803463	0.160693
NOL12	692	0.0803463	0.160693
EIF3G	693	0.0804102	0.16082
GPSM3	694	0.0804742	0.160948
MT1A	695	0.0805381	0.161076
NET1	695	0.0805381	0.161076
SLC5A9	696	0.0805689	0.161138
WDR6	697	0.0808642	0.161728
SENP6	697	0.0808642	0.161728
DALRD3	698	0.0811593	0.162319
LRRCC1	698	0.0811593	0.162319
CMAS	699	0.0811789	0.162358
SLC30A3	700	0.0812431	0.162486
CCDC65	701	0.0814359	0.162872
EXOC3L2	702	0.0814544	0.162909
FBN2	702	0.0814544	0.162909
COG5	703	0.0815002	0.163
MAK16	704	0.0815645	0.163129
YIPF5	705	0.0816288	0.163258
AMT	706	0.0816932	0.163386
SYNPO2	707	0.0817493	0.163499
CCDC12	707	0.0817493	0.163499
GDPD5	708	0.0817575	0.163515
TATDN1	709	0.081822	0.163644
FZD2	710	0.0820153	0.164031
PMPCB	710	0.0820153	0.164031
ALKBH2	711	0.082044	0.164088
SETD3	711	0.082044	0.164088
PML	712	0.0820798	0.16416
ZNF135	712	0.0820798	0.16416
STMN1	713	0.0821443	0.164289
ATP5L	714	0.0823387	0.164677
AKR1C4	715	0.0825319	0.165064
BLID	716	0.0826332	0.165266
COX7A2	716	0.0826332	0.165266
UBE2L3	717	0.0826612	0.165322
KCNMB1	717	0.0826612	0.165322
SCUBE3	718	0.0829276	0.165855
ZNF512	719	0.0830498	0.1661
ZCCHC24	720	0.0833094	0.166619
EIF3M	720	0.0833094	0.166619
ABR	721	0.0833743	0.166749
CBR4	722	0.0834393	0.166879
CEP152	723	0.0835042	0.167008
SEZ6L2	724	0.0835161	0.167032
RYBP	724	0.0835161	0.167032
SLC15A3	725	0.0835692	0.167138
PHLDB1	726	0.0837644	0.167529
SPATA5	726	0.0837644	0.167529
NDUFAF3	727	0.0838101	0.16762
CEBPZ	727	0.0838101	0.16762
IL1B	728	0.0838295	0.167659
UFSP2	729	0.0839597	0.167919
FKTN	730	0.0840901	0.16818
CEBPD	731	0.0841041	0.168208
EAF1	732	0.0842857	0.168571
MAGOH	733	0.0843979	0.168796
PARP10	734	0.0846915	0.169383
LSM7	735	0.0847431	0.169486
PNPT1	736	0.0848739	0.169748
KLHL21	737	0.0849394	0.169879
SYT16	738	0.0849851	0.16997
CRYZL1	738	0.0849851	0.16997
NDUFB5	739	0.0850049	0.17001
IFNAR2	740	0.0850704	0.170141
UBE2E2	741	0.0852785	0.170557
CD151	741	0.0852785	0.170557
FOXC1	742	0.0853327	0.170665
TIMM8B	742	0.0853327	0.170665
CPSF1	743	0.0853983	0.170797
FAU	744	0.0854639	0.170928
F5	745	0.0855296	0.171059
NDUFV2	746	0.0855719	0.171144
PGLYRP1	747	0.0855953	0.171191
TNKS	748	0.0858651	0.17173
NUDT21	749	0.0860557	0.172111
SH3GLB1	750	0.0864511	0.172902
ATP5J2	750	0.0864511	0.172902
MAGI1	751	0.0864512	0.172902
ZNF280D	752	0.0866493	0.173299
PNPLA1	753	0.0867439	0.173488
GAB2	753	0.0867439	0.173488
GABARAP	754	0.0867814	0.173563
CCDC112	755	0.0868475	0.173695
CEACAM3	756	0.0869136	0.173827
PCSK9	757	0.0870366	0.174073
WDR61	757	0.0870366	0.174073
HERC3	758	0.0873292	0.174658
ZDHHC12	758	0.0873292	0.174658
NUDT2	759	0.0875761	0.175152
COX6A1	759	0.0875761	0.175152
TXN	760	0.0876217	0.175243
FKBP10	761	0.0877089	0.175418
SMAP2	762	0.0877753	0.175551
TPP1	763	0.0878417	0.175683
NDUFB10	764	0.0879141	0.175828
SLC35B1	765	0.0879746	0.175949
SLC39A3	766	0.0881742	0.176348
RNF123	767	0.0882063	0.176413
MRFAP1L1	767	0.0882063	0.176413
STRN	768	0.0882408	0.176482
PLEKHA2	769	0.088374	0.176748
POLD4	770	0.0884984	0.176997
STX5	771	0.0886406	0.177281
ADSS	772	0.0889076	0.177815
FMNL2	773	0.0889744	0.177949
OR52W1	774	0.0890823	0.178165
SET	774	0.0890823	0.178165
MSH6	775	0.0893088	0.178618
CBX4	776	0.0893741	0.178748
RAPGEF6	777	0.0895097	0.179019
TNK2	778	0.0895767	0.179153
GPA33	779	0.0897107	0.179421
SUMO2	780	0.0898449	0.17969
CACNB2	781	0.089912	0.179824
WDR91	782	0.0899573	0.179915
SEC11C	782	0.0899573	0.179915
EIF2AK2	783	0.0899791	0.179958
INF2	784	0.0901135	0.180227
BNIP1	785	0.0901806	0.180361
MSRB3	786	0.0902487	0.180497
CLCF1	787	0.09054	0.18108
BNIPL	788	0.0908312	0.181662
TMEM120A	789	0.0909887	0.181977
PMS1	790	0.0910562	0.182112
OCEL1	791	0.0911222	0.182244
RPL26L1	791	0.0911222	0.182244
ACTC1	792	0.0914132	0.182826
IWS1	792	0.0914132	0.182826
EEF1E1	793	0.0914615	0.182923
TIPRL	794	0.0915292	0.183058
NICN1	795	0.091704	0.183408
ZNF445	795	0.091704	0.183408
AHI1	796	0.0918676	0.183735
CCDC68	797	0.0919947	0.183989
WDFY2	797	0.0919947	0.183989
GNG2	798	0.0920032	0.184006
PREX1	799	0.0921388	0.184278
PMEPA1	800	0.0922745	0.184549
ZNF649	801	0.0922853	0.184571
NOP58	801	0.0922853	0.184571
HSPA9	802	0.0923424	0.184685
MGAT4A	803	0.0924104	0.184821
LMTK3	804	0.0925758	0.185152
RB1CC1	805	0.0927502	0.1855
TRPT1	806	0.0928662	0.185732
RPL4	806	0.0928662	0.185732
TAPT1	807	0.0928864	0.185773
PPP1R3E	807	0.0928864	0.185773
OSBPL11	808	0.0930225	0.186045
RPS2	809	0.0931564	0.186313
KIAA0319L	809	0.0931564	0.186313
ZHX2	810	0.0931588	0.186318
IQCB1	811	0.0932952	0.18659
HDDC2	812	0.0933634	0.186727
LDB3	813	0.0934466	0.186893
FRG1	813	0.0934466	0.186893
CYB561	814	0.0934999	0.187
COLQ	815	0.0940265	0.188053
LATS2	816	0.0940468	0.188094
DYNC1LI1	817	0.0941152	0.18823
CEBPB	818	0.0942522	0.188504
SPP1	819	0.0943163	0.188633
AGTRAP	819	0.0943163	0.188633
NIPA2	820	0.0943207	0.188641
RUNX1T1	821	0.0945264	0.189053
RHPN2	822	0.094595	0.18919
CTSK	823	0.094606	0.189212
KLF2	823	0.094606	0.189212
ARHGAP24	824	0.0948009	0.189602
GAS7	825	0.0948696	0.189739
NAE1	826	0.0948955	0.189791
MYO5C	827	0.0949383	0.189877
FXN	827	0.0949383	0.189877
CD300LG	828	0.0950071	0.190014
CD84	828	0.0950071	0.190014
LRRC29	829	0.0950758	0.190152
MACF1	830	0.095185	0.19037
DNAJB2	831	0.0953511	0.190702
NSFL1C	831	0.0953511	0.190702
ALKBH1	832	0.0956956	0.191391
TUBB6	833	0.0957635	0.191527
STAB1	833	0.0957635	0.191527
SEMA4A	834	0.0957646	0.191529
NUCB2	835	0.0960526	0.192105
UBA2	836	0.0961097	0.192219
CCNY	836	0.0961097	0.192219
AGPS	837	0.0961788	0.192358
RPL3L	838	0.0963416	0.192683
DPH3	838	0.0963416	0.192683
THYN1	839	0.0966305	0.193261
FCHO1	840	0.0966631	0.193326
KLHL12	841	0.096871	0.193742
LIMK2	841	0.096871	0.193742
CLU	842	0.0969193	0.193839
BMPR1A	843	0.0972079	0.194416
CTNS	843	0.0972079	0.194416
LGI2	844	0.0972873	0.194575
RHBDD2	845	0.0974263	0.194853
SEC61G	846	0.0974965	0.194993
MZF1	847	0.0975653	0.195131
CEACAM21	848	0.0976348	0.19527
FAM96A	849	0.0977044	0.195409
LRCH4	850	0.0977849	0.19557
CALB2	851	0.0978436	0.195687
SLBP	852	0.0979829	0.195966
SLC13A1	853	0.0980732	0.196146
MOCS2	853	0.0980732	0.196146
CLC	854	0.0981223	0.196245
NTN5	855	0.0983315	0.196663
IL17RC	856	0.0984013	0.196803
ISCA2	856	0.0984013	0.196803
TRIM56	857	0.0984711	0.196942
SLC25A15	858	0.0985409	0.197082
IMPDH2	859	0.0986495	0.197299
CYB5B	859	0.0986495	0.197299
MUC4	860	0.0988903	0.197781
EFCAB6	860	0.0988903	0.197781
BTBD3	861	0.0991703	0.198341
PRKRA	862	0.0992253	0.198451
MTX1	862	0.0992253	0.198451
ANKRD44	863	0.0993805	0.198761
PARP9	864	0.0995131	0.199026
TMEM160	865	0.0995908	0.199182
AFG3L2	866	0.0998007	0.199601
RPL28	866	0.0998007	0.199601
SNX5	867	0.100082	0.200165
CDCA7	868	0.100088	0.200177
CD163	868	0.100088	0.200177
AMICA1	869	0.100376	0.200751
PSMB1	869	0.100376	0.200751
PAPOLG	870	0.100575	0.20115
SLC25A12	871	0.100663	0.201326
WWOX	872	0.10095	0.2019
KBTBD4	873	0.101237	0.202475
TIMM23	873	0.101237	0.202475
ERI3	874	0.101351	0.202703
PLEKHB1	875	0.101493	0.202985
ACTR8	875	0.101493	0.202985
PPP2R3C	876	0.101524	0.203049
DCLK1	877	0.101705	0.20341
BLCAP	878	0.101811	0.203622
DNAJC4	879	0.102098	0.204196
PSMC6	879	0.102098	0.204196
NRBP1	880	0.10213	0.20426
WDR81	881	0.102201	0.204402
MAP4K4	882	0.102272	0.204544
UBN1	883	0.102385	0.204769
KIF1B	883	0.102385	0.204769
RAI14	884	0.102485	0.20497
RAB3IP	885	0.102556	0.205112
MAPKAPK2	885	0.102556	0.205112
CETN3	886	0.102671	0.205342
TOMM70A	887	0.102698	0.205396
DUSP1	888	0.102769	0.205539
CAD	889	0.102957	0.205915
CDC26	889	0.102957	0.205915
OAS3	890	0.103196	0.206393
AKT3	891	0.103244	0.206488
NCSTN	892	0.103339	0.206678
ZNF23	893	0.10341	0.20682
KIAA0195	894	0.10353	0.20706
LANCL1	895	0.103767	0.207534
ZMYND12	896	0.103816	0.207632
NFATC4	897	0.10391	0.207819
ZNFX1	898	0.104053	0.208105
B3GALTL	899	0.104102	0.208204
JDP2	900	0.104124	0.208248
RWDD1	901	0.104196	0.208391
OR5M10	902	0.104267	0.208534
UBE2M	902	0.104267	0.208534
ZNF143	903	0.104388	0.208776
ANXA1	904	0.104674	0.209347
NDUFB2	905	0.104959	0.209919
FUBP3	906	0.105199	0.210398
QARS	907	0.105245	0.21049
LCOR	907	0.105245	0.21049
CDC42SE2	908	0.105487	0.210973
TMEM81	909	0.10553	0.211061
RPF1	909	0.10553	0.211061
ATP5A1	910	0.105702	0.211405
HIST2H2BE	911	0.105816	0.211631
DEF6	912	0.10599	0.211981
LZIC	913	0.106062	0.212125
AFF3	914	0.106101	0.212202
KIF21B	915	0.106351	0.212702
KERA	916	0.106386	0.212772
TAX1BP1	916	0.106386	0.212772
ECE1	917	0.106567	0.213135
FAM43A	918	0.106671	0.213342
GDI2	918	0.106671	0.213342
ARHGEF1	919	0.106857	0.213713
PABPC1	920	0.106956	0.213912
DENND3	920	0.106956	0.213912
PDE1B	921	0.107001	0.214002
POFUT2	922	0.107218	0.214437
ITGAX	923	0.107363	0.214726
PRR13	924	0.107508	0.215016
FBLIM1	925	0.107525	0.215051
KLRB1	925	0.107525	0.215051
KPNA1	926	0.10781	0.21562
NOL8	926	0.10781	0.21562
RIPK3	927	0.107871	0.215742
KIAA1407	928	0.107943	0.215887
KRT81	929	0.108094	0.216189
RNASEH2C	930	0.108379	0.216758
RAN	930	0.108379	0.216758
FUT10	931	0.108598	0.217196
SAMM50	932	0.108663	0.217326
TMUB2	932	0.108663	0.217326
IAH1	933	0.108889	0.217778
TESK1	934	0.108962	0.217924
FOXG1	935	0.109231	0.218463
PHF14	935	0.109231	0.218463
NUP50	936	0.109254	0.218508
PBX2	937	0.109327	0.218654
NR1H2	938	0.109473	0.218946
ARMC7	939	0.109515	0.21903
CWC22	940	0.109546	0.219092
R3HDM2	941	0.109619	0.219238
MAD2L2	942	0.109765	0.219531
ILKAP	943	0.109799	0.219598
THOC1	943	0.109799	0.219598
CRISPLD2	944	0.110083	0.220166
CPSF3L	945	0.110204	0.220409
ADAM32	946	0.110366	0.220733
EML4	946	0.110366	0.220733
AMPD3	947	0.110865	0.221729
USP19	948	0.110933	0.221867
PNKD	949	0.111217	0.222433
MAGEL2	950	0.111379	0.222759
FAM103A1	951	0.111453	0.222906
TOM1	952	0.1115	0.223
RNF8	953	0.111783	0.223566
MCEE	953	0.111783	0.223566
NCOA1	954	0.111821	0.223642
NSUN6	955	0.112066	0.224132
MBD6	955	0.112066	0.224132
MTF1	956	0.112116	0.224232
PIK3CD	957	0.112264	0.224528
ZNF621	958	0.112338	0.224675
SLC11A2	959	0.112412	0.224823
CDRT1	960	0.112559	0.225119
ZNF684	961	0.112632	0.225263
OTUB1	962	0.112707	0.225415
CEP57	963	0.112855	0.22571
HP	964	0.112914	0.225828
FGD3	964	0.112914	0.225828
ARID5A	965	0.113003	0.226007
COL11A1	966	0.113077	0.226155
ETFA	967	0.113374	0.226747
PTPRA	968	0.113479	0.226958
FLOT1	968	0.113479	0.226958
CCNB1IP1	969	0.113596	0.227193
CDKAL1	970	0.11367	0.227341
KAT5	971	0.113762	0.227523
ACAT1	971	0.113762	0.227523
ITIH5	972	0.113819	0.227638
FZD7	973	0.113893	0.227787
QRICH1	974	0.114044	0.228088
ATP6V0E1	975	0.114265	0.22853
PRMT1	976	0.114326	0.228652
RCN3	977	0.114488	0.228976
HSD17B13	978	0.114563	0.229125
WDFY1	979	0.114712	0.229423
UGT2B4	980	0.114861	0.229722
ARHGAP27	981	0.11489	0.22978
MKNK2	981	0.11489	0.22978
TANK	982	0.115085	0.230169
ANKRD32	983	0.115172	0.230344
LILRB3	983	0.115172	0.230344
NETO2	984	0.115383	0.230766
SH3RF1	985	0.115454	0.230907
ST8SIA4	985	0.115454	0.230907
ZNF513	986	0.115458	0.230916
RPL41	987	0.115735	0.23147
NRBP2	988	0.115757	0.231514
ANAPC10	989	0.115832	0.231663
INVS	990	0.115907	0.231813
HEXIM1	991	0.116017	0.232033
TMED10	991	0.116017	0.232033
DDOST	992	0.116131	0.232262
TAF12	992	0.116131	0.232262
DTWD2	993	0.116281	0.232562
HMG20A	994	0.116579	0.233159
SUB1	994	0.116579	0.233159
ARF3	995	0.116581	0.233162
HOMER2	996	0.116656	0.233312
RABEPK	996	0.116656	0.233312
SLC35A1	997	0.116731	0.233462
PSTPIP2	998	0.116861	0.233721
ZNF132	998	0.116861	0.233721
SLA2	999	0.117031	0.234063
TPM1	1000	0.117107	0.234213
VEGFB	1001	0.117142	0.234283
CTNNA1	1002	0.117257	0.234514
ZFR	1003	0.117407	0.234815
TOP3B	1003	0.117407	0.234815
DAG1	1004	0.117423	0.234845
TMBIM6	1004	0.117423	0.234845
FSD1L	1005	0.117483	0.234966
PLEKHG4	1006	0.117558	0.235116
CBX5	1007	0.117633	0.235267
ZCCHC2	1008	0.117704	0.235407
PSMB6	1008	0.117704	0.235407
CNOT6	1009	0.117859	0.235719
CPNE3	1010	0.117984	0.235969
ZBTB4	1011	0.11801	0.23602
TNIP1	1012	0.118265	0.23653
TSPAN32	1012	0.118265	0.23653
ADCY4	1013	0.118539	0.237077
HK3	1014	0.118546	0.237091
TRIM37	1015	0.118765	0.237531
DPEP3	1016	0.118826	0.237652
DDX10	1017	0.118992	0.237984
LONRF2	1018	0.119107	0.238213
PPARD	1019	0.119144	0.238287
CDK8	1020	0.119219	0.238439
EIF4EBP2	1021	0.119295	0.23859
LMBRD2	1021	0.119295	0.23859
ZDHHC23	1022	0.119371	0.238742
CALM2	1023	0.119387	0.238774
RBBP9	1024	0.119447	0.238893
EXO1	1025	0.119522	0.239045
SUPT7L	1026	0.119598	0.239197
EIF4B	1027	0.119667	0.239334
MRPL40	1028	0.11975	0.2395
SMARCA5	1029	0.119826	0.239652
SNX1	1030	0.119947	0.239894
RLF	1031	0.120054	0.240107
ZNF688	1031	0.120054	0.240107
PRIMA1	1032	0.120206	0.240411
BRSK1	1032	0.120206	0.240411
ZFYVE1	1033	0.120227	0.240454
TMEM60	1034	0.120282	0.240563
SUOX	1035	0.120358	0.240715
CAPN2	1036	0.120434	0.240867
ZNF76	1037	0.120507	0.241014
KCNG1	1038	0.12051	0.24102
LPIN2	1039	0.120662	0.241324
AURKA	1040	0.120787	0.241574
MRPL44	1041	0.121067	0.242133
SLC9A8	1041	0.121067	0.242133
RPL27A	1042	0.121119	0.242238
STK16	1043	0.121195	0.242391
ABTB1	1044	0.121346	0.242692
SIRT6	1045	0.121348	0.242696
ZHX1	1046	0.121577	0.243154
DTX2	1046	0.121577	0.243154
GTF2F2	1047	0.121626	0.243251
FAAH	1048	0.121806	0.243612
IQGAP2	1049	0.121905	0.24381
RAD51C	1049	0.121905	0.24381
DLAT	1050	0.122035	0.244071
TECR	1051	0.122112	0.244224
ZNF200	1052	0.122184	0.244368
SNAPC4	1052	0.122184	0.244368
BTBD7	1053	0.122188	0.244377
FEZ1	1054	0.122342	0.244683
PAFAH2	1055	0.122463	0.244927
MITD1	1055	0.122463	0.244927
SLC45A3	1056	0.122571	0.245143
SSR1	1056	0.122571	0.245143
GPX4	1057	0.122648	0.245296
ZNHIT3	1058	0.122742	0.245485
EIF1B	1059	0.122878	0.245756
FKBP2	1060	0.123021	0.246043
CCT8	1060	0.123021	0.246043
CRYM	1061	0.123031	0.246063
FAM136A	1062	0.123108	0.246216
ZC3H14	1063	0.123185	0.24637
RAB27B	1064	0.1233	0.246601
KIFC2	1065	0.123415	0.246831
PIP5K1A	1066	0.123579	0.247158
BRI3	1066	0.123579	0.247158
TRIM17	1067	0.123858	0.247716
CFDP1	1067	0.123858	0.247716
POLR3A	1068	0.123954	0.247908
TIA1	1069	0.124108	0.248216
SPIN1	1070	0.124136	0.248273
RPL30	1070	0.124136	0.248273
ACACB	1071	0.124415	0.24883
ZNF350	1071	0.124415	0.24883
MAEA	1072	0.12457	0.249141
XPO5	1073	0.124648	0.249295
LZTFL1	1074	0.124693	0.249386
DOK3	1074	0.124693	0.249386
PAF1	1075	0.124725	0.249449
PFDN5	1076	0.124802	0.249604
PPP1R12B	1077	0.124971	0.249943
INTS12	1077	0.124971	0.249943
STAU2	1078	0.125111	0.250222
GJA5	1079	0.12525	0.250499
MRPL24	1079	0.12525	0.250499
FBXO3	1080	0.125498	0.250995
NAP1L5	1081	0.125528	0.251055
OSGEP	1082	0.125575	0.25115
LGR6	1083	0.125806	0.251611
TROVE2	1083	0.125806	0.251611
OTP	1084	0.126084	0.252167
CAPRIN1	1084	0.126084	0.252167
AKAP9	1085	0.126195	0.25239
CROT	1086	0.12635	0.2527
SLC35F3	1087	0.126361	0.252723
ATG16L2	1087	0.126361	0.252723
SETDB1	1088	0.126428	0.252855
ALG14	1089	0.126505	0.25301
TP53I11	1089	0.126505	0.25301
LDLRAP1	1090	0.126639	0.253278
AKIRIN2	1091	0.126816	0.253632
SUV420H1	1091	0.126816	0.253632
UQCRC2	1092	0.126894	0.253787
MDM4	1093	0.126917	0.253833
HCN4	1094	0.127049	0.254098
TTLL5	1095	0.127127	0.254254
ST3GAL4	1095	0.127127	0.254254
ARNT	1096	0.127194	0.254388
IQCG	1096	0.127194	0.254388
DTNA	1097	0.127205	0.25441
PPP1R15A	1098	0.127471	0.254943
ANAPC13	1098	0.127471	0.254943
LTB4R	1099	0.127516	0.255033
NOL10	1100	0.127594	0.255188
FANCD2	1101	0.127749	0.255498
TBC1D2	1102	0.12775	0.2555
UBE2T	1103	0.128026	0.256052
PPWD1	1103	0.128026	0.256052
PARD6A	1104	0.128062	0.256124
FCGRT	1105	0.12814	0.25628
RANBP3	1106	0.128303	0.256606
VWC2	1107	0.12858	0.25716
DYSF	1108	0.128609	0.257218
ELF1	1109	0.128857	0.257714
COMMD3	1109	0.128857	0.257714
UBE2D3	1110	0.128922	0.257844
TSPYL5	1111	0.129134	0.258267
RPS12	1111	0.129134	0.258267
H1FX	1112	0.12941	0.258821
ZNF770	1113	0.129548	0.259097
TPO	1114	0.129627	0.259254
TMEM219	1115	0.129687	0.259374
GOSR1	1116	0.129862	0.259725
ANKS1A	1116	0.129862	0.259725
PREB	1117	0.129963	0.259927
ABHD8	1118	0.130019	0.260039
OR10A7	1119	0.13024	0.26048
TM9SF3	1119	0.13024	0.26048
KIF19	1120	0.130412	0.260825
ST6GALNAC2	1121	0.130491	0.260982
NUDT14	1122	0.130516	0.261032
BIN3	1122	0.130516	0.261032
CASP1	1123	0.130792	0.261585
ZBP1	1124	0.130884	0.261769
UBE2Z	1125	0.130963	0.261926
PGPEP1	1126	0.131069	0.262137
LEMD3	1127	0.1312	0.262399
NR2F6	1128	0.131345	0.262689
ZNF146	1128	0.131345	0.262689
F12	1129	0.131436	0.262872
PLCL2	1130	0.131594	0.263188
FAM46A	1131	0.13162	0.263241
PALM	1132	0.131673	0.263346
APOL1	1133	0.131752	0.263504
SLC10A7	1134	0.131896	0.263793
TYW3	1134	0.131896	0.263793
JAK3	1135	0.132068	0.264136
KRT83	1136	0.132172	0.264344
TMEM184B	1136	0.132172	0.264344
CCDC86	1137	0.132448	0.264895
LANCL2	1138	0.132463	0.264927
PFDN1	1139	0.132622	0.265244
ADCY7	1140	0.132701	0.265402
ZNF564	1140	0.132701	0.265402
TTF1	1141	0.132723	0.265446
NDE1	1142	0.132999	0.265997
EXOC7	1143	0.133177	0.266353
TJAP1	1144	0.133274	0.266548
CRIPT	1144	0.133274	0.266548
LPCAT3	1145	0.133415	0.266829
HIRA	1146	0.133549	0.267098
MKL1	1146	0.133549	0.267098
TNS3	1147	0.133653	0.267306
MTMR2	1148	0.133812	0.267623
GIMAP1	1149	0.133824	0.267649
TMUB1	1149	0.133824	0.267649
GABBR1	1150	0.133891	0.267782
RBBP5	1151	0.134099	0.268199
RPL31	1151	0.134099	0.268199
CIR1	1152	0.134289	0.268578
RPP40	1153	0.134369	0.268737
NTHL1	1154	0.134374	0.268749
DDX1	1154	0.134374	0.268749
IRAK2	1155	0.134448	0.268896
TRIM25	1156	0.134528	0.269056
ZNF277	1156	0.134528	0.269056
WBSCR17	1157	0.134608	0.269215
OXR1	1158	0.134649	0.269298
MVK	1159	0.134767	0.269534
BTG3	1160	0.134924	0.269848
LACTB	1160	0.134924	0.269848
SPTLC2	1161	0.134926	0.269853
ZNF532	1161	0.134926	0.269853
PFAS	1162	0.135006	0.270012
PBX3	1163	0.135086	0.270172
PPM1F	1164	0.135166	0.270331
MST1	1165	0.135199	0.270397
RNF152	1166	0.135473	0.270946
RBCK1	1166	0.135473	0.270946
PDCD10	1167	0.135565	0.27113
MYB	1168	0.135645	0.27129
NINJ2	1168	0.135645	0.27129
PHLDB3	1169	0.135748	0.271495
AP1S1	1169	0.135748	0.271495
DBP	1170	0.135805	0.27161
XRCC3	1171	0.135885	0.27177
UNKL	1172	0.136022	0.272044
PYGB	1173	0.136205	0.27241
KLF12	1174	0.136296	0.272592
TNRC6A	1175	0.136445	0.27289
SAR1B	1176	0.13657	0.273141
AP2A1	1177	0.136605	0.273211
WASF2	1178	0.136686	0.273371
NDUFS8	1178	0.136686	0.273371
THAP7	1179	0.136844	0.273689
ARID4B	1179	0.136844	0.273689
PEX26	1180	0.137007	0.274013
PARD3B	1181	0.137118	0.274237
DPP7	1182	0.137247	0.274495
LYSMD2	1183	0.137392	0.274785
ITPRIP	1183	0.137392	0.274785
ZC3H12A	1184	0.137408	0.274816
MAPK4	1185	0.137569	0.275138
RTN2	1185	0.137569	0.275138
CDH24	1186	0.137666	0.275332
MRPL32	1186	0.137666	0.275332
SDF2	1187	0.13781	0.27562
DTNB	1188	0.13794	0.27588
PAOX	1189	0.138052	0.276103
SIRPD	1190	0.138132	0.276264
MYLIP	1191	0.138214	0.276427
CFL1	1192	0.138293	0.276586
KLHL8	1193	0.138374	0.276747
ASS1	1194	0.138454	0.276909
OR4K15	1195	0.138487	0.276974
VPS16	1196	0.13876	0.277521
PDE5A	1196	0.13876	0.277521
CCDC88B	1197	0.138858	0.277715
SIM2	1198	0.139019	0.278038
PGBD4	1199	0.139034	0.278068
FAM129C	1200	0.139181	0.278361
CX3CR1	1201	0.139307	0.278614
COPS4	1201	0.139307	0.278614
CYFIP1	1202	0.139342	0.278684
KLK8	1203	0.139423	0.278846
TMEM88	1203	0.139423	0.278846
LIN7A	1204	0.13958	0.27916
ZNF385A	1204	0.13958	0.27916
PROC	1205	0.139585	0.279169
HECTD2	1206	0.139666	0.279331
CLCA4	1207	0.139853	0.279706
RSRC1	1207	0.139853	0.279706
DDX59	1208	0.139908	0.279817
AFAP1	1209	0.139989	0.279979
KCNQ2	1210	0.14007	0.280141
PGM2	1211	0.140126	0.280252
SRFBP1	1211	0.140126	0.280252
DDIT4	1212	0.140232	0.280465
TNFSF10	1213	0.140313	0.280627
KDM6B	1214	0.140394	0.280789
SLC3A2	1215	0.140399	0.280798
MICAL1	1215	0.140399	0.280798
DHX15	1216	0.140476	0.280951
SEC61A1	1217	0.140557	0.281113
ARHGAP17	1218	0.140672	0.281344
DNAJA2	1218	0.140672	0.281344
STARD3	1219	0.140719	0.281438
GP9	1220	0.140881	0.281762
SFXN4	1221	0.140944	0.281889
MPDU1	1221	0.140944	0.281889
ERCC1	1222	0.140962	0.281925
TRIAP1	1223	0.141125	0.28225
KLC1	1223	0.141125	0.28225
CD177	1224	0.141287	0.282575
FOXJ2	1225	0.14145	0.2829
ADARB1	1226	0.141613	0.283225
SLC6A20	1227	0.141694	0.283388
SLAMF1	1228	0.141762	0.283524
ERBB3	1229	0.141857	0.283714
CSNK2B	1229	0.141857	0.283714
ARHGEF2	1230	0.141938	0.283876
MXD3	1231	0.142034	0.284068
MEX3C	1232	0.142183	0.284365
ASGR1	1232	0.142183	0.284365
ZNF264	1233	0.142264	0.284528
CD46	1234	0.142306	0.284613
HSPH1	1234	0.142306	0.284613
TFCP2	1235	0.142579	0.285157
PSMA2	1235	0.142579	0.285157
CAMK1	1236	0.14259	0.285181
AK3	1237	0.142672	0.285344
ILDR2	1238	0.142754	0.285507
TMEM14B	1239	0.142835	0.28567
HFM1	1240	0.142851	0.285701
TTN	1241	0.143122	0.286245
IL17RA	1241	0.143122	0.286245
WWP1	1242	0.143244	0.286487
DSEL	1243	0.143394	0.286789
MRPL36	1243	0.143394	0.286789
MUS81	1244	0.143407	0.286814
STX7	1245	0.143571	0.287142
PARP14	1246	0.143898	0.287796
INPP5A	1247	0.143938	0.287875
RPL5	1247	0.143938	0.287875
ARRDC5	1248	0.144209	0.288419
SNX27	1248	0.144209	0.288419
PABPC3	1249	0.144308	0.288616
FEN1	1250	0.144472	0.288944
NLK	1250	0.144472	0.288944
KIAA1109	1251	0.144481	0.288961
LYRM2	1251	0.144481	0.288961
ZNF430	1252	0.144554	0.289108
CACNA1H	1252	0.144554	0.289108
ZNF571	1253	0.144636	0.289272
XAB2	1254	0.144718	0.289436
AGMAT	1255	0.144752	0.289504
ATG3	1255	0.144752	0.289504
JAG1	1256	0.1448	0.2896
MFAP1	1257	0.144882	0.289765
ZFYVE21	1258	0.144964	0.289929
ARID3A	1258	0.144964	0.289929
PLEKHA4	1259	0.145023	0.290047
MRPL21	1259	0.145023	0.290047
PRR14	1260	0.145047	0.290093
HMBOX1	1261	0.145129	0.290257
SYT7	1262	0.14554	0.29108
ARL6IP4	1263	0.145566	0.291131
RALGAPA1	1263	0.145566	0.291131
JAK2	1264	0.145704	0.291409
RASGRP1	1264	0.145704	0.291409
CCM2	1265	0.145869	0.291738
ATP6V0B	1266	0.146108	0.292215
RECK	1267	0.146281	0.292562
SH3GLB2	1268	0.146378	0.292757
ZNF302	1268	0.146378	0.292757
NR2E1	1269	0.146529	0.293057
LYPD5	1270	0.146611	0.293222
NEFH	1271	0.146649	0.293298
DPY19L1	1272	0.14692	0.293839
LRP1	1273	0.147024	0.294048
SLC33A1	1274	0.147107	0.294213
MRPS7	1275	0.147189	0.294378
BACE2	1276	0.14719	0.294381
RBM7	1277	0.147272	0.294544
SCUBE1	1278	0.147355	0.294709
OR51I2	1279	0.147437	0.294874
TMPRSS9	1279	0.147437	0.294874
PPP1CA	1280	0.147461	0.294921
BTBD10	1280	0.147461	0.294921
SLC29A1	1281	0.14752	0.29504
KCNMB3	1282	0.147685	0.295371
KCNQ4	1283	0.147731	0.295462
COPS8	1283	0.147731	0.295462
GRAMD1C	1284	0.147768	0.295536
AGL	1285	0.147851	0.295702
CCT4	1286	0.147934	0.295868
ZFAND2A	1287	0.148001	0.296003
MRPS28	1287	0.148001	0.296003
TAF13	1288	0.148017	0.296033
E4F1	1289	0.148182	0.296365
TASP1	1290	0.148272	0.296543
CCDC97	1290	0.148272	0.296543
ESCO1	1291	0.148348	0.296696
VPS33B	1292	0.148514	0.297028
ADIPOQ	1292	0.148514	0.297028
SP140	1293	0.148542	0.297083
DEFB123	1294	0.14868	0.29736
SMPD3	1295	0.148812	0.297623
CCNI	1295	0.148812	0.297623
IFT74	1296	0.148929	0.297858
LTC4S	1297	0.149012	0.298024
ALPI	1298	0.149081	0.298163
ADK	1298	0.149081	0.298163
NXN	1299	0.149095	0.29819
CLK1	1300	0.149178	0.298357
XRCC1	1301	0.149345	0.298689
ELMO2	1301	0.149345	0.298689
ORM2	1302	0.149351	0.298703
OSBPL10	1302	0.149351	0.298703
MRPL14	1303	0.149428	0.298855
MAPKAPK3	1304	0.149621	0.299242
MRPL46	1304	0.149621	0.299242
NPFFR2	1305	0.149677	0.299355
LRRC1	1305	0.149677	0.299355
USP30	1306	0.15016	0.30032
TXNDC12	1306	0.15016	0.30032
FNBP4	1307	0.150177	0.300354
PTGFR	1308	0.150344	0.300687
NPL	1309	0.15043	0.300859
WDR49	1310	0.15051	0.301021
MTCH2	1311	0.150699	0.301398
PARK7	1311	0.150699	0.301398
PCYOX1	1312	0.150761	0.301522
DOCK2	1313	0.150844	0.301689
EXOSC9	1314	0.150968	0.301936
RRAGC	1315	0.151011	0.302023
AKIRIN1	1316	0.151095	0.30219
PRDM16	1317	0.151237	0.302475
LAIR2	1318	0.151429	0.302858
ACBD4	1319	0.151507	0.303013
TSEN34	1319	0.151507	0.303013
KLF5	1320	0.151596	0.303193
TIRAP	1320	0.151596	0.303193
DHX9	1321	0.151775	0.303551
DENND1C	1321	0.151775	0.303551
ARID5B	1322	0.152044	0.304089
TMEM30A	1323	0.152182	0.304365
CTSB	1324	0.152313	0.304626
STK11IP	1324	0.152313	0.304626
FKBP3	1325	0.15235	0.3047
DYNC1LI2	1326	0.152518	0.305035
NRAP	1327	0.152582	0.305164
HINT1	1327	0.152582	0.305164
SRBD1	1328	0.152602	0.305203
SRRM2	1329	0.152685	0.305371
LAMB2	1330	0.152851	0.305701
TWSG1	1331	0.153119	0.306238
LRWD1	1331	0.153119	0.306238
TMX3	1332	0.153357	0.306714
DNAJC16	1333	0.153388	0.306775
OMA1	1333	0.153388	0.306775
CCT7	1334	0.153441	0.306883
MAN1A2	1335	0.153525	0.307051
PITPNM2	1336	0.153656	0.307312
ABHD4	1336	0.153656	0.307312
MS4A10	1337	0.153778	0.307555
ABHD1	1338	0.153924	0.307848
COTL1	1339	0.153946	0.307892
PSMB7	1340	0.15403	0.30806
CUEDC1	1341	0.154114	0.308229
SCG3	1342	0.154192	0.308385
SLC22A1	1343	0.154199	0.308397
CHP2	1343	0.154199	0.308397
TYSND1	1344	0.154367	0.308734
PCDHGC3	1345	0.154451	0.308903
WDR74	1346	0.15446	0.308921
PPA1	1346	0.15446	0.308921
MPL	1347	0.154536	0.309071
SLC4A1AP	1348	0.154704	0.309409
KITLG	1349	0.154729	0.309457
GRAP2	1350	0.154996	0.309993
CD200	1350	0.154996	0.309993
ZNF540	1351	0.155126	0.310253
PRR5	1352	0.155211	0.310421
MUC20	1353	0.155264	0.310528
ZNF641	1353	0.155264	0.310528
XRCC5	1354	0.155295	0.31059
LY6H	1355	0.155718	0.311436
FER	1356	0.1558	0.311599
NR2C1	1357	0.155802	0.311605
LETMD1	1358	0.155887	0.311774
TMEM156	1359	0.155972	0.311943
ALDH3B1	1360	0.156056	0.312112
ASPHD1	1361	0.156067	0.312134
FSCN1	1361	0.156067	0.312134
SIN3B	1362	0.156141	0.312282
CASP2	1363	0.15631	0.31262
ITPR2	1364	0.156335	0.312669
EXOSC1	1364	0.156335	0.312669
BST1	1365	0.156602	0.313204
PNN	1365	0.156602	0.313204
BCL7C	1366	0.156649	0.313298
TIFA	1367	0.156819	0.313638
HNRNPAB	1367	0.156819	0.313638
ST14	1368	0.156869	0.313739
RPA2	1368	0.156869	0.313739
PLA2G10	1369	0.157073	0.314147
TNFAIP2	1369	0.157073	0.314147
FXYD5	1370	0.157243	0.314486
TADA2A	1371	0.157328	0.314656
ALDH5A1	1372	0.157404	0.314807
FUZ	1373	0.157498	0.314996
DZIP3	1374	0.157668	0.315336
CCR9	1375	0.157671	0.315341
SUGT1	1375	0.157671	0.315341
WEE1	1376	0.157938	0.315875
FKBP1A	1377	0.158008	0.316016
MAPK10	1378	0.158178	0.316356
PARP15	1379	0.158204	0.316409
CBX6	1379	0.158204	0.316409
CCNH	1380	0.158433	0.316867
GPR89A	1381	0.158471	0.316943
ZNF439	1381	0.158471	0.316943
CDC20B	1382	0.158604	0.317208
DNAJB12	1383	0.158689	0.317378
PSMD4	1384	0.158738	0.317476
P2RY2	1385	0.159005	0.318009
GTF2E2	1385	0.159005	0.318009
MALT1	1386	0.159201	0.318401
CISH	1387	0.159271	0.318542
ZC3H3	1387	0.159271	0.318542
ZNF689	1388	0.159286	0.318572
ACVR1B	1388	0.159286	0.318572
ADAM10	1389	0.159371	0.318743
MFSD6	1390	0.159457	0.318913
DYRK1B	1391	0.159542	0.319084
TTC27	1391	0.159542	0.319084
DTWD1	1392	0.159713	0.319426
IGFL3	1393	0.159884	0.319768
SYK	1394	0.159969	0.319939
SMC2	1395	0.16014	0.320281
ITGB1BP1	1396	0.160311	0.320623
SLCO4C1	1397	0.160336	0.320672
CD226	1397	0.160336	0.320672
BCAN	1398	0.160397	0.320794
EDNRB	1399	0.160602	0.321204
WRN	1399	0.160602	0.321204
INTS8	1400	0.160654	0.321308
WNT5B	1401	0.160739	0.321479
SCYL1	1401	0.160739	0.321479
SCD5	1402	0.160868	0.321736
POLR2B	1402	0.160868	0.321736
TMEM86B	1403	0.160911	0.321822
LRP8	1404	0.160996	0.321993
CACNB1	1405	0.161134	0.322268
HNRNPF	1405	0.161134	0.322268
GAS2L1	1406	0.161168	0.322336
PARL	1406	0.161168	0.322336
SUMO4	1407	0.161511	0.323022
BACH2	1408	0.161597	0.323194
TARS2	1409	0.161666	0.323331
MLLT10	1410	0.161855	0.323709
NFYC	1411	0.161931	0.323862
KCNJ14	1412	0.162197	0.324393
GATS	1412	0.162197	0.324393
OXT	1413	0.162198	0.324396
RPS6KB1	1414	0.16237	0.32474
HELQ	1415	0.162456	0.324912
TMEM167B	1416	0.162462	0.324924
SMARCE1	1416	0.162462	0.324924
THSD7B	1417	0.162628	0.325257
MTA1	1418	0.162728	0.325455
ZNF142	1419	0.162973	0.325945
UBXN8	1420	0.162993	0.325986
ITGB3BP	1421	0.163145	0.32629
CNOT6L	1422	0.163258	0.326516
MYO9A	1423	0.163317	0.326635
EED	1424	0.163523	0.327046
SIPA1L2	1425	0.163662	0.327325
MAP3K11	1426	0.163749	0.327497
CYP2J2	1427	0.163788	0.327576
LSM14A	1427	0.163788	0.327576
FASLG	1428	0.163921	0.327842
BTAF1	1429	0.164008	0.328015
CD2	1430	0.164053	0.328106
CCDC34	1430	0.164053	0.328106
MGAT1	1431	0.164318	0.328636
GRIN3B	1432	0.164353	0.328706
UBAP1	1433	0.16444	0.328879
CLYBL	1434	0.164526	0.329052
PHAX	1435	0.164583	0.329165
GMIP	1436	0.164785	0.329571
CDKN2AIPNL	1437	0.164847	0.329695
BLM	1438	0.165045	0.33009
RPS3A	1438	0.165045	0.33009
DAPK2	1439	0.165112	0.330224
NFIL3	1440	0.165376	0.330753
JAM3	1441	0.165478	0.330956
PRKCE	1442	0.165565	0.33113
MRPL16	1443	0.165641	0.331282
IRX5	1444	0.165905	0.33181
MAPKAP1	1444	0.165905	0.33181
ABCF3	1445	0.165998	0.331997
DDI2	1446	0.166169	0.332339
DHX29	1446	0.166169	0.332339
ELP4	1447	0.166172	0.332344
BET1	1448	0.166259	0.332518
CD3G	1448	0.166259	0.332518
NSL1	1449	0.166346	0.332691
SUPT4H1	1450	0.166433	0.332867
ACD	1451	0.166519	0.333039
ANKH	1452	0.166698	0.333395
SRPRB	1452	0.166698	0.333395
ZNF549	1453	0.16678	0.33356
TAP2	1454	0.166867	0.333734
IRX3	1454	0.166867	0.333734
INTS9	1455	0.166962	0.333923
MFSD7	1456	0.167225	0.334451
PDCD6	1456	0.167225	0.334451
TMOD4	1457	0.167302	0.334604
ATP6V0A1	1457	0.167302	0.334604
CIDEB	1458	0.167476	0.334952
VIM	1459	0.167489	0.334978
SLC5A10	1460	0.16765	0.3353
ZNF586	1461	0.167737	0.335475
ACTR5	1462	0.167753	0.335506
DCP1A	1462	0.167753	0.335506
DUT	1463	0.167824	0.335649
COX7C	1464	0.168017	0.336033
KCNK1	1465	0.16828	0.33656
PKIA	1465	0.16828	0.33656
ZNF451	1466	0.168348	0.336695
TMEM101	1467	0.168522	0.337044
ECHDC3	1467	0.168522	0.337044
ZBTB20	1468	0.168544	0.337087
CSE1L	1469	0.16861	0.337219
MTAP	1470	0.168784	0.337568
PABPN1	1471	0.168807	0.337614
MAPK3	1472	0.16907	0.338141
TMEM175	1472	0.16907	0.338141
USE1	1473	0.169333	0.338667
SUCLA2	1473	0.169333	0.338667
ZFYVE19	1474	0.169396	0.338792
SOCS6	1475	0.169597	0.339193
NPHP4	1476	0.169834	0.339667
NT5C	1477	0.16986	0.339719
MRPS9	1477	0.16986	0.339719
BTLA	1478	0.170123	0.340245
GPR3	1479	0.170184	0.340368
FMNL3	1480	0.170272	0.340543
ST6GAL1	1481	0.170359	0.340719
SLC38A6	1482	0.170385	0.340771
PLOD1	1482	0.170385	0.340771
SLC35E1	1483	0.170447	0.340894
MFI2	1484	0.170535	0.341069
GIMAP2	1485	0.170648	0.341296
OGFR	1486	0.17071	0.34142
CAMK2B	1487	0.170911	0.341822
GAPDH	1487	0.170911	0.341822
ZMAT5	1488	0.171174	0.342347
VNN3	1488	0.171174	0.342347
DHX57	1489	0.171237	0.342474
NDUFA9	1490	0.171413	0.342825
LAPTM4B	1491	0.171436	0.342872
BEST1	1491	0.171436	0.342872
COQ2	1492	0.171501	0.343001
DERL1	1493	0.171588	0.343177
SHISA3	1494	0.171699	0.343397
TRIM62	1495	0.171764	0.343529
CTGF	1496	0.17194	0.34388
ANXA2	1497	0.172116	0.344232
LSG1	1498	0.172223	0.344446
FCER1A	1498	0.172223	0.344446
SNX13	1499	0.172292	0.344585
GNB4	1500	0.17238	0.344761
IGFBP4	1500	0.17238	0.344761
PHIP	1501	0.172557	0.345113
FBXO34	1502	0.172645	0.345289
OSBPL8	1503	0.172733	0.345466
RRM2	1504	0.172747	0.345495
SLC27A3	1504	0.172747	0.345495
ILF3	1505	0.173009	0.346019
LRFN2	1506	0.173086	0.346171
STXBP3	1507	0.173271	0.346543
BBS2	1508	0.17335	0.346701
SLC9A2	1509	0.173439	0.346877
WNT2B	1510	0.173533	0.347067
MNT	1510	0.173533	0.347067
RUVBL1	1511	0.17388	0.347761
MATK	1512	0.173969	0.347937
TTL	1512	0.173969	0.347937
LINGO2	1513	0.174057	0.348114
PPM1M	1514	0.174318	0.348637
RPRML	1515	0.17458	0.34916
ALDH8A1	1515	0.17458	0.34916
ZNF500	1516	0.174765	0.34953
CAPNS2	1517	0.174841	0.349683
CORO7	1517	0.174841	0.349683
OXCT1	1518	0.174854	0.349707
ZBTB45	1519	0.174942	0.349884
ART1	1520	0.175103	0.350205
CDK5RAP3	1520	0.175103	0.350205
ARPC4	1521	0.175297	0.350593
TBC1D22B	1522	0.175364	0.350728
ATHL1	1522	0.175364	0.350728
LSM1	1523	0.175625	0.35125
SNX4	1524	0.175652	0.351303
RBM45	1525	0.175829	0.351658
MAN2A1	1526	0.175886	0.351772
TMEM44	1527	0.176007	0.352013
UFD1L	1528	0.176147	0.352294
MAP9	1529	0.176184	0.352368
SHKBP1	1530	0.176408	0.352816
IGFBP2	1531	0.176629	0.353257
IDH3B	1532	0.176669	0.353338
CHMP5	1532	0.176669	0.353338
ZNF30	1533	0.176718	0.353435
EBF1	1534	0.176896	0.353791
PDE6B	1535	0.17693	0.353859
[truncated: 9,250 more rows]
