# Supplementary material for: Multiomics integrative analysis identifies APOE allele-specific blood biomarkers associated to Alzheimer’s disease etiopathogenesis
Source: Aging (Albany NY). 2021 Apr 12;13(7):9277–329. doi: 10.18632/aging.202950 (PMC8064208; doi:10.18632/aging.202950)
Supplement: Supplementary Table 27 [file aging-13-202950-s029.xlsx]

## Sheet: Sheet1
Supplementary Table 27. RRA integrative analysis in blood: APOE4 stratum.
Symbol	Rank	ExactP(Score)	AdjustP
LARP7	1	0.000100974	0.000201948
MRPL50	2	0.000249966	0.000499932
MRPL39	3	0.000282615	0.00056523
TOMM40	4	0.000353522	0.000707044
ENY2	4	0.000353522	0.000707044
AIF1	5	0.00036335	0.0007267
TMEM126B	6	0.000377784	0.000755567
CRYZL1	7	0.000454138	0.000908276
TMEM126A	8	0.000627726	0.00125545
APOC1	9	0.000705061	0.00141012
GTF2H5	9	0.000705061	0.00141012
EXOSC7	10	0.000947745	0.00189549
PVRL2	11	0.00105531	0.00211061
MRPL51	11	0.00105531	0.00211061
HSPA1L	12	0.00135994	0.00271987
CLPTM1	13	0.0014045	0.002809
NDUFS5	13	0.0014045	0.002809
CLU	14	0.00175278	0.00350556
PSMA3	14	0.00175278	0.00350556
ZNF384	15	0.00193134	0.00386267
PICALM	16	0.00210025	0.00420051
SHFM1	16	0.00210025	0.00420051
TOMM5	17	0.00217816	0.00435632
IL6	18	0.00244698	0.00489396
ATP5I	18	0.00244698	0.00489396
RPAP3	19	0.00253822	0.00507644
CSAD	20	0.00267701	0.00535403
EPHX2	21	0.00279302	0.00558603
MRPS18C	21	0.00279302	0.00558603
EHD1	22	0.00285889	0.00571779
BIN1	23	0.00313841	0.00627682
UQCRB	23	0.00313841	0.00627682
CDKN2C	24	0.00328246	0.00656492
UPF1	25	0.0034686	0.00693721
SLC24A4	26	0.00348319	0.00696639
RPF2	26	0.00348319	0.00696639
MAP3K11	27	0.00376478	0.00752956
POLR1D	28	0.0038274	0.00765479
UQCRH	28	0.0038274	0.00765479
PSMC6	29	0.00394817	0.00789635
MKNK1	30	0.00405712	0.00811424
COX6C	30	0.00405712	0.00811424
GAB2	31	0.00417105	0.0083421
MAGOH	31	0.00417105	0.0083421
CARD8	32	0.00431158	0.00862316
ADAM29	33	0.00451417	0.00902835
RPL36AL	33	0.00451417	0.00902835
FCRLB	34	0.00485679	0.00971357
ING3	34	0.00485679	0.00971357
ATP5O	35	0.00515533	0.0103107
FBP1	36	0.00519891	0.0103978
COX17	36	0.00519891	0.0103978
MVP	37	0.00540472	0.0108094
TCTEX1D2	38	0.00544082	0.0108816
TIMM17A	39	0.00554056	0.0110811
LSM3	39	0.00554056	0.0110811
IMPDH1	40	0.00575234	0.0115047
PDLIM7	41	0.00577093	0.0115419
SEC11A	42	0.00584557	0.0116911
RHOH	43	0.00588175	0.0117635
MGAT4A	44	0.00601522	0.0120304
RHOT2	45	0.00607229	0.0121446
MAPK8	46	0.00622249	0.012445
ATP5J	46	0.00622249	0.012445
SUB1	47	0.00622576	0.0124515
MAZ	48	0.00647912	0.0129582
NDST2	49	0.00655806	0.0131161
MDFIC	50	0.00656279	0.0131256
LSM5	50	0.00656279	0.0131256
HSPA1B	51	0.00677755	0.0135551
ALPK2	52	0.00690268	0.0138054
INO80C	53	0.00724214	0.0144843
UCHL3	53	0.00724214	0.0144843
FCRLA	54	0.00758121	0.0151624
CWC15	54	0.00758121	0.0151624
PRIM1	55	0.00771183	0.0154237
MS4A6A	56	0.00791988	0.0158398
NGDN	56	0.00791988	0.0158398
ALDOA	57	0.00814578	0.0162916
SEZ6L2	58	0.00825817	0.0165163
CDC26	58	0.00825817	0.0165163
SNRPD2	59	0.00830037	0.0166007
RAB40C	60	0.00838934	0.0167787
GNL2	61	0.008434	0.016868
LCOR	62	0.00856865	0.0171373
NARS2	63	0.00859607	0.0171921
MRPL33	63	0.00859607	0.0171921
TMEM14B	64	0.00863637	0.0172727
SNTB2	65	0.00877257	0.0175451
SORL1	66	0.00888685	0.0177737
MRPS21	66	0.00888685	0.0177737
FBP2	67	0.00893361	0.0178672
SRP19	67	0.00893361	0.0178672
CCNI	68	0.00902494	0.0180499
TPRKB	69	0.00918734	0.0183747
STK17B	70	0.00927078	0.0185416
MRPL22	70	0.00927078	0.0185416
ATXN3	71	0.00951632	0.0190326
FAM193A	72	0.0096076	0.0192152
SYF2	72	0.0096076	0.0192152
KTN1	73	0.00982679	0.0196536
SLC16A5	74	0.00989912	0.0197982
MEFV	75	0.00994406	0.0198881
MYBPC3	76	0.0102155	0.020431
RNPEP	77	0.0102802	0.0205604
METTL5	77	0.0102802	0.0205604
ATP6V0E1	78	0.0103385	0.0206769
SEMA4B	79	0.0106114	0.0212229
RBBP9	80	0.010616	0.0212319
DBI	80	0.010616	0.0212319
INPP4A	81	0.0109514	0.0219028
DNAJA1	81	0.0109514	0.0219028
SNRPG	82	0.0111166	0.0222331
PURA	83	0.0112865	0.022573
MRPL35	83	0.0112865	0.022573
RNF4	84	0.0113475	0.0226951
MUC6	85	0.0116213	0.0232426
SSB	85	0.0116213	0.0232426
MAP4K4	86	0.011633	0.0232659
UBL5	86	0.011633	0.0232659
RPS27L	87	0.0116591	0.0233181
ASPHD1	88	0.0119558	0.0239115
MRPS33	88	0.0119558	0.0239115
ALKBH3	89	0.0120276	0.0240552
MS4A2	90	0.0122899	0.0245799
OSBPL8	91	0.0123479	0.0246958
POLR3F	92	0.0126238	0.0252475
NDUFS4	92	0.0126238	0.0252475
MRPL24	93	0.0128632	0.0257265
TNIP2	94	0.0129573	0.0259146
UFC1	94	0.0129573	0.0259146
PCNXL3	95	0.0130005	0.0260011
ZNF324	96	0.0130281	0.0260562
NCOA7	97	0.0132905	0.0265811
NUCB2	97	0.0132905	0.0265811
NACA	98	0.0133608	0.0267215
RASAL3	99	0.0135006	0.0270011
NLRX1	100	0.0135286	0.0270572
FCGR2B	101	0.0136235	0.0272469
RPS24	101	0.0136235	0.0272469
DUSP12	102	0.0139561	0.0279122
TNFRSF9	103	0.0141526	0.0283052
SEC23B	104	0.0142884	0.0285769
RPL34	104	0.0142884	0.0285769
PMPCB	105	0.0142963	0.0285926
XYLT2	106	0.0145276	0.0290553
KCTD13	107	0.0146205	0.029241
COPS5	107	0.0146205	0.029241
CIITA	108	0.0149523	0.0299045
DCTN6	108	0.0149523	0.0299045
DPAGT1	109	0.0150842	0.0301684
LNPEP	110	0.0152838	0.0305675
PSMA4	110	0.0152838	0.0305675
EAF2	111	0.0153215	0.030643
ARHGEF18	112	0.0153811	0.0307622
MTMR3	113	0.0155007	0.0310013
PLEKHG1	114	0.015615	0.0312299
RPL26	114	0.015615	0.0312299
RSAD1	115	0.0159459	0.0318918
RPA3	115	0.0159459	0.0318918
VAMP8	116	0.0160136	0.0320272
DAGLB	117	0.0161355	0.032271
TATDN3	118	0.0161966	0.0323931
MS4A4A	119	0.0162765	0.0325531
CBX3	119	0.0162765	0.0325531
DGKQ	120	0.016442	0.0328841
CLC	121	0.0165345	0.0330691
RBMS2	122	0.0166069	0.0332138
ATP6V1E1	122	0.0166069	0.0332138
TSPAN32	123	0.0166273	0.0332546
BNIP1	124	0.0167513	0.0335027
PANK4	125	0.0168758	0.0337516
SH2D3C	126	0.016907	0.033814
EIF5AL1	127	0.016937	0.0338741
CETN3	127	0.016937	0.0338741
ACTR6	128	0.0171575	0.034315
GAK	129	0.017189	0.0343779
CENPN	130	0.0172204	0.0344408
SLC25A1	131	0.0172669	0.0345338
RPS25	131	0.0172669	0.0345338
PSMC2	132	0.0173466	0.0346931
USP35	133	0.0175965	0.0351929
TBCA	133	0.0175965	0.0351929
DCUN1D1	134	0.0176638	0.0353276
OBFC1	134	0.0176638	0.0353276
PIGT	135	0.0177595	0.035519
NCF4	136	0.0177914	0.0355829
LSM14A	137	0.0178554	0.0357109
HTR1E	138	0.0179258	0.0358516
RPL26L1	138	0.0179258	0.0358516
GDPD3	139	0.0182417	0.0364834
DOCK9	140	0.0182549	0.0365097
ATG2A	141	0.018274	0.0365481
SOD1	142	0.0184038	0.0368075
CD2AP	143	0.0185837	0.0371673
SNRPB2	143	0.0185837	0.0371673
SETDB1	144	0.0186318	0.0372637
FCHO1	145	0.0186972	0.0373945
MICB	145	0.0186972	0.0373945
NDUFS3	146	0.01873	0.03746
VARS	147	0.0188284	0.0376568
SLC35C1	148	0.0188941	0.0377882
FAM83A	149	0.0189122	0.0378244
ATP5F1	149	0.0189122	0.0378244
BPHL	150	0.0192405	0.038481
POMP	150	0.0192405	0.038481
MRPL27	151	0.019324	0.0386481
AGTPBP1	152	0.0195574	0.0391148
CUL2	153	0.0195686	0.0391371
MRPS17	153	0.0195686	0.0391371
IDUA	154	0.0196578	0.0393157
TCF20	155	0.0198258	0.0396515
HDHD2	156	0.0198931	0.0397863
SOAT2	157	0.0198964	0.0397927
GEMIN6	157	0.0198964	0.0397927
PPM1B	158	0.0199944	0.0399887
MRPL47	159	0.0200282	0.0400563
CTSD	160	0.020062	0.040124
ERAP2	161	0.0202239	0.0404478
ATP6V1D	161	0.0202239	0.0404478
IQSEC1	162	0.0202655	0.040531
IFNAR2	163	0.0203336	0.0406672
ACTL6A	164	0.0205384	0.0410768
IGFBP6	165	0.0205512	0.0411025
GIMAP7	165	0.0205512	0.0411025
MFSD10	166	0.0206069	0.0412138
CAMK2G	167	0.0206412	0.0412824
DONSON	168	0.0208783	0.0417566
TOMM7	168	0.0208783	0.0417566
RAB24	169	0.0208819	0.0417639
FBXO46	170	0.020951	0.0419019
LXN	171	0.021124	0.042248
DEXI	172	0.0212051	0.0424103
DPY19L4	173	0.0215317	0.0430634
DPY30	173	0.0215317	0.0430634
TMEM14C	174	0.0217877	0.0435754
MAP1S	175	0.0218581	0.0437161
CCT2	176	0.0218934	0.0437868
NDUFB5	177	0.0219287	0.0438573
PNPLA6	177	0.0219287	0.0438573
REEP5	178	0.0221055	0.0442109
USP7	179	0.0221842	0.0443684
PTRH2	179	0.0221842	0.0443684
NDUFA9	180	0.0222829	0.0445659
PTP4A1	181	0.0223541	0.0447082
LPAR1	181	0.0223541	0.0447082
TIGD7	182	0.0223897	0.0447795
DPM1	183	0.0225101	0.0450202
TM9SF3	184	0.0227834	0.0455668
LSM2	185	0.0228357	0.0456715
RARS	185	0.0228357	0.0456715
SS18L2	186	0.0228553	0.0457107
NSA2	187	0.0228913	0.0457827
ZMAT2	188	0.0229274	0.0458547
MED6	189	0.0230717	0.0461435
ZNF22	190	0.0231079	0.0462158
LAMC1	191	0.0231612	0.0463223
GTF2B	191	0.0231612	0.0463223
AP2A2	192	0.0234863	0.0469727
TXNDC17	192	0.0234863	0.0469727
LILRA2	193	0.0235439	0.0470878
ARHGAP1	194	0.0236901	0.0473802
DSCR4	195	0.0238113	0.0476226
ARPC3	195	0.0238113	0.0476226
SNX3	196	0.0241361	0.0482721
PPIG	196	0.0241361	0.0482721
ECHDC1	197	0.0241682	0.0483363
SIPA1	198	0.0242421	0.0484842
DPF2	199	0.0243532	0.0487065
KLRC3	200	0.0244274	0.0488549
HBEGF	201	0.0244606	0.0489212
RPAIN	201	0.0244606	0.0489212
SAR1B	202	0.0244646	0.0489292
ACTN1	203	0.0246507	0.0493014
DNAJC5	204	0.024688	0.049376
EXOSC1	204	0.024688	0.049376
HCRTR2	205	0.0247849	0.0495697
TYK2	205	0.0247849	0.0495697
PAQR5	206	0.0251089	0.0502179
SCFD1	206	0.0251089	0.0502179
GPR18	207	0.0251377	0.0502755
SND1	208	0.0252131	0.0504261
CCNY	209	0.0253262	0.0506525
ZSWIM4	210	0.0254328	0.0508656
RIOK2	210	0.0254328	0.0508656
CHCHD1	211	0.0254775	0.050955
FAM53B	212	0.0255154	0.0510308
RAPGEF1	213	0.0256292	0.0512585
UNC50	214	0.0257564	0.0515129
CCDC53	214	0.0257564	0.0515129
TMCO3	215	0.0259721	0.0519442
KPNA6	216	0.0260103	0.0520207
CXCL3	217	0.0260799	0.0521597
TXN	217	0.0260799	0.0521597
FXR1	218	0.0264031	0.0528061
CIR1	219	0.0264326	0.0528652
GTF2A2	220	0.0267261	0.0534521
SH2D1B	221	0.0270488	0.0540977
PSMA2	221	0.0270488	0.0540977
ALOX5	222	0.0272867	0.0545733
MXD3	223	0.0276004	0.0552008
CASP1	224	0.0276937	0.0553875
NUDCD2	225	0.0277185	0.0554369
HSPA1A	226	0.0280159	0.0560318
PPP2R5C	226	0.0280159	0.0560318
MRPL46	227	0.0282329	0.0564657
CISD1	228	0.0282726	0.0565452
MRPS22	229	0.0283378	0.0566757
WDFY3	230	0.0283522	0.0567044
SLC29A3	231	0.0286596	0.0573191
PLRG1	231	0.0286596	0.0573191
IQCK	232	0.0289811	0.0579622
RBX1	233	0.0290731	0.0581462
CALHM2	234	0.0291134	0.0582268
HYOU1	235	0.0292345	0.0584689
SRP14	236	0.0293024	0.0586048
TROVE2	237	0.0293558	0.0587115
ZNF189	238	0.0293962	0.0587925
DGAT1	239	0.0295584	0.0591169
GOLPH3	240	0.0296235	0.059247
NDUFB3	240	0.0296235	0.059247
LAMC2	241	0.0299444	0.0598889
BRIX1	241	0.0299444	0.0598889
CLEC4A	242	0.0299657	0.0599314
ZNF35	243	0.0300066	0.0600132
VIPR1	244	0.0301703	0.0603407
IL6ST	245	0.0302651	0.0605303
DCAF7	246	0.0303756	0.0607512
TUBA1B	246	0.0303756	0.0607512
NALCN	247	0.0305856	0.0611713
PRDX1	247	0.0305856	0.0611713
SON	248	0.0306641	0.0613281
ADD1	249	0.0308709	0.0617418
NMUR1	250	0.030906	0.0618119
PFDN5	250	0.030906	0.0618119
NDUFA8	251	0.0309953	0.0619906
TNFSF14	252	0.0311199	0.0622399
ZCCHC24	253	0.0312261	0.0624521
ERH	253	0.0312261	0.0624521
RIN3	254	0.0312865	0.062573
ZNF197	255	0.0313282	0.0626564
TMEM219	256	0.031546	0.063092
CHMP5	256	0.031546	0.063092
F11R	257	0.0318306	0.0636612
BCAM	258	0.0318657	0.0637314
RBM34	258	0.0318657	0.0637314
ZC3H15	259	0.0321852	0.0643704
TAOK2	260	0.0323367	0.0646735
ATP5S	261	0.0324639	0.0649277
CCDC50	262	0.0325045	0.0650091
PSMB1	262	0.0325045	0.0650091
CDIPT	263	0.0328237	0.0656474
METAP2	263	0.0328237	0.0656474
AGER	264	0.0329746	0.0659493
RABGAP1L	265	0.0330601	0.0661202
HEY2	266	0.0331426	0.0662852
TCIRG1	266	0.0331426	0.0662852
SPI1	267	0.0332314	0.0664628
ZNF200	268	0.0334614	0.0669227
HSP90AA1	268	0.0334614	0.0669227
EED	269	0.0334891	0.0669782
NOL11	270	0.0335321	0.0670643
RBM17	271	0.0337477	0.0674955
CYP4F22	272	0.0337799	0.0675599
SSBP1	272	0.0337799	0.0675599
TFIP11	273	0.0338774	0.0677548
HNRNPAB	274	0.0340983	0.0681966
POLR3GL	274	0.0340983	0.0681966
FUK	275	0.0343548	0.0687095
PTPN11	275	0.0343548	0.0687095
ACTR3	276	0.0344165	0.068833
SEC61G	277	0.0344855	0.068971
SIX5	278	0.0347345	0.0694689
FRG1	278	0.0347345	0.0694689
TREML2	279	0.0347477	0.0694953
TMEM63A	280	0.0350523	0.0701045
EMG1	280	0.0350523	0.0701045
DOK3	281	0.0353629	0.0707258
TUBB2A	282	0.0353699	0.0707398
UBE2V2	282	0.0353699	0.0707398
SLC26A8	283	0.0354071	0.0708141
CRYZ	284	0.0355396	0.0710793
STRAP	285	0.0356281	0.0712563
SH3BP2	286	0.0356873	0.0713746
ITGAX	286	0.0356873	0.0713746
CRAMP1L	287	0.0358055	0.0716109
CCL5	288	0.0360046	0.0720091
EFTUD2	289	0.0361613	0.0723226
CRISP1	290	0.0363216	0.0726432
CD3D	290	0.0363216	0.0726432
MTMR14	291	0.0363399	0.0726797
BCL6	292	0.0364293	0.0728586
INO80	293	0.0365188	0.0730376
HOXB1	294	0.0365636	0.0731272
DYDC1	295	0.0366385	0.073277
PRPF18	295	0.0366385	0.073277
PUM1	296	0.0367431	0.0734861
FAIM	297	0.0368779	0.0737558
LHFPL5	298	0.0369552	0.0739104
RPS6	299	0.036968	0.0739359
SRP72	300	0.0371483	0.0742966
CAPN1	301	0.0371935	0.074387
THEM4	302	0.0372717	0.0745434
H2AFZ	302	0.0372717	0.0745434
LEMD2	303	0.0374649	0.0749299
TESK1	304	0.0375556	0.0751113
MITD1	305	0.037588	0.0751761
KIR2DL3	306	0.0376464	0.0752928
COX6A1	307	0.0379042	0.0758084
PIGF	308	0.0382202	0.0764403
ARMC10	309	0.038239	0.0764781
FAM193B	310	0.0383764	0.0767528
PRR7	311	0.0385359	0.0770719
FABP5	311	0.0385359	0.0770719
TXLNA	312	0.0386978	0.0773956
DBN1	313	0.0388516	0.0777031
TBXAS1	314	0.0389281	0.0778562
RPL24	315	0.0390204	0.0780408
DYDC2	316	0.039167	0.078334
ACAT1	316	0.039167	0.078334
FKBP14	317	0.0394823	0.0789645
CCDC90B	317	0.0394823	0.0789645
FHOD1	318	0.0396694	0.0793387
SAC3D1	319	0.0397973	0.0795947
RPL31	319	0.0397973	0.0795947
CLEC16A	320	0.0398557	0.0797114
PSD4	321	0.0399957	0.0799914
LST1	322	0.0401122	0.0802245
CCDC25	322	0.0401122	0.0802245
PLCH2	323	0.0402295	0.0804591
GPSM3	324	0.0403701	0.0807403
BUB1B	325	0.0404171	0.0808341
MS4A3	326	0.040427	0.080854
SLU7	327	0.0407415	0.0814831
TRIOBP	328	0.0408405	0.0816809
STK35	329	0.0408876	0.0817753
CAMKK2	330	0.0409348	0.0818696
PROP1	331	0.0410559	0.0821118
EEF1B2	331	0.0410559	0.0821118
TMEM60	332	0.0411238	0.0822477
ATMIN	333	0.0411712	0.0823423
IWS1	334	0.0413133	0.0826266
ENSA	335	0.0413701	0.0827403
PUS3	336	0.0415031	0.0830062
CLTCL1	337	0.0415506	0.0831012
MRPL17	338	0.0416842	0.0833684
ATP5G3	339	0.0417886	0.0835772
PIGQ	340	0.0418363	0.0836725
GPRC5B	341	0.041998	0.0839961
MDH1	341	0.041998	0.0839961
NEU1	342	0.0420272	0.0840544
COMMD6	343	0.0423117	0.0846235
AGPAT1	344	0.0425062	0.0850125
TMEM175	345	0.0426024	0.0852047
RPL38	346	0.0426253	0.0852505
ADAM8	346	0.0426253	0.0852505
E2F4	347	0.0427467	0.0854934
IFFO1	348	0.0427949	0.0855898
NEUROG2	349	0.0429386	0.0858773
RPS27A	349	0.0429386	0.0858773
REXO1	350	0.0429395	0.0858791
ARID4A	351	0.0430361	0.0860722
MOG	352	0.0430844	0.0861688
NAALADL1	353	0.0432518	0.0865036
ATP5J2	353	0.0432518	0.0865036
UNC119	354	0.0432779	0.0865558
CHRNA2	355	0.0435204	0.0870407
MRPS27	356	0.0435648	0.0871297
MTIF3	356	0.0435648	0.0871297
EIF4A2	357	0.0438121	0.0876243
GAA	357	0.0438121	0.0876243
TRIM38	358	0.0438608	0.0877217
TMEM97	359	0.0438777	0.0877554
SYNJ2	360	0.0441904	0.0883807
ZCCHC17	360	0.0441904	0.0883807
PGS1	361	0.0443493	0.0886987
PAK4	362	0.0444964	0.0889928
NCR3	363	0.0445029	0.0890058
PSMA6	363	0.0445029	0.0890058
STRADA	364	0.0445945	0.089189
GRK6	365	0.0448152	0.0896305
RPL7	365	0.0448152	0.0896305
ANAPC13	366	0.0451274	0.0902549
DYRK4	367	0.0451361	0.0902722
CYP20A1	368	0.0451855	0.0903709
AKT1	368	0.0451855	0.0903709
TXNDC12	369	0.0454327	0.0908655
LTB	370	0.0454394	0.0908789
STX8	370	0.0454394	0.0908789
ZNF740	371	0.0454823	0.0909646
RAB5B	372	0.0455814	0.0911628
SEC24C	373	0.0457303	0.0914606
DCUN1D2	374	0.0457513	0.0915026
UGP2	374	0.0457513	0.0915026
UFM1	375	0.0458297	0.0916593
PEX11G	376	0.046063	0.092126
WDR33	376	0.046063	0.092126
CXCL16	377	0.0461284	0.0922568
MKNK2	377	0.0461284	0.0922568
GLS2	378	0.0463745	0.0927491
VPS29	378	0.0463745	0.0927491
WWP1	379	0.0465782	0.0931563
REPS1	380	0.0466859	0.0933718
ARL2	381	0.0469971	0.0939942
HIGD1A	381	0.0469971	0.0939942
MRPS28	382	0.0473081	0.0946163
KIR2DL4	383	0.0473826	0.0947653
IL17RA	383	0.0473826	0.0947653
SP140	384	0.0475847	0.0951695
DDI1	385	0.047619	0.095238
CKS2	385	0.047619	0.095238
TYW3	386	0.0477366	0.0954731
EIF3E	387	0.0479297	0.0958595
ITSN1	388	0.0482403	0.0964806
TIMM23	388	0.0482403	0.0964806
GLRX2	389	0.0482443	0.0964885
APIP	390	0.0485507	0.0971014
SAAL1	391	0.0489079	0.0978159
DDX41	392	0.049171	0.098342
RWDD1	392	0.049171	0.098342
CYP4F3	393	0.0493698	0.0987396
UBE2E1	394	0.0494809	0.0989619
FBXO3	395	0.0497304	0.0994608
ADPRHL1	396	0.0497907	0.0995814
SRP9	397	0.0500922	0.100184
CLASP2	398	0.0501003	0.100201
MRPS23	398	0.0501003	0.100201
ATG10	399	0.0501958	0.100392
ZSCAN18	400	0.0502476	0.100495
SRBD1	401	0.0502995	0.100599
RPL23	402	0.0504098	0.10082
PPFIA1	403	0.0505591	0.101118
PRKDC	404	0.0506632	0.101326
DENND4C	405	0.0507191	0.101438
TRIP4	405	0.0507191	0.101438
LRRC29	406	0.0507673	0.101535
NEDD9	407	0.0508194	0.101639
BAZ2A	408	0.0510282	0.102056
PPP2R3C	408	0.0510282	0.102056
ZNF239	409	0.0513372	0.102674
MTIF2	409	0.0513372	0.102674
DUSP26	410	0.0513417	0.102683
CKAP5	411	0.0514989	0.102998
MS4A7	412	0.051646	0.103292
CEBPZ	412	0.051646	0.103292
EEF2	413	0.0518139	0.103628
OSBPL7	414	0.0518664	0.103733
AK2	415	0.0519547	0.103909
PDHB	416	0.0520243	0.104049
TNF	417	0.0522632	0.104526
THOC7	417	0.0522632	0.104526
MLKL	418	0.052288	0.104576
POLRMT	419	0.0523408	0.104682
FGFR1OP2	420	0.0524993	0.104999
CNGA3	421	0.0525716	0.105143
VRK1	421	0.0525716	0.105143
CRKL	422	0.0526051	0.10521
RAF1	423	0.0527111	0.105422
CHID1	424	0.0528798	0.10576
GMFG	424	0.0528798	0.10576
ZDHHC7	425	0.0531357	0.106271
SRPK1	426	0.0531879	0.106376
CWF19L2	426	0.0531879	0.106376
PPIE	427	0.0531889	0.106378
DCAF6	428	0.0532421	0.106484
PFKFB3	429	0.0534019	0.106804
PFDN1	430	0.0534958	0.106992
PPIL3	430	0.0534958	0.106992
CPD	431	0.0535085	0.107017
SNAPC4	432	0.0536686	0.107337
CEP350	433	0.0537221	0.107444
TYROBP	434	0.0537755	0.107551
ARHGEF2	435	0.0538035	0.107607
LPP	436	0.053829	0.107658
CCNG2	437	0.0538825	0.107765
ZNFX1	438	0.053936	0.107872
MRI1	439	0.0540431	0.108086
HIRIP3	440	0.0541111	0.108222
RPS27	440	0.0541111	0.108222
TRADD	441	0.0541503	0.108301
GTPBP10	442	0.054204	0.108408
ZNF263	443	0.0544186	0.108837
RPL11	443	0.0544186	0.108837
PGM2L1	444	0.0547259	0.109452
GNL3	444	0.0547259	0.109452
RELA	445	0.0549035	0.109807
PIK3CD	445	0.0549035	0.109807
LILRB3	446	0.0549575	0.109915
RAC1	447	0.0550115	0.110023
RASGRF1	448	0.055033	0.110066
RNF24	449	0.0550655	0.110131
AP1G2	450	0.0551196	0.110239
RPL41	451	0.0552819	0.110564
EPHX1	452	0.05534	0.11068
ATP5C1	452	0.05534	0.11068
FCGR3A	453	0.0553902	0.11078
ZNF155	453	0.0553902	0.11078
PBX2	454	0.0555529	0.111106
CCDC6	455	0.0556469	0.111294
HELZ	455	0.0556469	0.111294
ADK	456	0.0556614	0.111323
ITLN1	457	0.0557701	0.11154
BATF2	458	0.0559536	0.111907
DPH3	458	0.0559536	0.111907
ARMC7	459	0.0561511	0.112302
TOM1	459	0.0561511	0.112302
ELL	460	0.0562057	0.112411
LRRC47	461	0.0562602	0.11252
TATDN1	461	0.0562602	0.11252
INO80E	462	0.0565666	0.113133
MRPL32	462	0.0565666	0.113133
METTL6	463	0.0566975	0.113395
VARS2	464	0.0567523	0.113505
MAPK13	465	0.0568728	0.113746
GRAMD4	466	0.0569716	0.113943
ZFPL1	467	0.0571363	0.114273
NDUFB2	468	0.0571789	0.114358
RPS6KA1	469	0.0574664	0.114933
CHAD	470	0.0574849	0.11497
CKS1B	470	0.0574849	0.11497
DUSP1	471	0.0575767	0.115153
ZNF283	472	0.0577907	0.115581
COPS4	472	0.0577907	0.115581
ZNF136	473	0.0578526	0.115705
RRP12	474	0.0580739	0.116148
FSCN1	474	0.0580739	0.116148
DMPK	475	0.0580964	0.116193
POFUT2	475	0.0580964	0.116193
SLC26A5	476	0.0581292	0.116258
LRRN1	477	0.0582955	0.116591
RNF146	478	0.0584019	0.116804
UQCRQ	478	0.0584019	0.116804
LUZP1	479	0.0584619	0.116924
TRNT1	480	0.058573	0.117146
PI3	481	0.0586286	0.117257
NHP2	482	0.0587073	0.117415
MAPK14	483	0.0588511	0.117702
DOC2A	484	0.0590125	0.118025
APBB3	484	0.0590125	0.118025
EMILIN2	485	0.0591298	0.11826
CDK2	486	0.0591856	0.118371
PIK3CB	487	0.0593176	0.118635
MPHOSPH10	487	0.0593176	0.118635
ZMAT3	488	0.0593532	0.118706
ARPC1A	489	0.059521	0.119042
CCNG1	490	0.059577	0.119154
RMND5B	491	0.0596226	0.119245
PDCL3	491	0.0596226	0.119245
ATF6	492	0.0599274	0.119855
ISY1	492	0.0599274	0.119855
DDR1	493	0.0599695	0.119939
ALG5	494	0.060232	0.120464
ZNF516	495	0.0604759	0.120952
PLAC8	496	0.0605323	0.121065
CRIPAK	497	0.0608145	0.121629
PPP2CB	498	0.0608409	0.121682
HPCAL1	499	0.0609276	0.121855
CEBPB	500	0.0610408	0.122082
PPA2	501	0.0611452	0.12229
KCNAB3	502	0.0612107	0.122421
ZDHHC3	503	0.0614493	0.122899
NDUFA4	503	0.0614493	0.122899
DDX47	504	0.0615512	0.123102
ZNF362	505	0.061608	0.123216
PPP1R3E	506	0.0616649	0.12333
UFSP2	506	0.0616649	0.12333
PHAX	507	0.0617532	0.123506
ACTR1A	508	0.0617786	0.123557
SLC23A2	509	0.0619495	0.123899
ZMIZ2	510	0.062057	0.124114
SNX2	510	0.062057	0.124114
RELB	511	0.0622918	0.124584
CCDC97	511	0.0622918	0.124584
LTA	512	0.0623607	0.124721
MBD6	512	0.0623607	0.124721
KHSRP	513	0.0625777	0.125155
NISCH	513	0.0625777	0.125155
ACPP	514	0.0626642	0.125328
ANXA1	514	0.0626642	0.125328
KIAA0513	515	0.0628068	0.125614
CTAGE5	516	0.0628642	0.125728
TMEM163	517	0.0629676	0.125935
CDK9	518	0.062979	0.125958
WAC	519	0.0631513	0.126303
MAPK9	520	0.0632663	0.126533
PTCD2	521	0.0632708	0.126542
PSMD14	521	0.0632708	0.126542
CORO2B	522	0.0635739	0.127148
ZNHIT3	522	0.0635739	0.127148
FAM89B	523	0.0637272	0.127454
RNF20	524	0.0637849	0.12757
TRAPPC4	525	0.0638769	0.127754
PABPN1	526	0.0639582	0.127916
GPSM1	527	0.0641317	0.128263
NDEL1	528	0.0641896	0.128379
CR1	529	0.0643634	0.128727
ETF1	530	0.0644214	0.128843
SOS2	531	0.0645374	0.129075
CDKN1B	532	0.0645954	0.129191
RFESD	533	0.0646535	0.129307
MRPL52	534	0.0647849	0.12957
NXF1	534	0.0647849	0.12957
GTPBP8	535	0.0650607	0.130121
BCCIP	536	0.0650874	0.130175
PPBP	537	0.0652355	0.130471
FAM98A	538	0.0653522	0.130704
CTSB	539	0.0653896	0.130779
DCUN1D5	539	0.0653896	0.130779
HSPA9	540	0.0655274	0.131055
LILRA1	541	0.0656918	0.131384
MRPS31	541	0.0656918	0.131384
GPR68	542	0.0659938	0.131988
SLPI	543	0.0660542	0.132108
CD14	543	0.0660542	0.132108
JMJD8	544	0.0661715	0.132343
PSPC1	545	0.0662302	0.13246
METTL8	546	0.0662956	0.132591
NDUFAF2	546	0.0662956	0.132591
GALT	547	0.0663477	0.132695
THUMPD2	547	0.0663477	0.132695
ZMYM5	548	0.0665241	0.133048
TSPAN14	549	0.0665973	0.133195
NFU1	549	0.0665973	0.133195
FCGR2A	550	0.0667595	0.133519
INSC	551	0.0668989	0.133798
ATP6V1G1	551	0.0668989	0.133798
HSF1	552	0.0671725	0.134345
PPP2R5B	553	0.0672004	0.134401
RPS7	553	0.0672004	0.134401
PIGS	554	0.0672316	0.134463
SERPINI1	555	0.0673499	0.1347
NSL1	556	0.0674682	0.134936
TTC32	557	0.0675017	0.135003
TMSB10	557	0.0675017	0.135003
SP1	558	0.0676459	0.135292
SLC9A3	559	0.0678029	0.135606
PSMB7	559	0.0678029	0.135606
ELMO2	560	0.0681039	0.136208
SIGLEC7	561	0.0683588	0.136718
USP13	562	0.0684048	0.13681
NDUFB6	562	0.0684048	0.13681
CLDN5	563	0.0684779	0.136956
CLIC1	564	0.0686568	0.137314
CCR3	565	0.0687056	0.137411
COMMD3	565	0.0687056	0.137411
KIAA1143	566	0.0688359	0.137672
HDAC3	567	0.0689554	0.137911
GJC1	568	0.0690062	0.138012
PDCD10	568	0.0690062	0.138012
NARFL	569	0.0691348	0.13827
IGF1R	570	0.0691947	0.138389
GNPNAT1	571	0.0693067	0.138613
ANKRA2	572	0.0693144	0.138629
KLF7	573	0.0695543	0.139109
GPHA2	574	0.0696071	0.139214
DNAJC8	574	0.0696071	0.139214
CEP63	575	0.0697344	0.139469
ASCC2	576	0.0699073	0.139815
COX7A2	576	0.0699073	0.139815
SNAI3	577	0.0699147	0.139829
MYO9B	578	0.0699749	0.13995
UBE2V1	579	0.0702074	0.140415
UBXN8	580	0.0705074	0.141015
KCNK7	581	0.0705173	0.141035
GPR132	581	0.0705173	0.141035
CLEC3B	582	0.0708072	0.141614
HOMEZ	583	0.071107	0.142214
RPL32	583	0.071107	0.142214
NFKB1	584	0.0712434	0.142487
P2RY13	585	0.0713041	0.142608
POLA2	586	0.0714065	0.142813
MICAL1	586	0.0714065	0.142813
HSPA6	587	0.0714862	0.142972
CDKL1	588	0.071706	0.143412
MED26	589	0.0717293	0.143459
CCR1	590	0.0720053	0.144011
WHSC1	591	0.0720338	0.144068
HCFC2	592	0.0720947	0.144189
USPL1	593	0.0722777	0.144555
LILRB1	594	0.0723045	0.144609
RBM5	594	0.0723045	0.144609
ADCK1	595	0.0723388	0.144678
SLC25A46	595	0.0723388	0.144678
SPATA20	596	0.0724609	0.144922
LILRA6	597	0.0725832	0.145166
LILRB4	598	0.0726035	0.145207
FAM136A	599	0.0726444	0.145289
ZNF45	600	0.0727667	0.145533
DHX16	600	0.0727667	0.145533
ZNF296	601	0.0729024	0.145805
LDHB	601	0.0729024	0.145805
GTF2H4	602	0.0731345	0.146269
NOL12	602	0.0731345	0.146269
GOSR1	603	0.0731958	0.146392
AP1M1	603	0.0731958	0.146392
KLRB1	604	0.0732012	0.146402
FBN2	605	0.0733186	0.146637
LSM1	606	0.0734999	0.147
KIF20B	607	0.0736876	0.147375
SHISA4	608	0.0737984	0.147597
HNMT	608	0.0737984	0.147597
GRAP2	609	0.0738108	0.147622
TUBA1A	610	0.0739957	0.147991
GABARAPL1	611	0.0740574	0.148115
SH2D2A	612	0.0740968	0.148194
COX7C	612	0.0740968	0.148194
MPST	613	0.0741808	0.148362
KIAA0020	614	0.0743951	0.14879
TBK1	615	0.074428	0.148856
TMEM88	616	0.0745517	0.149103
RPS18	617	0.0746755	0.149351
PPIA	618	0.0746932	0.149386
MRPL48	618	0.0746932	0.149386
ACAA2	619	0.0747374	0.149475
APH1A	620	0.0748613	0.149723
RPF1	621	0.0749912	0.149982
KCNMB1	622	0.0750474	0.150095
NSD1	623	0.0752337	0.150467
ZNF404	624	0.0752891	0.150578
CKLF	624	0.0752891	0.150578
KIR3DL1	625	0.0754202	0.15084
OXCT2	626	0.0755868	0.151174
UNC13D	626	0.0755868	0.151174
ATP5B	627	0.0756069	0.151214
MDM4	628	0.0758561	0.151712
FAM102B	629	0.0758845	0.151769
ATP5L	629	0.0758845	0.151769
DMAP1	630	0.0759185	0.151837
SH2D4B	631	0.076182	0.152364
SLC9A1	631	0.076182	0.152364
RPS3A	632	0.0762932	0.152586
GALR1	633	0.0764793	0.152959
CUTC	633	0.0764793	0.152959
CYLD	634	0.0764808	0.152962
BOP1	635	0.0765434	0.153087
ATP5H	636	0.0766686	0.153337
PIGR	637	0.0767766	0.153553
TAF1B	637	0.0767766	0.153553
ABCC3	638	0.076794	0.153588
TAF15	639	0.0770737	0.154147
GGPS1	639	0.0770737	0.154147
UQCRC2	640	0.0771705	0.154341
ASL	641	0.0772334	0.154467
MSRA	642	0.0772962	0.154592
IPO9	643	0.0773707	0.154741
ANAPC10	643	0.0773707	0.154741
CGRRF1	644	0.077422	0.154844
PRPF38B	645	0.0775479	0.155096
TMEM189	646	0.0776109	0.155222
TAS2R10	647	0.0776675	0.155335
NSMCE2	647	0.0776675	0.155335
TMPRSS4	648	0.0777369	0.155474
TECPR2	649	0.077863	0.155726
ITPR3	649	0.077863	0.155726
ZNF484	650	0.0779261	0.155852
PRRT2	651	0.0779643	0.155929
RDM1	652	0.0782609	0.156522
GTF2F2	652	0.0782609	0.156522
RGL2	653	0.0783051	0.15661
CENPQ	654	0.0783684	0.156737
SEMG1	655	0.0785574	0.157115
MRPL3	655	0.0785574	0.157115
CPEB2	656	0.0785582	0.157116
NAT10	657	0.0788117	0.157623
LYPLAL1	658	0.0788537	0.157707
TPX2	659	0.0791499	0.1583
UBA7	659	0.0791499	0.1583
RPL35A	660	0.0791926	0.158385
ERICH1	661	0.0793197	0.158639
TST	661	0.0793197	0.158639
OR1F1	662	0.0794461	0.158892
EEF1E1	662	0.0794461	0.158892
BTBD1	663	0.079447	0.158894
PPP1R2	664	0.079638	0.159276
GJB4	665	0.079742	0.159484
S100A8	665	0.079742	0.159484
NUDT5	666	0.0798292	0.159658
BUD31	667	0.079893	0.159786
SPNS1	668	0.0799568	0.159914
UBE2N	669	0.0800206	0.160041
GPR156	670	0.0800379	0.160076
CMTM2	670	0.0800379	0.160076
WWP2	671	0.0800845	0.160169
HYLS1	672	0.0801483	0.160297
ZNF446	673	0.0802122	0.160424
BCL10	674	0.0803336	0.160667
STK11IP	674	0.0803336	0.160667
CD44	675	0.0803401	0.16068
GNPAT	676	0.080468	0.160936
GHRL	677	0.080532	0.161064
TICAM1	677	0.080532	0.161064
ADAM11	678	0.0806292	0.161258
SMARCC2	678	0.0806292	0.161258
ZNF800	679	0.0809247	0.161849
TBC1D10C	679	0.0809247	0.161849
DENND5B	680	0.0812201	0.16244
LYRM2	680	0.0812201	0.16244
AASDH	681	0.0814305	0.162861
SF3B4	682	0.0814948	0.16299
CREBZF	683	0.0815153	0.163031
HMGB2	683	0.0815153	0.163031
SAFB2	684	0.0815592	0.163118
PSMD6	685	0.0816236	0.163247
PBX3	686	0.081688	0.163376
NCAM1	687	0.0817524	0.163505
POLD3	688	0.0818104	0.163621
PPWD1	688	0.0818104	0.163621
TMBIM4	689	0.0821054	0.164211
H2AFV	690	0.0824003	0.164801
CFDP1	690	0.0824003	0.164801
NIP7	691	0.082592	0.165184
MRPL21	692	0.082695	0.16539
XPO4	693	0.0829808	0.165962
GFM1	694	0.0829896	0.165979
DDX1	694	0.0829896	0.165979
IQCG	695	0.0831755	0.166351
CXCL5	696	0.0832841	0.166568
CALML4	696	0.0832841	0.166568
PHF12	697	0.0834354	0.166871
SPRY4	698	0.0835785	0.167157
MRPL40	698	0.0835785	0.167157
ALG14	699	0.0836957	0.167391
FBXL20	699	0.0836957	0.167391
PSMC3	700	0.0837608	0.167522
GAR1	701	0.0838911	0.167782
ANKS1A	702	0.0841669	0.168334
CMPK1	703	0.0843479	0.168696
ITGB7	704	0.0844132	0.168826
PTPN6	705	0.0844609	0.168922
ACIN1	706	0.0844786	0.168957
VPS4A	707	0.0846748	0.16935
CYB5D1	708	0.0847548	0.16951
ATPIF1	708	0.0847548	0.16951
DYNC2LI1	709	0.0848057	0.169611
AARS	710	0.0848712	0.169742
IGSF6	711	0.0849367	0.169873
SET	712	0.0850486	0.170097
SPATA7	713	0.085199	0.170398
STEAP1	714	0.0853422	0.170684
CPSF2	715	0.0855931	0.171186
GEMIN7	716	0.0856357	0.171271
HSPA4	716	0.0856357	0.171271
GOLGA2	717	0.0857247	0.171449
VPS52	718	0.0858563	0.171713
MAK	719	0.0859291	0.171858
KDM6B	720	0.0860539	0.172108
TMCO1	721	0.0862224	0.172445
WDFY2	722	0.0864498	0.1729
MMP14	723	0.0865156	0.173031
TMEM184B	723	0.0865156	0.173031
IL24	724	0.0868086	0.173617
RPL6	724	0.0868086	0.173617
ATG5	725	0.087045	0.17409
PRCC	726	0.0871016	0.174203
VAMP1	726	0.0871016	0.174203
RNF122	727	0.0873101	0.17462
GLCE	728	0.0873944	0.174789
ZNF358	729	0.0874428	0.174886
STYX	730	0.0876871	0.175374
MLST8	731	0.0877084	0.175417
CDH23	731	0.0877084	0.175417
TBC1D2	732	0.0878414	0.175683
RNF216	733	0.0879079	0.175816
SLC39A8	734	0.0879744	0.175949
BACE2	735	0.0879796	0.175959
TAF12	735	0.0879796	0.175959
DDX10	736	0.0881741	0.176348
AP3S1	736	0.0881741	0.176348
ARNTL	737	0.0882721	0.176544
TCEB1	737	0.0882721	0.176544
HSF4	738	0.0885074	0.177015
NT5C	739	0.0885644	0.177129
ATG3	739	0.0885644	0.177129
COMMD10	740	0.0887745	0.177549
BMP8B	741	0.0888566	0.177713
NOP10	741	0.0888566	0.177713
KIF1B	742	0.0889081	0.177816
BRPF1	743	0.088975	0.17795
NCOR2	744	0.0890419	0.178084
POLR3D	745	0.0891487	0.178297
NAE1	745	0.0891487	0.178297
MADD	746	0.0893096	0.178619
DNM2	747	0.0894407	0.178881
ZNF281	748	0.0894436	0.178887
ALDH5A1	749	0.0895777	0.179155
TFEB	750	0.0896448	0.17929
BAALC	751	0.0897325	0.179465
ASNSD1	751	0.0897325	0.179465
CYBA	752	0.089779	0.179558
CLDN15	753	0.0898461	0.179692
BCL3	754	0.0899805	0.179961
KCNJ15	755	0.0900243	0.180049
MGAT1	755	0.0900243	0.180049
CDCA5	756	0.0903159	0.180632
RAB8B	757	0.0903167	0.180633
PPP1R16B	757	0.0903167	0.180633
SLC39A1	758	0.0904514	0.180903
CCL19	759	0.0906074	0.181215
MAPK8IP3	759	0.0906074	0.181215
PIAS4	760	0.0908559	0.181712
NGRN	761	0.0909234	0.181847
ROBO3	762	0.091126	0.182252
ANKRD13D	763	0.0911901	0.18238
ECHDC3	764	0.0911936	0.182387
TRRAP	765	0.0912612	0.182522
RBPJL	766	0.0913288	0.182658
RPS13	766	0.0913288	0.182658
MAP3K3	767	0.0914641	0.182928
DFFB	768	0.0914812	0.182962
MRFAP1L1	768	0.0914812	0.182962
CCDC126	769	0.0915318	0.183064
MUT	770	0.0917722	0.183544
PRKCD	770	0.0917722	0.183544
B4GALT5	771	0.0919384	0.183877
FKBP15	772	0.0920062	0.184012
SUMO2	772	0.0920062	0.184012
GPX3	773	0.0920632	0.184126
PI4KB	773	0.0920632	0.184126
SCLY	774	0.0920741	0.184148
CPSF4	775	0.0922778	0.184556
GOT2	776	0.0923457	0.184691
LEFTY1	777	0.092354	0.184708
GLT8D2	778	0.0925497	0.185099
SUOX	779	0.0926177	0.185235
PRPF38A	779	0.0926177	0.185235
OR7D2	780	0.0926447	0.185289
DENND1C	780	0.0926447	0.185289
TMEM50B	781	0.0926858	0.185372
HCLS1	782	0.0927539	0.185508
DHX35	783	0.092822	0.185644
ARHGAP22	784	0.0929352	0.18587
TAX1BP1	784	0.0929352	0.18587
TRAM2	785	0.0930264	0.186053
HMMR	785	0.0930264	0.186053
UBE2G1	786	0.0930946	0.186189
HNRNPD	787	0.0931628	0.186326
CXCL12	788	0.0932257	0.186451
MRPL13	788	0.0932257	0.186451
DYM	789	0.093231	0.186462
SERPINA1	789	0.093231	0.186462
TRIB1	790	0.093516	0.187032
VPS33B	791	0.0935725	0.187145
CSF3R	792	0.0938063	0.187613
CAPRIN1	793	0.0939145	0.187829
ZNF562	794	0.0940514	0.188103
RORC	795	0.0940964	0.188193
RABL3	795	0.0940964	0.188193
ODF2	796	0.09412	0.18824
SERAC1	797	0.0943864	0.188773
KRCC1	797	0.0943864	0.188773
RPP40	798	0.0943942	0.188788
LPAR5	799	0.0946762	0.189352
COMMD8	799	0.0946762	0.189352
AQP9	800	0.094966	0.189932
RIT1	800	0.094966	0.189932
TNRC6A	801	0.0950814	0.190163
KCNH6	802	0.0952557	0.190511
WSB1	803	0.0952879	0.190576
RGS14	804	0.0953568	0.190714
CARD9	805	0.0954257	0.190851
PCIF1	806	0.0954947	0.190989
MAPRE2	807	0.0955452	0.19109
SPAG9	808	0.0955636	0.191127
PI15	809	0.0956326	0.191265
NTNG2	810	0.0957707	0.191541
SLC6A3	811	0.0958346	0.191669
PPHLN1	811	0.0958346	0.191669
VASP	812	0.0959779	0.191956
SLK	813	0.0961161	0.192232
ALDH18A1	814	0.0961239	0.192248
ITM2B	815	0.0961853	0.192371
BET1	816	0.0962544	0.192509
CD81	817	0.0963929	0.192786
LIME1	818	0.0964131	0.192826
SNIP1	819	0.0964621	0.192924
NDE1	820	0.0966007	0.193201
SLC2A4RG	821	0.0967022	0.193404
ZNF622	821	0.0967022	0.193404
CATSPER2	822	0.0967393	0.193479
VIM	823	0.0968086	0.193617
REXO2	824	0.096878	0.193756
ASS1	825	0.0969474	0.193895
ZNF585A	826	0.0969912	0.193982
MBOAT7	827	0.0972252	0.19445
ITGB2	828	0.09728	0.19456
DDX17	829	0.0972947	0.194589
DTWD1	830	0.0973642	0.194728
ZNF512B	831	0.0975033	0.195007
DMWD	832	0.0975688	0.195138
PTPRE	832	0.0975688	0.195138
TRIM8	833	0.0977818	0.195564
CEP152	833	0.0977818	0.195564
CCL13	834	0.0978574	0.195715
IAH1	834	0.0978574	0.195715
CHD3	835	0.0981459	0.196292
CCDC59	835	0.0981459	0.196292
SESN3	836	0.0982699	0.19654
UCKL1	837	0.0983397	0.196679
MAP4K5	837	0.0983397	0.196679
FAM50B	838	0.0984343	0.196869
PRICKLE4	838	0.0984343	0.196869
NFAT5	839	0.0985493	0.197099
LSM11	840	0.0986891	0.197378
TRAPPC6B	840	0.0986891	0.197378
RBM19	841	0.0987226	0.197445
HDDC2	841	0.0987226	0.197445
PSMA1	842	0.0987591	0.197518
ERAL1	843	0.0988291	0.197658
CCT8	844	0.0989691	0.197938
DGCR14	845	0.0990108	0.198022
MYL6	845	0.0990108	0.198022
RPS15A	846	0.0990391	0.198078
SSH2	847	0.0992493	0.198499
ARL15	848	0.0992989	0.198598
GMEB2	848	0.0992989	0.198598
FMNL1	849	0.0994597	0.198919
ANKFY1	850	0.0995299	0.19906
VDAC3	851	0.0995868	0.199174
TSEN34	852	0.0996001	0.1992
DHX38	853	0.0996703	0.199341
TTF1	854	0.0997406	0.199481
HINT1	855	0.0998747	0.199749
KHDRBS2	856	0.100162	0.200325
BANP	856	0.100162	0.200325
ICMT	857	0.100233	0.200466
NOTCH1	858	0.100444	0.200888
CDC42EP2	859	0.10045	0.2009
EXOC7	859	0.10045	0.2009
SKIV2L2	860	0.100738	0.201475
CD28	861	0.100867	0.201735
F12	862	0.100938	0.201876
DCP1A	863	0.101009	0.202017
KCNN4	864	0.101025	0.20205
AXIN1	864	0.101025	0.20205
MCTP2	865	0.101079	0.202159
CBX7	865	0.101079	0.202159
LYPD5	866	0.101312	0.202624
DENR	866	0.101312	0.202624
TNFSF15	867	0.101362	0.202724
RPS6KA5	868	0.101504	0.203007
AKAP9	869	0.101574	0.203149
FAF1	870	0.101599	0.203199
FGFRL1	871	0.101886	0.203773
PITPNM1	871	0.101886	0.203773
TMEM65	872	0.102071	0.204141
EFTUD1	873	0.102142	0.204283
DEK	874	0.102173	0.204347
CXCR6	875	0.102213	0.204425
GLT1D1	876	0.102355	0.204709
AACS	877	0.10246	0.20492
DYNC1I2	878	0.102497	0.204993
LDHA	879	0.102639	0.205278
ENTPD1	880	0.102747	0.205494
PDCD4	880	0.102747	0.205494
IL1R2	881	0.103034	0.206067
SYTL3	881	0.103034	0.206067
SCN4B	882	0.10332	0.20664
ZNF350	882	0.10332	0.20664
THUMPD3	883	0.103423	0.206845
NUP205	884	0.103607	0.207213
OCEL1	885	0.103708	0.207416
GATAD2B	885	0.103708	0.207416
CES2	886	0.10378	0.207559
MESDC1	887	0.103893	0.207786
ZNF701	887	0.103893	0.207786
PGP	888	0.103923	0.207845
ACSM3	889	0.104209	0.208418
TCF19	890	0.10428	0.208561
TRAF5	891	0.104465	0.20893
GBA	891	0.104465	0.20893
SLC25A45	892	0.104567	0.209134
SPRYD3	893	0.104751	0.209502
CASP4	893	0.104751	0.209502
PTPRO	894	0.104998	0.209995
ZKSCAN2	895	0.105037	0.210074
CCDC58	895	0.105037	0.210074
RUSC2	896	0.105323	0.210645
SEC11C	896	0.105323	0.210645
MFAP1	897	0.105573	0.211146
DNMT1	897	0.105573	0.211146
TREM1	898	0.105608	0.211217
DPH5	898	0.105608	0.211217
USP16	899	0.105717	0.211434
NFIC	900	0.105789	0.211578
RELL2	901	0.105861	0.211722
EPHB6	902	0.105894	0.211788
CCR5	903	0.106077	0.212154
LYZL6	904	0.106179	0.212359
HIVEP1	905	0.106294	0.212588
TRIT1	906	0.106465	0.212929
ARV1	906	0.106465	0.212929
MAPK3	907	0.106583	0.213165
ZFYVE27	908	0.106655	0.21331
LRRC58	909	0.10675	0.2135
SCO1	909	0.10675	0.2135
BBX	910	0.107089	0.214178
TREML4	911	0.107162	0.214323
COQ5	912	0.10732	0.21464
BIVM	913	0.107597	0.215193
CHRDL2	914	0.107605	0.215209
TLN1	914	0.107605	0.215209
ZNF540	915	0.107742	0.215484
ARHGAP30	916	0.107887	0.215774
ZNF518A	917	0.10789	0.215779
ATP6V0D1	918	0.10796	0.21592
DDX52	919	0.108033	0.216065
ANAPC4	919	0.108033	0.216065
MUTYH	920	0.108105	0.21621
NOL4	921	0.108174	0.216348
ISCA2	921	0.108174	0.216348
EIF3I	922	0.108251	0.216501
FBXL6	923	0.108323	0.216647
HN1	924	0.108459	0.216918
EPN1	924	0.108459	0.216918
EXOC3	925	0.108469	0.216938
TPST1	926	0.108542	0.217084
RAB11FIP3	927	0.108615	0.21723
NOL8	928	0.108743	0.217486
HIST1H2AM	929	0.108833	0.217667
SKIV2L	930	0.108979	0.217959
ZNF114	931	0.109028	0.218055
WDR12	931	0.109028	0.218055
GLRX	932	0.109052	0.218105
PTPN12	933	0.109312	0.218624
ARHGAP9	933	0.109312	0.218624
PRKAG1	934	0.109491	0.218981
STK19	935	0.109564	0.219128
DPP10	936	0.109596	0.219192
MRPL55	936	0.109596	0.219192
BEGAIN	937	0.109857	0.219713
FZD1	938	0.10988	0.21976
ACTN4	938	0.10988	0.21976
FNBP4	939	0.110164	0.220328
CCND3	939	0.110164	0.220328
BRPF3	940	0.110448	0.220895
TMEM167B	940	0.110448	0.220895
CCDC130	941	0.110516	0.221033
ARHGAP25	942	0.110731	0.221463
BTF3	942	0.110731	0.221463
CDA	943	0.110884	0.221767
LIMD2	944	0.111251	0.222503
ST3GAL2	944	0.111251	0.222503
TMEM159	945	0.111298	0.222597
TIMELESS	946	0.111399	0.222797
PNN	947	0.111546	0.223092
PAX8	948	0.111582	0.223164
ITGB3BP	949	0.111767	0.223534
CLK4	949	0.111767	0.223534
CORO7	950	0.111865	0.22373
TRIP11	951	0.111989	0.223977
WDR35	952	0.112148	0.224297
RPL5	952	0.112148	0.224297
HPS4	953	0.11221	0.22442
ZNF77	954	0.112284	0.224568
BLM	955	0.112432	0.224864
RFC4	956	0.112506	0.225012
LONRF2	957	0.112714	0.225429
RAD51C	957	0.112714	0.225429
PAX4	958	0.112728	0.225456
PGLYRP1	958	0.112728	0.225456
IL11RA	959	0.112997	0.225995
EEF2K	960	0.11328	0.22656
GPBP1	960	0.11328	0.22656
FGD3	961	0.113395	0.22679
STAB1	962	0.113618	0.227235
TNPO1	963	0.113766	0.227532
KDELR1	963	0.113766	0.227532
CHD4	964	0.113845	0.22769
SRRM2	964	0.113845	0.22769
FGD2	965	0.114064	0.228127
GLRA3	966	0.114128	0.228255
BSDC1	966	0.114128	0.228255
CD74	967	0.114138	0.228276
SAFB	968	0.114361	0.228723
FLOT2	969	0.11441	0.22882
KIAA0586	970	0.11451	0.229021
EZH2	971	0.114585	0.22917
GABRB3	972	0.114659	0.229319
E4F1	972	0.114659	0.229319
CCNT2	973	0.114692	0.229384
RPS20	973	0.114692	0.229384
MKL1	974	0.114883	0.229766
ZC3H3	975	0.114974	0.229949
CYP2S1	976	0.115033	0.230065
HAL	977	0.115107	0.230214
PPM1M	978	0.115256	0.230513
HINFP	979	0.115257	0.230513
ECD	979	0.115257	0.230513
ZGPAT	980	0.115331	0.230663
ZZZ3	981	0.115481	0.230962
NUP160	982	0.115538	0.231077
THYN1	982	0.115538	0.231077
CLSTN1	983	0.115705	0.231411
SNW1	984	0.11578	0.23156
PDSS1	985	0.11582	0.23164
ICAM3	985	0.11582	0.23164
APCS	986	0.116102	0.232204
TIPRL	986	0.116102	0.232204
DEDD2	987	0.11623	0.23246
SECISBP2	988	0.116305	0.23261
DISC1	989	0.11638	0.23276
POU5F1	990	0.116383	0.232767
EBAG9	990	0.116383	0.232767
STK38L	991	0.116665	0.23333
MRPL36	991	0.116665	0.23333
BMP1	992	0.116755	0.23351
FES	993	0.116946	0.233893
CEBPD	994	0.117056	0.234112
KATNB1	995	0.117228	0.234455
RIPK1	996	0.117282	0.234563
EXOG	997	0.117357	0.234714
GLE1	998	0.117432	0.234864
GSTM3	999	0.117509	0.235018
CALN1	1000	0.11779	0.23558
NUP37	1000	0.11779	0.23558
YPEL5	1001	0.118035	0.236071
STIM2	1002	0.118071	0.236142
HAT1	1002	0.118071	0.236142
CYTH3	1003	0.118186	0.236373
TPST2	1004	0.118338	0.236675
NBEAL2	1005	0.118352	0.236704
PRPF4B	1006	0.118413	0.236826
CLEC12A	1007	0.118489	0.236977
GABPA	1008	0.118633	0.237265
TAL1	1009	0.118913	0.237827
PTOV1	1009	0.118913	0.237827
KIAA0195	1010	0.11917	0.23834
PSORS1C1	1011	0.119194	0.238388
CCNH	1011	0.119194	0.238388
FAM103A1	1012	0.119246	0.238491
THUMPD1	1013	0.119397	0.238795
ARID4B	1014	0.119474	0.238949
GTF2H3	1015	0.119625	0.23925
LNX2	1016	0.119755	0.23951
UBE3A	1016	0.119755	0.23951
DVL2	1017	0.120005	0.24001
RGS18	1018	0.120035	0.24007
SLC11A1	1018	0.120035	0.24007
BIRC2	1019	0.120081	0.240162
ST3GAL1	1020	0.120157	0.240314
NAP1L1	1020	0.120157	0.240314
TMEM38A	1021	0.120233	0.240466
NR2E1	1022	0.120315	0.240631
PHF1	1022	0.120315	0.240631
UTP15	1023	0.120385	0.24077
MMP28	1024	0.120595	0.241191
ETFA	1024	0.120595	0.241191
FAM122A	1025	0.121155	0.24231
LTV1	1025	0.121155	0.24231
DENND3	1026	0.121376	0.242752
TOE1	1027	0.121435	0.24287
HK3	1027	0.121435	0.24287
METTL14	1028	0.121529	0.243058
PHC2	1028	0.121529	0.243058
RAVER1	1029	0.121715	0.243429
EPHB2	1030	0.121835	0.24367
TAPBP	1030	0.121835	0.24367
TMCO6	1031	0.121911	0.243823
PAK1IP1	1031	0.121911	0.243823
SLC35E1	1032	0.121988	0.243976
ACRBP	1033	0.121994	0.243988
ATXN7L3	1033	0.121994	0.243988
CLEC1B	1034	0.122064	0.244129
CDCA7L	1035	0.122217	0.244435
CINP	1035	0.122217	0.244435
NAV1	1036	0.122274	0.244547
MYB	1036	0.122274	0.244547
PPP2R2A	1037	0.122294	0.244588
CD160	1038	0.122371	0.244741
HLX	1039	0.122447	0.244895
ZNF445	1040	0.122553	0.245106
SS18	1040	0.122553	0.245106
ALPK1	1041	0.122601	0.245201
CCHCR1	1042	0.122832	0.245665
MRPL42	1042	0.122832	0.245665
EXOC2	1043	0.122984	0.245969
UTP11L	1044	0.123111	0.246223
CSNK1G2	1045	0.123215	0.24643
RNF166	1045	0.123215	0.24643
ZDHHC5	1046	0.123292	0.246584
CBX5	1047	0.123369	0.246737
INTS1	1048	0.123391	0.246781
NDUFA7	1049	0.123522	0.247045
NDUFB7	1050	0.123669	0.247339
B2M	1051	0.123676	0.247353
TNNC2	1052	0.123753	0.247507
TGM2	1053	0.123948	0.247897
ZNF282	1053	0.123948	0.247897
COPB2	1054	0.124293	0.248586
TRMT11	1055	0.124524	0.249049
BATF3	1056	0.124784	0.249569
SRF	1056	0.124784	0.249569
DIAPH3	1057	0.124833	0.249667
DCP2	1058	0.124911	0.249821
CPEB4	1058	0.124911	0.249821
CCDC149	1059	0.124988	0.249976
RAN	1059	0.124988	0.249976
RD3	1060	0.125063	0.250126
BTLA	1061	0.125297	0.250595
TCF15	1062	0.125341	0.250682
JUND	1062	0.125341	0.250682
THAP3	1063	0.12553	0.251059
TBX6	1064	0.125619	0.251239
AMICA1	1065	0.125762	0.251524
ZWILCH	1066	0.125898	0.251795
TAF4	1067	0.125917	0.251834
TALDO1	1068	0.126072	0.252144
ULK1	1069	0.126176	0.252351
AP3M1	1070	0.126227	0.252455
CERCAM	1071	0.126305	0.25261
ITGB1BP1	1072	0.126383	0.252766
COX19	1073	0.126454	0.252907
CRNKL1	1074	0.126538	0.253076
BLNK	1075	0.126732	0.253463
RCAN1	1075	0.126732	0.253463
ARPP19	1076	0.127009	0.254019
CLN3	1076	0.127009	0.254019
PSMB6	1077	0.127161	0.254321
TEX15	1078	0.127287	0.254574
PPA1	1078	0.127287	0.254574
ING4	1079	0.127472	0.254944
MRPS2	1080	0.12755	0.2551
MIOS	1080	0.12755	0.2551
SYS1	1081	0.127565	0.255129
ARPC2	1081	0.127565	0.255129
KHDRBS1	1082	0.127706	0.255412
TBC1D7	1083	0.127842	0.255684
XAB2	1083	0.127842	0.255684
IQCC	1084	0.12794	0.255881
NDNL2	1085	0.128018	0.256037
PPP1R12C	1086	0.128253	0.256505
PACSIN1	1087	0.128331	0.256662
TEK	1088	0.128397	0.256793
S100A10	1089	0.128409	0.256818
ZBTB7B	1089	0.128409	0.256818
HIST1H4K	1090	0.128565	0.257131
CHST15	1091	0.128644	0.257287
HSPA14	1092	0.128674	0.257348
RPL27	1093	0.1288	0.257601
LRRN3	1094	0.128879	0.257757
CCDC34	1095	0.128951	0.257902
VENTX	1096	0.128957	0.257914
BNIP2	1097	0.129114	0.258227
TTC8	1098	0.129228	0.258456
ITGAL	1098	0.129228	0.258456
DGCR2	1099	0.129427	0.258854
GPR139	1100	0.129505	0.25901
KLHL26	1101	0.129506	0.259011
GTF3C5	1102	0.129663	0.259325
PDPR	1103	0.129741	0.259482
NAGA	1104	0.129782	0.259563
SDF4	1104	0.129782	0.259563
PPP1R11	1105	0.130055	0.260111
DDX60	1106	0.130058	0.260116
ITGAM	1106	0.130058	0.260116
STX16	1107	0.130213	0.260425
CA4	1108	0.130291	0.260583
MYOM1	1109	0.130335	0.26067
LRWD1	1110	0.13037	0.26074
BTBD10	1111	0.130449	0.260898
ZMAT5	1112	0.130611	0.261223
STAT5B	1113	0.130888	0.261775
IK	1114	0.130921	0.261843
ANKRD49	1114	0.130921	0.261843
DTX2	1115	0.131164	0.262328
KCNE3	1116	0.131237	0.262474
IMMP2L	1117	0.13144	0.26288
SERTAD1	1117	0.13144	0.26288
SFXN5	1118	0.131474	0.262947
USP46	1119	0.131632	0.263263
RBBP8	1119	0.131632	0.263263
TMEM39B	1120	0.131716	0.263433
ASB6	1120	0.131716	0.263433
WDR1	1121	0.131992	0.263985
FAM120B	1122	0.132264	0.264528
ZNF613	1123	0.132268	0.264536
MALT1	1124	0.132343	0.264687
USP5	1125	0.132423	0.264845
BTG3	1126	0.132502	0.265004
SSSCA1	1127	0.132544	0.265088
DNAJC7	1127	0.132544	0.265088
ICOS	1128	0.13266	0.265321
KCTD21	1129	0.13274	0.265479
FASTKD2	1129	0.13274	0.265479
MCM3	1130	0.132819	0.265638
EBNA1BP2	1130	0.132819	0.265638
SLFN13	1131	0.13282	0.265639
ICT1	1131	0.13282	0.265639
PML	1132	0.133057	0.266114
TMEM63C	1133	0.133095	0.266191
CLEC4D	1133	0.133095	0.266191
CTSS	1134	0.133136	0.266272
DDX23	1134	0.133136	0.266272
CHRNA10	1135	0.133216	0.266431
RSRC2	1136	0.133295	0.26659
STYK1	1137	0.133371	0.266742
ZNF23	1137	0.133371	0.266742
C2CD2L	1138	0.133533	0.267067
CBR4	1138	0.133533	0.267067
LRP8	1139	0.133646	0.267293
LLGL1	1139	0.133646	0.267293
CTSA	1140	0.133851	0.267703
ZBTB45	1141	0.133931	0.267862
CCNK	1142	0.134011	0.268021
CLDN14	1143	0.13417	0.268339
CXCL14	1143	0.13417	0.268339
DDHD1	1144	0.134197	0.268394
DICER1	1144	0.134197	0.268394
CACNA1E	1145	0.134249	0.268499
TPK1	1146	0.134329	0.268658
FRMD4B	1147	0.134409	0.268817
FDFT1	1148	0.134472	0.268944
UBC	1148	0.134472	0.268944
SELL	1149	0.134568	0.269136
RGP1	1150	0.134648	0.269296
RAB6A	1151	0.134728	0.269455
MYBPC1	1152	0.134967	0.269934
CCDC27	1153	0.135022	0.270044
FASTK	1153	0.135022	0.270044
FAM160A2	1154	0.135297	0.270594
APP	1155	0.135366	0.270733
HNRNPA1	1156	0.135446	0.270893
PCMT1	1157	0.135572	0.271143
USMG5	1158	0.135606	0.271213
FAM73B	1159	0.135846	0.271692
ACTB	1160	0.135926	0.271853
CD200R1	1161	0.136006	0.272013
DTD1	1162	0.136121	0.272242
DRG1	1162	0.136121	0.272242
BCL6B	1163	0.136395	0.272791
ATG16L2	1163	0.136395	0.272791
CCPG1	1164	0.136567	0.273135
SLC6A7	1165	0.136648	0.273295
IFI27L2	1165	0.136648	0.273295
AKAP11	1166	0.136944	0.273888
EPHA8	1167	0.13721	0.27442
TMBIM6	1168	0.137218	0.274436
LDHAL6A	1169	0.137371	0.274741
TMEM41A	1169	0.137371	0.274741
IGLL1	1170	0.137451	0.274902
FAM3B	1171	0.137492	0.274984
HSPA8	1171	0.137492	0.274984
ATPAF1	1172	0.137531	0.275063
IFT88	1173	0.137612	0.275224
ESPNL	1174	0.137692	0.275385
NOBOX	1175	0.137766	0.275532
RAPGEFL1	1175	0.137766	0.275532
PPP1R3B	1176	0.137773	0.275546
SLC37A4	1177	0.137853	0.275707
KLHL21	1178	0.137934	0.275868
STIL	1179	0.13804	0.27608
CCM2	1179	0.13804	0.27608
USP33	1180	0.138256	0.276513
ZNF592	1181	0.138314	0.276628
RBCK1	1181	0.138314	0.276628
YPEL4	1182	0.138588	0.277175
FADD	1183	0.13866	0.277319
ORAI2	1184	0.13874	0.277481
C1RL	1184	0.13874	0.277481
PTPN1	1185	0.138861	0.277722
DNAJC9	1186	0.138902	0.277804
ZC3H14	1187	0.139063	0.278127
PTPRC	1188	0.139135	0.278269
TSPAN9	1189	0.139144	0.278289
VPS37B	1190	0.139408	0.278816
LAG3	1191	0.139468	0.278936
SF3B3	1192	0.139549	0.279097
FRAT2	1193	0.13963	0.279259
NSMCE4A	1194	0.139681	0.279363
CAPZA1	1195	0.139711	0.279421
ZNF217	1196	0.139792	0.279583
ADAT3	1197	0.139955	0.279909
FAM107B	1197	0.139955	0.279909
ZNF232	1198	0.140035	0.280069
PSMD12	1199	0.140197	0.280394
SEC61A1	1200	0.140228	0.280456
SIDT1	1201	0.140278	0.280556
PMPCA	1202	0.14044	0.28088
H2AFX	1203	0.140501	0.281002
EDC4	1203	0.140501	0.281002
N4BP2L1	1204	0.140521	0.281043
IL5RA	1204	0.140521	0.281043
THADA	1205	0.140774	0.281548
PTPRN2	1206	0.140846	0.281692
MAP3K14	1207	0.140927	0.281855
OLIG1	1208	0.141047	0.282093
PRUNE2	1209	0.14109	0.28218
EPS8L3	1210	0.141319	0.282639
FBXO4	1210	0.141319	0.282639
TTC27	1211	0.141334	0.282668
DHRS12	1212	0.141415	0.282831
NINL	1213	0.141497	0.282993
GDI2	1213	0.141497	0.282993
SCYL1	1214	0.141578	0.283156
ADCY4	1215	0.141592	0.283184
SYVN1	1216	0.141741	0.283482
SRPK2	1217	0.141865	0.283729
CPSF3	1218	0.141904	0.283808
CIRH1A	1219	0.142137	0.284274
PCYOX1	1220	0.142148	0.284297
FAM110A	1221	0.14223	0.28446
DNAJB12	1222	0.14241	0.284819
OR12D3	1223	0.142475	0.28495
ZNF302	1224	0.142682	0.285364
ABCA1	1225	0.14272	0.28544
IMMT	1226	0.142965	0.28593
CAMKK1	1226	0.142965	0.28593
TLR5	1227	0.143128	0.286257
PTGFR	1228	0.143226	0.286452
LRRCC1	1228	0.143226	0.286452
PYCR2	1229	0.143498	0.286996
PHF14	1229	0.143498	0.286996
RPS6KL1	1230	0.143538	0.287075
L2HGDH	1231	0.14377	0.28754
ITGA5	1231	0.14377	0.28754
PTGDS	1232	0.143865	0.28773
TBC1D15	1233	0.143947	0.287894
RPL10A	1234	0.144029	0.288058
ATHL1	1235	0.144042	0.288084
TRIM13	1236	0.144111	0.288222
CRTAP	1237	0.144193	0.288386
STX7	1238	0.144275	0.28855
CCL21	1239	0.144314	0.288627
ZCCHC7	1239	0.144314	0.288627
INSL3	1240	0.144357	0.288715
PIK3CA	1241	0.144521	0.289043
ZBTB46	1242	0.144585	0.289171
BOLA3	1242	0.144585	0.289171
MEI1	1243	0.144604	0.289207
LYPD2	1244	0.144768	0.289536
TDG	1245	0.14485	0.2897
CALM2	1246	0.144857	0.289714
EFCAB6	1247	0.145097	0.290193
LMAN1	1248	0.145128	0.290257
ARF1	1248	0.145128	0.290257
MTCH1	1249	0.145343	0.290687
GYPA	1250	0.1454	0.290799
SLC15A4	1250	0.1454	0.290799
LRIG2	1251	0.14559	0.291181
DNA2	1251	0.14559	0.291181
TMC5	1252	0.145671	0.291342
CLNS1A	1252	0.145671	0.291342
CPM	1253	0.145673	0.291346
PTCD3	1254	0.145838	0.291675
CECR1	1254	0.145838	0.291675
INPPL1	1255	0.145942	0.291884
ZNF75A	1256	0.146002	0.292005
TXNDC9	1257	0.146213	0.292426
ABTB1	1258	0.146484	0.292968
FEM1A	1259	0.14658	0.29316
ATP6V1F	1260	0.146745	0.29349
CCDC28B	1261	0.146755	0.29351
CBX6	1261	0.146755	0.29351
VRK3	1262	0.147026	0.294052
ACADM	1262	0.147026	0.294052
SLC38A9	1263	0.147076	0.294152
XCL1	1264	0.147159	0.294317
GPR141	1265	0.147297	0.294593
SUGT1	1266	0.147324	0.294648
SYDE2	1267	0.147567	0.295134
ASCC3	1268	0.147572	0.295145
IKBKE	1268	0.147572	0.295145
PREPL	1269	0.147655	0.29531
PRDM6	1270	0.147838	0.295676
METTL9	1271	0.148108	0.296216
SQSTM1	1271	0.148108	0.296216
MTCH2	1272	0.148379	0.296757
HECW2	1273	0.148401	0.296803
MKKS	1273	0.148401	0.296803
YPEL3	1274	0.148649	0.297298
DVL3	1274	0.148649	0.297298
NHP2L1	1275	0.14865	0.297301
AHCYL1	1276	0.148817	0.297633
BICD2	1277	0.1489	0.297799
TRA2A	1278	0.148919	0.297838
APBB1IP	1278	0.148919	0.297838
BACE1	1279	0.149066	0.298132
PRR13	1280	0.149149	0.298298
SPDYC	1281	0.149189	0.298378
FLII	1281	0.149189	0.298378
DMBX1	1282	0.149459	0.298918
PIK3R1	1282	0.149459	0.298918
MX2	1283	0.149482	0.298964
CPNE1	1284	0.149565	0.29913
GAPDH	1285	0.149649	0.299297
LPCAT1	1286	0.149729	0.299458
ASAP1	1286	0.149729	0.299458
SDCCAG3	1287	0.149732	0.299464
PCDH10	1288	0.149982	0.299964
DNAJA2	1288	0.149982	0.299964
PDGFB	1289	0.149999	0.299998
PSMG1	1289	0.149999	0.299998
CEP57	1290	0.150065	0.30013
TCF7L2	1291	0.150149	0.300297
TPD52L2	1292	0.150269	0.300537
ZUFSP	1292	0.150269	0.300537
FAM129A	1293	0.150315	0.300631
NR6A1	1294	0.150482	0.300965
VPS8	1295	0.150538	0.301076
GOLGA4	1296	0.150566	0.301131
PCBP2	1297	0.150733	0.301466
XYLB	1298	0.150808	0.301615
GCLC	1299	0.151067	0.302134
HIST1H2BJ	1300	0.151077	0.302154
CPLX4	1301	0.151346	0.302693
ORAI3	1301	0.151346	0.302693
ATP6V1C1	1302	0.151402	0.302803
AP1S1	1303	0.151616	0.303231
SREBF1	1304	0.151988	0.303976
PLAGL1	1305	0.152072	0.304143
VKORC1L1	1306	0.152154	0.304308
GNS	1306	0.152154	0.304308
UCHL5	1307	0.152155	0.304311
CDC40	1308	0.152407	0.304814
RSL1D1	1309	0.152423	0.304846
MYO10	1310	0.152692	0.305384
NUP88	1310	0.152692	0.305384
TP53I3	1311	0.153163	0.306326
SEC61A2	1312	0.153229	0.306459
TMEM30A	1312	0.153229	0.306459
RREB1	1313	0.153247	0.306494
PCNP	1314	0.153331	0.306662
APOBEC3B	1315	0.153498	0.306996
AGTRAP	1315	0.153498	0.306996
HIST1H3H	1316	0.153583	0.307167
MED25	1316	0.153583	0.307167
APH1B	1317	0.153752	0.307504
RBM12	1318	0.15392	0.307841
HMBS	1319	0.154035	0.30807
PFKL	1319	0.154035	0.30807
TRIM27	1320	0.154089	0.308178
SCFD2	1321	0.154303	0.308607
ATP2A2	1321	0.154303	0.308607
OTUB1	1322	0.154426	0.308852
PRNP	1323	0.154572	0.309143
STOM	1324	0.154679	0.309358
DLGAP4	1324	0.154679	0.309358
CD59	1325	0.15484	0.30968
VCL	1325	0.15484	0.30968
PABPC3	1326	0.154848	0.309696
MKLN1	1327	0.155101	0.310203
GUSB	1328	0.155108	0.310216
ANKHD1	1329	0.155186	0.310372
MRPS10	1330	0.155355	0.31071
ASTN1	1331	0.155376	0.310752
TNFRSF1A	1331	0.155376	0.310752
SERGEF	1332	0.15544	0.310879
MAP4K2	1333	0.155644	0.311288
FBLIM1	1334	0.155693	0.311387
XRCC3	1335	0.155778	0.311556
LITAF	1336	0.155863	0.311725
PAICS	1337	0.156032	0.312064
CLK1	1337	0.156032	0.312064
ASNS	1338	0.156117	0.312234
NANOS3	1339	0.156179	0.312359
MYADM	1339	0.156179	0.312359
CRLS1	1340	0.156286	0.312573
SDC4	1341	0.156447	0.312894
TNFSF10	1341	0.156447	0.312894
SLC25A42	1342	0.156456	0.312912
MCL1	1343	0.156625	0.313251
ZNF394	1343	0.156625	0.313251
USP8	1344	0.15671	0.313421
ZNF681	1345	0.156715	0.313429
PIGP	1345	0.156715	0.313429
COL23A1	1346	0.156795	0.31359
KIAA0196	1347	0.15688	0.31376
ARHGEF11	1348	0.156965	0.31393
QPCTL	1349	0.156982	0.313964
CCDC65	1349	0.156982	0.313964
NEDD4L	1350	0.15725	0.314499
DMTF1	1351	0.157305	0.314609
TAF5	1352	0.15739	0.314779
RNF39	1352	0.15739	0.314779
PLEKHA2	1353	0.157475	0.314949
PAG1	1354	0.157517	0.315034
CERK	1355	0.15773	0.31546
KLRC1	1356	0.157784	0.315568
ATP6V0B	1356	0.157784	0.315568
TMEM91	1357	0.157815	0.31563
EIF3D	1358	0.1579	0.3158
KDM5B	1358	0.1579	0.3158
RAB36	1359	0.158051	0.316102
GATAD2A	1359	0.158051	0.316102
KREMEN2	1360	0.158241	0.316481
SYCN	1361	0.158318	0.316636
KIF13B	1361	0.158318	0.316636
COQ7	1362	0.158585	0.31717
NCK1	1362	0.158585	0.31717
CCL3	1363	0.158667	0.317334
NOL7	1364	0.158852	0.317704
PPP3CB	1365	0.158923	0.317845
FAM46A	1366	0.159008	0.318016
CDK5RAP3	1367	0.159119	0.318237
VPS13B	1368	0.159179	0.318358
SCML4	1369	0.159385	0.318771
PRR14	1369	0.159385	0.318771
ZFP37	1370	0.159435	0.31887
NFE2	1371	0.159606	0.319212
SIGLEC11	1372	0.159652	0.319304
RPL12	1373	0.159918	0.319837
RGS6	1374	0.159948	0.319896
CKAP4	1374	0.159948	0.319896
CEACAM1	1375	0.160034	0.320067
TERF2	1376	0.160119	0.320238
SDCCAG8	1377	0.160185	0.32037
LAMP1	1377	0.160185	0.32037
ILVBL	1378	0.16029	0.320581
MOCS2	1378	0.16029	0.320581
MRPL20	1379	0.160376	0.320752
CDV3	1380	0.160451	0.320902
TTC1	1381	0.160633	0.321266
LY75	1382	0.160717	0.321435
ARPC4	1383	0.160805	0.321609
NCL	1384	0.160984	0.321967
SPTLC1	1384	0.160984	0.321967
PRUNE	1385	0.161062	0.322124
GNA15	1386	0.161233	0.322467
USF1	1387	0.161319	0.322639
GSR	1388	0.161516	0.323031
CHCHD7	1388	0.161516	0.323031
BCL2L2	1389	0.161663	0.323326
CECR6	1389	0.161663	0.323326
SEMA4D	1390	0.161781	0.323563
LPGAT1	1391	0.161835	0.323669
HORMAD2	1392	0.162047	0.324095
PURG	1393	0.162093	0.324185
SNX21	1394	0.162179	0.324357
OGFRL1	1395	0.162265	0.324529
STK32B	1396	0.162313	0.324626
ABCA7	1396	0.162313	0.324626
CTSH	1397	0.162579	0.325157
ILK	1398	0.162781	0.325563
LY6G6F	1399	0.162844	0.325688
NOP2	1400	0.162867	0.325735
TAF1C	1401	0.162954	0.325907
DLG1	1402	0.16311	0.326219
CYTH1	1402	0.16311	0.326219
ANKMY1	1403	0.163212	0.326425
NEURL4	1403	0.163212	0.326425
SP110	1404	0.163299	0.326597
CES3	1405	0.163375	0.32675
ZBTB48	1406	0.163558	0.327115
ARFRP1	1407	0.16364	0.32728
TNFRSF14	1408	0.163644	0.327288
BTF3L4	1409	0.163817	0.327633
COPS8	1409	0.163817	0.327633
WBP11	1410	0.163905	0.327811
ZNF341	1411	0.163989	0.327979
EP300	1412	0.164076	0.328152
ERP29	1413	0.164162	0.328324
DDAH2	1414	0.164171	0.328341
AKAP7	1414	0.164171	0.328341
ITGB3	1415	0.164249	0.328497
BCLAF1	1416	0.164422	0.328843
CLK2	1417	0.164436	0.328871
DNAJB6	1418	0.164508	0.329016
PYCARD	1419	0.164681	0.329363
HIST1H1C	1420	0.1647	0.329401
STXBP2	1420	0.1647	0.329401
SEC23IP	1421	0.164941	0.329882
BMF	1422	0.164965	0.329931
RRP15	1422	0.164965	0.329931
DHX8	1423	0.165201	0.330402
CNBP	1424	0.16523	0.33046
EGFR	1425	0.165374	0.330749
CSNK2B	1426	0.165461	0.330922
ABCG4	1427	0.165495	0.330989
DCTN1	1427	0.165495	0.330989
YME1L1	1428	0.165548	0.331096
HCK	1429	0.165635	0.331269
GPN1	1430	0.165759	0.331519
EIF2B1	1431	0.165808	0.331616
SAMD9	1431	0.165808	0.331616
PHACTR2	1432	0.165895	0.33179
ALOX5AP	1433	0.165982	0.331963
SLC30A9	1434	0.166024	0.332048
SCRG1	1435	0.166069	0.332137
ATP6AP1L	1436	0.166288	0.332576
WDR61	1436	0.166288	0.332576
CC2D1B	1437	0.166503	0.333006
KLF2	1438	0.166553	0.333105
ZNF333	1439	0.16659	0.33318
GALNT12	1440	0.166817	0.333634
RABEP1	1440	0.166817	0.333634
ACYP1	1441	0.167025	0.33405
OCIAD2	1442	0.167081	0.334162
PAQR4	1443	0.167112	0.334224
CREBL2	1444	0.167286	0.334572
SNRNP27	1445	0.167345	0.33469
FZD2	1446	0.16746	0.334921
P2RX1	1446	0.16746	0.334921
NUDT1	1447	0.167548	0.335095
RHBDL1	1448	0.167609	0.335218
SLC12A9	1448	0.167609	0.335218
ABCA2	1449	0.167809	0.335618
CEP170	1450	0.167873	0.335746
SUCLG1	1450	0.167873	0.335746
MACF1	1451	0.167984	0.335967
TUBGCP3	1452	0.168071	0.336142
RAB37	1453	0.168137	0.336273
CYP4F12	1454	0.168245	0.336491
POU2F2	1455	0.168333	0.336666
LSP1	1455	0.168333	0.336666
CAMK2B	1456	0.1684	0.336801
UNC93B1	1456	0.1684	0.336801
PDGFD	1457	0.168664	0.337328
TOP3B	1457	0.168664	0.337328
ZNF615	1458	0.168682	0.337364
UNC5B	1459	0.168928	0.337855
DGKA	1460	0.168944	0.337889
ZNF451	1461	0.169032	0.338064
DNAJC15	1462	0.169191	0.338382
NCBP2	1463	0.169207	0.338414
SSR1	1464	0.169294	0.338589
RAPH1	1465	0.169382	0.338764
CNOT7	1465	0.169382	0.338764
FBXL12	1466	0.169454	0.338909
MNT	1466	0.169454	0.338909
SLC25A44	1467	0.169645	0.339289
WBP2	1468	0.169718	0.339435
CDKL3	1469	0.16982	0.33964
HIST1H1A	1470	0.169981	0.339962
FAM195A	1471	0.169995	0.33999
MRE11A	1472	0.170171	0.340341
SPINK2	1472	0.170171	0.340341
BPTF	1473	0.170244	0.340488
SPAG7	1473	0.170244	0.340488
TDRD3	1474	0.170434	0.340867
ZZEF1	1474	0.170434	0.340867
EIF2A	1475	0.170507	0.341014
ESAM	1476	0.170609	0.341218
KLF13	1476	0.170609	0.341218
CEP70	1477	0.17077	0.34154
POLR2A	1477	0.17077	0.34154
ARPC1B	1478	0.170873	0.341745
SIRT2	1479	0.170961	0.341921
HP	1480	0.171033	0.342066
PPM1F	1480	0.171033	0.342066
PTTG1	1481	0.171048	0.342097
JAK2	1482	0.171136	0.342273
FPR2	1483	0.171224	0.342448
SDK2	1484	0.171296	0.342591
HSPH1	1484	0.171296	0.342591
CPNE3	1485	0.171558	0.343117
GPR137	1485	0.171558	0.343117
MEF2C	1486	0.171664	0.343328
SUSD4	1487	0.171752	0.343504
SLC7A7	1488	0.171821	0.343642
ANPEP	1488	0.171821	0.343642
CRY2	1489	0.171928	0.343856
E2F3	1490	0.172016	0.344032
ACADVL	1491	0.172084	0.344167
TEX261	1492	0.172104	0.344208
CNDP2	1492	0.172104	0.344208
PILRA	1493	0.172192	0.344385
HDGF	1494	0.172346	0.344692
MAN2A2	1494	0.172346	0.344692
FAM65A	1495	0.172608	0.345217
CIC	1496	0.172721	0.345443
ENG	1497	0.17281	0.345619
RCOR3	1498	0.172871	0.345741
PACSIN2	1498	0.172871	0.345741
MRPL9	1499	0.172898	0.345796
CHD2	1500	0.173133	0.346266
HEG1	1501	0.173163	0.346325
UNC5A	1502	0.173251	0.346502
HIST1H4B	1503	0.173395	0.34679
TMUB2	1503	0.173395	0.34679
SFXN1	1504	0.173428	0.346855
ESYT1	1505	0.173516	0.347032
RINL	1506	0.173604	0.347209
UBAP2L	1507	0.173657	0.347314
PLTP	1508	0.173693	0.347386
ZCCHC9	1508	0.173693	0.347386
TSSK2	1509	0.173919	0.347838
POLR3C	1509	0.173919	0.347838
APOM	1510	0.174181	0.348361
MFSD2B	1511	0.174224	0.348447
APTX	1512	0.174401	0.348801
ARRDC2	1513	0.174666	0.349333
DLD	1514	0.174704	0.349408
FKTN	1515	0.174844	0.349687
GOLT1A	1516	0.174966	0.349932
S100A12	1516	0.174966	0.349932
GTF2E2	1517	0.175227	0.350455
VAV2	1518	0.175465	0.350929
COPS7A	1519	0.175489	0.350978
MED28	1519	0.175489	0.350978
MRPS11	1520	0.17575	0.3515
DIDO1	1520	0.17575	0.3515
CDC42EP4	1521	0.175909	0.351817
PECAM1	1522	0.176011	0.352023
MME	1523	0.176086	0.352173
SCAMP4	1524	0.176273	0.352545
ZNF529	1525	0.176353	0.352707
TMED8	1526	0.176442	0.352884
NUDT9	1526	0.176442	0.352884
[truncated: 9,241 more rows]
