# Supplementary material for: Multiomics integrative analysis identifies APOE allele-specific blood biomarkers associated to Alzheimer’s disease etiopathogenesis
Source: Aging (Albany NY). 2021 Apr 12;13(7):9277–329. doi: 10.18632/aging.202950 (PMC8064208; doi:10.18632/aging.202950)
Supplement: Supplementary Table 28 [file aging-13-202950-s030.xlsx]

## Sheet: Sheet1
Supplementary Table 28. RRA integrative analysis in cortex: APOE2 stratum.
Symbol	Rank	ExactP(Score)	AdjustP
GANAB	1	3.92283e-05	7.84565e-05
CTSZ	2	0.000158941	0.000317883
RNF152	3	0.000267147	0.000534294
ZNF254	3	0.000267147	0.000534294
SGCD	4	0.000410374	0.000820748
AP2A1	5	0.000421918	0.000843836
METTL15	6	0.000507173	0.00101435
DUOX2	7	0.000532995	0.00106599
MPHOSPH8	7	0.000532995	0.00106599
ZC3H14	8	0.000581881	0.00116376
TMEM33	9	0.000721054	0.00144211
HNRNPD	10	0.000793522	0.00158704
METRN	11	0.000797994	0.00159599
MSI2	11	0.000797994	0.00159599
BRWD1	12	0.000820236	0.00164047
USP16	13	0.00100751	0.00201503
WDR24	14	0.00106231	0.00212461
H2AFY	14	0.00106231	0.00212461
SLC35E2B	15	0.00111141	0.00222282
HS2ST1	16	0.00126665	0.0025333
FBXL16	17	0.00132602	0.00265204
MCL1	17	0.00132602	0.00265204
PAPOLA	18	0.00133429	0.00266858
LMO4	19	0.0014892	0.0029784
MAVS	20	0.0015037	0.0030074
RABGAP1	21	0.00154025	0.0030805
FAM173A	22	0.00158921	0.00317841
TNPO1	22	0.00158921	0.00317841
WLS	23	0.00179232	0.00358464
JMJD8	24	0.0018519	0.0037038
ING3	24	0.0018519	0.0037038
SECISBP2L	25	0.00188052	0.00376104
PTPN14	26	0.00188864	0.00377728
AAGAB	27	0.00192951	0.00385902
AK2	28	0.00202934	0.00405869
KANSL1	29	0.00203777	0.00407555
U2SURP	30	0.00209728	0.00419455
CCDC78	31	0.00211415	0.0042283
ATXN1	31	0.00211415	0.0042283
DUOXA2	32	0.00237597	0.00475195
FN1	32	0.00237597	0.00475195
OTUD4	33	0.00237999	0.00475998
TRIM4	34	0.00243495	0.00486991
ZNF226	35	0.00252793	0.00505586
GSPT1	36	0.00253732	0.00507464
HAGHL	37	0.0026374	0.0052748
QSER1	37	0.0026374	0.0052748
XRCC5	38	0.00267059	0.00534119
EIF5A2	39	0.00273849	0.00547697
ADARB1	40	0.00276784	0.00553568
STIM2	41	0.00280721	0.00561443
NARFL	42	0.00289845	0.00579689
DLGAP4	42	0.00289845	0.00579689
TFAP2A	43	0.00290685	0.00581369
STUB1	44	0.00315913	0.00631827
ZC3H7B	44	0.00315913	0.00631827
NDUFA2	45	0.00325832	0.00651664
IBA57	46	0.00332238	0.00664477
ABCB4	47	0.00341947	0.00683895
INIP	47	0.00341947	0.00683895
RC3H2	48	0.00346328	0.00692656
TTN	49	0.00350721	0.00701442
NTRK2	50	0.00360704	0.00721408
NADK	51	0.00365185	0.00730369
APOC1	52	0.00367948	0.00735896
SPAG9	52	0.00367948	0.00735896
MAFF	53	0.00369693	0.00739385
OSBPL10	54	0.00373091	0.00746183
C8orf59	55	0.0037879	0.00757579
WWP2	56	0.0038453	0.0076906
AHI1	57	0.00385683	0.00771366
IRGC	58	0.00393917	0.00787834
CYB5B	58	0.00393917	0.00787834
MAPT	59	0.00394969	0.00789938
ERGIC1	60	0.00405545	0.0081109
PRDM1	60	0.00405545	0.0081109
EWSR1	61	0.00417456	0.00834911
SLC9A9	62	0.00419854	0.00839709
FZD3	63	0.00445762	0.00891524
DCUN1D1	63	0.00445762	0.00891524
KAT6A	64	0.0045921	0.0091842
CERS5	65	0.00460467	0.00920934
ENDOD1	66	0.0046425	0.00928499
SPATA5L1	67	0.0047164	0.00943281
SLC35D1	68	0.00473134	0.00946268
RHBDL1	69	0.0049749	0.00994981
ASB4	70	0.00502902	0.010058
NSF	71	0.0050685	0.010137
ALMS1	72	0.00509491	0.0101898
PLAUR	73	0.00523313	0.0104663
PURA	73	0.00523313	0.0104663
CDC42	74	0.00525473	0.0105095
TSPAN14	75	0.0052816	0.0105632
SYNPO2	76	0.00536262	0.0107252
DUOXA1	77	0.00549108	0.0109822
SPEN	77	0.00549108	0.0109822
RNF187	78	0.0056648	0.0113296
COL3A1	79	0.00569267	0.0113853
C15orf48	80	0.00574877	0.0114975
PDIA3	80	0.00574877	0.0114975
GATM	81	0.0060062	0.0120124
HNRNPH1	81	0.0060062	0.0120124
PLA2G16	82	0.00611869	0.0122374
KTN1	83	0.00619115	0.0123823
RHOT2	84	0.00626338	0.0125268
CFLAR	84	0.00626338	0.0125268
FOXJ3	85	0.00626402	0.012528
LYST	86	0.00627864	0.0125573
NT5DC2	87	0.006352	0.012704
ARNT	88	0.00651487	0.0130297
TOMM40	89	0.00652032	0.0130406
ZNF264	89	0.00652032	0.0130406
SRGAP1	90	0.0066496	0.0132992
TRNAU1AP	91	0.00669481	0.0133896
SREK1	92	0.00675532	0.0135106
APOE	93	0.00677701	0.013554
SRGAP3	93	0.00677701	0.013554
TMEM144	94	0.00683133	0.0136627
PPFIA1	95	0.0069538	0.0139076
SPATA7	96	0.00698459	0.0139692
FBXW8	97	0.00703346	0.0140669
DYNC2LI1	97	0.00703346	0.0140669
APOC2	98	0.00704635	0.0140927
FBXL4	99	0.00728968	0.0145794
PPP3R1	99	0.00728968	0.0145794
ANKHD1-EIF4EBP3	100	0.00739075	0.0147815
PTOV1	101	0.00754567	0.0150913
CD44	101	0.00754567	0.0150913
TCF3	102	0.00767845	0.0153569
FBXO16	103	0.00780144	0.0156029
NMRK1	103	0.00780144	0.0156029
C18orf25	104	0.00788954	0.0157791
ATXN7L1	105	0.00793864	0.0158773
CLK4	105	0.00793864	0.0158773
POU3F2	106	0.00805698	0.016114
TMCC1	107	0.00808684	0.0161737
MBP	108	0.00820302	0.016406
ATPIF1	109	0.00823637	0.0164727
SCAF4	110	0.0082865	0.016573
SEZ6L	111	0.00831231	0.0166246
SCD5	111	0.00831231	0.0166246
RASSF1	112	0.00832001	0.01664
CD86	113	0.00837039	0.0167408
WDR26	113	0.00837039	0.0167408
COL4A3BP	114	0.00850545	0.0170109
ST3GAL3	115	0.00852241	0.0170448
PNKP	116	0.00856742	0.0171348
EPC1	116	0.00856742	0.0171348
LDLRAD3	117	0.0085904	0.0171808
DUOX1	118	0.00882232	0.0176446
ATF7IP	118	0.00882232	0.0176446
C1QTNF7	119	0.00886496	0.0177299
E2F7	120	0.00902124	0.0180425
SYNE3	121	0.00907701	0.018154
AKT3	121	0.00907701	0.018154
HERC4	122	0.00912615	0.0182523
ZNF440	123	0.0091437	0.0182874
AKAP11	124	0.00919642	0.0183928
PCK1	125	0.00933149	0.018663
AKAP8L	125	0.00933149	0.018663
PGM2L1	126	0.00940878	0.0188176
FAM210A	127	0.00951584	0.0190317
TNFRSF11A	128	0.00958577	0.0191715
STAT5B	128	0.00958577	0.0191715
PCDHA9	129	0.00958754	0.0191751
FBXO24	130	0.0096055	0.019211
METTL14	131	0.00962348	0.019247
LAPTM4B	132	0.00971363	0.0194273
SLC30A4	133	0.00973171	0.0194634
WDR90	134	0.00983985	0.0196797
VASH1	135	0.0098587	0.0197174
AHNAK	136	0.00996819	0.0199364
ANKS1B	137	0.00998649	0.019973
KPNA1	138	0.0100048	0.0200096
SORD	139	0.0100937	0.0201875
CMC1	139	0.0100937	0.0201875
HOOK3	140	0.0100967	0.0201933
CR1	141	0.0102259	0.0204518
TESC	142	0.0103474	0.0206948
ZNF417	142	0.0103474	0.0206948
MRPL19	143	0.0104868	0.0209736
SLC35E1	144	0.0105619	0.0211239
GPR161	145	0.0105996	0.0211992
AKT1S1	146	0.0106009	0.0212018
POLR1E	146	0.0106009	0.0212018
PPM1F	147	0.010694	0.021388
SIN3A	148	0.0108459	0.0216919
CFI	149	0.0108542	0.0217084
USP2	150	0.0109223	0.0218446
EPB41L1	151	0.0109414	0.0218828
SMG9	152	0.0111073	0.0222147
TAOK1	152	0.0111073	0.0222147
ZNF789	153	0.0111336	0.0222671
RGS12	154	0.0113468	0.0226936
NKTR	155	0.0113603	0.0227205
SLC24A4	156	0.0115423	0.0230846
DCLK1	157	0.0115816	0.0231632
SLC6A19	158	0.011613	0.023226
RSBN1L	158	0.011613	0.023226
CIRBP	159	0.0116407	0.0232813
TRIM5	160	0.0117592	0.0235184
ZNF638	161	0.0117989	0.0235977
TLR9	162	0.0118656	0.0237311
STYX	162	0.0118656	0.0237311
ZC3H7A	163	0.0119781	0.0239562
ACVR1B	164	0.0120983	0.0241966
CDC27	165	0.012118	0.0242359
ARHGEF7	165	0.012118	0.0242359
RBMS1	166	0.0121184	0.0242367
MED25	167	0.0123702	0.0247403
MRTO4	167	0.0123702	0.0247403
COLGALT2	168	0.012381	0.0247619
CLPTM1	169	0.0125848	0.0251696
FXR1	170	0.0126222	0.0252444
EVI5L	171	0.012874	0.0257481
GUCY1A2	172	0.0128935	0.0257871
AP5S1	173	0.0131257	0.0262514
GART	173	0.0131257	0.0262514
PTCH2	174	0.0133772	0.0267544
CD46	174	0.0133772	0.0267544
HSPA12B	175	0.0136066	0.0272132
SPEF1	176	0.0136285	0.0272571
RUFY3	176	0.0136285	0.0272571
ABCA9	177	0.0137557	0.0275114
PPP2R2A	178	0.0138797	0.0277594
FARP2	178	0.0138797	0.0277594
SLC25A4	179	0.0141307	0.0282614
RBM33	179	0.0141307	0.0282614
SLC25A16	180	0.0143815	0.0287631
IL4I1	181	0.0146322	0.0292644
HLA-DRA	181	0.0146322	0.0292644
DNAJB1	182	0.0146444	0.0292889
MRPL57	183	0.0147547	0.0295093
MFAP3L	184	0.0148827	0.0297654
COX14	185	0.0149096	0.0298192
THUMPD1	185	0.0149096	0.0298192
TMEM169	186	0.0150653	0.0301306
RALGAPA2	187	0.0151099	0.0302199
WDR61	188	0.0151331	0.0302661
CEP290	189	0.0153832	0.0307665
AFF4	189	0.0153832	0.0307665
TWF2	190	0.0156333	0.0312665
STX16	190	0.0156333	0.0312665
APAF1	191	0.0158555	0.0317109
CENPB	192	0.0158831	0.0317663
ZNF75A	192	0.0158831	0.0317663
SORBS1	193	0.0159928	0.0319857
ZNF500	194	0.0160158	0.0320316
POGK	195	0.0160617	0.0321235
EIF2B3	196	0.0161328	0.0322657
BCL6	196	0.0161328	0.0322657
TP53INP1	197	0.0161769	0.0323538
VEGFC	198	0.0163824	0.0327648
SLAIN2	198	0.0163824	0.0327648
DNAJC6	199	0.0165014	0.0330028
PDCD2	200	0.0165713	0.0331427
CDKL2	201	0.0165947	0.0331894
KIN	202	0.016618	0.0332361
RELB	203	0.0166318	0.0332636
SLC25A37	203	0.0166318	0.0332636
SNAPC3	204	0.0166882	0.0333764
RBM8A	205	0.0168525	0.033705
ATM	206	0.016881	0.0337621
CNOT3	207	0.0169939	0.0339878
DNASE1	208	0.0170648	0.0341297
SLC25A3	209	0.0171301	0.0342603
GUCA1C	209	0.0171301	0.0342603
PTH2R	210	0.0173791	0.0347582
CRTAP	211	0.0174694	0.0349387
ABCB1	212	0.0176279	0.0352557
PRR11	212	0.0176279	0.0352557
NSUN4	213	0.0176372	0.0352745
ITGA5	214	0.01783	0.0356601
B3GAT3	215	0.0178765	0.035753
VTA1	216	0.0180968	0.0361935
SAP130	217	0.018125	0.03625
DST	217	0.018125	0.03625
PPM1M	218	0.0183734	0.0367467
ZMYM2	218	0.0183734	0.0367467
UBE2F	219	0.0183899	0.0367797
ZNF655	220	0.0185373	0.0370745
PSIP1	221	0.0186112	0.0372223
INTS5	222	0.0186216	0.0372431
CEP68	222	0.0186216	0.0372431
ZNF362	223	0.0186852	0.0373704
ROM1	224	0.0188696	0.0377393
PDLIM5	224	0.0188696	0.0377393
TSPAN3	225	0.0189082	0.0378163
PHF10	226	0.0189579	0.0379158
CYP4V2	227	0.0190825	0.0381649
DKK3	228	0.0191175	0.0382351
FOLR1	228	0.0191175	0.0382351
ZBTB26	229	0.0193653	0.0387306
COX15	229	0.0193653	0.0387306
CDC25B	230	0.0196129	0.0392259
ZNF207	230	0.0196129	0.0392259
GBP1	231	0.0197364	0.0394728
JADE1	231	0.0197364	0.0394728
WDR82	232	0.0198604	0.0397209
RBBP4	232	0.0198604	0.0397209
R3HDM1	233	0.0200929	0.0401857
LRRC8E	234	0.0201078	0.0402156
ZNF148	234	0.0201078	0.0402156
GOSR2	235	0.0201696	0.0403393
GNB1	236	0.0202209	0.0404418
MCOLN2	237	0.020355	0.04071
SLC44A1	237	0.020355	0.04071
EID2B	238	0.0204266	0.0408531
LGALS13	239	0.0206021	0.0412041
DDX59	239	0.0206021	0.0412041
CACNB2	240	0.0206332	0.0412664
PELI1	241	0.0207369	0.0414738
BOLA2	242	0.020849	0.041698
NFAT5	243	0.0208929	0.0417858
ZBTB6	244	0.0210958	0.0421916
CDK13	244	0.0210958	0.0421916
USP25	245	0.0212065	0.0424131
CBX5	246	0.0213379	0.0426757
MTMR11	247	0.0213425	0.0426849
RSF1	247	0.0213425	0.0426849
PAK2	248	0.0213642	0.0427284
IRGQ	249	0.0213905	0.042781
PPHLN1	250	0.021589	0.043178
CDC42SE1	251	0.0217076	0.0434153
KLF12	252	0.0217873	0.0435745
ATG4B	253	0.0218138	0.0436277
SF3B4	254	0.0218354	0.0436707
RBM14	254	0.0218354	0.0436707
ATF3	255	0.0219203	0.0438406
TMPO	256	0.0220537	0.0441074
PLEKHM3	257	0.0220816	0.0441632
FGFR1	257	0.0220816	0.0441632
OPA1	258	0.0221875	0.0443749
MDM4	259	0.0222143	0.0444285
KIF6	260	0.0223277	0.0446555
ASH1L	260	0.0223277	0.0446555
RBMS2	261	0.0223754	0.0447508
ZNF302	262	0.0224023	0.0448046
SV2A	263	0.0225737	0.0451475
HIRA	263	0.0225737	0.0451475
ZNF532	264	0.0226181	0.0452362
GORAB	265	0.0228196	0.0456392
EFCAB6	265	0.0228196	0.0456392
WWOX	266	0.0228621	0.0457242
PTPRO	267	0.0228893	0.0457785
C9orf163	268	0.0230653	0.0461306
CSNK1A1	268	0.0230653	0.0461306
METTL7A	269	0.02308	0.0461599
PCDHAC1	270	0.0231619	0.0463239
SEC22A	270	0.0231619	0.0463239
DIP2B	271	0.023244	0.046488
ANAPC4	272	0.0233109	0.0466218
GTDC1	272	0.0233109	0.0466218
AGFG2	273	0.0233263	0.0466525
RAB7A	274	0.0234911	0.0469823
G3BP2	275	0.0235564	0.0471128
DSC2	275	0.0235564	0.0471128
RHOBTB3	276	0.0236013	0.0472027
PRKAR2A	277	0.0236842	0.0473683
BOLA1	278	0.0238017	0.0476034
SMARCC2	279	0.0239057	0.0478114
SFTPD	280	0.0240469	0.0480938
MED13L	280	0.0240469	0.0480938
SLC41A2	281	0.0241561	0.0483122
ZCCHC4	282	0.024292	0.048584
ESYT2	282	0.024292	0.048584
PRKAA2	283	0.0244638	0.0489275
ABCD4	284	0.024537	0.0490739
CEP57	284	0.024537	0.0490739
TMEM237	285	0.0245761	0.0491522
MTHFD2L	286	0.0246324	0.0492647
EML3	287	0.0247818	0.0495636
KALRN	287	0.0247818	0.0495636
PAWR	288	0.024858	0.049716
PCDHAC2	289	0.0248863	0.0497726
RASGRP3	290	0.0249429	0.0498858
SPTBN1	291	0.0250265	0.050053
HIST2H2BE	292	0.0252711	0.0505421
G3BP1	292	0.0252711	0.0505421
FAF1	293	0.0252837	0.0505674
PKP4	294	0.0254263	0.0508527
BACE1	295	0.0255121	0.0510242
TBC1D17	296	0.0255155	0.051031
GOPC	296	0.0255155	0.051031
MCTP1	297	0.0257415	0.051483
RPS8	298	0.0257598	0.0515197
HHIP	299	0.0258278	0.0516555
C18orf54	300	0.0258854	0.0517707
C1orf56	301	0.025943	0.051886
HRK	302	0.026004	0.0520081
CUL3	302	0.026004	0.0520081
CBX3	303	0.0260585	0.0521169
IKBIP	304	0.0261452	0.0522905
GPHN	305	0.0261742	0.0523484
ALAS1	306	0.0262481	0.0524962
ASXL3	306	0.0262481	0.0524962
SLC6A15	307	0.0263192	0.0526383
TBC1D16	308	0.0264063	0.0528127
C12orf29	309	0.0264921	0.0529841
ICA1	309	0.0264921	0.0529841
NEK11	310	0.0267271	0.0534542
SEC16A	311	0.0267359	0.0534718
NPEPPS	311	0.0267359	0.0534718
HNRNPA2B1	312	0.0269322	0.0538643
RASGRP4	313	0.0269796	0.0539592
TNRC6B	313	0.0269796	0.0539592
TSR1	314	0.0271674	0.0543349
ADAM18	315	0.0272232	0.0544464
CSNK1G1	315	0.0272232	0.0544464
HECTD3	316	0.0273741	0.0547482
CENPF	317	0.0274667	0.0549334
NIPBL	317	0.0274667	0.0549334
CTSB	318	0.0274925	0.054985
CNIH4	319	0.0275221	0.0550443
SRR	320	0.0275518	0.0551036
PLCXD3	321	0.0276111	0.0552223
PPM1K	322	0.02771	0.0554201
ARMC8	322	0.02771	0.0554201
SSR3	323	0.02773	0.05546
KPNB1	324	0.0277598	0.0555196
GLYCTK	325	0.0279533	0.0559065
EPAS1	325	0.0279533	0.0559065
ATP6V1D	326	0.0280582	0.0561164
PITPNC1	327	0.028148	0.056296
MTMR9	328	0.028328	0.0566561
MAGI1	329	0.0283882	0.0567763
SCCPDH	330	0.0284394	0.0568787
NCOA2	331	0.0285388	0.0570775
IQCH	332	0.0286595	0.057319
STRBP	333	0.0286822	0.0573645
FLCN	333	0.0286822	0.0573645
GM2A	334	0.02872	0.0574399
PRRC2C	335	0.028841	0.0576821
SETD5	336	0.0289017	0.0578034
CCDC7	337	0.028925	0.05785
SH3GLB1	338	0.028932	0.057864
GNB5	339	0.0289624	0.0579247
USP24	340	0.0290535	0.0581071
MMP14	341	0.0291448	0.0582896
KIF2C	342	0.0291676	0.0583353
NTPCR	342	0.0291676	0.0583353
TRH	343	0.0294102	0.0588203
SFXN4	343	0.0294102	0.0588203
DGKE	344	0.0295419	0.0590839
ADGRF3	345	0.0296526	0.0593052
CRIPT	345	0.0296526	0.0593052
DIO2	346	0.0297568	0.0595136
ARPIN	347	0.0298949	0.0597898
SENP2	348	0.0299107	0.0598215
N6AMT1	349	0.0299724	0.0599448
TUT1	350	0.0301371	0.0602741
USP48	350	0.0301371	0.0602741
CHD1L	351	0.0301887	0.0603775
DOHH	352	0.0302817	0.0605633
FAM200A	353	0.0303791	0.0607582
WTAP	353	0.0303791	0.0607582
ZMIZ1	354	0.0304058	0.0608116
SLC27A6	355	0.0306211	0.0612421
CEP95	355	0.0306211	0.0612421
SLC28A2	356	0.0308629	0.0617258
CSPP1	356	0.0308629	0.0617258
GEMIN2	357	0.0310299	0.0620598
KAZN	358	0.0310613	0.0621226
APOL6	359	0.0310927	0.0621853
DNAH1	360	0.0311046	0.0622093
SORT1	360	0.0311046	0.0622093
NT5M	361	0.0313462	0.0626925
MTDH	361	0.0313462	0.0626925
NFIC	362	0.0314388	0.0628775
CDK2	363	0.0315335	0.063067
GALR1	364	0.0315877	0.0631755
FUS	364	0.0315877	0.0631755
RNF170	365	0.0316916	0.0633832
RAP2B	366	0.0318291	0.0636583
PRKG1	366	0.0318291	0.0636583
DDOST	367	0.0318819	0.0637637
ELMO1	368	0.0319136	0.0638272
DLC1	369	0.0319454	0.0638908
FPR3	370	0.0320408	0.0640816
C20orf27	371	0.0320704	0.0641408
N4BP2L2	371	0.0320704	0.0641408
FOXP1	372	0.0320726	0.0641453
ITIH2	373	0.0323116	0.0646231
TTF1	374	0.0323598	0.0647196
TMEM2	375	0.0325519	0.0651038
MYEF2	375	0.0325519	0.0651038
MTA2	376	0.0325526	0.0651053
TIAM2	377	0.0327767	0.0655533
EOMES	378	0.0327936	0.0655871
DNAJC7	378	0.0327936	0.0655871
RSPH1	379	0.032841	0.065682
RIMBP2	380	0.0330022	0.0660043
PLK3	381	0.0330344	0.0660688
PQLC3	382	0.0331313	0.0662627
CALD1	383	0.0332751	0.0665503
BAP1	384	0.0335157	0.0670315
RLBP1	384	0.0335157	0.0670315
EGFLAM	385	0.0337562	0.0675125
HP1BP3	385	0.0337562	0.0675125
DNAJB14	386	0.0339966	0.0679933
IRF5	387	0.0340749	0.0681498
UTP23	387	0.0340749	0.0681498
NUB1	388	0.0341732	0.0683464
VDR	389	0.0342369	0.0684739
ORAI2	389	0.0342369	0.0684739
CEP104	390	0.0342716	0.0685433
TRAM1	391	0.0343045	0.068609
FAM206A	392	0.0343702	0.0687404
C11orf54	392	0.0343702	0.0687404
SCAND1	393	0.0344031	0.0688062
MME	394	0.0344771	0.0689542
PPP2R2C	395	0.0345348	0.0690696
PLA2G12A	396	0.0345677	0.0691355
GPR21	397	0.0347172	0.0694344
FAM208B	397	0.0347172	0.0694344
SLC11A2	398	0.0348319	0.0696639
GKAP1	399	0.034865	0.0697301
IL1RN	400	0.0349313	0.0698625
PIGN	401	0.0349572	0.0699143
SNRNP70	401	0.0349572	0.0699143
EHD1	402	0.0350639	0.0701278
NUP62	403	0.035197	0.070394
CADM1	403	0.035197	0.070394
G2E3	404	0.0354298	0.0708596
NISCH	405	0.0354368	0.0708735
SRSF5	405	0.0354368	0.0708735
PEX7	406	0.0354631	0.0709263
FIGN	407	0.0355967	0.0711934
UFL1	408	0.0357305	0.071461
GINS4	409	0.035898	0.0717961
PHF7	410	0.035916	0.0718319
IVD	410	0.035916	0.0718319
TAP2	411	0.0359316	0.0718632
PTPN21	412	0.0361554	0.0723108
SSBP2	412	0.0361554	0.0723108
LRRC4C	413	0.0362006	0.0724011
NENF	414	0.0362342	0.0724685
TRIP12	415	0.0363947	0.0727895
CDK6	415	0.0363947	0.0727895
AOX1	416	0.0365381	0.0730761
ATP5H	417	0.0366057	0.0732115
SEMA3G	418	0.036634	0.0732679
KIF16B	418	0.036634	0.0732679
ITGB3BP	419	0.0368431	0.0736861
NELFCD	420	0.0368731	0.0737462
MAPK1	420	0.0368731	0.0737462
ST8SIA4	421	0.036911	0.073822
GAS7	422	0.036979	0.073958
AKAP12	423	0.0370811	0.0741622
BEST4	424	0.0371121	0.0742242
BMP1	424	0.0371121	0.0742242
SQSTM1	425	0.0372515	0.0745031
FBXL7	426	0.037351	0.0747021
LMLN	426	0.037351	0.0747021
ARIH2	427	0.0373882	0.0747763
FAM162A	428	0.0374223	0.0748447
IST1	428	0.0374223	0.0748447
LRCH3	429	0.0374566	0.0749131
IGF1R	430	0.0375898	0.0751797
KCNK10	431	0.0375935	0.075187
BCKDHB	432	0.0376621	0.0753242
GIPC2	433	0.0377651	0.0755301
OTUD7A	434	0.0378286	0.0756571
SLC20A2	435	0.0379025	0.0758051
FAM213A	436	0.0380672	0.0761343
HNRNPM	436	0.0380672	0.0761343
CMSS1	437	0.0381782	0.0763564
CC2D2A	438	0.0382127	0.0764255
C20orf85	439	0.0383057	0.0766113
ERBB3	440	0.038351	0.0767019
CMYA5	441	0.0385441	0.0770881
ILF3	441	0.0385441	0.0770881
CDADC1	442	0.038767	0.0775341
PIK3AP1	443	0.0387824	0.0775647
ACAT1	444	0.0388018	0.0776036
DGKG	445	0.0389062	0.0778124
SART3	446	0.038941	0.0778821
CCDC71	447	0.0389759	0.0779517
ABCA6	448	0.0390206	0.0780412
POSTN	448	0.0390206	0.0780412
CHN2	449	0.0390805	0.0781609
HMCES	450	0.0392201	0.0784403
ASPA	451	0.0392551	0.0785102
PTGFR	452	0.0394967	0.0789934
PPP1R12B	452	0.0394967	0.0789934
LRIG2	453	0.0395002	0.0790003
TFRC	454	0.0397108	0.0794216
PRDM9	455	0.0397346	0.0794692
ARID4B	455	0.0397346	0.0794692
AK9	456	0.039746	0.0794919
NAA15	457	0.0399572	0.0799144
TCF7	457	0.0399572	0.0799144
ADORA1	458	0.0399724	0.0799447
SMARCE1	459	0.0400277	0.0800554
UGCG	460	0.040063	0.080126
FOLH1B	461	0.0401336	0.0802672
F11	462	0.0402101	0.0804201
SEC61A1	462	0.0402101	0.0804201
CDO1	463	0.040275	0.08055
SLC35C2	464	0.0403104	0.0806207
SVIL	465	0.0403458	0.0806915
HBG2	466	0.0404477	0.0808953
CSTF2T	466	0.0404477	0.0808953
MIER1	467	0.040523	0.0810459
AP1AR	468	0.040594	0.0811879
GPM6A	469	0.0406295	0.0812589
LSR	470	0.0406852	0.0813703
MED13	470	0.0406852	0.0813703
ENTPD1	471	0.0407005	0.0814011
STAT1	472	0.0407361	0.0814722
HBD	473	0.0409226	0.0818452
SEMA3F	473	0.0409226	0.0818452
KIAA1468	474	0.0411599	0.0823198
UGGT2	475	0.0413971	0.0827942
SP110	476	0.0415219	0.0830438
LIFR	477	0.0416342	0.0832684
GSK3B	477	0.0416342	0.0832684
NBN	478	0.0417374	0.0834748
MCOLN3	479	0.0418712	0.0837424
PTK2	479	0.0418712	0.0837424
CCNT2	480	0.0419895	0.083979
RUNX1T1	481	0.0420255	0.0840511
TMEM245	482	0.0420616	0.0841232
HIST1H2BD	482	0.0420616	0.0841232
TM9SF3	483	0.0421081	0.0842162
KPNA6	483	0.0421081	0.0842162
USO1	484	0.0421338	0.0842677
PDE8B	485	0.0423449	0.0846898
TRIM22	486	0.0424957	0.0849914
INPP5E	487	0.0425816	0.0851633
XRN2	488	0.0428183	0.0856365
RPL15	488	0.0428183	0.0856365
RSL1D1	489	0.0428954	0.0857908
SCYL3	489	0.0428954	0.0857908
TJP2	490	0.0429318	0.0858637
MSLN	491	0.0430548	0.0861096
MIA3	491	0.0430548	0.0861096
GIGYF1	492	0.0431142	0.0862283
CTNNA3	493	0.0431872	0.0863744
TNNC1	494	0.0432912	0.0865824
ADD1	494	0.0432912	0.0865824
SPPL2B	495	0.0432968	0.0865937
NDUFC1	496	0.0434066	0.0868132
ADAM2	497	0.0435275	0.0870551
MPZL1	497	0.0435275	0.0870551
WDR78	498	0.0435899	0.0871797
WBP4	499	0.0436633	0.0873265
STAU1	500	0.0437367	0.0874734
LIMCH1	501	0.0437638	0.0875276
RRAGC	501	0.0437638	0.0875276
LACE1	502	0.0439574	0.0879148
TMTC3	503	0.0439999	0.0879998
DCTN5	503	0.0439999	0.0879998
EFCAB7	504	0.0440311	0.0880622
RBM12	505	0.0440679	0.0881359
TSHZ2	506	0.044236	0.0884719
DYM	507	0.0442525	0.0885049
NUDT16L1	508	0.0444003	0.0888007
DTX3L	509	0.0444719	0.0889438
GPLD1	509	0.0444719	0.0889438
CASP8AP2	510	0.0445855	0.089171
TRPM6	511	0.0447078	0.0894155
DENND1B	511	0.0447078	0.0894155
EEF1E1	512	0.0449435	0.089887
ENO1	512	0.0449435	0.089887
WAC	513	0.0449568	0.0899137
PARP9	514	0.0451792	0.0903584
CBFA2T2	515	0.0452176	0.0904353
ZNF483	516	0.0454043	0.0908087
SALL1	517	0.0454148	0.0908295
UGGT1	518	0.0454791	0.0909582
ULBP3	519	0.0455539	0.0911079
GINS2	520	0.0456288	0.0912577
RIPK4	521	0.0456502	0.0913005
DCLRE1C	521	0.0456502	0.0913005
METAP2	522	0.0456663	0.0913326
SGMS1	523	0.0458856	0.0917712
KCNJ16	523	0.0458856	0.0917712
TSC22D2	524	0.0460417	0.0920835
LMO7	524	0.0460417	0.0920835
PRKD2	525	0.046117	0.092234
CTBP2	526	0.0461209	0.0922418
AP1S1	527	0.0463054	0.0926107
SNRPB2	528	0.0463431	0.0926862
VN1R4	529	0.0463561	0.0927122
SP2	529	0.0463561	0.0927122
ACOX1	530	0.0465912	0.0931824
GMEB1	531	0.0467211	0.0934421
DNAJC12	532	0.0467589	0.0935179
SOS1	533	0.0467968	0.0935936
ITGB8	534	0.0468262	0.0936525
KDELR3	534	0.0468262	0.0936525
CAPN13	535	0.0470612	0.0941223
TPP2	535	0.0470612	0.0941223
CPEB2	536	0.0471384	0.0942769
GGA2	536	0.0471384	0.0942769
CBX4	537	0.0471765	0.0943529
KCNAB1	538	0.047296	0.094592
MARCH6	538	0.047296	0.094592
RGS5	539	0.047443	0.0948861
NADK2	540	0.0475307	0.0950614
KATNB1	541	0.0475575	0.095115
CSTF1	542	0.0475957	0.0951914
DCP1B	543	0.0477654	0.0955307
ENAH	543	0.0477654	0.0955307
PRDM2	544	0.0477868	0.0955736
UBE3C	545	0.0479016	0.0958032
ANKHD1	546	0.0479399	0.0958799
NOSIP	547	0.0479999	0.0959998
FRMD4A	547	0.0479999	0.0959998
EVI5	548	0.0480549	0.0961099
FAM169A	549	0.0482344	0.0964687
MPC2	550	0.0482469	0.0964938
LPAR1	551	0.0483238	0.0966475
SCUBE3	552	0.0483622	0.0967244
SIPA1L3	553	0.0484007	0.0968014
SAMD9L	554	0.0484392	0.0968784
CNOT4	555	0.0484687	0.0969375
BCAS4	556	0.0486318	0.0972637
DNAJC21	557	0.048703	0.097406
CCNB2	558	0.0489372	0.0978744
ANK3	558	0.0489372	0.0978744
HPS3	559	0.0489408	0.0978816
KCP	560	0.0494053	0.0988106
GATA2	561	0.0494059	0.0988118
SYNE1	562	0.0496003	0.0992006
DOK7	563	0.0496392	0.0992785
ZKSCAN5	564	0.0498731	0.0997461
VPS54	565	0.0501068	0.100214
TMEM248	566	0.0501073	0.100215
DNAJB6	567	0.0501855	0.100371
ADGRG5	568	0.0503405	0.100681
OCIAD1	568	0.0503405	0.100681
KHDRBS1	569	0.0504205	0.100841
ATG12	570	0.0505382	0.101076
HADHB	571	0.050574	0.101148
SATB2	572	0.0506167	0.101233
PALMD	573	0.050656	0.101312
BTG1	573	0.050656	0.101312
ADGRB3	574	0.0507346	0.101469
RCE1	575	0.0507739	0.101548
KHSRP	575	0.0507739	0.101548
S1PR4	576	0.0508075	0.101615
USP34	576	0.0508075	0.101615
PAOX	577	0.0508132	0.101626
EDIL3	577	0.0508132	0.101626
EIF3B	578	0.0509707	0.101941
LRPAP1	579	0.0510409	0.102082
OAZ2	579	0.0510409	0.102082
SMAD5	580	0.0511679	0.102336
FUZ	581	0.0512742	0.102548
CAAP1	581	0.0512742	0.102548
SPCS2	582	0.0512863	0.102573
TSEN54	583	0.0513258	0.102652
FAM98C	584	0.0515074	0.103015
IKBKE	585	0.0517405	0.103481
PHC3	585	0.0517405	0.103481
SLC25A23	586	0.0518011	0.103602
NTRK3	587	0.0519599	0.10392
PRDM14	588	0.0519735	0.103947
RNF130	589	0.0522065	0.104413
NAAA	590	0.0522385	0.104477
NCOA7	591	0.0524393	0.104879
RASA2	592	0.0526721	0.105344
TMEM30A	593	0.0526775	0.105355
CEPT1	594	0.0527575	0.105515
TOP3B	595	0.0529048	0.10581
LRRFIP1	595	0.0529048	0.10581
COPG1	596	0.0529177	0.105835
VAMP4	597	0.0531182	0.106236
ZNF397	598	0.0531373	0.106275
ATL3	599	0.0533593	0.106719
KIAA1549	600	0.0533699	0.10674
ANAPC16	600	0.0533699	0.10674
ZNF507	601	0.0533996	0.106799
OGFOD1	602	0.0534801	0.10696
JDP2	603	0.0536023	0.107205
LACTB2	603	0.0536023	0.107205
TMEM161B	604	0.0537623	0.107525
ELL2	605	0.0538346	0.107669
PPL	606	0.053843	0.107686
ANKMY1	606	0.053843	0.107686
HSPA12A	607	0.0539238	0.107848
WFIKKN1	608	0.0540669	0.108134
RABL6	608	0.0540669	0.108134
VCPKMT	609	0.0541261	0.108252
TSPAN4	610	0.0541665	0.108333
HOMER3	611	0.0542881	0.108576
HBB	612	0.054299	0.108598
RANBP2	612	0.054299	0.108598
NRBF2	613	0.0544098	0.10882
ZNF677	614	0.0545311	0.109062
UBA6	614	0.0545311	0.109062
SYNRG	615	0.0545316	0.109063
TIFAB	616	0.0545722	0.109144
PNN	617	0.0547349	0.10947
DPF1	618	0.0547631	0.109526
C1QTNF1	619	0.0548163	0.109633
FOXP4	620	0.054995	0.10999
DNER	621	0.0551424	0.110285
BMPR1A	621	0.0551424	0.110285
PARN	622	0.0552268	0.110454
WDR55	623	0.055265	0.11053
EPHA5	624	0.0553876	0.110775
GAR1	625	0.0554585	0.110917
RBBP6	625	0.0554585	0.110917
AKIP1	626	0.0555104	0.111021
PTGER3	627	0.0555923	0.111185
CADPS2	628	0.0556333	0.111267
CASR	629	0.0556902	0.11138
ZFYVE16	629	0.0556902	0.11138
RBM18	630	0.0557563	0.111513
OLA1	631	0.0557974	0.111595
DPY19L1	632	0.0558384	0.111677
KCNS2	633	0.0558795	0.111759
ABCC5	634	0.0559217	0.111843
ZNF160	634	0.0559217	0.111843
VAV2	635	0.0559617	0.111923
ATR	636	0.0560028	0.112006
STAB1	637	0.0561532	0.112306
TMTC1	637	0.0561532	0.112306
JMJD1C	638	0.0561673	0.112335
TRIM9	639	0.0563846	0.112769
MYADM	639	0.0563846	0.112769
TRIM55	640	0.0564146	0.112829
FBXO4	641	0.0566159	0.113232
GOLGA4	641	0.0566159	0.113232
OXA1L	642	0.056621	0.113242
TMEM50A	643	0.0567037	0.113407
LMBRD2	644	0.056745	0.11349
CDK17	645	0.0568471	0.113694
PCM1	645	0.0568471	0.113694
MZT2B	646	0.0568691	0.113738
CCDC91	647	0.0570783	0.114157
RNF133	648	0.0573093	0.114619
CDK12	648	0.0573093	0.114619
SCGB1A1	649	0.0573253	0.114651
COX6A1	650	0.0574085	0.114817
KLF6	651	0.0575403	0.115081
SEMA3C	652	0.0575749	0.11515
CXCR4	653	0.0576581	0.115316
SMCR8	654	0.0577712	0.115542
CDHR3	655	0.0578249	0.11565
HLA-DQB1	656	0.0579918	0.115984
SNX6	657	0.058002	0.116004
ESR1	658	0.0581172	0.116234
TPD52	658	0.0581172	0.116234
GALNT12	659	0.0582327	0.116465
KMT2E	659	0.0582327	0.116465
HEY2	660	0.0583683	0.116737
NME5	661	0.0584521	0.116904
TMEM184A	662	0.0584634	0.116927
MZF1	662	0.0584634	0.116927
GTF2A1	663	0.0585359	0.117072
BTRC	664	0.0586939	0.117388
PHF11	665	0.0588298	0.11766
AMIGO3	666	0.0589244	0.117849
TNXB	666	0.0589244	0.117849
EXOG	667	0.0589981	0.117996
SLC4A7	668	0.0590402	0.11808
ZNF138	669	0.0591244	0.118249
RAB10	670	0.0591548	0.11831
CD59	670	0.0591548	0.11831
FLRT3	671	0.0591665	0.118333
WWC1	672	0.0592508	0.118502
SMIM7	673	0.059293	0.118586
APBA2	674	0.0593774	0.118755
HADHA	675	0.0593851	0.11877
ANKRD10	675	0.0593851	0.11877
CD79A	676	0.0596153	0.119231
XRCC2	676	0.0596153	0.119231
SAMSN1	677	0.0598425	0.119685
MAP2K7	678	0.0598455	0.119691
SMCHD1	678	0.0598455	0.119691
IQCF3	679	0.0600755	0.120151
RDH11	679	0.0600755	0.120151
NDRG2	680	0.0600969	0.120194
TUSC2	681	0.0602668	0.120534
DYDC2	682	0.0603055	0.120611
CDC14B	682	0.0603055	0.120611
SLC1A1	683	0.0606072	0.121214
RRAS	684	0.0606498	0.1213
DCAF6	684	0.0606498	0.1213
ZNF473	685	0.0607652	0.12153
DDX17	685	0.0607652	0.12153
U2AF1	686	0.0608204	0.121641
EXOC6	687	0.060863	0.121726
PPP1R3B	688	0.060995	0.12199
PRDM15	689	0.0611194	0.122239
CAMK2A	689	0.0611194	0.122239
CDH26	690	0.0611621	0.122324
2001-08-01	691	0.0612246	0.122449
TM7SF2	692	0.0612905	0.122581
ABCF2	693	0.0613762	0.122752
E2F5	694	0.0614542	0.122908
NUP54	694	0.0614542	0.122908
ARHGAP32	695	0.0614619	0.122924
FIP1L1	696	0.0615048	0.12301
PDXDC1	697	0.0615476	0.123095
FAM135A	698	0.0615906	0.123181
NSL1	699	0.0616335	0.123267
ZNF701	700	0.0616764	0.123353
MAFK	701	0.0616837	0.123367
CNTNAP2	701	0.0616837	0.123367
IDH1	702	0.0617193	0.123439
H6PD	703	0.0618053	0.123611
HSP90AA1	704	0.0619131	0.123826
STK4	705	0.0619773	0.123955
S1PR1	706	0.0621424	0.124285
ZNF782	707	0.0623651	0.12473
COPA	708	0.0623717	0.124743
ITGB5	709	0.0624514	0.124903
OMP	710	0.0626008	0.125202
AIF1	710	0.0626008	0.125202
SYNGR1	711	0.0628299	0.12566
IGF2BP2	712	0.0628839	0.125768
VGF	713	0.0629272	0.125854
NDUFB7	714	0.0630139	0.126028
CACNG2	715	0.0630572	0.126114
ZMAT3	716	0.0630589	0.126118
MIA2	717	0.0632308	0.126462
UBE4B	718	0.0632742	0.126548
ALK	719	0.0632879	0.126576
HLA-DPB1	719	0.0632879	0.126576
ITGA2B	720	0.063448	0.126896
RANBP1	721	0.0634915	0.126983
MTX2	721	0.0634915	0.126983
BST1	722	0.0635167	0.127033
MUC4	722	0.0635167	0.127033
CTSS	723	0.063535	0.12707
ARL1	724	0.0636221	0.127244
PBRM1	725	0.0637092	0.127418
USF2	726	0.0637455	0.127491
NXPE3	726	0.0637455	0.127491
HPS6	727	0.0638399	0.12768
KIAA1109	728	0.0638836	0.127767
SOD1	729	0.0639742	0.127948
SARDH	729	0.0639742	0.127948
RNMT	730	0.0641018	0.128204
ESCO1	730	0.0641018	0.128204
APEH	731	0.0641455	0.128291
MS4A7	732	0.0642028	0.128406
ZNHIT2	733	0.0643642	0.128728
IRF6	734	0.0644079	0.128816
CASQ2	735	0.0644313	0.128863
PROX1	736	0.0644955	0.128991
SKP2	737	0.0646598	0.12932
RECQL	737	0.0646598	0.12932
ZNRF2	738	0.0648882	0.129776
TSPAN5	739	0.0649342	0.129868
KIF20A	739	0.0649342	0.129868
FAM46C	740	0.0650221	0.130044
ARV1	741	0.0651101	0.13022
C5orf51	742	0.0651165	0.130233
STK19	742	0.0651165	0.130233
ZNF521	743	0.0652861	0.130572
HINT3	744	0.0653302	0.13066
SLC6A18	745	0.0653447	0.130689
ERBB4	745	0.0653447	0.130689
RIOK2	746	0.0653743	0.130749
PPP6R3	747	0.0654183	0.130837
CLN8	748	0.0655506	0.131101
C19orf47	749	0.0655728	0.131146
TPCN2	749	0.0655728	0.131146
IQCK	750	0.0655948	0.13119
MCAM	751	0.0656389	0.131278
LTN1	752	0.0656831	0.131366
FAM149A	753	0.0657714	0.131543
ADAMTS3	754	0.0658009	0.131602
MGLL	754	0.0658009	0.131602
ZNF574	755	0.0659483	0.131897
HAMP	756	0.0660289	0.132058
PPP3CA	757	0.0660811	0.132162
PCDHA1	758	0.0662568	0.132514
WDR1	758	0.0662568	0.132514
PTPN12	759	0.0663026	0.132605
ACOT11	760	0.066347	0.132694
TSSC1	761	0.0664801	0.13296
EIF4EBP2	762	0.0664846	0.132969
TECR	763	0.0667123	0.133425
FARSB	763	0.0667123	0.133425
MRPL52	764	0.0667913	0.133583
RPF1	765	0.0668803	0.133761
CCT8	766	0.06694	0.13388
OGFRL1	767	0.0669694	0.133939
ALG10B	768	0.0671476	0.134295
ADD2	769	0.0671676	0.134335
FYTTD1	770	0.0673261	0.134652
CHST12	771	0.0673708	0.134742
PCBD2	771	0.0673708	0.134742
METTL21C	772	0.0673951	0.13479
RNF148	773	0.0676226	0.135245
RIF1	773	0.0676226	0.135245
CBX2	774	0.0676838	0.135368
CD74	775	0.0677285	0.135457
SMG7	776	0.0678181	0.135636
KLHDC9	777	0.0678499	0.1357
PECR	778	0.0678629	0.135726
THUMPD3	778	0.0678629	0.135726
RNF219	779	0.0680423	0.136085
CRTC3	780	0.0680772	0.136154
CDH8	780	0.0680772	0.136154
ZNF91	781	0.0680871	0.136174
KCTD1	782	0.068132	0.136264
MBNL1	782	0.068132	0.136264
NT5DC1	783	0.0681769	0.136354
SLC16A7	784	0.0682667	0.136533
UBXN1	785	0.0683044	0.136609
SCRN3	785	0.0683044	0.136609
CXCL6	786	0.0683117	0.136623
BTG3	787	0.0684916	0.136983
VRK3	788	0.0685315	0.137063
C6orf120	789	0.0687167	0.137433
TMX3	790	0.0687586	0.137517
WNK1	790	0.0687586	0.137517
MS4A6A	791	0.0688068	0.137614
PMPCA	792	0.0689856	0.137971
ZNF827	792	0.0689856	0.137971
GLRX3	793	0.0690324	0.138065
PCDHA2	794	0.0692125	0.138425
MARCH1	794	0.0692125	0.138425
SEC63	795	0.0692132	0.138426
MARK2	796	0.0693036	0.138607
C2CD5	797	0.0694393	0.138879
ARID5B	797	0.0694393	0.138879
FOXO3	798	0.0696205	0.139241
PLEKHM1	799	0.0696661	0.139332
MPRIP	799	0.0696661	0.139332
AFAP1L1	800	0.0697566	0.139513
PSMA1	801	0.0698927	0.139785
GLRX	802	0.0699835	0.139967
EID2	803	0.0701193	0.140239
VPS13A	803	0.0701193	0.140239
SPOCK3	804	0.0702108	0.140422
PCDHA5	805	0.0703458	0.140692
FAM98B	805	0.0703458	0.140692
SMARCA4	806	0.0704385	0.140877
BRD4	807	0.0705723	0.141145
SLC7A8	808	0.0705752	0.14115
KIAA1217	809	0.0706208	0.141242
PSMG3	810	0.0707987	0.141597
SSH2	810	0.0707987	0.141597
STK10	811	0.070849	0.141698
PIGO	811	0.070849	0.141698
TWF1	812	0.0709861	0.141972
MYBPH	813	0.071025	0.14205
CDH20	813	0.071025	0.14205
HLA-DQA1	814	0.0710318	0.142064
DOCK2	814	0.0710318	0.142064
LPP	815	0.0712512	0.142502
C11orf80	816	0.0713981	0.142796
USP19	817	0.0714439	0.142888
F12	817	0.0714439	0.142888
COMMD4	818	0.0714773	0.142955
USP1	818	0.0714773	0.142955
TGFBR1	819	0.0715815	0.143163
PRR14	820	0.0716274	0.143255
PTBP1	821	0.0717034	0.143407
TMEM57	822	0.0717652	0.14353
UGP2	823	0.0719294	0.143859
NDE1	824	0.072087	0.144174
KIF1A	825	0.0721331	0.144266
ANKRD33	826	0.0721553	0.144311
MGST3	826	0.0721553	0.144311
FAM204A	827	0.0722713	0.144543
POFUT2	828	0.0723634	0.144727
RAB36	829	0.0723811	0.144762
MOXD1	829	0.0723811	0.144762
CEP350	830	0.0724096	0.144819
IP6K1	831	0.0726069	0.145214
F11R	831	0.0726069	0.145214
FAM63A	832	0.0726403	0.145281
ATF4	833	0.0726865	0.145373
TNKS2	834	0.0728326	0.145665
CEP89	835	0.0729177	0.145835
TRNT1	836	0.0730102	0.14602
RPS19	837	0.0730582	0.146116
KCNJ4	837	0.0730582	0.146116
XKR6	838	0.0731491	0.146298
PHYKPL	839	0.0731955	0.146391
BCAM	840	0.0732838	0.146568
PPP2R2B	840	0.0732838	0.146568
RFC3	841	0.0733809	0.146762
MIEF1	842	0.0734273	0.146855
POT1	843	0.0734738	0.146948
TBC1D9B	844	0.0735093	0.147019
NAA30	844	0.0735093	0.147019
EPB41L4B	845	0.0735202	0.14704
CREB1	846	0.0735666	0.147133
ERC2	847	0.0737347	0.147469
ATAD2	848	0.0739386	0.147877
MYC	849	0.07396	0.14792
SULT1C2	849	0.07396	0.14792
USP31	850	0.0739851	0.14797
SERPINB13	851	0.0740783	0.148157
PLCE1	852	0.0741715	0.148343
FAM198B	853	0.0741852	0.14837
WDR20	853	0.0741852	0.14837
C10orf76	854	0.0743114	0.148623
STAM2	855	0.074358	0.148716
KLKB1	856	0.0744104	0.148821
FBXL17	856	0.0744104	0.148821
DDA1	857	0.0744514	0.148903
ITGB2	858	0.0745915	0.149183
CRHR1	859	0.0746355	0.149271
PSEN1	859	0.0746355	0.149271
COPG2	860	0.0747318	0.149464
PWWP2A	861	0.0747786	0.149557
2015-09-01	862	0.0748605	0.149721
TMEM50B	862	0.0748605	0.149721
ANKRD16	863	0.0748721	0.149744
MRPS16	864	0.0749658	0.149932
TSEN34	865	0.0750855	0.150171
TBX3	865	0.0750855	0.150171
SDAD1	866	0.0751063	0.150213
HYAL1	867	0.0751532	0.150306
PTPRJ	867	0.0751532	0.150306
POU6F2	868	0.075247	0.150494
ARHGAP27	869	0.0753104	0.150621
DAP3	869	0.0753104	0.150621
SIK3	870	0.0754348	0.15087
DNAJC9	871	0.0755287	0.151057
SEMA3E	872	0.0755352	0.15107
NCOR2	873	0.0755757	0.151151
SESN2	874	0.0757599	0.15152
PLEKHA2	874	0.0757599	0.15152
FILIP1L	875	0.0757638	0.151528
KAT6B	876	0.075905	0.15181
C12orf50	877	0.0759846	0.151969
NFX1	877	0.0759846	0.151969
HNRNPA1	878	0.0759992	0.151998
AKAP6	879	0.0760935	0.152187
ZDHHC21	880	0.0761407	0.152281
CADM4	881	0.0762092	0.152418
ZNF555	881	0.0762092	0.152418
TRAK1	882	0.076235	0.15247
EPHB1	882	0.076235	0.15247
TMEM52	883	0.0764337	0.152867
CAMK2B	883	0.0764337	0.152867
CNTROB	884	0.0766129	0.153226
GTSF1	885	0.0766581	0.153316
IWS1	885	0.0766581	0.153316
C10orf95	886	0.0767074	0.153415
UBE2L3	886	0.0767074	0.153415
RELA	887	0.0768825	0.153765
SMIM19	888	0.0768968	0.153794
OPA3	889	0.0769915	0.153983
BACH1	890	0.0770863	0.154173
CLEC5A	891	0.0771068	0.154214
AP2B1	892	0.0772761	0.154552
VAV3	893	0.0773236	0.154647
AP1B1	894	0.077331	0.154662
ARHGEF12	894	0.077331	0.154662
ELK3	895	0.0774185	0.154837
GTPBP2	896	0.0774661	0.154932
BRAT1	897	0.0775552	0.15511
MAPK14	898	0.0776562	0.155312
RBM47	899	0.0777038	0.155408
DDIT4	900	0.0777514	0.155503
CALML6	901	0.0777793	0.155559
CCAR2	901	0.0777793	0.155559
ESPNL	902	0.0778466	0.155693
ALDH3B1	903	0.0779895	0.155979
ROR2	904	0.0780033	0.156007
LEMD1	905	0.0780372	0.156074
CHERP	906	0.0780848	0.15617
EPS15L1	907	0.0781325	0.156265
PTAFR	908	0.0782272	0.156454
USP7	909	0.0783712	0.156742
YY1	910	0.0784189	0.156838
ZWINT	911	0.0784511	0.156902
WDR86	912	0.0784667	0.156933
UBE2J1	913	0.0786749	0.15735
ANK2	914	0.0787058	0.157412
MYCN	915	0.0788973	0.157795
SHF	916	0.0788986	0.157797
PIK3CA	916	0.0788986	0.157797
PKIB	917	0.079089	0.158178
TUBB1	918	0.0791223	0.158245
SRSF4	918	0.0791223	0.158245
COPS2	919	0.079137	0.158274
SLC4A4	919	0.079137	0.158274
GNAL	920	0.0792809	0.158562
F2RL2	921	0.0793459	0.158692
EIF2AK2	921	0.0793459	0.158692
ADO	922	0.079473	0.158946
PUM1	923	0.0795211	0.159042
GDAP2	923	0.0795211	0.159042
EIF2S1	924	0.0795694	0.159139
MARCH3	924	0.0795694	0.159139
FAM19A4	925	0.0796173	0.159235
NOTCH1	926	0.0797928	0.159586
SMIM14	927	0.0798579	0.159716
ZBTB24	928	0.0800024	0.160005
SRD5A1	929	0.0800162	0.160032
PTPRD	930	0.080147	0.160294
KIF9	931	0.0802395	0.160479
TC2N	932	0.0804627	0.160925
CR2	933	0.0805333	0.161067
CNTNAP3	934	0.08063	0.16126
BNIPL	935	0.0806784	0.161357
BTBD10	936	0.0806859	0.161372
VPS13B	936	0.0806859	0.161372
TRPC4	937	0.0807267	0.161453
RAB40C	938	0.0809089	0.161818
FGFR1OP2	938	0.0809089	0.161818
HNMT	939	0.0809204	0.161841
CD2BP2	940	0.0809688	0.161938
RNF123	941	0.0811319	0.162264
HNRNPU	941	0.0811319	0.162264
TEX9	942	0.0811627	0.162325
ANKRD13D	943	0.0812598	0.16252
CDCP1	944	0.0813083	0.162617
SDCCAG3	945	0.0813549	0.16271
CREBRF	945	0.0813549	0.16271
ZNF780B	946	0.0814054	0.162811
SLIT2	946	0.0814054	0.162811
SLC1A2	947	0.0815511	0.163102
NSUN6	948	0.0815778	0.163156
RTN4	948	0.0815778	0.163156
SUOX	949	0.0815997	0.163199
MKL2	950	0.0817456	0.163491
PLEK2	951	0.0818006	0.163601
FBLN1	951	0.0818006	0.163601
DDI2	952	0.081843	0.163686
ZNF576	953	0.0820233	0.164047
ABCC4	953	0.0820233	0.164047
NUAK2	954	0.082184	0.164368
ZFP64	955	0.082246	0.164492
HACD3	956	0.0822816	0.164563
WISP1	957	0.0824769	0.164954
SIGLEC1	958	0.0825257	0.165051
UGT2B15	959	0.0825746	0.165149
FSBP	959	0.0825746	0.165149
SBNO1	960	0.0826234	0.165247
TMEM132D	961	0.0826723	0.165345
SLC35F2	962	0.0826911	0.165382
GLIPR1	962	0.0826911	0.165382
INTS1	963	0.0829135	0.165827
ZNF493	963	0.0829135	0.165827
ATF5	964	0.0831359	0.166272
MAN2C1	965	0.0833582	0.166716
CUL4A	965	0.0833582	0.166716
F7	966	0.0834072	0.166814
ATP2C1	967	0.0834562	0.166912
PPP1R2	968	0.0835053	0.167011
MTF2	969	0.0835805	0.167161
TRERF1	970	0.0836036	0.167207
DPY19L3	971	0.0838026	0.167605
DOPEY1	971	0.0838026	0.167605
EREG	972	0.0839478	0.167896
EML1	973	0.0839971	0.167994
KIAA1211	974	0.0841448	0.16829
RTFDC1	975	0.0842434	0.168487
PHACTR4	976	0.0842468	0.168494
MAST4	976	0.0842468	0.168494
SPG21	977	0.084342	0.168684
TNPO3	978	0.0844407	0.168881
RASSF5	979	0.0844687	0.168937
FABP7	980	0.0845888	0.169178
RTN4RL1	981	0.0846906	0.169381
TOB2	981	0.0846906	0.169381
SUSD5	982	0.0849125	0.169825
DCN	982	0.0849125	0.169825
LDAH	983	0.0849843	0.169969
DPP8	984	0.0850338	0.170068
PZP	985	0.0851342	0.170268
STAR	986	0.0852319	0.170464
TCTE3	987	0.0852814	0.170563
BNIP3L	988	0.0853559	0.170712
ZBTB38	988	0.0853559	0.170712
ANK1	989	0.0853806	0.170761
TRIM2	990	0.0854302	0.17086
ATP5C1	991	0.0855775	0.171155
CFDP1	991	0.0855775	0.171155
CTH	992	0.0856287	0.171257
OLR1	993	0.0857991	0.171598
HENMT1	994	0.0859268	0.171854
MAPK8IP3	995	0.0860206	0.172041
RSPH14	996	0.0860263	0.172053
HSPA4	997	0.0861258	0.172252
ADAM33	998	0.0861756	0.172351
SERTAD4	999	0.086242	0.172484
PANX1	999	0.086242	0.172484
MBOAT7	1000	0.0864633	0.172927
MALSU1	1000	0.0864633	0.172927
HNRNPUL2	1001	0.0865743	0.173149
TTC30A	1001	0.0865743	0.173149
PTPRF	1002	0.0866242	0.173248
ERCC1	1003	0.0866741	0.173348
OSMR	1004	0.0868739	0.173748
ARNTL	1005	0.0869058	0.173812
RAB3IP	1005	0.0869058	0.173812
ESM1	1006	0.0871238	0.174248
ZNF234	1007	0.087127	0.174254
SON	1007	0.087127	0.174254
RNF7	1008	0.087324	0.174648
DZIP1L	1009	0.087348	0.174696
BCCIP	1009	0.087348	0.174696
POPDC2	1010	0.0873741	0.174748
ANKRD50	1011	0.0874743	0.174949
LYRM7	1012	0.087569	0.175138
HHAT	1013	0.0875746	0.175149
BRD8	1014	0.0877752	0.17555
GPR183	1015	0.08779	0.17558
SERINC3	1015	0.08779	0.17558
CEACAM3	1016	0.0880108	0.176022
CHD9	1016	0.0880108	0.176022
SPATA1	1017	0.0882778	0.176556
ATP5F1	1018	0.0883281	0.176656
HMGN1	1019	0.0884524	0.176905
MOBP	1019	0.0884524	0.176905
NAMPT	1020	0.0885799	0.17716
ATP13A4	1021	0.0886303	0.177261
DSG1	1022	0.088673	0.177346
YME1L1	1022	0.088673	0.177346
ABCA5	1023	0.0887311	0.177462
ARHGAP1	1023	0.0887311	0.177462
CABIN1	1024	0.0887815	0.177563
UBE3D	1024	0.0887815	0.177563
GATC	1025	0.088832	0.177664
SCNN1G	1026	0.0888936	0.177787
ESAM	1027	0.0889834	0.177967
VPS53	1028	0.0890844	0.178169
ZNF575	1029	0.0891142	0.178228
CFAP70	1030	0.0892865	0.178573
QKI	1031	0.0893346	0.178669
ZNF771	1032	0.0893877	0.178775
SLC30A5	1033	0.089555	0.17911
BFAR	1034	0.0897754	0.179551
KIAA1147	1034	0.0897754	0.179551
INTS6	1035	0.0899449	0.17989
MYL4	1036	0.0899956	0.179991
ATF1	1037	0.0900972	0.180194
OVCA2	1038	0.0902158	0.180432
SOX13	1038	0.0902158	0.180432
GLT8D1	1039	0.0902495	0.180499
COG8	1040	0.090436	0.180872
EPB41L2	1041	0.0905545	0.181109
EAPP	1042	0.090656	0.181312
PSD3	1042	0.090656	0.181312
SLC1A5	1043	0.0906563	0.181313
ABHD17B	1044	0.09086	0.18172
XRCC1	1045	0.090876	0.181752
MRPL21	1045	0.090876	0.181752
PCDHA10	1046	0.0910959	0.182192
RNF168	1046	0.0910959	0.182192
UBE3A	1047	0.0911149	0.18223
CYP4A22	1048	0.0911659	0.182332
PCDH10	1049	0.0912169	0.182434
EPB41L3	1050	0.0913158	0.182632
FGF14	1050	0.0913158	0.182632
FBXO32	1051	0.091319	0.182638
LETMD1	1052	0.0917279	0.183456
SCFD1	1052	0.0917279	0.183456
FAM212A	1053	0.0917553	0.183511
KCMF1	1053	0.0917553	0.183511
CAPN7	1054	0.0918303	0.183661
PARL	1055	0.091975	0.18395
XPR1	1055	0.091975	0.18395
SIGLEC8	1056	0.0921376	0.184275
NFU1	1057	0.0921889	0.184378
SLC2A2	1058	0.0921946	0.184389
ZFP36L2	1058	0.0921946	0.184389
AKT2	1059	0.0923427	0.184685
AURKA	1059	0.0923427	0.184685
WDR12	1060	0.092394	0.184788
TMEM19	1061	0.0924141	0.184828
GTF2F1	1062	0.0924454	0.184891
IFT122	1063	0.0924967	0.184993
ICAM1	1064	0.0926508	0.185302
PHIP	1064	0.0926508	0.185302
SLC25A29	1065	0.0927022	0.185404
TSN	1066	0.0927536	0.185507
TMED1	1067	0.092853	0.185706
FAM222B	1068	0.0928564	0.185713
CPNE8	1068	0.0928564	0.185713
SNUPN	1069	0.0930723	0.186145
LIMS1	1069	0.0930723	0.186145
ANKDD1A	1070	0.0931652	0.18633
CASP6	1071	0.0932916	0.186583
ATP5G2	1071	0.0932916	0.186583
DRAM2	1072	0.0933198	0.18664
ANKRD29	1073	0.0933714	0.186743
PCDH7	1074	0.0934745	0.186949
DZIP3	1075	0.0935108	0.187022
ID4	1076	0.0935261	0.187052
PSEN2	1077	0.0936809	0.187362
BHMT	1078	0.0937299	0.18746
RAPGEF5	1079	0.0938359	0.187672
CNKSR3	1079	0.0938359	0.187672
SNAPC4	1080	0.093949	0.187898
SLC5A3	1080	0.093949	0.187898
LPIN1	1081	0.0940426	0.188085
COL8A1	1081	0.0940426	0.188085
SETDB2	1082	0.0940943	0.188189
PRRG2	1083	0.094168	0.188336
ZNF611	1083	0.094168	0.188336
WDR6	1084	0.0943013	0.188603
SEPSECS	1085	0.0943869	0.188774
DPYD	1085	0.0943869	0.188774
C17orf80	1086	0.0944567	0.188913
RCC1	1087	0.0946058	0.189212
DDX31	1087	0.0946058	0.189212
TMX1	1088	0.0950274	0.190055
PLD3	1089	0.0950433	0.190087
TPR	1089	0.0950433	0.190087
PTPRE	1090	0.0951313	0.190263
LILRB3	1091	0.0951833	0.190367
HNRNPDL	1091	0.0951833	0.190367
IQCE	1092	0.095262	0.190524
LITAF	1093	0.0953393	0.190679
SIX5	1094	0.0953914	0.190783
ZNF311	1095	0.0954434	0.190887
MBD4	1095	0.0954434	0.190887
SPP1	1096	0.0954806	0.190961
SRRM4	1097	0.0954955	0.190991
LAMA3	1098	0.0956992	0.191398
TLK1	1098	0.0956992	0.191398
INTU	1099	0.0958602	0.19172
MFHAS1	1100	0.0959176	0.191835
SF3B6	1100	0.0959176	0.191835
YTHDF3	1101	0.0959645	0.191929
NR3C2	1102	0.0961361	0.192272
PFKFB2	1102	0.0961361	0.192272
SARM1	1103	0.0962255	0.192451
DUT	1104	0.0963544	0.192709
TDRP	1105	0.0964868	0.192974
NARS	1106	0.0965727	0.193145
KDM2A	1106	0.0965727	0.193145
PPM1A	1107	0.0967909	0.193582
SLC30A7	1108	0.0968008	0.193602
CWC22	1109	0.0968531	0.193706
RAB3GAP1	1110	0.0969579	0.193916
GNA15	1111	0.0970091	0.194018
SOGA1	1111	0.0970091	0.194018
LHX6	1112	0.0970627	0.194125
ALKBH7	1112	0.0970627	0.194125
BCL11B	1113	0.0972201	0.19444
SLC30A8	1114	0.0972272	0.194454
LRRFIP2	1114	0.0972272	0.194454
ESF1	1115	0.097325	0.19465
RRH	1116	0.0974452	0.19489
PREPL	1117	0.0974825	0.194965
CROT	1118	0.0976632	0.195326
MATR3	1118	0.0976632	0.195326
MECR	1119	0.0977979	0.195596
PGC	1120	0.0978811	0.195762
GCFC2	1121	0.0980989	0.196198
PKLR	1122	0.0981137	0.196227
MRPS31	1123	0.0983167	0.196633
SLC7A1	1123	0.0983167	0.196633
FAM49A	1124	0.0983245	0.196649
EPHA8	1125	0.0983772	0.196754
PRKAB2	1126	0.0984299	0.19686
GRM1	1127	0.0984827	0.196965
LYPD4	1128	0.0985344	0.197069
PCDH18	1128	0.0985344	0.197069
HCLS1	1129	0.0985882	0.197176
ACAD9	1130	0.0986938	0.197388
ZMYND8	1131	0.098752	0.197504
LY86	1132	0.0987994	0.197599
SMAD3	1133	0.0988523	0.197705
LLGL2	1134	0.098958	0.197916
DMRTC2	1135	0.0989696	0.197939
NFATC2IP	1135	0.0989696	0.197939
CEP164	1136	0.0990108	0.198022
PANK2	1137	0.0991871	0.198374
LRRN4CL	1138	0.0994046	0.198809
IGFBP5	1138	0.0994046	0.198809
FAM76B	1139	0.0994872	0.198974
TEX261	1140	0.0995402	0.19908
CHCHD7	1141	0.0995932	0.199186
TPD52L1	1142	0.0996219	0.199244
ABR	1142	0.0996219	0.199244
APP	1143	0.0996462	0.199292
OBSL1	1144	0.0997523	0.199505
RPS9	1145	0.0998393	0.199679
DYNC1H1	1145	0.0998393	0.199679
PDE12	1146	0.0998584	0.199717
CSE1L	1147	0.0999115	0.199823
GPR18	1148	0.100057	0.200113
DOCK10	1148	0.100057	0.200113
GPATCH8	1149	0.100071	0.200142
EIF3H	1150	0.10023	0.20046
HAUS1	1151	0.100274	0.200547
SPG11	1151	0.100274	0.200547
NDUFAF2	1152	0.100443	0.200886
CBLC	1153	0.100491	0.200982
PTPRG	1153	0.100491	0.200982
TXN2	1154	0.100549	0.201099
C1orf61	1155	0.100603	0.201205
PTPN9	1156	0.100708	0.201416
MAP9	1156	0.100708	0.201416
FAM187B	1157	0.100925	0.20185
PRKAA1	1157	0.100925	0.20185
CNOT6L	1158	0.100976	0.201951
DEXI	1159	0.101082	0.202164
PPFIA2	1160	0.101142	0.202284
SMAD7	1161	0.101189	0.202378
ADAL	1162	0.101296	0.202591
PRTFDC1	1163	0.101359	0.202717
WDR4	1163	0.101359	0.202717
ELMOD2	1164	0.101403	0.202805
MAN2A1	1165	0.101509	0.203019
SLC13A3	1166	0.101563	0.203126
RNF111	1167	0.101576	0.203151
POLDIP3	1167	0.101576	0.203151
MGAT4B	1168	0.101777	0.203554
TFEB	1169	0.101792	0.203585
PIAS2	1169	0.101792	0.203585
SLC30A9	1170	0.10183	0.203661
FAM20C	1171	0.101991	0.203982
HDGFL1	1172	0.102226	0.204451
SDCCAG8	1172	0.102226	0.204451
SIRT5	1173	0.102442	0.204884
FECH	1174	0.102527	0.205054
COA1	1175	0.102659	0.205317
CNOT1	1176	0.102688	0.205376
SLX4IP	1177	0.102875	0.20575
AHCYL2	1178	0.103064	0.206129
PLA2G6	1179	0.103092	0.206183
STIP1	1179	0.103092	0.206183
FITM1	1180	0.103118	0.206236
PDK4	1181	0.103308	0.206616
NAB1	1181	0.103308	0.206616
DTNA	1182	0.103387	0.206775
SLC2A5	1183	0.103441	0.206883
TIAL1	1184	0.103495	0.20699
XPO7	1185	0.103524	0.207048
APLP2	1186	0.103711	0.207422
IQCF2	1187	0.10374	0.207481
RNF150	1188	0.103819	0.207638
MYO9A	1189	0.103873	0.207745
TBC1D9	1190	0.103956	0.207913
PRDX2	1190	0.103956	0.207913
MAK16	1191	0.104035	0.208069
CACNB4	1191	0.104035	0.208069
RBM5	1192	0.104172	0.208345
VWA5B2	1193	0.104197	0.208394
TBX1	1194	0.104251	0.208502
DOCK5	1195	0.104388	0.208777
MAP6	1196	0.104413	0.208826
ZBTB40	1197	0.104604	0.209209
LSM8	1198	0.104684	0.209367
WDFY3	1198	0.104684	0.209367
RWDD2B	1199	0.10482	0.209641
FARP1	1199	0.10482	0.209641
ST6GAL1	1200	0.105036	0.210072
ZBED5	1201	0.105063	0.210126
SIN3B	1202	0.105252	0.210504
TPK1	1203	0.105468	0.210935
MREG	1204	0.105497	0.210995
ALKBH8	1205	0.105606	0.211212
IFI44	1206	0.10566	0.211321
METTL13	1207	0.105683	0.211366
CLN6	1208	0.105878	0.211756
CXCL2	1208	0.105878	0.211756
PLXND1	1209	0.105899	0.211797
ZNF577	1210	0.106096	0.212192
DEFA4	1211	0.106114	0.212228
SVEP1	1211	0.106114	0.212228
TMCO3	1212	0.10615	0.212301
PIGT	1213	0.106314	0.212628
ZNF394	1214	0.10633	0.212659
FITM2	1214	0.10633	0.212659
CARNS1	1215	0.106532	0.213064
KRT80	1216	0.106545	0.21309
MRPS5	1216	0.106545	0.21309
2004-09-01	1217	0.10675	0.213501
COPS3	1218	0.10676	0.213521
SAMHD1	1218	0.10676	0.213521
AKR1C1	1219	0.106969	0.213938
FAM171B	1219	0.106969	0.213938
TMC4	1220	0.106976	0.213951
ITGB1	1220	0.106976	0.213951
DGKH	1221	0.107023	0.214047
C14orf119	1222	0.107191	0.214382
DYRK1A	1222	0.107191	0.214382
DDX52	1223	0.107297	0.214594
IFT27	1224	0.107352	0.214703
MRPL30	1225	0.107406	0.214812
RAB28	1226	0.107461	0.214922
MEF2C	1226	0.107461	0.214922
LCK	1227	0.107516	0.215032
BCL2L10	1228	0.107621	0.215242
MED17	1229	0.107735	0.21547
MARC2	1230	0.10779	0.21558
SIGLEC11	1231	0.107836	0.215672
SMTN	1231	0.107836	0.215672
FIG4	1232	0.1079	0.215799
HIST3H2A	1233	0.107955	0.215909
SLC6A11	1233	0.107955	0.215909
ARHGEF1	1234	0.108051	0.216102
COMMD5	1234	0.108051	0.216102
GLS	1235	0.108229	0.216458
ALDH1L2	1236	0.108266	0.216532
GRK4	1236	0.108266	0.216532
PTBP3	1237	0.108284	0.216568
JARID2	1238	0.108394	0.216788
SYNJ2	1239	0.108449	0.216898
NPRL2	1240	0.108481	0.216961
UQCC1	1241	0.108559	0.217118
OSTM1	1242	0.108614	0.217228
ATP11B	1243	0.108695	0.217391
TNFAIP1	1244	0.108889	0.217778
IL6	1245	0.10891	0.21782
DDX18	1246	0.108999	0.217999
ING5	1247	0.109054	0.218109
CA1	1248	0.109125	0.21825
GSE1	1248	0.109125	0.21825
UNK	1249	0.109275	0.21855
SNX29	1250	0.109339	0.218679
ERCC6L2	1251	0.109385	0.21877
MPND	1252	0.10944	0.218881
LYZ	1253	0.109496	0.218991
SPHAR	1254	0.109551	0.219102
CLMP	1254	0.109551	0.219102
SMARCD1	1255	0.109554	0.219108
TMEM260	1255	0.109554	0.219108
EPS8L1	1256	0.109606	0.219212
PLEKHA5	1257	0.109661	0.219323
RASA1	1258	0.109717	0.219433
KIAA1429	1259	0.109772	0.219544
THSD7A	1260	0.109827	0.219654
GC	1261	0.109983	0.219966
GRB10	1262	0.110104	0.220207
RTN3	1263	0.110197	0.220394
ADAM10	1263	0.110197	0.220394
KLK10	1264	0.110214	0.220429
BHMT2	1265	0.110411	0.220823
ANKRD28	1265	0.110411	0.220823
KPNA3	1266	0.110491	0.220982
CENPN	1266	0.110491	0.220982
CCNC	1267	0.110547	0.221093
UBAC2	1268	0.110626	0.221251
NRP1	1268	0.110626	0.221251
DOCK6	1269	0.110658	0.221315
FOXN2	1270	0.110824	0.221648
NEK10	1271	0.11084	0.22168
ZNF562	1271	0.11084	0.22168
MRPL1	1272	0.110879	0.221759
C2orf27A	1273	0.111054	0.222108
RECK	1273	0.111054	0.222108
LYRM2	1274	0.111268	0.222536
C1QTNF5	1275	0.111379	0.222759
TNKS	1276	0.111435	0.22287
RERE	1277	0.111482	0.222964
CACNA2D4	1278	0.111491	0.222981
TACC1	1278	0.111491	0.222981
MTO1	1279	0.111546	0.223093
MFAP3	1280	0.111658	0.223315
TCAIM	1281	0.111825	0.223649
CRKL	1281	0.111825	0.223649
TMEM234	1282	0.11188	0.223761
B3GALT1	1282	0.11188	0.223761
CEBPE	1283	0.11191	0.223819
PCDHGC3	1283	0.11191	0.223819
NMD3	1284	0.111936	0.223872
NCOA3	1285	0.112047	0.224095
LRCH4	1286	0.112124	0.224247
NNT	1286	0.112124	0.224247
ROMO1	1287	0.112271	0.224541
TFDP1	1288	0.112326	0.224653
BCL2L11	1289	0.112337	0.224675
UBE2E3	1290	0.112551	0.225102
TBX18	1290	0.112551	0.225102
SERGEF	1291	0.112606	0.225211
ADAM22	1292	0.112661	0.225323
TCF4	1293	0.112765	0.225529
TTC5	1294	0.112773	0.225546
TCIRG1	1295	0.112941	0.225882
ZNF33A	1296	0.112978	0.225956
TMEM132A	1297	0.113053	0.226106
C9orf40	1298	0.113192	0.226383
NRF1	1298	0.113192	0.226383
LAMTOR2	1299	0.113277	0.226554
MEX3A	1300	0.113389	0.226778
POU2F1	1301	0.113405	0.22681
CCDC181	1301	0.113405	0.22681
PSPC1	1302	0.113501	0.227002
PTCD2	1303	0.113557	0.227114
SPCS1	1304	0.113613	0.227226
GAS2	1305	0.113618	0.227237
WSB1	1305	0.113618	0.227237
CXCL3	1306	0.113669	0.227338
CELF1	1307	0.113781	0.227563
MMP28	1308	0.113832	0.227664
RFXAP	1309	0.114045	0.22809
TYMS	1309	0.114045	0.22809
ANGPT1	1310	0.114174	0.228349
LIX1	1311	0.114258	0.228516
BOD1L1	1311	0.114258	0.228516
EDNRA	1312	0.114471	0.228943
GNAS	1312	0.114471	0.228943
FRK	1313	0.114684	0.229369
PPIL3	1313	0.114684	0.229369
COQ4	1314	0.114737	0.229474
SGSM3	1315	0.114793	0.229586
ADAMDEC1	1316	0.114897	0.229795
ELF2	1316	0.114897	0.229795
MOB2	1317	0.11511	0.230221
AZI2	1317	0.11511	0.230221
MAP6D1	1318	0.115323	0.230647
CSF1	1319	0.115357	0.230714
CANT1	1320	0.115526	0.231053
PGM5	1320	0.115526	0.231053
NYAP2	1321	0.115749	0.231498
SRRM2	1321	0.115749	0.231498
SHPRH	1322	0.115752	0.231505
PPP4R4	1322	0.115752	0.231505
ZDHHC17	1323	0.115962	0.231923
FGD2	1323	0.115962	0.231923
UBE2C	1324	0.116261	0.232523
DLGAP2	1324	0.116261	0.232523
PAMR1	1325	0.116387	0.232774
GIT2	1325	0.116387	0.232774
RBM43	1326	0.116431	0.232863
MTHFD1	1327	0.1166	0.233199
ARIH1	1328	0.116658	0.233316
RPS19BP1	1329	0.116715	0.23343
OR1D2	1330	0.116812	0.233624
MACF1	1330	0.116812	0.233624
LUC7L3	1331	0.116942	0.233884
JSRP1	1332	0.117024	0.234049
CACNA1S	1333	0.117237	0.234474
SSX2IP	1333	0.117237	0.234474
RARB	1334	0.117283	0.234565
FXN	1335	0.117339	0.234679
PAPD4	1335	0.117339	0.234679
CA10	1336	0.117396	0.234793
NCOA5	1336	0.117396	0.234793
DNM3	1337	0.117449	0.234898
ARHGEF2	1338	0.117567	0.235134
CDCA4	1339	0.117661	0.235323
FAM43A	1340	0.117738	0.235475
SLC35B3	1341	0.117852	0.235703
GRIN2C	1342	0.117874	0.235747
HBS1L	1342	0.117874	0.235747
FAR1	1343	0.118079	0.236159
FBXO25	1344	0.118086	0.236171
AIG1	1345	0.118136	0.236273
MEST	1346	0.118298	0.236596
VEZF1	1346	0.118298	0.236596
CAB39L	1347	0.118308	0.236615
NDST3	1348	0.118422	0.236843
CYP4X1	1348	0.118422	0.236843
SP1	1349	0.118479	0.236957
EPG5	1350	0.11851	0.23702
NR2F6	1351	0.118536	0.237072
RPL22	1352	0.11865	0.2373
CYB561D2	1353	0.118722	0.237444
BICD1	1353	0.118722	0.237444
BAG4	1354	0.118879	0.237757
CLIP2	1355	0.118934	0.237867
DNPEP	1355	0.118934	0.237867
SNRPD1	1356	0.118993	0.237986
PUS10	1356	0.118993	0.237986
LMF1	1357	0.11905	0.2381
TRPC7	1358	0.119107	0.238215
CHI3L1	1359	0.119146	0.238291
PPP1R3C	1359	0.119146	0.238291
ZFP90	1360	0.119279	0.238558
PDE5A	1361	0.119336	0.238672
PPP1R12A	1362	0.119357	0.238715
UBQLN4	1363	0.119451	0.238901
DZIP1	1364	0.119565	0.239131
GTF2H5	1365	0.119569	0.239138
SPATS2	1366	0.119623	0.239245
MYRIP	1367	0.119737	0.239474
GPD1	1368	0.119781	0.239561
CTSL	1369	0.119967	0.239933
NFKB1	1369	0.119967	0.239933
ZNF546	1370	0.119992	0.239985
SLC22A23	1370	0.119992	0.239985
FKBP15	1371	0.120024	0.240048
LNX2	1372	0.120139	0.240278
RPL10A	1373	0.120196	0.240392
PLK2	1374	0.120204	0.240408
CDC26	1375	0.120254	0.240507
PIGK	1376	0.120311	0.240622
ZNF117	1377	0.120369	0.240737
CYTH1	1378	0.120415	0.240831
ADAMTSL1	1378	0.120415	0.240831
IFITM2	1379	0.120426	0.240852
DPYSL3	1380	0.120541	0.241082
JUND	1381	0.120598	0.241197
COL24A1	1382	0.120627	0.241254
MFSD11	1382	0.120627	0.241254
EXOC6B	1383	0.120656	0.241312
PDE1A	1384	0.120714	0.241427
PKHD1	1385	0.120771	0.241542
SDR16C5	1385	0.120771	0.241542
LMBRD1	1386	0.120829	0.241657
ZNF24	1386	0.120829	0.241657
USP44	1387	0.120838	0.241676
PHLDA1	1387	0.120838	0.241676
MTIF3	1388	0.121059	0.242118
MFNG	1388	0.121059	0.242118
TMEM92	1389	0.121117	0.242233
TARS	1389	0.121117	0.242233
MPPED2	1390	0.121174	0.242348
THAP1	1390	0.121174	0.242348
TMBIM6	1391	0.121232	0.242463
FRMD6	1392	0.121261	0.242522
TCTEX1D1	1392	0.121261	0.242522
C16orf52	1393	0.121405	0.242809
PSMG1	1394	0.121472	0.242944
LARP1B	1394	0.121472	0.242944
CLDN18	1395	0.121578	0.243155
MESDC1	1396	0.121635	0.243271
PLOD2	1397	0.121683	0.243366
VPS41	1397	0.121683	0.243366
GBP3	1398	0.121693	0.243386
YTHDC1	1399	0.121809	0.243617
KCTD7	1400	0.121866	0.243733
TBC1D10B	1401	0.121894	0.243789
FANCM	1401	0.121894	0.243789
CLEC12A	1402	0.121924	0.243848
COL10A1	1403	0.122098	0.244195
STK17A	1403	0.122098	0.244195
ANTXR2	1404	0.122105	0.244211
PHKB	1404	0.122105	0.244211
TMEM63A	1405	0.122213	0.244426
CDKL3	1406	0.122271	0.244542
GRP	1407	0.122316	0.244633
LARP4	1407	0.122316	0.244633
RYR1	1408	0.122329	0.244658
GTF2IRD1	1409	0.122387	0.244773
FAM219B	1409	0.122387	0.244773
STK3	1410	0.122445	0.244889
CXCL16	1411	0.122502	0.245005
NCLN	1412	0.122527	0.245054
FICD	1413	0.12256	0.245121
PPP2R5E	1414	0.122676	0.245352
KIF18A	1415	0.122738	0.245476
ACSL6	1415	0.122738	0.245476
FDXR	1416	0.122949	0.245898
FAM13A	1417	0.12314	0.24628
MYT1L	1417	0.12314	0.24628
TEAD2	1418	0.12316	0.246319
ZNF596	1419	0.123256	0.246512
SACS	1420	0.123372	0.246744
EHF	1421	0.12343	0.24686
SCN7A	1422	0.123488	0.246976
CCNE2	1423	0.123604	0.247209
FBXO30	1424	0.123662	0.247325
MIB2	1424	0.123662	0.247325
GLDN	1425	0.123721	0.247441
RCN3	1426	0.123792	0.247583
C9orf64	1426	0.123792	0.247583
LCA5	1427	0.123837	0.247674
ADAM7	1428	0.124002	0.248004
TM9SF1	1428	0.124002	0.248004
FCHSD1	1429	0.124069	0.248139
LECT1	1430	0.124186	0.248372
SLITRK1	1431	0.124213	0.248425
NFKB2	1432	0.124244	0.248488
RNASE6	1433	0.124302	0.248605
SNCAIP	1434	0.124477	0.248954
FUT9	1435	0.124594	0.249187
MPP5	1436	0.124633	0.249267
C18orf8	1436	0.124633	0.249267
TRAF3IP2	1437	0.124769	0.249537
FYN	1437	0.124769	0.249537
PTGS1	1438	0.124827	0.249654
SNAPC2	1439	0.124844	0.249687
PGPEP1	1439	0.124844	0.249687
POLK	1440	0.124944	0.249887
OXCT1	1441	0.125054	0.250108
PDS5B	1441	0.125054	0.250108
NEBL	1442	0.12506	0.250121
TIMM21	1443	0.125119	0.250238
EEF1D	1444	0.125294	0.250588
METTL8	1444	0.125294	0.250588
TFB1M	1445	0.125353	0.250705
DNAJC8	1446	0.125474	0.250948
SDC1	1446	0.125474	0.250948
ZNFX1	1447	0.125528	0.251056
IFT80	1448	0.125645	0.25129
EGF	1449	0.125684	0.251368
NUAK1	1450	0.125879	0.251758
PRR12	1451	0.125894	0.251788
MIEN1	1452	0.125938	0.251875
WNT9B	1453	0.126104	0.252208
XAF1	1453	0.126104	0.252208
TANC2	1454	0.126113	0.252227
KANK1	1455	0.12623	0.252461
DYNLT1	1456	0.126289	0.252578
ACVRL1	1457	0.126314	0.252628
WBP2	1458	0.126348	0.252695
GHRL	1459	0.126465	0.25293
MDN1	1460	0.126524	0.253047
PTH	1461	0.126524	0.253048
FNIP1	1461	0.126524	0.253048
PDCD5	1462	0.126582	0.253165
RBM39	1463	0.126641	0.253282
SHISA2	1464	0.126734	0.253467
CACYBP	1464	0.126734	0.253467
PEX13	1465	0.126758	0.253517
KIZ	1466	0.126876	0.253752
CD1B	1467	0.126943	0.253887
IL6ST	1467	0.126943	0.253887
KIAA1324	1468	0.126993	0.253987
ENC1	1469	0.127052	0.254104
DHX36	1470	0.127111	0.254222
GABRG1	1471	0.127153	0.254306
RFX3	1471	0.127153	0.254306
KCNC4	1472	0.127287	0.254575
NUDT9	1472	0.127287	0.254575
NFATC3	1473	0.127363	0.254725
NOB1	1474	0.127572	0.255144
LMO3	1474	0.127572	0.255144
BPTF	1475	0.127758	0.255517
CA2	1476	0.127782	0.255563
TMEM87A	1477	0.127991	0.255982
FBXO15	1478	0.127994	0.255988
BUB3	1479	0.128201	0.256401
NUDT12	1480	0.128407	0.256814
ETHE1	1481	0.12841	0.25682
FBXO22	1482	0.128525	0.25705
MYL6	1483	0.128584	0.257168
SMUG1	1484	0.128619	0.257238
SWAP70	1484	0.128619	0.257238
SUSD1	1485	0.128643	0.257287
GBP2	1486	0.128702	0.257405
SMC5	1487	0.128821	0.257641
ASTE1	1488	0.128828	0.257657
RIT1	1488	0.128828	0.257657
2001-09-01	1489	0.129038	0.258075
SEC11C	1490	0.129057	0.258114
WDR89	1491	0.129175	0.258351
LILRB5	1492	0.129247	0.258493
CD6	1493	0.129294	0.258588
RNF216	1494	0.129353	0.258706
SLC39A13	1495	0.129412	0.258825
NUP50	1496	0.129456	0.258911
ZNF518B	1497	0.129471	0.258943
FBXO21	1497	0.129471	0.258943
CAPN1	1498	0.129531	0.259061
MTF1	1499	0.129649	0.259299
BNC2	1500	0.129665	0.259329
RASGRF2	1501	0.129768	0.259536
TMEM45A	1502	0.129874	0.259747
EMC1	1502	0.129874	0.259747
USH2A	1503	0.130005	0.26001
SLMAP	1504	0.130082	0.260165
CWF19L2	1505	0.130124	0.260248
NEK1	1506	0.130183	0.260366
S1PR3	1507	0.130243	0.260485
MYLPF	1508	0.130291	0.260583
SOCS6	1508	0.130291	0.260583
CEP250	1509	0.130302	0.260604
SSUH2	1510	0.130421	0.260842
PON1	1511	0.13048	0.26096
TXNL1	1512	0.1305	0.261
HEATR5B	1513	0.130709	0.261418
PHF20	1514	0.130837	0.261674
CPEB4	1514	0.130837	0.261674
COL2A1	1515	0.130896	0.261793
PHF21A	1516	0.130917	0.261835
FBXW2	1517	0.131126	0.262252
PPP1R17	1518	0.131373	0.262746
ARHGAP29	1519	0.131543	0.263086
HSD17B14	1519	0.131543	0.263086
NOVA1	1520	0.131671	0.263342
CLIC4	1521	0.131731	0.263461
IGSF11	1522	0.131752	0.263503
IKZF4	1523	0.13179	0.263581
MED20	1524	0.13196	0.26392
HAUS2	1524	0.13196	0.26392
PTPDC1	1525	0.132089	0.264178
WDTC1	1526	0.132168	0.264337
CRK	1526	0.132168	0.264337
CCDC14	1527	0.132208	0.264417
ISCA2	1528	0.132567	0.265134
SLC35A4	1529	0.132585	0.26517
B4GALT1	1529	0.132585	0.26517
ZNF274	1530	0.132687	0.265374
YIPF2	1531	0.132747	0.265493
GAP43	1532	0.132793	0.265586
FBXO42	1532	0.132793	0.265586
RNF38	1533	0.132986	0.265972
SOCS1	1534	0.133106	0.266212
KDM4B	1535	0.133166	0.266332
CLUAP1	1536	0.133209	0.266418
ARID2	1536	0.133209	0.266418
RAD54L2	1537	0.133226	0.266452
TINAGL1	1537	0.133226	0.266452
AIMP1	1538	0.133286	0.266572
ZFAND3	1539	0.133406	0.266811
DEFB127	1540	0.133417	0.266834
DEDD	1540	0.133417	0.266834
FAM124A	1541	0.133586	0.267171
OBSCN	1542	0.133625	0.26725
METTL9	1543	0.133833	0.267666
PDLIM4	1544	0.133946	0.267892
DHRS12	1545	0.134006	0.268012
[truncated: 12,888 more rows]
