# Supplementary material for: Multiomics integrative analysis identifies APOE allele-specific blood biomarkers associated to Alzheimer’s disease etiopathogenesis
Source: Aging (Albany NY). 2021 Apr 12;13(7):9277–329. doi: 10.18632/aging.202950 (PMC8064208; doi:10.18632/aging.202950)
Supplement: Supplementary Table 29 [file aging-13-202950-s031.xlsx]

## Sheet: Sheet1
Supplementary Table 29. RRA integrative analysis in cortex: APOE3 stratum.
Symbol	Rank	ExactP(Score)	AdjustP
ACP1	1	0.000245577	0.000491154
PTK2B	2	0.000248416	0.000496833
BIN1	3	0.000255461	0.000510921
VEZF1	3	0.000255461	0.000510921
CYCS	4	0.000318195	0.00063639
ENSA	5	0.000491387	0.000982773
FBN1	6	0.000509707	0.00101941
LANCL2	6	0.000509707	0.00101941
SNCA	7	0.000632005	0.00126401
SNRPN	8	0.00069695	0.0013939
TAF1C	9	0.000725746	0.00145149
WNT3	10	0.00076316	0.00152632
AP1S1	10	0.00076316	0.00152632
DENR	11	0.000965666	0.00193133
CLEC4M	12	0.00101597	0.00203194
DYNLRB1	12	0.00101597	0.00203194
MED1	13	0.00105121	0.00210242
NFATC3	14	0.00123305	0.0024661
CCKBR	15	0.00123936	0.00247872
NSF	16	0.00126822	0.00253645
ZNF397	16	0.00126822	0.00253645
MSRB3	17	0.0012904	0.00258079
CFLAR	18	0.0013098	0.00261959
KIAA1147	19	0.00149775	0.0029955
CASS4	20	0.00151998	0.00303996
ADCYAP1	20	0.00151998	0.00303996
APP	21	0.00177128	0.00354256
C21orf62	21	0.00177128	0.00354256
SMOX	22	0.00198982	0.00397964
PTPRA	23	0.0019978	0.0039956
GPR27	24	0.00202216	0.00404432
CD44	24	0.00202216	0.00404432
OCIAD2	25	0.0020785	0.00415701
HEXIM1	26	0.00212768	0.00425535
CRHR1	27	0.00227265	0.00454529
MXD4	27	0.00227265	0.00454529
ACACB	28	0.002417	0.004834
NAP1L5	29	0.00245223	0.00490446
CD209	30	0.00252276	0.00504552
LDLR	30	0.00252276	0.00504552
VWC2	31	0.0025775	0.005155
ELF1	32	0.00259564	0.00519129
MKLN1	33	0.00265965	0.00531929
SPPL2C	34	0.00277252	0.00554504
ZBTB20	34	0.00277252	0.00554504
KANSL1	35	0.00302194	0.00604389
OVOL2	35	0.00302194	0.00604389
ARHGAP17	36	0.00316901	0.00633801
EIF4E3	37	0.00327104	0.00654209
BDNF	37	0.00327104	0.00654209
DNAJC7	38	0.00339326	0.00678652
DLK2	39	0.00346619	0.00693238
HS3ST5	40	0.00351983	0.00703966
STMN1	40	0.00351983	0.00703966
GIMAP5	41	0.00364645	0.00729291
MAPT	42	0.00376832	0.00753664
MPPED2	42	0.00376832	0.00753664
SCG3	43	0.00398667	0.00797334
ARL17B	44	0.00401652	0.00803304
IKBKB	44	0.00401652	0.00803304
PML	45	0.00405423	0.00810845
ALDH5A1	46	0.00417953	0.00835905
PICALM	47	0.00426444	0.00852887
CEP135	47	0.00426444	0.00852887
ANKRD44	48	0.00428343	0.00856685
CACNA1A	49	0.00433	0.00866001
SCD5	50	0.00437683	0.00875366
DCTN6	51	0.00451208	0.00902416
RBPMS2	51	0.00451208	0.00902416
KLF12	52	0.0045546	0.00910921
INTS9	53	0.00472364	0.00944728
TRIM45	54	0.00475946	0.00951892
C1QTNF5	54	0.00475946	0.00951892
PXDC1	55	0.00500658	0.0100132
ITPKB	55	0.00500658	0.0100132
FAM163A	56	0.00514665	0.0102933
ILF3	57	0.00518482	0.0103696
RBBP5	58	0.00521034	0.0104207
WNT2B	59	0.00522313	0.0104463
RPLP0	60	0.00525345	0.0105069
RBM6	60	0.00525345	0.0105069
MS4A6A	61	0.00526158	0.0105232
NCF4	61	0.00526158	0.0105232
CDC27	62	0.00530016	0.0106003
ARHGAP35	62	0.00530016	0.0106003
SLC35F3	63	0.00545587	0.0109117
CAMK2B	64	0.00548203	0.0109641
CAPZA1	65	0.00550007	0.0110001
SST	65	0.00550007	0.0110001
ZNF44	66	0.00574646	0.0114929
ICA1	66	0.00574646	0.0114929
SYNJ2	67	0.00574702	0.011494
SPEN	68	0.00576043	0.0115209
TRIM38	69	0.00578729	0.0115746
C3orf14	70	0.00589535	0.0117907
CD5	71	0.0059926	0.0119852
POGK	71	0.0059926	0.0119852
SLC12A4	72	0.00621144	0.0124229
ST7L	73	0.00623852	0.012477
MCM7	73	0.00623852	0.012477
MAP4K4	74	0.00628121	0.0125624
GATAD2A	75	0.00630923	0.0126185
ZHX1	76	0.00640776	0.0128155
SAMD4B	77	0.00647859	0.0129572
ATPAF1	78	0.00648421	0.0129684
LCAT	78	0.00648421	0.0129684
CELF1	79	0.0064928	0.0129856
SCN11A	79	0.0064928	0.0129856
B3GALNT1	80	0.00652127	0.0130425
EIF1B	81	0.0065498	0.0130996
LYSMD2	82	0.00669336	0.0133867
PROK2	83	0.00672968	0.0134594
CALM3	83	0.00672968	0.0134594
ITGB5	84	0.00697492	0.0139498
RCHY1	85	0.00711819	0.0142364
CYB561	86	0.00713306	0.0142661
TNIP1	87	0.00714795	0.0142959
GDF3	88	0.00721996	0.0144399
RBPMS	88	0.00721996	0.0144399
SLC4A9	89	0.00732781	0.0146556
ANKH	90	0.00738824	0.0147765
PDIA4	91	0.00746479	0.0149296
C11orf1	91	0.00746479	0.0149296
FST	92	0.00749458	0.0149892
ALPK1	93	0.00754038	0.0150808
ABCC3	94	0.00758631	0.0151726
BAD	95	0.00767858	0.0153572
MOV10	96	0.0077094	0.0154188
IQGAP1	96	0.0077094	0.0154188
EXTL3	97	0.00795382	0.0159076
NIPBL	97	0.00795382	0.0159076
ISYNA1	98	0.00795863	0.0159173
RASGRF1	99	0.00797433	0.0159487
LRRFIP2	100	0.00803728	0.0160746
EFCAB14	101	0.00819803	0.0163961
GFAP	101	0.00819803	0.0163961
UBE2D3	102	0.00822757	0.0164551
TJAP1	103	0.0083717	0.0167434
CD22	104	0.00842001	0.01684
SCLT1	105	0.00844205	0.0168841
BMP1	105	0.00844205	0.0168841
NVL	106	0.00868587	0.0173717
NFKB1	106	0.00868587	0.0173717
OXR1	107	0.00871269	0.0174254
CACNB2	108	0.00881133	0.0176227
ACSL6	109	0.00887738	0.0177548
PKD2	110	0.00892949	0.017859
PBOV1	110	0.00892949	0.017859
EDNRB	111	0.00894367	0.0178873
PDE4B	112	0.00916077	0.0183215
LEPROTL1	113	0.00917293	0.0183459
CREB1	113	0.00917293	0.0183459
BCAT1	114	0.00926181	0.0185236
SEZ6L2	115	0.00938037	0.0187607
FKBP7	116	0.00941618	0.0188324
RALB	117	0.0094655	0.018931
PATL1	118	0.00948257	0.0189651
MEF2C	119	0.00956814	0.0191363
PLEKHA3	120	0.00965925	0.0193185
DCLRE1C	120	0.00965925	0.0193185
TAF6L	121	0.00970583	0.0194117
RELA	122	0.00979237	0.0195847
ANKRD50	123	0.00980972	0.0196194
VAT1L	124	0.00990213	0.0198043
ATPIF1	124	0.00990213	0.0198043
CD83	125	0.00998405	0.0199681
MACF1	126	0.0100191	0.0200382
ALDOA	127	0.0101448	0.0202897
PIAS2	127	0.0101448	0.0202897
TCF7L2	128	0.0101952	0.0203904
GPR22	129	0.0102306	0.0204612
ZFP64	129	0.0102306	0.0204612
PEX19	130	0.0103728	0.0207456
PPY	131	0.0103874	0.0207747
TNS1	131	0.0103874	0.0207747
PPM1A	132	0.010498	0.0209959
ACER3	133	0.0106297	0.0212594
FAM162A	134	0.0106961	0.0213923
MED29	135	0.0107324	0.0214647
CHDH	136	0.0107868	0.0215736
SMIM19	137	0.0108719	0.0217438
NIPSNAP1	137	0.0108719	0.0217438
GOSR2	138	0.0110059	0.0220118
USP47	139	0.0110426	0.0220853
RHOC	140	0.0111139	0.0222278
MAGI1	140	0.0111139	0.0222278
MYLIP	141	0.0111532	0.0223063
APOC1	142	0.0113557	0.0227114
CDC42	142	0.0113557	0.0227114
UBE3A	143	0.0113944	0.0227889
DLG1	144	0.0114318	0.0228635
GTPBP10	145	0.0115974	0.0231948
PRKAR1B	146	0.0118389	0.0236778
EID1	147	0.0120372	0.0240743
POLD3	148	0.0120802	0.0241604
POLDIP3	148	0.0120802	0.0241604
ZNF215	149	0.0121139	0.0242278
PIK3C2B	150	0.0122101	0.0244203
LRFN1	151	0.0123214	0.0246427
TNRC6A	151	0.0123214	0.0246427
LILRA5	152	0.0124426	0.0248852
PPP4C	153	0.0125624	0.0251248
DYRK2	153	0.0125624	0.0251248
NCS1	154	0.0125792	0.0251583
COPA	154	0.0125792	0.0251583
LETMD1	155	0.0126772	0.0253543
GABRA2	156	0.0127755	0.025551
GMFG	157	0.0128032	0.0256064
SLC47A2	157	0.0128032	0.0256064
MUC4	158	0.0128545	0.0257089
RTFDC1	159	0.0130439	0.0260878
RAB2A	159	0.0130439	0.0260878
ITGB4	160	0.0131726	0.0263451
SLCO3A1	161	0.0131926	0.0263851
EIF4G1	162	0.0132326	0.0264652
DCLK1	163	0.0132727	0.0265455
CLPTM1	164	0.0132844	0.0265689
LRRC1	164	0.0132844	0.0265689
MAP3K13	165	0.0133129	0.0266258
APOC2	166	0.0135248	0.0270496
FAM3C	166	0.0135248	0.0270496
SNX6	167	0.0135754	0.0271508
HBEGF	168	0.0135957	0.0271914
VHL	169	0.0136363	0.0272727
PALLD	170	0.0136974	0.0273948
MOB3C	171	0.013765	0.0275301
HSPB3	171	0.013765	0.0275301
PPM1L	172	0.0137995	0.0275989
GPR146	173	0.0139429	0.0278859
AKAP6	174	0.0139635	0.027927
RRBP1	174	0.0139635	0.027927
VPS37C	175	0.0140051	0.0280102
FBXW7	175	0.0140051	0.0280102
MPZL2	176	0.0140459	0.0280917
SP1	177	0.0141078	0.0282156
PLEKHM1	178	0.0141699	0.0283397
SCN2B	178	0.0141699	0.0283397
TAOK2	179	0.0142113	0.0284226
TBX6	180	0.014245	0.02849
SRD5A1	181	0.0144194	0.0288388
KATNB1	182	0.0144848	0.0289695
TSKU	183	0.0147244	0.0294487
C17orf58	183	0.0147244	0.0294487
RNF144B	184	0.0148187	0.0296375
SLC20A2	185	0.0149638	0.0299277
GALNT11	185	0.0149638	0.0299277
SSH3	186	0.0149884	0.0299769
SERP1	187	0.015031	0.030062
FMNL2	188	0.0150523	0.0301046
FANCD2	189	0.0152019	0.0304037
FAM57B	190	0.0152031	0.0304063
ATP6V1D	190	0.0152031	0.0304063
CR1	191	0.0152662	0.0305323
MYO9B	191	0.0152662	0.0305323
SLC30A3	192	0.0152876	0.0305752
DST	193	0.0153091	0.0306182
NRP2	194	0.0153306	0.0306612
VCAN	194	0.0153306	0.0306612
KANK1	195	0.0154423	0.0308846
EXOC6	195	0.0154423	0.0308846
MTPAP	196	0.015633	0.031266
TEX38	197	0.0156813	0.0313627
GABRB3	198	0.0157635	0.0315269
FEZF2	199	0.0158071	0.0316142
SLC16A9	199	0.0158071	0.0316142
RPH3A	200	0.0159163	0.0318327
MCL1	201	0.0159202	0.0318404
SLC25A35	202	0.0160699	0.0321398
LOC101928635	203	0.016159	0.0323179
CHST6	203	0.016159	0.0323179
ERBB2	204	0.0162463	0.0324925
JPH2	205	0.0163976	0.0327951
DOCK7	206	0.016636	0.033272
NUDT6	206	0.016636	0.033272
TCAP	207	0.0168033	0.0336066
HLF	208	0.0168743	0.0337486
ARHGEF10	208	0.0168743	0.0337486
PRICKLE4	209	0.0169158	0.0338316
CTSS	210	0.0170512	0.0341024
CASP8	210	0.0170512	0.0341024
DNAAF5	211	0.0171125	0.034225
ANTXR1	211	0.0171125	0.034225
IL17RE	212	0.0171191	0.0342383
CSTF3	213	0.0172326	0.0344652
GOLPH3L	214	0.0173505	0.0347011
ME3	214	0.0173505	0.0347011
KIAA0930	215	0.0174835	0.034967
IL1RAP	216	0.0175064	0.0350128
MAML2	217	0.0175884	0.0351769
MDP1	218	0.0175981	0.0351963
ABHD2	219	0.0176441	0.0352881
ZNF136	220	0.0178262	0.0356524
CALD1	220	0.0178262	0.0356524
UBE2T	221	0.0178284	0.0356568
MRPL35	222	0.0178515	0.0357031
ABCC10	223	0.0180638	0.0361276
FIG4	223	0.0180638	0.0361276
CLEC5A	224	0.0182699	0.0365398
PYY	225	0.0183013	0.0366026
MSH3	225	0.0183013	0.0366026
NDUFB5	226	0.0184338	0.0368677
MEGF6	227	0.0185387	0.0370773
NDUFA7	227	0.0185387	0.0370773
PHF11	228	0.0186929	0.0373857
PTTG1IP	229	0.0187401	0.0374803
CR1L	230	0.0187759	0.0375518
CRH	230	0.0187759	0.0375518
RTN3	231	0.0188349	0.0376697
ZNF281	232	0.0188823	0.0377646
LUC7L3	233	0.0189061	0.0378121
ELMO3	234	0.0189774	0.0379548
CST3	235	0.019013	0.038026
MARCH6	235	0.019013	0.038026
LTBR	236	0.019025	0.03805
PARD3B	237	0.0190488	0.0380977
TFCP2	238	0.0190727	0.0381453
CMAS	239	0.0191204	0.0382408
MS4A4A	240	0.01925	0.0384999
ETV1	240	0.01925	0.0384999
FAM126B	241	0.0194868	0.0389736
PGM2L1	241	0.0194868	0.0389736
RTN4IP1	242	0.0195284	0.0390568
MAP1B	243	0.0197218	0.0394436
NDUFB3	244	0.0197235	0.039447
NEUROD6	244	0.0197235	0.039447
FRYL	245	0.0197946	0.0395891
MBOAT1	246	0.0199601	0.0399201
RERG	246	0.0199601	0.0399201
SMO	247	0.0201113	0.0402227
GGH	248	0.0201965	0.040393
JDP2	248	0.0201965	0.040393
SNURF	249	0.0202829	0.0405657
RAPGEF2	250	0.0204328	0.0408657
BCKDHB	250	0.0204328	0.0408657
CACNB1	251	0.0205538	0.0411077
AGBL3	252	0.020669	0.0413381
ERAP1	252	0.020669	0.0413381
SRSF1	253	0.0206776	0.0413551
COX15	254	0.0208265	0.041653
RIMS3	255	0.0209051	0.0418102
DNAJC27	255	0.0209051	0.0418102
SUMO3	256	0.0209759	0.0419519
PPM1J	257	0.021141	0.0422821
NIN	257	0.021141	0.0422821
MMD	258	0.0212261	0.0424523
FAM129B	259	0.0213266	0.0426532
VPS37B	260	0.0213769	0.0427537
AEBP1	260	0.0213769	0.0427537
UHRF1	261	0.0213769	0.0427538
ZNF577	262	0.0214021	0.0428042
CTBP2	262	0.0214021	0.0428042
TTF2	263	0.0214777	0.0429555
KCNK5	264	0.0216125	0.0432251
SORBS1	264	0.0216125	0.0432251
KIFC3	265	0.0218481	0.0436962
SMYD2	265	0.0218481	0.0436962
RIN3	266	0.0219596	0.0439192
NUDT21	267	0.0219851	0.0439702
PSME3	268	0.0220106	0.0440212
RUFY3	269	0.0220836	0.0441671
CLTA	270	0.0221384	0.0442768
RAD54L2	271	0.022164	0.044328
UBN1	272	0.0223179	0.0446358
PCDHB15	273	0.0223189	0.0446378
UBE2V1	273	0.0223189	0.0446378
BCAP29	274	0.0223693	0.0447386
CSTF1	275	0.0225541	0.0451082
MTHFD2	275	0.0225541	0.0451082
FANCI	276	0.0227892	0.0455784
SLC8A1	277	0.0228085	0.045617
XPNPEP3	278	0.0228604	0.0457209
POLR2H	279	0.0229905	0.0459811
EN1	280	0.0230241	0.0460483
PAK1	280	0.0230241	0.0460483
UBASH3B	281	0.023259	0.046518
ACTR2	281	0.023259	0.046518
YIPF5	282	0.023488	0.046976
ADAD2	283	0.0234937	0.0469874
COX18	283	0.0234937	0.0469874
SPN	284	0.0236462	0.0472923
MARVELD3	285	0.0237283	0.0474567
ZC3H15	286	0.0237519	0.0475037
WDR6	287	0.0238048	0.0476096
CNIH3	288	0.0238578	0.0477156
BCL2L1	289	0.0238843	0.0477686
CD28	290	0.0239628	0.0479256
KIAA0408	290	0.0239628	0.0479256
CHRNA9	291	0.0241972	0.0483944
ZMIZ2	291	0.0241972	0.0483944
PEX5	292	0.0243907	0.0487815
CBX3	293	0.0244175	0.0488351
SEC24D	294	0.0244314	0.0488629
SCAMP1	295	0.0245517	0.0491034
AQP9	296	0.0246656	0.0493312
NME1	296	0.0246656	0.0493312
PPIH	297	0.0247132	0.0494263
ANGPTL3	298	0.0248996	0.0497992
ETV6	298	0.0248996	0.0497992
TTN	299	0.0249563	0.0499126
SLC39A13	300	0.0250919	0.0501837
MMRN1	301	0.0251335	0.050267
FAM49A	301	0.0251335	0.050267
CASP4	302	0.0252005	0.0504011
CNIH4	303	0.0253673	0.0507346
RAB3C	303	0.0253673	0.0507346
TRIM54	304	0.0255006	0.0510012
NELL1	305	0.0255553	0.0511106
CCDC30	306	0.025601	0.051202
TCF3	306	0.025601	0.051202
MORN4	307	0.0256101	0.0512202
SIPA1	308	0.0256375	0.051275
HFE	309	0.0257473	0.0514946
KHK	310	0.0258023	0.0516046
RPL10L	311	0.0258346	0.0516691
ARHGEF7	311	0.0258346	0.0516691
TP53INP1	312	0.0260504	0.0521007
SARAF	313	0.026068	0.052136
TUSC3	313	0.026068	0.052136
VDAC1	314	0.026078	0.052156
FAM43A	315	0.0261333	0.0522666
JAM3	316	0.026161	0.052322
TOR1AIP2	317	0.0261887	0.0523773
IGF2BP2	318	0.0263014	0.0526027
C12orf77	319	0.0265346	0.0530692
TUBB2A	319	0.0265346	0.0530692
PSMB8	320	0.0266615	0.0533229
LUM	321	0.0267677	0.0535354
SYDE1	321	0.0267677	0.0535354
SIDT1	322	0.0268293	0.0536586
PPP2CA	323	0.0269134	0.0538267
PHF21A	323	0.0269134	0.0538267
TXN	324	0.0270007	0.0540014
SLC35D3	325	0.0270819	0.0541639
PTCH1	325	0.0270819	0.0541639
IVNS1ABP	326	0.0271382	0.0542764
ORC2	327	0.0272336	0.0544672
ZHX3	328	0.027251	0.054502
NUCKS1	329	0.0274488	0.0548976
HORMAD1	330	0.0274664	0.0549328
SLN	330	0.0274664	0.0549328
RECQL	331	0.0274771	0.0549543
UBE2N	332	0.0276991	0.0553982
PLEKHA4	333	0.0277895	0.0555791
FBLN5	334	0.0279317	0.0558633
CAPS	334	0.0279317	0.0558633
SNCG	335	0.0281609	0.0563217
GCNT7	336	0.0281641	0.0563282
HIF3A	336	0.0281641	0.0563282
KAT6A	337	0.0282756	0.0565512
CDH13	338	0.028333	0.0566661
RAB23	339	0.0283965	0.0567929
GSTA4	339	0.0283965	0.0567929
LILRB1	340	0.0284193	0.0568386
ZFP37	341	0.0286287	0.0572574
CRTAP	341	0.0286287	0.0572574
CASP10	342	0.0287077	0.0574154
SERPINA5	343	0.0287656	0.0575311
EIF3M	344	0.0288609	0.0577217
YTHDF3	345	0.0290929	0.0581858
BMPR2	346	0.029172	0.0583441
LRP8	347	0.0292303	0.0584606
FERMT3	348	0.0292595	0.058519
NLRP7	349	0.0292887	0.0585773
CSNK1G1	350	0.0293248	0.0586496
FAM131A	351	0.0294933	0.0589865
METTL14	352	0.0295519	0.0591037
TTPA	353	0.0295566	0.0591132
CAV1	353	0.0295566	0.0591132
KIAA0319	354	0.0296692	0.0593384
ADAMTSL4	355	0.0297883	0.0595767
PPP3R1	355	0.0297883	0.0595767
TNPO1	356	0.0298161	0.0596323
MRPL19	357	0.0299634	0.0599269
SKI	358	0.0300199	0.0600399
RHEB	358	0.0300199	0.0600399
CSNK1G3	359	0.0300225	0.0600449
ZNF430	360	0.0301702	0.0603405
DOC2A	361	0.0302294	0.0604589
ZNF442	362	0.0302514	0.0605029
GABRA5	362	0.0302514	0.0605029
KLHL12	363	0.0304371	0.0608742
ASPHD1	364	0.0304668	0.0609336
YPEL3	365	0.0304828	0.0609657
UCHL5	365	0.0304828	0.0609657
SLC22A16	366	0.030556	0.0611121
GNB5	367	0.0306156	0.0612312
NOS1AP	368	0.0307141	0.0614283
GOLGA2	368	0.0307141	0.0614283
DDIT4	369	0.0307647	0.0615294
FERMT1	370	0.0309453	0.0618906
ENAH	370	0.0309453	0.0618906
MDM4	371	0.031094	0.062188
WAC	372	0.0311764	0.0623528
OPCML	373	0.0312442	0.0624884
H1F0	374	0.0312743	0.0625485
PHKB	375	0.0313345	0.062669
ZNF334	376	0.0313646	0.0627292
PLB1	377	0.0314074	0.0628148
STAT4	378	0.0314249	0.0628498
CBLB	379	0.0315456	0.0630912
HLA-DRB1	380	0.0316383	0.0632765
HSPB2	380	0.0316383	0.0632765
SPI1	381	0.031869	0.0637381
FBXO3	381	0.031869	0.0637381
CLIP4	382	0.0320307	0.0640614
CBR4	383	0.0320611	0.0641222
PXN	384	0.0320997	0.0641994
CDH23	384	0.0320997	0.0641994
FBXL20	385	0.032122	0.064244
RNF38	386	0.0322745	0.064549
NETO2	387	0.0323051	0.0646101
ISOC2	388	0.0323303	0.0646606
SALL4	389	0.0323356	0.0646712
SCG2	390	0.0323662	0.0647323
RUNX1	391	0.0325498	0.0650997
SUSD4	392	0.0325608	0.0651215
SLC9A5	393	0.0325805	0.065161
AKIRIN2	394	0.0327647	0.0655295
KIAA1551	395	0.0327911	0.0655823
RTN4	395	0.0327911	0.0655823
PRKAG1	396	0.0328263	0.0656525
NPAS3	397	0.0328878	0.0657757
HSPB7	398	0.0329186	0.0658373
PLK2	399	0.0329495	0.0658989
ANP32E	400	0.0329803	0.0659606
POLG	401	0.0330214	0.0660428
NCAM1	401	0.0330214	0.0660428
FAM83A	402	0.033042	0.066084
TMEM140	403	0.0332516	0.0665032
CHCHD7	403	0.0332516	0.0665032
SMAP2	404	0.0334134	0.0668268
IKZF4	404	0.0334134	0.0668268
SATB1	405	0.0334817	0.0669633
MARK2	405	0.0334817	0.0669633
MKNK1	406	0.0337116	0.0674233
MRGPRF	406	0.0337116	0.0674233
AGMAT	407	0.0337243	0.0674486
HEMGN	408	0.0338179	0.0676357
LSMEM1	409	0.0339415	0.067883
CSNK2A1	409	0.0339415	0.067883
GNPDA2	410	0.0339428	0.0678856
MORC2	411	0.0341619	0.0683238
MPP2	412	0.0341713	0.0683425
DNAJB6	412	0.0341713	0.0683425
PMFBP1	413	0.0344009	0.0688019
FGF12	413	0.0344009	0.0688019
OSBPL6	414	0.0344446	0.0688891
WSB1	415	0.0346021	0.0692041
KRT19	416	0.0346305	0.0692611
MSX1	416	0.0346305	0.0692611
MEGF10	417	0.0346967	0.0693935
CNTN4	418	0.0348231	0.0696463
APOE	419	0.03486	0.06972
FBLN7	419	0.03486	0.06972
UBE2E2-AS1	420	0.0350894	0.0701788
HIP1R	421	0.0353187	0.0706373
APOBEC3F	421	0.0353187	0.0706373
PCDHA1	422	0.0353309	0.0706618
PLEKHG6	423	0.0355479	0.0710957
ANK3	423	0.0355479	0.0710957
RLBP1	424	0.0357769	0.0715539
WBP4	425	0.0359704	0.0719407
DOCK6	426	0.0360059	0.0720119
LCP1	427	0.0360346	0.0720692
PCDHB14	428	0.0362348	0.0724697
KRT5	428	0.0362348	0.0724697
STAC2	429	0.0364636	0.0729273
NDE1	429	0.0364636	0.0729273
LAMB2	430	0.0364857	0.0729715
GJA4	431	0.0365181	0.0730361
PHACTR4	432	0.0365828	0.0731655
FGD2	433	0.0366799	0.0733598
PIK3C3	434	0.0366924	0.0733847
PDCD2	434	0.0366924	0.0733847
MRPS21	435	0.0367123	0.0734246
CEP152	436	0.0367771	0.0735543
HAPLN1	437	0.0368096	0.0736192
LRRN2	438	0.0368745	0.073749
JADE1	439	0.036921	0.0738419
TTC17	439	0.036921	0.0738419
RBM15B	440	0.0371347	0.0742695
GPR132	441	0.0371495	0.074299
STK38	441	0.0371495	0.074299
ENOPH1	442	0.0372978	0.0745956
ZNF609	443	0.0373631	0.0747263
INO80E	444	0.0373779	0.0747558
PCYOX1L	444	0.0373779	0.0747558
NEGR1	445	0.0374285	0.074857
NUBPL	446	0.037494	0.0749879
RGS12	447	0.0375267	0.0750534
TRIO	448	0.0375594	0.0751189
ZNF628	449	0.0376062	0.0752125
CDC40	450	0.0376578	0.0753155
VPS35	451	0.0377562	0.0755124
C1orf87	452	0.0378219	0.0756438
NAT14	453	0.0378345	0.0756689
SNX20	453	0.0378345	0.0756689
FMO3	454	0.0378876	0.0757753
SLC25A2	455	0.0379205	0.075841
RPS6KB2	456	0.0380522	0.0761044
USP1	457	0.0380626	0.0761252
MAP4K5	457	0.0380626	0.0761252
GPX3	458	0.0382907	0.0765813
SLC23A2	458	0.0382907	0.0765813
ADAMTS9	459	0.0383493	0.0766986
PLEK	460	0.0385186	0.0770372
COBLL1	460	0.0385186	0.0770372
CC2D2A	461	0.0385811	0.0771622
KCTD16	462	0.0387465	0.0774929
BACE2	462	0.0387465	0.0774929
ANP32B	463	0.0388136	0.0776271
GALNS	463	0.0388136	0.0776271
C7orf49	464	0.0389742	0.0779485
GPM6A	464	0.0389742	0.0779485
LSM4	465	0.0390467	0.0780933
EPHA4	466	0.03908	0.07816
LRRC6	467	0.0391134	0.0782268
ARHGAP27	468	0.0391468	0.0782935
UBE2W	469	0.0392019	0.0784038
PLXDC1	470	0.0394295	0.078859
SNAPC3	470	0.0394295	0.078859
PCDHA3	471	0.0394478	0.0788955
GNAQ	472	0.0395819	0.0791637
SFXN4	473	0.0396154	0.0792309
OCIAD1	474	0.039657	0.079314
FAM84B	474	0.039657	0.079314
MC4R	475	0.0398844	0.0797688
TINAG	475	0.0398844	0.0797688
SPOP	476	0.0399855	0.079971
ZNF625	477	0.0401117	0.0802234
BCL6	477	0.0401117	0.0802234
EHD2	478	0.0402218	0.0804436
FNIP1	479	0.0402894	0.0805788
GSPT1	480	0.0403233	0.0806465
SSC5D	481	0.0403389	0.0806778
PPFIBP2	481	0.0403389	0.0806778
ANKHD1-EIF4EBP3	482	0.040391	0.0807819
UNC13D	483	0.0404926	0.0809853
CADM1	484	0.040566	0.0811321
RARA	484	0.040566	0.0811321
ST5	485	0.0405944	0.0811888
COQ7	486	0.0407931	0.0815862
FAM69B	487	0.0409345	0.0818691
SAYSD1	488	0.04102	0.0820401
STOX2	489	0.0412418	0.0824835
DTNA	490	0.0412469	0.0824938
SPP1	491	0.041276	0.0825519
SCNN1A	492	0.0414472	0.0828943
ABCB9	493	0.0414737	0.0829473
S1PR2	494	0.04155	0.0831001
SLC35B1	494	0.04155	0.0831001
DHX38	495	0.0417003	0.0834007
SLC35E1	495	0.0417003	0.0834007
ARF6	496	0.0417562	0.0835123
GMPPB	497	0.0417906	0.0835811
PCDHB9	498	0.041825	0.0836499
ZNF428	499	0.0419269	0.0838538
NDUFC2	499	0.0419269	0.0838538
DNM2	500	0.0419627	0.0839255
NRN1	501	0.0421007	0.0842014
ADCY7	502	0.0421352	0.0842705
SH3BP5	503	0.0421534	0.0843068
SLC25A3	503	0.0421534	0.0843068
LILRA2	504	0.0422735	0.0845469
MYNN	505	0.0423773	0.0847546
HIRIP3	506	0.0423798	0.0847596
TBX3	506	0.0423798	0.0847596
SFT2D2	507	0.0426061	0.0852123
ZMAT3	507	0.0426061	0.0852123
RUNX1T1	508	0.04262	0.0852399
DRG1	509	0.0426894	0.0853789
DUS2	510	0.0428324	0.0856648
MAST2	510	0.0428324	0.0856648
NDUFS4	511	0.0428633	0.0857266
NXPH1	512	0.0430375	0.086075
PNPLA3	513	0.0430585	0.086117
CDC42EP4	513	0.0430585	0.086117
DDX28	514	0.0432846	0.0865692
PPP1R2	514	0.0432846	0.0865692
SNRPC	515	0.0433868	0.0867737
DYNC1LI1	516	0.0434218	0.0868437
RCC2	517	0.0434569	0.0869137
CASP7	518	0.0435105	0.0870211
OTUB1	518	0.0435105	0.0870211
DNAJC4	519	0.0435269	0.0870539
IRF2BPL	520	0.043562	0.087124
NAV2	521	0.0436322	0.0872643
GLIPR2	522	0.0437024	0.0874047
MGMT	523	0.0437364	0.0874728
SLC6A12	523	0.0437364	0.0874728
THY1	524	0.0437726	0.0875452
NTNG1	525	0.0439133	0.0878266
GIMAP1	526	0.0439485	0.087897
ATP13A5	527	0.0439622	0.0879244
KDM2A	528	0.0441247	0.0882494
PRAP1	529	0.04416	0.0883199
SBNO1	530	0.0441879	0.0883758
AKR1C2	530	0.0441879	0.0883758
ESR1	531	0.0443365	0.0886731
ITGA8	532	0.0443719	0.0887438
PSMC3	533	0.0444135	0.0888271
OAS2	534	0.0444426	0.0888853
FAM118A	535	0.0446197	0.0892395
PCP4	536	0.0446391	0.0892781
PDCD6	536	0.0446391	0.0892781
CP	537	0.0446552	0.0893104
TIMELESS	538	0.0446907	0.0893813
VANGL2	539	0.0447262	0.0894523
TMEM174	540	0.0447617	0.0895233
NUMA1	541	0.0447972	0.0895943
CCDC62	542	0.0448645	0.089729
INPP4A	542	0.0448645	0.089729
FAM210B	543	0.0448682	0.0897364
USP10	544	0.0450461	0.0900922
RELB	545	0.0450899	0.0901798
AKT3	545	0.0450899	0.0901798
HCLS1	546	0.0451886	0.0903772
ESD	547	0.0452243	0.0904486
USP28	548	0.0453671	0.0907341
CADM4	549	0.0455403	0.0910807
SMAD5	549	0.0455403	0.0910807
NNT	550	0.0455816	0.0911633
IGFBP5	551	0.0456174	0.0912349
DERL1	552	0.0457249	0.0914499
TFAP2C	553	0.0457654	0.0915309
RBFOX2	554	0.0458325	0.0916651
GLYR1	555	0.0458684	0.0917369
SUB1	556	0.0459905	0.0919809
HIVEP3	557	0.0460121	0.0920243
ITGA1	558	0.0460481	0.0920962
UNG	559	0.0462154	0.0924308
PTPRU	559	0.0462154	0.0924308
IER2	560	0.0463002	0.0926004
ADRA1D	561	0.0463362	0.0926725
SOX6	562	0.0464084	0.0928168
PDLIM5	563	0.0464402	0.0928805
ZNF521	564	0.0465167	0.0930335
SH3D19	565	0.0466614	0.0933228
TC2N	566	0.046665	0.09333
NRXN1	566	0.046665	0.09333
CCDC69	567	0.0467338	0.0934675
SUN1	568	0.0468897	0.0937794
FXR1	568	0.0468897	0.0937794
RCAN1	569	0.046915	0.09383
IGF1R	570	0.0470602	0.0941204
SRGAP1	570	0.0470602	0.0941204
TBX19	571	0.0471143	0.0942285
ZDHHC23	571	0.0471143	0.0942285
LDLRAP1	572	0.0471329	0.0942657
NDUFB1	573	0.0472056	0.0944112
CIDEA	574	0.0473388	0.0946776
PLXDC2	574	0.0473388	0.0946776
CYP4F3	575	0.0473876	0.0947752
CEACAM6	576	0.0474241	0.0948481
G3BP1	577	0.0474605	0.094921
NUDT2	578	0.0475335	0.095067
FAM160A2	579	0.0475632	0.0951264
DENND1B	579	0.0475632	0.0951264
TNFSF12-TNFSF13	580	0.0476065	0.095213
CAND1	581	0.0477161	0.0954322
ARL1	582	0.0477875	0.0955751
RORA	583	0.047899	0.095798
SH3YL1	584	0.0480118	0.0960236
RAD51C	584	0.0480118	0.0960236
SYK	585	0.0480456	0.0960912
CCNA1	586	0.048119	0.0962379
ZNF358	587	0.0481924	0.0963848
CAMK4	588	0.0482291	0.0964582
SLC38A11	589	0.048236	0.0964719
LGALS8	589	0.048236	0.0964719
AGBL5	590	0.0484129	0.0968259
PPP1R16B	591	0.0484497	0.0968995
CETP	592	0.0484601	0.0969201
INIP	592	0.0484601	0.0969201
FGF18	593	0.0484866	0.0969731
EPHA5	594	0.0486708	0.0973416
RPL19	595	0.0486841	0.0973681
GNAO1	596	0.0487815	0.0975631
SHMT2	596	0.0487815	0.0975631
WASL	597	0.0488185	0.0976369
SV2B	598	0.0488924	0.0977847
NIF3L1	599	0.048908	0.097816
SGIP1	599	0.048908	0.097816
NCOR2	600	0.0489293	0.0978587
CRTC3	601	0.0490403	0.0980806
GOLGA8A	602	0.0491144	0.0982287
C7orf50	603	0.0491318	0.0982637
GTDC1	603	0.0491318	0.0982637
COLGALT1	604	0.0492255	0.0984511
OGFOD1	605	0.0493368	0.0986737
ACTR10	606	0.0493556	0.0987112
LRRC34	607	0.0494854	0.0989708
MYBPC3	608	0.0495793	0.0991585
AIG1	608	0.0495793	0.0991585
ART1	609	0.0497459	0.0994917
USP4	610	0.0498029	0.0996057
MAPK9	611	0.0499696	0.0999392
MICALL1	612	0.050007	0.100014
WDR20	613	0.0500264	0.100053
COL24A1	614	0.0502312	0.100462
FLRT1	615	0.0502498	0.1005
PFDN6	615	0.0502498	0.1005
WNT10B	616	0.0503436	0.100687
TAP1	617	0.050381	0.100762
TXNL4B	618	0.0504732	0.100946
DICER1	619	0.0506812	0.101362
CDK2AP1	620	0.0506964	0.101393
SVOP	620	0.0506964	0.101393
CNRIP1	621	0.0509196	0.101839
ZBTB5	621	0.0509196	0.101839
BTG3	622	0.0510198	0.10204
RAPSN	623	0.0511427	0.102285
KIF1B	623	0.0511427	0.102285
ACLY	624	0.0511707	0.102341
PDLIM4	625	0.0512462	0.102492
DEF6	626	0.0512839	0.102568
SCRT1	626	0.0512839	0.102568
SOS2	627	0.0513595	0.102719
MUC15	628	0.0513657	0.102731
PHAX	628	0.0513657	0.102731
CAMK2D	629	0.051473	0.102946
GPX1	630	0.0515887	0.103177
SYCE1	630	0.0515887	0.103177
RAPGEF6	631	0.0517002	0.1034
PRSS37	632	0.0517381	0.103476
IL17RC	633	0.0517761	0.103552
SCN10A	634	0.0518115	0.103623
SASH1	634	0.0518115	0.103623
CD46	635	0.0520039	0.104008
ANKRD40	636	0.0520343	0.104069
STON1	636	0.0520343	0.104069
CDC42BPA	637	0.0522322	0.104464
ZPBP	638	0.052257	0.104514
HOPX	638	0.052257	0.104514
SFMBT2	639	0.0524797	0.104959
DOCK3	640	0.0527022	0.105404
KLK7	640	0.0527022	0.105404
SENP8	641	0.052805	0.10561
ZNF786	642	0.0529199	0.10584
ZNF883	643	0.0529247	0.105849
GATA2	643	0.0529247	0.105849
CD59	644	0.0529582	0.105916
VAV3	645	0.05315	0.1063
PRDM9	646	0.0533693	0.106739
NR2E3	646	0.0533693	0.106739
GOSR1	647	0.053573	0.107146
LPIN1	648	0.0535916	0.107183
IL15	649	0.0536887	0.107377
HIPK3	650	0.0538137	0.107627
UQCRC2	650	0.0538137	0.107627
PHLDB1	651	0.0538817	0.107763
MRPL15	652	0.0539589	0.107918
TSPAN33	653	0.0540358	0.108072
ZDHHC8	653	0.0540358	0.108072
C14orf2	654	0.0541911	0.108382
F11	655	0.0542578	0.108516
TAC3	656	0.0543073	0.108615
SLC5A5	657	0.0543461	0.108692
DCN	658	0.0544237	0.108847
PRPF4B	659	0.0544797	0.108959
CDIPT	660	0.0547015	0.109403
SULT1A1	660	0.0547015	0.109403
ECE2	661	0.0547734	0.109547
GNPNAT1	661	0.0547734	0.109547
HDAC4	662	0.0548123	0.109625
SFXN5	663	0.0548902	0.10978
GART	664	0.0549233	0.109847
GRIN2D	665	0.0549682	0.109936
AFAP1L1	666	0.0550072	0.110014
PLEKHB1	667	0.0551242	0.110248
MATK	667	0.0551242	0.110248
PIGK	668	0.0551449	0.11029
RBBP4	668	0.0551449	0.11029
GPLD1	669	0.0551632	0.110326
MRPL1	670	0.0553195	0.110639
PPCS	671	0.0553665	0.110733
SLC29A1	671	0.0553665	0.110733
RASSF3	672	0.0554368	0.110874
TM9SF1	673	0.0555151	0.11103
EMP3	674	0.0555543	0.111109
IP6K1	675	0.0555881	0.111176
ELF2	675	0.0555881	0.111176
DND1	676	0.0558095	0.111619
FMNL3	676	0.0558095	0.111619
TOX2	677	0.0560309	0.112062
N4BP2L1	677	0.0560309	0.112062
MAPK13	678	0.0561432	0.112286
TEP1	678	0.0561432	0.112286
MICU2	679	0.0562521	0.112504
SDCBP2	679	0.0562521	0.112504
CA10	680	0.0564734	0.112947
NAPEPLD	680	0.0564734	0.112947
ELK4	681	0.0564978	0.112996
PIK3R1	682	0.0566558	0.113312
ADAP1	683	0.0566945	0.113389
NF2	684	0.0566953	0.113391
CXADR	685	0.0567348	0.11347
KIR3DL2	685	0.0567348	0.11347
WDR55	686	0.0569155	0.113831
NUP210	687	0.0570119	0.114024
UNK	688	0.0571309	0.114262
FAM19A1	688	0.0571309	0.114262
PNPLA5	689	0.0571365	0.114273
MVP	690	0.0572102	0.11442
HS3ST1	691	0.0573574	0.114715
AGK	691	0.0573574	0.114715
DDOST	692	0.0574088	0.114818
TRIOBP	693	0.0574486	0.114897
FAM45A	694	0.0574883	0.114977
ZNF395	695	0.0575281	0.115056
TOP1	696	0.0575679	0.115136
PSMG3	697	0.0575782	0.115156
TRUB1	697	0.0575782	0.115156
HMGCLL1	698	0.0576874	0.115375
GJD2	699	0.057799	0.115598
KCNK4	700	0.0579266	0.115853
MARK4	701	0.0580197	0.116039
DNAJC19	701	0.0580197	0.116039
SMARCC1	702	0.0580464	0.116093
TNNI3K	703	0.0581663	0.116333
PCED1A	704	0.0582063	0.116413
IFRD1	705	0.0582403	0.116481
RSAD2	706	0.0583264	0.116653
CALCOCO2	706	0.0583264	0.116653
PAPOLA	707	0.0584608	0.116922
TSPAN3	708	0.0584866	0.116973
CYTH1	709	0.0585267	0.117053
FAM212A	710	0.0586812	0.117362
ARF1	710	0.0586812	0.117362
LIN7C	711	0.0586872	0.117374
CD244	712	0.0588077	0.117615
AMIGO3	713	0.0589016	0.117803
PTBP1	713	0.0589016	0.117803
IFT88	714	0.0589283	0.117857
MTMR3	715	0.059049	0.118098
ZNF318	716	0.0591219	0.118244
LYRM7	716	0.0591219	0.118244
NPL	717	0.0593311	0.118662
C12orf65	718	0.0593421	0.118684
PDZD2	719	0.0594118	0.118824
ARF3	720	0.0594522	0.118904
HCAR3	721	0.0595622	0.119124
RBM17	721	0.0595622	0.119124
RHOA	722	0.0597823	0.119565
SMAD1	723	0.0599377	0.119875
FRMD4A	724	0.0599782	0.119956
UBA7	725	0.0600023	0.120005
MTHFSD	725	0.0600023	0.120005
SCPEP1	726	0.0600187	0.120037
CMIP	727	0.0600999	0.1202
SCUBE3	728	0.0602217	0.120443
STK32A	729	0.0602222	0.120444
TCF4	729	0.0602222	0.120444
MOBP	730	0.0602623	0.120525
HCAR1	731	0.0604421	0.120884
TRIM13	731	0.0604421	0.120884
TOMM40	732	0.0606618	0.121324
DOPEY1	732	0.0606618	0.121324
TRNAU1AP	733	0.0607507	0.121501
PLCH1	733	0.0607507	0.121501
GPER1	734	0.0608815	0.121763
HERPUD1	735	0.0611012	0.122202
MSH6	735	0.0611012	0.122202
CRYGB	736	0.0612409	0.122482
SLC12A3	737	0.0613207	0.122641
RGS4	737	0.0613207	0.122641
LARP7	738	0.0613228	0.122646
CSMD3	739	0.0614047	0.122809
ZNF616	740	0.0615402	0.12308
RHBDF1	740	0.0615402	0.12308
FLVCR2	741	0.0615687	0.123137
CDK2	742	0.0616097	0.123219
VTCN1	743	0.0617596	0.123519
PODN	743	0.0617596	0.123519
RAB3B	744	0.061815	0.12363
CMTM3	745	0.0618972	0.123794
TRDN	746	0.0619789	0.123958
PTPN4	746	0.0619789	0.123958
STAT3	747	0.0619795	0.123959
RBMS1	748	0.0620206	0.124041
KANSL1L	749	0.0621981	0.124396
MYLK	750	0.0622678	0.124536
LILRB2	751	0.062309	0.124618
ATP5G1	752	0.0623503	0.124701
ERBB3	753	0.0623915	0.124783
PPIL3	754	0.0624173	0.124835
VASH1	754	0.0624173	0.124835
ILK	755	0.0625567	0.125113
HARS	756	0.0626364	0.125273
FBLIM1	757	0.0627634	0.125527
PCBP2	758	0.0628462	0.125692
ARHGEF18	759	0.0628555	0.125711
OPA1	759	0.0628555	0.125711
SLC25A20	760	0.0630744	0.126149
POU3F2	761	0.0632608	0.126522
ZNF827	762	0.0632933	0.126587
CAMSAP1	763	0.0633023	0.126605
LOXL4	764	0.0633854	0.126771
SOX5	765	0.063427	0.126854
TNFRSF1A	766	0.0635121	0.127024
AGFG2	766	0.0635121	0.127024
PYURF	767	0.0637308	0.127462
SKAP2	767	0.0637308	0.127462
KIF2A	768	0.0638016	0.127603
DOCK8	769	0.0639495	0.127899
ITGB2	770	0.0640937	0.128187
SERPINE2	771	0.0641355	0.128271
HARS2	772	0.0641681	0.128336
SRRT	772	0.0641681	0.128336
EXO5	773	0.0643445	0.128689
TVP23C	774	0.0643866	0.128773
BRF1	775	0.0644282	0.128856
PARVB	776	0.0645958	0.129192
PCDHB13	777	0.0646051	0.12921
CLDN15	777	0.0646051	0.12921
PKP4	778	0.0646377	0.129275
TXNDC5	779	0.0648235	0.129647
TBRG1	779	0.0648235	0.129647
KCTD2	780	0.0650418	0.130084
NPM3	780	0.0650418	0.130084
EVA1B	781	0.0651416	0.130283
EIF4E	782	0.0651837	0.130367
ARIH2	783	0.06526	0.13052
SLC39A3	783	0.06526	0.13052
WDR48	784	0.0654364	0.130873
SPHK2	784	0.0654364	0.130873
CRELD1	785	0.0654781	0.130956
CYLD	785	0.0654781	0.130956
ASCC2	786	0.0655207	0.131041
KMT2A	786	0.0655207	0.131041
YBX1	787	0.0656051	0.13121
NDUFA12	788	0.0656962	0.131392
NRCAM	788	0.0656962	0.131392
MYD88	789	0.0658586	0.131717
GDF15	790	0.0659008	0.131802
ZNF20	791	0.0659143	0.131829
BLZF1	792	0.0661322	0.132264
KMT2E	793	0.0662395	0.132479
CLIC6	794	0.0663501	0.1327
ZC3H7B	794	0.0663501	0.1327
ZSCAN2	795	0.0663667	0.132733
STK39	796	0.0665679	0.133136
OSBPL2	796	0.0665679	0.133136
CKM	797	0.0667856	0.133571
NR3C1	797	0.0667856	0.133571
HBP1	798	0.0668767	0.133753
KIAA0368	799	0.0670033	0.134007
PNOC	799	0.0670033	0.134007
DKK3	800	0.067047	0.134094
PRRX1	801	0.0672176	0.134435
PEAK1	802	0.0672209	0.134442
C21orf2	802	0.0672209	0.134442
AMACR	803	0.067431	0.134862
PIGG	804	0.0674384	0.134877
C16orf58	805	0.0675165	0.135033
ALPP	806	0.0676558	0.135312
F7	806	0.0676558	0.135312
TRA2A	807	0.0677732	0.135546
TRMT5	808	0.0678589	0.135718
TGFB2	809	0.0678732	0.135746
MYO1C	810	0.0679017	0.135803
DLEC1	810	0.0679017	0.135803
RASEF	811	0.0680303	0.136061
PPIB	812	0.0680905	0.136181
RFX2	812	0.0680905	0.136181
SHCBP1	813	0.068245	0.13649
C3orf62	814	0.0683078	0.136616
TOMM20	814	0.0683078	0.136616
TRIM22	815	0.0685029	0.137006
USP24	816	0.0685249	0.13705
EIF5A2	817	0.0685459	0.137092
ESR2	817	0.0685459	0.137092
P2RY11	818	0.068632	0.137264
CARTPT	819	0.068742	0.137484
ZNF621	820	0.0688043	0.137609
CGREF1	821	0.0689337	0.137867
BRWD1	822	0.0689591	0.137918
ROR1	823	0.069176	0.138352
SNX10	824	0.0691928	0.138386
ZNF576	825	0.0693929	0.138786
TDRD9	825	0.0693929	0.138786
NUP50	826	0.0694956	0.138991
RNF24	827	0.0695822	0.139164
CHRDL2	828	0.0696097	0.139219
EPOR	828	0.0696097	0.139219
OLFML2A	829	0.0697123	0.139425
RAB35	830	0.0698265	0.139653
DNM1L	830	0.0698265	0.139653
RNF219	831	0.0698424	0.139685
CDCA4	832	0.0700431	0.140086
PTPN3	832	0.0700431	0.140086
CTF1	833	0.0700595	0.140119
ALPPL2	834	0.0702598	0.14052
TMOD3	835	0.070364	0.140728
2002-08-01	836	0.0704511	0.140902
MACROD1	837	0.0704763	0.140953
METTL9	837	0.0704763	0.140953
SLC4A5	838	0.0706255	0.141251
DNAH7	839	0.0706691	0.141338
SLC5A6	840	0.0706928	0.141386
TCF21	841	0.0707127	0.141425
VPS33B	842	0.0708437	0.141687
PES1	843	0.0708873	0.141775
GLIS1	844	0.0709092	0.141818
UBE2L3	845	0.0710184	0.142037
ID2	846	0.0711059	0.142212
NEUROG2	847	0.0711255	0.142251
TERF1	847	0.0711255	0.142251
CLEC11A	848	0.0711497	0.142299
KANK4	849	0.0713418	0.142684
SLC5A11	850	0.0714124	0.142825
FOXC1	851	0.0715001	0.143
PHF19	852	0.071558	0.143116
PODXL	853	0.0716317	0.143263
ZNF721	854	0.0717741	0.143548
STK32C	854	0.0717741	0.143548
CPPED1	855	0.0718513	0.143703
SPTBN1	856	0.0719392	0.143878
HTR1E	857	0.0719902	0.14398
COPS8	857	0.0719902	0.14398
DUS4L	858	0.0720711	0.144142
SPATA7	859	0.0721592	0.144318
RILPL2	860	0.0722061	0.144412
NKX2-2	860	0.0722061	0.144412
TUBAL3	861	0.0722473	0.144495
RNF8	862	0.0723354	0.144671
CLYBL	862	0.0723354	0.144671
ITCH	863	0.0724221	0.144844
QRICH1	864	0.0724236	0.144847
TIA1	865	0.0724677	0.144935
LPCAT4	866	0.0725118	0.145024
TUBA1C	867	0.0725559	0.145112
HMBOX1	867	0.0725559	0.145112
KIF13B	868	0.0726001	0.1452
IK	869	0.0726379	0.145276
POMT2	869	0.0726379	0.145276
LZTFL1	870	0.0728209	0.145642
GAD2	870	0.0728209	0.145642
ZGRF1	871	0.0728537	0.145707
PDE5A	871	0.0728537	0.145707
ITGA10	872	0.0729536	0.145907
GUF1	873	0.0729979	0.145996
TMPRSS15	874	0.0730694	0.146139
NDUFA10	874	0.0730694	0.146139
AK1	875	0.0731307	0.146261
CTDSP2	876	0.0732851	0.14657
MAPK1	877	0.0733966	0.146793
CSRNP1	878	0.073441	0.146882
DMRTB1	879	0.0735007	0.147001
CNKSR3	879	0.0735007	0.147001
MAPRE2	880	0.073663	0.147326
DPEP2	881	0.0737162	0.147432
PTPRN2	881	0.0737162	0.147432
WASF1	882	0.0737519	0.147504
DUSP8	883	0.0737964	0.147593
DIXDC1	884	0.0738853	0.147771
STIP1	885	0.0739316	0.147863
CLSPN	885	0.0739316	0.147863
PARD6A	886	0.0740189	0.148038
KPNA1	887	0.0740634	0.148127
SNX22	888	0.074147	0.148294
PSMF1	888	0.074147	0.148294
MEF2D	889	0.0742417	0.148483
MS4A2	890	0.0743623	0.148725
PRKD2	890	0.0743623	0.148725
ITPR1	891	0.0744647	0.148929
ELAVL2	892	0.0745094	0.149019
SETDB2	893	0.0745541	0.149108
SFT2D3	893	0.0745541	0.149108
CYP4X1	894	0.0745776	0.149155
SP100	895	0.0745987	0.149197
TEX101	896	0.0747927	0.149585
BRD7	897	0.0749118	0.149824
C12orf66	898	0.0750078	0.150016
GALNT3	898	0.0750078	0.150016
CYP2W1	899	0.0752229	0.150446
NFKBIZ	899	0.0752229	0.150446
HERC2	900	0.0754379	0.150876
RAD17	900	0.0754379	0.150876
BHLHE40	901	0.0756528	0.151306
ZXDC	901	0.0756528	0.151306
NFAT5	902	0.0758094	0.151619
STAT5B	902	0.0758094	0.151619
WLS	903	0.0758676	0.151735
FANCE	903	0.0758676	0.151735
DSN1	904	0.0759895	0.151979
PCDHA5	905	0.0760346	0.152069
NENF	906	0.0760824	0.152165
MRPL50	906	0.0760824	0.152165
PRKAG2	907	0.0761247	0.152249
PMS1	908	0.0761698	0.15234
ARRDC2	909	0.0762971	0.152594
MKRN3	910	0.0765117	0.153023
ASCL1	910	0.0765117	0.153023
LAIR1	911	0.076531	0.153062
RAB3IP	911	0.076531	0.153062
IRAK2	912	0.0766666	0.153333
CSPG5	913	0.0767118	0.153424
P4HTM	914	0.0767263	0.153453
THYN1	914	0.0767263	0.153453
SLC16A5	915	0.0768023	0.153605
ZNF667	916	0.0769408	0.153882
TMPRSS3	917	0.0771194	0.154239
HPR	918	0.0771553	0.154311
ELMO1	919	0.0772555	0.154511
NIT2	920	0.0773463	0.154693
TMC7	921	0.0773696	0.154739
PIK3CG	921	0.0773696	0.154739
KIF19	922	0.0773917	0.154783
DOCK2	923	0.0774825	0.154965
ENKD1	924	0.0775734	0.155147
FPR3	925	0.077584	0.155168
GABARAPL1	925	0.077584	0.155168
BOP1	926	0.0776643	0.155329
TGM2	926	0.0776643	0.155329
FMNL1	927	0.0777098	0.15542
FFAR3	928	0.0777982	0.155596
ACTN1	929	0.0780124	0.156025
QSOX1	929	0.0780124	0.156025
SPATA18	930	0.0780286	0.156057
SQSTM1	931	0.0781198	0.15624
RAB6A	932	0.0781654	0.156331
ISY1	933	0.078211	0.156422
WWP1	934	0.0782265	0.156453
MRS2	935	0.0782566	0.156513
TSPAN18	936	0.0783936	0.156787
C7orf31	937	0.0784405	0.156881
KANK2	937	0.0784405	0.156881
CMTM4	938	0.0786545	0.157309
DIDO1	939	0.0788509	0.157702
CPB2	940	0.0788684	0.157737
SARM1	940	0.0788684	0.157737
ATP5H	941	0.0789883	0.157977
AZI2	942	0.0790823	0.158165
PRKAR2A	943	0.0792961	0.158592
UBE3B	944	0.0793093	0.158619
KLHL28	945	0.0793552	0.15871
JAG2	946	0.0795098	0.15902
SGK3	946	0.0795098	0.15902
PCGF3	947	0.0796769	0.159354
GGA3	948	0.0797235	0.159447
KPNB1	949	0.0799071	0.159814
GRB2	950	0.0799371	0.159874
SREK1	950	0.0799371	0.159874
HEYL	951	0.0799531	0.159906
FAM105A	952	0.0800453	0.160091
CDK6	952	0.0800453	0.160091
DBP	953	0.0800914	0.160183
FAM83F	954	0.0801506	0.160301
MRPS18A	954	0.0801506	0.160301
ALOX5	955	0.0802297	0.160459
AIF1	956	0.080322	0.160644
GTSF1L	957	0.0804144	0.160829
PARP2	958	0.080553	0.161106
SLC5A9	959	0.0805774	0.161155
HEMK1	960	0.0805992	0.161198
NOL12	961	0.0806454	0.161291
NET1	962	0.0807842	0.161568
TRAIP	963	0.0807908	0.161582
FCRL2	963	0.0807908	0.161582
COL3A1	964	0.0809694	0.161939
CASP2	965	0.081004	0.162008
ITSN2	966	0.0810621	0.162124
SDAD1	967	0.0811084	0.162217
DALRD3	968	0.0812172	0.162434
WDR89	968	0.0812172	0.162434
STAU2	969	0.0812476	0.162495
SMIM12	970	0.081294	0.162588
CYLC2	971	0.0813404	0.162681
ATRAID	972	0.0814304	0.162861
PPFIA1	972	0.0814304	0.162861
IQCF3	973	0.0816435	0.163287
PCDHGA3	973	0.0816435	0.163287
MED13	974	0.0816656	0.163331
UBE2E3	975	0.0818565	0.163713
CRK	976	0.0818982	0.163796
SYNPO2	977	0.0820694	0.164139
SNX5	978	0.082271	0.164542
ALKBH2	979	0.0822823	0.164565
TNRC6B	980	0.0823177	0.164635
ASB2	981	0.082411	0.164822
ZMAT2	982	0.0824951	0.16499
AMY2A	983	0.0825044	0.165009
JUP	984	0.0825511	0.165102
WEE1	985	0.0825979	0.165196
POLH	985	0.0825979	0.165196
MMP10	986	0.0826914	0.165383
NUMBL	987	0.0827079	0.165416
PMPCB	988	0.0828317	0.165663
SYNGR3	989	0.0828785	0.165757
DNALI1	990	0.0829721	0.165944
APOLD1	991	0.0831332	0.166266
ANKZF1	992	0.0832063	0.166413
STAU1	992	0.0832063	0.166413
SIRT3	993	0.0833001	0.1666
MEMO1	994	0.0833457	0.166691
SLC12A8	995	0.0834878	0.166976
ZDHHC20	996	0.0835582	0.167116
GRIK2	996	0.0835582	0.167116
SCAF11	997	0.0835817	0.167163
KCNMB1	998	0.0836287	0.167257
COL11A1	999	0.0836757	0.167351
LPCAT2	1000	0.0837697	0.167539
PCDHB12	1001	0.0837707	0.167541
CAPRIN1	1001	0.0837707	0.167541
PAFAH2	1002	0.0838168	0.167634
SLC45A3	1003	0.0839579	0.167916
NDUFAF3	1004	0.083983	0.167966
CDH8	1004	0.083983	0.167966
TNS3	1005	0.084005	0.16801
PDIA3	1006	0.0840521	0.168104
RGS8	1006	0.0840521	0.168104
ADRA1A	1007	0.0841934	0.168387
ABR	1007	0.0841934	0.168387
ARHGEF16	1008	0.0841954	0.168391
GCC1	1008	0.0841954	0.168391
ADH5	1009	0.0844076	0.168815
NEU2	1010	0.0846198	0.16924
GSTZ1	1010	0.0846198	0.16924
BCL2L10	1011	0.0846652	0.16933
MED28	1012	0.0847597	0.169519
MEFV	1013	0.0848319	0.169664
SLC43A3	1013	0.0848319	0.169664
CDC42SE2	1014	0.0849961	0.169992
FKTN	1015	0.0850435	0.170087
KATNBL1	1016	0.085044	0.170088
SH3RF2	1016	0.085044	0.170088
ZFAND5	1017	0.0852329	0.170466
C1QTNF4	1018	0.0852559	0.170512
CEBPD	1018	0.0852559	0.170512
FBXL17	1019	0.085375	0.17075
PRKCZ	1020	0.0854679	0.170936
ZNF518B	1020	0.0854679	0.170936
ZFP36	1021	0.0855173	0.171035
RAB28	1022	0.0855648	0.17113
ALS2CR12	1023	0.0856597	0.171319
UBE2E2	1024	0.0856797	0.171359
DCAF6	1024	0.0856797	0.171359
ATXN10	1025	0.0858497	0.171699
ST3GAL1	1026	0.0858915	0.171783
KCNIP4	1026	0.0858915	0.171783
PIGL	1027	0.0859448	0.17189
TNKS	1028	0.0861033	0.172207
ACOT11	1028	0.0861033	0.172207
TIMM8B	1029	0.0862303	0.172461
SMG5	1030	0.086315	0.17263
CPSF1	1031	0.0863256	0.172651
N4BP1	1032	0.0863732	0.172746
PAGR1	1033	0.0865266	0.173053
SEH1L	1033	0.0865266	0.173053
TNFRSF10D	1034	0.0866116	0.173223
SH3GLB1	1035	0.0867381	0.173476
WFDC3	1035	0.0867381	0.173476
CA12	1036	0.0868025	0.173605
KCNG1	1037	0.0868981	0.173796
PCSK9	1038	0.0869496	0.173899
HSPD1	1038	0.0869496	0.173899
SLC5A8	1039	0.0870415	0.174083
RCCD1	1040	0.0871371	0.174274
PLEKHS1	1041	0.0871611	0.174322
MBD6	1041	0.0871611	0.174322
FAM122A	1042	0.0873285	0.174657
HERC3	1043	0.0873724	0.174745
TNFSF13	1043	0.0873724	0.174745
EP300	1044	0.0874243	0.174849
AMT	1045	0.0875837	0.175167
BCAN	1045	0.0875837	0.175167
NDUFB10	1046	0.087795	0.17559
CSTL1	1046	0.087795	0.17559
HEATR5A	1047	0.0880061	0.176012
GABRA4	1047	0.0880061	0.176012
MUC20	1048	0.088048	0.176096
PCYOX1	1048	0.088048	0.176096
MRPL16	1049	0.0881442	0.176288
RNF123	1050	0.0882173	0.176435
ITPR3	1051	0.0884283	0.176857
NEK6	1052	0.0884328	0.176866
ING5	1053	0.088481	0.176962
FAM98B	1054	0.0886255	0.177251
POLD4	1055	0.0886393	0.177279
TMEM141	1056	0.0886737	0.177347
DLX3	1057	0.0888183	0.177637
ZCCHC7	1058	0.0888502	0.1777
SENP3	1058	0.0888502	0.1777
DNAAF1	1059	0.0890611	0.178122
OLAH	1059	0.0890611	0.178122
HIST1H4C	1060	0.0892046	0.178409
C14orf93	1060	0.0892046	0.178409
OTULIN	1061	0.0892529	0.178506
CHST4	1062	0.0892719	0.178544
WDR91	1063	0.0894827	0.178965
NBN	1063	0.0894827	0.178965
FLI1	1064	0.0895916	0.179183
SGCB	1065	0.08964	0.17928
ZFP69B	1066	0.0896934	0.179387
PAPLN	1066	0.0896934	0.179387
DSTYK	1067	0.0897853	0.179571
RBM5	1068	0.0898338	0.179668
TNK2	1068	0.0898338	0.179668
TGFB3	1069	0.0898823	0.179765
DRC7	1070	0.089904	0.179808
RAPGEF1	1070	0.089904	0.179808
CLCF1	1071	0.0903251	0.18065
TEAD2	1071	0.0903251	0.18065
INF2	1072	0.0903677	0.180735
IL22RA1	1073	0.0905355	0.181071
LSM14A	1073	0.0905355	0.181071
MCM8	1074	0.0905622	0.181124
AKAP7	1075	0.0906595	0.181319
SEMA3F	1076	0.0907082	0.181416
NOXO1	1077	0.0909517	0.181903
OCEL1	1078	0.0909562	0.181912
HIP1	1078	0.0909562	0.181912
DIS3L2	1079	0.0911955	0.182391
MED31	1079	0.0911955	0.182391
ACTC1	1080	0.0913767	0.182753
CD200	1080	0.0913767	0.182753
SMPD3	1081	0.0914885	0.182977
NICN1	1082	0.0915868	0.183174
FOXN3	1082	0.0915868	0.183174
PRC1	1083	0.0916351	0.18327
TMEM14B	1084	0.0917329	0.183466
CCDC68	1085	0.0917969	0.183594
PPP4R4	1085	0.0917969	0.183594
MAP3K2	1086	0.0918797	0.183759
CYP4Z1	1087	0.0920069	0.184014
TRIP10	1087	0.0920069	0.184014
EMC3	1088	0.0922168	0.184434
HOMER3	1088	0.0922168	0.184434
PLCD3	1089	0.0922717	0.184543
NFIX	1090	0.0924267	0.184853
ZNF585A	1091	0.0926153	0.185231
NDRG3	1091	0.0926153	0.185231
ZNF649	1092	0.0926366	0.185273
TUBB6	1093	0.0926644	0.185329
RABL6	1094	0.0927135	0.185427
PREX1	1095	0.0927627	0.185525
TRPT1	1096	0.0928463	0.185693
DTX3L	1097	0.092861	0.185722
PMEPA1	1097	0.092861	0.185722
RPS2	1098	0.093056	0.186112
ZNF200	1099	0.0932548	0.18651
LDB3	1100	0.0932657	0.186531
DLC1	1100	0.0932657	0.186531
IL18BP	1101	0.0934026	0.186805
DCAF8	1101	0.0934026	0.186805
ALCAM	1102	0.0934753	0.186951
EPRS	1103	0.0935012	0.187002
SYTL2	1103	0.0935012	0.187002
ST6GALNAC5	1104	0.0935506	0.187101
CAB39	1105	0.0936493	0.187299
COLQ	1106	0.0936848	0.18737
WIF1	1106	0.0936848	0.18737
THADA	1107	0.0936986	0.187397
COLEC12	1108	0.093748	0.187496
OSBPL11	1109	0.0938468	0.187694
NSL1	1110	0.0938943	0.187789
FAHD1	1111	0.093995	0.18799
NDUFA2	1112	0.0941037	0.188207
TYSND1	1113	0.0941929	0.188386
GSR	1114	0.0942424	0.188485
HDDC2	1114	0.0942424	0.188485
CTSK	1115	0.0943131	0.188626
XRN1	1115	0.0943131	0.188626
SCARA3	1116	0.0944404	0.188881
EEF1D	1117	0.0945224	0.189045
RBBP9	1118	0.0945891	0.189178
PRR30	1119	0.0947316	0.189463
LATS2	1120	0.0947378	0.189476
RNASE4	1121	0.0948371	0.189674
AFF1	1122	0.0948867	0.189773
HECTD3	1123	0.0949363	0.189873
COX6B1	1123	0.0949363	0.189873
EPB41L4B	1124	0.0949408	0.189882
METTL6	1125	0.0951499	0.1903
ZNF264	1125	0.0951499	0.1903
HERC5	1126	0.0952344	0.190469
KLF6	1127	0.0953589	0.190718
PIP5K1B	1128	0.0954334	0.190867
TCTA	1129	0.0955679	0.191136
STARD13	1129	0.0955679	0.191136
ARHGAP24	1130	0.0956325	0.191265
GAS7	1131	0.0956823	0.191365
RPL3L	1132	0.0957769	0.191554
SMTN	1132	0.0957769	0.191554
FXN	1133	0.0958318	0.191664
LRP2	1134	0.0959316	0.191863
CD84	1134	0.0959316	0.191863
NFIC	1135	0.0959857	0.191971
ZNF549	1136	0.0961811	0.192362
CLU	1137	0.0961945	0.192389
LAT2	1137	0.0961945	0.192389
BMPR1A	1138	0.0964033	0.192807
BCCIP	1138	0.0964033	0.192807
KIAA0753	1139	0.0964308	0.192862
KIR2DS4	1140	0.0965308	0.193062
LYPD3	1141	0.096612	0.193224
ABI3BP	1142	0.0966809	0.193362
TMEM184A	1143	0.0968206	0.193641
MAGI2	1143	0.0968206	0.193641
CCNY	1144	0.0969814	0.193963
PTGDR2	1145	0.0970292	0.194058
TXN2	1145	0.0970292	0.194058
ANK1	1146	0.0970315	0.194063
TRAM2	1147	0.0970816	0.194163
TMCO6	1148	0.0972377	0.194475
ABLIM1	1148	0.0972377	0.194475
SLC13A1	1149	0.0974462	0.194892
SPCS1	1149	0.0974462	0.194892
SOCS6	1150	0.097483	0.194966
SPATS2	1151	0.0975332	0.195066
LIMK2	1151	0.0975332	0.195066
CACNA1D	1152	0.0975835	0.195167
HECW1	1153	0.097684	0.195368
ATL3	1154	0.0978629	0.195726
ADIPOR2	1154	0.0978629	0.195726
FUT9	1155	0.0978851	0.19577
NOL4	1156	0.0980361	0.196072
IMPDH2	1157	0.0980712	0.196142
TNFRSF21	1157	0.0980712	0.196142
KREMEN2	1158	0.0980864	0.196173
MZF1	1159	0.0981872	0.196374
ADSS	1160	0.0982795	0.196559
RBPJ	1160	0.0982795	0.196559
PRKRA	1161	0.0984876	0.196975
GSS	1161	0.0984876	0.196975
ELSPBP1	1162	0.0985905	0.197181
TMIGD2	1163	0.098641	0.197282
PARP9	1164	0.0986957	0.197391
MICAL3	1164	0.0986957	0.197391
BTRC	1165	0.0987925	0.197585
ISCA2	1165	0.0987925	0.197585
AFG3L2	1166	0.0989038	0.197808
TRIM56	1167	0.098944	0.197888
NKD2	1168	0.0989946	0.197989
RRP8	1169	0.0990957	0.198191
CDCA7	1170	0.0991118	0.198224
CNNM2	1170	0.0991118	0.198224
ADAM17	1171	0.0991463	0.198293
SLC10A7	1172	0.0991969	0.198394
HMCES	1173	0.0993197	0.198639
EFCAB6	1174	0.09945	0.1989
YY1	1175	0.0995276	0.199055
ANKRD12	1176	0.0995514	0.199103
WWOX	1177	0.0997354	0.199471
GNRH1	1177	0.0997354	0.199471
TBC1D5	1178	0.0997541	0.199508
MASP1	1179	0.0998556	0.199711
NDC1	1180	0.0999432	0.199886
UBE2V2	1180	0.0999432	0.199886
PCDHA7	1181	0.100008	0.200016
ATL2	1182	0.100109	0.200219
MSTN	1183	0.100151	0.200302
GYPB	1183	0.100151	0.200302
PCM1	1184	0.10016	0.200321
PAPSS1	1185	0.100211	0.200422
C1S	1186	0.100313	0.200625
KBTBD4	1187	0.100359	0.200717
MARCH8	1188	0.100364	0.200727
TRIM11	1189	0.100566	0.201132
IL17RA	1189	0.100566	0.201132
IFT52	1190	0.10072	0.20144
RRAD	1191	0.100774	0.201547
AHRR	1192	0.100822	0.201643
GM2A	1193	0.100924	0.201847
LST1	1194	0.100981	0.201962
RNPC3	1195	0.101026	0.202051
GET4	1196	0.101077	0.202153
ATF1	1197	0.101128	0.202255
DYNC1H1	1198	0.101188	0.202377
NDUFS3	1199	0.101396	0.202792
CDK19	1200	0.101485	0.20297
CAD	1201	0.101603	0.203206
KRT15	1202	0.10181	0.203621
SSTR1	1203	0.101843	0.203686
DTD2	1204	0.102018	0.204035
CREB5	1204	0.102018	0.204035
ST6GALNAC4	1205	0.102048	0.204095
PRRT2	1206	0.102225	0.204449
CHEK2	1207	0.102253	0.204505
AK2	1208	0.102407	0.204813
ZMYND12	1209	0.102432	0.204864
NECAP1	1210	0.102458	0.204916
CNTNAP2	1211	0.102639	0.205278
PRKACB	1211	0.102639	0.205278
BOC	1212	0.102817	0.205634
ZNF143	1213	0.102846	0.205691
ENTPD2	1214	0.102971	0.205943
MPHOSPH9	1215	0.103053	0.206105
DHX36	1215	0.103053	0.206105
RAI14	1216	0.103126	0.206251
MAPKAPK2	1217	0.103177	0.206354
GDPD3	1218	0.103259	0.206519
DUSP1	1219	0.103332	0.206663
MYL12B	1220	0.103435	0.206869
QARS	1221	0.103466	0.206932
ASCL2	1222	0.103673	0.207346
HMG20A	1223	0.103847	0.207694
GFOD2	1223	0.103847	0.207694
KERA	1224	0.104086	0.208172
ILVBL	1224	0.104086	0.208172
DAB2IP	1225	0.104105	0.20821
TAOK3	1226	0.10426	0.208521
FAM171B	1227	0.104293	0.208586
PABPC1	1228	0.104499	0.208999
ABCE1	1228	0.104499	0.208999
GNB4	1229	0.104622	0.209245
BRPF1	1230	0.104706	0.209411
NFATC4	1231	0.10483	0.209659
KLHDC9	1232	0.104912	0.209824
THAP11	1233	0.105141	0.210281
KRT81	1234	0.105325	0.210649
DNAJB9	1235	0.105348	0.210696
RNASEH2C	1236	0.105531	0.211062
PBXIP1	1236	0.105531	0.211062
SAMM50	1237	0.105737	0.211474
VTA1	1237	0.105737	0.211474
PRPF38B	1238	0.105764	0.211528
BTBD11	1239	0.105816	0.211632
SUMO1	1240	0.105868	0.211736
NARS2	1241	0.10592	0.21184
IQCF2	1242	0.105943	0.211886
CHRNA2	1243	0.106149	0.212298
SLC22A7	1244	0.10618	0.212361
RNF122	1245	0.106232	0.212465
ACE	1245	0.106232	0.212465
FOXG1	1246	0.106355	0.21271
SLC6A9	1246	0.106355	0.21271
RRM2	1247	0.106389	0.212778
CAMKV	1248	0.106561	0.213122
FBXL5	1249	0.106597	0.213195
SPRYD7	1250	0.10665	0.213299
ARMC7	1251	0.106767	0.213534
CUX1	1251	0.106767	0.213534
KIAA0754	1252	0.106973	0.213946
KIF5A	1252	0.106973	0.213946
CTH	1253	0.107015	0.21403
KIF21B	1254	0.10712	0.21424
ILKAP	1255	0.107179	0.214357
ACSL5	1255	0.107179	0.214357
IQCF5	1256	0.107384	0.214768
DDIT4L	1256	0.107384	0.214768
CNTN2	1257	0.107486	0.214972
SSBP1	1258	0.10759	0.21518
DNAJC21	1258	0.10759	0.21518
BARD1	1259	0.107591	0.215182
SEC23B	1260	0.107643	0.215286
PLAUR	1261	0.107696	0.215391
PNPLA6	1262	0.107748	0.215496
COG5	1263	0.107795	0.215591
DENND5B	1263	0.107795	0.215591
EBF4	1264	0.107958	0.215916
USP19	1265	0.108001	0.216002
WDR61	1265	0.108001	0.216002
MAPK4	1266	0.108063	0.216126
NPEPPS	1266	0.108063	0.216126
PDE11A	1267	0.108115	0.216231
ESRP2	1268	0.108206	0.216413
GLRX	1268	0.108206	0.216413
TMCO1	1269	0.108273	0.216546
CCDC93	1270	0.108325	0.216651
NUDT22	1271	0.108412	0.216824
POLK	1271	0.108412	0.216824
CLCA4	1272	0.10843	0.216861
DBR1	1272	0.10843	0.216861
GHSR	1273	0.108483	0.216966
HSPB8	1274	0.108536	0.217071
PI4KB	1275	0.108588	0.217176
MYO5C	1276	0.108617	0.217234
S100A6	1276	0.108617	0.217234
HOXD13	1277	0.108693	0.217387
PEX11B	1277	0.108693	0.217387
TRIM47	1278	0.108823	0.217645
NSUN6	1279	0.109028	0.218056
CSF1	1279	0.109028	0.218056
IGF2BP3	1280	0.10922	0.21844
MAZ	1281	0.109233	0.218466
DBF4	1281	0.109233	0.218466
PPM1K	1282	0.109378	0.218757
ZNF684	1283	0.109438	0.218876
LAMB1	1283	0.109438	0.218876
IP6K2	1284	0.109484	0.218968
GTF2H5	1284	0.109484	0.218968
PDPN	1285	0.109537	0.219073
HP	1286	0.109643	0.219286
SUPT6H	1287	0.109748	0.219496
GIGYF2	1288	0.109801	0.219602
FAM189A2	1289	0.109848	0.219697
TPM3	1289	0.109848	0.219697
FZD6	1290	0.109906	0.219813
EAF1	1291	0.110053	0.220107
ADGRL3	1291	0.110053	0.220107
LLGL1	1292	0.110118	0.220236
IAH1	1293	0.110171	0.220342
MSRB1	1294	0.110258	0.220516
APPL1	1295	0.110277	0.220554
MAEL	1296	0.11033	0.220659
PTPRB	1296	0.11033	0.220659
SPDEF	1297	0.110436	0.220871
AMPD3	1298	0.110489	0.220977
KAT5	1299	0.110668	0.221336
MAX	1299	0.110668	0.221336
BNC2	1300	0.11086	0.22172
ZNF19	1301	0.110873	0.221745
CHD9	1301	0.110873	0.221745
ZP1	1302	0.111077	0.222155
SORCS3	1302	0.111077	0.222155
METAP1	1303	0.111125	0.22225
LRCH4	1304	0.111282	0.222564
LAPTM4B	1305	0.111444	0.222888
BOLA2	1306	0.111487	0.222973
TM4SF1	1307	0.111497	0.222995
PRKCE	1308	0.111604	0.223207
CD33	1309	0.111691	0.223382
AKAP8	1309	0.111691	0.223382
TMEM206	1310	0.111896	0.223791
KCNAB1	1310	0.111896	0.223791
MTCH2	1311	0.111923	0.223846
ZFP90	1312	0.111976	0.223953
DNPH1	1312	0.111976	0.223953
METTL7A	1313	0.11203	0.22406
FLII	1313	0.11203	0.22406
FUT6	1314	0.1121	0.2242
KCNJ3	1315	0.112136	0.224273
IL33	1315	0.112136	0.224273
ZEB1	1316	0.112243	0.224486
LAMA2	1317	0.112304	0.224609
ZBTB39	1318	0.112403	0.224806
TOR1AIP1	1319	0.112563	0.225127
NCOA1	1320	0.11267	0.22534
CDK12	1321	0.112713	0.225426
PTPRC	1321	0.112713	0.225426
CLMN	1322	0.112884	0.225768
SH3RF1	1323	0.112917	0.225834
MTF1	1324	0.112937	0.225875
ZCCHC24	1325	0.113044	0.226089
ZNF462	1326	0.113098	0.226196
ZNF622	1327	0.113121	0.226243
AGER	1328	0.113258	0.226517
IRGQ	1329	0.113325	0.226651
TIMM23	1329	0.113325	0.226651
SYNE1	1330	0.113366	0.226731
IMPAD1	1331	0.113526	0.227053
RASSF6	1332	0.113529	0.227059
CEP57	1333	0.11358	0.22716
PPAN-P2RY11	1334	0.113634	0.227267
RXFP1	1335	0.113733	0.227467
CD14	1336	0.113937	0.227875
DENND4C	1336	0.113937	0.227875
C2orf83	1337	0.114063	0.228126
ZNF623	1338	0.114224	0.228448
CDKAL1	1339	0.114278	0.228555
PSTPIP2	1340	0.114345	0.22869
N4BP2	1340	0.114345	0.22869
THAP6	1341	0.114493	0.228986
VEGFB	1342	0.114549	0.229098
GNPTAB	1342	0.114549	0.229098
S100A12	1343	0.114654	0.229308
PSMD12	1344	0.114708	0.229416
DAG1	1345	0.114753	0.229505
ATP5C1	1345	0.114753	0.229505
ZCCHC2	1346	0.114956	0.229912
CBFB	1347	0.115031	0.230062
SAV1	1348	0.115085	0.23017
CPNE3	1349	0.11516	0.23032
APLNR	1349	0.11516	0.23032
SERPINA3	1350	0.115247	0.230494
KCNN3	1351	0.115363	0.230727
PIEZO2	1352	0.115409	0.230818
KLHL9	1353	0.115517	0.231034
PRDX3	1354	0.115567	0.231134
DPEP3	1355	0.11577	0.231541
GPIHBP1	1356	0.115787	0.231574
RAN	1357	0.115895	0.23179
RNF5	1358	0.115949	0.231898
LONRF2	1359	0.115974	0.231947
PPARA	1359	0.115974	0.231947
PHIP	1360	0.116057	0.232114
COPG1	1361	0.116177	0.232354
PHB	1361	0.116177	0.232354
RANGRF	1362	0.11622	0.232439
TMEM161B	1363	0.116328	0.232656
GEM	1364	0.116382	0.232764
WASF2	1365	0.116545	0.233089
NKIRAS2	1366	0.116584	0.233167
FZD9	1366	0.116584	0.233167
ANAPC10	1367	0.116761	0.233523
SNX1	1368	0.116787	0.233573
TBL1XR1	1368	0.116787	0.233573
INVS	1369	0.116816	0.233631
MDH2	1370	0.11687	0.23374
GLO1	1371	0.11699	0.23398
CTSB	1372	0.117087	0.234174
ZNF76	1373	0.117193	0.234386
AKT2	1373	0.117193	0.234386
SIK1	1374	0.117196	0.234391
LMNA	1375	0.117359	0.234717
AURKA	1376	0.117396	0.234792
HAVCR2	1376	0.117396	0.234792
IFNLR1	1377	0.117413	0.234826
TPR	1378	0.117522	0.235044
MRPL44	1379	0.117599	0.235198
TPM1	1380	0.117794	0.235588
HEXIM2	1381	0.117802	0.235604
GTSE1	1381	0.117802	0.235604
TUB	1382	0.117848	0.235697
JAZF1	1383	0.117903	0.235806
PTPMT1	1384	0.118005	0.236009
HECTD2	1384	0.118005	0.236009
TOP3B	1385	0.118066	0.236132
HIRA	1386	0.118175	0.23635
VPS13D	1387	0.118207	0.236415
TTC36	1388	0.118339	0.236678
CBX5	1388	0.118339	0.236678
TLN2	1389	0.118393	0.236787
SCARB1	1390	0.118448	0.236896
RIC1	1391	0.118557	0.237114
MTUS1	1392	0.118612	0.237223
IQGAP2	1393	0.118613	0.237226
HAUS2	1393	0.118613	0.237226
ANXA6	1394	0.118776	0.237551
GSDMD	1395	0.118815	0.237631
HTR3B	1396	0.11883	0.23766
JRK	1396	0.11883	0.23766
TGIF2	1397	0.118939	0.237879
PTPDC1	1398	0.118994	0.237988
PEX7	1398	0.118994	0.237988
CENPU	1399	0.119158	0.238316
UROD	1400	0.119377	0.238754
FKBP2	1401	0.119423	0.238846
ARL4C	1401	0.119423	0.238846
RAB27B	1402	0.119626	0.239251
DDX10	1403	0.119815	0.239631
PIP5K1A	1404	0.119828	0.239656
LGI2	1405	0.11998	0.23996
PCDH9	1405	0.11998	0.23996
TRIM17	1406	0.12003	0.24006
KCNJ10	1406	0.12003	0.24006
CAB39L	1407	0.120035	0.24007
ACADVL	1408	0.120145	0.240289
SPIN1	1409	0.120232	0.240465
NFIB	1409	0.120232	0.240465
GNA12	1410	0.120309	0.240619
TIPRL	1411	0.120419	0.240838
MS4A6E	1412	0.120435	0.240869
CTDSPL	1412	0.120435	0.240869
ATP2A2	1413	0.120637	0.241274
ZNF443	1414	0.120639	0.241278
DDX24	1415	0.120694	0.241388
NDRG4	1416	0.120749	0.241498
LRRC32	1417	0.120839	0.241678
PTHLH	1418	0.120859	0.241718
SLC32A1	1419	0.120969	0.241939
DHRS7	1420	0.121024	0.242049
PPP1R12B	1421	0.121041	0.242082
ARPC2	1421	0.121041	0.242082
DNAJC1	1422	0.121079	0.242159
ZNF688	1423	0.12119	0.242379
GJA5	1424	0.121243	0.242486
RNF41	1424	0.121243	0.242486
UBE2L6	1425	0.121245	0.242489
ATF7	1426	0.121445	0.24289
KMT2B	1427	0.12152	0.243041
LGR6	1428	0.121647	0.243294
NOTCH3	1428	0.121647	0.243294
TMEM60	1429	0.121741	0.243482
OTP	1430	0.121849	0.243697
LRRFIP1	1430	0.121849	0.243697
FBXW11	1431	0.121851	0.243703
CAPN2	1431	0.121851	0.243703
MUC17	1432	0.121962	0.243924
VIP	1433	0.122252	0.244504
ADCY2	1434	0.122294	0.244587
UBE2R2	1435	0.122404	0.244808
PRKCH	1436	0.122454	0.244908
FFAR1	1437	0.122656	0.245311
SLC38A2	1437	0.122656	0.245311
APOL4	1438	0.122681	0.245362
DTX2	1438	0.122681	0.245362
GUCY1B3	1439	0.122736	0.245473
SCIN	1440	0.122857	0.245714
L2HGDH	1441	0.122903	0.245805
ZSCAN12	1442	0.123013	0.246027
PDP1	1443	0.123059	0.246117
SLC2A12	1444	0.123124	0.246249
ARNT	1445	0.12326	0.24652
MPHOSPH6	1446	0.123291	0.246582
TCIRG1	1447	0.123346	0.246693
ZNF613	1448	0.123457	0.246915
FEZ1	1448	0.123457	0.246915
PPP1R15A	1449	0.123462	0.246923
VPS41	1449	0.123462	0.246923
TREM1	1450	0.123513	0.247026
ARHGAP9	1450	0.123513	0.247026
SSR1	1451	0.123568	0.247137
ARAP1	1452	0.123663	0.247326
NFATC2IP	1453	0.123902	0.247804
CRYM	1453	0.123902	0.247804
ZC3H14	1454	0.124013	0.248026
VGF	1455	0.124066	0.248131
FNDC4	1456	0.124124	0.248249
CREBBP	1457	0.124267	0.248533
EEF1A1	1458	0.124291	0.248583
APOL3	1458	0.124291	0.248583
LCORL	1459	0.124403	0.248806
C22orf39	1460	0.124458	0.248917
TPRG1	1461	0.124468	0.248936
RBP4	1461	0.124468	0.248936
AVL9	1462	0.124626	0.249251
MTRF1L	1463	0.124669	0.249338
TAF3	1464	0.124681	0.249363
POLR3A	1464	0.124681	0.249363
CCDC86	1465	0.124793	0.249586
TSPYL5	1466	0.12487	0.24974
QRSL1	1467	0.124905	0.249809
UBE2B	1468	0.12496	0.249921
SOCS2	1469	0.125016	0.250032
H1FX	1470	0.125071	0.250142
GTF2E1	1471	0.125072	0.250144
CHRNG	1472	0.125128	0.250256
TMEM219	1473	0.125272	0.250544
TGFBR2	1474	0.125351	0.250702
UGCG	1474	0.125351	0.250702
ANXA2	1475	0.125463	0.250926
PREB	1476	0.125473	0.250946
PRELP	1476	0.125473	0.250946
NUDT14	1477	0.125674	0.251348
DYRK1A	1478	0.125687	0.251373
ETV2	1479	0.125799	0.251597
SLC19A3	1480	0.125855	0.251709
H3F3B	1481	0.125875	0.251749
FNBP1	1481	0.125875	0.251749
KIAA1217	1482	0.125911	0.251821
KRT37	1483	0.126023	0.252045
PGPEP1	1484	0.126075	0.252151
SLAIN2	1485	0.126247	0.252493
NR2F6	1486	0.126276	0.252552
RAD21L1	1487	0.126677	0.253355
CREG1	1488	0.126695	0.253391
CEBPB	1489	0.126751	0.253503
TBX10	1490	0.126808	0.253615
OCA2	1491	0.126864	0.253728
PLA2G16	1492	0.126878	0.253756
UBE2H	1492	0.126878	0.253756
WDR7	1493	0.127032	0.254065
UTS2	1494	0.127078	0.254157
DTNB	1495	0.127089	0.254177
AKAP9	1495	0.127089	0.254177
PAPOLB	1496	0.127279	0.254557
UBE2G2	1497	0.127313	0.254627
UAP1L1	1498	0.12737	0.254739
TP53I11	1498	0.12737	0.254739
KRT83	1499	0.127479	0.254958
FGR	1499	0.127479	0.254958
SLC5A4	1500	0.127538	0.255077
CCP110	1501	0.127679	0.255359
PARM1	1501	0.127679	0.255359
COL9A2	1502	0.127707	0.255415
HLA-C	1503	0.127989	0.255978
ZBTB43	1504	0.12808	0.25616
SLC4A7	1505	0.128102	0.256204
RHBDD1	1506	0.128271	0.256542
SPATA8	1507	0.12828	0.25656
CEACAM1	1507	0.12828	0.25656
MRPL40	1508	0.12848	0.256961
G6PC	1509	0.12868	0.257361
PANK2	1510	0.128779	0.257559
CCDC83	1511	0.12888	0.257761
SUV39H2	1511	0.12888	0.257761
TFIP11	1512	0.12908	0.258161
SMARCAL1	1513	0.129119	0.258237
AIF1L	1514	0.129175	0.25835
AFF3	1515	0.129232	0.258463
ADAD1	1516	0.12928	0.258561
B4GALT6	1516	0.12928	0.258561
CEP19	1517	0.129345	0.25869
THNSL2	1518	0.129402	0.258803
MT3	1519	0.12948	0.25896
MCM4	1519	0.12948	0.25896
FBXO32	1520	0.129571	0.259143
MOB2	1521	0.129685	0.25937
KIAA1109	1522	0.129798	0.259596
LAMA4	1522	0.129798	0.259596
H2AFY	1523	0.12988	0.259759
DLG5	1524	0.129912	0.259823
HPCAL4	1525	0.130025	0.26005
IQCF6	1526	0.130079	0.260159
LGSN	1526	0.130079	0.260159
RANBP2	1527	0.130082	0.260164
NTHL1	1528	0.130279	0.260558
PDE1A	1528	0.130279	0.260558
ZNF765	1529	0.130366	0.260731
CBX2	1530	0.130422	0.260845
CFB	1531	0.130479	0.260958
PI4K2A	1532	0.130593	0.261186
ZNF652	1533	0.130678	0.261357
ANKS1A	1534	0.130764	0.261527
DEPDC1	1535	0.130877	0.261755
[truncated: 13,571 more rows]
