# Supplementary material for: Multiomics integrative analysis identifies APOE allele-specific blood biomarkers associated to Alzheimer’s disease etiopathogenesis
Source: Aging (Albany NY). 2021 Apr 12;13(7):9277–329. doi: 10.18632/aging.202950 (PMC8064208; doi:10.18632/aging.202950)
Supplement: Supplementary Table 30 [file aging-13-202950-s032.xlsx]

## Sheet: Sheet1
Supplementary Table 30. RRA integrative analysis in cortex: APOE4 stratum.
Symbol	Rank	ExactP(Score)	AdjustP
TUBB2A	1	0.00016102	0.00032204
KCNQ3	2	0.000178645	0.00035729
TOMM40	3	0.00027298	0.00054596
TNXB	3	0.00027298	0.00054596
EHD1	4	0.000385705	0.000771411
PGM2L1	5	0.000393316	0.000786632
APOC1	6	0.000544618	0.00108924
LSM14A	6	0.000544618	0.00108924
TMEM163	7	0.000706083	0.00141217
PAGR1	8	0.000768732	0.00153746
APOE	9	0.000815378	0.00163076
ITGB5	9	0.000815378	0.00163076
APOC2	10	0.00108543	0.00217086
FAM181B	10	0.00108543	0.00217086
DENND4C	11	0.00124003	0.00248007
MS4A7	12	0.00126719	0.00253438
SEZ6L2	13	0.00129463	0.00258926
CLPTM1	14	0.00135486	0.00270973
C21orf62	14	0.00135486	0.00270973
ITSN1	15	0.00144347	0.00288694
CLU	16	0.00162375	0.0032475
SLC7A2	16	0.00162375	0.0032475
DENND5B	17	0.00182994	0.00365987
ALDOA	18	0.00187106	0.00374212
SCARA3	19	0.00189213	0.00378426
GFAP	20	0.00192101	0.00384201
TIMM17A	21	0.00205735	0.00411471
CHD4	22	0.00206603	0.00413206
DLG2	23	0.00213607	0.00427214
PICALM	24	0.00216005	0.0043201
RAPGEF4	24	0.00216005	0.0043201
CALN1	25	0.00221624	0.00443248
NFKB1	26	0.00223425	0.0044685
PFDN4	27	0.00239025	0.00478049
PALM2-AKAP2	28	0.00242753	0.00485506
CAPS	28	0.00242753	0.00485506
IFNLR1	29	0.00250347	0.00500695
LARP7	30	0.00253218	0.00506436
FCGR2B	31	0.00255141	0.00510282
CDK14	32	0.00261927	0.00523854
SYS1	33	0.00267813	0.00535627
IL6	34	0.0026946	0.00538919
CPM	34	0.0026946	0.00538919
TBC1D7	35	0.0026979	0.00539579
EPHX2	36	0.00296127	0.00592255
IKBKB	36	0.00296127	0.00592255
F12	37	0.00308693	0.00617386
BIN1	38	0.00322758	0.00645516
ARSG	38	0.00322758	0.00645516
SLC24A4	39	0.00349353	0.00698705
PTBP1	39	0.00349353	0.00698705
POLR1D	40	0.00375913	0.00751826
BMP1	40	0.00375913	0.00751826
SCN2B	41	0.00385878	0.00771755
CHRNA9	42	0.0040244	0.0080488
KANK2	42	0.0040244	0.0080488
SCFD2	43	0.00419595	0.00839191
GAB2	44	0.00428935	0.00857871
SLC16A9	45	0.00431971	0.00863943
FGFR1OP2	46	0.00447054	0.00894109
SMDT1	47	0.00448323	0.00896645
LMOD1	48	0.00455399	0.00910799
SNCG	48	0.00455399	0.00910799
DDR2	49	0.00466263	0.00932526
FCRLB	50	0.00481833	0.00963667
VPS53	50	0.00481833	0.00963667
GABRB3	51	0.00487186	0.00974372
CERS1	52	0.00507207	0.0101441
CALCB	53	0.00508238	0.0101648
HSPB2	53	0.00508238	0.0101648
UNC5B	54	0.00518046	0.0103609
DNAJC5	55	0.00534513	0.0106903
FBP1	56	0.00534614	0.0106923
CRTAP	56	0.00534614	0.0106923
HDGF	57	0.00551231	0.0110246
ITPKB	58	0.00560962	0.0112192
SCN11A	59	0.00562515	0.0112503
IL11RA	60	0.00571051	0.011421
MCM3	61	0.00573911	0.0114782
RHOH	62	0.00587283	0.0117457
ZDHHC23	62	0.00587283	0.0117457
SUSD4	63	0.00588311	0.0117662
LTBP3	64	0.00591212	0.0118242
MAPK8	65	0.00613577	0.0122715
DSTYK	65	0.00613577	0.0122715
LRP8	66	0.00626563	0.0125313
MDFIC	67	0.00639845	0.0127969
DPYSL4	67	0.00639845	0.0127969
SUB1	68	0.00659843	0.0131969
ALPK2	69	0.00666088	0.0133218
KALRN	69	0.00666088	0.0133218
METTL9	70	0.00676796	0.0135359
INO80C	71	0.00692305	0.0138461
NFIB	71	0.00692305	0.0138461
NTPCR	72	0.00711327	0.0142265
NAV2	73	0.00714507	0.0142901
BCL2L2	74	0.00717695	0.0143539
NEGR1	75	0.00718499	0.01437
CARTPT	75	0.00718499	0.01437
CHML	76	0.00730513	0.0146103
GART	77	0.00736963	0.0147393
CD59	78	0.00740198	0.014804
FCRLA	79	0.00744667	0.0148933
SRGAP1	79	0.00744667	0.0148933
PGR	80	0.0074669	0.0149338
MYO5A	81	0.00749946	0.0149989
MS4A6A	82	0.00770813	0.0154163
HSPB3	82	0.00770813	0.0154163
C17orf58	83	0.00771277	0.0154255
GAS7	84	0.00796935	0.0159387
NRSN1	85	0.00802973	0.0160595
RIMS2	86	0.00814806	0.0162961
NARS2	87	0.00823034	0.0164607
PDE5A	87	0.00823034	0.0164607
ISYNA1	88	0.00840444	0.0168089
FBP2	89	0.0084911	0.0169822
KAT6A	89	0.0084911	0.0169822
LANCL2	90	0.00866466	0.0173293
EMP3	91	0.00868214	0.0173643
STK17B	92	0.00875165	0.0175033
ABLIM1	92	0.00875165	0.0175033
FAM193A	93	0.00901197	0.0180239
CD44	94	0.00910685	0.0182137
CRTC3	95	0.00914269	0.0182854
MEFV	96	0.00927208	0.0185442
CENPF	96	0.00927208	0.0185442
RNPEP	97	0.00953197	0.0190639
PHAX	97	0.00953197	0.0190639
SDC4	98	0.00963309	0.0192662
ATXN3	99	0.00974374	0.0194875
RBBP9	100	0.00979166	0.0195833
LGALS8	100	0.00979166	0.0195833
CNNM2	101	0.00981785	0.0196357
DDHD1	102	0.00989223	0.0197845
ZHX1	103	0.00996687	0.0199337
SLC39A10	104	0.010023	0.0200461
INPP4A	105	0.0100511	0.0201023
ELOVL6	105	0.0100511	0.0201023
ME3	106	0.010117	0.020234
PURA	107	0.0103104	0.0206208
CRH	107	0.0103104	0.0206208
VKORC1L1	108	0.0104587	0.0209173
MTUS1	109	0.0105545	0.0211091
MUC6	110	0.0105695	0.021139
GSN	110	0.0105695	0.021139
CSRP1	111	0.0107864	0.0215727
ASPHD1	112	0.0108284	0.0216567
PCSK1	112	0.0108284	0.0216567
CCNY	113	0.0108642	0.0217284
SEMA4B	114	0.0108837	0.0217674
NSL1	115	0.0109423	0.0218845
GFM1	116	0.0109618	0.0219237
MS4A2	117	0.011087	0.0221741
NCALD	117	0.011087	0.0221741
AGBL5	118	0.0110992	0.0221985
GSE1	119	0.0111584	0.0223168
POLR3F	120	0.0113455	0.022691
ZFP36L2	120	0.0113455	0.022691
MAF	121	0.0114164	0.0228328
PGAM1	122	0.0114364	0.0228727
TMEM189-UBE2V1	123	0.0114964	0.0229927
TNIP2	124	0.0116038	0.0232076
KRT17	124	0.0116038	0.0232076
RASGRF1	125	0.0117379	0.0234757
C1orf52	126	0.0117986	0.0235972
CDS1	127	0.0118619	0.0237238
NEUROD6	127	0.0118619	0.0237238
ATP6V0E1	128	0.0118798	0.0237597
LY6G5C	129	0.0119002	0.0238004
TMEM132D	130	0.0119409	0.0238819
SNTB2	131	0.0120841	0.0241682
ELF3	132	0.0121198	0.0242396
S1PR3	132	0.0121198	0.0242396
CYSTM1	133	0.0121663	0.0243325
DMPK	134	0.0121868	0.0243737
WAC	135	0.0123107	0.0246214
FAM102B	136	0.0123314	0.0246628
NCOA7	137	0.0123775	0.0247551
DST	137	0.0123775	0.0247551
KCTD13	138	0.0124351	0.0248703
ANK3	139	0.0125811	0.0251622
SST	140	0.0126351	0.0252701
RRP12	141	0.0126649	0.0253297
ANKRD40	142	0.012791	0.025582
RASL11B	143	0.0128754	0.0257509
DUSP12	144	0.0128924	0.0257848
ZNF264	144	0.0128924	0.0257848
AP2S1	145	0.0128966	0.0257932
PIP5K1B	146	0.0129389	0.0258779
LRRFIP1	147	0.0129601	0.0259203
SH3PXD2A	148	0.013109	0.026218
SEC23B	149	0.0131496	0.0262992
MTMR3	149	0.0131496	0.0262992
MRPL24	150	0.0131517	0.0263034
CCHCR1	151	0.0132587	0.0265173
SLC16A5	152	0.0133016	0.0266032
PIP4K2A	153	0.0134066	0.0268132
SCG3	153	0.0134066	0.0268132
SERPINI1	154	0.0135605	0.0271209
HIST1H2BD	155	0.0136634	0.0273268
BEND5	156	0.013669	0.027338
CIITA	157	0.01392	0.0278401
CDC42EP4	157	0.01392	0.0278401
ATP6V1G2	158	0.0139752	0.0279504
NKX6-1	159	0.0141765	0.028353
MXI1	159	0.0141765	0.028353
WWTR1	160	0.0142402	0.0284805
HNRNPA1	161	0.0143514	0.0287027
CCDC50	162	0.0144182	0.0288365
LNPEP	163	0.0144328	0.0288656
CALM3	163	0.0144328	0.0288656
PML	164	0.0144853	0.0289705
LRIG3	165	0.0145973	0.0291946
CREM	166	0.0146647	0.0293294
PLEKHG1	167	0.0146889	0.0293778
PHF21A	167	0.0146889	0.0293778
PLCD3	168	0.0147323	0.0294646
CDIPT	169	0.0147548	0.0295097
HFE	170	0.0148	0.0296
FRAS1	171	0.0148226	0.0296452
RSAD1	172	0.0149449	0.0298897
PDLIM5	172	0.0149449	0.0298897
SULT4A1	173	0.0149813	0.0299626
BTF3L4	174	0.0150496	0.0300991
GCC1	175	0.0151637	0.0303273
MS4A4A	176	0.0152007	0.0304013
CDC42	176	0.0152007	0.0304013
DDAH2	177	0.0153241	0.0306481
TNFRSF11B	178	0.0154161	0.0308322
RBMS2	179	0.0154563	0.0309125
GPM6A	179	0.0154563	0.0309125
MTMR6	180	0.0154622	0.0309244
N4BP2L1	181	0.0155084	0.0310168
NTNG1	182	0.0157117	0.0314234
SLC25A1	183	0.015967	0.031934
RGS4	183	0.015967	0.031934
MS4A6E	184	0.0162221	0.0324443
ACACB	184	0.0162221	0.0324443
RIN3	185	0.0162325	0.0324651
POU2F2	186	0.0163271	0.0326543
ADD1	187	0.0163982	0.0327965
MUTYH	188	0.016422	0.032844
USP35	189	0.0164771	0.0329542
CYCS	189	0.0164771	0.0329542
SHC3	190	0.0164933	0.0329866
HTR1E	191	0.0167319	0.0334638
POLDIP3	191	0.0167319	0.0334638
CHMP4B	192	0.016732	0.0334641
SORBS2	193	0.01678	0.0335599
DOCK9	194	0.0169865	0.0339731
OPA1	194	0.0169865	0.0339731
MARK1	195	0.0172387	0.0344774
PPFIA1	196	0.017241	0.034482
ABCC3	197	0.0174336	0.0348672
CD2AP	198	0.0174953	0.0349907
MTMR11	198	0.0174953	0.0349907
ALDH1B1	199	0.017605	0.03521
DUSP1	200	0.0176296	0.0352591
ACTR6	201	0.0177279	0.0354558
FAM83A	202	0.0177495	0.035499
ZHX3	202	0.0177495	0.035499
ADGRL2	203	0.0180035	0.036007
C1orf87	203	0.0180035	0.036007
ZNF215	204	0.0181738	0.0363476
BPHL	205	0.0182574	0.0365148
PLCE1	205	0.0182574	0.0365148
GRK4	206	0.0183486	0.0366972
BICD1	207	0.0184237	0.0368475
CPD	208	0.0184488	0.0368976
CUL2	209	0.0185111	0.0370222
KLK7	209	0.0185111	0.0370222
JAM2	210	0.0186249	0.0372498
DNAJC18	211	0.0187511	0.0375022
SOAT2	212	0.0187646	0.0375293
AHNAK	212	0.0187646	0.0375293
ERAP2	213	0.0190181	0.0380361
NEBL	213	0.0190181	0.0380361
EGFR	214	0.0191578	0.0383156
C1QTNF5	215	0.0192713	0.0385426
MITF	216	0.019337	0.038674
PDE4B	217	0.0194398	0.0388795
IGFBP6	218	0.0195244	0.0390488
SPOP	218	0.0195244	0.0390488
DONSON	219	0.0197774	0.0395547
PHYHD1	219	0.0197774	0.0395547
SRPK2	220	0.0198015	0.0396029
NRGN	220	0.0198015	0.0396029
DEXI	221	0.0200302	0.0400604
MDH2	221	0.0200302	0.0400604
CAPRIN1	222	0.0200357	0.0400713
FBXL16	223	0.020114	0.040228
NDUFB5	224	0.0201402	0.0402803
OSBPL8	225	0.0202187	0.0404374
NDST3	226	0.0202829	0.0405657
GPRC5B	227	0.0203499	0.0406999
RPRD2	228	0.0204025	0.0408051
FBXL2	229	0.0204816	0.0409631
DPY19L4	230	0.0205354	0.0410707
VEZF1	230	0.0205354	0.0410707
SLC43A3	231	0.0205607	0.0411215
ERG	232	0.0206401	0.0412801
MYH10	233	0.0207726	0.0415451
MAP1S	234	0.0207878	0.0415755
CDK2AP1	234	0.0207878	0.0415755
BCAT1	235	0.0208257	0.0416514
CCL5	236	0.0209588	0.0419175
USP7	237	0.02104	0.04208
GAP43	237	0.02104	0.04208
HECW2	238	0.0211725	0.042345
NAV1	239	0.0211993	0.0423986
PCBP2	240	0.0212261	0.0424522
PEX5L	241	0.0212798	0.0425595
C1orf226	242	0.0212921	0.0425841
RHOQ	242	0.0212921	0.0425841
C9orf152	243	0.021544	0.043088
GNB5	243	0.021544	0.043088
CDK9	244	0.021576	0.0431521
FKBP14	245	0.0216031	0.0432062
NDUFA5	245	0.0216031	0.0432062
ITPRIPL2	246	0.0216301	0.0432602
PLCH1	247	0.0217385	0.0434769
CRYZL1	248	0.0217958	0.0435917
DYRK2	248	0.0217958	0.0435917
UBE2F	249	0.0219015	0.0438029
LSM2	250	0.0220475	0.044095
APC	250	0.0220475	0.044095
MAP4K4	251	0.0220924	0.0441847
ARNT	252	0.0221197	0.0442394
MYOT	253	0.0222018	0.0444036
LAMC1	254	0.022299	0.0445981
TNFRSF21	254	0.022299	0.0445981
AP2A2	255	0.0225504	0.0451008
LRRC20	255	0.0225504	0.0451008
HOXB7	256	0.0226697	0.0453394
DSCR4	257	0.0228017	0.0456033
ITGB8	257	0.0228017	0.0456033
CEMIP	258	0.0230528	0.0461056
DNALI1	259	0.0232261	0.0464522
SNX3	260	0.0233038	0.0466075
WNK4	260	0.0233038	0.0466075
STOML1	261	0.0233381	0.0466762
TSPAN14	262	0.0233942	0.0467885
ITGB1	263	0.0234504	0.0469008
HBEGF	264	0.0235546	0.0471092
WWOX	264	0.0235546	0.0471092
ADAMTS2	265	0.0236475	0.047295
HCRTR2	266	0.0238053	0.0476106
SYNGR1	266	0.0238053	0.0476106
ZNF217	267	0.0239872	0.0479745
HP1BP3	267	0.0239872	0.0479745
PAQR5	268	0.0240559	0.0481118
ZNF22	269	0.0242721	0.0485442
ZSWIM4	270	0.0243063	0.0486127
PLEKHB2	270	0.0243063	0.0486127
TBC1D31	271	0.0245566	0.0491133
BDH2	271	0.0245566	0.0491133
LST1	272	0.0245872	0.0491745
ENC1	273	0.0247023	0.0494046
CLN5	274	0.0247311	0.0494622
VPREB1	275	0.0248068	0.0496136
STK33	276	0.0248176	0.0496353
UNC13A	277	0.0249332	0.0498664
USP14	277	0.0249332	0.0498664
B3GALT2	278	0.0250201	0.0500401
UNC50	279	0.0250569	0.0501137
PNKD	279	0.0250569	0.0501137
LILRA2	280	0.0251942	0.0503884
CXCL3	281	0.0253068	0.0506135
SSFA2	281	0.0253068	0.0506135
FERMT2	282	0.0255566	0.0511131
ADCYAP1	282	0.0255566	0.0511131
CEP104	283	0.0256906	0.0513812
CES2	284	0.0257199	0.0514399
FBXO46	285	0.0258062	0.0516124
PTPRO	286	0.0258375	0.051675
PPP2R5C	287	0.0260557	0.0521115
HIST1H2BC	288	0.0261028	0.0522057
LSM11	289	0.0261324	0.0522648
CREBRF	290	0.0261916	0.0523831
FOXP2	291	0.0263051	0.0526103
SLC25A11	291	0.0263051	0.0526103
PTPN12	292	0.0264586	0.0529172
HLA-F	292	0.0264586	0.0529172
COL4A3BP	293	0.0265181	0.0530363
FCHO1	294	0.0265544	0.0531088
SORBS1	294	0.0265544	0.0531088
MOB3B	295	0.0266971	0.0533941
RNF4	296	0.0268035	0.0536071
GNG3	296	0.0268035	0.0536071
CSAD	297	0.0270526	0.0541051
SVOP	297	0.0270526	0.0541051
EPHA3	298	0.0270566	0.0541132
RHBDF1	299	0.027177	0.0543539
SLC29A3	300	0.0273014	0.0546029
MSRB3	300	0.0273014	0.0546029
IQCK	301	0.0275502	0.0551004
LZTS1	301	0.0275502	0.0551004
TM7SF2	302	0.0277824	0.0555649
VARS	303	0.0277988	0.0555977
KRT5	303	0.0277988	0.0555977
ATP5F1	304	0.0278738	0.0557476
BCL2L1	305	0.0280264	0.0560528
GOLPH3	306	0.0280474	0.0560947
HOPX	306	0.0280474	0.0560947
CAST	307	0.0281793	0.0563587
ALOX5	308	0.0282406	0.0564813
LAMC2	309	0.0282957	0.0565915
SNX10	309	0.0282957	0.0565915
CEP70	310	0.0285172	0.0570345
TRIM38	310	0.0285172	0.0570345
IL6ST	311	0.028544	0.057088
DBI	311	0.028544	0.057088
CSH2	312	0.0286097	0.0572195
NALCN	313	0.0287921	0.0575843
HIPK1	313	0.0287921	0.0575843
NMUR1	314	0.0290402	0.0580803
VAPB	314	0.0290402	0.0580803
DNAH7	315	0.0291053	0.0582106
BRD4	316	0.0291675	0.0583351
SFTPA2	317	0.0292881	0.0585761
CES4A	318	0.0292922	0.0585844
HYOU1	319	0.0293546	0.0587092
TPD52L1	320	0.0294796	0.0589592
ZCCHC24	321	0.0295358	0.0590717
FOXN3	321	0.0295358	0.0590717
ACVR2A	322	0.0296676	0.0593352
PPME1	323	0.0297304	0.0594608
TMEM219	324	0.0297835	0.059567
DTNA	324	0.0297835	0.059567
THEM4	325	0.0297932	0.0595865
FBXO3	326	0.0299822	0.0599643
RAMP1	326	0.0299822	0.0599643
BCAM	327	0.030031	0.0600621
ATPIF1	327	0.030031	0.0600621
TIMELESS	328	0.0301716	0.0603433
ATP2B2	329	0.0302033	0.0604065
MGAT4A	330	0.0302785	0.0605569
SDHC	330	0.0302785	0.0605569
PFN2	331	0.0303934	0.0607868
TNRC6A	332	0.0305257	0.0610515
ADAM11	333	0.0306159	0.0612318
CXCL8	334	0.0307729	0.0615459
SMYD2	334	0.0307729	0.0615459
ZNF592	335	0.0307753	0.0615506
TAF15	336	0.0308711	0.0617422
CARD8	337	0.0309351	0.0618701
RBPMS	338	0.03102	0.06204
CLEC4A	339	0.0310311	0.0620623
LYVE1	340	0.0312237	0.0624473
HEY2	341	0.0312669	0.0625339
SYTL2	341	0.0312669	0.0625339
GALT	342	0.0312879	0.0625759
MADD	343	0.0313523	0.0627046
TUBA1B	344	0.0314812	0.0629624
GSC2	345	0.0315138	0.0630275
AGFG2	345	0.0315138	0.0630275
BMP2K	346	0.0315458	0.0630915
EFCAB6	347	0.031675	0.0633501
ZNF200	348	0.0317605	0.0635209
TRIM36	348	0.0317605	0.0635209
TTYH2	349	0.0319668	0.0639336
CYP4F22	350	0.032007	0.0640141
LCAT	350	0.032007	0.0640141
CAMK2A	351	0.0320643	0.0641287
NDUFA8	352	0.0320969	0.0641937
NF2	353	0.0321294	0.0642588
HNRNPAB	354	0.0322535	0.064507
ECM2	354	0.0322535	0.064507
HEXIM1	355	0.0322924	0.0645849
CBLC	356	0.0324999	0.0649998
FMNL3	356	0.0324999	0.0649998
PTPRC	357	0.0325868	0.0651736
BTG3	358	0.0326524	0.0653048
DIS3	359	0.0327181	0.0654361
ACTR3	360	0.0327461	0.0654922
ILF3	360	0.0327461	0.0654922
HUNK	361	0.0328166	0.0656333
PCDHA2	362	0.0328495	0.0656991
BOC	363	0.0329154	0.0658307
F11R	364	0.0329813	0.0659625
SIX5	365	0.0329923	0.0659845
UBXN7	366	0.0331132	0.0662265
NCAM1	366	0.0331132	0.0662265
KTN1	367	0.0331793	0.0663586
GLRX2	368	0.0332124	0.0664248
TMEM63A	369	0.0332383	0.0664765
AP3M2	370	0.0333448	0.0666896
AKAP6	370	0.0333448	0.0666896
PTK2B	371	0.0333779	0.0667558
SYNM	372	0.0334842	0.0669683
MARCH8	373	0.0335771	0.0671541
SH3BP2	374	0.03373	0.0674599
UACA	374	0.03373	0.0674599
FRMD4A	375	0.0339756	0.0679512
RABGAP1L	376	0.0342113	0.0684227
CRISP1	377	0.0342212	0.0684424
FAM81A	377	0.0342212	0.0684424
DCUN1D1	378	0.034312	0.068624
ILVBL	378	0.034312	0.068624
DIO2	379	0.0344666	0.0689333
PHYKPL	380	0.034712	0.0694239
RFX2	380	0.034712	0.0694239
EAF1	381	0.0347159	0.0694319
RBM17	382	0.0347835	0.069567
FANCE	383	0.0348173	0.0696346
SH2D5	384	0.0348849	0.0697698
PTCD3	385	0.0349526	0.0699052
ZNF189	386	0.0349572	0.0699144
CPQ	386	0.0349572	0.0699144
NRXN3	387	0.0350204	0.0700407
UBR3	388	0.0350543	0.0701085
HES4	389	0.03519	0.07038
ACSF2	390	0.0352023	0.0704046
PPP4R1	391	0.035258	0.0705159
GALNT7	392	0.0354473	0.0708946
FYN	392	0.0354473	0.0708946
AGPAT1	393	0.0354622	0.0709245
MCHR1	394	0.0354963	0.0709927
BCL6B	395	0.0356329	0.0712657
CPEB1	396	0.0356922	0.0713844
ARMC9	397	0.0357354	0.0714709
LYNX1	398	0.0357697	0.0715393
SMURF1	399	0.0358381	0.0716763
CAMK2G	400	0.0358724	0.0717448
MYCBPAP	401	0.035937	0.0718739
TRIM8	401	0.035937	0.0718739
FLYWCH1	402	0.0361127	0.0722253
ACVR2B	403	0.0361815	0.0723629
DOK3	404	0.0361816	0.0723633
RAB40C	405	0.0362159	0.0724317
PCDH9	406	0.0362503	0.0725006
FAM83H	407	0.0363537	0.0727074
PRR7	408	0.0364262	0.0728524
BCL11A	408	0.0364262	0.0728524
DBN1	409	0.0366707	0.0733413
BCAP29	409	0.0366707	0.0733413
COPS7A	410	0.0368726	0.0737452
BCR	411	0.0369073	0.0738147
DYDC2	412	0.036915	0.07383
SCP2	413	0.0370464	0.0740927
SPATA18	414	0.0370812	0.0741623
FZD4	415	0.0371592	0.0743185
MAP1B	416	0.03736	0.0747201
STC2	417	0.0374034	0.0748067
TCF3	417	0.0374034	0.0748067
BCL6	418	0.0374299	0.0748598
SLFN12	419	0.0376048	0.0752097
TRPM3	420	0.0376474	0.0752948
SSPN	421	0.0377802	0.0755603
RAF1	422	0.0378855	0.0757711
TBC1D2B	423	0.0378913	0.0757826
SLC25A18	424	0.037991	0.0759821
SAC3D1	425	0.0381351	0.0762702
NIPBL	425	0.0381351	0.0762702
NFYA	426	0.0382025	0.0764049
STOX2	427	0.0382378	0.0764755
ADH1B	427	0.0382378	0.0764755
FAM213A	428	0.0383788	0.0767576
BDNF	428	0.0383788	0.0767576
KCNT2	429	0.0385915	0.077183
ITGB4	430	0.0386224	0.0772448
POMT2	431	0.0388044	0.0776089
MICAL3	432	0.03884	0.0776799
MS4A3	433	0.0388659	0.0777318
SLCO3A1	433	0.0388659	0.0777318
ZNF562	434	0.0390179	0.0780358
CXCL2	435	0.0390536	0.0781071
PDLIM7	436	0.0391093	0.0782185
SNCAIP	436	0.0391093	0.0782185
ETNK1	437	0.0391249	0.0782497
HOMER1	437	0.0391249	0.0782497
DCAF6	438	0.0391962	0.0783925
PROP1	439	0.0393525	0.0787051
NDUFB8	439	0.0393525	0.0787051
MRPL50	440	0.0395957	0.0791914
TRNT1	440	0.0395957	0.0791914
TOR1AIP1	441	0.0396257	0.0792515
SFMBT1	441	0.0396257	0.0792515
DGKZ	442	0.0397335	0.0794669
TAOK2	443	0.0398388	0.0796775
FBXW7	443	0.0398388	0.0796775
DDX25	444	0.0399133	0.0798265
DHRS11	445	0.0400817	0.0801635
RRAD	446	0.0402379	0.0804758
SON	447	0.0403246	0.0806492
S100A4	447	0.0403246	0.0806492
CHID1	448	0.040455	0.0809099
LUC7L3	449	0.0405637	0.0811274
RPL38	450	0.0405673	0.0811347
ADAMTSL1	450	0.0405673	0.0811347
NEUROG2	451	0.04081	0.08162
IL15	451	0.04081	0.08162
ATG10	452	0.0408543	0.0817087
NAALADL1	453	0.0410525	0.0821051
MAPKAPK2	453	0.0410525	0.0821051
KCNIP1	454	0.0411094	0.0822189
NMNAT2	455	0.041219	0.082438
PSD4	456	0.0412921	0.0825842
CLPS	457	0.041295	0.08259
PCOLCE	457	0.041295	0.08259
CD2	458	0.0413287	0.0826573
TSSK2	459	0.0414385	0.082877
FGFR2	460	0.0415118	0.0830235
MRPS27	461	0.0415373	0.0830746
ADD2	461	0.0415373	0.0830746
FAM111A	462	0.0416218	0.0832436
ERBB3	463	0.0416952	0.0833905
SNX15	464	0.0417796	0.0835591
NIPSNAP1	464	0.0417796	0.0835591
COL8A1	465	0.0419159	0.0838318
MRPL39	466	0.0420217	0.0840434
ARHGEF7	466	0.0420217	0.0840434
PRRX1	467	0.0420633	0.0841266
SYNJ2	468	0.0422637	0.0845275
SLTM	468	0.0422637	0.0845275
CAMKK2	469	0.0423588	0.0847176
BNIP1	470	0.0424328	0.0848656
NCR3	471	0.0425057	0.0850113
2001-08-01	471	0.0425057	0.0850113
WDR73	472	0.0427295	0.085459
GRK6	473	0.0427475	0.085495
HSPA1L	474	0.0429892	0.0859785
HBQ1	474	0.0429892	0.0859785
FCGR2C	475	0.0432137	0.0864273
LTB	476	0.0432309	0.0864617
C2CD2L	477	0.0434006	0.0868011
LOC441155	477	0.0434006	0.0868011
DCUN1D2	478	0.0434724	0.0869448
DEK	478	0.0434724	0.0869448
PEX11G	479	0.0437138	0.0874276
PILRA	479	0.0437138	0.0874276
GLS2	480	0.0439551	0.0879103
MRGPRF	480	0.0439551	0.0879103
RAC1	481	0.0440387	0.0880774
ZIC1	482	0.0441518	0.0883035
ASS1	483	0.0441895	0.088379
REPS1	484	0.0441964	0.0883928
NKD2	484	0.0441964	0.0883928
CEP350	485	0.0443783	0.0887565
CLASRP	486	0.0444375	0.088875
RPH3A	486	0.0444375	0.088875
BPTF	487	0.0445674	0.0891349
MKLN1	488	0.0446432	0.0892864
ARL2	489	0.0446785	0.0893571
LYRM7	489	0.0446785	0.0893571
TMEM42	490	0.044719	0.0894381
PHF3	491	0.0447949	0.0895898
DPP10	492	0.0448709	0.0897417
MVP	493	0.0449195	0.089839
CXCR4	493	0.0449195	0.089839
MCTP2	494	0.0450229	0.0900459
DDI1	495	0.0451603	0.0903206
HIF3A	495	0.0451603	0.0903206
GPR155	496	0.0453278	0.0906556
ECHDC1	497	0.0454011	0.0908021
HIGD1A	497	0.0454011	0.0908021
ATP6V1C1	498	0.0456417	0.0912834
PTP4A1	499	0.0457485	0.0914969
ATG2A	500	0.0458822	0.0917645
NFATC4	500	0.0458822	0.0917645
EXOSC7	501	0.0461227	0.0922454
CEP41	501	0.0461227	0.0922454
ZRANB3	502	0.0461709	0.0923419
TECPR2	503	0.0462479	0.0924959
DDX41	504	0.046363	0.092726
RHEB	504	0.046363	0.092726
CTTN	505	0.0465565	0.0931131
AIF1	506	0.0466033	0.0932065
USP47	506	0.0466033	0.0932065
THSD4	507	0.0466338	0.0932677
CD22	508	0.0466725	0.093345
RASAL2	509	0.0467112	0.0934224
ADPRHL1	510	0.0468434	0.0936869
OVOL2	510	0.0468434	0.0936869
WDR90	511	0.0469436	0.0938872
PPP2CB	512	0.0470212	0.0940424
TLL2	513	0.0470835	0.094167
PRKAR1A	513	0.0470835	0.094167
CLASP2	514	0.0473234	0.0946469
PID1	514	0.0473234	0.0946469
SF3B3	515	0.0473321	0.0946643
FYCO1	516	0.0473711	0.0947421
TMEM126B	517	0.0475633	0.0951266
ANKHD1-EIF4EBP3	517	0.0475633	0.0951266
RPL22	518	0.0477221	0.0954442
BTG2	519	0.0478031	0.0956062
NCOR2	520	0.0478394	0.0956788
BAZ2A	521	0.0480427	0.0960855
PLEC	521	0.0480427	0.0960855
PIN1	522	0.0481136	0.0962271
PFKFB3	523	0.0481528	0.0963056
FILIP1L	524	0.048192	0.096384
HLA-A	525	0.0482313	0.0964625
ZNF239	526	0.0482823	0.0965647
NPY2R	526	0.0482823	0.0965647
PLEKHA8	527	0.0485218	0.0970436
NACC2	527	0.0485218	0.0970436
EMCN	528	0.0487034	0.0974069
TMEM132E	529	0.0487612	0.0975224
MEGF9	529	0.0487612	0.0975224
COG8	530	0.0489008	0.0978016
RTFDC1	531	0.0489799	0.0979597
CPNE4	532	0.0490005	0.098001
ANKRD9	533	0.049059	0.0981179
STRADA	534	0.0490985	0.0981971
PODN	535	0.0492173	0.0984347
EPHA5	536	0.0492397	0.0984794
AK1	537	0.0492966	0.0985932
CLTCL1	538	0.0494788	0.0989576
TNF	539	0.0497178	0.0994356
STAU2	539	0.0497178	0.0994356
TRAM2	540	0.0497735	0.099547
GCAT	541	0.0499329	0.0998658
CNGA3	542	0.0499567	0.0999134
USP53	542	0.0499567	0.0999134
SAR1B	543	0.0500127	0.100025
KCNK3	544	0.0500526	0.100105
PAK4	545	0.0502125	0.100425
KCNMB1	545	0.0502125	0.100425
GLT1D1	546	0.0502925	0.100585
SRPK1	547	0.0504343	0.100869
PFDN1	548	0.0506729	0.101346
METTL21A	548	0.0506729	0.101346
DAB2IP	549	0.0508139	0.101628
NCS1	550	0.0508541	0.101708
PLCB1	551	0.0509115	0.101823
ENSA	552	0.0510151	0.10203
IQGAP1	553	0.0510554	0.102111
HIRIP3	554	0.0511499	0.1023
ZFAND5	554	0.0511499	0.1023
VRK3	555	0.0513378	0.102676
ARRB1	556	0.0513883	0.102777
PRKDC	557	0.051459	0.102918
MEF2C	558	0.0514994	0.102999
MPST	559	0.0515399	0.10308
HOMER3	560	0.0516265	0.103253
SH2D3C	561	0.0517019	0.103404
PRKCH	562	0.0517424	0.103485
EPHX1	563	0.0518647	0.103729
C18orf21	564	0.0520265	0.104053
CCDC6	565	0.0521028	0.104206
NPC1	565	0.0521028	0.104206
TNPO1	566	0.0521891	0.104378
POLA2	567	0.0522298	0.10446
MARCH7	568	0.0523408	0.104682
GDPD1	568	0.0523408	0.104682
GALNTL5	569	0.052556	0.105112
ITGB3	569	0.052556	0.105112
BTNL2	570	0.0525787	0.105157
RNF19A	570	0.0525787	0.105157
MYOM1	571	0.0526785	0.105357
AACS	572	0.0527194	0.105439
CLDN12	573	0.0528165	0.105633
LIPH	573	0.0528165	0.105633
BATF2	574	0.0530542	0.106108
NEXN	574	0.0530542	0.106108
CYLD	575	0.0530879	0.106176
RWDD2B	576	0.053252	0.106504
PRSS12	577	0.0532918	0.106584
RTN3	577	0.0532918	0.106584
LRRC47	578	0.0535294	0.107059
TTC17	578	0.0535294	0.107059
SPRED2	579	0.053581	0.107162
KATNAL1	580	0.0537046	0.107409
INO80E	581	0.0537668	0.107534
SLC22A18	581	0.0537668	0.107534
PPP1R2	582	0.0539935	0.107987
MAPK13	583	0.0540042	0.108008
TPPP	584	0.054159	0.108318
TMCO3	585	0.0542415	0.108483
NUP62	586	0.0542418	0.108484
LPP	587	0.0544075	0.108815
RNF182	588	0.0544786	0.108957
RIMS1	588	0.0544786	0.108957
PTPRK	589	0.0546566	0.109313
CHAD	590	0.0547157	0.109431
PPP2R2C	590	0.0547157	0.109431
DENND1B	591	0.0547397	0.109479
GEM	592	0.0549061	0.109812
SLC39A8	593	0.0549478	0.109896
ZNF283	594	0.0549527	0.109905
HSPB7	594	0.0549527	0.109905
FKBP1B	595	0.0549895	0.109979
DIRAS2	596	0.0550728	0.110146
LDB2	597	0.0551145	0.110229
ATP6V1H	598	0.0551562	0.110312
TMBIM4	599	0.0551896	0.110379
SORL1	600	0.0552815	0.110563
RNF146	601	0.0554264	0.110853
RNF213	601	0.0554264	0.110853
BACE2	602	0.0554487	0.110897
NHP2	603	0.0556632	0.111326
UBE2I	603	0.0556632	0.111326
RAB22A	604	0.0557837	0.111567
NKTR	605	0.0558676	0.111735
DOC2A	606	0.0558998	0.1118
PCIF1	607	0.0560356	0.112071
HSP90AA1	608	0.0560776	0.112155
SEC24D	609	0.0561197	0.112239
PIK3CB	610	0.0561364	0.112273
MEST	610	0.0561364	0.112273
SLC30A1	611	0.056288	0.112576
MAGI2	612	0.0563722	0.112744
RARRES1	613	0.0563728	0.112746
CTDSP2	613	0.0563728	0.112746
SLC9A9	614	0.0564987	0.112997
RMND5B	615	0.0566092	0.113218
MRPS18A	615	0.0566092	0.113218
TNFSF15	616	0.0568366	0.113673
ATF6	617	0.0568455	0.113691
DCN	617	0.0568455	0.113691
ZDHHC21	618	0.0568789	0.113758
TDRKH	618	0.0568789	0.113758
FAIM	619	0.0570817	0.114163
TNS1	619	0.0570817	0.114163
PGP	620	0.0572178	0.114436
SPATA7	621	0.0573027	0.114605
HSPA1B	622	0.0573178	0.114636
SPARC	622	0.0573178	0.114636
INPP5F	623	0.0574726	0.114945
SEC22C	624	0.0575151	0.11503
DNAH3	625	0.0575538	0.115108
FANCF	626	0.0577705	0.115541
SIRT5	627	0.0577898	0.11558
SNTG2	628	0.0578131	0.115626
RASSF4	629	0.057941	0.115882
DDX31	630	0.0580256	0.116051
METTL14	631	0.0581545	0.116309
FAM193B	632	0.0582614	0.116523
BASP1	632	0.0582614	0.116523
CLIC1	633	0.0583684	0.116737
ZDHHC3	634	0.0584971	0.116994
ZNF397	634	0.0584971	0.116994
GTPBP10	635	0.0587327	0.117465
C11orf1	635	0.0587327	0.117465
WDR20	636	0.0587542	0.117508
HBA2	637	0.058883	0.117766
ZMIZ2	638	0.0589682	0.117936
GBP2	639	0.0591842	0.118368
LTA	640	0.0592036	0.118407
SLC4A8	640	0.0592036	0.118407
FAM57B	641	0.0594389	0.118878
BHLHE41	641	0.0594389	0.118878
FDFT1	642	0.0594429	0.118886
S100A10	643	0.0595292	0.119058
NFATC2IP	644	0.0595724	0.119145
ACMSD	645	0.0596742	0.119348
NIN	645	0.0596742	0.119348
FUT4	646	0.0597453	0.119491
KDM6B	647	0.0597886	0.119577
ACPP	648	0.0599093	0.119819
COPS8	648	0.0599093	0.119819
ZMAT3	649	0.0599184	0.119837
PGM5	650	0.0599617	0.119923
DNAJC6	651	0.0601444	0.120289
XKR4	652	0.0602219	0.120444
KLF12	653	0.0603088	0.120618
PTCD2	654	0.0603794	0.120759
KRT16	654	0.0603794	0.120759
C12orf56	655	0.0606143	0.121229
ITGA10	655	0.0606143	0.121229
CTSZ	656	0.0606567	0.121313
CISD1	657	0.0607003	0.121401
ATF6B	658	0.0607439	0.121488
CORO2B	659	0.0608491	0.121698
PDGFB	660	0.0609183	0.121837
OPALIN	661	0.0610839	0.122168
SERPINB6	661	0.0610839	0.122168
ATP5S	662	0.0613185	0.122637
KNG1	663	0.0613553	0.122711
TRAF5	664	0.0614867	0.122973
TMEM126A	665	0.0615531	0.123106
GNG12	665	0.0615531	0.123106
EED	666	0.0617876	0.123575
ICA1	666	0.0617876	0.123575
MTAP	667	0.0617938	0.123588
TLE4	668	0.0619695	0.123939
DPPA5	669	0.062022	0.124044
ATP6V1D	669	0.062022	0.124044
MRPL52	670	0.0622563	0.124513
VAPA	670	0.0622563	0.124513
PTGFRN	671	0.0624541	0.124908
LXN	672	0.0624905	0.124981
PARD3B	672	0.0624905	0.124981
RUNDC1	673	0.0624982	0.124996
TBL1XR1	674	0.0626749	0.12535
TCTN3	675	0.0627246	0.125449
PAX6	675	0.0627246	0.125449
CLEC16A	676	0.062896	0.125792
LUZP1	677	0.0629403	0.125881
CTSB	678	0.0629587	0.125917
HMGCR	679	0.0631175	0.126235
PBOV1	680	0.0631927	0.126385
NXPE3	681	0.0632062	0.126412
LILRA1	682	0.0634266	0.126853
PTPRN2	682	0.0634266	0.126853
NOTCH3	683	0.0634726	0.126945
GPR68	684	0.0636604	0.127321
ITGB1BP1	684	0.0636604	0.127321
ADK	685	0.0637841	0.127568
SNRNP25	686	0.0638286	0.127657
METTL8	687	0.0638941	0.127788
TBRG1	687	0.0638941	0.127788
NAP1L5	688	0.0641278	0.128256
ALOX15B	689	0.0641855	0.128371
ARHGEF18	690	0.0642302	0.12846
INSC	691	0.0643613	0.128723
ATAT1	691	0.0643613	0.128723
SIDT1	692	0.0644985	0.128997
GLT8D2	693	0.0645433	0.129087
PPP2R5B	694	0.0645948	0.12919
RRBP1	694	0.0645948	0.12919
CAMK2D	695	0.0646329	0.129266
PRSS3	696	0.0646777	0.129355
MAP3K12	697	0.0648122	0.129624
TTC32	698	0.0648282	0.129656
CLTA	698	0.0648282	0.129656
CR1	699	0.0648571	0.129714
SLC9A3	700	0.0650615	0.130123
KCNF1	700	0.0650615	0.130123
SOS2	701	0.0650816	0.130163
SOCS5	702	0.0651266	0.130253
GOLM1	702	0.0651266	0.130253
ZNF197	703	0.0652948	0.13059
ANTXR2	703	0.0652948	0.13059
INTS6	704	0.0654416	0.130883
CREB3L1	705	0.0654867	0.130973
MMD2	706	0.0655279	0.131056
ATP4B	707	0.0655318	0.131064
CADPS	708	0.0655768	0.131154
USP13	709	0.065761	0.131522
DOCK5	709	0.065761	0.131522
CCR3	710	0.065994	0.131988
CLEC2D	710	0.065994	0.131988
WNK1	711	0.066119	0.132238
STYK1	712	0.0662096	0.132419
GJC1	713	0.0662269	0.132454
RHOBTB3	714	0.0663455	0.132691
POLR3K	715	0.0663908	0.132782
P4HA3	716	0.0664597	0.132919
CD58	716	0.0664597	0.132919
MDK	717	0.0665269	0.133054
GDF15	718	0.0665723	0.133145
COLEC12	719	0.0666632	0.133326
COPS4	719	0.0666632	0.133326
GNPNAT1	720	0.0666925	0.133385
RNF144B	720	0.0666925	0.133385
PRRC2A	721	0.0669251	0.13385
MET	721	0.0669251	0.13385
PIWIL2	722	0.067027	0.134054
ITGA8	723	0.0671577	0.134315
METTL1	723	0.0671577	0.134315
CNTNAP2	724	0.0671637	0.134327
GPHA2	725	0.0673902	0.13478
2002-08-01	725	0.0673902	0.13478
ASCC2	726	0.0676226	0.135245
SLC4A5	726	0.0676226	0.135245
FAM98A	727	0.0678032	0.135606
UBXN8	728	0.067855	0.13571
ABI2	729	0.0679864	0.135973
HOMEZ	730	0.0680872	0.136174
PCYOX1L	730	0.0680872	0.136174
ADGRA3	731	0.0683194	0.136639
SP1	732	0.0683535	0.136707
ZNF827	733	0.0684454	0.136891
MCMBP	734	0.0685373	0.137075
C6orf48	735	0.0685515	0.137103
TMEM248	736	0.0687675	0.137535
CDKN2A	736	0.0687675	0.137535
CDKL1	737	0.0687835	0.137567
CACNB1	737	0.0687835	0.137567
MYO10	738	0.0688135	0.137627
LILRA5	738	0.0688135	0.137627
ARPC4	739	0.0688596	0.137719
SRP72	740	0.0689057	0.137811
HCN2	741	0.0689518	0.137904
CCR1	742	0.0690155	0.138031
CALD1	742	0.0690155	0.138031
ASXL2	743	0.0690903	0.138181
RAB31	744	0.0692288	0.138458
LILRB1	745	0.0692473	0.138495
GLIS3	745	0.0692473	0.138495
HIST1H2AK	746	0.0693212	0.138642
C8orf76	747	0.0694791	0.138958
ANAPC16	747	0.0694791	0.138958
DSCAM	748	0.0695988	0.139198
POLR3E	749	0.0697108	0.139422
FRZB	749	0.0697108	0.139422
C9orf40	750	0.0697378	0.139476
SEC11A	751	0.0698305	0.139661
TMEM30B	752	0.0698769	0.139754
LILRB4	753	0.0699424	0.139885
TSC22D1	753	0.0699424	0.139885
KIF17	754	0.0699697	0.139939
PCDHA9	754	0.0699697	0.139939
ZNF296	755	0.070174	0.140348
HPCAL1	756	0.0702485	0.140497
TMEM97	757	0.070295	0.14059
ZNF35	758	0.0704054	0.140811
ATP11A	758	0.0704054	0.140811
DNM1	759	0.0705277	0.141055
GJB5	760	0.0706368	0.141274
UCHL5	761	0.0708542	0.141708
EME1	762	0.0709475	0.141895
SLC35C1	763	0.0710993	0.142199
GRM8	763	0.0710993	0.142199
ANAPC13	764	0.071228	0.142456
CCDC28B	765	0.0713216	0.142643
SHISA4	766	0.0713305	0.142661
DBF4B	767	0.0713684	0.142737
BRI3BP	768	0.0714621	0.142924
NIP7	769	0.0715559	0.143112
SH2D2A	770	0.0715616	0.143123
PLA1A	771	0.0717435	0.143487
MUC20	772	0.0717925	0.143585
RCL1	773	0.0718374	0.143675
OPN3	774	0.0719784	0.143957
PPIA	775	0.0720235	0.144047
HECTD2	776	0.0720724	0.144145
TIGD7	777	0.0722543	0.144509
ZNF404	778	0.072485	0.14497
MKRN1	778	0.072485	0.14497
ARHGEF10	779	0.0725434	0.145087
NR4A2	780	0.0725906	0.145181
C9orf116	781	0.0726378	0.145276
C12orf66	782	0.0727157	0.145431
AJUBA	782	0.0727157	0.145431
MCL1	783	0.0727322	0.145464
MAPRE3	784	0.0727794	0.145559
SV2A	785	0.0729212	0.145842
OXCT2	786	0.0729463	0.145893
EPS15	786	0.0729463	0.145893
SLC25A46	787	0.0729685	0.145937
TSPAN4	788	0.0730631	0.146126
SOX9	789	0.0731104	0.146221
PAICS	790	0.0732051	0.14641
CNGB3	791	0.0734073	0.146815
GPATCH2	791	0.0734073	0.146815
GALR1	792	0.0736377	0.147275
SYNRG	792	0.0736377	0.147275
C6orf136	793	0.0737744	0.147549
PIGR	794	0.073868	0.147736
MUC1	794	0.073868	0.147736
NOL12	795	0.073917	0.147834
AP1M1	796	0.0739646	0.147929
VPS13A	797	0.0740597	0.148119
CAMSAP1	798	0.0740982	0.148196
SLC35E1	799	0.0741073	0.148215
CCDC85A	800	0.0742502	0.1485
IPO9	801	0.0743283	0.148657
HTR3A	801	0.0743283	0.148657
RELA	802	0.074441	0.148882
TAS2R10	803	0.0745584	0.149117
FXYD7	803	0.0745584	0.149117
CSRNP1	804	0.0745842	0.149168
ANAPC5	805	0.0746797	0.149359
GABARAPL1	806	0.0747275	0.149455
PRRT2	807	0.0747883	0.149577
LRRC6	808	0.0748709	0.149742
FGD5	809	0.0749188	0.149838
PAPOLB	810	0.0750182	0.150036
DLG5	810	0.0750182	0.150036
THRB	811	0.0750624	0.150125
RDM1	812	0.0752481	0.150496
SHANK2	812	0.0752481	0.150496
ENY2	813	0.0754459	0.150892
SEMG1	814	0.0754778	0.150956
STMN2	814	0.0754778	0.150956
OLFML1	815	0.0754939	0.150988
STON2	816	0.075638	0.151276
SEL1L3	817	0.075686	0.151372
SV2B	818	0.0757075	0.151415
SERPIND1	819	0.0757822	0.151564
IKZF4	820	0.0758303	0.151661
MAML2	821	0.0758784	0.151757
PCDH7	822	0.0759265	0.151853
DNTT	823	0.0759371	0.151874
GHITM	823	0.0759371	0.151874
TPX2	824	0.0761666	0.152333
EPOR	824	0.0761666	0.152333
WWP1	825	0.0761673	0.152335
LARP6	826	0.0762155	0.152431
OR1F1	827	0.0763961	0.152792
YBX1	827	0.0763961	0.152792
ARHGAP17	828	0.0766016	0.153203
ZNF675	829	0.0766255	0.153251
C6orf118	829	0.0766255	0.153251
CTIF	830	0.0767466	0.153493
SLC44A1	831	0.076795	0.15359
DCTN1	832	0.0768547	0.153709
ZNF346	833	0.0769402	0.15388
TRIP11	834	0.0769886	0.153977
GJB4	835	0.077084	0.154168
VNN2	835	0.077084	0.154168
UBE2B	836	0.0770854	0.154171
TRIL	837	0.0772794	0.154559
C10orf53	838	0.0773131	0.154626
MAST3	838	0.0773131	0.154626
CMTM6	839	0.0773279	0.154656
ZC3H8	840	0.0775221	0.155044
FMO2	840	0.0775221	0.155044
GPR156	841	0.0775422	0.155084
EIF4EBP2	841	0.0775422	0.155084
ACP1	842	0.0776678	0.155336
CKMT1A	843	0.0777164	0.155433
DDB2	844	0.0777651	0.15553
BCL10	845	0.0777712	0.155542
NRN1	845	0.0777712	0.155542
MBNL1	846	0.0778624	0.155725
ACKR1	847	0.0779111	0.155822
B3GNT3	848	0.0780001	0.156
COL27A1	848	0.0780001	0.156
TBXAS1	849	0.0780084	0.156017
KHDC1	850	0.0780572	0.156114
UQCRC2	850	0.0780572	0.156114
RUSC2	851	0.0781059	0.156212
UBE2R2	852	0.0781546	0.156309
DDA1	853	0.0782289	0.156458
SNAP25	854	0.0783985	0.156797
GARNL3	855	0.0784577	0.156915
ELF1	855	0.0784577	0.156915
ADI1	856	0.0784962	0.156992
KCNH6	857	0.078545	0.15709
FGF9	857	0.078545	0.15709
TFEB	858	0.0785939	0.157188
PBX3	858	0.0785939	0.157188
ZNF800	859	0.0786864	0.157373
PDLIM4	859	0.0786864	0.157373
ITPR3	860	0.0786916	0.157383
MMD	861	0.0787894	0.157579
AIG1	862	0.078915	0.15783
SLIT1	863	0.0790832	0.158166
ALDOB	864	0.0791322	0.158264
CREBZF	865	0.0791436	0.158287
PTHLH	866	0.0792793	0.158559
CHST6	867	0.0793284	0.158657
POLD3	868	0.079372	0.158744
NLK	869	0.0793774	0.158755
MMP27	870	0.0795247	0.159049
TMEM88	871	0.0796004	0.159201
OLFM1	871	0.0796004	0.159201
INMT	872	0.079623	0.159246
MOBP	873	0.0796722	0.159344
SPHAR	874	0.0797213	0.159443
H2AFV	875	0.0798288	0.159658
OSBPL2	875	0.0798288	0.159658
SEL1L	876	0.0800166	0.160033
IMPDH1	877	0.080057	0.160114
VAMP1	877	0.080057	0.160114
NISCH	878	0.0802631	0.160526
HNF1B	879	0.0802852	0.16057
TJP2	879	0.0802852	0.16057
RPL35A	880	0.0803617	0.160723
SCN8A	881	0.0804111	0.160822
SYCE1	882	0.0804604	0.160921
CCNL1	883	0.080658	0.161316
ERF	883	0.080658	0.161316
FAM49A	884	0.0807413	0.161483
SLC17A6	885	0.0807569	0.161514
LILRB5	885	0.0807569	0.161514
CXCL5	886	0.0809692	0.161938
FUT6	886	0.0809692	0.161938
BAALC	887	0.0810043	0.162009
WSB1	888	0.0810539	0.162108
ESPN	889	0.0811034	0.162207
TPK1	890	0.081153	0.162306
SPRY4	891	0.0811971	0.162394
OGFOD1	891	0.0811971	0.162394
UBE2N	892	0.0812025	0.162405
ZFHX3	893	0.0813017	0.162603
KRT19	893	0.0813017	0.162603
WFDC2	894	0.0813513	0.162703
NDUFA6	895	0.0814009	0.162802
C12orf42	896	0.0814249	0.16285
SYT3	897	0.0815002	0.163
ZNF740	898	0.0816527	0.163305
MACF1	898	0.0816527	0.163305
MYO9B	899	0.0817984	0.163597
CCNG2	900	0.0818803	0.163761
CHP1	900	0.0818803	0.163761
NAGA	901	0.0819476	0.163895
RAB3B	901	0.0819476	0.163895
ZFYVE28	902	0.0821079	0.164216
RUFY3	902	0.0821079	0.164216
COBLL1	903	0.0821468	0.164294
MYLK2	904	0.0823354	0.164671
CFLAR	904	0.0823354	0.164671
CACNA2D1	905	0.0823462	0.164692
TOMM40L	905	0.0823462	0.164692
CXCR6	906	0.0825458	0.165092
VWA5B2	906	0.0825458	0.165092
NAA38	907	0.0825628	0.165126
SMTN	908	0.0825958	0.165192
SLC4A9	909	0.0827902	0.16558
KCNRG	909	0.0827902	0.16558
KIAA0355	910	0.0828457	0.165691
LIMD1	911	0.0828957	0.165791
XPNPEP3	911	0.0828957	0.165791
BAAT	912	0.0830175	0.166035
FANCC	912	0.0830175	0.166035
RAPGEF3	913	0.083196	0.166392
ZNF45	914	0.0832447	0.166489
POGK	914	0.0832447	0.166489
PTPRS	915	0.0832963	0.166593
ITPR2	916	0.0833966	0.166793
UBL5	917	0.0834467	0.166893
CYB5D1	918	0.0834719	0.166944
RAB11A	918	0.0834719	0.166944
NR2F2	919	0.0836977	0.167395
CAPN1	920	0.0836989	0.167398
ERBB2	920	0.0836989	0.167398
XPO4	921	0.0838485	0.167697
CCL1	922	0.0839259	0.167852
STEAP1	923	0.0841529	0.168306
FIBP	923	0.0841529	0.168306
ARNTL2	924	0.0842007	0.168401
ZFP91	925	0.0843015	0.168603
CHD1L	926	0.0843519	0.168704
GEMIN7	927	0.0843797	0.168759
CNIH3	927	0.0843797	0.168759
NEDD4L	928	0.0844023	0.168805
MAK	929	0.0846065	0.169213
EPPK1	929	0.0846065	0.169213
SYDE1	930	0.0846546	0.169309
KCNJ9	931	0.0848061	0.169612
MAZ	932	0.0848332	0.169666
HBG2	932	0.0848332	0.169666
RFFL	933	0.0848566	0.169713
ETFB	934	0.0849577	0.169915
EFCAB14	935	0.0850589	0.170118
MMP14	936	0.0850598	0.17012
NRIP1	937	0.0851601	0.17032
PITPNC1	937	0.0851601	0.17032
PLXDC2	938	0.0852613	0.170523
IL24	939	0.0852864	0.170573
CALML4	939	0.0852864	0.170573
PSMB4	940	0.085312	0.170624
ARHGAP20	940	0.085312	0.170624
SEMG2	941	0.0855129	0.171026
EP300	941	0.0855129	0.171026
GDAP1	942	0.0857176	0.171435
PRCC	943	0.0857393	0.171479
YWHAZ	943	0.0857393	0.171479
DYNC2LI1	944	0.0857684	0.171537
GLCE	945	0.0859657	0.171931
SOX6	945	0.0859657	0.171931
PI4K2A	946	0.0860224	0.172045
HSPA12A	947	0.086175	0.17235
STYX	948	0.086192	0.172384
TCERG1L	948	0.086192	0.172384
CEP57L1	949	0.0862259	0.172452
TANK	950	0.0863277	0.172655
GNAS	951	0.0864182	0.172836
CD151	952	0.0864805	0.172961
ARNTL	953	0.0866443	0.173289
RREB1	953	0.0866443	0.173289
IL25	954	0.0868376	0.173675
NT5C	955	0.0868704	0.173741
NRCAM	955	0.0868704	0.173741
RGL2	956	0.0869908	0.173982
CCDC136	957	0.087093	0.174186
BMP8B	958	0.0870964	0.174193
UBE2G1	959	0.0872464	0.174493
POLR3D	960	0.0873223	0.174645
WNT10B	960	0.0873223	0.174645
GABRG2	961	0.0873999	0.1748
ATL3	962	0.0874511	0.174902
NT5E	963	0.0875481	0.175096
TFIP11	964	0.0876048	0.17521
PPBP	965	0.0877739	0.175548
PTPRZ1	966	0.0879125	0.175825
LONRF2	967	0.0879638	0.175928
ARPP21	968	0.0879996	0.175999
GSK3B	969	0.0881692	0.176338
KCNJ15	970	0.0882253	0.176451
REPIN1	970	0.0882253	0.176451
HLA-DRB1	971	0.0883235	0.176647
CDCA5	972	0.0884508	0.176902
SLCO5A1	973	0.0885293	0.177059
CCL19	974	0.0886763	0.177353
IMMT	975	0.0886838	0.177368
CHSY3	976	0.0887353	0.177471
POLR2K	977	0.0889018	0.177804
MYCBP2	978	0.0890964	0.178193
TPH1	979	0.0891271	0.178254
LEPROT	979	0.0891271	0.178254
CAMK2N1	980	0.089148	0.178296
MSI2	981	0.0895098	0.17902
KRT81	982	0.0895615	0.179123
AP3S1	982	0.0895615	0.179123
N4BP3	983	0.0895776	0.179155
DFFB	984	0.0898028	0.179606
STEAP3	984	0.0898028	0.179606
FXR1	985	0.0898204	0.179641
SMOX	986	0.0898722	0.179744
C1QTNF6	987	0.0899758	0.179952
SELENBP1	988	0.0900277	0.180055
CDK20	989	0.0900279	0.180056
PPP3R1	989	0.0900279	0.180056
MUT	990	0.0902529	0.180506
NDUFB1	991	0.0904429	0.180886
KIF1B	991	0.0904429	0.180886
GPX3	992	0.0904778	0.180956
EPB41L4B	992	0.0904778	0.180956
GPLD1	993	0.0906509	0.181302
AFAP1L1	993	0.0906509	0.181302
LEFTY1	994	0.0907027	0.181405
AP1S1	994	0.0907027	0.181405
TTC22	995	0.0907549	0.18151
MPPED1	995	0.0907549	0.18151
ARHGAP22	996	0.0909275	0.181855
PLXNB1	996	0.0909275	0.181855
AP4E1	997	0.0910153	0.182031
UHRF1BP1L	998	0.0911195	0.182239
CXCL12	999	0.0911522	0.182304
CD84	999	0.0911522	0.182304
MED1	1000	0.0912238	0.182448
SLC13A3	1001	0.0913769	0.182754
CLDN15	1002	0.0913803	0.182761
ATF4	1003	0.091537	0.183074
TRIB1	1004	0.0916014	0.183203
CHRNA3	1004	0.0916014	0.183203
ADARB2	1005	0.0916415	0.183283
SAAL1	1006	0.091826	0.183652
RORC	1007	0.0920504	0.184101
N4BP2L2	1008	0.0921123	0.184225
AFM	1009	0.0922171	0.184434
NFIC	1009	0.0922171	0.184434
FOXG1	1010	0.0922695	0.184539
SERAC1	1011	0.0922748	0.18455
DEDD	1011	0.0922748	0.18455
PIAS4	1012	0.0924268	0.184854
NGRN	1013	0.0924793	0.184959
LPAR5	1014	0.0924991	0.184998
ABI3BP	1014	0.0924991	0.184998
AQP9	1015	0.0927233	0.185447
STK38	1015	0.0927233	0.185447
DLGAP2	1016	0.0928468	0.185694
CDK5R2	1017	0.0930046	0.186009
LRIG2	1018	0.0930572	0.186114
DTX4	1018	0.0930572	0.186114
MAP3K3	1019	0.0931098	0.18622
CCDC113	1020	0.0931624	0.186325
CACNG2	1021	0.0931716	0.186343
CLN8	1021	0.0931716	0.186343
CSH1	1022	0.0932677	0.186535
DDAH1	1022	0.0932677	0.186535
JAZF1	1023	0.0933204	0.186641
ACOT7	1023	0.0933204	0.186641
PF4	1024	0.0933957	0.186791
KLK10	1024	0.0933957	0.186791
PGM2	1025	0.0934257	0.186851
PIANP	1026	0.0934784	0.186957
CYP24A1	1027	0.0935311	0.187062
CAMK1	1027	0.0935311	0.187062
MAPRE2	1028	0.0936196	0.187239
ZCCHC17	1028	0.0936196	0.187239
UHMK1	1029	0.0936894	0.187379
MARVELD3	1030	0.0937421	0.187484
PSORS1C2	1031	0.0938435	0.187687
MAVS	1031	0.0938435	0.187687
ACP6	1032	0.0939005	0.187801
GABRA1	1033	0.0940062	0.188012
BDH1	1034	0.094059	0.188118
SLC6A3	1035	0.0940674	0.188135
TMEM50B	1036	0.0942705	0.188541
HLA-DRA	1037	0.0942911	0.188582
NOTCH2	1037	0.0942911	0.188582
GTPBP8	1038	0.0943234	0.188647
ALDH18A1	1039	0.0945148	0.18903
ZFP64	1039	0.0945148	0.18903
PRDM16	1040	0.0945352	0.18907
C14orf2	1041	0.0945882	0.189176
LIME1	1042	0.0947384	0.189477
ZBTB20	1042	0.0947384	0.189477
CYP2E1	1043	0.0949063	0.189813
RUNX1T1	1044	0.0950124	0.190025
ZNF136	1045	0.0951186	0.190237
KMO	1046	0.0951717	0.190343
RUFY1	1046	0.0951717	0.190343
SLC2A4RG	1047	0.0951855	0.190371
FAM131A	1047	0.0951855	0.190371
TROVE2	1048	0.0953843	0.190769
PGK2	1049	0.0954089	0.190818
ECHDC2	1049	0.0954089	0.190818
ECE2	1050	0.0954907	0.190981
UBAP2	1051	0.0958101	0.19162
FAM124A	1051	0.0958101	0.19162
KCNK7	1052	0.0958555	0.191711
LRP4	1053	0.0959167	0.191833
RPP40	1054	0.0960766	0.192153
PRDM15	1055	0.0960788	0.192158
NODAL	1056	0.0961833	0.192367
RARG	1057	0.0962367	0.192473
FSTL1	1058	0.0962901	0.19258
DMWD	1059	0.0963019	0.192604
MOCS2	1059	0.0963019	0.192604
RALGPS1	1060	0.0963435	0.192687
PERP	1061	0.0963969	0.192794
ARHGAP5	1062	0.0964503	0.192901
CCKBR	1063	0.0965038	0.193008
CCL13	1064	0.096525	0.19305
LENG8	1064	0.096525	0.19305
CHD3	1065	0.096748	0.193496
ENAH	1065	0.096748	0.193496
HIGD1B	1066	0.0969709	0.193942
CREB1	1066	0.0969709	0.193942
KLHL42	1067	0.0969852	0.19397
C1orf115	1068	0.0970924	0.194185
SPAG9	1069	0.097146	0.194292
MUSK	1070	0.0971938	0.194388
SORCS3	1070	0.0971938	0.194388
RIPK2	1071	0.0972532	0.194506
GPSM1	1072	0.0973604	0.194721
ADAM12	1072	0.0973604	0.194721
STMN3	1073	0.0974141	0.194828
FAM50B	1074	0.0974166	0.194833
ZNF621	1074	0.0974166	0.194833
RBM19	1075	0.0976394	0.195279
TEK	1076	0.0978438	0.195688
AKT3	1077	0.0978621	0.195724
GAS1	1078	0.0979513	0.195903
DGKQ	1079	0.0980589	0.196118
CCL27	1080	0.0980847	0.196169
CFDP1	1080	0.0980847	0.196169
ACTR1A	1081	0.0981127	0.196225
NT5C2	1082	0.0981665	0.196333
NDE1	1082	0.0981665	0.196333
LBH	1083	0.0982742	0.196548
RAB26	1084	0.0983072	0.196614
STAT4	1084	0.0983072	0.196614
VIM	1085	0.0983281	0.196656
ZNF704	1086	0.098382	0.196764
TAS2R9	1087	0.0985297	0.197059
SEC61A2	1088	0.0985437	0.197087
CORO2A	1089	0.0985976	0.197195
ARL15	1090	0.0987521	0.197504
SEMA3E	1090	0.0987521	0.197504
BEND6	1091	0.0987595	0.197519
C22orf39	1092	0.0989215	0.197843
PPIE	1093	0.0989744	0.197949
PHKB	1093	0.0989744	0.197949
MBOAT7	1094	0.0989755	0.197951
LDB3	1095	0.0990295	0.198059
DDX17	1096	0.0990836	0.198167
SSR1	1097	0.0991917	0.198383
ARMC7	1098	0.0991967	0.198393
HNRNPH3	1099	0.0992999	0.1986
C15orf41	1100	0.099354	0.198708
TMEM183B	1101	0.0994081	0.198816
KHDRBS2	1102	0.0994189	0.198838
SLC16A6	1103	0.0994623	0.198925
APOL3	1104	0.0995164	0.199033
UQCRB	1105	0.0995706	0.199141
CEP152	1105	0.0995706	0.199141
LPL	1106	0.0996247	0.199249
CDC42EP2	1107	0.0996411	0.199282
TAX1BP1	1108	0.0997331	0.199466
SLC25A44	1109	0.0998416	0.199683
TMEM14B	1110	0.0998631	0.199726
ELAVL4	1110	0.0998631	0.199726
PDPR	1111	0.0998958	0.199792
CP	1112	0.09995	0.1999
KCNN4	1113	0.100085	0.20017
MAP4K5	1114	0.100221	0.200443
PDE4A	1115	0.100276	0.200552
LYPD5	1116	0.100307	0.200614
PRNP	1117	0.100384	0.200769
NFAT5	1117	0.100384	0.200769
HOOK1	1118	0.100439	0.200878
CD109	1119	0.100493	0.200986
FAF1	1120	0.100529	0.201058
KLHDC4	1120	0.100529	0.201058
ZNF93	1121	0.100548	0.201095
KIF22	1122	0.100751	0.201502
TUB	1122	0.100751	0.201502
TAS2R8	1123	0.100973	0.201945
DLGAP1	1123	0.100973	0.201945
LNX1	1124	0.100983	0.201966
SPSB1	1125	0.101092	0.202184
PLEKHG4	1126	0.101147	0.202293
FGFRL1	1127	0.101194	0.202388
ANKFY1	1128	0.101256	0.202512
USP42	1129	0.10131	0.202621
SDCCAG3	1129	0.10131	0.202621
TPCN1	1130	0.101416	0.202832
GSX1	1131	0.101637	0.203275
ASB8	1131	0.101637	0.203275
RNF122	1132	0.101638	0.203276
SEZ6	1133	0.101857	0.203713
COL5A2	1134	0.101859	0.203718
NAPEPLD	1135	0.101966	0.203932
CYP2R1	1136	0.102021	0.204042
PRR13	1137	0.102076	0.204151
ENTPD1	1138	0.10208	0.204161
NASP	1138	0.10208	0.204161
NOTCH1	1139	0.102185	0.20437
LOX	1140	0.102295	0.204589
IL1R2	1141	0.102302	0.204603
BRINP2	1142	0.102349	0.204699
SULT1C2	1142	0.102349	0.204699
ZNF430	1143	0.102523	0.205046
SCN4B	1144	0.102744	0.205488
SEH1L	1144	0.102744	0.205488
PCDHA1	1145	0.102843	0.205687
NDST2	1146	0.102953	0.205906
NUP205	1147	0.102965	0.205931
HCLS1	1148	0.103008	0.206016
PAPPA2	1149	0.103118	0.206236
PPP1R3E	1150	0.103186	0.206373
LRPPRC	1150	0.103186	0.206373
RPS6KA5	1151	0.103283	0.206566
CACNG4	1152	0.103338	0.206676
MTMR9	1153	0.103407	0.206815
SCN3B	1154	0.103448	0.206896
APTX	1154	0.103448	0.206896
ITPA	1155	0.103503	0.207006
TACC1	1156	0.103613	0.207227
SPRYD3	1157	0.103628	0.207257
CMTM3	1157	0.103628	0.207257
KDM5A	1158	0.103779	0.207558
ZKSCAN2	1159	0.103849	0.207698
SLC39A3	1159	0.103849	0.207698
TMEM65	1160	0.103999	0.207999
TMEM155	1161	0.104055	0.208109
NKD1	1162	0.10407	0.20814
IQCA1	1163	0.104165	0.20833
TREM1	1164	0.104291	0.208582
LDLRAD3	1164	0.104291	0.208582
EPHB6	1165	0.104511	0.209023
FKBP15	1166	0.104663	0.209325
GALE	1166	0.104663	0.209325
LYZL6	1167	0.104732	0.209464
LDHA	1168	0.104773	0.209547
OGDHL	1169	0.104829	0.209657
CBS	1169	0.104829	0.209657
TRIT1	1170	0.104953	0.209905
TECPR1	1170	0.104953	0.209905
OXR1	1171	0.104995	0.20999
LRRC58	1172	0.105173	0.210346
C16orf58	1172	0.105173	0.210346
GLTP	1173	0.105327	0.210655
CSF1	1174	0.105383	0.210766
CENPQ	1175	0.105394	0.210787
SSTR1	1175	0.105394	0.210787
MOB3C	1176	0.105438	0.210877
TGM4	1177	0.105614	0.211228
LZTFL1	1177	0.105614	0.211228
ARHGAP44	1178	0.105661	0.211321
FAM169A	1179	0.105716	0.211432
NXT1	1180	0.105772	0.211544
CHRDL2	1181	0.105834	0.211669
HNMT	1181	0.105834	0.211669
EPDR1	1182	0.105883	0.211766
IGSF5	1183	0.106055	0.212109
SLC22A17	1184	0.106106	0.212211
ACSL6	1184	0.106106	0.212211
SAMSN1	1185	0.106161	0.212322
ZNF518A	1186	0.106275	0.212549
RAB27A	1186	0.106275	0.212549
SLC1A2	1187	0.106384	0.212768
NOL4	1188	0.106495	0.21299
ORAI2	1188	0.106495	0.21299
GOLT1A	1189	0.106495	0.212991
NTRK1	1190	0.106715	0.21343
S100A6	1190	0.106715	0.21343
RAPGEF1	1191	0.106774	0.213549
HLA-C	1191	0.106774	0.213549
RPRD1A	1192	0.10683	0.21366
ZNF384	1193	0.106935	0.21387
MSR1	1193	0.106935	0.21387
BTBD1	1194	0.106942	0.213884
TRIM33	1195	0.106998	0.213995
CTSS	1196	0.107054	0.214107
PDGFRL	1197	0.107155	0.21431
SAMD4A	1198	0.107375	0.214749
STOM	1199	0.107445	0.21489
MAP3K13	1200	0.107594	0.215189
TRAPPC1	1201	0.107613	0.215226
HSPA9	1202	0.107669	0.215338
TAS2R7	1203	0.107814	0.215628
GMPR	1203	0.107814	0.215628
FZD1	1204	0.108034	0.216068
SERBP1	1204	0.108034	0.216068
KIAA0319	1205	0.108061	0.216123
FNBP4	1206	0.108253	0.216507
LRIG1	1207	0.108286	0.216572
BRPF3	1208	0.108692	0.217385
PAK1	1208	0.108692	0.217385
TMEM175	1209	0.108848	0.217696
HILPDA	1210	0.108912	0.217824
RFK	1210	0.108912	0.217824
AASDH	1211	0.109017	0.218034
ARHGAP25	1212	0.109131	0.218262
DGKB	1212	0.109131	0.218262
RAD52	1213	0.109242	0.218484
MAP3K11	1214	0.10935	0.218701
NRXN1	1214	0.10935	0.218701
SESN3	1215	0.109468	0.218935
SLC17A7	1215	0.109468	0.218935
TMEM159	1216	0.10957	0.219139
TAF4	1217	0.109637	0.219274
IL1RAP	1218	0.109693	0.219387
CDH8	1219	0.10975	0.2195
PAX8	1220	0.109789	0.219578
PI3	1221	0.110008	0.220016
DYNLRB1	1221	0.110008	0.220016
MYO5C	1222	0.110032	0.220065
SMIM14	1223	0.110089	0.220178
WDR35	1224	0.110227	0.220454
MORN4	1225	0.110372	0.220743
BUB1B	1226	0.110446	0.220892
CRYM	1226	0.110446	0.220892
CFB	1227	0.110655	0.22131
RAB29	1228	0.110665	0.22133
TMEM173	1229	0.110712	0.221423
FAM19A4	1230	0.110825	0.22165
SMIM12	1230	0.110825	0.22165
NHLRC3	1231	0.110938	0.221877
TREML2	1232	0.111102	0.222205
LGMN	1232	0.111102	0.222205
ABCG4	1233	0.111109	0.222217
C11orf96	1234	0.111321	0.222642
ZMYND10	1234	0.111321	0.222642
SSSCA1	1235	0.111393	0.222785
ADAMTSL3	1235	0.111393	0.222785
NRP2	1236	0.111506	0.223013
EPN3	1237	0.11154	0.22308
ENPP5	1237	0.11154	0.22308
CFI	1238	0.111563	0.223126
GLRX	1239	0.11162	0.22324
EPAS1	1240	0.111677	0.223354
2008-09-01	1240	0.111677	0.223354
C6orf10	1241	0.111758	0.223517
TIMM23	1242	0.111848	0.223695
SLC26A8	1243	0.111905	0.223809
PPP4C	1244	0.111977	0.223954
ARHGDIG	1245	0.112075	0.224151
ATP1A2	1246	0.112132	0.224265
TMEM158	1247	0.112195	0.224391
GLRA3	1248	0.112414	0.224828
C16orf45	1249	0.112417	0.224835
PPP1R3B	1250	0.112474	0.224949
PLEKHB1	1250	0.112474	0.224949
LCOR	1251	0.112632	0.225264
FABP3	1251	0.112632	0.225264
YTHDC1	1252	0.112817	0.225634
CCNT2	1253	0.11285	0.225701
STAU1	1253	0.11285	0.225701
SH3GLB1	1254	0.112931	0.225863
TOMM5	1255	0.113069	0.226137
PACSIN1	1255	0.113069	0.226137
ABCA1	1256	0.113217	0.226435
C16orf62	1257	0.113287	0.226574
ERICH1	1258	0.113332	0.226664
ZNF24	1258	0.113332	0.226664
PSMD12	1259	0.113504	0.227007
EXOC3	1260	0.113505	0.22701
EFCAB2	1260	0.113505	0.22701
ULK4	1261	0.113561	0.227122
ATP5J2	1262	0.113675	0.227351
NUP160	1263	0.113723	0.227446
MPPED2	1263	0.113723	0.227446
ST3GAL2	1264	0.11379	0.22758
PDSS1	1265	0.113941	0.227882
CCDC8	1266	0.113962	0.227924
GDAP1L1	1267	0.114077	0.228154
APCS	1268	0.114159	0.228317
PCDHGB7	1268	0.114159	0.228317
PCYOX1	1269	0.114249	0.228498
STK38L	1270	0.114377	0.228753
AZGP1	1270	0.114377	0.228753
PDIA3	1271	0.114479	0.228958
FLVCR2	1272	0.114537	0.229073
KIAA0408	1272	0.114537	0.229073
MARCH1	1273	0.114594	0.229189
CHDH	1273	0.114594	0.229189
CYP3A43	1274	0.114652	0.229303
ATP2A2	1275	0.114812	0.229624
RIOK3	1276	0.114997	0.229994
KIR3DL3	1277	0.11503	0.230059
MAGI1	1277	0.11503	0.230059
CACNA1E	1278	0.115112	0.230224
CHAC1	1279	0.11517	0.23034
CACNB4	1280	0.115247	0.230495
DDX10	1281	0.115465	0.23093
NSD1	1282	0.115631	0.231263
GSTM3	1283	0.115682	0.231365
ILK	1283	0.115682	0.231365
CDKN2C	1284	0.115689	0.231378
QPCT	1284	0.115689	0.231378
DNAJA1	1285	0.115805	0.231609
LAMA2	1286	0.1159	0.231799
SGK2	1287	0.11592	0.23184
TSPAN18	1288	0.115978	0.231956
STIM2	1289	0.116117	0.232234
N4BP1	1289	0.116117	0.232234
SFXN1	1290	0.116151	0.232303
HIVEP1	1291	0.116209	0.232418
STRN	1292	0.116325	0.23265
CMTM4	1293	0.116334	0.232669
GP2	1294	0.116499	0.232997
MYSM1	1295	0.116552	0.233103
LMLN	1296	0.116614	0.233229
GABPA	1297	0.116769	0.233537
EBF1	1297	0.116769	0.233537
ABAT	1298	0.116788	0.233577
SPAM1	1299	0.116904	0.233809
TRDMT1	1300	0.116962	0.233925
TAL1	1301	0.116986	0.233972
VTA1	1301	0.116986	0.233972
PLD1	1302	0.11702	0.234041
CACNA1G	1303	0.117203	0.234406
HBD	1303	0.117203	0.234406
CCNB2	1304	0.117253	0.234505
PSORS1C1	1305	0.11742	0.23484
MIA2	1306	0.117427	0.234854
SNX33	1307	0.117485	0.23497
AP2B1	1308	0.117543	0.235086
FOXS1	1309	0.117637	0.235273
RBPJ	1309	0.117637	0.235273
DUOX1	1310	0.117659	0.235319
CALU	1310	0.117659	0.235319
RND1	1311	0.117834	0.235668
CCDC83	1312	0.117854	0.235707
KDSR	1312	0.117854	0.235707
RND3	1313	0.118067	0.236134
LNX2	1314	0.11807	0.236141
RGS18	1315	0.118287	0.236574
RNF24	1316	0.1183	0.2366
NR2E1	1317	0.118504	0.237007
CCDC150	1317	0.118504	0.237007
CYBRD1	1318	0.118591	0.237183
PLEKHA6	1319	0.11872	0.237441
TPD52	1319	0.11872	0.237441
CDK12	1320	0.118883	0.237767
MMP28	1321	0.118937	0.237874
CCT8	1322	0.118942	0.237884
TCF19	1323	0.119153	0.238307
MAPRE1	1323	0.119153	0.238307
PTPN21	1324	0.119176	0.238351
FAM122A	1325	0.11937	0.23874
STAG1	1325	0.11937	0.23874
BLOC1S3	1326	0.119468	0.238936
UBE4B	1326	0.119468	0.238936
ADPRH	1327	0.119585	0.23917
TOE1	1328	0.119586	0.239172
WEE1	1328	0.119586	0.239172
WDFY2	1329	0.119802	0.239605
CAPN2	1329	0.119802	0.239605
GJA1	1330	0.119878	0.239756
ZBTB10	1331	0.119937	0.239873
MRPS12	1332	0.119995	0.239991
LRRC8B	1333	0.120019	0.240037
TMPRSS3	1334	0.120171	0.240343
ACRBP	1335	0.120235	0.24047
PTTG1IP	1335	0.120235	0.24047
TMEM39A	1336	0.120406	0.240812
ST5	1336	0.120406	0.240812
AGBL2	1337	0.120451	0.240902
SLC44A5	1337	0.120451	0.240902
FLNB	1338	0.120667	0.241334
GSTK1	1339	0.1207	0.2414
TPI1	1340	0.120876	0.241753
EHBP1L1	1341	0.120883	0.241766
DNAJC10	1341	0.120883	0.241766
ZNF445	1342	0.121099	0.242198
TXNL1	1342	0.121099	0.242198
FAM45A	1343	0.121171	0.242341
LRMP	1344	0.121229	0.242459
FBN1	1345	0.121288	0.242577
AUNIP	1346	0.121315	0.24263
MRAS	1347	0.121531	0.243061
OGFRL1	1348	0.121642	0.243284
RPAP3	1349	0.121746	0.243493
MCFD2	1349	0.121746	0.243493
PPOX	1350	0.12176	0.24352
KLHL3	1350	0.12176	0.24352
NDUFB7	1351	0.121962	0.243924
UCHL1	1351	0.121962	0.243924
LRRC23	1352	0.121996	0.243992
TGM2	1353	0.122178	0.244356
CTNNA1	1353	0.122178	0.244356
L2HGDH	1354	0.122232	0.244465
THUMPD1	1354	0.122232	0.244465
PPP2R2B	1355	0.122393	0.244787
INVS	1356	0.122469	0.244938
SLC16A7	1357	0.122587	0.245174
PSD2	1358	0.122609	0.245218
SMAD4	1359	0.122706	0.245411
NAP1L1	1360	0.122765	0.245529
GABBR2	1361	0.122824	0.245648
HINFP	1362	0.122824	0.245649
TUBG2	1362	0.122824	0.245649
MCM5	1363	0.123002	0.246003
BATF3	1364	0.12304	0.246079
SLC23A2	1365	0.123061	0.246122
ATP6V1E1	1365	0.123061	0.246122
ARF5	1366	0.12312	0.24624
RD3	1367	0.123255	0.24651
CDH11	1368	0.123357	0.246715
ECHDC3	1369	0.123417	0.246833
TMEM132C	1370	0.12347	0.246941
PPP2R2A	1371	0.123654	0.247308
TCF15	1372	0.123686	0.247371
CCDC40	1373	0.123714	0.247427
FBXL14	1373	0.123714	0.247427
FBXL18	1374	0.123892	0.247784
TBX6	1375	0.123901	0.247801
APPBP2	1375	0.123901	0.247801
PDGFD	1376	0.123951	0.247902
DENND3	1376	0.123951	0.247902
SNAP91	1377	0.124011	0.248021
MFAP4	1378	0.124116	0.248232
TAPBP	1379	0.124249	0.248497
CINP	1380	0.124487	0.248973
ALPK1	1381	0.124546	0.249092
ATP5G3	1382	0.124546	0.249093
SERPINB13	1383	0.124665	0.249331
COX19	1384	0.124761	0.249522
RWDD2A	1384	0.124761	0.249522
ADAT3	1385	0.124904	0.249808
ANXA9	1386	0.124964	0.249927
GLRB	1387	0.124976	0.249951
ENO2	1388	0.125023	0.250046
IRF5	1389	0.125322	0.250643
EPS8L1	1389	0.125322	0.250643
SCRG1	1390	0.125381	0.250763
COA1	1391	0.125405	0.25081
PREPL	1392	0.125441	0.250882
LEMD2	1393	0.125501	0.251002
BLNK	1394	0.12562	0.25124
VASH1	1394	0.12562	0.25124
ELAVL2	1395	0.12562	0.251241
CD47	1395	0.12562	0.251241
SNIP1	1396	0.12568	0.25136
CBX5	1396	0.12568	0.25136
C15orf40	1397	0.125834	0.251669
SFXN5	1397	0.125834	0.251669
RCHY1	1398	0.12586	0.251719
B2M	1399	0.126039	0.252078
ARPP19	1400	0.126049	0.252098
IGFBP7	1400	0.126049	0.252098
GNA14	1401	0.126219	0.252437
TEX15	1402	0.126264	0.252527
GABRB2	1403	0.126398	0.252797
IGFBP5	1404	0.126458	0.252917
CDC14B	1405	0.126478	0.252956
CERS4	1406	0.126692	0.253385
CBLB	1406	0.126692	0.253385
NOX4	1407	0.126698	0.253397
NPAS3	1407	0.126698	0.253397
PSD3	1408	0.126818	0.253637
DNAJC21	1409	0.126907	0.253813
PLCH2	1410	0.127121	0.254242
FAM162A	1410	0.127121	0.254242
CALCA	1411	0.127239	0.254477
DIAPH3	1411	0.127239	0.254477
EHD3	1412	0.127335	0.25467
RAN	1413	0.127359	0.254718
DPYS	1414	0.127539	0.255079
FBXO44	1414	0.127539	0.255079
B4GALT5	1415	0.127549	0.255099
AP1G1	1416	0.1276	0.255199
KLF15	1417	0.12766	0.255319
ING4	1418	0.127763	0.255527
TTC31	1418	0.127763	0.255527
FBXL20	1419	0.12784	0.255681
NEDD9	1420	0.1279	0.255801
PTPRE	1421	0.127961	0.255921
TTC8	1422	0.127977	0.255955
PPP1CB	1422	0.127977	0.255955
TACC2	1423	0.128021	0.256042
MAX	1424	0.128191	0.256383
DDX60	1425	0.128405	0.256811
CHN1	1425	0.128405	0.256811
ZIC4	1426	0.128624	0.257248
IRAK2	1427	0.128684	0.257369
RERG	1428	0.128745	0.25749
GABRA5	1429	0.128805	0.257611
ZMAT5	1430	0.128833	0.257666
SWAP70	1430	0.128833	0.257666
SIPA1L2	1431	0.128987	0.257973
MZT2B	1431	0.128987	0.257973
PAX4	1432	0.129047	0.258094
CERCAM	1433	0.129228	0.258457
UQCR10	1434	0.12926	0.258521
MRPL42	1434	0.12926	0.258521
EFCAB7	1435	0.129289	0.258578
HNF4A	1436	0.12941	0.25882
ARF3	1437	0.129474	0.258948
ADIPOR2	1438	0.129531	0.259062
CTSH	1439	0.129592	0.259183
IMMP2L	1440	0.129688	0.259375
STRBP	1440	0.129688	0.259375
BTF3	1441	0.129713	0.259425
FOCAD	1442	0.129773	0.259547
VIPR1	1443	0.129834	0.259668
KIF18B	1444	0.129901	0.259802
PRPF40A	1444	0.129901	0.259802
TMEM39B	1445	0.130115	0.260229
ZBTB7A	1446	0.130198	0.260395
ATP5J	1447	0.130258	0.260517
ZSWIM3	1447	0.130258	0.260517
HTR1D	1448	0.130328	0.260656
ETV1	1449	0.130541	0.261083
KPNA6	1450	0.130755	0.261509
MRPS35	1450	0.130755	0.261509
ZNF561	1451	0.130805	0.26161
PEBP1	1452	0.130927	0.261853
GABPB1	1452	0.130927	0.261853
VCAN	1453	0.130968	0.261936
MAP3K9	1454	0.13117	0.26234
FCGR3B	1455	0.131181	0.262362
GRIK1	1455	0.131181	0.262362
OGG1	1456	0.131231	0.262462
UHRF1BP1	1457	0.131292	0.262584
ELN	1458	0.131394	0.262788
BNIP2	1459	0.131414	0.262827
HMMR	1460	0.131475	0.262949
LY6G6F	1461	0.131535	0.263071
KCTD2	1462	0.131596	0.263193
AKR1C1	1463	0.131607	0.263214
INA	1464	0.131718	0.263437
TMEM63C	1465	0.13182	0.26364
ASPH	1465	0.13182	0.26364
IAH1	1466	0.13184	0.263681
STRAP	1467	0.132023	0.264047
CACNG3	1468	0.132033	0.264066
ZNF789	1469	0.132084	0.264169
TMEM67	1470	0.132145	0.264291
PPP1R11	1471	0.132206	0.264413
MSANTD2	1472	0.132246	0.264492
CD163	1472	0.132246	0.264492
STX16	1473	0.132329	0.264657
UVSSA	1474	0.13239	0.264779
BTBD10	1475	0.132451	0.264902
HSP90AB1	1476	0.132512	0.265024
EFTUD2	1477	0.132671	0.265343
CADM3	1478	0.132756	0.265513
PDCD2	1479	0.132884	0.265768
KIAA0232	1480	0.13294	0.26588
PAPPA	1481	0.133062	0.266125
ACTL7A	1482	0.133097	0.266194
MYH11	1482	0.133097	0.266194
HTR4	1483	0.133309	0.266619
GH1	1484	0.13343	0.26686
BAG6	1485	0.133522	0.267044
BOD1L1	1486	0.133734	0.267469
RIMBP2	1486	0.133734	0.267469
CCDC47	1487	0.133921	0.267842
CD200	1487	0.133921	0.267842
ZKSCAN7	1488	0.133947	0.267894
STX1B	1488	0.133947	0.267894
ENPP3	1489	0.134166	0.268333
DCAKD	1490	0.134228	0.268456
ATF2	1491	0.134289	0.268579
LRRN3	1492	0.134351	0.268702
DCAF7	1493	0.134371	0.268743
PLN	1493	0.134371	0.268743
ATG13	1494	0.134412	0.268825
FASTKD2	1495	0.134474	0.268948
UBQLN1	1496	0.134535	0.269071
FAM89B	1497	0.134584	0.269167
SVIL	1497	0.134584	0.269167
DPAGT1	1498	0.134796	0.269592
PRUNE2	1499	0.134966	0.269932
MPC2	1500	0.135028	0.270055
CEP63	1501	0.135089	0.270179
CBR4	1502	0.135151	0.270302
PBX2	1503	0.135213	0.270425
IFNB1	1504	0.13522	0.27044
FBLN1	1504	0.13522	0.27044
PTPN11	1505	0.135336	0.270672
DTD1	1506	0.135432	0.270864
ISLR	1507	0.135644	0.271288
MKNK1	1508	0.135856	0.271712
U2AF1	1508	0.135856	0.271712
ZGPAT	1509	0.136068	0.272136
CFAP70	1510	0.136077	0.272153
STEAP2	1511	0.13628	0.272559
RAB6A	1512	0.136386	0.272772
VPS52	1513	0.136448	0.272895
KRR1	1513	0.136448	0.272895
ABHD17B	1514	0.136491	0.272983
PDZD3	1515	0.136509	0.273019
ELMO3	1516	0.136695	0.27339
NUDT5	1517	0.136703	0.273406
SMARCA4	1517	0.136703	0.273406
CCR2	1518	0.136819	0.273638
HOXB9	1519	0.136915	0.273829
MTMR10	1520	0.137005	0.27401
ZNF667	1521	0.137067	0.274134
APP	1521	0.137067	0.274134
ACTL7B	1522	0.137126	0.274252
MAPK9	1523	0.137191	0.274382
FAM3B	1524	0.137338	0.274675
ADCY2	1524	0.137338	0.274675
[truncated: 12,569 more rows]
