# Supplementary material for: Multiomics integrative analysis identifies APOE allele-specific blood biomarkers associated to Alzheimer’s disease etiopathogenesis
Source: Aging (Albany NY). 2021 Apr 12;13(7):9277–329. doi: 10.18632/aging.202950 (PMC8064208; doi:10.18632/aging.202950)
Supplement: Supplementary Table 31 [file aging-13-202950-s033.xlsx]

## Sheet: Sheet1
Supplementary Table 31. RRA integrative analysis in blood: enrichment analysis APOE2 stratum.
Tool	ID	Description	N_genes	N_overlap	p	adjP	genes
FUMA	GO:0005773	vacuole	760	26	4.12759e-10	2.60913e-07	VAMP4:TMEM63A:GDI2:SFTPD:HPS6:TOLLIP:SCARB1:ATP6V1D:ABCD4:HSP90AA1:WDR24:VAC14:TMEM97:RNF152:AP3D1:AP1M1:IL4I1:STK11IP:VPS16:SOD1:KLHL22:TLR9:TLR9:STX7:ATP6V1F:LAPTM4B:SURF4
FUMA	GO:0005740	mitochondrial envelope	725	25	7.75168e-10	2.60913e-07	AK2:UQCRH:ACADM:ATP5F1:MCL1:IKBKE:ATP5C1:CISD1:MRPL43:CPT1A:MRPL51:SUOX:SLC25A3:SPG20:SORD:GATM:RHOT2:SARM1:TOMM40:BOK:SOD1:SLC25A4:PLN:ATP5J2:PMPCA
FUMA	GO:0098805	whole membrane	1647	39	7.81956e-10	2.60913e-07	MCOLN2:SV2A:MCL1:VAMP4:IKBKE:TMEM63A:CISD1:HPS6:CPT1A:SCARB1:SPG20:ATP6V1D:ABCD4:RHOT2:WDR24:VAC14:SARM1:ERBB2:RNF152:AP3D1:AP1M1:PLAUR:TOMM40:STK11IP:BOK:VPS16:PMEPA1:TLR9:TLR9:SLC9A9:RAP2B:USO1:CD14:VPS52:STX7:ABCB4:ATP6V1F:LAPTM4B:SURF4:SEC16A
FUMA	GO:0031975	envelope	1166	31	3.56552e-09	8.92271e-07	AK2:UQCRH:ACADM:ATP5F1:MCL1:IKBKE:ATP5C1:CISD1:SIRT1:MRPL43:INTS5:NXF1:CPT1A:MRPL51:SUOX:TMPO:SLC25A3:SPG20:SORD:GATM:RHOT2:TMEM97:SARM1:TOMM40:BOK:SOD1:TMEM33:SLC25A4:PLN:ATP5J2:PMPCA
FUMA	GO:0005739	mitochondrion	1552	36	6.4321e-09	1.28771e-06	AK2:UQCRH:ACADM:ATP5F1:BOLA1:MCL1:IKBKE:ATP5C1:CISD1:SIRT1:MRPL43:FIBP:CPT1A:MRPL51:SUOX:SLC25A3:MTIF3:SPG20:NGDN:SORD:GATM:RHOT2:SARM1:TOMM40:PNKP:BOK:SOD1:PLA2G6:AMT:TUSC2:SLC25A4:PLN:ATP5J2:DNAJA1:ZBTB6:PMPCA
FUMA	GO:0022627	vacuolar part	553	20	1.87281e-08	3.07176e-06	TMEM63A:GDI2:HPS6:TOLLIP:SCARB1:ATP6V1D:ABCD4:HSP90AA1:WDR24:VAC14:RNF152:AP3D1:AP1M1:STK11IP:VPS16:TLR9:TLR9:STX7:ATP6V1F:LAPTM4B:SURF4
FUMA	GO:0005774	vacuolar membrane	399	17	2.14808e-08	3.07176e-06	TMEM63A:HPS6:SCARB1:ATP6V1D:ABCD4:WDR24:VAC14:RNF152:AP3D1:AP1M1:STK11IP:VPS16:TLR9:TLR9:STX7:ATP6V1F:LAPTM4B:SURF4
FUMA	GO:0030017	nucleoplasm part	1113	28	6.78951e-08	8.49538e-06	ACADM:RFWD2:IKBKE:SIRT1:SMNDC1:TOLLIP:NXF1:FIBP:CDK2:NR2C1:TINF2:PNN:SIN3A:USP36:MBD1:SIN3B:MED25:ZNF473:ZNF350:SAP130:HDAC4:CENPB:WDR82:COPS4:CPSF4:TAF6:ING3:SNAPC3
FUMA	GO:0030424	cytoplasmic vesicle part	1483	33	7.69597e-08	8.55963e-06	MCOLN2:SV2A:VAMP4:IKBKE:TMEM63A:GDI2:HPS6:TOLLIP:CEP290:SCARB1:ATP6V1D:HSP90AA1:VAC14:ERBB2:AP3D1:AP1M1:PLAUR:STK11IP:BOK:VPS16:PMEPA1:SLC26A6:CYB561D2:XXcos-LUCA11.4:TLR9:TLR9:SLC9A9:RAP2B:USO1:CD14:VPS52:STX7:LAPTM4B:SURF4:SEC16A
FUMA	GO:1902494	catalytic complex	1351	31	1.00806e-07	1.00907e-05	UQCRH:RFWD2:SIRT1:SMARCD1:CDK2:SMARCC2:FBXW8:POLR1D:PNN:ABCD4:DUOX1:SIN3A:STUB1:FBXL16:VAC14:SIN3B:CALM2:SAP130:HDAC4:KLHL22:WDR82:ISY1:ANAPC4:ANAPC10:FBXL7:PLN:BUD31:TAF6:ING3:PPP2R2A:DNAJA1
FUMA	GO:0070647	protein modification by small protein conjugation or removal	1097	30	3.4234e-09	1.32972e-05	CDC42:HECTD3:USP24:RFWD2:SIRT1:HERC4:TOLLIP:FBXW8:UCHL3:UBR7:HSP90AA1:STUB1:FBXL16:NFE2L1:USP36:RNF152:NMI:HDAC4:ASXL1:USP16:KLHL22:UBA7:ANAPC4:COPS4:ANAPC10:FBXL7:PJA2:DNAJA1:RC3H2:ASB6
FUMA	GO:0044093	positive regulation of molecular function	1740	39	3.61829e-09	1.32972e-05	GDI2:SIRT1:B3GAT3:TIRAP:TESC:SCARB1:HSP90AA1:STUB1:DNAJA2:ERBB2:STRADA:TNFRSF11A:EVI5L:HNRNPL:PLAUR:APOC1:MED25:PNKP:VRK3:CALM2:PKP4:ZC3H15:HDAC4:BOK:CDC25B:SOD1:HMGN1:TLR9:TLR9:RGS12:RICTOR:TBC1D9B:SRF:PDCD2:LFNG:NOD1:ABCB1:BUD31:DNAJA1:RABGAP1
FUMA	GO:0019866	mitochondrial part	1019	26	1.5638e-07	1.42306e-05	AK2:UQCRH:ACADM:ATP5F1:MCL1:IKBKE:ATP5C1:CISD1:MRPL43:CPT1A:MRPL51:SUOX:SLC25A3:SPG20:SORD:GATM:RHOT2:SARM1:TOMM40:BOK:SOD1:AMT:SLC25A4:PLN:ATP5J2:PMPCA
FUMA	GO:0003723	rna binding	1875	40	8.84183e-09	1.45448e-05	HNRNPCL1:RPF1:SF3B4:GDI2:ATP5C1:RPS24:MRPL43:SMNDC1:GANAB:NXF1:RPL41:MTIF3:NGDN:PNN:KTN1:PAPOLA:HSP90AA1:SIN3A:RPUSD1:THUMPD1:USP36:HNRNPL:R3HDM1:ZC3H15:ADARB1:TOP3B:TLR9:TLR9:TWF2:ISY1:G3BP2:USO1:LARP7:SRP19:BYSL:SRF:EIF4H:CPSF4:REPIN1:RBM18:RC3H2
FUMA	GO:0005783	endoplasmic reticulum	1884	37	2.68575e-07	2.24036e-05	CDC42:SV2A:SFTPD:HPS6:GANAB:ALG5:SCFD1:RPL36AL:KTN1:ABCD4:VASH1:DUOXA2:DUOX1:STUB1:JMJD8:VAC14:TMEM97:NFE2L1:LRRC8E:PLD3:PLAUR:APOC1:MOGS:BOK:PSMG1:SLC26A6:CYB561D2:XXcos-LUCA11.4:TLR9:TLR9:PLOD2:TMEM33:USO1:PJA2:ELOVL5:PLN:DNAJA1:SURF4:SEC16A
FUMA	GO:0046907	intracellular transport	1815	39	1.1438e-08	2.8023e-05	CDC42:ATP5F1:SV2A:VAMP4:ATP5C1:RPS24:B3GAT3:NXF1:CPT1A:RPL41:CEP290:SCFD1:HSP90AA1:RHOT2:ERBB2:STRADA:USP36:AP3D1:EVI5L:GIPC1:AP1M1:TOMM40:VPS16:SOD1:MAP6D1:USO1:SRP19:TBC1D9B:VPS52:PLN:STX7:CPSF4:ATP5J2:LAPTM4B:NRBP2:RABGAP1:SDCCAG3:PMPCA:SEC16A
FUMA	GO:0043687	post translational protein modification	1427	33	3.1357e-08	4.70041e-05	USP24:HIST2H2AC:RFWD2:IKBKE:GANAB:NR2C1:FBXW8:ALG5:UCHL3:SCFD1:KTN1:COMMD4:SIN3A:FBXL16:MBD1:RNF152:PLAUR:ZNF350:MOGS:GMPPA:HDAC4:ASXL1:USP16:KLHL22:L3MBTL2:NICN1:LSAMP:USO1:COPS4:FBXL7:NOD1:ASB6:SEC16A
WebGestalt	GO:0005774	vacuolar membrane	397	18	7.05629e-08	5.44745e-05	RNF152;WDR24;VAC14;STX7;ATP6V1D;STK11IP;LAPTM4B;TLR9;ATP6V1F;HPS6;SCARB1;VPS16;AP3D1;MCOLN2;AP1M1;TMEM63A;SURF4;ABCD4
FUMA	GO:1901566	organonitrogen compound biosynthetic process	1814	38	3.50256e-08	6.43595e-05	AK2:ACADM:HS2ST1:ATP5F1:ATP5C1:NDST2:RPS24:SFTPD:MRPL43:B3GAT3:TIRAP:MRPL51:RPL41:MTIF3:ALG5:NGDN:RPL36AL:GATM:ERBB2:NFE2L1:NARS:HNRNPL:MOGS:NMI:ZC3H15:SLC35C2:USP16:PLA2G6:TLR9:TLR9:PLOD2:MAP6D1:ZCCHC4:ELOVL5:LFNG:NOD1:EIF4H:ATP5J2:PYCRL
FUMA	GO:0032446	protein modification by small protein conjugation	896	25	5.10093e-08	7.49837e-05	CDC42:HECTD3:RFWD2:SIRT1:HERC4:TOLLIP:FBXW8:UCHL3:UBR7:HSP90AA1:STUB1:FBXL16:NFE2L1:RNF152:NMI:HDAC4:KLHL22:UBA7:ANAPC4:ANAPC10:FBXL7:PJA2:DNAJA1:RC3H2:ASB6
WebGestalt	GO:0005765	lysosomal membrane	345	16	2.88996e-07	7.73189e-05	RNF152;WDR24;STX7;ATP6V1D;STK11IP;LAPTM4B;TLR9;HPS6;SCARB1;VPS16;AP3D1;MCOLN2;AP1M1;TMEM63A;SURF4;ABCD4
WebGestalt	GO:0098852	lytic vacuole membrane	346	16	3.00462e-07	7.73189e-05	RNF152;WDR24;STX7;ATP6V1D;STK11IP;LAPTM4B;TLR9;HPS6;SCARB1;VPS16;AP3D1;MCOLN2;AP1M1;TMEM63A;SURF4;ABCD4
FUMA	GO:0071007	mitochondrial membrane part	221	11	1.54881e-06	0.000119258	UQCRH:ATP5F1:ATP5C1:CISD1:CPT1A:SLC25A3:RHOT2:SARM1:TOMM40:SLC25A4:ATP5J2
FUMA	GO:0022804	active transmembrane transporter activity	356	15	1.69822e-07	0.000139678	ATP5F1:ATP5C1:SLC25A3:ATP6V1D:ABCD4:ABCA9:ABCA10:SLC35E1:SLC35C2:SLC26A6:SLC9A9:SLC25A4:ABCB4:ABCB1:ATP6V1F
FUMA	GO:0031329	regulation of cellular catabolic process	805	23	1.17619e-07	0.000144084	MCL1:RFWD2:SIRT1:CPT1A:TIRAP:FBXW8:SCARB1:SCFD1:ATP6V1D:HSP90AA1:STUB1:WDR24:NFE2L1:EXOC7:USP36:RNF152:GIPC1:APOC1:BOK:KLHL22:NOD1:LAPTM4B:NRBP2
FUMA	R-HSA-168249	innate immune system	1101	27	1.95616e-07	0.000146614	CDC42:IKBKE:TMEM63A:GDI2:SFTPD:TOLLIP:TIRAP:CEP290:POLR1D:ATP6V1D:HSP90AA1:SARM1:AP1M1:PLD3:PLAUR:RELB:VRK3:STK11IP:PLA2G6:UBA7:TLR9:TLR9:RAP2B:CFI:CD14:NOD1:ATP6V1F:SURF4
FUMA	GO:0000139	golgi membrane	747	20	2.17088e-06	0.000155218	CDC42:HS2ST1:VAMP4:RFWD2:NDST2:B3GAT3:SCFD1:VAC14:AP3D1:AP1M1:BOK:PMEPA1:TLR9:TLR9:USO1:PJA2:SLC35A4:VPS52:LFNG:SURF4:SEC16A
FUMA	GO:0009894	regulation of catabolic process	959	25	1.83988e-07	0.000193188	MCL1:RFWD2:SIRT1:CPT1A:TIRAP:FBXW8:SCARB1:SCFD1:ATP6V1D:HSP90AA1:STUB1:JMJD8:WDR24:NFE2L1:EXOC7:USP36:RNF152:GIPC1:APOC1:HDAC4:BOK:KLHL22:NOD1:LAPTM4B:NRBP2
FUMA	R-HSA-1643685	disease	1072	26	4.10738e-07	0.000205232	SV2A:RPS24:SFTPD:PIK3AP1:B3GAT3:TIRAP:RPL41:RPL36AL:ABCD4:HSP90AA1:SIN3A:ERBB2:AP1M1:AKT1S1:MOGS:HDAC4:CDC25B:SLC9A9:SLC25A4:RICTOR:CD14:LFNG:ABCB4:CPSF4:TAF6:GALT:GALT
FUMA	GO:0016604	nuclear body	769	20	3.35235e-06	0.000222572	ACADM:RFWD2:IKBKE:SIRT1:SMNDC1:TOLLIP:NXF1:FIBP:CDK2:NR2C1:TINF2:PNN:USP36:MBD1:ZNF473:ZNF350:SAP130:CENPB:COPS4:SNAPC3
FUMA	GO:0044440	endosomal part	514	16	3.5576e-06	0.000222572	MCOLN2:IKBKE:HPS6:VAC14:ERBB2:AP3D1:BOK:VPS16:PMEPA1:TLR9:TLR9:SLC9A9:RAP2B:CD14:VPS52:STX7:LAPTM4B
FUMA	GO:0055085	transmembrane transport	1574	33	2.99e-07	0.000254789	MCOLN2:ATP5F1:SV2A:MCL1:TMEM63A:ATP5C1:CPT1A:SLC25A3:TESC:SCARB1:ATP6V1D:ABCD4:KCNK10:ABCA9:ABCA10:LRRC8E:SLC35E1:TOMM40:CALM2:SLC35C2:PLA2G6:SLC26A6:TLR9:TLR9:SLC9A9:SLC25A4:SRP19:SLC35A4:PLN:ABCB4:ABCB1:ATP5J2:ATP6V1F:PMPCA
FUMA	GO:0051726	regulation of cell cycle	1201	28	3.18268e-07	0.000254789	CDC42:SIRT1:CDK2:CEP290:VASH1:HSP90AA1:SIN3A:NFE2L1:STRADA:GIPC1:MED25:ATF5:CALM2:PKP4:CDC25B:CABLES2:USP16:ADARB1:KLHL22:L3MBTL2:ANAPC4:ANAPC10:FBXL7:LFNG:RPA3:TAF6:FZD3:SDCCAG3
FUMA	GO:0061919	process utilizing autophagic mechanism	485	17	3.46652e-07	0.000254789	MCL1:SIRT1:TOLLIP:SCFD1:ATP6V1D:HSP90AA1:STUB1:WDR24:EXOC7:USP36:RNF152:TOMM40:BOK:VPS16:KLHL22:NOD1:NRBP2
FUMA	GO:0015399	primary active transmembrane transporter activity	122	9	5.4478e-07	0.000298721	ATP5F1:ATP5C1:ATP6V1D:ABCD4:ABCA9:ABCA10:ABCB4:ABCB1:ATP6V1F
FUMA	GO:0042175	nuclear outer membrane endoplasmic reticulum membrane network	1080	24	5.2015e-06	0.000306277	CDC42:SFTPD:ALG5:SCFD1:KTN1:ABCD4:DUOXA2:TMEM97:NFE2L1:LRRC8E:PLD3:PLAUR:MOGS:BOK:CYB561D2:XXcos-LUCA11.4:TLR9:TLR9:PLOD2:TMEM33:PJA2:ELOVL5:PLN:DNAJA1:SURF4:SEC16A
FUMA	GO:0043492	atpase activity coupled to movement of substances	130	9	9.31345e-07	0.000312714	ATP5F1:ATP5C1:ATP6V1D:ABCD4:ABCA9:ABCA10:ABCB4:ABCB1:ATP6V1F
FUMA	GO:0019787	ubiquitin like protein transferase activity	408	15	9.50497e-07	0.000312714	CDC42:HECTD3:RFWD2:HERC4:FBXW8:UBR7:STUB1:FBXL16:RNF152:HDAC4:UBA7:ANAPC4:FBXL7:PJA2:RC3H2
FUMA	GO:0000228	nuclear chromosome	599	17	5.99114e-06	0.000333174	HIST2H2AC:SIRT1:SMARCD1:SMARCC2:TINF2:SIN3A:SIN3B:SAP130:CENPB:ASXL1:WDR82:RGS12:SRF:RPA3:BUD31:ING3:REPIN1
FUMA	GO:0019900	kinase binding	722	20	1.2965e-06	0.000355458	CDC42:SV2A:SIRT1:TOLLIP:TIRAP:HSP90AA1:STUB1:STRADA:RELB:ATF5:CALM2:STK11IP:HDAC4:CDC25B:PLA2G6:TWF2:NISCH:RICTOR:PJA2:LAPTM4B
FUMA	GO:0043085	positive regulation of catalytic activity	1397	30	6.5972e-07	0.000407022	GDI2:SIRT1:B3GAT3:TIRAP:SCARB1:HSP90AA1:STUB1:DNAJA2:ERBB2:STRADA:TNFRSF11A:EVI5L:APOC1:PNKP:VRK3:CALM2:PKP4:ZC3H15:BOK:CDC25B:SOD1:HMGN1:TLR9:TLR9:RGS12:RICTOR:TBC1D9B:PDCD2:NOD1:DNAJA1:RABGAP1
FUMA	GO:0044257	cellular protein catabolic process	756	21	6.69089e-07	0.000407022	HECTD3:USP24:RFWD2:SIRT1:TOLLIP:CDK2:FBXW8:UCHL3:HSP90AA1:STUB1:FBXL16:NFE2L1:USP36:GIPC1:USP16:KLHL22:UBA7:ANAPC4:ANAPC10:FBXL7:LAPTM4B
FUMA	GO:0080134	regulation of response to stress	1481	31	7.28585e-07	0.000407022	MCL1:IKBKE:SIRT1:SFTPD:PIK3AP1:TSPAN32:TIRAP:VASH1:HSP90AA1:DUOXA2:DUOX1:SIN3A:SHPK:SHPK:SARM1:NFE2L1:TNFRSF11A:PLAUR:RELB:AKT1S1:NMI:BOK:SOD1:TLR9:TLR9:TMEM33:RICTOR:PJA2:CD14:RPA3:NOD1:ABCB1:DNAJA1
FUMA	GO:0001775	cell activation	1408	30	7.75281e-07	0.000407022	CDC42:TMEM63A:GDI2:SFTPD:TOLLIP:TSPAN32:FIBP:TIRAP:CEP290:ATP6V1D:HSP90AA1:SHPK:SHPK:ERBB2:AP3D1:AP1M1:PLAUR:CLPTM1:RELB:STK11IP:HDAC4:SOD1:TUSC2:TLR9:TLR9:RAP2B:PJA2:CD14:SRF:LFNG:RC3H2:SURF4
FUMA	GO:0005768	endosome	885	21	7.75457e-06	0.000408544	MCOLN2:VAMP4:IKBKE:SFTPD:HPS6:CDK2:VAC14:ERBB2:AP3D1:BOK:VPS16:PMEPA1:TLR9:TLR9:NISCH:SLC9A9:RAP2B:CD14:VPS52:STX7:LAPTM4B:SDCCAG3
FUMA	GO:0044431	golgi apparatus part	964	22	8.62884e-06	0.000424514	CDC42:HS2ST1:VAMP4:RFWD2:NDST2:B3GAT3:SCFD1:VAC14:AP3D1:AP1M1:BOK:SLC35C2:PMEPA1:TLR9:TLR9:MAP6D1:USO1:PJA2:SLC35A4:VPS52:LFNG:SURF4:SEC16A
FUMA	GO:0055037	recycling endosome	171	9	8.90588e-06	0.000424514	MCOLN2:BOK:VPS16:NISCH:SLC9A9:RAP2B:VPS52:STX7:SDCCAG3
FUMA	GO:0051276	chromosome organization	1189	27	8.66388e-07	0.00042453	HIST2H2AC:SIRT1:SMARCD1:CDK2:SMARCC2:TINF2:ARID4A:HSP90AA1:SIN3A:USP36:MBD1:MUM1:SIN3B:PNKP:HDAC4:ASXL1:USP16:HMGN1:KLHL22:TOP3B:L3MBTL2:WDR82:ANAPC4:COPS4:RPA3:TAF6:ING3
FUMA	GO:0042592	homeostatic process	1906	36	9.8919e-07	0.000436686	MCOLN2:SV2A:MCL1:SIRT1:RPS24:SFTPD:SCARB1:TINF2:ARID4A:ATP6V1D:HSP90AA1:GATM:SIN3A:RHOT2:NARFL:TMEM97:NFE2L1:TNFRSF11A:AP3D1:LRRC8E:PNKP:CALM2:BOK:ASXL1:SOD1:COMT:PLA2G6:SLC26A6:TLR9:TLR9:SLC9A9:SRF:PLN:RPA3:ABCB4:ATP6V1F:RC3H2
FUMA	GO:0006811	ion transport	1663	33	1.01002e-06	0.000436686	MCOLN2:ATP5F1:SV2A:TMEM63A:ATP5C1:CPT1A:CDK2:SLC25A3:TESC:SCARB1:ATP6V1D:KCNK10:NFE2L1:TNFRSF11A:LRRC8E:GIPC1:TOMM40:APOC1:CALM2:SLC35C2:PLA2G6:SLC26A6:TLR9:TLR9:SLC9A9:SLC25A4:SLC35A4:PLN:ABCB4:ABCB1:ATP5J2:ATP6V1F:XKR6:PMPCA
FUMA	GO:0005215	transporter activity	1241	27	1.94061e-06	0.000456044	MCOLN2:ATP5F1:SV2A:MCL1:TMEM63A:ATP5C1:SLC25A3:SCARB1:ATP6V1D:ABCD4:KCNK10:ABCA9:ABCA10:AP3D1:LRRC8E:SLC35E1:TOMM40:SLC35C2:SLC26A6:SLC9A9:USO1:SLC25A4:SLC35A4:ABCB4:ABCB1:ATP5J2:ATP6V1F
gPROFILER	GO:0032592	integral component of mitochondrial membrane	63	3		0.000503207	SLC25A3,RHOT2,CPT1A
gPROFILER	GO:0098573	intrinsic component of mitochondrial membrane	65	3		0.000503207	SLC25A3,RHOT2,CPT1A
FUMA	GO:0005694	chromosome	1059	23	1.18607e-05	0.000539663	HIST2H2AC:SIRT1:SMARCD1:CDK2:SMARCC2:TMPO:NGDN:TINF2:SIN3A:MBD1:SIN3B:SAP130:CENPB:ASXL1:HMGN1:TOP3B:WDR82:RGS12:SRF:RPA3:BUD31:ING3:REPIN1
FUMA	GO:0022857	transmembrane transporter activity	1038	24	2.66257e-06	0.000547492	MCOLN2:ATP5F1:SV2A:MCL1:TMEM63A:ATP5C1:SLC25A3:ATP6V1D:ABCD4:KCNK10:ABCA9:ABCA10:LRRC8E:SLC35E1:TOMM40:SLC35C2:SLC26A6:SLC9A9:SLC25A4:SLC35A4:ABCB4:ABCB1:ATP5J2:ATP6V1F
FUMA	R-HSA-983169	class i mhc mediated antigen processing presentation	370	14	1.57094e-06	0.000588711	HECTD3:HERC4:TIRAP:FBXW8:STUB1:FBXL16:KLHL22:UBA7:ANAPC4:ANAPC10:FBXL7:PJA2:CD14:ASB6
FUMA	GO:0005794	golgi apparatus	1547	29	1.39849e-05	0.000608647	CDC42:HS2ST1:VAMP4:RFWD2:GDI2:NDST2:B3GAT3:GANAB:FBXW8:SCFD1:VAC14:AP3D1:AP1M1:SLC35E1:BOK:SLC35C2:PMEPA1:PSMG1:TLR9:TLR9:MAP6D1:USO1:PJA2:SLC35A4:CD14:VPS52:LFNG:GALT:GALT:SURF4:SEC16A
gPROFILER	GO:0031300	intrinsic component of organelle membrane	326	4		0.000613639	SLC25A3,RHOT2,RNF152,CPT1A
gPROFILER	GO:0031301	integral component of organelle membrane	305	4		0.000613639	SLC25A3,RHOT2,RNF152,CPT1A
gPROFILER	GO:0043227	membrane-bounded organelle	11124	156		0.000636652	SLC25A3,RHOT2,RNF152,ISY1,CPT1A,VRK3,UGP2,WDR24,PLCD1,TWF2,PMPCA,IKBKE,SRF,HS2ST1,UBA7,FAM173A,VAC14,SNAPC4,RC3H2,JMJD8,STX7,RAP2B,AK2,DUOXA2,MRPL51,ATP6V1D,PLOD2,TIRAP,SARM1,SLC35A4,TMPO,STUB1,MOGS,ABCB4,APBB3,APOC1,NXF1,ACADM,SLC9A9,FIBP,FBLIM1,DNAJA1,SCFD1,CDC42,PNN,USP36,PLAUR,PLN,NARS,HMGN1,SOD1,GATM,LFNG,SLC35C2,HSP90AA1,CDK2,ZNF473,INTS6,TOMM40,PSMG1,AMT,FBXW8,SLC26A6,L3MBTL2,RPS24,PTOV1,R…
FUMA	GO:0015711	organic anion transport	485	16	1.69438e-06	0.000691872	SV2A:CPT1A:SCARB1:NFE2L1:TNFRSF11A:LRRC8E:GIPC1:APOC1:SLC35C2:PLA2G6:SLC26A6:SLC25A4:SLC35A4:ABCB4:ABCB1:XKR6
FUMA	GO:0019216	regulation of lipid metabolic process	383	14	2.34795e-06	0.000908286	ACADM:SIRT1:DKK3:CPT1A:SCARB1:SIN3A:STUB1:NFE2L1:SIN3B:APOC1:SOD1:PLA2G6:ELOVL5:ABCB4
FUMA	GO:0043632	modification dependent macromolecule catabolic process	623	18	2.48269e-06	0.000912389	HECTD3:USP24:RFWD2:SIRT1:TOLLIP:CDK2:FBXW8:UCHL3:STUB1:FBXL16:USP36:GIPC1:USP16:KLHL22:UBA7:ANAPC4:ANAPC10:FBXL7
gPROFILER	GO:0043231	intracellular membrane-bounded organelle	9624	175		0.000929069	SLC25A3,RHOT2,RNF152,ISY1,CPT1A,VRK3,UGP2,WDR24,PMPCA,IKBKE,SRF,HS2ST1,UBA7,FAM173A,VAC14,SNAPC4,RC3H2,JMJD8,STX7,AK2,DUOXA2,MRPL51,ATP6V1D,PLOD2,SARM1,SLC35A4,TMPO,STUB1,MOGS,ABCB4,APBB3,APOC1,NXF1,ACADM,FIBP,FBLIM1,DNAJA1,SCFD1,CDC42,PNN,USP36,PLAUR,PLN,HMGN1,SOD1,GATM,SLC35C2,HSP90AA1,CDK2,ZNF473,INTS6,TOMM40,PSMG1,AMT,FBXW8,L3MBTL2,RPS24,PTOV1,RPL36AL,SIN3B,TMEM97,RPA3,PNKP,PAPOLA,SEC16A,DUOX…
gPROFILER	GO:0005774	vacuolar membrane	334	17		0.000929069	RNF152,WDR24,VAC14,STX7,ATP6V1D,STK11IP,LAPTM4B,TLR9,ATP6V1F,HPS6,SCARB1,VPS16,AP3D1,AP1M1,TMEM63A,SURF4,ABCD4
FUMA	GO:0005688	endoplasmic reticulum part	1344	26	2.34948e-05	0.000979927	CDC42:SFTPD:GANAB:ALG5:SCFD1:KTN1:ABCD4:DUOXA2:JMJD8:TMEM97:NFE2L1:LRRC8E:PLD3:PLAUR:MOGS:BOK:CYB561D2:XXcos-LUCA11.4:TLR9:TLR9:PLOD2:TMEM33:PJA2:ELOVL5:PLN:DNAJA1:SURF4:SEC16A
gPROFILER	GO:0044437	vacuolar part	482	20		0.00129348	RNF152,WDR24,VAC14,STX7,ATP6V1D,HSP90AA1,STK11IP,LAPTM4B,GDI2,TLR9,ATP6V1F,HPS6,TOLLIP,SCARB1,VPS16,AP3D1,AP1M1,TMEM63A,SURF4,ABCD4
gPROFILER	GO:0005773	vacuole	634	24		0.00129348	RNF152,WDR24,VAC14,STX7,ATP6V1D,HSP90AA1,TMEM97,STK11IP,LAPTM4B,GDI2,TLR9,ATP6V1F,HPS6,TOLLIP,SCARB1,KLHL22,VPS16,AP3D1,AP1M1,TMEM63A,SURF4,SFTPD,ABCD4,VAMP4
gPROFILER	GO:0005765	lysosomal membrane	294	15		0.00129348	RNF152,WDR24,STX7,ATP6V1D,STK11IP,LAPTM4B,TLR9,HPS6,SCARB1,VPS16,AP3D1,AP1M1,TMEM63A,SURF4,ABCD4
gPROFILER	GO:0098852	lytic vacuole membrane	294	15		0.00129348	RNF152,WDR24,STX7,ATP6V1D,STK11IP,LAPTM4B,TLR9,HPS6,SCARB1,VPS16,AP3D1,AP1M1,TMEM63A,SURF4,ABCD4
gPROFILER	GO:0044422	organelle part	8803	161		0.00129348	SLC25A3,RHOT2,RNF152,ISY1,CPT1A,VRK3,WDR24,TWF2,PMPCA,IKBKE,SRF,HS2ST1,UBA7,VAC14,SNAPC4,JMJD8,STX7,RAP2B,AK2,MRPL51,ATP6V1D,PLOD2,EML3,SARM1,SLC35A4,TMPO,STUB1,MOGS,ABCB4,NXF1,FBXL7,ACADM,SLC9A9,FIBP,FBLIM1,DNAJA1,SCFD1,CDC42,PNN,USP36,PLAUR,PLN,HMGN1,SOD1,GATM,SLC35C2,HSP90AA1,CDK2,ZNF473,INTS6,PLA2G6,TOMM40,PSMG1,AMT,SLC26A6,L3MBTL2,RPS24,PTOV1,RPL36AL,SIN3B,GIPC1,TMEM97,RPA3,PNKP,PAPOLA,SEC16…
gPROFILER	GO:0043226	organelle	12005	166		0.00129348	SLC25A3,RHOT2,RNF152,ISY1,CPT1A,VRK3,UGP2,WDR24,PLCD1,TWF2,PMPCA,IKBKE,SRF,HS2ST1,UBA7,FAM173A,VAC14,SNAPC4,RC3H2,JMJD8,STX7,RAP2B,AK2,DUOXA2,MRPL51,ATP6V1D,PLOD2,EML3,TIRAP,SARM1,SLC35A4,TMPO,STUB1,MOGS,ABCB4,APBB3,APOC1,NXF1,FBXL7,ACADM,SLC9A9,FIBP,FBLIM1,DNAJA1,SCFD1,CDC42,PNN,USP36,PLAUR,PLN,NARS,HMGN1,SOD1,GATM,LFNG,SLC35C2,HSP90AA1,CDK2,ZNF473,INTS6,PLA2G6,TOMM40,PSMG1,AMT,FBXW8,SLC26A6,L3M…
gPROFILER	GO:0005740	mitochondrial envelope	569	7		0.00129348	SLC25A3,RHOT2,CPT1A,PMPCA,IKBKE,AK2,MRPL51
gPROFILER	GO:0044446	intracellular organelle part	8599	159		0.00129348	SLC25A3,RHOT2,RNF152,ISY1,CPT1A,VRK3,WDR24,TWF2,PMPCA,IKBKE,SRF,HS2ST1,UBA7,VAC14,SNAPC4,JMJD8,STX7,RAP2B,AK2,MRPL51,ATP6V1D,PLOD2,EML3,SARM1,SLC35A4,TMPO,STUB1,MOGS,ABCB4,NXF1,FBXL7,ACADM,SLC9A9,FIBP,FBLIM1,DNAJA1,SCFD1,CDC42,PNN,USP36,PLAUR,PLN,HMGN1,SOD1,GATM,SLC35C2,HSP90AA1,CDK2,ZNF473,INTS6,PLA2G6,TOMM40,PSMG1,AMT,L3MBTL2,RPS24,PTOV1,RPL36AL,SIN3B,TMEM97,RPA3,PNKP,PAPOLA,SEC16A,NDST2,B3GAT3…
FUMA	GO:0044265	cellular macromolecule catabolic process	1139	25	4.07169e-06	0.00142509	HECTD3:USP24:RFWD2:SIRT1:RPS24:TOLLIP:TIRAP:CDK2:RPL41:FBXW8:UCHL3:HSP90AA1:STUB1:FBXL16:NFE2L1:USP36:GIPC1:USP16:KLHL22:UBA7:ANAPC4:ANAPC10:FBXL7:PPP2R2A:LAPTM4B
gPROFILER	GO:0044455	mitochondrial membrane part	202	3		0.00144874	SLC25A3,RHOT2,CPT1A
gPROFILER	GO:0005764	lysosome	565	22		0.00144874	RNF152,WDR24,STX7,ATP6V1D,HSP90AA1,TMEM97,STK11IP,LAPTM4B,GDI2,TLR9,HPS6,TOLLIP,SCARB1,KLHL22,VPS16,AP3D1,AP1M1,TMEM63A,SURF4,SFTPD,ABCD4,VAMP4
gPROFILER	GO:0000323	lytic vacuole	565	22		0.00144874	RNF152,WDR24,STX7,ATP6V1D,HSP90AA1,TMEM97,STK11IP,LAPTM4B,GDI2,TLR9,HPS6,TOLLIP,SCARB1,KLHL22,VPS16,AP3D1,AP1M1,TMEM63A,SURF4,SFTPD,ABCD4,VAMP4
gPROFILER	GO:0005801	cis-Golgi network	53	5		0.00144874	SCFD1,SLC35C2,B3GAT3,BOK,MAP6D1
gPROFILER	GO:0031090	organelle membrane	2634	23		0.0014553	SLC25A3,RHOT2,RNF152,CPT1A,WDR24,PMPCA,IKBKE,HS2ST1,VAC14,STX7,RAP2B,MRPL51,ATP6V1D,PLOD2,SLC35A4,TMPO,MOGS,ACADM,SLC9A9,DNAJA1,CDC42,PLAUR,PLN
gPROFILER	GO:0043229	intracellular organelle	11095	143		0.00146993	SLC25A3,RHOT2,RNF152,ISY1,CPT1A,VRK3,UGP2,WDR24,TWF2,PMPCA,IKBKE,SRF,HS2ST1,UBA7,FAM173A,VAC14,SNAPC4,RC3H2,JMJD8,STX7,RAP2B,AK2,DUOXA2,MRPL51,ATP6V1D,PLOD2,EML3,TIRAP,SARM1,SLC35A4,TMPO,STUB1,MOGS,ABCB4,APBB3,APOC1,NXF1,FBXL7,ACADM,SLC9A9,FIBP,FBLIM1,DNAJA1,SCFD1,CDC42,PNN,USP36,PLAUR,PLN,HMGN1,SOD1,GATM,SLC35C2,HSP90AA1,CDK2,ZNF473,INTS6,PLA2G6,TOMM40,PSMG1,AMT,FBXW8,L3MBTL2,RPS24,PTOV1,RPL36AL…
FUMA	GO:0000785	chromatin	557	15	3.86611e-05	0.00147066	HIST2H2AC:SIRT1:SMARCD1:SMARCC2:TMPO:SIN3A:SIN3B:SAP130:CENPB:ASXL1:HMGN1:WDR82:SRF:BUD31:ING3
FUMA	GO:0000790	nuclear chromatin	369	12	3.904e-05	0.00147066	HIST2H2AC:SIRT1:SMARCD1:SMARCC2:SIN3A:SIN3B:SAP130:CENPB:ASXL1:SRF:BUD31:ING3
FUMA	GO:0016469	proton transporting two sector atpase complex	49	5	4.07224e-05	0.00147066	ATP5F1:ATP5C1:ATP6V1D:ATP5J2:ATP6V1F
FUMA	GO:0048471	perinuclear region of cytoplasm	697	17	4.11373e-05	0.00147066	HECTD3:TOLLIP:FBXW8:HSP90AA1:ERBB2:APBA3:HNRNPL:PTOV1:PKP4:TWF2:USO1:VPS52:PLN:STX7:EIF4H:DNAJA1:SEC16A
FUMA	GO:0017053	transcriptional repressor complex	82	6	4.62766e-05	0.00159734	SIRT1:ARID4A:SIN3A:RELB:ZNF350:HDAC4
gPROFILER	GO:0031966	mitochondrial membrane	535	5		0.00163179	SLC25A3,RHOT2,CPT1A,PMPCA,IKBKE
FUMA	R-HSA-74160	gene expression transcription	1478	29	5.94587e-06	0.00163709	HIST2H2AC:SIRT1:INTS5:SMARCD1:CDK2:SMARCC2:NR2C1:POLR1D:INTS6:PAPOLA:HSP90AA1:SIN3A:STUB1:TAF1C:ERBB2:ZNF700:SIN3B:MED25:ZNF473:ZNF350:SAP130:HDAC4:L3MBTL2:RICTOR:RPA3:CPSF4:TAF6:SNAPC3:SNAPC4
FUMA	R-HSA-983168	antigen processing: ubiquitination proteasome degradation	308	12	6.55275e-06	0.00163709	HECTD3:HERC4:FBXW8:STUB1:FBXL16:KLHL22:UBA7:ANAPC4:ANAPC10:FBXL7:PJA2:ASB6
FUMA	GO:0031300	intrinsic component of organelle membrane	378	12	4.92161e-05	0.00164218	SV2A:VAMP4:CPT1A:SLC25A3:RHOT2:RNF152:TOMM40:TMEM33:SLC25A4:SLC35A4:ELOVL5:LFNG
FUMA	GO:0015630	microtubule cytoskeleton	1169	23	5.46841e-05	0.00176577	CDC42:TMEM63A:EML3:CDK2:CEP290:ATP6V1D:WDR90:SARM1:EXOC7:RELB:ATF5:CALM2:PKP4:CDC25B:KLHL22:PLA2G6:NICN1:MAP6D1:FBXL7:KIF6:DNAJA1:RABGAP1:SDCCAG3
FUMA	GO:0070727	cellular macromolecule localization	1886	34	5.56073e-06	0.00185779	RPS24:HPS6:TOLLIP:B3GAT3:NXF1:RPL41:CEP290:TESC:TINF2:MPP5:ATP6V1D:HSP90AA1:DUOXA2:SIN3A:ERBB2:STRADA:USP36:AP3D1:EVI5L:GIPC1:AP1M1:TOMM40:VPS16:TWF2:USO1:SRP19:TBC1D9B:STX7:CPSF4:DNAJA1:RABGAP1:SDCCAG3:PMPCA:SEC16A
FUMA	GO:0061024	membrane organization	869	21	5.88432e-06	0.00188042	CDC42:ATP5F1:VAMP4:ATP5C1:SCFD1:MPP5:HSP90AA1:RHOT2:AP3D1:BOK:VPS16:SOD1:USO1:STX7:ABCB4:ABCB1:ATP5J2:XKR6:PPP2R2A:LAPTM4B:SEC16A
FUMA	GO:0019904	protein domain specific binding	698	18	1.17037e-05	0.00202052	CDC42:MCL1:SIRT1:CDK2:MPP5:HSP90AA1:STUB1:NFE2L1:GIPC1:PLAUR:CALM2:BOK:PMEPA1:SLC26A6:RAP2B:NOD1:FZD3:DNAJA1
FUMA	GO:0016887	atpase activity	443	14	1.22828e-05	0.00202052	ATP5F1:ATP5C1:MYL6:ATP6V1D:ABCD4:HSP90AA1:SPATA5L1:ABCA9:ABCA10:KIF6:ABCB4:ABCB1:ATP5J2:ATP6V1F
FUMA	GO:1902531	regulation of intracellular signal transduction	1824	33	7.18082e-06	0.00216994	CDC42:MCL1:IKBKE:GDI2:SIRT1:PIK3AP1:TIRAP:CDK2:HSP90AA1:RHOT2:JMJD8:WDR24:ERBB2:RNF152:TNFRSF11A:PLAUR:AKT1S1:VRK3:CALM2:BOK:SOD1:KLHL22:PLA2G6:TLR9:TLR9:RICTOR:PJA2:CD14:PLN:RPA3:NOD1:TAF6:DNAJA1:RC3H2
FUMA	GO:0006820	anion transport	611	17	7.75636e-06	0.00216994	SV2A:CPT1A:SLC25A3:SCARB1:NFE2L1:TNFRSF11A:LRRC8E:GIPC1:APOC1:SLC35C2:PLA2G6:SLC26A6:SLC25A4:SLC35A4:ABCB4:ABCB1:XKR6
FUMA	GO:0007049	cell cycle	1834	33	8.03664e-06	0.00216994	CDC42:ENSA:SIRT1:CDK2:CEP290:VASH1:HSP90AA1:SIN3A:NFE2L1:STRADA:GIPC1:MED25:ATF5:CALM2:PKP4:CDC25B:CABLES2:USP16:ADARB1:KLHL22:L3MBTL2:TUSC2:ANAPC4:ANAPC10:FBXL7:LFNG:RPA3:ABCB1:TAF6:PPP2R2A:FZD3:RABGAP1:SDCCAG3
FUMA	GO:1901565	organonitrogen compound catabolic process	1263	26	8.08187e-06	0.00216994	HECTD3:USP24:RFWD2:SIRT1:TOLLIP:CDK2:FBXW8:SCARB1:UCHL3:HSP90AA1:STUB1:FBXL16:NFE2L1:USP36:GIPC1:APOC1:IL4I1:USP16:COMT:KLHL22:AMT:UBA7:ANAPC4:ANAPC10:FBXL7:LAPTM4B
FUMA	GO:0002520	immune system development	968	22	9.20101e-06	0.00216994	CDC42:SIRT1:TIRAP:TESC:ARID4A:SIN3A:NARFL:ERBB2:NFE2L1:TNFRSF11A:AP3D1:CLPTM1:RELB:HDAC4:ASXL1:SOD1:TUSC2:TLR9:TLR9:SRF:PDCD2:LFNG:RC3H2
FUMA	GO:0031347	regulation of defense response	754	19	9.23159e-06	0.00216994	IKBKE:SFTPD:PIK3AP1:TSPAN32:TIRAP:DUOXA2:SIN3A:SHPK:SHPK:SARM1:NFE2L1:TNFRSF11A:RELB:NMI:SOD1:TLR9:TLR9:RICTOR:PJA2:CD14:NOD1
FUMA	GO:0010506	regulation of autophagy	319	12	9.3257e-06	0.00216994	MCL1:SIRT1:SCFD1:ATP6V1D:WDR24:EXOC7:USP36:RNF152:BOK:KLHL22:NOD1:NRBP2
FUMA	GO:0009408	response to heat	172	9	9.3341e-06	0.00216994	SIRT1:HSP90AA1:STUB1:DNAJA2:AKT1S1:SOD1:CD14:RPA3:DNAJA1
FUMA	GO:0044839	cell cycle g2 m phase transition	267	11	9.44736e-06	0.00216994	ENSA:CDK2:CEP290:HSP90AA1:SIN3A:ATF5:CALM2:CDC25B:FBXL7:ABCB1:PPP2R2A
WebGestalt	GO:0010008	endosome membrane	461	16	1.2263e-05	0.00236676	IKBKE;VAC14;STX7;RAP2B;SLC9A9;BOK;PMEPA1;LAPTM4B;TLR9;HPS6;VPS52;VPS16;ERBB2;AP3D1;MCOLN2;CD14
FUMA	GO:0030163	protein catabolic process	907	21	1.12049e-05	0.00249564	HECTD3:USP24:RFWD2:SIRT1:TOLLIP:CDK2:FBXW8:UCHL3:HSP90AA1:STUB1:FBXL16:NFE2L1:USP36:GIPC1:USP16:KLHL22:UBA7:ANAPC4:ANAPC10:FBXL7:LAPTM4B
FUMA	GO:0009628	response to abiotic stimulus	1211	25	1.15928e-05	0.00250608	RFWD2:SIRT1:SCFD1:HSP90AA1:SORD:STUB1:NARFL:DNAJA2:NFE2L1:TNFRSF11A:LRRC8E:RELB:PNKP:AKT1S1:HDAC4:SOD1:HMGN1:PLOD2:TSC22D2:CD14:SRF:RPA3:ABCB1:FZD3:DNAJA1
FUMA	WP3858	toll-like receptor signaling related to myd88	32	5	4.79373e-06	0.00260299	IKBKE:TOLLIP:TIRAP:RELB:TLR9:TLR9
FUMA	GO:0002521	leukocyte differentiation	507	15	1.30902e-05	0.00274893	CDC42:SIRT1:TESC:ERBB2:TNFRSF11A:AP3D1:CLPTM1:RELB:HDAC4:SOD1:TUSC2:TLR9:TLR9:SRF:LFNG:RC3H2
FUMA	GO:0006325	chromatin organization	776	19	1.37673e-05	0.00281082	HIST2H2AC:SIRT1:SMARCD1:CDK2:SMARCC2:ARID4A:SIN3A:USP36:MBD1:MUM1:SIN3B:HDAC4:ASXL1:USP16:HMGN1:L3MBTL2:WDR82:TAF6:ING3
FUMA	GO:0002224	toll like receptor signaling pathway	140	8	1.5559e-05	0.00309078	IKBKE:SFTPD:PIK3AP1:TIRAP:SARM1:TLR9:TLR9:PJA2:CD14
FUMA	GO:0044430	cytoskeletal part	1639	28	9.91388e-05	0.00310118	FBLIM1:CDC42:TMEM63A:EML3:CDK2:MYL6:CEP290:PNN:ATP6V1D:WDR90:SARM1:EXOC7:RELB:ATF5:CALM2:PKP4:HDAC4:SPEF1:CDC25B:KLHL22:PLA2G6:NICN1:TWF2:MAP6D1:FBXL7:KIF6:RABGAP1:SDCCAG3
FUMA	GO:0031399	regulation of protein modification process	1826	32	1.87732e-05	0.00348674	ENSA:SIRT1:TOLLIP:B3GAT3:TIRAP:TESC:TINF2:HSP90AA1:SIN3A:STUB1:ERBB2:STRADA:TNFRSF11A:PLAUR:PNKP:AKT1S1:VRK3:CALM2:NMI:HDAC4:CDC25B:PMEPA1:SOD1:ADARB1:PLA2G6:TLR9:TLR9:RAP2B:RICTOR:PJA2:NOD1:PPP2R2A:DNAJA1
FUMA	GO:0009266	response to temperature stimulus	236	10	1.89083e-05	0.00348674	SIRT1:HSP90AA1:STUB1:DNAJA2:NFE2L1:AKT1S1:SOD1:CD14:RPA3:DNAJA1
FUMA	GO:0051049	regulation of transport	1827	32	1.89755e-05	0.00348674	SV2A:ENSA:VAMP4:SIRT1:SFTPD:B3GAT3:CPT1A:CEP290:TESC:SCARB1:SCFD1:KCNK10:ERBB2:USP36:TNFRSF11A:GIPC1:APOC1:CALM2:BOK:VPS16:SOD1:COMT:PLA2G6:SLC26A6:TLR9:TLR9:SLC25A4:CD14:PLN:ABCB4:ABCB1:DNAJA1:SEC16A
FUMA	GO:0019213	deacetylase activity	44	5	2.3944e-05	0.00358072	SIRT1:NDST2:SIN3A:SIN3B:HDAC4
FUMA	GO:0033043	regulation of organelle organization	1254	25	2.07263e-05	0.00371557	CDC42:SIRT1:TINF2:SCFD1:SIN3A:RHOT2:NFE2L1:USP36:EVI5L:PLAUR:PNKP:ATF5:BOK:VPS16:SPEF1:KLHL22:PLA2G6:TWF2:MAP6D1:ANAPC4:TMEM33:RICTOR:LAPTM4B:SURF4:SDCCAG3
FUMA	GO:0098796	membrane protein complex	1153	22	0.000123378	0.00374246	UQCRH:ATP5F1:ATP5C1:TOLLIP:TSPAN32:ATP6V1D:ABCD4:DUOX1:VAC14:AP3D1:LRRC8E:AP1M1:TOMM40:CALM2:VPS16:SLC26A6:CD14:PLN:STX7:ATP5J2:ATP6V1F:SDCCAG3
FUMA	GO:0002221	pattern recognition receptor signaling pathway	191	9	2.15291e-05	0.00376759	IKBKE:SFTPD:PIK3AP1:TIRAP:SARM1:TLR9:TLR9:PJA2:CD14:NOD1
FUMA	GO:0051336	regulation of hydrolase activity	1261	25	2.27165e-05	0.00388293	ENSA:GDI2:SIRT1:B3GAT3:DNAJA2:ERBB2:EVI5L:PLAUR:APOC1:VRK3:CALM2:PKP4:ZC3H15:BOK:SOD1:TLR9:TLR9:RGS12:RICTOR:TBC1D9B:PLN:PDCD2:NOD1:PPP2R2A:DNAJA1:RABGAP1
FUMA	GO:0051338	regulation of transferase activity	956	21	2.43272e-05	0.00406374	SIRT1:TIRAP:TESC:HSP90AA1:STUB1:JMJD8:ERBB2:STRADA:TNFRSF11A:PNKP:AKT1S1:CALM2:CDC25B:SOD1:HMGN1:ADARB1:TLR9:TLR9:RAP2B:RICTOR:NOD1:DNAJA1
gPROFILER	GO:0005737	cytoplasm	10038	105		0.00417262	SLC25A3,RHOT2,RNF152,CPT1A,VRK3,UGP2,WDR24,PLCD1,TWF2,PMPCA,IKBKE,FBXL16,SRF,HS2ST1,UBA7,FAM173A,VAC14,JMJD8,STX7,RAP2B,AK2,DUOXA2,MRPL51,COMMD4,ATP6V1D,PLOD2,TIRAP,UBR7,SARM1,SLC35A4,STUB1,MOGS,ABCB4,APBB3,APOC1,NXF1,FBXL7,ACADM,SLC9A9,FIBP,FBLIM1,FZD3,ASB6,PIK3AP1,SPATA5L1,DNAJA1,SCFD1,CDC42,USP36,PLAUR,PLN,NARS,SOD1,GATM,NISCH,SLC35C2,HSP90AA1,CDK2,PLA2G6,TOMM40,LSAMP,PSMG1,AMT,FBXW8,RPS24,RPL…
FUMA	R-HSA-5250941	negative epigenetic regulation of rrna expression	106	7	2.09702e-05	0.00441273	HIST2H2AC:SIRT1:POLR1D:SIN3A:TAF1C:SIN3B:SAP130
FUMA	R-HSA-1280218	adaptive immune system	807	19	2.35503e-05	0.00441273	CDC42:HECTD3:HERC4:SFTPD:PIK3AP1:TIRAP:FBXW8:STUB1:FBXL16:AP1M1:KLHL22:UBA7:ANAPC4:ANAPC10:FBXL7:RICTOR:PJA2:CD14:ASB6
FUMA	KEGG_ABC_TRANSPORTERS	abc transporters	44	5	2.3944e-05	0.00445359	ABCD4:ABCA9:ABCA10:ABCB4:ABCB1
FUMA	GO:1902600	proton transmembrane transport	152	8	2.81715e-05	0.00460134	ATP5F1:ATP5C1:SLC25A3:TESC:ATP6V1D:SLC9A9:ATP5J2:ATP6V1F
FUMA	R-HSA-168898	toll like receptor cascades	153	8	2.95269e-05	0.00491787	IKBKE:SFTPD:TIRAP:SARM1:VRK3:TLR9:TLR9:CD14:NOD1
FUMA	GO:0006839	mitochondrial transport	250	10	3.09201e-05	0.0049405	ATP5F1:ATP5C1:CPT1A:HSP90AA1:RHOT2:USP36:TOMM40:BOK:ATP5J2:PMPCA
FUMA	GO:0009891	positive regulation of biosynthetic process	1966	33	3.24542e-05	0.00500605	SIRT1:TIRAP:SMARCD1:CDK2:SMARCC2:CEP290:TESC:SCARB1:ARID4A:HSP90AA1:DUOXA2:SIN3A:ERBB2:NFE2L1:GIPC1:HNRNPL:RELB:MED25:PTOV1:PNKP:ATF5:ZNF350:HDAC4:ASXL1:USP16:HMGN1:PLA2G6:TLR9:TLR9:ZCCHC4:GPBP1:SRF:ELOVL5:BUD31
FUMA	GO:0010256	endomembrane system organization	422	13	3.26925e-05	0.00500605	CDC42:VAMP4:FBXW8:MPP5:AP3D1:SOD1:TMEM33:USO1:XKR6:PPP2R2A:LAPTM4B:SURF4:SEC16A
WebGestalt	GO:0031301	integral component of organelle membrane	204	10	3.30273e-05	0.00509942	SLC25A3;RHOT2;RNF152;CPT1A;SLC35A4;LFNG;TOMM40;SLC25A4;SV2A;VAMP4
FUMA	GO:0005813	centrosome	500	13	0.000178333	0.00511366	CDC42:CDK2:CEP290:ATP6V1D:EXOC7:RELB:ATF5:CALM2:CDC25B:KLHL22:FBXL7:RABGAP1:SDCCAG3
FUMA	GO:0120025	cell projection part	1438	25	0.000181516	0.00511366	CDC42:AK2:SV2A:ROM1:TIRAP:CEP290:TESC:SCARB1:NGDN:HSP90AA1:SARM1:EXOC7:AP3D1:APBA3:GIPC1:PLAUR:SPEF1:SOD1:COMT:SLC26A6:TWF2:RGS12:ELOVL5:FZD3:SDCCAG3
FUMA	GO:0005801	cis golgi network	67	5	0.000183908	0.00511366	B3GAT3:SCFD1:BOK:SLC35C2:MAP6D1
FUMA	GO:0000118	histone deacetylase complex	68	5	0.000197246	0.0053363	SIN3A:SIN3B:SAP130:HDAC4:ING3
FUMA	GO:0005815	microtubule organizing center	722	16	0.00020642	0.00543754	CDC42:TMEM63A:CDK2:CEP290:ATP6V1D:WDR90:EXOC7:RELB:ATF5:CALM2:CDC25B:KLHL22:PLA2G6:FBXL7:RABGAP1:SDCCAG3
FUMA	GO:0065003	protein containing complex assembly	1891	32	3.69273e-05	0.00553909	FBLIM1:CDC42:MCOLN2:SV2A:VAMP4:IKBKE:TSPAN4:CPT1A:SCFD1:HSP90AA1:STUB1:TAF1C:APOC1:MED25:BOK:VPS16:PMEPA1:USP16:PSMG1:TWF2:ISY1:G3BP2:USO1:FBXL7:RICTOR:SRP19:PLN:RPA3:NOD1:EIF4H:TAF6:SEC16A
gPROFILER	GO:0044424	intracellular part	12968	158		0.00563956	SLC25A3,RHOT2,RNF152,ISY1,CPT1A,VRK3,UGP2,WDR24,PLCD1,TWF2,PMPCA,IKBKE,FBXL16,SRF,HS2ST1,UBA7,FAM173A,VAC14,SNAPC4,RC3H2,JMJD8,STX7,RAP2B,AK2,DUOXA2,MRPL51,COMMD4,ATP6V1D,PLOD2,EML3,TIRAP,UBR7,SARM1,SLC35A4,TMPO,STUB1,MOGS,ABCB4,APBB3,APOC1,NXF1,FBXL7,ACADM,SLC9A9,FIBP,FBLIM1,FZD3,ASB6,PIK3AP1,SPATA5L1,DNAJA1,SCFD1,CDC42,PNN,USP36,PLAUR,PLN,NARS,HMGN1,SOD1,GATM,NISCH,SLC35C2,HSP90AA1,CDK2,ZNF473,…
FUMA	GO:0045177	apical part of cell	379	11	0.000220191	0.00565156	VASH1:DUOXA2:DUOX1:ERBB2:SLC26A6:TLR9:TLR9:BYSL:NOD1:ABCB4:ABCB1:FZD3
FUMA	GO:0002218	activation of innate immune response	311	11	3.85509e-05	0.00566699	IKBKE:SFTPD:PIK3AP1:TIRAP:SIN3A:SARM1:RELB:TLR9:TLR9:PJA2:CD14:NOD1
FUMA	GO:0019867	outer membrane	205	8	0.000227092	0.00568297	MCL1:CISD1:CPT1A:SPG20:RHOT2:SARM1:TOMM40:BOK
FUMA	GO:0031461	cullin ring ubiquitin ligase complex	156	7	0.000240494	0.00573052	RFWD2:FBXW8:FBXL16:KLHL22:ANAPC4:ANAPC10:FBXL7
FUMA	GO:0019866	organelle inner membrane	516	13	0.000241751	0.00573052	UQCRH:ATP5F1:ATP5C1:SIRT1:MRPL43:MRPL51:SLC25A3:GATM:TOMM40:BOK:SLC25A4:ATP5J2:PMPCA
FUMA	GO:0070822	sin3 type complex	16	3	0.000246166	0.00573052	SIN3A:SIN3B:SAP130
FUMA	GO:0005975	carbohydrate metabolic process	559	15	4.02624e-05	0.00574134	HS2ST1:SIRT1:NDST2:GANAB:CPT1A:SORD:MAN2C1:JMJD8:SHPK:SHPK:NFE2L1:UGP2:MOGS:HDAC4:NISCH:GALT:GALT
FUMA	GO:0023056	positive regulation of signaling	1813	31	4.0619e-05	0.00574134	MCL1:IKBKE:SIRT1:PIK3AP1:TIRAP:NR2C1:HSP90AA1:CSNK1G1:JMJD8:WDR24:SARM1:ERBB2:TNFRSF11A:GIPC1:PLAUR:CALM2:BOK:ASXL1:SLC35C2:SOD1:KLHL22:PLA2G6:TLR9:TLR9:TMEM33:RICTOR:PJA2:CD14:LFNG:NOD1:BUD31:RC3H2
gPROFILER	GO:0005622	intracellular	12980	158		0.00588344	SLC25A3,RHOT2,RNF152,ISY1,CPT1A,VRK3,UGP2,WDR24,PLCD1,TWF2,PMPCA,IKBKE,FBXL16,SRF,HS2ST1,UBA7,FAM173A,VAC14,SNAPC4,RC3H2,JMJD8,STX7,RAP2B,AK2,DUOXA2,MRPL51,COMMD4,ATP6V1D,PLOD2,EML3,TIRAP,UBR7,SARM1,SLC35A4,TMPO,STUB1,MOGS,ABCB4,APBB3,APOC1,NXF1,FBXL7,ACADM,SLC9A9,FIBP,FBLIM1,FZD3,ASB6,PIK3AP1,SPATA5L1,DNAJA1,SCFD1,CDC42,PNN,USP36,PLAUR,PLN,NARS,HMGN1,SOD1,GATM,NISCH,SLC35C2,HSP90AA1,CDK2,ZNF473,…
gPROFILER	GO:0098588	bounding membrane of organelle	1548	10		0.00594646	RHOT2,RNF152,CPT1A,WDR24,IKBKE,HS2ST1,VAC14,STX7,RAP2B,ATP6V1D
FUMA	GO:1905954	positive regulation of lipid localization	81	6	4.31712e-05	0.00598695	IKBKE:SIRT1:SCARB1:TNFRSF11A:PLA2G6:ABCB4
gPROFILER	GO:0098805	whole membrane	1265	9		0.00613917	RHOT2,RNF152,CPT1A,WDR24,IKBKE,VAC14,STX7,RAP2B,ATP6V1D
FUMA	GO:0098573	intrinsic component of mitochondrial membrane	73	5	0.000275328	0.00624201	CPT1A:SLC25A3:RHOT2:TOMM40:SLC25A4
FUMA	GO:0042581	specific granule	160	7	0.00028061	0.00624201	TMEM63A:TOLLIP:CEP290:ATP6V1D:AP1M1:PLAUR:RAP2B
FUMA	GO:0006886	intracellular protein transport	1156	23	4.61825e-05	0.00628596	RPS24:B3GAT3:NXF1:RPL41:CEP290:HSP90AA1:ERBB2:STRADA:USP36:AP3D1:EVI5L:GIPC1:AP1M1:TOMM40:VPS16:USO1:SRP19:TBC1D9B:STX7:CPSF4:RABGAP1:PMPCA:SEC16A
FUMA	GO:0044419	interspecies interaction between organisms	925	20	4.73922e-05	0.00633332	CDC42:IKBKE:SIRT1:RPS24:SFTPD:NXF1:TIRAP:RPL41:SCARB1:VAC14:EXOC7:AP1M1:CALM2:ADARB1:TUSC2:CFI:SLC25A4:RICTOR:EIF4H:CPSF4
FUMA	GO:0002252	immune effector process	1242	24	4.9751e-05	0.00643705	CDC42:TMEM63A:GDI2:TOLLIP:TSPAN32:CEP290:ATP6V1D:HSP90AA1:SIN3A:AP1M1:PLAUR:RELB:STK11IP:ADARB1:PLA2G6:TUSC2:TLR9:TLR9:RAP2B:CFI:CD14:STX7:LFNG:RC3H2:SURF4
FUMA	GO:1902533	positive regulation of intracellular signal transduction	1005	21	4.992e-05	0.00643705	MCL1:IKBKE:SIRT1:PIK3AP1:TIRAP:HSP90AA1:JMJD8:WDR24:ERBB2:TNFRSF11A:CALM2:BOK:SOD1:KLHL22:PLA2G6:TLR9:TLR9:RICTOR:PJA2:CD14:NOD1:RC3H2
gPROFILER	GO:0016021	integral component of membrane	2304	6		0.00676419	SLC25A3,RHOT2,RNF152,CLPTM1,CPT1A,PCDHA5
FUMA	GO:0010564	regulation of cell cycle process	785	18	5.42311e-05	0.00687239	CDC42:CDK2:CEP290:HSP90AA1:SIN3A:NFE2L1:GIPC1:MED25:ATF5:CALM2:PKP4:CDC25B:KLHL22:L3MBTL2:ANAPC4:ANAPC10:FBXL7:SDCCAG3
FUMA	GO:0006954	inflammatory response	714	17	5.53179e-05	0.0068913	PIK3AP1:TOLLIP:TIRAP:DUOXA2:SHPK:SHPK:NFE2L1:TNFRSF11A:RELB:NMI:HDAC4:SOD1:TUSC2:TLR9:TLR9:RICTOR:PJA2:CD14:NOD1
gPROFILER	GO:0005739	mitochondrion	1295	16		0.00689577	SLC25A3,RHOT2,CPT1A,PMPCA,IKBKE,FAM173A,AK2,MRPL51,SARM1,ACADM,FIBP,PLN,SOD1,GATM,TOMM40,AMT
FUMA	GO:0002274	myeloid leukocyte activation	646	16	5.78433e-05	0.0070858	TMEM63A:GDI2:TOLLIP:TSPAN32:CEP290:ATP6V1D:HSP90AA1:SHPK:SHPK:AP1M1:PLAUR:RELB:STK11IP:RAP2B:PJA2:CD14:SURF4
FUMA	GO:0032606	type i interferon production	126	7	6.36276e-05	0.00766661	IKBKE:TIRAP:RELB:NMI:UBA7:TLR9:TLR9:CD14
gPROFILER	GO:0031224	intrinsic component of membrane	2399	6		0.0079202	SLC25A3,RHOT2,RNF152,CLPTM1,CPT1A,PCDHA5
gPROFILER	GO:0044429	mitochondrial part	852	7		0.0079202	SLC25A3,RHOT2,CPT1A,PMPCA,IKBKE,AK2,MRPL51
FUMA	GO:1901700	response to oxygen containing compound	1603	28	6.80706e-05	0.00794298	SIRT1:CPT1A:TIRAP:SMARCD1:CDK2:TESC:SCARB1:ATP6V1D:DUOX1:SIN3A:SHPK:SHPK:SARM1:NFE2L1:TNFRSF11A:HNRNPL:ASXL1:SOD1:COMT:KLHL22:PLA2G6:SLC26A6:TWF2:CD14:SRF:PLN:NOD1:ABCB4:ATP6V1F
FUMA	GO:0032465	regulation of cytokinesis	88	6	6.88719e-05	0.00794298	CDC42:GIPC1:CALM2:PKP4:CDC25B:SDCCAG3
FUMA	GO:0051130	positive regulation of cellular component organization	1188	23	6.96394e-05	0.00794298	CDC42:SIRT1:FBXW8:HSP90AA1:SIN3A:STUB1:METRN:USP36:PLAUR:MED25:PNKP:HDAC4:BOK:PLA2G6:TWF2:ANAPC4:RICTOR:CD14:SRF:RPA3:ABCB4:SURF4:SDCCAG3
FUMA	GO:0034660	ncrna metabolic process	455	13	7.0244e-05	0.00794298	RPF1:SIRT1:RPS24:INTS5:INTS6:NGDN:THUMPD1:USP36:NARS:ZCCHC4:BYSL:CPSF4:RC3H2
FUMA	GO:0051301	cell division	592	15	7.65333e-05	0.00847779	CDC42:ENSA:CDK2:SPG20:GIPC1:CALM2:PKP4:CDC25B:CABLES2:USP16:KLHL22:ANAPC4:ANAPC10:FBXL7:SDCCAG3
FUMA	GO:0051247	positive regulation of protein metabolic process	1615	28	7.72806e-05	0.00847779	RFWD2:SIRT1:TOLLIP:TIRAP:FBXW8:HSP90AA1:STUB1:ERBB2:STRADA:TNFRSF11A:HNRNPL:PLAUR:VRK3:CALM2:NMI:HDAC4:BOK:CDC25B:USP16:SOD1:PLA2G6:TLR9:TLR9:RAP2B:ZCCHC4:RICTOR:PJA2:PDCD2:NOD1
FUMA	KEGG_UBIQUITIN_MEDIATED_PROTEOLYSIS	ubiquitin mediated proteolysis	134	7	9.38096e-05	0.00872429	RFWD2:HERC4:FBXW8:STUB1:UBA7:ANAPC4:ANAPC10
FUMA	GO:0000151	ubiquitin ligase complex	281	9	0.000402678	0.00876263	RFWD2:FBXW8:STUB1:FBXL16:KLHL22:ANAPC4:ANAPC10:FBXL7:DNAJA1
FUMA	GO:0009057	macromolecule catabolic process	1366	25	8.21517e-05	0.00887963	HECTD3:USP24:RFWD2:SIRT1:RPS24:TOLLIP:TIRAP:CDK2:RPL41:FBXW8:UCHL3:HSP90AA1:STUB1:FBXL16:NFE2L1:USP36:GIPC1:USP16:KLHL22:UBA7:ANAPC4:ANAPC10:FBXL7:PPP2R2A:LAPTM4B
FUMA	GO:0022402	cell cycle process	1370	25	8.60046e-05	0.0091052	CDC42:ENSA:CDK2:CEP290:VASH1:HSP90AA1:SIN3A:NFE2L1:STRADA:GIPC1:MED25:ATF5:CALM2:PKP4:CDC25B:USP16:KLHL22:L3MBTL2:ANAPC4:ANAPC10:FBXL7:RPA3:ABCB1:PPP2R2A:SDCCAG3
FUMA	GO:0019725	cellular homeostasis	967	20	8.67356e-05	0.0091052	MCOLN2:SV2A:MCL1:SIRT1:ATP6V1D:SIN3A:RHOT2:NFE2L1:AP3D1:LRRC8E:CALM2:BOK:SOD1:PLA2G6:SLC26A6:SLC9A9:SRF:PLN:RPA3:ATP6V1F
FUMA	GO:0046903	secretion	1628	28	8.85115e-05	0.0091052	MCOLN2:SV2A:ENSA:TMEM63A:GDI2:TOLLIP:CPT1A:CEP290:SCFD1:ATP6V1D:HSP90AA1:EXOC7:TNFRSF11A:GIPC1:AP1M1:PLAUR:STK11IP:SOD1:COMT:PLA2G6:SLC26A6:TLR9:TLR9:NISCH:RAP2B:SLC25A4:CD14:ABCB4:SURF4
FUMA	GO:0010498	proteasomal protein catabolic process	466	13	8.91938e-05	0.0091052	HECTD3:RFWD2:SIRT1:CDK2:FBXW8:STUB1:FBXL16:NFE2L1:GIPC1:KLHL22:ANAPC4:ANAPC10:FBXL7
FUMA	GO:1990234	transferase complex	772	16	0.000430806	0.00917526	RFWD2:SIRT1:CDK2:FBXW8:POLR1D:STUB1:FBXL16:VAC14:KLHL22:WDR82:ANAPC4:ANAPC10:FBXL7:TAF6:ING3:DNAJA1
FUMA	GO:0042802	identical protein binding	1706	29	8.07889e-05	0.00939418	CDC42:ACADM:MCL1:CISD1:SIRT1:SFTPD:PIK3AP1:CPT1A:TIRAP:CEP290:NR2C1:TESC:SCARB1:HSP90AA1:SORD:STUB1:ERBB2:GIPC1:RELB:UGP2:NMI:HDAC4:BOK:SOD1:TLR9:TLR9:NISCH:SRF:PLN:NOD1
FUMA	GO:0032553	ribonucleotide binding	1885	31	8.30825e-05	0.00939418	CDC42:AK2:IKBKE:CDK2:ABCD4:PAPOLA:HSP90AA1:SPATA5L1:CSNK1G1:RHOT2:DNAJA2:SHPK:SHPK:ERBB2:STRADA:ABCA9:ABCA10:NARS:PNKP:VRK3:UGP2:STK17B:UBA7:TWF2:RAP2B:CLK4:KIF6:NOD1:ABCB4:ABCB1:NRBP2:DNAJA1
FUMA	GO:0030554	adenyl nucleotide binding	1536	27	8.31061e-05	0.00939418	AK2:IKBKE:CDK2:ABCD4:PAPOLA:HSP90AA1:SPATA5L1:CSNK1G1:DNAJA2:SHPK:SHPK:ERBB2:STRADA:ABCA9:ABCA10:NARS:PNKP:VRK3:STK17B:UBA7:TWF2:CLK4:KIF6:NOD1:ABCB4:ABCB1:NRBP2:DNAJA1
FUMA	GO:0033558	protein deacetylase activity	30	4	8.56612e-05	0.00939418	SIRT1:SIN3A:SIN3B:HDAC4
FUMA	GO:0003682	chromatin binding	535	14	9.45816e-05	0.00972417	SMARCD1:SMARCC2:SIN3A:NFE2L1:MUM1:SIN3B:RELB:ATF5:HDAC4:CENPB:ASXL1:HMGN1:WDR82:SRF
FUMA	GO:0010876	lipid localization	406	12	9.68925e-05	0.00975561	IKBKE:SIRT1:CPT1A:SCARB1:ABCA9:ABCA10:TNFRSF11A:APOC1:PLA2G6:ABCB4:ABCB1:XKR6
FUMA	GO:0030098	lymphocyte differentiation	346	11	9.98658e-05	0.0099191	ERBB2:AP3D1:CLPTM1:RELB:HDAC4:SOD1:TUSC2:TLR9:TLR9:SRF:LFNG:RC3H2
FUMA	R-HSA-166016	toll like receptor 4 tlr4 cascade	127	7	6.68946e-05	0.0100275	IKBKE:SFTPD:TIRAP:SARM1:VRK3:CD14:NOD1
FUMA	GO:0019903	protein phosphatase binding	137	7	0.000107764	0.0104278	ENSA:IKBKE:ERBB2:VRK3:SOD1:ANAPC4:PPP2R2A
WebGestalt	GO:0031300	intrinsic component of organelle membrane	227	10	8.11596e-05	0.0104425	SLC25A3;RHOT2;RNF152;CPT1A;SLC35A4;LFNG;TOMM40;SLC25A4;SV2A;VAMP4
FUMA	GO:0044770	cell cycle phase transition	611	15	0.000108373	0.0106205	ENSA:CDK2:CEP290:HSP90AA1:SIN3A:ATF5:CALM2:CDC25B:KLHL22:ANAPC4:ANAPC10:FBXL7:RPA3:ABCB1:PPP2R2A
gPROFILER	GO:0031967	organelle envelope	912	7		0.0109067	SLC25A3,RHOT2,CPT1A,PMPCA,IKBKE,AK2,MRPL51
gPROFILER	GO:0031975	envelope	912	7		0.0109067	SLC25A3,RHOT2,CPT1A,PMPCA,IKBKE,AK2,MRPL51
FUMA	GO:0006508	proteolysis	1744	29	0.000118026	0.0114144	HECTD3:USP24:RFWD2:SIRT1:TOLLIP:CDK2:FBXW8:UCHL3:VASH1:RHBDL1:STUB1:FBXL16:NFE2L1:USP36:GIPC1:PLAUR:BOK:ASXL1:USP16:KLHL22:UBA7:ANAPC4:COPS4:CFI:ANAPC10:FBXL7:PDCD2:NOD1:PMPCA
FUMA	GO:0031306	intrinsic component of mitochondrial outer membrane	21	3	0.000567961	0.0116026	CPT1A:RHOT2:TOMM40
FUMA	GO:0045259	proton transporting atp synthase complex	21	3	0.000567961	0.0116026	ATP5F1:ATP5C1:ATP5J2
FUMA	R-HSA-8953854	metabolism of rna	668	16	8.53764e-05	0.0116345	SF3B4:RPS24:SMNDC1:NXF1:RPL41:RPL36AL:PAPOLA:THUMPD1:HNRNPL:ZNF473:ADARB1:ISY1:BYSL:BUD31:CPSF4:PPP2R2A
FUMA	GO:0009895	negative regulation of catabolic process	295	10	0.000122526	0.0116956	MCL1:TIRAP:SCFD1:USP36:GIPC1:APOC1:HDAC4:KLHL22:LAPTM4B:NRBP2
FUMA	GO:0008237	atpase activity coupled	356	11	0.000128178	0.0117141	ATP5F1:ATP5C1:MYL6:ATP6V1D:ABCD4:HSP90AA1:ABCA9:ABCA10:ABCB4:ABCB1:ATP6V1F
FUMA	GO:0031330	negative regulation of cellular catabolic process	240	9	0.000125564	0.011832	MCL1:TIRAP:SCFD1:USP36:GIPC1:APOC1:KLHL22:LAPTM4B:NRBP2
FUMA	GO:0002253	activation of immune response	692	16	0.00012795	0.0119042	CDC42:IKBKE:SFTPD:PIK3AP1:TIRAP:HSP90AA1:SIN3A:SARM1:RELB:PLA2G6:TLR9:TLR9:CFI:PJA2:CD14:NOD1:RC3H2
FUMA	GO:0003712	transcription coregulator activity	557	14	0.000143806	0.0124506	SIRT1:SMARCD1:SMARCC2:SIN3A:NFE2L1:SIN3B:RELB:ATF5:NMI:HDAC4:ASXL1:USP16:MXD4:BUD31
FUMA	R-HSA-8951664	neddylation	234	9	0.000103704	0.0129543	RFWD2:FBXW8:UCHL3:COMMD4:FBXL16:KLHL22:COPS4:FBXL7:ASB6
FUMA	GO:0044877	atpase activity coupled to transmembrane movement of ions rotational mechanism	35	4	0.00015871	0.0129999	ATP5F1:ATP5C1:ATP6V1D:ATP6V1F
FUMA	GO:0044877	protein containing complex binding	1096	21	0.000166293	0.0129999	SIRT1:TSPAN4:SMARCC2:SLC25A3:SCARB1:MTIF3:SCFD1:HSP90AA1:SIN3A:NFE2L1:MUM1:VPS16:PSMG1:HMGN1:TWF2:NISCH:RICTOR:SRP19:NOD1:EIF4H:PPP2R2A
FUMA	GO:0030234	enzyme regulator activity	1019	20	0.000173859	0.0129999	ENSA:IKBKE:GDI2:B3GAT3:TESC:HSP90AA1:DNAJA2:STRADA:APBA3:EVI5L:APOC1:CALM2:RGS12:RICTOR:TBC1D9B:PLN:NOD1:PPP2R2A:DNAJA1:RABGAP1
FUMA	GO:0006952	defense response	1684	28	0.000155579	0.0142938	MCOLN2:IKBKE:SFTPD:PIK3AP1:TOLLIP:TSPAN32:TIRAP:DUOXA2:DUOX1:SIN3A:SHPK:SHPK:SARM1:NFE2L1:TNFRSF11A:RELB:NMI:HDAC4:SOD1:ADARB1:PLA2G6:SLC26A6:TUSC2:TLR9:TLR9:CFI:RICTOR:PJA2:CD14:NOD1
FUMA	GO:0043209	myelin sheath	52	4	0.000739386	0.0148025	MPP5:HSP90AA1:ERBB2:CALM2
FUMA	GO:0035579	specific granule membrane	91	5	0.000760501	0.0149267	TMEM63A:ATP6V1D:AP1M1:PLAUR:RAP2B
FUMA	GO:0048878	chemical homeostasis	1177	22	0.00016488	0.0149613	MCOLN2:SV2A:SIRT1:SFTPD:SCARB1:ATP6V1D:SIN3A:NARFL:TMEM97:NFE2L1:AP3D1:CALM2:BOK:SOD1:COMT:PLA2G6:SLC26A6:SLC9A9:SRF:PLN:ABCB4:ATP6V1F
WebGestalt	GO:0000790	nuclear chromatin	341	12	0.000136803	0.0150874	SRF;SIN3B;SIRT1;SAP130;BUD31;ING3;CENPB;ASXL1;SMARCD1;SIN3A;HIST2H2AC;SMARCC2
FUMA	GO:0002682	regulation of immune system process	1606	27	0.000171562	0.0153778	CDC42:IKBKE:SIRT1:SFTPD:PIK3AP1:TSPAN32:TIRAP:TESC:HSP90AA1:SIN3A:SHPK:SHPK:SARM1:ERBB2:AP3D1:CLPTM1:RELB:NMI:SOD1:PLA2G6:TLR9:TLR9:CFI:PJA2:CD14:STX7:PDCD2:NOD1:RC3H2
FUMA	GO:0099503	secretory vesicle	983	18	0.000816586	0.0157193	SV2A:VAMP4:TMEM63A:GDI2:TOLLIP:CEP290:ATP6V1D:HSP90AA1:GIPC1:AP1M1:PLAUR:STK11IP:SOD1:RAP2B:COPS4:CD14:STX7:SURF4
FUMA	GO:0008047	enzyme activator activity	511	13	0.000220134	0.0157444	GDI2:B3GAT3:DNAJA2:STRADA:EVI5L:APOC1:CALM2:RGS12:RICTOR:TBC1D9B:NOD1:DNAJA1:RABGAP1
FUMA	GO:0000209	protein polyubiquitination	309	10	0.000178374	0.0157957	FBXW8:STUB1:FBXL16:NFE2L1:RNF152:NMI:ANAPC4:ANAPC10:FBXL7:RC3H2
FUMA	GO:0045088	regulation of innate immune response	435	12	0.000183732	0.0159026	IKBKE:SFTPD:PIK3AP1:TIRAP:SIN3A:SARM1:RELB:NMI:TLR9:TLR9:PJA2:CD14:NOD1
FUMA	GO:0034121	regulation of toll like receptor signaling pathway	67	5	0.000183908	0.0159026	TIRAP:SARM1:TLR9:TLR9:PJA2:CD14
gPROFILER	GO:0070822	Sin3-type complex	16	3		0.016033	SIN3B,SAP130,SIN3A
gPROFILER	GO:0005654	nucleoplasm	3471	62		0.016033	ISY1,IKBKE,SRF,UBA7,SNAPC4,STUB1,ABCB4,NXF1,ACADM,FIBP,PNN,USP36,HMGN1,SOD1,SLC35C2,HSP90AA1,CDK2,ZNF473,INTS6,PSMG1,AMT,L3MBTL2,RPS24,SIN3B,RPA3,PNKP,PAPOLA,MBD1,TAF1C,CPSF4,POLR1D,AKT1S1,ENSA,SIRT1,SAP130,MED25,ADARB1,USP16,TAF6,PPP2R2A,BUD31,USP24,ING3,SMNDC1,ANAPC10,THUMPD1,CENPB,ASXL1,LARP7,RELB,SMARCD1,ZNF350,SNAPC3,HDAC4,STRADA,BYSL,NR2C1,INTS5,COPS4,CDC25B,WDR82,ARID4A
gPROFILER	GO:0044444	cytoplasmic part	8879	93		0.016033	SLC25A3,RHOT2,RNF152,CPT1A,UGP2,WDR24,TWF2,PMPCA,IKBKE,FBXL16,HS2ST1,UBA7,FAM173A,VAC14,JMJD8,STX7,RAP2B,AK2,DUOXA2,MRPL51,ATP6V1D,PLOD2,TIRAP,SARM1,SLC35A4,STUB1,MOGS,ABCB4,APBB3,APOC1,NXF1,FBXL7,ACADM,SLC9A9,FIBP,FBLIM1,ASB6,PIK3AP1,DNAJA1,SCFD1,CDC42,PLAUR,PLN,NARS,SOD1,GATM,NISCH,SLC35C2,HSP90AA1,CDK2,PLA2G6,TOMM40,LSAMP,PSMG1,AMT,FBXW8,RPS24,RPL36AL,GIPC1,TMEM97,NOD1,EIF4H,SEC16A,DUOX1,NDST2…
FUMA	GO:0051347	positive regulation of transferase activity	643	15	0.000188374	0.0160994	SIRT1:TIRAP:HSP90AA1:STUB1:ERBB2:STRADA:TNFRSF11A:PNKP:CALM2:CDC25B:SOD1:HMGN1:TLR9:TLR9:RICTOR:NOD1
FUMA	GO:0080135	regulation of cellular response to stress	718	16	0.000193993	0.016389	MCL1:SIRT1:TIRAP:VASH1:HSP90AA1:NFE2L1:TNFRSF11A:AKT1S1:BOK:SOD1:TLR9:TLR9:TMEM33:PJA2:RPA3:NOD1:DNAJA1
FUMA	GO:0050778	positive regulation of immune response	871	18	0.000197498	0.0164956	CDC42:IKBKE:SIRT1:SFTPD:PIK3AP1:TIRAP:HSP90AA1:SIN3A:SARM1:RELB:PLA2G6:TLR9:TLR9:CFI:PJA2:CD14:STX7:NOD1:RC3H2
FUMA	GO:0034134	toll like receptor 2 signaling pathway	15	3	0.000201173	0.0166137	PIK3AP1:TIRAP:PJA2
WebGestalt	GO:0017053	transcriptional repressor complex	84	6	0.000173	0.0166945	SIRT1;RELB;ZNF350;HDAC4;ARID4A;SIN3A
FUMA	GO:1905952	regulation of lipid localization	152	7	0.00020513	0.0167523	IKBKE:SIRT1:SCARB1:TNFRSF11A:APOC1:PLA2G6:ABCB4
FUMA	GO:0034470	ncrna processing	377	11	0.000210433	0.0168168	RPF1:SIRT1:RPS24:INTS5:INTS6:NGDN:THUMPD1:USP36:ZCCHC4:BYSL:CPSF4
FUMA	GO:0006289	nucleotide excision repair	108	6	0.000213495	0.0168168	SIRT1:PNKP:HMGN1:ISY1:COPS4:RPA3
FUMA	GO:0005996	monosaccharide metabolic process	153	7	0.00021355	0.0168168	SIRT1:CPT1A:SORD:MAN2C1:NFE2L1:NISCH:GALT:GALT
FUMA	GO:0016070	rna metabolic process	1542	26	0.000216978	0.0168168	RPF1:SF3B4:SIRT1:RPS24:SMNDC1:INTS5:INTS6:NGDN:PNN:PAPOLA:RPUSD1:THUMPD1:USP36:NARS:HNRNPL:ZNF473:ADARB1:ISY1:ZCCHC4:LARP7:CLK4:BYSL:SRF:BUD31:CPSF4:RC3H2
FUMA	GO:1901701	cellular response to oxygen containing compound	1118	21	0.00021736	0.0168168	SIRT1:CPT1A:TIRAP:SMARCD1:CDK2:TESC:SCARB1:ATP6V1D:SIN3A:SHPK:SHPK:NFE2L1:SOD1:KLHL22:PLA2G6:SLC26A6:TWF2:CD14:SRF:NOD1:ABCB4:ATP6V1F
FUMA	GO:0098798	mitochondrial protein complex	254	8	0.000934542	0.0176505	UQCRH:ATP5F1:ATP5C1:MRPL43:MRPL51:TOMM40:ATP5J2:PMPCA
FUMA	R-HSA-212165	epigenetic regulation of gene expression	145	7	0.000153395	0.0176877	HIST2H2AC:SIRT1:POLR1D:SIN3A:TAF1C:SIN3B:SAP130
FUMA	GO:0034220	ion transmembrane transport	1125	21	0.000236279	0.0180901	MCOLN2:ATP5F1:TMEM63A:ATP5C1:CPT1A:SLC25A3:TESC:ATP6V1D:KCNK10:LRRC8E:CALM2:SLC35C2:PLA2G6:SLC26A6:TLR9:TLR9:SLC9A9:PLN:ABCB1:ATP5J2:ATP6V1F:PMPCA
gPROFILER	GO:0016740	transferase activity	2009	11		0.0181381	RNF152,CPT1A,VRK3,UGP2,IKBKE,FBXL16,HS2ST1,UBA7,FAM173A,RC3H2,AK2
gPROFILER	GO:0004407	histone deacetylase activity	25	4		0.0181381	SIN3B,SIRT1,HDAC4,SIN3A
gPROFILER	GO:0019904	protein domain specific binding	474	12		0.0181381	STUB1,FZD3,DNAJA1,CDC42,PLAUR,HSP90AA1,CDK2,SLC26A6,NOD1,PMEPA1,SIRT1,CALM2
gPROFILER	GO:0033558	protein deacetylase activity	26	4		0.0181381	SIN3B,SIRT1,HDAC4,SIN3A
gPROFILER	GO:0022804	active transmembrane transporter activity	300	11		0.0181381	SLC25A3,ATP6V1D,ABCB4,SLC9A9,SLC35C2,SLC26A6,ABCA10,SLC35E1,ATP6V1F,SLC25A4,ABCA9
gPROFILER	GO:0004842	ubiquitin-protein transferase activity	347	7		0.0181381	RNF152,FBXL16,UBA7,RC3H2,STUB1,FBXL7,CDC42
gPROFILER	GO:0019787	ubiquitin-like protein transferase activity	373	7		0.0181381	RNF152,FBXL16,UBA7,RC3H2,STUB1,FBXL7,CDC42
gPROFILER	GO:0005546	phosphatidylinositol-4 5-bisphosphate binding	67	3		0.0181381	PLCD1,TWF2,TIRAP
gPROFILER	GO:0019213	deacetylase activity	39	5		0.0181381	SIN3B,NDST2,SIRT1,HDAC4,SIN3A
gPROFILER	GO:0015297	antiporter activity	67	5		0.0181381	SLC9A9,SLC35C2,SLC26A6,SLC35E1,SLC25A4
WebGestalt	GO:0055037	recycling endosome	164	8	0.000212145	0.0181973	STX7;RAP2B;SLC9A9;NISCH;BOK;VPS52;VPS16;MCOLN2
FUMA	GO:0009301	snrna transcription	71	5	0.000241711	0.0182448	INTS5:INTS6:TAF6:SNAPC3:SNAPC4
FUMA	GO:0032467	positive regulation of cytokinesis	39	4	0.000243265	0.0182448	CDC42:GIPC1:PKP4:CDC25B
FUMA	GO:0017000	antibiotic biosynthetic process	16	3	0.000246166	0.018276	DUOXA2:DUOX1:SOD1
gPROFILER	GO:0031982	vesicle	3440	42		0.0184115	SLC25A3,UGP2,PLCD1,TWF2,IKBKE,VAC14,STX7,RAP2B,AK2,ATP6V1D,PLOD2,TIRAP,MOGS,ABCB4,SLC9A9,DNAJA1,SCFD1,CDC42,PLAUR,NARS,SOD1,GATM,LFNG,HSP90AA1,CDK2,SLC26A6,GIPC1,SEC16A,B3GAT3,BOK,SORD,PMEPA1,CFI,CALM2,STK11IP,LAPTM4B,COMT,MAP6D1,GDI2,TLR9,ATP6V1F,GPA33
FUMA	GO:0016072	rrna metabolic process	208	8	0.000250522	0.0184134	RPF1:SIRT1:RPS24:NGDN:THUMPD1:USP36:ZCCHC4:BYSL
FUMA	GO:0005849	neuron part	1709	26	0.0010004	0.0185444	CDC42:ACADM:SV2A:VAMP4:ROM1:SMARCD1:SMARCC2:CEP290:NGDN:HSP90AA1:SARM1:EXOC7:AP3D1:APBA3:GIPC1:PKP4:VPS16:SOD1:COMT:TWF2:RGS12:COPS4:PJA2:ELOVL5:STX7:FZD3
FUMA	GO:0007049	cell cycle	641	15	0.000182186	0.0191491	HIST2H2AC:ENSA:RFWD2:CDK2:CEP290:TMPO:TINF2:HSP90AA1:CDC25B:ANAPC4:USO1:ANAPC10:FBXL7:RPA3:PPP2R2A
FUMA	R-HSA-6799198	cellular responses to stress	437	12	0.000191619	0.0191491	HIST2H2AC:SIRT1:CDK2:TINF2:HSP90AA1:DNAJA2:AKT1S1:SOD1:ANAPC4:ANAPC10:RPA3:DNAJA1
FUMA	GO:0016607	nuclear speck	389	10	0.00106897	0.0194552	ACADM:RFWD2:SMNDC1:NXF1:FIBP:PNN:USP36:MBD1:SAP130:COPS4
gPROFILER	GO:0005758	mitochondrial intermembrane space	58	3		0.0194983	AK2,SOD1,GATM
gPROFILER	GO:0019208	phosphatase regulator activity	75	5		0.0198682	B3GAT3,TESC,ENSA,CALM2,PPP2R2A
FUMA	GO:0006887	exocytosis	897	18	0.000281341	0.0204738	SV2A:TMEM63A:GDI2:TOLLIP:CEP290:SCFD1:ATP6V1D:HSP90AA1:EXOC7:GIPC1:AP1M1:PLAUR:STK11IP:SOD1:PLA2G6:RAP2B:CD14:SURF4
FUMA	GO:0015849	organic acid transport	328	10	0.000287201	0.0206954	SV2A:CPT1A:NFE2L1:TNFRSF11A:LRRC8E:GIPC1:PLA2G6:SLC26A6:SLC35A4:ABCB4
FUMA	GO:0016569	covalent chromatin modification	458	12	0.000293468	0.0209417	SIRT1:CDK2:ARID4A:SIN3A:USP36:MBD1:SIN3B:HDAC4:ASXL1:USP16:WDR82:ING3
FUMA	GO:0006119	oxidative phosphorylation	118	6	0.000344511	0.0213597	UQCRH:ATP5F1:ATP5C1:ATP6V1D:ATP5J2:ATP6V1F
gPROFILER	GO:0017053	transcriptional repressor complex	71	5		0.0213735	SIRT1,RELB,ZNF350,HDAC4,ARID4A
FUMA	GO:0051345	positive regulation of hydrolase activity	748	16	0.000305389	0.0213859	GDI2:SIRT1:DNAJA2:ERBB2:EVI5L:VRK3:CALM2:PKP4:ZC3H15:BOK:RGS12:TBC1D9B:PDCD2:NOD1:DNAJA1:RABGAP1
FUMA	GO:0002684	positive regulation of immune system process	1147	21	0.000305512	0.0213859	CDC42:IKBKE:SIRT1:SFTPD:PIK3AP1:TIRAP:TESC:HSP90AA1:SIN3A:SARM1:AP3D1:RELB:PLA2G6:TLR9:TLR9:CFI:PJA2:CD14:STX7:PDCD2:NOD1:RC3H2
FUMA	GO:1901224	positive regulation of nik nf kappab signaling	75	5	0.000312378	0.0216602	TIRAP:TLR9:TLR9:CD14:NOD1:RC3H2
gPROFILER	GO:0000118	histone deacetylase complex	66	5		0.0221579	SIN3B,SAP130,ING3,HDAC4,SIN3A
FUMA	GO:0015748	organophosphate ester transport	117	6	0.000329124	0.022608	SCARB1:APOC1:SLC25A4:ABCB4:ABCB1:XKR6
FUMA	GO:0006970	response to osmotic stress	76	5	0.000332261	0.0226122	SORD:LRRC8E:RELB:TSC22D2:ABCB1
FUMA	GO:1904949	atpase complex	102	5	0.00127057	0.0227114	SMARCD1:SMARCC2:ABCD4:PLN:ING3
WebGestalt	GO:0005801	cis-Golgi network	60	5	0.000297782	0.0229888	SCFD1;SLC35C2;B3GAT3;BOK;MAP6D1
FUMA	R-HSA-163210	formation of atp by chemiosmotic coupling	16	3	0.000246166	0.0230627	ATP5F1:ATP5C1:ATP5J2
gPROFILER	GO:0031970	organelle envelope lumen	63	3		0.0231879	AK2,SOD1,GATM
FUMA	GO:0031929	tor signaling	118	6	0.000344511	0.0232308	SIRT1:WDR24:RNF152:AKT1S1:KLHL22:RICTOR
FUMA	GO:0021762	substantia nigra development	43	4	0.000356149	0.0235859	CDC42:ATP5F1:CALM2:SEC16A
FUMA	GO:0033993	response to lipid	915	18	0.000356195	0.0235859	SIRT1:CPT1A:TIRAP:SMARCD1:NR2C1:TESC:SCARB1:SHPK:SHPK:NFE2L1:TNFRSF11A:ASXL1:PMEPA1:COMT:TWF2:CD14:PLN:ABCB4:DNAJA1
FUMA	GO:0042127	regulation of cell population proliferation	1684	27	0.000361817	0.0237442	SIRT1:SFTPD:TSPAN32:TIRAP:CDK2:TESC:TINF2:VASH1:DNAJA2:ERBB2:TNFRSF11A:MED25:ATF5:HDAC4:BOK:CDC25B:HMGN1:ADARB1:COMT:PLCD1:TLR9:TLR9:MXD4:RICTOR:SRF:PDCD2:RPA3:FZD3
FUMA	GO:0012506	vesicle membrane	780	15	0.00136389	0.0239518	SV2A:VAMP4:TMEM63A:SCARB1:ATP6V1D:GIPC1:AP1M1:PLAUR:SLC26A6:CYB561D2:XXcos-LUCA11.4:RAP2B:USO1:CD14:SURF4:SEC16A
FUMA	GO:0016241	regulation of macroautophagy	168	7	0.000376954	0.0245187	SIRT1:SCFD1:ATP6V1D:EXOC7:USP36:NOD1:NRBP2
FUMA	KEGG_PROGESTERONE_MEDIATED_OOCYTE_MATURATION	progesterone mediated oocyte maturation	85	5	0.000557189	0.0259093	CDK2:HSP90AA1:CDC25B:ANAPC4:ANAPC10
FUMA	R-HSA-936964	activation of irf3 irf7 mediated by tbk1 ikk epsilon	17	3	0.000297189	0.0262051	IKBKE:SARM1:CD14
FUMA	GO:0030554	hydrolase activity acting on acid anhydrides	921	18	0.000384725	0.0263697	CDC42:ATP5F1:ATP5C1:MYL6:ATP6V1D:ABCD4:HSP90AA1:SPATA5L1:RHOT2:ABCA9:ABCA10:RAP2B:RGS12:KIF6:ABCB4:ABCB1:ATP5J2:ATP6V1F
gPROFILER	GO:0010008	endosome membrane	306	8		0.0264147	IKBKE,VAC14,RAP2B,SLC9A9,BOK,PMEPA1,LAPTM4B,TLR9
FUMA	R-HSA-8953897	cellular responses to external stimuli	532	13	0.000323572	0.0269257	HIST2H2AC:SIRT1:CDK2:TINF2:HSP90AA1:DNAJA2:TOMM40:AKT1S1:SOD1:ANAPC4:ANAPC10:RPA3:DNAJA1
FUMA	R-HSA-69278	cell cycle mitotic	535	13	0.000341287	0.0269257	HIST2H2AC:ENSA:CDK2:CEP290:TMPO:HSP90AA1:CDC25B:ANAPC4:USO1:ANAPC10:FBXL7:RPA3:PPP2R2A
FUMA	R-HSA-400206	regulation of lipid metabolism by peroxisome proliferator activated receptor alpha pparalpha	119	6	0.000360456	0.0270162	ACADM:CPT1A:SIN3A:SIN3B:MED25:ABCB4
FUMA	GO:0032480	negative regulation of type i interferon production	45	4	0.000424745	0.0272516	IKBKE:RELB:NMI:UBA7
FUMA	GO:0002444	myeloid leukocyte mediated immunity	548	13	0.000427927	0.0272516	TMEM63A:GDI2:TOLLIP:CEP290:ATP6V1D:HSP90AA1:AP1M1:PLAUR:STK11IP:TUSC2:RAP2B:CD14:SURF4
FUMA	GO:0046717	acid secretion	123	6	0.000430093	0.0272516	SV2A:TNFRSF11A:GIPC1:PLA2G6:SLC26A6:ABCB4
gPROFILER	GO:0055037	recycling endosome	129	6		0.0278618	STX7,RAP2B,SLC9A9,BOK,VPS52,VPS16
FUMA	GO:0010507	negative regulation of autophagy	81	5	0.000446404	0.0280433	MCL1:SCFD1:USP36:KLHL22:NRBP2
FUMA	R-HSA-6807505	rna polymerase ii transcribes snrna genes	79	5	0.000397683	0.0282277	INTS5:INTS6:TAF6:SNAPC3:SNAPC4
FUMA	GO:0043312	neutrophil degranulation	476	12	0.000414282	0.0282277	TMEM63A:GDI2:TOLLIP:CEP290:ATP6V1D:HSP90AA1:AP1M1:PLAUR:STK11IP:RAP2B:CD14:SURF4
FUMA	GO:1901135	carbohydrate derivative metabolic process	934	18	0.000453425	0.028243	AK2:HS2ST1:ATP5F1:ATP5C1:NDST2:B3GAT3:GANAB:ALG5:SORD:SHPK:SHPK:NFE2L1:UGP2:MOGS:SLC35C2:ELOVL5:LFNG:ATP5J2:GALT:GALT
FUMA	GO:0038061	nik nf kappab signaling	174	7	0.00046527	0.0285539	IKBKE:TIRAP:RELB:TLR9:TLR9:CD14:NOD1:RC3H2
FUMA	GO:0043549	regulation of kinase activity	857	17	0.00047133	0.0285539	SIRT1:TIRAP:TESC:HSP90AA1:ERBB2:STRADA:TNFRSF11A:AKT1S1:CALM2:CDC25B:SOD1:ADARB1:TLR9:TLR9:RAP2B:RICTOR:NOD1:DNAJA1
FUMA	GO:0022613	ribonucleoprotein complex biogenesis	483	12	0.000471458	0.0285539	RPF1:SIRT1:RPS24:NGDN:HSP90AA1:THUMPD1:USP36:ISY1:ZCCHC4:G3BP2:BYSL:EIF4H
FUMA	GO:0002263	cell activation involved in immune response	702	15	0.000473956	0.0285539	TMEM63A:GDI2:TOLLIP:CEP290:ATP6V1D:HSP90AA1:AP1M1:PLAUR:RELB:STK11IP:RAP2B:CD14:LFNG:RC3H2:SURF4
FUMA	GO:0000805	x chromosome	8	2	0.00165621	0.0285839	CDK2:SIN3B
FUMA	GO:0005769	early endosome	345	9	0.00170116	0.028862	HPS6:VAC14:BOK:VPS16:PMEPA1:NISCH:STX7:LAPTM4B:SDCCAG3
FUMA	GO:0060716	labyrinthine layer blood vessel development	20	3	0.000489649	0.0290235	FBXW8:VASH1:PLCD1
FUMA	GO:0010592	positive regulation of lamellipodium assembly	20	3	0.000489649	0.0290235	CDC42:HDAC4:TWF2
FUMA	GO:0007006	mitochondrial membrane organization	127	6	0.000509804	0.0299765	ATP5F1:ATP5C1:HSP90AA1:RHOT2:BOK:ATP5J2
FUMA	GO:0016236	macroautophagy	291	9	0.000518027	0.0302183	SIRT1:SCFD1:ATP6V1D:EXOC7:USP36:TOMM40:VPS16:NOD1:NRBP2
FUMA	GO:0023057	negative regulation of signaling	1369	23	0.000528781	0.0306027	CDC42:MCL1:SIRT1:DKK3:SPG20:STUB1:SARM1:ERBB2:RNF152:PLAUR:AKT1S1:VRK3:CALM2:BOK:ASXL1:PMEPA1:PLA2G6:TLR9:TLR9:RGS12:CD14:SRF:LFNG:DNAJA1
WebGestalt	WP3858	Toll-like Receptor Signaling	32	5	8.24101e-05	0.0313982	IKBKE;TIRAP;TLR9;TOLLIP;RELB
gPROFILER	GO:1902936	phosphatidylinositol bisphosphate binding	93	3		0.0314154	PLCD1,TWF2,TIRAP
FUMA	GO:0030217	t cell differentiation	234	8	0.000548707	0.0315078	ERBB2:AP3D1:CLPTM1:RELB:SOD1:SRF:LFNG:RC3H2
FUMA	GO:0099023	tethering complex	67	4	0.00191016	0.0318679	CDC42:EXOC7:VPS16:VPS52
gPROFILER	GO:0042626	ATPase-coupled transmembrane transporter activity	106	7		0.0320281	ATP6V1D,ABCB4,ABCA10,ATP6V1F,ABCA9,ABCB1,ABCD4
FUMA	GO:0008144	drug binding	1718	27	0.000491569	0.0323452	AK2:IKBKE:CDK2:ABCD4:PAPOLA:HSP90AA1:SPATA5L1:CSNK1G1:DNAJA2:SHPK:SHPK:ERBB2:STRADA:ABCA9:ABCA10:NARS:PNKP:VRK3:STK17B:UBA7:TWF2:CLK4:KIF6:NOD1:ABCB4:ABCB1:NRBP2:DNAJA1
FUMA	GO:0015297	antiporter activity	84	5	0.000527748	0.0323772	SLC35E1:SLC35C2:SLC26A6:SLC9A9:SLC25A4
FUMA	GO:0015078	proton transmembrane transporter activity	128	6	0.00053142	0.0323772	ATP5F1:ATP5C1:SLC25A3:ATP6V1D:SLC9A9:ATP6V1F
WebGestalt	GO:0070822	Sin3-type complex	16	3	0.000468036	0.0328476	SIN3B;SAP130;SIN3A
FUMA	GO:0038187	pattern recognition receptor activity	21	3	0.000567961	0.0333677	SCARB1:TLR9:TLR9:CD14
gPROFILER	GO:0003824	catalytic activity	4885	13		0.0334959	RHOT2,RNF152,ISY1,CPT1A,VRK3,UGP2,PLCD1,PMPCA,IKBKE,FBXL16,HS2ST1,UBA7,FAM173A
FUMA	GO:0006412	translation	291	9	0.000518027	0.0337619	RPS24:MRPL43:MRPL51:RPL41:MTIF3:RPL36AL:NARS:SRP19:EIF4H
FUMA	GO:0019902	phosphatase binding	182	7	0.000607894	0.0344823	ENSA:IKBKE:ERBB2:VRK3:SOD1:ANAPC4:PPP2R2A
gPROFILER	GO:0015399	primary active transmembrane transporter activity	110	6		0.0350158	ATP6V1D,ABCB4,ABCA10,ATP6V1F,ABCA9,ABCB1
FUMA	GO:0031401	positive regulation of protein modification process	1212	21	0.00062423	0.0353293	SIRT1:TOLLIP:TIRAP:HSP90AA1:STUB1:ERBB2:STRADA:TNFRSF11A:PLAUR:VRK3:CALM2:NMI:HDAC4:CDC25B:SOD1:PLA2G6:TLR9:TLR9:RAP2B:RICTOR:PJA2:NOD1
FUMA	GO:0002764	immune response regulating signaling pathway	645	14	0.000624872	0.0353293	CDC42:IKBKE:SFTPD:PIK3AP1:TIRAP:HSP90AA1:SARM1:RELB:PLA2G6:TLR9:TLR9:PJA2:CD14:NOD1:RC3H2
FUMA	GO:0032608	interferon beta production	50	4	0.000636725	0.035454	TIRAP:RELB:NMI:TLR9:TLR9
FUMA	GO:1903793	positive regulation of anion transport	50	4	0.000636725	0.035454	TNFRSF11A:PLA2G6:ABCB4:ABCB1
FUMA	GO:0005730	nucleolus	1342	21	0.00218181	0.0358031	FBLIM1:RPF1:SF3B4:SIRT1:HERC4:POLR1D:NGDN:SIN3A:TAF1C:USP36:PNKP:VRK3:ZC3H15:ADARB1:WDR82:RGS12:ZCCHC4:USO1:SRP19:BYSL:SNAPC3
FUMA	GO:0031349	positive regulation of defense response	501	12	0.000649802	0.0359101	IKBKE:SFTPD:PIK3AP1:TIRAP:SIN3A:SARM1:TNFRSF11A:RELB:TLR9:TLR9:PJA2:CD14:NOD1
WebGestalt	GO:0032592	integral component of mitochondrial membrane	69	5	0.000570955	0.0362288	SLC25A3;RHOT2;CPT1A;TOMM40;SLC25A4
WebGestalt	GO:0098573	intrinsic component of mitochondrial membrane	70	5	0.00061007	0.0362288	SLC25A3;RHOT2;CPT1A;TOMM40;SLC25A4
FUMA	GO:0051055	negative regulation of lipid biosynthetic process	51	4	0.000686699	0.0374271	SIRT1:DKK3:APOC1:SOD1
FUMA	GO:0015914	phospholipid transport	89	5	0.000687436	0.0374271	SCARB1:APOC1:ABCB4:ABCB1:XKR6
gPROFILER	GO:0044440	endosomal part	355	11		0.0378557	IKBKE,VAC14,RAP2B,SLC9A9,BOK,PMEPA1,LAPTM4B,TLR9,VPS52,ERBB2,AP3D1
gPROFILER	GO:1903561	extracellular vesicle	2164	18		0.0378557	SLC25A3,UGP2,PLCD1,TWF2,STX7,RAP2B,AK2,ATP6V1D,PLOD2,MOGS,ABCB4,DNAJA1,CDC42,NARS,SOD1,GATM,LFNG,HSP90AA1
gPROFILER	GO:0043230	extracellular organelle	2168	18		0.0378557	SLC25A3,UGP2,PLCD1,TWF2,STX7,RAP2B,AK2,ATP6V1D,PLOD2,MOGS,ABCB4,DNAJA1,CDC42,NARS,SOD1,GATM,LFNG,HSP90AA1
gPROFILER	GO:0035579	specific granule membrane	90	3		0.0378557	RAP2B,ATP6V1D,PLAUR
gPROFILER	GO:0045177	apical part of cell	202	6		0.0379306	DUOXA2,ABCB4,SLC26A6,DUOX1,VASH1,TLR9
gPROFILER	GO:0097447	dendritic tree	298	8		0.0379306	SARM1,CDC42,SOD1,HSP90AA1,GIPC1,COMT,RGS12,ELOVL5
gPROFILER	GO:0012505	endomembrane system	3718	42		0.0379306	IKBKE,HS2ST1,VAC14,JMJD8,STX7,RAP2B,DUOXA2,ATP6V1D,PLOD2,SLC35A4,TMPO,STUB1,MOGS,APOC1,SLC9A9,DNAJA1,SCFD1,CDC42,PLAUR,PLN,SLC35C2,HSP90AA1,CDK2,PSMG1,FBXW8,RPL36AL,GIPC1,TMEM97,SEC16A,DUOX1,NDST2,B3GAT3,BOK,PMEPA1,VASH1,SIRT1,STK11IP,LAPTM4B,SLC35E1,MAP6D1,GDI2,TLR9
gPROFILER	GO:0042581	specific granule	158	7		0.0380386	RAP2B,ATP6V1D,PLAUR,TOLLIP,CEP290,AP1M1,TMEM63A
FUMA	GO:0051098	regulation of binding	369	10	0.000717365	0.0387694	TIRAP:SIN3A:STUB1:HNRNPL:PLAUR:MED25:CALM2:HDAC4:PLN:LFNG
FUMA	GO:1901137	carbohydrate derivative biosynthetic process	655	14	0.000725037	0.0388979	AK2:HS2ST1:ATP5F1:ATP5C1:NDST2:B3GAT3:ALG5:SORD:UGP2:MOGS:SLC35C2:ELOVL5:LFNG:ATP5J2
FUMA	GO:0046890	regulation of lipid biosynthetic process	188	7	0.000736061	0.0389701	SIRT1:DKK3:SCARB1:APOC1:SOD1:PLA2G6:ELOVL5
FUMA	GO:0051276	energy coupled proton transport down electrochemical gradient	23	3	0.000747589	0.0389701	ATP5F1:ATP5C1:ATP5J2
FUMA	GO:0016578	histone deubiquitination	23	3	0.000747589	0.0389701	USP36:ASXL1:USP16
FUMA	GO:0034123	positive regulation of toll like receptor signaling pathway	23	3	0.000747589	0.0389701	TIRAP:TLR9:TLR9:PJA2
FUMA	GO:1990542	mitochondrial transmembrane transport	91	5	0.000760501	0.039364	ATP5F1:ATP5C1:CPT1A:TOMM40:ATP5J2
FUMA	KEGG_GLYCOSAMINOGLYCAN_BIOSYNTHESIS_HEPARAN_SULFATE	glycosaminoglycan biosynthesis heparan sulfate	26	3	0.00107868	0.0393876	HS2ST1:NDST2:B3GAT3
FUMA	GO:0002224	toll like receptor signaling pathway	102	5	0.00127057	0.0393876	IKBKE:TOLLIP:TIRAP:TLR9:TLR9:CD14
FUMA	GO:0016192	vesicle mediated transport	722	15	0.000631747	0.0394055	VAMP4:GDI2:SCARB1:SCFD1:HSP90AA1:EXOC7:AP1M1:PLA2G6:USO1:COPS4:VPS52:KIF6:RABGAP1:SURF4:SEC16A
FUMA	R-HSA-72203	processing of capped intron containing pre mrna	242	8	0.000683493	0.0394055	SF3B4:SMNDC1:NXF1:PAPOLA:HNRNPL:ISY1:BUD31:CPSF4
FUMA	R-HSA-382551	transport of small molecules	728	15	0.000687042	0.0394055	MCOLN2:SCARB1:ATP6V1D:ABCA9:ABCA10:LRRC8E:APOC1:SLC26A6:SLC9A9:SLC25A4:PLN:ABCB4:ABCB1:ATP6V1F:PMPCA
FUMA	R-HSA-2990846	sumoylation	187	7	0.000713334	0.0394055	IKBKE:NR2C1:SIN3A:MBD1:ZNF350:HDAC4:L3MBTL2
FUMA	R-HSA-72172	mrna splicing	188	7	0.000736061	0.0394055	SF3B4:SMNDC1:PAPOLA:HNRNPL:ISY1:BUD31:CPSF4
FUMA	GO:0006915	apoptotic process	1956	29	0.000767698	0.0394586	MCL1:IKBKE:SIRT1:SMNDC1:SIN3A:RHOT2:SARM1:USP36:RNF152:PLAUR:AKT1S1:ATF5:STK17B:HDAC4:BOK:SOD1:ADARB1:PLA2G6:NISCH:SLC25A4:CD14:PDCD2:NOD1:TAF6:ING3:XKR6:FZD3:NRBP2:DNAJA1
FUMA	WP1449	regulation of toll-like receptor signaling pathway	144	7	0.000146959	0.0398992	IKBKE:SFTPD:TOLLIP:TIRAP:SARM1:TLR9:TLR9:CD14
FUMA	GO:0007005	mitochondrion organization	512	12	0.000784391	0.0400366	ATP5F1:ATP5C1:HSP90AA1:RHOT2:USP36:PLAUR:TOMM40:BOK:PLA2G6:SLC25A4:ATP5J2:PMPCA
FUMA	GO:0097447	dendritic tree	588	12	0.00249911	0.0403485	CDC42:SV2A:NGDN:HSP90AA1:SARM1:APBA3:GIPC1:SOD1:COMT:RGS12:ELOVL5:FZD3
FUMA	GO:0030901	midbrain development	92	5	0.000799134	0.0405078	CDC42:ATP5F1:CALM2:FZD3:SEC16A
FUMA	GO:1990904	ribonucleoprotein complex	1361	21	0.0025738	0.0408949	CDC42:RPF1:SF3B4:RPS24:MRPL43:SMNDC1:MRPL51:RPL41:NGDN:PNN:RPL36AL:FAM195A:HNRNPL:ISY1:G3BP2:LARP7:SRP19:BYSL:EIF4H:BUD31:RC3H2
FUMA	GO:0022884	proton transporting atpase activity rotational mechanism	23	3	0.000747589	0.0409928	ATP5C1:ATP6V1D:ATP6V1F
FUMA	GO:0000932	mitochondrial proton transporting atp synthase complex coupling factor f o	10	2	0.00263438	0.0412033	ATP5F1:ATP5J2
FUMA	GO:0098660	inorganic ion transmembrane transport	821	16	0.000829164	0.0417422	MCOLN2:ATP5F1:ATP5C1:SLC25A3:TESC:ATP6V1D:KCNK10:CALM2:PLA2G6:SLC26A6:TLR9:TLR9:SLC9A9:PLN:ATP5J2:ATP6V1F:PMPCA
FUMA	GO:0033081	regulation of t cell differentiation in thymus	24	3	0.000849464	0.0424732	ERBB2:CLPTM1:SOD1
FUMA	GO:0050776	regulation of immune response	1072	19	0.000865029	0.0427871	CDC42:IKBKE:SIRT1:SFTPD:PIK3AP1:TIRAP:HSP90AA1:SIN3A:SARM1:RELB:NMI:PLA2G6:TLR9:TLR9:CFI:PJA2:CD14:STX7:NOD1:RC3H2
FUMA	GO:0044070	regulation of anion transport	94	5	0.000880768	0.0427871	SV2A:TNFRSF11A:PLA2G6:ABCB4:ABCB1
FUMA	GO:0010639	negative regulation of organelle organization	380	10	0.00089647	0.0427871	SIRT1:TINF2:SCFD1:SIN3A:EVI5L:BOK:SPEF1:KLHL22:TWF2:MAP6D1
FUMA	GO:0060696	regulation of phospholipid catabolic process	6	2	0.000896492	0.0427871	SCARB1:APOC1
FUMA	GO:1902177	positive regulation of oxidative stress induced intrinsic apoptotic signaling pathway	6	2	0.000896492	0.0427871	MCL1:SOD1
FUMA	GO:0045349	interferon alpha biosynthetic process	6	2	0.000896492	0.0427871	NMI:TLR9:TLR9
FUMA	GO:0034137	positive regulation of toll like receptor 2 signaling pathway	6	2	0.000896492	0.0427871	TIRAP:PJA2
FUMA	GO:0044087	regulation of cellular component biogenesis	909	17	0.000902847	0.0428124	FBLIM1:CDC42:SCFD1:HSP90AA1:STUB1:USP36:EVI5L:MED25:HDAC4:VPS16:PMEPA1:PLA2G6:TWF2:RICTOR:SRF:RPA3:SDCCAG3
FUMA	GO:0007030	golgi organization	142	6	0.000915547	0.0431364	CDC42:VAMP4:FBXW8:USO1:SURF4:SEC16A
FUMA	GO:0007623	circadian rhythm	196	7	0.000939223	0.04397	SIRT1:CPT1A:SIN3A:TNFRSF11A:HNRNPL:RELB:ATF5
FUMA	GO:0000278	mitotic cell cycle	998	18	0.000968699	0.0450629	ENSA:SIRT1:CDK2:CEP290:HSP90AA1:SIN3A:NFE2L1:CALM2:CDC25B:USP16:KLHL22:ANAPC4:ANAPC10:FBXL7:RPA3:ABCB1:PPP2R2A:FZD3
FUMA	GO:0016050	vesicle organization	319	9	0.000991946	0.0458541	VAMP4:SCFD1:AP3D1:AP1M1:VPS16:USO1:STX7:LAPTM4B:SEC16A
FUMA	GO:0071396	cellular response to lipid	601	13	0.00100006	0.0459402	SIRT1:CPT1A:SMARCD1:NR2C1:TESC:SCARB1:SHPK:SHPK:NFE2L1:PMEPA1:TWF2:CD14:ABCB4:DNAJA1
gPROFILER	GO:0019888	protein phosphatase regulator activity	63	4		0.04633	B3GAT3,ENSA,CALM2,PPP2R2A
gPROFILER	GO:0008200	ion channel inhibitor activity	36	3		0.04633	STX7,ENSA,CALM2
FUMA	GO:0055131	transferase activity transferring phosphorus containing groups	908	17	0.000892124	0.0473401	AK2:IKBKE:CDK2:POLR1D:PAPOLA:CSNK1G1:SHPK:SHPK:ERBB2:STRADA:PNKP:VRK3:UGP2:STK17B:GMPPA:CLK4:NRBP2:GALT:GALT
gPROFILER	GO:0016248	channel inhibitor activity	37	3		0.0474076	STX7,ENSA,CALM2
FUMA	GO:0019208	phosphatase regulator activity	95	5	0.000923837	0.047491	ENSA:B3GAT3:TESC:CALM2:PPP2R2A
gPROFILER	GO:0016607	nuclear speck	318	5		0.0476119	NXF1,ACADM,FIBP,PNN,USP36
FUMA	GO:0031902	late endosome membrane	125	5	0.00309484	0.0476606	MCOLN2:VAC14:VPS16:SLC9A9:LAPTM4B
FUMA	GO:0005770	late endosome	243	7	0.00317348	0.0478568	MCOLN2:SFTPD:VAC14:VPS16:SLC9A9:STX7:LAPTM4B
FUMA	GO:0005730	proton transporting atp synthase complex coupling factor f o	11	2	0.0032032	0.0478568	ATP5F1:ATP5J2
WebGestalt	GO:0031307	integral component of mitochondrial outer membrane	20	3	0.000925798	0.0480876	RHOT2;CPT1A;TOMM40
WebGestalt	GO:0043209	myelin sheath	158	7	0.000934345	0.0480876	SLC25A3;SOD1;HSP90AA1;GDI2;SLC25A4;MPP5;ERBB2
WebGestalt	GO:0042581	specific granule	160	7	0.00100563	0.0485216	RAP2B;ATP6V1D;PLAUR;TOLLIP;CEP290;AP1M1;TMEM63A
WebGestalt	GO:0031306	intrinsic component of mitochondrial outer membrane	21	3	0.00107238	0.0486985	RHOT2;CPT1A;TOMM40
FUMA	GO:0051241	negative regulation of multicellular organismal process	1265	21	0.00106792	0.0487531	IKBKE:SFTPD:SPG20:VASH1:ERBB2:PLAUR:APOC1:RELB:NMI:HDAC4:SOD1:COMT:UBA7:TUSC2:TLR9:TLR9:SRF:PLN:LFNG:FZD3:LAPTM4B:RC3H2
FUMA	R-HSA-69273	cyclin a b1 b2 associated events during g2 m transition	25	3	0.00095974	0.0490632	CDK2:CDC25B:PPP2R2A
FUMA	R-HSA-937061	trif ticam1 mediated tlr4 signaling	97	5	0.00101465	0.0490632	IKBKE:SARM1:VRK3:CD14:NOD1
FUMA	R-HSA-168179	toll like receptor tlr1:tlr2 cascade	97	5	0.00101465	0.0490632	SFTPD:TIRAP:VRK3:CD14:NOD1
gPROFILER	GO:0044451	nucleoplasm part	1006	22		0.0491252	IKBKE,NXF1,ACADM,FIBP,PNN,USP36,CDK2,ZNF473,SIN3B,MBD1,CPSF4,SIRT1,SAP130,MED25,TAF6,ING3,CENPB,ZNF350,SNAPC3,HDAC4,COPS4,WDR82
FUMA	GO:0043604	amide biosynthetic process	843	16	0.00109136	0.0495154	RPS24:MRPL43:MRPL51:RPL41:MTIF3:NGDN:RPL36AL:ERBB2:NARS:HNRNPL:ZC3H15:USP16:PLA2G6:ZCCHC4:ELOVL5:EIF4H
FUMA	GO:0032984	protein containing complex disassembly	324	9	0.00110527	0.0497577	MRPL43:MRPL51:SMARCD1:SMARCC2:MTIF3:VPS16:SPEF1:TWF2:MAP6D1
FUMA	GO:0034097	response to cytokine	1182	20	0.00111548	0.0497577	CDC42:MCL1:IKBKE:SIRT1:TOLLIP:ABCD4:HSP90AA1:DUOX1:SHPK:SHPK:TNFRSF11A:GIPC1:RELB:NMI:ZC3H15:HDAC4:SOD1:SLC26A6:CD14:SRF:NOD1
FUMA	GO:2001244	positive regulation of intrinsic apoptotic signaling pathway	58	4	0.00111701	0.0497577	MCL1:SIRT1:BOK:SOD1
FUMA	GO:0051235	maintenance of location	325	9	0.00112914	0.049995	MCOLN2:IKBKE:SIRT1:SCARB1:AP3D1:CALM2:TWF2:G3BP2:PLN
