# Supplementary material for: Multiomics integrative analysis identifies APOE allele-specific blood biomarkers associated to Alzheimer’s disease etiopathogenesis
Source: Aging (Albany NY). 2021 Apr 12;13(7):9277–329. doi: 10.18632/aging.202950 (PMC8064208; doi:10.18632/aging.202950)
Supplement: Supplementary Table 32 [file aging-13-202950-s034.xlsx]

## Sheet: Sheet1
Supplementary Table 32. RRA integrative analysis in blood: enrichment analysis APOE3 stratum.
Tool	ID	Description	N_genes	N_overlap	p	adjP	genes
WebGestalt	GO:0005840	ribosome	229	26	0	0	RPL36AL;MRPL51;RPS25;DENR;MRPS17;RPS27A;ZNF622;RPLP0;MRPL33;MRPS21;RPL26;MRPL27;RPL32;RPL6;RPL23;MRPL1;SNCA;MRPL48;MRPL35;RPL11;NCK1;RPS24;ZC3H15;RPL10L;RPL12;RRBP1
FUMA	GO:0046907	intracellular transport	1815	67	4.39433e-26	3.22983e-22	PRKCZ:RPL11:RIMS3:DOCK7:ATP5F1:CAPZA1:CNIH4:RPS24:FAM160A2:MYBPC3:VPS37C:NXF1:TBC1D10C:RAB6A:PICALM:RPS25:TRAPPC4:PEX5:RPL6:RPLP0:VPS37B:IFT88:CPSF2:HSP90AA1:SRP14:PRRT2:TAOK2:KATNB1:RPAIN:RPL26:STX8:RPL23:CRHR1:MAPT:NSF:RAB37:ATP5H:SNRPD2:RPS27A:BIN1:WDR33:SSB:PLEKHA3:NUP35:APP:SOD1:ATP5O:RPL32:HACL1:GORASP1:DTX3L:ATP5I:SDAD1:SNCA:SEC24D:SRP19:TMCO6:ERGIC1:RAB23:KPNA5:TOMM7:BCAP29:LEPROTL1:DCTN6…
FUMA	GO:0005840	ribosome	248	26	2.89127e-21	2.89417e-18	RPL11:MRPS21:RPS24:MRPL48:RPS25:MRPL51:RPL6:GCN1L1:RPLP0:RPL10L:RPL36AL:RPL26:RPL23:MRPL27:ICT1:MRPL33:RPS27A:MRPL35:RRBP1:RPL32:NCK1:MRPL1:SNCA:ZNF622:MRPS17:MRPS17:RPL12
FUMA	GO:0044391	ribosomal subunit	189	22	3.67018e-19	1.83692e-16	RPL11:MRPS21:RPS24:MRPL48:RPS25:MRPL51:RPL6:RPLP0:RPL10L:RPL36AL:RPL26:RPL23:MRPL27:ICT1:MRPL33:RPS27A:MRPL35:RPL32:MRPL1:ZNF622:MRPS17:MRPS17:RPL12
FUMA	GO:0043604	protein containing complex assembly	1891	59	2.37067e-19	8.71222e-16	PRKCZ:RPL11:NDUFS5:ATPAF1:GTF2B:CAPZA1:RHOC:COX15:TUBGCP2:RRM1:MYBPC3:PICALM:TRAPPC4:PEX5:ARPC3:RPL6:RPLP0:PXN:DENR:POMP:RPL10L:HSP90AA1:GTF2A2:MEFV:PRRT2:ALDOA:TAF1C:MAPT:NSF:ABCA7:GMFG:APOC1:SNRPD2:RPS27A:BIN1:NDUFB3:DRG1:HACL1:GORASP1:COX17:NCK1:PKD2:SNCA:SEC24D:BRIX1:SRP19:GMNN:AIF1:RPF2:COX19:RPA3:PSMC2:PTK2B:CHRNA2:UQCRB:EIF3E:KANK1:ANP32B:RPL12
FUMA	GO:0046907	cellular protein containing complex assembly	1112	45	5.20936e-19	1.27629e-15	RPL11:NDUFS5:ATPAF1:GTF2B:CAPZA1:COX15:TUBGCP2:MYBPC3:PICALM:ARPC3:RPL6:RPLP0:PXN:DENR:POMP:RPL10L:HSP90AA1:GTF2A2:MEFV:PRRT2:TAF1C:MAPT:GMFG:SNRPD2:RPS27A:BIN1:NDUFB3:DRG1:COX17:NCK1:SNCA:BRIX1:SRP19:GMNN:AIF1:RPF2:COX19:RPA3:PSMC2:PTK2B:UQCRB:EIF3E:KANK1:ANP32B:RPL12
FUMA	GO:0003723	rna binding	1875	56	1.61413e-17	2.65525e-14	RPL11:GNL2:EBNA1BP2:PRDX1:MOV10:MRPS21:NVL:RBM34:DDX50:RPS24:SPI1:NXF1:RPS25:METAP2:RPL6:GCN1L1:RPLP0:DENR:NGDN:ACTN1:CPSF2:HSP90AA1:SRP14:MAZ:ALDOA:SNTB2:RPL26:RPL23:MAPT:MRPL27:ICT1:SAMD4B:SNRPD2:RPS27A:SUCLG1:WDR33:RBMS1:SSB:ZC3H15:SNRPB2:RRBP1:CSTF1:RPL32:EIF4E3:MRPL1:LARP7:ZNF622:BRIX1:SRP19:RPF2:MRPS17:MRPS17:SSBP1:PDIA4:EIF3E:ZCCHC7:RPL12
FUMA	GO:1901566	organonitrogen compound biosynthetic process	1814	55	1.7165e-17	2.77947e-14	RPL11:AK2:ACADM:ATP5F1:MOV10:MRPS21:RPS24:COX15:MRPL48:RPS25:MRPL51:RPL6:GCN1L1:RPLP0:DENR:NGDN:RPL10L:RPL36AL:ALDOA:RPL26:RPL23:XYLT2:MRPL27:ICT1:ATP5H:ABCA7:SAMD4B:MRPL33:RPS27A:MRPL35:ZC3H15:ASNSD1:CD28:RRBP1:APP:ATP5O:DRG1:RPL32:GORASP1:CHDH:EIF4E3:NCK1:ATP5I:MRPL1:SNCA:VCAN:TMEM14C:HS3ST5:MRPS17:MRPS17:PTK2B:EXTL3:FABP5:EIF3E:ST3GAL1:RPL12
FUMA	GO:0070727	cellular macromolecule localization	1886	56	2.09043e-17	2.77947e-14	PRKCZ:RPL11:GOLPH3L:NVL:RPS24:VPS37C:NXF1:TBC1D10C:RAB6A:PICALM:RPS25:PEX5:RPL6:RPLP0:VPS37B:IFT88:TM9SF1:TM9SF1:ATP6V1D:CPSF2:HSP90AA1:SRP14:TAOK2:KATNB1:RPAIN:RPL26:STX8:RPL23:MAPT:NSF:RAB37:ABCA7:RPS27A:WDR33:SSB:NUP35:FAM126B:RPL32:HACL1:GORASP1:DTX3L:SDAD1:SEC24D:PLRG1:SRP19:TMCO6:RAB23:RPF2:KPNA5:TOMM7:BCAP29:CNTNAP2:LEPROTL1:ENY2:DNAJA1:ANP32B:RPL12
FUMA	GO:0043043	peptide biosynthetic process	719	35	2.26895e-17	2.77947e-14	RPL11:MOV10:MRPS21:RPS24:MRPL48:RPS25:MRPL51:RPL6:GCN1L1:RPLP0:DENR:NGDN:RPL10L:RPL36AL:RPL26:RPL23:MRPL27:ICT1:SAMD4B:MRPL33:RPS27A:MRPL35:ZC3H15:CD28:RRBP1:APP:DRG1:RPL32:EIF4E3:NCK1:MRPL1:MRPS17:MRPS17:PTK2B:EIF3E:RPL12
FUMA	GO:0043603	cellular amide metabolic process	1020	41	2.86462e-17	3.00785e-14	RPL11:MOV10:MRPS21:RPS24:MRPL48:PICALM:RPS25:MRPL51:RPL6:GCN1L1:RPLP0:DENR:NGDN:RPL10L:RPL36AL:RPL26:RPL23:MRPL27:ICT1:ABCA7:SAMD4B:MRPL33:RPS27A:SUCLG1:MRPL35:BIN1:ZC3H15:CD28:RRBP1:APP:SOD1:DRG1:RPL32:EIF4E3:NCK1:MRPL1:SNCA:MRPS17:MRPS17:PTK2B:EIF3E:RPL12
FUMA	GO:0031975	envelope	1166	43	9.91204e-17	3.30732e-14	PRKCZ:AK2:NDUFS5:UQCRH:ACADM:ATP5F1:MRPS21:MCL1:COX15:RRM1:NXF1:MRPL48:MRPL51:BCL2L2:MVP:CMTM3:MRPL27:ICT1:ATP5H:MRPL33:RPS27A:MRPL35:BIN1:NUP35:NDUFB3:APP:SOD1:ATP5O:CHDH:COX17:ATP5I:MRPL1:SNCA:PLRG1:TMEM14C:KPNA5:COX19:INTS1:TOMM7:CBX3:MRPS17:MRPS17:UQCRB:ENY2
FUMA	GO:0015934	large ribosomal subunit	120	17	1.49047e-16	3.7299e-14	RPL11:MRPL48:MRPL51:RPL6:RPLP0:RPL10L:RPL36AL:RPL26:RPL23:MRPL27:ICT1:MRPL33:MRPL35:RPL32:MRPL1:ZNF622:RPL12
FUMA	R-HSA-72766	translation	291	24	2.73998e-17	4.10724e-14	RPL11:MRPS21:RPS24:MRPL48:RPS25:MRPL51:RPL6:RPLP0:RPL10L:RPL36AL:SRP14:RPL26:RPL23:MRPL27:ICT1:MRPL33:RPS27A:MRPL35:RPL32:MRPL1:SRP19:MRPS17:MRPS17:EIF3E:RPL12
FUMA	GO:1990904	ribonucleoprotein complex	1361	45	9.86469e-16	1.97491e-13	RPL11:EBNA1BP2:MOV10:MRPS21:NVL:RPS24:MRPL48:RPS25:MRPL51:RPL6:GCN1L1:RPLP0:NGDN:RPL10L:RPL36AL:SRP14:RPL26:RPL23:MAPT:MRPL27:ICT1:SAMD4B:SNRPD2:MRPL33:RPS27A:MRPL35:RBMS1:SSB:PPIL3:SNRPB2:RRBP1:DRG1:RPL32:NCK1:MRPL1:SNCA:LARP7:PLRG1:ZNF622:SRP19:ZMAT2:MRPS17:MRPS17:PSMC2:EIF3E:RPL12
FUMA	GO:0043604	amide biosynthetic process	843	36	4.59807e-16	4.22448e-13	RPL11:MOV10:MRPS21:RPS24:MRPL48:RPS25:MRPL51:RPL6:GCN1L1:RPLP0:DENR:NGDN:RPL10L:RPL36AL:RPL26:RPL23:MRPL27:ICT1:SAMD4B:MRPL33:RPS27A:MRPL35:ZC3H15:CD28:RRBP1:APP:DRG1:RPL32:EIF4E3:NCK1:MRPL1:SNCA:MRPS17:MRPS17:PTK2B:EIF3E:RPL12
FUMA	GO:0042273	ribosomal large subunit biogenesis	71	14	5.86245e-16	4.78767e-13	RPL11:EBNA1BP2:NVL:RPL6:RPLP0:RPL10L:RPL26:SDAD1:MRPL1:ZNF622:BRIX1:PAK1IP1:RPF2:RPL12
WebGestalt	GO:0044391	ribosomal subunit	186	21	1.66533e-15	6.42819e-13	RPL36AL;MRPL51;RPS25;MRPS17;RPS27A;ZNF622;RPLP0;MRPL33;MRPS21;RPL26;MRPL27;RPL32;RPL6;RPL23;MRPL1;MRPL48;MRPL35;RPL11;RPS24;RPL10L;RPL12
FUMA	R-HSA-5663205	infectious disease	379	25	1.11006e-15	8.31993e-13	RPL11:GTF2B:RPS24:VPS37C:RPS25:RPL6:RPLP0:VPS37B:RPL10L:RPL36AL:PSMA3:HSP90AA1:GTF2A2:RPL26:RPL23:PSMD12:ELL:RPS27A:NUP35:CD28:RPL32:KPNA5:SHFM1:C7orf76:PSMC2:RPL12
FUMA	GO:0003735	structural constituent of ribosome	178	18	8.17504e-15	6.72397e-12	RPL11:MRPS21:RPS24:MRPL51:RPL6:RPLP0:RPL10L:RPL36AL:RPL26:RPL23:MRPL27:MRPL33:RPS27A:MRPL35:RPL32:MRPL1:MRPS17:MRPS17:RPL12
FUMA	GO:0006886	intracellular protein transport	1156	40	1.06237e-14	7.80839e-12	RPL11:RPS24:VPS37C:NXF1:TBC1D10C:RAB6A:RPS25:PEX5:RPL6:RPLP0:VPS37B:IFT88:CPSF2:HSP90AA1:SRP14:TAOK2:KATNB1:RPAIN:RPL26:STX8:RPL23:NSF:RAB37:RPS27A:WDR33:SSB:NUP35:RPL32:HACL1:SDAD1:SEC24D:SRP19:TMCO6:RAB23:KPNA5:TOMM7:BCAP29:ENY2:ANP32B:RPL12
FUMA	GO:0033365	protein localization to organelle	916	35	3.26695e-14	2.18292e-11	PRKCZ:RPL11:NVL:RPS24:VPS37C:RAB6A:RPS25:PEX5:RPL6:RPLP0:VPS37B:ATP6V1D:HSP90AA1:SRP14:RPAIN:RPL26:RPL23:MAPT:ABCA7:RPS27A:SSB:NUP35:RPL32:HACL1:DTX3L:PLRG1:SRP19:TMCO6:RAB23:RPF2:KPNA5:TOMM7:BCAP29:DNAJA1:RPL12
FUMA	GO:0005740	mitochondrial envelope	725	30	3.37571e-13	5.49016e-11	AK2:NDUFS5:UQCRH:ACADM:ATP5F1:MRPS21:MCL1:COX15:MRPL48:MRPL51:BCL2L2:MRPL27:ICT1:ATP5H:MRPL33:RPS27A:MRPL35:NDUFB3:SOD1:ATP5O:CHDH:COX17:ATP5I:MRPL1:SNCA:TMEM14C:COX19:TOMM7:MRPS17:MRPS17:UQCRB
FUMA	GO:0022626	cytosolic ribosome	111	14	3.83927e-13	5.49016e-11	RPL11:RPS24:RPS25:RPL6:RPLP0:RPL10L:RPL36AL:RPL26:RPL23:RPS27A:RPL32:MRPL1:ZNF622:RPL12
WebGestalt	GO:0015934	large ribosomal subunit	118	16	2.4114e-13	6.20535e-11	RPL36AL;MRPL51;ZNF622;RPLP0;MRPL33;RPL26;MRPL27;RPL32;RPL6;RPL23;MRPL1;MRPL48;MRPL35;RPL11;RPL10L;RPL12
FUMA	R-HSA-1799339	srp dependent cotranslational protein targeting to membrane	111	14	3.83927e-13	1.91836e-10	RPL11:RPS24:RPS25:RPL6:RPLP0:RPL10L:RPL36AL:SRP14:RPL26:RPL23:RPS27A:RPL32:SRP19:RPL12
FUMA	R-HSA-9010553	regulation of expression of slits and robos	170	16	7.99487e-13	2.99608e-10	RPL11:RPS24:RPS25:RPL6:RPLP0:RPL10L:RPL36AL:PSMA3:RPL26:RPL23:PSMD12:RPS27A:RPL32:SHFM1:C7orf76:PSMC2:RPL12
FUMA	GO:0022625	cytosolic large ribosomal subunit	62	11	2.79199e-12	3.49348e-10	RPL11:RPL6:RPLP0:RPL10L:RPL36AL:RPL26:RPL23:RPL32:MRPL1:ZNF622:RPL12
FUMA	GO:0098798	mitochondrial protein complex	254	18	3.73559e-12	4.15481e-10	NDUFS5:UQCRH:ATP5F1:MRPS21:MRPL48:MRPL51:MRPL27:ICT1:ATP5H:MRPL33:MRPL35:NDUFB3:ATP5O:ATP5I:SNCA:TOMM7:MRPS17:MRPS17:UQCRB
FUMA	R-HSA-168254	influenza infection	154	15	2.54711e-12	7.01172e-10	RPL11:RPS24:RPS25:RPL6:RPLP0:RPL10L:RPL36AL:HSP90AA1:RPL26:RPL23:RPS27A:NUP35:RPL32:KPNA5:RPL12
FUMA	R-HSA-376176	signaling by robo receptors	216	17	2.80656e-12	7.01172e-10	RPL11:RPS24:RPS25:RPL6:RPLP0:RPL10L:RPL36AL:PSMA3:RPL26:RPL23:PSMD12:RPS27A:RPL32:NCK1:SHFM1:C7orf76:PSMC2:RPL12
WebGestalt	GO:0003735	structural constituent of ribosome	156	18	6.28497e-13	7.47283e-10	RPL36AL;MRPL51;MRPS17;RPS27A;RPLP0;MRPL33;MRPS21;RPL26;MRPL27;RPL32;RPL6;RPL23;MRPL1;MRPL35;RPL11;RPS24;RPL10L;RPL12
FUMA	GO:0044093	positive regulation of molecular function	1740	46	1.3951e-12	8.545e-10	PRKCZ:RPL11:DOCK7:GTF2B:RHOC:CTSS:NVL:MYBPC3:TBC1D10C:PICALM:GCN1L1:HSP90AA1:GTF2A2:MEFV:TAOK2:MAPT:GMFG:APOC1:LILRA5:RPS27A:STK39:ZC3H15:CFLAR:JPH2:CASS4:APP:SOD1:SETMAR:GORASP1:PROK2:COX17:FAM162A:DTX3L:PKD2:PPM1K:FAM13A:SNCA:ZNF622:GM2A:GMNN:PRKAR1B:SSBP1:PTK2B:EIF3E:DNAJA1:ANP32B
FUMA	KEGG_RIBOSOME	ribosome	87	12	6.36699e-12	1.18426e-09	RPL11:RPS24:RPS25:RPL6:RPLP0:RPL10L:RPL36AL:RPL26:RPL23:RPS27A:RPL32:RPL12
FUMA	KEGG_OXIDATIVE_PHOSPHORYLATION	oxidative phosphorylation	118	13	1.55672e-11	1.44775e-09	NDUFS5:UQCRH:ATP5F1:COX15:TCIRG1:ATP6V1D:ATP5H:NDUFB3:ATP5O:ATP6V1E1:COX17:ATP5I:UQCRB
FUMA	GO:0005739	mitochondrial part	1019	33	1.60374e-11	1.60534e-09	AK2:NDUFS5:UQCRH:ACADM:ATP5F1:MRPS21:MCL1:COX15:MRPL48:MRPL51:BCL2L2:MRPL27:ICT1:ATP5H:MRPL33:RPS27A:SUCLG1:MRPL35:NDUFB3:SOD1:ATP5O:CHDH:COX17:ATP5I:MRPL1:PPM1K:SNCA:TMEM14C:COX19:TOMM7:MRPS17:MRPS17:SSBP1:UQCRB
FUMA	GO:0090150	establishment of protein localization to membrane	325	20	3.12129e-12	1.76473e-09	RPL11:GOLPH3L:RPS24:VPS37C:RPS25:PEX5:RPL6:RPLP0:VPS37B:HSP90AA1:SRP14:TAOK2:RPL26:RPL23:NSF:RPS27A:RPL32:GORASP1:SRP19:RPL12
FUMA	R-HSA-8953854	metabolism of rna	668	27	9.34734e-12	2.00167e-09	RPL11:DNAJC8:EBNA1BP2:RPS24:NXF1:RPS25:RPL6:RPLP0:RPL10L:RPL36AL:PSMA3:CPSF2:RPL26:RPL23:PSMD12:SNRPD2:RPS27A:WDR33:NUP35:PPIL3:SNRPB2:CSTF1:RPL32:PLRG1:SHFM1:C7orf76:PSMC2:RPL12
FUMA	GO:0070469	cytoplasmic vesicle part	1483	40	2.65728e-11	2.30086e-09	ECM1:CTSS:CNGA4:TMEM9B:VPS37C:TBC1D10C:TCIRG1:RAB6A:PICALM:VPS37B:ATP6V1D:ACTN1:HSP90AA1:SRP14:PRRT2:MVP:TAOK2:ALDOA:SNTB2:STX8:PLEKHM1:WNT3:PSMD12:RAB37:ABCA7:GMFG:RPS27A:CST3:ATP9A:APP:DTX3L:PKD2:SNCA:MMRN1:SEC24D:GM2A:RAB23:PSMC2:GGH:FABP5
FUMA	GO:0005739	mitochondrion	1552	41	2.75828e-11	2.30086e-09	AK2:NDUFS5:UQCRH:ATPAF1:ACADM:ATP5F1:MRPS21:MCL1:COX15:MRPL48:MRPL51:BCL2L2:NGDN:MAPT:MRPL27:PTRH2:ICT1:ATP5H:MRPL33:RPS27A:BOLA3:SUCLG1:MRPL35:NDUFB3:SOD1:ATP5O:CHDH:COX17:FAM162A:ATP5I:MRPL1:PPM1K:SNCA:TMEM14C:COX19:TOMM7:MRPS17:MRPS17:SSBP1:UQCRB:ENY2:DNAJA1
FUMA	GO:0019080	viral gene expression	190	16	4.43961e-12	2.33079e-09	RPL11:GTF2B:TRIM11:RPS24:RPS25:SP1:RPL6:RPLP0:DENR:RPL26:RPL23:RPS27A:SSB:NUP35:RPL32:RPL12
FUMA	GO:0072594	establishment of protein localization to organelle	552	25	5.02678e-12	2.46312e-09	RPL11:RPS24:VPS37C:RPS25:PEX5:RPL6:RPLP0:VPS37B:HSP90AA1:SRP14:RPAIN:RPL26:RPL23:MAPT:RPS27A:NUP35:RPL32:HACL1:SRP19:TMCO6:RAB23:KPNA5:TOMM7:DNAJA1:RPL12
FUMA	R-HSA-72613	eukaryotic translation initiation	118	13	1.55672e-11	2.71555e-09	RPL11:RPS24:RPS25:RPL6:RPLP0:RPL10L:RPL36AL:RPL26:RPL23:RPS27A:RPL32:EIF3E:RPL12
FUMA	R-HSA-975956	nonsense mediated decay nmd independent of the exon junction complex ejc	94	12	1.63042e-11	2.71555e-09	RPL11:RPS24:RPS25:RPL6:RPLP0:RPL10L:RPL36AL:RPL26:RPL23:RPS27A:RPL32:RPL12
FUMA	GO:0006612	protein targeting to membrane	197	16	7.71148e-12	3.54246e-09	RPL11:RPS24:VPS37C:RPS25:PEX5:RPL6:RPLP0:VPS37B:SRP14:TAOK2:RPL26:RPL23:RPS27A:RPL32:SRP19:RPL12
WebGestalt	GO:0022626	cytosolic ribosome	111	14	2.16385e-11	4.17622e-09	RPL36AL;RPS25;RPS27A;ZNF622;RPLP0;RPL26;RPL32;RPL6;RPL23;MRPL1;RPL11;RPS24;RPL10L;RPL12
FUMA	GO:0022613	ribonucleoprotein complex biogenesis	483	23	1.35805e-11	5.87158e-09	RPL11:GNL2:EBNA1BP2:NVL:RPS24:PWP1:RPL6:RPLP0:DENR:NGDN:RPL10L:HSP90AA1:RPL26:MAPT:SNRPD2:SDAD1:MRPL1:ZNF622:BRIX1:PAK1IP1:RPF2:EIF3E:RPL12
FUMA	GO:0043085	positive regulation of catalytic activity	1397	39	1.75304e-11	7.15825e-09	PRKCZ:DOCK7:RHOC:NVL:MYBPC3:TBC1D10C:PICALM:GCN1L1:HSP90AA1:MEFV:TAOK2:MAPT:GMFG:APOC1:LILRA5:RPS27A:STK39:ZC3H15:CFLAR:CASS4:APP:SOD1:SETMAR:GORASP1:PROK2:COX17:FAM162A:DTX3L:PKD2:PPM1K:FAM13A:SNCA:ZNF622:GM2A:PRKAR1B:SSBP1:PTK2B:DNAJA1:ANP32B
WebGestalt	GO:0022625	cytosolic large ribosomal subunit	61	11	6.01881e-11	9.29304e-09	RPL36AL;ZNF622;RPLP0;RPL26;RPL32;RPL6;RPL23;MRPL1;RPL11;RPL10L;RPL12
FUMA	GO:0042254	ribosome biogenesis	285	18	2.54244e-11	9.83523e-09	RPL11:GNL2:EBNA1BP2:NVL:RPS24:PWP1:RPL6:RPLP0:NGDN:RPL10L:RPL26:SDAD1:MRPL1:ZNF622:BRIX1:PAK1IP1:RPF2:RPL12
WebGestalt	GO:0042273	ribosomal large subunit biogenesis	73	14	2.45814e-12	1.55011e-08	ZNF622;PAK1IP1;RPLP0;BRIX1;RPL26;SDAD1;NVL;RPL6;MRPL1;EBNA1BP2;RPF2;RPL11;RPL10L;RPL12
FUMA	GO:0098805	cytosolic part	246	16	2.15085e-10	1.65616e-08	RPL11:RPS24:RRM1:RPS25:RPL6:RPLP0:RPL10L:RPL36AL:RPL26:RPL23:RPS27A:CFLAR:RPL32:MRPL1:ZNF622:RPL12
FUMA	GO:0072657	protein localization to membrane	613	25	4.71371e-11	1.71321e-08	PRKCZ:RPL11:GOLPH3L:RPS24:VPS37C:PICALM:RPS25:PEX5:RPL6:RPLP0:VPS37B:TM9SF1:TM9SF1:HSP90AA1:SRP14:TAOK2:RPL26:STX8:RPL23:NSF:RPS27A:FAM126B:RPL32:GORASP1:SRP19:RPL12
FUMA	GO:0006613	cotranslational protein targeting to membrane	103	12	4.89489e-11	1.71321e-08	RPL11:RPS24:RPS25:RPL6:RPLP0:SRP14:RPL26:RPL23:RPS27A:RPL32:SRP19:RPL12
FUMA	GO:0019866	organelle inner membrane	516	22	3.12397e-10	2.23364e-08	NDUFS5:UQCRH:ATP5F1:MRPS21:COX15:MRPL48:MRPL51:MRPL27:ICT1:ATP5H:MRPL33:MRPL35:NDUFB3:ATP5O:CHDH:ATP5I:MRPL1:SNCA:TMEM14C:CBX3:MRPS17:MRPS17:UQCRB
FUMA	R-HSA-927802	nonsense mediated decay nmd	114	12	1.63406e-10	2.44946e-08	RPL11:RPS24:RPS25:RPL6:RPLP0:RPL10L:RPL36AL:RPL26:RPL23:RPS27A:RPL32:RPL12
gPROFILER	GO:0042273	ribosomal large subunit biogenesis	66	14		2.55292e-08	ZNF622,PAK1IP1,RPLP0,BRIX1,RPL26,SDAD1,NVL,RPL6,MRPL1,EBNA1BP2,RPF2,RPL11,RPL10L,RPL12
gPROFILER	GO:0042273	ribosomal large subunit biogenesis	66	14		2.55292e-08	ZNF622,PAK1IP1,RPLP0,BRIX1,RPL26,SDAD1,NVL,RPL6,MRPL1,EBNA1BP2,RPF2,RPL11,RPL10L,RPL12
FUMA	R-HSA-2408522	selenoamino acid metabolism	116	12	2.00602e-10	2.73366e-08	RPL11:RPS24:RPS25:RPL6:RPLP0:RPL10L:RPL36AL:RPL26:RPL23:RPS27A:RPL32:RPL12
gPROFILER	GO:0005840	ribosome	211	21		3.14058e-08	RPL36AL,MRPL51,RPS25,MRPS17,RPS27A,RPLP0,MRPL33,MRPS21,RPL26,MRPL27,RPL32,RPL6,RPL23,MRPL48,MRPL35,RPL11,NCK1,RPS24,RPL10L,RPL12,RRBP1
FUMA	GO:0070972	protein localization to endoplasmic reticulum	140	13	1.37119e-10	4.4198e-08	RPL11:RPS24:RPS25:RPL6:RPLP0:SRP14:RPL26:RPL23:RPS27A:RPL32:SRP19:BCAP29:RPL12
FUMA	GO:0044419	interspecies interaction between organisms	925	30	1.38307e-10	4.4198e-08	RPL11:GTF2B:TRIM11:RPS24:VPS37C:NXF1:RAB6A:RPS25:SP1:RPL6:RPLP0:DENR:VPS37B:PSMA3:UBE3A:GTF2A2:RPL26:RPL23:CD209:RPS27A:BIN1:SSB:NUP35:CFLAR:CD28:RPL32:HS3ST5:KPNA5:SLC20A2:RPL12
FUMA	GO:0055085	transmembrane transport	1574	40	1.56405e-10	4.78991e-08	ATP5F1:MCL1:CTSS:COX15:CHRNA10:CNGA4:TCIRG1:PICALM:PEX5:PSMA3:ATP6V1D:SLC24A4:AQP9:SLCO3A1:CRHR1:ABCC3:PSMD12:ATP5H:SLC16A5:ABCA7:SLC5A6:RPS27A:BIN1:STK39:JPH2:APP:ATP5O:ATP6V1E1:COX17:ATP5I:PKD2:SNCA:SRP19:ABCC10:TOMM7:PSMC2:PTK2B:CHRNA2:SLC20A2:FABP5
gPROFILER	GO:0044391	ribosomal subunit	187	19		5.87419e-08	RPL36AL,MRPL51,RPS25,MRPS17,RPS27A,RPLP0,MRPL33,MRPS21,RPL26,MRPL27,RPL32,RPL6,RPL23,MRPL48,MRPL35,RPL11,RPS24,RPL10L,RPL12
gPROFILER	GO:1990904	ribonucleoprotein complex	790	40		5.87419e-08	RPL36AL,MRPL51,RPS25,ZMAT2,MRPS17,RPS27A,ZNF622,MAPT,PPIL3,RPLP0,MRPL33,MRPS21,RPL26,MOV10,MRPL27,NVL,RPL32,RPL6,SNRPD2,RPL23,MRPL1,NGDN,SRP19,SRP14,DRG1,MRPL48,EBNA1BP2,RBMS1,SNRPB2,MRPL35,RPL11,PSMC2,SSB,NCK1,SAMD4B,RPS24,PLRG1,RPL10L,RPL12,RRBP1
FUMA	GO:0072599	establishment of protein localization to endoplasmic reticulum	116	12	2.00602e-10	5.89771e-08	RPL11:RPS24:RPS25:RPL6:RPLP0:SRP14:RPL26:RPL23:RPS27A:RPL32:SRP19:RPL12
FUMA	GO:0001775	cell activation	1408	37	3.2883e-10	9.29578e-08	PRKCZ:PRDX1:CD160:CTSS:SWAP70:SPI1:CD5:TBC1D10C:TCIRG1:RAB6A:ATP6V1D:HSP90AA1:SRP14:MVP:ALDOA:CRHR1:MAPT:PSMD12:RAB37:CD209:GMFG:CLPTM1:LILRA5:CD28:CST3:APP:SOD1:NCK1:SNCA:GAPT:GM2A:CD83:AIF1:PSMC2:PTK2B:GGH:FABP5
FUMA	GO:0006605	protein targeting	426	20	3.90081e-10	1.06189e-07	RPL11:RPS24:VPS37C:RPS25:PEX5:RPL6:RPLP0:VPS37B:HSP90AA1:SRP14:TAOK2:KATNB1:RPL26:RPL23:RPS27A:RPL32:HACL1:SRP19:TOMM7:RPL12
FUMA	GO:0006413	translational initiation	187	14	4.70891e-10	1.23609e-07	RPL11:RPS24:RPS25:RPL6:RPLP0:DENR:RPL26:RPL23:RPS27A:RPL32:EIF4E3:NCK1:EIF3E:RPL12
WebGestalt	hsa03010	Ribosome	153	18	4.17966e-10	1.31659e-07	RPL36AL;RPS25;MRPS17;RPS27A;RPLP0;MRPL33;MRPS21;RPL26;MRPL27;RPL32;RPL6;RPL23;MRPL1;MRPL35;RPL11;RPS24;RPL10L;RPL12
FUMA	R-HSA-1643685	disease	1072	31	1.07557e-09	1.34356e-07	RPL11:PRDX1:GTF2B:RPS24:VPS37C:MAML2:RPS25:RPL6:RPLP0:VPS37B:RPL10L:RPL36AL:PSMA3:SLC24A4:HSP90AA1:GTF2A2:RPL26:RPL23:PSMD12:ELL:RPS27A:NUP35:CD28:APP:RPL32:VCAN:KPNA5:SHFM1:C7orf76:PSMC2:SLC20A2:RPL12
FUMA	R-HSA-71291	metabolism of amino acids and derivatives	369	18	1.64648e-09	1.89851e-07	RPL11:RPS24:RPS25:RPL6:RPLP0:RPL10L:RPL36AL:PSMA3:RPL26:RPL23:PSMD12:RPS27A:RPL32:CHDH:PPM1K:SHFM1:C7orf76:PSMC2:RPL12
FUMA	GO:0097435	supramolecular fiber organization	654	24	9.64815e-10	2.44531e-07	CAPZA1:RHOC:TUBGCP2:SWAP70:MYBPC3:SSH3:ARPC3:PXN:ACTN1:ALDOA:KATNB1:MAPT:GMFG:BIN1:CFLAR:CST3:CASS4:APP:DRG1:NCK1:SNCA:AIF1:PTK2B:KANK1
FUMA	GO:0046903	secretion	1628	39	1.44869e-09	3.5493e-07	PRKCZ:RIMS3:CD160:ECM1:ENSA:GOLPH3L:CTSS:TBC1D10C:TCIRG1:RAB6A:ATP6V1D:ACTN1:HSP90AA1:SRP14:AQP9:PRRT2:MVP:ALDOA:CRHR1:NSF:ABCC3:PSMD12:RAB37:GMFG:LILRA5:STK39:CST3:APP:SOD1:GPR27:SNCA:MMRN1:GM2A:AIF1:PSMC2:PDIA4:GGH:FABP5:ENY2
FUMA	GO:0005198	structural molecule activity	817	27	8.13971e-10	4.46327e-07	RPL11:MRPS21:ECM1:RPS24:MYBPC3:MRPL51:ARPC3:RPL6:RPLP0:RPL10L:RPL36AL:ACTN1:SNTB2:RPL26:RPL23:MRPL27:MRPL33:RPS27A:MRPL35:NUP35:RPL32:NCK1:MRPL1:MMRN1:VCAN:MRPS17:MRPS17:RPL12
FUMA	GO:0023056	positive regulation of signaling	1813	41	2.77922e-09	6.58944e-07	PRKCZ:RPL11:RIMS3:RHOC:ECM1:MCL1:AKR1C3:TMEM9B:RAD9A:MAML2:PSMA3:HSP90AA1:MAZ:TAOK2:CMTM3:RPL26:RPL23:CRHR1:NSF:WNT3:PSMD12:ABCA7:LILRA5:RPS27A:STK39:CFLAR:CD28:JPH2:APP:SOD1:GPR27:PROK2:FAM162A:NCK1:PKD2:SNCA:ZNF622:PSMC2:PTK2B:FABP5:KANK1
FUMA	GO:0099503	secretory vesicle	983	28	1.00296e-08	6.69305e-07	ECM1:CTSS:TBC1D10C:TCIRG1:RAB6A:PICALM:TRAPPC4:ATP6V1D:ACTN1:HSP90AA1:SRP14:ABHD2:PRRT2:MVP:ALDOA:PSMD12:RAB37:GMFG:BIN1:CST3:APP:SOD1:SNCA:MMRN1:GM2A:PSMC2:GGH:FABP5
WebGestalt	R-HSA-72766	Translation	291	23	4.88885e-10	6.74173e-07	RPL36AL;MRPL51;RPS25;MRPS17;RPS27A;RPLP0;MRPL33;MRPS21;RPL26;MRPL27;RPL32;RPL6;RPL23;MRPL1;SRP19;SRP14;MRPL48;MRPL35;EIF3E;RPL11;RPS24;RPL10L;RPL12
FUMA	R-HSA-8868773	rrna processing in the nucleus and cytosol	191	13	6.31103e-09	6.75731e-07	RPL11:EBNA1BP2:RPS24:RPS25:RPL6:RPLP0:RPL10L:RPL36AL:RPL26:RPL23:RPS27A:RPL32:RPL12
FUMA	GO:1902531	regulation of intracellular signal transduction	1824	41	3.30449e-09	7.59e-07	PRKCZ:RPL11:PRDX1:RHOC:ECM1:MCL1:AKR1C3:CHRNA10:TMEM9B:RAD9A:TBC1D10C:BCL2L2:HSP90AA1:MAZ:TAOK2:RPL26:RPL23:CRHR1:MAPT:ABCA7:LILRA5:RPS27A:STK39:CFLAR:CD28:JPH2:APP:SOD1:RCAN1:CHEK2:PROK2:NCK1:PKD2:FAM13A:ZNF622:PAK1IP1:RPF2:RPA3:PTK2B:KANK1:DNAJA1
FUMA	GO:0031399	regulation of protein modification process	1826	41	3.40958e-09	7.59407e-07	PRKCZ:RPL11:PRDX1:DOCK7:ENSA:CHRNA10:SWAP70:SPI1:PPP1R14B:TBC1D10C:PWP1:GCN1L1:HSP90AA1:UBE3A:FANCI:MVP:TAOK2:RPL23:MAPT:ABCA7:GMFG:LILRA5:RPS27A:STK39:CFLAR:CASS4:APP:SOD1:RCAN1:CHEK2:GORASP1:PROK2:DTX3L:NCK1:PKD2:SNCA:ZNF622:AIF1:PRKAR1B:PTK2B:DNAJA1
FUMA	GO:0002263	cell activation involved in immune response	702	24	3.85032e-09	7.88915e-07	PRKCZ:CTSS:SWAP70:TBC1D10C:TCIRG1:RAB6A:ATP6V1D:HSP90AA1:SRP14:MVP:ALDOA:CRHR1:PSMD12:RAB37:GMFG:CD28:CST3:APP:GAPT:GM2A:PSMC2:PTK2B:GGH:FABP5
FUMA	GO:0070897	nuclear transcribed mrna catabolic process nonsense mediated decay	119	11	3.8563e-09	7.88915e-07	RPL11:RPS24:RPS25:RPL6:RPLP0:RPL26:RPL23:RPS27A:RPL32:EIF3E:RPL12
FUMA	GO:0002274	myeloid leukocyte activation	646	23	3.86407e-09	7.88915e-07	CTSS:SPI1:TBC1D10C:TCIRG1:RAB6A:ATP6V1D:HSP90AA1:SRP14:MVP:ALDOA:CRHR1:MAPT:PSMD12:RAB37:GMFG:CST3:APP:SNCA:GM2A:AIF1:PSMC2:GGH:FABP5
FUMA	GO:0000027	ribosomal large subunit assembly	31	7	4.65834e-09	9.25374e-07	RPL11:RPL6:RPLP0:RPL10L:BRIX1:RPF2:RPL12
gPROFILER	GO:0015934	large ribosomal subunit	115	14		9.8076e-07	RPL36AL,MRPL51,RPLP0,MRPL33,RPL26,MRPL27,RPL32,RPL6,RPL23,MRPL48,MRPL35,RPL11,RPL10L,RPL12
FUMA	WP477	cytoplasmic ribosomal proteins	87	10	2.347e-09	9.94987e-07	RPL11:RPS24:RPS25:RPL6:RPLP0:RPL26:RPL23:RPS27A:RPL32:RPL12
FUMA	GO:0044437	electron transport chain (oxphos system in mitochondria)	91	10	3.66478e-09	9.94987e-07	NDUFS5:UQCRH:ATP5F1:COX15:ATP5H:NDUFB3:ATP5O:COX17:ATP5I:UQCRB
FUMA	GO:0002181	cytoplasmic translation	95	10	5.60087e-09	1.08333e-06	RPL11:RPL6:RPLP0:DENR:RPL26:ZC3H15:DRG1:RPL32:NCK1:EIF3E
FUMA	GO:0006887	exocytosis	897	27	5.93767e-09	1.11902e-06	RIMS3:ECM1:CTSS:TBC1D10C:TCIRG1:RAB6A:ATP6V1D:ACTN1:HSP90AA1:SRP14:PRRT2:MVP:ALDOA:CRHR1:NSF:PSMD12:RAB37:GMFG:CST3:APP:SOD1:SNCA:MMRN1:GM2A:PSMC2:GGH:FABP5
FUMA	R-HSA-72312	rrna processing	201	13	1.1649e-08	1.16412e-06	RPL11:EBNA1BP2:RPS24:RPS25:RPL6:RPLP0:RPL10L:RPL36AL:RPL26:RPL23:RPS27A:RPL32:RPL12
FUMA	GO:0098805	whole membrane	1647	37	2.13763e-08	1.33736e-06	PRKCZ:MCL1:CNGA4:TMEM9B:VPS37C:TBC1D10C:TCIRG1:RAB6A:PICALM:PEX5:VPS37B:BCL2L2:TM9SF1:TM9SF1:ATP6V1D:PRRT2:SNTB2:STX8:PLEKHM1:MAPT:NSF:WNT3:ABCC3:RAB37:ABCA7:RPS27A:CFLAR:ATP9A:APP:ATP6V1E1:DTX3L:SNCA:SEC24D:ABCC10:RAB23:TOMM7:PTK2B:FABP5
WebGestalt	GO:0044445	cytosolic part	244	16	1.40048e-08	1.80195e-06	RPL36AL;RPS25;CFLAR;RPS27A;ZNF622;RPLP0;RPL26;RPL32;RPL6;RPL23;MRPL1;RPL11;RPS24;RRM1;RPL10L;RPL12
FUMA	R-HSA-168249	innate immune system	1101	29	2.9619e-08	2.6611e-06	CAPZA1:CTSS:TBC1D10C:TCIRG1:RAB6A:ARPC3:PSMA3:ATP6V1D:HSP90AA1:SRP14:MEFV:MVP:ALDOA:NFATC3:PSMD12:RAB37:CD209:GMFG:RPS27A:CST3:APP:ATP6V1E1:UBA7:NCK1:GM2A:SHFM1:C7orf76:PSMC2:GGH:FABP5
FUMA	R-HSA-422475	axon guidance	551	20	3.01792e-08	2.6611e-06	RPL11:RHOC:RPS24:RPS25:ARPC3:RPL6:RPLP0:RPL10L:RPL36AL:PSMA3:HSP90AA1:RPL26:RPL23:PSMD12:RPS27A:RPL32:NCK1:SHFM1:C7orf76:PSMC2:RPL12
gPROFILER	GO:0003735	structural constituent of ribosome	144	16		2.67653e-06	MRPL51,RPS25,MRPS17,RPS27A,RPLP0,MRPS21,RPL26,MRPL27,RPL32,RPL6,RPL23,MRPL35,RPL11,RPS24,RPL10L,RPL12
gPROFILER	GO:0003735	structural constituent of ribosome	144	16		2.67653e-06	MRPL51,RPS25,MRPS17,RPS27A,RPLP0,MRPS21,RPL26,MRPL27,RPL32,RPL6,RPL23,MRPL35,RPL11,RPS24,RPL10L,RPL12
FUMA	GO:0051129	negative regulation of cellular component organization	694	23	1.46162e-08	2.68572e-06	PRKCZ:CAPZA1:SWAP70:SPI1:ANKRD13D:PICALM:PEX5:MEFV:PRRT2:TBX6:KATNB1:MAPT:WNT3:ABCA7:GMFG:APOC1:CFLAR:CST3:SETMAR:GORASP1:SNCA:CDKL3:KANK1
FUMA	GO:0048585	nuclear transcribed mrna catabolic process	206	13	1.56211e-08	2.80036e-06	RPL11:RPS24:RPS25:RPL6:RPLP0:RPL26:RPL23:SAMD4B:RPS27A:SSB:RPL32:EIF3E:RPL12
FUMA	GO:1902533	positive regulation of intracellular signal transduction	1005	28	1.60536e-08	2.80938e-06	PRKCZ:RPL11:RHOC:ECM1:MCL1:AKR1C3:TMEM9B:RAD9A:HSP90AA1:MAZ:TAOK2:RPL26:RPL23:CRHR1:ABCA7:LILRA5:RPS27A:STK39:CFLAR:CD28:JPH2:APP:SOD1:PROK2:NCK1:PKD2:ZNF622:PTK2B
FUMA	GO:0044265	cellular macromolecule catabolic process	1139	30	1.68456e-08	2.85231e-06	RPL11:MOV10:CTSS:RPS24:VPS37C:TCIRG1:RPS25:RPL6:RPLP0:VPS37B:PSMA3:HSP90AA1:UBE3A:SPSB3:RPL26:RPL23:PSMD12:SAMD4B:RPS27A:SSB:CST3:CHEK2:SETMAR:RPL32:UBA7:DTX3L:PSMC2:PTK2B:EIF3E:RPL12
FUMA	GO:1902750	regulation of protein complex assembly	429	18	1.70751e-08	2.85231e-06	PRKCZ:CAPZA1:RHOC:PEX5:ARPC3:HSP90AA1:MEFV:PRRT2:MAPT:GMFG:BIN1:DRG1:NCK1:SNCA:RPA3:PSMC2:PTK2B:KANK1
WebGestalt	R-HSA-1799339	SRP-dependent cotranslational protein targeting to membrane	112	14	4.44302e-09	3.06346e-06	RPL36AL;RPS25;RPS27A;RPLP0;RPL26;RPL32;RPL6;RPL23;SRP19;SRP14;RPL11;RPS24;RPL10L;RPL12
FUMA	GO:0006401	rna catabolic process	391	17	2.56472e-08	4.18904e-06	RPL11:MOV10:RPS24:RPS25:RPL6:RPLP0:PSMA3:RPL26:RPL23:PSMD12:SAMD4B:RPS27A:SSB:RPL32:PSMC2:EIF3E:RPL12
FUMA	GO:1902903	regulation of supramolecular fiber organization	345	16	2.72951e-08	4.28862e-06	CAPZA1:RHOC:SWAP70:SSH3:ARPC3:PXN:KATNB1:MAPT:GMFG:BIN1:APP:DRG1:NCK1:SNCA:PTK2B:KANK1
FUMA	GO:0043624	cellular protein complex disassembly	216	13	2.74238e-08	4.28862e-06	CAPZA1:MRPS21:SWAP70:MRPL48:MRPL51:KATNB1:NSF:MRPL27:ICT1:MRPL33:MRPL35:MRPL1:MRPS17:MRPS17
WebGestalt	R-HSA-72689	Formation of a pool of free 40S subunits	101	13	1.12727e-08	4.42961e-06	RPL36AL;RPS25;RPS27A;RPLP0;RPL26;RPL32;RPL6;RPL23;EIF3E;RPL11;RPS24;RPL10L;RPL12
WebGestalt	R-HSA-5663205	Infectious disease	382	24	1.94608e-08	4.42961e-06	RPL36AL;RPS25;RPS27A;RPLP0;RPL26;HSP90AA1;RPL32;GTF2A2;RPL6;PSMD12;RPL23;NUP35;VPS37C;VPS37B;RPL11;PSMC2;PSMA3;ELL;KPNA5;CD28;RPS24;GTF2B;RPL10L;RPL12
WebGestalt	R-HSA-156902	Peptide chain elongation	89	12	2.47256e-08	4.42961e-06	RPL36AL;RPS25;RPS27A;RPLP0;RPL26;RPL32;RPL6;RPL23;RPL11;RPS24;RPL10L;RPL12
WebGestalt	R-HSA-192823	Viral mRNA Translation	89	12	2.47256e-08	4.42961e-06	RPL36AL;RPS25;RPS27A;RPLP0;RPL26;RPL32;RPL6;RPL23;RPL11;RPS24;RPL10L;RPL12
WebGestalt	R-HSA-156827	L13a-mediated translational silencing of Ceruloplasmin expression	111	13	3.58946e-08	4.42961e-06	RPL36AL;RPS25;RPS27A;RPLP0;RPL26;RPL32;RPL6;RPL23;EIF3E;RPL11;RPS24;RPL10L;RPL12
WebGestalt	R-HSA-168254	Influenza Infection	154	15	3.86559e-08	4.42961e-06	RPL36AL;RPS25;RPS27A;RPLP0;RPL26;HSP90AA1;RPL32;RPL6;RPL23;NUP35;RPL11;KPNA5;RPS24;RPL10L;RPL12
WebGestalt	R-HSA-72706	GTP hydrolysis and joining of the 60S ribosomal subunit	112	13	4.00246e-08	4.42961e-06	RPL36AL;RPS25;RPS27A;RPLP0;RPL26;RPL32;RPL6;RPL23;EIF3E;RPL11;RPS24;RPL10L;RPL12
WebGestalt	R-HSA-156842	Eukaryotic Translation Elongation	93	12	4.09535e-08	4.42961e-06	RPL36AL;RPS25;RPS27A;RPLP0;RPL26;RPL32;RPL6;RPL23;RPL11;RPS24;RPL10L;RPL12
WebGestalt	R-HSA-2408557	Selenocysteine synthesis	93	12	4.09535e-08	4.42961e-06	RPL36AL;RPS25;RPS27A;RPLP0;RPL26;RPL32;RPL6;RPL23;RPL11;RPS24;RPL10L;RPL12
WebGestalt	R-HSA-72764	Eukaryotic Translation Termination	93	12	4.09535e-08	4.42961e-06	RPL36AL;RPS25;RPS27A;RPLP0;RPL26;RPL32;RPL6;RPL23;RPL11;RPS24;RPL10L;RPL12
WebGestalt	R-HSA-168273	Influenza Viral RNA Transcription and Replication	133	14	4.17585e-08	4.42961e-06	RPL36AL;RPS25;RPS27A;RPLP0;RPL26;HSP90AA1;RPL32;RPL6;RPL23;NUP35;RPL11;RPS24;RPL10L;RPL12
WebGestalt	R-HSA-975956	Nonsense Mediated Decay (NMD) independent of the Exon Junction Complex (EJC)	95	12	5.22028e-08	5.14197e-06	RPL36AL;RPS25;RPS27A;RPLP0;RPL26;RPL32;RPL6;RPL23;RPL11;RPS24;RPL10L;RPL12
FUMA	GO:0030141	secretory granule	831	24	9.27731e-08	5.4627e-06	ECM1:CTSS:TBC1D10C:TCIRG1:RAB6A:ATP6V1D:ACTN1:HSP90AA1:SRP14:ABHD2:MVP:ALDOA:PSMD12:RAB37:GMFG:CST3:APP:SOD1:SNCA:MMRN1:GM2A:PSMC2:GGH:FABP5
FUMA	R-HSA-5368287	mitochondrial translation	94	9	7.56367e-08	6.29886e-06	MRPS21:MRPL48:MRPL51:MRPL27:ICT1:MRPL33:MRPL35:MRPL1:MRPS17:MRPS17
FUMA	GO:0051336	regulation of hydrolase activity	1261	31	4.56296e-08	6.98704e-06	PRKCZ:DOCK7:ANGPTL3:RHOC:ECM1:ENSA:MYBPC3:PPP1R14B:TBC1D10C:PICALM:PSMA3:MEFV:MAPT:ELL:APOC1:BIN1:ZC3H15:CFLAR:CST3:APP:SOD1:RCAN1:SETMAR:FAM162A:FAM13A:SNCA:GM2A:SSBP1:PTK2B:DNAJA1:ANP32B
FUMA	GO:0070126	mitochondrial translational termination	89	9	4.68182e-08	7.02273e-06	MRPS21:MRPL48:MRPL51:MRPL27:ICT1:MRPL33:MRPL35:MRPL1:MRPS17:MRPS17
WebGestalt	R-HSA-72613	Eukaryotic Translation Initiation	119	13	8.31382e-08	7.16547e-06	RPL36AL;RPS25;RPS27A;RPLP0;RPL26;RPL32;RPL6;RPL23;EIF3E;RPL11;RPS24;RPL10L;RPL12
WebGestalt	R-HSA-72737	Cap-dependent Translation Initiation	119	13	8.31382e-08	7.16547e-06	RPL36AL;RPS25;RPS27A;RPLP0;RPL26;RPL32;RPL6;RPL23;EIF3E;RPL11;RPS24;RPL10L;RPL12
FUMA	GO:0071011	proton transporting two sector atpase complex	49	7	1.34394e-07	7.47382e-06	ATP5F1:TCIRG1:ATP6V1D:ATP5H:ATP5O:ATP6V1E1:ATP5I
WebGestalt	R-HSA-168255	Influenza Life Cycle	143	14	1.04929e-07	8.51162e-06	RPL36AL;RPS25;RPS27A;RPLP0;RPL26;HSP90AA1;RPL32;RPL6;RPL23;NUP35;RPL11;RPS24;RPL10L;RPL12
FUMA	GO:0032543	protein containing complex disassembly	324	15	7.63782e-08	1.12276e-05	CAPZA1:MRPS21:SWAP70:MRPL48:MRPL51:DENR:KATNB1:RPL23:NSF:MRPL27:ICT1:MRPL33:MRPL35:MRPL1:MRPS17:MRPS17
FUMA	GO:0007010	cytoskeleton organization	1293	31	7.96276e-08	1.14757e-05	PRKCZ:DOCK7:CAPZA1:RHOC:CEP350:TUBGCP2:SWAP70:MYBPC3:SSH3:ARPC3:PXN:ACTN1:TAOK2:ALDOA:KATNB1:MAPT:SS18:GMFG:BIN1:CFLAR:CASS4:SOD1:CHEK2:DRG1:NCK1:SDAD1:PKD2:SNCA:AIF1:PTK2B:KANK1
FUMA	GO:0009057	macromolecule catabolic process	1366	32	8.18697e-08	1.1572e-05	RPL11:MOV10:CTSS:RPS24:VPS37C:TCIRG1:RPS25:RPL6:RPLP0:VPS37B:PSMA3:HSP90AA1:UBE3A:SPSB3:RPL26:RPL23:NSF:PSMD12:SAMD4B:RPS27A:SSB:CST3:CHEK2:SETMAR:RPL32:UBA7:DTX3L:VCAN:PSMC2:PTK2B:EIF3E:RPL12
FUMA	GO:0006119	oxidative phosphorylation	126	10	8.57164e-08	1.17176e-05	NDUFS5:UQCRH:ATP5F1:COX15:ATP5H:NDUFB3:ATP5O:ATP5I:SNCA:UQCRB
FUMA	GO:0051338	regulation of transferase activity	956	26	8.60882e-08	1.17176e-05	PRKCZ:RPL11:NVL:GCN1L1:HSP90AA1:MVP:TAOK2:RPL23:MAPT:GMFG:LILRA5:RPS27A:STK39:CASS4:APP:SOD1:GORASP1:PROK2:DTX3L:NCK1:PKD2:SNCA:ZNF622:PRKAR1B:PTK2B:DNAJA1
WebGestalt	R-HSA-9010553	Regulation of expression of SLITs and ROBOs	171	15	1.56238e-07	1.19696e-05	RPL36AL;RPS25;RPS27A;RPLP0;RPL26;RPL32;RPL6;PSMD12;RPL23;RPL11;PSMC2;PSMA3;RPS24;RPL10L;RPL12
FUMA	R-HSA-74160	gene expression transcription	1478	33	1.52784e-07	1.20538e-05	PRDX1:GTF2B:MOV10:SPI1:RAD9A:MAML2:SP1:PSMA3:CPSF2:HSP90AA1:GTF2A2:FANCI:TAF1C:PSMD12:ZNF136:ZNF563:ELL:ZNF613:ZNF616:ZNF17:RPS27A:WDR33:SSB:NUP35:CSTF1:CHEK2:MED20:INTS1:RPA3:CBX3:SHFM1:C7orf76:PSMC2:ZFP37
FUMA	GO:0009894	regulation of catabolic process	959	26	9.14987e-08	1.22276e-05	RPL11:ANGPTL3:MOV10:MCL1:IFT88:PSMA3:ATP6V1D:HSP90AA1:UBE3A:MEFV:RPL23:MAPT:NSF:PSMD12:SAMD4B:APOC1:RPS27A:NUP35:CST3:ATP6V1E1:CHEK2:DTX3L:SNCA:TOMM7:PSMC2:PTK2B
gPROFILER	GO:0043933	protein-containing complex subunit organization	1827	66		1.2668e-05	NDUFB3,BIN1,MRPL51,NSF,DENR,KATNB1,MRPS17,PRRT2,RPS27A,ATPAF1,NDUFS5,MAPT,COX17,PICALM,RPA3,RPLP0,CAPZA1,MRPL33,MRPS21,BRIX1,ARPC3,GMFG,PXN,MRPL27,ABCA7,POMP,HSP90AA1,PRKCZ,PKD2,GTF2A2,MEFV,RPL6,SNRPD2,ALDOA,RPL23,MRPL1,SNCA,PTK2B,RHOC,APOC1,SRP19,HACL1,NUP35,DRG1,MRPL48,KANK1,RPF2,GORASP1,MRPL35,UQCRB,TRAPPC4,RPL11,PSMC2,TUBGCP2,AIF1,COX15,NCK1,VPS72,SEC24D,GTF2B,GMNN,ANP32B,COX19,PEX5,RPL10L,RP…
gPROFILER	GO:0043933	protein-containing complex subunit organization	1827	66		1.2668e-05	NDUFB3,BIN1,MRPL51,NSF,DENR,KATNB1,MRPS17,PRRT2,RPS27A,ATPAF1,NDUFS5,MAPT,COX17,PICALM,RPA3,RPLP0,CAPZA1,MRPL33,MRPS21,BRIX1,ARPC3,GMFG,PXN,MRPL27,ABCA7,POMP,HSP90AA1,PRKCZ,PKD2,GTF2A2,MEFV,RPL6,SNRPD2,ALDOA,RPL23,MRPL1,SNCA,PTK2B,RHOC,APOC1,SRP19,HACL1,NUP35,DRG1,MRPL48,KANK1,RPF2,GORASP1,MRPL35,UQCRB,TRAPPC4,RPL11,PSMC2,TUBGCP2,AIF1,COX15,NCK1,VPS72,SEC24D,GTF2B,GMNN,ANP32B,COX19,PEX5,RPL10L,RP…
FUMA	GO:0002252	immune effector process	1242	30	1.11586e-07	1.46457e-05	PRKCZ:PRDX1:CD160:CTSS:TRIM11:SWAP70:TBC1D10C:TCIRG1:RAB6A:ARPC3:ATP6V1D:HSP90AA1:SRP14:MVP:ALDOA:CRHR1:PSMD12:RAB37:GMFG:CD28:CST3:APP:DTX3L:NCK1:GAPT:GM2A:PSMC2:PTK2B:GGH:FABP5
FUMA	GO:1902905	positive regulation of supramolecular fiber organization	204	12	1.21211e-07	1.56299e-05	RHOC:SWAP70:ARPC3:PXN:KATNB1:MAPT:GMFG:BIN1:APP:DRG1:NCK1:PTK2B
FUMA	GO:0005773	vacuole	760	22	3.1218e-07	1.6447e-05	CTSS:TMEM9B:TCIRG1:TM9SF1:TM9SF1:ATP6V1D:HSP90AA1:MEFV:STX8:PLEKHM1:NSF:ABCC3:RAB37:SOD1:ATP6V1E1:DTX3L:SNCA:VCAN:GM2A:ABCC10:RAB23:GGH:FABP5
FUMA	GO:0030554	hydrolase activity acting on acid anhydrides	921	26	4.14435e-08	1.70437e-05	GNL2:ATP5F1:MOV10:RHOC:NVL:DDX50:NUDT22:TCIRG1:RAB6A:ATP6V1D:HSP90AA1:KATNB1:NSF:ABCC3:RAB37:ATP5H:ABCA7:ATP9A:ATP5O:ATP6V1E1:DRG1:ATP5I:ABCC10:RAB23:PSMC2:GIMAP7
gPROFILER	GO:0034622	cellular protein-containing complex assembly	928	42		1.91165e-05	NDUFB3,BIN1,DENR,PRRT2,RPS27A,ATPAF1,NDUFS5,MAPT,COX17,PICALM,RPA3,RPLP0,CAPZA1,BRIX1,ARPC3,GMFG,PXN,POMP,HSP90AA1,GTF2A2,MEFV,RPL6,SNRPD2,SNCA,PTK2B,SRP19,DRG1,KANK1,RPF2,UQCRB,RPL11,PSMC2,TUBGCP2,AIF1,COX15,NCK1,GTF2B,GMNN,ANP32B,COX19,RPL10L,RPL12
gPROFILER	GO:0034622	cellular protein-containing complex assembly	928	42		1.91165e-05	NDUFB3,BIN1,DENR,PRRT2,RPS27A,ATPAF1,NDUFS5,MAPT,COX17,PICALM,RPA3,RPLP0,CAPZA1,BRIX1,ARPC3,GMFG,PXN,POMP,HSP90AA1,GTF2A2,MEFV,RPL6,SNRPD2,SNCA,PTK2B,SRP19,DRG1,KANK1,RPF2,UQCRB,RPL11,PSMC2,TUBGCP2,AIF1,COX15,NCK1,GTF2B,GMNN,ANP32B,COX19,RPL10L,RPL12
gPROFILER	GO:0022626	cytosolic ribosome	105	12		1.95033e-05	RPL36AL,RPS25,RPS27A,RPLP0,RPL26,RPL32,RPL6,RPL23,RPL11,RPS24,RPL10L,RPL12
FUMA	GO:0051248	negative regulation of protein metabolic process	1123	28	1.6026e-07	2.02795e-05	PRKCZ:RPL11:MOV10:ECM1:ENSA:CHRNA10:SWAP70:SPI1:PPP1R14B:TBC1D10C:PICALM:PWP1:MVP:RPL23:MAPT:ABCA7:GMFG:SAMD4B:BIN1:CFLAR:CST3:APP:DTX3L:NCK1:SNCA:PRKAR1B:EIF3E:DNAJA1
FUMA	GO:0002443	leukocyte mediated immunity	857	24	1.62788e-07	2.02795e-05	PRKCZ:PRDX1:CD160:CTSS:SWAP70:TBC1D10C:TCIRG1:RAB6A:ATP6V1D:HSP90AA1:SRP14:MVP:ALDOA:CRHR1:PSMD12:RAB37:GMFG:CD28:CST3:GAPT:GM2A:PSMC2:GGH:FABP5
FUMA	GO:0007015	actin filament organization	396	16	1.79732e-07	2.19405e-05	CAPZA1:RHOC:SWAP70:MYBPC3:SSH3:ARPC3:PXN:ACTN1:ALDOA:GMFG:BIN1:CASS4:NCK1:AIF1:PTK2B:KANK1
FUMA	GO:0006415	translational termination	104	9	1.82091e-07	2.19405e-05	MRPS21:MRPL48:MRPL51:MRPL27:ICT1:MRPL33:MRPL35:MRPL1:MRPS17:MRPS17
FUMA	GO:0061024	membrane organization	869	24	2.09392e-07	2.48231e-05	ATP5F1:GOLPH3L:PICALM:TRAPPC4:ARPC3:HSP90AA1:PRRT2:STX8:NSF:ATP5H:ABCA7:RPS27A:BIN1:PLEKHA3:ATP9A:SOD1:ATP5O:GORASP1:ATP5I:SNCA:SEC24D:SCLT1:AIF1:CNTNAP2
FUMA	KEGG_PARKINSONS_DISEASE	parkinsons disease	115	9	4.31358e-07	2.67442e-05	NDUFS5:UQCRH:ATP5F1:ATP5H:NDUFB3:ATP5O:UBA7:SNCA:UQCRB
FUMA	GO:0000313	organellar ribosome	87	8	5.54669e-07	2.71878e-05	MRPS21:MRPL48:MRPL51:MRPL27:ICT1:MRPL33:MRPL35:MRPS17:MRPS17
FUMA	GO:0005730	nucleolus	1342	30	5.70374e-07	2.71878e-05	RPL11:GNL2:EBNA1BP2:NVL:RBM34:DDX50:RPS25:PWP1:NGDN:TAOK2:TAF1C:RPAIN:RPL26:RPL23:PLEKHM1:RPS27A:WDR33:ZC3H15:SNRPB2:SETMAR:SDAD1:PLRG1:ZNF622:BRIX1:SRP19:PAK1IP1:RPF2:ZCCHC7:ANP32B:RPL12
FUMA	GO:0006811	ion transport	1663	35	2.53657e-07	2.95933e-05	ATP5F1:CTSS:COX15:CHRNA10:CNGA4:TCIRG1:PICALM:ATP6V1D:SLC24A4:AQP9:SLCO3A1:CRHR1:NSF:ABCC3:ATP5H:SLC16A5:ABCA7:APOC1:LILRA5:SLC5A6:BIN1:STK39:PLEKHA3:JPH2:ATP9A:APP:ATP5O:ATP6V1E1:COX17:ATP5I:PKD2:SNCA:PTK2B:CHRNA2:SLC20A2
WebGestalt	R-HSA-927802	Nonsense-Mediated Decay (NMD)	115	12	4.41096e-07	3.04136e-05	RPL36AL;RPS25;RPS27A;RPLP0;RPL26;RPL32;RPL6;RPL23;RPL11;RPS24;RPL10L;RPL12
WebGestalt	R-HSA-975957	Nonsense Mediated Decay (NMD) enhanced by the Exon Junction Complex (EJC)	115	12	4.41096e-07	3.04136e-05	RPL36AL;RPS25;RPS27A;RPLP0;RPL26;RPL32;RPL6;RPL23;RPL11;RPS24;RPL10L;RPL12
FUMA	R-HSA-6798695	neutrophil degranulation	476	17	4.19776e-07	3.14622e-05	CTSS:TBC1D10C:TCIRG1:RAB6A:ATP6V1D:HSP90AA1:SRP14:MVP:ALDOA:PSMD12:RAB37:GMFG:CST3:GM2A:PSMC2:GGH:FABP5
FUMA	GO:0022627	vacuolar part	553	18	7.31961e-07	3.33042e-05	CTSS:TMEM9B:TCIRG1:TM9SF1:TM9SF1:ATP6V1D:HSP90AA1:STX8:PLEKHM1:NSF:ABCC3:RAB37:ATP6V1E1:DTX3L:VCAN:GM2A:ABCC10:GGH:FABP5
FUMA	GO:0031983	vesicle lumen	338	14	7.92609e-07	3.40768e-05	ECM1:ACTN1:HSP90AA1:SRP14:MVP:ALDOA:PSMD12:GMFG:APP:MMRN1:GM2A:PSMC2:GGH:FABP5
FUMA	GO:0030132	ficolin 1 rich granule	124	9	8.17026e-07	3.40768e-05	CTSS:HSP90AA1:SRP14:MVP:ALDOA:PSMD12:GMFG:CST3:PSMC2
FUMA	KEGG_ALZHEIMERS_DISEASE	alzheimers disease	159	10	7.50904e-07	3.49171e-05	NDUFS5:UQCRH:ATP5F1:MAPT:ATP5H:NDUFB3:APP:ATP5O:SNCA:UQCRB
FUMA	GO:0051174	regulation of phosphorus metabolic process	1677	35	3.08685e-07	3.53843e-05	PRKCZ:PRDX1:DOCK7:ENSA:CHRNA10:SWAP70:PPP1R14B:TBC1D10C:PWP1:GCN1L1:HSP90AA1:MVP:TAOK2:MAPT:ABCA7:ELL:GMFG:LILRA5:RPS27A:STK39:CFLAR:CASS4:APP:SOD1:RCAN1:CHEK2:PROK2:NCK1:PKD2:SNCA:ZNF622:AIF1:PRKAR1B:PTK2B:DNAJA1
FUMA	GO:0010942	positive regulation of cell death	698	21	3.12922e-07	3.53843e-05	RPL11:CD160:MCL1:AKR1C3:RAD9A:PICALM:KATNB1:RPL26:MAPT:PTRH2:RPS27A:BIN1:SOD1:CHEK2:FAM162A:NCK1:SNCA:ZNF622:ING3:DNAJA1:ANP32B
gPROFILER	GO:0022625	cytosolic large ribosomal subunit	57	9		3.61318e-05	RPL36AL,RPLP0,RPL26,RPL32,RPL6,RPL23,RPL11,RPL10L,RPL12
FUMA	R-HSA-162906	hiv infection	233	12	5.06334e-07	3.61426e-05	GTF2B:VPS37C:VPS37B:PSMA3:GTF2A2:PSMD12:ELL:RPS27A:NUP35:CD28:SHFM1:C7orf76:PSMC2
FUMA	GO:0098800	inner mitochondrial membrane protein complex	126	9	9.34907e-07	3.74337e-05	NDUFS5:UQCRH:ATP5F1:ATP5H:NDUFB3:ATP5O:ATP5I:SNCA:UQCRB
FUMA	GO:0043492	atpase activity coupled to movement of substances	130	10	1.15215e-07	3.79057e-05	ATP5F1:TCIRG1:ATP6V1D:ABCC3:ATP5H:ABCA7:ATP9A:ATP5O:ATP6V1E1:ABCC10
WebGestalt	R-HSA-2408522	Selenoamino acid metabolism	118	12	5.84391e-07	3.8375e-05	RPL36AL;RPS25;RPS27A;RPLP0;RPL26;RPL32;RPL6;RPL23;RPL11;RPS24;RPL10L;RPL12
FUMA	GO:0031252	cell leading edge	397	15	1.01233e-06	3.89746e-05	PRKCZ:ANGPTL3:SWAP70:ARPC3:PXN:ACTN1:MEFV:MAPT:ABCA7:APP:PKD2:AIF1:CNTNAP2:PTK2B:KANK1
FUMA	GO:0005768	endosome	885	23	1.07162e-06	3.97292e-05	PRKCZ:ANGPTL3:CTSS:TMEM9B:VPS37C:ANKRD13D:TCIRG1:PICALM:VPS37B:STX8:PLEKHM1:CRHR1:ABCA7:RPS27A:BIN1:ATP9A:APP:ATP6V1E1:DTX3L:OCIAD2:RAB23:CNTNAP2:LEPROTL1
FUMA	GO:0016887	atpase activity	443	17	1.53588e-07	4.21088e-05	ATP5F1:MOV10:NVL:TCIRG1:ATP6V1D:HSP90AA1:KATNB1:NSF:ABCC3:ATP5H:ABCA7:ATP9A:ATP5O:ATP6V1E1:ATP5I:ABCC10:PSMC2
WebGestalt	R-HSA-376176	Signaling by ROBO receptors	218	16	6.85686e-07	4.298e-05	RPL36AL;RPS25;RPS27A;RPLP0;RPL26;RPL32;RPL6;PSMD12;RPL23;RPL11;PSMC2;PSMA3;NCK1;RPS24;RPL10L;RPL12
FUMA	GO:0098655	cation transmembrane transport	834	23	3.8833e-07	4.32458e-05	ATP5F1:CTSS:COX15:CHRNA10:CNGA4:TCIRG1:PICALM:ATP6V1D:SLC24A4:CRHR1:ATP5H:BIN1:STK39:JPH2:APP:ATP5O:ATP6V1E1:COX17:ATP5I:PKD2:SNCA:PTK2B:SLC20A2
WebGestalt	GO:0006614	SRP-dependent cotranslational protein targeting to membrane	95	12	1.38257e-08	4.35923e-05	RPS25;RPS27A;RPLP0;RPL26;RPL32;RPL6;RPL23;SRP19;SRP14;RPL11;RPS24;RPL12
FUMA	GO:0005794	golgi apparatus	1547	32	1.25139e-06	4.47373e-05	ANGPTL3:GOLPH3L:CNGA4:RAB6A:PICALM:TRAPPC4:PEX5:PWP1:MPHOSPH9:CDIPT:STX8:CRHR1:NSF:WNT3:XYLT2:ABCA7:PLEKHA3:ATP9A:APP:CHEK2:GORASP1:PKD2:SNCA:SEC24D:ZNF622:VCAN:ERGIC1:HS3ST5:CNTNAP2:GIMAP7:EXTL3:ST3GAL1
FUMA	R-HSA-2262752	cellular responses to stress	437	16	6.66338e-07	4.54018e-05	PRDX1:CAPZA1:MOV10:SP1:PSMA3:HSP90AA1:DNAJC7:PSMD12:RPS27A:NUP35:SOD1:RPA3:SHFM1:C7orf76:PSMC2:DCTN6:DNAJA1
WebGestalt	GO:0006613	cotranslational protein targeting to membrane	99	12	2.22047e-08	4.66743e-05	RPS25;RPS27A;RPLP0;RPL26;RPL32;RPL6;RPL23;SRP19;SRP14;RPL11;RPS24;RPL12
FUMA	GO:0051258	protein polymerization	276	13	4.68462e-07	5.06687e-05	CAPZA1:TUBGCP2:ARPC3:HSP90AA1:MAPT:GMFG:BIN1:DRG1:NCK1:SNCA:AIF1:PTK2B:KANK1
FUMA	GO:0044087	regulation of cellular component biogenesis	909	24	4.68772e-07	5.06687e-05	PRKCZ:CAPZA1:RHOC:SWAP70:SSH3:PEX5:ARPC3:PXN:IFT88:HSP90AA1:MEFV:PRRT2:PLEKHM1:MAPT:GMFG:BIN1:APP:DRG1:NCK1:SNCA:RPA3:PSMC2:PTK2B:KANK1
FUMA	GO:0022411	cellular component disassembly	537	18	4.80186e-07	5.11502e-05	CAPZA1:MRPS21:CTSS:SWAP70:MRPL48:MRPL51:DENR:KATNB1:RPL23:NSF:MRPL27:ICT1:MRPL33:MRPL35:CST3:MRPL1:TOMM7:MRPS17:MRPS17
FUMA	GO:0080134	regulation of response to stress	1481	32	4.90793e-07	5.15332e-05	PRDX1:CD160:MCL1:CTSS:RAD9A:PSMA3:HSP90AA1:MEFV:TAOK2:RPL26:DNAJC7:MAPT:PSMD12:CD209:LILRA5:RPS27A:STK39:NUP35:CD28:APP:SOD1:CHEK2:SETMAR:DTX3L:NCK1:SNCA:ZNF622:RPA3:PSMC2:PTK2B:KANK1:DNAJA1
FUMA	GO:1901701	cellular response to oxygen containing compound	1118	27	5.01365e-07	5.19019e-05	PRKCZ:PRDX1:AKR1C3:SPI1:TCIRG1:SP1:PXN:ATP6V1D:AQP9:RPL23:CRHR1:MAPT:WNT3:CFLAR:APP:SOD1:ATP6V1E1:CHEK2:GPR27:NCK1:PKD2:SNCA:AIF1:PRKAR1B:PTK2B:ENY2:KANK1
FUMA	GO:0008237	atpase activity coupled	356	15	2.56819e-07	5.62827e-05	ATP5F1:MOV10:TCIRG1:ATP6V1D:HSP90AA1:KATNB1:NSF:ABCC3:ATP5H:ABCA7:ATP9A:ATP5O:ATP6V1E1:ABCC10:PSMC2
FUMA	GO:0008092	cytoskeletal protein binding	948	25	2.73715e-07	5.62827e-05	CAPZA1:CEP350:TUBGCP2:MYBPC3:SSH3:RAB6A:PICALM:ARPC3:PXN:IFT88:ACTN1:HSP90AA1:MEFV:TAOK2:ALDOA:KATNB1:SNTB2:MAPT:GMFG:BIN1:DRG1:NCK1:PKD2:SNCA:AIF1
FUMA	GO:0044877	atpase activity coupled to transmembrane movement of ions rotational mechanism	35	6	3.52307e-07	5.98337e-05	ATP5F1:TCIRG1:ATP6V1D:ATP5H:ATP5O:ATP6V1E1
FUMA	GO:0005215	transporter activity	1241	29	3.63731e-07	5.98337e-05	ATP5F1:MCL1:COX15:CHRNA10:CNGA4:TCIRG1:ATP6V1D:SLC24A4:AQP9:SLCO3A1:ABCC3:ATP5H:SLC16A5:ABCA7:SLC5A6:PLEKHA3:JPH2:ATP9A:ATP5O:ATP6V1E1:ATP5I:PKD2:GM2A:ABCC10:KPNA5:TOMM7:PTK2B:CHRNA2:SLC20A2
gPROFILER	GO:0006614	SRP-dependent cotranslational protein targeting to membrane	91	12		6.0718e-05	RPS25,RPS27A,RPLP0,RPL26,RPL32,RPL6,RPL23,SRP19,SRP14,RPL11,RPS24,RPL12
gPROFILER	GO:0006614	SRP-dependent cotranslational protein targeting to membrane	91	12		6.0718e-05	RPS25,RPS27A,RPLP0,RPL26,RPL32,RPL6,RPL23,SRP19,SRP14,RPL11,RPS24,RPL12
FUMA	GO:0043086	negative regulation of catalytic activity	793	22	6.34929e-07	6.47119e-05	PRKCZ:RPL11:ANGPTL3:ECM1:ENSA:PPP1R14B:PICALM:MVP:RPL23:MAPT:ELL:GMFG:APOC1:BIN1:CFLAR:CST3:APP:DTX3L:NCK1:SNCA:PRKAR1B:DNAJA1
FUMA	GO:0002444	myeloid leukocyte mediated immunity	548	18	6.42717e-07	6.47119e-05	CTSS:TBC1D10C:TCIRG1:RAB6A:ATP6V1D:HSP90AA1:SRP14:MVP:ALDOA:CRHR1:PSMD12:RAB37:GMFG:CST3:GM2A:PSMC2:GGH:FABP5
FUMA	GO:0009628	response to abiotic stimulus	1211	28	7.21259e-07	7.16386e-05	CTSS:CHRNA10:RRM1:RAD9A:METAP2:PSMA3:HSP90AA1:AQP9:RPL26:DNAJC7:CRHR1:MAPT:PSMD12:RPS27A:STK39:NUP35:CFLAR:APP:SOD1:CHEK2:FAM162A:PKD2:AIF1:RPA3:PSMC2:CNTNAP2:PTK2B:DNAJA1
FUMA	GO:0015934	mitochondrial membrane part	221	11	2.11487e-06	7.29996e-05	NDUFS5:UQCRH:ATP5F1:COX15:ATP5H:NDUFB3:ATP5O:ATP5I:SNCA:TOMM7:UQCRB
FUMA	GO:0042255	ribosome assembly	63	7	7.85985e-07	7.66537e-05	RPL11:RPL6:RPLP0:RPL10L:BRIX1:RPF2:RPL12
FUMA	GO:0051169	nuclear transport	338	14	7.92609e-07	7.66537e-05	NXF1:CPSF2:RPAIN:RPL23:SNRPD2:WDR33:SSB:NUP35:SDAD1:TMCO6:RAB23:KPNA5:ENY2:ANP32B
FUMA	GO:0031329	regulation of cellular catabolic process	805	22	8.13852e-07	7.76859e-05	RPL11:MOV10:MCL1:IFT88:PSMA3:ATP6V1D:HSP90AA1:UBE3A:MEFV:RPL23:MAPT:PSMD12:SAMD4B:APOC1:RPS27A:CST3:ATP6V1E1:DTX3L:SNCA:TOMM7:PSMC2:PTK2B
gPROFILER	GO:0006612	protein targeting to membrane	182	16		8.13526e-05	RPS25,RPS27A,RPLP0,RPL26,RPL32,RPL6,RPL23,SRP19,SRP14,TAOK2,VPS37C,VPS37B,RPL11,RPS24,PEX5,RPL12
gPROFILER	GO:0006613	cotranslational protein targeting to membrane	98	12		8.13526e-05	RPS25,RPS27A,RPLP0,RPL26,RPL32,RPL6,RPL23,SRP19,SRP14,RPL11,RPS24,RPL12
gPROFILER	GO:0046907	intracellular transport	1558	56		8.13526e-05	DCTN6,BIN1,MYBPC3,NSF,RPS25,KATNB1,APP,RPS27A,FAM160A2,IFT88,MAPT,PICALM,ERGIC1,RPLP0,CAPZA1,NXF1,RPL26,HSP90AA1,LEPROTL1,RPL32,PLEKHA3,RPL6,SNRPD2,RPL23,SRP19,RAB23,SRP14,HACL1,NUP35,TBC1D10C,TAOK2,VPS37C,RAB37,ENY2,TOMM7,RAB6A,WDR33,VPS37B,RPAIN,DOCK7,SOD1,BCAP29,GORASP1,CPSF2,TRAPPC4,RPL11,DTX3L,SSB,KPNA5,STX8,RPS24,SEC24D,CNIH4,ANP32B,PEX5,RPL12
gPROFILER	GO:0006612	protein targeting to membrane	182	16		8.13526e-05	RPS25,RPS27A,RPLP0,RPL26,RPL32,RPL6,RPL23,SRP19,SRP14,TAOK2,VPS37C,VPS37B,RPL11,RPS24,PEX5,RPL12
gPROFILER	GO:0006613	cotranslational protein targeting to membrane	98	12		8.13526e-05	RPS25,RPS27A,RPLP0,RPL26,RPL32,RPL6,RPL23,SRP19,SRP14,RPL11,RPS24,RPL12
gPROFILER	GO:0046907	intracellular transport	1558	56		8.13526e-05	DCTN6,BIN1,MYBPC3,NSF,RPS25,KATNB1,APP,RPS27A,FAM160A2,IFT88,MAPT,PICALM,ERGIC1,RPLP0,CAPZA1,NXF1,RPL26,HSP90AA1,LEPROTL1,RPL32,PLEKHA3,RPL6,SNRPD2,RPL23,SRP19,RAB23,SRP14,HACL1,NUP35,TBC1D10C,TAOK2,VPS37C,RAB37,ENY2,TOMM7,RAB6A,WDR33,VPS37B,RPAIN,DOCK7,SOD1,BCAP29,GORASP1,CPSF2,TRAPPC4,RPL11,DTX3L,SSB,KPNA5,STX8,RPS24,SEC24D,CNIH4,ANP32B,PEX5,RPL12
WebGestalt	GO:0045047	protein targeting to ER	107	12	5.37017e-08	8.46608e-05	RPS25;RPS27A;RPLP0;RPL26;RPL32;RPL6;RPL23;SRP19;SRP14;RPL11;RPS24;RPL12
gPROFILER	GO:0032991	protein-containing complex	4833	109		8.9286e-05	NDUFB3,BIN1,RPL36AL,MYBPC3,WNT3,MRPL51,RPS25,ZMAT2,KATNB1,CFLAR,MRPS17,APP,RPS27A,FAM160A2,ATP6V1E1,ZNF622,UQCRH,IFT88,EIF4E3,NDUFS5,MAPT,PICALM,RPA3,SHFM1,PPIL3,RPLP0,CAPZA1,MRPL33,MRPS21,TRIP4,NXF1,MED20,SNTB2,ARPC3,NFATC3,RPL26,PXN,MOV10,MRPL27,INTS1,SCLT1,HSP90AA1,NVL,ING3,PKD2,ATP6V1D,RPL32,GTF2A2,MEFV,RPL6,PSMD12,SNRPD2,RPL23,MRPL1,SNCA,PTK2B,NGDN,APOC1,SRP19,SRP14,PRKAR1B,NUP35,POLD3,TAOK2…
FUMA	GO:0051640	organelle localization	685	20	9.56347e-07	9.01173e-05	PRKCZ:RIMS3:DOCK7:RAB6A:PICALM:TRAPPC4:HSP90AA1:PRRT2:KATNB1:STX8:PLEKHM1:CRHR1:MAPT:NSF:BIN1:GORASP1:SDAD1:SNCA:SEC24D:SCLT1
FUMA	GO:0034504	protein localization to nucleus	248	12	9.78991e-07	9.10833e-05	RPL11:NVL:RPAIN:RPL23:ABCA7:NUP35:DTX3L:PLRG1:TMCO6:RAB23:RPF2:KPNA5
FUMA	GO:0060341	regulation of cellular localization	881	23	9.92542e-07	9.11898e-05	PRKCZ:RIMS3:NVL:MYBPC3:PICALM:HSP90AA1:STX8:CRHR1:MAPT:ABCA7:JPH2:GPR27:DTX3L:PKD2:SNCA:RAB23:PRKAR1B:TOMM7:PTK2B:LEPROTL1:ENY2:DNAJA1:ANP32B
FUMA	GO:0098796	membrane protein complex	1153	26	2.8832e-06	9.62029e-05	NDUFS5:UQCRH:ATP5F1:VPS37C:TCIRG1:PICALM:VPS37B:ATP6V1D:SNTB2:STX8:ATP5H:ABCA7:NDUFB3:CFLAR:ATP5O:ATP6V1E1:ATP5I:PKD2:SNCA:SEC24D:SCLT1:TOMM7:CNTNAP2:PTK2B:CHRNA2:UQCRB
FUMA	GO:0051247	positive regulation of protein metabolic process	1615	33	1.10016e-06	9.98294e-05	PRKCZ:DOCK7:PICALM:HSP90AA1:UBE3A:FANCI:MEFV:TAOK2:RPL26:MAPT:ABCA7:LILRA5:RPS27A:STK39:CFLAR:CD28:CASS4:APP:SOD1:CHEK2:GORASP1:PROK2:FAM162A:NCK1:PKD2:SNCA:ZNF622:AIF1:PRKAR1B:PSMC2:PTK2B:EIF3E:ANP32B
WebGestalt	GO:0072599	establishment of protein localization to endoplasmic reticulum	111	12	8.11391e-08	0.000102333	RPS25;RPS27A;RPLP0;RPL26;RPL32;RPL6;RPL23;SRP19;SRP14;RPL11;RPS24;RPL12
FUMA	GO:0015399	primary active transmembrane transporter activity	122	9	7.12225e-07	0.00010651	ATP5F1:TCIRG1:ATP6V1D:ABCC3:ATP5H:ABCA7:ATP5O:ATP6V1E1:ABCC10
FUMA	GO:0015672	monovalent inorganic cation transport	514	17	1.20383e-06	0.000107904	ATP5F1:COX15:TCIRG1:ATP6V1D:SLC24A4:NSF:ATP5H:SLC5A6:BIN1:STK39:ATP5O:ATP6V1E1:COX17:ATP5I:PKD2:PTK2B:SLC20A2
WebGestalt	GO:0070972	protein localization to endoplasmic reticulum	137	13	1.10536e-07	0.000116173	RPS25;RPS27A;RPLP0;RPL26;RPL32;RPL6;RPL23;SRP19;SRP14;BCAP29;RPL11;RPS24;RPL12
gPROFILER	GO:0019080	viral gene expression	194	16		0.000117482	RPS25,DENR,RPS27A,RPLP0,RPL26,TRIM11,RPL32,RPL6,RPL23,NUP35,SP1,RPL11,SSB,RPS24,GTF2B,RPL12
gPROFILER	GO:0045047	protein targeting to ER	105	12		0.000117482	RPS25,RPS27A,RPLP0,RPL26,RPL32,RPL6,RPL23,SRP19,SRP14,RPL11,RPS24,RPL12
gPROFILER	GO:0090150	establishment of protein localization to membrane	300	20		0.000117482	NSF,RPS25,RPS27A,RPLP0,RPL26,HSP90AA1,RPL32,RPL6,RPL23,SRP19,SRP14,TAOK2,VPS37C,VPS37B,GOLPH3L,GORASP1,RPL11,RPS24,PEX5,RPL12
gPROFILER	GO:0000027	ribosomal large subunit assembly	27	7		0.000117482	RPLP0,BRIX1,RPL6,RPF2,RPL11,RPL10L,RPL12
gPROFILER	GO:0065003	protein-containing complex assembly	1518	54		0.000117482	NDUFB3,BIN1,NSF,DENR,PRRT2,RPS27A,ATPAF1,NDUFS5,MAPT,COX17,PICALM,RPA3,RPLP0,CAPZA1,BRIX1,ARPC3,GMFG,PXN,ABCA7,POMP,HSP90AA1,PRKCZ,PKD2,GTF2A2,MEFV,RPL6,SNRPD2,ALDOA,SNCA,PTK2B,RHOC,APOC1,SRP19,HACL1,DRG1,KANK1,RPF2,GORASP1,UQCRB,TRAPPC4,RPL11,PSMC2,TUBGCP2,AIF1,COX15,NCK1,SEC24D,GTF2B,GMNN,ANP32B,COX19,PEX5,RPL10L,RPL12
gPROFILER	GO:0019080	viral gene expression	194	16		0.000117482	RPS25,DENR,RPS27A,RPLP0,RPL26,TRIM11,RPL32,RPL6,RPL23,NUP35,SP1,RPL11,SSB,RPS24,GTF2B,RPL12
gPROFILER	GO:0045047	protein targeting to ER	105	12		0.000117482	RPS25,RPS27A,RPLP0,RPL26,RPL32,RPL6,RPL23,SRP19,SRP14,RPL11,RPS24,RPL12
gPROFILER	GO:0090150	establishment of protein localization to membrane	300	20		0.000117482	NSF,RPS25,RPS27A,RPLP0,RPL26,HSP90AA1,RPL32,RPL6,RPL23,SRP19,SRP14,TAOK2,VPS37C,VPS37B,GOLPH3L,GORASP1,RPL11,RPS24,PEX5,RPL12
gPROFILER	GO:0000027	ribosomal large subunit assembly	27	7		0.000117482	RPLP0,BRIX1,RPL6,RPF2,RPL11,RPL10L,RPL12
gPROFILER	GO:0065003	protein-containing complex assembly	1518	54		0.000117482	NDUFB3,BIN1,NSF,DENR,PRRT2,RPS27A,ATPAF1,NDUFS5,MAPT,COX17,PICALM,RPA3,RPLP0,CAPZA1,BRIX1,ARPC3,GMFG,PXN,ABCA7,POMP,HSP90AA1,PRKCZ,PKD2,GTF2A2,MEFV,RPL6,SNRPD2,ALDOA,SNCA,PTK2B,RHOC,APOC1,SRP19,HACL1,DRG1,KANK1,RPF2,GORASP1,UQCRB,TRAPPC4,RPL11,PSMC2,TUBGCP2,AIF1,COX15,NCK1,SEC24D,GTF2B,GMNN,ANP32B,COX19,PEX5,RPL10L,RPL12
FUMA	GO:0005849	neuron part	1709	33	3.69063e-06	0.000119172	PRKCZ:RIMS3:DOCK7:ACADM:RHOC:CHRNA10:RRM1:PICALM:RPS25:TRAPPC4:RPL6:RPLP0:NGDN:HSP90AA1:PRRT2:TAOK2:KATNB1:RPL23:CRHR1:MAPT:NSF:SS18:BIN1:APP:SOD1:SNCA:AIF1:PSMC2:CNTNAP2:PTK2B:CHRNA2:FABP5:RPL12
FUMA	GO:0032271	regulation of protein polymerization	211	11	1.34785e-06	0.000119357	CAPZA1:ARPC3:HSP90AA1:MAPT:GMFG:BIN1:DRG1:NCK1:SNCA:PTK2B:KANK1
FUMA	GO:0019725	cellular homeostasis	967	24	1.38692e-06	0.000121356	PRDX1:MCL1:CHRNA10:SWAP70:TCIRG1:POLD3:PICALM:ATP6V1D:SLC24A4:ALDOA:CRHR1:JPH2:APP:SOD1:ATP6V1E1:GPR27:PROK2:PKD2:SNCA:COX19:RPA3:PDIA4:PTK2B:ENY2
FUMA	R-HSA-8953897	cellular responses to external stimuli	532	17	1.91583e-06	0.000124862	PRDX1:CAPZA1:MOV10:SP1:PSMA3:HSP90AA1:DNAJC7:PSMD12:RPS27A:NUP35:SOD1:RPA3:TOMM7:SHFM1:C7orf76:PSMC2:DCTN6:DNAJA1
FUMA	R-HSA-382556	abc family proteins mediated transport	103	8	2.01886e-06	0.000126094	PSMA3:ABCC3:PSMD12:ABCA7:RPS27A:ABCC10:SHFM1:C7orf76:PSMC2
WebGestalt	GO:0022613	ribonucleoprotein complex biogenesis	440	23	1.40529e-07	0.000126596	DENR;ZNF622;GNL2;PAK1IP1;MAPT;RPLP0;BRIX1;RPL26;HSP90AA1;SDAD1;NVL;RPL6;SNRPD2;MRPL1;NGDN;PWP1;EBNA1BP2;RPF2;EIF3E;RPL11;RPS24;RPL10L;RPL12
WebGestalt	GO:0042254	ribosome biogenesis	279	18	1.60646e-07	0.000126629	ZNF622;GNL2;PAK1IP1;RPLP0;BRIX1;RPL26;SDAD1;NVL;RPL6;MRPL1;NGDN;PWP1;EBNA1BP2;RPF2;RPL11;RPS24;RPL10L;RPL12
FUMA	GO:0051347	positive regulation of transferase activity	643	19	1.50845e-06	0.000130437	PRKCZ:NVL:GCN1L1:HSP90AA1:TAOK2:MAPT:LILRA5:RPS27A:STK39:CASS4:SOD1:GORASP1:PROK2:DTX3L:PKD2:SNCA:ZNF622:PRKAR1B:PTK2B
FUMA	GO:0006414	translational elongation	134	9	1.56572e-06	0.000133814	MRPS21:MRPL48:MRPL51:MRPL27:ICT1:MRPL33:MRPL35:MRPL1:MRPS17:MRPS17
gPROFILER	GO:0072599	establishment of protein localization to endoplasmic reticulum	109	12		0.000140151	RPS25,RPS27A,RPLP0,RPL26,RPL32,RPL6,RPL23,SRP19,SRP14,RPL11,RPS24,RPL12
gPROFILER	GO:0072599	establishment of protein localization to endoplasmic reticulum	109	12		0.000140151	RPS25,RPS27A,RPLP0,RPL26,RPL32,RPL6,RPL23,SRP19,SRP14,RPL11,RPS24,RPL12
FUMA	GO:0032543	mitochondrial translation	135	9	1.66581e-06	0.000140732	MRPS21:MRPL48:MRPL51:MRPL27:ICT1:MRPL33:MRPL35:MRPL1:MRPS17:MRPS17
FUMA	R-HSA-382551	transport of small molecules	728	20	2.40965e-06	0.000144483	ANGPTL3:TCIRG1:PSMA3:ATP6V1D:SLC24A4:AQP9:SLCO3A1:ABCC3:PSMD12:ABCA7:APOC1:SLC5A6:RPS27A:ATP9A:ATP6V1E1:ABCC10:PRKAR1B:SHFM1:C7orf76:PSMC2:SLC20A2
FUMA	GO:0034220	ion transmembrane transport	1125	26	1.84866e-06	0.000154405	ATP5F1:CTSS:COX15:CHRNA10:CNGA4:TCIRG1:PICALM:ATP6V1D:SLC24A4:AQP9:CRHR1:ATP5H:SLC5A6:BIN1:STK39:JPH2:APP:ATP5O:ATP6V1E1:COX17:ATP5I:PKD2:SNCA:PTK2B:CHRNA2:SLC20A2
gPROFILER	GO:0070972	protein localization to endoplasmic reticulum	132	13		0.000158879	RPS25,RPS27A,RPLP0,RPL26,RPL32,RPL6,RPL23,SRP19,SRP14,BCAP29,RPL11,RPS24,RPL12
gPROFILER	GO:0070972	protein localization to endoplasmic reticulum	132	13		0.000158879	RPS25,RPS27A,RPLP0,RPL26,RPL32,RPL6,RPL23,SRP19,SRP14,BCAP29,RPL11,RPS24,RPL12
FUMA	GO:0044092	negative regulation of molecular function	1131	26	2.03615e-06	0.000168154	PRKCZ:RPL11:ANGPTL3:ECM1:ENSA:PPP1R14B:PICALM:MVP:TBX6:RPL23:CRHR1:MAPT:ELL:GMFG:APOC1:BIN1:STK39:CFLAR:CST3:APP:DTX3L:NCK1:PKD2:SNCA:PRKAR1B:DNAJA1
FUMA	GO:0042592	homeostatic process	1906	36	2.12276e-06	0.000173359	PRDX1:DOCK7:ANGPTL3:MCL1:RPS24:CHRNA10:SWAP70:SPI1:TCIRG1:POLD3:PICALM:ATP6V1D:SLC24A4:HSP90AA1:AQP9:ALDOA:PLEKHM1:CRHR1:STK39:JPH2:APP:SOD1:ATP6V1E1:GPR27:PROK2:PKD2:SNCA:GAPT:TMEM14C:PRKAR1B:COX19:RPA3:PDIA4:PTK2B:FABP5:ENY2
WebGestalt	GO:0098798	mitochondrial protein complex	266	14	1.65536e-06	0.000182563	NDUFB3;MRPL51;MRPS17;UQCRH;NDUFS5;MRPL33;MRPS21;MRPL27;SUCLG1;SNCA;MRPL48;TOMM7;MRPL35;UQCRB
FUMA	GO:0031400	negative regulation of protein modification process	599	18	2.2622e-06	0.000182716	PRKCZ:RPL11:ENSA:CHRNA10:SWAP70:SPI1:PPP1R14B:TBC1D10C:PWP1:MVP:RPL23:MAPT:GMFG:DTX3L:NCK1:SNCA:PRKAR1B:DNAJA1
FUMA	GO:0022857	transmembrane transporter activity	1038	25	1.42035e-06	0.000184817	ATP5F1:MCL1:COX15:CHRNA10:CNGA4:TCIRG1:ATP6V1D:SLC24A4:AQP9:SLCO3A1:ABCC3:ATP5H:SLC16A5:ABCA7:SLC5A6:JPH2:ATP5O:ATP6V1E1:ATP5I:PKD2:ABCC10:TOMM7:PTK2B:CHRNA2:SLC20A2
FUMA	GO:0022804	active transmembrane transporter activity	356	14	1.46056e-06	0.000184817	ATP5F1:TCIRG1:ATP6V1D:SLC24A4:SLCO3A1:ABCC3:ATP5H:SLC16A5:ABCA7:SLC5A6:ATP5O:ATP6V1E1:ABCC10:SLC20A2
FUMA	GO:1901361	organic cyclic compound catabolic process	601	18	2.36976e-06	0.000188602	RPL11:MOV10:RPS24:RPS25:RPL6:RPLP0:PSMA3:RPL26:RPL23:PSMD12:SAMD4B:RPS27A:SSB:SETMAR:RPL32:PSMC2:EIF3E:RPL12
FUMA	GO:0000278	mitotic cell cycle	998	24	2.3864e-06	0.000188602	RHOC:ENSA:TUBGCP2:RRM1:RAD9A:SETDB2:PSMA3:HSP90AA1:TAOK2:KATNB1:RPL26:PSMD12:CD28:APP:CHEK2:DRG1:SETMAR:KLHDC8B:PKD2:PLRG1:GMNN:AIF1:RPA3:PSMC2
FUMA	R-HSA-163200	respiratory electron transport atp synthesis by chemiosmotic coupling and heat production by uncoupling proteins	110	8	3.3134e-06	0.00019103	NDUFS5:UQCRH:ATP5F1:ATP5H:NDUFB3:ATP5O:ATP5I:UQCRB
FUMA	GO:0051495	positive regulation of cytoskeleton organization	225	11	2.51548e-06	0.000196689	RHOC:SWAP70:ARPC3:PXN:KATNB1:MAPT:GMFG:BIN1:DRG1:NCK1:PTK2B
FUMA	GO:0006812	cation transport	1145	26	2.54354e-06	0.00019679	ATP5F1:CTSS:COX15:CHRNA10:CNGA4:TCIRG1:PICALM:ATP6V1D:SLC24A4:CRHR1:NSF:ATP5H:LILRA5:SLC5A6:BIN1:STK39:JPH2:APP:ATP5O:ATP6V1E1:COX17:ATP5I:PKD2:SNCA:PTK2B:SLC20A2
gPROFILER	GO:0044422	organelle part	8803	154		0.000200396	DCTN6,ENSA,NDUFB3,BIN1,RPL36AL,MYBPC3,WNT3,MRPL51,NSF,RPS25,ZMAT2,KATNB1,ZCCHC7,MRPS17,APP,RPS27A,SSBP1,ATP6V1E1,ZNF622,UQCRH,IFT88,GNL2,ZBTB43,PLEKHM1,NDUFS5,HS3ST5,DNAJC7,FANCI,MAPT,COX17,LARP7,MBOAT1,UBA7,GDPD3,PICALM,RPA3,SHFM1,ERGIC1,TRIM45,PPIL3,ZNF613,RPLP0,CAPZA1,MRPL33,MRPS21,TRIP4,BRIX1,NXF1,MED20,ARPC3,NFATC3,RPL26,GM2A,AK2,MPHOSPH9,GMFG,PDIA4,PXN,FABP5,MRPL27,INTS1,EXTL3,POMP,SCLT1,HS…
FUMA	GO:0120025	cell projection part	1438	29	6.61292e-06	0.000203833	PRKCZ:AK2:DOCK7:CNGA4:TBC1D10C:TRAPPC4:IFT88:NGDN:HSP90AA1:PRRT2:TAOK2:KATNB1:CRHR1:MAPT:NSF:ABCA7:SLC5A6:BIN1:APP:SOD1:PKD2:SNCA:SCLT1:AIF1:PRKAR1B:PSMC2:CNTNAP2:PTK2B:KANK1
FUMA	GO:0000315	organellar large ribosomal subunit	57	6	6.78608e-06	0.000203833	MRPL48:MRPL51:MRPL27:ICT1:MRPL33:MRPL35
FUMA	GO:0005759	mitochondrial matrix	465	15	6.92339e-06	0.000203833	ACADM:ATP5F1:MRPS21:MRPL48:MRPL51:MRPL27:ICT1:MRPL33:SUCLG1:MRPL35:SOD1:PPM1K:SNCA:MRPS17:MRPS17:SSBP1
gPROFILER	GO:0044085	cellular component biogenesis	2745	49		0.000213421	NDUFB3,BIN1,NSF,DENR,CFLAR,PRRT2,APP,RPS27A,ATPAF1,BOLA2,ZNF622,IFT88,PLEKHM1,NDUFS5,PAK1IP1,MAPT,COX17,PICALM,RPA3,RPLP0,CAPZA1,BRIX1,ARPC3,RPL26,GMFG,PXN,ABCA7,POMP,SCLT1,HSP90AA1,SDAD1,NVL,PRKCZ,PKD2,ATP6V1D,GTF2A2,MEFV,RPL6,SNRPD2,ALDOA,MRPL1,SNCA,PTK2B,RHOC,NGDN,CHEK2,APOC1,SRP19,RAB23
gPROFILER	GO:0044085	cellular component biogenesis	2745	49		0.000213421	NDUFB3,BIN1,NSF,DENR,CFLAR,PRRT2,APP,RPS27A,ATPAF1,BOLA2,ZNF622,IFT88,PLEKHM1,NDUFS5,PAK1IP1,MAPT,COX17,PICALM,RPA3,RPLP0,CAPZA1,BRIX1,ARPC3,RPL26,GMFG,PXN,ABCA7,POMP,SCLT1,HSP90AA1,SDAD1,NVL,PRKCZ,PKD2,ATP6V1D,GTF2A2,MEFV,RPL6,SNRPD2,ALDOA,MRPL1,SNCA,PTK2B,RHOC,NGDN,CHEK2,APOC1,SRP19,RAB23
FUMA	GO:0031970	organelle envelope lumen	88	7	7.59344e-06	0.000217172	AK2:NDUFS5:APP:SOD1:COX17:SNCA:COX19
gPROFILER	GO:0044446	intracellular organelle part	8599	151		0.000221214	DCTN6,ENSA,NDUFB3,RPL36AL,MYBPC3,WNT3,MRPL51,NSF,RPS25,ZMAT2,KATNB1,ZCCHC7,MRPS17,APP,RPS27A,SSBP1,ATP6V1E1,ZNF622,UQCRH,IFT88,GNL2,ZBTB43,PLEKHM1,NDUFS5,HS3ST5,DNAJC7,FANCI,MAPT,COX17,LARP7,MBOAT1,UBA7,GDPD3,PICALM,RPA3,SHFM1,ERGIC1,TRIM45,PPIL3,ZNF613,RPLP0,CAPZA1,MRPL33,MRPS21,TRIP4,BRIX1,NXF1,MED20,ARPC3,NFATC3,RPL26,GM2A,AK2,MPHOSPH9,GMFG,PDIA4,PXN,FABP5,MRPL27,INTS1,EXTL3,POMP,SCLT1,HSP90AA…
WebGestalt	GO:0000027	ribosomal large subunit assembly	32	7	3.25898e-07	0.000228346	RPLP0;BRIX1;RPL6;RPF2;RPL11;RPL10L;RPL12
FUMA	GO:0051345	positive regulation of hydrolase activity	748	20	3.61228e-06	0.000276565	PRKCZ:DOCK7:RHOC:MYBPC3:TBC1D10C:PICALM:MEFV:MAPT:ZC3H15:CFLAR:APP:SETMAR:FAM162A:FAM13A:SNCA:GM2A:SSBP1:PTK2B:DNAJA1:ANP32B
FUMA	GO:0071826	ribonucleoprotein complex subunit organization	284	12	3.98806e-06	0.000302188	RPL11:RPL6:RPLP0:DENR:RPL10L:HSP90AA1:MAPT:SNRPD2:BRIX1:RPF2:EIF3E:RPL12
FUMA	GO:0032870	cellular response to hormone stimulus	689	19	4.09708e-06	0.000307281	PRKCZ:CTSS:AKR1C3:TCIRG1:SP1:PXN:ATP6V1D:UBE3A:TRIP4:ABHD2:CRHR1:CFLAR:ATP6V1E1:CHEK2:NCK1:AIF1:PRKAR1B:KANK1:DNAJA1
FUMA	GO:0045202	synapse	1169	25	1.11347e-05	0.000309605	PRKCZ:RIMS3:CHRNA10:PICALM:RPS25:TRAPPC4:RPL6:RPLP0:PSMA3:ACTN1:TRIP4:PRRT2:SNTB2:RPL23:MAPT:NSF:BIN1:APP:SNCA:PRKAR1B:PSMC2:PTK2B:CHRNA2:FABP5:RPL12
FUMA	GO:0098794	postsynapse	610	17	1.15623e-05	0.000312808	PRKCZ:CHRNA10:PICALM:RPS25:RPL6:RPLP0:PRRT2:RPL23:MAPT:NSF:APP:SNCA:PSMC2:PTK2B:CHRNA2:FABP5:RPL12
gPROFILER	GO:0051649	establishment of localization in cell	1937	53		0.000327201	DCTN6,BIN1,MYBPC3,NSF,RPS25,KATNB1,PRRT2,APP,RPS27A,FAM160A2,IFT88,MAPT,PICALM,ERGIC1,RPLP0,CAPZA1,NXF1,RPL26,HSP90AA1,PKD2,LEPROTL1,RPL32,PLEKHA3,RPL6,SNRPD2,RPL23,SNCA,PTK2B,SRP19,RAB23,SRP14,HACL1,NUP35,TBC1D10C,TAOK2,VPS37C,RAB37,ENY2,TOMM7,RAB6A,WDR33,VPS37B,JPH2,RPAIN,DOCK7,SOD1,BCAP29,GORASP1,CPSF2,TRAPPC4,RPL11,DTX3L,SSB
gPROFILER	GO:0051649	establishment of localization in cell	1937	53		0.000327201	DCTN6,BIN1,MYBPC3,NSF,RPS25,KATNB1,PRRT2,APP,RPS27A,FAM160A2,IFT88,MAPT,PICALM,ERGIC1,RPLP0,CAPZA1,NXF1,RPL26,HSP90AA1,PKD2,LEPROTL1,RPL32,PLEKHA3,RPL6,SNRPD2,RPL23,SNCA,PTK2B,SRP19,RAB23,SRP14,HACL1,NUP35,TBC1D10C,TAOK2,VPS37C,RAB37,ENY2,TOMM7,RAB6A,WDR33,VPS37B,JPH2,RPAIN,DOCK7,SOD1,BCAP29,GORASP1,CPSF2,TRAPPC4,RPL11,DTX3L,SSB
FUMA	GO:1902600	proton transmembrane transport	152	9	4.43477e-06	0.000329248	ATP5F1:COX15:TCIRG1:ATP6V1D:ATP5H:ATP5O:ATP6V1E1:COX17:ATP5I
FUMA	R-HSA-69002	dna replication pre initiation	85	7	6.02691e-06	0.000334605	PSMA3:PSMD12:RPS27A:GMNN:RPA3:SHFM1:C7orf76:PSMC2
FUMA	GO:1901699	cellular response to nitrogen compound	632	18	4.74647e-06	0.000348866	PRKCZ:TCIRG1:SP1:PXN:ATP6V1D:AQP9:RPL23:CRHR1:CFLAR:APP:SOD1:ATP6V1E1:NCK1:PKD2:SNCA:AIF1:PRKAR1B:KANK1
FUMA	GO:0036477	somatodendritic compartment	818	20	1.33386e-05	0.000351366	PRKCZ:CHRNA10:RRM1:PICALM:TRAPPC4:NGDN:HSP90AA1:PRRT2:TAOK2:KATNB1:CRHR1:MAPT:NSF:APP:SOD1:SNCA:AIF1:PSMC2:CNTNAP2:PTK2B
FUMA	GO:0030427	axon part	376	13	1.37793e-05	0.000353668	PRKCZ:DOCK7:HSP90AA1:PRRT2:TAOK2:KATNB1:MAPT:BIN1:APP:SOD1:SNCA:CNTNAP2:PTK2B
FUMA	R-HSA-69541	stabilization of p53	57	6	6.78608e-06	0.000353948	PSMA3:PSMD12:RPS27A:CHEK2:SHFM1:C7orf76:PSMC2
FUMA	R-HSA-163210	formation of atp by chemiosmotic coupling	16	4	7.04148e-06	0.000353948	ATP5F1:ATP5H:ATP5O:ATP5I
FUMA	R-HSA-1428517	the citric acid tca cycle and respiratory electron transport	161	9	7.08368e-06	0.000353948	NDUFS5:UQCRH:ATP5F1:ATP5H:SUCLG1:NDUFB3:ATP5O:ATP5I:UQCRB
FUMA	GO:0034248	regulation of cellular amide metabolic process	453	15	5.06713e-06	0.000367725	MOV10:PICALM:GCN1L1:NGDN:RPL26:ABCA7:SAMD4B:BIN1:CD28:APP:EIF4E3:NCK1:SNCA:PTK2B:EIF3E
FUMA	GO:0007005	mitochondrion organization	512	16	5.10313e-06	0.000367725	NDUFS5:ATPAF1:ATP5F1:HSP90AA1:MAPT:ATP5H:NDUFB3:ATP5O:COX17:FAM162A:ATP5I:SNCA:COX19:TOMM7:SSBP1:UQCRB
FUMA	GO:1902494	catalytic complex	1351	27	1.63837e-05	0.000410002	NDUFS5:UQCRH:GTF2B:NVL:RRM1:POLD3:PSMA3:UBE3A:GTF2A2:SPSB3:PSMD12:SS18:ABCA7:SNRPD2:PPIL3:NDUFB3:CFLAR:SNRPB2:NCK1:SNCA:PLRG1:MED20:PSMC2:ING3:UQCRB:ENY2:DNAJA1
WebGestalt	GO:0006612	protein targeting to membrane	187	14	6.75646e-07	0.000426062	RPS25;RPS27A;RPLP0;RPL26;RPL32;RPL6;RPL23;SRP19;SRP14;TAOK2;RPL11;RPS24;PEX5;RPL12
FUMA	GO:0032553	protein containing complex binding	1096	25	3.69657e-06	0.000434348	ANGPTL3:CAPZA1:CD160:CTSS:NVL:MYBPC3:ARPC3:GCN1L1:PXN:ACTN1:HSP90AA1:KATNB1:RPAIN:CRHR1:MAPT:NSF:GMFG:BIN1:CFLAR:SNRPB2:ATP5I:SNCA:SRP19:AIF1:PTK2B
FUMA	GO:0019080	positive regulation of protein complex assembly	248	11	6.37985e-06	0.000455261	RHOC:ARPC3:HSP90AA1:MAPT:GMFG:BIN1:DRG1:NCK1:RPA3:PSMC2:PTK2B
FUMA	GO:0051493	regulation of cytoskeleton organization	522	16	6.50136e-06	0.000459471	CAPZA1:RHOC:SWAP70:SSH3:ARPC3:PXN:TAOK2:KATNB1:MAPT:GMFG:BIN1:DRG1:NCK1:SNCA:PTK2B:KANK1
FUMA	GO:0005844	polysome	68	6	1.90019e-05	0.000463924	RPL11:RPL6:GCN1L1:RPL10L:DRG1:RPL32
FUMA	R-HSA-69306	dna replication	127	8	9.63106e-06	0.000465708	POLD3:PSMA3:PSMD12:RPS27A:GMNN:RPA3:SHFM1:C7orf76:PSMC2
FUMA	GO:0140053	mitochondrial gene expression	160	9	6.73477e-06	0.000471434	MRPS21:MRPL48:MRPL51:MRPL27:ICT1:MRPL33:MRPL35:MRPL1:MRPS17:MRPS17
WebGestalt	GO:0090150	establishment of protein localization to membrane	313	18	8.70798e-07	0.000487965	NSF;RPS25;RPS27A;RPLP0;RPL26;HSP90AA1;RPL32;RPL6;RPL23;SRP19;SRP14;TAOK2;GOLPH3L;GORASP1;RPL11;RPS24;PEX5;RPL12
WebGestalt	GO:0006413	translational initiation	192	14	9.28572e-07	0.000487965	RPS25;DENR;RPS27A;EIF4E3;RPLP0;RPL26;RPL32;RPL6;RPL23;EIF3E;RPL11;NCK1;RPS24;RPL12
FUMA	KEGG_HUNTINGTONS_DISEASE	huntingtons disease	174	9	1.32343e-05	0.000492315	NDUFS5:UQCRH:ATP5F1:SP1:ATP5H:NDUFB3:SOD1:ATP5O:UQCRB
FUMA	GO:0080135	regulation of cellular response to stress	718	19	7.35002e-06	0.000509648	PRDX1:MCL1:RAD9A:HSP90AA1:TAOK2:RPL26:DNAJC7:MAPT:NUP35:APP:SOD1:CHEK2:SETMAR:DTX3L:NCK1:ZNF622:RPA3:PTK2B:DNAJA1
FUMA	GO:0002682	regulation of immune system process	1606	31	7.48159e-06	0.000511647	PRKCZ:MOV10:CD160:ECM1:CTSS:SWAP70:SPI1:CD5:TBC1D10C:ARPC3:PSMA3:HSP90AA1:CMTM3:NFATC3:CRHR1:PSMD12:CD209:CLPTM1:RPS27A:STK39:CD28:APP:SOD1:TCTA:DTX3L:NCK1:SNCA:CD83:AIF1:PSMC2:PTK2B
FUMA	GO:2001244	positive regulation of intrinsic apoptotic signaling pathway	58	6	7.51808e-06	0.000511647	RPL11:MCL1:RAD9A:RPL26:SOD1:NCK1
FUMA	GO:0045259	proton transporting two sector atpase complex proton transporting domain	21	4	2.24294e-05	0.000522135	ATP5F1:TCIRG1:ATP5H:ATP5I
FUMA	GO:0120115	proton transporting atp synthase complex	21	4	2.24294e-05	0.000522135	ATP5F1:ATP5H:ATP5O:ATP5I
FUMA	GO:0043549	regulation of kinase activity	857	21	7.82529e-06	0.000527668	PRKCZ:GCN1L1:HSP90AA1:MVP:TAOK2:MAPT:GMFG:LILRA5:RPS27A:STK39:CASS4:APP:SOD1:PROK2:NCK1:PKD2:SNCA:ZNF622:PRKAR1B:PTK2B:DNAJA1
FUMA	GO:0044242	cellular lipid catabolic process	207	10	8.00844e-06	0.000530288	ANGPTL3:ACADM:AKR1C3:ABHD2:GDPD3:PNPLA6:APOC1:HACL1:GM2A:FABP5
FUMA	GO:0008154	actin polymerization or depolymerization	207	10	8.00844e-06	0.000530288	CAPZA1:SWAP70:SSH3:ARPC3:GMFG:BIN1:NCK1:AIF1:PTK2B:KANK1
FUMA	GO:0030027	lamellipodium	188	9	2.44623e-05	0.000556517	ANGPTL3:SWAP70:ARPC3:PXN:MEFV:APP:PKD2:AIF1:PTK2B
FUMA	GO:0006468	protein phosphorylation	1949	35	8.90246e-06	0.000584224	PRKCZ:PRDX1:DOCK7:CHRNA10:TBC1D10C:PWP1:GCN1L1:PSMA3:HSP90AA1:MVP:TAOK2:PSMD12:ABCA7:GMFG:LILRA5:RPS27A:STK39:CFLAR:CASS4:APP:SOD1:ADRBK2:CHEK2:PROK2:NCK1:PKD2:SNCA:ZNF622:CDKL3:AIF1:PRKAR1B:PSMC2:PTK2B:ST3GAL1:DNAJA1
WebGestalt	GO:0101002	ficolin-1-rich granule	183	11	6.33189e-06	0.000611028	GMFG;HSP90AA1;PSMD12;ALDOA;CTSS;SRP14;TBC1D10C;MVP;CST3;TCIRG1;PSMC2
FUMA	GO:0005635	nuclear envelope	462	14	2.7889e-05	0.000620375	PRKCZ:RRM1:NXF1:MVP:CMTM3:BIN1:NUP35:APP:SNCA:PLRG1:KPNA5:INTS1:CBX3:ENY2
FUMA	GO:0110053	regulation of actin filament organization	260	11	9.95735e-06	0.000647669	CAPZA1:RHOC:SWAP70:SSH3:ARPC3:PXN:GMFG:BIN1:NCK1:PTK2B:KANK1
gPROFILER	GO:0019083	viral transcription	177	14		0.000682541	RPS25,RPS27A,RPLP0,RPL26,TRIM11,RPL32,RPL6,RPL23,NUP35,SP1,RPL11,RPS24,GTF2B,RPL12
gPROFILER	GO:0019083	viral transcription	177	14		0.000682541	RPS25,RPS27A,RPLP0,RPL26,TRIM11,RPL32,RPL6,RPL23,NUP35,SP1,RPL11,RPS24,GTF2B,RPL12
FUMA	GO:0032535	regulation of cellular component size	367	13	1.06685e-05	0.00068784	CAPZA1:SWAP70:SSH3:PICALM:ARPC3:MAPT:WNT3:GMFG:BIN1:NCK1:CDKL3:PTK2B:KANK1
FUMA	GO:0030029	actin filament based process	739	19	1.10002e-05	0.000703057	CAPZA1:RHOC:SWAP70:MYBPC3:SSH3:ARPC3:PXN:ACTN1:TAOK2:ALDOA:GMFG:BIN1:CFLAR:CASS4:NCK1:SDAD1:AIF1:PTK2B:KANK1
gPROFILER	GO:0051641	cellular localization	2549	63		0.00071911	DCTN6,BIN1,MYBPC3,NSF,RPS25,KATNB1,PRRT2,APP,RPS27A,FAM160A2,IFT88,PLEKHM1,MAPT,PICALM,ERGIC1,RPLP0,CAPZA1,NXF1,RPL26,ABCA7,SCLT1,HSP90AA1,NVL,PKD2,ATP6V1D,LEPROTL1,RPL32,PLEKHA3,RPL6,SNRPD2,RPL23,SNCA,DNAJA1,PTK2B,SRP19,RAB23,SRP14,HACL1,NUP35,TBC1D10C,TAOK2,VPS37C,RAB37,ENY2,TOMM7,RAB6A,WDR33,VPS37B,JPH2,RPAIN,DOCK7,GOLPH3L,SOD1,RPF2,BCAP29,GORASP1,CPSF2,TRAPPC4,FAM126B,RPL11,TM9SF1,DTX3L,SSB
gPROFILER	GO:0051641	cellular localization	2549	63		0.00071911	DCTN6,BIN1,MYBPC3,NSF,RPS25,KATNB1,PRRT2,APP,RPS27A,FAM160A2,IFT88,PLEKHM1,MAPT,PICALM,ERGIC1,RPLP0,CAPZA1,NXF1,RPL26,ABCA7,SCLT1,HSP90AA1,NVL,PKD2,ATP6V1D,LEPROTL1,RPL32,PLEKHA3,RPL6,SNRPD2,RPL23,SNCA,DNAJA1,PTK2B,SRP19,RAB23,SRP14,HACL1,NUP35,TBC1D10C,TAOK2,VPS37C,RAB37,ENY2,TOMM7,RAB6A,WDR33,VPS37B,JPH2,RPAIN,DOCK7,GOLPH3L,SOD1,RPF2,BCAP29,GORASP1,CPSF2,TRAPPC4,FAM126B,RPL11,TM9SF1,DTX3L,SSB
FUMA	GO:0061919	process utilizing autophagic mechanism	485	15	1.13876e-05	0.000721539	MCL1:VPS37C:TCIRG1:VPS37B:IFT88:TM9SF1:TM9SF1:ATP6V1D:HSP90AA1:MEFV:PLEKHM1:MAPT:ATP6V1E1:SNCA:RAB23:TOMM7
WebGestalt	GO:0000184	nuclear-transcribed mRNA catabolic process, nonsense-mediated decay	120	11	1.50789e-06	0.000731445	RPS25;RPS27A;RPLP0;RPL26;RPL32;RPL6;RPL23;EIF3E;RPL11;RPS24;RPL12
WebGestalt	R-HSA-6791226	Major pathway of rRNA processing in the nucleolus and cytosol	185	13	1.27076e-05	0.000761901	RPL36AL;RPS25;RPS27A;RPLP0;RPL26;RPL32;RPL6;RPL23;EBNA1BP2;RPL11;RPS24;RPL10L;RPL12
gPROFILER	GO:0044445	cytosolic part	213	14		0.00076308	RPL36AL,RPS25,CFLAR,RPS27A,RPLP0,RPL26,RPL32,RPL6,RPL23,RPL11,RPS24,RRM1,RPL10L,RPL12
FUMA	GO:0030424	axon	600	16	3.55192e-05	0.000772929	PRKCZ:DOCK7:ACADM:CHRNA10:NGDN:HSP90AA1:PRRT2:TAOK2:KATNB1:MAPT:BIN1:APP:SOD1:SNCA:CNTNAP2:PTK2B
WebGestalt	GO:1904813	ficolin-1-rich granule lumen	123	9	9.29454e-06	0.000797265	GMFG;HSP90AA1;PSMD12;ALDOA;CTSS;SRP14;MVP;CST3;PSMC2
FUMA	GO:0016050	vesicle organization	319	12	1.28678e-05	0.000808359	GOLPH3L:FAM160A2:VPS37C:PICALM:TRAPPC4:VPS37B:PRRT2:STX8:NSF:GORASP1:SNCA:SEC24D
FUMA	GO:0051656	establishment of organelle localization	491	15	1.31522e-05	0.000819226	PRKCZ:RIMS3:DOCK7:RAB6A:PICALM:TRAPPC4:PRRT2:KATNB1:CRHR1:MAPT:NSF:GORASP1:SDAD1:SNCA:SEC24D
FUMA	GO:0098660	inorganic ion transmembrane transport	821	20	1.40567e-05	0.000851647	ATP5F1:COX15:CHRNA10:TCIRG1:PICALM:ATP6V1D:SLC24A4:CRHR1:ATP5H:BIN1:STK39:JPH2:ATP5O:ATP6V1E1:COX17:ATP5I:PKD2:SNCA:PTK2B:SLC20A2
FUMA	GO:1901653	cellular response to peptide	377	13	1.41698e-05	0.000851647	PRKCZ:TCIRG1:SP1:PXN:ATP6V1D:RPL23:CRHR1:CFLAR:APP:ATP6V1E1:NCK1:PRKAR1B:KANK1
FUMA	GO:0032989	cellular component morphogenesis	1111	24	1.42559e-05	0.000851647	PRKCZ:DOCK7:MOV10:RHOC:MYBPC3:SSH3:PICALM:ACTN1:HSP90AA1:TAOK2:ALDOA:MAPT:WNT3:SS18:CFLAR:CASS4:APP:SOD1:GORASP1:CDKL3:SSBP1:CNTNAP2:PTK2B:KANK1
FUMA	GO:0032273	positive regulation of protein polymerization	134	8	1.42614e-05	0.000851647	ARPC3:HSP90AA1:MAPT:GMFG:BIN1:DRG1:NCK1:PTK2B
FUMA	GO:0006979	response to oxidative stress	435	14	1.43821e-05	0.000851647	PRDX1:MCL1:AKR1C3:SP1:PXN:MAPT:CFLAR:APP:SOD1:PKD2:SNCA:ZNF622:AIF1:PTK2B
FUMA	GO:0051051	negative regulation of transport	495	15	1.44595e-05	0.000851647	ANKRD13D:PICALM:PRRT2:CRHR1:ABCA7:APOC1:LILRA5:BIN1:STK39:PKD2:SNCA:RAB23:PTK2B:FABP5:ENY2
FUMA	GO:0051130	positive regulation of cellular component organization	1188	25	1.45874e-05	0.000851647	RHOC:SWAP70:ARPC3:PXN:HSP90AA1:KATNB1:PLEKHM1:MAPT:WNT3:ABCA7:GMFG:BIN1:CFLAR:CD28:CASS4:APP:DRG1:FAM162A:NCK1:SNCA:CDKL3:RPA3:TOMM7:PSMC2:PTK2B
FUMA	GO:0051049	regulation of transport	1827	33	1.45997e-05	0.000851647	PRKCZ:RIMS3:CD160:ENSA:GOLPH3L:CTSS:MYBPC3:ANKRD13D:PICALM:PRRT2:CRHR1:NSF:ABCA7:APOC1:LILRA5:BIN1:STK39:JPH2:APP:SOD1:GPR27:COX17:PKD2:SNCA:AIF1:RAB23:PRKAR1B:TOMM7:PTK2B:FABP5:ENY2:DNAJA1:ANP32B
FUMA	GO:0070925	organelle assembly	824	20	1.48094e-05	0.00085708	RPL11:TUBGCP2:MYBPC3:VPS37C:RPL6:RPLP0:VPS37B:IFT88:RPL10L:ATP6V1D:HSP90AA1:MAPT:CFLAR:CHEK2:DRG1:SCLT1:BRIX1:RAB23:RPF2:RPL12
FUMA	R-HSA-68867	assembly of the pre replicative complex	68	6	1.90019e-05	0.000863147	PSMA3:PSMD12:RPS27A:GMNN:SHFM1:C7orf76:PSMC2
FUMA	R-HSA-69615	g1 s dna damage checkpoints	68	6	1.90019e-05	0.000863147	PSMA3:PSMD12:RPS27A:CHEK2:SHFM1:C7orf76:PSMC2
FUMA	GO:0019900	kinase binding	722	19	7.94673e-06	0.000871491	PRKCZ:RHOC:CD160:RAD9A:GCN1L1:PXN:HSP90AA1:TRIP4:MVP:TAOK2:MAPT:NSF:STK39:CD28:CASS4:CHEK2:NCK1:PRKAR1B:PTK2B
FUMA	GO:0044183	ubiquitin like protein ligase binding	306	12	8.49115e-06	0.000872997	RPL11:PXN:PSMA3:HSP90AA1:TRIP4:STX8:RPL23:RPS27A:CHEK2:DTX3L:PTK2B:DNAJA1
FUMA	GO:0015075	ion transmembrane transporter activity	870	21	9.8103e-06	0.000888292	ATP5F1:COX15:CHRNA10:CNGA4:TCIRG1:ATP6V1D:SLC24A4:AQP9:SLCO3A1:ABCC3:ATP5H:SLC16A5:SLC5A6:JPH2:ATP5O:ATP6V1E1:ATP5I:PKD2:PTK2B:CHRNA2:SLC20A2
FUMA	GO:0015078	proton transmembrane transporter activity	128	8	1.0202e-05	0.000888292	ATP5F1:COX15:TCIRG1:ATP6V1D:ATP5H:ATP5O:ATP6V1E1:ATP5I
FUMA	GO:0070180	large ribosomal subunit rrna binding	6	3	1.02599e-05	0.000888292	RPLP0:RPL23:RPL12
FUMA	GO:0032970	regulation of actin filament based process	381	13	1.5831e-05	0.000909045	CAPZA1:RHOC:SWAP70:MYBPC3:SSH3:ARPC3:PXN:TAOK2:GMFG:BIN1:NCK1:PTK2B:KANK1
FUMA	GO:0019843	rrna binding	62	6	1.11139e-05	0.000910904	RPL11:RPLP0:RPL23:RPF2:MRPS17:MRPS17:RPL12
FUMA	GO:0004857	enzyme inhibitor activity	370	13	1.16286e-05	0.000910904	RPL11:ANGPTL3:ENSA:PPP1R14B:RPL23:GMFG:APOC1:CST3:APP:DTX3L:NCK1:SNCA:PRKAR1B
FUMA	GO:0044431	golgi apparatus part	964	21	4.39744e-05	0.000936561	GOLPH3L:CNGA4:RAB6A:TRAPPC4:MPHOSPH9:CDIPT:STX8:CRHR1:NSF:WNT3:XYLT2:ABCA7:PLEKHA3:ATP9A:APP:GORASP1:SEC24D:VCAN:ERGIC1:HS3ST5:ST3GAL1
FUMA	GO:0009725	response to hormone	973	22	1.64762e-05	0.000938763	PRKCZ:ANGPTL3:CTSS:AKR1C3:TCIRG1:SP1:PXN:ATP6V1D:UBE3A:TRIP4:ABHD2:CRHR1:CFLAR:ATP6V1E1:CHEK2:NCK1:AIF1:PRKAR1B:PTK2B:GGH:KANK1:DNAJA1
FUMA	GO:0030054	cell junction	1275	25	4.63598e-05	0.000966794	PRKCZ:RIMS3:DOCK7:CHRNA10:ARPC3:RPL6:RPLP0:PXN:ACTN1:GTF2A2:PRRT2:SNTB2:RPL23:ABCA7:CASS4:APP:NCK1:PKD2:SNCA:RAB23:CNTNAP2:PTK2B:CHRNA2:FABP5:RPL12
gPROFILER	GO:0006810	transport	4374	98		0.000969826	DCTN6,ENSA,BIN1,MYBPC3,NSF,RPS25,KATNB1,PRRT2,APP,RPS27A,FAM160A2,ATP6V1E1,CRHR1,IFT88,CD209,ANKRD13D,MAPT,COX17,PICALM,SHFM1,ERGIC1,RPLP0,CAPZA1,NXF1,ARPC3,RPL26,GM2A,GMFG,PDIA4,FABP5,CHRNA10,ABCA7,HSP90AA1,ABCC3,PRKCZ,PKD2,ATP6V1D,ECM1,LEPROTL1,RPL32,PLEKHA3,RPL6,ADRBK2,PSMD12,SNRPD2,ALDOA,RPL23,SNCA,DNAJA1,PTK2B,CTSS,APOC1,SRP19,RAB23,LILRA5,SRP14,HACL1,NUP35,STK39,SLC5A6,SLCO3A1,TBC1D10C,TAOK…
gPROFILER	GO:0006412	translation	619	28		0.000969826	MRPL51,RPS25,DENR,MRPS17,APP,RPS27A,RPLP0,MRPL33,MRPS21,RPL26,MOV10,MRPL27,RPL32,RPL6,RPL23,MRPL1,DRG1,MRPL48,MRPL35,EIF3E,RPL11,NCK1,SAMD4B,CD28,RPS24,ZC3H15,RPL12,RRBP1
gPROFILER	GO:0006810	transport	4374	98		0.000969826	DCTN6,ENSA,BIN1,MYBPC3,NSF,RPS25,KATNB1,PRRT2,APP,RPS27A,FAM160A2,ATP6V1E1,CRHR1,IFT88,CD209,ANKRD13D,MAPT,COX17,PICALM,SHFM1,ERGIC1,RPLP0,CAPZA1,NXF1,ARPC3,RPL26,GM2A,GMFG,PDIA4,FABP5,CHRNA10,ABCA7,HSP90AA1,ABCC3,PRKCZ,PKD2,ATP6V1D,ECM1,LEPROTL1,RPL32,PLEKHA3,RPL6,ADRBK2,PSMD12,SNRPD2,ALDOA,RPL23,SNCA,DNAJA1,PTK2B,CTSS,APOC1,SRP19,RAB23,LILRA5,SRP14,HACL1,NUP35,STK39,SLC5A6,SLCO3A1,TBC1D10C,TAOK…
gPROFILER	GO:0006412	translation	619	28		0.000969826	MRPL51,RPS25,DENR,MRPS17,APP,RPS27A,RPLP0,MRPL33,MRPS21,RPL26,MOV10,MRPL27,RPL32,RPL6,RPL23,MRPL1,DRG1,MRPL48,MRPL35,EIF3E,RPL11,NCK1,SAMD4B,CD28,RPS24,ZC3H15,RPL12,RRBP1
gPROFILER	GO:0000184	nuclear-transcribed mRNA catabolic process, nonsense-mediated decay	115	11		0.00105319	RPS25,RPS27A,RPLP0,RPL26,RPL32,RPL6,RPL23,EIF3E,RPL11,RPS24,RPL12
gPROFILER	GO:0000184	nuclear-transcribed mRNA catabolic process, nonsense-mediated decay	115	11		0.00105319	RPS25,RPS27A,RPLP0,RPL26,RPL32,RPL6,RPL23,EIF3E,RPL11,RPS24,RPL12
FUMA	GO:0033674	positive regulation of kinase activity	569	16	1.87823e-05	0.00105551	PRKCZ:GCN1L1:HSP90AA1:TAOK2:MAPT:LILRA5:RPS27A:STK39:CASS4:SOD1:PROK2:PKD2:SNCA:ZNF622:PRKAR1B:PTK2B
FUMA	GO:0006952	defense response	1684	31	1.88125e-05	0.00105551	PRKCZ:PRDX1:CAPZA1:CD160:ECM1:CTSS:TRIM11:PPP1R14B:TCIRG1:PSMA3:MEFV:NFATC3:STX8:MAPT:PSMD12:CD209:LILRA5:RPS27A:STK39:CD28:CST3:APP:SOD1:PROK2:DTX3L:SNCA:CD83:AIF1:RAB23:PSMC2:PTK2B
FUMA	GO:1901700	response to oxygen containing compound	1603	30	1.90106e-05	0.00105854	PRKCZ:PRDX1:AKR1C3:SPI1:TCIRG1:SP1:PXN:ATP6V1D:UBE3A:AQP9:ABHD2:RPL23:CRHR1:MAPT:WNT3:CFLAR:APP:SOD1:ATP6V1E1:CHEK2:GPR27:NCK1:PKD2:SNCA:AIF1:PRKAR1B:PTK2B:GGH:ENY2:KANK1
WebGestalt	GO:0034774	secretory granule lumen	320	14	1.38684e-05	0.00107064	APP;GM2A;GMFG;FABP5;HSP90AA1;ECM1;PSMD12;ALDOA;SRP14;ACTN1;MVP;PSMC2;GGH;MMRN1
FUMA	KEGG_PROTEASOME	proteasome	46	5	3.47869e-05	0.00107839	POMP:PSMA3:PSMD12:SHFM1:C7orf76:PSMC2
FUMA	GO:0017038	protein import	183	9	1.97696e-05	0.00109253	PEX5:HSP90AA1:RPAIN:RPL23:NUP35:TMCO6:RAB23:KPNA5:TOMM7
FUMA	GO:0015629	actin cytoskeleton	491	14	5.37813e-05	0.00109867	PRKCZ:CAPZA1:MYBPC3:ARPC3:PXN:ACTN1:TAOK2:ALDOA:GMFG:BIN1:PKD2:SNCA:AIF1:DCTN6
gPROFILER	GO:0006518	peptide metabolic process	776	32		0.00113852	BIN1,MRPL51,RPS25,DENR,MRPS17,APP,RPS27A,PICALM,RPLP0,MRPL33,MRPS21,RPL26,MOV10,MRPL27,ABCA7,RPL32,RPL6,RPL23,MRPL1,DRG1,MRPL48,SOD1,MRPL35,EIF3E,RPL11,NCK1,SAMD4B,CD28,RPS24,ZC3H15,RPL12,RRBP1
gPROFILER	GO:0022613	ribonucleoprotein complex biogenesis	386	14		0.00113852	DENR,ZNF622,PAK1IP1,MAPT,RPLP0,BRIX1,RPL26,HSP90AA1,SDAD1,NVL,RPL6,SNRPD2,MRPL1,NGDN
gPROFILER	GO:0042254	ribosome biogenesis	244	16		0.00113852	ZNF622,PAK1IP1,RPLP0,BRIX1,RPL26,SDAD1,NVL,RPL6,MRPL1,NGDN,EBNA1BP2,RPF2,RPL11,RPS24,RPL10L,RPL12
gPROFILER	GO:0006518	peptide metabolic process	776	32		0.00113852	BIN1,MRPL51,RPS25,DENR,MRPS17,APP,RPS27A,PICALM,RPLP0,MRPL33,MRPS21,RPL26,MOV10,MRPL27,ABCA7,RPL32,RPL6,RPL23,MRPL1,DRG1,MRPL48,SOD1,MRPL35,EIF3E,RPL11,NCK1,SAMD4B,CD28,RPS24,ZC3H15,RPL12,RRBP1
gPROFILER	GO:0022613	ribonucleoprotein complex biogenesis	386	14		0.00113852	DENR,ZNF622,PAK1IP1,MAPT,RPLP0,BRIX1,RPL26,HSP90AA1,SDAD1,NVL,RPL6,SNRPD2,MRPL1,NGDN
gPROFILER	GO:0042254	ribosome biogenesis	244	16		0.00113852	ZNF622,PAK1IP1,RPLP0,BRIX1,RPL26,SDAD1,NVL,RPL6,MRPL1,NGDN,EBNA1BP2,RPF2,RPL11,RPS24,RPL10L,RPL12
gPROFILER	GO:0072594	establishment of protein localization to organelle	497	19		0.00114123	RPS25,RPS27A,MAPT,RPLP0,RPL26,HSP90AA1,RPL32,RPL6,RPL23,DNAJA1,SRP19,RAB23,SRP14,HACL1,NUP35,VPS37C,TOMM7,VPS37B,RPAIN
gPROFILER	GO:0072594	establishment of protein localization to organelle	497	19		0.00114123	RPS25,RPS27A,MAPT,RPLP0,RPL26,HSP90AA1,RPL32,RPL6,RPL23,DNAJA1,SRP19,RAB23,SRP14,HACL1,NUP35,VPS37C,TOMM7,VPS37B,RPAIN
gPROFILER	GO:1902905	positive regulation of supramolecular fiber organization	166	10		0.00117779	BIN1,KATNB1,APP,MAPT,ARPC3,GMFG,PXN,PTK2B,RHOC,DRG1
gPROFILER	GO:1902905	positive regulation of supramolecular fiber organization	166	10		0.00117779	BIN1,KATNB1,APP,MAPT,ARPC3,GMFG,PXN,PTK2B,RHOC,DRG1
FUMA	GO:0071495	cellular response to endogenous stimulus	1373	27	2.17127e-05	0.00118628	PRKCZ:CTSS:AKR1C3:TCIRG1:SP1:PXN:ATP6V1D:UBE3A:AQP9:TRIP4:ABHD2:RPL23:CRHR1:MAPT:RPS27A:CFLAR:APP:SOD1:ATP6V1E1:CHEK2:NCK1:PKD2:SNCA:AIF1:PRKAR1B:KANK1:DNAJA1
FUMA	GO:0010941	regulation of cell death	1697	31	2.17887e-05	0.00118628	PRKCZ:RPL11:CD160:MCL1:AKR1C3:RAD9A:PICALM:BCL2L2:ACTN1:MAZ:KATNB1:RPL26:CRHR1:MAPT:PTRH2:RPS27A:BIN1:CFLAR:CD28:SOD1:CHEK2:PROK2:FAM162A:NCK1:SNCA:ZNF622:AIF1:ING3:PTK2B:DNAJA1:ANP32B
FUMA	GO:0022853	active ion transmembrane transporter activity	66	6	1.59883e-05	0.00119549	ATP5F1:TCIRG1:ATP6V1D:ATP5H:ATP5O:ATP6V1E1
FUMA	GO:0006754	atp biosynthetic process	42	5	2.21653e-05	0.0011979	ATP5F1:ALDOA:ATP5H:ATP5O:ATP5I
FUMA	GO:0000932	mitochondrial proton transporting atp synthase complex coupling factor f o	10	3	6.00983e-05	0.00120317	ATP5F1:ATP5H:ATP5I
FUMA	GO:0005783	endoplasmic reticulum	1884	32	6.43204e-05	0.00126244	CNIH4:RAB6A:TRAPPC4:RPL6:RPLP0:POMP:RPL10L:RPL36AL:CDIPT:GDPD3:STX8:WNT3:ABCA7:PNPLA6:APOC1:RPS27A:RRBP1:CST3:JPH2:APP:NCK1:PKD2:SNCA:SEC24D:VCAN:ERGIC1:MBOAT1:BCAP29:PDIA4:GIMAP7:EXTL3:DNAJA1
WebGestalt	R-HSA-8868773	rRNA processing in the nucleus and cytosol	195	13	2.23002e-05	0.00128133	RPL36AL;RPS25;RPS27A;RPLP0;RPL26;RPL32;RPL6;RPL23;EBNA1BP2;RPL11;RPS24;RPL10L;RPL12
WebGestalt	WP477	Cytoplasmic Ribosomal Proteins	91	10	3.4208e-06	0.00130333	RPS25;RPS27A;RPLP0;RPL26;RPL32;RPL6;RPL23;RPL11;RPS24;RPL12
FUMA	GO:0009142	nucleoside triphosphate biosynthetic process	71	6	2.43653e-05	0.00130719	ATP5F1:ALDOA:ATP5H:SUCLG1:ATP5O:ATP5I
FUMA	GO:0030427	site of polarized growth	167	8	6.88962e-05	0.00132625	DOCK7:HSP90AA1:TAOK2:KATNB1:MAPT:APP:SNCA:PTK2B
FUMA	R-HSA-72203	processing of capped intron containing pre mrna	242	10	3.08212e-05	0.00135885	DNAJC8:NXF1:CPSF2:SNRPD2:WDR33:NUP35:PPIL3:SNRPB2:CSTF1:PLRG1
FUMA	GO:0009891	positive regulation of biosynthetic process	1966	34	2.60929e-05	0.00138973	FOXJ3:GTF2B:NVL:SPI1:PICALM:MAML2:SP1:PWP1:GCN1L1:ACTN1:HSP90AA1:GTF2A2:TRIP4:MAZ:TBX6:NFATC3:RPL26:SS18:ELL:ZNF613:RPS27A:CD28:APP:CHEK2:DTX3L:NCK1:PKD2:SNCA:AIF1:MED20:PSMC2:PTK2B:EIF3E:ENY2
FUMA	GO:0012506	vesicle membrane	780	18	7.55979e-05	0.0014278	TBC1D10C:TCIRG1:RAB6A:PICALM:ATP6V1D:PRRT2:TAOK2:SNTB2:WNT3:RAB37:SLC5A6:RPS27A:NCK1:PKD2:SNCA:SEC24D:RAB23:FABP5
FUMA	GO:0009719	response to endogenous stimulus	1634	30	2.71495e-05	0.00143561	PRKCZ:ANGPTL3:CTSS:AKR1C3:TCIRG1:SP1:PXN:ATP6V1D:UBE3A:AQP9:TRIP4:ABHD2:RPL23:CRHR1:MAPT:RPS27A:CFLAR:APP:SOD1:ATP6V1E1:CHEK2:NCK1:PKD2:SNCA:AIF1:PRKAR1B:PTK2B:GGH:KANK1:DNAJA1
FUMA	GO:0008324	cation transmembrane transporter activity	637	17	2.00725e-05	0.00143562	ATP5F1:COX15:CHRNA10:CNGA4:TCIRG1:ATP6V1D:SLC24A4:ATP5H:SLC5A6:JPH2:ATP5O:ATP6V1E1:ATP5I:PKD2:PTK2B:CHRNA2:SLC20A2
FUMA	GO:1901135	carbohydrate derivative metabolic process	934	21	2.7912e-05	0.00146538	AK2:ATP5F1:AKR1C3:RRM1:ALDOA:XYLT2:ATP5H:ABCA7:SUCLG1:CST3:ATP5O:GORASP1:ATP5I:SNCA:VCAN:GM2A:RAB23:HS3ST5:GIMAP7:EXTL3:ST3GAL1
FUMA	GO:0007172	signal complex assembly	8	3	2.83846e-05	0.00147962	PXN:NCK1:PTK2B
FUMA	GO:0015935	synapse part	932	20	8.20035e-05	0.00149496	PRKCZ:RIMS3:CHRNA10:PICALM:RPS25:TRAPPC4:RPL6:RPLP0:PRRT2:RPL23:MAPT:NSF:BIN1:APP:SNCA:PSMC2:PTK2B:CHRNA2:FABP5:RPL12
FUMA	GO:0005730	proton transporting atp synthase complex coupling factor f o	11	3	8.21409e-05	0.00149496	ATP5F1:ATP5H:ATP5I
FUMA	GO:0034599	cellular response to oxidative stress	292	11	2.91382e-05	0.00150821	PRDX1:MCL1:AKR1C3:PXN:MAPT:CFLAR:SOD1:PKD2:SNCA:ZNF622:AIF1
FUMA	R-HSA-1266738	developmental biology	1100	23	3.57373e-05	0.00152397	RPL11:RHOC:RPS24:SPI1:MAML2:RPS25:ARPC3:RPL6:RPLP0:RPL10L:RPL36AL:PSMA3:HSP90AA1:RPL26:RPL23:PSMD12:RPS27A:RPL32:NCK1:MED20:SHFM1:C7orf76:PSMC2:RPL12
FUMA	R-HSA-1280218	adaptive immune system	807	19	3.65998e-05	0.00152397	CAPZA1:CD160:CTSS:TRIM11:PSMA3:UBE3A:NFATC3:PSMD12:CD209:LILRA5:RPS27A:CD28:UBA7:DTX3L:NCK1:SEC24D:SHFM1:C7orf76:PSMC2:DCTN6
gPROFILER	GO:0043043	peptide biosynthetic process	646	28		0.00154364	MRPL51,RPS25,DENR,MRPS17,APP,RPS27A,RPLP0,MRPL33,MRPS21,RPL26,MOV10,MRPL27,RPL32,RPL6,RPL23,MRPL1,DRG1,MRPL48,MRPL35,EIF3E,RPL11,NCK1,SAMD4B,CD28,RPS24,ZC3H15,RPL12,RRBP1
gPROFILER	GO:0042886	amide transport	1570	51		0.00154364	ENSA,NSF,RPS25,KATNB1,RPS27A,ATP6V1E1,CRHR1,IFT88,CD209,RPLP0,NXF1,RPL26,PDIA4,HSP90AA1,PRKCZ,ATP6V1D,RPL32,PLEKHA3,RPL6,RPL23,DNAJA1,SRP19,RAB23,LILRA5,SRP14,HACL1,NUP35,SLC5A6,TBC1D10C,TAOK2,VPS37C,RAB37,ENY2,TOMM7,RAB6A,WDR33,VPS37B,RPAIN,GOLPH3L,CPSF2,TCIRG1,RPL11,SSB,AIF1,KPNA5,STX8,RPS24,AQP9,ANP32B,PEX5,RPL12
gPROFILER	GO:0043043	peptide biosynthetic process	646	28		0.00154364	MRPL51,RPS25,DENR,MRPS17,APP,RPS27A,RPLP0,MRPL33,MRPS21,RPL26,MOV10,MRPL27,RPL32,RPL6,RPL23,MRPL1,DRG1,MRPL48,MRPL35,EIF3E,RPL11,NCK1,SAMD4B,CD28,RPS24,ZC3H15,RPL12,RRBP1
gPROFILER	GO:0042886	amide transport	1570	51		0.00154364	ENSA,NSF,RPS25,KATNB1,RPS27A,ATP6V1E1,CRHR1,IFT88,CD209,RPLP0,NXF1,RPL26,PDIA4,HSP90AA1,PRKCZ,ATP6V1D,RPL32,PLEKHA3,RPL6,RPL23,DNAJA1,SRP19,RAB23,LILRA5,SRP14,HACL1,NUP35,SLC5A6,TBC1D10C,TAOK2,VPS37C,RAB37,ENY2,TOMM7,RAB6A,WDR33,VPS37B,RPAIN,GOLPH3L,CPSF2,TCIRG1,RPL11,SSB,AIF1,KPNA5,STX8,RPS24,AQP9,ANP32B,PEX5,RPL12
FUMA	GO:0070469	respirasome	89	6	8.75627e-05	0.00156518	NDUFS5:UQCRH:COX15:NDUFB3:SNCA:UQCRB
gPROFILER	GO:0033365	protein localization to organelle	812	28		0.00157084	RPS25,RPS27A,MAPT,RPLP0,RPL26,ABCA7,HSP90AA1,NVL,ATP6V1D,RPL32,RPL6,RPL23,DNAJA1,SRP19,RAB23,SRP14,HACL1,NUP35,VPS37C,TOMM7,RAB6A,VPS37B,RPAIN,RPF2,BCAP29,RPL11,DTX3L,SSB
gPROFILER	GO:0033365	protein localization to organelle	812	28		0.00157084	RPS25,RPS27A,MAPT,RPLP0,RPL26,ABCA7,HSP90AA1,NVL,ATP6V1D,RPL32,RPL6,RPL23,DNAJA1,SRP19,RAB23,SRP14,HACL1,NUP35,VPS37C,TOMM7,RAB6A,VPS37B,RPAIN,RPF2,BCAP29,RPL11,DTX3L,SSB
FUMA	R-HSA-5610787	hedgehog off state	113	7	3.89116e-05	0.00157645	IFT88:PSMA3:PSMD12:RPS27A:PRKAR1B:SHFM1:C7orf76:PSMC2
WebGestalt	GO:0060205	cytoplasmic vesicle lumen	336	14	2.38582e-05	0.00158602	APP;GM2A;GMFG;FABP5;HSP90AA1;ECM1;PSMD12;ALDOA;SRP14;ACTN1;MVP;PSMC2;GGH;MMRN1
WebGestalt	GO:0031983	vesicle lumen	337	14	2.46532e-05	0.00158602	APP;GM2A;GMFG;FABP5;HSP90AA1;ECM1;PSMD12;ALDOA;SRP14;ACTN1;MVP;PSMC2;GGH;MMRN1
gPROFILER	GO:0043624	cellular protein complex disassembly	185	8		0.00160182	MRPL51,NSF,KATNB1,MRPS17,CAPZA1,MRPL33,MRPS21,MRPL27
gPROFILER	GO:0043624	cellular protein complex disassembly	185	8		0.00160182	MRPL51,NSF,KATNB1,MRPS17,CAPZA1,MRPL33,MRPS21,MRPL27
FUMA	R-HSA-8852276	the role of gtse1 in g2 m progression after g2 checkpoint	78	6	4.16812e-05	0.00164421	PSMA3:HSP90AA1:PSMD12:RPS27A:SHFM1:C7orf76:PSMC2
FUMA	GO:0051276	energy coupled proton transport down electrochemical gradient	23	4	3.27651e-05	0.00166596	ATP5F1:ATP5H:ATP5O:ATP5I
FUMA	GO:0015985	regulation of amyloid beta formation	23	4	3.27651e-05	0.00166596	PICALM:ABCA7:BIN1:APP
FUMA	GO:0048666	neuron development	1094	23	3.28658e-05	0.00166596	PRKCZ:DOCK7:MOV10:SSH3:PICALM:TRAPPC4:IFT88:HSP90AA1:TAOK2:TBX6:KATNB1:MAPT:WNT3:CFLAR:APP:SOD1:GORASP1:NCK1:SCLT1:CDKL3:CNTNAP2:PTK2B:KANK1
gPROFILER	GO:0002181	cytoplasmic translation	86	9		0.00167917	DENR,RPLP0,RPL26,RPL32,RPL6,DRG1,RPL11,NCK1,ZC3H15
gPROFILER	GO:0006605	protein targeting	390	16		0.00167917	RPS25,KATNB1,RPS27A,RPLP0,RPL26,HSP90AA1,RPL32,RPL6,RPL23,SRP19,SRP14,HACL1,TAOK2,VPS37C,TOMM7,VPS37B
gPROFILER	GO:0002181	cytoplasmic translation	86	9		0.00167917	DENR,RPLP0,RPL26,RPL32,RPL6,DRG1,RPL11,NCK1,ZC3H15
gPROFILER	GO:0006605	protein targeting	390	16		0.00167917	RPS25,KATNB1,RPS27A,RPLP0,RPL26,HSP90AA1,RPL32,RPL6,RPL23,SRP19,SRP14,HACL1,TAOK2,VPS37C,TOMM7,VPS37B
gPROFILER	GO:0051234	establishment of localization	4485	98		0.00177202	DCTN6,ENSA,BIN1,MYBPC3,NSF,RPS25,KATNB1,PRRT2,APP,RPS27A,FAM160A2,ATP6V1E1,CRHR1,IFT88,CD209,ANKRD13D,MAPT,COX17,PICALM,SHFM1,ERGIC1,RPLP0,CAPZA1,NXF1,ARPC3,RPL26,GM2A,GMFG,PDIA4,FABP5,CHRNA10,ABCA7,HSP90AA1,ABCC3,PRKCZ,PKD2,ATP6V1D,ECM1,LEPROTL1,RPL32,PLEKHA3,RPL6,ADRBK2,PSMD12,SNRPD2,ALDOA,RPL23,SNCA,DNAJA1,PTK2B,CTSS,APOC1,SRP19,RAB23,LILRA5,SRP14,HACL1,NUP35,STK39,SLC5A6,SLCO3A1,TBC1D10C,TAOK…
gPROFILER	GO:0051234	establishment of localization	4485	98		0.00177202	DCTN6,ENSA,BIN1,MYBPC3,NSF,RPS25,KATNB1,PRRT2,APP,RPS27A,FAM160A2,ATP6V1E1,CRHR1,IFT88,CD209,ANKRD13D,MAPT,COX17,PICALM,SHFM1,ERGIC1,RPLP0,CAPZA1,NXF1,ARPC3,RPL26,GM2A,GMFG,PDIA4,FABP5,CHRNA10,ABCA7,HSP90AA1,ABCC3,PRKCZ,PKD2,ATP6V1D,ECM1,LEPROTL1,RPL32,PLEKHA3,RPL6,ADRBK2,PSMD12,SNRPD2,ALDOA,RPL23,SNCA,DNAJA1,PTK2B,CTSS,APOC1,SRP19,RAB23,LILRA5,SRP14,HACL1,NUP35,STK39,SLC5A6,SLCO3A1,TBC1D10C,TAOK…
gPROFILER	GO:0101002	ficolin-1-rich granule	124	9		0.00181185	GMFG,HSP90AA1,PSMD12,ALDOA,CTSS,SRP14,MVP,CST3,PSMC2
gPROFILER	GO:1904813	ficolin-1-rich granule lumen	124	9		0.00181185	GMFG,HSP90AA1,PSMD12,ALDOA,CTSS,SRP14,MVP,CST3,PSMC2
gPROFILER	GO:0006413	translational initiation	178	13		0.00182852	RPS25,DENR,RPS27A,RPLP0,RPL26,RPL32,RPL6,RPL23,EIF3E,RPL11,NCK1,RPS24,RPL12
gPROFILER	GO:0006413	translational initiation	178	13		0.00182852	RPS25,DENR,RPS27A,RPLP0,RPL26,RPL32,RPL6,RPL23,EIF3E,RPL11,NCK1,RPS24,RPL12
FUMA	GO:1903409	reactive oxygen species biosynthetic process	112	7	3.67522e-05	0.0018502	HSP90AA1:CFLAR:SOD1:PKD2:SNCA:AIF1:PTK2B
gPROFILER	GO:0005740	mitochondrial envelope	569	22		0.00186275	NDUFB3,MRPL51,MRPS17,RPS27A,UQCRH,NDUFS5,COX17,MRPL33,MRPS21,AK2,MRPL27,MRPL1,MRPL48,TOMM7,MCL1,BCL2L2,SOD1,MRPL35,UQCRB,COX15,CHDH,ACADM
gPROFILER	GO:0070125	mitochondrial translational elongation	87	8		0.00191245	MRPL51,MRPS17,MRPL33,MRPS21,MRPL27,MRPL1,MRPL48,MRPL35
gPROFILER	GO:0070125	mitochondrial translational elongation	87	8		0.00191245	MRPL51,MRPS17,MRPL33,MRPS21,MRPL27,MRPL1,MRPL48,MRPL35
FUMA	GO:0098590	plasma membrane region	1185	23	0.000108985	0.00191393	PRKCZ:RIMS3:RHOC:CHRNA10:CNGA4:TBC1D10C:TCIRG1:PICALM:AQP9:PRRT2:MAPT:ABCA7:SLC5A6:STK39:ATP6V1E1:KLHDC8B:PKD2:GM2A:AIF1:CNTNAP2:CHRNA2:FABP5:KANK1
FUMA	GO:0005774	vacuolar membrane	399	12	0.000111445	0.00192338	TMEM9B:TCIRG1:TM9SF1:TM9SF1:ATP6V1D:STX8:PLEKHM1:NSF:ABCC3:RAB37:ATP6V1E1:DTX3L:ABCC10
gPROFILER	GO:0043254	regulation of protein complex assembly	368	13		0.00193286	BIN1,PRRT2,MAPT,RPA3,CAPZA1,ARPC3,GMFG,HSP90AA1,PRKCZ,MEFV,SNCA,PTK2B,RHOC
gPROFILER	GO:0043254	regulation of protein complex assembly	368	13		0.00193286	BIN1,PRRT2,MAPT,RPA3,CAPZA1,ARPC3,GMFG,HSP90AA1,PRKCZ,MEFV,SNCA,PTK2B,RHOC
FUMA	KEGG_HOMOLOGOUS_RECOMBINATION	homologous recombination	28	4	7.3389e-05	0.00195005	POLD3:RPA3:SHFM1:C7orf76:SSBP1
gPROFILER	GO:0070126	mitochondrial translational termination	88	8		0.00196803	MRPL51,MRPS17,MRPL33,MRPS21,MRPL27,MRPL1,MRPL48,MRPL35
gPROFILER	GO:0070126	mitochondrial translational termination	88	8		0.00196803	MRPL51,MRPS17,MRPL33,MRPS21,MRPL27,MRPL1,MRPL48,MRPL35
FUMA	R-HSA-202403	downstream signaling events of b cell receptor bcr	81	6	5.16109e-05	0.00198371	PSMA3:NFATC3:PSMD12:RPS27A:SHFM1:C7orf76:PSMC2
FUMA	GO:1901565	organonitrogen compound catabolic process	1263	25	3.98213e-05	0.00199107	RPL11:CTSS:VPS37C:TCIRG1:VPS37B:PSMA3:HSP90AA1:UBE3A:SPSB3:GDPD3:RPL23:NSF:PSMD12:APOC1:RPS27A:CST3:CHEK2:UBA7:CHDH:DTX3L:PPM1K:VCAN:GM2A:PSMC2:PTK2B
FUMA	GO:0071013	nucleoplasm part	1113	22	0.00011901	0.00199706	ACADM:GTF2B:VPS72:NXF1:MAML2:POMP:CPSF2:GTF2A2:TRIP4:RPAIN:MAPT:ELL:WDR33:SNRPB2:CSTF1:CHEK2:DRG1:PLRG1:MED20:ING3:EIF3E:ENY2
FUMA	GO:0098984	neuron to neuron synapse	342	11	0.000119704	0.00199706	PRKCZ:RPS25:RPL6:RPLP0:PRRT2:RPL23:NSF:PRKAR1B:PTK2B:FABP5:RPL12
WebGestalt	GO:0031252	cell leading edge	393	15	3.37225e-05	0.0020026	APP;MAPT;ARPC3;PXN;ABCA7;PRKCZ;PKD2;MEFV;PTK2B;ACTN1;KANK1;SWAP70;AIF1;CNTNAP2;ANGPTL3
FUMA	R-HSA-9013694	signaling by notch4	82	6	5.53113e-05	0.00207279	MAML2:PSMA3:PSMD12:RPS27A:SHFM1:C7orf76:PSMC2
WebGestalt	R-HSA-72312	rRNA processing	205	13	3.7733e-05	0.00208135	RPL36AL;RPS25;RPS27A;RPLP0;RPL26;RPL32;RPL6;RPL23;EBNA1BP2;RPL11;RPS24;RPL10L;RPL12
gPROFILER	GO:0032984	protein-containing complex disassembly	295	5		0.00211731	MRPL51,NSF,DENR,KATNB1,MRPS17
gPROFILER	GO:0032984	protein-containing complex disassembly	295	5		0.00211731	MRPL51,NSF,DENR,KATNB1,MRPS17
FUMA	GO:0048156	tau protein binding	45	5	3.12109e-05	0.00213924	PICALM:HSP90AA1:TAOK2:BIN1:SNCA
gPROFILER	GO:1902903	regulation of supramolecular fiber organization	285	13		0.00215203	BIN1,KATNB1,APP,MAPT,CAPZA1,ARPC3,GMFG,PXN,SNCA,PTK2B,RHOC,DRG1,KANK1
gPROFILER	GO:1902903	regulation of supramolecular fiber organization	285	13		0.00215203	BIN1,KATNB1,APP,MAPT,CAPZA1,ARPC3,GMFG,PXN,SNCA,PTK2B,RHOC,DRG1,KANK1
FUMA	GO:0030234	enzyme regulator activity	1019	22	3.30169e-05	0.00217251	RPL11:ANGPTL3:ENSA:MYBPC3:PPP1R14B:TBC1D10C:GCN1L1:HSP90AA1:RPL23:GMFG:APOC1:CFLAR:CST3:APP:RCAN1:DTX3L:NCK1:FAM13A:SNCA:GM2A:PRKAR1B:DNAJA1
gPROFILER	GO:1902003	regulation of amyloid-beta formation	28	4		0.00219322	BIN1,APP,PICALM,ABCA7
gPROFILER	GO:1902003	regulation of amyloid-beta formation	28	4		0.00219322	BIN1,APP,PICALM,ABCA7
gPROFILER	GO:0032271	regulation of protein polymerization	170	10		0.00220912	BIN1,MAPT,CAPZA1,ARPC3,GMFG,HSP90AA1,SNCA,PTK2B,DRG1,KANK1
gPROFILER	GO:0032271	regulation of protein polymerization	170	10		0.00220912	BIN1,MAPT,CAPZA1,ARPC3,GMFG,HSP90AA1,SNCA,PTK2B,DRG1,KANK1
FUMA	GO:0010563	negative regulation of phosphorus metabolic process	546	15	4.45525e-05	0.00221257	PRKCZ:ENSA:CHRNA10:SWAP70:PPP1R14B:TBC1D10C:PWP1:MVP:MAPT:ELL:GMFG:NCK1:SNCA:PRKAR1B:DNAJA1
gPROFILER	GO:0016032	viral process	463	22		0.00224195	RPS25,DENR,RPS27A,CD209,HS3ST5,RPLP0,RPL26,TRIM11,RPL32,RPL6,RPL23,NUP35,VPS37C,SP1,VPS37B,RPL11,SSB,KPNA5,CD28,RPS24,GTF2B,RPL12
gPROFILER	GO:0016032	viral process	463	22		0.00224195	RPS25,DENR,RPS27A,CD209,HS3ST5,RPLP0,RPL26,TRIM11,RPL32,RPL6,RPL23,NUP35,VPS37C,SP1,VPS37B,RPL11,SSB,KPNA5,CD28,RPS24,GTF2B,RPL12
FUMA	GO:0048193	golgi vesicle transport	363	12	4.55068e-05	0.0022448	CAPZA1:GOLPH3L:CNIH4:RAB6A:TRAPPC4:NSF:ATP9A:GORASP1:SEC24D:ERGIC1:BCAP29:DCTN6
WebGestalt	GO:0000313	organellar ribosome	86	7	4.72891e-05	0.00231374	MRPL51;MRPS17;MRPL33;MRPS21;MRPL27;MRPL48;MRPL35
WebGestalt	GO:0005761	mitochondrial ribosome	86	7	4.72891e-05	0.00231374	MRPL51;MRPS17;MRPL33;MRPS21;MRPL27;MRPL48;MRPL35
WebGestalt	GO:0005743	mitochondrial inner membrane	455	16	4.92693e-05	0.00231374	NDUFB3;MRPL51;MRPS17;UQCRH;NDUFS5;MRPL33;MRPS21;MRPL27;MRPL1;SNCA;MRPL48;MRPL35;UQCRB;COX15;TMEM14C;CHDH
WebGestalt	GO:0031970	organelle envelope lumen	87	7	5.09502e-05	0.00231374	APP;NDUFS5;COX17;AK2;SNCA;SOD1;COX19
FUMA	GO:2001242	regulation of intrinsic apoptotic signaling pathway	159	8	4.87459e-05	0.00238855	RPL11:MCL1:RAD9A:BCL2L2:RPL26:SOD1:NCK1:DNAJA1
FUMA	GO:0006091	generation of precursor metabolites and energy	488	14	5.03712e-05	0.00245184	NDUFS5:UQCRH:ATP5F1:COX15:ALDOA:ATP5H:SUCLG1:NUP35:NDUFB3:ATP5O:COX17:ATP5I:SNCA:UQCRB
gPROFILER	GO:0034613	cellular protein localization	1657	44		0.00252742	NSF,RPS25,KATNB1,RPS27A,IFT88,MAPT,PICALM,RPLP0,NXF1,RPL26,ABCA7,HSP90AA1,NVL,ATP6V1D,LEPROTL1,RPL32,RPL6,RPL23,DNAJA1,SRP19,RAB23,SRP14,HACL1,NUP35,TBC1D10C,TAOK2,VPS37C,RAB37,ENY2,TOMM7,RAB6A,WDR33,VPS37B,RPAIN,GOLPH3L,RPF2,BCAP29,GORASP1,CPSF2,FAM126B,RPL11,TM9SF1,DTX3L,SSB
gPROFILER	GO:0034613	cellular protein localization	1657	44		0.00252742	NSF,RPS25,KATNB1,RPS27A,IFT88,MAPT,PICALM,RPLP0,NXF1,RPL26,ABCA7,HSP90AA1,NVL,ATP6V1D,LEPROTL1,RPL32,RPL6,RPL23,DNAJA1,SRP19,RAB23,SRP14,HACL1,NUP35,TBC1D10C,TAOK2,VPS37C,RAB37,ENY2,TOMM7,RAB6A,WDR33,VPS37B,RPAIN,GOLPH3L,RPF2,BCAP29,GORASP1,CPSF2,FAM126B,RPL11,TM9SF1,DTX3L,SSB
FUMA	R-HSA-169911	regulation of apoptosis	53	5	6.95442e-05	0.0025426	PSMA3:PSMD12:RPS27A:SHFM1:C7orf76:PSMC2
FUMA	R-HSA-69481	g2 m checkpoints	168	8	7.18416e-05	0.00256406	RAD9A:PSMA3:PSMD12:RPS27A:CHEK2:RPA3:SHFM1:C7orf76:PSMC2
FUMA	R-HSA-180585	vif mediated degradation of apobec3g	54	5	7.61376e-05	0.00258782	PSMA3:PSMD12:RPS27A:SHFM1:C7orf76:PSMC2
FUMA	R-HSA-9604323	negative regulation of notch4 signaling	54	5	7.61376e-05	0.00258782	PSMA3:PSMD12:RPS27A:SHFM1:C7orf76:PSMC2
FUMA	R-HSA-8941858	regulation of runx3 expression and activity	55	5	8.32018e-05	0.00258782	PSMA3:PSMD12:RPS27A:SHFM1:C7orf76:PSMC2
FUMA	R-HSA-8854050	fbxl7 down regulates aurka during mitotic entry and in early mitosis	55	5	8.32018e-05	0.00258782	PSMA3:PSMD12:RPS27A:SHFM1:C7orf76:PSMC2
FUMA	R-HSA-450408	auf1 hnrnp d0 binds and destabilizes mrna	55	5	8.32018e-05	0.00258782	PSMA3:PSMD12:RPS27A:SHFM1:C7orf76:PSMC2
FUMA	R-HSA-4641257	degradation of axin	55	5	8.32018e-05	0.00258782	PSMA3:PSMD12:RPS27A:SHFM1:C7orf76:PSMC2
FUMA	R-HSA-8949613	cristae formation	29	4	8.45918e-05	0.00258782	ATP5F1:ATP5H:ATP5O:ATP5I
FUMA	GO:0016072	rrna metabolic process	208	9	5.384e-05	0.00260345	RPL11:EBNA1BP2:NVL:RPS24:NGDN:RPL26:MAPT:MRPL1:RPF2
FUMA	GO:0010628	positive regulation of gene expression	1955	33	5.53195e-05	0.00263237	RPL11:FOXJ3:GTF2B:MOV10:SPI1:PICALM:MAML2:SP1:PWP1:GCN1L1:GTF2A2:TRIP4:MAZ:TBX6:NFATC3:TAF1C:RPL26:RPL23:WNT3:SS18:ELL:ZNF613:RPS27A:CD28:APP:CHEK2:DTX3L:NCK1:PKD2:PSMC2:PTK2B:EIF3E:ENY2
FUMA	GO:0022402	cell cycle process	1370	26	5.58032e-05	0.00263237	RHOC:ENSA:TUBGCP2:RAD9A:POLD3:PSMA3:HSP90AA1:TAOK2:KATNB1:RPL26:RPL23:PSMD12:BIN1:CD28:APP:CHEK2:DRG1:SETMAR:KLHDC8B:PKD2:PLRG1:GMNN:AIF1:RPA3:CBX3:PSMC2
FUMA	GO:0006915	apoptotic process	1956	33	5.58648e-05	0.00263237	PRKCZ:RPL11:CD160:MCL1:AKR1C3:SPI1:CD5:RAD9A:BCL2L2:ACTN1:MAZ:TAOK2:RPL26:MAPT:PTRH2:RPS27A:BIN1:CFLAR:CD28:APP:SOD1:CHEK2:PROK2:FAM162A:NCK1:SNCA:ZNF622:AIF1:BCAP29:ING3:PTK2B:DNAJA1:ANP32B
FUMA	GO:0006888	endoplasmic reticulum to golgi vesicle mediated transport	209	9	5.58707e-05	0.00263237	CAPZA1:CNIH4:TRAPPC4:NSF:GORASP1:SEC24D:ERGIC1:BCAP29:DCTN6
FUMA	GO:0005694	chromosome	1059	21	0.000162692	0.00266975	GTF2B:SPI1:RAD9A:POLD3:SP1:PWP1:ARPC3:SETDB2:NGDN:TBX6:SS18:ELL:SSB:CHEK2:SETMAR:PLRG1:RPA3:CBX3:ING3:DCTN6:EIF3E
FUMA	GO:0032880	regulation of protein localization	982	21	5.71848e-05	0.00267712	PRKCZ:CD160:ENSA:GOLPH3L:NVL:SWAP70:PICALM:HSP90AA1:STX8:MAPT:ABCA7:LILRA5:GPR27:DTX3L:AIF1:RAB23:TOMM7:LEPROTL1:ENY2:DNAJA1:ANP32B
FUMA	GO:0071375	cellular response to peptide hormone stimulus	315	11	5.7817e-05	0.00268959	PRKCZ:TCIRG1:SP1:PXN:ATP6V1D:CRHR1:CFLAR:ATP6V1E1:NCK1:PRKAR1B:KANK1
gPROFILER	GO:0006886	intracellular protein transport	998	36		0.00277359	NSF,RPS25,KATNB1,RPS27A,IFT88,RPLP0,NXF1,RPL26,HSP90AA1,RPL32,RPL6,RPL23,SRP19,RAB23,SRP14,HACL1,NUP35,TBC1D10C,TAOK2,VPS37C,RAB37,ENY2,TOMM7,RAB6A,WDR33,VPS37B,RPAIN,CPSF2,RPL11,SSB,KPNA5,STX8,RPS24,ANP32B,PEX5,RPL12
gPROFILER	GO:0006886	intracellular protein transport	998	36		0.00277359	NSF,RPS25,KATNB1,RPS27A,IFT88,RPLP0,NXF1,RPL26,HSP90AA1,RPL32,RPL6,RPL23,SRP19,RAB23,SRP14,HACL1,NUP35,TBC1D10C,TAOK2,VPS37C,RAB37,ENY2,TOMM7,RAB6A,WDR33,VPS37B,RPAIN,CPSF2,RPL11,SSB,KPNA5,STX8,RPS24,ANP32B,PEX5,RPL12
gPROFILER	GO:0070727	cellular macromolecule localization	1667	44		0.00279464	NSF,RPS25,KATNB1,RPS27A,IFT88,MAPT,PICALM,RPLP0,NXF1,RPL26,ABCA7,HSP90AA1,NVL,ATP6V1D,LEPROTL1,RPL32,RPL6,RPL23,DNAJA1,SRP19,RAB23,SRP14,HACL1,NUP35,TBC1D10C,TAOK2,VPS37C,RAB37,ENY2,TOMM7,RAB6A,WDR33,VPS37B,RPAIN,GOLPH3L,RPF2,BCAP29,GORASP1,CPSF2,FAM126B,RPL11,TM9SF1,DTX3L,SSB
gPROFILER	GO:0070727	cellular macromolecule localization	1667	44		0.00279464	NSF,RPS25,KATNB1,RPS27A,IFT88,MAPT,PICALM,RPLP0,NXF1,RPL26,ABCA7,HSP90AA1,NVL,ATP6V1D,LEPROTL1,RPL32,RPL6,RPL23,DNAJA1,SRP19,RAB23,SRP14,HACL1,NUP35,TBC1D10C,TAOK2,VPS37C,RAB37,ENY2,TOMM7,RAB6A,WDR33,VPS37B,RPAIN,GOLPH3L,RPF2,BCAP29,GORASP1,CPSF2,FAM126B,RPL11,TM9SF1,DTX3L,SSB
FUMA	GO:0003779	actin binding	421	13	4.44405e-05	0.00281172	CAPZA1:MYBPC3:SSH3:ARPC3:ACTN1:MEFV:ALDOA:SNTB2:MAPT:GMFG:BIN1:SNCA:AIF1
FUMA	GO:0016192	vesicle mediated transport	722	17	9.39669e-05	0.00281713	CAPZA1:VPS37C:TBC1D10C:RAB6A:PICALM:TRAPPC4:ARPC3:VPS37B:HSP90AA1:NSF:RPS27A:BIN1:APP:ADRBK2:GORASP1:SEC24D:DCTN6
FUMA	R-HSA-4641258	degradation of dvl	57	5	9.88339e-05	0.00286548	PSMA3:PSMD12:RPS27A:SHFM1:C7orf76:PSMC2
FUMA	R-HSA-162909	host interactions of hiv factors	131	7	9.94029e-05	0.00286548	PSMA3:PSMD12:RPS27A:NUP35:CD28:SHFM1:C7orf76:PSMC2
FUMA	GO:0006974	cellular response to dna damage stimulus	841	19	6.32958e-05	0.00291004	MCL1:RAD9A:POLD3:BCL2L2:FANCI:TAOK2:RPAIN:RPL26:MAPT:RPS27A:WDR33:CHEK2:SETMAR:UBA7:DTX3L:RPA3:CBX3:SHFM1:C7orf76:DNAJA1
FUMA	GO:0042773	atp synthesis coupled electron transport	84	6	6.33479e-05	0.00291004	NDUFS5:UQCRH:COX15:NDUFB3:SNCA:UQCRB
FUMA	GO:0090066	regulation of anatomical structure size	499	14	6.38802e-05	0.00291627	CAPZA1:SWAP70:SSH3:PICALM:ARPC3:MAPT:WNT3:GMFG:BIN1:SOD1:NCK1:CDKL3:PTK2B:KANK1
FUMA	R-HSA-5619115	disorders of transmembrane transporters	177	8	0.000103374	0.00292374	PSMA3:SLC24A4:PSMD12:RPS27A:NUP35:SHFM1:C7orf76:PSMC2:SLC20A2
gPROFILER	GO:0098798	mitochondrial protein complex	255	7		0.0029556	NDUFB3,MRPL51,MRPS17,UQCRH,NDUFS5,MRPL33,MRPS21
gPROFILER	GO:0043231	intracellular membrane-bounded organelle	9624	189		0.00308168	ENSA,NDUFB3,BIN1,RPL36AL,WNT3,MRPL51,NSF,RPS25,ZMAT2,KATNB1,ZCCHC7,MRPS17,APP,RPS27A,ATPAF1,SSBP1,ATP6V1E1,BOLA2,ZNF622,RCAN1,UQCRH,GNL2,ZBTB43,PLEKHM1,NDUFS5,HS3ST5,DNAJC7,FANCI,MAPT,COX17,LARP7,MBOAT1,UBA7,GDPD3,PICALM,RPA3,SHFM1,ERGIC1,TRIM45,PPIL3,ZFP37,ZNF613,RPLP0,PRDX1,MRPL33,MRPS21,TRIP4,BRIX1,NXF1,MED20,ARPC3,NFATC3,GIMAP7,RPL26,GM2A,AK2,MPHOSPH9,PDIA4,MOV10,FABP5,MRPL27,INTS1,ABCA7,EXTL…
gPROFILER	GO:0045202	synapse	576	12		0.00308168	BIN1,NSF,RPS25,PRRT2,APP,MAPT,PICALM,RPLP0,TRIP4,SNTB2,FABP5,CHRNA10
gPROFILER	GO:0005761	mitochondrial ribosome	87	7		0.00308168	MRPL51,MRPS17,MRPL33,MRPS21,MRPL27,MRPL48,MRPL35
gPROFILER	GO:0000313	organellar ribosome	87	7		0.00308168	MRPL51,MRPS17,MRPL33,MRPS21,MRPL27,MRPL48,MRPL35
FUMA	R-HSA-5687128	mapk6 mapk4 signaling	93	6	0.000111805	0.00310363	MOV10:PSMA3:PSMD12:RPS27A:SHFM1:C7orf76:PSMC2
FUMA	GO:1901652	response to peptide	503	14	6.95234e-05	0.0031543	PRKCZ:TCIRG1:SP1:PXN:ATP6V1D:RPL23:CRHR1:CFLAR:APP:ATP6V1E1:NCK1:PRKAR1B:GGH:KANK1
gPROFILER	GO:0005730	nucleolus	801	28		0.00322215	RPS25,ZCCHC7,RPS27A,ZNF622,GNL2,PLEKHM1,BRIX1,RPL26,SDAD1,NVL,RPL23,NGDN,SETMAR,SRP19,PWP1,TAOK2,WDR33,RPAIN,TAF1C,EBNA1BP2,RPF2,SNRPB2,RPL11,RBM34,DDX50,ZC3H15,PLRG1,ANP32B
FUMA	GO:0030162	regulation of proteolysis	706	17	7.1712e-05	0.00323364	RPL11:ECM1:PICALM:PSMA3:UBE3A:MEFV:RPL23:MAPT:BIN1:CFLAR:CST3:APP:FAM162A:SNCA:PSMC2:PTK2B:ANP32B
gPROFILER	GO:0015935	small ribosomal subunit	74	3		0.0032364	RPS25,MRPS17,RPS27A
FUMA	GO:0044297	cell body	557	14	0.000200606	0.00323881	PRKCZ:CHRNA10:RRM1:PICALM:HSP90AA1:KATNB1:CRHR1:MAPT:APP:SOD1:SNCA:AIF1:CNTNAP2:PTK2B
FUMA	GO:0010562	positive regulation of phosphorus metabolic process	1075	22	7.23692e-05	0.00324338	PRKCZ:DOCK7:GCN1L1:HSP90AA1:TAOK2:MAPT:ABCA7:LILRA5:RPS27A:STK39:CFLAR:CASS4:APP:SOD1:CHEK2:PROK2:PKD2:SNCA:ZNF622:AIF1:PRKAR1B:PTK2B
WebGestalt	GO:0033267	axon part	374	14	7.62223e-05	0.00326909	BIN1;KATNB1;PRRT2;APP;MAPT;ARPC3;HSP90AA1;PRKCZ;SNCA;PTK2B;TAOK2;DOCK7;SOD1;CNTNAP2
FUMA	R-HSA-5656169	termination of translesion dna synthesis	32	4	0.000125657	0.003324	POLD3:RPS27A:UBA7:RPA3
FUMA	R-HSA-5610780	degradation of gli1 by the proteasome	60	5	0.000126396	0.003324	PSMA3:PSMD12:RPS27A:SHFM1:C7orf76:PSMC2
FUMA	R-HSA-187577	scf skp2 mediated degradation of p27 p21	60	5	0.000126396	0.003324	PSMA3:PSMD12:RPS27A:SHFM1:C7orf76:PSMC2
FUMA	R-HSA-8878159	transcriptional regulation by runx3	96	6	0.000133261	0.0034441	MAML2:PSMA3:PSMD12:RPS27A:SHFM1:C7orf76:PSMC2
FUMA	R-HSA-5678895	defective cftr causes cystic fibrosis	61	5	0.000136779	0.00347512	PSMA3:PSMD12:RPS27A:SHFM1:C7orf76:PSMC2
FUMA	GO:0098772	molecular function regulator	1787	31	5.73144e-05	0.00349193	PRKCZ:RPL11:DOCK7:ANGPTL3:ENSA:MYBPC3:PPP1R14B:TBC1D10C:TRAPPC4:GCN1L1:HSP90AA1:CMTM2:CMTM3:STX8:RPL23:MAPT:WNT3:GMFG:APOC1:CFLAR:CST3:APP:RCAN1:DTX3L:NCK1:FAM13A:SNCA:SCLT1:GM2A:PRKAR1B:DNAJA1
FUMA	GO:0015077	monovalent inorganic cation transmembrane transporter activity	374	12	6.05439e-05	0.00354183	ATP5F1:COX15:TCIRG1:ATP6V1D:SLC24A4:ATP5H:SLC5A6:ATP5O:ATP6V1E1:ATP5I:PKD2:SLC20A2
FUMA	GO:0019904	protein domain specific binding	698	17	6.24396e-05	0.00354183	MCL1:TRIM11:RRM1:RAD9A:RAB6A:SP1:BCL2L2:HSP90AA1:MAPT:NSF:WNT3:APP:NCK1:PKD2:SNCA:CBX3:DNAJA1
FUMA	GO:0006260	dna replication	271	10	7.95378e-05	0.00354305	RRM1:RAD9A:POLD3:RPAIN:RBMS1:CHEK2:SETMAR:GMNN:RPA3:SSBP1
gPROFILER	GO:0072657	protein localization to membrane	551	24		0.00355403	NSF,RPS25,RPS27A,PICALM,RPLP0,RPL26,HSP90AA1,RPL32,RPL6,RPL23,SRP19,SRP14,TAOK2,VPS37C,VPS37B,GOLPH3L,GORASP1,FAM126B,RPL11,TM9SF1,STX8,RPS24,PEX5,RPL12
gPROFILER	GO:0072657	protein localization to membrane	551	24		0.00355403	NSF,RPS25,RPS27A,PICALM,RPLP0,RPL26,HSP90AA1,RPL32,RPL6,RPL23,SRP19,SRP14,TAOK2,VPS37C,VPS37B,GOLPH3L,GORASP1,FAM126B,RPL11,TM9SF1,STX8,RPS24,PEX5,RPL12
FUMA	GO:0032553	ribonucleotide binding	1885	32	6.49611e-05	0.00356203	PRKCZ:AK2:GNL2:MOV10:RHOC:NVL:DDX50:RRM1:CNGA4:SWAP70:RAB6A:HSP90AA1:TAOK2:NSF:ABCC3:RAB37:ABCA7:STK39:ATP9A:ADRBK2:CHEK2:DRG1:UBA7:CDKL3:ABCC10:RAB23:HS3ST5:PRKAR1B:PSMC2:GIMAP7:PTK2B:DNAJA1
FUMA	R-HSA-5607761	dectin 1 mediated noncanonical nf kb signaling	62	5	0.000147803	0.00358408	PSMA3:PSMD12:RPS27A:SHFM1:C7orf76:PSMC2
FUMA	R-HSA-212436	generic transcription pathway	1211	23	0.000149506	0.00358408	PRDX1:MOV10:SPI1:RAD9A:MAML2:SP1:PSMA3:FANCI:PSMD12:ZNF136:ZNF563:ELL:ZNF613:ZNF616:ZNF17:RPS27A:CHEK2:MED20:RPA3:CBX3:SHFM1:C7orf76:PSMC2:ZFP37
FUMA	R-HSA-382551	c type lectin receptors clrs	140	7	0.000150415	0.00358408	PSMA3:NFATC3:PSMD12:CD209:RPS27A:SHFM1:C7orf76:PSMC2
FUMA	R-HSA-1852241	organelle biogenesis and maintenance	293	10	0.000150632	0.00358408	ATP5F1:CNGA4:IFT88:HSP90AA1:ATP5H:ATP5O:ATP5I:PKD2:SCLT1:SSBP1
WebGestalt	GO:0002181	cytoplasmic translation	92	9	8.05355e-06	0.00362755	DENR;RPLP0;RPL26;RPL32;RPL6;EIF3E;RPL11;NCK1;ZC3H15
FUMA	R-HSA-72172	mrna splicing	188	8	0.000156665	0.00364039	DNAJC8:CPSF2:SNRPD2:WDR33:PPIL3:SNRPB2:CSTF1:PLRG1
FUMA	R-HSA-1236975	antigen processing cross presentation	99	6	0.000157855	0.00364039	CTSS:PSMA3:PSMD12:RPS27A:SHFM1:C7orf76:PSMC2
FUMA	GO:1990204	oxidoreductase complex	106	6	0.000229275	0.00364292	NDUFS5:UQCRH:RRM1:NDUFB3:SNCA:UQCRB
gPROFILER	GO:0034205	amyloid-beta formation	33	4		0.00364535	BIN1,APP,PICALM,ABCA7
gPROFILER	GO:0034205	amyloid-beta formation	33	4		0.00364535	BIN1,APP,PICALM,ABCA7
WebGestalt	GO:0030426	growth cone	164	9	9.05336e-05	0.00367852	KATNB1;APP;MAPT;ARPC3;HSP90AA1;SNCA;PTK2B;TAOK2;DOCK7
FUMA	GO:1902991	regulation of amyloid precursor protein catabolic process	29	4	8.45918e-05	0.00372305	PICALM:ABCA7:BIN1:APP
FUMA	GO:1902991	amyloid beta formation	29	4	8.45918e-05	0.00372305	PICALM:ABCA7:BIN1:APP
gPROFILER	GO:0051258	protein polymerization	229	13		0.00373765	BIN1,MAPT,CAPZA1,ARPC3,GMFG,HSP90AA1,SNCA,PTK2B,DRG1,KANK1,TUBGCP2,AIF1,NCK1
gPROFILER	GO:0051258	protein polymerization	229	13		0.00373765	BIN1,MAPT,CAPZA1,ARPC3,GMFG,HSP90AA1,SNCA,PTK2B,DRG1,KANK1,TUBGCP2,AIF1,NCK1
FUMA	GO:0019882	antigen processing and presentation	221	9	8.57326e-05	0.0037508	CAPZA1:CTSS:RAB6A:PSMA3:PSMD12:CD209:SEC24D:PSMC2:DCTN6
gPROFILER	GO:0006415	translational termination	100	8		0.00376644	MRPL51,MRPS17,MRPL33,MRPS21,MRPL27,MRPL1,MRPL48,MRPL35
gPROFILER	GO:0006415	translational termination	100	8		0.00376644	MRPL51,MRPS17,MRPL33,MRPS21,MRPL27,MRPL1,MRPL48,MRPL35
FUMA	GO:0051169	protein dna complex subunit organization	274	10	8.71022e-05	0.00378817	GTF2B:VPS72:GTF2A2:TAF1C:RPL23:RPS27A:GMNN:RPA3:PSMC2:ANP32B
FUMA	R-HSA-5607764	clec7a dectin 1 signaling	100	6	0.000166806	0.00378852	PSMA3:NFATC3:PSMD12:RPS27A:SHFM1:C7orf76:PSMC2
WebGestalt	GO:0030427	site of polarized growth	166	9	9.93453e-05	0.00383473	KATNB1;APP;MAPT;ARPC3;HSP90AA1;SNCA;PTK2B;TAOK2;DOCK7
FUMA	R-HSA-4608870	asymmetric localization of pcp proteins	64	5	0.000171876	0.0038454	PSMA3:PSMD12:RPS27A:SHFM1:C7orf76:PSMC2
gPROFILER	GO:1902991	regulation of amyloid precursor protein catabolic process	34	4		0.00386564	BIN1,APP,PICALM,ABCA7
gPROFILER	GO:1902991	regulation of amyloid precursor protein catabolic process	34	4		0.00386564	BIN1,APP,PICALM,ABCA7
gPROFILER	GO:0022607	cellular component assembly	2551	42		0.00390112	NDUFB3,BIN1,NSF,DENR,CFLAR,PRRT2,APP,RPS27A,ATPAF1,BOLA2,IFT88,PLEKHM1,NDUFS5,MAPT,COX17,PICALM,RPA3,RPLP0,CAPZA1,BRIX1,ARPC3,GMFG,PXN,ABCA7,POMP,SCLT1,HSP90AA1,PRKCZ,PKD2,ATP6V1D,GTF2A2,MEFV,RPL6,SNRPD2,ALDOA,SNCA,PTK2B,RHOC,CHEK2,APOC1,SRP19,RAB23
gPROFILER	GO:0015833	peptide transport	1547	37		0.00390112	ENSA,NSF,RPS25,KATNB1,RPS27A,ATP6V1E1,CRHR1,IFT88,CD209,RPLP0,NXF1,RPL26,PDIA4,HSP90AA1,PRKCZ,ATP6V1D,RPL32,RPL6,RPL23,DNAJA1,SRP19,RAB23,LILRA5,SRP14,HACL1,NUP35,TBC1D10C,TAOK2,VPS37C,RAB37,ENY2,TOMM7,RAB6A,WDR33,VPS37B,RPAIN,GOLPH3L
gPROFILER	GO:0016192	vesicle-mediated transport	1851	48		0.00390112	DCTN6,BIN1,NSF,PRRT2,APP,RPS27A,FAM160A2,ANKRD13D,PICALM,ERGIC1,CAPZA1,ARPC3,GM2A,GMFG,FABP5,ABCA7,HSP90AA1,ATP6V1D,ECM1,LEPROTL1,ADRBK2,PSMD12,ALDOA,SNCA,CTSS,APOC1,SRP14,TBC1D10C,VPS37C,RAB37,ACTN1,LRP3,ATP9A,MVP,RAB6A,VPS37B,GOLPH3L,SOD1,BCAP29,GORASP1,CST3,TRAPPC4,TCIRG1,PSMC2,DTX3L,GGH,RIMS3,AIF1
gPROFILER	GO:0022607	cellular component assembly	2551	42		0.00390112	NDUFB3,BIN1,NSF,DENR,CFLAR,PRRT2,APP,RPS27A,ATPAF1,BOLA2,IFT88,PLEKHM1,NDUFS5,MAPT,COX17,PICALM,RPA3,RPLP0,CAPZA1,BRIX1,ARPC3,GMFG,PXN,ABCA7,POMP,SCLT1,HSP90AA1,PRKCZ,PKD2,ATP6V1D,GTF2A2,MEFV,RPL6,SNRPD2,ALDOA,SNCA,PTK2B,RHOC,CHEK2,APOC1,SRP19,RAB23
gPROFILER	GO:0015833	peptide transport	1547	37		0.00390112	ENSA,NSF,RPS25,KATNB1,RPS27A,ATP6V1E1,CRHR1,IFT88,CD209,RPLP0,NXF1,RPL26,PDIA4,HSP90AA1,PRKCZ,ATP6V1D,RPL32,RPL6,RPL23,DNAJA1,SRP19,RAB23,LILRA5,SRP14,HACL1,NUP35,TBC1D10C,TAOK2,VPS37C,RAB37,ENY2,TOMM7,RAB6A,WDR33,VPS37B,RPAIN,GOLPH3L
gPROFILER	GO:0016192	vesicle-mediated transport	1851	48		0.00390112	DCTN6,BIN1,NSF,PRRT2,APP,RPS27A,FAM160A2,ANKRD13D,PICALM,ERGIC1,CAPZA1,ARPC3,GM2A,GMFG,FABP5,ABCA7,HSP90AA1,ATP6V1D,ECM1,LEPROTL1,ADRBK2,PSMD12,ALDOA,SNCA,CTSS,APOC1,SRP14,TBC1D10C,VPS37C,RAB37,ACTN1,LRP3,ATP9A,MVP,RAB6A,VPS37B,GOLPH3L,SOD1,BCAP29,GORASP1,CST3,TRAPPC4,TCIRG1,PSMC2,DTX3L,GGH,RIMS3,AIF1
FUMA	GO:0051346	negative regulation of hydrolase activity	452	13	9.08944e-05	0.00392985	PRKCZ:ANGPTL3:ECM1:ENSA:PPP1R14B:PICALM:ELL:APOC1:BIN1:CFLAR:CST3:APP:SNCA
FUMA	R-HSA-5358346	hedgehog ligand biogenesis	65	5	0.000184979	0.00403879	PSMA3:PSMD12:RPS27A:SHFM1:C7orf76:PSMC2
FUMA	R-HSA-9020702	interleukin 1 signaling	102	6	0.000185908	0.00403879	PSMA3:PSMD12:RPS27A:APP:SHFM1:C7orf76:PSMC2
FUMA	GO:0031333	negative regulation of protein complex assembly	130	7	9.47372e-05	0.00407204	PRKCZ:CAPZA1:PEX5:MEFV:PRRT2:SNCA:KANK1
FUMA	GO:0048878	chemical homeostasis	1177	23	9.86615e-05	0.00421606	ANGPTL3:CHRNA10:SWAP70:TCIRG1:PICALM:ATP6V1D:SLC24A4:AQP9:CRHR1:STK39:JPH2:APP:SOD1:ATP6V1E1:GPR27:PROK2:PKD2:SNCA:PRKAR1B:COX19:PTK2B:FABP5:ENY2
FUMA	GO:0044089	positive regulation of cellular component biogenesis	521	14	0.000100645	0.00427595	RHOC:SWAP70:ARPC3:PXN:HSP90AA1:PLEKHM1:MAPT:GMFG:BIN1:DRG1:NCK1:RPA3:PSMC2:PTK2B
FUMA	GO:0045595	regulation of cell differentiation	1844	31	0.00010138	0.00428242	PRKCZ:DOCK7:MOV10:TRIM11:SPI1:SSH3:PWP1:PSMA3:TRIP4:TBX6:KATNB1:NFATC3:MAPT:WNT3:PSMD12:CLPTM1:BIN1:CFLAR:CD28:CASS4:APP:SOD1:GORASP1:TCTA:NCK1:CDKL3:CD83:PSMC2:PTK2B:KANK1:ANP32B
gPROFILER	GO:0042255	ribosome assembly	57	7		0.00428637	RPLP0,BRIX1,RPL6,RPF2,RPL11,RPL10L,RPL12
gPROFILER	GO:0042255	ribosome assembly	57	7		0.00428637	RPLP0,BRIX1,RPL6,RPF2,RPL11,RPL10L,RPL12
gPROFILER	GO:0006402	mRNA catabolic process	356	18		0.00431827	RPS25,RPS27A,SHFM1,RPLP0,RPL26,MOV10,RPL32,RPL6,PSMD12,RPL23,EIF3E,RPL11,PSMC2,SSB,PSMA3,SAMD4B,RPS24,RPL12
gPROFILER	GO:0006402	mRNA catabolic process	356	18		0.00431827	RPS25,RPS27A,SHFM1,RPLP0,RPL26,MOV10,RPL32,RPL6,PSMD12,RPL23,EIF3E,RPL11,PSMC2,SSB,PSMA3,SAMD4B,RPS24,RPL12
FUMA	GO:0015935	small ribosomal subunit	71	5	0.000280315	0.0043843	MRPS21:RPS24:RPS25:RPS27A:MRPS17:MRPS17
FUMA	GO:1903426	regulation of reactive oxygen species biosynthetic process	92	6	0.000105298	0.00438835	HSP90AA1:CFLAR:PKD2:SNCA:AIF1:PTK2B
FUMA	GO:0030030	cell projection organization	1509	27	0.00010665	0.00438835	PRKCZ:DOCK7:MOV10:SSH3:PICALM:TRAPPC4:IFT88:ATP6V1D:HSP90AA1:TAOK2:TBX6:KATNB1:PLEKHM1:MAPT:WNT3:CFLAR:APP:SOD1:GORASP1:NCK1:SCLT1:CDKL3:AIF1:RAB23:CNTNAP2:PTK2B:KANK1
FUMA	GO:0045576	atp hydrolysis coupled cation transmembrane transport	58	5	0.000107449	0.00438835	ATP5F1:TCIRG1:ATP5H:ATP5O:ATP6V1E1
FUMA	GO:0046794	transport of virus	58	5	0.000107449	0.00438835	VPS37C:VPS37B:CD209:RPS27A:NUP35
FUMA	GO:0097190	apoptotic signaling pathway	591	15	0.000107454	0.00438835	RPL11:MCL1:CD5:RAD9A:BCL2L2:MAZ:RPL26:CFLAR:CD28:SOD1:CHEK2:FAM162A:NCK1:ZNF622:DNAJA1
FUMA	GO:1901796	regulation of signal transduction by p53 class mediator	178	8	0.000107493	0.00438835	RPL11:RAD9A:RPL26:RPL23:CHEK2:PAK1IP1:RPF2:RPA3
FUMA	GO:0007346	regulation of mitotic cell cycle	660	16	0.000108067	0.00438835	RAD9A:PSMA3:HSP90AA1:TAOK2:RPL26:PSMD12:CD28:APP:CHEK2:DRG1:SETMAR:PKD2:PLRG1:AIF1:RPA3:PSMC2
FUMA	GO:0055082	cellular chemical homeostasis	803	18	0.000108711	0.00439027	CHRNA10:SWAP70:TCIRG1:PICALM:ATP6V1D:SLC24A4:CRHR1:JPH2:APP:SOD1:ATP6V1E1:GPR27:PROK2:PKD2:SNCA:COX19:PTK2B:ENY2
FUMA	GO:0006873	cellular ion homeostasis	661	16	0.000109956	0.00439612	CHRNA10:SWAP70:TCIRG1:PICALM:ATP6V1D:SLC24A4:CRHR1:JPH2:APP:SOD1:ATP6V1E1:PROK2:PKD2:SNCA:COX19:PTK2B
FUMA	GO:0032733	positive regulation of interleukin 10 production	31	4	0.000110651	0.00439612	PRKCZ:LILRA5:CD28:CD83
FUMA	GO:0042407	cristae formation	31	4	0.000110651	0.00439612	ATP5F1:ATP5H:ATP5O:ATP5I
FUMA	GO:0030041	actin filament polymerization	179	8	0.000111745	0.00441574	CAPZA1:ARPC3:GMFG:BIN1:NCK1:AIF1:PTK2B:KANK1
gPROFILER	GO:0044456	synapse part	439	5		0.00448507	BIN1,NSF,RPS25,PRRT2,APP
FUMA	GO:0009201	ribonucleoside triphosphate biosynthetic process	59	5	0.000116628	0.00456946	ATP5F1:ALDOA:ATP5H:ATP5O:ATP5I
FUMA	GO:0097193	intrinsic apoptotic signaling pathway	284	10	0.000116879	0.00456946	RPL11:MCL1:RAD9A:BCL2L2:RPL26:SOD1:CHEK2:NCK1:ZNF622:DNAJA1
FUMA	R-HSA-1169091	activation of nf kappab in b cells	67	5	0.000213459	0.00457107	PSMA3:PSMD12:RPS27A:SHFM1:C7orf76:PSMC2
FUMA	GO:0050865	regulation of cell activation	596	15	0.000117817	0.00458178	PRKCZ:CD160:CD5:TBC1D10C:CRHR1:CD209:CLPTM1:LILRA5:CD28:APP:SOD1:NCK1:SNCA:CD83:AIF1
FUMA	R-HSA-453279	mitotic g1 g1 s phases	149	7	0.000220828	0.00466227	PSMA3:PSMD12:RPS27A:GMNN:RPA3:SHFM1:C7orf76:PSMC2
FUMA	R-HSA-5658442	regulation of ras by gaps	68	5	0.000228892	0.00467608	PSMA3:PSMD12:RPS27A:SHFM1:C7orf76:PSMC2
FUMA	R-HSA-5358351	signaling by hedgehog	150	7	0.000230062	0.00467608	IFT88:PSMA3:PSMD12:RPS27A:PRKAR1B:SHFM1:C7orf76:PSMC2
FUMA	R-HSA-1280215	cytokine signaling in immune system	854	18	0.00023084	0.00467608	CAPZA1:TRIM45:MCL1:RPLP0:PSMA3:HSP90AA1:BOLA2:PSMD12:RPS27A:NUP35:APP:SOD1:UBA7:EIF4E3:KPNA5:SHFM1:C7orf76:PSMC2:PTK2B
WebGestalt	GO:0000956	nuclear-transcribed mRNA catabolic process	206	13	1.11304e-05	0.00467923	RPS25;RPS27A;RPLP0;RPL26;RPL32;RPL6;RPL23;EIF3E;RPL11;SSB;SAMD4B;RPS24;RPL12
FUMA	GO:0050801	ion homeostasis	810	18	0.000121053	0.00468284	ANGPTL3:CHRNA10:SWAP70:TCIRG1:PICALM:ATP6V1D:SLC24A4:CRHR1:STK39:JPH2:APP:SOD1:ATP6V1E1:PROK2:PKD2:SNCA:COX19:PTK2B
gPROFILER	GO:0099503	secretory vesicle	840	25		0.00470734	BIN1,PRRT2,APP,PICALM,GM2A,GMFG,FABP5,HSP90AA1,ATP6V1D,ECM1,PSMD12,ALDOA,SNCA,CTSS,SRP14,TBC1D10C,RAB37,ACTN1,MVP,RAB6A,CST3,TRAPPC4,TCIRG1,PSMC2,GGH
FUMA	R-HSA-112316	class i mhc mediated antigen processing presentation	370	11	0.000236337	0.0047236	CTSS:TRIM11:PSMA3:UBE3A:PSMD12:RPS27A:UBA7:DTX3L:SEC24D:SHFM1:C7orf76:PSMC2
FUMA	R-HSA-162587	hiv life cycle	151	7	0.000239604	0.00472587	GTF2B:VPS37C:VPS37B:GTF2A2:ELL:RPS27A:NUP35
FUMA	R-HSA-8948751	regulation of pten stability and activity	69	5	0.000245159	0.00477179	PSMA3:PSMD12:RPS27A:SHFM1:C7orf76:PSMC2
FUMA	R-HSA-8950505	gene and protein expression by jak stat signaling after interleukin 12 stimulation	38	4	0.000248299	0.00477179	CAPZA1:RPLP0:BOLA2:SOD1
WebGestalt	R-HSA-5389840	Mitochondrial translation elongation	87	8	9.71068e-05	0.00478251	MRPL51;MRPS17;MRPL33;MRPS21;MRPL27;MRPL1;MRPL48;MRPL35
WebGestalt	R-HSA-5368286	Mitochondrial translation initiation	87	8	9.71068e-05	0.00478251	MRPL51;MRPS17;MRPL33;MRPS21;MRPL27;MRPL1;MRPL48;MRPL35
WebGestalt	R-HSA-5419276	Mitochondrial translation termination	87	8	9.71068e-05	0.00478251	MRPL51;MRPS17;MRPL33;MRPS21;MRPL27;MRPL1;MRPL48;MRPL35
gPROFILER	GO:0071702	organic substance transport	2138	45		0.00479772	ENSA,NSF,RPS25,KATNB1,RPS27A,ATP6V1E1,CRHR1,IFT88,CD209,RPLP0,NXF1,RPL26,PDIA4,ABCA7,HSP90AA1,ABCC3,PRKCZ,ATP6V1D,RPL32,PLEKHA3,RPL6,RPL23,SNCA,DNAJA1,APOC1,SRP19,RAB23,LILRA5,SRP14,HACL1,NUP35,STK39,SLC5A6,SLCO3A1,TBC1D10C,TAOK2,VPS37C,RAB37,ENY2,TOMM7,ATP9A,RAB6A,WDR33,VPS37B,RPAIN
gPROFILER	GO:0043085	positive regulation of catalytic activity	1006	24		0.00479772	MYBPC3,CFLAR,CASS4,RPS27A,SSBP1,ZNF622,MAPT,COX17,PICALM,PROK2,HSP90AA1,NVL,PKD2,MEFV,FAM162A,SNCA,PTK2B,RHOC,SETMAR,LILRA5,PRKAR1B,STK39,TBC1D10C,TAOK2
gPROFILER	GO:0071702	organic substance transport	2138	45		0.00479772	ENSA,NSF,RPS25,KATNB1,RPS27A,ATP6V1E1,CRHR1,IFT88,CD209,RPLP0,NXF1,RPL26,PDIA4,ABCA7,HSP90AA1,ABCC3,PRKCZ,ATP6V1D,RPL32,PLEKHA3,RPL6,RPL23,SNCA,DNAJA1,APOC1,SRP19,RAB23,LILRA5,SRP14,HACL1,NUP35,STK39,SLC5A6,SLCO3A1,TBC1D10C,TAOK2,VPS37C,RAB37,ENY2,TOMM7,ATP9A,RAB6A,WDR33,VPS37B,RPAIN
gPROFILER	GO:0043085	positive regulation of catalytic activity	1006	24		0.00479772	MYBPC3,CFLAR,CASS4,RPS27A,SSBP1,ZNF622,MAPT,COX17,PICALM,PROK2,HSP90AA1,NVL,PKD2,MEFV,FAM162A,SNCA,PTK2B,RHOC,SETMAR,LILRA5,PRKAR1B,STK39,TBC1D10C,TAOK2
FUMA	GO:0048167	regulation of synaptic plasticity	182	8	0.000125347	0.00482354	PRKCZ:RIMS3:PRRT2:CRHR1:MAPT:APP:SNCA:PTK2B
FUMA	GO:0044440	endosomal part	514	13	0.000317496	0.0048407	CTSS:TMEM9B:VPS37C:TCIRG1:VPS37B:STX8:PLEKHM1:ABCA7:RPS27A:ATP9A:APP:DTX3L:RAB23
FUMA	GO:0044215	other organism	73	5	0.000319167	0.0048407	VPS37C:VPS37B:CD209:RPS27A:NUP35
FUMA	R-HSA-1640170	cell cycle	641	15	0.000257603	0.00488793	ENSA:TUBGCP2:RAD9A:POLD3:PSMA3:HSP90AA1:PSMD12:RPS27A:NUP35:CHEK2:GORASP1:GMNN:RPA3:SHFM1:C7orf76:PSMC2
gPROFILER	GO:0000956	nuclear-transcribed mRNA catabolic process	206	13		0.00492724	RPS25,RPS27A,RPLP0,RPL26,RPL32,RPL6,RPL23,EIF3E,RPL11,SSB,SAMD4B,RPS24,RPL12
gPROFILER	GO:0000956	nuclear-transcribed mRNA catabolic process	206	13		0.00492724	RPS25,RPS27A,RPLP0,RPL26,RPL32,RPL6,RPL23,EIF3E,RPL11,SSB,SAMD4B,RPS24,RPL12
FUMA	GO:0006405	rna export from nucleus	137	7	0.000131484	0.0050073	NXF1:CPSF2:WDR33:SSB:NUP35:SDAD1:ENY2
FUMA	GO:0007034	vacuolar transport	137	7	0.000131484	0.0050073	FAM160A2:VPS37C:VPS37B:STX8:BIN1:DTX3L:LEPROTL1
FUMA	R-HSA-175474	assembly of the hiv virion	16	3	0.000270552	0.00506946	VPS37C:VPS37B:RPS27A
FUMA	R-HSA-110313	translesion synthesis by y family dna polymerases bypasses lesions on dna template	39	4	0.000274927	0.00508785	POLD3:RPS27A:UBA7:RPA3
FUMA	GO:0010952	positive regulation of peptidase activity	184	8	0.000135152	0.00510319	PICALM:MEFV:MAPT:CFLAR:APP:FAM162A:SNCA:ANP32B
FUMA	GO:1901698	response to nitrogen compound	968	20	0.000136034	0.00510319	PRKCZ:TCIRG1:SP1:PXN:ATP6V1D:AQP9:RPL23:CRHR1:CFLAR:APP:SOD1:ATP6V1E1:NCK1:PKD2:SNCA:AIF1:PRKAR1B:PTK2B:GGH:KANK1
FUMA	GO:2000401	regulation of lymphocyte migration	61	5	0.000136779	0.00510319	ECM1:STK39:APP:AIF1:PTK2B
FUMA	GO:0046503	glycerolipid catabolic process	61	5	0.000136779	0.00510319	ABHD2:GDPD3:PNPLA6:APOC1:FABP5
FUMA	R-HSA-68949	orc1 removal from chromatin	71	5	0.000280315	0.00512429	PSMA3:PSMD12:RPS27A:SHFM1:C7orf76:PSMC2
FUMA	GO:0023057	negative regulation of signaling	1369	25	0.000141505	0.00525282	PRKCZ:CD160:ECM1:MCL1:CHRNA10:TBC1D10C:BCL2L2:PSMA3:MAZ:MVP:CRHR1:MAPT:PSMD12:RPS27A:CFLAR:RCAN1:NCK1:PKD2:SNCA:PAK1IP1:PSMC2:PTK2B:ENY2:KANK1:DNAJA1
FUMA	GO:0032446	protein modification by small protein conjugation	896	19	0.000143725	0.00530842	RPL11:UFC1:TRIM11:PEX5:PSMA3:HSP90AA1:UBE3A:FANCI:SPSB3:RPL23:PSMD12:RPS27A:NUP35:GORASP1:UBA7:DTX3L:MED20:PSMC2:DNAJA1
FUMA	R-HSA-174178	apc c:cdh1 mediated degradation of cdc20 and other apc c:cdh1 targeted proteins in late mitosis early g1	72	5	0.000299263	0.00534043	PSMA3:PSMD12:RPS27A:SHFM1:C7orf76:PSMC2
FUMA	R-HSA-69017	cdk mediated phosphorylation and removal of cdc6	72	5	0.000299263	0.00534043	PSMA3:PSMD12:RPS27A:SHFM1:C7orf76:PSMC2
FUMA	GO:0048002	antigen processing and presentation of peptide antigen	186	8	0.000145581	0.0053501	CAPZA1:CTSS:PSMA3:PSMD12:CD209:SEC24D:PSMC2:DCTN6
FUMA	GO:0022603	regulation of anatomical structure morphogenesis	1130	22	0.000147404	0.00539014	ANGPTL3:MOV10:RHOC:CD160:ECM1:SSH3:SP1:PSMA3:TAOK2:ALDOA:MAPT:WNT3:PSMD12:CFLAR:CST3:CASS4:GORASP1:PROK2:CDKL3:PSMC2:PTK2B:KANK1
FUMA	GO:0098803	respiratory chain complex	75	5	0.000361965	0.00540787	NDUFS5:UQCRH:NDUFB3:SNCA:UQCRB
FUMA	GO:0031401	positive regulation of protein modification process	1212	23	0.000151301	0.00550527	PRKCZ:DOCK7:HSP90AA1:UBE3A:FANCI:TAOK2:ABCA7:LILRA5:RPS27A:STK39:CFLAR:CASS4:APP:SOD1:CHEK2:GORASP1:PROK2:PKD2:SNCA:ZNF622:AIF1:PRKAR1B:PTK2B
gPROFILER	GO:0043603	cellular amide metabolic process	1002	35		0.00553433	BIN1,MRPL51,RPS25,DENR,MRPS17,APP,RPS27A,PICALM,RPLP0,MRPL33,MRPS21,RPL26,MOV10,MRPL27,ABCA7,RPL32,RPL6,SUCLG1,RPL23,MRPL1,SLC5A6,DRG1,MRPL48,SOD1,MRPL35,EIF3E,RPL11,GGH,NCK1,SAMD4B,CD28,RPS24,ZC3H15,RPL12,RRBP1
gPROFILER	GO:0043603	cellular amide metabolic process	1002	35		0.00553433	BIN1,MRPL51,RPS25,DENR,MRPS17,APP,RPS27A,PICALM,RPLP0,MRPL33,MRPS21,RPL26,MOV10,MRPL27,ABCA7,RPL32,RPL6,SUCLG1,RPL23,MRPL1,SLC5A6,DRG1,MRPL48,SOD1,MRPL35,EIF3E,RPL11,GGH,NCK1,SAMD4B,CD28,RPS24,ZC3H15,RPL12,RRBP1
FUMA	R-HSA-8939902	regulation of runx2 expression and activity	73	5	0.000319167	0.00562861	PSMA3:PSMD12:RPS27A:SHFM1:C7orf76:PSMC2
FUMA	GO:0034250	positive regulation of cellular amide metabolic process	141	7	0.000157195	0.00569153	PICALM:RPL26:CD28:APP:NCK1:PTK2B:EIF3E
FUMA	GO:0006369	termination of rna polymerase ii transcription	34	4	0.000160009	0.00573693	CPSF2:MAZ:WDR33:CSTF1
FUMA	GO:0017004	cytochrome complex assembly	34	4	0.000160009	0.00573693	COX15:COX17:COX19:UQCRB
FUMA	GO:0044257	cellular protein catabolic process	756	17	0.000162307	0.00579105	RPL11:CTSS:VPS37C:TCIRG1:VPS37B:PSMA3:HSP90AA1:UBE3A:SPSB3:RPL23:PSMD12:RPS27A:CHEK2:UBA7:DTX3L:PSMC2:PTK2B
WebGestalt	GO:0005844	polysome	73	6	0.000157595	0.00579347	RPL32;RPL6;DRG1;RPL11;ZC3H15;RPL10L
gPROFILER	GO:1902992	negative regulation of amyloid precursor protein catabolic process	15	3		0.00590021	BIN1,PICALM,ABCA7
gPROFILER	GO:1902992	negative regulation of amyloid precursor protein catabolic process	15	3		0.00590021	BIN1,PICALM,ABCA7
FUMA	GO:0050848	regulation of calcium mediated signaling	100	6	0.000166806	0.00592282	TBC1D10C:MAPT:JPH2:RCAN1:PKD2:PTK2B
FUMA	GO:0030163	protein catabolic process	907	19	0.000167816	0.00593002	RPL11:CTSS:VPS37C:TCIRG1:VPS37B:PSMA3:HSP90AA1:UBE3A:SPSB3:RPL23:NSF:PSMD12:RPS27A:CST3:CHEK2:UBA7:DTX3L:PSMC2:PTK2B
FUMA	R-HSA-69242	s phase	161	7	0.000353723	0.00616547	POLD3:PSMA3:PSMD12:RPS27A:RPA3:SHFM1:C7orf76:PSMC2
FUMA	GO:0006900	vesicle budding from membrane	101	6	0.000176153	0.00619484	GOLPH3L:PICALM:TRAPPC4:NSF:GORASP1:SEC24D
FUMA	GO:1902992	negative regulation of amyloid precursor protein catabolic process	14	3	0.000177978	0.00622922	PICALM:ABCA7:BIN1
FUMA	R-HSA-1234174	cellular response to hypoxia	75	5	0.000361965	0.00623662	PSMA3:PSMD12:RPS27A:SHFM1:C7orf76:PSMC2
FUMA	GO:0000139	golgi membrane	747	16	0.000429082	0.00631635	GOLPH3L:CNGA4:RAB6A:TRAPPC4:MPHOSPH9:CDIPT:NSF:XYLT2:ABCA7:PLEKHA3:APP:GORASP1:SEC24D:ERGIC1:HS3ST5:ST3GAL1
gPROFILER	GO:0045055	regulated exocytosis	705	24		0.00644121	PRRT2,APP,GM2A,GMFG,FABP5,HSP90AA1,ATP6V1D,ECM1,PSMD12,ALDOA,SNCA,CTSS,SRP14,TBC1D10C,RAB37,ACTN1,MVP,RAB6A,SOD1,CST3,TCIRG1,PSMC2,GGH,RIMS3
gPROFILER	GO:0045055	regulated exocytosis	705	24		0.00644121	PRRT2,APP,GM2A,GMFG,FABP5,HSP90AA1,ATP6V1D,ECM1,PSMD12,ALDOA,SNCA,CTSS,SRP14,TBC1D10C,RAB37,ACTN1,MVP,RAB6A,SOD1,CST3,TCIRG1,PSMC2,GGH,RIMS3
FUMA	GO:0090407	organophosphate biosynthetic process	553	14	0.000186382	0.00649246	AK2:ATP5F1:RRM1:CDIPT:ALDOA:ATP5H:SUCLG1:PLEKHA3:ATP5O:ATP5I:SNCA:MBOAT1:PTK2B:FABP5
gPROFILER	GO:0044093	positive regulation of molecular function	1305	28		0.00649852	MYBPC3,CFLAR,CASS4,APP,RPS27A,SSBP1,ZNF622,MAPT,COX17,PICALM,PROK2,HSP90AA1,NVL,PRKCZ,PKD2,GTF2A2,MEFV,FAM162A,SNCA,PTK2B,RHOC,SETMAR,CTSS,LILRA5,PRKAR1B,STK39,TBC1D10C,TAOK2
gPROFILER	GO:0044093	positive regulation of molecular function	1305	28		0.00649852	MYBPC3,CFLAR,CASS4,APP,RPS27A,SSBP1,ZNF622,MAPT,COX17,PICALM,PROK2,HSP90AA1,NVL,PRKCZ,PKD2,GTF2A2,MEFV,FAM162A,SNCA,PTK2B,RHOC,SETMAR,CTSS,LILRA5,PRKAR1B,STK39,TBC1D10C,TAOK2
FUMA	R-HSA-176814	activation of apc c and apc c:cdc20 mediated degradation of mitotic proteins	76	5	0.000384924	0.00655682	PSMA3:PSMD12:RPS27A:SHFM1:C7orf76:PSMC2
gPROFILER	GO:0033036	macromolecule localization	2493	57		0.00661527	ENSA,NSF,RPS25,KATNB1,RPS27A,ATP6V1E1,CRHR1,IFT88,MAPT,PICALM,RPLP0,NXF1,RPL26,PDIA4,ABCA7,HSP90AA1,ABCC3,NVL,PRKCZ,PKD2,ATP6V1D,LEPROTL1,RPL32,PLEKHA3,RPL6,RPL23,DNAJA1,APOC1,SRP19,RAB23,LILRA5,SRP14,HACL1,NUP35,SLCO3A1,TBC1D10C,TAOK2,VPS37C,RAB37,ENY2,TOMM7,ATP9A,RAB6A,WDR33,VPS37B,RPAIN,GOLPH3L,RPF2,BCAP29,GORASP1,CPSF2,FAM126B,TCIRG1,RPL11,TM9SF1,DTX3L,SSB
gPROFILER	GO:0044403	symbiotic process	513	22		0.00661527	RPS25,DENR,RPS27A,CD209,HS3ST5,RPLP0,RPL26,TRIM11,RPL32,RPL6,RPL23,NUP35,VPS37C,SP1,VPS37B,RPL11,SSB,KPNA5,CD28,RPS24,GTF2B,RPL12
gPROFILER	GO:0033036	macromolecule localization	2493	57		0.00661527	ENSA,NSF,RPS25,KATNB1,RPS27A,ATP6V1E1,CRHR1,IFT88,MAPT,PICALM,RPLP0,NXF1,RPL26,PDIA4,ABCA7,HSP90AA1,ABCC3,NVL,PRKCZ,PKD2,ATP6V1D,LEPROTL1,RPL32,PLEKHA3,RPL6,RPL23,DNAJA1,APOC1,SRP19,RAB23,LILRA5,SRP14,HACL1,NUP35,SLCO3A1,TBC1D10C,TAOK2,VPS37C,RAB37,ENY2,TOMM7,ATP9A,RAB6A,WDR33,VPS37B,RPAIN,GOLPH3L,RPF2,BCAP29,GORASP1,CPSF2,FAM126B,TCIRG1,RPL11,TM9SF1,DTX3L,SSB
gPROFILER	GO:0044403	symbiotic process	513	22		0.00661527	RPS25,DENR,RPS27A,CD209,HS3ST5,RPLP0,RPL26,TRIM11,RPL32,RPL6,RPL23,NUP35,VPS37C,SP1,VPS37B,RPL11,SSB,KPNA5,CD28,RPS24,GTF2B,RPL12
FUMA	R-HSA-9609507	protein localization	164	7	0.00039534	0.00665859	PEX5:RPS27A:APP:HACL1:COX17:COX19:TOMM7
FUMA	R-HSA-159234	transport of mature mrnas derived from intronless transcripts	43	4	0.000402178	0.00666345	NXF1:CPSF2:WDR33:NUP35
FUMA	R-HSA-202403	tcr signaling	118	6	0.000408595	0.00666345	PSMA3:PSMD12:RPS27A:NCK1:SHFM1:C7orf76:PSMC2
FUMA	R-HSA-5619084	abc transporter disorders	77	5	0.000408964	0.00666345	PSMA3:PSMD12:RPS27A:SHFM1:C7orf76:PSMC2
gPROFILER	GO:0007172	signal complex assembly	7	3		0.0066643	PXN,PTK2B,NCK1
gPROFILER	GO:0007172	signal complex assembly	7	3		0.0066643	PXN,PTK2B,NCK1
gPROFILER	GO:0050435	amyloid-beta metabolic process	42	4		0.00671058	BIN1,APP,PICALM,ABCA7
gPROFILER	GO:0050435	amyloid-beta metabolic process	42	4		0.00671058	BIN1,APP,PICALM,ABCA7
gPROFILER	GO:0051495	positive regulation of cytoskeleton organization	185	9		0.00673059	BIN1,KATNB1,MAPT,ARPC3,GMFG,PXN,PTK2B,RHOC,DRG1
gPROFILER	GO:0032273	positive regulation of protein polymerization	108	7		0.00673059	BIN1,MAPT,ARPC3,GMFG,HSP90AA1,PTK2B,DRG1
gPROFILER	GO:0051495	positive regulation of cytoskeleton organization	185	9		0.00673059	BIN1,KATNB1,MAPT,ARPC3,GMFG,PXN,PTK2B,RHOC,DRG1
gPROFILER	GO:0032273	positive regulation of protein polymerization	108	7		0.00673059	BIN1,MAPT,ARPC3,GMFG,HSP90AA1,PTK2B,DRG1
FUMA	GO:0009615	dna dependent dna replication	146	7	0.000194905	0.0067347	POLD3:RPAIN:CHEK2:SETMAR:GMNN:RPA3:SSBP1
FUMA	GO:0098781	ncrna transcription	103	6	0.000196085	0.0067347	GTF2B:SP1:PWP1:GTF2A2:ELL:INTS1
FUMA	GO:0022904	respiratory electron transport chain	103	6	0.000196085	0.0067347	NDUFS5:UQCRH:COX15:NDUFB3:SNCA:UQCRB
FUMA	GO:0043434	response to peptide hormone	425	12	0.000199709	0.00677927	PRKCZ:TCIRG1:SP1:PXN:ATP6V1D:CRHR1:CFLAR:ATP6V1E1:NCK1:PRKAR1B:GGH:KANK1
FUMA	GO:2000403	positive regulation of lymphocyte migration	36	4	0.000200674	0.00677927	STK39:APP:AIF1:PTK2B
FUMA	GO:0051168	nuclear export	195	8	0.000201072	0.00677927	NXF1:CPSF2:WDR33:SSB:NUP35:SDAD1:ENY2:ANP32B
FUMA	GO:0051236	establishment of rna localization	195	8	0.000201072	0.00677927	NXF1:CPSF2:MVP:WDR33:SSB:NUP35:SDAD1:ENY2
FUMA	R-HSA-983705	signaling by the b cell receptor bcr	166	7	0.000425195	0.00685341	PSMA3:NFATC3:PSMD12:RPS27A:NCK1:SHFM1:C7orf76:PSMC2
gPROFILER	GO:0098794	postsynapse	260	6		0.00688782	NSF,RPS25,APP,MAPT,PICALM,RPLP0
gPROFILER	GO:0060205	cytoplasmic vesicle lumen	318	13		0.00688782	APP,GM2A,GMFG,FABP5,HSP90AA1,ECM1,PSMD12,ALDOA,SRP14,ACTN1,MVP,PSMC2,GGH
gPROFILER	GO:0031966	mitochondrial membrane	535	19		0.00688782	NDUFB3,MRPL51,MRPS17,RPS27A,UQCRH,NDUFS5,MRPL33,MRPS21,MRPL27,MRPL1,MRPL48,TOMM7,MCL1,BCL2L2,MRPL35,UQCRB,COX15,CHDH,ACADM
gPROFILER	GO:0005829	cytosol	4781	64		0.00688782	DCTN6,BIN1,RPL36AL,MYBPC3,NSF,RPS25,KATNB1,ZCCHC7,CFLAR,APP,RPS27A,ATP6V1E1,BOLA2,ZNF622,EIF4E3,DNAJC7,FANCI,MAPT,LARP7,UBA7,PICALM,SHFM1,TRIM45,RPLP0,PRDX1,CAPZA1,NXF1,ARPC3,NFATC3,GIMAP7,RPL26,PXN,MOV10,FABP5,SCLT1,HSP90AA1,KLHDC8B,TRIM11,PRKCZ,ATP6V1D,RPL32,MEFV,PLEKHA3,RPL6,ADRBK2,SUCLG1,SETDB2,FAM162A,PSMD12,SNRPD2,ALDOA,DNAJC8,RPL23,SNCA,DNAJA1,PTK2B,RHOC,SRP19,RAB23,SRP14,HACL1,PRKAR1B,STK…
gPROFILER	GO:0030426	growth cone	84	6		0.00688782	MAPT,HSP90AA1,SNCA,PTK2B,TAOK2,DOCK7
gPROFILER	GO:0043228	non-membrane-bounded organelle	4034	92		0.00688782	DCTN6,BIN1,RPL36AL,MYBPC3,MRPL51,RPS25,KATNB1,ZCCHC7,MRPS17,RPS27A,SSBP1,ZNF622,IFT88,GNL2,ZBTB43,PLEKHM1,MAPT,RPA3,RPLP0,CAPZA1,MRPL33,MRPS21,TRIP4,BRIX1,ARPC3,NFATC3,GIMAP7,RPL26,MPHOSPH9,GMFG,PXN,MOV10,MRPL27,SCLT1,SDAD1,NVL,ING3,CEP350,PKD2,ATP6V1D,RPL32,MEFV,RPL6,ALDOA,RPL23,SNCA,DNAJA1,NGDN,SETMAR,CHEK2,SRP19,RAB23,PWP1,POLD3,TAOK2,SP1,ACTN1,MRPL48,TBX6,SS18,MVP,WDR33,RPAIN,RAD9A,TAF1C,EBNA…
gPROFILER	GO:0043232	intracellular non-membrane-bounded organelle	4032	92		0.00688782	DCTN6,BIN1,RPL36AL,MYBPC3,MRPL51,RPS25,KATNB1,ZCCHC7,MRPS17,RPS27A,SSBP1,ZNF622,IFT88,GNL2,ZBTB43,PLEKHM1,MAPT,RPA3,RPLP0,CAPZA1,MRPL33,MRPS21,TRIP4,BRIX1,ARPC3,NFATC3,GIMAP7,RPL26,MPHOSPH9,GMFG,PXN,MOV10,MRPL27,SCLT1,SDAD1,NVL,ING3,CEP350,PKD2,ATP6V1D,RPL32,MEFV,RPL6,ALDOA,RPL23,SNCA,DNAJA1,NGDN,SETMAR,CHEK2,SRP19,RAB23,PWP1,POLD3,TAOK2,SP1,ACTN1,MRPL48,TBX6,SS18,MVP,WDR33,RPAIN,RAD9A,TAF1C,EBNA…
gPROFILER	GO:0034774	secretory granule lumen	316	13		0.00688782	APP,GM2A,GMFG,FABP5,HSP90AA1,ECM1,PSMD12,ALDOA,SRP14,ACTN1,MVP,PSMC2,GGH
gPROFILER	GO:0044444	cytoplasmic part	8879	101		0.00688782	DCTN6,NDUFB3,BIN1,RPL36AL,MYBPC3,WNT3,MRPL51,NSF,RPS25,KATNB1,ZCCHC7,CFLAR,MRPS17,PRRT2,APP,RPS27A,ATPAF1,FAM160A2,SSBP1,ATP6V1E1,BOLA2,ZNF622,UQCRH,IFT88,EIF4E3,NDUFS5,ANKRD13D,HS3ST5,DNAJC7,FANCI,MAPT,COX17,LARP7,MBOAT1,UBA7,GDPD3,PICALM,SHFM1,ERGIC1,TRIM45,RPLP0,PRDX1,CAPZA1,MRPL33,MRPS21,NXF1,ARPC3,NFATC3,GIMAP7,RPL26,GM2A,AK2,MPHOSPH9,GMFG,PDIA4,PXN,MOV10,FABP5,MRPL27,ABCA7,EXTL3,SCLT1,HSP90…
gPROFILER	GO:0031983	vesicle lumen	319	13		0.00688782	APP,GM2A,GMFG,FABP5,HSP90AA1,ECM1,PSMD12,ALDOA,SRP14,ACTN1,MVP,PSMC2,GGH
FUMA	GO:0006508	proteolysis	1744	29	0.000205702	0.00690368	RPL11:ECM1:CTSS:VPS37C:PICALM:METAP2:VPS37B:PSMA3:UBE3A:SPSB3:MEFV:RPL23:MAPT:PSMD12:RPS27A:BIN1:CFLAR:CST3:APP:UBA7:FAM162A:DTX3L:SNCA:ZUFSP:PSMC2:PTK2B:GGH:ENY2:ANP32B
gPROFILER	GO:0042987	amyloid precursor protein catabolic process	43	4		0.00694993	BIN1,APP,PICALM,ABCA7
gPROFILER	GO:0071705	nitrogen compound transport	1800	40		0.00694993	ENSA,NSF,RPS25,KATNB1,RPS27A,ATP6V1E1,CRHR1,IFT88,CD209,RPLP0,NXF1,RPL26,PDIA4,HSP90AA1,PRKCZ,ATP6V1D,RPL32,PLEKHA3,RPL6,RPL23,SNCA,DNAJA1,SRP19,RAB23,LILRA5,SRP14,HACL1,NUP35,SLC5A6,TBC1D10C,TAOK2,VPS37C,RAB37,ENY2,TOMM7,RAB6A,WDR33,VPS37B,RPAIN,GOLPH3L
gPROFILER	GO:0042987	amyloid precursor protein catabolic process	43	4		0.00694993	BIN1,APP,PICALM,ABCA7
gPROFILER	GO:0071705	nitrogen compound transport	1800	40		0.00694993	ENSA,NSF,RPS25,KATNB1,RPS27A,ATP6V1E1,CRHR1,IFT88,CD209,RPLP0,NXF1,RPL26,PDIA4,HSP90AA1,PRKCZ,ATP6V1D,RPL32,PLEKHA3,RPL6,RPL23,SNCA,DNAJA1,SRP19,RAB23,LILRA5,SRP14,HACL1,NUP35,SLC5A6,TBC1D10C,TAOK2,VPS37C,RAB37,ENY2,TOMM7,RAB6A,WDR33,VPS37B,RPAIN,GOLPH3L
WebGestalt	R-HSA-71291	Metabolism of amino acids and derivatives	370	17	0.000146809	0.00698104	RPL36AL;RPS25;RPS27A;RPLP0;RPL26;RPL32;RPL6;PSMD12;RPL23;RPL11;PSMC2;PSMA3;CHDH;RPS24;PPM1K;RPL10L;RPL12
FUMA	GO:0007049	cell cycle	1834	30	0.000210937	0.00704723	RHOC:ENSA:TUBGCP2:RRM1:RAD9A:POLD3:SETDB2:PSMA3:HSP90AA1:FANCI:TAOK2:KATNB1:RPL26:RPL23:PSMD12:BIN1:CD28:APP:CHEK2:DRG1:SETMAR:KLHDC8B:PKD2:PLRG1:CDKL3:GMNN:AIF1:RPA3:CBX3:PSMC2
WebGestalt	R-HSA-5368287	Mitochondrial translation	93	8	0.00015549	0.00714734	MRPL51;MRPS17;MRPL33;MRPS21;MRPL27;MRPL1;MRPL48;MRPL35
FUMA	GO:0150034	distal axon	280	9	0.000495048	0.00718178	DOCK7:HSP90AA1:PRRT2:TAOK2:KATNB1:MAPT:APP:SNCA:PTK2B
gPROFILER	GO:0070180	large ribosomal subunit rRNA binding	4	3		0.00720909	RPLP0,RPL23,RPL12
gPROFILER	GO:0070180	large ribosomal subunit rRNA binding	4	3		0.00720909	RPLP0,RPL23,RPL12
FUMA	R-HSA-73887	processing of intronless pre mrnas	19	3	0.000459823	0.00722988	CPSF2:WDR33:CSTF1
FUMA	R-HSA-6807505	rna polymerase ii transcribes snrna genes	79	5	0.000460426	0.00722988	GTF2B:SP1:GTF2A2:ELL:INTS1
FUMA	R-HSA-69278	cell cycle mitotic	535	13	0.000463021	0.00722988	ENSA:TUBGCP2:POLD3:PSMA3:HSP90AA1:PSMD12:RPS27A:NUP35:GORASP1:GMNN:RPA3:SHFM1:C7orf76:PSMC2
gPROFILER	GO:0031975	envelope	912	27		0.00730782	NDUFB3,MRPL51,MRPS17,APP,RPS27A,UQCRH,NDUFS5,COX17,MRPL33,MRPS21,AK2,MRPL27,MRPL1,NUP35,MRPL48,ENY2,TOMM7,MCL1,BCL2L2,SOD1,MRPL35,UQCRB,CBX3,COX15,CHDH,KPNA5,ACADM
gPROFILER	GO:0031967	organelle envelope	912	27		0.00730782	NDUFB3,MRPL51,MRPS17,APP,RPS27A,UQCRH,NDUFS5,COX17,MRPL33,MRPS21,AK2,MRPL27,MRPL1,NUP35,MRPL48,ENY2,TOMM7,MCL1,BCL2L2,SOD1,MRPL35,UQCRB,CBX3,COX15,CHDH,KPNA5,ACADM
gPROFILER	GO:0030427	site of polarized growth	88	6		0.00732271	MAPT,HSP90AA1,SNCA,PTK2B,TAOK2,DOCK7
gPROFILER	GO:0033267	axon part	165	9		0.00740572	BIN1,PRRT2,MAPT,HSP90AA1,SNCA,PTK2B,TAOK2,DOCK7,CNTNAP2
gPROFILER	GO:0015031	protein transport	1515	43		0.00763715	ENSA,NSF,RPS25,KATNB1,RPS27A,ATP6V1E1,IFT88,RPLP0,NXF1,RPL26,PDIA4,HSP90AA1,PRKCZ,ATP6V1D,RPL32,RPL6,RPL23,DNAJA1,SRP19,RAB23,LILRA5,SRP14,HACL1,NUP35,TBC1D10C,TAOK2,VPS37C,RAB37,ENY2,TOMM7,RAB6A,WDR33,VPS37B,RPAIN,GOLPH3L,CPSF2,TCIRG1,RPL11,SSB,AIF1,KPNA5,STX8,RPS24
gPROFILER	GO:0015031	protein transport	1515	43		0.00763715	ENSA,NSF,RPS25,KATNB1,RPS27A,ATP6V1E1,IFT88,RPLP0,NXF1,RPL26,PDIA4,HSP90AA1,PRKCZ,ATP6V1D,RPL32,RPL6,RPL23,DNAJA1,SRP19,RAB23,LILRA5,SRP14,HACL1,NUP35,TBC1D10C,TAOK2,VPS37C,RAB37,ENY2,TOMM7,RAB6A,WDR33,VPS37B,RPAIN,GOLPH3L,CPSF2,TCIRG1,RPL11,SSB,AIF1,KPNA5,STX8,RPS24
FUMA	GO:0005849	mrna cleavage factor complex	20	3	0.000537743	0.00768973	CPSF2:WDR33:CSTF1
FUMA	GO:0052547	regulation of peptidase activity	432	12	0.000231786	0.00770872	ECM1:PICALM:PSMA3:MEFV:MAPT:BIN1:CFLAR:CST3:APP:FAM162A:SNCA:ANP32B
FUMA	GO:0030055	cell substrate junction	409	11	0.000548391	0.00773154	DOCK7:ARPC3:RPL6:RPLP0:PXN:ACTN1:SNTB2:RPL23:CASS4:PTK2B:RPL12
FUMA	GO:0046649	lymphocyte activation	709	16	0.000242231	0.00801434	PRKCZ:PRDX1:CD160:SWAP70:SPI1:CD5:TBC1D10C:CD209:CLPTM1:CD28:SOD1:NCK1:GAPT:CD83:AIF1:PTK2B
FUMA	GO:0050863	regulation of t cell activation	311	10	0.000243156	0.00801434	PRKCZ:CD160:CD5:CD209:CLPTM1:CD28:SOD1:NCK1:CD83:AIF1
gPROFILER	GO:0097435	supramolecular fiber organization	569	21		0.00804453	BIN1,KATNB1,CFLAR,CASS4,APP,MAPT,CAPZA1,ARPC3,GMFG,PXN,ALDOA,SNCA,PTK2B,RHOC,DRG1,ACTN1,KANK1,CST3,TUBGCP2,AIF1,NCK1
gPROFILER	GO:0097435	supramolecular fiber organization	569	21		0.00804453	BIN1,KATNB1,CFLAR,CASS4,APP,MAPT,CAPZA1,ARPC3,GMFG,PXN,ALDOA,SNCA,PTK2B,RHOC,DRG1,ACTN1,KANK1,CST3,TUBGCP2,AIF1,NCK1
FUMA	GO:0033043	regulation of organelle organization	1254	23	0.000246333	0.0080828	CAPZA1:RHOC:SWAP70:SPI1:SSH3:ARPC3:PXN:IFT88:PRRT2:TAOK2:KATNB1:MAPT:GMFG:BIN1:CD28:DRG1:SETMAR:FAM162A:NCK1:SNCA:TOMM7:PTK2B:KANK1
FUMA	GO:0042987	amyloid precursor protein catabolic process	38	4	0.000248299	0.0081111	PICALM:ABCA7:BIN1:APP
FUMA	GO:0010564	regulation of cell cycle process	785	17	0.000251603	0.00814772	PSMA3:HSP90AA1:TAOK2:RPL26:RPL23:PSMD12:BIN1:CD28:APP:CHEK2:DRG1:SETMAR:PKD2:PLRG1:AIF1:CBX3:PSMC2
FUMA	GO:1902680	positive regulation of rna biosynthetic process	1592	27	0.000251637	0.00814772	FOXJ3:GTF2B:SPI1:PICALM:MAML2:SP1:PWP1:GCN1L1:ACTN1:GTF2A2:TRIP4:MAZ:TBX6:NFATC3:SS18:ELL:ZNF613:RPS27A:CD28:APP:CHEK2:DTX3L:NCK1:PKD2:MED20:PSMC2:ENY2
FUMA	GO:0071156	regulation of cell cycle arrest	108	6	0.000253751	0.00818013	RPL26:RPL23:BIN1:CHEK2:SETMAR:PKD2
WebGestalt	GO:0005758	mitochondrial intermembrane space	79	6	0.000243582	0.00818891	NDUFS5;COX17;AK2;SNCA;SOD1;COX19
WebGestalt	GO:0030027	lamellipodium	187	9	0.00024397	0.00818891	APP;ARPC3;PXN;PKD2;MEFV;PTK2B;SWAP70;AIF1;ANGPTL3
FUMA	GO:0051170	import into nucleus	153	7	0.000259644	0.00833356	RPAIN:RPL23:SNRPD2:NUP35:TMCO6:RAB23:KPNA5
FUMA	GO:0030182	neuron differentiation	1343	24	0.00026428	0.00844547	PRKCZ:DOCK7:MOV10:SSH3:PICALM:TRAPPC4:IFT88:HSP90AA1:TAOK2:TBX6:KATNB1:MAPT:WNT3:BIN1:CFLAR:APP:SOD1:GORASP1:NCK1:SCLT1:CDKL3:CNTNAP2:PTK2B:KANK1
FUMA	R-HSA-1169410	antiviral mechanism by ifn stimulated genes	82	5	0.000546573	0.00844652	RPS27A:NUP35:UBA7:EIF4E3:KPNA5
FUMA	GO:0099565	chemical synaptic transmission postsynaptic	109	6	0.000266735	0.00848703	PRKCZ:CHRNA10:APP:SNCA:PTK2B:CHRNA2
FUMA	GO:0051444	negative regulation of ubiquitin protein transferase activity	16	3	0.000270552	0.00857136	RPL11:RPL23:DTX3L
FUMA	GO:0009395	phospholipid catabolic process	39	4	0.000274927	0.00863553	ANGPTL3:GDPD3:PNPLA6:APOC1
FUMA	GO:0042769	dna damage response detection of dna damage	39	4	0.000274927	0.00863553	POLD3:RPS27A:RPA3:DNAJA1
FUMA	R-HSA-9020591	interleukin 12 signaling	47	4	0.000566737	0.00866876	CAPZA1:RPLP0:BOLA2:SOD1
FUMA	GO:0051241	negative regulation of multicellular organismal process	1265	23	0.000278642	0.0086933	DOCK7:CD160:ECM1:TRIM11:MEFV:TBX6:NFATC3:WNT3:APOC1:LILRA5:BIN1:STK39:CST3:APP:SOD1:GORASP1:TCTA:UBA7:CDKL3:CD83:HS3ST5:PTK2B:KANK1
FUMA	GO:1902579	multi organism localization	71	5	0.000280315	0.0086933	VPS37C:VPS37B:CD209:RPS27A:NUP35
FUMA	GO:0009301	snrna transcription	71	5	0.000280315	0.0086933	GTF2B:SP1:GTF2A2:ELL:INTS1
FUMA	GO:0050867	positive regulation of cell activation	378	11	0.000283527	0.00875598	PRKCZ:CD160:CD5:CRHR1:CD209:LILRA5:CD28:APP:NCK1:CD83:AIF1
FUMA	GO:0097418	neurofibrillary tangle	5	2	0.000640478	0.00890442	PICALM:MAPT
gPROFILER	GO:0045184	establishment of protein localization	1625	45		0.00893452	ENSA,NSF,RPS25,KATNB1,RPS27A,ATP6V1E1,IFT88,MAPT,RPLP0,NXF1,RPL26,PDIA4,HSP90AA1,PRKCZ,ATP6V1D,RPL32,RPL6,RPL23,DNAJA1,SRP19,RAB23,LILRA5,SRP14,HACL1,NUP35,TBC1D10C,TAOK2,VPS37C,RAB37,ENY2,TOMM7,RAB6A,WDR33,VPS37B,RPAIN,GOLPH3L,GORASP1,CPSF2,TCIRG1,RPL11,SSB,AIF1,KPNA5,STX8,RPS24
gPROFILER	GO:0045184	establishment of protein localization	1625	45		0.00893452	ENSA,NSF,RPS25,KATNB1,RPS27A,ATP6V1E1,IFT88,MAPT,RPLP0,NXF1,RPL26,PDIA4,HSP90AA1,PRKCZ,ATP6V1D,RPL32,RPL6,RPL23,DNAJA1,SRP19,RAB23,LILRA5,SRP14,HACL1,NUP35,TBC1D10C,TAOK2,VPS37C,RAB37,ENY2,TOMM7,RAB6A,WDR33,VPS37B,RPAIN,GOLPH3L,GORASP1,CPSF2,TCIRG1,RPL11,SSB,AIF1,KPNA5,STX8,RPS24
gPROFILER	GO:0005762	mitochondrial large ribosomal subunit	57	5		0.00901551	MRPL51,MRPL33,MRPL27,MRPL48,MRPL35
gPROFILER	GO:0000315	organellar large ribosomal subunit	57	5		0.00901551	MRPL51,MRPL33,MRPL27,MRPL48,MRPL35
gPROFILER	GO:0016071	mRNA metabolic process	761	28		0.00906842	RPS25,ZMAT2,APP,RPS27A,SHFM1,PPIL3,RPLP0,RPL26,MOV10,RPL32,RPL6,PSMD12,SNRPD2,DNAJC8,RPL23,WDR33,SNRPB2,CPSF2,EIF3E,RPL11,PSMC2,SSB,PSMA3,SAMD4B,CSTF1,RPS24,PLRG1,RPL12
gPROFILER	GO:0048708	astrocyte differentiation	38	3		0.00906842	BIN1,APP,MAPT
gPROFILER	GO:0071840	cellular component organization or biogenesis	5593	72		0.00906842	NDUFB3,BIN1,WNT3,MRPL51,NSF,DENR,KATNB1,CFLAR,CASS4,MRPS17,PRRT2,APP,RPS27A,ATPAF1,FAM160A2,SSBP1,ATP6V1E1,BOLA2,ZNF622,IFT88,PLEKHM1,NDUFS5,ANKRD13D,PAK1IP1,MAPT,COX17,PICALM,RPA3,RPLP0,CAPZA1,MRPL33,MRPS21,BRIX1,ST7L,ARPC3,RPL26,SSH3,GMFG,PXN,MOV10,MRPL27,ABCA7,POMP,SCLT1,HSP90AA1,SDAD1,NVL,ING3,KLHDC8B,PRKCZ,PKD2,ATP6V1D,GTF2A2,MEFV,PLEKHA3,RPL6,SETDB2,FAM162A,SNRPD2,ALDOA,RPL23,MRPL1,SNCA,PTK…
gPROFILER	GO:0006414	translational elongation	121	8		0.00906842	MRPL51,MRPS17,MRPL33,MRPS21,MRPL27,MRPL1,MRPL48,MRPL35
gPROFILER	GO:0016071	mRNA metabolic process	761	28		0.00906842	RPS25,ZMAT2,APP,RPS27A,SHFM1,PPIL3,RPLP0,RPL26,MOV10,RPL32,RPL6,PSMD12,SNRPD2,DNAJC8,RPL23,WDR33,SNRPB2,CPSF2,EIF3E,RPL11,PSMC2,SSB,PSMA3,SAMD4B,CSTF1,RPS24,PLRG1,RPL12
gPROFILER	GO:0048708	astrocyte differentiation	38	3		0.00906842	BIN1,APP,MAPT
gPROFILER	GO:0071840	cellular component organization or biogenesis	5593	72		0.00906842	NDUFB3,BIN1,WNT3,MRPL51,NSF,DENR,KATNB1,CFLAR,CASS4,MRPS17,PRRT2,APP,RPS27A,ATPAF1,FAM160A2,SSBP1,ATP6V1E1,BOLA2,ZNF622,IFT88,PLEKHM1,NDUFS5,ANKRD13D,PAK1IP1,MAPT,COX17,PICALM,RPA3,RPLP0,CAPZA1,MRPL33,MRPS21,BRIX1,ST7L,ARPC3,RPL26,SSH3,GMFG,PXN,MOV10,MRPL27,ABCA7,POMP,SCLT1,HSP90AA1,SDAD1,NVL,ING3,KLHDC8B,PRKCZ,PKD2,ATP6V1D,GTF2A2,MEFV,PLEKHA3,RPL6,SETDB2,FAM162A,SNRPD2,ALDOA,RPL23,MRPL1,SNCA,PTK…
gPROFILER	GO:0006414	translational elongation	121	8		0.00906842	MRPL51,MRPS17,MRPL33,MRPS21,MRPL27,MRPL1,MRPL48,MRPL35
gPROFILER	GO:0006401	RNA catabolic process	390	17		0.009109	RPS25,RPS27A,SHFM1,RPLP0,RPL26,MOV10,RPL32,RPL6,PSMD12,RPL23,EIF3E,RPL11,PSMC2,SSB,PSMA3,SAMD4B,RPS24
gPROFILER	GO:0006401	RNA catabolic process	390	17		0.009109	RPS25,RPS27A,SHFM1,RPLP0,RPL26,MOV10,RPL32,RPL6,PSMD12,RPL23,EIF3E,RPL11,PSMC2,SSB,PSMA3,SAMD4B,RPS24
FUMA	R-HSA-8939236	runx1 regulates transcription of genes involved in differentiation of hscs	127	6	0.000603473	0.00911807	SPI1:PSMA3:PSMD12:RPS27A:SHFM1:C7orf76:PSMC2
FUMA	R-HSA-195253	degradation of beta catenin by the destruction complex	84	5	0.000610374	0.00911807	PSMA3:PSMD12:RPS27A:SHFM1:C7orf76:PSMC2
FUMA	R-HSA-73893	dna damage bypass	48	4	0.00061436	0.00911807	POLD3:RPS27A:UBA7:RPA3
gPROFILER	GO:0002274	myeloid leukocyte activation	596	21		0.00914285	APP,MAPT,GM2A,GMFG,FABP5,HSP90AA1,ATP6V1D,PSMD12,ALDOA,SNCA,CTSS,SRP14,TBC1D10C,RAB37,MVP,RAB6A,CST3,TCIRG1,PSMC2,GGH,AIF1
gPROFILER	GO:0002274	myeloid leukocyte activation	596	21		0.00914285	APP,MAPT,GM2A,GMFG,FABP5,HSP90AA1,ATP6V1D,PSMD12,ALDOA,SNCA,CTSS,SRP14,TBC1D10C,RAB37,MVP,RAB6A,CST3,TCIRG1,PSMC2,GGH,AIF1
FUMA	GO:0005643	nuclear pore	86	5	0.0006796	0.0093189	NXF1:MVP:NUP35:KPNA5:ENY2
FUMA	R-HSA-5357801	programmed cell death	178	7	0.000644283	0.00937663	PSMA3:MAPT:PSMD12:RPS27A:CFLAR:SHFM1:C7orf76:PSMC2
FUMA	R-HSA-69656	cyclin a:cdk2 associated events at s phase entry	85	5	0.000644291	0.00937663	PSMA3:PSMD12:RPS27A:SHFM1:C7orf76:PSMC2
FUMA	GO:0023014	signal transduction by protein phosphorylation	952	19	0.000307336	0.00945154	PRKCZ:PRDX1:CHRNA10:TBC1D10C:PSMA3:TAOK2:PSMD12:ABCA7:LILRA5:RPS27A:STK39:CFLAR:APP:SOD1:PROK2:ZNF622:PSMC2:PTK2B:DNAJA1
FUMA	R-HSA-5632684	hedgehog on state	86	5	0.0006796	0.0097021	PSMA3:PSMD12:RPS27A:SHFM1:C7orf76:PSMC2
FUMA	R-HSA-453276	regulation of mitotic cell cycle	86	5	0.0006796	0.0097021	PSMA3:PSMD12:RPS27A:SHFM1:C7orf76:PSMC2
gPROFILER	GO:0006887	exocytosis	785	25		0.00982029	NSF,PRRT2,APP,GM2A,GMFG,FABP5,HSP90AA1,ATP6V1D,ECM1,PSMD12,ALDOA,SNCA,CTSS,SRP14,TBC1D10C,RAB37,ACTN1,MVP,RAB6A,SOD1,CST3,TCIRG1,PSMC2,GGH,RIMS3
gPROFILER	GO:0051051	negative regulation of transport	415	13		0.00982029	BIN1,PRRT2,CRHR1,ANKRD13D,PICALM,ABCA7,PKD2,SNCA,PTK2B,APOC1,RAB23,LILRA5,STK39
gPROFILER	GO:0006887	exocytosis	785	25		0.00982029	NSF,PRRT2,APP,GM2A,GMFG,FABP5,HSP90AA1,ATP6V1D,ECM1,PSMD12,ALDOA,SNCA,CTSS,SRP14,TBC1D10C,RAB37,ACTN1,MVP,RAB6A,SOD1,CST3,TCIRG1,PSMC2,GGH,RIMS3
gPROFILER	GO:0051051	negative regulation of transport	415	13		0.00982029	BIN1,PRRT2,CRHR1,ANKRD13D,PICALM,ABCA7,PKD2,SNCA,PTK2B,APOC1,RAB23,LILRA5,STK39
gPROFILER	GO:0043604	amide biosynthetic process	765	28		0.00986016	MRPL51,RPS25,DENR,MRPS17,APP,RPS27A,RPLP0,MRPL33,MRPS21,RPL26,MOV10,MRPL27,RPL32,RPL6,RPL23,MRPL1,DRG1,MRPL48,MRPL35,EIF3E,RPL11,NCK1,SAMD4B,CD28,RPS24,ZC3H15,RPL12,RRBP1
gPROFILER	GO:0043604	amide biosynthetic process	765	28		0.00986016	MRPL51,RPS25,DENR,MRPS17,APP,RPS27A,RPLP0,MRPL33,MRPS21,RPL26,MOV10,MRPL27,RPL32,RPL6,RPL23,MRPL1,DRG1,MRPL48,MRPL35,EIF3E,RPL11,NCK1,SAMD4B,CD28,RPS24,ZC3H15,RPL12,RRBP1
FUMA	GO:1901137	carbohydrate derivative biosynthetic process	655	15	0.000323408	0.00990438	AK2:ATP5F1:RRM1:ALDOA:XYLT2:ATP5H:ABCA7:ATP5O:GORASP1:ATP5I:SNCA:VCAN:HS3ST5:EXTL3:ST3GAL1
FUMA	R-HSA-76005	response to elevated platelet cytosolic ca2plus	131	6	0.000710302	0.00996561	ECM1:ACTN1:ALDOA:APP:SOD1:MMRN1
FUMA	R-HSA-450531	regulation of mrna stability by proteins that bind au rich elements	87	5	0.000716336	0.00996561	PSMA3:PSMD12:RPS27A:SHFM1:C7orf76:PSMC2
FUMA	R-HSA-1236978	cross presentation of soluble exogenous antigens endosomes	50	4	0.000718003	0.00996561	PSMA3:PSMD12:SHFM1:C7orf76:PSMC2
gPROFILER	GO:0150034	distal axon	131	7		0.0099766	PRRT2,MAPT,HSP90AA1,SNCA,PTK2B,TAOK2,DOCK7
gPROFILER	GO:0022411	cellular component disassembly	484	5		0.0100149	MRPL51,NSF,DENR,KATNB1,MRPS17
gPROFILER	GO:0022411	cellular component disassembly	484	5		0.0100149	MRPL51,NSF,DENR,KATNB1,MRPS17
FUMA	GO:0050839	cell adhesion molecule binding	487	13	0.000189156	0.0100375	PRDX1:ANGPTL3:CAPZA1:SWAP70:PICALM:RPL6:GCN1L1:PXN:ACTN1:ALDOA:ZC3H15:NCK1:EIF3E
FUMA	GO:0030001	metal ion transport	880	18	0.000330292	0.0100732	CHRNA10:TCIRG1:PICALM:ATP6V1D:SLC24A4:CRHR1:NSF:LILRA5:SLC5A6:BIN1:STK39:JPH2:ATP6V1E1:COX17:PKD2:SNCA:PTK2B:SLC20A2
gPROFILER	GO:0008104	protein localization	2219	53		0.0101022	ENSA,NSF,RPS25,KATNB1,RPS27A,ATP6V1E1,IFT88,MAPT,PICALM,RPLP0,NXF1,RPL26,PDIA4,ABCA7,HSP90AA1,NVL,PRKCZ,PKD2,ATP6V1D,LEPROTL1,RPL32,RPL6,RPL23,DNAJA1,SRP19,RAB23,LILRA5,SRP14,HACL1,NUP35,TBC1D10C,TAOK2,VPS37C,RAB37,ENY2,TOMM7,RAB6A,WDR33,VPS37B,RPAIN,GOLPH3L,RPF2,BCAP29,GORASP1,CPSF2,FAM126B,TCIRG1,RPL11,TM9SF1,DTX3L,SSB,AIF1,CNTNAP2
gPROFILER	GO:0008104	protein localization	2219	53		0.0101022	ENSA,NSF,RPS25,KATNB1,RPS27A,ATP6V1E1,IFT88,MAPT,PICALM,RPLP0,NXF1,RPL26,PDIA4,ABCA7,HSP90AA1,NVL,PRKCZ,PKD2,ATP6V1D,LEPROTL1,RPL32,RPL6,RPL23,DNAJA1,SRP19,RAB23,LILRA5,SRP14,HACL1,NUP35,TBC1D10C,TAOK2,VPS37C,RAB37,ENY2,TOMM7,RAB6A,WDR33,VPS37B,RPAIN,GOLPH3L,RPF2,BCAP29,GORASP1,CPSF2,FAM126B,TCIRG1,RPL11,TM9SF1,DTX3L,SSB,AIF1,CNTNAP2
FUMA	GO:1905368	peptidase complex	88	5	0.000754537	0.0102066	PSMA3:UBE3A:PSMD12:PSMC2:ENY2
FUMA	GO:0006353	dna templated transcription termination	74	5	0.000340057	0.0103282	CPSF2:MAZ:TAF1C:WDR33:CSTF1
FUMA	WP111	oxidative phosphorylation	53	5	6.95442e-05	0.0103357	NDUFS5:ATP5F1:ATP5H:ATP5O:ATP5I
FUMA	WP3286	copper homeostasis	54	5	7.61376e-05	0.0103357	SP1:MAPT:APP:SOD1:COX17
FUMA	GO:0016042	lipid catabolic process	325	10	0.00034452	0.0104207	ANGPTL3:ACADM:AKR1C3:ABHD2:GDPD3:PNPLA6:APOC1:HACL1:GM2A:FABP5
FUMA	GO:1903827	regulation of cellular protein localization	519	13	0.000348013	0.0104832	PRKCZ:NVL:PICALM:HSP90AA1:STX8:MAPT:ABCA7:DTX3L:RAB23:TOMM7:LEPROTL1:DNAJA1:ANP32B
gPROFILER	GO:0048156	tau protein binding	40	5		0.0106174	BIN1,PICALM,HSP90AA1,SNCA,TAOK2
gPROFILER	GO:0048156	tau protein binding	40	5		0.0106174	BIN1,PICALM,HSP90AA1,SNCA,TAOK2
FUMA	GO:0099094	ligand gated cation channel activity	104	6	0.000206696	0.0106255	CHRNA10:CNGA4:JPH2:PKD2:PTK2B:CHRNA2
gPROFILER	GO:0070013	intracellular organelle lumen	5439	114		0.0107071	ENSA,WNT3,MRPL51,RPS25,ZCCHC7,MRPS17,APP,RPS27A,SSBP1,ZNF622,GNL2,ZBTB43,PLEKHM1,DNAJC7,FANCI,MAPT,COX17,LARP7,UBA7,RPA3,SHFM1,ERGIC1,TRIM45,ZNF613,MRPL33,MRPS21,TRIP4,BRIX1,NXF1,MED20,NFATC3,RPL26,GM2A,AK2,GMFG,PDIA4,FABP5,MRPL27,INTS1,POMP,HSP90AA1,SDAD1,NVL,ING3,ECM1,GTF2A2,SUCLG1,SETDB2,PSMD12,SNRPD2,ALDOA,DNAJC8,RPL23,NGDN,SETMAR,CTSS,CHEK2,SRP19,SRP14,HACL1,PWP1,NUP35,STK39,POLD3,TAOK2,DRG1…
gPROFILER	GO:0043233	organelle lumen	5439	114		0.0107071	ENSA,WNT3,MRPL51,RPS25,ZCCHC7,MRPS17,APP,RPS27A,SSBP1,ZNF622,GNL2,ZBTB43,PLEKHM1,DNAJC7,FANCI,MAPT,COX17,LARP7,UBA7,RPA3,SHFM1,ERGIC1,TRIM45,ZNF613,MRPL33,MRPS21,TRIP4,BRIX1,NXF1,MED20,NFATC3,RPL26,GM2A,AK2,GMFG,PDIA4,FABP5,MRPL27,INTS1,POMP,HSP90AA1,SDAD1,NVL,ING3,ECM1,GTF2A2,SUCLG1,SETDB2,PSMD12,SNRPD2,ALDOA,DNAJC8,RPL23,NGDN,SETMAR,CTSS,CHEK2,SRP19,SRP14,HACL1,PWP1,NUP35,STK39,POLD3,TAOK2,DRG1…
gPROFILER	GO:0031974	membrane-enclosed lumen	5439	114		0.0107071	ENSA,WNT3,MRPL51,RPS25,ZCCHC7,MRPS17,APP,RPS27A,SSBP1,ZNF622,GNL2,ZBTB43,PLEKHM1,DNAJC7,FANCI,MAPT,COX17,LARP7,UBA7,RPA3,SHFM1,ERGIC1,TRIM45,ZNF613,MRPL33,MRPS21,TRIP4,BRIX1,NXF1,MED20,NFATC3,RPL26,GM2A,AK2,GMFG,PDIA4,FABP5,MRPL27,INTS1,POMP,HSP90AA1,SDAD1,NVL,ING3,ECM1,GTF2A2,SUCLG1,SETDB2,PSMD12,SNRPD2,ALDOA,DNAJC8,RPL23,NGDN,SETMAR,CTSS,CHEK2,SRP19,SRP14,HACL1,PWP1,NUP35,STK39,POLD3,TAOK2,DRG1…
gPROFILER	GO:0030141	secretory granule	723	21		0.0107071	APP,GM2A,GMFG,FABP5,HSP90AA1,ATP6V1D,ECM1,PSMD12,ALDOA,SNCA,CTSS,SRP14,TBC1D10C,RAB37,ACTN1,MVP,RAB6A,CST3,TCIRG1,PSMC2,GGH
gPROFILER	GO:0005743	mitochondrial inner membrane	389	7		0.0107534	NDUFB3,MRPL51,MRPS17,UQCRH,NDUFS5,MRPL33,MRPS21
FUMA	GO:0048585	negative regulation of response to stimulus	1629	27	0.000359988	0.0107996	PRKCZ:CD160:ECM1:MCL1:CHRNA10:TBC1D10C:BCL2L2:PSMA3:MEFV:MAZ:WNT3:PSMD12:RPS27A:STK39:CFLAR:SOD1:RCAN1:CHEK2:NCK1:PKD2:SNCA:PAK1IP1:AIF1:PSMC2:ENY2:KANK1:DNAJA1
FUMA	GO:0032869	cellular response to insulin stimulus	213	8	0.00036436	0.0108356	PRKCZ:TCIRG1:SP1:ATP6V1D:CFLAR:ATP6V1E1:NCK1:KANK1
FUMA	GO:0006887	amyloid beta metabolic process	42	4	0.000367084	0.0108356	PICALM:ABCA7:BIN1:APP
FUMA	GO:0045429	positive regulation of nitric oxide biosynthetic process	42	4	0.000367084	0.0108356	HSP90AA1:PKD2:AIF1:PTK2B
FUMA	GO:2000404	regulation of t cell migration	42	4	0.000367084	0.0108356	ECM1:STK39:APP:AIF1
FUMA	GO:1904062	regulation of cation transmembrane transport	328	10	0.000370291	0.0108524	CTSS:CRHR1:BIN1:STK39:JPH2:APP:COX17:PKD2:SNCA:PTK2B
FUMA	GO:0032868	response to insulin	269	9	0.000370607	0.0108524	PRKCZ:TCIRG1:SP1:ATP6V1D:CFLAR:ATP6V1E1:NCK1:GGH:KANK1
FUMA	GO:0000149	snare binding	105	6	0.000217755	0.0108548	PICALM:PRRT2:STX8:NSF:SNCA:SEC24D
FUMA	GO:0032409	regulation of transporter activity	270	9	0.000380727	0.0111045	CTSS:CRHR1:STK39:JPH2:APP:COX17:PKD2:SNCA:PTK2B
FUMA	GO:0031091	platelet alpha granule	90	5	0.000835476	0.0111508	ACTN1:ALDOA:APP:SNCA:MMRN1
FUMA	GO:0005938	cell cortex	302	9	0.000847263	0.0111593	PRKCZ:RIMS3:CAPZA1:RHOC:PXN:GMFG:PKD2:SNCA:PTK2B
gPROFILER	GO:0005746	mitochondrial respirasome	82	3		0.0111866	NDUFB3,UQCRH,NDUFS5
FUMA	GO:1903039	positive regulation of leukocyte cell cell adhesion	215	8	0.00038775	0.0112647	PRKCZ:CD160:CD5:CD209:CD28:NCK1:CD83:AIF1
WebGestalt	GO:0042788	polysomal ribosome	31	4	0.000364044	0.0113877	RPL32;RPL6;RPL11;ZC3H15
WebGestalt	GO:0000315	organellar large ribosomal subunit	56	5	0.000383523	0.0113877	MRPL51;MRPL33;MRPL27;MRPL48;MRPL35
WebGestalt	GO:0005762	mitochondrial large ribosomal subunit	56	5	0.000383523	0.0113877	MRPL51;MRPL33;MRPL27;MRPL48;MRPL35
FUMA	GO:0034614	cellular response to reactive oxygen species	164	7	0.00039534	0.01144	PRDX1:AKR1C3:PXN:MAPT:CFLAR:SOD1:PKD2
FUMA	R-HSA-69052	switching of origins to a post replicative state	90	5	0.000835476	0.0114897	PSMA3:PSMD12:RPS27A:SHFM1:C7orf76:PSMC2
FUMA	GO:0002269	leukocyte activation involved in inflammatory response	43	4	0.000402178	0.0115469	MAPT:APP:SNCA:AIF1
FUMA	GO:0070897	transcription preinitiation complex assembly	43	4	0.000402178	0.0115469	GTF2B:GTF2A2:TAF1C:PSMC2
WebGestalt	GO:0042255	ribosome assembly	61	7	2.94408e-05	0.0116034	RPLP0;BRIX1;RPL6;RPF2;RPL11;RPL10L;RPL12
FUMA	GO:0003697	single stranded dna binding	107	6	0.000241269	0.0116732	MAPT:RBMS1:NUP35:SETMAR:RPA3:SSBP1
gPROFILER	GO:0003723	RNA binding	1718	32		0.0117436	RPS25,DENR,ZCCHC7,RPS27A,SSBP1,ZNF622,GNL2,EIF4E3,MAPT,LARP7,RPLP0,PRDX1,MRPS21,BRIX1,NXF1,SNTB2,RPL26,PDIA4,MOV10,MRPL27,HSP90AA1,NVL,RPL32,RPL6,SUCLG1,SNRPD2,ALDOA,RPL23,MRPL1,NGDN,SRP19,SRP14
gPROFILER	GO:0003723	RNA binding	1718	32		0.0117436	RPS25,DENR,ZCCHC7,RPS27A,SSBP1,ZNF622,GNL2,EIF4E3,MAPT,LARP7,RPLP0,PRDX1,MRPS21,BRIX1,NXF1,SNTB2,RPL26,PDIA4,MOV10,MRPL27,HSP90AA1,NVL,RPL32,RPL6,SUCLG1,SNRPD2,ALDOA,RPL23,MRPL1,NGDN,SRP19,SRP14
gPROFILER	GO:0098803	respiratory chain complex	84	3		0.01177	NDUFB3,UQCRH,NDUFS5
FUMA	R-HSA-157118	signaling by notch	243	8	0.000864511	0.0117809	MOV10:RAB6A:MAML2:PSMA3:PSMD12:RPS27A:SHFM1:C7orf76:PSMC2
FUMA	GO:1901293	nucleoside phosphate biosynthetic process	273	9	0.000412461	0.0117961	AK2:ATP5F1:RRM1:ALDOA:ATP5H:SUCLG1:ATP5O:ATP5I:SNCA
gPROFILER	GO:0043229	intracellular organelle	11095	208		0.0118902	DCTN6,ENSA,NDUFB3,BIN1,RPL36AL,MYBPC3,WNT3,MRPL51,NSF,RPS25,ZMAT2,KATNB1,ZCCHC7,MRPS17,PRRT2,APP,RPS27A,ATPAF1,SSBP1,ATP6V1E1,BOLA2,ZNF622,RCAN1,UQCRH,IFT88,GNL2,ZBTB43,PLEKHM1,NDUFS5,HS3ST5,DNAJC7,FANCI,MAPT,COX17,LARP7,MBOAT1,UBA7,GDPD3,PICALM,RPA3,SHFM1,ERGIC1,TRIM45,PPIL3,ZFP37,ZNF613,RPLP0,PRDX1,CAPZA1,MRPL33,MRPS21,TRIP4,BRIX1,NXF1,MED20,ARPC3,NFATC3,GIMAP7,RPL26,GM2A,AK2,MPHOSPH9,GMFG,PDIA…
FUMA	GO:0090175	peptidyl amino acid modification	1219	22	0.000417386	0.0118906	PRKCZ:DOCK7:GTF2B:SPI1:RAB6A:METAP2:PWP1:SETDB2:HSP90AA1:MVP:LILRA5:STK39:NUP35:PPIL3:CASS4:APP:CHEK2:SETMAR:NCK1:SNCA:ING3:PTK2B
FUMA	GO:2001233	regulation of apoptotic signaling pathway	396	11	0.000419391	0.0119016	RPL11:MCL1:RAD9A:BCL2L2:MAZ:RPL26:CFLAR:SOD1:FAM162A:NCK1:DNAJA1
FUMA	GO:0045785	positive regulation of cell adhesion	397	11	0.000428313	0.0120781	PRKCZ:CD160:CD5:CD209:CD28:CASS4:NCK1:MMRN1:CD83:AIF1:PTK2B
FUMA	GO:0032990	cell part morphogenesis	673	15	0.000428895	0.0120781	PRKCZ:DOCK7:MOV10:SSH3:PICALM:HSP90AA1:TAOK2:MAPT:WNT3:APP:GORASP1:CDKL3:SSBP1:CNTNAP2:KANK1
FUMA	GO:0097386	glial cell projection	24	3	0.00093219	0.0121185	MAPT:ABCA7:APP
FUMA	GO:0051348	negative regulation of transferase activity	275	9	0.000434803	0.0121928	RPL11:MVP:RPL23:MAPT:GMFG:DTX3L:NCK1:PRKAR1B:DNAJA1
FUMA	GO:0019637	organophosphate metabolic process	532	13	0.000439289	0.0121928	AK2:ANGPTL3:CDIPT:ALDOA:GDPD3:PNPLA6:SUCLG1:FAM126B:SNCA:MBOAT1:RAB23:GIMAP7:PTK2B
FUMA	GO:0007007	inner mitochondrial membrane organization	44	4	0.000439603	0.0121928	ATP5F1:ATP5H:ATP5O:ATP5I
FUMA	GO:0045806	negative regulation of endocytosis	44	4	0.000439603	0.0121928	ANKRD13D:PICALM:ABCA7:APOC1
FUMA	GO:0097136	bcl 2 family protein complex	6	2	0.000955587	0.0122634	MCL1:BCL2L2
FUMA	R-HSA-4086400	pcp ce pathway	92	5	0.000922713	0.0123495	PSMA3:PSMD12:RPS27A:SHFM1:C7orf76:PSMC2
FUMA	R-HSA-1592230	mitochondrial biogenesis	92	5	0.000922713	0.0123495	ATP5F1:ATP5H:ATP5O:ATP5I:SSBP1
FUMA	R-HSA-6807070	pten regulation	138	6	0.000931842	0.0123613	MOV10:PSMA3:PSMD12:RPS27A:SHFM1:C7orf76:PSMC2
FUMA	GO:0043005	neuron projection	1301	22	0.000979409	0.01241	PRKCZ:DOCK7:ACADM:RHOC:CHRNA10:TRAPPC4:NGDN:HSP90AA1:PRRT2:TAOK2:KATNB1:CRHR1:MAPT:NSF:BIN1:APP:SOD1:SNCA:PSMC2:CNTNAP2:PTK2B:CHRNA2
gPROFILER	GO:0070469	respirasome	90	3		0.0125337	NDUFB3,UQCRH,NDUFS5
FUMA	GO:0043408	regulation of mapk cascade	751	16	0.000454551	0.01256	PRKCZ:PRDX1:CHRNA10:TBC1D10C:TAOK2:ABCA7:LILRA5:RPS27A:STK39:CFLAR:APP:SOD1:PROK2:ZNF622:PTK2B:DNAJA1
FUMA	GO:1900034	regulation of cellular response to heat	79	5	0.000460426	0.0126274	HSP90AA1:DNAJC7:MAPT:NUP35:RPA3
FUMA	GO:0048194	golgi vesicle budding	79	5	0.000460426	0.0126274	GOLPH3L:TRAPPC4:NSF:GORASP1:SEC24D
gPROFILER	GO:0009894	regulation of catabolic process	858	27		0.0126431	NSF,APP,RPS27A,ATP6V1E1,IFT88,MAPT,SHFM1,MOV10,HSP90AA1,ATP6V1D,MEFV,PSMD12,RPL23,UBE3A,SNCA,PTK2B,CHEK2,APOC1,NUP35,TOMM7,MCL1,CST3,RPL11,PSMC2,DTX3L,PSMA3,SAMD4B
gPROFILER	GO:0009894	regulation of catabolic process	858	27		0.0126431	NSF,APP,RPS27A,ATP6V1E1,IFT88,MAPT,SHFM1,MOV10,HSP90AA1,ATP6V1D,MEFV,PSMD12,RPL23,UBE3A,SNCA,PTK2B,CHEK2,APOC1,NUP35,TOMM7,MCL1,CST3,RPL11,PSMC2,DTX3L,PSMA3,SAMD4B
FUMA	R-HSA-5576891	interleukin 1 family signaling	139	6	0.00096739	0.012675	PSMA3:PSMD12:RPS27A:APP:SHFM1:C7orf76:PSMC2
FUMA	R-HSA-983168	antigen processing: ubiquitination proteasome degradation	308	9	0.000972401	0.012675	TRIM11:PSMA3:UBE3A:PSMD12:RPS27A:UBA7:DTX3L:SHFM1:C7orf76:PSMC2
FUMA	GO:1903320	regulation of protein modification by small protein conjugation or removal	221	8	0.000465352	0.0127003	RPL11:HSP90AA1:UBE3A:FANCI:RPL23:GORASP1:DTX3L:DNAJA1
FUMA	GO:0043620	regulation of dna templated transcription in response to stress	121	6	0.000467077	0.0127003	GCN1L1:PSMA3:PSMD12:RPS27A:NCK1:PSMC2
FUMA	GO:0002684	positive regulation of immune system process	1147	21	0.000468269	0.0127003	PRKCZ:CD160:CTSS:SWAP70:CD5:ARPC3:PSMA3:HSP90AA1:CMTM3:CRHR1:PSMD12:CD209:RPS27A:STK39:CD28:APP:NCK1:CD83:AIF1:PSMC2:PTK2B
gPROFILER	GO:0005198	structural molecule activity	552	23		0.0127557	MYBPC3,MRPL51,RPS25,MRPS17,RPS27A,RPLP0,MRPS21,ARPC3,RPL26,MRPL27,ECM1,RPL32,RPL6,RPL23,NUP35,ACTN1,VCAN,MRPL35,RPL11,RPS24,MMRN1,RPL10L,RPL12
gPROFILER	GO:0005198	structural molecule activity	552	23		0.0127557	MYBPC3,MRPL51,RPS25,MRPS17,RPS27A,RPLP0,MRPS21,ARPC3,RPL26,MRPL27,ECM1,RPL32,RPL6,RPL23,NUP35,ACTN1,VCAN,MRPL35,RPL11,RPS24,MMRN1,RPL10L,RPL12
gPROFILER	GO:0019866	organelle inner membrane	425	15		0.012805	NDUFB3,MRPL51,MRPS17,UQCRH,NDUFS5,MRPL33,MRPS21,MRPL27,MRPL1,MRPL48,MRPL35,UQCRB,CBX3,COX15,CHDH
FUMA	GO:1903706	regulation of hemopoiesis	468	12	0.000474943	0.0128339	PRKCZ:MOV10:SPI1:PSMA3:PSMD12:CLPTM1:CD28:SOD1:TCTA:CD83:PSMC2:PTK2B
FUMA	GO:1904724	tertiary granule lumen	55	4	0.00103024	0.0128909	CTSS:ALDOA:CST3:GGH
FUMA	GO:0071407	cellular response to organic cyclic compound	539	13	0.000496349	0.0133632	AKR1C3:UBE3A:AQP9:TRIP4:ABHD2:CFLAR:APP:SOD1:CHEK2:PKD2:SNCA:AIF1:DNAJA1
FUMA	GO:0044770	cell cycle phase transition	611	14	0.000505838	0.013569	ENSA:PSMA3:HSP90AA1:TAOK2:RPL26:PSMD12:APP:CHEK2:PKD2:PLRG1:GMNN:AIF1:RPA3:PSMC2
FUMA	GO:0097447	dendritic tree	588	13	0.00109968	0.0135899	TRAPPC4:NGDN:HSP90AA1:PRRT2:TAOK2:CRHR1:MAPT:NSF:APP:SOD1:PSMC2:CNTNAP2:PTK2B
FUMA	R-HSA-5696397	gap filling dna repair synthesis and ligation in gg ner	25	3	0.001053	0.0136074	POLD3:RPS27A:RPA3
FUMA	WP2875	constitutive androstane receptor pathway	32	4	0.000125657	0.0136464	SP1:HSP90AA1:DNAJC7:ABCC3
FUMA	GO:1905114	cell surface receptor signaling pathway involved in cell cell signaling	612	14	0.000514003	0.0137379	PRKCZ:MOV10:CHRNA10:PSMA3:WNT3:PSMD12:RPS27A:APP:PKD2:SNCA:PSMC2:PTK2B:CHRNA2:KANK1
FUMA	GO:0031503	protein containing complex localization	282	9	0.000520989	0.0138493	PRKCZ:NXF1:IFT88:CPSF2:WDR33:SSB:NUP35:SDAD1:ENY2
FUMA	GO:0000302	response to reactive oxygen species	225	8	0.000523754	0.0138493	PRDX1:AKR1C3:PXN:MAPT:CFLAR:SOD1:PKD2:PTK2B
FUMA	GO:0062012	regulation of small molecule metabolic process	343	10	0.000524494	0.0138493	AKR1C3:SP1:PSMA3:PSMD12:APOC1:SOD1:SNCA:PSMC2:PTK2B:FABP5
FUMA	GO:0009408	response to heat	172	7	0.000525707	0.0138493	HSP90AA1:DNAJC7:MAPT:NUP35:SOD1:RPA3:DNAJA1
gPROFILER	GO:0044087	regulation of cellular component biogenesis	765	17		0.0140305	BIN1,PRRT2,APP,IFT88,PLEKHM1,MAPT,RPA3,CAPZA1,ARPC3,GMFG,PXN,HSP90AA1,PRKCZ,MEFV,SNCA,PTK2B,RHOC
gPROFILER	GO:0044087	regulation of cellular component biogenesis	765	17		0.0140305	BIN1,PRRT2,APP,IFT88,PLEKHM1,MAPT,RPA3,CAPZA1,ARPC3,GMFG,PXN,HSP90AA1,PRKCZ,MEFV,SNCA,PTK2B,RHOC
WebGestalt	GO:0005746	mitochondrial respiratory chain	90	6	0.000493434	0.0141086	NDUFB3;UQCRH;NDUFS5;SNCA;UQCRB;COX15
FUMA	R-HSA-3371497	hsp90 chaperone cycle for steroid hormone receptors shr	56	4	0.00110251	0.0141253	CAPZA1:HSP90AA1:DCTN6:DNAJA1
WebGestalt	GO:0006605	protein targeting	412	18	3.82389e-05	0.0141844	RPS25;KATNB1;RPS27A;RPLP0;RPL26;HSP90AA1;RPL32;RPL6;RPL23;SRP19;SRP14;HACL1;TAOK2;TOMM7;RPL11;RPS24;PEX5;RPL12
FUMA	GO:0022604	regulation of cell morphogenesis	475	12	0.000541266	0.0142082	MOV10:RHOC:SSH3:TAOK2:ALDOA:MAPT:WNT3:CASS4:GORASP1:CDKL3:PTK2B:KANK1
WebGestalt	GO:0070125	mitochondrial translational elongation	88	8	4.4117e-05	0.0146422	MRPL51;MRPS17;MRPL33;MRPS21;MRPL27;MRPL1;MRPL48;MRPL35
WebGestalt	GO:0070126	mitochondrial translational termination	88	8	4.4117e-05	0.0146422	MRPL51;MRPS17;MRPL33;MRPS21;MRPL27;MRPL1;MRPL48;MRPL35
FUMA	R-HSA-202424	downstream tcr signaling	97	5	0.00117034	0.0147811	PSMA3:PSMD12:RPS27A:SHFM1:C7orf76:PSMC2
FUMA	R-HSA-447115	interleukin 12 family signaling	57	4	0.00117826	0.0147811	CAPZA1:RPLP0:BOLA2:SOD1
FUMA	R-HSA-77387	insulin receptor recycling	26	3	0.00118327	0.0147811	TCIRG1:ATP6V1D:ATP6V1E1
FUMA	GO:0042551	neuron maturation	47	4	0.000566737	0.0148239	TBX6:APP:SCLT1:CNTNAP2
FUMA	GO:0006403	rna localization	228	8	0.00057134	0.0148648	NXF1:CPSF2:MVP:WDR33:SSB:NUP35:SDAD1:ENY2
FUMA	GO:0045862	positive regulation of proteolysis	347	10	0.00057358	0.0148648	PICALM:MEFV:MAPT:CFLAR:APP:FAM162A:SNCA:PSMC2:PTK2B:ANP32B
FUMA	GO:0010638	positive regulation of organelle organization	619	14	0.000574366	0.0148648	RHOC:SWAP70:ARPC3:PXN:KATNB1:MAPT:GMFG:BIN1:CD28:DRG1:FAM162A:NCK1:TOMM7:PTK2B
FUMA	R-HSA-3858494	beta catenin independent wnt signaling	145	6	0.00120308	0.0149043	MOV10:PSMA3:PSMD12:RPS27A:SHFM1:C7orf76:PSMC2
FUMA	GO:0046933	proton transporting atp synthase activity rotational mechanism	17	3	0.000326566	0.0149456	ATP5F1:ATP5H:ATP5O
FUMA	GO:0042802	identical protein binding	1706	28	0.000327077	0.0149456	PRDX1:ACADM:MCL1:RRM1:MYBPC3:SP1:BCL2L2:ACTN1:HSP90AA1:GTF2A2:MEFV:MVP:ALDOA:MAPT:BIN1:CD28:CST3:APP:SOD1:CHEK2:DRG1:SETMAR:HACL1:PKD2:SNCA:CBX3:GIMAP7:FABP5
FUMA	GO:0045296	cadherin binding	324	10	0.00033627	0.0149504	PRDX1:CAPZA1:SWAP70:PICALM:RPL6:GCN1L1:ALDOA:ZC3H15:NCK1:EIF3E
FUMA	GO:0010948	negative regulation of cell cycle process	348	10	0.000586428	0.0151237	PSMA3:TAOK2:RPL26:RPL23:PSMD12:CHEK2:SETMAR:PKD2:CBX3:PSMC2
gPROFILER	GO:0071156	regulation of cell cycle arrest	105	6		0.0151654	BIN1,RPL26,PKD2,RPL23,SETMAR,CHEK2
gPROFILER	GO:0071156	regulation of cell cycle arrest	105	6		0.0151654	BIN1,RPL26,PKD2,RPL23,SETMAR,CHEK2
FUMA	R-HSA-453274	mitotic g2 g2 m phases	199	7	0.00123494	0.0151736	TUBGCP2:PSMA3:HSP90AA1:PSMD12:RPS27A:SHFM1:C7orf76:PSMC2
FUMA	R-HSA-917937	iron uptake and transport	58	4	0.00125758	0.0152025	TCIRG1:ATP6V1D:RPS27A:ATP6V1E1
FUMA	R-HSA-72662	activation of the mrna upon binding of the cap binding complex and eifs and subsequent binding to 43s	58	4	0.00125758	0.0152025	RPS24:RPS25:RPS27A:EIF3E
FUMA	GO:2001235	positive regulation of apoptotic signaling pathway	176	7	0.000602616	0.0154011	RPL11:MCL1:RAD9A:RPL26:SOD1:FAM162A:NCK1
FUMA	GO:0007006	mitochondrial membrane organization	127	6	0.000603473	0.0154011	ATP5F1:HSP90AA1:ATP5H:ATP5O:ATP5I:SNCA
FUMA	GO:0002576	platelet degranulation	127	6	0.000603473	0.0154011	ECM1:ACTN1:ALDOA:APP:SOD1:MMRN1
gPROFILER	GO:0044429	mitochondrial part	852	26		0.0155273	NDUFB3,MRPL51,MRPS17,RPS27A,SSBP1,UQCRH,NDUFS5,COX17,MRPL33,MRPS21,AK2,MRPL27,SUCLG1,MRPL1,MRPL48,TOMM7,MCL1,BCL2L2,SOD1,MRPL35,UQCRB,COX15,CHDH,ACADM,PPM1K,COX19
WebGestalt	GO:0005635	nuclear envelope	455	14	0.000567725	0.015653	BIN1;APP;NXF1;INTS1;PRKCZ;SNCA;NUP35;ENY2;MVP;CBX3;CMTM3;KPNA5;RRM1;PLRG1
FUMA	GO:1901798	positive regulation of signal transduction by p53 class mediator	21	3	0.000623629	0.0158058	RPL11:RPL26:RPL23
FUMA	GO:1904666	regulation of ubiquitin protein ligase activity	21	3	0.000623629	0.0158058	RPL11:RPL23:GORASP1
FUMA	R-HSA-6814848	glycerophospholipid catabolism	7	2	0.00133068	0.0158246	GDPD3:PNPLA6
FUMA	R-HSA-351202	metabolism of polyamines	59	4	0.00134055	0.0158246	PSMA3:PSMD12:SHFM1:C7orf76:PSMC2
FUMA	R-HSA-5668541	tnfr2 non canonical nf kb pathway	100	5	0.00134071	0.0158246	PSMA3:PSMD12:RPS27A:SHFM1:C7orf76:PSMC2
FUMA	R-HSA-9006931	signaling by nuclear receptors	261	8	0.00136401	0.0159739	PRKCZ:MOV10:AKR1C3:SP1:HSP90AA1:GTF2A2:FABP5:KANK1
gPROFILER	GO:0031329	regulation of cellular catabolic process	737	24		0.016004	APP,RPS27A,ATP6V1E1,IFT88,MAPT,SHFM1,MOV10,HSP90AA1,ATP6V1D,MEFV,PSMD12,RPL23,UBE3A,SNCA,PTK2B,APOC1,TOMM7,MCL1,CST3,RPL11,PSMC2,DTX3L,PSMA3,SAMD4B
gPROFILER	GO:0044419	interspecies interaction between organisms	560	22		0.016004	RPS25,DENR,RPS27A,CD209,HS3ST5,RPLP0,RPL26,TRIM11,RPL32,RPL6,RPL23,NUP35,VPS37C,SP1,VPS37B,RPL11,SSB,KPNA5,CD28,RPS24,GTF2B,RPL12
gPROFILER	GO:0031329	regulation of cellular catabolic process	737	24		0.016004	APP,RPS27A,ATP6V1E1,IFT88,MAPT,SHFM1,MOV10,HSP90AA1,ATP6V1D,MEFV,PSMD12,RPL23,UBE3A,SNCA,PTK2B,APOC1,TOMM7,MCL1,CST3,RPL11,PSMC2,DTX3L,PSMA3,SAMD4B
gPROFILER	GO:0044419	interspecies interaction between organisms	560	22		0.016004	RPS25,DENR,RPS27A,CD209,HS3ST5,RPLP0,RPL26,TRIM11,RPL32,RPL6,RPL23,NUP35,VPS37C,SP1,VPS37B,RPL11,SSB,KPNA5,CD28,RPS24,GTF2B,RPL12
FUMA	GO:0051793	medium chain fatty acid catabolic process	5	2	0.000640478	0.0160119	ACADM:ABHD2
FUMA	GO:1902255	positive regulation of intrinsic apoptotic signaling pathway by p53 class mediator	5	2	0.000640478	0.0160119	RPL11:RPL26
FUMA	GO:0048669	collateral sprouting in absence of injury	5	2	0.000640478	0.0160119	WNT3:APP
FUMA	GO:2001181	positive regulation of interleukin 10 secretion	5	2	0.000640478	0.0160119	PRKCZ:LILRA5
gPROFILER	GO:0032543	mitochondrial translation	135	8		0.0160418	MRPL51,MRPS17,MRPL33,MRPS21,MRPL27,MRPL1,MRPL48,MRPL35
gPROFILER	GO:0032543	mitochondrial translation	135	8		0.0160418	MRPL51,MRPS17,MRPL33,MRPS21,MRPL27,MRPL1,MRPL48,MRPL35
gPROFILER	GO:0031334	positive regulation of protein complex assembly	217	9		0.0162196	BIN1,MAPT,RPA3,ARPC3,GMFG,HSP90AA1,PTK2B,RHOC,DRG1
gPROFILER	GO:0031334	positive regulation of protein complex assembly	217	9		0.0162196	BIN1,MAPT,RPA3,ARPC3,GMFG,HSP90AA1,PTK2B,RHOC,DRG1
FUMA	GO:0050890	cognition	291	9	0.000651917	0.0162427	PRKCZ:PICALM:CRHR1:MAPT:ABCA7:APP:GM2A:PRKAR1B:CNTNAP2
FUMA	R-HSA-5689603	uch proteinases	101	5	0.00140136	0.0162824	PSMA3:PSMD12:RPS27A:SHFM1:C7orf76:PSMC2
FUMA	R-HSA-68886	m phase	391	10	0.00141208	0.0162824	ENSA:TUBGCP2:PSMA3:HSP90AA1:PSMD12:RPS27A:NUP35:GORASP1:SHFM1:C7orf76:PSMC2
FUMA	GO:0032613	interleukin 10 production	49	4	0.000664752	0.0164807	PRKCZ:LILRA5:CD28:CD83
FUMA	GO:0045333	cellular respiration	179	7	0.000665956	0.0164807	NDUFS5:UQCRH:COX15:SUCLG1:NDUFB3:SNCA:UQCRB
gPROFILER	GO:1990204	oxidoreductase complex	104	3		0.0164826	NDUFB3,UQCRH,NDUFS5
gPROFILER	GO:0005737	cytoplasm	10038	108		0.0164826	DCTN6,ENSA,NDUFB3,BIN1,RPL36AL,MYBPC3,WNT3,MRPL51,NSF,RPS25,KATNB1,ZCCHC7,CFLAR,CASS4,MRPS17,PRRT2,APP,RPS27A,ATPAF1,FAM160A2,SSBP1,ATP6V1E1,BOLA2,ZNF622,RCAN1,UQCRH,IFT88,CD209,EIF4E3,NDUFS5,ANKRD13D,HS3ST5,DNAJC7,FANCI,MAPT,COX17,LARP7,MBOAT1,UBA7,GDPD3,PICALM,SHFM1,ERGIC1,TRIM45,RPLP0,PRDX1,CAPZA1,MRPL33,MRPS21,TRIP4,NXF1,SNTB2,ARPC3,NFATC3,GIMAP7,RPL26,GM2A,AK2,MPHOSPH9,GMFG,PDIA4,PXN,MOV10,F…
FUMA	GO:0070647	protein modification by small protein conjugation or removal	1097	20	0.000671114	0.0165456	RPL11:UFC1:TRIM11:PEX5:PSMA3:HSP90AA1:UBE3A:FANCI:SPSB3:RPL23:PSMD12:RPS27A:NUP35:GORASP1:UBA7:DTX3L:MED20:PSMC2:ENY2:DNAJA1
FUMA	GO:0010975	regulation of neuron projection development	487	12	0.000673081	0.0165456	MOV10:SSH3:TBX6:KATNB1:MAPT:WNT3:CFLAR:GORASP1:NCK1:CDKL3:PTK2B:KANK1
FUMA	GO:0006890	retrograde vesicle mediated transport golgi to endoplasmic reticulum	86	5	0.0006796	0.0166502	GOLPH3L:RAB6A:NSF:ATP9A:ERGIC1
FUMA	R-HSA-75067	processing of capped intronless pre mrna	28	3	0.00147326	0.0167304	CPSF2:WDR33:CSTF1
FUMA	R-HSA-162588	budding and maturation of hiv virion	28	3	0.00147326	0.0167304	VPS37C:VPS37B:RPS27A
gPROFILER	GO:0050790	regulation of catalytic activity	1641	31		0.0171435	BIN1,MYBPC3,CFLAR,CASS4,APP,RPS27A,SSBP1,ZNF622,CRHR1,MAPT,COX17,PICALM,PROK2,HSP90AA1,NVL,PKD2,ECM1,MEFV,FAM162A,RPL23,SNCA,DNAJA1,PTK2B,RHOC,SETMAR,APOC1,LILRA5,PRKAR1B,STK39,TBC1D10C,TAOK2
gPROFILER	GO:0050790	regulation of catalytic activity	1641	31		0.0171435	BIN1,MYBPC3,CFLAR,CASS4,APP,RPS27A,SSBP1,ZNF622,CRHR1,MAPT,COX17,PICALM,PROK2,HSP90AA1,NVL,PKD2,ECM1,MEFV,FAM162A,RPL23,SNCA,DNAJA1,PTK2B,RHOC,SETMAR,APOC1,LILRA5,PRKAR1B,STK39,TBC1D10C,TAOK2
gPROFILER	GO:0042982	amyloid precursor protein metabolic process	59	4		0.0173851	BIN1,APP,PICALM,ABCA7
gPROFILER	GO:0075733	intracellular transport of virus	55	5		0.0173851	RPS27A,CD209,NUP35,VPS37C,VPS37B
gPROFILER	GO:0042982	amyloid precursor protein metabolic process	59	4		0.0173851	BIN1,APP,PICALM,ABCA7
gPROFILER	GO:0075733	intracellular transport of virus	55	5		0.0173851	RPS27A,CD209,NUP35,VPS37C,VPS37B
FUMA	GO:0060291	long term synaptic potentiation	87	5	0.000716336	0.0174746	PRKCZ:CRHR1:APP:SNCA:PTK2B
FUMA	GO:0070671	response to interleukin 12	50	4	0.000718003	0.0174746	CAPZA1:RPLP0:BOLA2:SOD1
FUMA	GO:0015630	microtubule cytoskeleton	1169	20	0.00144076	0.0175563	PRKCZ:CEP350:TUBGCP2:PXN:MPHOSPH9:IFT88:ATP6V1D:TRIP4:MEFV:KATNB1:SNTB2:MAPT:SS18:APP:PKD2:SCLT1:RAB23:CBX3:DCTN6:DNAJA1
FUMA	GO:0030894	replisome	28	3	0.00147326	0.0175563	POLD3:PLRG1:RPA3
FUMA	GO:0070069	cytochrome complex	28	3	0.00147326	0.0175563	UQCRH:COX15:UQCRB
FUMA	GO:0006897	endocytosis	634	14	0.00072425	0.0175684	CD5:ANKRD13D:PICALM:HSP90AA1:ABCA7:CD209:LRP3:APOC1:BIN1:ATP9A:APP:ADRBK2:SNCA:AIF1
WebGestalt	GO:2000379	positive regulation of reactive oxygen species metabolic process	91	8	5.61764e-05	0.0177124	MAPT;HSP90AA1;PKD2;SNCA;PTK2B;SOD1;AIF1;AKR1C3
FUMA	GO:0051099	positive regulation of binding	182	7	0.000734462	0.0177576	RPL11:GTF2B:NVL:APP:DTX3L:GMNN:EIF3E
FUMA	GO:1904950	nucleobase containing compound transport	238	8	0.000755802	0.0182136	NXF1:CPSF2:MVP:WDR33:SSB:NUP35:SDAD1:ENY2
FUMA	GO:0046390	ribose phosphate biosynthetic process	183	7	0.000758497	0.0182188	AK2:ATP5F1:ALDOA:ATP5H:ATP5O:ATP5I:SNCA
FUMA	GO:1902904	negative regulation of supramolecular fiber organization	133	6	0.000768919	0.018409	CAPZA1:SWAP70:KATNB1:GMFG:SNCA:KANK1
FUMA	R-HSA-199977	er to golgi anterograde transport	154	6	0.0016361	0.01844	CAPZA1:TRAPPC4:NSF:GORASP1:SEC24D:DCTN6
FUMA	GO:0051438	regulation of ubiquitin protein transferase activity	51	4	0.0007742	0.0184752	RPL11:RPL23:GORASP1:DTX3L
FUMA	R-HSA-194138	signaling by vegf	105	5	0.00166436	0.0186185	PRKCZ:PXN:HSP90AA1:NCK1:PTK2B
FUMA	GO:0070382	exocytic vesicle	208	7	0.00159082	0.0187342	RAB6A:PICALM:TRAPPC4:PRRT2:BIN1:APP:SNCA
FUMA	GO:0016604	nuclear body	769	15	0.00162907	0.0189617	ACADM:GTF2B:VPS72:NXF1:MAML2:POMP:TRIP4:RPAIN:MAPT:ELL:SNRPB2:CHEK2:DRG1:PLRG1:EIF3E
FUMA	KEGG_MISMATCH_REPAIR	mismatch repair	23	3	0.00082055	0.0190778	POLD3:RPA3:SSBP1
WebGestalt	GO:0043624	cellular protein complex disassembly	210	12	6.4111e-05	0.0192516	MRPL51;NSF;KATNB1;MRPS17;CAPZA1;MRPL33;MRPS21;MRPL27;MRPL1;MRPL48;SWAP70;MRPL35
FUMA	GO:0006297	nucleotide excision repair dna gap filling	23	3	0.00082055	0.0193924	POLD3:RPS27A:RPA3
FUMA	GO:0071157	negative regulation of cell cycle arrest	23	3	0.00082055	0.0193924	RPL23:CHEK2:SETMAR
FUMA	GO:0046475	glycerophospholipid catabolic process	23	3	0.00082055	0.0193924	GDPD3:PNPLA6:APOC1
FUMA	GO:0006301	postreplication repair	52	4	0.000833434	0.0195565	POLD3:RPS27A:WDR33:RPA3
FUMA	GO:1903428	positive regulation of reactive oxygen species biosynthetic process	52	4	0.000833434	0.0195565	HSP90AA1:PKD2:AIF1:PTK2B
FUMA	GO:0033108	mitochondrial respiratory chain complex assembly	90	5	0.000835476	0.0195565	NDUFS5:NDUFB3:COX17:COX19:UQCRB
FUMA	R-HSA-446388	regulation of cytoskeletal remodeling and cell spreading by ipp complex components	8	2	0.00176478	0.0195956	PXN:ACTN1
FUMA	GO:0051726	regulation of cell cycle	1201	21	0.000840749	0.0196175	RAD9A:PSMA3:HSP90AA1:TAOK2:RPL26:RPL23:PSMD12:BIN1:CD28:APP:CHEK2:DRG1:SETMAR:PKD2:PLRG1:CDKL3:GMNN:AIF1:RPA3:CBX3:PSMC2
FUMA	KEGG_VIBRIO_CHOLERAE_INFECTION	vibrio cholerae infection	54	4	0.000961364	0.0198682	TCIRG1:ATP6V1D:ATP6V1E1:PDIA4
FUMA	R-HSA-110314	recognition of dna damage by pcna containing replication complex	30	3	0.00180421	0.0198861	POLD3:RPS27A:RPA3
FUMA	GO:0045664	regulation of neuron differentiation	646	14	0.000866869	0.020106	MOV10:SSH3:TBX6:KATNB1:MAPT:WNT3:BIN1:CFLAR:APP:GORASP1:NCK1:CDKL3:PTK2B:KANK1
FUMA	GO:0051648	vesicle localization	303	9	0.000867156	0.020106	PRKCZ:RIMS3:PICALM:TRAPPC4:PRRT2:NSF:GORASP1:SNCA:SEC24D
FUMA	GO:1990542	mitochondrial transmembrane transport	91	5	0.000878289	0.0203001	ATP5F1:ATP5H:ATP5O:ATP5I:TOMM7
gPROFILER	GO:0045321	leukocyte activation	1085	32		0.0203399	APP,CD209,MAPT,PRDX1,CD5,GM2A,GMFG,FABP5,HSP90AA1,PRKCZ,ATP6V1D,PSMD12,ALDOA,SNCA,PTK2B,CTSS,SRP14,TBC1D10C,CLPTM1,RAB37,CD160,MVP,RAB6A,SOD1,CST3,TCIRG1,PSMC2,GGH,AIF1,NCK1,GAPT,CD28
gPROFILER	GO:0045321	leukocyte activation	1085	32		0.0203399	APP,CD209,MAPT,PRDX1,CD5,GM2A,GMFG,FABP5,HSP90AA1,PRKCZ,ATP6V1D,PSMD12,ALDOA,SNCA,PTK2B,CTSS,SRP14,TBC1D10C,CLPTM1,RAB37,CD160,MVP,RAB6A,SOD1,CST3,TCIRG1,PSMC2,GGH,AIF1,NCK1,GAPT,CD28
FUMA	GO:0042788	polysomal ribosome	30	3	0.00180421	0.0205229	RPL11:RPL6:RPL32
FUMA	GO:0120114	u2 type catalytic step 2 spliceosome	30	3	0.00180421	0.0205229	SNRPD2:SNRPB2:PLRG1
FUMA	GO:0061900	glial cell activation	53	4	0.000895792	0.0206397	MAPT:APP:SNCA:AIF1
gPROFILER	GO:0046794	transport of virus	58	5		0.0208702	RPS27A,CD209,NUP35,VPS37C,VPS37B
gPROFILER	GO:0051129	negative regulation of cellular component organization	568	14		0.0208702	KATNB1,CFLAR,PRRT2,ANKRD13D,MAPT,PICALM,CAPZA1,GMFG,ABCA7,PRKCZ,MEFV,SNCA,SETMAR,APOC1
gPROFILER	GO:0045806	negative regulation of endocytosis	43	4		0.0208702	ANKRD13D,PICALM,ABCA7,APOC1
gPROFILER	GO:0046794	transport of virus	58	5		0.0208702	RPS27A,CD209,NUP35,VPS37C,VPS37B
gPROFILER	GO:0051129	negative regulation of cellular component organization	568	14		0.0208702	KATNB1,CFLAR,PRRT2,ANKRD13D,MAPT,PICALM,CAPZA1,GMFG,ABCA7,PRKCZ,MEFV,SNCA,SETMAR,APOC1
gPROFILER	GO:0045806	negative regulation of endocytosis	43	4		0.0208702	ANKRD13D,PICALM,ABCA7,APOC1
FUMA	GO:0044430	cytoskeletal part	1639	25	0.00187992	0.0211439	PRKCZ:CAPZA1:CEP350:TUBGCP2:MYBPC3:ARPC3:PXN:MPHOSPH9:IFT88:ATP6V1D:ACTN1:TRIP4:MEFV:KATNB1:SNTB2:MAPT:SS18:GMFG:APP:PKD2:SCLT1:AIF1:RAB23:CBX3:DCTN6
FUMA	GO:0032509	endosome transport via multivesicular body sorting pathway	24	3	0.00093219	0.0212783	VPS37C:VPS37B:LEPROTL1
FUMA	GO:2000209	regulation of anoikis	24	3	0.00093219	0.0212783	MCL1:PTRH2:CHEK2
FUMA	GO:0008535	respiratory chain complex iv assembly	24	3	0.00093219	0.0212783	COX15:COX17:COX19
FUMA	GO:1905369	endopeptidase complex	65	4	0.0019202	0.0213569	PSMA3:UBE3A:PSMD12:PSMC2
FUMA	R-HSA-9612973	autophagy	109	5	0.00196188	0.0214137	VPS37C:VPS37B:HSP90AA1:RPS27A:TOMM7
FUMA	R-HSA-917729	endosomal sorting complex required for transport escrt	31	3	0.00198566	0.0214137	VPS37C:VPS37B:RPS27A
FUMA	R-HSA-917977	transferrin endocytosis and recycling	31	3	0.00198566	0.0214137	TCIRG1:ATP6V1D:ATP6V1E1
FUMA	GO:0031253	cell projection membrane	341	9	0.00195574	0.0215132	CNGA4:TBC1D10C:MAPT:ABCA7:SLC5A6:PKD2:AIF1:CNTNAP2:KANK1
FUMA	GO:1902177	positive regulation of oxidative stress induced intrinsic apoptotic signaling pathway	6	2	0.000955587	0.0217448	MCL1:SOD1
FUMA	GO:0042982	amyloid precursor protein metabolic process	54	4	0.000961364	0.0217778	PICALM:ABCA7:BIN1:APP
FUMA	GO:0033135	regulation of peptidyl serine phosphorylation	139	6	0.00096739	0.0217778	DOCK7:PWP1:HSP90AA1:APP:NCK1:SNCA
FUMA	GO:0008286	insulin receptor signaling pathway	139	6	0.00096739	0.0217778	PRKCZ:TCIRG1:ATP6V1D:ATP6V1E1:NCK1:KANK1
FUMA	GO:0045087	innate immune response	966	18	0.000968889	0.0217778	PRDX1:CAPZA1:CD160:CTSS:TRIM11:PPP1R14B:PSMA3:MEFV:STX8:PSMD12:CD209:LILRA5:RPS27A:APP:DTX3L:SNCA:AIF1:PSMC2
gPROFILER	GO:0005739	mitochondrion	1295	28		0.0218289	NDUFB3,MRPL51,MRPS17,RPS27A,ATPAF1,SSBP1,UQCRH,NDUFS5,MAPT,COX17,MRPL33,MRPS21,AK2,MRPL27,SUCLG1,FAM162A,MRPL1,SNCA,NGDN,MRPL48,ENY2,TOMM7,MCL1,BCL2L2,SOD1,BOLA3,MRPL35,UQCRB
FUMA	R-HSA-449147	signaling by interleukins	631	13	0.00204824	0.0219308	CAPZA1:MCL1:RPLP0:PSMA3:HSP90AA1:BOLA2:PSMD12:RPS27A:APP:SOD1:SHFM1:C7orf76:PSMC2:PTK2B
FUMA	KEGG_GLYCOSAMINOGLYCAN_BIOSYNTHESIS_HEPARAN_SULFATE	glycosaminoglycan biosynthesis heparan sulfate	26	3	0.00118327	0.0220089	XYLT2:HS3ST5:EXTL3
gPROFILER	GO:0043312	neutrophil degranulation	481	17		0.0221137	GM2A,GMFG,FABP5,HSP90AA1,ATP6V1D,PSMD12,ALDOA,CTSS,SRP14,TBC1D10C,RAB37,MVP,RAB6A,CST3,TCIRG1,PSMC2,GGH
gPROFILER	GO:0043312	neutrophil degranulation	481	17		0.0221137	GM2A,GMFG,FABP5,HSP90AA1,ATP6V1D,PSMD12,ALDOA,CTSS,SRP14,TBC1D10C,RAB37,MVP,RAB6A,CST3,TCIRG1,PSMC2,GGH
FUMA	GO:0007017	microtubule based process	731	15	0.000991763	0.0222208	PRKCZ:DOCK7:CEP350:TUBGCP2:RAB6A:IFT88:KATNB1:MAPT:SS18:APP:SOD1:CHEK2:DRG1:PKD2:SNCA
FUMA	GO:0018209	peptidyl serine modification	309	9	0.000994644	0.0222208	PRKCZ:DOCK7:PWP1:HSP90AA1:STK39:APP:CHEK2:NCK1:SNCA
FUMA	GO:0042326	negative regulation of phosphorylation	441	11	0.0010126	0.0225534	PRKCZ:CHRNA10:TBC1D10C:PWP1:MVP:MAPT:GMFG:NCK1:SNCA:PRKAR1B:DNAJA1
FUMA	GO:0051270	regulation of cellular component movement	1053	19	0.00102729	0.022808	DOCK7:ANGPTL3:RHOC:ECM1:SWAP70:MYBPC3:SP1:ACTN1:ABHD2:MAZ:WNT3:BIN1:STK39:CASS4:APP:NCK1:AIF1:PTK2B:KANK1
FUMA	GO:0033260	nuclear dna replication	55	4	0.00103024	0.022808	POLD3:CHEK2:GMNN:RPA3
FUMA	R-HSA-5685942	hdr through homologous recombination hrr	67	4	0.00214667	0.0228217	RAD9A:POLD3:RPS27A:RPA3
FUMA	GO:0007417	central nervous system development	972	18	0.00103849	0.0229216	DOCK7:ATP5F1:UFC1:RRM1:HSP90AA1:UBE3A:CRHR1:MAPT:WNT3:BIN1:APP:RCAN1:COX17:PKD2:VCAN:AIF1:CNTNAP2:ANP32B
WebGestalt	GO:0070469	respiratory chain	100	6	0.000862382	0.0229572	NDUFB3;UQCRH;NDUFS5;SNCA;UQCRB;COX15
FUMA	GO:0005769	early endosome	345	9	0.00211548	0.0230173	ANGPTL3:TMEM9B:PICALM:STX8:ABCA7:ATP9A:APP:DTX3L:CNTNAP2
FUMA	GO:0031093	platelet alpha granule lumen	67	4	0.00214667	0.0231056	ACTN1:ALDOA:APP:MMRN1
FUMA	GO:0099568	cytoplasmic region	488	11	0.00224469	0.0233897	PRKCZ:RIMS3:CAPZA1:RHOC:PXN:MAPT:GMFG:SOD1:PKD2:SNCA:PTK2B
FUMA	GO:0070820	tertiary granule	164	6	0.00224615	0.0233897	CTSS:TBC1D10C:TCIRG1:ALDOA:CST3:GGH
FUMA	GO:0044294	dendritic growth cone	9	2	0.00225691	0.0233897	HSP90AA1:TAOK2
FUMA	GO:0044304	main axon	68	4	0.00226654	0.0233897	MAPT:BIN1:APP:CNTNAP2
gPROFILER	GO:0002283	neutrophil activation involved in immune response	484	17		0.0234857	GM2A,GMFG,FABP5,HSP90AA1,ATP6V1D,PSMD12,ALDOA,CTSS,SRP14,TBC1D10C,RAB37,MVP,RAB6A,CST3,TCIRG1,PSMC2,GGH
gPROFILER	GO:0002283	neutrophil activation involved in immune response	484	17		0.0234857	GM2A,GMFG,FABP5,HSP90AA1,ATP6V1D,PSMD12,ALDOA,CTSS,SRP14,TBC1D10C,RAB37,MVP,RAB6A,CST3,TCIRG1,PSMC2,GGH
FUMA	GO:0034470	ncrna processing	377	10	0.00107672	0.0236943	RPL11:EBNA1BP2:NVL:RPS24:NGDN:RPL26:SSB:MRPL1:RPF2:INTS1
FUMA	GO:0051494	negative regulation of cytoskeleton organization	142	6	0.00108031	0.0237024	CAPZA1:SWAP70:KATNB1:GMFG:SNCA:KANK1
FUMA	GO:0022409	positive regulation of cell cell adhesion	252	8	0.0010916	0.0238787	PRKCZ:CD160:CD5:CD209:CD28:NCK1:CD83:AIF1
FUMA	R-HSA-204005	copii mediated vesicle transport	68	4	0.00226654	0.0239263	TRAPPC4:NSF:GORASP1:SEC24D
FUMA	GO:0008333	endosome to lysosome transport	56	4	0.00110251	0.0239746	FAM160A2:STX8:BIN1:DTX3L
FUMA	GO:0051353	positive regulation of oxidoreductase activity	56	4	0.00110251	0.0239746	COX17:PPM1K:SNCA:PTK2B
FUMA	GO:0002020	protease binding	125	6	0.00055497	0.0240243	ECM1:TRIP4:BIN1:CFLAR:CD28:CST3
gPROFILER	GO:0044450	microtubule organizing center part	154	5		0.0240811	KATNB1,IFT88,MPHOSPH9,SCLT1,CEP350
FUMA	GO:0031123	rna 3 end processing	143	6	0.00112012	0.0242143	CPSF2:WDR33:SSB:CSTF1:APP:INTS1
FUMA	GO:0060078	regulation of postsynaptic membrane potential	143	6	0.00112012	0.0242143	PRKCZ:CHRNA10:APP:SNCA:PTK2B:CHRNA2
FUMA	GO:0043254	purine containing compound biosynthetic process	196	7	0.00113135	0.0243854	AK2:ATP5F1:ALDOA:ATP5H:ATP5O:ATP5I:SNCA
FUMA	GO:0031344	regulation of cell projection organization	665	14	0.00114088	0.0244809	MOV10:SSH3:IFT88:TBX6:KATNB1:PLEKHM1:MAPT:WNT3:CFLAR:GORASP1:NCK1:CDKL3:PTK2B:KANK1
FUMA	GO:0010639	negative regulation of organelle organization	380	10	0.00114244	0.0244809	CAPZA1:SWAP70:SPI1:PRRT2:KATNB1:MAPT:GMFG:SETMAR:SNCA:KANK1
gPROFILER	GO:0036297	interstrand cross-link repair	52	3		0.0247575	RPS27A,FANCI,RPA3
gPROFILER	GO:0036297	interstrand cross-link repair	52	3		0.0247575	RPS27A,FANCI,RPA3
FUMA	R-HSA-2559585	oncogene induced senescence	33	3	0.00238167	0.0249659	MOV10:SP1:RPS27A
FUMA	GO:0060191	regulation of lipase activity	97	5	0.00117034	0.0250059	PRKCZ:ANGPTL3:RHOC:APOC1:SNCA
FUMA	GO:0048261	negative regulation of receptor mediated endocytosis	26	3	0.00118327	0.0252089	ANKRD13D:PICALM:APOC1
gPROFILER	GO:0044248	cellular catabolic process	1995	54		0.0253683	RPS25,APP,RPS27A,ATP6V1E1,IFT88,MAPT,GDPD3,SHFM1,RPLP0,PRDX1,RPL26,MOV10,FABP5,ABCA7,HSP90AA1,ATP6V1D,RPL32,MEFV,RPL6,PSMD12,RPL23,UBE3A,SNCA,PTK2B,SETMAR,CTSS,CHEK2,APOC1,RAB23,HACL1,VPS37C,TOMM7,ABHD2,VCAN,MCL1,VPS37B,CST3,EIF3E,PNPLA6,TCIRG1,RPL11,PSMC2,DTX3L,SSB,PSMA3,SAMD4B,CHDH,SPSB3,ACADM,RPS24,ANGPTL3,AKR1C3,PPM1K,RPL12
gPROFILER	GO:0044248	cellular catabolic process	1995	54		0.0253683	RPS25,APP,RPS27A,ATP6V1E1,IFT88,MAPT,GDPD3,SHFM1,RPLP0,PRDX1,RPL26,MOV10,FABP5,ABCA7,HSP90AA1,ATP6V1D,RPL32,MEFV,RPL6,PSMD12,RPL23,UBE3A,SNCA,PTK2B,SETMAR,CTSS,CHEK2,APOC1,RAB23,HACL1,VPS37C,TOMM7,ABHD2,VCAN,MCL1,VPS37B,CST3,EIF3E,PNPLA6,TCIRG1,RPL11,PSMC2,DTX3L,SSB,PSMA3,SAMD4B,CHDH,SPSB3,ACADM,RPS24,ANGPTL3,AKR1C3,PPM1K,RPL12
gPROFILER	GO:0033674	positive regulation of kinase activity	459	13		0.0253689	CASS4,RPS27A,ZNF622,MAPT,PROK2,HSP90AA1,PKD2,SNCA,PTK2B,LILRA5,PRKAR1B,STK39,TAOK2
gPROFILER	GO:0002446	neutrophil mediated immunity	491	17		0.0253689	GM2A,GMFG,FABP5,HSP90AA1,ATP6V1D,PSMD12,ALDOA,CTSS,SRP14,TBC1D10C,RAB37,MVP,RAB6A,CST3,TCIRG1,PSMC2,GGH
gPROFILER	GO:0051179	localization	5753	111		0.0253689	DCTN6,ENSA,BIN1,MYBPC3,NSF,RPS25,KATNB1,CASS4,PRRT2,APP,RPS27A,FAM160A2,ATP6V1E1,CRHR1,IFT88,CD209,PLEKHM1,ANKRD13D,MAPT,COX17,PICALM,SHFM1,ERGIC1,RPLP0,CAPZA1,NXF1,ARPC3,RPL26,GM2A,GMFG,PDIA4,PXN,FABP5,CHRNA10,ABCA7,SCLT1,HSP90AA1,ABCC3,NVL,PRKCZ,PKD2,ATP6V1D,ECM1,LEPROTL1,RPL32,PLEKHA3,RPL6,ADRBK2,PSMD12,SNRPD2,ALDOA,RPL23,SNCA,DNAJA1,PTK2B,RHOC,CTSS,APOC1,SRP19,RAB23,LILRA5,SRP14,HACL1,NUP35,S…
gPROFILER	GO:0033674	positive regulation of kinase activity	459	13		0.0253689	CASS4,RPS27A,ZNF622,MAPT,PROK2,HSP90AA1,PKD2,SNCA,PTK2B,LILRA5,PRKAR1B,STK39,TAOK2
gPROFILER	GO:0002446	neutrophil mediated immunity	491	17		0.0253689	GM2A,GMFG,FABP5,HSP90AA1,ATP6V1D,PSMD12,ALDOA,CTSS,SRP14,TBC1D10C,RAB37,MVP,RAB6A,CST3,TCIRG1,PSMC2,GGH
gPROFILER	GO:0051179	localization	5753	111		0.0253689	DCTN6,ENSA,BIN1,MYBPC3,NSF,RPS25,KATNB1,CASS4,PRRT2,APP,RPS27A,FAM160A2,ATP6V1E1,CRHR1,IFT88,CD209,PLEKHM1,ANKRD13D,MAPT,COX17,PICALM,SHFM1,ERGIC1,RPLP0,CAPZA1,NXF1,ARPC3,RPL26,GM2A,GMFG,PDIA4,PXN,FABP5,CHRNA10,ABCA7,SCLT1,HSP90AA1,ABCC3,NVL,PRKCZ,PKD2,ATP6V1D,ECM1,LEPROTL1,RPL32,PLEKHA3,RPL6,ADRBK2,PSMD12,SNRPD2,ALDOA,RPL23,SNCA,DNAJA1,PTK2B,RHOC,CTSS,APOC1,SRP19,RAB23,LILRA5,SRP14,HACL1,NUP35,S…
FUMA	GO:0090734	site of dna damage	70	4	0.00251994	0.0257393	ARPC3:SETMAR:RPA3:CBX3
gPROFILER	GO:0042119	neutrophil activation	493	17		0.02595	GM2A,GMFG,FABP5,HSP90AA1,ATP6V1D,PSMD12,ALDOA,CTSS,SRP14,TBC1D10C,RAB37,MVP,RAB6A,CST3,TCIRG1,PSMC2,GGH
gPROFILER	GO:0042119	neutrophil activation	493	17		0.02595	GM2A,GMFG,FABP5,HSP90AA1,ATP6V1D,PSMD12,ALDOA,CTSS,SRP14,TBC1D10C,RAB37,MVP,RAB6A,CST3,TCIRG1,PSMC2,GGH
FUMA	GO:1903169	regulation of calcium ion transmembrane transport	146	6	0.00124629	0.0264747	CRHR1:BIN1:JPH2:PKD2:SNCA:PTK2B
FUMA	GO:1990948	ubiquitin ligase inhibitor activity	5	2	0.000640478	0.0264965	RPL11:RPL23
FUMA	GO:0008135	translation factor activity rna binding	85	5	0.000644291	0.0264965	GCN1L1:DENR:ICT1:EIF4E3:EIF3E
gPROFILER	GO:1905368	peptidase complex	75	5		0.0267666	SHFM1,PSMD12,ENY2,PSMC2,PSMA3
gPROFILER	GO:0098800	inner mitochondrial membrane protein complex	130	3		0.0268406	NDUFB3,UQCRH,NDUFS5
gPROFILER	GO:0031970	organelle envelope lumen	63	5		0.0268406	APP,COX17,AK2,SOD1,COX19
FUMA	GO:0005775	vacuolar lumen	170	6	0.00268629	0.0271614	CTSS:HSP90AA1:VCAN:GM2A:GGH:FABP5
FUMA	GO:0022008	neurogenesis	1594	25	0.0012904	0.0272766	PRKCZ:DOCK7:MOV10:TRIM11:SSH3:PICALM:TRAPPC4:IFT88:HSP90AA1:TAOK2:TBX6:KATNB1:MAPT:WNT3:BIN1:CFLAR:APP:SOD1:GORASP1:NCK1:SCLT1:CDKL3:CNTNAP2:PTK2B:KANK1
FUMA	GO:0051960	regulation of nervous system development	910	17	0.00129631	0.0272766	DOCK7:MOV10:TRIM11:SSH3:TBX6:KATNB1:MAPT:WNT3:BIN1:CFLAR:APP:GORASP1:NCK1:SNCA:CDKL3:PTK2B:KANK1
FUMA	GO:0034660	ncrna metabolic process	455	11	0.00129923	0.0272766	RPL11:EBNA1BP2:NVL:RPS24:NGDN:RPL26:MAPT:SSB:MRPL1:RPF2:INTS1
FUMA	GO:0006644	phospholipid metabolic process	259	8	0.00129925	0.0272766	ANGPTL3:CDIPT:GDPD3:PNPLA6:FAM126B:SNCA:MBOAT1:PTK2B
FUMA	GO:0044281	small molecule metabolic process	1685	26	0.0013026	0.0272766	AK2:ANGPTL3:ACADM:AKR1C3:RRM1:SP1:PSMA3:ABHD2:CDIPT:ALDOA:PSMD12:APOC1:SLC5A6:SUCLG1:ASNSD1:APP:SOD1:HACL1:PPM1K:SNCA:RAB23:PSMC2:GIMAP7:PTK2B:FABP5:ST3GAL1
FUMA	GO:0051123	rna polymerase ii preinitiation complex assembly	27	3	0.00132327	0.0273199	GTF2B:GTF2A2:PSMC2
FUMA	GO:0051953	negative regulation of amine transport	27	3	0.00132327	0.0273199	CRHR1:STK39:SNCA
FUMA	GO:0006578	amino acid betaine biosynthetic process	7	2	0.00133068	0.0273199	ACADM:CHDH
FUMA	GO:0051005	negative regulation of lipoprotein lipase activity	7	2	0.00133068	0.0273199	ANGPTL3:APOC1
FUMA	GO:2000210	positive regulation of anoikis	7	2	0.00133068	0.0273199	PTRH2:CHEK2
FUMA	GO:1902231	positive regulation of intrinsic apoptotic signaling pathway in response to dna damage	7	2	0.00133068	0.0273199	RAD9A:RPL26
FUMA	GO:0090647	modulation of age related behavioral decline	7	2	0.00133068	0.0273199	PICALM:APP
FUMA	GO:0031347	regulation of defense response	754	15	0.00134547	0.0275466	CD160:CTSS:PSMA3:MEFV:PSMD12:CD209:LILRA5:RPS27A:STK39:CD28:APP:SOD1:DTX3L:SNCA:PSMC2
FUMA	GO:0019058	viral life cycle	323	9	0.0013518	0.0275993	TRIM11:VPS37C:VPS37B:CD209:RPS27A:NUP35:CD28:HS3ST5:SLC20A2
gPROFILER	GO:0015629	actin cytoskeleton	428	11		0.0276168	BIN1,MYBPC3,CAPZA1,ARPC3,GMFG,PXN,PKD2,ALDOA,SNCA,TAOK2,ACTN1
gPROFILER	GO:0051092	positive regulation of NF-kappaB transcription factor activity	138	3		0.0279091	CFLAR,APP,RPS27A
gPROFILER	GO:0051092	positive regulation of NF-kappaB transcription factor activity	138	3		0.0279091	CFLAR,APP,RPS27A
FUMA	R-HSA-69620	cell cycle checkpoints	291	8	0.0026814	0.0279126	RAD9A:PSMA3:PSMD12:RPS27A:CHEK2:RPA3:SHFM1:C7orf76:PSMC2
FUMA	GO:0000813	escrt i complex	10	2	0.00280612	0.0280892	VPS37C:VPS37B
FUMA	GO:0051028	mrna transport	149	6	0.00138306	0.0281592	NXF1:CPSF2:MVP:WDR33:NUP35:ENY2
gPROFILER	GO:0035722	interleukin-12-mediated signaling pathway	47	3		0.028187	BOLA2,RPLP0,CAPZA1
gPROFILER	GO:0035722	interleukin-12-mediated signaling pathway	47	3		0.028187	BOLA2,RPLP0,CAPZA1
gPROFILER	GO:0036230	granulocyte activation	499	17		0.028347	GM2A,GMFG,FABP5,HSP90AA1,ATP6V1D,PSMD12,ALDOA,CTSS,SRP14,TBC1D10C,RAB37,MVP,RAB6A,CST3,TCIRG1,PSMC2,GGH
gPROFILER	GO:0036230	granulocyte activation	499	17		0.028347	GM2A,GMFG,FABP5,HSP90AA1,ATP6V1D,PSMD12,ALDOA,CTSS,SRP14,TBC1D10C,RAB37,MVP,RAB6A,CST3,TCIRG1,PSMC2,GGH
FUMA	GO:0030838	positive regulation of actin filament polymerization	101	5	0.00140136	0.0284531	ARPC3:GMFG:BIN1:NCK1:PTK2B
gPROFILER	GO:0031333	negative regulation of protein complex assembly	100	6		0.0285502	PRRT2,CAPZA1,PRKCZ,MEFV,SNCA,KANK1
gPROFILER	GO:0031333	negative regulation of protein complex assembly	100	6		0.0285502	PRRT2,CAPZA1,PRKCZ,MEFV,SNCA,KANK1
FUMA	GO:0045930	negative regulation of mitotic cell cycle	325	9	0.00141033	0.0285563	RAD9A:PSMA3:TAOK2:RPL26:PSMD12:CHEK2:SETMAR:PKD2:PSMC2
gPROFILER	GO:1900034	regulation of cellular response to heat	79	5		0.0287233	DNAJC7,MAPT,RPA3,HSP90AA1,NUP35
gPROFILER	GO:0046503	glycerolipid catabolic process	57	5		0.0287233	GDPD3,FABP5,APOC1,ABHD2,PNPLA6
gPROFILER	GO:0002263	cell activation involved in immune response	640	20		0.0287233	APP,GM2A,GMFG,FABP5,HSP90AA1,PRKCZ,ATP6V1D,PSMD12,ALDOA,PTK2B,CTSS,SRP14,TBC1D10C,RAB37,MVP,RAB6A,CST3,TCIRG1,PSMC2,GGH
gPROFILER	GO:1903828	negative regulation of cellular protein localization	84	5		0.0287233	MAPT,PICALM,LEPROTL1,DNAJA1,RAB23
gPROFILER	GO:0051347	positive regulation of transferase activity	531	14		0.0287233	CASS4,RPS27A,ZNF622,MAPT,PROK2,HSP90AA1,NVL,PKD2,SNCA,PTK2B,LILRA5,PRKAR1B,STK39,TAOK2
gPROFILER	GO:1900034	regulation of cellular response to heat	79	5		0.0287233	DNAJC7,MAPT,RPA3,HSP90AA1,NUP35
gPROFILER	GO:0046503	glycerolipid catabolic process	57	5		0.0287233	GDPD3,FABP5,APOC1,ABHD2,PNPLA6
gPROFILER	GO:0002263	cell activation involved in immune response	640	20		0.0287233	APP,GM2A,GMFG,FABP5,HSP90AA1,PRKCZ,ATP6V1D,PSMD12,ALDOA,PTK2B,CTSS,SRP14,TBC1D10C,RAB37,MVP,RAB6A,CST3,TCIRG1,PSMC2,GGH
gPROFILER	GO:1903828	negative regulation of cellular protein localization	84	5		0.0287233	MAPT,PICALM,LEPROTL1,DNAJA1,RAB23
gPROFILER	GO:0051347	positive regulation of transferase activity	531	14		0.0287233	CASS4,RPS27A,ZNF622,MAPT,PROK2,HSP90AA1,NVL,PKD2,SNCA,PTK2B,LILRA5,PRKAR1B,STK39,TAOK2
FUMA	GO:0017025	tbp class protein binding	22	3	0.000717795	0.0287993	GTF2B:GTF2A2:PSMC2
WebGestalt	GO:1902903	regulation of supramolecular fiber organization	329	15	0.0001066	0.0288707	BIN1;KATNB1;APP;MAPT;CAPZA1;ARPC3;SSH3;GMFG;PXN;SNCA;PTK2B;RHOC;KANK1;SWAP70;NCK1
WebGestalt	GO:0043254	regulation of protein complex assembly	447	18	0.000108516	0.0288707	BIN1;PRRT2;MAPT;RPA3;CAPZA1;ARPC3;GMFG;HSP90AA1;PRKCZ;MEFV;SNCA;PTK2B;RHOC;KANK1;PSMC2;NCK1;GTF2B;PEX5
WebGestalt	GO:0006415	translational termination	100	8	0.000109879	0.0288707	MRPL51;MRPS17;MRPL33;MRPS21;MRPL27;MRPL1;MRPL48;MRPL35
FUMA	GO:0034767	positive regulation of ion transmembrane transport	150	6	0.0014311	0.0288972	CTSS:STK39:JPH2:COX17:PKD2:SNCA
WebGestalt	GO:0015935	small ribosomal subunit	71	5	0.00114349	0.0289981	RPS25;MRPS17;RPS27A;MRPS21;RPS24
WebGestalt	GO:0150034	distal axon	280	10	0.00116443	0.0289981	KATNB1;PRRT2;APP;MAPT;ARPC3;HSP90AA1;SNCA;PTK2B;TAOK2;DOCK7
gPROFILER	GO:0070671	response to interleukin-12	49	3		0.029267	BOLA2,RPLP0,CAPZA1
gPROFILER	GO:0071349	cellular response to interleukin-12	49	3		0.029267	BOLA2,RPLP0,CAPZA1
gPROFILER	GO:0070671	response to interleukin-12	49	3		0.029267	BOLA2,RPLP0,CAPZA1
gPROFILER	GO:0071349	cellular response to interleukin-12	49	3		0.029267	BOLA2,RPLP0,CAPZA1
FUMA	GO:0008630	intrinsic apoptotic signaling pathway in response to dna damage	102	5	0.00146401	0.0294808	MCL1:RAD9A:BCL2L2:RPL26:CHEK2
FUMA	GO:0090383	phagosome acidification	28	3	0.00147326	0.0295053	TCIRG1:ATP6V1D:ATP6V1E1
FUMA	GO:0032673	regulation of interleukin 4 production	28	3	0.00147326	0.0295053	PRKCZ:CD28:CD83
FUMA	GO:0043271	negative regulation of ion transport	151	6	0.0014804	0.0295679	CRHR1:BIN1:STK39:PKD2:SNCA:PTK2B
WebGestalt	GO:1990204	oxidoreductase complex	107	6	0.00122671	0.0295943	NDUFB3;UQCRH;NDUFS5;SNCA;UQCRB;RRM1
FUMA	GO:0072331	signal transduction by p53 class mediator	265	8	0.00150123	0.0299025	RPL11:RAD9A:RPL26:RPL23:CHEK2:PAK1IP1:RPF2:RPA3
gPROFILER	GO:0034655	nucleobase-containing compound catabolic process	496	18		0.0299729	RPS25,RPS27A,SHFM1,RPLP0,RPL26,MOV10,RPL32,RPL6,PSMD12,RPL23,SETMAR,EIF3E,RPL11,PSMC2,SSB,PSMA3,SAMD4B,RPS24
gPROFILER	GO:0034655	nucleobase-containing compound catabolic process	496	18		0.0299729	RPS25,RPS27A,SHFM1,RPLP0,RPL26,MOV10,RPL32,RPL6,PSMD12,RPL23,SETMAR,EIF3E,RPL11,PSMC2,SSB,PSMA3,SAMD4B,RPS24
FUMA	GO:0072678	t cell migration	61	4	0.00151784	0.0301517	ECM1:STK39:APP:AIF1
FUMA	GO:0030554	adenyl nucleotide binding	1536	25	0.000771062	0.0301999	PRKCZ:AK2:MOV10:NVL:DDX50:RRM1:CNGA4:SWAP70:HSP90AA1:TAOK2:NSF:ABCC3:ABCA7:STK39:ATP9A:ADRBK2:CHEK2:UBA7:CDKL3:ABCC10:HS3ST5:PRKAR1B:PSMC2:PTK2B:DNAJA1
FUMA	GO:0048524	positive regulation of viral process	103	5	0.0015287	0.0302857	GTF2B:TRIM11:SP1:VPS37B:CD28
FUMA	GO:0043270	positive regulation of ion transport	266	8	0.00153719	0.0303718	CTSS:ABCA7:LILRA5:STK39:JPH2:COX17:PKD2:SNCA
FUMA	GO:0043410	positive regulation of mapk cascade	537	12	0.00154715	0.0304867	PRKCZ:TAOK2:ABCA7:LILRA5:RPS27A:STK39:CFLAR:APP:SOD1:PROK2:ZNF622:PTK2B
FUMA	R-HSA-556833	metabolism of lipids	738	14	0.00295926	0.0305886	ACADM:AKR1C3:SP1:CDIPT:GDPD3:ABCC3:PNPLA6:PLEKHA3:HACL1:SEC24D:GM2A:MBOAT1:MED20:FABP5
FUMA	R-HSA-8878166	transcriptional regulation by runx2	120	5	0.00297928	0.0305886	PSMA3:PSMD12:RPS27A:SHFM1:C7orf76:PSMC2
gPROFILER	GO:0031252	cell leading edge	268	10		0.0307701	MAPT,ARPC3,PXN,ABCA7,PKD2,PTK2B,ACTN1,KANK1,AIF1,CNTNAP2
gPROFILER	GO:0015012	heparan sulfate proteoglycan biosynthetic process	22	3		0.0308568	HS3ST5,EXTL3,XYLT2
gPROFILER	GO:0015012	heparan sulfate proteoglycan biosynthetic process	22	3		0.0308568	HS3ST5,EXTL3,XYLT2
FUMA	GO:0044839	cell cycle g2 m phase transition	267	8	0.00157382	0.0309294	ENSA:PSMA3:HSP90AA1:TAOK2:PSMD12:APP:CHEK2:PSMC2
FUMA	R-HSA-1222556	ros and rns production in phagocytes	36	3	0.0030617	0.0310663	TCIRG1:ATP6V1D:ATP6V1E1
FUMA	GO:0043687	post translational protein modification	1427	22	0.00306725	0.0310663	CAPZA1:RAB6A:TRAPPC4:PEX5:PSMA3:SPSB3:NSF:PTRH2:PSMD12:RAB37:RPS27A:NUP35:CST3:APP:GORASP1:SEC24D:VCAN:RAB23:SHFM1:C7orf76:PSMC2:DCTN6:ST3GAL1
FUMA	GO:0022884	proton transporting atpase activity rotational mechanism	23	3	0.00082055	0.0310757	TCIRG1:ATP6V1D:ATP6V1E1
FUMA	GO:0045182	translation regulator activity	135	6	0.000831203	0.0310757	GCN1L1:DENR:ICT1:SAMD4B:EIF4E3:EIF3E
gPROFILER	GO:2000403	positive regulation of lymphocyte migration	32	4		0.0314767	APP,PTK2B,STK39,AIF1
gPROFILER	GO:0022618	ribonucleoprotein complex assembly	208	11		0.0314767	DENR,MAPT,RPLP0,BRIX1,HSP90AA1,RPL6,SNRPD2,RPF2,RPL11,RPL10L,RPL12
gPROFILER	GO:0043271	negative regulation of ion transport	121	6		0.0314767	BIN1,CRHR1,PKD2,SNCA,PTK2B,STK39
gPROFILER	GO:0043299	leukocyte degranulation	510	17		0.0314767	GM2A,GMFG,FABP5,HSP90AA1,ATP6V1D,PSMD12,ALDOA,CTSS,SRP14,TBC1D10C,RAB37,MVP,RAB6A,CST3,TCIRG1,PSMC2,GGH
gPROFILER	GO:2000403	positive regulation of lymphocyte migration	32	4		0.0314767	APP,PTK2B,STK39,AIF1
gPROFILER	GO:0022618	ribonucleoprotein complex assembly	208	11		0.0314767	DENR,MAPT,RPLP0,BRIX1,HSP90AA1,RPL6,SNRPD2,RPF2,RPL11,RPL10L,RPL12
gPROFILER	GO:0043271	negative regulation of ion transport	121	6		0.0314767	BIN1,CRHR1,PKD2,SNCA,PTK2B,STK39
gPROFILER	GO:0043299	leukocyte degranulation	510	17		0.0314767	GM2A,GMFG,FABP5,HSP90AA1,ATP6V1D,PSMD12,ALDOA,CTSS,SRP14,TBC1D10C,RAB37,MVP,RAB6A,CST3,TCIRG1,PSMC2,GGH
FUMA	GO:0071806	protein transmembrane transport	62	4	0.00161233	0.0315175	MCL1:PEX5:SRP19:TOMM7
FUMA	GO:0046635	positive regulation of alpha beta t cell activation	62	4	0.00161233	0.0315175	PRKCZ:CD160:CD28:CD83
FUMA	GO:0051249	regulation of lymphocyte activation	468	11	0.00162212	0.0315411	PRKCZ:CD160:CD5:TBC1D10C:CD209:CLPTM1:CD28:SOD1:NCK1:CD83:AIF1
FUMA	GO:1901987	regulation of cell cycle phase transition	468	11	0.00162212	0.0315411	PSMA3:HSP90AA1:TAOK2:RPL26:PSMD12:APP:CHEK2:PKD2:PLRG1:AIF1:PSMC2
FUMA	GO:0060284	regulation of cell development	930	17	0.00163085	0.0315626	DOCK7:MOV10:TRIM11:SSH3:TBX6:KATNB1:MAPT:WNT3:BIN1:CFLAR:CASS4:APP:GORASP1:NCK1:CDKL3:PTK2B:KANK1
FUMA	GO:2001020	regulation of response to dna damage stimulus	209	7	0.00163482	0.0315626	MCL1:RAD9A:RPL26:MAPT:CHEK2:SETMAR:DTX3L
FUMA	GO:0061572	actin filament bundle organization	154	6	0.0016361	0.0315626	RHOC:SWAP70:PXN:ACTN1:AIF1:PTK2B
gPROFILER	GO:0140053	mitochondrial gene expression	161	8		0.0323801	MRPL51,MRPS17,MRPL33,MRPS21,MRPL27,MRPL1,MRPL48,MRPL35
gPROFILER	GO:0034504	protein localization to nucleus	203	10		0.0323801	ABCA7,NVL,RPL23,RAB23,NUP35,RPAIN,RPF2,RPL11,DTX3L,KPNA5
gPROFILER	GO:0140053	mitochondrial gene expression	161	8		0.0323801	MRPL51,MRPS17,MRPL33,MRPS21,MRPL27,MRPL1,MRPL48,MRPL35
gPROFILER	GO:0034504	protein localization to nucleus	203	10		0.0323801	ABCA7,NVL,RPL23,RAB23,NUP35,RPAIN,RPF2,RPL11,DTX3L,KPNA5
FUMA	R-HSA-8878171	transcriptional regulation by runx1	236	7	0.00322506	0.0324454	MOV10:SPI1:PSMA3:PSMD12:RPS27A:SHFM1:C7orf76:PSMC2
gPROFILER	GO:0002275	myeloid cell activation involved in immune response	513	17		0.0327031	GM2A,GMFG,FABP5,HSP90AA1,ATP6V1D,PSMD12,ALDOA,CTSS,SRP14,TBC1D10C,RAB37,MVP,RAB6A,CST3,TCIRG1,PSMC2,GGH
gPROFILER	GO:0002275	myeloid cell activation involved in immune response	513	17		0.0327031	GM2A,GMFG,FABP5,HSP90AA1,ATP6V1D,PSMD12,ALDOA,CTSS,SRP14,TBC1D10C,RAB37,MVP,RAB6A,CST3,TCIRG1,PSMC2,GGH
gPROFILER	GO:0005814	centriole	106	4		0.0327576	IFT88,MPHOSPH9,SCLT1,CEP350
FUMA	GO:0015276	ligand gated ion channel activity	137	6	0.000897308	0.0328016	CHRNA10:CNGA4:JPH2:PKD2:PTK2B:CHRNA2
gPROFILER	GO:0002444	myeloid leukocyte mediated immunity	519	17		0.0328948	GM2A,GMFG,FABP5,HSP90AA1,ATP6V1D,PSMD12,ALDOA,CTSS,SRP14,TBC1D10C,RAB37,MVP,RAB6A,CST3,TCIRG1,PSMC2,GGH
gPROFILER	GO:0006297	nucleotide-excision repair, DNA gap filling	23	3		0.0328948	RPS27A,RPA3,POLD3
gPROFILER	GO:0016043	cellular component organization	5431	67		0.0328948	NDUFB3,BIN1,WNT3,MRPL51,NSF,DENR,KATNB1,CFLAR,CASS4,MRPS17,PRRT2,APP,RPS27A,ATPAF1,FAM160A2,SSBP1,ATP6V1E1,BOLA2,IFT88,PLEKHM1,NDUFS5,ANKRD13D,MAPT,COX17,PICALM,RPA3,RPLP0,CAPZA1,MRPL33,MRPS21,BRIX1,ST7L,ARPC3,SSH3,GMFG,PXN,MOV10,MRPL27,ABCA7,POMP,SCLT1,HSP90AA1,SDAD1,ING3,KLHDC8B,PRKCZ,PKD2,ATP6V1D,GTF2A2,MEFV,PLEKHA3,RPL6,SETDB2,FAM162A,SNRPD2,ALDOA,RPL23,MRPL1,SNCA,PTK2B,RHOC,SETMAR,CTSS,CHEK2…
gPROFILER	GO:2000008	regulation of protein localization to cell surface	31	3		0.0328948	PICALM,ABCA7,LEPROTL1
gPROFILER	GO:0098815	modulation of excitatory postsynaptic potential	26	3		0.0328948	APP,PRKCZ,PTK2B
gPROFILER	GO:0030041	actin filament polymerization	140	8		0.0328948	BIN1,CAPZA1,ARPC3,GMFG,PTK2B,KANK1,AIF1,NCK1
gPROFILER	GO:1902579	multi-organism localization	70	5		0.0328948	RPS27A,CD209,NUP35,VPS37C,VPS37B
gPROFILER	GO:0044766	multi-organism transport	70	5		0.0328948	RPS27A,CD209,NUP35,VPS37C,VPS37B
gPROFILER	GO:0048261	negative regulation of receptor-mediated endocytosis	25	3		0.0328948	ANKRD13D,PICALM,APOC1
gPROFILER	GO:0032940	secretion by cell	1247	32		0.0328948	ENSA,NSF,PRRT2,APP,CRHR1,GM2A,GMFG,PDIA4,FABP5,HSP90AA1,PRKCZ,ATP6V1D,ECM1,PSMD12,ALDOA,SNCA,CTSS,LILRA5,SRP14,TBC1D10C,RAB37,ACTN1,MVP,RAB6A,GOLPH3L,SOD1,CST3,TCIRG1,PSMC2,GGH,RIMS3,AIF1
gPROFILER	GO:0051444	negative regulation of ubiquitin-protein transferase activity	16	3		0.0328948	RPL23,RPL11,DTX3L
gPROFILER	GO:0002444	myeloid leukocyte mediated immunity	519	17		0.0328948	GM2A,GMFG,FABP5,HSP90AA1,ATP6V1D,PSMD12,ALDOA,CTSS,SRP14,TBC1D10C,RAB37,MVP,RAB6A,CST3,TCIRG1,PSMC2,GGH
gPROFILER	GO:0006297	nucleotide-excision repair, DNA gap filling	23	3		0.0328948	RPS27A,RPA3,POLD3
gPROFILER	GO:0016043	cellular component organization	5431	67		0.0328948	NDUFB3,BIN1,WNT3,MRPL51,NSF,DENR,KATNB1,CFLAR,CASS4,MRPS17,PRRT2,APP,RPS27A,ATPAF1,FAM160A2,SSBP1,ATP6V1E1,BOLA2,IFT88,PLEKHM1,NDUFS5,ANKRD13D,MAPT,COX17,PICALM,RPA3,RPLP0,CAPZA1,MRPL33,MRPS21,BRIX1,ST7L,ARPC3,SSH3,GMFG,PXN,MOV10,MRPL27,ABCA7,POMP,SCLT1,HSP90AA1,SDAD1,ING3,KLHDC8B,PRKCZ,PKD2,ATP6V1D,GTF2A2,MEFV,PLEKHA3,RPL6,SETDB2,FAM162A,SNRPD2,ALDOA,RPL23,MRPL1,SNCA,PTK2B,RHOC,SETMAR,CTSS,CHEK2…
gPROFILER	GO:2000008	regulation of protein localization to cell surface	31	3		0.0328948	PICALM,ABCA7,LEPROTL1
gPROFILER	GO:0098815	modulation of excitatory postsynaptic potential	26	3		0.0328948	APP,PRKCZ,PTK2B
gPROFILER	GO:0030041	actin filament polymerization	140	8		0.0328948	BIN1,CAPZA1,ARPC3,GMFG,PTK2B,KANK1,AIF1,NCK1
gPROFILER	GO:1902579	multi-organism localization	70	5		0.0328948	RPS27A,CD209,NUP35,VPS37C,VPS37B
gPROFILER	GO:0044766	multi-organism transport	70	5		0.0328948	RPS27A,CD209,NUP35,VPS37C,VPS37B
gPROFILER	GO:0048261	negative regulation of receptor-mediated endocytosis	25	3		0.0328948	ANKRD13D,PICALM,APOC1
gPROFILER	GO:0032940	secretion by cell	1247	32		0.0328948	ENSA,NSF,PRRT2,APP,CRHR1,GM2A,GMFG,PDIA4,FABP5,HSP90AA1,PRKCZ,ATP6V1D,ECM1,PSMD12,ALDOA,SNCA,CTSS,LILRA5,SRP14,TBC1D10C,RAB37,ACTN1,MVP,RAB6A,GOLPH3L,SOD1,CST3,TCIRG1,PSMC2,GGH,RIMS3,AIF1
gPROFILER	GO:0051444	negative regulation of ubiquitin-protein transferase activity	16	3		0.0328948	RPL23,RPL11,DTX3L
FUMA	GO:0072676	lymphocyte migration	106	5	0.0017354	0.0332167	ECM1:STK39:APP:AIF1:PTK2B
FUMA	GO:0032411	positive regulation of transporter activity	106	5	0.0017354	0.0332167	CTSS:STK39:JPH2:COX17:PKD2
FUMA	GO:0051341	regulation of oxidoreductase activity	106	5	0.0017354	0.0332167	HSP90AA1:COX17:PPM1K:SNCA:PTK2B
gPROFILER	GO:2000379	positive regulation of reactive oxygen species metabolic process	73	6		0.0332267	MAPT,HSP90AA1,PKD2,SNCA,SOD1,AKR1C3
gPROFILER	GO:2000379	positive regulation of reactive oxygen species metabolic process	73	6		0.0332267	MAPT,HSP90AA1,PKD2,SNCA,SOD1,AKR1C3
gPROFILER	GO:0031410	cytoplasmic vesicle	1805	38		0.0333848	BIN1,WNT3,PRRT2,APP,RPS27A,ATP6V1E1,PICALM,ERGIC1,GM2A,GMFG,FABP5,HSP90AA1,ATP6V1D,ECM1,LEPROTL1,PSMD12,ALDOA,SNCA,CTSS,RAB23,SRP14,TBC1D10C,TAOK2,VPS37C,RAB37,ACTN1,ATP9A,MVP,RAB6A,VPS37B,SOD1,CST3,TRAPPC4,TCIRG1,PSMC2,DTX3L,GGH,CNTNAP2
gPROFILER	GO:1904724	tertiary granule lumen	55	4		0.0333848	ALDOA,CTSS,CST3,GGH
gPROFILER	GO:0005849	mRNA cleavage factor complex	25	3		0.0333848	WDR33,CPSF2,CSTF1
gPROFILER	GO:0097458	neuron part	960	5		0.0333848	BIN1,NSF,RPS25,PRRT2,APP
gPROFILER	GO:0097708	intracellular vesicle	1806	38		0.0333848	BIN1,WNT3,PRRT2,APP,RPS27A,ATP6V1E1,PICALM,ERGIC1,GM2A,GMFG,FABP5,HSP90AA1,ATP6V1D,ECM1,LEPROTL1,PSMD12,ALDOA,SNCA,CTSS,RAB23,SRP14,TBC1D10C,TAOK2,VPS37C,RAB37,ACTN1,ATP9A,MVP,RAB6A,VPS37B,SOD1,CST3,TRAPPC4,TCIRG1,PSMC2,DTX3L,GGH,CNTNAP2
gPROFILER	GO:0030424	axon	308	11		0.0333848	BIN1,PRRT2,APP,MAPT,HSP90AA1,SNCA,PTK2B,TAOK2,DOCK7,CNTNAP2,ACADM
gPROFILER	GO:0044433	cytoplasmic vesicle part	1192	23		0.0333848	WNT3,APP,RPS27A,PICALM,GM2A,GMFG,FABP5,HSP90AA1,ATP6V1D,ECM1,PSMD12,ALDOA,SNCA,CTSS,RAB23,SRP14,TBC1D10C,VPS37C,RAB37,ACTN1,MVP,RAB6A,VPS37B
FUMA	GO:1903136	cuprous ion binding	6	2	0.000955587	0.0334455	COX17:SNCA
FUMA	GO:0055105	ubiquitin protein transferase inhibitor activity	6	2	0.000955587	0.0334455	RPL11:RPL23
FUMA	GO:0034638	phosphatidylcholine catabolic process	8	2	0.00176478	0.0335172	GDPD3:APOC1
FUMA	GO:0072608	interleukin 10 secretion	8	2	0.00176478	0.0335172	PRKCZ:LILRA5
FUMA	GO:1903748	negative regulation of establishment of protein localization to mitochondrion	8	2	0.00176478	0.0335172	MAPT:DNAJA1
FUMA	R-HSA-9006925	intracellular signaling by second messengers	302	8	0.00335831	0.0335607	MOV10:PSMA3:PSMD12:RPS27A:CD28:PRKAR1B:SHFM1:C7orf76:PSMC2
FUMA	GO:0016070	rna metabolic process	1542	24	0.0017782	0.0336851	RPL11:DNAJC8:EBNA1BP2:MOV10:NVL:RPS24:NGDN:CPSF2:RPL26:MAPT:SNRPD2:WDR33:RBMS1:SSB:PPIL3:SNRPB2:CSTF1:APP:MRPL1:LARP7:PLRG1:ZMAT2:RPF2:INTS1
FUMA	GO:0005786	signal recognition particle endoplasmic reticulum targeting	11	2	0.00341144	0.0338105	SRP14:SRP19
FUMA	R-HSA-174414	processive synthesis on the c strand of the telomere	11	2	0.00341144	0.0338659	POLD3:RPA3
WebGestalt	GO:0099572	postsynaptic specialization	340	11	0.00148191	0.0339358	NSF;RPS25;PRRT2;RPLP0;FABP5;CHRNA10;PRKCZ;RPL6;RPL23;PTK2B;RPL12
WebGestalt	GO:0098984	neuron to neuron synapse	341	11	0.00151679	0.0339358	NSF;RPS25;PRRT2;RPLP0;FABP5;PRKCZ;RPL6;RPL23;PTK2B;PRKAR1B;RPL12
WebGestalt	GO:0005849	mRNA cleavage factor complex	21	3	0.00153854	0.0339358	WDR33;CPSF2;CSTF1
gPROFILER	GO:0042788	polysomal ribosome	30	3		0.0340831	RPL32,RPL6,RPL11
gPROFILER	GO:0031090	organelle membrane	2634	49		0.0340831	NDUFB3,WNT3,MRPL51,NSF,MRPS17,APP,RPS27A,ATP6V1E1,UQCRH,NDUFS5,HS3ST5,MBOAT1,GDPD3,PICALM,ERGIC1,MRPL33,MRPS21,FABP5,MRPL27,EXTL3,PKD2,ATP6V1D,PLEKHA3,MRPL1,SNCA,DNAJA1,RAB23,ST3GAL1,XYLT2,NUP35,TBC1D10C,VPS37C,RAB37,MRPL48,TOMM7,RAB6A,MCL1,VPS37B,BCL2L2,JPH2,GOLPH3L,BCAP29,GORASP1,ABCC10,MRPL35,UQCRB,PNPLA6,TCIRG1,CBX3
gPROFILER	GO:0030666	endocytic vesicle membrane	125	3		0.0340831	WNT3,RPS27A,PICALM
gPROFILER	GO:0070062	extracellular exosome	2142	28		0.0340831	WNT3,RPS25,APP,RPS27A,SSBP1,ATP6V1E1,DNAJC7,GDPD3,RPLP0,PRDX1,CAPZA1,ARPC3,RPL26,GM2A,AK2,UFC1,FABP5,HSP90AA1,PRKCZ,PKD2,ATP6V1D,ECM1,PSMD12,SNRPD2,ALDOA,RPL23,DNAJA1,RHOC
FUMA	GO:2000406	positive regulation of t cell migration	30	3	0.00180421	0.034086	STK39:APP:AIF1
FUMA	GO:0044774	mitotic dna integrity checkpoint	107	5	0.00180864	0.034086	RAD9A:TAOK2:RPL26:CHEK2:SETMAR
gPROFILER	GO:0000502	proteasome complex	56	4		0.0341731	SHFM1,PSMD12,PSMC2,PSMA3
gPROFILER	GO:0007015	actin filament organization	335	11		0.0342079	BIN1,CASS4,CAPZA1,ARPC3,GMFG,PXN,ALDOA,PTK2B,RHOC,ACTN1,KANK1
gPROFILER	GO:0046903	secretion	1310	33		0.0342079	ENSA,NSF,PRRT2,APP,CRHR1,GM2A,GMFG,PDIA4,FABP5,HSP90AA1,ABCC3,PRKCZ,ATP6V1D,ECM1,PSMD12,ALDOA,SNCA,CTSS,LILRA5,SRP14,TBC1D10C,RAB37,ACTN1,MVP,RAB6A,GOLPH3L,SOD1,CST3,TCIRG1,PSMC2,GGH,RIMS3,AIF1
gPROFILER	GO:0007015	actin filament organization	335	11		0.0342079	BIN1,CASS4,CAPZA1,ARPC3,GMFG,PXN,ALDOA,PTK2B,RHOC,ACTN1,KANK1
gPROFILER	GO:0046903	secretion	1310	33		0.0342079	ENSA,NSF,PRRT2,APP,CRHR1,GM2A,GMFG,PDIA4,FABP5,HSP90AA1,ABCC3,PRKCZ,ATP6V1D,ECM1,PSMD12,ALDOA,SNCA,CTSS,LILRA5,SRP14,TBC1D10C,RAB37,ACTN1,MVP,RAB6A,GOLPH3L,SOD1,CST3,TCIRG1,PSMC2,GGH,RIMS3,AIF1
FUMA	R-HSA-446203	asparagine n linked glycosylation	304	8	0.00349447	0.034462	CAPZA1:TRAPPC4:NSF:RPS27A:GORASP1:SEC24D:DCTN6:ST3GAL1
FUMA	GO:0030163	modification dependent macromolecule catabolic process	623	13	0.00183336	0.0344635	RPL11:VPS37C:VPS37B:PSMA3:UBE3A:SPSB3:RPL23:PSMD12:RPS27A:UBA7:DTX3L:PSMC2:PTK2B
FUMA	GO:0031589	cell substrate adhesion	338	9	0.00184239	0.0345448	PRKCZ:ANGPTL3:PXN:ACTN1:TAOK2:CASS4:MMRN1:PTK2B:KANK1
WebGestalt	GO:0005774	vacuolar membrane	397	12	0.00162434	0.0345663	NSF;ATP6V1E1;PLEKHM1;ABCC3;ATP6V1D;TMEM9B;RAB37;ABCC10;TCIRG1;TM9SF1;DTX3L;STX8
WebGestalt	GO:0005765	lysosomal membrane	345	11	0.00166312	0.0345663	NSF;ATP6V1E1;PLEKHM1;ATP6V1D;TMEM9B;RAB37;ABCC10;TCIRG1;TM9SF1;DTX3L;STX8
WebGestalt	GO:0098852	lytic vacuole membrane	346	11	0.00170145	0.0345663	NSF;ATP6V1E1;PLEKHM1;ATP6V1D;TMEM9B;RAB37;ABCC10;TCIRG1;TM9SF1;DTX3L;STX8
gPROFILER	GO:0008021	synaptic vesicle	128	3		0.0347537	BIN1,PRRT2,PICALM
FUMA	GO:0010876	lipid localization	406	10	0.00186103	0.0348055	ANGPTL3:AQP9:SLCO3A1:CRHR1:ABCC3:ABCA7:APOC1:PLEKHA3:ATP9A:GM2A
FUMA	GO:0072522	cytokine mediated signaling pathway	780	15	0.00186749	0.0348378	CAPZA1:ECM1:MCL1:SPI1:RPLP0:PSMA3:HSP90AA1:BOLA2:PSMD12:RPS27A:STK39:ZC3H15:SOD1:PSMC2:PTK2B
FUMA	GO:0005739	microtubule organizing center part	180	6	0.00355951	0.0349321	CEP350:TUBGCP2:MPHOSPH9:IFT88:KATNB1:SCLT1
gPROFILER	GO:1905369	endopeptidase complex	57	4		0.0351204	SHFM1,PSMD12,PSMC2,PSMA3
gPROFILER	GO:0042775	mitochondrial ATP synthesis coupled electron transport	91	3		0.035216	NDUFB3,UQCRH,NDUFS5
gPROFILER	GO:0042775	mitochondrial ATP synthesis coupled electron transport	91	3		0.035216	NDUFB3,UQCRH,NDUFS5
gPROFILER	GO:0120025	plasma membrane bounded cell projection	1345	32		0.0355592	BIN1,NSF,PRRT2,APP,IFT88,MAPT,ARPC3,PXN,CHRNA10,ABCA7,SCLT1,HSP90AA1,PKD2,ATP6V1D,SNCA,PTK2B,RHOC,PRKAR1B,TBC1D10C,TAOK2,ACTN1,ABHD2,KANK1,DOCK7,SOD1,TRAPPC4,PSMC2,AIF1,CNTNAP2,ACADM,CHRNA2,CNGA4
gPROFILER	GO:0044463	cell projection part	904	22		0.0355592	BIN1,NSF,PRRT2,APP,IFT88,MAPT,ABCA7,SCLT1,HSP90AA1,PKD2,SNCA,PTK2B,PRKAR1B,TBC1D10C,TAOK2,KANK1,DOCK7,SOD1,TRAPPC4,PSMC2,AIF1,CNTNAP2
gPROFILER	GO:0120038	plasma membrane bounded cell projection part	904	22		0.0355592	BIN1,NSF,PRRT2,APP,IFT88,MAPT,ABCA7,SCLT1,HSP90AA1,PKD2,SNCA,PTK2B,PRKAR1B,TBC1D10C,TAOK2,KANK1,DOCK7,SOD1,TRAPPC4,PSMC2,AIF1,CNTNAP2
gPROFILER	GO:1903561	extracellular vesicle	2164	28		0.0356147	WNT3,RPS25,APP,RPS27A,SSBP1,ATP6V1E1,DNAJC7,GDPD3,RPLP0,PRDX1,CAPZA1,ARPC3,RPL26,GM2A,AK2,UFC1,FABP5,HSP90AA1,PRKCZ,PKD2,ATP6V1D,ECM1,PSMD12,SNRPD2,ALDOA,RPL23,DNAJA1,RHOC
FUMA	GO:0044786	cell cycle dna replication	65	4	0.0019202	0.0356401	POLD3:CHEK2:GMNN:RPA3
FUMA	GO:0150076	neuroinflammatory response	65	4	0.0019202	0.0356401	MAPT:APP:SNCA:AIF1
FUMA	GO:0031984	organelle subcompartment	375	9	0.00367227	0.0356888	GOLPH3L:RAB6A:TRAPPC4:STX8:CRHR1:NSF:ATP9A:APP:ST3GAL1
gPROFILER	GO:0043230	extracellular organelle	2168	28		0.0359538	WNT3,RPS25,APP,RPS27A,SSBP1,ATP6V1E1,DNAJC7,GDPD3,RPLP0,PRDX1,CAPZA1,ARPC3,RPL26,GM2A,AK2,UFC1,FABP5,HSP90AA1,PRKCZ,PKD2,ATP6V1D,ECM1,PSMD12,SNRPD2,ALDOA,RPL23,DNAJA1,RHOC
gPROFILER	GO:0043601	nuclear replisome	26	3		0.0359801	RPA3,POLD3,PLRG1
gPROFILER	GO:0042773	ATP synthesis coupled electron transport	92	3		0.0361305	NDUFB3,UQCRH,NDUFS5
gPROFILER	GO:0042773	ATP synthesis coupled electron transport	92	3		0.0361305	NDUFB3,UQCRH,NDUFS5
FUMA	GO:0006518	peptide metabolic process	109	5	0.00196188	0.03614	PICALM:ABCA7:BIN1:APP:SOD1
FUMA	GO:0031109	microtubule polymerization or depolymerization	109	5	0.00196188	0.03614	TUBGCP2:KATNB1:MAPT:DRG1:SNCA
FUMA	GO:1903828	negative regulation of cellular protein localization	109	5	0.00196188	0.03614	PICALM:MAPT:RAB23:LEPROTL1:DNAJA1
WebGestalt	GO:2001244	positive regulation of intrinsic apoptotic signaling pathway	55	6	0.000147322	0.0363941	RPL26;MCL1;RAD9A;SOD1;RPL11;NCK1
WebGestalt	GO:0022618	ribonucleoprotein complex assembly	231	12	0.000158282	0.0363941	DENR;MAPT;RPLP0;BRIX1;HSP90AA1;RPL6;SNRPD2;RPF2;EIF3E;RPL11;RPL10L;RPL12
WebGestalt	GO:1902905	positive regulation of supramolecular fiber organization	197	11	0.000158402	0.0363941	BIN1;KATNB1;APP;MAPT;ARPC3;GMFG;PXN;PTK2B;RHOC;SWAP70;NCK1
WebGestalt	GO:0034504	protein localization to nucleus	267	13	0.000161598	0.0363941	TMCO6;ABCA7;NVL;RPL23;RAB23;NUP35;RPAIN;RPF2;RPL11;DTX3L;KPNA5;AKR1C3;PLRG1
FUMA	GO:0002183	cytoplasmic translational initiation	31	3	0.00198566	0.0363955	DENR:NCK1:EIF3E
FUMA	GO:0031112	positive regulation of microtubule polymerization or depolymerization	31	3	0.00198566	0.0363955	KATNB1:MAPT:DRG1
FUMA	R-HSA-6781827	transcription coupled nucleotide excision repair tc ner	78	4	0.00372819	0.0365265	POLD3:ELL:RPS27A:RPA3
FUMA	GO:0071806	immune response regulating cell surface receptor signaling pathway	481	11	0.00200789	0.0367114	CD160:ARPC3:PSMA3:HSP90AA1:CMTM3:NFATC3:PSMD12:CD209:CD28:NCK1:PSMC2
gPROFILER	GO:0030425	dendrite	295	10		0.0369391	NSF,APP,MAPT,HSP90AA1,PTK2B,TAOK2,SOD1,TRAPPC4,PSMC2,CNTNAP2
gPROFILER	GO:0070069	cytochrome complex	30	3		0.0369391	UQCRH,UQCRB,COX15
FUMA	GO:0045861	negative regulation of proteolysis	343	9	0.00203436	0.0370323	RPL11:ECM1:PICALM:RPL23:BIN1:CFLAR:CST3:APP:SNCA
FUMA	GO:0051050	positive regulation of transport	950	17	0.00203552	0.0370323	PRKCZ:CD160:GOLPH3L:CTSS:CRHR1:ABCA7:LILRA5:STK39:JPH2:SOD1:GPR27:COX17:PKD2:SNCA:AIF1:TOMM7:ANP32B
FUMA	R-HSA-6783310	fanconi anemia pathway	39	3	0.00384972	0.0374723	FANCI:RPS27A:RPA3
gPROFILER	GO:0010972	negative regulation of G2/M transition of mitotic cell cycle	88	6		0.0375068	GPR132,SHFM1,PSMD12,TAOK2,PSMC2,PSMA3
gPROFILER	GO:0065005	protein-lipid complex assembly	27	3		0.0375068	BIN1,ABCA7,APOC1
gPROFILER	GO:1904062	regulation of cation transmembrane transport	282	9		0.0375068	BIN1,APP,CRHR1,COX17,PKD2,SNCA,PTK2B,CTSS,STK39
gPROFILER	GO:0043270	positive regulation of ion transport	188	8		0.0375068	COX17,ABCA7,PKD2,SNCA,CTSS,LILRA5,STK39,JPH2
gPROFILER	GO:0010972	negative regulation of G2/M transition of mitotic cell cycle	88	6		0.0375068	GPR132,SHFM1,PSMD12,TAOK2,PSMC2,PSMA3
gPROFILER	GO:0065005	protein-lipid complex assembly	27	3		0.0375068	BIN1,ABCA7,APOC1
gPROFILER	GO:1904062	regulation of cation transmembrane transport	282	9		0.0375068	BIN1,APP,CRHR1,COX17,PKD2,SNCA,PTK2B,CTSS,STK39
gPROFILER	GO:0043270	positive regulation of ion transport	188	8		0.0375068	COX17,ABCA7,PKD2,SNCA,CTSS,LILRA5,STK39,JPH2
FUMA	GO:0019722	calcium mediated signaling	218	7	0.00207487	0.0375918	TBC1D10C:NFATC3:MAPT:JPH2:RCAN1:PKD2:PTK2B
FUMA	GO:0045786	negative regulation of cell cycle	632	13	0.0020765	0.0375918	RAD9A:PSMA3:TAOK2:RPL26:RPL23:PSMD12:BIN1:CHEK2:SETMAR:PKD2:GMNN:CBX3:PSMC2
gPROFILER	GO:0005924	cell-substrate adherens junction	367	10		0.0376937	CASS4,RPLP0,SNTB2,ARPC3,PXN,RPL6,RPL23,PTK2B,ACTN1,DOCK7
gPROFILER	GO:0042995	cell projection	1359	32		0.0376937	BIN1,NSF,PRRT2,APP,IFT88,MAPT,ARPC3,PXN,CHRNA10,ABCA7,SCLT1,HSP90AA1,PKD2,ATP6V1D,SNCA,PTK2B,RHOC,PRKAR1B,TBC1D10C,TAOK2,ACTN1,ABHD2,KANK1,DOCK7,SOD1,TRAPPC4,PSMC2,AIF1,CNTNAP2,ACADM,CHRNA2,CNGA4
gPROFILER	GO:0005925	focal adhesion	365	10		0.0376937	CASS4,RPLP0,SNTB2,ARPC3,PXN,RPL6,RPL23,PTK2B,ACTN1,DOCK7
gPROFILER	GO:0097447	dendritic tree	298	10		0.0376937	NSF,APP,MAPT,HSP90AA1,PTK2B,TAOK2,SOD1,TRAPPC4,PSMC2,CNTNAP2
FUMA	GO:0070997	neuron death	345	9	0.00211548	0.0382034	MCL1:PICALM:CRHR1:MAPT:APP:SOD1:FAM162A:SNCA:PTK2B
FUMA	GO:0006406	mrna export from nucleus	111	5	0.0021244	0.0382705	NXF1:CPSF2:WDR33:NUP35:ENY2
FUMA	GO:0015711	organic anion transport	485	11	0.00214057	0.0383894	AQP9:SLCO3A1:ABCC3:SLC16A5:ABCA7:APOC1:SLC5A6:STK39:PLEKHA3:ATP9A:SNCA
FUMA	GO:0007169	transmembrane receptor protein tyrosine kinase signaling pathway	712	14	0.00214441	0.0383894	PRKCZ:TCIRG1:ARPC3:PXN:ATP6V1D:HSP90AA1:MVP:SS18:APP:ATP6V1E1:NCK1:SNCA:PTK2B:KANK1
FUMA	GO:0030166	proteoglycan biosynthetic process	67	4	0.00214667	0.0383894	XYLT2:VCAN:HS3ST5:EXTL3
gPROFILER	GO:0001775	cell activation	1217	33		0.0384117	APP,CD209,MAPT,PRDX1,CD5,GM2A,GMFG,FABP5,HSP90AA1,PRKCZ,ATP6V1D,PSMD12,ALDOA,SNCA,PTK2B,CTSS,LILRA5,SRP14,TBC1D10C,CLPTM1,RAB37,CD160,MVP,RAB6A,SOD1,CST3,TCIRG1,PSMC2,GGH,AIF1,NCK1,GAPT,CD28
gPROFILER	GO:0001775	cell activation	1217	33		0.0384117	APP,CD209,MAPT,PRDX1,CD5,GM2A,GMFG,FABP5,HSP90AA1,PRKCZ,ATP6V1D,PSMD12,ALDOA,SNCA,PTK2B,CTSS,LILRA5,SRP14,TBC1D10C,CLPTM1,RAB37,CD160,MVP,RAB6A,SOD1,CST3,TCIRG1,PSMC2,GGH,AIF1,NCK1,GAPT,CD28
FUMA	GO:0071985	multivesicular body sorting pathway	32	3	0.00217808	0.0387624	VPS37C:VPS37B:LEPROTL1
FUMA	GO:0065005	protein lipid complex assembly	32	3	0.00217808	0.0387624	ABCA7:APOC1:BIN1
FUMA	GO:0016197	endosomal transport	220	7	0.00218403	0.0387744	VPS37C:TBC1D10C:RAB6A:PICALM:VPS37B:RPS27A:LEPROTL1
gPROFILER	GO:0022898	regulation of transmembrane transporter activity	234	9		0.0388733	APP,CRHR1,COX17,PKD2,SNCA,PTK2B,CTSS,STK39,JPH2
gPROFILER	GO:0022898	regulation of transmembrane transporter activity	234	9		0.0388733	APP,CRHR1,COX17,PKD2,SNCA,PTK2B,CTSS,STK39,JPH2
FUMA	GO:0045275	respiratory chain complex iii	12	2	0.00407196	0.0391926	UQCRH:UQCRB
gPROFILER	GO:0051493	regulation of cytoskeleton organization	452	13		0.0392112	BIN1,KATNB1,MAPT,CAPZA1,ARPC3,GMFG,PXN,SNCA,PTK2B,RHOC,TAOK2,DRG1,KANK1
gPROFILER	GO:0051493	regulation of cytoskeleton organization	452	13		0.0392112	BIN1,KATNB1,MAPT,CAPZA1,ARPC3,GMFG,PXN,SNCA,PTK2B,RHOC,TAOK2,DRG1,KANK1
WebGestalt	GO:0005759	mitochondrial matrix	462	13	0.00198097	0.0392131	MRPL51;MRPS17;SSBP1;MRPL33;MRPS21;MRPL27;SUCLG1;SNCA;MRPL48;SOD1;MRPL35;ACADM;PPM1K
gPROFILER	GO:0071826	ribonucleoprotein complex subunit organization	222	11		0.0393091	DENR,MAPT,RPLP0,BRIX1,HSP90AA1,RPL6,SNRPD2,RPF2,RPL11,RPL10L,RPL12
gPROFILER	GO:0051338	regulation of transferase activity	795	22		0.0393091	CASS4,APP,RPS27A,ZNF622,MAPT,PROK2,HSP90AA1,NVL,PKD2,RPL23,SNCA,DNAJA1,PTK2B,LILRA5,PRKAR1B,STK39,TAOK2,MVP,SOD1,GORASP1,RPL11,DTX3L
gPROFILER	GO:0110053	regulation of actin filament organization	204	7		0.0393091	BIN1,CAPZA1,ARPC3,GMFG,PXN,PTK2B,RHOC
gPROFILER	GO:0071826	ribonucleoprotein complex subunit organization	222	11		0.0393091	DENR,MAPT,RPLP0,BRIX1,HSP90AA1,RPL6,SNRPD2,RPF2,RPL11,RPL10L,RPL12
gPROFILER	GO:0051338	regulation of transferase activity	795	22		0.0393091	CASS4,APP,RPS27A,ZNF622,MAPT,PROK2,HSP90AA1,NVL,PKD2,RPL23,SNCA,DNAJA1,PTK2B,LILRA5,PRKAR1B,STK39,TAOK2,MVP,SOD1,GORASP1,RPL11,DTX3L
gPROFILER	GO:0110053	regulation of actin filament organization	204	7		0.0393091	BIN1,CAPZA1,ARPC3,GMFG,PXN,PTK2B,RHOC
FUMA	R-HSA-948021	transport to the golgi and subsequent modification	185	6	0.00406782	0.0393398	CAPZA1:TRAPPC4:NSF:GORASP1:SEC24D:DCTN6
FUMA	GO:0099738	cell cortex region	40	3	0.00413725	0.0394418	PRKCZ:RIMS3:PKD2
gPROFILER	GO:1902533	positive regulation of intracellular signal transduction	878	22		0.0396402	CFLAR,APP,RPS27A,ZNF622,PROK2,RPL26,ABCA7,HSP90AA1,PRKCZ,PKD2,ECM1,RPL23,PTK2B,RHOC,LILRA5,STK39,TAOK2,TMEM9B,MCL1,JPH2,SOD1,MAZ
gPROFILER	GO:1902533	positive regulation of intracellular signal transduction	878	22		0.0396402	CFLAR,APP,RPS27A,ZNF622,PROK2,RPL26,ABCA7,HSP90AA1,PRKCZ,PKD2,ECM1,RPL23,PTK2B,RHOC,LILRA5,STK39,TAOK2,TMEM9B,MCL1,JPH2,SOD1,MAZ
FUMA	GO:0032386	regulation of aspartic type endopeptidase activity involved in amyloid precursor protein catabolic process	9	2	0.00225691	0.0398758	PICALM:BIN1
FUMA	GO:1904667	negative regulation of ubiquitin protein ligase activity	9	2	0.00225691	0.0398758	RPL11:RPL23
FUMA	R-HSA-2454202	fc epsilon receptor fceri signaling	186	6	0.0041756	0.0401233	PSMA3:NFATC3:PSMD12:RPS27A:SHFM1:C7orf76:PSMC2
FUMA	GO:0016234	inclusion body	81	4	0.00426741	0.0402988	NXF1:PICALM:MAPT:SNCA
gPROFILER	GO:0045171	intercellular bridge	58	3		0.0403312	TRIM45,KLHDC8B,DNAJC8
gPROFILER	GO:0030894	replisome	28	3		0.0403312	RPA3,POLD3,PLRG1
gPROFILER	GO:0030055	cell-substrate junction	372	10		0.0403312	CASS4,RPLP0,SNTB2,ARPC3,PXN,RPL6,RPL23,PTK2B,ACTN1,DOCK7
gPROFILER	GO:0009395	phospholipid catabolic process	33	4		0.0404444	GDPD3,APOC1,PNPLA6,ANGPTL3
gPROFILER	GO:0009395	phospholipid catabolic process	33	4		0.0404444	GDPD3,APOC1,PNPLA6,ANGPTL3
FUMA	GO:0009896	positive regulation of catabolic process	418	10	0.0022978	0.0405008	ANGPTL3:MOV10:HSP90AA1:MEFV:NSF:DTX3L:SNCA:TOMM7:PSMC2:PTK2B
WebGestalt	GO:0006402	mRNA catabolic process	308	14	0.000186509	0.040556	RPS25;RPS27A;RPLP0;RPL26;MOV10;RPL32;RPL6;RPL23;EIF3E;RPL11;SSB;SAMD4B;RPS24;RPL12
gPROFILER	GO:0004857	enzyme inhibitor activity	298	14		0.0405791	ENSA,BIN1,APP,PPP1R14B,GMFG,RPL23,SNCA,APOC1,PRKAR1B,CST3,RPL11,DTX3L,NCK1,ANGPTL3
gPROFILER	GO:0004857	enzyme inhibitor activity	298	14		0.0405791	ENSA,BIN1,APP,PPP1R14B,GMFG,RPL23,SNCA,APOC1,PRKAR1B,CST3,RPL11,DTX3L,NCK1,ANGPTL3
gPROFILER	GO:0016020	membrane	7412	134		0.0410774	NDUFB3,BIN1,RPL36AL,WNT3,MRPL51,NSF,KATNB1,CFLAR,CASS4,MRPS17,PRRT2,APP,RPS27A,GPR27,ATP6V1E1,CRHR1,UQCRH,CD209,GNL2,NDUFS5,ANKRD13D,HS3ST5,DNAJC7,FANCI,MAPT,MBOAT1,GDPD3,PICALM,GPR132,ERGIC1,RPLP0,MRPL33,CD5,MRPS21,SNTB2,ARPC3,RPL26,MPHOSPH9,PXN,FABP5,MRPL27,INTS1,CHRNA10,ABCA7,EXTL3,HSP90AA1,ABCC3,NVL,KLHDC8B,TAS2R5,CEP350,PRKCZ,PKD2,ATP6V1D,RPL32,CD83,PLEKHA3,RPL6,ADRBK2,SUCLG1,PSMD12,ALDOA,RP…
gPROFILER	GO:0002366	leukocyte activation involved in immune response	636	19		0.0412589	GM2A,GMFG,FABP5,HSP90AA1,PRKCZ,ATP6V1D,PSMD12,ALDOA,PTK2B,CTSS,SRP14,TBC1D10C,RAB37,MVP,RAB6A,CST3,TCIRG1,PSMC2,GGH
gPROFILER	GO:0002366	leukocyte activation involved in immune response	636	19		0.0412589	GM2A,GMFG,FABP5,HSP90AA1,PRKCZ,ATP6V1D,PSMD12,ALDOA,PTK2B,CTSS,SRP14,TBC1D10C,RAB37,MVP,RAB6A,CST3,TCIRG1,PSMC2,GGH
gPROFILER	GO:1901796	regulation of signal transduction by p53 class mediator	167	8		0.0413633	PAK1IP1,RPA3,RPL26,RPL23,CHEK2,RAD9A,RPF2,RPL11
gPROFILER	GO:0030201	heparan sulfate proteoglycan metabolic process	28	3		0.0413633	HS3ST5,EXTL3,XYLT2
gPROFILER	GO:0030833	regulation of actin filament polymerization	120	7		0.0413633	BIN1,CAPZA1,ARPC3,GMFG,PTK2B,KANK1,NCK1
gPROFILER	GO:0002269	leukocyte activation involved in inflammatory response	38	4		0.0413633	APP,MAPT,SNCA,AIF1
gPROFILER	GO:0001774	microglial cell activation	38	4		0.0413633	APP,MAPT,SNCA,AIF1
gPROFILER	GO:0009056	catabolic process	2255	53		0.0413633	NSF,RPS25,APP,RPS27A,ATP6V1E1,IFT88,MAPT,GDPD3,SHFM1,RPLP0,PRDX1,RPL26,MOV10,FABP5,ABCA7,HSP90AA1,ATP6V1D,RPL32,MEFV,RPL6,PSMD12,ALDOA,RPL23,UBE3A,SNCA,PTK2B,SETMAR,CTSS,CHEK2,APOC1,RAB23,HACL1,NUP35,VPS37C,TOMM7,ABHD2,VCAN,MCL1,VPS37B,CST3,EIF3E,PNPLA6,TCIRG1,RPL11,PSMC2,DTX3L,SSB,PSMA3,SAMD4B,CHDH,SPSB3,ACADM,RPS24
gPROFILER	GO:1901796	regulation of signal transduction by p53 class mediator	167	8		0.0413633	PAK1IP1,RPA3,RPL26,RPL23,CHEK2,RAD9A,RPF2,RPL11
gPROFILER	GO:0030201	heparan sulfate proteoglycan metabolic process	28	3		0.0413633	HS3ST5,EXTL3,XYLT2
gPROFILER	GO:0030833	regulation of actin filament polymerization	120	7		0.0413633	BIN1,CAPZA1,ARPC3,GMFG,PTK2B,KANK1,NCK1
gPROFILER	GO:0002269	leukocyte activation involved in inflammatory response	38	4		0.0413633	APP,MAPT,SNCA,AIF1
gPROFILER	GO:0001774	microglial cell activation	38	4		0.0413633	APP,MAPT,SNCA,AIF1
gPROFILER	GO:0009056	catabolic process	2255	53		0.0413633	NSF,RPS25,APP,RPS27A,ATP6V1E1,IFT88,MAPT,GDPD3,SHFM1,RPLP0,PRDX1,RPL26,MOV10,FABP5,ABCA7,HSP90AA1,ATP6V1D,RPL32,MEFV,RPL6,PSMD12,ALDOA,RPL23,UBE3A,SNCA,PTK2B,SETMAR,CTSS,CHEK2,APOC1,RAB23,HACL1,NUP35,VPS37C,TOMM7,ABHD2,VCAN,MCL1,VPS37B,CST3,EIF3E,PNPLA6,TCIRG1,RPL11,PSMC2,DTX3L,SSB,PSMA3,SAMD4B,CHDH,SPSB3,ACADM,RPS24
gPROFILER	GO:0140352	export from cell	1291	32		0.0414665	ENSA,NSF,PRRT2,APP,CRHR1,GM2A,GMFG,PDIA4,FABP5,HSP90AA1,PRKCZ,ATP6V1D,ECM1,PSMD12,ALDOA,SNCA,CTSS,LILRA5,SRP14,TBC1D10C,RAB37,ACTN1,MVP,RAB6A,GOLPH3L,SOD1,CST3,TCIRG1,PSMC2,GGH,RIMS3,AIF1
gPROFILER	GO:0140352	export from cell	1291	32		0.0414665	ENSA,NSF,PRRT2,APP,CRHR1,GM2A,GMFG,PDIA4,FABP5,HSP90AA1,PRKCZ,ATP6V1D,ECM1,PSMD12,ALDOA,SNCA,CTSS,LILRA5,SRP14,TBC1D10C,RAB37,ACTN1,MVP,RAB6A,GOLPH3L,SOD1,CST3,TCIRG1,PSMC2,GGH,RIMS3,AIF1
gPROFILER	GO:0070382	exocytic vesicle	147	3		0.0417367	BIN1,PRRT2,PICALM
FUMA	GO:0050849	negative regulation of calcium mediated signaling	33	3	0.00238167	0.0418787	TBC1D10C:RCAN1:PKD2
FUMA	GO:0030133	transport vesicle	387	9	0.00450197	0.0421166	RAB6A:PICALM:TRAPPC4:PRRT2:SNTB2:BIN1:APP:SNCA:SEC24D
WebGestalt	GO:0007015	actin filament organization	388	16	0.000200512	0.0421477	BIN1;MYBPC3;CASS4;CAPZA1;ARPC3;SSH3;GMFG;PXN;ALDOA;PTK2B;RHOC;ACTN1;KANK1;SWAP70;AIF1;NCK1
gPROFILER	GO:0022904	respiratory electron transport chain	105	3		0.0422735	NDUFB3,UQCRH,NDUFS5
gPROFILER	GO:0022904	respiratory electron transport chain	105	3		0.0422735	NDUFB3,UQCRH,NDUFS5
FUMA	GO:0001650	fibrillar center	133	5	0.00461783	0.0423577	TAF1C:RPAIN:WDR33:SNRPB2:PLRG1
FUMA	GO:0016607	nuclear speck	389	9	0.00465341	0.0423577	ACADM:VPS72:NXF1:MAML2:POMP:MAPT:ELL:SNRPB2:PLRG1
FUMA	GO:0005759	u2 type spliceosomal complex	83	4	0.0046547	0.0423577	SNRPD2:SNRPB2:PLRG1:ZMAT2
FUMA	R-HSA-5696400	dual incision in gg ner	41	3	0.00443749	0.0423681	POLD3:RPS27A:RPA3
FUMA	GO:0048471	perinuclear region of cytoplasm	697	13	0.00473724	0.0424029	PRKCZ:ANKRD13D:PICALM:HSP90AA1:MVP:GDPD3:STX8:ATP9A:APP:SNCA:AIF1:PTK2B:DNAJA1
FUMA	GO:0043596	nuclear replication fork	42	3	0.0047506	0.0424029	POLD3:PLRG1:RPA3
FUMA	GO:0044292	dendrite terminus	13	2	0.00478674	0.0424029	HSP90AA1:TAOK2
gPROFILER	GO:0022900	electron transport chain	106	3		0.0432294	NDUFB3,UQCRH,NDUFS5
gPROFILER	GO:0022900	electron transport chain	106	3		0.0432294	NDUFB3,UQCRH,NDUFS5
FUMA	GO:0046914	transition metal ion binding	1072	19	0.00126243	0.0432647	GTF2B:TRIM45:TRIM11:SETDB2:TRIP4:MEFV:CDIPT:VAT1L:XYLT2:APP:SOD1:SETMAR:COX17:SNCA:SEC24D:ZNF622:ZMAT2:ZCCHC7:ZFP37
FUMA	GO:0002520	immune system development	968	17	0.00246879	0.0432969	PRKCZ:MOV10:SWAP70:SPI1:PICALM:PSMA3:ACTN1:PSMD12:CLPTM1:CD28:APP:SOD1:TCTA:TMEM14C:CD83:PSMC2:PTK2B
FUMA	GO:0034248	immune response regulating signaling pathway	645	13	0.00247411	0.0432969	CD160:CTSS:ARPC3:PSMA3:HSP90AA1:CMTM3:NFATC3:PSMD12:CD209:RPS27A:CD28:NCK1:PSMC2
gPROFILER	GO:0007005	mitochondrion organization	465	6		0.043406	NDUFB3,ATPAF1,SSBP1,NDUFS5,MAPT,COX17
gPROFILER	GO:0007005	mitochondrion organization	465	6		0.043406	NDUFB3,ATPAF1,SSBP1,NDUFS5,MAPT,COX17
gPROFILER	GO:0010950	positive regulation of endopeptidase activity	162	6		0.0435779	CFLAR,MAPT,PICALM,MEFV,FAM162A,SNCA
gPROFILER	GO:1904666	regulation of ubiquitin protein ligase activity	20	3		0.0435779	RPL23,GORASP1,RPL11
gPROFILER	GO:0010950	positive regulation of endopeptidase activity	162	6		0.0435779	CFLAR,MAPT,PICALM,MEFV,FAM162A,SNCA
gPROFILER	GO:1904666	regulation of ubiquitin protein ligase activity	20	3		0.0435779	RPL23,GORASP1,RPL11
gPROFILER	GO:0005844	polysome	67	4		0.0437928	RPL32,RPL6,DRG1,RPL11
gPROFILER	GO:0046700	heterocycle catabolic process	537	18		0.0437939	RPS25,RPS27A,SHFM1,RPLP0,RPL26,MOV10,RPL32,RPL6,PSMD12,RPL23,SETMAR,EIF3E,RPL11,PSMC2,SSB,PSMA3,SAMD4B,RPS24
gPROFILER	GO:0046700	heterocycle catabolic process	537	18		0.0437939	RPS25,RPS27A,SHFM1,RPLP0,RPL26,MOV10,RPL32,RPL6,PSMD12,RPL23,SETMAR,EIF3E,RPL11,PSMC2,SSB,PSMA3,SAMD4B,RPS24
gPROFILER	GO:0006996	organelle organization	3360	13		0.0438208	NDUFB3,BIN1,NSF,DENR,KATNB1,CFLAR,CASS4,PRRT2,RPS27A,ATPAF1,FAM160A2,SSBP1,ATP6V1E1
gPROFILER	GO:0016050	vesicle organization	285	12		0.0438208	NSF,PRRT2,FAM160A2,PICALM,SNCA,VPS37C,VPS37B,GOLPH3L,GORASP1,TRAPPC4,STX8,SEC24D
gPROFILER	GO:0044270	cellular nitrogen compound catabolic process	539	18		0.0438208	RPS25,RPS27A,SHFM1,RPLP0,RPL26,MOV10,RPL32,RPL6,PSMD12,RPL23,SETMAR,EIF3E,RPL11,PSMC2,SSB,PSMA3,SAMD4B,RPS24
gPROFILER	GO:1903170	negative regulation of calcium ion transmembrane transport	40	3		0.0438208	BIN1,CRHR1,PKD2
gPROFILER	GO:0034767	positive regulation of ion transmembrane transport	117	6		0.0438208	COX17,PKD2,SNCA,CTSS,STK39,JPH2
gPROFILER	GO:0032535	regulation of cellular component size	253	6		0.0438208	BIN1,MAPT,PICALM,CAPZA1,ARPC3,GMFG
gPROFILER	GO:0006996	organelle organization	3360	13		0.0438208	NDUFB3,BIN1,NSF,DENR,KATNB1,CFLAR,CASS4,PRRT2,RPS27A,ATPAF1,FAM160A2,SSBP1,ATP6V1E1
gPROFILER	GO:0016050	vesicle organization	285	12		0.0438208	NSF,PRRT2,FAM160A2,PICALM,SNCA,VPS37C,VPS37B,GOLPH3L,GORASP1,TRAPPC4,STX8,SEC24D
gPROFILER	GO:0044270	cellular nitrogen compound catabolic process	539	18		0.0438208	RPS25,RPS27A,SHFM1,RPLP0,RPL26,MOV10,RPL32,RPL6,PSMD12,RPL23,SETMAR,EIF3E,RPL11,PSMC2,SSB,PSMA3,SAMD4B,RPS24
gPROFILER	GO:1903170	negative regulation of calcium ion transmembrane transport	40	3		0.0438208	BIN1,CRHR1,PKD2
gPROFILER	GO:0034767	positive regulation of ion transmembrane transport	117	6		0.0438208	COX17,PKD2,SNCA,CTSS,STK39,JPH2
gPROFILER	GO:0032535	regulation of cellular component size	253	6		0.0438208	BIN1,MAPT,PICALM,CAPZA1,ARPC3,GMFG
FUMA	GO:0000904	cell morphogenesis involved in differentiation	725	14	0.00252482	0.0440795	DOCK7:SSH3:PICALM:ACTN1:HSP90AA1:TAOK2:MAPT:WNT3:CASS4:APP:SOD1:GORASP1:CDKL3:KANK1
gPROFILER	GO:0032414	positive regulation of ion transmembrane transporter activity	81	5		0.0441128	COX17,PKD2,CTSS,STK39,JPH2
gPROFILER	GO:0032414	positive regulation of ion transmembrane transporter activity	81	5		0.0441128	COX17,PKD2,CTSS,STK39,JPH2
FUMA	GO:0031674	i band	136	5	0.00507186	0.0441896	MYBPC3:ACTN1:ALDOA:BIN1:JPH2
FUMA	GO:0022627	cytosolic small ribosomal subunit	43	3	0.00507673	0.0441896	RPS24:RPS25:RPS27A
gPROFILER	GO:0035861	site of double-strand break	57	3		0.0446032	RPA3,ARPC3,SETMAR
FUMA	GO:0008312	7s rna binding	7	2	0.00133068	0.0446729	SRP14:SRP19
gPROFILER	GO:0048167	regulation of synaptic plasticity	112	5		0.0447676	PRRT2,APP,MAPT,PRKCZ,PTK2B
gPROFILER	GO:0032409	regulation of transporter activity	248	9		0.0447676	APP,CRHR1,COX17,PKD2,SNCA,PTK2B,CTSS,STK39,JPH2
gPROFILER	GO:0017004	cytochrome complex assembly	34	4		0.0447676	COX17,UQCRB,COX15,COX19
gPROFILER	GO:0048167	regulation of synaptic plasticity	112	5		0.0447676	PRRT2,APP,MAPT,PRKCZ,PTK2B
gPROFILER	GO:0032409	regulation of transporter activity	248	9		0.0447676	APP,CRHR1,COX17,PKD2,SNCA,PTK2B,CTSS,STK39,JPH2
gPROFILER	GO:0017004	cytochrome complex assembly	34	4		0.0447676	COX17,UQCRB,COX15,COX19
WebGestalt	GO:1902003	regulation of amyloid-beta formation	21	4	0.000220525	0.0448591	BIN1;APP;PICALM;ABCA7
FUMA	GO:0043276	anoikis	34	3	0.00259667	0.0451195	MCL1:PTRH2:CHEK2
FUMA	GO:0032633	interleukin 4 production	34	3	0.00259667	0.0451195	PRKCZ:CD28:CD83
WebGestalt	GO:0006913	nucleocytoplasmic transport	353	15	0.000229813	0.0452875	NXF1;TMCO6;SDAD1;SNRPD2;RPL23;RAB23;NUP35;ENY2;WDR33;RPAIN;CPSF2;SSB;KPNA5;AKR1C3;ANP32B
FUMA	R-HSA-879415	advanced glycosylation endproduct receptor signaling	13	2	0.00478674	0.0454134	CAPZA1:APP
gPROFILER	GO:0033108	mitochondrial respiratory chain complex assembly	95	3		0.0455345	NDUFB3,NDUFS5,COX17
gPROFILER	GO:0033108	mitochondrial respiratory chain complex assembly	95	3		0.0455345	NDUFB3,NDUFS5,COX17
gPROFILER	GO:0030684	preribosome	78	4		0.0455376	ZNF622,MRPL1,NGDN,EBNA1BP2
gPROFILER	GO:0043005	neuron projection	739	4		0.0455376	BIN1,NSF,PRRT2,APP
gPROFILER	GO:0031091	platelet alpha granule	89	4		0.0455376	APP,ALDOA,SNCA,ACTN1
gPROFILER	GO:0071007	U2-type catalytic step 2 spliceosome	30	3		0.0455376	SNRPD2,SNRPB2,PLRG1
gPROFILER	GO:0044455	mitochondrial membrane part	202	3		0.0455376	NDUFB3,UQCRH,NDUFS5
gPROFILER	GO:1903169	regulation of calcium ion transmembrane transport	119	6		0.0457168	BIN1,CRHR1,PKD2,SNCA,PTK2B,JPH2
gPROFILER	GO:1903169	regulation of calcium ion transmembrane transport	119	6		0.0457168	BIN1,CRHR1,PKD2,SNCA,PTK2B,JPH2
gPROFILER	GO:0043202	lysosomal lumen	85	4		0.0457558	GM2A,HSP90AA1,CTSS,VCAN
FUMA	R-HSA-72202	transport of mature transcript to cytoplasm	84	4	0.00485691	0.0457894	NXF1:CPSF2:WDR33:NUP35
FUMA	GO:0090114	copii coated vesicle budding	71	4	0.00265365	0.0458925	TRAPPC4:NSF:GORASP1:SEC24D
FUMA	GO:0046785	microtubule polymerization	71	4	0.00265365	0.0458925	TUBGCP2:MAPT:DRG1:SNCA
gPROFILER	GO:0016072	rRNA metabolic process	185	9		0.0459238	MAPT,RPL26,NVL,MRPL1,NGDN,EBNA1BP2,RPF2,RPL11,RPS24
gPROFILER	GO:0044265	cellular macromolecule catabolic process	1053	29		0.0459238	RPS25,RPS27A,SHFM1,RPLP0,RPL26,MOV10,HSP90AA1,RPL32,RPL6,PSMD12,RPL23,UBE3A,PTK2B,SETMAR,CTSS,CHEK2,VPS37C,VPS37B,CST3,EIF3E,TCIRG1,RPL11,PSMC2,DTX3L,SSB,PSMA3,SAMD4B,SPSB3,RPS24
gPROFILER	GO:0031396	regulation of protein ubiquitination	171	8		0.0459238	FANCI,HSP90AA1,RPL23,UBE3A,DNAJA1,GORASP1,RPL11,DTX3L
gPROFILER	GO:0034765	regulation of ion transmembrane transport	305	9		0.0459238	BIN1,APP,CRHR1,COX17,PKD2,SNCA,PTK2B,CTSS,STK39
gPROFILER	GO:0016072	rRNA metabolic process	185	9		0.0459238	MAPT,RPL26,NVL,MRPL1,NGDN,EBNA1BP2,RPF2,RPL11,RPS24
gPROFILER	GO:0044265	cellular macromolecule catabolic process	1053	29		0.0459238	RPS25,RPS27A,SHFM1,RPLP0,RPL26,MOV10,HSP90AA1,RPL32,RPL6,PSMD12,RPL23,UBE3A,PTK2B,SETMAR,CTSS,CHEK2,VPS37C,VPS37B,CST3,EIF3E,TCIRG1,RPL11,PSMC2,DTX3L,SSB,PSMA3,SAMD4B,SPSB3,RPS24
gPROFILER	GO:0031396	regulation of protein ubiquitination	171	8		0.0459238	FANCI,HSP90AA1,RPL23,UBE3A,DNAJA1,GORASP1,RPL11,DTX3L
gPROFILER	GO:0034765	regulation of ion transmembrane transport	305	9		0.0459238	BIN1,APP,CRHR1,COX17,PKD2,SNCA,PTK2B,CTSS,STK39
FUMA	GO:0016236	macroautophagy	291	8	0.0026814	0.0462394	VPS37C:TCIRG1:VPS37B:IFT88:ATP6V1D:ATP6V1E1:RAB23:TOMM7
FUMA	GO:0050806	positive regulation of synaptic transmission	170	6	0.00268629	0.0462394	PRKCZ:RIMS3:CRHR1:APP:SNCA:PTK2B
FUMA	GO:0071011	precatalytic spliceosome	44	3	0.00541603	0.0463368	SNRPD2:SNRPB2:ZMAT2
FUMA	GO:0071013	catalytic step 2 spliceosome	87	4	0.00549874	0.0463368	SNRPD2:PPIL3:SNRPB2:PLRG1
FUMA	GO:0098554	cytoplasmic side of endoplasmic reticulum membrane	14	2	0.00555487	0.0463368	PKD2:DNAJA1
FUMA	GO:0030479	actin cortical patch	14	2	0.00555487	0.0463368	CAPZA1:GMFG
FUMA	GO:0048500	signal recognition particle	14	2	0.00555487	0.0463368	SRP14:SRP19
FUMA	GO:0040017	positive regulation of locomotion	575	12	0.00271058	0.0465485	DOCK7:ANGPTL3:RHOC:SWAP70:SP1:VPS37B:MAZ:STK39:CASS4:APP:AIF1:PTK2B
FUMA	GO:0070161	anchoring junction	552	11	0.00563694	0.0466329	DOCK7:ARPC3:RPL6:RPLP0:PXN:ACTN1:SNTB2:RPL23:CASS4:PTK2B:RPL12
FUMA	WP4016	dna ir-damage and cellular response via atr	81	5	0.000516618	0.0467539	RAD9A:SP1:FANCI:CHEK2:SHFM1:C7orf76
gPROFILER	GO:0099512	supramolecular fiber	568	3		0.0468043	BIN1,MYBPC3,KATNB1
FUMA	GO:0031349	positive regulation of defense response	501	11	0.00274445	0.0469791	CD160:CTSS:PSMA3:PSMD12:CD209:LILRA5:RPS27A:CD28:APP:SNCA:PSMC2
FUMA	GO:0055065	metal ion homeostasis	653	13	0.00274843	0.0469791	CHRNA10:SWAP70:PICALM:SLC24A4:CRHR1:JPH2:APP:SOD1:PROK2:PKD2:SNCA:COX19:PTK2B
gPROFILER	GO:0006301	postreplication repair	52	4		0.0471084	RPS27A,RPA3,POLD3,WDR33
gPROFILER	GO:0006301	postreplication repair	52	4		0.0471084	RPS27A,RPA3,POLD3,WDR33
FUMA	R-HSA-2871837	fceri mediated nf kb activation	136	5	0.00507186	0.047309	PSMA3:PSMD12:RPS27A:SHFM1:C7orf76:PSMC2
FUMA	R-HSA-9006934	signaling by receptor tyrosine kinases	468	10	0.00508122	0.047309	PRKCZ:DOCK7:TCIRG1:PXN:ATP6V1D:HSP90AA1:RPS27A:ATP6V1E1:NCK1:PTK2B
gPROFILER	GO:0019882	antigen processing and presentation	217	10		0.0474088	DCTN6,CD209,SHFM1,CAPZA1,PSMD12,CTSS,RAB6A,PSMC2,PSMA3,SEC24D
gPROFILER	GO:0019882	antigen processing and presentation	217	10		0.0474088	DCTN6,CD209,SHFM1,CAPZA1,PSMD12,CTSS,RAB6A,PSMC2,PSMA3,SEC24D
FUMA	GO:0075522	ires dependent viral translational initiation	10	2	0.00280612	0.0476327	DENR:SSB
FUMA	GO:0072611	interleukin 13 secretion	10	2	0.00280612	0.0476327	PRKCZ:LILRA5
FUMA	GO:0051764	actin crosslink formation	10	2	0.00280612	0.0476327	ACTN1:AIF1
FUMA	GO:0042391	regulation of membrane potential	430	10	0.00281347	0.0476475	PRKCZ:RIMS3:CHRNA10:MAPT:BIN1:APP:SOD1:SNCA:PTK2B:CHRNA2
FUMA	GO:2000516	positive regulation of cd4 positive alpha beta t cell activation	35	3	0.00282328	0.0477038	PRKCZ:CD160:CD83
gPROFILER	GO:0030054	cell junction	761	13		0.0479368	CASS4,RPLP0,SNTB2,ARPC3,PXN,ABCA7,PRKCZ,PKD2,GTF2A2,RPL6,RPL23,PTK2B,RAB23
gPROFILER	GO:0099080	supramolecular complex	577	3		0.0479586	BIN1,MYBPC3,KATNB1
gPROFILER	GO:0099081	supramolecular polymer	576	3		0.0479586	BIN1,MYBPC3,KATNB1
FUMA	GO:2001257	regulation of cation channel activity	172	6	0.00284647	0.0479852	CTSS:CRHR1:JPH2:APP:PKD2:PTK2B
WebGestalt	GO:0051169	nuclear transport	356	15	0.000251643	0.0480867	NXF1;TMCO6;SDAD1;SNRPD2;RPL23;RAB23;NUP35;ENY2;WDR33;RPAIN;CPSF2;SSB;KPNA5;AKR1C3;ANP32B
gPROFILER	GO:0010952	positive regulation of peptidase activity	170	6		0.0481364	CFLAR,MAPT,PICALM,MEFV,FAM162A,SNCA
gPROFILER	GO:0010952	positive regulation of peptidase activity	170	6		0.0481364	CFLAR,MAPT,PICALM,MEFV,FAM162A,SNCA
gPROFILER	GO:0005856	cytoskeleton	1592	3		0.048282	DCTN6,BIN1,MYBPC3
FUMA	GO:0070273	phosphatidylinositol 4 phosphate binding	28	3	0.00147326	0.0484701	GOLPH3L:PLEKHA3:JPH2
gPROFILER	GO:1901216	positive regulation of neuron death	53	4		0.0485572	MAPT,PICALM,SNCA,MCL1
gPROFILER	GO:1901216	positive regulation of neuron death	53	4		0.0485572	MAPT,PICALM,SNCA,MCL1
FUMA	GO:0022900	electron transport chain	173	6	0.00292919	0.048925	NDUFS5:UQCRH:COX15:NDUFB3:SNCA:UQCRB
FUMA	GO:0072347	response to anesthetic	73	4	0.0029355	0.048925	CRHR1:SNCA:AIF1:PTK2B
FUMA	GO:0006029	proteoglycan metabolic process	73	4	0.0029355	0.048925	XYLT2:VCAN:HS3ST5:EXTL3
FUMA	GO:0002312	b cell activation involved in immune response	73	4	0.0029355	0.048925	SWAP70:CD28:GAPT:PTK2B
FUMA	GO:0048199	vesicle targeting to from or within golgi	73	4	0.0029355	0.048925	TRAPPC4:NSF:GORASP1:SEC24D
FUMA	GO:0006082	organic acid metabolic process	901	16	0.00294336	0.048945	ANGPTL3:ACADM:AKR1C3:PSMA3:ABHD2:PSMD12:APOC1:SLC5A6:SUCLG1:ASNSD1:HACL1:PPM1K:SNCA:PSMC2:FABP5:ST3GAL1
FUMA	GO:0099177	regulation of trans synaptic signaling	433	10	0.00295585	0.0490417	PRKCZ:RIMS3:PRRT2:CRHR1:MAPT:APP:SNCA:PRKAR1B:PTK2B:FABP5
WebGestalt	GO:0005643	nuclear pore	85	5	0.00254372	0.0490938	NXF1;NUP35;ENY2;MVP;KPNA5
gPROFILER	GO:0043267	negative regulation of potassium ion transport	31	3		0.0491104	BIN1,PTK2B,STK39
gPROFILER	GO:0043267	negative regulation of potassium ion transport	31	3		0.0491104	BIN1,PTK2B,STK39
FUMA	GO:0090068	positive regulation of cell cycle process	296	8	0.00297441	0.0492386	RPL26:RPL23:CD28:APP:CHEK2:PKD2:PLRG1:AIF1
gPROFILER	GO:1901653	cellular response to peptide	277	11		0.0492629	APP,ATP6V1E1,CRHR1,PXN,PRKCZ,ATP6V1D,RPL23,PRKAR1B,KANK1,TCIRG1,NCK1
gPROFILER	GO:1901653	cellular response to peptide	277	11		0.0492629	APP,ATP6V1E1,CRHR1,PXN,PRKCZ,ATP6V1D,RPL23,PRKAR1B,KANK1,TCIRG1,NCK1
FUMA	R-HSA-76002	platelet activation signaling and aggregation	259	7	0.00533747	0.0493881	PRKCZ:ECM1:ACTN1:ALDOA:APP:SOD1:MMRN1
gPROFILER	GO:0019439	aromatic compound catabolic process	551	18		0.0496037	RPS25,RPS27A,SHFM1,RPLP0,RPL26,MOV10,RPL32,RPL6,PSMD12,RPL23,SETMAR,EIF3E,RPL11,PSMC2,SSB,PSMA3,SAMD4B,RPS24
gPROFILER	GO:0019439	aromatic compound catabolic process	551	18		0.0496037	RPS25,RPS27A,SHFM1,RPLP0,RPL26,MOV10,RPL32,RPL6,PSMD12,RPL23,SETMAR,EIF3E,RPL11,PSMC2,SSB,PSMA3,SAMD4B,RPS24
FUMA	GO:0048469	cell maturation	174	6	0.00301369	0.049665	ABHD2:TBX6:APP:SCLT1:CNTNAP2:PTK2B
FUMA	GO:0030705	cytoskeleton dependent intracellular transport	174	6	0.00301369	0.049665	PRKCZ:RAB6A:IFT88:MAPT:APP:SOD1
FUMA	GO:0010038	response to metal ion	364	9	0.00302193	0.0496894	AKR1C3:AQP9:MAPT:APP:SOD1:PKD2:SNCA:PTK2B:GGH
FUMA	WP411	mrna processing	130	6	0.000682322	0.0499182	DNAJC8:NXF1:CPSF2:SNRPD2:SNRPB2:CSTF1
FUMA	WP3888	vegfa-vegfr2 signaling pathway	237	8	0.000735443	0.0499182	PRKCZ:RHOC:PXN:HSP90AA1:BIN1:RCAN1:NCK1:PTK2B
