# Supplementary material for: Multiomics integrative analysis identifies APOE allele-specific blood biomarkers associated to Alzheimer’s disease etiopathogenesis
Source: Aging (Albany NY). 2021 Apr 12;13(7):9277–329. doi: 10.18632/aging.202950 (PMC8064208; doi:10.18632/aging.202950)
Supplement: Supplementary Table 33 [file aging-13-202950-s035.xlsx]

## Sheet: Sheet1
Supplementary Table 33. RRA integrative analysis in blood: enrichment analysis APOE4 stratum.
Tool	ID	Description	N_genes	N_overlap	p	adjP	genes
Webgestalt	GO:0098798	mitochondrial protein complex	266	25	0	0	MRPL50;MRPL39;TOMM40;MRPL51;NDUFS5;TOMM5;MRPS18C;UQCRB;UQCRH;TIMM17A;MRPL33;MRPS21;MRPL22;MRPL35;MRPS33;NDUFS4;MRPL24;PMPCB;NDUFS3;MRPL27;MRPS17;MRPL47;TOMM7;NDUFB5;NDUFA9
FUMA	GO:0098798	mitochondrial protein complex	254	29	6.23538e-25	6.24161e-22	NDUFS5:UQCRH:ATP5F1:MRPS21:MRPL24:TIMM17A:NDUFS3:NDUFA9:MRPL51:MRPL27:TOMM40:MRPL33:MRPL35:MRPL39:ATP5J:ATP5O:MRPL47:NDUFB5:ATP5I:MRPS18C:NDUFS4:MRPL22:TOMM7:MRPS17:MRPS17:PMPCB:MRPS33:UQCRB:TOMM5:MRPL50
FUMA	GO:0005740	mitochondrial envelope	725	42	6.43855e-24	3.22249e-21	NDUFS5:UQCRH:ATP5F1:MRPS21:MRPL24:TIMM17A:NDUFS3:TMEM126B:TMEM126A:NLRX1:NDUFA9:MRPL51:ATXN3:RHOT2:MRPL27:TOMM40:MRPL33:MRPL35:MRPL39:ATP5J:SOD1:ATP5O:SLC25A1:COX17:MRPL47:NDUFB5:ATP5I:MRPS18C:NDUFS4:MRPL22:BNIP1:BPHL:TMEM14C:TOMM7:MRPS17:MRPS17:PMPCB:MRPS33:CLU:UQCRB:COX6C:TOMM5:MRPL50
FUMA	GO:0031975	envelope	1166	51	2.0106e-23	6.70871e-21	NDUFS5:UQCRH:ATP5F1:MRPS21:MRPL24:TIMM17A:EIF5AL1:NUCB2:NDUFS3:TMEM126B:TMEM126A:NLRX1:SORL1:NDUFA9:MRPL51:OSBPL8:ATXN3:RHOT2:MVP:MRPL27:TOMM40:MRPL33:MRPL35:BIN1:MRPL39:ATP5J:SOD1:ATP5O:SLC25A1:COX17:MRPL47:NDUFB5:ATP5I:MRPS18C:NDUFS4:MRPL22:BNIP1:BPHL:TMEM14C:TOMM7:CBX3:MRPS17:MRPS17:PMPCB:MRPS33:CLU:DPY19L4:UQCRB:COX6C:ENY2:TOMM5:MRPL50
FUMA	GO:0019866	organelle inner membrane	516	35	2.97134e-22	7.43578e-20	NDUFS5:UQCRH:ATP5F1:MRPS21:MRPL24:TIMM17A:NDUFS3:TMEM126B:TMEM126A:NDUFA9:MRPL51:MRPL27:TOMM40:MRPL33:MRPL35:MRPL39:ATP5J:ATP5O:SLC25A1:MRPL47:NDUFB5:ATP5I:MRPS18C:NDUFS4:MRPL22:TMEM14C:CBX3:MRPS17:MRPS17:PMPCB:MRPS33:CLU:DPY19L4:UQCRB:COX6C:MRPL50
FUMA	GO:0005739	mitochondrion	1552	54	3.13373e-20	6.27372e-18	NDUFS5:UQCRH:ATP5F1:MRPS21:MRPL24:TIMM17A:MAPK8:ALKBH3:NDUFS3:NARS2:TMEM126B:TMEM126A:CWC15:NLRX1:NDUFA9:MRPL51:NGDN:ATXN3:RHOT2:MRPL27:RSAD1:PTRH2:TOMM40:MRPL33:MRPL35:DNAJC5:MRPL39:ATP5J:SOD1:ATP5O:SLC25A1:COX17:MRPL47:NDUFB5:ATP5I:MRPS18C:NDUFS4:MRPL22:BNIP1:BPHL:TMEM14C:HSPA1B:TOMM7:MRPS17:MRPS17:PMPCB:MRPS33:CLU:UQCRB:COX6C:ENY2:DNAJA1:TOMM5:AGTPBP1:MRPL50
FUMA	GO:0044429	mitochondrial part	1019	43	3.24049e-19	5.40621e-17	NDUFS5:UQCRH:ATP5F1:MRPS21:MRPL24:TIMM17A:NDUFS3:NARS2:TMEM126B:TMEM126A:NLRX1:NDUFA9:MRPL51:ATXN3:RHOT2:MRPL27:TOMM40:MRPL33:MRPL35:MRPL39:ATP5J:SOD1:ATP5O:SLC25A1:COX17:MRPL47:NDUFB5:ATP5I:MRPS18C:NDUFS4:MRPL22:BNIP1:BPHL:TMEM14C:TOMM7:MRPS17:MRPS17:PMPCB:MRPS33:CLU:UQCRB:COX6C:TOMM5:MRPL50
FUMA	GO:0044391	ribosomal subunit	189	20	6.88447e-17	9.84479e-15	MRPS21:MRPL24:RPS24:RPS25:MRPL51:RPL36AL:RPS27L:RPL26:MRPL27:MRPL33:MRPL35:MRPL39:MRPL47:MRPS18C:RPL34:MRPL22:RPL26L1:MRPS17:MRPS17:MRPS33:MRPL50
FUMA	GO:1902494	catalytic complex	1351	44	1.64732e-15	2.0612e-13	SYF2:NDUFS5:UQCRH:MAGOH:GTF2B:CUL2:EXOSC1:NDUFS3:DPF2:CWC15:NDUFA9:PRIM1:POLR1D:PSMC6:PSMA3:PSMA4:SEC11A:KCTD13:INO80C:SNRPD2:DPY30:SNRPG:SNRPB2:POLR3F:PIGT:DPM1:NCF4:LSM3:EXOSC7:ACTL6A:NDUFB5:DCUN1D1:TCTEX1D2:CCNI:NDUFS4:LSM2:HSPA1B:GTF2H5:PSMC2:ING3:UQCRB:ENY2:DNAJA1:CDC26
FUMA	GO:1901566	organonitrogen compound biosynthetic process	1814	54	2.93163e-17	2.15475e-13	PANK4:MKNK1:MAGOH:ATP5F1:MRPS21:MRPL24:NDST2:RPS24:EIF5AL1:MUC6:SLC35C1:NARS2:RPS25:DPAGT1:MRPL51:CSAD:NGDN:RPL36AL:RPS27L:ALDOA:RPL26:XYLT2:MRPL27:RSAD1:UPF1:LSM14A:MRPL33:PPM1B:MRPL35:MGAT4A:PIGT:DPM1:MRPL39:ATP5J:ATP5O:SLC25A1:MRPL47:ATP5I:MRPS18C:RPL34:PURA:HBEGF:MRPL22:RARS:RPL26L1:TMEM14C:VARS:IL6:MRPS17:MRPS17:IMPDH1:MRPS33:COPS5:DPY19L4:MRPL50
FUMA	GO:0043603	cellular amide metabolic process	1020	40	7.87808e-17	2.89519e-13	MKNK1:MAGOH:MRPS21:MRPL24:RPS24:EIF5AL1:NARS2:PICALM:RPS25:SORL1:MRPL51:NGDN:RPL36AL:RPS27L:SEC11A:RPL26:MRPL27:UPF1:LSM14A:MRPL33:MRPL35:DBI:BIN1:MRPL39:SOD1:SLC25A1:MRPL47:MRPS18C:RPL34:PURA:MRPL22:RARS:RPL26L1:VARS:IL6:MRPS17:MRPS17:MRPS33:CLU:COPS5:MRPL50
FUMA	KEGG_OXIDATIVE_PHOSPHORYLATION	oxidative phosphorylation	118	16	1.72638e-15	3.21107e-13	NDUFS5:UQCRH:ATP5F1:NDUFS3:NDUFA9:ATP6V1D:ATP5J:ATP5O:ATP6V1E1:COX17:NDUFB5:ATP5I:NDUFS4:ATP6V0E1:UQCRB:COX6C
FUMA	GO:0005840	ribosome	248	20	1.34288e-14	1.49359e-12	MRPS21:MRPL24:RPS24:RPS25:MRPL51:RPL36AL:RPS27L:RPL26:MRPL27:MRPL33:MRPL35:MRPL39:MRPL47:MRPS18C:RPL34:MRPL22:RPL26L1:MRPS17:MRPS17:MRPS33:MRPL50
gPROFILER	GO:0098798	mitochondrial protein complex	255	26		1.87279e-12	MRPL50,MRPL39,TOMM40,MRPL51,NDUFS5,TOMM5,MRPS18C,UQCRB,UQCRH,TIMM17A,ATP5J,MRPL33,MRPS21,MRPL22,MRPL35,MRPS33,NDUFS4,MRPL24,PMPCB,NDUFS3,MRPL27,MRPS17,MRPL47,TOMM7,NDUFB5,NDUFA9
gPROFILER	GO:0005740	mitochondrial envelope	569	37		2.24162e-12	MRPL50,MRPL39,TOMM40,TMEM126B,MRPL51,NDUFS5,CLU,TOMM5,MRPS18C,UQCRB,UQCRH,COX6C,COX17,TIMM17A,RHOT2,ATP5J,MRPL33,MRPS21,MRPL22,ATXN3,MRPL35,MRPS33,NDUFS4,MRPL24,NLRX1,PMPCB,BNIP1,SLC25A1,SOD1,NDUFS3,BPHL,MRPL27,MRPS17,MRPL47,TOMM7,NDUFB5,NDUFA9
Webgestalt	GO:0044391	ribosomal subunit	186	20	5.9952e-15	2.31415e-12	MRPL50;MRPL39;MRPL51;MRPS18C;RPL36AL;MRPL33;MRPS21;MRPL22;MRPL35;RPS27L;MRPS33;MRPL24;RPS24;RPL34;RPL26;RPS25;RPL26L1;MRPL27;MRPS17;MRPL47
gPROFILER	GO:0031966	mitochondrial membrane	535	35		7.21721e-12	MRPL50,MRPL39,TOMM40,TMEM126B,MRPL51,NDUFS5,CLU,TOMM5,MRPS18C,UQCRB,UQCRH,COX6C,TIMM17A,RHOT2,ATP5J,MRPL33,MRPS21,MRPL22,ATXN3,MRPL35,MRPS33,NDUFS4,MRPL24,NLRX1,PMPCB,BNIP1,SLC25A1,NDUFS3,BPHL,MRPL27,MRPS17,MRPL47,TOMM7,NDUFB5,NDUFA9
Webgestalt	GO:0005743	mitochondrial inner membrane	455	28	3.24185e-14	8.34236e-12	MRPL50;MRPL39;TOMM40;TMEM126B;TMEM126A;MRPL51;NDUFS5;MRPS18C;UQCRB;UQCRH;COX6C;TIMM17A;MRPL33;MRPS21;MRPL22;MRPL35;MRPS33;NDUFS4;MRPL24;PMPCB;SLC25A1;NDUFS3;MRPL27;MRPS17;MRPL47;TMEM14C;NDUFB5;NDUFA9
FUMA	GO:0043043	peptide biosynthetic process	719	32	3.8548e-15	9.44427e-12	MKNK1:MAGOH:MRPS21:MRPL24:RPS24:EIF5AL1:NARS2:RPS25:MRPL51:NGDN:RPL36AL:RPS27L:RPL26:MRPL27:UPF1:LSM14A:MRPL33:MRPL35:MRPL39:MRPL47:MRPS18C:RPL34:PURA:MRPL22:RARS:RPL26L1:VARS:IL6:MRPS17:MRPS17:MRPS33:COPS5:MRPL50
FUMA	GO:0006415	translational termination	104	15	5.17784e-15	9.51428e-12	MRPS21:MRPL24:EIF5AL1:MRPL51:MRPL27:UPF1:MRPL33:MRPL35:MRPL39:MRPL47:MRPS18C:MRPL22:MRPS17:MRPS17:MRPS33:MRPL50
gPROFILER	GO:0019866	organelle inner membrane	425	31		9.90104e-12	MRPL50,MRPL39,TOMM40,TMEM126B,MRPL51,NDUFS5,CLU,MRPS18C,UQCRB,UQCRH,COX6C,TIMM17A,ATP5J,MRPL33,MRPS21,MRPL22,MRPL35,MRPS33,NDUFS4,MRPL24,PMPCB,CBX3,SLC25A1,NDUFS3,MRPL27,MRPS17,MRPL47,MFSD10,DPY19L4,NDUFB5,NDUFA9
FUMA	GO:0046907	intracellular transport	1815	50	1.10449e-14	1.6236e-11	MAGOH:ATP5F1:TIMM17A:RPS24:AP2A2:ARHGAP1:MYBPC3:EHD1:GAB2:PICALM:RPS25:SORL1:RAB40C:RHOT2:RPAIN:RPL26:UBL5:MAP1S:UPF1:TOMM40:SNRPD2:DPY30:GEMIN6:SNRPG:VAMP8:BIN1:SSB:SEC23B:DNAJC5:ATP5J:SOD1:ATP5O:TCTEX1D2:ATP5I:GAK:RPL34:SRP19:SAR1B:PURA:RAB24:HSPA1L:SNX3:TOMM7:PMPCB:MDFIC:EPHX2:CLU:DCTN6:ENY2:TOMM5
FUMA	GO:1990904	ribonucleoprotein complex	1361	41	2.17729e-13	1.98355e-11	SYF2:MAGOH:MRPS21:MRPL24:RPS24:CWC15:RPS25:MRPL51:RBMS2:NGDN:RPL36AL:RPS27L:PSMA4:RPL26:MRPL27:UPF1:LSM14A:SNRPD2:MRPL33:SNRPG:MRPL35:SSB:SNRPB2:MRPL39:LSM3:MRPL47:MRPS18C:RPL34:LARP7:NSA2:SRP19:ZMAT2:MRPL22:RPL26L1:LSM2:HSPA1B:LSM5:MRPS17:MRPS17:PSMC2:MRPS33:MRPL50
FUMA	GO:0000313	organellar ribosome	87	13	2.17972e-13	1.98355e-11	MRPS21:MRPL24:MRPL51:MRPL27:MRPL33:MRPL35:MRPL39:MRPL47:MRPS18C:MRPL22:MRPS17:MRPS17:MRPS33:MRPL50
gPROFILER	GO:0044391	ribosomal subunit	187	20		2.84431e-11	MRPL50,MRPL39,MRPL51,MRPS18C,RPL36AL,MRPL33,MRPS21,MRPL22,MRPL35,RPS27L,MRPS33,MRPL24,RPS24,RPL34,RPL26,RPS25,RPL26L1,MRPL27,MRPS17,MRPL47
FUMA	GO:0034622	cellular protein containing complex assembly	1112	38	3.88773e-14	4.76247e-11	NDUFS5:GTF2B:MYBPC3:NDUFS3:TMEM126B:PICALM:NDUFA9:CCT2:ARPC3:POMP:PSMC6:MED6:RPS27L:MEFV:CENPN:FCHO1:LSM14A:SNRPD2:GEMIN6:SNRPG:BIN1:LSM3:COX17:NDUFB5:DGKQ:RNF4:NDUFS4:TBCA:SRP19:MRPL22:AIF1:HSPA1B:RPF2:GTF2H5:RPA3:PSMC2:CLU:UQCRB
FUMA	GO:0043604	amide biosynthetic process	843	33	5.19765e-14	4.87929e-11	MKNK1:MAGOH:MRPS21:MRPL24:RPS24:EIF5AL1:NARS2:RPS25:MRPL51:NGDN:RPL36AL:RPS27L:RPL26:MRPL27:UPF1:LSM14A:MRPL33:MRPL35:MRPL39:SLC25A1:MRPL47:MRPS18C:RPL34:PURA:MRPL22:RARS:RPL26L1:VARS:IL6:MRPS17:MRPS17:MRPS33:COPS5:MRPL50
FUMA	GO:0065003	protein containing complex assembly	1891	50	5.3108e-14	4.87929e-11	NDUFS5:GTF2B:LAMC1:CAMK2G:MYBPC3:NDUFS3:EHD1:TMEM126B:PICALM:DPAGT1:SORL1:NDUFA9:SOAT2:CCT2:ARPC3:POMP:PSMC6:MED6:RPS27L:MEFV:KCTD13:ALDOA:CENPN:FCHO1:LSM14A:APOC1:SNRPD2:GEMIN6:SNRPG:BIN1:LSM3:COX17:NDUFB5:DGKQ:RNF4:NDUFS4:TBCA:SRP19:SAR1B:MRPL22:AIF1:HSPA1B:CD2AP:RPF2:GTF2H5:RPA3:PSMC2:CLU:UQCRB:FBP1
Webgestalt	GO:0005840	ribosome	229	20	3.22964e-13	6.2332e-11	MRPL50;MRPL39;MRPL51;MRPS18C;RPL36AL;MRPL33;MRPS21;MRPL22;MRPL35;RPS27L;MRPS33;MRPL24;RPS24;RPL34;RPL26;RPS25;RPL26L1;MRPL27;MRPS17;MRPL47
FUMA	GO:0003735	structural constituent of ribosome	178	17	8.42756e-14	1.38633e-10	MRPS21:MRPL24:RPS24:MRPL51:RPL36AL:RPS27L:RPL26:MRPL27:MRPL33:MRPL35:MRPL47:MRPS18C:RPL34:MRPL22:RPL26L1:MRPS17:MRPS17:MRPS33
gPROFILER	GO:0005743	mitochondrial inner membrane	389	28		1.61771e-10	MRPL50,MRPL39,TOMM40,TMEM126B,MRPL51,NDUFS5,CLU,MRPS18C,UQCRB,UQCRH,COX6C,TIMM17A,ATP5J,MRPL33,MRPS21,MRPL22,MRPL35,MRPS33,NDUFS4,MRPL24,PMPCB,SLC25A1,NDUFS3,MRPL27,MRPS17,MRPL47,NDUFB5,NDUFA9
gPROFILER	GO:0005840	ribosome	211	20		1.80002e-10	MRPL50,MRPL39,MRPL51,MRPS18C,RPL36AL,MRPL33,MRPS21,MRPL22,MRPL35,RPS27L,MRPS33,MRPL24,RPS24,RPL34,RPL26,RPS25,RPL26L1,MRPL27,MRPS17,MRPL47
gPROFILER	GO:0031975	envelope	912	43		1.80002e-10	MRPL50,MRPL39,TOMM40,ENY2,TMEM126B,MRPL51,NDUFS5,CLU,TOMM5,MRPS18C,UQCRB,UQCRH,COX6C,COX17,TIMM17A,RHOT2,ATP5J,MRPL33,SORL1,MRPS21,MRPL22,ATXN3,MRPL35,MRPS33,NDUFS4,MRPL24,NLRX1,PMPCB,CBX3,BNIP1,CETN3,SLC25A1,SOD1,NDUFS3,BPHL,MRPL27,MRPS17,MRPL47,MFSD10,TOMM7,DPY19L4,NDUFB5,NDUFA9
gPROFILER	GO:0031967	organelle envelope	912	43		1.80002e-10	MRPL50,MRPL39,TOMM40,ENY2,TMEM126B,MRPL51,NDUFS5,CLU,TOMM5,MRPS18C,UQCRB,UQCRH,COX6C,COX17,TIMM17A,RHOT2,ATP5J,MRPL33,SORL1,MRPS21,MRPL22,ATXN3,MRPL35,MRPS33,NDUFS4,MRPL24,NLRX1,PMPCB,CBX3,BNIP1,CETN3,SLC25A1,SOD1,NDUFS3,BPHL,MRPL27,MRPS17,MRPL47,MFSD10,TOMM7,DPY19L4,NDUFB5,NDUFA9
gPROFILER	GO:1990904	ribonucleoprotein complex	790	37		2.10754e-10	MRPL50,MRPL39,MRPL51,MRPS18C,UPF1,MAGOH,RPL36AL,LSM3,LSM5,HSPA1B,CWC15,NGDN,SNRPD2,MRPL33,MRPS21,SRP19,MRPL22,SYF2,SNRPG,MRPL35,SSB,RPS27L,MRPS33,MRPL24,RPS24,RPL34,PSMA4,RPL26,RBMS2,RPS25,PSMC2,LSM14A,RPL26L1,SNRPB2,MRPL27,MRPS17,MRPL47
FUMA	WP111	electron transport chain (oxphos system in mitochondria)	91	13	3.97096e-13	2.15623e-10	NDUFS5:UQCRH:ATP5F1:NDUFS3:NDUFA9:ATP5J:ATP5O:COX17:NDUFB5:ATP5I:NDUFS4:UQCRB:COX6C
FUMA	GO:0070126	mitochondrial translational termination	89	13	2.95323e-13	2.41181e-10	MRPS21:MRPL24:MRPL51:MRPL27:MRPL33:MRPL35:MRPL39:MRPL47:MRPS18C:MRPL22:MRPS17:MRPS17:MRPS33:MRPL50
FUMA	GO:0007005	mitochondrion organization	512	25	6.06449e-13	4.4574e-10	NDUFS5:ATP5F1:TIMM17A:MAPK8:NDUFS3:ATG2A:TMEM126B:NDUFA9:RHOT2:UBL5:PVRL2:TOMM40:ATP5J:ATP5O:COX17:NDUFB5:ATP5I:NDUFS4:HSPA1L:TOMM7:PMPCB:CLU:UQCRB:TOMM5:AGTPBP1
FUMA	GO:0003723	rna binding	1875	48	5.9463e-13	4.89083e-10	SYF2:GNL2:MAGOH:MRPS21:RPS24:EIF5AL1:EXOSC1:CWC15:RPS25:RBMS2:NGDN:KTN1:ACTN1:RPS27L:MAZ:ALDOA:SNTB2:RPL26:MRPL27:UPF1:LSM14A:SNRPD2:SNRPG:PPIG:SSB:SNRPB2:MRPL39:TCF20:LSM3:EXOSC7:MRPS18C:RPL34:LARP7:SUB1:NSA2:TBCA:SRP19:PURA:MRPL22:RARS:RPL26L1:LSM2:HSPA1B:RPF2:LSM5:MRPS17:MRPS17:IMPDH1:COPS5
Webgestalt	GO:0000313	organellar ribosome	86	13	4.87155e-12	6.26806e-10	MRPL50;MRPL39;MRPL51;MRPS18C;MRPL33;MRPS21;MRPL22;MRPL35;MRPS33;MRPL24;MRPL27;MRPS17;MRPL47
Webgestalt	GO:0005761	mitochondrial ribosome	86	13	4.87155e-12	6.26806e-10	MRPL50;MRPL39;MRPL51;MRPS18C;MRPL33;MRPS21;MRPL22;MRPL35;MRPS33;MRPL24;MRPL27;MRPS17;MRPL47
FUMA	GO:0015934	large ribosomal subunit	120	13	1.47981e-11	1.23441e-09	MRPL24:MRPL51:RPL36AL:RPL26:MRPL27:MRPL33:MRPL35:MRPL39:MRPL47:RPL34:MRPL22:RPL26L1:MRPL50
FUMA	GO:0043624	cellular protein complex disassembly	216	17	1.99464e-12	1.33278e-09	MRPS21:MRPL24:EIF5AL1:MRPL51:MRPL27:MAP1S:UPF1:MRPL33:MRPL35:MRPL39:MRPL47:GAK:MRPS18C:MRPL22:MRPS17:MRPS17:MRPS33:MRPL50
FUMA	GO:0006414	translational elongation	134	14	3.97013e-12	2.4317e-09	MRPS21:MRPL24:EIF5AL1:MRPL51:MRPL27:MRPL33:MRPL35:MRPL39:MRPL47:MRPS18C:MRPL22:MRPS17:MRPS17:MRPS33:MRPL50
FUMA	GO:0044455	mitochondrial membrane part	221	16	3.18395e-11	2.45164e-09	NDUFS5:UQCRH:ATP5F1:TIMM17A:NDUFS3:NDUFA9:RHOT2:TOMM40:ATP5J:ATP5O:NDUFB5:ATP5I:NDUFS4:TOMM7:UQCRB:TOMM5
gPROFILER	GO:0005761	mitochondrial ribosome	87	13		2.91833e-09	MRPL50,MRPL39,MRPL51,MRPS18C,MRPL33,MRPS21,MRPL22,MRPL35,MRPS33,MRPL24,MRPL27,MRPS17,MRPL47
gPROFILER	GO:0000313	organellar ribosome	87	13		2.91833e-09	MRPL50,MRPL39,MRPL51,MRPS18C,MRPL33,MRPS21,MRPL22,MRPL35,MRPS33,MRPL24,MRPL27,MRPS17,MRPL47
Webgestalt	GO:0003735	structural constituent of ribosome	156	17	1.23885e-11	1.473e-08	MRPL51;MRPS18C;RPL36AL;MRPL33;MRPS21;MRPL22;MRPL35;RPS27L;MRPS33;MRPL24;RPS24;RPL34;RPL26;RPL26L1;MRPL27;MRPS17;MRPL47
FUMA	GO:0098796	membrane protein complex	1153	33	2.21521e-10	1.58388e-08	NDUFS5:UQCRH:ATP5F1:TIMM17A:AP2A2:TSPAN32:NDUFS3:MS4A2:PICALM:NDUFA9:ATP6V1D:SEC11A:SNTB2:FCHO1:TOMM40:VAMP8:SEC23B:PIGT:ATP5J:ATP5O:ATP6V1E1:NCF4:NDUFB5:ATP5I:NDUFS4:SAR1B:ATP6V0E1:BNIP1:SNX3:IL6:TOMM7:UQCRB:TOMM5
FUMA	GO:0098800	inner mitochondrial membrane protein complex	126	12	4.1444e-10	2.76569e-08	NDUFS5:UQCRH:ATP5F1:TIMM17A:NDUFS3:NDUFA9:ATP5J:ATP5O:NDUFB5:ATP5I:NDUFS4:UQCRB
gPROFILER	GO:0005840	ribosome	211	21		3.14058e-08	ENY2,CRYZL1,EXOSC7,ZNF384,TOMM5,SUB1,MDFIC,HSPA1B,RAB40C,TPRKB,RNF4,ASPHD1,NCOA7,PANK4,IDUA,IGFBP6,NDUFA9,GTF2B
Webgestalt	GO:0015934	large ribosomal subunit	118	13	2.91737e-10	3.21744e-08	MRPL50;MRPL39;MRPL51;RPL36AL;MRPL33;MRPL22;MRPL35;MRPL24;RPL34;RPL26;RPL26L1;MRPL27;MRPL47
FUMA	GO:0032543	mitochondrial translation	135	13	6.65338e-11	3.76172e-08	MRPS21:MRPL24:MRPL51:MRPL27:MRPL33:MRPL35:MRPL39:MRPL47:MRPS18C:MRPL22:MRPS17:MRPS17:MRPS33:MRPL50
FUMA	KEGG_SPLICEOSOME	spliceosome	127	12	4.54493e-10	4.22678e-08	SYF2:MAGOH:CWC15:SNRPD2:SNRPG:SNRPB2:LSM3:ZMAT2:LSM2:HSPA1L:HSPA1B:LSM5
FUMA	GO:0000315	organellar large ribosomal subunit	57	9	6.88295e-10	4.30615e-08	MRPL24:MRPL51:MRPL27:MRPL33:MRPL35:MRPL39:MRPL47:MRPL22:MRPL50
gPROFILER	GO:0044429	mitochondrial part	852	37		5.0553e-08	MRPL50,MRPL39,TOMM40,TMEM126B,MRPL51,NDUFS5,CLU,TOMM5,MRPS18C,UQCRB,UQCRH,COX6C,COX17,TIMM17A,RHOT2,ATP5J,MRPL33,MRPS21,MRPL22,ATXN3,MRPL35,MRPS33,NDUFS4,MRPL24,NLRX1,PMPCB,BNIP1,SLC25A1,SOD1,NDUFS3,BPHL,MRPL27,MRPS17,MRPL47,TOMM7,NDUFB5,NDUFA9
gPROFILER	GO:0044391	ribosomal subunit	187	19		5.87419e-08	ENY2,CRYZL1,EXOSC7,ZNF384,TOMM5,SUB1,MDFIC,HSPA1B,RAB40C,TPRKB,RNF4,ASPHD1,NCOA7,PANK4,IDUA,IGFBP6,GTF2B
gPROFILER	GO:1990904	ribonucleoprotein complex	790	40		5.87419e-08	ENY2,CRYZL1,EXOSC7,MRPL51,ZNF384,TOMM5,UQCRB,FCRLB,MGAT4A,SUB1,MDFIC,HSPA1B,RAB40C,SRP19,TPRKB,RNPEP,RNF4,ASPHD1,TNIP2,NCOA7,NUCB2,DUSP12,XYLT2,DPAGT1,CBX3,PANK4,SNRPB2,MRPL27,MRPS17,IDUA,IGFBP6,GIMAP7,TOMM7,NDUFA9,LPAR1,GTF2B,EXOSC1
Webgestalt	R-HSA-72766	Translation	291	25	4.47329e-11	6.16866e-08	MRPL50;MRPL39;MRPL51;MRPS18C;RPL36AL;SEC11A;NARS2;MRPL33;MRPS21;SRP19;MRPL22;MRPL35;RPS27L;MRPS33;MRPL24;RPS24;RPL34;RPL26;RPS25;RPL26L1;VARS;MRPL27;MRPS17;MRPL47;RARS
FUMA	GO:0005759	mitochondrial matrix	465	20	1.21953e-09	7.18087e-08	ATP5F1:MRPS21:MRPL24:NDUFS3:NARS2:NDUFA9:MRPL51:ATXN3:MRPL27:MRPL33:MRPL35:MRPL39:SOD1:MRPL47:MRPS18C:MRPL22:MRPS17:MRPS17:PMPCB:MRPS33:MRPL50
FUMA	GO:0032984	protein containing complex disassembly	324	18	1.45993e-10	7.66463e-08	MRPS21:MRPL24:EIF5AL1:MRPL51:MRPL27:MAP1S:UPF1:MRPL33:VAMP8:MRPL35:MRPL39:MRPL47:GAK:MRPS18C:MRPL22:MRPS17:MRPS17:MRPS33:MRPL50
gPROFILER	GO:0015934	large ribosomal subunit	115	13		8.76695e-08	MRPL50,MRPL39,MRPL51,RPL36AL,MRPL33,MRPL22,MRPL35,MRPL24,RPL34,RPL26,RPL26L1,MRPL27,MRPL47
FUMA	GO:0006119	oxidative phosphorylation	53	9	3.4854e-10	9.46285e-08	NDUFS5:ATP5F1:NDUFS3:NDUFA9:ATP5J:ATP5O:NDUFB5:ATP5I:NDUFS4
FUMA	KEGG_HUNTINGTONS_DISEASE	huntingtons disease	174	13	1.57221e-09	9.74773e-08	NDUFS5:UQCRH:ATP5F1:AP2A2:NDUFS3:NDUFA9:ATP5J:SOD1:ATP5O:NDUFB5:NDUFS4:UQCRB:COX6C
FUMA	KEGG_PARKINSONS_DISEASE	parkinsons disease	115	11	2.14292e-09	9.96458e-08	NDUFS5:UQCRH:ATP5F1:NDUFS3:NDUFA9:ATP5J:ATP5O:NDUFB5:NDUFS4:UQCRB:COX6C
Webgestalt	GO:0006415	translational termination	100	15	1.65957e-11	1.04653e-07	MRPL50;MRPL39;MRPL51;MRPS18C;UPF1;MRPL33;MRPS21;MRPL22;MRPL35;MRPS33;MRPL24;EIF5AL1;MRPL27;MRPS17;MRPL47
gPROFILER	GO:0070126	mitochondrial translational termination	88	13		1.79997e-07	MRPL50,MRPL39,MRPL51,MRPS18C,MRPL33,MRPS21,MRPL22,MRPL35,MRPS33,MRPL24,MRPL27,MRPS17,MRPL47
gPROFILER	GO:0070125	mitochondrial translational elongation	87	13		1.79997e-07	MRPL50,MRPL39,MRPL51,MRPS18C,MRPL33,MRPS21,MRPL22,MRPL35,MRPS33,MRPL24,MRPL27,MRPS17,MRPL47
gPROFILER	GO:0006415	translational termination	100	14		1.79997e-07	MRPL50,MRPL39,MRPL51,MRPS18C,UPF1,MRPL33,MRPS21,MRPL22,MRPL35,MRPS33,MRPL24,MRPL27,MRPS17,MRPL47
gPROFILER	GO:0005739	mitochondrion	1295	31		1.88843e-07	MRPL50,MRPL39,TOMM40,ENY2,TMEM126B,TMEM126A,MRPL51,NDUFS5,CLU,TOMM5,MRPS18C,UQCRB,UQCRH,COX6C,COX17,TIMM17A,RHOT2,ATP5J,HSPA1B,CWC15,NGDN,NARS2,MRPL33,MRPS21,MRPL22,ATXN3,MRPL35,MRPS33,ALKBH3,NDUFS4,MRPL24
FUMA	GO:0006119	oxidative phosphorylation	126	12	4.1444e-10	2.01771e-07	NDUFS5:UQCRH:ATP5F1:NDUFS3:NDUFA9:ATP5J:ATP5O:NDUFB5:ATP5I:NDUFS4:UQCRB:COX6C
FUMA	GO:0022411	cellular component disassembly	537	22	4.39229e-10	2.01771e-07	MRPS21:MRPL24:LAMC1:EIF5AL1:ATG2A:MRPL51:MRPL27:MAP1S:UPF1:MRPL33:VAMP8:MRPL35:MRPL39:MRPL47:GAK:MRPS18C:MRPL22:IL6:TOMM7:MRPS17:MRPS17:MRPS33:MRPL50
gPROFILER	GO:0032991	protein-containing complex	4833	116		2.06138e-07	MRPL50,MRPL39,TOMM40,ENY2,APOC1,GTF2H5,EXOSC7,MRPL51,HSPA1L,NDUFS5,CLU,PSMA3,PICALM,SHFM1,TOMM5,IL6,RPAP3,MRPS18C,BIN1,UQCRB,UPF1,POLR1D,UQCRH,PSMC6,MAGOH,CARD8,RPL36AL,ING3,TCTEX1D2,TIMM17A,LSM3,PDLIM7,SEC11A,ATP5J,SUB1,LSM5,HSPA1B,INO80C,CWC15,PRIM1,NGDN,CDC26,SNRPD2,MRPL33,SNTB2,MRPS21,SRP19,CCNI,TPRKB,MRPL22,SYF2,MEFV,MYBPC3,SNRPG,PURA,MRPL35,SSB,RPS27L,MRPS33,POLR3F,NDUFS4,MRPL24,NACA,RPS24,…
FUMA	GO:0140053	mitochondrial gene expression	160	13	5.59312e-10	2.4182e-07	MRPS21:MRPL24:MRPL51:MRPL27:MRPL33:MRPL35:MRPL39:MRPL47:MRPS18C:MRPL22:MRPS17:MRPS17:MRPS33:MRPL50
gPROFILER	GO:0003735	structural constituent of ribosome	144	15		4.40202e-07	MRPL51,MRPS18C,MRPS21,MRPL22,MRPL35,RPS27L,MRPS33,RPS24,RPL34,RPL26,RPS25,RPL26L1,MRPL27,MRPS17,MRPL47
Webgestalt	GO:0000315	organellar large ribosomal subunit	56	9	5.81405e-09	4.98716e-07	MRPL50;MRPL39;MRPL51;MRPL33;MRPL22;MRPL35;MRPL24;MRPL27;MRPL47
Webgestalt	GO:0005762	mitochondrial large ribosomal subunit	56	9	5.81405e-09	4.98716e-07	MRPL50;MRPL39;MRPL51;MRPL33;MRPL22;MRPL35;MRPL24;MRPL27;MRPL47
gPROFILER	GO:0006414	translational elongation	121	14		7.34514e-07	MRPL50,MRPL39,MRPL51,MRPS18C,MRPL33,MRPS21,MRPL22,MRPL35,MRPS33,MRPL24,EIF5AL1,MRPL27,MRPS17,MRPL47
FUMA	GO:0006839	mitochondrial transport	250	15	1.80171e-09	7.35699e-07	ATP5F1:TIMM17A:MAPK8:RHOT2:UBL5:TOMM40:ATP5J:ATP5O:SLC25A1:ATP5I:TMEM14C:HSPA1L:TOMM7:PMPCB:TOMM5
gPROFILER	GO:0006518	peptide metabolic process	776	34		8.29118e-07	MRPL50,MRPL39,MRPL51,CLU,PICALM,IL6,MRPS18C,BIN1,UPF1,SEC11A,NARS2,MRPL33,SORL1,MRPS21,MRPL22,MRPL35,RPS27L,MRPS33,MRPL24,NACA,RPS24,RPL34,COPS5,LNPEP,RPL26,EIF5AL1,RPS25,RPL26L1,SOD1,VARS,MRPL27,MRPS17,MRPL47,ERAP2
gPROFILER	GO:0015934	large ribosomal subunit	115	14		9.8076e-07	ENY2,CRYZL1,SUB1,MDFIC,RAB40C,TPRKB,RNF4,ASPHD1,NCOA7,PANK4,IDUA,IGFBP6
Webgestalt	GO:0070125	mitochondrial translational elongation	88	13	4.6815e-10	9.8405e-07	MRPL50;MRPL39;MRPL51;MRPS18C;MRPL33;MRPS21;MRPL22;MRPL35;MRPS33;MRPL24;MRPL27;MRPS17;MRPL47
Webgestalt	GO:0070126	mitochondrial translational termination	88	13	4.6815e-10	9.8405e-07	MRPL50;MRPL39;MRPL51;MRPS18C;MRPL33;MRPS21;MRPL22;MRPL35;MRPS33;MRPL24;MRPL27;MRPS17;MRPL47
gPROFILER	GO:0005762	mitochondrial large ribosomal subunit	57	9		1.11436e-06	MRPL50,MRPL39,MRPL51,MRPL33,MRPL22,MRPL35,MRPL24,MRPL27,MRPL47
gPROFILER	GO:0000315	organellar large ribosomal subunit	57	9		1.11436e-06	MRPL50,MRPL39,MRPL51,MRPL33,MRPL22,MRPL35,MRPL24,MRPL27,MRPL47
FUMA	GO:0005684	u2 type spliceosomal complex	83	9	2.102e-08	1.16895e-06	SYF2:CWC15:SNRPD2:SNRPG:SNRPB2:LSM3:ZMAT2:LSM2:LSM5
Webgestalt	R-HSA-5389840	Mitochondrial translation elongation	87	13	3.40775e-09	1.17482e-06	MRPL50;MRPL39;MRPL51;MRPS18C;MRPL33;MRPS21;MRPL22;MRPL35;MRPS33;MRPL24;MRPL27;MRPS17;MRPL47
Webgestalt	R-HSA-5368286	Mitochondrial translation initiation	87	13	3.40775e-09	1.17482e-06	MRPL50;MRPL39;MRPL51;MRPS18C;MRPL33;MRPS21;MRPL22;MRPL35;MRPS33;MRPL24;MRPL27;MRPS17;MRPL47
Webgestalt	R-HSA-5419276	Mitochondrial translation termination	87	13	3.40775e-09	1.17482e-06	MRPL50;MRPL39;MRPL51;MRPS18C;MRPL33;MRPS21;MRPL22;MRPL35;MRPS33;MRPL24;MRPL27;MRPS17;MRPL47
FUMA	GO:0048002	antigen processing and presentation of peptide antigen	186	13	3.54533e-09	1.37148e-06	FCGR2B:AP2A2:CTSD:PSMC6:PSMA3:PSMA4:VAMP8:NCF4:ERAP2:LNPEP:SAR1B:PSMC2:DCTN6
FUMA	GO:0033365	protein localization to organelle	916	27	5.82318e-09	2.14002e-06	TIMM17A:MAPK8:RPS24:EHD1:RPS25:SORL1:CCT2:OSBPL8:ATP6V1D:RPAIN:RPL26:UBL5:TOMM40:SSB:GAK:RPL34:SRP19:HSPA1L:CD2AP:RPF2:TOMM7:PMPCB:MDFIC:EPHX2:CLU:DNAJA1:TOMM5
Webgestalt	R-HSA-5368287	Mitochondrial translation	93	13	7.88304e-09	2.17414e-06	MRPL50;MRPL39;MRPL51;MRPS18C;MRPL33;MRPS21;MRPL22;MRPL35;MRPS33;MRPL24;MRPL27;MRPS17;MRPL47
FUMA	KEGG_ALZHEIMERS_DISEASE	alzheimers disease	159	11	6.40066e-08	2.38105e-06	NDUFS5:UQCRH:ATP5F1:NDUFS3:NDUFA9:ATP5J:ATP5O:NDUFB5:NDUFS4:UQCRB:COX6C
gPROFILER	GO:0043933	protein-containing complex subunit organization	1827	55		2.46736e-06	MRPL50,MRPL39,AIF1,TMEM126B,APOC1,GTF2H5,MRPL51,NDUFS5,CLU,PICALM,MRPS18C,EHD1,BIN1,UQCRB,UPF1,RPF2,PSMC6,FBP1,COX17,LSM3,SUB1,HSPA1B,ALDOA,SNRPD2,MRPL33,SORL1,MRPS21,SRP19,MRPL22,MEFV,SNRPG,MRPL35,RNF4,RPS27L,MRPS33,NDUFS4,MRPL24,DPAGT1,RPA3,VAMP8,ACTR6,GAK,CENPN,PSMC2,TBCA,LSM14A,CD2AP,FCHO1,NDUFS3,POMP,MRPL27,MRPS17,SOAT2,GEMIN6,MRPL47
Webgestalt	GO:0071005	U2-type precatalytic spliceosome	33	7	3.98834e-08	2.79909e-06	LSM3;LSM5;SNRPD2;SNRPG;SNRPB2;LSM2;ZMAT2
Webgestalt	GO:0071011	precatalytic spliceosome	33	7	3.98834e-08	2.79909e-06	LSM3;LSM5;SNRPD2;SNRPG;SNRPB2;LSM2;ZMAT2
FUMA	GO:0071011	precatalytic spliceosome	44	7	5.36522e-08	2.82662e-06	SNRPD2:SNRPG:SNRPB2:LSM3:ZMAT2:LSM2:LSM5
gPROFILER	GO:0043231	intracellular membrane-bounded organelle	9624	185		4.17468e-06	LARP7,MRPL50,MRPL39,TOMM40,ENY2,AIF1,TMEM126B,TMEM126A,APOC1,GTF2H5,EXOSC7,MRPL51,HSPA1L,NDUFS5,CLU,PSMA3,PICALM,SHFM1,TOMM5,IL6,EPHX2,MRPS18C,EHD1,BIN1,UQCRB,CDKN2C,UPF1,RPF2,POLR1D,UQCRH,PSMC6,MKNK1,COX6C,MAGOH,CARD8,RPL36AL,ING3,FBP1,COX17,MVP,TIMM17A,LSM3,IMPDH1,PDLIM7,SEC11A,MGAT4A,RHOT2,MAPK8,ATP5J,SUB1,NDST2,MDFIC,LSM5,HSPA1B,INO80C,UCHL3,CWC15,PRIM1,NGDN,ALDOA,CDC26,SNRPD2,GNL2,LCOR,NARS2…
FUMA	GO:0002274	myeloid leukocyte activation	646	22	1.28034e-08	4.48119e-06	FCGR2B:AP2A2:CTSD:TSPAN32:GAB2:CCT2:ATP6V1D:MVP:ALDOA:PVRL2:LILRA2:VAMP8:DNAJC5:TNIP2:RHOH:RAB24:AIF1:HSPA1B:IL6:PSMC2:IMPDH1:CLU
FUMA	GO:0070727	cellular macromolecule localization	1886	40	1.41731e-08	4.6425e-06	MAGOH:TIMM17A:MAPK8:RPS24:TM9SF3:AP2A2:EHD1:PICALM:RPS25:SORL1:CCT2:OSBPL8:ATP6V1D:RAB40C:RPAIN:RPL26:UBL5:UPF1:TOMM40:VAMP8:SSB:SEC23B:TCTEX1D2:GAK:RPL34:SRP19:SAR1B:PURA:RAB24:HSPA1L:CD2AP:RPF2:TOMM7:PMPCB:MDFIC:EPHX2:CLU:ENY2:DNAJA1:TOMM5
FUMA	GO:0009057	macromolecule catabolic process	1366	33	1.45276e-08	4.6425e-06	MAGOH:CUL2:RPS24:EXOSC1:AP2A2:CTSD:USP35:RPS25:SORL1:UCHL3:PSMC6:PSMA3:ATXN3:PSMA4:USP7:KCTD13:RPL26:UPF1:SSB:LSM3:EXOSC7:IDUA:RNF4:RPL34:LNPEP:LSM2:HSPA1B:CD2AP:SNX3:LSM5:PSMC2:CLU:CDC26
Webgestalt	GO:0005759	mitochondrial matrix	462	20	7.73292e-08	4.97485e-06	MRPL50;MRPL39;MRPL51;MRPS18C;NARS2;MRPL33;MRPS21;MRPL22;ATXN3;MRPL35;MRPS33;MRPL24;PMPCB;SOD1;NDUFS3;BPHL;MRPL27;MRPS17;MRPL47;NDUFA9
gPROFILER	GO:0044446	intracellular organelle part	8599	180		5.62615e-06	LARP7,MRPL50,MRPL39,TOMM40,ENY2,AIF1,TMEM126B,GTF2H5,EXOSC7,MRPL51,HSPA1L,NDUFS5,CLU,PSMA3,PICALM,SHFM1,TOMM5,IL6,EPHX2,MRPS18C,EHD1,UQCRB,UPF1,RPF2,MAP3K11,POLR1D,UQCRH,PSMC6,MKNK1,COX6C,MAGOH,CARD8,RPL36AL,ING3,COX17,MVP,TCTEX1D2,TIMM17A,LSM3,IMPDH1,PDLIM7,SEC11A,MGAT4A,RHOT2,MAPK8,ATP5J,SUB1,NDST2,LSM5,HSPA1B,INO80C,CWC15,PRIM1,NGDN,ALDOA,CDC26,SNRPD2,GNL2,LCOR,NARS2,MRPL33,SORL1,MRPS21,FBP2,S…
FUMA	GO:0006401	rna catabolic process	391	17	1.87494e-08	5.74202e-06	MAGOH:RPS24:EXOSC1:RPS25:PSMC6:PSMA3:PSMA4:RPL26:UPF1:SSB:LSM3:EXOSC7:RPL34:LSM2:HSPA1B:LSM5:PSMC2
FUMA	GO:0016469	proton transporting two sector atpase complex	49	7	1.16277e-07	5.81969e-06	ATP5F1:ATP6V1D:ATP5J:ATP5O:ATP6V1E1:ATP5I:ATP6V0E1
Webgestalt	GO:0005684	U2-type spliceosomal complex	77	9	1.02651e-07	6.09591e-06	LSM3;LSM5;CWC15;SNRPD2;SYF2;SNRPG;SNRPB2;LSM2;ZMAT2
FUMA	GO:0072594	establishment of protein localization to organelle	552	20	2.17918e-08	6.40679e-06	TIMM17A:MAPK8:RPS24:RPS25:SORL1:CCT2:RPAIN:RPL26:UBL5:TOMM40:RPL34:SRP19:HSPA1L:TOMM7:PMPCB:MDFIC:EPHX2:CLU:DNAJA1:TOMM5
gPROFILER	GO:0043624	cellular protein complex disassembly	185	16		7.04312e-06	MRPL50,MRPL39,MRPL51,MRPS18C,UPF1,MRPL33,MRPS21,MRPL22,MRPL35,MRPS33,MRPL24,GAK,MRPL27,MRPS17,MRPL47,MAP1S
FUMA	WP4396	nonalcoholic fatty liver disease	153	11	4.30963e-08	7.80043e-06	NDUFS5:UQCRH:MAPK8:NDUFS3:MAP3K11:NDUFA9:NDUFB5:NDUFS4:IL6:UQCRB:COX6C
FUMA	GO:0019882	antigen processing and presentation	221	13	2.79635e-08	7.90507e-06	FCGR2B:AP2A2:CTSD:PSMC6:PSMA3:PSMA4:VAMP8:NCF4:ERAP2:LNPEP:SAR1B:PSMC2:DCTN6
FUMA	GO:0080134	regulation of response to stress	1481	34	2.97407e-08	8.09608e-06	FCGR2B:CAMK2G:MUC6:TSPAN32:MAP3K11:NLRX1:PSMC6:PSMA3:ATXN3:PSMA4:MEFV:RPL26:LSM14A:PVRL2:LILRA2:PPM1B:VAMP8:MAP4K4:POLR3F:SOD1:IFNAR2:AP000295.9:TNIP2:HBEGF:MICB:HSPA1L:HSPA1B:NCOA7:RPA3:IL6:PSMC2:MDFIC:CLU:COPS5:DNAJA1
FUMA	GO:0005681	spliceosomal complex	176	11	1.79989e-07	8.57946e-06	SYF2:MAGOH:CWC15:UPF1:SNRPD2:SNRPG:SNRPB2:LSM3:ZMAT2:LSM2:LSM5
FUMA	GO:0006508	proteolysis	1744	37	5.22363e-08	1.33071e-05	TIMM17A:RNPEP:CUL2:CTSD:USP35:PICALM:SORL1:UCHL3:PSMC6:PSMA3:ATXN3:RPS27L:PSMA4:SEC11A:MEFV:USP7:KCTD13:INO80C:CARD8:BIN1:LXN:ACTL6A:RNF4:TNIP2:ADAM29:ERAP2:LNPEP:HSPA1B:CD2AP:SNX3:PMPCB:PSMC2:CLU:COPS5:ENY2:AGTPBP1:CDC26
FUMA	GO:0006886	intracellular protein transport	1156	29	5.25044e-08	1.33071e-05	MAGOH:TIMM17A:RPS24:AP2A2:EHD1:RPS25:SORL1:RAB40C:RPAIN:RPL26:UBL5:UPF1:TOMM40:SSB:SEC23B:TCTEX1D2:RPL34:SRP19:SAR1B:PURA:RAB24:HSPA1L:TOMM7:PMPCB:MDFIC:EPHX2:CLU:ENY2:TOMM5
gPROFILER	GO:0032543	mitochondrial translation	135	13		1.41695e-05	MRPL50,MRPL39,MRPL51,MRPS18C,MRPL33,MRPS21,MRPL22,MRPL35,MRPS33,MRPL24,MRPL27,MRPS17,MRPL47
Webgestalt	GO:0006414	translational elongation	133	14	9.34515e-09	1.47326e-05	MRPL50;MRPL39;MRPL51;MRPS18C;MRPL33;MRPS21;MRPL22;MRPL35;MRPS33;MRPL24;EIF5AL1;MRPL27;MRPS17;MRPL47
FUMA	GO:0002474	antigen processing and presentation of peptide antigen via mhc class i	95	9	6.91793e-08	1.69489e-05	PSMC6:PSMA3:PSMA4:VAMP8:NCF4:ERAP2:LNPEP:SAR1B:PSMC2
gPROFILER	GO:0044455	mitochondrial membrane part	202	8		1.76484e-05	TOMM40,NDUFS5,TOMM5,UQCRB,UQCRH,TIMM17A,RHOT2,ATP5J
gPROFILER	GO:0022626	cytosolic ribosome	105	12		1.95033e-05	ENY2,EXOSC7,TOMM5,SUB1,RAB40C,RNF4,ASPHD1,NCOA7,IGFBP6,GTF2B
gPROFILER	GO:0044422	organelle part	8803	181		2.07045e-05	LARP7,MRPL50,MRPL39,TOMM40,ENY2,AIF1,TMEM126B,GTF2H5,EXOSC7,MRPL51,HSPA1L,NDUFS5,CLU,PSMA3,PICALM,SHFM1,TOMM5,IL6,EPHX2,MRPS18C,EHD1,BIN1,UQCRB,UPF1,RPF2,MAP3K11,POLR1D,UQCRH,PSMC6,MKNK1,COX6C,MAGOH,CARD8,RPL36AL,ING3,COX17,MVP,TCTEX1D2,TIMM17A,LSM3,IMPDH1,PDLIM7,SEC11A,MGAT4A,RHOT2,MAPK8,ATP5J,SUB1,NDST2,LSM5,HSPA1B,INO80C,CWC15,PRIM1,NGDN,ALDOA,CDC26,SNRPD2,GNL2,LCOR,NARS2,MRPL33,SORL1,MRPS21,F…
FUMA	GO:0071013	catalytic step 2 spliceosome	87	8	4.7219e-07	2.14847e-05	SYF2:MAGOH:CWC15:SNRPD2:SNRPG:SNRPB2:LSM3:LSM2
FUMA	GO:0048585	negative regulation of response to stimulus	1629	35	9.19372e-08	2.1798e-05	FCGR2B:FCRLB:NUCB2:SLC35C1:NDUFS3:NLRX1:SORL1:IGFBP6:PSMC6:PSMA3:PSMA4:SEMA4B:MEFV:MAZ:KCTD13:RASAL3:CARD8:LILRA2:PPM1B:MAP4K4:SOD1:RHOH:HBEGF:MICB:AIF1:HSPA1B:CD2AP:NCOA7:IL6:PSMC2:CLU:ENY2:DNAJA1:FBP1:LPAR1
FUMA	GO:0000956	nuclear transcribed mrna catabolic process	206	12	1.06996e-07	2.45757e-05	MAGOH:RPS24:EXOSC1:RPS25:RPL26:UPF1:SSB:LSM3:EXOSC7:RPL34:LSM2:LSM5
FUMA	GO:0005198	structural molecule activity	817	24	4.53158e-08	2.48482e-05	MRPS21:MRPL24:LAMC1:RPS24:MUC6:MYBPC3:MRPL51:ARPC3:RPL36AL:ACTN1:RPS27L:SNTB2:RPL26:MRPL27:MRPL33:MRPL35:MRPL47:MRPS18C:RPL34:MRPL22:RPL26L1:CD2AP:MRPS17:MRPS17:MRPS33
gPROFILER	GO:0043603	cellular amide metabolic process	1002	36		2.5356e-05	MRPL50,MRPL39,MRPL51,CLU,PICALM,IL6,MRPS18C,BIN1,UPF1,SEC11A,NARS2,MRPL33,SORL1,MRPS21,MRPL22,DBI,MRPL35,RPS27L,MRPS33,MRPL24,NACA,RPS24,RPL34,COPS5,LNPEP,RPL26,EIF5AL1,SLC25A1,RPS25,RPL26L1,SOD1,VARS,MRPL27,MRPS17,MRPL47,ERAP2
FUMA	GO:0007264	small gtpase mediated signal transduction	554	19	1.16077e-07	2.58535e-05	SETDB1:ARHGAP1:SIPA1:DOCK9:RAB40C:RHOT2:KCTD13:ARHGEF18:RASAL3:MAP4K4:IQSEC1:RHOH:RAB24:AIF1:CD2AP:PLEKHG1:FBP1:LPAR1:SH2D3C
FUMA	GO:0070646	protein modification by small protein removal	298	14	1.34435e-07	2.87446e-05	USP35:UCHL3:PSMC6:PSMA3:ATXN3:PSMA4:USP7:INO80C:ACTL6A:TNIP2:SNX3:PSMC2:COPS5:ENY2
FUMA	GO:0044265	cellular macromolecule catabolic process	1139	28	1.36879e-07	2.87446e-05	MAGOH:CUL2:RPS24:EXOSC1:AP2A2:USP35:RPS25:UCHL3:PSMC6:PSMA3:ATXN3:PSMA4:USP7:KCTD13:RPL26:UPF1:SSB:LSM3:EXOSC7:RNF4:RPL34:LSM2:HSPA1B:CD2AP:LSM5:PSMC2:CLU:CDC26
gPROFILER	GO:0022625	cytosolic large ribosomal subunit	57	9		3.61318e-05	ENY2,SUB1,RAB40C,RNF4,ASPHD1,NCOA7,IGFBP6
gPROFILER	GO:1902494	catalytic complex	1292	20		3.78246e-05	ENY2,GTF2H5,EXOSC7,NDUFS5,PSMA3,SHFM1,UQCRB,POLR1D,UQCRH,PSMC6,MAGOH,ING3,TCTEX1D2,LSM3,SEC11A,INO80C,CWC15,PRIM1,CDC26,SNRPD2
Webgestalt	GO:0044455	mitochondrial membrane part	229	13	8.3298e-07	4.07101e-05	TOMM40;NDUFS5;TOMM5;UQCRB;UQCRH;TIMM17A;RHOT2;NDUFS4;PMPCB;NDUFS3;TOMM7;NDUFB5;NDUFA9
Webgestalt	GO:0046540	U4/U6 x U5 tri-snRNP complex	32	6	8.43733e-07	4.07101e-05	LSM3;LSM5;SNRPD2;SNRPG;LSM2;ZMAT2
Webgestalt	GO:0097526	spliceosomal tri-snRNP complex	32	6	8.43733e-07	4.07101e-05	LSM3;LSM5;SNRPD2;SNRPG;LSM2;ZMAT2
FUMA	GO:0044451	nucleoplasm part	1113	26	1.01782e-06	4.42972e-05	SYF2:MAGOH:GTF2B:NDUFS3:DPF2:CWC15:POMP:MED6:USP7:CIITA:KCTD13:RPAIN:INO80C:DPY30:GEMIN6:PPIG:SNRPB2:TCF20:EAF2:ACTL6A:DGKQ:RNF4:HSPA1B:GTF2H5:ING3:ENY2
FUMA	GO:0097526	spliceosomal tri snrnp complex	43	6	1.10739e-06	4.45787e-05	SNRPD2:SNRPG:LSM3:ZMAT2:LSM2:LSM5
FUMA	GO:1990234	transferase complex	772	21	1.11335e-06	4.45787e-05	GTF2B:CUL2:DPF2:PRIM1:POLR1D:KCTD13:INO80C:SNRPD2:DPY30:SNRPG:POLR3F:DPM1:ACTL6A:DCUN1D1:CCNI:HSPA1B:GTF2H5:ING3:ENY2:DNAJA1:CDC26
gPROFILER	GO:0031090	organelle membrane	2634	72		4.82071e-05	MRPL50,MRPL39,TOMM40,TMEM126B,MRPL51,NDUFS5,CLU,PICALM,TOMM5,MRPS18C,EHD1,UQCRB,UQCRH,COX6C,TIMM17A,SEC11A,MGAT4A,RHOT2,ATP5J,NDST2,MRPL33,SORL1,MRPS21,MRPL22,ATXN3,KTN1,ATP6V0E1,DNAJA1,MRPL35,MRPS33,NDUFS4,MRPL24,NLRX1,SEC23B,PMPCB,XYLT2,DPAGT1,LNPEP,VAMP8,DAGLB,CBX3,DGKQ,ATP6V1E1,BNIP1,SLC25A1,PIGT,NCF4,GDPD3,NDUFS3,SLC35C1,BPHL,MRPL27,MRPS17,SOAT2,MRPL47,CTSD,ATP6V1D,MFSD10,CAMK2G,TOMM7,RAB24,…
gPROFILER	GO:0044444	cytoplasmic part	8879	50		4.82071e-05	LARP7,MRPL50,MRPL39,TOMM40,ENY2,AIF1,TMEM126B,CRYZL1,TMEM126A,APOC1,EXOSC7,MRPL51,HSPA1L,NDUFS5,CLU,PSMA3,PICALM,SHFM1,TOMM5,IL6,RPAP3,EPHX2,MRPS18C,EHD1,BIN1,UQCRB,CDKN2C,UPF1,POLR1D,UQCRH,PSMC6,MKNK1,COX6C,GAB2,CARD8,RPL36AL,FBP1,COX17,MVP,TCTEX1D2,TIMM17A,LSM3,IMPDH1,PDLIM7,SEC11A,RHOH,MGAT4A,RHOT2,MAPK8,ATP5J
Webgestalt	GO:0120114	Sm-like protein family complex	75	8	1.09348e-06	4.96568e-05	LSM3;LSM5;SNRPD2;SNRPG;SNRPB2;GEMIN6;LSM2;ZMAT2
FUMA	KEGG_PROTEASOME	proteasome	46	6	1.66794e-06	5.1706e-05	POMP:PSMC6:PSMA3:PSMA4:SHFM1:C7orf76:PSMC2
FUMA	GO:0015935	small ribosomal subunit	71	7	1.55205e-06	5.9754e-05	MRPS21:RPS24:RPS25:RPS27L:MRPS18C:MRPS17:MRPS17:MRPS33
gPROFILER	GO:0007005	mitochondrion organization	465	12		6.28251e-05	TOMM40,TMEM126B,HSPA1L,NDUFS5,CLU,TOMM5,UQCRB,COX17,TIMM17A,RHOT2,MAPK8,ATP5J
gPROFILER	KEGG:03010	Ribosome	134	13		6.64638e-05	ENY2,EXOSC7,ZNF384,TOMM5,SUB1,MDFIC,HSPA1B,RAB40C,TPRKB,RNF4,ASPHD1,NCOA7,NUCB2
gPROFILER	GO:0005737	cytoplasm	10038	160		7.02127e-05	LARP7,MRPL50,MRPL39,TOMM40,ENY2,AIF1,TMEM126B,CRYZL1,TMEM126A,APOC1,EXOSC7,MRPL51,HSPA1L,NDUFS5,CLU,PSMA3,PICALM,SHFM1,TOMM5,IL6,RPAP3,CSAD,EPHX2,MRPS18C,EHD1,BIN1,UQCRB,CDKN2C,UPF1,SLC24A4,POLR1D,UQCRH,PSMC6,MKNK1,COX6C,GAB2,CARD8,RPL36AL,FCRLB,FBP1,COX17,MVP,TCTEX1D2,TIMM17A,LSM3,IMPDH1,PDLIM7,SEC11A,RHOH,MGAT4A,RHOT2,MAPK8,ATP5J,NDST2,MDFIC,LSM5,HSPA1B,UCHL3,FCRLA,CWC15,NGDN,ALDOA,CDC26,SNRPD2…
FUMA	GO:0042773	atp synthesis coupled electron transport	84	8	3.59567e-07	7.34115e-05	NDUFS5:UQCRH:NDUFS3:NDUFA9:NDUFB5:NDUFS4:UQCRB:COX6C
Webgestalt	GO:1990204	oxidoreductase complex	107	9	1.74629e-06	7.48966e-05	NDUFS5;UQCRB;UQCRH;NDUFS4;PMPCB;NCF4;NDUFS3;NDUFB5;NDUFA9
FUMA	GO:0022613	ribonucleoprotein complex biogenesis	483	17	3.8115e-07	7.5715e-05	GNL2:RPS24:EXOSC1:NGDN:RPS27L:RPL26:LSM14A:SNRPD2:GEMIN6:SNRPG:LSM3:EXOSC7:NSA2:MRPL22:RPL26L1:RPF2:GTF2H5
gPROFILER	GO:0006412	translation	619	26		7.58916e-05	MRPL50,MRPL39,MRPL51,IL6,MRPS18C,UPF1,NARS2,MRPL33,MRPS21,MRPL22,MRPL35,RPS27L,MRPS33,MRPL24,NACA,RPS24,RPL34,COPS5,RPL26,EIF5AL1,RPS25,RPL26L1,VARS,MRPL27,MRPS17,MRPL47
gPROFILER	GO:0140053	mitochondrial gene expression	161	13		7.58916e-05	MRPL50,MRPL39,MRPL51,MRPS18C,MRPL33,MRPS21,MRPL22,MRPL35,MRPS33,MRPL24,MRPL27,MRPS17,MRPL47
FUMA	GO:1990204	oxidoreductase complex	106	8	2.14102e-06	7.93763e-05	NDUFS5:UQCRH:NDUFS3:NDUFA9:NCF4:NDUFB5:NDUFS4:UQCRB
FUMA	GO:0098803	respiratory chain complex	75	7	2.25484e-06	8.06107e-05	NDUFS5:UQCRH:NDUFS3:NDUFA9:NDUFB5:NDUFS4:UQCRB
gPROFILER	GO:0032991	protein-containing complex	4833	109		8.9286e-05	MRPL39,TOMM40,ENY2,AIF1,TMEM126B,CRYZL1,EXOSC7,MRPL51,CLPTM1,CLU,ZNF384,SHFM1,TOMM5,RPAP3,EHD1,UQCRB,SLC24A4,RPF2,MKNK1,COX6C,FCRLB,TIMM17A,LSM3,PDLIM7,MGAT4A,SUB1,NDST2,MDFIC,HSPA1B,ALPK2,UCHL3,CWC15,MS4A6A,NGDN,ALDOA,RAB40C,FBP2,SRP19,TPRKB,STK17B,KTN1,SLC16A5,RNPEP,METTL5,DNAJA1,SNRPG,RNF4,MAP4K4,UBL5,ASPHD1,NDUFS4,TNIP2,NCOA7,NUCB2,RASAL3,FCGR2B,DUSP12,PMPCB,XYLT2,DPAGT1,EAF2,MTMR3,RPL26,TATD…
Webgestalt	GO:0043624	cellular protein complex disassembly	210	16	8.32824e-08	8.93411e-05	MRPL50;MRPL39;MRPL51;MRPS18C;UPF1;MRPL33;MRPS21;MRPL22;MRPL35;MRPS33;MRPL24;EIF5AL1;GAK;MRPL27;MRPS17;MRPL47
Webgestalt	GO:0032543	mitochondrial translation	134	13	8.50058e-08	8.93411e-05	MRPL50;MRPL39;MRPL51;MRPS18C;MRPL33;MRPS21;MRPL22;MRPL35;MRPS33;MRPL24;MRPL27;MRPS17;MRPL47
Webgestalt	GO:0097525	spliceosomal snRNP complex	58	7	2.25484e-06	9.09287e-05	LSM3;LSM5;SNRPD2;SNRPG;SNRPB2;LSM2;ZMAT2
Webgestalt	GO:0005681	spliceosomal complex	176	11	2.35567e-06	9.09287e-05	UPF1;MAGOH;LSM3;LSM5;CWC15;SNRPD2;SYF2;SNRPG;SNRPB2;LSM2;ZMAT2
FUMA	GO:0120114	sm like protein family complex	109	8	2.64256e-06	9.1214e-05	SNRPD2:GEMIN6:SNRPG:SNRPB2:LSM3:ZMAT2:LSM2:LSM5
Webgestalt	hsa03010	Ribosome	153	15	3.25151e-07	0.000102423	MRPS18C;RPL36AL;MRPL33;MRPS21;MRPL22;MRPL35;RPS27L;MRPL24;RPS24;RPL34;RPL26;RPS25;RPL26L1;MRPL27;MRPS17
gPROFILER	GO:1905368	peptidase complex	75	5		0.000103104	ENY2,PSMA3,SHFM1,PSMC6,SEC11A
gPROFILER	GO:0097526	spliceosomal tri-snRNP complex	31	6		0.000103104	LSM3,LSM5,SNRPD2,SNRPG,LSM2,ZMAT2
gPROFILER	GO:0046540	U4/U6 x U5 tri-snRNP complex	31	6		0.000103104	LSM3,LSM5,SNRPD2,SNRPG,LSM2,ZMAT2
FUMA	GO:0061024	membrane organization	869	23	5.41917e-07	0.000104818	ATP5F1:FCGR2B:MAPK8:AP2A2:PICALM:ARPC3:RHOT2:FCHO1:PVRL2:VAMP8:BIN1:SEC23B:ATP5J:SOD1:ATP5O:ATP5I:GAK:SAR1B:HBEGF:BNIP1:AIF1:SNX3:CLU
Webgestalt	GO:0098803	respiratory chain complex	86	8	3.12036e-06	0.000109496	NDUFS5;UQCRB;UQCRH;NDUFS4;PMPCB;NDUFS3;NDUFB5;NDUFA9
Webgestalt	GO:0071013	catalytic step 2 spliceosome	86	8	3.12036e-06	0.000109496	MAGOH;LSM3;CWC15;SNRPD2;SYF2;SNRPG;SNRPB2;LSM2
FUMA	GO:0033108	mitochondrial respiratory chain complex assembly	90	8	6.13704e-07	0.00011566	NDUFS5:NDUFS3:TMEM126B:NDUFA9:COX17:NDUFB5:NDUFS4:UQCRB
FUMA	GO:0071007	u2 type catalytic step 2 spliceosome	30	5	3.62255e-06	0.000120872	SYF2:CWC15:SNRPD2:SNRPG:SNRPB2
FUMA	GO:1990542	mitochondrial transmembrane transport	91	8	6.68284e-07	0.000122797	ATP5F1:TIMM17A:TOMM40:ATP5J:ATP5O:SLC25A1:ATP5I:TOMM7
FUMA	GO:0031347	regulation of defense response	754	21	7.65127e-07	0.000137163	FCGR2B:MUC6:TSPAN32:NLRX1:PSMC6:PSMA3:PSMA4:MEFV:LSM14A:PVRL2:LILRA2:PPM1B:VAMP8:POLR3F:SOD1:IFNAR2:AP000295.9:TNIP2:MICB:HSPA1B:IL6:PSMC2
FUMA	GO:0030139	endocytic vesicle	294	12	4.5647e-06	0.000147396	CAMK2G:AP2A2:PICALM:FCHO1:VAMP8:NCF4:HBEGF:ATP6V0E1:RAB24:CD2AP:SNX3:LPAR1
Webgestalt	GO:0005746	mitochondrial respiratory chain	90	8	4.40022e-06	0.000147694	NDUFS5;UQCRB;UQCRH;NDUFS4;PMPCB;NDUFS3;NDUFB5;NDUFA9
gPROFILER	GO:0043043	peptide biosynthetic process	646	26		0.000149208	MRPL50,MRPL39,MRPL51,IL6,MRPS18C,UPF1,NARS2,MRPL33,MRPS21,MRPL22,MRPL35,RPS27L,MRPS33,MRPL24,NACA,RPS24,RPL34,COPS5,RPL26,EIF5AL1,RPS25,RPL26L1,VARS,MRPL27,MRPS17,MRPL47
FUMA	GO:1990726	lsm1 7 pat1 complex	5	3	4.84079e-06	0.000151426	LSM3:LSM2:LSM5
gPROFILER	GO:0071005	U2-type precatalytic spliceosome	50	7		0.000154917	LSM3,LSM5,SNRPD2,SNRPG,SNRPB2,LSM2,ZMAT2
gPROFILER	GO:0043233	organelle lumen	5439	101		0.000157703	LARP7,MRPL50,MRPL39,ENY2,GTF2H5,EXOSC7,MRPL51,HSPA1L,CLU,PSMA3,SHFM1,IL6,EPHX2,MRPS18C,UPF1,RPF2,POLR1D,PSMC6,MKNK1,MAGOH,CARD8,ING3,COX17,MVP,TIMM17A,LSM3,IMPDH1,MGAT4A,MAPK8,SUB1,LSM5,HSPA1B,INO80C,CWC15,PRIM1,NGDN,ALDOA,CDC26,SNRPD2,GNL2,LCOR,NARS2,MRPL33,SORL1,MRPS21,FBP2,SRP19,MRPL22,ATXN3,SYF2,KTN1,RBBP9,DBI,SNRPG,PURA,MRPL35,RNF4,MUC6,SSB,MRPS33,ALKBH3,POLR3F,MRPL24,TNIP2,RPS24,PMPCB,KCTD1…
gPROFILER	GO:0071011	precatalytic spliceosome	51	7		0.000157703	LSM3,LSM5,SNRPD2,SNRPG,SNRPB2,LSM2,ZMAT2
gPROFILER	GO:0005684	U2-type spliceosomal complex	92	9		0.000157703	LSM3,LSM5,CWC15,SNRPD2,SYF2,SNRPG,SNRPB2,LSM2,ZMAT2
gPROFILER	GO:0070013	intracellular organelle lumen	5439	101		0.000157703	LARP7,MRPL50,MRPL39,ENY2,GTF2H5,EXOSC7,MRPL51,HSPA1L,CLU,PSMA3,SHFM1,IL6,EPHX2,MRPS18C,UPF1,RPF2,POLR1D,PSMC6,MKNK1,MAGOH,CARD8,ING3,COX17,MVP,TIMM17A,LSM3,IMPDH1,MGAT4A,MAPK8,SUB1,LSM5,HSPA1B,INO80C,CWC15,PRIM1,NGDN,ALDOA,CDC26,SNRPD2,GNL2,LCOR,NARS2,MRPL33,SORL1,MRPS21,FBP2,SRP19,MRPL22,ATXN3,SYF2,KTN1,RBBP9,DBI,SNRPG,PURA,MRPL35,RNF4,MUC6,SSB,MRPS33,ALKBH3,POLR3F,MRPL24,TNIP2,RPS24,PMPCB,KCTD1…
gPROFILER	GO:0031974	membrane-enclosed lumen	5439	101		0.000157703	LARP7,MRPL50,MRPL39,ENY2,GTF2H5,EXOSC7,MRPL51,HSPA1L,CLU,PSMA3,SHFM1,IL6,EPHX2,MRPS18C,UPF1,RPF2,POLR1D,PSMC6,MKNK1,MAGOH,CARD8,ING3,COX17,MVP,TIMM17A,LSM3,IMPDH1,MGAT4A,MAPK8,SUB1,LSM5,HSPA1B,INO80C,CWC15,PRIM1,NGDN,ALDOA,CDC26,SNRPD2,GNL2,LCOR,NARS2,MRPL33,SORL1,MRPS21,FBP2,SRP19,MRPL22,ATXN3,SYF2,KTN1,RBBP9,DBI,SNRPG,PURA,MRPL35,RNF4,MUC6,SSB,MRPS33,ALKBH3,POLR3F,MRPL24,TNIP2,RPS24,PMPCB,KCTD1…
Webgestalt	GO:0030532	small nuclear ribonucleoprotein complex	65	7	4.91082e-06	0.000157965	LSM3;LSM5;SNRPD2;SNRPG;SNRPB2;LSM2;ZMAT2
FUMA	GO:0005840	ribosome	87	7	6.12338e-06	0.000162707	RPS24:RPS25:RPL36AL:RPS27L:RPL26:RPL34:RPL26L1
gPROFILER	GO:0048002	antigen processing and presentation of peptide antigen	187	15		0.000177351	PSMA3,SHFM1,PSMC6,FCGR2B,DCTN6,LNPEP,PSMA4,VAMP8,PSMC2,NCF4,MICB,CTSD,ERAP2,AP2A2,SAR1B
gPROFILER	GO:0032994	protein-lipid complex	26	3		0.000183171	APOC1,CLU,BIN1
gPROFILER	GO:0002474	antigen processing and presentation of peptide antigen via MHC class I	98	11		0.000193458	PSMA3,SHFM1,PSMC6,LNPEP,PSMA4,VAMP8,PSMC2,NCF4,MICB,ERAP2,SAR1B
gPROFILER	GO:0005681	spliceosomal complex	165	8		0.000197411	UPF1,MAGOH,LSM3,LSM5,CWC15,SNRPD2,SYF2,SNRPG
gPROFILER	GO:0044422	organelle part	8803	154		0.000200396	LARP7,MRPL50,MRPL39,TOMM40,ENY2,AIF1,TMEM126B,CRYZL1,GTF2H5,EXOSC7,MRPL51,CLPTM1,NDUFS5,ZNF384,SHFM1,TOMM5,CSAD,EHD1,UQCRB,SLC24A4,RPF2,POLR1D,UQCRH,PSMC6,COX6C,MAGOH,CARD8,RPL36AL,FCRLB,ING3,FBP1,COX17,MVP,TCTEX1D2,TIMM17A,LSM3,PDLIM7,SEC11A,RHOH,MGAT4A,ATP5J,SUB1,NDST2,MDFIC,HSPA1B,ALPK2,INO80C,UCHL3,CWC15,NGDN,ALDOA,RAB40C,GNL2,NARS2,TMEM14B,SNTB2,SORL1,FBP2,CCNI,TPRKB,STK17B,FAM193A,SYF2,KTN1…
FUMA	GO:0005783	endoplasmic reticulum	1884	34	6.88938e-06	0.000208978	FCRLB:LAMC1:CAMK2G:EIF5AL1:NUCB2:DPAGT1:SORL1:SOAT2:OSBPL8:POMP:RPL36AL:KTN1:ATXN3:SEC11A:SEZ6L2:GDPD3:PNPLA6:APOC1:MGAT4A:DBI:SEC23B:PIGT:DPM1:RPL34:ERAP2:REEP5:SAR1B:BNIP1:HSPA1B:PTP4A1:IL6:GIMAP7:CLU:DNAJA1
FUMA	GO:0070469	respirasome	89	7	7.12402e-06	0.00020974	NDUFS5:UQCRH:NDUFS3:NDUFA9:NDUFB5:NDUFS4:UQCRB
gPROFILER	GO:0044446	intracellular organelle part	8599	151		0.000221214	LARP7,MRPL50,MRPL39,ENY2,AIF1,TMEM126B,CRYZL1,GTF2H5,EXOSC7,MRPL51,CLPTM1,NDUFS5,ZNF384,SHFM1,TOMM5,CSAD,EHD1,UQCRB,SLC24A4,RPF2,POLR1D,UQCRH,PSMC6,COX6C,MAGOH,CARD8,RPL36AL,FCRLB,ING3,FBP1,COX17,MVP,TCTEX1D2,TIMM17A,LSM3,PDLIM7,SEC11A,RHOH,MGAT4A,ATP5J,SUB1,NDST2,MDFIC,HSPA1B,ALPK2,INO80C,UCHL3,CWC15,NGDN,ALDOA,RAB40C,GNL2,NARS2,TMEM14B,SNTB2,SORL1,FBP2,CCNI,TPRKB,STK17B,FAM193A,SYF2,KTN1,SLC16A…
FUMA	GO:0044433	cytoplasmic vesicle part	1483	29	7.82424e-06	0.000223773	CAMK2G:AP2A2:CTSD:ARHGAP1:EHD1:PICALM:SORL1:CCT2:ATP6V1D:ACTN1:MVP:ALDOA:SNTB2:FCHO1:VAMP8:SEC23B:DNAJC5:NCF4:MFSD10:LNPEP:SAR1B:HBEGF:ATP6V0E1:RAB24:HSPA1B:SNX3:PSMC2:IMPDH1:CLU
FUMA	GO:1902531	regulation of intracellular signal transduction	1824	35	1.28111e-06	0.000224194	FCGR2B:ARHGAP1:NDUFS3:MAP3K11:SIPA1:NLRX1:SORL1:OSBPL8:RHOT2:MAZ:KCTD13:RPL26:ARHGEF18:RASAL3:CARD8:PPM1B:MAP4K4:SOD1:IQSEC1:DGKQ:TNIP2:RHOH:HBEGF:HSPA1B:CD2AP:RPF2:PLEKHG1:RPA3:IL6:MDFIC:CLU:COPS5:DNAJA1:FBP1:LPAR1
gPROFILER	GO:1902992	negative regulation of amyloid precursor protein catabolic process	15	4		0.000250403	CLU,PICALM,BIN1,SORL1
gPROFILER	GO:0120114	Sm-like protein family complex	77	8		0.00025771	LSM3,LSM5,SNRPD2,SNRPG,SNRPB2,GEMIN6,LSM2,ZMAT2
gPROFILER	GO:0034622	cellular protein-containing complex assembly	928	36		0.000259477	AIF1,TMEM126B,GTF2H5,NDUFS5,CLU,PICALM,BIN1,UQCRB,RPF2,PSMC6,COX17,LSM3,HSPA1B,SNRPD2,SRP19,MRPL22,MEFV,SNRPG,RNF4,RPS27L,NDUFS4,RPA3,CENPN,PSMC2,TBCA,LSM14A,FCHO1,NDUFS3,POMP,GEMIN6,CCT2,NDUFB5,NDUFA9,MED6,GTF2B,ARPC3
gPROFILER	GO:0071013	catalytic step 2 spliceosome	84	6		0.000261868	MAGOH,LSM3,CWC15,SNRPD2,SYF2,SNRPG
Webgestalt	GO:0015935	small ribosomal subunit	71	7	8.90148e-06	0.000274878	MRPS18C;MRPS21;RPS27L;MRPS33;RPS24;RPS25;MRPS17
gPROFILER	GO:0071007	U2-type catalytic step 2 spliceosome	30	5		0.0002817	CWC15,SNRPD2,SYF2,SNRPG,SNRPB2
FUMA	GO:0022904	respiratory electron transport chain	103	8	1.7228e-06	0.00028614	NDUFS5:UQCRH:NDUFS3:NDUFA9:NDUFB5:NDUFS4:UQCRB:COX6C
FUMA	GO:0002682	regulation of immune system process	1606	32	1.73402e-06	0.00028614	FCGR2B:FCRLB:MAPK8:MUC6:TSPAN32:MS4A2:DPF2:GAB2:NLRX1:ARPC3:PSMC6:PSMA3:PSMA4:RASAL3:LSM14A:CLC:PVRL2:CLPTM1:LILRA2:DPY30:PPM1B:VAMP8:POLR3F:SOD1:IFNAR2:AP000295.9:TNIP2:MICB:AIF1:HSPA1B:IL6:PSMC2:CLU
FUMA	GO:1901361	organic cyclic compound catabolic process	601	18	1.75188e-06	0.00028614	MAGOH:RPS24:EXOSC1:RPS25:PSMC6:PSMA3:PSMA4:RPL26:UPF1:SSB:LSM3:EXOSC7:RPL34:LSM2:HSPA1B:LSM5:PSMC2:EPHX2
Webgestalt	GO:0070469	respiratory chain	100	8	9.67058e-06	0.000287142	NDUFS5;UQCRB;UQCRH;NDUFS4;PMPCB;NDUFS3;NDUFB5;NDUFA9
FUMA	GO:1901135	carbohydrate derivative metabolic process	934	23	1.838e-06	0.000289848	PANK4:ATP5F1:NDST2:MUC6:SLC35C1:DPAGT1:ALDOA:XYLT2:MGAT4A:DBI:PIGT:DPM1:ATP5J:ATP5O:SLC25A1:ATP5I:HBEGF:HSPA1B:IMPDH1:GIMAP7:DPY19L4:FBP2:FBP1
FUMA	GO:0006605	protein targeting	426	15	1.85345e-06	0.000289848	TIMM17A:RPS24:RPS25:SORL1:RPL26:UBL5:TOMM40:RPL34:SRP19:HSPA1L:TOMM7:PMPCB:EPHX2:CLU:TOMM5
FUMA	GO:0070585	protein localization to mitochondrion	142	9	2.1282e-06	0.000325881	TIMM17A:MAPK8:UBL5:TOMM40:HSPA1L:TOMM7:PMPCB:DNAJA1:TOMM5
gPROFILER	GO:0032984	protein-containing complex disassembly	295	17		0.000337151	MRPL50,MRPL39,MRPL51,MRPS18C,UPF1,MRPL33,MRPS21,MRPL22,MRPL35,MRPS33,MRPL24,VAMP8,GAK,MRPL27,MRPS17,MRPL47,MAP1S
gPROFILER	GO:0005759	mitochondrial matrix	422	17		0.000346409	MRPL50,MRPL39,MRPL51,MRPS18C,MRPL33,MRPS21,MRPL22,ATXN3,MRPL35,MRPS33,MRPL24,PMPCB,SOD1,NDUFS3,MRPL27,MRPS17,MRPL47
FUMA	GO:0045088	regulation of innate immune response	435	15	2.39322e-06	0.000356093	FCGR2B:MUC6:NLRX1:PSMC6:PSMA3:PSMA4:LSM14A:PVRL2:LILRA2:POLR3F:IFNAR2:AP000295.9:TNIP2:MICB:HSPA1B:PSMC2
FUMA	GO:0002252	immune effector process	1242	27	2.4224e-06	0.000356093	FCGR2B:AP2A2:CTSD:TSPAN32:GAB2:NLRX1:CCT2:ARPC3:ATP6V1D:MVP:ALDOA:LSM14A:CLC:PVRL2:LILRA2:PPM1B:VAMP8:POLR3F:DNAJC5:IFNAR2:AP000295.9:RAB24:MICB:HSPA1B:IL6:PSMC2:IMPDH1:CLU
FUMA	GO:0060341	regulation of cellular localization	881	22	2.47961e-06	0.000357356	MAPK8:ARHGAP1:MYBPC3:EHD1:GAB2:PICALM:SORL1:CCT2:UBL5:VAMP8:MAP4K4:DNAJC5:TCTEX1D2:DGKQ:SAR1B:HSPA1L:CD2AP:SNX3:TOMM7:MDFIC:ENY2:DNAJA1
FUMA	GO:0007265	ras protein signal transduction	437	15	2.53079e-06	0.000357717	SETDB1:ARHGAP1:RAB40C:RHOT2:KCTD13:ARHGEF18:RASAL3:MAP4K4:IQSEC1:RHOH:RAB24:AIF1:PLEKHG1:FBP1:LPAR1
gPROFILER	GO:0097525	spliceosomal snRNP complex	60	7		0.000368506	LSM3,LSM5,SNRPD2,SNRPG,SNRPB2,LSM2,ZMAT2
gPROFILER	GO:1990726	Lsm1-7-Pat1 complex	5	3		0.000379171	LSM3,LSM5,LSM2
Webgestalt	GO:0071007	U2-type catalytic step 2 spliceosome	30	5	1.32928e-05	0.000380074	CWC15;SNRPD2;SYF2;SNRPG;SNRPB2
gPROFILER	GO:0043229	intracellular organelle	11095	197		0.000392891	LARP7,MRPL50,MRPL39,TOMM40,ENY2,AIF1,TMEM126B,TMEM126A,APOC1,GTF2H5,EXOSC7,MRPL51,HSPA1L,NDUFS5,CLU,PSMA3,PICALM,SHFM1,TOMM5,IL6,EPHX2,MRPS18C,EHD1,BIN1,UQCRB,CDKN2C,UPF1,RPF2,MAP3K11,POLR1D,UQCRH,PSMC6,MKNK1,COX6C,MAGOH,CARD8,RPL36AL,ING3,FBP1,COX17,MVP,TCTEX1D2,TIMM17A,LSM3,IMPDH1,PDLIM7,SEC11A,MGAT4A,RHOT2,MAPK8,ATP5J,SUB1,NDST2,MDFIC,LSM5,HSPA1B,INO80C,UCHL3,CWC15,PRIM1,NGDN,ALDOA,CDC26,SNRPD…
gPROFILER	GO:0015935	small ribosomal subunit	74	7		0.000392891	MRPS18C,MRPS21,RPS27L,MRPS33,RPS24,RPS25,MRPS17
FUMA	GO:0051056	regulation of small gtpase mediated signal transduction	332	13	2.88159e-06	0.000394992	ARHGAP1:SIPA1:RHOT2:KCTD13:ARHGEF18:RASAL3:MAP4K4:IQSEC1:RHOH:CD2AP:PLEKHG1:FBP1:LPAR1
FUMA	GO:0001775	cell activation	1408	29	2.90198e-06	0.000394992	FCGR2B:AP2A2:CTSD:TSPAN32:GAB2:CCT2:ATP6V1D:MVP:ALDOA:RASAL3:CLC:PVRL2:CLPTM1:LILRA2:VAMP8:DNAJC5:SOD1:DGKQ:TNIP2:RHOH:PURA:RAB24:MICB:AIF1:HSPA1B:IL6:PSMC2:IMPDH1:CLU
FUMA	GO:0042590	antigen processing and presentation of exogenous peptide antigen via mhc class i	79	7	3.20562e-06	0.000428388	PSMC6:PSMA3:PSMA4:VAMP8:NCF4:LNPEP:PSMC2
FUMA	GO:0042254	ribosome biogenesis	285	12	3.32254e-06	0.000436083	GNL2:RPS24:EXOSC1:NGDN:RPS27L:RPL26:EXOSC7:NSA2:MRPL22:RPL26L1:RPF2:GTF2H5
Webgestalt	GO:0098800	inner mitochondrial membrane protein complex	140	9	1.59027e-05	0.000438461	NDUFS5;UQCRB;UQCRH;TIMM17A;NDUFS4;PMPCB;NDUFS3;NDUFB5;NDUFA9
FUMA	GO:0051049	regulation of transport	1827	34	3.58212e-06	0.000456803	FCGR2B:MAPK8:CAMK2G:ARHGAP1:MYBPC3:EHD1:GAB2:PICALM:SORL1:OSBPL8:UBL5:APOC1:CARD8:LILRA2:VAMP8:MAP4K4:BIN1:DNAJC5:ATP5J:SOD1:COX17:TCTEX1D2:DGKQ:SAR1B:AIF1:HSPA1L:CD2AP:SNX3:IL6:TOMM7:MDFIC:CLU:ENY2:DNAJA1
FUMA	GO:1902992	negative regulation of amyloid precursor protein catabolic process	14	4	3.6047e-06	0.000456803	PICALM:SORL1:BIN1:CLU
FUMA	GO:1902600	proton transmembrane transport	152	9	3.73011e-06	0.000464683	ATP5F1:ATP6V1D:ATP5J:ATP5O:ATP6V1E1:COX17:ATP5I:ATP6V0E1:COX6C
FUMA	GO:0120115	lsm2 8 complex	7	3	1.67446e-05	0.000465594	LSM3:LSM2:LSM5
gPROFILER	GO:0006402	mRNA catabolic process	356	16		0.000499133	EXOSC7,PSMA3,SHFM1,UPF1,PSMC6,MAGOH,LSM3,LSM5,HSPA1B,SSB,RPS24,RPL34,PSMA4,RPL26,RPS25,PSMC2
FUMA	GO:0045259	proton transporting atp synthase complex	21	4	2.06317e-05	0.00053744	ATP5F1:ATP5J:ATP5O:ATP5I
FUMA	GO:0033177	proton transporting two sector atpase complex proton transporting domain	21	4	2.06317e-05	0.00053744	ATP5F1:ATP5J:ATP5I:ATP6V0E1
FUMA	GO:0098805	whole membrane	1647	30	2.09392e-05	0.00053744	CAMK2G:AP2A2:CTSD:NUCB2:ARHGAP1:EHD1:ATG2A:PICALM:NLRX1:SORL1:ATP6V1D:RHOT2:SNTB2:FCHO1:TOMM40:VAMP8:SEC23B:DNAJC5:ATP6V1E1:NCF4:LNPEP:SAR1B:HBEGF:ATP6V0E1:RAB24:BPHL:SNX3:DAGLB:TOMM7:TOMM5
Webgestalt	GO:0140053	mitochondrial gene expression	159	13	6.26672e-07	0.000564542	MRPL50;MRPL39;MRPL51;MRPS18C;MRPL33;MRPS21;MRPL22;MRPL35;MRPS33;MRPL24;MRPL27;MRPS17;MRPL47
gPROFILER	REAC:R-HSA-192823	Viral mRNA Translation	90	12		0.000574395	ENY2,EXOSC7,TOMM5,SUB1,RAB40C,RNF4,ASPHD1,NCOA7,IGFBP6,GTF2B
gPROFILER	REAC:R-HSA-72766	Translation	292	23		0.000574395	ENY2,CRYZL1,EXOSC7,ZNF384,TOMM5,SUB1,MDFIC,HSPA1B,RAB40C,TPRKB,RNF4,ASPHD1,NCOA7,NUCB2,XYLT2,DPAGT1,PANK4,IDUA,PPM1B,IGFBP6,GTF2B
gPROFILER	REAC:R-HSA-156842	Eukaryotic Translation Elongation	94	12		0.000574395	ENY2,EXOSC7,TOMM5,SUB1,RAB40C,RNF4,ASPHD1,NCOA7,IGFBP6,GTF2B
gPROFILER	REAC:R-HSA-72764	Eukaryotic Translation Termination	94	12		0.000574395	ENY2,EXOSC7,TOMM5,SUB1,RAB40C,RNF4,ASPHD1,NCOA7,IGFBP6,GTF2B
gPROFILER	REAC:R-HSA-72689	Formation of a pool of free 40S subunits	102	13		0.000574395	ENY2,EXOSC7,TOMM5,SUB1,RAB40C,RNF4,ASPHD1,NCOA7,PPM1B,IGFBP6,GTF2B
gPROFILER	REAC:R-HSA-72706	GTP hydrolysis and joining of the 60S ribosomal subunit	113	13		0.000574395	ENY2,EXOSC7,TOMM5,SUB1,RAB40C,RNF4,ASPHD1,NCOA7,PPM1B,IGFBP6,GTF2B
gPROFILER	REAC:R-HSA-975956	Nonsense Mediated Decay (NMD) independent of the Exon Junction Complex (EJC)	96	12		0.000574395	ENY2,EXOSC7,TOMM5,SUB1,RAB40C,RNF4,ASPHD1,NCOA7,IGFBP6,GTF2B
gPROFILER	REAC:R-HSA-2408557	Selenocysteine synthesis	94	12		0.000574395	ENY2,EXOSC7,TOMM5,SUB1,RAB40C,RNF4,ASPHD1,NCOA7,IGFBP6,GTF2B
gPROFILER	REAC:R-HSA-156827	L13a-mediated translational silencing of Ceruloplasmin expression	112	13		0.000574395	ENY2,EXOSC7,TOMM5,SUB1,RAB40C,RNF4,ASPHD1,NCOA7,PPM1B,IGFBP6,GTF2B
gPROFILER	REAC:R-HSA-1799339	SRP-dependent cotranslational protein targeting to membrane	113	14		0.000574395	ENY2,EXOSC7,TOMM5,SUB1,RAB40C,RNF4,ASPHD1,NCOA7,XYLT2,DPAGT1,IGFBP6,GTF2B
gPROFILER	REAC:R-HSA-156902	Peptide chain elongation	90	12		0.000574395	ENY2,EXOSC7,TOMM5,SUB1,RAB40C,RNF4,ASPHD1,NCOA7,IGFBP6,GTF2B
FUMA	GO:0023057	negative regulation of signaling	1369	28	4.95313e-06	0.000606759	FCGR2B:SLC35C1:NDUFS3:NLRX1:SORL1:IGFBP6:PSMC6:PSMA3:PSMA4:MAZ:MVP:KCTD13:RASAL3:CARD8:LILRA2:PPM1B:MAP4K4:RHOH:HBEGF:HSPA1B:CD2AP:IL6:PSMC2:CLU:ENY2:DNAJA1:FBP1:LPAR1
gPROFILER	REAC:R-HSA-168254	Influenza Infection	152	15		0.000611304	ENY2,EXOSC7,TOMM5,SUB1,RAB40C,SLC16A5,RNF4,ASPHD1,NCOA7,MTMR3,IGFBP6,TM9SF3,GTF2B
gPROFILER	REAC:R-HSA-168273	Influenza Viral RNA Transcription and Replication	133	14		0.000611304	ENY2,EXOSC7,TOMM5,SUB1,RAB40C,SLC16A5,RNF4,ASPHD1,NCOA7,MTMR3,IGFBP6,GTF2B
gPROFILER	REAC:R-HSA-9010553	Regulation of expression of SLITs and ROBOs	171	16		0.000611304	ENY2,EXOSC7,TOMM5,PDLIM7,SUB1,RAB40C,RNF4,ASPHD1,NDUFS4,NCOA7,IGFBP6,GIMAP7,DPY19L4,GTF2B
gPROFILER	GO:0042590	antigen processing and presentation of exogenous peptide antigen via MHC class I	79	8		0.000623774	PSMA3,SHFM1,PSMC6,LNPEP,PSMA4,VAMP8,PSMC2,NCF4
gPROFILER	GO:0030532	small nuclear ribonucleoprotein complex	66	7		0.000630497	LSM3,LSM5,SNRPD2,SNRPG,SNRPB2,LSM2,ZMAT2
FUMA	GO:0044419	interspecies interaction between organisms	925	22	5.37933e-06	0.000648165	GTF2B:SETDB1:FCGR2B:CUL2:RPS24:AP2A2:RPS25:NLRX1:PSMA3:PSMA4:USP7:RPL26:UPF1:PVRL2:VAMP8:BIN1:SSB:RPL34:MICB:HSPA1B:SNX3:MDFIC
FUMA	GO:0050776	regulation of immune response	1072	24	5.52822e-06	0.000655362	FCGR2B:FCRLB:MAPK8:MUC6:MS4A2:GAB2:NLRX1:ARPC3:PSMC6:PSMA3:PSMA4:LSM14A:CLC:PVRL2:LILRA2:VAMP8:POLR3F:IFNAR2:AP000295.9:TNIP2:MICB:HSPA1B:IL6:PSMC2:CLU
FUMA	GO:1901137	carbohydrate derivative biosynthetic process	655	18	5.75626e-06	0.000671564	PANK4:ATP5F1:NDST2:MUC6:SLC35C1:DPAGT1:ALDOA:XYLT2:MGAT4A:PIGT:DPM1:ATP5J:ATP5O:SLC25A1:ATP5I:HBEGF:IMPDH1:DPY19L4
gPROFILER	GO:0043604	amide biosynthetic process	765	27		0.000676189	MRPL50,MRPL39,MRPL51,IL6,MRPS18C,UPF1,NARS2,MRPL33,MRPS21,MRPL22,MRPL35,RPS27L,MRPS33,MRPL24,NACA,RPS24,RPL34,COPS5,RPL26,EIF5AL1,SLC25A1,RPS25,RPL26L1,VARS,MRPL27,MRPS17,MRPL47
FUMA	GO:0016070	rna metabolic process	1542	30	5.96814e-06	0.000685403	SYF2:MAGOH:RPS24:EXOSC1:ALKBH3:NARS2:CWC15:RBMS2:NGDN:RPL26:UBL5:UPF1:SNRPD2:GEMIN6:SNRPG:TPRKB:PPIG:SSB:SNRPB2:LSM3:EXOSC7:LARP7:NSA2:ZMAT2:RARS:VARS:LSM2:RPF2:GTF2H5:LSM5
gPROFILER	GO:0043227	membrane-bounded organelle	11124	197		0.000709953	LARP7,MRPL50,MRPL39,TOMM40,ENY2,AIF1,TMEM126B,TMEM126A,APOC1,GTF2H5,EXOSC7,MRPL51,HSPA1L,NDUFS5,CLU,PSMA3,PICALM,SHFM1,TOMM5,IL6,EPHX2,MRPS18C,EHD1,BIN1,UQCRB,CDKN2C,UPF1,RPF2,POLR1D,UQCRH,PSMC6,MKNK1,COX6C,MAGOH,CARD8,RPL36AL,ING3,FBP1,COX17,MVP,TIMM17A,LSM3,IMPDH1,PDLIM7,SEC11A,MGAT4A,RHOT2,MAPK8,ATP5J,SUB1,NDST2,MDFIC,LSM5,HSPA1B,INO80C,UCHL3,CWC15,PRIM1,NGDN,ALDOA,CDC26,SNRPD2,RAB40C,GNL2,LCO…
gPROFILER	REAC:R-HSA-72613	Eukaryotic Translation Initiation	120	13		0.000719942	ENY2,EXOSC7,TOMM5,SUB1,RAB40C,RNF4,ASPHD1,NCOA7,PPM1B,IGFBP6,GTF2B
gPROFILER	REAC:R-HSA-72737	Cap-dependent Translation Initiation	120	13		0.000719942	ENY2,EXOSC7,TOMM5,SUB1,RAB40C,RNF4,ASPHD1,NCOA7,PPM1B,IGFBP6,GTF2B
gPROFILER	REAC:R-HSA-5663205	Infectious disease	370	25		0.000719942	ENY2,EXOSC7,TOMM5,PDLIM7,SUB1,RAB40C,SLC16A5,RNF4,MAP4K4,ASPHD1,NDUFS4,NCOA7,MTMR3,CLC,HTR1E,IGFBP6,GIMAP7,DPY19L4,USP7,TM9SF3,LAMC1,GTF2B,ECHDC1
gPROFILER	GO:0019882	antigen processing and presentation	217	15		0.00072564	PSMA3,SHFM1,PSMC6,FCGR2B,DCTN6,LNPEP,PSMA4,VAMP8,PSMC2,NCF4,MICB,CTSD,ERAP2,AP2A2,SAR1B
FUMA	GO:0044445	cytosolic part	246	10	2.95612e-05	0.000739582	RPS24:RPS25:CCT2:RPL36AL:PSMC6:RPS27L:RPL26:CARD8:RPL34:RPL26L1
FUMA	GO:0022626	cytosolic ribosome	111	7	3.02926e-05	0.000739582	RPS24:RPS25:RPL36AL:RPS27L:RPL26:RPL34:RPL26L1
FUMA	GO:0005747	mitochondrial respiratory chain complex i	46	5	3.14229e-05	0.000748913	NDUFS5:NDUFS3:NDUFA9:NDUFB5:NDUFS4
FUMA	GO:0010257	nadh dehydrogenase complex assembly	58	6	6.65685e-06	0.000752737	NDUFS5:NDUFS3:TMEM126B:NDUFA9:NDUFB5:NDUFS4
gPROFILER	GO:0044445	cytosolic part	213	14		0.00076308	ENY2,EXOSC7,CLU,TOMM5,SUB1,RAB40C,RNF4,ASPHD1,NCOA7,IGFBP6,GTF2B,TXNDC17
FUMA	GO:0043085	positive regulation of catalytic activity	1397	28	7.20873e-06	0.000795701	DUSP12:MAPK8:ARHGAP1:MYBPC3:MAP3K11:SIPA1:PICALM:SORL1:CCT2:OSBPL8:DOCK9:RPS27L:MEFV:RASAL3:APOC1:CARD8:MAP4K4:SEC23B:SOD1:NCF4:IQSEC1:COX17:DCUN1D1:DGKQ:MDFIC:CLU:DNAJA1:LPAR1
FUMA	GO:0061077	chaperone mediated protein folding	59	6	7.36159e-06	0.000795701	CCT2:DNAJC5:GAK:HSPA1L:HSPA1B:CLU
FUMA	GO:0009201	ribonucleoside triphosphate biosynthetic process	59	6	7.36159e-06	0.000795701	ATP5F1:ALDOA:ATP5J:ATP5O:ATP5I:IMPDH1
FUMA	GO:0043687	post translational protein modification	363	13	7.5582e-06	0.000805112	LAMC1:CUL2:UCHL3:PSMC6:KTN1:PSMA3:PSMA4:MGAT4A:DCUN1D1:IL6:PSMC2:COPS5:AGTPBP1
gPROFILER	GO:0005829	cytosol	4781	107		0.000819278	LARP7,TOMM40,AIF1,CRYZL1,EXOSC7,HSPA1L,CLU,PSMA3,PICALM,SHFM1,RPAP3,EPHX2,BIN1,CDKN2C,UPF1,POLR1D,PSMC6,MKNK1,GAB2,CARD8,RPL36AL,FBP1,MVP,LSM3,IMPDH1,PDLIM7,RHOH,RHOT2,MAPK8,LSM5,HSPA1B,UCHL3,ALDOA,CDC26,SNRPD2,NARS2,FBP2,SRP19,TPRKB,ATXN3,MEFV,MYBPC3,INPP4A,DNAJA1,SNRPG,RPS27L,ALKBH3,OSBPL8,POLR3F,TNIP2,NUCB2,RASAL3,RPS24,RPL34,COPS5,DCTN6,LNPEP,PSMA4,ARHGEF18,MTMR3,RPL26,VAMP8,DGKQ,CLC,ATP6V1E1…
FUMA	GO:0000291	nuclear transcribed mrna catabolic process exonucleolytic	35	5	7.98968e-06	0.000838917	EXOSC1:LSM3:EXOSC7:LSM2:LSM5
FUMA	GO:0070647	protein modification by small protein conjugation or removal	1097	24	8.10706e-06	0.000839252	UFC1:CUL2:USP35:UCHL3:PSMC6:PSMA3:ATXN3:PSMA4:RAB40C:USP7:KCTD13:INO80C:ACTL6A:DCUN1D1:RNF4:TNIP2:LNPEP:HSPA1B:SNX3:PSMC2:COPS5:ENY2:DNAJA1:CDC26
FUMA	GO:0044093	positive regulation of molecular function	1740	32	9.0038e-06	0.000919138	GTF2B:DUSP12:MAPK8:ARHGAP1:MYBPC3:MAP3K11:SIPA1:PICALM:SORL1:CCT2:OSBPL8:DOCK9:RPS27L:MEFV:RASAL3:APOC1:CARD8:MAP4K4:SEC23B:SOD1:NCF4:IQSEC1:COX17:DCUN1D1:DGKQ:HSPA1B:IL6:MDFIC:CLU:COPS5:DNAJA1:LPAR1
FUMA	GO:0009894	regulation of catabolic process	959	22	9.44808e-06	0.000944064	MAPK8:EXOSC1:SORL1:PSMC6:PSMA3:ATP6V1D:ATXN3:PSMA4:MEFV:USP7:UPF1:APOC1:ATP6V1E1:MTMR3:EXOSC7:ATP6V0E1:HSPA1B:SNX3:TOMM7:PSMC2:CLU:FBP1
FUMA	GO:0006091	generation of precursor metabolites and energy	488	15	9.50486e-06	0.000944064	NDUFS5:UQCRH:ATP5F1:NDUFS3:NDUFA9:ALDOA:ATP5J:ATP5O:COX17:NDUFB5:ATP5I:NDUFS4:UQCRB:COX6C:FBP1
gPROFILER	REAC:R-HSA-168255	Influenza Life Cycle	142	14		0.000946245	ENY2,EXOSC7,TOMM5,SUB1,RAB40C,SLC16A5,RNF4,ASPHD1,NCOA7,MTMR3,IGFBP6,GTF2B
gPROFILER	GO:0002478	antigen processing and presentation of exogenous peptide antigen	171	13		0.00108642	PSMA3,SHFM1,PSMC6,FCGR2B,DCTN6,LNPEP,PSMA4,VAMP8,PSMC2,NCF4,CTSD,AP2A2,SAR1B
FUMA	GO:0048471	perinuclear region of cytoplasm	697	17	4.70994e-05	0.00109155	ARHGAP1:SIPA1:PICALM:RAB40C:MVP:GDPD3:MAP1S:VAMP8:SEC23B:GAK:LNPEP:AIF1:HSPA1B:CD2AP:CLU:COPS5:DNAJA1
FUMA	GO:0016604	nuclear body	769	18	4.79804e-05	0.00109155	SYF2:MAGOH:GTF2B:NDUFS3:CWC15:POMP:USP7:CIITA:KCTD13:RPAIN:GEMIN6:PPIG:SNRPB2:TCF20:EAF2:DGKQ:RNF4:HSPA1B
gPROFILER	GO:0098800	inner mitochondrial membrane protein complex	130	9		0.00109886	NDUFS5,UQCRB,UQCRH,TIMM17A,ATP5J,NDUFS4,NDUFS3,NDUFB5,NDUFA9
gPROFILER	GO:0120115	Lsm2-8 complex	7	3		0.00109886	LSM3,LSM5,LSM2
FUMA	GO:0000932	p body	84	6	5.63026e-05	0.00120135	PSMA4:UPF1:LSM14A:LSM3:LSM2:PSMC2
FUMA	GO:0000276	mitochondrial proton transporting atp synthase complex coupling factor f o	10	3	5.6407e-05	0.00120135	ATP5F1:ATP5J:ATP5I
FUMA	GO:0005742	mitochondrial outer membrane translocase complex	10	3	5.6407e-05	0.00120135	TOMM40:TOMM7:TOMM5
FUMA	GO:0044281	small molecule metabolic process	1685	31	1.24657e-05	0.00122164	DUSP12:NARS2:DPAGT1:SORL1:NDUFA9:SOAT2:CSAD:PSMC6:PSMA3:PSMA4:ALDOA:APOC1:INPP4A:DBI:DPM1:SOD1:CRYZL1:SLC25A1:DGKQ:RARS:BPHL:VARS:HSPA1B:ECHDC1:DAGLB:PSMC2:IMPDH1:GIMAP7:EPHX2:FBP2:FBP1
gPROFILER	GO:1990204	oxidoreductase complex	104	8		0.00124128	NDUFS5,UQCRB,UQCRH,NDUFS4,NCF4,NDUFS3,NDUFB5,NDUFA9
FUMA	GO:0031349	positive regulation of defense response	501	15	1.29438e-05	0.00125181	MUC6:NLRX1:PSMC6:PSMA3:PSMA4:LSM14A:PVRL2:LILRA2:VAMP8:POLR3F:TNIP2:MICB:HSPA1B:IL6:PSMC2
gPROFILER	GO:0006401	RNA catabolic process	390	16		0.00125895	EXOSC7,PSMA3,SHFM1,UPF1,PSMC6,MAGOH,LSM3,LSM5,HSPA1B,SSB,RPS24,RPL34,PSMA4,RPL26,RPS25,PSMC2
FUMA	GO:0006468	protein phosphorylation	1949	34	1.3969e-05	0.00133341	MKNK1:CDKN2C:FCGR2B:MAPK8:CAMK2G:MAP3K11:SORL1:OSBPL8:PSMC6:PSMA3:PSMA4:MVP:ALPK2:TYK2:RASAL3:MAP4K4:STK17B:SOD1:GAK:DGKQ:TNIP2:CCNI:NDUFS4:HBEGF:AIF1:GTF2H5:IL6:PSMC2:MDFIC:CLU:COPS5:DNAJA1:LPAR1:SH2D3C
gPROFILER	GO:0019884	antigen processing and presentation of exogenous antigen	176	13		0.00136717	PSMA3,SHFM1,PSMC6,FCGR2B,DCTN6,LNPEP,PSMA4,VAMP8,PSMC2,NCF4,CTSD,AP2A2,SAR1B
Webgestalt	GO:0030139	endocytic vesicle	289	12	5.1578e-05	0.00137304	PICALM;ATP6V0E1;VAMP8;NCF4;CD2AP;FCHO1;CAMK2G;RAB24;LPAR1;AP2A2;SNX3;HBEGF
FUMA	GO:0030894	replisome	28	4	6.75712e-05	0.00138038	PRIM1:DONSON:PURA:RPA3
FUMA	GO:0000314	organellar small ribosomal subunit	28	4	6.75712e-05	0.00138038	MRPS21:MRPS18C:MRPS17:MRPS17:MRPS33
Webgestalt	hsa00190	Oxidative phosphorylation	133	12	1.22997e-05	0.00139444	NDUFS5;UQCRB;UQCRH;COX6C;COX17;ATP6V0E1;NDUFS4;ATP6V1E1;NDUFS3;ATP6V1D;NDUFB5;NDUFA9
Webgestalt	hsa03040	Spliceosome	134	12	1.32803e-05	0.00139444	HSPA1L;MAGOH;LSM3;LSM5;HSPA1B;CWC15;SNRPD2;SYF2;SNRPG;SNRPB2;LSM2;ZMAT2
FUMA	GO:0006915	apoptotic process	1956	34	1.50383e-05	0.00141707	TNFRSF9:CUL2:MAPK8:NDUFS3:DPF2:MAP3K11:ACTN1:RPS27L:RHOT2:MAZ:RPL26:PTRH2:ARHGEF18:MAP1S:CLC:CARD8:MAP4K4:BIN1:STK17B:PIGT:DNAJC5:SOD1:EAF2:TNIP2:MFSD10:BNIP1:AIF1:HSPA1B:IL6:ING3:CLU:COPS5:DNAJA1:LPAR1
gPROFILER	GO:0044424	intracellular part	12968	59		0.0014416	LARP7,MRPL50,MRPL39,TOMM40,ENY2,AIF1,TMEM126B,CRYZL1,TMEM126A,APOC1,GTF2H5,EXOSC7,MRPL51,HSPA1L,NDUFS5,CLU,PSMA3,PICALM,SHFM1,TOMM5,IL6,RPAP3,CSAD,EPHX2,MRPS18C,EHD1,BIN1,UQCRB,CDKN2C,UPF1,SLC24A4,RPF2,MAP3K11,POLR1D,UQCRH,PSMC6,MKNK1,COX6C,GAB2,MAGOH,CARD8,RPL36AL,FCRLB,ING3,FBP1,COX17,MVP,TCTEX1D2,TIMM17A,LSM3,IMPDH1,PDLIM7,SEC11A,RHOH,MGAT4A,RHOT2,MAPK8,ATP5J,SUB1
FUMA	GO:1905368	peptidase complex	88	6	7.31103e-05	0.0014524	PSMC6:PSMA3:PSMA4:SEC11A:PSMC2:ENY2
FUMA	GO:0005730	nucleolus	1342	25	7.39983e-05	0.0014524	GNL2:CUL2:EXOSC1:OBFC1:RPS25:POLR1D:NGDN:ATXN3:RPAIN:RPL26:INO80C:MAP1S:PPM1B:SNRPB2:IQSEC1:EXOSC7:SUB1:NSA2:TBCA:CETN3:SRP19:RPF2:GTF2H5:MDFIC:AGTPBP1
gPROFILER	GO:0005622	intracellular	12980	59		0.00148234	LARP7,MRPL50,MRPL39,TOMM40,ENY2,AIF1,TMEM126B,CRYZL1,TMEM126A,APOC1,GTF2H5,EXOSC7,MRPL51,HSPA1L,NDUFS5,CLU,PSMA3,PICALM,SHFM1,TOMM5,IL6,RPAP3,CSAD,EPHX2,MRPS18C,EHD1,BIN1,UQCRB,CDKN2C,UPF1,SLC24A4,RPF2,MAP3K11,POLR1D,UQCRH,PSMC6,MKNK1,COX6C,GAB2,MAGOH,CARD8,RPL36AL,FCRLB,ING3,FBP1,COX17,MVP,TCTEX1D2,TIMM17A,LSM3,IMPDH1,PDLIM7,SEC11A,RHOH,MGAT4A,RHOT2,MAPK8,ATP5J,SUB1
FUMA	GO:0045263	proton transporting atp synthase complex coupling factor f o	11	3	7.71055e-05	0.00148428	ATP5F1:ATP5J:ATP5I
FUMA	GO:0006626	protein targeting to mitochondrion	101	7	1.64055e-05	0.00152634	TIMM17A:UBL5:TOMM40:HSPA1L:TOMM7:PMPCB:TOMM5
gPROFILER	GO:0022626	cytosolic ribosome	105	7		0.00153244	RPL36AL,RPS27L,RPS24,RPL34,RPL26,RPS25,RPL26L1
gPROFILER	GO:0005688	U6 snRNP	8	3		0.00153244	LSM3,LSM5,LSM2
gPROFILER	GO:0005746	mitochondrial respirasome	82	7		0.00153244	NDUFS5,UQCRB,UQCRH,NDUFS4,NDUFS3,NDUFB5,NDUFA9
FUMA	GO:0060261	positive regulation of transcription initiation from rna polymerase ii promoter	20	4	1.68063e-05	0.00154408	GTF2B:PSMC6:SUB1:PSMC2
FUMA	GO:0030662	coated vesicle membrane	175	8	8.24022e-05	0.00155631	AP2A2:PICALM:FCHO1:VAMP8:SEC23B:DNAJC5:SAR1B:HBEGF
FUMA	GO:0034248	regulation of cellular amide metabolic process	453	14	1.7758e-05	0.0016031	MKNK1:MAGOH:EIF5AL1:PICALM:SORL1:NGDN:RPS27L:RPL26:UPF1:LSM14A:BIN1:PURA:IL6:CLU
FUMA	GO:0002764	immune response regulating signaling pathway	645	17	1.78849e-05	0.0016031	FCGR2B:MAPK8:MUC6:MS4A2:GAB2:NLRX1:ARPC3:PSMC6:PSMA3:PSMA4:LSM14A:PVRL2:LILRA2:TNIP2:MICB:HSPA1B:PSMC2
FUMA	GO:0016655	oxidoreductase activity acting on nad p h quinone or similar compound as acceptor	53	6	3.90279e-06	0.00160502	NDUFS5:NDUFS3:NDUFA9:CRYZL1:NDUFB5:NDUFS4
FUMA	GO:0060627	regulation of vesicle mediated transport	517	15	1.86625e-05	0.00165264	FCGR2B:ARHGAP1:EHD1:GAB2:PICALM:SORL1:APOC1:VAMP8:BIN1:SOD1:DGKQ:SAR1B:CD2AP:SNX3:CLU
FUMA	GO:0030120	vesicle coat	57	5	8.94148e-05	0.00165748	AP2A2:PICALM:FCHO1:SEC23B:SAR1B
FUMA	GO:0030135	coated vesicle	282	10	9.25949e-05	0.00168523	AP2A2:PICALM:FCHO1:VAMP8:SEC23B:DNAJC5:IDUA:SAR1B:HBEGF:SNX3
FUMA	GO:0006754	atp biosynthetic process	42	5	2.00106e-05	0.00175092	ATP5F1:ALDOA:ATP5J:ATP5O:ATP5I
gPROFILER	GO:0098803	respiratory chain complex	84	7		0.00175321	NDUFS5,UQCRB,UQCRH,NDUFS4,NDUFS3,NDUFB5,NDUFA9
FUMA	GO:0032553	ribonucleotide binding	1885	34	6.96686e-06	0.00179689	PANK4:GNL2:MKNK1:MAPK8:CAMK2G:EHD1:MAP3K11:NARS2:NLRX1:SOAT2:CCT2:PSMC6:RAB40C:RHOT2:CIITA:ALPK2:TYK2:UPF1:MAP4K4:DBI:STK17B:GAK:DGKQ:RHOH:SAR1B:RARS:RAB24:VARS:HSPA1L:HSPA1B:PSMC2:GIMAP7:DNAJA1:FBP1
FUMA	GO:0044877	protein containing complex binding	1096	24	7.98584e-06	0.00179689	FCGR2B:CUL2:EIF5AL1:MYBPC3:MS4A2:SORL1:NDUFA9:ARPC3:ACTN1:CIITA:RPAIN:MAP1S:FCHO1:LILRA2:BIN1:SNRPB2:ATP5J:ACTL6A:ATP5I:RNF4:SRP19:AIF1:CD2AP:CLU
FUMA	O:0044769	atpase activity coupled to transmembrane movement of ions rotational mechanism	35	5	7.98968e-06	0.00179689	ATP5F1:ATP6V1D:ATP5O:ATP6V1E1:ATP6V0E1
FUMA	GO:0015078	proton transmembrane transporter activity	128	8	8.73866e-06	0.00179689	ATP5F1:ATP6V1D:ATP5J:ATP5O:ATP6V1E1:ATP5I:ATP6V0E1:COX6C
gPROFILER	GO:0101002	ficolin-1-rich granule	124	9		0.00181185	SNTB2,SLC16A5,NDUFS4,UFC1,SEC23B,DPAGT1,DCUN1D1,GEMIN6,GIMAP7
gPROFILER	GO:1904813	ficolin-1-rich granule lumen	124	9		0.00181185	SNTB2,SLC16A5,NDUFS4,UFC1,SEC23B,DPAGT1,DCUN1D1,GEMIN6,GIMAP7
gPROFILER	GO:1902959	regulation of aspartic-type endopeptidase activity involved in amyloid precursor protein catabolic process	9	3		0.00181932	PICALM,BIN1,SORL1
FUMA	GO:0070201	regulation of establishment of protein localization	723	18	2.15756e-05	0.00184732	FCGR2B:MAPK8:SORL1:CCT2:UBL5:CARD8:LILRA2:MAP4K4:TCTEX1D2:SAR1B:AIF1:HSPA1L:SNX3:IL6:TOMM7:MDFIC:ENY2:DNAJA1
FUMA	GO:0009142	nucleoside triphosphate biosynthetic process	71	6	2.16149e-05	0.00184732	ATP5F1:ALDOA:ATP5J:ATP5O:ATP5I:IMPDH1
gPROFILER	GO:0005740	mitochondrial envelope	569	22		0.00186275	MRPL39,CRYZL1,ZNF384,TOMM5,SLC24A4,COX6C,ING3,MDFIC,HSPA1B,NARS2,TPRKB,NUCB2,PANK4,ACTR6,NCF4,RPL26L1,MICB,IDUA,HDHD2,PTRH2,DPM1,ZMAT2
FUMA	GO:0002832	negative regulation of response to biotic stimulus	43	5	2.24978e-05	0.00190068	NLRX1:CARD8:LILRA2:PPM1B:MICB
gPROFILER	REAC:R-HSA-927802	Nonsense-Mediated Decay (NMD)	116	12		0.00207009	ENY2,EXOSC7,TOMM5,SUB1,RAB40C,RNF4,ASPHD1,NCOA7,IGFBP6,GTF2B
gPROFILER	REAC:R-HSA-975957	Nonsense Mediated Decay (NMD) enhanced by the Exon Junction Complex (EJC)	116	12		0.00207009	ENY2,EXOSC7,TOMM5,SUB1,RAB40C,RNF4,ASPHD1,NCOA7,IGFBP6,GTF2B
gPROFILER	REAC:R-HSA-2408522	Selenoamino acid metabolism	117	12		0.00208443	ENY2,EXOSC7,TOMM5,SUB1,RAB40C,RNF4,ASPHD1,NCOA7,IGFBP6,GTF2B
gPROFILER	REAC:R-HSA-376176	Signaling by ROBO receptors	217	17		0.00208443	ENY2,EXOSC7,TOMM5,PDLIM7,SUB1,RAB40C,RNF4,ASPHD1,NDUFS4,NCOA7,IGFBP6,GIMAP7,DPY19L4,NDUFA9,GTF2B
gPROFILER	GO:1902003	regulation of amyloid-beta formation	28	4		0.00210716	CLU,PICALM,BIN1,SORL1
FUMA	GO:0031329	regulation of cellular catabolic process	805	19	2.64394e-05	0.00220829	MAPK8:EXOSC1:PSMC6:PSMA3:ATP6V1D:ATXN3:PSMA4:MEFV:USP7:UPF1:APOC1:ATP6V1E1:MTMR3:EXOSC7:ATP6V0E1:HSPA1B:TOMM7:PSMC2:CLU
Webgestalt	R-HSA-9010553	Regulation of expression of SLITs and ROBOs	171	13	9.86129e-06	0.00226645	PSMA3;PSMC6;MAGOH;RPL36AL;RPS27L;RPS24;RPL34;PSMA4;RPL26;RPS25;PSMC2;RPL26L1;CUL2
FUMA	GO:1901565	organonitrogen compound catabolic process	1263	25	2.79579e-05	0.00230888	CUL2:AP2A2:CTSD:USP35:SORL1:CSAD:UCHL3:PSMC6:PSMA3:ATXN3:PSMA4:USP7:KCTD13:GDPD3:APOC1:IDUA:RNF4:ERAP2:LNPEP:HSPA1B:CD2AP:SNX3:PSMC2:CLU:CDC26
FUMA	GO:0005688	u6 snrnp	13	3	0.00013209	0.00236111	LSM3:LSM2:LSM5
gPROFILER	GO:0019439	aromatic compound catabolic process	551	11		0.00237933	EXOSC7,PSMA3,SHFM1,IL6,EPHX2,UPF1,PSMC6,MAGOH,LSM3,LSM5,HSPA1B
gPROFILER	GO:0034205	amyloid-beta formation	33	3		0.00238566	CLU,PICALM,BIN1
gPROFILER	GO:0070585	protein localization to mitochondrion	134	8		0.00238566	TOMM40,HSPA1L,TOMM5,TIMM17A,MAPK8,DNAJA1,UBL5,PMPCB
gPROFILER	GO:0030388	fructose 1,6-bisphosphate metabolic process	10	3		0.00238566	FBP1,ALDOA,FBP2
gPROFILER	GO:0022411	cellular component disassembly	484	20		0.00238566	MRPL50,MRPL39,MRPL51,IL6,MRPS18C,UPF1,MRPL33,MRPS21,MRPL22,MRPL35,MRPS33,MRPL24,VAMP8,GAK,ATG2A,MRPL27,MRPS17,MRPL47,TOMM7,MAP1S
gPROFILER	GO:1905245	regulation of aspartic-type peptidase activity	11	3		0.00238566	PICALM,BIN1,SORL1
gPROFILER	GO:0072655	establishment of protein localization to mitochondrion	131	8		0.00238566	TOMM40,HSPA1L,TOMM5,TIMM17A,MAPK8,DNAJA1,UBL5,PMPCB
gPROFILER	GO:1902991	regulation of amyloid precursor protein catabolic process	34	3		0.00238566	CLU,PICALM,BIN1
gPROFILER	GO:0001774	microglial cell activation	38	3		0.00238566	AIF1,CLU,IL6
gPROFILER	GO:0002269	leukocyte activation involved in inflammatory response	38	3		0.00238566	AIF1,CLU,IL6
gPROFILER	GO:0002479	antigen processing and presentation of exogenous peptide antigen via MHC class I, TAP-dependent	75	7		0.00238566	PSMA3,SHFM1,PSMC6,PSMA4,VAMP8,PSMC2,NCF4
gPROFILER	GO:0065003	protein-containing complex assembly	1518	46		0.00238566	AIF1,TMEM126B,APOC1,GTF2H5,NDUFS5,CLU,PICALM,EHD1,BIN1,UQCRB,RPF2,PSMC6,FBP1,COX17,LSM3,SUB1,HSPA1B,ALDOA,SNRPD2,SORL1,SRP19,MRPL22,MEFV,SNRPG,RNF4,RPS27L,NDUFS4,DPAGT1,RPA3,CENPN,PSMC2,TBCA,LSM14A,CD2AP,FCHO1,NDUFS3,POMP,SOAT2,GEMIN6,CCT2,NDUFB5,NDUFA9,MED6,LAMC1,GTF2B,ARPC3
gPROFILER	GO:0061900	glial cell activation	43	3		0.00238566	AIF1,CLU,IL6
gPROFILER	GO:1901361	organic cyclic compound catabolic process	576	11		0.00238566	EXOSC7,PSMA3,SHFM1,IL6,EPHX2,UPF1,PSMC6,MAGOH,LSM3,LSM5,HSPA1B
gPROFILER	GO:0072594	establishment of protein localization to organelle	497	16		0.00238566	TOMM40,HSPA1L,CLU,TOMM5,EPHX2,TIMM17A,MAPK8,MDFIC,SORL1,SRP19,DNAJA1,UBL5,RPS24,RPL34,PMPCB,RPL26
gPROFILER	GO:0071840	cellular component organization or biogenesis	5593	23		0.00238566	MRPL50,MRPL39,TOMM40,ENY2,AIF1,TMEM126B,APOC1,GTF2H5,EXOSC7,MRPL51,HSPA1L,NDUFS5,CLU,PICALM,TOMM5,IL6,EPHX2,MRPS18C,EHD1,BIN1,UQCRB,CDKN2C,UPF1
gPROFILER	GO:0000502	proteasome complex	56	3		0.00239741	PSMA3,SHFM1,PSMC6
FUMA	GO:0051276	chromosome organization	1189	24	2.98474e-05	0.00240849	GTF2B:SETDB1:MAPK8:OBFC1:DPF2:PRIM1:CCT2:ACTR6:USP7:CENPN:INO80C:MAP1S:UPF1:DPY30:ACTL6A:RNF4:PURA:GTF2H5:RPA3:CBX3:ING3:COPS5:ENY2:CDC26
FUMA	GO:0015985	energy coupled proton transport down electrochemical gradient	23	4	3.01471e-05	0.00240849	ATP5F1:ATP5J:ATP5O:ATP5I
FUMA	GO:1902003	regulation of amyloid beta formation	23	4	3.01471e-05	0.00240849	PICALM:SORL1:BIN1:CLU
gPROFILER	GO:1902430	negative regulation of amyloid-beta formation	12	3		0.00244819	CLU,BIN1,SORL1
gPROFILER	GO:0046034	ATP metabolic process	259	8		0.00244819	NDUFS5,UQCRB,UQCRH,COX6C,FBP1,ATP5J,HSPA1B,ALDOA
FUMA	KEGG_RNA_DEGRADATION	rna degradation	59	5	0.000105543	0.00245386	EXOSC1:LSM3:EXOSC7:LSM2:LSM5
FUMA	GO:0006120	mitochondrial electron transport nadh to ubiquinone	46	5	3.14229e-05	0.00247117	NDUFS5:NDUFS3:NDUFA9:NDUFB5:NDUFS4
FUMA	GO:0006952	defense response	1684	30	3.16041e-05	0.00247117	FCGR2B:CAMK2G:MUC6:TSPAN32:MS4A2:NLRX1:NKG2-E:KLRC3:PSMC6:PSMA3:PSMA4:MEFV:CIITA:TYK2:LSM14A:PVRL2:LILRA2:PPM1B:VAMP8:POLR3F:SOD1:IFNAR2:AP000295.9:LXN:TNIP2:MICB:AIF1:HSPA1B:IL6:PSMC2:EPHX2:CLU
gPROFILER	GO:1905369	endopeptidase complex	57	3		0.00248733	PSMA3,SHFM1,PSMC6
gPROFILER	GO:0070469	respirasome	90	7		0.00248733	NDUFS5,UQCRB,UQCRH,NDUFS4,NDUFS3,NDUFB5,NDUFA9
FUMA	GO:0045087	innate immune response	966	21	3.31853e-05	0.0025675	FCGR2B:CAMK2G:MUC6:NLRX1:PSMC6:PSMA3:PSMA4:MEFV:CIITA:TYK2:LSM14A:PVRL2:LILRA2:POLR3F:IFNAR2:AP000295.9:TNIP2:MICB:AIF1:HSPA1B:PSMC2:CLU
gPROFILER	GO:0006000	fructose metabolic process	12	3		0.00256938	FBP1,ALDOA,FBP2
FUMA	GO:0044770	cell cycle phase transition	611	16	3.41089e-05	0.00261146	SYF2:CDKN2C:CUL2:PRIM1:PSMC6:PSMA3:RPS27L:PSMA4:RPL26:UPF1:DONSON:TMEM14B:AIF1:RPA3:PSMC2:CDC26
FUMA	GO:0003954	nadh dehydrogenase activity	40	5	1.56797e-05	0.00269871	NDUFS5:NDUFS3:NDUFA9:NDUFB5:NDUFS4
FUMA	GO:0016651	oxidoreductase activity acting on nad p h	101	7	1.64055e-05	0.00269871	NDUFS5:NDUFS3:NDUFA9:TXNDC17:CRYZL1:NDUFB5:NDUFS4
FUMA	GO:0002444	myeloid leukocyte mediated immunity	548	15	3.63891e-05	0.00275732	FCGR2B:AP2A2:CTSD:GAB2:CCT2:ATP6V1D:MVP:ALDOA:VAMP8:DNAJC5:RAB24:HSPA1B:IL6:PSMC2:IMPDH1
FUMA	GO:0061919	process utilizing autophagic mechanism	485	14	3.74109e-05	0.00280582	MAPK8:ATG2A:ATP6V1D:MEFV:MAP1S:TOMM40:VAMP8:ATP6V1E1:MTMR3:ATP6V0E1:RAB24:TOMM7:CLU:TOMM5
gPROFILER	GO:0090083	regulation of inclusion body assembly	13	3		0.00283031	CLU,HSPA1B,SORL1
gPROFILER	GO:0034655	nucleobase-containing compound catabolic process	496	10		0.00283031	EXOSC7,PSMA3,SHFM1,IL6,UPF1,PSMC6,MAGOH,LSM3,LSM5,HSPA1B
gPROFILER	GO:0006839	mitochondrial transport	244	7		0.00283031	TOMM40,HSPA1L,TOMM5,TIMM17A,RHOT2,MAPK8,ATP5J
gPROFILER	GO:0071347	cellular response to interleukin-1	163	5		0.00283031	PSMA3,SHFM1,IL6,UPF1,PSMC6
gPROFILER	GO:0016071	mRNA metabolic process	761	22		0.00283031	GTF2H5,EXOSC7,PSMA3,SHFM1,UPF1,PSMC6,MAGOH,LSM3,LSM5,HSPA1B,CWC15,SNRPD2,SYF2,SNRPG,SSB,UBL5,RPS24,RPL34,PSMA4,RPL26,RPS25,PSMC2
FUMA	GO:0032386	regulation of intracellular transport	425	13	3.93142e-05	0.00291878	ARHGAP1:MYBPC3:EHD1:GAB2:SORL1:UBL5:VAMP8:TCTEX1D2:SAR1B:HSPA1L:SNX3:TOMM7:MDFIC
FUMA	GO:1902959	regulation of aspartic type endopeptidase activity involved in amyloid precursor protein catabolic process	9	3	3.97175e-05	0.00291924	PICALM:SORL1:BIN1
gPROFILER	GO:0098798	mitochondrial protein complex	255	7		0.0029556	MRPL39,CRYZL1,ZNF384,SLC24A4,COX6C,MDFIC,HSPA1B
FUMA	GO:0032880	regulation of protein localization	982	21	4.20058e-05	0.00303196	FCGR2B:MAPK8:PICALM:SORL1:CCT2:UBL5:CARD8:LILRA2:VAMP8:MAP4K4:TCTEX1D2:SAR1B:AIF1:HSPA1L:CD2AP:SNX3:IL6:TOMM7:MDFIC:ENY2:DNAJA1
FUMA	GO:0030163	protein catabolic process	907	20	4.20762e-05	0.00303196	CUL2:AP2A2:CTSD:USP35:SORL1:UCHL3:PSMC6:PSMA3:ATXN3:PSMA4:USP7:KCTD13:RNF4:LNPEP:HSPA1B:CD2AP:SNX3:PSMC2:CLU:CDC26
gPROFILER	GO:0043488	regulation of mRNA stability	168	5		0.00304877	EXOSC7,PSMA3,SHFM1,UPF1,PSMC6
FUMA	GO:0043632	modification dependent macromolecule catabolic process	623	16	4.29619e-05	0.00306422	CUL2:USP35:UCHL3:PSMC6:PSMA3:ATXN3:PSMA4:USP7:KCTD13:EXOSC7:RNF4:HSPA1B:CD2AP:PSMC2:CLU:CDC26
FUMA	GO:0000375	rna splicing via transesterification reactions	369	12	4.33576e-05	0.00306422	SYF2:MAGOH:CWC15:UBL5:SNRPD2:GEMIN6:SNRPG:SNRPB2:LSM3:ZMAT2:LSM2:LSM5
gPROFILER	GO:0097346	INO80-type complex	27	4		0.00307958	ING3,INO80C,ACTR6,ACTL6A
gPROFILER	GO:0043231	intracellular membrane-bounded organelle	9624	189		0.00308168	MRPL50,MRPL39,TOMM40,ENY2,TMEM126B,CRYZL1,GTF2H5,EXOSC7,MRPL51,CLPTM1,NDUFS5,ZNF384,SHFM1,TOMM5,IL6,CSAD,EHD1,BIN1,UQCRB,CDKN2C,SLC24A4,POLR1D,UQCRH,PSMC6,COX6C,MAGOH,CARD8,RPL36AL,FCRLB,ING3,FBP1,COX17,MVP,TCTEX1D2,TIMM17A,LSM3,PDLIM7,SEC11A,RHOH,MGAT4A,MAPK8,ATP5J,SUB1,MAZ,MDFIC,HSPA1B,ALPK2,INO80C,UCHL3,CWC15,NGDN,ALDOA,SNRPD2,RAB40C,GNL2,NARS2,TMEM14B,SORL1,SRP19,CCNI,TPRKB,STK17B,ATXN3,FAM19…
gPROFILER	GO:0045202	synapse	576	12		0.00308168	TOMM40,GTF2H5,EXOSC7,PICALM,SHFM1,FCRLB,TIMM17A,SUB1,ALPK2,MS4A6A,CCNI,MRPL22
gPROFILER	GO:0005761	mitochondrial ribosome	87	7		0.00308168	CRYZL1,ZNF384,MDFIC,HSPA1B,TPRKB,PANK4,IDUA
gPROFILER	GO:0000313	organellar ribosome	87	7		0.00308168	CRYZL1,ZNF384,MDFIC,HSPA1B,TPRKB,PANK4,IDUA
gPROFILER	GO:0005763	mitochondrial small ribosomal subunit	29	4		0.00314294	MRPS18C,MRPS21,MRPS33,MRPS17
gPROFILER	GO:0000314	organellar small ribosomal subunit	29	4		0.00314294	MRPS18C,MRPS21,MRPS33,MRPS17
gPROFILER	GO:0005730	nucleolus	801	28		0.00322215	EXOSC7,NDUFS5,TOMM5,UQCRB,POLR1D,PSMC6,INO80C,RAB40C,MEFV,RNPEP,NCOA7,DUSP12,TNFRSF9,XYLT2,ARHGEF18,TATDN3,LSM14A,DOCK9,SOD1,SNRPB2,VARS,MRPS17,IGFBP6,TIGD7,ARHGAP1,KLRC3,EXOSC1,HCRTR2
FUMA	GO:0016788	hydrolase activity acting on ester bonds	723	18	2.15756e-05	0.00322654	DUSP12:TATDN3:CAMK2G:GDPD3:PTRH2:HDHD2:PNPLA6:CLC:PPM1B:INPP4A:MTMR3:EXOSC7:BPHL:VARS:PTP4A1:EPHX2:FBP2:FBP1
gPROFILER	GO:0015935	small ribosomal subunit	74	3		0.0032364	EXOSC7,ZNF384,TOMM5
Webgestalt	GO:0005742	mitochondrial outer membrane translocase complex	10	3	0.000125843	0.00323837	TOMM40;TOMM5;TOMM7
FUMA	GO:0016071	mrna metabolic process	560	15	4.64899e-05	0.00325429	SYF2:MAGOH:CWC15:UBL5:UPF1:SNRPD2:GEMIN6:SNRPG:SSB:SNRPB2:LSM3:ZMAT2:LSM2:GTF2H5:LSM5
FUMA	GO:0010942	positive regulation of cell death	698	17	4.79369e-05	0.00332393	FCGR2B:MAPK8:MAP3K11:PICALM:RPS27L:RPL26:PTRH2:ARHGEF18:CARD8:BIN1:STK17B:SOD1:IL6:ING3:CLU:DNAJA1:LPAR1
gPROFILER	GO:0043487	regulation of RNA stability	172	5		0.00335154	EXOSC7,PSMA3,SHFM1,UPF1,PSMC6
gPROFILER	GO:0046907	intracellular transport	1558	32		0.00336108	TOMM40,ENY2,HSPA1L,CLU,PICALM,TOMM5,EPHX2,EHD1,BIN1,UPF1,GAB2,MAGOH,TCTEX1D2,TIMM17A,RHOT2,ATP5J,MDFIC,SNRPD2,RAB40C,SORL1,SRP19,MYBPC3,SNRPG,SSB,UBL5,RPS24,SEC23B,RPL34,PMPCB,DCTN6,RPL26,VAMP8
FUMA	GO:0044432	endoplasmic reticulum part	1344	24	0.000194409	0.0034141	LAMC1:CAMK2G:EIF5AL1:DPAGT1:SOAT2:OSBPL8:KTN1:ATXN3:SEC11A:SEZ6L2:GDPD3:PNPLA6:MGAT4A:DBI:SEC23B:PIGT:DPM1:ERAP2:REEP5:SAR1B:BNIP1:IL6:CLU:DNAJA1
FUMA	GO:0030128	clathrin coat of endocytic vesicle	15	3	0.000207693	0.0035845	AP2A2:PICALM:FCHO1
gPROFILER	GO:0050435	amyloid-beta metabolic process	42	3		0.00362536	CLU,PICALM,BIN1
gPROFILER	GO:0016579	protein deubiquitination	280	15		0.00368746	ENY2,PSMA3,SHFM1,PSMC6,INO80C,UCHL3,ATXN3,TNIP2,COPS5,PSMA4,PSMC2,USP35,ACTL6A,USP7,SNX3
gPROFILER	GO:0030894	replisome	28	4		0.00371456	PRIM1,PURA,RPA3,DONSON
FUMA	GO:0033209	tumor necrosis factor mediated signaling pathway	165	8	5.45256e-05	0.00374545	TNFRSF9:PSMC6:PSMA3:PSMA4:TXNDC17:CARD8:HSPA1B:PSMC2
gPROFILER	GO:0042987	amyloid precursor protein catabolic process	43	3		0.00376689	CLU,PICALM,BIN1
FUMA	GO:0030388	fructose 1 6 bisphosphate metabolic process	10	3	5.6407e-05	0.00376901	ALDOA:FBP2:FBP1
FUMA	GO:0006000	fructose metabolic process	10	3	5.6407e-05	0.00376901	ALDOA:FBP2:FBP1
FUMA	GO:2001135	regulation of endocytic recycling	10	3	5.6407e-05	0.00376901	ARHGAP1:EHD1:SORL1
FUMA	GO:0045893	positive regulation of dna templated transcription initiation	27	4	5.82797e-05	0.00382461	GTF2B:PSMC6:SUB1:PSMC2
FUMA	GO:0051123	rna polymerase ii preinitiation complex assembly	27	4	5.82797e-05	0.00382461	GTF2B:PSMC6:MED6:PSMC2
gPROFILER	GO:0042775	mitochondrial ATP synthesis coupled electron transport	91	8		0.00391446	NDUFS5,UQCRB,UQCRH,COX6C,NDUFS4,NDUFS3,NDUFB5,NDUFA9
FUMA	GO:0002443	leukocyte mediated immunity	857	19	6.09978e-05	0.00396756	FCGR2B:AP2A2:CTSD:GAB2:CCT2:ATP6V1D:MVP:ALDOA:CLC:PVRL2:VAMP8:DNAJC5:RAB24:MICB:HSPA1B:IL6:PSMC2:IMPDH1:CLU
gPROFILER	GO:0070555	response to interleukin-1	182	5		0.00397218	PSMA3,SHFM1,IL6,UPF1,PSMC6
Webgestalt	GO:0022626	cytosolic ribosome	111	7	0.000160392	0.00399427	RPL36AL;RPS27L;RPS24;RPL34;RPL26;RPS25;RPL26L1
Webgestalt	GO:0005747	mitochondrial respiratory chain complex I	51	5	0.000183652	0.00408891	NDUFS5;NDUFS4;NDUFS3;NDUFB5;NDUFA9
Webgestalt	GO:0030964	NADH dehydrogenase complex	51	5	0.000183652	0.00408891	NDUFS5;NDUFS4;NDUFS3;NDUFB5;NDUFA9
Webgestalt	GO:0045271	respiratory chain complex I	51	5	0.000183652	0.00408891	NDUFS5;NDUFS4;NDUFS3;NDUFB5;NDUFA9
Webgestalt	GO:0000314	organellar small ribosomal subunit	28	4	0.000190675	0.00408891	MRPS18C;MRPS21;MRPS33;MRPS17
Webgestalt	GO:0005763	mitochondrial small ribosomal subunit	28	4	0.000190675	0.00408891	MRPS18C;MRPS21;MRPS33;MRPS17
gPROFILER	GO:0042773	ATP synthesis coupled electron transport	92	8		0.00410199	NDUFS5,UQCRB,UQCRH,COX6C,NDUFS4,NDUFS3,NDUFB5,NDUFA9
gPROFILER	GO:0016043	cellular component organization	5431	22		0.00423253	MRPL50,MRPL39,TOMM40,ENY2,AIF1,TMEM126B,APOC1,GTF2H5,MRPL51,HSPA1L,NDUFS5,CLU,PICALM,TOMM5,IL6,EPHX2,MRPS18C,EHD1,BIN1,UQCRB,CDKN2C,UPF1
FUMA	KEGG_EPITHELIAL_CELL_SIGNALING_IN_HELICOBACTER_PYLORI_INFECTION	epithelial cell signaling in helicobacter pylori infection	68	5	0.000207397	0.00428621	MAPK8:ATP6V1D:ATP6V1E1:HBEGF:ATP6V0E1
FUMA	GO:0060260	regulation of transcription initiation from rna polymerase ii promoter	28	4	6.75712e-05	0.00435657	GTF2B:PSMC6:SUB1:PSMC2
FUMA	GO:0033043	regulation of organelle organization	1254	24	6.85055e-05	0.0043784	SETDB1:MAPK8:OBFC1:CCT2:ARPC3:RHOT2:USP7:UBL5:MAP1S:UPF1:BIN1:MTMR3:TCTEX1D2:RNF4:RHOH:CCNI:SAR1B:HSPA1L:HSPA1B:CD2AP:TOMM7:CLU:LPAR1:CDC26
gPROFILER	GO:0046700	heterocycle catabolic process	537	10		0.00443941	EXOSC7,PSMA3,SHFM1,IL6,UPF1,PSMC6,MAGOH,LSM3,LSM5,HSPA1B
gPROFILER	GO:0061013	regulation of mRNA catabolic process	189	5		0.00444561	EXOSC7,PSMA3,SHFM1,UPF1,PSMC6
gPROFILER	GO:0044270	cellular nitrogen compound catabolic process	539	10		0.00444561	EXOSC7,PSMA3,SHFM1,IL6,UPF1,PSMC6,MAGOH,LSM3,LSM5,HSPA1B
FUMA	GO:0030665	clathrin coated vesicle membrane	111	6	0.000262555	0.00445454	AP2A2:PICALM:FCHO1:VAMP8:DNAJC5:HBEGF
gPROFILER	GO:0044456	synapse part	439	5		0.00448507	TOMM40,GTF2H5,EXOSC7,PICALM,SHFM1
gPROFILER	GO:0033108	mitochondrial respiratory chain complex assembly	95	8		0.00452623	TMEM126B,NDUFS5,UQCRB,COX17,NDUFS4,NDUFS3,NDUFB5,NDUFA9
gPROFILER	GO:0150076	neuroinflammatory response	61	3		0.00452623	AIF1,CLU,IL6
Webgestalt	GO:0030894	replisome	29	4	0.000219395	0.00457765	PRIM1;PURA;RPA3;DONSON
Webgestalt	GO:0032984	protein-containing complex disassembly	323	17	5.81664e-06	0.00458497	MRPL50;MRPL39;MRPL51;MRPS18C;UPF1;MRPL33;MRPS21;MRPL22;MRPL35;MRPS33;MRPL24;VAMP8;EIF5AL1;GAK;MRPL27;MRPS17;MRPL47
Webgestalt	GO:0000932	P-body	83	6	0.000226653	0.00460464	UPF1;LSM3;PSMA4;PSMC2;LSM14A;LSM2
gPROFILER	GO:0044445	cytosolic part	213	9		0.00462482	PSMC6,CARD8,RPL36AL,RPS27L,RPS24,RPL34,RPL26,RPS25,RPL26L1
FUMA	GO:0009408	response to heat	172	8	7.302e-05	0.0046267	CAMK2G:ATXN3:SOD1:MICB:HSPA1L:HSPA1B:RPA3:DNAJA1
FUMA	GO:0032994	protein lipid complex	40	4	0.000279935	0.00467026	SORL1:APOC1:BIN1:CLU
FUMA	GO:0050778	positive regulation of immune response	871	19	7.544e-05	0.00468276	FCGR2B:MUC6:GAB2:NLRX1:ARPC3:PSMC6:PSMA3:PSMA4:LSM14A:PVRL2:LILRA2:VAMP8:POLR3F:TNIP2:MICB:HSPA1B:IL6:PSMC2:CLU
FUMA	GO:0022900	electron transport chain	173	8	7.60433e-05	0.00468276	NDUFS5:UQCRH:NDUFS3:NDUFA9:NDUFB5:NDUFS4:UQCRB:COX6C
FUMA	GO:1905245	regulation of aspartic type peptidase activity	11	3	7.71055e-05	0.00468276	PICALM:SORL1:BIN1
FUMA	GO:1902991	regulation of amyloid precursor protein catabolic process	29	4	7.78965e-05	0.00468276	PICALM:SORL1:BIN1:CLU
FUMA	GO:0034205	amyloid beta formation	29	4	7.78965e-05	0.00468276	PICALM:SORL1:BIN1:CLU
FUMA	GO:0006457	protein folding	223	9	7.80631e-05	0.00468276	CCT2:PPIG:DNAJC5:GAK:TBCA:HSPA1L:HSPA1B:CLU:DNAJA1
FUMA	GO:0034660	ncrna metabolic process	455	13	7.83646e-05	0.00468276	RPS24:EXOSC1:NARS2:NGDN:RPL26:TPRKB:SSB:EXOSC7:NSA2:RARS:VARS:RPF2:GTF2H5
gPROFILER	GO:0070498	interleukin-1-mediated signaling pathway	101	4		0.00469495	PSMA3,SHFM1,IL6,PSMC6
gPROFILER	GO:0099503	secretory vesicle	840	25		0.00470734	TOMM40,PICALM,SHFM1,TIMM17A,GNL2,SNTB2,CCNI,SLC16A5,SNRPG,PURA,NDUFS4,UFC1,RASAL3,SEC23B,DPAGT1,DAGLB,RBMS2,BNIP1,DCUN1D1,PIGT,GEMIN6,ERAP2,ACTL6A,GIMAP7,DEXI
FUMA	GO:0008380	rna splicing	456	13	8.01038e-05	0.00474809	SYF2:MAGOH:CWC15:UBL5:SNRPD2:GEMIN6:SNRPG:PPIG:SNRPB2:LSM3:ZMAT2:LSM2:LSM5
Webgestalt	GO:0044445	cytosolic part	244	10	0.000243403	0.00481814	PSMC6;CARD8;RPL36AL;RPS27L;RPS24;RPL34;RPL26;RPS25;RPL26L1;CCT2
FUMA	GO:0098799	outer mitochondrial membrane protein complex	17	3	0.000306783	0.00497724	TOMM40:TOMM7:TOMM5
FUMA	GO:0030669	clathrin coated endocytic vesicle membrane	41	4	0.000308281	0.00497724	AP2A2:PICALM:FCHO1:HBEGF
gPROFILER	GO:0000956	nuclear-transcribed mRNA catabolic process	206	10		0.00503904	EXOSC7,UPF1,MAGOH,LSM3,LSM5,SSB,RPS24,RPL34,RPL26,RPS25
FUMA	GO:0030666	endocytic vesicle membrane	162	7	0.000323017	0.00513238	CAMK2G:AP2A2:PICALM:FCHO1:VAMP8:HBEGF:ATP6V0E1
FUMA	GO:0005694	chromosome	1059	20	0.000329439	0.00515262	GTF2B:SETDB1:OBFC1:DPF2:PRIM1:ARPC3:NGDN:USP7:CENPN:INO80C:UPF1:SSB:DONSON:ACTL6A:PURA:RPA3:CBX3:ING3:DCTN6:COPS5
FUMA	GO:0010941	regulation of cell death	1697	29	8.93588e-05	0.0052543	FCGR2B:MAPK8:NDUFS3:MAP3K11:PICALM:SORL1:ACTN1:RPS27L:MAZ:RPL26:PTRH2:ARHGEF18:CARD8:MAP4K4:BIN1:STK17B:DNAJC5:SOD1:TNIP2:BNIP1:AIF1:HSPA1B:NCOA7:IL6:ING3:CLU:COPS5:DNAJA1:LPAR1
FUMA	GO:0099503	secretory vesicle	983	19	0.000349233	0.00537819	RNPEP:AP2A2:CTSD:PICALM:CCT2:ATP6V1D:ACTN1:MVP:ALDOA:VAMP8:BIN1:DNAJC5:SOD1:RAB24:HSPA1B:PSMC2:IMPDH1:CLU:COPS5
gPROFILER	GO:0006605	protein targeting	390	13		0.005453	TOMM40,HSPA1L,CLU,TOMM5,EPHX2,TIMM17A,SORL1,SRP19,UBL5,RPS24,RPL34,PMPCB,RPL26
gPROFILER	GO:0070646	protein modification by small protein removal	297	15		0.00550138	ENY2,PSMA3,SHFM1,PSMC6,INO80C,UCHL3,ATXN3,TNIP2,COPS5,PSMA4,PSMC2,USP35,ACTL6A,USP7,SNX3
FUMA	GO:0034719	smn sm protein complex	18	3	0.000365989	0.00555084	SNRPD2:GEMIN6:SNRPG
gPROFILER	GO:0005747	mitochondrial respiratory chain complex I	51	5		0.00555463	NDUFS5,NDUFS4,NDUFS3,NDUFB5,NDUFA9
gPROFILER	GO:0045271	respiratory chain complex I	51	5		0.00555463	NDUFS5,NDUFS4,NDUFS3,NDUFB5,NDUFA9
gPROFILER	GO:0030964	NADH dehydrogenase complex	51	5		0.00555463	NDUFS5,NDUFS4,NDUFS3,NDUFB5,NDUFA9
FUMA	GO:0045333	cellular respiration	179	8	9.64472e-05	0.00562609	NDUFS5:UQCRH:NDUFS3:NDUFA9:NDUFB5:NDUFS4:UQCRB:COX6C
gPROFILER	GO:0060261	positive regulation of transcription initiation from RNA polymerase II promoter	17	4		0.00572066	PSMC6,SUB1,PSMC2,GTF2B
gPROFILER	GO:0044237	cellular metabolic process	9116	150		0.00572288	MRPL50,MRPL39,TOMM40,ENY2,CRYZL1,APOC1,GTF2H5,EXOSC7,MRPL51,NDUFS5,CLU,PSMA3,PICALM,SHFM1,TOMM5,IL6,CSAD,EPHX2,MRPS18C,BIN1,UQCRB,CDKN2C,UPF1,RPF2,MAP3K11,POLR1D,UQCRH,PSMC6,MKNK1,COX6C,MAGOH,CARD8,ING3,FBP1,COX17,MVP,LSM3,IMPDH1,SEC11A,RHOH,MGAT4A,MAPK8,ATP5J,SUB1,MAZ,NDST2,MDFIC,LSM5,HSPA1B,INO80C,UCHL3,CWC15,PRIM1,NGDN,ALDOA,CDC26,SNRPD2,NARS2,MRPL33,SORL1,MRPS21,FBP2,CCNI,TPRKB,STK17B,MRPL22,…
gPROFILER	GO:0042180	cellular ketone metabolic process	207	5		0.00572288	CRYZL1,APOC1,PSMA3,SHFM1,PSMC6
FUMA	GO:0010498	proteasomal protein catabolic process	466	13	9.94206e-05	0.00575387	CUL2:PSMC6:PSMA3:ATXN3:PSMA4:USP7:KCTD13:RNF4:HSPA1B:CD2AP:PSMC2:CLU:CDC26
FUMA	GO:0032102	negative regulation of response to external stimulus	343	11	0.000101791	0.0058071	FCGR2B:NUCB2:NLRX1:SEMA4B:MEFV:CARD8:LILRA2:PPM1B:SOD1:MICB:AIF1
FUMA	GO:0042407	cristae formation	31	4	0.000101921	0.0058071	ATP5F1:ATP5J:ATP5O:ATP5I
FUMA	GO:0008233	peptidase activity	623	16	4.29619e-05	0.00588936	RNPEP:CTSD:USP35:UCHL3:PSMA3:ATXN3:PSMA4:SEC11A:USP7:CLC:ADAM29:ERAP2:LNPEP:PMPCB:COPS5:AGTPBP1
gPROFILER	GO:0016234	inclusion body	74	4		0.00590417	CLU,PICALM,HSPA1B,ATXN3
Webgestalt	GO:0030120	vesicle coat	57	5	0.000311294	0.00600797	PICALM;SEC23B;FCHO1;AP2A2;SAR1B
FUMA	GO:0003713	transcription coactivator activity	315	11	4.77216e-05	0.00603862	ACTN1:MED6:CIITA:TCF20:SS18L2:ACTL6A:RNF4:SUB1:NCOA7:COPS5:ENY2
gPROFILER	GO:0022904	respiratory electron transport chain	105	4		0.0060452	NDUFS5,UQCRB,UQCRH,COX6C
gPROFILER	GO:0022900	electron transport chain	106	4		0.00609638	NDUFS5,UQCRB,UQCRH,COX6C
gPROFILER	GO:0070841	inclusion body assembly	19	3		0.00609638	CLU,HSPA1B,SORL1
gPROFILER	GO:0048259	regulation of receptor-mediated endocytosis	82	3		0.00609638	APOC1,CLU,PICALM
FUMA	GO:0002831	regulation of response to biotic stimulus	136	7	0.000110093	0.00622451	TSPAN32:NLRX1:PVRL2:CARD8:LILRA2:PPM1B:MICB
Webgestalt	GO:1905368	peptidase complex	89	6	0.000331475	0.00624144	ENY2;PSMA3;PSMC6;SEC11A;PSMA4;PSMC2
gPROFILER	GO:1903311	regulation of mRNA metabolic process	308	6		0.00627794	EXOSC7,PSMA3,SHFM1,UPF1,PSMC6,MAGOH
gPROFILER	GO:0006119	oxidative phosphorylation	132	5		0.00629335	NDUFS5,UQCRB,UQCRH,COX6C,ATP5J
FUMA	GO:0046390	ribose phosphate biosynthetic process	183	8	0.000112419	0.00630746	PANK4:ATP5F1:ALDOA:ATP5J:ATP5O:SLC25A1:ATP5I:IMPDH1
FUMA	WP4324	mitochondrial complex i assembly model oxphos system	50	5	4.73331e-05	0.00642547	NDUFS5:NDUFS3:TMEM126B:NDUFB5:NDUFS4
FUMA	GO:0030132	clathrin coat of coated pit	19	3	0.000432076	0.00645534	AP2A2:PICALM:FCHO1
gPROFILER	GO:0042116	macrophage activation	74	3		0.00656092	AIF1,CLU,IL6
FUMA	GO:0016236	macroautophagy	291	10	0.000119766	0.00663331	MAPK8:ATG2A:ATP6V1D:TOMM40:VAMP8:ATP6V1E1:MTMR3:ATP6V0E1:TOMM7:TOMM5
FUMA	GO:0009266	response to temperature stimulus	236	9	0.000120031	0.00663331	CAMK2G:ATXN3:SOD1:LXN:MICB:HSPA1L:HSPA1B:RPA3:DNAJA1
Webgestalt	GO:0005750	mitochondrial respiratory chain complex III	14	3	0.000370188	0.00664617	UQCRB;UQCRH;PMPCB
Webgestalt	GO:0045275	respiratory chain complex III	14	3	0.000370188	0.00664617	UQCRB;UQCRH;PMPCB
gPROFILER	GO:0042982	amyloid precursor protein metabolic process	59	3		0.00670185	CLU,PICALM,BIN1
gPROFILER	GO:0005984	disaccharide metabolic process	9	3		0.00670785	FBP1,FBP2,IDUA
gPROFILER	GO:0098794	postsynapse	260	6		0.00688782	GTF2H5,EXOSC7,SHFM1,FCRLB,TIMM17A,SUB1
gPROFILER	GO:0060205	cytoplasmic vesicle lumen	318	13		0.00688782	SHFM1,GNL2,SNTB2,CCNI,SLC16A5,PURA,NDUFS4,UFC1,DPAGT1,BNIP1,DCUN1D1,GIMAP7,DEXI
gPROFILER	GO:0031966	mitochondrial membrane	535	19		0.00688782	MRPL39,CRYZL1,ZNF384,TOMM5,SLC24A4,COX6C,MDFIC,HSPA1B,TPRKB,NUCB2,PANK4,ACTR6,NCF4,RPL26L1,IDUA,HDHD2,PTRH2,DPM1,ZMAT2
gPROFILER	GO:0005829	cytosol	4781	64		0.00688782	LARP7,TOMM40,ENY2,AIF1,GTF2H5,EXOSC7,CLPTM1,NDUFS5,CLU,SHFM1,TOMM5,EHD1,BIN1,UQCRB,MKNK1,CARD8,RPL36AL,FCRLB,FBP1,MVP,TIMM17A,PDLIM7,RHOH,SUB1,MAZ,NDST2,UCHL3,NGDN,ALDOA,SNRPD2,RAB40C,FBP2,SRP19,CCNI,KTN1,SLC16A5,ATP6V0E1,SEMA4B,INPP4A,SNRPG,RNF4,UBL5,RPS27L,ASPHD1,MRPS33,ALKBH3,MS4A2,OSBPL8,NDUFS4,TNIP2,UFC1,ZNF324,NCOA7,RASAL3,NLRX1,FCGR2B,RPS24,XYLT2,KCTD13,DPAGT1,LNPEP,EAF2,PLEKHG1,RSAD1
gPROFILER	GO:0030426	growth cone	84	6		0.00688782	FCRLB,SLC16A5,RASAL3,FCGR2B,TATDN3,CD2AP
gPROFILER	GO:0043228	non-membrane-bounded organelle	4034	92		0.00688782	LARP7,TOMM40,ENY2,AIF1,CRYZL1,EXOSC7,CLPTM1,NDUFS5,ZNF384,TOMM5,CSAD,UQCRB,RPF2,POLR1D,UQCRH,PSMC6,FCRLB,LSM3,SUB1,NDST2,MDFIC,HSPA1B,ALPK2,INO80C,NGDN,ALDOA,SNRPD2,RAB40C,TMEM14B,SNTB2,FBP2,SRP19,TPRKB,KTN1,MEFV,RNPEP,METTL5,DBI,DNAJA1,SNRPG,RNF4,UBL5,ASPHD1,UFC1,NCOA7,RASAL3,NLRX1,DUSP12,TNFRSF9,RPL34,XYLT2,KCTD13,ARHGEF18,RPL26,TATDN3,ATP6V1E1,BNIP1,PANK4,SH2D3C,CENPN,DCUN1D1,LSM14A,DOCK9,ATG2…
gPROFILER	GO:0043232	intracellular non-membrane-bounded organelle	4032	92		0.00688782	LARP7,TOMM40,ENY2,AIF1,CRYZL1,EXOSC7,CLPTM1,NDUFS5,ZNF384,TOMM5,CSAD,UQCRB,RPF2,POLR1D,UQCRH,PSMC6,FCRLB,LSM3,SUB1,NDST2,MDFIC,HSPA1B,ALPK2,INO80C,NGDN,ALDOA,SNRPD2,RAB40C,TMEM14B,SNTB2,FBP2,SRP19,TPRKB,KTN1,MEFV,RNPEP,METTL5,DBI,DNAJA1,SNRPG,RNF4,UBL5,ASPHD1,UFC1,NCOA7,RASAL3,NLRX1,DUSP12,TNFRSF9,RPL34,XYLT2,KCTD13,ARHGEF18,RPL26,TATDN3,ATP6V1E1,BNIP1,PANK4,SH2D3C,CENPN,DCUN1D1,LSM14A,DOCK9,ATG2…
gPROFILER	GO:0034774	secretory granule lumen	316	13		0.00688782	SHFM1,GNL2,SNTB2,CCNI,SLC16A5,PURA,NDUFS4,UFC1,DPAGT1,BNIP1,DCUN1D1,GIMAP7,DEXI
gPROFILER	GO:0044444	cytoplasmic part	8879	101		0.00688782	LARP7,MRPL39,TOMM40,ENY2,AIF1,TMEM126B,CRYZL1,GTF2H5,EXOSC7,CLPTM1,NDUFS5,CLU,ZNF384,PICALM,SHFM1,TOMM5,IL6,RPAP3,CSAD,EHD1,BIN1,UQCRB,SLC24A4,RPF2,MKNK1,COX6C,GAB2,MAGOH,CARD8,RPL36AL,FCRLB,ING3,FBP1,COX17,MVP,TCTEX1D2,TIMM17A,PDLIM7,SEC11A,RHOH,SUB1,MAZ,NDST2,MDFIC,HSPA1B,UCHL3,NGDN,ALDOA,SNRPD2,RAB40C,GNL2,NARS2,TMEM14B,SNTB2,SORL1,FBP2,SRP19,CCNI,TPRKB,ATXN3,FAM193A,KTN1,SLC16A5,ATP6V0E1,SEMA…
gPROFILER	GO:0031983	vesicle lumen	319	13		0.00688782	SHFM1,GNL2,SNTB2,CCNI,SLC16A5,PURA,NDUFS4,UFC1,DPAGT1,BNIP1,DCUN1D1,GIMAP7,DEXI
Webgestalt	GO:0030662	coated vesicle membrane	169	8	0.000394928	0.00692919	PICALM;SEC23B;VAMP8;FCHO1;AP2A2;HBEGF;SAR1B;DNAJC5
FUMA	GO:0101002	ficolin 1 rich granule	124	6	0.000475446	0.00699884	CTSD:MVP:ALDOA:HSPA1B:PSMC2:IMPDH1
FUMA	GO:0016791	phosphatase activity	268	10	6.07555e-05	0.00713877	DUSP12:CAMK2G:HDHD2:PPM1B:INPP4A:MTMR3:PTP4A1:EPHX2:FBP2:FBP1
gPROFILER	GO:0031975	envelope	912	27		0.00730782	MRPL39,CRYZL1,ZNF384,SHFM1,TOMM5,SLC24A4,COX6C,ING3,MDFIC,HSPA1B,NARS2,TPRKB,NUCB2,MTMR3,PANK4,EIF5AL1,ACTR6,NCF4,RPL26L1,MICB,IDUA,HDHD2,CAMK2G,PTRH2,DPM1,TM9SF3,ZMAT2
gPROFILER	GO:0031967	organelle envelope	912	27		0.00730782	MRPL39,CRYZL1,ZNF384,SHFM1,TOMM5,SLC24A4,COX6C,ING3,MDFIC,HSPA1B,NARS2,TPRKB,NUCB2,MTMR3,PANK4,EIF5AL1,ACTR6,NCF4,RPL26L1,MICB,IDUA,HDHD2,CAMK2G,PTRH2,DPM1,TM9SF3,ZMAT2
gPROFILER	GO:0030427	site of polarized growth	88	6		0.00732271	FCRLB,SLC16A5,RASAL3,FCGR2B,TATDN3,CD2AP
gPROFILER	GO:1901566	organonitrogen compound biosynthetic process	1614	39		0.00732535	MRPL50,MRPL39,MRPL51,IL6,MRPS18C,UPF1,IMPDH1,MGAT4A,ATP5J,NDST2,ALDOA,NARS2,MRPL33,MRPS21,MRPL22,MRPL35,MUC6,RPS27L,MRPS33,MRPL24,NACA,RPS24,RPL34,XYLT2,COPS5,DPAGT1,RPL26,PANK4,EIF5AL1,SLC25A1,RPS25,PIGT,RPL26L1,VARS,SLC35C1,MRPL27,MRPS17,PPM1B,MRPL47
FUMA	GO:0071806	protein transmembrane transport	62	5	0.000133811	0.00733961	TIMM17A:TOMM40:SRP19:TOMM7:CLU
FUMA	GO:0002768	immune response regulating cell surface receptor signaling pathway	481	13	0.000135912	0.00736215	FCGR2B:MAPK8:MUC6:MS4A2:GAB2:ARPC3:PSMC6:PSMA3:PSMA4:PVRL2:LILRA2:MICB:PSMC2
FUMA	GO:0038093	fc receptor signaling pathway	240	9	0.000136225	0.00736215	FCGR2B:MAPK8:MS4A2:GAB2:ARPC3:PSMC6:PSMA3:PSMA4:PSMC2
gPROFILER	GO:0033267	axon part	165	9		0.00740572	TOMM40,PICALM,FCRLB,SLC16A5,RASAL3,FCGR2B,TATDN3,CD2AP,NDUFB5
gPROFILER	GO:0006996	organelle organization	3360	26		0.00751839	TOMM40,ENY2,AIF1,TMEM126B,GTF2H5,HSPA1L,NDUFS5,CLU,PICALM,TOMM5,EPHX2,EHD1,BIN1,UQCRB,UPF1,RPF2,ING3,COX17,TCTEX1D2,TIMM17A,LSM3,PDLIM7,RHOT2,MAPK8,ATP5J,SUB1
FUMA	GO:0070498	interleukin 1 mediated signaling pathway	99	6	0.000140602	0.00754327	PSMC6:PSMA3:PSMA4:TNIP2:IL6:PSMC2
gPROFILER	GO:0006626	protein targeting to mitochondrion	95	6		0.00778696	TOMM40,HSPA1L,TOMM5,TIMM17A,UBL5,PMPCB
gPROFILER	GO:0034719	SMN-Sm protein complex	17	3		0.00779159	SNRPD2,SNRPG,GEMIN6
FUMA	GO:0006974	cellular response to dna damage stimulus	841	18	0.000147287	0.00784461	SYF2:ALKBH3:ATXN3:RPS27L:USP7:RPAIN:RPL26:INO80C:UPF1:DONSON:ACTL6A:GTF2H5:RPA3:CBX3:SHFM1:C7orf76:CLU:COPS5:DNAJA1
FUMA	GO:0055085	transmembrane transport	1574	27	0.000148384	0.0078462	ATP5F1:TIMM17A:SLC35C1:PICALM:OSBPL8:PSMC6:PSMA3:ATP6V1D:SLC24A4:PSMA4:SLC16A5:TOMM40:BIN1:ATP5J:ATP5O:ATP6V1E1:SLC25A1:COX17:ATP5I:MFSD10:SRP19:ATP6V0E1:TOMM7:PMPCB:PSMC2:CLU:COX6C
FUMA	GO:0012506	vesicle membrane	780	16	0.00054155	0.0078564	CAMK2G:AP2A2:PICALM:ATP6V1D:SNTB2:FCHO1:VAMP8:SEC23B:DNAJC5:DGKQ:MFSD10:LNPEP:SAR1B:HBEGF:ATP6V0E1:RAB24
Webgestalt	GO:0030122	AP-2 adaptor complex	15	3	0.000459203	0.00787788	PICALM;FCHO1;AP2A2
gPROFILER	GO:2001135	regulation of endocytic recycling	8	3		0.00817269	EHD1,SORL1,ARHGAP1
gPROFILER	GO:0043928	exonucleolytic catabolism of deadenylated mRNA	33	5		0.00825215	EXOSC7,LSM3,LSM5,LSM2,EXOSC1
FUMA	GO:0005686	u2 snrnp	21	3	0.000586147	0.0083819	SNRPD2:SNRPG:SNRPB2
FUMA	GO:0097418	neurofibrillary tangle	5	2	0.000613865	0.00865463	PICALM:CLU
FUMA	GO:0051547	regulation of keratinocyte migration	14	3	0.000167132	0.00877441	MAP4K4:IQSEC1:HBEGF
FUMA	GO:0002263	cell activation involved in immune response	702	16	0.000170381	0.00888157	FCGR2B:AP2A2:CTSD:GAB2:CCT2:ATP6V1D:MVP:ALDOA:LILRA2:VAMP8:DNAJC5:RAB24:HSPA1B:IL6:PSMC2:IMPDH1
gPROFILER	GO:0005762	mitochondrial large ribosomal subunit	57	5		0.00901551	CRYZL1,MDFIC,TPRKB,PANK4,IDUA
gPROFILER	GO:0000315	organellar large ribosomal subunit	57	5		0.00901551	CRYZL1,MDFIC,TPRKB,PANK4,IDUA
gPROFILER	REAC:R-HSA-5368286	Mitochondrial translation initiation	87	8		0.00903814	CRYZL1,ZNF384,MDFIC,HSPA1B,TPRKB,NUCB2,PANK4,IDUA
gPROFILER	REAC:R-HSA-5419276	Mitochondrial translation termination	87	8		0.00903814	CRYZL1,ZNF384,MDFIC,HSPA1B,TPRKB,NUCB2,PANK4,IDUA
gPROFILER	REAC:R-HSA-5389840	Mitochondrial translation elongation	87	8		0.00903814	CRYZL1,ZNF384,MDFIC,HSPA1B,TPRKB,NUCB2,PANK4,IDUA
FUMA	GO:1902750	negative regulation of cell cycle g2 m phase transition	103	6	0.000174754	0.00904536	SYF2:PSMC6:PSMA3:PSMA4:DONSON:PSMC2
gPROFILER	GO:0044267	cellular protein metabolic process	4453	64		0.00907962	MRPL50,MRPL39,ENY2,GTF2H5,MRPL51,CLU,PSMA3,PICALM,SHFM1,IL6,MRPS18C,BIN1,CDKN2C,UPF1,MAP3K11,PSMC6,MKNK1,CARD8,ING3,MVP,SEC11A,MGAT4A,MAPK8,MDFIC,HSPA1B,INO80C,UCHL3,CDC26,NARS2,MRPL33,SORL1,MRPS21,CCNI,STK17B,MRPL22,ATXN3,KTN1,MEFV,DNAJA1,MRPL35,RNF4,MUC6,MAP4K4,RPS27L,MRPS33,OSBPL8,NDUFS4,MRPL24,TNIP2,UFC1,NACA,RASAL3,FCGR2B,RPS24,DUSP12,RPL34,PMPCB,KCTD13,COPS5,DPAGT1,LNPEP,PSMA4,MTMR3,RPL26
FUMA	GO:0043254	regulation of protein complex assembly	429	12	0.000178772	0.00918861	SORL1:ARPC3:PSMC6:MEFV:BIN1:RNF4:SAR1B:HSPA1B:GTF2H5:RPA3:PSMC2:CLU
FUMA	GO:0072522	purine containing compound biosynthetic process	196	8	0.000180136	0.00919446	PANK4:ATP5F1:ALDOA:ATP5J:ATP5O:SLC25A1:ATP5I:IMPDH1
Webgestalt	GO:0030128	clathrin coat of endocytic vesicle	16	3	0.000560861	0.00921244	PICALM;FCHO1;AP2A2
Webgestalt	GO:0034719	SMN-Sm protein complex	16	3	0.000560861	0.00921244	SNRPD2;SNRPG;GEMIN6
FUMA	GO:0019221	cytokine mediated signaling pathway	780	17	0.000181744	0.00921253	TNFRSF9:CAMK2G:GAB2:PSMC6:PSMA3:PSMA4:CIITA:TXNDC17:TYK2:LSM14A:CARD8:SOD1:IFNAR2:AP000295.9:TNIP2:HSPA1B:IL6:PSMC2
FUMA	GO:0033572	transferrin transport	36	4	0.000184967	0.00931167	ARHGAP1:ATP6V1D:ATP6V1E1:ATP6V0E1
gPROFILER	GO:0032592	integral component of mitochondrial membrane	63	3		0.00947248	TOMM40,TIMM17A,RHOT2
gPROFILER	GO:0005685	U1 snRNP	20	3		0.00947248	SNRPD2,SNRPG,SNRPB2
gPROFILER	GO:0005686	U2 snRNP	20	3		0.00947248	SNRPD2,SNRPG,SNRPB2
FUMA	GO:0030136	clathrin coated vesicle	184	7	0.000691141	0.00960878	AP2A2:PICALM:FCHO1:VAMP8:DNAJC5:HBEGF:SNX3
FUMA	GO:0010564	regulation of cell cycle process	785	17	0.000195826	0.00979132	SYF2:CDKN2C:PSMC6:PSMA3:RPS27L:PSMA4:RPL26:BIN1:DONSON:RNF4:CCNI:TMEM14B:AIF1:HSPA1B:CBX3:PSMC2:CDC26
gPROFILER	GO:0006897	endocytosis	509	6		0.00985922	AIF1,APOC1,CLU,PICALM,EHD1,BIN1
gPROFILER	GO:0015031	protein transport	1515	14		0.00997122	TOMM40,ENY2,AIF1,HSPA1L,CLU,TOMM5,IL6,EPHX2,EHD1,UPF1,MAGOH,CARD8,TCTEX1D2,TIMM17A
gPROFILER	GO:0033365	protein localization to organelle	812	21		0.00997122	TOMM40,HSPA1L,CLU,TOMM5,EPHX2,EHD1,RPF2,TIMM17A,MAPK8,MDFIC,SORL1,SRP19,DNAJA1,SSB,UBL5,RPS24,RPL34,PMPCB,RPL26,GAK,RPS25
gPROFILER	GO:0150034	distal axon	131	7		0.0099766	PICALM,FCRLB,SLC16A5,RASAL3,FCGR2B,TATDN3,CD2AP
Webgestalt	GO:0030135	coated vesicle	275	10	0.000624093	0.00998728	PICALM;SEC23B;VAMP8;FCHO1;IDUA;AP2A2;SNX3;HBEGF;SAR1B;DNAJC5
Webgestalt	GO:0032994	protein-lipid complex	38	4	0.000633908	0.00998728	APOC1;CLU;BIN1;SORL1
gPROFILER	GO:0098573	intrinsic component of mitochondrial membrane	65	3		0.0100802	TOMM40,TIMM17A,RHOT2
FUMA	GO:0002218	activation of innate immune response	311	10	0.000204985	0.0101668	MUC6:NLRX1:PSMC6:PSMA3:PSMA4:LSM14A:LILRA2:TNIP2:HSPA1B:PSMC2
FUMA	GO:0045893	regulation of dna templated transcription initiation	37	4	0.000206103	0.0101668	GTF2B:PSMC6:SUB1:PSMC2
gPROFILER	GO:0000291	nuclear-transcribed mRNA catabolic process, exonucleolytic	35	5		0.0102448	EXOSC7,LSM3,LSM5,LSM2,EXOSC1
FUMA	GO:0051020	gtpase binding	531	14	9.80425e-05	0.0102554	ARHGAP1:EHD1:MAP3K11:PICALM:SORL1:DOCK9:KCTD13:ARHGEF18:SOD1:IQSEC1:RHOH:LSM2:PLEKHG1:SH2D3C
FUMA	GO:0030554	adenyl nucleotide binding	1536	27	9.9749e-05	0.0102554	PANK4:MKNK1:MAPK8:CAMK2G:EHD1:MAP3K11:NARS2:NLRX1:SOAT2:CCT2:PSMC6:CIITA:ALPK2:TYK2:UPF1:MAP4K4:DBI:STK17B:GAK:DGKQ:RARS:VARS:HSPA1L:HSPA1B:PSMC2:DNAJA1:FBP1
gPROFILER	GO:0031329	regulation of cellular catabolic process	737	8		0.010337	APOC1,EXOSC7,CLU,PSMA3,SHFM1,IL6,UPF1,PSMC6
Webgestalt	GO:0098799	outer mitochondrial membrane protein complex	17	3	0.000675851	0.0104351	TOMM40;TOMM5;TOMM7
gPROFILER	GO:0031145	anaphase-promoting complex-dependent catabolic process	82	6		0.0104677	PSMA3,SHFM1,PSMC6,CDC26,PSMA4,PSMC2
gPROFILER	GO:0005634	nucleus	6365	119		0.0105235	LARP7,ENY2,AIF1,GTF2H5,EXOSC7,HSPA1L,CLU,PSMA3,PICALM,SHFM1,BIN1,CDKN2C,UPF1,RPF2,POLR1D,PSMC6,MKNK1,MAGOH,CARD8,RPL36AL,ING3,FBP1,MVP,TIMM17A,LSM3,IMPDH1,PDLIM7,MAPK8,SUB1,MDFIC,LSM5,HSPA1B,INO80C,UCHL3,CWC15,PRIM1,NGDN,ALDOA,CDC26,SNRPD2,GNL2,LCOR,NARS2,SORL1,FBP2,SRP19,CCNI,TPRKB,STK17B,ATXN3,SYF2,MEFV,RBBP9,INPP4A,SNRPG,PURA,RNF4,SSB,UBL5,RPS27L,ALKBH3,POLR3F,TNIP2,NACA,RPS24,DUSP12,KCTD13,CO…
gPROFILER	GO:0048156	tau protein binding	40	3		0.0106791	CLU,PICALM,BIN1
gPROFILER	GO:0070013	intracellular organelle lumen	5439	114		0.0107071	MRPL50,TMEM126B,CRYZL1,EXOSC7,NDUFS5,ZNF384,SHFM1,TOMM5,CSAD,UQCRB,POLR1D,UQCRH,PSMC6,CARD8,RPL36AL,FCRLB,ING3,FBP1,MVP,LSM3,PDLIM7,SEC11A,RHOH,ATP5J,MDFIC,HSPA1B,ALPK2,INO80C,UCHL3,CWC15,ALDOA,RAB40C,GNL2,NARS2,SNTB2,SORL1,CCNI,TPRKB,STK17B,SYF2,SLC16A5,MEFV,RNPEP,METTL5,PURA,MAP4K4,ALKBH3,MS4A2,NDUFS4,TNIP2,UFC1,ZNF324,NCOA7,DUSP12,TNFRSF9,SEC23B,RPL34,XYLT2,DPAGT1,LNPEP,ARHGEF18,MTMR3,PLEKHG1,…
gPROFILER	GO:0043233	organelle lumen	5439	114		0.0107071	MRPL50,TMEM126B,CRYZL1,EXOSC7,NDUFS5,ZNF384,SHFM1,TOMM5,CSAD,UQCRB,POLR1D,UQCRH,PSMC6,CARD8,RPL36AL,FCRLB,ING3,FBP1,MVP,LSM3,PDLIM7,SEC11A,RHOH,ATP5J,MDFIC,HSPA1B,ALPK2,INO80C,UCHL3,CWC15,ALDOA,RAB40C,GNL2,NARS2,SNTB2,SORL1,CCNI,TPRKB,STK17B,SYF2,SLC16A5,MEFV,RNPEP,METTL5,PURA,MAP4K4,ALKBH3,MS4A2,NDUFS4,TNIP2,UFC1,ZNF324,NCOA7,DUSP12,TNFRSF9,SEC23B,RPL34,XYLT2,DPAGT1,LNPEP,ARHGEF18,MTMR3,PLEKHG1,…
gPROFILER	GO:0031974	membrane-enclosed lumen	5439	114		0.0107071	MRPL50,TMEM126B,CRYZL1,EXOSC7,NDUFS5,ZNF384,SHFM1,TOMM5,CSAD,UQCRB,POLR1D,UQCRH,PSMC6,CARD8,RPL36AL,FCRLB,ING3,FBP1,MVP,LSM3,PDLIM7,SEC11A,RHOH,ATP5J,MDFIC,HSPA1B,ALPK2,INO80C,UCHL3,CWC15,ALDOA,RAB40C,GNL2,NARS2,SNTB2,SORL1,CCNI,TPRKB,STK17B,SYF2,SLC16A5,MEFV,RNPEP,METTL5,PURA,MAP4K4,ALKBH3,MS4A2,NDUFS4,TNIP2,UFC1,ZNF324,NCOA7,DUSP12,TNFRSF9,SEC23B,RPL34,XYLT2,DPAGT1,LNPEP,ARHGEF18,MTMR3,PLEKHG1,…
gPROFILER	GO:0030141	secretory granule	723	21		0.0107071	SHFM1,GNL2,SNTB2,CCNI,SLC16A5,SNRPG,PURA,NDUFS4,UFC1,RASAL3,SEC23B,DPAGT1,DAGLB,RBMS2,BNIP1,DCUN1D1,PIGT,GEMIN6,ACTL6A,GIMAP7,DEXI
FUMA	GO:0051130	positive regulation of cellular component organization	1188	22	0.000218771	0.0107198	SETDB1:MAPK8:EIF5AL1:EHD1:CCT2:ARPC3:PSMC6:UBL5:MAP4K4:BIN1:IQSEC1:SS18L2:HSPA1L:HSPA1B:SNX3:GTF2H5:RPA3:IL6:TOMM7:PSMC2:CLU:LPAR1
FUMA	GO:1901988	negative regulation of cell cycle phase transition	256	9	0.000220426	0.0107293	SYF2:CDKN2C:PSMC6:PSMA3:RPS27L:PSMA4:RPL26:DONSON:PSMC2
gPROFILER	GO:0005743	mitochondrial inner membrane	389	7		0.0107534	MRPL39,CRYZL1,ZNF384,SLC24A4,COX6C,MDFIC,HSPA1B
gPROFILER	GO:0043601	nuclear replisome	26	3		0.011043	PRIM1,PURA,RPA3
gPROFILER	GO:0006886	intracellular protein transport	998	11		0.0110641	TOMM40,ENY2,HSPA1L,CLU,TOMM5,EPHX2,EHD1,UPF1,MAGOH,TCTEX1D2,TIMM17A
FUMA	GO:0042987	amyloid precursor protein catabolic process	38	4	0.000228925	0.0110697	PICALM:SORL1:BIN1:CLU
gPROFILER	GO:0005746	mitochondrial respirasome	82	3		0.0111866	MRPL39,SLC24A4,COX6C
FUMA	GO:0023014	signal transduction by protein phosphorylation	952	19	0.000234949	0.0112868	FCGR2B:MAPK8:MAP3K11:SORL1:PSMC6:PSMA3:PSMA4:RASAL3:MAP4K4:SOD1:TNIP2:HBEGF:IL6:PSMC2:MDFIC:COPS5:DNAJA1:LPAR1:SH2D3C
FUMA	GO:0006518	peptide metabolic process	109	6	0.000237923	0.0113554	PICALM:SORL1:SEC11A:BIN1:SOD1:CLU
gPROFILER	GO:0015833	peptide transport	1547	14		0.0115289	TOMM40,ENY2,AIF1,HSPA1L,CLU,TOMM5,IL6,EPHX2,EHD1,UPF1,MAGOH,CARD8,TCTEX1D2,TIMM17A
gPROFILER	GO:0098803	respiratory chain complex	84	3		0.01177	MRPL39,SLC24A4,COX6C
gPROFILER	GO:0043229	intracellular organelle	11095	208		0.0118902	LARP7,MRPL50,MRPL39,TOMM40,ENY2,AIF1,TMEM126B,CRYZL1,GTF2H5,EXOSC7,MRPL51,CLPTM1,NDUFS5,ZNF384,PICALM,SHFM1,TOMM5,IL6,CSAD,EHD1,BIN1,UQCRB,CDKN2C,SLC24A4,RPF2,POLR1D,UQCRH,PSMC6,COX6C,MAGOH,CARD8,RPL36AL,FCRLB,ING3,FBP1,COX17,MVP,TCTEX1D2,TIMM17A,LSM3,PDLIM7,SEC11A,RHOH,MGAT4A,MAPK8,ATP5J,SUB1,MAZ,NDST2,MDFIC,HSPA1B,ALPK2,INO80C,UCHL3,CWC15,NGDN,ALDOA,SNRPD2,RAB40C,GNL2,NARS2,TMEM14B,SNTB2,SORL1,…
FUMA	GO:0097346	ino80 type complex	24	3	0.000876496	0.0120188	INO80C:ACTL6A:ING3
FUMA	GO:0090083	regulation of inclusion body assembly	16	3	0.000254129	0.0120506	SORL1:HSPA1B:CLU
Webgestalt	GO:0005685	U1 snRNP	18	3	0.00080484	0.0121831	SNRPD2;SNRPG;SNRPB2
FUMA	GO:0032388	positive regulation of intracellular transport	207	8	0.000260857	0.0122904	EHD1:GAB2:SORL1:UBL5:VAMP8:SAR1B:HSPA1L:TOMM7
Webgestalt	WP111	Electron Transport Chain (OXPHOS system in mitochondria)	105	9	5.98782e-05	0.0124316	NDUFS5;UQCRB;UQCRH;COX6C;COX17;NDUFS4;NDUFS3;NDUFB5;NDUFA9
Webgestalt	WP4396	Nonalcoholic fatty liver disease	159	11	6.52576e-05	0.0124316	NDUFS5;IL6;UQCRB;MAP3K11;UQCRH;COX6C;MAPK8;NDUFS4;NDUFS3;NDUFB5;NDUFA9
gPROFILER	GO:0070469	respirasome	90	3		0.0125337	MRPL39,SLC24A4,COX6C
FUMA	GO:0016072	rrna metabolic process	208	8	0.000269465	0.0126151	RPS24:EXOSC1:NGDN:RPL26:EXOSC7:NSA2:RPF2:GTF2H5
FUMA	GO:1903747	regulation of establishment of protein localization to mitochondrion	72	5	0.000271312	0.0126212	MAPK8:UBL5:HSPA1L:TOMM7:DNAJA1
gPROFILER	GO:0032981	mitochondrial respiratory chain complex I assembly	64	6		0.0126442	TMEM126B,NDUFS5,NDUFS4,NDUFS3,NDUFB5,NDUFA9
gPROFILER	GO:0010257	NADH dehydrogenase complex assembly	64	6		0.0126442	TMEM126B,NDUFS5,NDUFS4,NDUFS3,NDUFB5,NDUFA9
gPROFILER	GO:0006521	regulation of cellular amino acid metabolic process	60	3		0.0126442	PSMA3,SHFM1,PSMC6
gPROFILER	GO:0071806	protein transmembrane transport	44	3		0.0126991	TOMM40,CLU,TIMM17A
gPROFILER	GO:0042886	amide transport	1570	14		0.0127232	TOMM40,ENY2,AIF1,HSPA1L,CLU,TOMM5,IL6,EPHX2,EHD1,UPF1,MAGOH,CARD8,TCTEX1D2,TIMM17A
Webgestalt	R-HSA-611105	Respiratory electron transport	100	9	6.4698e-05	0.0127455	TMEM126B;NDUFS5;UQCRB;UQCRH;COX6C;NDUFS4;NDUFS3;NDUFB5;NDUFA9
gPROFILER	GO:0019866	organelle inner membrane	425	15		0.012805	MRPL39,CRYZL1,ZNF384,SLC24A4,COX6C,MDFIC,HSPA1B,TPRKB,NUCB2,PANK4,IDUA,HDHD2,CAMK2G,PTRH2,DPM1
FUMA	GO:0007346	regulation of mitotic cell cycle	660	15	0.000279302	0.0129111	SYF2:CDKN2C:PSMC6:PSMA3:RPS27L:PSMA4:RPL26:DONSON:CCNI:TMEM14B:AIF1:HSPA1B:RPA3:PSMC2:CDC26
gPROFILER	GO:0038095	Fc-epsilon receptor signaling pathway	167	5		0.0130206	PSMA3,SHFM1,PSMC6,GAB2,MAPK8
FUMA	GO:1903827	regulation of cellular protein localization	519	13	0.000283719	0.0130333	MAPK8:PICALM:SORL1:CCT2:UBL5:VAMP8:TCTEX1D2:SAR1B:HSPA1L:CD2AP:TOMM7:MDFIC:DNAJA1
Webgestalt	GO:0030665	clathrin-coated vesicle membrane	107	6	0.000883922	0.0131228	PICALM;VAMP8;FCHO1;AP2A2;HBEGF;DNAJC5
gPROFILER	GO:0061418	regulation of transcription from RNA polymerase II promoter in response to hypoxia	76	6		0.0131827	PSMA3,SHFM1,PSMC6,PSMA4,PSMC2,CUL2
FUMA	GO:1902532	negative regulation of intracellular signal transduction	521	13	0.000294316	0.0134362	NDUFS3:NLRX1:SORL1:KCTD13:RASAL3:CARD8:PPM1B:RHOH:CD2AP:CLU:DNAJA1:FBP1:LPAR1
gPROFILER	GO:1904813	ficolin-1-rich granule lumen	124	4		0.0135894	MVP,IMPDH1,HSPA1B,ALDOA
gPROFILER	GO:0101002	ficolin-1-rich granule	124	4		0.0135894	MVP,IMPDH1,HSPA1B,ALDOA
gPROFILER	GO:0051787	misfolded protein binding	24	3		0.0136021	HSPA1L,CLU,HSPA1B
gPROFILER	GO:0016655	oxidoreductase activity, acting on NAD(P)H, quinone or similar compound as acceptor	57	6		0.0136021	CRYZL1,NDUFS5,NDUFS4,NDUFS3,NDUFB5,NDUFA9
gPROFILER	GO:0003723	RNA binding	1718	27		0.0136021	LARP7,MRPL39,EXOSC7,MRPS18C,UPF1,RPF2,MAGOH,LSM3,SUB1,MAZ,LSM5,HSPA1B,CWC15,NGDN,ALDOA,SNRPD2,GNL2,SNTB2,MRPS21,SRP19,MRPL22,SYF2,KTN1,SNRPG,PURA,SSB,RPS27L
gPROFILER	REAC:R-HSA-5368287	Mitochondrial translation	93	8		0.0137175	CRYZL1,ZNF384,MDFIC,HSPA1B,TPRKB,NUCB2,PANK4,IDUA
FUMA	GO:0048475	coated membrane	96	5	0.00101632	0.0137477	AP2A2:PICALM:FCHO1:SEC23B:SAR1B
FUMA	GO:0007254	jnk cascade	212	8	0.000306251	0.0138162	FCGR2B:MAPK8:MAP3K11:MAP4K4:MDFIC:COPS5:DNAJA1:SH2D3C
FUMA	GO:0072583	clathrin dependent endocytosis	41	4	0.000308281	0.0138162	AP2A2:PICALM:FCHO1:GAK
FUMA	GO:0006458	de novo protein folding	41	4	0.000308281	0.0138162	CCT2:GAK:HSPA1L:HSPA1B
gPROFILER	GO:0033209	tumor necrosis factor-mediated signaling pathway	161	8		0.0139476	PSMA3,SHFM1,PSMC6,CARD8,HSPA1B,TNFRSF9,PSMA4,PSMC2
FUMA	GO:0030141	secretory granule	831	16	0.00105405	0.014068	RNPEP:AP2A2:CTSD:CCT2:ATP6V1D:ACTN1:MVP:ALDOA:VAMP8:DNAJC5:SOD1:RAB24:HSPA1B:PSMC2:IMPDH1:CLU
gPROFILER	GO:0043226	organelle	12005	202		0.0140802	LARP7,MRPL50,MRPL39,TOMM40,ENY2,AIF1,TMEM126B,TMEM126A,APOC1,GTF2H5,EXOSC7,MRPL51,HSPA1L,NDUFS5,CLU,PSMA3,PICALM,SHFM1,TOMM5,IL6,EPHX2,MRPS18C,EHD1,BIN1,UQCRB,CDKN2C,UPF1,RPF2,MAP3K11,POLR1D,UQCRH,PSMC6,MKNK1,COX6C,MAGOH,CARD8,RPL36AL,ING3,FBP1,COX17,MVP,TCTEX1D2,TIMM17A,LSM3,IMPDH1,PDLIM7,SEC11A,MGAT4A,RHOT2,MAPK8,ATP5J,SUB1,NDST2,MDFIC,LSM5,HSPA1B,INO80C,UCHL3,CWC15,PRIM1,NGDN,ALDOA,CDC26,SNRPD…
Webgestalt	hsa04932	Non-alcoholic fatty liver disease (NAFLD)	149	11	0.000179274	0.0141178	NDUFS5;IL6;UQCRB;MAP3K11;UQCRH;COX6C;MAPK8;NDUFS4;NDUFS3;NDUFB5;NDUFA9
FUMA	GO:0042175	nuclear outer membrane endoplasmic reticulum membrane network	1080	19	0.00107203	0.0141198	CAMK2G:EIF5AL1:NUCB2:DPAGT1:SOAT2:OSBPL8:KTN1:ATXN3:SEC11A:SEZ6L2:GDPD3:PNPLA6:SEC23B:PIGT:DPM1:ERAP2:SAR1B:BNIP1:DNAJA1
FUMA	GO:0002220	innate immune response activating cell surface receptor signaling pathway	115	6	0.000317811	0.014157	MUC6:PSMC6:PSMA3:PSMA4:LILRA2:PSMC2
FUMA	GO:0006887	exocytosis	897	18	0.000320671	0.0141984	FCGR2B:AP2A2:CTSD:GAB2:CCT2:ATP6V1D:ACTN1:MVP:ALDOA:VAMP8:DNAJC5:SOD1:RAB24:HSPA1B:PSMC2:IMPDH1:CLU:COPS5
gPROFILER	GO:0010565	regulation of cellular ketone metabolic process	153	4		0.014234	APOC1,PSMA3,SHFM1,PSMC6
gPROFILER	GO:0009894	regulation of catabolic process	858	15		0.014234	APOC1,EXOSC7,CLU,PSMA3,SHFM1,IL6,UPF1,PSMC6,FBP1,MAPK8,HSPA1B,SORL1,ATXN3,MEFV,ATP6V0E1
gPROFILER	GO:0019538	protein metabolic process	4837	67		0.0142546	MRPL50,MRPL39,ENY2,GTF2H5,MRPL51,CLU,PSMA3,PICALM,SHFM1,IL6,MRPS18C,BIN1,CDKN2C,UPF1,MAP3K11,PSMC6,MKNK1,CARD8,ING3,MVP,SEC11A,MGAT4A,MAPK8,NDST2,MDFIC,HSPA1B,INO80C,UCHL3,CDC26,NARS2,MRPL33,SORL1,MRPS21,CCNI,STK17B,MRPL22,ATXN3,KTN1,MEFV,RNPEP,DNAJA1,MRPL35,RNF4,MUC6,MAP4K4,RPS27L,MRPS33,OSBPL8,NDUFS4,MRPL24,TNIP2,UFC1,NACA,RASAL3,FCGR2B,RPS24,DUSP12,RPL34,PMPCB,XYLT2,KCTD13,COPS5,DPAGT1,LNPEP,P…
gPROFILER	GO:0045184	establishment of protein localization	1625	28		0.0142546	TOMM40,ENY2,AIF1,HSPA1L,CLU,TOMM5,IL6,EPHX2,EHD1,UPF1,MAGOH,CARD8,TCTEX1D2,TIMM17A,MAPK8,MDFIC,RAB40C,SORL1,SRP19,ATP6V0E1,DNAJA1,SSB,MAP4K4,UBL5,FCGR2B,RPS24,RPL34,PMPCB
gPROFILER	GO:2000144	positive regulation of DNA-templated transcription, initiation	24	4		0.0146186	PSMC6,SUB1,PSMC2,GTF2B
gPROFILER	GO:0060260	regulation of transcription initiation from RNA polymerase II promoter	24	4		0.0146186	PSMC6,SUB1,PSMC2,GTF2B
FUMA	GO:0016817	hydrolase activity acting on acid anhydrides	921	19	0.00015486	0.0148139	GNL2:ATP5F1:PSMC6:ATP6V1D:RAB40C:RHOT2:UPF1:ATP5J:ATP5O:ATP6V1E1:ATP5I:RHOH:SAR1B:ATP6V0E1:RAB24:HSPA1L:HSPA1B:PSMC2:GIMAP7
FUMA	GO:0042578	phosphoric ester hydrolase activity	364	11	0.000170861	0.0148139	DUSP12:CAMK2G:GDPD3:HDHD2:PPM1B:INPP4A:MTMR3:PTP4A1:EPHX2:FBP2:FBP1
FUMA	GO:0051087	chaperone binding	103	6	0.000174754	0.0148139	BIN1:SOD1:GAK:TBCA:CLU:DNAJA1
FUMA	GO:0022853	active ion transmembrane transporter activity	66	5	0.000180109	0.0148139	ATP5F1:ATP6V1D:ATP5O:ATP6V1E1:ATP6V0E1
FUMA	GO:0050435	amyloid beta metabolic process	42	4	0.000338625	0.0149035	PICALM:SORL1:BIN1:CLU
FUMA	GO:0006826	iron ion transport	76	5	0.000349166	0.0151856	ARHGAP1:PICALM:ATP6V1D:ATP6V1E1:ATP6V0E1
FUMA	GO:0061418	regulation of transcription from rna polymerase ii promoter in response to hypoxia	76	5	0.000349166	0.0151856	CUL2:PSMC6:PSMA3:PSMA4:PSMC2
FUMA	GO:0002684	positive regulation of immune system process	1147	21	0.000353162	0.015269	FCGR2B:MUC6:GAB2:NLRX1:ARPC3:PSMC6:PSMA3:PSMA4:RASAL3:LSM14A:PVRL2:LILRA2:VAMP8:POLR3F:TNIP2:MICB:AIF1:HSPA1B:IL6:PSMC2:CLU
FUMA	GO:0005773	vacuole	760	15	0.00117727	0.0153045	AP2A2:CTSD:CCT2:ATP6V1D:MEFV:VAMP8:DNAJC5:SOD1:ATP6V1E1:NCF4:IDUA:LNPEP:RAB24:DAGLB:IMPDH1
gPROFILER	GO:0044429	mitochondrial part	852	26		0.0155273	MRPL39,CRYZL1,ZNF384,TOMM5,CSAD,SLC24A4,COX6C,ING3,MDFIC,HSPA1B,NARS2,TPRKB,ALKBH3,NUCB2,PANK4,ACTR6,NCF4,RPL26L1,MICB,IDUA,HDHD2,PTRH2,DPM1,ZMAT2,TYK2
FUMA	WP183	proteasome degradation	63	5	0.000144414	0.0156834	UCHL3:PSMC6:PSMA3:PSMA4:PSMC2
FUMA	GO:0000288	nuclear transcribed mrna catabolic process deadenylation dependent decay	77	5	0.000371026	0.0158558	EXOSC1:LSM3:EXOSC7:LSM2:LSM5
FUMA	GO:0070897	transcription preinitiation complex assembly	43	4	0.000371048	0.0158558	GTF2B:PSMC6:MED6:PSMC2
Webgestalt	GO:0030132	clathrin coat of coated pit	20	3	0.00110735	0.0158778	PICALM;FCHO1;AP2A2
Webgestalt	GO:0030669	clathrin-coated endocytic vesicle membrane	44	4	0.00111062	0.0158778	PICALM;FCHO1;AP2A2;HBEGF
gPROFILER	GO:0033238	regulation of cellular amine metabolic process	68	3		0.0160069	PSMA3,SHFM1,PSMC6
gPROFILER	REAC:R-HSA-5656169	Termination of translesion DNA synthesis	32	3		0.0162033	TOMM5,MVP,LSM3
FUMA	GO:0000184	nuclear transcribed mrna catabolic process nonsense mediated decay	119	6	0.000381789	0.0162205	MAGOH:RPS24:RPS25:RPL26:UPF1:RPL34
gPROFILER	GO:0062012	regulation of small molecule metabolic process	345	6		0.0162539	APOC1,PSMA3,SHFM1,EPHX2,PSMC6,FBP1
FUMA	GO:0044257	cellular protein catabolic process	756	16	0.00038667	0.0163335	CUL2:AP2A2:USP35:UCHL3:PSMC6:PSMA3:ATXN3:PSMA4:USP7:KCTD13:RNF4:HSPA1B:CD2AP:PSMC2:CLU:CDC26
FUMA	GO:0043900	regulation of multi organism process	401	11	0.000389361	0.0163532	GTF2B:SETDB1:TSPAN32:NLRX1:PVRL2:CARD8:LILRA2:PPM1B:MICB:SNX3:MDFIC
FUMA	GO:0002199	zona pellucida receptor complex	7	2	0.00127568	0.0163712	CCT2:HSPA1L
FUMA	GO:1901987	regulation of cell cycle phase transition	468	12	0.000392631	0.0163968	SYF2:CDKN2C:PSMC6:PSMA3:RPS27L:PSMA4:RPL26:DONSON:TMEM14B:AIF1:PSMC2:CDC26
FUMA	GO:0019867	outer membrane	205	7	0.0012962	0.0164239	NUCB2:NLRX1:RHOT2:TOMM40:BPHL:TOMM7:TOMM5
gPROFILER	GO:1990204	oxidoreductase complex	104	3		0.0164826	MRPL39,SLC24A4,COX6C
gPROFILER	GO:0005737	cytoplasm	10038	108		0.0164826	LARP7,MRPL50,MRPL39,TOMM40,ENY2,AIF1,TMEM126B,CRYZL1,GTF2H5,EXOSC7,CLPTM1,NDUFS5,CLU,PSMA3,ZNF384,PICALM,SHFM1,TOMM5,IL6,RPAP3,CSAD,EHD1,BIN1,UQCRB,CDKN2C,SLC24A4,RPF2,MAP3K11,MKNK1,COX6C,GAB2,MAGOH,CARD8,RPL36AL,FCRLB,ING3,FBP1,COX17,MVP,TCTEX1D2,TIMM17A,PDLIM7,SEC11A,RHOH,SUB1,MAZ,NDST2,MDFIC,HSPA1B,ALPK2,UCHL3,MS4A6A,NGDN,ALDOA,SNRPD2,RAB40C,GNL2,NARS2,TMEM14B,SNTB2,SORL1,FBP2,SRP19,CCNI,TPRKB…
FUMA	GO:0045334	clathrin coated endocytic vesicle	60	4	0.0013198	0.0165141	AP2A2:PICALM:FCHO1:HBEGF
FUMA	GO:0038095	fc epsilon receptor signaling pathway	168	7	0.000402223	0.0167025	MAPK8:MS4A2:GAB2:PSMC6:PSMA3:PSMA4:PSMC2
FUMA	GO:0007007	inner mitochondrial membrane organization	44	4	0.000405631	0.0167494	ATP5F1:ATP5J:ATP5O:ATP5I
FUMA	GO:0030125	clathrin vesicle coat	28	3	0.00138594	0.0169186	AP2A2:PICALM:FCHO1
FUMA	GO:0030131	clathrin adaptor complex	28	3	0.00138594	0.0169186	AP2A2:PICALM:FCHO1
gPROFILER	GO:1902036	regulation of hematopoietic stem cell differentiation	70	3		0.016939	PSMA3,SHFM1,PSMC6
gPROFILER	GO:0051649	establishment of localization in cell	1937	18		0.016939	TOMM40,ENY2,HSPA1L,CLU,PICALM,TOMM5,EPHX2,EHD1,BIN1,UPF1,GAB2,MAGOH,TCTEX1D2,TIMM17A,RHOT2,MAPK8,ATP5J,MDFIC
FUMA	GO:0006066	alcohol metabolic process	222	8	0.000416429	0.0170992	DPAGT1:SORL1:SOAT2:APOC1:INPP4A:DPM1:DGKQ:EPHX2
FUMA	GO:0030150	protein import into mitochondrial matrix	19	3	0.000432076	0.0174492	TIMM17A:TOMM40:TOMM7
FUMA	GO:0051546	keratinocyte migration	19	3	0.000432076	0.0174492	MAP4K4:IQSEC1:HBEGF
FUMA	GO:0033005	positive regulation of mast cell activation	19	3	0.000432076	0.0174492	GAB2:PVRL2:VAMP8
gPROFILER	GO:0008180	COP9 signalosome	35	3		0.0177044	HSPA1L,HSPA1B,COPS5
FUMA	GO:0043124	negative regulation of i kappab kinase nf kappab signaling	45	4	0.000442455	0.0177472	NLRX1:CARD8:PPM1B:RHOH
FUMA	GO:0062012	regulation of small molecule metabolic process	343	10	0.000444285	0.0177472	DUSP12:PSMC6:PSMA3:PSMA4:APOC1:SOD1:DGKQ:PSMC2:EPHX2:FBP1
FUMA	GO:0006259	dna metabolic process	844	17	0.000449093	0.0178423	OBFC1:ALKBH3:PRIM1:CCT2:ATXN3:USP7:RPAIN:INO80C:MAP1S:UPF1:DONSON:ACTL6A:PURA:GTF2H5:RPA3:SHFM1:C7orf76:COPS5
FUMA	GO:0022625	cytosolic large ribosomal subunit	62	4	0.00149132	0.0179856	RPL36AL:RPL26:RPL34:RPL26L1
FUMA	GO:0000041	transition metal ion transport	123	6	0.000455418	0.0179888	ARHGAP1:PICALM:ATP6V1D:ATP6V1E1:COX17:ATP6V0E1
FUMA	GO:0002253	activation of immune response	692	15	0.000457675	0.0179888	FCGR2B:MUC6:NLRX1:ARPC3:PSMC6:PSMA3:PSMA4:LSM14A:PVRL2:LILRA2:TNIP2:MICB:HSPA1B:PSMC2:CLU
Webgestalt	GO:0005686	U2 snRNP	21	3	0.00128207	0.0179956	SNRPD2;SNRPG;SNRPB2
FUMA	GO:0031145	anaphase promoting complex dependent catabolic process	81	5	0.000468953	0.0183341	PSMC6:PSMA3:PSMA4:PSMC2:CDC26
gPROFILER	GO:0045333	cellular respiration	160	4		0.0186316	NDUFS5,UQCRB,UQCRH,COX6C
FUMA	GO:0016887	atpase activity	443	12	0.000239677	0.0187747	ATP5F1:PSMC6:ATP6V1D:UPF1:ATP5J:ATP5O:ATP6V1E1:ATP5I:ATP6V0E1:HSPA1L:HSPA1B:PSMC2
gPROFILER	GO:0022625	cytosolic large ribosomal subunit	57	4		0.0188172	RPL36AL,RPL34,RPL26,RPL26L1
gPROFILER	GO:0051087	chaperone binding	83	6		0.0188661	CLU,BIN1,DNAJA1,GAK,TBCA,SOD1
gPROFILER	GO:0050136	NADH dehydrogenase (quinone) activity	43	5		0.0188661	NDUFS5,NDUFS4,NDUFS3,NDUFB5,NDUFA9
gPROFILER	GO:0003954	NADH dehydrogenase activity	44	5		0.0188661	NDUFS5,NDUFS4,NDUFS3,NDUFB5,NDUFA9
gPROFILER	GO:0008137	NADH dehydrogenase (ubiquinone) activity	43	5		0.0188661	NDUFS5,NDUFS4,NDUFS3,NDUFB5,NDUFA9
gPROFILER	GO:0005198	structural molecule activity	552	18		0.0188661	MRPL51,MRPS18C,MRPS21,MRPL22,MYBPC3,MRPL35,MUC6,RPS27L,MRPS33,RPS24,RPL34,RPL26,RPS25,RPL26L1,CD2AP,MRPL27,MRPS17,MRPL47
FUMA	GO:0045862	positive regulation of proteolysis	347	10	0.000486155	0.018906	TIMM17A:PICALM:PSMC6:ATXN3:RPS27L:MEFV:CARD8:HSPA1B:PSMC2:CLU
FUMA	GO:0051336	regulation of hydrolase activity	1261	22	0.000490984	0.0189317	MAPK8:ARHGAP1:MYBPC3:SIPA1:PICALM:SORL1:DOCK9:PSMA3:RPS27L:MEFV:RASAL3:APOC1:CARD8:MAP4K4:BIN1:SEC23B:SOD1:IQSEC1:LXN:RHOH:DNAJA1:LPAR1
FUMA	GO:1901532	regulation of hematopoietic progenitor cell differentiation	82	5	0.000496213	0.0189317	DPF2:PSMC6:PSMA3:PSMA4:PSMC2
FUMA	GO:0006403	rna localization	228	8	0.000496696	0.0189317	MAGOH:EIF5AL1:CCT2:MVP:UPF1:SSB:PURA:ENY2
FUMA	GO:0010948	negative regulation of cell cycle process	348	10	0.000497119	0.0189317	SYF2:CDKN2C:PSMC6:PSMA3:RPS27L:PSMA4:RPL26:DONSON:CBX3:PSMC2
gPROFILER	GO:0007254	JNK cascade	180	8		0.0190764	MAP3K11,MAPK8,MDFIC,DNAJA1,MAP4K4,FCGR2B,COPS5,SH2D3C
FUMA	GO:0008144	drug binding	1718	28	0.000258096	0.0192985	PANK4:MKNK1:MAPK8:CAMK2G:EHD1:MAP3K11:NARS2:NLRX1:CSAD:CCT2:PSMC6:CIITA:ALPK2:TYK2:UPF1:MAP4K4:PPIG:STK17B:ATP5O:GAK:DGKQ:RARS:VARS:HSPA1L:HSPA1B:PSMC2:DNAJA1:FBP1
FUMA	GO:0090407	organophosphate biosynthetic process	553	13	0.000515857	0.0194649	PANK4:ATP5F1:DPAGT1:ALDOA:INPP4A:PIGT:DPM1:ATP5J:ATP5O:SLC25A1:MTMR3:ATP5I:IMPDH1
FUMA	GO:0051247	positive regulation of protein metabolic process	1615	26	0.000516416	0.0194649	FCGR2B:TIMM17A:MAPK8:EIF5AL1:MAP3K11:PICALM:OSBPL8:PSMC6:ATXN3:RPS27L:MEFV:RPL26:CARD8:MAP4K4:SOD1:DCUN1D1:DGKQ:HBEGF:AIF1:HSPA1B:IL6:PSMC2:MDFIC:CLU:LPAR1:SH2D3C
FUMA	GO:0034097	response to cytokine	1182	21	0.00052161	0.0195604	TNFRSF9:MAPK8:CAMK2G:GAB2:PSMC6:PSMA3:PSMA4:MEFV:CIITA:TXNDC17:TYK2:UPF1:LSM14A:CARD8:SOD1:IFNAR2:AP000295.9:TNIP2:AIF1:HSPA1B:IL6:PSMC2
Webgestalt	GO:1902992	negative regulation of amyloid precursor protein catabolic process	13	4	2.88897e-05	0.0196623	CLU;PICALM;BIN1;SORL1
Webgestalt	GO:0042775	mitochondrial ATP synthesis coupled electron transport	84	8	3.14628e-05	0.0196623	NDUFS5;UQCRB;UQCRH;NDUFS4;PMPCB;NDUFS3;NDUFB5;NDUFA9
Webgestalt	GO:0042773	ATP synthesis coupled electron transport	85	8	3.42983e-05	0.0196623	NDUFS5;UQCRB;UQCRH;NDUFS4;PMPCB;NDUFS3;NDUFB5;NDUFA9
Webgestalt	GO:0030666	endocytic vesicle membrane	160	7	0.00143952	0.0198447	PICALM;ATP6V0E1;VAMP8;FCHO1;CAMK2G;AP2A2;HBEGF
gPROFILER	GO:0006810	transport	4374	29		0.0198536	TOMM40,ENY2,AIF1,APOC1,HSPA1L,CLU,PSMA3,PICALM,SHFM1,TOMM5,IL6,EPHX2,EHD1,BIN1,UPF1,SLC24A4,PSMC6,GAB2,MAGOH,CARD8,COX17,MVP,TCTEX1D2,TIMM17A,IMPDH1,PDLIM7,RHOT2,MAPK8,ATP5J
gPROFILER	GO:0008334	histone mRNA metabolic process	25	3		0.0199174	UPF1,SNRPG,SSB
gPROFILER	GO:0043687	post-translational protein modification	359	13		0.0200139	PSMA3,SHFM1,IL6,PSMC6,MGAT4A,UCHL3,KTN1,COPS5,PSMA4,PSMC2,DCUN1D1,AGTPBP1,CUL2
gPROFILER	GO:0006091	generation of precursor metabolites and energy	410	8		0.0200139	NDUFS5,UQCRB,UQCRH,COX6C,FBP1,COX17,ATP5J,ALDOA
gPROFILER	GO:0044248	cellular catabolic process	1995	10		0.020022	TOMM40,APOC1,EXOSC7,CLU,PSMA3,SHFM1,TOMM5,IL6,CSAD,EPHX2
gPROFILER	GO:0016310	phosphorylation	1977	18		0.020022	GTF2H5,NDUFS5,CLU,PSMA3,SHFM1,IL6,UQCRB,CDKN2C,MAP3K11,UQCRH,PSMC6,MKNK1,COX6C,FBP1,MVP,MAPK8,ATP5J,MDFIC
FUMA	GO:0007006	mitochondrial membrane organization	127	6	0.00053967	0.0201349	ATP5F1:MAPK8:RHOT2:ATP5J:ATP5O:ATP5I
gPROFILER	GO:0098796	membrane protein complex	1035	10		0.0201613	TOMM40,NDUFS5,PICALM,TOMM5,IL6,UQCRB,UQCRH,TIMM17A,SEC11A,ATP5J
FUMA	GO:0005839	proteasome core complex alpha subunit complex	8	2	0.00169203	0.0201634	PSMA3:PSMA4
gPROFILER	GO:0051084	'de novo' posttranslational protein folding	29	4		0.0201764	HSPA1L,HSPA1B,GAK,CCT2
gPROFILER	GO:0006094	gluconeogenesis	66	5		0.0201764	FBP1,ALDOA,FBP2,DGKQ,SLC25A1
gPROFILER	GO:0034250	positive regulation of cellular amide metabolic process	128	3		0.0201764	CLU,PICALM,IL6
FUMA	GO:0030880	rna polymerase complex	108	5	0.00171669	0.0202165	GTF2B:PRIM1:POLR1D:POLR3F:GTF2H5
gPROFILER	GO:0000932	P-body	72	5		0.0202356	LSM3,PSMA4,PSMC2,LSM14A,LSM2
FUMA	GO:0043901	negative regulation of multi organism process	177	7	0.000549405	0.0203946	SETDB1:NLRX1:CARD8:LILRA2:PPM1B:MICB:SNX3
FUMA	GO:0006898	receptor mediated endocytosis	353	10	0.000555064	0.0205011	FCGR2B:AP2A2:PICALM:SORL1:FCHO1:APOC1:GAK:PDLIM7:CD2AP:CLU
FUMA	GO:0030162	regulation of proteolysis	706	15	0.000562166	0.0206596	TIMM17A:PICALM:SORL1:PSMC6:PSMA3:ATXN3:RPS27L:MEFV:USP7:CARD8:BIN1:LXN:HSPA1B:PSMC2:CLU
FUMA	GO:1905369	endopeptidase complex	65	4	0.00177679	0.0206811	PSMC6:PSMA3:PSMA4:PSMC2
FUMA	GO:0046578	regulation of ras protein signal transduction	233	8	0.00057278	0.0209449	KCTD13:ARHGEF18:RASAL3:MAP4K4:IQSEC1:PLEKHG1:FBP1:LPAR1
gPROFILER	GO:0060218	hematopoietic stem cell differentiation	78	3		0.0211157	PSMA3,SHFM1,PSMC6
FUMA	GO:0046903	secretion	1628	26	0.000581242	0.0211491	FCGR2B:CAMK2G:AP2A2:CTSD:GAB2:CCT2:ATP6V1D:ACTN1:MVP:ALDOA:CARD8:LILRA2:VAMP8:MAP4K4:DNAJC5:ATP5J:SOD1:RAB24:AIF1:HSPA1B:IL6:PSMC2:IMPDH1:CLU:COPS5:ENY2
FUMA	GO:1902652	secondary alcohol metabolic process	85	5	0.000585172	0.0211861	SORL1:SOAT2:APOC1:DGKQ:EPHX2
FUMA	GO:0006897	endocytosis	634	14	0.000588022	0.0211861	FCGR2B:AP2A2:EHD1:PICALM:SORL1:FCHO1:APOC1:BIN1:GAK:DGKQ:PDLIM7:AIF1:CD2AP:CLU
Webgestalt	R-HSA-376176	Signaling by ROBO receptors	218	13	0.000124917	0.0215325	PSMA3;PSMC6;MAGOH;RPL36AL;RPS27L;RPS24;RPL34;PSMA4;RPL26;RPS25;PSMC2;RPL26L1;CUL2
gPROFILER	GO:0005654	nucleoplasm	3471	70		0.0216268	LARP7,ENY2,GTF2H5,EXOSC7,HSPA1L,PSMA3,SHFM1,UPF1,POLR1D,PSMC6,MKNK1,MAGOH,CARD8,ING3,TIMM17A,LSM3,MAPK8,LSM5,HSPA1B,INO80C,CWC15,PRIM1,CDC26,SNRPD2,LCOR,NARS2,FBP2,ATXN3,SYF2,RBBP9,SNRPG,RNF4,ALKBH3,POLR3F,TNIP2,RPS24,KCTD13,COPS5,CIITA,PSMA4,EAF2,PLEKHG1,RPL26,RPA3,CBX3,DGKQ,ACTR6,CENPN,RPS25,PSMC2,SOD1,SNRPB2,SETDB1,FCHO1,NDUFS3,POMP,CUL2,TCF20,GEMIN6,ACTL6A,CAMK2G,DPY30,NDUFB5,USP7,NDUFA9,LSM2…
FUMA	GO:0035770	ribonucleoprotein granule	219	7	0.00188825	0.0217257	PSMA4:UPF1:LSM14A:SNRPG:LSM3:LSM2:PSMC2
gPROFILER	GO:0005739	mitochondrion	1295	28		0.0218289	MRPL39,CRYZL1,ZNF384,TOMM5,IL6,CSAD,SLC24A4,COX6C,FCRLB,ING3,MDFIC,HSPA1B,NARS2,TPRKB,ALKBH3,OSBPL8,NUCB2,RASAL3,DUSP12,PANK4,EIF5AL1,ACTR6,NCF4,RPL26L1,MICB,BPHL,IDUA,HDHD2
gPROFILER	GO:0030100	regulation of endocytosis	153	3		0.021877	APOC1,CLU,PICALM
FUMA	GO:0046351	disaccharide biosynthetic process	5	2	0.000613865	0.0219025	FBP2:FBP1
FUMA	GO:2001137	positive regulation of endocytic recycling	5	2	0.000613865	0.0219025	EHD1:SORL1
gPROFILER	GO:0098657	import into cell	638	6		0.0220591	AIF1,APOC1,CLU,PICALM,EHD1,BIN1
FUMA	GO:0051050	positive regulation of transport	950	18	0.000626965	0.0222618	FCGR2B:MAPK8:EHD1:GAB2:SORL1:OSBPL8:UBL5:CARD8:LILRA2:VAMP8:SOD1:COX17:SAR1B:AIF1:HSPA1L:IL6:TOMM7:CLU
gPROFILER	GO:0032386	regulation of intracellular transport	278	13		0.0223509	HSPA1L,EHD1,GAB2,TCTEX1D2,MDFIC,SORL1,MYBPC3,UBL5,VAMP8,TOMM7,ARHGAP1,SNX3,SAR1B
gPROFILER	GO:0010001	glial cell differentiation	106	3		0.022368	CLU,IL6,BIN1
FUMA	GO:0051726	regulation of cell cycle	1201	21	0.000639533	0.0225989	SYF2:CDKN2C:CUL2:SIPA1:PSMC6:PSMA3:RPS27L:PSMA4:RPL26:BIN1:DONSON:RNF4:CCNI:TMEM14B:AIF1:HSPA1B:RPA3:CBX3:PSMC2:COPS5:CDC26
FUMA	GO:0051051	negative regulation of transport	495	12	0.000643419	0.0226274	FCGR2B:ARHGAP1:PICALM:APOC1:CARD8:VAMP8:MAP4K4:BIN1:ATP5J:SNX3:MDFIC:ENY2
FUMA	GO:1904950	negative regulation of establishment of protein localization	182	7	0.000647988	0.0226796	FCGR2B:CARD8:MAP4K4:SNX3:MDFIC:ENY2:DNAJA1
FUMA	GO:0005768	endosome	885	16	0.00199644	0.0227095	AP2A2:ARHGAP1:EHD1:PICALM:SORL1:VAMP8:BIN1:ATP6V1E1:NCF4:DGKQ:LNPEP:ATP6V0E1:RAB24:PTP4A1:SNX3:LPAR1
gPROFILER	GO:1901532	regulation of hematopoietic progenitor cell differentiation	82	3		0.0227971	PSMA3,SHFM1,PSMC6
gPROFILER	GO:0009060	aerobic respiration	78	3		0.0227971	UQCRB,UQCRH,COX6C
gPROFILER	GO:0019319	hexose biosynthetic process	69	5		0.0227971	FBP1,ALDOA,FBP2,DGKQ,SLC25A1
gPROFILER	GO:0006120	mitochondrial electron transport, NADH to ubiquinone	51	5		0.0227971	NDUFS5,NDUFS4,NDUFS3,NDUFB5,NDUFA9
gPROFILER	GO:0061077	chaperone-mediated protein folding	53	5		0.0227971	HSPA1L,CLU,HSPA1B,GAK,CCT2
FUMA	GO:0015931	nucleobase containing compound transport	238	8	0.000658022	0.0228135	MAGOH:EIF5AL1:SLC35C1:MVP:UPF1:SSB:PURA:ENY2
FUMA	GO:0051607	defense response to virus	238	8	0.000658022	0.0228135	TSPAN32:NLRX1:LSM14A:PPM1B:POLR3F:IFNAR2:AP000295.9:MICB:IL6
gPROFILER	REAC:R-HSA-69613	p53-Independent G1/S DNA damage checkpoint	52	6		0.0229612	TOMM5,PDLIM7,NDUFS4,RPL34,GIMAP7,DPY19L4
gPROFILER	REAC:R-HSA-69610	p53-Independent DNA Damage Response	52	6		0.0229612	TOMM5,PDLIM7,NDUFS4,RPL34,GIMAP7,DPY19L4
gPROFILER	REAC:R-HSA-69601	Ubiquitin Mediated Degradation of Phosphorylated Cdc25A	52	6		0.0229612	TOMM5,PDLIM7,NDUFS4,RPL34,GIMAP7,DPY19L4
FUMA	GO:0080135	regulation of cellular response to stress	718	15	0.00066733	0.0230276	FCGR2B:CAMK2G:MAP3K11:ATXN3:RPL26:MAP4K4:SOD1:HSPA1L:HSPA1B:NCOA7:RPA3:MDFIC:CLU:COPS5:DNAJA1
FUMA	KEGG_PENTOSE_PHOSPHATE_PATHWAY	pentose phosphate pathway	27	3	0.00124468	0.0231511	ALDOA:FBP2:FBP1
FUMA	GO:0050687	negative regulation of defense response to virus	22	3	0.000674739	0.0231745	NLRX1:PPM1B:MICB
gPROFILER	GO:0090305	nucleic acid phosphodiester bond hydrolysis	142	3		0.0232904	GTF2H5,EXOSC7,IL6
FUMA	GO:0007010	cytoskeleton organization	1293	22	0.0006831	0.0233525	TSPAN32:MYBPC3:SIPA1:ARPC3:ACTN1:ATXN3:KCTD13:ALDOA:ARHGEF18:MAP1S:PVRL2:BIN1:SOD1:IQSEC1:RNF4:RHOH:CETN3:PDLIM7:AIF1:HSPA1B:CD2AP:LPAR1
gPROFILER	GO:0043170	macromolecule metabolic process	7773	93		0.0235692	MRPL50,MRPL39,ENY2,AIF1,GTF2H5,EXOSC7,MRPL51,CLU,PSMA3,PICALM,SHFM1,IL6,EPHX2,MRPS18C,BIN1,CDKN2C,UPF1,RPF2,MAP3K11,POLR1D,PSMC6,MKNK1,MAGOH,CARD8,ING3,FBP1,MVP,LSM3,SEC11A,RHOH,MGAT4A,MAPK8,SUB1,MAZ,NDST2,MDFIC,LSM5,HSPA1B,ALPK2,INO80C,UCHL3,CWC15,PRIM1,NGDN,CDC26,SNRPD2,NARS2,MRPL33,SORL1,MRPS21,CCNI,TPRKB,STK17B,MRPL22,ATXN3,SYF2,KTN1,MEFV,RNPEP,DNAJA1,SNRPG,PURA,MRPL35,RNF4,MUC6,SSB,MAP4K4,UB…
FUMA	GO:0005657	replication fork	68	4	0.0020981	0.0235977	PRIM1:DONSON:PURA:RPA3
gPROFILER	GO:0009145	purine nucleoside triphosphate biosynthetic process	43	3		0.0236193	IMPDH1,ATP5J,ALDOA
gPROFILER	GO:0009206	purine ribonucleoside triphosphate biosynthetic process	43	3		0.0236193	IMPDH1,ATP5J,ALDOA
gPROFILER	GO:0034248	regulation of cellular amide metabolic process	400	5		0.0238381	CLU,PICALM,IL6,BIN1,UPF1
Webgestalt	R-HSA-1799339	SRP-dependent cotranslational protein targeting to membrane	112	9	0.00015593	0.0238919	RPL36AL;SEC11A;SRP19;RPS27L;RPS24;RPL34;RPL26;RPS25;RPL26L1
Webgestalt	R-HSA-927802	Nonsense-Mediated Decay (NMD)	115	9	0.00019074	0.0239119	UPF1;MAGOH;RPL36AL;RPS27L;RPS24;RPL34;RPL26;RPS25;RPL26L1
Webgestalt	R-HSA-975957	Nonsense Mediated Decay (NMD) enhanced by the Exon Junction Complex (EJC)	115	9	0.00019074	0.0239119	UPF1;MAGOH;RPL36AL;RPS27L;RPS24;RPL34;RPL26;RPS25;RPL26L1
gPROFILER	GO:0051234	establishment of localization	4485	29		0.0239288	TOMM40,ENY2,AIF1,APOC1,HSPA1L,CLU,PSMA3,PICALM,SHFM1,TOMM5,IL6,EPHX2,EHD1,BIN1,UPF1,SLC24A4,PSMC6,GAB2,MAGOH,CARD8,COX17,MVP,TCTEX1D2,TIMM17A,IMPDH1,PDLIM7,RHOT2,MAPK8,ATP5J
gPROFILER	GO:0044450	microtubule organizing center part	154	5		0.0240811	CLPTM1,RPF2,TMEM14B,KTN1,DBI
gPROFILER	GO:0008152	metabolic process	9679	153		0.0241455	MRPL50,MRPL39,TOMM40,ENY2,AIF1,CRYZL1,APOC1,GTF2H5,EXOSC7,MRPL51,NDUFS5,CLU,PSMA3,PICALM,SHFM1,TOMM5,IL6,CSAD,EPHX2,MRPS18C,BIN1,UQCRB,CDKN2C,UPF1,RPF2,MAP3K11,POLR1D,UQCRH,PSMC6,MKNK1,COX6C,MAGOH,CARD8,ING3,FBP1,COX17,MVP,LSM3,IMPDH1,SEC11A,RHOH,MGAT4A,MAPK8,ATP5J,SUB1,MAZ,NDST2,MDFIC,LSM5,HSPA1B,ALPK2,INO80C,UCHL3,CWC15,PRIM1,NGDN,ALDOA,CDC26,SNRPD2,NARS2,MRPL33,SORL1,MRPS21,FBP2,CCNI,TPRKB,STK…
FUMA	GO:0030308	negative regulation of cell growth	185	7	0.000713555	0.0242807	CDKN2C:NDUFS3:SIPA1:SEMA4B:EAF2:HSPA1B:FBP1
gPROFILER	GO:0010972	negative regulation of G2/M transition of mitotic cell cycle	88	3		0.0245718	PSMA3,SHFM1,PSMC6
gPROFILER	REAC:R-HSA-110313	Translesion synthesis by Y family DNA polymerases bypasses lesions on DNA template	39	3		0.0245742	TOMM5,MVP,LSM3
gPROFILER	REAC:R-HSA-6783310	Fanconi Anemia Pathway	39	3		0.0245742	TOMM5,RPL36AL,LSM3
gPROFILER	GO:0038093	Fc receptor signaling pathway	232	9		0.024827	PSMA3,SHFM1,PSMC6,GAB2,MAPK8,MS4A2,FCGR2B,PSMA4,PSMC2
FUMA	GO:0006367	transcription initiation from rna polymerase ii promoter	186	7	0.00073654	0.0249473	GTF2B:PSMC6:MED6:MAZ:SUB1:GTF2H5:PSMC2
FUMA	KEGG_NOD_LIKE_RECEPTOR_SIGNALING_PATHWAY	nod like receptor signaling pathway	62	4	0.00149132	0.0252168	MAPK8:MEFV:CARD8:IL6
gPROFILER	GO:0051403	stress-activated MAPK cascade	244	9		0.0252394	MAP3K11,MAPK8,MDFIC,DNAJA1,MAP4K4,TNIP2,FCGR2B,COPS5,SH2D3C
FUMA	GO:0042116	macrophage activation	90	5	0.000759341	0.0253125	FCGR2B:TNIP2:AIF1:IL6:CLU
FUMA	GO:0031146	scf dependent proteasomal ubiquitin dependent protein catabolic process	90	5	0.000759341	0.0253125	CUL2:PSMC6:PSMA3:PSMA4:PSMC2
FUMA	GO:0019725	cellular homeostasis	967	18	0.000767857	0.0253125	PICALM:PRIM1:ATP6V1D:SLC24A4:RHOT2:ALDOA:UPF1:MAP4K4:SOD1:ATP6V1E1:NCF4:ATP6V0E1:HCRTR2:RPA3:IL6:EPHX2:ENY2:LPAR1
FUMA	GO:0065002	intracellular protein transmembrane transport	52	4	0.000769852	0.0253125	TIMM17A:TOMM40:SRP19:TOMM7
FUMA	GO:0046475	glycerophospholipid catabolic process	23	3	0.000771428	0.0253125	GDPD3:PNPLA6:APOC1
FUMA	GO:0051654	establishment of mitochondrion localization	23	3	0.000771428	0.0253125	RHOT2:MAP1S:PVRL2
FUMA	GO:0070841	inclusion body assembly	23	3	0.000771428	0.0253125	SORL1:HSPA1B:CLU
FUMA	GO:1904951	positive regulation of establishment of protein localization	436	11	0.000776656	0.0253708	MAPK8:SORL1:CCT2:UBL5:CARD8:LILRA2:SAR1B:AIF1:HSPA1L:IL6:TOMM7
gPROFILER	GO:0010467	gene expression	4466	60		0.0253722	MRPL50,MRPL39,ENY2,AIF1,GTF2H5,EXOSC7,MRPL51,CLU,PSMA3,PICALM,SHFM1,IL6,EPHX2,MRPS18C,UPF1,RPF2,POLR1D,PSMC6,MAGOH,CARD8,FBP1,LSM3,SEC11A,RHOH,MAPK8,SUB1,MAZ,MDFIC,LSM5,HSPA1B,ALPK2,CWC15,NGDN,SNRPD2,NARS2,MRPL33,SORL1,MRPS21,TPRKB,MRPL22,SYF2,SNRPG,MRPL35,RNF4,SSB,UBL5,RPS27L,MRPS33,POLR3F,MRPL24,TNIP2,NCOA7,NACA,RPS24,RPL34,PMPCB,COPS5,CIITA,PSMA4,EAF2
gPROFILER	GO:0033036	macromolecule localization	2493	13		0.0253722	TOMM40,ENY2,AIF1,APOC1,HSPA1L,CLU,PICALM,TOMM5,IL6,EPHX2,EHD1,UPF1,RPF2
gPROFILER	GO:0006458	'de novo' protein folding	33	4		0.0254235	HSPA1L,HSPA1B,GAK,CCT2
gPROFILER	GO:0031146	SCF-dependent proteasomal ubiquitin-dependent protein catabolic process	94	6		0.0254578	PSMA3,SHFM1,PSMC6,PSMA4,PSMC2,CUL2
Webgestalt	GO:0097346	INO80-type complex	24	3	0.00190689	0.0258267	ING3;INO80C;ACTL6A
Webgestalt	GO:0016579	protein deubiquitination	272	14	5.00332e-05	0.0258275	ENY2;PSMA3;PSMC6;INO80C;UCHL3;ATXN3;TNIP2;COPS5;PSMA4;PSMC2;USP35;ACTL6A;USP7;SNX3
Webgestalt	GO:0000956	nuclear-transcribed mRNA catabolic process	206	12	5.3244e-05	0.0258275	EXOSC7;UPF1;MAGOH;LSM3;LSM5;SSB;RPS24;RPL34;RPL26;RPS25;LSM2;EXOSC1
gPROFILER	GO:0046364	monosaccharide biosynthetic process	74	5		0.0258468	FBP1,ALDOA,FBP2,DGKQ,SLC25A1
gPROFILER	GO:0010942	positive regulation of cell death	577	8		0.0260702	CLU,PICALM,IL6,BIN1,MAP3K11,CARD8,ING3,MAPK8
gPROFILER	GO:0009201	ribonucleoside triphosphate biosynthetic process	46	3		0.0260702	IMPDH1,ATP5J,ALDOA
gPROFILER	GO:0051058	negative regulation of small GTPase mediated signal transduction	41	4		0.0260702	FBP1,RASAL3,KCTD13,CD2AP
gPROFILER	GO:0060071	Wnt signaling pathway, planar cell polarity pathway	93	3		0.0260702	PSMA3,SHFM1,PSMC6
gPROFILER	GO:2000142	regulation of DNA-templated transcription, initiation	31	4		0.0260702	PSMC6,SUB1,PSMC2,GTF2B
gPROFILER	GO:0031098	stress-activated protein kinase signaling cascade	248	9		0.0260702	MAP3K11,MAPK8,MDFIC,DNAJA1,MAP4K4,TNIP2,FCGR2B,COPS5,SH2D3C
gPROFILER	GO:0002223	stimulatory C-type lectin receptor signaling pathway	109	6		0.0260702	PSMA3,SHFM1,PSMC6,MUC6,PSMA4,PSMC2
gPROFILER	REAC:R-HSA-6791226	Major pathway of rRNA processing in the nucleolus and cytosol	183	13		0.0261628	ENY2,EXOSC7,TOMM5,SUB1,RAB40C,RNF4,ASPHD1,NCOA7,SNRPB2,IGFBP6,GTF2B
gPROFILER	GO:0090175	regulation of establishment of planar polarity	94	3		0.0263171	PSMA3,SHFM1,PSMC6
gPROFILER	GO:1905368	peptidase complex	75	5		0.0267666	PDLIM7,NDUFS4,EIF5AL1,GIMAP7,DPY19L4
gPROFILER	GO:0098800	inner mitochondrial membrane protein complex	130	3		0.0268406	MRPL39,SLC24A4,COX6C
gPROFILER	GO:0031970	organelle envelope lumen	63	5		0.0268406	SHFM1,ING3,NARS2,MICB
gPROFILER	GO:0008104	protein localization	2219	16		0.0268708	TOMM40,ENY2,AIF1,HSPA1L,CLU,PICALM,TOMM5,IL6,EPHX2,EHD1,UPF1,RPF2,MAGOH,CARD8,TCTEX1D2,TIMM17A
gPROFILER	GO:0046503	glycerolipid catabolic process	57	5		0.0268708	APOC1,SORL1,DAGLB,GDPD3,PNPLA6
gPROFILER	GO:1905952	regulation of lipid localization	131	3		0.0269484	APOC1,IL6,EHD1
gPROFILER	GO:1901564	organonitrogen compound metabolic process	5712	101		0.0269484	MRPL50,MRPL39,ENY2,APOC1,GTF2H5,MRPL51,CLU,PSMA3,PICALM,SHFM1,IL6,CSAD,MRPS18C,BIN1,CDKN2C,UPF1,MAP3K11,PSMC6,MKNK1,CARD8,ING3,FBP1,MVP,IMPDH1,SEC11A,MGAT4A,MAPK8,ATP5J,NDST2,MDFIC,HSPA1B,INO80C,UCHL3,ALDOA,CDC26,NARS2,MRPL33,SORL1,MRPS21,CCNI,STK17B,MRPL22,ATXN3,KTN1,MEFV,RNPEP,DBI,DNAJA1,MRPL35,RNF4,MUC6,MAP4K4,RPS27L,MRPS33,OSBPL8,NDUFS4,MRPL24,TNIP2,UFC1,NACA,RASAL3,FCGR2B,RPS24,DUSP12,RPL34,…
FUMA	GO:0019080	viral gene expression	190	7	0.000834408	0.0271367	GTF2B:RPS24:RPS25:RPL26:SSB:RPL34:MDFIC
gPROFILER	GO:0051049	regulation of transport	1424	12		0.0271992	AIF1,APOC1,HSPA1L,CLU,PICALM,IL6,EHD1,BIN1,GAB2,CARD8,COX17,TCTEX1D2
gPROFILER	GO:0002220	innate immune response activating cell surface receptor signaling pathway	112	6		0.0272518	PSMA3,SHFM1,PSMC6,MUC6,PSMA4,PSMC2
gPROFILER	GO:0071705	nitrogen compound transport	1800	14		0.0272518	TOMM40,ENY2,AIF1,HSPA1L,CLU,TOMM5,IL6,EPHX2,EHD1,UPF1,MAGOH,CARD8,TCTEX1D2,TIMM17A
gPROFILER	GO:1903747	regulation of establishment of protein localization to mitochondrion	68	4		0.0272518	HSPA1L,MAPK8,DNAJA1,UBL5
gPROFILER	GO:0044770	cell cycle phase transition	573	14		0.027556	AIF1,PSMA3,SHFM1,CDKN2C,UPF1,PSMC6,PRIM1,CDC26,TMEM14B,CCNI,RPS27L,PSMA4,RPL26,RPA3
gPROFILER	GO:0015629	actin cytoskeleton	428	11		0.0276168	TOMM40,AIF1,NDST2,NGDN,SNTB2,FBP2,DNAJA1,UFC1,RASAL3,TATDN3,BNIP1
FUMA	GO:0031334	positive regulation of protein complex assembly	248	8	0.000859193	0.0278197	ARPC3:PSMC6:BIN1:HSPA1B:GTF2H5:RPA3:PSMC2:CLU
gPROFILER	GO:0007164	establishment of tissue polarity	99	3		0.0281588	PSMA3,SHFM1,PSMC6
gPROFILER	GO:0001736	establishment of planar polarity	99	3		0.0281588	PSMA3,SHFM1,PSMC6
FUMA	GO:0042180	cellular ketone metabolic process	192	7	0.000887045	0.0284734	NDUFA9:PSMC6:PSMA3:PSMA4:CRYZL1:DGKQ:PSMC2
FUMA	GO:0042982	amyloid precursor protein metabolic process	54	4	0.000888261	0.0284734	PICALM:SORL1:BIN1:CLU
FUMA	GO:0015672	monovalent inorganic cation transport	514	12	0.000891005	0.0284734	ATP5F1:NDUFA9:ATP6V1D:SLC24A4:BIN1:ATP5J:ATP5O:ATP6V1E1:COX17:ATP5I:ATP6V0E1:COX6C
FUMA	GO:0031098	stress activated protein kinase signaling cascade	311	9	0.000896133	0.0285133	FCGR2B:MAPK8:MAP3K11:MAP4K4:TNIP2:MDFIC:COPS5:DNAJA1:SH2D3C
FUMA	GO:1904684	negative regulation of metalloendopeptidase activity	6	2	0.000915985	0.0289173	PICALM:SORL1
FUMA	GO:0034470	ncrna processing	377	10	0.000916697	0.0289173	RPS24:EXOSC1:NGDN:RPL26:TPRKB:SSB:EXOSC7:NSA2:RPF2:GTF2H5
gPROFILER	GO:0031334	positive regulation of protein complex assembly	217	4		0.0289648	GTF2H5,CLU,BIN1,PSMC6
gPROFILER	GO:0006508	proteolysis	1424	25		0.0289648	ENY2,CLU,PSMA3,PICALM,SHFM1,BIN1,PSMC6,CARD8,SEC11A,HSPA1B,INO80C,UCHL3,CDC26,SORL1,ATXN3,MEFV,RNPEP,RNF4,RPS27L,TNIP2,PMPCB,KCTD13,COPS5,LNPEP,PSMA4
gPROFILER	GO:0072583	clathrin-dependent endocytosis	33	4		0.0292907	PICALM,GAK,FCHO1,AP2A2
gPROFILER	GO:1902750	negative regulation of cell cycle G2/M phase transition	101	3		0.0292907	PSMA3,SHFM1,PSMC6
gPROFILER	GO:0000184	nuclear-transcribed mRNA catabolic process, nonsense-mediated decay	115	6		0.0292907	UPF1,MAGOH,RPS24,RPL34,RPL26,RPS25
gPROFILER	GO:0016651	oxidoreductase activity, acting on NAD(P)H	97	7		0.0293046	CRYZL1,NDUFS5,NDUFS4,NDUFS3,NDUFB5,NDUFA9,TXNDC17
FUMA	GO:0034250	positive regulation of cellular amide metabolic process	141	6	0.00093333	0.0293161	EIF5AL1:PICALM:RPS27L:RPL26:IL6:CLU
FUMA	GO:0061013	regulation of mrna catabolic process	194	7	0.000942266	0.0294709	EXOSC1:PSMC6:PSMA3:PSMA4:UPF1:EXOSC7:PSMC2
FUMA	GO:0033260	nuclear dna replication	55	4	0.000952027	0.02965	PRIM1:UPF1:DONSON:RPA3
gPROFILER	GO:2000736	regulation of stem cell differentiation	103	3		0.029765	PSMA3,SHFM1,PSMC6
gPROFILER	GO:0017111	nucleoside-triphosphatase activity	608	10		0.029801	HSPA1L,UPF1,PSMC6,RHOH,RHOT2,ATP5J,SUB1,HSPA1B,RAB40C,GNL2
FUMA	GO:0051236	establishment of rna localization	195	7	0.000970874	0.0299829	MAGOH:EIF5AL1:MVP:UPF1:SSB:PURA:ENY2
FUMA	GO:0070555	response to interleukin 1	195	7	0.000970874	0.0299829	PSMC6:PSMA3:PSMA4:UPF1:TNIP2:IL6:PSMC2
gPROFILER	GO:0034613	cellular protein localization	1657	10		0.0300449	TOMM40,ENY2,HSPA1L,CLU,PICALM,TOMM5,EPHX2,EHD1,UPF1,RPF2
gPROFILER	GO:0022613	ribonucleoprotein complex biogenesis	386	13		0.0300449	EXOSC7,RPF2,LSM3,NGDN,SNRPD2,MRPL22,SNRPG,RPS27L,RPS24,RPL26,LSM14A,RPL26L1,GEMIN6
Webgestalt	R-HSA-975956	Nonsense Mediated Decay (NMD) independent of the Exon Junction Complex (EJC)	95	8	0.000263174	0.030243	UPF1;RPL36AL;RPS27L;RPS24;RPL34;RPL26;RPS25;RPL26L1
FUMA	GO:0009891	positive regulation of biosynthetic process	1966	29	0.000985506	0.0303074	GTF2B:EIF5AL1:OBFC1:DPF2:PICALM:CCT2:PSMC6:ACTN1:MED6:RPS27L:CIITA:MAZ:KCTD13:RPL26:TCF20:SS18L2:EAF2:ACTL6A:RNF4:TNIP2:SUB1:AIF1:NCOA7:IL6:PSMC2:MDFIC:CLU:COPS5:ENY2
FUMA	GO:0008334	histone mrna metabolic process	25	3	0.000990218	0.0303254	UPF1:SNRPG:SSB
FUMA	GO:0051345	positive regulation of hydrolase activity	748	15	0.00100599	0.0306807	MAPK8:ARHGAP1:MYBPC3:SIPA1:PICALM:DOCK9:RPS27L:MEFV:RASAL3:CARD8:MAP4K4:SEC23B:IQSEC1:DNAJA1:LPAR1
FUMA	GO:0046364	monosaccharide biosynthetic process	96	5	0.00101632	0.0306936	ALDOA:SLC25A1:DGKQ:FBP2:FBP1
FUMA	GO:0016125	sterol metabolic process	96	5	0.00101632	0.0306936	SORL1:SOAT2:APOC1:DGKQ:EPHX2
FUMA	GO:0051058	negative regulation of small gtpase mediated signal transduction	56	4	0.00101894	0.0306936	KCTD13:RASAL3:CD2AP:FBP1
FUMA	GO:0050865	regulation of cell activation	596	13	0.00102353	0.0307058	FCGR2B:TSPAN32:GAB2:RASAL3:CLC:PVRL2:CLPTM1:LILRA2:VAMP8:SOD1:TNIP2:AIF1:IL6
gPROFILER	GO:0043232	intracellular non-membrane-bounded organelle	4032	70		0.0307517	MRPL50,MRPL39,AIF1,GTF2H5,MRPL51,CLU,MRPS18C,EHD1,BIN1,UPF1,RPF2,MAP3K11,POLR1D,RPL36AL,ING3,MVP,TCTEX1D2,LSM3,PDLIM7,SUB1,HSPA1B,INO80C,PRIM1,NGDN,ALDOA,GNL2,MRPL33,MRPS21,SRP19,MRPL22,ATXN3,MEFV,MYBPC3,DNAJA1,SNRPG,PURA,MRPL35,SSB,RPS27L,MRPS33,MRPL24,RPS24,RPL34,COPS5,DCTN6,PSMA4,RPL26,RPA3,CBX3,DGKQ,CETN3,ACTR6,RPS25,PSMC2,TBCA,LSM14A,RPL26L1,CD2AP,SNRPB2,FCHO1,MRPL27,AGTPBP1,MRPS17,PPM1B,MRP…
gPROFILER	GO:0031252	cell leading edge	268	10		0.0307701	FCRLB,NGDN,FBP2,ATXN3,DNAJA1,FCGR2B,BNIP1,USP35,MAP1S,NDUFB5
gPROFILER	GO:0070727	cellular macromolecule localization	1667	10		0.0307802	TOMM40,ENY2,HSPA1L,CLU,PICALM,TOMM5,EPHX2,EHD1,UPF1,RPF2
FUMA	GO:0001816	cytokine production	750	15	0.00103298	0.0308634	FCGR2B:NLRX1:MEFV:LSM14A:CLC:CARD8:LILRA2:PPM1B:POLR3F:SOD1:AIF1:HSPA1B:CD2AP:IL6:CLU
gPROFILER	GO:0043228	non-membrane-bounded organelle	4034	70		0.0308711	MRPL50,MRPL39,AIF1,GTF2H5,MRPL51,CLU,MRPS18C,EHD1,BIN1,UPF1,RPF2,MAP3K11,POLR1D,RPL36AL,ING3,MVP,TCTEX1D2,LSM3,PDLIM7,SUB1,HSPA1B,INO80C,PRIM1,NGDN,ALDOA,GNL2,MRPL33,MRPS21,SRP19,MRPL22,ATXN3,MEFV,MYBPC3,DNAJA1,SNRPG,PURA,MRPL35,SSB,RPS27L,MRPS33,MRPL24,RPS24,RPL34,COPS5,DCTN6,PSMA4,RPL26,RPA3,CBX3,DGKQ,CETN3,ACTR6,RPS25,PSMC2,TBCA,LSM14A,RPL26L1,CD2AP,SNRPB2,FCHO1,MRPL27,AGTPBP1,MRPS17,PPM1B,MRP…
gPROFILER	GO:0009056	catabolic process	2255	10		0.030948	TOMM40,APOC1,EXOSC7,CLU,PSMA3,SHFM1,TOMM5,IL6,CSAD,EPHX2
FUMA	GO:0015399	primary active transmembrane transporter activity	122	6	0.000436054	0.0311873	ATP5F1:TIMM17A:ATP6V1D:ATP5O:ATP6V1E1:ATP6V0E1
gPROFILER	GO:0043596	nuclear replication fork	42	3		0.031395	PRIM1,PURA,RPA3
FUMA	GO:0002697	regulation of immune effector process	453	11	0.00105739	0.0314649	FCGR2B:TSPAN32:GAB2:NLRX1:CLC:PVRL2:PPM1B:VAMP8:MICB:IL6:CLU
gPROFILER	GO:0006796	phosphate-containing compound metabolic process	2765	15		0.0315059	APOC1,GTF2H5,NDUFS5,CLU,PSMA3,SHFM1,IL6,EPHX2,UQCRB,CDKN2C,MAP3K11,UQCRH,PSMC6,MKNK1,COX6C
gPROFILER	GO:0010876	lipid localization	314	4		0.0315618	APOC1,CLU,IL6,EHD1
FUMA	GO:0008180	cop9 signalosome	36	3	0.00288314	0.0317145	HSPA1L:HSPA1B:COPS5
FUMA	GO:0005685	u1 snrnp	36	3	0.00288314	0.0317145	SNRPD2:SNRPG:SNRPB2
gPROFILER	GO:1901991	negative regulation of mitotic cell cycle phase transition	231	4		0.0317833	PSMA3,SHFM1,CDKN2C,PSMC6
gPROFILER	GO:0006353	DNA-templated transcription, termination	79	4		0.0317833	GTF2H5,POLR1D,MAZ,SNRPG
gPROFILER	GO:0009205	purine ribonucleoside triphosphate metabolic process	54	3		0.0317833	IMPDH1,ATP5J,ALDOA
gPROFILER	GO:0051050	positive regulation of transport	765	9		0.0317833	AIF1,HSPA1L,CLU,IL6,EHD1,GAB2,CARD8,COX17,MAPK8
gPROFILER	GO:0051085	chaperone cofactor-dependent protein refolding	24	3		0.0317833	HSPA1L,HSPA1B,GAK
gPROFILER	GO:0042063	gliogenesis	144	3		0.0318035	CLU,IL6,BIN1
gPROFILER	GO:0032201	telomere maintenance via semi-conservative replication	27	3		0.0320347	UPF1,PRIM1,RPA3
gPROFILER	GO:0071345	cellular response to cytokine stimulus	881	8		0.0320347	AIF1,PSMA3,SHFM1,IL6,UPF1,PSMC6,GAB2,CARD8
gPROFILER	GO:0071702	organic substance transport	2138	11		0.0320347	TOMM40,ENY2,AIF1,APOC1,HSPA1L,CLU,TOMM5,IL6,EPHX2,EHD1,UPF1
Webgestalt	GO:0043601	nuclear replisome	26	3	0.0024125	0.0321112	PRIM1;PURA;RPA3
gPROFILER	GO:0006793	phosphorus metabolic process	2791	15		0.0321935	APOC1,GTF2H5,NDUFS5,CLU,PSMA3,SHFM1,IL6,EPHX2,UQCRB,CDKN2C,MAP3K11,UQCRH,PSMC6,MKNK1,COX6C
gPROFILER	GO:0009142	nucleoside triphosphate biosynthetic process	55	3		0.0321935	IMPDH1,ATP5J,ALDOA
FUMA	GO:1905953	negative regulation of lipid localization	57	4	0.0010891	0.0322777	OSBPL8:APOC1:ATP5J:IL6
gPROFILER	GO:0071222	cellular response to lipopolysaccharide	148	4		0.0323174	IL6,UPF1,CARD8,MAPK8
gPROFILER	GO:0006352	DNA-templated transcription, initiation	234	5		0.0323174	GTF2H5,POLR1D,PSMC6,SUB1,MAZ
gPROFILER	GO:0002244	hematopoietic progenitor cell differentiation	111	3		0.0323174	PSMA3,SHFM1,PSMC6
gPROFILER	GO:0044106	cellular amine metabolic process	111	3		0.0323174	PSMA3,SHFM1,PSMC6
gPROFILER	GO:0044772	mitotic cell cycle phase transition	532	13		0.0325117	AIF1,PSMA3,SHFM1,CDKN2C,PSMC6,PRIM1,CDC26,TMEM14B,CCNI,RPS27L,PSMA4,RPL26,RPA3
gPROFILER	GO:0001738	morphogenesis of a polarized epithelium	112	3		0.0325751	PSMA3,SHFM1,PSMC6
gPROFILER	GO:0006807	nitrogen compound metabolic process	8250	96		0.0327062	MRPL50,MRPL39,ENY2,APOC1,GTF2H5,EXOSC7,MRPL51,CLU,PSMA3,PICALM,SHFM1,IL6,CSAD,MRPS18C,BIN1,CDKN2C,UPF1,RPF2,MAP3K11,POLR1D,PSMC6,MKNK1,MAGOH,CARD8,ING3,FBP1,MVP,LSM3,IMPDH1,SEC11A,RHOH,MGAT4A,MAPK8,ATP5J,SUB1,MAZ,NDST2,MDFIC,LSM5,HSPA1B,INO80C,UCHL3,CWC15,PRIM1,NGDN,ALDOA,CDC26,SNRPD2,NARS2,MRPL33,SORL1,MRPS21,CCNI,TPRKB,STK17B,MRPL22,ATXN3,SYF2,KTN1,MEFV,RNPEP,DBI,DNAJA1,SNRPG,PURA,MRPL35,RNF4,M…
gPROFILER	GO:0005814	centriole	106	4		0.0327576	RPF2,TMEM14B,KTN1,DBI
FUMA	GO:0009615	response to virus	321	9	0.00111732	0.0327928	TSPAN32:NLRX1:LSM14A:PPM1B:POLR3F:IFNAR2:AP000295.9:MICB:IL6:CLU
FUMA	GO:0006261	dna dependent dna replication	146	6	0.00111753	0.0327928	PRIM1:RPAIN:UPF1:DONSON:PURA:RPA3
FUMA	GO:0007266	rho protein signal transduction	200	7	0.00112433	0.0327928	ARHGAP1:RHOT2:KCTD13:ARHGEF18:RHOH:PLEKHG1:LPAR1
FUMA	GO:0002703	regulation of leukocyte mediated immunity	200	7	0.00112433	0.0327928	FCGR2B:GAB2:CLC:PVRL2:VAMP8:MICB:IL6
FUMA	GO:0004622	lysophospholipase activity	20	3	0.000505359	0.0328787	GDPD3:PNPLA6:CLC
FUMA	GO:0140098	catalytic activity acting on rna	349	10	0.000508287	0.0328787	ALKBH3:NARS2:PRIM1:POLR1D:PTRH2:UPF1:POLR3F:EXOSC7:RARS:VARS
FUMA	GO:0033218	amide binding	350	10	0.000519663	0.0328787	FCGR2B:PICALM:SORL1:SOAT2:DBI:PPIG:ERAP2:LNPEP:HCRTR2:CLU
gPROFILER	GO:0043124	negative regulation of I-kappaB kinase/NF-kappaB signaling	43	4		0.0329722	CARD8,RHOH,NLRX1,PPM1B
gPROFILER	GO:0015980	energy derivation by oxidation of organic compounds	226	4		0.0329722	NDUFS5,UQCRB,UQCRH,COX6C
gPROFILER	REAC:R-HSA-69541	Stabilization of p53	57	6		0.0330225	TOMM5,PDLIM7,NDUFS4,RPL34,GIMAP7,DPY19L4
gPROFILER	GO:0030120	vesicle coat	49	4		0.033248	PICALM,SEC23B,AP2A2,SAR1B
gPROFILER	GO:0071219	cellular response to molecule of bacterial origin	160	6		0.0332701	IL6,UPF1,CARD8,MAPK8,TNIP2,FCGR2B
gPROFILER	GO:1901990	regulation of mitotic cell cycle phase transition	399	5		0.0332701	AIF1,PSMA3,SHFM1,CDKN2C,PSMC6
gPROFILER	GO:0031410	cytoplasmic vesicle	1805	38		0.0333848	TOMM40,TMEM126B,PICALM,SHFM1,TOMM5,EHD1,TIMM17A,SEC11A,GNL2,SNTB2,CCNI,SLC16A5,SNRPG,PURA,MRPL35,NDUFS4,UFC1,RASAL3,SEC23B,KCTD13,DPAGT1,DAGLB,TATDN3,CLC,RBMS2,BNIP1,RPS25,DCUN1D1,PIGT,HTR1E,MICB,GEMIN6,ERAP2,ACTL6A,GIMAP7,DONSON,DEXI,NDUFB5
gPROFILER	GO:1904724	tertiary granule lumen	55	4		0.0333848	UFC1,SEC23B,GEMIN6,DEXI
gPROFILER	GO:0005849	mRNA cleavage factor complex	25	3		0.0333848	LSM14A,SOAT2,LSM2
gPROFILER	GO:0097458	neuron part	960	5		0.0333848	TOMM40,GTF2H5,EXOSC7,PICALM,SHFM1
gPROFILER	GO:0097708	intracellular vesicle	1806	38		0.0333848	TOMM40,TMEM126B,PICALM,SHFM1,TOMM5,EHD1,TIMM17A,SEC11A,GNL2,SNTB2,CCNI,SLC16A5,SNRPG,PURA,MRPL35,NDUFS4,UFC1,RASAL3,SEC23B,KCTD13,DPAGT1,DAGLB,TATDN3,CLC,RBMS2,BNIP1,RPS25,DCUN1D1,PIGT,HTR1E,MICB,GEMIN6,ERAP2,ACTL6A,GIMAP7,DONSON,DEXI,NDUFB5
gPROFILER	GO:0030424	axon	308	11		0.0333848	TOMM40,PICALM,SHFM1,FCRLB,SLC16A5,RASAL3,FCGR2B,TATDN3,CD2AP,NDUFB5,ZMAT2
gPROFILER	GO:0044433	cytoplasmic vesicle part	1192	23		0.0333848	TMEM126B,SHFM1,TOMM5,TIMM17A,GNL2,SNTB2,CCNI,SLC16A5,SNRPG,PURA,NDUFS4,UFC1,RASAL3,SEC23B,KCTD13,DPAGT1,DAGLB,CLC,RBMS2,BNIP1,DCUN1D1,PIGT,HTR1E
FUMA	GO:1903749	positive regulation of establishment of protein localization to mitochondrion	58	4	0.00116257	0.0335094	MAPK8:UBL5:HSPA1L:TOMM7
FUMA	GO:0045576	mast cell activation	58	4	0.00116257	0.0335094	GAB2:PVRL2:VAMP8:RHOH
FUMA	GO:0099132	atp hydrolysis coupled cation transmembrane transport	58	4	0.00116257	0.0335094	ATP5F1:ATP5O:ATP6V1E1:ATP6V0E1
Webgestalt	R-HSA-163200	Respiratory electron transport, ATP synthesis by chemiosmotic coupling, and heat production by uncoupling proteins.	123	9	0.000316414	0.0335642	TMEM126B;NDUFS5;UQCRB;UQCRH;COX6C;NDUFS4;NDUFS3;NDUFB5;NDUFA9
gPROFILER	GO:0034641	cellular nitrogen compound metabolic process	5169	66		0.0335703	MRPL50,MRPL39,ENY2,GTF2H5,EXOSC7,MRPL51,CLU,PSMA3,PICALM,SHFM1,IL6,MRPS18C,BIN1,UPF1,RPF2,POLR1D,PSMC6,MAGOH,CARD8,FBP1,LSM3,IMPDH1,SEC11A,RHOH,MAPK8,ATP5J,SUB1,MAZ,MDFIC,LSM5,HSPA1B,CWC15,PRIM1,NGDN,ALDOA,SNRPD2,NARS2,MRPL33,SORL1,MRPS21,TPRKB,MRPL22,ATXN3,SYF2,DBI,SNRPG,PURA,MRPL35,RNF4,SSB,UBL5,RPS27L,MRPS33,ALKBH3,POLR3F,MRPL24,TNIP2,NCOA7,NACA,RPS24,RPL34,COPS5,CIITA,LNPEP,PSMA4,EAF2
gPROFILER	GO:0009408	response to heat	132	7		0.0335703	HSPA1L,HSPA1B,ATXN3,RPA3,SOD1,MICB,CAMK2G
FUMA	GO:0050750	low density lipoprotein particle receptor binding	21	3	0.000586147	0.0336056	PICALM:CLU:DNAJA1
FUMA	GO:0008237	metallopeptidase activity	179	7	0.000587293	0.0336056	RNPEP:ADAM29:ERAP2:LNPEP:PMPCB:COPS5:AGTPBP1
FUMA	GO:0042623	atpase activity coupled	356	10	0.000592439	0.0336056	ATP5F1:PSMC6:ATP6V1D:UPF1:ATP5O:ATP6V1E1:ATP6V0E1:HSPA1L:HSPA1B:PSMC2
gPROFILER	GO:0009199	ribonucleoside triphosphate metabolic process	57	3		0.0336399	IMPDH1,ATP5J,ALDOA
gPROFILER	GO:0043300	regulation of leukocyte degranulation	28	3		0.0337612	GAB2,FCGR2B,VAMP8
gPROFILER	GO:0033572	transferrin transport	36	4		0.0337612	ATP6V0E1,ATP6V1E1,ATP6V1D,ARHGAP1
FUMA	GO:0000784	nuclear chromosome telomeric region	124	5	0.00313152	0.0338682	OBFC1:UPF1:SSB:PURA:CBX3
FUMA	GO:0070603	swi snf superfamily type complex	76	4	0.0031466	0.0338682	DPF2:INO80C:ACTL6A:ING3
gPROFILER	GO:0042788	polysomal ribosome	30	3		0.0340831	RNF4,ASPHD1,IGFBP6
gPROFILER	GO:0031090	organelle membrane	2634	49		0.0340831	MRPL39,TMEM126B,CRYZL1,GTF2H5,ZNF384,SHFM1,TOMM5,EHD1,SLC24A4,COX6C,MAGOH,COX17,TCTEX1D2,TIMM17A,SEC11A,MDFIC,HSPA1B,CCNI,TPRKB,FAM193A,DNAJA1,SNRPG,RPS27L,NUCB2,RASAL3,NLRX1,KCTD13,CIITA,PSMA4,MTMR3,DAGLB,CLC,RBMS2,PANK4,ACTR6,PIGT,NCF4,HTR1E,RPL26L1,GDPD3,FCHO1,SLC35C1,POMP,CUL2,IDUA,HDHD2,MRPL47,ACTL6A,CAMK2G
gPROFILER	GO:0030666	endocytic vesicle membrane	125	3		0.0340831	TMEM126B,TOMM5,TIMM17A
gPROFILER	GO:0070062	extracellular exosome	2142	28		0.0340831	TMEM126B,EXOSC7,SHFM1,TOMM5,CSAD,EHD1,CARD8,TCTEX1D2,SUB1,MAZ,NDST2,NGDN,RAB40C,GNL2,NARS2,MRPS21,CCNI,SLC16A5,INPP4A,DNAJA1,SNRPG,PURA,NDUFS4,TNIP2,UFC1,NCOA7,NLRX1,RPS24
gPROFILER	GO:0000502	proteasome complex	56	4		0.0341731	PDLIM7,NDUFS4,GIMAP7,DPY19L4
gPROFILER	GO:0043618	regulation of transcription from RNA polymerase II promoter in response to stress	116	3		0.0343214	PSMA3,SHFM1,PSMC6
gPROFILER	GO:0009144	purine nucleoside triphosphate metabolic process	58	3		0.0344943	IMPDH1,ATP5J,ALDOA
FUMA	GO:0052689	carboxylic ester hydrolase activity	133	6	0.000688209	0.0346199	GDPD3:PTRH2:PNPLA6:CLC:BPHL:VARS
FUMA	GO:0031267	small gtpase binding	435	11	0.000762292	0.0346199	ARHGAP1:EHD1:MAP3K11:PICALM:SORL1:KCTD13:ARHGEF18:SOD1:RHOH:LSM2:PLEKHG1
FUMA	GO:0051787	misfolded protein binding	23	3	0.000771428	0.0346199	HSPA1L:HSPA1B:CLU
FUMA	GO:0022884	macromolecule transmembrane transporter activity	23	3	0.000771428	0.0346199	TIMM17A:TOMM40:TOMM7
FUMA	GO:0046961	proton transporting atpase activity rotational mechanism	23	3	0.000771428	0.0346199	ATP6V1D:ATP6V1E1:ATP6V0E1
FUMA	GO:0019865	immunoglobulin binding	23	3	0.000771428	0.0346199	FCGR2B:MS4A2:LILRA2
FUMA	GO:0044183	protein folding chaperone	23	3	0.000771428	0.0346199	CCT2:HSPA1L:HSPA1B
FUMA	GO:0044389	ubiquitin like protein ligase binding	306	9	0.000799723	0.0346199	CUL2:CCT2:PSMA3:ATXN3:USP7:HSPA1L:HSPA1B:CLU:DNAJA1
FUMA	GO:0016491	oxidoreductase activity	731	15	0.000799731	0.0346199	NDUFS5:UQCRH:ALKBH3:NDUFS3:NDUFA9:ASPHD1:TXNDC17:RSAD1:SOD1:CRYZL1:NDUFB5:NDUFS4:IMPDH1:UQCRB:COX6C
gPROFILER	GO:0008021	synaptic vesicle	128	3		0.0347537	TOMM40,PICALM,TIMM17A
gPROFILER	GO:0051123	RNA polymerase II preinitiation complex assembly	37	4		0.0348069	PSMC6,PSMC2,MED6,GTF2B
gPROFILER	GO:0016817	hydrolase activity, acting on acid anhydrides	653	10		0.0348262	HSPA1L,UPF1,PSMC6,RHOH,RHOT2,ATP5J,SUB1,HSPA1B,RAB40C,GNL2
gPROFILER	GO:0016462	pyrophosphatase activity	651	10		0.0348262	HSPA1L,UPF1,PSMC6,RHOH,RHOT2,ATP5J,SUB1,HSPA1B,RAB40C,GNL2
gPROFILER	GO:0016787	hydrolase activity	2032	47		0.0348262	EXOSC7,HSPA1L,PSMA3,EPHX2,UPF1,PSMC6,ADAM29,FBP1,SEC11A,RHOH,RHOT2,ATP5J,SUB1,NDST2,HSPA1B,UCHL3,RAB40C,GNL2,FBP2,ATXN3,RNPEP,INPP4A,DUSP12,PMPCB,COPS5,LNPEP,PSMA4,MTMR3,CLC,PSMC2,USP35,PIGT,GDPD3,BPHL,AGTPBP1,IDUA,HDHD2,PPM1B,CTSD,ERAP2,GIMAP7,CAMK2G,RAB24,PNPLA6,USP7,PTRH2,PTP4A1
gPROFILER	GO:0016818	hydrolase activity, acting on acid anhydrides, in phosphorus-containing anhydrides	653	10		0.0348262	HSPA1L,UPF1,PSMC6,RHOH,RHOT2,ATP5J,SUB1,HSPA1B,RAB40C,GNL2
FUMA	GO:0045930	negative regulation of mitotic cell cycle	325	9	0.00121731	0.0348973	SYF2:CDKN2C:PSMC6:PSMA3:RPS27L:PSMA4:RPL26:DONSON:PSMC2
FUMA	GO:0002504	antigen processing and presentation of peptide or polysaccharide antigen via mhc class ii	100	5	0.00122022	0.0348973	FCGR2B:AP2A2:CTSD:SAR1B:DCTN6
gPROFILER	GO:0046328	regulation of JNK cascade	153	6		0.0350997	MAP3K11,MDFIC,DNAJA1,MAP4K4,FCGR2B,COPS5
gPROFILER	GO:1905369	endopeptidase complex	57	4		0.0351204	PDLIM7,NDUFS4,GIMAP7,DPY19L4
gPROFILER	GO:0031674	I band	91	3		0.0351869	BIN1,PDLIM7,ALDOA
gPROFILER	GO:0120025	plasma membrane bounded cell projection	1345	32		0.0355592	TOMM40,GTF2H5,PICALM,SHFM1,RPF2,FCRLB,NGDN,FBP2,MRPL22,ATXN3,KTN1,SLC16A5,DNAJA1,SNRPG,RASAL3,FCGR2B,RPS24,EAF2,DAGLB,TATDN3,BNIP1,SLC25A1,USP35,CD2AP,MICB,ERAP2,GIMAP7,MAP1S,NDUFB5,ZMAT2,MED6,LILRA2
gPROFILER	GO:0044463	cell projection part	904	22		0.0355592	TOMM40,GTF2H5,PICALM,SHFM1,RPF2,FCRLB,ATXN3,KTN1,SLC16A5,DNAJA1,RASAL3,FCGR2B,EAF2,DAGLB,TATDN3,USP35,CD2AP,MICB,ERAP2,GIMAP7,MAP1S,NDUFB5
gPROFILER	GO:0120038	plasma membrane bounded cell projection part	904	22		0.0355592	TOMM40,GTF2H5,PICALM,SHFM1,RPF2,FCRLB,ATXN3,KTN1,SLC16A5,DNAJA1,RASAL3,FCGR2B,EAF2,DAGLB,TATDN3,USP35,CD2AP,MICB,ERAP2,GIMAP7,MAP1S,NDUFB5
gPROFILER	GO:1903561	extracellular vesicle	2164	28		0.0356147	TMEM126B,EXOSC7,SHFM1,TOMM5,CSAD,EHD1,CARD8,TCTEX1D2,SUB1,MAZ,NDST2,NGDN,RAB40C,GNL2,NARS2,MRPS21,CCNI,SLC16A5,INPP4A,DNAJA1,SNRPG,PURA,NDUFS4,TNIP2,UFC1,NCOA7,NLRX1,RPS24
FUMA	GO:0009607	response to biotic stimulus	1010	18	0.00125094	0.0356373	FCGR2B:MAPK8:TSPAN32:NLRX1:UPF1:LSM14A:PVRL2:CARD8:LILRA2:PPM1B:POLR3F:IFNAR2:AP000295.9:TNIP2:MICB:SNX3:IL6:LSM5:CLU
gPROFILER	GO:0044428	nuclear part	4675	88		0.0356982	LARP7,ENY2,GTF2H5,EXOSC7,HSPA1L,PSMA3,SHFM1,UPF1,RPF2,POLR1D,PSMC6,MKNK1,MAGOH,CARD8,ING3,TIMM17A,LSM3,MAPK8,SUB1,LSM5,HSPA1B,INO80C,CWC15,PRIM1,NGDN,CDC26,SNRPD2,GNL2,LCOR,NARS2,SORL1,FBP2,SRP19,ATXN3,SYF2,RBBP9,SNRPG,PURA,RNF4,SSB,ALKBH3,POLR3F,TNIP2,RPS24,KCTD13,COPS5,CIITA,PSMA4,EAF2,PLEKHG1,RPL26,RPA3,CBX3,DGKQ,BNIP1,CETN3,ACTR6,CENPN,RPS25,PSMC2,TBCA,SOD1,SNRPB2,SETDB1,FCHO1,NDUFS3,POMP,AGT…
gPROFILER	GO:0005741	mitochondrial outer membrane	132	6		0.0356982	TOMM40,TOMM5,RHOT2,NLRX1,BPHL,TOMM7
gPROFILER	GO:0006396	RNA processing	816	14		0.0357805	GTF2H5,EXOSC7,RPF2,MAGOH,LSM3,LSM5,CWC15,NGDN,SNRPD2,TPRKB,SYF2,SNRPG,SSB,UBL5
gPROFILER	GO:0009308	amine metabolic process	119	3		0.0358733	PSMA3,SHFM1,PSMC6
gPROFILER	REAC:R-HSA-8868773	rRNA processing in the nucleus and cytosol	193	13		0.0358783	ENY2,EXOSC7,TOMM5,SUB1,RAB40C,RNF4,ASPHD1,NCOA7,SNRPB2,IGFBP6,GTF2B
gPROFILER	REAC:R-HSA-8950505	Gene and protein expression by JAK-STAT signaling after Interleukin-12 stimulation	38	3		0.0358783	BIN1,SUB1,NDST2
gPROFILER	REAC:R-HSA-174490	Membrane binding and targetting of GAG proteins	14	3		0.0358783	TOMM5,CLC,HTR1E
gPROFILER	REAC:R-HSA-382556	ABC-family proteins mediated transport	103	8		0.0358783	TOMM5,PDLIM7,ATXN3,MYBPC3,NDUFS4,CUL2,GIMAP7,DPY19L4
gPROFILER	REAC:R-HSA-174495	Synthesis And Processing Of GAG, GAGPOL Polyproteins	14	3		0.0358783	TOMM5,CLC,HTR1E
gPROFILER	GO:0043230	extracellular organelle	2168	28		0.0359538	TMEM126B,EXOSC7,SHFM1,TOMM5,CSAD,EHD1,CARD8,TCTEX1D2,SUB1,MAZ,NDST2,NGDN,RAB40C,GNL2,NARS2,MRPS21,CCNI,SLC16A5,INPP4A,DNAJA1,SNRPG,PURA,NDUFS4,TNIP2,UFC1,NCOA7,NLRX1,RPS24
gPROFILER	GO:1901988	negative regulation of cell cycle phase transition	249	4		0.0359672	PSMA3,SHFM1,CDKN2C,PSMC6
gPROFILER	GO:0043601	nuclear replisome	26	3		0.0359801	LSM3,RPL26,EXOSC1
gPROFILER	REAC:R-HSA-73893	DNA Damage Bypass	48	3		0.0360418	TOMM5,MVP,LSM3
FUMA	GO:0071671	regulation of smooth muscle cell chemotaxis	7	2	0.00127568	0.0361924	AIF1:LPAR1
FUMA	GO:0042592	homeostatic process	1906	28	0.00128028	0.0361924	RPS24:OBFC1:MUC6:EHD1:PICALM:SOAT2:PRIM1:CCT2:ATP6V1D:SLC24A4:RHOT2:USP7:ALDOA:UPF1:MAP4K4:SOD1:ATP6V1E1:NCF4:LNPEP:ATP6V0E1:TMEM14C:HSPA1B:HCRTR2:RPA3:IL6:EPHX2:ENY2:LPAR1
gPROFILER	GO:0010821	regulation of mitochondrion organization	157	4		0.0364338	HSPA1L,CLU,RHOT2,MAPK8
gPROFILER	GO:0070603	SWI/SNF superfamily-type complex	82	5		0.0366184	ING3,INO80C,ACTR6,ACTL6A,DPF2
gPROFILER	GO:0030017	sarcomere	136	4		0.0366184	BIN1,PDLIM7,ALDOA,MYBPC3
FUMA	GO:0004301	epoxide hydrolase activity	6	2	0.000915985	0.0367511	RNPEP:EPHX2
FUMA	GO:0036402	proteasome activating atpase activity	6	2	0.000915985	0.0367511	PSMC6:PSMC2
FUMA	GO:0055131	c3hc4 type ring finger domain binding	6	2	0.000915985	0.0367511	HSPA1B:DNAJA1
gPROFILER	GO:0030425	dendrite	295	10		0.0369391	GTF2H5,SHFM1,FCRLB,SLC16A5,FCGR2B,TATDN3,MICB,ERAP2,GIMAP7,NDUFB5
gPROFILER	GO:0070069	cytochrome complex	30	3		0.0369391	SLC24A4,HDHD2,PTRH2
gPROFILER	GO:0044260	cellular macromolecule metabolic process	6825	85		0.0369612	MRPL50,MRPL39,ENY2,GTF2H5,EXOSC7,MRPL51,CLU,PSMA3,PICALM,SHFM1,IL6,MRPS18C,BIN1,CDKN2C,UPF1,MAP3K11,POLR1D,PSMC6,MKNK1,MAGOH,CARD8,ING3,FBP1,MVP,LSM3,SEC11A,RHOH,MGAT4A,MAPK8,SUB1,MAZ,NDST2,MDFIC,LSM5,HSPA1B,INO80C,UCHL3,PRIM1,CDC26,NARS2,MRPL33,SORL1,MRPS21,CCNI,STK17B,MRPL22,ATXN3,KTN1,MEFV,DNAJA1,SNRPG,PURA,MRPL35,RNF4,MUC6,SSB,MAP4K4,RPS27L,MRPS33,ALKBH3,OSBPL8,POLR3F,NDUFS4,MRPL24,TNIP2,UFC1…
gPROFILER	GO:0071427	mRNA-containing ribonucleoprotein complex export from nucleus	110	3		0.0369939	ENY2,UPF1,MAGOH
gPROFILER	GO:0006406	mRNA export from nucleus	110	3		0.0369939	ENY2,UPF1,MAGOH
gPROFILER	GO:0043620	regulation of DNA-templated transcription in response to stress	122	3		0.037077	PSMA3,SHFM1,PSMC6
Webgestalt	GO:0033108	mitochondrial respiratory chain complex assembly	96	8	8.2322e-05	0.0370802	TMEM126B;NDUFS5;UQCRB;COX17;NDUFS4;NDUFS3;NDUFB5;NDUFA9
FUMA	GO:0007015	actin filament organization	396	10	0.00132394	0.0372833	MYBPC3:ARPC3:ACTN1:KCTD13:ALDOA:BIN1:RHOH:AIF1:CD2AP:LPAR1
gPROFILER	GO:0005924	cell-substrate adherens junction	367	10		0.0376937	PSMA3,SUB1,MS4A6A,NGDN,FBP2,ASPHD1,NCOA7,FCGR2B,BNIP1,CD2AP
gPROFILER	GO:0042995	cell projection	1359	32		0.0376937	TOMM40,GTF2H5,PICALM,SHFM1,RPF2,FCRLB,NGDN,FBP2,MRPL22,ATXN3,KTN1,SLC16A5,DNAJA1,SNRPG,RASAL3,FCGR2B,RPS24,EAF2,DAGLB,TATDN3,BNIP1,SLC25A1,USP35,CD2AP,MICB,ERAP2,GIMAP7,MAP1S,NDUFB5,ZMAT2,MED6,LILRA2
gPROFILER	GO:0005925	focal adhesion	365	10		0.0376937	PSMA3,SUB1,MS4A6A,NGDN,FBP2,ASPHD1,NCOA7,FCGR2B,BNIP1,CD2AP
gPROFILER	GO:0097447	dendritic tree	298	10		0.0376937	GTF2H5,SHFM1,FCRLB,SLC16A5,FCGR2B,TATDN3,MICB,ERAP2,GIMAP7,NDUFB5
gPROFILER	GO:0044265	cellular macromolecule catabolic process	1053	20		0.0377568	EXOSC7,CLU,PSMA3,SHFM1,IL6,UPF1,PSMC6,MAGOH,LSM3,LSM5,HSPA1B,CDC26,ATXN3,RNF4,SSB,RPS24,RPL34,KCTD13,PSMA4,RPL26
Webgestalt	GO:0030136	clathrin-coated vesicle	181	7	0.00289186	0.0378392	PICALM;VAMP8;FCHO1;AP2A2;SNX3;HBEGF;DNAJC5
Webgestalt	GO:0030125	clathrin vesicle coat	28	3	0.0029938	0.0378888	PICALM;FCHO1;AP2A2
Webgestalt	GO:0030131	clathrin adaptor complex	28	3	0.0029938	0.0378888	PICALM;FCHO1;AP2A2
FUMA	KEGG_FRUCTOSE_AND_MANNOSE_METABOLISM	fructose and mannose metabolism	34	3	0.00244462	0.0378916	ALDOA:FBP2:FBP1
gPROFILER	GO:0044451	nucleoplasm part	1006	26		0.0379171	ENY2,GTF2H5,ING3,HSPA1B,INO80C,CWC15,SYF2,RNF4,KCTD13,CIITA,EAF2,DGKQ,ACTR6,SNRPB2,NDUFS3,POMP,TCF20,GEMIN6,ACTL6A,DPY30,USP7,MED6,GTF2B,PPIG,DPF2,RPAIN
gPROFILER	GO:0000377	RNA splicing, via transesterification reactions with bulged adenosine as nucleophile	331	8		0.0379206	MAGOH,LSM3,LSM5,CWC15,SNRPD2,SYF2,SNRPG,UBL5
gPROFILER	GO:0000398	mRNA splicing, via spliceosome	331	8		0.0379206	MAGOH,LSM3,LSM5,CWC15,SNRPD2,SYF2,SNRPG,UBL5
FUMA	KEGG_PRION_DISEASES	prion diseases	35	3	0.00265829	0.038034	LAMC1:SOD1:IL6
gPROFILER	GO:0023057	negative regulation of signaling	1144	12		0.038282	CLU,PSMA3,SHFM1,IL6,PSMC6,CARD8,FBP1,MVP,RHOH,MAZ,HSPA1B,ALPK2
Webgestalt	R-HSA-6799198	Complex I biogenesis	55	6	0.000391138	0.0385271	TMEM126B;NDUFS5;NDUFS4;NDUFS3;NDUFB5;NDUFA9
FUMA	GO:0032201	telomere maintenance via semi conservative replication	28	3	0.00138594	0.0387325	PRIM1:UPF1:RPA3
FUMA	GO:0090383	phagosome acidification	28	3	0.00138594	0.0387325	ATP6V1D:ATP6V1E1:ATP6V0E1
FUMA	GO:0006613	cotranslational protein targeting to membrane	103	5	0.00139189	0.0387516	RPS24:RPS25:RPL26:RPL34:SRP19
FUMA	GO:0046503	glycerolipid catabolic process	61	4	0.00140373	0.0387874	GDPD3:PNPLA6:APOC1:DAGLB
FUMA	GO:0006521	regulation of cellular amino acid metabolic process	61	4	0.00140373	0.0387874	PSMC6:PSMA3:PSMA4:PSMC2
Webgestalt	GO:0070646	protein modification by small protein removal	288	14	9.23402e-05	0.0388198	ENY2;PSMA3;PSMC6;INO80C;UCHL3;ATXN3;TNIP2;COPS5;PSMA4;PSMC2;USP35;ACTL6A;USP7;SNX3
gPROFILER	GO:0030136	clathrin-coated vesicle	149	7		0.0391485	PICALM,VAMP8,FCHO1,AP2A2,SNX3,HBEGF,DNAJC5
FUMA	GO:0016772	transferase activity transferring phosphorus containing groups	908	17	0.00100467	0.0393497	PANK4:MKNK1:MAPK8:CAMK2G:MAP3K11:DPAGT1:PRIM1:POLR1D:CIITA:ALPK2:TYK2:MAP4K4:STK17B:POLR3F:GAK:DGKQ:CCNI
FUMA	GO:0022402	cell cycle process	1370	22	0.0014316	0.0394092	SYF2:CDKN2C:CUL2:PRIM1:PSMC6:PSMA3:RPS27L:PSMA4:RPL26:UPF1:BIN1:DONSON:RNF4:CCNI:CETN3:TMEM14B:AIF1:HSPA1B:RPA3:CBX3:PSMC2:CDC26
gPROFILER	GO:0055029	nuclear DNA-directed RNA polymerase complex	115	4		0.0394394	GTF2H5,POLR1D,PRIM1,POLR3F
gPROFILER	GO:0000375	RNA splicing, via transesterification reactions	334	8		0.0395348	MAGOH,LSM3,LSM5,CWC15,SNRPD2,SYF2,SNRPG,UBL5
FUMA	GO:0015980	energy derivation by oxidation of organic compounds	269	8	0.00144231	0.039556	NDUFS5:UQCRH:NDUFS3:NDUFA9:NDUFB5:NDUFS4:UQCRB:COX6C
gPROFILER	GO:0000428	DNA-directed RNA polymerase complex	116	4		0.0396967	GTF2H5,POLR1D,PRIM1,POLR3F
gPROFILER	GO:0005657	replication fork	65	4		0.0396967	PRIM1,PURA,RPA3,DONSON
gPROFILER	GO:1904949	ATPase complex	85	5		0.0396967	ING3,INO80C,ACTR6,ACTL6A,DPF2
FUMA	GO:0002456	t cell mediated immunity	104	5	0.00145289	0.0396978	FCGR2B:CLC:PVRL2:MICB:IL6
gPROFILER	GO:0016887	ATPase activity	321	6		0.0397947	HSPA1L,UPF1,PSMC6,ATP5J,SUB1,HSPA1B
gPROFILER	GO:0070647	protein modification by small protein conjugation or removal	904	20		0.0399245	ENY2,PSMA3,SHFM1,PSMC6,HSPA1B,INO80C,UCHL3,CDC26,ATXN3,DNAJA1,RNF4,TNIP2,UFC1,KCTD13,COPS5,LNPEP,PSMA4,PSMC2,USP35,DCUN1D1
gPROFILER	GO:0006614	SRP-dependent cotranslational protein targeting to membrane	91	5		0.0399309	SRP19,RPS24,RPL34,RPL26,RPS25
gPROFILER	GO:0051028	mRNA transport	115	3		0.0399309	ENY2,UPF1,MAGOH
gPROFILER	GO:0070661	leukocyte proliferation	213	3		0.0399309	AIF1,CLU,IL6
gPROFILER	GO:0002886	regulation of myeloid leukocyte mediated immunity	31	3		0.0400375	GAB2,FCGR2B,VAMP8
gPROFILER	GO:0045171	intercellular bridge	58	3		0.0403312	RHOH,ATP6V0E1,ZNF324
gPROFILER	GO:0030894	replisome	28	3		0.0403312	LSM3,RPL26,EXOSC1
gPROFILER	GO:0030055	cell-substrate junction	372	10		0.0403312	PSMA3,SUB1,MS4A6A,NGDN,FBP2,ASPHD1,NCOA7,FCGR2B,BNIP1,CD2AP
gPROFILER	GO:0090263	positive regulation of canonical Wnt signaling pathway	129	3		0.0404184	PSMA3,SHFM1,PSMC6
gPROFILER	GO:0060627	regulation of vesicle-mediated transport	401	5		0.0404184	APOC1,CLU,PICALM,EHD1,GAB2
gPROFILER	GO:1901987	regulation of cell cycle phase transition	434	5		0.0404184	AIF1,PSMA3,SHFM1,CDKN2C,PSMC6
gPROFILER	GO:0001819	positive regulation of cytokine production	381	5		0.0404184	AIF1,CLU,IL6,POLR1D,CARD8
gPROFILER	GO:1901575	organic substance catabolic process	1861	18		0.0405441	APOC1,EXOSC7,CLU,PSMA3,SHFM1,IL6,CSAD,EPHX2,UPF1,PSMC6,MAGOH,FBP1,LSM3,LSM5,HSPA1B,UCHL3,ALDOA,CDC26
gPROFILER	GO:0034097	response to cytokine	950	8		0.0406436	AIF1,PSMA3,SHFM1,IL6,UPF1,PSMC6,GAB2,CARD8
gPROFILER	GO:0017038	protein import	154	4		0.0407089	TOMM40,CLU,TIMM17A,MDFIC
FUMA	GO:0045275	respiratory chain complex iii	12	2	0.00390587	0.0407268	UQCRH:UQCRB
FUMA	GO:0034709	methylosome	12	2	0.00390587	0.0407268	SNRPD2:SNRPG
FUMA	GO:0008540	proteasome regulatory particle base subcomplex	12	2	0.00390587	0.0407268	PSMC6:PSMC2
FUMA	GO:0032101	regulation of response to external stimulus	779	15	0.00149848	0.040792	FCGR2B:TSPAN32:NUCB2:NLRX1:SEMA4B:MEFV:CARD8:LILRA2:PPM1B:VAMP8:SOD1:MICB:AIF1:IL6:LPAR1
FUMA	GO:0016234	inclusion body	81	4	0.00395707	0.0408353	PICALM:ATXN3:HSPA1B:CLU
FUMA	GO:0006260	dna replication	271	8	0.00151112	0.040931	OBFC1:PRIM1:KCTD13:RPAIN:UPF1:DONSON:PURA:RPA3
FUMA	GO:0007049	cell cycle	1834	27	0.00151472	0.040931	SYF2:CDKN2C:CUL2:SIPA1:PRIM1:PSMC6:PSMA3:RPS27L:PSMA4:RPL26:UPF1:BIN1:DONSON:GAK:RNF4:CCNI:CETN3:TMEM14B:AIF1:HSPA1B:CD2AP:PTP4A1:RPA3:CBX3:PSMC2:COPS5:CDC26
FUMA	GO:0005635	nuclear envelope	462	10	0.00400907	0.0409497	EIF5AL1:NUCB2:SORL1:OSBPL8:MVP:BIN1:BNIP1:CBX3:DPY19L4:ENY2
gPROFILER	GO:0046580	negative regulation of Ras protein signal transduction	35	3		0.0409528	FBP1,RASAL3,KCTD13
gPROFILER	GO:0043065	positive regulation of apoptotic process	529	7		0.0409528	CLU,IL6,BIN1,MAP3K11,CARD8,ING3,MAPK8
gPROFILER	GO:0000288	nuclear-transcribed mRNA catabolic process, deadenylation-dependent decay	75	3		0.0409528	EXOSC7,LSM3,LSM5
gPROFILER	GO:0044085	cellular component biogenesis	2745	52		0.0409528	AIF1,TMEM126B,APOC1,GTF2H5,EXOSC7,NDUFS5,CLU,PICALM,EHD1,BIN1,UQCRB,RPF2,PSMC6,FBP1,COX17,TCTEX1D2,LSM3,SUB1,HSPA1B,NGDN,ALDOA,SNRPD2,SORL1,SRP19,MRPL22,MEFV,SNRPG,RNF4,MAP4K4,RPS27L,NDUFS4,RPS24,KCTD13,COPS5,DPAGT1,MTMR3,RPL26,RPA3,CETN3,GAK,CENPN,PSMC2,TBCA,LSM14A,RPL26L1,ATG2A,CD2AP,FCHO1,NDUFS3,POMP,SOAT2,GEMIN6
gPROFILER	GO:0051260	protein homooligomerization	216	5		0.0409528	CLU,EHD1,FBP1,SUB1,ALDOA
FUMA	GO:0016607	nuclear speck	389	9	0.00405417	0.0409922	SYF2:MAGOH:CWC15:POMP:PPIG:SNRPB2:EAF2:DGKQ:HSPA1B
gPROFILER	GO:0016020	membrane	7412	134		0.0410774	MRPL39,TOMM40,ENY2,TMEM126B,CRYZL1,GTF2H5,CLPTM1,CLU,PSMA3,ZNF384,PICALM,SHFM1,TOMM5,MRPS18C,EHD1,UPF1,SLC24A4,MAP3K11,POLR1D,COX6C,GAB2,MAGOH,CARD8,RPL36AL,FCRLB,COX17,TCTEX1D2,TIMM17A,IMPDH1,SEC11A,SUB1,MDFIC,LSM5,HSPA1B,MS4A6A,NGDN,RAB40C,TMEM14B,FBP2,CCNI,TPRKB,STK17B,MRPL22,ATXN3,FAM193A,SLC16A5,MYBPC3,RNPEP,ATP6V0E1,RBBP9,DBI,INPP4A,DNAJA1,SNRPG,RNF4,MUC6,RPS27L,ASPHD1,MRPS33,ALKBH3,NDUFS4,…
gPROFILER	GO:0071356	cellular response to tumor necrosis factor	246	5		0.0410775	PSMA3,SHFM1,PSMC6,CARD8,HSPA1B
FUMA	GO:0033044	regulation of chromosome organization	336	9	0.00153004	0.0411933	SETDB1:MAPK8:OBFC1:CCT2:USP7:MAP1S:UPF1:RNF4:CDC26
gPROFILER	GO:0044238	primary metabolic process	8674	99		0.041357	MRPL50,MRPL39,ENY2,APOC1,GTF2H5,EXOSC7,MRPL51,CLU,PSMA3,PICALM,SHFM1,IL6,CSAD,EPHX2,MRPS18C,BIN1,CDKN2C,UPF1,RPF2,MAP3K11,POLR1D,PSMC6,MKNK1,MAGOH,CARD8,ING3,FBP1,MVP,LSM3,IMPDH1,SEC11A,RHOH,MGAT4A,MAPK8,ATP5J,SUB1,MAZ,NDST2,MDFIC,LSM5,HSPA1B,INO80C,UCHL3,CWC15,PRIM1,NGDN,ALDOA,CDC26,SNRPD2,NARS2,MRPL33,SORL1,MRPS21,FBP2,CCNI,TPRKB,STK17B,MRPL22,ATXN3,SYF2,KTN1,MEFV,RNPEP,DBI,INPP4A,DNAJA1,SNRPG,…
gPROFILER	GO:0022627	cytosolic small ribosomal subunit	45	3		0.0413858	RPS27L,RPS24,RPS25
gPROFILER	GO:0030880	RNA polymerase complex	119	4		0.041479	GTF2H5,POLR1D,PRIM1,POLR3F
gPROFILER	GO:0030662	coated vesicle membrane	153	7		0.041479	PICALM,SEC23B,VAMP8,AP2A2,HBEGF,SAR1B,DNAJC5
FUMA	GO:0030276	clathrin binding	57	4	0.0010891	0.0416058	AP2A2:PICALM:BIN1:GAK
FUMA	GO:0070325	lipoprotein particle receptor binding	26	3	0.00111286	0.0416058	PICALM:CLU:DNAJA1
gPROFILER	GO:0070382	exocytic vesicle	147	3		0.0417367	TOMM40,PICALM,TIMM17A
Webgestalt	GO:0030117	membrane coat	97	5	0.00343231	0.0420594	PICALM;SEC23B;FCHO1;AP2A2;SAR1B
Webgestalt	GO:0048475	coated membrane	97	5	0.00343231	0.0420594	PICALM;SEC23B;FCHO1;AP2A2;SAR1B
gPROFILER	GO:0008237	metallopeptidase activity	138	7		0.042067	ADAM29,RNPEP,PMPCB,COPS5,LNPEP,AGTPBP1,ERAP2
gPROFILER	GO:0044183	protein folding chaperone	19	3		0.042067	HSPA1L,HSPA1B,CCT2
gPROFILER	GO:0030097	hemopoiesis	607	8		0.0422951	CLPTM1,PSMA3,SHFM1,IL6,PSMC6,GAB2,RHOH,HSPA1B
FUMA	GO:1901293	nucleoside phosphate biosynthetic process	273	8	0.00158251	0.0424506	PANK4:ATP5F1:ALDOA:ATP5J:ATP5O:SLC25A1:ATP5I:IMPDH1
FUMA	GO:0051169	nuclear transport	338	9	0.00159327	0.0425838	MAGOH:RPAIN:UPF1:SNRPD2:GEMIN6:SNRPG:SSB:MDFIC:ENY2
gPROFILER	GO:0043161	proteasome-mediated ubiquitin-dependent protein catabolic process	392	10		0.0426995	CLU,PSMA3,SHFM1,PSMC6,HSPA1B,CDC26,ATXN3,RNF4,KCTD13,PSMA4
gPROFILER	GO:0043068	positive regulation of programmed cell death	538	7		0.0430142	CLU,IL6,BIN1,MAP3K11,CARD8,ING3,MAPK8
gPROFILER	GO:0034645	cellular macromolecule biosynthetic process	3863	55		0.0430142	MRPL50,MRPL39,ENY2,GTF2H5,MRPL51,CLU,PSMA3,PICALM,SHFM1,IL6,MRPS18C,UPF1,POLR1D,PSMC6,CARD8,FBP1,RHOH,MGAT4A,MAPK8,SUB1,MAZ,NDST2,MDFIC,HSPA1B,PRIM1,NARS2,MRPL33,SORL1,MRPS21,MRPL22,SNRPG,PURA,MRPL35,RNF4,MUC6,RPS27L,MRPS33,POLR3F,MRPL24,TNIP2,NCOA7,NACA,RPS24,RPL34,XYLT2,KCTD13,COPS5,CIITA,DPAGT1,PSMA4,EAF2,RPL26,RPA3,CBX3,DGKQ
gPROFILER	GO:0071216	cellular response to biotic stimulus	178	6		0.0430142	IL6,UPF1,CARD8,MAPK8,TNIP2,FCGR2B
gPROFILER	GO:0035567	non-canonical Wnt signaling pathway	138	3		0.0430142	PSMA3,SHFM1,PSMC6
gPROFILER	GO:1905330	regulation of morphogenesis of an epithelium	137	3		0.0430142	PSMA3,SHFM1,PSMC6
gPROFILER	GO:0006397	mRNA processing	425	9		0.0430142	GTF2H5,MAGOH,LSM3,LSM5,CWC15,SNRPD2,SYF2,SNRPG,UBL5
gPROFILER	GO:0051128	regulation of cellular component organization	1967	10		0.0430142	APOC1,GTF2H5,HSPA1L,CLU,PICALM,IL6,EHD1,BIN1,CDKN2C,UPF1
gPROFILER	GO:0070201	regulation of establishment of protein localization	587	11		0.0430142	AIF1,HSPA1L,IL6,CARD8,TCTEX1D2,MAPK8,MDFIC,SORL1,DNAJA1,MAP4K4,UBL5
gPROFILER	GO:0060341	regulation of cellular localization	674	12		0.0430142	HSPA1L,PICALM,EHD1,GAB2,TCTEX1D2,MAPK8,MDFIC,SORL1,MYBPC3,DNAJA1,MAP4K4,UBL5
FUMA	GO:0071824	protein dna complex subunit organization	274	8	0.0016192	0.0431199	GTF2B:PSMC6:MED6:CENPN:RNF4:GTF2H5:RPA3:PSMC2
Webgestalt	GO:0043928	exonucleolytic nuclear-transcribed mRNA catabolic process involved in deadenylation-dependent decay	33	5	0.000109614	0.0432018	EXOSC7;LSM3;LSM5;LSM2;EXOSC1
FUMA	GO:0045296	cadherin binding	324	9	0.00119166	0.0435618	ARHGAP1:EHD1:PICALM:DOCK9:KTN1:ALDOA:RPL34:RARS:CD2AP
gPROFILER	GO:0006006	glucose metabolic process	139	6		0.0436944	FBP1,ALDOA,FBP2,DUSP12,DGKQ,SLC25A1
gPROFILER	GO:0005637	nuclear inner membrane	36	3		0.0437344	CBX3,MFSD10,DPY19L4
gPROFILER	GO:0048471	perinuclear region of cytoplasm	417	3		0.0437344	AIF1,CLU,PICALM
gPROFILER	GO:0031981	nuclear lumen	4374	82		0.0437689	LARP7,ENY2,GTF2H5,EXOSC7,HSPA1L,PSMA3,SHFM1,UPF1,RPF2,POLR1D,PSMC6,MKNK1,MAGOH,CARD8,ING3,TIMM17A,LSM3,MAPK8,SUB1,LSM5,HSPA1B,INO80C,CWC15,PRIM1,NGDN,CDC26,SNRPD2,GNL2,LCOR,NARS2,FBP2,SRP19,ATXN3,SYF2,RBBP9,SNRPG,PURA,RNF4,SSB,ALKBH3,POLR3F,TNIP2,RPS24,KCTD13,COPS5,CIITA,PSMA4,EAF2,PLEKHG1,RPL26,RPA3,CBX3,DGKQ,ACTR6,CENPN,RPS25,PSMC2,TBCA,SOD1,SNRPB2,SETDB1,FCHO1,NDUFS3,POMP,AGTPBP1,CUL2,TCF20,GE…
gPROFILER	GO:0030016	myofibril	150	4		0.0437689	BIN1,PDLIM7,ALDOA,MYBPC3
gPROFILER	GO:0005844	polysome	67	4		0.0437928	RNF4,ASPHD1,CBX3,IGFBP6
gPROFILER	GO:0031968	organelle outer membrane	145	6		0.0438269	TOMM40,TOMM5,RHOT2,NLRX1,BPHL,TOMM7
gPROFILER	GO:0044449	contractile fiber part	151	4		0.0438562	BIN1,PDLIM7,ALDOA,MYBPC3
FUMA	GO:0009101	glycoprotein biosynthetic process	340	9	0.00165859	0.0440094	NDST2:MUC6:SLC35C1:DPAGT1:XYLT2:MGAT4A:DPM1:HBEGF:DPY19L4
FUMA	GO:0009628	response to abiotic stimulus	1211	20	0.00169018	0.0442577	CUL2:MAPK8:CAMK2G:SIPA1:PSMC6:PSMA3:ATXN3:PSMA4:RPL26:SOD1:LXN:MICB:AIF1:HSPA1L:HSPA1B:GTF2H5:RPA3:PSMC2:DNAJA1:LPAR1
FUMA	GO:1905049	negative regulation of metallopeptidase activity	8	2	0.00169203	0.0442577	PICALM:SORL1
FUMA	GO:0034638	phosphatidylcholine catabolic process	8	2	0.00169203	0.0442577	GDPD3:APOC1
FUMA	GO:0030210	heparin biosynthetic process	8	2	0.00169203	0.0442577	NDST2:XYLT2
FUMA	GO:0055114	oxidation reduction process	954	17	0.00169862	0.0442724	NDUFS5:UQCRH:ALKBH3:NDUFS3:NDUFA9:ASPHD1:TXNDC17:RSAD1:SOD1:CRYZL1:NCF4:NDUFB5:NDUFS4:ECHDC1:IMPDH1:UQCRB:COX6C
gPROFILER	GO:0071426	ribonucleoprotein complex export from nucleus	127	3		0.0442769	ENY2,UPF1,MAGOH
FUMA	GO:0006289	nucleotide excision repair	108	5	0.00171669	0.0445714	ATXN3:USP7:GTF2H5:RPA3:COPS5
FUMA	GO:0045786	negative regulation of cell cycle	632	13	0.00172221	0.0445714	SYF2:CDKN2C:CUL2:SIPA1:PSMC6:PSMA3:RPS27L:PSMA4:RPL26:BIN1:DONSON:CBX3:PSMC2
gPROFILER	GO:0035861	site of double-strand break	57	3		0.0446032	LSM3,NGDN,TNFRSF9
FUMA	GO:0051338	regulation of transferase activity	956	17	0.00173622	0.0447763	CDKN2C:DUSP12:MAP3K11:SORL1:CCT2:OSBPL8:MVP:MAP4K4:SOD1:DCUN1D1:DGKQ:RHOH:CCNI:MDFIC:CLU:DNAJA1:LPAR1
gPROFILER	GO:0071166	ribonucleoprotein complex localization	128	3		0.0447773	ENY2,UPF1,MAGOH
gPROFILER	GO:0022618	ribonucleoprotein complex assembly	208	6		0.0447773	RPF2,LSM3,SNRPD2,MRPL22,SNRPG,RPS27L
gPROFILER	GO:0048534	hematopoietic or lymphoid organ development	623	8		0.0447773	CLPTM1,PSMA3,SHFM1,IL6,PSMC6,GAB2,RHOH,HSPA1B
FUMA	GO:0043596	nuclear replication fork	42	3	0.0044769	0.0448137	PRIM1:PURA:RPA3
gPROFILER	GO:0009057	macromolecule catabolic process	1245	22		0.0448395	EXOSC7,CLU,PSMA3,SHFM1,IL6,UPF1,PSMC6,MAGOH,LSM3,LSM5,HSPA1B,UCHL3,CDC26,SORL1,ATXN3,RNF4,SSB,RPS24,RPL34,KCTD13,PSMA4,RPL26
Webgestalt	GO:0022625	cytosolic large ribosomal subunit	61	4	0.00372335	0.0449129	RPL36AL;RPL34;RPL26;RPL26L1
gPROFILER	GO:0070897	transcription preinitiation complex assembly	43	4		0.0449936	PSMC6,PSMC2,MED6,GTF2B
gPROFILER	GO:0006613	cotranslational protein targeting to membrane	98	5		0.0449936	SRP19,RPS24,RPL34,RPL26,RPS25
gPROFILER	GO:0002831	regulation of response to biotic stimulus	464	14		0.0452013	PSMA3,SHFM1,PSMC6,CARD8,HSPA1B,MUC6,POLR3F,TNIP2,FCGR2B,PSMA4,PSMC2,MICB,PPM1B,IFNAR2
FUMA	GO:0005687	u4 snrnp	13	2	0.00459201	0.0455109	SNRPD2:SNRPG
FUMA	GO:0031674	i band	136	5	0.00463884	0.0455243	MYBPC3:ACTN1:ALDOA:BIN1:FBP2
gPROFILER	GO:0030684	preribosome	78	4		0.0455376	UQCRB,NUCB2,DUSP12,SNRPB2
gPROFILER	GO:0043005	neuron projection	739	4		0.0455376	TOMM40,GTF2H5,PICALM,SHFM1
gPROFILER	GO:0031091	platelet alpha granule	89	4		0.0455376	SHFM1,UFC1,RASAL3,BNIP1
gPROFILER	GO:0071007	U2-type catalytic step 2 spliceosome	30	3		0.0455376	TNIP2,MRPS17,EXOSC1
gPROFILER	GO:0044455	mitochondrial membrane part	202	3		0.0455376	MRPL39,SLC24A4,COX6C
FUMA	GO:0019784	nedd8 specific protease activity	7	2	0.00127568	0.0456195	UCHL3:COPS5
gPROFILER	GO:0043254	regulation of protein complex assembly	368	8		0.0456292	GTF2H5,CLU,BIN1,PSMC6,HSPA1B,SORL1,MEFV,RNF4
gPROFILER	GO:1903706	regulation of hemopoiesis	373	6		0.0456292	CLPTM1,PSMA3,SHFM1,PSMC6,RHOH,HSPA1B
FUMA	GO:0044786	cell cycle dna replication	65	4	0.00177679	0.0456624	PRIM1:UPF1:DONSON:RPA3
gPROFILER	GO:0043202	lysosomal lumen	85	4		0.0457558	GNL2,SLC16A5,SEC23B,PSMC2
FUMA	GO:0090175	regulation of establishment of planar polarity	109	5	0.00178778	0.0457846	AP2A2:PSMC6:PSMA3:PSMA4:PSMC2
gPROFILER	GO:0019867	outer membrane	147	6		0.0458069	TOMM40,TOMM5,RHOT2,NLRX1,BPHL,TOMM7
gPROFILER	GO:0030139	endocytic vesicle	239	9		0.0459511	PICALM,ATP6V0E1,VAMP8,NCF4,CAMK2G,LPAR1,AP2A2,SNX3,HBEGF
gPROFILER	GO:0016236	macroautophagy	269	10		0.0460116	TOMM40,TOMM5,MAPK8,ATP6V0E1,MTMR3,VAMP8,ATP6V1E1,ATG2A,ATP6V1D,TOMM7
gPROFILER	GO:0006898	receptor-mediated endocytosis	281	3		0.0462416	APOC1,CLU,PICALM
FUMA	GO:0022627	cytosolic small ribosomal subunit	43	3	0.00478483	0.0465012	RPS24:RPS25:RPS27L
gPROFILER	GO:1905897	regulation of response to endoplasmic reticulum stress	76	4		0.0465167	CLU,ATXN3,FCGR2B,COPS5
gPROFILER	GO:0006913	nucleocytoplasmic transport	288	7		0.0465224	ENY2,UPF1,MAGOH,MDFIC,SNRPD2,SNRPG,SSB
FUMA	GO:0018193	peptidyl amino acid modification	1219	20	0.00182449	0.0465625	MKNK1:GTF2B:SETDB1:MAPK8:DPF2:MVP:ASPHD1:TYK2:DPY30:PPIG:DPM1:ACTL6A:DGKQ:HBEGF:NCOA7:IL6:ING3:DPY19L4:AGTPBP1:SH2D3C
gPROFILER	GO:0046475	glycerophospholipid catabolic process	24	3		0.0465658	APOC1,GDPD3,PNPLA6
FUMA	GO:0070997	neuron death	345	9	0.00183131	0.0465748	FCGR2B:MAP3K11:PICALM:SORL1:PIGT:DNAJC5:SOD1:NCOA7:CLU
gPROFILER	GO:0001540	amyloid-beta binding	70	4		0.0467946	CLU,PICALM,SORL1,FCGR2B
gPROFILER	GO:0099512	supramolecular fiber	568	3		0.0468043	TOMM40,AIF1,CLPTM1
gPROFILER	GO:0031625	ubiquitin protein ligase binding	262	3		0.0468046	HSPA1L,CLU,PSMA3
Webgestalt	GO:0022904	respiratory electron transport chain	102	8	0.000126283	0.0468436	NDUFS5;UQCRB;UQCRH;NDUFS4;PMPCB;NDUFS3;NDUFB5;NDUFA9
FUMA	GO:0010628	positive regulation of gene expression	1955	28	0.00185257	0.0469531	GTF2B:TIMM17A:MAPK8:EIF5AL1:DPF2:PICALM:PSMC6:MED6:RPS27L:CIITA:MAZ:RPL26:TCF20:SS18L2:EAF2:DGKQ:RNF4:TNIP2:SUB1:HSPA1B:NCOA7:IL6:PSMC2:MDFIC:EPHX2:CLU:COPS5:ENY2
gPROFILER	REAC:R-HSA-175474	Assembly Of The HIV Virion	16	3		0.0469579	TOMM5,CLC,HTR1E
FUMA	GO:0044437	vacuolar part	553	11	0.00488535	0.0470215	AP2A2:CTSD:CCT2:ATP6V1D:VAMP8:DNAJC5:ATP6V1E1:IDUA:LNPEP:DAGLB:IMPDH1
gPROFILER	GO:0050863	regulation of T cell activation	247	3		0.0471869	AIF1,CLPTM1,IL6
gPROFILER	GO:0043632	modification-dependent macromolecule catabolic process	547	4		0.0471869	EXOSC7,CLU,PSMA3,SHFM1
gPROFILER	GO:0034612	response to tumor necrosis factor	265	5		0.0471869	PSMA3,SHFM1,PSMC6,CARD8,HSPA1B
gPROFILER	GO:0035966	response to topologically incorrect protein	174	6		0.0471869	HSPA1L,CLU,HSPA1B,ATXN3,DNAJA1,COPS5
gPROFILER	GO:0030666	endocytic vesicle membrane	125	6		0.0472675	PICALM,ATP6V0E1,VAMP8,CAMK2G,AP2A2,HBEGF
Webgestalt	GO:0060261	positive regulation of transcription initiation from RNA polymerase II promoter	19	4	0.000146142	0.0473357	PSMC6;SUB1;PSMC2;GTF2B
Webgestalt	GO:0000291	nuclear-transcribed mRNA catabolic process, exonucleolytic	35	5	0.0001464	0.0473357	EXOSC7;LSM3;LSM5;LSM2;EXOSC1
Webgestalt	GO:0072655	establishment of protein localization to mitochondrion	133	9	0.000150129	0.0473357	TOMM40;HSPA1L;TOMM5;TIMM17A;MAPK8;DNAJA1;UBL5;PMPCB;TOMM7
gPROFILER	GO:0051169	nuclear transport	291	7		0.0473433	ENY2,UPF1,MAGOH,MDFIC,SNRPD2,SNRPG,SSB
Webgestalt	R-HSA-2262752	Cellular responses to stress	426	18	0.000518811	0.047696	HSPA1L;PSMA3;IL6;CDKN2C;PSMC6;MAPK8;HSPA1B;CDC26;DNAJA1;MAP4K4;DCTN6;PSMA4;RPA3;PSMC2;NCF4;SOD1;CUL2;CAMK2G
gPROFILER	GO:1990542	mitochondrial transmembrane transport	93	3		0.0478267	TOMM40,TIMM17A,ATP5J
gPROFILER	GO:0030054	cell junction	761	13		0.0479368	PSMA3,SUB1,MS4A6A,NGDN,FBP2,ATXN3,INPP4A,DNAJA1,MAP4K4,ASPHD1,NCOA7,FCGR2B,KCTD13
gPROFILER	GO:0099080	supramolecular complex	577	3		0.0479586	TOMM40,AIF1,CLPTM1
gPROFILER	GO:0099081	supramolecular polymer	576	3		0.0479586	TOMM40,AIF1,CLPTM1
gPROFILER	GO:0005856	cytoskeleton	1592	3		0.048282	LARP7,TOMM40,AIF1
gPROFILER	GO:0003899	DNA-directed 5'-3' RNA polymerase activity	38	3		0.0486395	POLR1D,PRIM1,POLR3F
gPROFILER	GO:0006405	RNA export from nucleus	137	3		0.0486767	ENY2,UPF1,MAGOH
gPROFILER	GO:0010951	negative regulation of endopeptidase activity	134	3		0.0487926	PICALM,BIN1,CARD8
gPROFILER	REAC:R-HSA-69563	p53-Dependent G1 DNA Damage Response	66	6		0.0488608	TOMM5,PDLIM7,NDUFS4,RPL34,GIMAP7,DPY19L4
gPROFILER	REAC:R-HSA-69580	p53-Dependent G1/S DNA damage checkpoint	66	6		0.0488608	TOMM5,PDLIM7,NDUFS4,RPL34,GIMAP7,DPY19L4
gPROFILER	REAC:R-HSA-9020591	Interleukin-12 signaling	47	3		0.0488608	BIN1,SUB1,NDST2
gPROFILER	REAC:R-HSA-72312	rRNA processing	203	13		0.0488608	ENY2,EXOSC7,TOMM5,SUB1,RAB40C,RNF4,ASPHD1,NCOA7,SNRPB2,IGFBP6,GTF2B
gPROFILER	GO:0051641	cellular localization	2549	19		0.0489088	TOMM40,ENY2,HSPA1L,CLU,PICALM,TOMM5,EPHX2,EHD1,BIN1,UPF1,RPF2,GAB2,MAGOH,TCTEX1D2,TIMM17A,RHOT2,MAPK8,ATP5J,MDFIC
gPROFILER	GO:0032508	DNA duplex unwinding	52	3		0.0489667	GTF2H5,SUB1,PURA
FUMA	GO:0008235	metalloexopeptidase activity	61	4	0.00140373	0.0491307	RNPEP:ERAP2:LNPEP:AGTPBP1
gPROFILER	GO:0009141	nucleoside triphosphate metabolic process	76	3		0.0491679	IMPDH1,ATP5J,ALDOA
Webgestalt	GO:0045334	clathrin-coated endocytic vesicle	63	4	0.0041823	0.0496729	PICALM;FCHO1;AP2A2;HBEGF
gPROFILER	GO:0030135	coated vesicle	240	9		0.0497135	PICALM,SEC23B,VAMP8,FCHO1,AP2A2,SNX3,HBEGF,SAR1B,DNAJC5
gPROFILER	GO:0043292	contractile fiber	159	4		0.0497135	BIN1,PDLIM7,ALDOA,MYBPC3
FUMA	GO:0002520	immune system development	968	17	0.00197692	0.0499325	FCGR2B:DPF2:GAB2:PICALM:PSMC6:PSMA3:ACTN1:PSMA4:CLC:CLPTM1:DPY30:SOD1:RHOH:TMEM14C:HSPA1B:IL6:PSMC2
