# Supplementary material for: Multiomics integrative analysis identifies APOE allele-specific blood biomarkers associated to Alzheimer’s disease etiopathogenesis
Source: Aging (Albany NY). 2021 Apr 12;13(7):9277–329. doi: 10.18632/aging.202950 (PMC8064208; doi:10.18632/aging.202950)
Supplement: Supplementary Table 34 [file aging-13-202950-s036.xlsx]

## Sheet: Sheet1
Supplementary Table 34. RRA integrative analysis in cortex: enrichment analysis APOE2 stratum.
Tool	ID	Description	N_genes	N_overlap	p	adjP	genes
FUMA	GO:0009891	positive regulation of biosynthetic process	1966	60	1.29963e-13	4.77615e-10	FOXJ3:NSUN4:LMO4:ARNT:ASH1L:ATF3:RNF187:EPC1:SORBS1:RBM14:RSF1:ATM:ATF7IP:ACVR1B:SMARCC2:E2F7:PAWR:CEP290:TESC:KLF12:DUOXA2:DUOXA1:SIN3A:WDR61:NFAT5:WWP2:WWOX:STAT5B:CIRBP:TCF3:AKAP8L:APOE:APOC2:RELB:MED25:PTOV1:PNKP:PPP3R1:XRCC5:MAVS:PCK1:USP16:MAFF:TLR9:TLR9:GUCA1C:CD86:ZNF148:EIF5A2:FXR1:ZCCHC4:HNRNPD:JADE1:TFAP2A:POU3F2:AHI1:PHF10:CDK13:FGFR1:KAT6A:TP53INP1
FUMA	GO:0010628	positive regulation of gene expression	1955	60	1.02158e-13	4.77615e-10	FOXJ3:NSUN4:LMO4:SF3B4:ARNT:ASH1L:CD46:ATF3:RNF187:EPC1:RBM14:RSF1:ATM:ATF7IP:ACVR1B:SMARCC2:E2F7:PAWR:CEP290:TESC:KLF12:SIN3A:WDR61:NFAT5:WWP2:WWOX:STAT5B:CIRBP:TCF3:AKAP8L:APOE:RELB:MED25:PTOV1:PPP3R1:TTN:FN1:MAVS:PCK1:USP16:PPM1F:MAFF:TLR9:TLR9:CD86:ZNF148:EIF5A2:FXR1:ZCCHC4:HNRNPD:H2AFY:TFAP2A:POU3F2:PRDM1:AHI1:PHF10:CDK13:KAT6A:TP53INP1:POLR1E:NTRK2
gProfiler	GO:0043231	intracellular membrane-bounded organelle	11036	259	NA	3.28324e-09	GANAB,CTSZ,RNF152,ZNF254,SGCD,AP2A1,DUOX2,MPHOSPH8,ZC3H14,TMEM33,HNRNPD,MSI2,BRWD1,USP16,WDR24,H2AFY,SLC35E2B,HS2ST1,MCL1,PAPOLA,MAVS,FAM173A,TNPO1,WLS,JMJD8,ING3,PTPN14,AAGAB,AK2,KANSL1,U2SURP,CCDC78,ATXN1,DUOXA2,FN1,OTUD4,TRIM4,ZNF226,XRCC5,EIF5A2,ADARB1,STIM2,TFAP2A,STUB1,ZC3H7B,NDUFA2,IBA57,ABCB4,INIP,RC3H2,TTN,NTRK2,APOC1,SPAG9,MAFF,OSBPL10,WWP2,CYB5B,MAPT,ERGIC1,PRDM1,EWSR1,DCUN1D1,KAT6A,CE…
FUMA	GO:0003723	RNA binding	1875	55	7.31529e-12	1.20337e-08	SPEN:MRTO4:TRNAU1AP:EIF2B3:NSUN4:RBM8A:SF3B4:DDX59:IBA57:KIN:AHNAK:GANAB:RBM14:PPHLN1:RBMS2:KTN1:ZC3H14:PAPOLA:PDIA3:SECISBP2L:SIN3A:ZC3H7A:GSPT1:THUMPD1:ZNF207:MAPT:MSI2:CIRBP:AKAP8L:ZNF638:R3HDM1:RBMS1:XRCC5:SCAF4:ADARB1:EWSR1:ZC3H7B:TLR9:TLR9:TWF2:U2SURP:EIF5A2:FXR1:G3BP2:HNRNPD:METTL14:OTUD4:SREK1:TNPO1:PURA:HNRNPH1:ATXN1:CDK13:RBM33:PSIP1:RC3H2
FUMA	GO:0045595	regulation of cell differentiation	1844	54	1.24148e-11	3.04164e-08	SPEN:CDC42:PTCH2:LMO4:GBP1:ARNT:CR1:CD46:PTPRO:ACVR1B:FBXW8:TESC:ARHGEF7:DUOXA1:SIN3A:WDR61:METRN:STAT5B:MAPT:SPAG9:TCF3:EID2B:APOE:CLPTM1:AP2A1:COL3A1:CFLAR:FN1:XRCC5:CTSZ:MAFF:TLR9:TLR9:TWF2:CD86:KALRN:BCL6:OPA1:RUFY3:PDLIM5:VEGFC:H2AFY:TFAP2A:POU3F2:PRDM1:AHI1:PDCD2:CDK13:ASB4:FZD3:FGFR1:HOOK3:TP53INP1:NTRK2:RC3H2
FUMA	GO:0009890	negative regulation of biosynthetic process	1612	49	3.45334e-11	6.34552e-08	SPEN:MDM4:ATF3:EPC1:SFTPD:DKK3:RSF1:USP2:ATF7IP:PPHLN1:CBX5:SMARCC2:E2F7:PAWR:MPHOSPH8:KLF12:SIN3A:WWP2:WWOX:CIRBP:TCF3:DNAJB1:ZNF254:EID2B:APOE:APOC1:RELB:AP2A1:MED25:CNOT3:ZNF417:SAP130:CFLAR:XRCC5:HIRA:PPM1F:ZNF148:FXR1:BCL6:HNRNPD:METTL14:H2AFY:PURA:TFAP2A:ATXN1:PRDM1:PHF10:FGFR1:KAT6A
FUMA	GO:1902494	catalytic complex	1351	43	1.51293e-10	7.57222e-08	GNB1:RBBP4:PRKAA2:RBM8A:WDR26:EPC1:SORBS1:RSF1:ACVR1B:CBX5:SMARCC2:FBXW8:ABCD4:DUOX2:DUOX1:SIN3A:WDR61:STUB1:FBXL16:WWP2:KANSL1:CDC27:DYNC2LI1:PPP3R1:SAP130:CFLAR:PRKAR2A:WDR82:DCUN1D1:ANAPC4:METTL14:JADE1:NDUFA2:HNRNPH1:FBXL4:PHF10:CDK13:ASB4:FBXO24:ING3:PPP2R2A:KAT6A:POLR1E
FUMA	GO:0044463	cell projection part	1438	45	9.38788e-11	7.57222e-08	GNB1:CDC42:AK2:PRKAA2:WLS:RBM8A:SV2A:GPR161:CD44:ROM1:FOLR1:PTPRO:ITGA5:CEP290:ANKS1B:TESC:SPATA7:ZC3H14:MAPT:NSF:MBP:DNAJB1:PLAUR:APOE:AP2A1:DYNC2LI1:TMEM237:SPEF1:CTSZ:PRKAR2A:TWF2:GUCA1C:KPNA1:FXR1:OPA1:RGS12:RUFY3:JADE1:SLC6A19:PURA:CSNK1A1:DST:AHI1:FZD3:NTRK2
FUMA	GO:0033043	regulation of organelle organization	1254	42	5.31448e-11	7.81229e-08	CDC42:ATPIF1:PRKAA2:RBM14:PPFIA1:ATM:ATF7IP:PPHLN1:MPHOSPH8:SIN3A:WDR61:RHOT2:TAOK1:ZNF207:MAPT:CDC27:EVI5L:AKAP8L:PLAUR:PNKP:DYNC2LI1:PPP3R1:ALMS1:XRCC5:SPEF1:MAVS:HIRA:PPM1F:RASSF1:TWF2:RAB7A:BCL6:OPA1:ANAPC4:TMEM33:SLAIN2:HNRNPD:SYNPO2:RHOBTB3:H2AFY:CDK13:LAPTM4B
FUMA	GO:0044451	nucleoplasm part	1113	38	2.74944e-10	9.17398e-08	RBBP4:PRKAA2:RBM8A:ARNT:EPC1:RBM14:RSF1:ATF7IP:CBX5:E2F7:ANKS1B:MED13L:ZMYM2:ZC3H14:AAGAB:SIN3A:WDR61:MAPT:KANSL1:TCF3:AKAP8L:MED25:ZNF638:SAP130:CENPB:HIRA:WDR82:JADE1:SREK1:AFF4:CSNK1A1:FBXL4:PHF10:CDK13:ING3:KAT6A:TP53INP1:SNAPC3
FUMA	R-HSA-74160	gene expression transcription	1478	46	6.80182e-11	1.01959e-07	RBBP4:PRKAA2:RBM8A:MDM4:CR1:AKT3:EPC1:INTS5:RBM14:ATM:USP2:COX14:CBX5:ITGA5:SMARCC2:E2F7:APAF1:PAPOLA:SIN3A:WDR61:STUB1:ZNF75A:ZNF500:WWOX:TCF3:ZNF440:ZNF254:ZNF302:ZNF226:APOE:MED25:CNOT3:ZNF264:ZNF417:SAP130:PCK1:BCL6:AFF4:TFAP2A:PRDM1:CDK13:ZNF655:KAT6A:TP53INP1:SNAPC3:POLR1E
FUMA	GO:0051130	positive regulation of cellular component organization	1188	40	1.35732e-10	1.42519e-07	CDC42:ATPIF1:ATM:ATF7IP:PPHLN1:FBXW8:MPHOSPH8:ARHGEF7:SIN3A:WDR61:STUB1:METRN:MAPT:AKAP8L:PLAUR:APOE:APOC2:AP2A1:MED25:PNKP:PPP3R1:CFLAR:FN1:XRCC5:PPM1F:TWF2:KALRN:EIF5A2:BCL6:OPA1:ANAPC4:SLAIN2:RUFY3:HNRNPD:SYNPO2:H2AFY:AHI1:ABCB4:FGFR1:NTRK2
FUMA	GO:0051247	positive regulation of protein metabolic process	1615	48	1.19614e-10	1.42519e-07	ATPIF1:NSUN4:PRKAA2:ARNT:CR1:TRIM5:CD44:ATM:ACVR1B:ITGA5:PAWR:APAF1:FBXW8:WDR61:STUB1:TAOK1:STAT5B:MAPT:SPAG9:TNFRSF11A:MBP:CIRBP:AKAP8L:PLAUR:APOE:PELI1:CFLAR:FN1:XRCC5:CDC25B:MAVS:USP16:PPM1F:PRKAR2A:TLR9:TLR9:CD86:EIF5A2:FXR1:DCUN1D1:BCL6:PAK2:ZCCHC4:HNRNPD:VEGFC:CSNK1A1:PDCD2:FGFR1:NTRK2
FUMA	GO:0065003	protein containing complex assembly	1891	52	2.94172e-10	2.7027e-07	GNB1:MRTO4:CDC42:ATPIF1:RBBP4:NSUN4:PRKAA2:MCOLN2:LMO4:GBP1:SV2A:MDM4:COX15:AHNAK:FOLR1:RSF1:CEP57:ATM:ATF7IP:COX14:APAF1:STUB1:ZNF207:MAPT:NSF:GOSR2:SPAG9:CIRBP:APOE:APOC1:APOC2:MED25:TTN:FN1:FARP2:CTSZ:USP16:HIRA:TWF2:ZNF148:TMCC1:OPA1:SLAIN2:G3BP2:H2AFY:NDUFA2:CSNK1A1:HLA-DRA:TRIM4:KAT6A:PSIP1:POLR1E
FUMA	GO:0009057	macromolecule catabolic process	1366	42	7.10095e-10	5.01471e-07	MRTO4:ATPIF1:RBM8A:MDM4:RNF187:CD44:PGM2L1:ATM:USP2:APAF1:FBXW8:STYX:ZC3H14:WDR61:STUB1:FBXL16:DNASE1:GSPT1:WWP2:NSF:CDC27:CIRBP:SMG9:APOE:AP2A1:CNOT3:PELI1:ATG4B:CTSZ:USP25:USP16:KPNA1:RAB7A:FXR1:ANAPC4:HNRNPD:METTL14:TNPO1:CSNK1A1:FBXL4:PPP2R2A:LAPTM4B
FUMA	GO:1902680	positive regulation of RNA biosynthetic process	1592	46	7.46764e-10	5.01471e-07	FOXJ3:LMO4:ARNT:ASH1L:ATF3:RNF187:EPC1:RBM14:RSF1:ATM:ATF7IP:ACVR1B:SMARCC2:E2F7:CEP290:TESC:KLF12:SIN3A:WDR61:NFAT5:WWP2:WWOX:STAT5B:TCF3:AKAP8L:APOE:RELB:MED25:PTOV1:PPP3R1:MAVS:PCK1:USP16:MAFF:TLR9:TLR9:CD86:ZNF148:HNRNPD:JADE1:TFAP2A:POU3F2:AHI1:PHF10:CDK13:KAT6A:TP53INP1
FUMA	GO:1902531	regulation of intracellular signal transduction	1824	50	7.50501e-10	5.01471e-07	CDC42:RBBP4:PRKAA2:WLS:GBP1:MCL1:CDC42SE1:ASH1L:MDM4:ATF3:AKT3:TRIM5:CD44:GUCY1A2:ATM:SRGAP1:ARHGEF7:STYX:RHOT2:JMJD8:WDR24:NFAT5:TAOK1:MAPT:SPAG9:RNF152:TNFRSF11A:PLAUR:APOE:AKT1S1:PELI1:COL3A1:CFLAR:FN1:FARP2:MAVS:RALGAPA2:SEZ6L:SRGAP3:TLR9:TLR9:CD86:KALRN:BCL6:OPA1:PAK2:FGFR1:KAT6A:TP53INP1:NTRK2:RC3H2
gProfiler	GO:0043227	membrane-bounded organelle	12536	294	NA	5.19877e-07	GANAB,CTSZ,RNF152,ZNF254,SGCD,AP2A1,DUOX2,MPHOSPH8,ZC3H14,TMEM33,HNRNPD,MSI2,BRWD1,USP16,WDR24,H2AFY,SLC35E2B,HS2ST1,MCL1,PAPOLA,MAVS,FAM173A,TNPO1,WLS,JMJD8,ING3,PTPN14,AAGAB,AK2,KANSL1,U2SURP,CCDC78,ATXN1,DUOXA2,FN1,OTUD4,TRIM4,ZNF226,XRCC5,EIF5A2,ADARB1,STIM2,TFAP2A,STUB1,ZC3H7B,NDUFA2,IBA57,ABCB4,INIP,RC3H2,TTN,NTRK2,APOC1,SPAG9,MAFF,OSBPL10,WWP2,CYB5B,MAPT,ERGIC1,PRDM1,EWSR1,SLC9A9,DCUN1D1,K…
FUMA	GO:0005783	endoplasmic reticulum	1884	50	2.20216e-09	5.51092e-07	CDC42:SLC35D1:WLS:SV2A:COLGALT2:SFTPD:TSPAN14:GANAB:PLA2G16:FOLR1:CERS5:METTL7A:ITGA5:KTN1:ABCD4:VASH1:LINC00341:SYNE3:PDIA3:DUOX2:DUOXA2:DUOXA1:DUOX1:STUB1:JMJD8:CCDC78:GOSR2:LRRC8E:PLAUR:APOE:APOC1:COL3A1:FN1:CTSZ:USP25:SEZ6L:CRTAP:TLR9:TLR9:SEC22A:TMCC1:EIF5A2:STIM2:TMEM33:SCD5:CYP4V2:COL4A3BP:SGCD:ERGIC1:HLA-DRA:DST:ESYT2
gProfiler	GO:0043229	intracellular organelle	12818	301	NA	6.10742e-07	GANAB,CTSZ,RNF152,ZNF254,SGCD,AP2A1,DUOX2,MPHOSPH8,ZC3H14,TMEM33,HNRNPD,MSI2,BRWD1,USP16,WDR24,H2AFY,SLC35E2B,HS2ST1,MCL1,PAPOLA,MAVS,RABGAP1,FAM173A,TNPO1,WLS,JMJD8,ING3,PTPN14,AAGAB,AK2,KANSL1,U2SURP,CCDC78,ATXN1,DUOXA2,FN1,OTUD4,TRIM4,ZNF226,XRCC5,EIF5A2,ADARB1,STIM2,TFAP2A,STUB1,ZC3H7B,NDUFA2,IBA57,ABCB4,INIP,RC3H2,TTN,NTRK2,APOC1,SPAG9,MAFF,OSBPL10,WWP2,AHI1,CYB5B,MAPT,ERGIC1,PRDM1,EWSR1,SLC…
gProfiler	GO:0044424	intracellular part	14552	304	NA	6.10742e-07	GANAB,CTSZ,RNF152,ZNF254,SGCD,AP2A1,DUOX2,MPHOSPH8,ZC3H14,TMEM33,HNRNPD,MSI2,BRWD1,USP16,WDR24,H2AFY,SLC35E2B,HS2ST1,FBXL16,MCL1,PAPOLA,LMO4,MAVS,RABGAP1,FAM173A,TNPO1,WLS,JMJD8,ING3,PTPN14,AAGAB,AK2,KANSL1,U2SURP,CCDC78,ATXN1,DUOXA2,FN1,OTUD4,TRIM4,ZNF226,GSPT1,XRCC5,EIF5A2,ADARB1,STIM2,TFAP2A,STUB1,ZC3H7B,NDUFA2,IBA57,ABCB4,INIP,RC3H2,TTN,NTRK2,NADK,APOC1,SPAG9,MAFF,OSBPL10,WWP2,AHI1,CYB5B,MAPT…
gProfiler	GO:0043226	organelle	13667	315	NA	6.10742e-07	GANAB,CTSZ,RNF152,ZNF254,SGCD,AP2A1,DUOX2,MPHOSPH8,ZC3H14,TMEM33,HNRNPD,MSI2,BRWD1,USP16,WDR24,H2AFY,SLC35E2B,HS2ST1,MCL1,PAPOLA,MAVS,RABGAP1,FAM173A,TNPO1,WLS,JMJD8,ING3,PTPN14,AAGAB,AK2,KANSL1,U2SURP,CCDC78,ATXN1,DUOXA2,FN1,OTUD4,TRIM4,ZNF226,XRCC5,EIF5A2,ADARB1,STIM2,DLGAP4,TFAP2A,STUB1,ZC3H7B,NDUFA2,IBA57,ABCB4,INIP,RC3H2,TTN,NTRK2,APOC1,SPAG9,MAFF,OSBPL10,WWP2,AHI1,CYB5B,MAPT,ERGIC1,PRDM1,EW…
gProfiler	GO:0005622	intracellular	14596	304	NA	7.66175e-07	GANAB,CTSZ,RNF152,ZNF254,SGCD,AP2A1,DUOX2,MPHOSPH8,ZC3H14,TMEM33,HNRNPD,MSI2,BRWD1,USP16,WDR24,H2AFY,SLC35E2B,HS2ST1,FBXL16,MCL1,PAPOLA,LMO4,MAVS,RABGAP1,FAM173A,TNPO1,WLS,JMJD8,ING3,PTPN14,AAGAB,AK2,KANSL1,U2SURP,CCDC78,ATXN1,DUOXA2,FN1,OTUD4,TRIM4,ZNF226,GSPT1,XRCC5,EIF5A2,ADARB1,STIM2,TFAP2A,STUB1,ZC3H7B,NDUFA2,IBA57,ABCB4,INIP,RC3H2,TTN,NTRK2,NADK,APOC1,SPAG9,MAFF,OSBPL10,WWP2,AHI1,CYB5B,MAPT…
FUMA	GO:0044093	positive regulation of molecular function	1740	48	1.39249e-09	8.52901e-07	LMO4:CR1:CACNB2:TRIM5:B3GAT3:SRGAP1:APAF1:TESC:ARHGEF7:STUB1:TAOK1:MAPT:SPAG9:TNFRSF11A:MBP:TCF3:EVI5L:DNAJB1:PLAUR:APOE:APOC1:APOC2:MED25:PNKP:RASGRP3:CFLAR:FN1:XRCC5:CDC25B:MAVS:RALGAPA2:PPM1F:SRGAP3:PRKAR2A:TLR9:TLR9:GUCA1C:KALRN:DCUN1D1:PAK2:RGS12:STIM2:HNRNPD:PDCD2:ABCB1:AGFG2:FGFR1:NTRK2:RABGAP1
FUMA	GO:1902679	negative regulation of RNA biosynthetic process	1238	39	1.54192e-09	8.71776e-07	SPEN:MDM4:ATF3:EPC1:DKK3:RSF1:USP2:ATF7IP:PPHLN1:CBX5:SMARCC2:E2F7:PAWR:MPHOSPH8:KLF12:SIN3A:WWP2:WWOX:TCF3:DNAJB1:ZNF254:EID2B:RELB:MED25:ZNF417:SAP130:XRCC5:HIRA:PPM1F:ZNF148:BCL6:H2AFY:PURA:TFAP2A:ATXN1:PRDM1:PHF10:FGFR1:KAT6A
FUMA	GO:0044265	cellular macromolecule catabolic process	1139	37	1.84352e-09	9.14358e-07	MRTO4:ATPIF1:RBM8A:RNF187:ATM:USP2:APAF1:FBXW8:STYX:ZC3H14:WDR61:STUB1:FBXL16:DNASE1:GSPT1:WWP2:CDC27:CIRBP:SMG9:APOE:AP2A1:CNOT3:PELI1:CTSZ:USP25:USP16:KPNA1:RAB7A:FXR1:ANAPC4:HNRNPD:METTL14:TNPO1:CSNK1A1:FBXL4:PPP2R2A:LAPTM4B
FUMA	GO:0046907	intracellular transport	1815	49	1.86604e-09	9.14358e-07	CDC42:ATPIF1:PRKAA2:WLS:RBM8A:SV2A:PTPN14:LYST:CACNB2:B3GAT3:FOLR1:CEP290:DCLK1:STYX:LINC00341:SYNE3:RHOT2:MAPT:NSF:GOSR2:SPAG9:EVI5L:AKAP8L:TOMM40:APOE:AP2A1:DYNC2LI1:ALMS1:AP5S1:MAVS:STX16:CTSZ:KPNA1:SEC22A:RAB7A:TMCC1:OPA1:RUFY3:TNPO1:COL4A3BP:RHOBTB3:PURA:ERGIC1:ATXN1:DST:VTA1:HOOK3:LAPTM4B:PSIP1:RABGAP1
FUMA	GO:1990234	transferase complex	772	29	4.93935e-09	9.88857e-07	RBBP4:PRKAA2:WDR26:EPC1:SORBS1:RSF1:ACVR1B:CBX5:FBXW8:WDR61:STUB1:FBXL16:WWP2:KANSL1:CDC27:PRKAR2A:WDR82:DCUN1D1:ANAPC4:METTL14:JADE1:FBXL4:PHF10:CDK13:ASB4:FBXO24:ING3:KAT6A:POLR1E
FUMA	GO:0051726	regulation of cell cycle	1201	38	2.25353e-09	1.03522e-06	CDC42:RBBP4:PRKAA2:MDM4:EPC1:PLA2G16:RBM14:CEP57:ATM:USP2:CBX5:E2F7:CEP290:APAF1:VASH1:SIN3A:TAOK1:ZNF207:STAT5B:CDC27:PRR11:MED25:CNOT3:ALMS1:CDC25B:USP16:ADARB1:RASSF1:BCL6:ANAPC4:CDKL2:JADE1:H2AFY:CDK13:ZNF655:FZD3:FGFR1:TP53INP1
FUMA	GO:0051240	positive regulation of multicellular organismal process	1771	48	2.45577e-09	1.06176e-06	SPEN:MCOLN2:ARNT:GORAB:CD46:AKT3:ACVR1B:ITGA5:FBXW8:TESC:DUOXA1:GATM:JMJD8:METRN:STAT5B:MAPT:SPAG9:TNFRSF11A:MBP:TCF3:APOE:APOC2:AP2A1:CNOT3:PELI1:ALMS1:CFLAR:PTH2R:FN1:XRCC5:MAVS:PPM1F:TLR9:TLR9:TWF2:CD86:KALRN:BCL6:OPA1:RUFY3:VEGFC:H2AFY:TFAP2A:POU3F2:PDCD2:ASB4:FZD3:FGFR1:NTRK2
FUMA	GO:0051094	positive regulation of developmental process	1393	41	4.03438e-09	1.64737e-06	SPEN:CDC42:PTCH2:ARNT:GORAB:CD46:AKT3:ACVR1B:ITGA5:PAWR:FBXW8:TESC:ARHGEF7:DUOXA1:JMJD8:METRN:STAT5B:MAPT:SPAG9:TCF3:APOE:AP2A1:CFLAR:FN1:XRCC5:TWF2:CD86:KALRN:BCL6:OPA1:RUFY3:VEGFC:H2AFY:TFAP2A:POU3F2:AHI1:PDCD2:ASB4:FZD3:FGFR1:NTRK2
FUMA	GO:0016569	covalent chromatin modification	458	22	5.01137e-09	1.79473e-06	PRKAA2:ASH1L:EPC1:RBM14:RSF1:ATM:ATF7IP:PPHLN1:MPHOSPH8:SIN3A:WDR61:KANSL1:AKAP8L:USP16:PPM1F:WDR82:BCL6:JADE1:H2AFY:PHF10:ING3:KAT6A
FUMA	GO:0045597	positive regulation of cell differentiation	970	33	4.78902e-09	1.79473e-06	SPEN:CDC42:PTCH2:ARNT:CD46:ACVR1B:FBXW8:TESC:ARHGEF7:DUOXA1:METRN:STAT5B:MAPT:SPAG9:TCF3:APOE:AP2A1:CFLAR:FN1:XRCC5:TWF2:CD86:KALRN:BCL6:OPA1:RUFY3:VEGFC:H2AFY:AHI1:ASB4:FZD3:FGFR1:NTRK2
FUMA	GO:0022603	regulation of anatomical structure morphogenesis	1130	36	5.1278e-09	1.79473e-06	CDC42:GBP1:CDC42SE1:AKT3:CD44:PTPRO:ITGA5:FBXW8:ZMYM2:ARHGEF7:VASH1:LINC00341:SYNE3:JMJD8:METRN:MAPT:MBP:APOE:AP2A1:CFLAR:FN1:BRWD1:TWF2:KALRN:BCL6:OPA1:RUFY3:PDLIM5:VEGFC:RHOBTB3:TFAP2A:POU3F2:AHI1:ASB4:FZD3:FGFR1:NTRK2
FUMA	GO:0044419	interspecies interaction between organisms	925	32	5.57877e-09	1.86382e-06	SPEN:CDC42:CR1:CD46:KIN:SFTPD:TRIM5:RSF1:ATF7IP:CBX5:ITGA5:MPHOSPH8:WWP2:APOE:AP2A1:CFLAR:FN1:XRCC5:MAVS:ADARB1:ZC3H7B:CD86:KPNA1:RAB7A:PAK2:CFI:SLC25A4:TNPO1:HLA-DRA:VTA1:CDK13:PSIP1
FUMA	R-HSA-212436	generic transcription pathway	1211	38	2.82226e-09	2.11528e-06	RBBP4:PRKAA2:MDM4:CR1:AKT3:EPC1:RBM14:ATM:USP2:COX14:CBX5:ITGA5:SMARCC2:E2F7:APAF1:SIN3A:STUB1:ZNF75A:ZNF500:WWOX:TCF3:ZNF440:ZNF254:ZNF302:ZNF226:APOE:MED25:CNOT3:ZNF264:ZNF417:PCK1:BCL6:TFAP2A:PRDM1:CDK13:ZNF655:KAT6A:TP53INP1
FUMA	GO:0007049	cell cycle	1834	48	7.42519e-09	2.37283e-06	CDC42:RBBP4:PRKAA2:MDM4:EPC1:PLA2G16:RBM14:CEP57:ATM:USP2:ACVR1B:CBX5:E2F7:CEP290:APAF1:VASH1:SIN3A:GSPT1:TAOK1:ZNF207:STAT5B:CDC27:PRR11:AKAP8L:MED25:CNOT3:CEP68:ALMS1:TTN:CDC25B:USP16:ADARB1:HIRA:RASSF1:BCL6:ANAPC4:CDKL2:JADE1:H2AFY:CSNK1A1:CDK13:ABCB1:ZNF655:PPP2R2A:FZD3:FGFR1:TP53INP1:RABGAP1
FUMA	GO:0022402	cell cycle process	1370	40	7.91376e-09	2.42359e-06	CDC42:RBBP4:PRKAA2:MDM4:EPC1:RBM14:CEP57:ATM:ACVR1B:CBX5:E2F7:CEP290:APAF1:VASH1:SIN3A:GSPT1:TAOK1:ZNF207:CDC27:PRR11:AKAP8L:MED25:CNOT3:CEP68:ALMS1:TTN:CDC25B:USP16:HIRA:RASSF1:BCL6:ANAPC4:JADE1:H2AFY:CDK13:ABCB1:ZNF655:PPP2R2A:FGFR1:TP53INP1
FUMA	GO:0022604	regulation of cell morphogenesis	475	22	9.67355e-09	2.84403e-06	CDC42:GBP1:CDC42SE1:CD44:PTPRO:FBXW8:ZMYM2:ARHGEF7:LINC00341:SYNE3:METRN:MAPT:APOE:FN1:BRWD1:TWF2:KALRN:OPA1:RUFY3:PDLIM5:RHOBTB3:POU3F2:NTRK2
FUMA	GO:0098805	whole membrane	1647	44	1.85004e-08	3.08649e-06	GNB1:WLS:MCOLN2:SV2A:MCL1:GPR161:CR1:CD46:TSPAN14:SORBS1:CD44:AHNAK:PLA2G16:FOLR1:ABCD4:LINC00341:SYNE3:PDIA3:SLC30A4:RHOT2:WDR24:CYB5B:MAPT:NSF:GOSR2:RNF152:PLAUR:TOMM40:APOE:AP2A1:CFLAR:AP5S1:MAVS:STX16:PRKAR2A:TLR9:TLR9:RAB7A:SLC9A9:OPA1:HLA-DRA:VTA1:ABCB4:LAPTM4B:NTRK2:SLC44A1
FUMA	GO:0045944	positive regulation of transcription by RNA polymerase II	1178	36	1.4857e-08	4.19995e-06	FOXJ3:LMO4:ARNT:ASH1L:ATF3:EPC1:RBM14:RSF1:ATM:ACVR1B:E2F7:KLF12:SIN3A:WDR61:NFAT5:WWP2:WWOX:STAT5B:TCF3:AKAP8L:RELB:MED25:PTOV1:PPP3R1:MAVS:PCK1:USP16:MAFF:TLR9:TLR9:ZNF148:TFAP2A:POU3F2:AHI1:PHF10:CDK13:KAT6A
FUMA	GO:0070727	cellular macromolecule localization	1886	48	1.77003e-08	4.81842e-06	ATPIF1:PRKAA2:WLS:GBP1:RBM8A:PTPN14:CACNB2:TSPAN14:SORBS1:B3GAT3:PPFIA1:ATM:PPHLN1:CEP290:TESC:DCLK1:STYX:SPATA7:LINC00341:SYNE3:DUOXA2:DUOXA1:SIN3A:MAPT:NSF:GOSR2:EVI5L:AKAP8L:TOMM40:APOE:AP2A1:DYNC2LI1:CEP68:PPP3R1:XRCC5:MAVS:STX16:PPM1F:TWF2:KPNA1:RAB7A:RUFY3:TNPO1:H2AFY:PURA:SGCD:AHI1:HOOK3:RABGAP1
FUMA	GO:0010720	positive regulation of cell development	538	23	1.96072e-08	5.14689e-06	SPEN:CDC42:FBXW8:ARHGEF7:DUOXA1:METRN:MAPT:SPAG9:TCF3:APOE:AP2A1:CFLAR:FN1:XRCC5:TWF2:KALRN:BCL6:OPA1:RUFY3:VEGFC:FZD3:FGFR1:NTRK2
FUMA	GO:0005694	chromosome	1059	33	3.88889e-08	5.56112e-06	RBBP4:ASH1L:RSF1:ATM:PPHLN1:CBX5:SMARCC2:PAWR:TMPO:MPHOSPH8:SIN3A:WDR61:ZNF207:KANSL1:TCF3:AKAP8L:SAP130:TTN:XRCC5:CENPB:HIRA:WDR82:BCL6:RGS12:AFF4:H2AFY:PURA:CSNK1A1:PHF10:CDK13:ING3:KAT6A:PSIP1
FUMA	GO:0005815	microtubule organizing center	722	26	7.25115e-08	9.07301e-06	CDC42:SORBS1:CEP57:USP2:CEP290:AKAP11:SPATA7:WDR90:CCDC78:CDC27:SPAG9:RELB:DYNC2LI1:CEP68:ALMS1:CDC25B:PRKAR2A:RASSF1:SLAIN2:CDKL2:JADE1:CSNK1A1:TFAP2A:AHI1:HOOK3:RABGAP1
FUMA	GO:0043085	positive regulation of catalytic activity	1397	39	4.06227e-08	9.95255e-06	LMO4:CR1:B3GAT3:SRGAP1:APAF1:ARHGEF7:STUB1:TAOK1:MAPT:SPAG9:TNFRSF11A:MBP:EVI5L:DNAJB1:APOE:APOC1:APOC2:PNKP:RASGRP3:CFLAR:FN1:XRCC5:CDC25B:RALGAPA2:PPM1F:SRGAP3:PRKAR2A:TLR9:TLR9:GUCA1C:KALRN:DCUN1D1:PAK2:RGS12:HNRNPD:PDCD2:AGFG2:FGFR1:NTRK2:RABGAP1
FUMA	GO:2001252	positive regulation of chromosome organization	171	13	3.93842e-08	9.95255e-06	ATM:ATF7IP:PPHLN1:MPHOSPH8:SIN3A:WDR61:AKAP8L:PNKP:XRCC5:BCL6:ANAPC4:HNRNPD:H2AFY
FUMA	GO:0009894	regulation of catabolic process	959	31	4.5404e-08	1.07651e-05	ATPIF1:PRKAA2:MCL1:ARNT:MDM4:ATM:APAF1:FBXW8:STYX:ZC3H14:STUB1:JMJD8:WDR24:WWP2:MAPT:NSF:RNF152:CIRBP:APOE:APOC1:APOC2:ATG4B:USP25:RAB7A:FXR1:HNRNPD:METTL14:TNPO1:CSNK1A1:TP53INP1:LAPTM4B
FUMA	GO:0031399	regulation of protein modification process	1826	46	4.89642e-08	1.12465e-05	PRKAA2:GBP1:ARNT:ASH1L:ATF3:TRIM5:CD44:B3GAT3:ATM:ACVR1B:ITGA5:TESC:STYX:SIN3A:WDR61:STUB1:TAOK1:MAPT:SPAG9:TNFRSF11A:AKAP8L:PLAUR:APOE:PNKP:AKT1S1:PELI1:TTN:CFLAR:FN1:XRCC5:CDC25B:MAVS:ADARB1:PPM1F:CRTAP:PRKAR2A:TLR9:TLR9:DCUN1D1:BCL6:PAK2:OTUD4:VEGFC:H2AFY:PPP2R2A:FGFR1:NTRK2
FUMA	GO:0051276	chromosome organization	1189	35	5.94594e-08	1.32432e-05	RBBP4:PRKAA2:ASH1L:EPC1:RBM14:RSF1:ATM:ATF7IP:PPHLN1:SMARCC2:MPHOSPH8:SIN3A:WDR61:ZNF207:MAPT:KANSL1:CDC27:AKAP8L:PNKP:TTN:XRCC5:USP16:BRWD1:HIRA:PPM1F:WDR82:BCL6:ANAPC4:HNRNPD:JADE1:H2AFY:PURA:PHF10:ING3:KAT6A
FUMA	GO:0042592	homeostatic process	1906	47	6.50841e-08	1.40696e-05	NADK:GNB1:ATPIF1:PRKAA2:MCOLN2:SV2A:MCL1:ARNT:AKT3:CACNB2:SFTPD:ATM:ACVR1B:SPATA7:SLC24A4:PDIA3:GATM:SLC30A4:SIN3A:RHOT2:NARFL:TAOK1:STAT5B:TNFRSF11A:LRRC8E:APOE:APOC2:PNKP:CNOT3:ALMS1:PTH2R:XRCC5:PCK1:PRKAR2A:TLR9:TLR9:RAB7A:SLC9A9:EIF5A2:BCL6:OPA1:STIM2:HNRNPD:COL4A3BP:SGCD:ABCB4:SLC25A37:RC3H2
FUMA	GO:0051962	positive regulation of nervous system development	530	22	6.70344e-08	1.40772e-05	SPEN:GORAB:FBXW8:DUOXA1:METRN:MAPT:SPAG9:TCF3:APOE:AP2A1:CFLAR:FN1:XRCC5:TWF2:KALRN:BCL6:OPA1:RUFY3:VEGFC:FZD3:FGFR1:NTRK2
FUMA	GO:0044432	endoplasmic reticulum part	1344	37	1.30939e-07	1.45633e-05	CDC42:SLC35D1:WLS:COLGALT2:SFTPD:TSPAN14:GANAB:FOLR1:CERS5:KTN1:ABCD4:PDIA3:DUOXA2:DUOXA1:JMJD8:GOSR2:LRRC8E:PLAUR:APOE:COL3A1:FN1:CTSZ:SEZ6L:CRTAP:TLR9:TLR9:SEC22A:TMCC1:EIF5A2:STIM2:TMEM33:SCD5:CYP4V2:COL4A3BP:ERGIC1:HLA-DRA:DST:ESYT2
FUMA	GO:0000785	chromatin	557	22	1.57841e-07	1.57999e-05	RBBP4:RSF1:CBX5:SMARCC2:PAWR:TMPO:MPHOSPH8:SIN3A:WDR61:TCF3:AKAP8L:SAP130:CENPB:HIRA:WDR82:AFF4:H2AFY:PHF10:CDK13:ING3:KAT6A:PSIP1
FUMA	GO:0060284	regulation of cell development	930	30	7.89784e-08	1.61248e-05	SPEN:CDC42:GBP1:PTPRO:FBXW8:ARHGEF7:DUOXA1:METRN:MAPT:SPAG9:TCF3:APOE:AP2A1:COL3A1:CFLAR:FN1:XRCC5:CTSZ:TWF2:KALRN:BCL6:OPA1:RUFY3:PDLIM5:VEGFC:POU3F2:FZD3:FGFR1:HOOK3:NTRK2
gProfiler	GO:0005634	nucleus	7445	181	NA	1.62786e-05	ZNF254,MPHOSPH8,ZC3H14,TMEM33,HNRNPD,MSI2,BRWD1,USP16,H2AFY,MCL1,PAPOLA,TNPO1,JMJD8,ING3,PTPN14,AAGAB,KANSL1,U2SURP,ATXN1,OTUD4,TRIM4,ZNF226,XRCC5,EIF5A2,ADARB1,TFAP2A,STUB1,ZC3H7B,ABCB4,INIP,TTN,MAFF,WWP2,MAPT,ERGIC1,PRDM1,EWSR1,DCUN1D1,KAT6A,CERS5,PURA,SYNPO2,SPEN,RNF187,C15ORF48,PDIA3,HNRNPH1,FOXJ3,ARNT,ZNF264,TRNAU1AP,SREK1,APOE,SPATA7,FBXL4,PPP3R1,PTOV1,TCF3,CLK4,POU3F2,MBP,SCAF4,RASSF1,WDR2…
FUMA	GO:0005794	Golgi apparatus	1547	40	2.02884e-07	1.84625e-05	SLC35E2B:CDC42:ST3GAL3:PRKAA2:SLC35D1:WLS:HS2ST1:GBP1:ASH1L:GORAB:CD44:B3GAT3:GANAB:FOLR1:CEP57:PPHLN1:ITGA5:FBXW8:WWOX:NSF:GOSR2:SLC35E1:APOE:AP2A1:PLEKHM3:STX16:CTSZ:OSBPL10:TLR9:TLR9:ZNF148:RAB7A:BCL6:COL4A3BP:RHOBTB3:ERGIC1:TFAP2A:HLA-DRA:CDK13:HOOK3:NTRK2
FUMA	GO:0016604	nuclear body	769	26	2.45081e-07	2.04439e-05	PRKAA2:RBM8A:ARNT:RBM14:ATF7IP:CBX5:E2F7:ANKS1B:ZMYM2:ZC3H14:AAGAB:MAPT:TCF3:AKAP8L:ZNF638:SAP130:CENPB:HIRA:JADE1:SREK1:CSNK1A1:FBXL4:CDK13:KAT6A:TP53INP1:SNAPC3
gProfiler	GO:0005737	cytoplasm	11620	246	NA	2.32949e-05	GANAB,CTSZ,RNF152,SGCD,AP2A1,DUOX2,MPHOSPH8,ZC3H14,TMEM33,HNRNPD,MSI2,BRWD1,USP16,WDR24,SLC35E2B,HS2ST1,FBXL16,MCL1,PAPOLA,MAVS,RABGAP1,FAM173A,TNPO1,WLS,JMJD8,PTPN14,AAGAB,AK2,CCDC78,ATXN1,DUOXA2,FN1,OTUD4,TRIM4,GSPT1,XRCC5,EIF5A2,ADARB1,STIM2,TFAP2A,STUB1,NDUFA2,IBA57,ABCB4,RC3H2,TTN,NTRK2,NADK,APOC1,SPAG9,MAFF,OSBPL10,WWP2,AHI1,CYB5B,MAPT,ERGIC1,PRDM1,EWSR1,SLC9A9,FZD3,DCUN1D1,KAT6A,CERS5,ENDO…
FUMA	GO:0051129	negative regulation of cellular component organization	694	25	1.29236e-07	2.52751e-05	CDC42:LMO4:GBP1:RBM14:PPFIA1:ATM:PTPRO:SIN3A:TAOK1:ZNF207:MAPT:EVI5L:DNAJB1:APOE:APOC1:APOC2:CFLAR:XRCC5:SPEF1:CTSZ:TWF2:RAB7A:OPA1:RUFY3:H2AFY
FUMA	GO:0010769	regulation of cell morphogenesis involved in differentiation	296	16	1.30674e-07	2.52751e-05	CDC42:GBP1:PTPRO:FBXW8:ARHGEF7:METRN:MAPT:APOE:FN1:TWF2:KALRN:OPA1:RUFY3:PDLIM5:POU3F2:NTRK2
FUMA	GO:0006915	apoptotic process	1956	47	1.38961e-07	2.55341e-05	GNB1:ATPIF1:PRKAA2:MCL1:MDM4:ATF3:CD44:ATM:ACVR1B:ITGA5:PAWR:APAF1:ARHGEF7:PDIA3:SIN3A:RHOT2:DNASE1:WWOX:TAOK1:STAT5B:MAPT:RNF152:LGALS13:PLAUR:APOE:AKT1S1:PPP3R1:CFLAR:CTSZ:ADARB1:PPM1F:KPNA1:KALRN:FXR1:BCL6:OPA1:PAK2:JADE1:SLC25A4:TFAP2A:AHI1:PDCD2:ING3:FZD3:FGFR1:TP53INP1:NTRK2
FUMA	GO:0033044	regulation of chromosome organization	336	17	1.36413e-07	2.55341e-05	ATM:ATF7IP:PPHLN1:MPHOSPH8:SIN3A:WDR61:ZNF207:MAPT:CDC27:AKAP8L:PNKP:XRCC5:HIRA:BCL6:ANAPC4:HNRNPD:H2AFY
FUMA	GO:0015630	microtubule cytoskeleton	1169	33	3.71994e-07	2.86435e-05	CDC42:LYST:SORBS1:EML3:CEP57:USP2:CEP290:AKAP11:SPATA7:WDR90:CCDC78:TAOK1:ZNF207:MAPT:CDC27:SPAG9:RELB:DYNC2LI1:CEP68:ALMS1:CDC25B:PRKAR2A:RASSF1:SLAIN2:CDKL2:JADE1:CSNK1A1:TFAP2A:KIF6:DST:AHI1:HOOK3:RABGAP1
FUMA	GO:0008092	cytoskeletal protein binding	948	31	3.50699e-08	2.8845e-05	GNB1:GBP1:CACNB2:SORBS1:EML3:CEP57:PAWR:KTN1:VASH1:LINC00341:SYNE3:STUB1:DNASE1:TAOK1:ZNF207:MAPT:SPAG9:APOE:ALMS1:TTN:FARP2:SPEF1:EPB41L1:TWF2:OPA1:PDLIM5:SYNPO2:KIF6:DST:PPP2R2A:HOOK3:RABGAP1
FUMA	GO:0051960	regulation of nervous system development	910	29	1.68739e-07	3.02495e-05	SPEN:GPR161:GORAB:PTPRO:FBXW8:DUOXA1:METRN:MAPT:SPAG9:TCF3:APOE:AP2A1:COL3A1:CFLAR:FN1:XRCC5:CTSZ:TWF2:KALRN:BCL6:OPA1:RUFY3:PDLIM5:VEGFC:POU3F2:FZD3:FGFR1:HOOK3:NTRK2
FUMA	GO:0080134	regulation of response to stress	1481	39	1.83579e-07	3.21262e-05	MCL1:ASH1L:CR1:AKT3:SFTPD:TRIM5:CD44:RBM14:ATM:PAWR:VASH1:DUOX2:DUOXA2:DUOXA1:DUOX1:SIN3A:DNASE1:TAOK1:STAT5B:MAPT:SPAG9:TNFRSF11A:DNAJB1:PLAUR:APOE:RELB:AKT1S1:PELI1:XRCC5:MAVS:USP25:TLR9:TLR9:BCL6:OPA1:PAK2:TMEM33:OTUD4:H2AFY:ABCB1
FUMA	GO:0007417	central nervous system development	972	30	2.02999e-07	3.46987e-05	CDC42:EIF2B3:WLS:LMO4:AKT3:ACVR1B:CEP290:APAF1:DCLK1:DUOX2:MAPT:MBP:DNAJB1:SMG9:COL3A1:XRCC5:GART:ADARB1:SEZ6L:ZNF148:HNRNPD:METTL14:TFAP2A:ATXN1:POU3F2:AHI1:FZD3:FGFR1:HOOK3:NTRK2
FUMA	GO:0042802	identical protein binding	1706	43	1.37616e-07	3.70926e-05	CDC42:ATPIF1:GBP1:MCL1:ARNT:ATF3:SFTPD:TRIM5:CEP57:USP2:PTPRO:CBX5:E2F7:CEP290:APAF1:TESC:PDIA3:SORD:STUB1:MAPT:TCF3:EID2B:SMG9:APOE:APOC2:RELB:TTN:FN1:EWSR1:TLR9:TLR9:TMCC1:FXR1:BCL6:PAK2:TFAP2A:ATXN1:POU3F2:AHI1:ESYT2:FGFR1:HOOK3:NTRK2:ZBTB26
FUMA	GO:0019900	kinase binding	722	26	7.25115e-08	3.70926e-05	CDC42:SV2A:PTPN14:TRIM5:ARHGEF7:STUB1:MAPT:NSF:SPAG9:TCF3:RELB:AP2A1:RASGRP3:CEP68:TTN:CDC25B:MAVS:PRKAR2A:TWF2:OPA1:PAK2:PDLIM5:RHOBTB3:H2AFY:CDK13:LAPTM4B
FUMA	GO:0032553	ribonucleotide binding	1885	46	1.23122e-07	3.70926e-05	NADK:CDC42:AK2:PRKAA2:GBP1:DDX59:AKT3:GUCY1A2:ATM:ACVR1B:APAF1:DCLK1:ABCD4:PAPOLA:SPATA5L1:RHOT2:GSPT1:TAOK1:NSF:ABCA9:IRGQ:IRGC:PNKP:TTN:XRCC5:UBE2F:HSPA12B:PCK1:GART:PRKAR2A:TWF2:KALRN:RAB7A:OPA1:PAK2:CDKL2:RHOBTB3:CSNK1A1:CLK4:KIF6:CDK13:ABCB4:ABCB1:FGFR1:NMRK1:NTRK2
FUMA	GO:0003712	transcription coregulator activity	557	22	1.57841e-07	3.70926e-05	SPEN:ARNT:ATF3:PTPN14:RBM14:ATF7IP:SMARCC2:E2F7:PAWR:MED13L:KLF12:SIN3A:WWOX:TCF3:DNAJB1:RELB:USP16:HIRA:JADE1:TFAP2A:POU3F2:KAT6A
FUMA	GO:0003690	double stranded dna binding	952	30	1.30478e-07	3.70926e-05	RBBP4:LMO4:ARNT:ATF3:KIN:SMARCC2:E2F7:KLF12:SIN3A:NFAT5:STAT5B:MAPT:TCF3:RELB:PNKP:ZNF638:RBMS1:XRCC5:CENPB:MAFF:ZNF148:BCL6:HNRNPD:AFF4:H2AFY:PURA:TFAP2A:POU3F2:PRDM1:PSIP1
FUMA	GO:0000122	negative regulation of transcription by RNA polymerase II	818	27	2.29792e-07	3.83856e-05	SPEN:MDM4:ATF3:EPC1:USP2:ATF7IP:CBX5:E2F7:PAWR:KLF12:SIN3A:WWP2:WWOX:TCF3:DNAJB1:ZNF254:RELB:MED25:SAP130:ZNF148:BCL6:H2AFY:PURA:TFAP2A:ATXN1:PRDM1:FGFR1
FUMA	GO:0000228	nuclear chromosome	599	22	5.38458e-07	3.84997e-05	RBBP4:RSF1:ATM:CBX5:SMARCC2:PAWR:MPHOSPH8:SIN3A:TCF3:SAP130:TTN:XRCC5:CENPB:HIRA:WDR82:RGS12:H2AFY:PURA:PHF10:CDK13:ING3:KAT6A
FUMA	GO:0070925	organelle assembly	824	27	2.65135e-07	4.33054e-05	MRTO4:NSUN4:PRKAA2:GORAB:RBM14:CEP57:CEP290:WDR90:CCDC78:ZNF207:MAPT:CIRBP:EVI5L:DYNC2LI1:ALMS1:TTN:CFLAR:TMEM237:FARP2:ATG4B:RAB7A:G3BP2:SYNPO2:TNPO1:AHI1:VTA1:TP53INP1
FUMA	GO:0006325	chromatin organization	776	26	2.91213e-07	4.65308e-05	RBBP4:PRKAA2:ASH1L:EPC1:RBM14:RSF1:ATM:ATF7IP:PPHLN1:SMARCC2:MPHOSPH8:SIN3A:WDR61:KANSL1:AKAP8L:USP16:BRWD1:HIRA:PPM1F:WDR82:BCL6:JADE1:H2AFY:PHF10:ING3:KAT6A
gProfiler	GO:0044444	cytoplasmic part	9760	183	NA	4.77826e-05	GANAB,CTSZ,RNF152,SGCD,AP2A1,DUOX2,MPHOSPH8,ZC3H14,TMEM33,HNRNPD,BRWD1,WDR24,SLC35E2B,HS2ST1,FBXL16,MCL1,MAVS,RABGAP1,FAM173A,TNPO1,WLS,JMJD8,AAGAB,AK2,CCDC78,ATXN1,DUOXA2,FN1,TRIM4,GSPT1,XRCC5,EIF5A2,ADARB1,STIM2,TFAP2A,STUB1,NDUFA2,IBA57,ABCB4,RC3H2,TTN,NTRK2,NADK,APOC1,SPAG9,MAFF,OSBPL10,WWP2,AHI1,CYB5B,MAPT,ERGIC1,SLC9A9,DCUN1D1,KAT6A,CERS5,ENDOD1,SLC35D1,ASB4,NSF,ALMS1,PLAUR,PURA,CDC42,TSPAN…
FUMA	GO:0071229	cellular response to acid chemical	205	13	3.26487e-07	5.10571e-05	GNB1:PRKAA2:FOLR1:ATM:TESC:COL3A1:XRCC5:PCK1:TWF2:OPA1:HNRNPD:ABCB4:NTRK2
FUMA	GO:0000278	mitotic cell cycle	998	30	3.5363e-07	5.30445e-05	MDM4:CEP57:ATM:USP2:ACVR1B:E2F7:CEP290:SIN3A:GSPT1:TAOK1:ZNF207:STAT5B:CDC27:AKAP8L:CNOT3:ALMS1:TTN:CDC25B:USP16:HIRA:BCL6:ANAPC4:JADE1:H2AFY:CDK13:ABCB1:ZNF655:PPP2R2A:FZD3:FGFR1
FUMA	GO:0045786	negative regulation of cell cycle	632	23	3.47723e-07	5.30445e-05	RBBP4:PRKAA2:MDM4:EPC1:PLA2G16:RBM14:ATM:CBX5:E2F7:APAF1:VASH1:TAOK1:ZNF207:PRR11:MED25:CNOT3:RASSF1:BCL6:JADE1:H2AFY:ZNF655:FZD3:TP53INP1
FUMA	GO:0010564	regulation of cell cycle process	785	26	3.62342e-07	5.32643e-05	CDC42:RBBP4:MDM4:EPC1:RBM14:CEP57:ATM:CBX5:E2F7:CEP290:APAF1:SIN3A:TAOK1:ZNF207:CDC27:MED25:CNOT3:ALMS1:CDC25B:BCL6:ANAPC4:JADE1:H2AFY:CDK13:ZNF655:FGFR1
FUMA	GO:0045666	positive regulation of neuron differentiation	361	17	3.74747e-07	5.40077e-05	FBXW8:DUOXA1:METRN:MAPT:SPAG9:TCF3:APOE:AP2A1:CFLAR:FN1:TWF2:KALRN:BCL6:OPA1:RUFY3:FGFR1:NTRK2
FUMA	GO:0044877	protein containing complex binding	1096	32	2.70168e-07	5.55532e-05	GNB1:ATPIF1:RBBP4:CACNB2:SORBS1:CD44:ATM:ACVR1B:CBX5:ITGA5:SMARCC2:SLC25A3:LINC00341:SYNE3:SECISBP2L:SIN3A:MAPT:NSF:APOE:AP2A1:TTN:COL3A1:CFLAR:FN1:XRCC5:HIRA:TWF2:RAB7A:EIF5A2:H2AFY:HLA-DRA:DST:PPP2R2A
FUMA	GO:0022008	neurogenesis	1594	40	4.35874e-07	6.16091e-05	SPEN:CDC42:EIF2B3:LMO4:ROM1:FOLR1:PTPRO:CEP290:FBXW8:DCLK1:DUOXA1:METRN:MAPT:SPAG9:TCF3:APOE:AP2A1:COL3A1:CFLAR:FN1:XRCC5:FARP2:CTSZ:ADARB1:TWF2:KALRN:BCL6:OPA1:PAK2:RUFY3:PDLIM5:METTL14:VEGFC:POU3F2:PRDM1:AHI1:FZD3:FGFR1:HOOK3:NTRK2
FUMA	GO:0031975	envelope	1166	32	1.03111e-06	6.57334e-05	AK2:MCL1:EPC1:SLC25A16:COX15:INTS5:COX14:CERS5:CBX5:TMPO:SLC25A3:LINC00341:SYNE3:SORD:GATM:RHOT2:DNASE1:CYB5B:TOMM40:MRPL19:MAVS:KPNA1:EIF5A2:OPA1:TMEM33:MTHFD2L:SLC25A4:TNPO1:NDUFA2:DST:FBXL4:SLC25A37:SLC44A1
FUMA	GO:0016607	nuclear speck	389	17	1.05068e-06	6.57334e-05	PRKAA2:RBM8A:RBM14:E2F7:ZC3H14:AAGAB:MAPT:TCF3:AKAP8L:ZNF638:SAP130:JADE1:SREK1:CSNK1A1:FBXL4:CDK13:KAT6A
FUMA	GO:0010770	positive regulation of cell morphogenesis involved in differentiation	148	11	5.51266e-07	7.64492e-05	CDC42:FBXW8:ARHGEF7:METRN:MAPT:FN1:TWF2:KALRN:OPA1:RUFY3:NTRK2
FUMA	GO:0019219	regulation of nucleobase containing compound metabolic process	510	20	6.4937e-07	8.83865e-05	ATPIF1:RBM8A:SF3B4:AHNAK:ATM:APAF1:MPHOSPH8:ZC3H14:PAPOLA:CIRBP:PNKP:XRCC5:KPNA1:BCL6:HNRNPD:OTUD4:SREK1:CLK4:HNRNPH1:RC3H2
FUMA	GO:0097447	dendritic tree	588	21	1.5221e-06	8.96248e-05	GNB1:CDC42:PRKAA2:WLS:RBM8A:SV2A:PTPRO:ANKS1B:ZC3H14:MAPT:NSF:DNAJB1:APOE:KPNA1:FXR1:OPA1:RGS12:RUFY3:PURA:FZD3:NTRK2
FUMA	GO:0042127	regulation of cell population proliferation	1684	41	6.7275e-07	8.99039e-05	ATPIF1:RBBP4:ARNT:MDM4:CD46:ATF3:PTPN14:RNF187:AKT3:SFTPD:ATM:E2F7:PAWR:TESC:VASH1:STAT5B:TNFRSF11A:APOE:MED25:PELI1:CFLAR:FN1:XRCC5:CDC25B:CTSZ:ADARB1:TLR9:TLR9:CD86:EIF5A2:BCL6:VEGFC:PURA:TFAP2A:POU3F2:PRDM1:PDCD2:CDK13:FZD3:FGFR1:TP53INP1:NTRK2
FUMA	GO:0023056	positive regulation of signaling	1813	43	7.02689e-07	9.22279e-05	NADK:ATPIF1:WLS:MCL1:ARNT:GORAB:ATF3:AKT3:CACNB2:TSPAN14:SORBS1:TRIM5:CD44:GUCY1A2:ATM:ACVR1B:ITGA5:APAF1:ARHGEF7:PDIA3:JMJD8:WDR24:NFAT5:WWOX:TAOK1:NSF:SPAG9:TNFRSF11A:PLAUR:APOE:PELI1:PPP3R1:COL3A1:CFLAR:MAVS:TLR9:TLR9:CD86:OPA1:PAK2:TMEM33:FGFR1:NTRK2:RC3H2
FUMA	GO:0060322	head development	764	25	7.60667e-07	9.8086e-05	CDC42:EIF2B3:WLS:AKT3:CEP290:APAF1:DCLK1:DUOX2:MBP:DNAJB1:SMG9:COL3A1:XRCC5:GART:SEZ6L:ZNF148:HNRNPD:METTL14:ATXN1:POU3F2:AHI1:FZD3:FGFR1:HOOK3:NTRK2
FUMA	GO:0009628	response to abiotic stimulus	1211	33	8.10859e-07	0.000102755	GNB1:EIF2B3:ARNT:MDM4:ATM:USP2:APAF1:SORD:STUB1:NARFL:NFAT5:MAPT:TNFRSF11A:CIRBP:LRRC8E:DNAJB1:RELB:PNKP:AKT1S1:TTN:COL3A1:CFLAR:XRCC5:PCK1:GUCA1C:OPA1:HNRNPD:VEGFC:ABCB1:FZD3:TP53INP1:PSIP1:INIP
FUMA	GO:0009790	embryo development	986	29	8.64463e-07	0.000107692	SLC35E2B:SLC35D1:WLS:LMO4:ARNT:GPR161:GORAB:FOLR1:ACVR1B:ITGA5:E2F7:CEP290:APAF1:FBXW8:VASH1:SIN3A:MBP:CNOT3:FN1:HIRA:MAFF:VEGFC:COL4A3BP:NDUFA2:TFAP2A:PRDM1:AHI1:FZD3:FGFR1
FUMA	GO:0005813	centrosome	500	19	1.96436e-06	0.00010924	CDC42:SORBS1:CEP57:USP2:CEP290:CDC27:RELB:DYNC2LI1:CEP68:ALMS1:CDC25B:PRKAR2A:SLAIN2:CDKL2:CSNK1A1:TFAP2A:AHI1:HOOK3:RABGAP1
FUMA	GO:0010638	positive regulation of organelle organization	619	22	9.27609e-07	0.000113632	CDC42:ATPIF1:ATM:ATF7IP:PPHLN1:MPHOSPH8:SIN3A:WDR61:MAPT:AKAP8L:PLAUR:PNKP:PPP3R1:XRCC5:PPM1F:BCL6:OPA1:ANAPC4:SLAIN2:HNRNPD:SYNPO2:H2AFY
FUMA	GO:0000790	nuclear chromatin	369	16	2.41071e-06	0.000122263	RBBP4:RSF1:CBX5:SMARCC2:PAWR:MPHOSPH8:SIN3A:TCF3:SAP130:CENPB:HIRA:H2AFY:PHF10:CDK13:ING3:KAT6A
FUMA	GO:0097458	neuron part	1709	40	2.44281e-06	0.000122263	GNB1:CDC42:PRKAA2:DNAJC6:WLS:RBM8A:SV2A:CACNB2:ROM1:PPFIA1:PTPRO:SMARCC2:CEP290:ANKS1B:DCLK1:ARHGEF7:SPATA7:ZC3H14:MAPT:NSF:MBP:DNAJB1:APOE:STX16:CTSZ:SEZ6L:TWF2:GUCA1C:KPNA1:FXR1:OPA1:PAK2:RGS12:RUFY3:PDLIM5:PURA:DST:PHF10:FZD3:NTRK2
FUMA	GO:0008047	enzyme activator activity	511	20	6.6939e-07	0.00012235	B3GAT3:SRGAP1:APAF1:TAOK1:EVI5L:DNAJB1:APOE:APOC1:APOC2:RASGRP3:CFLAR:FN1:XRCC5:RALGAPA2:SRGAP3:GUCA1C:PAK2:RGS12:AGFG2:RABGAP1
FUMA	GO:0003700	dna binding transcription factor activity	1691	41	7.47566e-07	0.000122975	ZNF362:FOXJ3:LMO4:BOLA1:ARNT:ASH1L:ATF3:SMARCC2:E2F7:ZMYM2:KLF12:SIN3A:ZNF75A:ZNF500:BOLA2:NFAT5:ZNF207:STAT5B:ZNF532:TCF3:ZNF440:ZNF254:ZNF302:ZNF226:RELB:ZNF264:ZNF417:HIRA:MAFF:ZNF148:BCL6:AFF4:PURA:TFAP2A:POU3F2:PRDM1:ZNF789:ZNF655:RC3H2:ZBTB6:ZBTB26
gProfiler	GO:0005654	nucleoplasm	3553	100	NA	0.000144035	ZC3H14,HNRNPD,BRWD1,USP16,MCL1,PAPOLA,ING3,PTPN14,AAGAB,KANSL1,U2SURP,ATXN1,TRIM4,XRCC5,ADARB1,TFAP2A,STUB1,ABCB4,INIP,MAFF,MAPT,ERGIC1,PRDM1,KAT6A,SPEN,RNF187,HNRNPH1,ARNT,SREK1,SPATA7,FBXL4,PPP3R1,TCF3,SCAF4,WDR26,COL4A3BP,PNKP,EPC1,ATF7IP,E2F7,AKAP8L,STAT5B,METTL14,ANKS1B,KPNA1,AKT1S1,POLR1E,SIN3A,USP2,ZNF789,NKTR,CIRBP,ZNF638,STYX,CDC27,MED25,AP5S1,PPP2R2A,DNAJB1,THUMPD1,WDR61,AFF4,CENPB,ZNF5…
FUMA	GO:0006473	protein acetylation	194	12	1.2056e-06	0.000145265	PRKAA2:EPC1:RSF1:SIN3A:TAOK1:MAPT:KANSL1:PCK1:JADE1:PHF10:ING3:KAT6A
FUMA	GO:0051248	negative regulation of protein metabolic process	1123	31	1.35709e-06	0.00016088	PRKAA2:GBP1:ASH1L:CR1:ATF3:SFTPD:CD44:TESC:STYX:SIN3A:MAPT:CIRBP:PLAUR:APOE:PNKP:AKT1S1:CNOT3:CFLAR:CTSZ:USP25:ADARB1:PPM1F:CRTAP:PRKAR2A:FXR1:PAK2:HNRNPD:METTL14:H2AFY:PURA:LAPTM4B
FUMA	GO:0008187	poly pyrimidine tract binding	33	6	1.15775e-06	0.000173136	RBMS2:MSI2:CIRBP:RBMS1:HNRNPH1:ATXN1
FUMA	GO:0005739	mitochondrion	1552	37	3.94729e-06	0.000188154	ATPIF1:AK2:NSUN4:BOLA1:MCL1:WDR26:IBA57:SLC25A16:COX15:COX14:SLC25A3:SPATA7:SORD:GATM:RHOT2:CYB5B:WWOX:MAPT:FAM210A:TOMM40:PNKP:PPP3R1:MRPL19:MAVS:PCK1:MAFF:CMC1:NKTR:OPA1:MTHFD2L:SLC25A4:COL4A3BP:NDUFA2:FBXL4:SLC25A37:SLC44A1:ZBTB6
FUMA	GO:1901566	organonitrogen compound biosynthetic process	1814	42	1.76503e-06	0.00020592	NADK:ATPIF1:TRNAU1AP:AK2:ST3GAL3:EIF2B3:NSUN4:SLC35D1:HS2ST1:RBM8A:IBA57:SFTPD:COX15:B3GAT3:GUCY1A2:CERS5:PAWR:GATM:SECISBP2L:GSPT1:STAT5B:CIRBP:APOE:AP2A1:CNOT3:MRPL19:USP16:GART:TLR9:TLR9:GUCA1C:CD86:EIF5A2:FXR1:ZCCHC4:MTHFD2L:HNRNPD:SCD5:METTL14:COL4A3BP:PURA:NMRK1:SLC44A1
FUMA	GO:0002520	immune system development	968	28	1.84856e-06	0.000212296	CDC42:ATPIF1:LMO4:ARNT:CR1:CD46:ATM:ACVR1B:TESC:ARHGEF7:SIN3A:WDR61:NARFL:STAT5B:TNFRSF11A:TCF3:CLPTM1:RELB:XRCC5:FARP2:TLR9:TLR9:CD86:BCL6:PRDM1:PDCD2:CDK13:KAT6A:RC3H2
FUMA	GO:0031329	regulation of cellular catabolic process	805	25	1.93684e-06	0.000219011	ATPIF1:PRKAA2:MCL1:ARNT:ATM:APAF1:FBXW8:STYX:ZC3H14:STUB1:WDR24:MAPT:RNF152:CIRBP:APOE:APOC1:APOC2:USP25:FXR1:HNRNPD:METTL14:TNPO1:CSNK1A1:TP53INP1:LAPTM4B
FUMA	GO:0042175	nuclear outer membrane endoplasmic reticulum membrane network	1080	29	5.11082e-06	0.000232543	CDC42:SLC35D1:WLS:SFTPD:FOLR1:CERS5:KTN1:ABCD4:LINC00341:SYNE3:PDIA3:DUOXA2:DUOXA1:GOSR2:LRRC8E:PLAUR:SEZ6L:TLR9:TLR9:SEC22A:TMCC1:EIF5A2:STIM2:TMEM33:SCD5:CYP4V2:COL4A3BP:ERGIC1:HLA-DRA:DST:ESYT2
FUMA	GO:0051188	cofactor biosynthetic process	208	12	2.49729e-06	0.000278107	NADK:ATPIF1:IBA57:SLC25A16:COX15:DUOX2:DUOXA2:DUOXA1:DUOX1:GART:SCD5:NMRK1
FUMA	GO:0007346	regulation of mitotic cell cycle	660	22	2.63048e-06	0.000288568	MDM4:CEP57:ATM:USP2:E2F7:CEP290:SIN3A:TAOK1:ZNF207:STAT5B:CDC27:CNOT3:ALMS1:CDC25B:BCL6:ANAPC4:JADE1:H2AFY:CDK13:ZNF655:FZD3:FGFR1
FUMA	GO:0044770	cell cycle phase transition	611	21	2.77219e-06	0.000295524	MDM4:CEP57:ATM:ACVR1B:E2F7:CEP290:SIN3A:GSPT1:TAOK1:ZNF207:CDC27:AKAP8L:CNOT3:ALMS1:CDC25B:ANAPC4:JADE1:H2AFY:ABCB1:ZNF655:PPP2R2A
FUMA	GO:0009896	positive regulation of catabolic process	418	17	2.77431e-06	0.000295524	ATPIF1:PRKAA2:ARNT:ATM:FBXW8:STUB1:WWP2:NSF:RNF152:APOE:APOC2:ATG4B:RAB7A:HNRNPD:METTL14:CSNK1A1:TP53INP1
FUMA	GO:0031344	regulation of cell projection organization	665	22	2.96849e-06	0.000311691	CDC42:CD44:PTPRO:FBXW8:ARHGEF7:METRN:MAPT:EVI5L:APOE:AP2A1:DYNC2LI1:CFLAR:FN1:CTSZ:TWF2:KALRN:OPA1:RUFY3:PDLIM5:POU3F2:FGFR1:NTRK2
FUMA	GO:0032989	cellular component morphogenesis	1111	30	3.13235e-06	0.000324264	CDC42:GBP1:CDC42SE1:CD44:PTPRO:FBXW8:ZMYM2:DCLK1:ARHGEF7:LINC00341:SYNE3:METRN:MAPT:APOE:TTN:CFLAR:FN1:BRWD1:ADARB1:TWF2:KALRN:BCL6:OPA1:RUFY3:PDLIM5:COL4A3BP:RHOBTB3:CSNK1A1:POU3F2:FZD3:NTRK2
FUMA	GO:0007010	cytoskeleton organization	1293	33	3.30724e-06	0.000337614	CDC42:PRKAA2:SORBS1:EML3:RBM14:PPFIA1:CEP57:PAWR:LINC00341:SYNE3:CCDC78:TAOK1:ZNF207:MAPT:APOE:CEP68:ALMS1:TTN:CFLAR:FARP2:SPEF1:EPB41L1:BRWD1:PPM1F:RASSF1:TWF2:BCL6:SLAIN2:RUFY3:SYNPO2:RHOBTB3:CSNK1A1:DST:HOOK3
FUMA	GO:0036477	somatodendritic compartment	818	24	8.0681e-06	0.000351138	GNB1:CDC42:PRKAA2:WLS:RBM8A:SV2A:PTPRO:ANKS1B:ARHGEF7:ZC3H14:MAPT:NSF:MBP:DNAJB1:APOE:SEZ6L:KPNA1:FXR1:OPA1:RGS12:RUFY3:PURA:FZD3:NTRK2
FUMA	GO:0009792	embryo development ending in birth or egg hatching	621	21	3.56293e-06	0.000358733	SLC35E2B:SLC35D1:LMO4:ARNT:GPR161:GORAB:FOLR1:ACVR1B:E2F7:APAF1:FBXW8:VASH1:SIN3A:CNOT3:MAFF:COL4A3BP:NDUFA2:TFAP2A:PRDM1:FZD3:FGFR1
FUMA	GO:0007017	microtubule based process	731	23	4.04859e-06	0.000402123	CDC42:PRKAA2:EML3:RBM14:CEP57:KTN1:RHOT2:CCDC78:TAOK1:ZNF207:MAPT:DYNC2LI1:CEP68:ALMS1:SPEF1:RASSF1:OPA1:SLAIN2:TNPO1:PURA:KIF6:DST:HOOK3
FUMA	GO:0016197	endosomal transport	220	12	4.45212e-06	0.000436308	LYST:DCLK1:GOSR2:SPAG9:ALMS1:AP5S1:STX16:RAB7A:TMCC1:RHOBTB3:VTA1:LAPTM4B
FUMA	GO:0048870	cell motility	1691	39	4.64833e-06	0.000449542	MCOLN2:LMO4:ASH1L:LYST:AKT3:SFTPD:CD44:FOLR1:ATM:PTPRO:ACVR1B:ITGA5:SRGAP1:DCLK1:ARHGEF7:VASH1:SORD:DUOX2:DUOXA2:DUOX1:STAT5B:SPAG9:TNFRSF11A:APOE:COL3A1:FN1:SPEF1:ADARB1:PPM1F:SRGAP3:PAK2:RUFY3:VEGFC:DST:POU3F2:FZD3:FGFR1:TP53INP1:NTRK2
FUMA	GO:0030030	cell projection organization	1509	36	5.28752e-06	0.000496728	CDC42:GORAB:CD44:FOLR1:CEP57:PTPRO:CEP290:FBXW8:DCLK1:ARHGEF7:WDR90:METRN:CCDC78:MAPT:EVI5L:APOE:AP2A1:DYNC2LI1:ALMS1:CFLAR:TMEM237:FN1:CTSZ:ADARB1:TWF2:KALRN:OPA1:PAK2:RUFY3:PDLIM5:TNPO1:POU3F2:AHI1:FZD3:FGFR1:NTRK2
FUMA	GO:0010948	negative regulation of cell cycle process	348	15	5.33898e-06	0.000496728	RBBP4:MDM4:EPC1:RBM14:ATM:CBX5:E2F7:APAF1:TAOK1:ZNF207:CNOT3:BCL6:JADE1:H2AFY:ZNF655
FUMA	GO:0051336	regulation of hydrolase activity	1261	32	5.26137e-06	0.000496728	ATPIF1:CDC42SE1:CR1:CD44:B3GAT3:SRGAP1:APAF1:ARHGEF7:MAPT:MBP:EVI5L:DNAJB1:PLAUR:APOC1:APOC2:RASGRP3:CFLAR:FN1:RALGAPA2:PPM1F:SRGAP3:TLR9:TLR9:KALRN:BCL6:PAK2:RGS12:PDCD2:AGFG2:PPP2R2A:FGFR1:NTRK2:RABGAP1
FUMA	GO:0005215	transporter activity	1241	32	3.79555e-06	0.000512074	SLC35E2B:SLC35D1:MCOLN2:SV2A:MCL1:CACNB2:SLC25A16:COX15:SLC25A3:SLC41A2:ABCD4:SLC24A4:SLC30A4:ABCA9:LRRC8E:SLC35E1:TOMM40:APOE:OSBPL10:KPNA1:SEC22A:SLC9A9:STIM2:TMEM144:SLC25A4:SLC6A19:TNPO1:COL4A3BP:ABCB4:ABCB1:SLC25A37:SLC44A1
FUMA	GO:0003727	single stranded rna binding	87	8	4.04679e-06	0.000512074	RBMS2:ZC3H14:MSI2:CIRBP:RBMS1:FXR1:HNRNPH1:ATXN1
FUMA	GO:0010942	positive regulation of cell death	698	22	6.38913e-06	0.000587002	ATPIF1:MCL1:ATF3:ATM:PAWR:APAF1:ARHGEF7:PDIA3:WWOX:MAPT:LGALS13:PLAUR:PPP3R1:CTSZ:PPM1F:KALRN:BCL6:PAK2:TFAP2A:PDCD2:ING3:TP53INP1
FUMA	GO:0045177	apical part of cell	379	15	1.46796e-05	0.000587771	CD44:FOLR1:PTPRO:VASH1:DUOX2:DUOXA2:DUOX1:AP2A1:DYNC2LI1:FN1:TLR9:TLR9:SLC6A19:ABCB4:ABCB1:FZD3
FUMA	GO:0034399	nuclear periphery	135	9	1.43716e-05	0.000587771	KIN:SORBS1:MAPT:AKAP8L:LGALS13:RGS12:ANAPC4:TNPO1:ATXN1
FUMA	GO:0045664	regulation of neuron differentiation	646	21	6.51267e-06	0.000590964	PTPRO:FBXW8:DUOXA1:METRN:MAPT:SPAG9:TCF3:APOE:AP2A1:CFLAR:FN1:CTSZ:TWF2:KALRN:BCL6:OPA1:RUFY3:PDLIM5:POU3F2:FGFR1:NTRK2
FUMA	GO:0040011	locomotion	1915	42	6.72757e-06	0.00060302	MCOLN2:LMO4:ASH1L:LYST:AKT3:SFTPD:TRIM5:CD44:FOLR1:ATM:PTPRO:ACVR1B:ITGA5:SRGAP1:DCLK1:ARHGEF7:VASH1:SORD:DUOX2:DUOXA2:DUOX1:STAT5B:SPAG9:TNFRSF11A:PLAUR:APOE:COL3A1:FN1:SPEF1:ADARB1:PPM1F:SRGAP3:RAB7A:PAK2:RUFY3:VEGFC:DST:POU3F2:FZD3:FGFR1:TP53INP1:NTRK2
FUMA	GO:0030182	neuron differentiation	1343	33	7.27905e-06	0.000629424	CDC42:LMO4:ROM1:FOLR1:PTPRO:CEP290:FBXW8:DCLK1:DUOXA1:METRN:MAPT:SPAG9:TCF3:APOE:AP2A1:CFLAR:FN1:FARP2:CTSZ:ADARB1:TWF2:KALRN:BCL6:OPA1:PAK2:RUFY3:PDLIM5:POU3F2:PRDM1:AHI1:FZD3:FGFR1:NTRK2
FUMA	GO:0010976	positive regulation of neuron projection development	271	13	7.25623e-06	0.000629424	FBXW8:METRN:MAPT:APOE:AP2A1:CFLAR:FN1:TWF2:KALRN:OPA1:RUFY3:FGFR1:NTRK2
FUMA	GO:0032880	regulation of protein localization	982	27	7.13813e-06	0.000629424	NADK:ATPIF1:PRKAA2:WLS:GBP1:PTPN14:SORBS1:TRIM5:B3GAT3:PPFIA1:CEP290:DCLK1:SIN3A:WWP2:MAPT:MBP:AKAP8L:PPP3R1:TTN:FN1:MAVS:PPM1F:TLR9:TLR9:RUFY3:VEGFC:SLC25A4:H2AFY
gProfiler	GO:0044428	nuclear part	4894	125	NA	0.000644448	MPHOSPH8,ZC3H14,TMEM33,HNRNPD,BRWD1,USP16,H2AFY,MCL1,PAPOLA,ING3,PTPN14,AAGAB,KANSL1,U2SURP,ATXN1,TRIM4,XRCC5,EIF5A2,ADARB1,TFAP2A,STUB1,ABCB4,INIP,TTN,MAFF,MAPT,ERGIC1,PRDM1,EWSR1,KAT6A,PURA,SPEN,RNF187,HNRNPH1,FOXJ3,ARNT,SREK1,SPATA7,FBXL4,PPP3R1,PTOV1,TCF3,POU3F2,SCAF4,WDR26,COL4A3BP,PNKP,EPC1,ATF7IP,E2F7,SYNE3,HERC4,AKAP11,AKAP8L,STAT5B,METTL14,ANKS1B,KPNA1,MRPL19,AKT1S1,POLR1E,SIN3A,USP2,ZNF…
FUMA	GO:0001775	cell activation	1408	34	7.59109e-06	0.000648773	GNB1:CDC42:LMO4:CR1:CD46:SFTPD:TSPAN14:CD44:ATM:METTL7A:PAWR:CEP290:APAF1:DNASE1:STAT5B:MAPT:TCF3:PLAUR:APOE:CLPTM1:RELB:PELI1:COL3A1:XRCC5:CTSZ:TLR9:TLR9:CD86:RAB7A:BCL6:PAK2:PURA:PRDM1:CDK13:RC3H2
FUMA	GO:0097435	supramolecular fiber organization	654	21	7.84433e-06	0.000662711	CDC42:SORBS1:PPFIA1:PAWR:TAOK1:ZNF207:MAPT:APOE:ALMS1:TTN:COL3A1:CFLAR:SPEF1:PPM1F:TWF2:SLAIN2:RUFY3:SYNPO2:RHOBTB3:DST:HOOK3
gProfiler	GO:0044446	intracellular organelle part	9699	231	NA	0.000663294	GANAB,CTSZ,RNF152,AP2A1,MPHOSPH8,ZC3H14,TMEM33,HNRNPD,BRWD1,USP16,WDR24,H2AFY,HS2ST1,MCL1,PAPOLA,MAVS,RABGAP1,FAM173A,WLS,JMJD8,ING3,PTPN14,AAGAB,AK2,KANSL1,U2SURP,CCDC78,ATXN1,DUOXA2,FN1,TRIM4,XRCC5,EIF5A2,ADARB1,STIM2,TFAP2A,STUB1,NDUFA2,IBA57,ABCB4,INIP,TTN,NTRK2,SPAG9,MAFF,AHI1,CYB5B,MAPT,ERGIC1,PRDM1,EWSR1,SLC9A9,KAT6A,CERS5,SLC35D1,NSF,ALMS1,PLAUR,PURA,CDC42,TSPAN14,SYNPO2,DUOXA1,SPEN,RNF18…
FUMA	GO:0005730	nucleolus	1342	32	1.8191e-05	0.000700353	MRTO4:SF3B4:GORAB:ATF3:HERC4:RBM14:ATM:CBX5:MPHOSPH8:AKAP11:ZC3H14:SIN3A:ZNF207:CIRBP:DNAJB1:PNKP:XRCC5:BRWD1:ADARB1:EWSR1:WDR82:FXR1:RGS12:ZCCHC4:AFF4:H2AFY:ATXN1:ZNF655:FGFR1:KAT6A:SNAPC3:POLR1E
FUMA	GO:0002682	regulation of immune system process	1606	37	8.47286e-06	0.000707677	CDC42:EIF2B3:GBP1:ARNT:CR1:CD46:SFTPD:TRIM5:RBM14:ATM:ACVR1B:PAWR:TESC:SIN3A:WDR61:DNASE1:STAT5B:TCF3:APOE:CLPTM1:RELB:PELI1:PPP3R1:COL3A1:XRCC5:MAVS:TLR9:TLR9:CD86:BCL6:PAK2:CFI:OTUD4:VEGFC:HLA-DRA:PRDM1:PDCD2:RC3H2
FUMA	GO:0043543	protein acylation	238	12	9.889e-06	0.000816676	PRKAA2:EPC1:RSF1:SIN3A:TAOK1:MAPT:KANSL1:PCK1:JADE1:PHF10:ING3:KAT6A
gProfiler	GO:0005788	endoplasmic reticulum lumen	306	10	NA	0.000821958	GANAB,CTSZ,JMJD8,FN1,PLAUR,TSPAN14,COL3A1,PDIA3,KTN1,APOE
FUMA	GO:0006468	protein phosphorylation	1949	42	1.02658e-05	0.000831767	PRKAA2:GBP1:ASH1L:ATF3:AKT3:TRIM5:CD44:ATM:ACVR1B:ITGA5:TESC:DCLK1:STYX:TAOK1:SPAG9:TNFRSF11A:MBP:AKAP8L:PLAUR:APOE:AKT1S1:RASGRP3:TTN:CFLAR:FN1:XRCC5:CDC25B:MAVS:ADARB1:PPM1F:PRKAR2A:TLR9:TLR9:KALRN:PAK2:CDKL2:VEGFC:H2AFY:CSNK1A1:CLK4:CDK13:FGFR1:NTRK2
FUMA	GO:0019058	viral life cycle	323	14	1.02981e-05	0.000831767	CDC42:CR1:CD46:TRIM5:ITGA5:MPHOSPH8:WWP2:APOE:MAVS:ADARB1:CD86:KPNA1:RAB7A:VTA1
FUMA	GO:0023057	negative regulation of signaling	1369	33	1.0766e-05	0.000860112	CDC42:PTCH2:PRKAA2:GBP1:MCL1:ASH1L:GPR161:CD46:ATF3:DKK3:CD44:ATM:PTPRO:PAWR:ARHGEF7:STUB1:WWP2:WWOX:MAPT:RNF152:PLAUR:APOE:AKT1S1:CFLAR:TLR9:TLR9:KALRN:RAB7A:BCL6:OPA1:RGS12:JADE1:OTUD4:CSNK1A1
FUMA	GO:0031937	positive regulation of chromatin silencing	14	4	1.12542e-05	0.000889444	ATF7IP:PPHLN1:MPHOSPH8:SIN3A
gProfiler	GO:0005829	cytosol	5086	121	NA	0.000892757	AP2A1,DUOX2,MPHOSPH8,HNRNPD,BRWD1,FBXL16,MCL1,RABGAP1,TNPO1,AAGAB,ATXN1,DUOXA2,TRIM4,GSPT1,XRCC5,EIF5A2,ADARB1,TFAP2A,STUB1,ABCB4,TTN,NTRK2,NADK,SPAG9,OSBPL10,WWP2,AHI1,MAPT,DCUN1D1,KAT6A,ENDOD1,ASB4,NSF,ALMS1,CDC42,SYNPO2,RNF187,HNRNPH1,RHOT2,CFLAR,TOMM40,SRGAP1,SRGAP3,PPFIA1,SPATA7,FBXW8,FBXL4,PPP3R1,CD44,NMRK1,TMCC1,WDR26,COL4A3BP,ATF7IP,HERC4,AKAP11,PCK1,PGM2L1,TNFRSF11A,STAT5B,AHNAK,ANKS1B,K…
gProfiler	GO:0031981	nuclear lumen	4518	115	NA	0.000892757	MPHOSPH8,ZC3H14,HNRNPD,BRWD1,USP16,H2AFY,MCL1,PAPOLA,ING3,PTPN14,AAGAB,KANSL1,U2SURP,ATXN1,TRIM4,XRCC5,ADARB1,TFAP2A,STUB1,ABCB4,INIP,TTN,MAFF,MAPT,ERGIC1,PRDM1,EWSR1,KAT6A,PURA,SPEN,RNF187,HNRNPH1,FOXJ3,ARNT,SREK1,SPATA7,FBXL4,PPP3R1,TCF3,POU3F2,SCAF4,WDR26,COL4A3BP,PNKP,EPC1,ATF7IP,E2F7,HERC4,AKAP11,AKAP8L,STAT5B,METTL14,ANKS1B,KPNA1,AKT1S1,POLR1E,SIN3A,USP2,ZNF789,RGS12,NKTR,CIRBP,ZNF638,STYX,…
FUMA	GO:1905269	positive regulation of chromatin organization	100	8	1.14423e-05	0.000894689	ATM:ATF7IP:PPHLN1:MPHOSPH8:SIN3A:WDR61:AKAP8L:BCL6
FUMA	GO:0051049	regulation of transport	1827	40	1.1787e-05	0.000911944	NADK:ATPIF1:DNAJC6:WLS:GBP1:SV2A:PTPN14:CACNB2:SFTPD:SORBS1:AHNAK:B3GAT3:CEP290:TESC:ARHGEF7:WWP2:NSF:TNFRSF11A:MBP:AKAP8L:APOE:APOC1:APOC2:AP2A1:PPP3R1:TTN:FN1:MAVS:PPM1F:TLR9:TLR9:KALRN:RAB7A:STIM2:RUFY3:VEGFC:SLC25A4:AHI1:ABCB4:ABCB1:FGFR1
FUMA	GO:0030554	adenyl nucleotide binding	1536	36	7.79112e-06	0.000915457	NADK:AK2:PRKAA2:DDX59:AKT3:ATM:ACVR1B:APAF1:DCLK1:ABCD4:PAPOLA:SPATA5L1:TAOK1:NSF:ABCA9:PNKP:TTN:XRCC5:UBE2F:HSPA12B:GART:PRKAR2A:TWF2:KALRN:PAK2:CDKL2:RHOBTB3:CSNK1A1:CLK4:KIF6:CDK13:ABCB4:ABCB1:FGFR1:NMRK1:NTRK2
FUMA	GO:0010941	regulation of cell death	1697	38	1.20321e-05	0.000921206	ATPIF1:PRKAA2:MCL1:MDM4:ATF3:CD44:ATM:ITGA5:PAWR:APAF1:ARHGEF7:PDIA3:SIN3A:WWOX:STAT5B:MAPT:LGALS13:PLAUR:APOE:AKT1S1:PELI1:PPP3R1:CFLAR:CTSZ:PPM1F:KALRN:BCL6:OPA1:PAK2:SLC25A4:TFAP2A:AHI1:PDCD2:ING3:FZD3:FGFR1:TP53INP1:NTRK2
FUMA	GO:0031346	positive regulation of cell projection organization	373	15	1.2175e-05	0.000922541	CDC42:FBXW8:ARHGEF7:METRN:MAPT:APOE:AP2A1:CFLAR:FN1:TWF2:KALRN:OPA1:RUFY3:FGFR1:NTRK2
FUMA	GO:0043005	neuron projection	1301	31	2.50084e-05	0.000927163	GNB1:CDC42:PRKAA2:WLS:RBM8A:SV2A:ROM1:PTPRO:CEP290:ANKS1B:ARHGEF7:SPATA7:ZC3H14:MAPT:NSF:MBP:DNAJB1:APOE:CTSZ:TWF2:GUCA1C:KPNA1:FXR1:OPA1:RGS12:RUFY3:PDLIM5:PURA:DST:FZD3:NTRK2
FUMA	GO:0019787	ubiquitin like protein transferase activity	408	16	8.57315e-06	0.000940189	CDC42:RNF187:HERC4:TRIM5:FBXW8:STUB1:FBXL16:WWP2:RNF152:PELI1:UBE2F:ANAPC4:FBXL4:ASB4:FBXO24:RC3H2
FUMA	GO:0030155	regulation of cell adhesion	676	21	1.28708e-05	0.000965307	CDC42:GBP1:CD46:SFTPD:CD44:ATM:PTPRO:ITGA5:PAWR:TESC:ARHGEF7:NFAT5:STAT5B:MBP:PELI1:FN1:PPM1F:CD86:BCL6:PAK2:RC3H2
FUMA	GO:0070161	anchoring junction	552	18	2.85253e-05	0.00101978	CDC42:CD46:SORBS1:CD44:AHNAK:PPFIA1:ITGA5:ARHGEF7:PDIA3:DSC2:PLAUR:STX16:PRKAR2A:PDLIM5:SYNPO2:DST:AHI1:ABCB4
FUMA	GO:0044430	cytoskeletal part	1639	36	3.08732e-05	0.00106566	CDC42:SORBS1:EML3:CEP57:USP2:PAWR:CEP290:AKAP11:SPATA7:WDR90:CCDC78:ZNF207:MAPT:CDC27:SPAG9:RELB:DYNC2LI1:CEP68:ALMS1:TTN:SPEF1:CDC25B:PRKAR2A:RASSF1:TWF2:SLAIN2:CDKL2:SYNPO2:JADE1:CSNK1A1:TFAP2A:KIF6:DST:AHI1:HOOK3:RABGAP1
FUMA	GO:0030055	cell substrate junction	409	15	3.53673e-05	0.00118009	CDC42:CD46:SORBS1:CD44:AHNAK:PPFIA1:ITGA5:ARHGEF7:PDIA3:PLAUR:STX16:PRKAR2A:SYNPO2:DST:ABCB4
gProfiler	GO:0044422	organelle part	10009	235	NA	0.00122793	GANAB,CTSZ,RNF152,AP2A1,MPHOSPH8,ZC3H14,TMEM33,HNRNPD,BRWD1,USP16,WDR24,H2AFY,HS2ST1,MCL1,PAPOLA,MAVS,RABGAP1,FAM173A,WLS,JMJD8,ING3,PTPN14,AAGAB,AK2,KANSL1,U2SURP,CCDC78,ATXN1,DUOXA2,FN1,TRIM4,XRCC5,EIF5A2,ADARB1,STIM2,TFAP2A,STUB1,NDUFA2,IBA57,ABCB4,INIP,TTN,NTRK2,SPAG9,MAFF,AHI1,CYB5B,MAPT,ERGIC1,PRDM1,EWSR1,SLC9A9,KAT6A,CERS5,SLC35D1,NSF,ALMS1,PLAUR,PURA,CDC42,TSPAN14,SYNPO2,DUOXA1,SPEN,RNF18…
FUMA	GO:0051345	positive regulation of hydrolase activity	748	22	1.85591e-05	0.00137787	CR1:SRGAP1:APAF1:ARHGEF7:MAPT:MBP:EVI5L:DNAJB1:APOC2:RASGRP3:CFLAR:FN1:RALGAPA2:PPM1F:SRGAP3:KALRN:RGS12:PDCD2:AGFG2:FGFR1:NTRK2:RABGAP1
gProfiler	GO:0070013	intracellular organelle lumen	5664	138	NA	0.00140495	GANAB,CTSZ,MPHOSPH8,ZC3H14,HNRNPD,BRWD1,USP16,H2AFY,MCL1,PAPOLA,JMJD8,ING3,PTPN14,AAGAB,AK2,KANSL1,U2SURP,ATXN1,FN1,TRIM4,XRCC5,ADARB1,TFAP2A,STUB1,IBA57,ABCB4,INIP,TTN,MAFF,MAPT,ERGIC1,PRDM1,EWSR1,KAT6A,PLAUR,PURA,TSPAN14,SPEN,RNF187,COL3A1,PDIA3,GATM,HNRNPH1,KTN1,FOXJ3,ARNT,SREK1,APOE,SPATA7,FBXL4,PPP3R1,TCF3,POU3F2,SCAF4,WDR26,COL4A3BP,PNKP,EPC1,ATF7IP,E2F7,HERC4,AKAP11,AKAP8L,STAT5B,METTL14,A…
gProfiler	GO:0031974	membrane-enclosed lumen	5664	138	NA	0.00140495	GANAB,CTSZ,MPHOSPH8,ZC3H14,HNRNPD,BRWD1,USP16,H2AFY,MCL1,PAPOLA,JMJD8,ING3,PTPN14,AAGAB,AK2,KANSL1,U2SURP,ATXN1,FN1,TRIM4,XRCC5,ADARB1,TFAP2A,STUB1,IBA57,ABCB4,INIP,TTN,MAFF,MAPT,ERGIC1,PRDM1,EWSR1,KAT6A,PLAUR,PURA,TSPAN14,SPEN,RNF187,COL3A1,PDIA3,GATM,HNRNPH1,KTN1,FOXJ3,ARNT,SREK1,APOE,SPATA7,FBXL4,PPP3R1,TCF3,POU3F2,SCAF4,WDR26,COL4A3BP,PNKP,EPC1,ATF7IP,E2F7,HERC4,AKAP11,AKAP8L,STAT5B,METTL14,A…
gProfiler	GO:0043233	organelle lumen	5664	138	NA	0.00140495	GANAB,CTSZ,MPHOSPH8,ZC3H14,HNRNPD,BRWD1,USP16,H2AFY,MCL1,PAPOLA,JMJD8,ING3,PTPN14,AAGAB,AK2,KANSL1,U2SURP,ATXN1,FN1,TRIM4,XRCC5,ADARB1,TFAP2A,STUB1,IBA57,ABCB4,INIP,TTN,MAFF,MAPT,ERGIC1,PRDM1,EWSR1,KAT6A,PLAUR,PURA,TSPAN14,SPEN,RNF187,COL3A1,PDIA3,GATM,HNRNPH1,KTN1,FOXJ3,ARNT,SREK1,APOE,SPATA7,FBXL4,PPP3R1,TCF3,POU3F2,SCAF4,WDR26,COL4A3BP,PNKP,EPC1,ATF7IP,E2F7,HERC4,AKAP11,AKAP8L,STAT5B,METTL14,A…
FUMA	GO:0015711	organic anion transport	485	17	1.92219e-05	0.00141281	PRKAA2:SLC35D1:SV2A:PPFIA1:FOLR1:TNFRSF11A:LRRC8E:APOE:APOC1:APOC2:OSBPL10:SLC25A4:SLC6A19:COL4A3BP:ABCB4:ABCB1:NTRK2
FUMA	GO:0030234	enzyme regulator activity	1019	27	1.37743e-05	0.00141617	ATPIF1:CDC42SE1:B3GAT3:SRGAP1:APAF1:TESC:STYX:TAOK1:EVI5L:DNAJB1:APOE:APOC1:APOC2:RASGRP3:CFLAR:FN1:XRCC5:RALGAPA2:SRGAP3:PRKAR2A:GUCA1C:PAK2:RGS12:H2AFY:AGFG2:PPP2R2A:RABGAP1
FUMA	GO:0017000	antibiotic biosynthetic process	16	4	2.01228e-05	0.00144503	DUOX2:DUOXA2:DUOXA1:DUOX1
FUMA	GO:0010975	regulation of neuron projection development	487	17	2.02501e-05	0.00144503	PTPRO:FBXW8:METRN:MAPT:APOE:AP2A1:CFLAR:FN1:CTSZ:TWF2:KALRN:OPA1:RUFY3:PDLIM5:POU3F2:FGFR1:NTRK2
FUMA	GO:0006590	thyroid hormone generation	16	4	2.01228e-05	0.00144503	DUOX2:DUOXA2:DUOXA1:DUOX1
FUMA	GO:0008144	drug binding	1718	38	1.57876e-05	0.00152768	NADK:AK2:PRKAA2:DDX59:AKT3:FOLR1:ATM:ACVR1B:APAF1:DCLK1:ABCD4:PAPOLA:SPATA5L1:TAOK1:NSF:ABCA9:PNKP:PPP3R1:TTN:XRCC5:UBE2F:HSPA12B:GART:NKTR:TWF2:KALRN:PAK2:CDKL2:RHOBTB3:CSNK1A1:CLK4:KIF6:CDK13:ABCB4:ABCB1:FGFR1:NMRK1:NTRK2
FUMA	GO:0051174	regulation of phosphorus metabolic process	1677	37	2.16721e-05	0.00153163	ATPIF1:LMO4:GBP1:ASH1L:ATF3:TRIM5:CD44:B3GAT3:ATM:ACVR1B:ITGA5:TESC:STYX:TAOK1:MAPT:SPAG9:TNFRSF11A:AKAP8L:PLAUR:APOE:AKT1S1:TTN:CFLAR:FN1:XRCC5:CDC25B:MAVS:ADARB1:PPM1F:PRKAR2A:TLR9:TLR9:PAK2:VEGFC:H2AFY:PPP2R2A:FGFR1:NTRK2
FUMA	GO:0032838	plasma membrane bounded cell projection cytoplasm	196	10	4.90376e-05	0.00158344	WLS:SPATA7:ZC3H14:MAPT:DYNC2LI1:SPEF1:PRKAR2A:OPA1:PURA:DST
FUMA	GO:0030162	regulation of proteolysis	706	21	2.43757e-05	0.0017063	ATPIF1:CR1:CD44:LDLRAD3:APAF1:FBXW8:STYX:STUB1:MAPT:MBP:PLAUR:APOE:CFLAR:FN1:CTSZ:USP25:PPM1F:PAK2:OTUD4:CSNK1A1:PDCD2
FUMA	GO:0003682	chromatin binding	535	18	1.89282e-05	0.00172982	RBBP4:PRKAA2:ASH1L:CBX5:SMARCC2:MPHOSPH8:SIN3A:NFAT5:STAT5B:RELB:CENPB:HIRA:WDR82:BCL6:HNRNPD:H2AFY:TFAP2A:PRDM1
FUMA	GO:0031902	late endosome membrane	125	8	5.75627e-05	0.00180063	MCOLN2:SLC30A4:GOSR2:AP5S1:RAB7A:SLC9A9:HLA-DRA:LAPTM4B
FUMA	GO:1902275	regulation of chromatin organization	182	10	2.61312e-05	0.00181193	ATM:ATF7IP:PPHLN1:MPHOSPH8:SIN3A:WDR61:AKAP8L:HIRA:BCL6:H2AFY
FUMA	GO:0031248	protein acetyltransferase complex	93	7	6.00739e-05	0.00182224	EPC1:RSF1:KANSL1:JADE1:PHF10:ING3:KAT6A
FUMA	GO:0048585	negative regulation of response to stimulus	1629	36	2.71921e-05	0.00186787	CDC42:PTCH2:PRKAA2:GBP1:MCL1:ASH1L:GPR161:CR1:CD46:ATF3:AKT3:DKK3:CD44:ATM:PTPRO:PAWR:ARHGEF7:STUB1:WWP2:WWOX:RNF152:PLAUR:APOE:AKT1S1:COL3A1:CFLAR:USP25:TLR9:TLR9:RAB7A:BCL6:OPA1:RGS12:JADE1:OTUD4:CSNK1A1:RC3H2
FUMA	GO:0007264	small GTPase mediated signal transduction	554	18	2.99002e-05	0.00203487	GNB1:CDC42:CDC42SE1:SRGAP1:ARHGEF7:RHOT2:APOE:RASGRP3:COL3A1:FARP2:RALGAPA2:SRGAP3:RASSF1:KALRN:RAB7A:BCL6:G3BP2:RHOBTB3
FUMA	GO:0050863	regulation of T cell activation	311	13	3.09634e-05	0.0020879	CDC42:CR1:CD46:SFTPD:PAWR:STAT5B:CLPTM1:PELI1:CD86:BCL6:PAK2:PRDM1:RC3H2
gProfiler	GO:0005783	endoplasmic reticulum	1925	24	NA	0.00210198	GANAB,CTSZ,SGCD,DUOX2,TMEM33,WLS,JMJD8,CCDC78,DUOXA2,FN1,EIF5A2,STIM2,STUB1,APOC1,ERGIC1,CERS5,SLC35D1,PLAUR,CDC42,TSPAN14,DUOXA1,COL3A1,PDIA3,KTN1
gProfiler	GO:0044432	endoplasmic reticulum part	1354	24	NA	0.00210198	GANAB,CTSZ,TMEM33,WLS,JMJD8,DUOXA2,FN1,EIF5A2,STIM2,ERGIC1,CERS5,SLC35D1,PLAUR,CDC42,TSPAN14,DUOXA1,COL3A1,PDIA3,KTN1,APOE,TMCC1,SEZ6L,SCD5,COL4A3BP
FUMA	GO:0044092	negative regulation of molecular function	1131	28	3.20599e-05	0.00212981	ATPIF1:CDC42SE1:CR1:SFTPD:DKK3:CD44:RSF1:TESC:STYX:SIN3A:STUB1:WWP2:MAPT:PLAUR:APOE:APOC1:APOC2:AKT1S1:PELI1:CFLAR:CTSZ:ADARB1:PPM1F:PRKAR2A:TLR9:TLR9:PAK2:G3BP2:H2AFY
FUMA	GO:0051050	positive regulation of transport	950	25	3.21644e-05	0.00212981	NADK:ATPIF1:WLS:CACNB2:SFTPD:SORBS1:B3GAT3:CEP290:TESC:ARHGEF7:TNFRSF11A:MBP:APOE:AP2A1:PPP3R1:TTN:MAVS:RAB7A:STIM2:RUFY3:VEGFC:AHI1:ABCB4:ABCB1:FGFR1
FUMA	GO:0006820	anion transport	611	19	3.27457e-05	0.00214893	PRKAA2:SLC35D1:SV2A:PPFIA1:FOLR1:SLC25A3:TNFRSF11A:LRRC8E:APOE:APOC1:APOC2:OSBPL10:SLC25A4:SLC6A19:COL4A3BP:ABCB4:ABCB1:FGFR1:NTRK2
FUMA	GO:0034063	stress granule assembly	18	4	3.32721e-05	0.00216416	PRKAA2:MAPT:CIRBP:G3BP2
FUMA	GO:0032259	methylation	360	14	3.41363e-05	0.00220089	NSUN4:ASH1L:METTL15:ATF7IP:METTL7A:MPHOSPH8:WDR61:FAM173A:GSPT1:WDR82:ZCCHC4:METTL14:H2AFY:PRDM1
FUMA	GO:0015748	organophosphate ester transport	117	8	3.59002e-05	0.00229449	APOE:APOC1:APOC2:OSBPL10:SLC25A4:COL4A3BP:ABCB4:ABCB1
FUMA	GO:0032990	cell part morphogenesis	673	20	3.84759e-05	0.00243791	CDC42:CD44:PTPRO:FBXW8:DCLK1:ARHGEF7:METRN:MAPT:APOE:FN1:ADARB1:TWF2:KALRN:OPA1:RUFY3:PDLIM5:COL4A3BP:POU3F2:FZD3:NTRK2
FUMA	GO:0035295	tube development	1082	27	3.88361e-05	0.00243971	ATPIF1:LMO4:GPR161:GORAB:AKT3:SFTPD:FOLR1:ITGA5:E2F7:CEP290:APAF1:VASH1:JMJD8:APOE:COL3A1:FN1:CTSZ:VEGFC:SGCD:ATXN1:PRDM1:AHI1:ASB4:FZD3:FGFR1:NTRK2:RC3H2
FUMA	GO:0002684	positive regulation of immune system process	1147	28	4.09506e-05	0.00255074	CDC42:EIF2B3:GBP1:ARNT:CR1:CD46:SFTPD:TRIM5:RBM14:ACVR1B:PAWR:TESC:SIN3A:STAT5B:RELB:PELI1:XRCC5:MAVS:TLR9:TLR9:CD86:BCL6:PAK2:CFI:OTUD4:VEGFC:HLA-DRA:PDCD2:RC3H2
FUMA	GO:0016741	transferase activity transferring one carbon groups	224	11	2.94693e-05	0.00255142	NSUN4:ASH1L:METTL15:METTL7A:GATM:FAM173A:GART:WDR82:ZCCHC4:METTL14:PRDM1
FUMA	GO:0006575	cellular modified amino acid metabolic process	37	5	4.21525e-05	0.00256051	DUOX2:DUOXA2:DUOXA1:DUOX1:CRTAP
FUMA	GO:0006811	ion transport	1663	36	4.16377e-05	0.00256051	PRKAA2:SLC35D1:MCOLN2:SV2A:CACNB2:COX15:AHNAK:PPFIA1:FOLR1:SLC25A3:SLC41A2:TESC:SLC24A4:SLC30A4:WWP2:NSF:TNFRSF11A:LRRC8E:TOMM40:APOE:APOC1:APOC2:OSBPL10:TLR9:TLR9:SLC9A9:OPA1:STIM2:SLC25A4:SLC6A19:COL4A3BP:ABCB4:ABCB1:SLC25A37:FGFR1:NTRK2:SLC44A1
FUMA	GO:0031935	regulation of chromatin silencing	37	5	4.21525e-05	0.00256051	ATF7IP:PPHLN1:MPHOSPH8:SIN3A:HIRA
FUMA	GO:0015297	antiporter activity	84	7	3.11476e-05	0.00256189	SLC35E2B:SLC35D1:SLC25A16:SLC24A4:SLC35E1:SLC9A9:SLC25A4
FUMA	GO:0022610	biological adhesion	1404	32	4.33234e-05	0.00261006	CDC42:GBP1:CD46:SFTPD:SORBS1:CD44:ROM1:PPFIA1:ATM:PTPRO:ITGA5:PAWR:TESC:ARHGEF7:NFAT5:STAT5B:DSC2:MBP:PELI1:COL3A1:FN1:FARP2:PPM1F:CD86:BCL6:PAK2:PDLIM5:PCDHA9:PCDHAC1:PCDHAC2:DST:RC3H2
FUMA	GO:0015914	phospholipid transport	89	7	4.52952e-05	0.00262141	APOE:APOC1:APOC2:OSBPL10:COL4A3BP:ABCB4:ABCB1
FUMA	GO:1901987	regulation of cell cycle phase transition	468	16	4.52774e-05	0.00262141	MDM4:CEP57:ATM:E2F7:CEP290:SIN3A:TAOK1:ZNF207:CDC27:CNOT3:ALMS1:CDC25B:ANAPC4:JADE1:H2AFY:ZNF655
FUMA	GO:0044087	regulation of cellular component biogenesis	909	24	4.39381e-05	0.00262141	CDC42:PRKAA2:LMO4:RBM14:PPFIA1:ATM:ATF7IP:STUB1:MAPT:EVI5L:DNAJB1:APOE:MED25:DYNC2LI1:ALMS1:XRCC5:FARP2:PPM1F:TWF2:RAB7A:SLAIN2:PDLIM5:SYNPO2:NTRK2
FUMA	GO:1903827	regulation of cellular protein localization	519	17	4.48525e-05	0.00262141	ATPIF1:PRKAA2:GBP1:PTPN14:SORBS1:B3GAT3:PPFIA1:CEP290:DCLK1:SIN3A:MAPT:AKAP8L:PPP3R1:MAVS:PPM1F:RUFY3:H2AFY
FUMA	GO:1903706	regulation of hemopoiesis	468	16	4.52774e-05	0.00262141	ARNT:CR1:CD46:ACVR1B:TESC:SIN3A:WDR61:STAT5B:TCF3:CLPTM1:TLR9:TLR9:CD86:BCL6:PRDM1:PDCD2:RC3H2
FUMA	GO:0048666	neuron development	1094	27	4.67962e-05	0.00268712	CDC42:FOLR1:PTPRO:CEP290:FBXW8:DCLK1:METRN:MAPT:APOE:AP2A1:CFLAR:FN1:FARP2:CTSZ:ADARB1:TWF2:KALRN:OPA1:PAK2:RUFY3:PDLIM5:POU3F2:PRDM1:AHI1:FZD3:FGFR1:NTRK2
FUMA	GO:0018193	peptidyl amino acid modification	1219	29	4.71878e-05	0.00268861	PRKAA2:ARNT:ASH1L:AKT3:EPC1:CD44:RSF1:ATM:ACVR1B:ITGA5:DCLK1:SIN3A:WDR61:KANSL1:TTN:PPM1F:CRTAP:NKTR:WDR82:PAK2:JADE1:H2AFY:CSNK1A1:CLK4:PHF10:ING3:FGFR1:KAT6A:NTRK2
gProfiler	GO:0042627	chylomicron	14	3	NA	0.00270473	APOC1,APOE,APOC2
FUMA	GO:0032350	regulation of hormone metabolic process	38	5	4.81211e-05	0.00272069	ARNT:DKK3:DUOXA2:DUOXA1:STUB1
FUMA	GO:0010256	endomembrane system organization	422	15	5.04094e-05	0.00282831	CDC42:LYST:FBXW8:ARHGEF7:AKAP8L:STX16:RAB7A:TMCC1:TMEM33:COL4A3BP:CSNK1A1:VTA1:PPP2R2A:HOOK3:LAPTM4B
FUMA	GO:0031252	cell leading edge	397	14	9.70269e-05	0.00285659	WLS:LMO4:CD44:PTPRO:ITGA5:TESC:ARHGEF7:DUOX2:DUOXA2:DUOX1:MAPT:TWF2:RUFY3:DST
FUMA	GO:0042403	thyroid hormone metabolic process	20	4	5.18084e-05	0.00288478	DUOX2:DUOXA2:DUOXA1:DUOX1
FUMA	GO:0006952	defense response	1684	36	5.37534e-05	0.00297059	MCOLN2:GBP1:ASH1L:CR1:CD46:LYST:SFTPD:TRIM5:CD44:RBM14:ATM:DUOX2:DUOXA2:DUOXA1:DUOX1:SIN3A:DNASE1:STAT5B:MAPT:TNFRSF11A:APOE:RELB:PELI1:FN1:XRCC5:MAVS:ADARB1:TLR9:TLR9:ZNF148:BCL6:PAK2:CFI:OTUD4:HLA-DRA:PRDM1:TRIM4
FUMA	GO:0042578	phosphoric ester hydrolase activity	364	14	3.84798e-05	0.00301425	GNB1:DNAJC6:PTPN14:PTPRO:STYX:PDIA3:PNKP:PPP3R1:CDC25B:PPM1F:PRKAR2A:PPM1M:NT5DC2:PPP2R2A
FUMA	GO:0005740	mitochondrial envelope	725	20	0.000105964	0.00303058	AK2:MCL1:SLC25A16:COX15:COX14:SLC25A3:SORD:GATM:RHOT2:CYB5B:TOMM40:MRPL19:MAVS:OPA1:MTHFD2L:SLC25A4:NDUFA2:FBXL4:SLC25A37:SLC44A1
FUMA	GO:0002253	activation of immune response	692	20	5.64546e-05	0.00309658	CDC42:EIF2B3:GBP1:CR1:CD46:SFTPD:TRIM5:RBM14:PAWR:SIN3A:RELB:PELI1:XRCC5:MAVS:TLR9:TLR9:PAK2:CFI:OTUD4:HLA-DRA:RC3H2
FUMA	GO:0007266	Rho protein signal transduction	200	10	5.81061e-05	0.00314029	CDC42:CDC42SE1:ARHGEF7:RHOT2:APOE:COL3A1:FARP2:KALRN:BCL6:RHOBTB3
FUMA	GO:0018394	peptidyl lysine acetylation	161	9	5.77232e-05	0.00314029	PRKAA2:EPC1:RSF1:SIN3A:KANSL1:JADE1:PHF10:ING3:KAT6A
FUMA	GO:0007159	leukocyte cell cell adhesion	331	13	5.85794e-05	0.00314277	CDC42:CD46:SFTPD:CD44:ITGA5:PAWR:NFAT5:STAT5B:PELI1:CD86:BCL6:PAK2:RC3H2
FUMA	GO:0016772	transferase activity transferring phosphorus containing groups	908	24	4.31894e-05	0.00322939	NADK:AK2:EIF2B3:PRKAA2:AKT3:PGM2L1:ATM:ACVR1B:DCLK1:PAPOLA:TAOK1:PNKP:TTN:KALRN:PAK2:CDKL2:COL4A3BP:CSNK1A1:CLK4:CDK13:FGFR1:POLR1E:NMRK1:NTRK2
FUMA	GO:0005788	endoplasmic reticulum lumen	307	12	0.000117164	0.00322977	COLGALT2:TSPAN14:GANAB:KTN1:PDIA3:JMJD8:PLAUR:APOE:COL3A1:FN1:CTSZ:CRTAP
FUMA	GO:0044433	cytoplasmic vesicle part	1483	32	0.000119382	0.00322977	WLS:MCOLN2:SV2A:GPR161:CR1:CD46:TSPAN14:CD44:FOLR1:METTL7A:CEP290:APAF1:PDIA3:SLC30A4:GOSR2:PLAUR:APOE:AP2A1:FN1:XRCC5:AP5S1:STX16:CTSZ:TLR9:TLR9:RAB7A:SLC9A9:VEGFC:HLA-DRA:VTA1:CDK13:LAPTM4B:NTRK2
FUMA	GO:0010639	negative regulation of organelle organization	380	14	6.10772e-05	0.00325271	RBM14:PPFIA1:ATM:SIN3A:TAOK1:ZNF207:MAPT:EVI5L:XRCC5:SPEF1:TWF2:RAB7A:OPA1:H2AFY
FUMA	GO:0034622	cellular protein containing complex assembly	1112	27	6.15139e-05	0.00325271	MRTO4:RBBP4:NSUN4:PRKAA2:SV2A:COX15:RSF1:ATM:ATF7IP:COX14:STUB1:ZNF207:MAPT:CIRBP:MED25:TTN:HIRA:TWF2:OPA1:SLAIN2:G3BP2:H2AFY:NDUFA2:HLA-DRA:KAT6A:PSIP1:POLR1E
FUMA	GO:0031347	regulation of defense response	754	21	6.2532e-05	0.00328293	ASH1L:CR1:SFTPD:TRIM5:RBM14:ATM:DUOXA2:DUOXA1:SIN3A:DNASE1:STAT5B:TNFRSF11A:APOE:RELB:PELI1:XRCC5:MAVS:TLR9:TLR9:BCL6:PAK2:OTUD4
FUMA	GO:0097190	apoptotic signaling pathway	591	18	6.85129e-05	0.00350231	ATPIF1:MCL1:ATF3:CD44:ATM:ACVR1B:PAWR:APAF1:PDIA3:RHOT2:WWOX:PLAUR:PPP3R1:CFLAR:PPM1F:OPA1:PAK2:FGFR1
FUMA	GO:0001101	response to acid chemical	336	13	6.81602e-05	0.00350231	GNB1:PRKAA2:FOLR1:ATM:TESC:COL3A1:XRCC5:PCK1:TWF2:OPA1:HNRNPD:ABCB4:NTRK2
FUMA	GO:0034097	response to cytokine	1182	28	6.86168e-05	0.00350231	CDC42:GBP1:MCL1:PTPN14:TRIM5:CD44:ABCD4:PDIA3:DUOX2:DUOX1:BOLA2:NFAT5:STAT5B:TNFRSF11A:RELB:PELI1:COL3A1:FN1:XRCC5:MAVS:PCK1:BRWD1:CD86:BCL6:PAK2:OTUD4:VEGFC:HLA-DRA
FUMA	GO:0018205	peptidyl lysine modification	384	14	6.82754e-05	0.00350231	PRKAA2:ARNT:ASH1L:EPC1:RSF1:SIN3A:WDR61:KANSL1:WDR82:JADE1:H2AFY:PHF10:ING3:KAT6A
FUMA	GO:0022857	transmembrane transporter activity	1038	26	5.08018e-05	0.00357695	SLC35E2B:SLC35D1:MCOLN2:SV2A:MCL1:CACNB2:SLC25A16:COX15:SLC25A3:SLC41A2:ABCD4:SLC24A4:SLC30A4:ABCA9:LRRC8E:SLC35E1:TOMM40:SLC9A9:STIM2:TMEM144:SLC25A4:SLC6A19:ABCB4:ABCB1:SLC25A37:SLC44A1
FUMA	GO:1990837	sequence specific double stranded dna binding	860	23	5.21865e-05	0.00357695	RBBP4:LMO4:ARNT:ATF3:SMARCC2:E2F7:KLF12:SIN3A:NFAT5:STAT5B:MAPT:TCF3:RELB:CENPB:MAFF:ZNF148:BCL6:HNRNPD:H2AFY:PURA:TFAP2A:POU3F2:PRDM1
FUMA	GO:0006979	response to oxidative stress	435	15	7.08022e-05	0.00358894	PRKAA2:MCL1:ARNT:PAWR:DUOX2:DUOX1:SIN3A:MAPT:APOE:PNKP:CFLAR:HNRNPD:H2AFY:TP53INP1:PSIP1
FUMA	GO:0055085	transmembrane transport	1574	34	7.14472e-05	0.00359683	SLC35E2B:PRKAA2:SLC35D1:MCOLN2:SV2A:MCL1:CACNB2:SLC25A16:SORBS1:COX15:AHNAK:FOLR1:SLC25A3:SLC41A2:TESC:ABCD4:SLC24A4:SLC30A4:WWP2:ABCA9:LRRC8E:SLC35E1:TOMM40:TLR9:TLR9:SLC9A9:OPA1:STIM2:TMEM144:SLC25A4:SLC6A19:ABCB4:ABCB1:SLC25A37:SLC44A1
FUMA	#REF!	apoptosis	87	7	3.91115e-05	0.00363737	AKT3:ENDOD1:ATM:APAF1:PPP3R1:CFLAR:PRKAR2A
FUMA	#REF!	mapk signaling pathway	267	12	3.08775e-05	0.00363737	CDC42:AKT3:CACNB2:TAOK1:MAPT:RELB:RASGRP3:PPP3R1:CDC25B:PAK2:FGFR1:NTRK2
FUMA	GO:0016324	apical plasma membrane	313	12	0.00014032	0.00369632	CD44:FOLR1:PTPRO:DUOX2:DUOX1:AP2A1:FN1:TLR9:TLR9:SLC6A19:ABCB4:ABCB1:FZD3
FUMA	R-HSA-1643685	disease	1072	28	1.23552e-05	0.0037041	ST3GAL3:SLC35D1:SV2A:AKT3:SFTPD:B3GAT3:ZMYM2:ABCD4:SLC24A4:SIN3A:STAT5B:AP2A1:AKT1S1:FN1:XRCC5:CDC25B:CD86:KPNA1:SLC9A9:FXR1:PAK2:SLC25A4:SLC6A19:CSNK1A1:VTA1:ABCB4:FGFR1:PSIP1
FUMA	R-HSA-9006934	signaling by receptor tyrosine kinases	468	17	1.21921e-05	0.0037041	CDC42:AKT3:PTPRO:ARHGEF7:STUB1:WWOX:STAT5B:APOE:AP2A1:COL3A1:FN1:TLR9:TLR9:PAK2:VEGFC:HNRNPH1:FGFR1:NTRK2
FUMA	R-HSA-3700989	transcriptional regulation by tp53	359	15	7.74469e-06	0.0037041	RBBP4:PRKAA2:MDM4:AKT3:ATM:USP2:COX14:E2F7:APAF1:CNOT3:BCL6:PRDM1:CDK13:KAT6A:TP53INP1
FUMA	GO:0007265	Ras protein signal transduction	437	15	7.45081e-05	0.00372541	GNB1:CDC42:CDC42SE1:ARHGEF7:RHOT2:APOE:RASGRP3:COL3A1:FARP2:RASSF1:KALRN:RAB7A:BCL6:G3BP2:RHOBTB3
FUMA	GO:0045619	regulation of lymphocyte differentiation	167	9	7.65608e-05	0.00379467	CR1:CD46:STAT5B:CLPTM1:TLR9:TLR9:CD86:BCL6:PRDM1:RC3H2
FUMA	GO:0042094	interleukin 2 biosynthetic process	22	4	7.69259e-05	0.00379467	SFTPD:PAWR:STAT5B:CD86
FUMA	GO:0006401	RNA catabolic process	391	14	8.26629e-05	0.00404612	MRTO4:RBM8A:ATM:ZC3H14:WDR61:GSPT1:CIRBP:SMG9:CNOT3:FXR1:HNRNPD:METTL14:TNPO1:PPP2R2A
FUMA	GO:0007169	transmembrane receptor protein tyrosine kinase signaling pathway	712	20	8.31244e-05	0.00404612	CDC42:ARNT:SORBS1:CEP57:ITGA5:ARHGEF7:STUB1:STAT5B:PLAUR:AP2A1:AKT1S1:KALRN:RAB7A:OPA1:PAK2:VEGFC:HNRNPH1:AHI1:FGFR1:NTRK2
FUMA	GO:0051186	cofactor metabolic process	442	15	8.45249e-05	0.00406557	NADK:ATPIF1:IBA57:SLC25A16:COX15:FOLR1:ABCD4:DUOX2:DUOXA2:DUOXA1:DUOX1:GART:MTHFD2L:SCD5:NMRK1
FUMA	GO:1901361	organic cyclic compound catabolic process	601	18	8.46302e-05	0.00406557	MRTO4:RBM8A:ATM:APAF1:ZC3H14:WDR61:DNASE1:GSPT1:CIRBP:SMG9:APOE:CNOT3:KPNA1:FXR1:HNRNPD:METTL14:TNPO1:PPP2R2A
FUMA	GO:0050776	regulation of immune response	1072	26	8.56604e-05	0.00408834	CDC42:EIF2B3:GBP1:CR1:CD46:SFTPD:TRIM5:RBM14:PAWR:SIN3A:STAT5B:APOE:RELB:PELI1:PPP3R1:COL3A1:XRCC5:MAVS:TLR9:TLR9:CD86:BCL6:PAK2:CFI:OTUD4:HLA-DRA:RC3H2
FUMA	GO:0001701	in utero embryonic development	344	13	8.63211e-05	0.00409329	SLC35E2B:ARNT:ACVR1B:E2F7:FBXW8:VASH1:SIN3A:CNOT3:MAFF:COL4A3BP:NDUFA2:PRDM1:FGFR1
FUMA	GO:0072359	circulatory system development	1136	27	8.75893e-05	0.00410052	ATPIF1:LMO4:PTPN14:AKT3:EPC1:ROM1:FOLR1:ITGA5:E2F7:FBXW8:VASH1:JMJD8:SMG9:APOE:TTN:COL3A1:CFLAR:FN1:PDLIM5:VEGFC:COL4A3BP:SGCD:PRDM1:AHI1:ASB4:FGFR1:NTRK2
FUMA	GO:0022407	regulation of cell cell adhesion	393	14	8.723e-05	0.00410052	CDC42:CD46:SFTPD:CD44:PAWR:NFAT5:STAT5B:MBP:PELI1:PPM1F:CD86:BCL6:PAK2:RC3H2
FUMA	GO:0048729	tissue morphogenesis	659	19	8.90321e-05	0.00414169	CDC42:WLS:LMO4:GORAB:CD44:FOLR1:ITGA5:CEP290:APAF1:AP2A1:TTN:COL3A1:CTSZ:ADARB1:VEGFC:TFAP2A:AHI1:FZD3:FGFR1
FUMA	GO:0071830	triglyceride rich lipoprotein particle clearance	9	3	9.35306e-05	0.00432358	APOE:APOC1:APOC2
FUMA	GO:0045862	positive regulation of proteolysis	347	13	9.41383e-05	0.00432448	ATPIF1:CR1:APAF1:FBXW8:STUB1:MAPT:MBP:APOE:CFLAR:FN1:PPM1F:CSNK1A1:PDCD2
FUMA	GO:0051338	regulation of transferase activity	956	24	9.54039e-05	0.0043554	LMO4:TESC:STUB1:JMJD8:TAOK1:MAPT:SPAG9:TNFRSF11A:APOE:PNKP:AKT1S1:TTN:XRCC5:CDC25B:ADARB1:PPM1F:PRKAR2A:TLR9:TLR9:DCUN1D1:PAK2:HNRNPD:H2AFY:FGFR1:NTRK2
FUMA	GO:0016301	kinase activity	758	21	6.73625e-05	0.00443245	NADK:AK2:PRKAA2:AKT3:PGM2L1:ATM:ACVR1B:DCLK1:TAOK1:PNKP:TTN:KALRN:PAK2:CDKL2:COL4A3BP:CSNK1A1:CLK4:CDK13:FGFR1:NMRK1:NTRK2
FUMA	GO:0045814	negative regulation of gene expression epigenetic	135	8	9.89594e-05	0.00448983	RBBP4:EPC1:ATF7IP:PPHLN1:MPHOSPH8:SIN3A:HIRA:H2AFY
FUMA	GO:0070201	regulation of establishment of protein localization	723	20	0.000102124	0.00460498	NADK:ATPIF1:WLS:GBP1:PTPN14:B3GAT3:CEP290:WWP2:MAPT:MBP:AKAP8L:PPP3R1:TTN:FN1:MAVS:PPM1F:TLR9:TLR9:RUFY3:VEGFC:SLC25A4
FUMA	GO:0031401	positive regulation of protein modification process	1212	28	0.00010468	0.00464115	PRKAA2:ARNT:TRIM5:CD44:ATM:ACVR1B:ITGA5:WDR61:STUB1:TAOK1:SPAG9:TNFRSF11A:AKAP8L:PLAUR:APOE:PELI1:CFLAR:XRCC5:CDC25B:MAVS:PRKAR2A:TLR9:TLR9:DCUN1D1:BCL6:PAK2:VEGFC:FGFR1:NTRK2
FUMA	GO:0070848	response to growth factor	724	20	0.000104028	0.00464115	ARNT:DKK3:CD44:FOLR1:CEP57:ACVR1B:ITGA5:APAF1:STUB1:WWOX:STAT5B:MAPT:AKT1S1:COL3A1:CFLAR:TWF2:VEGFC:HNRNPH1:FGFR1:NTRK2
FUMA	GO:0030705	cytoskeleton dependent intracellular transport	174	9	0.000104821	0.00464115	CDC42:RHOT2:MAPT:DYNC2LI1:OPA1:TNPO1:PURA:DST:HOOK3
FUMA	GO:0072358	cardiovascular system development	783	21	0.00010583	0.00465781	ATPIF1:PTPN14:AKT3:EPC1:ROM1:FOLR1:ITGA5:E2F7:FBXW8:VASH1:JMJD8:APOE:COL3A1:CFLAR:FN1:VEGFC:SGCD:PRDM1:ASB4:FGFR1:NTRK2
FUMA	GO:0008284	positive regulation of cell population proliferation	965	24	0.000109907	0.00472408	ARNT:CD46:ATF3:RNF187:AKT3:STAT5B:TNFRSF11A:PELI1:CFLAR:FN1:CDC25B:CTSZ:TLR9:TLR9:CD86:EIF5A2:BCL6:VEGFC:PURA:POU3F2:PDCD2:CDK13:FZD3:FGFR1:NTRK2
FUMA	GO:0006508	proteolysis	1744	36	0.000108086	0.00472408	ATPIF1:MDM4:CR1:RNF187:CD44:LDLRAD3:USP2:APAF1:FBXW8:STYX:VASH1:PDIA3:RHBDL1:STUB1:FBXL16:WWP2:MAPT:CDC27:MBP:PLAUR:APOE:PELI1:CFLAR:FN1:ATG4B:CTSZ:USP25:USP16:PPM1F:PAK2:ANAPC4:CFI:OTUD4:CSNK1A1:FBXL4:PDCD2
FUMA	GO:0045580	regulation of T cell differentiation	137	8	0.00010965	0.00472408	CR1:CD46:STAT5B:CLPTM1:CD86:BCL6:PRDM1:RC3H2
FUMA	GO:0016070	RNA metabolic process	1542	33	0.000108824	0.00472408	MRTO4:NSUN4:RBM8A:SF3B4:ARNT:KIN:METTL15:AHNAK:INTS5:ATM:RBMS2:ZC3H14:PAPOLA:ZC3H7A:THUMPD1:MAPT:CIRBP:AKAP8L:ZNF638:RBMS1:ADARB1:ZC3H7B:U2SURP:ZCCHC4:HNRNPD:METTL14:SREK1:CLK4:HNRNPH1:ATXN1:CDK13:PSIP1:RC3H2
FUMA	GO:0045087	innate immune response	966	24	0.000111634	0.00477041	MCOLN2:GBP1:CR1:CD46:LYST:SFTPD:TRIM5:CD44:RBM14:SIN3A:STAT5B:APOE:RELB:PELI1:XRCC5:MAVS:ADARB1:TLR9:TLR9:PAK2:CFI:OTUD4:HLA-DRA:PRDM1:TRIM4
Webgestalt	GO:0008266	poly(U) RNA binding	28	6	4.28121e-06	0.00477907	MSI2;ATXN1;HNRNPH1;CIRBP;RBMS1;RBMS2
Webgestalt	GO:0008187	poly-pyrimidine tract binding	31	6	8.03881e-06	0.00477907	MSI2;ATXN1;HNRNPH1;CIRBP;RBMS1;RBMS2
FUMA	GO:0016071	mRNA metabolic process	560	17	0.000112848	0.00479441	RBM8A:SF3B4:ARNT:KIN:ATM:ZC3H14:PAPOLA:CIRBP:AKAP8L:ADARB1:U2SURP:HNRNPD:METTL14:SREK1:HNRNPH1:CDK13:PSIP1
FUMA	GO:0002521	leukocyte differentiation	507	16	0.000114879	0.00480147	CDC42:CR1:CD46:ATM:TESC:STAT5B:TNFRSF11A:TCF3:CLPTM1:RELB:FARP2:TLR9:TLR9:CD86:BCL6:PRDM1:RC3H2
FUMA	GO:2001235	positive regulation of apoptotic signaling pathway	176	9	0.000114338	0.00480147	ATPIF1:MCL1:ATF3:APAF1:PDIA3:WWOX:PLAUR:PPP3R1:PAK2
FUMA	GO:0030163	protein catabolic process	907	23	0.000114974	0.00480147	ATPIF1:MDM4:RNF187:USP2:FBXW8:STYX:STUB1:FBXL16:WWP2:NSF:CDC27:APOE:AP2A1:PELI1:ATG4B:CTSZ:USP25:USP16:RAB7A:ANAPC4:CSNK1A1:FBXL4:LAPTM4B
FUMA	GO:0008380	RNA splicing	456	15	0.000119089	0.00494523	RBM8A:SF3B4:AHNAK:PAPOLA:CIRBP:AKAP8L:ZNF638:U2SURP:HNRNPD:METTL14:SREK1:CLK4:HNRNPH1:CDK13:PSIP1
FUMA	GO:0007167	enzyme linked receptor protein signaling pathway	1034	25	0.00012285	0.00496594	CDC42:ARNT:SORBS1:DKK3:RBM14:FOLR1:CEP57:ACVR1B:ITGA5:ARHGEF7:STUB1:STAT5B:PLAUR:AP2A1:AKT1S1:COL3A1:KALRN:RAB7A:OPA1:PAK2:VEGFC:HNRNPH1:AHI1:FGFR1:NTRK2
FUMA	GO:0045023	G0 to G1 transition	46	5	0.000122634	0.00496594	RBBP4:MDM4:EPC1:CBX5:APAF1
FUMA	GO:0070647	protein modification by small protein conjugation or removal	1097	26	0.000123642	0.00496594	CDC42:ARNT:MDM4:RNF187:HERC4:TRIM5:USP2:FBXW8:WDR61:STUB1:FBXL16:WWP2:CDC27:RNF152:PELI1:UBE2F:USP25:USP16:DCUN1D1:ANAPC4:OTUD4:FBXL4:ASB4:TRIM4:FBXO24:RC3H2
FUMA	GO:0051252	regulation of RNA metabolic process	219	10	0.000123216	0.00496594	RBM8A:SF3B4:AHNAK:ZC3H14:PAPOLA:CIRBP:SREK1:CLK4:HNRNPH1:RC3H2
FUMA	GO:0042110	T cell activation	457	15	0.000121972	0.00496594	CDC42:CR1:CD46:SFTPD:CD44:PAWR:STAT5B:CLPTM1:RELB:PELI1:CD86:BCL6:PAK2:PRDM1:RC3H2
FUMA	GO:0198738	cell cell signaling by wnt	510	16	0.000122888	0.00496594	GNB1:CDC42:PRKAA2:WLS:DKK3:FOLR1:PTPRO:WDR61:WWOX:APOE:AP2A1:PPP3R1:TMEM237:JADE1:CSNK1A1:FZD3
FUMA	GO:0000209	protein polyubiquitination	309	12	0.000124487	0.00497273	RNF187:TRIM5:FBXW8:STUB1:FBXL16:WWP2:CDC27:RNF152:PELI1:ANAPC4:FBXL4:RC3H2
FUMA	GO:0042445	hormone metabolic process	220	10	0.000127894	0.0050812	ARNT:DKK3:DUOX2:DUOXA2:DUOXA1:DUOX1:STUB1:STAT5B:CTSZ:FGFR1
FUMA	GO:0090309	positive regulation of methylation dependent chromatin silencing	10	3	0.000132569	0.00521059	ATF7IP:PPHLN1:MPHOSPH8
FUMA	GO:0034447	very low density lipoprotein particle clearance	10	3	0.000132569	0.00521059	APOE:APOC1:APOC2
FUMA	GO:0090398	cellular senescence	74	6	0.000134593	0.00526203	AKT3:PAWR:VASH1:BCL6:OPA1:KAT6A
FUMA	GO:0046903	secretion	1628	34	0.000135674	0.00527623	NADK:WLS:MCOLN2:GBP1:SV2A:CR1:CACNB2:TSPAN14:CD44:PPFIA1:ENDOD1:METTL7A:CEP290:APAF1:ARHGEF7:STAT5B:NSF:TNFRSF11A:MBP:PLAUR:TTN:FN1:XRCC5:MAVS:CTSZ:TLR9:TLR9:KALRN:RAB7A:VEGFC:SLC25A4:CDK13:ABCB4:FGFR1:NTRK2
FUMA	GO:0044839	cell cycle G2/M phase transition	267	11	0.000141858	0.00548765	CEP57:ATM:CEP290:SIN3A:TAOK1:AKAP8L:ALMS1:CDC25B:H2AFY:ABCB1:PPP2R2A
FUMA	GO:0005929	cilium	593	17	0.000221413	0.00554087	GNB1:AK2:GPR161:ROM1:CEP290:SPATA7:SORD:DYNC2LI1:ALMS1:TMEM237:SPEF1:PRKAR2A:GUCA1C:JADE1:TNPO1:CSNK1A1:AHI1
FUMA	GO:0000151	ubiquitin ligase complex	281	11	0.000220801	0.00554087	WDR26:FBXW8:STUB1:FBXL16:WWP2:CDC27:DCUN1D1:ANAPC4:FBXL4:ASB4:FBXO24
gProfiler	GO:0044451	nucleoplasm part	1144	40	NA	0.00558427	ZC3H14,ING3,AAGAB,KANSL1,TRIM4,MAPT,KAT6A,RNF187,ARNT,SREK1,FBXL4,TCF3,EPC1,ATF7IP,E2F7,AKAP8L,ANKS1B,SIN3A,ZNF638,MED25,WDR61,AFF4,CENPB,TP53INP1,SNAPC3,RBM8A,SAP130,ZMYM2,PHF10,JADE1,WDR82,RBBP4,CDK13,CBX5,RSF1,RBM14,HIRA,CSNK1A1,MED13L,PRKAA2
FUMA	GO:0050770	regulation of axonogenesis	182	9	0.000147335	0.00566968	PTPRO:METRN:MAPT:APOE:FN1:TWF2:RUFY3:POU3F2:NTRK2
FUMA	GO:0060090	molecular adaptor activity	212	10	9.43401e-05	0.00574776	SORBS1:TRIM5:RBM14:CBX5:STUB1:MAPT:SPAG9:AP2A1:MAVS:SYNPO2
FUMA	GO:0034212	peptide n acetyltransferase activity	69	6	9.10341e-05	0.00574776	EPC1:RSF1:KANSL1:PHF10:ING3:KAT6A
FUMA	GO:0120111	neuron projection cytoplasm	82	6	0.000237054	0.00578758	WLS:ZC3H14:MAPT:OPA1:PURA:DST
FUMA	GO:0048667	cell morphogenesis involved in neuron differentiation	575	17	0.00015439	0.00591025	CDC42:PTPRO:FBXW8:DCLK1:METRN:MAPT:APOE:FN1:ADARB1:TWF2:KALRN:OPA1:RUFY3:PDLIM5:POU3F2:FZD3:NTRK2
FUMA	GO:0006970	response to osmotic stress	76	6	0.000156054	0.005943	SORD:NFAT5:LRRC8E:RELB:XRCC5:ABCB1
FUMA	GO:0051249	regulation of lymphocyte activation	468	15	0.000157927	0.0059833	CDC42:CR1:CD46:SFTPD:ATM:PAWR:STAT5B:CLPTM1:PELI1:TLR9:TLR9:CD86:BCL6:PAK2:PRDM1:RC3H2
FUMA	GO:0006260	DNA replication	271	11	0.000161465	0.00608597	RBBP4:KIN:RBM14:ATM:E2F7:SIN3A:PNKP:RBMS1:BCL6:PURA:FGFR1
FUMA	GO:0051270	regulation of cellular component movement	1053	25	0.000162333	0.00608747	LMO4:AKT3:ATM:PTPRO:ACVR1B:ITGA5:SRGAP1:ARHGEF7:VASH1:DUOX2:DUOXA2:DUOX1:SPAG9:DSC2:APOE:COL3A1:FN1:ADARB1:PPM1F:SRGAP3:BCL6:RUFY3:VEGFC:FGFR1:TP53INP1
FUMA	GO:0001816	cytokine production	750	20	0.000165948	0.00616018	MCOLN2:GBP1:ARNT:ASH1L:CD46:SFTPD:PAWR:NFAT5:STAT5B:MBP:RELB:PELI1:FN1:XRCC5:MAVS:TLR9:TLR9:CD86:BCL6:FGFR1:LAPTM4B
FUMA	GO:0061024	membrane organization	869	22	0.000165165	0.00616018	CDC42:ATPIF1:DNAJC6:FOLR1:RHOT2:NSF:GOSR2:MBP:AKAP8L:APOE:AP2A1:PPP3R1:STX16:CTSZ:RAB7A:TMCC1:OPA1:COL4A3BP:ABCB4:ABCB1:PPP2R2A:LAPTM4B
FUMA	GO:0050778	positive regulation of immune response	871	22	0.000170552	0.00629927	CDC42:EIF2B3:GBP1:CR1:CD46:SFTPD:TRIM5:RBM14:PAWR:SIN3A:STAT5B:RELB:PELI1:XRCC5:MAVS:TLR9:TLR9:CD86:PAK2:CFI:OTUD4:HLA-DRA:RC3H2
FUMA	GO:0070534	protein k63 linked ubiquitination	50	5	0.000183122	0.00672972	TRIM5:STUB1:WWP2:RNF152:PELI1
FUMA	GO:0044257	cellular protein catabolic process	756	20	0.000184176	0.00673481	ATPIF1:RNF187:USP2:FBXW8:STYX:STUB1:FBXL16:WWP2:CDC27:APOE:AP2A1:PELI1:CTSZ:USP25:USP16:RAB7A:ANAPC4:CSNK1A1:FBXL4:LAPTM4B
FUMA	GO:0031253	cell projection membrane	341	12	0.000307384	0.0068646	GNB1:WLS:GPR161:CD44:ROM1:FOLR1:ITGA5:TESC:MAPT:PLAUR:GUCA1C:SLC6A19
FUMA	GO:0042627	chylomicron	13	3	0.000308599	0.0068646	APOE:APOC1:APOC2
FUMA	GO:0031226	intrinsic component of plasma membrane	1697	34	0.00029127	0.0068646	CR1:CD46:CACNB2:TSPAN14:SORBS1:CD44:ROM1:FOLR1:PTPRO:ACVR1B:ITGA5:SLC25A3:DCLK1:KTN1:SLC24A4:DUOX2:DUOX1:TSPAN3:RHBDL1:LRRC8E:PLAUR:CLPTM1:RASGRP3:PTH2R:SLC25A4:SLC6A19:PCDHA9:PCDHAC1:PCDHAC2:HLA-DRA:ABCB4:ESYT2:FGFR1:NTRK2
FUMA	GO:0044441	ciliary part	443	14	0.000299125	0.0068646	GNB1:AK2:GPR161:ROM1:CEP290:SPATA7:DYNC2LI1:TMEM237:SPEF1:PRKAR2A:GUCA1C:JADE1:CSNK1A1:AHI1
FUMA	GO:0022804	active transmembrane transporter activity	356	13	0.000121376	0.00692116	SLC35E2B:SLC35D1:SLC25A16:SLC25A3:ABCD4:SLC24A4:ABCA9:SLC35E1:SLC9A9:SLC25A4:SLC6A19:ABCB4:ABCB1
FUMA	GO:0016410	n acyltransferase activity	104	7	0.000122014	0.00692116	EPC1:RSF1:CERS5:KANSL1:PHF10:ING3:KAT6A
FUMA	GO:0042176	regulation of protein catabolic process	374	13	0.00019674	0.00715859	ATPIF1:MDM4:FBXW8:STYX:STUB1:WWP2:NSF:APOE:ATG4B:USP25:RAB7A:CSNK1A1:LAPTM4B
Webgestalt	GO:0000790	nuclear chromatin	341	16	9.56177e-06	0.00738168	MPHOSPH8;H2AFY;ING3;KAT6A;TCF3;SIN3A;CENPB;SAP130;PHF10;RBBP4;CDK13;CBX5;RSF1;HIRA;SMARCC2;PAWR
FUMA	GO:0007569	cell aging	113	7	0.000204592	0.0073832	AKT3:ATM:PAWR:VASH1:BCL6:OPA1:KAT6A
FUMA	GO:0000070	mitotic sister chromatid segregation	150	8	0.000204921	0.0073832	ATM:ZNF207:CDC27:AKAP8L:TTN:HIRA:ANAPC4:H2AFY
gProfiler	GO:0017000	antibiotic biosynthetic process	20	4	NA	0.00751517	DUOX2,DUOXA2,DUOXA1,DUOX1
gProfiler	GO:0006725	cellular aromatic compound metabolic process	5895	151	NA	0.00751517	ZNF254,METTL15,DUOX2,MPHOSPH8,ZC3H14,HNRNPD,BRWD1,USP16,H2AFY,PAPOLA,LMO4,MAVS,TNPO1,JMJD8,PTPN14,AK2,U2SURP,ATXN1,DUOXA2,OTUD4,ZNF226,GSPT1,XRCC5,ADARB1,TFAP2A,STUB1,ZC3H7B,IBA57,INIP,RC3H2,NADK,MAFF,WWP2,AHI1,MAPT,PRDM1,EWSR1,KAT6A,ENDOD1,SLC35D1,PURA,DUOXA1,SPEN,RNF187,HNRNPH1,CFLAR,FOXJ3,ARNT,ZNF264,SREK1,APOE,PPP3R1,PTOV1,TCF3,NMRK1,CLK4,POU3F2,SCAF4,SCD5,CD86,PNKP,EPC1,DUOX1,ATF7IP,E2F7,ZNF…
gProfiler	GO:0044237	cellular metabolic process	10785	89	NA	0.00751517	GANAB,CTSZ,RNF152,ZNF254,AP2A1,METTL15,DUOX2,MPHOSPH8,ZC3H14,HNRNPD,BRWD1,USP16,WDR24,H2AFY,HS2ST1,FBXL16,MCL1,PAPOLA,LMO4,MAVS,FAM173A,TNPO1,JMJD8,ING3,SECISBP2L,PTPN14,AK2,KANSL1,U2SURP,ATXN1,DUOXA2,FN1,OTUD4,TRIM4,ZNF226,GSPT1,HAGHL,XRCC5,EIF5A2,ADARB1,TFAP2A,STUB1,ZC3H7B,NDUFA2,IBA57,INIP,RC3H2,TTN,NTRK2,NADK,APOC1,SPAG9,MAFF,OSBPL10,WWP2,AHI1,CYB5B,MAPT,PRDM1,EWSR1,DCUN1D1,KAT6A,CERS5,ENDOD1…
gProfiler	GO:0034382	chylomicron remnant clearance	10	3	NA	0.00751517	APOC1,APOE,APOC2
gProfiler	GO:0046483	heterocycle metabolic process	5852	146	NA	0.00751517	ZNF254,METTL15,MPHOSPH8,ZC3H14,HNRNPD,BRWD1,USP16,H2AFY,PAPOLA,LMO4,MAVS,TNPO1,JMJD8,PTPN14,AK2,U2SURP,ATXN1,OTUD4,ZNF226,GSPT1,XRCC5,ADARB1,TFAP2A,STUB1,ZC3H7B,IBA57,INIP,RC3H2,NADK,MAFF,WWP2,AHI1,MAPT,PRDM1,EWSR1,KAT6A,ENDOD1,SLC35D1,PURA,SPEN,RNF187,HNRNPH1,CFLAR,FOXJ3,ARNT,ZNF264,SREK1,APOE,PPP3R1,PTOV1,TCF3,NMRK1,CLK4,POU3F2,SCAF4,SCD5,CD86,PNKP,EPC1,ATF7IP,E2F7,ZNF440,PCK1,AKAP8L,PGM2L1,TNF…
gProfiler	GO:0050665	hydrogen peroxide biosynthetic process	16	4	NA	0.00751517	DUOX2,DUOXA2,DUOXA1,DUOX1
gProfiler	GO:0008152	metabolic process	11612	93	NA	0.00751517	GANAB,CTSZ,RNF152,ZNF254,AP2A1,METTL15,DUOX2,MPHOSPH8,ZC3H14,HNRNPD,BRWD1,USP16,WDR24,H2AFY,HS2ST1,FBXL16,MCL1,PAPOLA,LMO4,MAVS,FAM173A,TNPO1,JMJD8,ING3,SECISBP2L,PTPN14,AK2,KANSL1,U2SURP,ATXN1,DUOXA2,FN1,OTUD4,TRIM4,ZNF226,GSPT1,HAGHL,XRCC5,EIF5A2,ADARB1,TFAP2A,STUB1,ZC3H7B,NDUFA2,IBA57,ABCB4,INIP,RC3H2,TTN,NTRK2,NADK,APOC1,SPAG9,MAFF,OSBPL10,WWP2,AHI1,CYB5B,MAPT,PRDM1,EWSR1,DCUN1D1,KAT6A,CERS5,…
gProfiler	GO:0006807	nitrogen compound metabolic process	10039	145	NA	0.00751517	GANAB,CTSZ,RNF152,ZNF254,AP2A1,METTL15,DUOX2,MPHOSPH8,ZC3H14,HNRNPD,BRWD1,USP16,H2AFY,HS2ST1,FBXL16,PAPOLA,LMO4,MAVS,FAM173A,TNPO1,JMJD8,ING3,SECISBP2L,PTPN14,AK2,KANSL1,U2SURP,ATXN1,DUOXA2,FN1,OTUD4,TRIM4,ZNF226,GSPT1,XRCC5,EIF5A2,ADARB1,TFAP2A,STUB1,ZC3H7B,IBA57,INIP,RC3H2,TTN,NTRK2,NADK,APOC1,SPAG9,MAFF,OSBPL10,WWP2,AHI1,MAPT,PRDM1,EWSR1,DCUN1D1,KAT6A,CERS5,ENDOD1,SLC35D1,RHBDL1,ASB4,NSF,PLAUR…
gProfiler	GO:0090304	nucleic acid metabolic process	5145	132	NA	0.00751517	ZNF254,METTL15,MPHOSPH8,ZC3H14,HNRNPD,BRWD1,USP16,H2AFY,PAPOLA,LMO4,MAVS,TNPO1,PTPN14,U2SURP,ATXN1,OTUD4,ZNF226,GSPT1,XRCC5,ADARB1,TFAP2A,STUB1,ZC3H7B,INIP,RC3H2,MAFF,WWP2,AHI1,MAPT,PRDM1,EWSR1,KAT6A,ENDOD1,PURA,SPEN,RNF187,HNRNPH1,CFLAR,FOXJ3,ARNT,ZNF264,SREK1,APOE,PPP3R1,PTOV1,TCF3,CLK4,POU3F2,SCAF4,CD86,PNKP,EPC1,ATF7IP,E2F7,ZNF440,PCK1,AKAP8L,TNFRSF11A,STAT5B,METTL14,AHNAK,KPNA1,TESC,ZNF417,P…
gProfiler	GO:0006139	nucleobase-containing compound metabolic process	5677	143	NA	0.00751517	ZNF254,METTL15,MPHOSPH8,ZC3H14,HNRNPD,BRWD1,USP16,H2AFY,PAPOLA,LMO4,MAVS,TNPO1,JMJD8,PTPN14,AK2,U2SURP,ATXN1,OTUD4,ZNF226,GSPT1,XRCC5,ADARB1,TFAP2A,STUB1,ZC3H7B,INIP,RC3H2,NADK,MAFF,WWP2,AHI1,MAPT,PRDM1,EWSR1,KAT6A,ENDOD1,SLC35D1,PURA,SPEN,RNF187,HNRNPH1,CFLAR,FOXJ3,ARNT,ZNF264,SREK1,APOE,PPP3R1,PTOV1,TCF3,NMRK1,CLK4,POU3F2,SCAF4,SCD5,CD86,PNKP,EPC1,ATF7IP,E2F7,ZNF440,PCK1,AKAP8L,PGM2L1,TNFRSF11A…
gProfiler	GO:1901360	organic cyclic compound metabolic process	6122	153	NA	0.00751517	ZNF254,METTL15,DUOX2,MPHOSPH8,ZC3H14,HNRNPD,BRWD1,USP16,H2AFY,PAPOLA,LMO4,MAVS,TNPO1,JMJD8,PTPN14,AK2,U2SURP,ATXN1,DUOXA2,OTUD4,ZNF226,GSPT1,XRCC5,ADARB1,TFAP2A,STUB1,ZC3H7B,IBA57,INIP,RC3H2,NADK,APOC1,MAFF,WWP2,AHI1,MAPT,PRDM1,EWSR1,KAT6A,ENDOD1,SLC35D1,PURA,DUOXA1,SPEN,RNF187,HNRNPH1,CFLAR,FOXJ3,ARNT,ZNF264,SREK1,APOE,PPP3R1,PTOV1,TCF3,NMRK1,CLK4,POU3F2,SCAF4,SCD5,CD86,PNKP,EPC1,DUOX1,ATF7IP,E2…
gProfiler	GO:0048518	positive regulation of biological process	6290	55	NA	0.00751517	CTSZ,RNF152,AP2A1,DUOX2,MPHOSPH8,TMEM33,HNRNPD,METRN,USP16,WDR24,H2AFY,MCL1,LMO4,MAVS,WLS,JMJD8,ING3,DUOXA2,FN1,OTUD4,XRCC5,EIF5A2,ADARB1,STIM2,TFAP2A,STUB1,ABCB4,RC3H2,TTN,NTRK2,NADK,APOC1,SPAG9,MAFF,WWP2,AHI1,MAPT,PRDM1,FZD3,DCUN1D1,KAT6A,ASB4,NSF,ALMS1,PLAUR,PURA,CDC42,TSPAN14,SYNPO2,DUOXA1,SPEN,RNF187,COL3A1,PDIA3,GATM
gProfiler	GO:0010720	positive regulation of cell development	568	15	NA	0.00751517	AP2A1,METRN,FN1,XRCC5,NTRK2,SPAG9,MAPT,FZD3,CDC42,DUOXA1,SPEN,CFLAR,APOE,FBXW8,TCF3
gProfiler	GO:0045597	positive regulation of cell differentiation	1002	31	NA	0.00751517	AP2A1,METRN,H2AFY,FN1,XRCC5,NTRK2,SPAG9,AHI1,MAPT,FZD3,ASB4,CDC42,DUOXA1,SPEN,CFLAR,ARNT,APOE,FBXW8,TCF3,CD86,STAT5B,TESC,SIN3A,ACVR1B,ARHGEF7,PTCH2,CD46,RUFY3,TWF2,BCL6,VEGFC
gProfiler	GO:0048522	positive regulation of cellular process	5515	50	NA	0.00751517	CTSZ,RNF152,AP2A1,DUOX2,MPHOSPH8,TMEM33,HNRNPD,METRN,USP16,WDR24,H2AFY,MCL1,LMO4,MAVS,WLS,JMJD8,ING3,DUOXA2,FN1,OTUD4,XRCC5,EIF5A2,TFAP2A,STUB1,ABCB4,RC3H2,TTN,NTRK2,NADK,APOC1,SPAG9,MAFF,WWP2,AHI1,MAPT,FZD3,DCUN1D1,KAT6A,ASB4,NSF,PLAUR,PURA,CDC42,TSPAN14,SYNPO2,DUOXA1,SPEN,RNF187,COL3A1,PDIA3
gProfiler	GO:0009893	positive regulation of metabolic process	3676	99	NA	0.00751517	RNF152,MPHOSPH8,HNRNPD,USP16,H2AFY,LMO4,MAVS,DUOXA2,FN1,OTUD4,XRCC5,EIF5A2,TFAP2A,STUB1,TTN,NTRK2,APOC1,SPAG9,MAFF,WWP2,AHI1,MAPT,PRDM1,DCUN1D1,KAT6A,NSF,ALMS1,PLAUR,CDC42,DUOXA1,RNF187,GATM,CFLAR,FOXJ3,ARNT,APOE,APOC2,PPP3R1,PTOV1,CD44,TCF3,POU3F2,MBP,CD86,PNKP,EPC1,ATF7IP,E2F7,PCK1,AKAP8L,TNFRSF11A,STAT5B,METTL14,CR1,TESC,POLR1E,PPM1F,SIN3A,TAOK1,CIRBP,TRIM5,TLR9,ACVR1B,MED25,FXR1,CD46,WDR61,CE…
gProfiler	GO:0051962	positive regulation of nervous system development	554	14	NA	0.00751517	AP2A1,METRN,FN1,XRCC5,NTRK2,SPAG9,MAPT,FZD3,DUOXA1,SPEN,CFLAR,APOE,FBXW8,TCF3
gProfiler	GO:0050769	positive regulation of neurogenesis	488	14	NA	0.00751517	AP2A1,METRN,FN1,XRCC5,NTRK2,SPAG9,MAPT,FZD3,DUOXA1,SPEN,CFLAR,APOE,FBXW8,TCF3
gProfiler	GO:0051128	regulation of cellular component organization	2488	61	NA	0.00751517	CTSZ,AP2A1,MPHOSPH8,TMEM33,HNRNPD,METRN,BRWD1,H2AFY,LMO4,MAVS,FN1,GSPT1,XRCC5,EIF5A2,STUB1,ABCB4,NTRK2,APOC1,AHI1,MAPT,ALMS1,PLAUR,CDC42,SYNPO2,RHOT2,CFLAR,APOE,PPFIA1,FBXW8,DYNC2LI1,APOC2,PPP3R1,CD44,POU3F2,SCAF4,RASSF1,PNKP,ATF7IP,SYNE3,AKAP8L,LAPTM4B,PPM1F,SIN3A,TAOK1,ACVR1B,CDC27,ARHGEF7,MED25,FXR1,EVI5L,PTCH2,SPEF1,RUFY3,FARP2,DNAJB1,WDR61,TWF2,APAF1,BCL6,SLAIN2,DNAJC6
gProfiler	GO:0019222	regulation of metabolic process	6871	166	NA	0.00751517	CTSZ,RNF152,ZNF254,AP2A1,MPHOSPH8,ZC3H14,HNRNPD,BRWD1,USP16,WDR24,H2AFY,MCL1,PAPOLA,LMO4,MAVS,TNPO1,JMJD8,SECISBP2L,PTPN14,ATXN1,DUOXA2,FN1,OTUD4,ZNF226,GSPT1,XRCC5,EIF5A2,ADARB1,TFAP2A,STUB1,ZC3H7B,ABCB4,RC3H2,TTN,NTRK2,APOC1,SPAG9,MAFF,WWP2,AHI1,MAPT,PRDM1,EWSR1,DCUN1D1,KAT6A,NSF,ALMS1,PLAUR,PURA,CDC42,DUOXA1,SPEN,RNF187,GATM,HNRNPH1,CFLAR,FOXJ3,ARNT,ZNF264,TRNAU1AP,SREK1,APOE,APOC2,PPP3R1,PTOV…
gProfiler	GO:0051171	regulation of nitrogen compound metabolic process	5916	148	NA	0.00751517	CTSZ,ZNF254,AP2A1,MPHOSPH8,ZC3H14,HNRNPD,BRWD1,USP16,H2AFY,PAPOLA,LMO4,MAVS,TNPO1,JMJD8,SECISBP2L,PTPN14,ATXN1,DUOXA2,FN1,OTUD4,ZNF226,GSPT1,XRCC5,EIF5A2,ADARB1,TFAP2A,STUB1,RC3H2,TTN,NTRK2,APOC1,SPAG9,MAFF,WWP2,AHI1,MAPT,PRDM1,EWSR1,DCUN1D1,KAT6A,NSF,PLAUR,PURA,CDC42,DUOXA1,SPEN,RNF187,HNRNPH1,CFLAR,FOXJ3,ARNT,ZNF264,TRNAU1AP,SREK1,APOE,PPP3R1,PTOV1,CD44,TCF3,CLK4,POU3F2,MBP,SCAF4,CD86,PNKP,EPC1…
gProfiler	GO:0019219	regulation of nucleobase-containing compound metabolic process	4050	108	NA	0.00751517	ZNF254,MPHOSPH8,ZC3H14,HNRNPD,BRWD1,USP16,H2AFY,PAPOLA,LMO4,MAVS,TNPO1,JMJD8,PTPN14,ATXN1,OTUD4,ZNF226,XRCC5,TFAP2A,RC3H2,MAFF,WWP2,AHI1,PRDM1,EWSR1,KAT6A,PURA,SPEN,RNF187,HNRNPH1,CFLAR,FOXJ3,ARNT,ZNF264,SREK1,APOE,PPP3R1,PTOV1,TCF3,CLK4,POU3F2,SCAF4,CD86,PNKP,EPC1,ATF7IP,E2F7,ZNF440,PCK1,AKAP8L,TNFRSF11A,STAT5B,METTL14,AHNAK,KPNA1,TESC,ZNF417,PPM1F,SIN3A,USP2,ZNF789,CIRBP,TRIM5,TLR9,ACVR1B,MED25…
gProfiler	GO:0016070	RNA metabolic process	4653	122	NA	0.00751517	ZNF254,METTL15,MPHOSPH8,ZC3H14,HNRNPD,BRWD1,USP16,H2AFY,PAPOLA,LMO4,MAVS,TNPO1,PTPN14,U2SURP,ATXN1,ZNF226,GSPT1,XRCC5,ADARB1,TFAP2A,ZC3H7B,RC3H2,MAFF,WWP2,AHI1,MAPT,PRDM1,EWSR1,KAT6A,PURA,SPEN,RNF187,HNRNPH1,CFLAR,FOXJ3,ARNT,ZNF264,SREK1,APOE,PPP3R1,PTOV1,TCF3,CLK4,POU3F2,SCAF4,CD86,EPC1,ATF7IP,E2F7,ZNF440,PCK1,AKAP8L,TNFRSF11A,STAT5B,METTL14,AHNAK,TESC,ZNF417,POLR1E,PPM1F,SIN3A,USP2,SMG9,ZNF789,…
gProfiler	GO:0006590	thyroid hormone generation	19	4	NA	0.00751517	DUOX2,DUOXA2,DUOXA1,DUOX1
gProfiler	GO:0042403	thyroid hormone metabolic process	23	4	NA	0.00751517	DUOX2,DUOXA2,DUOXA1,DUOX1
gProfiler	GO:0071830	triglyceride-rich lipoprotein particle clearance	10	3	NA	0.00751517	APOC1,APOE,APOC2
FUMA	GO:0061061	muscle structure development	648	18	0.000213908	0.00766939	CDC42:ATF3:EPC1:USP2:SPAG9:TCF3:EID2B:TTN:COL3A1:CFLAR:PLEKHM3:ADARB1:HIRA:MAFF:FXR1:PDLIM5:SGCD:FGFR1
gProfiler	GO:0048483	autonomic nervous system development	45	4	NA	0.00768959	FN1,ADARB1,TFAP2A,FZD3
FUMA	GO:0009986	cell surface	857	21	0.000356309	0.0076934	ATPIF1:CR1:CD46:TSPAN14:CD44:FOLR1:ACVR1B:ITGA5:PDIA3:DUOX2:DUOX1:TNFRSF11A:MBP:PLAUR:CLPTM1:CTSZ:CD86:HLA-DRA:ABCB1:FZD3:RC3H2
FUMA	GO:0098687	chromosomal region	348	12	0.000368914	0.0076934	ATM:CBX5:SIN3A:ZNF207:KANSL1:XRCC5:CENPB:HIRA:WDR82:H2AFY:PURA:CSNK1A1
FUMA	GO:0005774	vacuolar membrane	399	13	0.000365736	0.0076934	GNB1:AHNAK:ABCD4:SLC30A4:WDR24:NSF:RNF152:AP2A1:AP5S1:TLR9:TLR9:RAB7A:HLA-DRA:LAPTM4B
gProfiler	GO:2001252	positive regulation of chromosome organization	178	13	NA	0.00774098	MPHOSPH8,HNRNPD,H2AFY,XRCC5,PNKP,ATF7IP,AKAP8L,SIN3A,WDR61,BCL6,ATM,PPHLN1,ANAPC4
gProfiler	GO:0010468	regulation of gene expression	4649	120	NA	0.00774098	CTSZ,ZNF254,MPHOSPH8,ZC3H14,HNRNPD,BRWD1,USP16,H2AFY,PAPOLA,LMO4,MAVS,TNPO1,SECISBP2L,ATXN1,FN1,ZNF226,GSPT1,XRCC5,EIF5A2,TFAP2A,ZC3H7B,RC3H2,TTN,NTRK2,MAFF,WWP2,AHI1,MAPT,PRDM1,EWSR1,KAT6A,PURA,SPEN,RNF187,HNRNPH1,CFLAR,FOXJ3,ARNT,ZNF264,TRNAU1AP,SREK1,APOE,PPP3R1,PTOV1,TCF3,CLK4,POU3F2,SCAF4,CD86,EPC1,LDLRAD3,ATF7IP,E2F7,ZNF440,PCK1,AKAP8L,TNFRSF11A,STAT5B,METTL14,AHNAK,TESC,ZNF417,POLR1E,PPM1F…
gProfiler	GO:0051252	regulation of RNA metabolic process	3789	102	NA	0.00774098	ZNF254,MPHOSPH8,ZC3H14,HNRNPD,BRWD1,USP16,H2AFY,PAPOLA,LMO4,MAVS,TNPO1,PTPN14,ATXN1,ZNF226,XRCC5,TFAP2A,RC3H2,MAFF,WWP2,AHI1,PRDM1,EWSR1,KAT6A,PURA,SPEN,RNF187,HNRNPH1,CFLAR,FOXJ3,ARNT,ZNF264,SREK1,APOE,PPP3R1,PTOV1,TCF3,CLK4,POU3F2,SCAF4,CD86,EPC1,ATF7IP,E2F7,ZNF440,PCK1,AKAP8L,TNFRSF11A,STAT5B,METTL14,AHNAK,TESC,ZNF417,PPM1F,SIN3A,USP2,ZNF789,CIRBP,TRIM5,TLR9,ACVR1B,MED25,FXR1,DNAJB1,WDR61,CEP2…
gProfiler	GO:0034447	very-low-density lipoprotein particle clearance	11	3	NA	0.00774098	APOC1,APOE,APOC2
FUMA	GO:0004721	phosphoprotein phosphatase activity	181	9	0.000141341	0.0077502	DNAJC6:PTPN14:PTPRO:STYX:PPP3R1:CDC25B:PPM1F:PPM1M:PPP2R2A
FUMA	GO:0016791	phosphatase activity	268	11	0.000146559	0.00777706	DNAJC6:PTPN14:PTPRO:STYX:PNKP:PPP3R1:CDC25B:PPM1F:PPM1M:NT5DC2:PPP2R2A
FUMA	GO:0022411	cellular component disassembly	537	16	0.000219872	0.00784494	ATPIF1:DNAJC6:CD44:SMARCC2:APAF1:GSPT1:TAOK1:NSF:AKAP8L:MRPL19:SPEF1:TWF2:KPNA1:EIF5A2:CSNK1A1:VTA1
FUMA	GO:0003730	mrna 3 utr binding	76	6	0.000156054	0.00784803	RBMS2:SECISBP2L:CIRBP:RBMS1:FXR1:HNRNPD
FUMA	GO:0043565	sequence specific dna binding	1114	26	0.000157438	0.00784803	RBBP4:FOXJ3:LMO4:ARNT:ATF3:SMARCC2:E2F7:KLF12:SIN3A:NFAT5:STAT5B:MAPT:TCF3:RELB:XRCC5:CENPB:MAFF:TLR9:TLR9:ZNF148:BCL6:HNRNPD:H2AFY:PURA:TFAP2A:POU3F2:PRDM1
gProfiler	GO:0045177	apical part of cell	396	13	NA	0.00790486	AP2A1,DUOX2,DUOXA2,FN1,ABCB4,FZD3,CDC42,DYNC2LI1,CD44,DUOX1,VASH1,SLC6A19,TLR9
gProfiler	GO:0034385	triglyceride-rich plasma lipoprotein particle	21	3	NA	0.00790486	APOC1,APOE,APOC2
gProfiler	GO:0034361	very-low-density lipoprotein particle	21	3	NA	0.00790486	APOC1,APOE,APOC2
gProfiler	GO:0032991	protein-containing complex	5641	65	NA	0.00791044	GANAB,SGCD,AP2A1,DUOX2,MPHOSPH8,ZC3H14,TMEM33,HNRNPD,MSI2,WDR24,H2AFY,FBXL16,MCL1,LMO4,RABGAP1,ING3,SECISBP2L,KANSL1,FN1,GSPT1,XRCC5,EIF5A2,STUB1,NDUFA2,INIP,RC3H2,NTRK2,APOC1,WWP2,AHI1,MAPT,DCUN1D1,KAT6A,ASB4,PURA,CDC42,SYNPO2,SPEN,COL3A1,C15ORF48,PDIA3,HNRNPH1,CFLAR,ARNT,TOMM40,SREK1,APOE,FBXW8,DYNC2LI1,APOC2,FBXL4,PPP3R1,PTOV1,CD44,TCF3,POU3F2,MBP,WDR26,COL4A3BP,EPC1,DUOX1,ATF7IP,C1QTNF7,E2F7,…
FUMA	GO:0046649	lymphocyte activation	709	19	0.000226121	0.00802892	CDC42:CR1:CD46:SFTPD:CD44:ATM:PAWR:STAT5B:TCF3:CLPTM1:RELB:PELI1:TLR9:TLR9:CD86:BCL6:PAK2:PURA:PRDM1:RC3H2
FUMA	GO:0061919	process utilizing autophagic mechanism	485	15	0.00023155	0.00818218	ATPIF1:PRKAA2:MCL1:TRIM5:ATM:STUB1:WDR24:MAPT:RNF152:TOMM40:ATG4B:RAB7A:SYNPO2:VTA1:TP53INP1
FUMA	GO:0060429	epithelium development	1273	28	0.00023429	0.00821639	CDC42:PTCH2:LMO4:GPR161:GORAB:CD44:FOLR1:PTPRO:PPHLN1:ACVR1B:ITGA5:E2F7:CEP290:APAF1:CCDC78:STAT5B:DSC2:AP2A1:PCK1:CTSZ:MAFF:VEGFC:H2AFY:TFAP2A:PRDM1:AHI1:FZD3:FGFR1
FUMA	GO:0050865	regulation of cell activation	596	17	0.000234754	0.00821639	CDC42:LMO4:CR1:CD46:SFTPD:ATM:PAWR:STAT5B:APOE:CLPTM1:PELI1:TLR9:TLR9:CD86:BCL6:PAK2:PRDM1:RC3H2
gProfiler	GO:0034641	cellular nitrogen compound metabolic process	6441	156	NA	0.00826323	CTSZ,ZNF254,METTL15,MPHOSPH8,ZC3H14,HNRNPD,BRWD1,USP16,H2AFY,PAPOLA,LMO4,MAVS,TNPO1,JMJD8,SECISBP2L,PTPN14,AK2,U2SURP,ATXN1,OTUD4,ZNF226,GSPT1,XRCC5,EIF5A2,ADARB1,TFAP2A,STUB1,ZC3H7B,IBA57,INIP,RC3H2,NADK,MAFF,WWP2,AHI1,MAPT,PRDM1,EWSR1,KAT6A,CERS5,ENDOD1,SLC35D1,PURA,SPEN,RNF187,HNRNPH1,CFLAR,FOXJ3,ARNT,ZNF264,TRNAU1AP,SREK1,APOE,PPP3R1,PTOV1,TCF3,NMRK1,CLK4,POU3F2,SCAF4,SCD5,CD86,COL4A3BP,PNKP,…
FUMA	GO:0033700	phospholipid efflux	12	3	0.000239254	0.0082949	APOE:APOC1:APOC2
FUMA	GO:0045472	response to ether	12	3	0.000239254	0.0082949	OPA1:HNRNPD:ABCB4
FUMA	GO:0051056	regulation of small GTPase mediated signal transduction	332	12	0.000241249	0.0083248	CDC42:CDC42SE1:SRGAP1:ARHGEF7:RHOT2:APOE:COL3A1:FARP2:RALGAPA2:SRGAP3:KALRN:BCL6
FUMA	GO:0035239	tube morphogenesis	894	22	0.000244629	0.00840198	ATPIF1:LMO4:AKT3:FOLR1:ITGA5:E2F7:CEP290:APAF1:VASH1:JMJD8:APOE:COL3A1:FN1:CTSZ:VEGFC:SGCD:PRDM1:AHI1:ASB4:FZD3:FGFR1:NTRK2
FUMA	WP382	mapk signaling pathway	249	12	1.5533e-05	0.00843439	CDC42:AKT3:CACNB2:TAOK1:MAPT:RELB:RASGRP3:PPP3R1:CDC25B:PAK2:FGFR1:NTRK2
FUMA	GO:0048732	gland development	435	14	0.000248929	0.0084705	WLS:LMO4:ASH1L:DKK3:E2F7:DUOX2:STAT5B:TNFRSF11A:CFLAR:PCK1:KALRN:HNRNPD:POU3F2:FGFR1
FUMA	GO:0045088	regulation of innate immune response	435	14	0.000248929	0.0084705	CR1:SFTPD:TRIM5:RBM14:SIN3A:STAT5B:APOE:RELB:PELI1:XRCC5:MAVS:TLR9:TLR9:PAK2:OTUD4
gProfiler	GO:0080090	regulation of primary metabolic process	6094	149	NA	0.00850519	CTSZ,ZNF254,AP2A1,MPHOSPH8,ZC3H14,HNRNPD,BRWD1,USP16,H2AFY,PAPOLA,LMO4,MAVS,TNPO1,JMJD8,SECISBP2L,PTPN14,ATXN1,FN1,OTUD4,ZNF226,GSPT1,XRCC5,EIF5A2,ADARB1,TFAP2A,STUB1,ABCB4,RC3H2,TTN,NTRK2,APOC1,SPAG9,MAFF,WWP2,AHI1,MAPT,PRDM1,EWSR1,DCUN1D1,KAT6A,NSF,PLAUR,PURA,CDC42,SPEN,RNF187,HNRNPH1,CFLAR,FOXJ3,ARNT,ZNF264,TRNAU1AP,SREK1,APOE,APOC2,PPP3R1,PTOV1,CD44,TCF3,CLK4,POU3F2,MBP,SCAF4,CD86,PNKP,EPC1,L…
FUMA	GO:0050772	positive regulation of axonogenesis	83	6	0.00025328	0.00857885	METRN:MAPT:FN1:TWF2:RUFY3:NTRK2
FUMA	GO:0003779	actin binding	421	14	0.000178379	0.0086304	GBP1:CACNB2:SORBS1:PAWR:VASH1:LINC00341:SYNE3:DNASE1:MAPT:TTN:EPB41L1:TWF2:PDLIM5:SYNPO2:DST
FUMA	GO:0005667	transcription factor complex	354	12	0.000429657	0.00877728	LMO4:ARNT:RBM14:ATF7IP:E2F7:SIN3A:NFAT5:WWOX:TCF3:MED25:PTOV1:POU3F2
FUMA	GO:0005720	nuclear heterochromatin	34	4	0.000441334	0.00883551	CBX5:MPHOSPH8:CENPB:H2AFY
gProfiler	GO:0033700	phospholipid efflux	12	3	NA	0.00887107	APOC1,APOE,APOC2
FUMA	GO:0051020	GTPase binding	531	16	0.000193929	0.00911468	GNB1:EIF2B3:CDC42SE1:SRGAP1:ARHGEF7:NSF:RNF152:EVI5L:RASGRP3:FARP2:SRGAP3:KALRN:PAK2:TNPO1:RHOBTB3:RABGAP1
FUMA	GO:0007050	cell cycle arrest	243	10	0.000285081	0.00956777	PRKAA2:MDM4:ATM:E2F7:VASH1:PRR11:MED25:CNOT3:RASSF1:TP53INP1
FUMA	GO:0031589	cell substrate adhesion	338	12	0.000283814	0.00956777	CDC42:GBP1:SORBS1:CD44:PPFIA1:PTPRO:ITGA5:ARHGEF7:COL3A1:FN1:PPM1F:BCL6
FUMA	GO:0070661	leukocyte proliferation	290	11	0.000289052	0.00965695	CD46:SFTPD:ATM:PAWR:STAT5B:PELI1:TLR9:TLR9:CD86:BCL6:PURA:RC3H2
FUMA	GO:0000904	cell morphogenesis involved in differentiation	725	19	0.000298347	0.0099109	CDC42:GBP1:PTPRO:FBXW8:DCLK1:ARHGEF7:METRN:MAPT:APOE:FN1:ADARB1:TWF2:KALRN:OPA1:RUFY3:PDLIM5:POU3F2:FZD3:NTRK2
FUMA	GO:0017144	drug metabolic process	340	12	0.00029935	0.0099109	NADK:ATPIF1:AK2:FOLR1:ABCD4:DUOX2:DUOXA2:DUOXA1:DUOX1:GATM:STAT5B:MTHFD2L
gProfiler	GO:0000123	histone acetyltransferase complex	82	7	NA	0.00997568	ING3,KANSL1,KAT6A,EPC1,PHF10,JADE1,RSF1
gProfiler	GO:0051130	positive regulation of cellular component organization	1216	21	NA	0.0100064	AP2A1,MPHOSPH8,HNRNPD,METRN,H2AFY,FN1,XRCC5,EIF5A2,STUB1,ABCB4,NTRK2,AHI1,MAPT,PLAUR,CDC42,SYNPO2,CFLAR,APOE,FBXW8,APOC2,PPP3R1
FUMA	GO:0033127	regulation of histone phosphorylation	13	3	0.000308599	0.0101259	ATM:AKAP8L:H2AFY
FUMA	GO:0090308	regulation of methylation dependent chromatin silencing	13	3	0.000308599	0.0101259	ATF7IP:PPHLN1:MPHOSPH8
FUMA	R-HSA-1280218	adaptive immune system	807	22	5.74049e-05	0.0104674	CDC42:AKT3:HERC4:SFTPD:FBXW8:PDIA3:STUB1:FBXL16:CDC27:AP2A1:RASGRP3:PPP3R1:COL3A1:UBE2F:CD86:RAB7A:PAK2:ANAPC4:HLA-DRA:FBXL4:ASB4:TRIM4
FUMA	R-HSA-428543	inactivation of cdc42 and rac1	8	3	6.28461e-05	0.0104674	CDC42:SRGAP1:SRGAP3
FUMA	R-HSA-5633007	regulation of tp53 activity	159	9	5.23865e-05	0.0104674	RBBP4:PRKAA2:MDM4:AKT3:ATM:USP2:PRDM1:KAT6A:TP53INP1
FUMA	R-HSA-6806003	regulation of tp53 expression and degradation	37	5	4.21525e-05	0.0104674	MDM4:AKT3:ATM:USP2:PRDM1
gProfiler	GO:0015914	phospholipid transport	90	6	NA	0.0106147	ABCB4,APOC1,OSBPL10,APOE,APOC2,COL4A3BP
gProfiler	GO:0032839	dendrite cytoplasm	33	3	NA	0.0107069	ZC3H14,WLS,PURA
gProfiler	GO:0007420	brain development	743	25	NA	0.0108264	DUOX2,HNRNPD,WLS,ATXN1,XRCC5,NTRK2,AHI1,FZD3,CDC42,COL3A1,POU3F2,MBP,SEZ6L,AKT3,METTL14,HOOK3,SIN3A,SMG9,DCLK1,GART,DNAJB1,CEP290,APAF1,EIF2B3,ATM
gProfiler	GO:0031937	positive regulation of chromatin silencing	14	4	NA	0.0108264	MPHOSPH8,ATF7IP,SIN3A,PPHLN1
gProfiler	GO:0045666	positive regulation of neuron differentiation	382	11	NA	0.0108264	AP2A1,METRN,FN1,NTRK2,SPAG9,MAPT,DUOXA1,CFLAR,APOE,FBXW8,TCF3
FUMA	GO:2001233	regulation of apoptotic signaling pathway	396	13	0.000340498	0.0110737	ATPIF1:MCL1:ATF3:CD44:APAF1:PDIA3:WWOX:PLAUR:PPP3R1:CFLAR:OPA1:PAK2:FGFR1
FUMA	GO:0031267	small GTPase binding	435	14	0.000248929	0.0111189	CDC42SE1:SRGAP1:ARHGEF7:NSF:RNF152:EVI5L:RASGRP3:FARP2:SRGAP3:KALRN:PAK2:TNPO1:RHOBTB3:RABGAP1
FUMA	GO:0003714	transcription corepressor activity	241	10	0.000266941	0.0111189	SPEN:ATF3:ATF7IP:E2F7:PAWR:KLF12:SIN3A:DNAJB1:RELB:HIRA
FUMA	GO:0004197	cysteine type endopeptidase activity	118	7	0.000267043	0.0111189	USP2:PDIA3:CFLAR:ATG4B:CTSZ:USP25:USP16
FUMA	GO:0008080	n acetyltransferase activity	84	6	0.000270368	0.0111189	EPC1:RSF1:KANSL1:PHF10:ING3:KAT6A
FUMA	GO:0070717	poly purine tract binding	30	4	0.000269616	0.0111189	RBMS2:ZC3H14:RBMS1:ATXN1
FUMA	GO:0090068	positive regulation of cell cycle process	296	11	0.000343799	0.0111318	CDC42:MDM4:ATM:E2F7:SIN3A:MED25:CNOT3:CDC25B:ANAPC4:H2AFY:FGFR1
gProfiler	GO:0010467	gene expression	5596	138	NA	0.0111982	CTSZ,ZNF254,METTL15,MPHOSPH8,ZC3H14,HNRNPD,BRWD1,USP16,H2AFY,PAPOLA,LMO4,MAVS,TNPO1,SECISBP2L,U2SURP,ATXN1,DUOXA2,FN1,ZNF226,GSPT1,XRCC5,EIF5A2,ADARB1,TFAP2A,STUB1,ZC3H7B,RC3H2,TTN,NTRK2,MAFF,WWP2,AHI1,MAPT,PRDM1,EWSR1,KAT6A,PURA,TSPAN14,SPEN,RNF187,HNRNPH1,CFLAR,FOXJ3,ARNT,ZNF264,TRNAU1AP,SREK1,APOE,PPP3R1,PTOV1,TCF3,CLK4,POU3F2,SCAF4,CD86,EPC1,LDLRAD3,ATF7IP,E2F7,ZNF440,PCK1,AKAP8L,TNFRSF11A,ST…
gProfiler	GO:0032350	regulation of hormone metabolic process	40	4	NA	0.0111982	DUOXA2,STUB1,DUOXA1,ARNT
FUMA	GO:0045785	positive regulation of cell adhesion	397	13	0.000348741	0.0112423	CDC42:CD46:CD44:ATM:ITGA5:ARHGEF7:NFAT5:STAT5B:FN1:PPM1F:CD86:BCL6:PAK2
FUMA	GO:0030098	lymphocyte differentiation	346	12	0.000350356	0.011245	CR1:CD46:ATM:STAT5B:TCF3:CLPTM1:RELB:TLR9:TLR9:CD86:BCL6:PRDM1:RC3H2
gProfiler	GO:0015297	antiporter activity	83	7	NA	0.011254	SLC35E2B,SLC9A9,SLC35D1,SLC35E1,SLC24A4,SLC25A4,SLC25A16
gProfiler	GO:0019899	enzyme binding	2228	71	NA	0.011254	RNF152,AP2A1,HNRNPD,H2AFY,MAVS,RABGAP1,TNPO1,PTPN14,KANSL1,DUOXA2,FN1,XRCC5,STUB1,TTN,SPAG9,MAPT,PRDM1,DCUN1D1,ASB4,NSF,PLAUR,CDC42,TSPAN14,COL3A1,CFLAR,SRGAP1,SRGAP3,APOC2,PPP3R1,TCF3,MBP,SCAF4,AKAP11,AKAP8L,LAPTM4B,USP2,TRIM5,ACVR1B,CDC27,ARHGEF7,EVI5L,PPP2R2A,FARP2,DNAJB1,TWF2,EIF2B3,PDCD2,RELB,ABCB1,ZMYM2,CEP68,PDLIM5,CDC25B,GBP1,RBBP4,GNB1,CDK13,USP25,CBX5,PAK2,CDC42SE1,OPA1,MDM4,SV2A,WWOX,A…
gProfiler	GO:0003723	RNA binding	1902	26	NA	0.011254	GANAB,ZC3H14,HNRNPD,MSI2,PAPOLA,TNPO1,SECISBP2L,U2SURP,ATXN1,OTUD4,GSPT1,XRCC5,EIF5A2,ADARB1,ZC3H7B,IBA57,RC3H2,MAPT,EWSR1,PURA,SPEN,PDIA3,HNRNPH1,KTN1,TRNAU1AP,SREK1
gProfiler	GO:0016740	transferase activity	2359	39	NA	0.011254	RNF152,METTL15,HS2ST1,FBXL16,PAPOLA,FAM173A,ING3,AK2,KANSL1,TRIM4,STUB1,IBA57,RC3H2,TTN,NTRK2,NADK,WWP2,PRDM1,KAT6A,CERS5,ASB4,CDC42,RNF187,GATM,FBXW8,FBXL4,NMRK1,C18ORF25,CLK4,COL4A3BP,ST3GAL3,PNKP,EPC1,AKT3,HERC4,AKAP8L,PGM2L1,FBXO24,METTL14
gProfiler	GO:0019787	ubiquitin-like protein transferase activity	417	13	NA	0.011254	RNF152,FBXL16,STUB1,RC3H2,WWP2,ASB4,CDC42,RNF187,FBXW8,FBXL4,C18ORF25,HERC4,FBXO24
gProfiler	GO:0004842	ubiquitin-protein transferase activity	391	13	NA	0.011254	RNF152,FBXL16,STUB1,RC3H2,WWP2,ASB4,CDC42,RNF187,FBXW8,FBXL4,C18ORF25,HERC4,FBXO24
FUMA	GO:0002683	negative regulation of immune system process	451	14	0.000357766	0.0114329	GBP1:CR1:SFTPD:ATM:PAWR:WDR61:STAT5B:PELI1:COL3A1:TLR9:TLR9:CD86:BCL6:OTUD4:RC3H2
FUMA	GO:0002252	immune effector process	1242	27	0.000362436	0.0115321	CDC42:GBP1:CR1:CD46:LYST:TSPAN14:TRIM5:CD44:METTL7A:CEP290:APAF1:SIN3A:DNASE1:STAT5B:PLAUR:RELB:XRCC5:MAVS:CTSZ:ADARB1:TLR9:TLR9:CD86:RAB7A:BCL6:CFI:CDK13:RC3H2
FUMA	GO:0070822	sin3 type complex	16	3	0.0005902	0.0115841	RBBP4:SIN3A:SAP130
FUMA	GO:0072593	reactive oxygen species metabolic process	164	8	0.000374576	0.011816	ATPIF1:SFTPD:DUOX2:DUOXA2:DUOXA1:DUOX1:MAPT:TFAP2A
FUMA	GO:0034248	regulation of cellular amide metabolic process	453	14	0.000373875	0.011816	TRNAU1AP:NSUN4:RBM8A:SECISBP2L:CIRBP:APOE:CNOT3:USP16:EIF5A2:FXR1:ZCCHC4:HNRNPD:METTL14:PURA
FUMA	GO:0030029	actin filament based process	739	19	0.0003773	0.0118511	CDC42:CACNB2:SORBS1:PPFIA1:PAWR:TAOK1:DSC2:ALMS1:TTN:CFLAR:FARP2:EPB41L1:PPM1F:TWF2:BCL6:RUFY3:SYNPO2:RHOBTB3:SGCD
FUMA	GO:0042803	protein homodimerization activity	846	21	0.000300715	0.0120653	ATPIF1:GBP1:MCL1:ARNT:ATF3:TRIM5:CEP57:PTPRO:CBX5:TESC:STUB1:MAPT:TCF3:APOE:APOC2:TLR9:TLR9:TMCC1:FXR1:TFAP2A:FGFR1:NTRK2
FUMA	GO:0060996	dendritic spine development	90	6	0.000392788	0.012233	CDC42:APOE:KALRN:OPA1:PAK2:PDLIM5
FUMA	GO:0045787	positive regulation of cell cycle	402	13	0.00039255	0.012233	CDC42:MDM4:ATM:USP2:E2F7:SIN3A:STAT5B:MED25:CNOT3:CDC25B:ANAPC4:H2AFY:FGFR1
FUMA	GO:0043414	macromolecule methylation	301	11	0.000395851	0.0122764	NSUN4:ASH1L:METTL15:ATF7IP:MPHOSPH8:WDR61:GSPT1:WDR82:ZCCHC4:METTL14:H2AFY
gProfiler	GO:0034364	high-density lipoprotein particle	27	3	NA	0.0125035	APOC1,APOE,APOC2
FUMA	GO:0016605	PML body	99	6	0.000653057	0.0125713	CBX5:ZMYM2:AKAP8L:HIRA:KAT6A:TP53INP1
FUMA	GO:0035869	ciliary transition zone	66	5	0.000673016	0.0127111	CEP290:SPATA7:DYNC2LI1:TMEM237:AHI1
FUMA	GO:0051640	organelle localization	685	18	0.000414306	0.0127948	CDC42:SV2A:CACNB2:FOLR1:CEP57:CEP290:LINC00341:SYNE3:RHOT2:MAPT:NSF:GOSR2:ALMS1:STX16:CTSZ:OPA1:AHI1:ESYT2:HOOK3
FUMA	GO:0010817	regulation of hormone levels	513	15	0.000417599	0.0128425	NADK:ARNT:DKK3:ARHGEF7:DUOX2:DUOXA2:DUOXA1:DUOX1:SIN3A:STUB1:STAT5B:CTSZ:KALRN:SLC25A4:FGFR1
gProfiler	GO:0120111	neuron projection cytoplasm	85	4	NA	0.0129859	ZC3H14,WLS,MAPT,PURA
FUMA	GO:0030888	regulation of B cell proliferation	60	5	0.000433066	0.0132626	ATM:PAWR:PELI1:TLR9:TLR9:BCL6
FUMA	GO:0030901	midbrain development	92	6	0.000441996	0.0134799	CDC42:WLS:MBP:ZNF148:FZD3:FGFR1
FUMA	GO:1904949	ATPase complex	102	6	0.000764351	0.0135931	RBBP4:RSF1:SMARCC2:ABCD4:PHF10:ING3
FUMA	GO:0099568	cytoplasmic region	488	14	0.000774035	0.0135931	CDC42:WLS:ARHGEF7:SPATA7:ZC3H14:MAPT:DYNC2LI1:SPEF1:CTSZ:PRKAR2A:OPA1:RHOBTB3:PURA:DST
FUMA	GO:0000118	histone deacetylase complex	68	5	0.000771643	0.0135931	RBBP4:CBX5:SIN3A:SAP130:ING3
FUMA	GO:0045202	synapse	1169	25	0.000750971	0.0135931	CDC42:DNAJC6:SV2A:CACNB2:PPFIA1:PTPRO:ITGA5:ANKS1B:DCLK1:MAPT:NSF:DNAJB1:APOE:DLGAP4:STX16:KPNA1:FXR1:PAK2:RGS12:HNRNPD:PDLIM5:PURA:PPP2R2A:FZD3:NTRK2
FUMA	GO:0030099	myeloid cell differentiation	408	13	0.000451218	0.0137043	CDC42:ATPIF1:ARNT:ACVR1B:TESC:SIN3A:WDR61:STAT5B:TNFRSF11A:RELB:FARP2:BCL6:KAT6A
GSEA	GO:0048483	autonomic nervous system development	43	NA	0.0001	0.0138125	NA
GSEA	GO:0003729	mRNA binding	195	NA	0.0001	0.0138125	NA
GSEA	GO:0016071	mRNA metabolic process	433	NA	0.0001	0.0138125	NA
GSEA	GO:0034249	negative regulation of cellular amide metabolic process	121	NA	0.0001	0.0138125	NA
GSEA	GO:0032007	negative regulation of TOR signaling	38	NA	0.0001	0.0138125	NA
GSEA	GO:0005635	nuclear envelope	386	NA	0.0001	0.0138125	NA
GSEA	GO:0016607	nuclear speck	333	NA	0.0001	0.0138125	NA
GSEA	GO:2001252	positive regulation of chromosome organization	144	NA	0.0001	0.0138125	NA
GSEA	GO:2000573	positive regulation of DNA biosynthetic process	61	NA	0.0001	0.0138125	NA
GSEA	GO:0051973	positive regulation of telomerase activity	34	NA	0.0001	0.0138125	NA
GSEA	GO:0032206	positive regulation of telomere maintenance	42	NA	0.0001	0.0138125	NA
GSEA	GO:1904358	positive regulation of telomere maintenance via telomere lengthening	34	NA	0.0001	0.0138125	NA
GSEA	GO:0000209	protein polyubiquitination	273	NA	0.0001	0.0138125	NA
GSEA	GO:0050770	regulation of axonogenesis	162	NA	0.0001	0.0138125	NA
GSEA	GO:0010769	regulation of cell morphogenesis involved in differentiation	260	NA	0.0001	0.0138125	NA
GSEA	GO:0033044	regulation of chromosome organization	288	NA	0.0001	0.0138125	NA
GSEA	GO:0050684	regulation of mRNA processing	113	NA	0.0001	0.0138125	NA
GSEA	GO:0051252	regulation of RNA metabolic process	183	NA	0.0001	0.0138125	NA
GSEA	GO:0043484	regulation of RNA splicing	107	NA	0.0001	0.0138125	NA
GSEA	GO:0032204	regulation of telomere maintenance	64	NA	0.0001	0.0138125	NA
GSEA	GO:1904356	regulation of telomere maintenance via telomere lengthening	52	NA	0.0001	0.0138125	NA
GSEA	GO:0008380	RNA splicing	349	NA	0.0001	0.0138125	NA
GSEA	GO:0016233	telomere capping	44	NA	0.0001	0.0138125	NA
GSEA	GO:0006590	thyroid hormone generation	16	NA	0.0001	0.0138125	NA
GSEA	GO:0042403	thyroid hormone metabolic process	20	NA	0.0001	0.0138125	NA
GSEA	GO:0000380	alternative mrna splicing via spliceosome	59	NA	0.0001	0.0138125	NA
GSEA	GO:0004197	cysteine type endopeptidase activity	83	NA	0.0001	0.0138125	NA
GSEA	GO:0003730	mrna 3 utr binding	66	NA	0.0001	0.0138125	NA
GSEA	GO:0048024	regulation of mrna splicing via spliceosome	80	NA	0.0001	0.0138125	NA
GSEA	GO:0019219	regulation of nucleobase containing compound metabolic process	416	NA	0.0001	0.0138125	NA
GSEA	GO:0003727	single stranded rna binding	70	NA	0.0001	0.0138125	NA
GSEA	GO:0019787	ubiquitin like protein transferase activity	351	NA	0.0001	0.0138125	NA
GSEA	R-HSA-983168	antigen processing: ubiquitination proteasome degradation	269	NA	0.0001	0.0138125	NA
GSEA	R-HSA-209776	metabolism of amine derived hormones	16	NA	0.0001	0.0138125	NA
GSEA	R-HSA-6806003	regulation of tp53 expression and degradation	36	NA	0.0001	0.0138125	NA
FUMA	R-HSA-162592	integration of provirus	9	3	9.35306e-05	0.0140202	XRCC5:KPNA1:PSIP1
FUMA	GO:0098772	molecular function regulator	1787	35	0.00035981	0.0140249	ATPIF1:EIF2B3:CDC42SE1:DKK3:B3GAT3:SRGAP1:APAF1:TESC:ARHGEF7:STYX:TAOK1:MAPT:EVI5L:DNAJB1:APOE:APOC1:APOC2:RASGRP3:CFLAR:FN1:XRCC5:FARP2:RALGAPA2:SRGAP3:PRKAR2A:GUCA1C:KALRN:PAK2:RGS12:STIM2:VEGFC:H2AFY:AGFG2:PPP2R2A:RABGAP1
FUMA	GO:0016818	hydrolase activity acting on acid anhydrides	921	22	0.000366607	0.0140249	GNB1:CDC42:RBBP4:GBP1:DDX59:ATF7IP:ABCD4:SPATA5L1:RHOT2:GSPT1:NSF:ABCA9:IRGC:DYNC2LI1:XRCC5:RAB7A:OPA1:RGS12:RHOBTB3:KIF6:ABCB4:ABCB1
FUMA	GO:1901565	organonitrogen compound catabolic process	1263	27	0.000468366	0.0141666	ATPIF1:MDM4:RNF187:CD44:USP2:FBXW8:STYX:STUB1:FBXL16:WWP2:NSF:CDC27:APOE:APOC1:AP2A1:IL4I1:PELI1:ATG4B:CTSZ:USP25:USP16:RAB7A:ANAPC4:CSNK1A1:FBXL4:LAPTM4B:SLC44A1
gProfiler	GO:1902493	acetyltransferase complex	92	7	NA	0.0143763	ING3,KANSL1,KAT6A,EPC1,PHF10,JADE1,RSF1
gProfiler	GO:0005764	lysosome	688	3	NA	0.0143763	CTSZ,RNF152,AP2A1
gProfiler	GO:0000323	lytic vacuole	688	3	NA	0.0143763	CTSZ,RNF152,AP2A1
gProfiler	GO:0016604	nuclear body	768	27	NA	0.0143763	ZC3H14,AAGAB,TRIM4,MAPT,KAT6A,RNF187,ARNT,SREK1,FBXL4,TCF3,ATF7IP,E2F7,AKAP8L,ANKS1B,ZNF638,CENPB,TP53INP1,SNAPC3,RBM8A,SAP130,ZMYM2,JADE1,CDK13,CBX5,RBM14,HIRA,CSNK1A1
gProfiler	GO:0005730	nucleolus	939	31	NA	0.0143763	MPHOSPH8,ZC3H14,BRWD1,H2AFY,ATXN1,XRCC5,ADARB1,EWSR1,KAT6A,PNKP,HERC4,AKAP11,POLR1E,SIN3A,RGS12,CIRBP,MRTO4,FXR1,DNAJB1,AFF4,SNAPC3,ATM,ZNF655,ZNF207,WDR82,CBX5,SF3B4,RBM14,ATF3,FGFR1,GORAB
gProfiler	GO:0031248	protein acetyltransferase complex	92	7	NA	0.0143763	ING3,KANSL1,KAT6A,EPC1,PHF10,JADE1,RSF1
FUMA	GO:1902533	positive regulation of intracellular signal transduction	1005	23	0.000490637	0.0147794	WLS:MCL1:AKT3:TRIM5:CD44:GUCY1A2:ATM:JMJD8:WDR24:NFAT5:TAOK1:SPAG9:TNFRSF11A:APOE:PELI1:COL3A1:CFLAR:MAVS:TLR9:TLR9:CD86:FGFR1:NTRK2:RC3H2
gProfiler	GO:0000151	ubiquitin ligase complex	291	9	NA	0.0147875	FBXL16,STUB1,WWP2,DCUN1D1,ASB4,FBXW8,FBXL4,WDR26,FBXO24
Webgestalt	GO:0034399	nuclear periphery	133	9	5.75354e-05	0.0148058	TNPO1;ATXN1;MAPT;AKAP8L;RGS12;SORBS1;KIN;LGALS13;ANAPC4
Webgestalt	GO:0016607	nuclear speck	383	16	3.95796e-05	0.0148058	ZC3H14;AAGAB;MAPT;KAT6A;SREK1;FBXL4;TCF3;E2F7;AKAP8L;ZNF638;RBM8A;SAP130;JADE1;CDK13;CSNK1A1;PRKAA2
FUMA	GO:0044070	regulation of anion transport	94	6	0.000495881	0.0148764	SV2A:TNFRSF11A:APOE:ABCB4:ABCB1:FGFR1
gProfiler	GO:0031323	regulation of cellular metabolic process	6285	151	NA	0.0149537	CTSZ,RNF152,ZNF254,AP2A1,MPHOSPH8,ZC3H14,HNRNPD,BRWD1,USP16,WDR24,H2AFY,MCL1,PAPOLA,LMO4,MAVS,TNPO1,JMJD8,SECISBP2L,PTPN14,ATXN1,DUOXA2,FN1,OTUD4,ZNF226,GSPT1,XRCC5,EIF5A2,ADARB1,TFAP2A,STUB1,RC3H2,TTN,NTRK2,APOC1,SPAG9,MAFF,WWP2,AHI1,MAPT,PRDM1,EWSR1,DCUN1D1,KAT6A,NSF,PLAUR,PURA,CDC42,DUOXA1,SPEN,RNF187,HNRNPH1,CFLAR,FOXJ3,ARNT,ZNF264,TRNAU1AP,SREK1,APOE,APOC2,PPP3R1,PTOV1,CD44,TCF3,CLK4,POU3F2,…
FUMA	GO:0098609	cell cell adhesion	819	20	0.000510978	0.015267	CDC42:CD46:SFTPD:CD44:ITGA5:PAWR:NFAT5:STAT5B:DSC2:MBP:PELI1:PPM1F:CD86:BCL6:PAK2:PDLIM5:PCDHA9:PCDHAC1:PCDHAC2:RC3H2
FUMA	GO:0009408	response to heat	172	8	0.000514116	0.0152986	EIF2B3:ATM:STUB1:MAPT:DNAJB1:AKT1S1:TP53INP1:PSIP1
FUMA	GO:0002218	activation of innate immune response	311	11	0.00051995	0.0153596	SFTPD:TRIM5:RBM14:SIN3A:RELB:PELI1:XRCC5:MAVS:TLR9:TLR9:PAK2:OTUD4
FUMA	GO:0045732	positive regulation of protein catabolic process	216	9	0.000520344	0.0153596	ATPIF1:FBXW8:STUB1:WWP2:NSF:APOE:ATG4B:RAB7A:CSNK1A1
gProfiler	GO:1901216	positive regulation of neuron death	98	5	NA	0.0154798	CTSZ,MCL1,TFAP2A,MAPT,CDC42
FUMA	GO:0043484	regulation of RNA splicing	132	7	0.000526542	0.0154803	RBM8A:SF3B4:AHNAK:CIRBP:SREK1:CLK4:HNRNPH1
gProfiler	GO:0060255	regulation of macromolecule metabolic process	6346	152	NA	0.0156151	CTSZ,ZNF254,AP2A1,MPHOSPH8,ZC3H14,HNRNPD,BRWD1,USP16,H2AFY,PAPOLA,LMO4,MAVS,TNPO1,SECISBP2L,PTPN14,ATXN1,FN1,OTUD4,ZNF226,GSPT1,XRCC5,EIF5A2,ADARB1,TFAP2A,STUB1,ZC3H7B,RC3H2,TTN,NTRK2,SPAG9,MAFF,WWP2,AHI1,MAPT,PRDM1,EWSR1,DCUN1D1,KAT6A,NSF,PLAUR,PURA,CDC42,SPEN,RNF187,HNRNPH1,CFLAR,FOXJ3,ARNT,ZNF264,TRNAU1AP,SREK1,APOE,PPP3R1,PTOV1,CD44,TCF3,CLK4,POU3F2,MBP,SCAF4,CD86,PNKP,EPC1,LDLRAD3,ATF7IP,E2F…
FUMA	GO:0022408	negative regulation of cell cell adhesion	173	8	0.000534179	0.0156423	SFTPD:PAWR:MBP:PELI1:PPM1F:CD86:BCL6:RC3H2
FUMA	GO:0098590	plasma membrane region	1185	25	0.00090849	0.0156793	GNB1:WLS:GPR161:CD44:ROM1:FOLR1:PTPRO:ITGA5:ANKS1B:TESC:DUOX2:DUOX1:MAPT:PLAUR:AP2A1:FN1:PRKAR2A:TLR9:TLR9:GUCA1C:PDLIM5:SLC6A19:DST:ABCB4:ABCB1:FZD3
FUMA	GO:0002009	morphogenesis of an epithelium	526	15	0.000540493	0.0157171	CDC42:LMO4:GORAB:CD44:FOLR1:ITGA5:CEP290:APAF1:AP2A1:CTSZ:VEGFC:TFAP2A:AHI1:FZD3:FGFR1
FUMA	GO:0046530	photoreceptor cell differentiation	63	5	0.000543149	0.0157171	ROM1:CEP290:PRDM1:AHI1:NTRK2
FUMA	GO:0032623	interleukin 2 production	63	5	0.000543149	0.0157171	GBP1:SFTPD:PAWR:STAT5B:CD86
gProfiler	GO:0007417	central nervous system development	1009	29	NA	0.015778	DUOX2,HNRNPD,LMO4,WLS,ATXN1,XRCC5,ADARB1,TFAP2A,NTRK2,AHI1,MAPT,FZD3,CDC42,COL3A1,POU3F2,MBP,SEZ6L,AKT3,METTL14,HOOK3,SIN3A,SMG9,DCLK1,ACVR1B,GART,DNAJB1,CEP290,APAF1,EIF2B3
FUMA	GO:0008361	regulation of cell size	174	8	0.000554871	0.0158689	AKT3:MAPT:LRRC8E:APOE:AKT1S1:FN1:TWF2:RUFY3
FUMA	GO:0000154	rRNA modification	36	4	0.000551332	0.0158689	NSUN4:METTL15:THUMPD1:ZCCHC4
FUMA	GO:0007044	cell substrate junction assembly	96	6	0.000554745	0.0158689	SORBS1:ITGA5:ARHGEF7:FN1:PPM1F:DST
FUMA	GO:0072331	signal transduction by p53 class mediator	265	10	0.000562386	0.0160215	RBBP4:PRKAA2:MDM4:CD44:ATM:E2F7:WWOX:CNOT3:KAT6A:TP53INP1
Webgestalt	GO:1902493	acetyltransferase complex	92	7	0.000187441	0.0160782	ING3;KANSL1;KAT6A;EPC1;PHF10;JADE1;RSF1
Webgestalt	GO:0045177	apical part of cell	375	15	0.000112131	0.0160782	AP2A1;DUOX2;DUOXA2;FN1;ABCB4;FZD3;DYNC2LI1;CD44;DUOX1;VASH1;SLC6A19;TLR9;ABCB1;FOLR1;PTPRO
Webgestalt	GO:0000123	histone acetyltransferase complex	82	7	9.06925e-05	0.0160782	ING3;KANSL1;KAT6A;EPC1;PHF10;JADE1;RSF1
Webgestalt	GO:0005765	lysosomal membrane	345	14	0.000163478	0.0160782	RNF152;AP2A1;WDR24;NSF;LAPTM4B;SLC30A4;AHNAK;TLR9;AP5S1;HLA-DRA;GNB1;MCOLN2;RAB7A;ABCD4
Webgestalt	GO:0098852	lytic vacuole membrane	346	14	0.000168454	0.0160782	RNF152;AP2A1;WDR24;NSF;LAPTM4B;SLC30A4;AHNAK;TLR9;AP5S1;HLA-DRA;GNB1;MCOLN2;RAB7A;ABCD4
Webgestalt	GO:0031248	protein acetyltransferase complex	92	7	0.000187441	0.0160782	ING3;KANSL1;KAT6A;EPC1;PHF10;JADE1;RSF1
Webgestalt	GO:0005924	cell-substrate adherens junction	407	15	0.000272483	0.0161813	ABCB4;PLAUR;CDC42;SYNPO2;PDIA3;PPFIA1;CD44;AHNAK;ARHGEF7;CD46;STX16;SORBS1;ITGA5;DST;PRKAR2A
Webgestalt	GO:0005925	focal adhesion	404	15	0.000251805	0.0161813	ABCB4;PLAUR;CDC42;SYNPO2;PDIA3;PPFIA1;CD44;AHNAK;ARHGEF7;CD46;STX16;SORBS1;ITGA5;DST;PRKAR2A
Webgestalt	GO:0031902	late endosome membrane	127	8	0.000243704	0.0161813	SLC9A9;LAPTM4B;SLC30A4;AP5S1;HLA-DRA;GOSR2;MCOLN2;RAB7A
Webgestalt	GO:0032838	plasma membrane bounded cell projection cytoplasm	196	10	0.000236952	0.0161813	ZC3H14;WLS;MAPT;PURA;SPATA7;DYNC2LI1;SPEF1;DST;OPA1;PRKAR2A
FUMA	GO:0070663	regulation of leukocyte proliferation	219	9	0.000574513	0.0163038	CD46:SFTPD:ATM:PAWR:STAT5B:PELI1:TLR9:TLR9:CD86:BCL6
FUMA	GO:0044297	cell body	557	15	0.000963665	0.0163496	GNB1:CDC42:PRKAA2:RBM8A:SV2A:ARHGEF7:MAPT:MBP:DNAJB1:APOE:SEZ6L:FXR1:RUFY3:PURA:FZD3
gProfiler	GO:0050767	regulation of neurogenesis	840	17	NA	0.0163618	CTSZ,AP2A1,METRN,FN1,XRCC5,NTRK2,SPAG9,MAPT,FZD3,DUOXA1,SPEN,COL3A1,CFLAR,APOE,FBXW8,TCF3,POU3F2
FUMA	GO:0001067	regulatory region nucleic acid binding	934	22	0.000442366	0.0165385	RBBP4:LMO4:ARNT:ATF3:SMARCC2:E2F7:KLF12:SIN3A:NFAT5:STAT5B:TCF3:RELB:XRCC5:MAFF:ZNF148:BCL6:H2AFY:PURA:TFAP2A:POU3F2:PRDM1:CDK13
Webgestalt	GO:0030055	cell-substrate junction	411	15	0.000302323	0.016671	ABCB4;PLAUR;CDC42;SYNPO2;PDIA3;PPFIA1;CD44;AHNAK;ARHGEF7;CD46;STX16;SORBS1;ITGA5;DST;PRKAR2A
FUMA	GO:0001946	lymphangiogenesis	16	3	0.0005902	0.0166845	PTPN14:VASH1:VEGFC
gProfiler	GO:1990234	transferase complex	804	26	NA	0.0168236	FBXL16,ING3,KANSL1,STUB1,WWP2,DCUN1D1,KAT6A,ASB4,FBXW8,FBXL4,WDR26,EPC1,FBXO24,METTL14,POLR1E,ACVR1B,CDC27,WDR61,SORBS1,PHF10,JADE1,WDR82,RBBP4,CDK13,CBX5,RSF1
FUMA	GO:0044456	synapse part	932	21	0.0010359	0.0172823	CDC42:DNAJC6:SV2A:CACNB2:PPFIA1:PTPRO:ANKS1B:DCLK1:MAPT:NSF:DNAJB1:APOE:DLGAP4:STX16:KPNA1:FXR1:PAK2:PDLIM5:PURA:FZD3:NTRK2
FUMA	GO:0016363	nuclear matrix	109	6	0.00108092	0.0172945	KIN:SORBS1:AKAP8L:LGALS13:RGS12:ATXN1
FUMA	GO:0000775	chromosome centromeric region	193	8	0.00108804	0.0172945	CBX5:SIN3A:ZNF207:KANSL1:CENPB:HIRA:H2AFY:CSNK1A1
FUMA	GO:0022406	membrane docking	177	8	0.000620868	0.0174175	CEP57:CEP290:NSF:ALMS1:STX16:RAB7A:AHI1:ESYT2
FUMA	GO:0000226	microtubule cytoskeleton organization	533	15	0.000618615	0.0174175	PRKAA2:EML3:RBM14:CEP57:CCDC78:TAOK1:ZNF207:MAPT:CEP68:ALMS1:SPEF1:RASSF1:SLAIN2:DST:HOOK3
FUMA	GO:0006325	chromatin organization	268	11	0.000146559	0.0174566	RBBP4:ASH1L:EPC1:ATF7IP:SMARCC2:KANSL1:SAP130:BRWD1:JADE1:ING3:KAT6A
FUMA	GO:0043687	post translational protein modification	1427	31	0.000135545	0.0174566	ST3GAL3:MDM4:KIN:GANAB:FOLR1:USP2:CBX5:FBXW8:KTN1:PDIA3:SIN3A:WDR61:FBXL16:NSF:GOSR2:RNF152:PLAUR:APOE:FN1:UBE2F:MAVS:CTSZ:USP25:USP16:SEC22A:RAB7A:EIF5A2:DCUN1D1:TFAP2A:FBXL4:ASB4
FUMA	R-HSA-112315	transmission across chemical synapses	269	11	0.000151391	0.0174566	GNB1:PRKAA2:CACNB2:PPFIA1:ARHGEF7:MAPT:NSF:AP2A1:EPB41L1:PPM1F:PRKAR2A
FUMA	GO:0098984	neuron to neuron synapse	342	11	0.00112778	0.0176392	DNAJC6:PTPRO:ANKS1B:DCLK1:NSF:DNAJB1:KPNA1:FXR1:PAK2:PDLIM5:NTRK2
FUMA	GO:0005721	pericentric heterochromatin	20	3	0.00116445	0.0176608	CBX5:CENPB:H2AFY
FUMA	GO:0034385	triglyceride rich plasma lipoprotein particle	20	3	0.00116445	0.0176608	APOE:APOC1:APOC2
FUMA	GO:0032446	protein modification by small protein conjugation	896	21	0.000632365	0.0176726	CDC42:ARNT:RNF187:HERC4:TRIM5:FBXW8:WDR61:STUB1:FBXL16:WWP2:CDC27:RNF152:PELI1:UBE2F:DCUN1D1:ANAPC4:FBXL4:ASB4:TRIM4:FBXO24:RC3H2
gProfiler	GO:0044248	cellular catabolic process	2287	10	NA	0.0177097	CTSZ,RNF152,AP2A1,DUOX2,ZC3H14,HNRNPD,USP16,WDR24,FBXL16,MCL1
FUMA	GO:0016050	vesicle organization	319	11	0.000641263	0.0178533	LYST:FOLR1:NSF:GOSR2:STX16:CTSZ:RAB7A:TMCC1:VTA1:HOOK3:LAPTM4B
FUMA	GO:0005770	late endosome	243	9	0.00119606	0.0178694	MCOLN2:SFTPD:SLC30A4:GOSR2:AP5S1:RAB7A:SLC9A9:HLA-DRA:LAPTM4B
FUMA	GO:1902105	regulation of leukocyte differentiation	270	10	0.000649525	0.0180151	CR1:CD46:TESC:STAT5B:CLPTM1:TLR9:TLR9:CD86:BCL6:PRDM1:RC3H2
FUMA	GO:0044440	endosomal part	514	14	0.00126645	0.0185242	WLS:MCOLN2:PDIA3:SLC30A4:GOSR2:AP2A1:AP5S1:TLR9:TLR9:RAB7A:SLC9A9:HLA-DRA:VTA1:LAPTM4B:NTRK2
FUMA	GO:0070603	swi snf superfamily type complex	76	5	0.0012769	0.0185242	RBBP4:RSF1:SMARCC2:PHF10:ING3
FUMA	GO:0043967	histone H4 acetylation	66	5	0.000673016	0.0185268	EPC1:KANSL1:JADE1:ING3:KAT6A
FUMA	GO:0002292	T cell differentiation involved in immune response	66	5	0.000673016	0.0185268	CD46:RELB:CD86:BCL6:RC3H2
gProfiler	GO:0034375	high-density lipoprotein particle remodeling	17	3	NA	0.0185522	APOC1,APOE,APOC2
gProfiler	GO:0045595	regulation of cell differentiation	1903	46	NA	0.0185522	CTSZ,AP2A1,METRN,H2AFY,LMO4,FN1,XRCC5,TFAP2A,RC3H2,NTRK2,SPAG9,MAFF,AHI1,MAPT,PRDM1,FZD3,ASB4,CDC42,DUOXA1,SPEN,COL3A1,CFLAR,ARNT,APOE,FBXW8,TCF3,POU3F2,CD86,STAT5B,HOOK3,CR1,TESC,SIN3A,TLR9,ACVR1B,ARHGEF7,CLPTM1,PTCH2,CD46,RUFY3,WDR61,TWF2,BCL6,TP53INP1,VEGFC,PDCD2
FUMA	GO:0016572	histone phosphorylation	38	4	0.000679513	0.0186359	PRKAA2:ATM:AKAP8L:H2AFY
FUMA	GO:0009887	animal organ morphogenesis	1030	23	0.000684265	0.018676	CDC42:ASH1L:AKT3:ROM1:FOLR1:CEP290:SLC24A4:DUOX2:WWOX:AP2A1:TTN:COL3A1:CFLAR:CTSZ:ADARB1:VEGFC:COL4A3BP:TFAP2A:PRDM1:AHI1:FZD3:FGFR1:NTRK2
FUMA	GO:0035023	regulation of Rho protein signal transduction	138	7	0.000686055	0.018676	CDC42SE1:ARHGEF7:APOE:COL3A1:FARP2:KALRN:BCL6
FUMA	GO:0098732	macromolecule deacylation	100	6	0.000688658	0.0186776	PRKAA2:RBM14:SIN3A:MAPT:AKAP8L:BCL6
FUMA	GO:2000811	negative regulation of anoikis	17	3	0.00071108	0.0190052	MCL1:ITGA5:NTRK2
FUMA	GO:0062099	negative regulation of programmed necrotic cell death	17	3	0.00071108	0.0190052	PELI1:CFLAR:SLC25A4
FUMA	GO:0032101	regulation of response to external stimulus	779	19	0.000710852	0.0190052	ASH1L:TRIM5:ATM:PTPRO:DUOXA2:DUOXA1:SIN3A:DNASE1:STAT5B:TNFRSF11A:PLAUR:APOE:MAVS:PPM1F:TLR9:TLR9:GUCA1C:BCL6:VEGFC:FGFR1
FUMA	GO:0034375	high density lipoprotein particle remodeling	17	3	0.00071108	0.0190052	APOE:APOC1:APOC2
FUMA	GO:0031400	negative regulation of protein modification process	599	16	0.000719517	0.0191501	PRKAA2:GBP1:ASH1L:ATF3:TESC:SIN3A:MAPT:APOE:PNKP:AKT1S1:ADARB1:PPM1F:CRTAP:PRKAR2A:PAK2:H2AFY
FUMA	GO:0019221	cytokine mediated signaling pathway	780	19	0.000721711	0.0191501	CDC42:GBP1:MCL1:TRIM5:CD44:DUOX2:DUOX1:BOLA2:STAT5B:TNFRSF11A:PELI1:FN1:MAVS:BRWD1:CD86:BCL6:PAK2:OTUD4:HLA-DRA
FUMA	GO:0005773	vacuole	760	18	0.00135018	0.0192426	GNB1:SFTPD:AHNAK:ARHGEF7:ABCD4:SLC30A4:WDR24:NSF:RNF152:AP2A1:IL4I1:AP5S1:CTSZ:TLR9:TLR9:RAB7A:HLA-DRA:TP53INP1:LAPTM4B
FUMA	GO:0044429	mitochondrial part	1019	22	0.00136486	0.0192426	AK2:NSUN4:MCL1:IBA57:SLC25A16:COX15:COX14:SLC25A3:SORD:GATM:RHOT2:CYB5B:TOMM40:MRPL19:MAVS:OPA1:MTHFD2L:SLC25A4:NDUFA2:FBXL4:SLC25A37:SLC44A1
FUMA	GO:0032984	protein containing complex disassembly	324	11	0.00072842	0.0192586	DNAJC6:SMARCC2:GSPT1:TAOK1:NSF:MRPL19:SPEF1:TWF2:EIF5A2:CSNK1A1:VTA1
FUMA	WP4217	ebola virus pathway on host	131	8	8.01533e-05	0.0193403	CDC42:FOLR1:ITGA5:RELB:KPNA1:RAB7A:TFAP2A:HLA-DRA
FUMA	WP3584	mecp2 and associated rett syndrome	71	6	0.000106852	0.0193403	SIN3A:MBP:BCL6:HNRNPH1:POU3F2:PSIP1
gProfiler	GO:0060322	head development	787	25	NA	0.0194872	DUOX2,HNRNPD,WLS,ATXN1,XRCC5,NTRK2,AHI1,FZD3,CDC42,COL3A1,POU3F2,MBP,SEZ6L,AKT3,METTL14,HOOK3,SIN3A,SMG9,DCLK1,GART,DNAJB1,CEP290,APAF1,EIF2B3,ATM
gProfiler	GO:0010629	negative regulation of gene expression	2120	63	NA	0.0194872	CTSZ,ZNF254,MPHOSPH8,ZC3H14,HNRNPD,H2AFY,TNPO1,ATXN1,GSPT1,XRCC5,TFAP2A,ZC3H7B,WWP2,MAPT,PRDM1,KAT6A,PURA,SPEN,APOE,TCF3,POU3F2,SCAF4,EPC1,ATF7IP,E2F7,METTL14,PPM1F,SIN3A,USP2,SMG9,CIRBP,ZC3H7A,ACVR1B,MED25,MRTO4,FXR1,CD46,PPP2R2A,DNAJB1,WDR61,BCL6,TP53INP1,RELB,RBM8A,ATM,CNOT3,SAP130,PHF10,DKK3,ZBTB26,RBBP4,ZNF148,EID2B,ZBTB6,CBX5,RSF1,PPHLN1,KLF12,ATF3,FGFR1,MDM4,HIRA,WWOX
gProfiler	GO:1901564	organonitrogen compound metabolic process	6854	103	NA	0.0194872	GANAB,CTSZ,RNF152,AP2A1,DUOX2,HNRNPD,USP16,H2AFY,HS2ST1,FBXL16,MAVS,FAM173A,JMJD8,ING3,SECISBP2L,PTPN14,AK2,KANSL1,DUOXA2,FN1,OTUD4,TRIM4,GSPT1,XRCC5,EIF5A2,ADARB1,STUB1,IBA57,RC3H2,TTN,NTRK2,NADK,APOC1,SPAG9,OSBPL10,WWP2,MAPT,DCUN1D1,KAT6A,CERS5,SLC35D1,RHBDL1,ASB4,NSF,PLAUR,PURA,CDC42,TSPAN14,SYNPO2,DUOXA1,RNF187,COL3A1,PDIA3,GATM,KTN1,CFLAR,ARNT,TRNAU1AP,APOE,FBXW8,FBXL4,PPP3R1,CD44,NMRK1,C18O…
gProfiler	GO:0010769	regulation of cell morphogenesis involved in differentiation	305	17	NA	0.0194872	METRN,FN1,NTRK2,MAPT,CDC42,APOE,FBXW8,POU3F2,SIN3A,ARHGEF7,RUFY3,TWF2,PDLIM5,GBP1,OPA1,PTPRO,KALRN
FUMA	GO:0005635	nuclear envelope	462	13	0.00140175	0.0194882	EPC1:INTS5:CERS5:CBX5:TMPO:LINC00341:SYNE3:DNASE1:MRPL19:KPNA1:EIF5A2:TMEM33:TNPO1:DST
gProfiler	GO:0005773	vacuole	787	3	NA	0.0195033	CTSZ,RNF152,AP2A1
FUMA	GO:1903708	positive regulation of hemopoiesis	182	8	0.000744837	0.019622	ARNT:CD46:ACVR1B:TESC:STAT5B:CD86:BCL6:PDCD2
FUMA	GO:0006308	DNA catabolic process	39	4	0.000750918	0.0197116	ATM:APAF1:DNASE1:KPNA1
FUMA	GO:0030900	forebrain development	378	12	0.000763933	0.0198894	EIF2B3:APAF1:DCLK1:DUOX2:DNAJB1:COL3A1:GART:METTL14:POU3F2:FGFR1:HOOK3:NTRK2
FUMA	GO:0007162	negative regulation of cell adhesion	276	10	0.000768515	0.0198894	GBP1:SFTPD:PTPRO:PAWR:MBP:PELI1:PPM1F:CD86:BCL6:RC3H2
FUMA	GO:0051983	regulation of chromosome segregation	102	6	0.000764351	0.0198894	CDC42:ATM:ZNF207:CDC27:ANAPC4:H2AFY
FUMA	GO:0007018	microtubule based movement	276	10	0.000768515	0.0198894	CDC42:KTN1:RHOT2:MAPT:DYNC2LI1:OPA1:TNPO1:PURA:KIF6:DST
FUMA	GO:0034250	positive regulation of cellular amide metabolic process	141	7	0.000779008	0.0200902	NSUN4:CIRBP:USP16:EIF5A2:FXR1:ZCCHC4:HNRNPD
FUMA	GO:0010952	positive regulation of peptidase activity	184	8	0.000799682	0.0205513	CR1:APAF1:MAPT:MBP:CFLAR:FN1:PPM1F:PDCD2
FUMA	GO:0015849	organic acid transport	328	11	0.000805039	0.0206168	PRKAA2:SLC35D1:SV2A:PPFIA1:FOLR1:TNFRSF11A:LRRC8E:APOE:SLC6A19:ABCB4:NTRK2
FUMA	GO:0044309	neuron spine	158	7	0.00150964	0.0207007	CDC42:PTPRO:ANKS1B:MAPT:DNAJB1:FXR1:NTRK2
gProfiler	GO:0043525	positive regulation of neuron apoptotic process	60	4	NA	0.0207476	CTSZ,MCL1,TFAP2A,CDC42
FUMA	GO:0040007	growth	979	22	0.000820292	0.0209345	CDC42:EPC1:ACVR1B:DCLK1:DUOX2:STAT5B:MAPT:APOE:CFLAR:FN1:ADARB1:PPM1F:TWF2:BCL6:PAK2:RUFY3:PDLIM5:JADE1:POU3F2:ING3:FGFR1:RC3H2
FUMA	GO:0045773	positive regulation of axon extension	40	4	0.000827464	0.0210445	MAPT:FN1:TWF2:RUFY3
FUMA	GO:0009611	response to wounding	667	17	0.000832093	0.0210893	GNB1:CDC42:CD44:FOLR1:CBX5:ITGA5:VASH1:DUOX2:DUOX1:PLAUR:APOE:COL3A1:CFLAR:FN1:MAFF:PRKAR2A:DST
FUMA	GO:0051250	negative regulation of lymphocyte activation	143	7	0.000846313	0.0213759	SFTPD:ATM:PAWR:PELI1:CD86:BCL6:RC3H2
FUMA	GO:0042060	wound healing	550	15	0.000849374	0.0213798	GNB1:CDC42:CD44:CBX5:ITGA5:DUOX2:DUOX1:PLAUR:APOE:COL3A1:CFLAR:FN1:MAFF:PRKAR2A:DST
FUMA	GO:0140014	mitotic nuclear division	280	10	0.000857392	0.021508	ATM:ZNF207:CDC27:AKAP8L:TTN:USP16:HIRA:ANAPC4:H2AFY:CDK13
FUMA	GO:0019867	outer membrane	205	8	0.00159561	0.0215839	MCL1:LINC00341:SYNE3:RHOT2:CYB5B:TOMM40:MAVS:OPA1:SLC44A1
gProfiler	GO:1990777	lipoprotein particle	37	3	NA	0.0216213	APOC1,APOE,APOC2
gProfiler	GO:0005815	microtubule organizing center	751	23	NA	0.0216213	RABGAP1,CCDC78,TFAP2A,SPAG9,AHI1,ALMS1,CDC42,SPATA7,DYNC2LI1,RASSF1,AKAP11,WDR90,HOOK3,USP2,CDC27,CEP290,SORBS1,SLAIN2,CDKL2,RELB,CEP68,CDC25B,JADE1
gProfiler	GO:0034358	plasma lipoprotein particle	37	3	NA	0.0216213	APOC1,APOE,APOC2
FUMA	GO:0043086	negative regulation of catalytic activity	793	19	0.000876428	0.0219107	ATPIF1:CDC42SE1:CR1:CD44:TESC:STYX:MAPT:PLAUR:APOE:APOC1:APOC2:AKT1S1:CFLAR:ADARB1:PPM1F:PRKAR2A:TLR9:TLR9:PAK2:H2AFY
FUMA	GO:0048844	artery morphogenesis	70	5	0.000880672	0.0219422	AKT3:FOLR1:APOE:COL3A1:PRDM1
Webgestalt	GO:0042627	chylomicron	12	3	0.000427719	0.0220133	APOC1;APOE;APOC2
FUMA	GO:0000819	sister chromatid segregation	187	8	0.000887989	0.0220497	ATM:ZNF207:CDC27:AKAP8L:TTN:HIRA:ANAPC4:H2AFY
gProfiler	GO:0010770	positive regulation of cell morphogenesis involved in differentiation	157	9	NA	0.0220525	METRN,FN1,NTRK2,MAPT,CDC42,FBXW8,ARHGEF7,RUFY3,TWF2
gProfiler	GO:0022604	regulation of cell morphogenesis	493	23	NA	0.0220525	METRN,BRWD1,FN1,NTRK2,MAPT,CDC42,APOE,FBXW8,CD44,POU3F2,SYNE3,SIN3A,ARHGEF7,RUFY3,TWF2,ZMYM2,PDLIM5,GBP1,CDC42SE1,OPA1,PTPRO,RHOBTB3,KALRN
FUMA	GO:1905114	cell surface receptor signaling pathway involved in cell cell signaling	612	16	0.000901169	0.0223016	GNB1:CDC42:PRKAA2:WLS:DKK3:FOLR1:PTPRO:WDR61:WWOX:APOE:AP2A1:PPP3R1:TMEM237:JADE1:CSNK1A1:FZD3
FUMA	GO:1901701	cellular response to oxygen containing compound	1118	24	0.000905753	0.0223399	NADK:GNB1:PRKAA2:SORBS1:TRIM5:FOLR1:ATM:PAWR:TESC:SIN3A:STAT5B:MAPT:COL3A1:CFLAR:XRCC5:PCK1:PRKAR2A:TWF2:CD86:OPA1:HNRNPD:ABCB4:TP53INP1:NTRK2
FUMA	GO:0090311	regulation of protein deacetylation	41	4	0.000909352	0.0223536	PRKAA2:MAPT:AKAP8L:BCL6
FUMA	GO:0030217	T cell differentiation	234	9	0.000919152	0.0225192	CR1:CD46:STAT5B:CLPTM1:RELB:CD86:BCL6:PRDM1:RC3H2
gProfiler	GO:0032838	plasma membrane bounded cell projection cytoplasm	204	6	NA	0.0225828	ZC3H14,WLS,MAPT,PURA,SPATA7,DYNC2LI1
gProfiler	GO:0070822	Sin3-type complex	16	3	NA	0.0225828	SIN3A,SAP130,RBBP4
FUMA	WP4223	WP_RAS_SIGNALING	185	9	0.000166602	0.0226163	GNB1:CDC42:AKT3:PLA2G16:RASGRP3:RASSF1:PAK2:FGFR1:NTRK2
gProfiler	GO:1902494	catalytic complex	1391	38	NA	0.0226312	DUOX2,FBXL16,ING3,KANSL1,STUB1,NDUFA2,WWP2,DCUN1D1,KAT6A,ASB4,HNRNPH1,CFLAR,FBXW8,DYNC2LI1,FBXL4,PPP3R1,WDR26,EPC1,DUOX1,FBXO24,METTL14,POLR1E,SIN3A,ACVR1B,CDC27,PPP2R2A,WDR61,SORBS1,RBM8A,SAP130,PHF10,JADE1,WDR82,RBBP4,GNB1,CDK13,CBX5,RSF1
gProfiler	GO:0044463	cell projection part	1488	45	NA	0.0226312	CTSZ,AP2A1,ZC3H14,WLS,AK2,NTRK2,AHI1,MAPT,FZD3,NSF,PLAUR,PURA,CDC42,APOE,SPATA7,DYNC2LI1,CD44,MBP,ANKS1B,KPNA1,TESC,GPR161,RGS12,SLC6A19,FXR1,SPEF1,RUFY3,DNAJB1,CEP290,TWF2,RBM8A,GUCA1C,ITGA5,DST,ROM1,FOLR1,JADE1,GNB1,OPA1,SV2A,PTPRO,CSNK1A1,PRKAR2A,PRKAA2,TMEM237
gProfiler	GO:0120038	plasma membrane bounded cell projection part	1488	45	NA	0.0226312	CTSZ,AP2A1,ZC3H14,WLS,AK2,NTRK2,AHI1,MAPT,FZD3,NSF,PLAUR,PURA,CDC42,APOE,SPATA7,DYNC2LI1,CD44,MBP,ANKS1B,KPNA1,TESC,GPR161,RGS12,SLC6A19,FXR1,SPEF1,RUFY3,DNAJB1,CEP290,TWF2,RBM8A,GUCA1C,ITGA5,DST,ROM1,FOLR1,JADE1,GNB1,OPA1,SV2A,PTPRO,CSNK1A1,PRKAR2A,PRKAA2,TMEM237
gProfiler	GO:0032994	protein-lipid complex	39	3	NA	0.0226312	APOC1,APOE,APOC2
gProfiler	GO:0030175	filopodium	104	6	NA	0.0227565	AP2A1,FZD3,CDC42,FXR1,RUFY3,TWF2
FUMA	GO:1901700	response to oxygen containing compound	1603	31	0.000957004	0.0233687	NADK:GNB1:RBBP4:EIF2B3:PRKAA2:SORBS1:TRIM5:FOLR1:ATM:PAWR:TESC:DUOX2:DUOX1:SIN3A:STAT5B:MAPT:TNFRSF11A:APOE:PELI1:COL3A1:CFLAR:XRCC5:PCK1:PRKAR2A:TWF2:CD86:OPA1:HNRNPD:ABCB4:TP53INP1:NTRK2
gProfiler	GO:0016607	nuclear speck	402	17	NA	0.0234517	ZC3H14,AAGAB,MAPT,KAT6A,SREK1,FBXL4,TCF3,E2F7,AKAP8L,ZNF638,RBM8A,SAP130,JADE1,CDK13,RBM14,CSNK1A1,PRKAA2
FUMA	GO:0036064	ciliary basal body	120	6	0.0017705	0.0235947	CEP290:SPATA7:DYNC2LI1:JADE1:CSNK1A1:AHI1
FUMA	GO:0017053	transcriptional repressor complex	82	5	0.00179141	0.0235947	SPEN:RBBP4:CBX5:SIN3A:RELB
gProfiler	GO:0098805	whole membrane	1678	20	NA	0.0236772	RNF152,AP2A1,WDR24,MCL1,MAVS,WLS,ABCB4,NTRK2,SPAG9,CYB5B,MAPT,SLC9A9,NSF,PLAUR,TSPAN14,PDIA3,RHOT2,CFLAR,TOMM40,APOE
FUMA	GO:0009266	response to temperature stimulus	236	9	0.000975663	0.0237454	EIF2B3:ATM:STUB1:MAPT:CIRBP:DNAJB1:AKT1S1:TP53INP1:PSIP1
gProfiler	GO:0060284	regulation of cell development	972	18	NA	0.0238125	CTSZ,AP2A1,METRN,FN1,XRCC5,NTRK2,SPAG9,MAPT,FZD3,CDC42,DUOXA1,SPEN,COL3A1,CFLAR,APOE,FBXW8,TCF3,POU3F2
gProfiler	GO:0098797	plasma membrane protein complex	680	3	NA	0.0240371	SGCD,AP2A1,DUOX2
FUMA	GO:0036303	lymph vessel morphogenesis	19	3	0.000997551	0.024198	PTPN14:VASH1:VEGFC
gProfiler	GO:0031326	regulation of cellular biosynthetic process	4257	108	NA	0.0242568	ZNF254,AP2A1,MPHOSPH8,HNRNPD,BRWD1,USP16,H2AFY,LMO4,MAVS,SECISBP2L,PTPN14,ATXN1,DUOXA2,ZNF226,GSPT1,XRCC5,EIF5A2,TFAP2A,RC3H2,APOC1,MAFF,WWP2,AHI1,PRDM1,EWSR1,KAT6A,PURA,CDC42,DUOXA1,SPEN,RNF187,CFLAR,FOXJ3,ARNT,ZNF264,TRNAU1AP,APOE,APOC2,PPP3R1,PTOV1,TCF3,POU3F2,SCAF4,CD86,PNKP,EPC1,ATF7IP,E2F7,ZNF440,PCK1,AKAP8L,TNFRSF11A,STAT5B,METTL14,TESC,ZNF417,PPM1F,SIN3A,USP2,ZNF789,CIRBP,TRIM5,TLR9,ACVR1…
gProfiler	GO:0005925	focal adhesion	403	14	NA	0.024313	ABCB4,PLAUR,CDC42,SYNPO2,PDIA3,PPFIA1,CD44,AHNAK,ARHGEF7,CD46,STX16,SORBS1,ITGA5,DST
FUMA	GO:0031032	actomyosin structure organization	191	8	0.00101772	0.0246061	CDC42:SORBS1:PPFIA1:ALMS1:TTN:CFLAR:EPB41L1:PPM1F
FUMA	GO:0015631	tubulin binding	321	11	0.00067502	0.0246757	EML3:CEP57:TAOK1:ZNF207:MAPT:SPEF1:OPA1:KIF6:DST:HOOK3:RABGAP1
gProfiler	GO:0005924	cell-substrate adherens junction	406	14	NA	0.0251674	ABCB4,PLAUR,CDC42,SYNPO2,PDIA3,PPFIA1,CD44,AHNAK,ARHGEF7,CD46,STX16,SORBS1,ITGA5,DST
gProfiler	GO:0016569	covalent chromatin modification	486	21	NA	0.0254783	MPHOSPH8,USP16,H2AFY,ING3,KANSL1,KAT6A,EPC1,ATF7IP,AKAP8L,PPM1F,SIN3A,WDR61,BCL6,ATM,PHF10,JADE1,WDR82,RSF1,PPHLN1,RBM14,ASH1L
gProfiler	GO:0031090	organelle membrane	3500	31	NA	0.025542	CTSZ,RNF152,AP2A1,TMEM33,WDR24,HS2ST1,MCL1,MAVS,FAM173A,WLS,DUOXA2,EIF5A2,STIM2,NDUFA2,NTRK2,SPAG9,CYB5B,ERGIC1,SLC9A9,CERS5,SLC35D1,NSF,PLAUR,CDC42,TSPAN14,DUOXA1,C15ORF48,PDIA3,GATM,KTN1,RHOT2
gProfiler	GO:0031252	cell leading edge	409	14	NA	0.0255647	DUOX2,LMO4,WLS,DUOXA2,MAPT,CDC42,CD44,DUOX1,TESC,ARHGEF7,RUFY3,TWF2,ITGA5,DST
gProfiler	GO:0005789	endoplasmic reticulum membrane	1072	17	NA	0.0255647	TMEM33,WLS,DUOXA2,EIF5A2,STIM2,ERGIC1,CERS5,SLC35D1,PLAUR,CDC42,DUOXA1,PDIA3,KTN1,TMCC1,SEZ6L,SCD5,COL4A3BP
gProfiler	GO:0042175	nuclear outer membrane-endoplasmic reticulum membrane network	1094	18	NA	0.0255647	TMEM33,WLS,DUOXA2,EIF5A2,STIM2,ERGIC1,CERS5,SLC35D1,PLAUR,CDC42,DUOXA1,PDIA3,KTN1,TMCC1,SEZ6L,SCD5,COL4A3BP,SYNE3
FUMA	R-HSA-389359	cd28 dependent vav1 pathway	12	3	0.000239254	0.0256173	CDC42:CD86:PAK2
FUMA	GO:0008285	negative regulation of cell population proliferation	745	18	0.00108265	0.0258072	ATPIF1:RBBP4:MDM4:PTPN14:SFTPD:ATM:E2F7:PAWR:TESC:VASH1:APOE:MED25:PELI1:ADARB1:CD86:BCL6:TFAP2A:TP53INP1
FUMA	GO:1903828	negative regulation of cellular protein localization	109	6	0.00108092	0.0258072	GBP1:PPFIA1:DCLK1:SIN3A:MAPT:H2AFY
gProfiler	GO:0030055	cell-substrate junction	411	14	NA	0.0259005	ABCB4,PLAUR,CDC42,SYNPO2,PDIA3,PPFIA1,CD44,AHNAK,ARHGEF7,CD46,STX16,SORBS1,ITGA5,DST
FUMA	GO:0051402	neuron apoptotic process	240	9	0.00109714	0.0259293	MCL1:ATM:APAF1:APOE:AKT1S1:CTSZ:ADARB1:TFAP2A:NTRK2
gProfiler	GO:0008266	poly(U) RNA binding	23	3	NA	0.0260973	MSI2,ATXN1,HNRNPH1
FUMA	GO:0050866	negative regulation of cell activation	194	8	0.00112463	0.0264936	SFTPD:ATM:PAWR:APOE:PELI1:CD86:BCL6:RC3H2
FUMA	WP1984	integrated breast cancer pathway	154	8	0.00024514	0.0266222	CDC42:ATM:LGALS13:RASGRP3:UBE2F:CDC25B:USP16:ZNF655
FUMA	GO:0042805	actinin binding	39	4	0.000750918	0.0268535	ALMS1:TTN:PDLIM5:SYNPO2
FUMA	GO:0016788	hydrolase activity acting on ester bonds	723	18	0.000772646	0.0270426	GNB1:DNAJC6:PTPN14:PLA2G16:ENDOD1:PTPRO:STYX:PDIA3:DNASE1:LGALS13:PNKP:PPP3R1:CDC25B:PPM1F:PRKAR2A:PPM1M:NT5DC2:PPP2R2A
FUMA	GO:0000784	nuclear chromosome telomeric region	124	6	0.00208995	0.0271694	ATM:CBX5:XRCC5:WDR82:H2AFY:PURA
Webgestalt	GO:0031252	cell leading edge	393	14	0.000608132	0.0272795	DUOX2;LMO4;WLS;DUOXA2;MAPT;CD44;DUOX1;TESC;ARHGEF7;RUFY3;TWF2;ITGA5;DST;PTPRO
Webgestalt	GO:0005788	endoplasmic reticulum lumen	306	12	0.000646521	0.0272795	GANAB;CTSZ;JMJD8;FN1;PLAUR;TSPAN14;COL3A1;PDIA3;KTN1;APOE;COLGALT2;CRTAP
Webgestalt	GO:0120111	neuron projection cytoplasm	81	6	0.000625456	0.0272795	ZC3H14;WLS;MAPT;PURA;DST;OPA1
Webgestalt	GO:0005774	vacuolar membrane	397	14	0.000671385	0.0272795	RNF152;AP2A1;WDR24;NSF;LAPTM4B;SLC30A4;AHNAK;TLR9;AP5S1;HLA-DRA;GNB1;MCOLN2;RAB7A;ABCD4
FUMA	GO:0016407	acetyltransferase activity	103	6	0.000804528	0.0273916	EPC1:RSF1:KANSL1:PHF10:ING3:KAT6A
FUMA	GO:0004674	protein serine/threonine kinase activity	435	13	0.00081592	0.0273916	PRKAA2:AKT3:ATM:ACVR1B:DCLK1:TAOK1:TTN:KALRN:PAK2:CDKL2:CSNK1A1:CLK4:CDK13
gProfiler	GO:0034399	nuclear periphery	131	8	NA	0.0274187	ATXN1,MAPT,AKAP8L,RGS12,SORBS1,KIN,LGALS13,ANAPC4
FUMA	GO:0001227	dna binding transcription repressor activity rna polymerase ii specific	231	9	0.000839394	0.027616	ATF3:E2F7:KLF12:TCF3:ZNF148:BCL6:PURA:TFAP2A:PRDM1
gProfiler	GO:0032993	protein-DNA complex	209	5	NA	0.0277266	MPHOSPH8,H2AFY,XRCC5,KAT6A,PURA
gProfiler	GO:0008187	poly-pyrimidine tract binding	26	3	NA	0.0283915	MSI2,ATXN1,HNRNPH1
FUMA	GO:1902903	regulation of supramolecular fiber organization	345	11	0.00120923	0.0283956	CDC42:PPFIA1:TAOK1:MAPT:APOE:ALMS1:SPEF1:PPM1F:TWF2:SLAIN2:SYNPO2
FUMA	GO:0046983	protein dimerization activity	1319	27	0.00089474	0.0285284	ATPIF1:GBP1:MCL1:ARNT:ATF3:TRIM5:CEP57:ATM:PTPRO:CBX5:TESC:STUB1:WWOX:STAT5B:MAPT:TCF3:APOE:APOC2:CFLAR:RALGAPA2:TLR9:TLR9:TMCC1:FXR1:H2AFY:TFAP2A:FGFR1:NTRK2
FUMA	GO:0015291	secondary active transmembrane transporter activity	234	9	0.000919152	0.0285284	SLC35E2B:SLC35D1:SLC25A16:SLC25A3:SLC24A4:SLC35E1:SLC9A9:SLC25A4:SLC6A19
FUMA	GO:0008234	cysteine type peptidase activity	188	8	0.000919103	0.0285284	USP2:PDIA3:CFLAR:ATG4B:CTSZ:USP25:USP16:OTUD4
Webgestalt	GO:0016324	apical plasma membrane	311	12	0.000745083	0.0287602	AP2A1;DUOX2;FN1;ABCB4;FZD3;CD44;DUOX1;SLC6A19;TLR9;ABCB1;FOLR1;PTPRO
FUMA	GO:0035327	transcriptionally active chromatin	25	3	0.00225937	0.0289952	WDR61:AFF4:PSIP1
FUMA	GO:1901654	response to ketone	197	8	0.00124031	0.0290327	GNB1:PRKAA2:SIN3A:CFLAR:PCK1:OPA1:HNRNPD:ABCB4
FUMA	GO:0098794	postsynapse	610	15	0.00232748	0.0294912	CDC42:DNAJC6:PTPRO:ANKS1B:DCLK1:MAPT:NSF:DNAJB1:DLGAP4:KPNA1:FXR1:PAK2:PDLIM5:PURA:NTRK2
FUMA	GO:0042393	histone binding	191	8	0.00101772	0.0298956	RBBP4:RSF1:CBX5:MPHOSPH8:USP16:PHF10:ING3:KAT6A
FUMA	GO:0008017	microtubule binding	237	9	0.00100496	0.0298956	EML3:CEP57:ZNF207:MAPT:SPEF1:OPA1:KIF6:DST:HOOK3
FUMA	GO:0060589	nucleoside triphosphatase regulator activity	337	11	0.0010021	0.0298956	ATPIF1:CDC42SE1:SRGAP1:EVI5L:DNAJB1:RASGRP3:RALGAPA2:SRGAP3:RGS12:AGFG2:RABGAP1
FUMA	GO:0035770	ribonucleoprotein granule	219	8	0.00240721	0.0301202	CDC42:PRKAA2:TRIM5:MAPT:CIRBP:CNOT3:FXR1:RC3H2
gProfiler	GO:0015748	organophosphate ester transport	121	6	NA	0.0301416	ABCB4,APOC1,OSBPL10,APOE,APOC2,COL4A3BP
FUMA	GO:0030054	cell junction	1275	25	0.00244118	0.030147	CDC42:SV2A:ASH1L:CD46:SORBS1:CD44:AHNAK:PPFIA1:ITGA5:ANKS1B:ARHGEF7:PDIA3:DUOX2:DSC2:PLAUR:CEP68:STX16:PRKAR2A:RGS12:RUFY3:PDLIM5:SYNPO2:DST:AHI1:ABCB4
FUMA	GO:0031300	intrinsic component of organelle membrane	378	11	0.00246959	0.030147	SV2A:SLC25A3:PDIA3:RHOT2:RNF152:TOMM40:STX16:TMEM33:SLC25A4:HLA-DRA:ESYT2
FUMA	GO:0099080	supramolecular complex	936	20	0.00250054	0.0301572	AHNAK:EML3:CEP57:PAWR:STUB1:ZNF207:MAPT:CDC27:DYNC2LI1:TTN:COL3A1:RASSF1:TWF2:FXR1:SLAIN2:SYNPO2:CSNK1A1:KIF6:DST:HOOK3
FUMA	R-HSA-1280215	cytokine signaling in immune system	854	21	0.00034032	0.0303097	CDC42:GBP1:MCL1:PTPN14:TRIM5:CD44:BOLA2:STAT5B:TNFRSF11A:RELB:RASGRP3:PELI1:FN1:BRWD1:TLR9:TLR9:CD86:KPNA1:BCL6:PAK2:HLA-DRA:FGFR1
FUMA	R-HSA-1266738	developmental biology	1100	25	0.000312299	0.0303097	CDC42:RBBP4:RBM8A:AKT3:CACNB2:ACVR1B:ITGA5:SRGAP1:MED13L:ARHGEF7:GSPT1:SPAG9:DSC2:TCF3:AP2A1:MED25:ZNF638:COL3A1:FARP2:PCK1:SRGAP3:PRKAR2A:KALRN:PAK2:FGFR1
FUMA	R-HSA-112314	neurotransmitter receptors and postsynaptic signal transmission	204	9	0.000343739	0.0303097	GNB1:PRKAA2:ARHGEF7:MAPT:NSF:AP2A1:EPB41L1:PPM1F:PRKAR2A
FUMA	GO:0061572	actin filament bundle organization	154	7	0.00130277	0.0303979	CDC42:SORBS1:PPFIA1:PAWR:ALMS1:PPM1F:SYNPO2
FUMA	GO:0016482	cytosolic transport	155	7	0.00135227	0.030867	GOSR2:SPAG9:AP2A1:STX16:RAB7A:RHOBTB3:HOOK3
FUMA	GO:0071103	DNA conformation change	297	10	0.00133452	0.030867	RBBP4:ASH1L:RSF1:AKAP8L:TTN:XRCC5:HIRA:H2AFY:PURA:KAT6A
FUMA	GO:0006783	heme biosynthetic process	21	3	0.00134794	0.030867	ATPIF1:IBA57:COX15
FUMA	GO:0000002	mitochondrial genome maintenance	21	3	0.00134794	0.030867	AKT3:OPA1:SLC25A4
FUMA	GO:0033673	negative regulation of kinase activity	247	9	0.00133902	0.030867	TESC:MAPT:APOE:AKT1S1:ADARB1:PPM1F:PRKAR2A:PAK2:H2AFY
FUMA	GO:0048285	organelle fission	460	13	0.00134885	0.030867	ATM:ZNF207:MAPT:CDC27:AKAP8L:TTN:CDC25B:USP16:HIRA:OPA1:ANAPC4:H2AFY:CDK13
FUMA	GO:0007267	cell cell signaling	1638	31	0.00134507	0.030867	NADK:GNB1:CDC42:PRKAA2:WLS:SV2A:ASH1L:CACNB2:DKK3:PPFIA1:FOLR1:PTPRO:ARHGEF7:WDR61:WWOX:MAPT:TNFRSF11A:MBP:APOE:AP2A1:PPP3R1:TMEM237:ADARB1:KPNA1:KALRN:JADE1:SLC25A4:CSNK1A1:FZD3:FGFR1:NTRK2
FUMA	R-HSA-389356	cd28 co stimulation	33	4	0.000392661	0.0309789	CDC42:AKT3:CD86:PAK2
FUMA	R-HSA-162594	early phase of hiv life cycle	14	3	0.000389692	0.0309789	XRCC5:KPNA1:PSIP1
Webgestalt	GO:0003727	single-stranded RNA binding	88	8	7.86363e-05	0.0311662	ZC3H14;MSI2;ATXN1;HNRNPH1;CIRBP;RBMS1;FXR1;RBMS2
FUMA	GO:0043603	cellular amide metabolic process	1020	22	0.00138172	0.0314416	TRNAU1AP:EIF2B3:NSUN4:RBM8A:FOLR1:CERS5:SECISBP2L:GSPT1:CIRBP:APOE:CNOT3:MRPL19:USP16:EIF5A2:FXR1:ZCCHC4:MTHFD2L:HNRNPD:SCD5:METTL14:COL4A3BP:PURA
FUMA	GO:0048483	autonomic nervous system development	46	4	0.0014059	0.0315756	FN1:ADARB1:TFAP2A:FZD3
FUMA	GO:0006323	DNA packaging	201	8	0.00140909	0.0315756	RBBP4:ASH1L:RSF1:AKAP8L:TTN:HIRA:H2AFY:KAT6A
FUMA	GO:0001754	eye photoreceptor cell differentiation	46	4	0.0014059	0.0315756	ROM1:CEP290:PRDM1:NTRK2
FUMA	GO:0010876	lipid localization	406	12	0.00140483	0.0315756	PRKAA2:STAT5B:ABCA9:TNFRSF11A:APOE:APOC1:APOC2:OSBPL10:COL4A3BP:ABCB4:ABCB1:ESYT2
FUMA	GO:2001236	regulation of extrinsic apoptotic signaling pathway	156	7	0.00140323	0.0315756	MCL1:ATF3:PDIA3:WWOX:CFLAR:PAK2:FGFR1
gProfiler	GO:0005765	lysosomal membrane	360	3	NA	0.0317188	RNF152,AP2A1,WDR24
gProfiler	GO:0098852	lytic vacuole membrane	360	3	NA	0.0317188	RNF152,AP2A1,WDR24
Webgestalt	GO:0000151	ubiquitin ligase complex	273	11	0.000866244	0.0318448	FBXL16;STUB1;WWP2;DCUN1D1;ASB4;FBXW8;FBXL4;WDR26;FBXO24;CDC27;ANAPC4
gProfiler	GO:0071229	cellular response to acid chemical	213	13	NA	0.0318645	HNRNPD,XRCC5,ABCB4,NTRK2,COL3A1,PCK1,TESC,TWF2,ATM,FOLR1,GNB1,OPA1,PRKAA2
gProfiler	GO:0016032	viral process	832	29	NA	0.0318645	AP2A1,MPHOSPH8,MAVS,TNPO1,XRCC5,ADARB1,ZC3H7B,WWP2,CDC42,SPEN,CFLAR,APOE,CD86,ATF7IP,KPNA1,CR1,CFI,TRIM5,CD46,SLC25A4,HLA-DRA,KIN,ITGA5,VTA1,PSIP1,CDK13,CBX5,RSF1,PAK2
FUMA	GO:0070664	negative regulation of leukocyte proliferation	78	5	0.00143432	0.0320432	SFTPD:ATM:PAWR:PELI1:CD86
FUMA	GO:0002263	cell activation involved in immune response	702	17	0.00144047	0.0320831	CR1:CD46:TSPAN14:CD44:METTL7A:CEP290:APAF1:DNASE1:PLAUR:RELB:XRCC5:CTSZ:CD86:RAB7A:BCL6:CDK13:RC3H2
gProfiler	GO:0016234	inclusion body	83	3	NA	0.032116	ATXN1,STUB1,MAPT
gProfiler	GO:0031902	late endosome membrane	136	8	NA	0.0321644	SLC9A9,LAPTM4B,SLC30A4,AP5S1,HLA-DRA,GOSR2,MCOLN2,RAB7A
gProfiler	GO:0050772	positive regulation of axonogenesis	89	4	NA	0.0321664	METRN,FN1,NTRK2,MAPT
gProfiler	GO:0010604	positive regulation of macromolecule metabolic process	3397	95	NA	0.0322925	MPHOSPH8,HNRNPD,USP16,H2AFY,LMO4,MAVS,FN1,OTUD4,XRCC5,EIF5A2,TFAP2A,STUB1,TTN,NTRK2,SPAG9,MAFF,WWP2,AHI1,MAPT,PRDM1,DCUN1D1,KAT6A,NSF,PLAUR,CDC42,RNF187,CFLAR,FOXJ3,ARNT,APOE,PPP3R1,PTOV1,CD44,TCF3,POU3F2,MBP,CD86,PNKP,EPC1,ATF7IP,E2F7,PCK1,AKAP8L,TNFRSF11A,STAT5B,METTL14,CR1,TESC,POLR1E,PPM1F,SIN3A,TAOK1,CIRBP,TRIM5,TLR9,ACVR1B,MED25,FXR1,CD46,WDR61,CEP290,APAF1,SORBS1,BCL6,TP53INP1,VEGFC,PDCD2,…
gProfiler	GO:0005741	mitochondrial outer membrane	183	5	NA	0.0323519	MCL1,MAVS,CYB5B,RHOT2,TOMM40
Webgestalt	GO:0005720	nuclear heterochromatin	34	4	0.000923218	0.0323966	MPHOSPH8;H2AFY;CENPB;CBX5
FUMA	GO:0051493	regulation of cytoskeleton organization	522	14	0.00146258	0.0324772	CDC42:PRKAA2:RBM14:PPFIA1:TAOK1:MAPT:ALMS1:SPEF1:PPM1F:RASSF1:TWF2:SLAIN2:SYNPO2:RHOBTB3
FUMA	GO:1904115	axon cytoplasm	55	4	0.00272785	0.0325068	ZC3H14:MAPT:OPA1:DST
gProfiler	GO:0044403	symbiotic process	886	33	NA	0.0328708	AP2A1,MPHOSPH8,MAVS,TNPO1,FN1,XRCC5,ADARB1,ZC3H7B,WWP2,CDC42,SPEN,CFLAR,APOE,CD86,ATF7IP,KPNA1,CR1,CFI,TRIM5,CD46,SLC25A4,HLA-DRA,KIN,ITGA5,VTA1,PSIP1,CDK13,CBX5,RSF1,PAK2,RAB7A,G3BP2,SFTPD
gProfiler	GO:0003727	single-stranded RNA binding	87	3	NA	0.0330321	ZC3H14,MSI2,ATXN1
gProfiler	GO:0046624	sphingolipid transporter activity	13	3	NA	0.0330321	ABCB4,COL4A3BP,ABCB1
gProfiler	GO:0042162	telomeric DNA binding	37	3	NA	0.0330321	HNRNPD,XRCC5,PURA
FUMA	R-HSA-8953750	transcriptional regulation by e2f6	34	4	0.000441334	0.033078	RBBP4:EPC1:CBX5:APAF1
FUMA	GO:0051347	positive regulation of transferase activity	643	16	0.00149736	0.0331494	LMO4:STUB1:TAOK1:MAPT:SPAG9:TNFRSF11A:PNKP:XRCC5:CDC25B:PRKAR2A:TLR9:TLR9:DCUN1D1:PAK2:HNRNPD:FGFR1:NTRK2
FUMA	GO:1990904	ribonucleoprotein complex	1361	26	0.00285536	0.0332351	CDC42:NSUN4:PRKAA2:RBM8A:SF3B4:TRIM5:RBM14:CBX5:RBMS2:ZC3H14:SECISBP2L:MAPT:MSI2:CIRBP:AKAP8L:CNOT3:MRPL19:RBMS1:XRCC5:FXR1:G3BP2:HNRNPD:SREK1:CSNK1A1:HNRNPH1:RC3H2
FUMA	GO:0034364	high density lipoprotein particle	27	3	0.00282888	0.0332351	APOE:APOC1:APOC2
FUMA	GO:0010498	proteasomal protein catabolic process	466	13	0.00151273	0.0333891	RNF187:FBXW8:STYX:STUB1:FBXL16:WWP2:CDC27:APOE:PELI1:USP25:ANAPC4:CSNK1A1:FBXL4
FUMA	GO:0007032	endosome organization	79	5	0.00151817	0.0334089	RAB7A:TMCC1:VTA1:HOOK3:LAPTM4B
FUMA	GO:0042461	photoreceptor cell development	47	4	0.00152402	0.0334375	CEP290:PRDM1:AHI1:NTRK2
gProfiler	GO:0003690	double-stranded DNA binding	987	32	NA	0.0335956	HNRNPD,H2AFY,LMO4,XRCC5,TFAP2A,MAFF,MAPT,PRDM1,PURA,FOXJ3,ARNT,TCF3,POU3F2,PNKP,E2F7,STAT5B,SIN3A,ZNF638,RBMS1,AFF4,CENPB,BCL6,KIN,RELB,PSIP1,ZBTB26,RBBP4,ZNF148,NFAT5,ZBTB6,KLF12,ATF3
FUMA	R-HSA-112316	neuronal system	410	13	0.000472357	0.0337173	GNB1:PRKAA2:CACNB2:PPFIA1:ARHGEF7:MAPT:NSF:AP2A1:EPB41L1:DLGAP4:PPM1F:PRKAR2A:PDLIM5
FUMA	GO:0060547	negative regulation of necrotic cell death	22	3	0.00154863	0.0337758	PELI1:CFLAR:SLC25A4
FUMA	GO:0016226	iron sulfur cluster assembly	22	3	0.00154863	0.0337758	IBA57:NARFL:BOLA2
FUMA	GO:0048675	axon extension	117	6	0.00155633	0.0338433	DCLK1:MAPT:APOE:FN1:TWF2:RUFY3
gProfiler	GO:0051094	positive regulation of developmental process	1432	36	NA	0.0339849	AP2A1,METRN,H2AFY,JMJD8,FN1,XRCC5,TFAP2A,NTRK2,SPAG9,AHI1,MAPT,FZD3,ASB4,CDC42,DUOXA1,SPEN,CFLAR,ARNT,APOE,FBXW8,TCF3,POU3F2,CD86,AKT3,STAT5B,TESC,SIN3A,ACVR1B,ARHGEF7,PTCH2,CD46,RUFY3,TWF2,BCL6,VEGFC,PDCD2
gProfiler	GO:0034063	stress granule assembly	19	4	NA	0.0339849	MAPT,CIRBP,G3BP2,PRKAA2
gProfiler	GO:0031301	integral component of organelle membrane	358	7	NA	0.0342475	RNF152,TMEM33,ERGIC1,PDIA3,KTN1,RHOT2,TOMM40
FUMA	GO:0035690	cellular response to drug	358	11	0.00162015	0.0344285	GNB1:PRKAA2:FOLR1:PAWR:SIN3A:CFLAR:PCK1:PPM1F:OPA1:HNRNPD:TP53INP1
FUMA	GO:0043087	regulation of GTPase activity	469	13	0.00160067	0.0344285	CDC42SE1:SRGAP1:ARHGEF7:EVI5L:RASGRP3:RALGAPA2:SRGAP3:KALRN:BCL6:RGS12:AGFG2:NTRK2:RABGAP1
FUMA	GO:0033045	regulation of sister chromatid segregation	80	5	0.00160558	0.0344285	ATM:ZNF207:CDC27:ANAPC4:H2AFY
FUMA	GO:0031929	TOR signaling	118	6	0.0016254	0.0344285	PRKAA2:AKT3:ATM:WDR24:RNF152:AKT1S1
FUMA	GO:0007033	vacuole organization	160	7	0.00162224	0.0344285	LYST:ATG4B:RAB7A:SYNPO2:HOOK3:TP53INP1:LAPTM4B
gProfiler	GO:0051865	protein autoubiquitination	70	4	NA	0.0345697	STUB1,WWP2,ASB4,RNF187
gProfiler	GO:0031935	regulation of chromatin silencing	36	5	NA	0.0346264	MPHOSPH8,ATF7IP,SIN3A,PPHLN1,HIRA
FUMA	GO:0032007	negative regulation of TOR signaling	48	4	0.00164888	0.0346265	PRKAA2:ATM:RNF152:AKT1S1
FUMA	GO:1902743	regulation of lamellipodium organization	48	4	0.00164888	0.0346265	CDC42:CD44:ARHGEF7:TWF2
FUMA	GO:0000956	nuclear transcribed mrna catabolic process	206	8	0.00164517	0.0346265	MRTO4:RBM8A:ATM:WDR61:GSPT1:SMG9:CNOT3:PPP2R2A
FUMA	GO:0005768	endosome	885	19	0.00301579	0.034699	WLS:MCOLN2:GPR161:SFTPD:FOLR1:PDIA3:SLC30A4:GOSR2:APOE:APOC2:AP2A1:AP5S1:TLR9:TLR9:RAB7A:SLC9A9:HLA-DRA:VTA1:LAPTM4B:NTRK2
Webgestalt	GO:0070822	Sin3-type complex	16	3	0.001048	0.0351764	SIN3A;SAP130;RBBP4
gProfiler	GO:0033044	regulation of chromosome organization	351	17	NA	0.0354729	MPHOSPH8,HNRNPD,H2AFY,XRCC5,MAPT,PNKP,ATF7IP,AKAP8L,SIN3A,CDC27,WDR61,BCL6,ATM,ZNF207,PPHLN1,HIRA,ANAPC4
gProfiler	GO:0009056	catabolic process	2665	10	NA	0.0355933	CTSZ,RNF152,AP2A1,DUOX2,ZC3H14,HNRNPD,USP16,WDR24,FBXL16,MCL1
gProfiler	GO:0031328	positive regulation of cellular biosynthetic process	1998	57	NA	0.0355933	HNRNPD,USP16,LMO4,MAVS,DUOXA2,XRCC5,EIF5A2,TFAP2A,MAFF,WWP2,AHI1,KAT6A,CDC42,DUOXA1,RNF187,FOXJ3,ARNT,APOE,APOC2,PPP3R1,PTOV1,TCF3,POU3F2,CD86,PNKP,EPC1,ATF7IP,E2F7,PCK1,AKAP8L,STAT5B,TESC,SIN3A,CIRBP,TLR9,ACVR1B,MED25,FXR1,WDR61,CEP290,SORBS1,TP53INP1,RELB,ATM,GUCA1C,NSUN4,PHF10,JADE1,ZNF148,NFAT5,CDK13,RSF1,KLF12,RBM14,ATF3,FGFR1,ASH1L
gProfiler	GO:1905269	positive regulation of chromatin organization	107	8	NA	0.0355933	MPHOSPH8,ATF7IP,AKAP8L,SIN3A,WDR61,BCL6,ATM,PPHLN1
gProfiler	GO:0090309	positive regulation of methylation-dependent chromatin silencing	10	3	NA	0.0355933	MPHOSPH8,ATF7IP,PPHLN1
gProfiler	GO:0010976	positive regulation of neuron projection development	288	8	NA	0.0355933	AP2A1,METRN,FN1,NTRK2,MAPT,CFLAR,APOE,FBXW8
gProfiler	GO:0009889	regulation of biosynthetic process	4340	108	NA	0.0355933	ZNF254,AP2A1,MPHOSPH8,HNRNPD,BRWD1,USP16,H2AFY,LMO4,MAVS,SECISBP2L,PTPN14,ATXN1,DUOXA2,ZNF226,GSPT1,XRCC5,EIF5A2,TFAP2A,RC3H2,APOC1,MAFF,WWP2,AHI1,PRDM1,EWSR1,KAT6A,PURA,CDC42,DUOXA1,SPEN,RNF187,CFLAR,FOXJ3,ARNT,ZNF264,TRNAU1AP,APOE,APOC2,PPP3R1,PTOV1,TCF3,POU3F2,SCAF4,CD86,PNKP,EPC1,ATF7IP,E2F7,ZNF440,PCK1,AKAP8L,TNFRSF11A,STAT5B,METTL14,TESC,ZNF417,PPM1F,SIN3A,USP2,ZNF789,CIRBP,TRIM5,TLR9,ACVR1…
gProfiler	GO:0051960	regulation of nervous system development	945	17	NA	0.0355933	CTSZ,AP2A1,METRN,FN1,XRCC5,NTRK2,SPAG9,MAPT,FZD3,DUOXA1,SPEN,COL3A1,CFLAR,APOE,FBXW8,TCF3,POU3F2
FUMA	#REF!	ubiquitin mediated proteolysis	134	7	0.000576025	0.0357136	HERC4:FBXW8:STUB1:WWP2:CDC27:UBE2F:ANAPC4
gProfiler	GO:0004402	histone acetyltransferase activity	66	6	NA	0.0357735	ING3,KANSL1,KAT6A,EPC1,PHF10,RSF1
gProfiler	GO:0051188	cofactor biosynthetic process	235	8	NA	0.0358117	DUOX2,DUOXA2,IBA57,NADK,DUOXA1,NMRK1,SCD5,DUOX1
gProfiler	GO:0071704	organic substance metabolic process	11036	78	NA	0.0358117	GANAB,CTSZ,RNF152,ZNF254,AP2A1,METTL15,DUOX2,MPHOSPH8,ZC3H14,HNRNPD,BRWD1,USP16,H2AFY,HS2ST1,FBXL16,PAPOLA,LMO4,MAVS,FAM173A,TNPO1,JMJD8,ING3,SECISBP2L,PTPN14,AK2,KANSL1,U2SURP,ATXN1,DUOXA2,FN1,OTUD4,TRIM4,ZNF226,GSPT1,HAGHL,XRCC5,EIF5A2,ADARB1,TFAP2A,STUB1,ZC3H7B,IBA57,ABCB4,INIP,RC3H2,TTN,NTRK2,NADK,APOC1,SPAG9,MAFF,OSBPL10,WWP2,AHI1,MAPT,PRDM1,EWSR1,DCUN1D1,KAT6A,CERS5,ENDOD1,SLC35D1,RHBDL1,AS…
gProfiler	GO:2000112	regulation of cellular macromolecule biosynthetic process	3966	100	NA	0.0358117	ZNF254,MPHOSPH8,HNRNPD,BRWD1,USP16,H2AFY,LMO4,MAVS,SECISBP2L,ATXN1,ZNF226,GSPT1,XRCC5,EIF5A2,TFAP2A,RC3H2,MAFF,WWP2,AHI1,PRDM1,EWSR1,KAT6A,PURA,CDC42,SPEN,RNF187,CFLAR,FOXJ3,ARNT,ZNF264,TRNAU1AP,APOE,PPP3R1,PTOV1,TCF3,POU3F2,SCAF4,CD86,PNKP,EPC1,ATF7IP,E2F7,ZNF440,PCK1,AKAP8L,TNFRSF11A,STAT5B,METTL14,TESC,ZNF417,PPM1F,SIN3A,USP2,ZNF789,CIRBP,TRIM5,TLR9,ACVR1B,MED25,FXR1,DNAJB1,WDR61,CEP290,AFF4,Z…
gProfiler	GO:0010970	transport along microtubule	160	6	NA	0.0358117	TNPO1,MAPT,PURA,CDC42,RHOT2,DYNC2LI1
FUMA	GO:1901988	negative regulation of cell cycle phase transition	256	9	0.00171127	0.0358342	MDM4:ATM:E2F7:TAOK1:ZNF207:CNOT3:JADE1:H2AFY:ZNF655
gProfiler	GO:0005721	pericentric heterochromatin	21	3	NA	0.0358415	H2AFY,CENPB,CBX5
gProfiler	GO:0010556	regulation of macromolecule biosynthetic process	4113	103	NA	0.0361474	ZNF254,AP2A1,MPHOSPH8,HNRNPD,BRWD1,USP16,H2AFY,LMO4,MAVS,SECISBP2L,PTPN14,ATXN1,ZNF226,GSPT1,XRCC5,EIF5A2,TFAP2A,RC3H2,MAFF,WWP2,AHI1,PRDM1,EWSR1,KAT6A,PURA,CDC42,SPEN,RNF187,CFLAR,FOXJ3,ARNT,ZNF264,TRNAU1AP,APOE,PPP3R1,PTOV1,TCF3,POU3F2,SCAF4,CD86,PNKP,EPC1,ATF7IP,E2F7,ZNF440,PCK1,AKAP8L,TNFRSF11A,STAT5B,METTL14,TESC,ZNF417,PPM1F,SIN3A,USP2,ZNF789,CIRBP,TRIM5,TLR9,ACVR1B,MED25,FXR1,DNAJB1,WDR61,…
FUMA	GO:0008637	apoptotic mitochondrial changes	120	6	0.0017705	0.0368645	ATPIF1:RHOT2:PLAUR:PPP3R1:OPA1:SLC25A4
FUMA	GO:0051654	establishment of mitochondrion localization	23	3	0.00176707	0.0368645	RHOT2:MAPT:OPA1
FUMA	GO:0048878	chemical homeostasis	1177	24	0.00179417	0.0371468	NADK:GNB1:PRKAA2:MCOLN2:SV2A:CACNB2:SFTPD:SLC24A4:SLC30A4:SIN3A:NARFL:APOE:APOC2:PCK1:PRKAR2A:RAB7A:SLC9A9:EIF5A2:OPA1:STIM2:COL4A3BP:SGCD:ABCB4:SLC25A37
FUMA	GO:0071158	positive regulation of cell cycle arrest	82	5	0.00179141	0.0371468	MDM4:ATM:E2F7:MED25:CNOT3
FUMA	GO:0051701	interaction with host	209	8	0.00180118	0.0371873	CR1:CD46:TRIM5:ITGA5:WWP2:CD86:KPNA1:RAB7A
FUMA	GO:0048156	tau protein binding	45	4	0.00129431	0.0373533	STUB1:TAOK1:APOE:PPP2R2A
gProfiler	GO:0097659	nucleic acid-templated transcription	3693	95	NA	0.0375067	ZNF254,MPHOSPH8,HNRNPD,BRWD1,USP16,H2AFY,PAPOLA,LMO4,MAVS,PTPN14,ATXN1,ZNF226,XRCC5,TFAP2A,RC3H2,MAFF,WWP2,AHI1,PRDM1,EWSR1,KAT6A,PURA,SPEN,RNF187,CFLAR,FOXJ3,ARNT,ZNF264,APOE,PPP3R1,PTOV1,TCF3,POU3F2,SCAF4,CD86,EPC1,ATF7IP,E2F7,ZNF440,PCK1,AKAP8L,TNFRSF11A,STAT5B,TESC,ZNF417,POLR1E,PPM1F,SIN3A,USP2,ZNF789,TRIM5,TLR9,ACVR1B,MED25,DNAJB1,WDR61,CEP290,AFF4,ZNF75A,ZNF500,POGK,BCL6,TP53INP1,RELB,SNAP…
gProfiler	GO:0031325	positive regulation of cellular metabolic process	3353	86	NA	0.0375067	RNF152,HNRNPD,USP16,LMO4,MAVS,DUOXA2,FN1,OTUD4,XRCC5,EIF5A2,TFAP2A,STUB1,NTRK2,APOC1,SPAG9,MAFF,WWP2,AHI1,MAPT,DCUN1D1,KAT6A,NSF,PLAUR,CDC42,DUOXA1,RNF187,CFLAR,FOXJ3,ARNT,APOE,APOC2,PPP3R1,PTOV1,CD44,TCF3,POU3F2,MBP,CD86,PNKP,EPC1,ATF7IP,E2F7,PCK1,AKAP8L,TNFRSF11A,STAT5B,METTL14,CR1,TESC,PPM1F,SIN3A,TAOK1,CIRBP,TRIM5,TLR9,ACVR1B,MED25,FXR1,WDR61,CEP290,APAF1,SORBS1,BCL6,TP53INP1,VEGFC,PDCD2,RELB…
gProfiler	GO:0033127	regulation of histone phosphorylation	13	3	NA	0.0375067	H2AFY,AKAP8L,ATM
FUMA	GO:0080135	regulation of cellular response to stress	718	17	0.00182449	0.037563	MCL1:AKT3:CD44:ATM:PAWR:VASH1:TAOK1:MAPT:SPAG9:TNFRSF11A:DNAJB1:AKT1S1:USP25:TLR9:TLR9:BCL6:OPA1:TMEM33
gProfiler	GO:0061733	peptide-lysine-N-acetyltransferase activity	68	6	NA	0.0376564	ING3,KANSL1,KAT6A,EPC1,PHF10,RSF1
gProfiler	GO:0005515	protein binding	12715	261	NA	0.0376564	GANAB,CTSZ,RNF152,AP2A1,DUOX2,MPHOSPH8,ZC3H14,TMEM33,HNRNPD,METRN,MSI2,BRWD1,USP16,WDR24,H2AFY,FBXL16,MCL1,PAPOLA,LMO4,MAVS,RABGAP1,TNPO1,WLS,JMJD8,ING3,SECISBP2L,PTPN14,AAGAB,KANSL1,U2SURP,ATXN1,DUOXA2,FN1,OTUD4,TRIM4,GSPT1,XRCC5,EIF5A2,ADARB1,STIM2,DLGAP4,TFAP2A,STUB1,ZC3H7B,IBA57,ABCB4,INIP,TTN,NTRK2,NADK,SPAG9,MAFF,WWP2,AHI1,CYB5B,MAPT,ERGIC1,PRDM1,EWSR1,SLC9A9,FZD3,DCUN1D1,KAT6A,ASB4,NSF,ALM…
gProfiler	GO:0032374	regulation of cholesterol transport	62	4	NA	0.0376777	ABCB4,APOC1,APOE,APOC2
FUMA	GO:0051046	regulation of secretion	782	18	0.00184291	0.0378362	NADK:WLS:GBP1:SV2A:CACNB2:ARHGEF7:NSF:TNFRSF11A:MBP:TTN:FN1:MAVS:TLR9:TLR9:KALRN:RAB7A:VEGFC:SLC25A4:FGFR1
FUMA	GO:0010810	regulation of cell substrate adhesion	210	8	0.0018557	0.0379927	CDC42:GBP1:PTPRO:ITGA5:ARHGEF7:FN1:PPM1F:BCL6
gProfiler	GO:0034377	plasma lipoprotein particle assembly	28	3	NA	0.0381641	APOC1,APOE,APOC2
gProfiler	GO:0034369	plasma lipoprotein particle remodeling	28	3	NA	0.0381641	APOC1,APOE,APOC2
gProfiler	GO:0051240	positive regulation of multicellular organismal process	1835	30	NA	0.0381641	AP2A1,METRN,H2AFY,MAVS,JMJD8,FN1,XRCC5,TFAP2A,NTRK2,SPAG9,MAPT,FZD3,ASB4,ALMS1,CDC42,DUOXA1,SPEN,GATM,CFLAR,ARNT,APOE,FBXW8,APOC2,TCF3,POU3F2,MBP,CD86,AKT3,TNFRSF11A,STAT5B
gProfiler	GO:0034368	protein-lipid complex remodeling	28	3	NA	0.0381641	APOC1,APOE,APOC2
gProfiler	GO:0032371	regulation of sterol transport	63	4	NA	0.0381641	ABCB4,APOC1,APOE,APOC2
gProfiler	GO:0035327	transcriptionally active chromatin	25	3	NA	0.0383394	WDR61,AFF4,PSIP1
gProfiler	GO:0005774	vacuolar membrane	416	3	NA	0.0383394	RNF152,AP2A1,WDR24
gProfiler	GO:0006475	internal protein amino acid acetylation	169	10	NA	0.0383917	ING3,KANSL1,MAPT,KAT6A,EPC1,PCK1,SIN3A,PHF10,JADE1,RSF1
FUMA	GO:0033218	amide binding	350	11	0.0013557	0.0384505	LDLRAD3:FOLR1:APOE:PPP3R1:PTH2R:NKTR:KPNA1:TNPO1:COL4A3BP:HLA-DRA:LAPTM4B
gProfiler	GO:0032774	RNA biosynthetic process	3707	95	NA	0.0386156	ZNF254,MPHOSPH8,HNRNPD,BRWD1,USP16,H2AFY,PAPOLA,LMO4,MAVS,PTPN14,ATXN1,ZNF226,XRCC5,TFAP2A,RC3H2,MAFF,WWP2,AHI1,PRDM1,EWSR1,KAT6A,PURA,SPEN,RNF187,CFLAR,FOXJ3,ARNT,ZNF264,APOE,PPP3R1,PTOV1,TCF3,POU3F2,SCAF4,CD86,EPC1,ATF7IP,E2F7,ZNF440,PCK1,AKAP8L,TNFRSF11A,STAT5B,TESC,ZNF417,POLR1E,PPM1F,SIN3A,USP2,ZNF789,TRIM5,TLR9,ACVR1B,MED25,DNAJB1,WDR61,CEP290,AFF4,ZNF75A,ZNF500,POGK,BCL6,TP53INP1,RELB,SNAP…
FUMA	GO:0098813	nuclear chromosome segregation	260	9	0.00190131	0.0388185	CDC42:ATM:ZNF207:CDC27:AKAP8L:TTN:HIRA:ANAPC4:H2AFY
gProfiler	GO:0018130	heterocycle biosynthetic process	4237	105	NA	0.0388379	ZNF254,MPHOSPH8,HNRNPD,BRWD1,USP16,H2AFY,PAPOLA,LMO4,MAVS,PTPN14,AK2,ATXN1,ZNF226,XRCC5,TFAP2A,IBA57,RC3H2,NADK,MAFF,WWP2,AHI1,PRDM1,EWSR1,KAT6A,SLC35D1,PURA,SPEN,RNF187,CFLAR,FOXJ3,ARNT,ZNF264,APOE,PPP3R1,PTOV1,TCF3,NMRK1,POU3F2,SCAF4,SCD5,CD86,PNKP,EPC1,ATF7IP,E2F7,ZNF440,PCK1,AKAP8L,TNFRSF11A,STAT5B,TESC,ZNF417,POLR1E,PPM1F,SIN3A,USP2,ZNF789,TRIM5,TLR9,ACVR1B,MED25,GUCY1A2,GART,DNAJB1,WDR61,CE…
FUMA	GO:1903793	positive regulation of anion transport	50	4	0.00191959	0.0388677	TNFRSF11A:APOE:ABCB4:ABCB1
FUMA	GO:2001238	positive regulation of extrinsic apoptotic signaling pathway	50	4	0.00191959	0.0388677	ATF3:PDIA3:WWOX:PAK2
FUMA	GO:0032886	regulation of microtubule based process	211	8	0.00191151	0.0388677	PRKAA2:RBM14:TAOK1:MAPT:ALMS1:SPEF1:RASSF1:SLAIN2
FUMA	GO:0008134	transcription factor binding	639	16	0.00140549	0.039187	SPEN:LMO4:ARNT:CBX5:E2F7:SIN3A:NFAT5:WWP2:STAT5B:TCF3:MED25:HNRNPD:PURA:CDK13:KAT6A:POLR1E
FUMA	GO:0048514	blood vessel morphogenesis	660	16	0.00194624	0.0392992	ATPIF1:AKT3:FOLR1:ITGA5:E2F7:VASH1:JMJD8:APOE:COL3A1:FN1:VEGFC:SGCD:PRDM1:ASB4:FGFR1:NTRK2
gProfiler	GO:0042461	photoreceptor cell development	47	3	NA	0.0396995	NTRK2,AHI1,PRDM1
gProfiler	GO:0070534	protein K63-linked ubiquitination	51	3	NA	0.0396995	RNF152,STUB1,WWP2
gProfiler	GO:0034367	protein-containing complex remodeling	29	3	NA	0.0396995	APOC1,APOE,APOC2
gProfiler	GO:0050770	regulation of axonogenesis	188	9	NA	0.0396995	METRN,FN1,NTRK2,MAPT,APOE,POU3F2,SIN3A,RUFY3,TWF2
FUMA	GO:1902807	negative regulation of cell cycle G1/S phase transition	123	6	0.00200631	0.039963	MDM4:ATM:E2F7:CNOT3:JADE1:ZNF655
FUMA	GO:0106027	neuron projection organization	84	5	0.00199251	0.039963	CDC42:APOE:KALRN:OPA1:PDLIM5
FUMA	GO:0045931	positive regulation of mitotic cell cycle	166	7	0.00199958	0.039963	USP2:SIN3A:STAT5B:CDC25B:ANAPC4:H2AFY:FGFR1
FUMA	GO:2000209	regulation of anoikis	24	3	0.00200381	0.039963	MCL1:ITGA5:NTRK2
FUMA	GO:0008384	i kappab kinase nf kappab signaling	262	9	0.00200247	0.039963	WLS:ASH1L:TRIM5:JMJD8:RELB:PELI1:CFLAR:MAVS:TLR9:TLR9
gProfiler	GO:0019438	aromatic compound biosynthetic process	4246	105	NA	0.0400786	ZNF254,MPHOSPH8,HNRNPD,BRWD1,USP16,H2AFY,PAPOLA,LMO4,MAVS,PTPN14,AK2,ATXN1,ZNF226,XRCC5,TFAP2A,IBA57,RC3H2,NADK,MAFF,WWP2,AHI1,PRDM1,EWSR1,KAT6A,SLC35D1,PURA,SPEN,RNF187,CFLAR,FOXJ3,ARNT,ZNF264,APOE,PPP3R1,PTOV1,TCF3,NMRK1,POU3F2,SCAF4,SCD5,CD86,PNKP,EPC1,ATF7IP,E2F7,ZNF440,PCK1,AKAP8L,TNFRSF11A,STAT5B,TESC,ZNF417,POLR1E,PPM1F,SIN3A,USP2,ZNF789,TRIM5,TLR9,ACVR1B,MED25,GUCY1A2,GART,DNAJB1,WDR61,CE…
gProfiler	GO:0009891	positive regulation of biosynthetic process	2032	57	NA	0.0400786	HNRNPD,USP16,LMO4,MAVS,DUOXA2,XRCC5,EIF5A2,TFAP2A,MAFF,WWP2,AHI1,KAT6A,CDC42,DUOXA1,RNF187,FOXJ3,ARNT,APOE,APOC2,PPP3R1,PTOV1,TCF3,POU3F2,CD86,PNKP,EPC1,ATF7IP,E2F7,PCK1,AKAP8L,STAT5B,TESC,SIN3A,CIRBP,TLR9,ACVR1B,MED25,FXR1,WDR61,CEP290,SORBS1,TP53INP1,RELB,ATM,GUCA1C,NSUN4,PHF10,JADE1,ZNF148,NFAT5,CDK13,RSF1,KLF12,RBM14,ATF3,FGFR1,ASH1L
gProfiler	GO:0005813	centrosome	519	19	NA	0.0401392	RABGAP1,TFAP2A,AHI1,ALMS1,CDC42,DYNC2LI1,HOOK3,USP2,CDC27,CEP290,SORBS1,SLAIN2,CDKL2,RELB,CEP68,CDC25B,CSNK1A1,PRKAR2A,CEP57
gProfiler	GO:0031968	organelle outer membrane	207	6	NA	0.0401392	MCL1,MAVS,CYB5B,RHOT2,TOMM40,SYNE3
gProfiler	GO:1990904	ribonucleoprotein complex	878	28	NA	0.0401392	ZC3H14,HNRNPD,MSI2,SECISBP2L,XRCC5,RC3H2,MAPT,CDC42,HNRNPH1,SREK1,AKAP8L,MRPL19,CIRBP,TRIM5,RBMS1,MRTO4,FXR1,MRPL57,RBM8A,CNOT3,NSUN4,CBX5,SF3B4,RBM14,RBMS2,CSNK1A1,G3BP2,PRKAA2
gProfiler	GO:0048729	tissue morphogenesis	677	11	NA	0.0402	CTSZ,AP2A1,LMO4,WLS,ADARB1,TFAP2A,TTN,AHI1,FZD3,CDC42,COL3A1
FUMA	GO:1902749	regulation of cell cycle G2/M phase transition	213	8	0.00202711	0.0402683	CEP57:ATM:CEP290:SIN3A:TAOK1:ALMS1:CDC25B:H2AFY
gProfiler	GO:0035627	ceramide transport	14	3	NA	0.0403986	ABCB4,COL4A3BP,ABCB1
gProfiler	GO:0043414	macromolecule methylation	311	5	NA	0.0403986	METTL15,MPHOSPH8,H2AFY,FAM173A,GSPT1
gProfiler	GO:0051402	neuron apoptotic process	250	7	NA	0.0403986	CTSZ,MCL1,ADARB1,TFAP2A,NTRK2,CDC42,APOE
gProfiler	GO:0006473	protein acetylation	206	12	NA	0.0403986	ING3,KANSL1,MAPT,KAT6A,EPC1,PCK1,SIN3A,TAOK1,PHF10,JADE1,RSF1,PRKAA2
gProfiler	GO:2000026	regulation of multicellular organismal development	2180	43	NA	0.0403986	CTSZ,AP2A1,METRN,H2AFY,JMJD8,FN1,XRCC5,TFAP2A,RC3H2,NTRK2,SPAG9,MAFF,AHI1,MAPT,PRDM1,FZD3,ASB4,CDC42,DUOXA1,SPEN,COL3A1,CFLAR,ARNT,APOE,FBXW8,TCF3,POU3F2,MBP,CD86,AKT3,STAT5B,VASH1,HOOK3,CR1,TESC,GPR161,SIN3A,TLR9,ACVR1B,CLPTM1,PTCH2,CD46,RUFY3
gProfiler	GO:1903506	regulation of nucleic acid-templated transcription	3536	91	NA	0.0403986	ZNF254,MPHOSPH8,HNRNPD,BRWD1,USP16,H2AFY,LMO4,MAVS,PTPN14,ATXN1,ZNF226,XRCC5,TFAP2A,RC3H2,MAFF,WWP2,AHI1,PRDM1,EWSR1,KAT6A,PURA,SPEN,RNF187,CFLAR,FOXJ3,ARNT,ZNF264,APOE,PPP3R1,PTOV1,TCF3,POU3F2,SCAF4,CD86,EPC1,ATF7IP,E2F7,ZNF440,PCK1,AKAP8L,TNFRSF11A,STAT5B,TESC,ZNF417,PPM1F,SIN3A,USP2,ZNF789,TRIM5,TLR9,ACVR1B,MED25,DNAJB1,WDR61,CEP290,AFF4,ZNF75A,ZNF500,POGK,BCL6,TP53INP1,RELB,ATM,CNOT3,SAP130,Z…
gProfiler	GO:0051338	regulation of transferase activity	981	12	NA	0.0403986	HNRNPD,H2AFY,LMO4,JMJD8,XRCC5,ADARB1,STUB1,TTN,NTRK2,SPAG9,MAPT,DCUN1D1
gProfiler	GO:0048675	axon extension	124	7	NA	0.0405022	FN1,MAPT,APOE,SIN3A,DCLK1,RUFY3,TWF2
gProfiler	GO:0044265	cellular macromolecule catabolic process	1194	31	NA	0.0405022	CTSZ,AP2A1,ZC3H14,HNRNPD,USP16,FBXL16,TNPO1,GSPT1,STUB1,WWP2,RNF187,APOE,FBXL4,C18ORF25,METTL14,LAPTM4B,KPNA1,USP2,SMG9,CIRBP,STYX,CDC27,MRTO4,FXR1,PPP2R2A,WDR61,APAF1,RBM8A,ATM,CNOT3,DNASE1
gProfiler	GO:0030705	cytoskeleton-dependent intracellular transport	183	6	NA	0.0405022	TNPO1,MAPT,PURA,CDC42,RHOT2,DYNC2LI1
gProfiler	GO:0042743	hydrogen peroxide metabolic process	57	4	NA	0.0405022	DUOX2,DUOXA2,DUOXA1,DUOX1
gProfiler	GO:0044419	interspecies interaction between organisms	936	33	NA	0.0405022	AP2A1,MPHOSPH8,MAVS,TNPO1,FN1,XRCC5,ADARB1,ZC3H7B,WWP2,CDC42,SPEN,CFLAR,APOE,CD86,ATF7IP,KPNA1,CR1,CFI,TRIM5,CD46,SLC25A4,HLA-DRA,KIN,ITGA5,VTA1,PSIP1,CDK13,CBX5,RSF1,PAK2,RAB7A,G3BP2,SFTPD
gProfiler	GO:0001946	lymphangiogenesis	16	3	NA	0.0405022	PTPN14,VASH1,VEGFC
gProfiler	GO:0033036	macromolecule localization	3228	36	NA	0.0405022	SGCD,AP2A1,H2AFY,MCL1,MAVS,RABGAP1,TNPO1,WLS,PTPN14,AAGAB,DUOXA2,FN1,XRCC5,EIF5A2,ABCB4,TTN,NADK,APOC1,OSBPL10,WWP2,AHI1,MAPT,NSF,PURA,CDC42,TSPAN14,DUOXA1,KTN1,LYST,TOMM40,APOE,PPFIA1,SPATA7,DYNC2LI1,APOC2,PPP3R1
gProfiler	GO:0006402	mRNA catabolic process	371	14	NA	0.0405022	ZC3H14,HNRNPD,TNPO1,GSPT1,METTL14,SMG9,CIRBP,MRTO4,FXR1,PPP2R2A,WDR61,RBM8A,ATM,CNOT3
gProfiler	GO:0010605	negative regulation of macromolecule metabolic process	2990	79	NA	0.0405022	CTSZ,ZNF254,AP2A1,MPHOSPH8,ZC3H14,HNRNPD,H2AFY,TNPO1,ATXN1,GSPT1,XRCC5,ADARB1,TFAP2A,ZC3H7B,WWP2,MAPT,PRDM1,KAT6A,PLAUR,PURA,SPEN,CFLAR,APOE,CD44,TCF3,POU3F2,SCAF4,PNKP,EPC1,ATF7IP,E2F7,METTL14,LAPTM4B,CR1,TESC,AKT1S1,PPM1F,SIN3A,USP2,SMG9,CIRBP,STYX,ZC3H7A,ACVR1B,MED25,MRTO4,FXR1,CD46,PPP2R2A,DNAJB1,WDR61,BCL6,TP53INP1,RELB,RBM8A,ATM,CNOT3,CRTAP,SAP130,PHF10,DKK3,ZBTB26,GBP1,RBBP4,ZNF148,EID2B,Z…
gProfiler	GO:0045892	negative regulation of transcription, DNA-templated	1229	39	NA	0.0405022	ZNF254,MPHOSPH8,H2AFY,ATXN1,XRCC5,TFAP2A,WWP2,PRDM1,KAT6A,PURA,SPEN,TCF3,SCAF4,EPC1,ATF7IP,E2F7,PPM1F,SIN3A,USP2,MED25,DNAJB1,BCL6,RELB,SAP130,PHF10,DKK3,ZBTB26,ZNF148,EID2B,ZBTB6,CBX5,RSF1,PPHLN1,KLF12,ATF3,FGFR1,MDM4,HIRA,WWOX
gProfiler	GO:0034654	nucleobase-containing compound biosynthetic process	4171	103	NA	0.0405022	ZNF254,MPHOSPH8,HNRNPD,BRWD1,USP16,H2AFY,PAPOLA,LMO4,MAVS,PTPN14,AK2,ATXN1,ZNF226,XRCC5,TFAP2A,RC3H2,NADK,MAFF,WWP2,AHI1,PRDM1,EWSR1,KAT6A,SLC35D1,PURA,SPEN,RNF187,CFLAR,FOXJ3,ARNT,ZNF264,APOE,PPP3R1,PTOV1,TCF3,NMRK1,POU3F2,SCAF4,SCD5,CD86,PNKP,EPC1,ATF7IP,E2F7,ZNF440,PCK1,AKAP8L,TNFRSF11A,STAT5B,TESC,ZNF417,POLR1E,PPM1F,SIN3A,USP2,ZNF789,TRIM5,TLR9,ACVR1B,MED25,GUCY1A2,GART,DNAJB1,WDR61,CEP290,A…
gProfiler	GO:0031346	positive regulation of cell projection organization	389	9	NA	0.0405022	AP2A1,METRN,FN1,NTRK2,MAPT,CDC42,CFLAR,APOE,FBXW8
gProfiler	GO:0010628	positive regulation of gene expression	2017	40	NA	0.0405022	HNRNPD,USP16,H2AFY,LMO4,MAVS,FN1,EIF5A2,TFAP2A,TTN,NTRK2,MAFF,WWP2,AHI1,PRDM1,KAT6A,RNF187,FOXJ3,ARNT,APOE,PPP3R1,PTOV1,TCF3,POU3F2,CD86,EPC1,ATF7IP,E2F7,PCK1,AKAP8L,STAT5B,TESC,POLR1E,PPM1F,SIN3A,CIRBP,TLR9,ACVR1B,MED25,FXR1,CD46
gProfiler	GO:0008104	protein localization	2863	33	NA	0.0405022	SGCD,AP2A1,H2AFY,MCL1,MAVS,RABGAP1,TNPO1,WLS,PTPN14,AAGAB,DUOXA2,FN1,XRCC5,EIF5A2,TTN,NADK,WWP2,AHI1,MAPT,NSF,PURA,CDC42,TSPAN14,DUOXA1,KTN1,LYST,TOMM40,APOE,PPFIA1,SPATA7,DYNC2LI1,APOC2,PPP3R1
gProfiler	GO:0019538	protein metabolic process	5905	88	NA	0.0405022	GANAB,CTSZ,RNF152,AP2A1,HNRNPD,USP16,H2AFY,HS2ST1,FBXL16,MAVS,FAM173A,ING3,SECISBP2L,PTPN14,KANSL1,DUOXA2,FN1,OTUD4,TRIM4,GSPT1,XRCC5,EIF5A2,ADARB1,STUB1,RC3H2,TTN,NTRK2,APOC1,SPAG9,WWP2,MAPT,DCUN1D1,KAT6A,SLC35D1,RHBDL1,ASB4,NSF,PLAUR,PURA,CDC42,TSPAN14,SYNPO2,RNF187,COL3A1,PDIA3,KTN1,CFLAR,ARNT,TRNAU1AP,APOE,FBXW8,FBXL4,PPP3R1,CD44,C18ORF25,CLK4,MBP,CD86,ST3GAL3,PNKP,EPC1,LDLRAD3,AKT3,HERC4,PCK…
gProfiler	GO:0000209	protein polyubiquitination	313	8	NA	0.0405022	RNF152,FBXL16,STUB1,RC3H2,WWP2,RNF187,FBXW8,FBXL4
gProfiler	GO:0065005	protein-lipid complex assembly	32	3	NA	0.0405022	APOC1,APOE,APOC2
gProfiler	GO:0009894	regulation of catabolic process	998	7	NA	0.0405022	RNF152,ZC3H14,HNRNPD,WDR24,MCL1,TNPO1,JMJD8
gProfiler	GO:1903706	regulation of hemopoiesis	481	16	NA	0.0405022	RC3H2,PRDM1,ARNT,TCF3,CD86,STAT5B,CR1,TESC,SIN3A,TLR9,ACVR1B,CLPTM1,CD46,WDR61,BCL6,PDCD2
gProfiler	GO:0090308	regulation of methylation-dependent chromatin silencing	13	3	NA	0.0405022	MPHOSPH8,ATF7IP,PPHLN1
gProfiler	GO:0045664	regulation of neuron differentiation	671	13	NA	0.0405022	CTSZ,AP2A1,METRN,FN1,NTRK2,SPAG9,MAPT,DUOXA1,CFLAR,APOE,FBXW8,TCF3,POU3F2
gProfiler	GO:2001141	regulation of RNA biosynthetic process	3541	91	NA	0.0405022	ZNF254,MPHOSPH8,HNRNPD,BRWD1,USP16,H2AFY,LMO4,MAVS,PTPN14,ATXN1,ZNF226,XRCC5,TFAP2A,RC3H2,MAFF,WWP2,AHI1,PRDM1,EWSR1,KAT6A,PURA,SPEN,RNF187,CFLAR,FOXJ3,ARNT,ZNF264,APOE,PPP3R1,PTOV1,TCF3,POU3F2,SCAF4,CD86,EPC1,ATF7IP,E2F7,ZNF440,PCK1,AKAP8L,TNFRSF11A,STAT5B,TESC,ZNF417,PPM1F,SIN3A,USP2,ZNF789,TRIM5,TLR9,ACVR1B,MED25,DNAJB1,WDR61,CEP290,AFF4,ZNF75A,ZNF500,POGK,BCL6,TP53INP1,RELB,ATM,CNOT3,SAP130,Z…
gProfiler	GO:0006355	regulation of transcription, DNA-templated	3464	89	NA	0.0405022	ZNF254,MPHOSPH8,HNRNPD,BRWD1,USP16,H2AFY,LMO4,MAVS,ATXN1,ZNF226,XRCC5,TFAP2A,RC3H2,MAFF,WWP2,AHI1,PRDM1,EWSR1,KAT6A,PURA,SPEN,RNF187,CFLAR,FOXJ3,ARNT,ZNF264,APOE,PPP3R1,PTOV1,TCF3,POU3F2,SCAF4,CD86,EPC1,ATF7IP,E2F7,ZNF440,PCK1,AKAP8L,TNFRSF11A,STAT5B,TESC,ZNF417,PPM1F,SIN3A,USP2,ZNF789,TRIM5,TLR9,ACVR1B,MED25,DNAJB1,WDR61,CEP290,AFF4,ZNF75A,ZNF500,POGK,BCL6,TP53INP1,RELB,ATM,CNOT3,SAP130,ZMYM2,ZN…
gProfiler	GO:0006351	transcription, DNA-templated	3647	93	NA	0.0405022	ZNF254,MPHOSPH8,HNRNPD,BRWD1,USP16,H2AFY,PAPOLA,LMO4,MAVS,ATXN1,ZNF226,XRCC5,TFAP2A,RC3H2,MAFF,WWP2,AHI1,PRDM1,EWSR1,KAT6A,PURA,SPEN,RNF187,CFLAR,FOXJ3,ARNT,ZNF264,APOE,PPP3R1,PTOV1,TCF3,POU3F2,SCAF4,CD86,EPC1,ATF7IP,E2F7,ZNF440,PCK1,AKAP8L,TNFRSF11A,STAT5B,TESC,ZNF417,POLR1E,PPM1F,SIN3A,USP2,ZNF789,TRIM5,TLR9,ACVR1B,MED25,DNAJB1,WDR61,CEP290,AFF4,ZNF75A,ZNF500,POGK,BCL6,TP53INP1,RELB,SNAPC3,ATM,…
FUMA	GO:0007568	aging	315	10	0.00205546	0.040503	AKT3:ATM:PAWR:APAF1:VASH1:SIN3A:PCK1:BCL6:OPA1:KAT6A
FUMA	GO:0006470	protein dephosphorylation	315	10	0.00205546	0.040503	DNAJC6:PTPN14:B3GAT3:PTPRO:STYX:PPP3R1:CDC25B:PPM1F:PPM1M:PPP2R2A
FUMA	GO:0000375	rna splicing via transesterification reactions	369	11	0.00205125	0.040503	RBM8A:SF3B4:PAPOLA:CIRBP:U2SURP:HNRNPD:METTL14:SREK1:HNRNPH1:CDK13:PSIP1
FUMA	GO:0032206	positive regulation of telomere maintenance	51	4	0.00206583	0.0405985	ATM:PNKP:XRCC5:HNRNPD
gProfiler	GO:0019867	outer membrane	209	6	NA	0.0407313	MCL1,MAVS,CYB5B,RHOT2,TOMM40,SYNE3
FUMA	#REF!	renal cell carcinoma	70	5	0.000880672	0.0409512	CDC42:ARNT:AKT3:PAK2:VEGFC
Webgestalt	GO:0098687	chromosomal region	331	12	0.0012742	0.0409866	H2AFY;KANSL1;XRCC5;PURA;SIN3A;CENPB;ATM;ZNF207;WDR82;CBX5;HIRA;CSNK1A1
FUMA	GO:0097581	lamellipodium organization	85	5	0.00209902	0.0410314	CDC42:CD44:PTPRO:ARHGEF7:TWF2
FUMA	GO:0042147	retrograde transport endosome to golgi	85	5	0.00209902	0.0410314	GOSR2:SPAG9:STX16:RAB7A:RHOBTB3
FUMA	GO:0043549	regulation of kinase activity	857	19	0.00212103	0.0413516	LMO4:TESC:TAOK1:MAPT:SPAG9:TNFRSF11A:APOE:AKT1S1:TTN:XRCC5:CDC25B:ADARB1:PPM1F:PRKAR2A:TLR9:TLR9:PAK2:H2AFY:FGFR1:NTRK2
gProfiler	GO:0043170	macromolecule metabolic process	9523	132	NA	0.0415221	GANAB,CTSZ,RNF152,ZNF254,AP2A1,METTL15,MPHOSPH8,ZC3H14,HNRNPD,BRWD1,USP16,H2AFY,HS2ST1,FBXL16,PAPOLA,LMO4,MAVS,FAM173A,TNPO1,ING3,SECISBP2L,PTPN14,KANSL1,U2SURP,ATXN1,DUOXA2,FN1,OTUD4,TRIM4,ZNF226,GSPT1,XRCC5,EIF5A2,ADARB1,TFAP2A,STUB1,ZC3H7B,INIP,RC3H2,TTN,NTRK2,APOC1,SPAG9,MAFF,WWP2,AHI1,MAPT,PRDM1,EWSR1,DCUN1D1,KAT6A,ENDOD1,SLC35D1,RHBDL1,ASB4,NSF,PLAUR,PURA,CDC42,TSPAN14,SYNPO2,SPEN,RNF187,CO…
gProfiler	GO:0034381	plasma lipoprotein particle clearance	73	4	NA	0.0415221	AP2A1,APOC1,APOE,APOC2
gProfiler	GO:0051173	positive regulation of nitrogen compound metabolic process	3209	88	NA	0.0417438	HNRNPD,USP16,LMO4,MAVS,FN1,OTUD4,XRCC5,EIF5A2,TFAP2A,STUB1,NTRK2,SPAG9,MAFF,WWP2,AHI1,MAPT,DCUN1D1,KAT6A,NSF,PLAUR,CDC42,RNF187,CFLAR,FOXJ3,ARNT,APOE,PPP3R1,PTOV1,CD44,TCF3,POU3F2,MBP,CD86,PNKP,EPC1,ATF7IP,E2F7,PCK1,AKAP8L,TNFRSF11A,STAT5B,METTL14,CR1,TESC,PPM1F,SIN3A,TAOK1,CIRBP,TRIM5,TLR9,ACVR1B,MED25,FXR1,WDR61,CEP290,APAF1,BCL6,TP53INP1,VEGFC,PDCD2,RELB,ATM,GUCA1C,NSUN4,ITGA5,PHF10,CDC25B,JAD…
FUMA	GO:1903039	positive regulation of leukocyte cell cell adhesion	215	8	0.00214814	0.0417694	CDC42:CD46:CD44:NFAT5:STAT5B:CD86:BCL6:PAK2
gProfiler	GO:0044271	cellular nitrogen compound biosynthetic process	4937	118	NA	0.0419568	ZNF254,MPHOSPH8,HNRNPD,BRWD1,USP16,H2AFY,PAPOLA,LMO4,MAVS,SECISBP2L,PTPN14,AK2,ATXN1,ZNF226,GSPT1,XRCC5,EIF5A2,TFAP2A,IBA57,RC3H2,NADK,MAFF,WWP2,AHI1,PRDM1,EWSR1,KAT6A,CERS5,SLC35D1,PURA,SPEN,RNF187,CFLAR,FOXJ3,ARNT,ZNF264,TRNAU1AP,APOE,PPP3R1,PTOV1,TCF3,NMRK1,POU3F2,SCAF4,SCD5,CD86,PNKP,EPC1,ATF7IP,E2F7,ZNF440,PCK1,AKAP8L,TNFRSF11A,STAT5B,METTL14,TESC,ZNF417,MRPL19,POLR1E,PPM1F,SIN3A,USP2,ZNF789…
gProfiler	GO:0051253	negative regulation of RNA metabolic process	1372	42	NA	0.0419568	ZNF254,MPHOSPH8,ZC3H14,HNRNPD,H2AFY,ATXN1,XRCC5,TFAP2A,WWP2,PRDM1,KAT6A,PURA,SPEN,TCF3,SCAF4,EPC1,ATF7IP,E2F7,PPM1F,SIN3A,USP2,CIRBP,MED25,DNAJB1,BCL6,RELB,SAP130,PHF10,DKK3,ZBTB26,ZNF148,EID2B,ZBTB6,CBX5,RSF1,PPHLN1,KLF12,ATF3,FGFR1,MDM4,HIRA,WWOX
gProfiler	GO:0007097	nuclear migration	24	3	NA	0.0419568	CDC42,SYNE3,HOOK3
gProfiler	GO:0033043	regulation of organelle organization	1284	42	NA	0.0419568	MPHOSPH8,TMEM33,HNRNPD,H2AFY,MAVS,XRCC5,MAPT,ALMS1,PLAUR,CDC42,SYNPO2,RHOT2,PPFIA1,DYNC2LI1,PPP3R1,RASSF1,PNKP,ATF7IP,AKAP8L,LAPTM4B,PPM1F,SIN3A,TAOK1,CDC27,EVI5L,SPEF1,WDR61,TWF2,BCL6,SLAIN2,ATM,ZNF207,CDK13,PPHLN1,RBM14,OPA1,HIRA,ANAPC4,RAB7A,G3BP2,RHOBTB3,PRKAA2
FUMA	GO:1903038	negative regulation of leukocyte cell cell adhesion	125	6	0.0021762	0.0422034	SFTPD:PAWR:PELI1:CD86:BCL6:RC3H2
gProfiler	GO:0000118	histone deacetylase complex	72	5	NA	0.0423709	ING3,SIN3A,SAP130,RBBP4,CBX5
gProfiler	GO:0099111	microtubule-based transport	187	6	NA	0.0423787	TNPO1,MAPT,PURA,CDC42,RHOT2,DYNC2LI1
gProfiler	GO:0031300	intrinsic component of organelle membrane	389	7	NA	0.0424536	RNF152,TMEM33,ERGIC1,PDIA3,KTN1,RHOT2,TOMM40
FUMA	GO:0140098	catalytic activity acting on a rrna	22	3	0.00154863	0.0424583	NSUN4:METTL15:ZCCHC4
FUMA	GO:0043624	cellular protein complex disassembly	216	8	0.00221075	0.0425579	DNAJC6:GSPT1:TAOK1:NSF:MRPL19:SPEF1:TWF2:EIF5A2
FUMA	GO:0097194	execution phase of apoptosis	86	5	0.00220963	0.0425579	APAF1:TAOK1:KPNA1:PAK2:FZD3
FUMA	GO:0045927	positive regulation of growth	266	9	0.00221764	0.0425579	CDC42:STAT5B:MAPT:FN1:PPM1F:TWF2:RUFY3:POU3F2:FGFR1
FUMA	GO:0043254	regulation of protein complex assembly	429	12	0.00221746	0.0425579	CDC42:PRKAA2:LMO4:ATM:ATF7IP:STUB1:MAPT:APOE:MED25:FARP2:TWF2:SLAIN2
FUMA	GO:0045334	clathrin coated endocytic vesicle	60	4	0.00374287	0.0425751	SFTPD:APOE:AP2A1:HLA-DRA
FUMA	GO:0001945	lymph vessel development	25	3	0.00225937	0.0429104	PTPN14:VASH1:VEGFC
FUMA	GO:0062098	regulation of programmed necrotic cell death	25	3	0.00225937	0.0429104	PELI1:CFLAR:SLC25A4
FUMA	GO:0006346	methylation dependent chromatin silencing	25	3	0.00225937	0.0429104	ATF7IP:PPHLN1:MPHOSPH8
gProfiler	GO:0008022	protein C-terminus binding	189	4	NA	0.042967	AP2A1,ATXN1,FN1,XRCC5
gProfiler	GO:0044238	primary metabolic process	10527	143	NA	0.0430664	GANAB,CTSZ,RNF152,ZNF254,AP2A1,METTL15,MPHOSPH8,ZC3H14,HNRNPD,BRWD1,USP16,H2AFY,HS2ST1,FBXL16,PAPOLA,LMO4,MAVS,FAM173A,TNPO1,JMJD8,ING3,SECISBP2L,PTPN14,AK2,KANSL1,U2SURP,ATXN1,DUOXA2,FN1,OTUD4,TRIM4,ZNF226,GSPT1,XRCC5,EIF5A2,ADARB1,TFAP2A,STUB1,ZC3H7B,ABCB4,INIP,RC3H2,TTN,NTRK2,NADK,APOC1,SPAG9,MAFF,OSBPL10,WWP2,AHI1,MAPT,PRDM1,EWSR1,DCUN1D1,KAT6A,CERS5,ENDOD1,SLC35D1,RHBDL1,ASB4,NSF,PLAUR,PURA,…
gProfiler	GO:0031329	regulation of cellular catabolic process	838	6	NA	0.0430664	RNF152,ZC3H14,HNRNPD,WDR24,MCL1,TNPO1
gProfiler	GO:0045184	establishment of protein localization	2199	27	NA	0.0432663	AP2A1,H2AFY,MCL1,MAVS,RABGAP1,TNPO1,WLS,PTPN14,AAGAB,DUOXA2,FN1,EIF5A2,TTN,NADK,WWP2,MAPT,NSF,PURA,CDC42,DUOXA1,KTN1,LYST,TOMM40,APOE,DYNC2LI1,APOC2,PPP3R1
gProfiler	GO:0120035	regulation of plasma membrane bounded cell projection organization	683	13	NA	0.0433267	CTSZ,AP2A1,METRN,FN1,NTRK2,MAPT,CDC42,CFLAR,APOE,FBXW8,DYNC2LI1,CD44,POU3F2
gProfiler	GO:0019058	viral life cycle	330	13	NA	0.043339	MPHOSPH8,MAVS,ADARB1,WWP2,CDC42,APOE,CD86,KPNA1,CR1,TRIM5,CD46,ITGA5,VTA1
gProfiler	GO:1903311	regulation of mRNA metabolic process	332	4	NA	0.0434011	ZC3H14,HNRNPD,PAPOLA,TNPO1
gProfiler	GO:0045023	G0 to G1 transition	47	5	NA	0.0434304	EPC1,APAF1,RBBP4,CBX5,MDM4
FUMA	GO:0004672	protein kinase activity	588	15	0.00163874	0.0434796	PRKAA2:AKT3:ATM:ACVR1B:DCLK1:TAOK1:TTN:KALRN:PAK2:CDKL2:CSNK1A1:CLK4:CDK13:FGFR1:NTRK2
Webgestalt	GO:0031253	cell projection membrane	335	12	0.00141063	0.0435604	WLS;MAPT;PLAUR;CD44;TESC;GPR161;SLC6A19;GUCA1C;ITGA5;ROM1;FOLR1;GNB1
FUMA	GO:0012501	programmed cell death	178	8	0.000644223	0.043895	AKT3:APAF1:MAPT:PPP3R1:CFLAR:KPNA1:OPA1:PAK2
FUMA	GO:0097730	non motile cilium	141	6	0.00395316	0.0439679	GNB1:ROM1:CEP290:SPATA7:GUCA1C:AHI1
gProfiler	GO:0060090	molecular adaptor activity	249	6	NA	0.0439774	MAVS,OTUD4,STUB1,SPAG9,MAPT,SYNPO2
gProfiler	GO:0016410	N-acyltransferase activity	116	4	NA	0.0439774	ING3,KANSL1,KAT6A,CERS5
FUMA	#REF!	abc transporters	44	4	0.00118906	0.044233	ABCD4:ABCA9:ABCB4:ABCB1
Webgestalt	GO:0044441	ciliary part	440	14	0.00178373	0.0444206	AK2;AHI1;SPATA7;DYNC2LI1;GPR161;SPEF1;CEP290;GUCA1C;ROM1;JADE1;GNB1;CSNK1A1;PRKAR2A;TMEM237
Webgestalt	GO:0035869	ciliary transition zone	66	5	0.00161223	0.0444206	AHI1;SPATA7;DYNC2LI1;CEP290;TMEM237
Webgestalt	GO:0016605	PML body	99	6	0.0017829	0.0444206	KAT6A;AKAP8L;TP53INP1;ZMYM2;CBX5;HIRA
Webgestalt	GO:0099572	postsynaptic specialization	340	12	0.00159796	0.0444206	DLGAP4;NTRK2;NSF;ANKS1B;KPNA1;DCLK1;FXR1;DNAJB1;DNAJC6;PDLIM5;PAK2;PTPRO
Webgestalt	GO:0034385	triglyceride-rich plasma lipoprotein particle	19	3	0.00176239	0.0444206	APOC1;APOE;APOC2
Webgestalt	GO:0034361	very-low-density lipoprotein particle	19	3	0.00176239	0.0444206	APOC1;APOE;APOC2
gProfiler	GO:0030425	dendrite	613	15	NA	0.0447081	ZC3H14,WLS,NTRK2,MAPT,FZD3,NSF,PURA,CDC42,APOE,ANKS1B,KPNA1,RGS12,FXR1,RUFY3,DNAJB1
gProfiler	GO:0097447	dendritic tree	615	15	NA	0.044847	ZC3H14,WLS,NTRK2,MAPT,FZD3,NSF,PURA,CDC42,APOE,ANKS1B,KPNA1,RGS12,FXR1,RUFY3,DNAJB1
gProfiler	GO:0016605	PML body	98	6	NA	0.044847	KAT6A,AKAP8L,TP53INP1,ZMYM2,CBX5,HIRA
FUMA	GO:0031122	cytoplasmic microtubule organization	53	4	0.00238104	0.0451048	MAPT:SLAIN2:DST:HOOK3
gProfiler	GO:0010557	positive regulation of macromolecule biosynthetic process	1904	53	NA	0.0453827	HNRNPD,USP16,LMO4,MAVS,XRCC5,EIF5A2,TFAP2A,MAFF,WWP2,AHI1,KAT6A,CDC42,RNF187,FOXJ3,ARNT,APOE,PPP3R1,PTOV1,TCF3,POU3F2,CD86,PNKP,EPC1,ATF7IP,E2F7,PCK1,AKAP8L,STAT5B,TESC,SIN3A,CIRBP,TLR9,ACVR1B,MED25,FXR1,WDR61,CEP290,SORBS1,TP53INP1,RELB,ATM,NSUN4,PHF10,JADE1,ZNF148,NFAT5,CDK13,RSF1,KLF12,RBM14,ATF3,FGFR1,ASH1L
gProfiler	GO:0010608	posttranscriptional regulation of gene expression	837	9	NA	0.0453827	ZC3H14,HNRNPD,USP16,TNPO1,SECISBP2L,GSPT1,EIF5A2,ZC3H7B,RC3H2
gProfiler	GO:0009057	macromolecule catabolic process	1431	35	NA	0.0458043	CTSZ,AP2A1,ZC3H14,HNRNPD,USP16,FBXL16,TNPO1,GSPT1,STUB1,WWP2,NSF,SYNPO2,RNF187,APOE,FBXL4,CD44,C18ORF25,PGM2L1,METTL14,LAPTM4B,KPNA1,USP2,SMG9,CIRBP,STYX,CDC27,MRTO4,FXR1,PPP2R2A,WDR61,APAF1,RBM8A,ATM,CNOT3,DNASE1
FUMA	GO:0001892	embryonic placenta development	88	5	0.00244348	0.0461685	ARNT:E2F7:FBXW8:VASH1:PRDM1
FUMA	GO:0001818	negative regulation of cytokine production	270	9	0.00245084	0.0461888	GBP1:SFTPD:RELB:FN1:MAVS:TLR9:TLR9:BCL6:FGFR1:LAPTM4B
gProfiler	GO:0005912	adherens junction	546	16	NA	0.0464527	ABCB4,AHI1,PLAUR,CDC42,SYNPO2,PDIA3,PPFIA1,CD44,AHNAK,ARHGEF7,CD46,STX16,SORBS1,ITGA5,DST,PDLIM5
gProfiler	GO:0043232	intracellular non-membrane-bounded organelle	4904	117	NA	0.0464527	SGCD,MPHOSPH8,ZC3H14,BRWD1,H2AFY,RABGAP1,ING3,PTPN14,KANSL1,CCDC78,ATXN1,XRCC5,ADARB1,TFAP2A,STUB1,ABCB4,RC3H2,TTN,SPAG9,MAFF,OSBPL10,AHI1,MAPT,EWSR1,KAT6A,ALMS1,PURA,CDC42,SYNPO2,FOXJ3,LYST,ARNT,SPATA7,DYNC2LI1,TCF3,POU3F2,RASSF1,PNKP,E2F7,HERC4,AKAP11,AKAP8L,STAT5B,WDR90,AHNAK,HOOK3,MRPL19,POLR1E,SIN3A,USP2,EPB41L1,TAOK1,RGS12,CIRBP,TRIM5,CDC27,MRTO4,FXR1,SPEF1,FARP2,DNAJB1,MRPL57,WDR61,CEP290,…
gProfiler	GO:0016363	nuclear matrix	109	6	NA	0.0464527	ATXN1,AKAP8L,RGS12,SORBS1,KIN,LGALS13
FUMA	GO:0016358	dendrite development	220	8	0.00247565	0.0465371	CDC42:FBXW8:DCLK1:APOE:KALRN:OPA1:PAK2:PDLIM5
gProfiler	GO:0031344	regulation of cell projection organization	693	13	NA	0.046568	CTSZ,AP2A1,METRN,FN1,NTRK2,MAPT,CDC42,CFLAR,APOE,FBXW8,DYNC2LI1,CD44,POU3F2
gProfiler	GO:0030516	regulation of axon extension	97	6	NA	0.0465757	FN1,MAPT,APOE,SIN3A,RUFY3,TWF2
FUMA	GO:0030139	endocytic vesicle	294	9	0.00428858	0.0471743	WLS:GPR161:SFTPD:PDIA3:APOE:AP2A1:TLR9:TLR9:RAB7A:HLA-DRA
FUMA	GO:0098978	glutamatergic synapse	350	10	0.00434084	0.0472302	SV2A:PTPRO:DNAJB1:APOE:DLGAP4:KPNA1:FXR1:PAK2:PURA:PPP2R2A
gProfiler	GO:0044093	positive regulation of molecular function	1786	35	NA	0.0472758	HNRNPD,LMO4,MAVS,RABGAP1,FN1,XRCC5,STIM2,STUB1,NTRK2,APOC1,SPAG9,MAPT,DCUN1D1,PLAUR,CDC42,CFLAR,SRGAP1,APOE,SRGAP3,APOC2,CD44,TCF3,MBP,PNKP,TNFRSF11A,CR1,TESC,PPM1F,TAOK1,RGS12,TRIM5,TLR9,ARHGEF7,MED25,EVI5L
FUMA	GO:0021846	cell proliferation in forebrain	26	3	0.00253423	0.047337	POU3F2:FGFR1:HOOK3
FUMA	GO:0060997	dendritic spine morphogenesis	54	4	0.0025504	0.047337	CDC42:KALRN:OPA1:PDLIM5
FUMA	GO:0032722	positive regulation of chemokine production	54	4	0.0025504	0.047337	MCOLN2:MBP:MAVS:TLR9:TLR9
FUMA	GO:1904353	regulation of telomere capping	26	3	0.00253423	0.047337	ATM:PNKP:HNRNPD
FUMA	GO:0007160	cell matrix adhesion	221	8	0.0025456	0.047337	SORBS1:CD44:PPFIA1:ARHGEF7:COL3A1:FN1:PPM1F:BCL6
gProfiler	GO:0005740	mitochondrial envelope	753	11	NA	0.0474389	MCL1,MAVS,FAM173A,AK2,NDUFA2,CYB5B,C15ORF48,GATM,RHOT2,TOMM40,FBXL4
gProfiler	GO:0043228	non-membrane-bounded organelle	4913	117	NA	0.0474389	SGCD,MPHOSPH8,ZC3H14,BRWD1,H2AFY,RABGAP1,ING3,PTPN14,KANSL1,CCDC78,ATXN1,XRCC5,ADARB1,TFAP2A,STUB1,ABCB4,RC3H2,TTN,SPAG9,MAFF,OSBPL10,AHI1,MAPT,EWSR1,KAT6A,ALMS1,PURA,CDC42,SYNPO2,FOXJ3,LYST,ARNT,SPATA7,DYNC2LI1,TCF3,POU3F2,RASSF1,PNKP,E2F7,HERC4,AKAP11,AKAP8L,STAT5B,WDR90,AHNAK,HOOK3,MRPL19,POLR1E,SIN3A,USP2,EPB41L1,TAOK1,RGS12,CIRBP,TRIM5,CDC27,MRTO4,FXR1,SPEF1,FARP2,DNAJB1,MRPL57,WDR61,CEP290,…
FUMA	GO:0045930	negative regulation of mitotic cell cycle	325	10	0.00257485	0.0475506	MDM4:ATM:E2F7:TAOK1:ZNF207:CNOT3:BCL6:JADE1:ZNF655:FZD3
FUMA	GO:0034976	response to endoplasmic reticulum stress	272	9	0.00257451	0.0475506	ATF3:APAF1:PDIA3:STUB1:GOSR2:USP25:OPA1:TMEM33:COL4A3BP
FUMA	GO:0030175	filopodium	101	5	0.00442211	0.0475971	CDC42:AP2A1:TWF2:RUFY3:FZD3
FUMA	R-HSA-422475	axon guidance	551	15	0.000864961	0.0480214	CDC42:RBM8A:CACNB2:ITGA5:SRGAP1:ARHGEF7:GSPT1:AP2A1:COL3A1:FARP2:SRGAP3:PRKAR2A:KALRN:PAK2:FGFR1
FUMA	R-HSA-204005	copii mediated vesicle transport	68	5	0.000771643	0.0480214	FOLR1:NSF:GOSR2:CTSZ:SEC22A
FUMA	R-HSA-388841	costimulation by the cd28 family	69	5	0.000824816	0.0480214	CDC42:AKT3:CD86:PAK2:HLA-DRA
FUMA	R-HSA-382551	transport of small molecules	728	18	0.000835425	0.0480214	GNB1:SLC35D1:MCOLN2:SLC41A2:SLC24A4:ABCA9:LRRC8E:APOE:APOC1:APOC2:AP2A1:PRKAR2A:SLC9A9:SLC25A4:SLC6A19:ABCB4:ABCB1:SLC44A1
FUMA	GO:0016192	vesicle mediated transport	722	18	0.000760589	0.0480214	PRKAA2:DNAJC6:AKT3:FOLR1:NSF:GOSR2:APOE:AP2A1:COL3A1:RALGAPA2:STX16:CTSZ:SEC22A:RAB7A:RHOBTB3:KIF6:VTA1:RABGAP1
FUMA	GO:0040008	regulation of growth	680	16	0.00261341	0.0481417	CDC42:EPC1:ACVR1B:STAT5B:MAPT:APOE:FN1:PPM1F:TWF2:BCL6:PAK2:RUFY3:JADE1:POU3F2:ING3:FGFR1
gProfiler	GO:0070997	neuron death	360	8	NA	0.0482665	CTSZ,MCL1,ADARB1,TFAP2A,NTRK2,MAPT,CDC42,APOE
gProfiler	GO:0022603	regulation of anatomical structure morphogenesis	1170	20	NA	0.0482665	AP2A1,METRN,BRWD1,JMJD8,FN1,TFAP2A,NTRK2,AHI1,MAPT,FZD3,ASB4,CDC42,CFLAR,APOE,FBXW8,CD44,POU3F2,MBP,SYNE3,AKT3
FUMA	GO:0010562	positive regulation of phosphorus metabolic process	1075	22	0.00262946	0.0483164	LMO4:TRIM5:CD44:ATM:ACVR1B:ITGA5:TAOK1:MAPT:SPAG9:TNFRSF11A:PLAUR:APOE:CFLAR:XRCC5:CDC25B:MAVS:PRKAR2A:TLR9:TLR9:PAK2:VEGFC:FGFR1:NTRK2
FUMA	GO:1901293	nucleoside phosphate biosynthetic process	273	9	0.00263818	0.0483557	NADK:AK2:GUCY1A2:PNKP:GART:GUCA1C:MTHFD2L:SCD5:NMRK1
FUMA	GO:0005874	microtubule	410	11	0.00454767	0.0484278	EML3:CEP57:ZNF207:MAPT:CDC27:DYNC2LI1:RASSF1:SLAIN2:KIF6:DST:HOOK3
gProfiler	GO:0030176	integral component of endoplasmic reticulum membrane	155	4	NA	0.0487501	TMEM33,ERGIC1,PDIA3,KTN1
gProfiler	GO:0008047	enzyme activator activity	519	17	NA	0.0489841	RABGAP1,FN1,XRCC5,APOC1,CFLAR,SRGAP1,APOE,SRGAP3,APOC2,TAOK1,RGS12,EVI5L,DNAJB1,RALGAPA2,APAF1,GUCA1C,B3GAT3
gProfiler	GO:0048156	tau protein binding	45	4	NA	0.0490402	STUB1,APOE,TAOK1,PPP2R2A
FUMA	GO:0030031	cell projection assembly	558	14	0.00268653	0.0491193	CDC42:GORAB:CEP57:PTPRO:CEP290:ARHGEF7:WDR90:EVI5L:DYNC2LI1:ALMS1:TMEM237:TWF2:TNPO1:AHI1
FUMA	GO:1901216	positive regulation of neuron death	90	5	0.0026948	0.0491483	MCL1:ATM:MAPT:CTSZ:TFAP2A
gProfiler	GO:0030669	clathrin-coated endocytic vesicle membrane	37	3	NA	0.0492606	AP2A1,APOE,HLA-DRA
FUMA	GO:0043525	positive regulation of neuron apoptotic process	55	4	0.00272785	0.049306	MCL1:ATM:CTSZ:TFAP2A
FUMA	GO:0051259	protein complex oligomerization	559	14	0.00272989	0.049306	GNB1:ATPIF1:MCOLN2:GBP1:AHNAK:CEP57:APAF1:MAPT:SPAG9:APOE:USP16:TMCC1:OPA1:TRIM4
FUMA	GO:0090342	regulation of cell aging	55	4	0.00272785	0.049306	AKT3:PAWR:VASH1:BCL6
FUMA	GO:0019216	regulation of lipid metabolic process	383	11	0.00273028	0.049306	PRKAA2:SORBS1:DKK3:SIN3A:STUB1:STAT5B:APOE:APOC1:APOC2:H2AFY:ABCB4
gProfiler	GO:0000122	negative regulation of transcription by RNA polymerase II	863	31	NA	0.0493419	ZNF254,H2AFY,ATXN1,TFAP2A,WWP2,PRDM1,PURA,SPEN,TCF3,SCAF4,EPC1,ATF7IP,E2F7,SIN3A,USP2,MED25,DNAJB1,BCL6,RELB,SAP130,ZBTB26,ZNF148,ZBTB6,CBX5,KLF12,ATF3,FGFR1,MDM4,WWOX,SMARCC2,PAWR
gProfiler	GO:0006979	response to oxidative stress	457	4	NA	0.0493419	DUOX2,HNRNPD,H2AFY,MCL1
gProfiler	GO:0051172	negative regulation of nitrogen compound metabolic process	2467	70	NA	0.0495931	CTSZ,ZNF254,AP2A1,MPHOSPH8,ZC3H14,HNRNPD,H2AFY,ATXN1,XRCC5,ADARB1,TFAP2A,APOC1,WWP2,MAPT,PRDM1,KAT6A,PLAUR,PURA,SPEN,CFLAR,APOE,CD44,TCF3,SCAF4,PNKP,EPC1,ATF7IP,E2F7,METTL14,LAPTM4B,CR1,TESC,AKT1S1,PPM1F,SIN3A,USP2,CIRBP,STYX,MED25,FXR1,DNAJB1,BCL6,RELB,ATM,CNOT3,CRTAP,SAP130,PHF10,DKK3,ZBTB26,GBP1,ZNF148,EID2B,ZBTB6,USP25,CBX5,RSF1,PAK2,PPHLN1,KLF12,ATF3,FGFR1,MDM4,ASH1L,HIRA,WWOX,PRKAR2A,SMARCC…
FUMA	GO:0097191	extrinsic apoptotic signaling pathway	224	8	0.00276478	0.0497317	MCL1:ATF3:ACVR1B:PDIA3:WWOX:CFLAR:PAK2:FGFR1
FUMA	GO:0042326	negative regulation of phosphorylation	441	12	0.00277415	0.0497317	GBP1:ASH1L:ATF3:TESC:MAPT:APOE:AKT1S1:ADARB1:PPM1F:PRKAR2A:PAK2:H2AFY
FUMA	GO:0051348	negative regulation of transferase activity	275	9	0.00276925	0.0497317	TESC:MAPT:APOE:AKT1S1:ADARB1:PPM1F:PRKAR2A:PAK2:H2AFY
gProfiler	GO:0034212	peptide N-acetyltransferase activity	77	6	NA	0.0497362	ING3,KANSL1,KAT6A,EPC1,PHF10,RSF1
gProfiler	GO:0036303	lymph vessel morphogenesis	19	3	NA	0.0498477	PTPN14,VASH1,VEGFC
gProfiler	GO:0016197	endosomal transport	230	12	NA	0.0499637	SPAG9,ALMS1,LYST,TMCC1,LAPTM4B,DCLK1,AP5S1,STX16,VTA1,GOSR2,RAB7A,RHOBTB3
