# Supplementary material for: Multiomics integrative analysis identifies APOE allele-specific blood biomarkers associated to Alzheimer’s disease etiopathogenesis
Source: Aging (Albany NY). 2021 Apr 12;13(7):9277–329. doi: 10.18632/aging.202950 (PMC8064208; doi:10.18632/aging.202950)
Supplement: Supplementary Table 35 [file aging-13-202950-s037.xlsx]

## Sheet: Sheet1
Supplementary Table 35. RRA integrative analysis in cortex: enrichment analysis APOE3 stratum.
Tool	ID	Description	N_genes	N_overlap	p	adjP	genes
FUMA	GO:0045595	regulation of cell differentiation	1844	79	3.56324e-25	2.61898e-21	SPEN:CDC42:MACF1:DOCK7:MOV10:RBBP5:CR1:ITPKB:TCF7L2:BDNF:BAD:RELA:SSH3:PAK1:UBASH3B:GDF3:EDNRB:AKAP6:NIN:JDP2:FBN1:EID1:RBPMS2:IQGAP1:TNRC6A:FAM57B:TBX6:NUDT21:KATNB1:NFATC3:MED1:ERBB2:PSME3:GFAP:MAPT:WNT3:NME1:MMD:VEZF1:ADCYAP1:LDLR:CLPTM1:ARHGAP35:ACTR2:MAP4K4:BIN1:CFLAR:CASP8:CD28:CREB1:OVOL2:CASS4:RTFDC1:APP:FANCD2:VHL:FEZF2:EIF4G1:MAP3K13:RUFY3:NFKB1:FBXW7:RAPGEF2:NIPBL:MAP1B:MEF2C:CD83:MYLI…
FUMA	GO:0060284	regulation of cell development	930	53	2.28994e-22	8.41554e-19	SPEN:CDC42:MACF1:DOCK7:MOV10:BDNF:BAD:RELA:SSH3:PAK1:EDNRB:AKAP6:NIN:FBN1:IQGAP1:TBX6:KATNB1:MED1:GFAP:MAPT:WNT3:NME1:MMD:ADCYAP1:LDLR:ARHGAP35:ACTR2:MAP4K4:BIN1:CFLAR:CREB1:CASS4:APP:FEZF2:EIF4G1:MAP3K13:RUFY3:FBXW7:RAPGEF2:NIPBL:MAP1B:MEF2C:MYLIP:RTN4IP1:FIG4:CAMK2B:VWC2:SMO:PTK2B:IKBKB:KANK1:FAM129B:NCS1
FUMA	GO:0022008	neurogenesis	1594	67	7.19638e-21	1.76311e-17	SPEN:CDC42:STMN1:MACF1:DOCK7:WNT2B:MOV10:BDNF:RELA:SSH3:TSKU:PAK1:PICALM:ETV6:DCLK1:EDNRB:NIN:GABRB3:RASGRF1:IQGAP1:TAOK2:TBX6:KATNB1:MED1:ERBB2:GFAP:MAPT:WNT3:NME1:MMD:SRSF1:ADCYAP1:LDLR:ARHGAP35:ACTR2:MAP4K4:EN1:BIN1:CFLAR:NRP2:CREB1:PTPRA:APP:FEZF2:EIF4G1:MAP3K13:FRYL:RUFY3:SCLT1:RAPGEF2:PALLD:NIPBL:MAP1B:MEF2C:ACSL6:MYLIP:RTN4IP1:FIG4:ETV1:CAMK2B:VWC2:SMO:ARHGEF10:PTK2B:KANK1:FAM129B:NCS1
FUMA	GO:0044093	positive regulation of molecular function	1740	69	4.05059e-20	7.44295e-17	STMN1:DOCK7:RHOC:CTSS:CR1:NVL:CACNB2:TCF7L2:CTBP2:BDNF:BAD:RELA:PAK1:PICALM:AKAP6:RIN3:PML:RASGRF1:IQGAP1:ARHGAP17:TAOK2:MED1:ERBB2:PSME3:MAPT:NME1:MMD:ADCYAP1:UHRF1:MYO9B:GMFG:APOC1:APOC2:CALM3:ARHGAP35:LILRA5:ANTXR1:MAP4K4:RALB:ZC3H15:CFLAR:CASP8:JPH2:UBE2V1:CASS4:APP:NCF4:PROK2:FAM162A:EIF4G1:MAP3K13:IL1RAP:DLG1:PKD2:SNCA:NFKB1:FBXW7:RAPGEF2:NIPBL:MSH3:MEF2C:TRIM38:PRKAR1B:CYCS:SMO:ARHGEF10:PT…
FUMA	GO:0051240	positive regulation of multicellular organismal process	1771	69	1.04349e-19	1.30952e-16	SPEN:MACF1:ANGPTL3:PDE4B:WNT2B:ITPKB:TCF7L2:BDNF:BAD:RELA:PAK1:SP1:ACACB:EDNRB:AKAP6:NIN:IQGAP1:SPN:NUDT21:KATNB1:MED1:GFAP:PLEKHM1:MAPT:WNT3:NME1:MMD:ADCYAP1:APOC2:ARHGAP35:LILRA5:SLC8A1:ACTR2:MAP4K4:BIN1:CFLAR:CASP8:CD28:NRP2:CREB1:OVOL2:APP:FEZF2:PROK2:ZBTB20:SERP1:EIF4G1:POLR2H:MAP3K13:IL1RAP:RUFY3:NFKB1:RAPGEF2:NIPBL:FST:MAP1B:MEF2C:ERAP1:HBEGF:CD83:FIG4:CAMK2B:VWC2:SMO:CLEC5A:BMP1:PTK2B:CRH…
FUMA	GO:0051960	regulation of nervous system development	910	49	1.06899e-19	1.30952e-16	SPEN:MACF1:DOCK7:MOV10:BDNF:RELA:SSH3:PAK1:EDNRB:NIN:IQGAP1:TBX6:KATNB1:MED1:GFAP:MAPT:WNT3:NME1:MMD:ADCYAP1:LDLR:LRFN1:ARHGAP35:ACTR2:MAP4K4:BIN1:CFLAR:CREB1:APP:FEZF2:EIF4G1:MAP3K13:IL1RAP:DLG1:RUFY3:SNCA:RAPGEF2:NIPBL:MAP1B:MEF2C:MYLIP:RTN4IP1:FIG4:CAMK2B:VWC2:SMO:PTK2B:KANK1:NCS1
FUMA	GO:0098805	whole membrane	1647	66	1.75375e-19	1.7555e-16	MCL1:PEX19:COPA:CR1:CNIH3:SORBS1:CD44:VPS37C:BAD:PICALM:PEX5:LETMD1:ACACB:RPH3A:VPS37B:EDNRB:AKAP6:SNX6:ATP6V1D:SCG3:PML:IQGAP1:SLC12A4:CTC-479C5.17:ERBB2:GFAP:PLEKHM1:SPPL2C:MAPT:NSF:WNT3:GOSR2:ABCC3:NME1:MMD:CYB561:LDLR:CALM3:SLC30A3:ANTXR1:CFLAR:CASP8:BCL2L1:APP:NCF4:DLG1:GABRA2:SNCA:UBE2D3:SEC24D:SCAMP1:ACSL6:HBEGF:ABCC10:RTN4IP1:FIG4:SYNJ2:ICA1:CAMK2B:AP1S1:SMO:CLEC5A:GIMAP5:PTK2B:IKBKB:RAB2…
FUMA	GO:0048666	neuron development	1094	53	3.17281e-19	2.62534e-16	CDC42:STMN1:MACF1:DOCK7:MOV10:BDNF:SSH3:TSKU:PAK1:PICALM:DCLK1:EDNRB:NIN:GABRB3:RASGRF1:IQGAP1:TAOK2:TBX6:KATNB1:ERBB2:GFAP:MAPT:WNT3:NME1:ADCYAP1:ARHGAP35:ACTR2:MAP4K4:EN1:CFLAR:NRP2:CREB1:PTPRA:APP:FEZF2:MAP3K13:FRYL:RUFY3:SCLT1:RAPGEF2:PALLD:MAP1B:MEF2C:MYLIP:RTN4IP1:FIG4:ETV1:CAMK2B:SMO:PTK2B:KANK1:FAM129B:NCS1
FUMA	GO:0030182	neuron differentiation	1343	59	2.61082e-19	2.62534e-16	CDC42:STMN1:MACF1:DOCK7:WNT2B:MOV10:BDNF:SSH3:TSKU:PAK1:PICALM:DCLK1:EDNRB:NIN:GABRB3:RASGRF1:IQGAP1:TAOK2:TBX6:KATNB1:MED1:ERBB2:GFAP:MAPT:WNT3:NME1:MMD:ADCYAP1:ARHGAP35:ACTR2:MAP4K4:EN1:BIN1:CFLAR:NRP2:CREB1:PTPRA:APP:FEZF2:EIF4G1:MAP3K13:FRYL:RUFY3:SCLT1:RAPGEF2:PALLD:MAP1B:MEF2C:MYLIP:RTN4IP1:FIG4:ETV1:CAMK2B:VWC2:SMO:PTK2B:KANK1:FAM129B:NCS1
FUMA	GO:0051094	positive regulation of developmental process	1393	60	3.2147e-19	2.62534e-16	SPEN:CDC42:MACF1:ANGPTL3:WNT2B:ITPKB:TCF7L2:BDNF:BAD:RELA:PAK1:GDF3:SP1:ACACB:AKAP6:NIN:IQGAP1:NUDT21:KATNB1:MED1:GFAP:MAPT:WNT3:NME1:MMD:VEZF1:ADCYAP1:ARHGAP35:SLC8A1:ACTR2:BIN1:CFLAR:CASP8:CD28:CREB1:OVOL2:CASS4:APP:VHL:FEZF2:SERP1:EIF4G1:MAP3K13:IL1RAP:RUFY3:NFKB1:RAPGEF2:NIPBL:FST:MAP1B:MEF2C:ERAP1:CD83:FIG4:CAMK2B:VWC2:SMO:BMP1:PTK2B:FAM129B
FUMA	GO:0032989	cellular component morphogenesis	1111	53	6.20366e-19	4.55969e-16	CDC42:STMN1:MACF1:DOCK7:MOV10:RHOC:BDNF:CD44:SSH3:TSKU:PAK1:PICALM:DCLK1:NIN:IQGAP1:TAOK2:ALDOA:MED1:TCAP:ERBB2:MAPT:WNT3:ARHGAP35:ACTR2:ANTXR1:MAP4K4:FMNL2:TTN:CFLAR:NRP2:CREB1:PTPRA:BCL2L1:CASS4:APP:VHL:FEZF2:MAP3K13:DLG1:FRYL:RUFY3:RAPGEF2:PALLD:MAP1B:MEF2C:FIG4:ETV1:CAMK2B:SMO:MKLN1:PTK2B:KANK1:FAM129B
FUMA	GO:0045597	positive regulation of cell differentiation	970	49	1.46846e-18	9.81196e-16	SPEN:CDC42:MACF1:ITPKB:TCF7L2:BDNF:BAD:RELA:PAK1:GDF3:AKAP6:NIN:IQGAP1:NUDT21:KATNB1:MED1:GFAP:MAPT:WNT3:NME1:MMD:VEZF1:ADCYAP1:ARHGAP35:ACTR2:BIN1:CFLAR:CASP8:CREB1:OVOL2:CASS4:APP:VHL:FEZF2:EIF4G1:MAP3K13:RUFY3:NFKB1:RAPGEF2:NIPBL:MAP1B:MEF2C:CD83:FIG4:CAMK2B:VWC2:SMO:PTK2B:FAM129B
FUMA	GO:0010720	positive regulation of cell development	538	37	1.68106e-18	1.02965e-15	SPEN:CDC42:MACF1:BDNF:BAD:RELA:PAK1:AKAP6:NIN:IQGAP1:KATNB1:GFAP:MAPT:WNT3:NME1:MMD:ADCYAP1:ARHGAP35:ACTR2:BIN1:CFLAR:CASS4:APP:FEZF2:EIF4G1:MAP3K13:RUFY3:RAPGEF2:NIPBL:MAP1B:MEF2C:FIG4:CAMK2B:VWC2:SMO:PTK2B:FAM129B
FUMA	GO:0009719	response to endogenous stimulus	1634	64	2.09419e-18	1.18402e-15	ANGPTL3:PDE4B:CTSS:SORBS1:BDNF:CD44:BAD:RELA:PAK1:GDF3:RERG:SP1:EDNRB:AKAP6:SNX6:PPM1A:ATP6V1D:SNRPN:UBE3A:GABRB3:FBN1:AQP9:RBPMS2:PML:ABHD2:IQGAP1:CACNB1:MED1:ERBB2:CRHR1:MAPT:NME1:ADCYAP1:PIAS2:LDLR:CACNA1A:CALM3:SLC8A1:ACTR2:CFLAR:CASP8:CREB1:PTPRA:OVOL2:BCL2L1:APP:ITGB5:POLR2H:SST:PKD2:SNCA:NFKB1:UBE2D3:RAPGEF2:SRD5A1:MEF2C:PRKAR1B:VWC2:LANCL2:MCM7:PTK2B:GGH:CRH:KANK1
FUMA	GO:0051049	regulation of transport	1827	67	8.59152e-18	4.51055e-15	ATPIF1:RIMS3:PDE4B:ENSA:GOLPH3L:CTSS:CNIH3:CACNB2:SORBS1:TCF7L2:BAD:PAK1:PICALM:SCN2B:UBASH3B:EDNRB:AKAP6:PPM1A:PML:RASGRF1:CACNB1:ERBB2:GFAP:CRHR1:NSF:ADCYAP1:CACNA1A:CD22:APOC1:APOC2:CALM3:LILRA5:DNAJC27:SLC30A3:SLC8A1:MAP4K4:RALB:BIN1:TTN:CASP8:CREB1:JPH2:APP:SCN11A:GPR27:SERP1:IL1RAP:DLG1:RUFY3:PKD2:SNCA:NFKB1:UBE2D3:FBXW7:MAP1B:MEF2C:YIPF5:KCNK5:PRKAR1B:ICA1:CAMK2B:SMO:MKLN1:CLEC5A:PTK2B:CRH…
FUMA	GO:0023056	positive regulation of signaling	1813	66	2.26522e-17	1.10996e-14	ATPIF1:MACF1:RIMS3:RHOC:MCL1:ITPKB:CACNB2:SORBS1:TCF7L2:CTBP2:USP47:BDNF:CD44:BAD:RELA:PAK1:MAML2:LTBR:GDF3:AKAP6:PPM1A:PML:RASGRF1:IQGAP1:TAOK2:MED1:ERBB2:PSME3:GFAP:HEXIM1:CRHR1:NSF:WNT3:ADCYAP1:CALM3:LILRA5:DNAJC27:MAP4K4:CFLAR:CASP8:CD28:CREB1:BCL2L1:JPH2:UBE2V1:APP:GPR27:PROK2:FAM162A:SERP1:MAP3K13:PKD2:SNCA:NFKB1:ALPK1:FBXW7:RAPGEF2:HBEGF:TRIM38:LANCL2:SMO:PTK2B:RBPMS:IKBKB:CRH:KANK1
FUMA	GO:0051247	positive regulation of protein metabolic process	1615	61	8.04123e-17	3.69394e-14	ATPIF1:DOCK7:CR1:TCF7L2:BDNF:CD44:BAD:RELA:PAK1:PICALM:LTBR:GDF3:EDNRB:JDP2:UBE3A:PML:FANCI:IQGAP1:SPN:TAOK2:ERBB2:PSME3:MAPT:MMD:ADCYAP1:UHRF1:LDLR:CALM3:LILRA5:DNAJC27:ANTXR1:MAP4K4:RALB:CFLAR:CASP8:CD28:UBE2V1:CASS4:APP:PTTG1IP:POLDIP3:PROK2:FAM162A:SERP1:EIF4G1:MAP3K13:DLG1:RCHY1:PKD2:SNCA:FBXW7:RAPGEF2:NIPBL:HBEGF:TNIP1:RNF144B:PRKAR1B:CYCS:PTK2B:RBPMS:CRH
FUMA	GO:0097458	neuron part	1709	63	7.43763e-17	3.72253e-14	CDC42:STMN1:RIMS3:DOCK7:PDE4B:RHOC:CNIH3:CACNB2:EXOC6:CTBP2:BDNF:PAK1:PICALM:RPH3A:RPLP0:DCLK1:NIN:GABRB3:RASGRF1:IQGAP1:TAOK2:KATNB1:CRHR1:MAPT:NSF:ADCYAP1:LDLR:CACNA1A:CD22:LRFN1:CALM3:SLC30A3:SLC8A1:ACTR2:BIN1:CASP8:NRP2:CREB1:BCL2L1:APP:SCN11A:SST:DLG1:CHRNA9:GABRA2:RUFY3:SNCA:RAPGEF2:PALLD:SRD5A1:MAP1B:SCAMP1:PCDHB15:DST:SYNJ2:ICA1:CAMK2B:AP1S1:SMO:PTK2B:CRH:CLTA:NCS1
FUMA	GO:0045664	regulation of neuron differentiation	646	38	1.02071e-16	4.41305e-14	MACF1:MOV10:BDNF:SSH3:PAK1:EDNRB:NIN:IQGAP1:TBX6:KATNB1:MED1:GFAP:MAPT:WNT3:NME1:MMD:ADCYAP1:ARHGAP35:ACTR2:MAP4K4:BIN1:CFLAR:APP:FEZF2:EIF4G1:MAP3K13:RUFY3:RAPGEF2:MAP1B:MEF2C:MYLIP:RTN4IP1:FIG4:CAMK2B:VWC2:PTK2B:KANK1:NCS1
FUMA	GO:0060341	regulation of cellular localization	881	44	1.43802e-16	5.87191e-14	ATPIF1:RIMS3:NVL:CACNB2:SORBS1:TCF7L2:BDNF:BAD:PAK1:PICALM:UBASH3B:DCLK1:AKAP6:PPM1A:PML:IQGAP1:ERBB2:CRHR1:MAPT:CALM3:DNAJC27:SLC8A1:MAP4K4:RALB:CASP8:BCL2L1:JPH2:GPR27:DLG1:RUFY3:PKD2:SNCA:UBE2D3:FBXW7:NIPBL:MAP1B:MEF2C:YIPF5:PRKAR1B:SMO:PTK2B:LEPROTL1:CRH:NCS1
FUMA	GO:0030030	cell projection organization	1509	57	9.41107e-16	3.6406e-13	CDC42:STMN1:MACF1:DOCK7:MOV10:BDNF:CD44:SSH3:TSKU:PAK1:PICALM:DCLK1:NIN:ATP6V1D:RASGRF1:IQGAP1:TAOK2:TBX6:KATNB1:ERBB2:GFAP:PLEKHM1:MAPT:WNT3:NME1:ADCYAP1:ARHGAP35:ACTR2:MAP4K4:CFLAR:NRP2:CREB1:PTPRA:DYNLRB1:APP:FEZF2:MAP3K13:FRYL:CEP135:RUFY3:SCLT1:RAPGEF2:PALLD:MAP1B:MEF2C:MYLIP:RTN4IP1:FIG4:ETV1:CAMK2B:GPR22:SMO:GALNT11:PTK2B:KANK1:FAM129B:NCS1
FUMA	GO:0032990	cell part morphogenesis	673	37	2.22463e-15	8.04227e-13	CDC42:STMN1:MACF1:DOCK7:MOV10:BDNF:CD44:SSH3:TSKU:PAK1:PICALM:DCLK1:NIN:IQGAP1:TAOK2:ERBB2:MAPT:WNT3:ARHGAP35:ACTR2:MAP4K4:NRP2:CREB1:PTPRA:BCL2L1:APP:FEZF2:MAP3K13:RUFY3:RAPGEF2:PALLD:MAP1B:ETV1:CAMK2B:SMO:KANK1:FAM129B
FUMA	GO:0051962	positive regulation of nervous system development	530	33	2.29779e-15	8.04227e-13	SPEN:MACF1:BDNF:RELA:PAK1:NIN:IQGAP1:KATNB1:GFAP:MAPT:WNT3:NME1:MMD:ADCYAP1:ARHGAP35:ACTR2:BIN1:CFLAR:APP:FEZF2:EIF4G1:MAP3K13:IL1RAP:RUFY3:RAPGEF2:NIPBL:MAP1B:MEF2C:FIG4:CAMK2B:VWC2:SMO:PTK2B
FUMA	GO:0071495	cellular response to endogenous stimulus	1373	53	4.49978e-15	1.50334e-12	PDE4B:CTSS:SORBS1:BDNF:CD44:RELA:PAK1:GDF3:SP1:AKAP6:SNX6:PPM1A:ATP6V1D:UBE3A:GABRB3:FBN1:AQP9:RBPMS2:PML:ABHD2:IQGAP1:CACNB1:MED1:ERBB2:CRHR1:MAPT:ADCYAP1:PIAS2:CACNA1A:SLC8A1:ACTR2:CFLAR:CREB1:PTPRA:OVOL2:BCL2L1:APP:ITGB5:POLR2H:SST:PKD2:SNCA:NFKB1:UBE2D3:RAPGEF2:SRD5A1:MEF2C:PRKAR1B:VWC2:LANCL2:MCM7:CRH:KANK1
FUMA	GO:0065003	protein containing complex assembly	1891	63	8.32621e-15	2.66077e-12	CDC42:STMN1:ATPIF1:PPIH:ATPAF1:CAPZA1:RHOC:RBBP5:CNIH3:COX15:TCF7L2:CELF1:PATL1:TAF6L:BAD:PAK1:PICALM:C1QTNF5:PEX5:ACACB:RPLP0:DENR:NIN:PPM1A:PML:UBN1:ALDOA:NUDT21:LCAT:TAF1C:TCAP:GFAP:MAPT:NSF:GOSR2:LUC7L3:SRSF1:NDUFA7:NDUFA7:GMFG:APOC1:APOC2:ACTR2:RALB:BIN1:TTN:NDUFB3:CASP8:CREB1:MAGI1:NDUFB5:EIF4G1:IL1RAP:DLG1:COX18:PKD2:NAP1L5:SNCA:SEC24D:ALDH5A1:BMP1:PTK2B:KANK1:CLTA
FUMA	GO:0010975	regulation of neuron projection development	487	31	9.18607e-15	2.81323e-12	MACF1:MOV10:BDNF:SSH3:PAK1:NIN:IQGAP1:TBX6:KATNB1:GFAP:MAPT:WNT3:NME1:ADCYAP1:ARHGAP35:ACTR2:MAP4K4:CFLAR:FEZF2:MAP3K13:RUFY3:RAPGEF2:MAP1B:MEF2C:MYLIP:RTN4IP1:FIG4:CAMK2B:PTK2B:KANK1:NCS1
FUMA	GO:0044419	interspecies interaction between organisms	925	42	1.92002e-14	5.64485e-12	SPEN:CDC42:PPIH:CR1:CTBP2:VPS37C:RTN3:BAD:RELA:LTBR:SP1:RPLP0:DENR:VPS37B:UBE3A:PML:IQGAP1:UBN1:CD209:CLEC4M:ILF3:LDLR:CALM3:BIN1:CFLAR:CASP8:CD28:NRP2:CREB1:BCL2L1:ITGB5:EIF4G1:POLR2H:DLG1:FBXW7:TNIP1:TRIM38:HS3ST5:AP1S1:CLEC5A:IKBKB:SLC20A2
FUMA	GO:0080134	regulation of response to stress	1481	54	2.47256e-14	6.73085e-12	MCL1:CTSS:CR1:SMYD2:USP47:CD44:BAD:RELA:PAK1:UBASH3B:LTBR:EDNRB:PML:TAOK2:PPP4C:MARVELD3:MED1:DNAJC7:PSME3:HEXIM1:MAPT:ADCYAP1:CD209:LDLR:LILRA5:ACTR2:MAP4K4:CASP8:CD28:BCL2L1:UBE2V1:APP:PTTG1IP:FANCD2:EIF4G1:MAP3K13:MUC4:DLG1:SNCA:NFKB1:UBE2D3:ALPK1:FBXW7:MEF2C:ERAP1:HBEGF:TNIP1:TRIM38:CAMK2B:PTK2B:IKBKB:CRH:OXR1:KANK1
FUMA	GO:0046903	secretion	1628	57	2.39758e-14	6.73085e-12	RIMS3:ENSA:GOLPH3L:CTSS:COPA:CR1:CACNB2:EXOC6:TCF7L2:CTBP2:CCKBR:CD44:BAD:PAK1:C1QTNF5:EDNRB:ATP6V1D:SCG3:AQP9:PML:IQGAP1:ARHGAP17:ALDOA:MED1:PPY:CRHR1:NSF:ABCC3:NME1:ADCYAP1:CACNA1A:CD22:GMFG:CALM3:LILRA5:ACTR2:MAP4K4:RALB:TTN:CREB1:CST3:APP:GPR27:SERP1:IL1RAP:SNCA:NFKB1:SCAMP1:MEF2C:ICA1:FAM3C:CLEC5A:PDIA4:GGH:CRH:FAM129B:NCS1
FUMA	GO:0097435	supramolecular fiber organization	654	35	2.91239e-14	7.64503e-12	CDC42:STMN1:CAPZA1:RHOC:SORBS1:SSH3:PAK1:NIN:ARHGAP17:ALDOA:KATNB1:TCAP:GFAP:MAPT:LDLR:GMFG:ARHGAP35:ACTR2:BIN1:TTN:CFLAR:CST3:CASS4:APP:ITGB5:DLG1:RUFY3:SNCA:MAP1B:MEF2C:DST:AEBP1:ARHGEF10:PTK2B:KANK1
FUMA	GO:0031344	regulation of cell projection organization	665	35	4.74687e-14	1.20309e-11	CDC42:MACF1:MOV10:BDNF:CD44:SSH3:PAK1:NIN:IQGAP1:TBX6:KATNB1:GFAP:PLEKHM1:MAPT:WNT3:NME1:ADCYAP1:ARHGAP35:ACTR2:MAP4K4:CFLAR:FEZF2:MAP3K13:CEP135:RUFY3:RAPGEF2:MAP1B:MEF2C:MYLIP:RTN4IP1:FIG4:CAMK2B:PTK2B:KANK1:NCS1
FUMA	GO:0046907	intracellular transport	1815	60	5.58491e-14	1.364e-11	CDC42:ATPIF1:RIMS3:DOCK7:CAPZA1:PEX19:COPA:CNIH3:CACNB2:TCF7L2:CTBP2:VPS37C:PAK1:PICALM:PEX5:ACACB:RPH3A:RPLP0:VPS37B:DCLK1:AKAP6:SNX6:PPM1A:PML:TAOK2:KATNB1:ERBB2:CRHR1:MAPT:NSF:GOSR2:SRSF1:LDLR:CALM3:DNAJC27:ACTR2:BIN1:PLEKHA3:DYNLRB1:APP:PTTG1IP:POLDIP3:RUFY3:COX18:SNCA:UBE2D3:SEC24D:ANKRD50:FBXW7:MAP1B:YIPF5:DST:AP1S1:BCAP29:SMO:LEPROTL1:DCTN6:RAB2A:CLTA:NCS1
FUMA	GO:0009890	negative regulation of biosynthetic process	1612	56	5.75293e-14	1.364e-11	SPEN:MOV10:ZNF281:SMYD2:TCF7L2:CTBP2:USP47:CELF1:RELA:ETV6:KLF12:EDNRB:SNX6:PPM1A:JDP2:EID1:PML:TNRC6A:TBX6:NFATC3:MED1:HEXIM1:UHRF1:ILF3:ZNF136:GATAD2A:SAMD4B:APOC1:ARHGAP35:EN1:CFLAR:CREB1:OVOL2:VHL:FEZF2:ZBTB20:EIF4G1:DLG1:MXD4:SNCA:NFKB1:UBE2D3:FBXW7:RAPGEF2:NIPBL:FST:MSH3:MEF2C:HBEGF:CBX3:AEBP1:LANCL2:FAM3C:SMO:ZHX1:FAM129B
FUMA	GO:0045202	synapse	1169	47	4.27233e-14	1.42553e-11	CDC42:RIMS3:PDE4B:CNIH3:CACNB2:CTBP2:BDNF:RTN3:RELA:PICALM:RPH3A:RPLP0:DCLK1:GABRB3:MAPT:NSF:ADCYAP1:LRFN1:CALM3:SLC30A3:SLC8A1:ACTR2:BIN1:NRP2:PTPRA:BCL2L1:APP:NIPSNAP1:IL1RAP:DLG1:CHRNA9:GABRA2:SNCA:RAPGEF2:MAP1B:SCAMP1:MEF2C:SYNJ2:PRKAR1B:ICA1:CAMK2B:VWC2:AP1S1:MKLN1:PTK2B:CLTA:NCS1
FUMA	GO:0030054	cell junction	1275	49	6.3648e-14	1.59279e-11	CDC42:RIMS3:DOCK7:CNIH3:SORBS1:CTBP2:CD44:PAK1:C1QTNF5:RPH3A:RPLP0:AKAP6:GABRB3:IQGAP1:UBN1:ARHGAP17:KIFC3:MARVELD3:ITGB4:LRFN1:SLC30A3:SLC8A1:ACTR2:MAP4K4:PARD3B:TNS1:BCL2L1:CASS4:APP:MAGI1:ITGB5:DLG1:CHRNA9:GABRA2:RUFY3:PKD2:SNCA:RAPGEF2:PALLD:MAP1B:TJAP1:DST:ICA1:CAMK2B:VWC2:MKLN1:PTK2B:FAM129B:NCS1
FUMA	GO:0051130	positive regulation of cellular component organization	1188	47	7.65996e-14	1.7594e-11	CDC42:ATPIF1:MACF1:RHOC:BDNF:BAD:PAK1:NIN:JDP2:PML:IQGAP1:KATNB1:PLEKHM1:MAPT:WNT3:NME1:ADCYAP1:GMFG:APOC2:ARHGAP35:ACTR2:MAP4K4:RALB:BIN1:CFLAR:CASP8:CD28:CREB1:CASS4:APP:FAM162A:EIF4G1:MAP3K13:IL1RAP:DLG1:CEP135:RUFY3:SNCA:UBE2D3:FBXW7:RAPGEF2:NIPBL:MAP1B:FIG4:CAMK2B:ARHGEF10:PTK2B
FUMA	GO:0007267	cell cell signaling	1638	56	1.10795e-13	2.4677e-11	CDC42:MACF1:RIMS3:WNT2B:MOV10:ENSA:CNIH3:CACNB2:TCF7L2:CTBP2:USP47:BDNF:BAD:RELA:TSKU:SCN2B:PPM1A:GABRB3:RASGRF1:TNRC6A:SLC12A4:CTC-479C5.17:CACNB1:PSME3:GFAP:CRHR1:MAPT:WNT3:ADCYAP1:CACNA1A:CALM3:MAP4K4:CREB1:PTPRA:APP:LRRFIP2:GPR27:SERP1:SST:IL1RAP:DLG1:CHRNA9:GABRA2:PKD2:SNCA:NFKB1:RAPGEF2:MEF2C:PRKAR1B:ICA1:CAMK2B:SMO:PTK2B:CRH:KANK1:FAM129B:NCS1
FUMA	GO:0048667	cell morphogenesis involved in neuron differentiation	575	32	1.35072e-13	2.83651e-11	CDC42:STMN1:MACF1:DOCK7:BDNF:SSH3:TSKU:PAK1:PICALM:DCLK1:NIN:TAOK2:ERBB2:MAPT:WNT3:ARHGAP35:ACTR2:NRP2:CREB1:PTPRA:APP:FEZF2:MAP3K13:RUFY3:RAPGEF2:PALLD:MAP1B:MEF2C:ETV1:CAMK2B:SMO:FAM129B
FUMA	GO:0043085	positive regulation of catalytic activity	1397	51	1.33941e-13	2.83651e-11	DOCK7:RHOC:CR1:NVL:BDNF:BAD:PAK1:PICALM:RIN3:PML:RASGRF1:IQGAP1:ARHGAP17:TAOK2:ERBB2:PSME3:MAPT:MMD:ADCYAP1:UHRF1:MYO9B:GMFG:APOC1:APOC2:CALM3:ARHGAP35:LILRA5:ANTXR1:MAP4K4:RALB:ZC3H15:CFLAR:CASP8:UBE2V1:CASS4:APP:NCF4:PROK2:FAM162A:MAP3K13:DLG1:PKD2:SNCA:FBXW7:RAPGEF2:MSH3:MEF2C:PRKAR1B:CYCS:ARHGEF10:PTK2B
FUMA	GO:0044877	protein containing complex binding	1096	46	1.75191e-14	2.88189e-11	ATPIF1:MACF1:PPIH:ANGPTL3:CAPZA1:CTSS:NVL:CACNB2:SORBS1:CTBP2:CD44:RELA:PAK1:LETMD1:RPH3A:FBN1:IQGAP1:KATNB1:MED1:GFAP:CRHR1:MAPT:NSF:NME1:ITGB4:UHRF1:LDLR:CD22:GMFG:ACTR2:ANTXR1:BIN1:TTN:CFLAR:CASP8:POLDIP3:EIF1B:ITGB5:MAP3K13:SNCA:NIPBL:FST:DST:AEBP1:PTK2B:CLTA
FUMA	GO:1902531	regulation of intracellular signal transduction	1824	59	2.34017e-13	4.77786e-11	CDC42:STMN1:RHOC:MCL1:SMYD2:ITPKB:TCF7L2:USP47:CD44:BAD:RELA:PAK1:LTBR:GDF3:DYRK2:AKAP6:PPM1A:PML:RASGRF1:IQGAP1:ARHGAP17:TAOK2:MARVELD3:ERBB2:HEXIM1:CRHR1:MAPT:ADCYAP1:MYO9B:CD22:CALM3:ARHGAP35:LILRA5:DNAJC27:MAP4K4:CFLAR:CASP8:CD28:BCL2L1:JPH2:UBE2V1:APP:PTTG1IP:PROK2:MAP3K13:DLG1:CHRNA9:PKD2:ALPK1:FBXW7:RAPGEF2:HBEGF:TNIP1:TRIM38:ARHGEF10:PTK2B:IKBKB:CRH:KANK1
FUMA	GO:0045927	positive regulation of growth	266	22	4.39873e-13	8.73801e-11	CDC42:MACF1:USP47:BDNF:PAK1:ACACB:AKAP6:ERBB2:MAPT:WNT3:CREB1:SERP1:EIF4G1:MAP3K13:RUFY3:NIPBL:MAP1B:MEF2C:HBEGF:SMO:PTK2B:EXTL3
FUMA	GO:0000904	cell morphogenesis involved in differentiation	725	35	5.75366e-13	1.11288e-10	CDC42:STMN1:MACF1:DOCK7:BDNF:SSH3:TSKU:PAK1:PICALM:DCLK1:NIN:TAOK2:ERBB2:MAPT:WNT3:ARHGAP35:ACTR2:ANTXR1:NRP2:CREB1:PTPRA:CASS4:APP:FEZF2:MAP3K13:RUFY3:RAPGEF2:PALLD:MAP1B:MEF2C:ETV1:CAMK2B:SMO:KANK1:FAM129B
FUMA	GO:0045666	positive regulation of neuron differentiation	361	25	5.97914e-13	1.12279e-10	MACF1:BDNF:PAK1:NIN:IQGAP1:KATNB1:MAPT:WNT3:NME1:MMD:ADCYAP1:ARHGAP35:ACTR2:CFLAR:FEZF2:EIF4G1:MAP3K13:RUFY3:RAPGEF2:MAP1B:MEF2C:FIG4:CAMK2B:VWC2:PTK2B
FUMA	GO:0032880	regulation of protein localization	982	41	6.11041e-13	1.12279e-10	ATPIF1:ENSA:GOLPH3L:NVL:SORBS1:TCF7L2:BDNF:BAD:PAK1:PICALM:DCLK1:PPM1A:PML:IQGAP1:ERBB2:MAPT:MMD:ADCYAP1:CACNA1A:CD22:LILRA5:DNAJC27:MAP4K4:RALB:TTN:CASP8:BCL2L1:GPR27:SERP1:IL1RAP:DLG1:CEP135:RUFY3:UBE2D3:FBXW7:NIPBL:ICA1:SMO:CLEC5A:LEPROTL1:CRH
FUMA	GO:0044433	cytoplasmic vesicle part	1483	51	1.26768e-12	2.5379e-10	CTSS:COPA:CR1:CNIH3:CD44:VPS37C:PICALM:RPH3A:VPS37B:SNX6:ATP6V1D:GABRB3:SCG3:PML:IQGAP1:TAOK2:ALDOA:KIFC3:ERBB2:PLEKHM1:SPPL2C:WNT3:GOSR2:MMD:LDLR:GMFG:CALM3:SLC30A3:ACTR2:ANTXR1:CST3:BCL2L1:APP:NCF4:GABRA2:PKD2:SNCA:NFKB1:UBE2D3:SEC24D:SCAMP1:HBEGF:FIG4:ICA1:CAMK2B:AP1S1:FAM3C:SMO:CLEC5A:GGH:CLTA
FUMA	GO:1901698	response to nitrogen compound	968	40	1.64526e-12	2.94943e-10	PDE4B:SORBS1:BAD:RELA:PAK1:SP1:EDNRB:AKAP6:SNX6:ATP6V1D:GABRB3:FBN1:AQP9:IQGAP1:CACNB1:CRHR1:NME1:LDLR:CACNA1A:CALM3:SLC8A1:ACTR2:RALB:CFLAR:CREB1:PTPRA:BCL2L1:APP:SST:PKD2:SNCA:NFKB1:RAPGEF2:SRD5A1:MEF2C:PRKAR1B:PTK2B:GGH:CRH:KANK1
FUMA	GO:0043005	neuron projection	1301	47	1.92745e-12	3.10313e-10	CDC42:STMN1:DOCK7:PDE4B:RHOC:CNIH3:EXOC6:BDNF:PAK1:RPH3A:NIN:GABRB3:RASGRF1:IQGAP1:TAOK2:KATNB1:CRHR1:MAPT:NSF:ADCYAP1:CALM3:SLC30A3:SLC8A1:BIN1:CASP8:NRP2:CREB1:APP:SCN11A:DLG1:CHRNA9:GABRA2:RUFY3:SNCA:RAPGEF2:PALLD:SRD5A1:MAP1B:PCDHB15:DST:SYNJ2:CAMK2B:AP1S1:SMO:PTK2B:CRH:NCS1
FUMA	GO:0044456	synapse part	932	39	2.17002e-12	3.10313e-10	CDC42:RIMS3:PDE4B:CNIH3:CACNB2:CTBP2:BDNF:PICALM:RPH3A:RPLP0:DCLK1:GABRB3:MAPT:NSF:ADCYAP1:LRFN1:CALM3:SLC30A3:SLC8A1:ACTR2:BIN1:NRP2:PTPRA:BCL2L1:APP:NIPSNAP1:DLG1:CHRNA9:GABRA2:SNCA:MAP1B:SCAMP1:MEF2C:SYNJ2:ICA1:AP1S1:PTK2B:CLTA:NCS1
FUMA	GO:0007417	central nervous system development	972	40	1.87023e-12	3.27291e-10	CDC42:STMN1:DOCK7:WNT2B:BAD:TSKU:PAK1:DCLK1:NIN:UBE3A:MED1:ERBB2:GFAP:CRHR1:MAPT:WNT3:NME1:SRSF1:ADCYAP1:LDLR:CALM3:ARHGAP35:SLC8A1:EN1:BIN1:NRP2:CREB1:APP:FANCD2:FEZF2:PKD2:RAPGEF2:SRD5A1:NIPBL:VCAN:ALDH5A1:SYNJ2:NEUROD6:SMO:CRH
FUMA	GO:1901701	cellular response to oxygen containing compound	1118	43	2.4219e-12	4.13976e-10	PDE4B:SORBS1:BAD:RELA:PAK1:SP1:EDNRB:AKAP6:SNX6:ATP6V1D:FBN1:AQP9:CACNB1:MED1:CRHR1:MAPT:WNT3:NME1:LDLR:CACNA1A:SLC8A1:ACTR2:MAP4K4:CFLAR:CREB1:PTPRA:BCL2L1:APP:GPR27:ZBTB20:PKD2:SNCA:NFKB1:RAPGEF2:SRD5A1:MEF2C:PRKAR1B:LANCL2:SMO:PTK2B:CRH:OXR1:KANK1
FUMA	GO:0031226	intrinsic component of plasma membrane	1697	54	5.16337e-12	6.46066e-10	CR1:CNIH3:CACNB2:SLC16A9:SORBS1:CD44:CD5:SCN2B:DCLK1:EDNRB:GABRB3:AQP9:SLCO3A1:SPN:SLC12A4:CTC-479C5.17:ERBB2:CRHR1:ABCC3:MMD:ITGB4:CLEC4M:LDLR:LRFN1:CLPTM1:CALM3:SLC30A3:SLC8A1:CD28:NRP2:PTPRA:APP:NCF4:SCN11A:ITGB5:IL1RAP:MUC4:DLG1:CHRNA9:GABRA2:PKD2:RAPGEF2:ANKH:HBEGF:SLC4A9:PCDHB15:CD83:KCNK5:VWC2:GPR22:BCAP29:CLEC5A:PTK2B:IKBKB:SLC20A2
FUMA	GO:0008092	cytoskeletal protein binding	948	40	8.57476e-13	7.05274e-10	STMN1:MACF1:PDE4B:CAPZA1:CACNB2:SORBS1:RELA:SSH3:PICALM:SNX6:TAOK2:ALDOA:KATNB1:KIFC3:TCAP:MAPT:NME1:MYO9B:GMFG:CALM3:SLC8A1:ACTR2:ANTXR1:MAP4K4:BIN1:FMNL2:TTN:TNS1:MAGI1:DLG1:PKD2:SNCA:NFKB1:PALLD:MAP1B:MYLIP:DST:CAMK2B:CALD1:ARHGEF10
FUMA	GO:0030029	actin filament based process	739	34	4.70688e-12	7.68791e-10	CDC42:STMN1:PDE4B:CAPZA1:RHOC:CACNB2:SORBS1:SSH3:PAK1:SCN2B:ARHGAP17:TAOK2:ALDOA:TCAP:MYO9B:GMFG:ARHGAP35:ACTR2:ANTXR1:BIN1:FMNL2:TTN:CFLAR:CASS4:ITGB5:DLG1:RUFY3:PALLD:MEF2C:MKLN1:ARHGEF10:PTK2B:IKBKB:KANK1
FUMA	GO:0042592	homeostatic process	1906	58	4.61189e-12	7.68791e-10	STMN1:ATPIF1:DOCK7:ANGPTL3:PDE4B:MCL1:ITPKB:DCLRE1C:CACNB2:TCF7L2:CCKBR:BAD:POLD3:PICALM:SCN2B:UBASH3B:ACACB:EDNRB:AKAP6:ATP6V1D:AQP9:PML:ALDOA:LCAT:SLC12A4:CTC-479C5.17:MED1:PLEKHM1:CRHR1:NME1:ADCYAP1:LDLR:CACNA1A:APOC2:CALM3:SLC30A3:SLC8A1:MAP4K4:JPH2:APP:NCF4:GPR27:PROK2:ZBTB20:EIF4G1:MUC4:CHRNA9:PKD2:SNCA:FBXW7:MEF2C:SLC4A9:MYLIP:PRKAR1B:SMO:PDIA4:PTK2B:CRH:NCS1
FUMA	GO:1902533	positive regulation of intracellular signal transduction	1005	40	5.24308e-12	8.37753e-10	RHOC:MCL1:ITPKB:TCF7L2:CD44:BAD:RELA:PAK1:LTBR:AKAP6:PPM1A:RASGRF1:IQGAP1:TAOK2:ERBB2:HEXIM1:CRHR1:ADCYAP1:CALM3:LILRA5:DNAJC27:MAP4K4:CFLAR:CASP8:CD28:BCL2L1:JPH2:UBE2V1:APP:PROK2:MAP3K13:PKD2:ALPK1:FBXW7:RAPGEF2:HBEGF:TRIM38:PTK2B:IKBKB:CRH
FUMA	GO:0051345	positive regulation of hydrolase activity	748	34	6.54722e-12	1.01251e-09	DOCK7:RHOC:CR1:BDNF:BAD:PICALM:RIN3:PML:RASGRF1:IQGAP1:ARHGAP17:ERBB2:PSME3:MAPT:ADCYAP1:UHRF1:MYO9B:APOC2:CALM3:ARHGAP35:ANTXR1:MAP4K4:ZC3H15:CFLAR:CASP8:APP:FAM162A:SNCA:RAPGEF2:MSH3:MEF2C:CYCS:ARHGEF10:PTK2B
FUMA	GO:1901700	response to oxygen containing compound	1603	52	6.61232e-12	1.01251e-09	PDE4B:SORBS1:TCF7L2:BAD:RELA:PAK1:SP1:EDNRB:AKAP6:SNX6:ATP6V1D:UBE3A:FBN1:AQP9:ABHD2:IQGAP1:CACNB1:MED1:CRHR1:MAPT:WNT3:NME1:ADCYAP1:LDLR:CACNA1A:CALM3:SLC8A1:ACTR2:MAP4K4:CFLAR:CASP8:CREB1:PTPRA:BCL2L1:APP:GPR27:ZBTB20:SST:PKD2:SNCA:NFKB1:RAPGEF2:SRD5A1:MEF2C:PRKAR1B:LANCL2:SMO:PTK2B:GGH:CRH:OXR1:KANK1
FUMA	GO:0022604	regulation of cell morphogenesis	475	27	7.15415e-12	1.07312e-09	CDC42:MACF1:MOV10:RHOC:BDNF:CD44:SSH3:PAK1:NIN:TAOK2:ALDOA:MAPT:WNT3:ARHGAP35:ACTR2:FMNL2:CASS4:FEZF2:MAP3K13:DLG1:RUFY3:RAPGEF2:MAP1B:CAMK2B:MKLN1:PTK2B:KANK1
FUMA	GO:0099536	synaptic signaling	712	33	8.09288e-12	1.18965e-09	RIMS3:CNIH3:CACNB2:CTBP2:BDNF:RELA:SCN2B:GABRB3:RASGRF1:SLC12A4:CTC-479C5.17:CACNB1:GFAP:CRHR1:MAPT:ADCYAP1:CACNA1A:CALM3:CREB1:PTPRA:APP:SST:IL1RAP:DLG1:CHRNA9:GABRA2:SNCA:RAPGEF2:MEF2C:PRKAR1B:CAMK2B:PTK2B:CRH:NCS1
FUMA	GO:0031399	regulation of protein modification process	1826	56	8.38634e-12	1.20862e-09	DOCK7:ENSA:ITPKB:BDNF:CD44:RELA:PAK1:UBASH3B:LTBR:GDF3:EDNRB:SNX6:JDP2:UBE3A:EID1:PML:FANCI:IQGAP1:TAOK2:MARVELD3:ERBB2:HEXIM1:MAPT:MMD:ADCYAP1:GMFG:CALM3:LILRA5:DNAJC27:MAP4K4:RALB:TTN:CFLAR:UBE2V1:CASS4:APP:PTTG1IP:PROK2:EIF4G1:MAP3K13:DLG1:CHRNA9:RCHY1:PKD2:SNCA:FBXW7:RAPGEF2:NIPBL:HBEGF:TNIP1:PRKAR1B:PTK2B:RBPMS:IKBKB:CRH:OXR1
FUMA	GO:1901699	cellular response to nitrogen compound	632	31	8.57626e-12	1.21222e-09	PDE4B:SORBS1:RELA:PAK1:SP1:AKAP6:SNX6:ATP6V1D:GABRB3:FBN1:AQP9:CACNB1:CRHR1:CACNA1A:SLC8A1:ACTR2:RALB:CFLAR:CREB1:PTPRA:BCL2L1:APP:PKD2:SNCA:NFKB1:RAPGEF2:SRD5A1:MEF2C:PRKAR1B:CRH:KANK1
FUMA	GO:0070727	cellular macromolecule localization	1886	57	9.46665e-12	1.31283e-09	ATPIF1:MACF1:GOLPH3L:PEX19:COPA:NVL:CACNB2:SORBS1:TCF7L2:BDNF:VPS37C:BAD:PAK1:PICALM:PEX5:RPH3A:RPLP0:VPS37B:DCLK1:AKAP6:SNX6:PPM1A:ATP6V1D:SCG3:PML:IQGAP1:TAOK2:KATNB1:ERBB2:MAPT:NSF:GOSR2:SRSF1:CALM3:DNAJC27:RALB:FAM126B:CASP8:BCL2L1:DYNLRB1:PTTG1IP:POLDIP3:DLG1:RUFY3:COX18:UBE2D3:SEC24D:FBXW7:RAPGEF2:NIPBL:AP1S1:BCAP29:SMO:LEPROTL1:IKBKB:RAB2A:CLTA
FUMA	GO:0006468	protein phosphorylation	1949	58	1.12178e-11	1.4991e-09	DOCK7:ITPKB:BDNF:CD44:PAK1:UBASH3B:LTBR:GDF3:DYRK2:DCLK1:EDNRB:SNX6:PML:RASGRF1:IQGAP1:TAOK2:MARVELD3:MED1:ERBB2:PSME3:HEXIM1:MMD:ADCYAP1:ILF3:GMFG:CALM3:LILRA5:DNAJC27:MAP4K4:RALB:TTN:CFLAR:CREB1:PTPRA:UBE2V1:CASS4:APP:PROK2:PPM1L:EIF4G1:MAP3K13:DLG1:CHRNA9:PKD2:SNCA:NFKB1:ALPK1:FBXW7:RAPGEF2:MEF2C:HBEGF:TNIP1:PRKAR1B:CAMK2B:PTK2B:RBPMS:IKBKB:CRH
FUMA	GO:1902903	regulation of supramolecular fiber organization	345	23	1.11199e-11	1.4991e-09	CDC42:STMN1:CAPZA1:RHOC:SSH3:PAK1:NIN:KATNB1:MAPT:LDLR:GMFG:ARHGAP35:ACTR2:BIN1:APP:DLG1:SNCA:MAP1B:MEF2C:AEBP1:ARHGEF10:PTK2B:KANK1
FUMA	GO:0006915	apoptotic process	1956	58	1.29277e-11	1.6911e-09	ATPIF1:MCL1:ITPKB:TCF7L2:USP47:BDNF:CD44:CD5:RTN3:BAD:RELA:PAK1:LTBR:GDF3:ETV6:DYRK2:EDNRB:SNX6:GABRB3:PML:TAOK2:ELMO3:MED1:PSME3:MAPT:NME1:ADCYAP1:MAP4K4:EN1:RALB:BIN1:CFLAR:CASP8:CD28:CREB1:BCL2L1:APP:PTTG1IP:VHL:PROK2:FAM162A:SST:SNCA:NFKB1:UBE2D3:FBXW7:RAPGEF2:MEF2C:RNF144B:CYCS:BCAP29:SMO:CLEC5A:PTK2B:IKBKB:CRH:OXR1:FAM129B
FUMA	GO:0022603	regulation of anatomical structure morphogenesis	1130	42	1.31147e-11	1.6911e-09	CDC42:MACF1:ANGPTL3:WNT2B:MOV10:RHOC:BDNF:CD44:SSH3:PAK1:SP1:NIN:PML:TAOK2:ALDOA:MED1:ERBB2:PSME3:MAPT:WNT3:ARHGAP35:ACTR2:FMNL2:CFLAR:CST3:CASS4:FEZF2:PROK2:MAP3K13:DLG1:RUFY3:FBXW7:RAPGEF2:MAP1B:MEF2C:ERAP1:CAMK2B:SMO:MKLN1:PTK2B:KANK1:FAM129B
FUMA	GO:0000122	negative regulation of transcription by rna polymerase ii	818	35	1.69207e-11	2.14426e-09	SPEN:ZNF281:SMYD2:TCF7L2:RELA:ETV6:KLF12:EDNRB:PPM1A:JDP2:EID1:TBX6:NFATC3:MED1:HEXIM1:UHRF1:ZNF136:GATAD2A:ARHGAP35:EN1:OVOL2:VHL:FEZF2:ZBTB20:DLG1:MXD4:SNCA:NFKB1:UBE2D3:NIPBL:FST:MEF2C:AEBP1:SMO:ZHX1
FUMA	GO:1902679	negative regulation of rna biosynthetic process	1238	44	1.77061e-11	2.20576e-09	SPEN:ZNF281:SMYD2:TCF7L2:CTBP2:USP47:RELA:ETV6:KLF12:EDNRB:SNX6:PPM1A:JDP2:EID1:PML:TBX6:NFATC3:MED1:HEXIM1:UHRF1:ILF3:ZNF136:GATAD2A:ARHGAP35:EN1:CREB1:OVOL2:VHL:FEZF2:ZBTB20:DLG1:MXD4:SNCA:NFKB1:UBE2D3:NIPBL:FST:MEF2C:CBX3:AEBP1:LANCL2:SMO:ZHX1:FAM129B
FUMA	GO:0005794	golgi apparatus	1547	50	2.00155e-11	2.22617e-09	CDC42:MACF1:ANGPTL3:GOLPH3L:COPA:CNIH3:DCLRE1C:CD44:RTN3:ACER3:PICALM:LTBR:PEX5:RPH3A:TNRC6A:FAM57B:KIFC3:CHST6:CRHR1:ARL17B:NSF:WNT3:GOSR2:MMD:LDLR:PLEKHA3:APP:B3GALNT1:MUC4:DLG1:PKD2:SNCA:SEC24D:FBXW7:SCAMP1:VCAN:YIPF5:TJAP1:FIG4:HS3ST5:ICA1:AP1S1:FAM3C:SMO:GALNT11:BMP1:EXTL3:RAB2A:CLTA:NCS1
FUMA	GO:0044087	regulation of cellular component biogenesis	909	37	1.82313e-11	2.23333e-09	CDC42:STMN1:MACF1:CAPZA1:RHOC:BDNF:SSH3:PAK1:PEX5:NIN:PPM1A:IQGAP1:LCAT:GFAP:PLEKHM1:MAPT:LRFN1:GMFG:ARHGAP35:ACTR2:ANTXR1:MAP4K4:RALB:BIN1:CREB1:APP:EIF4G1:IL1RAP:DLG1:CEP135:SNCA:RAPGEF2:MEF2C:ARHGEF10:PTK2B:IKBKB:KANK1
FUMA	GO:0061564	axon development	508	27	3.29757e-11	3.9733e-09	STMN1:MACF1:DOCK7:BDNF:SSH3:TSKU:PAK1:PICALM:DCLK1:NIN:TAOK2:ERBB2:MAPT:WNT3:ARHGAP35:NRP2:CREB1:PTPRA:APP:FEZF2:MAP3K13:RUFY3:PALLD:MAP1B:ETV1:SMO:FAM129B
FUMA	GO:0051174	regulation of phosphorus metabolic process	1677	52	3.43655e-11	4.07398e-09	ATPIF1:DOCK7:ENSA:ITPKB:CCKBR:BDNF:CD44:BAD:PAK1:UBASH3B:LTBR:GDF3:EDNRB:SNX6:PML:IQGAP1:TAOK2:MARVELD3:ERBB2:HEXIM1:MAPT:MMD:ADCYAP1:GMFG:CALM3:LILRA5:DNAJC27:MAP4K4:RALB:TTN:CFLAR:UBE2V1:CASS4:APP:PROK2:EIF4G1:MAP3K13:DLG1:CHRNA9:PKD2:SNCA:FBXW7:RAPGEF2:MEF2C:HBEGF:TNIP1:PRKAR1B:MCM7:PTK2B:RBPMS:IKBKB:CRH
FUMA	GO:0030307	positive regulation of cell growth	160	16	4.1533e-11	4.7698e-09	CDC42:MACF1:USP47:BDNF:PAK1:AKAP6:ERBB2:MAPT:WNT3:EIF4G1:MAP3K13:RUFY3:MAP1B:HBEGF:PTK2B:EXTL3
FUMA	GO:0010976	positive regulation of neuron projection development	271	20	4.10315e-11	4.7698e-09	MACF1:BDNF:PAK1:NIN:IQGAP1:KATNB1:MAPT:WNT3:NME1:ADCYAP1:ARHGAP35:ACTR2:CFLAR:MAP3K13:RUFY3:RAPGEF2:MAP1B:FIG4:CAMK2B:PTK2B
FUMA	GO:0005102	signaling receptor binding	1619	52	9.53269e-12	5.22709e-09	CDC42:ANGPTL3:WNT2B:ENSA:COPA:SORBS1:TCF7L2:CTBP2:CCKBR:BDNF:PICALM:GDF3:RERG:EDNRB:FBN1:RASGRF1:TAOK2:MED1:ERBB2:PPY:PYY:GFAP:MAPT:NSF:WNT3:ITGB4:ADCYAP1:PIAS2:MYO9B:CD22:GMFG:CALM3:CFLAR:CASP8:APP:PROK2:ITGB5:SST:MUC4:DLG1:RCHY1:PKD2:RAPGEF2:FST:ERAP1:HBEGF:DST:FAM3C:SMO:GALNT11:BMP1:CRH
FUMA	GO:0009891	positive regulation of biosynthetic process	1966	57	4.74206e-11	5.36218e-09	ZNF281:NVL:SORBS1:TCF7L2:CTBP2:TAF6L:RELA:PICALM:MAML2:ETV6:TFCP2:SP1:DYRK2:ELF1:KLF12:PPM1A:PML:SPN:TBX6:NFATC3:MED1:ERBB2:HLF:VEZF1:ADCYAP1:PIAS2:UHRF1:ILF3:LDLR:APOC2:ACTR2:EN1:CD28:CREB1:OVOL2:UBE2V1:APP:POLDIP3:VHL:FEZF2:ZBTB20:SERP1:PKD2:SNCA:NFKB1:FBXW7:NIPBL:MEF2C:TNIP1:ETV1:NEUROD6:ZMIZ2:SMO:PTK2B:RBPMS:IKBKB:FAM129B
FUMA	GO:0031346	positive regulation of cell projection organization	373	23	5.33134e-11	5.93718e-09	CDC42:MACF1:BDNF:PAK1:NIN:IQGAP1:KATNB1:PLEKHM1:MAPT:WNT3:NME1:ADCYAP1:ARHGAP35:ACTR2:CFLAR:MAP3K13:CEP135:RUFY3:RAPGEF2:MAP1B:FIG4:CAMK2B:PTK2B
FUMA	GO:0002682	regulation of immune system process	1606	50	7.4384e-11	8.16004e-09	CDC42:PDE4B:MOV10:CTSS:RBBP5:CR1:ITPKB:CD5:BAD:RELA:PAK1:UBASH3B:ELF1:FBN1:TNRC6A:SPN:NUDT21:NFATC3:MED1:ERBB2:PSME3:HEXIM1:CRHR1:NME1:ADCYAP1:CD209:LDLR:CD22:CLPTM1:ACTR2:CASP8:CD28:CREB1:UBE2V1:APP:FANCD2:MUC4:DLG1:SNCA:NFKB1:UBE2D3:ALPK1:FBXW7:MEF2C:ERAP1:TNIP1:CD83:TRIM38:PTK2B:IKBKB
FUMA	GO:0042802	identical protein binding	1706	53	2.02666e-11	8.33465e-09	CDC42:ATPIF1:MCL1:MTPAP:RELA:C1QTNF5:UBASH3B:LTBR:BCAT1:SP1:ACACB:SNX6:GABRB3:FBN1:RBPMS2:PML:ALDOA:NUDT21:ERBB2:PSME3:GFAP:SPPL2C:MAPT:NME1:UHRF1:LDLR:APOC2:BIN1:TTN:CASP8:CD28:CREB1:CST3:BCL2L1:APP:XPNPEP3:EIF4G1:MAP3K13:RCHY1:PKD2:SNCA:NFKB1:FBXW7:ACSL6:TNIP1:ALDH5A1:DLK2:CBX3:CAMK2B:MKLN1:BMP1:RBPMS:IKBKB
FUMA	GO:0010628	positive regulation of gene expression	1955	56	1.13006e-10	1.20376e-08	MOV10:ZNF281:TCF7L2:CTBP2:RELA:PICALM:MAML2:ETV6:TFCP2:SP1:ELF1:KLF12:PPM1A:TNRC6A:TBX6:NUDT21:NFATC3:TAF1C:MED1:ERBB2:WNT3:HLF:VEZF1:SRSF1:ADCYAP1:PIAS2:UHRF1:ILF3:LDLR:ACTR2:EN1:TTN:CD28:CREB1:OVOL2:UBE2V1:APP:POLDIP3:VHL:FEZF2:SERP1:POLR2H:PKD2:NFKB1:FBXW7:NIPBL:MEF2C:TNIP1:ETV1:NEUROD6:ZMIZ2:SMO:PTK2B:IKBKB:CRH:FAM129B
FUMA	GO:0051336	regulation of hydrolase activity	1261	43	1.1207e-10	1.20376e-08	ATPIF1:DOCK7:ANGPTL3:RHOC:ENSA:CR1:USP47:BDNF:CD44:BAD:PICALM:RIN3:PML:RASGRF1:IQGAP1:ARHGAP17:ERBB2:PSME3:MAPT:ADCYAP1:UHRF1:MYO9B:APOC1:APOC2:CALM3:ARHGAP35:ANTXR1:MAP4K4:BIN1:ZC3H15:CFLAR:CASP8:CST3:APP:FAM162A:SNCA:RAPGEF2:MSH3:MEF2C:CYCS:ARHGEF10:PTK2B:IKBKB
FUMA	GO:0055085	transmembrane transport	1574	49	1.17829e-10	1.2372e-08	PDE4B:MCL1:CTSS:PEX19:CNIH3:CACNB2:SLC16A9:SORBS1:COX15:PICALM:SCN2B:UBASH3B:PEX5:ACACB:AKAP6:ATP6V1D:GABRB3:AQP9:RASGRF1:SLCO3A1:SLC12A4:CTC-479C5.17:SLC25A35:SLC47A2:CACNB1:PSME3:CRHR1:ABCC3:CACNA1A:CALM3:SLC30A3:SLC8A1:BIN1:JPH2:APP:SCN11A:DLG1:CHRNA9:GABRA2:PKD2:SNCA:ANKH:MEF2C:SLC4A9:KCNK5:ABCC10:PTK2B:SLC20A2:CRH:NCS1
FUMA	GO:2001257	regulation of cation channel activity	172	16	1.23696e-10	1.28052e-08	PDE4B:CTSS:CNIH3:CACNB2:AKAP6:RASGRF1:CACNB1:CRHR1:CALM3:JPH2:APP:DLG1:PKD2:MEF2C:PTK2B:CRH
FUMA	GO:0023057	negative regulation of signaling	1369	45	1.30224e-10	1.32937e-08	CDC42:STMN1:MCL1:TCF7L2:USP47:CD44:RELA:TSKU:UBASH3B:GDF3:DYRK2:ELF1:SNX6:PPM1A:FBN1:RBPMS2:MARVELD3:ERBB2:PSME3:CRHR1:MAPT:PIAS2:CD22:CALM3:ARHGAP35:MAP4K4:CFLAR:CASP8:BCL2L1:PTTG1IP:VHL:DLG1:CHRNA9:PKD2:SNCA:FBXW7:FST:HBEGF:TNIP1:DLK2:VWC2:PTK2B:CRH:KANK1:FAM129B
FUMA	GO:0016049	cell growth	468	25	1.61687e-10	1.6163e-08	CDC42:MACF1:ST7L:USP47:BDNF:PAK1:RERG:DCLK1:AKAP6:NIN:PML:IQGAP1:TAOK2:ERBB2:MAPT:WNT3:NRP2:APP:EIF4G1:MAP3K13:RUFY3:MAP1B:HBEGF:PTK2B:EXTL3
FUMA	GO:0010941	regulation of cell death	1697	51	1.6273e-10	1.6163e-08	ATPIF1:MCL1:ITPKB:TCF7L2:USP47:BDNF:CD44:BAD:RELA:ACER3:PICALM:LTBR:GDF3:EDNRB:SNX6:GABRB3:PML:KATNB1:MED1:PSME3:CRHR1:MAPT:NME1:ADCYAP1:MAP4K4:EN1:BIN1:CFLAR:CASP8:CD28:CREB1:BCL2L1:PTTG1IP:VHL:PROK2:FAM162A:EIF4G1:SNCA:NFKB1:FBXW7:RAPGEF2:MEF2C:RNF144B:CYCS:SMO:CLEC5A:PTK2B:IKBKB:CRH:OXR1:FAM129B
FUMA	GO:0048878	chemical homeostasis	1177	41	1.66661e-10	1.63327e-08	STMN1:ANGPTL3:CACNB2:TCF7L2:CCKBR:BAD:PICALM:SCN2B:UBASH3B:EDNRB:AKAP6:ATP6V1D:AQP9:PML:LCAT:SLC12A4:CTC-479C5.17:CRHR1:NME1:ADCYAP1:LDLR:CACNA1A:APOC2:CALM3:SLC30A3:SLC8A1:MAP4K4:JPH2:APP:GPR27:PROK2:ZBTB20:CHRNA9:PKD2:SNCA:FBXW7:SLC4A9:MYLIP:PRKAR1B:PTK2B:CRH:NCS1
FUMA	GO:1904062	regulation of cation transmembrane transport	328	21	1.86968e-10	1.80818e-08	PDE4B:CTSS:CNIH3:CACNB2:SCN2B:UBASH3B:AKAP6:RASGRF1:CACNB1:CRHR1:CALM3:SLC8A1:BIN1:JPH2:APP:DLG1:PKD2:SNCA:MEF2C:PTK2B:CRH
FUMA	GO:0006811	ion transport	1663	50	2.47296e-10	2.36055e-08	PDE4B:CTSS:CNIH3:CACNB2:SLC16A9:COX15:PICALM:SCN2B:UBASH3B:ACACB:AKAP6:ATP6V1D:GABRB3:AQP9:PML:RASGRF1:SLCO3A1:SLC12A4:CTC-479C5.17:CACNB1:CRHR1:NSF:ABCC3:ADCYAP1:LDLR:CACNA1A:APOC1:APOC2:CALM3:LILRA5:SLC30A3:SLC8A1:BIN1:PLEKHA3:JPH2:APP:SCN11A:DLG1:CHRNA9:GABRA2:PKD2:SNCA:ANKH:MEF2C:SLC4A9:KCNK5:CAMK2B:PTK2B:SLC20A2:CRH:NCS1
FUMA	WP2380	brain-derived neurotrophic factor (bdnf) signaling pathway	144	15	9.46311e-11	2.56923e-08	CDC42:BDNF:BAD:RELA:ACACB:GABRB3:RASGRF1:MAPT:NSF:CREB1:DLG1:NFKB1:MEF2C:PTK2B:IKBKB
FUMA	WP382	mapk signaling pathway	249	19	7.15004e-11	2.56923e-08	CDC42:STMN1:CACNB2:BDNF:RELA:PAK1:PPM1A:RASGRF1:TAOK2:NFATC3:CACNB1:MAPT:CACNA1A:MAP4K4:MAP3K13:NFKB1:RAPGEF2:MEF2C:IKBKB
FUMA	GO:0022610	biological adhesion	1404	45	2.90758e-10	2.70515e-08	CDC42:MACF1:ANGPTL3:ITPKB:SORBS1:CD44:CD5:BAD:RELA:PAK1:MPZL2:UBASH3B:FBN1:PML:IQGAP1:SPN:TAOK2:KIFC3:ERBB2:ITGB4:CD209:CLEC4M:CD22:ANTXR1:MAP4K4:CD28:PARD3B:NRP2:CASS4:APP:MAGI1:ITGB5:IL1RAP:MUC4:DLG1:PALLD:VCAN:PCDHB15:TNIP1:CD83:DST:VWC2:MKLN1:PTK2B:KANK1
FUMA	GO:0060548	negative regulation of cell death	1003	37	2.88752e-10	2.70515e-08	MCL1:ITPKB:TCF7L2:USP47:BDNF:CD44:BAD:RELA:EDNRB:SNX6:GABRB3:MED1:PSME3:CRHR1:ADCYAP1:MAP4K4:EN1:CFLAR:CASP8:CD28:CREB1:BCL2L1:PTTG1IP:VHL:PROK2:EIF4G1:SNCA:NFKB1:MEF2C:RNF144B:SMO:CLEC5A:PTK2B:IKBKB:CRH:OXR1:FAM129B
FUMA	GO:0030424	axon	600	28	2.80294e-10	2.80575e-08	DOCK7:EXOC6:BDNF:PAK1:NIN:RASGRF1:IQGAP1:TAOK2:KATNB1:MAPT:ADCYAP1:CALM3:BIN1:NRP2:CREB1:APP:SCN11A:DLG1:RUFY3:SNCA:PALLD:MAP1B:DST:SYNJ2:AP1S1:PTK2B:CRH:NCS1
FUMA	GO:0098796	membrane protein complex	1153	40	3.18679e-10	2.89998e-08	PDE4B:COPA:PIK3C2B:CNIH3:CACNB2:SORBS1:VPS37C:PICALM:SCN2B:VPS37B:AKAP6:SNX6:ATP6V1D:GABRB3:CACNB1:GOSR2:ITGB4:NDUFA7:NDUFA7:CACNA1A:CALM3:NDUFB3:CFLAR:CASP8:NCF4:SCN11A:ITGB5:NDUFB5:DLG1:CHRNA9:GABRA2:PKD2:SNCA:SEC24D:SCLT1:MARCH6:VWC2:AP1S1:PTK2B:IKBKB:CLTA
FUMA	GO:0014070	response to organic cyclic compound	912	35	3.18064e-10	2.92221e-08	PDE4B:BAD:RELA:PAK1:ACACB:EDNRB:AKAP6:UBE3A:GABRB3:AQP9:ABHD2:MED1:CRHR1:NME1:ADCYAP1:PIAS2:CALM3:SLC8A1:ACTR2:RALB:CFLAR:CASP8:BCL2L1:APP:SST:PKD2:SNCA:NFKB1:RAPGEF2:SRD5A1:MEF2C:CD83:SMO:PTK2B:CRH
FUMA	GO:0045596	negative regulation of cell differentiation	733	31	3.38803e-10	3.07432e-08	ITPKB:BDNF:PAK1:UBASH3B:GDF3:EDNRB:JDP2:FBN1:RBPMS2:FAM57B:TBX6:NFATC3:MED1:ERBB2:GFAP:WNT3:NME1:ADCYAP1:LDLR:MAP4K4:CFLAR:OVOL2:APP:FEZF2:RUFY3:FBXW7:RAPGEF2:MYLIP:SMO:PTK2B:KANK1
FUMA	GO:0042127	regulation of cell population proliferation	1684	50	3.78997e-10	3.39711e-08	ATPIF1:SMYD2:TCF7L2:CTBP2:CCKBR:BAD:RELA:ACER3:PAK1:RERG:SP1:EDNRB:RBPMS2:PML:SPN:MARVELD3:MED1:ERBB2:GFAP:WNT3:NME1:ADCYAP1:UHRF1:CD209:CD22:CFLAR:CD28:NRP2:CREB1:OVOL2:BCL2L1:APP:VHL:WDR6:FEZF2:PROK2:EIF4G1:SST:DLG1:MXD4:PKD2:NUDT6:FBXW7:RAPGEF2:MEF2C:HBEGF:SMO:PTK2B:CRH:FAM129B
FUMA	GO:0019725	cellular homeostasis	967	36	3.98441e-10	3.48636e-08	MCL1:CACNB2:CCKBR:BAD:POLD3:PICALM:UBASH3B:EDNRB:AKAP6:ATP6V1D:PML:ALDOA:SLC12A4:CTC-479C5.17:CRHR1:NME1:ADCYAP1:CACNA1A:CALM3:SLC30A3:SLC8A1:MAP4K4:JPH2:APP:NCF4:GPR27:PROK2:ZBTB20:CHRNA9:PKD2:SNCA:FBXW7:SLC4A9:PDIA4:PTK2B:CRH:NCS1
FUMA	GO:0031401	positive regulation of protein modification process	1212	41	3.97614e-10	3.48636e-08	DOCK7:BDNF:CD44:PAK1:LTBR:GDF3:EDNRB:JDP2:UBE3A:FANCI:IQGAP1:TAOK2:ERBB2:MMD:ADCYAP1:CALM3:LILRA5:DNAJC27:MAP4K4:RALB:CFLAR:UBE2V1:CASS4:APP:PTTG1IP:PROK2:EIF4G1:MAP3K13:DLG1:RCHY1:PKD2:SNCA:FBXW7:RAPGEF2:NIPBL:HBEGF:TNIP1:PRKAR1B:PTK2B:RBPMS:CRH
FUMA	GO:0007167	enzyme linked receptor protein signaling pathway	1034	37	6.64428e-10	5.74534e-08	CDC42:STMN1:SORBS1:BDNF:RELA:PAK1:UBASH3B:GDF3:SNX6:PPM1A:ATP6V1D:FBN1:RBPMS2:PML:IQGAP1:ERBB2:ACTR2:NRP2:CREB1:PTPRA:OVOL2:APP:NCF4:ITGB5:PPM1L:POLR2H:SNCA:UBE2D3:FBXW7:RAPGEF2:FST:HBEGF:VWC2:PTK2B:RBPMS:KANK1:FAM129B
FUMA	GO:0007010	cytoskeleton organization	1293	42	8.06103e-10	6.88937e-08	CDC42:STMN1:MACF1:DOCK7:CAPZA1:RHOC:SORBS1:SSH3:PAK1:NIN:ARHGAP17:TAOK2:ALDOA:KATNB1:TCAP:GFAP:MAPT:GMFG:ARHGAP35:ACTR2:ANTXR1:BIN1:FMNL2:TTN:CFLAR:PARD3B:CASS4:ITGB5:DLG1:CEP135:RUFY3:PKD2:SNCA:PALLD:MAP1B:MEF2C:DST:MKLN1:ARHGEF10:PTK2B:IKBKB:KANK1
FUMA	GO:0034765	regulation of ion transmembrane transport	467	24	8.19222e-10	6.92102e-08	PDE4B:CTSS:CNIH3:CACNB2:SCN2B:UBASH3B:AKAP6:RASGRF1:CACNB1:CRHR1:CACNA1A:CALM3:SLC8A1:BIN1:JPH2:APP:SCN11A:DLG1:PKD2:SNCA:MEF2C:KCNK5:PTK2B:CRH
FUMA	GO:0042391	regulation of membrane potential	430	23	8.6311e-10	7.20893e-08	ATPIF1:RIMS3:CNIH3:CACNB2:BAD:SCN2B:AKAP6:GABRB3:MAPT:ADCYAP1:CACNA1A:SLC8A1:BIN1:BCL2L1:APP:SCN11A:DLG1:CHRNA9:GABRA2:SNCA:MEF2C:KCNK5:PTK2B
FUMA	GO:0060322	head development	764	31	9.17275e-10	7.57525e-08	CDC42:STMN1:DOCK7:WNT2B:BAD:TSKU:PAK1:DCLK1:NIN:UBE3A:MED1:CRHR1:WNT3:NME1:ADCYAP1:CALM3:ARHGAP35:SLC8A1:EN1:NRP2:CREB1:APP:FANCD2:FEZF2:RAPGEF2:SRD5A1:NIPBL:SYNJ2:NEUROD6:SMO:CRH
FUMA	GO:0007015	actin filament organization	396	22	1.00146e-09	8.1786e-08	CDC42:STMN1:CAPZA1:RHOC:SORBS1:SSH3:PAK1:ARHGAP17:ALDOA:TCAP:GMFG:ARHGAP35:ACTR2:BIN1:TTN:CASS4:ITGB5:DLG1:RUFY3:ARHGEF10:PTK2B:KANK1
FUMA	GO:0006952	defense response	1684	49	1.12841e-09	9.03823e-08	CAPZA1:CTSS:CR1:CD44:RELA:ACER3:PAK1:EDNRB:PML:SPN:NFATC3:MED1:PSME3:HEXIM1:MAPT:VEZF1:ADCYAP1:CD209:CLEC4M:ILF3:LDLR:LILRA5:ACTR2:CASP8:CD28:CST3:UBE2V1:APP:IL17RE:FANCD2:PROK2:EIF4G1:IL1RAP:MUC4:SNCA:NFKB1:UBE2D3:ALPK1:MEF2C:ERAP1:TNIP1:CD83:TRIM38:CAMK2B:SMO:CLEC5A:PTK2B:IKBKB:CRH
FUMA	GO:0048585	negative regulation of response to stimulus	1629	48	1.13132e-09	9.03823e-08	CDC42:STMN1:MCL1:CR1:TCF7L2:USP47:CD44:RELA:TSKU:UBASH3B:GDF3:DYRK2:ELF1:SNX6:PPM1A:FBN1:RBPMS2:MARVELD3:ERBB2:PSME3:WNT3:ADCYAP1:PIAS2:LDLR:CD22:CALM3:ARHGAP35:MAP4K4:CFLAR:CASP8:BCL2L1:PTTG1IP:VHL:DLG1:CHRNA9:PKD2:SNCA:NFKB1:FBXW7:FST:HBEGF:TNIP1:TRIM38:DLK2:VWC2:OXR1:KANK1:FAM129B
FUMA	GO:0040011	locomotion	1915	53	1.26435e-09	9.99243e-08	MACF1:DOCK7:ANGPTL3:PDE4B:RHOC:PIK3C2B:BDNF:CD44:PAK1:SP1:VPS37B:DCLK1:EDNRB:PML:ABHD2:IQGAP1:SPN:TAOK2:ELMO3:MARVELD3:ERBB2:WNT3:ITGB4:ARHGAP35:SLC8A1:MAP4K4:NRP2:CREB1:TNS1:PTPRA:OVOL2:CASS4:APP:FEZF2:PROK2:ITGB5:SST:RUFY3:SNCA:FBXW7:RAPGEF2:PALLD:NIPBL:MAP1B:MEF2C:HBEGF:DST:ETV1:CAMK2B:SMO:PTK2B:KANK1:FAM129B
FUMA	GO:0051093	negative regulation of developmental process	1013	36	1.37409e-09	1.07331e-07	ITPKB:BDNF:PAK1:UBASH3B:GDF3:EDNRB:JDP2:FBN1:RBPMS2:PML:FAM57B:TBX6:NFATC3:MED1:ERBB2:GFAP:MAPT:WNT3:NME1:ADCYAP1:LDLR:MAP4K4:CFLAR:OVOL2:CST3:APP:FEZF2:RUFY3:FBXW7:RAPGEF2:MYLIP:FIG4:SMO:PTK2B:KANK1:FAM129B
FUMA	GO:0051241	negative regulation of multicellular organismal process	1265	41	1.38728e-09	1.07331e-07	DOCK7:PDE4B:ITPKB:PAK1:UBASH3B:EDNRB:FBN1:PML:TBX6:NFATC3:MARVELD3:MED1:ERBB2:GFAP:WNT3:NME1:ADCYAP1:LDLR:APOC1:APOC2:LILRA5:MAP4K4:BIN1:OVOL2:CST3:APP:FEZF2:RUFY3:NFKB1:FBXW7:RAPGEF2:MEF2C:CD83:MYLIP:FIG4:HS3ST5:SMO:PTK2B:CRH:KANK1:FAM129B
FUMA	GO:0009725	response to hormone	973	35	1.72451e-09	1.32033e-07	ANGPTL3:CTSS:SORBS1:BAD:RELA:PAK1:RERG:SP1:EDNRB:ATP6V1D:SNRPN:UBE3A:FBN1:ABHD2:IQGAP1:MED1:CRHR1:NME1:ADCYAP1:PIAS2:CALM3:CFLAR:CASP8:CREB1:PTPRA:SST:NFKB1:SRD5A1:MEF2C:PRKAR1B:LANCL2:PTK2B:GGH:CRH:KANK1
FUMA	GO:0098655	cation transmembrane transport	834	32	1.90183e-09	1.41197e-07	PDE4B:CTSS:CNIH3:CACNB2:COX15:PICALM:SCN2B:UBASH3B:AKAP6:ATP6V1D:RASGRF1:SLC12A4:CTC-479C5.17:CACNB1:CRHR1:CACNA1A:CALM3:SLC30A3:SLC8A1:BIN1:JPH2:APP:SCN11A:DLG1:CHRNA9:PKD2:SNCA:MEF2C:KCNK5:PTK2B:SLC20A2:CRH:NCS1
FUMA	GO:0034220	ion transmembrane transport	1125	38	1.89282e-09	1.41197e-07	PDE4B:CTSS:CNIH3:CACNB2:COX15:PICALM:SCN2B:UBASH3B:ACACB:AKAP6:ATP6V1D:GABRB3:AQP9:RASGRF1:SLC12A4:CTC-479C5.17:CACNB1:CRHR1:CACNA1A:CALM3:SLC30A3:SLC8A1:BIN1:JPH2:APP:SCN11A:DLG1:CHRNA9:GABRA2:PKD2:SNCA:ANKH:MEF2C:SLC4A9:KCNK5:PTK2B:SLC20A2:CRH:NCS1
FUMA	GO:0010562	positive regulation of phosphorus metabolic process	1075	37	1.89746e-09	1.41197e-07	DOCK7:BDNF:CD44:BAD:PAK1:LTBR:GDF3:EDNRB:IQGAP1:TAOK2:ERBB2:MAPT:MMD:ADCYAP1:CALM3:LILRA5:DNAJC27:MAP4K4:RALB:CFLAR:UBE2V1:CASS4:APP:PROK2:EIF4G1:MAP3K13:DLG1:PKD2:SNCA:FBXW7:RAPGEF2:MEF2C:HBEGF:PRKAR1B:PTK2B:RBPMS:CRH
FUMA	GO:0032409	regulation of transporter activity	270	18	1.99161e-09	1.46384e-07	PDE4B:CTSS:CNIH3:CACNB2:SCN2B:AKAP6:RASGRF1:CACNB1:CRHR1:CALM3:JPH2:APP:DLG1:PKD2:SNCA:MEF2C:PTK2B:CRH
FUMA	GO:0040007	growth	979	35	2.02016e-09	1.47012e-07	CDC42:MACF1:ST7L:USP47:BDNF:PAK1:RERG:ACACB:DCLK1:AKAP6:NIN:PML:IQGAP1:TAOK2:MED1:ERBB2:MAPT:WNT3:EN1:CFLAR:NRP2:CREB1:BCL2L1:APP:SERP1:EIF4G1:MAP3K13:RUFY3:NIPBL:MAP1B:MEF2C:HBEGF:SMO:PTK2B:EXTL3
FUMA	GO:0005938	cell cortex	302	19	1.85174e-09	1.48284e-07	CDC42:RIMS3:CAPZA1:RHOC:EXOC6:CTBP2:MYO9B:GMFG:ACTR2:PARD3B:FRYL:PKD2:SNCA:DST:LANCL2:MKLN1:CALD1:PTK2B:CLTA
FUMA	GO:0044463	cell projection part	1438	44	1.92576e-09	1.48284e-07	CDC42:MACF1:DOCK7:PDE4B:PEX19:CNIH3:EXOC6:BDNF:CD44:PAK1:NIN:RASGRF1:IQGAP1:TAOK2:KATNB1:CRHR1:MAPT:NSF:NME1:ADCYAP1:CALM3:ARHGAP35:SLC8A1:ANTXR1:BIN1:DYNLRB1:APP:DLG1:GABRA2:RUFY3:PKD2:SNCA:SCLT1:PALLD:MAP1B:PCDHB15:DST:PRKAR1B:AP1S1:SMO:PTK2B:CRH:KANK1:NCS1
FUMA	GO:0019904	protein domain specific binding	698	30	4.5165e-10	1.48593e-07	CDC42:MCL1:TCF7L2:USP47:RELA:ETV6:SP1:IQGAP1:ARHGAP17:ELMO3:MED1:TCAP:MAPT:NSF:WNT3:SRSF1:CALM3:CASP8:BCL2L1:APP:LRRFIP2:DLG1:PKD2:SNCA:RAPGEF2:NIPBL:MEF2C:SYNJ2:ICA1:CBX3
FUMA	GO:0033267	axon part	376	21	2.19933e-09	1.57252e-07	DOCK7:EXOC6:NIN:RASGRF1:IQGAP1:TAOK2:KATNB1:MAPT:ADCYAP1:CALM3:BIN1:APP:DLG1:RUFY3:SNCA:PALLD:DST:AP1S1:PTK2B:CRH:NCS1
FUMA	GO:0044092	negative regulation of molecular function	1131	38	2.18789e-09	1.57657e-07	STMN1:ATPIF1:ANGPTL3:ENSA:PEX19:CR1:TCF7L2:USP47:CD44:PICALM:UBASH3B:ACACB:EDNRB:SNX6:IQGAP1:TBX6:HEXIM1:CRHR1:MAPT:ADCYAP1:GMFG:APOC1:APOC2:CALM3:RALB:BIN1:CFLAR:CASP8:CST3:APP:SUMO3:PKD2:SNCA:NFKB1:FBXW7:PRKAR1B:SMO:IKBKB
FUMA	GO:0048639	positive regulation of developmental growth	181	15	2.35595e-09	1.68119e-07	MACF1:BDNF:PAK1:ACACB:AKAP6:MAPT:WNT3:CREB1:SERP1:MAP3K13:RUFY3:NIPBL:MAP1B:MEF2C:SMO
FUMA	GO:0051924	regulation of calcium ion transport	241	17	2.39715e-09	1.69414e-07	PDE4B:CACNB2:UBASH3B:AKAP6:PML:CACNB1:CRHR1:CALM3:LILRA5:SLC8A1:BIN1:JPH2:PKD2:SNCA:CAMK2B:PTK2B:CRH
FUMA	GO:0070997	neuron death	345	20	2.82885e-09	1.9802e-07	MCL1:BDNF:BAD:PICALM:SNX6:GABRB3:CRHR1:MAPT:EN1:CASP8:CREB1:BCL2L1:APP:FAM162A:EIF4G1:SNCA:FBXW7:MEF2C:PTK2B:OXR1
FUMA	GO:0051050	positive regulation of transport	950	34	3.38114e-09	2.34447e-07	ATPIF1:GOLPH3L:CTSS:CACNB2:SORBS1:TCF7L2:BAD:PAK1:EDNRB:AKAP6:PPM1A:ERBB2:CRHR1:ADCYAP1:CALM3:LILRA5:SLC30A3:TTN:CASP8:CREB1:JPH2:GPR27:SERP1:IL1RAP:DLG1:RUFY3:PKD2:SNCA:UBE2D3:FBXW7:SMO:CLEC5A:CRH:NCS1
FUMA	GO:0030133	transport vesicle	387	21	3.66306e-09	2.44449e-07	PDE4B:COPA:CNIH3:BDNF:PICALM:C1QTNF5:RPH3A:SCG3:GOSR2:CALM3:SLC30A3:BIN1:BCL2L1:APP:GABRA2:SNCA:SEC24D:SCAMP1:ICA1:AP1S1:CLTA
FUMA	GO:0043269	regulation of ion transport	677	28	4.05545e-09	2.78575e-07	PDE4B:CTSS:CNIH3:CACNB2:SCN2B:UBASH3B:AKAP6:PML:RASGRF1:CACNB1:CRHR1:ADCYAP1:CACNA1A:CALM3:LILRA5:SLC8A1:BIN1:JPH2:APP:SCN11A:DLG1:PKD2:SNCA:MEF2C:KCNK5:CAMK2B:PTK2B:CRH
FUMA	GO:0040008	regulation of growth	680	28	4.46333e-09	3.03755e-07	CDC42:MACF1:ST7L:USP47:BDNF:PAK1:RERG:ACACB:AKAP6:PML:TAOK2:ERBB2:MAPT:WNT3:CREB1:BCL2L1:APP:SERP1:EIF4G1:MAP3K13:RUFY3:NIPBL:MAP1B:MEF2C:HBEGF:SMO:PTK2B:EXTL3
FUMA	KEGG_MAPK_SIGNALING_PATHWAY	mapk signaling pathway	267	18	1.668e-09	3.10248e-07	CDC42:STMN1:CACNB2:BDNF:RELA:PAK1:PPM1A:RASGRF1:TAOK2:CACNB1:MAPT:CACNA1A:MAP4K4:MAP3K13:NFKB1:RAPGEF2:MEF2C:IKBKB
FUMA	GO:0034622	cellular protein containing complex assembly	1112	37	4.66139e-09	3.14323e-07	STMN1:ATPAF1:CAPZA1:COX15:CELF1:PATL1:TAF6L:PAK1:PICALM:RPLP0:DENR:NIN:PPM1A:UBN1:NUDT21:TAF1C:TCAP:MAPT:LUC7L3:SRSF1:NDUFA7:NDUFA7:GMFG:ACTR2:RALB:BIN1:TTN:NDUFB3:CREB1:NDUFB5:EIF4G1:DLG1:COX18:NAP1L5:SNCA:PTK2B:KANK1:CLTA
FUMA	GO:1902680	positive regulation of rna biosynthetic process	1592	46	4.75289e-09	3.1758e-07	ZNF281:TCF7L2:CTBP2:TAF6L:RELA:PICALM:MAML2:ETV6:TFCP2:SP1:ELF1:KLF12:PPM1A:PML:TBX6:NFATC3:MED1:ERBB2:HLF:VEZF1:ADCYAP1:PIAS2:UHRF1:ILF3:ACTR2:EN1:CD28:CREB1:OVOL2:UBE2V1:APP:VHL:FEZF2:PKD2:NFKB1:FBXW7:NIPBL:MEF2C:TNIP1:ETV1:NEUROD6:ZMIZ2:SMO:RBPMS:IKBKB:FAM129B
FUMA	GO:0010469	regulation of signaling receptor activity	595	26	4.82399e-09	3.19426e-07	ANGPTL3:COPA:CNIH3:BDNF:GDF3:SNX6:FBN1:RASGRF1:MED1:PPY:PYY:MAPT:WNT3:ADCYAP1:GMFG:APP:SST:MUC4:DLG1:FBXW7:MEF2C:HBEGF:FAM3C:BMP1:PTK2B:CRH
FUMA	GO:0034762	regulation of transmembrane transport	553	25	4.89092e-09	3.20967e-07	PDE4B:CTSS:CNIH3:CACNB2:SORBS1:SCN2B:UBASH3B:AKAP6:RASGRF1:CACNB1:CRHR1:CACNA1A:CALM3:SLC8A1:BIN1:JPH2:APP:SCN11A:DLG1:PKD2:SNCA:MEF2C:KCNK5:PTK2B:CRH
FUMA	WP3888	vegfa-vegfr2 signaling pathway	237	17	1.85955e-09	3.36579e-07	CDC42:RHOC:RELA:PAK1:ACACB:IQGAP1:ACP1:SLC8A1:BIN1:NRP2:CREB1:BCL2L1:ITGB5:NFKB1:MEF2C:HBEGF:PTK2B
FUMA	GO:0002520	immune system development	968	34	5.39325e-09	3.508e-07	CDC42:ATPIF1:WNT2B:MOV10:RBBP5:CR1:ITPKB:DCLRE1C:BAD:PICALM:UBASH3B:LTBR:ETV6:FBN1:PML:TNRC6A:SPN:NUDT21:MED1:ERBB2:PSME3:NME1:CLPTM1:CASP8:CD28:CREB1:APP:FANCD2:FBXW7:FST:MEF2C:CD83:CLEC5A:PTK2B
FUMA	GO:0012506	vesicle membrane	780	30	5.8822e-09	3.68005e-07	COPA:CR1:CNIH3:CD44:PICALM:RPH3A:ATP6V1D:GABRB3:SCG3:IQGAP1:TAOK2:KIFC3:WNT3:GOSR2:LDLR:CALM3:SLC30A3:BCL2L1:GABRA2:PKD2:SNCA:SEC24D:SCAMP1:HBEGF:ICA1:CAMK2B:AP1S1:SMO:CLEC5A:CLTA
FUMA	GO:0005739	mitochondrion	1552	45	6.39544e-09	3.76579e-07	ATPIF1:ATPAF1:MCL1:MTPAP:COX15:BDNF:BAD:ME3:BCAT1:LETMD1:MSRB3:ACACB:SLC25A35:MAPT:NME1:NDUFA7:NDUFA7:ILF3:CALM3:SLC8A1:MTHFD2:MRPL35:NDUFB3:CASP8:CREB1:BCL2L1:NIPSNAP1:XPNPEP3:VHL:CHDH:FAM162A:NDUFB5:COX18:SNCA:NFKB1:NUDT6:FBXW7:ACSL6:RNF144B:ALDH5A1:BCKDHB:RTN4IP1:CYCS:ZMIZ2:GIMAP5:OXR1
FUMA	GO:0030427	site of polarized growth	167	14	6.95676e-09	3.86873e-07	DOCK7:EXOC6:NIN:RASGRF1:IQGAP1:TAOK2:KATNB1:MAPT:CALM3:APP:RUFY3:SNCA:PALLD:PTK2B
FUMA	GO:1903827	regulation of cellular protein localization	519	24	6.46582e-09	4.16875e-07	ATPIF1:NVL:SORBS1:TCF7L2:BDNF:BAD:PAK1:PICALM:DCLK1:PPM1A:IQGAP1:ERBB2:MAPT:DNAJC27:RALB:CASP8:BCL2L1:DLG1:RUFY3:UBE2D3:FBXW7:NIPBL:SMO:LEPROTL1
FUMA	GO:0032535	regulation of cellular component size	367	20	8.05955e-09	5.1511e-07	MACF1:CAPZA1:BDNF:SSH3:PAK1:PICALM:SLC12A4:CTC-479C5.17:MAPT:WNT3:GMFG:ARHGAP35:ACTR2:BIN1:CREB1:MAP3K13:DLG1:RUFY3:MAP1B:PTK2B:KANK1
FUMA	GO:0010769	regulation of cell morphogenesis involved in differentiation	296	18	8.43025e-09	5.34158e-07	CDC42:MACF1:BDNF:SSH3:PAK1:NIN:MAPT:WNT3:ARHGAP35:ACTR2:CASS4:FEZF2:MAP3K13:RUFY3:RAPGEF2:MAP1B:CAMK2B:KANK1
FUMA	KEGG_PATHWAYS_IN_CANCER	pathways in cancer	325	19	6.16412e-09	5.73263e-07	CDC42:WNT2B:TCF7L2:CTBP2:BAD:RELA:PML:ERBB2:WNT3:PIAS2:RALB:CASP8:BCL2L1:VHL:NFKB1:MSH3:CYCS:SMO:IKBKB
FUMA	GO:0006812	cation transport	1145	37	1.00237e-08	6.29694e-07	PDE4B:CTSS:CNIH3:CACNB2:COX15:PICALM:SCN2B:UBASH3B:AKAP6:ATP6V1D:PML:RASGRF1:SLC12A4:CTC-479C5.17:CACNB1:CRHR1:NSF:ADCYAP1:CACNA1A:CALM3:LILRA5:SLC30A3:SLC8A1:BIN1:JPH2:APP:SCN11A:DLG1:CHRNA9:PKD2:SNCA:MEF2C:KCNK5:CAMK2B:PTK2B:SLC20A2:CRH:NCS1
gPROFILER	GO:0060284	regulation of cell development		53		6.47582e-07	PTK2B,BIN1,FBN1,WNT3,MED1,CFLAR,CASS4,ADCYAP1,APP,LDLR,VWC2,BDNF,MAPT,IKBKB,CACNA1A,ARHGAP35,CAMK2B,SPEN,MAP4K4,BAD,MOV10,IQGAP1,NIPBL,GFAP,EDNRB,CREB1,MEF2C,RELA,MACF1,MYLIP,CDC42,UBE3A,NCS1,EIF4G1,MAP3K13,AKAP6,FBXW7,TBX6,KATNB1,KANK1,FEZF2,DOCK7,FIG4,RTN4IP1,MAP1B,SMO,RAPGEF2,NIN,MMD,FAM129B,RUFY3,PAK1,ACTR2
gPROFILER	GO:0050793	regulation of developmental process		82		6.47582e-07	PTK2B,BIN1,VEZF1,FBN1,SNCA,WNT3,MED1,NFATC3,CFLAR,CASS4,ADCYAP1,APP,CD44,ACACB,LDLR,VWC2,MKLN1,OVOL2,BDNF,DLK2,MAPT,IKBKB,PML,CACNA1A,RBPMS2,ITPKB,RBBP5,WNT2B,ARHGAP35,CAMK2B,SPEN,MAP4K4,CELF1,PROK2,GDF3,ANKH,FST,BAD,MOV10,IQGAP1,NIPBL,GFAP,BMP1,NFKB1,EDNRB,CREB1,MEF2C,TAF6L,RELA,CD83,MACF1,ALDOA,TCF7L2,RHOC,MYLIP,CDC42,UBE3A,DLG1,EID1,LRFN1,TNRC6A,NCS1,EIF4G1,CLPTM1,MAP3K13,VHL,AKAP6,FBXW7,SP1,T…
FUMA	GO:0033043	regulation of organelle organization	1254	39	1.10445e-08	6.87941e-07	CDC42:STMN1:ATPIF1:CAPZA1:RHOC:BAD:SSH3:PAK1:NIN:JDP2:EID1:PML:ARHGAP17:TAOK2:KATNB1:MAPT:CDC27:LRFN1:GMFG:ARHGAP35:ACTR2:RALB:BIN1:CASP8:CD28:BCL2L1:FAM162A:IL1RAP:DLG1:CEP135:SNCA:UBE2D3:FBXW7:NIPBL:MAP1B:MEF2C:ARHGEF10:PTK2B:KANK1
FUMA	GO:1903169	regulation of calcium ion transmembrane transport	146	13	1.16598e-08	7.20167e-07	PDE4B:CACNB2:UBASH3B:AKAP6:CACNB1:CRHR1:CALM3:SLC8A1:BIN1:JPH2:PKD2:SNCA:PTK2B
FUMA	GO:0023014	signal transduction by protein phosphorylation	952	33	1.25439e-08	7.68316e-07	ITPKB:CD44:PAK1:LTBR:GDF3:RASGRF1:IQGAP1:TAOK2:MARVELD3:MED1:ERBB2:PSME3:ADCYAP1:LILRA5:DNAJC27:MAP4K4:CFLAR:PTPRA:UBE2V1:APP:PROK2:PPM1L:MAP3K13:DLG1:CHRNA9:NFKB1:FBXW7:RAPGEF2:MEF2C:HBEGF:TNIP1:PTK2B:IKBKB
FUMA	GO:0030900	forebrain development	378	20	1.32145e-08	8.02696e-07	DOCK7:WNT2B:BAD:TSKU:DCLK1:NIN:CRHR1:NME1:ADCYAP1:ARHGAP35:SLC8A1:NRP2:CREB1:APP:FEZF2:RAPGEF2:SRD5A1:NEUROD6:SMO:CRH
FUMA	GO:0071407	cellular response to organic cyclic compound	539	24	1.33412e-08	8.02996e-07	PDE4B:PAK1:AKAP6:UBE3A:GABRB3:AQP9:ABHD2:MED1:ADCYAP1:PIAS2:SLC8A1:ACTR2:RALB:CFLAR:CASP8:APP:PKD2:SNCA:NFKB1:RAPGEF2:SRD5A1:MEF2C:SMO:CRH
FUMA	GO:0043549	regulation of kinase activity	857	31	1.34379e-08	8.02996e-07	CCKBR:BDNF:BAD:PAK1:UBASH3B:SNX6:IQGAP1:TAOK2:ERBB2:HEXIM1:MAPT:MMD:ADCYAP1:GMFG:CALM3:LILRA5:MAP4K4:RALB:TTN:UBE2V1:CASS4:APP:PROK2:MAP3K13:DLG1:PKD2:SNCA:FBXW7:RAPGEF2:PRKAR1B:PTK2B
FUMA	GO:0010770	positive regulation of cell morphogenesis involved in differentiation	148	13	1.37436e-08	8.12003e-07	CDC42:MACF1:BDNF:PAK1:NIN:MAPT:WNT3:ACTR2:CASS4:MAP3K13:RUFY3:MAP1B:CAMK2B
FUMA	GO:0010959	regulation of metal ion transport	379	20	1.38096e-08	8.12003e-07	PDE4B:CACNB2:SCN2B:UBASH3B:AKAP6:PML:CACNB1:CRHR1:ADCYAP1:CALM3:LILRA5:SLC8A1:BIN1:JPH2:DLG1:PKD2:SNCA:CAMK2B:PTK2B:CRH
FUMA	GO:0034329	cell junction assembly	238	16	1.40428e-08	8.19166e-07	CDC42:MACF1:CAPZA1:RHOC:SORBS1:IQGAP1:TAOK2:MARVELD3:ITGB4:MAP4K4:TNS1:DLG1:RAPGEF2:DST:PTK2B:IKBKB
FUMA	GO:0090066	regulation of anatomical structure size	499	23	1.42646e-08	8.25548e-07	MACF1:CAPZA1:BDNF:SSH3:PAK1:PICALM:EDNRB:SLC12A4:CTC-479C5.17:MAPT:WNT3:ADCYAP1:GMFG:ARHGAP35:SLC8A1:ACTR2:BIN1:CREB1:MAP3K13:DLG1:RUFY3:MAP1B:PTK2B:KANK1
FUMA	WP4659	gastrin signaling pathway	114	12	6.4178e-09	8.71216e-07	CDC42:CCKBR:CD44:BAD:RELA:PAK1:SP1:CREB1:BCL2L1:NFKB1:MEF2C:IKBKB
FUMA	GO:0051701	interaction with host	209	15	1.66651e-08	9.49525e-07	CR1:BAD:VPS37B:PML:CD209:CLEC4M:LDLR:CASP8:BCL2L1:ITGB5:TNIP1:TRIM38:HS3ST5:CLEC5A:SLC20A2
FUMA	GO:0070201	regulation of establishment of protein localization	723	28	1.66011e-08	9.49525e-07	ATPIF1:ENSA:GOLPH3L:TCF7L2:BAD:PAK1:PPM1A:PML:ERBB2:MAPT:CACNA1A:CD22:LILRA5:DNAJC27:MAP4K4:TTN:CASP8:GPR27:SERP1:IL1RAP:CEP135:RUFY3:UBE2D3:FBXW7:ICA1:SMO:CLEC5A:CRH
FUMA	GO:0070848	response to growth factor	724	28	1.70942e-08	9.66481e-07	BDNF:CD44:RELA:GDF3:SNX6:PPM1A:FBN1:RBPMS2:PML:IQGAP1:MED1:ERBB2:MAPT:CFLAR:NRP2:CREB1:OVOL2:APP:ITGB5:POLR2H:SNCA:UBE2D3:RAPGEF2:SRD5A1:MEF2C:VWC2:MCM7:FAM129B
FUMA	GO:0045862	positive regulation of proteolysis	347	19	1.77149e-08	9.93928e-07	ATPIF1:CR1:BAD:PICALM:PML:PSME3:MAPT:ANTXR1:CFLAR:CASP8:APP:FAM162A:RCHY1:SNCA:FBXW7:TNIP1:RNF144B:CYCS:PTK2B
FUMA	GO:0019900	kinase binding	722	29	4.08435e-09	1.11979e-06	CDC42:RHOC:TCF7L2:CTBP2:BAD:RELA:PAK1:GDF3:NIN:IQGAP1:TAOK2:SLC12A4:CTC-479C5.17:MARVELD3:GFAP:MAPT:NSF:SRSF1:CALM3:TTN:CD28:BCL2L1:CASS4:MAP3K13:DLG1:TNIP1:PRKAR1B:PTK2B:IKBKB:NCS1
FUMA	GO:0051640	organelle localization	685	27	2.0988e-08	1.15121e-06	CDC42:RIMS3:DOCK7:CNIH3:CACNB2:EXOC6:CTBP2:PICALM:NIN:KATNB1:PLEKHM1:CRHR1:MAPT:NSF:GOSR2:CALM3:ACTR2:RALB:BIN1:PARD3B:DLG1:CEP135:SNCA:SEC24D:SCLT1:MAP1B:NCS1
FUMA	GO:0051099	positive regulation of binding	182	14	2.09058e-08	1.15121e-06	STMN1:NVL:TCF7L2:CTBP2:BDNF:NME1:CALM3:RALB:APP:EIF4G1:RAPGEF2:NIPBL:MEF2C:FAM129B
FUMA	GO:1903706	regulation of hemopoiesis	468	22	2.08448e-08	1.15121e-06	MOV10:RBBP5:CR1:ITPKB:BAD:UBASH3B:FBN1:TNRC6A:NUDT21:MED1:ERBB2:PSME3:NME1:CLPTM1:CASP8:CD28:CREB1:FANCD2:FBXW7:MEF2C:CD83:PTK2B
FUMA	GO:0150034	distal axon	280	17	2.24403e-08	1.18225e-06	DOCK7:EXOC6:NIN:RASGRF1:IQGAP1:TAOK2:KATNB1:MAPT:ADCYAP1:CALM3:APP:RUFY3:SNCA:PALLD:AP1S1:PTK2B:NCS1
FUMA	GO:0043254	regulation of protein complex assembly	429	21	2.1974e-08	1.19636e-06	CDC42:STMN1:CAPZA1:RHOC:PAK1:PEX5:NIN:PPM1A:LCAT:GFAP:MAPT:GMFG:ACTR2:RALB:BIN1:CREB1:EIF4G1:DLG1:SNCA:PTK2B:KANK1
FUMA	GO:0030001	metal ion transport	880	31	2.45308e-08	1.32574e-06	PDE4B:CACNB2:PICALM:SCN2B:UBASH3B:AKAP6:ATP6V1D:PML:SLC12A4:CTC-479C5.17:CACNB1:CRHR1:NSF:ADCYAP1:CACNA1A:CALM3:LILRA5:SLC30A3:SLC8A1:BIN1:JPH2:SCN11A:DLG1:CHRNA9:PKD2:SNCA:KCNK5:CAMK2B:PTK2B:SLC20A2:CRH:NCS1
FUMA	GO:1902494	catalytic complex	1351	40	2.70477e-08	1.35374e-06	PIK3C2B:RBBP5:NVL:SORBS1:USP47:TAF6L:POLD3:DYRK2:SNRPN:UBE3A:PPP4C:MED1:PSME3:KANSL1:CDC27:SRSF1:NDUFA7:NDUFA7:GATAD2A:CALM3:EN1:NDUFB3:CFLAR:CASP8:DYNLRB1:UBE2V1:ZFP64:NCF4:VHL:NDUFB5:POLR2H:RCHY1:SNCA:UBE2D3:FBXW7:MARCH6:RNF144B:BCKDHB:CYCS:MKLN1:IKBKB
FUMA	GO:0099177	regulation of trans synaptic signaling	433	21	2.57582e-08	1.38192e-06	RIMS3:CACNB2:BDNF:RASGRF1:GFAP:CRHR1:MAPT:ADCYAP1:CACNA1A:CALM3:CREB1:PTPRA:APP:SNCA:RAPGEF2:MEF2C:PRKAR1B:CAMK2B:PTK2B:CRH:NCS1
FUMA	GO:0072359	circulatory system development	1136	36	2.62153e-08	1.39625e-06	ATPIF1:PPIH:ANGPTL3:SMYD2:TCF7L2:PAK1:SP1:ACACB:AKAP6:FBN1:PML:NFATC3:MED1:TCAP:ERBB2:HEXIM1:VEZF1:SLC8A1:ANTXR1:TTN:CFLAR:NRP2:CREB1:OVOL2:JPH2:PROK2:PKD2:FBXW7:RAPGEF2:NIPBL:MEF2C:ERAP1:SMO:GALNT11:PTK2B:FAM129B
FUMA	WP2034	leptin signaling pathway	76	10	1.35225e-08	1.46854e-06	CDC42:BAD:RELA:SP1:ACACB:ERBB2:CREB1:BCL2L1:NFKB1:IKBKB
FUMA	GO:0034330	cell junction organization	287	17	3.22015e-08	1.69397e-06	CDC42:MACF1:CAPZA1:RHOC:SORBS1:IQGAP1:TAOK2:KIFC3:MARVELD3:ITGB4:MAP4K4:TNS1:DLG1:RAPGEF2:DST:PTK2B:IKBKB
FUMA	GO:0019058	viral life cycle	323	18	3.22661e-08	1.69397e-06	CDC42:PPIH:CR1:CTBP2:VPS37C:VPS37B:PML:CD209:CLEC4M:ILF3:LDLR:CD28:ITGB5:TNIP1:TRIM38:HS3ST5:CLEC5A:SLC20A2
FUMA	GO:1901566	organonitrogen compound biosynthetic process	1814	48	3.31431e-08	1.72767e-06	ATPIF1:MOV10:COX15:TCF7L2:CELF1:ACER3:BCAT1:ACACB:RPLP0:DENR:PPM1A:TNRC6A:FAM57B:ALDOA:LCAT:CHST6:ERBB2:NME1:NDUFA7:NDUFA7:ILF3:SAMD4B:MRPL35:ZC3H15:CD28:SMOX:RRBP1:APP:POLDIP3:EIF1B:CHDH:EIF4E3:SERP1:PPM1L:B3GALNT1:EIF4G1:IL1RAP:MUC4:SCD5:SNCA:NFKB1:VCAN:ACSL6:HBEGF:TNIP1:HS3ST5:GALNT11:PTK2B:EXTL3
FUMA	GO:0005783	endoplasmic reticulum	1884	49	3.99788e-08	1.90566e-06	CDC42:COPA:PIK3C2B:CNIH3:RTN3:ACER3:MSRB3:RPLP0:AKAP6:FBN1:SCG3:PML:SEZ6L2:FAM57B:SPPL2C:WNT3:GOSR2:APOC1:FKBP7:RRBP1:CST3:BCL2L1:JPH2:APP:VHL:SERP1:PPM1L:B3GALNT1:DLG1:SCD5:PKD2:SNCA:SEC24D:FBXW7:SRD5A1:MARCH6:VCAN:ERAP1:ACSL6:YIPF5:MBOAT1:DST:FIG4:CAMK2B:BCAP29:PDIA4:GIMAP5:EXTL3:RAB2A
FUMA	GO:0033674	positive regulation of kinase activity	569	24	3.709e-08	1.9198e-06	BDNF:BAD:PAK1:IQGAP1:TAOK2:ERBB2:MAPT:MMD:ADCYAP1:CALM3:LILRA5:MAP4K4:RALB:UBE2V1:CASS4:PROK2:MAP3K13:DLG1:PKD2:SNCA:FBXW7:RAPGEF2:PRKAR1B:PTK2B
FUMA	GO:0031347	regulation of defense response	754	28	4.01147e-08	2.06184e-06	CTSS:CR1:RELA:PAK1:EDNRB:MED1:PSME3:HEXIM1:ADCYAP1:CD209:LDLR:LILRA5:CASP8:CD28:UBE2V1:APP:FANCD2:MUC4:SNCA:NFKB1:UBE2D3:ALPK1:MEF2C:ERAP1:TNIP1:TRIM38:IKBKB:CRH
FUMA	GO:0055082	cellular chemical homeostasis	803	29	4.14891e-08	2.11767e-06	CACNB2:CCKBR:BAD:PICALM:UBASH3B:EDNRB:AKAP6:ATP6V1D:PML:CRHR1:NME1:ADCYAP1:CACNA1A:CALM3:SLC30A3:SLC8A1:MAP4K4:JPH2:APP:GPR27:PROK2:ZBTB20:CHRNA9:PKD2:SNCA:SLC4A9:PTK2B:CRH:NCS1
FUMA	GO:0031329	regulation of cellular catabolic process	805	29	4.37512e-08	2.21773e-06	ATPIF1:MOV10:MCL1:BAD:ACACB:SNX6:ATP6V1D:UBE3A:PML:TNRC6A:PSME3:GFAP:MAPT:LDLR:SAMD4B:APOC1:APOC2:RALB:CST3:PTTG1IP:WDR6:ZBTB20:EIF4G1:RCHY1:SNCA:FBXW7:MYLIP:RNF144B:PTK2B
FUMA	GO:0010638	positive regulation of organelle organization	619	25	4.44357e-08	2.237e-06	CDC42:ATPIF1:RHOC:BAD:PAK1:NIN:JDP2:PML:KATNB1:MAPT:GMFG:ARHGAP35:ACTR2:RALB:BIN1:CASP8:CD28:FAM162A:DLG1:CEP135:UBE2D3:FBXW7:NIPBL:ARHGEF10:PTK2B
FUMA	GO:0051098	regulation of binding	369	19	4.6964e-08	2.33534e-06	STMN1:PEX19:NVL:TCF7L2:CTBP2:BDNF:UBASH3B:NME1:CALM3:RALB:APP:SUMO3:EIF4G1:FBXW7:RAPGEF2:NIPBL:MEF2C:SMO:FAM129B
FUMA	GO:0051338	regulation of transferase activity	956	32	4.70246e-08	2.33534e-06	NVL:CCKBR:BDNF:BAD:PAK1:UBASH3B:SNX6:IQGAP1:TAOK2:ERBB2:HEXIM1:MAPT:MMD:ADCYAP1:GMFG:CALM3:LILRA5:MAP4K4:RALB:TTN:UBE2V1:CASS4:APP:PROK2:MAP3K13:DLG1:PKD2:SNCA:FBXW7:RAPGEF2:PRKAR1B:PTK2B
FUMA	GO:0009894	regulation of catabolic process	959	32	5.05071e-08	2.49146e-06	ATPIF1:ANGPTL3:MOV10:MCL1:BAD:RELA:ACACB:SNX6:ATP6V1D:UBE3A:PML:TNRC6A:PSME3:GFAP:MAPT:NSF:LDLR:SAMD4B:APOC1:APOC2:RALB:CST3:PTTG1IP:WDR6:ZBTB20:EIF4G1:RCHY1:SNCA:FBXW7:MYLIP:RNF144B:PTK2B
FUMA	GO:0051248	negative regulation of protein metabolic process	1123	35	6.19263e-08	3.03439e-06	MOV10:ENSA:CR1:USP47:CD44:CELF1:RELA:PICALM:UBASH3B:EDNRB:SNX6:PML:TNRC6A:MARVELD3:HEXIM1:MAPT:ILF3:LDLR:GMFG:SAMD4B:CALM3:BIN1:CFLAR:CST3:APP:EIF4G1:DLG1:CHRNA9:SNCA:NFKB1:HBEGF:TNIP1:PRKAR1B:IKBKB:OXR1
FUMA	KEGG_APOPTOSIS	apoptosis	87	10	5.08202e-08	3.15085e-06	BAD:RELA:CFLAR:CASP8:BCL2L1:IL1RAP:NFKB1:PRKAR1B:CYCS:IKBKB
FUMA	GO:0098660	inorganic ion transmembrane transport	821	29	6.64602e-08	3.23498e-06	PDE4B:CACNB2:COX15:PICALM:SCN2B:UBASH3B:AKAP6:ATP6V1D:GABRB3:SLC12A4:CTC-479C5.17:CACNB1:CRHR1:CACNA1A:CALM3:SLC30A3:SLC8A1:BIN1:JPH2:SCN11A:DLG1:CHRNA9:GABRA2:PKD2:SNCA:ANKH:KCNK5:PTK2B:SLC20A2:NCS1
FUMA	GO:0003779	actin binding	421	21	1.58995e-08	3.26933e-06	MACF1:CAPZA1:CACNB2:SORBS1:SSH3:ALDOA:MAPT:MYO9B:GMFG:ACTR2:ANTXR1:BIN1:FMNL2:TTN:TNS1:SNCA:PALLD:MAP1B:DST:CAMK2B:CALD1
FUMA	GO:0032553	ribonucleotide binding	1885	50	1.53856e-08	3.26933e-06	CDC42:PDE4B:MOV10:RHOC:TTF2:UBE2T:PIK3C2B:NVL:ITPKB:MTPAP:PAK1:RERG:DYRK2:ACACB:DCLK1:NIN:TAOK2:KIFC3:ERBB2:ARL17B:NSF:ABCC3:NME1:MYO9B:ARHGAP35:DNAJC27:ACTR2:MAP4K4:RALB:TTN:RAD54L2:MAGI1:EIF4G1:MAP3K13:UBE2D3:ALPK1:RAPGEF2:MSH3:ACSL6:ABCC10:HS3ST5:PRKAR1B:CAMK2B:LANCL2:GTPBP10:MCM7:GIMAP5:PTK2B:IKBKB:RAB2A
FUMA	GO:0031349	positive regulation of defense response	501	22	6.89919e-08	3.33612e-06	CTSS:RELA:PAK1:MED1:PSME3:HEXIM1:CD209:LDLR:LILRA5:CASP8:CD28:UBE2V1:APP:MUC4:SNCA:NFKB1:UBE2D3:ALPK1:MEF2C:TNIP1:IKBKB:CRH
FUMA	GO:0007610	behavior	592	24	7.74563e-08	3.69678e-06	BDNF:PICALM:RASGRF1:PYY:CRHR1:MAPT:ADCYAP1:LDLR:ACTR2:EN1:CREB1:DYNLRB1:APP:FEZF2:EIF4G1:SNCA:SRD5A1:ANKH:MEF2C:FIG4:PRKAR1B:ETV1:CRH:OXR1
FUMA	GO:0003012	muscle system process	462	21	7.72214e-08	3.69678e-06	PDE4B:CACNB2:SORBS1:PAK1:SCN2B:EDNRB:AKAP6:ALDOA:TCAP:SRSF1:CALM3:SLC8A1:BIN1:TTN:CFLAR:PROK2:ITGB5:DLG1:MEF2C:CAMK2B:CALD1
FUMA	GO:0098772	molecular function regulator	1787	48	2.09679e-08	3.83247e-06	ATPIF1:DOCK7:ANGPTL3:ENSA:COPA:CNIH3:CCKBR:BDNF:BAD:SCN2B:GDF3:RIN3:FBN1:EID1:RASGRF1:IQGAP1:ARHGAP17:PPP4C:PSME3:PPY:PYY:HEXIM1:MAPT:WNT3:ADCYAP1:MYO9B:GMFG:APOC1:APOC2:CALM3:ARHGAP35:CFLAR:CST3:APP:NCF4:SST:DLG1:SNCA:SCLT1:FBXW7:RAPGEF2:FST:HBEGF:PRKAR1B:FAM3C:ARHGEF10:BMP1:CRH
FUMA	GO:0001775	cell activation	1408	40	8.12681e-08	3.85368e-06	CDC42:CTSS:CR1:ITPKB:DCLRE1C:CD44:CD5:BAD:PAK1:UBASH3B:LTBR:ATP6V1D:IQGAP1:SPN:ALDOA:ERBB2:CRHR1:MAPT:CD209:LDLR:CD22:GMFG:CLPTM1:LILRA5:ACTR2:CASP8:CD28:CST3:APP:FANCD2:DLG1:SNCA:NFKB1:SCAMP1:MEF2C:CD83:SMO:CLEC5A:PTK2B:GGH
FUMA	GO:0002521	leukocyte differentiation	507	22	8.48164e-08	3.99361e-06	CDC42:CR1:ITPKB:DCLRE1C:BAD:UBASH3B:LTBR:FBN1:SPN:MED1:ERBB2:NME1:CLPTM1:CASP8:CD28:CREB1:APP:FANCD2:FBXW7:MEF2C:CD83:PTK2B
FUMA	GO:0051046	regulation of secretion	782	28	8.53057e-08	3.99361e-06	RIMS3:ENSA:GOLPH3L:CACNB2:TCF7L2:BAD:EDNRB:PML:CRHR1:NSF:ADCYAP1:CACNA1A:CD22:CALM3:LILRA5:MAP4K4:RALB:TTN:CREB1:GPR27:SERP1:IL1RAP:SNCA:MEF2C:ICA1:CLEC5A:CRH:NCS1
FUMA	GO:0005768	endosome	885	30	9.57005e-08	4.16505e-06	ANGPTL3:CTSS:VPS37C:PICALM:VPS37B:SNX6:RIN3:PML:ERBB2:PLEKHM1:CRHR1:GOSR2:MMD:LDLR:CD22:APOC2:SLC30A3:ANTXR1:BIN1:APP:NCF4:OCIAD2:UBE2D3:ANKRD50:RAPGEF2:SCAMP1:TJAP1:FIG4:LEPROTL1:CLTA
FUMA	GO:0030658	transport vesicle membrane	205	14	9.30523e-08	4.16505e-06	CNIH3:RPH3A:SCG3:GOSR2:CALM3:SLC30A3:BCL2L1:GABRA2:SNCA:SEC24D:SCAMP1:ICA1:AP1S1:CLTA
FUMA	GO:0051347	positive regulation of transferase activity	643	25	9.17784e-08	4.26944e-06	NVL:BDNF:BAD:PAK1:IQGAP1:TAOK2:ERBB2:MAPT:MMD:ADCYAP1:CALM3:LILRA5:MAP4K4:RALB:UBE2V1:CASS4:PROK2:MAP3K13:DLG1:PKD2:SNCA:FBXW7:RAPGEF2:PRKAR1B:PTK2B
FUMA	GO:0007163	establishment or maintenance of cell polarity	205	14	9.30523e-08	4.30147e-06	CDC42:DOCK7:RHOC:PAK1:SPN:ARHGAP35:ACTR2:PARD3B:DLG1:RUFY3:MAP1B:DST:PTK2B:KANK1
FUMA	GO:0070382	exocytic vesicle	208	14	1.11389e-07	4.64586e-06	PDE4B:BDNF:PICALM:RPH3A:CALM3:SLC30A3:BIN1:BCL2L1:APP:GABRA2:SNCA:SCAMP1:ICA1:CLTA
Webgestalt	GO:0050769	positive regulation of neurogenesis	447	32	7.44209e-10	4.69298e-06	PTK2B;BIN1;WNT3;CFLAR;ADCYAP1;APP;VWC2;BDNF;MAPT;ARHGAP35;CAMK2B;SPEN;IQGAP1;NIPBL;GFAP;MEF2C;RELA;MACF1;EIF4G1;MAP3K13;KATNB1;FEZF2;FIG4;MAP1B;SMO;RAPGEF2;NIN;MMD;RUFY3;PAK1;ACTR2;NME1
FUMA	GO:0051129	negative regulation of cellular component organization	694	26	1.04382e-07	4.79507e-06	CDC42:STMN1:CAPZA1:PICALM:PEX5:PPM1A:TBX6:KATNB1:GFAP:MAPT:WNT3:LDLR:GMFG:APOC1:APOC2:ANTXR1:MAP4K4:CFLAR:CST3:BCL2L1:RUFY3:SNCA:RAPGEF2:MYLIP:IKBKB:KANK1
FUMA	GO:0006974	cellular response to dna damage stimulus	841	29	1.10299e-07	5.03541e-06	MCL1:UBE2T:RBBP5:SMYD2:DCLRE1C:USP47:CD44:BAD:POLD3:PAK1:DYRK2:PML:FANCI:TAOK2:PPP4C:MAPT:UHRF1:ACTR2:BCL2L1:UBE2V1:PTTG1IP:FANCD2:POLR2H:RCHY1:UBE2D3:NIPBL:MSH3:CBX3:MCM7
FUMA	GO:0072511	divalent inorganic cation transport	473	21	1.1442e-07	5.17496e-06	PDE4B:CACNB2:UBASH3B:AKAP6:PML:CACNB1:CRHR1:CACNA1A:CALM3:LILRA5:SLC30A3:SLC8A1:BIN1:JPH2:CHRNA9:PKD2:SNCA:CAMK2B:PTK2B:CRH:NCS1
FUMA	GO:0008285	negative regulation of cell population proliferation	745	27	1.14764e-07	5.17496e-06	ATPIF1:SMYD2:CTBP2:PAK1:RERG:PML:SPN:MARVELD3:MED1:ERBB2:NME1:ADCYAP1:OVOL2:APP:VHL:WDR6:FEZF2:SST:DLG1:MXD4:PKD2:NUDT6:FBXW7:RAPGEF2:MEF2C:PTK2B:FAM129B
FUMA	GO:0051480	regulation of cytosolic calcium ion concentration	352	18	1.1767e-07	5.27361e-06	CACNB2:CCKBR:UBASH3B:EDNRB:AKAP6:PML:CRHR1:ADCYAP1:CACNA1A:CALM3:SLC8A1:JPH2:PROK2:CHRNA9:PKD2:SNCA:PTK2B:NCS1
FUMA	GO:0007049	cell cycle	1834	47	1.19915e-07	5.34165e-06	CDC42:STMN1:RHOC:ENSA:TCF7L2:USP47:BAD:POLD3:BCAT1:NIN:PPM1A:EID1:PML:FANCI:IQGAP1:TAOK2:KATNB1:MED1:PSME3:HEXIM1:CDC27:ADCYAP1:UHRF1:CALM3:ACTR2:RALB:BIN1:TTN:CD28:PARD3B:BCL2L1:RTFDC1:APP:FANCD2:WDR6:EIF4G1:DLG1:CEP135:PKD2:NUDT6:FBXW7:NIPBL:MSH3:CBX3:MCM7:ARHGEF10:CLTA
FUMA	GO:0051270	regulation of cellular component movement	1053	33	1.32356e-07	5.86035e-06	STMN1:MACF1:DOCK7:ANGPTL3:PDE4B:RHOC:PAK1:SP1:ABHD2:IQGAP1:SPN:MARVELD3:ERBB2:WNT3:SLC8A1:MAP4K4:BIN1:NRP2:CASS4:APP:FEZF2:SST:DLG1:RUFY3:FBXW7:RAPGEF2:NIPBL:MEF2C:HBEGF:CAMK2B:SMO:PTK2B:KANK1
FUMA	GO:0031252	cell leading edge	397	19	1.4672e-07	5.87198e-06	MACF1:ANGPTL3:CD44:PAK1:IQGAP1:MAPT:NME1:ITGB4:ACTR2:ANTXR1:APP:GABRA2:RUFY3:PKD2:PALLD:DST:MKLN1:PTK2B:KANK1
FUMA	GO:0043235	receptor complex	398	19	1.52519e-07	5.87198e-06	CR1L:CNIH3:SORBS1:CD44:GABRB3:TAOK2:ERBB2:ITGB4:LDLR:NRP2:PTPRA:APP:ITGB5:DLG1:CHRNA9:GABRA2:VWC2:PTK2B:IKBKB
FUMA	GO:0051493	regulation of cytoskeleton organization	522	22	1.40169e-07	6.1691e-06	CDC42:STMN1:CAPZA1:RHOC:SSH3:PAK1:NIN:ARHGAP17:TAOK2:KATNB1:MAPT:GMFG:ARHGAP35:ACTR2:BIN1:DLG1:SNCA:MAP1B:MEF2C:ARHGEF10:PTK2B:KANK1
FUMA	GO:0098793	presynapse	484	21	1.6754e-07	6.2114e-06	RIMS3:PDE4B:CACNB2:CTBP2:BDNF:PICALM:RPH3A:ADCYAP1:CALM3:SLC30A3:BIN1:BCL2L1:APP:GABRA2:SNCA:SCAMP1:SYNJ2:ICA1:AP1S1:CLTA:NCS1
FUMA	GO:0099568	cytoplasmic region	488	21	1.91917e-07	6.80406e-06	CDC42:RIMS3:CAPZA1:RHOC:EXOC6:CTBP2:MAPT:MYO9B:GMFG:ACTR2:PARD3B:DYNLRB1:FRYL:PKD2:SNCA:DST:LANCL2:MKLN1:CALD1:PTK2B:CLTA
FUMA	GO:0044432	endoplasmic reticulum part	1344	38	1.97121e-07	6.80406e-06	CDC42:COPA:CNIH3:RTN3:ACER3:AKAP6:FBN1:SCG3:PML:SEZ6L2:FAM57B:SPPL2C:WNT3:GOSR2:FKBP7:RRBP1:CST3:JPH2:APP:SERP1:PPM1L:DLG1:SCD5:PKD2:SEC24D:SRD5A1:MARCH6:VCAN:ERAP1:ACSL6:YIPF5:MBOAT1:DST:CAMK2B:BCAP29:PDIA4:EXTL3:RAB2A
FUMA	GO:0048167	regulation of synaptic plasticity	182	13	1.59343e-07	6.97124e-06	RIMS3:RASGRF1:GFAP:CRHR1:MAPT:CREB1:APP:SNCA:RAPGEF2:MEF2C:CAMK2B:PTK2B:CRH
FUMA	GO:0036477	somatodendritic compartment	818	28	2.13138e-07	7.11171e-06	CDC42:PDE4B:CNIH3:BDNF:PAK1:PICALM:NIN:TAOK2:KATNB1:CRHR1:MAPT:NSF:ADCYAP1:LDLR:CACNA1A:CD22:SLC8A1:APP:SST:RUFY3:SNCA:RAPGEF2:SRD5A1:MAP1B:SMO:PTK2B:CRH:NCS1
gPROFILER	GO:0051960	regulation of nervous system development		49		7.41683e-06	PTK2B,BIN1,SNCA,WNT3,MED1,CFLAR,ADCYAP1,APP,LDLR,VWC2,BDNF,MAPT,CACNA1A,ARHGAP35,CAMK2B,SPEN,MAP4K4,MOV10,IQGAP1,NIPBL,GFAP,EDNRB,CREB1,MEF2C,RELA,MACF1,MYLIP,UBE3A,DLG1,LRFN1,NCS1,EIF4G1,MAP3K13,TBX6,KATNB1,KANK1,FEZF2,DOCK7,IL1RAP,FIG4,RTN4IP1,MAP1B,SMO,RAPGEF2,NIN,MMD,RUFY3,PAK1,ACTR2
FUMA	GO:0044430	cytoskeletal part	1639	43	2.31127e-07	7.46317e-06	CDC42:STMN1:MACF1:PDE4B:CAPZA1:SORBS1:PAK1:NIN:ATP6V1D:IQGAP1:PPP4C:NUDT21:KATNB1:KIFC3:GFAP:MAPT:CDC27:NME1:MYO9B:GMFG:CALM3:ARHGAP35:SLC8A1:ACTR2:TTN:BCL2L1:DYNLRB1:APP:SERP1:DLG1:CEP135:PKD2:SCLT1:PALLD:MAP1B:DST:CBX3:CAMK2B:LANCL2:CALD1:ARHGEF10:DCTN6:CLTA
FUMA	GO:0051591	response to camp	99	10	1.75713e-07	7.64195e-06	RELA:AKAP6:AQP9:NME1:SLC8A1:APP:PKD2:RAPGEF2:SRD5A1:PTK2B
FUMA	GO:0010952	positive regulation of peptidase activity	184	13	1.80898e-07	7.82118e-06	CR1:BAD:PICALM:PML:PSME3:MAPT:ANTXR1:CFLAR:CASP8:APP:FAM162A:SNCA:CYCS
gPROFILER	GO:0045927	positive regulation of growth		24		7.89528e-06	PTK2B,WNT3,ACACB,BDNF,MAPT,CELF1,EXTL3,NIPBL,CREB1,MEF2C,MACF1,USP47,CDC42,EIF4G1,MAP3K13,HBEGF,AKAP6,SERP1,ERBB2,MAP1B,SMO,RUFY3,PAK1,PEX5
gPROFILER	GO:0045595	regulation of cell differentiation		77		7.89528e-06	PTK2B,BIN1,VEZF1,FBN1,WNT3,MED1,NFATC3,CFLAR,CASS4,ADCYAP1,APP,LDLR,VWC2,OVOL2,BDNF,DLK2,MAPT,IKBKB,CACNA1A,RBPMS2,ITPKB,RBBP5,ARHGAP35,CAMK2B,SPEN,MAP4K4,GDF3,BAD,MOV10,IQGAP1,NIPBL,GFAP,NFKB1,EDNRB,CREB1,MEF2C,RELA,CD83,MACF1,TCF7L2,MYLIP,CDC42,UBE3A,EID1,TNRC6A,NCS1,EIF4G1,CLPTM1,MAP3K13,VHL,AKAP6,FBXW7,TBX6,KATNB1,FANCD2,FAM57B,CR1,KANK1,FEZF2,ERBB2,DOCK7,CASP8,FIG4,RTN4IP1,MAP1B,SMO,JDP2,RAP…
gPROFILER	GO:0050767	regulation of neurogenesis		45		7.89528e-06	PTK2B,BIN1,WNT3,MED1,CFLAR,ADCYAP1,APP,LDLR,VWC2,BDNF,MAPT,CACNA1A,ARHGAP35,CAMK2B,SPEN,MAP4K4,MOV10,IQGAP1,NIPBL,GFAP,EDNRB,CREB1,MEF2C,RELA,MACF1,MYLIP,UBE3A,NCS1,EIF4G1,MAP3K13,TBX6,KATNB1,KANK1,FEZF2,DOCK7,FIG4,RTN4IP1,MAP1B,SMO,RAPGEF2,NIN,MMD,RUFY3,PAK1,ACTR2
FUMA	GO:0008610	lipid biosynthetic process	668	25	1.88004e-07	8.08086e-06	PIK3C2B:SORBS1:ACER3:SP1:ACACB:ABHD2:FAM57B:LCAT:MED1:LDLR:ISYNA1:APOC1:APOC2:PLEKHA3:CREB1:ZBTB20:PPM1L:SCD5:NFKB1:FBXW7:SRD5A1:MBOAT1:FIG4:SYNJ2:CRH
FUMA	GO:0050808	synapse organization	404	19	1.91955e-07	8.20272e-06	CDC42:CACNB2:CTBP2:BDNF:GABRB3:CACNB1:ERBB2:MAPT:LRFN1:ACTR2:NRP2:APP:EIF4G1:IL1RAP:DLG1:GABRA2:SNCA:MEF2C:CAMK2B
FUMA	GO:0080135	regulation of cellular response to stress	718	26	2.01099e-07	8.54382e-06	MCL1:SMYD2:USP47:CD44:BAD:PAK1:LTBR:PML:TAOK2:PPP4C:MARVELD3:DNAJC7:MAPT:ACTR2:MAP4K4:BCL2L1:UBE2V1:APP:PTTG1IP:EIF4G1:MAP3K13:DLG1:FBXW7:CAMK2B:PTK2B:OXR1
FUMA	GO:0048002	antigen processing and presentation of peptide antigen	186	13	2.05033e-07	8.66086e-06	CAPZA1:CTSS:PSME3:CD209:CLEC4M:NCF4:ITGB5:SEC24D:ERAP1:AP1S1:DCTN6:IKBKB:CLTA
FUMA	GO:0048870	cell motility	1691	44	2.07515e-07	8.71561e-06	MACF1:DOCK7:ANGPTL3:PDE4B:RHOC:PIK3C2B:CD44:PAK1:SP1:DCLK1:EDNRB:PML:ABHD2:IQGAP1:SPN:TAOK2:ELMO3:MARVELD3:ERBB2:ITGB4:ARHGAP35:SLC8A1:MAP4K4:NRP2:TNS1:OVOL2:CASS4:APP:FEZF2:ITGB5:SST:RUFY3:FBXW7:RAPGEF2:PALLD:NIPBL:MAP1B:MEF2C:HBEGF:DST:CAMK2B:SMO:PTK2B:KANK1
FUMA	GO:0030099	myeloid cell differentiation	408	19	2.23214e-07	9.32173e-06	CDC42:ATPIF1:MOV10:RBBP5:ITPKB:UBASH3B:LTBR:FBN1:PML:TNRC6A:MED1:NME1:CASP8:CREB1:APP:FBXW7:MEF2C:CLEC5A:PTK2B
gPROFILER	GO:0010720	positive regulation of cell development		35		9.64548e-06	PTK2B,BIN1,WNT3,CFLAR,CASS4,ADCYAP1,VWC2,BDNF,MAPT,ARHGAP35,CAMK2B,SPEN,BAD,IQGAP1,NIPBL,GFAP,MEF2C,RELA,MACF1,CDC42,EIF4G1,MAP3K13,AKAP6,KATNB1,FEZF2,FIG4,MAP1B,SMO,RAPGEF2,NIN,MMD,FAM129B,RUFY3,PAK1,ACTR2
FUMA	GO:0099080	supramolecular complex	936	30	3.14414e-07	9.83525e-06	STMN1:MACF1:PDE4B:PAK1:NIN:FBN1:IQGAP1:ALDOA:KATNB1:KIFC3:TCAP:GFAP:MAPT:CDC27:NME1:MYO9B:CALM3:SLC8A1:BIN1:TTN:DYNLRB1:JPH2:SERP1:DLG1:PKD2:SNCA:PALLD:MAP1B:DST:CALD1
gPROFILER	GO:2000026	regulation of multicellular organismal development		84		1.0065e-05	PTK2B,BIN1,VEZF1,FBN1,SNCA,WNT3,MED1,NFATC3,CFLAR,ADCYAP1,APP,ACACB,LDLR,VWC2,OVOL2,BDNF,MAPT,IKBKB,PML,CACNA1A,ITPKB,RBBP5,WNT2B,ARHGAP35,CAMK2B,SPEN,MAP4K4,PROK2,GDF3,ANKH,FST,BAD,MOV10,IQGAP1,NIPBL,GFAP,BMP1,EDNRB,CREB1,MEF2C,RELA,CD83,MACF1,TCF7L2,MYLIP,CDC42,UBE3A,DLG1,LRFN1,TNRC6A,NCS1,EIF4G1,CLPTM1,MAP3K13,AKAP6,FBXW7,SP1,TBX6,KATNB1,FANCD2,CR1,KANK1,FEZF2,ERBB2,JPH2,DOCK7,CASP8,IL1RAP,FIG…
FUMA	GO:0010721	negative regulation of cell development	332	17	2.59523e-07	1.07768e-05	PAK1:EDNRB:FBN1:TBX6:MED1:GFAP:WNT3:ADCYAP1:LDLR:MAP4K4:APP:FEZF2:RUFY3:FBXW7:RAPGEF2:MYLIP:KANK1
FUMA	GO:0048588	developmental cell growth	223	14	2.61798e-07	1.08102e-05	MACF1:BDNF:PAK1:DCLK1:AKAP6:NIN:IQGAP1:MAPT:WNT3:NRP2:APP:MAP3K13:RUFY3:MAP1B
FUMA	GO:1901652	response to peptide	503	21	3.15312e-07	1.29472e-05	SORBS1:RELA:PAK1:SP1:EDNRB:SNX6:ATP6V1D:FBN1:IQGAP1:CACNB1:CRHR1:CACNA1A:CFLAR:CREB1:PTPRA:APP:NFKB1:SRD5A1:PRKAR1B:GGH:KANK1
FUMA	GO:0023061	signal release	460	20	3.19664e-07	1.3053e-05	RIMS3:ENSA:CACNB2:TCF7L2:CTBP2:BAD:CRHR1:ADCYAP1:CACNA1A:CALM3:MAP4K4:CREB1:GPR27:SERP1:SNCA:MEF2C:ICA1:CRH:FAM129B:NCS1
FUMA	GO:1901653	cellular response to peptide	377	18	3.235e-07	1.31366e-05	SORBS1:RELA:PAK1:SP1:SNX6:ATP6V1D:FBN1:CACNB1:CRHR1:CACNA1A:CFLAR:CREB1:PTPRA:APP:NFKB1:SRD5A1:PRKAR1B:KANK1
FUMA	GO:0031589	cell substrate adhesion	338	17	3.33651e-07	1.34744e-05	CDC42:MACF1:ANGPTL3:SORBS1:CD44:IQGAP1:TAOK2:ITGB4:ANTXR1:MAP4K4:CASS4:ITGB5:MUC4:VWC2:MKLN1:PTK2B:KANK1
FUMA	GO:0060560	developmental growth involved in morphogenesis	228	14	3.42748e-07	1.37661e-05	MACF1:BDNF:PAK1:DCLK1:NIN:IQGAP1:MED1:MAPT:WNT3:NRP2:APP:MAP3K13:RUFY3:MAP1B
FUMA	GO:1901565	organonitrogen compound catabolic process	1263	36	3.47226e-07	1.38702e-05	ATPIF1:PDE4B:CTSS:USP47:CD44:VPS37C:RELA:ACER3:BCAT1:VPS37B:UBE3A:PML:PSME3:NSF:CDC27:UHRF1:LDLR:APOC1:CASP8:SMOX:CST3:PTTG1IP:CHDH:RCHY1:UBE2D3:FBXW7:MARCH6:VCAN:ERAP1:MYLIP:RNF144B:ALDH5A1:TRIM38:BCKDHB:PTK2B:CLTA
gPROFILER	GO:0048666	neuron development		53		1.40208e-05	PTK2B,WNT3,CFLAR,ADCYAP1,APP,PTPRA,BDNF,STMN1,MAPT,PICALM,CACNA1A,ARHGAP35,CAMK2B,MAP4K4,MOV10,IQGAP1,RASGRF1,GFAP,SCLT1,EDNRB,CREB1,MEF2C,MACF1,MYLIP,CDC42,UBE3A,NCS1,DCLK1,MAP3K13,PALLD,TAOK2,TBX6,KATNB1,TSKU,NRP2,KANK1,GABRB3,FEZF2,ERBB2,DOCK7,FIG4,ETV1,RTN4IP1,MAP1B,FRYL,SMO,RAPGEF2,NIN,FAM129B,RUFY3,EN1,PAK1,ACTR2
gPROFILER	GO:0031175	neuron projection development		49		1.40208e-05	PTK2B,WNT3,CFLAR,ADCYAP1,APP,PTPRA,BDNF,STMN1,MAPT,PICALM,CACNA1A,ARHGAP35,CAMK2B,MAP4K4,MOV10,IQGAP1,RASGRF1,GFAP,CREB1,MEF2C,MACF1,MYLIP,CDC42,UBE3A,NCS1,DCLK1,MAP3K13,PALLD,TAOK2,TBX6,KATNB1,TSKU,NRP2,KANK1,FEZF2,ERBB2,DOCK7,FIG4,ETV1,RTN4IP1,MAP1B,FRYL,SMO,RAPGEF2,NIN,FAM129B,RUFY3,PAK1,ACTR2
gPROFILER	GO:0045664	regulation of neuron differentiation		38		1.40208e-05	PTK2B,BIN1,WNT3,MED1,CFLAR,ADCYAP1,APP,VWC2,BDNF,MAPT,CACNA1A,ARHGAP35,CAMK2B,MAP4K4,MOV10,IQGAP1,GFAP,EDNRB,MEF2C,MACF1,MYLIP,UBE3A,NCS1,EIF4G1,MAP3K13,TBX6,KATNB1,KANK1,FEZF2,FIG4,RTN4IP1,MAP1B,RAPGEF2,NIN,MMD,RUFY3,PAK1,ACTR2
FUMA	GO:0015630	microtubule cytoskeleton	1169	34	4.74059e-07	1.43798e-05	CDC42:STMN1:MACF1:PDE4B:SORBS1:NIN:ATP6V1D:IQGAP1:PPP4C:NUDT21:KATNB1:KIFC3:MAPT:CDC27:NME1:ZNF397:CALM3:ARHGAP35:SLC8A1:BCL2L1:DYNLRB1:APP:SERP1:DLG1:CEP135:PKD2:SCLT1:MAP1B:DST:CBX3:CAMK2B:ARHGEF10:DCTN6:CLTA
FUMA	GO:0006886	intracellular protein transport	1156	34	3.67865e-07	1.46152e-05	ATPIF1:PEX19:COPA:TCF7L2:VPS37C:PAK1:PEX5:RPH3A:RPLP0:VPS37B:AKAP6:SNX6:PPM1A:PML:TAOK2:KATNB1:ERBB2:NSF:GOSR2:SRSF1:DNAJC27:DYNLRB1:PTTG1IP:POLDIP3:RUFY3:COX18:UBE2D3:SEC24D:FBXW7:AP1S1:BCAP29:SMO:RAB2A:CLTA
FUMA	GO:0032970	regulation of actin filament based process	381	18	3.77292e-07	1.49091e-05	CDC42:STMN1:PDE4B:CAPZA1:RHOC:SSH3:PAK1:ARHGAP17:TAOK2:GMFG:ARHGAP35:ACTR2:BIN1:DLG1:MEF2C:ARHGEF10:PTK2B:KANK1
FUMA	GO:0098794	postsynapse	610	23	5.14401e-07	1.51446e-05	CDC42:PDE4B:CNIH3:PICALM:RPLP0:DCLK1:GABRB3:MAPT:NSF:LRFN1:SLC8A1:ACTR2:NRP2:APP:DLG1:CHRNA9:GABRA2:SNCA:MAP1B:MEF2C:PTK2B:CLTA:NCS1
FUMA	GO:0043086	negative regulation of catalytic activity	793	27	3.91289e-07	1.53795e-05	ATPIF1:ANGPTL3:ENSA:CR1:USP47:CD44:PICALM:UBASH3B:ACACB:EDNRB:SNX6:IQGAP1:HEXIM1:MAPT:ADCYAP1:GMFG:APOC1:APOC2:BIN1:CFLAR:CASP8:CST3:APP:SNCA:NFKB1:PRKAR1B:IKBKB
FUMA	GO:0050772	positive regulation of axonogenesis	83	9	3.95889e-07	1.54776e-05	MACF1:BDNF:PAK1:NIN:MAPT:WNT3:MAP3K13:RUFY3:MAP1B
FUMA	GO:0061061	muscle structure development	648	24	3.99594e-07	1.55398e-05	CDC42:TCF7L2:BDNF:PAK1:GDF3:EDNRB:AKAP6:RBPMS2:NFATC3:MED1:TCAP:HLF:SLC8A1:BIN1:TTN:CFLAR:CREB1:JPH2:SERP1:MEF2C:HBEGF:ETV1:SMO:FAM129B
FUMA	GO:0006887	exocytosis	897	29	4.1727e-07	1.61418e-05	RIMS3:CTSS:CR1:CACNB2:EXOC6:CTBP2:CD44:PAK1:ATP6V1D:SCG3:IQGAP1:ARHGAP17:ALDOA:CRHR1:NSF:GMFG:CALM3:ACTR2:RALB:TTN:CST3:APP:SNCA:NFKB1:SCAMP1:FAM3C:CLEC5A:GGH:NCS1
gPROFILER	GO:0051239	regulation of multicellular organismal process		87		1.6853e-05	PTK2B,BIN1,VEZF1,FBN1,SNCA,WNT3,MED1,NFATC3,CFLAR,ADCYAP1,APP,CRHR1,ACACB,LDLR,VWC2,ELF1,ZBTB20,OVOL2,BDNF,HS3ST5,MAPT,IKBKB,PML,CACNA1A,ITPKB,RBBP5,WNT2B,ARHGAP35,CAMK2B,SPEN,TRIM38,MAP4K4,LCAT,CELF1,SCN11A,PROK2,CALM3,GDF3,ANKH,FST,BAD,MOV10,IQGAP1,NIPBL,GFAP,BMP1,NFKB1,CACNB2,EDNRB,PDE4B,CREB1,MEF2C,TAF6L,RELA,CD83,MACF1,TCF7L2,MYLIP,APOC1,CDC42,UBE3A,DLG1,LRFN1,TNRC6A,LILRA5,NCS1,EIF4G1,CLPTM…
gPROFILER	GO:0000902	cell morphogenesis		50		1.8359e-05	PTK2B,WNT3,MED1,CASS4,APP,PTPRA,CD44,MKLN1,BDNF,STMN1,MAPT,PICALM,CACNA1A,ARHGAP35,CAMK2B,MAP4K4,MOV10,IQGAP1,CREB1,MEF2C,MACF1,ALDOA,RHOC,CDC42,UBE3A,DLG1,DCLK1,MAP3K13,VHL,PALLD,TAOK2,TSKU,SSH3,FMNL2,NRP2,KANK1,FEZF2,ERBB2,DOCK7,ANTXR1,ETV1,MAP1B,FRYL,SMO,RAPGEF2,NIN,FAM129B,RUFY3,PAK1,ACTR2
FUMA	R-HSA-1280215	cytokine signaling in immune system	854	31	1.24024e-08	1.85913e-05	CDC42:CAPZA1:TRIM45:MCL1:CD44:RELA:LTBR:RPLP0:PML:RASGRF1:IQGAP1:ERBB2:PSME3:CREB1:PTPRA:BCL2L1:UBE2V1:APP:IL17RE:EIF4E3:EIF4G1:IL1RAP:DLG1:NFKB1:RAPGEF2:MEF2C:HBEGF:TRIM38:CAMK2B:PTK2B:IKBKB
FUMA	GO:0043296	apical junction complex	143	11	6.87911e-07	1.96743e-05	SORBS1:C1QTNF5:UBN1:ARHGAP17:KIFC3:MARVELD3:PARD3B:MAGI1:DLG1:RAPGEF2:TJAP1
gPROFILER	GO:0032989	cellular component morphogenesis		54		1.97729e-05	PTK2B,WNT3,MED1,CFLAR,CASS4,APP,PTPRA,CD44,MKLN1,BDNF,STMN1,MAPT,PICALM,CACNA1A,ARHGAP35,CAMK2B,MAP4K4,MOV10,IQGAP1,CREB1,MEF2C,MACF1,ALDOA,RHOC,CDC42,UBE3A,DLG1,DCLK1,MAP3K13,VHL,PALLD,TAOK2,TSKU,SSH3,FMNL2,NRP2,KANK1,FEZF2,ERBB2,DOCK7,TCAP,ANTXR1,FIG4,ETV1,MAP1B,FRYL,SMO,RAPGEF2,NIN,FAM129B,RUFY3,PAK1,ACTR2,BCL2L1
FUMA	GO:0044089	positive regulation of cellular component biogenesis	521	21	5.57686e-07	2.14261e-05	CDC42:RHOC:BDNF:PAK1:NIN:IQGAP1:PLEKHM1:MAPT:GMFG:ARHGAP35:ACTR2:MAP4K4:RALB:BIN1:CREB1:EIF4G1:IL1RAP:DLG1:CEP135:ARHGEF10:PTK2B
FUMA	GO:0072657	protein localization to membrane	613	23	5.59702e-07	2.14261e-05	MACF1:GOLPH3L:PEX19:CACNB2:SORBS1:VPS37C:BAD:PAK1:PICALM:PEX5:RPLP0:VPS37B:TAOK2:ERBB2:NSF:CALM3:FAM126B:CASP8:BCL2L1:DLG1:COX18:RAPGEF2:IKBKB
FUMA	GO:0045944	positive regulation of transcription by rna polymerase ii	1178	34	5.6361e-07	2.14639e-05	TCF7L2:CTBP2:RELA:MAML2:ETV6:TFCP2:SP1:ELF1:KLF12:TBX6:NFATC3:MED1:HLF:VEZF1:ADCYAP1:UHRF1:ACTR2:EN1:CD28:CREB1:OVOL2:APP:FEZF2:PKD2:NFKB1:FBXW7:NIPBL:MEF2C:TNIP1:ETV1:NEUROD6:ZMIZ2:SMO:IKBKB
FUMA	GO:0050801	ion homeostasis	810	27	5.89114e-07	2.21673e-05	ANGPTL3:CACNB2:CCKBR:PICALM:SCN2B:UBASH3B:EDNRB:AKAP6:ATP6V1D:PML:SLC12A4:CTC-479C5.17:CRHR1:ADCYAP1:CACNA1A:CALM3:SLC30A3:SLC8A1:JPH2:APP:PROK2:CHRNA9:PKD2:SNCA:SLC4A9:PTK2B:CRH:NCS1
FUMA	GO:1902905	positive regulation of supramolecular fiber organization	204	13	5.91129e-07	2.21673e-05	CDC42:RHOC:PAK1:NIN:KATNB1:MAPT:GMFG:ACTR2:BIN1:APP:DLG1:ARHGEF10:PTK2B
FUMA	GO:0006979	response to oxidative stress	435	19	5.88993e-07	2.21673e-05	MCL1:BAD:RELA:SP1:MSRB3:PML:MAPT:SLC8A1:CFLAR:APP:NCF4:FANCD2:PKD2:SNCA:FBXW7:CYCS:PTK2B:RBPMS:OXR1
FUMA	GO:0070588	calcium ion transmembrane transport	313	16	5.97083e-07	2.22769e-05	PDE4B:CACNB2:UBASH3B:AKAP6:CACNB1:CRHR1:CACNA1A:CALM3:SLC8A1:BIN1:JPH2:CHRNA9:PKD2:SNCA:PTK2B:NCS1
FUMA	GO:1904951	positive regulation of establishment of protein localization	436	19	6.09613e-07	2.26296e-05	GOLPH3L:TCF7L2:BAD:PAK1:PPM1A:ERBB2:LILRA5:TTN:CASP8:GPR27:SERP1:IL1RAP:CEP135:RUFY3:UBE2D3:FBXW7:SMO:CLEC5A:CRH
FUMA	GO:0043603	cellular amide metabolic process	1020	31	6.18544e-07	2.28457e-05	MOV10:CELF1:PICALM:ACACB:RPLP0:DENR:TNRC6A:FAM57B:ERBB2:NDUFA7:NDUFA7:ILF3:SAMD4B:MTHFD2:MRPL35:BIN1:ZC3H15:CD28:RRBP1:APP:POLDIP3:EIF1B:EIF4E3:SERP1:EIF4G1:SCD5:SNCA:ACSL6:TNIP1:ALDH5A1:AEBP1:PTK2B
FUMA	GO:0099503	secretory vesicle	983	30	8.66971e-07	2.41066e-05	PDE4B:CTSS:CR1:BDNF:CD44:PICALM:RPH3A:ATP6V1D:SCG3:ABHD2:IQGAP1:ALDOA:GMFG:CALM3:SLC30A3:ACTR2:BIN1:CST3:BCL2L1:APP:GABRA2:SNCA:NFKB1:SCAMP1:ICA1:FAM3C:CLEC5A:GGH:CLTA:NCS1
Webgestalt	GO:0045927	positive regulation of growth	250	22	9.49248e-09	2.62327e-05	PTK2B;WNT3;ACACB;BDNF;MAPT;EXTL3;NIPBL;CREB1;MEF2C;MACF1;USP47;CDC42;EIF4G1;MAP3K13;HBEGF;AKAP6;SERP1;ERBB2;MAP1B;SMO;RUFY3;PAK1
Webgestalt	GO:0010975	regulation of neuron projection development	475	31	1.24799e-08	2.62327e-05	PTK2B;WNT3;CFLAR;ADCYAP1;BDNF;MAPT;ARHGAP35;CAMK2B;MAP4K4;MOV10;IQGAP1;GFAP;MEF2C;MACF1;MYLIP;NCS1;MAP3K13;TBX6;KATNB1;SSH3;KANK1;FEZF2;FIG4;RTN4IP1;MAP1B;RAPGEF2;NIN;RUFY3;PAK1;ACTR2;NME1
FUMA	GO:0035295	tube development	1082	32	7.30259e-07	2.6837e-05	ATPIF1:PPIH:ANGPTL3:WNT2B:CCKBR:PAK1:SP1:EDNRB:RBPMS2:PML:MED1:TCAP:ERBB2:VEZF1:ITGB4:ARHGAP35:EN1:NRP2:CREB1:OVOL2:PROK2:DLG1:PKD2:FBXW7:RAPGEF2:NIPBL:MEF2C:ERAP1:SMO:PTK2B:CRH:FAM129B
FUMA	GO:0051656	establishment of organelle localization	491	20	8.83243e-07	3.22977e-05	CDC42:RIMS3:DOCK7:CNIH3:CACNB2:CTBP2:PICALM:KATNB1:CRHR1:MAPT:NSF:GOSR2:CALM3:ACTR2:PARD3B:DLG1:SNCA:SEC24D:MAP1B:NCS1
FUMA	GO:0002684	positive regulation of immune system process	1147	33	8.92174e-07	3.24628e-05	CDC42:PDE4B:CTSS:CR1:ITPKB:CD5:BAD:RELA:PAK1:ELF1:SPN:NUDT21:MED1:PSME3:HEXIM1:CRHR1:CD209:CD22:ACTR2:CASP8:CD28:CREB1:UBE2V1:APP:MUC4:NFKB1:UBE2D3:ALPK1:MEF2C:TNIP1:CD83:PTK2B:IKBKB
FUMA	GO:0010038	response to metal ion	364	17	9.31135e-07	3.37135e-05	ITPKB:BAD:AQP9:IQGAP1:MAPT:CALM3:SLC30A3:TTN:CASP8:CREB1:APP:PKD2:SNCA:UBE2D3:MEF2C:PTK2B:GGH
FUMA	R-HSA-1280215	adaptive immune system	807	29	4.6128e-08	3.45729e-05	CDC42:CAPZA1:CTSS:RELA:PAK1:UBE3A:NFATC3:PSME3:CDC27:CD209:CD22:LILRA5:CD28:UBE2V1:NCF4:VHL:ITGB5:RCHY1:NFKB1:UBE2D3:SEC24D:FBXW7:ERAP1:MYLIP:RNF144B:AP1S1:DCTN6:IKBKB:CLTA
gPROFILER	GO:0051128	regulation of cellular component organization		72		3.51066e-05	PTK2B,BIN1,SNCA,WNT3,CFLAR,CASS4,ADCYAP1,APP,CD44,LDLR,MKLN1,ARHGAP17,BDNF,STMN1,MAPT,IKBKB,PML,PICALM,CEP135,CACNA1A,CDC27,ARHGAP35,CAMK2B,CAPZA1,ST7L,MAP4K4,LCAT,CALM3,BAD,MOV10,IQGAP1,EXTL3,NIPBL,GFAP,UBE2D3,CD22,CREB1,RALB,MEF2C,MACF1,ALDOA,PPM1A,FAM162A,USP47,RHOC,MYLIP,APOC1,CDC42,UBE3A,DLG1,EID1,LRFN1,NCS1,GMFG,EIF4G1,MAP3K13,APOC2,HBEGF,AKAP6,FBXW7,PLEKHM1,TAOK2,TBX6,KATNB1,FMNL2,NRP2,KAN…
gPROFILER	GO:0044093	positive regulation of molecular function		69		3.57896e-05	PTK2B,CYCS,SNCA,MED1,CFLAR,CASS4,ADCYAP1,APP,CD44,ARHGAP17,BDNF,STMN1,MAPT,IKBKB,PML,PICALM,NCF4,ARHGAP35,TRIM38,MAP4K4,PROK2,CALM3,BAD,IQGAP1,NIPBL,RASGRF1,NVL,NFKB1,CACNB2,PKD2,RALB,MEF2C,RELA,TCF7L2,FAM162A,RHOC,APOC1,CDC42,DLG1,PRKAR1B,LILRA5,GMFG,EIF4G1,MAP3K13,APOC2,AKAP6,FBXW7,TAOK2,CR1,MYO9B,ERBB2,JPH2,DOCK7,ARHGEF10,CTSS,CASP8,ANTXR1,IL1RAP,MSH3,SMO,RAPGEF2,PPM1J,MMD,FAM129B,UHRF1,CTBP2,…
gPROFILER	GO:0010975	regulation of neuron projection development		32		3.57896e-05	PTK2B,WNT3,CFLAR,ADCYAP1,BDNF,MAPT,CACNA1A,ARHGAP35,CAMK2B,MAP4K4,MOV10,IQGAP1,GFAP,MEF2C,MACF1,MYLIP,UBE3A,NCS1,MAP3K13,TBX6,KATNB1,KANK1,FEZF2,FIG4,RTN4IP1,MAP1B,RAPGEF2,NIN,RUFY3,PAK1,ACTR2,NME1
gPROFILER	GO:0120039	plasma membrane bounded cell projection morphogenesis		37		3.66392e-05	WNT3,APP,PTPRA,CD44,BDNF,STMN1,MAPT,PICALM,CACNA1A,ARHGAP35,CAMK2B,MAP4K4,MOV10,IQGAP1,CREB1,MACF1,CDC42,UBE3A,DCLK1,MAP3K13,PALLD,TAOK2,TSKU,NRP2,KANK1,FEZF2,ERBB2,DOCK7,ETV1,MAP1B,SMO,RAPGEF2,NIN,FAM129B,RUFY3,PAK1,ACTR2
FUMA	GO:0070161	anchoring junction	552	21	1.40217e-06	3.6936e-05	CDC42:DOCK7:SORBS1:CD44:PAK1:RPLP0:IQGAP1:KIFC3:ITGB4:ACTR2:MAP4K4:PARD3B:TNS1:CASS4:MAGI1:ITGB5:DLG1:PALLD:DST:PTK2B:FAM129B
FUMA	GO:1990351	transporter complex	334	16	1.39937e-06	3.6936e-05	PDE4B:CNIH3:CACNB2:SCN2B:AKAP6:GABRB3:CACNB1:CACNA1A:CALM3:SCN11A:DLG1:CHRNA9:GABRA2:PKD2:VWC2:PTK2B
gPROFILER	GO:0048858	cell projection morphogenesis		37		3.70596e-05	WNT3,APP,PTPRA,CD44,BDNF,STMN1,MAPT,PICALM,CACNA1A,ARHGAP35,CAMK2B,MAP4K4,MOV10,IQGAP1,CREB1,MACF1,CDC42,UBE3A,DCLK1,MAP3K13,PALLD,TAOK2,TSKU,NRP2,KANK1,FEZF2,ERBB2,DOCK7,ETV1,MAP1B,SMO,RAPGEF2,NIN,FAM129B,RUFY3,PAK1,ACTR2
gPROFILER	GO:0030182	neuron differentiation		59		3.70596e-05	PTK2B,BIN1,WNT3,MED1,CFLAR,ADCYAP1,APP,PTPRA,VWC2,BDNF,STMN1,MAPT,PICALM,CACNA1A,WNT2B,ARHGAP35,CAMK2B,MAP4K4,MOV10,IQGAP1,RASGRF1,GFAP,SCLT1,EDNRB,CREB1,MEF2C,MACF1,MYLIP,CDC42,UBE3A,NCS1,EIF4G1,DCLK1,MAP3K13,PALLD,TAOK2,TBX6,KATNB1,TSKU,NRP2,KANK1,GABRB3,FEZF2,ERBB2,DOCK7,FIG4,ETV1,RTN4IP1,MAP1B,FRYL,SMO,RAPGEF2,NIN,MMD,FAM129B,RUFY3,EN1,PAK1,ACTR2
gPROFILER	GO:0050769	positive regulation of neurogenesis		31		3.70596e-05	PTK2B,BIN1,WNT3,CFLAR,ADCYAP1,VWC2,BDNF,MAPT,ARHGAP35,CAMK2B,SPEN,IQGAP1,NIPBL,GFAP,MEF2C,RELA,MACF1,EIF4G1,MAP3K13,KATNB1,FEZF2,FIG4,MAP1B,SMO,RAPGEF2,NIN,MMD,RUFY3,PAK1,ACTR2,NME1
FUMA	GO:0009628	response to abiotic stimulus	1211	34	1.04472e-06	3.76406e-05	CTSS:DCLRE1C:USP47:BAD:RELA:PAK1:LTBR:AQP9:PML:MARVELD3:TCAP:DNAJC7:PSME3:CRHR1:MAPT:SLC8A1:TTN:CFLAR:CASP8:CREB1:BCL2L1:DYNLRB1:APP:FANCD2:VHL:FAM162A:SST:CHRNA9:PKD2:NFKB1:NIPBL:ETV1:CAMK2B:PTK2B
FUMA	WP254	apoptosis	84	9	4.3906e-07	3.97349e-05	MCL1:BAD:RELA:CFLAR:CASP8:BCL2L1:NFKB1:CYCS:IKBKB
FUMA	GO:0050770	regulation of axonogenesis	182	12	1.12014e-06	4.01612e-05	MACF1:BDNF:SSH3:PAK1:NIN:MAPT:WNT3:ARHGAP35:FEZF2:MAP3K13:RUFY3:MAP1B
FUMA	GO:0032870	cellular response to hormone stimulus	689	24	1.17809e-06	4.20338e-05	CTSS:SORBS1:RELA:PAK1:SP1:ATP6V1D:UBE3A:FBN1:ABHD2:MED1:CRHR1:ADCYAP1:PIAS2:CFLAR:CREB1:PTPRA:SST:NFKB1:SRD5A1:MEF2C:PRKAR1B:LANCL2:CRH:KANK1
FUMA	GO:0006508	proteolysis	1744	43	1.19284e-06	4.23543e-05	ATPIF1:CTSS:CR1:USP47:CD44:VPS37C:BAD:RELA:PICALM:VPS37B:UBE3A:PML:PSME3:SPPL2C:MAPT:CDC27:UHRF1:ANTXR1:BIN1:CFLAR:CASP8:CST3:APP:XPNPEP3:VHL:FAM162A:RCHY1:SNCA:NFKB1:UBE2D3:FBXW7:MARCH6:ERAP1:TNIP1:MYLIP:RNF144B:TRIM38:CYCS:AEBP1:AGBL3:BMP1:PTK2B:GGH
FUMA	GO:0018193	peptidyl amino acid modification	1219	34	1.2085e-06	4.27042e-05	PPIH:DOCK7:RBBP5:SMYD2:BDNF:CD44:TAF6L:RELA:PAK1:DYRK2:DCLK1:SNX6:EID1:IQGAP1:ERBB2:KANSL1:PIAS2:CALM3:LILRA5:FKBP7:TTN:CASS4:APP:SUMO3:EIF4G1:MAP3K13:SNCA:FBXW7:HBEGF:AGBL3:GALNT11:PTK2B:IKBKB:OXR1
gPROFILER	GO:0032990	cell part morphogenesis		38		4.34809e-05	WNT3,APP,PTPRA,CD44,BDNF,STMN1,MAPT,PICALM,CACNA1A,ARHGAP35,CAMK2B,MAP4K4,MOV10,IQGAP1,CREB1,MACF1,CDC42,UBE3A,DCLK1,MAP3K13,PALLD,TAOK2,TSKU,NRP2,KANK1,FEZF2,ERBB2,DOCK7,ETV1,MAP1B,SMO,RAPGEF2,NIN,FAM129B,RUFY3,PAK1,ACTR2,BCL2L1
gPROFILER	GO:0045597	positive regulation of cell differentiation		47		4.34809e-05	PTK2B,BIN1,VEZF1,WNT3,MED1,CFLAR,CASS4,ADCYAP1,VWC2,OVOL2,BDNF,MAPT,ITPKB,ARHGAP35,CAMK2B,SPEN,GDF3,BAD,IQGAP1,NIPBL,GFAP,NFKB1,CREB1,MEF2C,RELA,CD83,MACF1,TCF7L2,CDC42,EIF4G1,MAP3K13,VHL,AKAP6,KATNB1,FEZF2,CASP8,FIG4,MAP1B,SMO,RAPGEF2,NIN,MMD,FAM129B,NUDT21,RUFY3,PAK1,ACTR2
FUMA	GO:0050865	regulation of cell activation	596	22	1.29128e-06	4.54109e-05	CDC42:CR1:ITPKB:CD5:BAD:PAK1:UBASH3B:SPN:ERBB2:CRHR1:CD209:LDLR:CD22:CLPTM1:LILRA5:CD28:APP:FANCD2:DLG1:SNCA:MEF2C:CD83
FUMA	GO:0098590	plasma membrane region	1185	33	1.80405e-06	4.63038e-05	MACF1:RIMS3:RHOC:PEX19:CNIH3:CD44:PAK1:PICALM:C1QTNF5:AKAP6:GABRB3:AQP9:ERBB2:MAPT:NME1:LDLR:LRFN1:SLC8A1:ANTXR1:PARD3B:NRP2:PTPRA:NIPSNAP1:DLG1:CHRNA9:GABRA2:PKD2:RAPGEF2:DST:SMO:KANK1:CLTA:NCS1
FUMA	GO:0007044	cell substrate junction assembly	96	9	1.37442e-06	4.81047e-05	MACF1:SORBS1:IQGAP1:TAOK2:ITGB4:MAP4K4:TNS1:DST:PTK2B
FUMA	GO:0016358	dendrite development	220	13	1.38314e-06	4.81806e-05	CDC42:PICALM:DCLK1:IQGAP1:TAOK2:ACTR2:APP:FEZF2:RAPGEF2:MAP1B:MEF2C:RTN4IP1:CAMK2B
FUMA	GO:0072507	divalent inorganic cation homeostasis	506	20	1.40098e-06	4.85716e-05	CACNB2:CCKBR:UBASH3B:EDNRB:AKAP6:PML:CRHR1:ADCYAP1:CACNA1A:CALM3:SLC30A3:SLC8A1:JPH2:APP:PROK2:CHRNA9:PKD2:SNCA:PTK2B:NCS1
FUMA	GO:0001067	regulatory region nucleic acid binding	934	30	3.00626e-07	4.9453e-05	ZNF281:RBBP5:TCF7L2:RELA:ETV6:TFCP2:SP1:ELF1:KLF12:JDP2:TBX6:NFATC3:TAF1C:MED1:NME1:HLF:VEZF1:UHRF1:ARHGAP35:EN1:CREB1:ZFP64:FEZF2:ZBTB20:SNCA:NFKB1:MEF2C:ETV1:NEUROD6:AEBP1
FUMA	GO:0042493	response to drug	1008	30	1.44406e-06	4.98304e-05	PDE4B:SLC35F3:USP47:BAD:RELA:ACACB:UBE3A:ABHD2:SLC47A2:CRHR1:NME1:ADCYAP1:APOC2:CALM3:SLC8A1:ACTR2:CFLAR:CASP8:CREB1:BCL2L1:SCN11A:SST:SNCA:NFKB1:SRD5A1:MEF2C:MCM7:PTK2B:GGH:CRH
FUMA	GO:0019882	antigen processing and presentation	221	13	1.45493e-06	4.99708e-05	CAPZA1:CTSS:PSME3:CD209:CLEC4M:NCF4:ITGB5:SEC24D:ERAP1:AP1S1:DCTN6:IKBKB:CLTA
FUMA	GO:0071396	cellular response to lipid	601	22	1.47979e-06	5.0588e-05	PDE4B:BAD:RELA:PAK1:EDNRB:UBE3A:ABHD2:MED1:WNT3:NME1:ADCYAP1:PIAS2:LDLR:CFLAR:CREB1:NFKB1:SRD5A1:MEF2C:LANCL2:SMO:PTK2B:CRH
FUMA	GO:0042175	nuclear outer membrane endoplasmic reticulum membrane network	1080	31	2.02761e-06	5.0741e-05	CDC42:COPA:CNIH3:RTN3:ACER3:AKAP6:PML:SEZ6L2:FAM57B:SPPL2C:GOSR2:RRBP1:JPH2:SERP1:PPM1L:DLG1:SCD5:PKD2:SNCA:SEC24D:SRD5A1:MARCH6:ERAP1:ACSL6:YIPF5:MBOAT1:DST:CAMK2B:BCAP29:EXTL3:RAB2A
FUMA	R-HSA-1280218	gene expression transcription	1478	41	1.04742e-07	5.23363e-05	MOV10:RBBP5:CR1:SMYD2:TCF7L2:ZNF215:BDNF:CSTF3:MAML2:SP1:DYRK2:ELF1:PPM1A:PML:FANCI:TNRC6A:NUDT21:TAF1C:MED1:ERBB2:PSME3:SRSF1:UHRF1:ZNF136:GATAD2A:ZNF577:CREB1:CSTF1:POLDIP3:FANCD2:POLR2H:SST:COX18:UBE2D3:FBXW7:MEF2C:CYCS:CBX3:CAMK2B:INTS9:CRH
FUMA	WP4263	pancreatic adenocarcinoma pathway	89	9	7.21746e-07	5.38997e-05	CDC42:BAD:RELA:PAK1:ERBB2:RALB:BCL2L1:NFKB1:IKBKB
FUMA	WP69	t-cell antigen receptor (tcr) signaling pathway	90	9	7.94103e-07	5.38997e-05	CDC42:RELA:PAK1:CD28:CREB1:NFKB1:CD83:PTK2B:IKBKB
FUMA	KEGG_PANCREATIC_CANCER	pancreatic cancer	70	8	1.1751e-06	5.4642e-05	CDC42:BAD:RELA:ERBB2:RALB:BCL2L1:NFKB1:IKBKB
FUMA	GO:2000310	regulation of nmda receptor activity	33	6	1.61584e-06	5.49833e-05	RASGRF1:APP:DLG1:MEF2C:PTK2B:CRH
FUMA	GO:0048638	regulation of developmental growth	338	16	1.63311e-06	5.53151e-05	MACF1:BDNF:PAK1:ACACB:AKAP6:MAPT:WNT3:CREB1:APP:SERP1:MAP3K13:RUFY3:NIPBL:MAP1B:MEF2C:SMO
FUMA	GO:0110053	regulation of actin filament organization	260	14	1.64383e-06	5.54227e-05	CDC42:STMN1:CAPZA1:RHOC:SSH3:PAK1:GMFG:ARHGAP35:ACTR2:BIN1:DLG1:ARHGEF10:PTK2B:KANK1
gPROFILER	GO:0048699	generation of neurons		63		5.6237e-05	PTK2B,BIN1,WNT3,MED1,CFLAR,ADCYAP1,APP,PTPRA,LDLR,VWC2,BDNF,STMN1,MAPT,PICALM,CACNA1A,WNT2B,ARHGAP35,CAMK2B,SPEN,MAP4K4,MOV10,IQGAP1,NIPBL,RASGRF1,GFAP,SCLT1,EDNRB,CREB1,MEF2C,RELA,MACF1,MYLIP,CDC42,UBE3A,NCS1,EIF4G1,DCLK1,MAP3K13,PALLD,TAOK2,TBX6,KATNB1,TSKU,NRP2,KANK1,GABRB3,FEZF2,ERBB2,DOCK7,FIG4,ETV1,RTN4IP1,MAP1B,FRYL,SMO,RAPGEF2,NIN,MMD,FAM129B,RUFY3,EN1,PAK1,ACTR2
gPROFILER	GO:0007399	nervous system development		86		5.6237e-05	PTK2B,BIN1,SNCA,WNT3,MED1,CFLAR,ADCYAP1,APP,PTPRA,LDLR,VWC2,OVOL2,BDNF,STMN1,MAPT,ALDH5A1,PICALM,CACNA1A,WNT2B,ARHGAP35,CAMK2B,SYNJ2,SPEN,MAP4K4,CALM3,BAD,MOV10,IQGAP1,NIPBL,RASGRF1,GFAP,SCLT1,PKD2,EDNRB,CREB1,SEZ6L2,MEF2C,RELA,MACF1,ACER3,MYLIP,CDC42,UBE3A,DLG1,ZNF215,LRFN1,NCS1,GABRA2,EIF4G1,DCLK1,MAP3K13,PALLD,SCN2B,TAOK2,TBX6,SRD5A1,KATNB1,TSKU,FANCD2,NRP2,VCAN,KANK1,GABRB3,FEZF2,ERBB2,DOCK7,…
FUMA	GO:0048589	developmental growth	654	23	1.679e-06	5.63501e-05	MACF1:BDNF:PAK1:ACACB:DCLK1:AKAP6:NIN:IQGAP1:MED1:MAPT:WNT3:EN1:CFLAR:NRP2:CREB1:APP:SERP1:MAP3K13:RUFY3:NIPBL:MAP1B:MEF2C:SMO
FUMA	GO:0098797	plasma membrane protein complex	570	21	2.31942e-06	5.66277e-05	PDE4B:CNIH3:CACNB2:SORBS1:PICALM:SCN2B:CACNB1:ITGB4:CACNA1A:CALM3:CFLAR:CASP8:NCF4:SCN11A:ITGB5:DLG1:CHRNA9:VWC2:PTK2B:IKBKB:CLTA
FUMA	GO:0005543	phospholipid binding	423	19	3.86527e-07	5.78034e-05	GOLPH3L:PIK3C2B:BAD:PICALM:RPH3A:SNX6:IQGAP1:MAPT:APOC1:ARHGAP35:BIN1:PLEKHA3:PARD3B:JPH2:NCF4:SNCA:RAPGEF2:PXDC1:LANCL2
FUMA	GO:0035994	response to muscle stretch	19	5	1.74304e-06	5.82333e-05	RELA:TCAP:SLC8A1:TTN:NFKB1
FUMA	GO:0071320	cellular response to camp	52	7	1.7995e-06	5.9578e-05	AKAP6:AQP9:SLC8A1:APP:PKD2:RAPGEF2:SRD5A1
FUMA	GO:0030162	regulation of proteolysis	706	24	1.79638e-06	5.9578e-05	ATPIF1:CR1:USP47:CD44:BAD:PICALM:UBE3A:PML:PSME3:MAPT:ANTXR1:BIN1:CFLAR:CASP8:CST3:APP:FAM162A:RCHY1:SNCA:FBXW7:TNIP1:RNF144B:CYCS:PTK2B
FUMA	GO:0045087	innate immune response	966	29	1.83286e-06	6.04102e-05	CAPZA1:CTSS:CR1:CD44:RELA:PAK1:PML:MED1:PSME3:HEXIM1:CD209:CLEC4M:LILRA5:ACTR2:CASP8:UBE2V1:APP:IL1RAP:MUC4:SNCA:NFKB1:UBE2D3:ALPK1:ERAP1:TNIP1:TRIM38:CAMK2B:CLEC5A:IKBKB
FUMA	GO:0031032	actomyosin structure organization	191	12	1.86001e-06	6.10317e-05	CDC42:STMN1:RHOC:SORBS1:PAK1:TCAP:TTN:CFLAR:ITGB5:MEF2C:ARHGEF10:PTK2B
FUMA	GO:0010522	regulation of calcium ion transport into cytosol	100	9	1.93886e-06	6.33362e-05	UBASH3B:AKAP6:PML:CALM3:SLC8A1:JPH2:PKD2:SNCA:PTK2B
FUMA	WP3303	rac1/pak1/p38/mmp2 pathway	69	8	1.05097e-06	6.34087e-05	STMN1:BAD:RELA:PAK1:ERBB2:NFKB1:TNIP1:IKBKB
FUMA	GO:1905114	cell surface receptor signaling pathway involved in cell cell signaling	612	22	1.9861e-06	6.45921e-05	CDC42:MACF1:WNT2B:MOV10:TCF7L2:USP47:TSKU:PPM1A:GABRB3:TNRC6A:PSME3:WNT3:APP:LRRFIP2:CHRNA9:PKD2:SNCA:NFKB1:MEF2C:SMO:PTK2B:KANK1
FUMA	GO:0006873	cellular ion homeostasis	661	23	2.00585e-06	6.49472e-05	CACNB2:CCKBR:PICALM:UBASH3B:EDNRB:AKAP6:ATP6V1D:PML:CRHR1:ADCYAP1:CACNA1A:CALM3:SLC30A3:SLC8A1:JPH2:APP:PROK2:CHRNA9:PKD2:SNCA:SLC4A9:PTK2B:NCS1
FUMA	GO:0007169	transmembrane receptor protein tyrosine kinase signaling pathway	712	24	2.07758e-06	6.69746e-05	CDC42:STMN1:SORBS1:BDNF:RELA:PAK1:UBASH3B:SNX6:ATP6V1D:IQGAP1:ERBB2:ACTR2:NRP2:PTPRA:APP:NCF4:POLR2H:SNCA:FBXW7:RAPGEF2:HBEGF:PTK2B:KANK1:FAM129B
FUMA	GO:0051961	negative regulation of nervous system development	305	15	2.16198e-06	6.93912e-05	EDNRB:TBX6:MED1:GFAP:WNT3:ADCYAP1:LDLR:MAP4K4:APP:FEZF2:RUFY3:RAPGEF2:MYLIP:FIG4:KANK1
FUMA	GO:0022402	cell cycle process	1370	36	2.27609e-06	7.27359e-05	CDC42:STMN1:RHOC:ENSA:TCF7L2:USP47:POLD3:BCAT1:NIN:PPM1A:PML:TAOK2:KATNB1:MED1:PSME3:CDC27:CALM3:ACTR2:BIN1:TTN:CD28:BCL2L1:RTFDC1:APP:FANCD2:WDR6:EIF4G1:DLG1:CEP135:PKD2:FBXW7:NIPBL:MSH3:CBX3:MCM7:ARHGEF10
FUMA	GO:0033218	amide binding	350	17	5.42364e-07	7.31381e-05	PPIH:PEX19:CCKBR:PICALM:PEX5:ACACB:EDNRB:CRHR1:CD209:CLEC4M:LDLR:CACNA1A:PLEKHA3:CST3:SRD5A1:ERAP1:CLTA
FUMA	GO:1990837	sequence specific double stranded dna binding	860	28	5.77991e-07	7.31381e-05	ZNF281:TCF7L2:RELA:ETV6:TFCP2:SP1:ELF1:KLF12:JDP2:TBX6:NFATC3:TAF1C:MED1:MAPT:NME1:HLF:VEZF1:UHRF1:ARHGAP35:EN1:CREB1:ZFP64:FEZF2:NFKB1:MEF2C:ETV1:NEUROD6:AEBP1
FUMA	GO:0030672	synaptic vesicle membrane	106	9	3.15579e-06	7.52131e-05	RPH3A:CALM3:SLC30A3:BCL2L1:GABRA2:SNCA:SCAMP1:ICA1:CLTA
FUMA	GO:0031674	i band	136	10	3.32486e-06	7.73996e-05	PDE4B:PAK1:ALDOA:TCAP:SLC8A1:BIN1:TTN:JPH2:PALLD:DST
FUMA	GO:0015629	actin cytoskeleton	491	19	3.48885e-06	7.93713e-05	MACF1:CAPZA1:SORBS1:PAK1:IQGAP1:TAOK2:ALDOA:MYO9B:GMFG:ARHGAP35:ACTR2:BIN1:TTN:PKD2:SNCA:PALLD:LANCL2:CALD1:DCTN6
FUMA	GO:1902105	regulation of leukocyte differentiation	270	14	2.55559e-06	8.13142e-05	CR1:ITPKB:BAD:UBASH3B:FBN1:ERBB2:NME1:CLPTM1:CASP8:CD28:CREB1:FANCD2:FBXW7:CD83
FUMA	GO:0044451	nucleoplasm part	1113	31	3.73234e-06	8.30239e-05	PPIH:TTF2:RBBP5:TCF7L2:BDNF:PATL1:TAF6L:MAML2:SNURF:SNURF:PML:UBN1:SPN:NUDT21:MED1:MAPT:KANSL1:LUC7L3:SRSF1:PIAS2:GATAD2A:MED29:PARD3B:ZFP64:CSTF1:SUMO3:POLDIP3:FANCD2:ZBTB20:POLR2H:RCHY1:MEF2C
FUMA	GO:0019867	outer membrane	205	12	3.87373e-06	8.42958e-05	MCL1:BAD:LETMD1:ACACB:NME1:CASP8:BCL2L1:SNCA:ANKH:ACSL6:RTN4IP1:GIMAP5
FUMA	R-HSA-449147	signaling by interleukins	631	24	2.4805e-07	9.29567e-05	CDC42:CAPZA1:MCL1:RELA:RPLP0:RASGRF1:IQGAP1:ERBB2:PSME3:CREB1:PTPRA:BCL2L1:UBE2V1:APP:IL17RE:IL1RAP:DLG1:NFKB1:RAPGEF2:MEF2C:HBEGF:CAMK2B:PTK2B:IKBKB
FUMA	WP289	myometrial relaxation and contraction pathways	157	11	1.73337e-06	9.4122e-05	PDE4B:SP1:CRHR1:CALM3:SLC8A1:CREB1:NFKB1:PRKAR1B:CAMK2B:CALD1:CRH
FUMA	GO:0019637	organophosphate metabolic process	532	20	2.98678e-06	9.46242e-05	ATPIF1:ANGPTL3:PIK3C2B:ITPKB:CCKBR:BAD:ACACB:ALDOA:LCAT:NME1:ADCYAP1:ISYNA1:FAM126B:DLG1:SNCA:ACSL6:MBOAT1:ALDH5A1:SYNJ2:PTK2B
Webgestalt	GO:0045666	positive regulation of neuron differentiation	350	25	6.06173e-08	9.55631e-05	PTK2B;WNT3;CFLAR;ADCYAP1;VWC2;BDNF;MAPT;ARHGAP35;CAMK2B;IQGAP1;MEF2C;MACF1;EIF4G1;MAP3K13;KATNB1;FEZF2;FIG4;MAP1B;RAPGEF2;NIN;MMD;RUFY3;PAK1;ACTR2;NME1
gPROFILER	GO:0048667	cell morphogenesis involved in neuron differentiation		33		0.000100557	WNT3,APP,PTPRA,BDNF,STMN1,MAPT,PICALM,CACNA1A,ARHGAP35,CAMK2B,CREB1,MEF2C,MACF1,CDC42,UBE3A,DCLK1,MAP3K13,PALLD,TAOK2,TSKU,NRP2,FEZF2,ERBB2,DOCK7,ETV1,MAP1B,SMO,RAPGEF2,NIN,FAM129B,RUFY3,PAK1,ACTR2
gPROFILER	GO:0051094	positive regulation of developmental process		61		0.000100557	PTK2B,BIN1,VEZF1,WNT3,MED1,CFLAR,CASS4,ADCYAP1,ACACB,VWC2,OVOL2,BDNF,MAPT,ITPKB,WNT2B,ARHGAP35,CAMK2B,SPEN,CELF1,GDF3,FST,BAD,IQGAP1,NIPBL,GFAP,BMP1,NFKB1,CREB1,MEF2C,RELA,CD83,MACF1,TCF7L2,CDC42,EIF4G1,MAP3K13,VHL,AKAP6,SP1,KATNB1,SERP1,FEZF2,CASP8,IL1RAP,FIG4,MAP1B,SMO,RAPGEF2,ERAP1,NIN,MMD,FAM129B,NUDT21,RUFY3,SLC8A1,PAK1,ACTR2,CD28,PEX5,NME1,ANGPTL3
gPROFILER	GO:0060341	regulation of cellular localization		44		0.000100557	PTK2B,SNCA,GPR27,BDNF,MAPT,PML,PICALM,CACNA1A,MAP4K4,CALM3,BAD,IQGAP1,NIPBL,UBE2D3,NVL,CACNB2,PKD2,LEPROTL1,RALB,MEF2C,TCF7L2,PPM1A,CDC42,DLG1,PRKAR1B,NCS1,DCLK1,AKAP6,FBXW7,ERBB2,JPH2,CASP8,CRH,MAP1B,SMO,RIMS3,DNAJC27,SORBS1,RUFY3,SLC8A1,PAK1,UBASH3B,YIPF5,BCL2L1
FUMA	GO:0021954	central nervous system neuron development	80	8	3.27403e-06	0.000102838	TSKU:DCLK1:NIN:MAPT:ARHGAP35:NRP2:FEZF2:RAPGEF2
FUMA	GO:0051279	regulation of release of sequestered calcium ion into cytosol	80	8	3.27403e-06	0.000102838	UBASH3B:AKAP6:CALM3:SLC8A1:JPH2:PKD2:SNCA:PTK2B
FUMA	GO:0006936	muscle contraction	357	16	3.29742e-06	0.000103132	PDE4B:CACNB2:SORBS1:SCN2B:EDNRB:ALDOA:TCAP:SRSF1:CALM3:SLC8A1:BIN1:TTN:PROK2:ITGB5:DLG1:CALD1
FUMA	GO:0060048	cardiac muscle contraction	136	10	3.32486e-06	0.00010355	PDE4B:CACNB2:SCN2B:TCAP:SRSF1:CALM3:SLC8A1:BIN1:TTN:DLG1
gPROFILER	GO:0030307	positive regulation of cell growth		16		0.000105925	PTK2B,WNT3,BDNF,MAPT,EXTL3,MACF1,USP47,CDC42,EIF4G1,MAP3K13,HBEGF,AKAP6,ERBB2,MAP1B,RUFY3,PAK1
FUMA	GO:0046683	response to organophosphorus	137	10	3.5514e-06	0.000110138	RELA:AKAP6:AQP9:NME1:SLC8A1:APP:PKD2:RAPGEF2:SRD5A1:PTK2B
gPROFILER	GO:0048812	neuron projection morphogenesis		35		0.000111683	WNT3,APP,PTPRA,BDNF,STMN1,MAPT,PICALM,CACNA1A,ARHGAP35,CAMK2B,MAP4K4,MOV10,IQGAP1,CREB1,MACF1,CDC42,UBE3A,DCLK1,MAP3K13,PALLD,TAOK2,TSKU,NRP2,FEZF2,ERBB2,DOCK7,ETV1,MAP1B,SMO,RAPGEF2,NIN,FAM129B,RUFY3,PAK1,ACTR2
FUMA	GO:0051402	neuron apoptotic process	240	13	3.61733e-06	0.000111712	MCL1:BDNF:SNX6:GABRB3:EN1:BCL2L1:APP:FAM162A:SNCA:FBXW7:MEF2C:PTK2B:OXR1
FUMA	GO:0046983	protein dimerization activity	1319	36	9.57802e-07	0.000112542	ATPIF1:MCL1:MTPAP:TAF6L:BAD:RELA:SP1:SNX6:JDP2:RBPMS2:PML:NUDT21:KATNB1:ERBB2:SPPL2C:MAPT:APOC2:CFLAR:BCL2L1:NCF4:XPNPEP3:MAP3K13:MXD4:RCHY1:PKD2:NFKB1:MEF2C:ACSL6:ALDH5A1:DLK2:NEUROD6:CAMK2B:MKLN1:RBPMS:IKBKB:ZHX1
FUMA	R-HSA-449147	signaling by receptor tyrosine kinases	468	20	4.19102e-07	0.000113658	CDC42:STMN1:DOCK7:BDNF:PAK1:ATP6V1D:GABRB3:ERBB2:GFAP:ADCYAP1:RALB:NRP2:CREB1:NCF4:POLR2H:MXD4:MEF2C:HBEGF:PTK2B:CLTA
FUMA	R-HSA-9006934	transcriptional regulation by mecp2	62	8	4.54935e-07	0.000113658	MOV10:BDNF:TNRC6A:CREB1:SST:MEF2C:CAMK2B:CRH
FUMA	GO:1903829	positive regulation of cellular protein localization	319	15	3.73875e-06	0.000114978	SORBS1:TCF7L2:BAD:PAK1:PPM1A:IQGAP1:ERBB2:MAPT:CASP8:DLG1:RUFY3:UBE2D3:FBXW7:NIPBL:SMO
FUMA	WP437	egf/egfr signaling pathway	162	11	2.35499e-06	0.000116251	CDC42:STMN1:PIK3C2B:PAK1:SP1:IQGAP1:ERBB2:RALB:CREB1:MEF2C:PTK2B
FUMA	GO:0043950	positive regulation of camp mediated signaling	22	5	3.83988e-06	0.000117596	CRHR1:ADCYAP1:CALM3:RAPGEF2:CRH
FUMA	GO:0043604	amide biosynthetic process	843	26	3.91712e-06	0.000119464	MOV10:CELF1:ACACB:RPLP0:DENR:TNRC6A:FAM57B:ERBB2:NDUFA7:NDUFA7:ILF3:SAMD4B:MRPL35:ZC3H15:CD28:RRBP1:APP:POLDIP3:EIF1B:EIF4E3:SERP1:EIF4G1:SCD5:SNCA:ACSL6:TNIP1:PTK2B
FUMA	GO:0097190	apoptotic signaling pathway	591	21	4.06001e-06	0.000122803	ATPIF1:MCL1:TCF7L2:USP47:CD44:CD5:BAD:RELA:LTBR:DYRK2:PML:PSME3:CFLAR:CASP8:CD28:BCL2L1:PTTG1IP:FAM162A:SST:FBXW7:CRH
FUMA	GO:0002790	peptide secretion	591	21	4.06001e-06	0.000122803	ENSA:GOLPH3L:TCF7L2:BAD:C1QTNF5:PML:PPY:CRHR1:ADCYAP1:CACNA1A:CD22:LILRA5:MAP4K4:TTN:GPR27:SERP1:IL1RAP:ICA1:CLEC5A:PDIA4:CRH
gPROFILER	GO:0051962	positive regulation of nervous system development		32		0.000125365	PTK2B,BIN1,WNT3,CFLAR,ADCYAP1,VWC2,BDNF,MAPT,ARHGAP35,CAMK2B,SPEN,IQGAP1,NIPBL,GFAP,MEF2C,RELA,MACF1,EIF4G1,MAP3K13,KATNB1,FEZF2,IL1RAP,FIG4,MAP1B,SMO,RAPGEF2,NIN,MMD,RUFY3,PAK1,ACTR2,NME1
FUMA	GO:0006941	striated muscle contraction	172	11	4.20667e-06	0.000126717	PDE4B:CACNB2:SCN2B:ALDOA:TCAP:SRSF1:CALM3:SLC8A1:BIN1:TTN:DLG1
FUMA	GO:1901215	negative regulation of neuron death	207	12	4.2802e-06	0.000127884	BDNF:SNX6:GABRB3:CRHR1:EN1:CREB1:BCL2L1:EIF4G1:SNCA:MEF2C:PTK2B:OXR1
FUMA	GO:0009612	response to mechanical stimulus	207	12	4.2802e-06	0.000127884	BAD:RELA:LTBR:TCAP:SLC8A1:TTN:CASP8:CHRNA9:PKD2:NFKB1:ETV1:PTK2B
FUMA	GO:0002764	immune response regulating signaling pathway	645	22	4.59934e-06	0.000136863	CDC42:PDE4B:CTSS:CR1:RELA:PAK1:ELF1:NFATC3:PSME3:CD209:CD22:ACTR2:CASP8:CD28:UBE2V1:MUC4:NFKB1:UBE2D3:ALPK1:MEF2C:TNIP1:IKBKB
FUMA	GO:0090150	establishment of protein localization to membrane	325	15	4.68373e-06	0.000138255	MACF1:GOLPH3L:PEX19:VPS37C:BAD:PAK1:PEX5:RPLP0:VPS37B:TAOK2:ERBB2:NSF:CALM3:CASP8:COX18
FUMA	GO:0051235	maintenance of location	325	15	4.68373e-06	0.000138255	ANGPTL3:UBASH3B:ACACB:AKAP6:FBN1:PML:CALM3:SLC30A3:SLC8A1:JPH2:PKD2:SNCA:NFKB1:FBXW7:PTK2B
FUMA	GO:0051047	positive regulation of secretion	412	17	4.9219e-06	0.000144704	GOLPH3L:CACNB2:TCF7L2:BAD:EDNRB:CRHR1:ADCYAP1:LILRA5:TTN:CREB1:GPR27:SERP1:IL1RAP:SNCA:CLEC5A:CRH:NCS1
gPROFILER	GO:0048639	positive regulation of developmental growth		17		0.000145554	WNT3,ACACB,BDNF,MAPT,CELF1,NIPBL,CREB1,MEF2C,MACF1,MAP3K13,AKAP6,SERP1,MAP1B,SMO,RUFY3,PAK1,PEX5
gPROFILER	GO:0022008	neurogenesis		67		0.00014719	PTK2B,BIN1,WNT3,MED1,CFLAR,ADCYAP1,APP,PTPRA,LDLR,VWC2,BDNF,STMN1,MAPT,PICALM,CACNA1A,WNT2B,ARHGAP35,CAMK2B,SPEN,MAP4K4,MOV10,IQGAP1,NIPBL,RASGRF1,GFAP,SCLT1,EDNRB,CREB1,MEF2C,RELA,MACF1,MYLIP,CDC42,UBE3A,NCS1,EIF4G1,DCLK1,MAP3K13,PALLD,TAOK2,TBX6,KATNB1,TSKU,NRP2,KANK1,GABRB3,FEZF2,ERBB2,DOCK7,ARHGEF10,FIG4,ETV1,RTN4IP1,MAP1B,FRYL,SMO,RAPGEF2,NIN,MMD,FAM129B,RUFY3,EN1,PAK1,ACTR2,PEX5,NME1,ETV6
gPROFILER	GO:0051240	positive regulation of multicellular organismal process		72		0.00014719	PTK2B,BIN1,WNT3,MED1,CFLAR,ADCYAP1,APP,ACACB,VWC2,ZBTB20,OVOL2,BDNF,MAPT,ITPKB,WNT2B,ARHGAP35,CAMK2B,SPEN,MAP4K4,CELF1,PROK2,FST,BAD,IQGAP1,NIPBL,GFAP,BMP1,NFKB1,EDNRB,PDE4B,CREB1,MEF2C,RELA,CD83,MACF1,TCF7L2,CDC42,LILRA5,EIF4G1,MAP3K13,APOC2,HBEGF,AKAP6,SP1,PLEKHM1,KATNB1,SERP1,NRP2,FEZF2,CASP8,IL1RAP,FIG4,CLEC5A,CRH,MAP1B,SMO,RAPGEF2,ERAP1,NIN,MMD,FAM129B,NUDT21,RUFY3,SLC8A1,POLR2H,PAK1,ACTR2,S…
FUMA	R-HSA-8986944	muscle contraction	207	13	6.97498e-07	0.000149364	CACNB2:SORBS1:PAK1:SCN2B:CACNB1:TCAP:SLC8A1:TTN:SCN11A:ITGB5:KCNK5:CAMK2B:CALD1
FUMA	GO:0003690	double stranded dna binding	952	29	1.37535e-06	0.00015083	ZNF281:TCF7L2:RELA:ETV6:TFCP2:SP1:ELF1:KLF12:JDP2:TBX6:NFATC3:TAF1C:MED1:MAPT:NME1:HLF:VEZF1:UHRF1:ARHGAP35:EN1:CREB1:ZFP64:FEZF2:NFKB1:MSH3:MEF2C:ETV1:NEUROD6:AEBP1
FUMA	GO:1901019	regulation of calcium ion transmembrane transporter activity	85	8	5.17784e-06	0.000151622	PDE4B:CACNB2:AKAP6:CACNB1:CRHR1:CALM3:JPH2:PKD2
FUMA	GO:0045773	positive regulation of axon extension	40	6	5.24195e-06	0.000151773	MACF1:PAK1:MAPT:MAP3K13:RUFY3:MAP1B
FUMA	GO:0008284	positive regulation of cell population proliferation	965	28	5.24496e-06	0.000151773	TCF7L2:CCKBR:BAD:RELA:ACER3:PAK1:SP1:EDNRB:RBPMS2:PML:MED1:ERBB2:GFAP:NME1:ADCYAP1:CD209:CFLAR:CD28:NRP2:BCL2L1:PROK2:EIF4G1:DLG1:MEF2C:HBEGF:SMO:PTK2B:CRH
FUMA	GO:0032271	regulation of protein polymerization	211	12	5.20718e-06	0.000151773	STMN1:CAPZA1:PAK1:NIN:MAPT:GMFG:ACTR2:BIN1:DLG1:SNCA:PTK2B:KANK1
Webgestalt	GO:0033267	axon part	374	21	1.97669e-07	0.000152601	PTK2B;BIN1;SNCA;AP1S1;ADCYAP1;APP;MAPT;SYNJ2;IQGAP1;RASGRF1;DLG1;NCS1;PALLD;TAOK2;KATNB1;DST;EXOC6;DOCK7;CRH;NIN;RUFY3
FUMA	GO:0010035	response to inorganic substance	553	20	5.30826e-06	0.000153003	ITPKB:BAD:RELA:AQP9:IQGAP1:MAPT:CALM3:SLC30A3:SLC8A1:TTN:CFLAR:CASP8:CREB1:APP:PKD2:SNCA:UBE2D3:MEF2C:PTK2B:GGH
FUMA	GO:1900449	regulation of glutamate receptor signaling pathway	61	7	5.38266e-06	0.000154541	CNIH3:RASGRF1:APP:DLG1:MEF2C:PTK2B:CRH
FUMA	GO:0050673	epithelial cell proliferation	415	17	5.41491e-06	0.000154862	ATPIF1:TCF7L2:BAD:SP1:EDNRB:MARVELD3:MED1:ERBB2:NME1:UHRF1:CFLAR:NRP2:OVOL2:DLG1:FBXW7:MEF2C:SMO
FUMA	GO:0009057	macromolecule catabolic process	1366	35	5.48006e-06	0.000156118	ATPIF1:MOV10:CTSS:MTPAP:USP47:CD44:PATL1:VPS37C:RELA:PGM2L1:RPLP0:VPS37B:UBE3A:PML:TNRC6A:PSME3:NSF:CDC27:UHRF1:LDLR:SAMD4B:CASP8:CST3:PTTG1IP:EIF4G1:RCHY1:UBE2D3:FBXW7:MARCH6:VCAN:MYLIP:RNF144B:TRIM38:PTK2B:CLTA
FUMA	GO:0055065	metal ion homeostasis	653	22	5.58614e-06	0.000158526	CACNB2:CCKBR:PICALM:UBASH3B:EDNRB:AKAP6:PML:SLC12A4:CTC-479C5.17:CRHR1:ADCYAP1:CACNA1A:CALM3:SLC30A3:SLC8A1:JPH2:APP:PROK2:CHRNA9:PKD2:SNCA:PTK2B:NCS1
Webgestalt	GO:0005938	cell cortex	293	18	4.11306e-07	0.000158764	PTK2B;LANCL2;SNCA;MKLN1;CAPZA1;PKD2;RHOC;CDC42;MYO9B;DST;EXOC6;CALD1;PARD3B;FRYL;RIMS3;CTBP2;CLTA;ACTR2
FUMA	GO:0045637	regulation of myeloid cell differentiation	250	13	5.63914e-06	0.000159414	MOV10:RBBP5:ITPKB:UBASH3B:FBN1:TNRC6A:MED1:NME1:CASP8:CREB1:FBXW7:MEF2C:PTK2B
Webgestalt	GO:0030307	positive regulation of cell growth	156	16	1.26697e-07	0.000159791	PTK2B;WNT3;BDNF;MAPT;EXTL3;MACF1;USP47;CDC42;EIF4G1;MAP3K13;HBEGF;AKAP6;ERBB2;MAP1B;RUFY3;PAK1
FUMA	GO:0007159	leukocyte cell cell adhesion	331	15	5.83634e-06	0.000164357	CDC42:ITPKB:CD44:CD5:BAD:RELA:PAK1:SPN:ERBB2:CD209:CLEC4M:CD28:DLG1:TNIP1:CD83
gPROFILER	GO:0120035	regulation of plasma membrane bounded cell projection organization		35		0.00016542	PTK2B,WNT3,CFLAR,ADCYAP1,CD44,BDNF,MAPT,CEP135,CACNA1A,ARHGAP35,CAMK2B,MAP4K4,MOV10,IQGAP1,GFAP,MEF2C,MACF1,MYLIP,CDC42,UBE3A,NCS1,MAP3K13,PLEKHM1,TBX6,KATNB1,KANK1,FEZF2,FIG4,RTN4IP1,MAP1B,RAPGEF2,NIN,RUFY3,PAK1,ACTR2
FUMA	GO:0009896	positive regulation of catabolic process	418	17	5.9518e-06	0.000166968	ATPIF1:ANGPTL3:MOV10:BAD:TNRC6A:NSF:LDLR:APOC2:RALB:PTTG1IP:ZBTB20:RCHY1:SNCA:FBXW7:MYLIP:RNF144B:PTK2B
FUMA	GO:0050890	cognition	291	14	6.05595e-06	0.000169244	BDNF:PICALM:RASGRF1:CRHR1:MAPT:LDLR:ACTR2:EN1:CREB1:APP:NIPBL:MEF2C:PRKAR1B:CRH
FUMA	GO:0034703	cation channel complex	220	12	7.9628e-06	0.000169591	PDE4B:CNIH3:CACNB2:SCN2B:AKAP6:CACNB1:CACNA1A:CALM3:SCN11A:PKD2:VWC2:PTK2B
FUMA	R-HSA-9022702	innate immune system	1101	32	1.05918e-06	0.000176412	CDC42:CAPZA1:CTSS:CR1:CD44:RELA:PAK1:ATP6V1D:IQGAP1:ALDOA:NFATC3:PSME3:CD209:MYO9B:GMFG:ACTR2:CASP8:CREB1:CST3:BCL2L1:UBE2V1:APP:NCF4:POLR2H:MUC4:NFKB1:UBE2D3:SCAMP1:MEF2C:CLEC5A:IKBKB:GGH
FUMA	R-HSA-397014	mecp2 regulates transcription of neuronal ligands	8	4	1.04085e-06	0.000176412	BDNF:CREB1:SST:CRH
Webgestalt	GO:0150034	distal axon	280	17	1.02283e-06	0.000185257	PTK2B;SNCA;AP1S1;ADCYAP1;APP;MAPT;SYNJ2;IQGAP1;RASGRF1;NCS1;PALLD;TAOK2;KATNB1;EXOC6;DOCK7;NIN;RUFY3
Webgestalt	GO:0030426	growth cone	164	13	1.04587e-06	0.000185257	PTK2B;SNCA;APP;MAPT;IQGAP1;RASGRF1;PALLD;TAOK2;KATNB1;EXOC6;DOCK7;NIN;RUFY3
Webgestalt	GO:0030427	site of polarized growth	166	13	1.19985e-06	0.000185257	PTK2B;SNCA;APP;MAPT;IQGAP1;RASGRF1;PALLD;TAOK2;KATNB1;EXOC6;DOCK7;NIN;RUFY3
gPROFILER	GO:0048468	cell development		82		0.000192128	PTK2B,BIN1,VEZF1,FBN1,WNT3,MED1,CFLAR,CASS4,ADCYAP1,APP,PTPRA,LDLR,VWC2,OVOL2,BDNF,STMN1,MAPT,IKBKB,PICALM,CACNA1A,ARHGAP35,CAMK2B,SPEN,MAP4K4,CELF1,GDF3,BAD,MOV10,IQGAP1,NIPBL,RASGRF1,GFAP,SCLT1,EDNRB,CREB1,MEF2C,RELA,MACF1,MYLIP,CDC42,UBE3A,NCS1,EIF4G1,DCLK1,MAP3K13,PALLD,AKAP6,FBXW7,TAOK2,TBX6,KATNB1,TSKU,NRP2,KANK1,GABRB3,FEZF2,ERBB2,DOCK7,TCAP,ARHGEF10,ANTXR1,ABHD2,FIG4,CLEC5A,ETV1,RTN4IP1,M…
gPROFILER	GO:0016032	viral process		41		0.000193632	BIN1,AP1S1,DENR,CLEC4M,CFLAR,CD209,LDLR,HS3ST5,IKBKB,PML,ILF3,RPLP0,SPEN,TRIM38,ITGB5,TNIP1,BAD,IQGAP1,CREB1,RELA,CDC42,UBE3A,DLG1,EIF4G1,VPS37C,FBXW7,SP1,SLC20A2,CR1,NRP2,CASP8,CLEC5A,RTN3,LTBR,VPS37B,CTBP2,UBN1,POLR2H,BCL2L1,CD28,PPIH
gPROFILER	GO:0045666	positive regulation of neuron differentiation		25		0.000193976	PTK2B,WNT3,CFLAR,ADCYAP1,VWC2,BDNF,MAPT,ARHGAP35,CAMK2B,IQGAP1,MEF2C,MACF1,EIF4G1,MAP3K13,KATNB1,FEZF2,FIG4,MAP1B,RAPGEF2,NIN,MMD,RUFY3,PAK1,ACTR2,NME1
FUMA	WP710	dna damage response (only atm dependent)	110	9	4.29062e-06	0.00019415	CDC42:WNT2B:PIK3C2B:TCF7L2:BAD:ERBB2:WNT3:LDLR:NFKB1
FUMA	GO:0031975	envelope	1166	31	9.38343e-06	0.000195684	MCL1:COX15:BAD:PAK1:LETMD1:ACACB:PHF11:EDNRB:AKAP6:SLC25A35:NME1:NDUFA7:NDUFA7:CALM3:MRPL35:BIN1:NDUFB3:CASP8:SMOX:BCL2L1:APP:CHDH:NDUFB5:COX18:SNCA:ACSL6:RNF144B:DST:RTN4IP1:CYCS:CBX3:GIMAP5
FUMA	R-HSA-168249	plasma lipoprotein assembly remodeling and clearance	71	8	1.3115e-06	0.000196594	ANGPTL3:LCAT:LDLR:APOC1:APOC2:MYLIP:BMP1:CLTA
FUMA	GO:0007507	heart development	564	20	7.08826e-06	0.000197344	SMYD2:PAK1:ACACB:AKAP6:FBN1:MED1:TCAP:ERBB2:HEXIM1:SLC8A1:TTN:NRP2:CREB1:OVOL2:JPH2:PKD2:NIPBL:MEF2C:SMO:GALNT11
FUMA	GO:0048675	axon extension	117	9	7.12558e-06	0.000197634	MACF1:PAK1:DCLK1:MAPT:WNT3:NRP2:MAP3K13:RUFY3:MAP1B
FUMA	GO:0030554	adenyl nucleotide binding	1536	39	1.93106e-06	0.000198537	PDE4B:MOV10:TTF2:UBE2T:PIK3C2B:NVL:ITPKB:MTPAP:PAK1:DYRK2:ACACB:DCLK1:TAOK2:KIFC3:ERBB2:NSF:ABCC3:NME1:MYO9B:ACTR2:MAP4K4:TTN:RAD54L2:MAGI1:EIF4G1:MAP3K13:UBE2D3:ALPK1:RAPGEF2:MSH3:ACSL6:ABCC10:HS3ST5:PRKAR1B:CAMK2B:LANCL2:MCM7:PTK2B:IKBKB
FUMA	GO:0032386	regulation of intracellular transport	425	17	7.39477e-06	0.000203564	ATPIF1:RIMS3:CACNB2:TCF7L2:PAK1:PPM1A:ERBB2:CRHR1:CALM3:DNAJC27:RUFY3:UBE2D3:FBXW7:MAP1B:YIPF5:SMO:NCS1
FUMA	GO:0043434	response to peptide hormone	425	17	7.39477e-06	0.000203564	SORBS1:RELA:PAK1:SP1:EDNRB:ATP6V1D:FBN1:IQGAP1:CRHR1:CFLAR:CREB1:PTPRA:NFKB1:SRD5A1:PRKAR1B:GGH:KANK1
FUMA	R-HSA-937061	trif ticam1 mediated tlr4 signaling	97	9	1.50019e-06	0.000204435	RELA:CASP8:CREB1:UBE2V1:APP:NFKB1:UBE2D3:MEF2C:IKBKB
FUMA	GO:0016311	dephosphorylation	471	18	7.45959e-06	0.000204582	PPM1J:ENSA:SSH3:UBASH3B:MDP1:PPM1A:IQGAP1:PPP4C:CALM3:ACP1:PTPRA:PPM1L:DLG1:MEF2C:FIG4:SYNJ2:CYCS:IKBKB
gPROFILER	GO:0031344	regulation of cell projection organization		35		0.000206798	PTK2B,WNT3,CFLAR,ADCYAP1,CD44,BDNF,MAPT,CEP135,CACNA1A,ARHGAP35,CAMK2B,MAP4K4,MOV10,IQGAP1,GFAP,MEF2C,MACF1,MYLIP,CDC42,UBE3A,NCS1,MAP3K13,PLEKHM1,TBX6,KATNB1,KANK1,FEZF2,FIG4,RTN4IP1,MAP1B,RAPGEF2,NIN,RUFY3,PAK1,ACTR2
FUMA	GO:0045165	cell fate commitment	257	13	7.5946e-06	0.000207511	DOCK7:WNT2B:MCL1:TCF7L2:GDF3:PML:SPN:TBX6:WNT3:RTFDC1:FEZF2:MEF2C:SMO
FUMA	GO:1902532	negative regulation of intracellular signal transduction	521	19	8.10788e-06	0.000220715	STMN1:MCL1:USP47:CD44:RELA:DYRK2:PPM1A:MARVELD3:CD22:CALM3:ARHGAP35:CASP8:BCL2L1:PTTG1IP:DLG1:CHRNA9:PKD2:TNIP1:KANK1
FUMA	GO:0007160	cell matrix adhesion	221	12	8.33646e-06	0.000226099	MACF1:ANGPTL3:SORBS1:CD44:IQGAP1:TAOK2:ITGB4:MAP4K4:ITGB5:MUC4:MKLN1:PTK2B
gPROFILER	GO:0009719	response to endogenous stimulus		37		0.000229173	PTK2B,FBN1,LANCL2,SNCA,SNRPN,MED1,CFLAR,ADCYAP1,APP,PTPRA,CD44,CRHR1,LDLR,VWC2,OVOL2,BDNF,MAPT,PML,CACNA1A,RBPMS2,SST,MCM7,CALM3,ITGB5,GDF3,FST,BAD,IQGAP1,UBE2D3,NFKB1,PKD2,EDNRB,PDE4B,CREB1,MEF2C,RELA,PIAS2
FUMA	GO:0001227	dna binding transcription repressor activity rna polymerase ii specific	231	13	2.37716e-06	0.000230025	ZNF281:RELA:ETV6:KLF12:JDP2:NFATC3:ARHGAP35:EN1:OVOL2:FEZF2:ZBTB20:NFKB1:AEBP1
Webgestalt	GO:0031252	cell leading edge	393	20	1.80399e-06	0.000232113	PTK2B;APP;CD44;MKLN1;MAPT;SYNJ2;IQGAP1;PKD2;MACF1;GABRA2;ITGB4;PALLD;DST;KANK1;ANTXR1;RUFY3;PAK1;ACTR2;NME1;ANGPTL3
FUMA	GO:0043292	contractile fiber	228	12	1.14107e-05	0.000233103	PDE4B:PAK1:ALDOA:TCAP:CALM3:SLC8A1:BIN1:TTN:JPH2:PALLD:DST:CALD1
FUMA	GO:0045665	negative regulation of neuron differentiation	222	12	8.7254e-06	0.000235778	EDNRB:TBX6:MED1:GFAP:WNT3:MAP4K4:APP:FEZF2:RUFY3:RAPGEF2:MYLIP:KANK1
gPROFILER	GO:0071363	cellular response to growth factor stimulus		22		0.000235801	FBN1,SNCA,MED1,CFLAR,APP,CD44,VWC2,OVOL2,BDNF,MAPT,PML,RBPMS2,MCM7,ITGB5,GDF3,FST,IQGAP1,UBE2D3,CREB1,MEF2C,RELA,PPM1A
FUMA	GO:0014074	response to purine containing compound	152	10	8.95474e-06	0.000241089	RELA:AKAP6:AQP9:NME1:SLC8A1:APP:PKD2:RAPGEF2:SRD5A1:PTK2B
FUMA	GO:0052547	regulation of peptidase activity	432	17	9.14375e-06	0.000245279	CR1:USP47:CD44:BAD:PICALM:PML:PSME3:MAPT:ANTXR1:BIN1:CFLAR:CASP8:CST3:APP:FAM162A:SNCA:CYCS
gPROFILER	GO:0022604	regulation of cell morphogenesis		28		0.000248751	PTK2B,WNT3,CASS4,CD44,MKLN1,BDNF,MAPT,CACNA1A,ARHGAP35,CAMK2B,MOV10,MACF1,ALDOA,RHOC,CDC42,UBE3A,DLG1,MAP3K13,TAOK2,FMNL2,KANK1,FEZF2,MAP1B,RAPGEF2,NIN,RUFY3,PAK1,ACTR2
FUMA	GO:0030155	regulation of cell adhesion	676	22	9.58722e-06	0.00025624	CDC42:MACF1:ITPKB:CD44:CD5:BAD:RELA:PAK1:UBASH3B:PML:IQGAP1:SPN:ERBB2:CD209:MAP4K4:CD28:CASS4:DLG1:CD83:VWC2:PTK2B:KANK1
FUMA	GO:0048598	embryonic morphogenesis	577	20	9.87579e-06	0.000262997	WNT2B:ZNF281:GDF3:FBN1:RBPMS2:TBX6:MED1:TCAP:WNT3:ITGB4:ARHGAP35:EN1:OVOL2:ITGB5:DLG1:CHRNA9:PKD2:NIPBL:MEF2C:SMO
FUMA	GO:0048732	gland development	435	17	1.00005e-05	0.000263026	CCKBR:RELA:PML:MED1:CRHR1:WNT3:NME1:SRSF1:ADCYAP1:ARHGAP35:CFLAR:CREB1:PKD2:FBXW7:SRD5A1:SMO:CRH
FUMA	GO:0051495	positive regulation of cytoskeleton organization	225	12	9.98928e-06	0.000263026	CDC42:RHOC:PAK1:NIN:KATNB1:MAPT:GMFG:ACTR2:BIN1:DLG1:ARHGEF10:PTK2B
FUMA	GO:0045088	regulation of innate immune response	435	17	1.00005e-05	0.000263026	CTSS:CR1:RELA:PAK1:MED1:PSME3:HEXIM1:CD209:CASP8:UBE2V1:MUC4:NFKB1:UBE2D3:ALPK1:ERAP1:TNIP1:IKBKB
FUMA	GO:0019079	viral genome replication	122	9	1.002e-05	0.000263026	CDC42:PPIH:CTBP2:CD209:CLEC4M:ILF3:CD28:TNIP1:TRIM38
FUMA	R-HSA-168643	nucleotide binding domain leucine rich repeat containing receptor nlr signaling pathways	54	7	2.33683e-06	0.000282222	RELA:CASP8:BCL2L1:UBE2V1:APP:NFKB1:IKBKB
FUMA	R-HSA-112315	transmission across chemical synapses	269	14	2.44756e-06	0.000282222	CACNB2:GABRB3:RASGRF1:CACNB1:MAPT:NSF:CACNA1A:CREB1:DLG1:CHRNA9:GABRA2:ALDH5A1:PRKAR1B:CAMK2B
FUMA	GO:0005911	cell cell junction	447	17	1.41911e-05	0.000284106	SORBS1:PAK1:C1QTNF5:AKAP6:IQGAP1:UBN1:ARHGAP17:KIFC3:MARVELD3:SLC8A1:PARD3B:APP:MAGI1:DLG1:PKD2:RAPGEF2:TJAP1
FUMA	GO:0044431	golgi apparatus part	964	27	1.44897e-05	0.000284274	CDC42:GOLPH3L:COPA:CNIH3:RTN3:ACER3:FAM57B:CHST6:CRHR1:NSF:WNT3:GOSR2:PLEKHA3:APP:B3GALNT1:MUC4:SEC24D:SCAMP1:VCAN:TJAP1:FIG4:HS3ST5:ICA1:AP1S1:GALNT11:RAB2A:CLTA
FUMA	GO:0070160	tight junction	128	9	1.47675e-05	0.000284274	C1QTNF5:UBN1:ARHGAP17:MARVELD3:PARD3B:MAGI1:DLG1:RAPGEF2:TJAP1
FUMA	GO:0035239	tube morphogenesis	894	26	1.09783e-05	0.000287156	ATPIF1:PPIH:ANGPTL3:WNT2B:PAK1:SP1:RBPMS2:PML:MED1:TCAP:ERBB2:VEZF1:ARHGAP35:NRP2:OVOL2:PROK2:DLG1:PKD2:FBXW7:RAPGEF2:NIPBL:MEF2C:ERAP1:SMO:PTK2B:FAM129B
FUMA	GO:0035902	response to immobilization stress	27	5	1.12423e-05	0.000293017	CRHR1:SLC8A1:ACTR2:PTK2B:CRH
FUMA	R-HSA-112315	generic transcription pathway	1211	33	2.86192e-06	0.000303382	MOV10:RBBP5:CR1:SMYD2:TCF7L2:ZNF215:BDNF:MAML2:SP1:DYRK2:ELF1:PPM1A:PML:FANCI:TNRC6A:MED1:ERBB2:PSME3:ZNF136:GATAD2A:ZNF577:CREB1:FANCD2:POLR2H:SST:COX18:UBE2D3:FBXW7:MEF2C:CYCS:CBX3:CAMK2B:CRH
FUMA	R-HSA-212436	transport of small molecules	728	24	3.03585e-06	0.000303382	ANGPTL3:PEX19:ATP6V1D:AQP9:SLCO3A1:LCAT:SLC12A4:CTC-479C5.17:SLC47A2:PSME3:ABCC3:LDLR:APOC1:APOC2:SLC30A3:SLC8A1:ANKH:SLC4A9:MYLIP:ABCC10:PRKAR1B:CAMK2B:BMP1:SLC20A2:CLTA
FUMA	GO:0044003	modification by symbiont of host morphology or physiology	46	6	1.20888e-05	0.000312939	BAD:CD209:CLEC4M:CASP8:BCL2L1:TNIP1
FUMA	GO:2001233	regulation of apoptotic signaling pathway	396	16	1.20918e-05	0.000312939	ATPIF1:MCL1:TCF7L2:USP47:CD44:BAD:RELA:LTBR:PML:PSME3:CFLAR:CASP8:BCL2L1:PTTG1IP:FAM162A:FBXW7
FUMA	GO:0099601	regulation of neurotransmitter receptor activity	69	7	1.23289e-05	0.000317957	CNIH3:RASGRF1:APP:DLG1:MEF2C:PTK2B:CRH
FUMA	GO:0045785	positive regulation of cell adhesion	397	16	1.24732e-05	0.000320551	CDC42:ITPKB:CD44:CD5:BAD:RELA:PAK1:IQGAP1:ERBB2:CD209:MAP4K4:CD28:CASS4:CD83:VWC2:PTK2B
gPROFILER	GO:2001257	regulation of cation channel activity		15		0.000322819	PTK2B,APP,CRHR1,CALM3,RASGRF1,CACNB2,PKD2,PDE4B,MEF2C,DLG1,AKAP6,JPH2,CTSS,CRH,CACNB1
gPROFILER	GO:0044403	symbiotic process		42		0.000322819	BIN1,AP1S1,DENR,CLEC4M,CFLAR,CD209,LDLR,HS3ST5,IKBKB,PML,ILF3,RPLP0,SPEN,TRIM38,CALM3,ITGB5,TNIP1,BAD,IQGAP1,CREB1,RELA,CDC42,UBE3A,DLG1,EIF4G1,VPS37C,FBXW7,SP1,SLC20A2,CR1,NRP2,CASP8,CLEC5A,RTN3,LTBR,VPS37B,CTBP2,UBN1,POLR2H,BCL2L1,CD28,PPIH
FUMA	GO:0002218	activation of innate immune response	311	14	1.28271e-05	0.000326226	CTSS:RELA:PAK1:PSME3:HEXIM1:CD209:CASP8:UBE2V1:MUC4:NFKB1:UBE2D3:ALPK1:TNIP1:IKBKB
FUMA	GO:0030038	contractile actin filament bundle assembly	96	8	1.28226e-05	0.000326226	CDC42:STMN1:RHOC:SORBS1:PAK1:ITGB5:ARHGEF10:PTK2B
FUMA	GO:0050863	regulation of t cell activation	311	14	1.28271e-05	0.000326226	CDC42:CR1:ITPKB:CD5:BAD:PAK1:SPN:ERBB2:CD209:CLPTM1:CD28:FANCD2:DLG1:CD83
FUMA	GO:0030055	cell substrate junction	409	16	1.79601e-05	0.000339209	CDC42:DOCK7:SORBS1:CD44:PAK1:RPLP0:IQGAP1:ITGB4:ACTR2:MAP4K4:TNS1:CASS4:ITGB5:PALLD:DST:PTK2B
FUMA	GO:0044437	vacuolar part	553	19	1.85528e-05	0.000343914	CTSS:ATP6V1D:SLC12A4:CTC-479C5.17:GFAP:PLEKHM1:SPPL2C:NSF:ABCC3:MMD:CYB561:LDLR:SLC30A3:ACTR2:VCAN:ABCC10:AP1S1:RAB2A:GGH:CLTA
FUMA	GO:0052150	modulation by symbiont of host apoptotic process	5	3	1.36518e-05	0.000346004	BAD:CASP8:BCL2L1
FUMA	GO:0002253	activation of immune response	692	22	1.37439e-05	0.000347111	CDC42:PDE4B:CTSS:CR1:RELA:PAK1:ELF1:PSME3:HEXIM1:CD209:CD22:ACTR2:CASP8:CD28:UBE2V1:MUC4:NFKB1:UBE2D3:ALPK1:MEF2C:TNIP1:IKBKB
FUMA	GO:0001667	ameboidal type cell migration	446	17	1.379e-05	0.000347111	MACF1:PAK1:SP1:EDNRB:PML:MARVELD3:SLC8A1:MAP4K4:NRP2:TNS1:OVOL2:FBXW7:MEF2C:HBEGF:SMO:PTK2B:KANK1
FUMA	WP2324	age/rage pathway	66	7	9.15897e-06	0.000355237	CDC42:RELA:SP1:CASP8:NFKB1:CYCS:IKBKB
FUMA	WP1772	apoptosis modulation and signaling	91	8	8.62668e-06	0.000355237	MCL1:BAD:CFLAR:CASP8:BCL2L1:NFKB1:CYCS:IKBKB
FUMA	GO:0097305	response to alcohol	233	12	1.41748e-05	0.000355578	BAD:CRHR1:ADCYAP1:CALM3:ACTR2:CASP8:BCL2L1:LANCL2:SMO:PTK2B:GGH:CRH
FUMA	GO:0071375	cellular response to peptide hormone stimulus	315	14	1.47932e-05	0.000368576	SORBS1:RELA:PAK1:SP1:ATP6V1D:FBN1:CRHR1:CFLAR:CREB1:PTPRA:NFKB1:SRD5A1:PRKAR1B:KANK1
FUMA	GO:0006470	protein dephosphorylation	315	14	1.47932e-05	0.000368576	PPM1J:ENSA:SSH3:UBASH3B:MDP1:PPM1A:PPP4C:CALM3:ACP1:PTPRA:PPM1L:DLG1:CYCS:IKBKB
Webgestalt	GO:0030133	transport vesicle	374	19	3.37528e-06	0.000372246	BIN1;SNCA;AP1S1;BDNF;SCG3;PICALM;C1QTNF5;ICA1;PDE4B;GOSR2;COPA;GABRA2;SLC30A3;RPH3A;CLTA;CNIH3;BCL2L1;SEC24D;SCAMP1
FUMA	GO:0044297	cell body	557	19	2.04773e-05	0.000372687	CDC42:PICALM:KATNB1:GFAP:CRHR1:MAPT:ADCYAP1:CACNA1A:CD22:CASP8:APP:SST:RUFY3:SNCA:RAPGEF2:SRD5A1:MAP1B:PTK2B:CRH
FUMA	GO:0044265	cellular macromolecule catabolic process	1139	30	1.56407e-05	0.000387067	ATPIF1:MOV10:CTSS:MTPAP:USP47:PATL1:VPS37C:RPLP0:VPS37B:UBE3A:PML:TNRC6A:PSME3:CDC27:UHRF1:LDLR:SAMD4B:CASP8:CST3:PTTG1IP:EIF4G1:RCHY1:UBE2D3:FBXW7:MARCH6:MYLIP:RNF144B:TRIM38:PTK2B:CLTA
FUMA	GO:1990138	neuron projection extension	162	10	1.56391e-05	0.000387067	MACF1:PAK1:DCLK1:IQGAP1:MAPT:WNT3:NRP2:MAP3K13:RUFY3:MAP1B
FUMA	GO:0042805	actinin binding	39	6	4.49787e-06	0.000389421	RELA:TTN:MAGI1:PKD2:NFKB1:PALLD
FUMA	GO:0035091	phosphatidylinositol binding	244	13	4.33218e-06	0.000389421	GOLPH3L:PIK3C2B:PICALM:RPH3A:SNX6:IQGAP1:MAPT:PLEKHA3:PARD3B:JPH2:NCF4:PXDC1:LANCL2
FUMA	GO:0043408	regulation of mapk cascade	751	23	1.58608e-05	0.000391197	CD44:PAK1:LTBR:GDF3:IQGAP1:TAOK2:MARVELD3:ERBB2:ADCYAP1:LILRA5:DNAJC27:MAP4K4:CFLAR:UBE2V1:APP:PROK2:MAP3K13:DLG1:CHRNA9:FBXW7:RAPGEF2:TNIP1:PTK2B
FUMA	GO:0033993	response to lipid	915	26	1.63525e-05	0.000401976	PDE4B:BAD:RELA:PAK1:EDNRB:UBE3A:ABHD2:MED1:WNT3:NME1:ADCYAP1:PIAS2:LDLR:CALM3:CFLAR:CASP8:CREB1:SST:SNCA:NFKB1:SRD5A1:MEF2C:LANCL2:SMO:PTK2B:CRH
FUMA	GO:0044281	small molecule metabolic process	1685	39	1.64161e-05	0.000402195	ATPIF1:ANGPTL3:PDE4B:ITPKB:SLC16A9:SORBS1:BAD:PGM2L1:ACER3:ME3:CMAS:BCAT1:SP1:DYRK2:ACACB:ABHD2:ALDOA:LCAT:PSME3:NME1:ADCYAP1:LDLR:ISYNA1:APOC1:APOC2:MTHFD2:APP:SERP1:DLG1:SCD5:SNCA:NFKB1:SRD5A1:ACSL6:ALDH5A1:BCKDHB:SYNJ2:FAM3C:PTK2B
FUMA	R-HSA-382551	c type lectin receptors clrs	140	10	4.31332e-06	0.000404104	RELA:PAK1:NFATC3:PSME3:CD209:CASP8:UBE2V1:MUC4:NFKB1:IKBKB
FUMA	R-HSA-112316	neuronal system	410	17	4.61604e-06	0.000407026	CACNB2:RTN3:GABRB3:RASGRF1:CACNB1:MAPT:NSF:CACNA1A:LRFN1:CREB1:IL1RAP:DLG1:CHRNA9:GABRA2:ALDH5A1:PRKAR1B:CAMK2B
FUMA	GO:0034248	regulation of cellular amide metabolic process	453	17	1.68241e-05	0.00041082	MOV10:CELF1:PICALM:TNRC6A:ERBB2:ILF3:SAMD4B:BIN1:CD28:APP:POLDIP3:EIF1B:EIF4E3:SERP1:EIF4G1:SNCA:PTK2B
FUMA	KEGG_ALZHEIMERS_DISEASE	alzheimers disease	159	10	1.32895e-05	0.000411973	BAD:MAPT:NDUFA7:NDUFA7:CALM3:NDUFB3:CASP8:APP:NDUFB5:SNCA:CYCS
FUMA	KEGG_EPITHELIAL_CELL_SIGNALING_IN_HELICOBACTER_PYLORI_INFECTION	epithelial cell signaling in helicobacter pylori infection	68	7	1.11848e-05	0.000411973	CDC42:RELA:PAK1:ATP6V1D:NFKB1:HBEGF:IKBKB
gPROFILER	GO:0070848	response to growth factor		22		0.000412709	FBN1,SNCA,MED1,CFLAR,APP,CD44,VWC2,OVOL2,BDNF,MAPT,PML,RBPMS2,MCM7,ITGB5,GDF3,FST,IQGAP1,UBE2D3,CREB1,MEF2C,RELA,PPM1A
FUMA	GO:0050848	regulation of calcium mediated signaling	100	8	1.73104e-05	0.000419976	DYRK2:AKAP6:MAPT:CD22:CALM3:JPH2:PKD2:PTK2B
FUMA	GO:0044057	regulation of system process	600	20	1.73133e-05	0.000419976	PDE4B:CACNB2:PAK1:SCN2B:EDNRB:AKAP6:CACNB1:CRHR1:CALM3:SLC8A1:BIN1:APP:SCN11A:PROK2:DLG1:HBEGF:FIG4:CAMK2B:PTK2B:CRH
FUMA	GO:0044440	endosomal part	514	18	2.39233e-05	0.000427629	CTSS:VPS37C:VPS37B:SNX6:PML:ERBB2:PLEKHM1:GOSR2:MMD:LDLR:SLC30A3:ANTXR1:APP:NCF4:UBE2D3:SCAMP1:FIG4:CLTA
gPROFILER	GO:0007409	axonogenesis		27		0.000429991	WNT3,APP,PTPRA,BDNF,STMN1,MAPT,PICALM,CACNA1A,ARHGAP35,CREB1,MACF1,DCLK1,MAP3K13,PALLD,TAOK2,TSKU,NRP2,FEZF2,ERBB2,DOCK7,ETV1,MAP1B,SMO,NIN,FAM129B,RUFY3,PAK1
gPROFILER	GO:0030030	cell projection organization		56		0.000429991	PTK2B,WNT3,DYNLRB1,CFLAR,ADCYAP1,APP,PTPRA,CD44,BDNF,STMN1,MAPT,PICALM,CEP135,CACNA1A,ARHGAP35,CAMK2B,MAP4K4,MOV10,IQGAP1,RASGRF1,GFAP,SCLT1,PKD2,CREB1,MEF2C,MACF1,GPR22,MYLIP,CDC42,UBE3A,NCS1,DCLK1,MAP3K13,PALLD,PLEKHM1,TAOK2,TBX6,KATNB1,TSKU,GALNT11,ATP6V1D,NRP2,KANK1,FEZF2,ERBB2,DOCK7,DNAAF5,FIG4,ETV1,RTN4IP1,MAP1B,FRYL,SMO,RAPGEF2,NIN,FAM129B
gPROFILER	GO:0007166	cell surface receptor signaling pathway		77		0.000429991	PTK2B,FBN1,SNCA,WNT3,MED1,NFATC3,CCKBR,CFLAR,APP,PTPRA,CD44,CRHR1,CD209,VWC2,ELF1,OVOL2,BDNF,DLK2,STMN1,IKBKB,PML,RBPMS2,ITPKB,WNT2B,RPLP0,NCF4,CAMK2B,CAPZA1,SST,SPEN,TRIM38,ITGB5,GDF3,RBPMS,FST,BAD,MOV10,IQGAP1,RASGRF1,LRRFIP2,UBE2D3,CD22,NFKB1,PKD2,EDNRB,PDE4B,CREB1,MEF2C,RELA,MACF1,TCF7L2,PPM1A,USP47,MAGI1,CDC42,DLG1,TNRC6A,DYRK2,MUC4,ITGB4,SNX6,HBEGF,VHL,PPM1L,FBXW7,TSKU,GALNT11,FANCD2,ATP6V1…
gPROFILER	GO:0070997	neuron death		19		0.000429991	PTK2B,SNCA,APP,BDNF,MAPT,PICALM,CACNA1A,BAD,OXR1,CREB1,MEF2C,FAM162A,CDC42,EIF4G1,SNX6,FBXW7,GABRB3,MCL1,CASP8
gPROFILER	GO:0120036	plasma membrane bounded cell projection organization		55		0.000429991	PTK2B,WNT3,DYNLRB1,CFLAR,ADCYAP1,APP,PTPRA,CD44,BDNF,STMN1,MAPT,PICALM,CEP135,CACNA1A,ARHGAP35,CAMK2B,MAP4K4,MOV10,IQGAP1,RASGRF1,GFAP,SCLT1,PKD2,CREB1,MEF2C,MACF1,MYLIP,CDC42,UBE3A,NCS1,DCLK1,MAP3K13,PALLD,PLEKHM1,TAOK2,TBX6,KATNB1,TSKU,GALNT11,ATP6V1D,NRP2,KANK1,FEZF2,ERBB2,DOCK7,DNAAF5,FIG4,ETV1,RTN4IP1,MAP1B,FRYL,SMO,RAPGEF2,NIN,FAM129B
FUMA	R-HSA-112316	class i mhc mediated antigen processing presentation	370	16	5.18804e-06	0.000432048	CTSS:UBE3A:PSME3:CDC27:UBE2V1:NCF4:VHL:ITGB5:RCHY1:UBE2D3:SEC24D:FBXW7:ERAP1:MYLIP:RNF144B:IKBKB
gPROFILER	GO:0098805	whole membrane		53		0.000445273	PTK2B,SNCA,WNT3,AP1S1,NSF,CFLAR,APP,CD44,ACACB,LDLR,SPPL2C,GIMAP5,MAPT,SCG3,IKBKB,PML,PICALM,NCF4,CAMK2B,ICA1,SYNJ2,SLC12A4,CALM3,CYB561,BAD,IQGAP1,GFAP,UBE2D3,ACSL6,EDNRB,PEX19,GOSR2,DLG1,COPA,LETMD1,GABRA2,RAB2A,SNX6,HBEGF,AKAP6,VPS37C,PLEKHM1,ATP6V1D,CR1,SLC30A3,RPH3A,MCL1,ERBB2,CASP8,ANTXR1,ABCC10,FIG4,CLEC5A
gPROFILER	GO:0000904	cell morphogenesis involved in differentiation		36		0.000453402	WNT3,CASS4,APP,PTPRA,BDNF,STMN1,MAPT,PICALM,CACNA1A,ARHGAP35,CAMK2B,CREB1,MEF2C,MACF1,CDC42,UBE3A,DCLK1,MAP3K13,PALLD,TAOK2,TSKU,NRP2,KANK1,FEZF2,ERBB2,DOCK7,ANTXR1,ETV1,MAP1B,SMO,RAPGEF2,NIN,FAM129B,RUFY3,PAK1,ACTR2
FUMA	GO:0042277	peptide binding	290	14	5.82278e-06	0.000462349	PPIH:PEX19:CCKBR:PICALM:PEX5:EDNRB:CRHR1:CD209:CLEC4M:LDLR:CACNA1A:CST3:ERAP1:CLTA
FUMA	GO:0003712	transcription coregulator activity	557	20	5.90233e-06	0.000462349	SPEN:ZNF281:CTBP2:TAF6L:MAML2:KLF12:JDP2:EID1:PML:MED1:PIAS2:ZNF136:ARHGAP35:CREB1:MXD4:AEBP1:ZMIZ2:RBPMS:ZHX1:FAM129B
FUMA	GO:0002573	myeloid leukocyte differentiation	202	11	1.92375e-05	0.000465117	CDC42:UBASH3B:LTBR:FBN1:MED1:NME1:CASP8:CREB1:APP:FBXW7:MEF2C
FUMA	WP23	b cell receptor signaling pathway	98	8	1.49252e-05	0.000471779	CDC42:RELA:NFATC3:CD22:CREB1:NFKB1:MEF2C:IKBKB
FUMA	WP4008	no/cgmp/pkg mediated neuroprotection	48	6	1.55421e-05	0.000471779	BAD:RELA:CREB1:NFKB1:CYCS:CAMK2B
FUMA	WP2038	regulation of microtubule cytoskeleton	48	6	1.55421e-05	0.000471779	CDC42:STMN1:PAK1:MAPT:PTPRA:MAP1B
FUMA	WP706	sudden infant death syndrome (sids) susceptibility pathways	162	10	1.56391e-05	0.000471779	BDNF:SP1:ALDOA:ADCYAP1:EN1:CREB1:SST:NFKB1:MEF2C:PRKAR1B
FUMA	GO:0042692	muscle cell differentiation	367	15	1.97367e-05	0.000475623	CDC42:BDNF:PAK1:EDNRB:AKAP6:RBPMS2:NFATC3:TCAP:SLC8A1:BIN1:TTN:CFLAR:MEF2C:SMO:FAM129B
FUMA	GO:0005740	mitochondrial envelope	725	22	2.78215e-05	0.000488584	MCL1:COX15:BAD:LETMD1:ACACB:SLC25A35:NME1:NDUFA7:NDUFA7:CALM3:MRPL35:NDUFB3:CASP8:BCL2L1:CHDH:NDUFB5:COX18:SNCA:ACSL6:RNF144B:RTN4IP1:CYCS:GIMAP5
FUMA	GO:0048729	tissue morphogenesis	659	21	2.0808e-05	0.0004998	CDC42:WNT2B:RHOC:CD44:PAK1:PML:TBX6:MED1:TCAP:PSME3:WNT3:ITGB4:ARHGAP35:TTN:NRP2:OVOL2:DLG1:PKD2:MEF2C:HBEGF:SMO
FUMA	GO:0042063	gliogenesis	283	13	2.10931e-05	0.000504997	RELA:ERBB2:GFAP:MAPT:SRSF1:ADCYAP1:LDLR:BIN1:CREB1:APP:SMO:ARHGEF10:PTK2B
FUMA	WP4217	ebola virus pathway on host	131	9	1.77843e-05	0.000508256	CDC42:RHOC:RELA:PAK1:IQGAP1:CD209:CLEC4M:NFKB1:CLTA
FUMA	GO:0051828	entry into other organism involved in symbiotic interaction	134	9	2.13101e-05	0.000508536	CR1:CD209:CLEC4M:LDLR:ITGB5:TRIM38:HS3ST5:CLEC5A:SLC20A2
FUMA	GO:0009790	embryo development	986	27	2.14778e-05	0.000510879	WNT2B:ZNF281:CELF1:GDF3:FBN1:RBPMS2:TBX6:MED1:TCAP:WNT3:SRSF1:ITGB4:ARHGAP35:EN1:CASP8:NRP2:OVOL2:BCL2L1:ITGB5:DLG1:CHRNA9:PKD2:SEC24D:NIPBL:MEF2C:SMO:FAM129B
FUMA	GO:0004721	phosphoprotein phosphatase activity	181	11	6.85443e-06	0.000512525	PPM1J:SSH3:UBASH3B:MDP1:PPM1A:PPP4C:ACP1:PTPRA:PPM1L:DLG1:CYCS
Webgestalt	GO:0007409	axonogenesis	449	27	5.76412e-07	0.000519265	WNT3;APP;PTPRA;BDNF;STMN1;MAPT;PICALM;ARHGAP35;CREB1;MACF1;DCLK1;MAP3K13;PALLD;TAOK2;TSKU;SSH3;NRP2;FEZF2;ERBB2;DOCK7;ETV1;MAP1B;SMO;NIN;FAM129B;RUFY3;PAK1
Webgestalt	GO:0010976	positive regulation of neuron projection development	264	20	5.19783e-07	0.000519265	PTK2B;WNT3;CFLAR;ADCYAP1;BDNF;MAPT;ARHGAP35;CAMK2B;IQGAP1;MACF1;MAP3K13;KATNB1;FIG4;MAP1B;RAPGEF2;NIN;RUFY3;PAK1;ACTR2;NME1
FUMA	GO:0022857	transmembrane transporter activity	1038	29	7.29611e-06	0.000521831	MCL1:CACNB2:SLC16A9:COX15:SCN2B:ATP6V1D:GABRB3:AQP9:SLCO3A1:SLC12A4:CTC-479C5.17:SLC25A35:SLC47A2:CACNB1:ABCC3:CACNA1A:SLC30A3:SLC8A1:JPH2:SCN11A:CHRNA9:GABRA2:PKD2:ANKH:SLC4A9:KCNK5:ABCC10:PTK2B:SLC20A2:NCS1
FUMA	GO:0043062	extracellular structure organization	417	16	2.27196e-05	0.000538675	CTSS:CD44:FBN1:LCAT:GFAP:ITGB4:APOC1:APOC2:ANTXR1:CFLAR:CST3:APP:ITGB5:VCAN:AEBP1:BMP1
FUMA	GO:0044448	cell cortex part	176	10	3.19344e-05	0.000551143	RIMS3:CAPZA1:EXOC6:CTBP2:GMFG:ACTR2:PKD2:LANCL2:CALD1:CLTA
FUMA	GO:0031110	regulation of microtubule polymerization or depolymerization	76	7	2.33632e-05	0.000552152	STMN1:PAK1:NIN:KATNB1:MAPT:SNCA:MAP1B
FUMA	GO:0050806	positive regulation of synaptic transmission	170	10	2.37255e-05	0.000558919	RIMS3:CACNB2:GFAP:CRHR1:ADCYAP1:CREB1:APP:SNCA:PTK2B:CRH
gPROFILER	GO:0097435	supramolecular fiber organization		33		0.000570205	PTK2B,BIN1,SNCA,CFLAR,CASS4,APP,LDLR,ARHGAP17,STMN1,MAPT,ARHGAP35,CAPZA1,ITGB5,GFAP,MEF2C,ALDOA,RHOC,CDC42,DLG1,GMFG,KATNB1,DST,KANK1,TCAP,ARHGEF10,CST3,MAP1B,NIN,AEBP1,SORBS1,RUFY3,PAK1,ACTR2
gPROFILER	GO:0023056	positive regulation of signaling		41		0.000572884	PTK2B,LANCL2,SNCA,WNT3,MED1,NSF,CFLAR,ADCYAP1,APP,GPR27,CD44,HEXIM1,BDNF,IKBKB,PML,ITPKB,TRIM38,MAP4K4,PROK2,CALM3,GDF3,RBPMS,ALPK1,BAD,IQGAP1,RASGRF1,GFAP,NFKB1,CACNB2,PKD2,CREB1,MEF2C,RELA,MACF1,TCF7L2,PPM1A,FAM162A,USP47,RHOC,CDC42,UBE3A
FUMA	GO:0098657	import into cell	773	23	2.48814e-05	0.000584277	CDC42:CD5:PICALM:RIN3:SLC12A4:CTC-479C5.17:GFAP:NME1:CD209:CLEC4M:LDLR:CD22:APOC1:APOC2:CALM3:SLC8A1:BIN1:BCL2L1:APP:DLG1:SNCA:AP1S1:MKLN1:CLTA
gPROFILER	GO:0030426	growth cone		15		0.000584351	PTK2B,SNCA,APP,MAPT,CALM3,IQGAP1,RASGRF1,PALLD,TAOK2,KATNB1,EXOC6,DOCK7,MAP1B,NIN,RUFY3
gPROFILER	GO:0030427	site of polarized growth		15		0.000589999	PTK2B,SNCA,APP,MAPT,CALM3,IQGAP1,RASGRF1,PALLD,TAOK2,KATNB1,EXOC6,DOCK7,MAP1B,NIN,RUFY3
FUMA	GO:0021536	diencephalon development	77	7	2.54548e-05	0.000595837	CRHR1:ADCYAP1:NRP2:CREB1:SRD5A1:SMO:CRH
gPROFILER	GO:0030054	cell junction		52		0.000600596	PTK2B,SNCA,CASS4,APP,CD44,VWC2,MKLN1,ARHGAP17,C1QTNF5,RPLP0,CAMK2B,ICA1,MAP4K4,ITGB5,IQGAP1,TJAP1,PKD2,MACF1,TNS1,MAGI1,CDC42,DLG1,LRFN1,NCS1,GABRA2,ITGB4,LRRC1,PALLD,AKAP6,SLC30A3,DST,GABRB3,RPH3A,DOCK7,PRICKLE4,PARD3B,MAP1B,RAPGEF2,RIMS3,FAM129B,CTBP2,SORBS1,KIFC3,RUFY3,UBN1,SLC8A1,PAK1,ACTR2,MARVELD3,CNIH3,BCL2L1,CHRNA9
FUMA	GO:0061387	regulation of extent of cell growth	106	8	2.64695e-05	0.000613725	MACF1:BDNF:PAK1:MAPT:WNT3:MAP3K13:RUFY3:MAP1B
FUMA	GO:0001505	regulation of neurotransmitter levels	332	14	2.64364e-05	0.000613725	RIMS3:CACNB2:CTBP2:GFAP:CALM3:CHDH:GABRA2:PKD2:SNCA:SRD5A1:MEF2C:ALDH5A1:PTK2B:NCS1
FUMA	GO:2001020	regulation of response to dna damage stimulus	209	11	2.63552e-05	0.000613725	MCL1:SMYD2:USP47:CD44:PML:PPP4C:MAPT:ACTR2:BCL2L1:UBE2V1:PTTG1IP
gPROFILER	GO:1901701	cellular response to oxygen-containing compound		13		0.000616693	PTK2B,FBN1,LANCL2,SNCA,WNT3,MED1,CFLAR,APP,PTPRA,GPR27,CRHR1,LDLR,ZBTB20
gPROFILER	GO:0045596	negative regulation of cell differentiation		11		0.000616693	PTK2B,FBN1,WNT3,MED1,NFATC3,CFLAR,ADCYAP1,APP,LDLR,OVOL2,BDNF
gPROFILER	GO:0010976	positive regulation of neuron projection development		20		0.000616693	PTK2B,WNT3,CFLAR,ADCYAP1,BDNF,MAPT,ARHGAP35,CAMK2B,IQGAP1,MACF1,MAP3K13,KATNB1,FIG4,MAP1B,RAPGEF2,NIN,RUFY3,PAK1,ACTR2,NME1
gPROFILER	GO:0010952	positive regulation of peptidase activity		7		0.000616693	CYCS,SNCA,CFLAR,APP,MAPT,PML,PICALM
gPROFILER	GO:1902903	regulation of supramolecular fiber organization		22		0.000616693	PTK2B,BIN1,SNCA,APP,LDLR,STMN1,MAPT,ARHGAP35,CAPZA1,MEF2C,RHOC,CDC42,DLG1,GMFG,KATNB1,KANK1,ARHGEF10,MAP1B,NIN,AEBP1,PAK1,ACTR2
FUMA	GO:0065005	protein lipid complex assembly	32	5	2.67838e-05	0.000619059	LCAT:APOC1:APOC2:BIN1:BMP1
FUMA	GO:0044531	modulation of programmed cell death in other organism	6	3	2.70767e-05	0.000621917	BAD:CASP8:BCL2L1
FUMA	GO:0060696	regulation of phospholipid catabolic process	6	3	2.70767e-05	0.000621917	LDLR:APOC1:APOC2
FUMA	GO:0002791	regulation of peptide secretion	471	17	2.75286e-05	0.000630327	ENSA:GOLPH3L:TCF7L2:BAD:PML:ADCYAP1:CACNA1A:CD22:LILRA5:MAP4K4:TTN:GPR27:SERP1:IL1RAP:ICA1:CLEC5A:CRH
FUMA	GO:0044429	mitochondrial part	1019	27	3.77773e-05	0.000640934	MCL1:COX15:BAD:ME3:LETMD1:ACACB:SLC25A35:NME1:NDUFA7:NDUFA7:CALM3:MTHFD2:MRPL35:NDUFB3:CASP8:CREB1:BCL2L1:CHDH:NDUFB5:COX18:SNCA:ACSL6:RNF144B:ALDH5A1:BCKDHB:RTN4IP1:CYCS:GIMAP5
gPROFILER	GO:0019899	enzyme binding		83		0.000647358	PTK2B,BIN1,ENSA,SNCA,NSF,CFLAR,KIAA1147,CASS4,APP,LDLR,KANSL1,ARHGAP17,MAPT,IKBKB,PML,PICALM,CDC27,SLC12A4,CALM3,TNIP1,GDF3,BAD,IQGAP1,NIPBL,RASGRF1,GFAP,UBE2D3,CD22,PKD2,CREB1,RALB,MEF2C,RELA,PIAS2,TCF7L2,PEX19,RHOC,CDC42,DLG1,PRKAR1B,EID1,NCS1,MAP3K13,APOC2,VHL,AKAP6,FBXW7,SP1,TAOK2,RNF144B,FMNL2,FANCD2,MYO9B,RPH3A,ERBB2,DOCK7,ARHGEF10,CASP8,UBE2T,MSH3,CST3,MARCH6,LTBR,RAPGEF2,SRSF1,RIMS3,SUMO3…
FUMA	GO:0019221	cytokine mediated signaling pathway	780	23	2.85976e-05	0.000650751	CDC42:CAPZA1:MCL1:CD44:BAD:RELA:LTBR:RPLP0:ELF1:PML:MED1:PSME3:ZC3H15:CASP8:BCL2L1:UBE2V1:IL17RE:IL1RAP:NFKB1:TRIM38:CAMK2B:PTK2B:IKBKB
FUMA	GO:0009991	response to extracellular stimulus	521	18	2.85495e-05	0.000650751	WNT2B:ENSA:PIK3C2B:RELA:GDF3:ACACB:TNRC6A:MED1:ADCYAP1:LDLR:ARHGAP35:SLC8A1:RALB:CREB1:EIF4G1:SST:SRD5A1:BCKDHB
Webgestalt	GO:0043296	apical junction complex	141	11	8.32299e-06	0.000651892	ARHGAP17;C1QTNF5;TJAP1;MAGI1;DLG1;PARD3B;RAPGEF2;SORBS1;KIFC3;UBN1;MARVELD3
Webgestalt	GO:0043235	receptor complex	396	19	7.67461e-06	0.000651892	PTK2B;APP;PTPRA;CD44;LDLR;VWC2;IKBKB;ITGB5;DLG1;GABRA2;ITGB4;TAOK2;NRP2;GABRB3;ERBB2;CR1L;SORBS1;CNIH3;CHRNA9
Webgestalt	GO:0030658	transport vesicle membrane	198	13	8.44419e-06	0.000651892	SNCA;AP1S1;SCG3;ICA1;GOSR2;GABRA2;SLC30A3;RPH3A;CLTA;CNIH3;BCL2L1;SEC24D;SCAMP1
FUMA	GO:0008361	regulation of cell size	174	10	2.89636e-05	0.000657045	MACF1:BDNF:PAK1:SLC12A4:CTC-479C5.17:MAPT:WNT3:CREB1:MAP3K13:RUFY3:MAP1B
gPROFILER	GO:0033267	axon part		22		0.000660428	PTK2B,BIN1,SNCA,AP1S1,ADCYAP1,APP,MAPT,CALM3,IQGAP1,RASGRF1,DLG1,NCS1,PALLD,TAOK2,KATNB1,DST,EXOC6,DOCK7,CRH,MAP1B,NIN,RUFY3
gPROFILER	GO:0045202	synapse		49		0.000660428	PTK2B,BIN1,SNCA,AP1S1,NSF,ADCYAP1,APP,PTPRA,VWC2,MKLN1,BDNF,MAPT,PICALM,CACNA1A,RPLP0,CAMK2B,ICA1,SYNJ2,CALM3,CACNB2,PDE4B,MEF2C,RELA,NIPSNAP1,CDC42,DLG1,PRKAR1B,LRFN1,NCS1,GABRA2,DCLK1,LRRC1,SLC30A3,NRP2,GABRB3,RPH3A,IL1RAP,RTN3,MAP1B,RAPGEF2,RIMS3,CTBP2,CLTA,SLC8A1,ACTR2,CNIH3,BCL2L1,CHRNA9,SCAMP1
FUMA	GO:0034599	cellular response to oxidative stress	292	13	2.92163e-05	0.000660739	MCL1:RELA:MSRB3:PML:MAPT:CFLAR:NCF4:FANCD2:PKD2:SNCA:FBXW7:CYCS:OXR1
FUMA	GO:0035770	ribonucleoprotein granule	219	11	4.04132e-05	0.000674228	CDC42:MOV10:PATL1:RPLP0:EID1:IQGAP1:TNRC6A:MAPT:SAMD4B:POLDIP3:RBPMS
FUMA	GO:0072358	cardiovascular system development	783	23	3.03379e-05	0.000683998	ATPIF1:PPIH:ANGPTL3:TCF7L2:SP1:PML:NFATC3:MED1:ERBB2:VEZF1:ANTXR1:CFLAR:NRP2:OVOL2:PROK2:PKD2:FBXW7:RAPGEF2:MEF2C:ERAP1:SMO:PTK2B:FAM129B
FUMA	GO:0043565	sequence specific dna binding	1114	30	1.0277e-05	0.0007044	ZNF281:TCF7L2:RELA:ETV6:TFCP2:SP1:ELF1:KLF12:JDP2:TBX6:NFATC3:TAF1C:MED1:MAPT:NME1:HLF:VEZF1:UHRF1:GATAD2A:ARHGAP35:EN1:CREB1:OVOL2:ZFP64:FEZF2:NFKB1:MEF2C:ETV1:NEUROD6:AEBP1
FUMA	KEGG_HUNTINGTONS_DISEASE	huntingtons disease	174	10	2.89636e-05	0.000704579	BDNF:SP1:NDUFA7:NDUFA7:NDUFB3:CASP8:CREB1:NDUFB5:POLR2H:CYCS:CLTA
FUMA	KEGG_T_CELL_RECEPTOR_SIGNALING_PATHWAY	t cell receptor signaling pathway	108	8	3.03045e-05	0.000704579	CDC42:RELA:PAK1:NFATC3:CD28:DLG1:NFKB1:IKBKB
FUMA	GO:0040017	positive regulation of locomotion	575	19	3.1537e-05	0.00070886	DOCK7:ANGPTL3:RHOC:PAK1:SP1:VPS37B:IQGAP1:SPN:SLC8A1:MAP4K4:NRP2:CASS4:APP:RUFY3:RAPGEF2:NIPBL:HBEGF:SMO:PTK2B
FUMA	GO:0000139	golgi membrane	747	22	4.33649e-05	0.000711612	CDC42:GOLPH3L:COPA:CNIH3:RTN3:ACER3:FAM57B:CHST6:NSF:GOSR2:PLEKHA3:APP:B3GALNT1:SEC24D:SCAMP1:FIG4:HS3ST5:ICA1:AP1S1:GALNT11:RAB2A:CLTA
gPROFILER	GO:0007267	cell-cell signaling		40		0.000712097	PTK2B,ENSA,SNCA,WNT3,ADCYAP1,APP,PTPRA,GPR27,CRHR1,BDNF,MAPT,CACNA1A,WNT2B,CAMK2B,SST,ICA1,SLC12A4,MAP4K4,CALM3,BAD,MOV10,RASGRF1,LRRFIP2,GFAP,NFKB1,CACNB2,PKD2,CREB1,MEF2C,RELA,MACF1,TCF7L2,PPM1A,USP47,CDC42,DLG1,PRKAR1B,TNRC6A,NCS1,GABRA2
FUMA	GO:0021761	limbic system development	109	8	3.23897e-05	0.000725806	CRHR1:NME1:NRP2:FEZF2:SRD5A1:NEUROD6:SMO:CRH
FUMA	WP2112	il17 signaling pathway	32	5	2.67838e-05	0.00072718	RELA:SP1:IL17RE:NFKB1:IKBKB
FUMA	GO:0055114	oxidation reduction process	954	26	3.30334e-05	0.000737981	SORBS1:COX15:CTBP2:PGM2L1:ME3:MSRB3:DYRK2:ACACB:VAT1L:CYB561:NDUFA7:NDUFA7:MTHFD2:NDUFB3:SMOX:NCF4:CHDH:NDUFB5:SCD5:SNCA:SRD5A1:ALDH5A1:BCKDHB:RTN4IP1:CYCS:PDIA4:OXR1
FUMA	R-HSA-168898	toll like receptor cascades	153	10	9.4869e-06	0.000748466	CTSS:RELA:CASP8:CREB1:UBE2V1:APP:NFKB1:UBE2D3:MEF2C:IKBKB
gPROFILER	GO:0097458	neuron part		64		0.000758619	PTK2B,BIN1,SNCA,AP1S1,NSF,ADCYAP1,APP,LDLR,BDNF,STMN1,MAPT,PICALM,CACNA1A,RPLP0,CAMK2B,SST,ICA1,SYNJ2,SCN11A,CALM3,IQGAP1,RASGRF1,CD22,CACNB2,PDE4B,CREB1,SEZ6L2,RHOC,CDC42,DLG1,LRFN1,NCS1,GABRA2,DCLK1,LRRC1,PALLD,TAOK2,SRD5A1,KATNB1,SLC30A3,DST,NRP2,EXOC6,GABRB3,RPH3A,DOCK7,CASP8,CRH,MAP1B,SMO,RAPGEF2,RIMS3,NIN,CTBP2,RUFY3,CLTA,PCDHB15,SLC8A1,PAK1,ACTR2,CNIH3,BCL2L1,CHRNA9,SCAMP1
FUMA	GO:0016791	phosphatase activity	268	13	1.18825e-05	0.00078187	PPM1J:SSH3:UBASH3B:MDP1:PPM1A:PPP4C:ACP1:PTPRA:PPM1L:DLG1:FIG4:SYNJ2:CYCS
FUMA	GO:0055001	muscle cell development	178	10	3.51621e-05	0.000783155	PAK1:AKAP6:TCAP:SLC8A1:BIN1:TTN:CFLAR:MEF2C:SMO:FAM129B
FUMA	GO:0042803	protein homodimerization activity	846	25	1.24252e-05	0.000786132	ATPIF1:MCL1:MTPAP:RELA:SP1:SNX6:RBPMS2:PML:NUDT21:SPPL2C:MAPT:APOC2:BCL2L1:XPNPEP3:MAP3K13:RCHY1:PKD2:NFKB1:ACSL6:ALDH5A1:DLK2:CAMK2B:MKLN1:RBPMS:IKBKB
FUMA	GO:0060078	regulation of postsynaptic membrane potential	143	9	3.56544e-05	0.000791721	GABRB3:ADCYAP1:SLC8A1:APP:CHRNA9:GABRA2:SNCA:MEF2C:PTK2B
FUMA	R-HSA-2262752	cellular responses to stress	437	17	1.06108e-05	0.000795279	CAPZA1:MOV10:RELA:SP1:UBN1:TNRC6A:DNAJC7:PSME3:CDC27:MAP4K4:NCF4:VHL:NFKB1:UBE2D3:CYCS:CAMK2B:DCTN6
gPROFILER	GO:0016043	cellular component organization		185		0.000802417	PTK2B,BIN1,CYCS,FBN1,SNCA,TAF1C,WNT3,DENR,DYNLRB1,MED1,NSF,CFLAR,CASS4,ADCYAP1,APP,PTPRA,CD44,ACACB,NAP1L5,LDLR,MKLN1,KANSL1,ARHGAP17,BDNF,STMN1,MAPT,IKBKB,PML,ALDH5A1,PICALM,CEP135,CACNA1A,RBBP5,RPLP0,CDC27,ARHGAP35,CAMK2B,CAPZA1,SYNJ2,SLC12A4,ST7L,MCM7,MAP4K4,ATPAF1,LCAT,CELF1,CALM3,ITGB5,BAD,MOV10,IQGAP1,EXTL3,NIPBL,RASGRF1,GFAP,UBE2D3,TJAP1,CD22,SCLT1,BMP1,CACNB2,PKD2,CREB1,SEZ6L2,RALB,PATL1,…
gPROFILER	GO:0023052	signaling		136		0.00081225	PTK2B,BIN1,ENSA,FBN1,LANCL2,SNCA,WNT3,CLEC4M,MED1,NFATC3,CCKBR,NSF,CFLAR,ADCYAP1,APP,PTPRA,GPR27,CD44,HEXIM1,CRHR1,CD209,VWC2,ELF1,MKLN1,OVOL2,ARHGAP17,BDNF,DLK2,STMN1,MAPT,IKBKB,PML,CACNA1A,RBPMS2,ITPKB,WNT2B,RPLP0,NCF4,ARHGAP35,CAMK2B,CAPZA1,SST,ICA1,SPEN,TRIM38,CD5,SLC12A4,MAP4K4,SCN11A,PROK2,CALM3,ITGB5,TNIP1,GDF3,RBPMS,FST,ALPK1,BAD,MOV10,IQGAP1,EXTL3,RASGRF1,LRRFIP2,GFAP,UBE2D3,CD22,BMP1,NF…
FUMA	GO:0051817	modification of morphology or physiology of other organism involved in symbiotic interaction	111	8	3.69213e-05	0.000817384	BAD:SP1:CD209:CLEC4M:CALM3:CASP8:BCL2L1:TNIP1
FUMA	GO:0005774	vacuolar membrane	399	15	5.13351e-05	0.000828814	ATP6V1D:SLC12A4:CTC-479C5.17:GFAP:PLEKHM1:SPPL2C:NSF:ABCC3:MMD:CYB561:LDLR:SLC30A3:ABCC10:AP1S1:RAB2A:CLTA
FUMA	GO:0062012	regulation of small molecule metabolic process	343	14	3.77069e-05	0.000829777	ATPIF1:SORBS1:BAD:SP1:DYRK2:ACACB:PSME3:LDLR:APOC1:APOC2:SNCA:NFKB1:FAM3C:PTK2B
FUMA	GO:0007178	transmembrane receptor protein serine threonine kinase signaling pathway	343	14	3.77069e-05	0.000829777	GDF3:SNX6:PPM1A:FBN1:RBPMS2:PML:CREB1:OVOL2:ITGB5:PPM1L:UBE2D3:FST:VWC2:RBPMS
FUMA	GO:0019722	calcium mediated signaling	218	11	3.87653e-05	0.000850522	DYRK2:EDNRB:AKAP6:NFATC3:MAPT:CD22:CALM3:SLC8A1:JPH2:PKD2:PTK2B
FUMA	GO:0030163	protein catabolic process	907	25	3.90194e-05	0.000853549	ATPIF1:CTSS:USP47:VPS37C:RELA:VPS37B:UBE3A:PML:PSME3:NSF:CDC27:UHRF1:LDLR:CASP8:CST3:PTTG1IP:RCHY1:UBE2D3:FBXW7:MARCH6:MYLIP:RNF144B:TRIM38:PTK2B:CLTA
FUMA	GO:0030027	lamellipodium	188	10	5.58169e-05	0.000863717	ANGPTL3:CD44:PAK1:ACTR2:ANTXR1:APP:RUFY3:PKD2:PALLD:PTK2B
FUMA	GO:0099513	polymeric cytoskeletal fiber	706	21	5.60855e-05	0.000863717	STMN1:MACF1:PAK1:NIN:IQGAP1:KATNB1:KIFC3:GFAP:MAPT:CDC27:NME1:MYO9B:CALM3:SLC8A1:DYNLRB1:SERP1:DLG1:PKD2:PALLD:MAP1B:DST
FUMA	GO:0005773	vacuole	760	22	5.58485e-05	0.000863717	CTSS:ATP6V1D:SLC12A4:CTC-479C5.17:GFAP:PLEKHM1:SPPL2C:NSF:ABCC3:MMD:CYB561:LDLR:SLC30A3:ACTR2:NCF4:SNCA:VCAN:ABCC10:AP1S1:GIMAP5:RAB2A:GGH:CLTA
gPROFILER	GO:0044419	interspecies interaction between organisms		42		0.000864522	BIN1,AP1S1,DENR,CLEC4M,CFLAR,CD209,LDLR,HS3ST5,IKBKB,PML,ILF3,RPLP0,SPEN,TRIM38,CALM3,ITGB5,TNIP1,BAD,IQGAP1,CREB1,RELA,CDC42,UBE3A,DLG1,EIF4G1,VPS37C,FBXW7,SP1,SLC20A2,CR1,NRP2,CASP8,CLEC5A,RTN3,LTBR,VPS37B,CTBP2,UBN1,POLR2H,BCL2L1,CD28,PPIH
gPROFILER	GO:0033674	positive regulation of kinase activity		22		0.000864522	PTK2B,SNCA,CASS4,ADCYAP1,CD44,BDNF,MAPT,MAP4K4,PROK2,CALM3,BAD,IQGAP1,PKD2,RALB,MEF2C,CDC42,DLG1,PRKAR1B,LILRA5,MAP3K13,FBXW7,TAOK2
gPROFILER	GO:0019050	suppression by virus of host apoptotic process		3		0.000864522	BAD,CASP8,BCL2L1
FUMA	GO:0061919	process utilizing autophagic mechanism	485	17	3.96619e-05	0.00086503	ATPIF1:MCL1:PIK3C2B:VPS37C:BAD:VPS37B:SNX6:ATP6V1D:GFAP:PLEKHM1:MAPT:ITGB4:RALB:WDR6:EIF4G1:SNCA:FBXW7
FUMA	KEGG_ACUTE_MYELOID_LEUKEMIA	acute myeloid leukemia	57	6	4.22292e-05	0.000872736	TCF7L2:BAD:RELA:PML:NFKB1:IKBKB
FUMA	GO:0005813	centrosome	500	17	5.77117e-05	0.000875295	CDC42:PDE4B:SORBS1:NIN:ATP6V1D:NUDT21:KATNB1:KIFC3:CDC27:NME1:CALM3:BCL2L1:DYNLRB1:CEP135:SCLT1:ARHGEF10:DCTN6
FUMA	GO:0021953	central nervous system neuron differentiation	181	10	4.05249e-05	0.000881236	TSKU:DCLK1:NIN:MAPT:WNT3:ARHGAP35:NRP2:FEZF2:RAPGEF2:SMO
gPROFILER	GO:0050804	modulation of chemical synaptic transmission		15		0.00088475	PTK2B,SNCA,ADCYAP1,APP,PTPRA,BDNF,MAPT,CACNA1A,CAMK2B,CALM3,RASGRF1,GFAP,CACNB2,CREB1,MEF2C
gPROFILER	GO:0043085	positive regulation of catalytic activity		44		0.00088475	PTK2B,CYCS,SNCA,CFLAR,CASS4,ADCYAP1,APP,CD44,ARHGAP17,BDNF,MAPT,PML,PICALM,NCF4,ARHGAP35,MAP4K4,PROK2,CALM3,BAD,IQGAP1,RASGRF1,NVL,PKD2,RALB,MEF2C,FAM162A,RHOC,APOC1,CDC42,DLG1,PRKAR1B,LILRA5,GMFG,MAP3K13,APOC2,FBXW7,TAOK2,CR1,MYO9B,ERBB2,DOCK7,ARHGEF10,CASP8,ANTXR1
gPROFILER	GO:0051247	positive regulation of protein metabolic process		64		0.00088475	PTK2B,CYCS,SNCA,NSF,CFLAR,CASS4,ADCYAP1,APP,CD44,LDLR,BDNF,MAPT,PML,PICALM,MAP4K4,PROK2,CALM3,RCHY1,TNIP1,GDF3,RBPMS,BAD,IQGAP1,NIPBL,PKD2,EDNRB,RALB,MEF2C,RELA,TCF7L2,FAM162A,MYLIP,CDC42,UBE3A,DLG1,PRKAR1B,POLDIP3,LILRA5,EIF4G1,MAP3K13,HBEGF,FBXW7,TAOK2,RNF144B,SERP1,CR1,ERBB2,DOCK7,CASP8,ANTXR1,PTTG1IP,CRH,LTBR,JDP2,RAPGEF2,DNAJC27,MMD,UHRF1,PSME3,UBE2V1,FANCI,PAK1,SPN,CD28
gPROFILER	GO:0099177	regulation of trans-synaptic signaling		15		0.00088475	PTK2B,SNCA,ADCYAP1,APP,PTPRA,BDNF,MAPT,CACNA1A,CAMK2B,CALM3,RASGRF1,GFAP,CACNB2,CREB1,MEF2C
gPROFILER	GO:0007154	cell communication		136		0.000893674	PTK2B,ENSA,FBN1,LANCL2,SNCA,WNT3,CLEC4M,MED1,NFATC3,CCKBR,CFLAR,ADCYAP1,APP,PTPRA,GPR27,CD44,HEXIM1,CRHR1,CD209,VWC2,ELF1,MKLN1,OVOL2,ARHGAP17,BDNF,DLK2,STMN1,MAPT,IKBKB,PML,CACNA1A,RBPMS2,ITPKB,WNT2B,RPLP0,NCF4,ARHGAP35,CAMK2B,CAPZA1,SST,ICA1,SPEN,TRIM38,CD5,SLC12A4,MAP4K4,SCN11A,PROK2,CALM3,ITGB5,TNIP1,GDF3,RBPMS,FST,ALPK1,BAD,MOV10,IQGAP1,EXTL3,RASGRF1,LRRFIP2,GFAP,UBE2D3,CD22,BMP1,NFKB1,CACNB…
FUMA	GO:0006919	activation of cysteine type endopeptidase activity involved in apoptotic process	83	7	4.14975e-05	0.000899725	BAD:PML:MAPT:CASP8:FAM162A:SNCA:CYCS
Webgestalt	GO:0019867	outer membrane	206	13	1.29287e-05	0.000907358	SNCA;ACACB;GIMAP5;SYNJ2;ANKH;BAD;ACSL6;LETMD1;MCL1;CASP8;RTN4IP1;BCL2L1;NME1
FUMA	GO:0019932	second messenger mediated signaling	439	16	4.20548e-05	0.000909126	DYRK2:EDNRB:AKAP6:NFATC3:CRHR1:MAPT:ADCYAP1:CD22:CALM3:SLC8A1:JPH2:PKD2:RAPGEF2:PRKAR1B:PTK2B:CRH
FUMA	GO:0043123	positive regulation of i kappab kinase nf kappab signaling	182	10	4.2461e-05	0.000915215	RHOC:RELA:LTBR:PPM1A:CFLAR:CASP8:UBE2V1:ALPK1:TRIM38:IKBKB
gPROFILER	GO:1901700	response to oxygen-containing compound		15		0.000918549	PTK2B,ENSA,FBN1,LANCL2,SNCA,WNT3,MED1,CFLAR,ADCYAP1,APP,PTPRA,GPR27,CRHR1,LDLR,ZBTB20
Webgestalt	GO:1902903	regulation of supramolecular fiber organization	329	22	1.16816e-06	0.000920804	PTK2B;BIN1;SNCA;APP;LDLR;STMN1;MAPT;ARHGAP35;CAPZA1;MEF2C;RHOC;CDC42;DLG1;GMFG;KATNB1;SSH3;KANK1;ARHGEF10;NIN;AEBP1;PAK1;ACTR2
gPROFILER	GO:0030029	actin filament-based process		29		0.000931757	PTK2B,BIN1,CFLAR,CASS4,MKLN1,ARHGAP17,STMN1,IKBKB,ARHGAP35,CAPZA1,ITGB5,CACNB2,PDE4B,MEF2C,ALDOA,RHOC,CDC42,DLG1,GMFG,PALLD,SCN2B,TAOK2,FMNL2,MYO9B,KANK1,TCAP,ARHGEF10,PRICKLE4,ANTXR1
gPROFILER	GO:0010647	positive regulation of cell communication		40		0.000931757	PTK2B,LANCL2,SNCA,WNT3,MED1,CFLAR,ADCYAP1,APP,GPR27,CD44,HEXIM1,BDNF,IKBKB,PML,ITPKB,TRIM38,MAP4K4,PROK2,CALM3,GDF3,RBPMS,ALPK1,BAD,IQGAP1,RASGRF1,GFAP,NFKB1,CACNB2,PKD2,CREB1,MEF2C,RELA,MACF1,TCF7L2,PPM1A,FAM162A,USP47,RHOC,CDC42,UBE3A
FUMA	R-HSA-2262752	disease	1072	29	1.33094e-05	0.000944654	TCF7L2:CTBP2:BDNF:VPS37C:BAD:RELA:MAML2:RPLP0:VPS37B:IQGAP1:CHST6:ERBB2:PSME3:ANTXR1:CD28:CREB1:APP:POLR2H:MUC4:NFKB1:FBXW7:MSH3:VCAN:HBEGF:CAMK2B:AP1S1:IKBKB:SLC20A2:CLTA
FUMA	R-HSA-1643685	toll like receptor 4 tlr4 cascade	127	9	1.38642e-05	0.000944654	RELA:CASP8:CREB1:UBE2V1:APP:NFKB1:UBE2D3:MEF2C:IKBKB
gPROFILER	GO:0030424	axon		24		0.000960454	PTK2B,BIN1,SNCA,AP1S1,ADCYAP1,APP,BDNF,MAPT,SYNJ2,SCN11A,CALM3,IQGAP1,RASGRF1,CREB1,DLG1,NCS1,GABRA2,PALLD,TAOK2,KATNB1,DST,NRP2,EXOC6,DOCK7
gPROFILER	GO:0150034	distal axon		18		0.000960454	PTK2B,SNCA,AP1S1,ADCYAP1,APP,MAPT,CALM3,IQGAP1,RASGRF1,NCS1,PALLD,TAOK2,KATNB1,EXOC6,DOCK7,MAP1B,NIN,RUFY3
gPROFILER	GO:0044456	synapse part		41		0.000960454	PTK2B,BIN1,SNCA,AP1S1,NSF,ADCYAP1,APP,PTPRA,BDNF,MAPT,PICALM,CACNA1A,RPLP0,ICA1,SYNJ2,CALM3,CACNB2,PDE4B,MEF2C,NIPSNAP1,CDC42,DLG1,LRFN1,NCS1,GABRA2,DCLK1,LRRC1,SLC30A3,NRP2,GABRB3,RPH3A,MAP1B,RIMS3,CTBP2,CLTA,SLC8A1,ACTR2,CNIH3,BCL2L1,CHRNA9,SCAMP1
Webgestalt	GO:0048639	positive regulation of developmental growth	164	15	1.37438e-06	0.000962981	WNT3;ACACB;BDNF;MAPT;NIPBL;CREB1;MEF2C;MACF1;MAP3K13;AKAP6;SERP1;MAP1B;SMO;RUFY3;PAK1
gPROFILER	GO:0023051	regulation of signaling		79		0.000976758	PTK2B,ENSA,FBN1,LANCL2,SNCA,WNT3,MED1,NSF,CFLAR,ADCYAP1,APP,PTPRA,GPR27,CD44,HEXIM1,CRHR1,VWC2,ELF1,OVOL2,ARHGAP17,BDNF,DLK2,STMN1,MAPT,IKBKB,PML,CACNA1A,RBPMS2,ITPKB,ARHGAP35,CAMK2B,ICA1,TRIM38,MAP4K4,PROK2,CALM3,TNIP1,GDF3,RBPMS,FST,ALPK1,BAD,IQGAP1,RASGRF1,GFAP,CD22,NFKB1,CACNB2,PKD2,CREB1,SEZ6L2,MEF2C,RELA,MACF1,PIAS2,TCF7L2,PPM1A,FAM162A,USP47,RHOC,CDC42,UBE3A,DLG1,PRKAR1B,LILRA5,DYRK2,NCS1,…
FUMA	GO:0016604	nuclear body	769	22	6.62815e-05	0.000990265	PPIH:TCF7L2:BDNF:PATL1:MAML2:SNURF:SNURF:PML:UBN1:SPN:NUDT21:MAPT:LUC7L3:SRSF1:PIAS2:GATAD2A:PARD3B:SUMO3:POLDIP3:FANCD2:ZBTB20:RCHY1:MEF2C
Webgestalt	GO:0022604	regulation of cell morphogenesis	473	27	1.57155e-06	0.000991022	PTK2B;WNT3;CASS4;CD44;MKLN1;BDNF;MAPT;ARHGAP35;CAMK2B;MOV10;MACF1;ALDOA;RHOC;CDC42;DLG1;MAP3K13;TAOK2;SSH3;FMNL2;KANK1;FEZF2;MAP1B;RAPGEF2;NIN;RUFY3;PAK1;ACTR2
FUMA	GO:0046883	regulation of hormone secretion	263	12	4.65042e-05	0.000999432	ENSA:TCF7L2:BAD:CRHR1:ADCYAP1:CACNA1A:MAP4K4:CREB1:GPR27:SERP1:ICA1:CRH
FUMA	GO:0043547	positive regulation of gtpase activity	396	15	4.71466e-05	0.00101028	DOCK7:PICALM:RIN3:RASGRF1:IQGAP1:ARHGAP17:ERBB2:ADCYAP1:MYO9B:ARHGAP35:MAP4K4:ZC3H15:RAPGEF2:ARHGEF10:PTK2B
gPROFILER	GO:1901214	regulation of neuron death		17		0.00102329	PTK2B,SNCA,BDNF,MAPT,PICALM,CACNA1A,BAD,OXR1,CREB1,MEF2C,CDC42,EIF4G1,SNX6,FBXW7,GABRB3,MCL1,CASP8
FUMA	GO:0005874	microtubule	410	15	6.96213e-05	0.00102487	STMN1:MACF1:NIN:IQGAP1:KATNB1:KIFC3:MAPT:CDC27:CALM3:SLC8A1:DYNLRB1:SERP1:DLG1:MAP1B:DST
FUMA	GO:1901385	regulation of voltage gated calcium channel activity	36	5	4.83338e-05	0.00103271	PDE4B:CACNB2:CACNB1:CRHR1:CALM3
gPROFILER	GO:0098588	bounding membrane of organelle		57		0.00103286	SNCA,WNT3,AP1S1,NSF,APP,CD44,ACACB,LDLR,SPPL2C,HS3ST5,GIMAP5,SCG3,PML,PICALM,NCF4,CAMK2B,ICA1,SLC12A4,B3GALNT1,CALM3,CYB561,BAD,IQGAP1,GFAP,UBE2D3,ACSL6,PKD2,PLEKHA3,PEX19,ACER3,GOSR2,CDC42,COPA,LETMD1,GABRA2,RAB2A,SNX6,HBEGF,AKAP6,VPS37C,PLEKHM1,GALNT11,FAM57B,ATP6V1D,CR1,SLC30A3,RPH3A,MCL1,CHST6,ERBB2,JPH2,CASP8,ANTXR1,GOLPH3L,ABCC10,FIG4,CLEC5A
Webgestalt	GO:0005741	mitochondrial outer membrane	180	12	1.61397e-05	0.00103832	SNCA;ACACB;GIMAP5;SYNJ2;BAD;ACSL6;LETMD1;MCL1;CASP8;RTN4IP1;BCL2L1;NME1
gPROFILER	GO:0071495	cellular response to endogenous stimulus		32		0.00104293	FBN1,LANCL2,SNCA,MED1,CFLAR,ADCYAP1,APP,PTPRA,CD44,CRHR1,VWC2,OVOL2,BDNF,MAPT,PML,CACNA1A,RBPMS2,SST,MCM7,ITGB5,GDF3,FST,IQGAP1,UBE2D3,NFKB1,PKD2,PDE4B,CREB1,MEF2C,RELA,PIAS2,PPM1A
gPROFILER	GO:0036464	cytoplasmic ribonucleoprotein granule		11		0.00105141	MAPT,RPLP0,SAMD4B,RBPMS,MOV10,IQGAP1,PATL1,CDC42,EID1,POLDIP3,TNRC6A
Webgestalt	GO:0031346	positive regulation of cell projection organization	365	23	1.84442e-06	0.00105736	PTK2B;WNT3;CFLAR;ADCYAP1;BDNF;MAPT;CEP135;ARHGAP35;CAMK2B;IQGAP1;MACF1;CDC42;MAP3K13;PLEKHM1;KATNB1;FIG4;MAP1B;RAPGEF2;NIN;RUFY3;PAK1;ACTR2;NME1
gPROFILER	GO:0006919	activation of cysteine-type endopeptidase activity involved in apoptotic process		5		0.00108185	CYCS,SNCA,CFLAR,MAPT,PML
FUMA	GO:0140272	exogenous protein binding	74	7	1.96032e-05	0.00108669	CR1:CD209:CLEC4M:LDLR:ITGB5:CLEC5A:SLC20A2
FUMA	GO:0015075	ion transmembrane transporter activity	870	25	1.9784e-05	0.00108669	CACNB2:SLC16A9:COX15:SCN2B:ATP6V1D:GABRB3:AQP9:SLCO3A1:SLC12A4:CTC-479C5.17:CACNB1:ABCC3:CACNA1A:SLC30A3:SLC8A1:JPH2:SCN11A:CHRNA9:GABRA2:PKD2:ANKH:SLC4A9:KCNK5:PTK2B:SLC20A2:NCS1
FUMA	GO:0042578	phosphoric ester hydrolase activity	364	15	1.79414e-05	0.00108669	PDE4B:PPM1J:SSH3:UBASH3B:MDP1:PPM1A:PPP4C:ACP1:PTPRA:PPM1L:DLG1:FIG4:SYNJ2:PRKAR1B:CYCS
FUMA	GO:0003714	transcription corepressor activity	241	12	1.9818e-05	0.00108669	SPEN:ZNF281:CTBP2:KLF12:JDP2:EID1:MED1:ZNF136:ARHGAP35:MXD4:AEBP1:ZHX1
gPROFILER	GO:0051346	negative regulation of hydrolase activity		7		0.00108675	BIN1,ENSA,SNCA,CFLAR,ADCYAP1,APP,CD44
FUMA	GO:0051051	negative regulation of transport	495	17	5.10209e-05	0.00108697	PICALM:PML:CRHR1:ADCYAP1:CD22:APOC1:APOC2:CALM3:LILRA5:MAP4K4:BIN1:PKD2:SNCA:NFKB1:MAP1B:PTK2B:CRH
FUMA	GO:0044257	cellular protein catabolic process	756	22	5.17028e-05	0.00109454	ATPIF1:CTSS:USP47:VPS37C:VPS37B:UBE3A:PML:PSME3:CDC27:UHRF1:LDLR:CASP8:PTTG1IP:RCHY1:UBE2D3:FBXW7:MARCH6:MYLIP:RNF144B:TRIM38:PTK2B:CLTA
FUMA	GO:0043524	negative regulation of neuron apoptotic process	150	9	5.1823e-05	0.00109454	BDNF:SNX6:GABRB3:EN1:BCL2L1:SNCA:MEF2C:PTK2B:OXR1
FUMA	GO:0051092	positive regulation of nf kappab transcription factor activity	150	9	5.1823e-05	0.00109454	RELA:CFLAR:UBE2V1:APP:MAP3K13:IL1RAP:NFKB1:TRIM38:IKBKB
gPROFILER	GO:0010646	regulation of cell communication		78		0.00109633	PTK2B,ENSA,FBN1,LANCL2,SNCA,WNT3,MED1,CFLAR,ADCYAP1,APP,PTPRA,GPR27,CD44,HEXIM1,CRHR1,VWC2,ELF1,OVOL2,ARHGAP17,BDNF,DLK2,STMN1,MAPT,IKBKB,PML,CACNA1A,RBPMS2,ITPKB,ARHGAP35,CAMK2B,ICA1,TRIM38,MAP4K4,PROK2,CALM3,TNIP1,GDF3,RBPMS,FST,ALPK1,BAD,IQGAP1,RASGRF1,GFAP,CD22,NFKB1,CACNB2,PKD2,CREB1,SEZ6L2,MEF2C,RELA,MACF1,PIAS2,TCF7L2,PPM1A,FAM162A,USP47,RHOC,CDC42,UBE3A,DLG1,PRKAR1B,LILRA5,DYRK2,NCS1,MUC4…
FUMA	GO:0070371	erk1 and erk2 cascade	309	13	5.2231e-05	0.00109999	CD44:MED1:ERBB2:ADCYAP1:DNAJC27:CFLAR:APP:DLG1:CHRNA9:FBXW7:RAPGEF2:TNIP1:PTK2B
FUMA	GO:0005815	microtubule organizing center	722	21	7.68577e-05	0.00111499	CDC42:PDE4B:SORBS1:NIN:ATP6V1D:PPP4C:NUDT21:KATNB1:KIFC3:CDC27:NME1:CALM3:ARHGAP35:BCL2L1:DYNLRB1:CEP135:PKD2:SCLT1:CAMK2B:ARHGEF10:DCTN6
FUMA	GO:0006836	neurotransmitter transport	267	12	5.37728e-05	0.00112675	RIMS3:CACNB2:CTBP2:GFAP:ADCYAP1:CALM3:GABRA2:SNCA:MEF2C:ICA1:CRH:NCS1
FUMA	GO:0051928	positive regulation of calcium ion transport	117	8	5.38078e-05	0.00112675	CACNB2:AKAP6:CALM3:LILRA5:JPH2:PKD2:SNCA:CRH
FUMA	GO:0061024	membrane organization	869	24	5.39647e-05	0.00112682	CDC42:ATPIF1:GOLPH3L:CNIH3:BAD:PICALM:NSF:GOSR2:LDLR:CALM3:ACTR2:BIN1:PLEKHA3:CASP8:BCL2L1:SERP1:DLG1:COX18:SNCA:SEC24D:SCLT1:HBEGF:SYNJ2:CLTA
gPROFILER	GO:0051701	interaction with host		9		0.00112845	CLEC4M,CD209,LDLR,HS3ST5,PML,TRIM38,ITGB5,TNIP1,BAD
gPROFILER	GO:0043271	negative regulation of ion transport		5		0.00114333	PTK2B,BIN1,SNCA,ADCYAP1,CRHR1
FUMA	R-HSA-422475	axon guidance	551	19	1.76527e-05	0.0011505	CDC42:RHOC:CACNB2:PAK1:SCN2B:RPLP0:CACNB1:ERBB2:PSME3:MYO9B:ARHGAP35:ACTR2:NRP2:CREB1:PTPRA:SCN11A:EIF4G1:DLG1:CLTA
FUMA	GO:0060537	muscle tissue development	402	15	5.58469e-05	0.00115129	PAK1:AKAP6:MED1:TCAP:HLF:SLC8A1:TTN:CFLAR:CREB1:JPH2:DLG1:PKD2:MEF2C:SMO:FAM129B
FUMA	GO:1901021	positive regulation of calcium ion transmembrane transporter activity	37	5	5.53756e-05	0.00115129	CACNB2:AKAP6:CALM3:JPH2:PKD2
FUMA	GO:0050778	positive regulation of immune response	871	24	5.59196e-05	0.00115129	CDC42:PDE4B:CTSS:CR1:RELA:PAK1:ELF1:MED1:PSME3:HEXIM1:CRHR1:CD209:CD22:ACTR2:CASP8:CD28:UBE2V1:MUC4:NFKB1:UBE2D3:ALPK1:MEF2C:TNIP1:IKBKB
FUMA	GO:0046890	regulation of lipid biosynthetic process	188	10	5.58169e-05	0.00115129	SORBS1:SP1:ACACB:LDLR:APOC1:APOC2:CREB1:ZBTB20:NFKB1:FBXW7
FUMA	GO:0043903	regulation of symbiosis encompassing mutualism through parasitism	227	11	5.59116e-05	0.00115129	PPIH:BAD:SP1:VPS37B:PML:ILF3:CD28:POLR2H:TNIP1:TRIM38:HS3ST5
FUMA	GO:0060291	long term synaptic potentiation	87	7	5.62131e-05	0.0011541	GFAP:CRHR1:CREB1:APP:SNCA:PTK2B:CRH
FUMA	GO:0032994	protein lipid complex	40	5	8.13243e-05	0.00116294	LCAT:LDLR:APOC1:APOC2:BIN1
FUMA	GO:0098589	membrane region	324	13	8.42851e-05	0.0011883	SORBS1:EDNRB:AKAP6:IQGAP1:MAPT:CFLAR:CASP8:APP:DLG1:SYNJ2:SMO:PTK2B:IKBKB
FUMA	WP3414	initiation of transcription and translation elongation at the hiv-1 ltr	36	5	4.83338e-05	0.00120325	RELA:SP1:NFATC3:HEXIM1:NFKB1
FUMA	WP4223	ras signaling	185	10	4.87503e-05	0.00120325	CDC42:BAD:RELA:PAK1:RASGRF1:CALM3:RALB:BCL2L1:NFKB1:IKBKB
gPROFILER	GO:0061564	axon development		27		0.00120394	WNT3,APP,PTPRA,BDNF,STMN1,MAPT,PICALM,CACNA1A,ARHGAP35,CREB1,MACF1,DCLK1,MAP3K13,PALLD,TAOK2,TSKU,NRP2,FEZF2,ERBB2,DOCK7,ETV1,MAP1B,SMO,NIN,FAM129B,RUFY3,PAK1
gPROFILER	GO:0070371	ERK1 and ERK2 cascade		6		0.00120394	PTK2B,MED1,CFLAR,ADCYAP1,APP,CD44
gPROFILER	GO:0009890	negative regulation of biosynthetic process		43		0.00120394	LANCL2,SNCA,MED1,NFATC3,CFLAR,HEXIM1,MXD4,ZBTB20,OVOL2,PML,CACNA1A,KLF12,ILF3,ARHGAP35,SPEN,GATAD2A,ZHX1,SAMD4B,CELF1,FST,MOV10,NIPBL,UBE2D3,NFKB1,EDNRB,CREB1,MEF2C,RELA,TCF7L2,PPM1A,USP47,APOC1,DLG1,EID1,ZNF215,TNRC6A,EIF4G1,FAM3C,SNX6,HBEGF,VHL,FBXW7,TBX6
gPROFILER	GO:0031346	positive regulation of cell projection organization		23		0.00120394	PTK2B,WNT3,CFLAR,ADCYAP1,BDNF,MAPT,CEP135,ARHGAP35,CAMK2B,IQGAP1,MACF1,CDC42,MAP3K13,PLEKHM1,KATNB1,FIG4,MAP1B,RAPGEF2,NIN,RUFY3,PAK1,ACTR2,NME1
gPROFILER	GO:0052548	regulation of endopeptidase activity		9		0.00120394	BIN1,CYCS,SNCA,CFLAR,APP,CD44,MAPT,PML,PICALM
gPROFILER	GO:0051246	regulation of protein metabolic process		60		0.00120394	PTK2B,BIN1,CYCS,ENSA,SNCA,NSF,CFLAR,CASS4,ADCYAP1,APP,CD44,HEXIM1,LDLR,EIF4E3,BDNF,MAPT,IKBKB,PML,PICALM,ITPKB,ILF3,MAP4K4,SAMD4B,CELF1,EIF1B,PROK2,CALM3,RCHY1,TNIP1,GDF3,RBPMS,BAD,MOV10,IQGAP1,NIPBL,GFAP,NFKB1,OXR1,PKD2,EDNRB,RALB,MEF2C,RELA,TCF7L2,FAM162A,USP47,MYLIP,CDC42,UBE3A,DLG1,PRKAR1B,EID1,POLDIP3,TNRC6A,LILRA5,GMFG,EIF4G1,MAP3K13,SNX6,HBEGF
FUMA	KEGG_PROSTATE_CANCER	prostate cancer	89	7	6.50304e-05	0.00120957	TCF7L2:BAD:RELA:ERBB2:CREB1:NFKB1:IKBKB
FUMA	GO:0051346	negative regulation of hydrolase activity	452	16	5.9326e-05	0.00121461	ATPIF1:ANGPTL3:ENSA:CR1:USP47:CD44:PICALM:IQGAP1:ADCYAP1:APOC1:BIN1:CFLAR:CST3:APP:SNCA:IKBKB
FUMA	GO:0000151	ubiquitin ligase complex	281	12	8.74927e-05	0.00121639	USP47:DYRK2:MED1:CDC27:UBE2V1:VHL:RCHY1:UBE2D3:FBXW7:MARCH6:RNF144B:MKLN1
gPROFILER	GO:0022898	regulation of transmembrane transporter activity		17		0.00122025	PTK2B,SNCA,APP,CRHR1,CALM3,RASGRF1,CACNB2,PKD2,PDE4B,MEF2C,DLG1,AKAP6,SCN2B,JPH2,CTSS,CRH,CACNB1
gPROFILER	GO:0099536	synaptic signaling		32		0.00122264	PTK2B,SNCA,ADCYAP1,APP,PTPRA,BDNF,MAPT,CACNA1A,CAMK2B,SST,SLC12A4,CALM3,RASGRF1,GFAP,CACNB2,CREB1,MEF2C,RELA,DLG1,PRKAR1B,NCS1,GABRA2,SCN2B,GABRB3,RPH3A,IL1RAP,CRH,MAP1B,RAPGEF2,CACNB1,RIMS3,CTBP2
FUMA	GO:0072594	establishment of protein localization to organelle	552	18	6.00709e-05	0.00122645	ATPIF1:PEX19:VPS37C:BAD:PEX5:RPLP0:VPS37B:PML:MAPT:GOSR2:CALM3:CASP8:PTTG1IP:COX18:UBE2D3:FBXW7:NIPBL:SMO
FUMA	GO:0030135	coated vesicle	282	12	9.04779e-05	0.00124066	COPA:CNIH3:PICALM:GOSR2:LDLR:APP:SEC24D:SCAMP1:HBEGF:YIPF5:AP1S1:CLTA
FUMA	GO:0097485	neuron projection guidance	271	12	6.20038e-05	0.0012624	BDNF:ERBB2:WNT3:ARHGAP35:NRP2:PTPRA:APP:FEZF2:PALLD:ETV1:SMO:FAM129B
FUMA	GO:1901135	carbohydrate derivative metabolic process	934	25	6.23361e-05	0.00126351	ATPIF1:TCF7L2:BAD:ACACB:ALDOA:CHST6:NME1:ADCYAP1:CST3:SERP1:B3GALNT1:MUC4:DLG1:SCD5:SNCA:NFKB1:MARCH6:VCAN:ACSL6:HBEGF:TNIP1:ALDH5A1:HS3ST5:GALNT11:EXTL3
FUMA	GO:0007517	muscle organ development	406	15	6.24017e-05	0.00126351	PAK1:AKAP6:MED1:TCAP:HLF:TTN:CFLAR:CREB1:JPH2:SERP1:MEF2C:HBEGF:ETV1:SMO:FAM129B
gPROFILER	GO:0006950	response to stress		103		0.00130356	PTK2B,VEZF1,CYCS,SNCA,CLEC4M,MED1,NFATC3,MSRB3,CFLAR,ADCYAP1,APP,CD44,HEXIM1,CD209,LDLR,DNAJC7,MAPT,IKBKB,PML,CACNA1A,ILF3,RBBP5,WNT2B,NCF4,ARHGAP35,CAMK2B,CAPZA1,SST,TRIM38,SLC12A4,MCM7,MAP4K4,PROK2,RCHY1,TNIP1,RBPMS,PDIA4,ALPK1,BAD,MOV10,EXTL3,NIPBL,RASGRF1,GFAP,UBE2D3,NFKB1,OXR1,PKD2,EDNRB,CREB1,RALB,MEF2C,DCLRE1C,RELA,CD83,MACF1,ACER3,FAM162A,GOSR2,USP47,RHOC,CDC42,UBE3A,DLG1,PRKAR1B,POLD3,PI…
gPROFILER	GO:0051347	positive regulation of transferase activity		23		0.00131387	PTK2B,SNCA,CASS4,ADCYAP1,CD44,BDNF,MAPT,MAP4K4,PROK2,CALM3,BAD,IQGAP1,NVL,PKD2,RALB,MEF2C,CDC42,DLG1,PRKAR1B,LILRA5,MAP3K13,FBXW7,TAOK2
gPROFILER	GO:0071840	cellular component organization or biogenesis		172		0.0013142	PTK2B,BIN1,CYCS,FBN1,SNCA,TAF1C,WNT3,DENR,DYNLRB1,MED1,NSF,CFLAR,CASS4,ADCYAP1,APP,PTPRA,CD44,ACACB,NAP1L5,LDLR,MKLN1,KANSL1,ARHGAP17,BDNF,STMN1,MAPT,IKBKB,PML,ALDH5A1,PICALM,CEP135,CACNA1A,RBBP5,RPLP0,CDC27,ARHGAP35,CAMK2B,CAPZA1,SYNJ2,SLC12A4,ST7L,MCM7,MAP4K4,ATPAF1,LCAT,CELF1,CALM3,ITGB5,BAD,MOV10,IQGAP1,EXTL3,NIPBL,RASGRF1,GFAP,UBE2D3,TJAP1,CD22,SCLT1,BMP1,NVL,CACNB2,PKD2,CREB1,SEZ6L2,RALB,PA…
FUMA	GO:0034704	calcium channel complex	66	6	9.71658e-05	0.00131436	PDE4B:CACNB2:AKAP6:CACNB1:CACNA1A:CALM3
FUMA	GO:0006954	inflammatory response	714	21	6.5744e-05	0.00132752	CD44:RELA:ACER3:EDNRB:NFATC3:MAPT:ADCYAP1:LDLR:LILRA5:CD28:APP:IL17RE:FANCD2:PROK2:IL1RAP:SNCA:NFKB1:TNIP1:SMO:IKBKB:CRH
FUMA	R-HSA-422475	developmental biology	1100	29	2.13472e-05	0.00133331	CDC42:RHOC:RBBP5:CACNB2:RELA:PAK1:MAML2:SCN2B:RPLP0:PML:CACNB1:MED1:ERBB2:PSME3:PIAS2:MYO9B:MED29:ARHGAP35:ACTR2:NRP2:CREB1:PTPRA:SCN11A:EIF4G1:POLR2H:DLG1:NFKB1:MEF2C:CLTA
gPROFILER	GO:0002269	leukocyte activation involved in inflammatory response		4		0.00134238	SNCA,APP,LDLR,MAPT
gPROFILER	GO:0001774	microglial cell activation		4		0.00134238	SNCA,APP,LDLR,MAPT
gPROFILER	GO:0032879	regulation of localization		93		0.00134238	PTK2B,BIN1,ENSA,SNCA,WNT3,NSF,CASS4,ADCYAP1,APP,GPR27,CRHR1,ACACB,MKLN1,BDNF,STMN1,MAPT,PML,PICALM,CEP135,CACNA1A,CAMK2B,SST,ICA1,MAP4K4,SCN11A,CALM3,BAD,IQGAP1,NIPBL,RASGRF1,GFAP,UBE2D3,CD22,NVL,NFKB1,CACNB2,PKD2,EDNRB,PDE4B,LEPROTL1,CREB1,RALB,MEF2C,MACF1,TCF7L2,PPM1A,RHOC,APOC1,CDC42,DLG1,PRKAR1B,LILRA5,NCS1,DCLK1,APOC2,HBEGF,AKAP6,FBXW7,SP1,SCN2B,SERP1,SLC30A3,NRP2,KANK1,FEZF2,ERBB2,JPH2,DOCK…
FUMA	GO:0042110	t cell activation	457	16	6.74718e-05	0.00135868	CDC42:CR1:ITPKB:CD44:CD5:BAD:PAK1:SPN:ERBB2:CD209:CLPTM1:CASP8:CD28:FANCD2:DLG1:CD83
gPROFILER	GO:0032268	regulation of cellular protein metabolic process		57		0.00136632	PTK2B,BIN1,CYCS,ENSA,SNCA,CFLAR,CASS4,ADCYAP1,APP,CD44,HEXIM1,LDLR,EIF4E3,BDNF,MAPT,IKBKB,PML,PICALM,ITPKB,ILF3,MAP4K4,SAMD4B,CELF1,EIF1B,PROK2,CALM3,RCHY1,TNIP1,GDF3,RBPMS,BAD,MOV10,IQGAP1,NIPBL,NFKB1,OXR1,PKD2,EDNRB,RALB,MEF2C,RELA,FAM162A,USP47,MYLIP,CDC42,UBE3A,DLG1,PRKAR1B,EID1,POLDIP3,TNRC6A,LILRA5,GMFG,EIF4G1,MAP3K13,SNX6,HBEGF
gPROFILER	GO:0050808	synapse organization		23		0.00136632	SNCA,APP,BDNF,MAPT,CACNA1A,CAMK2B,CACNB2,SEZ6L2,MEF2C,CDC42,UBE3A,DLG1,LRFN1,GABRA2,EIF4G1,NRP2,GABRB3,ERBB2,IL1RAP,MAP1B,CACNB1,CTBP2,ACTR2
FUMA	WP4666	hepatitis b infection	154	9	6.35682e-05	0.0013807	BAD:RELA:NFATC3:CASP8:CREB1:NFKB1:CYCS:PTK2B:IKBKB
FUMA	WP1984	integrated breast cancer pathway	154	9	6.35682e-05	0.0013807	CDC42:BAD:PAK1:SP1:PML:CASP8:CREB1:MAP3K13:NFKB1
FUMA	WP4396	nonalcoholic fatty liver disease	153	9	6.04403e-05	0.0013807	CDC42:RELA:NDUFA7:NDUFA7:NDUFB3:CASP8:NDUFB5:NFKB1:CYCS:IKBKB
gPROFILER	GO:0071310	cellular response to organic substance		46		0.00138272	PTK2B,FBN1,LANCL2,SNCA,WNT3,MED1,CFLAR,ADCYAP1,APP,PTPRA,GPR27,CD44,CRHR1,LDLR,VWC2,ELF1,ZBTB20,OVOL2,BDNF,MAPT,IKBKB,PML,CACNA1A,RBPMS2,RPLP0,CAMK2B,CAPZA1,SST,TRIM38,MCM7,MAP4K4,ITGB5,GDF3,FST,BAD,IQGAP1,EXTL3,UBE2D3,NFKB1,PKD2,EDNRB,PDE4B,CREB1,RALB,MEF2C,RELA
gPROFILER	GO:0010769	regulation of cell morphogenesis involved in differentiation		19		0.00138272	WNT3,CASS4,BDNF,MAPT,CACNA1A,ARHGAP35,CAMK2B,MACF1,CDC42,UBE3A,MAP3K13,KANK1,FEZF2,MAP1B,RAPGEF2,NIN,RUFY3,PAK1,ACTR2
Webgestalt	GO:2001257	regulation of cation channel activity	151	14	2.63343e-06	0.00138387	PTK2B;APP;RASGRF1;CACNB2;PKD2;PDE4B;MEF2C;DLG1;AKAP6;JPH2;CTSS;CRH;CACNB1;CNIH3
FUMA	GO:1901216	positive regulation of neuron death	90	7	6.98448e-05	0.00140262	MCL1:BAD:PICALM:MAPT:CASP8:SNCA:FBXW7
gPROFILER	GO:1904062	regulation of cation transmembrane transport		21		0.00140388	PTK2B,BIN1,SNCA,APP,CRHR1,CALM3,RASGRF1,CACNB2,PKD2,PDE4B,MEF2C,DLG1,AKAP6,SCN2B,JPH2,CTSS,CRH,CACNB1,SLC8A1,UBASH3B,CNIH3
FUMA	GO:2001236	regulation of extrinsic apoptotic signaling pathway	156	9	7.02342e-05	0.0014066	MCL1:TCF7L2:RELA:LTBR:PML:PSME3:CFLAR:CASP8:BCL2L1
FUMA	GO:0005975	carbohydrate metabolic process	559	18	7.04692e-05	0.00140747	ANGPTL3:SORBS1:BAD:PGM2L1:DYRK2:ACACB:ALDOA:CHST6:ISYNA1:ZBTB20:SERP1:B3GALNT1:SNCA:NFKB1:ALDH5A1:SYNJ2:FAM3C:PTK2B
gPROFILER	GO:0005938	cell cortex		19		0.00141125	PTK2B,LANCL2,SNCA,MKLN1,CAPZA1,PKD2,RHOC,CDC42,GMFG,MYO9B,DST,EXOC6,CALD1,PARD3B,FRYL,RIMS3,CTBP2,CLTA,ACTR2
FUMA	GO:0009914	hormone transport	319	13	7.20988e-05	0.00143223	ENSA:TCF7L2:BAD:CRHR1:ADCYAP1:CACNA1A:MAP4K4:CREB1:GPR27:SERP1:ICA1:CRH:FAM129B
FUMA	GO:0046677	response to antibiotic	319	13	7.20988e-05	0.00143223	BAD:RELA:CRHR1:ADCYAP1:SLC8A1:ACTR2:CASP8:BCL2L1:SRD5A1:MEF2C:PTK2B:GGH:CRH
gPROFILER	GO:0043086	negative regulation of catalytic activity		12		0.00143628	BIN1,ENSA,SNCA,CFLAR,ADCYAP1,APP,CD44,HEXIM1,ACACB,MAPT,IKBKB,PICALM
gPROFILER	GO:0010770	positive regulation of cell morphogenesis involved in differentiation		13		0.00143628	WNT3,CASS4,BDNF,MAPT,CAMK2B,MACF1,CDC42,MAP3K13,MAP1B,NIN,RUFY3,PAK1,ACTR2
FUMA	GO:0043043	peptide biosynthetic process	719	21	7.25081e-05	0.00143648	MOV10:CELF1:RPLP0:DENR:TNRC6A:ERBB2:NDUFA7:NDUFA7:ILF3:SAMD4B:MRPL35:ZC3H15:CD28:RRBP1:APP:POLDIP3:EIF1B:EIF4E3:SERP1:EIF4G1:TNIP1:PTK2B
gPROFILER	GO:0035770	ribonucleoprotein granule		11		0.00143677	MAPT,RPLP0,SAMD4B,RBPMS,MOV10,IQGAP1,PATL1,CDC42,EID1,POLDIP3,TNRC6A
gPROFILER	GO:1990000	amyloid fibril formation		3		0.00144038	APP,LDLR,MAPT
gPROFILER	GO:0051093	negative regulation of developmental process		15		0.00144038	PTK2B,FBN1,WNT3,MED1,NFATC3,CFLAR,ADCYAP1,APP,LDLR,OVOL2,BDNF,MAPT,PML,RBPMS2,ITPKB
FUMA	GO:0051258	protein polymerization	276	12	7.38044e-05	0.00145823	STMN1:CAPZA1:PAK1:NIN:MAPT:GMFG:ACTR2:BIN1:DLG1:SNCA:PTK2B:KANK1
FUMA	GO:0071316	cellular response to nicotine	8	3	7.456e-05	0.00146528	BAD:RELA:NFKB1
FUMA	GO:0060316	positive regulation of ryanodine sensitive calcium release channel activity	8	3	7.456e-05	0.00146528	AKAP6:CALM3:JPH2
FUMA	GO:0006629	lipid metabolic process	1241	30	7.48937e-05	0.00146792	ANGPTL3:PIK3C2B:SORBS1:CCKBR:ACER3:SP1:ACACB:ABHD2:FAM57B:LCAT:MED1:LDLR:APOC1:APOC2:FAM126B:CREB1:APP:ZBTB20:PPM1L:B3GALNT1:SNCA:NFKB1:FBXW7:SRD5A1:ACSL6:MBOAT1:ALDH5A1:SYNJ2:PTK2B:CRH
gPROFILER	GO:0048002	antigen processing and presentation of peptide antigen		8		0.001475	AP1S1,CLEC4M,CD209,IKBKB,DCTN6,NCF4,CAPZA1,ITGB5
gPROFILER	GO:0031327	negative regulation of cellular biosynthetic process		42		0.001475	LANCL2,SNCA,MED1,NFATC3,HEXIM1,MXD4,ZBTB20,OVOL2,PML,CACNA1A,KLF12,ILF3,ARHGAP35,SPEN,GATAD2A,ZHX1,SAMD4B,CELF1,FST,MOV10,NIPBL,UBE2D3,NFKB1,EDNRB,CREB1,MEF2C,RELA,TCF7L2,PPM1A,USP47,APOC1,DLG1,EID1,ZNF215,TNRC6A,EIF4G1,FAM3C,SNX6,HBEGF,VHL,FBXW7,TBX6
gPROFILER	GO:0051345	positive regulation of hydrolase activity		28		0.001475	PTK2B,CYCS,SNCA,CFLAR,ADCYAP1,APP,ARHGAP17,BDNF,MAPT,PML,PICALM,ARHGAP35,MAP4K4,CALM3,BAD,IQGAP1,RASGRF1,MEF2C,FAM162A,RHOC,APOC2,CR1,MYO9B,ERBB2,DOCK7,ARHGEF10,CASP8,ANTXR1
gPROFILER	GO:2000310	regulation of NMDA receptor activity		6		0.001475	PTK2B,APP,RASGRF1,MEF2C,DLG1,CRH
gPROFILER	GO:0052547	regulation of peptidase activity		9		0.001475	BIN1,CYCS,SNCA,CFLAR,APP,CD44,MAPT,PML,PICALM
gPROFILER	GO:0007165	signal transduction		121		0.001475	PTK2B,FBN1,LANCL2,SNCA,WNT3,CLEC4M,MED1,NFATC3,CCKBR,CFLAR,ADCYAP1,APP,PTPRA,GPR27,CD44,HEXIM1,CRHR1,CD209,VWC2,ELF1,MKLN1,OVOL2,ARHGAP17,BDNF,DLK2,STMN1,MAPT,IKBKB,PML,CACNA1A,RBPMS2,ITPKB,WNT2B,RPLP0,NCF4,ARHGAP35,CAMK2B,CAPZA1,SST,SPEN,TRIM38,CD5,MAP4K4,PROK2,CALM3,ITGB5,TNIP1,GDF3,RBPMS,FST,ALPK1,BAD,MOV10,IQGAP1,EXTL3,RASGRF1,LRRFIP2,UBE2D3,CD22,BMP1,NFKB1,PKD2,EDNRB,PDE4B,CREB1,SEZ6L2,RALB,…
gPROFILER	GO:0099537	trans-synaptic signaling		31		0.001475	PTK2B,SNCA,ADCYAP1,APP,PTPRA,BDNF,MAPT,CACNA1A,CAMK2B,SST,SLC12A4,CALM3,RASGRF1,GFAP,CACNB2,CREB1,MEF2C,DLG1,PRKAR1B,NCS1,GABRA2,SCN2B,GABRB3,RPH3A,IL1RAP,CRH,MAP1B,RAPGEF2,CACNB1,RIMS3,CTBP2
Webgestalt	GO:0061564	axon development	490	27	3.05701e-06	0.00148288	WNT3;APP;PTPRA;BDNF;STMN1;MAPT;PICALM;ARHGAP35;CREB1;MACF1;DCLK1;MAP3K13;PALLD;TAOK2;TSKU;SSH3;NRP2;FEZF2;ERBB2;DOCK7;ETV1;MAP1B;SMO;NIN;FAM129B;RUFY3;PAK1
gPROFILER	GO:1902533	positive regulation of intracellular signal transduction		34		0.00149146	PTK2B,CFLAR,ADCYAP1,APP,CD44,HEXIM1,IKBKB,ITPKB,TRIM38,MAP4K4,PROK2,CALM3,ALPK1,BAD,IQGAP1,RASGRF1,PKD2,MEF2C,RELA,TCF7L2,PPM1A,RHOC,CDC42,UBE3A,LILRA5,MAP3K13,HBEGF,AKAP6,FBXW7,TAOK2,MCL1,ERBB2,JPH2,CASP8
FUMA	GO:0034097	response to cytokine	1182	29	7.64796e-05	0.00149501	CDC42:CAPZA1:MCL1:CTBP2:CD44:BAD:RELA:LTBR:RPLP0:ELF1:AKAP6:PML:MED1:PSME3:ACTR2:ZC3H15:CASP8:NRP2:CREB1:BCL2L1:UBE2V1:IL17RE:IL1RAP:SNCA:NFKB1:TRIM38:CAMK2B:PTK2B:IKBKB
FUMA	WP4562	canonical nf-kb pathway	8	3	7.456e-05	0.00149948	RELA:NFKB1:IKBKB
FUMA	WP4549	fragile x syndrome	122	8	7.23916e-05	0.00149948	BDNF:CREB1:APP:EIF4G1:MAP1B:ALDH5A1:CAMK2B:CLTA
FUMA	GO:0007005	mitochondrion organization	512	17	7.70251e-05	0.00150168	ATPIF1:ATPAF1:BAD:MAPT:NDUFA7:NDUFA7:CALM3:NDUFB3:CASP8:BCL2L1:FAM162A:NDUFB5:EIF4G1:COX18:SNCA:UBE2D3:FBXW7:CYCS
gPROFILER	GO:0032270	positive regulation of cellular protein metabolic process		58		0.00151495	PTK2B,CYCS,SNCA,CFLAR,CASS4,ADCYAP1,APP,CD44,LDLR,BDNF,MAPT,PML,PICALM,MAP4K4,PROK2,CALM3,RCHY1,TNIP1,GDF3,RBPMS,BAD,IQGAP1,NIPBL,PKD2,EDNRB,RALB,MEF2C,FAM162A,CDC42,UBE3A,DLG1,PRKAR1B,POLDIP3,LILRA5,EIF4G1,MAP3K13,HBEGF,FBXW7,TAOK2,RNF144B,SERP1,CR1,ERBB2,DOCK7,CASP8,ANTXR1,PTTG1IP,CRH,LTBR,JDP2,RAPGEF2,DNAJC27,MMD,UHRF1,PSME3,UBE2V1,FANCI,PAK1
gPROFILER	GO:0051336	regulation of hydrolase activity		15		0.00151495	PTK2B,BIN1,CYCS,ENSA,SNCA,CFLAR,ADCYAP1,APP,CD44,ARHGAP17,BDNF,MAPT,IKBKB,PML,PICALM
FUMA	KEGG_NEUROTROPHIN_SIGNALING_PATHWAY	neurotrophin signaling pathway	126	8	9.08417e-05	0.00153605	CDC42:BDNF:BAD:RELA:CALM3:NFKB1:CAMK2B:IKBKB
FUMA	R-HSA-445989	clec7a inflammasome pathway	6	3	2.70767e-05	0.00156107	RELA:CASP8:NFKB1
FUMA	R-HSA-1266738	tak1 activates nfkb by phosphorylation and activation of ikks complex	32	5	2.67838e-05	0.00156107	RELA:UBE2V1:APP:NFKB1:IKBKB
FUMA	GO:0009986	cell surface	857	23	0.000117468	0.0015678	ATPIF1:ANGPTL3:CR1:CD44:CD5:PICALM:SPN:ITGB4:CD209:LDLR:CD22:LRFN1:CLPTM1:LILRA5:ANTXR1:CD28:TNS1:APP:ITGB5:HBEGF:CD83:CLEC5A:PDIA4
FUMA	GO:0042596	fear response	40	5	8.13243e-05	0.00157713	CRHR1:ADCYAP1:EIF4G1:MEF2C:CRH
FUMA	GO:0051281	positive regulation of release of sequestered calcium ion into cytosol	40	5	8.13243e-05	0.00157713	AKAP6:CALM3:JPH2:PKD2:SNCA
FUMA	GO:0030545	receptor regulator activity	524	18	3.0765e-05	0.00159081	ANGPTL3:COPA:BDNF:GDF3:FBN1:PPY:PYY:MAPT:WNT3:ADCYAP1:GMFG:APP:SST:FST:HBEGF:FAM3C:BMP1:CRH
FUMA	GO:0005215	transporter activity	1241	31	3.09459e-05	0.00159081	MCL1:CACNB2:SLC16A9:COX15:SCN2B:ATP6V1D:GABRB3:AQP9:SLCO3A1:SLC12A4:CTC-479C5.17:SLC25A35:SLC47A2:CACNB1:ABCC3:CACNA1A:SLC30A3:SLC8A1:PLEKHA3:JPH2:SCN11A:CHRNA9:GABRA2:COX18:PKD2:ANKH:SLC4A9:KCNK5:ABCC10:PTK2B:SLC20A2:NCS1
FUMA	GO:1901654	response to ketone	197	10	8.24762e-05	0.00159526	BAD:RELA:UBE3A:ABHD2:NME1:CALM3:CFLAR:BCL2L1:SRD5A1:CRH
FUMA	GO:0032092	positive regulation of protein binding	93	7	8.60625e-05	0.00165591	NVL:TCF7L2:BDNF:RALB:APP:RAPGEF2:MEF2C
FUMA	GO:0045471	response to ethanol	125	8	8.58999e-05	0.00165591	BAD:CRHR1:ADCYAP1:ACTR2:CASP8:PTK2B:GGH:CRH
gPROFILER	GO:0070374	positive regulation of ERK1 and ERK2 cascade		5		0.00165779	PTK2B,CFLAR,ADCYAP1,APP,CD44
gPROFILER	GO:0031410	cytoplasmic vesicle		77		0.00165897	BIN1,SNCA,WNT3,AP1S1,APP,CD44,OCIAD2,CRHR1,LDLR,SPPL2C,BDNF,GIMAP5,SCG3,PML,PICALM,C1QTNF5,NCF4,CAMK2B,ICA1,CALM3,ITGB5,CYB561,PDIA4,IQGAP1,UBE2D3,TJAP1,CD22,NFKB1,PKD2,PDE4B,LEPROTL1,ANKRD50,ALDOA,GOSR2,CDC42,PIK3C2B,NCS1,COPA,GABRA2,GMFG,RAB2A,APOC2,FAM3C,SNX6,HBEGF,VPS37C,PLEKHM1,TAOK2,ATP6V1D,CR1,SLC30A3,DST,GABRB3,RPH3A,ERBB2,CTSS,ANTXR1,ABHD2,FIG4,CLEC5A,CST3,SMO,GGH,RAPGEF2,MMD,VPS37B,KIFC…
gPROFILER	GO:0097708	intracellular vesicle		77		0.00165897	BIN1,SNCA,WNT3,AP1S1,APP,CD44,OCIAD2,CRHR1,LDLR,SPPL2C,BDNF,GIMAP5,SCG3,PML,PICALM,C1QTNF5,NCF4,CAMK2B,ICA1,CALM3,ITGB5,CYB561,PDIA4,IQGAP1,UBE2D3,TJAP1,CD22,NFKB1,PKD2,PDE4B,LEPROTL1,ANKRD50,ALDOA,GOSR2,CDC42,PIK3C2B,NCS1,COPA,GABRA2,GMFG,RAB2A,APOC2,FAM3C,SNX6,HBEGF,VPS37C,PLEKHM1,TAOK2,ATP6V1D,CR1,SLC30A3,DST,GABRB3,RPH3A,ERBB2,CTSS,ANTXR1,ABHD2,FIG4,CLEC5A,CST3,SMO,GGH,RAPGEF2,MMD,VPS37B,KIFC…
FUMA	GO:0001501	skeletal system development	517	17	8.66218e-05	0.00166233	WNT2B:TRIM45:CD44:RELA:GDF3:FBN1:MED1:EN1:SERP1:DLG1:FBXW7:SRD5A1:ANKH:NIPBL:VCAN:MEF2C:BMP1
FUMA	GO:0016605	pml body	99	7	0.000127718	0.00168218	TCF7L2:PATL1:PML:UBN1:SPN:PIAS2:SUMO3
FUMA	GO:0050776	regulation of immune response	1072	27	8.81142e-05	0.00168656	CDC42:PDE4B:CTSS:CR1:RELA:PAK1:ELF1:NFATC3:MED1:PSME3:HEXIM1:CRHR1:ADCYAP1:CD209:CD22:ACTR2:CASP8:CD28:UBE2V1:MUC4:NFKB1:UBE2D3:ALPK1:MEF2C:ERAP1:TNIP1:IKBKB
gPROFILER	GO:1903169	regulation of calcium ion transmembrane transport		13		0.00168874	PTK2B,BIN1,SNCA,CRHR1,CALM3,CACNB2,PKD2,PDE4B,AKAP6,JPH2,CACNB1,SLC8A1,UBASH3B
FUMA	GO:0051249	regulation of lymphocyte activation	468	16	8.89331e-05	0.00169781	CDC42:CR1:ITPKB:CD5:BAD:PAK1:SPN:ERBB2:CD209:CD22:CLPTM1:CD28:FANCD2:DLG1:MEF2C:CD83
FUMA	GO:0008037	cell recognition	199	10	8.9679e-05	0.00170762	CD5:ALDOA:CD209:CLEC4M:ARHGAP35:APP:FEZF2:DLG1:PALLD:VCAN
gPROFILER	GO:0051234	establishment of localization		156		0.00172219	PTK2B,BIN1,ENSA,SNCA,AP1S1,CLEC4M,DYNLRB1,MED1,CCKBR,NSF,ADCYAP1,APP,GPR27,CD44,CRHR1,ACACB,CD209,LDLR,MKLN1,ARHGAP17,MAPT,SCG3,ARL17B,PML,PICALM,CEP135,CACNA1A,DCTN6,C1QTNF5,RPLP0,NCF4,SLC35F3,CAMK2B,CAPZA1,ICA1,CD5,SLC12A4,MAP4K4,LCAT,SCN11A,CALM3,SLC4A9,ANKH,PDIA4,ABCC3,BAD,IQGAP1,NIPBL,RASGRF1,GFAP,UBE2D3,CD22,NFKB1,CACNB2,PKD2,EDNRB,PDE4B,LEPROTL1,CREB1,RALB,MEF2C,PLEKHA3,ANKRD50,MACF1,ALDOA…
gPROFILER	GO:0032409	regulation of transporter activity		17		0.00172219	PTK2B,SNCA,APP,CRHR1,CALM3,RASGRF1,CACNB2,PKD2,PDE4B,MEF2C,DLG1,AKAP6,SCN2B,JPH2,CTSS,CRH,CACNB1
gPROFILER	GO:0030658	transport vesicle membrane		15		0.00172353	SNCA,AP1S1,SCG3,ICA1,CALM3,CYB561,GOSR2,GABRA2,SLC30A3,RPH3A,CLTA,CNIH3,BCL2L1,SEC24D,SCAMP1
gPROFILER	GO:0039526	modulation by virus of host apoptotic process		3		0.00172466	BAD,CASP8,BCL2L1
gPROFILER	GO:0033668	negative regulation by symbiont of host apoptotic process		3		0.00172466	BAD,CASP8,BCL2L1
gPROFILER	GO:0052041	negative regulation by symbiont of host programmed cell death		3		0.00172466	BAD,CASP8,BCL2L1
gPROFILER	GO:0045862	positive regulation of proteolysis		8		0.00172466	PTK2B,CYCS,SNCA,CFLAR,APP,MAPT,PML,PICALM
gPROFILER	GO:0006810	transport		153		0.00172466	PTK2B,BIN1,ENSA,SNCA,AP1S1,CLEC4M,DYNLRB1,MED1,CCKBR,NSF,ADCYAP1,APP,GPR27,CD44,CRHR1,ACACB,CD209,LDLR,MKLN1,ARHGAP17,MAPT,SCG3,ARL17B,PML,PICALM,CACNA1A,DCTN6,C1QTNF5,RPLP0,NCF4,SLC35F3,CAMK2B,CAPZA1,ICA1,CD5,SLC12A4,MAP4K4,LCAT,SCN11A,CALM3,SLC4A9,ANKH,PDIA4,ABCC3,BAD,IQGAP1,RASGRF1,GFAP,UBE2D3,CD22,NFKB1,CACNB2,PKD2,EDNRB,PDE4B,LEPROTL1,CREB1,RALB,MEF2C,PLEKHA3,ANKRD50,MACF1,ALDOA,TCF7L2,PEX19…
FUMA	GO:0007017	microtubule based process	731	21	9.13329e-05	0.00173462	CDC42:STMN1:MACF1:DOCK7:PAK1:NIN:KATNB1:KIFC3:ERBB2:MAPT:ACTR2:PARD3B:DYNLRB1:APP:DLG1:CEP135:PKD2:SNCA:MAP1B:DST:ARHGEF10
gPROFILER	GO:0065005	protein-lipid complex assembly		5		0.00174842	BIN1,LCAT,BMP1,APOC1,APOC2
gPROFILER	GO:0043549	regulation of kinase activity		27		0.00174842	PTK2B,SNCA,CCKBR,CASS4,ADCYAP1,APP,CD44,HEXIM1,BDNF,MAPT,MAP4K4,PROK2,CALM3,BAD,IQGAP1,PKD2,RALB,MEF2C,CDC42,DLG1,PRKAR1B,LILRA5,GMFG,MAP3K13,SNX6,FBXW7,TAOK2
gPROFILER	GO:0030133	transport vesicle		11		0.00176691	BIN1,SNCA,AP1S1,APP,BDNF,SCG3,PICALM,C1QTNF5,ICA1,CALM3,CYB561
FUMA	GO:0006259	dna metabolic process	844	23	9.38761e-05	0.00177832	UBE2T:DCLRE1C:TCF7L2:USP47:POLD3:PML:FANCI:PPP4C:NME1:UHRF1:GATAD2A:ACTR2:CD28:UBE2V1:RTFDC1:FANCD2:POLR2H:RCHY1:UBE2D3:NIPBL:MSH3:MCM7:FAM129B
FUMA	GO:0042176	regulation of protein catabolic process	374	14	9.49444e-05	0.00179394	ATPIF1:RELA:UBE3A:PML:PSME3:NSF:LDLR:CST3:PTTG1IP:RCHY1:FBXW7:MYLIP:RNF144B:PTK2B
gPROFILER	GO:0006796	phosphate-containing compound metabolic process		66		0.00180409	ACP1,PTK2B,CYCS,ENSA,SNCA,MED1,CCKBR,CFLAR,CASS4,ADCYAP1,APP,PTPRA,CD44,HEXIM1,ACACB,LDLR,ZBTB20,BDNF,MAPT,IKBKB,PML,ALDH5A1,SCD5,ITPKB,ILF3,CAMK2B,SYNJ2,MCM7,MAP4K4,LCAT,PROK2,CALM3,TNIP1,GDF3,RBPMS,ALPK1,BAD,IQGAP1,ISYNA1,RASGRF1,NFKB1,ACSL6,PKD2,EDNRB,PDE4B,CREB1,RALB,MEF2C,PLEKHA3,ALDOA,PPM1A,APOC1,CDC42,DLG1,PRKAR1B,PIK3C2B,LILRA5,PPP4C,DYRK2,GMFG,EIF4G1,DCLK1,MAP3K13,APOC2,SNX6,HBEGF
FUMA	GO:0021854	hypothalamus development	22	4	9.60765e-05	0.00181067	CRHR1:NRP2:SRD5A1:CRH
gPROFILER	GO:0010950	positive regulation of endopeptidase activity		6		0.00181491	CYCS,SNCA,CFLAR,MAPT,PML,PICALM
FUMA	GO:2001259	positive regulation of cation channel activity	66	6	9.71658e-05	0.00182652	CTSS:CACNB2:AKAP6:CALM3:JPH2:PKD2
gPROFILER	GO:0016049	cell growth		25		0.00185108	PTK2B,WNT3,APP,BDNF,MAPT,PML,ST7L,IQGAP1,EXTL3,MACF1,USP47,CDC42,EIF4G1,DCLK1,MAP3K13,HBEGF,AKAP6,TAOK2,NRP2,ERBB2,MAP1B,RERG,NIN,RUFY3,PAK1
gPROFILER	GO:2000113	negative regulation of cellular macromolecule biosynthetic process		37		0.00185108	LANCL2,SNCA,MED1,NFATC3,HEXIM1,MXD4,ZBTB20,OVOL2,PML,KLF12,ILF3,ARHGAP35,SPEN,GATAD2A,ZHX1,SAMD4B,CELF1,FST,MOV10,NIPBL,UBE2D3,NFKB1,EDNRB,CREB1,MEF2C,RELA,TCF7L2,PPM1A,USP47,DLG1,EID1,ZNF215,TNRC6A,EIF4G1,SNX6,HBEGF,VHL
gPROFILER	GO:0010033	response to organic substance		22		0.00185108	PTK2B,ENSA,FBN1,LANCL2,SNCA,SNRPN,WNT3,MED1,CFLAR,ADCYAP1,APP,PTPRA,GPR27,CD44,CRHR1,ACACB,LDLR,VWC2,ELF1,ZBTB20,OVOL2,BDNF
FUMA	R-HSA-5683057	mapk family signaling cascades	296	13	3.36277e-05	0.00186696	CDC42:MOV10:PAK1:RASGRF1:IQGAP1:TNRC6A:ERBB2:PSME3:PTPRA:DLG1:RAPGEF2:HBEGF:CAMK2B
gPROFILER	GO:0061900	glial cell activation		4		0.00187273	SNCA,APP,LDLR,MAPT
gPROFILER	GO:0051924	regulation of calcium ion transport		17		0.00187927	PTK2B,BIN1,SNCA,CRHR1,PML,CAMK2B,CALM3,CACNB2,PKD2,PDE4B,LILRA5,AKAP6,JPH2,CRH,CACNB1,SLC8A1,UBASH3B
gPROFILER	GO:0048167	regulation of synaptic plasticity		9		0.00187927	PTK2B,SNCA,APP,MAPT,CAMK2B,RASGRF1,GFAP,CREB1,MEF2C
gPROFILER	GO:0048869	cellular developmental process		134		0.00190229	PTK2B,BIN1,VEZF1,FBN1,WNT3,MED1,NFATC3,CFLAR,CASS4,ADCYAP1,APP,PTPRA,CD44,LDLR,VWC2,ELF1,MKLN1,OVOL2,BDNF,DLK2,STMN1,MAPT,IKBKB,PML,PICALM,CACNA1A,RBPMS2,ITPKB,RBBP5,WNT2B,ARHGAP35,CAMK2B,SPEN,MAP4K4,ZHX1,CELF1,ITGB5,GDF3,FST,BAD,MOV10,IQGAP1,NIPBL,RASGRF1,GFAP,SCLT1,BMP1,NFKB1,EDNRB,CREB1,MEF2C,DCLRE1C,RELA,CD83,MACF1,ALDOA,TCF7L2,RHOC,MYLIP,CDC42,UBE3A,DLG1,EID1,TNRC6A,NCS1,ITGB4,EIF4G1,DCLK1,C…
gPROFILER	GO:0035994	response to muscle stretch		5		0.00190229	NFKB1,RELA,TCAP,SLC8A1,TTN
Webgestalt	GO:0099568	cytoplasmic region	479	20	3.31221e-05	0.00190372	PTK2B;LANCL2;SNCA;DYNLRB1;MKLN1;MAPT;CAPZA1;PKD2;RHOC;CDC42;MYO9B;DST;EXOC6;CALD1;PARD3B;FRYL;RIMS3;CTBP2;CLTA;ACTR2
Webgestalt	GO:0070382	exocytic vesicle	197	12	3.94554e-05	0.00190372	BIN1;SNCA;BDNF;PICALM;ICA1;PDE4B;GABRA2;SLC30A3;RPH3A;CLTA;BCL2L1;SCAMP1
Webgestalt	GO:0031674	I band	136	10	3.5843e-05	0.00190372	BIN1;PDE4B;ALDOA;PALLD;DST;JPH2;TCAP;SLC8A1;PAK1;TTN
Webgestalt	GO:0098793	presynapse	483	20	3.72261e-05	0.00190372	BIN1;SNCA;AP1S1;ADCYAP1;APP;BDNF;PICALM;ICA1;SYNJ2;CACNB2;PDE4B;NCS1;GABRA2;SLC30A3;RPH3A;RIMS3;CTBP2;CLTA;BCL2L1;SCAMP1
gPROFILER	GO:0043195	terminal bouton		3		0.00191695	SNCA,AP1S1,ADCYAP1
gPROFILER	GO:0034329	cell junction assembly		13		0.00192665	PTK2B,IKBKB,CAPZA1,MAP4K4,IQGAP1,MACF1,TNS1,RHOC,CDC42,DLG1,ITGB4,TAOK2,DST
gPROFILER	GO:0051641	cellular localization		95		0.00192665	PTK2B,BIN1,SNCA,AP1S1,DYNLRB1,MED1,NSF,APP,GPR27,ACACB,LDLR,BDNF,MAPT,SCG3,ARL17B,IKBKB,PML,PICALM,CEP135,CACNA1A,DCTN6,RPLP0,CAPZA1,MAP4K4,CALM3,BAD,IQGAP1,NIPBL,UBE2D3,SCLT1,NVL,CACNB2,PKD2,LEPROTL1,RALB,MEF2C,PLEKHA3,ANKRD50,MACF1,TCF7L2,PEX19,PPM1A,GOSR2,CDC42,DLG1,PRKAR1B,POLDIP3,NCS1,COPA,RAB2A,DCLK1,LRRC1,SNX6,AKAP6,VPS37C,FBXW7,PLEKHM1,TAOK2,KATNB1,ATP6V1D,DST,EXOC6,RPH3A,ERBB2,JPH2,DOCK7…
gPROFILER	GO:0044092	negative regulation of molecular function		14		0.00192665	BIN1,ENSA,SNCA,CFLAR,ADCYAP1,APP,CD44,HEXIM1,CRHR1,ACACB,STMN1,MAPT,IKBKB,PICALM
gPROFILER	GO:0009967	positive regulation of signal transduction		36		0.00192665	PTK2B,LANCL2,WNT3,MED1,CFLAR,ADCYAP1,APP,GPR27,CD44,HEXIM1,BDNF,IKBKB,PML,ITPKB,TRIM38,MAP4K4,PROK2,CALM3,GDF3,RBPMS,ALPK1,BAD,IQGAP1,RASGRF1,NFKB1,PKD2,MEF2C,RELA,MACF1,TCF7L2,PPM1A,FAM162A,USP47,RHOC,CDC42,UBE3A
gPROFILER	GO:0032412	regulation of ion transmembrane transporter activity		16		0.00192665	PTK2B,APP,CRHR1,CALM3,RASGRF1,CACNB2,PKD2,PDE4B,MEF2C,DLG1,AKAP6,SCN2B,JPH2,CTSS,CRH,CACNB1
FUMA	GO:0014002	astrocyte development	42	5	0.000103226	0.0019355	GFAP:MAPT:LDLR:APP:SMO
FUMA	GO:0071902	positive regulation of protein serine threonine kinase activity	331	13	0.000104322	0.00195106	PAK1:IQGAP1:TAOK2:ERBB2:CALM3:RALB:UBE2V1:PROK2:MAP3K13:PKD2:SNCA:RAPGEF2:PTK2B
gPROFILER	GO:0051099	positive regulation of binding		14		0.00195986	APP,BDNF,STMN1,CALM3,NIPBL,NVL,RALB,MEF2C,TCF7L2,EIF4G1,RAPGEF2,FAM129B,CTBP2,NME1
gPROFILER	GO:0006979	response to oxidative stress		6		0.00195986	PTK2B,CYCS,SNCA,MSRB3,CFLAR,APP
FUMA	GO:0006605	protein targeting	426	15	0.00010633	0.00198356	ATPIF1:PEX19:VPS37C:PAK1:PEX5:RPLP0:VPS37B:AKAP6:TAOK2:KATNB1:ERBB2:GOSR2:COX18:UBE2D3:FBXW7
FUMA	GO:0003015	heart process	287	12	0.000106754	0.00198644	PDE4B:CACNB2:SCN2B:CACNB1:TCAP:SRSF1:CALM3:SLC8A1:BIN1:TTN:DLG1:HBEGF
FUMA	GO:0051208	sequestering of calcium ion	129	8	0.0001071	0.00198784	UBASH3B:AKAP6:CALM3:SLC8A1:JPH2:PKD2:SNCA:PTK2B
Webgestalt	GO:0034702	ion channel complex	300	15	4.4275e-05	0.00201061	PTK2B;VWC2;CACNA1A;SCN11A;CACNB2;PKD2;PDE4B;DLG1;GABRA2;AKAP6;SCN2B;GABRB3;CACNB1;CNIH3;CHRNA9
FUMA	KEGG_ADHERENS_JUNCTION	adherens junction	73	6	0.000170484	0.00201096	CDC42:SORBS1:TCF7L2:IQGAP1:ERBB2:ACP1
FUMA	KEGG_ARRHYTHMOGENIC_RIGHT_VENTRICULAR_CARDIOMYOPATHY_ARVC	arrhythmogenic right ventricular cardiomyopathy arvc	74	6	0.000183798	0.00201096	CACNB2:TCF7L2:CACNB1:ITGB4:SLC8A1:ITGB5
FUMA	KEGG_CALCIUM_SIGNALING_PATHWAY	calcium signaling pathway	177	9	0.000183483	0.00201096	ITPKB:CCKBR:EDNRB:ERBB2:CACNA1A:CALM3:SLC8A1:CAMK2B:PTK2B
FUMA	KEGG_CHRONIC_MYELOID_LEUKEMIA	chronic myeloid leukemia	73	6	0.000170484	0.00201096	CTBP2:BAD:RELA:BCL2L1:NFKB1:IKBKB
FUMA	KEGG_MELANOGENESIS	melanogenesis	101	7	0.000144771	0.00201096	WNT2B:TCF7L2:EDNRB:WNT3:CALM3:CREB1:CAMK2B
FUMA	KEGG_UBIQUITIN_MEDIATED_PROTEOLYSIS	ubiquitin mediated proteolysis	134	8	0.00013951	0.00201096	UBE3A:PML:CDC27:PIAS2:VHL:RCHY1:UBE2D3:FBXW7
gPROFILER	GO:0006793	phosphorus metabolic process		66		0.00201393	ACP1,PTK2B,CYCS,ENSA,SNCA,MED1,CCKBR,CFLAR,CASS4,ADCYAP1,APP,PTPRA,CD44,HEXIM1,ACACB,LDLR,ZBTB20,BDNF,MAPT,IKBKB,PML,ALDH5A1,SCD5,ITPKB,ILF3,CAMK2B,SYNJ2,MCM7,MAP4K4,LCAT,PROK2,CALM3,TNIP1,GDF3,RBPMS,ALPK1,BAD,IQGAP1,ISYNA1,RASGRF1,NFKB1,ACSL6,PKD2,EDNRB,PDE4B,CREB1,RALB,MEF2C,PLEKHA3,ALDOA,PPM1A,APOC1,CDC42,DLG1,PRKAR1B,PIK3C2B,LILRA5,PPP4C,DYRK2,GMFG,EIF4G1,DCLK1,MAP3K13,APOC2,SNX6,HBEGF
FUMA	GO:1903362	regulation of cellular protein catabolic process	245	11	0.000110334	0.00204271	ATPIF1:UBE3A:PML:PSME3:LDLR:PTTG1IP:RCHY1:FBXW7:MYLIP:RNF144B:PTK2B
FUMA	GO:0071830	triglyceride rich lipoprotein particle clearance	9	3	0.000110912	0.00204824	LDLR:APOC1:APOC2
FUMA	GO:0042330	taxis	633	19	0.000111947	0.00206219	PDE4B:BDNF:EDNRB:SPN:ERBB2:WNT3:ARHGAP35:NRP2:CREB1:PTPRA:APP:FEZF2:PROK2:PALLD:HBEGF:ETV1:SMO:PTK2B:FAM129B
FUMA	GO:0007215	glutamate receptor signaling pathway	97	7	0.000112332	0.00206409	CNIH3:RASGRF1:APP:DLG1:MEF2C:PTK2B:CRH
FUMA	GO:0030010	establishment of cell polarity	130	8	0.000113026	0.00207168	CDC42:DOCK7:PAK1:PARD3B:RUFY3:MAP1B:PTK2B:KANK1
FUMA	WP4480	role altered glycolysation of muc1 in tumour microenvironment	9	3	0.000110912	0.00207672	RELA:NFKB1:IKBKB
FUMA	WP4479	supression of hmgb1 mediated inflammation by thbd	9	3	0.000110912	0.00207672	RELA:NFKB1:IKBKB
gPROFILER	GO:0030036	actin cytoskeleton organization		25		0.00207795	PTK2B,BIN1,CFLAR,CASS4,MKLN1,ARHGAP17,STMN1,IKBKB,ARHGAP35,CAPZA1,ITGB5,MEF2C,ALDOA,RHOC,CDC42,DLG1,GMFG,PALLD,TAOK2,FMNL2,KANK1,TCAP,ARHGEF10,PRICKLE4,ANTXR1
FUMA	GO:0006897	endocytosis	634	19	0.000114245	0.00208436	CDC42:CD5:PICALM:RIN3:NME1:CD209:CLEC4M:LDLR:CD22:APOC1:APOC2:CALM3:BIN1:BCL2L1:APP:SNCA:AP1S1:MKLN1:CLTA
FUMA	GO:0030073	insulin secretion	205	10	0.000114569	0.00208436	ENSA:TCF7L2:BAD:ADCYAP1:CACNA1A:MAP4K4:GPR27:SERP1:ICA1:CRH
FUMA	GO:0090276	regulation of peptide hormone secretion	205	10	0.000114569	0.00208436	ENSA:TCF7L2:BAD:ADCYAP1:CACNA1A:MAP4K4:GPR27:SERP1:ICA1:CRH
FUMA	WP712	estrogen signaling pathway	23	4	0.00011528	0.00208656	SP1:CREB1:NFKB1:IKBKB
FUMA	GO:0005798	golgi associated vesicle	174	9	0.000161396	0.00209815	COPA:CNIH3:SPPL2C:GOSR2:APP:SEC24D:YIPF5:AP1S1:CLTA
gPROFILER	GO:0098916	anterograde trans-synaptic signaling		30		0.00211021	PTK2B,SNCA,ADCYAP1,APP,PTPRA,BDNF,MAPT,CACNA1A,CAMK2B,SST,SLC12A4,CALM3,RASGRF1,GFAP,CACNB2,CREB1,MEF2C,DLG1,PRKAR1B,NCS1,GABRA2,SCN2B,GABRB3,RPH3A,CRH,MAP1B,RAPGEF2,CACNB1,RIMS3,CTBP2
gPROFILER	GO:0007268	chemical synaptic transmission		30		0.00211021	PTK2B,SNCA,ADCYAP1,APP,PTPRA,BDNF,MAPT,CACNA1A,CAMK2B,SST,SLC12A4,CALM3,RASGRF1,GFAP,CACNB2,CREB1,MEF2C,DLG1,PRKAR1B,NCS1,GABRA2,SCN2B,GABRB3,RPH3A,CRH,MAP1B,RAPGEF2,CACNB1,RIMS3,CTBP2
FUMA	GO:0060429	epithelium development	1273	30	0.000117085	0.00212487	CDC42:WNT2B:RHOC:CD44:BAD:RELA:PAK1:GDF3:PML:IQGAP1:TBX6:MED1:TCAP:PSME3:CRHR1:WNT3:VEZF1:ARHGAP35:EN1:CREB1:OVOL2:DLG1:PKD2:RAPGEF2:PALLD:FST:MEF2C:HBEGF:SMO:IKBKB
gPROFILER	GO:0033554	cellular response to stress		50		0.00214592	PTK2B,CYCS,SNCA,CFLAR,APP,CD44,DNAJC7,MAPT,IKBKB,PML,RBBP5,WNT2B,NCF4,CAMK2B,SLC12A4,MCM7,MAP4K4,RCHY1,PDIA4,BAD,EXTL3,NIPBL,RASGRF1,GFAP,UBE2D3,NFKB1,OXR1,PKD2,RALB,MEF2C,DCLRE1C,RELA,FAM162A,GOSR2,USP47,CDC42,DLG1,POLD3,PIK3C2B,TNRC6A,PPP4C,DYRK2,EIF4G1,MAP3K13,VHL,FBXW7,TAOK2,SRD5A1,SERP1,FANCD2
gPROFILER	GO:0051049	regulation of transport		66		0.00214592	PTK2B,BIN1,ENSA,SNCA,NSF,ADCYAP1,APP,GPR27,CRHR1,MKLN1,PML,PICALM,CACNA1A,CAMK2B,ICA1,MAP4K4,SCN11A,CALM3,BAD,RASGRF1,GFAP,UBE2D3,CD22,NFKB1,CACNB2,PKD2,EDNRB,PDE4B,CREB1,RALB,MEF2C,TCF7L2,PPM1A,APOC1,CDC42,DLG1,PRKAR1B,LILRA5,NCS1,APOC2,AKAP6,FBXW7,SCN2B,SERP1,SLC30A3,ERBB2,JPH2,CTSS,CASP8,GOLPH3L,IL1RAP,CLEC5A,CRH,MAP1B,SMO,CACNB1,RIMS3,DNAJC27,KCNK5,SORBS1,RUFY3,SLC8A1,PAK1,UBASH3B,YIPF5,CNIH3
FUMA	GO:0005509	calcium ion binding	693	21	4.30669e-05	0.00214682	MEGF6:MACF1:EFCAB14:RPH3A:NIN:FBN1:IQGAP1:LDLR:CALM3:SLC8A1:FKBP7:TTN:PKD2:SNCA:RAPGEF2:VCAN:PCDHB15:DLK2:DST:BMP1:NCS1
FUMA	GO:0048646	anatomical structure formation involved in morphogenesis	1152	28	0.000118836	0.00215134	ATPIF1:PPIH:ANGPTL3:WNT2B:GDF3:SP1:PML:TBX6:MED1:TCAP:ERBB2:WNT3:VEZF1:ITGB4:ARHGAP35:TTN:CFLAR:NRP2:OVOL2:PROK2:ITGB5:FBXW7:MEF2C:ERAP1:FIG4:SMO:PTK2B:FAM129B
FUMA	GO:0031532	actin cytoskeleton reorganization	98	7	0.000119824	0.0021586	CDC42:PAK1:GMFG:ANTXR1:CASS4:MKLN1:PTK2B
FUMA	GO:0031124	mrna 3 end processing	98	7	0.000119824	0.0021586	MTPAP:CSTF3:NUDT21:SRSF1:CSTF1:APP:POLDIP3
gPROFILER	GO:0071316	cellular response to nicotine		3		0.00215946	BAD,NFKB1,RELA
FUMA	GO:0030662	coated vesicle membrane	175	9	0.000168498	0.00216239	COPA:CNIH3:PICALM:GOSR2:LDLR:SEC24D:HBEGF:AP1S1:CLTA
FUMA	GO:0033365	protein localization to organelle	916	24	0.000120473	0.00216498	ATPIF1:PEX19:NVL:VPS37C:BAD:PEX5:RPLP0:VPS37B:DCLK1:ATP6V1D:SCG3:PML:MAPT:GOSR2:CALM3:CASP8:PTTG1IP:DLG1:COX18:UBE2D3:FBXW7:NIPBL:BCAP29:SMO
FUMA	GO:0002768	immune response regulating cell surface receptor signaling pathway	481	16	0.000121825	0.00217862	CDC42:PDE4B:CR1:RELA:PAK1:ELF1:NFATC3:PSME3:CD209:CD22:ACTR2:CD28:MUC4:NFKB1:MEF2C:IKBKB
FUMA	GO:0019216	regulation of lipid metabolic process	383	14	0.000121754	0.00217862	SORBS1:CCKBR:SP1:ACACB:MED1:LDLR:APOC1:APOC2:CREB1:ZBTB20:SNCA:NFKB1:FBXW7:PTK2B
gPROFILER	GO:0000122	negative regulation of transcription by RNA polymerase II		23		0.00218061	SNCA,MED1,NFATC3,HEXIM1,MXD4,ZBTB20,OVOL2,KLF12,ARHGAP35,SPEN,GATAD2A,ZHX1,FST,NIPBL,UBE2D3,NFKB1,EDNRB,MEF2C,RELA,TCF7L2,PPM1A,DLG1,EID1
gPROFILER	GO:0065008	regulation of biological quality		90		0.00218061	PTK2B,BIN1,ENSA,FBN1,SNCA,WNT3,MED1,CCKBR,ADCYAP1,APP,GPR27,CRHR1,ACACB,LDLR,MKLN1,ZBTB20,BDNF,STMN1,MAPT,PML,ALDH5A1,PICALM,CACNA1A,ITPKB,NCF4,ARHGAP35,CAMK2B,CAPZA1,ICA1,SLC12A4,MAP4K4,SAMD4B,LCAT,SCN11A,PROK2,CALM3,SLC4A9,PDIA4,BAD,MOV10,RASGRF1,GFAP,NFKB1,CACNB2,PKD2,EDNRB,PDE4B,CREB1,MEF2C,DCLRE1C,MACF1,ALDOA,TCF7L2,PEX19,CHDH,RHOC,MYLIP,CDC42,UBE3A,DLG1,PRKAR1B,POLD3,LRFN1,NCS1,COPA,GABRA2,…
gPROFILER	GO:0060696	regulation of phospholipid catabolic process		3		0.00218061	LDLR,APOC1,APOC2
FUMA	GO:0030072	peptide hormone secretion	248	11	0.000122798	0.00218539	ENSA:TCF7L2:BAD:CRHR1:ADCYAP1:CACNA1A:MAP4K4:GPR27:SERP1:ICA1:CRH
FUMA	GO:0031334	positive regulation of protein complex assembly	248	11	0.000122798	0.00218539	RHOC:PAK1:NIN:MAPT:GMFG:ACTR2:BIN1:CREB1:EIF4G1:DLG1:PTK2B
gPROFILER	GO:0060078	regulation of postsynaptic membrane potential		4		0.00219437	PTK2B,SNCA,ADCYAP1,APP
FUMA	GO:0060401	cytosolic calcium ion transport	168	9	0.000123824	0.0021973	UBASH3B:AKAP6:PML:CALM3:SLC8A1:JPH2:PKD2:SNCA:PTK2B
FUMA	GO:0032388	positive regulation of intracellular transport	207	10	0.000124065	0.0021973	CACNB2:TCF7L2:PAK1:PPM1A:ERBB2:CRHR1:RUFY3:UBE2D3:FBXW7:SMO
FUMA	GO:1904427	positive regulation of calcium ion transmembrane transport	69	6	0.000124642	0.00220221	CACNB2:AKAP6:CALM3:JPH2:PKD2:SNCA
FUMA	R-HSA-5683057	intracellular signaling by second messengers	302	13	4.13337e-05	0.00221283	MOV10:BAD:PML:TNRC6A:ERBB2:PSME3:GATAD2A:CD28:CREB1:IL1RAP:HBEGF:PRKAR1B:CAMK2B
gPROFILER	GO:0022607	cellular component assembly		97		0.00223689	PTK2B,BIN1,SNCA,TAF1C,DENR,DYNLRB1,NSF,CFLAR,APP,ACACB,NAP1L5,BDNF,STMN1,MAPT,IKBKB,PML,ALDH5A1,PICALM,CEP135,CACNA1A,RBBP5,RPLP0,ARHGAP35,CAPZA1,MCM7,MAP4K4,ATPAF1,LCAT,CELF1,ITGB5,BAD,IQGAP1,GFAP,SCLT1,BMP1,PKD2,CREB1,RALB,PATL1,MEF2C,TAF6L,MACF1,ALDOA,TCF7L2,TNS1,PPM1A,GOSR2,RHOC,MAGI1,APOC1,CDC42,DLG1,LRFN1,GABRA2,GMFG,ITGB4,EIF4G1,APOC2,VPS37C,PLEKHM1,TAOK2,GALNT11,ATP6V1D,DST,KANK1,GABRB3,T…
gPROFILER	GO:0048668	collateral sprouting		3		0.00223689	WNT3,APP,BDNF
gPROFILER	GO:0044087	regulation of cellular component biogenesis		26		0.00223689	PTK2B,BIN1,SNCA,APP,BDNF,STMN1,MAPT,IKBKB,CEP135,ARHGAP35,CAPZA1,MAP4K4,LCAT,IQGAP1,GFAP,CREB1,RALB,MEF2C,MACF1,PPM1A,RHOC,CDC42,DLG1,LRFN1,GMFG,EIF4G1
gPROFILER	GO:0051591	response to cAMP		10		0.00223689	PTK2B,APP,PKD2,RELA,AKAP6,SRD5A1,RAPGEF2,SLC8A1,AQP9,NME1
FUMA	GO:0016051	carbohydrate biosynthetic process	208	10	0.000129058	0.00227476	SORBS1:PGM2L1:DYRK2:ALDOA:ISYNA1:B3GALNT1:SNCA:NFKB1:FAM3C:PTK2B
gPROFILER	GO:0071417	cellular response to organonitrogen compound		31		0.00227721	FBN1,SNCA,CFLAR,APP,PTPRA,CRHR1,CACNA1A,NFKB1,PKD2,PDE4B,CREB1,MEF2C,RELA,PRKAR1B,SNX6,AKAP6,SP1,SRD5A1,ATP6V1D,KANK1,GABRB3,CRH,MAP1B,RAPGEF2,CACNB1,SORBS1,SLC8A1,PAK1,ACTR2,BCL2L1,AQP9
FUMA	R-HSA-9006925	myd88 cascade initiated on plasma membrane	84	7	4.48394e-05	0.00231774	RELA:CREB1:UBE2V1:APP:NFKB1:MEF2C:IKBKB
FUMA	WP366	tgf-beta signaling pathway	133	8	0.000132453	0.00232006	CDC42:SP1:PPM1A:PML:ITGB4:PIAS2:APP:MEF2C
FUMA	R-HSA-975871	ikba variant leads to eda id	7	3	4.69903e-05	0.00234795	RELA:NFKB1:IKBKB
FUMA	GO:0010001	glial cell differentiation	209	10	0.000134219	0.00236006	RELA:ERBB2:GFAP:MAPT:SRSF1:LDLR:BIN1:APP:SMO:ARHGEF10
Webgestalt	GO:0031968	organelle outer membrane	204	12	5.54094e-05	0.00237645	SNCA;ACACB;GIMAP5;SYNJ2;BAD;ACSL6;LETMD1;MCL1;CASP8;RTN4IP1;BCL2L1;NME1
FUMA	GO:0043410	positive regulation of mapk cascade	537	17	0.000136348	0.00239179	CD44:PAK1:LTBR:IQGAP1:TAOK2:ERBB2:ADCYAP1:LILRA5:DNAJC27:CFLAR:UBE2V1:APP:PROK2:MAP3K13:FBXW7:RAPGEF2:PTK2B
FUMA	GO:0048143	astrocyte activation	24	4	0.000137119	0.00239388	MAPT:LDLR:APP:SMO
FUMA	GO:1901615	organic hydroxy compound metabolic process	486	16	0.000137056	0.00239388	ANGPTL3:ITPKB:ACER3:SP1:ACACB:LCAT:MED1:LDLR:ISYNA1:APOC1:APP:SNCA:NFKB1:RAPGEF2:SRD5A1:PTK2B
gPROFILER	GO:0009605	response to external stimulus		17		0.00240309	PTK2B,ENSA,SNCA,WNT3,AP1S1,CLEC4M,MED1,CFLAR,ADCYAP1,APP,PTPRA,CD44,OCIAD2,HEXIM1,ACACB,CD209,LDLR
gPROFILER	GO:0019216	regulation of lipid metabolic process		7		0.0024054	PTK2B,SNCA,MED1,CCKBR,ACACB,LDLR,ZBTB20
FUMA	GO:0010942	positive regulation of cell death	698	20	0.000138339	0.00240947	ATPIF1:MCL1:BAD:PICALM:LTBR:PML:KATNB1:MAPT:BIN1:CASP8:CREB1:BCL2L1:FAM162A:EIF4G1:SNCA:FBXW7:RAPGEF2:MEF2C:CYCS:CRH
FUMA	GO:0032273	positive regulation of protein polymerization	134	8	0.00013951	0.0024241	PAK1:NIN:MAPT:GMFG:ACTR2:BIN1:DLG1:PTK2B
gPROFILER	GO:0043229	intracellular organelle		304		0.00243218	PTK2B,BIN1,VEZF1,CYCS,ENSA,FBN1,LANCL2,SNCA,SNRPN,TAF1C,WNT3,AP1S1,DYNLRB1,MED1,NFATC3,NSF,ZNF397,MSRB3,CASS4,APP,SMOX,CD44,OCIAD2,HEXIM1,CRHR1,MXD4,ACACB,NAP1L5,LDLR,ELF1,MKLN1,SPPL2C,ZBTB20,KANSL1,OVOL2,ARHGAP17,BDNF,DNAJC7,HS3ST5,STMN1,GIMAP5,MAPT,SCG3,ARL17B,IKBKB,PML,ALDH5A1,PICALM,CEP135,CACNA1A,SCD5,DCTN6,KLF12,INTS9,TRIM45,C1QTNF5,ITPKB,ILF3,RBBP5,WNT2B,RPLP0,RBM6,NCF4,CDC27,ARHGAP35,CAMK…
FUMA	GO:1990234	transferase complex	772	21	0.000192584	0.00244022	PIK3C2B:RBBP5:SORBS1:USP47:TAF6L:POLD3:DYRK2:MED1:KANSL1:CDC27:UBE2V1:ZFP64:VHL:POLR2H:RCHY1:UBE2D3:FBXW7:MARCH6:RNF144B:MKLN1:IKBKB
gPROFILER	GO:0031324	negative regulation of cellular metabolic process		55		0.00244447	BIN1,ENSA,LANCL2,SNCA,MED1,NFATC3,CFLAR,APP,CD44,HEXIM1,MXD4,ACACB,ZBTB20,OVOL2,MAPT,IKBKB,PML,PICALM,CACNA1A,KLF12,ILF3,ARHGAP35,SPEN,GATAD2A,ZHX1,SAMD4B,CELF1,CALM3,TNIP1,FST,MOV10,IQGAP1,NIPBL,UBE2D3,NFKB1,OXR1,EDNRB,CREB1,MEF2C,RELA,TCF7L2,PPM1A,USP47,APOC1,DLG1,PRKAR1B,EID1,ZNF215,TNRC6A,GMFG,EIF4G1,FAM3C,SNX6,HBEGF,VHL
FUMA	GO:0072659	protein localization to plasma membrane	252	11	0.000141267	0.00244885	MACF1:GOLPH3L:CACNB2:SORBS1:PICALM:NSF:FAM126B:BCL2L1:DLG1:RAPGEF2:IKBKB
gPROFILER	GO:0051172	negative regulation of nitrogen compound metabolic process		52		0.00247177	BIN1,ENSA,LANCL2,SNCA,MED1,NFATC3,CFLAR,APP,CD44,HEXIM1,MXD4,LDLR,ZBTB20,OVOL2,MAPT,IKBKB,PML,PICALM,KLF12,ILF3,ARHGAP35,SPEN,GATAD2A,ZHX1,SAMD4B,CELF1,CALM3,TNIP1,FST,MOV10,NIPBL,UBE2D3,NFKB1,OXR1,EDNRB,CREB1,MEF2C,RELA,TCF7L2,PPM1A,USP47,APOC1,DLG1,PRKAR1B,EID1,ZNF215,TNRC6A,GMFG,EIF4G1,SNX6,HBEGF,VHL
FUMA	WP3584	mecp2 and associated rett syndrome	71	6	0.000146146	0.00247991	BDNF:SP1:UBE3A:CREB1:SST:MEF2C
FUMA	GO:0006091	generation of precursor metabolites and energy	488	16	0.000143598	0.00248341	ATPIF1:SORBS1:COX15:PGM2L1:ME3:DYRK2:ALDOA:CYB561:NDUFA7:NDUFA7:NDUFB3:ZBTB20:NDUFB5:SNCA:SRD5A1:ALDH5A1:CYCS
FUMA	GO:0031113	regulation of microtubule polymerization	45	5	0.00014424	0.00248865	STMN1:PAK1:NIN:MAPT:SNCA
FUMA	GO:0097006	regulation of plasma lipoprotein particle levels	101	7	0.000144771	0.00249197	LCAT:LDLR:APOC1:APOC2:MYLIP:BMP1:CLTA
FUMA	GO:0002274	myeloid leukocyte activation	646	19	0.000145241	0.0024942	CTSS:CR1:CD44:LTBR:ATP6V1D:IQGAP1:ALDOA:CRHR1:MAPT:LDLR:GMFG:ACTR2:CST3:APP:SNCA:NFKB1:SCAMP1:CLEC5A:GGH
gPROFILER	GO:0007163	establishment or maintenance of cell polarity		15		0.00252276	PTK2B,ARHGAP35,RHOC,CDC42,DLG1,LRRC1,DST,KANK1,DOCK7,PARD3B,MAP1B,RUFY3,PAK1,ACTR2,SPN
FUMA	GO:0003013	circulatory system process	541	17	0.000148856	0.00255034	PDE4B:CACNB2:SCN2B:EDNRB:CACNB1:TCAP:SRSF1:ADCYAP1:CALM3:ARHGAP35:SLC8A1:BIN1:TTN:DLG1:ERAP1:HBEGF:CRH
gPROFILER	GO:0045892	negative regulation of transcription, DNA-templated		29		0.0025633	LANCL2,SNCA,MED1,NFATC3,HEXIM1,MXD4,ZBTB20,OVOL2,PML,KLF12,ILF3,ARHGAP35,SPEN,GATAD2A,ZHX1,FST,NIPBL,UBE2D3,NFKB1,EDNRB,CREB1,MEF2C,RELA,TCF7L2,PPM1A,USP47,DLG1,EID1,ZNF215
gPROFILER	GO:0033036	macromolecule localization		102		0.00258133	ENSA,FBN1,AP1S1,DYNLRB1,MED1,NSF,ADCYAP1,GPR27,CRHR1,ACACB,LDLR,BDNF,MAPT,SCG3,ARL17B,IKBKB,PML,PICALM,CEP135,CACNA1A,C1QTNF5,RPLP0,ICA1,MAP4K4,LCAT,CALM3,PDIA4,ABCC3,BAD,IQGAP1,NIPBL,UBE2D3,CD22,NVL,NFKB1,CACNB2,PKD2,LEPROTL1,RALB,PLEKHA3,ANKRD50,MACF1,TCF7L2,PEX19,PPY,PPM1A,GOSR2,APOC1,CDC42,DLG1,POLDIP3,LILRA5,COPA,RAB2A,SLCO3A1,DCLK1,LRRC1,APOC2,SNX6,AKAP6,RRBP1,VPS37C,FBXW7,PLEKHM1,TAOK2,KAT…
gPROFILER	GO:0007044	cell-substrate junction assembly		8		0.00258415	PTK2B,MAP4K4,IQGAP1,MACF1,TNS1,ITGB4,TAOK2,DST
gPROFILER	GO:0051649	establishment of localization in cell		76		0.00258415	PTK2B,BIN1,SNCA,AP1S1,DYNLRB1,MED1,NSF,APP,GPR27,ACACB,LDLR,MAPT,ARL17B,PML,PICALM,CACNA1A,DCTN6,RPLP0,CAPZA1,MAP4K4,CALM3,BAD,UBE2D3,CACNB2,PKD2,LEPROTL1,MEF2C,PLEKHA3,ANKRD50,TCF7L2,PEX19,PPM1A,GOSR2,CDC42,DLG1,PRKAR1B,POLDIP3,NCS1,COPA,RAB2A,DCLK1,LRRC1,SNX6,AKAP6,VPS37C,FBXW7,TAOK2,KATNB1,DST,RPH3A,ERBB2,JPH2,DOCK7,CASP8,PTTG1IP,CRH,PARD3B,MAP1B,SMO,SRSF1,RIMS3,DNAJC27,VPS37B,CTBP2,RUFY3,CLTA…
gPROFILER	GO:0010951	negative regulation of endopeptidase activity		5		0.00258415	BIN1,SNCA,CFLAR,APP,CD44
gPROFILER	GO:0048143	astrocyte activation		3		0.00262135	APP,LDLR,MAPT
FUMA	GO:0022900	electron transport chain	173	9	0.000154546	0.00262944	COX15:CYB561:NDUFA7:NDUFA7:NDUFB3:NDUFB5:SNCA:SRD5A1:ALDH5A1:CYCS
FUMA	GO:0008630	intrinsic apoptotic signaling pathway in response to dna damage	102	7	0.000153965	0.00262944	MCL1:USP47:CD44:BAD:DYRK2:PML:BCL2L1
FUMA	GO:0050796	regulation of insulin secretion	173	9	0.000154546	0.00262944	ENSA:TCF7L2:BAD:CACNA1A:MAP4K4:GPR27:SERP1:ICA1:CRH
gPROFILER	GO:0005905	clathrin-coated pit		4		0.00264425	AP1S1,APP,LDLR,PICALM
gPROFILER	GO:0032994	protein-lipid complex		5		0.00265897	BIN1,LDLR,LCAT,APOC1,APOC2
FUMA	GO:0014041	regulation of neuron maturation	10	3	0.00015713	0.00266723	EDNRB:TBX6:MAP3K13
gPROFILER	GO:0034702	ion channel complex		14		0.00267234	PTK2B,VWC2,CACNA1A,SCN11A,CALM3,CACNB2,PKD2,PDE4B,DLG1,GABRA2,LRRC1,AKAP6,SCN2B,GABRB3
FUMA	GO:1903747	regulation of establishment of protein localization to mitochondrion	72	6	0.000157945	0.00267487	ATPIF1:BAD:MAPT:CASP8:UBE2D3:FBXW7
FUMA	GO:0022407	regulation of cell cell adhesion	393	14	0.000159019	0.00268688	CDC42:ITPKB:CD44:CD5:BAD:RELA:PAK1:UBASH3B:SPN:ERBB2:CD209:CD28:DLG1:CD83
gPROFILER	GO:0051130	positive regulation of cellular component organization		33		0.0026879	PTK2B,BIN1,SNCA,WNT3,CFLAR,CASS4,ADCYAP1,APP,BDNF,MAPT,PML,CEP135,ARHGAP35,CAMK2B,MAP4K4,BAD,IQGAP1,NIPBL,UBE2D3,CREB1,RALB,MACF1,FAM162A,RHOC,CDC42,DLG1,GMFG,EIF4G1,MAP3K13,APOC2,FBXW7,PLEKHM1,KATNB1
FUMA	WP399	wnt signaling pathway and pluripotency	103	7	0.000163625	0.00269237	WNT2B:PPM1J:TCF7L2:CTBP2:CD44:WNT3:LDLR
FUMA	GO:0098609	cell cell adhesion	819	22	0.000162573	0.00273047	CDC42:ITPKB:CD44:CD5:BAD:RELA:PAK1:MPZL2:UBASH3B:SPN:KIFC3:ERBB2:CD209:CLEC4M:CD28:ITGB5:IL1RAP:DLG1:PALLD:PCDHB15:TNIP1:CD83
FUMA	GO:0071241	cellular response to inorganic substance	214	10	0.000162714	0.00273047	ITPKB:BAD:IQGAP1:CFLAR:CREB1:APP:PKD2:SNCA:UBE2D3:MEF2C
FUMA	GO:0045580	regulation of t cell differentiation	137	8	0.000162563	0.00273047	CR1:ITPKB:BAD:ERBB2:CLPTM1:CD28:FANCD2:CD83
FUMA	GO:0022904	respiratory electron transport chain	103	7	0.000163625	0.0027395	COX15:NDUFA7:NDUFA7:NDUFB3:NDUFB5:SNCA:ALDH5A1:CYCS
gPROFILER	GO:0044433	cytoplasmic vesicle part		53		0.00275634	SNCA,WNT3,AP1S1,APP,CD44,LDLR,SPPL2C,GIMAP5,SCG3,PML,PICALM,NCF4,CAMK2B,ICA1,CALM3,CYB561,IQGAP1,UBE2D3,NFKB1,PKD2,ALDOA,GOSR2,COPA,GABRA2,GMFG,FAM3C,SNX6,HBEGF,VPS37C,PLEKHM1,TAOK2,ATP6V1D,CR1,SLC30A3,GABRB3,RPH3A,ERBB2,CTSS,ANTXR1,FIG4,CLEC5A,CST3,SMO,GGH,MMD,VPS37B,KIFC3,CLTA,ACTR2,CNIH3,BCL2L1,SEC24D,SCAMP1
gPROFILER	GO:0043231	intracellular membrane-bounded organelle		268		0.00275634	PTK2B,BIN1,VEZF1,CYCS,ENSA,FBN1,LANCL2,SNCA,SNRPN,TAF1C,WNT3,AP1S1,MED1,NFATC3,NSF,ZNF397,MSRB3,APP,SMOX,CD44,HEXIM1,MXD4,ACACB,NAP1L5,LDLR,ELF1,MKLN1,SPPL2C,ZBTB20,KANSL1,OVOL2,ARHGAP17,BDNF,DNAJC7,HS3ST5,GIMAP5,MAPT,SCG3,ARL17B,IKBKB,PML,ALDH5A1,PICALM,CACNA1A,SCD5,KLF12,INTS9,TRIM45,ITPKB,ILF3,RBBP5,WNT2B,RPLP0,RBM6,NCF4,CDC27,ARHGAP35,CAMK2B,ZNF44,ICA1,SPEN,POGK,SLC12A4,MCM7,GATAD2A,ZHX1,SAMD…
gPROFILER	GO:0008021	synaptic vesicle		14		0.00275634	BIN1,SNCA,APP,BDNF,PICALM,ICA1,CALM3,PDE4B,GABRA2,SLC30A3,RPH3A,CLTA,BCL2L1,SCAMP1
FUMA	GO:0051147	regulation of muscle cell differentiation	175	9	0.000168498	0.00280829	CDC42:BDNF:PAK1:AKAP6:RBPMS2:NFATC3:CFLAR:MEF2C:FAM129B
FUMA	GO:0007416	synapse assembly	175	9	0.000168498	0.00280829	BDNF:GABRB3:LRFN1:APP:EIF4G1:IL1RAP:GABRA2:SNCA:MEF2C
FUMA	GO:1903039	positive regulation of leukocyte cell cell adhesion	215	10	0.000168984	0.00281004	CDC42:ITPKB:CD44:CD5:BAD:RELA:PAK1:CD209:CD28:CD83
FUMA	GO:0046649	lymphocyte activation	709	20	0.000169933	0.00281943	CDC42:CR1:ITPKB:DCLRE1C:CD44:CD5:BAD:PAK1:SPN:ERBB2:CD209:CD22:CLPTM1:CASP8:CD28:FANCD2:DLG1:MEF2C:CD83:PTK2B
FUMA	GO:0033555	multicellular organismal response to stress	73	6	0.000170484	0.00282221	EDNRB:CRHR1:ADCYAP1:EIF4G1:MEF2C:CRH
FUMA	GO:0097553	calcium ion transmembrane import into cytosol	138	8	0.000170911	0.0028229	UBASH3B:AKAP6:CALM3:SLC8A1:JPH2:PKD2:SNCA:PTK2B
gPROFILER	GO:0010656	negative regulation of muscle cell apoptotic process		3		0.00282362	PTK2B,CFLAR,ADCYAP1
FUMA	GO:2001237	negative regulation of extrinsic apoptotic signaling pathway	104	7	0.000173769	0.00286369	MCL1:TCF7L2:RELA:PSME3:CFLAR:CASP8:BCL2L1
gPROFILER	GO:0042327	positive regulation of phosphorylation		30		0.00287633	PTK2B,SNCA,CFLAR,CASS4,ADCYAP1,APP,CD44,ZBTB20,BDNF,MAPT,MAP4K4,PROK2,CALM3,GDF3,RBPMS,BAD,IQGAP1,PKD2,EDNRB,RALB,MEF2C,CDC42,DLG1,PRKAR1B,LILRA5,EIF4G1,MAP3K13,HBEGF,FBXW7,TAOK2
FUMA	GO:2001235	positive regulation of apoptotic signaling pathway	176	9	0.000175857	0.00289161	ATPIF1:MCL1:BAD:LTBR:PML:CASP8:BCL2L1:FAM162A:FBXW7
FUMA	GO:0030660	golgi associated vesicle membrane	109	7	0.000232403	0.00290795	COPA:CNIH3:SPPL2C:GOSR2:SEC24D:AP1S1:CLTA
FUMA	GO:0042551	neuron maturation	47	5	0.000177812	0.00291073	EDNRB:TBX6:APP:MAP3K13:SCLT1
FUMA	GO:0070849	response to epidermal growth factor	47	5	0.000177812	0.00291073	IQGAP1:MED1:ERBB2:CFLAR:MCM7
FUMA	GO:0030048	actin filament based movement	139	8	0.000179607	0.00293358	PDE4B:CACNB2:SCN2B:TCAP:MYO9B:BIN1:TTN:DLG1
FUMA	GO:0045444	fat cell differentiation	217	10	0.000182138	0.00296832	TCF7L2:CTBP2:GDF3:JDP2:FAM57B:MED1:CREB1:NIPBL:ERAP1:DLK2
gPROFILER	GO:0060333	interferon-gamma-mediated signaling pathway		5		0.00297927	MED1,CD44,PML,CAMK2B,TRIM38
gPROFILER	GO:0010466	negative regulation of peptidase activity		5		0.00297927	BIN1,SNCA,CFLAR,APP,CD44
gPROFILER	GO:0051402	neuron apoptotic process		13		0.00297927	PTK2B,SNCA,APP,BDNF,CACNA1A,OXR1,MEF2C,FAM162A,CDC42,SNX6,FBXW7,GABRB3,MCL1
gPROFILER	GO:0050772	positive regulation of axonogenesis		9		0.00297927	WNT3,BDNF,MAPT,MACF1,MAP3K13,MAP1B,NIN,RUFY3,PAK1
gPROFILER	GO:0045785	positive regulation of cell adhesion		14		0.00297927	PTK2B,CASS4,CD44,CD209,VWC2,ITPKB,CD5,MAP4K4,BAD,IQGAP1,RELA,CD83,MAGI1,CDC42
gPROFILER	GO:1902905	positive regulation of supramolecular fiber organization		14		0.00297927	PTK2B,BIN1,APP,MAPT,RHOC,CDC42,DLG1,GMFG,KATNB1,ARHGEF10,MAP1B,NIN,PAK1,ACTR2
gPROFILER	GO:0050806	positive regulation of synaptic transmission		4		0.00297927	PTK2B,SNCA,ADCYAP1,APP
gPROFILER	GO:0050790	regulation of catalytic activity		20		0.00297927	PTK2B,BIN1,CYCS,ENSA,SNCA,CCKBR,CFLAR,CASS4,ADCYAP1,APP,CD44,HEXIM1,CRHR1,ACACB,ARHGAP17,BDNF,MAPT,IKBKB,PML,PICALM
gPROFILER	GO:0065009	regulation of molecular function		72		0.00297927	PTK2B,BIN1,CYCS,ENSA,SNCA,MED1,CCKBR,CFLAR,CASS4,ADCYAP1,APP,CD44,HEXIM1,CRHR1,ACACB,ARHGAP17,BDNF,STMN1,MAPT,IKBKB,PML,PICALM,NCF4,ARHGAP35,TRIM38,MAP4K4,PROK2,CALM3,BAD,IQGAP1,NIPBL,RASGRF1,NVL,NFKB1,CACNB2,PKD2,EDNRB,PDE4B,RALB,MEF2C,RELA,TCF7L2,PEX19,FAM162A,USP47,RHOC,APOC1,CDC42,DLG1,PRKAR1B,LILRA5,GMFG,MUC4,EIF4G1,MAP3K13,APOC2,SNX6,AKAP6,FBXW7,SCN2B,TAOK2,TBX6,FANCD2,CR1,MYO9B,ERBB2,JPH2,…
FUMA	GO:0006353	dna templated transcription termination	74	6	0.000183798	0.00298874	TTF2:CSTF3:NUDT21:TAF1C:CSTF1:POLR2H
gPROFILER	GO:0043280	positive regulation of cysteine-type endopeptidase activity involved in apoptotic process		5		0.00300177	CYCS,SNCA,CFLAR,MAPT,PML
gPROFILER	GO:0043281	regulation of cysteine-type endopeptidase activity involved in apoptotic process		6		0.00300177	CYCS,SNCA,CFLAR,CD44,MAPT,PML
FUMA	GO:0044262	cellular carbohydrate metabolic process	260	11	0.000185368	0.00300762	ANGPTL3:SORBS1:BAD:PGM2L1:DYRK2:ACACB:ISYNA1:SNCA:SYNJ2:FAM3C:PTK2B
FUMA	WP4352	ciliary landscape	218	10	0.000189031	0.00301893	EXOC6:CTBP2:IQGAP1:RALB:DYNLRB1:XPNPEP3:NFKB1:MCM7:MKLN1:RAB2A
FUMA	GO:0044255	cellular lipid metabolic process	885	23	0.000186954	0.00302667	ANGPTL3:PIK3C2B:CCKBR:ACER3:ACACB:ABHD2:FAM57B:LCAT:LDLR:APOC1:APOC2:FAM126B:PPM1L:B3GALNT1:SNCA:FBXW7:SRD5A1:ACSL6:MBOAT1:ALDH5A1:SYNJ2:PTK2B:CRH
gPROFILER	GO:0043254	regulation of protein complex assembly		16		0.00302765	PTK2B,BIN1,SNCA,STMN1,MAPT,CAPZA1,LCAT,GFAP,CREB1,RALB,PPM1A,RHOC,CDC42,DLG1,GMFG,EIF4G1
FUMA	GO:0061008	hepaticobiliary system development	140	8	0.000188664	0.00304765	RELA:MED1:SRSF1:CFLAR:PKD2:FBXW7:SRD5A1:NIPBL
FUMA	GO:0060314	regulation of ryanodine sensitive calcium release channel activity	26	4	0.000189538	0.00305506	AKAP6:CALM3:JPH2:PKD2
gPROFILER	GO:0009725	response to hormone		9		0.00306974	PTK2B,FBN1,LANCL2,SNRPN,MED1,CFLAR,ADCYAP1,PTPRA,CRHR1
FUMA	WP2118	arrhythmogenic right ventricular cardiomyopathy	75	6	0.000197918	0.00307055	CACNB2:TCF7L2:CACNB1:ITGB4:SLC8A1:ITGB5
gPROFILER	GO:0007420	brain development		33		0.00307538	WNT3,MED1,ADCYAP1,APP,STMN1,CACNA1A,WNT2B,ARHGAP35,SYNJ2,CALM3,BAD,NIPBL,CREB1,SEZ6L2,CDC42,UBE3A,DCLK1,SRD5A1,TSKU,FANCD2,NRP2,FEZF2,DOCK7,CRH,NEUROD6,SMO,RAPGEF2,NIN,SLC8A1,EN1,PAK1,PEX5,NME1
gPROFILER	GO:0051338	regulation of transferase activity		28		0.00307643	PTK2B,SNCA,CCKBR,CASS4,ADCYAP1,APP,CD44,HEXIM1,BDNF,MAPT,MAP4K4,PROK2,CALM3,BAD,IQGAP1,NVL,PKD2,RALB,MEF2C,CDC42,DLG1,PRKAR1B,LILRA5,GMFG,MAP3K13,SNX6,FBXW7,TAOK2
Webgestalt	GO:0005923	bicellular tight junction	121	9	8.05758e-05	0.00311023	ARHGAP17;C1QTNF5;TJAP1;MAGI1;DLG1;PARD3B;RAPGEF2;UBN1;MARVELD3
Webgestalt	GO:0008021	synaptic vesicle	180	11	8.03407e-05	0.00311023	BIN1;SNCA;BDNF;ICA1;PDE4B;GABRA2;SLC30A3;RPH3A;CLTA;BCL2L1;SCAMP1
FUMA	R-HSA-622312	inflammasomes	20	4	6.47706e-05	0.00313197	RELA:BCL2L1:APP:NFKB1
FUMA	GO:0008384	i kappab kinase nf kappab signaling	262	11	0.000198056	0.00315831	RHOC:RELA:LTBR:PPM1A:CFLAR:CASP8:UBE2V1:ALPK1:TNIP1:TRIM38:IKBKB
FUMA	GO:0002683	negative regulation of immune system process	451	15	0.000197393	0.00315831	CR1:ITPKB:UBASH3B:ELF1:FBN1:SPN:ERBB2:NME1:ADCYAP1:LDLR:CD22:DLG1:FBXW7:TRIM38:PTK2B
FUMA	GO:0007422	peripheral nervous system development	75	6	0.000197918	0.00315831	BDNF:RELA:EDNRB:ERBB2:ETV1:ARHGEF10
FUMA	GO:0051588	regulation of neurotransmitter transport	141	8	0.000198093	0.00315831	RIMS3:CACNB2:GFAP:CALM3:SNCA:MEF2C:CRH:NCS1
FUMA	GO:0007264	small gtpase mediated signal transduction	554	17	0.00019671	0.00315831	CDC42:STMN1:DOCK7:RHOC:ITPKB:RERG:RASGRF1:ARHGAP17:MYO9B:ARHGAP35:DNAJC27:MAP4K4:RALB:RAPGEF2:ARHGEF10:RAB2A:KANK1
gPROFILER	GO:0007417	central nervous system development		41		0.00319313	BIN1,WNT3,MED1,ADCYAP1,APP,LDLR,STMN1,MAPT,ALDH5A1,CACNA1A,WNT2B,ARHGAP35,SYNJ2,CALM3,BAD,NIPBL,GFAP,PKD2,CREB1,SEZ6L2,CDC42,UBE3A,DCLK1,SRD5A1,TSKU,FANCD2,NRP2,VCAN,FEZF2,ERBB2,DOCK7,CRH,NEUROD6,SMO,RAPGEF2,NIN,SLC8A1,EN1,PAK1,PEX5,NME1
gPROFILER	GO:0019882	antigen processing and presentation		8		0.00321257	AP1S1,CLEC4M,CD209,IKBKB,DCTN6,NCF4,CAPZA1,ITGB5
gPROFILER	GO:0010721	negative regulation of cell development		6		0.00321257	FBN1,WNT3,MED1,ADCYAP1,APP,LDLR
gPROFILER	GO:0150076	neuroinflammatory response		4		0.00329048	SNCA,APP,LDLR,MAPT
FUMA	GO:0038127	erbb signaling pathway	142	8	0.000207905	0.00329332	CDC42:SNX6:IQGAP1:ERBB2:APP:FBXW7:HBEGF:PTK2B
FUMA	GO:0070585	protein localization to mitochondrion	142	8	0.000207905	0.00329332	ATPIF1:BAD:MAPT:CALM3:CASP8:COX18:UBE2D3:FBXW7
FUMA	GO:0043279	response to alkaloid	107	7	0.000207292	0.00329332	RELA:CRHR1:SLC8A1:BCL2L1:SNCA:PTK2B:CRH
gPROFILER	GO:0007204	positive regulation of cytosolic calcium ion concentration		11		0.00329897	PTK2B,SNCA,CCKBR,ADCYAP1,PML,CACNA1A,PROK2,CALM3,CACNB2,PKD2,EDNRB
FUMA	GO:0001664	g protein coupled receptor binding	274	12	6.88705e-05	0.00330101	WNT2B:CCKBR:EDNRB:PPY:PYY:WNT3:ITGB4:ADCYAP1:CALM3:PROK2:RAPGEF2:CRH
FUMA	GO:1901981	phosphatidylinositol phosphate binding	156	9	7.02342e-05	0.00330101	GOLPH3L:PICALM:RPH3A:IQGAP1:MAPT:PLEKHA3:JPH2:NCF4:LANCL2
gPROFILER	GO:0005737	cytoplasm		279		0.00331296	ACP1,PTK2B,BIN1,CYCS,ENSA,FBN1,LANCL2,SNCA,SNRPN,WNT3,AP1S1,CLEC4M,DYNLRB1,NFATC3,NSF,ZNF397,MSRB3,CFLAR,CASS4,APP,SMOX,CD44,OCIAD2,HEXIM1,CRHR1,ACACB,CD209,LDLR,MKLN1,SPPL2C,ZBTB20,ARHGAP17,EIF4E3,BDNF,DNAJC7,HS3ST5,STMN1,GIMAP5,MAPT,SCG3,ARL17B,IKBKB,PML,ALDH5A1,PICALM,CEP135,CACNA1A,SCD5,DCTN6,RBPMS2,KLF12,INTS9,TRIM45,C1QTNF5,ITPKB,ILF3,RPLP0,NCF4,CDC27,ARHGAP35,CAMK2B,CAPZA1,ICA1,SYNJ2,TRIM3…
gPROFILER	GO:0043227	membrane-bounded organelle		297		0.00331296	ACP1,PTK2B,BIN1,VEZF1,CYCS,ENSA,FBN1,LANCL2,SNCA,SNRPN,TAF1C,WNT3,AP1S1,MED1,NFATC3,NSF,ZNF397,MSRB3,APP,SMOX,PTPRA,CD44,OCIAD2,HEXIM1,CRHR1,MXD4,ACACB,NAP1L5,LDLR,ELF1,MKLN1,SPPL2C,ZBTB20,KANSL1,OVOL2,ARHGAP17,BDNF,DNAJC7,HS3ST5,STMN1,GIMAP5,MAPT,SCG3,ARL17B,IKBKB,PML,ALDH5A1,PICALM,CACNA1A,SCD5,KLF12,INTS9,TRIM45,C1QTNF5,ITPKB,ILF3,RBBP5,WNT2B,RPLP0,RBM6,NCF4,CDC27,ARHGAP35,CAMK2B,CAPZA1,ZNF44,…
gPROFILER	GO:0048708	astrocyte differentiation		4		0.0033202	BIN1,APP,LDLR,MAPT
gPROFILER	GO:1901699	cellular response to nitrogen compound		32		0.0033202	FBN1,SNCA,CFLAR,APP,PTPRA,CRHR1,CACNA1A,NFKB1,PKD2,PDE4B,CREB1,RALB,MEF2C,RELA,PRKAR1B,SNX6,AKAP6,SP1,SRD5A1,ATP6V1D,KANK1,GABRB3,CRH,MAP1B,RAPGEF2,CACNB1,SORBS1,SLC8A1,PAK1,ACTR2,BCL2L1,AQP9
gPROFILER	GO:0031325	positive regulation of cellular metabolic process		100		0.0033202	PTK2B,VEZF1,CYCS,SNCA,MED1,NFATC3,NSF,CFLAR,CASS4,ADCYAP1,APP,CD44,ACACB,LDLR,ELF1,ZBTB20,OVOL2,BDNF,MAPT,IKBKB,PML,PICALM,KLF12,ILF3,MAP4K4,PROK2,CALM3,RCHY1,TNIP1,GDF3,RBPMS,BAD,MOV10,IQGAP1,NIPBL,NVL,NFKB1,PKD2,EDNRB,CREB1,RALB,MEF2C,TAF6L,RELA,PIAS2,TCF7L2,PPM1A,FAM162A,APOC1,CDC42,UBE3A,DLG1,PRKAR1B,POLDIP3,TNRC6A,LILRA5,DYRK2,EIF4G1,MAP3K13,APOC2,HBEGF,VHL,FBXW7,SP1,TAOK2,TBX6,RNF144B,SERP1…
gPROFILER	GO:0045937	positive regulation of phosphate metabolic process		31		0.0033202	PTK2B,SNCA,CFLAR,CASS4,ADCYAP1,APP,CD44,ZBTB20,BDNF,MAPT,MAP4K4,PROK2,CALM3,GDF3,RBPMS,BAD,IQGAP1,PKD2,EDNRB,RALB,MEF2C,CDC42,DLG1,PRKAR1B,LILRA5,EIF4G1,MAP3K13,APOC2,HBEGF,FBXW7,TAOK2
gPROFILER	GO:0010562	positive regulation of phosphorus metabolic process		31		0.0033202	PTK2B,SNCA,CFLAR,CASS4,ADCYAP1,APP,CD44,ZBTB20,BDNF,MAPT,MAP4K4,PROK2,CALM3,GDF3,RBPMS,BAD,IQGAP1,PKD2,EDNRB,RALB,MEF2C,CDC42,DLG1,PRKAR1B,LILRA5,EIF4G1,MAP3K13,APOC2,HBEGF,FBXW7,TAOK2
gPROFILER	GO:0006470	protein dephosphorylation		3		0.0033202	ACP1,CYCS,ENSA
gPROFILER	GO:0065003	protein-containing complex assembly		37		0.0033202	PTK2B,BIN1,SNCA,TAF1C,DENR,NSF,ACACB,NAP1L5,STMN1,MAPT,PML,ALDH5A1,PICALM,RBBP5,RPLP0,CAPZA1,MCM7,ATPAF1,LCAT,CELF1,BAD,GFAP,BMP1,PKD2,CREB1,RALB,PATL1,TAF6L,ALDOA,TCF7L2,PPM1A,GOSR2,RHOC,MAGI1,APOC1,CDC42,DLG1
gPROFILER	GO:0019220	regulation of phosphate metabolic process		41		0.0033202	PTK2B,ENSA,SNCA,CCKBR,CFLAR,CASS4,ADCYAP1,APP,CD44,HEXIM1,LDLR,ZBTB20,BDNF,MAPT,IKBKB,PML,ITPKB,MCM7,MAP4K4,PROK2,CALM3,TNIP1,GDF3,RBPMS,BAD,IQGAP1,PKD2,EDNRB,RALB,MEF2C,APOC1,CDC42,DLG1,PRKAR1B,LILRA5,GMFG,EIF4G1,MAP3K13,APOC2,SNX6,HBEGF
gPROFILER	GO:0051148	negative regulation of muscle cell differentiation		4		0.00333285	NFATC3,CFLAR,BDNF,RBPMS2
gPROFILER	GO:0051174	regulation of phosphorus metabolic process		41		0.00335213	PTK2B,ENSA,SNCA,CCKBR,CFLAR,CASS4,ADCYAP1,APP,CD44,HEXIM1,LDLR,ZBTB20,BDNF,MAPT,IKBKB,PML,ITPKB,MCM7,MAP4K4,PROK2,CALM3,TNIP1,GDF3,RBPMS,BAD,IQGAP1,PKD2,EDNRB,RALB,MEF2C,APOC1,CDC42,DLG1,PRKAR1B,LILRA5,GMFG,EIF4G1,MAP3K13,APOC2,SNX6,HBEGF
FUMA	GO:0032050	clathrin heavy chain binding	8	3	7.456e-05	0.00335761	PICALM:LDLR:CLTA
FUMA	GO:0001216	dna binding transcription activator activity	414	15	7.75618e-05	0.00335761	RELA:ETV6:TFCP2:SP1:ELF1:NFATC3:HLF:VEZF1:CREB1:OVOL2:FEZF2:NFKB1:MEF2C:ETV1:NEUROD6
FUMA	GO:0044325	ion channel binding	123	8	7.66828e-05	0.00335761	RIMS3:PDE4B:AKAP6:TCAP:CALM3:SLC8A1:DLG1:PKD2
FUMA	GO:0018212	peptidyl tyrosine modification	356	13	0.000213121	0.00336146	BDNF:CD44:DYRK2:SNX6:IQGAP1:ERBB2:LILRA5:TTN:CASS4:APP:FBXW7:HBEGF:PTK2B
FUMA	GO:0006970	response to osmotic stress	76	6	0.00021288	0.00336146	BAD:AQP9:MARVELD3:SST:PKD2:PTK2B
gPROFILER	GO:0046718	viral entry into host cell		6		0.00336197	CLEC4M,CD209,LDLR,HS3ST5,TRIM38,ITGB5
FUMA	GO:1903018	regulation of glycoprotein metabolic process	11	3	0.000214263	0.00337223	TCF7L2:CST3:HBEGF
FUMA	GO:0043949	regulation of camp mediated signaling	49	5	0.000217037	0.00340859	CRHR1:ADCYAP1:CALM3:RAPGEF2:CRH
FUMA	GO:0098802	plasma membrane receptor complex	187	9	0.000276071	0.00341169	CNIH3:SORBS1:ITGB4:ITGB5:DLG1:CHRNA9:VWC2:PTK2B:IKBKB
FUMA	GO:0051963	regulation of synapse assembly	108	7	0.000219558	0.00344084	BDNF:LRFN1:APP:EIF4G1:IL1RAP:SNCA:MEF2C
FUMA	GO:0048668	collateral sprouting	27	4	0.000220546	0.00344897	BDNF:NIN:WNT3:APP
FUMA	GO:0010876	lipid localization	406	14	0.000221911	0.00346294	ANGPTL3:ACACB:AQP9:SLCO3A1:LCAT:CRHR1:ABCC3:LDLR:APOC1:APOC2:PLEKHA3:NFKB1:FBXW7:CRH
FUMA	GO:0016071	mrna metabolic process	560	17	0.000222988	0.00347238	PPIH:TTF2:MTPAP:CSTF3:CELF1:TFCP2:SNRPN:RBPMS2:NUDT21:MED1:LUC7L3:SRSF1:CSTF1:APP:POLDIP3:POLR2H:RBPMS
FUMA	GO:0031098	stress activated protein kinase signaling cascade	311	12	0.000224595	0.00349001	PAK1:LTBR:TAOK2:MARVELD3:MAP4K4:UBE2V1:APP:MAP3K13:DLG1:NFKB1:PTK2B:IKBKB
gPROFILER	GO:0044444	cytoplasmic part		241		0.00351497	PTK2B,BIN1,CYCS,FBN1,LANCL2,SNCA,WNT3,AP1S1,NFATC3,NSF,ZNF397,MSRB3,CFLAR,APP,SMOX,CD44,OCIAD2,CRHR1,ACACB,LDLR,MKLN1,SPPL2C,ARHGAP17,EIF4E3,BDNF,DNAJC7,HS3ST5,STMN1,GIMAP5,MAPT,SCG3,ARL17B,IKBKB,PML,ALDH5A1,PICALM,CEP135,SCD5,DCTN6,KLF12,INTS9,TRIM45,C1QTNF5,ITPKB,ILF3,RPLP0,NCF4,CDC27,ARHGAP35,CAMK2B,CAPZA1,ICA1,SYNJ2,TRIM38,SLC12A4,MCM7,SAMD4B,ATPAF1,B3GALNT1,EIF1B,CALM3,ITGB5,RCHY1,CYB561,TNI…
FUMA	GO:2001234	negative regulation of apoptotic signaling pathway	223	10	0.000226875	0.003518	MCL1:TCF7L2:USP47:CD44:RELA:PSME3:CFLAR:CASP8:BCL2L1:PTTG1IP
gPROFILER	GO:0030154	cell differentiation		127		0.00353658	PTK2B,BIN1,VEZF1,FBN1,WNT3,MED1,NFATC3,CFLAR,CASS4,ADCYAP1,APP,PTPRA,LDLR,VWC2,ELF1,OVOL2,BDNF,DLK2,STMN1,MAPT,IKBKB,PML,PICALM,CACNA1A,RBPMS2,ITPKB,RBBP5,WNT2B,ARHGAP35,CAMK2B,SPEN,MAP4K4,ZHX1,CELF1,ITGB5,GDF3,FST,BAD,MOV10,IQGAP1,NIPBL,RASGRF1,GFAP,SCLT1,BMP1,NFKB1,EDNRB,CREB1,MEF2C,DCLRE1C,RELA,CD83,MACF1,TCF7L2,MYLIP,CDC42,UBE3A,EID1,TNRC6A,NCS1,ITGB4,EIF4G1,DCLK1,CLPTM1,MAP3K13,VHL,PALLD,AKA…
FUMA	GO:1903900	regulation of viral life cycle	144	8	0.000228727	0.00353925	PPIH:VPS37B:PML:ILF3:CD28:TNIP1:TRIM38:HS3ST5
FUMA	KEGG_HYPERTROPHIC_CARDIOMYOPATHY_HCM	hypertrophic cardiomyopathy hcm	83	6	0.00034424	0.00355715	CACNB2:CACNB1:ITGB4:SLC8A1:TTN:ITGB5
FUMA	GO:0031109	microtubule polymerization or depolymerization	109	7	0.000232403	0.00358858	STMN1:PAK1:NIN:KATNB1:MAPT:SNCA:MAP1B
FUMA	KEGG_SMALL_CELL_LUNG_CANCER	small cell lung cancer	84	6	0.000367271	0.00359539	RELA:PIAS2:BCL2L1:NFKB1:CYCS:IKBKB
gPROFILER	GO:0051704	multi-organism process		17		0.00361485	PTK2B,BIN1,SNCA,WNT3,AP1S1,DENR,CLEC4M,MED1,CFLAR,ADCYAP1,APP,CD44,OCIAD2,HEXIM1,CRHR1,CD209,LDLR
FUMA	GO:0198738	cell cell signaling by wnt	510	16	0.000235632	0.00362321	CDC42:MACF1:WNT2B:MOV10:TCF7L2:USP47:TSKU:PPM1A:TNRC6A:PSME3:WNT3:APP:LRRFIP2:PKD2:NFKB1:KANK1
FUMA	GO:0097191	extrinsic apoptotic signaling pathway	224	10	0.00023516	0.00362321	MCL1:TCF7L2:BAD:RELA:LTBR:PML:PSME3:CFLAR:CASP8:BCL2L1
gPROFILER	GO:0010558	negative regulation of macromolecule biosynthetic process		37		0.00362464	LANCL2,SNCA,MED1,NFATC3,HEXIM1,MXD4,ZBTB20,OVOL2,PML,KLF12,ILF3,ARHGAP35,SPEN,GATAD2A,ZHX1,SAMD4B,CELF1,FST,MOV10,NIPBL,UBE2D3,NFKB1,EDNRB,CREB1,MEF2C,RELA,TCF7L2,PPM1A,USP47,DLG1,EID1,ZNF215,TNRC6A,EIF4G1,SNX6,HBEGF,VHL
FUMA	GO:0030514	negative regulation of bmp signaling pathway	50	5	0.000238958	0.00365904	GDF3:PPM1A:FBN1:RBPMS2:VWC2
FUMA	GO:0071825	protein lipid complex subunit organization	50	5	0.000238958	0.00365904	LCAT:APOC1:APOC2:BIN1:BMP1
gPROFILER	GO:0021954	central nervous system neuron development		8		0.00369109	MAPT,ARHGAP35,DCLK1,TSKU,NRP2,FEZF2,RAPGEF2,NIN
gPROFILER	GO:1901216	positive regulation of neuron death		8		0.00369109	SNCA,MAPT,PICALM,BAD,CDC42,FBXW7,MCL1,CASP8
gPROFILER	GO:1902003	regulation of amyloid-beta formation		3		0.00369109	BIN1,APP,PICALM
Webgestalt	GO:1902495	transmembrane transporter complex	324	15	0.000105213	0.00369202	PTK2B;VWC2;CACNA1A;SCN11A;CACNB2;PKD2;PDE4B;DLG1;GABRA2;AKAP6;SCN2B;GABRB3;CACNB1;CNIH3;CHRNA9
Webgestalt	GO:0030018	Z disc	125	9	0.000103602	0.00369202	BIN1;PDE4B;PALLD;DST;JPH2;TCAP;SLC8A1;PAK1;TTN
gPROFILER	GO:0050848	regulation of calcium-mediated signaling		8		0.00369648	PTK2B,MAPT,CALM3,CD22,PKD2,DYRK2,AKAP6,JPH2
gPROFILER	GO:0032271	regulation of protein polymerization		3		0.00369648	PTK2B,BIN1,SNCA
Webgestalt	GO:0070160	tight junction	126	9	0.000110149	0.00369716	ARHGAP17;C1QTNF5;TJAP1;MAGI1;DLG1;PARD3B;RAPGEF2;UBN1;MARVELD3
FUMA	R-HSA-622312	cd209 dc sign signaling	21	4	7.93062e-05	0.003715	RELA:PAK1:CD209:NFKB1
FUMA	GO:0046914	transition metal ion binding	1072	27	8.81142e-05	0.00371661	TTF2:TRIM45:MTPAP:MSRB3:DYRK2:RPH3A:PPM1A:PML:VAT1L:PIAS2:UHRF1:GATAD2A:APP:XPNPEP3:RCHY1:SCD5:SNCA:SEC24D:MARCH6:ERAP1:TRIM38:PRICKLE4:RTN4IP1:AEBP1:ZMIZ2:AGBL3:BMP1
gPROFILER	GO:0071320	cellular response to cAMP		7		0.00375301	APP,PKD2,AKAP6,SRD5A1,RAPGEF2,SLC8A1,AQP9
gPROFILER	GO:0071241	cellular response to inorganic substance		9		0.00375301	SNCA,CFLAR,APP,ITPKB,BAD,IQGAP1,PKD2,CREB1,MEF2C
FUMA	GO:0016491	oxidoreductase activity	731	21	9.13329e-05	0.00375607	COX15:CTBP2:ME3:MSRB3:VAT1L:CYB561:NDUFA7:NDUFA7:MTHFD2:NDUFB3:SMOX:CHDH:NDUFB5:SCD5:SNCA:SRD5A1:ALDH5A1:BCKDHB:RTN4IP1:CYCS:PDIA4:OXR1
gPROFILER	GO:0051248	negative regulation of protein metabolic process		30		0.00379438	BIN1,ENSA,SNCA,CFLAR,APP,CD44,HEXIM1,LDLR,MAPT,IKBKB,PML,PICALM,ILF3,SAMD4B,CELF1,CALM3,TNIP1,MOV10,NFKB1,OXR1,EDNRB,RELA,USP47,DLG1,PRKAR1B,TNRC6A,GMFG,EIF4G1,SNX6,HBEGF
gPROFILER	GO:0051173	positive regulation of nitrogen compound metabolic process		98		0.00379438	PTK2B,VEZF1,CYCS,SNCA,MED1,NFATC3,NSF,CFLAR,CASS4,ADCYAP1,APP,CD44,LDLR,ELF1,ZBTB20,OVOL2,BDNF,MAPT,IKBKB,PML,PICALM,KLF12,ILF3,MAP4K4,PROK2,CALM3,RCHY1,TNIP1,GDF3,RBPMS,BAD,MOV10,IQGAP1,NIPBL,NVL,NFKB1,PKD2,EDNRB,CREB1,RALB,MEF2C,TAF6L,RELA,PIAS2,TCF7L2,PPM1A,FAM162A,MYLIP,CDC42,UBE3A,DLG1,PRKAR1B,POLDIP3,TNRC6A,LILRA5,EIF4G1,MAP3K13,HBEGF,VHL,FBXW7,SP1,TAOK2,TBX6,RNF144B,SERP1,CR1,FEZF2,ERBB2,D…
FUMA	GO:0015980	energy derivation by oxidation of organic compounds	269	11	0.000248422	0.00379606	SORBS1:COX15:PGM2L1:ME3:DYRK2:NDUFA7:NDUFA7:NDUFB3:NDUFB5:SNCA:ALDH5A1:CYCS
gPROFILER	GO:0070887	cellular response to chemical stimulus		50		0.00380479	PTK2B,CYCS,FBN1,LANCL2,SNCA,WNT3,MED1,CFLAR,ADCYAP1,APP,PTPRA,GPR27,CD44,CRHR1,LDLR,VWC2,ELF1,ZBTB20,OVOL2,BDNF,MAPT,IKBKB,PML,CACNA1A,RBPMS2,ITPKB,RPLP0,NCF4,CAMK2B,CAPZA1,SST,TRIM38,MCM7,MAP4K4,ITGB5,GDF3,FST,BAD,IQGAP1,EXTL3,UBE2D3,NFKB1,OXR1,PKD2,EDNRB,PDE4B,CREB1,RALB,MEF2C,RELA
gPROFILER	GO:0030514	negative regulation of BMP signaling pathway		5		0.00380479	FBN1,VWC2,RBPMS2,GDF3,PPM1A
gPROFILER	GO:0080134	regulation of response to stress		55		0.00380791	PTK2B,SNCA,MED1,ADCYAP1,APP,CD44,HEXIM1,CD209,LDLR,DNAJC7,MAPT,IKBKB,PML,CAMK2B,TRIM38,MAP4K4,TNIP1,ALPK1,BAD,UBE2D3,NFKB1,OXR1,EDNRB,MEF2C,RELA,USP47,CDC42,DLG1,LILRA5,PPP4C,MUC4,EIF4G1,MAP3K13,HBEGF,FBXW7,TAOK2,FANCD2,CR1,KANK1,MCL1,CTSS,CASP8,PTTG1IP,CRH,LTBR,ERAP1,SMYD2,PSME3,UBE2V1,PAK1,UBASH3B,ACTR2,MARVELD3,BCL2L1,CD28
FUMA	GO:0010817	regulation of hormone levels	513	16	0.000251484	0.00382694	ENSA:TCF7L2:BAD:MED1:CRHR1:ADCYAP1:CACNA1A:MAP4K4:CREB1:GPR27:SERP1:NFKB1:SRD5A1:ICA1:CRH:FAM129B
FUMA	GO:0009636	response to toxic substance	513	16	0.000251484	0.00382694	BAD:RELA:SCN2B:CRHR1:ADCYAP1:CALM3:SLC8A1:ACTR2:CASP8:CREB1:BCL2L1:NFKB1:SRD5A1:PTK2B:GGH:CRH
gPROFILER	GO:0035556	intracellular signal transduction		60		0.00382915	PTK2B,CLEC4M,MED1,NFATC3,CFLAR,ADCYAP1,APP,PTPRA,CD44,HEXIM1,CRHR1,CD209,ARHGAP17,STMN1,MAPT,IKBKB,PML,ITPKB,ARHGAP35,TRIM38,MAP4K4,PROK2,CALM3,TNIP1,GDF3,ALPK1,BAD,IQGAP1,RASGRF1,CD22,NFKB1,PKD2,EDNRB,SEZ6L2,RALB,MEF2C,RELA,TCF7L2,TNS1,PPM1A,USP47,RHOC,CDC42,UBE3A,DLG1,PRKAR1B,PIK3C2B,LILRA5,PPP4C,DYRK2,NCS1,RAB2A,DCLK1,MAP3K13,HBEGF,PPM1L,AKAP6,FBXW7,PLEKHM1,TAOK2
gPROFILER	GO:0061515	myeloid cell development		3		0.00382915	FBN1,MED1,APP
gPROFILER	GO:1903507	negative regulation of nucleic acid-templated transcription		29		0.00382915	LANCL2,SNCA,MED1,NFATC3,HEXIM1,MXD4,ZBTB20,OVOL2,PML,KLF12,ILF3,ARHGAP35,SPEN,GATAD2A,ZHX1,FST,NIPBL,UBE2D3,NFKB1,EDNRB,CREB1,MEF2C,RELA,TCF7L2,PPM1A,USP47,DLG1,EID1,ZNF215
gPROFILER	GO:0023061	signal release		14		0.00382915	ENSA,SNCA,ADCYAP1,GPR27,CRHR1,CACNA1A,ICA1,MAP4K4,CALM3,BAD,CACNB2,CREB1,MEF2C,TCF7L2
gPROFILER	GO:0007178	transmembrane receptor protein serine/threonine kinase signaling pathway		14		0.00382915	FBN1,VWC2,OVOL2,PML,RBPMS2,ITGB5,GDF3,RBPMS,FST,UBE2D3,CREB1,PPM1A,SNX6,PPM1L
gPROFILER	GO:0043296	apical junction complex		11		0.00384007	ARHGAP17,C1QTNF5,TJAP1,MAGI1,DLG1,PARD3B,RAPGEF2,SORBS1,KIFC3,UBN1,MARVELD3
gPROFILER	GO:0043005	neuron projection		47		0.00384007	PTK2B,BIN1,SNCA,AP1S1,NSF,ADCYAP1,APP,BDNF,STMN1,MAPT,CACNA1A,CAMK2B,SYNJ2,SCN11A,CALM3,IQGAP1,RASGRF1,PDE4B,CREB1,RHOC,CDC42,DLG1,NCS1,GABRA2,PALLD,TAOK2,SRD5A1,KATNB1,SLC30A3,DST,NRP2,EXOC6,GABRB3,RPH3A,DOCK7,CASP8,CRH,MAP1B,SMO,RAPGEF2,NIN,RUFY3,PCDHB15,SLC8A1,PAK1,CNIH3,CHRNA9
gPROFILER	GO:1902495	transmembrane transporter complex		14		0.00384007	PTK2B,VWC2,CACNA1A,SCN11A,CALM3,CACNB2,PKD2,PDE4B,DLG1,GABRA2,LRRC1,AKAP6,SCN2B,GABRB3
gPROFILER	GO:1902679	negative regulation of RNA biosynthetic process		29		0.00386522	LANCL2,SNCA,MED1,NFATC3,HEXIM1,MXD4,ZBTB20,OVOL2,PML,KLF12,ILF3,ARHGAP35,SPEN,GATAD2A,ZHX1,FST,NIPBL,UBE2D3,NFKB1,EDNRB,CREB1,MEF2C,RELA,TCF7L2,PPM1A,USP47,DLG1,EID1,ZNF215
gPROFILER	GO:0008104	protein localization		90		0.00386522	ENSA,FBN1,AP1S1,DYNLRB1,MED1,NSF,ADCYAP1,GPR27,BDNF,MAPT,SCG3,ARL17B,IKBKB,PML,PICALM,CEP135,CACNA1A,C1QTNF5,RPLP0,ICA1,MAP4K4,CALM3,PDIA4,BAD,IQGAP1,NIPBL,UBE2D3,CD22,NVL,CACNB2,PKD2,LEPROTL1,RALB,ANKRD50,MACF1,TCF7L2,PEX19,PPY,PPM1A,GOSR2,CDC42,DLG1,POLDIP3,LILRA5,COPA,RAB2A,DCLK1,LRRC1,APOC2,SNX6,AKAP6,RRBP1,VPS37C,FBXW7,PLEKHM1,TAOK2,KATNB1,SERP1,ATP6V1D,EXOC6,RPH3A,MCL1,ERBB2,CASP8,GOLPH3L,I…
gPROFILER	GO:0006109	regulation of carbohydrate metabolic process		5		0.00386522	PTK2B,SNCA,APP,ACACB,ZBTB20
gPROFILER	GO:0034765	regulation of ion transmembrane transport		24		0.00386522	PTK2B,BIN1,SNCA,APP,CRHR1,CACNA1A,SCN11A,CALM3,RASGRF1,CACNB2,PKD2,PDE4B,MEF2C,DLG1,AKAP6,SCN2B,JPH2,CTSS,CRH,CACNB1,KCNK5,SLC8A1,UBASH3B,CNIH3
gPROFILER	GO:0046903	secretion		32		0.00386522	ENSA,SNCA,MED1,CCKBR,NSF,ADCYAP1,APP,GPR27,CD44,CRHR1,ARHGAP17,SCG3,PML,CACNA1A,C1QTNF5,ICA1,MAP4K4,CALM3,PDIA4,ABCC3,BAD,IQGAP1,CD22,NFKB1,CACNB2,EDNRB,CREB1,RALB,MEF2C,ALDOA,TCF7L2,PPY
FUMA	GO:0030234	enzyme regulator activity	1019	26	9.67433e-05	0.00388153	ATPIF1:ANGPTL3:ENSA:CCKBR:BAD:RIN3:EID1:IQGAP1:ARHGAP17:PPP4C:PSME3:HEXIM1:MYO9B:GMFG:APOC1:APOC2:CALM3:ARHGAP35:CFLAR:CST3:APP:NCF4:SNCA:FBXW7:RAPGEF2:PRKAR1B
FUMA	GO:0048193	golgi vesicle transport	363	13	0.000257142	0.00390494	MACF1:CAPZA1:GOLPH3L:COPA:CNIH3:EXOC6:NSF:GOSR2:SEC24D:SCAMP1:YIPF5:BCAP29:DCTN6
gPROFILER	GO:0006897	endocytosis		8		0.00397736	BIN1,SNCA,AP1S1,CLEC4M,APP,CD209,LDLR,MKLN1
gPROFILER	GO:2001056	positive regulation of cysteine-type endopeptidase activity		5		0.00397736	CYCS,SNCA,CFLAR,MAPT,PML
FUMA	GO:0048708	astrocyte differentiation	79	6	0.000263171	0.00398006	GFAP:MAPT:LDLR:BIN1:APP:SMO
FUMA	GO:0008360	regulation of cell shape	147	8	0.00026314	0.00398006	CDC42:RHOC:TAOK2:ALDOA:ARHGAP35:DLG1:MKLN1:PTK2B
gPROFILER	GO:2000116	regulation of cysteine-type endopeptidase activity		6		0.00405211	CYCS,SNCA,CFLAR,CD44,MAPT,PML
gPROFILER	GO:0070372	regulation of ERK1 and ERK2 cascade		5		0.00405211	PTK2B,CFLAR,ADCYAP1,APP,CD44
gPROFILER	GO:0031674	I band		11		0.0040823	BIN1,PDE4B,ALDOA,PALLD,DST,JPH2,TCAP,PRICKLE4,SLC8A1,PAK1,TTN
gPROFILER	GO:0098793	presynapse		10		0.0040823	BIN1,SNCA,AP1S1,ADCYAP1,APP,BDNF,PICALM,CACNA1A,ICA1,SYNJ2
Webgestalt	GO:0099501	exocytic vesicle membrane	102	8	0.000138725	0.00411905	SNCA;ICA1;GABRA2;SLC30A3;RPH3A;CLTA;BCL2L1;SCAMP1
Webgestalt	GO:0030672	synaptic vesicle membrane	102	8	0.000138725	0.00411905	SNCA;ICA1;GABRA2;SLC30A3;RPH3A;CLTA;BCL2L1;SCAMP1
Webgestalt	GO:1990351	transporter complex	332	15	0.000137656	0.00411905	PTK2B;VWC2;CACNA1A;SCN11A;CACNB2;PKD2;PDE4B;DLG1;GABRA2;AKAP6;SCN2B;GABRB3;CACNB1;CNIH3;CHRNA9
gPROFILER	GO:0034330	cell junction organization		17		0.0041216	PTK2B,IKBKB,CAPZA1,MAP4K4,IQGAP1,MACF1,TNS1,RHOC,CDC42,DLG1,ITGB4,TAOK2,DST,RAPGEF2,SORBS1,KIFC3,MARVELD3
gPROFILER	GO:0043647	inositol phosphate metabolic process		5		0.0041216	PTK2B,SNCA,ITPKB,SYNJ2,ISYNA1
gPROFILER	GO:0140058	neuron projection arborization		4		0.0041216	MOV10,MACF1,MAP3K13,TAOK2
gPROFILER	GO:0060316	positive regulation of ryanodine-sensitive calcium-release channel activity		3		0.0041216	CALM3,AKAP6,JPH2
gPROFILER	GO:0010243	response to organonitrogen compound		42		0.0041216	PTK2B,FBN1,SNCA,CFLAR,APP,PTPRA,CRHR1,LDLR,CACNA1A,SST,CALM3,BAD,IQGAP1,NFKB1,PKD2,EDNRB,PDE4B,CREB1,MEF2C,RELA,UBE3A,PRKAR1B,SNX6,AKAP6,SP1,SRD5A1,ATP6V1D,KANK1,GABRB3,CRH,MARCH6,MAP1B,GGH,RAPGEF2,CACNB1,SORBS1,SLC8A1,PAK1,ACTR2,BCL2L1,AQP9,NME1
FUMA	GO:0002793	positive regulation of peptide secretion	272	11	0.000273104	0.0041218	GOLPH3L:TCF7L2:BAD:ADCYAP1:LILRA5:TTN:GPR27:SERP1:IL1RAP:CLEC5A:CRH
gPROFILER	GO:0052433	modulation by organism of apoptotic process in other organism involved in symbiotic interaction		3		0.00413567	BAD,CASP8,BCL2L1
gPROFILER	GO:0052150	modulation by symbiont of host apoptotic process		3		0.00413567	BAD,CASP8,BCL2L1
gPROFILER	GO:0044532	modulation of apoptotic process in other organism		3		0.00413567	BAD,CASP8,BCL2L1
gPROFILER	GO:0044531	modulation of programmed cell death in other organism		3		0.00413567	BAD,CASP8,BCL2L1
gPROFILER	GO:0052248	modulation of programmed cell death in other organism involved in symbiotic interaction		3		0.00413567	BAD,CASP8,BCL2L1
FUMA	GO:0051592	response to calcium ion	148	8	0.000275509	0.00414957	ITPKB:BAD:IQGAP1:CALM3:TTN:PKD2:MEF2C:PTK2B
gPROFILER	GO:0032535	regulation of cellular component size		14		0.00416434	PTK2B,BIN1,WNT3,BDNF,MAPT,PICALM,ARHGAP35,CAPZA1,SLC12A4,CREB1,MACF1,DLG1,GMFG,MAP3K13
gPROFILER	GO:0016310	phosphorylation		53		0.00418041	PTK2B,CYCS,SNCA,MED1,CCKBR,CFLAR,CASS4,ADCYAP1,APP,PTPRA,CD44,HEXIM1,ZBTB20,BDNF,MAPT,IKBKB,PML,ITPKB,ILF3,CAMK2B,MCM7,MAP4K4,PROK2,CALM3,TNIP1,GDF3,RBPMS,ALPK1,BAD,IQGAP1,RASGRF1,NFKB1,PKD2,EDNRB,CREB1,RALB,MEF2C,ALDOA,CDC42,DLG1,PRKAR1B,PIK3C2B,LILRA5,DYRK2,GMFG,EIF4G1,DCLK1,MAP3K13,SNX6,HBEGF,PPM1L,FBXW7,TAOK2
gPROFILER	GO:0042325	regulation of phosphorylation		39		0.00418635	PTK2B,SNCA,CCKBR,CFLAR,CASS4,ADCYAP1,APP,CD44,HEXIM1,ZBTB20,BDNF,MAPT,IKBKB,PML,ITPKB,MCM7,MAP4K4,PROK2,CALM3,TNIP1,GDF3,RBPMS,BAD,IQGAP1,PKD2,EDNRB,RALB,MEF2C,CDC42,DLG1,PRKAR1B,LILRA5,GMFG,EIF4G1,MAP3K13,SNX6,HBEGF,FBXW7,TAOK2
FUMA	GO:0009887	animal organ morphogenesis	1030	25	0.000279507	0.00419871	CDC42:WNT2B:RELA:TSKU:FBN1:RBPMS2:PML:MED1:TCAP:PSME3:ITGB4:TTN:CFLAR:NRP2:OVOL2:FANCD2:SERP1:DLG1:CHRNA9:PKD2:FBXW7:NIPBL:MEF2C:SMO:BMP1
FUMA	GO:2000116	regulation of cysteine type endopeptidase activity	229	10	0.000280485	0.00419871	USP47:CD44:BAD:PML:MAPT:CFLAR:CASP8:FAM162A:SNCA:CYCS
FUMA	GO:0050803	regulation of synapse structure or activity	229	10	0.000280485	0.00419871	BDNF:LRFN1:ACTR2:NRP2:APP:EIF4G1:IL1RAP:SNCA:MEF2C:CAMK2B
FUMA	GO:0010506	regulation of autophagy	319	12	0.000282937	0.0042268	ATPIF1:MCL1:BAD:SNX6:ATP6V1D:GFAP:MAPT:RALB:WDR6:EIF4G1:SNCA:FBXW7
FUMA	GO:0090316	positive regulation of intracellular protein transport	149	8	0.00028835	0.00428156	TCF7L2:PAK1:PPM1A:ERBB2:RUFY3:UBE2D3:FBXW7:SMO
FUMA	GO:0050994	regulation of lipid catabolic process	52	5	0.000287807	0.00428156	ANGPTL3:ACACB:LDLR:APOC1:APOC2
FUMA	GO:1990089	response to nerve growth factor	52	5	0.000287807	0.00428156	BDNF:MAPT:CREB1:APP:RAPGEF2
gPROFILER	GO:0070382	exocytic vesicle		14		0.00432727	BIN1,SNCA,APP,BDNF,PICALM,ICA1,CALM3,PDE4B,GABRA2,SLC30A3,RPH3A,CLTA,BCL2L1,SCAMP1
gPROFILER	GO:0031090	organelle membrane		101		0.00432727	CYCS,SNCA,WNT3,AP1S1,NSF,APP,SMOX,CD44,ACACB,LDLR,SPPL2C,HS3ST5,GIMAP5,SCG3,PML,PICALM,SCD5,NCF4,CAMK2B,ICA1,SLC12A4,B3GALNT1,CALM3,CYB561,BAD,IQGAP1,EXTL3,GFAP,UBE2D3,ACSL6,PKD2,EDNRB,SEZ6L2,PLEKHA3,PEX19,ACER3,CHDH,GOSR2,CDC42,DLG1,COPA,LETMD1,GABRA2,RAB2A,SNX6,HBEGF,PPM1L,AKAP6,RRBP1,VPS37C,PLEKHM1,TAOK2,SRD5A1,RNF144B,GALNT11,SERP1,FAM57B,ATP6V1D,CR1,SLC30A3,DST,GABRB3,RPH3A,MCL1,SLC25A35,CHS…
gPROFILER	GO:1990351	transporter complex		14		0.00432727	PTK2B,VWC2,CACNA1A,SCN11A,CALM3,CACNB2,PKD2,PDE4B,DLG1,GABRA2,LRRC1,AKAP6,SCN2B,GABRB3
gPROFILER	GO:1902531	regulation of intracellular signal transduction		49		0.00432749	PTK2B,CFLAR,ADCYAP1,APP,CD44,HEXIM1,ARHGAP17,STMN1,MAPT,IKBKB,PML,ITPKB,ARHGAP35,TRIM38,MAP4K4,PROK2,CALM3,TNIP1,GDF3,ALPK1,BAD,IQGAP1,RASGRF1,CD22,PKD2,SEZ6L2,MEF2C,RELA,TCF7L2,PPM1A,USP47,RHOC,CDC42,UBE3A,DLG1,LILRA5,DYRK2,MAP3K13,HBEGF,AKAP6,FBXW7,TAOK2,MYO9B,KANK1,MCL1,ERBB2,JPH2,ARHGEF10,CASP8
gPROFILER	GO:1990090	cellular response to nerve growth factor stimulus		5		0.00434051	APP,BDNF,MAPT,CREB1,UBE3A
gPROFILER	GO:0010604	positive regulation of macromolecule metabolic process		100		0.00434051	PTK2B,VEZF1,CYCS,SNCA,TAF1C,WNT3,MED1,NFATC3,NSF,CFLAR,CASS4,ADCYAP1,APP,CD44,LDLR,ELF1,OVOL2,BDNF,MAPT,IKBKB,PML,PICALM,KLF12,ILF3,MAP4K4,PROK2,CALM3,RCHY1,TNIP1,GDF3,RBPMS,BAD,MOV10,IQGAP1,NIPBL,NVL,NFKB1,PKD2,EDNRB,CREB1,RALB,MEF2C,TAF6L,RELA,PIAS2,TCF7L2,PPM1A,FAM162A,MYLIP,CDC42,UBE3A,DLG1,PRKAR1B,POLDIP3,TNRC6A,LILRA5,DYRK2,EIF4G1,MAP3K13,HBEGF,VHL,FBXW7,SP1,TAOK2,TBX6,RNF144B,SERP1,CR1,FEZ…
gPROFILER	GO:0034382	chylomicron remnant clearance		3		0.00436096	LDLR,APOC1,APOC2
gPROFILER	GO:0071830	triglyceride-rich lipoprotein particle clearance		3		0.00436096	LDLR,APOC1,APOC2
gPROFILER	GO:0042391	regulation of membrane potential		22		0.00442666	PTK2B,BIN1,SNCA,ADCYAP1,APP,MAPT,CACNA1A,SCN11A,BAD,CACNB2,MEF2C,DLG1,GABRA2,AKAP6,SCN2B,GABRB3,RIMS3,KCNK5,SLC8A1,CNIH3,BCL2L1,CHRNA9
gPROFILER	GO:0044424	intracellular part		334		0.00443038	ACP1,PTK2B,BIN1,VEZF1,CYCS,ENSA,FBN1,LANCL2,SNCA,SNRPN,TAF1C,WNT3,AP1S1,CLEC4M,DYNLRB1,MED1,NFATC3,NSF,ZNF397,MSRB3,CFLAR,CASS4,APP,SMOX,CD44,OCIAD2,HEXIM1,CRHR1,MXD4,ACACB,NAP1L5,CD209,LDLR,ELF1,MKLN1,SPPL2C,ZBTB20,KANSL1,OVOL2,ARHGAP17,EIF4E3,BDNF,DNAJC7,HS3ST5,STMN1,GIMAP5,MAPT,SCG3,ARL17B,IKBKB,PML,ALDH5A1,PICALM,CEP135,CACNA1A,SCD5,DCTN6,RBPMS2,KLF12,INTS9,TRIM45,C1QTNF5,ITPKB,ILF3,RBBP5,WNT…
FUMA	GO:0043087	regulation of gtpase activity	469	15	0.000299164	0.00443318	DOCK7:PICALM:RIN3:RASGRF1:IQGAP1:ARHGAP17:ERBB2:ADCYAP1:MYO9B:ARHGAP35:MAP4K4:ZC3H15:RAPGEF2:ARHGEF10:PTK2B
gPROFILER	GO:0051179	localization		186		0.00445974	PTK2B,BIN1,ENSA,FBN1,SNCA,WNT3,AP1S1,CLEC4M,DYNLRB1,MED1,CCKBR,NSF,CASS4,ADCYAP1,APP,GPR27,CD44,CRHR1,ACACB,CD209,LDLR,MKLN1,OVOL2,ARHGAP17,BDNF,STMN1,MAPT,SCG3,ARL17B,IKBKB,PML,PICALM,CEP135,CACNA1A,DCTN6,C1QTNF5,RPLP0,NCF4,ARHGAP35,SLC35F3,CAMK2B,CAPZA1,SST,ICA1,CD5,SLC12A4,MAP4K4,LCAT,SCN11A,CALM3,ITGB5,SLC4A9,ANKH,PDIA4,ABCC3,BAD,IQGAP1,NIPBL,RASGRF1,GFAP,UBE2D3,CD22,SCLT1,NVL,NFKB1,CACNB2,PK…
FUMA	R-HSA-168138	toll like receptor 9 tlr9 cascade	95	7	9.84864e-05	0.00447367	RELA:CREB1:UBE2V1:APP:NFKB1:MEF2C:IKBKB
Webgestalt	GO:0010770	positive regulation of cell morphogenesis involved in differentiation	147	13	1.00664e-05	0.00453418	WNT3;CASS4;BDNF;MAPT;CAMK2B;MACF1;CDC42;MAP3K13;MAP1B;NIN;RUFY3;PAK1;ACTR2
gPROFILER	GO:0071396	cellular response to lipid		6		0.00454423	PTK2B,LANCL2,WNT3,MED1,CFLAR,ADCYAP1
FUMA	GO:0097060	synaptic membrane	428	14	0.000377329	0.00460617	RIMS3:CNIH3:PICALM:GABRB3:LRFN1:SLC8A1:NRP2:PTPRA:NIPSNAP1:DLG1:CHRNA9:GABRA2:CLTA:NCS1
gPROFILER	GO:0044409	entry into host		6		0.00461498	CLEC4M,CD209,LDLR,HS3ST5,TRIM38,ITGB5
gPROFILER	GO:0030260	entry into host cell		6		0.00461498	CLEC4M,CD209,LDLR,HS3ST5,TRIM38,ITGB5
gPROFILER	GO:0016358	dendrite development		14		0.00463401	APP,PICALM,CACNA1A,CAMK2B,IQGAP1,MEF2C,CDC42,UBE3A,DCLK1,TAOK2,FEZF2,RTN4IP1,MAP1B,RAPGEF2
gPROFILER	GO:0044003	modification by symbiont of host morphology or physiology		4		0.00463401	CLEC4M,CD209,TNIP1,BAD
FUMA	GO:0006968	cellular defense response	53	5	0.000314898	0.00464759	RELA:SPN:VEZF1:CLEC5A:PTK2B
FUMA	GO:0061900	glial cell activation	53	5	0.000314898	0.00464759	MAPT:LDLR:APP:SNCA:SMO
FUMA	GO:0008144	drug binding	1718	37	0.000119864	0.00469466	PPIH:MOV10:TTF2:UBE2T:PIK3C2B:NVL:ITPKB:MTPAP:PAK1:DYRK2:ACACB:DCLK1:TAOK2:KIFC3:ERBB2:NSF:ABCC3:NME1:MYO9B:ACTR2:MAP4K4:TTN:RAD54L2:MAGI1:EIF4G1:MAP3K13:UBE2D3:ALPK1:MSH3:ACSL6:ABCC10:CAMK2B:LANCL2:MCM7:SMO:PTK2B:IKBKB
FUMA	GO:0097447	dendritic tree	588	17	0.000390159	0.00470541	CDC42:PDE4B:CNIH3:BDNF:PAK1:NIN:TAOK2:CRHR1:MAPT:NSF:SLC8A1:APP:RUFY3:MAP1B:SMO:PTK2B:NCS1
gPROFILER	GO:0007015	actin filament organization		21		0.00472271	PTK2B,BIN1,CASS4,ARHGAP17,STMN1,ARHGAP35,CAPZA1,ITGB5,ALDOA,RHOC,CDC42,DLG1,GMFG,KANK1,TCAP,ARHGEF10,SORBS1,RUFY3,PAK1,ACTR2,TTN
FUMA	GO:0002220	innate immune response activating cell surface receptor signaling pathway	115	7	0.00032277	0.00473525	RELA:PAK1:PSME3:CD209:MUC4:NFKB1:IKBKB
FUMA	GO:0010675	regulation of cellular carbohydrate metabolic process	115	7	0.00032277	0.00473525	SORBS1:BAD:DYRK2:ACACB:SNCA:FAM3C:PTK2B
FUMA	GO:0072089	stem cell proliferation	115	7	0.00032277	0.00473525	DOCK7:WNT2B:ETV6:WNT3:OVOL2:ACSL6:SMO
gPROFILER	GO:0040008	regulation of growth		22		0.00474171	PTK2B,WNT3,APP,ACACB,BDNF,MAPT,PML,ST7L,CELF1,EXTL3,NIPBL,CREB1,MEF2C,MACF1,USP47,CDC42,EIF4G1,MAP3K13,HBEGF,AKAP6,TAOK2,SERP1
gPROFILER	GO:0005829	cytosol		94		0.00476472	PTK2B,BIN1,CYCS,LANCL2,SNCA,AP1S1,NFATC3,NSF,ZNF397,MSRB3,CFLAR,APP,SMOX,CD44,ACACB,MKLN1,ARHGAP17,EIF4E3,DNAJC7,STMN1,MAPT,IKBKB,PML,PICALM,CEP135,DCTN6,KLF12,INTS9,TRIM45,ITPKB,RPLP0,NCF4,CDC27,ARHGAP35,CAMK2B,CAPZA1,ICA1,SYNJ2,TRIM38,MCM7,SAMD4B,RCHY1,TNIP1,RBPMS,ALPK1,BAD,MOV10,IQGAP1,ISYNA1,RASGRF1,GFAP,UBE2D3,SCLT1,NFKB1,PDE4B,BCAT1,PATL1,MEF2C,PLEKHA3,RELA,ALDOA,PEX19,PPM1A,FAM162A,GOSR2,R…
gPROFILER	GO:0031970	organelle envelope lumen		3		0.00476472	CYCS,SNCA,APP
Webgestalt	R-HSA-8986944	Transcriptional Regulation by MECP2	55	9	3.45564e-06	0.00476532	BDNF;CAMK2B;SST;CALM3;MOV10;CREB1;MEF2C;TNRC6A;CRH
gPROFILER	GO:0019725	cellular homeostasis		20		0.00476838	PTK2B,SNCA,CCKBR,ADCYAP1,APP,GPR27,ZBTB20,PML,CACNA1A,NCF4,SLC12A4,MAP4K4,PROK2,CALM3,SLC4A9,PDIA4,BAD,CACNB2,PKD2,EDNRB
FUMA	R-HSA-112314	neurotransmitter receptors and postsynaptic signal transmission	204	10	0.000110056	0.004811	GABRB3:RASGRF1:MAPT:NSF:CREB1:DLG1:CHRNA9:GABRA2:PRKAR1B:CAMK2B
FUMA	R-HSA-112314	toll like receptor tlr1:tlr2 cascade	97	7	0.000112332	0.004811	RELA:CREB1:UBE2V1:APP:NFKB1:MEF2C:IKBKB
FUMA	GO:0010977	negative regulation of neuron projection development	152	8	0.000329836	0.00482927	TBX6:GFAP:WNT3:MAP4K4:RUFY3:RAPGEF2:MYLIP:KANK1
FUMA	GO:0002009	morphogenesis of an epithelium	526	16	0.000331336	0.00484159	CDC42:WNT2B:RHOC:CD44:PAK1:PML:MED1:TCAP:PSME3:ARHGAP35:OVOL2:DLG1:PKD2:MEF2C:HBEGF:SMO
Webgestalt	WP2380	Brain-Derived Neurotrophic Factor (BDNF) signaling pathway	144	15	1.27161e-05	0.00484483	PTK2B;NSF;ACACB;BDNF;MAPT;IKBKB;BAD;RASGRF1;NFKB1;CREB1;MEF2C;RELA;CDC42;DLG1;GABRB3
gPROFILER	GO:0048169	regulation of long-term neuronal synaptic plasticity		3		0.00484822	SNCA,APP,CAMK2B
gPROFILER	GO:0030162	regulation of proteolysis		10		0.00484822	PTK2B,BIN1,CYCS,SNCA,CFLAR,APP,CD44,MAPT,PML,PICALM
FUMA	GO:0048568	embryonic organ development	423	14	0.00033561	0.00488461	GDF3:FBN1:RBPMS2:MED1:TCAP:EN1:CASP8:OVOL2:DLG1:CHRNA9:PKD2:NIPBL:MEF2C:SMO
FUMA	GO:0044068	modulation by symbiont of host cellular process	30	4	0.000335399	0.00488461	BAD:CASP8:BCL2L1:TNIP1
gPROFILER	GO:0044446	intracellular organelle part		238		0.00489513	BIN1,VEZF1,CYCS,ENSA,FBN1,LANCL2,SNCA,SNRPN,TAF1C,WNT3,AP1S1,DYNLRB1,MED1,NFATC3,NSF,ZNF397,APP,SMOX,CD44,HEXIM1,MXD4,ACACB,LDLR,ELF1,MKLN1,SPPL2C,ZBTB20,KANSL1,BDNF,DNAJC7,HS3ST5,STMN1,GIMAP5,MAPT,SCG3,PML,ALDH5A1,PICALM,CEP135,SCD5,DCTN6,KLF12,INTS9,TRIM45,ILF3,RBBP5,RPLP0,NCF4,CDC27,ARHGAP35,CAMK2B,CAPZA1,ICA1,SPEN,SLC12A4,MCM7,GATAD2A,ZHX1,CELF1,B3GALNT1,CALM3,RCHY1,CYB561,TNIP1,RBPMS,PDIA4,C…
gPROFILER	GO:0043226	organelle		317		0.00489513	ACP1,PTK2B,BIN1,VEZF1,CYCS,ENSA,FBN1,LANCL2,SNCA,SNRPN,TAF1C,WNT3,AP1S1,DYNLRB1,MED1,NFATC3,NSF,ZNF397,MSRB3,CASS4,APP,SMOX,PTPRA,CD44,OCIAD2,HEXIM1,CRHR1,MXD4,ACACB,NAP1L5,LDLR,ELF1,MKLN1,SPPL2C,ZBTB20,KANSL1,OVOL2,ARHGAP17,BDNF,DNAJC7,HS3ST5,STMN1,GIMAP5,MAPT,SCG3,ARL17B,IKBKB,PML,ALDH5A1,PICALM,CEP135,CACNA1A,SCD5,DCTN6,KLF12,INTS9,TRIM45,C1QTNF5,ITPKB,ILF3,RBBP5,WNT2B,RPLP0,RBM6,NCF4,CDC27,AR…
FUMA	KEGG_DILATED_CARDIOMYOPATHY	dilated cardiomyopathy	90	6	0.000531894	0.00494662	CACNB2:CACNB1:ITGB4:SLC8A1:TTN:ITGB5
FUMA	GO:0010524	positive regulation of calcium ion transport into cytosol	54	5	0.000343875	0.00498158	AKAP6:CALM3:JPH2:PKD2:SNCA
FUMA	GO:0051289	protein homotetramerization	83	6	0.00034424	0.00498158	ATPIF1:PEX5:ACACB:ALDOA:PKD2:ALDH5A1
FUMA	GO:0033157	regulation of intracellular protein transport	235	10	0.000344305	0.00498158	ATPIF1:TCF7L2:PAK1:PPM1A:ERBB2:DNAJC27:RUFY3:UBE2D3:FBXW7:SMO
FUMA	GO:0022836	gated channel activity	339	13	0.000132143	0.00499589	CACNB2:SCN2B:GABRB3:CACNB1:CACNA1A:JPH2:SCN11A:CHRNA9:GABRA2:PKD2:KCNK5:PTK2B:NCS1
FUMA	GO:0031267	small gtpase binding	435	15	0.000133629	0.00499589	RIMS3:DOCK7:PAK1:PICALM:PEX5:RPH3A:RIN3:RASGRF1:IQGAP1:ARHGAP17:NSF:MYO9B:FMNL2:RAPGEF2:ARHGEF10
FUMA	GO:0005694	chromosome	1059	25	0.000420172	0.00500705	DCLRE1C:TCF7L2:RELA:POLD3:SP1:PML:TBX6:MED1:KANSL1:UHRF1:GATAD2A:ACTR2:EN1:TTN:CREB1:RTFDC1:SUMO3:FANCD2:NIPBL:MEF2C:CBX3:ZMIZ2:GTPBP10:MCM7:DCTN6
FUMA	GO:0050839	cell adhesion molecule binding	487	16	0.000140294	0.00501703	MACF1:ANGPTL3:CAPZA1:PICALM:FBN1:IQGAP1:ALDOA:GFAP:ITGB4:FMNL2:ZC3H15:ITGB5:DLG1:DST:CALD1:FAM129B
FUMA	GO:0000987	proximal promoter sequence specific dna binding	538	17	0.000139386	0.00501703	ZNF281:TCF7L2:RELA:ETV6:TFCP2:SP1:ELF1:JDP2:NFATC3:MED1:UHRF1:EN1:CREB1:FEZF2:MEF2C:ETV1:NEUROD6
Webgestalt	KEGG_MAPK SIGNALING PATHWAY	MAPK signaling pathway	295	21	1.59775e-05	0.0050329	NFATC3;BDNF;STMN1;MAPT;IKBKB;CACNA1A;MAP4K4;RASGRF1;NFKB1;CACNB2;MEF2C;RELA;PPM1A;CDC42;MAP3K13;TAOK2;ERBB2;IL1RAP;RAPGEF2;CACNB1;PAK1
FUMA	GO:0046873	metal ion transmembrane transporter activity	438	15	0.000143992	0.00503972	CACNB2:SCN2B:SLC12A4:CTC-479C5.17:CACNB1:CACNA1A:SLC30A3:SLC8A1:JPH2:SCN11A:CHRNA9:PKD2:SLC4A9:KCNK5:SLC20A2:NCS1
gPROFILER	GO:0046883	regulation of hormone secretion		10		0.00504679	ENSA,ADCYAP1,GPR27,CRHR1,CACNA1A,ICA1,MAP4K4,BAD,CREB1,TCF7L2
FUMA	GO:0001816	cytokine production	750	20	0.000350699	0.00506412	PDE4B:RELA:ELF1:PML:IQGAP1:SPN:NFATC3:ADCYAP1:LILRA5:CD28:CREB1:APP:ZBTB20:POLR2H:IL1RAP:DLG1:NFKB1:CD83:TRIM38:CLEC5A
FUMA	GO:0051090	regulation of dna binding transcription factor activity	425	14	0.000351797	0.00507001	TCF7L2:RELA:TBX6:CFLAR:UBE2V1:APP:FANCD2:MAP3K13:IL1RAP:PKD2:NFKB1:TRIM38:SMO:IKBKB
FUMA	R-HSA-168179	cellular responses to external stimuli	532	17	0.000122014	0.00508054	CAPZA1:MOV10:RELA:SP1:UBN1:TNRC6A:DNAJC7:PSME3:CDC27:MAP4K4:NCF4:VHL:NFKB1:UBE2D3:CYCS:CAMK2B:DCTN6
gPROFILER	GO:0034205	amyloid-beta formation		3		0.00508564	BIN1,APP,PICALM
FUMA	GO:0070252	actin mediated cell contraction	117	7	0.000358476	0.00515616	PDE4B:CACNB2:SCN2B:TCAP:BIN1:TTN:DLG1
FUMA	GO:0061572	actin filament bundle organization	154	8	0.000360103	0.00515937	CDC42:STMN1:RHOC:SORBS1:PAK1:ITGB5:ARHGEF10:PTK2B
FUMA	GO:0001764	neuron migration	154	8	0.000360103	0.00515937	DCLK1:NRP2:FEZF2:RAPGEF2:NIPBL:MAP1B:MEF2C:CAMK2B
gPROFILER	GO:0071364	cellular response to epidermal growth factor stimulus		4		0.00516722	MED1,CFLAR,MCM7,IQGAP1
gPROFILER	GO:0014041	regulation of neuron maturation		3		0.00516722	EDNRB,MAP3K13,TBX6
gPROFILER	GO:1990089	response to nerve growth factor		5		0.00519715	APP,BDNF,MAPT,CREB1,UBE3A
gPROFILER	GO:0048731	system development		142		0.00519715	PTK2B,BIN1,VEZF1,FBN1,SNCA,WNT3,MED1,NFATC3,CCKBR,CFLAR,ADCYAP1,APP,PTPRA,CD44,HEXIM1,ACACB,LDLR,VWC2,OVOL2,BDNF,STMN1,MAPT,PML,ALDH5A1,PICALM,CACNA1A,RBPMS2,TRIM45,C1QTNF5,ITPKB,RBBP5,WNT2B,ARHGAP35,CAMK2B,SYNJ2,SPEN,MAP4K4,PROK2,CALM3,GDF3,ANKH,FST,BAD,MOV10,IQGAP1,NIPBL,RASGRF1,GFAP,SCLT1,BMP1,PKD2,EDNRB,CREB1,SEZ6L2,MEF2C,DCLRE1C,RELA,CD83,MACF1,TCF7L2,ACER3,MYLIP,CDC42,UBE3A,DLG1,ZNF215,LRFN…
gPROFILER	GO:0032991	protein-containing complex		148		0.00520675	PTK2B,BIN1,CYCS,SNCA,SNRPN,WNT3,AP1S1,DYNLRB1,MED1,NFATC3,CFLAR,APP,PTPRA,CD44,LDLR,VWC2,MKLN1,KANSL1,EIF4E3,MAPT,IKBKB,PICALM,CACNA1A,DCTN6,INTS9,C1QTNF5,ILF3,RBBP5,RPLP0,NCF4,CDC27,CAMK2B,CAPZA1,SPEN,MCM7,GATAD2A,SAMD4B,LCAT,CELF1,SCN11A,EIF1B,CALM3,ITGB5,RCHY1,RBPMS,MOV10,IQGAP1,NIPBL,UBE2D3,SCLT1,NVL,NFKB1,CACNB2,PKD2,PDE4B,CREB1,PATL1,MEF2C,DCLRE1C,TAF6L,RELA,TCF7L2,PEX19,MED29,GOSR2,USP47,A…
FUMA	GO:0071872	cellular response to epinephrine stimulus	13	3	0.000365259	0.00521292	PDE4B:SNCA:SRD5A1
FUMA	GO:2000345	regulation of hepatocyte proliferation	13	3	0.000365259	0.00521292	MED1:CFLAR:FBXW7
FUMA	GO:0030120	vesicle coat	57	5	0.000442988	0.00521683	COPA:PICALM:SEC24D:AP1S1:CLTA
FUMA	GO:0042773	atp synthesis coupled electron transport	84	6	0.000367271	0.00523148	COX15:NDUFA7:NDUFA7:NDUFB3:NDUFB5:SNCA:CYCS
FUMA	R-HSA-8953897	phase 0 rapid depolarisation	44	5	0.000129393	0.00524215	CACNB2:SCN2B:CACNB1:SCN11A:CAMK2B
FUMA	R-HSA-5607764	clec7a dectin 1 signaling	100	7	0.000136028	0.00527028	RELA:NFATC3:PSME3:CASP8:UBE2V1:NFKB1:IKBKB
FUMA	R-HSA-933542	traf6 mediated nf kb activation	24	4	0.000137119	0.00527028	RELA:APP:NFKB1:IKBKB
gPROFILER	GO:0042116	macrophage activation		4		0.0052704	SNCA,APP,LDLR,MAPT
gPROFILER	GO:0045861	negative regulation of proteolysis		7		0.0052704	BIN1,SNCA,CFLAR,APP,CD44,PML,PICALM
gPROFILER	GO:0048518	positive regulation of biological process		173		0.0052704	PTK2B,BIN1,VEZF1,CYCS,LANCL2,SNCA,TAF1C,WNT3,MED1,NFATC3,CCKBR,NSF,CFLAR,CASS4,ADCYAP1,APP,GPR27,CD44,HEXIM1,ACACB,CD209,LDLR,VWC2,ELF1,ZBTB20,OVOL2,BDNF,STMN1,MAPT,IKBKB,PML,PICALM,CEP135,RBPMS2,KLF12,ITPKB,ILF3,WNT2B,ARHGAP35,CAMK2B,SPEN,TRIM38,CD5,MAP4K4,CELF1,PROK2,CALM3,RCHY1,TNIP1,GDF3,RBPMS,FST,ALPK1,BAD,MOV10,IQGAP1,EXTL3,NIPBL,RASGRF1,GFAP,UBE2D3,CD22,BMP1,NVL,NFKB1,CACNB2,PKD2,EDNRB,PDE…
gPROFILER	GO:0006468	protein phosphorylation		45		0.0052704	PTK2B,SNCA,MED1,CFLAR,CASS4,ADCYAP1,APP,PTPRA,CD44,HEXIM1,BDNF,IKBKB,PML,ITPKB,ILF3,CAMK2B,MAP4K4,PROK2,CALM3,TNIP1,GDF3,RBPMS,ALPK1,IQGAP1,RASGRF1,NFKB1,PKD2,EDNRB,CREB1,RALB,MEF2C,CDC42,DLG1,PRKAR1B,LILRA5,DYRK2,GMFG,EIF4G1,DCLK1,MAP3K13,SNX6,HBEGF,PPM1L,FBXW7,TAOK2
gPROFILER	GO:0150011	regulation of neuron projection arborization		3		0.0052704	MOV10,MACF1,MAP3K13
gPROFILER	GO:0032880	regulation of protein localization		40		0.0052704	ENSA,ADCYAP1,GPR27,BDNF,MAPT,PML,PICALM,CEP135,CACNA1A,ICA1,MAP4K4,BAD,IQGAP1,NIPBL,UBE2D3,CD22,NVL,LEPROTL1,RALB,TCF7L2,PPM1A,CDC42,DLG1,LILRA5,DCLK1,FBXW7,SERP1,ERBB2,CASP8,GOLPH3L,IL1RAP,CLEC5A,CRH,SMO,DNAJC27,MMD,SORBS1,RUFY3,PAK1,BCL2L1
FUMA	GO:0008331	high voltage gated calcium channel activity	10	3	0.00015713	0.00527509	CACNB2:CACNB1:CACNA1A
FUMA	GO:0005198	structural molecule activity	817	22	0.000157106	0.00527509	MACF1:COPA:CTBP2:RPLP0:AKAP6:FBN1:IQGAP1:TCAP:GFAP:NDUFA7:NDUFA7:ACTR2:MRPL35:TTN:MAGI1:EIF4G1:MUC4:DLG1:MAP1B:VCAN:DST:AEBP1:CLTA
gPROFILER	GO:1902991	regulation of amyloid precursor protein catabolic process		3		0.00529099	BIN1,APP,PICALM
gPROFILER	GO:0032269	negative regulation of cellular protein metabolic process		28		0.00532107	BIN1,ENSA,SNCA,CFLAR,APP,CD44,HEXIM1,MAPT,IKBKB,PML,PICALM,ILF3,SAMD4B,CELF1,CALM3,TNIP1,MOV10,NFKB1,OXR1,EDNRB,RELA,USP47,DLG1,PRKAR1B,TNRC6A,GMFG,EIF4G1,SNX6
gPROFILER	GO:1903426	regulation of reactive oxygen species biosynthetic process		3		0.00532107	PTK2B,SNCA,CFLAR
FUMA	GO:0070936	protein k48 linked ubiquitination	55	5	0.000374825	0.00532876	UBE2T:UBE3A:UBE2D3:MARCH6:TRIM38
gPROFILER	GO:0044422	organelle part		244		0.00536136	BIN1,VEZF1,CYCS,ENSA,FBN1,LANCL2,SNCA,SNRPN,TAF1C,WNT3,AP1S1,DYNLRB1,MED1,NFATC3,NSF,ZNF397,APP,SMOX,CD44,HEXIM1,MXD4,ACACB,LDLR,ELF1,MKLN1,SPPL2C,ZBTB20,KANSL1,BDNF,DNAJC7,HS3ST5,STMN1,GIMAP5,MAPT,SCG3,PML,ALDH5A1,PICALM,CEP135,SCD5,DCTN6,KLF12,INTS9,TRIM45,ILF3,RBBP5,RPLP0,NCF4,CDC27,ARHGAP35,CAMK2B,CAPZA1,ICA1,SPEN,SLC12A4,MCM7,GATAD2A,ZHX1,CELF1,B3GALNT1,CALM3,RCHY1,CYB561,TNIP1,RBPMS,PDIA4,C…
gPROFILER	GO:0045860	positive regulation of protein kinase activity		18		0.00540054	PTK2B,SNCA,CASS4,ADCYAP1,BDNF,MAP4K4,PROK2,CALM3,IQGAP1,PKD2,RALB,MEF2C,DLG1,PRKAR1B,LILRA5,MAP3K13,FBXW7,TAOK2
FUMA	GO:0031112	positive regulation of microtubule polymerization or depolymerization	31	4	0.000381709	0.00541614	PAK1:NIN:KATNB1:MAPT
gPROFILER	GO:0051258	protein polymerization		3		0.00543647	PTK2B,BIN1,SNCA
FUMA	R-HSA-448424	interleukin 17 signaling	71	6	0.000146146	0.00547682	CREB1:UBE2V1:IL17RE:NFKB1:MEF2C:IKBKB
gPROFILER	GO:0048557	embryonic digestive tract morphogenesis		3		0.00547783	OVOL2,RBPMS2,NIPBL
gPROFILER	GO:0060291	long-term synaptic potentiation		3		0.00547783	PTK2B,SNCA,APP
FUMA	WP1434	osteopontin signaling	13	3	0.000365259	0.00550933	RELA:NFKB1:IKBKB
FUMA	GO:0007626	locomotory behavior	196	9	0.00038968	0.0055186	CRHR1:EN1:APP:FEZF2:SNCA:ANKH:FIG4:CRH:OXR1
gPROFILER	GO:0060322	head development		33		0.00551994	WNT3,MED1,ADCYAP1,APP,STMN1,CACNA1A,WNT2B,ARHGAP35,SYNJ2,CALM3,BAD,NIPBL,CREB1,SEZ6L2,CDC42,UBE3A,DCLK1,SRD5A1,TSKU,FANCD2,NRP2,FEZF2,DOCK7,CRH,NEUROD6,SMO,RAPGEF2,NIN,SLC8A1,EN1,PAK1,PEX5,NME1
gPROFILER	GO:0032092	positive regulation of protein binding		6		0.00551994	APP,BDNF,NVL,RALB,MEF2C,TCF7L2
gPROFILER	GO:0031323	regulation of cellular metabolic process		30		0.00551994	PTK2B,BIN1,VEZF1,CYCS,ENSA,FBN1,LANCL2,SNCA,TAF1C,MED1,NFATC3,CCKBR,NSF,ZNF397,CFLAR,CASS4,ADCYAP1,APP,CD44,HEXIM1,MXD4,ACACB,LDLR,VWC2,ELF1,MKLN1,ZBTB20,OVOL2,EIF4E3,BDNF
gPROFILER	GO:0051480	regulation of cytosolic calcium ion concentration		11		0.00551994	PTK2B,SNCA,CCKBR,ADCYAP1,PML,CACNA1A,PROK2,CALM3,CACNB2,PKD2,EDNRB
gPROFILER	GO:1901841	regulation of high voltage-gated calcium channel activity		3		0.00551994	CALM3,CACNB2,PDE4B
gPROFILER	GO:0007610	behavior		15		0.00554906	SNCA,DYNLRB1,ADCYAP1,APP,LDLR,BDNF,MAPT,PICALM,CACNA1A,ANKH,RASGRF1,OXR1,CREB1,SEZ6L2,MEF2C
gPROFILER	GO:0048522	positive regulation of cellular process		116		0.00554906	PTK2B,BIN1,VEZF1,CYCS,LANCL2,SNCA,WNT3,MED1,NFATC3,CCKBR,NSF,CFLAR,CASS4,ADCYAP1,APP,GPR27,CD44,HEXIM1,ACACB,CD209,LDLR,VWC2,ELF1,ZBTB20,OVOL2,BDNF,STMN1,MAPT,IKBKB,PML,PICALM,CEP135,RBPMS2,KLF12,ITPKB,ILF3,ARHGAP35,CAMK2B,SPEN,TRIM38,CD5,MAP4K4,PROK2,CALM3,RCHY1,TNIP1,GDF3,RBPMS,ALPK1,BAD,MOV10,IQGAP1,EXTL3,NIPBL,RASGRF1,GFAP,UBE2D3,NVL,NFKB1,CACNB2,PKD2,EDNRB,CREB1,RALB,MEF2C,TAF6L,RELA,CD83,MA…
gPROFILER	GO:0030510	regulation of BMP signaling pathway		6		0.00554906	FBN1,VWC2,RBPMS2,GDF3,FST,PPM1A
gPROFILER	GO:0033993	response to lipid		7		0.00556139	PTK2B,LANCL2,SNCA,WNT3,MED1,CFLAR,ADCYAP1
FUMA	GO:0000228	nuclear chromosome	599	17	0.000480748	0.00559568	DCLRE1C:TCF7L2:RELA:POLD3:SP1:PML:TBX6:UHRF1:GATAD2A:EN1:TTN:CREB1:NIPBL:MEF2C:CBX3:ZMIZ2:MCM7
FUMA	WP430	statin pathway	31	4	0.000381709	0.00560184	LCAT:LDLR:APOC1:APOC2
gPROFILER	GO:0009966	regulation of signal transduction		73		0.00561421	PTK2B,FBN1,LANCL2,SNCA,WNT3,MED1,CFLAR,ADCYAP1,APP,GPR27,CD44,HEXIM1,VWC2,ELF1,OVOL2,ARHGAP17,BDNF,DLK2,STMN1,MAPT,IKBKB,PML,RBPMS2,ITPKB,ARHGAP35,TRIM38,MAP4K4,PROK2,CALM3,TNIP1,GDF3,RBPMS,FST,ALPK1,BAD,IQGAP1,RASGRF1,CD22,NFKB1,PKD2,SEZ6L2,MEF2C,RELA,MACF1,PIAS2,TCF7L2,PPM1A,FAM162A,USP47,RHOC,CDC42,UBE3A,DLG1,LILRA5,DYRK2,MUC4,MAP3K13,SNX6,HBEGF,VHL,AKAP6,FBXW7,TAOK2,TSKU,GALNT11,FANCD2,MYO9B,…
FUMA	GO:0007173	epidermal growth factor receptor signaling pathway	119	7	0.000397277	0.00561535	CDC42:SNX6:IQGAP1:APP:FBXW7:HBEGF:PTK2B
FUMA	R-HSA-9020702	interleukin 1 signaling	102	7	0.000153965	0.0056291	RELA:PSME3:UBE2V1:APP:IL1RAP:NFKB1:IKBKB
gPROFILER	GO:0051716	cellular response to stimulus		138		0.00563921	PTK2B,CYCS,FBN1,LANCL2,SNCA,WNT3,CLEC4M,MED1,NFATC3,CCKBR,CFLAR,ADCYAP1,APP,PTPRA,GPR27,CD44,HEXIM1,CRHR1,CD209,LDLR,VWC2,ELF1,MKLN1,ZBTB20,OVOL2,ARHGAP17,BDNF,DNAJC7,DLK2,STMN1,MAPT,IKBKB,PML,CACNA1A,RBPMS2,ITPKB,RBBP5,WNT2B,RPLP0,NCF4,ARHGAP35,CAMK2B,CAPZA1,SST,SPEN,TRIM38,CD5,SLC12A4,MCM7,MAP4K4,PROK2,CALM3,ITGB5,RCHY1,TNIP1,GDF3,RBPMS,PDIA4,FST,ALPK1,BAD,MOV10,IQGAP1,EXTL3,NIPBL,RASGRF1,LRRFI…
gPROFILER	GO:1901021	positive regulation of calcium ion transmembrane transporter activity		5		0.00563921	CALM3,CACNB2,PKD2,AKAP6,JPH2
gPROFILER	GO:0051281	positive regulation of release of sequestered calcium ion into cytosol		5		0.00563921	SNCA,CALM3,PKD2,AKAP6,JPH2
gPROFILER	GO:0071825	protein-lipid complex subunit organization		5		0.00563921	BIN1,LCAT,BMP1,APOC1,APOC2
gPROFILER	GO:0005622	intracellular		334		0.00564283	ACP1,PTK2B,BIN1,VEZF1,CYCS,ENSA,FBN1,LANCL2,SNCA,SNRPN,TAF1C,WNT3,AP1S1,CLEC4M,DYNLRB1,MED1,NFATC3,NSF,ZNF397,MSRB3,CFLAR,CASS4,APP,SMOX,CD44,OCIAD2,HEXIM1,CRHR1,MXD4,ACACB,NAP1L5,CD209,LDLR,ELF1,MKLN1,SPPL2C,ZBTB20,KANSL1,OVOL2,ARHGAP17,EIF4E3,BDNF,DNAJC7,HS3ST5,STMN1,GIMAP5,MAPT,SCG3,ARL17B,IKBKB,PML,ALDH5A1,PICALM,CEP135,CACNA1A,SCD5,DCTN6,RBPMS2,KLF12,INTS9,TRIM45,C1QTNF5,ITPKB,ILF3,RBBP5,WNT…
gPROFILER	GO:0051098	regulation of binding		20		0.00565075	APP,BDNF,STMN1,CALM3,NIPBL,NVL,RALB,MEF2C,TCF7L2,PEX19,CDC42,EIF4G1,FBXW7,SMO,RAPGEF2,SUMO3,FAM129B,CTBP2,UBASH3B,NME1
gPROFILER	GO:0019058	viral life cycle		9		0.0056574	CLEC4M,CD209,LDLR,HS3ST5,PML,ILF3,TRIM38,ITGB5,TNIP1
gPROFILER	GO:0006952	defense response		12		0.0056962	PTK2B,VEZF1,SNCA,CLEC4M,MED1,NFATC3,ADCYAP1,APP,CD44,HEXIM1,CD209,LDLR
FUMA	GO:0016607	nuclear speck	389	13	0.000495214	0.00569781	PPIH:BDNF:PATL1:MAML2:SNURF:SNURF:MAPT:LUC7L3:SRSF1:PIAS2:GATAD2A:POLDIP3:RCHY1:MEF2C
FUMA	GO:0070469	respirasome	89	6	0.000501091	0.00569991	COX15:NDUFA7:NDUFA7:NDUFB3:NDUFB5:SNCA:CYCS
FUMA	GO:0030141	secretory granule	831	21	0.000507436	0.00570723	CTSS:CR1:CD44:RPH3A:ATP6V1D:SCG3:ABHD2:IQGAP1:ALDOA:GMFG:ACTR2:CST3:APP:SNCA:NFKB1:SCAMP1:ICA1:FAM3C:CLEC5A:GGH:NCS1
FUMA	GO:0031253	cell projection membrane	341	12	0.000513532	0.00571162	MACF1:PEX19:CD44:PAK1:MAPT:NME1:ANTXR1:DLG1:GABRA2:PKD2:SMO:KANK1
gPROFILER	GO:0010959	regulation of metal ion transport		15		0.00572804	PTK2B,BIN1,SNCA,ADCYAP1,CRHR1,PML,CAMK2B,CALM3,CACNB2,PKD2,PDE4B,DLG1,LILRA5,AKAP6,SCN2B
FUMA	GO:0030139	endocytic vesicle	294	11	0.000525397	0.00573362	PIK3C2B:PICALM:WNT3:LDLR:NCF4:ITGB5:RAPGEF2:HBEGF:CAMK2B:SMO:CLTA
FUMA	GO:0098984	neuron to neuron synapse	342	12	0.000526966	0.00573362	PDE4B:RPLP0:DCLK1:NSF:LRFN1:SLC30A3:ACTR2:DLG1:MAP1B:PRKAR1B:PTK2B:NCS1
gPROFILER	GO:0030659	cytoplasmic vesicle membrane		31		0.00580406	SNCA,WNT3,AP1S1,CD44,LDLR,SCG3,PICALM,CAMK2B,ICA1,CALM3,CYB561,IQGAP1,PKD2,GOSR2,COPA,GABRA2,HBEGF,TAOK2,ATP6V1D,CR1,SLC30A3,GABRB3,RPH3A,CLEC5A,SMO,KIFC3,CLTA,CNIH3,BCL2L1,SEC24D,SCAMP1
FUMA	WP195	il-1 signaling pathway	56	5	0.000407834	0.00580504	RELA:UBE2V1:IL1RAP:NFKB1:IKBKB
FUMA	WP1530	mirna regulation of dna damage response	86	6	0.000416937	0.00580504	PML:CASP8:CREB1:FANCD2:CYCS:MCM7
gPROFILER	GO:0071229	cellular response to acid chemical		3		0.00582874	PTK2B,LANCL2,WNT3
gPROFILER	GO:0009893	positive regulation of metabolic process		110		0.00582874	PTK2B,VEZF1,CYCS,SNCA,TAF1C,WNT3,MED1,NFATC3,NSF,CFLAR,CASS4,ADCYAP1,APP,CD44,ACACB,LDLR,ELF1,ZBTB20,OVOL2,BDNF,MAPT,IKBKB,PML,PICALM,KLF12,ILF3,MAP4K4,PROK2,CALM3,RCHY1,TNIP1,GDF3,RBPMS,BAD,MOV10,IQGAP1,NIPBL,NVL,NFKB1,PKD2,EDNRB,CREB1,RALB,MEF2C,TAF6L,RELA,PIAS2,TCF7L2,PPM1A,FAM162A,MYLIP,APOC1,CDC42,UBE3A,DLG1,PRKAR1B,POLDIP3,TNRC6A,LILRA5,DYRK2,EIF4G1,MAP3K13,APOC2,HBEGF,VHL,FBXW7,SP1,TAOK2,T…
gPROFILER	GO:0042063	gliogenesis		6		0.00585441	PTK2B,BIN1,ADCYAP1,APP,LDLR,MAPT
FUMA	WP2363	gastric cancer network 2	32	4	0.000432413	0.00587	UBE2T:SNURF:SNURF:FANCI:RNF144B
FUMA	GO:0015085	calcium ion transmembrane transporter activity	139	8	0.000179607	0.00590907	CACNB2:CACNB1:CACNA1A:SLC8A1:JPH2:CHRNA9:PKD2:NCS1
gPROFILER	GO:0010522	regulation of calcium ion transport into cytosol		9		0.00591652	PTK2B,SNCA,PML,CALM3,PKD2,AKAP6,JPH2,SLC8A1,UBASH3B
FUMA	GO:0000278	mitotic cell cycle	998	24	0.00042053	0.00593262	STMN1:RHOC:ENSA:USP47:BCAT1:PML:IQGAP1:TAOK2:KATNB1:PSME3:CDC27:CALM3:TTN:CD28:BCL2L1:RTFDC1:APP:EIF4G1:DLG1:CEP135:PKD2:NIPBL:MCM7:ARHGEF10
gPROFILER	GO:0034377	plasma lipoprotein particle assembly		4		0.00596098	LCAT,BMP1,APOC1,APOC2
FUMA	GO:0003700	dna binding transcription factor activity	1691	36	0.000185365	0.00597892	ZNF281:TCF7L2:ZNF215:RELA:ETV6:TFCP2:SP1:ELF1:KLF12:JDP2:UBN1:TBX6:NFATC3:HLF:VEZF1:ZNF397:ZNF136:ZNF44:GATAD2A:ARHGAP35:ZNF577:EN1:ZC3H15:CREB1:OVOL2:ZFP64:LRRFIP2:FEZF2:ZBTB20:MXD4:NFKB1:MEF2C:ETV1:NEUROD6:AEBP1:ZHX1
FUMA	GO:0071496	cellular response to external stimulus	334	12	0.000427328	0.00600692	WNT2B:PIK3C2B:BAD:LTBR:TNRC6A:MED1:ARHGAP35:RALB:CASP8:EIF4G1:NFKB1:SRD5A1
FUMA	GO:0090288	negative regulation of cellular response to growth factor stimulus	158	8	0.000427432	0.00600692	GDF3:SNX6:PPM1A:FBN1:RBPMS2:CFLAR:VWC2:FAM129B
gPROFILER	GO:0031252	cell leading edge		20		0.00601725	PTK2B,APP,CD44,MKLN1,MAPT,IQGAP1,PKD2,MACF1,CDC42,GABRA2,ITGB4,PALLD,DST,KANK1,ANTXR1,RUFY3,PAK1,ACTR2,NME1,ANGPTL3
gPROFILER	GO:0045773	positive regulation of axon extension		6		0.00601803	MAPT,MACF1,MAP3K13,MAP1B,RUFY3,PAK1
gPROFILER	GO:0060255	regulation of macromolecule metabolic process		30		0.00601803	PTK2B,BIN1,VEZF1,CYCS,ENSA,FBN1,LANCL2,SNCA,TAF1C,WNT3,MED1,NFATC3,NSF,ZNF397,CFLAR,CASS4,ADCYAP1,APP,CD44,HEXIM1,MXD4,ACACB,LDLR,VWC2,ELF1,MKLN1,ZBTB20,OVOL2,EIF4E3,BDNF
gPROFILER	GO:0010660	regulation of muscle cell apoptotic process		3		0.00601803	PTK2B,CFLAR,ADCYAP1
gPROFILER	GO:0051279	regulation of release of sequestered calcium ion into cytosol		8		0.00601803	PTK2B,SNCA,CALM3,PKD2,AKAP6,JPH2,SLC8A1,UBASH3B
gPROFILER	GO:0051046	regulation of secretion		19		0.00601803	ENSA,SNCA,NSF,ADCYAP1,GPR27,CRHR1,PML,CACNA1A,ICA1,MAP4K4,CALM3,BAD,CD22,CACNB2,EDNRB,CREB1,RALB,MEF2C,TCF7L2
gPROFILER	GO:0010469	regulation of signaling receptor activity		9		0.00601803	PTK2B,MED1,APP,RASGRF1,MEF2C,DLG1,MUC4,SNX6,FBXW7
gPROFILER	GO:0070849	response to epidermal growth factor		4		0.00603793	MED1,CFLAR,MCM7,IQGAP1
FUMA	GO:0090504	epiboly	32	4	0.000432413	0.00605378	RHOC:CD44:ARHGAP35:HBEGF
FUMA	GO:0099174	regulation of presynapse organization	32	4	0.000432413	0.00605378	APP:EIF4G1:IL1RAP:SNCA
gPROFILER	GO:0030018	Z disc		10		0.00606039	BIN1,PDE4B,PALLD,DST,JPH2,TCAP,PRICKLE4,SLC8A1,PAK1,TTN
FUMA	GO:0006109	regulation of carbohydrate metabolic process	199	9	0.000435173	0.00608084	SORBS1:BAD:DYRK2:ACACB:ZBTB20:SNCA:NFKB1:FAM3C:PTK2B
gPROFILER	GO:0034703	cation channel complex		8		0.00608264	PTK2B,VWC2,CACNA1A,SCN11A,CALM3,CACNB2,PKD2,PDE4B
FUMA	GO:0044389	ubiquitin like protein ligase binding	306	12	0.000193609	0.00610452	UBE2T:RELA:UBASH3B:LTBR:PML:PIAS2:RALB:CASP8:SUMO3:UBE2D3:FBXW7:PTK2B
FUMA	GO:0005245	voltage gated calcium channel activity	48	5	0.000196681	0.00610452	CACNB2:CACNB1:CACNA1A:PKD2:NCS1
Webgestalt	GO:0007015	actin filament organization	388	22	1.65056e-05	0.00612261	PTK2B;BIN1;CASS4;ARHGAP17;STMN1;ARHGAP35;CAPZA1;ITGB5;ALDOA;RHOC;CDC42;DLG1;GMFG;SSH3;KANK1;TCAP;ARHGEF10;SORBS1;RUFY3;PAK1;ACTR2;TTN
Webgestalt	GO:0016049	cell growth	473	25	1.46007e-05	0.00612261	PTK2B;WNT3;APP;BDNF;MAPT;PML;ST7L;IQGAP1;EXTL3;MACF1;USP47;CDC42;EIF4G1;DCLK1;MAP3K13;HBEGF;AKAP6;TAOK2;NRP2;ERBB2;MAP1B;RERG;NIN;RUFY3;PAK1
Webgestalt	GO:1904062	regulation of cation transmembrane transport	303	19	1.57292e-05	0.00612261	PTK2B;BIN1;SNCA;APP;RASGRF1;CACNB2;PKD2;PDE4B;MEF2C;DLG1;AKAP6;SCN2B;JPH2;CTSS;CRH;CACNB1;SLC8A1;UBASH3B;CNIH3
FUMA	GO:0090101	negative regulation of transmembrane receptor protein serine threonine kinase signaling pathway	121	7	0.000439363	0.00612774	GDF3:SNX6:PPM1A:FBN1:RBPMS2:FST:VWC2
FUMA	GO:0061097	regulation of protein tyrosine kinase activity	87	6	0.000443657	0.00617591	BDNF:SNX6:LILRA5:CASS4:APP:FBXW7
gPROFILER	GO:0014002	astrocyte development		4		0.00618831	APP,LDLR,MAPT,GFAP
gPROFILER	GO:0008360	regulation of cell shape		9		0.00618831	PTK2B,MKLN1,ARHGAP35,ALDOA,RHOC,CDC42,DLG1,TAOK2,FMNL2
gPROFILER	GO:1900449	regulation of glutamate receptor signaling pathway		7		0.00618831	PTK2B,APP,RASGRF1,MEF2C,DLG1,CRH,CNIH3
gPROFILER	GO:0007416	synapse assembly		11		0.00618831	SNCA,APP,BDNF,CACNA1A,MEF2C,LRFN1,GABRA2,EIF4G1,GABRB3,IL1RAP,MAP1B
gPROFILER	GO:0045913	positive regulation of carbohydrate metabolic process		6		0.00620925	SNCA,APP,ZBTB20,BAD,NFKB1,DYRK2
gPROFILER	GO:0048732	gland development		5		0.00624812	WNT3,MED1,CCKBR,CFLAR,ADCYAP1
gPROFILER	GO:0048523	negative regulation of cellular process		91		0.00624812	PTK2B,BIN1,ENSA,FBN1,LANCL2,SNCA,WNT3,MED1,NFATC3,CFLAR,ADCYAP1,APP,CD44,HEXIM1,MXD4,ACACB,LDLR,VWC2,ELF1,ZBTB20,OVOL2,BDNF,DLK2,STMN1,MAPT,IKBKB,PML,PICALM,CACNA1A,RBPMS2,KLF12,ITPKB,ILF3,ARHGAP35,CAPZA1,SST,SPEN,ST7L,MAP4K4,GATAD2A,ZHX1,SAMD4B,CELF1,PROK2,CALM3,TNIP1,GDF3,FST,BAD,MOV10,IQGAP1,NIPBL,GFAP,UBE2D3,CD22,NFKB1,OXR1,PKD2,EDNRB,CREB1,MEF2C,RELA,PIAS2,TCF7L2,PPM1A,USP47,MYLIP,APOC1,CDC4…
FUMA	GO:0006281	dna repair	541	16	0.000449852	0.00625031	UBE2T:DCLRE1C:USP47:POLD3:PML:FANCI:PPP4C:UHRF1:ACTR2:UBE2V1:FANCD2:POLR2H:RCHY1:UBE2D3:NIPBL:MSH3
gPROFILER	GO:0016311	dephosphorylation		3		0.00632257	ACP1,CYCS,ENSA
Webgestalt	GO:0036464	cytoplasmic ribonucleoprotein granule	202	11	0.00022223	0.00635413	MAPT;RPLP0;SAMD4B;RBPMS;MOV10;IQGAP1;PATL1;CDC42;EID1;POLDIP3;TNRC6A
FUMA	GO:0048545	response to steroid hormone	386	13	0.000460619	0.00638783	BAD:RELA:PAK1:UBE3A:ABHD2:MED1:ADCYAP1:PIAS2:CALM3:CFLAR:SST:SRD5A1:CRH
FUMA	GO:0014013	regulation of gliogenesis	122	7	0.000461701	0.00639077	RELA:GFAP:ADCYAP1:LDLR:BIN1:CREB1:APP
FUMA	GO:0007265	ras protein signal transduction	437	14	0.000463645	0.00640562	CDC42:STMN1:RHOC:ITPKB:RASGRF1:MYO9B:ARHGAP35:DNAJC27:MAP4K4:RALB:RAPGEF2:ARHGEF10:RAB2A:KANK1
Webgestalt	GO:0032994	protein-lipid complex	38	5	0.000232438	0.00640864	BIN1;LDLR;LCAT;APOC1;APOC2
FUMA	GO:0035821	modification of morphology or physiology of other organism	160	8	0.000464738	0.00640867	BAD:SP1:CD209:CLEC4M:CALM3:CASP8:BCL2L1:TNIP1
gPROFILER	GO:0032870	cellular response to hormone stimulus		7		0.00645953	FBN1,LANCL2,MED1,CFLAR,ADCYAP1,PTPRA,CRHR1
gPROFILER	GO:0042592	homeostatic process		48		0.00653069	PTK2B,SNCA,MED1,CCKBR,ADCYAP1,APP,GPR27,ACACB,LDLR,ZBTB20,STMN1,PML,PICALM,CACNA1A,ITPKB,NCF4,SLC12A4,MAP4K4,LCAT,PROK2,CALM3,SLC4A9,PDIA4,BAD,CACNB2,PKD2,EDNRB,PDE4B,MEF2C,DCLRE1C,ALDOA,TCF7L2,MYLIP,PRKAR1B,POLD3,NCS1,MUC4,EIF4G1,APOC2,AKAP6,FBXW7,PLEKHM1,SCN2B,ATP6V1D,SLC30A3,MCL1,JPH2,DOCK7
gPROFILER	GO:0044085	cellular component biogenesis		59		0.00658678	PTK2B,BIN1,SNCA,TAF1C,DENR,DYNLRB1,NSF,CFLAR,APP,ACACB,NAP1L5,BDNF,STMN1,MAPT,IKBKB,PML,ALDH5A1,PICALM,CEP135,CACNA1A,RBBP5,RPLP0,ARHGAP35,CAPZA1,MCM7,MAP4K4,ATPAF1,LCAT,CELF1,ITGB5,BAD,IQGAP1,GFAP,SCLT1,BMP1,NVL,PKD2,CREB1,RALB,PATL1,MEF2C,TAF6L,MACF1,ALDOA,TCF7L2,TNS1,PPM1A,GOSR2,RHOC,MAGI1,APOC1,CDC42,DLG1,GTPBP10,LRFN1,GABRA2,GMFG,ITGB4,EIF4G1
gPROFILER	GO:0010657	muscle cell apoptotic process		3		0.00659363	PTK2B,CFLAR,ADCYAP1
gPROFILER	GO:1903530	regulation of secretion by cell		18		0.00659363	ENSA,SNCA,NSF,ADCYAP1,GPR27,CRHR1,PML,CACNA1A,ICA1,MAP4K4,CALM3,BAD,CD22,CACNB2,CREB1,RALB,MEF2C,TCF7L2
FUMA	GO:0043198	dendritic shaft	35	4	0.00061321	0.00660024	CNIH3:NSF:SLC8A1:APP
FUMA	GO:0031400	negative regulation of protein modification process	599	17	0.000480748	0.00661703	ENSA:RELA:UBASH3B:SNX6:MARVELD3:HEXIM1:MAPT:GMFG:CALM3:EIF4G1:DLG1:CHRNA9:SNCA:TNIP1:PRKAR1B:IKBKB:OXR1
gPROFILER	GO:1901019	regulation of calcium ion transmembrane transporter activity		8		0.00663246	CRHR1,CALM3,CACNB2,PKD2,PDE4B,AKAP6,JPH2,CACNB1
FUMA	GO:1901137	carbohydrate derivative biosynthetic process	655	18	0.000483134	0.00663745	TCF7L2:ACACB:ALDOA:CHST6:NME1:SERP1:B3GALNT1:MUC4:SCD5:SNCA:NFKB1:VCAN:ACSL6:HBEGF:TNIP1:HS3ST5:GALNT11:EXTL3
FUMA	GO:0050679	positive regulation of epithelial cell proliferation	202	9	0.000484947	0.00663754	TCF7L2:BAD:SP1:MED1:ERBB2:NME1:CFLAR:NRP2:SMO
FUMA	GO:0051262	protein tetramerization	161	8	0.000484357	0.00663754	ATPIF1:PEX5:ACACB:ALDOA:NUDT21:PKD2:SNCA:ALDH5A1
FUMA	GO:0050849	negative regulation of calcium mediated signaling	33	4	0.000487741	0.00666338	DYRK2:CD22:CALM3:PKD2
gPROFILER	GO:0042551	neuron maturation		5		0.00666687	APP,SCLT1,EDNRB,MAP3K13,TBX6
gPROFILER	GO:0031589	cell-substrate adhesion		15		0.0066897	PTK2B,CASS4,CD44,VWC2,MKLN1,MAP4K4,ITGB5,IQGAP1,MACF1,CDC42,MUC4,ITGB4,TAOK2,KANK1,ANTXR1
gPROFILER	GO:0030900	forebrain development		20		0.0066897	ADCYAP1,APP,WNT2B,ARHGAP35,BAD,CREB1,DCLK1,SRD5A1,TSKU,NRP2,FEZF2,DOCK7,CRH,NEUROD6,SMO,RAPGEF2,NIN,SLC8A1,PEX5,NME1
gPROFILER	GO:0048584	positive regulation of response to stimulus		44		0.0066897	PTK2B,LANCL2,SNCA,WNT3,MED1,CFLAR,ADCYAP1,APP,GPR27,CD44,HEXIM1,CD209,LDLR,ELF1,BDNF,IKBKB,PML,ITPKB,TRIM38,MAP4K4,PROK2,CALM3,TNIP1,GDF3,RBPMS,ALPK1,BAD,IQGAP1,RASGRF1,UBE2D3,CD22,NFKB1,PKD2,PDE4B,MEF2C,RELA,MACF1,TCF7L2,PPM1A,FAM162A,USP47,RHOC,CDC42,UBE3A
gPROFILER	GO:0022603	regulation of anatomical structure morphogenesis		42		0.0066897	PTK2B,WNT3,MED1,CFLAR,CASS4,CD44,MKLN1,BDNF,MAPT,PML,CACNA1A,WNT2B,ARHGAP35,CAMK2B,PROK2,MOV10,MEF2C,MACF1,ALDOA,RHOC,CDC42,UBE3A,DLG1,MAP3K13,FBXW7,SP1,TAOK2,FMNL2,KANK1,FEZF2,ERBB2,CST3,MAP1B,SMO,RAPGEF2,ERAP1,NIN,FAM129B,PSME3,RUFY3,PAK1,ACTR2
gPROFILER	GO:0051592	response to calcium ion		7		0.0066897	PTK2B,ITPKB,CALM3,BAD,IQGAP1,PKD2,MEF2C
gPROFILER	GO:1901698	response to nitrogen compound		43		0.00669579	PTK2B,FBN1,SNCA,CFLAR,APP,PTPRA,CRHR1,LDLR,CACNA1A,SST,CALM3,BAD,IQGAP1,NFKB1,PKD2,EDNRB,PDE4B,CREB1,RALB,MEF2C,RELA,UBE3A,PRKAR1B,SNX6,AKAP6,SP1,SRD5A1,ATP6V1D,KANK1,GABRB3,CRH,MARCH6,MAP1B,GGH,RAPGEF2,CACNB1,SORBS1,SLC8A1,PAK1,ACTR2,BCL2L1,AQP9,NME1
FUMA	GO:0050730	regulation of peptidyl tyrosine phosphorylation	246	10	0.000492794	0.00671992	BDNF:CD44:SNX6:IQGAP1:LILRA5:CASS4:APP:FBXW7:HBEGF:PTK2B
gPROFILER	GO:0099501	exocytic vesicle membrane		9		0.00673517	SNCA,ICA1,CALM3,GABRA2,SLC30A3,RPH3A,CLTA,BCL2L1,SCAMP1
gPROFILER	GO:0030672	synaptic vesicle membrane		9		0.00673517	SNCA,ICA1,CALM3,GABRA2,SLC30A3,RPH3A,CLTA,BCL2L1,SCAMP1
gPROFILER	GO:0006813	potassium ion transport		4		0.00674528	PTK2B,BIN1,NSF,ADCYAP1
FUMA	GO:0010563	negative regulation of phosphorus metabolic process	546	16	0.000496717	0.00676088	ENSA:UBASH3B:SNX6:IQGAP1:MARVELD3:HEXIM1:MAPT:GMFG:CALM3:EIF4G1:DLG1:CHRNA9:SNCA:TNIP1:PRKAR1B:IKBKB
gPROFILER	GO:1901385	regulation of voltage-gated calcium channel activity		4		0.00678931	CRHR1,CALM3,CACNB2,PDE4B
FUMA	GO:0034333	adherens junction assembly	89	6	0.000501091	0.00679524	MACF1:SORBS1:IQGAP1:TAOK2:MAP4K4:PTK2B
FUMA	GO:0051899	membrane depolarization	89	6	0.000501091	0.00679524	ATPIF1:CACNB2:SCN2B:CACNA1A:SLC8A1:SCN11A
gPROFILER	GO:0048878	chemical homeostasis		22		0.00681125	PTK2B,SNCA,CCKBR,ADCYAP1,APP,GPR27,LDLR,ZBTB20,STMN1,PML,PICALM,CACNA1A,SLC12A4,MAP4K4,LCAT,PROK2,CALM3,SLC4A9,BAD,CACNB2,PKD2,EDNRB
gPROFILER	GO:0060079	excitatory postsynaptic potential		3		0.00681125	PTK2B,SNCA,APP
gPROFILER	GO:0019048	modulation by virus of host morphology or physiology		5		0.00681125	CLEC4M,CD209,BAD,CASP8,BCL2L1
gPROFILER	GO:0043154	negative regulation of cysteine-type endopeptidase activity involved in apoptotic process		3		0.00681125	SNCA,CFLAR,CD44
gPROFILER	GO:0001558	regulation of cell growth		15		0.00681125	PTK2B,WNT3,BDNF,MAPT,PML,ST7L,EXTL3,MACF1,USP47,CDC42,EIF4G1,MAP3K13,HBEGF,AKAP6,TAOK2
gPROFILER	GO:0043523	regulation of neuron apoptotic process		11		0.00681125	PTK2B,SNCA,BDNF,CACNA1A,OXR1,MEF2C,CDC42,SNX6,FBXW7,GABRB3,MCL1
gPROFILER	GO:0080090	regulation of primary metabolic process		29		0.00681125	PTK2B,BIN1,VEZF1,CYCS,ENSA,FBN1,LANCL2,SNCA,TAF1C,MED1,NFATC3,CCKBR,NSF,ZNF397,CFLAR,CASS4,ADCYAP1,APP,CD44,HEXIM1,MXD4,ACACB,LDLR,VWC2,ELF1,ZBTB20,OVOL2,EIF4E3,BDNF
gPROFILER	GO:0090066	regulation of anatomical structure size		10		0.00686068	PTK2B,BIN1,WNT3,ADCYAP1,BDNF,MAPT,PICALM,ARHGAP35,CAPZA1,SLC12A4
gPROFILER	GO:0010038	response to metal ion		11		0.00686068	PTK2B,SNCA,APP,MAPT,ITPKB,CALM3,BAD,IQGAP1,PKD2,CREB1,MEF2C
gPROFILER	GO:0048588	developmental cell growth		14		0.0068789	WNT3,APP,BDNF,MAPT,IQGAP1,MACF1,DCLK1,MAP3K13,AKAP6,NRP2,MAP1B,NIN,RUFY3,PAK1
FUMA	GO:0051101	regulation of dna binding	124	7	0.000509091	0.00689101	NME1:CALM3:SUMO3:FBXW7:NIPBL:SMO:FAM129B
gPROFILER	GO:0048519	negative regulation of biological process		111		0.00689298	PTK2B,BIN1,ENSA,FBN1,LANCL2,SNCA,WNT3,MED1,NFATC3,CFLAR,ADCYAP1,APP,CD44,HEXIM1,CRHR1,MXD4,ACACB,LDLR,VWC2,ELF1,ZBTB20,OVOL2,BDNF,DLK2,HS3ST5,STMN1,MAPT,IKBKB,PML,PICALM,CACNA1A,RBPMS2,KLF12,ITPKB,ILF3,RPLP0,ARHGAP35,CAPZA1,SST,SPEN,TRIM38,ST7L,MAP4K4,GATAD2A,ZHX1,SAMD4B,CELF1,PROK2,CALM3,TNIP1,GDF3,FST,BAD,MOV10,IQGAP1,NIPBL,GFAP,UBE2D3,CD22,NFKB1,OXR1,PKD2,EDNRB,PDE4B,LEPROTL1,CREB1,PATL1,MEF2C…
gPROFILER	GO:0050768	negative regulation of neurogenesis		13		0.00689298	WNT3,MED1,ADCYAP1,APP,LDLR,MAP4K4,GFAP,EDNRB,MYLIP,UBE3A,TBX6,KANK1,FEZF2
gPROFILER	GO:0052040	modulation by symbiont of host programmed cell death		3		0.00690933	BAD,CASP8,BCL2L1
gPROFILER	GO:0051253	negative regulation of RNA metabolic process		29		0.00690933	LANCL2,SNCA,MED1,NFATC3,HEXIM1,MXD4,ZBTB20,OVOL2,PML,KLF12,ILF3,ARHGAP35,SPEN,GATAD2A,ZHX1,FST,NIPBL,UBE2D3,NFKB1,EDNRB,CREB1,MEF2C,RELA,TCF7L2,PPM1A,USP47,DLG1,EID1,ZNF215
gPROFILER	GO:0001934	positive regulation of protein phosphorylation		27		0.00690933	PTK2B,SNCA,CFLAR,CASS4,ADCYAP1,APP,CD44,BDNF,MAP4K4,PROK2,CALM3,GDF3,RBPMS,IQGAP1,PKD2,EDNRB,RALB,MEF2C,CDC42,DLG1,PRKAR1B,LILRA5,EIF4G1,MAP3K13,HBEGF,FBXW7,TAOK2
gPROFILER	GO:1903409	reactive oxygen species biosynthetic process		3		0.00690933	PTK2B,SNCA,CFLAR
gPROFILER	GO:0031399	regulation of protein modification process		40		0.00690933	PTK2B,ENSA,SNCA,CFLAR,CASS4,ADCYAP1,APP,CD44,HEXIM1,BDNF,MAPT,IKBKB,PML,ITPKB,MAP4K4,PROK2,CALM3,RCHY1,TNIP1,GDF3,RBPMS,IQGAP1,NIPBL,OXR1,PKD2,EDNRB,RALB,MEF2C,RELA,CDC42,UBE3A,DLG1,PRKAR1B,EID1,LILRA5,GMFG,EIF4G1,MAP3K13,SNX6,HBEGF
FUMA	GO:0008289	lipid binding	726	20	0.00023129	0.00704578	GOLPH3L:PIK3C2B:BAD:PICALM:RPH3A:SNX6:IQGAP1:MAPT:APOC1:APOC2:ARHGAP35:BIN1:PLEKHA3:PARD3B:JPH2:NCF4:SNCA:RAPGEF2:PXDC1:LANCL2
FUMA	GO:0021537	telencephalon development	248	10	0.000524796	0.00709054	BAD:TSKU:NIN:NME1:SLC8A1:NRP2:FEZF2:SRD5A1:NEUROD6:SMO
gPROFILER	GO:0070588	calcium ion transmembrane transport		3		0.00710215	PTK2B,BIN1,SNCA
gPROFILER	GO:0060560	developmental growth involved in morphogenesis		14		0.00710357	WNT3,MED1,APP,BDNF,MAPT,IQGAP1,MACF1,DCLK1,MAP3K13,NRP2,MAP1B,NIN,RUFY3,PAK1
FUMA	GO:0048514	blood vessel morphogenesis	660	18	0.000527743	0.00711438	ATPIF1:PPIH:ANGPTL3:SP1:PML:MED1:ERBB2:VEZF1:NRP2:OVOL2:PROK2:PKD2:FBXW7:RAPGEF2:ERAP1:SMO:PTK2B:FAM129B
FUMA	GO:0051726	regulation of cell cycle	1201	27	0.000528497	0.00711438	CDC42:TCF7L2:USP47:BAD:PPM1A:PML:IQGAP1:TAOK2:MED1:PSME3:HEXIM1:CDC27:ADCYAP1:CALM3:BIN1:CD28:BCL2L1:APP:WDR6:EIF4G1:DLG1:CEP135:PKD2:NUDT6:FBXW7:NIPBL:CBX3
gPROFILER	GO:0031401	positive regulation of protein modification process		31		0.00713152	PTK2B,SNCA,CFLAR,CASS4,ADCYAP1,APP,CD44,BDNF,MAP4K4,PROK2,CALM3,RCHY1,TNIP1,GDF3,RBPMS,IQGAP1,NIPBL,PKD2,EDNRB,RALB,MEF2C,CDC42,UBE3A,DLG1,PRKAR1B,LILRA5,EIF4G1,MAP3K13,HBEGF,FBXW7,TAOK2
gPROFILER	GO:0009653	anatomical structure morphogenesis		63		0.00713899	PTK2B,VEZF1,FBN1,WNT3,MED1,CFLAR,CASS4,APP,PTPRA,CD44,LDLR,MKLN1,OVOL2,BDNF,STMN1,MAPT,PML,PICALM,CACNA1A,RBPMS2,WNT2B,ARHGAP35,CAMK2B,MAP4K4,PROK2,ITGB5,GDF3,MOV10,IQGAP1,NIPBL,BMP1,PKD2,CREB1,MEF2C,RELA,MACF1,ALDOA,RHOC,CDC42,UBE3A,DLG1,ITGB4,DCLK1,MAP3K13,HBEGF,VHL,PALLD,FBXW7,MPZL2,SP1,TAOK2,TBX6,TSKU,SSH3,SERP1,FMNL2,FANCD2,NRP2,KANK1,FEZF2,ERBB2,DOCK7,TCAP
gPROFILER	GO:0043170	macromolecule metabolic process		12		0.00713899	ACP1,PTK2B,BIN1,VEZF1,CYCS,ENSA,FBN1,LANCL2,SNCA,SNRPN,TAF1C,WNT3
gPROFILER	GO:0030072	peptide hormone secretion		8		0.00717968	ENSA,ADCYAP1,GPR27,CRHR1,CACNA1A,ICA1,MAP4K4,BAD
gPROFILER	GO:1902930	regulation of alcohol biosynthetic process		3		0.00722286	PTK2B,SNCA,ACACB
gPROFILER	GO:0035729	cellular response to hepatocyte growth factor stimulus		3		0.00723384	MED1,CREB1,RELA
FUMA	WP4496	signal transduction through il1r	34	4	0.000547929	0.00725672	RELA:IL1RAP:NFKB1:IKBKB
gPROFILER	GO:0051235	maintenance of location		3		0.00727605	PTK2B,FBN1,SNCA
gPROFILER	GO:0031113	regulation of microtubule polymerization		3		0.00727605	SNCA,STMN1,MAPT
FUMA	GO:0030521	androgen receptor signaling pathway	91	6	0.000564149	0.00729365	CDC42:RELA:SP1:UBE3A:PIAS2:CREB1
gPROFILER	GO:0090505	epiboly involved in wound healing		4		0.00731909	CD44,ARHGAP35,RHOC,HBEGF
gPROFILER	GO:0043269	regulation of ion transport		16		0.00731909	PTK2B,BIN1,SNCA,ADCYAP1,APP,CRHR1,PML,CACNA1A,CAMK2B,SCN11A,CALM3,RASGRF1,CACNB2,PKD2,PDE4B,MEF2C
gPROFILER	GO:0044319	wound healing, spreading of cells		4		0.00731909	CD44,ARHGAP35,RHOC,HBEGF
FUMA	GO:0071437	invadopodium	16	3	0.000697586	0.00735035	PAK1:ACTR2:RUFY3
FUMA	GO:0031256	leading edge membrane	170	8	0.000692963	0.00735035	MACF1:CD44:PAK1:MAPT:NME1:ANTXR1:GABRA2:KANK1
FUMA	GO:0006369	termination of rna polymerase ii transcription	34	4	0.000547929	0.00736248	TTF2:CSTF3:NUDT21:CSTF1
FUMA	GO:0032446	protein modification by small protein conjugation	896	22	0.00055123	0.00739332	CDC42:UBE2T:RELA:PEX5:UBE3A:FANCI:MED1:PSME3:CDC27:PIAS2:UHRF1:UBE2V1:SUMO3:PTTG1IP:VHL:RCHY1:UBE2D3:FBXW7:MARCH6:MYLIP:RNF144B:TRIM38
gPROFILER	GO:0010629	negative regulation of gene expression		40		0.00740094	LANCL2,SNCA,MED1,NFATC3,APP,HEXIM1,MXD4,ACACB,LDLR,ZBTB20,OVOL2,MAPT,PML,PICALM,KLF12,ILF3,RPLP0,ARHGAP35,SPEN,GATAD2A,ZHX1,SAMD4B,CELF1,FST,MOV10,NIPBL,UBE2D3,NFKB1,EDNRB,CREB1,PATL1,MEF2C,RELA,TCF7L2,PPM1A,USP47,DLG1,EID1,ZNF215,TNRC6A
FUMA	GO:0001819	positive regulation of cytokine production	445	14	0.000553975	0.0074166	PDE4B:RELA:SPN:ADCYAP1:LILRA5:CD28:CREB1:APP:ZBTB20:POLR2H:IL1RAP:NFKB1:CD83:CLEC5A
gPROFILER	GO:0050849	negative regulation of calcium-mediated signaling		4		0.00743557	CALM3,CD22,PKD2,DYRK2
gPROFILER	GO:0006066	alcohol metabolic process		12		0.00745884	PTK2B,SNCA,APP,ACACB,LDLR,ITPKB,SYNJ2,LCAT,ISYNA1,NFKB1,ACER3,APOC1
gPROFILER	GO:0042987	amyloid precursor protein catabolic process		3		0.00745884	BIN1,APP,PICALM
gPROFILER	GO:0045665	negative regulation of neuron differentiation		11		0.00745884	WNT3,MED1,APP,MAP4K4,GFAP,EDNRB,MYLIP,UBE3A,TBX6,KANK1,FEZF2
FUMA	GO:0005184	neuropeptide hormone activity	28	4	0.000255044	0.00749192	PPY:PYY:ADCYAP1:CRH
FUMA	GO:0070273	phosphatidylinositol 4 phosphate binding	28	4	0.000255044	0.00749192	GOLPH3L:PLEKHA3:JPH2:LANCL2
gPROFILER	GO:0099565	chemical synaptic transmission, postsynaptic		3		0.00753445	PTK2B,SNCA,APP
gPROFILER	GO:0051241	negative regulation of multicellular organismal process		8		0.00753445	PTK2B,BIN1,FBN1,WNT3,MED1,NFATC3,ADCYAP1,APP
gPROFILER	GO:0050770	regulation of axonogenesis		12		0.00753445	WNT3,BDNF,MAPT,CACNA1A,ARHGAP35,MACF1,MAP3K13,FEZF2,MAP1B,NIN,RUFY3,PAK1
gPROFILER	GO:0060314	regulation of ryanodine-sensitive calcium-release channel activity		4		0.00753445	CALM3,PKD2,AKAP6,JPH2
FUMA	WP2355	corticotropin-releasing hormone signaling pathway	93	6	0.000633202	0.00755709	RELA:SP1:CRHR1:CREB1:NFKB1:CRH
FUMA	WP61	notch signaling pathway netpath	62	5	0.000654112	0.00755709	SPEN:MAML2:MAPT:NFKB1:FBXW7
FUMA	WP3617	photodynamic therapy-induced nf-kb survival signaling	35	4	0.00061321	0.00755709	RELA:CFLAR:NFKB1:IKBKB
FUMA	WP3863	t-cell antigen receptor (tcr) pathway during staphylococcus aureus infection	62	5	0.000654112	0.00755709	PAK1:CD28:DLG1:NFKB1:IKBKB
FUMA	WP231	tnf alpha signaling pathway	93	6	0.000633202	0.00755709	BAD:CFLAR:CASP8:BCL2L1:NFKB1:IKBKB
gPROFILER	GO:0034341	response to interferon-gamma		6		0.00762072	SNCA,MED1,CD44,PML,CAMK2B,TRIM38
FUMA	GO:1990000	amyloid fibril formation	15	3	0.000571515	0.00763752	MAPT:LDLR:APP
gPROFILER	GO:0043679	axon terminus		3		0.0076572	SNCA,AP1S1,ADCYAP1
gPROFILER	GO:0044463	cell projection part		9		0.0076572	PTK2B,BIN1,SNCA,AP1S1,DYNLRB1,NSF,ADCYAP1,APP,CD44
gPROFILER	GO:0005654	nucleoplasm		58		0.0076572	VEZF1,ENSA,SNRPN,TAF1C,MED1,NFATC3,SMOX,HEXIM1,ELF1,MKLN1,ZBTB20,KANSL1,BDNF,DNAJC7,MAPT,PML,KLF12,INTS9,TRIM45,ILF3,RBBP5,CDC27,CAMK2B,SPEN,MCM7,GATAD2A,ZHX1,CELF1,RCHY1,TNIP1,RBPMS,C11ORF1,NIPBL,UBE2D3,NVL,NFKB1,OXR1,CREB1,PATL1,MEF2C,DCLRE1C,TAF6L,RELA,PIAS2,TCF7L2,PEX19,PPM1A,MED29,USP47,MAGI1,EID1,POLD3,POLDIP3,PIK3C2B,TNRC6A,PPP4C,DYRK2,LETMD1
gPROFILER	GO:0120038	plasma membrane bounded cell projection part		9		0.0076572	PTK2B,BIN1,SNCA,AP1S1,DYNLRB1,NSF,ADCYAP1,APP,CD44
gPROFILER	GO:0012506	vesicle membrane		31		0.0076572	SNCA,WNT3,AP1S1,CD44,LDLR,SCG3,PICALM,CAMK2B,ICA1,CALM3,CYB561,IQGAP1,PKD2,GOSR2,COPA,GABRA2,HBEGF,TAOK2,ATP6V1D,CR1,SLC30A3,GABRB3,RPH3A,CLEC5A,SMO,KIFC3,CLTA,CNIH3,BCL2L1,SEC24D,SCAMP1
gPROFILER	GO:0042805	actinin binding		7		0.00767212	NFKB1,PKD2,RELA,MAGI1,PALLD,PRICKLE4,TTN
gPROFILER	GO:0008092	cytoskeletal protein binding		34		0.00767212	BIN1,SNCA,STMN1,MAPT,PICALM,CAMK2B,CAPZA1,MAP4K4,CALM3,NFKB1,CACNB2,PKD2,PDE4B,RELA,MACF1,ALDOA,TNS1,MAGI1,MYLIP,DLG1,GMFG,SNX6,PALLD,TAOK2,KATNB1,SSH3,FMNL2,MYO9B,DST,TCAP,ARHGEF10,PRICKLE4,ANTXR1,CALD1
FUMA	R-HSA-5653656	vesicle mediated transport	722	20	0.000215329	0.00768519	CAPZA1:COPA:CNIH3:EXOC6:VPS37C:PICALM:VPS37B:RIN3:NSF:GOSR2:LDLR:ACTR2:BIN1:APP:SEC24D:HBEGF:SYNJ2:AP1S1:DCTN6:CLTA
gPROFILER	GO:0050435	amyloid-beta metabolic process		3		0.00769438	BIN1,APP,PICALM
gPROFILER	GO:0071872	cellular response to epinephrine stimulus		3		0.00769438	SNCA,PDE4B,SRD5A1
gPROFILER	GO:1901653	cellular response to peptide		15		0.00769438	FBN1,CFLAR,APP,PTPRA,CRHR1,CACNA1A,NFKB1,CREB1,RELA,PRKAR1B,SNX6,SP1,SRD5A1,ATP6V1D,KANK1
gPROFILER	GO:0040007	growth		28		0.00769438	PTK2B,WNT3,MED1,CFLAR,APP,ACACB,BDNF,MAPT,PML,ST7L,CELF1,IQGAP1,EXTL3,NIPBL,CREB1,MEF2C,MACF1,USP47,CDC42,UBE3A,EIF4G1,DCLK1,MAP3K13,HBEGF,AKAP6,TAOK2,SERP1,NRP2
gPROFILER	GO:2000117	negative regulation of cysteine-type endopeptidase activity		3		0.00769438	SNCA,CFLAR,CD44
gPROFILER	GO:0048168	regulation of neuronal synaptic plasticity		4		0.00769438	SNCA,APP,CAMK2B,RASGRF1
FUMA	GO:0008154	actin polymerization or depolymerization	207	9	0.00057824	0.00771336	CAPZA1:SSH3:GMFG:ARHGAP35:ACTR2:BIN1:DLG1:PTK2B:KANK1
FUMA	GO:0016772	transferase activity transferring phosphorus containing groups	908	23	0.000269056	0.00776486	PIK3C2B:ITPKB:MTPAP:PGM2L1:POLD3:PAK1:CMAS:DYRK2:DCLK1:TAOK2:ERBB2:NME1:MMD:MAP4K4:TTN:NRP2:POLR2H:MAP3K13:DLG1:ALPK1:CAMK2B:PTK2B:IKBKB
gPROFILER	GO:1903827	regulation of cellular protein localization		24		0.00777002	BDNF,MAPT,PICALM,BAD,IQGAP1,NIPBL,UBE2D3,NVL,LEPROTL1,RALB,TCF7L2,PPM1A,CDC42,DLG1,DCLK1,FBXW7,ERBB2,CASP8,SMO,DNAJC27,SORBS1,RUFY3,PAK1,BCL2L1
gPROFILER	GO:0055082	cellular chemical homeostasis		17		0.00778244	PTK2B,SNCA,CCKBR,ADCYAP1,APP,GPR27,ZBTB20,PML,CACNA1A,MAP4K4,PROK2,CALM3,SLC4A9,BAD,CACNB2,PKD2,EDNRB
FUMA	GO:0048475	coated membrane	96	6	0.000748858	0.00780841	COPA:PICALM:SEC24D:SCLT1:AP1S1:CLTA
FUMA	GO:0007006	mitochondrial membrane organization	127	7	0.000587356	0.00782078	ATPIF1:BAD:CALM3:CASP8:BCL2L1:COX18:SNCA
FUMA	GO:0008022	protein c terminus binding	187	9	0.000276071	0.00782995	SP1:ERBB2:MAGI1:DLG1:CEP135:SCLT1:NIPBL:DST:PTK2B
gPROFILER	GO:0090504	epiboly		4		0.00785018	CD44,ARHGAP35,RHOC,HBEGF
gPROFILER	GO:0036477	somatodendritic compartment		10		0.00788274	PTK2B,SNCA,NSF,ADCYAP1,APP,LDLR,BDNF,MAPT,PICALM,CACNA1A
FUMA	GO:0022409	positive regulation of cell cell adhesion	252	10	0.000593979	0.00789466	CDC42:ITPKB:CD44:CD5:BAD:RELA:PAK1:CD209:CD28:CD83
FUMA	GO:0042301	phosphate ion binding	12	3	0.000283316	0.00789922	RELA:RPH3A:MTHFD2
FUMA	GO:0045638	negative regulation of myeloid cell differentiation	92	6	0.000597903	0.00791818	ITPKB:UBASH3B:FBN1:NME1:FBXW7:PTK2B
FUMA	GO:1901184	regulation of erbb signaling pathway	92	6	0.000597903	0.00791818	CDC42:SNX6:ERBB2:APP:FBXW7:HBEGF
Webgestalt	GO:0051701	interaction with host	207	15	2.36077e-05	0.00793598	CLEC4M;CD209;LDLR;HS3ST5;PML;TRIM38;ITGB5;TNIP1;BAD;SLC20A2;CR1;CASP8;CLEC5A;VPS37B;BCL2L1
Webgestalt	GO:0019058	viral life cycle	285	18	2.39111e-05	0.00793598	CLEC4M;CD209;LDLR;HS3ST5;PML;ILF3;TRIM38;ITGB5;TNIP1;CDC42;VPS37C;SLC20A2;CR1;CLEC5A;VPS37B;CTBP2;CD28;PPIH
gPROFILER	GO:0019222	regulation of metabolic process		31		0.00795936	PTK2B,BIN1,VEZF1,CYCS,ENSA,FBN1,LANCL2,SNCA,TAF1C,WNT3,MED1,NFATC3,CCKBR,NSF,ZNF397,CFLAR,CASS4,ADCYAP1,APP,CD44,HEXIM1,MXD4,ACACB,LDLR,VWC2,ELF1,MKLN1,ZBTB20,OVOL2,EIF4E3,BDNF
gPROFILER	GO:0031112	positive regulation of microtubule polymerization or depolymerization		5		0.00796413	MAPT,KATNB1,MAP1B,NIN,PAK1
FUMA	GO:0098562	cytoplasmic side of membrane	173	8	0.000776701	0.00801524	IQGAP1:GFAP:SPPL2C:ACP1:DLG1:PKD2:PTK2B:IKBKB
gPROFILER	GO:0006874	cellular calcium ion homeostasis		12		0.00802309	PTK2B,SNCA,CCKBR,ADCYAP1,APP,PML,CACNA1A,PROK2,CALM3,CACNB2,PKD2,EDNRB
gPROFILER	GO:0051707	response to other organism		27		0.00803248	SNCA,AP1S1,CLEC4M,MED1,CFLAR,APP,CD44,OCIAD2,HEXIM1,CD209,STMN1,IKBKB,PML,ILF3,CAMK2B,CAPZA1,TRIM38,TNIP1,ALPK1,BAD,MOV10,UBE2D3,NFKB1,EDNRB,PDE4B,MEF2C,RELA
FUMA	GO:0035035	histone acetyltransferase binding	29	4	0.000293253	0.00804003	SP1:EID1:KANSL1:CREB1
FUMA	GO:0015631	tubulin binding	321	12	0.000299383	0.00807353	STMN1:MACF1:PDE4B:ALDOA:KATNB1:KIFC3:MAPT:NME1:MAP4K4:SNCA:MAP1B:DST
gPROFILER	GO:0007167	enzyme linked receptor protein signaling pathway		30		0.00810303	PTK2B,FBN1,SNCA,APP,PTPRA,VWC2,OVOL2,BDNF,STMN1,PML,RBPMS2,NCF4,ITGB5,GDF3,RBPMS,FST,IQGAP1,UBE2D3,CREB1,RELA,PPM1A,CDC42,SNX6,HBEGF,PPM1L,FBXW7,ATP6V1D,NRP2,KANK1,ERBB2
FUMA	GO:0021955	central nervous system neuron axonogenesis	35	4	0.00061321	0.00810628	TSKU:DCLK1:NIN:ARHGAP35
gPROFILER	GO:0098657	import into cell		8		0.00811532	BIN1,SNCA,AP1S1,CLEC4M,APP,CD209,LDLR,MKLN1
gPROFILER	GO:0043207	response to external biotic stimulus		27		0.00812314	SNCA,AP1S1,CLEC4M,MED1,CFLAR,APP,CD44,OCIAD2,HEXIM1,CD209,STMN1,IKBKB,PML,ILF3,CAMK2B,CAPZA1,TRIM38,TNIP1,ALPK1,BAD,MOV10,UBE2D3,NFKB1,EDNRB,PDE4B,MEF2C,RELA
gPROFILER	GO:0042886	amide transport		70		0.00813439	ENSA,AP1S1,CLEC4M,DYNLRB1,MED1,NSF,ADCYAP1,GPR27,CRHR1,CD209,ARL17B,PML,CACNA1A,C1QTNF5,RPLP0,ICA1,MAP4K4,PDIA4,BAD,UBE2D3,CD22,PLEKHA3,ANKRD50,MACF1,TCF7L2,PEX19,PPY,PPM1A,GOSR2,CDC42,POLDIP3,LILRA5,COPA,RAB2A,LRRC1,APOC2,SNX6,AKAP6,RRBP1,VPS37C,FBXW7,PLEKHM1,TAOK2,KATNB1,SERP1,ATP6V1D,EXOC6,RPH3A,MCL1,ERBB2,GOLPH3L,IL1RAP,CLEC5A,PTTG1IP,CRH,SMO,SRSF1,DNAJC27,VPS37B,RUFY3,CLTA,BCAP29,PAK1,YIPF5,…
gPROFILER	GO:0030858	positive regulation of epithelial cell differentiation		3		0.00813439	VEZF1,MED1,OVOL2
FUMA	GO:0045619	regulation of lymphocyte differentiation	167	8	0.000616655	0.00813718	CR1:ITPKB:BAD:ERBB2:CLPTM1:CD28:FANCD2:CD83
FUMA	GO:0006888	endoplasmic reticulum to golgi vesicle mediated transport	209	9	0.00061945	0.00815942	CAPZA1:COPA:CNIH3:NSF:GOSR2:SEC24D:YIPF5:BCAP29:DCTN6
Webgestalt	GO:0034329	cell junction assembly	235	16	2.7363e-05	0.00821671	PTK2B;IKBKB;CAPZA1;MAP4K4;IQGAP1;MACF1;TNS1;RHOC;CDC42;DLG1;ITGB4;TAOK2;DST;RAPGEF2;SORBS1;MARVELD3
Webgestalt	GO:0022898	regulation of transmembrane transporter activity	235	16	2.7363e-05	0.00821671	PTK2B;SNCA;APP;RASGRF1;CACNB2;PKD2;PDE4B;MEF2C;DLG1;AKAP6;SCN2B;JPH2;CTSS;CRH;CACNB1;CNIH3
gPROFILER	GO:0051961	negative regulation of nervous system development		5		0.00823637	WNT3,MED1,ADCYAP1,APP,LDLR
gPROFILER	GO:0006970	response to osmotic stress		5		0.00823637	PTK2B,SST,SLC12A4,BAD,PKD2
FUMA	KEGG_ADIPOCYTOKINE_SIGNALING_PATHWAY	adipocytokine signaling pathway	67	5	0.000932787	0.00826183	RELA:ACACB:NFKB1:ACSL6:IKBKB
gPROFILER	GO:0043235	receptor complex		6		0.00829233	PTK2B,APP,PTPRA,CD44,LDLR,VWC2
FUMA	GO:0015850	organic hydroxy compound transport	254	10	0.0006313	0.00830063	AQP9:LCAT:CRHR1:ABCC3:LDLR:APOC1:APOC2:SNCA:NFKB1:CRH
FUMA	GO:0110020	regulation of actomyosin structure organization	93	6	0.000633202	0.00831078	CDC42:STMN1:RHOC:PAK1:MEF2C:ARHGEF10
gPROFILER	GO:1903170	negative regulation of calcium ion transmembrane transport		4		0.00838488	BIN1,CRHR1,CALM3,PKD2
FUMA	GO:0035270	endocrine system development	129	7	0.000644636	0.00841577	BAD:CRHR1:ADCYAP1:CREB1:SRD5A1:SMO:CRH
FUMA	GO:0046887	positive regulation of hormone secretion	129	7	0.000644636	0.00841577	TCF7L2:BAD:ADCYAP1:CREB1:GPR27:SERP1:CRH
FUMA	GO:0071900	regulation of protein serine threonine kinase activity	505	15	0.000643114	0.00841577	PAK1:IQGAP1:TAOK2:ERBB2:HEXIM1:CALM3:RALB:UBE2V1:PROK2:MAP3K13:PKD2:SNCA:RAPGEF2:PRKAR1B:PTK2B
FUMA	GO:0046622	positive regulation of organ growth	62	5	0.000654112	0.00852434	ACACB:AKAP6:SERP1:MEF2C:SMO
gPROFILER	GO:0008344	adult locomotory behavior		5		0.00853202	SNCA,APP,CACNA1A,OXR1,SEZ6L2
gPROFILER	GO:0034762	regulation of transmembrane transport		25		0.00853202	PTK2B,BIN1,SNCA,APP,CRHR1,CACNA1A,SCN11A,CALM3,RASGRF1,CACNB2,PKD2,PDE4B,MEF2C,DLG1,AKAP6,SCN2B,JPH2,CTSS,CRH,CACNB1,KCNK5,SORBS1,SLC8A1,UBASH3B,CNIH3
Webgestalt	GO:0015629	actin cytoskeleton	482	18	0.000326014	0.00853326	BIN1;LANCL2;SNCA;DCTN6;ARHGAP35;CAPZA1;IQGAP1;PKD2;MACF1;ALDOA;PALLD;TAOK2;MYO9B;CALD1;SORBS1;PAK1;ACTR2;TTN
Webgestalt	GO:0005911	cell-cell junction	441	17	0.000331603	0.00853326	APP;ARHGAP17;C1QTNF5;IQGAP1;TJAP1;PKD2;MAGI1;DLG1;AKAP6;PARD3B;RAPGEF2;SORBS1;KIFC3;UBN1;SLC8A1;PAK1;MARVELD3
FUMA	R-HSA-168928	ddx58 ifih1 mediated induction of interferon alpha beta	78	6	0.00024547	0.0085572	RELA:CASP8:APP:NFKB1:UBE2D3:IKBKB
FUMA	GO:0016818	hydrolase activity acting on acid anhydrides	921	23	0.000328319	0.00857277	CDC42:MACF1:MOV10:RHOC:TTF2:NVL:RERG:ATP6V1D:KATNB1:KIFC3:NSF:ABCC3:MYO9B:ARHGAP35:DNAJC27:RALB:DYNLRB1:RAD54L2:NUDT6:MSH3:ABCC10:MCM7:RAB2A
FUMA	GO:0003723	rna binding	1875	38	0.000323622	0.00857277	SPEN:MACF1:MOV10:NVL:MTPAP:CSTF3:CELF1:PATL1:RPLP0:DENR:SNRPN:SCG3:RBPMS2:TNRC6A:ALDOA:NUDT21:ADAD2:HEXIM1:MAPT:LUC7L3:NME1:SRSF1:ILF3:SAMD4B:ZC3H15:TNS1:RRBP1:CSTF1:POLDIP3:EIF1B:WDR6:RBM6:EIF4E3:EIF4G1:SYNJ2:GTPBP10:PDIA4:RBPMS
FUMA	GO:0032886	regulation of microtubule based process	211	9	0.000663031	0.00862527	STMN1:MACF1:PAK1:NIN:KATNB1:ERBB2:MAPT:SNCA:MAP1B
gPROFILER	GO:0055074	calcium ion homeostasis		5		0.00863315	PTK2B,SNCA,CCKBR,ADCYAP1,APP
gPROFILER	GO:0062012	regulation of small molecule metabolic process		6		0.00863315	PTK2B,SNCA,APP,ACACB,LDLR,ZBTB20
FUMA	R-HSA-442742	creb1 phosphorylation through nmda receptor mediated activation of ras signaling	28	4	0.000255044	0.00868889	RASGRF1:CREB1:DLG1:CAMK2B
gPROFILER	GO:0009896	positive regulation of catabolic process		6		0.00870119	PTK2B,SNCA,NSF,APP,LDLR,ZBTB20
gPROFILER	GO:0031329	regulation of cellular catabolic process		24		0.00870119	PTK2B,SNCA,APP,ACACB,LDLR,ZBTB20,MAPT,PML,SAMD4B,RCHY1,BAD,MOV10,GFAP,RALB,MYLIP,APOC1,UBE3A,TNRC6A,EIF4G1,APOC2,SNX6,FBXW7,RNF144B,ATP6V1D
FUMA	GO:0090277	positive regulation of peptide hormone secretion	94	6	0.000670095	0.00870177	TCF7L2:BAD:ADCYAP1:GPR27:SERP1:CRH
FUMA	GO:0001508	action potential	130	7	0.000674891	0.00871783	CACNB2:SCN2B:AKAP6:SLC8A1:BIN1:SCN11A:DLG1
FUMA	GO:0031333	negative regulation of protein complex assembly	130	7	0.000674891	0.00871783	CDC42:STMN1:CAPZA1:PEX5:PPM1A:SNCA:KANK1
FUMA	GO:0051648	vesicle localization	303	11	0.000673819	0.00871783	RIMS3:CNIH3:CACNB2:CTBP2:PICALM:NSF:GOSR2:CALM3:SNCA:SEC24D:NCS1
gPROFILER	GO:0034248	regulation of cellular amide metabolic process		11		0.00876167	PTK2B,BIN1,SNCA,APP,EIF4E3,PICALM,ILF3,SAMD4B,CELF1,EIF1B,MOV10
FUMA	GO:0008270	zinc ion binding	806	21	0.000341369	0.00877425	TTF2:TRIM45:MSRB3:RPH3A:PML:VAT1L:PIAS2:UHRF1:GATAD2A:RCHY1:SNCA:SEC24D:MARCH6:ERAP1:TRIM38:PRICKLE4:RTN4IP1:AEBP1:ZMIZ2:AGBL3:BMP1
gPROFILER	GO:0035728	response to hepatocyte growth factor		3		0.0087773	MED1,CREB1,RELA
FUMA	GO:0008324	cation transmembrane transporter activity	637	18	0.000348412	0.0088175	CACNB2:COX15:SCN2B:ATP6V1D:SLC12A4:CTC-479C5.17:CACNB1:CACNA1A:SLC30A3:SLC8A1:JPH2:SCN11A:CHRNA9:PKD2:SLC4A9:KCNK5:PTK2B:SLC20A2:NCS1
FUMA	GO:0007254	jnk cascade	212	9	0.000685743	0.00884247	PAK1:LTBR:TAOK2:MARVELD3:MAP4K4:UBE2V1:APP:MAP3K13:PTK2B
gPROFILER	GO:0050730	regulation of peptidyl-tyrosine phosphorylation		5		0.00887149	PTK2B,CASS4,APP,CD44,BDNF
Webgestalt	GO:0005925	focal adhesion	404	16	0.000368383	0.00887348	PTK2B;CASS4;CD44;RPLP0;MAP4K4;ITGB5;IQGAP1;TNS1;CDC42;ITGB4;PALLD;DST;DOCK7;SORBS1;PAK1;ACTR2
Webgestalt	GO:0030016	myofibril	215	11	0.000379307	0.00887348	BIN1;PDE4B;ALDOA;PALLD;DST;JPH2;TCAP;CALD1;SLC8A1;PAK1;TTN
Webgestalt	GO:0035770	ribonucleoprotein granule	214	11	0.000364592	0.00887348	MAPT;RPLP0;SAMD4B;RBPMS;MOV10;IQGAP1;PATL1;CDC42;EID1;POLDIP3;TNRC6A
FUMA	GO:0061577	calcium ion transmembrane transport via high voltage gated calcium channel	16	3	0.000697586	0.00891696	CACNB2:CACNB1:BIN1
FUMA	GO:0021542	dentate gyrus development	16	3	0.000697586	0.00891696	FEZF2:NEUROD6:SMO
FUMA	GO:1901841	regulation of high voltage gated calcium channel activity	16	3	0.000697586	0.00891696	PDE4B:CACNB2:CALM3
FUMA	GO:0071871	response to epinephrine	16	3	0.000697586	0.00891696	PDE4B:SNCA:SRD5A1
FUMA	GO:0014866	skeletal myofibril assembly	16	3	0.000697586	0.00891696	TCAP:TTN:CFLAR
gPROFILER	GO:0048638	regulation of developmental growth		18		0.00896046	WNT3,APP,ACACB,BDNF,MAPT,CELF1,NIPBL,CREB1,MEF2C,MACF1,MAP3K13,AKAP6,SERP1,MAP1B,SMO,RUFY3,PAK1,PEX5
FUMA	GO:0051148	negative regulation of muscle cell differentiation	63	5	0.000704059	0.00898408	BDNF:PAK1:RBPMS2:NFATC3:CFLAR
gPROFILER	GO:0043950	positive regulation of cAMP-mediated signaling		4		0.00898726	ADCYAP1,CALM3,CRH,RAPGEF2
FUMA	GO:0002474	antigen processing and presentation of peptide antigen via mhc class i	95	6	0.000708631	0.00900134	PSME3:NCF4:ITGB5:SEC24D:ERAP1:IKBKB
FUMA	GO:0032869	cellular response to insulin stimulus	213	9	0.000709085	0.00900134	SORBS1:RELA:PAK1:SP1:ATP6V1D:CFLAR:PTPRA:SRD5A1:KANK1
FUMA	GO:0019935	cyclic nucleotide mediated signaling	213	9	0.000709085	0.00900134	EDNRB:AKAP6:CRHR1:ADCYAP1:CALM3:RAPGEF2:PRKAR1B:PTK2B:CRH
FUMA	WP2374	oncostatin m signaling pathway	65	5	0.000812437	0.00900313	RELA:LDLR:CREB1:NFKB1:PTK2B
FUMA	WP3998	prader-willi and angelman syndrome	65	5	0.000812437	0.00900313	BDNF:SNRPN:SNURF:SNURF:UBE3A:GABRB3
FUMA	GO:0005244	voltage gated ion channel activity	194	9	0.000361588	0.0090123	CACNB2:SCN2B:CACNB1:CACNA1A:SCN11A:PKD2:KCNK5:PTK2B:NCS1
FUMA	GO:0051020	gtpase binding	531	16	0.000367419	0.00902096	RIMS3:DOCK7:PAK1:PICALM:PEX5:RPH3A:RIN3:RASGRF1:IQGAP1:ARHGAP17:NSF:MYO9B:FMNL2:RAPGEF2:ARHGEF10:CLTA
gPROFILER	GO:0040018	positive regulation of multicellular organism growth		5		0.00902335	CELF1,NIPBL,CREB1,SMO,PEX5
Webgestalt	GO:0035994	response to muscle stretch	19	5	3.15306e-05	0.0090378	NFKB1;RELA;TCAP;SLC8A1;TTN
Webgestalt	GO:0010769	regulation of cell morphogenesis involved in differentiation	293	18	3.44824e-05	0.00906025	WNT3;CASS4;BDNF;MAPT;ARHGAP35;CAMK2B;MACF1;CDC42;MAP3K13;SSH3;KANK1;FEZF2;MAP1B;RAPGEF2;NIN;RUFY3;PAK1;ACTR2
Webgestalt	GO:0051591	response to cAMP	99	10	3.41281e-05	0.00906025	PTK2B;APP;PKD2;RELA;AKAP6;SRD5A1;RAPGEF2;SLC8A1;AQP9;NME1
FUMA	WP4658	small cell lung cancer	98	6	0.000834588	0.00906362	RELA:CASP8:BCL2L1:NFKB1:CYCS:IKBKB
Webgestalt	GO:0005924	cell-substrate adherens junction	407	16	0.000399532	0.00907173	PTK2B;CASS4;CD44;RPLP0;MAP4K4;ITGB5;IQGAP1;TNS1;CDC42;ITGB4;PALLD;DST;DOCK7;SORBS1;PAK1;ACTR2
FUMA	GO:0009792	embryo development ending in birth or egg hatching	621	17	0.000717371	0.00909082	CELF1:GDF3:TBX6:MED1:TCAP:SRSF1:ARHGAP35:EN1:CASP8:OVOL2:BCL2L1:DLG1:PKD2:SEC24D:NIPBL:MEF2C:SMO
gPROFILER	GO:0030856	regulation of epithelial cell differentiation		6		0.00920596	VEZF1,MED1,OVOL2,IKBKB,GDF3,BAD
FUMA	R-HSA-389359	cd28 dependent vav1 pathway	12	3	0.000283316	0.00923239	CDC42:PAK1:CD28
FUMA	R-HSA-389359	presynaptic depolarization and calcium channel opening	12	3	0.000283316	0.00923239	CACNB2:CACNB1:CACNA1A
FUMA	GO:0051393	alpha actinin binding	31	4	0.000381709	0.00923399	TTN:MAGI1:PKD2:PALLD
gPROFILER	GO:0071498	cellular response to fluid shear stress		3		0.00926975	PTK2B,PKD2,MEF2C
gPROFILER	GO:0002376	immune system process		47		0.00926975	PTK2B,FBN1,SNCA,AP1S1,CLEC4M,MED1,NFATC3,ADCYAP1,APP,CD44,HEXIM1,CRHR1,CD209,LDLR,ELF1,MAPT,IKBKB,PML,PICALM,DCTN6,ITPKB,ILF3,RBBP5,WNT2B,NCF4,CAMK2B,CAPZA1,TRIM38,CD5,ITGB5,TNIP1,FST,ALPK1,BAD,MOV10,IQGAP1,UBE2D3,CD22,NFKB1,EDNRB,PDE4B,CREB1,MEF2C,DCLRE1C,RELA,CD83,ALDOA
FUMA	WP3651	pathways affected in adenoid cystic carcinoma	66	5	0.000871066	0.00927429	ERBB2:KANSL1:UHRF1:MAGI1:FBXW7
FUMA	GO:0006644	phospholipid metabolic process	259	10	0.000733151	0.0092748	ANGPTL3:PIK3C2B:CCKBR:LCAT:FAM126B:SNCA:MBOAT1:ALDH5A1:SYNJ2:PTK2B
gPROFILER	GO:1904427	positive regulation of calcium ion transmembrane transport		6		0.00931547	SNCA,CALM3,CACNB2,PKD2,AKAP6,JPH2
gPROFILER	GO:0012505	endomembrane system		99		0.00941315	BIN1,FBN1,SNCA,WNT3,AP1S1,NSF,MSRB3,APP,SMOX,CD44,OCIAD2,CRHR1,ACACB,LDLR,SPPL2C,BDNF,HS3ST5,GIMAP5,SCG3,ARL17B,PML,PICALM,SCD5,C1QTNF5,RPLP0,NCF4,CAMK2B,ICA1,B3GALNT1,CALM3,CYB561,PDIA4,IQGAP1,EXTL3,UBE2D3,TJAP1,CD22,BMP1,NFKB1,ACSL6,PKD2,EDNRB,PDE4B,LEPROTL1,SEZ6L2,FKBP7,PLEKHA3,DCLRE1C,ANKRD50,MACF1,ALDOA,ACER3,GOSR2,APOC1,CDC42,DLG1,PIK3C2B,TNRC6A,NCS1,COPA,GABRA2,GMFG,MUC4,RAB2A,APOC2,FAM3C,…
gPROFILER	GO:0097386	glial cell projection		3		0.00941315	APP,MAPT,GFAP
gPROFILER	GO:1990777	lipoprotein particle		4		0.00941315	LDLR,LCAT,APOC1,APOC2
gPROFILER	GO:0034358	plasma lipoprotein particle		4		0.00941315	LDLR,LCAT,APOC1,APOC2
gPROFILER	GO:0002478	antigen processing and presentation of exogenous peptide antigen		6		0.00948075	AP1S1,IKBKB,DCTN6,NCF4,CAPZA1,ITGB5
gPROFILER	GO:0009607	response to biotic stimulus		27		0.00948075	SNCA,AP1S1,CLEC4M,MED1,CFLAR,APP,CD44,OCIAD2,HEXIM1,CD209,STMN1,IKBKB,PML,ILF3,CAMK2B,CAPZA1,TRIM38,TNIP1,ALPK1,BAD,MOV10,UBE2D3,NFKB1,EDNRB,PDE4B,MEF2C,RELA
gPROFILER	GO:0030073	insulin secretion		7		0.00949569	ENSA,ADCYAP1,GPR27,CACNA1A,ICA1,MAP4K4,BAD
gPROFILER	GO:0042995	cell projection		51		0.00951476	PTK2B,BIN1,SNCA,AP1S1,DYNLRB1,NSF,ADCYAP1,APP,CD44,MKLN1,BDNF,STMN1,MAPT,CACNA1A,C1QTNF5,ARHGAP35,CAMK2B,SYNJ2,SCN11A,CALM3,IQGAP1,RASGRF1,GFAP,SCLT1,PKD2,PDE4B,CREB1,MACF1,PEX19,RHOC,MAGI1,CDC42,DLG1,PRKAR1B,NCS1,GABRA2,PALLD,TAOK2,SRD5A1,KATNB1,ATP6V1D,SLC30A3,DST,NRP2,KANK1,EXOC6,GABRB3,RPH3A,DOCK7,CASP8,ANTXR1
gPROFILER	GO:0044306	neuron projection terminus		3		0.00952329	SNCA,AP1S1,ADCYAP1
FUMA	GO:0005905	clathrin coated pit	67	5	0.000932787	0.00952776	PICALM:LDLR:APP:AP1S1:CLTA
Webgestalt	GO:0034703	cation channel complex	219	11	0.000443254	0.00953373	PTK2B;VWC2;CACNA1A;SCN11A;CACNB2;PKD2;PDE4B;AKAP6;SCN2B;CACNB1;CNIH3
Webgestalt	GO:0030055	cell-substrate junction	411	16	0.000444578	0.00953373	PTK2B;CASS4;CD44;RPLP0;MAP4K4;ITGB5;IQGAP1;TNS1;CDC42;ITGB4;PALLD;DST;DOCK7;SORBS1;PAK1;ACTR2
FUMA	GO:0051091	positive regulation of dna binding transcription factor activity	260	10	0.000755062	0.00953558	RELA:CFLAR:UBE2V1:APP:MAP3K13:IL1RAP:NFKB1:TRIM38:SMO:IKBKB
FUMA	GO:0086010	membrane depolarization during action potential	37	4	0.000759994	0.0095814	CACNB2:SCN2B:SLC8A1:SCN11A
gPROFILER	GO:0072359	circulatory system development		10		0.00960028	PTK2B,VEZF1,FBN1,MED1,NFATC3,CFLAR,HEXIM1,ACACB,LDLR,OVOL2
gPROFILER	GO:0016192	vesicle-mediated transport		43		0.00960028	BIN1,SNCA,AP1S1,CLEC4M,NSF,APP,CD44,CD209,LDLR,MKLN1,ARHGAP17,SCG3,ARL17B,PICALM,CACNA1A,DCTN6,NCF4,CAPZA1,CD5,CALM3,IQGAP1,CD22,NFKB1,CACNB2,LEPROTL1,RALB,ANKRD50,MACF1,ALDOA,GOSR2,APOC1,CDC42,UBE3A,PRKAR1B,NCS1,COPA,GMFG,RAB2A,DCLK1,LRRC1,APOC2,FAM3C,SNX6
gPROFILER	GO:0046683	response to organophosphorus		10		0.00963885	PTK2B,APP,PKD2,RELA,AKAP6,SRD5A1,RAPGEF2,SLC8A1,AQP9,NME1
FUMA	GO:0005516	calmodulin binding	197	9	0.000404387	0.00964082	ATPIF1:ITPKB:IQGAP1:MYO9B:SLC8A1:TTN:AEBP1:CAMK2B:CALD1
Webgestalt	GO:0070997	neuron death	325	19	4.13055e-05	0.00965536	PTK2B;SNCA;APP;BDNF;MAPT;PICALM;BAD;OXR1;CREB1;MEF2C;FAM162A;CDC42;EIF4G1;FBXW7;GABRB3;MCL1;CASP8;EN1;BCL2L1
Webgestalt	GO:0050772	positive regulation of axonogenesis	81	9	3.94863e-05	0.00965536	WNT3;BDNF;MAPT;MACF1;MAP3K13;MAP1B;NIN;RUFY3;PAK1
Webgestalt	GO:2000310	regulation of NMDA receptor activity	20	5	4.13407e-05	0.00965536	PTK2B;APP;RASGRF1;MEF2C;CRH
FUMA	GO:0015672	monovalent inorganic cation transport	514	15	0.000768953	0.00967774	COX15:SCN2B:AKAP6:ATP6V1D:SLC12A4:CTC-479C5.17:NSF:ADCYAP1:SLC8A1:BIN1:SCN11A:DLG1:PKD2:KCNK5:PTK2B:SLC20A2
FUMA	GO:1902904	negative regulation of supramolecular fiber organization	133	7	0.000772455	0.0097052	STMN1:CAPZA1:KATNB1:LDLR:GMFG:SNCA:KANK1
Webgestalt	WP2034	Leptin signaling pathway	76	10	5.14806e-05	0.00974563	ACACB;IKBKB;BAD;NFKB1;CREB1;RELA;CDC42;SP1;ERBB2;BCL2L1
Webgestalt	WP382	MAPK Signaling Pathway	249	19	7.67372e-05	0.00974563	NFATC3;BDNF;STMN1;MAPT;IKBKB;CACNA1A;MAP4K4;RASGRF1;NFKB1;CACNB2;MEF2C;RELA;PPM1A;CDC42;MAP3K13;TAOK2;RAPGEF2;CACNB1;PAK1
gPROFILER	GO:0033138	positive regulation of peptidyl-serine phosphorylation		3		0.00980016	SNCA,APP,CD44
FUMA	GO:0045732	positive regulation of protein catabolic process	216	9	0.000783033	0.00980458	ATPIF1:NSF:LDLR:PTTG1IP:RCHY1:FBXW7:MYLIP:RNF144B:PTK2B
FUMA	GO:0043393	regulation of protein binding	216	9	0.000783033	0.00980458	STMN1:NVL:TCF7L2:BDNF:UBASH3B:RALB:APP:RAPGEF2:MEF2C
FUMA	GO:0000209	protein polyubiquitination	309	11	0.000790966	0.00985356	UBE2T:UBE3A:PSME3:CDC27:UBE2V1:UBE2D3:FBXW7:MARCH6:MYLIP:RNF144B:TRIM38
FUMA	GO:0043255	regulation of carbohydrate biosynthetic process	97	6	0.000790827	0.00985356	SORBS1:DYRK2:SNCA:NFKB1:FAM3C:PTK2B
FUMA	GO:0060191	regulation of lipase activity	97	6	0.000790827	0.00985356	ANGPTL3:RHOC:BDNF:APOC1:APOC2:SNCA
gPROFILER	GO:0005923	bicellular tight junction		9		0.00986304	ARHGAP17,C1QTNF5,TJAP1,MAGI1,DLG1,PARD3B,RAPGEF2,UBN1,MARVELD3
gPROFILER	GO:0090101	negative regulation of transmembrane receptor protein serine/threonine kinase signaling pathway		7		0.00986599	FBN1,VWC2,RBPMS2,GDF3,FST,PPM1A,SNX6
gPROFILER	GO:0090276	regulation of peptide hormone secretion		7		0.00990644	ENSA,ADCYAP1,GPR27,CACNA1A,ICA1,MAP4K4,BAD
gPROFILER	GO:0050807	regulation of synapse organization		11		0.00990644	SNCA,APP,BDNF,CAMK2B,MEF2C,CDC42,UBE3A,LRFN1,EIF4G1,NRP2,IL1RAP
gPROFILER	GO:0030509	BMP signaling pathway		7		0.00991527	FBN1,VWC2,RBPMS2,GDF3,FST,UBE2D3,PPM1A
gPROFILER	GO:0072503	cellular divalent inorganic cation homeostasis		5		0.00994105	PTK2B,SNCA,CCKBR,ADCYAP1,APP
gPROFILER	GO:0000165	MAPK cascade		25		0.00996312	PTK2B,MED1,CFLAR,ADCYAP1,APP,PTPRA,CD44,IKBKB,ITPKB,MAP4K4,PROK2,TNIP1,GDF3,IQGAP1,RASGRF1,NFKB1,MEF2C,CDC42,DLG1,LILRA5,MAP3K13,HBEGF,PPM1L,FBXW7,TAOK2
gPROFILER	GO:0046879	hormone secretion		10		0.0100051	ENSA,ADCYAP1,GPR27,CRHR1,CACNA1A,ICA1,MAP4K4,BAD,CREB1,TCF7L2
FUMA	GO:0009100	glycoprotein metabolic process	134	7	0.000807342	0.0100405	TCF7L2:CST3:MARCH6:VCAN:HBEGF:HS3ST5:EXTL3
FUMA	GO:0150076	neuroinflammatory response	65	5	0.000812437	0.0100869	MAPT:LDLR:APP:SNCA:SMO
FUMA	GO:0044304	main axon	68	5	0.000997701	0.0100879	MAPT:BIN1:APP:DLG1:CRH
FUMA	GO:0060627	regulation of vesicle mediated transport	517	15	0.000815294	0.0101052	RIMS3:CACNB2:PICALM:CRHR1:NSF:CD22:APOC1:APOC2:CALM3:RALB:BIN1:SNCA:YIPF5:MKLN1:NCS1
gPROFILER	GO:0007173	epidermal growth factor receptor signaling pathway		7		0.010113	PTK2B,APP,IQGAP1,CDC42,SNX6,HBEGF,FBXW7
gPROFILER	GO:0051171	regulation of nitrogen compound metabolic process		8		0.010209	PTK2B,BIN1,VEZF1,CYCS,ENSA,FBN1,LANCL2,SNCA
gPROFILER	GO:0021953	central nervous system neuron differentiation		12		0.010235	WNT3,MAPT,CACNA1A,ARHGAP35,DCLK1,TSKU,NRP2,FEZF2,SMO,RAPGEF2,NIN,PEX5
gPROFILER	GO:0045859	regulation of protein kinase activity		22		0.010235	PTK2B,SNCA,CASS4,ADCYAP1,APP,HEXIM1,BDNF,MAP4K4,PROK2,CALM3,IQGAP1,PKD2,RALB,MEF2C,DLG1,PRKAR1B,LILRA5,GMFG,MAP3K13,SNX6,FBXW7,TAOK2
FUMA	GO:0099738	cell cortex region	40	4	0.00102429	0.0102531	RIMS3:CTBP2:PKD2:CLTA
FUMA	GO:0030276	clathrin binding	57	5	0.000442988	0.0102636	PICALM:LDLR:BIN1:SCLT1:CLTA
FUMA	GO:0005179	hormone activity	121	7	0.000439363	0.0102636	COPA:FBN1:PPY:PYY:ADCYAP1:SST:CRH
Webgestalt	GO:0030027	lamellipodium	187	10	0.000492475	0.0102754	PTK2B;APP;CD44;PKD2;PALLD;ANTXR1;RUFY3;PAK1;ACTR2;ANGPTL3
gPROFILER	GO:0001505	regulation of neurotransmitter levels		14		0.0103064	PTK2B,SNCA,ALDH5A1,CACNA1A,CALM3,GFAP,CACNB2,PKD2,MEF2C,CHDH,NCS1,GABRA2,SRD5A1,RPH3A
FUMA	GO:1990778	protein localization to cell periphery	311	11	0.000833582	0.0103145	MACF1:GOLPH3L:CACNB2:SORBS1:PICALM:NSF:FAM126B:BCL2L1:DLG1:RAPGEF2:IKBKB
gPROFILER	GO:0007160	cell-matrix adhesion		10		0.0103304	PTK2B,CD44,MKLN1,MAP4K4,ITGB5,IQGAP1,MACF1,MUC4,ITGB4,TAOK2
gPROFILER	GO:0044304	main axon		6		0.010337	BIN1,APP,MAPT,DLG1,CRH,MAP1B
gPROFILER	GO:0030016	myofibril		13		0.010337	BIN1,CALM3,PDE4B,ALDOA,PALLD,DST,JPH2,TCAP,PRICKLE4,CALD1,SLC8A1,PAK1,TTN
FUMA	GO:0046165	alcohol biosynthetic process	175	8	0.000836911	0.0103383	ITPKB:ACER3:SP1:ACACB:ISYNA1:SNCA:NFKB1:PTK2B
FUMA	GO:0034375	high density lipoprotein particle remodeling	17	3	0.000840067	0.0103425	LCAT:APOC1:APOC2
FUMA	GO:0072576	liver morphogenesis	17	3	0.000840067	0.0103425	MED1:CFLAR:FBXW7
FUMA	WP707	dna damage response	68	5	0.000997701	0.010343	PML:CASP8:CREB1:FANCD2:CYCS
FUMA	WP185	integrin-mediated cell adhesion	102	6	0.00102859	0.010343	CDC42:SORBS1:PAK1:ITGB4:TNS1:ITGB5
FUMA	WP3941	oxidative damage	40	4	0.00102429	0.010343	CDC42:BAD:NFKB1:CYCS
FUMA	GO:0071869	response to catecholamine	38	4	0.000841972	0.0103486	PDE4B:APP:SNCA:SRD5A1
gPROFILER	GO:0033218	amide binding		8		0.0103675	CLEC4M,CCKBR,CRHR1,ACACB,CD209,LDLR,PICALM,CACNA1A
gPROFILER	GO:0042277	peptide binding		7		0.0103675	CLEC4M,CCKBR,CRHR1,CD209,LDLR,PICALM,CACNA1A
gPROFILER	GO:0005543	phospholipid binding		20		0.0103675	BIN1,LANCL2,SNCA,MAPT,PICALM,PXDC1,NCF4,ARHGAP35,BAD,IQGAP1,PLEKHA3,APOC1,PIK3C2B,SNX6,RPH3A,JPH2,GOLPH3L,PARD3B,MAP1B,RAPGEF2
gPROFILER	GO:0005515	protein binding		182		0.0103675	ACP1,PTK2B,BIN1,CYCS,ENSA,FBN1,LANCL2,SNCA,SNRPN,TAF1C,WNT3,DENR,CLEC4M,DYNLRB1,MED1,NFATC3,CCKBR,NSF,ZNF397,MSRB3,CFLAR,KIAA1147,CASS4,ADCYAP1,APP,PTPRA,CD44,HEXIM1,CRHR1,MXD4,ACACB,CD209,LDLR,VWC2,ELF1,MKLN1,SPPL2C,ZBTB20,KANSL1,ARHGAP17,BDNF,DNAJC7,DLK2,HS3ST5,STMN1,GIMAP5,MAPT,MPPED2,IKBKB,PML,ALDH5A1,PICALM,CEP135,ANKRD44,CACNA1A,RBPMS2,KLF12,INTS9,TRIM45,C1QTNF5,ITPKB,ILF3,RBBP5,WNT2B,RPLP0…
gPROFILER	GO:0019904	protein domain specific binding		20		0.0103675	SNCA,WNT3,MED1,NSF,APP,ARHGAP17,MAPT,ICA1,SYNJ2,CALM3,IQGAP1,NIPBL,LRRFIP2,PKD2,MEF2C,RELA,TCF7L2,USP47,CDC42,DLG1
gPROFILER	GO:0044877	protein-containing complex binding		45		0.0103675	PTK2B,BIN1,FBN1,SNCA,MED1,NSF,CFLAR,CD44,LDLR,MAPT,CAPZA1,EIF1B,ITGB5,FST,IQGAP1,NIPBL,GFAP,CD22,NVL,CACNB2,RELA,MACF1,POLDIP3,LETMD1,GMFG,ITGB4,MAP3K13,KATNB1,DST,RPH3A,CTSS,CASP8,ANTXR1,MAP1B,AEBP1,UHRF1,CTBP2,SORBS1,CLTA,PAK1,ACTR2,NME1,PPIH,ANGPTL3,TTN
gPROFILER	GO:0099626	voltage-gated calcium channel activity involved in regulation of presynaptic cytosolic calcium levels		3		0.0103675	CACNA1A,CACNB2,NCS1
gPROFILER	GO:0032940	secretion by cell		28		0.0104375	ENSA,SNCA,NSF,ADCYAP1,APP,GPR27,CD44,CRHR1,ARHGAP17,SCG3,PML,CACNA1A,C1QTNF5,ICA1,MAP4K4,CALM3,PDIA4,BAD,IQGAP1,CD22,NFKB1,CACNB2,CREB1,RALB,MEF2C,ALDOA,TCF7L2,PPY
gPROFILER	GO:1903725	regulation of phospholipid metabolic process		6		0.0106617	PTK2B,CCKBR,LDLR,APOC1,CDC42,APOC2
FUMA	GO:0045913	positive regulation of carbohydrate metabolic process	66	5	0.000871066	0.0106884	SORBS1:BAD:DYRK2:SNCA:NFKB1
gPROFILER	GO:0071616	acyl-CoA biosynthetic process		4		0.0107168	SNCA,ACACB,SCD5,ACSL6
gPROFILER	GO:0008277	regulation of G protein-coupled receptor signaling pathway		4		0.0107168	SNCA,ADCYAP1,GPR27,STMN1
gPROFILER	GO:0035384	thioester biosynthetic process		4		0.0107168	SNCA,ACACB,SCD5,ACSL6
gPROFILER	GO:2001259	positive regulation of cation channel activity		6		0.0107597	CALM3,CACNB2,PKD2,AKAP6,JPH2,CTSS
FUMA	GO:0007229	integrin mediated signaling pathway	99	6	0.000880192	0.0107644	CDC42:ANGPTL3:ITGB4:ITGB5:DST:PTK2B
FUMA	GO:0070498	interleukin 1 mediated signaling pathway	99	6	0.000880192	0.0107644	RELA:PSME3:UBE2V1:IL1RAP:NFKB1:IKBKB
gPROFILER	GO:0046034	ATP metabolic process		5		0.0107796	CYCS,SNCA,ADCYAP1,APP,ZBTB20
gPROFILER	GO:0019884	antigen processing and presentation of exogenous antigen		6		0.0108404	AP1S1,IKBKB,DCTN6,NCF4,CAPZA1,ITGB5
gPROFILER	GO:0006836	neurotransmitter transport		14		0.0108404	SNCA,ADCYAP1,CACNA1A,ICA1,CALM3,GFAP,CACNB2,MEF2C,NCS1,GABRA2,RPH3A,CRH,RIMS3,CTBP2
gPROFILER	GO:0032956	regulation of actin cytoskeleton organization		14		0.0108404	PTK2B,BIN1,ARHGAP17,STMN1,ARHGAP35,CAPZA1,MEF2C,RHOC,CDC42,DLG1,GMFG,TAOK2,KANK1,ARHGEF10
gPROFILER	GO:1903706	regulation of hemopoiesis		22		0.0108404	PTK2B,FBN1,MED1,ITPKB,RBBP5,BAD,MOV10,CREB1,MEF2C,CD83,TNRC6A,CLPTM1,FBXW7,FANCD2,CR1,ERBB2,CASP8,NUDT21,PSME3,UBASH3B,CD28,NME1
gPROFILER	GO:0009612	response to mechanical stimulus		13		0.0108404	PTK2B,BAD,NFKB1,PKD2,RELA,TCAP,CASP8,LTBR,ETV1,MAP1B,SLC8A1,CHRNA9,TTN
FUMA	GO:0016197	endosomal transport	220	9	0.00089128	0.0108819	VPS37C:PICALM:VPS37B:DCLK1:SNX6:GOSR2:ANKRD50:AP1S1:LEPROTL1
FUMA	GO:0060562	epithelial tube morphogenesis	314	11	0.000901062	0.0109287	WNT2B:PAK1:PML:MED1:TCAP:ARHGAP35:OVOL2:DLG1:PKD2:MEF2C:SMO
FUMA	GO:0043270	positive regulation of ion transport	266	10	0.000898148	0.0109287	CTSS:CACNB2:AKAP6:CALM3:LILRA5:JPH2:DLG1:PKD2:SNCA:CRH
FUMA	GO:0010821	regulation of mitochondrion organization	177	8	0.000900811	0.0109287	ATPIF1:BAD:MAPT:CASP8:BCL2L1:FAM162A:UBE2D3:FBXW7
FUMA	GO:0008202	steroid metabolic process	314	11	0.000901062	0.0109287	ANGPTL3:SP1:ACACB:LCAT:MED1:LDLR:APOC1:APP:NFKB1:SRD5A1:CRH
gPROFILER	GO:0032502	developmental process		173		0.0109924	PTK2B,BIN1,VEZF1,FBN1,SNCA,WNT3,MED1,NFATC3,CCKBR,CFLAR,CASS4,ADCYAP1,APP,PTPRA,CD44,HEXIM1,ACACB,LDLR,VWC2,ELF1,MKLN1,OVOL2,BDNF,DLK2,STMN1,MAPT,IKBKB,PML,ALDH5A1,PICALM,CACNA1A,RBPMS2,TRIM45,C1QTNF5,ITPKB,RBBP5,WNT2B,ARHGAP35,CAMK2B,SYNJ2,SPEN,POGK,MAP4K4,ZHX1,CELF1,PROK2,CALM3,ITGB5,GDF3,ANKH,FST,BAD,MOV10,IQGAP1,NIPBL,RASGRF1,GFAP,SCLT1,BMP1,NFKB1,PKD2,EDNRB,CREB1,SEZ6L2,MEF2C,DCLRE1C,TAF6L,R…
gPROFILER	GO:0072507	divalent inorganic cation homeostasis		5		0.0109924	PTK2B,SNCA,CCKBR,ADCYAP1,APP
gPROFILER	GO:0099509	regulation of presynaptic cytosolic calcium ion concentration		3		0.0109924	CACNA1A,CACNB2,NCS1
gPROFILER	GO:0098794	postsynapse		25		0.0110305	PTK2B,SNCA,NSF,APP,MAPT,PICALM,RPLP0,PDE4B,MEF2C,CDC42,DLG1,LRFN1,NCS1,GABRA2,DCLK1,LRRC1,NRP2,GABRB3,RPH3A,MAP1B,CLTA,SLC8A1,ACTR2,CNIH3,CHRNA9
gPROFILER	GO:0009914	hormone transport		10		0.0111079	ENSA,ADCYAP1,GPR27,CRHR1,CACNA1A,ICA1,MAP4K4,BAD,CREB1,TCF7L2
gPROFILER	GO:0009892	negative regulation of metabolic process		59		0.0111079	BIN1,ENSA,LANCL2,SNCA,MED1,NFATC3,CFLAR,APP,CD44,HEXIM1,MXD4,ACACB,LDLR,ZBTB20,OVOL2,MAPT,IKBKB,PML,PICALM,CACNA1A,KLF12,ILF3,RPLP0,ARHGAP35,SPEN,GATAD2A,ZHX1,SAMD4B,CELF1,CALM3,TNIP1,FST,MOV10,IQGAP1,NIPBL,UBE2D3,NFKB1,OXR1,EDNRB,CREB1,PATL1,MEF2C,RELA,TCF7L2,PPM1A,USP47,APOC1,DLG1,PRKAR1B,EID1,ZNF215,TNRC6A,GMFG,EIF4G1,APOC2,FAM3C,SNX6,HBEGF,VHL
FUMA	GO:0045834	positive regulation of lipid metabolic process	137	7	0.00091952	0.0111342	SORBS1:LDLR:APOC1:APOC2:CREB1:ZBTB20:PTK2B
gPROFILER	GO:0034622	cellular protein-containing complex assembly		39		0.0111854	PTK2B,BIN1,SNCA,TAF1C,DENR,NAP1L5,STMN1,MAPT,PICALM,RPLP0,CAPZA1,MCM7,ATPAF1,CELF1,CREB1,RALB,PATL1,TAF6L,PPM1A,DLG1,GMFG,EIF4G1,KANK1,TCAP,DNAAF5,NDUFB5,NDUFA7,LUC7L3,MAP1B,NDUFB3,SRSF1,COX15,NIN,NUDT21,CLTA,UBN1,PAK1,ACTR2,COX18
FUMA	GO:0002504	antigen processing and presentation of peptide or polysaccharide antigen via mhc class ii	100	6	0.000927692	0.0111873	CAPZA1:CTSS:SEC24D:AP1S1:DCTN6:CLTA
FUMA	GO:1903170	negative regulation of calcium ion transmembrane transport	39	4	0.00092999	0.0111873	CRHR1:CALM3:BIN1:PKD2
FUMA	GO:0009395	phospholipid catabolic process	39	4	0.00092999	0.0111873	ANGPTL3:LDLR:APOC1:APOC2
FUMA	GO:1903053	regulation of extracellular matrix organization	39	4	0.00092999	0.0111873	ANTXR1:CFLAR:CST3:AEBP1
gPROFILER	GO:0034375	high-density lipoprotein particle remodeling		3		0.0111966	LCAT,APOC1,APOC2
gPROFILER	GO:0044260	cellular macromolecule metabolic process		9		0.0112446	ACP1,PTK2B,BIN1,VEZF1,CYCS,ENSA,FBN1,LANCL2,SNCA
gPROFILER	GO:0042762	regulation of sulfur metabolic process		3		0.0112446	SNCA,CACNA1A,SP1
gPROFILER	GO:0035094	response to nicotine		4		0.0112534	BAD,NFKB1,CREB1,RELA
Webgestalt	GO:0032409	regulation of transporter activity	247	16	4.99734e-05	0.0112547	PTK2B;SNCA;APP;RASGRF1;CACNB2;PKD2;PDE4B;MEF2C;DLG1;AKAP6;SCN2B;JPH2;CTSS;CRH;CACNB1;CNIH3
gPROFILER	GO:0099601	regulation of neurotransmitter receptor activity		7		0.0112612	PTK2B,APP,RASGRF1,MEF2C,DLG1,CRH,CNIH3
Webgestalt	GO:1903706	regulation of hemopoiesis	389	21	5.25387e-05	0.0114245	PTK2B;FBN1;MED1;ITPKB;RBBP5;BAD;MOV10;CREB1;MEF2C;CD83;TNRC6A;CLPTM1;FBXW7;FANCD2;CR1;ERBB2;CASP8;NUDT21;UBASH3B;CD28;NME1
gPROFILER	GO:0061097	regulation of protein tyrosine kinase activity		6		0.011429	CASS4,APP,BDNF,LILRA5,SNX6,FBXW7
gPROFILER	GO:0005887	integral component of plasma membrane		53		0.0114501	PTK2B,CLEC4M,APP,PTPRA,CD44,CRHR1,LDLR,VWC2,IKBKB,NCF4,CD5,SLC12A4,SCN11A,CALM3,ITGB5,ANKH,ABCC3,CACNB2,PKD2,EDNRB,CD83,DLG1,LRFN1,GABRA2,MUC4,ITGB4,SLCO3A1,DCLK1,CLPTM1,LRRC1,HBEGF,SCN2B,SLC20A2,CR1,SLC30A3,NRP2,GABRB3,SLC16A9,ERBB2,IL1RAP,CLEC5A,RAPGEF2,MMD,KCNK5,SORBS1,PCDHB15,BCAP29,SLC8A1,SPN,CNIH3,CD28,CHRNA9,AQP9
gPROFILER	GO:0045184	establishment of protein localization		70		0.0114751	ENSA,AP1S1,DYNLRB1,MED1,NSF,ADCYAP1,GPR27,MAPT,ARL17B,PML,CEP135,CACNA1A,C1QTNF5,RPLP0,ICA1,MAP4K4,CALM3,PDIA4,BAD,NIPBL,UBE2D3,CD22,ANKRD50,MACF1,TCF7L2,PEX19,PPY,PPM1A,GOSR2,CDC42,POLDIP3,LILRA5,COPA,RAB2A,LRRC1,APOC2,SNX6,AKAP6,RRBP1,VPS37C,FBXW7,PLEKHM1,TAOK2,KATNB1,SERP1,ATP6V1D,EXOC6,RPH3A,MCL1,ERBB2,CASP8,GOLPH3L,IL1RAP,CLEC5A,PTTG1IP,CRH,SMO,SRSF1,DNAJC27,VPS37B,RUFY3,CLTA,BCAP29,PAK1,YIP…
gPROFILER	GO:0046890	regulation of lipid biosynthetic process		9		0.0114754	ACACB,LDLR,ZBTB20,NFKB1,CREB1,APOC1,APOC2,FBXW7,SP1
gPROFILER	GO:0044267	cellular protein metabolic process		91		0.0114837	ACP1,PTK2B,BIN1,CYCS,ENSA,FBN1,SNCA,DENR,MED1,MSRB3,CFLAR,CASS4,ADCYAP1,APP,PTPRA,CD44,HEXIM1,LDLR,KANSL1,EIF4E3,BDNF,HS3ST5,MAPT,SCG3,IKBKB,PML,PICALM,ITPKB,ILF3,RBBP5,RPLP0,CDC27,CAMK2B,TRIM38,MAP4K4,SAMD4B,CELF1,B3GALNT1,EIF1B,PROK2,CALM3,RCHY1,TNIP1,GDF3,RBPMS,ALPK1,BAD,MOV10,IQGAP1,EXTL3,NIPBL,RASGRF1,UBE2D3,NFKB1,OXR1,PKD2,EDNRB,CREB1,FKBP7,RALB,MEF2C,TAF6L,RELA,PIAS2,PPM1A,FAM162A,USP47,MY…
FUMA	GO:0048813	dendrite morphogenesis	138	7	0.000959522	0.0115237	CDC42:PICALM:DCLK1:TAOK2:ACTR2:RAPGEF2:CAMK2B
FUMA	R-HSA-112308	nf kb is activated and signals survival	13	3	0.000365259	0.0115927	RELA:NFKB1:IKBKB
FUMA	R-HSA-597592	post translational protein modification	1427	31	0.000371213	0.0115927	CAPZA1:COPA:UBE2T:RBBP5:CNIH3:USP47:RELA:PEX5:CMAS:FBN1:SCG3:PML:PSME3:NSF:GOSR2:PIAS2:CST3:APP:SUMO3:VHL:MUC4:UBE2D3:SEC24D:FBXW7:MARCH6:VCAN:TNIP1:AGBL3:GALNT11:DCTN6:RAB2A
gPROFILER	GO:0048675	axon extension		9		0.0115976	WNT3,MAPT,MACF1,DCLK1,MAP3K13,NRP2,MAP1B,RUFY3,PAK1
gPROFILER	GO:0030038	contractile actin filament bundle assembly		8		0.0115976	PTK2B,STMN1,ITGB5,RHOC,CDC42,ARHGEF10,SORBS1,PAK1
gPROFILER	GO:0015833	peptide transport		68		0.0115976	ENSA,AP1S1,CLEC4M,DYNLRB1,MED1,NSF,ADCYAP1,GPR27,CRHR1,CD209,ARL17B,PML,CACNA1A,C1QTNF5,RPLP0,ICA1,MAP4K4,PDIA4,BAD,UBE2D3,CD22,ANKRD50,MACF1,TCF7L2,PEX19,PPY,PPM1A,GOSR2,CDC42,POLDIP3,LILRA5,COPA,RAB2A,LRRC1,APOC2,SNX6,AKAP6,RRBP1,VPS37C,FBXW7,PLEKHM1,TAOK2,KATNB1,SERP1,ATP6V1D,EXOC6,RPH3A,MCL1,ERBB2,GOLPH3L,IL1RAP,CLEC5A,PTTG1IP,CRH,SMO,SRSF1,DNAJC27,VPS37B,RUFY3,CLTA,BCAP29,PAK1,YIPF5,COX18,PE…
gPROFILER	GO:0043149	stress fiber assembly		8		0.0115976	PTK2B,STMN1,ITGB5,RHOC,CDC42,ARHGEF10,SORBS1,PAK1
FUMA	GO:0045333	cellular respiration	179	8	0.000968565	0.0116133	COX15:ME3:NDUFA7:NDUFA7:NDUFB3:NDUFB5:SNCA:ALDH5A1:CYCS
FUMA	WP384	apoptosis modulation by hsp70	19	3	0.0011774	0.0116242	CASP8:NFKB1:CYCS
gPROFILER	GO:0071871	response to epinephrine		3		0.0116692	SNCA,PDE4B,SRD5A1
gPROFILER	GO:0014013	regulation of gliogenesis		6		0.0116811	BIN1,ADCYAP1,LDLR,GFAP,CREB1,RELA
gPROFILER	GO:0023014	signal transduction by protein phosphorylation		25		0.0116811	PTK2B,MED1,CFLAR,ADCYAP1,APP,PTPRA,CD44,IKBKB,ITPKB,MAP4K4,PROK2,TNIP1,GDF3,IQGAP1,RASGRF1,NFKB1,MEF2C,CDC42,DLG1,LILRA5,MAP3K13,HBEGF,PPM1L,FBXW7,TAOK2
FUMA	GO:0032868	response to insulin	269	10	0.000977624	0.0116838	SORBS1:RELA:PAK1:SP1:ATP6V1D:CFLAR:PTPRA:SRD5A1:GGH:KANK1
FUMA	GO:0006900	vesicle budding from membrane	101	6	0.00097714	0.0116838	GOLPH3L:CNIH3:PICALM:NSF:GOSR2:SEC24D
gPROFILER	GO:0034704	calcium channel complex		6		0.0116961	CACNA1A,CALM3,CACNB2,PDE4B,AKAP6,CACNB1
gPROFILER	GO:0005911	cell-cell junction		20		0.0116961	APP,ARHGAP17,C1QTNF5,IQGAP1,TJAP1,PKD2,MAGI1,CDC42,DLG1,LRRC1,AKAP6,PRICKLE4,PARD3B,RAPGEF2,SORBS1,KIFC3,UBN1,SLC8A1,PAK1,MARVELD3
gPROFILER	WP2380	Brain-Derived Neurotrophic Factor (BDNF) signaling pathway		14		0.0117125	PTK2B,NSF,ACACB,BDNF,MAPT,IKBKB,BAD,RASGRF1,NFKB1,CREB1,MEF2C,RELA,CDC42,DLG1
gPROFILER	WP3888	VEGFA-VEGFR2 Signaling Pathway		3		0.0117125	ACP1,PTK2B,BIN1
Webgestalt	GO:0043292	contractile fiber	226	11	0.000576897	0.0117201	BIN1;PDE4B;ALDOA;PALLD;DST;JPH2;TCAP;CALD1;SLC8A1;PAK1;TTN
FUMA	WP4341	non-genomic actions of 1,25 dihydroxyvitamin d3	71	5	0.00121262	0.0117427	SP1:MED1:NFKB1:CAMK2B:IKBKB
FUMA	WP2036	tnf related weak inducer of apoptosis (tweak) signaling pathway	42	4	0.00123266	0.0117427	RELA:CASP8:NFKB1:IKBKB
gPROFILER	GO:0120025	plasma membrane bounded cell projection		49		0.01176	PTK2B,BIN1,SNCA,AP1S1,DYNLRB1,NSF,ADCYAP1,APP,CD44,MKLN1,BDNF,STMN1,MAPT,CACNA1A,ARHGAP35,CAMK2B,SYNJ2,SCN11A,CALM3,IQGAP1,RASGRF1,GFAP,SCLT1,PKD2,PDE4B,CREB1,MACF1,PEX19,RHOC,CDC42,DLG1,PRKAR1B,NCS1,GABRA2,PALLD,TAOK2,SRD5A1,KATNB1,ATP6V1D,SLC30A3,DST,NRP2,KANK1,EXOC6,GABRB3,RPH3A,DOCK7,CASP8,ANTXR1
gPROFILER	GO:0030017	sarcomere		12		0.01176	BIN1,CALM3,PDE4B,ALDOA,PALLD,DST,JPH2,TCAP,PRICKLE4,SLC8A1,PAK1,TTN
gPROFILER	GO:0070160	tight junction		9		0.01176	ARHGAP17,C1QTNF5,TJAP1,MAGI1,DLG1,PARD3B,RAPGEF2,UBN1,MARVELD3
FUMA	GO:0051276	chromosome organization	1189	26	0.000994108	0.0118615	RBBP5:SMYD2:DCLRE1C:TCF7L2:TAF6L:RELA:POLD3:PAK1:JDP2:EID1:PML:UBN1:KATNB1:MAPT:KANSL1:CDC27:UHRF1:TTN:FANCD2:NAP1L5:SNCA:FBXW7:NIPBL:MSH3:CBX3:MCM7
FUMA	GO:0048557	embryonic digestive tract morphogenesis	18	3	0.000999753	0.0118711	RBPMS2:OVOL2:NIPBL
FUMA	GO:0140058	neuron projection arborization	18	3	0.000999753	0.0118711	MOV10:TAOK2:MAP3K13
FUMA	GO:0034381	plasma lipoprotein particle clearance	68	5	0.000997701	0.0118711	LDLR:APOC1:APOC2:MYLIP:CLTA
FUMA	GO:1905475	regulation of protein localization to membrane	180	8	0.00100394	0.0119015	SORBS1:BAD:PAK1:PICALM:ERBB2:CASP8:BCL2L1:DLG1
gPROFILER	GO:0032970	regulation of actin filament-based process		15		0.0119475	PTK2B,BIN1,ARHGAP17,STMN1,ARHGAP35,CAPZA1,PDE4B,MEF2C,RHOC,CDC42,DLG1,GMFG,TAOK2,KANK1,ARHGEF10
gPROFILER	GO:0043066	negative regulation of apoptotic process		19		0.0119689	PTK2B,SNCA,MED1,CFLAR,ADCYAP1,CD44,BDNF,IKBKB,CACNA1A,ITPKB,MAP4K4,PROK2,BAD,NFKB1,OXR1,EDNRB,MEF2C,RELA,TCF7L2
FUMA	GO:0019001	guanyl nucleotide binding	392	13	0.000531985	0.0120377	CDC42:RHOC:RERG:NIN:ARL17B:NME1:ARHGAP35:DNAJC27:RALB:LANCL2:GTPBP10:GIMAP5:RAB2A
FUMA	GO:0002020	protease binding	125	7	0.000534195	0.0120377	LDLR:BIN1:TTN:CFLAR:CD28:CST3:MARCH6
gPROFILER	GO:0005912	adherens junction		22		0.0120536	PTK2B,CASS4,CD44,RPLP0,MAP4K4,ITGB5,IQGAP1,TNS1,MAGI1,CDC42,DLG1,LRRC1,PALLD,DST,DOCK7,PRICKLE4,PARD3B,FAM129B,SORBS1,KIFC3,PAK1,ACTR2
Webgestalt	GO:0032535	regulation of cellular component size	362	20	5.74986e-05	0.0120862	PTK2B;BIN1;WNT3;BDNF;MAPT;PICALM;ARHGAP35;CAPZA1;SLC12A4;CREB1;MACF1;DLG1;GMFG;MAP3K13;SSH3;KANK1;MAP1B;RUFY3;PAK1;ACTR2
gPROFILER	GO:0006464	cellular protein modification process		79		0.0121245	ACP1,PTK2B,CYCS,ENSA,FBN1,SNCA,MED1,CFLAR,CASS4,ADCYAP1,APP,PTPRA,CD44,HEXIM1,KANSL1,BDNF,HS3ST5,MAPT,SCG3,IKBKB,PML,ITPKB,ILF3,RBBP5,CDC27,CAMK2B,TRIM38,MAP4K4,B3GALNT1,PROK2,CALM3,RCHY1,TNIP1,GDF3,RBPMS,ALPK1,IQGAP1,EXTL3,NIPBL,RASGRF1,UBE2D3,NFKB1,OXR1,PKD2,EDNRB,CREB1,FKBP7,RALB,MEF2C,TAF6L,RELA,PIAS2,PPM1A,USP47,MYLIP,CDC42,UBE3A,DLG1,PRKAR1B,EID1,LILRA5,PPP4C,DYRK2,GMFG,MUC4,RAB2A,EIF4G1,DC…
gPROFILER	GO:0036211	protein modification process		79		0.0121245	ACP1,PTK2B,CYCS,ENSA,FBN1,SNCA,MED1,CFLAR,CASS4,ADCYAP1,APP,PTPRA,CD44,HEXIM1,KANSL1,BDNF,HS3ST5,MAPT,SCG3,IKBKB,PML,ITPKB,ILF3,RBBP5,CDC27,CAMK2B,TRIM38,MAP4K4,B3GALNT1,PROK2,CALM3,RCHY1,TNIP1,GDF3,RBPMS,ALPK1,IQGAP1,EXTL3,NIPBL,RASGRF1,UBE2D3,NFKB1,OXR1,PKD2,EDNRB,CREB1,FKBP7,RALB,MEF2C,TAF6L,RELA,PIAS2,PPM1A,USP47,MYLIP,CDC42,UBE3A,DLG1,PRKAR1B,EID1,LILRA5,PPP4C,DYRK2,GMFG,MUC4,RAB2A,EIF4G1,DC…
FUMA	GO:1990204	oxidoreductase complex	106	6	0.00125547	0.0122012	NDUFA7:NDUFA7:NDUFB3:NCF4:NDUFB5:SNCA:BCKDHB
gPROFILER	GO:0006816	calcium ion transport		3		0.0122228	PTK2B,BIN1,SNCA
gPROFILER	GO:0014009	glial cell proliferation		4		0.0122575	PTK2B,ADCYAP1,GFAP,CREB1
FUMA	GO:0034332	adherens junction organization	140	7	0.00104363	0.0123125	MACF1:SORBS1:IQGAP1:TAOK2:KIFC3:MAP4K4:PTK2B
FUMA	GO:0030879	mammary gland development	140	7	0.00104363	0.0123125	PML:MED1:WNT3:NME1:ARHGAP35:CREB1:SMO
FUMA	GO:0072006	nephron development	140	7	0.00104363	0.0123125	WNT2B:IQGAP1:CFLAR:DLG1:PKD2:MEF2C:SMO
FUMA	WP2059	alzheimers disease	147	7	0.00138453	0.0123246	BAD:MAPT:CALM3:CASP8:APP:SNCA:CYCS
FUMA	WP4216	chromosomal and microsatellite instability in colorectal cancer	73	5	0.00137374	0.0123246	TCF7L2:BAD:RALB:MSH3:CYCS
FUMA	WP314	fas ligand (fasl) pathway and stress induction of heat shock proteins (hsp) regulation	43	4	0.00134722	0.0123246	PAK1:CFLAR:CASP8:CYCS
FUMA	WP2507	nanomaterial induced apoptosis	20	3	0.00137375	0.0123246	CFLAR:CASP8:CYCS
gPROFILER	GO:0051588	regulation of neurotransmitter transport		7		0.0125376	SNCA,CACNA1A,CALM3,GFAP,CACNB2,MEF2C,NCS1
FUMA	GO:0002263	cell activation involved in immune response	702	18	0.00106469	0.0125408	CTSS:CR1:CD44:ATP6V1D:IQGAP1:SPN:ALDOA:CRHR1:GMFG:ACTR2:CD28:CST3:APP:NFKB1:SCAMP1:CLEC5A:PTK2B:GGH
gPROFILER	GO:0007159	leukocyte cell-cell adhesion		11		0.0125589	CLEC4M,CD44,CD209,ITPKB,CD5,TNIP1,BAD,RELA,CD83,CDC42,DLG1
gPROFILER	GO:0030155	regulation of cell adhesion		17		0.0125715	PTK2B,CASS4,CD44,CD209,VWC2,PML,ITPKB,CD5,MAP4K4,BAD,IQGAP1,RELA,CD83,MACF1,MAGI1,CDC42,DLG1
gPROFILER	GO:1901615	organic hydroxy compound metabolic process		6		0.0126146	PTK2B,SNCA,MED1,APP,ACACB,LDLR
gPROFILER	GO:1901215	negative regulation of neuron death		10		0.0126308	PTK2B,SNCA,BDNF,CACNA1A,OXR1,CREB1,MEF2C,EIF4G1,SNX6,GABRB3
gPROFILER	GO:0051928	positive regulation of calcium ion transport		8		0.0126308	SNCA,CALM3,CACNB2,PKD2,LILRA5,AKAP6,JPH2,CRH
gPROFILER	GO:0010524	positive regulation of calcium ion transport into cytosol		5		0.0126518	SNCA,CALM3,PKD2,AKAP6,JPH2
FUMA	GO:0048738	cardiac muscle tissue development	226	9	0.00107617	0.0126558	PAK1:AKAP6:MED1:TCAP:SLC8A1:TTN:CREB1:JPH2:MEF2C
gPROFILER	GO:0003779	actin binding		18		0.0126693	BIN1,SNCA,MAPT,CAMK2B,CAPZA1,CACNB2,MACF1,ALDOA,TNS1,GMFG,PALLD,SSH3,FMNL2,MYO9B,DST,PRICKLE4,ANTXR1,CALD1
gPROFILER	GO:0140272	exogenous protein binding		7		0.0126693	CLEC4M,CD209,LDLR,ITGB5,SLC20A2,CR1,CLEC5A
gPROFILER	GO:0098772	molecular function regulator		10		0.0126693	BIN1,ENSA,FBN1,SNCA,WNT3,CCKBR,CFLAR,KIAA1147,ADCYAP1,APP
gPROFILER	GO:0001618	virus receptor activity		7		0.0126693	CLEC4M,CD209,LDLR,ITGB5,SLC20A2,CR1,CLEC5A
gPROFILER	GO:0099511	voltage-gated calcium channel activity involved in regulation of cytosolic calcium levels		3		0.0126693	CACNA1A,CACNB2,NCS1
Webgestalt	GO:0005765	lysosomal membrane	345	14	0.000671416	0.0126945	AP1S1;NSF;LDLR;SPPL2C;SLC12A4;CYB561;GFAP;RAB2A;PLEKHM1;ATP6V1D;SLC30A3;ABCC10;MMD;CLTA
Webgestalt	GO:0098852	lytic vacuole membrane	346	14	0.000690636	0.0126945	AP1S1;NSF;LDLR;SPPL2C;SLC12A4;CYB561;GFAP;RAB2A;PLEKHM1;ATP6V1D;SLC30A3;ABCC10;MMD;CLTA
Webgestalt	GO:0016605	PML body	99	7	0.000680009	0.0126945	PML;PATL1;PIAS2;TCF7L2;SUMO3;UBN1;SPN
Webgestalt	GO:0030017	sarcomere	194	10	0.000655791	0.0126945	BIN1;PDE4B;ALDOA;PALLD;DST;JPH2;TCAP;SLC8A1;PAK1;TTN
FUMA	GO:0048524	positive regulation of viral process	103	6	0.00108209	0.0127051	PPIH:SP1:VPS37B:CD28:POLR2H:TRIM38
gPROFILER	GO:0002682	regulation of immune system process		11		0.0127072	PTK2B,FBN1,SNCA,MED1,NFATC3,ADCYAP1,APP,HEXIM1,CD209,LDLR,ELF1
gPROFILER	GO:0050803	regulation of synapse structure or activity		11		0.0127072	SNCA,APP,BDNF,CAMK2B,MEF2C,CDC42,UBE3A,LRFN1,EIF4G1,NRP2,IL1RAP
FUMA	GO:0034250	positive regulation of cellular amide metabolic process	141	7	0.0010878	0.0127314	PICALM:ERBB2:CD28:APP:POLDIP3:SERP1:PTK2B
FUMA	GO:2001056	positive regulation of cysteine type endopeptidase activity	141	7	0.0010878	0.0127314	BAD:PML:MAPT:CASP8:FAM162A:SNCA:CYCS
gPROFILER	GO:0043292	contractile fiber		13		0.0127862	BIN1,CALM3,PDE4B,ALDOA,PALLD,DST,JPH2,TCAP,PRICKLE4,CALD1,SLC8A1,PAK1,TTN
gPROFILER	GO:0099568	cytoplasmic region		3		0.0128852	PTK2B,LANCL2,SNCA
gPROFILER	GO:0031326	regulation of cellular biosynthetic process		73		0.012944	PTK2B,VEZF1,FBN1,LANCL2,SNCA,TAF1C,MED1,NFATC3,ZNF397,CFLAR,ADCYAP1,APP,HEXIM1,MXD4,LDLR,VWC2,ELF1,ZBTB20,OVOL2,EIF4E3,IKBKB,PML,PICALM,CACNA1A,RBPMS2,KLF12,ILF3,ARHGAP35,ZNF44,SPEN,TRIM38,POGK,GATAD2A,ZHX1,SAMD4B,CELF1,EIF1B,TNIP1,GDF3,RBPMS,FST,MOV10,NIPBL,LRRFIP2,UBE2D3,NVL,NFKB1,PKD2,EDNRB,CREB1,MEF2C,TAF6L,RELA,PIAS2,TCF7L2,PPM1A,USP47,APOC1,CDC42,UBE3A,DLG1,EID1,POLDIP3,ZNF215,TNRC6A,DYRK2,…
gPROFILER	GO:0015629	actin cytoskeleton		3		0.0129524	BIN1,LANCL2,SNCA
gPROFILER	GO:0140352	export from cell		44		0.0129633	ENSA,SNCA,NSF,ADCYAP1,APP,GPR27,CD44,CRHR1,ARHGAP17,SCG3,PML,CACNA1A,C1QTNF5,ICA1,MAP4K4,CALM3,PDIA4,BAD,IQGAP1,CD22,NFKB1,CACNB2,CREB1,RALB,MEF2C,ALDOA,TCF7L2,PPY,DLG1,LILRA5,NCS1,GMFG,FAM3C,SERP1,ATP6V1D,CR1,EXOC6,RPH3A,CTSS,GOLPH3L,IL1RAP,CLEC5A,CRH,CST3
FUMA	R-HSA-9022692	nuclear signaling by erbb4	32	4	0.000432413	0.0129637	STMN1:GFAP:MXD4:HBEGF
FUMA	R-HSA-9022692	regulation of mecp2 expression and activity	32	4	0.000432413	0.0129637	MOV10:TNRC6A:CREB1:CAMK2B
FUMA	GO:0005891	voltage gated calcium channel complex	43	4	0.00134722	0.012967	PDE4B:CACNB2:CACNB1:CACNA1A
FUMA	GO:0031345	negative regulation of cell projection organization	183	8	0.0011163	0.0130029	TBX6:GFAP:WNT3:MAP4K4:RUFY3:RAPGEF2:MYLIP:KANK1
FUMA	GO:0070925	organelle assembly	824	20	0.00111597	0.0130029	PATL1:VPS37C:RPLP0:VPS37B:ATP6V1D:TCAP:MAPT:LRFN1:ARHGAP35:ACTR2:RALB:TTN:CFLAR:DYNLRB1:IL1RAP:CEP135:SCLT1:MEF2C:GALNT11:ARHGEF10
FUMA	GO:0043902	positive regulation of multi organism process	183	8	0.0011163	0.0130029	PPIH:BAD:SP1:VPS37B:EDNRB:CD28:POLR2H:TRIM38
FUMA	GO:1904738	vascular associated smooth muscle cell migration	41	4	0.0011251	0.0130846	DOCK7:PAK1:IQGAP1:MEF2C
FUMA	GO:0036019	endolysosome	20	3	0.00137375	0.0130964	CTSS:LDLR:CLTA
FUMA	KEGG_B_CELL_RECEPTOR_SIGNALING_PATHWAY	b cell receptor signaling pathway	75	5	0.00155011	0.0131055	RELA:NFATC3:CD22:NFKB1:IKBKB
FUMA	GO:0086003	cardiac muscle cell contraction	70	5	0.00113751	0.0131273	PDE4B:CACNB2:SCN2B:BIN1:DLG1
FUMA	GO:0055123	digestive system development	142	7	0.00113342	0.0131273	CCKBR:EDNRB:RBPMS2:ITGB4:OVOL2:NIPBL:SMO
FUMA	GO:1903364	positive regulation of cellular protein catabolic process	142	7	0.00113342	0.0131273	ATPIF1:LDLR:PTTG1IP:RCHY1:FBXW7:RNF144B:PTK2B
FUMA	GO:0032024	positive regulation of insulin secretion	70	5	0.00113751	0.0131273	TCF7L2:BAD:GPR27:SERP1:CRH
FUMA	GO:0006892	post golgi vesicle mediated transport	104	6	0.0011377	0.0131273	MACF1:GOLPH3L:EXOC6:NSF:GOSR2:SCAMP1
FUMA	GO:0009743	response to carbohydrate	228	9	0.00114428	0.0131825	TCF7L2:BAD:NME1:SLC8A1:MAP4K4:GPR27:ZBTB20:PTK2B:CRH
gPROFILER	GO:1903829	positive regulation of cellular protein localization		16		0.0132018	MAPT,BAD,IQGAP1,NIPBL,UBE2D3,TCF7L2,PPM1A,CDC42,DLG1,FBXW7,ERBB2,CASP8,SMO,SORBS1,RUFY3,PAK1
gPROFILER	GO:0038127	ERBB signaling pathway		8		0.0132178	PTK2B,APP,IQGAP1,CDC42,SNX6,HBEGF,FBXW7,ERBB2
gPROFILER	GO:0051817	modification of morphology or physiology of other organism involved in symbiotic interaction		5		0.0132217	CLEC4M,CD209,CALM3,TNIP1,BAD
gPROFILER	GO:0048583	regulation of response to stimulus		26		0.0132837	PTK2B,FBN1,LANCL2,SNCA,WNT3,MED1,NFATC3,CFLAR,ADCYAP1,APP,GPR27,CD44,HEXIM1,CD209,LDLR,VWC2,ELF1,OVOL2,ARHGAP17,BDNF,DNAJC7,DLK2,STMN1,MAPT,IKBKB,PML
FUMA	GO:0050731	positive regulation of peptidyl tyrosine phosphorylation	184	8	0.00115591	0.0132957	BDNF:CD44:IQGAP1:LILRA5:CASS4:FBXW7:HBEGF:PTK2B
gPROFILER	GO:0071773	cellular response to BMP stimulus		7		0.0133393	FBN1,VWC2,RBPMS2,GDF3,FST,UBE2D3,PPM1A
gPROFILER	GO:0071772	response to BMP		7		0.0133393	FBN1,VWC2,RBPMS2,GDF3,FST,UBE2D3,PPM1A
FUMA	GO:0010985	negative regulation of lipoprotein particle clearance	19	3	0.0011774	0.0135007	APOC1:APOC2:MYLIP
FUMA	GO:0035728	response to hepatocyte growth factor	19	3	0.0011774	0.0135007	RELA:MED1:CREB1
FUMA	GO:0031123	rna 3 end processing	143	7	0.00118054	0.0135155	MTPAP:CSTF3:NUDT21:SRSF1:CSTF1:APP:POLDIP3
gPROFILER	GO:0050890	cognition		9		0.0135352	APP,LDLR,BDNF,MAPT,PICALM,NIPBL,RASGRF1,CREB1,MEF2C
gPROFILER	GO:0055065	metal ion homeostasis		14		0.0135352	PTK2B,SNCA,CCKBR,ADCYAP1,APP,PML,PICALM,CACNA1A,SLC12A4,PROK2,CALM3,CACNB2,PKD2,EDNRB
gPROFILER	GO:0045934	negative regulation of nucleobase-containing compound metabolic process		29		0.0135352	LANCL2,SNCA,MED1,NFATC3,HEXIM1,MXD4,ZBTB20,OVOL2,PML,KLF12,ILF3,ARHGAP35,SPEN,GATAD2A,ZHX1,FST,NIPBL,UBE2D3,NFKB1,EDNRB,CREB1,MEF2C,RELA,TCF7L2,PPM1A,USP47,DLG1,EID1,ZNF215
gPROFILER	GO:0010811	positive regulation of cell-substrate adhesion		6		0.0135352	PTK2B,CASS4,VWC2,MAP4K4,IQGAP1,CDC42
gPROFILER	GO:0009889	regulation of biosynthetic process		74		0.0135352	PTK2B,VEZF1,FBN1,LANCL2,SNCA,TAF1C,MED1,NFATC3,ZNF397,CFLAR,ADCYAP1,APP,HEXIM1,MXD4,ACACB,LDLR,VWC2,ELF1,ZBTB20,OVOL2,EIF4E3,IKBKB,PML,PICALM,CACNA1A,RBPMS2,KLF12,ILF3,ARHGAP35,ZNF44,SPEN,TRIM38,POGK,GATAD2A,ZHX1,SAMD4B,CELF1,EIF1B,TNIP1,GDF3,RBPMS,FST,MOV10,NIPBL,LRRFIP2,UBE2D3,NVL,NFKB1,PKD2,EDNRB,CREB1,MEF2C,TAF6L,RELA,PIAS2,TCF7L2,PPM1A,USP47,APOC1,CDC42,UBE3A,DLG1,EID1,POLDIP3,ZNF215,TNRC6A,…
gPROFILER	GO:0001101	response to acid chemical		3		0.0135352	PTK2B,LANCL2,WNT3
gPROFILER	GO:0019079	viral genome replication		5		0.0135352	CLEC4M,CD209,ILF3,TRIM38,TNIP1
FUMA	R-HSA-1251985	diseases of signal transduction	386	13	0.000460619	0.0135386	TCF7L2:CTBP2:BAD:MAML2:IQGAP1:ERBB2:PSME3:CD28:CREB1:POLR2H:FBXW7:HBEGF:CAMK2B
FUMA	WP4655	cytosolic dna-sensing pathway	75	5	0.00155011	0.013576	RELA:CASP8:POLR2H:NFKB1:IKBKB
FUMA	GO:0007218	neuropeptide signaling pathway	105	6	0.00119548	0.013644	PPY:PYY:CRHR1:ADCYAP1:PROK2:RAPGEF2
FUMA	GO:0033138	positive regulation of peptidyl serine phosphorylation	105	6	0.00119548	0.013644	DOCK7:CD44:PAK1:APP:EIF4G1:SNCA
gPROFILER	GO:0046928	regulation of neurotransmitter secretion		6		0.0136459	SNCA,CACNA1A,CALM3,CACNB2,MEF2C,NCS1
gPROFILER	GO:0031032	actomyosin structure organization		12		0.0136692	PTK2B,CFLAR,STMN1,ITGB5,MEF2C,RHOC,CDC42,TCAP,ARHGEF10,SORBS1,PAK1,TTN
gPROFILER	GO:0055080	cation homeostasis		15		0.0136848	PTK2B,SNCA,CCKBR,ADCYAP1,APP,PML,PICALM,CACNA1A,SLC12A4,PROK2,CALM3,SLC4A9,CACNB2,PKD2,EDNRB
FUMA	WP3657	hematopoietic stem cell gene regulation by gabp alpha/beta complex	21	3	0.00158949	0.0136999	MCL1:ETV6:BCL2L1
FUMA	GO:0086001	cardiac muscle cell action potential	71	5	0.00121262	0.0137113	CACNB2:SCN2B:SLC8A1:BIN1:DLG1
FUMA	GO:0030522	intracellular receptor signaling pathway	277	10	0.00121812	0.0137113	CTBP2:RELA:PAK1:UBE3A:PML:MED1:PIAS2:CASP8:UBE2V1:ALPK1
FUMA	GO:0046785	microtubule polymerization	71	5	0.00121262	0.0137113	STMN1:PAK1:NIN:MAPT:SNCA
FUMA	R-HSA-1236394	plasma lipoprotein clearance	33	4	0.000487741	0.0137948	LDLR:APOC1:MYLIP:CLTA
FUMA	R-HSA-5663202	signaling by erbb4	58	5	0.000480377	0.0137948	STMN1:GABRB3:GFAP:MXD4:HBEGF
gPROFILER	GO:0005794	Golgi apparatus		50		0.0138139	SNCA,WNT3,AP1S1,NSF,APP,CD44,LDLR,HS3ST5,ARL17B,PICALM,ICA1,B3GALNT1,EXTL3,TJAP1,BMP1,PKD2,PLEKHA3,DCLRE1C,MACF1,ACER3,GOSR2,CDC42,DLG1,TNRC6A,NCS1,COPA,MUC4,RAB2A,FAM3C,FBXW7,GALNT11,FAM57B,VCAN,RPH3A,CHST6,GOLPH3L,FIG4,RTN3,CST3,LTBR,SMO,MMD,KIFC3,CLTA,YIPF5,CNIH3,PEX5,SEC24D,SCAMP1,ANGPTL3
gPROFILER	GO:0019751	polyol metabolic process		6		0.0138166	PTK2B,SNCA,ITPKB,SYNJ2,ISYNA1,ACER3
gPROFILER	GO:0090092	regulation of transmembrane receptor protein serine/threonine kinase signaling pathway		7		0.0138252	FBN1,VWC2,OVOL2,RBPMS2,GDF3,RBPMS,FST
FUMA	GO:0033574	response to testosterone	42	4	0.00123266	0.0138322	BAD:NME1:CFLAR:SRD5A1
gPROFILER	GO:0008037	cell recognition		10		0.013839	CLEC4M,APP,CD209,ARHGAP35,CD5,ALDOA,DLG1,PALLD,VCAN,FEZF2
gPROFILER	GO:0042982	amyloid precursor protein metabolic process		3		0.0139371	BIN1,APP,PICALM
gPROFILER	GO:0010648	negative regulation of cell communication		37		0.0139371	PTK2B,FBN1,SNCA,CFLAR,CD44,VWC2,ELF1,BDNF,DLK2,STMN1,MAPT,RBPMS2,ARHGAP35,MAP4K4,CALM3,TNIP1,GDF3,FST,CD22,PKD2,RELA,PIAS2,TCF7L2,PPM1A,USP47,CDC42,DLG1,DYRK2,SNX6,HBEGF,VHL,FBXW7,TSKU,KANK1,MCL1,ERBB2,CASP8
gPROFILER	GO:0060548	negative regulation of cell death		37		0.0139371	PTK2B,SNCA,MED1,CFLAR,ADCYAP1,CD44,BDNF,IKBKB,CACNA1A,ITPKB,MAP4K4,PROK2,BAD,NFKB1,OXR1,EDNRB,CREB1,MEF2C,RELA,TCF7L2,USP47,EIF4G1,SNX6,VHL,RNF144B,GABRB3,MCL1,CASP8,CLEC5A,PTTG1IP,CRH,SMO,FAM129B,PSME3,EN1,BCL2L1,CD28
gPROFILER	GO:0043069	negative regulation of programmed cell death		19		0.0139371	PTK2B,SNCA,MED1,CFLAR,ADCYAP1,CD44,BDNF,IKBKB,CACNA1A,ITPKB,MAP4K4,PROK2,BAD,NFKB1,OXR1,EDNRB,MEF2C,RELA,TCF7L2
gPROFILER	GO:0044089	positive regulation of cellular component biogenesis		16		0.0139371	PTK2B,BIN1,BDNF,MAPT,CEP135,ARHGAP35,MAP4K4,IQGAP1,CREB1,RALB,RHOC,CDC42,DLG1,GMFG,EIF4G1,PLEKHM1
gPROFILER	GO:0006357	regulation of transcription by RNA polymerase II		40		0.0139371	VEZF1,FBN1,SNCA,MED1,NFATC3,ADCYAP1,APP,HEXIM1,MXD4,VWC2,ELF1,ZBTB20,OVOL2,IKBKB,RBPMS2,KLF12,ARHGAP35,ZNF44,SPEN,GATAD2A,ZHX1,TNIP1,GDF3,FST,NIPBL,UBE2D3,NFKB1,PKD2,EDNRB,CREB1,MEF2C,TAF6L,RELA,PIAS2,TCF7L2,PPM1A,UBE3A,DLG1,EID1,ZNF215
gPROFILER	GO:0014866	skeletal myofibril assembly		3		0.0139371	CFLAR,TCAP,TTN
FUMA	GO:0050867	positive regulation of cell activation	378	12	0.00125033	0.014009	CDC42:ITPKB:CD5:BAD:PAK1:CRHR1:CD209:LILRA5:CD28:APP:MEF2C:CD83
FUMA	GO:0032411	positive regulation of transporter activity	106	6	0.00125547	0.0140239	CTSS:CACNB2:AKAP6:CALM3:JPH2:PKD2
FUMA	GO:0046928	regulation of neurotransmitter secretion	106	6	0.00125547	0.0140239	RIMS3:CACNB2:CALM3:SNCA:MEF2C:NCS1
gPROFILER	GO:0007275	multicellular organism development		110		0.0141114	PTK2B,BIN1,VEZF1,FBN1,SNCA,WNT3,MED1,NFATC3,CCKBR,CFLAR,ADCYAP1,APP,PTPRA,CD44,HEXIM1,ACACB,LDLR,VWC2,OVOL2,BDNF,STMN1,MAPT,IKBKB,PML,ALDH5A1,PICALM,CACNA1A,RBPMS2,TRIM45,C1QTNF5,ITPKB,RBBP5,WNT2B,ARHGAP35,CAMK2B,SYNJ2,SPEN,POGK,MAP4K4,CELF1,PROK2,CALM3,ITGB5,GDF3,ANKH,FST,BAD,MOV10,IQGAP1,NIPBL,RASGRF1,GFAP,SCLT1,BMP1,PKD2,EDNRB,CREB1,SEZ6L2,MEF2C,DCLRE1C,RELA,CD83,MACF1,TCF7L2,ACER3,MYLIP,CDC42…
gPROFILER	GO:0009749	response to glucose		4		0.0141114	PTK2B,ENSA,GPR27,ZBTB20
gPROFILER	GO:0031331	positive regulation of cellular catabolic process		13		0.0142034	PTK2B,SNCA,APP,LDLR,ZBTB20,RCHY1,BAD,MOV10,RALB,TNRC6A,APOC2,FBXW7,RNF144B
Webgestalt	GO:0045121	membrane raft	311	13	0.000791281	0.0142062	PTK2B;CFLAR;APP;MAPT;IKBKB;SYNJ2;IQGAP1;EDNRB;DLG1;AKAP6;CASP8;SMO;SORBS1
gPROFILER	GO:0070838	divalent metal ion transport		3		0.0142688	PTK2B,BIN1,SNCA
FUMA	GO:0055088	lipid homeostasis	145	7	0.00127936	0.014269	ANGPTL3:LCAT:LDLR:APOC2:ZBTB20:FBXW7:MYLIP
FUMA	GO:0009410	response to xenobiotic stimulus	279	10	0.00128523	0.0142911	RELA:CRHR1:CALM3:SLC8A1:CFLAR:SNCA:SRD5A1:MCM7:PTK2B:CRH
FUMA	GO:0051146	striated muscle cell differentiation	279	10	0.00128523	0.0142911	BDNF:PAK1:AKAP6:TCAP:SLC8A1:TTN:CFLAR:MEF2C:SMO:FAM129B
Webgestalt	GO:0098857	membrane microdomain	312	13	0.000814991	0.0142994	PTK2B;CFLAR;APP;MAPT;IKBKB;SYNJ2;IQGAP1;EDNRB;DLG1;AKAP6;CASP8;SMO;SORBS1
FUMA	GO:0035050	embryonic heart tube development	72	5	0.00129132	0.0143156	MED1:OVOL2:PKD2:MEF2C:SMO
FUMA	GO:0009755	hormone mediated signaling pathway	232	9	0.00129095	0.0143156	PAK1:UBE3A:ABHD2:MED1:CRHR1:PIAS2:SST:LANCL2:CRH
gPROFILER	GO:0071248	cellular response to metal ion		7		0.0143221	SNCA,APP,ITPKB,IQGAP1,PKD2,CREB1,MEF2C
gPROFILER	GO:0033555	multicellular organismal response to stress		6		0.0143348	ADCYAP1,CACNA1A,EDNRB,MEF2C,EIF4G1,CRH
FUMA	GO:0022803	passive transmembrane transporter activity	452	14	0.000644883	0.0143356	CACNB2:SCN2B:GABRB3:AQP9:CACNB1:CACNA1A:JPH2:SCN11A:CHRNA9:GABRA2:PKD2:KCNK5:PTK2B:NCS1
gPROFILER	GO:0045637	regulation of myeloid cell differentiation		3		0.0143365	PTK2B,FBN1,MED1
FUMA	GO:0030863	cortical cytoskeleton	110	6	0.00151876	0.0143422	RIMS3:CAPZA1:GMFG:ACTR2:LANCL2:CALD1
gPROFILER	GO:0023057	negative regulation of signaling		37		0.0143973	PTK2B,FBN1,SNCA,CFLAR,CD44,VWC2,ELF1,BDNF,DLK2,STMN1,MAPT,RBPMS2,ARHGAP35,MAP4K4,CALM3,TNIP1,GDF3,FST,CD22,PKD2,RELA,PIAS2,TCF7L2,PPM1A,USP47,CDC42,DLG1,DYRK2,SNX6,HBEGF,VHL,FBXW7,TSKU,KANK1,MCL1,ERBB2,CASP8
gPROFILER	GO:0051963	regulation of synapse assembly		7		0.014413	SNCA,APP,BDNF,MEF2C,LRFN1,EIF4G1,IL1RAP
Webgestalt	GO:0007163	establishment or maintenance of cell polarity	203	14	7.53619e-05	0.0144304	PTK2B;ARHGAP35;RHOC;CDC42;DLG1;DST;KANK1;DOCK7;PARD3B;MAP1B;RUFY3;PAK1;ACTR2;SPN
Webgestalt	GO:0051924	regulation of calcium ion transport	229	15	7.55157e-05	0.0144304	PTK2B;BIN1;SNCA;PML;CAMK2B;CACNB2;PKD2;PDE4B;LILRA5;AKAP6;JPH2;CRH;CACNB1;SLC8A1;UBASH3B
Webgestalt	GO:0032412	regulation of ion transmembrane transporter activity	228	15	7.1874e-05	0.0144304	PTK2B;APP;RASGRF1;CACNB2;PKD2;PDE4B;MEF2C;DLG1;AKAP6;SCN2B;JPH2;CTSS;CRH;CACNB1;CNIH3
gPROFILER	GO:0061134	peptidase regulator activity		4		0.0144664	BIN1,SNCA,CFLAR,APP
gPROFILER	GO:0035091	phosphatidylinositol binding		13		0.0144664	LANCL2,MAPT,PICALM,PXDC1,NCF4,IQGAP1,PLEKHA3,PIK3C2B,SNX6,RPH3A,JPH2,GOLPH3L,PARD3B
gPROFILER	GO:0019901	protein kinase binding		19		0.0144664	PTK2B,NSF,CASS4,MAPT,IKBKB,SLC12A4,CALM3,TNIP1,GDF3,BAD,IQGAP1,RELA,TCF7L2,RHOC,CDC42,DLG1,PRKAR1B,NCS1,MAP3K13
gPROFILER	GO:0005102	signaling receptor binding		40		0.0144664	ENSA,FBN1,WNT3,MED1,CCKBR,NSF,CFLAR,ADCYAP1,APP,BDNF,DLK2,MAPT,PICALM,WNT2B,SST,PROK2,CALM3,ITGB5,GDF3,FST,RASGRF1,GFAP,CD22,BMP1,PKD2,EDNRB,PIAS2,TCF7L2,PPY,CDC42,COPA,GMFG,MUC4,ITGB4,FAM3C,HBEGF,TAOK2,GALNT11,MYO9B,DST
FUMA	GO:0001655	urogenital system development	329	11	0.00130993	0.0145	WNT2B:FBN1:IQGAP1:ITGB4:CFLAR:DLG1:PKD2:SRD5A1:NIPBL:MEF2C:SMO
gPROFILER	GO:0046165	alcohol biosynthetic process		7		0.0145022	PTK2B,SNCA,ACACB,ITPKB,ISYNA1,NFKB1,ACER3
gPROFILER	GO:0006366	transcription by RNA polymerase II		42		0.0145022	VEZF1,FBN1,SNCA,TAF1C,MED1,NFATC3,ADCYAP1,APP,HEXIM1,MXD4,VWC2,ELF1,ZBTB20,OVOL2,IKBKB,RBPMS2,KLF12,INTS9,ARHGAP35,ZNF44,SPEN,GATAD2A,ZHX1,TNIP1,GDF3,FST,NIPBL,UBE2D3,NFKB1,PKD2,EDNRB,CREB1,MEF2C,TAF6L,RELA,PIAS2,TCF7L2,PPM1A,UBE3A,DLG1,EID1,ZNF215
FUMA	GO:0072009	nephron epithelium development	107	6	0.00131774	0.0145645	WNT2B:IQGAP1:DLG1:PKD2:MEF2C:SMO
gPROFILER	GO:0072511	divalent inorganic cation transport		3		0.0146244	PTK2B,BIN1,SNCA
gPROFILER	GO:0031110	regulation of microtubule polymerization or depolymerization		7		0.0146991	SNCA,STMN1,MAPT,KATNB1,MAP1B,NIN,PAK1
FUMA	GO:0001503	ossification	381	12	0.00133652	0.0147499	WNT3:SLC8A1:RRBP1:ANKH:NIPBL:VCAN:MEF2C:BCAP29:SMO:CLEC5A:BMP1:PTK2B
FUMA	GO:0050982	detection of mechanical stimulus	43	4	0.00134722	0.0148013	TCAP:TTN:CHRNA9:PKD2
FUMA	GO:0010761	fibroblast migration	43	4	0.00134722	0.0148013	PAK1:PML:SLC8A1:TNS1
FUMA	GO:0002269	leukocyte activation involved in inflammatory response	43	4	0.00134722	0.0148013	MAPT:LDLR:APP:SNCA
Webgestalt	GO:0030135	coated vesicle	275	12	0.00086313	0.0148075	AP1S1;APP;LDLR;PICALM;GOSR2;COPA;HBEGF;CLTA;YIPF5;CNIH3;SEC24D;SCAMP1
gPROFILER	GO:0048856	anatomical structure development		118		0.0148496	PTK2B,BIN1,VEZF1,FBN1,SNCA,WNT3,MED1,NFATC3,CCKBR,CFLAR,CASS4,ADCYAP1,APP,PTPRA,CD44,HEXIM1,ACACB,LDLR,VWC2,MKLN1,OVOL2,BDNF,STMN1,MAPT,IKBKB,PML,ALDH5A1,PICALM,CACNA1A,RBPMS2,TRIM45,C1QTNF5,ITPKB,RBBP5,WNT2B,ARHGAP35,CAMK2B,SYNJ2,SPEN,POGK,MAP4K4,CELF1,PROK2,CALM3,ITGB5,GDF3,ANKH,FST,BAD,MOV10,IQGAP1,NIPBL,RASGRF1,GFAP,SCLT1,BMP1,PKD2,EDNRB,CREB1,SEZ6L2,MEF2C,DCLRE1C,RELA,CD83,MACF1,ALDOA,TCF7L2…
Webgestalt	GO:0044448	cell cortex part	168	9	0.000923275	0.0148663	LANCL2;CAPZA1;PKD2;EXOC6;CALD1;RIMS3;CTBP2;CLTA;ACTR2
Webgestalt	GO:0030662	coated vesicle membrane	169	9	0.000962846	0.0148663	AP1S1;LDLR;PICALM;GOSR2;COPA;HBEGF;CLTA;CNIH3;SEC24D
Webgestalt	GO:0005798	Golgi-associated vesicle	169	9	0.000962846	0.0148663	AP1S1;APP;SPPL2C;GOSR2;COPA;CLTA;YIPF5;CNIH3;SEC24D
Webgestalt	GO:0031256	leading edge membrane	169	9	0.000962846	0.0148663	CD44;MAPT;SYNJ2;MACF1;GABRA2;KANK1;ANTXR1;PAK1;NME1
Webgestalt	GO:0005774	vacuolar membrane	397	15	0.000904067	0.0148663	AP1S1;NSF;LDLR;SPPL2C;SLC12A4;CYB561;ABCC3;GFAP;RAB2A;PLEKHM1;ATP6V1D;SLC30A3;ABCC10;MMD;CLTA
gPROFILER	GO:1905114	cell surface receptor signaling pathway involved in cell-cell signaling		16		0.0148764	PTK2B,SNCA,WNT3,APP,WNT2B,MOV10,LRRFIP2,NFKB1,PKD2,MEF2C,MACF1,TCF7L2,PPM1A,USP47,CDC42,TNRC6A
gPROFILER	GO:0098771	inorganic ion homeostasis		15		0.0148764	PTK2B,SNCA,CCKBR,ADCYAP1,APP,PML,PICALM,CACNA1A,SLC12A4,PROK2,CALM3,SLC4A9,CACNB2,PKD2,EDNRB
gPROFILER	GO:0009894	regulation of catabolic process		26		0.0149072	PTK2B,SNCA,NSF,APP,ACACB,LDLR,ZBTB20,MAPT,PML,SAMD4B,RCHY1,BAD,MOV10,GFAP,RALB,RELA,MYLIP,APOC1,UBE3A,TNRC6A,EIF4G1,APOC2,SNX6,FBXW7,RNF144B,ATP6V1D
gPROFILER	GO:0009746	response to hexose		4		0.0149072	PTK2B,ENSA,GPR27,ZBTB20
FUMA	GO:0071498	cellular response to fluid shear stress	20	3	0.00137375	0.0150031	PKD2:MEF2C:PTK2B
FUMA	GO:0090092	regulation of transmembrane receptor protein serine threonine kinase signaling pathway	234	9	0.00136977	0.0150031	GDF3:SNX6:PPM1A:FBN1:RBPMS2:OVOL2:FST:VWC2:RBPMS
FUMA	GO:0072347	response to anesthetic	73	5	0.00137374	0.0150031	RELA:CRHR1:SNCA:PTK2B:CRH
FUMA	GO:0030217	t cell differentiation	234	9	0.00136977	0.0150031	CR1:ITPKB:BAD:SPN:ERBB2:CLPTM1:CD28:FANCD2:CD83
gPROFILER	GO:0050796	regulation of insulin secretion		7		0.01504	ENSA,GPR27,CACNA1A,ICA1,MAP4K4,BAD,TCF7L2
FUMA	GO:0098552	side of membrane	554	15	0.00161126	0.0150736	CD5:IQGAP1:GFAP:SPPL2C:CD209:LDLR:CLPTM1:ACP1:ANTXR1:CD28:DLG1:PKD2:CD83:PTK2B:IKBKB
gPROFILER	GO:0019538	protein metabolic process		98		0.0151193	ACP1,PTK2B,BIN1,CYCS,ENSA,FBN1,SNCA,DENR,MED1,NSF,MSRB3,CFLAR,CASS4,ADCYAP1,APP,PTPRA,CD44,HEXIM1,LDLR,SPPL2C,KANSL1,EIF4E3,BDNF,HS3ST5,MAPT,SCG3,IKBKB,PML,PICALM,ITPKB,ILF3,RBBP5,RPLP0,CDC27,CAMK2B,TRIM38,MAP4K4,SAMD4B,LCAT,CELF1,B3GALNT1,EIF1B,PROK2,CALM3,RCHY1,TNIP1,GDF3,RBPMS,ALPK1,BAD,MOV10,IQGAP1,EXTL3,NIPBL,RASGRF1,GFAP,UBE2D3,BMP1,NFKB1,OXR1,PKD2,EDNRB,CREB1,FKBP7,RALB,MEF2C,TAF6L,RELA,PI…
gPROFILER	GO:0051051	negative regulation of transport		12		0.0151285	PTK2B,BIN1,SNCA,ADCYAP1,CRHR1,PML,PICALM,MAP4K4,CALM3,CD22,NFKB1,PKD2
gPROFILER	GO:0006807	nitrogen compound metabolic process		11		0.0151285	ACP1,PTK2B,BIN1,VEZF1,CYCS,ENSA,FBN1,LANCL2,SNCA,SNRPN,TAF1C
gPROFILER	GO:0034599	cellular response to oxidative stress		9		0.015132	CYCS,SNCA,CFLAR,MAPT,PML,NCF4,OXR1,PKD2,RELA
gPROFILER	GO:0022409	positive regulation of cell-cell adhesion		9		0.015132	CD44,CD209,ITPKB,CD5,BAD,RELA,CD83,MAGI1,CDC42
gPROFILER	GO:0031532	actin cytoskeleton reorganization		3		0.0151353	PTK2B,CASS4,MKLN1
gPROFILER	GO:0006875	cellular metal ion homeostasis		5		0.0151353	PTK2B,SNCA,CCKBR,ADCYAP1,APP
Webgestalt	GO:0034330	cell junction organization	285	17	8.17181e-05	0.0151563	PTK2B;IKBKB;CAPZA1;MAP4K4;IQGAP1;MACF1;TNS1;RHOC;CDC42;DLG1;ITGB4;TAOK2;DST;RAPGEF2;SORBS1;KIFC3;MARVELD3
gPROFILER	GO:0043524	negative regulation of neuron apoptotic process		10		0.0151726	PTK2B,SNCA,BDNF,CACNA1A,OXR1,MEF2C,SNX6,GABRB3,EN1,BCL2L1
Webgestalt	GO:0030660	Golgi-associated vesicle membrane	106	7	0.00101991	0.015218	AP1S1;SPPL2C;GOSR2;COPA;CLTA;CNIH3;SEC24D
Webgestalt	GO:0005874	microtubule	402	15	0.00102504	0.015218	DYNLRB1;STMN1;MAPT;CDC27;SYNJ2;IQGAP1;MACF1;DLG1;KATNB1;SERP1;DST;MAP1B;NIN;KIFC3;SLC8A1
gPROFILER	GO:0046785	microtubule polymerization		3		0.0152377	SNCA,STMN1,MAPT
gPROFILER	GO:0048585	negative regulation of response to stimulus		41		0.0152377	FBN1,SNCA,WNT3,CFLAR,ADCYAP1,CD44,LDLR,VWC2,ELF1,BDNF,DLK2,STMN1,RBPMS2,ARHGAP35,TRIM38,MAP4K4,CALM3,TNIP1,GDF3,FST,CD22,NFKB1,OXR1,PKD2,RELA,PIAS2,TCF7L2,PPM1A,USP47,CDC42,DLG1,DYRK2,SNX6,HBEGF,VHL,FBXW7,TSKU,CR1,KANK1,MCL1,ERBB2
gPROFILER	GO:1901652	response to peptide		22		0.0152377	FBN1,CFLAR,APP,PTPRA,CRHR1,CACNA1A,IQGAP1,NFKB1,EDNRB,CREB1,RELA,PRKAR1B,SNX6,SP1,SRD5A1,ATP6V1D,KANK1,MAP1B,GGH,CACNB1,SORBS1,PAK1
FUMA	WP3872	regulation of apoptosis by parathyroid hormone-related protein	22	3	0.00182529	0.0152482	MCL1:ITGB4:BCL2L1
FUMA	WP4482	vitamin d in inflammatory diseases	22	3	0.00182529	0.0152482	RELA:NFKB1:IKBKB
FUMA	GO:0007389	pattern specification process	436	13	0.00139888	0.0152548	WNT2B:GDF3:TBX6:TCAP:WNT3:EN1:NRP2:OVOL2:FEZF2:PKD2:MEF2C:SMO:GALNT11
FUMA	GO:0051371	muscle alpha actinin binding	16	3	0.000697586	0.0153004	TTN:PKD2:PALLD
gPROFILER	GO:0097006	regulation of plasma lipoprotein particle levels		6		0.0153082	LDLR,LCAT,BMP1,MYLIP,APOC1,APOC2
FUMA	GO:0006813	potassium ion transport	235	9	0.0014106	0.0153145	AKAP6:SLC12A4:CTC-479C5.17:NSF:ADCYAP1:BIN1:DLG1:PKD2:KCNK5:PTK2B
FUMA	GO:0051056	regulation of small gtpase mediated signal transduction	332	11	0.00140766	0.0153145	CDC42:STMN1:RHOC:ITPKB:RASGRF1:ARHGAP17:MYO9B:ARHGAP35:MAP4K4:ARHGEF10:KANK1
FUMA	GO:0070302	regulation of stress activated protein kinase signaling cascade	235	9	0.0014106	0.0153145	PAK1:LTBR:TAOK2:MARVELD3:MAP4K4:APP:MAP3K13:DLG1:PTK2B
Webgestalt	GO:0051099	positive regulation of binding	180	13	8.50123e-05	0.0153168	APP;BDNF;STMN1;NIPBL;NVL;RALB;MEF2C;TCF7L2;EIF4G1;RAPGEF2;FAM129B;CTBP2;NME1
FUMA	KEGG_FOCAL_ADHESION	focal adhesion	199	8	0.00189647	0.0153366	CDC42:BAD:PAK1:RASGRF1:ERBB2:ITGB4:ARHGAP35:ITGB5
gPROFILER	GO:0043902	positive regulation of multi-organism process		23		0.0153409	MED1,HEXIM1,CD209,IKBKB,TRIM38,TNIP1,ALPK1,BAD,UBE2D3,NFKB1,EDNRB,RELA,MUC4,SP1,CTSS,CASP8,VPS37B,PSME3,UBE2V1,POLR2H,PAK1,CD28,PPIH
gPROFILER	GO:0009991	response to extracellular stimulus		15		0.0153409	ENSA,MED1,ADCYAP1,ACACB,LDLR,WNT2B,ARHGAP35,SST,GDF3,CREB1,RALB,RELA,PIK3C2B,TNRC6A,EIF4G1
FUMA	GO:0099504	synaptic vesicle cycle	190	8	0.00141771	0.015369	RIMS3:CACNB2:CTBP2:PICALM:CALM3:SNCA:PRKAR1B:NCS1
gPROFILER	GO:0015012	heparan sulfate proteoglycan biosynthetic process		3		0.0154056	HS3ST5,EXTL3,TCF7L2
gPROFILER	GO:2000377	regulation of reactive oxygen species metabolic process		3		0.0154214	PTK2B,SNCA,CFLAR
FUMA	WP4534	mechanoregulation and pathology of yap/taz via hippo and non-hippo mechanisms	47	4	0.00188006	0.015436	PAK1:ITGB4:MAP4K4:ITGB5
FUMA	WP428	wnt signaling	115	6	0.00190462	0.015436	WNT2B:TCF7L2:CTBP2:NFATC3:WNT3:CAMK2B
gPROFILER	GO:0070161	anchoring junction		22		0.0156111	PTK2B,CASS4,CD44,RPLP0,MAP4K4,ITGB5,IQGAP1,TNS1,MAGI1,CDC42,DLG1,LRRC1,PALLD,DST,DOCK7,PRICKLE4,PARD3B,FAM129B,SORBS1,KIFC3,PAK1,ACTR2
gPROFILER	GO:0043025	neuronal cell body		7		0.0156111	PTK2B,SNCA,ADCYAP1,APP,MAPT,PICALM,CACNA1A
gPROFILER	GO:0014074	response to purine-containing compound		10		0.0156148	PTK2B,APP,PKD2,RELA,AKAP6,SRD5A1,RAPGEF2,SLC8A1,AQP9,NME1
FUMA	WP306	focal adhesion	200	8	0.00195668	0.0156247	CDC42:BAD:PAK1:RASGRF1:ERBB2:ITGB4:ARHGAP35:ITGB5
FUMA	GO:0099565	chemical synaptic transmission postsynaptic	109	6	0.00144932	0.0156655	GABRB3:APP:CHRNA9:SNCA:MEF2C:PTK2B
FUMA	GO:0046620	regulation of organ growth	109	6	0.00144932	0.0156655	PAK1:ACACB:AKAP6:SERP1:MEF2C:SMO
FUMA	GO:0008047	enzyme activator activity	511	15	0.000724868	0.0156896	BAD:RIN3:IQGAP1:ARHGAP17:PSME3:MYO9B:GMFG:APOC1:APOC2:CALM3:ARHGAP35:CFLAR:APP:NCF4:RAPGEF2
Webgestalt	GO:0010952	positive regulation of peptidase activity	181	13	8.99378e-05	0.0157541	CYCS;SNCA;CFLAR;APP;MAPT;PML;PICALM;BAD;FAM162A;CR1;CASP8;ANTXR1;PSME3
FUMA	GO:0048562	embryonic organ morphogenesis	284	10	0.00146626	0.0157853	FBN1:RBPMS2:TCAP:OVOL2:DLG1:CHRNA9:PKD2:NIPBL:MEF2C:SMO
FUMA	GO:0002221	pattern recognition receptor signaling pathway	191	8	0.00146558	0.0157853	CTSS:RELA:CASP8:UBE2V1:UBE2D3:ALPK1:TNIP1:IKBKB
FUMA	GO:0050850	positive regulation of calcium mediated signaling	44	4	0.001469	0.0157853	AKAP6:CALM3:JPH2:PKD2
FUMA	GO:0010676	positive regulation of cellular carbohydrate metabolic process	44	4	0.001469	0.0157853	SORBS1:BAD:DYRK2:SNCA
gPROFILER	GO:0034284	response to monosaccharide		4		0.0157951	PTK2B,ENSA,GPR27,ZBTB20
gPROFILER	GO:0061180	mammary gland epithelium development		3		0.0158584	WNT3,MED1,PML
FUMA	R-HSA-8964043	the nlrp3 inflammasome	15	3	0.000571515	0.0158648	RELA:APP:NFKB1
FUMA	GO:0030118	clathrin coat	46	4	0.00173519	0.0159351	PICALM:SCLT1:AP1S1:CLTA
FUMA	GO:0005747	mitochondrial respiratory chain complex i	46	4	0.00173519	0.0159351	NDUFA7:NDUFA7:NDUFB3:NDUFB5:SNCA
FUMA	GO:0005770	late endosome	243	9	0.0017738	0.0159502	VPS37C:VPS37B:CRHR1:GOSR2:MMD:LDLR:SLC30A3:RAPGEF2:FIG4
FUMA	WP410	exercise-induced circadian regulation	48	4	0.0020331	0.0159996	ETV6:SUMO3:CBX3:RBPMS
gPROFILER	GO:0044249	cellular biosynthetic process		97		0.0160615	PTK2B,VEZF1,FBN1,LANCL2,SNCA,TAF1C,DENR,MED1,NFATC3,ZNF397,CFLAR,ADCYAP1,APP,SMOX,HEXIM1,MXD4,ACACB,LDLR,VWC2,ELF1,ZBTB20,OVOL2,EIF4E3,HS3ST5,IKBKB,PML,PICALM,CACNA1A,SCD5,RBPMS2,KLF12,INTS9,ILF3,RPLP0,ARHGAP35,ZNF44,SYNJ2,SPEN,TRIM38,POGK,MCM7,GATAD2A,ZHX1,SAMD4B,LCAT,CELF1,B3GALNT1,EIF1B,RCHY1,TNIP1,GDF3,RBPMS,FST,MOV10,EXTL3,NIPBL,ISYNA1,LRRFIP2,UBE2D3,NVL,NFKB1,ACSL6,PKD2,EDNRB,PDE4B,CREB1,BC…
gPROFILER	GO:0035902	response to immobilization stress		4		0.0160947	PTK2B,CRH,SLC8A1,ACTR2
gPROFILER	GO:0048566	embryonic digestive tract development		3		0.0161373	OVOL2,RBPMS2,NIPBL
Webgestalt	GO:0071320	cellular response to cAMP	53	7	9.51583e-05	0.0162181	APP;PKD2;AKAP6;SRD5A1;RAPGEF2;SLC8A1;AQP9
gPROFILER	GO:0032755	positive regulation of interleukin-6 production		3		0.016257	ADCYAP1,APP,ZBTB20
gPROFILER	GO:0033135	regulation of peptidyl-serine phosphorylation		3		0.016257	SNCA,APP,CD44
FUMA	GO:0042107	cytokine metabolic process	110	6	0.00151876	0.0162724	RELA:SPN:CD28:APP:IL1RAP:NFKB1
FUMA	GO:0021782	glial cell development	110	6	0.00151876	0.0162724	GFAP:MAPT:LDLR:APP:SMO:ARHGEF10
FUMA	GO:0044283	small molecule biosynthetic process	666	17	0.00152269	0.0162908	PDE4B:ITPKB:ACER3:BCAT1:SP1:ACACB:ABHD2:ALDOA:NME1:ISYNA1:APOC1:APOC2:SCD5:SNCA:NFKB1:FAM3C:PTK2B
FUMA	R-HSA-844456	activation of nmda receptors and postsynaptic events	92	6	0.000597903	0.0162956	RASGRF1:MAPT:CREB1:DLG1:PRKAR1B:CAMK2B
FUMA	GO:0070647	protein modification by small protein conjugation or removal	1097	24	0.00152946	0.0163394	CDC42:UBE2T:USP47:RELA:PEX5:UBE3A:FANCI:MED1:PSME3:CDC27:PIAS2:UHRF1:UBE2V1:SUMO3:PTTG1IP:VHL:RCHY1:UBE2D3:FBXW7:MARCH6:TNIP1:MYLIP:RNF144B:TRIM38
FUMA	GO:0019787	ubiquitin like protein transferase activity	408	13	0.000769497	0.0164393	CDC42:UBE2T:UBE3A:MED1:PIAS2:UHRF1:UBE2V1:VHL:RCHY1:UBE2D3:MARCH6:MYLIP:RNF144B
FUMA	GO:0048754	branching morphogenesis of an epithelial tube	150	7	0.00155482	0.0164431	WNT2B:PAK1:PML:MED1:DLG1:PKD2:SMO
FUMA	GO:0045833	negative regulation of lipid metabolic process	75	5	0.00155011	0.0164431	ACACB:APOC1:APOC2:NFKB1:FBXW7
FUMA	GO:0042326	negative regulation of phosphorylation	441	13	0.00154718	0.0164431	UBASH3B:SNX6:MARVELD3:HEXIM1:MAPT:GMFG:CALM3:EIF4G1:DLG1:CHRNA9:SNCA:TNIP1:PRKAR1B
FUMA	GO:0034767	positive regulation of ion transmembrane transport	150	7	0.00155482	0.0164431	CTSS:CACNB2:AKAP6:CALM3:JPH2:PKD2:SNCA
FUMA	GO:0030856	regulation of epithelial cell differentiation	150	7	0.00155482	0.0164431	BAD:GDF3:MED1:VEZF1:OVOL2:SMO:IKBKB
FUMA	GO:0001101	response to acid chemical	336	11	0.00154719	0.0164431	BAD:RELA:WNT3:NME1:LDLR:CREB1:BCL2L1:SST:PKD2:LANCL2:PTK2B
FUMA	GO:0009611	response to wounding	667	17	0.00154692	0.0164431	CDC42:MACF1:CAPZA1:RHOC:CD44:PAK1:UBASH3B:ABHD2:ERBB2:GFAP:ITGB4:ARHGAP35:CFLAR:HBEGF:DST:PRKAR1B:KANK1
gPROFILER	GO:0050731	positive regulation of peptidyl-tyrosine phosphorylation		4		0.0164893	PTK2B,CASS4,CD44,BDNF
gPROFILER	GO:1990776	response to angiotensin		3		0.0164895	IQGAP1,NFKB1,RELA
gPROFILER	GO:0001932	regulation of protein phosphorylation		33		0.0165166	PTK2B,SNCA,CFLAR,CASS4,ADCYAP1,APP,CD44,HEXIM1,BDNF,PML,ITPKB,MAP4K4,PROK2,CALM3,TNIP1,GDF3,RBPMS,IQGAP1,PKD2,EDNRB,RALB,MEF2C,CDC42,DLG1,PRKAR1B,LILRA5,GMFG,EIF4G1,MAP3K13,SNX6,HBEGF,FBXW7,TAOK2
gPROFILER	GO:0007611	learning or memory		9		0.0166258	APP,LDLR,BDNF,MAPT,PICALM,RASGRF1,CREB1,MEF2C,PRKAR1B
FUMA	WP4016	dna ir-damage and cellular response via atr	81	5	0.00217927	0.0166668	SP1:PML:FANCI:FANCD2:UBE2D3
FUMA	WP2431	spinal cord injury	118	6	0.00216925	0.0166668	CDC42:RHOC:BDNF:GFAP:PTPRA:VCAN
gPROFILER	GO:0044271	cellular nitrogen compound biosynthetic process		74		0.0166837	PTK2B,VEZF1,FBN1,LANCL2,SNCA,TAF1C,DENR,MED1,NFATC3,ZNF397,CFLAR,ADCYAP1,APP,SMOX,HEXIM1,MXD4,ACACB,VWC2,ELF1,ZBTB20,OVOL2,EIF4E3,IKBKB,PML,PICALM,SCD5,RBPMS2,KLF12,INTS9,ILF3,RPLP0,ARHGAP35,ZNF44,SPEN,TRIM38,POGK,GATAD2A,ZHX1,SAMD4B,CELF1,EIF1B,RCHY1,TNIP1,GDF3,RBPMS,FST,MOV10,NIPBL,LRRFIP2,UBE2D3,NVL,NFKB1,ACSL6,PKD2,EDNRB,PDE4B,CREB1,MEF2C,TAF6L,RELA,ALDOA,PIAS2,TCF7L2,PPM1A,ACER3,CHDH,USP47,U…
gPROFILER	GO:0051493	regulation of cytoskeleton organization		3		0.0166837	PTK2B,BIN1,SNCA
FUMA	GO:0090407	organophosphate biosynthetic process	553	15	0.00158335	0.0167207	PIK3C2B:ITPKB:ACACB:ALDOA:LCAT:NME1:ISYNA1:PLEKHA3:SCD5:SNCA:ACSL6:MBOAT1:FIG4:SYNJ2:PTK2B
Webgestalt	GO:0098589	membrane region	324	13	0.00114935	0.0167414	PTK2B;CFLAR;APP;MAPT;IKBKB;SYNJ2;IQGAP1;EDNRB;DLG1;AKAP6;CASP8;SMO;SORBS1
FUMA	GO:0035024	negative regulation of rho protein signal transduction	21	3	0.00158949	0.0167501	STMN1:ARHGAP35:KANK1
FUMA	GO:0051153	regulation of striated muscle cell differentiation	111	6	0.00159069	0.0167501	BDNF:PAK1:AKAP6:CFLAR:MEF2C:FAM129B
FUMA	GO:1904645	response to amyloid beta	45	4	0.00159825	0.0168056	SNX6:CACNB1:CACNA1A:APP
gPROFILER	GO:0071407	cellular response to organic cyclic compound		5		0.0168252	SNCA,MED1,CFLAR,ADCYAP1,APP
gPROFILER	GO:0051129	negative regulation of cellular component organization		20		0.0168252	SNCA,WNT3,CFLAR,LDLR,STMN1,MAPT,IKBKB,PICALM,CAPZA1,MAP4K4,GFAP,PPM1A,MYLIP,APOC1,CDC42,UBE3A,GMFG,APOC2,TBX6,KATNB1
gPROFILER	GO:0019722	calcium-mediated signaling		10		0.0168369	PTK2B,NFATC3,MAPT,CALM3,CD22,PKD2,EDNRB,DYRK2,AKAP6,JPH2
gPROFILER	GO:0044068	modulation by symbiont of host cellular process		4		0.0168369	TNIP1,BAD,CASP8,BCL2L1
gPROFILER	GO:0033866	nucleoside bisphosphate biosynthetic process		3		0.0168369	SNCA,ACACB,SCD5
gPROFILER	GO:0034033	purine nucleoside bisphosphate biosynthetic process		3		0.0168369	SNCA,ACACB,SCD5
gPROFILER	GO:0010035	response to inorganic substance		13		0.0168369	PTK2B,SNCA,CFLAR,APP,MAPT,ITPKB,CALM3,BAD,IQGAP1,PKD2,CREB1,MEF2C,RELA
gPROFILER	GO:0034030	ribonucleoside bisphosphate biosynthetic process		3		0.0168369	SNCA,ACACB,SCD5
gPROFILER	GO:0045834	positive regulation of lipid metabolic process		7		0.0168417	PTK2B,LDLR,ZBTB20,CREB1,APOC1,CDC42,APOC2
FUMA	GO:0006820	anion transport	611	16	0.00160411	0.0168432	SLC16A9:ACACB:GABRB3:AQP9:SLCO3A1:SLC12A4:CTC-479C5.17:ABCC3:LDLR:APOC1:APOC2:PLEKHA3:GABRA2:SNCA:ANKH:SLC4A9:SLC20A2
gPROFILER	GO:0051393	alpha-actinin binding		5		0.016928	PKD2,MAGI1,PALLD,PRICKLE4,TTN
gPROFILER	GO:0035035	histone acetyltransferase binding		4		0.016928	KANSL1,CREB1,EID1,SP1
gPROFILER	GO:0019900	kinase binding		20		0.016928	PTK2B,NSF,CASS4,MAPT,IKBKB,SLC12A4,CALM3,TNIP1,GDF3,BAD,IQGAP1,GFAP,RELA,TCF7L2,RHOC,CDC42,DLG1,PRKAR1B,NCS1,MAP3K13
gPROFILER	GO:0051371	muscle alpha-actinin binding		4		0.016928	PKD2,PALLD,PRICKLE4,TTN
Webgestalt	GO:0048002	antigen processing and presentation of peptide antigen	135	11	0.000102031	0.0169317	AP1S1;CLEC4M;CD209;IKBKB;DCTN6;CAPZA1;ITGB5;CTSS;ERAP1;CLTA;SEC24D
FUMA	GO:0043271	negative regulation of ion transport	151	7	0.00161506	0.016934	CRHR1:ADCYAP1:CALM3:BIN1:PKD2:SNCA:PTK2B
gPROFILER	GO:0007155	cell adhesion		37		0.0170965	PTK2B,FBN1,CLEC4M,CASS4,APP,CD44,CD209,VWC2,MKLN1,PML,ITPKB,CD5,MAP4K4,ITGB5,TNIP1,BAD,IQGAP1,CD22,RELA,CD83,MACF1,MAGI1,CDC42,DLG1,MUC4,ITGB4,LRRC1,PALLD,MPZL2,TAOK2,DST,NRP2,VCAN,KANK1,ERBB2,ANTXR1,IL1RAP
gPROFILER	GO:0071827	plasma lipoprotein particle organization		4		0.0170965	LCAT,BMP1,APOC1,APOC2
FUMA	GO:0055102	lipase inhibitor activity	17	3	0.000840067	0.0170993	ANGPTL3:APOC1:APOC2
FUMA	GO:0004724	magnesium dependent protein serine threonine phosphatase activity	17	3	0.000840067	0.0170993	PPM1J:PPM1A:PPM1L
FUMA	GO:0016504	peptidase activator activity	38	4	0.000841972	0.0170993	BAD:PSME3:CFLAR:APP
FUMA	GO:0017048	rho gtpase binding	175	8	0.000836911	0.0170993	DOCK7:PAK1:RASGRF1:IQGAP1:ARHGAP17:MYO9B:FMNL2:ARHGEF10
gPROFILER	GO:0007190	activation of adenylate cyclase activity		3		0.0172062	ADCYAP1,CRHR1,CALM3
gPROFILER	GO:0010638	positive regulation of organelle organization		25		0.0172062	PTK2B,BIN1,MAPT,PML,CEP135,ARHGAP35,BAD,NIPBL,UBE2D3,RALB,FAM162A,RHOC,CDC42,DLG1,GMFG,FBXW7,KATNB1,ARHGEF10,CASP8,MAP1B,JDP2,NIN,PAK1,ACTR2,CD28
FUMA	GO:0046173	polyol biosynthetic process	76	5	0.00164428	0.0172158	ITPKB:ACER3:ISYNA1:SNCA:PTK2B
gPROFILER	GO:0034613	cellular protein localization		61		0.0173254	AP1S1,DYNLRB1,MED1,NSF,BDNF,MAPT,SCG3,ARL17B,IKBKB,PML,PICALM,CACNA1A,RPLP0,CALM3,BAD,IQGAP1,NIPBL,UBE2D3,NVL,CACNB2,LEPROTL1,RALB,MACF1,TCF7L2,PEX19,PPM1A,GOSR2,CDC42,DLG1,POLDIP3,COPA,RAB2A,DCLK1,LRRC1,SNX6,AKAP6,VPS37C,FBXW7,TAOK2,KATNB1,ATP6V1D,RPH3A,ERBB2,CASP8,GOLPH3L,PTTG1IP,FAM126B,SMO,RAPGEF2,SRSF1,DNAJC27,VPS37B,SORBS1,RUFY3,CLTA,BCAP29,PAK1,COX18,BCL2L1,PEX5,SEC24D
FUMA	WP262	ebv lmp1 signaling	24	3	0.00235961	0.0173508	RELA:NFKB1:IKBKB
FUMA	WP_PHOTODYNAMIC_THERAPY-INDUCED_AP-1_SURVIVAL_SIGNALING.	photodynamic therapy-induced ap-1 survival signaling.	50	4	0.00236457	0.0173508	MCL1:CFLAR:BCL2L1:HBEGF
FUMA	WP2637	structural pathway of interleukin 1 (il-1)	50	4	0.00236457	0.0173508	RELA:IL1RAP:NFKB1:IKBKB
gPROFILER	GO:0007010	cytoskeleton organization		35		0.0173713	PTK2B,BIN1,SNCA,CFLAR,CASS4,MKLN1,ARHGAP17,STMN1,MAPT,IKBKB,CEP135,ARHGAP35,CAPZA1,ITGB5,GFAP,PKD2,MEF2C,MACF1,ALDOA,RHOC,CDC42,DLG1,GMFG,PALLD,TAOK2,KATNB1,FMNL2,DST,KANK1,DOCK7,TCAP,ARHGEF10,PRICKLE4,DNAAF5,ANTXR1
gPROFILER	GO:0007249	I-kappaB kinase/NF-kappaB signaling		9		0.01738	CFLAR,IKBKB,TRIM38,TNIP1,ALPK1,NFKB1,RELA,PPM1A,RHOC
FUMA	GO:1905952	regulation of lipid localization	152	7	0.00167711	0.0175345	ACACB:CRHR1:APOC1:APOC2:NFKB1:FBXW7:CRH
Webgestalt	GO:0034765	regulation of ion transmembrane transport	441	22	0.000111548	0.0175856	PTK2B;BIN1;SNCA;APP;CACNA1A;SCN11A;RASGRF1;CACNB2;PKD2;PDE4B;MEF2C;DLG1;AKAP6;SCN2B;JPH2;CTSS;CRH;CACNB1;KCNK5;SLC8A1;UBASH3B;CNIH3
Webgestalt	GO:1901214	regulation of neuron death	292	17	0.000109833	0.0175856	PTK2B;SNCA;BDNF;MAPT;PICALM;BAD;OXR1;CREB1;MEF2C;CDC42;EIF4G1;FBXW7;GABRB3;MCL1;CASP8;EN1;BCL2L1
gPROFILER	GO:0014070	response to organic cyclic compound		19		0.0177402	PTK2B,SNCA,MED1,CFLAR,ADCYAP1,APP,ACACB,SST,CALM3,BAD,NFKB1,PKD2,EDNRB,PDE4B,RALB,MEF2C,RELA,CD83,PIAS2
Webgestalt	GO:0044449	contractile fiber part	211	10	0.00124472	0.0177949	BIN1;PDE4B;ALDOA;PALLD;DST;JPH2;TCAP;SLC8A1;PAK1;TTN
Webgestalt	GO:1903169	regulation of calcium ion transmembrane transport	137	11	0.000116421	0.0179062	PTK2B;BIN1;SNCA;CACNB2;PKD2;PDE4B;AKAP6;JPH2;CACNB1;SLC8A1;UBASH3B
FUMA	R-HSA-442755	class b 2 secretin family receptors	94	6	0.000670095	0.017937	WNT2B:CRHR1:WNT3:ADCYAP1:SMO:CRH
FUMA	GO:0008306	associative learning	77	5	0.00174259	0.0179384	CRHR1:ACTR2:CREB1:APP:CRH
FUMA	GO:0070509	calcium ion import	77	5	0.00174259	0.0179384	CACNB2:CACNA1A:SLC8A1:PKD2:CRH
FUMA	GO:0006120	mitochondrial electron transport nadh to ubiquinone	46	4	0.00173519	0.0179384	NDUFA7:NDUFA7:NDUFB3:NDUFB5:SNCA
FUMA	GO:0005996	monosaccharide metabolic process	153	7	0.00174099	0.0179384	SORBS1:BAD:DYRK2:ACACB:ALDOA:SERP1:ALDH5A1
FUMA	GO:0001763	morphogenesis of a branching structure	196	8	0.00172454	0.0179384	WNT2B:PAK1:PML:MED1:MAP3K13:DLG1:PKD2:SMO
FUMA	GO:1903707	negative regulation of hemopoiesis	153	7	0.00174099	0.0179384	ITPKB:UBASH3B:FBN1:ERBB2:NME1:FBXW7:PTK2B
FUMA	GO:0099172	presynapse organization	46	4	0.00173519	0.0179384	APP:EIF4G1:IL1RAP:SNCA
FUMA	GO:0035094	response to nicotine	46	4	0.00173519	0.0179384	BAD:RELA:CREB1:NFKB1
FUMA	GO:0032570	response to progesterone	46	4	0.00173519	0.0179384	BAD:RELA:UBE3A:ABHD2
FUMA	GO:0043631	rna polyadenylation	46	4	0.00173519	0.0179384	MTPAP:CSTF3:NUDT21:APP
FUMA	GO:0050852	t cell receptor signaling pathway	196	8	0.00172454	0.0179384	PDE4B:RELA:PAK1:ELF1:PSME3:CD28:NFKB1:IKBKB
gPROFILER	GO:0008610	lipid biosynthetic process		20		0.0179389	MED1,ACACB,LDLR,ZBTB20,SCD5,SYNJ2,LCAT,ISYNA1,NFKB1,CREB1,PLEKHA3,ACER3,APOC1,PIK3C2B,APOC2,PPM1L,FBXW7,SP1,SRD5A1,FAM57B
gPROFILER	GO:0061387	regulation of extent of cell growth		8		0.0179389	WNT3,BDNF,MAPT,MACF1,MAP3K13,MAP1B,RUFY3,PAK1
gPROFILER	GO:0016020	membrane		162		0.018019	ACP1,PTK2B,BIN1,CYCS,LANCL2,SNCA,WNT3,AP1S1,CLEC4M,DYNLRB1,MED1,CCKBR,NSF,ZNF397,CFLAR,CASS4,APP,SMOX,PTPRA,GPR27,CD44,CRHR1,ACACB,CD209,LDLR,VWC2,SPPL2C,ARHGAP17,DNAJC7,DLK2,HS3ST5,STMN1,GIMAP5,MAPT,SCG3,ARL17B,IKBKB,PML,PICALM,CACNA1A,SCD5,C1QTNF5,ITPKB,FAM163A,ILF3,RPLP0,MS4A6A,NCF4,CDC27,ARHGAP35,SLC35F3,CAMK2B,ICA1,SYNJ2,CD5,SLC12A4,ST7L,MCM7,LCAT,CELF1,SCN11A,B3GALNT1,CALM3,ITGB5,CYB561,SLC…
gPROFILER	GO:0000932	P-body		5		0.018019	SAMD4B,RBPMS,MOV10,PATL1,TNRC6A
gPROFILER	GO:0010605	negative regulation of macromolecule metabolic process		54		0.0180193	BIN1,ENSA,LANCL2,SNCA,MED1,NFATC3,CFLAR,APP,CD44,HEXIM1,MXD4,ACACB,LDLR,ZBTB20,OVOL2,MAPT,IKBKB,PML,PICALM,KLF12,ILF3,RPLP0,ARHGAP35,SPEN,GATAD2A,ZHX1,SAMD4B,CELF1,CALM3,TNIP1,FST,MOV10,NIPBL,UBE2D3,NFKB1,OXR1,EDNRB,CREB1,PATL1,MEF2C,RELA,TCF7L2,PPM1A,USP47,DLG1,PRKAR1B,EID1,ZNF215,TNRC6A,GMFG,EIF4G1,SNX6,HBEGF,VHL
gPROFILER	GO:0022610	biological adhesion		37		0.0180678	PTK2B,FBN1,CLEC4M,CASS4,APP,CD44,CD209,VWC2,MKLN1,PML,ITPKB,CD5,MAP4K4,ITGB5,TNIP1,BAD,IQGAP1,CD22,RELA,CD83,MACF1,MAGI1,CDC42,DLG1,MUC4,ITGB4,LRRC1,PALLD,MPZL2,TAOK2,DST,NRP2,VCAN,KANK1,ERBB2,ANTXR1,IL1RAP
gPROFILER	GO:0090150	establishment of protein localization to membrane		16		0.0181268	NSF,RPLP0,CALM3,BAD,MACF1,PEX19,LRRC1,VPS37C,TAOK2,ERBB2,CASP8,GOLPH3L,VPS37B,PAK1,COX18,PEX5
gPROFILER	GO:0030099	myeloid cell differentiation		7		0.0181268	PTK2B,FBN1,MED1,APP,PML,ITPKB,RBBP5
FUMA	GO:0044309	neuron spine	158	7	0.00208926	0.0181856	CDC42:PDE4B:MAPT:SLC8A1:APP:MAP1B:PTK2B
FUMA	GO:0005518	collagen binding	67	5	0.000932787	0.0182671	CTSS:CD44:PAK1:ANTXR1:AEBP1
FUMA	GO:0019903	protein phosphatase binding	137	7	0.00091952	0.0182671	ENSA:BAD:IQGAP1:ERBB2:MAPT:CDC27:CD22
FUMA	GO:0000980	rna polymerase ii distal enhancer sequence specific dna binding	100	6	0.000927692	0.0182671	ZNF281:RELA:TBX6:CREB1:NFKB1:MEF2C
Webgestalt	GO:0048588	developmental cell growth	213	14	0.000125822	0.0182712	WNT3;APP;BDNF;MAPT;IQGAP1;MACF1;DCLK1;MAP3K13;AKAP6;NRP2;MAP1B;NIN;RUFY3;PAK1
Webgestalt	GO:0045773	positive regulation of axon extension	39	6	0.000127487	0.0182712	MAPT;MACF1;MAP3K13;MAP1B;RUFY3;PAK1
Webgestalt	GO:0042391	regulation of membrane potential	414	21	0.000126646	0.0182712	PTK2B;BIN1;SNCA;ADCYAP1;APP;MAPT;CACNA1A;SCN11A;BAD;CACNB2;MEF2C;DLG1;GABRA2;AKAP6;SCN2B;GABRB3;RIMS3;SLC8A1;CNIH3;BCL2L1;CHRNA9
FUMA	GO:0003002	regionalization	342	11	0.00177754	0.0182726	WNT2B:GDF3:TBX6:TCAP:WNT3:EN1:NRP2:OVOL2:FEZF2:MEF2C:SMO
FUMA	GO:0006612	protein targeting to membrane	197	8	0.00178042	0.0182767	PEX19:VPS37C:PAK1:PEX5:RPLP0:VPS37B:TAOK2:ERBB2
gPROFILER	GO:1903039	positive regulation of leukocyte cell-cell adhesion		8		0.0182991	CD44,CD209,ITPKB,CD5,BAD,RELA,CD83,CDC42
gPROFILER	GO:0051092	positive regulation of NF-kappaB transcription factor activity		7		0.0183024	CFLAR,APP,IKBKB,TRIM38,NFKB1,RELA,MAP3K13
FUMA	R-HSA-193639	p75ntr signals via nf kb	16	3	0.000697586	0.0183453	RELA:NFKB1:IKBKB
FUMA	GO:0017156	calcium ion regulated exocytosis	154	7	0.00180675	0.0184032	RIMS3:CACNB2:CTBP2:ARHGAP17:CALM3:SNCA:NCS1
FUMA	GO:0002252	immune effector process	1242	26	0.00182522	0.0184032	CDC42:CTSS:CR1:CD44:RELA:PAK1:ATP6V1D:PML:IQGAP1:SPN:ALDOA:CRHR1:ILF3:CD22:GMFG:ACTR2:CD28:CST3:APP:DLG1:NFKB1:SCAMP1:TRIM38:CLEC5A:PTK2B:GGH
FUMA	GO:0006379	mrna cleavage	22	3	0.00182529	0.0184032	MOV10:CSTF3:NUDT21
FUMA	GO:1903429	regulation of cell maturation	22	3	0.00182529	0.0184032	EDNRB:TBX6:MAP3K13
FUMA	GO:0098693	regulation of synaptic vesicle cycle	114	6	0.00182209	0.0184032	RIMS3:CACNB2:CALM3:SNCA:PRKAR1B:NCS1
FUMA	GO:0072001	renal system development	292	10	0.00179858	0.0184032	WNT2B:FBN1:IQGAP1:ITGB4:CFLAR:DLG1:PKD2:NIPBL:MEF2C:SMO
gPROFILER	GO:0071346	cellular response to interferon-gamma		5		0.0184496	MED1,CD44,PML,CAMK2B,TRIM38
gPROFILER	GO:1902514	regulation of calcium ion transmembrane transport via high voltage-gated calcium channel		3		0.0185011	BIN1,CACNB2,CACNB1
FUMA	WP4298	viral acute myocarditis	84	5	0.00255545	0.0185015	CASP8:CREB1:BCL2L1:EIF4G1:CYCS
FUMA	GO:0034764	positive regulation of transmembrane transport	198	8	0.00183772	0.0185031	CTSS:CACNB2:SORBS1:AKAP6:CALM3:JPH2:PKD2:SNCA
gPROFILER	GO:0031349	positive regulation of defense response		12		0.0185216	SNCA,MED1,HEXIM1,CD209,LDLR,IKBKB,TNIP1,ALPK1,UBE2D3,NFKB1,MEF2C,RELA
gPROFILER	GO:0045684	positive regulation of epidermis development		3		0.0186131	MED1,OVOL2,FST
gPROFILER	GO:1901564	organonitrogen compound metabolic process		110		0.0188152	ACP1,PTK2B,BIN1,CYCS,ENSA,FBN1,SNCA,DENR,MED1,NSF,MSRB3,CFLAR,CASS4,ADCYAP1,APP,SMOX,PTPRA,CD44,HEXIM1,ACACB,LDLR,SPPL2C,ZBTB20,KANSL1,EIF4E3,BDNF,HS3ST5,MAPT,SCG3,IKBKB,PML,ALDH5A1,PICALM,CACNA1A,SCD5,ITPKB,ILF3,RBBP5,RPLP0,CDC27,CAMK2B,TRIM38,MAP4K4,SAMD4B,LCAT,CELF1,B3GALNT1,EIF1B,PROK2,CALM3,RCHY1,TNIP1,GDF3,RBPMS,ALPK1,BAD,MOV10,IQGAP1,EXTL3,NIPBL,RASGRF1,GFAP,UBE2D3,BMP1,NFKB1,OXR1,ACSL6,PK…
FUMA	GO:0005261	cation channel activity	317	11	0.000973003	0.0188305	CACNB2:SCN2B:CACNB1:CACNA1A:JPH2:SCN11A:CHRNA9:PKD2:KCNK5:PTK2B:NCS1
gPROFILER	GO:0070727	cellular macromolecule localization		61		0.0188337	AP1S1,DYNLRB1,MED1,NSF,BDNF,MAPT,SCG3,ARL17B,IKBKB,PML,PICALM,CACNA1A,RPLP0,CALM3,BAD,IQGAP1,NIPBL,UBE2D3,NVL,CACNB2,LEPROTL1,RALB,MACF1,TCF7L2,PEX19,PPM1A,GOSR2,CDC42,DLG1,POLDIP3,COPA,RAB2A,DCLK1,LRRC1,SNX6,AKAP6,VPS37C,FBXW7,TAOK2,KATNB1,ATP6V1D,RPH3A,ERBB2,CASP8,GOLPH3L,PTTG1IP,FAM126B,SMO,RAPGEF2,SRSF1,DNAJC27,VPS37B,SORBS1,RUFY3,CLTA,BCAP29,PAK1,COX18,BCL2L1,PEX5,SEC24D
FUMA	GO:0008038	neuron recognition	47	4	0.00188006	0.0189035	ARHGAP35:APP:FEZF2:PALLD
gPROFILER	GO:0043933	protein-containing complex subunit organization		37		0.0189462	PTK2B,BIN1,SNCA,TAF1C,DENR,NSF,ACACB,NAP1L5,STMN1,MAPT,PML,ALDH5A1,PICALM,RBBP5,RPLP0,CAPZA1,MCM7,ATPAF1,LCAT,CELF1,BAD,GFAP,BMP1,PKD2,CREB1,RALB,PATL1,TAF6L,ALDOA,TCF7L2,PPM1A,GOSR2,RHOC,MAGI1,APOC1,CDC42,DLG1
FUMA	GO:0050851	antigen receptor mediated signaling pathway	294	10	0.00189052	0.0189827	PDE4B:RELA:PAK1:ELF1:PSME3:CD22:CD28:NFKB1:MEF2C:IKBKB
FUMA	WP205	il-7 signaling pathway	25	3	0.00265931	0.0190001	BAD:BCL2L1:PTK2B
FUMA	GO:0016301	kinase activity	758	19	0.00101788	0.0190275	PIK3C2B:ITPKB:PGM2L1:PAK1:DYRK2:DCLK1:TAOK2:ERBB2:NME1:MMD:MAP4K4:TTN:NRP2:MAP3K13:DLG1:ALPK1:CAMK2B:PTK2B:IKBKB
FUMA	GO:0061659	ubiquitin like protein ligase activity	224	9	0.00101138	0.0190275	CDC42:UBE3A:MED1:PIAS2:UHRF1:VHL:MARCH6:MYLIP:RNF144B
FUMA	GO:0022843	voltage gated cation channel activity	139	7	0.00100088	0.0190275	CACNB2:CACNB1:CACNA1A:PKD2:KCNK5:PTK2B:NCS1
gPROFILER	GO:0007422	peripheral nervous system development		6		0.0190686	BDNF,EDNRB,RELA,ERBB2,ARHGEF10,ETV1
FUMA	GO:0007613	memory	115	6	0.00190462	0.0190982	BDNF:RASGRF1:CRHR1:MAPT:LDLR:CREB1
FUMA	GO:0004857	enzyme inhibitor activity	370	12	0.00104272	0.0192728	ATPIF1:ANGPTL3:ENSA:IQGAP1:HEXIM1:GMFG:APOC1:APOC2:CST3:APP:SNCA:PRKAR1B
gPROFILER	GO:0004857	enzyme inhibitor activity		5		0.0193504	BIN1,ENSA,SNCA,APP,HEXIM1
gPROFILER	GO:0008331	high voltage-gated calcium channel activity		3		0.0193504	CACNA1A,CACNB2,CACNB1
Webgestalt	GO:0007044	cell-substrate junction assembly	95	9	0.000138558	0.0194165	PTK2B;MAP4K4;IQGAP1;MACF1;TNS1;ITGB4;TAOK2;DST;SORBS1
FUMA	GO:0048194	golgi vesicle budding	79	5	0.00195202	0.0194346	GOLPH3L:CNIH3:NSF:GOSR2:SEC24D
FUMA	GO:0030098	lymphocyte differentiation	346	11	0.0019461	0.0194346	CR1:ITPKB:DCLRE1C:BAD:SPN:ERBB2:CLPTM1:CD28:FANCD2:CD83:PTK2B
FUMA	GO:0043632	modification dependent macromolecule catabolic process	623	16	0.00194958	0.0194346	USP47:VPS37C:VPS37B:UBE3A:PML:PSME3:CDC27:UHRF1:RCHY1:UBE2D3:FBXW7:MARCH6:MYLIP:RNF144B:TRIM38:PTK2B
FUMA	GO:0046889	positive regulation of lipid biosynthetic process	79	5	0.00195202	0.0194346	SORBS1:LDLR:APOC2:CREB1:ZBTB20
FUMA	GO:0055117	regulation of cardiac muscle contraction	79	5	0.00195202	0.0194346	PDE4B:CALM3:SLC8A1:BIN1:DLG1
FUMA	GO:0030100	regulation of endocytosis	200	8	0.00195668	0.0194346	PICALM:CD22:APOC1:APOC2:CALM3:BIN1:SNCA:MKLN1
FUMA	GO:0007266	rho protein signal transduction	200	8	0.00195668	0.0194346	CDC42:STMN1:RHOC:RASGRF1:MYO9B:ARHGAP35:ARHGEF10:KANK1
gPROFILER	GO:0021536	diencephalon development		6		0.0194919	ADCYAP1,CREB1,SRD5A1,NRP2,CRH,SMO
gPROFILER	GO:0010985	negative regulation of lipoprotein particle clearance		3		0.0195008	MYLIP,APOC1,APOC2
FUMA	GO:0019902	phosphatase binding	182	8	0.00107779	0.0196995	ENSA:BAD:IQGAP1:ERBB2:MAPT:CDC27:CD22:DLG1
gPROFILER	GO:0009968	negative regulation of signal transduction		34		0.0197012	FBN1,SNCA,CFLAR,CD44,VWC2,ELF1,BDNF,DLK2,STMN1,RBPMS2,ARHGAP35,CALM3,TNIP1,GDF3,FST,CD22,PKD2,RELA,PIAS2,TCF7L2,PPM1A,USP47,CDC42,DLG1,DYRK2,SNX6,HBEGF,VHL,FBXW7,TSKU,KANK1,MCL1,ERBB2,CASP8
gPROFILER	GO:0043393	regulation of protein binding		8		0.0197012	APP,BDNF,STMN1,NVL,RALB,MEF2C,TCF7L2,CDC42
FUMA	GO:0010822	positive regulation of mitochondrion organization	116	6	0.00198995	0.0197384	ATPIF1:BAD:CASP8:FAM162A:UBE2D3:FBXW7
gPROFILER	GO:0044449	contractile fiber part		12		0.0198238	BIN1,CALM3,PDE4B,ALDOA,PALLD,DST,JPH2,TCAP,PRICKLE4,SLC8A1,PAK1,TTN
gPROFILER	GO:0006790	sulfur compound metabolic process		6		0.0199176	SNCA,ACACB,HS3ST5,ALDH5A1,CACNA1A,SCD5
gPROFILER	GO:0019637	organophosphate metabolic process		22		0.0199408	PTK2B,SNCA,CCKBR,APP,ACACB,LDLR,ZBTB20,ALDH5A1,SCD5,ITPKB,SYNJ2,LCAT,BAD,ISYNA1,ACSL6,PDE4B,PLEKHA3,ALDOA,APOC1,CDC42,DLG1,PIK3C2B
gPROFILER	GO:0031667	response to nutrient levels		14		0.0199408	ENSA,MED1,ADCYAP1,ACACB,LDLR,WNT2B,SST,GDF3,CREB1,RALB,RELA,PIK3C2B,TNRC6A,EIF4G1
gPROFILER	GO:0071560	cellular response to transforming growth factor beta stimulus		8		0.0200512	FBN1,CFLAR,OVOL2,PML,ITGB5,CREB1,MEF2C,PPM1A
gPROFILER	GO:0043410	positive regulation of MAPK cascade		5		0.0200512	PTK2B,CFLAR,ADCYAP1,APP,CD44
gPROFILER	GO:0009615	response to virus		8		0.0200512	AP1S1,STMN1,IKBKB,PML,ILF3,TRIM38,BAD,MOV10
gPROFILER	GO:0015031	protein transport		65		0.0200821	ENSA,AP1S1,DYNLRB1,MED1,NSF,ADCYAP1,GPR27,ARL17B,PML,CACNA1A,C1QTNF5,RPLP0,ICA1,MAP4K4,PDIA4,BAD,UBE2D3,CD22,ANKRD50,MACF1,TCF7L2,PEX19,PPY,PPM1A,GOSR2,CDC42,POLDIP3,LILRA5,COPA,RAB2A,LRRC1,APOC2,SNX6,AKAP6,RRBP1,VPS37C,FBXW7,PLEKHM1,TAOK2,KATNB1,SERP1,ATP6V1D,EXOC6,RPH3A,MCL1,ERBB2,GOLPH3L,IL1RAP,CLEC5A,PTTG1IP,CRH,SMO,SRSF1,DNAJC27,VPS37B,RUFY3,CLTA,BCAP29,PAK1,YIPF5,COX18,PEX5,SEC24D,SCAMP1,TTN
FUMA	GO:0014009	glial cell proliferation	48	4	0.0020331	0.020085	GFAP:ADCYAP1:CREB1:PTK2B
FUMA	GO:0007528	neuromuscular junction development	48	4	0.0020331	0.020085	CACNB2:CACNB1:ERBB2:APP
FUMA	GO:1902743	regulation of lamellipodium organization	48	4	0.0020331	0.020085	CDC42:CD44:SSH3:KANK1
FUMA	GO:0048863	stem cell differentiation	248	9	0.00203641	0.0200907	ZNF281:EDNRB:NUDT21:PSME3:WNT3:NRP2:OVOL2:MEF2C:SMO
gPROFILER	GO:0032103	positive regulation of response to external stimulus		6		0.0201167	PTK2B,SNCA,MED1,HEXIM1,CD209,LDLR
gPROFILER	GO:0070936	protein K48-linked ubiquitination		5		0.0201219	TRIM38,UBE2D3,UBE3A,UBE2T,MARCH6
gPROFILER	GO:0071692	protein localization to extracellular region		14		0.0201219	ENSA,FBN1,ADCYAP1,GPR27,PML,CACNA1A,C1QTNF5,ICA1,MAP4K4,PDIA4,BAD,CD22,TCF7L2,PPY
FUMA	GO:0043900	regulation of multi organism process	401	12	0.00204552	0.0201536	PPIH:BAD:SP1:VPS37B:EDNRB:PML:ILF3:CD28:POLR2H:TNIP1:TRIM38:HS3ST5
gPROFILER	GO:0006644	phospholipid metabolic process		13		0.0202679	PTK2B,SNCA,CCKBR,LDLR,ALDH5A1,SYNJ2,LCAT,ISYNA1,PLEKHA3,APOC1,CDC42,PIK3C2B,APOC2
gPROFILER	GO:0071375	cellular response to peptide hormone stimulus		12		0.0203458	FBN1,CFLAR,PTPRA,CRHR1,NFKB1,CREB1,RELA,PRKAR1B,SP1,SRD5A1,ATP6V1D,KANK1
FUMA	GO:0097386	glial cell projection	24	3	0.00235961	0.0203618	GFAP:MAPT:APP
gPROFILER	GO:0045682	regulation of epidermis development		4		0.0203751	MED1,OVOL2,GDF3,FST
FUMA	GO:0086012	membrane depolarization during cardiac muscle cell action potential	23	3	0.0020818	0.0204016	CACNB2:SCN2B:SLC8A1
FUMA	GO:1902003	regulation of amyloid beta formation	23	3	0.0020818	0.0204016	PICALM:BIN1:APP
FUMA	GO:0050727	regulation of inflammatory response	349	11	0.00208088	0.0204016	RELA:EDNRB:ADCYAP1:LDLR:LILRA5:CD28:APP:FANCD2:SNCA:NFKB1:TNIP1
FUMA	GO:0051004	regulation of lipoprotein lipase activity	23	3	0.0020818	0.0204016	ANGPTL3:APOC1:APOC2
gPROFILER	GO:0086003	cardiac muscle cell contraction		5		0.0204099	BIN1,CACNB2,PDE4B,DLG1,SCN2B
gPROFILER	GO:1901184	regulation of ERBB signaling pathway		6		0.0204404	APP,CDC42,SNX6,HBEGF,FBXW7,ERBB2
FUMA	GO:0071383	cellular response to steroid hormone stimulus	249	9	0.00209247	0.0204789	PAK1:UBE3A:ABHD2:MED1:ADCYAP1:PIAS2:CFLAR:SRD5A1:CRH
gPROFILER	GO:0019903	protein phosphatase binding		6		0.0205775	ENSA,MAPT,CDC27,BAD,IQGAP1,CD22
gPROFILER	GO:0000149	SNARE binding		4		0.0205775	SNCA,NSF,PICALM,CACNA1A
gPROFILER	GO:0002521	leukocyte differentiation		22		0.0205942	PTK2B,FBN1,MED1,APP,ITPKB,BAD,CREB1,MEF2C,DCLRE1C,CD83,CDC42,CLPTM1,FBXW7,FANCD2,CR1,ERBB2,CASP8,LTBR,UBASH3B,SPN,CD28,NME1
gPROFILER	GO:0016234	inclusion body		3		0.0206136	SNCA,MAPT,PICALM
gPROFILER	GO:0030003	cellular cation homeostasis		5		0.0206631	PTK2B,SNCA,CCKBR,ADCYAP1,APP
gPROFILER	GO:0061008	hepaticobiliary system development		7		0.0206631	MED1,CFLAR,NIPBL,PKD2,RELA,FBXW7,SRD5A1
gPROFILER	GO:0043123	positive regulation of I-kappaB kinase/NF-kappaB signaling		7		0.0206631	CFLAR,IKBKB,TRIM38,ALPK1,RELA,PPM1A,RHOC
gPROFILER	GO:0044238	primary metabolic process		11		0.0206631	ACP1,PTK2B,BIN1,VEZF1,CYCS,ENSA,FBN1,LANCL2,SNCA,SNRPN,TAF1C
gPROFILER	GO:0040014	regulation of multicellular organism growth		4		0.0206631	APP,CELF1,NIPBL,CREB1
gPROFILER	GO:0032101	regulation of response to external stimulus		8		0.0206631	PTK2B,SNCA,WNT3,MED1,ADCYAP1,HEXIM1,CD209,LDLR
gPROFILER	GO:1903900	regulation of viral life cycle		5		0.0206631	HS3ST5,PML,ILF3,TRIM38,TNIP1
gPROFILER	GO:0042221	response to chemical		22		0.0206631	PTK2B,CYCS,ENSA,FBN1,LANCL2,SNCA,SNRPN,WNT3,MED1,CFLAR,ADCYAP1,APP,PTPRA,GPR27,CD44,CRHR1,ACACB,LDLR,VWC2,ELF1,ZBTB20,OVOL2
FUMA	GO:0030864	cortical actin cytoskeleton	83	5	0.00242521	0.020749	CAPZA1:GMFG:ACTR2:LANCL2:CALD1
gPROFILER	GO:0008328	ionotropic glutamate receptor complex		4		0.0207672	PTK2B,VWC2,DLG1,LRRC1
gPROFILER	GO:0016197	endosomal transport		9		0.0207992	AP1S1,PICALM,LEPROTL1,ANKRD50,GOSR2,DCLK1,LRRC1,SNX6,VPS37C
gPROFILER	GO:0045165	cell fate commitment		11		0.0208311	WNT3,PML,WNT2B,GDF3,MEF2C,TCF7L2,CDC42,TBX6,FEZF2,MCL1,DOCK7
Webgestalt	GO:0031253	cell projection membrane	335	13	0.00154979	0.0208424	CD44;MAPT;SYNJ2;PKD2;MACF1;PEX19;DLG1;GABRA2;KANK1;ANTXR1;SMO;PAK1;NME1
Webgestalt	GO:0010008	endosome membrane	461	16	0.00149473	0.0208424	LDLR;PML;NCF4;UBE2D3;GOSR2;SNX6;VPS37C;PLEKHM1;SLC30A3;ERBB2;ANTXR1;FIG4;MMD;VPS37B;CLTA;SCAMP1
Webgestalt	GO:0071437	invadopodium	16	3	0.00156588	0.0208424	RUFY3;PAK1;ACTR2
Webgestalt	GO:0030120	vesicle coat	57	5	0.00154261	0.0208424	AP1S1;PICALM;COPA;CLTA;SEC24D
FUMA	GO:0000149	snare binding	105	6	0.00119548	0.0209057	PICALM:NSF:GOSR2:CACNA1A:SNCA:SEC24D
FUMA	GO:0005248	voltage gated sodium channel activity	19	3	0.0011774	0.0209057	SCN2B:SCN11A:PKD2
gPROFILER	GO:0071702	organic substance transport		61		0.0209678	ENSA,SNCA,AP1S1,CLEC4M,DYNLRB1,MED1,NSF,ADCYAP1,GPR27,CRHR1,ACACB,CD209,LDLR,ARL17B,PML,CACNA1A,C1QTNF5,RPLP0,SLC35F3,ICA1,MAP4K4,LCAT,SLC4A9,PDIA4,ABCC3,BAD,UBE2D3,CD22,NFKB1,PLEKHA3,ANKRD50,MACF1,TCF7L2,PEX19,PPY,PPM1A,GOSR2,APOC1,CDC42,POLDIP3,LILRA5,COPA,RAB2A,SLCO3A1,LRRC1,APOC2,SNX6,AKAP6,RRBP1,VPS37C,FBXW7,PLEKHM1,TAOK2,KATNB1,SERP1,ATP6V1D,EXOC6,SLC16A9,RPH3A,MCL1,ERBB2
FUMA	R-HSA-8934593	regulation of runx1 expression and activity	17	3	0.000840067	0.0210353	MOV10:PML:TNRC6A
FUMA	R-HSA-8934593	rip mediated nfkb activation via zbp1	17	3	0.000840067	0.0210353	RELA:NFKB1:IKBKB
FUMA	R-HSA-445355	smooth muscle contraction	38	4	0.000841972	0.0210353	SORBS1:PAK1:ITGB5:CALD1
gPROFILER	GO:0051926	negative regulation of calcium ion transport		4		0.0210386	BIN1,CRHR1,CALM3,PKD2
gPROFILER	GO:2000112	regulation of cellular macromolecule biosynthetic process		62		0.0210386	PTK2B,VEZF1,FBN1,LANCL2,SNCA,TAF1C,MED1,NFATC3,ZNF397,CFLAR,ADCYAP1,APP,HEXIM1,MXD4,VWC2,ELF1,ZBTB20,OVOL2,EIF4E3,IKBKB,PML,PICALM,RBPMS2,KLF12,ILF3,ARHGAP35,ZNF44,SPEN,TRIM38,POGK,GATAD2A,ZHX1,SAMD4B,CELF1,EIF1B,TNIP1,GDF3,FST,MOV10,NIPBL,LRRFIP2,UBE2D3,NVL,NFKB1,PKD2,EDNRB,CREB1,MEF2C,TAF6L,RELA,PIAS2,TCF7L2,PPM1A,USP47,CDC42,UBE3A,DLG1,EID1,POLDIP3,ZNF215,TNRC6A,DYRK2
gPROFILER	GO:0001709	cell fate determination		4		0.0210643	MEF2C,CDC42,FEZF2,MCL1
gPROFILER	GO:1990138	neuron projection extension		10		0.0210643	WNT3,MAPT,IQGAP1,MACF1,DCLK1,MAP3K13,NRP2,MAP1B,RUFY3,PAK1
gPROFILER	GO:0071704	organic substance metabolic process		12		0.0210643	ACP1,PTK2B,BIN1,VEZF1,CYCS,ENSA,FBN1,LANCL2,SNCA,SNRPN,TAF1C,WNT3
FUMA	GO:0006006	glucose metabolic process	118	6	0.00216925	0.0211036	SORBS1:BAD:DYRK2:ACACB:SERP1:ALDH5A1
FUMA	GO:0021766	hippocampus development	81	5	0.00217927	0.0211036	NME1:FEZF2:SRD5A1:NEUROD6:SMO
FUMA	GO:0010811	positive regulation of cell substrate adhesion	118	6	0.00216925	0.0211036	CDC42:IQGAP1:MAP4K4:CASS4:VWC2:PTK2B
FUMA	GO:1902930	regulation of alcohol biosynthetic process	81	5	0.00217927	0.0211036	SP1:ACACB:SNCA:NFKB1:PTK2B
FUMA	GO:2001242	regulation of intrinsic apoptotic signaling pathway	159	7	0.00216495	0.0211036	MCL1:USP47:CD44:BAD:BCL2L1:PTTG1IP:FBXW7
FUMA	GO:0002761	regulation of myeloid leukocyte differentiation	118	6	0.00216925	0.0211036	UBASH3B:FBN1:NME1:CASP8:CREB1:FBXW7
FUMA	GO:1903533	regulation of protein targeting	81	5	0.00217927	0.0211036	ATPIF1:PAK1:ERBB2:UBE2D3:FBXW7
FUMA	GO:1901342	regulation of vasculature development	404	12	0.00217449	0.0211036	ANGPTL3:SP1:PML:NFATC3:ERBB2:CFLAR:PROK2:FBXW7:RAPGEF2:ERAP1:PTK2B:FAM129B
gPROFILER	GO:0001944	vasculature development		5		0.0211128	PTK2B,VEZF1,MED1,NFATC3,CFLAR
FUMA	GO:0002762	negative regulation of myeloid leukocyte differentiation	49	4	0.00219452	0.0212233	UBASH3B:FBN1:NME1:FBXW7
gPROFILER	REAC:R-HSA-9022702	MECP2 regulates transcription of neuronal ligands		4		0.0212437	BDNF,SST,CREB1,CRH
FUMA	R-HSA-445355	rna polymerase ii transcription termination	66	5	0.000871066	0.0212808	CSTF3:NUDT21:SRSF1:CSTF1:POLDIP3
FUMA	R-HSA-73856	signaling by ntrks	99	6	0.000880192	0.0212808	BDNF:ADCYAP1:RALB:CREB1:MEF2C:CLTA
gPROFILER	GO:0072657	protein localization to membrane		25		0.0212931	NSF,IKBKB,PICALM,CACNA1A,RPLP0,CALM3,BAD,CACNB2,MACF1,PEX19,DLG1,LRRC1,VPS37C,TAOK2,ERBB2,CASP8,GOLPH3L,FAM126B,RAPGEF2,VPS37B,SORBS1,PAK1,COX18,BCL2L1,PEX5
gPROFILER	GO:0050896	response to stimulus		156		0.0212976	PTK2B,VEZF1,CYCS,ENSA,FBN1,LANCL2,SNCA,SNRPN,WNT3,AP1S1,CLEC4M,DYNLRB1,MED1,NFATC3,CCKBR,MSRB3,CFLAR,ADCYAP1,APP,PTPRA,GPR27,CD44,OCIAD2,HEXIM1,CRHR1,ACACB,CD209,LDLR,VWC2,ELF1,MKLN1,ZBTB20,OVOL2,ARHGAP17,BDNF,DNAJC7,DLK2,STMN1,MAPT,IKBKB,PML,CACNA1A,RBPMS2,ITPKB,ILF3,RBBP5,WNT2B,RPLP0,NCF4,ARHGAP35,SLC35F3,CAMK2B,CAPZA1,SST,SPEN,TRIM38,CD5,SLC12A4,MCM7,MAP4K4,SCN11A,PROK2,CALM3,ITGB5,RCHY1,TNIP1…
FUMA	GO:0014704	intercalated disc	51	4	0.00254347	0.0213168	PAK1:AKAP6:SLC8A1:DLG1
FUMA	GO:0000932	p body	84	5	0.00255545	0.0213168	MOV10:PATL1:TNRC6A:SAMD4B:RBPMS
FUMA	GO:0003007	heart morphogenesis	251	9	0.00220828	0.0213283	MED1:TCAP:TTN:NRP2:OVOL2:PKD2:NIPBL:MEF2C:SMO
gPROFILER	GO:1901576	organic substance biosynthetic process		97		0.0214946	PTK2B,VEZF1,FBN1,LANCL2,SNCA,TAF1C,DENR,MED1,NFATC3,ZNF397,CFLAR,ADCYAP1,APP,SMOX,HEXIM1,MXD4,ACACB,LDLR,VWC2,ELF1,ZBTB20,OVOL2,EIF4E3,HS3ST5,IKBKB,PML,PICALM,SCD5,RBPMS2,KLF12,INTS9,ITPKB,ILF3,RPLP0,ARHGAP35,ZNF44,SYNJ2,SPEN,TRIM38,POGK,MCM7,GATAD2A,ZHX1,SAMD4B,LCAT,CELF1,B3GALNT1,EIF1B,RCHY1,TNIP1,GDF3,RBPMS,FST,MOV10,EXTL3,NIPBL,ISYNA1,LRRFIP2,UBE2D3,NVL,NFKB1,ACSL6,PKD2,EDNRB,PDE4B,CREB1,BCAT…
gPROFILER	GO:0071559	response to transforming growth factor beta		8		0.0214946	FBN1,CFLAR,OVOL2,PML,ITGB5,CREB1,MEF2C,PPM1A
gPROFILER	GO:0048565	digestive tract development		8		0.0215363	CCKBR,OVOL2,RBPMS2,NIPBL,EDNRB,ITGB4,PYY,SMO
gPROFILER	GO:0043412	macromolecule modification		80		0.0215427	ACP1,PTK2B,CYCS,ENSA,FBN1,SNCA,MED1,CFLAR,CASS4,ADCYAP1,APP,PTPRA,CD44,HEXIM1,KANSL1,BDNF,HS3ST5,MAPT,SCG3,IKBKB,PML,ITPKB,ILF3,RBBP5,CDC27,CAMK2B,TRIM38,MAP4K4,GATAD2A,B3GALNT1,PROK2,CALM3,RCHY1,TNIP1,GDF3,RBPMS,ALPK1,IQGAP1,EXTL3,NIPBL,RASGRF1,UBE2D3,NFKB1,OXR1,PKD2,EDNRB,CREB1,FKBP7,RALB,MEF2C,TAF6L,RELA,PIAS2,PPM1A,USP47,MYLIP,CDC42,UBE3A,DLG1,PRKAR1B,EID1,LILRA5,PPP4C,DYRK2,GMFG,MUC4,RAB2A,E…
gPROFILER	GO:0006873	cellular ion homeostasis		5		0.0215937	PTK2B,SNCA,CCKBR,ADCYAP1,APP
gPROFILER	GO:1900542	regulation of purine nucleotide metabolic process		3		0.0215939	SNCA,APP,ZBTB20
gPROFILER	GO:0031116	positive regulation of microtubule polymerization		4		0.0216623	MAPT,MAP1B,NIN,PAK1
gPROFILER	GO:0021700	developmental maturation		8		0.0216774	PTK2B,APP,PICALM,CACNA1A,CAMK2B,SCLT1,EDNRB,SEZ6L2
FUMA	GO:0045786	negative regulation of cell cycle	632	16	0.00224776	0.0216811	TCF7L2:USP47:PPM1A:PML:TAOK2:PSME3:HEXIM1:ADCYAP1:BIN1:BCL2L1:WDR6:DLG1:PKD2:NUDT6:FBXW7:CBX3
gPROFILER	GO:0010468	regulation of gene expression		22		0.0216967	PTK2B,VEZF1,FBN1,LANCL2,SNCA,TAF1C,WNT3,MED1,NFATC3,ZNF397,CFLAR,ADCYAP1,APP,HEXIM1,MXD4,ACACB,LDLR,VWC2,ELF1,ZBTB20,OVOL2,EIF4E3
gPROFILER	GO:0072358	cardiovascular system development		5		0.0217162	PTK2B,VEZF1,MED1,NFATC3,CFLAR
FUMA	GO:0010466	negative regulation of peptidase activity	252	9	0.00226807	0.0217913	CR1:USP47:CD44:PICALM:BIN1:CFLAR:CST3:APP:SNCA
FUMA	GO:0090257	regulation of muscle system process	252	9	0.00226807	0.0217913	PDE4B:PAK1:AKAP6:CALM3:SLC8A1:BIN1:PROK2:DLG1:CAMK2B
FUMA	GO:0071559	response to transforming growth factor beta	252	9	0.00226807	0.0217913	SNX6:PPM1A:FBN1:PML:CFLAR:CREB1:OVOL2:ITGB5:MEF2C
FUMA	GO:0071229	cellular response to acid chemical	205	8	0.00228073	0.0218843	WNT3:NME1:LDLR:CREB1:BCL2L1:PKD2:LANCL2:PTK2B
gPROFILER	GO:1903578	regulation of ATP metabolic process		3		0.0219125	SNCA,APP,ZBTB20
gPROFILER	GO:1903429	regulation of cell maturation		3		0.0219421	EDNRB,MAP3K13,TBX6
gPROFILER	GO:0030201	heparan sulfate proteoglycan metabolic process		3		0.022025	HS3ST5,EXTL3,TCF7L2
FUMA	GO:0045682	regulation of epidermis development	82	5	0.00229985	0.0220389	GDF3:MED1:OVOL2:FST:SMO
gPROFILER	GO:0021542	dentate gyrus development		3		0.0220902	FEZF2,NEUROD6,SMO
gPROFILER	GO:0005184	neuropeptide hormone activity		4		0.0221473	ADCYAP1,PPY,PYY,CRH
gPROFILER	GO:1901981	phosphatidylinositol phosphate binding		9		0.0221473	LANCL2,MAPT,PICALM,NCF4,IQGAP1,PLEKHA3,RPH3A,JPH2,GOLPH3L
gPROFILER	GO:0070273	phosphatidylinositol-4-phosphate binding		4		0.0221473	LANCL2,PLEKHA3,JPH2,GOLPH3L
gPROFILER	GO:0031226	intrinsic component of plasma membrane		39		0.0221585	PTK2B,CLEC4M,APP,PTPRA,CD44,CRHR1,LDLR,VWC2,IKBKB,NCF4,CD5,SLC12A4,SCN11A,CALM3,ITGB5,ANKH,ABCC3,CACNB2,PKD2,EDNRB,CD83,DLG1,LRFN1,GABRA2,MUC4,ITGB4,SLCO3A1,DCLK1,CLPTM1,LRRC1,HBEGF,SCN2B,SLC20A2,CR1,SLC30A3,NRP2,GABRB3,SLC16A9,ERBB2
gPROFILER	GO:0098878	neurotransmitter receptor complex		4		0.0221585	PTK2B,VWC2,DLG1,LRRC1
gPROFILER	GO:0031982	vesicle		71		0.0221585	ACP1,BIN1,SNCA,WNT3,AP1S1,APP,PTPRA,CD44,OCIAD2,CRHR1,LDLR,SPPL2C,BDNF,DNAJC7,STMN1,GIMAP5,SCG3,PML,PICALM,C1QTNF5,RPLP0,NCF4,CAMK2B,CAPZA1,ICA1,SPEN,LCAT,SCN11A,CALM3,ITGB5,CYB561,PDIA4,IQGAP1,NIPBL,UBE2D3,TJAP1,CD22,BMP1,NFKB1,PKD2,PDE4B,LEPROTL1,RALB,TAF6L,ANKRD50,ALDOA,GOSR2,RHOC,CDC42,DLG1,PIK3C2B,NCS1,COPA,GABRA2,GMFG,MUC4,RAB2A,ITGB4,APOC2,FAM3C,SNX6,HBEGF,PPM1L,VPS37C,PLEKHM1,TAOK2,SLC20A…
gPROFILER	GO:0006140	regulation of nucleotide metabolic process		3		0.0222274	SNCA,APP,ZBTB20
FUMA	GO:0099173	postsynapse organization	161	7	0.00232266	0.0222286	CDC42:LRFN1:ACTR2:NRP2:IL1RAP:DLG1:CAMK2B
FUMA	GO:0045178	basal part of cell	52	4	0.00273144	0.0222291	DOCK7:ERBB2:PKD2:DST
FUMA	GO:0043209	myelin sheath	52	4	0.00273144	0.0222291	ERBB2:CALM3:DLG1:SRD5A1
FUMA	GO:0030315	t tubule	52	4	0.00273144	0.0222291	CACNB2:AKAP6:SLC8A1:BIN1
gPROFILER	GO:0035050	embryonic heart tube development		6		0.0222307	MED1,OVOL2,PKD2,MEF2C,TBX6,SMO
gPROFILER	GO:0048813	dendrite morphogenesis		7		0.0222845	PICALM,CACNA1A,CAMK2B,CDC42,UBE3A,DCLK1,TAOK2
[truncated: 766 more rows]
