# Supplementary material for: Multiomics integrative analysis identifies APOE allele-specific blood biomarkers associated to Alzheimer’s disease etiopathogenesis
Source: Aging (Albany NY). 2021 Apr 12;13(7):9277–329. doi: 10.18632/aging.202950 (PMC8064208; doi:10.18632/aging.202950)
Supplement: Supplementary Table 36 [file aging-13-202950-s038.xlsx]

## Sheet: Sheet1
Supplementary Table 36. RRA integrative analysis in cortex: enrichment analysis APOE4 stratum.
Tool	ID	Description	N_genes	N_overlap	p	adjP	genes
FUMA	GO:0030030	cell projection organization	1509	55	1.6273e-16	8.51878e-13	CDC42:DNALI1:LRP8:NEGR1:NTNG1:FCGR2B:MARK1:ITGB1:ANK3:UNC5B:ABLIM1:DPYSL4:CAPRIN1:CD44:EHD1:GAB2:PICALM:RASGRF1:SEMA4B:GPRC5B:MYH10:GAS7:GFAP:CDC42EP4:ZSWIM4:UNC13A:MAP1S:APOE:EMP3:RHOQ:MAP4K4:HECW2:SDC4:GAP43:KALRN:WWTR1:SERPINI1:OPA1:NKX6-1:PDLIM5:GPM6A:ENC1:APC:MYOT:TBC1D7:LST1:TNFRSF21:CD2AP:SNX3:IL6:EGFR:RIMS2:NFIB:SHC3:GSN
FUMA	GO:0007267	cell cell signaling	1638	57	3.26235e-16	8.51878e-13	CDC42:LRP8:NTNG1:RGS4:MARK1:ITGB1:CCNY:SNCG:AP2A2:PPFIA1:DLG2:PGR:SCN2B:NRGN:IGFBP6:ATXN3:GABRB3:MYO5A:RASGRF1:GPRC5B:KCTD13:WWOX:CCL5:GFAP:USP14:UNC13A:APOE:DMPK:CALM3:AP2S1:MAP4K4:RAPGEF4:DNAJC5:SYNGR1:MITF:KALRN:WWTR1:SST:CHRNA9:NKX6-1:NFKB1:CARTPT:PCSK1:LNPEP:APC:HFE:HCRTR2:HTR1E:SNX3:IL6:EGFR:CDK14:MDFIC:CRH:RIMS2:KCNQ3:SHC3
FUMA	GO:0048666	neuron development	1094	46	3.47705e-16	8.51878e-13	CDC42:LRP8:NEGR1:NTNG1:MARK1:ITGB1:MAPK8:ANK3:UNC5B:DPYSL4:CAPRIN1:EHD1:GAB2:PICALM:CLN5:GABRB3:RASGRF1:SEMA4B:GPRC5B:MYH10:GAS7:GFAP:ZSWIM4:UNC13A:MAP1S:APOE:MAP4K4:HECW2:SDC4:GAP43:KALRN:SERPINI1:OPA1:NKX6-1:PDLIM5:GPM6A:ENC1:MYOT:LST1:TNFRSF21:SNX3:IL6:EGFR:RIMS2:NFIB:SHC3
FUMA	GO:0097458	neuron part	1709	54	1.09866e-13	1.09976e-10	CDC42:LRP8:PDE4B:NTNG1:FCGR2B:NAV1:MARK1:ITGB1:MAPK8:ANK3:SNCG:CAPRIN1:PPFIA1:DLG2:PICALM:NRGN:GABRB3:GNB5:MYO5A:RASGRF1:MYH10:UNC13A:MAP1S:APOE:CALM3:BIN1:TMEM163:DNAJC5:ITSN1:SYNGR1:SCN11A:GAP43:SERPINI1:SST:OPA1:ADD1:GRK4:CHRNA9:PDLIM5:GPM6A:ENC1:PCSK1:PHAX:MYOT:PURA:NRSN1:TNFRSF21:DST:HTR1E:CLU:CRH:RIMS2:KCNQ3:NFIB
FUMA	GO:0030182	neuron differentiation	1343	47	1.43462e-13	2.63611e-10	CDC42:LRP8:NEGR1:NTNG1:MARK1:ITGB1:MAPK8:ANK3:UNC5B:DPYSL4:CAPRIN1:EHD1:GAB2:PICALM:CLN5:GABRB3:RASGRF1:SEMA4B:GPRC5B:MYH10:GAS7:GFAP:ZSWIM4:UNC13A:MAP1S:APOE:MAP4K4:BIN1:HECW2:SDC4:GAP43:KALRN:SERPINI1:OPA1:NKX6-1:PDLIM5:GPM6A:ENC1:MYOT:LST1:TNFRSF21:SNX3:IL6:EGFR:RIMS2:NFIB:SHC3
FUMA	GO:0032989	cellular component morphogenesis	1111	42	2.62996e-13	3.86604e-10	CDC42:LRP8:NTNG1:LAMC1:LMOD1:NEBL:ITGB1:ANK3:UNC5B:DPYSL4:CAPRIN1:CD44:GAB2:PICALM:SEMA4B:ALDOA:MYH10:GAS7:CDC42EP4:ZSWIM4:UNC13A:MAP1S:APOE:RHOQ:MAP4K4:HECW2:GAP43:KALRN:OPA1:ADD1:RHOH:NKX6-1:PDLIM5:GPM6A:MYOT:LST1:EGFR:CLU:SCARA3:RIMS2:NFIB:SHC3
FUMA	GO:0022008	neurogenesis	1594	51	3.62488e-13	4.44048e-10	CDC42:LRP8:NEGR1:NTNG1:NAV1:MARK1:ITGB1:MAPK8:ANK3:UNC5B:DPYSL4:NAV2:CAPRIN1:EHD1:GAB2:PICALM:CLN5:GABRB3:RASGRF1:SEMA4B:GPRC5B:MYH10:GAS7:GFAP:ZSWIM4:UNC13A:MAP1S:APOE:MAP4K4:BIN1:HECW2:SDC4:GAP43:KALRN:SERPINI1:OPA1:NKX6-1:PDLIM5:GPM6A:ENC1:MYOT:LST1:TNFRSF21:SNX3:IL6:EGFR:CLU:RIMS2:NFIB:SHC3:GSN
FUMA	GO:0044093	positive regulation of molecular function	1740	53	7.92876e-13	8.3252e-10	LRP8:DUSP12:DDR2:RGS4:DSTYK:CHML:ITGB1:CCNY:MAPK8:ANK3:PLCE1:SH3PXD2A:PICALM:HSPB2:SRGAP1:OSBPL8:CLN5:DOCK9:RIN3:GNB5:PML:RASGRF1:CRTC3:MEFV:GPRC5B:CCL5:WNK4:APOE:APOC1:APOC2:CALM3:MAP4K4:SLC39A10:LRRFIP1:SEC23B:SDC4:ITSN1:KALRN:ADD1:NKX6-1:NFKB1:PDE5A:CARTPT:TBC1D7:HFE:IL6:CYCS:EGFR:MDFIC:CLU:IKBKB:GSN:CDK9
FUMA	GO:0099536	synaptic signaling	712	32	2.57617e-12	2.36686e-09	LRP8:NTNG1:RGS4:ITGB1:SNCG:PPFIA1:DLG2:SCN2B:NRGN:ATXN3:GABRB3:MYO5A:RASGRF1:KCTD13:GFAP:USP14:UNC13A:APOE:DMPK:CALM3:DNAJC5:SYNGR1:SST:CHRNA9:CARTPT:HCRTR2:HTR1E:EGFR:CRH:RIMS2:KCNQ3:SHC3
FUMA	GO:0032990	cell part morphogenesis	673	31	3.07206e-12	2.50885e-09	CDC42:LRP8:NTNG1:ITGB1:ANK3:UNC5B:DPYSL4:CAPRIN1:CD44:GAB2:PICALM:SEMA4B:MYH10:GAS7:ZSWIM4:UNC13A:MAP1S:APOE:MAP4K4:HECW2:GAP43:KALRN:OPA1:NKX6-1:PDLIM5:GPM6A:MYOT:EGFR:RIMS2:NFIB:SHC3
FUMA	GO:0008092	cytoskeletal protein binding	948	37	3.04092e-12	5.00231e-09	LRP8:PDE4B:LMOD1:MARK1:NEBL:ITGB1:ANK3:ABLIM1:DPYSL4:PICALM:BICD1:MYO5A:MEFV:ALDOA:SNTB2:MYH10:GAS7:MAP1S:APOE:CALM3:AGBL5:MAP4K4:BIN1:OPA1:ADD1:PDLIM5:NFKB1:SORBS2:ENC1:APC:MYOT:DST:EGFR:MTUS1:CLU:NCALD:GSN
FUMA	GO:0098805	whole membrane	1647	49	1.48207e-11	7.41774e-09	LRP8:ITGB1:UNC5B:TSPAN14:AP2A2:CD59:CD44:AHNAK:EHD1:PICALM:PGR:NRGN:ACACB:CLN5:BCL2L2:SCG3:STOML1:PML:SNTB2:VPS53:GFAP:ABCC3:UNC13A:TOMM40:APOE:DMPK:CALM3:AP2S1:RHOQ:PLEKHB2:TMEM163:SEC23B:CHMP4B:SDC4:DNAJC5:SYNGR1:PEX5L:OPA1:ADD1:LNPEP:CYSTM1:HBEGF:ATP6V0E1:BPHL:ATP6V1G2:SNX3:EGFR:IKBKB:NCALD
FUMA	GO:1902531	regulation of intracellular signal transduction	1824	52	1.56671e-11	1.11162e-08	CDC42:FCGR2B:RGS4:DSTYK:ITPKB:PIP4K2A:ITGB1:UNC5B:PLCE1:CD44:CHD4:SRGAP1:DYRK2:OSBPL8:BCL2L2:MYO5A:PML:RASGRF1:CRTC3:GPRC5B:KCTD13:CCL5:PTBP1:KANK2:APOE:CALM3:RHOQ:MAP4K4:ITSN1:FBXL2:KALRN:PEX5L:OPA1:TNIP2:RHOH:CHRNA9:PDE5A:CARTPT:HBEGF:DUSP1:TBC1D7:CD2AP:PLEKHG1:IL6:EGFR:MDFIC:CLU:KAT6A:IKBKB:CRH:PIP5K1B:FBP1
FUMA	GO:0051049	regulation of transport	1827	52	1.66364e-11	1.11162e-08	PDE4B:FCGR2B:RGS4:MAPK8:ANK3:SNCG:AHNAK:EHD1:GAB2:DLG2:PICALM:SCN2B:BICD1:OSBPL8:GNB5:MYO5A:PML:RASGRF1:MYH10:CCL5:WNK4:GFAP:UNC13A:APOE:APOC1:APOC2:DMPK:CALM3:AP2S1:RHOQ:MAP4K4:BIN1:RAPGEF4:HECW2:SDC4:DNAJC5:SCN11A:KALRN:NKX6-1:NFKB1:CARTPT:HFE:TNFRSF21:CD2AP:SNX3:IL6:EGFR:MDFIC:CLU:CRH:RIMS2:KCNQ3
FUMA	GO:0097435	supramolecular fiber organization	654	29	3.93201e-11	2.40835e-08	CDC42:DDR2:RGS4:LMOD1:NEBL:ITGB1:PPFIA1:KCTD13:ALDOA:MYH10:GAS7:GFAP:CDC42EP4:MAP1S:APOE:RHOQ:BIN1:SDC4:ITGB5:ADD1:RHOH:SORBS2:APC:ADAMTS2:TNXB:CD2AP:DST:CLU:GSN
FUMA	GO:0030054	cell junction	1275	41	7.97633e-11	2.66143e-08	CDC42:DDR2:CSRP1:DSTYK:ITGB1:ANK3:SH3PXD2A:CD59:CD44:AHNAK:PPFIA1:DLG2:C1QTNF5:PCBP2:GABRB3:SNTB2:WNK4:CDC42EP4:UNC13A:MAP1S:MAP4K4:TMEM163:SDC4:JAM2:ITSN1:SYNGR1:GAP43:ITGB5:ADD1:CHRNA9:PDLIM5:SORBS2:APC:CD2AP:DST:ITGB8:EGFR:SLC7A2:RIMS2:FBP2:GSN
FUMA	GO:0031344	regulation of cell projection organization	665	29	5.83169e-11	3.29715e-08	CDC42:LRP8:NEGR1:FCGR2B:MARK1:CAPRIN1:CD44:SEMA4B:GPRC5B:GFAP:CDC42EP4:ZSWIM4:UNC13A:APOE:RHOQ:MAP4K4:HECW2:GAP43:KALRN:SERPINI1:OPA1:NKX6-1:PDLIM5:GPM6A:ENC1:APC:TBC1D7:SNX3:RIMS2
FUMA	GO:0006811	ion transport	1663	48	6.88239e-11	3.52841e-08	PDE4B:RGS4:SLC16A9:ANK3:SNCG:PLCE1:CNNM2:AHNAK:PPFIA1:DLG2:PICALM:SCN2B:OSBPL8:ACACB:MTMR6:SLC24A4:GABRB3:GNB5:MYO5A:PML:RASGRF1:CCL5:WNK4:ABCC3:SLC16A5:TOMM40:APOE:APOC1:APOC2:DMPK:CALM3:BIN1:TMEM163:SLC39A10:HECW2:SLC25A1:SMDT1:SCN11A:PLCH1:OPA1:CHRNA9:GPM6A:ATP6V0E1:HFE:ATP6V1G2:SLC7A2:CRH:KCNQ3
FUMA	GO:0045595	regulation of cell differentiation	1844	51	7.41308e-11	3.52841e-08	CDC42:LRP8:NEGR1:ARNT:FCGR2B:DDR2:RGS4:MARK1:ITPKB:ITGB1:CAPRIN1:EHD1:LTBP3:SEMA4B:GPRC5B:MAF:GFAP:VEZF1:PTBP1:ZSWIM4:UNC13A:APOE:CLPTM1:DMPK:ZFP36L2:MAP4K4:BIN1:PLEKHB2:HECW2:ZHX3:MITF:KALRN:WWTR1:SERPINI1:OPA1:ADD1:NKX6-1:PDLIM5:NFKB1:PDE5A:CARTPT:ENC1:APC:TNFRSF21:SNX3:IL6:EGFR:IKBKB:RIMS2:S1PR3:CDK9
FUMA	GO:0042592	homeostatic process	1906	52	7.68089e-11	3.52841e-08	PDE4B:ARNT:ITPKB:ANK3:PLCE1:CNNM2:MUC6:CALCB:EHD1:PICALM:SCN2B:SOAT2:HNRNPA1:ACACB:CLN5:SLC24A4:MYO5A:PML:CRTC3:USP7:GPRC5B:ALDOA:CCL5:WNK4:APOE:APOC2:DMPK:CALM3:MAP4K4:SLC39A10:CHMP4B:SMDT1:WWTR1:PLCH1:OPA1:ADD1:CHRNA9:BDH2:ELOVL6:CARTPT:LNPEP:APC:ATP6V0E1:HFE:ATP6V1G2:HCRTR2:IL6:EGFR:EPHX2:CRH:TNFRSF11B:S1PR3
FUMA	GO:0043005	neuron projection	1301	41	1.46303e-10	3.66123e-08	CDC42:LRP8:PDE4B:FCGR2B:NAV1:MARK1:ITGB1:MAPK8:ANK3:SNCG:CAPRIN1:DLG2:NRGN:GABRB3:MYO5A:RASGRF1:MYH10:UNC13A:MAP1S:APOE:CALM3:BIN1:ITSN1:SCN11A:GAP43:OPA1:GRK4:CHRNA9:PDLIM5:GPM6A:PCSK1:MYOT:PURA:NRSN1:TNFRSF21:DST:HTR1E:CLU:CRH:KCNQ3:NFIB
FUMA	GO:0055085	transmembrane transport	1574	46	1.19834e-10	5.18105e-08	PDE4B:RGS4:TIMM17A:SLC16A9:ANK3:PLCE1:CNNM2:SLC43A3:AHNAK:DLG2:PICALM:SCN2B:OSBPL8:ACACB:MTMR6:SLC24A4:GABRB3:GNB5:MYO5A:RASGRF1:WNK4:ABCC3:SLC16A5:TOMM40:CALM3:RHOQ:BIN1:TMEM163:SLC39A10:HECW2:SLC25A1:SMDT1:SCN11A:PLCH1:PEX5L:OPA1:ADD1:CHRNA9:GPM6A:ATP6V0E1:HFE:ATP6V1G2:SLC7A2:CLU:CRH:KCNQ3
FUMA	GO:0098655	cation transmembrane transport	834	32	1.49102e-10	6.08831e-08	PDE4B:RGS4:ANK3:PLCE1:CNNM2:AHNAK:DLG2:PICALM:SCN2B:MTMR6:SLC24A4:GNB5:MYO5A:RASGRF1:WNK4:CALM3:BIN1:TMEM163:SLC39A10:HECW2:SMDT1:SCN11A:PLCH1:OPA1:CHRNA9:GPM6A:ATP6V0E1:HFE:ATP6V1G2:SLC7A2:CRH:KCNQ3
FUMA	GO:0006468	protein phosphorylation	1949	52	1.69752e-10	6.56673e-08	LRP8:FCGR2B:DDR2:RGS4:DSTYK:MARK1:ITPKB:CCNY:MAPK8:PLCE1:STK33:CD44:DLG2:DYRK2:OSBPL8:CDK2AP1:PML:RASGRF1:GPRC5B:CCL5:WNK4:ALPK2:APOE:DMPK:CALM3:ZFP36L2:MAP4K4:STK17B:SDC4:ERG:KALRN:WWTR1:TNIP2:GRK4:CHRNA9:NFKB1:PDE5A:CARTPT:APC:HBEGF:DUSP1:HFE:IL6:EGFR:CDK14:SRPK2:MDFIC:CLU:IKBKB:CRH:SHC3:CDK9
FUMA	GO:0030001	metal ion transport	880	32	5.64797e-10	2.07563e-07	PDE4B:RGS4:ANK3:PLCE1:CNNM2:AHNAK:PICALM:SCN2B:MTMR6:SLC24A4:GNB5:MYO5A:PML:CCL5:WNK4:DMPK:CALM3:BIN1:TMEM163:SLC39A10:HECW2:SMDT1:SCN11A:PLCH1:OPA1:CHRNA9:GPM6A:ATP6V0E1:HFE:ATP6V1G2:CRH:KCNQ3
FUMA	GO:0045202	synapse	1169	37	1.10051e-09	2.20322e-07	CDC42:LRP8:PDE4B:NTNG1:FCGR2B:ITGB1:ANK3:CAPRIN1:PPFIA1:DLG2:PICALM:NRGN:GABRB3:GNB5:MYO5A:SNTB2:MYH10:USP14:UNC13A:MAP1S:APOE:CALM3:BIN1:TMEM163:RAPGEF4:DNAJC5:ITSN1:SYNGR1:GAP43:ADD1:CHRNA9:PDLIM5:GPM6A:PURA:EGFR:CLU:RIMS2
FUMA	GO:0015629	actin cytoskeleton	491	23	1.54746e-09	2.58167e-07	DDR2:LMOD1:NEBL:SH3PXD2A:ABLIM1:AHNAK:MYO5A:ALDOA:MYH10:GAS7:CDC42EP4:RHOQ:BIN1:STK17B:KALRN:ADD1:PDLIM5:SORBS2:MYOT:HFE:CD2AP:LANCL2:GSN
FUMA	KEGG_EPITHELIAL_CELL_SIGNALING_IN_HELICOBACTER_PYLORI_INFECTION	epithelial cell signaling in helicobacter pylori infection	68	10	1.687e-09	3.13781e-07	CDC42:MAPK8:CCL5:JAM2:NFKB1:HBEGF:ATP6V0E1:ATP6V1G2:EGFR:IKBKB
FUMA	GO:0006508	proteolysis	1744	47	1.03782e-09	3.63237e-07	LRP8:TIMM17A:RNPEP:WAC:CUL2:CD44:USP35:PICALM:PCBP2:CPM:CLN5:ATXN3:PML:FBXL16:MEFV:USP7:KCTD13:CPD:SPOP:USP14:INO80C:APOE:KLK7:AGBL5:BIN1:HECW2:CHMP4B:FBXL2:WWTR1:SERPINI1:TNIP2:NFKB1:ENC1:PCSK1:ERAP2:LNPEP:APC:DNAJC18:F12:ADAMTS2:HFE:CD2AP:SNX3:CYCS:BMP1:CLU:GSN
FUMA	GO:0043085	positive regulation of catalytic activity	1397	41	1.19176e-09	3.98155e-07	LRP8:DUSP12:DDR2:RGS4:DSTYK:CHML:ITGB1:CCNY:MAPK8:PLCE1:SH3PXD2A:PICALM:HSPB2:SRGAP1:OSBPL8:DOCK9:RIN3:GNB5:PML:RASGRF1:MEFV:GPRC5B:CCL5:APOE:APOC1:APOC2:CALM3:MAP4K4:SLC39A10:SEC23B:SDC4:ITSN1:KALRN:PDE5A:CARTPT:TBC1D7:CYCS:EGFR:MDFIC:CLU:GSN
FUMA	GO:0030424	axon	600	25	3.21232e-09	4.59362e-07	LRP8:NAV1:MAPK8:ANK3:SNCG:DLG2:NRGN:MYO5A:RASGRF1:MYH10:UNC13A:CALM3:BIN1:ITSN1:SCN11A:GAP43:OPA1:GPM6A:MYOT:NRSN1:TNFRSF21:DST:CRH:KCNQ3:NFIB
FUMA	GO:0044877	protein containing complex binding	1096	36	7.03659e-10	4.73298e-07	HP1BP3:MUTYH:LRP8:FCGR2B:DDR2:CENPF:LGALS8:NEBL:ITGB1:CUL2:ABLIM1:CD44:MS4A2:CHD4:BICD1:MYO5A:CIITA:MYH10:GAS7:GFAP:USP14:MAP1S:APOE:BIN1:POLDIP3:ITGB5:ADD1:APC:TNXB:CD2AP:DST:ITGB8:EGFR:CLU:S1PR3:GSN
FUMA	GO:0031267	small gtpase binding	435	22	8.63157e-10	4.73298e-07	CHML:PLCE1:EHD1:PICALM:DENND5B:BICD1:SRGAP1:RIN3:MYO5A:RASGRF1:KCTD13:CDC42EP4:RAPGEF4:ITSN1:KALRN:PEX5L:RHOH:TBC1D7:LSM2:PLEKHG1:RIMS2:DENND4C
FUMA	GO:0006812	cation transport	1145	36	2.23441e-09	6.93862e-07	PDE4B:RGS4:ANK3:SNCG:PLCE1:CNNM2:AHNAK:DLG2:PICALM:SCN2B:MTMR6:SLC24A4:GNB5:MYO5A:PML:RASGRF1:CCL5:WNK4:DMPK:CALM3:BIN1:TMEM163:SLC39A10:HECW2:SMDT1:SCN11A:PLCH1:OPA1:CHRNA9:GPM6A:ATP6V0E1:HFE:ATP6V1G2:SLC7A2:CRH:KCNQ3
FUMA	GO:0043062	extracellular structure organization	417	21	2.26567e-09	6.93862e-07	DDR2:LAMC1:ELF3:ITGB1:SH3PXD2A:CD44:SOAT2:GFAP:APOE:APOC1:APOC2:KLK7:SDC4:JAM2:ITGB5:ADAMTS2:TNXB:ITGB8:IL6:BMP1:TNFRSF11B
FUMA	GO:0044433	cytoplasmic vesicle part	1483	41	6.57119e-09	7.33671e-07	TSPAN14:PGAM1:AP2A2:CD59:CD44:EHD1:PICALM:NRGN:LRIG3:GABRB3:SCG3:STOML1:PML:GPRC5B:ALDOA:SNTB2:VPS53:UNC13A:APOE:CALM3:AP2S1:RHOQ:PLEKHB2:TMEM163:SEC23B:CHMP4B:DNAJC5:SYNGR1:SERPINI1:NFKB1:PCSK1:LNPEP:CYSTM1:HBEGF:ATP6V0E1:SNX3:EGFR:CLU:NCALD:DENND4C:GSN
FUMA	GO:0036477	somatodendritic compartment	818	29	6.59644e-09	7.33671e-07	CDC42:LRP8:PDE4B:FCGR2B:MARK1:ITGB1:MAPK8:ANK3:SNCG:CAPRIN1:PICALM:NRGN:MYO5A:MYH10:MAP1S:APOE:SERPINI1:SST:OPA1:GRK4:GPM6A:ENC1:PHAX:MYOT:PURA:NRSN1:HTR1E:CLU:CRH
FUMA	GO:0048585	negative regulation of response to stimulus	1629	44	3.5072e-09	1.03112e-06	CDC42:FCGR2B:FCRLB:RGS4:ITGB1:UNC5B:CD59:CD44:BICD1:IGFBP6:PCBP2:DYRK2:BCL2L2:SEMA4B:CRTC3:MEFV:KCTD13:WWOX:CCL5:USP14:KANK2:APOE:CALM3:MAP4K4:WWTR1:OPA1:GRK4:RHOH:CHRNA9:RASL11B:NFKB1:CARTPT:APC:HBEGF:DUSP1:F12:TBC1D7:HFE:CD2AP:NCOA7:IL6:EGFR:CLU:FBP1
FUMA	GO:0007010	cytoskeleton organization	1293	38	4.87731e-09	1.34745e-06	CDC42:DNALI1:RGS4:NAV1:LMOD1:MARK1:NEBL:ITGB1:ANK3:PLCE1:ABLIM1:PPFIA1:BICD1:ATXN3:KCTD13:ALDOA:MYH10:GAS7:KRT17:GFAP:CDC42EP4:MAP1S:APOE:RHOQ:BIN1:CHMP4B:SDC4:ITGB5:ADD1:RHOH:SORBS2:APC:TUBB2A:TNXB:CD2AP:DST:IKBKB:GSN
FUMA	GO:0034220	ion transmembrane transport	1125	35	4.9498e-09	1.34745e-06	PDE4B:RGS4:ANK3:PLCE1:CNNM2:AHNAK:DLG2:PICALM:SCN2B:ACACB:MTMR6:SLC24A4:GABRB3:GNB5:MYO5A:RASGRF1:WNK4:CALM3:BIN1:TMEM163:SLC39A10:HECW2:SLC25A1:SMDT1:SCN11A:PLCH1:OPA1:CHRNA9:GPM6A:ATP6V0E1:HFE:ATP6V1G2:SLC7A2:CRH:KCNQ3
FUMA	GO:0051130	positive regulation of cellular component organization	1188	36	5.82046e-09	1.52787e-06	CDC42:LRP8:NEGR1:DDR2:LMOD1:PIP4K2A:MAPK8:CAPRIN1:EHD1:BICD1:HNRNPA1:DDHD1:PML:GPRC5B:CDC42EP4:UNC13A:APOE:APOC2:RHOQ:MAP4K4:BIN1:SDC4:KALRN:SERPINI1:OPA1:ADD1:GPM6A:ENC1:APC:HFE:SNX3:IL6:CLU:RIMS2:GSN:CDK9
FUMA	GO:0032553	ribonucleotide binding	1885	48	4.18504e-09	1.7211e-06	CDC42:PDE4B:DDR2:DSTYK:MARK1:ITPKB:NTPCR:PIP4K2A:MAPK8:CNNM2:STK33:NAV2:EHD1:NARS2:CHD4:SOAT2:DYRK2:ACACB:MYO5A:CIITA:MYH10:WNK4:ABCC3:ALPK2:DMPK:RHOQ:MAP4K4:RAPGEF4:STK17B:UBE2F:GART:KALRN:GFM1:OPA1:GRK4:RHOH:RASL11B:PDE5A:TUBB2A:MCM3:EGFR:LANCL2:CDK14:SRPK2:IKBKB:PIP5K1B:FBP1:CDK9
FUMA	GO:0098660	inorganic ion transmembrane transport	821	29	7.15057e-09	1.79416e-06	PDE4B:RGS4:ANK3:PLCE1:CNNM2:AHNAK:PICALM:SCN2B:MTMR6:SLC24A4:GABRB3:GNB5:MYO5A:WNK4:CALM3:BIN1:TMEM163:SLC39A10:HECW2:SMDT1:SCN11A:PLCH1:OPA1:CHRNA9:GPM6A:ATP6V0E1:HFE:ATP6V1G2:KCNQ3
FUMA	GO:0050808	synapse organization	404	20	7.32312e-09	1.79416e-06	CDC42:LRP8:NTNG1:FCGR2B:ANK3:SNCG:CAPRIN1:DLG2:GABRB3:MYO5A:MYH10:UNC13A:APOE:DMPK:GAP43:KALRN:OPA1:PDLIM5:GPM6A:MYOT
FUMA	GO:0098657	import into cell	773	28	7.67038e-09	1.81862e-06	CDC42:LRP8:FCGR2B:RGS4:ITGB1:AP2A2:EHD1:PICALM:BICD1:RIN3:WNK4:GFAP:APOE:APOC1:APOC2:CALM3:AP2S1:RHOQ:BIN1:SLC39A10:ITSN1:GRK4:HFE:CD2AP:SLC7A2:CLU:SCARA3:GSN
FUMA	GO:0044281	small molecule metabolic process	1685	44	9.55301e-09	2.19421e-06	PDE4B:DUSP12:ITPKB:CREM:SLC16A9:PLCE1:PGAM1:PGM2L1:NARS2:DLG2:ME3:BCAT1:SOAT2:DYRK2:ACACB:MYO5A:CDIPT:ALDOA:PLCD3:ISYNA1:APOE:APOC1:APOC2:RHOQ:INPP4A:GART:CRYZL1:SLC25A1:SULT4A1:PLCH1:OPA1:NFKB1:BDH2:ELOVL6:PDE5A:BPHL:DDAH2:VKORC1L1:MDH2:SLC7A2:EPHX2:ALDH1B1:FBP2:FBP1
FUMA	GO:0051020	gtpase binding	531	23	6.76967e-09	2.22722e-06	CHML:PLCE1:EHD1:PICALM:DENND5B:BICD1:SRGAP1:DOCK9:RIN3:MYO5A:RASGRF1:KCTD13:CDC42EP4:RAPGEF4:ITSN1:KALRN:PEX5L:RHOH:TBC1D7:LSM2:PLEKHG1:RIMS2:DENND4C
FUMA	GO:0023056	positive regulation of signaling	1813	46	1.02031e-08	2.2725e-06	ARNT:FCGR2B:RGS4:ELF3:DSTYK:ITPKB:ITGB1:MAPK8:UNC5B:TSPAN14:PLCE1:CD44:NRGN:OSBPL8:PML:RASGRF1:GPRC5B:PAGR1:PAGR1:KCTD13:WWOX:CCL5:GFAP:PTBP1:UNC13A:LSM14A:APOE:CALM3:MAP4K4:SLC39A10:ITSN1:OPA1:TNIP2:NKX6-1:NFKB1:PDE5A:CARTPT:HBEGF:HFE:IL6:EGFR:LANCL2:MDFIC:IKBKB:CRH:RIMS2:GSN
FUMA	GO:0065003	protein containing complex assembly	1891	47	1.30516e-08	2.82145e-06	HP1BP3:CDC42:DNALI1:LAMC1:LMOD1:CENPF:CD59:AHNAK:EHD1:PICALM:C1QTNF5:BICD1:SOAT2:ACACB:PML:CRTC3:MEFV:KCTD13:ALDOA:GAS7:CCL5:GFAP:CDC42EP4:UNC13A:LSM14A:APOE:APOC1:APOC2:AP2S1:BIN1:CHMP4B:MITF:NDUFB5:OPA1:ADD1:APC:HFE:HIST1H2BD:LY6G5C:CD2AP:SRPK2:NDUFA5:BMP1:CLU:KAT6A:FBP1:GSN
FUMA	GO:0098796	membrane protein complex	1153	34	3.05628e-08	2.83456e-06	IFNLR1:PDE4B:TIMM17A:ITGB1:AP2A2:MS4A2:DLG2:PICALM:SCN2B:GABRB3:SNTB2:TOMM40:CALM3:AP2S1:SEC23B:CHMP4B:SMDT1:SCN11A:ITGB5:NDUFB5:CHRNA9:APC:ATP6V0E1:HFE:ATP6V1G2:SNX3:ITGB8:IL6:EGFR:NDUFA5:IKBKB:NCALD:KCNQ3:DENND4C
FUMA	GO:0044456	synapse part	932	30	3.1149e-08	2.83456e-06	CDC42:LRP8:PDE4B:NTNG1:FCGR2B:ITGB1:ANK3:PPFIA1:DLG2:PICALM:NRGN:GABRB3:GNB5:MYO5A:MYH10:UNC13A:APOE:CALM3:BIN1:TMEM163:DNAJC5:ITSN1:SYNGR1:GAP43:ADD1:CHRNA9:PDLIM5:GPM6A:PURA:RIMS2
FUMA	GO:0048878	chemical homeostasis	1177	35	1.53677e-08	3.22721e-06	ANK3:PLCE1:CNNM2:CALCB:EHD1:PICALM:SCN2B:SOAT2:CLN5:SLC24A4:MYO5A:PML:GPRC5B:CCL5:WNK4:APOE:APOC2:DMPK:CALM3:MAP4K4:SLC39A10:SMDT1:PLCH1:OPA1:CHRNA9:BDH2:CARTPT:ATP6V0E1:HFE:ATP6V1G2:HCRTR2:EGFR:EPHX2:CRH:S1PR3
FUMA	GO:0030055	cell substrate junction	409	19	4.78203e-08	3.98901e-06	CDC42:DDR2:CSRP1:ITGB1:CD59:CD44:AHNAK:PPFIA1:PCBP2:SNTB2:MAP4K4:SDC4:ITGB5:ADD1:SORBS2:DST:ITGB8:EGFR:GSN
FUMA	GO:0003779	actin binding	421	20	1.45812e-08	3.99767e-06	LMOD1:NEBL:ITGB1:ABLIM1:MYO5A:MEFV:ALDOA:SNTB2:MYH10:GAS7:MAP1S:BIN1:ADD1:PDLIM5:ENC1:MYOT:DST:EGFR:NCALD:GSN
FUMA	GO:0016772	transferase activity transferring phosphorus containing groups	908	30	1.75031e-08	4.11323e-06	DDR2:DSTYK:MARK1:ITPKB:PIP4K2A:MAPK8:STK33:PGM2L1:DLG2:DYRK2:POLR1D:CIITA:CDIPT:CCL5:WNK4:USP14:ALPK2:DMPK:MAP4K4:STK17B:POLR3F:KALRN:GRK4:CDS1:EGFR:CDK14:SRPK2:IKBKB:PIP5K1B:CDK9
FUMA	GO:0002682	regulation of immune system process	1606	42	2.0536e-08	4.1186e-06	CDC42:IFNLR1:LRP8:PDE4B:ARNT:FCGR2B:FCRLB:SUSD4:ITPKB:ITGB1:MAPK8:MUC6:CD59:MS4A2:GAB2:PCBP2:GPRC5B:CCL5:LSM14A:APOE:CLPTM1:KLK7:ZFP36L2:SLC39A10:POLR3F:SDC4:MITF:TNIP2:NFKB1:PDE5A:CARTPT:DUSP1:HFE:LST1:TNFRSF21:IL6:SLC7A2:MTUS1:CLU:SCARA3:IKBKB:GSN
FUMA	GO:0050801	ion homeostasis	810	28	2.07331e-08	4.1186e-06	ANK3:PLCE1:CNNM2:CALCB:PICALM:SCN2B:CLN5:SLC24A4:MYO5A:PML:CCL5:WNK4:APOE:DMPK:CALM3:SLC39A10:SMDT1:PLCH1:CHRNA9:BDH2:ATP6V0E1:HFE:ATP6V1G2:HCRTR2:EGFR:EPHX2:CRH:S1PR3
FUMA	KEGG_INOSITOL_PHOSPHATE_METABOLISM	inositol phosphate metabolism	54	8	6.95945e-08	4.82388e-06	ITPKB:PIP4K2A:PLCE1:CDIPT:PLCD3:ISYNA1:INPP4A:PIP5K1B
FUMA	KEGG_PHOSPHATIDYLINOSITOL_SIGNALING_SYSTEM	phosphatidylinositol signaling system	76	9	7.78045e-08	4.82388e-06	ITPKB:PIP4K2A:PLCE1:CDIPT:PLCD3:CALM3:INPP4A:CDS1:PIP5K1B
FUMA	GO:0070161	anchoring junction	552	22	6.28145e-08	4.83672e-06	CDC42:DDR2:CSRP1:ITGB1:CD59:CD44:AHNAK:PPFIA1:PCBP2:SNTB2:CDC42EP4:MAP4K4:SDC4:ITGB5:ADD1:PDLIM5:SORBS2:APC:DST:ITGB8:EGFR:GSN
FUMA	GO:1901565	organonitrogen compound catabolic process	1263	36	2.75582e-08	5.33033e-06	PDE4B:WAC:CUL2:AP2A2:CD44:USP35:BCAT1:PCBP2:CLN5:ATXN3:PML:FBXL16:USP7:KCTD13:SPOP:USP14:APOE:APOC1:AP2S1:HECW2:CHMP4B:SDC4:FBXL2:WWTR1:PDE5A:ENC1:ERAP2:LNPEP:APC:DNAJC18:HFE:DDAH2:CD2AP:SNX3:EGFR:CLU
FUMA	GO:0048667	cell morphogenesis involved in neuron differentiation	575	23	2.9337e-08	5.52889e-06	CDC42:LRP8:NTNG1:ITGB1:ANK3:UNC5B:CAPRIN1:GAB2:PICALM:SEMA4B:MYH10:ZSWIM4:MAP1S:APOE:HECW2:GAP43:KALRN:OPA1:NKX6-1:PDLIM5:MYOT:NFIB:SHC3
FUMA	GO:0044463	cell projection part	1438	38	7.85852e-08	5.61884e-06	CDC42:DNALI1:LRP8:PDE4B:FCGR2B:NAV1:CENPF:MARK1:ITGB1:MAPK8:ANK3:CAPRIN1:CD44:EHD1:DLG2:NRGN:MYO5A:RASGRF1:MYH10:UNC13A:MAP1S:APOE:CALM3:BIN1:ITSN1:GAP43:OPA1:GRK4:GPM6A:APC:PURA:TBC1D7:NRSN1:DST:HTR1E:CLU:CRH:KCNQ3
FUMA	GO:0050839	cell adhesion molecule binding	487	21	3.35059e-08	6.88965e-06	NTNG1:LGALS8:ITGB1:ANK3:AHNAK:EHD1:PICALM:DOCK9:ALDOA:GFAP:LRRFIP1:CHMP4B:ITGB5:ADD1:PDLIM5:TNXB:CD2AP:DST:ITGB8:EGFR:S1PR3
FUMA	GO:0051240	positive regulation of multicellular organismal process	1771	44	4.03922e-08	7.42206e-06	LRP8:PDE4B:NEGR1:ARNT:DDR2:RGS4:ITPKB:ITGB1:CAPRIN1:ACACB:GPRC5B:GFAP:HOXB7:UNC13A:LSM14A:APOE:APOC2:MAP4K4:BIN1:LRRFIP1:POLR3F:ZHX3:KALRN:WWTR1:SERPINI1:OPA1:NKX6-1:NFKB1:ELOVL6:PDE5A:CARTPT:ENC1:APC:HBEGF:F12:SNX3:ITGB8:IL6:EGFR:BMP1:CLU:CRH:RIMS2:CDK9
FUMA	GO:0030029	actin filament based process	739	26	4.76603e-08	8.54398e-06	CDC42:PDE4B:RGS4:LMOD1:NEBL:ITGB1:PPFIA1:SCN2B:ATXN3:MYO5A:KCTD13:ALDOA:MYH10:GAS7:CDC42EP4:RHOQ:BIN1:SDC4:ITGB5:ADD1:RHOH:SORBS2:TNXB:CD2AP:IKBKB:GSN
FUMA	GO:0030554	adenyl nucleotide binding	1536	40	5.1407e-08	8.58346e-06	PDE4B:DDR2:DSTYK:MARK1:ITPKB:NTPCR:PIP4K2A:MAPK8:CNNM2:STK33:NAV2:EHD1:NARS2:CHD4:SOAT2:DYRK2:ACACB:MYO5A:CIITA:MYH10:WNK4:ABCC3:ALPK2:DMPK:MAP4K4:RAPGEF4:STK17B:UBE2F:GART:KALRN:GRK4:MCM3:EGFR:LANCL2:CDK14:SRPK2:IKBKB:PIP5K1B:FBP1:CDK9
FUMA	GO:0098772	molecular function regulator	1787	44	5.21791e-08	8.58346e-06	HDGF:RGS4:CHML:CCNY:MAPK8:PLCE1:SH3PXD2A:CALCB:HSPB2:SCN2B:DENND5B:SRGAP1:DOCK9:RIN3:GNB5:RASGRF1:SEMA4B:GPRC5B:CCL5:WNK4:USP14:APOE:APOC1:APOC2:DMPK:CALM3:RAPGEF4:SEC23B:ITSN1:KALRN:SERPINI1:SST:RHOH:CARTPT:APC:HBEGF:TBC1D7:PLEKHG1:IL6:EGFR:BMP1:CRH:TNFRSF11B:DENND4C
FUMA	GO:0040011	locomotion	1915	46	5.20493e-08	9.10862e-06	PDE4B:DDR2:LAMC1:NAV1:MARK1:LGALS8:ITGB1:UNC5B:DPYSL4:CD44:GAB2:SRGAP1:OSBPL8:MYO5A:PML:SEMA4B:KCTD13:MYH10:CCL5:USP14:KANK2:ZSWIM4:APOE:MAP4K4:CHMP4B:SDC4:JAM2:VPREB1:MITF:GAP43:ITGB5:SST:NKX6-1:GPM6A:APC:MYOT:HBEGF:DUSP1:CD2AP:DST:ITGB8:IL6:EGFR:MTUS1:NFIB:SHC3
FUMA	GO:0012506	vesicle membrane	780	26	1.36598e-07	9.11563e-06	TSPAN14:AP2A2:CD59:CD44:PICALM:NRGN:LRIG3:GABRB3:SCG3:GPRC5B:SNTB2:UNC13A:APOE:CALM3:AP2S1:TMEM163:SEC23B:DNAJC5:SYNGR1:LNPEP:CYSTM1:HBEGF:ATP6V0E1:EGFR:NCALD:DENND4C
FUMA	GO:0009894	regulation of catabolic process	959	30	5.81293e-08	9.93606e-06	ARNT:PIP4K2A:WAC:ITGB1:MAPK8:PGAM1:ACACB:ATXN3:PML:CRTC3:MEFV:USP7:GFAP:USP14:APOE:APOC1:APOC2:ZFP36L2:HECW2:CHMP4B:MTMR3:FBXL2:APC:ATP6V0E1:HFE:ATP6V1G2:SNX3:EGFR:CLU:FBP1
FUMA	GO:0051056	regulation of small gtpase mediated signal transduction	332	17	6.12296e-08	1.02281e-05	CDC42:ITPKB:ITGB1:PLCE1:SRGAP1:RASGRF1:KCTD13:KANK2:APOE:RHOQ:MAP4K4:ITSN1:KALRN:RHOH:CD2AP:PLEKHG1:FBP1
FUMA	GO:0007264	small gtpase mediated signal transduction	554	22	6.68885e-08	1.08689e-05	CDC42:ITPKB:CHML:ITGB1:PLCE1:SRGAP1:DOCK9:RASGRF1:KCTD13:CDC42EP4:KANK2:APOE:RHOQ:MAP4K4:RAPGEF4:ITSN1:KALRN:RHOH:CD2AP:PLEKHG1:SHC3:FBP1
FUMA	GO:0051174	regulation of phosphorus metabolic process	1677	42	6.80229e-08	1.08689e-05	LRP8:FCGR2B:DUSP12:DDR2:RGS4:DSTYK:ITPKB:CCNY:PLCE1:CD44:DLG2:OSBPL8:CDK2AP1:TMEM132D:PML:GPRC5B:CCL5:PTBP1:APOE:DMPK:CALM3:MAP4K4:SLC39A10:SDC4:ITSN1:MTMR3:WWTR1:RHOH:CHRNA9:PDE5A:CARTPT:APC:HBEGF:DUSP1:HFE:IL6:EGFR:MDFIC:CLU:IKBKB:CRH:CDK9
gPROFILER	GO:0032994	protein-lipid complex	39	5		1.26635e-05	APOC1,APOE,APOC2,CLU,BIN1
gPROFILER	GO:1990777	lipoprotein particle	37	4		1.26635e-05	APOC1,APOE,APOC2,CLU
gPROFILER	GO:0034358	plasma lipoprotein particle	37	4		1.26635e-05	APOC1,APOE,APOC2,CLU
gPROFILER	GO:0034364	high-density lipoprotein particle	27	4		1.26635e-05	APOC1,APOE,APOC2,CLU
gPROFILER	GO:0042627	chylomicron	14	3		1.28131e-05	APOC1,APOE,APOC2
FUMA	GO:0044419	interspecies interaction between organisms	925	29	9.31292e-08	1.454e-05	CDC42:FCGR2B:CENPF:ITGB1:CUL2:AP2A2:BICD1:PCBP2:HNRNPA1:PML:CRTC3:USP7:CCL5:PTBP1:APOE:CALM3:AP2S1:BIN1:CHMP4B:ITSN1:FBXL2:ITGB5:SNX3:EGFR:SRPK2:MDFIC:IKBKB:GSN:CDK9
FUMA	GO:0010628	positive regulation of gene expression	1955	46	9.49554e-08	1.454e-05	ARNT:TIMM17A:ELF3:WAC:CREM:MAPK8:ANK3:PICALM:PGR:CRTC3:CIITA:PAGR1:PAGR1:WWOX:MAF:CCL5:HOXB7:VEZF1:POU2F2:APOE:RHOQ:ERG:POLDIP3:MITF:WWTR1:TNIP2:NKX6-1:NFKB1:SUB1:F12:HFE:NCOA7:ITGB8:IL6:NEUROD6:EGFR:SRPK2:MDFIC:EPHX2:CLU:KAT6A:IKBKB:CRH:RIMS2:NFIB:GSN:CDK9
FUMA	GO:0072511	divalent inorganic cation transport	473	20	9.80207e-08	1.47031e-05	PDE4B:RGS4:PLCE1:CNNM2:AHNAK:SLC24A4:GNB5:MYO5A:PML:CCL5:CALM3:BIN1:TMEM163:SLC39A10:SMDT1:PLCH1:OPA1:CHRNA9:GPM6A:CRH
FUMA	GO:0060284	regulation of cell development	930	29	1.04281e-07	1.51185e-05	CDC42:LRP8:NEGR1:RGS4:MARK1:CAPRIN1:SEMA4B:GPRC5B:GFAP:ZSWIM4:UNC13A:APOE:MAP4K4:BIN1:HECW2:KALRN:SERPINI1:OPA1:ADD1:NKX6-1:PDLIM5:PDE5A:ENC1:TNFRSF21:SNX3:IL6:IKBKB:RIMS2:S1PR3
FUMA	GO:0022604	regulation of cell morphogenesis	475	20	1.04904e-07	1.51185e-05	CDC42:LRP8:CAPRIN1:CD44:SEMA4B:ALDOA:MYH10:CDC42EP4:ZSWIM4:UNC13A:APOE:RHOQ:HECW2:KALRN:OPA1:RHOH:NKX6-1:PDLIM5:LST1:RIMS2
FUMA	GO:0044430	cytoskeletal part	1639	40	2.79792e-07	1.75045e-05	CDC42:DNALI1:LRP8:PDE4B:NAV1:LMOD1:CENPF:NEBL:SNCG:SH3PXD2A:ABLIM1:CHD4:BICD1:MYO5A:MEFV:SNTB2:MYH10:GAS7:KRT17:GFAP:MAP1S:CALM3:AGBL5:RHOQ:HECW2:ADD1:APC:PHAX:TUBB2A:TBC1D7:HFE:CCHCR1:DDAH2:CD2AP:MCM3:DST:LANCL2:MTUS1:TBC1D31:GSN
FUMA	GO:0000904	cell morphogenesis involved in differentiation	725	25	1.27033e-07	1.79557e-05	CDC42:LRP8:NTNG1:LAMC1:ITGB1:ANK3:UNC5B:CAPRIN1:GAB2:PICALM:SEMA4B:MYH10:ZSWIM4:MAP1S:APOE:HECW2:GAP43:KALRN:OPA1:NKX6-1:PDLIM5:MYOT:SCARA3:NFIB:SHC3
FUMA	GO:0044297	cell body	557	21	3.13629e-07	1.84672e-05	CDC42:LRP8:FCGR2B:SNCG:PICALM:NRGN:MYO5A:MYH10:GFAP:MAP1S:APOE:SERPINI1:SST:GRK4:GPM6A:ENC1:PHAX:MYOT:PURA:NRSN1:CRH
FUMA	GO:0033267	axon part	376	17	3.57467e-07	1.98791e-05	NAV1:ANK3:DLG2:MYO5A:RASGRF1:MYH10:UNC13A:CALM3:BIN1:ITSN1:GAP43:OPA1:GPM6A:NRSN1:DST:CRH:KCNQ3
FUMA	R-HSA-422475	axon guidance	551	23	1.3435e-08	2.01391e-05	CDC42:LAMC1:ITGB1:CUL2:MAPK8:ANK3:UNC5B:ABLIM1:DPYSL4:AP2A2:GAB2:SCN2B:SRGAP1:MYH10:AP2S1:ITSN1:SCN11A:GAP43:KALRN:TUBB2A:EGFR:KCNQ3:SHC3
FUMA	GO:0019637	organophosphate metabolic process	532	21	1.47534e-07	2.0334e-05	ITPKB:PIP4K2A:PLCE1:DLG2:OSBPL8:ACACB:MTMR6:CDIPT:ALDOA:PLCD3:ISYNA1:RHOQ:INPP4A:MTMR3:SULT4A1:PLCH1:OPA1:MDH2:PIP5K1B:FBP2:FBP1
FUMA	GO:0007015	actin filament organization	396	18	1.49393e-07	2.0334e-05	CDC42:RGS4:LMOD1:NEBL:PPFIA1:KCTD13:ALDOA:GAS7:CDC42EP4:RHOQ:BIN1:SDC4:ITGB5:ADD1:RHOH:SORBS2:CD2AP:GSN
FUMA	GO:0010975	regulation of neuron projection development	487	20	1.56425e-07	2.09041e-05	LRP8:NEGR1:MARK1:CAPRIN1:SEMA4B:GPRC5B:GFAP:ZSWIM4:UNC13A:APOE:MAP4K4:HECW2:KALRN:SERPINI1:OPA1:NKX6-1:PDLIM5:ENC1:SNX3:RIMS2
FUMA	GO:0006897	endocytosis	634	23	1.68723e-07	2.21449e-05	CDC42:LRP8:FCGR2B:ITGB1:AP2A2:EHD1:PICALM:BICD1:RIN3:APOE:APOC1:APOC2:CALM3:AP2S1:RHOQ:BIN1:ITSN1:GRK4:HFE:CD2AP:CLU:SCARA3:GSN
FUMA	GO:0098797	plasma membrane protein complex	570	21	4.56126e-07	2.40306e-05	IFNLR1:PDE4B:ITGB1:AP2A2:MS4A2:DLG2:PICALM:SCN2B:SNTB2:CALM3:AP2S1:SCN11A:ITGB5:CHRNA9:APC:HFE:ITGB8:IL6:EGFR:IKBKB:KCNQ3
FUMA	GO:0023057	negative regulation of signaling	1369	36	1.98951e-07	2.56542e-05	CDC42:FCGR2B:RGS4:ITGB1:UNC5B:CD44:BICD1:IGFBP6:DYRK2:BCL2L2:CRTC3:KCTD13:WWOX:CCL5:KANK2:APOE:CALM3:MAP4K4:KALRN:WWTR1:OPA1:GRK4:RHOH:CHRNA9:RASL11B:CARTPT:APC:HBEGF:DUSP1:TBC1D7:CD2AP:IL6:EGFR:CLU:CRH:FBP1
FUMA	GO:0051051	negative regulation of transport	495	20	2.02731e-07	2.56909e-05	FCGR2B:RGS4:ANK3:PICALM:GNB5:PML:WNK4:APOC1:APOC2:CALM3:MAP4K4:BIN1:HECW2:KALRN:NFKB1:CARTPT:TNFRSF21:SNX3:MDFIC:CRH
FUMA	GO:0042127	regulation of cell population proliferation	1684	41	2.08751e-07	2.60054e-05	HP1BP3:IFNLR1:ARNT:FCGR2B:DDR2:LAMC1:ITGB1:CUL2:MXI1:LTBP3:GAB2:PGR:IGFBP6:PML:CCL5:GFAP:PLCD3:KANK2:APOE:EMP3:SLC39A10:RBBP9:SDC4:MITF:WWTR1:SST:PDE5A:APC:PURA:HBEGF:DUSP1:LST1:TNFRSF21:IL6:EGFR:SRPK2:CLU:CRH:NFIB:IL11RA:S1PR3
FUMA	GO:0030163	protein catabolic process	907	28	2.13592e-07	2.60191e-05	WAC:CUL2:AP2A2:USP35:PCBP2:CLN5:ATXN3:PML:FBXL16:USP7:KCTD13:SPOP:USP14:APOE:AP2S1:HECW2:CHMP4B:FBXL2:WWTR1:ENC1:LNPEP:APC:DNAJC18:HFE:CD2AP:SNX3:EGFR:CLU
FUMA	GO:0046907	intracellular transport	1815	43	2.15941e-07	2.60191e-05	CDC42:TIMM17A:CHML:ANK3:AP2A2:CD59:EHD1:GAB2:DLG2:PICALM:BICD1:HNRNPA1:ACACB:CLN5:MYO5A:PML:VPS53:MYH10:UNC13A:MAP1S:TOMM40:APOE:CALM3:AP2S1:BIN1:SEC23B:CHMP4B:SYS1:DNAJC5:SYNGR1:POLDIP3:ZDHHC23:PEX5L:OPA1:PHAX:PURA:CCHCR1:DST:SNX3:MDFIC:EPHX2:CLU:RIMS2
FUMA	GO:0030133	transport vesicle	387	17	5.33614e-07	2.67074e-05	PDE4B:CD59:PICALM:C1QTNF5:NRGN:SCG3:SNTB2:UNC13A:CALM3:BIN1:TMEM163:SEC23B:DNAJC5:SYNGR1:PCSK1:NRSN1:NCALD
FUMA	GO:0046903	secretion	1628	40	2.35398e-07	2.7906e-05	FCGR2B:TSPAN14:SNCG:PGAM1:AP2A2:CD59:CD44:PPFIA1:GAB2:C1QTNF5:SCG3:MYO5A:PML:ALDOA:MYH10:CCL5:WNK4:ABCC3:UNC13A:POU2F2:CALM3:MAP4K4:RAPGEF4:SDC4:DNAJC5:SYNGR1:KALRN:SCFD2:NKX6-1:NFKB1:CARTPT:CYSTM1:HFE:TNFRSF21:IL6:EGFR:CLU:CRH:RIMS2:GSN
FUMA	R-HSA-373760	l1cam interactions	119	11	3.82147e-08	2.86419e-05	LAMC1:ITGB1:ANK3:AP2A2:SCN2B:AP2S1:SCN11A:GAP43:TUBB2A:EGFR:KCNQ3
FUMA	GO:0051336	regulation of hydrolase activity	1261	34	2.50423e-07	2.92161e-05	RGS4:CHML:ITGB1:MAPK8:CD44:DLG2:PICALM:BICD1:SRGAP1:TMEM132D:DOCK9:RIN3:GNB5:PML:RASGRF1:MEFV:CCL5:USP14:APOC1:APOC2:DMPK:CALM3:MAP4K4:BIN1:SLC39A10:SEC23B:KALRN:SERPINI1:RHOH:TBC1D7:CYCS:EGFR:IKBKB:GSN
FUMA	GO:0005102	signaling receptor binding	1619	40	2.04081e-07	3.05194e-05	CDC42:ARNT:HDGF:LGALS8:ITGB1:CALCB:GAB2:DLG2:PICALM:BICD1:IGFBP6:RASGRF1:SEMA4B:GPRC5B:PAGR1:PAGR1:CCL5:KRT17:GFAP:APOE:CALM3:ITGB5:SST:RASL11B:CARTPT:HBEGF:HFE:TNXB:CD2AP:DST:NCOA7:ITGB8:IL6:EGFR:BMP1:EPHX2:CLU:CRH:TNFRSF11B:S1PR3:SHC3
FUMA	GO:0043292	contractile fiber	228	13	6.66116e-07	3.07147e-05	PDE4B:LMOD1:NEBL:ANK3:AHNAK:ALDOA:CALM3:BIN1:SDC4:SORBS2:MYOT:DST:FBP2
FUMA	GO:0031226	intrinsic component of plasma membrane	1697	40	6.75049e-07	3.07147e-05	IFNLR1:NTNG1:FCGR2B:DDR2:ITGB1:SLC16A9:TSPAN14:CD59:CD44:MS4A2:DLG2:SCN2B:SLC24A4:GABRB3:SEMA4B:ABCC3:SLC16A5:CLPTM1:CALM3:SLC39A10:SDC4:JAM2:SCN11A:ITGB5:CHRNA9:GPM6A:LNPEP:HBEGF:HFE:TNFRSF21:HCRTR2:HTR1E:ITGB8:IL6:EGFR:SLC7A2:IKBKB:KCNQ3:IL11RA:S1PR3
FUMA	GO:0007167	enzyme linked receptor protein signaling pathway	1034	30	2.90252e-07	3.33337e-05	CDC42:ARNT:DDR2:DSTYK:PLCE1:AP2A2:GAB2:IGFBP6:HNRNPA1:OSBPL8:PML:PTBP1:AP2S1:RHOQ:ITSN1:KALRN:ITGB5:WWTR1:OPA1:RASL11B:SUB1:LNPEP:APC:HBEGF:ATP6V0E1:HFE:ATP6V1G2:EGFR:FAM83A:SHC3
gPROFILER	GO:0034361	very-low-density lipoprotein particle	21	3		3.33476e-05	APOC1,APOE,APOC2
gPROFILER	GO:0034385	triglyceride-rich plasma lipoprotein particle	21	3		3.33476e-05	APOC1,APOE,APOC2
FUMA	GO:0043235	receptor complex	398	17	7.85237e-07	3.41749e-05	IFNLR1:LRP8:DDR2:ITGB1:CD44:DLG2:GABRB3:GPRC5B:ITGB5:PEX5L:CHRNA9:HFE:ITGB8:IL6:EGFR:IKBKB:IL11RA
FUMA	GO:0031346	positive regulation of cell projection organization	373	17	3.19636e-07	3.61434e-05	CDC42:LRP8:NEGR1:CAPRIN1:GPRC5B:CDC42EP4:UNC13A:APOE:RHOQ:KALRN:SERPINI1:OPA1:GPM6A:ENC1:APC:SNX3:RIMS2
FUMA	GO:0010498	proteasomal protein catabolic process	466	19	3.57392e-07	3.96157e-05	WAC:CUL2:PCBP2:ATXN3:PML:FBXL16:USP7:KCTD13:SPOP:USP14:APOE:HECW2:FBXL2:WWTR1:ENC1:DNAJC18:HFE:CD2AP:CLU
FUMA	GO:0022610	biological adhesion	1404	36	3.63209e-07	3.96157e-05	CDC42:NEGR1:NTNG1:FCGR2B:DDR2:LAMC1:CSRP1:ITPKB:ITGB1:ANK3:CD44:PPFIA1:DLG2:ATXN3:PML:MYH10:CCL5:MAP4K4:SDC4:JAM2:ITGB5:SERPINI1:PDLIM5:PDE5A:APC:MYOT:DUSP1:HFE:TNXB:TNFRSF21:CD2AP:DST:ITGB8:IL6:EGFR:GSN
FUMA	GO:1905114	cell surface receptor signaling pathway involved in cell cell signaling	612	22	3.66513e-07	3.96157e-05	CDC42:RGS4:MARK1:CCNY:AP2A2:IGFBP6:GABRB3:GPRC5B:WWOX:APOE:DMPK:AP2S1:MITF:WWTR1:CHRNA9:NFKB1:APC:SNX3:EGFR:CDK14:MDFIC:RIMS2
FUMA	GO:0016301	kinase activity	758	25	2.91214e-07	3.99206e-05	DDR2:DSTYK:MARK1:ITPKB:PIP4K2A:MAPK8:STK33:PGM2L1:DLG2:DYRK2:CIITA:CCL5:WNK4:ALPK2:DMPK:MAP4K4:STK17B:KALRN:GRK4:EGFR:CDK14:SRPK2:IKBKB:PIP5K1B:CDK9
FUMA	R-HSA-1474244	extracellular matrix organization	299	16	8.23477e-08	4.11464e-05	DDR2:LAMC1:ITGB1:SH3PXD2A:CD44:LTBP3:KLK7:SDC4:JAM2:CRTAP:ITGB5:ADAMTS2:TNXB:DST:ITGB8:BMP1
FUMA	GO:0001775	cell activation	1408	36	3.88494e-07	4.1383e-05	CDC42:FCGR2B:CSRP1:ITPKB:ITGB1:TSPAN14:PGAM1:AP2A2:CD59:CD44:GAB2:CRTC3:ALDOA:CCL5:POU2F2:APOE:CLPTM1:ZFP36L2:SLC39A10:SDC4:DNAJC5:SYNGR1:TNIP2:RHOH:NFKB1:PDE5A:PURA:CYSTM1:HFE:LST1:TNFRSF21:IL6:EGFR:SLC7A2:CLU:GSN
FUMA	GO:0044283	small molecule biosynthetic process	666	23	3.986e-07	4.1853e-05	PDE4B:ITPKB:PLCE1:PGAM1:BCAT1:ACACB:MYO5A:ALDOA:PLCD3:ISYNA1:APOE:APOC1:APOC2:SLC25A1:PLCH1:NFKB1:BDH2:ELOVL6:PDE5A:MDH2:EPHX2:FBP2:FBP1
FUMA	R-HSA-5653656	vesicle mediated transport	722	25	1.17501e-07	4.40333e-05	CHML:ANK3:AP2A2:CD59:PICALM:DENND5B:BICD1:RIN3:MYO5A:VPS53:CPD:APOE:AP2S1:RHOQ:BIN1:CHMP4B:SYS1:ITSN1:LNPEP:HBEGF:TUBB2A:TBC1D7:EGFR:GCC1:DENND4C
Wegestalt	GO:0015629	actin cytoskeleton	482	23	5.78249e-08	4.46408e-05	ALDOA;BIN1;LMOD1;DDR2;KALRN;MYO5A;GAS7;LANCL2;STK17B;ABLIM1;GSN;SH3PXD2A;CDC42EP4;HFE;PDLIM5;ADD1;SORBS2;CD2AP;AHNAK;NEBL;MYH10;RHOQ;MYOT
FUMA	GO:0016358	dendrite development	220	13	4.44277e-07	4.59921e-05	CDC42:LRP8:MARK1:ITGB1:CAPRIN1:PICALM:MAP1S:APOE:HECW2:KALRN:OPA1:PDLIM5:LST1
FUMA	GO:0051247	positive regulation of protein metabolic process	1615	39	5.1883e-07	5.29639e-05	LRP8:ARNT:FCGR2B:DDR2:TIMM17A:DSTYK:CCNY:MAPK8:PLCE1:CD44:PICALM:OSBPL8:CDK2AP1:ATXN3:PML:MEFV:GPRC5B:CCL5:PTBP1:APOE:CALM3:MAP4K4:SLC39A10:SDC4:POLDIP3:PDE5A:CARTPT:HBEGF:F12:TBC1D7:HFE:IL6:CYCS:EGFR:MDFIC:CLU:CRH:GSN:CDK9
FUMA	GO:0099080	supramolecular complex	936	27	1.29657e-06	5.40776e-05	PDE4B:NAV1:LMOD1:NEBL:ANK3:AHNAK:BICD1:MYO5A:MEFV:ALDOA:SNTB2:GAS7:KRT17:GFAP:MAP1S:CALM3:RHOQ:BIN1:SDC4:SORBS2:APC:MYOT:TUBB2A:CD2AP:DST:MTUS1:FBP2
FUMA	GO:0019900	kinase binding	722	24	4.39985e-07	5.5675e-05	CDC42:DUSP12:CCNY:PGAM1:AP2A2:GAB2:DLG2:BICD1:GPRC5B:GFAP:CALM3:RHOQ:SDC4:OPA1:TNIP2:RHOH:PDLIM5:APC:DUSP1:EGFR:IKBKB:FAM83A:SHC3:CDK9
gPROFILER	GO:0034382	chylomicron remnant clearance	10	3		6.0508e-05	APOC1,APOE,APOC2
gPROFILER	GO:0071830	triglyceride-rich lipoprotein particle clearance	10	3		6.0508e-05	APOC1,APOE,APOC2
gPROFILER	GO:0065005	protein-lipid complex assembly	32	5		6.0508e-05	APOC1,APOE,APOC2,BIN1,BMP1
FUMA	GO:0022603	regulation of anatomical structure morphogenesis	1130	31	6.04762e-07	6.08905e-05	CDC42:LRP8:ITGB1:AP2A2:CAPRIN1:CD44:EHD1:DDHD1:PML:SEMA4B:ALDOA:MYH10:HOXB7:CDC42EP4:ZSWIM4:UNC13A:APOE:AP2S1:RHOQ:HECW2:KALRN:OPA1:RHOH:NKX6-1:PDLIM5:LST1:ITGB8:IL6:RIMS2:TNFRSF11B:NFIB
gPROFILER	GO:0034447	very-low-density lipoprotein particle clearance	11	3		6.23726e-05	APOC1,APOE,APOC2
gPROFILER	GO:0033700	phospholipid efflux	12	3		6.65028e-05	APOC1,APOE,APOC2
FUMA	GO:0010941	regulation of cell death	1697	40	6.75049e-07	6.70488e-05	LRP8:FCGR2B:DSTYK:ITPKB:ITGB1:MAPK8:UNC5B:CD44:PICALM:BCL2L2:GABRB3:PML:WWOX:CCL5:KANK2:APOE:MAP4K4:BIN1:SLC39A10:STK17B:CHMP4B:DNAJC5:ITSN1:MITF:KALRN:OPA1:TNIP2:NFKB1:APC:DUSP1:DDAH2:NCOA7:IL6:CYCS:EGFR:SRPK2:CLU:IKBKB:CRH:GSN
gPROFILER	GO:1902992	negative regulation of amyloid precursor protein catabolic process	16	4		6.85427e-05	APOE,CLU,PICALM,BIN1
gPROFILER	GO:0005829	cytosol	5086	128		6.94728e-05	TOMM40,PGM2L1,LSM14A,DENND4C,ITSN1,CLU,DENND5B,ALDOA,GFAP,DLG2,PICALM,RAPGEF4,NFKB1,PFDN4,LARP7,CDK14,SYS1,TBC1D7,EPHX2,IKBKB,BIN1,POLR1D,GAB2,FGFR1OP2,LMOD1,VPS53,HSPB2,FBP1,ITPKB,RHOH,MAPK8,DPYSL4,KALRN,BCL2L2,CHML,GART,SRGAP1,PGR,MYO5A,NARS2,PDE5A,ISYNA1,FBP2,KAT6A,LANCL2,CD44,CRTC3,MEFV,CENPF,PHAX,ATXN3,LGALS8,DDHD1,INPP4A,GSN,NSL1,NCALD,AGBL5,POLR3F,PGAM1,TNIP2,KRT17,RASGRF1,ELF3,DMPK,DST,AN…
FUMA	GO:0065005	protein lipid complex assembly	32	6	7.3975e-07	7.24955e-05	SOAT2:APOE:APOC1:APOC2:BIN1:BMP1
FUMA	GO:0019725	cellular homeostasis	967	28	7.61916e-07	7.36853e-05	PLCE1:CALCB:PICALM:CLN5:SLC24A4:MYO5A:PML:ALDOA:CCL5:APOE:DMPK:CALM3:MAP4K4:SLC39A10:SMDT1:PLCH1:OPA1:ADD1:CHRNA9:CARTPT:ATP6V0E1:HFE:ATP6V1G2:HCRTR2:IL6:EPHX2:CRH:S1PR3
FUMA	GO:0030662	coated vesicle membrane	175	11	1.88029e-06	7.52866e-05	AP2A2:CD59:PICALM:NRGN:APOE:AP2S1:SEC23B:DNAJC5:HBEGF:EGFR:NCALD
FUMA	GO:0045597	positive regulation of cell differentiation	970	28	8.09476e-07	7.72681e-05	CDC42:LRP8:NEGR1:ARNT:DDR2:ITPKB:CAPRIN1:EHD1:LTBP3:GPRC5B:GFAP:VEZF1:UNC13A:APOE:BIN1:ZHX3:KALRN:WWTR1:SERPINI1:OPA1:ADD1:NKX6-1:NFKB1:PDE5A:ENC1:SNX3:IL6:RIMS2
FUMA	GO:0099173	postsynapse organization	161	11	8.27836e-07	7.76659e-05	CDC42:LRP8:FCGR2B:CAPRIN1:DLG2:MYH10:APOE:GAP43:KALRN:OPA1:PDLIM5
FUMA	GO:0055082	cellular chemical homeostasis	803	25	8.34776e-07	7.76659e-05	PLCE1:CALCB:PICALM:CLN5:SLC24A4:MYO5A:PML:CCL5:APOE:DMPK:CALM3:MAP4K4:SLC39A10:SMDT1:PLCH1:OPA1:CHRNA9:CARTPT:ATP6V0E1:HFE:ATP6V1G2:HCRTR2:EPHX2:CRH:S1PR3
FUMA	GO:0030665	clathrin coated vesicle membrane	111	9	2.02448e-06	7.79426e-05	AP2A2:PICALM:NRGN:APOE:AP2S1:DNAJC5:HBEGF:EGFR:NCALD
FUMA	GO:0042802	identical protein binding	1706	40	7.70499e-07	9.05336e-05	CDC42:ARNT:CENPF:EHD1:PGR:C1QTNF5:BCAT1:FGFR1OP2:ACACB:BCL2L2:GABRB3:MYO5A:PML:MEFV:KCTD13:ALDOA:CCL5:GFAP:MAP1S:APOE:APOC2:BIN1:LRRFIP1:CHMP4B:ZHX3:SDC4:SULT4A1:WWTR1:ADD1:NFKB1:SUB1:PCSK1:APC:LY6G5C:EGFR:BMP1:EPHX2:IKBKB:FBP2:FBP1
Wegestalt	KEGG_INOSITOL_PHOSPHATE_METABOLISM	Inositol phosphate metabolism	74	11	2.92395e-07	9.21045e-05	ITPKB;ISYNA1;INPP4A;PIP5K1B;MTMR3;PIP4K2A;PLCD3;CDIPT;MTMR6;PLCE1;PLCH1
FUMA	GO:0007266	rho protein signal transduction	200	12	1.04966e-06	9.64379e-05	CDC42:ITGB1:RASGRF1:KCTD13:CDC42EP4:KANK2:APOE:RHOQ:ITSN1:KALRN:RHOH:PLEKHG1
FUMA	GO:0055065	metal ion homeostasis	653	22	1.07518e-06	9.75622e-05	ANK3:PLCE1:CNNM2:CALCB:PICALM:SLC24A4:MYO5A:PML:CCL5:APOE:DMPK:CALM3:SLC39A10:SMDT1:PLCH1:CHRNA9:BDH2:HFE:HCRTR2:EGFR:EPHX2:S1PR3
FUMA	GO:0005516	calmodulin binding	197	12	8.94818e-07	9.81317e-05	RGS4:ITPKB:NRGN:MYO5A:SNTB2:MYH10:UNC13A:FBXL2:GAP43:ADD1:EGFR:KCNQ3
FUMA	GO:0072507	divalent inorganic cation homeostasis	506	19	1.22214e-06	0.000109546	ANK3:PLCE1:CNNM2:CALCB:SLC24A4:MYO5A:PML:CCL5:APOE:DMPK:CALM3:SLC39A10:SMDT1:PLCH1:CHRNA9:HCRTR2:EGFR:EPHX2:S1PR3
FUMA	GO:0007169	transmembrane receptor protein tyrosine kinase signaling pathway	712	23	1.24733e-06	0.000110456	CDC42:ARNT:DDR2:DSTYK:PLCE1:AP2A2:GAB2:IGFBP6:HNRNPA1:OSBPL8:PTBP1:AP2S1:RHOQ:ITSN1:KALRN:OPA1:APC:HBEGF:ATP6V0E1:ATP6V1G2:EGFR:FAM83A:SHC3
FUMA	GO:0009890	negative regulation of biosynthetic process	1612	38	1.30795e-06	0.000114445	BEND5:LRP8:HDGF:ELF3:CENPF:CREM:MXI1:CAPRIN1:PHF21A:HNRNPA1:PML:CIITA:WWOX:MAF:KANK2:CERS1:APOE:APOC1:ZFP36L2:LRRFIP1:ZHX3:ZNF217:DONSON:MITF:WWTR1:NKX6-1:NFKB1:ENC1:PURA:HBEGF:DUSP1:IL6:LANCL2:MDFIC:KAT6A:ZHX1:NFIB:FBP1
FUMA	GO:0060341	regulation of cellular localization	881	26	1.35092e-06	0.000116815	ITGB1:MAPK8:ANK3:SNCG:EHD1:PPFIA1:GAB2:PICALM:BICD1:MYO5A:PML:UNC13A:CALM3:RHOQ:MAP4K4:RAPGEF4:DNAJC5:APC:HFE:CD2AP:SNX3:EGFR:MDFIC:CRH:RIMS2:GSN
FUMA	GO:0042578	phosphoric ester hydrolase activity	364	16	1.14279e-06	0.000117493	PDE4B:DUSP12:NTPCR:PLCE1:MTMR6:CCL5:PLCD3:INPP4A:MTMR3:PLCH1:PDE5A:DUSP1:CYCS:EPHX2:FBP2:FBP1
FUMA	GO:0006952	defense response	1684	39	1.44342e-06	0.000123362	IFNLR1:LRP8:FCGR2B:ELF3:SUSD4:LGALS8:ITGB1:MUC6:CD44:MS4A2:PCBP2:PML:MEFV:CIITA:GPRC5B:CCL5:VEZF1:CDC42EP4:USP14:LSM14A:APOE:KLK7:AGBL5:POLR3F:TNIP2:NFKB1:F12:HFE:IL6:EGFR:SRPK2:SLC7A2:EPHX2:CLU:SCARA3:IKBKB:CRH:S1PR3:GSN
FUMA	GO:0070727	cellular macromolecule localization	1886	42	1.50316e-06	0.000126991	TIMM17A:CHML:ITGB1:MAPK8:ANK3:TSPAN14:AP2A2:EHD1:PPFIA1:DLG2:PICALM:BICD1:OSBPL8:SCG3:MYO5A:PML:TOMM40:APOE:CALM3:AP2S1:RHOQ:SEC23B:CHMP4B:SYS1:ITSN1:SYNGR1:POLDIP3:ZDHHC23:PEX5L:APC:PURA:HFE:CCHCR1:CD2AP:EGFR:MDFIC:EPHX2:CLU:IKBKB:RIMS2:DENND4C:GSN
gPROFILER	GO:0034375	high-density lipoprotein particle remodeling	17	3		0.000128202	APOC1,APOE,APOC2
gPROFILER	GO:0034381	plasma lipoprotein particle clearance	73	4		0.000128202	EHD1,APOC1,APOE,APOC2
FUMA	GO:0060548	negative regulation of cell death	1003	28	1.5478e-06	0.000128509	DSTYK:ITPKB:ITGB1:MAPK8:UNC5B:CD44:BCL2L2:GABRB3:CCL5:KANK2:APOE:MAP4K4:SLC39A10:CHMP4B:DNAJC5:ITSN1:MITF:OPA1:TNIP2:NFKB1:DUSP1:DDAH2:NCOA7:IL6:EGFR:CLU:IKBKB:CRH
FUMA	GO:0006915	apoptotic process	1956	43	1.5561e-06	0.000128509	LRP8:DSTYK:ITPKB:ITGB1:CUL2:MAPK8:UNC5B:CD44:DYRK2:BCL2L2:GABRB3:PML:WWOX:CCL5:KANK2:MAP1S:APOE:DMPK:MAP4K4:BIN1:SLC39A10:STK17B:DNAJC5:ITSN1:MITF:KALRN:SST:OPA1:TNIP2:NFKB1:APC:DUSP1:DDAH2:TNFRSF21:IL6:CYCS:EGFR:SRPK2:CLU:IKBKB:CRH:TNFRSF11B:GSN
FUMA	GO:0031399	regulation of protein modification process	1826	41	1.65145e-06	0.000134868	LRP8:ARNT:FCGR2B:DDR2:RGS4:DSTYK:ITPKB:CCNY:MAPK8:PLCE1:CD44:OSBPL8:CDK2AP1:PML:GPRC5B:CCL5:PTBP1:APOE:DMPK:CALM3:MAP4K4:SLC39A10:SDC4:CRTAP:WWTR1:CHRNA9:PDE5A:CARTPT:APC:HBEGF:DUSP1:TBC1D7:HFE:NCOA7:IL6:EGFR:MDFIC:CLU:IKBKB:CRH:CDK9
FUMA	GO:0010959	regulation of metal ion transport	379	16	1.92844e-06	0.000154588	PDE4B:RGS4:ANK3:AHNAK:SCN2B:GNB5:MYO5A:PML:CCL5:WNK4:DMPK:CALM3:BIN1:HECW2:HFE:CRH
FUMA	GO:0043269	regulation of ion transport	677	22	1.93497e-06	0.000154588	PDE4B:RGS4:ANK3:SNCG:AHNAK:DLG2:SCN2B:GNB5:MYO5A:PML:RASGRF1:CCL5:WNK4:APOE:DMPK:CALM3:BIN1:HECW2:SCN11A:HFE:CRH:KCNQ3
FUMA	GO:0010562	positive regulation of phosphorus metabolic process	1075	29	1.96747e-06	0.000155494	LRP8:FCGR2B:DUSP12:DDR2:DSTYK:CCNY:PLCE1:CD44:OSBPL8:CDK2AP1:GPRC5B:CCL5:PTBP1:APOE:CALM3:MAP4K4:SLC39A10:SDC4:ITSN1:PDE5A:CARTPT:HBEGF:HFE:IL6:EGFR:MDFIC:CLU:CRH:CDK9
FUMA	GO:0043603	cellular amide metabolic process	1020	28	2.13495e-06	0.000166935	MRPL24:PGAM1:CAPRIN1:NARS2:PICALM:CPM:ACACB:CLN5:CPD:CCL5:UNC13A:CERS1:LSM14A:APOE:ZFP36L2:BIN1:SLC25A1:POLDIP3:GFM1:BDH2:ELOVL6:ENC1:PCSK1:PURA:ITGB8:IL6:EGFR:CLU
FUMA	GO:0106027	neuron projection organization	84	8	2.24144e-06	0.000173417	CDC42:LRP8:FCGR2B:CAPRIN1:APOE:KALRN:OPA1:PDLIM5
FUMA	GO:0051094	positive regulation of developmental process	1393	34	2.31516e-06	0.000177255	CDC42:LRP8:NEGR1:ARNT:DDR2:ITPKB:ITGB1:CAPRIN1:EHD1:LTBP3:ACACB:DDHD1:GPRC5B:GFAP:HOXB7:VEZF1:UNC13A:APOE:BIN1:ZHX3:KALRN:WWTR1:SERPINI1:OPA1:ADD1:NKX6-1:NFKB1:PDE5A:ENC1:SNX3:ITGB8:IL6:BMP1:RIMS2
Wegestalt	KEGG_EPITHELIAL_CELL_SIGNALING_IN_HELICOBACTER_PYLORI_INFECTION	Epithelial cell signaling in Helicobacter pylori infection	68	10	1.14663e-06	0.000180594	NFKB1;IKBKB;MAPK8;ATP6V0E1;ATP6V1G2;CDC42;JAM2;EGFR;CCL5;HBEGF
gPROFILER	GO:0071825	protein-lipid complex subunit organization	49	5		0.00018356	APOC1,APOE,APOC2,BIN1,BMP1
FUMA	GO:0099177	regulation of trans synaptic signaling	433	17	2.4619e-06	0.000186546	LRP8:NTNG1:RGS4:ITGB1:SNCG:NRGN:RASGRF1:KCTD13:GFAP:UNC13A:APOE:DMPK:CALM3:SYNGR1:EGFR:CRH:RIMS2
FUMA	GO:0007265	ras protein signal transduction	437	17	2.78379e-06	0.000208784	CDC42:ITPKB:ITGB1:PLCE1:RASGRF1:KCTD13:CDC42EP4:KANK2:APOE:RHOQ:MAP4K4:ITSN1:KALRN:RHOH:PLEKHG1:SHC3:FBP1
FUMA	GO:0051345	positive regulation of hydrolase activity	748	23	2.84036e-06	0.000210875	RGS4:CHML:ITGB1:MAPK8:PICALM:SRGAP1:DOCK9:RIN3:GNB5:PML:RASGRF1:MEFV:CCL5:APOC2:CALM3:MAP4K4:SLC39A10:SEC23B:KALRN:TBC1D7:CYCS:EGFR:GSN
FUMA	GO:0051129	negative regulation of cellular component organization	694	22	2.8833e-06	0.000211922	CDC42:LMOD1:CENPF:PPFIA1:PICALM:HNRNPA1:SEMA4B:MEFV:GFAP:APOE:APOC1:APOC2:MAP4K4:CHMP4B:OPA1:ADD1:APC:DUSP1:TBC1D7:CLU:IKBKB:GSN
FUMA	GO:0019932	second messenger mediated signaling	439	17	2.95855e-06	0.000215286	PLCE1:CALCB:DYRK2:MYO5A:CRTC3:PTBP1:APOE:DMPK:CALM3:RAPGEF4:PEX5L:PDE5A:DDAH2:EGFR:CRH:NCALD:RIMS2
FUMA	GO:0010720	positive regulation of cell development	538	19	2.98764e-06	0.000215286	CDC42:LRP8:NEGR1:CAPRIN1:GPRC5B:GFAP:UNC13A:APOE:BIN1:KALRN:SERPINI1:OPA1:ADD1:NKX6-1:PDE5A:ENC1:SNX3:IL6:RIMS2
Wegestalt	GO:0005925	focal adhesion	404	19	1.08096e-06	0.000215435	ITGB5;DDR2;CD59;CD44;SDC4;GSN;CSRP1;SNTB2;DST;CDC42;ADD1;SORBS2;PPFIA1;AHNAK;EGFR;PCBP2;MAP4K4;ITGB8;ITGB1
Wegestalt	GO:0030665	clathrin-coated vesicle membrane	107	10	1.09433e-06	0.000215435	APOE;PICALM;DNAJC5;NCALD;AP2S1;EGFR;NRGN;AP2A2;CEMIP;HBEGF
Wegestalt	GO:0005924	cell-substrate adherens junction	407	19	1.20679e-06	0.000215435	ITGB5;DDR2;CD59;CD44;SDC4;GSN;CSRP1;SNTB2;DST;CDC42;ADD1;SORBS2;PPFIA1;AHNAK;EGFR;PCBP2;MAP4K4;ITGB8;ITGB1
Wegestalt	GO:0030055	cell-substrate junction	411	19	1.3953e-06	0.000215435	ITGB5;DDR2;CD59;CD44;SDC4;GSN;CSRP1;SNTB2;DST;CDC42;ADD1;SORBS2;PPFIA1;AHNAK;EGFR;PCBP2;MAP4K4;ITGB8;ITGB1
Wegestalt	GO:0030662	coated vesicle membrane	169	12	1.77123e-06	0.000227898	APOE;PICALM;DNAJC5;CD59;NCALD;AP2S1;SEC23B;EGFR;NRGN;AP2A2;CEMIP;HBEGF
FUMA	GO:0045664	regulation of neuron differentiation	646	21	3.29923e-06	0.000235431	LRP8:NEGR1:MARK1:CAPRIN1:SEMA4B:GPRC5B:GFAP:ZSWIM4:UNC13A:APOE:MAP4K4:BIN1:HECW2:KALRN:SERPINI1:OPA1:NKX6-1:PDLIM5:ENC1:SNX3:RIMS2
FUMA	GO:0044257	cellular protein catabolic process	756	23	3.38433e-06	0.000239181	WAC:CUL2:AP2A2:USP35:PCBP2:ATXN3:PML:FBXL16:USP7:KCTD13:SPOP:USP14:APOE:AP2S1:HECW2:CHMP4B:FBXL2:WWTR1:ENC1:DNAJC18:HFE:CD2AP:CLU
FUMA	GO:0004674	protein serine threonine kinase activity	435	17	2.61839e-06	0.000253368	DSTYK:MARK1:MAPK8:STK33:DYRK2:WNK4:ALPK2:DMPK:MAP4K4:STK17B:KALRN:GRK4:EGFR:CDK14:SRPK2:IKBKB:CDK9
gPROFILER	GO:0098657	import into cell	819	10		0.000256239	EHD1,APOC1,APOE,APOC2,ITSN1,CLU,SLC7A2,SCARA3,GFAP,PICALM
FUMA	GO:0006898	receptor mediated endocytosis	353	15	3.72761e-06	0.000260933	LRP8:FCGR2B:ITGB1:AP2A2:PICALM:BICD1:APOE:APOC1:APOC2:AP2S1:GRK4:HFE:CD2AP:CLU:SCARA3
FUMA	GO:0009057	macromolecule catabolic process	1366	33	4.07542e-06	0.000282588	WAC:CUL2:AP2A2:CD44:PGM2L1:USP35:PCBP2:CLN5:ATXN3:PML:FBXL16:USP7:KCTD13:SPOP:USP14:APOE:AP2S1:ZFP36L2:HECW2:CHMP4B:SDC4:FBXL2:WWTR1:ENC1:LNPEP:APC:DNAJC18:HFE:LSM2:CD2AP:SNX3:EGFR:CLU
FUMA	GO:0071495	cellular response to endogenous stimulus	1373	33	4.53454e-06	0.000310282	PDE4B:FCGR2B:DSTYK:CD44:EHD1:PGR:HNRNPA1:OSBPL8:GABRB3:MYO5A:PML:PAGR1:PAGR1:WWOX:CCL5:PTBP1:KANK2:ZFP36L2:RHOQ:ITGB5:SST:OPA1:RASL11B:NKX6-1:NFKB1:APC:DUSP1:ATP6V0E1:HFE:ATP6V1G2:EGFR:LANCL2:CRH:DENND4C
FUMA	GO:0009719	response to endogenous stimulus	1634	37	4.55925e-06	0.000310282	PDE4B:FCGR2B:DSTYK:ITGB1:CD44:EHD1:PGR:HNRNPA1:OSBPL8:GABRB3:MYO5A:PML:PAGR1:PAGR1:WWOX:CCL5:PTBP1:KANK2:APOE:CALM3:ZFP36L2:RHOQ:ITGB5:SST:OPA1:RASL11B:NKX6-1:NFKB1:APC:DUSP1:ATP6V0E1:HFE:ATP6V1G2:IL6:EGFR:LANCL2:CRH:DENND4C
FUMA	KEGG_PATHWAYS_IN_CANCER	pathways in cancer	325	14	6.71701e-06	0.000312341	CDC42:ARNT:LAMC1:ITGB1:CUL2:MAPK8:PML:MITF:NFKB1:APC:IL6:CYCS:EGFR:IKBKB
FUMA	GO:0006873	cellular ion homeostasis	661	21	4.6941e-06	0.000316529	PLCE1:CALCB:PICALM:CLN5:SLC24A4:MYO5A:PML:CCL5:APOE:DMPK:CALM3:SLC39A10:SMDT1:PLCH1:CHRNA9:ATP6V0E1:HFE:ATP6V1G2:HCRTR2:EPHX2:S1PR3
FUMA	GO:0030658	transport vesicle membrane	205	11	8.59644e-06	0.000318705	CD59:NRGN:SCG3:SNTB2:UNC13A:CALM3:TMEM163:SEC23B:DNAJC5:SYNGR1:NCALD
FUMA	GO:0005739	mitochondrion	1552	35	9.1372e-06	0.00031904	MUTYH:MRPL24:TIMM17A:MAPK8:NARS2:ME3:PGR:NRGN:BCAT1:ACACB:BCL2L2:ATXN3:WWOX:RSAD1:KANK2:TOMM40:DMPK:CALM3:ZNF217:PFDN4:DNAJC5:SLC25A1:SMDT1:GFM1:NDUFB5:OPA1:NFKB1:BPHL:DDAH2:CYCS:MDH2:NDUFA5:MTUS1:CLU:ALDH1B1
FUMA	GO:0099503	secretory vesicle	983	26	9.54036e-06	0.00031904	PDE4B:RNPEP:TSPAN14:PGAM1:AP2A2:CD59:CD44:PICALM:SCG3:MYO5A:ALDOA:UNC13A:CALM3:KLK7:BIN1:TMEM163:DNAJC5:SYNGR1:SERPINI1:NFKB1:CARTPT:PCSK1:CYSTM1:CLU:DENND4C:GSN
FUMA	GO:0015630	microtubule cytoskeleton	1169	29	9.7703e-06	0.00031904	CDC42:DNALI1:LRP8:PDE4B:NAV1:CENPF:MARK1:SNCG:CHD4:BICD1:MYO5A:MEFV:SNTB2:MYH10:CDC42EP4:MAP1S:CALM3:AGBL5:HECW2:APC:PHAX:TUBB2A:TBC1D7:CCHCR1:DDAH2:MCM3:DST:MTUS1:TBC1D31
FUMA	GO:0048471	perinuclear region of cytoplasm	697	21	1.04654e-05	0.00031904	CENPF:ITGB1:SNCG:STK33:PICALM:BICD1:CDK2AP1:CLN5:VPS53:MAP1S:SEC23B:SORBS2:LNPEP:APC:HFE:CD2AP:MCM3:EGFR:CALN1:CLU:GSN
FUMA	GO:0097447	dendritic tree	588	19	1.05365e-05	0.00031904	CDC42:LRP8:PDE4B:FCGR2B:MARK1:ITGB1:MAPK8:ANK3:CAPRIN1:NRGN:MYH10:MAP1S:APOE:OPA1:GRK4:GPM6A:PURA:HTR1E:CLU
FUMA	GO:0031674	i band	136	9	1.07536e-05	0.00031904	PDE4B:NEBL:ANK3:ALDOA:BIN1:SORBS2:MYOT:DST:FBP2
FUMA	GO:0030139	endocytic vesicle	294	13	1.08365e-05	0.00031904	AP2A2:PICALM:CDC42EP4:APOE:AP2S1:ITSN1:ITGB5:HBEGF:ATP6V0E1:CD2AP:SNX3:EGFR:GSN
gPROFILER	GO:0030100	regulation of endocytosis	210	6		0.000320504	APOC1,APOE,APOC2,ITSN1,CLU,PICALM
gPROFILER	GO:0034368	protein-lipid complex remodeling	28	3		0.000320504	APOC1,APOE,APOC2
gPROFILER	GO:0034369	plasma lipoprotein particle remodeling	28	3		0.000320504	APOC1,APOE,APOC2
gPROFILER	GO:0097006	regulation of plasma lipoprotein particle levels	105	4		0.000320504	EHD1,APOC1,APOE,APOC2
gPROFILER	GO:1902003	regulation of amyloid-beta formation	29	4		0.000320504	APOE,CLU,PICALM,BIN1
gPROFILER	GO:0015918	sterol transport	103	5		0.000320504	APOC1,APOE,APOC2,CLU,NFKB1
gPROFILER	GO:0030301	cholesterol transport	99	5		0.000320504	APOC1,APOE,APOC2,CLU,NFKB1
gPROFILER	GO:0034367	protein-containing complex remodeling	29	3		0.000320504	APOC1,APOE,APOC2
gPROFILER	GO:0034377	plasma lipoprotein particle assembly	28	3		0.000320504	APOC1,APOE,APOC2
FUMA	R-HSA-70263	gluconeogenesis	34	6	1.07934e-06	0.000323588	PGAM1:ALDOA:SLC25A1:MDH2:FBP2:FBP1
FUMA	GO:0046578	regulation of ras protein signal transduction	233	12	5.11911e-06	0.000339185	ITPKB:ITGB1:PLCE1:RASGRF1:KCTD13:KANK2:APOE:MAP4K4:ITSN1:KALRN:PLEKHG1:FBP1
FUMA	GO:0033043	regulation of organelle organization	1254	31	5.12238e-06	0.000339185	CDC42:RGS4:LMOD1:CENPF:PIP4K2A:MAPK8:PPFIA1:BICD1:HNRNPA1:DDHD1:PML:USP7:CDC42EP4:MAP1S:RHOQ:BIN1:HECW2:CHMP4B:SDC4:MTMR3:GAP43:OPA1:ADD1:RHOH:APC:DUSP1:TBC1D7:CD2AP:CLU:GSN:CDK9
FUMA	GO:0031594	neuromuscular junction	76	7	1.21678e-05	0.000347998	ITGB1:ANK3:DLG2:MYH10:UNC13A:DNAJC5:SYNGR1
FUMA	GO:0023061	signal release	460	17	5.48792e-06	0.000360145	SNCG:PPFIA1:MYO5A:CCL5:UNC13A:CALM3:MAP4K4:RAPGEF4:DNAJC5:KALRN:NKX6-1:CARTPT:HFE:IL6:EGFR:CRH:RIMS2
FUMA	GO:0034381	plasma lipoprotein particle clearance	68	7	5.78164e-06	0.000376063	AP2A2:EHD1:SOAT2:APOE:APOC1:APOC2:AP2S1
gPROFILER	GO:0060627	regulation of vesicle-mediated transport	558	11		0.000381631	EHD1,APOC1,APOE,APOC2,ITSN1,CLU,PICALM,RAPGEF4,FCGR2B,BIN1,GAB2
FUMA	R-HSA-9006934	signaling by receptor tyrosine kinases	468	18	1.66632e-06	0.000416302	CDC42:LAMC1:ITGB1:AP2A2:GAB2:PGR:HNRNPA1:GABRB3:WWOX:GFAP:PTBP1:APOE:AP2S1:HBEGF:ATP6V0E1:ATP6V1G2:EGFR:SHC3
FUMA	R-HSA-1236394	signaling by erbb4	58	7	1.95513e-06	0.000418677	PGR:GABRB3:WWOX:GFAP:APOE:HBEGF:EGFR
gPROFILER	GO:0043691	reverse cholesterol transport	21	3		0.000420755	APOE,APOC2,CLU
gPROFILER	GO:1905952	regulation of lipid localization	159	6		0.000420755	EHD1,APOC1,APOE,APOC2,NFKB1,IL6
FUMA	GO:1901981	phosphatidylinositol phosphate binding	156	10	4.63834e-06	0.000423892	MARK1:SH3PXD2A:GAB2:PICALM:NRGN:OSBPL8:PLEKHB2:GAP43:SNX3:LANCL2
FUMA	GO:0060627	regulation of vesicle mediated transport	517	18	6.60878e-06	0.000426092	FCGR2B:EHD1:GAB2:PICALM:BICD1:APOE:APOC1:APOC2:CALM3:AP2S1:BIN1:RAPGEF4:SDC4:HFE:CD2AP:SNX3:CLU:RIMS2
FUMA	GO:0051235	maintenance of location	325	14	6.71701e-06	0.000429305	ANK3:PLCE1:MXI1:EHD1:OSBPL8:ACACB:MYO5A:PML:APOE:CALM3:PLCH1:NFKB1:IL6:GSN
FUMA	GO:0030100	regulation of endocytosis	200	11	6.80372e-06	0.000431097	PICALM:BICD1:APOE:APOC1:APOC2:CALM3:AP2S1:BIN1:HFE:CD2AP:CLU
FUMA	GO:0099175	regulation of postsynapse organization	98	8	7.15808e-06	0.000449674	LRP8:FCGR2B:CAPRIN1:APOE:GAP43:KALRN:OPA1:PDLIM5
gPROFILER	GO:0044449	contractile fiber part	221	14		0.000453448	ALDOA,BIN1,LMOD1,FBP2,SDC4,CSRP1,DST,ANK3,CALM3,PDLIM5,SORBS2,AHNAK,NEBL,PDE4B
FUMA	GO:1904062	regulation of cation transmembrane transport	328	14	7.45438e-06	0.000461585	PDE4B:RGS4:ANK3:AHNAK:DLG2:SCN2B:GNB5:MYO5A:RASGRF1:WNK4:CALM3:BIN1:HECW2:CRH
FUMA	GO:0016311	dephosphorylation	471	17	7.47329e-06	0.000461585	DUSP12:NTPCR:DLG2:TMEM132D:MTMR6:PTBP1:DMPK:CALM3:INPP4A:SLC39A10:MTMR3:DUSP1:CYCS:EPHX2:IKBKB:FBP2:FBP1
FUMA	GO:0003690	double stranded dna binding	952	26	5.446e-06	0.000471509	MUTYH:ARNT:ELF3:CREM:MXI1:PGR:CHD4:MAF:HOXB7:VEZF1:LSM14A:POU2F2:LRRFIP1:POLR3F:ZHX3:ZNF217:ERG:MITF:NKX6-1:NFKB1:SUB1:PURA:NEUROD6:EGFR:NFIB:CDK9
FUMA	GO:0043647	inositol phosphate metabolic process	47	6	7.71547e-06	0.000472573	ITPKB:PLCE1:PLCD3:ISYNA1:INPP4A:PLCH1
FUMA	GO:0007417	central nervous system development	972	26	7.84377e-06	0.00047646	CDC42:LRP8:FCGR2B:RGS4:CENPF:ITGB1:NAV2:NRGN:CLN5:MYH10:GFAP:MAP1S:CALM3:BIN1:GART:SERPINI1:NKX6-1:TNFRSF21:IL6:NEUROD6:EGFR:CLU:CRH:NFIB:SHC3:GSN
FUMA	GO:0008289	lipid binding	726	22	5.89027e-06	0.000482896	MARK1:SH3PXD2A:AP2A2:GAB2:PICALM:PGR:NRGN:SOAT2:OSBPL8:PAQR5:CDIPT:UNC13A:APOE:APOC1:APOC2:BIN1:PLEKHB2:GAP43:OPA1:SNX3:LANCL2:S1PR3
FUMA	GO:0005178	integrin binding	127	9	6.16464e-06	0.000482896	LGALS8:ITGB1:GFAP:ITGB5:TNXB:DST:ITGB8:EGFR:S1PR3
gPROFILER	GO:0034205	amyloid-beta formation	35	4		0.000495486	APOE,CLU,PICALM,BIN1
gPROFILER	GO:0030016	myofibril	226	14		0.00050157	ALDOA,BIN1,LMOD1,FBP2,SDC4,CSRP1,DST,ANK3,CALM3,PDLIM5,SORBS2,AHNAK,NEBL,PDE4B
FUMA	GO:0043549	regulation of kinase activity	857	24	8.33377e-06	0.000502076	LRP8:DUSP12:DDR2:RGS4:DSTYK:CCNY:PLCE1:OSBPL8:GPRC5B:CCL5:APOE:CALM3:MAP4K4:SDC4:ITSN1:WWTR1:RHOH:PDE5A:CARTPT:APC:DUSP1:EGFR:MDFIC:CLU
gPROFILER	GO:1902991	regulation of amyloid precursor protein catabolic process	36	4		0.000533143	APOE,CLU,PICALM,BIN1
FUMA	GO:0097006	regulation of plasma lipoprotein particle levels	101	8	8.95467e-06	0.000535096	AP2A2:EHD1:SOAT2:APOE:APOC1:APOC2:AP2S1:BMP1
FUMA	GO:0030136	clathrin coated vesicle	184	10	1.97273e-05	0.000548529	AP2A2:PICALM:NRGN:APOE:AP2S1:DNAJC5:HBEGF:SNX3:EGFR:NCALD
FUMA	GO:0031329	regulation of cellular catabolic process	805	23	9.36123e-06	0.000554879	ARNT:PIP4K2A:WAC:MAPK8:PGAM1:ACACB:ATXN3:PML:MEFV:USP7:GFAP:USP14:APOE:APOC1:APOC2:ZFP36L2:CHMP4B:MTMR3:FBXL2:ATP6V0E1:HFE:ATP6V1G2:CLU
FUMA	GO:1902992	negative regulation of amyloid precursor protein catabolic process	14	4	9.46245e-06	0.000556392	PICALM:APOE:BIN1:CLU
FUMA	GO:0030072	peptide hormone secretion	248	12	9.62809e-06	0.000561639	MYO5A:CCL5:MAP4K4:RAPGEF4:KALRN:NKX6-1:CARTPT:HFE:IL6:EGFR:CRH:RIMS2
FUMA	GO:0016051	carbohydrate biosynthetic process	208	11	9.85872e-06	0.000566463	PGAM1:PGM2L1:DYRK2:ALDOA:ISYNA1:SLC25A1:NFKB1:NDST3:MDH2:FBP2:FBP1
FUMA	GO:0009891	positive regulation of biosynthetic process	1966	41	9.86493e-06	0.000566463	ARNT:ELF3:WAC:CREM:PICALM:PGR:HNRNPA1:DYRK2:PML:CRTC3:CIITA:PAGR1:PAGR1:KCTD13:WWOX:MAF:CCL5:HOXB7:VEZF1:POU2F2:APOE:APOC2:RHOQ:ERG:POLDIP3:MITF:WWTR1:TNIP2:NKX6-1:NFKB1:SUB1:DDAH2:NCOA7:IL6:NEUROD6:EGFR:MDFIC:CLU:KAT6A:IKBKB:NFIB:CDK9
FUMA	GO:1902991	regulation of amyloid precursor protein catabolic process	29	5	9.95167e-06	0.000567014	PICALM:UNC13A:APOE:BIN1:CLU
FUMA	R-HSA-1266738	developmental biology	1100	29	3.07618e-06	0.000576399	CDC42:LAMC1:ITGB1:CUL2:MAPK8:ANK3:UNC5B:ABLIM1:DPYSL4:AP2A2:GAB2:SCN2B:SRGAP1:PML:PAGR1:PAGR1:MYH10:KRT17:AP2S1:ITSN1:SCN11A:GAP43:KALRN:NKX6-1:NFKB1:TUBB2A:HIST1H2BD:EGFR:KCNQ3:SHC3
FUMA	GO:1902494	catalytic complex	1351	31	2.18378e-05	0.0005908	DNALI1:RPRD2:CHML:CUL2:CCNY:PHF21A:CHD4:HNRNPA1:DYRK2:POLR1D:FBXL16:PAGR1:PAGR1:KCTD13:SPOP:USP14:INO80C:ZSWIM4:CALM3:POLR3F:ZNF217:FBXL2:NDUFB5:ENC1:LSM2:MCM3:CYCS:CDK14:NDUFA5:KAT6A:IKBKB:CDK9
Wegestalt	KEGG_PHOSPHATIDYLINOSITOL_SIGNALING_SYSTEM	Phosphatidylinositol signaling system	99	11	5.64569e-06	0.000592797	ITPKB;INPP4A;CDS1;PIP5K1B;MTMR3;PIP4K2A;CALM3;PLCD3;CDIPT;MTMR6;PLCE1
gPROFILER	GO:0031175	neuron projection development	1004	43		0.000595075	EHD1,APOE,ITSN1,GFAP,PICALM,IL6,GAB2,UNC5B,LRP8,DPYSL4,KALRN,NFIB,NEGR1,GAS7,RIMS2,SDC4,SEMA4B,RASGRF1,ANK3,SERPINI1,NKX6-1,PDLIM5,CDC42,GPM6A,NTNG1,SHC3,OPA1,MARK1,EGFR,CAPRIN1,MYH10,MAP1S,GAP43,HECW2,MAP4K4,MYOT,TNFRSF21,SNX3,ITGB1,ZSWIM4,LST1,ENC1,UNC13A
FUMA	GO:0071825	protein lipid complex subunit organization	50	6	1.1131e-05	0.00062933	SOAT2:APOE:APOC1:APOC2:BIN1:BMP1
FUMA	GO:0072659	protein localization to plasma membrane	252	12	1.13039e-05	0.000629775	ITGB1:ANK3:TSPAN14:PPFIA1:PICALM:MYO5A:RHOQ:SYS1:ZDHHC23:EGFR:IKBKB:DENND4C
FUMA	GO:0002790	peptide secretion	591	19	1.13102e-05	0.000629775	FCGR2B:SNCG:C1QTNF5:MYO5A:PML:MYH10:CCL5:POU2F2:MAP4K4:RAPGEF4:KALRN:NKX6-1:CARTPT:HFE:TNFRSF21:IL6:EGFR:CRH:RIMS2
FUMA	GO:0002274	myeloid leukocyte activation	646	20	1.15042e-05	0.000635758	FCGR2B:TSPAN14:PGAM1:AP2A2:CD59:CD44:GAB2:CRTC3:ALDOA:CCL5:DNAJC5:SYNGR1:TNIP2:RHOH:NFKB1:CYSTM1:IL6:SLC7A2:CLU:GSN
FUMA	GO:0031975	envelope	1166	28	2.49378e-05	0.000656913	MRPL24:TIMM17A:CENPF:RRP12:PGR:NRGN:OSBPL8:ACACB:MTMR6:BCL2L2:ATXN3:TOMM40:DMPK:CALM3:BIN1:CHMP4B:ITSN1:SLC25A1:SMDT1:NDUFB5:OPA1:BPHL:DST:CYCS:EGFR:NDUFA5:CLU:DPY19L4
FUMA	GO:0048813	dendrite morphogenesis	138	9	1.20974e-05	0.000663349	CDC42:LRP8:ITGB1:CAPRIN1:PICALM:HECW2:KALRN:OPA1:PDLIM5
FUMA	GO:0003013	circulatory system process	541	18	1.2184e-05	0.000663349	PDE4B:RGS4:RNPEP:NAV2:SCN2B:APOE:DMPK:CALM3:BIN1:WWTR1:PDE5A:CARTPT:ERAP2:HBEGF:EGFR:EPHX2:CRH:NCALD
FUMA	GO:0017137	rab gtpase binding	169	10	9.41516e-06	0.000703997	CHML:EHD1:PICALM:DENND5B:BICD1:RIN3:MYO5A:TBC1D7:RIMS2:DENND4C
FUMA	GO:0070997	neuron death	345	14	1.31535e-05	0.000710869	FCGR2B:UNC5B:DPYSL4:PICALM:GABRB3:CCL5:APOE:CHMP4B:DNAJC5:ITSN1:TNFRSF21:NCOA7:SRPK2:CLU
gPROFILER	GO:0043292	contractile fiber	235	14		0.000716348	ALDOA,BIN1,LMOD1,FBP2,SDC4,CSRP1,DST,ANK3,CALM3,PDLIM5,SORBS2,AHNAK,NEBL,PDE4B
FUMA	KEGG_CYTOSOLIC_DNA_SENSING_PATHWAY	cytosolic dna sensing pathway	55	6	1.94628e-05	0.000724017	POLR1D:CCL5:POLR3F:NFKB1:IL6:IKBKB
FUMA	KEGG_ECM_RECEPTOR_INTERACTION	ecm receptor interaction	84	7	2.3528e-05	0.000729369	LAMC1:ITGB1:CD44:SDC4:ITGB5:TNXB:ITGB8
FUMA	WP2018	rankl/rank (receptor activator of nfkb (ligand)) signaling pathway	55	7	1.35424e-06	0.000735353	CDC42:MAPK8:GAB2:MITF:NFKB1:IKBKB:TNFRSF11B
FUMA	GO:0004672	protein kinase activity	588	19	1.05365e-05	0.000753589	DDR2:DSTYK:MARK1:MAPK8:STK33:DYRK2:CCL5:WNK4:ALPK2:DMPK:MAP4K4:STK17B:KALRN:GRK4:EGFR:CDK14:SRPK2:IKBKB:CDK9
FUMA	GO:0044092	negative regulation of molecular function	1131	28	1.44824e-05	0.000776975	RGS4:MAPK8:ANK3:MXI1:CD44:DLG2:PICALM:BICD1:ACACB:TMEM132D:GNB5:USP7:USP14:CERS1:APOE:APOC1:APOC2:CALM3:BIN1:HECW2:WWTR1:SERPINI1:RHOH:NFKB1:APC:DUSP1:HFE:IKBKB
FUMA	GO:0006954	inflammatory response	714	21	1.49734e-05	0.000797495	FCGR2B:ELF3:CD44:MS4A2:MEFV:CIITA:GPRC5B:CCL5:APOE:TNIP2:NFKB1:F12:HFE:IL6:EGFR:SLC7A2:EPHX2:CLU:IKBKB:CRH:S1PR3
FUMA	GO:0042060	wound healing	550	18	1.51791e-05	0.000802638	CDC42:CSRP1:CD59:CD44:PHF21A:EHD1:FGFR1OP2:DOCK9:MYH10:APOE:SDC4:GAP43:HBEGF:F12:DST:IL6:EGFR:GSN
FUMA	GO:0050776	regulation of immune response	1072	27	1.52968e-05	0.00080308	CDC42:LRP8:PDE4B:FCGR2B:FCRLB:SUSD4:ITGB1:MAPK8:MUC6:CD59:MS4A2:GAB2:GPRC5B:CCL5:LSM14A:APOE:KLK7:SLC39A10:POLR3F:TNIP2:NFKB1:HFE:TNFRSF21:IL6:CLU:SCARA3:IKBKB
gPROFILER	GO:0071827	plasma lipoprotein particle organization	45	3		0.000813521	APOC1,APOE,APOC2
FUMA	GO:0006518	peptide metabolic process	109	8	1.56969e-05	0.000818242	PICALM:CPM:CLN5:CPD:UNC13A:APOE:BIN1:CLU
FUMA	GO:0023014	signal transduction by protein phosphorylation	952	25	1.59915e-05	0.00082773	FCGR2B:RGS4:DSTYK:ITPKB:MAPK8:PLCE1:CD44:DLG2:RASGRF1:CCL5:APOE:ZFP36L2:MAP4K4:TNIP2:CHRNA9:NFKB1:PDE5A:CARTPT:HBEGF:DUSP1:IL6:EGFR:MDFIC:IKBKB:SHC3
FUMA	GO:0034762	regulation of transmembrane transport	553	18	1.63149e-05	0.000838563	PDE4B:RGS4:ANK3:AHNAK:DLG2:SCN2B:OSBPL8:GNB5:MYO5A:RASGRF1:WNK4:CALM3:RHOQ:BIN1:HECW2:SCN11A:CRH:KCNQ3
FUMA	GO:0098590	plasma membrane region	1185	28	3.31309e-05	0.000850361	LRP8:NTNG1:DDR2:DSTYK:ITGB1:ANK3:CNNM2:CD44:EHD1:DLG2:PICALM:C1QTNF5:NRGN:GABRB3:MYH10:PLCD3:UNC13A:GAP43:ADD1:GRK4:CHRNA9:PDLIM5:GPM6A:SORBS2:APC:DST:EGFR:RIMS2
FUMA	GO:0030135	coated vesicle	282	12	3.42799e-05	0.000857855	AP2A2:CD59:PICALM:NRGN:APOE:AP2S1:SEC23B:DNAJC5:HBEGF:SNX3:EGFR:NCALD
FUMA	GO:0051338	regulation of transferase activity	956	25	1.71441e-05	0.000875062	LRP8:DUSP12:DDR2:RGS4:DSTYK:CCNY:PLCE1:OSBPL8:GPRC5B:CCL5:CERS1:APOE:CALM3:MAP4K4:SDC4:ITSN1:WWTR1:RHOH:PDE5A:CARTPT:APC:DUSP1:EGFR:MDFIC:CLU
FUMA	WP4223	ras signaling	185	11	3.22485e-06	0.000875546	CDC42:MAPK8:PLCE1:GAB2:GNB5:RASGRF1:CALM3:NFKB1:EGFR:IKBKB:SHC3
FUMA	GO:0060997	dendritic spine morphogenesis	54	6	1.74873e-05	0.000882721	CDC42:LRP8:CAPRIN1:KALRN:OPA1:PDLIM5
FUMA	GO:0006887	exocytosis	897	24	1.75343e-05	0.000882721	FCGR2B:TSPAN14:PGAM1:AP2A2:CD59:CD44:GAB2:SCG3:MYO5A:ALDOA:MYH10:CCL5:UNC13A:CALM3:RAPGEF4:SDC4:DNAJC5:SYNGR1:SCFD2:NFKB1:CYSTM1:CLU:RIMS2:GSN
gPROFILER	GO:0032374	regulation of cholesterol transport	62	4		0.00088789	APOC1,APOE,APOC2,NFKB1
gPROFILER	GO:1902430	negative regulation of amyloid-beta formation	13	3		0.00088789	APOE,CLU,BIN1
gPROFILER	GO:0032371	regulation of sterol transport	63	4		0.000894785	APOC1,APOE,APOC2,NFKB1
FUMA	GO:0048017	inositol lipid mediated signaling	182	10	1.79516e-05	0.000896919	PIP4K2A:UNC5B:PLCE1:GAB2:CCL5:FBXL2:PLCH1:EGFR:PIP5K1B:GSN
FUMA	GO:0006066	alcohol metabolic process	222	11	1.81214e-05	0.000896919	ITPKB:PLCE1:SOAT2:PLCD3:ISYNA1:APOE:APOC1:INPP4A:PLCH1:EPHX2:ALDH1B1
FUMA	GO:0009611	response to wounding	667	20	1.81824e-05	0.000896919	CDC42:CSRP1:CD59:CD44:PHF21A:EHD1:FGFR1OP2:DOCK9:MYH10:GFAP:APOE:ZFP36L2:SDC4:GAP43:HBEGF:F12:DST:IL6:EGFR:GSN
FUMA	KEGG_FOCAL_ADHESION	focal adhesion	199	10	3.854e-05	0.000904287	CDC42:LAMC1:ITGB1:MAPK8:RASGRF1:ITGB5:TNXB:ITGB8:EGFR:SHC3
FUMA	KEGG_NOD_LIKE_RECEPTOR_SIGNALING_PATHWAY	nod like receptor signaling pathway	62	6	3.88941e-05	0.000904287	MAPK8:MEFV:CCL5:NFKB1:IL6:IKBKB
FUMA	GO:0031401	positive regulation of protein modification process	1212	29	1.90338e-05	0.000932658	LRP8:ARNT:FCGR2B:DDR2:DSTYK:CCNY:PLCE1:CD44:OSBPL8:CDK2AP1:GPRC5B:CCL5:PTBP1:APOE:CALM3:MAP4K4:SLC39A10:SDC4:PDE5A:CARTPT:HBEGF:TBC1D7:HFE:IL6:EGFR:MDFIC:CLU:CRH:CDK9
FUMA	GO:0008144	drug binding	1718	37	1.38165e-05	0.000947008	DDR2:DSTYK:MARK1:ITPKB:NTPCR:PIP4K2A:MAPK8:CNNM2:STK33:NAV2:EHD1:NARS2:CHD4:DYRK2:ACACB:MYO5A:CIITA:MYH10:WNK4:ABCC3:ALPK2:DMPK:MAP4K4:STK17B:UBE2F:GART:KALRN:GRK4:MCM3:EGFR:LANCL2:CDK14:SRPK2:IKBKB:PIP5K1B:FBP1:CDK9
FUMA	GO:1990778	protein localization to cell periphery	311	13	1.96002e-05	0.000954049	ITGB1:ANK3:TSPAN14:PPFIA1:DLG2:PICALM:MYO5A:RHOQ:SYS1:ZDHHC23:EGFR:IKBKB:DENND4C
FUMA	GO:0061564	axon development	508	17	1.97303e-05	0.000954066	NTNG1:ITGB1:ANK3:UNC5B:GAB2:PICALM:SEMA4B:MYH10:ZSWIM4:MAP1S:APOE:GAP43:NKX6-1:MYOT:TNFRSF21:NFIB:SHC3
gPROFILER	R-HSA-8963898	Plasma lipoprotein assembly	18	3		0.000980076	APOC1,APOE,APOC2
FUMA	GO:0198738	cell cell signaling by wnt	510	17	2.07357e-05	0.000996128	CDC42:MARK1:CCNY:AP2A2:IGFBP6:GPRC5B:WWOX:APOE:AP2S1:MITF:WWTR1:NFKB1:APC:SNX3:EGFR:CDK14:MDFIC
FUMA	GO:0070588	calcium ion transmembrane transport	313	13	2.0958e-05	0.00100027	PDE4B:PLCE1:AHNAK:SLC24A4:GNB5:MYO5A:CALM3:BIN1:SMDT1:PLCH1:OPA1:CHRNA9:GPM6A
gPROFILER	GO:0050750	low-density lipoprotein particle receptor binding	21	3		0.00103633	APOE,CLU,PICALM
gPROFILER	GO:0048156	tau protein binding	45	4		0.00103633	APOE,CLU,PICALM,BIN1
gPROFILER	GO:0017016	Ras GTPase binding	431	13		0.00103633	EHD1,DENND4C,ITSN1,DENND5B,PICALM,RAPGEF4,TBC1D7,RHOH,KALRN,CHML,SRGAP1,MYO5A,RIMS2
gPROFILER	GO:0031267	small GTPase binding	446	13		0.00103633	EHD1,DENND4C,ITSN1,DENND5B,PICALM,RAPGEF4,TBC1D7,RHOH,KALRN,CHML,SRGAP1,MYO5A,RIMS2
FUMA	GO:0051960	regulation of nervous system development	910	24	2.20905e-05	0.00104752	LRP8:NEGR1:MARK1:CAPRIN1:SEMA4B:GPRC5B:GFAP:ZSWIM4:UNC13A:APOE:MAP4K4:BIN1:HECW2:GAP43:KALRN:SERPINI1:OPA1:NKX6-1:PDLIM5:ENC1:TNFRSF21:SNX3:IL6:RIMS2
FUMA	GO:0043194	axon initial segment	20	4	4.36554e-05	0.00104902	NAV1:ANK3:BIN1:KCNQ3
FUMA	GO:0099568	cytoplasmic region	488	16	4.40147e-05	0.00104902	CDC42:DNALI1:CENPF:DLG2:MYH10:UNC13A:RHOQ:OPA1:GRK4:RHOH:PURA:HFE:DST:LANCL2:RIMS2:GSN
FUMA	GO:0032409	regulation of transporter activity	270	12	2.2412e-05	0.00105595	PDE4B:ANK3:AHNAK:DLG2:SCN2B:GNB5:MYO5A:RASGRF1:WNK4:CALM3:HECW2:CRH
FUMA	GO:0003012	muscle system process	462	16	2.28757e-05	0.00107093	PDE4B:RGS4:LMOD1:PLCE1:SCN2B:ALDOA:DMPK:CALM3:BIN1:ITGB5:PDLIM5:PDE5A:SORBS2:MYOT:GSN:CDK9
FUMA	GO:0010976	positive regulation of neuron projection development	271	12	2.32411e-05	0.00108115	LRP8:NEGR1:CAPRIN1:GPRC5B:UNC13A:APOE:KALRN:SERPINI1:OPA1:ENC1:SNX3:RIMS2
FUMA	GO:0033674	positive regulation of kinase activity	569	18	2.37564e-05	0.00109817	LRP8:DUSP12:DDR2:DSTYK:CCNY:PLCE1:OSBPL8:GPRC5B:CCL5:CALM3:MAP4K4:SDC4:ITSN1:PDE5A:CARTPT:EGFR:MDFIC:CLU
gPROFILER	GO:0042987	amyloid precursor protein catabolic process	46	4		0.00112113	APOE,CLU,PICALM,BIN1
gPROFILER	GO:0050435	amyloid-beta metabolic process	47	4		0.00114889	APOE,CLU,PICALM,BIN1
FUMA	GO:0032994	protein lipid complex	40	5	5.03396e-05	0.00117186	APOE:APOC1:APOC2:BIN1:CLU
FUMA	GO:0034765	regulation of ion transmembrane transport	467	16	2.60446e-05	0.00119429	PDE4B:RGS4:ANK3:AHNAK:DLG2:SCN2B:GNB5:MYO5A:RASGRF1:WNK4:CALM3:BIN1:HECW2:SCN11A:CRH:KCNQ3
FUMA	GO:1905952	regulation of lipid localization	152	9	2.61605e-05	0.00119429	EHD1:OSBPL8:ACACB:APOE:APOC1:APOC2:NFKB1:IL6:CRH
FUMA	GO:0032880	regulation of protein localization	982	25	2.6662e-05	0.00120967	FCGR2B:ITGB1:MAPK8:ANK3:PPFIA1:PICALM:BICD1:PML:MYH10:CCL5:RHOQ:MAP4K4:RAPGEF4:NKX6-1:CARTPT:APC:HFE:TNFRSF21:CD2AP:SNX3:IL6:EGFR:MDFIC:CRH:GSN
FUMA	GO:1902532	negative regulation of intracellular signal transduction	521	17	2.71249e-05	0.00122312	RGS4:ITGB1:CD44:DYRK2:BCL2L2:CRTC3:KCTD13:APOE:CALM3:OPA1:RHOH:CHRNA9:DUSP1:TBC1D7:CD2AP:CLU:FBP1
gPROFILER	GO:0043062	extracellular structure organization	429	5		0.00123546	TNXB,APOC1,APOE,ITGB5,APOC2
gPROFILER	GO:0033344	cholesterol efflux	58	3		0.00125263	APOC1,APOE,APOC2
gPROFILER	GO:0006897	endocytosis	669	10		0.00125263	EHD1,APOC1,APOE,APOC2,ITSN1,CLU,SCARA3,PICALM,FCGR2B,BIN1
FUMA	GO:0061003	positive regulation of dendritic spine morphogenesis	18	4	2.80158e-05	0.00125559	LRP8:CAPRIN1:KALRN:OPA1
FUMA	R-HSA-168249	plasma lipoprotein assembly remodeling and clearance	71	7	7.72839e-06	0.00128721	AP2A2:SOAT2:APOE:APOC1:APOC2:AP2S1:BMP1
FUMA	GO:0030669	clathrin coated endocytic vesicle membrane	41	5	5.6859e-05	0.00129354	AP2A2:PICALM:APOE:AP2S1:HBEGF
FUMA	GO:0019058	viral life cycle	323	13	2.90581e-05	0.00129441	CDC42:ITGB1:PCBP2:PML:CCL5:APOE:CHMP4B:FBXL2:ITGB5:SNX3:EGFR:SRPK2:GSN
FUMA	GO:0098794	postsynapse	610	18	5.83146e-05	0.00129718	CDC42:LRP8:PDE4B:FCGR2B:ITGB1:ANK3:DLG2:PICALM:NRGN:GABRB3:MYO5A:MYH10:GAP43:ADD1:CHRNA9:PDLIM5:GPM6A:PURA
FUMA	R-HSA-1483249	inositol phosphate metabolism	48	6	8.7431e-06	0.00131059	ITPKB:PLCE1:PLCD3:ISYNA1:INPP4A:PLCH1
FUMA	GO:0045944	positive regulation of transcription by rna polymerase ii	1178	28	2.98646e-05	0.00132232	ARNT:ELF3:CREM:PGR:CRTC3:CIITA:PAGR1:PAGR1:WWOX:MAF:HOXB7:VEZF1:POU2F2:RHOQ:ERG:MITF:WWTR1:TNIP2:NKX6-1:NFKB1:SUB1:NCOA7:IL6:NEUROD6:EGFR:KAT6A:IKBKB:NFIB:CDK9
FUMA	KEGG_REGULATION_OF_ACTIN_CYTOSKELETON	regulation of actin cytoskeleton	212	10	6.56024e-05	0.00135578	CDC42:PIP4K2A:ITGB1:MYH10:ITGB5:APC:ITGB8:EGFR:PIP5K1B:GSN
Wegestalt	GO:0043235	receptor complex	396	17	1.34392e-05	0.00135978	ITGB5;DLG2;IFNLR1;IL6;IKBKB;CHRNA9;DDR2;GABRB3;IL11RA;LRP8;CD44;HFE;EGFR;GPRC5B;PEX5L;ITGB8;ITGB1
Wegestalt	GO:0043025	neuronal cell body	486	19	1.55159e-05	0.00135978	APOE;PICALM;SNCG;LRP8;MYO5A;NRSN1;PHAX;PURA;CRH;SST;SERPINI1;CDC42;GPM6A;GRK4;NRGN;MYH10;MAP1S;MYOT;ENC1
Wegestalt	GO:0044449	contractile fiber part	211	12	1.72585e-05	0.00135978	ALDOA;BIN1;LMOD1;FBP2;SDC4;DST;ANK3;SORBS2;AHNAK;NEBL;PDE4B;MYOT
Wegestalt	GO:0030016	myofibril	215	12	2.08045e-05	0.00135978	ALDOA;BIN1;LMOD1;FBP2;SDC4;DST;ANK3;SORBS2;AHNAK;NEBL;PDE4B;MYOT
Wegestalt	GO:0030136	clathrin-coated vesicle	181	11	2.10358e-05	0.00135978	APOE;PICALM;DNAJC5;NCALD;AP2S1;EGFR;NRGN;AP2A2;CEMIP;SNX3;HBEGF
Wegestalt	GO:0030139	endocytic vesicle	289	14	2.11365e-05	0.00135978	APOE;ITGB5;ITSN1;PICALM;GSN;ATP6V0E1;AP2S1;CDC42EP4;CD2AP;EGFR;AP2A2;CEMIP;SNX3;HBEGF
FUMA	GO:0061024	membrane organization	869	23	3.10297e-05	0.00136568	CDC42:FCGR2B:MAPK8:ANK3:AP2A2:CD59:PICALM:MYH10:APOE:DMPK:CALM3:AP2S1:BIN1:SEC23B:CHMP4B:ITSN1:SYNGR1:OPA1:HBEGF:SNX3:EGFR:CLU:GSN
Wegestalt	GO:0033267	axon part	374	16	2.52744e-05	0.0013937	KCNQ3;ITSN1;DLG2;BIN1;MYO5A;NRSN1;CRH;RASGRF1;DST;ANK3;GPM6A;OPA1;MYH10;GAP43;NAV1;UNC13A
Wegestalt	GO:0030133	transport vesicle	374	16	2.52744e-05	0.0013937	TMEM163;PICALM;BIN1;DNAJC5;CD59;NRSN1;PCSK1;NCALD;SNTB2;SEC23B;SCG3;C1QTNF5;PDE4B;NRGN;SYNGR1;UNC13A
gPROFILER	GO:0044444	cytoplasmic part	9760	216		0.00140179	TOMM40,EHD1,PGM2L1,APOC1,LSM14A,TMEM163,APOE,ITGB5,APOC2,DENND4C,SEZ6L2,ITSN1,CLU,DENND5B,ALDOA,SCARA3,GFAP,TIMM17A,DLG2,PICALM,RAPGEF4,CALN1,NFKB1,PFDN4,LARP7,CDK14,SYS1,IL6,TBC1D7,EPHX2,IKBKB,F12,BIN1,ARSG,POLR1D,BMP1,KANK2,GAB2,FGFR1OP2,SMDT1,LMOD1,SNCG,FCRLB,VPS53,GABRB3,CERS1,HSPB2,DNAJC5,FBP1,CRTAP,ITPKB,MCM3,RHOH,ZDHHC23,MAPK8,DPYSL4,KALRN,BCL2L2,CARTPT,CHML,GART,CD59,SRGAP1,PGR,MYO5A,NRSN…
gPROFILER	GO:0097458	neuron part	1771	58		0.00140254	KCNQ3,TMEM163,APOE,SEZ6L2,ITSN1,CLU,DLG2,PICALM,FCGR2B,BIN1,CHRNA9,SNCG,GABRB3,DNAJC5,SCN11A,MAPK8,LRP8,NFIB,MYO5A,NRSN1,RIMS2,PHAX,INPP4A,PURA,CRH,PCSK1,RASGRF1,DST,ANK3,SST,SERPINI1,CALM3,PDLIM5,CDC42,GPM6A,NTNG1,ADD1,HTR1E,OPA1,MARK1,PPFIA1,ADGRL2,GRK4,PDE4B,NRGN,CAPRIN1,MYH10,MAP1S,GAP43,NAV1,PCBP2,GNB5,MYOT,TNFRSF21,ITGB1,SYNGR1,ENC1,UNC13A
gPROFILER	GO:0005737	cytoplasm	11620	248		0.00140254	TUBB2A,TOMM40,EHD1,PGM2L1,APOC1,LSM14A,TMEM163,APOE,ITGB5,APOC2,DENND4C,SEZ6L2,ITSN1,CLU,DENND5B,ALDOA,SCARA3,GFAP,TIMM17A,CHD4,DLG2,PICALM,RAPGEF4,CALN1,NFKB1,PFDN4,CAPS,LARP7,CDK14,SYS1,IL6,TBC1D7,EPHX2,IKBKB,F12,BIN1,ARSG,SLC24A4,POLR1D,BMP1,KANK2,GAB2,FGFR1OP2,SMDT1,LMOD1,SNCG,FCRLB,VPS53,GABRB3,CERS1,HSPB2,DNAJC5,FBP1,CRTAP,HDGF,ITPKB,MCM3,RHOH,ZDHHC23,MAPK8,DSTYK,MDFIC,DPYSL4,KALRN,BCL2L2,C…
gPROFILER	GO:0030665	clathrin-coated vesicle membrane	110	10		0.00140254	APOE,PICALM,DNAJC5,NCALD,AP2S1,EGFR,NRGN,AP2A2,CEMIP,HBEGF
gPROFILER	GO:0015629	actin cytoskeleton	517	23		0.00140254	ITSN1,ALDOA,BIN1,LMOD1,DDR2,KALRN,MYO5A,LANCL2,STK17B,ABLIM1,GSN,SH3PXD2A,CDC42EP4,HFE,PDLIM5,ADD1,SORBS2,CD2AP,AHNAK,NEBL,MYH10,RHOQ,MYOT
gPROFILER	GO:0031674	I band	142	11		0.00140254	ALDOA,BIN1,FBP2,CSRP1,DST,ANK3,PDLIM5,SORBS2,NEBL,PDE4B,MYOT
FUMA	GO:0044304	main axon	68	6	6.58188e-05	0.00143227	NAV1:ANK3:DLG2:BIN1:CRH:KCNQ3
gPROFILER	GO:0048666	neuron development	1131	45		0.00148073	EHD1,APOE,ITSN1,GFAP,PICALM,IL6,GAB2,GABRB3,UNC5B,LRP8,DPYSL4,KALRN,NFIB,NEGR1,GAS7,RIMS2,SDC4,SEMA4B,RASGRF1,ANK3,SERPINI1,NKX6-1,PDLIM5,CDC42,GPM6A,NTNG1,SHC3,OPA1,MARK1,EGFR,CAPRIN1,MYH10,MAP1S,GAP43,HECW2,MAP4K4,MYOT,TNFRSF21,SNX3,ITGB1,ZSWIM4,LST1,ENC1,CLN5,UNC13A
FUMA	GO:0051248	negative regulation of protein metabolic process	1123	27	3.41662e-05	0.00149477	RGS4:WAC:CAPRIN1:CD44:PICALM:PML:USP7:USP14:APOE:CALM3:ZFP36L2:BIN1:CRTAP:WWTR1:SERPINI1:CHRNA9:NFKB1:ENC1:APC:PURA:HBEGF:DUSP1:HFE:NCOA7:IL6:CLU:IKBKB
gPROFILER	GO:0070325	lipoprotein particle receptor binding	26	3		0.00150146	APOE,CLU,PICALM
FUMA	KEGG_INSULIN_SIGNALING_PATHWAY	insulin signaling pathway	137	8	8.08907e-05	0.00150457	MAPK8:ACACB:CALM3:RHOQ:IKBKB:SHC3:FBP2:FBP1
FUMA	GO:0009986	cell surface	857	22	7.19699e-05	0.00153281	FCGR2B:ITGB1:ANK3:TSPAN14:CD59:CD44:MS4A2:PICALM:CPM:GPRC5B:USP14:CLPTM1:SDC4:ITGB5:HBEGF:HFE:LY6G5C:ITGB8:EGFR:CLU:KCNQ3:IL11RA
FUMA	GO:0060996	dendritic spine development	90	7	3.68544e-05	0.00160238	CDC42:LRP8:CAPRIN1:APOE:KALRN:OPA1:PDLIM5
FUMA	GO:0098609	cell cell adhesion	819	22	3.7062e-05	0.00160238	CDC42:NEGR1:NTNG1:FCGR2B:CSRP1:ITPKB:ITGB1:ANK3:CD44:DLG2:CCL5:SDC4:JAM2:ITGB5:PDLIM5:PDE5A:MYOT:HFE:TNFRSF21:CD2AP:IL6:EGFR
FUMA	GO:1902533	positive regulation of intracellular signal transduction	1005	25	3.88177e-05	0.00166831	FCGR2B:DSTYK:ITPKB:ITGB1:UNC5B:PLCE1:CD44:OSBPL8:RASGRF1:GPRC5B:CCL5:PTBP1:APOE:CALM3:MAP4K4:ITSN1:TNIP2:PDE5A:CARTPT:HBEGF:IL6:EGFR:MDFIC:IKBKB:CRH
FUMA	GO:0042987	amyloid precursor protein catabolic process	38	5	3.90408e-05	0.00166831	PICALM:UNC13A:APOE:BIN1:CLU
gPROFILER	GO:0017137	Rab GTPase binding	176	8		0.00169613	EHD1,DENND4C,DENND5B,PICALM,TBC1D7,CHML,MYO5A,RIMS2
FUMA	GO:0051015	actin filament binding	190	10	2.59881e-05	0.00171002	NEBL:ABLIM1:MYO5A:MYH10:GAS7:MAP1S:BIN1:ADD1:EGFR:GSN
FUMA	GO:0042493	response to drug	1008	25	4.07261e-05	0.00173027	LRP8:PDE4B:RGS4:CENPF:SNCG:HNRNPA1:ACACB:CERS1:APOC2:CALM3:SLC25A1:SCN11A:SST:OPA1:NKX6-1:NFKB1:DUSP1:IL6:EGFR:SLC7A2:CRH:TNFRSF11B:FBP1:GSN:CDK9
gPROFILER	GO:0048261	negative regulation of receptor-mediated endocytosis	29	3		0.00173656	APOC1,APOC2,PICALM
gPROFILER	GO:1905953	negative regulation of lipid localization	64	4		0.00173656	APOC1,APOC2,NFKB1,IL6
FUMA	GO:0051241	negative regulation of multicellular organismal process	1265	29	4.11375e-05	0.0017377	PDE4B:FCGR2B:RGS4:ITPKB:PCBP2:PML:SEMA4B:MEFV:WNK4:GFAP:APOE:APOC1:APOC2:MAP4K4:BIN1:NKX6-1:NFKB1:PDE5A:CARTPT:LNPEP:F12:HFE:TNFRSF21:CD2AP:IL6:EGFR:CRH:TNFRSF11B:NFIB
Wegestalt	GO:0043292	contractile fiber	226	12	3.4022e-05	0.001751	ALDOA;BIN1;LMOD1;FBP2;SDC4;DST;ANK3;SORBS2;AHNAK;NEBL;PDE4B;MYOT
FUMA	GO:0046649	lymphocyte activation	709	20	4.27803e-05	0.00179677	CDC42:FCGR2B:ITPKB:ITGB1:CD44:CCL5:POU2F2:CLPTM1:ZFP36L2:SLC39A10:SDC4:TNIP2:RHOH:PDE5A:PURA:HFE:LST1:TNFRSF21:IL6:GSN
FUMA	GO:0050865	regulation of cell activation	596	18	4.33453e-05	0.00181016	CDC42:FCGR2B:ITPKB:GAB2:CCL5:APOE:CLPTM1:ZFP36L2:SLC39A10:SDC4:TNIP2:PDE5A:HFE:LST1:TNFRSF21:IL6:SLC7A2:GSN
gPROFILER	GO:0030017	sarcomere	204	12		0.00184623	ALDOA,BIN1,LMOD1,FBP2,CSRP1,DST,ANK3,CALM3,PDLIM5,SORBS2,NEBL,PDE4B
FUMA	GO:0045296	cadherin binding	324	13	3.00016e-05	0.00189818	ITGB1:ANK3:AHNAK:EHD1:PICALM:DOCK9:ALDOA:LRRFIP1:CHMP4B:ADD1:PDLIM5:CD2AP:EGFR
FUMA	GO:0005543	phospholipid binding	423	15	3.13723e-05	0.00191139	MARK1:SH3PXD2A:GAB2:PICALM:NRGN:OSBPL8:UNC13A:APOE:APOC1:BIN1:PLEKHB2:GAP43:OPA1:SNX3:LANCL2
FUMA	GO:0051656	establishment of organelle localization	491	16	4.732e-05	0.00196498	CDC42:CENPF:MARK1:CD59:GAB2:PICALM:BICD1:MYO5A:MYH10:UNC13A:MAP1S:CALM3:CHMP4B:DNAJC5:OPA1:RIMS2
FUMA	GO:0008235	metalloexopeptidase activity	61	6	3.54291e-05	0.0020275	RNPEP:CPM:CPD:AGBL5:ERAP2:LNPEP
FUMA	GO:0005198	structural molecule activity	817	22	3.57431e-05	0.0020275	MRPL24:LAMC1:CENPF:NEBL:ANK3:MUC6:AHNAK:DLG2:BICD1:SNTB2:KRT17:GFAP:APOE:ITSN1:ADD1:FRAS1:SORBS2:MYOT:TUBB2A:TNXB:CD2AP:DST
FUMA	GO:0061001	regulation of dendritic spine morphogenesis	40	5	5.03396e-05	0.00206702	LRP8:CAPRIN1:KALRN:OPA1:PDLIM5
FUMA	GO:0060999	positive regulation of dendritic spine development	40	5	5.03396e-05	0.00206702	LRP8:CAPRIN1:APOE:KALRN:OPA1
FUMA	GO:0080134	regulation of response to stress	1481	32	5.08596e-05	0.00207677	IFNLR1:LRP8:FCGR2B:MUC6:CD44:PCBP2:ATXN3:PML:MEFV:GPRC5B:CCL5:USP14:LSM14A:APOE:KLK7:MAP4K4:POLR3F:OPA1:TNIP2:NFKB1:HBEGF:DUSP1:F12:NCOA7:IL6:EGFR:MDFIC:SLC7A2:CLU:IKBKB:CRH:CDK9
FUMA	GO:0032101	regulation of response to external stimulus	779	21	5.28741e-05	0.00213875	IFNLR1:FCGR2B:PCBP2:SEMA4B:MEFV:GPRC5B:CCL5:USP14:KANK2:ZSWIM4:APOE:KLK7:GRK4:NFKB1:CARTPT:DUSP1:F12:IL6:EGFR:SLC7A2:MTUS1
FUMA	GO:0009895	negative regulation of catabolic process	295	12	5.29595e-05	0.00213875	WAC:ACACB:PML:CRTC3:USP7:USP14:APOC1:CHMP4B:HFE:SNX3:EGFR:FBP1
FUMA	GO:0048870	cell motility	1691	35	5.33282e-05	0.00214187	PDE4B:DDR2:LAMC1:NAV1:MARK1:LGALS8:ITGB1:CD44:SRGAP1:OSBPL8:PML:SEMA4B:KCTD13:MYH10:CCL5:KANK2:APOE:MAP4K4:SDC4:JAM2:VPREB1:MITF:ITGB5:SST:NKX6-1:GPM6A:APC:HBEGF:DUSP1:CD2AP:DST:ITGB8:IL6:EGFR:MTUS1
FUMA	GO:0019915	lipid storage	66	6	5.55701e-05	0.00221813	EHD1:OSBPL8:ACACB:APOE:NFKB1:IL6
FUMA	GO:0051046	regulation of secretion	782	21	5.58306e-05	0.00221813	FCGR2B:SNCG:GAB2:PML:MYH10:CCL5:WNK4:UNC13A:CALM3:MAP4K4:RAPGEF4:SDC4:KALRN:NKX6-1:CARTPT:HFE:TNFRSF21:IL6:EGFR:CRH:RIMS2
gPROFILER	GO:0005769	early endosome	355	4		0.00222296	EHD1,TMEM163,APOE,APOC2
FUMA	GO:0045087	innate immune response	966	24	5.65168e-05	0.00223026	IFNLR1:LRP8:FCGR2B:SUSD4:MUC6:CD44:PCBP2:PML:MEFV:CIITA:CCL5:CDC42EP4:USP14:LSM14A:APOE:POLR3F:TNIP2:NFKB1:F12:SRPK2:CLU:SCARA3:IKBKB:GSN
FUMA	GO:0090407	organophosphate biosynthetic process	553	17	5.67499e-05	0.00223026	ITPKB:PIP4K2A:PLCE1:ACACB:MTMR6:CDIPT:ALDOA:PLCD3:ISYNA1:INPP4A:GART:SLC25A1:MTMR3:PLCH1:CDS1:ELOVL6:PIP5K1B
FUMA	GO:1902903	regulation of supramolecular fiber organization	345	13	5.70462e-05	0.00223026	CDC42:RGS4:LMOD1:PPFIA1:CDC42EP4:MAP1S:APOE:BIN1:SDC4:ADD1:APC:CLU:GSN
FUMA	R-HSA-1251985	nuclear signaling by erbb4	32	5	1.64608e-05	0.00224316	PGR:WWOX:GFAP:APOE:HBEGF
FUMA	GO:0010001	glial cell differentiation	209	10	5.82374e-05	0.00226479	GFAP:BIN1:GAP43:NKX6-1:TNFRSF21:IL6:EGFR:CLU:NFIB:GSN
FUMA	GO:0043547	positive regulation of gtpase activity	396	14	5.92313e-05	0.0022793	RGS4:CHML:ITGB1:PICALM:SRGAP1:DOCK9:RIN3:GNB5:RASGRF1:CCL5:MAP4K4:SEC23B:KALRN:TBC1D7
FUMA	GO:0008610	lipid biosynthetic process	668	19	5.94676e-05	0.0022793	PIP4K2A:PLCE1:ACACB:MTMR6:MYO5A:CDIPT:ISYNA1:CERS1:APOE:APOC1:APOC2:INPP4A:MTMR3:CDS1:NFKB1:ELOVL6:EPHX2:CRH:PIP5K1B
FUMA	GO:0044770	cell cycle phase transition	611	18	5.95409e-05	0.0022793	CENPF:ITGB1:CUL2:CCNY:BCAT1:PML:PAGR1:PAGR1:KANK2:CALM3:ZFP36L2:HECW2:CHMP4B:DONSON:APC:DUSP1:MCM3:EGFR:CDK14
gPROFILER	GO:0001540	amyloid-beta binding	76	4		0.00228416	APOE,CLU,PICALM,FCGR2B
gPROFILER	GO:0019915	lipid storage	70	4		0.00231783	EHD1,APOE,NFKB1,IL6
gPROFILER	GO:0032375	negative regulation of cholesterol transport	30	3		0.00231783	APOC1,APOC2,NFKB1
gPROFILER	GO:0032372	negative regulation of sterol transport	30	3		0.00231783	APOC1,APOC2,NFKB1
gPROFILER	GO:0030662	coated vesicle membrane	176	12		0.00233455	APOE,PICALM,DNAJC5,CD59,NCALD,AP2S1,SEC23B,EGFR,NRGN,AP2A2,CEMIP,HBEGF
gPROFILER	GO:0031982	vesicle	3891	105		0.00233455	TUBB2A,TNXB,EHD1,TMEM163,APOE,ITGB5,APOC2,DENND4C,ITSN1,CLU,ALDOA,PICALM,NFKB1,CAPS,CPM,TBC1D7,EPHX2,F12,BIN1,PTBP1,BMP1,SNCG,VPS53,GABRB3,DNAJC5,FBP1,SCN11A,LTBP3,SUB1,KALRN,CARTPT,GART,CD59,MYO5A,NRSN1,RIMS2,FBP2,CD44,MEFV,RNPEP,SDC4,LGALS8,INPP4A,GSN,CSRP1,PCSK1,NCALD,PGAM1,KRT17,ATP6V0E1,SNTB2,CYSTM1,DST,AP2S1,SEC23B,SCG3,SERPINI1,HIST1H2BD,CDC42EP4,ATP6V1G2,NKX6-1,HNRNPA1,LNPEP,CALM3,PML,LRI…
gPROFILER	GO:0030018	Z disc	130	10		0.00233455	BIN1,FBP2,CSRP1,DST,ANK3,PDLIM5,SORBS2,NEBL,PDE4B,MYOT
gPROFILER	GO:0043235	receptor complex	502	10		0.00233455	ITGB5,DLG2,IFNLR1,IL6,IKBKB,CHRNA9,DDR2,GABRB3,IL11RA,LRP8
gPROFILER	GO:0030139	endocytic vesicle	297	5		0.00233455	EHD1,APOE,ITGB5,ITSN1,PICALM
FUMA	GO:0044087	regulation of cellular component biogenesis	909	23	6.14161e-05	0.0023389	CDC42:LMOD1:PIP4K2A:PPFIA1:MEFV:GFAP:CDC42EP4:APOE:RHOQ:MAP4K4:BIN1:CHMP4B:SDC4:MTMR3:GAP43:ADD1:PDLIM5:GPM6A:APC:TBC1D7:CLU:IKBKB:GSN
FUMA	GO:0015850	organic hydroxy compound transport	254	11	6.18723e-05	0.00233928	SNCG:SOAT2:OSBPL8:ABCC3:APOE:APOC1:APOC2:NFKB1:CARTPT:CLU:CRH
FUMA	GO:0072657	protein localization to membrane	613	18	6.20624e-05	0.00233928	ITGB1:MAPK8:ANK3:TSPAN14:PPFIA1:DLG2:PICALM:MYO5A:APOE:CALM3:RHOQ:CHMP4B:SYS1:ZDHHC23:EGFR:IKBKB:DENND4C:GSN
FUMA	GO:0050806	positive regulation of synaptic transmission	170	9	6.27457e-05	0.00235296	RGS4:NRGN:KCTD13:GFAP:UNC13A:APOE:EGFR:CRH:RIMS2
FUMA	GO:0005794	golgi apparatus	1547	32	0.000113862	0.0023745	CDC42:BEND5:ELF3:ANK3:PLCE1:MUC6:CD59:CD44:PICALM:BICD1:IGFBP6:CLN5:MYO5A:CDIPT:WWOX:VPS53:CERS1:APOE:SEC23B:SDC4:SYS1:ZDHHC23:NDST3:LST1:EGFR:CALN1:GCC1:MTUS1:BMP1:CLU:SCARA3:NCALD
FUMA	GO:0050435	amyloid beta metabolic process	42	5	6.40112e-05	0.00238823	PICALM:UNC13A:APOE:BIN1:CLU
FUMA	R-HSA-8964043	plasma lipoprotein clearance	33	5	1.92402e-05	0.00240342	AP2A2:SOAT2:APOE:APOC1:AP2S1
gPROFILER	GO:0045833	negative regulation of lipid metabolic process	92	4		0.00242517	APOC1,APOE,APOC2,NFKB1
gPROFILER	GO:0120039	plasma membrane bounded cell projection morphogenesis	681	31		0.00242767	APOE,PICALM,GAB2,UNC5B,LRP8,DPYSL4,KALRN,NFIB,GAS7,RIMS2,CD44,SEMA4B,ANK3,NKX6-1,PDLIM5,CDC42,GPM6A,NTNG1,SHC3,OPA1,EGFR,CAPRIN1,MYH10,MAP1S,GAP43,HECW2,MAP4K4,MYOT,ITGB1,ZSWIM4,UNC13A
Wegestalt	GO:0031594	neuromuscular junction	76	7	5.11848e-05	0.00243763	DLG2;DNAJC5;ANK3;MYH10;ITGB1;SYNGR1;UNC13A
Wegestalt	GO:0030135	coated vesicle	275	13	5.36783e-05	0.00243763	APOE;PICALM;DNAJC5;CD59;NCALD;AP2S1;SEC23B;EGFR;NRGN;AP2A2;CEMIP;SNX3;HBEGF
FUMA	GO:0060998	regulation of dendritic spine development	68	6	6.58188e-05	0.00244327	LRP8:CAPRIN1:APOE:KALRN:OPA1:PDLIM5
FUMA	R-HSA-112315	transmission across chemical synapses	269	12	2.16088e-05	0.00249166	AP2A2:PPFIA1:DLG2:NRGN:GABRB3:GNB5:RASGRF1:AP2S1:DNAJC5:CHRNA9:TUBB2A:NCALD
FUMA	GO:0043900	regulation of multi organism process	401	14	6.7692e-05	0.00250018	IFNLR1:PCBP2:PML:CCL5:APOE:KLK7:CHMP4B:FBXL2:PDE5A:SNX3:SRPK2:MDFIC:GSN:CDK9
FUMA	GO:2001257	regulation of cation channel activity	172	9	6.86701e-05	0.00252363	PDE4B:ANK3:AHNAK:DLG2:GNB5:MYO5A:RASGRF1:CALM3:CRH
FUMA	GO:0030155	regulation of cell adhesion	676	19	6.95398e-05	0.00254287	CDC42:FCGR2B:DDR2:ITPKB:ANK3:CD44:ATXN3:PML:CCL5:MAP4K4:SDC4:JAM2:SERPINI1:PDE5A:DUSP1:HFE:TNFRSF21:IL6:GSN
gPROFILER	GO:0042982	amyloid precursor protein metabolic process	65	4		0.00257214	APOE,CLU,PICALM,BIN1
gPROFILER	GO:0048858	cell projection morphogenesis	685	31		0.00257214	APOE,PICALM,GAB2,UNC5B,LRP8,DPYSL4,KALRN,NFIB,GAS7,RIMS2,CD44,SEMA4B,ANK3,NKX6-1,PDLIM5,CDC42,GPM6A,NTNG1,SHC3,OPA1,EGFR,CAPRIN1,MYH10,MAP1S,GAP43,HECW2,MAP4K4,MYOT,ITGB1,ZSWIM4,UNC13A
FUMA	GO:0019751	polyol metabolic process	69	6	7.14797e-05	0.00260087	ITPKB:PLCE1:PLCD3:ISYNA1:INPP4A:PLCH1
FUMA	R-HSA-168249	innate immune system	1101	27	2.43347e-05	0.00260555	CDC42:MAPK8:TSPAN14:PGAM1:AP2A2:MUC6:CD59:CD44:MS4A2:GAB2:PCBP2:POLR1D:MYO5A:MEFV:ALDOA:LRRFIP1:POLR3F:DNAJC5:SYNGR1:TNIP2:NFKB1:CYSTM1:ATP6V0E1:ATP6V1G2:CLU:IKBKB:GSN
FUMA	WP2380	brain-derived neurotrophic factor (bdnf) signaling pathway	144	9	1.70211e-05	0.00261185	CDC42:MAPK8:ACACB:GABRB3:RASGRF1:NFKB1:APC:IKBKB:SHC3
FUMA	WP4481	resistin as a regulator of inflammation	33	5	1.92402e-05	0.00261185	PLCE1:PLCD3:NFKB1:IL6:IKBKB
FUMA	GO:0048259	regulation of receptor mediated endocytosis	100	7	7.24471e-05	0.00262309	PICALM:BICD1:APOC1:APOC2:HFE:CD2AP:CLU
Wegestalt	GO:0031674	I band	136	9	6.17815e-05	0.00264974	ALDOA;BIN1;FBP2;DST;ANK3;SORBS2;NEBL;PDE4B;MYOT
FUMA	GO:0098802	plasma membrane receptor complex	187	9	0.00012998	0.00265531	IFNLR1:ITGB1:DLG2:ITGB5:CHRNA9:HFE:ITGB8:IL6:IKBKB
FUMA	GO:1990234	transferase complex	772	20	0.000135231	0.00265602	RPRD2:CHML:CUL2:CCNY:DYRK2:POLR1D:FBXL16:PAGR1:PAGR1:KCTD13:SPOP:INO80C:ZSWIM4:POLR3F:FBXL2:ENC1:MCM3:CDK14:KAT6A:IKBKB:CDK9
FUMA	GO:0030027	lamellipodium	188	9	0.000135322	0.00265602	ITGB1:ABLIM1:CD44:MEFV:MYH10:ITSN1:SORBS2:APC:GSN
gPROFILER	GO:0097242	amyloid-beta clearance	36	3		0.00266321	APOE,CLU,PICALM
gPROFILER	GO:0048259	regulation of receptor-mediated endocytosis	107	4		0.00266321	APOC1,APOC2,CLU,PICALM
FUMA	GO:0002252	immune effector process	1242	28	7.43965e-05	0.00268046	CDC42:IFNLR1:FCGR2B:SUSD4:TSPAN14:PGAM1:AP2A2:CD59:CD44:GAB2:PCBP2:PML:GPRC5B:ALDOA:LSM14A:POU2F2:KLK7:AGBL5:POLR3F:DNAJC5:SYNGR1:NFKB1:CYSTM1:HFE:IL6:CLU:SCARA3:GSN
gPROFILER	GO:0030388	fructose 1,6-bisphosphate metabolic process	10	3		0.00271196	ALDOA,FBP1,FBP2
FUMA	GO:0043632	modification dependent macromolecule catabolic process	623	18	7.61422e-05	0.00272998	WAC:CUL2:USP35:PCBP2:ATXN3:PML:FBXL16:USP7:KCTD13:SPOP:USP14:HECW2:FBXL2:WWTR1:DNAJC18:HFE:CD2AP:CLU
FUMA	GO:1902003	regulation of amyloid beta formation	23	4	7.78997e-05	0.00277943	PICALM:APOE:BIN1:CLU
FUMA	GO:0046165	alcohol biosynthetic process	175	9	7.84352e-05	0.00278502	ITPKB:PLCE1:ACACB:PLCD3:ISYNA1:APOE:PLCH1:NFKB1:ELOVL6
FUMA	GO:0034097	response to cytokine	1182	27	8.0641e-05	0.00284957	CDC42:IFNLR1:LRP8:HDGF:ITGB1:MAPK8:CD44:GAB2:PML:MEFV:CIITA:CCL5:CDC42EP4:LSM14A:ZFP36L2:SYNGR1:TNIP2:NKX6-1:NFKB1:DUSP1:TNFRSF21:IL6:IKBKB:TNFRSF11B:IL11RA:GSN:CDK9
FUMA	GO:0034364	high density lipoprotein particle	27	4	0.000149547	0.00287878	APOE:APOC1:APOC2:CLU
FUMA	GO:0071830	triglyceride rich lipoprotein particle clearance	9	3	8.20829e-05	0.00288665	APOE:APOC1:APOC2
gPROFILER	GO:0015914	phospholipid transport	90	3		0.00291237	APOC1,APOE,APOC2
gPROFILER	GO:0098797	plasma membrane protein complex	680	9		0.00296408	KCNQ3,ITGB5,DLG2,PICALM,IFNLR1,IL6,IKBKB,SCN2B,CHRNA9
gPROFILER	GO:0098796	membrane protein complex	1286	14		0.00296408	KCNQ3,TOMM40,ITGB5,DENND4C,TIMM17A,DLG2,PICALM,IFNLR1,IL6,IKBKB,SCN2B,CHRNA9,SMDT1,GABRB3
gPROFILER	GO:0036477	somatodendritic compartment	843	29		0.00296408	APOE,SEZ6L2,ITSN1,CLU,PICALM,FCGR2B,SNCG,MAPK8,LRP8,MYO5A,NRSN1,PHAX,PURA,CRH,ANK3,SST,SERPINI1,CDC42,GPM6A,HTR1E,OPA1,MARK1,GRK4,PDE4B,NRGN,CAPRIN1,MYH10,MAP1S,GAP43
FUMA	GO:0035023	regulation of rho protein signal transduction	138	8	8.51242e-05	0.00297486	ITGB1:RASGRF1:KCTD13:KANK2:APOE:ITSN1:KALRN:PLEKHG1
FUMA	GO:1902680	positive regulation of rna biosynthetic process	1592	33	8.54006e-05	0.00297486	ARNT:ELF3:WAC:CREM:PICALM:PGR:PML:CRTC3:CIITA:PAGR1:PAGR1:WWOX:MAF:HOXB7:VEZF1:POU2F2:APOE:RHOQ:ERG:MITF:WWTR1:TNIP2:NKX6-1:NFKB1:SUB1:NCOA7:IL6:NEUROD6:EGFR:MDFIC:KAT6A:IKBKB:NFIB:CDK9
FUMA	GO:0032870	cellular response to hormone stimulus	689	19	8.91551e-05	0.00307643	PGR:OSBPL8:MYO5A:PAGR1:PAGR1:KANK2:ZFP36L2:RHOQ:SST:OPA1:NKX6-1:NFKB1:APC:DUSP1:ATP6V0E1:ATP6V1G2:EGFR:LANCL2:CRH:DENND4C
FUMA	GO:0010883	regulation of lipid storage	45	5	8.96836e-05	0.00307643	EHD1:OSBPL8:ACACB:NFKB1:IL6
FUMA	GO:2000059	negative regulation of ubiquitin dependent protein catabolic process	45	5	8.96836e-05	0.00307643	WAC:PML:USP7:USP14:HFE
FUMA	GO:0045666	positive regulation of neuron differentiation	361	13	8.99907e-05	0.00307643	LRP8:NEGR1:CAPRIN1:GPRC5B:UNC13A:APOE:KALRN:SERPINI1:OPA1:NKX6-1:ENC1:SNX3:RIMS2
gPROFILER	GO:0120036	plasma membrane bounded cell projection organization	1523	54		0.00308244	EHD1,APOE,ITSN1,GFAP,PICALM,FCGR2B,IL6,TBC1D7,GAB2,UNC5B,LRP8,DPYSL4,KALRN,NFIB,NEGR1,GAS7,RIMS2,EMP3,ABLIM1,CD44,SDC4,GSN,SEMA4B,RASGRF1,ANK3,SERPINI1,CDC42EP4,NKX6-1,WWTR1,PDLIM5,CDC42,GPM6A,NTNG1,SHC3,OPA1,MARK1,CD2AP,EGFR,CAPRIN1,MYH10,MAP1S,GAP43,HECW2,RHOQ,APC,MAP4K4,MYOT,TNFRSF21,SNX3,ITGB1,ZSWIM4,LST1,ENC1,UNC13A
gPROFILER	GO:0070091	glucagon secretion	9	3		0.0031237	IL6,CARTPT,CRH
FUMA	GO:0001816	cytokine production	750	20	9.19987e-05	0.00313051	PDE4B:ARNT:FCGR2B:LTBP3:PCBP2:PML:MEFV:GPRC5B:MAF:LSM14A:LRRFIP1:POLR3F:NFKB1:HFE:TNFRSF21:CD2AP:ITGB8:IL6:CLU:S1PR3
gPROFILER	GO:0097061	dendritic spine organization	79	8		0.00313466	APOE,FCGR2B,LRP8,KALRN,PDLIM5,CDC42,OPA1,CAPRIN1
gPROFILER	GO:0035556	intracellular signal transduction	2880	38		0.00313466	LSM14A,APOE,SEZ6L2,ITSN1,CLU,CHD4,DLG2,RAPGEF4,NFKB1,CAPS,FCGR2B,IL6,TBC1D7,IKBKB,PTBP1,CHRNA9,KANK2,GAB2,CALCB,UNC5B,FBP1,ITPKB,RHOH,MAPK8,DSTYK,MDFIC,KALRN,BCL2L2,CARTPT,CHML,SRGAP1,MYO5A,RIMS2,PDE5A,KAT6A,STK17B,CD44,CRTC3
gPROFILER	GO:0048812	neuron projection morphogenesis	667	30		0.00313466	APOE,PICALM,GAB2,UNC5B,LRP8,DPYSL4,KALRN,NFIB,GAS7,RIMS2,SEMA4B,ANK3,NKX6-1,PDLIM5,CDC42,GPM6A,NTNG1,SHC3,OPA1,EGFR,CAPRIN1,MYH10,MAP1S,GAP43,HECW2,MAP4K4,MYOT,ITGB1,ZSWIM4,UNC13A
gPROFILER	GO:0007267	cell-cell signaling	1679	58		0.00313466	KCNQ3,APOE,ITSN1,GFAP,DLG2,RAPGEF4,NFKB1,CDK14,IL6,SCN2B,CHRNA9,SNCG,GABRB3,DNAJC5,LRP8,MDFIC,ALPK2,KALRN,CARTPT,PGR,MYO5A,RIMS2,ATXN3,CRH,PCSK1,CCNY,RASGRF1,KCTD13,SST,AP2S1,NKX6-1,WWTR1,LNPEP,CALM3,HFE,CDC42,NTNG1,RGS4,SHC3,HTR1E,MARK1,PPFIA1,EGFR,MITF,IGFBP6,NRGN,GPRC5B,CCL5,APC,MAP4K4,AP2A2,SNX3,ITGB1,WWOX,HCRTR2,SYNGR1,UNC13A,USP14
FUMA	GO:0030125	clathrin vesicle coat	28	4	0.000173087	0.00326906	AP2A2:PICALM:AP2S1:NCALD
FUMA	GO:0051493	regulation of cytoskeleton organization	522	16	9.6595e-05	0.00327177	CDC42:RGS4:LMOD1:PPFIA1:BICD1:CDC42EP4:MAP1S:RHOQ:BIN1:CHMP4B:SDC4:ADD1:RHOH:APC:CD2AP:GSN
FUMA	GO:0016049	cell growth	468	15	9.75106e-05	0.00327262	CDC42:RGS4:ITGB1:PLCE1:PML:SEMA4B:UNC13A:APOE:NKX6-1:PDLIM5:SORBS2:HBEGF:EGFR:RIMS2:FBP1
FUMA	GO:0051249	regulation of lymphocyte activation	468	15	9.75106e-05	0.00327262	CDC42:FCGR2B:ITPKB:CCL5:CLPTM1:ZFP36L2:SLC39A10:SDC4:TNIP2:PDE5A:HFE:LST1:TNFRSF21:IL6:GSN
FUMA	GO:0031347	regulation of defense response	754	20	9.87993e-05	0.00329057	IFNLR1:LRP8:FCGR2B:MUC6:PCBP2:MEFV:GPRC5B:CCL5:LSM14A:APOE:KLK7:POLR3F:TNIP2:NFKB1:F12:IL6:EGFR:SLC7A2:IKBKB:CRH
FUMA	GO:0050773	regulation of dendrite development	141	8	9.89409e-05	0.00329057	LRP8:MARK1:CAPRIN1:APOE:HECW2:KALRN:OPA1:PDLIM5
FUMA	GO:0043087	regulation of gtpase activity	469	15	9.98264e-05	0.00330506	RGS4:CHML:ITGB1:PICALM:SRGAP1:DOCK9:RIN3:GNB5:RASGRF1:CCL5:MAP4K4:SEC23B:KALRN:RHOH:TBC1D7
gPROFILER	GO:0010876	lipid localization	423	7		0.00334988	EHD1,APOC1,APOE,APOC2,CLU,NFKB1,IL6
gPROFILER	GO:0097435	supramolecular fiber organization	672	29		0.00334988	TNXB,APOE,ITGB5,CLU,ALDOA,GFAP,BIN1,LMOD1,DDR2,SDC4,GSN,CSRP1,KRT17,DST,KCTD13,CDC42EP4,CDC42,RGS4,ADD1,SORBS2,PPFIA1,CD2AP,NEBL,MYH10,MAP1S,RHOQ,APC,ITGB1,ADAMTS2
gPROFILER	GO:0007268	chemical synaptic transmission	706	31		0.00334988	KCNQ3,APOE,GFAP,DLG2,SCN2B,CHRNA9,SNCG,GABRB3,DNAJC5,LRP8,CARTPT,MYO5A,RIMS2,ATXN3,CRH,RASGRF1,KCTD13,SST,CALM3,NTNG1,RGS4,SHC3,HTR1E,PPFIA1,EGFR,NRGN,ITGB1,HCRTR2,SYNGR1,UNC13A,USP14
gPROFILER	GO:0032990	cell part morphogenesis	705	31		0.00334988	APOE,PICALM,GAB2,UNC5B,LRP8,DPYSL4,KALRN,NFIB,GAS7,RIMS2,CD44,SEMA4B,ANK3,NKX6-1,PDLIM5,CDC42,GPM6A,NTNG1,SHC3,OPA1,EGFR,CAPRIN1,MYH10,MAP1S,GAP43,HECW2,MAP4K4,MYOT,ITGB1,ZSWIM4,UNC13A
gPROFILER	GO:1901214	regulation of neuron death	324	8		0.00334988	APOE,ITSN1,CLU,PICALM,FCGR2B,GABRB3,UNC5B,DNAJC5
gPROFILER	GO:0042632	cholesterol homeostasis	100	3		0.00334988	EHD1,APOE,APOC2
gPROFILER	GO:0098916	anterograde trans-synaptic signaling	706	31		0.00334988	KCNQ3,APOE,GFAP,DLG2,SCN2B,CHRNA9,SNCG,GABRB3,DNAJC5,LRP8,CARTPT,MYO5A,RIMS2,ATXN3,CRH,RASGRF1,KCTD13,SST,CALM3,NTNG1,RGS4,SHC3,HTR1E,PPFIA1,EGFR,NRGN,ITGB1,HCRTR2,SYNGR1,UNC13A,USP14
gPROFILER	GO:0055092	sterol homeostasis	101	3		0.00334988	EHD1,APOE,APOC2
gPROFILER	GO:0051020	GTPase binding	549	13		0.00335517	EHD1,DENND4C,ITSN1,DENND5B,PICALM,RAPGEF4,TBC1D7,RHOH,KALRN,CHML,SRGAP1,MYO5A,RIMS2
FUMA	GO:0005085	guanyl nucleotide exchange factor activity	211	10	6.30641e-05	0.00338015	PLCE1:DENND5B:DOCK9:RIN3:RASGRF1:RAPGEF4:ITSN1:KALRN:PLEKHG1:DENND4C
FUMA	GO:0005200	structural constituent of cytoskeleton	98	7	6.36988e-05	0.00338015	ANK3:BICD1:KRT17:GFAP:SORBS2:TUBB2A:CD2AP
FUMA	GO:0010942	positive regulation of cell death	698	19	0.00010546	0.00347592	FCGR2B:ITGB1:MAPK8:PICALM:PML:WWOX:CCL5:BIN1:STK17B:ITSN1:KALRN:APC:DUSP1:IL6:CYCS:SRPK2:CLU:CRH:GSN
FUMA	GO:0042692	muscle cell differentiation	367	13	0.000106031	0.00347914	CDC42:RGS4:LMOD1:NEBL:ITGB1:EHD1:MYH10:PTBP1:DMPK:BIN1:PDLIM5:SORBS2:CDK9
FUMA	R-HSA-8963898	plasma lipoprotein assembly	19	4	3.52044e-05	0.00351809	APOE:APOC1:APOC2:BMP1
FUMA	WP289	myometrial relaxation and contraction pathways	157	9	3.37621e-05	0.0035223	PDE4B:RGS4:IGFBP6:GNB5:CALM3:GRK4:NFKB1:IL6:CRH
FUMA	WP306	focal adhesion	200	10	4.02103e-05	0.0035223	CDC42:LAMC1:ITGB1:MAPK8:RASGRF1:ITGB5:TNXB:ITGB8:EGFR:SHC3
FUMA	WP2324	age/rage pathway	66	6	5.55701e-05	0.0035223	CDC42:MAPK8:NFKB1:CYCS:EGFR:IKBKB
FUMA	WP2036	tnf related weak inducer of apoptosis (tweak) signaling pathway	42	5	6.40112e-05	0.0035223	MAPK8:CCL5:NFKB1:IL6:IKBKB
FUMA	WP4300	extracellular vesicles in the crosstalk of cardiac cells	22	4	6.48674e-05	0.0035223	PDLIM5:SORBS2:IL6:EGFR
FUMA	WP4482	vitamin d in inflammatory diseases	22	4	6.48674e-05	0.0035223	NFKB1:DUSP1:IL6:IKBKB
FUMA	WP3303	rac1/pak1/p38/mmp2 pathway	69	6	7.14797e-05	0.0035285	ITGB1:MAPK8:TNIP2:NFKB1:EGFR:IKBKB
FUMA	WP4480	role altered glycolysation of muc1 in tumour microenvironment	9	3	8.20829e-05	0.00359688	NFKB1:IL6:IKBKB
FUMA	WP534	glycolysis and gluconeogenesis	45	5	8.96836e-05	0.00359688	PGAM1:ALDOA:MDH2:FBP2:FBP1
FUMA	WP262	ebv lmp1 signaling	24	4	9.27371e-05	0.00359688	MAPK8:CCL5:NFKB1:IKBKB
gPROFILER	GO:0006641	triglyceride metabolic process	107	3		0.003603	APOC1,APOE,APOC2
gPROFILER	GO:0043194	axon initial segment	18	4		0.00360785	KCNQ3,BIN1,ANK3,NAV1
FUMA	GO:0009914	hormone transport	319	12	0.00011112	0.00362991	MYO5A:CCL5:MAP4K4:RAPGEF4:KALRN:NKX6-1:CARTPT:HFE:IL6:EGFR:CRH:RIMS2
FUMA	GO:0051347	positive regulation of transferase activity	643	18	0.000113005	0.00365561	LRP8:DUSP12:DDR2:DSTYK:CCNY:PLCE1:OSBPL8:GPRC5B:CCL5:CALM3:MAP4K4:SDC4:ITSN1:PDE5A:CARTPT:EGFR:MDFIC:CLU
FUMA	GO:0034976	response to endoplasmic reticulum stress	272	11	0.000113596	0.00365561	HDGF:FCGR2B:ATXN3:PML:RASGRF1:USP14:OPA1:ADD1:DNAJC18:FKBP14:CLU
FUMA	GO:0044255	cellular lipid metabolic process	885	22	0.000114059	0.00365561	LRP8:PIP4K2A:CREM:PLCE1:SOAT2:OSBPL8:ACACB:MTMR6:CDIPT:CERS1:APOE:APOC1:APOC2:SDC4:MTMR3:BDH2:ELOVL6:ITGB8:EGFR:EPHX2:CRH:PIP5K1B
FUMA	GO:0051962	positive regulation of nervous system development	530	16	0.000115007	0.00365561	LRP8:NEGR1:CAPRIN1:GPRC5B:GFAP:UNC13A:APOE:BIN1:KALRN:SERPINI1:OPA1:NKX6-1:ENC1:SNX3:IL6:RIMS2
FUMA	GO:0043903	regulation of symbiosis encompassing mutualism through parasitism	227	10	0.000115458	0.00365561	PML:CCL5:APOE:CHMP4B:FBXL2:SNX3:SRPK2:MDFIC:GSN:CDK9
FUMA	GO:0006000	fructose metabolic process	10	3	0.000116383	0.00365561	ALDOA:FBP2:FBP1
FUMA	GO:0030388	fructose 1 6 bisphosphate metabolic process	10	3	0.000116383	0.00365561	ALDOA:FBP2:FBP1
FUMA	GO:0070091	glucagon secretion	10	3	0.000116383	0.00365561	CARTPT:IL6:CRH
FUMA	GO:0034447	very low density lipoprotein particle clearance	10	3	0.000116383	0.00365561	APOE:APOC1:APOC2
FUMA	GO:0015918	sterol transport	108	7	0.000117805	0.00368453	SOAT2:OSBPL8:APOE:APOC1:APOC2:NFKB1:CLU
FUMA	GO:0008047	enzyme activator activity	511	16	7.55141e-05	0.00371738	RGS4:CHML:SH3PXD2A:HSPB2:SRGAP1:RIN3:GNB5:GPRC5B:CCL5:APOE:APOC1:APOC2:CALM3:SEC23B:ITSN1:TBC1D7
FUMA	GO:1990837	sequence specific double stranded dna binding	860	22	7.56944e-05	0.00371738	ARNT:ELF3:CREM:MXI1:PGR:CHD4:MAF:HOXB7:VEZF1:POU2F2:LRRFIP1:ZHX3:ZNF217:ERG:MITF:NKX6-1:NFKB1:SUB1:PURA:NEUROD6:NFIB:CDK9
FUMA	GO:0005088	ras guanyl nucleotide exchange factor activity	136	8	7.68334e-05	0.00371738	DENND5B:RIN3:RASGRF1:RAPGEF4:ITSN1:KALRN:PLEKHG1:DENND4C
gPROFILER	GO:0019899	enzyme binding	2228	68		0.00380962	EHD1,APOC2,DENND4C,ITSN1,CLU,DENND5B,GFAP,CHD4,DLG2,PICALM,RAPGEF4,TBC1D7,IKBKB,BIN1,GAB2,RHOH,MAPK8,KALRN,CHML,SRGAP1,PGR,MYO5A,RIMS2,SDC4,ATXN3,CCNY,PGAM1,TNIP2,RASGRF1,WAC,KCTD13,DUSP12,SH3PXD2A,MTMR3,CDC42EP4,CCDC50,CALM3,PML,PLEKHG1,PDLIM5,CDC42,RIN3,SHC3,DOCK9,OPA1,DUSP1,FAM83A,PLCE1,BICD1,CUL2,EGFR,SPOP,GPRC5B,RPRD2,FBXL2,CDK2AP1,USP7,PCBP2,PEX5L,RHOQ,CDK9,LSM2,APC,AP2A2,SNX3,TSPAN14,ITGB1…
gPROFILER	GO:0008092	cytoskeletal protein binding	984	36		0.00380962	APOE,CLU,ALDOA,PICALM,NFKB1,BIN1,LMOD1,LRP8,DPYSL4,MYO5A,GAS7,ABLIM1,MEFV,MTUS1,GSN,CSRP1,NCALD,AGBL5,SNTB2,DST,ANK3,CALM3,PDLIM5,ADD1,SORBS2,OPA1,MARK1,BICD1,NEBL,EGFR,PDE4B,MYH10,MAP1S,APC,MAP4K4,MYOT
gPROFILER	GO:0006898	receptor-mediated endocytosis	319	6		0.00383021	APOC1,APOE,APOC2,CLU,PICALM,FCGR2B
FUMA	GO:0050803	regulation of synapse structure or activity	229	10	0.000124053	0.00386352	LRP8:FCGR2B:CAPRIN1:APOE:DMPK:GAP43:KALRN:OPA1:PDLIM5:GPM6A
FUMA	WP4534	mechanoregulation and pathology of yap/taz via hippo and non-hippo mechanisms	47	5	0.000110754	0.00387309	ITGB1:MAPK8:MAP4K4:ITGB5:ITGB8
FUMA	WP4655	cytosolic dna-sensing pathway	75	6	0.000114124	0.00387309	POLR1D:CCL5:POLR3F:NFKB1:IL6:IKBKB
gPROFILER	GO:0099537	trans-synaptic signaling	715	31		0.00392303	KCNQ3,APOE,GFAP,DLG2,SCN2B,CHRNA9,SNCG,GABRB3,DNAJC5,LRP8,CARTPT,MYO5A,RIMS2,ATXN3,CRH,RASGRF1,KCTD13,SST,CALM3,NTNG1,RGS4,SHC3,HTR1E,PPFIA1,EGFR,NRGN,ITGB1,HCRTR2,SYNGR1,UNC13A,USP14
gPROFILER	GO:0120035	regulation of plasma membrane bounded cell projection organization	683	30		0.00392303	EHD1,APOE,ITSN1,GFAP,FCGR2B,TBC1D7,LRP8,KALRN,NEGR1,RIMS2,CD44,SEMA4B,SERPINI1,CDC42EP4,NKX6-1,PDLIM5,CDC42,GPM6A,OPA1,MARK1,CAPRIN1,GAP43,HECW2,RHOQ,APC,MAP4K4,SNX3,ZSWIM4,ENC1,UNC13A
gPROFILER	GO:0098802	plasma membrane receptor complex	293	6		0.00393053	ITGB5,DLG2,IFNLR1,IL6,IKBKB,CHRNA9
gPROFILER	GO:0044297	cell body	576	23		0.00396496	APOE,SEZ6L2,ITSN1,GFAP,PICALM,FCGR2B,SNCG,LRP8,MYO5A,NRSN1,PHAX,PURA,CRH,SST,SERPINI1,CDC42,GPM6A,GRK4,NRGN,MYH10,MAP1S,GAP43,MYOT
FUMA	R-HSA-70326	glucose metabolism	92	7	4.24754e-05	0.00397941	PGAM1:PGM2L1:ALDOA:SLC25A1:MDH2:FBP2:FBP1
FUMA	GO:0051788	response to misfolded protein	26	4	0.000128411	0.00398236	ATXN3:DNAJC18:F12:CLU
gPROFILER	GO:0051049	regulation of transport	1915	23		0.00403906	KCNQ3,EHD1,APOC1,APOE,APOC2,ITSN1,CLU,GFAP,DLG2,PICALM,RAPGEF4,NFKB1,FCGR2B,IL6,BIN1,SCN2B,GAB2,SNCG,DNAJC5,SCN11A,MAPK8,MDFIC,KALRN
gPROFILER	GO:0006796	phosphate-containing compound metabolic process	3351	90		0.00406857	PGM2L1,APOC1,APOE,APOC2,ITSN1,CLU,ALDOA,DLG2,NFKB1,FCGR2B,CDK14,IL6,EPHX2,IKBKB,PTBP1,CHRNA9,DDR2,FBP1,ITPKB,RHOH,MAPK8,DSTYK,LRP8,MDFIC,ALPK2,KALRN,NTPCR,CARTPT,GART,PDE5A,ISYNA1,FBP2,STK17B,CD44,SDC4,DDHD1,SLC39A10,INPP4A,ELOVL6,CRH,CCNY,ZFP36L2,PGAM1,TNIP2,RASGRF1,CDS1,TMEM132D,DMPK,DUSP12,PIP5K1B,MTMR3,PIP4K2A,CIITA,WWTR1,CALM3,PML,PLCD3,CDIPT,HFE,SULT4A1,CDC42,MTMR6,SLC25A1,RGS4,ACACB,CYCS,S…
gPROFILER	GO:0045806	negative regulation of endocytosis	48	3		0.00406857	APOC1,APOC2,PICALM
gPROFILER	GO:0070997	neuron death	360	9		0.00406857	APOE,ITSN1,CLU,PICALM,FCGR2B,GABRB3,UNC5B,DNAJC5,DPYSL4
gPROFILER	WP4480	Role Altered Glycolysation of MUC1 in Tumour Microenvironment	9	3		0.00418981	NFKB1,IL6,IKBKB
gPROFILER	WP430	Statin Pathway	31	3		0.00418981	APOC1,APOE,APOC2
FUMA	R-HSA-112314	neurotransmitter receptors and postsynaptic signal transmission	204	10	4.75246e-05	0.00419055	AP2A2:DLG2:NRGN:GABRB3:GNB5:RASGRF1:AP2S1:CHRNA9:TUBB2A:NCALD
gPROFILER	GO:0030030	cell projection organization	1562	54		0.00420339	EHD1,APOE,ITSN1,GFAP,PICALM,FCGR2B,IL6,TBC1D7,GAB2,UNC5B,LRP8,DPYSL4,KALRN,NFIB,NEGR1,GAS7,RIMS2,EMP3,ABLIM1,CD44,SDC4,GSN,SEMA4B,RASGRF1,ANK3,SERPINI1,CDC42EP4,NKX6-1,WWTR1,PDLIM5,CDC42,GPM6A,NTNG1,SHC3,OPA1,MARK1,CD2AP,EGFR,CAPRIN1,MYH10,MAP1S,GAP43,HECW2,RHOQ,APC,MAP4K4,MYOT,TNFRSF21,SNX3,ITGB1,ZSWIM4,LST1,ENC1,UNC13A
FUMA	GO:0048156	tau protein binding	45	5	8.96836e-05	0.00421513	MARK1:PICALM:APOE:BIN1:CLU
gPROFILER	GO:0043025	neuronal cell body	506	21		0.00422221	APOE,SEZ6L2,ITSN1,PICALM,SNCG,LRP8,MYO5A,NRSN1,PHAX,PURA,CRH,SST,SERPINI1,CDC42,GPM6A,GRK4,NRGN,MYH10,MAP1S,GAP43,MYOT
gPROFILER	GO:0034702	ion channel complex	302	7		0.00422221	KCNQ3,DLG2,SCN2B,CHRNA9,SMDT1,GABRB3,SCN11A
FUMA	GO:0005769	early endosome	345	12	0.000229168	0.0042481	EHD1:PICALM:RIN3:MYO5A:PML:APOE:APOC2:TMEM163:LNPEP:HFE:SNX3:EGFR
Wegestalt	GO:0043194	axon initial segment	20	4	0.000105539	0.00428823	KCNQ3;BIN1;ANK3;NAV1
Wegestalt	GO:0032994	protein-lipid complex	38	5	0.000113949	0.00439842	APOC1;APOE;APOC2;CLU;BIN1
gPROFILER	GO:0060999	positive regulation of dendritic spine development	45	4		0.00448416	APOE,ITSN1,LRP8,KALRN
FUMA	GO:1901615	organic hydroxy compound metabolic process	486	15	0.00014723	0.0045468	ITPKB:PLCE1:SOAT2:ACACB:MYO5A:PLCD3:ISYNA1:APOE:APOC1:INPP4A:PLCH1:NFKB1:ELOVL6:EPHX2:ALDH1B1
gPROFILER	GO:0031344	regulation of cell projection organization	693	30		0.00454962	EHD1,APOE,ITSN1,GFAP,FCGR2B,TBC1D7,LRP8,KALRN,NEGR1,RIMS2,CD44,SEMA4B,SERPINI1,CDC42EP4,NKX6-1,PDLIM5,CDC42,GPM6A,OPA1,MARK1,CAPRIN1,GAP43,HECW2,RHOQ,APC,MAP4K4,SNX3,ZSWIM4,ENC1,UNC13A
gPROFILER	GO:0015748	organophosphate ester transport	121	3		0.00454962	APOC1,APOE,APOC2
gPROFILER	GO:0106027	neuron projection organization	87	8		0.004559	APOE,FCGR2B,LRP8,KALRN,PDLIM5,CDC42,OPA1,CAPRIN1
gPROFILER	GO:0032368	regulation of lipid transport	127	4		0.004559	APOC1,APOE,APOC2,NFKB1
gPROFILER	GO:0032989	cellular component morphogenesis	1156	43		0.0046166	APOE,CLU,ALDOA,SCARA3,PICALM,PALM2-AKAP2,GAB2,LMOD1,UNC5B,LRP8,DPYSL4,KALRN,NFIB,GAS7,RIMS2,CD44,CSRP1,SEMA4B,ANK3,CDC42EP4,NKX6-1,PDLIM5,CDC42,GPM6A,NTNG1,ADD1,SHC3,OPA1,NEBL,EGFR,CAPRIN1,MYH10,MAP1S,GAP43,HECW2,RHOQ,MAP4K4,MYOT,LAMC1,ITGB1,ZSWIM4,LST1,UNC13A
gPROFILER	GO:0042116	macrophage activation	100	4		0.0046166	CLU,SLC7A2,FCGR2B,IL6
FUMA	GO:0044057	regulation of system process	600	17	0.000151207	0.00463846	PDE4B:RGS4:PLCE1:SCN2B:WNK4:DMPK:CALM3:BIN1:SCN11A:PDE5A:CARTPT:HBEGF:TNFRSF21:EGFR:CRH:RIMS2:CDK9
FUMA	GO:0022617	extracellular matrix disassembly	79	6	0.000152304	0.00463846	DDR2:LAMC1:CD44:KLK7:IL6:BMP1
FUMA	GO:0031032	actomyosin structure organization	191	9	0.00015246	0.00463846	CDC42:LMOD1:NEBL:ITGB1:PPFIA1:KCTD13:MYH10:SDC4:ITGB5
FUMA	GO:0030258	lipid modification	235	10	0.000153153	0.00463846	PIP4K2A:SOAT2:ACACB:MTMR6:APOE:APOC1:MTMR3:BDH2:EPHX2:PIP5K1B
FUMA	GO:0032970	regulation of actin filament based process	381	13	0.000153353	0.00463846	CDC42:PDE4B:RGS4:LMOD1:PPFIA1:CDC42EP4:RHOQ:BIN1:SDC4:ADD1:RHOH:CD2AP:GSN
FUMA	GO:1901698	response to nitrogen compound	968	23	0.000154874	0.00466526	PDE4B:FCGR2B:RGS4:ITGB1:OSBPL8:GABRB3:MYO5A:APOE:CALM3:RHOQ:SST:OPA1:NKX6-1:NFKB1:APC:DUSP1:ATP6V0E1:ATP6V1G2:IL6:EGFR:CRH:DENND4C:GSN
gPROFILER	GO:0071806	protein transmembrane transport	58	3		0.00466945	TOMM40,CLU,TIMM17A
gPROFILER	GO:0000902	cell morphogenesis	1050	40		0.00475276	APOE,CLU,ALDOA,SCARA3,PICALM,PALM2-AKAP2,GAB2,UNC5B,LRP8,DPYSL4,KALRN,NFIB,GAS7,RIMS2,CD44,SEMA4B,ANK3,CDC42EP4,NKX6-1,PDLIM5,CDC42,GPM6A,NTNG1,ADD1,SHC3,OPA1,EGFR,CAPRIN1,MYH10,MAP1S,GAP43,HECW2,RHOQ,MAP4K4,MYOT,LAMC1,ITGB1,ZSWIM4,LST1,UNC13A
gPROFILER	GO:0032369	negative regulation of lipid transport	48	3		0.00475276	APOC1,APOC2,NFKB1
gPROFILER	GO:0006793	phosphorus metabolic process	3377	90		0.00475276	PGM2L1,APOC1,APOE,APOC2,ITSN1,CLU,ALDOA,DLG2,NFKB1,FCGR2B,CDK14,IL6,EPHX2,IKBKB,PTBP1,CHRNA9,DDR2,FBP1,ITPKB,RHOH,MAPK8,DSTYK,LRP8,MDFIC,ALPK2,KALRN,NTPCR,CARTPT,GART,PDE5A,ISYNA1,FBP2,STK17B,CD44,SDC4,DDHD1,SLC39A10,INPP4A,ELOVL6,CRH,CCNY,ZFP36L2,PGAM1,TNIP2,RASGRF1,CDS1,TMEM132D,DMPK,DUSP12,PIP5K1B,MTMR3,PIP4K2A,CIITA,WWTR1,CALM3,PML,PLCD3,CDIPT,HFE,SULT4A1,CDC42,MTMR6,SLC25A1,RGS4,ACACB,CYCS,S…
gPROFILER	GO:0015850	organic hydroxy compound transport	255	5		0.00482655	APOC1,APOE,APOC2,CLU,NFKB1
gPROFILER	GO:0050808	synapse organization	416	20		0.00482655	APOE,SEZ6L2,ITSN1,DLG2,FCGR2B,SNCG,GABRB3,LRP8,KALRN,MYO5A,ANK3,PDLIM5,CDC42,GPM6A,NTNG1,OPA1,CAPRIN1,MYH10,GAP43,MYOT
FUMA	GO:0042627	chylomicron	13	3	0.000271198	0.00484489	APOE:APOC1:APOC2
FUMA	GO:0044432	endoplasmic reticulum part	1344	28	0.000273093	0.00484489	CDC42:LAMC1:TSPAN14:CD59:SOAT2:OSBPL8:ATXN3:SCG3:PML:CDIPT:SEZ6L2:ARSG:CERS1:APOE:DMPK:SEC23B:CRTAP:CDS1:ELOVL6:ERAP2:DNAJC18:DST:IL6:FKBP14:EGFR:VKORC1L1:CLU:SCARA3
FUMA	GO:0030120	vesicle coat	57	5	0.000278385	0.00484489	AP2A2:PICALM:AP2S1:SEC23B:NCALD
FUMA	GO:0005938	cell cortex	302	11	0.000280723	0.00484489	CDC42:MYH10:UNC13A:RHOQ:GRK4:RHOH:HFE:DST:LANCL2:RIMS2:GSN
FUMA	WP3888	vegfa-vegfr2 signaling pathway	237	10	0.000164048	0.00497592	CDC42:ITGB1:MAPK8:ACACB:BIN1:ERG:ITGB5:NFKB1:HBEGF:TNXB
FUMA	WP4659	gastrin signaling pathway	114	7	0.000165109	0.00497592	CDC42:ITGB1:MAPK8:CD44:NFKB1:EGFR:IKBKB
FUMA	WP4396	nonalcoholic fatty liver disease	153	8	0.000174111	0.00497592	CDC42:MAPK8:NDUFB5:NFKB1:IL6:CYCS:NDUFA5:IKBKB
gPROFILER	GO:0006639	acylglycerol metabolic process	130	3		0.00499544	APOC1,APOE,APOC2
gPROFILER	GO:0006638	neutral lipid metabolic process	131	3		0.00501303	APOC1,APOE,APOC2
gPROFILER	GO:0099536	synaptic signaling	734	31		0.00501303	KCNQ3,APOE,GFAP,DLG2,SCN2B,CHRNA9,SNCG,GABRB3,DNAJC5,LRP8,CARTPT,MYO5A,RIMS2,ATXN3,CRH,RASGRF1,KCTD13,SST,CALM3,NTNG1,RGS4,SHC3,HTR1E,PPFIA1,EGFR,NRGN,ITGB1,HCRTR2,SYNGR1,UNC13A,USP14
FUMA	GO:1902679	negative regulation of rna biosynthetic process	1238	27	0.000170941	0.00512824	BEND5:LRP8:HDGF:ELF3:CENPF:CREM:MXI1:PHF21A:PML:CIITA:WWOX:MAF:KANK2:LRRFIP1:ZHX3:ZNF217:MITF:WWTR1:NKX6-1:NFKB1:PURA:LANCL2:MDFIC:KAT6A:ZHX1:NFIB:FBP1
FUMA	GO:0005768	endosome	885	21	0.00030298	0.00514039	ITGB1:AP2A2:EHD1:PICALM:RIN3:MYO5A:STOML1:PML:VPS53:APOE:APOC2:AP2S1:BIN1:PLEKHB2:TMEM163:CHMP4B:LNPEP:ATP6V0E1:HFE:SNX3:EGFR
FUMA	GO:0006629	lipid metabolic process	1241	27	0.000177671	0.00529961	LRP8:PIP4K2A:CREM:PLCE1:SOAT2:OSBPL8:ACACB:MTMR6:CDIPT:WWOX:CERS1:APOE:APOC1:APOC2:SDC4:MTMR3:SULT4A1:NFKB1:BDH2:ELOVL6:TNFRSF21:ITGB8:EGFR:EPHX2:CLU:CRH:PIP5K1B
FUMA	GO:0035966	response to topologically incorrect protein	195	9	0.000178096	0.00529961	HDGF:HSPB2:ATXN3:ADD1:HSPB3:DNAJC18:F12:FKBP14:CLU
FUMA	GO:0044429	mitochondrial part	1019	23	0.000320986	0.00535511	MRPL24:TIMM17A:NARS2:ME3:PGR:NRGN:ACACB:BCL2L2:ATXN3:TOMM40:DMPK:CALM3:SLC25A1:SMDT1:GFM1:NDUFB5:OPA1:BPHL:CYCS:MDH2:NDUFA5:CLU:ALDH1B1
Wegestalt	GO:0045334	clathrin-coated endocytic vesicle	63	6	0.00014764	0.00542751	APOE;PICALM;AP2S1;AP2A2;CEMIP;HBEGF
FUMA	GO:0006661	phosphatidylinositol biosynthetic process	116	7	0.000183915	0.00545072	PIP4K2A:MTMR6:CDIPT:INPP4A:MTMR3:CDS1:PIP5K1B
gPROFILER	GO:0006000	fructose metabolic process	15	3		0.00545138	ALDOA,FBP1,FBP2
gPROFILER	GO:0030424	axon	627	24		0.0054631	KCNQ3,ITSN1,DLG2,BIN1,SNCG,SCN11A,MAPK8,LRP8,NFIB,MYO5A,NRSN1,CRH,RASGRF1,DST,ANK3,CALM3,GPM6A,OPA1,NRGN,MYH10,GAP43,NAV1,MYOT,TNFRSF21
gPROFILER	GO:0005088	Ras guanyl-nucleotide exchange factor activity	139	4		0.00551418	DENND4C,ITSN1,DENND5B,RAPGEF4
FUMA	GO:0034637	cellular carbohydrate biosynthetic process	82	6	0.000187064	0.00552149	PGM2L1:DYRK2:ISYNA1:NDST3:FBP2:FBP1
FUMA	GO:0051924	regulation of calcium ion transport	241	10	0.000187806	0.00552149	PDE4B:RGS4:AHNAK:GNB5:MYO5A:PML:CCL5:CALM3:BIN1:CRH
FUMA	GO:0043086	negative regulation of catalytic activity	793	20	0.000192326	0.00563187	RGS4:CD44:DLG2:PICALM:BICD1:ACACB:TMEM132D:USP14:CERS1:APOE:APOC1:APOC2:BIN1:WWTR1:SERPINI1:RHOH:NFKB1:APC:DUSP1:IKBKB
gPROFILER	GO:0065008	regulation of biological quality	4103	84		0.0056637	KCNQ3,EHD1,APOE,APOC2,ITSN1,CLU,SLC7A2,ALDOA,GFAP,DLG2,PICALM,RAPGEF4,NFKB1,PALM2-AKAP2,FCGR2B,IL6,EPHX2,F12,BIN1,SLC24A4,SCN2B,CHRNA9,SMDT1,LMOD1,SNCG,GABRB3,CALCB,DNAJC5,CRTAP,ITPKB,SCN11A,LTBP3,MAPK8,LRP8,KALRN,NAV2,CARTPT,GART,CD59,MYO5A,RIMS2,CRTC3,RNPEP,CNNM2,SLC39A10,ELOVL6,CRH,MUC6,GSN,CSRP1,PCSK1,SEMA4B,NCALD,ZFP36L2,TNIP2,RASGRF1,ATP6V0E1,S1PR3,DMPK,ANK3,CDC42EP4,ATP6V1G2,NKX6-1,MXI1,WW…
gPROFILER	GO:1902495	transmembrane transporter complex	325	7		0.00570555	KCNQ3,DLG2,SCN2B,CHRNA9,SMDT1,GABRB3,SCN11A
gPROFILER	GO:0097708	intracellular vesicle	2349	68		0.00570555	EHD1,TMEM163,APOE,ITGB5,APOC2,DENND4C,ITSN1,CLU,ALDOA,PICALM,NFKB1,TBC1D7,BIN1,VPS53,GABRB3,DNAJC5,CARTPT,CD59,MYO5A,NRSN1,CD44,MEFV,RNPEP,LGALS8,INPP4A,GSN,PCSK1,NCALD,PGAM1,ATP6V0E1,SNTB2,CYSTM1,DST,AP2S1,SEC23B,SCG3,SERPINI1,CDC42EP4,ATP6V1G2,LNPEP,CALM3,PML,LRIG3,HFE,CDC42,RIN3,CHMP4B,OPA1,CD2AP,BICD1,KLK7,EGFR,C1QTNF5,PDE4B,NRGN,GPRC5B,RHOQ,AP2A2,CEMIP,SNX3,STOML1,TSPAN14,ITGB1,HBEGF,SYNGR1,…
gPROFILER	GO:0031410	cytoplasmic vesicle	2346	68		0.00570555	EHD1,TMEM163,APOE,ITGB5,APOC2,DENND4C,ITSN1,CLU,ALDOA,PICALM,NFKB1,TBC1D7,BIN1,VPS53,GABRB3,DNAJC5,CARTPT,CD59,MYO5A,NRSN1,CD44,MEFV,RNPEP,LGALS8,INPP4A,GSN,PCSK1,NCALD,PGAM1,ATP6V0E1,SNTB2,CYSTM1,DST,AP2S1,SEC23B,SCG3,SERPINI1,CDC42EP4,ATP6V1G2,LNPEP,CALM3,PML,LRIG3,HFE,CDC42,RIN3,CHMP4B,OPA1,CD2AP,BICD1,KLK7,EGFR,C1QTNF5,PDE4B,NRGN,GPRC5B,RHOQ,AP2A2,CEMIP,SNX3,STOML1,TSPAN14,ITGB1,HBEGF,SYNGR1,…
gPROFILER	GO:0033268	node of Ranvier	15	3		0.00570555	KCNQ3,BIN1,ANK3
FUMA	GO:0030141	secretory granule	831	20	0.000350958	0.00571949	RNPEP:TSPAN14:PGAM1:AP2A2:CD59:CD44:SCG3:MYO5A:ALDOA:KLK7:DNAJC5:SYNGR1:SERPINI1:NFKB1:CARTPT:PCSK1:CYSTM1:CLU:DENND4C:GSN
FUMA	GO:0045334	clathrin coated endocytic vesicle	60	5	0.000354254	0.00571949	AP2A2:PICALM:APOE:AP2S1:HBEGF
FUMA	GO:0007263	nitric oxide mediated signal transduction	29	4	0.000199189	0.00578671	APOE:PDE5A:DDAH2:EGFR
FUMA	GO:0034205	amyloid beta formation	29	4	0.000199189	0.00578671	PICALM:APOE:BIN1:CLU
FUMA	KEGG_AXON_GUIDANCE	axon guidance	129	7	0.000352642	0.00579343	CDC42:NTNG1:ITGB1:UNC5B:ABLIM1:SRGAP1:SEMA4B
FUMA	KEGG_FRUCTOSE_AND_MANNOSE_METABOLISM	fructose and mannose metabolism	34	4	0.00037377	0.00579343	MTMR6:ALDOA:FBP2:FBP1
FUMA	GO:0030234	enzyme regulator activity	1019	24	0.000127401	0.00582153	RGS4:CHML:CCNY:MAPK8:SH3PXD2A:HSPB2:SRGAP1:RIN3:GNB5:GPRC5B:CCL5:USP14:APOE:APOC1:APOC2:DMPK:CALM3:SEC23B:ITSN1:SERPINI1:RHOH:APC:TBC1D7:EGFR
FUMA	KEGG_GLYCOLYSIS_GLUCONEOGENESIS	glycolysis gluconeogenesis	62	5	0.000412881	0.00590737	PGAM1:ALDOA:ALDH1B1:FBP2:FBP1
FUMA	GO:0030031	cell projection assembly	558	16	0.000205807	0.00595543	CDC42:DNALI1:ITGB1:ABLIM1:EHD1:MYH10:CDC42EP4:EMP3:RHOQ:GAP43:WWTR1:GPM6A:APC:TBC1D7:CD2AP:GSN
FUMA	GO:0005975	carbohydrate metabolic process	559	16	0.000209963	0.00601115	ARNT:DUSP12:CREM:PGAM1:PGM2L1:DYRK2:ACACB:ALDOA:ISYNA1:SLC25A1:NFKB1:NDST3:MDH2:ALDH1B1:FBP2:FBP1
FUMA	GO:0033700	phospholipid efflux	12	3	0.000210186	0.00601115	APOE:APOC1:APOC2
FUMA	GO:1901550	regulation of endothelial cell development	12	3	0.000210186	0.00601115	ADD1:IKBKB:S1PR3
gPROFILER	GO:0005887	integral component of plasma membrane	1668	17		0.00602883	KCNQ3,ITGB5,CLPTM1,SLC7A2,DLG2,IFNLR1,FCGR2B,IL6,IKBKB,SLC24A4,SCN2B,CHRNA9,SLC16A9,DDR2,GABRB3,SCN11A,IL11RA
FUMA	GO:0042982	amyloid precursor protein metabolic process	54	5	0.000215527	0.00614	PICALM:UNC13A:APOE:BIN1:CLU
gPROFILER	GO:1990351	transporter complex	333	7		0.00631241	KCNQ3,DLG2,SCN2B,CHRNA9,SMDT1,GABRB3,SCN11A
gPROFILER	GO:0044093	positive regulation of molecular function	1786	44		0.00646623	APOC1,APOE,APOC2,ITSN1,CLU,PICALM,NFKB1,IL6,TBC1D7,IKBKB,DDR2,HSPB2,MAPK8,DSTYK,LRP8,MDFIC,KALRN,CARTPT,CHML,SRGAP1,PDE5A,CD44,CRTC3,MEFV,SDC4,SLC39A10,GSN,CCNY,RASGRF1,ANK3,DUSP12,LRRFIP1,SH3PXD2A,SEC23B,NKX6-1,CALM3,PML,HFE,CDC42,RGS4,RIN3,ADD1,CYCS,DOCK9
gPROFILER	GO:0006954	inflammatory response	765	9		0.00646623	APOE,CLU,SLC7A2,NFKB1,FCGR2B,IL6,EPHX2,IKBKB,F12
gPROFILER	GO:0045834	positive regulation of lipid metabolic process	146	3		0.00646623	APOC1,APOE,APOC2
gPROFILER	GO:0099173	postsynapse organization	166	11		0.00650744	APOE,DLG2,FCGR2B,LRP8,KALRN,PDLIM5,CDC42,OPA1,CAPRIN1,MYH10,GAP43
FUMA	GO:0005783	endoplasmic reticulum	1884	35	0.000415742	0.00654538	CDC42:FCRLB:LAMC1:ANK3:TSPAN14:CD59:SOAT2:OSBPL8:CLN5:ATXN3:SCG3:MYO5A:PML:CDIPT:SEZ6L2:ARSG:CERS1:APOE:APOC1:DMPK:SEC23B:CRTAP:ZDHHC23:CDS1:ELOVL6:ERAP2:DNAJC18:F12:DST:IL6:FKBP14:EGFR:VKORC1L1:CLU:SCARA3
FUMA	GO:0033268	node of ranvier	15	3	0.000425025	0.00654538	ANK3:BIN1:KCNQ3
FUMA	GO:0030128	clathrin coat of endocytic vesicle	15	3	0.000425025	0.00654538	AP2A2:PICALM:AP2S1
gPROFILER	GO:0005925	focal adhesion	403	18		0.00667359	ITGB5,DDR2,CD59,CD44,SDC4,GSN,CSRP1,SNTB2,DST,CDC42,ADD1,SORBS2,PPFIA1,AHNAK,EGFR,PCBP2,MAP4K4,ITGB1
FUMA	GO:0048475	coated membrane	96	6	0.000440105	0.00667492	AP2A2:PICALM:AP2S1:SEC23B:CHMP4B:NCALD
Wegestalt	GO:0030017	sarcomere	194	10	0.000195936	0.00670297	ALDOA;BIN1;LMOD1;FBP2;DST;ANK3;SORBS2;NEBL;PDE4B;MYOT
Wegestalt	GO:0030018	Z disc	125	8	0.0001997	0.00670297	BIN1;FBP2;DST;ANK3;SORBS2;NEBL;PDE4B;MYOT
FUMA	GO:0010769	regulation of cell morphogenesis involved in differentiation	296	11	0.000236548	0.00671285	CDC42:LRP8:CAPRIN1:SEMA4B:ZSWIM4:APOE:HECW2:KALRN:OPA1:NKX6-1:PDLIM5
gPROFILER	GO:0051055	negative regulation of lipid biosynthetic process	57	3		0.0068202	APOC1,APOE,NFKB1
FUMA	GO:0051640	organelle localization	685	18	0.000244655	0.00691621	CDC42:CENPF:MARK1:CD59:GAB2:PICALM:BICD1:MYO5A:MYH10:UNC13A:MAP1S:CALM3:BIN1:CHMP4B:DNAJC5:OPA1:SCFD2:RIMS2
FUMA	GO:0098793	presynapse	484	14	0.000464755	0.00694358	PDE4B:NTNG1:PPFIA1:PICALM:GNB5:UNC13A:CALM3:BIN1:TMEM163:DNAJC5:ITSN1:SYNGR1:GPM6A:RIMS2
gPROFILER	GO:0005924	cell-substrate adherens junction	406	18		0.00698464	ITGB5,DDR2,CD59,CD44,SDC4,GSN,CSRP1,SNTB2,DST,CDC42,ADD1,SORBS2,PPFIA1,AHNAK,EGFR,PCBP2,MAP4K4,ITGB1
gPROFILER	GO:0044304	main axon	68	5		0.00698464	KCNQ3,DLG2,BIN1,CRH,ANK3
FUMA	GO:0005740	mitochondrial envelope	725	18	0.000478702	0.00704677	MRPL24:TIMM17A:PGR:NRGN:ACACB:BCL2L2:ATXN3:TOMM40:DMPK:CALM3:SLC25A1:SMDT1:NDUFB5:OPA1:BPHL:CYCS:NDUFA5:CLU
FUMA	R-HSA-112316	neuronal system	410	14	8.56004e-05	0.00712861	AP2A2:PPFIA1:DLG2:NRGN:GABRB3:GNB5:RASGRF1:AP2S1:DNAJC5:CHRNA9:PDLIM5:TUBB2A:NCALD:KCNQ3
Wegestalt	GO:0030658	transport vesicle membrane	198	10	0.000231068	0.0071556	TMEM163;DNAJC5;CD59;NCALD;SNTB2;SEC23B;SCG3;NRGN;SYNGR1;UNC13A
Wegestalt	GO:0030669	clathrin-coated endocytic vesicle membrane	44	5	0.000231723	0.0071556	APOE;PICALM;AP2S1;AP2A2;HBEGF
FUMA	KEGG_ENDOCYTOSIS	endocytosis	181	8	0.000539357	0.00716575	CDC42:AP2A2:EHD1:AP2S1:CHMP4B:GRK4:EGFR:PIP5K1B
gPROFILER	GO:0030669	clathrin-coated endocytic vesicle membrane	37	5		0.00720905	APOE,PICALM,AP2S1,AP2A2,HBEGF
gPROFILER	GO:0045334	clathrin-coated endocytic vesicle	56	6		0.00720905	APOE,PICALM,AP2S1,AP2A2,CEMIP,HBEGF
Wegestalt	GO:0044304	main axon	69	6	0.000244492	0.00725954	KCNQ3;DLG2;BIN1;CRH;ANK3;NAV1
FUMA	GO:0090276	regulation of peptide hormone secretion	205	9	0.000258265	0.00727298	CCL5:MAP4K4:RAPGEF4:KALRN:NKX6-1:CARTPT:HFE:EGFR:CRH
FUMA	GO:0016788	hydrolase activity acting on ester bonds	723	19	0.000165369	0.00730073	PDE4B:DUSP12:NTPCR:PLCE1:MTMR6:DDHD1:CCL5:PLCD3:ARSG:INPP4A:MTMR3:PLCH1:PDE5A:DUSP1:BPHL:CYCS:EPHX2:FBP2:FBP1
FUMA	GO:0070273	phosphatidylinositol 4 phosphate binding	28	4	0.000173087	0.00730073	SH3PXD2A:OSBPL8:SNX3:LANCL2
FUMA	GO:0004629	phospholipase c activity	28	4	0.000173087	0.00730073	PLCE1:CCL5:PLCD3:PLCH1
FUMA	GO:0042110	t cell activation	457	14	0.000262238	0.00731343	CDC42:FCGR2B:ITPKB:CD44:CCL5:CLPTM1:ZFP36L2:SDC4:RHOH:PDE5A:HFE:TNFRSF21:IL6:GSN
FUMA	GO:0010817	regulation of hormone levels	513	15	0.000262686	0.00731343	ARNT:MYO5A:CCL5:MAP4K4:RAPGEF4:KALRN:NKX6-1:NFKB1:CARTPT:PCSK1:HFE:IL6:EGFR:CRH:RIMS2
FUMA	GO:0009636	response to toxic substance	513	15	0.000262686	0.00731343	RGS4:SCN2B:HNRNPA1:CCL5:CERS1:APOE:CALM3:NKX6-1:NFKB1:DUSP1:BPHL:IL6:EPHX2:CRH:GSN
gPROFILER	GO:0055088	lipid homeostasis	155	3		0.00740374	EHD1,APOE,APOC2
FUMA	GO:0030111	regulation of wnt signaling pathway	351	12	0.000268039	0.00743428	CCNY:IGFBP6:GPRC5B:WWOX:APOE:WWTR1:NFKB1:APC:SNX3:EGFR:CDK14:MDFIC
FUMA	GO:0044265	cellular macromolecule catabolic process	1139	25	0.000270147	0.00746458	WAC:CUL2:AP2A2:USP35:PCBP2:ATXN3:PML:FBXL16:USP7:KCTD13:SPOP:USP14:APOE:AP2S1:ZFP36L2:HECW2:CHMP4B:FBXL2:WWTR1:ENC1:DNAJC18:HFE:LSM2:CD2AP:CLU
FUMA	GO:0010960	magnesium ion homeostasis	13	3	0.000271198	0.00746555	ANK3:CNNM2:EGFR
gPROFILER	GO:0030055	cell-substrate junction	411	18		0.00747884	ITGB5,DDR2,CD59,CD44,SDC4,GSN,CSRP1,SNTB2,DST,CDC42,ADD1,SORBS2,PPFIA1,AHNAK,EGFR,PCBP2,MAP4K4,ITGB1
gPROFILER	GO:0062023	collagen-containing extracellular matrix	405	9		0.00747884	TNXB,APOE,CLU,SCARA3,F12,HDGF,LTBP3,NAV2,C17ORF58
FUMA	GO:0016101	diterpenoid metabolic process	88	6	0.000275219	0.00751991	LRP8:APOE:APOC2:SDC4:EGFR:CRH
FUMA	GO:0048814	regulation of dendrite morphogenesis	88	6	0.000275219	0.00751991	LRP8:CAPRIN1:HECW2:KALRN:OPA1:PDLIM5
FUMA	GO:1905953	negative regulation of lipid localization	57	5	0.000278385	0.00757825	OSBPL8:APOC1:APOC2:NFKB1:IL6
FUMA	GO:0042330	taxis	633	17	0.000281975	0.00764767	PDE4B:UNC5B:DPYSL4:GAB2:SEMA4B:MYH10:CCL5:USP14:ZSWIM4:GAP43:MYOT:HBEGF:DUSP1:IL6:MTUS1:NFIB:SHC3
FUMA	GO:0010876	lipid localization	406	13	0.000283619	0.00766398	EHD1:SOAT2:OSBPL8:ACACB:STOML1:ABCC3:APOE:APOC1:APOC2:NFKB1:IL6:CLU:CRH
gPROFILER	GO:0010883	regulation of lipid storage	47	3		0.00772096	EHD1,NFKB1,IL6
FUMA	GO:0000122	negative regulation of transcription by rna polymerase ii	818	20	0.000287119	0.00773013	LRP8:HDGF:CREM:MXI1:PHF21A:CIITA:WWOX:MAF:KANK2:LRRFIP1:ZHX3:ZNF217:MITF:WWTR1:NKX6-1:NFKB1:PURA:ZHX1:NFIB:FBP1
FUMA	GO:0042177	negative regulation of protein catabolic process	125	7	0.000291154	0.00781015	WAC:PML:USP7:USP14:HFE:SNX3:EGFR
FUMA	GO:0032435	negative regulation of proteasomal ubiquitin dependent protein catabolic process	32	4	0.000294467	0.00787029	WAC:USP7:USP14:HFE
gPROFILER	GO:1902531	regulation of intracellular signal transduction	1881	27		0.00792799	APOE,SEZ6L2,ITSN1,CLU,CHD4,FCGR2B,IL6,TBC1D7,IKBKB,PTBP1,CHRNA9,KANK2,UNC5B,FBP1,ITPKB,RHOH,DSTYK,MDFIC,KALRN,BCL2L2,CARTPT,SRGAP1,MYO5A,PDE5A,KAT6A,CD44,CRTC3
gPROFILER	GO:0098655	cation transmembrane transport	887	33		0.00803167	KCNQ3,TMEM163,SLC7A2,DLG2,BIN1,SLC24A4,SCN2B,CHRNA9,SMDT1,SCN11A,MYO5A,CNNM2,SLC39A10,CRH,RASGRF1,ATP6V0E1,ANK3,ATP6V1G2,CALM3,PLCD3,HFE,GPM6A,MTMR6,RGS4,OPA1,PLCE1,AHNAK,PDE4B,HECW2,GNB5,PLCH1,CEMIP,WNK4
gPROFILER	GO:0060996	dendritic spine development	98	8		0.00807464	APOE,ITSN1,LRP8,KALRN,PDLIM5,CDC42,OPA1,CAPRIN1
FUMA	GO:0051050	positive regulation of transport	950	22	0.000305293	0.00813008	FCGR2B:MAPK8:ANK3:EHD1:GAB2:BICD1:OSBPL8:MYH10:CCL5:WNK4:UNC13A:APOE:CALM3:RHOQ:SDC4:NKX6-1:CARTPT:HFE:IL6:EGFR:CLU:CRH
FUMA	GO:0042116	macrophage activation	90	6	0.000310906	0.00824967	FCGR2B:CRTC3:TNIP2:IL6:SLC7A2:CLU
gPROFILER	GO:0017038	protein import	196	4		0.0082983	TOMM40,APOE,CLU,TIMM17A
gPROFILER	GO:0043005	neuron projection	1336	40		0.00833931	KCNQ3,APOE,ITSN1,CLU,DLG2,FCGR2B,BIN1,CHRNA9,SNCG,GABRB3,SCN11A,MAPK8,LRP8,NFIB,MYO5A,NRSN1,PURA,CRH,PCSK1,RASGRF1,DST,ANK3,CALM3,PDLIM5,CDC42,GPM6A,HTR1E,OPA1,MARK1,ADGRL2,GRK4,PDE4B,NRGN,CAPRIN1,MYH10,MAP1S,GAP43,NAV1,MYOT,TNFRSF21
gPROFILER	GO:0031226	intrinsic component of plasma membrane	1744	17		0.00833931	KCNQ3,ITGB5,CLPTM1,SLC7A2,DLG2,IFNLR1,FCGR2B,IL6,IKBKB,SLC24A4,SCN2B,CHRNA9,SLC16A9,DDR2,GABRB3,SCN11A,IL11RA
FUMA	GO:0030175	filopodium	101	6	0.000576858	0.00836862	CDC42:DNALI1:ITGB1:MYO5A:GAP43:GPM6A
FUMA	GO:0018193	peptidyl amino acid modification	1219	26	0.000316533	0.00836878	LRP8:ARNT:DDR2:DSTYK:MARK1:MAPK8:CD44:DYRK2:GPRC5B:PAGR1:PAGR1:ASPHD1:CCL5:DMPK:CALM3:AGBL5:CRTAP:ZDHHC23:HBEGF:NCOA7:IL6:FKBP14:EGFR:VKORC1L1:KAT6A:IKBKB:DPY19L4
FUMA	KEGG_PYRUVATE_METABOLISM	pyruvate metabolism	40	4	0.000702298	0.0084058	ME3:ACACB:MDH2:ALDH1B1
FUMA	KEGG_PANCREATIC_CANCER	pancreatic cancer	70	5	0.00072308	0.0084058	CDC42:MAPK8:NFKB1:EGFR:IKBKB
FUMA	WP69	t-cell antigen receptor (tcr) signaling pathway	90	6	0.000310906	0.00844109	CDC42:MAPK8:GAB2:NFKB1:IL6:IKBKB
gPROFILER	GO:0030136	clathrin-coated vesicle	188	11		0.00846118	APOE,PICALM,DNAJC5,NCALD,AP2S1,EGFR,NRGN,AP2A2,CEMIP,SNX3,HBEGF
gPROFILER	GO:0031594	neuromuscular junction	77	7		0.00846118	DLG2,DNAJC5,ANK3,MYH10,ITGB1,SYNGR1,UNC13A
FUMA	GO:0035091	phosphatidylinositol binding	244	10	0.000207466	0.00853204	MARK1:SH3PXD2A:GAB2:PICALM:NRGN:OSBPL8:PLEKHB2:GAP43:SNX3:LANCL2
FUMA	WP1772	apoptosis modulation and signaling	91	6	0.000330058	0.00853436	MAPK8:BCL2L2:NFKB1:CYCS:IKBKB:TNFRSF11B
gPROFILER	GO:0031347	regulation of defense response	803	9		0.00855499	LSM14A,APOE,SLC7A2,NFKB1,IFNLR1,FCGR2B,IL6,IKBKB,F12
gPROFILER	GO:0050839	cell adhesion molecule binding	502	6		0.00858666	TNXB,EHD1,ITGB5,ALDOA,GFAP,PICALM
gPROFILER	GO:0060998	regulation of dendritic spine development	75	7		0.00863827	APOE,ITSN1,LRP8,KALRN,PDLIM5,OPA1,CAPRIN1
FUMA	GO:1990542	mitochondrial transmembrane transport	91	6	0.000330058	0.00869508	TIMM17A:ACACB:TOMM40:SLC25A1:SMDT1:OPA1
Wegestalt	GO:0034364	high-density lipoprotein particle	26	4	0.000306724	0.00877004	APOC1;APOE;APOC2;CLU
gPROFILER	GO:0070838	divalent metal ion transport	500	22		0.00877417	TMEM163,BIN1,SLC24A4,CHRNA9,SMDT1,MYO5A,CNNM2,SLC39A10,CRH,CALM3,PML,PLCD3,GPM6A,RGS4,OPA1,PLCE1,AHNAK,PDE4B,CCL5,GNB5,PLCH1,CEMIP
gPROFILER	GO:0007626	locomotory behavior	205	7		0.00877417	APOE,SEZ6L2,SNCG,KALRN,NAV2,NEGR1,MYO5A
gPROFILER	GO:0033267	axon part	388	16		0.00881736	KCNQ3,ITSN1,DLG2,BIN1,MYO5A,NRSN1,CRH,RASGRF1,DST,ANK3,CALM3,GPM6A,OPA1,MYH10,GAP43,NAV1
FUMA	GO:0031272	regulation of pseudopodium assembly	14	3	0.00034258	0.0088974	CDC42:CDC42EP4:APC
FUMA	GO:0034433	steroid esterification	14	3	0.00034258	0.0088974	SOAT2:APOE:APOC1
FUMA	GO:0046851	negative regulation of bone remodeling	14	3	0.00034258	0.0088974	CARTPT:IL6:TNFRSF11B
FUMA	GO:0032802	low density lipoprotein particle receptor catabolic process	14	3	0.00034258	0.0088974	AP2A2:APOE:AP2S1
gPROFILER	GO:0045807	positive regulation of endocytosis	103	3		0.00896757	APOE,ITSN1,CLU
gPROFILER	GO:0006810	transport	5296	34		0.00902351	KCNQ3,TOMM40,EHD1,APOC1,TMEM163,APOE,APOC2,DENND4C,ITSN1,CLU,SLC7A2,ALDOA,SCARA3,GFAP,TIMM17A,DLG2,PICALM,RAPGEF4,NFKB1,FCGR2B,SYS1,IL6,EPHX2,BIN1,SLC24A4,SCN2B,CHRNA9,SCFD2,GAB2,SLC16A9,SMDT1,SNCG,VPS53,GABRB3
FUMA	GO:0030162	regulation of proteolysis	706	18	0.000350583	0.0090732	TIMM17A:WAC:CD44:PICALM:ATXN3:PML:MEFV:USP7:SPOP:USP14:APOE:BIN1:SERPINI1:F12:HFE:CYCS:CLU:GSN
gPROFILER	GO:0005200	structural constituent of cytoskeleton	105	8		0.00909326	TUBB2A,GFAP,KRT17,ANK3,ADD1,SORBS2,CD2AP,BICD1
gPROFILER	GO:0030122	AP-2 adaptor complex	11	3		0.00909643	PICALM,AP2S1,AP2A2
FUMA	GO:0071241	cellular response to inorganic substance	214	9	0.000354042	0.0091209	ITPKB:MAPK8:ANK3:DLG2:ADD1:HFE:EGFR:FBP1:GSN
FUMA	GO:0002791	regulation of peptide secretion	471	14	0.000354908	0.0091209	FCGR2B:PML:MYH10:CCL5:MAP4K4:RAPGEF4:KALRN:NKX6-1:CARTPT:HFE:TNFRSF21:IL6:EGFR:CRH
FUMA	R-HSA-8953897	cellular responses to external stimuli	532	16	0.000120064	0.00916608	ARNT:CSRP1:CUL2:MAPK8:PGR:HSPB2:TOMM40:MAP4K4:CHMP4B:MTMR3:NFKB1:TUBB2A:HIST1H2BD:TNFRSF21:IL6:CYCS
FUMA	R-HSA-6806667	metabolism of fat soluble vitamins	48	5	0.000122616	0.00916608	LRP8:APOE:APOC2:SDC4:VKORC1L1
FUMA	R-HSA-1855204	synthesis of ip3 and ip4 in the cytosol	26	4	0.000128411	0.00916608	ITPKB:PLCE1:PLCD3:PLCH1
gPROFILER	GO:0019218	regulation of steroid metabolic process	121	4		0.0092066	APOC1,APOE,NFKB1,EPHX2
FUMA	GO:0050863	regulation of t cell activation	311	11	0.000359916	0.00921736	CDC42:FCGR2B:ITPKB:CCL5:CLPTM1:SDC4:PDE5A:HFE:TNFRSF21:IL6:GSN
FUMA	WP4496	signal transduction through il1r	34	4	0.00037377	0.00922532	MAPK8:NFKB1:IL6:IKBKB
FUMA	WP2849	hematopoietic stem cell differentiation	62	5	0.000412881	0.00923154	MXI1:CIITA:RHOH:TNXB:IL6
FUMA	WP3617	photodynamic therapy-induced nf-kb survival signaling	35	4	0.000418658	0.00923154	BCL2L2:NFKB1:IL6:IKBKB
FUMA	WP3958	gpr40 pathway	15	3	0.000425025	0.00923154	PLCE1:PLCD3:PLCH1
FUMA	GO:0010038	response to metal ion	364	12	0.000371816	0.00947787	ITPKB:MAPK8:ANK3:DLG2:CALM3:ADD1:DUSP1:HFE:EGFR:TNFRSF11B:FBP1:GSN
FUMA	GO:0009887	animal organ morphogenesis	1030	23	0.000372667	0.00947787	CDC42:ELF3:ZNF22:ABLIM1:AP2A2:PGR:LRIG3:SLC24A4:MYO5A:PML:WWOX:WNK4:HOXB7:AP2S1:WWTR1:CHRNA9:FRAS1:NKX6-1:EGFR:BMP1:SCARA3:TNFRSF11B:NFIB
FUMA	GO:0008270	zinc ion binding	806	20	0.000237462	0.00948123	DUSP12:CSRP1:RNPEP:CENPF:ZNF22:PGR:CHD4:CPM:PML:MEFV:CPD:ZSWIM4:AGBL5:TMEM163:SEC23B:ERAP2:LNPEP:ADAMTS2:BMP1:KAT6A
FUMA	GO:0001067	regulatory region nucleic acid binding	934	22	0.000242074	0.00948123	ARNT:ELF3:CREM:MXI1:PGR:CHD4:CIITA:MAF:HOXB7:VEZF1:POU2F2:LRRFIP1:ZHX3:ZNF217:ERG:MITF:NKX6-1:NFKB1:PURA:NEUROD6:NFIB:CDK9
FUMA	GO:0070647	protein modification by small protein conjugation or removal	1097	24	0.000374195	0.00948391	CDC42:ARNT:WAC:CUL2:USP35:ATXN3:FBXL16:USP7:KCTD13:SPOP:USP14:INO80C:HECW2:UBE2F:FBXL2:WWTR1:TNIP2:ENC1:LNPEP:APC:TBC1D7:HIST1H2BD:SNX3:CDK9
gPROFILER	GO:0002673	regulation of acute inflammatory response	47	3		0.00959583	FCGR2B,IL6,F12
FUMA	R-HSA-597592	post translational protein modification	1427	30	0.000141504	0.00964159	NEGR1:NTNG1:LAMC1:CHML:WAC:CUL2:ANK3:MUC6:CD59:PGR:CPM:ATXN3:SCG3:PML:FBXL16:USP7:ARSG:USP14:INO80C:APOE:AGBL5:UBE2F:MITF:TNIP2:APC:ADAMTS2:TUBB2A:HIST1H2BD:SNX3:IL6
gPROFILER	GO:0043954	cellular component maintenance	57	3		0.00968379	APOE,DLG2,FCGR2B
gPROFILER	GO:0030125	clathrin vesicle coat	25	4		0.00977376	PICALM,NCALD,AP2S1,AP2A2
FUMA	GO:1901617	organic hydroxy compound biosynthetic process	264	10	0.000387815	0.00979533	ITPKB:PLCE1:ACACB:MYO5A:PLCD3:ISYNA1:APOE:PLCH1:NFKB1:ELOVL6
FUMA	GO:0097718	disordered domain specific binding	31	4	0.000259716	0.00993565	AP2A2:BCL2L2:MYO5A:CALM3
FUMA	GO:0007610	behavior	592	16	0.000394862	0.00993918	NEGR1:ITGB1:SNCG:NAV2:PICALM:NRGN:MYO5A:RASGRF1:GPRC5B:APOE:KALRN:CARTPT:HCRTR2:EGFR:CRH:SHC3
gPROFILER	GO:0072511	divalent inorganic cation transport	507	22		0.0100145	TMEM163,BIN1,SLC24A4,CHRNA9,SMDT1,MYO5A,CNNM2,SLC39A10,CRH,CALM3,PML,PLCD3,GPM6A,RGS4,OPA1,PLCE1,AHNAK,PDE4B,CCL5,GNB5,PLCH1,CEMIP
FUMA	GO:0048871	multicellular organismal homeostasis	477	14	0.000402475	0.0100962	MUC6:ACACB:CRTC3:CHMP4B:WWTR1:ADD1:ELOVL6:CARTPT:LNPEP:APC:HFE:IL6:EGFR:TNFRSF11B
FUMA	WP23	b cell receptor signaling pathway	98	6	0.000491373	0.0102621	CDC42:MAPK8:GAB2:NFKB1:IKBKB:PIP5K1B
FUMA	GO:0048786	presynaptic active zone	70	5	0.00072308	0.01034	NTNG1:PPFIA1:UNC13A:GPM6A:RIMS2
FUMA	GO:0030705	cytoskeleton dependent intracellular transport	174	8	0.000415345	0.0103836	CDC42:DLG2:BICD1:MYO5A:MAP1S:OPA1:PURA:DST
FUMA	GO:0010469	regulation of signaling receptor activity	595	16	0.000417111	0.0103924	HDGF:FCGR2B:ITGB1:CALCB:DLG2:BICD1:RASGRF1:CCL5:SST:CARTPT:HBEGF:HFE:IL6:BMP1:CRH:TNFRSF11B
FUMA	GO:0030276	clathrin binding	57	5	0.000278385	0.0104078	AP2A2:PICALM:AP2S1:BIN1:NCALD
FUMA	GO:1990000	amyloid fibril formation	15	3	0.000425025	0.0105538	APOE:CLU:GSN
gPROFILER	GO:0014009	glial cell proliferation	55	3		0.0107098	CLU,GFAP,IL6
FUMA	GO:0046364	monosaccharide biosynthetic process	96	6	0.000440105	0.0108915	PGAM1:ALDOA:SLC25A1:MDH2:FBP2:FBP1
FUMA	GO:0002792	negative regulation of peptide secretion	134	7	0.000443678	0.0109431	FCGR2B:PML:MAP4K4:KALRN:CARTPT:TNFRSF21:CRH
Wegestalt	GO:0042627	chylomicron	12	3	0.000411386	0.0109621	APOC1;APOE;APOC2
Wegestalt	GO:0030125	clathrin vesicle coat	28	4	0.000411787	0.0109621	PICALM;NCALD;AP2S1;AP2A2
gPROFILER	R-HSA-174824	Plasma lipoprotein assembly, remodeling, and clearance	67	3		0.0111134	APOC1,APOE,APOC2
FUMA	GO:0031252	cell leading edge	397	12	0.000797199	0.0112394	ITGB1:ABLIM1:CD44:MYO5A:MEFV:MYH10:ITSN1:SORBS2:APC:CD2AP:DST:GSN
FUMA	GO:0040007	growth	979	22	0.000457501	0.0112463	CDC42:DDR2:RGS4:ITGB1:PLCE1:ACACB:PML:SEMA4B:UNC13A:APOE:GAP43:WWTR1:ADD1:NKX6-1:PDLIM5:SORBS2:HBEGF:EGFR:SCARA3:RIMS2:FBP1:GSN
Wegestalt	GO:0099568	cytoplasmic region	479	16	0.000439067	0.0112987	DLG2;RHOH;RIMS2;LANCL2;CENPF;PURA;GSN;DST;HFE;CDC42;OPA1;GRK4;MYH10;RHOQ;DNALI1;UNC13A
gPROFILER	GO:0030128	clathrin coat of endocytic vesicle	12	3		0.011313	PICALM,AP2S1,AP2A2
gPROFILER	GO:0045202	synapse	1206	39		0.011313	TMEM163,APOE,ITSN1,CLU,DLG2,PICALM,RAPGEF4,FCGR2B,BIN1,CHRNA9,GABRB3,DNAJC5,LRP8,MYO5A,RIMS2,INPP4A,PURA,SNTB2,ANK3,CALM3,PDLIM5,CDC42,GPM6A,NTNG1,ADD1,PPFIA1,EGFR,PDE4B,NRGN,CAPRIN1,MYH10,MAP1S,GAP43,PCBP2,GNB5,ITGB1,SYNGR1,UNC13A,USP14
FUMA	GO:0050775	positive regulation of dendrite morphogenesis	36	4	0.000467264	0.0114099	LRP8:CAPRIN1:KALRN:OPA1
FUMA	GO:1901385	regulation of voltage gated calcium channel activity	36	4	0.000467264	0.0114099	PDE4B:AHNAK:GNB5:CALM3
FUMA	GO:0009615	response to virus	321	11	0.000469138	0.0114178	IFNLR1:LGALS8:PCBP2:PML:CCL5:LSM14A:AGBL5:POLR3F:IL6:CLU:IKBKB
FUMA	GO:0042176	regulation of protein catabolic process	374	12	0.000473144	0.0114569	WAC:ATXN3:PML:USP7:USP14:APOE:HECW2:APC:HFE:SNX3:EGFR:CLU
FUMA	GO:0061919	process utilizing autophagic mechanism	485	14	0.00047429	0.0114569	LGALS8:PIP4K2A:WAC:MAPK8:MEFV:GFAP:MAP1S:TOMM40:CHMP4B:MTMR3:FBXL2:ATP6V0E1:ATP6V1G2:CLU
FUMA	GO:0097485	neuron projection guidance	271	10	0.000475802	0.0114569	UNC5B:DPYSL4:GAB2:SEMA4B:MYH10:ZSWIM4:GAP43:MYOT:NFIB:SHC3
FUMA	GO:0048588	developmental cell growth	223	9	0.000477403	0.0114569	RGS4:ITGB1:SEMA4B:UNC13A:APOE:NKX6-1:PDLIM5:SORBS2:RIMS2
FUMA	GO:0032768	regulation of monooxygenase activity	64	5	0.000478542	0.0114569	APOE:CALM3:NFKB1:DDAH2:EGFR
gPROFILER	GO:0005912	adherens junction	546	21		0.0114614	ITGB5,DDR2,CD59,CD44,SDC4,GSN,CSRP1,SNTB2,DST,CDC42EP4,PDLIM5,CDC42,ADD1,SORBS2,PPFIA1,AHNAK,EGFR,PCBP2,APC,MAP4K4,ITGB1
FUMA	GO:0055001	muscle cell development	178	8	0.000482984	0.0115258	RGS4:LMOD1:NEBL:ITGB1:MYH10:BIN1:PDLIM5:SORBS2
FUMA	GO:1901701	cellular response to oxygen containing compound	1118	24	0.000489299	0.0116387	LRP8:PDE4B:FCGR2B:MAPK8:OSBPL8:MYO5A:CCL5:KANK2:CERS1:RHOQ:MAP4K4:OPA1:TNIP2:NKX6-1:NFKB1:APC:ATP6V0E1:ATP6V1G2:IL6:EGFR:LANCL2:CLU:CRH:DENND4C
FUMA	GO:0034766	negative regulation of ion transmembrane transport	98	6	0.000491373	0.0116503	RGS4:ANK3:GNB5:CALM3:BIN1:HECW2
gPROFILER	GO:0007266	Rho protein signal transduction	207	10		0.0116922	APOE,ITSN1,KANK2,RHOH,KALRN,RASGRF1,KCTD13,CDC42EP4,PLEKHG1,CDC42
FUMA	R-HSA-1280215	cytokine signaling in immune system	854	21	0.000188397	0.0118523	CDC42:IFNLR1:ITGB1:MAPK8:CD44:GAB2:DLG2:PML:RASGRF1:CIITA:CCL5:TNIP2:NFKB1:HBEGF:DUSP1:IL6:EGFR:IKBKB:TNFRSF11B:IL11RA:SHC3
FUMA	R-HSA-1660499	synthesis of pips at the plasma membrane	53	5	0.00019719	0.0118523	PIP4K2A:MTMR6:INPP4A:MTMR3:PIP5K1B
FUMA	R-HSA-109582	hemostasis	673	18	0.00019767	0.0118523	CDC42:LRP8:ITGB1:CD44:PHF21A:EHD1:DOCK9:SCG3:GNB5:ALDOA:RAPGEF4:SDC4:JAM2:VPREB1:PDE5A:F12:TUBB2A:CLU
gPROFILER	GO:0099175	regulation of postsynapse organization	100	8		0.011922	APOE,FCGR2B,LRP8,KALRN,PDLIM5,OPA1,CAPRIN1,GAP43
gPROFILER	GO:0046890	regulation of lipid biosynthetic process	196	3		0.0120037	APOC1,APOE,APOC2
gPROFILER	GO:0060997	dendritic spine morphogenesis	58	6		0.0120314	LRP8,KALRN,PDLIM5,CDC42,OPA1,CAPRIN1
FUMA	GO:0030132	clathrin coat of coated pit	19	3	0.00087844	0.0120455	AP2A2:PICALM:AP2S1
FUMA	GO:0043034	costamere	19	3	0.00087844	0.0120455	ANK3:AHNAK:SDC4
FUMA	GO:0001780	neutrophil homeostasis	16	3	0.0005192	0.0122501	PDE4B:ITPKB:IL6
FUMA	GO:1905475	regulation of protein localization to membrane	180	8	0.000520004	0.0122501	ITGB1:MAPK8:ANK3:PPFIA1:PICALM:RHOQ:EGFR:GSN
gPROFILER	GO:0043030	regulation of macrophage activation	59	3		0.0122876	SLC7A2,FCGR2B,IL6
gPROFILER	GO:0051056	regulation of small GTPase mediated signal transduction	343	17		0.0123287	APOE,ITSN1,KANK2,FBP1,ITPKB,RHOH,KALRN,SRGAP1,RASGRF1,KCTD13,PLEKHG1,CDC42,CD2AP,PLCE1,RHOQ,MAP4K4,ITGB1
FUMA	R-HSA-556833	metabolism of lipids	738	19	0.000214187	0.0123487	ARNT:PIP4K2A:OSBPL8:ACACB:MTMR6:DDHD1:CDIPT:ABCC3:ARSG:CERS1:INPP4A:SLC25A1:MTMR3:CDS1:BDH2:ELOVL6:TNFRSF21:EPHX2:PIP5K1B
gPROFILER	GO:0098805	whole membrane	1678	50		0.0123735	TOMM40,EHD1,TMEM163,APOE,GFAP,PICALM,IKBKB,VPS53,UNC5B,DNAJC5,LRP8,BCL2L2,CD59,PGR,CD44,SDC4,INPP4A,NCALD,ATP6V0E1,SNTB2,CYSTM1,DMPK,AP2S1,SEC23B,SCG3,ATP6V1G2,LNPEP,CALM3,PML,ACACB,ADD1,CHMP4B,OPA1,BPHL,AHNAK,EGFR,NRGN,PEX5L,RHOQ,AP2A2,CEMIP,SNX3,STOML1,TSPAN14,ITGB1,HBEGF,SYNGR1,PLEKHB2,CLN5,UNC13A
gPROFILER	GO:0030054	cell junction	1312	40		0.0124038	TMEM163,ITGB5,ITSN1,SLC7A2,DLG2,CHRNA9,DDR2,GABRB3,DSTYK,CD59,RIMS2,FBP2,CD44,SDC4,INPP4A,GSN,CSRP1,SNTB2,DST,ANK3,SH3PXD2A,CDC42EP4,PDLIM5,CDC42,ADD1,SORBS2,PPFIA1,CD2AP,JAM2,AHNAK,EGFR,C1QTNF5,MAP1S,GAP43,PCBP2,APC,MAP4K4,WNK4,ITGB1,SYNGR1
gPROFILER	GO:0061003	positive regulation of dendritic spine morphogenesis	22	4		0.0124147	LRP8,KALRN,OPA1,CAPRIN1
gPROFILER	GO:0051234	establishment of localization	5419	34		0.0124147	KCNQ3,TOMM40,EHD1,APOC1,TMEM163,APOE,APOC2,DENND4C,ITSN1,CLU,SLC7A2,ALDOA,SCARA3,GFAP,TIMM17A,DLG2,PICALM,RAPGEF4,NFKB1,FCGR2B,SYS1,IL6,EPHX2,BIN1,SLC24A4,SCN2B,CHRNA9,SCFD2,GAB2,SLC16A9,SMDT1,SNCG,VPS53,GABRB3
gPROFILER	GO:0030182	neuron differentiation	1392	47		0.0124147	EHD1,APOE,ITSN1,GFAP,PICALM,IL6,BIN1,GAB2,GABRB3,UNC5B,LRP8,DPYSL4,KALRN,NFIB,NEGR1,GAS7,RIMS2,SDC4,SEMA4B,RASGRF1,ANK3,SERPINI1,NKX6-1,PDLIM5,CDC42,GPM6A,NTNG1,SHC3,OPA1,MARK1,EGFR,CAPRIN1,GPRC5B,MYH10,MAP1S,GAP43,HECW2,MAP4K4,MYOT,TNFRSF21,SNX3,ITGB1,ZSWIM4,LST1,ENC1,CLN5,UNC13A
gPROFILER	GO:0048468	cell development	2196	67		0.0124147	EHD1,APOE,ITSN1,CLU,SCARA3,GFAP,PICALM,IL6,IKBKB,BIN1,GAB2,LMOD1,GABRB3,UNC5B,LRP8,DPYSL4,ALPK2,KALRN,NFIB,NEGR1,PGR,GAS7,RIMS2,PDE5A,SDC4,GSN,CSRP1,SEMA4B,MAF,RASGRF1,S1PR3,ANK3,PIP4K2A,SERPINI1,NKX6-1,PDLIM5,CDC42,GPM6A,NTNG1,RGS4,POU2F2,ADD1,SHC3,SORBS2,OPA1,MARK1,NEBL,EGFR,CAPRIN1,GPRC5B,VEZF1,MYH10,MAP1S,GAP43,HECW2,MAP4K4,MYOT,LAMC1,TNFRSF21,SNX3,ITGB1,PAQR5,ZSWIM4,LST1,ENC1,CLN5,UNC13A
gPROFILER	GO:0043524	negative regulation of neuron apoptotic process	154	5		0.0124147	APOE,ITSN1,GABRB3,UNC5B,DNAJC5
gPROFILER	GO:0071702	organic substance transport	2893	17		0.0124147	TOMM40,EHD1,APOC1,APOE,APOC2,DENND4C,ITSN1,CLU,SLC7A2,TIMM17A,DLG2,RAPGEF4,NFKB1,FCGR2B,SYS1,IL6,EPHX2
FUMA	WP4337	ncrnas involved in stat3 signaling in hepatocellular carcinoma	17	3	0.000625751	0.0125845	NFKB1:IL6:IL11RA
FUMA	R-HSA-6804758	regulation of tp53 activity through acetylation	30	4	0.000228011	0.0126588	PIP4K2A:CHD4:PML:KAT6A
FUMA	GO:0062023	collagen containing extracellular matrix	405	12	0.000946399	0.0127155	HDGF:LAMC1:NAV2:LTBP3:APOE:FRAS1:F12:ADAMTS2:TNXB:DST:CLU:SCARA3
FUMA	GO:0099513	polymeric cytoskeletal fiber	706	17	0.000952733	0.0127155	NAV1:LMOD1:BICD1:MYO5A:MEFV:SNTB2:GAS7:KRT17:GFAP:MAP1S:CALM3:RHOQ:APC:TUBB2A:CD2AP:DST:MTUS1
FUMA	GO:0031012	extracellular matrix	522	14	0.000965411	0.0127155	HDGF:LAMC1:NAV2:LTBP3:LRIG3:APOE:FRAS1:F12:ADAMTS2:TNXB:DST:CLU:SCARA3:TNFRSF11B
FUMA	GO:0010639	negative regulation of organelle organization	380	12	0.000544436	0.0127847	LMOD1:CENPF:PPFIA1:HNRNPA1:CHMP4B:OPA1:ADD1:APC:DUSP1:TBC1D7:CLU:GSN
gPROFILER	GO:0015031	protein transport	2084	14		0.0128048	TOMM40,EHD1,APOE,APOC2,DENND4C,ITSN1,CLU,TIMM17A,DLG2,RAPGEF4,FCGR2B,SYS1,IL6,EPHX2
FUMA	GO:0034385	triglyceride rich plasma lipoprotein particle	20	3	0.00102576	0.0129972	APOE:APOC1:APOC2
FUMA	GO:0048167	regulation of synaptic plasticity	182	8	0.000559289	0.0130916	NRGN:RASGRF1:GFAP:UNC13A:APOE:SYNGR1:CRH:RIMS2
GSEA	GO:0034375	high density lipoprotein particle remodeling	17			0.0133169
GSEA	GO:0070273	phosphatidylinositol 4 phosphate binding	23			0.0133169
GSEA	R-HSA-380108	chemokine receptors bind chemokines	46			0.0133169
GSEA	GO:0032801	receptor catabolic process	31			0.0133169
GSEA	GO:0048156	tau protein binding	42			0.0133169
GSEA	KEGG_EPITHELIAL_CELL_SIGNALING_IN_HELICOBACTER_PYLORI_INFECTION	epithelial cell signaling in helicobacter pylori infection	61			0.0133169
GSEA	R-HSA-8953897	phase 0 rapid depolarisation	42			0.0133169
GSEA	KEGG_DILATED_CARDIOMYOPATHY	dilated cardiomyopathy	84			0.0133169
GSEA	KEGG_HYPERTROPHIC_CARDIOMYOPATHY_HCM	hypertrophic cardiomyopathy hcm	78			0.0133169
GSEA	GO:0005884	actin filament	79			0.0133169
GSEA	KEGG_ECM_RECEPTOR_INTERACTION	ecm receptor interaction	78			0.0133169
GSEA	GO:0030672	synaptic vesicle membrane	97			0.0133169
GSEA	GO:0016247	channel regulator activity	121			0.0133169
GSEA	GO:2001257	regulation of cation channel activity	140			0.0133169
GSEA	GO:0010921	regulation of phosphatase activity	145			0.0133169
GSEA	GO:0030658	transport vesicle membrane	186			0.0133169
GSEA	GO:0061572	actin filament bundle organization	133			0.0133169
GSEA	GO:0010001	glial cell differentiation	191			0.0133169
GSEA	GO:0070588	calcium ion transmembrane transport	259			0.0133169
GSEA	R-HSA-112314	neurotransmitter receptors and postsynaptic signal transmission	179			0.0133169
GSEA	GO:0035303	regulation of dephosphorylation	174			0.0133169
GSEA	GO:0070382	exocytic vesicle	184			0.0133169
GSEA	GO:0032409	regulation of transporter activity	227			0.0133169
GSEA	GO:0046578	regulation of ras protein signal transduction	203			0.0133169
GSEA	GO:0007266	rho protein signal transduction	168			0.0133169
GSEA	R-HSA-112315	transmission across chemical synapses	238			0.0133169
GSEA	GO:0051056	regulation of small gtpase mediated signal transduction	285			0.0133169
GSEA	GO:0042063	gliogenesis	254			0.0133169
GSEA	GO:0030073	insulin secretion	186			0.0133169
GSEA	GO:0072511	divalent inorganic cation transport	399			0.0133169
GSEA	GO:0051924	regulation of calcium ion transport	208			0.0133169
GSEA	GO:0030133	transport vesicle	345			0.0133169
GSEA	GO:0007265	ras protein signal transduction	375			0.0133169
GSEA	GO:0010976	positive regulation of neuron projection development	238			0.0133169
GSEA	GO:0007264	small gtpase mediated signal transduction	475			0.0133169
GSEA	GO:0016311	dephosphorylation	390			0.0133169
GSEA	GO:0050808	synapse organization	342			0.0133169
GSEA	GO:0022604	regulation of cell morphogenesis	415			0.0133169
GSEA	GO:0004674	protein serine threonine kinase activity	362			0.0133169
GSEA	GO:0061564	axon development	446			0.0133169
GSEA	GO:0023061	signal release	415			0.0133169
GSEA	GO:0010720	positive regulation of cell development	473			0.0133169
GSEA	GO:0099177	regulation of trans synaptic signaling	392			0.0133169
FUMA	GO:0010035	response to inorganic substance	553	15	0.000573513	0.013382	ITPKB:MAPK8:ANK3:DLG2:HNRNPA1:CALM3:GART:ADD1:DUSP1:HFE:IL6:EGFR:TNFRSF11B:FBP1:GSN
FUMA	GO:0043902	positive regulation of multi organism process	183	8	0.000579813	0.0134861	CCL5:APOE:KLK7:CHMP4B:PDE5A:SRPK2:MDFIC:CDK9
gPROFILER	GO:1905954	positive regulation of lipid localization	81	3		0.0135654	EHD1,APOE,NFKB1
FUMA	GO:0008081	phosphoric diester hydrolase activity	93	6	0.000371128	0.0135668	PDE4B:PLCE1:CCL5:PLCD3:PLCH1:PDE5A
FUMA	GO:0031461	cullin ring ubiquitin ligase complex	156	7	0.00109001	0.0136387	CUL2:FBXL16:KCTD13:SPOP:ZSWIM4:FBXL2:ENC1
FUMA	GO:0000278	mitotic cell cycle	998	22	0.000589979	0.0136793	NSL1:CENPF:ITGB1:CUL2:CCNY:ANK3:STK33:BCAT1:PML:MYH10:KANK2:CALM3:ZFP36L2:HECW2:CHMP4B:DONSON:APC:DUSP1:TUBB2A:MCM3:EGFR:CDK14
FUMA	R-HSA-445095	interaction between l1 and ankyrins	31	4	0.000259716	0.0139041	ANK3:SCN2B:SCN11A:KCNQ3
FUMA	GO:0051588	regulation of neurotransmitter transport	141	7	0.000601646	0.013906	RGS4:SNCG:GFAP:UNC13A:CALM3:CRH:RIMS2
FUMA	GO:0007159	leukocyte cell cell adhesion	331	11	0.000604839	0.0139359	CDC42:FCGR2B:ITPKB:ITGB1:CD44:CCL5:SDC4:PDE5A:HFE:TNFRSF21:IL6
FUMA	R-HSA-449147	signaling by interleukins	631	17	0.000271903	0.0140546	CDC42:IFNLR1:ITGB1:MAPK8:GAB2:DLG2:RASGRF1:CCL5:TNIP2:NFKB1:HBEGF:DUSP1:IL6:EGFR:IKBKB:IL11RA:SHC3
gPROFILER	GO:0045124	regulation of bone resorption	42	5		0.0142154	IL6,LTBP3,CARTPT,TNFRSF11B,EGFR
FUMA	GO:0001505	regulation of neurotransmitter levels	332	11	0.000620045	0.0142417	RGS4:SNCG:PPFIA1:GFAP:UNC13A:CALM3:DNAJC5:DDAH2:SLC7A2:CLU:RIMS2
FUMA	GO:0031268	pseudopodium organization	17	3	0.000625751	0.0142834	CDC42:CDC42EP4:APC
FUMA	GO:0034375	high density lipoprotein particle remodeling	17	3	0.000625751	0.0142834	APOE:APOC1:APOC2
FUMA	GO:0050778	positive regulation of immune response	871	20	0.000631339	0.0143176	CDC42:PDE4B:FCGR2B:SUSD4:MUC6:CD59:GAB2:GPRC5B:CCL5:LSM14A:KLK7:SLC39A10:POLR3F:TNIP2:NFKB1:TNFRSF21:IL6:CLU:SCARA3:IKBKB
FUMA	GO:1903051	negative regulation of proteolysis involved in cellular protein catabolic process	68	5	0.000633093	0.0143176	WAC:PML:USP7:USP14:HFE
FUMA	GO:1900006	positive regulation of dendrite development	68	5	0.000633093	0.0143176	LRP8:CAPRIN1:APOE:KALRN:OPA1
FUMA	GO:0048524	positive regulation of viral process	103	6	0.000639966	0.0143887	CCL5:APOE:CHMP4B:SRPK2:MDFIC:CDK9
FUMA	GO:0051259	protein complex oligomerization	559	15	0.00064015	0.0143887	AHNAK:EHD1:C1QTNF5:ACACB:CRTC3:KCTD13:ALDOA:CCL5:APOE:CHMP4B:OPA1:APC:LY6G5C:CLU:FBP1
gPROFILER	GO:0008235	metalloexopeptidase activity	60	6		0.0144205	CPM,RNPEP,AGBL5,LNPEP,CPD,ERAP2
gPROFILER	GO:0098662	inorganic cation transmembrane transport	780	29		0.0144499	KCNQ3,TMEM163,BIN1,SLC24A4,SCN2B,CHRNA9,SMDT1,SCN11A,MYO5A,CNNM2,SLC39A10,ATP6V0E1,ANK3,ATP6V1G2,CALM3,PLCD3,HFE,GPM6A,MTMR6,RGS4,OPA1,PLCE1,AHNAK,PDE4B,HECW2,GNB5,PLCH1,CEMIP,WNK4
FUMA	GO:0048002	antigen processing and presentation of peptide antigen	186	8	0.000645062	0.0144549	FCGR2B:AP2A2:AP2S1:ITGB5:ERAP2:LNPEP:HFE:IKBKB
gPROFILER	GO:0016358	dendrite development	248	14		0.0144689	APOE,ITSN1,PICALM,LRP8,KALRN,PDLIM5,CDC42,OPA1,MARK1,CAPRIN1,MAP1S,HECW2,ITGB1,LST1
gPROFILER	GO:0002682	regulation of immune system process	1671	29		0.0144689	LSM14A,APOE,CLPTM1,CLU,SLC7A2,NFKB1,IFNLR1,FCGR2B,IL6,IKBKB,GAB2,FCRLB,ITPKB,RHOH,SUSD4,MAPK8,LRP8,CARTPT,CD59,PDE5A,SDC4,SLC39A10,MTUS1,MUC6,GSN,MS4A2,POLR3F,ZFP36L2,TNIP2
gPROFILER	GO:0043069	negative regulation of programmed cell death	943	13		0.0144689	APOE,ITSN1,CLU,NFKB1,IL6,IKBKB,KANK2,GABRB3,UNC5B,DNAJC5,ITPKB,MAPK8,DSTYK
gPROFILER	GO:0006811	ion transport	1717	16		0.0144689	KCNQ3,TOMM40,APOC1,TMEM163,APOE,APOC2,SLC7A2,DLG2,BIN1,SLC24A4,SCN2B,CHRNA9,SLC16A9,SMDT1,SNCG,GABRB3
FUMA	GO:0044309	neuron spine	158	7	0.00117357	0.014503	CDC42:PDE4B:FCGR2B:ITGB1:NRGN:MYH10:GPM6A
FUMA	GO:0030118	clathrin coat	46	4	0.0011958	0.0145975	AP2A2:PICALM:AP2S1:NCALD
gPROFILER	GO:0051129	negative regulation of cellular component organization	733	8		0.0146203	APOC1,APOE,APOC2,CLU,GFAP,PICALM,TBC1D7,IKBKB
gPROFILER	GO:0015833	peptide transport	2124	14		0.0146203	TOMM40,EHD1,APOE,APOC2,DENND4C,ITSN1,CLU,TIMM17A,DLG2,RAPGEF4,FCGR2B,SYS1,IL6,EPHX2
gPROFILER	GO:0050727	regulation of inflammatory response	387	6		0.0146203	APOE,SLC7A2,NFKB1,FCGR2B,IL6,F12
FUMA	GO:0008285	negative regulation of cell population proliferation	745	18	0.000655484	0.0146438	IFNLR1:FCGR2B:CUL2:MXI1:IGFBP6:PML:KANK2:APOE:EMP3:SDC4:SST:PDE5A:APC:DUSP1:LST1:TNFRSF21:IL6:NFIB
gPROFILER	GO:0070161	anchoring junction	561	21		0.0147072	ITGB5,DDR2,CD59,CD44,SDC4,GSN,CSRP1,SNTB2,DST,CDC42EP4,PDLIM5,CDC42,ADD1,SORBS2,PPFIA1,AHNAK,EGFR,PCBP2,APC,MAP4K4,ITGB1
gPROFILER	GO:0030133	transport vesicle	407	15		0.0147072	TMEM163,PICALM,BIN1,DNAJC5,CD59,NRSN1,PCSK1,NCALD,SNTB2,SEC23B,SCG3,CALM3,C1QTNF5,PDE4B,NRGN
FUMA	GO:0042063	gliogenesis	283	10	0.000664972	0.0148107	GFAP:BIN1:GAP43:NKX6-1:TNFRSF21:IL6:EGFR:CLU:NFIB:GSN
FUMA	GO:0005788	endoplasmic reticulum lumen	307	10	0.00123065	0.0148419	LAMC1:TSPAN14:SCG3:ARSG:APOE:CRTAP:ERAP2:IL6:FKBP14:CLU
Wegestalt	GO:0098802	plasma membrane receptor complex	184	9	0.000596492	0.0148546	ITGB5;DLG2;IFNLR1;IL6;IKBKB;CHRNA9;HFE;ITGB8;ITGB1
FUMA	GO:0098858	actin based cell projection	206	8	0.00124692	0.0148592	CDC42:DNALI1:ITGB1:CD44:MYO5A:WWOX:GAP43:GPM6A
FUMA	GO:0010314	phosphatidylinositol 5 phosphate binding	15	3	0.000425025	0.0149509	SH3PXD2A:SNX3:LANCL2
FUMA	GO:0017048	rho gtpase binding	175	8	0.000431485	0.0149509	SRGAP1:RASGRF1:KCTD13:CDC42EP4:ITSN1:KALRN:RHOH:PLEKHG1
FUMA	GO:0016791	phosphatase activity	268	10	0.000436258	0.0149509	DUSP12:NTPCR:MTMR6:INPP4A:MTMR3:DUSP1:CYCS:EPHX2:FBP2:FBP1
FUMA	GO:0006720	isoprenoid metabolic process	104	6	0.00067346	0.0149545	LRP8:APOE:APOC2:SDC4:EGFR:CRH
FUMA	WP4341	non-genomic actions of 1,25 dihydroxyvitamin d3	71	5	0.000771498	0.0149615	MAPK8:PLCE1:NFKB1:IL6:IKBKB
FUMA	GO:1903900	regulation of viral life cycle	144	7	0.0006817	0.0150918	PML:CCL5:CHMP4B:FBXL2:SNX3:SRPK2:GSN
FUMA	GO:0051260	protein homooligomerization	337	11	0.000700939	0.0154712	EHD1:ACACB:CRTC3:KCTD13:ALDOA:APOE:CHMP4B:APC:LY6G5C:CLU:FBP1
FUMA	GO:0070382	exocytic vesicle	208	8	0.00132583	0.0156136	PDE4B:PICALM:UNC13A:CALM3:BIN1:TMEM163:DNAJC5:SYNGR1
FUMA	R-HSA-1483257	phospholipid metabolism	211	9	0.000319314	0.0158322	PIP4K2A:OSBPL8:MTMR6:DDHD1:CDIPT:INPP4A:MTMR3:CDS1:PIP5K1B
FUMA	R-HSA-3000171	non integrin membrane ecm interactions	59	5	0.000327417	0.0158322	DDR2:LAMC1:ITGB1:SDC4:ITGB5
gPROFILER	GO:0042886	amide transport	2158	14		0.0160475	TOMM40,EHD1,APOE,APOC2,DENND4C,ITSN1,CLU,TIMM17A,DLG2,RAPGEF4,FCGR2B,SYS1,IL6,EPHX2
gPROFILER	GO:1900006	positive regulation of dendrite development	75	4		0.0160475	APOE,ITSN1,LRP8,KALRN
gPROFILER	GO:0051788	response to misfolded protein	26	4		0.0160475	CLU,F12,ATXN3,DNAJC18
gPROFILER	GO:0051051	negative regulation of transport	542	7		0.0160475	APOC1,APOE,APOC2,PICALM,NFKB1,FCGR2B,BIN1
Wegestalt	GO:0030027	lamellipodium	187	9	0.000669914	0.0161617	ITSN1;ABLIM1;CD44;MEFV;GSN;SORBS2;MYH10;APC;ITGB1
gPROFILER	GO:0045597	positive regulation of cell differentiation	1002	16		0.0161749	EHD1,APOE,ITSN1,GFAP,NFKB1,IL6,BIN1,DDR2,ITPKB,RHOH,LTBP3,LRP8,KALRN,NEGR1,RIMS2,PDE5A
FUMA	WP51	regulation of actin cytoskeleton	150	7	0.000867036	0.0162345	CDC42:PIP4K2A:MYH10:APC:EGFR:PIP5K1B:GSN
gPROFILER	GO:0032592	integral component of mitochondrial membrane	74	3		0.0163275	TOMM40,TIMM17A,SMDT1
Wegestalt	GO:0050839	cell adhesion molecule binding	478	22	1.90382e-05	0.0163313	TNXB;EHD1;ITGB5;ALDOA;GFAP;PICALM;LGALS8;S1PR3;DST;ANK3;LRRFIP1;PDLIM5;NTNG1;ADD1;CHMP4B;DOCK9;CD2AP;AHNAK;EGFR;APC;ITGB8;ITGB1
Wegestalt	GO:0003779	actin binding	419	20	2.74707e-05	0.0163313	ALDOA;BIN1;LMOD1;MYO5A;GAS7;ABLIM1;MEFV;GSN;NCALD;SNTB2;DST;PDLIM5;ADD1;NEBL;EGFR;MYH10;MAP1S;MYOT;ITGB1;ENC1
FUMA	R-HSA-3928664	eph ephrin signaling	92	6	0.000350122	0.016401	CDC42:AP2A2:MYH10:AP2S1:ITSN1:KALRN
gPROFILER	GO:0033036	macromolecule localization	3228	18		0.0165761	TOMM40,EHD1,APOC1,APOE,APOC2,DENND4C,ITSN1,CLU,TIMM17A,DLG2,PICALM,RAPGEF4,NFKB1,FCGR2B,SYS1,IL6,EPHX2,IKBKB
gPROFILER	GO:0006869	lipid transport	386	5		0.0166413	APOC1,APOE,APOC2,CLU,NFKB1
gPROFILER	GO:0016043	cellular component organization	6454	20		0.0166413	TUBB2A,TOMM40,TNXB,EHD1,APOC1,LSM14A,PAGR1,APOE,ITGB5,APOC2,SEZ6L2,ITSN1,CLU,ALDOA,SCARA3,GFAP,TIMM17A,CHD4,DLG2,PICALM
gPROFILER	GO:0006996	organelle organization	3920	15		0.0166413	TUBB2A,TOMM40,TNXB,EHD1,LSM14A,PAGR1,APOE,ITGB5,CLU,ALDOA,GFAP,TIMM17A,CHD4,DLG2,PICALM
gPROFILER	GO:0002274	myeloid leukocyte activation	653	16		0.0166862	CLU,SLC7A2,ALDOA,NFKB1,FCGR2B,IL6,GAB2,DNAJC5,RHOH,CD59,CD44,CRTC3,GSN,PGAM1,TNIP2,CYSTM1
gPROFILER	GO:0098573	intrinsic component of mitochondrial membrane	75	3		0.0167456	TOMM40,TIMM17A,SMDT1
FUMA	GO:0008237	metallopeptidase activity	179	8	0.000501217	0.0168266	RNPEP:CPM:CPD:AGBL5:ERAP2:LNPEP:ADAMTS2:BMP1
gPROFILER	GO:0045779	negative regulation of bone resorption	14	3		0.0169222	IL6,CARTPT,TNFRSF11B
FUMA	GO:0008360	regulation of cell shape	147	7	0.000769969	0.0169439	CDC42:ALDOA:MYH10:CDC42EP4:RHOQ:RHOH:LST1
gPROFILER	GO:0051179	localization	6824	39		0.0171029	TUBB2A,KCNQ3,TOMM40,EHD1,APOC1,TMEM163,APOE,ITGB5,APOC2,DENND4C,ITSN1,CLU,SLC7A2,ALDOA,SCARA3,GFAP,TIMM17A,DLG2,PICALM,RAPGEF4,NFKB1,FCGR2B,SYS1,IL6,EPHX2,IKBKB,BIN1,SLC24A4,SCN2B,CHRNA9,KANK2,SCFD2,GAB2,SLC16A9,SMDT1,SNCG,DDR2,VPS53,GABRB3
gPROFILER	GO:0061001	regulation of dendritic spine morphogenesis	44	5		0.0171029	LRP8,KALRN,PDLIM5,OPA1,CAPRIN1
gPROFILER	GO:0048015	phosphatidylinositol-mediated signaling	191	11		0.0171029	GAB2,UNC5B,GSN,PIP5K1B,PIP4K2A,PLCD3,PLCE1,EGFR,FBXL2,CCL5,PLCH1
gPROFILER	GO:0062014	negative regulation of small molecule metabolic process	98	4		0.0171029	APOC1,APOE,NFKB1,FBP1
gPROFILER	GO:0071705	nitrogen compound transport	2466	15		0.0171029	TOMM40,EHD1,APOE,APOC2,DENND4C,ITSN1,CLU,SLC7A2,TIMM17A,DLG2,RAPGEF4,FCGR2B,SYS1,IL6,EPHX2
gPROFILER	KEGG_CHOLESTEROL_METABOLISM	Cholesterol metabolism	50	3		0.0171903	APOC1,APOE,APOC2
gPROFILER	GO:0016192	vesicle-mediated transport	2146	13		0.01721	EHD1,APOC1,APOE,APOC2,ITSN1,CLU,ALDOA,SCARA3,PICALM,RAPGEF4,NFKB1,FCGR2B,SYS1
gPROFILER	GO:0045184	establishment of protein localization	2199	14		0.01721	TOMM40,EHD1,APOE,APOC2,DENND4C,ITSN1,CLU,TIMM17A,DLG2,RAPGEF4,FCGR2B,SYS1,IL6,EPHX2
FUMA	GO:0034248	regulation of cellular amide metabolic process	453	13	0.000789395	0.0173196	PGAM1:CAPRIN1:PICALM:CCL5:LSM14A:APOE:ZFP36L2:BIN1:POLDIP3:ENC1:PURA:IL6:CLU
gPROFILER	GO:0042995	cell projection	2216	59		0.0174074	KCNQ3,EHD1,APOE,ITSN1,CLU,GFAP,DLG2,FCGR2B,TBC1D7,BIN1,CHRNA9,SNCG,GABRB3,SCN11A,MAPK8,LRP8,NFIB,MYO5A,NRSN1,ABLIM1,CD44,MEFV,CENPF,PURA,CRH,GSN,PCSK1,RASGRF1,DST,ANK3,PIP5K1B,SH3PXD2A,CALM3,PDLIM5,CDC42,GPM6A,MTMR6,HTR1E,SORBS2,OPA1,MARK1,CD2AP,ADGRL2,GRK4,C1QTNF5,PDE4B,NRGN,CAPRIN1,MYH10,MAP1S,GAP43,NAV1,RHOQ,APC,MYOT,TNFRSF21,DNALI1,ITGB1,WWOX
gPROFILER	GO:0044456	synapse part	971	29		0.0174074	TMEM163,APOE,ITSN1,DLG2,PICALM,FCGR2B,BIN1,CHRNA9,GABRB3,DNAJC5,LRP8,MYO5A,RIMS2,INPP4A,PURA,ANK3,CALM3,PDLIM5,CDC42,GPM6A,NTNG1,ADD1,PPFIA1,PDE4B,NRGN,MYH10,GAP43,PCBP2,GNB5
FUMA	GO:0070661	leukocyte proliferation	290	10	0.000801412	0.0175309	FCGR2B:CCL5:SLC39A10:SDC4:PDE5A:PURA:LST1:TNFRSF21:IL6:CLU
gPROFILER	GO:0043085	positive regulation of catalytic activity	1427	24		0.0175516	APOC1,APOE,APOC2,ITSN1,CLU,PICALM,TBC1D7,DDR2,HSPB2,MAPK8,DSTYK,LRP8,MDFIC,KALRN,CARTPT,CHML,SRGAP1,PDE5A,CD44,MEFV,SDC4,SLC39A10,GSN,CCNY
gPROFILER	GO:0010960	magnesium ion homeostasis	12	3		0.0175516	CNNM2,ANK3,EGFR
FUMA	GO:0097060	synaptic membrane	428	12	0.00151011	0.0175769	NTNG1:ITGB1:ANK3:DLG2:PICALM:NRGN:GABRB3:UNC13A:CHRNA9:PDLIM5:GPM6A:RIMS2
gPROFILER	GO:0030001	metal ion transport	919	32		0.0176719	KCNQ3,TMEM163,BIN1,SLC24A4,SCN2B,CHRNA9,SMDT1,SCN11A,MYO5A,CNNM2,SLC39A10,CRH,ATP6V0E1,ANK3,ATP6V1G2,CALM3,PML,PLCD3,HFE,GPM6A,MTMR6,RGS4,OPA1,PLCE1,AHNAK,PDE4B,CCL5,HECW2,GNB5,PLCH1,CEMIP,WNK4
gPROFILER	GO:0006661	phosphatidylinositol biosynthetic process	115	7		0.0177852	INPP4A,CDS1,PIP5K1B,MTMR3,PIP4K2A,CDIPT,MTMR6
FUMA	KEGG_SMALL_CELL_LUNG_CANCER	small cell lung cancer	84	5	0.00164443	0.0179919	LAMC1:ITGB1:NFKB1:CYCS:IKBKB
gPROFILER	GO:1901550	regulation of endothelial cell development	14	3		0.0181943	IKBKB,S1PR3,ADD1
gPROFILER	GO:0009653	anatomical structure morphogenesis	2764	79		0.0181943	EHD1,APOE,ITGB5,CLU,ALDOA,SCARA3,PICALM,PALM2-AKAP2,IL6,CPM,SLC24A4,BMP1,CHRNA9,GAB2,LMOD1,UNC5B,LTBP3,LRP8,DPYSL4,ALPK2,KALRN,NFIB,PGR,MYO5A,GAS7,RIMS2,ABLIM1,CD44,SDC4,LGALS8,DDHD1,CSRP1,SEMA4B,KRT17,ELF3,S1PR3,ANK3,AP2S1,SH3PXD2A,CDC42EP4,NKX6-1,WWTR1,PML,LRIG3,PLCD3,FRAS1,PDLIM5,CDC42,TNFRSF11B,GPM6A,NTNG1,ADD1,SHC3,OPA1,BICD1,NEBL,EGFR,SRPK2,CAPRIN1,VEZF1,MYH10,MAP1S,GAP43,HECW2,RHOQ,MAP4K4,…
gPROFILER	GO:1903140	regulation of establishment of endothelial barrier	14	3		0.0181943	IKBKB,S1PR3,ADD1
Wegestalt	GO:0030120	vesicle coat	57	5	0.000781414	0.0182443	PICALM;NCALD;AP2S1;SEC23B;AP2A2
Wegestalt	GO:0030122	AP-2 adaptor complex	15	3	0.00082714	0.0182443	PICALM;AP2S1;AP2A2
Wegestalt	GO:0033268	node of Ranvier	15	3	0.00082714	0.0182443	KCNQ3;BIN1;ANK3
gPROFILER	GO:0048017	inositol lipid-mediated signaling	194	11		0.0182529	GAB2,UNC5B,GSN,PIP5K1B,PIP4K2A,PLCD3,PLCE1,EGFR,FBXL2,CCL5,PLCH1
FUMA	GO:0045601	regulation of endothelial cell differentiation	42	4	0.000846609	0.01841	VEZF1:ADD1:IKBKB:S1PR3
FUMA	GO:0032958	inositol phosphate biosynthetic process	42	4	0.000846609	0.01841	ITPKB:PLCE1:PLCD3:PLCH1
FUMA	GO:0030427	site of polarized growth	167	7	0.00161361	0.0185658	MYO5A:RASGRF1:MYH10:CALM3:GAP43:GPM6A:NRSN1
gPROFILER	GO:0044283	small molecule biosynthetic process	721	13		0.018634	APOC1,APOE,APOC2,ALDOA,NFKB1,EPHX2,FBP1,ITPKB,GART,MYO5A,PDE5A,ISYNA1,FBP2
gPROFILER	GO:0010954	positive regulation of protein processing	23	3		0.0186908	TIMM17A,F12,GSN
FUMA	KEGG_NEUROTROPHIN_SIGNALING_PATHWAY	neurotrophin signaling pathway	126	6	0.00181747	0.0187806	CDC42:MAPK8:CALM3:NFKB1:IKBKB:SHC3
gPROFILER	GO:0030120	vesicle coat	54	4		0.0188251	PICALM,NCALD,AP2S1,SEC23B
gPROFILER	GO:0034703	cation channel complex	224	5		0.0188251	KCNQ3,DLG2,SCN2B,SMDT1,SCN11A
FUMA	GO:0034104	negative regulation of tissue remodeling	19	3	0.00087844	0.0189341	CARTPT:IL6:TNFRSF11B
FUMA	GO:0032026	response to magnesium ion	19	3	0.00087844	0.0189341	ANK3:TNFRSF11B:FBP1
FUMA	GO:0043691	reverse cholesterol transport	19	3	0.00087844	0.0189341	APOE:APOC2:CLU
gPROFILER	GO:0030659	cytoplasmic vesicle membrane	777	27		0.0189425	TMEM163,APOE,DENND4C,PICALM,GABRB3,DNAJC5,CD59,CD44,NCALD,ATP6V0E1,SNTB2,CYSTM1,AP2S1,SEC23B,SCG3,LNPEP,CALM3,LRIG3,EGFR,NRGN,GPRC5B,AP2A2,CEMIP,TSPAN14,HBEGF,SYNGR1,UNC13A
FUMA	WP2034	leptin signaling pathway	76	5	0.00105073	0.0190182	CDC42:MAPK8:ACACB:NFKB1:IKBKB
gPROFILER	GO:0005768	endosome	922	5		0.019075	EHD1,TMEM163,APOE,APOC2,ITSN1
gPROFILER	GO:0016311	dephosphorylation	492	17		0.0191643	DLG2,EPHX2,IKBKB,PTBP1,FBP1,NTPCR,FBP2,SLC39A10,INPP4A,TMEM132D,DMPK,DUSP12,MTMR3,CALM3,MTMR6,CYCS,DUSP1
FUMA	GO:0043271	negative regulation of ion transport	151	7	0.000901452	0.0193733	RGS4:ANK3:GNB5:WNK4:CALM3:BIN1:HECW2
FUMA	GO:0007626	locomotory behavior	196	8	0.000906553	0.0194261	NEGR1:SNCG:NAV2:MYO5A:GPRC5B:APOE:KALRN:CRH
gPROFILER	GO:0003678	DNA helicase activity	73	4		0.0195918	CHD4,MCM3,SUB1,NAV2
gPROFILER	GO:0005085	guanyl-nucleotide exchange factor activity	222	4		0.0195918	DENND4C,ITSN1,DENND5B,RAPGEF4
gPROFILER	GO:0098772	molecular function regulator	1827	22		0.0195918	APOC1,APOE,APOC2,DENND4C,ITSN1,DENND5B,RAPGEF4,IL6,TBC1D7,BIN1,BMP1,SCN2B,CERS1,CALCB,HSPB2,HDGF,RHOH,MAPK8,KALRN,CARTPT,CHML,SRGAP1
gPROFILER	GO:0007263	nitric oxide mediated signal transduction	28	4		0.0196204	APOE,PDE5A,DDAH2,EGFR
gPROFILER	GO:0051235	maintenance of location	344	16		0.0196451	EHD1,APOE,NFKB1,IL6,MYO5A,GSN,ANK3,MXI1,CALM3,PML,PLCD3,ACACB,PLCE1,OSBPL8,PLCH1,CEMIP
FUMA	GO:0051489	regulation of filopodium assembly	43	4	0.000926072	0.0197294	CDC42:RHOQ:GAP43:GPM6A
FUMA	GO:0034383	low density lipoprotein particle clearance	43	4	0.000926072	0.0197294	AP2A2:EHD1:SOAT2:AP2S1
gPROFILER	GO:0043034	costamere	19	3		0.020078	SDC4,ANK3,AHNAK
FUMA	R-HSA-1834949	cytosolic sensors of pathogen associated dna	63	5	0.000444799	0.0202047	POLR1D:LRRFIP1:POLR3F:NFKB1:IKBKB
FUMA	GO:1901700	response to oxygen containing compound	1603	30	0.000958098	0.0203527	LRP8:PDE4B:FCGR2B:RGS4:MAPK8:OSBPL8:MYO5A:CCL5:KANK2:CERS1:APOE:CALM3:RHOQ:MAP4K4:SST:OPA1:TNIP2:NKX6-1:NFKB1:APC:DUSP1:ATP6V0E1:ATP6V1G2:IL6:EGFR:LANCL2:CLU:CRH:DENND4C:GSN
FUMA	GO:0005996	monosaccharide metabolic process	153	7	0.000973508	0.0206204	DUSP12:CREM:DYRK2:ACACB:ALDOA:FBP2:FBP1
FUMA	GO:0045833	negative regulation of lipid metabolic process	75	5	0.000989684	0.0207673	ACACB:APOE:APOC1:APOC2:NFKB1
FUMA	GO:0098589	membrane region	324	10	0.00183135	0.0208316	LRP8:ITGB1:UNC5B:AHNAK:STOML1:RHOQ:SDC4:ADD1:EGFR:IKBKB
FUMA	GO:0030099	myeloid cell differentiation	408	12	0.00100803	0.0209245	CDC42:ARNT:ITPKB:PIP4K2A:SH3PXD2A:GAB2:PML:HOXB7:MITF:ADD1:CARTPT:KAT6A
FUMA	GO:0046850	regulation of bone remodeling	44	4	0.00101064	0.0209245	CARTPT:IL6:EGFR:TNFRSF11B
gPROFILER	GO:0048583	regulation of response to stimulus	4370	55		0.0209433	LSM14A,PAGR1,APOE,SEZ6L2,ITSN1,CLU,SLC7A2,CHD4,DLG2,NFKB1,IFNLR1,FCGR2B,CDK14,IL6,TBC1D7,IKBKB,F12,PTBP1,CHRNA9,KANK2,GAB2,SNCG,FCRLB,UNC5B,FBP1,ITPKB,RHOH,SUSD4,MAPK8,DSTYK,LRP8,MDFIC,ALPK2,KALRN,BCL2L2,CARTPT,CD59,SRGAP1,MYO5A,RIMS2,PDE5A,KAT6A,LANCL2,CD44,CRTC3,MEFV,ATXN3,SLC39A10,CRH,MTUS1,MUC6,GSN,CCNY,SEMA4B,MS4A2
gPROFILER	GO:0046850	regulation of bone remodeling	49	5		0.0209433	IL6,LTBP3,CARTPT,TNFRSF11B,EGFR
gPROFILER	GO:0051240	positive regulation of multicellular organismal process	1835	21		0.0209433	EHD1,LSM14A,APOE,APOC2,ITSN1,CLU,GFAP,NFKB1,IL6,F12,BIN1,POLR1D,BMP1,DDR2,ITPKB,RHOH,LTBP3,LRP8,KALRN,NEGR1,CARTPT
gPROFILER	GO:0010646	regulation of cell communication	3595	40		0.0209433	LSM14A,PAGR1,APOE,SEZ6L2,ITSN1,CLU,GFAP,CHD4,DLG2,RAPGEF4,NFKB1,FCGR2B,CDK14,IL6,TBC1D7,IKBKB,PTBP1,CHRNA9,KANK2,SNCG,UNC5B,FBP1,ITPKB,RHOH,MAPK8,DSTYK,LRP8,MDFIC,ALPK2,KALRN,BCL2L2,CARTPT,SRGAP1,MYO5A,RIMS2,PDE5A,KAT6A,LANCL2,CD44,CRTC3
FUMA	GO:0009725	response to hormone	973	21	0.00101763	0.02101	PGR:OSBPL8:MYO5A:PAGR1:PAGR1:KANK2:CALM3:ZFP36L2:RHOQ:SST:OPA1:NKX6-1:NFKB1:APC:DUSP1:ATP6V0E1:ATP6V1G2:IL6:EGFR:LANCL2:CRH:DENND4C
gPROFILER	GO:0005516	calmodulin binding	201	11		0.0210414	KCNQ3,ITPKB,MYO5A,SNTB2,RGS4,ADD1,EGFR,NRGN,FBXL2,MYH10,GAP43
gPROFILER	GO:0071840	cellular component organization or biogenesis	6636	20		0.0211123	TUBB2A,TOMM40,TNXB,EHD1,APOC1,LSM14A,PAGR1,APOE,ITGB5,APOC2,SEZ6L2,ITSN1,CLU,ALDOA,SCARA3,GFAP,TIMM17A,CHD4,DLG2,PICALM
gPROFILER	GO:0022008	neurogenesis	1656	52		0.0211123	TUBB2A,EHD1,APOE,ITSN1,CLU,GFAP,PICALM,IL6,BIN1,GAB2,GABRB3,UNC5B,LRP8,DPYSL4,KALRN,NFIB,NAV2,NEGR1,GAS7,RIMS2,SDC4,GSN,SEMA4B,RASGRF1,ANK3,SERPINI1,NKX6-1,PDLIM5,CDC42,GPM6A,NTNG1,SHC3,OPA1,MARK1,EGFR,CAPRIN1,GPRC5B,MYH10,MAP1S,GAP43,HECW2,NAV1,MAP4K4,MYOT,TNFRSF21,SNX3,ITGB1,ZSWIM4,LST1,ENC1,CLN5,UNC13A
gPROFILER	GO:0050769	positive regulation of neurogenesis	488	10		0.0211123	EHD1,APOE,ITSN1,GFAP,IL6,BIN1,LRP8,KALRN,NEGR1,RIMS2
FUMA	WP3594	circadian rhythm related genes	205	8	0.00120889	0.0211751	ARNT:CREM:MAPK8:PML:CARTPT:HCRTR2:IL6:CRH
gPROFILER	GO:0030072	peptide hormone secretion	259	13		0.0212333	ITSN1,RAPGEF4,IL6,KALRN,CARTPT,MYO5A,RIMS2,CRH,NKX6-1,HFE,EGFR,CCL5,MAP4K4
gPROFILER	GO:0010720	positive regulation of cell development	568	11		0.0212333	EHD1,APOE,ITSN1,GFAP,IL6,BIN1,LRP8,KALRN,NEGR1,RIMS2,PDE5A
gPROFILER	GO:0046851	negative regulation of bone remodeling	16	3		0.0212528	IL6,CARTPT,TNFRSF11B
FUMA	GO:0045178	basal part of cell	52	4	0.00189191	0.0212787	ANK3:HFE:DST:EGFR
gPROFILER	GO:0030425	dendrite	613	20		0.0213471	APOE,ITSN1,CLU,FCGR2B,MAPK8,LRP8,PURA,ANK3,CDC42,GPM6A,HTR1E,OPA1,MARK1,GRK4,PDE4B,NRGN,CAPRIN1,MYH10,MAP1S,GAP43
gPROFILER	GO:0031346	positive regulation of cell projection organization	389	18		0.021494	EHD1,APOE,ITSN1,LRP8,KALRN,NEGR1,RIMS2,SERPINI1,CDC42EP4,CDC42,GPM6A,OPA1,CAPRIN1,RHOQ,APC,SNX3,ENC1,UNC13A
FUMA	WP2203	thymic stromal lymphopoietin (tslp) signaling pathway	47	4	0.00129673	0.0215262	MAPK8:GAB2:NFKB1:IL6
FUMA	WP481	insulin signaling	161	7	0.00130822	0.0215262	MAPK8:EHD1:RHOQ:INPP4A:MAP4K4:IKBKB:SHC3
gPROFILER	GO:0030658	transport vesicle membrane	213	8		0.0215783	TMEM163,DNAJC5,CD59,NCALD,SNTB2,SEC23B,SCG3,CALM3
gPROFILER	GO:1903319	positive regulation of protein maturation	25	3		0.0216015	TIMM17A,F12,GSN
Wegestalt	GO:0030128	clathrin coat of endocytic vesicle	16	3	0.0010085	0.0216266	PICALM;AP2S1;AP2A2
FUMA	GO:0046173	polyol biosynthetic process	76	5	0.00105073	0.0216326	ITPKB:PLCE1:PLCD3:ISYNA1:PLCH1
gPROFILER	GO:0097447	dendritic tree	615	20		0.0216626	APOE,ITSN1,CLU,FCGR2B,MAPK8,LRP8,PURA,ANK3,CDC42,GPM6A,HTR1E,OPA1,MARK1,GRK4,PDE4B,NRGN,CAPRIN1,MYH10,MAP1S,GAP43
gPROFILER	GO:0030135	coated vesicle	293	13		0.0217741	APOE,PICALM,DNAJC5,CD59,NCALD,AP2S1,SEC23B,EGFR,NRGN,AP2A2,CEMIP,SNX3,HBEGF
gPROFILER	GO:0005856	cytoskeleton	2221	56		0.0217741	TUBB2A,ITSN1,CLU,ALDOA,GFAP,CHD4,TBC1D7,BIN1,LMOD1,SNCG,DDR2,MCM3,LRP8,KALRN,MYO5A,GAS7,RIMS2,LANCL2,STK17B,ABLIM1,MEFV,CENPF,PHAX,MTUS1,GSN,AGBL5,KRT17,SNTB2,DST,ANK3,LRRFIP1,SH3PXD2A,CCHCR1,CDC42EP4,CALM3,HFE,PDLIM5,CDC42,DDAH2,ADD1,SORBS2,MARK1,CD2AP,ACTR6,BICD1,AHNAK,NEBL,PDE4B,MYH10,MAP1S,HECW2,NAV1,RHOQ,DYRK2,APC,MYOT
gPROFILER	GO:0006816	calcium ion transport	454	19		0.0218013	BIN1,SLC24A4,CHRNA9,SMDT1,MYO5A,CRH,CALM3,PML,PLCD3,GPM6A,RGS4,OPA1,PLCE1,AHNAK,PDE4B,CCL5,GNB5,PLCH1,CEMIP
FUMA	R-HSA-382551	transport of small molecules	728	18	0.000502247	0.0221432	AP2A2:SOAT2:SLC24A4:GNB5:WNK4:ABCC3:APOE:APOC1:APOC2:AP2S1:SLC39A10:SMDT1:ADD1:ATP6V0E1:HFE:ATP6V1G2:SLC7A2:BMP1
gPROFILER	GO:0030132	clathrin coat of coated pit	17	3		0.0221449	PICALM,AP2S1,AP2A2
gPROFILER	GO:0010941	regulation of cell death	1760	20		0.0221633	APOE,ITSN1,CLU,PICALM,NFKB1,FCGR2B,IL6,IKBKB,BIN1,KANK2,GABRB3,UNC5B,DNAJC5,ITPKB,MAPK8,DSTYK,LRP8,ALPK2,KALRN,BCL2L2
Wegestalt	GO:0034358	plasma lipoprotein particle	36	4	0.00109406	0.0222267	APOC1;APOE;APOC2;CLU
Wegestalt	GO:1990777	lipoprotein particle	36	4	0.00109406	0.0222267	APOC1;APOE;APOC2;CLU
FUMA	R-HSA-5684264	map3k8 tpl2 dependent mapk1 3 activation	16	3	0.0005192	0.0222366	TNIP2:NFKB1:IKBKB
FUMA	GO:0098739	import across plasma membrane	114	6	0.00108829	0.0223434	RGS4:PICALM:WNK4:SLC39A10:HFE:SLC7A2
FUMA	WP2586	aryl hydrocarbon receptor netpath	48	4	0.00140347	0.0224142	ARNT:NFKB1:NCOA7:EGFR
gPROFILER	GO:0098660	inorganic ion transmembrane transport	864	30		0.022482	KCNQ3,TMEM163,BIN1,SLC24A4,SCN2B,CHRNA9,SMDT1,GABRB3,SCN11A,MYO5A,CNNM2,SLC39A10,ATP6V0E1,ANK3,ATP6V1G2,CALM3,PLCD3,HFE,GPM6A,MTMR6,RGS4,OPA1,PLCE1,AHNAK,PDE4B,HECW2,GNB5,PLCH1,CEMIP,WNK4
gPROFILER	GO:0007264	small GTPase mediated signal transduction	579	19		0.022482	APOE,ITSN1,RAPGEF4,KANK2,FBP1,ITPKB,RHOH,KALRN,CHML,SRGAP1,RASGRF1,KCTD13,CDC42EP4,PLEKHG1,CDC42,SHC3,DOCK9,CD2AP,PLCE1
gPROFILER	GO:0032957	inositol trisphosphate metabolic process	26	4		0.022482	ITPKB,PLCD3,PLCE1,PLCH1
gPROFILER	GO:0060548	negative regulation of cell death	1032	13		0.022482	APOE,ITSN1,CLU,NFKB1,IL6,IKBKB,KANK2,GABRB3,UNC5B,DNAJC5,ITPKB,MAPK8,DSTYK
gPROFILER	GO:0042759	long-chain fatty acid biosynthetic process	27	3		0.022482	EPHX2,MYO5A,ELOVL6
FUMA	GO:0090278	negative regulation of peptide hormone secretion	45	4	0.00110049	0.0225073	MAP4K4:KALRN:CARTPT:CRH
FUMA	GO:0014070	response to organic cyclic compound	912	20	0.0011024	0.0225073	LRP8:PDE4B:RGS4:PGR:ACACB:GABRB3:PAGR1:PAGR1:CCL5:KANK2:CALM3:ZFP36L2:SST:OPA1:NFKB1:DUSP1:IL6:EGFR:CLU:CRH:GSN
gPROFILER	GO:0044433	cytoplasmic vesicle part	1506	29		0.0225617	EHD1,TMEM163,APOE,DENND4C,CLU,ALDOA,PICALM,NFKB1,VPS53,GABRB3,DNAJC5,CD59,CD44,INPP4A,GSN,PCSK1,NCALD,PGAM1,ATP6V0E1,SNTB2,CYSTM1,AP2S1,SEC23B,SCG3,SERPINI1,LNPEP,CALM3,PML,LRIG3
gPROFILER	GO:0012506	vesicle membrane	798	27		0.0225617	TMEM163,APOE,DENND4C,PICALM,GABRB3,DNAJC5,CD59,CD44,NCALD,ATP6V0E1,SNTB2,CYSTM1,AP2S1,SEC23B,SCG3,LNPEP,CALM3,LRIG3,EGFR,NRGN,GPRC5B,AP2A2,CEMIP,TSPAN14,HBEGF,SYNGR1,UNC13A
gPROFILER	GO:0030276	clathrin binding	59	6		0.022576	PICALM,BIN1,NCALD,AP2S1,AP2A2,CEMIP
gPROFILER	GO:0007166	cell surface receptor signaling pathway	3128	83		0.0227083	LSM14A,APOE,ITGB5,ITSN1,DLG2,NFKB1,IFNLR1,FCGR2B,CDK14,IL6,IKBKB,PTBP1,CHRNA9,GAB2,DDR2,GABRB3,UNC5B,ITPKB,IL11RA,LTBP3,MAPK8,DSTYK,LRP8,MDFIC,SUB1,ALPK2,KALRN,BCL2L2,CD59,RIMS2,CD44,SLC39A10,CRH,MUC6,CCNY,SEMA4B,MS4A2,TNIP2,RASGRF1,ATP6V0E1,ELF3,S1PR3,DST,SST,RASL11B,AP2S1,CIITA,ATP6V1G2,NKX6-1,WWTR1,HNRNPA1,LNPEP,PML,HFE,CDC42,TNFRSF11B,RGS4,SHC3,SORBS2,OPA1,MARK1,FAM83A,ADGRL2,PLCE1,EGFR,MITF,…
FUMA	GO:0006936	muscle contraction	357	11	0.00111751	0.0227526	PDE4B:LMOD1:PLCE1:SCN2B:ALDOA:DMPK:CALM3:BIN1:ITGB5:PDE5A:MYOT
gPROFILER	GO:0014015	positive regulation of gliogenesis	78	3		0.0227773	GFAP,IL6,BIN1
FUMA	R-HSA-2187338	visual phototransduction	100	6	0.000547174	0.0227837	LRP8:GNB5:APOE:APOC2:SDC4:GRK4
gPROFILER	GO:0023051	regulation of signaling	3637	40		0.0229355	LSM14A,PAGR1,APOE,SEZ6L2,ITSN1,CLU,GFAP,CHD4,DLG2,RAPGEF4,NFKB1,FCGR2B,CDK14,IL6,TBC1D7,IKBKB,PTBP1,CHRNA9,KANK2,SNCG,UNC5B,FBP1,ITPKB,RHOH,MAPK8,DSTYK,LRP8,MDFIC,ALPK2,KALRN,BCL2L2,CARTPT,SRGAP1,MYO5A,RIMS2,PDE5A,KAT6A,LANCL2,CD44,CRTC3
gPROFILER	GO:0016310	phosphorylation	2462	68		0.0229607	PGM2L1,APOE,ITSN1,CLU,ALDOA,DLG2,NFKB1,FCGR2B,CDK14,IL6,IKBKB,CHRNA9,DDR2,FBP1,ITPKB,RHOH,MAPK8,DSTYK,LRP8,MDFIC,ALPK2,KALRN,CARTPT,PDE5A,STK17B,CD44,SDC4,CRH,CCNY,ZFP36L2,PGAM1,TNIP2,RASGRF1,DMPK,DUSP12,PIP5K1B,PIP4K2A,CIITA,WWTR1,CALM3,PML,HFE,CDC42,RGS4,CYCS,SHC3,MARK1,DUSP1,PLCE1,GRK4,EGFR,SRPK2,NRGN,NDUFB5,OSBPL8,GPRC5B,ERG,CDK2AP1,CCL5,CDK9,NDUFA5,DYRK2,APC,MAP4K4,ARNT,CEMIP,WNK4,HBEGF
FUMA	GO:0048589	developmental growth	654	16	0.00113249	0.0229938	DDR2:RGS4:ITGB1:ACACB:SEMA4B:UNC13A:APOE:GAP43:WWTR1:ADD1:NKX6-1:PDLIM5:SORBS2:SCARA3:RIMS2:GSN
FUMA	R-HSA-2129379	molecules associated with elastic fibres	38	4	0.000576314	0.0233485	ITGB1:LTBP3:ITGB5:ITGB8
FUMA	WP3929	chemokine signaling pathway	165	7	0.00150623	0.0233681	CDC42:GNB5:CCL5:GRK4:NFKB1:IKBKB:SHC3
gPROFILER	GO:1901216	positive regulation of neuron death	98	3		0.0233999	CLU,PICALM,FCGR2B
FUMA	WP3646	hepatitis c and hepatocellular carcinoma	50	4	0.00163505	0.023498	MAPK8:CD44:NFKB1:IL6
FUMA	WP_PHOTODYNAMIC_THERAPY-INDUCED_AP-1_SURVIVAL_SIGNALING.	photodynamic therapy-induced ap-1 survival signaling.	50	4	0.00163505	0.023498	MAPK8:HBEGF:IL6:EGFR
FUMA	WP254	apoptosis	84	5	0.00164443	0.023498	BCL2L2:NFKB1:TNFRSF21:CYCS:IKBKB
gPROFILER	GO:0019932	second-messenger-mediated signaling	444	18		0.023512	APOE,RAPGEF4,PTBP1,CALCB,MYO5A,RIMS2,PDE5A,CRTC3,CRH,NCALD,DMPK,CALM3,DDAH2,ADGRL2,PLCE1,EGFR,PEX5L,DYRK2
gPROFILER	R-HSA-70263	Gluconeogenesis	32	6		0.0235709	ALDOA,FBP1,FBP2,PGAM1,SLC25A1,MDH2
FUMA	GO:1902905	positive regulation of supramolecular fiber organization	204	8	0.0011718	0.0237265	CDC42:LMOD1:CDC42EP4:APOE:BIN1:SDC4:CLU:GSN
gPROFILER	GO:0007154	cell communication	6706	126		0.0237542	KCNQ3,LSM14A,PAGR1,APOE,ITGB5,SEZ6L2,ITSN1,CLU,GFAP,CHD4,DLG2,RAPGEF4,NFKB1,CAPS,IFNLR1,FCGR2B,CDK14,IL6,TBC1D7,IKBKB,PTBP1,BMP1,SCN2B,CHRNA9,KANK2,GAB2,SNCG,DDR2,GABRB3,CERS1,CALCB,UNC5B,DNAJC5,FBP1,HDGF,ITPKB,SCN11A,IL11RA,RHOH,LTBP3,MAPK8,DSTYK,LRP8,MDFIC,SUB1,ALPK2,KALRN,BCL2L2,CARTPT,CHML,CD59,SRGAP1,PGR,MYO5A,RIMS2,PDE5A,KAT6A,LANCL2,STK17B,CD44,CRTC3,ATXN3,SLC39A10,INPP4A,CRH,MUC6,GSN,PCSK…
FUMA	GO:0070664	negative regulation of leukocyte proliferation	78	5	0.00118114	0.0238499	FCGR2B:SDC4:PDE5A:LST1:TNFRSF21
gPROFILER	GO:0005615	extracellular space	3541	42		0.0239607	TUBB2A,TNXB,EHD1,APOC1,APOE,ITGB5,APOC2,CLU,ALDOA,SCARA3,IL6,CPM,EPHX2,F12,ARSG,PTBP1,BMP1,SNCG,CALCB,FBP1,CRTAP,HDGF,SCN11A,LTBP3,SUB1,KALRN,CARTPT,GART,CD59,MYO5A,RIMS2,FBP2,CD44,RNPEP,SDC4,LGALS8,CRH,MTUS1,GSN,CSRP1,PCSK1,SEMA4B
gPROFILER	GO:0044421	extracellular region part	3751	44		0.0239607	TUBB2A,TNXB,EHD1,APOC1,APOE,ITGB5,APOC2,CLU,ALDOA,SCARA3,IL6,CPM,EPHX2,F12,ARSG,PTBP1,BMP1,SNCG,CALCB,FBP1,CRTAP,HDGF,SCN11A,LTBP3,SUB1,KALRN,NAV2,CARTPT,GART,CD59,MYO5A,C17ORF58,RIMS2,FBP2,CD44,RNPEP,SDC4,LGALS8,CRH,MTUS1,GSN,CSRP1,PCSK1,SEMA4B
gPROFILER	GO:0031012	extracellular matrix	530	9		0.0239607	TNXB,APOE,CLU,SCARA3,F12,HDGF,LTBP3,NAV2,C17ORF58
gPROFILER	GO:0031300	intrinsic component of organelle membrane	389	6		0.0239607	TOMM40,TMEM163,TIMM17A,SYS1,SMDT1,DNAJC5
gPROFILER	GO:0098794	postsynapse	624	20		0.0239607	ITSN1,DLG2,PICALM,FCGR2B,CHRNA9,GABRB3,LRP8,MYO5A,INPP4A,PURA,ANK3,PDLIM5,CDC42,GPM6A,ADD1,PDE4B,NRGN,MYH10,GAP43,PCBP2
gPROFILER	GO:0048699	generation of neurons	1556	49		0.0241859	TUBB2A,EHD1,APOE,ITSN1,GFAP,PICALM,IL6,BIN1,GAB2,GABRB3,UNC5B,LRP8,DPYSL4,KALRN,NFIB,NEGR1,GAS7,RIMS2,SDC4,SEMA4B,RASGRF1,ANK3,SERPINI1,NKX6-1,PDLIM5,CDC42,GPM6A,NTNG1,SHC3,OPA1,MARK1,EGFR,CAPRIN1,GPRC5B,MYH10,MAP1S,GAP43,HECW2,NAV1,MAP4K4,MYOT,TNFRSF21,SNX3,ITGB1,ZSWIM4,LST1,ENC1,CLN5,UNC13A
gPROFILER	GO:0048708	astrocyte differentiation	81	3		0.0242176	GFAP,IL6,BIN1
gPROFILER	KEGG_INOSITOL_PHOSPHATE_METABOLISM	Inositol phosphate metabolism	74	10		0.0242706	ITPKB,ISYNA1,INPP4A,PIP5K1B,MTMR3,PIP4K2A,PLCD3,CDIPT,MTMR6,PLCE1
FUMA	GO:0030073	insulin secretion	205	8	0.00120889	0.0243435	MYO5A:CCL5:MAP4K4:RAPGEF4:NKX6-1:CARTPT:CRH:RIMS2
gPROFILER	GO:0050801	ion homeostasis	829	21		0.0244408	APOE,PICALM,EPHX2,SLC24A4,SCN2B,CHRNA9,SMDT1,CALCB,MYO5A,CNNM2,SLC39A10,CRH,ATP6V0E1,S1PR3,DMPK,ANK3,ATP6V1G2,CALM3,PML,PLCD3,HFE
gPROFILER	GO:0043066	negative regulation of apoptotic process	922	12		0.0244408	APOE,ITSN1,CLU,NFKB1,IL6,IKBKB,GABRB3,UNC5B,DNAJC5,ITPKB,MAPK8,DSTYK
FUMA	GO:0035051	cardiocyte differentiation	159	7	0.00121718	0.0244435	RGS4:NEBL:ITGB1:MYH10:PDLIM5:SORBS2:EGFR
FUMA	KEGG_PENTOSE_PHOSPHATE_PATHWAY	pentose phosphate pathway	27	3	0.00249783	0.0244525	ALDOA:FBP2:FBP1
FUMA	WP1533	vitamin b12 metabolism	51	4	0.00176023	0.0245079	CCL5:APOE:NFKB1:IL6
gPROFILER	GO:0032588	trans-Golgi network membrane	90	3		0.0245185	CALN1,SYS1,VPS53
gPROFILER	GO:0120025	plasma membrane bounded cell projection	2144	56		0.0245185	KCNQ3,EHD1,APOE,ITSN1,CLU,GFAP,DLG2,FCGR2B,TBC1D7,BIN1,CHRNA9,SNCG,GABRB3,SCN11A,MAPK8,LRP8,NFIB,MYO5A,NRSN1,ABLIM1,CD44,MEFV,CENPF,PURA,CRH,GSN,PCSK1,RASGRF1,DST,ANK3,PIP5K1B,CALM3,PDLIM5,CDC42,GPM6A,MTMR6,HTR1E,SORBS2,OPA1,MARK1,CD2AP,ADGRL2,GRK4,PDE4B,NRGN,CAPRIN1,MYH10,MAP1S,GAP43,NAV1,APC,MYOT,TNFRSF21,DNALI1,ITGB1,WWOX
gPROFILER	GO:0009179	purine ribonucleoside diphosphate metabolic process	138	3		0.0249	PGM2L1,ALDOA,DLG2
gPROFILER	GO:0050896	response to stimulus	9379	116		0.0249	EHD1,LSM14A,PAGR1,APOE,ITGB5,APOC2,DENND4C,SEZ6L2,ITSN1,CLU,SLC7A2,ALDOA,SCARA3,GFAP,CHD4,DLG2,RAPGEF4,NFKB1,CAPS,IFNLR1,FCGR2B,CDK14,IL6,TBC1D7,EPHX2,IKBKB,F12,SLC24A4,PTBP1,BMP1,SCN2B,CHRNA9,KANK2,GAB2,FGFR1OP2,SNCG,DDR2,FCRLB,GABRB3,CERS1,CALCB,HSPB2,UNC5B,DNAJC5,FBP1,HDGF,ITPKB,SCN11A,IL11RA,MCM3,RHOH,SUSD4,LTBP3,MAPK8,DSTYK,LRP8,MDFIC,DPYSL4,SUB1,ALPK2,KALRN,INO80C,NFIB,BCL2L2,CARTPT,CHML,GA…
gPROFILER	GO:0032508	DNA duplex unwinding	105	5		0.0249	CHD4,MCM3,SUB1,NAV2,PURA
gPROFILER	GO:0050773	regulation of dendrite development	153	9		0.0249	APOE,ITSN1,LRP8,KALRN,PDLIM5,OPA1,MARK1,CAPRIN1,HECW2
gPROFILER	GO:0007015	actin filament organization	397	15		0.0249	ITGB5,ALDOA,BIN1,LMOD1,SDC4,GSN,KCTD13,CDC42EP4,CDC42,RGS4,ADD1,SORBS2,PPFIA1,CD2AP,NEBL
gPROFILER	GO:0009135	purine nucleoside diphosphate metabolic process	138	3		0.0249	PGM2L1,ALDOA,DLG2
FUMA	GO:0035303	regulation of dephosphorylation	206	8	0.00124692	0.0249724	DLG2:TMEM132D:PTBP1:DMPK:CALM3:SLC39A10:MTMR3:IKBKB
gPROFILER	GO:0042221	response to chemical	4841	44		0.0251862	EHD1,LSM14A,PAGR1,APOE,ITGB5,APOC2,DENND4C,CLU,SLC7A2,DLG2,NFKB1,IFNLR1,FCGR2B,IL6,TBC1D7,EPHX2,IKBKB,F12,PTBP1,SCN2B,KANK2,GAB2,SNCG,GABRB3,CERS1,HSPB2,UNC5B,FBP1,HDGF,ITPKB,SCN11A,IL11RA,LTBP3,MAPK8,DSTYK,LRP8,DPYSL4,NFIB,BCL2L2,CARTPT,GART,PGR,MYO5A,HSPB3
gPROFILER	GO:0043086	negative regulation of catalytic activity	824	8		0.0251862	APOC1,APOE,APOC2,DLG2,PICALM,NFKB1,IKBKB,BIN1
gPROFILER	GO:0008104	protein localization	2863	16		0.0251862	TOMM40,EHD1,APOE,APOC2,DENND4C,ITSN1,CLU,TIMM17A,DLG2,PICALM,RAPGEF4,FCGR2B,SYS1,IL6,EPHX2,IKBKB
gPROFILER	GO:0048869	cellular developmental process	4470	116		0.0251862	TUBB2A,EHD1,APOE,ITGB5,CLPTM1,ITSN1,CLU,ALDOA,SCARA3,GFAP,PICALM,NFKB1,PALM2-AKAP2,FCGR2B,IL6,IKBKB,BIN1,PTBP1,BMP1,GAB2,LMOD1,DDR2,GABRB3,UNC5B,ITPKB,RHOH,LTBP3,LRP8,DPYSL4,ALPK2,KALRN,NFIB,NAV2,NEGR1,CARTPT,FCRLA,PGR,MYO5A,GAS7,RIMS2,PDE5A,KAT6A,CD44,CENPF,SDC4,ZHX1,PURA,GSN,CSRP1,SEMA4B,ZFP36L2,MAF,KRT17,RASGRF1,NEUROD6,ELF3,S1PR3,DMPK,ANK3,SH3PXD2A,CCHCR1,PIP4K2A,SERPINI1,CDC42EP4,NKX6-1,WWTR…
gPROFILER	GO:0009185	ribonucleoside diphosphate metabolic process	140	3		0.0253019	PGM2L1,ALDOA,DLG2
gPROFILER	GO:0046578	regulation of Ras protein signal transduction	242	6		0.0253019	APOE,ITSN1,KANK2,FBP1,ITPKB,KALRN
FUMA	GO:0150034	distal axon	280	9	0.00232918	0.0255049	MYO5A:RASGRF1:MYH10:UNC13A:CALM3:ITSN1:GAP43:GPM6A:NRSN1
FUMA	GO:0044451	nucleoplasm part	1113	22	0.00233778	0.0255049	HP1BP3:RPRD2:ARNT:NSL1:WAC:PHF21A:CHD4:PML:USP7:CIITA:PAGR1:PAGR1:KCTD13:HOXB7:SPOP:INO80C:ZNF217:POLDIP3:WWTR1:ADD1:PHAX:KAT6A:CDK9
FUMA	GO:0016604	nuclear body	769	17	0.0023441	0.0255049	HP1BP3:ARNT:NSL1:WAC:PML:USP7:CIITA:KCTD13:HOXB7:SPOP:ZNF217:POLDIP3:WWTR1:ADD1:PHAX:KAT6A:CDK9
gPROFILER	GO:0031274	positive regulation of pseudopodium assembly	13	3		0.025506	CDC42EP4,CDC42,APC
gPROFILER	GO:0009986	cell surface	908	7		0.0256034	KCNQ3,ITGB5,CLPTM1,CLU,PICALM,FCGR2B,CPM
FUMA	GO:0005509	calcium ion binding	693	17	0.000778395	0.0256092	LRP8:EHD1:LTBP3:MYO5A:CAPS:UNC13A:CALM3:ITSN1:PLCH1:F12:DST:FKBP14:CALN1:BMP1:SCARA3:NCALD:GSN
FUMA	GO:0044440	endosomal part	514	13	0.00241629	0.0260076	AP2A2:EHD1:STOML1:PML:VPS53:AP2S1:PLEKHB2:TMEM163:CHMP4B:LNPEP:ATP6V0E1:SNX3:EGFR
gPROFILER	GO:1990778	protein localization to cell periphery	330	5		0.0260343	DENND4C,DLG2,PICALM,SYS1,IKBKB
gPROFILER	GO:0071944	cell periphery	5726	28		0.0261486	KCNQ3,EHD1,APOE,ITGB5,DENND4C,SEZ6L2,CLPTM1,ITSN1,CLU,SLC7A2,DLG2,PICALM,RAPGEF4,CALN1,PALM2-AKAP2,IFNLR1,FCGR2B,CDK14,IL6,CPM,IKBKB,F12,BIN1,SLC24A4,SCN2B,CHRNA9,GAB2,SLC16A9
gPROFILER	GO:0005178	integrin binding	137	3		0.0262533	TNXB,ITGB5,GFAP
FUMA	GO:0071396	cellular response to lipid	601	15	0.00131809	0.0262604	LRP8:PDE4B:MAPK8:PGR:PAGR1:PAGR1:CCL5:KANK2:ZFP36L2:TNIP2:NFKB1:IL6:EGFR:LANCL2:CLU:CRH
FUMA	GO:0060429	epithelium development	1273	25	0.00131838	0.0262604	CDC42:ELF3:AP2A2:CD44:PGR:MYO5A:PML:MAF:KRT17:WNK4:HOXB7:VEZF1:KANK2:AP2S1:SDC4:WWTR1:ADD1:FRAS1:NKX6-1:BDH2:HBEGF:EGFR:IKBKB:NFIB:S1PR3
gPROFILER	GO:0034103	regulation of tissue remodeling	90	4		0.0263557	IL6,DDR2,LTBP3,CARTPT
gPROFILER	GO:0045104	intermediate filament cytoskeleton organization	50	4		0.0263557	GFAP,ATXN3,KRT17,DST
gPROFILER	GO:0004435	phosphatidylinositol phospholipase C activity	26	4		0.0263646	PLCD3,PLCE1,CCL5,PLCH1
gPROFILER	GO:0003779	actin binding	432	19		0.0263646	ALDOA,BIN1,LMOD1,MYO5A,ABLIM1,MEFV,GSN,NCALD,SNTB2,DST,PDLIM5,ADD1,NEBL,EGFR,MYH10,MAP1S,MYOT,ITGB1,ENC1
FUMA	GO:0031983	vesicle lumen	338	10	0.00248723	0.0264863	PGAM1:SCG3:ALDOA:APOE:SERPINI1:NFKB1:PCSK1:EGFR:CLU:GSN
gPROFILER	GO:0009615	response to virus	333	5		0.0266442	LSM14A,CLU,IFNLR1,IL6,IKBKB
gPROFILER	GO:0051128	regulation of cellular component organization	2488	71		0.0266675	EHD1,APOC1,APOE,APOC2,ITSN1,CLU,ALDOA,GFAP,PICALM,PALM2-AKAP2,FCGR2B,IL6,TBC1D7,IKBKB,BIN1,LMOD1,DDR2,FBP1,MAPK8,LRP8,KALRN,NEGR1,RIMS2,CD44,MEFV,CENPF,SDC4,DDHD1,GSN,SEMA4B,KRT17,AP2S1,MTMR3,PIP4K2A,SERPINI1,CDC42EP4,NKX6-1,HNRNPA1,CALM3,PML,HFE,PDLIM5,CDC42,GPM6A,RGS4,ADD1,CHMP4B,OPA1,MARK1,PPFIA1,CD2AP,DUSP1,PLCE1,BICD1,EGFR,CAPRIN1,MYH10,MAP1S,USP7,GAP43,HECW2,RHOQ,CDK9,APC,MAP4K4,SNX3,HBEGF,…
gPROFILER	GO:0072507	divalent inorganic cation homeostasis	528	21		0.0268381	APOE,EPHX2,SLC24A4,CHRNA9,SMDT1,CALCB,MYO5A,CNNM2,SLC39A10,S1PR3,DMPK,ANK3,CALM3,PML,PLCD3,PLCE1,EGFR,CCL5,PLCH1,CEMIP,HCRTR2
gPROFILER	GO:0023052	signaling	6681	55		0.0268392	KCNQ3,LSM14A,PAGR1,APOE,ITGB5,SEZ6L2,ITSN1,CLU,GFAP,CHD4,DLG2,RAPGEF4,NFKB1,CAPS,IFNLR1,FCGR2B,CDK14,IL6,TBC1D7,IKBKB,BIN1,PTBP1,BMP1,SCN2B,CHRNA9,KANK2,GAB2,SNCG,DDR2,GABRB3,CERS1,CALCB,UNC5B,DNAJC5,FBP1,HDGF,ITPKB,SCN11A,IL11RA,RHOH,LTBP3,MAPK8,DSTYK,LRP8,MDFIC,SUB1,ALPK2,KALRN,BCL2L2,CARTPT,CHML,CD59,SRGAP1,PGR,MYO5A
gPROFILER	GO:0050807	regulation of synapse organization	221	11		0.0268392	APOE,ITSN1,FCGR2B,LRP8,KALRN,PDLIM5,CDC42,GPM6A,OPA1,CAPRIN1,GAP43
gPROFILER	GO:0016042	lipid catabolic process	336	3		0.0268392	APOC1,APOE,APOC2
gPROFILER	GO:0019637	organophosphate metabolic process	1045	26		0.0268392	PGM2L1,APOC1,APOC2,ALDOA,DLG2,FBP1,ITPKB,GART,PDE5A,ISYNA1,FBP2,DDHD1,INPP4A,ELOVL6,PGAM1,CDS1,PIP5K1B,MTMR3,PIP4K2A,PLCD3,CDIPT,SULT4A1,CDC42,MTMR6,SLC25A1,ACACB
gPROFILER	GO:0006006	glucose metabolic process	211	11		0.0268392	PGM2L1,ALDOA,FBP1,FBP2,PGAM1,DUSP12,CREM,SLC25A1,ACACB,MDH2,DYRK2
Wegestalt	GO:0005938	cell cortex	293	11	0.00137544	0.0268816	RHOH;RIMS2;LANCL2;GSN;DST;HFE;CDC42;GRK4;MYH10;RHOQ;UNC13A
Wegestalt	GO:0005769	early endosome	339	12	0.00139283	0.0268816	EHD1;TMEM163;APOE;APOC2;PICALM;MYO5A;LNPEP;PML;HFE;RIN3;EGFR;SNX3
gPROFILER	GO:0051091	positive regulation of DNA-binding transcription factor activity	262	6		0.0269338	CLU,NFKB1,IL6,IKBKB,DDR2,LRP8
FUMA	GO:0007173	epidermal growth factor receptor signaling pathway	119	6	0.00135788	0.0269718	CDC42:PLCE1:HBEGF:EGFR:FAM83A:SHC3
FUMA	GO:0010884	positive regulation of lipid storage	22	3	0.0013651	0.0269718	EHD1:ACACB:NFKB1
FUMA	GO:0050995	negative regulation of lipid catabolic process	22	3	0.0013651	0.0269718	ACACB:CRTC3:APOC1
gPROFILER	GO:0009966	regulation of signal transduction	3209	36		0.027005	LSM14A,PAGR1,APOE,SEZ6L2,ITSN1,CLU,CHD4,DLG2,NFKB1,FCGR2B,CDK14,IL6,TBC1D7,IKBKB,PTBP1,CHRNA9,KANK2,UNC5B,FBP1,ITPKB,RHOH,MAPK8,DSTYK,MDFIC,ALPK2,KALRN,BCL2L2,CARTPT,SRGAP1,MYO5A,RIMS2,PDE5A,KAT6A,LANCL2,CD44,CRTC3
gPROFILER	GO:0045103	intermediate filament-based process	51	4		0.0270966	GFAP,ATXN3,KRT17,DST
FUMA	R-HSA-8856825	cargo cognition for clathrin mediated endocytosis	105	6	0.000708296	0.0272965	AP2A2:PICALM:AP2S1:ITSN1:HBEGF:EGFR
FUMA	R-HSA-8856828	clathrin mediated endocytosis	145	7	0.000710182	0.0272965	AP2A2:PICALM:AP2S1:BIN1:ITSN1:HBEGF:EGFR
FUMA	KEGG_FC_GAMMA_R_MEDIATED_PHAGOCYTOSIS	fc gamma r mediated phagocytosis	96	5	0.00295175	0.0274513	CDC42:FCGR2B:GAB2:PIP5K1B:GSN
FUMA	GO:1905954	positive regulation of lipid localization	81	5	0.00139869	0.0274634	EHD1:ACACB:APOE:NFKB1:CRH
FUMA	GO:0051091	positive regulation of dna binding transcription factor activity	260	9	0.00140858	0.0274634	LRP8:DDR2:CRTC3:LRRFIP1:NKX6-1:NFKB1:IL6:CLU:IKBKB
FUMA	GO:0110053	regulation of actin filament organization	260	9	0.00140858	0.0274634	CDC42:RGS4:LMOD1:PPFIA1:CDC42EP4:BIN1:SDC4:ADD1:GSN
FUMA	GO:0044262	cellular carbohydrate metabolic process	260	9	0.00140858	0.0274634	DUSP12:PGAM1:PGM2L1:DYRK2:ACACB:ISYNA1:NDST3:FBP2:FBP1
FUMA	GO:0016485	protein processing	210	8	0.00140867	0.0274634	TIMM17A:CPM:CLN5:CPD:PCSK1:F12:ADAMTS2:GSN
gPROFILER	GO:0016101	diterpenoid metabolic process	109	5		0.027514	APOE,APOC2,LRP8,SDC4,CRH
gPROFILER	GO:0043647	inositol phosphate metabolic process	71	6		0.027514	ITPKB,ISYNA1,INPP4A,PLCD3,PLCE1,PLCH1
gPROFILER	GO:0032026	response to magnesium ion	19	3		0.027514	FBP1,ANK3,TNFRSF11B
gPROFILER	GO:0010975	regulation of neuron projection development	509	21		0.0275628	EHD1,APOE,ITSN1,GFAP,LRP8,KALRN,NEGR1,RIMS2,SEMA4B,SERPINI1,NKX6-1,PDLIM5,OPA1,MARK1,CAPRIN1,HECW2,MAP4K4,SNX3,ZSWIM4,ENC1,UNC13A
gPROFILER	GO:0035023	regulation of Rho protein signal transduction	143	7		0.0275628	APOE,ITSN1,KANK2,KALRN,RASGRF1,KCTD13,PLEKHG1
gPROFILER	GO:1901215	negative regulation of neuron death	215	5		0.0275628	APOE,ITSN1,GABRB3,UNC5B,DNAJC5
Wegestalt	GO:0030117	membrane coat	97	6	0.00150117	0.027593	PICALM;NCALD;AP2S1;SEC23B;CHMP4B;AP2A2
Wegestalt	GO:0048475	coated membrane	97	6	0.00150117	0.027593	PICALM;NCALD;AP2S1;SEC23B;CHMP4B;AP2A2
gPROFILER	GO:0005184	neuropeptide hormone activity	27	3		0.0276013	CALCB,CARTPT,CRH
gPROFILER	GO:0017048	Rho GTPase binding	177	8		0.0276051	ITSN1,RHOH,KALRN,SRGAP1,RASGRF1,KCTD13,CDC42EP4,PLEKHG1
gPROFILER	GO:0042578	phosphoric ester hydrolase activity	379	16		0.0276051	EPHX2,FBP1,NTPCR,PDE5A,FBP2,INPP4A,DUSP12,MTMR3,PLCD3,MTMR6,CYCS,DUSP1,PLCE1,PDE4B,CCL5,PLCH1
gPROFILER	GO:1901981	phosphatidylinositol phosphate binding	160	10		0.0276051	PICALM,GAB2,LANCL2,SH3PXD2A,MARK1,NRGN,OSBPL8,GAP43,SNX3,PLEKHB2
FUMA	GO:0051090	regulation of dna binding transcription factor activity	425	12	0.00142378	0.0276847	LRP8:DDR2:MAPK8:MXI1:CRTC3:USP7:LRRFIP1:NKX6-1:NFKB1:IL6:CLU:IKBKB
gPROFILER	GO:0016051	carbohydrate biosynthetic process	213	11		0.0278401	PGM2L1,ALDOA,NFKB1,FBP1,ISYNA1,FBP2,PGAM1,SLC25A1,MDH2,NDST3,DYRK2
Wegestalt	GO:0005905	clathrin-coated pit	67	5	0.00162646	0.0278676	ITSN1;PICALM;AP2S1;AP2A2;CEMIP
Wegestalt	GO:0030175	filopodium	99	6	0.00166692	0.0278676	MYO5A;CDC42;GPM6A;GAP43;DNALI1;ITGB1
Wegestalt	GO:0043034	costamere	19	3	0.0016966	0.0278676	SDC4;ANK3;AHNAK
Wegestalt	GO:0034361	very-low-density lipoprotein particle	19	3	0.0016966	0.0278676	APOC1;APOE;APOC2
Wegestalt	GO:0034385	triglyceride-rich plasma lipoprotein particle	19	3	0.0016966	0.0278676	APOC1;APOE;APOC2
gPROFILER	GO:0061077	chaperone-mediated protein folding	58	3		0.0278904	CLU,DNAJC5,CRTAP
FUMA	R-HSA-1839117	signaling by cytosolic fgfr1 fusion mutants	18	3	0.000745298	0.02793	GAB2:FGFR1OP2:LRRFIP1
FUMA	GO:0030894	replisome	28	3	0.0027768	0.0280766	DONSON:PURA:MCM3
FUMA	GO:0030131	clathrin adaptor complex	28	3	0.0027768	0.0280766	AP2A2:PICALM:AP2S1
gPROFILER	GO:0050865	regulation of cell activation	630	14		0.028156	APOE,CLPTM1,SLC7A2,FCGR2B,IL6,GAB2,ITPKB,RHOH,PDE5A,SDC4,SLC39A10,GSN,ZFP36L2,TNIP2
gPROFILER	GO:0034248	regulation of cellular amide metabolic process	485	6		0.028156	LSM14A,APOE,CLU,PICALM,IL6,BIN1
FUMA	GO:0070300	phosphatidic acid binding	19	3	0.00087844	0.0281711	MARK1:NRGN:OPA1
FUMA	GO:0008134	transcription factor binding	639	16	0.000890514	0.0281711	ARNT:HDGF:CENPF:CREM:CHD4:CRTC3:USP7:CIITA:PAGR1:PAGR1:ADD1:NFKB1:PURA:NCOA7:MDFIC:KAT6A:CDK9
FUMA	WP4263	pancreatic adenocarcinoma pathway	89	5	0.00212236	0.0281851	CDC42:MAPK8:NFKB1:EGFR:IKBKB
FUMA	WP411	mrna processing	130	6	0.00212816	0.0281851	PCBP2:HNRNPA1:SPOP:PTBP1:LSM2:SRPK2
FUMA	GO:0008202	steroid metabolic process	314	10	0.00145474	0.028212	SOAT2:ACACB:WWOX:APOE:APOC1:SULT4A1:NFKB1:ELOVL6:EPHX2:CRH
FUMA	GO:1905897	regulation of response to endoplasmic reticulum stress	82	5	0.00147737	0.0282851	FCGR2B:ATXN3:USP14:OPA1:CLU
FUMA	GO:1901879	regulation of protein depolymerization	82	5	0.00147737	0.0282851	LMOD1:MAP1S:ADD1:APC:GSN
FUMA	GO:1903363	negative regulation of cellular protein catabolic process	82	5	0.00147737	0.0282851	WAC:PML:USP7:USP14:HFE
FUMA	GO:0071375	cellular response to peptide hormone stimulus	315	10	0.0014893	0.0282851	OSBPL8:MYO5A:RHOQ:OPA1:NKX6-1:NFKB1:APC:ATP6V0E1:ATP6V1G2:DENND4C
FUMA	GO:0006470	protein dephosphorylation	315	10	0.0014893	0.0282851	DUSP12:MTMR6:PTBP1:DMPK:CALM3:SLC39A10:MTMR3:DUSP1:CYCS:IKBKB
FUMA	KEGG_CHEMOKINE_SIGNALING_PATHWAY	chemokine signaling pathway	189	7	0.00323058	0.0286137	CDC42:GNB5:CCL5:GRK4:NFKB1:IKBKB:SHC3
gPROFILER	GO:0032991	protein-containing complex	5641	35		0.0286178	KCNQ3,TOMM40,APOC1,LSM14A,PAGR1,APOE,ITGB5,APOC2,DENND4C,CLU,SCARA3,TIMM17A,CHD4,DLG2,PICALM,NFKB1,PFDN4,IFNLR1,LARP7,CDK14,IL6,IKBKB,BIN1,POLR1D,SCN2B,CHRNA9,SMDT1,DDR2,VPS53,GABRB3,CRTAP,HDGF,SCN11A,IL11RA,MCM3
FUMA	GO:0043949	regulation of camp mediated signaling	49	4	0.00151618	0.0287205	CRTC3:CALM3:PEX5L:CRH
FUMA	GO:0002444	myeloid leukocyte mediated immunity	548	14	0.00152308	0.0287205	FCGR2B:TSPAN14:PGAM1:AP2A2:CD59:CD44:GAB2:ALDOA:DNAJC5:SYNGR1:NFKB1:CYSTM1:IL6:GSN
FUMA	GO:0046883	regulation of hormone secretion	263	9	0.00152395	0.0287205	CCL5:MAP4K4:RAPGEF4:KALRN:NKX6-1:CARTPT:HFE:EGFR:CRH
gPROFILER	GO:0031272	regulation of pseudopodium assembly	14	3		0.0287358	CDC42EP4,CDC42,APC
FUMA	GO:0032869	cellular response to insulin stimulus	213	8	0.00154057	0.0287739	OSBPL8:MYO5A:RHOQ:OPA1:APC:ATP6V0E1:ATP6V1G2:DENND4C
FUMA	GO:0019935	cyclic nucleotide mediated signaling	213	8	0.00154057	0.0287739	CALCB:CRTC3:APOE:CALM3:RAPGEF4:PEX5L:CRH:RIMS2
FUMA	GO:0014066	regulation of phosphatidylinositol 3 kinase signaling	122	6	0.00154244	0.0287739	PIP4K2A:UNC5B:CCL5:FBXL2:EGFR:PIP5K1B
FUMA	GO:0019218	regulation of steroid metabolic process	122	6	0.00154244	0.0287739	ACACB:APOE:APOC1:NFKB1:ELOVL6:EPHX2
FUMA	GO:0032959	inositol trisphosphate biosynthetic process	23	3	0.00155818	0.028848	PLCE1:PLCD3:PLCH1
FUMA	GO:0051654	establishment of mitochondrion localization	23	3	0.00155818	0.028848	MARK1:MAP1S:OPA1
FUMA	GO:0032799	low density lipoprotein receptor particle metabolic process	23	3	0.00155818	0.028848	AP2A2:APOE:AP2S1
gPROFILER	GO:0043523	regulation of neuron apoptotic process	220	5		0.0294675	APOE,ITSN1,GABRB3,UNC5B,DNAJC5
FUMA	GO:0000041	transition metal ion transport	123	6	0.00160801	0.0296212	PICALM:TMEM163:SLC39A10:ATP6V0E1:HFE:ATP6V1G2
FUMA	GO:0034763	negative regulation of transmembrane transport	123	6	0.00160801	0.0296212	RGS4:ANK3:GNB5:CALM3:BIN1:HECW2
FUMA	GO:0060249	anatomical structure homeostasis	432	12	0.00163188	0.0298945	MUC6:HNRNPA1:PML:USP7:ALDOA:CHMP4B:WWTR1:ADD1:CARTPT:IL6:EGFR:TNFRSF11B
FUMA	GO:0010506	regulation of autophagy	319	10	0.00163427	0.0298945	PIP4K2A:WAC:MAPK8:MEFV:GFAP:CHMP4B:MTMR3:FBXL2:ATP6V0E1:ATP6V1G2
FUMA	GO:0045744	negative regulation of g protein coupled receptor signaling pathway	50	4	0.00163505	0.0298945	RGS4:BICD1:CCL5:GRK4
gPROFILER	GO:0004629	phospholipase C activity	28	4		0.0299768	PLCD3,PLCE1,CCL5,PLCH1
FUMA	GO:0046849	bone remodeling	84	5	0.00164443	0.0299914	MITF:CARTPT:IL6:EGFR:TNFRSF11B
gPROFILER	GO:0030154	cell differentiation	4279	111		0.0300864	TUBB2A,EHD1,APOE,ITGB5,CLPTM1,ITSN1,CLU,SCARA3,GFAP,PICALM,NFKB1,FCGR2B,IL6,IKBKB,BIN1,PTBP1,BMP1,GAB2,LMOD1,DDR2,GABRB3,UNC5B,ITPKB,RHOH,LTBP3,LRP8,DPYSL4,ALPK2,KALRN,NFIB,NAV2,NEGR1,CARTPT,FCRLA,PGR,MYO5A,GAS7,RIMS2,PDE5A,KAT6A,CENPF,SDC4,ZHX1,PURA,GSN,CSRP1,SEMA4B,ZFP36L2,MAF,KRT17,RASGRF1,NEUROD6,ELF3,S1PR3,DMPK,ANK3,SH3PXD2A,CCHCR1,PIP4K2A,SERPINI1,NKX6-1,WWTR1,PML,CREM,PDLIM5,CDC42,GPM6A,NT…
gPROFILER	GO:0070588	calcium ion transmembrane transport	338	15		0.0301869	BIN1,SLC24A4,CHRNA9,SMDT1,MYO5A,CALM3,PLCD3,GPM6A,OPA1,PLCE1,AHNAK,PDE4B,GNB5,PLCH1,CEMIP
FUMA	GO:0016241	regulation of macroautophagy	168	7	0.00166948	0.030298	PIP4K2A:WAC:MAPK8:CHMP4B:MTMR3:ATP6V0E1:ATP6V1G2
FUMA	GO:0060401	cytosolic calcium ion transport	168	7	0.00166948	0.030298	PLCE1:MYO5A:PML:CALM3:SMDT1:PLCH1:OPA1
gPROFILER	GO:0032392	DNA geometric change	114	5		0.0304474	CHD4,MCM3,SUB1,NAV2,PURA
FUMA	GO:0006836	neurotransmitter transport	267	9	0.00168945	0.0305848	RGS4:SNCG:PPFIA1:GFAP:UNC13A:CALM3:DNAJC5:CRH:RIMS2
gPROFILER	GO:0002831	regulation of response to biotic stimulus	520	6		0.0305985	LSM14A,APOE,NFKB1,IFNLR1,FCGR2B,IKBKB
gPROFILER	GO:0009132	nucleoside diphosphate metabolic process	158	3		0.0308676	PGM2L1,ALDOA,DLG2
FUMA	GO:0022402	cell cycle process	1370	26	0.00170981	0.0308773	CDC42:NSL1:CENPF:ITGB1:CUL2:CCNY:ANK3:STK33:BCAT1:PML:PAGR1:PAGR1:MYH10:GAS7:KANK2:CALM3:ZFP36L2:BIN1:HECW2:CHMP4B:DONSON:APC:DUSP1:MCM3:EGFR:CDK14:CDK9
FUMA	GO:0005884	actin filament	97	5	0.00308689	0.0308998	LMOD1:MYO5A:GAS7:RHOQ:CD2AP
gPROFILER	GO:0070062	extracellular exosome	2143	25		0.0309035	TUBB2A,TNXB,EHD1,APOE,ITGB5,CLU,ALDOA,CPM,EPHX2,F12,PTBP1,SNCG,FBP1,SCN11A,LTBP3,SUB1,KALRN,GART,CD59,MYO5A,RIMS2,FBP2,CD44,RNPEP,SDC4
gPROFILER	GO:0043933	protein-containing complex subunit organization	2177	10		0.0309319	TNXB,EHD1,APOC1,LSM14A,APOE,APOC2,CLU,ALDOA,GFAP,PICALM
gPROFILER	GO:0022617	extracellular matrix disassembly	79	4		0.0309319	IL6,BMP1,DDR2,CD44
gPROFILER	GO:0048813	dendrite morphogenesis	147	9		0.0309319	PICALM,LRP8,KALRN,PDLIM5,CDC42,OPA1,CAPRIN1,HECW2,ITGB1
gPROFILER	GO:0048667	cell morphogenesis involved in neuron differentiation	603	23		0.0309319	APOE,PICALM,GAB2,UNC5B,LRP8,KALRN,NFIB,SEMA4B,ANK3,NKX6-1,PDLIM5,CDC42,NTNG1,SHC3,OPA1,CAPRIN1,MYH10,MAP1S,GAP43,HECW2,MYOT,ITGB1,ZSWIM4
gPROFILER	GO:0055080	cation homeostasis	747	19		0.0309346	APOE,PICALM,EPHX2,SLC24A4,CHRNA9,SMDT1,CALCB,MYO5A,CNNM2,SLC39A10,ATP6V0E1,S1PR3,DMPK,ANK3,ATP6V1G2,CALM3,PML,PLCD3,HFE
FUMA	R-HSA-71387	metabolism of carbohydrates	293	10	0.000866545	0.0309538	PGAM1:CD44:PGM2L1:ALDOA:SDC4:SLC25A1:NDST3:MDH2:FBP2:FBP1
FUMA	R-HSA-8964038	ldl clearance	19	3	0.00087844	0.0309538	AP2A2:SOAT2:AP2S1
FUMA	R-HSA-418594	g alpha i signalling events	402	12	0.000887936	0.0309538	LRP8:PDE4B:RGS4:GNB5:CCL5:APOE:APOC2:SDC4:SST:GRK4:HTR1E:S1PR3
FUMA	KEGG_GNRH_SIGNALING_PATHWAY	gnrh signaling pathway	101	5	0.0036723	0.0309752	CDC42:MAPK8:CALM3:HBEGF:EGFR
FUMA	KEGG_TOLL_LIKE_RECEPTOR_SIGNALING_PATHWAY	toll like receptor signaling pathway	102	5	0.00383027	0.0309752	MAPK8:CCL5:NFKB1:IL6:IKBKB
FUMA	GO:1901653	cellular response to peptide	377	11	0.00171984	0.0309824	FCGR2B:OSBPL8:MYO5A:RHOQ:OPA1:NKX6-1:NFKB1:APC:ATP6V0E1:ATP6V1G2:DENND4C
gPROFILER	GO:0030198	extracellular matrix organization	375	6		0.0310078	TNXB,ITGB5,GFAP,IL6,BMP1,DDR2
gPROFILER	GO:1990542	mitochondrial transmembrane transport	95	6		0.0310686	TOMM40,TIMM17A,SMDT1,SLC25A1,ACACB,OPA1
FUMA	GO:1901019	regulation of calcium ion transmembrane transporter activity	85	5	0.00173296	0.0311425	PDE4B:AHNAK:GNB5:MYO5A:CALM3
Wegestalt	KEGG_ANTIFOLATE_RESISTANCE	Antifolate resistance	31	5	0.000396355	0.0312129	NFKB1;IL6;IKBKB;GART;ABCC3
FUMA	GO:0046983	protein dimerization activity	1319	26	0.00100643	0.0312374	ARNT:CENPF:ITGB1:MXI1:FGFR1OP2:POLR1D:BCL2L2:PML:WWOX:CCL5:APOE:APOC2:LRRFIP1:CHMP4B:ZHX3:JAM2:MITF:WWTR1:ADD1:NFKB1:HIST1H2BD:NEUROD6:EGFR:EPHX2:IKBKB:ZHX1
gPROFILER	GO:0010976	positive regulation of neuron projection development	288	7		0.0313353	EHD1,APOE,ITSN1,LRP8,KALRN,NEGR1,RIMS2
FUMA	WP2795	cardiac hypertrophic response	56	4	0.00248697	0.0314052	MAPK8:NFKB1:IKBKB:CDK9
FUMA	WP195	il-1 signaling pathway	56	4	0.00248697	0.0314052	MAPK8:HSPB2:NFKB1:IKBKB
FUMA	GO:0050999	regulation of nitric oxide synthase activity	51	4	0.00176023	0.0314786	APOE:CALM3:DDAH2:EGFR
FUMA	GO:0048168	regulation of neuronal synaptic plasticity	51	4	0.00176023	0.0314786	RASGRF1:UNC13A:APOE:SYNGR1
FUMA	GO:1904376	negative regulation of protein localization to cell periphery	24	3	0.00176753	0.0315324	PPFIA1:PICALM:RHOQ
gPROFILER	GO:0070498	interleukin-1-mediated signaling pathway	102	3		0.0315899	NFKB1,IL6,IKBKB
FUMA	GO:0098978	glutamatergic synapse	350	10	0.00318862	0.0316021	NTNG1:ITGB1:DLG2:NRGN:MYO5A:MYH10:UNC13A:APOE:GPM6A:PURA
gPROFILER	GO:0016323	basolateral plasma membrane	220	7		0.031604	DLG2,DSTYK,ALPK2,CD44,CNNM2,DST,ANK3
gPROFILER	GO:0032101	regulation of response to external stimulus	1122	9		0.0316179	LSM14A,APOE,SLC7A2,NFKB1,IFNLR1,FCGR2B,IL6,IKBKB,F12
gPROFILER	GO:0034104	negative regulation of tissue remodeling	21	3		0.031619	IL6,CARTPT,TNFRSF11B
FUMA	GO:0008238	exopeptidase activity	113	6	0.0010397	0.0316724	RNPEP:CPM:CPD:AGBL5:ERAP2:LNPEP
FUMA	GO:0019722	calcium mediated signaling	218	8	0.001782	0.0317135	PLCE1:DYRK2:MYO5A:PTBP1:DMPK:CALM3:EGFR:NCALD
gPROFILER	GO:0055085	transmembrane transport	1625	45		0.0317688	KCNQ3,TOMM40,TMEM163,CLU,SLC7A2,TIMM17A,DLG2,BIN1,SLC24A4,SCN2B,CHRNA9,SLC16A9,SMDT1,GABRB3,SCN11A,MYO5A,CNNM2,SLC39A10,CRH,RASGRF1,ATP6V0E1,ANK3,SLC16A5,ATP6V1G2,CALM3,PLCD3,HFE,GPM6A,MTMR6,SLC25A1,RGS4,ACACB,ADD1,OPA1,ABCC3,PLCE1,AHNAK,PDE4B,OSBPL8,SLC43A3,HECW2,PEX5L,RHOQ,GNB5,PLCH1
Wegestalt	GO:0030132	clathrin coat of coated pit	20	3	0.00197738	0.0318029	PICALM;AP2S1;AP2A2
gPROFILER	GO:0034637	cellular carbohydrate biosynthetic process	86	4		0.0319155	PGM2L1,FBP1,ISYNA1,FBP2
gPROFILER	GO:0050803	regulation of synapse structure or activity	232	11		0.0320291	APOE,ITSN1,FCGR2B,LRP8,KALRN,PDLIM5,CDC42,GPM6A,OPA1,CAPRIN1,GAP43
FUMA	GO:0043565	sequence specific dna binding	1114	23	0.00107141	0.032045	ARNT:ELF3:CREM:MXI1:PGR:CHD4:HNRNPA1:MAF:HOXB7:VEZF1:POU2F2:LRRFIP1:ZHX3:ZNF217:ERG:MITF:NKX6-1:NFKB1:SUB1:PURA:NEUROD6:NFIB:CDK9
FUMA	GO:0005874	microtubule	410	11	0.00327432	0.0321333	NAV1:BICD1:MYO5A:MEFV:SNTB2:MAP1S:CALM3:APC:TUBB2A:DST:MTUS1
FUMA	GO:0055007	cardiac muscle cell differentiation	126	6	0.00181747	0.0321664	RGS4:NEBL:ITGB1:MYH10:PDLIM5:SORBS2
FUMA	GO:0001818	negative regulation of cytokine production	270	9	0.00182279	0.0321664	FCGR2B:PCBP2:PML:MEFV:NFKB1:HFE:TNFRSF21:CD2AP:IL6
FUMA	GO:0048013	ephrin receptor signaling pathway	86	5	0.00182495	0.0321664	CDC42:AP2A2:AP2S1:ITSN1:KALRN
FUMA	GO:0002028	regulation of sodium ion transport	86	5	0.00182495	0.0321664	ANK3:SCN2B:WNK4:DMPK:HECW2
FUMA	GO:0070663	regulation of leukocyte proliferation	219	8	0.00183368	0.0322429	FCGR2B:CCL5:SLC39A10:SDC4:PDE5A:LST1:TNFRSF21:IL6
gPROFILER	GO:0007399	nervous system development	2400	68		0.0323006	TUBB2A,EHD1,APOE,SEZ6L2,ITSN1,CLU,GFAP,PICALM,FCGR2B,IL6,BIN1,SCN2B,GAB2,GABRB3,UNC5B,LRP8,DPYSL4,KALRN,NFIB,NAV2,NEGR1,GART,MYO5A,GAS7,NRSN1,RIMS2,CENPF,SDC4,ATXN3,PURA,CRH,GSN,SEMA4B,RASGRF1,NEUROD6,ANK3,SERPINI1,NKX6-1,CALM3,PDLIM5,CDC42,GPM6A,NTNG1,RGS4,SHC3,OPA1,MARK1,ADGRL2,ZNF215,EGFR,NRGN,CAPRIN1,GPRC5B,MYH10,MAP1S,GAP43,HECW2,NAV1,MAP4K4,MYOT,TNFRSF21,SNX3,ITGB1,ZSWIM4,LST1,ENC1,CLN5,UNC…
gPROFILER	GO:0032802	low-density lipoprotein particle receptor catabolic process	15	3		0.0323006	APOE,AP2S1,AP2A2
gPROFILER	GO:0005886	plasma membrane	5603	95		0.0326061	KCNQ3,EHD1,APOE,ITGB5,DENND4C,SEZ6L2,CLPTM1,ITSN1,SLC7A2,DLG2,PICALM,RAPGEF4,CALN1,PALM2-AKAP2,IFNLR1,FCGR2B,CDK14,IL6,CPM,IKBKB,F12,BIN1,SLC24A4,SCN2B,CHRNA9,GAB2,SLC16A9,DDR2,GABRB3,UNC5B,DNAJC5,SCN11A,IL11RA,RHOH,DSTYK,LRP8,ALPK2,NEGR1,CD59,GAS7,RIMS2,FBP2,LANCL2,EMP3,STK17B,CD44,RNPEP,SDC4,ATXN3,CNNM2,SLC39A10,INPP4A,MTUS1,MUC6,GSN,CCNY,SEMA4B,MS4A2,RASGRF1,LY6G5C,SNTB2,S1PR3,CYSTM1,DMPK,DST,…
gPROFILER	GO:0030029	actin filament-based process	771	25		0.0326551	TNXB,ITGB5,ALDOA,IKBKB,BIN1,SCN2B,LMOD1,MYO5A,SDC4,ATXN3,GSN,CSRP1,KCTD13,CDC42EP4,PDLIM5,CDC42,RGS4,ADD1,SORBS2,PPFIA1,CD2AP,NEBL,PDE4B,MYH10,RHOQ
FUMA	GO:0016605	pml body	99	5	0.00337047	0.0327557	PML:USP7:CIITA:KAT6A:CDK9
gPROFILER	GO:0051962	positive regulation of nervous system development	554	10		0.0327746	EHD1,APOE,ITSN1,GFAP,IL6,BIN1,LRP8,KALRN,NEGR1,RIMS2
gPROFILER	GO:0006721	terpenoid metabolic process	119	5		0.0327746	APOE,APOC2,LRP8,SDC4,CRH
gPROFILER	GO:0045862	positive regulation of proteolysis	362	5		0.0327746	APOE,CLU,TIMM17A,PICALM,F12
FUMA	GO:0060070	canonical wnt signaling pathway	325	10	0.00187298	0.0327771	CCNY:IGFBP6:GPRC5B:APOE:MITF:WWTR1:NFKB1:APC:EGFR:CDK14
FUMA	GO:0016042	lipid catabolic process	325	10	0.00187298	0.0327771	PLCE1:ACACB:DDHD1:CRTC3:PLCD3:APOE:APOC1:APOC2:PLCH1:BDH2
FUMA	GO:2000649	regulation of sodium ion transmembrane transporter activity	52	4	0.00189191	0.0329516	ANK3:SCN2B:WNK4:HECW2
FUMA	GO:0050994	regulation of lipid catabolic process	52	4	0.00189191	0.0329516	ACACB:CRTC3:APOC1:APOC2
gPROFILER	GO:0016020	membrane	9701	54		0.033081	KCNQ3,TOMM40,EHD1,TMEM163,APOE,ITGB5,DENND4C,MS4A7,SEZ6L2,CLPTM1,ITSN1,CLU,SLC7A2,DENND5B,ALDOA,SCARA3,GFAP,TIMM17A,CHD4,DLG2,PICALM,RAPGEF4,CALN1,PALM2-AKAP2,IFNLR1,FCGR2B,CDK14,SYS1,IL6,CPM,IKBKB,F12,BIN1,SLC24A4,PTBP1,SCN2B,CHRNA9,GAB2,SLC16A9,SMDT1,LMOD1,DDR2,VPS53,GABRB3,CERS1,UNC5B,DNAJC5,ITPKB,SCN11A,IL11RA,MCM3,RHOH,ZDHHC23,SUSD4
gPROFILER	GO:1903561	extracellular vesicle	2166	25		0.0331282	TUBB2A,TNXB,EHD1,APOE,ITGB5,CLU,ALDOA,CPM,EPHX2,F12,PTBP1,SNCG,FBP1,SCN11A,LTBP3,SUB1,KALRN,GART,CD59,MYO5A,RIMS2,FBP2,CD44,RNPEP,SDC4
gPROFILER	GO:0031301	integral component of organelle membrane	358	5		0.0331282	TOMM40,TMEM163,TIMM17A,SYS1,SMDT1
FUMA	GO:0006941	striated muscle contraction	172	7	0.00190818	0.0331563	PDE4B:SCN2B:ALDOA:DMPK:CALM3:BIN1:PDE5A
Wegestalt	GO:0048786	presynaptic active zone	71	5	0.00210465	0.033159	RIMS2;GPM6A;NTNG1;PPFIA1;UNC13A
gPROFILER	GO:0065003	protein-containing complex assembly	1852	9		0.0331594	EHD1,APOC1,LSM14A,APOE,APOC2,CLU,ALDOA,GFAP,PICALM
gPROFILER	GO:0022607	cellular component assembly	3017	7		0.0332467	TNXB,EHD1,APOC1,LSM14A,APOE,ITGB5,APOC2
FUMA	WP2643	nanoparticle-mediated activation of receptor signaling	28	3	0.0027768	0.0332946	ITGB1:MAPK8:EGFR
FUMA	WP4172	pi3k-akt signaling pathway	344	10	0.00282053	0.0332946	LAMC1:ITGB1:GNB5:ITGB5:NFKB1:TNXB:ITGB8:IL6:EGFR:IKBKB
gPROFILER	GO:0098771	inorganic ion homeostasis	759	19		0.0334449	APOE,PICALM,EPHX2,SLC24A4,CHRNA9,SMDT1,CALCB,MYO5A,CNNM2,SLC39A10,ATP6V0E1,S1PR3,DMPK,ANK3,ATP6V1G2,CALM3,PML,PLCD3,HFE
FUMA	GO:0031349	positive regulation of defense response	501	13	0.00193684	0.0334821	MUC6:GPRC5B:CCL5:LSM14A:KLK7:POLR3F:TNIP2:NFKB1:F12:IL6:EGFR:IKBKB:CRH
FUMA	GO:0019882	antigen processing and presentation	221	8	0.0019406	0.0334821	FCGR2B:AP2A2:AP2S1:ITGB5:ERAP2:LNPEP:HFE:IKBKB
FUMA	GO:0001894	tissue homeostasis	221	8	0.0019406	0.0334821	MUC6:CHMP4B:WWTR1:ADD1:CARTPT:IL6:EGFR:TNFRSF11B
FUMA	GO:0001216	dna binding transcription activator activity	414	12	0.00114135	0.0335272	ELF3:PGR:MAF:HOXB7:VEZF1:POU2F2:ERG:MITF:NFKB1:SUB1:NEUROD6:NFIB
gPROFILER	GO:0048475	coated membrane	94	6		0.0337216	PICALM,NCALD,AP2S1,SEC23B,CHMP4B,AP2A2
gPROFILER	GO:0030117	membrane coat	94	6		0.0337216	PICALM,NCALD,AP2S1,SEC23B,CHMP4B,AP2A2
gPROFILER	GO:0030118	clathrin coat	42	4		0.0337216	PICALM,NCALD,AP2S1,AP2A2
gPROFILER	GO:0043230	extracellular organelle	2171	25		0.0337216	TUBB2A,TNXB,EHD1,APOE,ITGB5,CLU,ALDOA,CPM,EPHX2,F12,PTBP1,SNCG,FBP1,SCN11A,LTBP3,SUB1,KALRN,GART,CD59,MYO5A,RIMS2,FBP2,CD44,RNPEP,SDC4
gPROFILER	GO:0005576	extracellular region	4536	50		0.0337216	TUBB2A,TNXB,EHD1,APOC1,APOE,ITGB5,APOC2,CLU,ALDOA,SCARA3,NFKB1,IL6,CPM,EPHX2,F12,ARSG,PTBP1,BMP1,SNCG,CERS1,CALCB,FBP1,CRTAP,HDGF,SCN11A,SUSD4,LTBP3,LRP8,SUB1,KALRN,NAV2,NEGR1,CARTPT,GART,CD59,MYO5A,C17ORF58,RIMS2,FBP2,CD44,RNPEP,SDC4,LGALS8,CRH,MTUS1,MUC6,GSN,CSRP1,PCSK1,SEMA4B
gPROFILER	GO:0007165	signal transduction	6210	146		0.0338634	LSM14A,PAGR1,APOE,ITGB5,SEZ6L2,ITSN1,CLU,CHD4,DLG2,RAPGEF4,NFKB1,CAPS,IFNLR1,FCGR2B,CDK14,IL6,TBC1D7,IKBKB,PTBP1,BMP1,CHRNA9,KANK2,GAB2,DDR2,GABRB3,CERS1,CALCB,UNC5B,FBP1,HDGF,ITPKB,IL11RA,RHOH,LTBP3,MAPK8,DSTYK,LRP8,MDFIC,SUB1,ALPK2,KALRN,BCL2L2,CARTPT,CHML,CD59,SRGAP1,PGR,MYO5A,RIMS2,PDE5A,KAT6A,LANCL2,STK17B,CD44,CRTC3,SLC39A10,INPP4A,CRH,MUC6,GSN,CCNY,SEMA4B,MS4A2,NCALD,ZFP36L2,TNIP2,KRT17,RA…
FUMA	GO:1901068	guanosine containing compound metabolic process	25	3	0.00199362	0.0340362	DLG2:RHOQ:OPA1
FUMA	GO:0042759	long chain fatty acid biosynthetic process	25	3	0.00199362	0.0340362	MYO5A:ELOVL6:EPHX2
FUMA	GO:1903319	positive regulation of protein maturation	25	3	0.00199362	0.0340362	TIMM17A:F12:GSN
FUMA	GO:0032372	negative regulation of sterol transport	25	3	0.00199362	0.0340362	APOC1:APOC2:NFKB1
FUMA	GO:0045017	glycerolipid biosynthetic process	222	8	0.00199586	0.0340362	PIP4K2A:PLCE1:MTMR6:CDIPT:INPP4A:MTMR3:CDS1:PIP5K1B
FUMA	GO:0050750	low density lipoprotein particle receptor binding	21	3	0.0011878	0.034065	PICALM:APOE:CLU
FUMA	GO:0044389	ubiquitin like protein ligase binding	306	10	0.00120107	0.034065	CUL2:PCBP2:ATXN3:PML:USP7:SPOP:CCDC50:APC:EGFR:CLU
gPROFILER	GO:0002694	regulation of leukocyte activation	586	13		0.0340963	CLPTM1,SLC7A2,FCGR2B,IL6,GAB2,ITPKB,RHOH,PDE5A,SDC4,SLC39A10,GSN,ZFP36L2,TNIP2
gPROFILER	GO:0022604	regulation of cell morphogenesis	493	20		0.034104	APOE,ALDOA,PALM2-AKAP2,LRP8,KALRN,RIMS2,CD44,SEMA4B,CDC42EP4,NKX6-1,PDLIM5,CDC42,OPA1,CAPRIN1,MYH10,HECW2,RHOQ,ZSWIM4,LST1,UNC13A
FUMA	GO:0070925	organelle assembly	824	18	0.00200709	0.0341484	DNALI1:LMOD1:CENPF:NEBL:PIP4K2A:ITGB1:ABLIM1:EHD1:BICD1:MYH10:LSM14A:CHMP4B:SDC4:MTMR3:GAP43:WWTR1:TBC1D7:GSN
gPROFILER	GO:0021782	glial cell development	119	3		0.0342323	CLU,GFAP,IL6
gPROFILER	GO:0099010	modification of postsynaptic structure	17	3		0.0342323	ITSN1,CDC42,MYH10
gPROFILER	GO:0019220	regulation of phosphate metabolic process	1827	18		0.0343456	APOC1,APOE,APOC2,ITSN1,CLU,DLG2,FCGR2B,IL6,IKBKB,PTBP1,CHRNA9,DDR2,FBP1,ITPKB,RHOH,DSTYK,LRP8,MDFIC
FUMA	GO:1901799	negative regulation of proteasomal protein catabolic process	53	4	0.00203026	0.0344628	WAC:USP7:USP14:HFE
gPROFILER	GO:0051174	regulation of phosphorus metabolic process	1829	18		0.0346399	APOC1,APOE,APOC2,ITSN1,CLU,DLG2,FCGR2B,IL6,IKBKB,PTBP1,CHRNA9,DDR2,FBP1,ITPKB,RHOH,DSTYK,LRP8,MDFIC
gPROFILER	GO:0031269	pseudopodium assembly	16	3		0.0348228	CDC42EP4,CDC42,APC
gPROFILER	GO:0023061	signal release	470	9		0.0348228	ITSN1,RAPGEF4,IL6,SNCG,DNAJC5,KALRN,CARTPT,MYO5A,RIMS2
gPROFILER	GO:0010001	glial cell differentiation	220	4		0.0350478	CLU,GFAP,IL6,BIN1
FUMA	GO:0060491	regulation of cell projection assembly	175	7	0.00210393	0.0353864	CDC42:CDC42EP4:RHOQ:GAP43:GPM6A:APC:TBC1D7
FUMA	GO:0051048	negative regulation of secretion	224	8	0.00211012	0.0354095	FCGR2B:PML:WNK4:MAP4K4:KALRN:CARTPT:TNFRSF21:CRH
FUMA	WP3851	tlr4 signaling and tolerance	29	3	0.00307422	0.0355171	NFKB1:IL6:IKBKB
FUMA	GO:0031333	negative regulation of protein complex assembly	130	6	0.00212816	0.0356309	CDC42:LMOD1:MEFV:ADD1:CLU:GSN
gPROFILER	GO:0043067	regulation of programmed cell death	1638	18		0.0356679	APOE,ITSN1,CLU,NFKB1,IL6,IKBKB,BIN1,KANK2,GABRB3,UNC5B,DNAJC5,ITPKB,MAPK8,DSTYK,LRP8,ALPK2,KALRN,BCL2L2
gPROFILER	GO:0044459	plasma membrane part	3022	24		0.0356782	KCNQ3,EHD1,ITGB5,CLPTM1,SLC7A2,DLG2,PICALM,IFNLR1,FCGR2B,IL6,IKBKB,BIN1,SLC24A4,SCN2B,CHRNA9,SLC16A9,DDR2,GABRB3,SCN11A,IL11RA,RHOH,DSTYK,LRP8,ALPK2
FUMA	GO:1901699	cellular response to nitrogen compound	632	15	0.00214023	0.0357515	PDE4B:FCGR2B:OSBPL8:GABRB3:MYO5A:RHOQ:OPA1:NKX6-1:NFKB1:APC:ATP6V0E1:ATP6V1G2:EGFR:CRH:DENND4C
FUMA	WP4329	mirnas involvement in the immune response in sepsis	60	4	0.00319936	0.0357542	MAPK8:NFKB1:IL6:IKBKB
FUMA	WP4658	small cell lung cancer	98	5	0.00322644	0.0357542	LAMC1:ITGB1:NFKB1:CYCS:IKBKB
gPROFILER	GO:0019216	regulation of lipid metabolic process	412	3		0.0357711	APOC1,APOE,APOC2
FUMA	GO:0000987	proximal promoter sequence specific dna binding	538	14	0.00128317	0.0357765	ELF3:PGR:CHD4:MAF:HOXB7:POU2F2:LRRFIP1:ZNF217:ERG:MITF:NKX6-1:NEUROD6:NFIB:CDK9
FUMA	GO:0002521	leukocyte differentiation	507	13	0.00214731	0.0357885	CDC42:FCGR2B:ITPKB:ITGB1:SH3PXD2A:GAB2:POU2F2:CLPTM1:ZFP36L2:MITF:RHOH:CARTPT:IL6
gPROFILER	GO:0032768	regulation of monooxygenase activity	63	5		0.0361302	APOE,NFKB1,CALM3,DDAH2,EGFR
FUMA	GO:0033344	cholesterol efflux	54	4	0.00217544	0.0361753	SOAT2:APOE:APOC1:APOC2
gPROFILER	GO:0005788	endoplasmic reticulum lumen	306	5		0.0362044	APOE,CLU,IL6,ARSG,CRTAP
gPROFILER	GO:0099512	supramolecular fiber	977	28		0.0362044	TUBB2A,ALDOA,GFAP,BIN1,LMOD1,MYO5A,FBP2,MEFV,SDC4,MTUS1,CSRP1,KRT17,SNTB2,DST,ANK3,CALM3,PDLIM5,SORBS2,CD2AP,BICD1,AHNAK,NEBL,PDE4B,MAP1S,NAV1,RHOQ,APC,MYOT
gPROFILER	GO:0099503	secretory vesicle	1001	6		0.0362044	TMEM163,DENND4C,CLU,ALDOA,PICALM,NFKB1
gPROFILER	GO:0015711	organic anion transport	501	4		0.0363552	APOC1,APOE,APOC2,SLC7A2
FUMA	GO:0060322	head development	764	17	0.00219225	0.0363726	CDC42:LRP8:FCGR2B:RGS4:CENPF:ITGB1:NRGN:CLN5:MYH10:MAP1S:CALM3:GART:NEUROD6:EGFR:CRH:NFIB:IL11RA
gPROFILER	GO:0046486	glycerolipid metabolic process	416	3		0.0364984	APOC1,APOE,APOC2
gPROFILER	GO:0002526	acute inflammatory response	110	3		0.0365502	FCGR2B,IL6,F12
FUMA	GO:0002520	immune system development	968	20	0.00221072	0.0365963	CDC42:ARNT:FCGR2B:ITPKB:PIP4K2A:ITGB1:SH3PXD2A:GAB2:PICALM:PML:HOXB7:POU2F2:CLPTM1:ZFP36L2:MITF:ADD1:RHOH:CARTPT:IL6:KAT6A
FUMA	R-HSA-1566948	elastic fibre formation	45	4	0.00110049	0.0366586	ITGB1:LTBP3:ITGB5:ITGB8
gPROFILER	GO:0034613	cellular protein localization	1945	12		0.0367422	TOMM40,EHD1,APOE,DENND4C,ITSN1,CLU,TIMM17A,DLG2,PICALM,SYS1,EPHX2,IKBKB
FUMA	GO:0055006	cardiac cell development	90	5	0.00222892	0.0367815	RGS4:NEBL:MYH10:PDLIM5:SORBS2
FUMA	GO:0048261	negative regulation of receptor mediated endocytosis	26	3	0.00223691	0.0367815	PICALM:APOC1:APOC2
FUMA	GO:0061615	glycolytic process through fructose 6 phosphate	26	3	0.00223691	0.0367815	PGAM1:PGM2L1:ALDOA
gPROFILER	GO:0001775	cell activation	1455	24		0.0368098	APOE,CLPTM1,CLU,SLC7A2,ALDOA,NFKB1,FCGR2B,IL6,GAB2,DNAJC5,ITPKB,RHOH,CD59,PDE5A,CD44,CRTC3,SDC4,SLC39A10,PURA,GSN,CSRP1,ZFP36L2,PGAM1,TNIP2
FUMA	GO:0034593	phosphatidylinositol bisphosphate phosphatase activity	22	3	0.0013651	0.036813	MTMR6:INPP4A:MTMR3
FUMA	GO:0070840	dynein complex binding	22	3	0.0013651	0.036813	CENPF:BICD1:APC
FUMA	KEGG_ADIPOCYTOKINE_SIGNALING_PATHWAY	adipocytokine signaling pathway	67	4	0.00475942	0.0368855	MAPK8:ACACB:NFKB1:IKBKB
gPROFILER	GO:0051087	chaperone binding	101	3		0.0369051	CLU,PFDN4,BIN1
gPROFILER	GO:0070273	phosphatidylinositol-4-phosphate binding	29	4		0.0369051	LANCL2,SH3PXD2A,OSBPL8,SNX3
gPROFILER	GO:0097367	carbohydrate derivative binding	2256	27		0.0369051	TUBB2A,TNXB,EHD1,APOE,CHD4,RAPGEF4,CDK14,IKBKB,DDR2,FBP1,HDGF,ITPKB,MCM3,RHOH,MAPK8,DSTYK,ALPK2,KALRN,NTPCR,NAV2,GART,MYO5A,NARS2,PDE5A,LANCL2,STK17B,CD44
gPROFILER	GO:0008047	enzyme activator activity	519	4		0.0369051	APOC1,APOE,APOC2,ITSN1
FUMA	WP1449	regulation of toll-like receptor signaling pathway	144	6	0.00353779	0.0369427	MAPK8:USP7:CCL5:NFKB1:IL6:IKBKB
FUMA	GO:0051146	striated muscle cell differentiation	279	9	0.002274	0.0373079	RGS4:LMOD1:NEBL:ITGB1:EHD1:MYH10:DMPK:PDLIM5:SORBS2
gPROFILER	KEGG_ANTIFOLATE_RESISTANCE	Antifolate resistance	31	4		0.0374723	NFKB1,IL6,IKBKB,GART
gPROFILER	KEGG_PHOSPHATIDYLINOSITOL_SIGNALING_SYSTEM	Phosphatidylinositol signaling system	99	11		0.0374723	ITPKB,INPP4A,CDS1,PIP5K1B,MTMR3,PIP4K2A,CALM3,PLCD3,CDIPT,MTMR6,PLCE1
gPROFILER	KEGG_CYTOSOLIC_DNA-SENSING_PATHWAY	Cytosolic DNA-sensing pathway	62	4		0.0374723	NFKB1,IL6,IKBKB,POLR1D
gPROFILER	GO:0008610	lipid biosynthetic process	710	19		0.0378027	APOC1,APOE,APOC2,NFKB1,EPHX2,CERS1,MYO5A,ISYNA1,DDHD1,INPP4A,ELOVL6,CRH,CDS1,PIP5K1B,MTMR3,PIP4K2A,CDIPT,MTMR6,ACACB
FUMA	GO:0034622	cellular protein containing complex assembly	1112	22	0.0023125	0.0378092	HP1BP3:DNALI1:LMOD1:CENPF:PICALM:BICD1:MEFV:GAS7:CDC42EP4:UNC13A:LSM14A:AP2S1:BIN1:NDUFB5:OPA1:ADD1:HIST1H2BD:SRPK2:NDUFA5:CLU:KAT6A:GSN
FUMA	GO:0008217	regulation of blood pressure	178	7	0.00231485	0.0378092	RNPEP:NAV2:CARTPT:ERAP2:EPHX2:CRH:NCALD
FUMA	GO:0002683	negative regulation of immune system process	451	12	0.002326	0.0378749	FCGR2B:FCRLB:ITPKB:CD59:PCBP2:SDC4:PDE5A:CARTPT:DUSP1:HFE:LST1:TNFRSF21
FUMA	GO:0051604	protein maturation	280	9	0.00232918	0.0378749	TIMM17A:TSPAN14:CPM:CLN5:CPD:PCSK1:F12:ADAMTS2:GSN
gPROFILER	GO:0071248	cellular response to metal ion	192	9		0.037957	DLG2,FBP1,ITPKB,MAPK8,GSN,ANK3,HFE,ADD1,EGFR
gPROFILER	GO:0070727	cellular macromolecule localization	1956	12		0.037957	TOMM40,EHD1,APOE,DENND4C,ITSN1,CLU,TIMM17A,DLG2,PICALM,SYS1,EPHX2,IKBKB
gPROFILER	GO:0046849	bone remodeling	92	6		0.0380361	IL6,LTBP3,CARTPT,TNFRSF11B,EGFR,MITF
gPROFILER	GO:0034220	ion transmembrane transport	1174	36		0.0380361	KCNQ3,TMEM163,SLC7A2,DLG2,BIN1,SLC24A4,SCN2B,CHRNA9,SMDT1,GABRB3,SCN11A,MYO5A,CNNM2,SLC39A10,CRH,RASGRF1,ATP6V0E1,ANK3,ATP6V1G2,CALM3,PLCD3,HFE,GPM6A,MTMR6,SLC25A1,RGS4,ACACB,OPA1,PLCE1,AHNAK,PDE4B,HECW2,GNB5,PLCH1,CEMIP,WNK4
gPROFILER	GO:0055001	muscle cell development	186	10		0.0380361	BIN1,LMOD1,ALPK2,CSRP1,PDLIM5,RGS4,SORBS2,NEBL,MYH10,ITGB1
gPROFILER	GO:0045453	bone resorption	65	5		0.0381611	IL6,LTBP3,CARTPT,TNFRSF11B,EGFR
gPROFILER	GO:0062012	regulation of small molecule metabolic process	434	3		0.0381611	APOC1,APOE,APOC2
gPROFILER	GO:0045321	leukocyte activation	1296	22		0.0381611	CLPTM1,CLU,SLC7A2,ALDOA,NFKB1,FCGR2B,IL6,GAB2,DNAJC5,ITPKB,RHOH,CD59,PDE5A,CD44,CRTC3,SDC4,SLC39A10,PURA,GSN,ZFP36L2,PGAM1,TNIP2
gPROFILER	GO:0031268	pseudopodium organization	17	3		0.0381611	CDC42EP4,CDC42,APC
gPROFILER	GO:0055013	cardiac muscle cell development	86	6		0.0381611	ALPK2,PDLIM5,RGS4,SORBS2,NEBL,MYH10
gPROFILER	GO:0048523	negative regulation of cellular process	4914	79		0.0381611	APOC1,APOE,APOC2,ITSN1,CLU,GFAP,DLG2,PICALM,NFKB1,IFNLR1,FCGR2B,IL6,TBC1D7,IKBKB,BIN1,PTBP1,CHRNA9,KANK2,LMOD1,GABRB3,CERS1,UNC5B,DNAJC5,FBP1,CRTAP,HDGF,ITPKB,RHOH,LTBP3,MAPK8,DSTYK,MDFIC,ALPK2,KALRN,NFIB,BCL2L2,CARTPT,SRGAP1,MYO5A,GAS7,PDE5A,KAT6A,LANCL2,CD44,CRTC3,MEFV,CENPF,SDC4,ZHX1,SLC39A10,PURA,CRH,GSN,SEMA4B,ZFP36L2,MAF,TNIP2,TMEM132D,ELF3,S1PR3,WAC,NCOA7,KCTD13,SST,RASL11B,LRRFIP1,SERPINI…
gPROFILER	GO:0033674	positive regulation of kinase activity	579	21		0.0381611	ITSN1,CLU,DDR2,DSTYK,LRP8,MDFIC,CARTPT,PDE5A,CD44,SDC4,CCNY,DUSP12,CALM3,CDC42,PLCE1,EGFR,OSBPL8,GPRC5B,CCL5,MAP4K4,CEMIP
gPROFILER	GO:0050995	negative regulation of lipid catabolic process	23	3		0.0381611	APOC1,CRTC3,ACACB
gPROFILER	GO:2000059	negative regulation of ubiquitin-dependent protein catabolic process	50	5		0.0381611	WAC,PML,HFE,USP7,USP14
gPROFILER	GO:0043161	proteasome-mediated ubiquitin-dependent protein catabolic process	425	16		0.0381611	CLU,ATXN3,WAC,KCTD13,WWTR1,PML,HFE,CD2AP,CUL2,DNAJC18,SPOP,FBXL16,FBXL2,USP7,HECW2,PCBP2
gPROFILER	GO:0006094	gluconeogenesis	90	6		0.0381611	ALDOA,FBP1,FBP2,PGAM1,SLC25A1,MDH2
gPROFILER	GO:0051402	neuron apoptotic process	250	5		0.0381611	APOE,ITSN1,GABRB3,UNC5B,DNAJC5
gPROFILER	GO:1904062	regulation of cation transmembrane transport	353	15		0.0381611	DLG2,BIN1,SCN2B,MYO5A,CRH,RASGRF1,ANK3,CALM3,RGS4,AHNAK,PDE4B,HECW2,GNB5,CEMIP,WNK4
FUMA	WP430	statin pathway	31	3	0.0037259	0.0381729	APOE:APOC1:APOC2
FUMA	GO:0046914	transition metal ion binding	1072	22	0.00147456	0.0381974	DUSP12:CSRP1:RNPEP:CENPF:ZNF22:PGR:CHD4:DYRK2:CPM:PML:MEFV:CDIPT:CPD:ZSWIM4:AGBL5:TMEM163:SEC23B:ERAP2:LNPEP:ADAMTS2:BMP1:KAT6A
gPROFILER	GO:0048856	anatomical structure development	6028	146		0.0384294	TUBB2A,EHD1,LSM14A,APOE,ITGB5,SEZ6L2,CLPTM1,ITSN1,CLU,ALDOA,SCARA3,GFAP,PICALM,PALM2-AKAP2,FCGR2B,IL6,CPM,IKBKB,BIN1,SLC24A4,PTBP1,BMP1,SCN2B,CHRNA9,KANK2,GAB2,LMOD1,DDR2,GABRB3,UNC5B,ITPKB,IL11RA,RHOH,LTBP3,LRP8,DPYSL4,ALPK2,KALRN,NFIB,NAV2,BCL2L2,NEGR1,CARTPT,GART,PGR,MYO5A,GAS7,NRSN1,RIMS2,PDE5A,KAT6A,ABLIM1,CD44,CENPF,SDC4,ATXN3,LGALS8,DDHD1,PURA,CRH,GSN,CSRP1,SEMA4B,ZFP36L2,MAF,KRT17,RASGRF1…
gPROFILER	GO:0065009	regulation of molecular function	3013	58		0.0384294	APOC1,APOE,APOC2,ITSN1,CLU,DLG2,PICALM,NFKB1,FCGR2B,IL6,TBC1D7,IKBKB,BIN1,SCN2B,DDR2,CERS1,HSPB2,RHOH,MAPK8,DSTYK,LRP8,MDFIC,KALRN,CARTPT,CHML,SRGAP1,MYO5A,PDE5A,CD44,CRTC3,MEFV,SDC4,SLC39A10,CRH,GSN,CCNY,RASGRF1,TMEM132D,DMPK,ANK3,DUSP12,LRRFIP1,SH3PXD2A,SEC23B,SERPINI1,NKX6-1,MXI1,WWTR1,CALM3,PML,HFE,CDC42,DDAH2,RGS4,ACACB,RIN3,ADD1,CYCS
gPROFILER	GO:0035966	response to topologically incorrect protein	200	6		0.0384294	CLU,F12,HSPB2,HDGF,HSPB3,ATXN3
FUMA	GO:0022407	regulation of cell cell adhesion	393	11	0.00237322	0.038463	CDC42:FCGR2B:ITPKB:ANK3:CD44:CCL5:SDC4:PDE5A:HFE:TNFRSF21:IL6
FUMA	GO:0033044	regulation of chromosome organization	336	10	0.00238344	0.038463	CENPF:MAPK8:HNRNPA1:PML:USP7:MAP1S:HECW2:APC:DUSP1:CDK9
FUMA	GO:1902904	negative regulation of supramolecular fiber organization	133	6	0.00238627	0.038463	LMOD1:PPFIA1:ADD1:APC:CLU:GSN
FUMA	GO:0031644	regulation of neurological system process	133	6	0.00238627	0.038463	RGS4:DMPK:SCN11A:CARTPT:TNFRSF21:RIMS2
FUMA	WP185	integrin-mediated cell adhesion	102	5	0.00383027	0.0385155	CDC42:ITGB1:ITGB5:ITGB8:SHC3
gPROFILER	GO:0003013	circulatory system process	561	18		0.0385183	APOE,EPHX2,BIN1,SCN2B,NAV2,CARTPT,PDE5A,RNPEP,CRH,NCALD,DMPK,WWTR1,CALM3,CDC42,RGS4,ERAP2,EGFR,PDE4B
Wegestalt	GO:0005516	calmodulin binding	192	12	9.72397e-05	0.0385393	KCNQ3;ITPKB;MYO5A;SNTB2;RGS4;ADD1;EGFR;NRGN;FBXL2;MYH10;GAP43;UNC13A
gPROFILER	GO:0098542	defense response to other organism	1196	9		0.0388161	LSM14A,APOE,CLU,NFKB1,IFNLR1,FCGR2B,IL6,IKBKB,F12
gPROFILER	GO:0070887	cellular response to chemical stimulus	3364	27		0.0388212	EHD1,LSM14A,PAGR1,APOE,ITGB5,DENND4C,CLU,DLG2,NFKB1,IFNLR1,FCGR2B,IL6,EPHX2,IKBKB,PTBP1,KANK2,GAB2,GABRB3,CERS1,FBP1,HDGF,ITPKB,IL11RA,LTBP3,MAPK8,DSTYK,LRP8
FUMA	GO:0015672	monovalent inorganic cation transport	514	13	0.00241629	0.0388616	RGS4:ANK3:SCN2B:MTMR6:SLC24A4:WNK4:DMPK:BIN1:HECW2:SCN11A:ATP6V0E1:ATP6V1G2:KCNQ3
gPROFILER	GO:0099081	supramolecular polymer	985	28		0.0390763	TUBB2A,ALDOA,GFAP,BIN1,LMOD1,MYO5A,FBP2,MEFV,SDC4,MTUS1,CSRP1,KRT17,SNTB2,DST,ANK3,CALM3,PDLIM5,SORBS2,CD2AP,BICD1,AHNAK,NEBL,PDE4B,MAP1S,NAV1,RHOQ,APC,MYOT
gPROFILER	GO:0099080	supramolecular complex	986	28		0.0390954	TUBB2A,ALDOA,GFAP,BIN1,LMOD1,MYO5A,FBP2,MEFV,SDC4,MTUS1,CSRP1,KRT17,SNTB2,DST,ANK3,CALM3,PDLIM5,SORBS2,CD2AP,BICD1,AHNAK,NEBL,PDE4B,MAP1S,NAV1,RHOQ,APC,MYOT
gPROFILER	GO:0008021	synaptic vesicle	206	4		0.0390954	TMEM163,PICALM,BIN1,DNAJC5
FUMA	KEGG_PRION_DISEASES	prion diseases	35	3	0.00526626	0.039181	LAMC1:CCL5:IL6
gPROFILER	GO:0030036	actin cytoskeleton organization	670	19		0.039182	TNXB,ITGB5,ALDOA,IKBKB,BIN1,LMOD1,SDC4,ATXN3,GSN,CSRP1,KCTD13,CDC42EP4,PDLIM5,CDC42,RGS4,ADD1,SORBS2,PPFIA1,CD2AP
gPROFILER	GO:0045178	basal part of cell	54	4		0.039211	DST,ANK3,HFE,EGFR
gPROFILER	KEGG_EPITHELIAL_CELL_SIGNALING_IN_HELICOBACTER_PYLORI_INFECTION	Epithelial cell signaling in Helicobacter pylori infection	70	10		0.0392611	NFKB1,IKBKB,MAPK8,ATP6V0E1,ATP6V1G2,CDC42,JAM2,EGFR,CCL5,HBEGF
gPROFILER	GO:0030894	replisome	28	3		0.0396442	MCM3,PURA,DONSON
gPROFILER	GO:0035303	regulation of dephosphorylation	211	8		0.0396516	DLG2,IKBKB,PTBP1,SLC39A10,TMEM132D,DMPK,MTMR3,CALM3
FUMA	GO:0046486	glycerolipid metabolic process	230	8	0.00248399	0.0396554	PIP4K2A:OSBPL8:MTMR6:CDIPT:APOE:APOC1:MTMR3:PIP5K1B
FUMA	GO:0044784	metaphase anaphase transition of cell cycle	56	4	0.00248697	0.0396554	CENPF:HECW2:APC:DUSP1
FUMA	GO:0051058	negative regulation of small gtpase mediated signal transduction	56	4	0.00248697	0.0396554	ITGB1:KCTD13:CD2AP:FBP1
FUMA	GO:0031589	cell substrate adhesion	338	10	0.00248723	0.0396554	CDC42:DDR2:LAMC1:ITGB1:CD44:PPFIA1:ATXN3:MAP4K4:SDC4:ITGB5
FUMA	WP382	mapk signaling pathway	249	8	0.00401877	0.0396762	CDC42:MAPK8:RASGRF1:MAP4K4:NFKB1:DUSP1:EGFR:IKBKB
gPROFILER	GO:0046879	hormone secretion	317	8		0.0399007	ITSN1,RAPGEF4,IL6,KALRN,CARTPT,MYO5A,RIMS2,CRH
gPROFILER	GO:0055065	metal ion homeostasis	669	17		0.0400531	APOE,PICALM,EPHX2,SLC24A4,CHRNA9,SMDT1,CALCB,MYO5A,CNNM2,SLC39A10,S1PR3,DMPK,ANK3,CALM3,PML,PLCD3,HFE
gPROFILER	R-HSA-6806667	Metabolism of fat-soluble vitamins	48	5		0.0400811	APOE,APOC2,LRP8,SDC4,VKORC1L1
FUMA	WP75	toll-like receptor signaling pathway	104	5	0.00416069	0.0403439	MAPK8:CCL5:NFKB1:IL6:IKBKB
FUMA	GO:0043604	amide biosynthetic process	843	18	0.00255883	0.0405926	MRPL24:CAPRIN1:NARS2:ACACB:CCL5:CERS1:LSM14A:ZFP36L2:SLC25A1:POLDIP3:GFM1:BDH2:ELOVL6:ENC1:PCSK1:PURA:IL6:EGFR
FUMA	GO:0055092	sterol homeostasis	93	5	0.00257196	0.0405926	EHD1:SOAT2:APOE:APOC2:EPHX2
FUMA	GO:1903076	regulation of protein localization to plasma membrane	93	5	0.00257196	0.0405926	ITGB1:PPFIA1:PICALM:RHOQ:EGFR
FUMA	GO:0007009	plasma membrane organization	93	5	0.00257196	0.0405926	ANK3:MYH10:BIN1:CLU:GSN
FUMA	GO:0050877	nervous system process	1412	26	0.00257362	0.0405926	RGS4:ITGB1:ANK3:ABLIM1:NAV2:DLG2:PICALM:NRGN:SLC24A4:GABRB3:MYO5A:RASGRF1:MYH10:APOE:DMPK:SCN11A:KALRN:CCDC50:OPA1:CHRNA9:CARTPT:TNFRSF21:EGFR:CRH:RIMS2:SHC3
gPROFILER	GO:0008094	DNA-dependent ATPase activity	111	4		0.0409427	CHD4,MCM3,SUB1,NAV2
gPROFILER	GO:0055037	recycling endosome	174	5		0.0411751	EHD1,ITSN1,VPS53,MYO5A,INPP4A
FUMA	GO:0061136	regulation of proteasomal protein catabolic process	182	7	0.00262101	0.0412241	WAC:ATXN3:USP7:USP14:APOE:HFE:CLU
FUMA	GO:1903827	regulation of cellular protein localization	519	13	0.00262488	0.0412241	ITGB1:MAPK8:ANK3:PPFIA1:PICALM:BICD1:RHOQ:APC:HFE:CD2AP:EGFR:MDFIC:GSN
gPROFILER	GO:0050775	positive regulation of dendrite morphogenesis	40	4		0.0414971	LRP8,KALRN,OPA1,CAPRIN1
FUMA	GO:0061695	transferase complex transferring phosphorus containing groups	252	8	0.00431628	0.0415442	RPRD2:CCNY:POLR1D:POLR3F:MCM3:CDK14:IKBKB:CDK9
Wegestalt	R-HSA-373760	L1CAM interactions	117	11	4.36419e-05	0.0417003	TUBB2A;KCNQ3;SCN2B;SCN11A;ANK3;AP2S1;EGFR;GAP43;LAMC1;AP2A2;ITGB1
Wegestalt	R-HSA-70263	Gluconeogenesis	34	6	7.71225e-05	0.0417003	ALDOA;FBP1;FBP2;PGAM1;SLC25A1;MDH2
Wegestalt	R-HSA-1483249	Inositol phosphate metabolism	50	7	9.07186e-05	0.0417003	ITPKB;ISYNA1;INPP4A;CALM3;PLCD3;PLCE1;PLCH1
gPROFILER	GO:0032559	adenyl ribonucleotide binding	1556	20		0.0418353	EHD1,CHD4,RAPGEF4,CDK14,IKBKB,DDR2,FBP1,ITPKB,MCM3,MAPK8,DSTYK,ALPK2,KALRN,NTPCR,NAV2,GART,MYO5A,NARS2,LANCL2,STK17B
gPROFILER	GO:0034593	phosphatidylinositol bisphosphate phosphatase activity	23	3		0.0418353	INPP4A,MTMR3,MTMR6
gPROFILER	GO:0032879	regulation of localization	2893	12		0.0419645	KCNQ3,EHD1,APOC1,APOE,APOC2,ITSN1,CLU,GFAP,DLG2,PICALM,RAPGEF4,NFKB1
gPROFILER	GO:0019319	hexose biosynthetic process	93	6		0.0419645	ALDOA,FBP1,FBP2,PGAM1,SLC25A1,MDH2
FUMA	GO:0008654	phospholipid biosynthetic process	233	8	0.0026894	0.0420002	PIP4K2A:MTMR6:CDIPT:ISYNA1:INPP4A:MTMR3:CDS1:PIP5K1B
FUMA	GO:0006942	regulation of striated muscle contraction	94	5	0.00269437	0.0420002	PDE4B:DMPK:CALM3:BIN1:PDE5A
FUMA	GO:0017038	protein import	183	7	0.00270219	0.0420002	TIMM17A:PML:TOMM40:APOE:PEX5L:MDFIC:CLU
FUMA	GO:0061061	muscle structure development	648	15	0.00270896	0.0420002	CDC42:RGS4:LMOD1:CENPF:NEBL:ITGB1:EHD1:MYH10:PTBP1:DMPK:BIN1:PDLIM5:SORBS2:HBEGF:CDK9
FUMA	GO:0009991	response to extracellular stimulus	521	13	0.00271234	0.0420002	MAPK8:HNRNPA1:ACACB:KANK2:APOE:MTMR3:SST:OPA1:CARTPT:HFE:EGFR:TNFRSF11B:GSN
FUMA	GO:0003015	heart process	287	9	0.00274585	0.0420458	PDE4B:RGS4:SCN2B:DMPK:CALM3:BIN1:WWTR1:PDE5A:HBEGF
FUMA	GO:0032102	negative regulation of response to external stimulus	343	10	0.00276263	0.0421273	FCGR2B:PCBP2:SEMA4B:MEFV:KANK2:APOE:NFKB1:CARTPT:DUSP1:F12
FUMA	GO:0062012	regulation of small molecule metabolic process	343	10	0.00276263	0.0421273	DUSP12:DYRK2:ACACB:APOE:APOC1:APOC2:NFKB1:ELOVL6:EPHX2:FBP1
gPROFILER	GO:0042641	actomyosin	80	5		0.0421309	MYO5A,ABLIM1,PDLIM5,NEBL,MYH10
gPROFILER	GO:0030131	clathrin adaptor complex	25	3		0.0421309	PICALM,AP2S1,AP2A2
gPROFILER	GO:0031090	organelle membrane	3500	12		0.0421309	TOMM40,EHD1,TMEM163,APOE,DENND4C,SEZ6L2,CLU,SCARA3,GFAP,TIMM17A,PICALM,CALN1
gPROFILER	GO:0044085	cellular component biogenesis	3253	7		0.0423041	TNXB,EHD1,APOC1,LSM14A,APOE,ITGB5,APOC2
FUMA	GO:0051726	regulation of cell cycle	1201	23	0.00278138	0.0423253	CDC42:CENPF:WAC:ITGB1:CUL2:CCNY:STK33:PML:PAGR1:PAGR1:GAS7:KANK2:CALM3:ZFP36L2:BIN1:HECW2:CHMP4B:DONSON:APC:DUSP1:EGFR:CDK14:SRPK2:CDK9
Wegestalt	GO:0030118	clathrin coat	46	4	0.00274492	0.0423815	PICALM;NCALD;AP2S1;AP2A2
FUMA	WP4159	gaba receptor signaling	33	3	0.00445573	0.0424467	AP2A2:GABRB3:AP2S1
gPROFILER	GO:0030027	lamellipodium	195	9		0.0424628	ITSN1,ABLIM1,CD44,MEFV,GSN,SORBS2,MYH10,APC,ITGB1
FUMA	GO:0030672	synaptic vesicle membrane	106	5	0.00451098	0.0425989	UNC13A:CALM3:TMEM163:DNAJC5:SYNGR1
FUMA	GO:0048770	pigment granule	106	5	0.00451098	0.0425989	ITGB1:MYO5A:DNAJC5:SYNGR1:ATP6V1G2
FUMA	GO:0002474	antigen processing and presentation of peptide antigen via mhc class i	95	5	0.00282094	0.0427667	ITGB5:ERAP2:LNPEP:HFE:IKBKB
FUMA	GO:0001885	endothelial cell development	58	4	0.00282784	0.0427667	VEZF1:ADD1:IKBKB:S1PR3
FUMA	GO:0045453	bone resorption	58	4	0.00282784	0.0427667	CARTPT:IL6:EGFR:TNFRSF11B
gPROFILER	GO:0030554	adenyl nucleotide binding	1567	20		0.0427775	EHD1,CHD4,RAPGEF4,CDK14,IKBKB,DDR2,FBP1,ITPKB,MCM3,MAPK8,DSTYK,ALPK2,KALRN,NTPCR,NAV2,GART,MYO5A,NARS2,LANCL2,STK17B
gPROFILER	GO:0032553	ribonucleotide binding	1926	23		0.0427775	TUBB2A,EHD1,CHD4,RAPGEF4,CDK14,IKBKB,DDR2,FBP1,ITPKB,MCM3,RHOH,MAPK8,DSTYK,ALPK2,KALRN,NTPCR,NAV2,GART,MYO5A,NARS2,PDE5A,LANCL2,STK17B
gPROFILER	GO:0070300	phosphatidic acid binding	19	3		0.0427775	OPA1,MARK1,NRGN
gPROFILER	GO:0042277	peptide binding	295	4		0.0427775	APOE,CLU,PICALM,FCGR2B
gPROFILER	GO:0010314	phosphatidylinositol-5-phosphate binding	17	3		0.0427775	LANCL2,SH3PXD2A,SNX3
gPROFILER	GO:0097718	disordered domain specific binding	34	4		0.0427775	BCL2L2,MYO5A,CALM3,AP2A2
gPROFILER	GO:0032555	purine ribonucleotide binding	1910	23		0.0427775	TUBB2A,EHD1,CHD4,RAPGEF4,CDK14,IKBKB,DDR2,FBP1,ITPKB,MCM3,RHOH,MAPK8,DSTYK,ALPK2,KALRN,NTPCR,NAV2,GART,MYO5A,NARS2,PDE5A,LANCL2,STK17B
gPROFILER	GO:0017076	purine nucleotide binding	1923	23		0.0427775	TUBB2A,EHD1,CHD4,RAPGEF4,CDK14,IKBKB,DDR2,FBP1,ITPKB,MCM3,RHOH,MAPK8,DSTYK,ALPK2,KALRN,NTPCR,NAV2,GART,MYO5A,NARS2,PDE5A,LANCL2,STK17B
gPROFILER	GO:0043168	anion binding	2820	31		0.0427775	TUBB2A,TNXB,EHD1,APOC1,APOE,CHD4,PICALM,RAPGEF4,CDK14,IKBKB,BIN1,GAB2,DDR2,FBP1,HDGF,ITPKB,MCM3,RHOH,MAPK8,DSTYK,ALPK2,KALRN,NTPCR,NAV2,GART,MYO5A,NARS2,PDE5A,LANCL2,STK17B,CD44
FUMA	KEGG_MAPK_SIGNALING_PATHWAY	mapk signaling pathway	267	8	0.006066	0.042831	CDC42:MAPK8:RASGRF1:MAP4K4:NFKB1:DUSP1:EGFR:IKBKB
FUMA	KEGG_LEUKOCYTE_TRANSENDOTHELIAL_MIGRATION	leukocyte transendothelial migration	115	5	0.00634985	0.042831	CDC42:ITGB1:RAPGEF4:JAM2:RHOH
FUMA	KEGG_CHRONIC_MYELOID_LEUKEMIA	chronic myeloid leukemia	73	4	0.00644767	0.042831	GAB2:NFKB1:IKBKB:SHC3
gPROFILER	GO:0009914	hormone transport	324	8		0.0430163	ITSN1,RAPGEF4,IL6,KALRN,CARTPT,MYO5A,RIMS2,CRH
gPROFILER	GO:2000310	regulation of NMDA receptor activity	36	3		0.0430163	DLG2,CRH,RASGRF1
gPROFILER	GO:0006812	cation transport	1195	36		0.0430163	KCNQ3,TMEM163,SLC7A2,DLG2,BIN1,SLC24A4,SCN2B,CHRNA9,SMDT1,SNCG,SCN11A,MYO5A,CNNM2,SLC39A10,CRH,RASGRF1,ATP6V0E1,ANK3,ATP6V1G2,CALM3,PML,PLCD3,HFE,GPM6A,MTMR6,RGS4,OPA1,PLCE1,AHNAK,PDE4B,CCL5,HECW2,GNB5,PLCH1,CEMIP,WNK4
gPROFILER	GO:0071396	cellular response to lipid	618	13		0.0430163	PAGR1,CLU,NFKB1,IL6,KANK2,MAPK8,LRP8,BCL2L2,PGR,LANCL2,CRH,ZFP36L2,TNIP2
gPROFILER	GO:0045087	innate immune response	1000	8		0.0430163	LSM14A,APOE,CLU,NFKB1,IFNLR1,FCGR2B,IKBKB,F12
gPROFILER	GO:0046165	alcohol biosynthetic process	173	9		0.0430163	APOE,NFKB1,ITPKB,ISYNA1,ELOVL6,PLCD3,ACACB,PLCE1,PLCH1
gPROFILER	GO:0051239	regulation of multicellular organismal process	3300	84		0.0430163	EHD1,APOC1,LSM14A,APOE,APOC2,CLPTM1,ITSN1,CLU,GFAP,NFKB1,FCGR2B,IL6,IKBKB,F12,BIN1,POLR1D,BMP1,SCN2B,DDR2,ITPKB,SCN11A,RHOH,LTBP3,LRP8,ALPK2,KALRN,NFIB,NEGR1,CARTPT,RIMS2,PDE5A,MEFV,CENPF,ELOVL6,CRH,SEMA4B,POLR3F,ZFP36L2,MAF,KRT17,S1PR3,DMPK,AP2S1,LRRFIP1,SERPINI1,NKX6-1,WWTR1,LNPEP,CALM3,PML,HFE,PDLIM5,CDC42,TNFRSF11B,RGS4,ACACB,ADD1,OPA1,MARK1,CD2AP,ZHX3,PLCE1,EGFR,MITF,PDE4B,CAPRIN1,GPRC5B,VEZ…
FUMA	GO:0015631	tubulin binding	321	10	0.00171093	0.0432996	PDE4B:ALDOA:MAP1S:AGBL5:MAP4K4:OPA1:APC:DST:MTUS1:NCALD
gPROFILER	GO:0044877	protein-containing complex binding	1128	35		0.0436946	TNXB,APOE,ITGB5,CLU,GFAP,CHD4,FCGR2B,BIN1,DDR2,LRP8,MYO5A,ABLIM1,CD44,CENPF,LGALS8,GSN,MS4A2,S1PR3,DST,CIITA,ADD1,MUTYH,POLDIP3,CD2AP,ACTR6,BICD1,CUL2,NEBL,EGFR,MYH10,MAP1S,APC,ITGB8,ITGB1,HP1BP3
gPROFILER	GO:0032502	developmental process	6449	154		0.0436987	TUBB2A,EHD1,LSM14A,APOE,ITGB5,SEZ6L2,CLPTM1,ITSN1,CLU,ALDOA,SCARA3,GFAP,PICALM,NFKB1,PALM2-AKAP2,FCGR2B,IL6,CPM,IKBKB,BIN1,SLC24A4,PTBP1,BMP1,SCN2B,CHRNA9,KANK2,GAB2,LMOD1,DDR2,GABRB3,UNC5B,ITPKB,IL11RA,RHOH,LTBP3,LRP8,DPYSL4,ALPK2,KALRN,NFIB,NAV2,BCL2L2,NEGR1,CARTPT,GART,FCRLA,PGR,MYO5A,GAS7,NRSN1,RIMS2,PDE5A,KAT6A,ABLIM1,CD44,CENPF,SDC4,ATXN3,LGALS8,DDHD1,ZHX1,PURA,CRH,GSN,CSRP1,SEMA4B,ZFP36L2,…
gPROFILER	GO:1902905	positive regulation of supramolecular fiber organization	203	8		0.0441098	APOE,CLU,BIN1,LMOD1,SDC4,GSN,CDC42EP4,CDC42
FUMA	GO:0002009	morphogenesis of an epithelium	526	13	0.00294148	0.044394	CDC42:AP2A2:CD44:PGR:PML:KRT17:WNK4:HOXB7:AP2S1:SDC4:FRAS1:HBEGF:EGFR
FUMA	GO:0030038	contractile actin filament bundle assembly	96	5	0.00295175	0.0444578	CDC42:PPFIA1:KCTD13:SDC4:ITGB5
gPROFILER	GO:0070382	exocytic vesicle	222	4		0.0445001	TMEM163,PICALM,BIN1,DNAJC5
FUMA	GO:0005905	clathrin coated pit	67	4	0.00475942	0.0445251	AP2A2:PICALM:AP2S1:ITSN1
FUMA	GO:0035725	sodium ion transmembrane transport	139	6	0.00297234	0.0445851	ANK3:SCN2B:SLC24A4:WNK4:HECW2:SCN11A
FUMA	GO:0008286	insulin receptor signaling pathway	139	6	0.00297234	0.0445851	OSBPL8:RHOQ:OPA1:APC:ATP6V0E1:ATP6V1G2
FUMA	GO:0045862	positive regulation of proteolysis	347	10	0.00300008	0.0445992	TIMM17A:PICALM:ATXN3:PML:MEFV:APOE:F12:CYCS:CLU:GSN
FUMA	GO:0050890	cognition	291	9	0.00300916	0.0445992	ITGB1:PICALM:NRGN:RASGRF1:APOE:KALRN:EGFR:CRH:SHC3
FUMA	GO:0016236	macroautophagy	291	9	0.00300916	0.0445992	LGALS8:PIP4K2A:WAC:MAPK8:TOMM40:CHMP4B:MTMR3:ATP6V0E1:ATP6V1G2
FUMA	GO:0032371	regulation of sterol transport	59	4	0.00300969	0.0445992	APOE:APOC1:APOC2:NFKB1
FUMA	GO:0046847	filopodium assembly	59	4	0.00300969	0.0445992	CDC42:RHOQ:GAP43:GPM6A
FUMA	GO:0061077	chaperone mediated protein folding	59	4	0.00300969	0.0445992	DNAJC5:CRTAP:DNAJC18:CLU
gPROFILER	GO:0005198	structural molecule activity	680	5		0.0446967	TUBB2A,TNXB,APOE,GFAP,DLG2
gPROFILER	GO:0008083	growth factor activity	163	4		0.0447508	IL6,BMP1,CERS1,HDGF
FUMA	GO:0009925	basal plasma membrane	34	3	0.00485075	0.0449593	ANK3:DST:EGFR
FUMA	GO:0002443	leukocyte mediated immunity	857	18	0.00304218	0.04499	FCGR2B:SUSD4:TSPAN14:PGAM1:AP2A2:CD59:CD44:GAB2:ALDOA:POU2F2:DNAJC5:SYNGR1:NFKB1:CYSTM1:HFE:IL6:CLU:GSN
gPROFILER	GO:0048471	perinuclear region of cytoplasm	712	23		0.0451701	EHD1,CLU,PICALM,CALN1,SNCG,VPS53,MCM3,CENPF,GSN,SEC23B,LNPEP,HFE,MTMR6,SORBS2,CD2AP,BICD1,EGFR,MAP1S,CDK2AP1,APC,ITGB1,CLN5,STK33
gPROFILER	GO:0002790	peptide secretion	646	22		0.045261	APOE,ITSN1,RAPGEF4,FCGR2B,IL6,SNCG,KALRN,CARTPT,MYO5A,RIMS2,CRH,NKX6-1,PML,HFE,POU2F2,CD2AP,EGFR,C1QTNF5,MYH10,CCL5,MAP4K4,TNFRSF21
gPROFILER	GO:0055006	cardiac cell development	92	6		0.0453399	ALPK2,PDLIM5,RGS4,SORBS2,NEBL,MYH10
gPROFILER	GO:0031032	actomyosin structure organization	196	10		0.0453728	ITGB5,LMOD1,SDC4,CSRP1,KCTD13,CDC42,PPFIA1,NEBL,MYH10,ITGB1
FUMA	GO:0070201	regulation of establishment of protein localization	723	16	0.003083	0.0453773	FCGR2B:MAPK8:ANK3:PML:MYH10:CCL5:MAP4K4:RAPGEF4:NKX6-1:CARTPT:TNFRSF21:SNX3:IL6:EGFR:MDFIC:CRH
FUMA	GO:0060191	regulation of lipase activity	97	5	0.00308689	0.0453773	BICD1:CCL5:APOC1:APOC2:EGFR
FUMA	GO:0048525	negative regulation of viral process	97	5	0.00308689	0.0453773	PML:CCL5:SNX3:SRPK2:GSN
gPROFILER	GO:0050806	positive regulation of synaptic transmission	162	8		0.0454476	APOE,GFAP,RIMS2,CRH,KCTD13,RGS4,EGFR,NRGN
FUMA	GO:0005773	vacuole	760	16	0.00495474	0.0455018	PIP4K2A:ANK3:AP2A2:AHNAK:CLN5:MYO5A:MEFV:GFAP:ABCC3:ARSG:AP2S1:SDC4:DNAJC5:SYNGR1:LNPEP:ATP6V1G2
gPROFILER	GO:0052866	phosphatidylinositol phosphate phosphatase activity	27	3		0.0455674	INPP4A,MTMR3,MTMR6
gPROFILER	GO:0099504	synaptic vesicle cycle	198	3		0.045601	ITSN1,PICALM,RAPGEF4
gPROFILER	GO:0010498	proteasomal protein catabolic process	482	19		0.045601	APOE,CLU,ATXN3,WAC,KCTD13,WWTR1,PML,HFE,CD2AP,CUL2,DNAJC18,SPOP,FBXL16,FBXL2,USP7,HECW2,PCBP2,ENC1,USP14
gPROFILER	GO:0050793	regulation of developmental process	2729	74		0.045601	EHD1,APOE,CLPTM1,ITSN1,ALDOA,GFAP,NFKB1,PALM2-AKAP2,FCGR2B,IL6,IKBKB,BIN1,PTBP1,BMP1,DDR2,ITPKB,RHOH,LTBP3,LRP8,ALPK2,KALRN,NFIB,NEGR1,CARTPT,RIMS2,PDE5A,CD44,CENPF,DDHD1,SEMA4B,ZFP36L2,MAF,KRT17,S1PR3,DMPK,AP2S1,SERPINI1,CDC42EP4,NKX6-1,WWTR1,PML,PDLIM5,CDC42,TNFRSF11B,RGS4,ACACB,ADD1,OPA1,MARK1,ZHX3,EGFR,MITF,CAPRIN1,GPRC5B,VEZF1,MYH10,GAP43,HECW2,RHOQ,CDK9,APC,MAP4K4,ARNT,TNFRSF21,AP2A2,HOXB7,…
FUMA	GO:0019867	outer membrane	205	7	0.00502653	0.0457414	PGR:ACACB:BCL2L2:TOMM40:DMPK:OPA1:BPHL
FUMA	GO:0070848	response to growth factor	724	16	0.00312446	0.0457509	LRP8:ARNT:DSTYK:CD44:EHD1:HNRNPA1:PML:WWOX:CCL5:PTBP1:ZFP36L2:ITGB5:RASL11B:TBC1D7:HFE:EGFR
FUMA	GO:0050727	regulation of inflammatory response	349	10	0.00312475	0.0457509	FCGR2B:MEFV:GPRC5B:CCL5:APOE:NFKB1:F12:IL6:EGFR:SLC7A2
FUMA	GO:0030660	golgi associated vesicle membrane	109	5	0.00507502	0.0457666	CD59:NRGN:RHOQ:SEC23B:NCALD
gPROFILER	GO:0050863	regulation of T cell activation	322	8		0.0458431	CLPTM1,FCGR2B,IL6,ITPKB,RHOH,PDE5A,SDC4,GSN
FUMA	GO:1902115	regulation of organelle assembly	188	7	0.00313745	0.0458454	PIP4K2A:CHMP4B:SDC4:MTMR3:GAP43:TBC1D7:GSN
FUMA	GO:1903522	regulation of blood circulation	293	9	0.00314809	0.0459097	PDE4B:RGS4:SCN2B:DMPK:CALM3:BIN1:PDE5A:HBEGF:EGFR
FUMA	GO:0048729	tissue morphogenesis	659	15	0.00316829	0.0461127	CDC42:ITGB1:AP2A2:CD44:PGR:PML:KRT17:WNK4:HOXB7:AP2S1:SDC4:FRAS1:HBEGF:EGFR:SCARA3
gPROFILER	GO:0051090	regulation of DNA-binding transcription factor activity	434	7		0.0462842	CLU,NFKB1,IL6,IKBKB,DDR2,MAPK8,LRP8
FUMA	GO:0008233	peptidase activity	623	15	0.00186659	0.0465234	RNPEP:USP35:CPM:ATXN3:USP7:CPD:USP14:KLK7:AGBL5:PCSK1:ERAP2:LNPEP:F12:ADAMTS2:BMP1
FUMA	GO:1901566	organonitrogen compound biosynthetic process	1814	31	0.00320284	0.0465235	MRPL24:MUC6:CAPRIN1:NARS2:BCAT1:ACACB:ALDOA:CCL5:RSAD1:CERS1:LSM14A:APOE:ZFP36L2:SDC4:GART:SLC25A1:POLDIP3:ZDHHC23:GFM1:CDS1:NFKB1:BDH2:ELOVL6:NDST3:ENC1:PCSK1:PURA:HBEGF:IL6:EGFR:DPY19L4
FUMA	GO:0031330	negative regulation of cellular catabolic process	240	8	0.00322035	0.0466856	WAC:ACACB:PML:USP7:USP14:APOC1:CHMP4B:HFE
gPROFILER	GO:0014013	regulation of gliogenesis	129	3		0.0467638	GFAP,IL6,BIN1
gPROFILER	GO:0010959	regulation of metal ion transport	406	16		0.0468973	BIN1,SCN2B,MYO5A,CRH,ANK3,CALM3,PML,HFE,RGS4,AHNAK,PDE4B,CCL5,HECW2,GNB5,CEMIP,WNK4
gPROFILER	GO:1905114	cell surface receptor signaling pathway involved in cell-cell signaling	624	22		0.0469421	APOE,NFKB1,CDK14,CHRNA9,GABRB3,MDFIC,ALPK2,RIMS2,CCNY,AP2S1,WWTR1,CDC42,RGS4,MARK1,EGFR,MITF,IGFBP6,GPRC5B,APC,AP2A2,SNX3,WWOX
gPROFILER	GO:0006066	alcohol metabolic process	372	13		0.0469471	APOC1,APOE,NFKB1,EPHX2,ITPKB,ISYNA1,INPP4A,ELOVL6,PLCD3,ACACB,ALDH1B1,PLCE1,SOAT2
gPROFILER	GO:0006952	defense response	1760	11		0.0470214	LSM14A,APOE,CLU,SLC7A2,NFKB1,IFNLR1,FCGR2B,IL6,EPHX2,IKBKB,F12
FUMA	GO:0098636	protein complex involved in cell adhesion	35	3	0.00526626	0.0470672	ITGB1:ITGB5:ITGB8
gPROFILER	GO:0072659	protein localization to plasma membrane	271	4		0.0470802	DENND4C,PICALM,SYS1,IKBKB
gPROFILER	GO:0043197	dendritic spine	166	8		0.0471111	ITSN1,FCGR2B,CDC42,GPM6A,PDE4B,NRGN,MYH10,ITGB1
gPROFILER	WP4482	Vitamin D in inflammatory diseases	22	3		0.047742	NFKB1,IL6,IKBKB
gPROFILER	GO:0045601	regulation of endothelial cell differentiation	42	4		0.0477746	IKBKB,S1PR3,ADD1,VEZF1
gPROFILER	GO:0048814	regulation of dendrite morphogenesis	92	6		0.0477841	LRP8,KALRN,PDLIM5,OPA1,CAPRIN1,HECW2
FUMA	GO:0038127	erbb signaling pathway	142	6	0.00330278	0.0477864	CDC42:PLCE1:HBEGF:EGFR:FAM83A:SHC3
gPROFILER	GO:0045296	cadherin binding	330	12		0.0477867	EHD1,ALDOA,PICALM,ANK3,LRRFIP1,PDLIM5,ADD1,CHMP4B,DOCK9,CD2AP,AHNAK,EGFR
FUMA	GO:0099504	synaptic vesicle cycle	190	7	0.0033258	0.0480248	PICALM:UNC13A:CALM3:RAPGEF4:DNAJC5:ITSN1:RIMS2
FUMA	GO:1901135	carbohydrate derivative metabolic process	934	19	0.00333987	0.0481334	CREM:MUC6:DLG2:ACACB:ALDOA:RHOQ:SDC4:GART:SLC25A1:SULT4A1:OPA1:NFKB1:ELOVL6:NDST3:HBEGF:ITGB8:DPY19L4:FBP2:FBP1
gPROFILER	GO:0090278	negative regulation of peptide hormone secretion	45	3		0.0481455	KALRN,CARTPT,CRH
gPROFILER	GO:0032435	negative regulation of proteasomal ubiquitin-dependent protein catabolic process	35	4		0.0481455	WAC,HFE,USP7,USP14
FUMA	GO:0002684	positive regulation of immune system process	1147	22	0.00334814	0.0481582	CDC42:PDE4B:ARNT:FCGR2B:SUSD4:ITPKB:MUC6:CD59:GAB2:GPRC5B:CCL5:LSM14A:KLK7:SLC39A10:POLR3F:TNIP2:NFKB1:TNFRSF21:IL6:CLU:SCARA3:IKBKB
FUMA	GO:0007229	integrin mediated signaling pathway	99	5	0.00337047	0.048201	CDC42:ITGB1:ITGB5:DST:ITGB8
FUMA	GO:0051491	positive regulation of filopodium assembly	30	3	0.00339047	0.048201	CDC42:RHOQ:GPM6A
FUMA	GO:1901380	negative regulation of potassium ion transmembrane transport	30	3	0.00339047	0.048201	RGS4:ANK3:BIN1
FUMA	GO:1905476	negative regulation of protein localization to membrane	30	3	0.00339047	0.048201	PPFIA1:PICALM:RHOQ
FUMA	GO:0034367	protein containing complex remodeling	30	3	0.00339047	0.048201	APOE:APOC1:APOC2
FUMA	GO:0043030	regulation of macrophage activation	61	4	0.00339702	0.048201	FCGR2B:TNIP2:IL6:SLC7A2
FUMA	GO:1900449	regulation of glutamate receptor signaling pathway	61	4	0.00339702	0.048201	DLG2:RASGRF1:UNC13A:CRH
gPROFILER	GO:0038093	Fc receptor signaling pathway	239	5		0.0483402	NFKB1,FCGR2B,IKBKB,GAB2,MAPK8
FUMA	GO:0051250	negative regulation of lymphocyte activation	143	6	0.00341878	0.0484163	FCGR2B:SDC4:PDE5A:HFE:LST1:TNFRSF21
gPROFILER	GO:0044463	cell projection part	1488	9		0.0486079	KCNQ3,EHD1,APOE,ITSN1,CLU,DLG2,FCGR2B,TBC1D7,BIN1
gPROFILER	GO:0120038	plasma membrane bounded cell projection part	1488	9		0.0486079	KCNQ3,EHD1,APOE,ITSN1,CLU,DLG2,FCGR2B,TBC1D7,BIN1
gPROFILER	GO:0046364	monosaccharide biosynthetic process	99	6		0.048705	ALDOA,FBP1,FBP2,PGAM1,SLC25A1,MDH2
gPROFILER	GO:0051015	actin filament binding	194	9		0.0487609	BIN1,MYO5A,ABLIM1,GSN,ADD1,NEBL,EGFR,MYH10,MAP1S
gPROFILER	GO:0030175	filopodium	104	6		0.0488167	MYO5A,CDC42,GPM6A,GAP43,DNALI1,ITGB1
gPROFILER	GO:0044309	neuron spine	168	8		0.0488877	ITSN1,FCGR2B,CDC42,GPM6A,PDE4B,NRGN,MYH10,ITGB1
FUMA	GO:0045596	negative regulation of cell differentiation	733	16	0.00351879	0.0490799	FCGR2B:RGS4:ITPKB:ITGB1:SEMA4B:GFAP:PTBP1:APOE:ZFP36L2:MAP4K4:WWTR1:NKX6-1:CARTPT:IL6:EGFR:S1PR3
FUMA	GO:0120034	positive regulation of plasma membrane bounded cell projection assembly	100	5	0.00351906	0.0490799	CDC42:CDC42EP4:RHOQ:GPM6A:APC
gPROFILER	GO:0072657	protein localization to membrane	636	6		0.0492094	APOE,DENND4C,DLG2,PICALM,SYS1,IKBKB
FUMA	R-HSA-73980	rna polymerase iii transcription termination	23	3	0.00155818	0.0492999	POLR1D:POLR3F:NFIB
FUMA	R-HSA-373752	netrin 1 signaling	50	4	0.00163505	0.0492999	CDC42:MAPK8:UNC5B:ABLIM1
FUMA	R-HSA-1483255	pi metabolism	84	5	0.00164443	0.0492999	PIP4K2A:MTMR6:INPP4A:MTMR3:PIP5K1B
FUMA	R-HSA-216083	integrin cell surface interactions	84	5	0.00164443	0.0492999	ITGB1:CD44:JAM2:ITGB5:ITGB8
FUMA	GO:0009607	response to biotic stimulus	1010	20	0.00356215	0.0495867	IFNLR1:PDE4B:FCGR2B:LGALS8:MAPK8:PCBP2:PML:CCL5:LSM14A:KLK7:AGBL5:POLR3F:TNIP2:NFKB1:GPM6A:SNX3:IL6:CLU:IKBKB:NFIB
FUMA	GO:0018212	peptidyl tyrosine modification	356	10	0.003594	0.0497759	LRP8:DDR2:DSTYK:CD44:DYRK2:GPRC5B:CCL5:HBEGF:IL6:EGFR
FUMA	GO:0071806	protein transmembrane transport	62	4	0.00360282	0.0497759	TIMM17A:TOMM40:PEX5L:CLU
FUMA	GO:1905818	regulation of chromosome separation	62	4	0.00360282	0.0497759	CENPF:HECW2:APC:DUSP1
FUMA	GO:1902305	regulation of sodium ion transmembrane transport	62	4	0.00360282	0.0497759	ANK3:SCN2B:WNK4:HECW2
gPROFILER	GO:0016032	viral process	832	27		0.0499495	APOE,ITGB5,ITSN1,FCGR2B,IKBKB,BIN1,PTBP1,MDFIC,CRTC3,GSN,AP2S1,HNRNPA1,PML,CDC42,CHMP4B,BICD1,CUL2,EGFR,SRPK2,FBXL2,CCL5,USP7,PCBP2,CDK9,AP2A2,SNX3,ITGB1
Wegestalt	GO:0031461	cullin-RING ubiquitin ligase complex	153	7	0.00348406	0.0527391	KCTD13;CUL2;SPOP;FBXL16;FBXL2;ZSWIM4;ENC1
Wegestalt	GO:0098858	actin-based cell projection	197	8	0.00380354	0.056468	MYO5A;CD44;CDC42;GPM6A;GAP43;DNALI1;ITGB1;WWOX
Wegestalt	GO:0045178	basal part of cell	51	4	0.00400095	0.058278	DST;ANK3;HFE;EGFR
Wegestalt	WP2018	RANKL/RANK (Receptor activator of NFKB (ligand)) Signaling Pathway	55	7	0.000154096	0.0587104	NFKB1;IKBKB;GAB2;MAPK8;CDC42;TNFRSF11B;MITF
Wegestalt	GO:0065005	protein-lipid complex assembly	31	6	1.96297e-05	0.0642723	APOC1;APOE;APOC2;BIN1;BMP1;SOAT2
Wegestalt	GO:0043062	extracellular structure organization	400	21	2.03845e-05	0.0642723	TNXB;APOC1;APOE;ITGB5;APOC2;GFAP;BMP1;DDR2;CD44;SDC4;GSN;ELF3;SH3PXD2A;TNFRSF11B;KLK7;JAM2;SOAT2;LAMC1;ITGB8;ITGB1;ADAMTS2
Wegestalt	GO:1901981	phosphatidylinositol phosphate binding	150	10	0.000219279	0.0651807	PICALM;GAB2;LANCL2;SH3PXD2A;MARK1;NRGN;OSBPL8;GAP43;SNX3;PLEKHB2
Wegestalt	GO:0031252	cell leading edge	393	12	0.00464733	0.0664396	ITSN1;MYO5A;ABLIM1;CD44;MEFV;GSN;DST;SORBS2;CD2AP;MYH10;APC;ITGB1
Wegestalt	GO:0005178	integrin binding	127	9	0.000286836	0.0682097	TNXB;ITGB5;GFAP;LGALS8;S1PR3;DST;EGFR;ITGB8;ITGB1
Wegestalt	GO:0043197	dendritic spine	165	7	0.00525834	0.0726907	FCGR2B;CDC42;GPM6A;PDE4B;NRGN;MYH10;ITGB1
Wegestalt	GO:0030131	clathrin adaptor complex	28	3	0.0052729	0.0726907	PICALM;AP2S1;AP2A2
Wegestalt	GO:0030276	clathrin binding	57	6	0.000369268	0.0731766	PICALM;BIN1;NCALD;AP2S1;AP2A2;CEMIP
Wegestalt	GO:0044309	neuron spine	167	7	0.00560998	0.0759808	FCGR2B;CDC42;GPM6A;PDE4B;NRGN;MYH10;ITGB1
Wegestalt	GO:0042578	phosphoric ester hydrolase activity	370	16	0.000525149	0.0774893	EPHX2;FBP1;NTPCR;PDE5A;FBP2;INPP4A;DUSP12;MTMR3;PLCD3;MTMR6;CYCS;DUSP1;PLCE1;PDE4B;CCL5;PLCH1
Wegestalt	GO:0008235	metalloexopeptidase activity	61	6	0.000534378	0.0774893	CPM;RNPEP;AGBL5;LNPEP;CPD;ERAP2
Wegestalt	GO:0004674	protein serine/threonine kinase activity	449	18	0.000586547	0.0774893	CDK14;IKBKB;MAPK8;DSTYK;ALPK2;KALRN;STK17B;DMPK;CDC42;MARK1;GRK4;EGFR;SRPK2;CDK9;DYRK2;MAP4K4;WNK4;STK33
Wegestalt	GO:0030894	replisome	29	3	0.00582674	0.0775559	MCM3;PURA;DONSON
Wegestalt	GO:0005788	endoplasmic reticulum lumen	306	10	0.00597878	0.0782308	APOE;CLU;IL6;ARSG;CRTAP;SCG3;ERAP2;FKBP14;LAMC1;TSPAN14
Wegestalt	GO:0045121	membrane raft	311	10	0.00667443	0.0858777	IKBKB;UNC5B;LRP8;SDC4;ADD1;AHNAK;EGFR;RHOQ;STOML1;ITGB1
Wegestalt	GO:0098857	membrane microdomain	312	10	0.00682082	0.0863225	IKBKB;UNC5B;LRP8;SDC4;ADD1;AHNAK;EGFR;RHOQ;STOML1;ITGB1
Wegestalt	GO:0045296	cadherin binding	315	14	0.000891629	0.0909704	EHD1;ALDOA;PICALM;ANK3;LRRFIP1;PDLIM5;ADD1;CHMP4B;DOCK9;CD2AP;AHNAK;EGFR;APC;ITGB1
Wegestalt	GO:0048156	tau protein binding	45	5	0.000895075	0.0909704	APOE;CLU;PICALM;BIN1;MARK1
Wegestalt	GO:0004435	phosphatidylinositol phospholipase C activity	27	4	0.00099463	0.0909704	PLCD3;PLCE1;CCL5;PLCH1
Wegestalt	GO:0070273	phosphatidylinositol-4-phosphate binding	27	4	0.00099463	0.0909704	LANCL2;SH3PXD2A;OSBPL8;SNX3
Wegestalt	KEGG_ECM-RECEPTOR_INTERACTION	ECM-receptor interaction	82	7	0.00149542	0.0942116	TNXB;ITGB5;CD44;SDC4;LAMC1;ITGB8;ITGB1
Wegestalt	GO:0034381	plasma lipoprotein particle clearance	54	7	6.02594e-05	0.0944503	EHD1;APOC1;APOE;APOC2;AP2S1;SOAT2;AP2A2
Wegestalt	GO:1902992	negative regulation of amyloid precursor protein catabolic process	13	4	7.35238e-05	0.0944503	APOE;CLU;PICALM;BIN1
Wegestalt	GO:0097061	dendritic spine organization	75	8	7.48892e-05	0.0944503	APOE;FCGR2B;LRP8;KALRN;PDLIM5;CDC42;OPA1;CAPRIN1
Wegestalt	GO:0008305	integrin complex	32	3	0.00769147	0.0957711	ITGB5;ITGB8;ITGB1
Wegestalt	GO:1902991	regulation of amyloid precursor protein catabolic process	26	5	0.000102871	0.0966024	APOE;CLU;PICALM;BIN1;UNC13A
Wegestalt	GO:0034377	plasma lipoprotein particle assembly	27	5	0.000124341	0.0966024	APOC1;APOE;APOC2;BMP1;SOAT2
Wegestalt	GO:0007015	actin filament organization	388	19	0.000126922	0.0966024	ITGB5;ALDOA;BIN1;LMOD1;RHOH;GAS7;SDC4;GSN;KCTD13;CDC42EP4;CDC42;RGS4;ADD1;SORBS2;PPFIA1;CD2AP;NEBL;RHOQ;ITGB1
Wegestalt	GO:0106027	neuron projection organization	83	8	0.000153992	0.0966024	APOE;FCGR2B;LRP8;KALRN;PDLIM5;CDC42;OPA1;CAPRIN1
Wegestalt	GO:0051056	regulation of small GTPase mediated signal transduction	331	17	0.000163364	0.0966024	APOE;ITSN1;KANK2;FBP1;ITPKB;RHOH;KALRN;SRGAP1;RASGRF1;KCTD13;PLEKHG1;CDC42;CD2AP;PLCE1;RHOQ;MAP4K4;ITGB1
Wegestalt	GO:0097006	regulation of plasma lipoprotein particle levels	85	8	0.000181956	0.0966024	EHD1;APOC1;APOE;APOC2;BMP1;AP2S1;SOAT2;AP2A2
Wegestalt	GO:0099173	postsynapse organization	158	11	0.000183829	0.0966024	APOE;DLG2;FCGR2B;LRP8;KALRN;PDLIM5;CDC42;OPA1;CAPRIN1;MYH10;GAP43
Wegestalt	KEGG_CYTOSOLIC_DNA-SENSING_PATHWAY	Cytosolic DNA-sensing pathway	63	6	0.00185739	0.0975129	NFKB1;IL6;IKBKB;POLR1D;POLR3F;CCL5
Wegestalt	KEGG_SHIGELLOSIS	Shigellosis	65	6	0.00218259	0.0982167	NFKB1;IKBKB;MAPK8;CD44;CDC42;ITGB1
Wegestalt	GO:0005884	actin filament	98	5	0.00833568	0.0996668	LMOD1;MYO5A;GAS7;CD2AP;RHOQ
Wegestalt	GO:0005741	mitochondrial outer membrane	180	7	0.00834112	0.0996668	TOMM40;BCL2L2;PGR;DMPK;ACACB;OPA1;BPHL
Wegestalt	GO:0000151	ubiquitin ligase complex	273	9	0.00844964	0.0996668	TMEM189-UBE2V1;KCTD13;CUL2;SPOP;FBXL16;FBXL2;DYRK2;ZSWIM4;ENC1
Wegestalt	GO:0016605	PML body	99	5	0.0086904	0.0996668	KAT6A;CIITA;PML;USP7;CDK9
Wegestalt	GO:0031300	intrinsic component of organelle membrane	227	8	0.0087398	0.0996668	TOMM40;TMEM163;TIMM17A;SYS1;SMDT1;DNAJC5;DMPK;SYNGR1
Wegestalt	GO:0098589	membrane region	324	10	0.00877894	0.0996668	IKBKB;UNC5B;LRP8;SDC4;ADD1;AHNAK;EGFR;RHOQ;STOML1;ITGB1
