# Supplementary material for: Multiomics integrative analysis identifies APOE allele-specific blood biomarkers associated to Alzheimer’s disease etiopathogenesis
Source: Aging (Albany NY). 2021 Apr 12;13(7):9277–329. doi: 10.18632/aging.202950 (PMC8064208; doi:10.18632/aging.202950)
Supplement: Supplementary Table 37 [file aging-13-202950-s039.xlsx]

## Sheet: Sheet1
Supplementary Table 37. Blood proteomics differential expression results (all strata).
Symbol	RRA Blood Stratum	logFC_CC	P.Value_CC	adj.P.Val_CC	logFC_CC_E2	P.Value_CC_E2	adj.P.Val_CC_E2	logFC_CC_E3	P.Value_CC_E3	adj.P.Val_CC_E3	logFC_CC_E4	P.Value_CC_E4	adj.P.Val_CC_E4
AIF1	E3E4	0.014598	0.547293	0.820143	-0.113935	0.405214	0.99834	0.162275	0.00876954	0.23106	-0.118624	0.0610986	0.397502
ALDOA	E3E4	-0.0144194	0.0312373	0.239486	0.00823585	0.800167	0.99834	-0.00582387	0.686101	0.823321	-0.00100436	0.948728	0.989444
ANGPTL3	E3	-0.0180245	0.0672982	0.318677	0.0100859	0.829951	0.99834	-0.0421659	0.0726061	0.333988	0.0352832	0.120992	0.482968
APP	E3	-0.00675326	0.910272	0.965228	-0.139411	0.614708	0.99834	0.17239	0.262692	0.525772	-0.221367	0.13868	0.509257
CD209	E3	-0.0481106	0.0712033	0.325749	0.115966	0.324258	0.99834	-0.0290791	0.5909	0.745603	-0.0602517	0.344654	0.719083
CDK2	E2	-0.0174097	0.00324182	0.0561769	-0.0318702	0.208197	0.99834	0.00143113	0.908332	0.940459	0.000954053	0.936104	0.986418
CFI	E2	-0.0191068	0.0540245	0.303417	-0.0393461	0.417447	0.99834	-0.0250424	0.177988	0.454097	0.0149502	0.504492	0.819058
CHEK2	E3	-0.00478106	0.777047	0.90875	-0.0357767	0.665871	0.99834	0.0333781	0.312475	0.556894	-0.000749124	0.986384	0.996116
CLU	E4	-0.00542809	0.599904	0.842963	0.00283636	0.947604	0.99834	0.031679	0.102936	0.370595	0.0443808	0.0247827	0.36831
CST3	E3	-0.00894051	0.54483	0.818738	0.00553493	0.943203	0.99834	0.0275964	0.375993	0.607374	0.0282099	0.360443	0.731544
CTSD	E4	0.0273635	0.421141	0.76184	0.0649258	0.678779	0.99834	0.225184	0.00475551	0.206735	0.0422499	0.603817	0.87977
CTSS	E3	0.0210497	0.0866955	0.350466	0.0380295	0.413229	0.99834	0.0575542	0.0599622	0.327251	-0.00816885	0.766206	0.942872
DKK3	E2	0.0219517	0.10708	0.389118	0.0126045	0.816846	0.99834	0.0305044	0.321518	0.561639	0.017999	0.53811	0.845637
ECM1	E3	-0.0469796	0.0273427	0.224721	-0.162975	0.0744933	0.99834	-0.00866912	0.871358	0.921941	-0.0419925	0.359817	0.731544
ERBB2	E2	-0.00465186	0.50725	0.804075	0.00186718	0.952681	0.99834	0.0124943	0.412484	0.63348	-0.0389731	0.0462926	0.397499
FABP5	E3	0.00808715	0.705587	0.87948	-0.0483385	0.569804	0.99834	0.0178286	0.723935	0.843572	-0.0644732	0.14759	0.51191
FCGR2B	E4	-0.146571	0.0127758	0.158224	0.14491	0.47594	0.99834	-0.126561	0.323765	0.563527	-0.186435	0.1357	0.509257
GDI2	E2	0.0653787	0.122141	0.41111	0.00864989	0.965951	0.99834	0.188074	0.0907294	0.353551	-0.158741	0.113661	0.467609
HBEGF	E4	-0.0106136	0.209358	0.563792	0.0217997	0.647146	0.99834	-0.0438446	0.0275574	0.281331	0.0526854	0.00282375	0.272774
HSP90AA1	E2E3	-0.00109376	0.984635	0.998067	0.0645296	0.815795	0.99834	0.196377	0.188975	0.463292	-0.260189	0.0644323	0.397502
IDUA	E4	-0.00810671	0.763723	0.907926	0.0791343	0.582231	0.99834	0.0401949	0.483166	0.675454	-0.0317255	0.609256	0.880951
IGFBP6	E4	-0.00864709	0.667048	0.868421	0.0376561	0.662903	0.99834	0.00494908	0.90483	0.938846	-0.0115658	0.791805	0.945563
IL6	E4	-0.00425681	0.361936	0.728397	-0.0424957	0.0962543	0.99834	0.00282462	0.788511	0.88262	0.00931069	0.370307	0.73453
LSAMP	E2	-0.0260232	0.0287248	0.231235	-0.0692822	0.180032	0.99834	0.00444291	0.857174	0.916887	-0.01874	0.470398	0.798973
MAPK8	E4	-0.0207853	0.211276	0.563792	-0.0861328	0.193269	0.99834	0.0310998	0.429813	0.650559	-0.057882	0.139707	0.509257
MAPT	E3	-0.0114039	0.235957	0.587459	0.0283012	0.513432	0.99834	-0.0014344	0.941319	0.958514	0.0297763	0.160788	0.528417
METAP2	E3	0.034192	0.349101	0.714474	0.0363554	0.836793	0.99834	0.193735	0.036758	0.289857	-0.116734	0.16137	0.528417
NACA	E4	0.0265435	0.369524	0.730706	-0.0802896	0.530523	0.99834	0.128132	0.087425	0.35352	-0.098866	0.139047	0.509257
NCK1	E3	-0.00414408	0.921329	0.970849	-0.0229336	0.903219	0.99834	0.217383	0.0476825	0.289857	-0.201414	0.0520462	0.397502
PLAUR	E2	0.00120326	0.935073	0.979697	0.109529	0.0971621	0.99834	0.0649844	0.0325166	0.285625	-0.0218796	0.469018	0.798973
PRDX1	E3	0.111295	0.000147093	0.00592051	-0.0401194	0.781003	0.99834	0.163712	0.021207	0.270921	-0.0413976	0.546324	0.848906
PRKCZ	E3	-0.0158183	0.0743844	0.328484	0.0139684	0.743154	0.99834	-0.0384651	0.0410158	0.289857	0.0440989	0.0188626	0.35728
RPS27A	E3	0.0823422	0.00303965	0.0555843	0.0458888	0.718746	0.99834	0.178365	0.00875018	0.23106	-0.0708621	0.27457	0.661485
SEZ6L2	E4	-0.0203239	0.0914563	0.356237	-0.0225963	0.632761	0.99834	-0.0389518	0.136714	0.411421	-0.033251	0.191265	0.576753
SFTPD	E2	0.0223618	0.676927	0.870721	0.0291271	0.894626	0.99834	0.145823	0.300716	0.548098	-0.222879	0.094858	0.44779
SOD1	E2E3E4	0.0191441	0.0292317	0.231458	0.00498896	0.904285	0.99834	0.0135945	0.479157	0.673357	0.0400481	0.0464827	0.397499
TNFRSF9	E4	-0.00237474	0.819683	0.928269	-0.0470737	0.526651	0.99834	0.0218572	0.409953	0.633259	-0.00373608	0.854135	0.967896
UFC1	E3E4	0.0181522	0.662614	0.86498	-0.00271947	0.989599	0.99834	0.177062	0.112629	0.379092	-0.190927	0.0570486	0.397502
