# Supplementary material for: Multiomics integrative analysis identifies APOE allele-specific blood biomarkers associated to Alzheimer’s disease etiopathogenesis
Source: Aging (Albany NY). 2021 Apr 12;13(7):9277–329. doi: 10.18632/aging.202950 (PMC8064208; doi:10.18632/aging.202950)
Supplement: Supplementary Table 38 [file aging-13-202950-s040.xlsx]

## Sheet: Sheet1
Supplementary Table 38. Cortex proteomics meta-analysis (all strata).
Symbol	RRA Cortex Stratum	All.rank	All.logFC..case.vs.ctl.	All.Var	All.Qpvalue	All.REM.Pvalue	All.REM.FDR	All.Fisher.Pvalue	All.Fisher.FDR	All.n.estimators	E2.rankE2	E2.logFC..case.vs.ctl.	E2.Var	E2.Qpvalue	E2.REM.Pvalue	E2.REM.FDR	E2.Fisher.Pvalue	E2.Fisher.FDR	E2.n.estimators	E3.rankE3	E3.logFC..case.vs.ctl.	E3.Var	E3.Qpvalue	E3.REM.Pvalue	E3.REM.FDR	E3.Fisher.Pvalue	E3.Fisher.FDR	E3.n.estimators	E4.rankE4	E4.logFC..case.vs.ctl.	E4.Var	E4.Qpvalue	E4.REM.Pvalue	E4.REM.FDR	E4.Fisher.Pvalue	E4.Fisher.FDR	E4.n.estimators
ABLIM1	E4	510	0.0770553	0.00103283	0.278364	0.0164998	0.106669	0.0199661	0.0612295	4	711	0.103883	0.00401061	0.555812	0.100931	0.579007	0.254914	0.559574	4	1512	0.0317325	0.00136754	0.998641	0.390841	0.714668	0.930539	0.962541	4	266	0.106433	0.0111929	0.0651117	0.314409	0.747495	0.0593421	0.346282	4
ACP1	E3	1565	0.213231	0.0347431	1	0.252635	0.500748	NA	NA	1	1565	0.396173	0.283542	1	0.456873	0.845821	NA	NA	1	1565	0.231096	0.0822287	1	0.420302	0.730746	NA	NA	1	1565	0.485044	0.814709	1	0.591007	0.871751	NA	NA	1
ACSL6	E3	908	0.0429721	0.00128786	0.17497	0.231136	0.479526	0.132085	0.227512	4	202	0.187892	0.0184486	0.0527962	0.166562	0.665205	0.0484336	0.374415	4	194	0.0784961	0.00600231	0.00333416	0.310972	0.658091	0.0179373	0.144608	4	1081	0.0730977	0.00283416	0.646675	0.169732	0.621415	0.519246	0.75125	4
ACTR2	E3	847	0.00638144	0.000603076	0.0856002	0.794975	0.902397	0.105924	0.195512	4	592	0.0904772	0.00309037	0.444892	0.10362	0.579007	0.20059	0.529596	4	1454	0.00659929	0.000470518	0.756967	0.760949	0.924829	0.851325	0.915731	4	33	-0.0659787	0.00651763	0.00112373	0.413782	0.795107	0.00283829	0.129391	4
ADD1	E4	641	0.019445	0.000371259	0.130256	0.312887	0.566007	0.0418872	0.102202	4	271	0.11966	0.00257563	0.439538	0.0183839	0.341708	0.0724463	0.418104	4	1186	-0.000958145	0.000324867	0.425152	0.957605	0.997205	0.592767	0.781693	4	1330	0.0150397	0.00108419	0.591664	0.647846	0.902833	0.730511	0.859037	4
AHNAK	E2E4	132	0.207316	0.00200293	0.481475	3.6158e-06	0.000247714	0.000108842	0.00128961	4	103	0.290944	0.0337323	0.0583631	0.113168	0.599117	0.0219971	0.331933	4	864	0.109778	0.00330601	0.81538	0.0562291	0.314646	0.347498	0.628317	4	656	0.231812	0.010706	0.948693	0.0250662	0.335309	0.236001	0.56246	4
AK2	E2	1565	0.101962	0.0131647	1	0.374188	0.623959	NA	NA	1	1565	0.109696	0.0612574	1	0.657614	0.936652	NA	NA	1	1565	0.00161205	0.024856	1	0.991842	1	NA	NA	1	1565	0.202801	0.0500785	1	0.364808	0.770169	NA	NA	1
AKT3	E2	1565	0.0176275	0.00374632	0.519799	0.773349	0.890659	NA	NA	2	1565	0.077494	0.029209	0.909687	0.650239	0.934741	NA	NA	2	1565	-0.171558	0.0483194	0.32005	0.43512	0.740428	NA	NA	2	1565	0.895362	0.941992	0.000161641	0.356258	0.770169	NA	NA	2
ALDH5A1	E3	928	-0.0447201	0.00058907	0.56589	0.065395	0.239752	0.140092	0.235939	3	1468	-0.042878	0.00426009	0.997361	0.511221	0.86715	0.876998	0.934026	3	525	-0.0712394	0.00114933	0.907223	0.0356103	0.253081	0.147066	0.437966	3	931	0.00852977	0.00305894	0.399863	0.877433	0.984499	0.40874	0.685639	3
ALDOA	E3E4	1311	-0.00844372	0.00021243	0.333307	0.562367	0.767336	0.452077	0.53932	4	1197	0.000793701	0.00234967	0.45558	0.986936	1	0.586185	0.765236	4	879	-0.0111744	0.000435742	0.314324	0.592433	0.83897	0.355312	0.63154	4	952	-0.00956911	0.0010937	0.370251	0.772314	0.951628	0.421656	0.69155	4
ANK3	E4	286	-0.0138222	0.00194405	0.00509483	0.753908	0.881605	0.00281133	0.0153738	4	748	0.0217441	0.00750488	0.141912	0.801816	0.962914	0.271483	0.56717	4	297	-0.0280994	0.00184645	0.0790016	0.513161	0.796752	0.047106	0.247731	4	1488	-0.0250531	0.0022771	0.869506	0.599574	0.873243	0.90422	0.950403	4
ANKS1B	E2	422	-0.0959335	0.00364965	0.252015	0.112291	0.322196	0.0103257	0.0382687	3	1522	0.0499802	0.0124297	0.994371	0.653937	0.935266	0.943049	0.969072	3	91	0.0538661	0.025326	0.00816569	0.735002	0.914806	0.00394348	0.0677758	3	96	-0.283254	0.0092092	0.600377	0.00316083	0.107711	0.0107335	0.171219	3
AP2A1	E2	672	-0.0488616	0.00112805	0.0431272	0.145725	0.37455	0.0484804	0.112832	4	684	0.0954407	0.00310646	0.509071	0.0868264	0.560156	0.240377	0.549368	4	375	-0.0595559	0.0017607	0.0747592	0.155804	0.507508	0.0755481	0.314986	4	495	-0.0785001	0.00214143	0.345209	0.0898173	0.533584	0.156989	0.495608	4
AP2A2	E4	426	-0.0659762	0.00128025	0.0402859	0.0651955	0.239466	0.010765	0.0394068	4	611	0.062171	0.00605056	0.302898	0.424137	0.831384	0.210232	0.537739	4	262	-0.0725519	0.00124257	0.202465	0.0395702	0.266273	0.0353593	0.211076	4	797	-0.0567595	0.00218557	0.381477	0.224708	0.675757	0.316272	0.620431	4
AP2S1	E4	1317	0.00879969	0.000699206	0.328322	0.739296	0.8753	0.459914	0.54617	4	295	0.137343	0.00767577	0.27363	0.116967	0.606709	0.0804236	0.424954	4	1349	-0.0275384	0.00109332	0.740759	0.40493	0.723424	0.738621	0.855771	4	247	0.0995551	0.00589543	0.105675	0.194769	0.652599	0.051672	0.325937	4
APOE	E2E4	101	0.207326	0.00656653	0.0461459	0.0105124	0.0808426	3.29826e-05	0.00051074	4	174	0.266731	0.0149076	0.243134	0.0289188	0.396217	0.0421878	0.374415	4	145	0.159829	0.00406664	0.261693	0.0121994	0.153677	0.0113182	0.121278	4	1211	0.126684	0.0159632	0.701972	0.316015	0.749302	0.616858	0.796214	4
APP	E3	3	0.401273	0.0161168	9.78954e-10	0.00157319	0.0241196	7.77156e-16	4.05157e-13	4	43	0.350891	0.0614617	0.000780138	0.15696	0.651775	0.00811896	0.291055	4	2	0.290325	0.0106612	0.00154949	0.00492673	0.0923161	1.96437e-07	0.000144186	4	56	0.191365	0.0147886	0.0257106	0.115577	0.560658	0.00533836	0.149093	4
ARHGAP35	E3	1366	0.0207281	0.00130923	0.381069	0.566737	0.768354	0.531375	0.608397	4	571	0.0487558	0.0312403	0.0962964	0.782666	0.962699	0.188985	0.517073	4	1180	0.0253593	0.00261978	0.452962	0.620279	0.857657	0.590614	0.781693	4	1222	-0.0676045	0.00426292	0.769203	0.300466	0.742792	0.628396	0.803163	4
ARHGEF7	E2	1511	-0.0180687	0.000480783	0.88219	0.409913	0.654384	0.833888	0.862791	4	926	0.128877	0.00623228	0.648691	0.102576	0.579007	0.369486	0.624057	4	1020	-0.023458	0.000775546	0.480901	0.399599	0.721853	0.457023	0.700237	4	563	-0.112809	0.00265971	0.59523	0.0287144	0.351719	0.190622	0.527323	4
ATP6V1D	E3	875	-0.0289635	0.000978081	0.112032	0.354388	0.603435	0.117336	0.209596	4	498	0.0714952	0.00858668	0.139209	0.440381	0.841504	0.154574	0.484584	4	769	-0.0195397	0.00133251	0.197477	0.592455	0.83897	0.290104	0.590016	4	1006	-0.0740565	0.00238983	0.757165	0.129801	0.580899	0.465115	0.719869	4
ATP6V1G2	E4	1521	-0.00351119	0.000546478	0.85813	0.880607	0.947633	0.852443	0.876542	3	737	0.0764697	0.00434999	0.604321	0.24628	0.727061	0.267338	0.565245	3	1126	-0.00452987	0.00088412	0.602963	0.878914	0.969108	0.541256	0.751664	3	1456	-0.0105753	0.00338727	0.889659	0.855814	0.979053	0.851198	0.913452	3
ATPAF1	E3	1185	-0.0330656	0.00157459	0.410015	0.404685	0.648764	0.323245	0.426628	3	686	0.186688	0.0128595	0.569136	0.099705	0.579007	0.241289	0.549368	3	968	-0.0888401	0.0028765	0.897676	0.097632	0.406749	0.417658	0.674738	3	693	0.129604	0.00820135	0.701928	0.152396	0.598957	0.254681	0.574777	3
ATPIF1	E2E3	634	0.0542078	0.0093721	0.0614472	0.575518	0.773631	0.0408253	0.100711	3	732	0.172507	0.0154144	0.382998	0.164696	0.665205	0.264474	0.564693	3	198	0.0776587	0.0210421	0.0276459	0.592402	0.83897	0.0194567	0.153688	3	967	-0.0963465	0.0108922	0.633487	0.355924	0.770169	0.435548	0.70389	3
BCAP29	E3	1303	-0.0509707	0.00121659	0.913623	0.143925	0.37141	0.442246	0.530602	3	880	0.0764574	0.00987081	0.474933	0.44156	0.841577	0.343978	0.60823	3	1298	-0.00980043	0.0019132	0.774506	0.822711	0.951181	0.691947	0.833258	3	796	-0.142392	0.00777319	0.936014	0.1063	0.553573	0.315264	0.619438	3
BCAT1	E3E4	1565	0.0105381	0.0980009	1	0.973146	0.993902	NA	NA	1	1565	-0.531859	0.494195	1	0.449309	0.843847	NA	NA	1	1565	-0.01013	0.165257	1	0.98012	1	NA	NA	1	1565	1.74205	0.869541	1	0.0617387	0.474319	NA	NA	1
BCKDHB	E3	1263	-0.0802443	0.00236499	0.972282	0.0989311	0.299435	0.398576	0.493566	3	820	-0.179637	0.0128742	0.690929	0.113377	0.599117	0.311129	0.593422	3	934	-0.0879246	0.00399714	0.86822	0.164314	0.512614	0.394277	0.659511	3	1093	-0.133784	0.0116831	0.837263	0.215814	0.669135	0.528139	0.755727	3
BDH2	E4	115	0.200056	0.00510266	0.0841101	0.00510063	0.0513541	6.28092e-05	0.000854205	4	356	0.179472	0.0247183	0.083956	0.253649	0.729651	0.0997978	0.438438	4	96	0.200658	0.00706763	0.14139	0.0169949	0.178547	0.00423808	0.0685566	4	1206	0.035513	0.0117113	0.508062	0.742791	0.944268	0.613518	0.79564	4
BIN1	E3E4	333	0.0266037	0.00305644	0.00158037	0.630368	0.809038	0.00474816	0.0223007	4	1100	-0.0421422	0.00468535	0.422157	0.538114	0.883131	0.49719	0.706151	4	121	0.0305534	0.00558276	0.00205509	0.682601	0.890003	0.00745743	0.0963919	4	1258	0.0462408	0.00260425	0.758192	0.364874	0.770169	0.65959	0.820031	4
BOLA2	E2	1565	-0.0960881	0.0785896	1	0.731781	0.871449	NA	NA	1	1565	-0.350831	0.315445	1	0.532201	0.879524	NA	NA	1	1565	0.311301	0.186649	1	0.471183	0.772135	NA	NA	1	1565	-0.455377	0.47845	1	0.510317	0.840604	NA	NA	1
BPHL	E4	1565	-0.074782	0.00599008	0.99642	0.333929	0.584064	NA	NA	2	1565	-0.0135775	0.02794	0.997238	0.935261	0.992384	NA	NA	2	1565	-0.135516	0.011412	0.857842	0.204597	0.554436	NA	NA	2	1565	-0.0709082	0.0341011	0.735288	0.700991	0.926286	NA	NA	2
BTF3L4	E4	1565	0.445511	0.0681886	1	0.0879911	0.285917	NA	NA	1	1565	0.165695	0.43071	1	0.800674	0.962914	NA	NA	1	1565	0.447021	0.111776	1	0.181201	0.530636	NA	NA	1	1565	0.721373	0.884364	1	0.44303	0.811001	NA	NA	1
CALD1	E3	1032	0.0462979	0.00415173	0.209736	0.472428	0.705385	0.201621	0.305557	4	1325	0.11769	0.0199472	0.800695	0.40468	0.817383	0.708299	0.835973	4	642	-0.00103772	0.0101898	0.121333	0.991798	1	0.211338	0.514848	4	1504	0.0658814	0.0102502	0.955198	0.515225	0.841149	0.923253	0.960013	4
CAMK2B	E3	867	0.0047564	0.000872693	0.0859028	0.872087	0.943814	0.113706	0.205116	4	734	0.0613945	0.00315483	0.337732	0.274371	0.736852	0.265016	0.564693	4	760	-0.0011624	0.0012693	0.191816	0.973972	1	0.284513	0.584607	4	1479	-0.00351551	0.00152733	0.828842	0.928324	0.999053	0.891882	0.942456	4
CAPRIN1	E4	500	-0.0328817	0.00395274	0.0582496	0.600972	0.793099	0.0182029	0.0569388	3	98	0.054801	0.0474667	0.0197123	0.801403	0.962914	0.0207046	0.329436	3	294	-0.0877456	0.00109143	0.814937	0.00790754	0.11994	0.0466235	0.247563	3	459	0.0836104	0.00409237	0.38831	0.191215	0.645807	0.143221	0.488011	3
CAPZA1	E3	1253	-0.0211162	0.000270353	0.385979	0.199053	0.444261	0.38788	0.484153	4	1477	-0.0083758	0.00409792	0.856762	0.895901	0.986865	0.893124	0.945731	4	916	-0.0414017	0.000467885	0.851773	0.0556162	0.312532	0.382502	0.652873	4	1069	0.0323839	0.00152604	0.478645	0.407113	0.789928	0.511431	0.74825	4
CBX3	E3	1565	0.0520363	0.00323615	0.998714	0.360334	0.611211	NA	NA	2	1565	0.0687075	0.0251458	0.965639	0.664809	0.940573	NA	NA	2	1565	-0.00186031	0.00620775	0.978442	0.981163	1	NA	NA	2	1565	0.241771	0.0164768	1	0.0596306	0.46893	NA	NA	2
CD44	E2E3E4	1565	0.543787	0.0864729	1	0.0644261	0.238148	NA	NA	1	1565	-0.0221039	0.27596	1	0.966437	1	NA	NA	1	1565	0.39168	0.149779	1	0.31151	0.658706	NA	NA	1	1565	1.33472	1.02338	1	0.18704	0.637534	NA	NA	1
CD59	E4	1407	-0.0185244	0.00194482	0.419745	0.674447	0.834581	0.606098	0.67373	4	801	0.114852	0.0114715	0.277811	0.283571	0.744391	0.302777	0.589406	4	799	-0.0272368	0.00706675	0.173306	0.745937	0.919199	0.304178	0.595251	4	1386	-0.113296	0.00942201	0.915983	0.243132	0.697889	0.780697	0.879959	4
CDC42	E2E3E4	176	-0.100893	0.00216987	0.00964492	0.0303172	0.154875	0.000490758	0.00435178	4	410	-0.125775	0.00932926	0.124977	0.192855	0.687667	0.124823	0.475903	4	434	-0.058146	0.000813512	0.402946	0.0414873	0.271553	0.103603	0.373353	4	775	-0.0537477	0.00344961	0.352088	0.360131	0.770169	0.299644	0.602709	4
CDK14	E4	1565	0.142207	0.0281038	1	0.396284	0.641878	NA	NA	1	1565	0.128551	0.0858679	1	0.660884	0.938808	NA	NA	1	1565	-0.0267734	422212465065984	1	1	1	NA	NA	1	1565	1.9113	0.165372	1	2.60173e-06	0.000276616	NA	NA	1
CHMP4B	E4	1565	-0.0620418	0.0194665	0.0395723	0.656556	0.824985	NA	NA	2	1565	0.0343158	0.00933288	0.510899	0.722431	0.951044	NA	NA	2	1565	0.0113188	0.00226778	0.435822	0.812127	0.944974	NA	NA	2	1565	-0.341636	0.157335	0.0613229	0.389076	0.780632	NA	NA	2
CIRBP	E2	1565	-0.107091	0.00433773	0.919526	0.103948	0.306992	NA	NA	2	1565	0.282996	0.0262016	0.659029	0.0804113	0.5595	NA	NA	2	1565	-0.0778523	0.00724062	0.9563	0.360233	0.697737	NA	NA	2	1565	-0.321305	0.0239099	0.888704	0.037717	0.388573	NA	NA	2
CLTA	E3	1565	-0.0757721	0.00211346	0.865329	0.0993098	0.29962	NA	NA	2	1565	0.0178745	0.00999637	0.963758	0.858112	0.975826	NA	NA	2	1565	-0.0273244	0.00435029	0.825006	0.67867	0.887749	NA	NA	2	1565	-0.134847	0.015722	0.907045	0.282175	0.728387	NA	NA	2
CLU	E4	11	0.228819	0.00142857	0.286521	1.41322e-09	9.39083e-07	2.97125e-10	4.22458e-08	4	213	0.201557	0.00524525	0.817583	0.0053858	0.193452	0.0530231	0.386876	4	18	0.177046	0.00198953	0.291881	7.20928e-05	0.00659847	0.000107974	0.0093817	4	131	0.234673	0.00655875	0.384224	0.00375917	0.120384	0.0184211	0.219928	4
CMAS	E3	677	0.0136211	0.00358185	0.0192701	0.819963	0.91706	0.0498341	0.115126	4	42	-0.0107086	0.0393739	0.00135083	0.956962	1	0.00759938	0.282987	4	676	-0.00794813	0.00309612	0.173789	0.886415	0.971584	0.229005	0.529828	4	1244	0.0561825	0.00425964	0.614787	0.389335	0.780632	0.6468	0.812596	4
COPA	E3	263	0.0968534	0.00184673	0.057885	0.0242096	0.133782	0.00203716	0.0121145	4	753	0.0801412	0.0108794	0.216028	0.442286	0.841577	0.274091	0.569294	4	155	0.0937977	0.00181919	0.208865	0.0278677	0.224114	0.012755	0.128702	4	1375	0.046442	0.00279985	0.881418	0.380109	0.778974	0.774404	0.879959	4
CSRP1	E4	9	0.207741	0.00582228	0.000970622	0.00647808	0.0591805	1.15243e-10	2.00266e-08	4	279	0.197842	0.0131868	0.165826	0.0849147	0.5595	0.075876	0.419488	4	5	0.194506	0.00707165	0.0137859	0.0207234	0.193954	7.57917e-06	0.00232921	4	868	0.130264	0.00492325	0.767958	0.0633794	0.474908	0.361884	0.6517	4
CST3	E3	570	0.0279864	0.0144567	0.0340541	0.815946	0.915075	0.0302448	0.0829876	3	338	0.254219	0.0527616	0.158916	0.268403	0.729846	0.0945329	0.435122	3	306	-0.0540831	0.0145417	0.115324	0.653798	0.877675	0.0496181	0.253604	3	1004	0.17366	0.0196565	0.879294	0.215478	0.669135	0.462759	0.719869	3
CUL2	E4	705	-0.0012131	0.00218825	0.0307948	0.979311	0.994313	0.0575091	0.127581	4	436	0.0126756	0.0181887	0.0782036	0.925119	0.992384	0.133847	0.477654	4	1250	0.0310934	0.000901329	0.811476	0.300351	0.649578	0.647145	0.809708	4	128	-0.118733	0.00500541	0.184626	0.0933026	0.541481	0.0170422	0.208235	4
CYB5B	E2	1565	0.304667	0.0590287	1	0.209846	0.456734	NA	NA	1	1565	0.395965	0.312191	1	0.478526	0.857091	NA	NA	1	1565	0.47968	0.125217	1	0.175238	0.524977	NA	NA	1	1565	-1.05113	0.276383	1	0.0455651	0.429475	NA	NA	1
CYCS	E3E4	478	-0.0913247	0.000801685	0.838165	0.00125787	0.0204476	0.0158524	0.0518684	4	1283	0.0747258	0.00595579	0.786202	0.332905	0.769191	0.659688	0.804172	4	514	-0.0839792	0.00135025	0.743803	0.0222886	0.200824	0.141311	0.429981	4	138	-0.188853	0.0086589	0.114765	0.0424055	0.414389	0.0202735	0.229766	4
DCLK1	E2E3	240	-0.0862648	0.000500562	0.631191	0.000115393	0.00351921	0.00152374	0.00988847	4	1041	-0.0371146	0.00321603	0.472542	0.512814	0.868122	0.445982	0.669755	4	385	-0.0769354	0.000941146	0.504918	0.0121476	0.153677	0.0792827	0.322073	4	229	-0.125756	0.00317183	0.322153	0.0255537	0.335309	0.0461304	0.314964	4
DCUN1D1	E2	1565	-0.0147589	0.00213248	1	0.749269	0.878499	NA	NA	1	1565	-0.0723823	0.0245963	1	0.64442	0.931413	NA	NA	1	1565	-0.00846368	0.00279498	1	0.872809	0.966878	NA	NA	1	1565	-0.0243713	0.0173913	1	0.853382	0.978932	NA	NA	1
DDAH2	E4	51	0.177616	0.00516227	0.00644621	0.0134333	0.0949618	2.43033e-06	7.453e-05	4	381	0.174127	0.0176193	0.11862	0.189584	0.687667	0.108313	0.443717	4	271	0.12305	0.00467632	0.123164	0.0719538	0.351569	0.0378444	0.218409	4	304	0.168027	0.00515978	0.425742	0.0193259	0.300399	0.0707704	0.364095	4
DENR	E3	1565	-0.019228	0.00125591	0.882095	0.587428	0.781473	NA	NA	2	1565	0.129866	0.0170403	0.886999	0.319808	0.762377	NA	NA	2	1565	-0.0278337	0.00184638	0.992645	0.517144	0.799769	NA	NA	2	1565	-0.137241	0.00724386	0.993988	0.106854	0.553573	NA	NA	2
DIP2B	E2	1565	0.483248	0.191207	2.97665e-05	0.269098	0.521709	NA	NA	2	1565	0.194967	0.0506008	0.568783	0.386093	0.802537	NA	NA	2	1565	0.44052	0.169543	0.00352736	0.284685	0.638231	NA	NA	2	1565	0.750341	0.231071	0.053636	0.118538	0.561629	NA	NA	2
DLG1	E3	1225	-0.0252438	0.000576182	0.34239	0.292956	0.547208	0.366084	0.467392	4	1295	-0.0575391	0.00572384	0.679891	0.446935	0.843847	0.675436	0.815316	4	1052	-0.00164215	0.00102586	0.312248	0.95911	0.997205	0.478531	0.711429	4	660	-0.0659325	0.00496783	0.223314	0.349561	0.76598	0.237836	0.56246	4
DLG2	E4	1219	0.00805486	0.00063185	0.225192	0.748633	0.878499	0.360159	0.462091	4	305	0.159435	0.00317431	0.842463	0.00465749	0.190455	0.0846398	0.433841	4	1499	0.0159193	0.000680009	0.864448	0.541548	0.815081	0.915778	0.955488	4	113	-0.0915469	0.00474562	0.106528	0.183876	0.631578	0.0133466	0.183883	4
DNAJB1	E2	788	0.0220836	0.00204493	0.0664712	0.625303	0.807824	0.0839972	0.166618	4	302	0.0329561	0.0206852	0.0500262	0.818758	0.965087	0.0840386	0.433841	4	1325	-0.00912023	0.00118666	0.595545	0.791199	0.938314	0.716896	0.846208	4	712	0.0672803	0.00555834	0.159689	0.366826	0.77077	0.266324	0.584768	4
DNAJC5	E4	1484	-0.0210329	0.000669415	0.800253	0.41626	0.661339	0.756243	0.797011	4	1066	0.117614	0.00485686	0.952463	0.0914787	0.566908	0.471935	0.69238	4	1256	-0.00804009	0.00110192	0.465005	0.80862	0.943095	0.656065	0.816907	4	189	-0.197353	0.0181884	0.00483435	0.143372	0.597243	0.0346004	0.285469	4
DNAJC6	E2	636	-0.053771	0.00134427	0.124521	0.142491	0.368785	0.0416716	0.102123	3	1020	0.0336616	0.00354607	0.56343	0.571885	0.90384	0.435131	0.664141	3	351	-0.0701125	0.000923075	0.661609	0.0210166	0.194272	0.0647785	0.288643	3	740	-0.0307863	0.00346598	0.356306	0.601022	0.873916	0.281227	0.594378	3
DPYSL4	E4	514	-0.0701026	0.00140333	0.0826745	0.0612974	0.230826	0.0211576	0.0643783	4	938	0.0416301	0.00639851	0.300778	0.602759	0.915558	0.377336	0.629162	4	508	-0.0608408	0.00109342	0.359094	0.0657786	0.339494	0.138969	0.42754	4	272	-0.129634	0.00295575	0.38867	0.0171055	0.283535	0.0608259	0.349248	4
DST	E2E3E4	78	0.130996	0.00343474	0.000903854	0.0254059	0.137606	1.32027e-05	0.000261595	4	300	0.147635	0.0149797	0.0905038	0.227719	0.704592	0.0838625	0.433841	4	162	0.0993684	0.00295346	0.0371275	0.0674823	0.344276	0.0144053	0.13812	4	353	0.0725362	0.00556294	0.121996	0.330788	0.761191	0.0951152	0.421026	4
DYNLRB1	E3	1565	-0.00436229	0.0130342	0.103346	0.969521	0.993902	NA	NA	2	1565	-0.0933127	0.0125494	0.990752	0.404861	0.817383	NA	NA	2	1565	0.00796009	0.00495447	0.427268	0.90996	0.981611	NA	NA	2	1565	0.313543	0.0304054	0.437591	0.072156	0.499378	NA	NA	2
EGFR	E4	1565	0.132214	0.0560669	1	0.576591	0.77403	NA	NA	1	1565	0.283584	0.248432	1	0.569387	0.90384	NA	NA	1	1565	0.105236	0.0740725	1	0.699005	0.897228	NA	NA	1	1565	0.0670544	1.23538	1	0.951893	1	NA	NA	1
EHD1	E4	42	0.0813425	0.00527638	4.33908e-05	0.262789	0.512826	1.127e-06	4.19674e-05	4	229	0.15105	0.0201908	0.0216101	0.287771	0.746214	0.0584743	0.398975	4	87	0.0202721	0.00647774	0.000986935	0.801137	0.940609	0.00370085	0.0665302	4	392	0.150312	0.00344005	0.866839	0.0103838	0.219049	0.113717	0.453707	4
EIF1B	E3	1565	0.544895	0.112259	1	0.103884	0.306992	NA	NA	1	1565	0.899275	0.412466	1	0.161445	0.661693	NA	NA	1	1565	0.941066	0.166554	1	0.0211155	0.194272	NA	NA	1	1565	-0.280245	1.54142	1	0.821416	0.969858	NA	NA	1
EIF4G1	E3	1359	-0.041342	0.000497681	0.895918	0.0638577	0.237722	0.521238	0.599865	4	1156	-0.108518	0.00616995	0.932243	0.167115	0.665205	0.540035	0.730635	4	367	-0.042928	0.00324425	0.135294	0.451045	0.756389	0.0710598	0.302704	4	913	-0.0295273	0.0036261	0.339966	0.623888	0.887714	0.397714	0.681118	4
ENDOD1	E2	871	0.0952386	0.00280231	0.498516	0.072003	0.254376	0.116078	0.208279	3	527	0.142092	0.0626936	0.17172	0.570382	0.90384	0.168354	0.499615	3	656	0.133716	0.00445417	0.996314	0.0451179	0.28151	0.218428	0.520763	3	1215	0.0874944	0.0132469	0.820032	0.44714	0.812715	0.620333	0.79852	3
ENSA	E3	520	-0.0574358	0.00340227	0.0191042	0.324778	0.57666	0.021961	0.066052	4	344	0.0693771	0.0211174	0.0355417	0.633067	0.93067	0.0963013	0.435122	4	461	-0.0557523	0.00481666	0.0588791	0.421788	0.730843	0.113133	0.383819	4	961	-0.0965284	0.00378821	0.791552	0.116804	0.560658	0.430693	0.70094	4
EPB41L1	E2	776	0.0159844	0.000493427	0.111729	0.471778	0.705385	0.0815553	0.164372	4	289	0.0919451	0.00434819	0.21846	0.163209	0.664335	0.0779062	0.419488	4	869	0.0195986	0.000466192	0.343505	0.364037	0.700152	0.350103	0.62992	4	1549	-0.0105009	0.00140814	0.960707	0.779604	0.954021	0.984157	0.993688	4
ESYT2	E2	544	0.0839124	0.0024353	0.0740859	0.0890563	0.286741	0.0251679	0.0723578	4	73	0.251325	0.0182647	0.0590315	0.0629367	0.521082	0.0155615	0.326512	4	1468	0.00362226	0.00167883	0.803811	0.929555	0.988599	0.867154	0.923861	4	723	0.0861903	0.00357544	0.421719	0.149463	0.598303	0.273381	0.588922	4
EWSR1	E2	1565	-0.029246	0.00407475	1	0.646839	0.820967	NA	NA	1	1565	-0.0564238	0.0593838	1	0.816894	0.964582	NA	NA	1	1565	-0.171832	0.00619507	1	0.0290256	0.227369	NA	NA	1	1565	0.578281	0.0172162	1	1.04674e-05	0.000959396	NA	NA	1
FAM162A	E3	951	-0.0346089	0.00154541	0.226324	0.378658	0.627086	0.15284	0.250923	4	862	0.0145208	0.0107825	0.261639	0.888787	0.983716	0.33401	0.604271	4	1031	-0.0238572	0.00163996	0.383238	0.555782	0.823759	0.462023	0.700876	4	711	-0.0751794	0.00693004	0.26671	0.366478	0.770648	0.266316	0.584768	4
FBXL16	E2E4	564	-0.134794	0.00242884	0.750657	0.00623657	0.0579609	0.0291899	0.0809328	3	1214	0.0545449	0.0267182	0.699587	0.738609	0.953322	0.596946	0.769047	3	824	-0.0795552	0.00345295	0.667136	0.175781	0.525346	0.318078	0.60373	3	417	-0.283064	0.0151784	0.963716	0.0215855	0.310132	0.124006	0.464003	3
FMNL2	E3	189	0.143113	0.0078939	0.0294089	0.107229	0.313547	0.000589707	0.00487991	3	738	0.0865494	0.0128988	0.482656	0.446024	0.843847	0.267538	0.565245	3	113	0.152765	0.0177417	0.0153411	0.251421	0.604162	0.00656981	0.0909309	3	399	0.128565	0.0102995	0.36527	0.205219	0.659102	0.116324	0.455969	3
FXR1	E2	1565	0.354897	0.127332	1	0.319948	0.573025	NA	NA	1	1565	0.2148	0.441421	1	0.746467	0.955918	NA	NA	1	1565	0.246197	0.352368	1	0.678326	0.887735	NA	NA	1	1565	1.98519	0.297672	1	0.000274136	0.0148705	NA	NA	1
G3BP2	E2	1430	-0.017543	0.000786516	0.628802	0.531621	0.744493	0.6418	0.701941	4	900	0.0886319	0.0104304	0.298862	0.385482	0.802537	0.350575	0.60823	4	1006	-0.0347645	0.00106187	0.475864	0.286042	0.638231	0.446707	0.694402	4	1320	0.0168257	0.00459202	0.676382	0.803905	0.962514	0.72164	0.854855	4
GABRA2	E3	1565	-0.550095	0.0273868	1	0.000887227	0.0160425	NA	NA	1	1565	-0.391605	0.0576098	1	0.102775	0.579007	NA	NA	1	1565	-0.588539	0.0806242	1	0.0381974	0.263711	NA	NA	1	1565	-1.04458	0.15426	1	0.00782353	0.194112	NA	NA	1
GABRB3	E3E4	1565	-0.200222	0.0480299	1	0.360926	0.611825	NA	NA	1	1565	-0.171915	0.112678	1	0.608548	0.917482	NA	NA	1	1565	-0.597121	0.102923	1	0.0627081	0.329085	NA	NA	1	1565	1.68911	0.11436	1	5.88925e-07	7.45411e-05	NA	NA	1
GANAB	E2	349	0.0254616	0.00145185	0.00296344	0.503987	0.727646	0.00533932	0.0239275	4	736	0.0728483	0.00308372	0.357359	0.189573	0.687667	0.266753	0.565245	4	1396	-0.021205	0.000389508	0.864468	0.282627	0.636091	0.79396	0.889508	4	124	0.0718936	0.00654382	0.00952439	0.374143	0.774676	0.0152414	0.192238	4
GAP43	E4	111	-0.113584	0.000550896	0.556486	1.30305e-06	0.000119431	4.49335e-05	0.000633118	4	1132	-0.0994053	0.00353081	0.979399	0.0943452	0.566908	0.518023	0.715714	4	190	-0.100119	0.00138973	0.322212	0.00723883	0.1159	0.01729	0.142324	4	48	-0.197253	0.00730443	0.0990994	0.0210005	0.307831	0.00417458	0.136022	4
GART	E2E4	1565	0.0658211	0.00259941	0.998689	0.196703	0.442173	NA	NA	2	1565	0.0718756	0.0227575	0.997886	0.633752	0.93067	NA	NA	2	1565	0.0676094	0.00448583	0.700829	0.312758	0.658768	NA	NA	2	1565	-0.0880237	0.0137304	0.9884	0.45253	0.812715	NA	NA	2
GAS7	E4	371	-0.0807179	0.00177341	0.118856	0.0552702	0.21811	0.00687007	0.0289617	4	499	-0.0615826	0.0100994	0.199659	0.540016	0.884809	0.154819	0.484584	4	653	-0.073614	0.0011942	0.853942	0.033154	0.243588	0.216083	0.516804	4	1370	-0.0485177	0.00359037	0.77446	0.418106	0.797909	0.771168	0.879959	4
GATM	E2	681	0.102687	0.00342592	0.188576	0.079364	0.271143	0.0502022	0.115153	4	169	0.289909	0.0189428	0.248083	0.0351702	0.427122	0.0411295	0.374415	4	1077	-0.0382373	0.00352066	0.497797	0.519297	0.800169	0.505439	0.733948	4	411	0.212511	0.00741812	0.942244	0.0136107	0.256816	0.120594	0.457798	4
GFAP	E3E4	7	0.438552	0.00726303	0.221776	2.66227e-07	5.44957e-05	2.36137e-11	5.27597e-09	3	19	0.258482	0.141319	0.0214725	0.491711	0.862784	0.0028593	0.235366	3	10	0.387378	0.00694927	0.68214	3.36926e-06	0.00128616	4.80521e-05	0.00751535	3	41	0.446007	0.0179333	0.6194	0.000866848	0.0397812	0.00348543	0.131337	3
GMFG	E3	1565	0.0326805	0.0155872	1	0.793506	0.902397	NA	NA	1	1565	0.245162	0.162163	1	0.542654	0.884809	NA	NA	1	1565	-0.132311	0.0247163	1	0.400014	0.721853	NA	NA	1	1565	-0.139825	0.0574117	1	0.559517	0.86159	NA	NA	1
GNB1	E2	1461	-0.0120408	0.000507402	0.696849	0.592969	0.786638	0.713903	0.763867	3	698	-0.021707	0.00594174	0.347769	0.778245	0.962128	0.249775	0.556492	3	866	-0.0516518	0.000934574	0.999755	0.0911085	0.396344	0.347937	0.628376	3	748	0.040583	0.00373123	0.324484	0.506446	0.840604	0.287417	0.599365	3
GNB5	E4	507	-0.0695242	0.000587298	0.461246	0.00411975	0.0460097	0.0194225	0.0599148	4	1011	-0.0197283	0.00430385	0.350624	0.763628	0.958321	0.430777	0.664141	4	287	-0.0836598	0.00103099	0.589805	0.00917425	0.131103	0.045322	0.246666	4	601	-0.0749125	0.00613755	0.153378	0.338962	0.762567	0.206081	0.535058	4
GPM6A	E4	1011	-0.00817257	0.00168384	0.12158	0.842135	0.928389	0.188579	0.291503	4	41	0.212925	0.00961303	0.210322	0.0298798	0.405207	0.00739803	0.282208	4	335	-0.0567076	0.0041975	0.0397778	0.381423	0.712071	0.0585427	0.273316	4	59	0.146936	0.0288619	9.04939e-05	0.387093	0.780632	0.00616947	0.162155	4
GSN	E4	71	0.132475	0.0059884	0.00185046	0.0869149	0.284836	8.82419e-06	0.000194381	4	1392	0.0337531	0.00972579	0.6417	0.732158	0.951576	0.783603	0.880428	4	108	0.110065	0.00869484	0.00837699	0.237854	0.5942	0.00569325	0.0821536	4	276	0.189759	0.00509548	0.614575	0.00785273	0.194112	0.063294	0.354015	4
GSPT1	E2	965	0.0430252	0.000440948	0.496153	0.0404679	0.184947	0.159127	0.257901	4	1409	0.0556808	0.003588	0.890863	0.352597	0.779855	0.798809	0.885865	4	1302	0.0379703	0.000724206	0.984434	0.158258	0.507851	0.695387	0.835144	4	950	0.0269117	0.002762	0.406329	0.608603	0.876784	0.421236	0.69155	4
GUCY1A2	E2	1565	0.152758	0.00851177	0.864249	0.0977729	0.299142	NA	NA	2	1565	0.369469	0.038433	0.432321	0.0594799	0.521082	NA	NA	2	1565	0.0367763	0.0193884	0.998059	0.791689	0.938314	NA	NA	2	1565	0.136045	0.0397024	0.763684	0.494751	0.834211	NA	NA	2
H2AFY	E2	308	0.106618	0.00215272	0.110152	0.0215662	0.12555	0.00381558	0.0193626	4	307	0.192246	0.0202772	0.0730399	0.176996	0.67985	0.0854136	0.433841	4	1265	0.041748	0.00173641	0.672547	0.316409	0.662738	0.661558	0.817064	4	897	0.114659	0.00407793	0.888747	0.0725729	0.499378	0.381621	0.665391	4
HDGF	E4	244	0.123591	0.00125018	0.340737	0.000473302	0.0100643	0.0015502	0.00993651	4	1016	0.108762	0.00620865	0.567461	0.167488	0.665205	0.433199	0.664141	4	146	0.114167	0.00451283	0.155522	0.0892276	0.394258	0.0113213	0.121278	4	743	0.114468	0.00515639	0.631225	0.110919	0.560658	0.283304	0.59635	4
HNRNPA1	E4	1565	0.130397	0.00221532	0.863917	0.00559799	0.0535232	NA	NA	2	1565	0.354729	0.0160025	0.981547	0.00504484	0.193452	NA	NA	2	1565	0.155167	0.00438255	0.996715	0.0190839	0.188569	NA	NA	2	1565	0.0471372	0.0117825	0.965286	0.664103	0.907085	NA	NA	2
HNRNPD	E2	1439	0.0271005	0.000680196	0.644509	0.298754	0.553613	0.666574	0.724476	4	873	0.0324016	0.00822579	0.186443	0.720901	0.950946	0.341459	0.60823	4	1564	0.00671372	0.00132408	0.996526	0.853618	0.962221	0.998841	0.998841	4	1256	0.0717043	0.00306592	0.782439	0.195326	0.652599	0.659226	0.820031	4
HNRNPH1	E2	318	0.0957306	0.00365433	0.0261672	0.113284	0.323979	0.00412747	0.0202999	3	536	0.0554833	0.0086958	0.24007	0.551852	0.890581	0.172013	0.501483	3	398	0.0543863	0.00475722	0.119819	0.430392	0.735784	0.0882505	0.346206	3	363	0.139748	0.00337564	0.983886	0.0161593	0.280728	0.102198	0.440323	3
HOOK3	E2	1565	-0.0618725	0.00926297	1	0.520309	0.736412	NA	NA	1	1565	-0.488181	0.134551	1	0.18323	0.685081	NA	NA	1	1565	-0.0717805	0.0139361	1	0.543157	0.81658	NA	NA	1	1565	0.212287	0.0308302	1	0.226652	0.677663	NA	NA	1
HP1BP3	E4	242	0.108855	0.00372806	0.0375216	0.0746161	0.260275	0.00153006	0.00988847	4	486	0.203537	0.0126455	0.285268	0.0702974	0.531189	0.150039	0.48284	4	350	0.089679	0.00503895	0.104828	0.206466	0.557144	0.0645057	0.288248	4	1086	0.0509913	0.00540678	0.502395	0.488015	0.831503	0.524923	0.755607	4
HSPA12B	E2	1565	0.0766672	0.0100026	1	0.443335	0.683914	NA	NA	1	1565	0.0733921	0.0551752	1	0.7547	0.956774	NA	NA	1	1565	-0.0179044	0.0130052	1	0.875244	0.967318	NA	NA	1	1565	0.912588	0.0457797	1	1.99732e-05	0.00139707	NA	NA	1
ILF3	E3	181	0.0727097	0.000350505	0.343482	0.000102879	0.00337796	0.000521593	0.00450539	4	528	0.104614	0.00299756	0.342701	0.0560355	0.510077	0.168749	0.499615	4	932	0.0433159	0.000637855	0.544106	0.0863289	0.388261	0.392326	0.658366	4	130	0.0946331	0.00254444	0.192978	0.0606471	0.474319	0.0183812	0.219928	4
INPP4A	E4	1565	-0.189579	0.0318753	1	0.288304	0.543432	NA	NA	1	1565	-0.395572	0.115168	1	0.243766	0.722329	NA	NA	1	1565	0.0863978	0.0454245	1	0.685202	0.890003	NA	NA	1	1565	-1.62189	0.292773	1	0.0027223	0.0975889	NA	NA	1
IQGAP1	E3	1565	0.149747	0.0179378	0.680037	0.263534	0.513442	NA	NA	2	1565	0.645555	0.162626	0.704675	0.109421	0.587556	NA	NA	2	1565	0.08897	0.0200832	0.978502	0.530129	0.806393	NA	NA	2	1565	-0.0345179	0.16698	0.996441	0.932681	1	NA	NA	2
IRGQ	E2	1565	-0.549347	0.132222	1	0.13085	0.3478	NA	NA	1	1565	-0.892591	0.625483	1	0.259061	0.729846	NA	NA	1	1565	-0.881581	0.133066	1	0.0156606	0.174913	NA	NA	1	1565	2.75993	1.09966	1	0.00849116	0.203008	NA	NA	1
ISYNA1	E3E4	1565	0.347912	0.080741	1	0.220803	0.466843	NA	NA	1	1565	0.939784	0.283823	1	0.0777282	0.550238	NA	NA	1	1565	0.26486	0.0964702	1	0.3938	0.717423	NA	NA	1	1565	-0.0695824	1.83441	1	0.959027	1	NA	NA	1
ITGB1	E4	1565	0.167196	0.00809185	1	0.0630733	0.235462	NA	NA	1	1565	0.0836558	0.129907	1	0.816458	0.964582	NA	NA	1	1565	0.157738	0.0126074	1	0.160072	0.507851	NA	NA	1	1565	0.0378314	0.0482314	1	0.863232	0.979348	NA	NA	1
ITGB8	E4	381	0.149245	0.00260864	0.398069	0.00347698	0.0410747	0.00722313	0.0296509	3	171	0.294286	0.0302168	0.207176	0.0904638	0.566908	0.0414749	0.374415	3	619	0.0897997	0.00476153	0.393976	0.193131	0.545331	0.198477	0.501483	3	1555	0.0358584	0.013534	0.998478	0.757906	0.949021	0.99036	0.996049	3
ITSN1	E4	1116	0.0564407	0.000838626	0.992662	0.0512974	0.211536	0.263542	0.369172	3	34	0.244241	0.00487165	0.617619	0.00046649	0.0756507	0.0057553	0.25645	3	1524	0.010473	0.00168477	0.960425	0.798604	0.940431	0.942381	0.966797	3	1127	-0.0343313	0.00334446	0.569074	0.552749	0.859379	0.550206	0.762044	3
KPNA1	E2	1565	0.104164	0.00284526	0.987317	0.0508428	0.211156	NA	NA	2	1565	0.192668	0.0240374	0.993021	0.213979	0.70288	NA	NA	2	1565	-0.000855194	0.00552323	0.999577	0.990819	1	NA	NA	2	1565	0.175305	0.0152096	0.741427	0.155183	0.603036	NA	NA	2
KRT17	E4	1565	1.02975	0.164149	1	0.0110337	0.0819207	NA	NA	1	1565	0.508862	0.563015	1	0.497663	0.865329	NA	NA	1	1565	1.18872	0.451386	1	0.0768405	0.366025	NA	NA	1	1565	0.964854	0.732244	1	0.259513	0.70997	NA	NA	1
KTN1	E2	356	0.0856193	0.00125298	0.16549	0.015572	0.103766	0.0058161	0.0255516	4	828	0.0513368	0.0102807	0.202384	0.612639	0.921037	0.3161	0.596523	4	859	0.0376491	0.00087809	0.387219	0.203895	0.554436	0.344859	0.627197	4	319	0.161407	0.00322844	0.864361	0.00450131	0.13596	0.0793839	0.389205	4
LAMC1	E4	1565	0.14816	0.00951059	0.999443	0.128701	0.346934	NA	NA	2	1565	0.192707	0.0668358	0.98378	0.456027	0.845788	NA	NA	2	1565	0.0584732	0.0155522	0.999582	0.639156	0.872113	NA	NA	2	1565	0.13648	0.0446793	0.96691	0.518488	0.841807	NA	NA	2
LANCL2	E3E4	561	-0.028748	0.00369935	0.0209422	0.636458	0.813711	0.0286797	0.0798824	3	818	0.0924923	0.00372162	0.718158	0.129484	0.631042	0.309835	0.592398	3	355	-0.066638	0.00436123	0.106007	0.312945	0.658768	0.066789	0.294248	3	1353	0.0618465	0.0039093	0.98519	0.322586	0.757399	0.752713	0.869627	3
MACF1	E3	207	0.0682168	0.000981845	0.0522678	0.0294763	0.152725	0.000839247	0.00631296	4	72	0.165535	0.010088	0.0727954	0.0993297	0.578988	0.0154705	0.326512	4	825	0.039845	0.000476079	0.794946	0.0678293	0.344723	0.318884	0.604527	4	640	0.061963	0.00128114	0.56634	0.0834254	0.518095	0.226213	0.552808	4
MAP1B	E3	1108	0.00130455	0.000634295	0.302606	0.95869	0.988894	0.258379	0.36444	3	1543	-0.0119645	0.00592204	0.990283	0.876447	0.978889	0.975904	0.989186	3	1290	0.00701559	0.000784697	0.735233	0.802243	0.940609	0.686855	0.832167	3	1317	0.0066382	0.0026354	0.744961	0.897113	0.990737	0.718181	0.852873	3
MAP1S	E4	1565	-0.622098	0.0489115	1	0.00490976	0.0503875	NA	NA	1	1565	-0.783162	0.227308	1	0.100456	0.579007	NA	NA	1	1565	-0.959153	0.0973357	1	0.00210968	0.0578097	NA	NA	1	1565	0.416244	0.236711	1	0.392254	0.782154	NA	NA	1
MAP4K4	E3E4	1565	-0.150384	0.0111367	1	0.154149	0.386172	NA	NA	1	1565	-0.239962	0.0773764	1	0.388326	0.802537	NA	NA	1	1565	-0.0833405	0.0239155	1	0.589949	0.83897	NA	NA	1	1565	-0.182244	0.118463	1	0.596462	0.872252	NA	NA	1
MAPK8	E4	1565	-0.393613	0.00760734	1	6.39553e-06	0.000346925	NA	NA	1	1565	-0.296225	0.0586377	1	0.221216	0.70288	NA	NA	1	1565	-0.383345	0.0169451	1	0.00323079	0.0733969	NA	NA	1	1565	-0.556231	0.0511175	1	0.0138859	0.256816	NA	NA	1
MAPT	E2E3	60	0.168709	0.00504847	0.00427114	0.0175763	0.110888	4.97733e-06	0.000129742	4	8	0.439268	0.0468002	0.0252123	0.0423044	0.458694	0.00141346	0.235366	4	63	0.106033	0.00340065	0.0947879	0.0690218	0.345854	0.00170265	0.0421464	4	955	0.0371392	0.00311039	0.384334	0.505459	0.840475	0.42227	0.69155	4
MARK1	E4	1565	-0.753119	0.0824016	1	0.00870084	0.0722714	NA	NA	1	1565	-0.316978	0.11872	1	0.357596	0.782942	NA	NA	1	1565	-0.74291	0.189569	1	0.0879546	0.392254	NA	NA	1	1565	-1.77939	0.980114	1	0.0722804	0.499378	NA	NA	1
MBP	E2	259	0.0918186	0.0180531	0.00237792	0.494375	0.72232	0.00194227	0.0117286	4	663	-0.280385	0.0187542	0.847717	0.0406178	0.451724	0.234298	0.549368	4	70	0.144589	0.0399987	0.00187349	0.469707	0.770667	0.00214112	0.0476377	4	1157	0.104541	0.0159586	0.537282	0.407929	0.790288	0.572258	0.773562	4
MDH2	E4	1082	-0.0414172	0.000434213	0.782035	0.0468554	0.19998	0.238402	0.344603	4	976	0.0815568	0.00410218	0.551187	0.202889	0.687768	0.405602	0.649536	4	532	-0.0626852	0.00079542	0.759227	0.0262408	0.221167	0.149216	0.438674	4	782	-0.0771679	0.00252849	0.549919	0.124873	0.574364	0.302719	0.605437	4
ME3	E3E4	1203	-0.0229262	0.000784746	0.283063	0.413126	0.658327	0.344391	0.447736	4	1432	0.0697646	0.00455983	0.948459	0.301536	0.755487	0.834884	0.911842	4	1437	-0.0347744	0.00107253	0.990914	0.288313	0.638343	0.838603	0.912718	4	414	-0.073793	0.00875867	0.062391	0.43041	0.801773	0.122643	0.463319	4
METTL7A	E2	400	0.103925	0.000960686	0.713659	0.000799502	0.0146557	0.00897808	0.0351043	4	1188	0.0891719	0.00446055	0.933391	0.181824	0.685081	0.579898	0.763435	4	1367	0.0211441	0.0018235	0.620629	0.620495	0.857657	0.76467	0.874867	4	161	0.156919	0.00848939	0.146306	0.088552	0.532779	0.0259016	0.249249	4
MYH10	E4	1214	0.000795014	0.0003234	0.260393	0.964738	0.99099	0.35669	0.459525	4	1347	0.0162461	0.0026031	0.649899	0.750165	0.955918	0.725989	0.842945	4	1532	-0.0128112	0.000360928	0.988388	0.500095	0.790281	0.950797	0.970657	4	221	-0.014289	0.00540029	0.023492	0.845829	0.978932	0.0432137	0.303898	4
MYO5A	E4	750	-0.02098	0.00185774	0.051461	0.626429	0.807824	0.0687538	0.143338	3	662	0.0918967	0.00338772	0.631977	0.114366	0.602198	0.234106	0.549368	3	620	-0.0413073	0.00114419	0.329885	0.22202	0.581408	0.198838	0.501584	3	1414	0.0134734	0.00178386	0.844466	0.749723	0.94808	0.806418	0.891964	3
NCALD	E4	225	-0.141255	0.00150861	0.373733	0.000276071	0.00667504	0.00114008	0.0079026	4	286	-0.132565	0.015497	0.134365	0.286924	0.746214	0.0774986	0.419488	4	56	-0.1784	0.00552519	0.177222	0.0163924	0.174913	0.0013927	0.0388961	4	298	0.00983702	0.0225003	0.0416156	0.947713	1	0.0680486	0.357141	4
NCOA7	E4	1305	0.00819258	0.000861597	0.417116	0.780164	0.894597	0.446443	0.534936	3	1491	0.0768441	0.0124832	0.993704	0.491594	0.862784	0.908623	0.953109	3	415	-0.0149549	0.00502166	0.13641	0.832857	0.953028	0.0946224	0.356601	3	881	-0.109144	0.00473957	0.77872	0.112883	0.560658	0.369791	0.656474	3
NCS1	E3	1478	0.030582	0.00143416	0.901263	0.419353	0.661507	0.743876	0.786804	3	303	0.158517	0.0340846	0.193507	0.390556	0.803146	0.0841249	0.433841	3	1427	-0.0433437	0.0025954	0.998341	0.394884	0.718413	0.822498	0.901462	3	394	0.136051	0.00874843	0.355366	0.145787	0.597243	0.114845	0.454741	3
NDUFA2	E2	1565	-0.0364462	0.00163633	0.42884	0.367597	0.618285	NA	NA	2	1565	0.18453	0.00997931	0.472782	0.0647169	0.521082	NA	NA	2	1565	-0.0850586	0.00279013	0.679136	0.107333	0.425355	NA	NA	2	1565	-0.0276242	0.00795956	0.642716	0.756841	0.948908	NA	NA	2
NDUFA5	E4	459	-0.0784606	0.00162342	0.0940641	0.0514967	0.211536	0.0137574	0.0468771	4	1010	0.0341669	0.00661007	0.360553	0.674306	0.940573	0.430749	0.664141	4	440	-0.087008	0.0012661	0.809099	0.0144747	0.169488	0.106295	0.377581	4	896	-0.0566482	0.00414204	0.299633	0.378754	0.778632	0.380864	0.664812	4
NDUFA7	E3	140	-0.10837	0.000552919	0.513443	4.05226e-06	0.00025645	0.000135042	0.00150861	4	756	-0.081373	0.0040761	0.361151	0.202468	0.687768	0.2768	0.572639	4	57	-0.1181	0.000892263	0.49346	7.69573e-05	0.00659847	0.00142464	0.0390901	4	553	-0.0799579	0.00680461	0.164243	0.332394	0.761191	0.183681	0.519487	4
NDUFB3	E3	275	-0.133529	0.00149811	0.533741	0.000560817	0.011379	0.00234007	0.0133086	3	703	0.0427795	0.0131309	0.318476	0.708905	0.949018	0.25113	0.556492	3	248	-0.147706	0.00268446	0.946928	0.00436069	0.0858276	0.0310515	0.195825	3	386	-0.185005	0.00906108	0.546928	0.0519514	0.444009	0.111501	0.45107	3
NDUFB5	E3E4	122	-0.125798	0.000665181	0.949537	1.07403e-06	0.00011112	7.59719e-05	0.000973935	4	1426	-0.0068455	0.00608033	0.76543	0.930044	0.992384	0.824991	0.904829	4	55	-0.137037	0.00103837	0.758135	2.11221e-05	0.00374284	0.00133946	0.0380894	4	457	-0.129517	0.00449307	0.39057	0.0533336	0.451405	0.142244	0.486541	4
NEBL	E4	1265	0.03621	0.000797609	0.491869	0.199796	0.444772	0.399979	0.494403	4	587	0.135757	0.00497108	0.468454	0.054171	0.502217	0.196665	0.523724	4	1511	0.00575669	0.00133973	0.883794	0.875027	0.967318	0.930277	0.962541	4	286	-0.0790706	0.0186781	0.0122014	0.562886	0.86159	0.0653903	0.354015	4
NEGR1	E4	1048	0.00854602	0.00145055	0.124252	0.822456	0.91706	0.213143	0.317907	4	68	0.207146	0.00469955	0.378574	0.00251384	0.142063	0.0143638	0.326512	4	498	-0.0345538	0.0029464	0.10038	0.524401	0.804449	0.13329	0.418115	4	788	-2.1525e-05	0.00497705	0.234077	0.999757	1	0.30888	0.612976	4
NIPSNAP1	E3	136	-0.0847931	0.00118244	0.0824563	0.0136677	0.0961079	0.0001213	0.00139495	4	1431	0.0309487	0.0054647	0.797806	0.675467	0.940573	0.834466	0.911842	4	104	-0.101888	0.000755473	0.84897	0.000209788	0.0132766	0.00497955	0.0748848	4	359	-0.0724221	0.00469074	0.169806	0.290316	0.731921	0.0989032	0.430876	4
NME1	E3	1565	-0.101646	0.00415062	1	0.114625	0.325855	NA	NA	1	1565	-0.0749438	0.0303223	1	0.666918	0.940573	NA	NA	1	1565	-0.148404	0.0079116	1	0.0952263	0.404496	NA	NA	1	1565	-0.178975	0.0827385	1	0.533803	0.85225	NA	NA	1
NRGN	E4	1565	0.0584091	0.00642461	0.64203	0.466177	0.702883	NA	NA	2	1565	0.624994	0.0458205	0.997918	0.0035031	0.168414	NA	NA	2	1565	-0.0199966	0.00866561	0.99568	0.829915	0.952841	NA	NA	2	1565	0.550348	0.808581	0.010866	0.540515	0.857258	NA	NA	2
NSF	E2E3	1322	0.0116369	0.00022653	0.411857	0.439421	0.680666	0.462292	0.546918	4	1157	0.0621573	0.00275266	0.757852	0.236128	0.714223	0.540505	0.730639	4	757	0.0370585	0.00046186	0.674723	0.0846395	0.385447	0.283791	0.584607	4	815	-0.0372187	0.00215127	0.227866	0.422297	0.798159	0.32864	0.630667	4
NTRK2	E2	1487	-0.0201047	0.00108524	0.855665	0.541672	0.750367	0.764202	0.803774	3	366	-0.0430975	0.0264499	0.126049	0.791012	0.962699	0.103916	0.440469	3	1026	-0.04742	0.00201411	0.701963	0.290683	0.639676	0.460406	0.700876	3	205	0.197851	0.0510859	0.00740646	0.381377	0.779171	0.0380757	0.287938	3
NUDT21	E3	1565	0.143648	0.0117393	0.0873103	0.184904	0.429988	NA	NA	2	1565	0.3894	0.097354	0.101224	0.212027	0.700083	NA	NA	2	1565	0.082608	0.00690754	0.328164	0.320252	0.667108	NA	NA	2	1565	0.0864763	0.010884	1	0.407161	0.789928	NA	NA	2
OPA1	E2E4	1405	-0.0261778	0.00051402	0.888673	0.248241	0.495364	0.603703	0.672022	3	948	0.1025	0.0048844	0.877148	0.142478	0.633167	0.386633	0.637863	3	465	-0.0746331	0.000967305	0.979941	0.0164103	0.174913	0.116586	0.391628	3	1134	0.00259245	0.00235886	0.651956	0.957431	1	0.553618	0.762944	3
OSBPL8	E4	1414	-0.0321404	0.00115657	0.778565	0.34462	0.595192	0.620094	0.685875	3	829	-0.13966	0.0194423	0.322036	0.316533	0.758703	0.316642	0.596523	3	1383	-0.0121789	0.00169382	0.835298	0.767291	0.927027	0.777537	0.878759	3	1036	-0.0607469	0.00728166	0.648723	0.476537	0.82517	0.488007	0.736721	3
OXR1	E3	511	-0.0436203	0.00216013	0.00983466	0.347972	0.596715	0.0206391	0.0631693	4	586	0.0426972	0.0101934	0.101756	0.672366	0.940573	0.196431	0.523724	4	326	-0.0625518	0.00289271	0.0399042	0.244821	0.598158	0.0557645	0.266525	4	1516	-0.00592007	0.00261504	0.884427	0.907837	0.991792	0.933333	0.962885	4
PAK1	E3	153	-0.0971068	0.00350328	0.00133163	0.100873	0.302671	0.000220862	0.0022577	4	866	0.034423	0.00673508	0.304978	0.67489	0.940573	0.334605	0.604299	4	110	-0.114545	0.00290635	0.0600442	0.0336104	0.24543	0.00599026	0.0851706	4	1089	-0.0475305	0.00430723	0.292139	0.468928	0.822171	0.526221	0.755727	4
PAK2	E2	157	0.0358038	0.00511803	0.000123921	0.616744	0.803582	0.000249495	0.00248541	4	56	0.23697	0.0261736	0.0231044	0.14299	0.633167	0.0106526	0.293224	4	295	-0.00527085	0.00367504	0.0266506	0.930714	0.988599	0.0466951	0.247563	4	291	0.00840097	0.0139971	0.02862	0.943391	1	0.0660921	0.354015	4
PCBP2	E4	1222	0.0231665	0.000710423	0.373152	0.384757	0.631676	0.365711	0.467392	3	172	0.151825	0.0303343	0.0542772	0.383361	0.802537	0.0415855	0.374415	3	1334	-0.0130159	0.00126402	0.816965	0.714292	0.906741	0.724375	0.849267	3	697	0.0754555	0.00351588	0.484011	0.203179	0.657717	0.256829	0.575842	3
PDIA3	E2	915	0.0316382	0.000723082	0.0718203	0.239367	0.489037	0.136534	0.233365	4	273	0.108405	0.00741076	0.0865761	0.207936	0.693634	0.0729871	0.418139	4	813	-0.00292676	0.000864841	0.225187	0.920724	0.985616	0.312253	0.598647	4	816	0.0469459	0.00119976	0.510361	0.175306	0.629936	0.329912	0.632324	4
PDIA4	E3	1528	-0.00250187	0.001243	0.905142	0.943428	0.980692	0.883259	0.904069	3	834	0.0401592	0.0108895	0.457159	0.700356	0.949018	0.318141	0.59661	3	1452	-0.0292746	0.00218921	0.948241	0.531529	0.806856	0.847956	0.913363	3	1542	0.0465027	0.00765738	0.998247	0.595128	0.872252	0.967629	0.981434	3
PDLIM5	E2E4	1565	0.0514762	0.00490381	0.948816	0.462285	0.700944	NA	NA	2	1565	0.27812	0.0589992	0.753749	0.252206	0.72825	NA	NA	2	1565	0.0657947	0.00686148	0.728901	0.427024	0.733478	NA	NA	2	1565	-0.0150432	0.0342911	0.835022	0.935254	1	NA	NA	2
PFDN4	E4	1094	0.0333849	0.0011832	0.365623	0.331768	0.583721	0.248248	0.354899	3	159	0.20521	0.017148	0.166345	0.117096	0.606709	0.0386795	0.374415	3	1227	-0.023521	0.00192033	0.676382	0.591445	0.83897	0.62809	0.799637	3	1432	0.0559334	0.00528403	0.980077	0.441617	0.810995	0.824622	0.900634	3
PGAM1	E4	1427	0.00911872	0.000178129	0.514127	0.494462	0.72232	0.637347	0.698536	4	1488	0.0351143	0.0024928	0.864497	0.481869	0.857662	0.904992	0.951215	4	965	-0.0123926	0.000390562	0.312512	0.530612	0.806393	0.417021	0.674738	4	1266	0.0223015	0.00125059	0.665136	0.528281	0.848955	0.66659	0.823497	4
PGM2L1	E2E3E4	699	-0.06471	0.00210516	0.278111	0.158435	0.391739	0.0555565	0.124307	3	317	-0.0733245	0.0252387	0.185232	0.644406	0.931413	0.0886204	0.435122	3	672	-0.0819582	0.00210762	0.780271	0.0742226	0.358046	0.227006	0.52833	3	1264	-0.051697	0.00575229	0.83988	0.495477	0.834587	0.665728	0.823497	3
PICALM	E3E4	1110	-0.0465761	0.00130326	0.234226	0.196991	0.442173	0.258917	0.364817	4	1071	-0.0532019	0.00763202	0.433036	0.542533	0.884809	0.47413	0.69238	4	894	-0.0491457	0.00197296	0.272417	0.268538	0.623929	0.36459	0.637494	4	1487	-0.0253219	0.00452148	0.765176	0.706487	0.929625	0.902919	0.949674	4
PIP4K2A	E4	327	0.0841367	0.00627675	0.0115667	0.288243	0.543432	0.00456235	0.0218211	4	605	-0.144273	0.0168025	0.224076	0.265706	0.729846	0.206239	0.533153	4	254	0.123622	0.0083614	0.0536348	0.176396	0.525346	0.0336823	0.206866	4	992	0.0634228	0.00568759	0.465915	0.400364	0.788857	0.457235	0.719869	4
PPFIA1	E2E4	1565	0.0547746	0.0143406	1	0.647384	0.820967	NA	NA	1	1565	0.192359	0.0456177	1	0.367786	0.791558	NA	NA	1	1565	0.16359	0.0333482	1	0.370348	0.703635	NA	NA	1	1565	-0.635171	0.130732	1	0.0789676	0.510344	NA	NA	1
PPM1A	E3	1257	0.00937033	0.000701358	0.263249	0.723472	0.865514	0.390807	0.486255	4	581	0.0207429	0.0110645	0.168207	0.843673	0.970771	0.193999	0.522228	4	1163	0.00135326	0.000696493	0.493395	0.959105	0.997205	0.57471	0.772869	4	1019	-0.00578501	0.00314685	0.330473	0.917863	0.995788	0.469352	0.72038	4
PPM1F	E2	1565	0.076928	0.00281412	0.78603	0.147017	0.376103	NA	NA	2	1565	0.291232	0.0224889	0.656426	0.0521336	0.494989	NA	NA	2	1565	0.0611882	0.00542371	0.954179	0.406062	0.723424	NA	NA	2	1565	-0.00253626	0.0109716	0.999721	0.980682	1	NA	NA	2
PPP2R2A	E2	1368	0.00971036	0.000260996	0.433837	0.547799	0.75443	0.533277	0.609683	4	1137	0.0854733	0.00334597	0.928877	0.139503	0.633167	0.522078	0.718144	4	1534	-0.00908939	0.000437493	0.915442	0.663882	0.881893	0.953186	0.971708	4	1196	0.0134544	0.00169556	0.543072	0.743862	0.944268	0.606663	0.792847	4
PPP3R1	E2	1158	0.0133669	0.000762347	0.231426	0.628299	0.808158	0.294679	0.397995	4	469	0.0876914	0.00719392	0.261097	0.301188	0.755487	0.145076	0.482169	4	1418	-0.00176815	0.000863819	0.72575	0.952028	0.996016	0.812463	0.895827	4	644	0.0182633	0.00354753	0.183393	0.759124	0.949021	0.227781	0.553183	4
PPP4C	E3	1565	-0.0886231	0.0269185	1	0.589087	0.782897	NA	NA	1	1565	0.213595	0.035547	1	0.257259	0.729846	NA	NA	1	1565	-0.0675696	0.0470781	1	0.755484	0.923326	NA	NA	1	1565	0.278611	0.374506	1	0.648915	0.90301	NA	NA	1
PRKAA2	E2	1565	0.589303	0.158525	1	0.138848	0.361467	NA	NA	1	1565	0.15683	0.983214	1	0.874328	0.978658	NA	NA	1	1565	0.524926	0.219861	1	0.262927	0.615193	NA	NA	1	1565	1.41166	2.22825	1	0.344306	0.762637	NA	NA	1
PRKAR1B	E3	1565	0.00139064	0.00315062	0.990221	0.980234	0.994313	NA	NA	2	1565	-0.0838332	0.0322552	0.991683	0.640655	0.931045	NA	NA	2	1565	0.0681302	0.00508157	0.98739	0.339203	0.676878	NA	NA	2	1565	0.071607	0.016603	0.871574	0.578396	0.868084	NA	NA	2
PRKAR2A	E2	1428	-0.00324165	0.000387916	0.433576	0.869268	0.943068	0.639961	0.70091	4	1327	0.0454278	0.00262034	0.841164	0.374838	0.794514	0.710054	0.836239	4	1307	-0.0159288	0.000763544	0.659991	0.564307	0.825043	0.699537	0.836998	4	118	-0.135881	0.00871495	0.00686241	0.145519	0.597243	0.0143835	0.190643	4
PSIP1	E2	1417	0.0468156	0.00106879	0.939107	0.152142	0.383311	0.622413	0.686982	4	916	0.0737303	0.00629917	0.40627	0.352901	0.779855	0.365717	0.623759	4	1537	0.00819698	0.00206499	0.902916	0.856852	0.963269	0.959305	0.976157	4	790	0.110502	0.00504841	0.55212	0.119894	0.563034	0.310366	0.614446	4
PTK2B	E3	379	-0.119868	0.00362909	0.175682	0.0466149	0.19998	0.00721612	0.0296509	3	954	-0.0289677	0.012659	0.485676	0.796821	0.962914	0.390563	0.640294	3	259	-0.109968	0.0023184	0.41434	0.0223794	0.200961	0.0350076	0.210708	3	928	-0.135698	0.00893967	0.927559	0.15123	0.598957	0.406881	0.685639	3
PTPRA	E3	1261	0.0402744	0.00117651	0.57196	0.240327	0.489494	0.396652	0.491962	3	629	0.189634	0.0188335	0.51987	0.167029	0.665205	0.219617	0.546003	3	1063	0.0658636	0.00184437	0.999792	0.12512	0.457441	0.486827	0.716272	3	126	-0.0465261	0.0311607	0.0470196	0.792113	0.957451	0.0166238	0.206346	3
PURA	E2E4	1301	-0.0491828	0.000994451	0.837262	0.118848	0.331147	0.440811	0.529921	3	92	0.247413	0.0368039	0.0184209	0.197168	0.687667	0.0192066	0.326512	3	550	-0.0806953	0.00198188	0.715231	0.069889	0.348527	0.160146	0.455396	3	227	-0.0167148	0.019495	0.105222	0.904711	0.991009	0.0447109	0.308053	3
RAB2A	E3	880	-0.032977	0.000438995	0.195723	0.115506	0.327659	0.118432	0.210328	4	363	0.0135939	0.00670172	0.0967354	0.868114	0.975826	0.103368	0.440469	4	728	-0.0350499	0.000458177	0.510319	0.101535	0.415199	0.26076	0.560203	4	1278	-0.0318292	0.00162275	0.689274	0.429451	0.801601	0.675798	0.827033	4
RAB7A	E2	1104	0.0133529	0.000313177	0.231424	0.450526	0.68766	0.257024	0.363954	4	1304	0.0331294	0.00240187	0.698335	0.499048	0.865369	0.682331	0.818378	4	1364	0.00408043	0.000291358	0.594597	0.811065	0.944289	0.759791	0.870767	4	717	0.00896235	0.00234608	0.192411	0.853203	0.978932	0.269767	0.588158	4
RABGAP1	E2	1565	-0.0475009	0.00324395	0.494574	0.404282	0.648764	NA	NA	2	1565	-0.198341	0.0287676	0.882635	0.242245	0.719877	NA	NA	2	1565	0.0407422	0.00572234	0.980462	0.59017	0.83897	NA	NA	2	1565	-0.257406	0.0170908	0.923027	0.0489575	0.436675	NA	NA	2
RALB	E3	639	-0.0731599	0.000690396	0.965689	0.00536347	0.0527707	0.0417242	0.102123	3	1034	0.0238325	0.00949795	0.559099	0.806811	0.964582	0.4411	0.667196	3	137	-0.110746	0.00113178	0.947087	0.000995088	0.0362321	0.0104636	0.118888	3	1237	-0.0559896	0.00429185	0.892117	0.392749	0.782504	0.640266	0.80952	3
RAPGEF2	E3	1228	0.0580944	0.00123491	0.989315	0.0982974	0.299157	0.369081	0.469748	3	11	0.212326	0.0269731	0.0653256	0.196074	0.687667	0.00197737	0.235366	3	1235	0.0467629	0.00248613	0.835708	0.348314	0.686616	0.635545	0.802572	3	1328	-0.0612587	0.00437387	0.919403	0.354309	0.770035	0.728615	0.858098	3
RAPGEF4	E4	1086	-0.0545178	0.00151359	0.633079	0.161121	0.396904	0.244481	0.351974	3	1166	0.0521438	0.0136772	0.673438	0.655695	0.936369	0.552957	0.741321	3	1098	-0.0510337	0.00200739	0.795459	0.254683	0.606585	0.520086	0.738258	3	865	-0.132019	0.0106359	0.804139	0.200503	0.655464	0.360758	0.651671	3
RBBP4	E2	342	0.131178	0.00366987	0.100778	0.0303575	0.154875	0.00502302	0.0229641	4	674	0.150329	0.0178886	0.310906	0.261026	0.729846	0.23807	0.549368	4	540	0.100011	0.00425049	0.224442	0.125028	0.457441	0.153576	0.444802	4	277	0.209272	0.00656292	0.712974	0.00978799	0.209856	0.0633781	0.354015	4
RBBP9	E4	1565	0.126823	0.00360788	0.552544	0.0347373	0.168489	NA	NA	2	1565	0.31437	0.0443618	0.446631	0.135548	0.631042	NA	NA	2	1565	0.310692	0.0321997	0.247423	0.0833759	0.383828	NA	NA	2	1565	-0.0904611	0.0176914	0.999998	0.496433	0.835668	NA	NA	2
RHOC	E3	1565	-0.147209	0.00450886	1	0.028357	0.148372	NA	NA	1	1565	-0.205794	0.0339608	1	0.264114	0.729846	NA	NA	1	1565	-0.131493	0.0120408	1	0.23079	0.588714	NA	NA	1	1565	-0.0194547	0.0501811	1	0.930793	0.999616	NA	NA	1
RNPEP	E4	1565	0.0946117	0.00365675	0.461513	0.117682	0.329957	NA	NA	2	1565	0.29821	0.0191352	0.995801	0.0311004	0.411191	NA	NA	2	1565	-0.00457078	0.00537648	0.542472	0.950295	0.995869	NA	NA	2	1565	0.201474	0.0251637	0.989964	0.204054	0.657717	NA	NA	2
RPH3A	E3	17	-0.286902	0.00202756	0.886447	1.87095e-10	1.65766e-07	1.79949e-08	1.65031e-06	3	914	-0.197013	0.013321	0.881482	0.0878279	0.56388	0.364878	0.623759	3	19	-0.269273	0.00350168	0.940009	5.35295e-06	0.00134163	0.000117332	0.00965832	3	30	-0.40782	0.0126692	0.43889	0.000290974	0.0154682	0.00254634	0.129391	3
RPLP0	E3	1565	-0.00987643	0.00225743	0.33881	0.83533	0.923482	NA	NA	2	1565	0.136626	0.0234844	0.248864	0.372635	0.793201	NA	NA	2	1565	-0.0554177	0.00310394	0.755008	0.319882	0.666861	NA	NA	2	1565	-0.0230256	0.00856911	0.926558	0.803563	0.962514	NA	NA	2
RRBP1	E3	1565	0.212564	0.00413289	0.843433	0.000944842	0.0166317	NA	NA	2	1565	0.30521	0.0361548	0.991331	0.108461	0.585966	NA	NA	2	1565	0.170022	0.00775475	0.910571	0.0535161	0.308844	NA	NA	2	1565	0.169493	0.0202105	0.979534	0.233169	0.687628	NA	NA	2
RTN3	E3	1344	-0.0328961	0.00046153	0.875813	0.125709	0.342352	0.497918	0.579423	4	1373	0.023702	0.0034399	0.731919	0.686123	0.944766	0.758115	0.863175	4	802	-0.0542948	0.000862442	0.869982	0.0644846	0.334113	0.305397	0.595561	4	821	0.0342194	0.00304921	0.238891	0.535459	0.853267	0.334078	0.634048	4
RUFY3	E2E3	394	0.00813736	0.00153015	0.00754329	0.835209	0.923482	0.00849468	0.03372	4	1338	-0.0059367	0.0032841	0.563899	0.917491	0.991042	0.71956	0.8411	4	753	-0.00904606	0.00100152	0.209629	0.774997	0.933367	0.27825	0.577932	4	1168	-0.0190632	0.00148646	0.40699	0.620991	0.886672	0.584859	0.783151	4
SCAMP1	E3	990	-0.00794729	0.00212319	0.0728487	0.863065	0.938252	0.177222	0.279763	4	716	0.121211	0.00906012	0.330442	0.202865	0.687768	0.256269	0.559574	4	836	-0.0337278	0.00308952	0.138373	0.543987	0.817306	0.326689	0.611174	4	957	-0.00865677	0.00460787	0.249869	0.898522	0.990737	0.423401	0.691953	4
SCG3	E3E4	840	0.0636595	0.0014026	0.230656	0.0891694	0.286741	0.103918	0.193486	4	367	0.203913	0.00594597	0.886641	0.00818263	0.253357	0.104197	0.440469	4	341	0.0671381	0.00376293	0.109383	0.273746	0.629427	0.0614603	0.281888	4	1115	-0.0118792	0.00465225	0.379543	0.861738	0.979348	0.539554	0.756827	4
SCN2B	E3E4	1565	-0.0422764	0.0022088	0.998995	0.368366	0.618285	NA	NA	2	1565	0.0924568	0.0563204	0.327503	0.696841	0.949018	NA	NA	2	1565	-0.0630567	0.00406379	0.994779	0.322585	0.668109	NA	NA	2	1565	-0.335187	0.289574	0.230142	0.53336	0.85225	NA	NA	2
SEZ6L2	E3E4	1565	-0.115397	0.0770064	1	0.677524	0.837219	NA	NA	1	1565	0.341341	0.0596419	1	0.162204	0.661693	NA	NA	1	1565	-0.0220642	0.122146	1	0.949662	0.995869	NA	NA	1	1565	-1.25058	1.67926	1	0.334516	0.761191	NA	NA	1
SLC25A1	E4	1565	-0.0730284	0.002794	0.94747	0.167098	0.403944	NA	NA	2	1565	-0.0170658	0.0395978	0.986538	0.931656	0.992384	NA	NA	2	1565	-0.0908946	0.00462131	0.808388	0.181198	0.530636	NA	NA	2	1565	0.11235	0.0144151	0.92914	0.349399	0.76598	NA	NA	2
SLC25A3	E2	620	-0.0631484	0.000492281	0.548947	0.0044253	0.0476411	0.0380819	0.0960646	4	1357	0.0270294	0.00487091	0.700542	0.698544	0.949018	0.735408	0.846978	4	407	-0.0720665	0.000883076	0.533519	0.0153031	0.174645	0.0908817	0.34862	4	918	-0.0788958	0.00270999	0.553558	0.129633	0.580899	0.400596	0.682297	4
SLC25A4	E2	912	-0.0654219	0.000749666	0.732733	0.0168759	0.108087	0.135001	0.231514	4	1246	0.0955272	0.0072931	0.659098	0.263315	0.729846	0.626454	0.786335	4	793	-0.0722427	0.00130692	0.970526	0.0456799	0.282928	0.300933	0.593518	4	1195	-0.0623737	0.00418763	0.590114	0.335112	0.761191	0.604453	0.7911	4
SLC30A3	E3	1565	-0.429997	844424930131968	1	1	1	NA	NA	1	1565	0.0859761	0.136454	1	0.815957	0.964582	NA	NA	1	1565	-0.799942	0.100876	1	0.0117813	0.150704	NA	NA	1	1565	-0.278213	0.11554	1	0.413081	0.795054	NA	NA	1
SLC44A1	E2	1553	0.0272204	0.00547187	0.957159	0.712887	0.85889	0.956766	0.963542	3	541	-0.321193	0.0245883	0.891676	0.0405268	0.451724	0.174789	0.505305	3	1546	0.0503676	0.0104658	0.999047	0.622479	0.859059	0.968016	0.979287	3	1512	0.0865796	0.02245	0.999494	0.563372	0.86159	0.930615	0.962621	3
SLC8A1	E3	1544	-0.00955591	0.000755972	0.860219	0.728177	0.86824	0.930888	0.942946	4	357	0.170093	0.00560939	0.616602	0.0231435	0.365081	0.100643	0.440469	4	1013	-0.0442125	0.00150065	0.525521	0.253739	0.606585	0.452101	0.697319	4	559	-0.0844326	0.00463597	0.285937	0.214956	0.669135	0.187231	0.523845	4
SMARCC2	E2	1565	0.00917809	0.00448777	0.70447	0.891027	0.954176	NA	NA	2	1565	0.0185412	0.0331613	0.592832	0.918901	0.991083	NA	NA	2	1565	-0.0348237	0.00810225	0.850071	0.698848	0.897228	NA	NA	2	1565	0.087133	0.0243265	0.861101	0.576398	0.866554	NA	NA	2
SNCA	E3	403	-0.0854327	0.00351933	0.00691002	0.149837	0.379664	0.00927709	0.0360034	4	845	0.0681971	0.00918374	0.215678	0.476692	0.855535	0.326433	0.603819	4	212	-0.0845712	0.00523321	0.0182999	0.242378	0.595829	0.0222268	0.163975	4	336	-0.139064	0.00910719	0.0951441	0.145058	0.597243	0.0873697	0.405491	4
SNCG	E4	594	-0.0703899	0.00173602	0.135159	0.0911428	0.288103	0.0349264	0.0917983	4	1351	0.0163559	0.0053243	0.649769	0.822638	0.966143	0.730541	0.845718	4	791	-0.0445087	0.00250889	0.203862	0.374221	0.706448	0.300245	0.593518	4	202	-0.181018	0.00378985	0.788145	0.00327756	0.110138	0.0376145	0.287938	4
SNRPN	E3	1565	0.133428	0.0278046	1	0.423604	0.665214	NA	NA	1	1565	0.387959	0.0786374	1	0.16652	0.665205	NA	NA	1	1565	-0.272824	0.0201205	1	0.0544333	0.31048	NA	NA	1	1565	1.92714	0.218471	1	3.73941e-05	0.00248484	NA	NA	1
SNX3	E4	1565	0.0253552	0.00127404	0.651538	0.477484	0.707749	NA	NA	2	1565	0.0518551	0.00463205	0.991031	0.446112	0.843847	NA	NA	2	1565	-0.00472614	0.00268237	0.557648	0.927292	0.987904	NA	NA	2	1565	0.0990069	0.00627513	0.995035	0.211358	0.667387	NA	NA	2
SNX6	E3	742	0.0273743	0.00950411	0.0774945	0.778869	0.893497	0.0668415	0.140692	3	365	-0.104843	0.050654	0.103758	0.641334	0.931045	0.103909	0.440469	3	1019	-0.00442113	0.00237353	0.504534	0.927693	0.987904	0.456535	0.700237	3	1383	0.00663318	0.00707243	0.797359	0.937132	1	0.779153	0.879959	3
SORBS1	E2E3	926	0.0417363	0.00114169	0.284452	0.216754	0.464735	0.1397	0.235939	4	708	0.129417	0.00519452	0.626437	0.072552	0.533381	0.252135	0.556492	4	1014	0.0131203	0.00182079	0.306636	0.75848	0.92399	0.4522	0.697319	4	1552	0.0255057	0.00531704	0.987633	0.7265	0.939907	0.986115	0.99374	4
SORD	E2	1565	0.125111	0.00284212	0.890041	0.018936	0.116509	NA	NA	2	1565	0.222587	0.0188491	0.942421	0.10496	0.579007	NA	NA	2	1565	0.00759383	0.00478361	0.974009	0.912572	0.982192	NA	NA	2	1565	0.382084	0.0474382	0.260892	0.0793852	0.51091	NA	NA	2
SRGAP3	E2	918	0.0555068	0.00294059	0.0500493	0.306026	0.558281	0.137419	0.234121	4	1204	0.0361841	0.00774613	0.559712	0.68098	0.940573	0.589377	0.765602	4	643	0.0397784	0.00377034	0.115712	0.517099	0.799769	0.21207	0.515827	4	61	0.186304	0.0464839	9.37559e-06	0.387524	0.780632	0.00654537	0.162155	4
SRPK2	E4	1565	-0.252592	0.0862189	1	0.389658	0.635406	NA	NA	1	1565	0.852243	0.332528	1	0.139431	0.633167	NA	NA	1	1565	-0.662158	0.179921	1	0.118508	0.449681	NA	NA	1	1565	-0.497885	0.458385	1	0.462106	0.817824	NA	NA	1
SRSF1	E3	1565	0.151469	0.0296701	0.189674	0.37921	0.62761	NA	NA	2	1565	0.0196967	0.00771643	0.883575	0.822582	0.966143	NA	NA	2	1565	0.0451523	0.0165162	0.263543	0.725335	0.910695	NA	NA	2	1565	1.62931	2.21526	5.73574e-24	0.273652	0.718195	NA	NA	2
STMN1	E3	1243	0.0418838	0.000723418	0.932099	0.119417	0.332367	0.378904	0.476432	3	1131	0.081166	0.0159629	0.634255	0.520602	0.873443	0.517666	0.715714	3	503	0.0672997	0.00119897	0.77743	0.0519427	0.304105	0.137346	0.426496	3	297	-0.122529	0.0032978	0.470853	0.0328704	0.365563	0.0675462	0.355698	3
STUB1	E2	985	0.0433268	0.00106251	0.191965	0.183782	0.429619	0.171858	0.27288	4	243	0.190965	0.00593326	0.459812	0.0131688	0.317078	0.0633976	0.403169	4	1562	-0.0077842	0.000900672	0.989275	0.795345	0.939315	0.994175	0.995448	4	193	0.179094	0.0209444	0.00134611	0.2159	0.669135	0.0355701	0.285488	4
SUB1	E4	1121	-0.0483677	0.00100041	0.683606	0.126213	0.34302	0.266574	0.371306	3	125	0.0872765	0.0424397	0.0437774	0.671818	0.940573	0.0290678	0.360893	3	645	-0.0750081	0.00155483	0.871838	0.0571388	0.316805	0.213521	0.516804	3	490	0.131554	0.02335	0.071524	0.389283	0.780632	0.156023	0.495608	3
SULT4A1	E4	1345	-0.0247249	0.000839441	0.419034	0.393452	0.639767	0.498595	0.579778	4	1201	-0.0234665	0.00774887	0.474607	0.789792	0.962699	0.588377	0.765602	4	1467	-0.0283985	0.00145567	0.856765	0.45668	0.761037	0.862176	0.919184	4	423	0.10912	0.0205448	0.0106688	0.446482	0.812715	0.128191	0.472957	4
SUMO3	E3	1565	0.042472	0.00119914	0.923073	0.220011	0.466703	NA	NA	2	1565	0.219233	0.01395	0.812758	0.0634279	0.521082	NA	NA	2	1565	0.00807878	0.00242732	0.999081	0.869749	0.966878	NA	NA	2	1565	-0.0242299	0.00542911	0.995437	0.742275	0.944268	NA	NA	2
SV2A	E2	1357	-0.0280345	0.000461551	0.735621	0.191922	0.437878	0.51892	0.598077	4	409	0.10361	0.00392795	0.36131	0.0982937	0.574997	0.124654	0.475903	4	752	-0.0431331	0.00121171	0.280217	0.215302	0.569994	0.277371	0.576873	4	1188	-0.0425795	0.00239198	0.701265	0.383969	0.780632	0.597639	0.786791	4
SYNGR1	E4	1565	-0.114238	0.0187231	1	0.403787	0.648764	NA	NA	1	1565	0.0138387	0.125024	1	0.96878	1	NA	NA	1	1565	-0.245672	0.0362586	1	0.196989	0.549407	NA	NA	1	1565	0.745865	0.0512878	1	0.000989594	0.043208	NA	NA	1
SYNJ2	E3	1565	-0.0841147	0.0086488	1	0.365747	0.615965	NA	NA	1	1565	0.010187	0.036985	1	0.957755	1	NA	NA	1	1565	0.0148351	0.00979898	1	0.880872	0.969907	NA	NA	1	1565	-0.948715	0.108462	1	0.00396805	0.122701	NA	NA	1
TAOK1	E2	1565	-0.0612418	0.10149	1	0.847557	0.930968	NA	NA	1	1565	-0.735851	0.454336	1	0.274967	0.736852	NA	NA	1	1565	0.148091	0.213745	1	0.748728	0.919752	NA	NA	1	1565	1.12698	0.716595	1	0.183086	0.631578	NA	NA	1
TESC	E2	1565	-0.0834336	0.0174979	1	0.528213	0.741517	NA	NA	1	1565	0.223173	0.082861	1	0.438165	0.841098	NA	NA	1	1565	-0.165634	0.0401438	1	0.408417	0.723424	NA	NA	1	1565	-0.107024	0.173165	1	0.797034	0.959473	NA	NA	1
TMEM33	E2	1565	-0.123526	0.0124646	1	0.268545	0.521397	NA	NA	1	1565	-0.193836	0.0451308	1	0.361545	0.787049	NA	NA	1	1565	-0.237371	0.0147695	1	0.0507963	0.300785	NA	NA	1	1565	1.11322	0.0534124	1	1.45852e-06	0.000161531	NA	NA	1
TMPO	E2	736	0.0744524	0.00107194	0.390818	0.0229653	0.1296	0.0655373	0.139267	4	1030	0.0721228	0.00679807	0.333862	0.381714	0.801263	0.439212	0.666432	4	1038	0.0371216	0.00199798	0.481351	0.406266	0.723424	0.466407	0.702756	4	334	0.154855	0.00858427	0.230949	0.0946478	0.542109	0.0861586	0.403449	4
TNPO1	E2	1565	-0.00953489	0.0171075	1	0.941886	0.979922	NA	NA	1	1565	-0.00973862	0.070303	1	0.970701	1	NA	NA	1	1565	-0.153803	0.0441649	1	0.464257	0.768365	NA	NA	1	1565	0.425085	0.126666	1	0.232325	0.687628	NA	NA	1
TNS1	E3	1565	0.0900135	0.00530698	0.931499	0.216601	0.464735	NA	NA	2	1565	0.140309	0.0808123	0.400065	0.621612	0.924591	NA	NA	2	1565	-0.0258987	0.00798869	0.975919	0.771999	0.930713	NA	NA	2	1565	0.289475	0.0290701	0.534712	0.0895449	0.533584	NA	NA	2
TTN	E2E3	1565	0.668479	0.312828	1	0.232015	0.479918	NA	NA	1	1565	0.363487	1.49952	1	0.766594	0.958945	NA	NA	1	1565	0.355586	0.706362	1	0.672231	0.882625	NA	NA	1	1565	2.43317	2.32902	1	0.110856	0.560658	NA	NA	1
TUBB2A	E4	839	-0.0397772	0.00146746	0.086304	0.2991	0.553613	0.102718	0.191479	4	894	-0.055341	0.00653222	0.368301	0.493517	0.862784	0.349313	0.60823	4	969	-0.013891	0.00187348	0.234456	0.748263	0.919752	0.418044	0.674738	4	936	-0.107832	0.00354941	0.85957	0.0703024	0.49566	0.410763	0.685639	4
TWF2	E2	567	-0.0300769	0.00113924	0.0296959	0.372876	0.622882	0.029677	0.0818605	4	745	0.0374924	0.00606997	0.205638	0.630355	0.93067	0.270367	0.56717	4	708	-0.0284948	0.000693488	0.315246	0.279231	0.634135	0.249979	0.552035	4	854	-0.054106	0.00193899	0.445504	0.219172	0.671067	0.353421	0.647248	4
UBE2V1	E3	1565	-0.0749903	0.00515874	0.292139	0.296449	0.550636	NA	NA	2	1565	-7.60618e-05	0.00519988	0.967532	0.999158	1	NA	NA	2	1565	-0.0364853	0.00154393	0.750232	0.353124	0.690797	NA	NA	2	1565	-0.410822	0.181323	0.125687	0.334656	0.761191	NA	NA	2
UNC13A	E4	1565	-0.130671	0.00215612	0.99991	0.0048911	0.0503875	NA	NA	2	1565	0.0962506	0.0188955	0.948732	0.4838	0.859586	NA	NA	2	1565	-0.082545	0.00277436	0.985804	0.117081	0.445847	NA	NA	2	1565	-0.271294	0.0157163	0.585282	0.0304612	0.356149	NA	NA	2
USP14	E4	864	-0.00988161	0.000886816	0.111963	0.74002	0.875545	0.113083	0.204701	4	919	0.0108033	0.00613201	0.227638	0.890272	0.983716	0.367201	0.624057	4	421	-0.0476703	0.000967962	0.255765	0.12547	0.457476	0.0963604	0.357434	4	331	-0.010692	0.00659281	0.0585542	0.895236	0.990737	0.0844217	0.398451	4
USP7	E4	1319	0.000613812	0.000407586	0.378486	0.975745	0.993902	0.461049	0.546499	4	1272	0.0705478	0.00410745	0.679719	0.270996	0.733511	0.654091	0.802576	4	1368	-0.00292476	0.000687379	0.650079	0.911176	0.981984	0.765341	0.874995	4	1427	-0.00992863	0.00197039	0.662169	0.823012	0.969858	0.821561	0.900436	4
VAT1L	E3	704	0.0740403	0.00149711	0.262846	0.0556772	0.218597	0.0573396	0.127385	4	432	0.191041	0.00592213	0.839374	0.0130467	0.317078	0.132605	0.477654	4	943	0.0652603	0.00181227	0.478987	0.125279	0.457441	0.398269	0.659511	4	684	-0.0618378	0.00929436	0.214812	0.521248	0.84276	0.249374	0.570207	4
VCAN	E3	13	0.250894	0.0140126	0.000260131	0.0340496	0.166981	8.19235e-10	9.85603e-08	4	1312	0.15602	0.0162189	0.687527	0.22054	0.70288	0.693838	0.827106	4	4	0.267574	0.0204214	0.00113396	0.06115	0.327036	2.28554e-06	0.000893648	4	18	0.40796	0.0429232	0.00367997	0.0489397	0.436675	0.00114993	0.0963559	4
VPS53	E4	1565	0.0135127	0.00168352	0.729806	0.741905	0.875659	NA	NA	2	1565	0.330761	0.0202661	0.665821	0.0201561	0.34352	NA	NA	2	1565	-0.00560793	0.00287504	0.990888	0.916703	0.984086	NA	NA	2	1565	-0.0387253	0.00923389	0.980753	0.68695	0.918467	NA	NA	2
VTA1	E2	815	0.00911593	0.00121721	0.0747381	0.793871	0.902397	0.0956059	0.18347	4	531	0.131404	0.00513877	0.575158	0.0667922	0.525248	0.170059	0.50001	4	233	0.00951667	0.00315635	0.0203646	0.865489	0.966878	0.0282507	0.189631	4	1082	-0.0404293	0.00242272	0.443881	0.411429	0.794175	0.519826	0.751394	4
WDR61	E2	1565	-0.0597979	0.00367225	1	0.323751	0.576191	NA	NA	1	1565	0.0674175	0.044672	1	0.749746	0.955918	NA	NA	1	1565	-0.0556695	105553116266496	1	1	1	NA	NA	1	1565	0.0627679	0.0255682	1	0.694657	0.922493	NA	NA	1
XRCC5	E2	397	0.0747165	0.000529136	0.474846	0.00116167	0.0192983	0.00874581	0.0344545	4	138	0.144578	0.0061547	0.141762	0.065345	0.521082	0.0320305	0.360893	4	1127	0.0342979	0.00113331	0.607736	0.308293	0.655555	0.54164	0.751664	4	874	0.0814476	0.00243284	0.609275	0.0986805	0.548188	0.364396	0.651988	4
