# Supplementary material for: Multiomics integrative analysis identifies APOE allele-specific blood biomarkers associated to Alzheimer’s disease etiopathogenesis
Source: Aging (Albany NY). 2021 Apr 12;13(7):9277–329. doi: 10.18632/aging.202950 (PMC8064208; doi:10.18632/aging.202950)
Supplement: Supplementary Table 39 [file aging-13-202950-s041.xlsx]

## Sheet: Sheet1
Supplementary Table 39. Cortex snRNAseq differential expression analysis.
genes	RRA Cortex Stratum	Ast.logFC	Ast.logCPM	Ast.F	Ast.PValue	Ast.FDR	Ex.logFC	Ex.logCPM	Ex.F	Ex.PValue	Ex.FDR	In.logFC	In.logCPM	In.F	In.PValue	In.FDR	Mic.logFC	Mic.logCPM	Mic.F	Mic.PValue	Mic.FDR	Oli.logFC	Oli.logCPM	Oli.F	Oli.PValue	Oli.FDR	Opc.logFC	Opc.logCPM	Opc.F	Opc.PValue	Opc.FDR	Ast_E2.logFC	Ast_E2.logCPM	Ast_E2.F	Ast_E2.PValue	Ast_E2.FDR	Ex_E2.logFC	Ex_E2.logCPM	Ex_E2.F	Ex_E2.PValue	Ex_E2.FDR	In_E2.logFC	In_E2.logCPM	In_E2.F	In_E2.PValue	In_E2.FDR	Mic_E2.logFC	Mic_E2.logCPM	Mic_E2.F
AAGAB	E2	-0.0652258	10.0337	1.08058	0.456425	0.835998	-0.272393	10.0337	226.657	3.11043e-30	2.70311e-29	-0.174893	10.0337	20.7121	0.000891909	0.00528543	-0.017484	10.0337	0.0533163	0.866227	1	-0.0437108	10.0337	3.79987	0.166671	0.45711	-0.117952	10.0337	3.04071	0.210086	0.734344	-0.0669178	9.69637	0.998302	0.44627	0.876519	-0.168779	9.69637	12.6701	0.00500924	0.0115108	-0.00518368	9.69637	0.0210917	0.90181	1	0.368228	9.69637	2.39936
ABCA9	E2	-0.0249907	9.99255	0.0588065	0.884984	1	-0.207912	9.99255	167.154	3.92654e-17	1.93357e-16	-0.196349	9.99255	35.1059	0.000115819	0.000901987	0.0280795	9.99255	1.87465	0.400091	0.880984	0.0749018	9.99255	35.391	0.000248874	0.00407648	-0.129481	9.99255	15.9109	0.0143444	0.347313	0.0315268	9.64779	0.156831	0.788401	1	-0.322555	9.64779	58.6212	6.58863e-08	3.02801e-07	-0.0680484	9.64779	0.617664	0.57967	0.827284	0.0181035	9.64779	5.62896e-11
ABCB1	E2	-0.0412498	9.94891	8.36177	0.190007	0.616641	-0.19548	9.94891	284.032	5.02962e-15	2.20925e-14	-0.0233793	9.94891	1.31031	0.581121	0.765014	0.0264428	9.94891	0.40132	0.781358	1	0.0128529	9.94891	2.11215	0.514848	0.783915	-0.0760601	9.94891	8.16014	0.191856	0.730424	0.00860034	9.59164	0.25412	0.794163	1	-0.37403	9.59164	148.519	6.09166e-10	3.4511e-09	-0.0827432	9.59164	3.57411	0.327442	0.622318	0.0678173	9.59164	0.151093
ABCB4	E2	-0.0133218	9.92282	7.21792	0.594408	0.92324	0.00146466	9.92282	1.00254	0.838554	0.876016	-0.0366084	9.92282	46.1853	0.173554	0.346212	0.0266644	9.92282	4.56629	0.671711	1	0.0076237	9.92282	33.6455	0.251025	0.562251	-0.0453121	9.92282	25.908	0.310035	0.792683	0.0531154	9.55869	6.39851	0.582221	0.953633	-0.0262967	9.55869	35.3787	0.195597	0.287302	-0.00174001	9.55869	0.334615	0.896728	1	-0.0529245	9.55869	2.04814
ABCC10	E3	0.175826	9.9783	14.4995	0.0230154	0.248499	-0.158472	9.9783	101.854	4.64574e-10	1.53351e-09	-0.0988347	9.9783	9.61103	0.0623401	0.165064	-0.00845703	9.9783	0.00599625	0.96119	1	0.0342709	9.9783	4.83734	0.192441	0.495415	0.100158	9.9783	3.45635	0.266881	0.78789	0.121234	9.63019	0.56687	0.631413	0.990072	-0.180058	9.63019	18.665	0.00425253	0.00992853	-0.0553644	9.63019	0.49978	0.654038	0.881649	0.0689478	9.63019	0.064812
ABCC3	E3E4	0.0580412	9.93641	11.62	0.19508	0.62389	-0.0596651	9.93641	44.2025	0.0102662	0.0175519	-0.0375333	9.93641	10.2363	0.221593	0.405912	0.362748	9.93641	72.366	0.000840156	0.0735529	0.0154026	9.93641	7.12121	0.31178	0.609633	-0.0246368	9.93641	1.09566	0.687475	1	0.0192268	9.57157	0.359178	0.822636	1	-0.117222	9.57157	35.4431	0.0206174	0.0410868	-0.04621	9.57157	6.03695	0.351633	0.647077	0.353104	9.57157	14.942
ABCD4	E2	0.00842325	10.0831	0.0124414	0.916065	1	-0.192643	10.0831	93.2182	1.09677e-15	5.01073e-15	-0.127399	10.0831	9.45188	0.0104029	0.0408124	0.0119133	10.0831	0.00364308	0.962966	1	0.051641	10.0831	2.71502	0.180521	0.479342	0.142644	10.0831	3.21459	0.136041	0.700748	-0.103862	9.75928	0.261408	0.649832	1	-0.275997	9.75928	36.8305	3.78995e-08	1.78741e-07	0.0357791	9.75928	0.156154	0.730171	0.933591	0.381543	9.75928	2.47655
ABHD2	E3	0.0445814	10.2381	0.391933	0.539356	0.894227	-0.20405	10.2381	117.404	2.51048e-27	1.9198e-26	-0.155954	10.2381	14.6427	0.000276031	0.00190584	0.202679	10.2381	3.24713	0.112536	0.736298	-0.00861555	10.2381	0.0768268	0.811107	0.971953	-0.00211864	10.2381	0.000783147	0.977674	1	0.00666077	9.93261	2.0242e-05	0.998461	1	-0.214522	9.93261	26.3257	2.93411e-07	1.2629e-06	-0.170689	9.93261	3.6881	0.0692776	0.255436	-0.0130801	9.93261	0.0187428
ABLIM1	E4	-0.165367	10.2997	9.62053	0.00192521	0.0566992	-0.334677	10.2997	337.364	4.21001e-75	1.8612e-73	-0.260741	10.2997	55.276	1.06397e-13	6.17938e-12	-0.0155458	10.2997	0.0892807	0.790113	1	-0.0435076	10.2997	4.32664	0.070678	0.277282	0.320162	10.2997	13.9466	0.000691184	0.088482	-0.0846153	9.98537	0.272991	0.601343	0.966122	-0.608557	9.98537	222.358	8.58783e-50	5.2994e-48	-0.0838555	9.98537	1.17407	0.278591	0.567658	0.0327657	9.98537	0.0470764
ACACB	E3E4	-0.306228	9.98428	58.09	1.02314e-07	2.24484e-05	-0.076798	9.98428	32.9985	0.000934756	0.00182896	-0.072059	9.98428	7.04442	0.130534	0.283669	-0.0483734	9.98428	0.789621	0.613738	1	-0.0187904	9.98428	0.754186	0.599908	0.848856	0.0404096	9.98428	0.378217	0.719554	1	-1.02709	9.62228	90.3224	1.81419e-10	1.3434e-07	-0.092188	9.62228	7.75669	0.101635	0.165682	-0.12641	9.62228	3.88299	0.247159	0.528489	-0.103188	9.62228	2.32926
ACER3	E3	0.00201836	10.1648	0.000427155	0.983511	1	-0.268068	10.1648	151.769	1.21174e-32	1.14792e-31	-0.294114	10.1648	41.7369	7.52408e-10	2.1921e-08	0.303664	10.1648	7.01711	0.0135462	0.368719	0.224709	10.1648	56.4815	1.18389e-13	1.25988e-11	-0.0957582	10.1648	1.58811	0.207885	0.732859	0.042843	9.8166	0.018617	0.918065	1	-0.312294	9.8166	39.9506	7.92403e-10	4.44807e-09	-0.223604	9.8166	5.0526	0.0315903	0.151884	0.3009	9.8166	1.0792
ACP1	E3	0.0911745	9.99758	3.0497	0.255902	0.70151	-0.130728	9.99758	53.906	2.62124e-06	6.5802e-06	-0.0239596	9.99758	0.457285	0.657861	0.826077	0.119829	9.99758	2.83803	0.275349	0.842645	0.0740515	9.99758	12.8827	0.0200581	0.122083	-0.16253	9.99758	7.19013	0.0794465	0.591505	0.264754	9.66785	0.479174	0.615005	0.976841	0.185339	9.66785	25.5762	7.89946e-05	0.00024712	0.162303	9.66785	3.4098	0.194848	0.464811	0.34646	9.66785	1.80737
ACSL6	E3	-0.0209124	9.92166	8.40978	0.639349	0.948631	-0.0176978	9.92166	166.561	0.0328844	0.0515408	-0.0296906	9.92166	64.8521	0.183538	0.358644	0.00305215	9.92166	1.41928e-09	1	1	-8.76027e-05	9.92166	1.76454	0.826723	0.978411	-0.0206763	9.92166	18.1813	0.482152	0.908482	-0.00904732	9.55718	0.302513	0.92005	1	-0.0310521	9.55718	98.2509	0.0739469	0.126097	-0.0747147	9.55718	154.721	0.024682	0.12826	0.000341098	9.55718	-2.46332e-11
ACTR2	E3	-0.150006	10.2475	3.52879	0.0924774	0.484811	-0.315733	10.2475	312.506	1.00916e-69	3.66018e-68	-0.200127	10.2475	23.552	2.26568e-06	2.84161e-05	-0.110989	10.2475	1.02627	0.344726	0.849833	0.114935	10.2475	12.1125	0.00213114	0.0231224	-0.1123	10.2475	1.67012	0.239523	0.775136	0.115931	9.97789	0.01222	0.944056	1	-0.194821	9.97789	22.7824	1.83783e-06	7.15014e-06	0.211209	9.97789	5.82718	0.0204131	0.112183	0.16084	9.97789	0.247997
ACTR6	E4	0.0825669	10.0167	2.79462	0.255529	0.700919	-0.20401	10.0167	131.636	3.06672e-16	1.44414e-15	-0.216351	10.0167	34.0802	4.35311e-05	0.000387011	0.230766	10.0167	13.5762	0.0124408	0.359746	0.0332519	10.0167	2.71477	0.262908	0.573231	0.18896	10.0167	8.5576	0.0446457	0.506287	0.162458	9.6911	0.022185	0.913353	1	0.0891091	9.6911	6.41931	0.0356233	0.0668318	0.0254946	9.6911	0.119789	0.775466	0.962805	0.34994	9.6911	3.59421
ACVR1B	E2	-0.00174789	10.098	0.000135553	0.99741	1	-0.0607233	10.098	11.5098	0.00583467	0.0103168	-0.129578	10.098	10.9427	0.00692606	0.0290924	0.0578182	10.098	0.522091	0.586676	1	-0.020076	10.098	0.809173	0.498985	0.772942	-0.048629	10.098	0.420663	0.616254	0.991568	0.0344566	9.77296	0.0734025	0.823926	1	0.193676	9.77296	25.4203	9.86603e-06	3.50678e-05	0.145208	9.77296	2.68278	0.189488	0.457179	0.149358	9.77296	0.157627
ADAD2	E3	-0.00271551	9.92211	-1.02462e-09	1	1	-0.0273713	9.92211	171.52	0.00680248	0.0119072	0.00733399	9.92211	55.9268	0.130742	0.28381	0.0172537	9.92211	24.6088	0.315834	0.842645	0.000899663	9.92211	27.9425	0.285467	0.586537	-0.0455419	9.92211	125.257	0.0233543	0.400417	0.0317618	9.5582	6.17641e-11	0.999994	1	-0.0244627	9.5582	4.13933	0.592261	0.694213	0.0146199	9.5582	8.51343e-11	0.999993	1	0.0160895	9.5582	7.17799e-11
ADAMTS2	E4	0.0122512	9.97837	0.0567668	0.889073	1	0.207156	9.97837	180.742	3.20798e-17	1.58676e-16	-0.00316764	9.97837	0.00205458	0.978111	1	-0.0311013	9.97837	0.333618	0.737971	1	0.0775415	9.97837	33.6962	0.000788366	0.0107363	0.0987904	9.97837	9.56218	0.0739934	0.573124	0.212555	9.62758	6.84124	0.10725	0.531189	0.497801	9.62758	169.686	1.94521e-17	1.99828e-16	0.0147115	9.62758	0.137817	0.813255	0.984414	-0.0089948	9.62758	0.0104294
ADARB1	E2	-0.010948	10.0434	0.0427386	0.886672	1	-0.26392	10.0434	219.378	7.94272e-29	6.47811e-28	-0.131896	10.0434	13.3787	0.0085589	0.0347122	-0.0345857	10.0434	0.17845	0.760459	1	0.0116194	10.0434	0.679065	0.565498	0.823258	-0.149157	10.0434	5.22657	0.10418	0.654006	0.124478	9.71696	0.00288468	0.968632	1	-0.0601528	9.71696	1.18382	0.42257	0.532731	0.257958	9.71696	12.0002	0.00527484	0.0427546	0.0981045	9.71696	0.00268148
ADCYAP1	E3	0.0159163	9.95207	3.76533	0.363843	0.763986	-0.194807	9.95207	267.917	5.19124e-16	2.41831e-15	-0.0473365	9.95207	12.1762	0.10092	0.234973	0.0184978	9.95207	8.99433	0.161357	0.739251	-0.00619264	9.95207	1.0253	0.636322	0.87592	0.0224003	9.95207	14.9226	0.0712325	0.569988	0.159292	9.59389	9.01671e-10	1	1	0.0144572	9.59389	1.67696	0.469673	0.579776	0.0237224	9.59389	0.00298187	0.973744	1	0.0357101	9.59389	2.00184e-10
ADD1	E4	-0.0261205	10.3257	0.126323	0.722277	0.989079	-0.214116	10.3257	123.815	9.98746e-29	8.10489e-28	-0.118196	10.3257	7.76475	0.00532955	0.0235614	-0.148933	10.3257	1.48761	0.235799	0.80142	0.11243	10.3257	12.3762	0.00043522	0.00653233	-0.254305	10.3257	8.64195	0.00328658	0.189683	-0.12186	10.0395	0.519222	0.471189	0.882828	-0.0418896	10.0395	0.96505	0.510928	0.619345	0.0861495	10.0395	0.970758	0.324513	0.6194	-0.0470998	10.0395	0.0433794
ADGRL2	E4	-0.111738	10.7238	1.93648	0.19317	0.621137	-0.359407	10.7238	533.252	2.25742e-117	5.42147e-115	-0.306638	10.7238	80.158	3.57099e-19	6.10227e-17	0.0978576	10.7238	1.14249	0.323788	0.842645	-0.0384386	10.7238	1.73172	0.220984	0.522892	0.00307707	10.7238	0.000974739	0.981099	1	0.201837	10.5004	0.0299558	0.875879	1	-0.0989695	10.5004	8.06943	0.0045102	0.0104874	0.0401513	10.5004	0.368969	0.543579	0.799313	0.0546866	10.5004	0.186752
AEBP1	E3	0.359997	9.93173	245.594	1.18831e-05	0.00127992	0.00428803	9.93173	6.65032	0.525887	0.599337	0.00122668	9.93173	0.461721	0.85915	0.954925	0.0331964	9.93173	33.3526	0.156003	0.739251	0.00262016	9.93173	2.33291	0.709581	0.921547	0.0826621	9.93173	20.1753	0.259116	0.78789	0.749888	9.56322	29.9619	0.25095	0.737085	-0.0651163	9.56322	181.861	0.00437484	0.0101916	-0.0368598	9.56322	36.6446	0.205549	0.478143	-0.0125134	9.56322	-3.45985e-09
AFF4	E2	-0.0276023	10.2674	0.139682	0.735451	0.99569	-0.252067	10.2674	180.947	3.54549e-41	4.66744e-40	-0.229501	10.2674	30.2653	5.33083e-08	1.00042e-06	-0.0663469	10.2674	0.381141	0.568159	1	0.0369	10.2674	1.07631	0.329608	0.627308	-0.150192	10.2674	3.28808	0.0824298	0.601125	-0.342471	9.96485	3.25051	0.0809622	0.484396	-0.403861	9.96485	97.1923	7.84319e-23	1.16839e-21	-0.217458	9.96485	5.82792	0.0157902	0.0933542	-0.490633	9.96485	3.04435
AGBL3	E3	-0.0299895	10.0258	0.361006	0.674212	0.96711	-0.0967649	10.0258	24.0233	0.000586722	0.0011753	-0.0742764	10.0258	3.64872	0.163256	0.331955	0.0444845	10.0258	0.123121	0.801878	1	0.052938	10.0258	3.76514	0.158198	0.443301	-0.127627	10.0258	3.46578	0.176685	0.730424	-0.282403	9.66712	3.34173	0.176725	0.651319	-0.593655	9.66712	172.389	9.43034e-24	1.48053e-22	-0.524442	9.66712	34.4221	9.27145e-06	0.000268359	-0.0386507	9.66712	1.32897
AGBL5	E4	-0.105372	9.98741	3.93429	0.205829	0.636921	-0.234088	9.98741	191.016	4.20964e-19	2.26639e-18	-0.140189	9.98741	16.4165	0.00867377	0.03509	0.167487	9.98741	9.46134	0.0535369	0.597878	-0.0385186	9.98741	3.97669	0.208017	0.507862	-0.111933	9.98741	3.33659	0.240732	0.776712	-0.0719008	9.64776	0.45471	0.628885	0.987937	-0.445756	9.64776	106.631	2.5163e-13	1.90135e-12	-0.140639	9.64776	2.65857	0.243032	0.524078	0.101787	9.64776	0.0753672
AGFG2	E2	0.0554306	9.96328	1.39871	0.509649	0.876729	-0.0797811	9.96328	32.7009	0.00169941	0.00322394	-0.128414	9.96328	26.2962	0.00593756	0.0256808	0.0131768	9.96328	0.123809	0.851904	1	-0.00911883	9.96328	1.0372	0.590811	0.841945	-0.0612177	9.96328	1.76539	0.476772	0.906255	-0.225971	9.6033	3.42488	0.291916	0.773105	-0.0330962	9.6033	1.31057	0.52437	0.63219	-0.178738	9.6033	8.72944	0.101526	0.321626	0.0557237	9.6033	0.935893
AHI1	E2	-0.142406	11.1104	4.10582	0.042741	0.345584	-0.30872	11.1104	374.488	3.95433e-83	2.43171e-81	-0.253086	11.1104	63.0175	2.09075e-15	1.6813e-13	0.0478491	11.1104	0.0331162	0.8556	1	0.0904538	11.1104	6.71568	0.00955966	0.0726665	-0.306115	11.1104	15.659	7.59541e-05	0.0249973	-0.463775	10.8756	8.66846	0.00324451	0.0925545	-0.626264	10.8756	443.608	1.48813e-96	5.62702e-94	-0.333175	10.8756	34.7195	3.92105e-09	3.37852e-07	0.222137	10.8756	0.654118
AHNAK	E2E4	0.363146	9.94204	100.326	1.11661e-05	0.00121745	-0.0495306	9.94204	39.0609	0.0110573	0.0188247	-0.0273811	9.94204	2.9932	0.47794	0.675012	0.0783964	9.94204	3.02339	0.496429	0.982556	-0.00595491	9.94204	0.751299	0.726047	0.928162	-0.0735436	9.94204	7.40669	0.274884	0.78789	0.192311	9.57451	4.62088	0.365485	0.839967	-0.104812	9.57451	43.2635	0.00845416	0.018492	-0.0701453	9.57451	4.45773	0.38741	0.67219	0.0535585	9.57451	0.400758
AK2	E2	0.0555453	9.97093	1.33637	0.493162	0.865487	-0.105139	9.97093	46.7146	4.90208e-05	0.000110125	-0.212722	9.97093	48.2286	3.86154e-05	0.000348362	0.211234	9.97093	9.95635	0.0636602	0.618012	0.0782878	9.97093	15.3284	0.021261	0.12688	-0.0161168	9.97093	0.0822521	0.862938	1	-0.0864344	9.61372	1.01002	0.539193	0.920779	-0.0847005	9.61372	4.34439	0.209935	0.303874	-0.365243	9.61372	25.2593	0.00203062	0.0208241	0.159304	9.61372	0.845952
AKAP11	E2	-0.119519	10.2289	2.09978	0.212286	0.646635	-0.0719706	10.2289	16.9163	6.04246e-05	0.00013462	-0.146197	10.2289	13.2228	0.000542573	0.0034352	0.00500718	10.2289	0.0412048	0.870317	1	0.0254679	10.2289	0.891146	0.411069	0.711278	-0.0896626	10.2289	0.961134	0.381062	0.865701	0.31989	9.95589	0.888726	0.394537	0.86166	0.319085	9.95589	74.1813	8.11141e-18	8.60119e-17	0.362263	9.95589	19.2453	1.49559e-05	0.000399693	0.0893539	9.95589	3.19306e-06
AKAP6	E3	-0.24914	10.8964	10.0854	0.00149537	0.0475755	-0.335366	10.8964	414.497	9.01502e-92	7.77743e-90	-0.235978	10.8964	50.5792	1.15969e-12	5.66207e-11	0.0137421	10.8964	0.00957542	0.930048	1	-0.111244	10.8964	17.798	2.46068e-05	0.000585424	-0.108384	10.8964	2.3954	0.121699	0.69268	-0.727356	10.6639	13.6791	0.00021792	0.0136825	-0.322105	10.6639	101.518	9.0064e-24	1.41648e-22	-0.0348944	10.6639	0.311638	0.597873	0.841083	0.115795	10.6639	0.0902208
AKAP8L	E2	-0.109817	10.1261	2.53127	0.201222	0.630821	-0.17274	10.1261	84.0523	1.9029e-15	8.56595e-15	-0.0323339	10.1261	0.574323	0.601197	0.781257	-0.175866	10.1261	3.79831	0.116359	0.73894	0.00471153	10.1261	1.61816e-05	0.99679	1	-0.0519397	10.1261	0.523504	0.562283	0.961136	-0.456896	9.77748	5.76277	0.0468173	0.376874	-0.587445	9.77748	181.646	1.16528e-32	3.12829e-31	-0.157634	9.77748	2.83132	0.16169	0.418514	-0.393957	9.77748	2.77706
AKT3	E2	-0.132509	10.9126	4.74743	0.0293466	0.283748	-0.350128	10.9126	454.815	1.79806e-100	2.15912e-98	-0.270957	10.9126	56.464	5.81791e-14	3.56537e-12	-0.206148	10.9126	3.49558	0.0615388	0.610988	0.0696654	10.9126	4.76514	0.0290462	0.156255	-0.0643489	10.9126	1.00392	0.316368	0.797672	-0.316227	10.6669	5.30812	0.0212451	0.252892	-0.375509	10.6669	140.452	3.34666e-32	8.74979e-31	-0.14936	10.6669	4.72358	0.0297733	0.145842	-0.44726	10.6669	3.25558
ALDH1B1	E4	0.0243435	9.92623	40.4838	0.0848457	0.469305	0.0225557	9.92623	38.189	0.0818773	0.118486	-0.0254684	9.92623	8.30652	0.414348	0.616114	-0.0556283	9.92623	50.6338	0.0537481	0.597878	0.0145536	9.92623	41.6769	0.0801943	0.298874	-0.031035	9.92623	8.51872	0.426745	0.888038	0.0614831	9.56363	1.44027e-09	0.99997	1	0.154497	9.56363	197.517	8.05557e-06	2.89278e-05	0.030145	9.56363	4.49147	0.507125	0.770837	0.0380645	9.56363	6.46459e-10
ALDH5A1	E3	-0.112542	10.0158	4.28309	0.171198	0.604132	-0.162975	10.0158	89.1197	6.13609e-11	2.14836e-10	-0.0671544	10.0158	3.90121	0.174814	0.347829	-0.0586903	10.0158	2.02678	0.350863	0.851615	-0.0317167	10.0158	8.19556	0.0611186	0.255456	0.0598373	10.0158	0.912993	0.527804	0.936312	0.260847	9.67698	1.39494	0.398096	0.863213	-0.0660841	9.67698	1.63524	0.37249	0.484283	0.266408	9.67698	13.5894	0.00675228	0.0509949	-0.0341407	9.67698	2.63481
ALDOA	E3E4	0.241528	10.4713	7.41359	0.00647552	0.119152	-0.0241867	10.4713	1.48704	0.222683	0.288085	0.0585754	10.4713	2.13529	0.14395	0.303797	0.223173	10.4713	2.80596	0.093921	0.682739	0.152971	10.4713	14.7059	0.000125807	0.00234611	0.0371322	10.4713	0.140689	0.707599	1	0.384091	10.3221	0.986103	0.320719	0.798048	0.782439	10.3221	441.749	3.65069e-96	1.2976e-93	0.443152	10.3221	27.2753	1.79718e-07	9.31182e-06	0.449016	10.3221	0.96441
ALMS1	E2	-0.185789	10.0815	6.76759	0.0338236	0.305191	-0.251041	10.0815	163.588	1.63572e-28	1.31064e-27	-0.284662	10.0815	45.799	1.32563e-08	2.81808e-07	0.219915	10.0815	5.1559	0.0690141	0.633532	0.0320403	10.0815	1.08359	0.391151	0.693836	-0.0852919	10.0815	1.17165	0.373092	0.860345	-0.387168	9.74655	4.85951	0.0626438	0.431116	-0.334658	9.74655	51.8712	1.46072e-10	8.75839e-10	-0.417333	9.74655	18.5748	0.000210594	0.00354715	0.798129	9.74655	12.7105
ALPK1	E3	-0.0256511	9.93222	1.49331	0.694585	0.977733	-0.0135202	9.93222	4.44094	0.510201	0.584271	0.0042059	9.93222	0.0653785	0.925312	0.994557	-0.113357	9.93222	3.89796	0.528181	0.998175	-0.00549926	9.93222	9.17834	0.331011	0.628863	-0.0289484	9.93222	16.0122	0.199262	0.730424	0.115188	9.56893	3.75388	0.49117	0.889813	-0.000336011	9.56893	0.0184646	0.965446	1	-0.00995361	9.56893	0.90523	0.743246	0.942245	-0.350764	9.56893	7.57031
ALPK2	E4	0.0128909	9.92828	0.891756	0.775129	1	-0.0314182	9.92828	32.8926	0.0815973	0.118158	-0.0385219	9.92828	18.529	0.194491	0.371865	-0.0490715	9.92828	8.75439	0.37271	0.861133	0.0131595	9.92828	8.29811	0.387001	0.689225	0.0701439	9.92828	16.8001	0.215465	0.740692	-0.113743	9.56385	21.752	0.15721	0.618674	-0.0843048	9.56385	50.6697	0.0285486	0.0548564	-0.074958	9.56385	30.004	0.096094	0.311525	-0.13046	9.56385	15.0211
ANAPC4	E2	0.000772169	10.0042	0.000127769	0.991419	1	-0.209491	10.0042	135.084	5.4671e-16	2.54149e-15	-0.200256	10.0042	30.1528	9.349e-05	0.000752493	-0.0537744	10.0042	0.482428	0.636953	1	0.0248404	10.0042	1.05799	0.482662	0.761644	-0.162071	10.0042	5.98354	0.0934077	0.62443	-0.193597	9.65478	2.45228	0.264299	0.750984	-0.314135	9.65478	51.646	1.57573e-07	6.99398e-07	-0.20679	9.65478	5.63523	0.0803626	0.279055	-0.01439	9.65478	0.00662675
ANK3	E4	0.00765127	11.2057	0.0181985	0.89269	1	-0.331762	11.2057	483.176	1.38057e-106	2.06181e-104	-0.256926	11.2057	70.4139	4.93087e-17	5.58162e-15	0.0321505	11.2057	0.0686291	0.805187	1	-0.0243454	11.2057	1.18544	0.276257	0.586155	-0.0703621	11.2057	1.23688	0.266078	0.78789	-0.0862113	10.9872	1.14448	0.317867	0.796138	-0.248227	10.9872	80.7147	3.0385e-19	3.57618e-18	0.000310079	10.9872	0.000101361	0.991967	1	0.0108215	10.9872	0.0255229
ANKH	E3	-0.0504227	10.3177	0.343925	0.580456	0.915051	-0.164431	10.3177	76.17	2.68048e-18	1.40069e-17	-0.166341	10.3177	18.7188	1.51773e-05	0.00015378	0.103058	10.3177	0.765546	0.417912	0.901461	0.03109	10.3177	0.843872	0.372145	0.673705	-0.183921	10.3177	4.60862	0.0332263	0.460607	-0.164705	10.0418	1.04697	0.328016	0.804402	0.0415491	10.0418	1.37098	0.24167	0.342119	0.100351	10.0418	1.7089	0.191156	0.459023	0.111444	10.0418	0.0501236
ANKHD1-EIF4EBP3	E2	-0.202143	9.94733	39.9783	0.00315783	0.0775152	-0.160758	9.94733	201.131	1.0281e-11	3.77509e-11	-0.10542	9.94733	26.8998	0.0146189	0.053679	0.0498036	9.94733	3.64861	0.378863	0.865666	-0.0136678	9.94733	1.567	0.562277	0.820763	0.105167	9.94733	7.82263	0.19264	0.730424	-0.276215	9.58887	7.9812	0.156741	0.617866	-0.417432	9.58887	217.391	6.6284e-14	5.22394e-13	-0.145249	9.58887	8.58669	0.14195	0.387815	-0.158647	9.58887	6.24891
ANKRD40	E4	0.0490363	9.9917	1.51668	0.427302	0.812938	-0.0276947	9.9917	2.74445	0.34027	0.414907	-0.0486974	9.9917	1.91036	0.363947	0.563371	0.25386	9.9917	17.7235	0.00705345	0.26785	0.124185	9.9917	30.6227	0.000340445	0.00532136	0.0798033	9.9917	3.1748	0.255106	0.78789	0.160903	9.6522	0.194889	0.761488	1	0.429436	9.6522	115.945	3.10727e-15	2.71097e-14	0.473449	9.6522	33.224	4.36872e-05	0.000974165	0.0567823	9.6522	0.000492141
ANKRD44	E3	-0.219877	10.1763	8.74351	0.00461575	0.0982007	-0.220386	10.1763	94.1835	2.4512e-20	1.39534e-19	-0.332681	10.1763	68.4451	1.33614e-16	1.3492e-14	-0.0343154	10.1763	0.192683	0.660695	1	-0.0344013	10.1763	1.18336	0.288303	0.587094	-0.121071	10.1763	3.29949	0.0693072	0.569186	-0.378402	9.83405	3.96351	0.0558248	0.410151	-0.266836	9.83405	27.2396	7.30726e-07	2.98049e-06	-0.308677	9.83405	12.3176	0.000450526	0.00657368	-0.280332	9.83405	2.2867
ANKRD50	E3	-0.0719302	9.97724	3.44672	0.276933	0.726518	-0.0883974	9.97724	33.6011	0.000398304	0.000813733	-0.116429	9.97724	13.999	0.0234675	0.0776801	0.0971269	9.97724	6.10379	0.151161	0.739251	0.0639471	9.97724	19.115	0.0107098	0.0789443	-0.0451318	9.97724	0.651524	0.622416	0.993741	0.155669	9.63165	0.168649	0.799745	1	0.187727	9.63165	26.9695	0.000679886	0.00183186	0.450398	9.63165	52.0806	1.4964e-06	5.68249e-05	0.172211	9.63165	0.207543
ANKS1B	E2	-0.213716	11.7799	9.547	0.00200385	0.0582856	-0.2993	11.7799	467.928	2.67376e-103	3.46847e-101	-0.198676	11.7799	48.4966	3.34901e-12	1.5068e-10	0.086755	11.7799	0.42132	0.534084	1	-0.074863	11.7799	8.54211	0.00347177	0.033976	-0.14703	11.7799	7.33906	0.0067495	0.252214	-0.388426	11.6001	6.53513	0.0105899	0.178325	-0.234507	11.6001	93.8985	4.08112e-22	5.78386e-21	-0.115195	11.6001	5.52502	0.0187642	0.105364	0.191314	11.6001	0.442509
ANTXR1	E3	0.00611171	10.0418	0.0098209	0.935882	1	-0.123182	10.0418	43.6272	9.48916e-07	2.47021e-06	-0.167188	10.0418	18.7637	0.00132417	0.00736131	0.174215	10.0418	4.71075	0.120854	0.739251	0.00549536	10.0418	0.377982	0.662476	0.893925	0.0517252	10.0418	0.67912	0.519062	0.930293	-0.444951	9.6894	7.0252	0.0442366	0.366514	-0.302809	9.6894	49.0642	6.47236e-08	2.97535e-07	-0.340257	9.6894	14.8334	0.0032786	0.029942	-0.201292	9.6894	1.25098
AP1S1	E3	-0.126835	10.056	9.30891	0.0284139	0.278528	-0.073486	10.056	14.5794	0.0290713	0.0460231	0.0170913	10.056	0.148995	0.725369	0.873746	0.00666178	10.056	0.110169	0.814826	1	-0.00400556	10.056	0.162636	0.774216	0.955445	0.115426	10.056	2.72092	0.228874	0.76157	0.247458	9.75677	0.278105	0.679348	1	0.541078	9.75677	199.142	1.93971e-41	8.09213e-40	0.468934	9.75677	19.9536	0.000229224	0.00379662	0.0508344	9.75677	1.94742
AP2A1	E2	-0.176562	10.0654	7.03284	0.0427735	0.345689	-0.188182	10.0654	103.022	1.703e-16	8.09458e-16	-0.0879334	10.0654	4.76341	0.0941475	0.222884	-0.0774241	10.0654	0.691431	0.528097	0.998122	-0.0581811	10.0654	4.62963	0.103159	0.349001	0.116389	10.0654	2.4559	0.230453	0.764279	-0.317751	9.74038	5.40084	0.0604168	0.42306	-0.00221027	9.74038	0.0675336	0.794967	0.869211	0.168129	9.74038	3.68891	0.106389	0.331884	-0.275535	9.74038	3.13487
AP2A2	E4	-0.121119	10.1672	2.8638	0.160289	0.602447	-0.165139	10.1672	82.0855	1.04095e-15	4.76184e-15	-0.107073	10.1672	7.07178	0.0185934	0.0648817	-0.341009	10.1672	10.2526	0.00704058	0.26785	0.0408386	10.1672	1.7783	0.269074	0.579702	-0.00692823	10.1672	0.006414	0.943421	1	-0.166213	9.85494	1.06608	0.367995	0.841915	-0.185561	9.85494	19.9336	4.64054e-05	0.000149948	-0.202699	9.85494	5.26461	0.0359064	0.16549	-0.320764	9.85494	1.59466
AP2S1	E4	-0.0709106	10.101	1.18023	0.390155	0.783573	-0.0611404	10.101	10.1063	0.0423799	0.0651479	-0.00185195	10.101	4.19302e-05	0.994833	1	0.163498	10.101	3.09842	0.161313	0.739251	0.0701455	10.101	6.86377	0.0375064	0.184797	-0.0499864	10.101	0.437037	0.600805	0.985457	0.727424	9.82226	6.36074	0.0295661	0.299343	0.828647	9.82226	454.748	6.99194e-99	2.88978e-96	0.584051	9.82226	39.2906	1.95934e-08	1.3818e-06	0.309081	9.82226	0.590882
AP5S1	E2	-0.0171209	9.93949	0.466786	0.779512	1	-0.0286247	9.93949	7.41273	0.267652	0.338147	0.0111575	9.93949	0.783235	0.688927	0.848866	0.0386006	9.93949	12.2999	0.152022	0.739251	0.0121277	9.93949	2.84592	0.488667	0.765701	0.00100719	9.93949	2.83662e-05	0.997642	1	0.111758	9.57877	2.51498	0.486233	0.888112	-0.106001	9.57877	19.6306	0.0479627	0.0866958	0.116852	9.57877	8.81351	0.18507	0.451621	-0.00901313	9.57877	3.52946e-10
APAF1	E2	-0.0739547	9.96042	3.90859	0.292444	0.742685	-0.0730619	9.96042	27.1941	0.00437161	0.00785882	-0.0509737	9.96042	3.34696	0.332168	0.527362	0.146781	9.96042	4.55393	0.242468	0.815509	-0.0026011	9.96042	0.121466	0.85421	0.988435	0.0899629	9.96042	3.60887	0.306981	0.789755	-0.317355	9.59983	9.61502	0.0839479	0.492892	-0.0935523	9.59983	7.34115	0.12171	0.193403	0.0699204	9.59983	1.44874	0.483068	0.751365	0.183836	9.59983	1.41546
APC	E4	-0.198352	10.2397	12.7642	0.000353643	0.0166268	-0.295665	10.2397	215.201	1.26979e-48	2.22551e-47	-0.322126	10.2397	67.6969	1.95172e-16	1.89541e-14	-0.0810195	10.2397	0.5317	0.496527	0.982556	-0.000418448	10.2397	0.00235487	0.965158	1	-0.0460073	10.2397	0.370959	0.542739	0.947547	-0.531612	9.91872	13.5683	0.000231157	0.0142149	-0.422537	9.91872	88.9581	4.85366e-21	6.47106e-20	-0.304907	9.91872	12.9122	0.000327886	0.00508924	-0.198943	9.91872	0.59632
APOC1	E2E3E4	0.0178739	9.92474	5.09979	0.643214	0.951212	-0.0159299	9.92474	60.5718	0.0883616	0.127031	0.0138408	9.92474	6.4679	0.582257	0.765715	0.816666	9.92474	659.977	8.10632e-10	9.0041e-07	0.00725171	9.92474	28.7817	0.25502	0.565439	-0.0229997	9.92474	13.3429	0.433581	0.890261	-0.033315	9.5589	10.7052	0.429385	0.875067	-0.0337052	9.5589	44.64	0.0991762	0.162149	-0.0413568	9.5589	11.5875	0.401755	0.68345	0.472818	9.5589	39.2366
APOE	E2E4	0.0790184	10.0533	5.26031	0.0982425	0.497729	0.0039776	10.0533	0.0111796	0.970064	0.981324	-0.105424	10.0533	16.5788	0.0151495	0.0552168	0.971943	10.0533	283.031	8.92179e-34	7.92791e-30	-0.0532489	10.0533	13.3881	0.0334735	0.170553	-0.0831392	10.0533	2.08151	0.35892	0.845707	-0.269313	9.68743	2.81953	0.187898	0.665204	0.19272	9.68743	20.6401	0.00595775	0.0134555	0.182752	9.68743	4.5724	0.197705	0.467794	1.33735	9.68743	153.108
APP	E3	-0.100705	10.9273	1.14918	0.283726	0.732904	-0.237566	10.9273	196.393	1.551e-44	2.30664e-43	-0.201168	10.9273	32.5389	1.17481e-08	2.53963e-07	0.242347	10.9273	3.32878	0.0680831	0.629866	0.114309	10.9273	15.87	6.79424e-05	0.0013927	-0.0688418	10.9273	0.940235	0.332222	0.816848	0.37747	10.7973	1.57308	0.209787	0.692998	0.129815	10.7973	18.0953	2.11885e-05	7.1959e-05	0.27895	10.7973	19.3491	1.09907e-05	0.000308572	0.396611	10.7973	1.13322
AQP9	E3	0.0158435	9.92703	22.0687	0.16032	0.602447	-0.0419455	9.92703	52.6787	0.0254952	0.0407501	0.00712552	9.92703	3.03663	0.600924	0.781074	-0.0575131	9.92703	21.4975	0.164106	0.739251	-0.0043255	9.92703	36.8339	0.0696856	0.275579	0.00263931	9.92703	-5.09258e-12	1	1	0.0209996	9.56591	2.1179e-11	0.999996	1	-0.0229194	9.56591	1.35546	0.702269	0.791723	-0.0120699	9.56591	6.35531	0.386012	0.671098	-0.00170185	9.56591	-7.70146e-12
ARHGAP17	E3	-0.0882795	10.0173	1.99518	0.30627	0.746499	-0.258324	10.0173	189.182	1.26938e-24	8.69677e-24	-0.262532	10.0173	45.6104	8.95005e-07	1.25146e-05	0.121866	10.0173	1.71319	0.341321	0.847685	0.136454	10.0173	24.3192	0.000325941	0.00512621	-0.0284342	10.0173	0.157219	0.770256	1	0.0527145	9.66734	0.0779796	0.836744	1	-0.464462	9.66734	107.405	1.74503e-15	1.55141e-14	-0.149378	9.66734	2.68327	0.220561	0.49785	0.272361	9.66734	1.65634
ARHGAP35	E3	0.0641866	10.1698	0.774893	0.421323	0.808823	-0.144677	10.1698	57.0275	4.42673e-14	1.86692e-13	-0.118447	10.1698	8.43386	0.00536094	0.0236531	0.0507359	10.1698	0.233858	0.674904	1	-0.0744806	10.1698	4.97046	0.0521821	0.231209	0.00852145	10.1698	0.0133101	0.924418	1	0.0468336	9.85486	0.0406009	0.861266	1	-0.0747298	9.85486	2.69975	0.100393	0.163972	0.152669	9.85486	3.32214	0.0712508	0.259668	0.408461	9.85486	2.21029
ARHGEF10	E3	-0.0737483	10.0342	1.61445	0.299872	0.746499	-0.274104	10.0342	204.616	1.32466e-27	1.02134e-26	-0.118004	10.0342	9.19695	0.0228132	0.0760812	-0.104101	10.0342	3.22487	0.187965	0.739251	0.00271938	10.0342	0.00892906	0.953787	1	-0.0800641	10.0342	1.38854	0.339415	0.82507	-0.072793	9.6869	0.233548	0.648533	1	-0.421696	9.6869	81.5687	5.8998e-13	4.3309e-12	-0.0774606	9.6869	0.504281	0.574815	0.823594	-0.0490359	9.6869	0.0027807
ARHGEF7	E2	-0.132641	10.4852	2.68206	0.101491	0.504389	-0.340277	10.4852	372.955	8.47731e-83	5.08982e-81	-0.213242	10.4852	28.9965	7.28324e-08	1.33717e-06	0.00847412	10.4852	0.00663103	0.951706	1	0.127442	10.4852	14.0401	0.000179149	0.00311529	-0.23415	10.4852	8.32381	0.00391454	0.199679	0.114052	10.2434	0.131493	0.72015	1	-0.11068	10.2434	8.9623	0.00276227	0.00668543	0.163807	10.2434	4.37063	0.0365866	0.167452	0.17719	10.2434	0.197105
ARL17B	E3	-0.384495	10.1928	23.392	1.73361e-06	0.000252539	-0.401904	10.1928	373.908	5.27832e-83	3.22359e-81	-0.528138	10.1928	138.582	5.98515e-32	4.09108e-29	-0.510032	10.1928	19.486	2.49607e-05	0.00806549	-0.522762	10.1928	211.057	2.58292e-44	3.53105e-41	-0.180485	10.1928	4.39918	0.0372288	0.475141	-0.188938	9.82933	2.78419	0.141955	0.597401	-0.877039	9.82933	311.488	1.97841e-62	2.17039e-60	-0.893144	9.82933	78.7136	8.43479e-16	3.05924e-13	-0.222338	9.82933	3.67367
ARNT	E2E4	-0.116216	10.0428	3.0293	0.186656	0.613913	-0.215798	10.0428	128.615	4.11196e-19	2.21515e-18	-0.18717	10.0428	22.0623	0.000334799	0.00225894	-0.0293356	10.0428	0.0849364	0.823243	1	0.0356135	10.0428	1.76612	0.321398	0.619526	0.00714387	10.0428	0.00975695	0.947028	1	-0.531183	9.7043	9.88706	0.0134392	0.206253	-0.311736	9.7043	47.4476	2.11978e-08	1.02818e-07	-0.0912793	9.7043	0.95959	0.466811	0.736651	-0.461292	9.7043	4.63218
ARSG	E4	0.0389058	10.007	0.303566	0.706565	0.982147	-0.270858	10.007	235.535	1.07737e-26	8.01463e-26	-0.138613	10.007	14.673	0.00760313	0.0314264	-0.159859	10.007	4.60262	0.151987	0.739251	0.0489967	10.007	5.36989	0.123125	0.387152	-0.162119	10.007	7.25689	0.0711934	0.569988	0.105527	9.65057	0.102338	0.836892	1	-0.700978	9.65057	276.375	5.33752e-31	1.28014e-29	-0.458221	9.65057	30.493	0.000107893	0.00203122	-0.476232	9.65057	6.87225
ASB4	E2	-0.0277911	9.92189	7.7907	0.638156	0.947636	0.00722351	9.92189	106.933	0.0854707	0.123254	-0.00276616	9.92189	1.34463	0.847985	0.948334	0.00133217	9.92189	2.67711e-09	1	1	0.0221826	9.92189	73.449	0.15267	0.434815	0.0741541	9.92189	160.269	0.034738	0.466332	-0.161824	9.55748	33.2723	0.333999	0.810655	0.00401563	9.55748	78.8192	0.145555	0.223682	0.0158854	9.55748	30.768	0.362162	0.654806	0.00325133	9.55748	1.196e-07
ASH1L	E2	-0.169447	10.5824	6.01847	0.0141603	0.192398	-0.225883	10.5824	167.85	2.51229e-38	2.93161e-37	-0.178745	10.5824	22.6554	1.9435e-06	2.5035e-05	0.0262401	10.5824	0.0603495	0.805945	1	-0.0119564	10.5824	0.133556	0.714774	0.921879	-0.135921	10.5824	3.19171	0.0740187	0.573124	-0.147726	10.3258	0.885875	0.346618	0.822663	-0.156977	10.3258	19.861	8.41151e-06	3.01572e-05	0.0507221	10.3258	0.494422	0.481977	0.750739	0.114138	10.3258	0.175984
ASPHD1	E4	-0.0749224	10.0402	1.9967	0.30435	0.746499	-0.223899	10.0402	144.293	2.94403e-20	1.67054e-19	-0.175286	10.0402	20.0154	0.000774863	0.00465704	-0.117768	10.0402	6.97539	0.0561082	0.598535	-0.0207833	10.0402	0.640753	0.558111	0.81794	-0.176198	10.0402	8.06404	0.0381861	0.478254	-0.0288038	9.71012	0.425082	0.612336	0.974333	-0.165761	9.71012	12.4618	0.00563103	0.0127924	0.00621829	9.71012	0.00339995	0.995827	1	0.0950445	9.71012	0.0458453
ATF3	E2	0.0987797	9.93758	17.4855	0.091216	0.482625	-0.0524421	9.93758	44.818	0.00625542	0.0110103	-0.0174301	9.93758	1.33375	0.638892	0.811418	0.0160194	9.93758	0.28003	0.831712	1	0.093826	9.93758	55.8296	0.00231526	0.0248471	0.142668	9.93758	28.4449	0.0311116	0.451172	0.49429	9.57578	55.0644	0.00149325	0.0538299	0.0673372	9.57578	14.5617	0.0954759	0.156849	0.154215	9.57578	15.813	0.0904001	0.299681	-0.13235	9.57578	9.46201
ATF7IP	E2	-0.201491	10.0916	8.04662	0.0139989	0.191376	-0.186415	10.0916	80.7129	2.53182e-15	1.12714e-14	-0.0679633	10.0916	2.43811	0.183825	0.359043	-0.0186598	10.0916	0.0314112	0.88587	1	0.032796	10.0916	1.085	0.370796	0.672162	-0.143998	10.0916	3.5654	0.0934987	0.624449	-0.215615	9.75348	1.34846	0.302915	0.782296	0.0221227	9.75348	0.238369	0.625397	0.722765	0.193239	9.75348	4.14864	0.0649749	0.24512	-0.280754	9.75348	1.31279
ATG4B	E2	-0.0755864	10.1388	1.08436	0.367293	0.766052	-0.350981	10.1388	299.589	6.63614e-58	1.5916e-56	-0.209457	10.1388	22.2954	2.05761e-05	0.000201143	-0.135571	10.1388	1.75478	0.249066	0.827209	0.14723	10.1388	20.2694	4.4025e-05	0.000978015	-0.159831	10.1388	3.67358	0.0875937	0.610956	-0.158563	9.83373	0.762254	0.393873	0.861318	-0.52617	9.83373	133.819	9.68152e-30	2.15344e-28	-0.117875	9.83373	1.26881	0.288381	0.578325	0.0453013	9.83373	0.0996912
ATM	E2	0.0429481	10.1556	0.315293	0.598288	0.92491	-0.200171	10.1556	90.6019	2.46759e-19	1.34192e-18	-0.150887	10.1556	11.9655	0.00130325	0.00726743	0.0232198	10.1556	0.0575614	0.810394	1	0.0996134	10.1556	9.47953	0.0040601	0.0382385	0.131085	10.1556	2.58371	0.130392	0.700312	-0.0499711	9.82853	0.0761029	0.792385	1	-0.179802	9.82853	14.4023	0.000197273	0.000583643	0.152052	9.82853	2.75198	0.0984503	0.315823	0.341105	9.82853	2.48821
ATP6V0E1	E4	0.108047	10.044	2.54128	0.208258	0.640498	-0.199409	10.044	102.542	2.22322e-15	9.94488e-15	-0.0729245	10.044	3.12069	0.182201	0.356773	0.127767	10.044	1.58603	0.331679	0.84352	0.111962	10.044	14.4365	0.00333962	0.0331019	0.0259487	10.044	0.111574	0.790662	1	-0.142132	9.71112	0.654609	0.507766	0.898064	-0.173924	9.71112	13.7602	0.00193592	0.00481798	0.00719785	9.71112	0.000865563	0.999222	1	0.521156	9.71112	4.69487
ATP6V1D	E3	0.0243722	10.1344	0.0813787	0.813167	1	-0.183119	10.1344	92.75	1.68611e-16	8.02078e-16	-0.104286	10.1344	6.10606	0.0460849	0.131485	0.133695	10.1344	2.38055	0.20173	0.751919	0.0308079	10.1344	0.89959	0.429871	0.724565	0.0743466	10.1344	0.757638	0.467321	0.901357	0.624516	9.864	4.40238	0.0600521	0.42171	0.240286	9.864	40.4196	2.13122e-10	1.25918e-09	0.303216	9.864	11.1534	0.00209502	0.0213533	0.453267	9.864	1.90515
ATP6V1G2	E4	0.0480726	9.92296	27.5528	0.279911	0.728876	0.0139536	9.92296	75.2001	0.0745632	0.108778	0.0247218	9.92296	68.6026	0.0915327	0.218352	0.105864	9.92296	149.675	0.0126509	0.360803	0.0510409	9.92296	301.624	0.000392021	0.00598026	-0.0324685	9.92296	13.9773	0.444789	0.89298	0.0857577	9.55891	0.0270584	0.966168	1	-0.0199931	9.55891	16.067	0.387456	0.496601	0.0702387	9.55891	69.4002	0.0710494	0.259303	-0.0204012	9.55891	-1.62881e-09
ATPAF1	E3	-0.0733875	10.079	1.22222	0.390321	0.783618	-0.284013	10.079	226.531	1.12863e-35	1.2018e-34	-0.172723	10.079	20.0304	0.000259352	0.00180541	-0.0851633	10.079	1.6455	0.325109	0.842645	0.0601484	10.079	4.63749	0.0966633	0.336513	0.0117566	10.079	0.0193885	0.917158	1	-0.381769	9.75197	6.80782	0.0339443	0.321053	-0.136984	9.75197	8.63487	0.0138413	0.0288447	0.207594	9.75197	6.57709	0.0278858	0.139878	-0.154018	9.75197	1.33168
ATPIF1	E2E3	0.0947186	10.2402	1.47138	0.27835	0.72789	-0.30046	10.2402	255.369	2.4269e-57	5.72027e-56	-0.277406	10.2402	48.3264	3.65236e-12	1.6309e-10	-0.167668	10.2402	2.95376	0.118976	0.739251	-0.0244161	10.2402	0.543718	0.490735	0.767589	-0.05397	10.2402	0.463492	0.514453	0.927984	0.537506	10.0381	2.18458	0.157599	0.619352	0.409773	10.0381	124.454	9.59992e-29	2.02144e-27	0.126669	10.0381	2.48949	0.125967	0.366216	0.176991	10.0381	0.016481
ATXN1	E2	-0.274527	10.7953	13.4067	0.000250987	0.0134342	-0.339285	10.7953	376.771	1.26959e-83	7.97287e-82	-0.275959	10.7953	57.3508	3.70821e-14	2.38777e-12	-0.0198918	10.7953	0.0299329	0.862643	1	0.0201767	10.7953	0.452315	0.501241	0.774731	-0.113059	10.7953	2.27066	0.13185	0.700312	-0.45304	10.5288	6.20999	0.0127179	0.200552	-0.405013	10.5288	135.866	3.27355e-31	7.94775e-30	-0.259418	10.5288	13.1233	0.000292979	0.00464481	0.291157	10.5288	1.33802
ATXN3	E4	-0.144615	10.1167	4.0005	0.0920097	0.483786	-0.179519	10.1167	83.0584	1.61977e-15	7.31366e-15	-0.15577	10.1167	13.0406	0.00184101	0.00971163	-0.00925588	10.1167	0.0176795	0.912509	1	0.00234224	10.1167	0.000730578	0.978437	1	0.0431352	10.1167	0.269142	0.648472	1	-0.44453	9.79175	5.47524	0.0393711	0.347369	-0.167399	9.79175	13.1505	0.000959181	0.00252692	-0.102226	9.79175	1.21387	0.301099	0.593232	-0.0815012	9.79175	0.158428
ATXN7L1	E2	-0.127057	10.207	2.83828	0.123821	0.560812	-0.272027	10.207	208.54	3.55292e-47	5.9681e-46	-0.252922	10.207	37.4538	1.96888e-09	5.13817e-08	-0.0526702	10.207	0.23666	0.649494	1	-0.0624137	10.207	3.43171	0.100596	0.343623	0.254354	10.207	8.24007	0.0105423	0.308415	-0.59418	9.89213	9.16115	0.00520879	0.1196	-0.505137	9.89213	142.671	1.11097e-32	2.987e-31	-0.364375	9.89213	15.9593	0.000111652	0.00209091	0.110759	9.89213	0.159214
B3GALNT1	E3	-0.0973711	9.99835	3.9934	0.212775	0.64711	-0.160405	9.99835	91.8569	9.10388e-10	2.94385e-09	-0.178635	9.99835	26.9267	0.00103496	0.0060261	0.0342886	9.99835	0.413236	0.690907	1	-0.013528	9.99835	3.01888	0.283983	0.586395	-0.0424208	9.99835	0.5527	0.639805	1	-0.0533318	9.66701	1.76597	0.35995	0.83534	0.0351839	9.66701	1.87289	0.281202	0.387706	-0.0285772	9.66701	0.0434033	0.912343	1	-0.057876	9.66701	0.883828
B3GAT3	E2	-0.0472612	10.0336	0.607848	0.569184	0.908936	-0.0373199	10.0336	3.04615	0.334226	0.4088	0.0485239	10.0336	1.78372	0.244448	0.43465	0.0236353	10.0336	0.0258091	0.907041	1	0.0557573	10.0336	4.13882	0.136205	0.406692	0.0390536	10.0336	0.264494	0.700905	1	0.0139451	9.69789	0.16331	0.749177	1	0.26596	9.69789	40.9147	5.98087e-08	2.75582e-07	0.34924	9.69789	16.8475	0.000797364	0.0102583	0.0116764	9.69789	0.0793646
BAD	E3	0.150653	10.0227	8.12571	0.0494218	0.367346	-0.00361929	10.0227	0.0113252	0.91525	0.937565	0.120251	10.0227	10.9114	0.0188964	0.0656296	0.0705493	10.0227	2.50974	0.28038	0.842645	0.106644	10.0227	26.0808	0.000464721	0.00689977	0.0720148	10.0227	1.30271	0.428849	0.888183	0.547363	9.68744	7.2972	0.0461233	0.373817	0.519636	9.68744	178.913	2.35838e-26	4.30319e-25	0.363392	9.68744	15.6383	0.003576	0.0317922	0.177623	9.68744	0.113436
BCAP29	E3	-0.0112451	10.166	0.00382186	0.955163	1	-0.176591	10.166	95.9466	8.5428e-20	4.74891e-19	-0.0689965	10.166	2.82413	0.192711	0.369776	0.0971461	10.166	1.38744	0.333637	0.844237	0.0588155	10.166	4.77756	0.0716542	0.279055	-0.00285553	10.166	1.46031e-05	0.996951	1	-0.0499051	9.90029	0.976748	0.379289	0.850624	0.228572	9.90029	37.4278	9.81261e-10	5.44968e-09	0.538059	9.90029	41.3379	7.61932e-10	7.60734e-08	0.364777	9.90029	1.39965
BCAT1	E3E4	-0.0583812	10.0459	2.62178	0.238224	0.679336	-0.121735	10.0459	40.3052	1.15363e-06	2.98562e-06	-0.143036	10.0459	15.5294	0.00137885	0.00761731	-0.0533439	10.0459	0.3177	0.662628	1	-0.0281778	10.0459	1.19358	0.420044	0.719485	-0.263495	10.0459	13.816	0.00391872	0.199679	0.104197	9.71817	2.52235	0.212148	0.696091	0.0883095	9.71817	4.29974	0.0575903	0.101477	0.274772	9.71817	14.604	0.000591108	0.00818797	-0.331439	9.71817	2.13429
BCKDHB	E3	-0.0542805	10.1294	0.848079	0.36358	0.763986	-0.36583	10.1294	312.581	7.03475e-62	1.91164e-60	-0.304723	10.1294	48.6798	1.7908e-10	5.99226e-09	-0.0810294	10.1294	0.480807	0.538735	1	0.0310481	10.1294	0.932803	0.391806	0.69465	0.17951	10.1294	5.41499	0.0314252	0.453138	-0.34173	9.79167	3.83206	0.0630583	0.432191	-0.374227	9.79167	60.1644	5.0001e-13	3.69488e-12	-0.00325142	9.79167	0.00328736	0.954279	1	-0.056195	9.79167	0.080553
BCL2L1	E3	0.0377675	10.0556	0.260204	0.686836	0.973032	-0.129633	10.0556	41.6766	2.56436e-07	6.9557e-07	-0.0770287	10.0556	3.27616	0.171555	0.343922	0.199835	10.0556	3.75359	0.12586	0.739251	0.1007	10.0556	11.2474	0.00720252	0.0590965	-0.0856722	10.0556	1.40454	0.352055	0.837835	0.253957	9.72159	1.65058	0.280613	0.765057	-0.050018	9.72159	0.948728	0.43757	0.548413	0.195078	9.72159	4.20695	0.0817191	0.281746	0.13362	9.72159	0.18748
BCL2L2	E4	-0.044581	9.92465	16.9846	0.312629	0.746499	-0.0207903	9.92465	38.2201	0.130428	0.179966	-0.0335988	9.92465	36.3645	0.138002	0.294846	-0.0303099	9.92465	32.044	0.169547	0.739251	0.00459178	9.92465	3.33294	0.656778	0.890401	-0.00236241	9.92465	0.0348394	0.962926	1	-0.163092	9.56101	43.3965	0.0864083	0.497779	-0.0921502	9.56101	146.082	0.00158004	0.00399835	-0.108701	9.56101	62.5258	0.039047	0.173935	0.00806583	9.56101	1.14855e-09
BCL6	E2	0.0497107	9.98409	1.12639	0.488793	0.863752	0.0515848	9.98409	14.0007	0.0270126	0.0430208	-0.0555051	9.98409	3.28766	0.276437	0.470129	0.303686	9.98409	16.7824	0.0146645	0.381123	0.11399	9.98409	28.9414	0.00143634	0.0170404	-0.260856	9.98409	22.1443	0.00241724	0.168468	-0.584986	9.6257	44.0618	8.07625e-06	0.00120614	0.175461	9.6257	39.019	0.000126632	0.000385558	-0.144864	9.6257	5.96312	0.120542	0.356095	-0.0164615	9.6257	0.216233
BDH2	E4	0.00904174	9.92428	0.172722	0.929385	1	-0.015957	9.92428	64.4694	0.0663879	0.0979938	-0.000281982	9.92428	0.0933843	0.941158	1	-0.00865786	9.92428	1.56459	0.775155	1	0.00171233	9.92428	0.0982909	0.941445	1	-0.037145	9.92428	26.6192	0.238038	0.773667	-0.139087	9.56026	8.01721	0.487237	0.888883	-0.0223294	9.56026	21.9014	0.259813	0.363118	-0.0191021	9.56026	1.23368	0.792925	0.972457	-0.00464489	9.56026	2.03716e-10
BDNF	E3	-0.0199039	9.95857	0.748184	0.652926	0.956718	-0.265754	9.95857	369.661	3.43926e-26	2.51017e-25	0.00394245	9.95857	0.0574655	0.898962	0.978404	-0.0471928	9.95857	13.7259	0.0561825	0.598535	0.000367158	9.95857	0.0539077	0.906614	1	-0.0366158	9.95857	4.66318	0.26438	0.78789	0.0714249	9.60749	2.97007	0.319846	0.797609	-0.282617	9.60749	44.7639	5.33001e-05	0.000170614	0.181203	9.60749	11.2573	0.0496126	0.203959	0.0165751	9.60749	1.89381
BICD1	E4	-0.0394897	10.4192	0.347586	0.555486	0.902639	-0.328418	10.4192	313.478	6.21858e-70	2.26468e-68	-0.277277	10.4192	55.8546	7.92925e-14	4.74474e-12	0.234187	10.4192	3.26657	0.0769351	0.652032	-0.0118408	10.4192	0.133622	0.714707	0.921879	-0.22406	10.4192	7.84998	0.00508405	0.220914	0.0353976	10.125	0.0425796	0.844347	1	-0.478493	10.125	142.783	1.05093e-32	2.83416e-31	-0.174383	10.125	5.22388	0.022298	0.119362	0.129295	10.125	0.162607
BIN1	E3E4	-0.119538	10.2949	1.87174	0.210316	0.643771	-0.0559225	10.2949	7.74592	0.0053854	0.00956805	-0.157143	10.2949	12.6883	0.000368287	0.00244772	0.137348	10.2949	1.68595	0.194518	0.742636	0.0489837	10.2949	3.12335	0.077184	0.291978	0.105725	10.2949	1.50424	0.253004	0.78789	0.238193	9.99117	0.985879	0.351318	0.826119	0.170023	9.99117	16.4747	4.96501e-05	0.000159678	0.0266332	9.99117	0.0745254	0.784863	0.967794	-0.117682	9.99117	0.238693
BMP1	E3E4	-0.125855	9.93713	19.8706	0.0730872	0.440853	-0.0585196	9.93713	56.4453	0.0024557	0.00456371	0.0413332	9.93713	8.08751	0.253286	0.44489	0.049846	9.93713	4.91536	0.378481	0.865356	0.0496411	9.93713	19.9753	0.0725231	0.28068	-0.0381192	9.93713	1.23798	0.652785	1	-0.212517	9.57388	8.08591	0.235153	0.720963	-0.0292649	9.57388	2.47589	0.502705	0.611525	-0.0331129	9.57388	0.945661	0.680481	0.899814	0.143066	9.57388	13.4205
BOLA1	E2	0.0985707	9.94251	11.9385	0.127442	0.569499	-0.0916021	9.94251	78.339	9.32991e-05	0.00020395	-0.173584	9.94251	70.4742	0.000183557	0.00135472	0.0680504	9.94251	4.45775	0.354178	0.852244	0.0337306	9.94251	8.22796	0.207042	0.507175	-0.0264628	9.94251	0.589486	0.733275	1	-0.114673	9.58577	5.07768	0.275506	0.761475	0.043897	9.58577	3.56092	0.339546	0.451374	0.0163707	9.58577	0.192657	0.842962	1	-0.0088753	9.58577	2.7185
BOLA2	E2	-0.000849449	9.92036	-1.22053e-09	1	1	0.00149003	9.92036	9.38745	0.730793	0.785227	-0.00782885	9.92036	36.7106	0.496454	0.691857	0.0181677	9.92036	82.2905	0.308764	0.842645	0.00277666	9.92036	47.3906	0.439951	0.729534	0.000122724	9.92036	-1.44655e-09	1	1	0.00657774	9.55612	3.56537e-10	1	1	0.00654412	9.55612	14.0102	0.5631	0.667383	0.0176275	9.55612	21.4014	0.475582	0.744477	0.00453187	9.55612	1.78268e-10
BPHL	E4	0.0168331	9.95594	0.182757	0.826441	1	-0.130389	9.95594	95.1126	1.04777e-06	2.71958e-06	-0.090264	9.95594	10.0705	0.11879	0.265351	-0.0340943	9.95594	1.5108	0.537568	1	-0.0331855	9.95594	17.205	0.0379688	0.186404	0.0700034	9.95594	2.35909	0.432632	0.890135	-0.11099	9.60158	1.63755	0.484667	0.887821	-0.30078	9.60158	79.839	6.15283e-07	2.5359e-06	-0.314167	9.60158	22.1606	0.00942468	0.0645952	0.121784	9.60158	1.28193
BRWD1	E2	-0.118527	10.3643	2.40855	0.133048	0.581392	-0.168305	10.3643	86.8443	1.21981e-20	7.02703e-20	-0.116191	10.3643	8.67157	0.00323361	0.0156139	0.218797	10.3643	3.49919	0.0739921	0.648775	0.113827	10.3643	10.9417	0.00147654	0.0173897	0.0589388	10.3643	0.571554	0.451005	0.894458	-0.135438	10.0969	0.738571	0.423157	0.873646	0.0315047	10.0969	0.960756	0.327018	0.438029	0.186805	10.0969	5.44732	0.0196166	0.108946	0.331185	10.0969	1.25748
BTF3L4	E4	0.115354	10.0392	3.97261	0.147648	0.599044	-0.164345	10.0392	78.6637	9.1143e-12	3.35778e-11	-0.0821592	10.0392	4.27497	0.132902	0.287095	0.0204887	10.0392	0.0452128	0.879792	1	-0.00456541	10.0392	0.0283883	0.902499	1	0.00091143	10.0392	5.02426e-05	0.998385	1	-0.00897024	9.71394	0.623762	0.547373	0.927144	0.0409848	9.71394	1.87268	0.219941	0.315887	0.202982	9.71394	5.04586	0.0745613	0.266417	-0.121773	9.71394	0.777075
C11orf1	E3	0.0767228	9.94446	5.82659	0.276615	0.72593	-0.0571253	9.94446	21.7762	0.0441873	0.0676862	-0.0995793	9.94446	18.6131	0.0482756	0.136248	0.116515	9.94446	31.5403	0.0122169	0.35742	0.036109	9.94446	17.9249	0.0581775	0.247691	0.106207	9.94446	14.7067	0.0855346	0.607318	-0.0144121	9.59385	0.283994	0.778738	1	0.110274	9.59385	16.3146	0.0265076	0.0512949	0.0241212	9.59385	0.332606	0.758688	0.952092	0.0577036	9.59385	2.33497e-09
C15orf48	E2	0.0120529	9.92213	4.45946	0.702712	0.980463	-0.0242553	9.92213	212.391	0.00764331	0.0132887	-0.0184793	9.92213	59.7621	0.158974	0.326058	0.0358324	9.92213	61.558	0.153773	0.739251	0.0124047	9.92213	49.2328	0.202659	0.503237	0.0297694	9.92213	34.5885	0.285304	0.78789	-0.0100402	9.55721	3.18117e-10	1	1	-0.0276682	9.55721	60.0268	0.155604	0.236723	-0.0475047	9.55721	90.7569	0.0827448	0.283943	-0.000789465	9.55721	-7.39407e-11
C17orf58	E3E4	-0.0767392	9.94278	11.0401	0.153592	0.601094	-0.0425176	9.94278	15.6351	0.0914396	0.131022	-0.0419337	9.94278	5.03249	0.332733	0.52807	0.015551	9.94278	5.55135	0.314756	0.842645	-0.00319005	9.94278	0.288018	0.81873	0.975101	-0.0167074	9.94278	0.570496	0.746043	1	-0.0687528	9.58563	11.8893	0.0975668	0.513904	0.0786532	9.58563	15.0037	0.0485644	0.0876319	-0.0526242	9.58563	1.34527	0.561237	0.812534	0.0820947	9.58563	2.07585e-09
C18orf25	E2	-0.153849	10.0184	7.9422	0.0545126	0.382691	-0.201863	10.0184	134.456	1.4326e-17	7.22275e-17	-0.0936599	10.0184	6.42865	0.0705461	0.180343	-0.139276	10.0184	3.39044	0.208041	0.759005	-0.0259214	10.0184	1.12634	0.468976	0.752971	-0.000310748	10.0184	0.00448804	0.97055	1	-0.247734	9.67763	8.52833	0.0359897	0.331404	-0.0120588	9.67763	0.0279347	0.875827	0.934172	0.0634756	9.67763	0.566041	0.558771	0.810849	-0.0489151	9.67763	0.782384
C1QTNF7	E2	-0.112067	9.92786	37.5548	0.0734704	0.442316	-0.096505	9.92786	499.374	3.12121e-11	1.11386e-10	-0.0659297	9.92786	43.0964	0.0524702	0.145169	-0.00396068	9.92786	-4.40343e-10	1	1	-0.0301665	9.92786	79.2222	0.00938596	0.0718427	-0.0356318	9.92786	5.59836	0.491281	0.914289	-0.324817	9.56672	45.7114	0.0190197	0.240925	-0.151625	9.56672	159.519	1.1165e-05	3.9331e-05	-0.128544	9.56672	11.1515	0.239458	0.520894	0.0441184	9.56672	7.66018e-10
C1orf226	E4	-0.00245247	9.92781	0.0311704	0.95945	1	-0.0209872	9.92781	13.0403	0.296096	0.368812	0.0172191	9.92781	5.21082	0.508488	0.701806	0.0009044	9.92781	-2.14156e-11	1	1	-0.0124252	9.92781	10.8052	0.336655	0.636103	-0.0345825	9.92781	3.55189	0.5761	0.972559	0.139334	9.56598	17.2402	0.171436	0.642653	-0.0129372	9.56598	0.925885	0.738147	0.823137	-0.0147782	9.56598	1.35916	0.694981	0.908911	-0.000942272	9.56598	2.84998e-10
C1orf52	E4	-0.0906217	10.0383	1.91389	0.307653	0.746499	-0.181336	10.0383	95.25	4.01532e-13	1.6018e-12	-0.0921458	10.0383	5.38206	0.0882635	0.21258	0.145487	10.0383	5.22713	0.0976537	0.694996	0.0217682	10.0383	0.7126	0.533789	0.798593	0.118675	10.0383	2.94825	0.207226	0.732371	0.144739	9.72375	0.120702	0.772361	1	0.271124	9.72375	46.7084	7.77449e-10	4.36689e-09	0.158855	9.72375	2.01059	0.257183	0.541772	0.181324	9.72375	0.0886143
C1orf87	E4	0.106894	9.92339	82.8748	0.0449102	0.35261	-0.0180109	9.92339	46.9947	0.142891	0.194939	0.0233031	9.92339	26.7546	0.270262	0.463978	0.0207931	9.92339	23.3768	0.302194	0.842645	0.0186982	9.92339	76.4337	0.0615545	0.256317	-0.00220385	9.92339	0.0607022	0.958869	1	-0.136333	9.55803	50.4052	0.152679	0.612934	-0.0615233	9.55803	236.54	0.00195987	0.00487349	0.0120485	9.55803	5.75299	0.630004	0.865849	-0.0127743	9.55803	-6.56949e-10
C21orf62	E3E4	0.0978088	9.9283	22.0752	0.148695	0.5993	-0.020406	9.9283	19.1525	0.192613	0.25362	-0.0493905	9.9283	29.5677	0.100734	0.234632	0.00463722	9.9283	0.0180314	0.966952	1	-0.0331563	9.9283	26.7642	0.117589	0.376811	-0.0832563	9.9283	12.0234	0.286756	0.78789	0.411087	9.56565	42.4964	0.0296051	0.299343	-0.0616188	9.56565	30.045	0.0722598	0.123695	-0.0810965	9.56565	9.51991	0.311514	0.605913	-0.0708636	9.56565	6.9133
C3orf14	E3	0.0548749	10.0694	1.54896	0.360194	0.7608	-0.14264	10.0694	63.5802	5.29878e-10	1.74389e-09	-0.0494804	10.0694	1.59543	0.358898	0.557693	0.0198799	10.0694	0.707652	0.541464	1	0.068939	10.0694	13.9817	0.00624412	0.0529439	-0.030875	10.0694	0.123723	0.789556	1	0.504945	9.78134	4.60908	0.0863637	0.497736	0.36265	9.78134	90.3715	1.19309e-17	1.248e-16	0.409535	9.78134	23.8381	3.7795e-05	0.000860042	0.107978	9.78134	0.999205
C8orf59	E2	0.210742	10.0081	14.2091	0.0101656	0.157234	-0.214516	10.0081	140.143	1.64731e-16	7.84248e-16	-0.186563	10.0081	25.6859	0.000441937	0.0028602	0.0241647	10.0081	0.0539291	0.875762	1	0.112326	10.0081	21.7154	0.00147616	0.0173897	0.046878	10.0081	0.460535	0.641075	1	0.850354	9.68368	26.0166	0.000127005	0.00899259	0.199232	9.68368	24.7384	6.44909e-05	0.000204447	0.15265	9.68368	2.81757	0.202429	0.473958	0.163822	9.68368	0.287521
C9orf152	E4	0.0386042	9.92296	54.3713	0.129145	0.573036	-0.0130619	9.92296	19.9247	0.362945	0.438524	0.0193964	9.92296	27.4085	0.27955	0.473339	0.0224196	9.92296	25.9828	0.29577	0.842645	-0.000888918	9.92296	1.0714	0.83278	0.981257	0.0437187	9.92296	48.4575	0.152779	0.718602	-0.0476781	9.55894	3.76586e-09	0.999973	1	-0.0723867	9.55894	158.504	0.00381731	0.00900229	-0.0345409	9.55894	14.1005	0.400201	0.68198	-0.0146407	9.55894	-1.1897e-10
CACNA1A	E3	-0.344346	10.8262	17.7875	7.87165e-05	0.00564092	-0.265942	10.8262	304.263	6.14802e-68	2.1012e-66	-0.299653	10.8262	92.5468	6.86631e-22	1.56446e-19	0.723942	10.8262	41.6886	2.0134e-10	2.75247e-07	-0.0376404	10.8262	1.48122	0.263559	0.574016	-0.133544	10.8262	4.68646	0.0304059	0.44659	-0.621096	10.5802	8.28545	0.00835262	0.156091	-0.362194	10.5802	147.826	8.57899e-34	2.44336e-32	-0.321679	10.5802	29.7302	5.07426e-08	3.12001e-06	0.697706	10.5802	9.11727
CACNB1	E3	-0.0766848	9.99594	1.89549	0.400471	0.790378	-0.171672	9.99594	122.366	7.02442e-13	2.7558e-12	-0.0578289	9.99594	2.94744	0.292362	0.485867	-0.0533433	9.99594	0.826273	0.582864	1	-0.0136976	9.99594	0.328295	0.729489	0.929834	-0.0556676	9.99594	1.2466	0.497838	0.917236	0.0298463	9.66774	0.327309	0.697521	1	0.156685	9.66774	21.4261	0.000534183	0.0014689	0.247496	9.66774	7.90569	0.0460747	0.194027	0.137375	9.66774	1.46301e-09
CACNB2	E2E3	-0.0889269	10.8939	3.07708	0.0794089	0.455685	-0.387068	10.8939	585.407	1.35706e-128	4.638e-126	-0.285104	10.8939	61.8682	3.74486e-15	2.88111e-13	0.173008	10.8939	2.03632	0.161435	0.739251	-0.0427073	10.8939	1.71626	0.19354	0.496531	-0.191566	10.8939	4.92641	0.0264536	0.422479	-0.192805	10.6711	2.89194	0.0890523	0.500739	-0.501406	10.6711	245.596	9.40541e-55	7.46218e-53	-0.0678287	10.6711	0.877468	0.348917	0.644925	0.412666	10.6711	2.35452
CALCB	E4	-0.0807672	9.93014	9.07469	0.317174	0.746499	-0.0344901	9.93014	40.8055	0.0361625	0.0562569	-0.0202131	9.93014	3.3242	0.557678	0.744991	-0.0277789	9.93014	1.4519	0.698096	1	-0.0104816	9.93014	5.77546	0.440544	0.730078	0.00646252	9.93014	0.103269	0.918307	1	-0.419759	9.56706	37.084	0.0318725	0.311744	0.0145582	9.56706	1.13263	0.699298	0.789025	0.00367809	9.56706	0.0513085	0.938292	1	-0.28664	9.56706	26.9077
CALD1	E3	-0.0258687	10.1614	0.0896772	0.773575	1	-0.271675	10.1614	161.909	1.46363e-36	1.60566e-35	-0.194888	10.1614	18.294	3.94205e-05	0.000354366	0.0995928	10.1614	1.5225	0.27008	0.842645	0.16788	10.1614	27.4328	5.73436e-07	2.15913e-05	-0.179466	10.1614	5.68921	0.0170732	0.368661	-0.613555	9.848	8.09361	0.00562628	0.124999	-0.568055	9.848	135.194	4.57198e-31	1.0995e-29	-0.418392	9.848	15.9769	8.93282e-05	0.00175225	0.00499606	9.848	0.146902
CALM3	E3E4	-0.210156	10.6633	5.5822	0.0228226	0.24747	-0.199377	10.6633	150.87	1.25407e-34	1.28162e-33	-0.0151025	10.6633	0.154216	0.971421	1	0.0457974	10.6633	0.219848	0.656045	1	0.01568	10.6633	0.300868	0.591112	0.84217	-0.104443	10.6633	1.13591	0.287056	0.78789	0.330342	10.5417	0.210542	0.662214	1	0.406332	10.5417	175.62	8.91719e-40	3.37903e-38	0.573054	10.5417	72.1764	2.22472e-17	9.88441e-15	0.477635	10.5417	1.32059
CALN1	E4	-0.154615	10.3451	3.22883	0.0723585	0.438187	-0.198691	10.3451	100.249	1.41375e-23	9.30909e-23	-0.182099	10.3451	22.605	1.99518e-06	2.55832e-05	0.0153958	10.3451	0.0105269	0.924848	1	0.0480435	10.3451	1.55517	0.21238	0.512063	0.221355	10.3451	5.32474	0.0210287	0.390107	-1.07932	10.0649	19.7835	8.75958e-06	0.00128657	-0.390677	10.0649	77.4448	1.57296e-18	1.74281e-17	0.0707885	10.0649	0.86852	0.351386	0.64685	-0.259878	10.0649	3.26393
CAMK2B	E3	0.0597805	10.672	0.8939	0.388686	0.782344	-0.0147394	10.672	1.238	0.265863	0.336245	0.00924932	10.672	0.101895	0.749569	0.889215	0.0116883	10.672	0.109264	0.78887	1	-0.0714915	10.672	7.36891	0.0268678	0.148984	-0.160712	10.672	3.65321	0.106552	0.658025	-0.217423	10.4359	1.55037	0.245737	0.73202	0.0343461	10.4359	1.42351	0.232853	0.331167	0.0860586	10.4359	1.90013	0.168092	0.428046	-0.211549	10.4359	3.05939
CAPRIN1	E4	-0.116011	10.0596	2.8513	0.192483	0.62005	-0.164859	10.0596	75.597	3.22477e-12	1.21886e-11	-0.0781503	10.0596	3.66863	0.139984	0.29769	0.0873371	10.0596	0.987935	0.451554	0.94142	0.121453	10.0596	19.3244	0.000783947	0.0106925	0.00352912	10.0596	0.00385124	0.96706	1	0.359056	9.74152	2.79724	0.171865	0.643165	0.235839	9.74152	32.8974	2.35236e-07	1.02316e-06	0.305868	9.74152	11.9109	0.00336242	0.0305038	0.709216	9.74152	8.42493
CAPS	E4	0.0501891	9.93533	2.91146	0.507995	0.875409	-0.0617504	9.93533	80.9026	0.00059378	0.00118836	0.0184492	9.93533	2.82207	0.504201	0.698229	-0.0719148	9.93533	7.12756	0.310916	0.842645	0.0104938	9.93533	0.927036	0.710389	0.921569	-0.0110484	9.93533	0.19949	0.864556	1	0.250286	9.57033	10.0846	0.223476	0.708119	-0.167393	9.57033	137.348	6.78743e-06	2.45642e-05	-0.0186673	9.57033	0.272913	0.840085	0.999129	-0.160903	9.57033	10.9975
CAPZA1	E3	-0.130665	10.0706	3.59759	0.120085	0.552175	-0.205002	10.0706	107.628	6.18998e-18	3.18127e-17	-0.135047	10.0706	10.5267	0.00753211	0.0312321	0.205896	10.0706	3.99462	0.105336	0.717804	0.0871369	10.0706	8.40376	0.0206337	0.124475	0.00586029	10.0706	0.00538117	0.956333	1	-0.374235	9.74041	4.50582	0.0725081	0.461401	-0.144202	9.74041	9.12815	0.0100786	0.0216429	0.016417	9.74041	0.0301474	0.863074	1	0.0338492	9.74041	0.0043268
CARTPT	E4	0.134253	10.0023	0.515135	0.599389	0.925025	0.00247103	10.0023	5.62486	0.0177112	0.0291252	0.076958	10.0023	7.43442	0.0458014	0.130837	0.129447	10.0023	4.26551	0.131281	0.739251	0.0664194	10.0023	5.48408	0.0867103	0.31398	0.0939978	10.0023	1.76884	0.330467	0.814797	0.217932	9.64013	4.65042	0.09109	0.504158	0.776743	9.64013	281.099	1.40003e-47	7.82433e-46	0.362429	9.64013	43.4251	2.43796e-07	1.20354e-05	0.0232521	9.64013	4.50069e-11
CASP8	E3	-0.0689875	9.92744	23.6469	0.169541	0.604132	0.00177264	9.92744	1.87788	0.663495	0.726085	0.00674997	9.92744	0.853854	0.793708	0.915663	-0.0462996	9.92744	0.9373	0.773129	1	0.00735749	9.92744	4.76973	0.538096	0.801609	-0.0459256	9.92744	14.0695	0.290047	0.78789	0.00270298	9.56302	0.00973601	0.968599	1	-0.0422601	9.56302	16.4173	0.219208	0.315115	0.0131951	9.56302	0.443506	0.847558	1	-0.17333	9.56302	3.63431
CASS4	E3	0.0396734	9.93093	9.9981	0.301031	0.746499	-0.0162106	9.93093	6.11428	0.417024	0.493662	-0.00196134	9.93093	0.0687891	0.926975	0.995282	-0.109347	9.93093	5.40791	0.420611	0.904328	0.00961993	9.93093	3.70433	0.529504	0.795882	-0.056121	9.93093	10.8324	0.27961	0.78789	-0.0595356	9.57005	5.23145	0.407481	0.867327	0.115448	9.57005	43.5942	0.0140761	0.0292859	0.0491429	9.57005	4.33725	0.443634	0.715905	-0.580109	9.57005	25.9964
CBX3	E3	0.127948	10.0649	4.59176	0.101463	0.504389	-0.0217678	10.0649	1.22551	0.441387	0.517949	0.0188	10.0649	0.268143	0.667144	0.833555	0.110448	10.0649	1.44415	0.358306	0.853023	0.158845	10.0649	35.028	5.65654e-06	0.000160077	0.155669	10.0649	4.16404	0.11344	0.674729	0.263357	9.7537	0.561727	0.534143	0.917056	0.38356	9.7537	89.1984	5.06402e-17	5.02781e-16	0.38509	9.7537	19.2292	0.000256409	0.00417299	-0.182709	9.7537	1.30173
CBX5	E2	-0.00603156	10.1077	0.00232424	0.966438	1	0.0389086	10.1077	4.18206	0.0408592	0.0630229	-0.0351478	10.1077	0.771575	0.438748	0.638036	0.0134862	10.1077	0.0814109	0.8226	1	0.0506866	10.1077	3.49087	0.132088	0.399027	0.0249578	10.1077	0.11898	0.7878	1	-0.296479	9.8017	4.91915	0.059193	0.419282	0.454145	9.8017	119.909	5.26759e-25	8.94987e-24	0.275536	9.8017	10.7907	0.00294751	0.0275395	0.325222	9.8017	1.66268
CCDC50	E4	-0.041661	9.97955	0.692541	0.63512	0.945973	-0.0297226	9.97955	3.86548	0.260351	0.330096	-0.0675211	9.97955	4.8023	0.207209	0.387062	-0.192281	9.97955	7.17604	0.12115	0.739251	0.0288515	9.97955	4.92095	0.204457	0.504661	0.0664597	9.97955	1.26765	0.469522	0.901549	-0.123437	9.62326	1.40564	0.456708	0.878395	0.10565	9.62326	8.62376	0.0837767	0.140384	0.172494	9.62326	6.26169	0.126594	0.366904	0.0452786	9.62326	0.0583118
CCDC78	E2	-0.0185587	9.92372	3.5831	0.670053	0.964721	-0.0114748	9.92372	15.1975	0.38812	0.464427	-0.0224013	9.92372	20.0026	0.323166	0.517369	-0.00361348	9.92372	1.71098e-09	0.999973	1	-0.00439081	9.92372	4.85071	0.624655	0.867832	-0.0543962	9.92372	50.9101	0.112102	0.671127	0.0299915	9.55943	1.99493	0.735317	1	-0.0299586	9.55943	16.5101	0.33403	0.445106	-0.01061	9.55943	1.43257	0.776934	0.963417	0.00508479	9.55943	6.79006e-10
CCHCR1	E4	-0.107417	9.95105	10.989	0.113398	0.535783	-0.14447	9.95105	135.53	1.32733e-08	3.96201e-08	-0.086948	9.95105	15.6763	0.0604381	0.161235	0.0229686	9.95105	0.243615	0.813816	1	-0.0202527	9.95105	8.35415	0.171503	0.464769	0.0201701	9.95105	0.322843	0.786492	1	-0.347246	9.59275	15.7803	0.0412924	0.355625	-0.289197	9.59275	86.7535	1.08414e-06	4.34243e-06	-0.0175582	9.59275	0.0765472	0.888725	1	-0.147584	9.59275	5.66615
CCKBR	E3	-0.0431801	9.96647	13.1742	0.061464	0.404869	-0.123434	9.96647	73.7187	4.83932e-06	1.18971e-05	-0.0887717	9.96647	15.8743	0.0365851	0.109607	-0.0274281	9.96647	3.20195	0.356	0.852425	-0.0134525	9.96647	7.44803	0.159625	0.445208	-0.0579961	9.96647	15.7117	0.0409638	0.494571	0.0538344	9.61715	4.29038	0.220129	0.704811	0.0305999	9.61715	3.04897	0.263423	0.367383	0.0434639	9.61715	0.0309442	0.910712	1	0.0260157	9.61715	1.8146
CCL5	E4	-0.0041839	9.92348	2.07254	0.760518	1	-0.0225102	9.92348	86.1285	0.0475963	0.0724276	-0.0216659	9.92348	37.0519	0.195128	0.372561	-0.187143	9.92348	50.0572	0.113886	0.736622	-0.00695223	9.92348	9.6768	0.509442	0.779963	0.00378917	9.92348	0.379218	0.898768	1	-0.0314479	9.55998	11.1341	0.438477	0.875475	-0.0291198	9.55998	22.7297	0.255019	0.357401	-0.0614001	9.55998	33.7437	0.170288	0.431412	-0.661991	9.55998	91.3731
CCNY	E4	-0.143798	10.3279	3.26933	0.0705925	0.434149	-0.322868	10.3279	280.344	9.34206e-63	2.62286e-61	-0.256073	10.3279	32.9491	9.51465e-09	2.10081e-07	0.0181106	10.3279	0.0245753	0.875431	1	-0.0307963	10.3279	0.872408	0.350294	0.650892	0.0615018	10.3279	0.56168	0.453588	0.895088	-0.237187	10.0411	1.61705	0.20353	0.684777	-0.266929	10.0411	42.2829	8.24452e-11	5.04551e-10	-0.0441251	10.0411	0.243005	0.630936	0.866073	0.023798	10.0411	0.00195601
CD209	E3	0.000405789	9.91995	9.30981e-10	1	1	-0.00178079	9.91995	22.4475	0.697297	0.755678	-0.00123443	9.91995	2.26954	0.901455	0.980216	-0.0347738	9.91995	85.1321	0.443213	0.931661	0.000185998	9.91995	6.96139e-10	1	1	0.000493005	9.91995	-3.0194e-10	1	1	-0.000517424	9.55533	2.1569e-10	1	1	0.000272165	9.55533	4.60529	0.851755	0.915033	0.000663532	9.55533	3.02912e-09	1	1	0.000827054	9.55533	1.22981e-11
CD22	E3	-0.000184523	9.9904	0.349484	0.763386	1	-0.058639	9.9904	66.8132	2.96538e-05	6.7966e-05	-0.0116094	9.9904	0.0658159	0.896545	0.97685	0.0034112	9.9904	0.19898	0.820909	1	-0.0466686	9.9904	5.57138	0.169398	0.461211	0.00711713	9.9904	0.321727	0.773638	1	-0.00804261	9.62262	3.00974e-11	0.999996	1	-0.0763429	9.62262	35.8181	0.00165396	0.0041676	0.0595699	9.62262	0.788583	0.646526	0.87684	0.126678	9.62262	1.35463
CD28	E3	0.000887938	9.9203	-9.59796e-10	1	1	-0.0117129	9.9203	372.514	0.0251601	0.0402761	-0.00817031	9.9203	254.925	0.0645873	0.169268	-0.0445128	9.9203	54.4848	0.392137	0.872422	0.00553593	9.9203	267.209	0.0585206	0.248513	-0.0149767	9.9203	124.93	0.195829	0.730424	0.00292185	9.55584	1.10376e-10	1	1	-0.0206822	9.55584	224.066	0.0211036	0.0419569	-0.00900934	9.55584	27.404	0.419792	0.696856	-0.0691339	9.55584	26.432
CD2AP	E4	-0.101267	10.0184	2.65695	0.252618	0.696428	-0.175621	10.0184	93.3445	1.24915e-12	4.83763e-12	-0.0864161	10.0184	5.22639	0.0977163	0.229444	-0.0738295	10.0184	0.652562	0.561627	1	0.0319711	10.0184	2.27922	0.29258	0.590456	-0.167593	10.0184	6.32081	0.0769045	0.58275	-0.240614	9.67007	2.6891	0.230993	0.71584	-0.301625	9.67007	46.2588	2.48614e-07	1.0787e-06	-0.125588	9.67007	2.04482	0.287985	0.577922	-0.133107	9.67007	0.383177
CD44	E2E3E4	0.366994	9.93024	193.527	6.40307e-06	0.000768888	-0.015816	9.93024	17.8655	0.217765	0.282429	0.0143101	9.93024	4.84135	0.522182	0.714138	0.00953566	9.93024	0.0838401	0.897095	1	0.0128564	9.93024	9.44871	0.366458	0.667968	-0.111247	9.93024	72.6511	0.0123449	0.323589	0.545621	9.56458	63.153	0.0114568	0.186297	-0.0439154	9.56458	27.6524	0.109895	0.177196	0.15144	9.56458	76.9136	0.0104179	0.0695104	0.0162835	9.56458	0.173159
CD46	E2	-0.086495	10.0952	1.42545	0.32587	0.746499	-0.188982	10.0952	87.3131	1.16638e-15	5.32328e-15	-0.0539079	10.0952	1.60129	0.28856	0.481846	-0.0916755	10.0952	0.942473	0.422092	0.906329	0.07613	10.0952	5.69324	0.0446445	0.208466	-0.109828	10.0952	2.05632	0.216046	0.741341	-0.394626	9.75774	4.44951	0.0709448	0.457984	-0.250442	9.75774	28.9079	1.79968e-06	7.01094e-06	-0.0702348	9.75774	0.569651	0.495929	0.761739	-0.237112	9.75774	1.06073
CD5	E3	-0.0567475	9.92329	72.4705	0.0739515	0.443507	-0.00579999	9.92329	0.0637312	0.925616	0.945786	-0.00194175	9.92329	1.68791	0.788694	0.912589	-0.079695	9.92329	64.5288	0.0908424	0.672968	0.00287035	9.92329	0.328617	0.904186	1	-0.0141846	9.92329	13.3147	0.444396	0.89298	-0.058049	9.55868	15.8782	0.313115	0.791969	0.0109717	9.55868	3.67719	0.621174	0.718952	-0.0420816	9.55868	45.2152	0.0886794	0.296633	-0.0730616	9.55868	11.1789
CD59	E4	0.350062	10.0765	25.4812	4.18688e-05	0.00341327	-0.106138	10.0765	28.9918	4.68643e-05	0.00010548	-0.105574	10.0765	6.57976	0.0367587	0.110035	0.12756	10.0765	1.80212	0.294517	0.842645	0.0819057	10.0765	10.7486	0.0105766	0.0782869	0.187029	10.0765	5.90634	0.0492268	0.527341	0.670325	9.77984	11.589	0.00273885	0.0824269	0.304136	9.77984	55.4514	1.04472e-13	8.13616e-13	0.179327	9.77984	3.78049	0.0853729	0.289551	0.421667	9.77984	2.14756
CD83	E3	-0.0619278	9.96285	2.74455	0.386094	0.78071	-0.0934686	9.96285	49.3826	0.000110377	0.000239367	0.0213221	9.96285	0.913386	0.576138	0.760481	-0.341396	9.96285	26.8649	0.00555312	0.242481	-0.00566919	9.96285	0.00476462	0.971523	1	-0.0250774	9.96285	0.307031	0.771749	1	0.084559	9.61338	0.150927	0.816377	1	-0.00188504	9.61338	0.379503	0.720026	0.807694	0.243839	9.61338	12.4705	0.03175	0.152462	-0.767544	9.61338	20.6254
CD86	E2	0.0544001	9.92649	213.992	0.00937061	0.148427	-0.00717299	9.92649	35.6932	0.287018	0.358964	-0.0411317	9.92649	362.243	0.000728001	0.00442629	-0.0390952	9.92649	4.76974	0.530795	0.999713	-0.00294601	9.92649	4.25529	0.716074	0.922343	0.00192075	9.92649	0.313797	0.921982	1	0.269207	9.56325	172.206	0.00594142	0.128974	0.0177293	9.56325	33.0109	0.244937	0.345971	-0.0707044	9.56325	100.55	0.0315954	0.151884	-0.248639	9.56325	13.4807
CDC25B	E2	-0.120066	10.0569	3.55976	0.155358	0.602421	-0.272929	10.0569	219.656	9.3011e-32	8.4943e-31	-0.0979741	10.0569	6.19939	0.0583698	0.157314	0.152484	10.0569	6.55084	0.0597534	0.604797	0.0507639	10.0569	4.42269	0.120152	0.382336	-0.0438625	10.0569	0.341999	0.648754	1	-0.328206	9.72868	4.26764	0.103141	0.525103	-0.441473	9.72868	101.23	5.54923e-17	5.49726e-16	-0.310378	9.72868	11.6095	0.00601459	0.0471302	0.167273	9.72868	1.09076
CDC27	E2E3	-0.110373	10.2919	2.01984	0.178571	0.605761	-0.351986	10.2919	359.22	7.89659e-80	4.21436e-78	-0.221683	10.2919	28.6422	8.74444e-08	1.57294e-06	0.261469	10.2919	4.8788	0.0368569	0.542685	0.0708487	10.2919	3.98827	0.0588291	0.249347	-0.125637	10.2919	2.36518	0.124553	0.696659	-0.518865	10.0105	7.07559	0.0104475	0.177677	-0.33414	10.0105	69.156	1.01833e-16	9.93833e-16	-0.179969	10.0105	4.39707	0.0360239	0.165816	0.423888	10.0105	2.52504
CDC42	E2E3E4	0.00894189	10.1494	0.02264	0.893378	1	-0.134543	10.1494	48.5841	2.83805e-10	9.51837e-10	-0.2238	10.1494	30.441	4.07554e-07	6.16713e-06	0.0243467	10.1494	0.068497	0.827482	1	0.0869035	10.1494	7.15531	0.0207708	0.125061	0.130468	10.1494	2.42158	0.1804	0.730424	0.0256901	9.85068	0.751348	0.447851	0.876519	0.201215	9.85068	26.2108	3.11348e-07	1.33622e-06	0.0477847	9.85068	0.402919	0.563455	0.814191	0.388223	9.85068	1.32559
CDC42EP4	E4	-0.0086937	9.94437	0.238142	0.782576	1	0.00458565	9.94437	0.461627	0.796258	0.840726	0.00253228	9.94437	0.0253743	0.947155	1	-0.0450627	9.94437	5.12168	0.361664	0.85401	0.0613194	9.94437	48.0017	0.00524266	0.0466329	-0.00070931	9.94437	0.000655285	0.987266	1	-0.701394	9.58051	62.4803	0.000349931	0.0198056	0.0555156	9.58051	12.0379	0.122484	0.194495	0.125793	9.58051	12.589	0.12996	0.371085	-0.217787	9.58051	13.1425
CDC42SE1	E2	-0.0128399	9.98518	0.0392386	0.899088	1	-0.189725	9.98518	132.026	9.02238e-14	3.74202e-13	-0.188091	9.98518	32.7884	0.000210517	0.0015174	-0.150712	9.98518	3.54721	0.229893	0.791488	0.0605546	9.98518	9.13408	0.0585785	0.248522	0.0441212	9.98518	0.493879	0.661769	1	-0.0101519	9.63657	0.118775	0.819007	1	-0.168808	9.63657	14.8518	0.00898668	0.0195485	0.130082	9.63657	2.61756	0.278266	0.567469	0.108526	9.63657	0.225877
CDIPT	E4	0.0901337	10.0411	2.32233	0.26456	0.712822	-0.175607	10.0411	92.0235	5.19234e-13	2.05886e-12	0.0138298	10.0411	0.175805	0.675005	0.839599	0.192801	10.0411	10.2681	0.0211888	0.443864	-0.00227322	10.0411	0.00328971	0.970162	1	-0.138038	10.0411	3.58293	0.161393	0.729435	0.16076	9.7221	0.0198853	0.917612	1	0.0588672	9.7221	3.08127	0.112395	0.180506	0.208603	9.7221	5.44992	0.0590629	0.230039	0.491959	9.7221	6.33454
CDK13	E2	-0.214726	10.3434	8.62574	0.00331596	0.0800425	-0.346	10.3434	334.121	2.11818e-74	9.09283e-73	-0.224244	10.3434	29.1021	6.89706e-08	1.27284e-06	0.147734	10.3434	1.59837	0.215702	0.768187	0.0543307	10.3434	2.48591	0.115463	0.372887	0.0535966	10.3434	0.457359	0.498864	0.917509	-0.27946	10.0491	2.51778	0.112598	0.539756	-0.387482	10.0491	90.4732	2.27064e-21	3.10652e-20	-0.0693938	10.0491	0.640115	0.423686	0.69916	0.425359	10.0491	2.48104
CDK14	E4	-0.197159	10.5955	6.48979	0.0114243	0.169525	-0.284715	10.5955	306.76	1.77085e-68	6.20741e-67	-0.269581	10.5955	58.7309	1.84002e-14	1.26747e-12	0.0505127	10.5955	0.174048	0.704873	1	0.0748269	10.5955	5.41228	0.0300141	0.159227	-0.0147138	10.5955	0.0458275	0.830491	1	-0.151558	10.3567	0.923331	0.336623	0.812189	-0.198418	10.3567	34.2461	4.99694e-09	2.58984e-08	-0.141982	10.3567	4.02795	0.0447771	0.190926	0.800874	10.3567	9.68308
CDK2AP1	E4	-0.00238922	9.92084	0.912556	0.895872	1	-0.0104518	9.92084	136.341	0.110575	0.155457	-0.0253849	9.92084	266.033	0.0262739	0.0849135	-0.00207321	9.92084	1.39608e-09	0.999986	1	0.0071237	9.92084	92.3016	0.191262	0.494271	-0.0166108	9.92084	97.1903	0.179925	0.730424	0.0998854	9.55675	113.035	0.0819554	0.486314	-0.0206155	9.55675	38.4982	0.310404	0.419698	-0.0255217	9.55675	58.783	0.21224	0.487052	0.0104437	9.55675	2.73508e-09
CDK9	E4	0.0304785	9.97737	0.35536	0.722044	0.989079	-0.147439	9.97737	90.7078	5.43854e-09	1.67134e-08	-0.12423	9.97737	16.5059	0.0145942	0.0536216	-0.0343168	9.97737	0.232173	0.777109	1	-0.0354772	9.97737	5.14533	0.183301	0.483588	0.00809354	9.97737	0.0515393	0.894337	1	-0.510518	9.62104	21.5871	0.00453221	0.11156	-0.0990093	9.62104	5.81724	0.133966	0.208663	-0.0469277	9.62104	0.442499	0.676731	0.896858	0.245237	9.62104	4.62602
CDKL2	E2	0.0540773	10.0076	0.837655	0.543015	0.896201	-0.148376	10.0076	67.9245	7.26217e-08	2.0558e-07	-0.187814	10.0076	28.1076	0.000263227	0.00182737	-0.0024796	10.0076	0.351249	0.697502	1	0.0132768	10.0076	0.177889	0.776986	0.956605	0.0197637	10.0076	0.071274	0.861006	1	0.0390446	9.66475	0.070973	0.850142	1	-0.110005	9.66475	5.48107	0.0996921	0.162918	-0.176112	9.66475	4.10058	0.124525	0.363485	0.0528265	9.66475	8.26567e-10
CDS1	E4	0.0270051	10.0379	0.189162	0.758557	1	-0.243834	10.0379	187.035	5.03488e-25	3.50764e-24	-0.0955829	10.0379	7.98382	0.03439	0.1046	-0.0690419	10.0379	1.151	0.451587	0.94142	-0.038308	10.0379	10.4497	0.0245755	0.140436	-0.0340874	10.0379	0.324321	0.687104	1	-0.346916	9.71301	4.3393	0.101398	0.522482	0.0177448	9.71301	0.367778	0.572649	0.67628	0.191752	9.71301	6.68964	0.0273033	0.137758	0.0140153	9.71301	0.0618033
CELF1	E3	-0.176948	10.4449	6.37577	0.0142483	0.192857	-0.201248	10.4449	143.923	4.09835e-33	3.96062e-32	-0.173359	10.4449	20.2631	6.76422e-06	7.55111e-05	0.0251448	10.4449	0.058486	0.82072	1	-0.066588	10.4449	3.62847	0.0812852	0.301272	0.0536961	10.4449	0.435434	0.526272	0.935398	-0.430644	10.1474	5.74827	0.0191179	0.241309	-0.299466	10.1474	69.2303	9.809e-17	9.58886e-16	-0.176629	10.1474	4.76012	0.0291479	0.144009	-0.327202	10.1474	1.80778
CEMIP	E4	-0.0177335	10.0557	0.409982	0.641322	0.950239	-0.188514	10.0557	96.2206	9.57111e-14	3.96129e-13	-0.14674	10.0557	14.0807	0.003655	0.0172619	-0.0607696	10.0557	2.76092	0.22405	0.781958	-0.00135664	10.0557	0.463526	0.619235	0.863621	-0.111017	10.0557	5.92822	0.0735637	0.573124	-0.167731	9.70882	2.31874	0.240786	0.727762	-0.287156	9.70882	41.6819	1.59934e-07	7.08991e-07	0.010504	9.70882	0.00966659	0.949043	1	-0.339726	9.70882	3.27068
CENPB	E2	0.00890958	9.95149	0.338044	0.777708	1	-0.0494066	9.95149	19.1674	0.0249481	0.0399727	-0.0369375	9.95149	2.72977	0.397964	0.600562	0.0333164	9.95149	1.05698	0.617767	1	0.0568949	9.95149	23.3354	0.0185937	0.115662	0.019152	9.95149	1.64125	0.534942	0.941473	0.121838	9.59376	0.632153	0.67931	1	-0.0483841	9.59376	1.65432	0.48572	0.595407	0.10273	9.59376	3.29441	0.330866	0.625881	0.634813	9.59376	28.7952
CENPF	E4	-0.0151948	9.92424	16.3294	0.34989	0.754636	-0.0204796	9.92424	24.4411	0.260282	0.330032	0.00108166	9.92424	0.160434	0.921178	0.991624	-0.00526471	9.92424	1.16196	0.80376	1	0.00193912	9.92424	0.609401	0.856756	0.988435	0.0363028	9.92424	64.0386	0.0639603	0.569186	-0.0462324	9.56098	8.25306	0.410315	0.868772	-0.0151388	9.56098	2.36135	0.655466	0.750528	-0.0214857	9.56098	4.06259	0.561022	0.812325	0.0789033	9.56098	3.51941
CEP135	E3	-0.0233593	9.95664	0.339167	0.764254	1	-0.0721804	9.95664	29.9216	0.00343594	0.00627064	-0.078442	9.95664	9.65825	0.0995803	0.232555	0.0215328	9.95664	0.128985	0.847727	1	0.0427818	9.95664	8.24756	0.132243	0.399103	0.105071	9.95664	5.94318	0.200169	0.730424	-0.275686	9.59627	7.6634	0.129964	0.574414	-0.0345227	9.59627	0.96321	0.57338	0.676816	-0.000807494	9.59627	0.000666507	0.989982	1	-0.408607	9.59627	8.87163
CEP290	E2	-0.139359	10.2265	3.09855	0.111094	0.530277	-0.211186	10.2265	121.692	2.90438e-28	2.30431e-27	-0.146466	10.2265	13.2082	0.000344555	0.00231593	-0.231672	10.2265	4.37932	0.0616716	0.6117	0.0205881	10.2265	0.379564	0.564395	0.822612	-0.0851977	10.2265	1.01519	0.343942	0.830507	-0.00717419	9.92887	0.0397103	0.842154	1	-0.0417899	9.92887	0.846192	0.357652	0.470829	0.283513	9.92887	12.0317	0.000525062	0.00743252	-0.0833059	9.92887	0.300119
CEP57	E2	0.0162678	10.144	0.0209638	0.887824	1	-0.276025	10.144	196.769	3.97444e-37	4.45921e-36	-0.169863	10.144	17.4198	0.000176701	0.00130956	0.0273638	10.144	0.0299177	0.886012	1	0.152799	10.144	20.9717	7.20434e-05	0.00146326	0.00902632	10.144	0.0096296	0.924944	1	-0.275156	9.8324	1.9443	0.208009	0.690474	-0.365827	9.8324	68.8993	1.06825e-15	9.69115e-15	-0.217958	9.8324	5.90914	0.0202878	0.111662	-0.14222	9.8324	0.267927
CEP68	E2	-0.141682	10.0409	5.59135	0.0866081	0.473907	-0.169662	10.0409	83.0941	5.43204e-12	2.02599e-11	-0.214857	10.0409	31.4134	1.99431e-05	0.000196142	-0.142199	10.0409	3.77432	0.16035	0.739251	-0.0298305	10.0409	1.74007	0.341117	0.641042	-0.17962	10.0409	6.47639	0.0616382	0.569186	-0.243104	9.69907	2.61787	0.223296	0.708119	-0.458977	9.69907	108.067	2.95901e-16	2.79275e-15	-0.405916	9.69907	20.8061	0.000348401	0.00531484	-0.48228	9.69907	6.19775
CERS1	E4	0.0165418	9.91977	307.954	0.164225	0.603256	0.000633771	9.91977	169.339	0.30263	0.37579	3.36159e-05	9.91977	1.94815e-10	1	1	1.56541e-05	9.91977	-6.07098e-10	1	1	0.00348487	9.91977	367.171	0.129037	0.39559	1.07528e-05	9.91977	-3.28467e-10	1	1	1.0251e-14	9.55513	0	1	1	-5.12548e-15	9.55513	0	1	1	-2.56274e-15	9.55513	0	1	1	-7.68822e-15	9.55513	0
CERS5	E2	-0.205775	10.0602	9.42563	0.0175103	0.213957	-0.0813468	10.0602	17.9258	0.000529185	0.00106532	-0.02478	10.0602	0.423782	0.589689	0.772118	-0.0214503	10.0602	0.0606502	0.848293	1	0.0293792	10.0602	0.988648	0.447166	0.73525	0.030534	10.0602	0.159172	0.76387	1	-0.157605	9.7076	0.878973	0.452063	0.876653	-0.197022	9.7076	17.7459	0.000504741	0.00139528	-0.0986644	9.7076	1.08602	0.392187	0.675841	0.103523	9.7076	0.0881987
CFI	E2	0.0769147	9.92206	99.2293	0.073349	0.441735	-0.0108858	9.92206	29.3357	0.338461	0.413127	-0.012939	9.92206	22.0739	0.405851	0.608111	-0.0156713	9.92206	3.54799	0.740318	1	-0.0114794	9.92206	96.3539	0.0833972	0.30667	0.0127291	9.92206	37.1112	0.282341	0.78789	0.383982	9.55717	225.435	0.00716831	0.143625	-0.0184794	9.55717	38.3624	0.270684	0.375534	-0.053402	9.55717	101.789	0.0745217	0.266417	0.159945	9.55717	81.9522
CFLAR	E2E3	0.00781134	9.98548	0.030958	0.900561	1	0.0284878	9.98548	3.32681	0.221023	0.286153	-0.0488653	9.98548	2.03579	0.357704	0.556129	0.0410625	9.98548	0.308977	0.703294	1	0.110254	9.98548	20.1156	0.00350133	0.0341712	0.140049	9.98548	4.82144	0.151132	0.715483	0.281506	9.62562	2.64223	0.271843	0.758668	-0.141123	9.62562	12.5366	0.0173306	0.0353048	-0.0616661	9.62562	0.625948	0.594178	0.838206	-0.0337252	9.62562	0.069265
CHD4	E4	0.0610186	10.0747	0.764023	0.467408	0.84556	-0.0990666	10.0747	25.4131	1.81311e-05	4.23813e-05	0.0132693	10.0747	0.0938391	0.816683	0.930111	0.0880877	10.0747	0.792635	0.472823	0.963649	0.150952	10.0747	24.2803	6.5649e-05	0.0013535	0.0650934	10.0747	0.695433	0.501996	0.919947	-0.135558	9.73537	0.680767	0.480522	0.885675	0.0260852	9.73537	0.488934	0.526906	0.634343	0.246391	9.73537	7.16607	0.0206356	0.113016	0.386962	9.73537	2.30817
CHDH	E3	0.163602	9.96241	10.4204	0.0668274	0.422504	-0.154858	9.96241	128.001	5.37738e-10	1.76845e-09	-0.0663972	9.96241	5.44141	0.212566	0.394293	-0.0437029	9.96241	0.654299	0.659011	1	0.155674	9.96241	93.8101	1.3853e-07	5.93244e-06	0.0335108	9.96241	0.173484	0.827879	1	-0.285535	9.60872	6.82405	0.102171	0.523594	-0.460282	9.60872	182.129	7.0512e-16	6.46281e-15	-0.311136	9.60872	21.1248	0.00630976	0.0487129	0.152555	9.60872	3.93643
CHMP4B	E4	0.0817275	10.065	1.98481	0.289722	0.73979	-0.185906	10.065	104.212	4.16026e-16	1.94876e-15	-0.186439	10.065	21.9415	0.000287948	0.00198042	0.0928657	10.065	1.23134	0.410119	0.892777	0.0429198	10.065	3.12827	0.185796	0.487087	-0.060909	10.065	0.803535	0.500421	0.918178	0.420775	9.76309	1.81205	0.273681	0.760087	0.33905	9.76309	79.2299	1.15239e-15	1.04384e-14	0.274389	9.76309	7.41642	0.0255651	0.131672	0.374562	9.76309	1.34682
CHRNA9	E3E4	0.0344817	9.92147	155.467	0.0416253	0.341063	-0.00878875	9.92147	46.3218	0.263309	0.333395	-0.00151351	9.92147	1.75709	0.825177	0.93518	0.0554678	9.92147	120.795	0.0722672	0.644824	0.0137984	9.92147	100.308	0.101894	0.346312	-0.0024496	9.92147	1.14316	0.860914	1	0.00416123	9.55667	1.92401e-10	0.999989	1	-0.0183657	9.55667	30.9732	0.325393	0.436411	-0.00483352	9.55667	0.52077	0.900528	1	0.00464881	9.55667	2.59244e-10
CHST6	E3	0.238223	9.9287	131.807	0.00052347	0.0221578	-0.00632146	9.9287	5.08738	0.501822	0.576713	-0.0308636	9.9287	10.9078	0.332913	0.528261	0.0360739	9.9287	23.3563	0.153337	0.739251	0.0373863	9.9287	19.0712	0.188195	0.49041	0.0112418	9.9287	0.274564	0.872627	1	0.296463	9.56383	32.402	0.0826194	0.488875	0.0223053	9.56383	6.93809	0.43143	0.542439	-0.00687047	9.56383	0.113592	0.922968	1	0.0100199	9.56383	1.68225e-09
CIITA	E4	-0.0778445	9.9263	58.2391	0.0648749	0.415027	-0.0245242	9.9263	61.6694	0.0620599	0.0922645	-0.0346449	9.9263	52.4977	0.078006	0.194081	0.185353	9.9263	33.1385	0.0961367	0.690286	-0.00580849	9.9263	17.5301	0.313042	0.610463	0.0320083	9.9263	20.4169	0.271784	0.78789	-0.0706591	9.56312	4.46711	0.558429	0.935827	-0.110631	9.56312	168.746	0.000354144	0.00100831	-0.0935208	9.56312	35.1379	0.104375	0.328018	0.142094	9.56312	0.416995
CIRBP	E2	-0.410279	10.2243	33.495	7.18688e-09	2.09879e-06	-0.301715	10.2243	215.859	9.13157e-49	1.61158e-47	-0.305024	10.2243	51.5382	7.1185e-13	3.62493e-11	-0.024303	10.2243	0.134977	0.748634	1	-0.090875	10.2243	7.28438	0.00802988	0.0644567	-0.0339769	10.2243	0.18035	0.693438	1	-1.02783	9.89058	25.3604	1.57546e-06	0.000346073	-0.571735	9.89058	151.768	2.03282e-34	6.07182e-33	-0.886394	9.89058	79.8587	4.67101e-19	3.07456e-16	-0.0327003	9.89058	0.269621
CLEC4M	E3	0.000505407	9.92013	-5.77467e-10	1	1	0.00580523	9.92013	228.708	0.123097	0.170993	0.0128276	9.92013	190.084	0.156507	0.322599	0.00102094	9.92013	-1.10544e-09	1	1	0.00198712	9.92013	113.777	0.278086	0.586395	0.0119465	9.92013	113.999	0.277479	0.78789	0.00659191	9.55563	7.86431e-09	1	1	0.0171416	9.55563	326.815	0.0413051	0.0762199	0.00688539	9.55563	63.6298	0.36609	0.656654	0.00607986	9.55563	4.6648e-10
CLEC5A	E3	-0.0290952	9.92102	22.0731	0.528804	0.887606	0.0090044	9.92102	254.096	0.0315905	0.049697	0.00813632	9.92102	23.7154	0.509898	0.702922	0.359058	9.92102	740.241	0.000147416	0.0247159	0.00769644	9.92102	264.583	0.0289249	0.155963	-0.0288386	9.92102	179.235	0.0717933	0.571645	-0.201845	9.55648	152.919	0.0698107	0.454019	-0.00119412	9.55648	3.54559	0.789622	0.864927	-0.0200201	9.55648	61.4481	0.253974	0.538153	0.423811	9.55648	163.711
CLK4	E2	-0.109323	10.0253	2.86988	0.216087	0.650611	-0.222804	10.0253	145.774	1.39858e-19	7.68569e-19	-0.0421544	10.0253	1.1736	0.437159	0.636608	0.144463	10.0253	2.94962	0.222051	0.777774	0.0274353	10.0253	1.31467	0.412518	0.712478	0.00658664	10.0253	0.00867133	0.9543	1	-0.24658	9.68974	2.62216	0.219324	0.704624	-0.176442	9.68974	12.8013	0.00616583	0.0138831	0.302815	9.68974	10.2801	0.0123675	0.0784982	0.131691	9.68974	0.0630737
CLN5	E4	0.0817682	9.95274	3.77488	0.316527	0.746499	-0.136084	9.95274	123.005	1.28618e-08	3.84361e-08	-0.0694282	9.95274	7.09907	0.185686	0.36125	0.154119	9.95274	12.6326	0.0726742	0.645817	0.00288303	9.95274	0.0427276	0.915997	1	-0.0569885	9.95274	1.54668	0.520919	0.932116	0.11577	9.59862	0.8674	0.592524	0.960064	0.0178994	9.59862	0.586227	0.638934	0.735103	0.214045	9.59862	12.765	0.0402394	0.177497	0.102542	9.59862	0.187946
CLPTM1	E2E3E4	-0.159876	10.0839	5.11318	0.0724301	0.43828	-0.142298	10.0839	56.5514	7.31492e-10	2.38446e-09	-0.0225176	10.0839	0.28581	0.673795	0.838798	-0.128439	10.0839	2.10746	0.259829	0.842645	0.0586176	10.0839	4.60997	0.0927454	0.327907	-0.117288	10.0839	2.27343	0.228938	0.76164	-0.0400531	9.77942	0.285121	0.648889	1	0.192569	9.77942	23.6396	4.6303e-06	1.71258e-05	0.157139	9.77942	2.73986	0.144709	0.392098	0.270839	9.77942	0.872812
CLTA	E3	-0.199978	10.2001	6.02754	0.0257598	0.264932	-0.214079	10.2001	122.942	1.54952e-28	1.24382e-27	-0.173755	10.2001	16.9168	5.44761e-05	0.000469292	-0.184535	10.2001	2.73914	0.134761	0.739251	0.181434	10.2001	27.9816	1.35965e-06	4.60261e-05	0.126113	10.2001	1.99857	0.193861	0.730424	-0.138664	9.95064	2.26175	0.153799	0.614218	0.363405	9.95064	85.1959	3.20339e-20	4.00637e-19	0.259998	9.95064	8.44999	0.00365784	0.0323258	0.138348	9.95064	0.00592972
CLU	E4	0.316704	10.6479	33.705	6.45186e-09	1.94343e-06	0.0831214	10.6479	20.6469	5.53532e-06	1.35613e-05	0.0749514	10.6479	3.14737	0.0760557	0.190429	-0.217036	10.6479	2.64599	0.103817	0.715688	0.289528	10.6479	51.4527	7.43491e-13	7.10393e-11	-0.0240733	10.6479	0.0681343	0.794074	1	0.135462	10.4576	1.24594	0.264355	0.750984	0.477202	10.4576	175.331	1.02898e-39	3.87437e-38	0.265794	10.4576	8.49577	0.003567	0.031744	-0.191698	10.4576	0.638335
CMAS	E3	0.0158973	10.0842	0.19098	0.742504	0.99752	-0.17638	10.0842	95.7366	1.01496e-15	4.64892e-15	-0.0987577	10.0842	5.99487	0.0485811	0.136893	0.118852	10.0842	4.0535	0.127985	0.739251	0.0116684	10.0842	0.354745	0.653322	0.888134	-0.0023184	10.0842	0.00118389	0.983093	1	0.265013	9.7912	0.00272358	0.958907	1	0.174248	9.7912	22.9202	3.1378e-06	1.18322e-05	0.271945	9.7912	8.30869	0.0149728	0.0900802	-0.0362451	9.7912	2.87434
CMC1	E2	0.0765941	10.024	1.5237	0.368289	0.766959	-0.20645	10.024	120.108	1.4127e-16	6.74723e-16	-0.0868599	10.024	5.02422	0.0840123	0.20467	-0.186786	10.024	4.17791	0.135093	0.739251	0.0438955	10.024	3.02764	0.207925	0.507862	-0.134398	10.024	3.45614	0.167046	0.730424	0.0728269	9.68519	0.0784108	0.819691	1	-0.00571891	9.68519	0.00132333	0.970982	1	0.0932511	9.68519	1.24496	0.372346	0.660611	0.0549959	9.68519	0.0230598
CNIH3	E3	-0.104675	10.0567	2.41855	0.228946	0.667241	-0.218404	10.0567	134.274	9.28441e-21	5.37643e-20	-0.22146	10.0567	30.3175	1.61851e-05	0.000162785	0.0268363	10.0567	0.054205	0.865504	1	0.0760709	10.0567	10.705	0.0141105	0.0951267	-0.0160614	10.0567	0.0480242	0.859556	1	-0.907087	9.72022	24.1174	7.0838e-05	0.00605256	-0.287626	9.72022	42.3445	3.95528e-08	1.85813e-07	-0.540343	9.72022	31.4789	5.43187e-06	0.000172384	-0.40764	9.72022	7.21481
CNNM2	E4	-0.285385	10.2685	13.7555	0.000286352	0.0146658	-0.255395	10.2685	170.959	5.28695e-39	6.36583e-38	-0.192725	10.2685	23.5574	1.21606e-06	1.64099e-05	-0.100225	10.2685	0.66432	0.43928	0.926942	-0.140576	10.2685	16.0097	0.000125987	0.00234701	-0.0326129	10.2685	0.160227	0.68895	1	-0.739898	9.96032	13.5352	0.000321612	0.0188637	-0.323963	9.96032	55.3266	1.09781e-13	8.52721e-13	0.0790857	9.96032	0.95504	0.328462	0.623311	0.473707	9.96032	2.54378
CNOT3	E2	0.0491108	9.95991	1.89338	0.46387	0.842819	-0.0872314	9.95991	43.815	0.00030638	0.00063358	0.013987	9.95991	0.232787	0.809929	0.925006	-0.0688792	9.95991	2.16179	0.440088	0.927786	0.0351552	9.95991	8.30887	0.127227	0.3933	0.0310292	9.95991	0.568212	0.68399	1	0.42998	9.60556	13.9198	0.033479	0.3192	-0.0241868	9.60556	0.270116	0.75339	0.836201	0.0430793	9.60556	0.384163	0.744844	0.943034	-0.020246	9.60556	0.128253
COL3A1	E2	-0.000486515	9.92023	-1.35847e-09	1	1	-0.00246362	9.92023	87.9493	0.376905	0.453112	0.00230504	9.92023	5.77055	0.847672	0.948161	4.58434e-05	9.92023	5.23027e-10	0.999996	1	-0.000136705	9.92023	1.05307e-11	0.999997	1	3.52356e-05	9.92023	-6.66947e-10	1	1	-0.00715303	9.55612	2.30547e-08	1	1	-0.0118757	9.55612	211.291	0.0621895	0.1086	-0.0179222	9.55612	105.758	0.190132	0.457801	-0.00753793	9.55612	1.62724e-08
COL4A3BP	E2	-0.079392	10.1589	0.951572	0.39273	0.784576	-0.226986	10.1589	136.56	1.91853e-29	1.61211e-28	-0.131803	10.1589	9.77497	0.00349235	0.0166263	-0.0473443	10.1589	0.153218	0.723743	1	-0.0122606	10.1589	0.0999306	0.778274	0.956994	-0.226407	10.1589	7.68523	0.0119982	0.321132	-0.140022	9.86557	1.14598	0.332796	0.809279	0.069829	9.86557	3.27121	0.0705332	0.121058	0.160456	9.86557	3.1586	0.083657	0.2858	-0.364146	9.86557	2.09086
COLGALT2	E2	0.274004	10.1572	12.0164	0.00182547	0.0552514	-0.266822	10.1572	155.563	1.2577e-33	1.23906e-32	-0.182408	10.1572	16.535	0.000163103	0.00122152	0.0461629	10.1572	1.94553	0.223498	0.780968	0.00751613	10.1572	0.0643261	0.804238	0.968063	-0.0817431	10.1572	1.03851	0.326345	0.809689	0.528878	9.83215	5.53807	0.0277406	0.292574	-0.0879251	9.83215	3.35127	0.0737251	0.125784	0.302822	9.83215	9.95573	0.0018262	0.0192499	0.0237269	9.83215	0.807619
COPA	E3	-0.104349	10.2062	1.56969	0.24972	0.692684	-0.156948	10.2062	63.8374	8.97769e-15	3.89435e-14	-0.130242	10.2062	9.05425	0.00334647	0.0160306	-0.202922	10.2062	2.92902	0.117959	0.739251	0.293191	10.2062	78.9511	1.0968e-16	1.80484e-14	-0.0680181	10.2062	0.609282	0.461982	0.898865	0.0295572	9.91981	0.0333317	0.877389	1	0.200299	9.91981	24.6758	6.88621e-07	2.81921e-06	0.150078	9.91981	2.68505	0.108143	0.334987	-0.0548054	9.91981	0.0857379
COX14	E2	0.00855732	9.91993	168.704	0.306368	0.746499	0.00100649	9.91993	32.7325	0.652813	0.716381	0.0122426	9.91993	674.649	0.0405983	0.119003	-0.000241339	9.91993	-3.66828e-11	1	1	0.00703009	9.91993	755.993	0.0303482	0.16052	-0.000161496	9.91993	4.5395e-10	0.999994	1	0.00235264	9.55531	-4.01031e-10	1	1	0.00840042	9.55531	142.676	0.226702	0.32364	0.000416363	9.55531	3.39066e-10	1	1	0.000384597	9.55531	-3.65523e-10
COX15	E2E3	-0.132074	9.96777	10.0895	0.0731034	0.440853	-0.2069	9.96777	194.254	4.80669e-16	2.24329e-15	-0.116705	9.96777	15.1775	0.0269911	0.0866797	0.0229479	9.96777	0.0696347	0.881933	1	0.0295328	9.96777	2.95379	0.333188	0.631368	-0.104823	9.96777	4.04632	0.251993	0.78789	-0.359359	9.6134	13.4565	0.0277561	0.292574	-0.249777	9.6134	45.2027	3.31748e-05	0.00010969	-0.211516	9.6134	9.01163	0.0657744	0.246977	-0.248341	9.6134	8.02313
COX18	E3	0.0345426	9.95259	0.859392	0.644914	0.951865	-0.113264	9.95259	76.7214	1.32004e-05	3.12296e-05	-0.122782	9.95259	27.2944	0.00848147	0.034453	-0.0143278	9.95259	0.199939	0.826001	1	0.0119534	9.95259	0.612726	0.699694	0.916232	-0.0972266	9.95259	6.00396	0.224041	0.754063	0.12367	9.59545	1.02478	0.595383	0.961663	-0.163484	9.59545	24.3384	0.00772824	0.0170723	-0.202558	9.59545	11.3633	0.072697	0.262596	-0.0503099	9.59545	0.22698
CPD	E4	-0.137248	10.1251	3.39374	0.120081	0.552175	-0.220656	10.1251	128.435	1.39687e-24	9.54816e-24	-0.219251	10.1251	25.2835	1.04308e-05	0.000110146	-0.207121	10.1251	4.38935	0.0800506	0.652032	0.0578454	10.1251	3.22244	0.119905	0.381754	-0.137632	10.1251	2.60882	0.169055	0.730424	-0.270097	9.80428	2.63523	0.150054	0.60871	-0.0463863	9.80428	0.766564	0.471294	0.581373	0.00838941	9.80428	0.00258792	0.962517	1	0.138678	9.80428	0.134352
CPM	E4	-0.0759587	10.0113	1.81444	0.39213	0.784215	-0.0692577	10.0113	30.3498	0.000633271	0.00126228	-0.0116351	10.0113	0.032167	0.914271	0.987621	0.538215	10.0113	45.7342	9.40522e-06	0.00371444	0.12726	10.0113	34.4426	8.42013e-05	0.0016664	-0.113741	10.0113	4.0359	0.210604	0.734421	-0.802175	9.64151	31.39	0.000336085	0.0193925	-0.211929	9.64151	35.4653	0.000173846	0.000519258	-0.105526	9.64151	1.3471	0.464884	0.734915	0.589307	9.64151	10.1477
CR1	E2E3	0.0189617	9.93006	38.024	0.0540786	0.381297	-0.0317228	9.93006	55.8219	0.0187396	0.0306865	-0.0494207	9.93006	53.922	0.0215121	0.0727385	0.0987191	9.93006	14.3645	0.233808	0.798471	0.0767188	9.93006	55.4587	0.0181813	0.1141	-0.0848301	9.93006	25.9876	0.108625	0.662258	-0.0442049	9.56711	5.30819e-11	1	1	-0.085065	9.56711	52.1144	0.0151936	0.0313561	-0.102674	9.56711	18.3112	0.150441	0.400126	-0.0476783	9.56711	4.08323e-11
CR1L	E3	0.0432318	9.93445	4.08094	0.449083	0.830255	-0.0264535	9.93445	11.701	0.201271	0.263731	-0.0283354	9.93445	3.65205	0.485923	0.682081	0.0764023	9.93445	10.1305	0.233611	0.798382	0.00159682	9.93445	0.0836832	0.918681	1	0.0785359	9.93445	14.1018	0.161044	0.728273	0.047193	9.56794	1.49177	0.660123	1	-0.119324	9.56794	70.0658	0.0024025	0.00588279	-0.0876066	9.56794	11.2381	0.225516	0.505023	0.0839469	9.56794	2.5168
CREB1	E3	-0.087466	10.1103	1.33465	0.332472	0.746761	-0.135949	10.1103	47.7848	4.34855e-10	1.43915e-09	-0.0844086	10.1103	3.82338	0.090612	0.216805	0.216044	10.1103	4.03751	0.0899671	0.671105	0.0612763	10.1103	3.82246	0.099371	0.341609	-0.0877403	10.1103	1.20851	0.331154	0.816038	0.0380239	9.78668	0.000970464	0.982743	1	0.0976708	9.78668	5.63713	0.0187146	0.0377307	0.3722	9.78668	15.4337	0.000364283	0.00550981	0.249175	9.78668	0.80404
CREM	E4	-0.0541869	10.0432	0.638546	0.541037	0.895116	-0.231148	10.0432	150.019	5.41981e-22	3.31683e-21	-0.148503	10.0432	14.0168	0.00417521	0.0192882	-0.397971	10.0432	17.3088	0.00167313	0.116152	-0.0689739	10.0432	7.20675	0.0464468	0.213848	-0.272584	10.0432	20.0615	0.000152043	0.0380579	-0.168559	9.71048	1.27316	0.357703	0.832475	-0.203023	9.71048	18.4721	0.000451801	0.0012613	-0.0339624	9.71048	0.262736	0.669419	0.891822	-0.539781	9.71048	5.27673
CRH	E3E4	-0.0533731	9.93855	25.7651	0.0541708	0.381678	-0.0503297	9.93855	58.5838	0.00279341	0.00515573	-0.428321	9.93855	396.824	3.96602e-18	5.46388e-16	-0.0162091	9.93855	0.672858	0.752983	1	-0.00338594	9.93855	0.00980661	0.97235	1	-0.0235421	9.93855	5.09541	0.391404	0.873983	0.342453	9.58519	0.934978	0.658536	1	0.24619	9.58519	60.5681	0.000256923	0.000747429	-0.0848534	9.58519	33.8117	0.00415352	0.0357984	0.465849	9.58519	18.475
CRHR1	E3	0.0212576	10.1286	0.017834	0.902247	1	-0.37117	10.1286	399.873	2.51016e-71	9.59368e-70	-0.184352	10.1286	20.9971	7.8748e-05	0.000647023	0.0807059	10.1286	0.241502	0.692994	1	-0.0386228	10.1286	2.78023	0.18033	0.479306	-0.306327	10.1286	15.3792	0.00127208	0.125596	-0.540826	9.79087	15.2153	0.00141509	0.0522849	-0.733349	9.79087	275.852	8.01476e-49	4.7165e-47	-0.313411	9.79087	12.0219	0.0025405	0.0245914	0.181655	9.79087	0.600959
CRTAP	E2E4	0.0546106	9.96959	1.19037	0.523102	0.883802	-0.11628	9.96959	61.9156	3.07777e-06	7.68881e-06	-0.0769696	9.96959	6.20928	0.153436	0.317891	0.109859	9.96959	3.22214	0.301993	0.842645	-0.0221124	9.96959	1.58372	0.470654	0.754166	0.0709904	9.96959	1.73279	0.445903	0.8932	0.201078	9.614	2.15086	0.371248	0.844791	-0.0887048	9.614	5.13306	0.163318	0.246769	-0.0180788	9.614	0.0341	0.933547	1	0.411775	9.614	6.90307
CRTC3	E4	0.113874	10.1936	2.01329	0.184594	0.611481	-0.315569	10.1936	246.237	9.14402e-54	1.88743e-52	-0.151646	10.1936	12.3726	0.00108387	0.00622781	0.0280964	10.1936	0.0449024	0.850809	1	0.0474998	10.1936	2.08394	0.169407	0.461211	0.0173926	10.1936	0.0395642	0.853445	1	-0.120348	9.89802	0.614408	0.46759	0.882352	-0.111297	9.89802	5.8055	0.0337723	0.0637495	-0.0721554	9.89802	0.616472	0.432378	0.70725	0.114972	9.89802	0.0311332
CSNK1A1	E2	-0.155476	10.3351	4.84954	0.027658	0.275063	-0.269193	10.3351	194.4	4.20611e-44	6.15235e-43	-0.196355	10.3351	22.7972	1.80534e-06	2.35223e-05	-0.060661	10.3351	0.282259	0.595226	1	0.0569665	10.3351	2.7783	0.0955557	0.333834	-0.169977	10.3351	5.16476	0.0230539	0.400111	-0.0137242	10.0602	0.0159044	0.899645	1	0.0196303	10.0602	0.341578	0.558932	0.66355	0.0434899	10.0602	0.286981	0.592172	0.836706	-0.0705631	10.0602	0.114381
CSRP1	E4	0.475741	10.0351	73.4227	9.45e-11	4.30629e-08	0.0372779	10.0351	8.86017	0.0344102	0.053738	0.0055014	10.0351	0.0878206	0.843762	0.945958	-0.00213781	10.0351	0.0903891	0.839882	1	0.421312	10.0351	305.204	3.89655e-39	3.46247e-36	-0.0557029	10.0351	0.668171	0.577274	0.973292	0.406385	9.66338	10.3448	0.0240953	0.270869	0.202485	9.66338	27.524	0.00030245	0.000868079	0.00567942	9.66338	0.000665084	0.997185	1	0.165713	9.66338	1.4097
CST3	E3	-0.0244122	10.1209	0.656801	0.417695	0.805828	-0.104825	10.1209	31.5476	2.30366e-05	5.32456e-05	-0.19421	10.1209	25.9175	0.000163419	0.00122337	0.392468	10.1209	19.4715	0.000913421	0.0773015	-0.0642532	10.1209	9.07785	0.0317748	0.164829	-0.0179912	10.1209	0.124525	0.72418	1	-0.0452961	9.78195	0.368245	0.543975	0.924061	0.381091	9.78195	65.0932	4.55983e-10	2.61326e-09	-0.151396	9.78195	4.16465	0.088591	0.296575	1.09628	9.78195	32.6439
CSTF1	E3	0.0245117	9.94718	1.20455	0.611322	0.93223	-0.0731633	9.94718	40.8766	0.00232783	0.00433831	0.0530188	9.94718	7.04938	0.193462	0.370615	0.0914055	9.94718	7.77253	0.197912	0.74798	0.00241467	9.94718	0.0770774	0.897025	1	-0.153314	9.94718	22.6026	0.0274381	0.427885	0.0179257	9.59234	8.17936	0.142853	0.59891	0.142046	9.59234	30.8443	0.00294094	0.00707354	0.360634	9.59234	42.579	0.000583672	0.00810392	0.328086	9.59234	8.19285
CSTF3	E3	-0.0583069	10.1578	0.590788	0.516171	0.880811	-0.327039	10.1578	301.16	1.93635e-58	4.75972e-57	-0.18949	10.1578	20.7302	5.11997e-05	0.000445821	0.138012	10.1578	1.58826	0.289812	0.842645	0.0755175	10.1578	5.66741	0.043579	0.204945	-0.0543651	10.1578	0.482315	0.527574	0.936199	0.426973	9.87041	3.81876	0.0851477	0.494917	0.0198137	9.87041	0.581639	0.445687	0.556272	0.148376	9.87041	2.81077	0.113789	0.345686	0.775286	9.87041	8.39382
CTBP2	E3	-0.101612	10.0596	2.26202	0.204978	0.63618	-0.229235	10.0596	127.598	1.79431e-21	1.06958e-20	-0.208124	10.0596	24.0262	5.9376e-05	0.000506348	-0.0753932	10.0596	0.554195	0.530776	0.999713	0.0847295	10.0596	7.56339	0.0257885	0.145152	-0.0115551	10.0596	0.0213117	0.899474	1	-0.206372	9.72256	1.45359	0.283389	0.767294	-0.323702	9.72256	46.5318	1.39168e-09	7.61718e-09	-0.159734	9.72256	2.57253	0.162901	0.420358	-0.42738	9.72256	3.05662
CTSS	E3	-0.00918	9.94767	0.0631024	0.909424	1	-0.137872	9.94767	158.159	5.78552e-09	1.77302e-08	-0.0372038	9.94767	3.34011	0.38823	0.589863	0.0431844	9.94767	0.493211	0.738087	1	-0.000137206	9.94767	0.11802	0.877847	0.992981	-0.0269152	9.94767	2.96312	0.441118	0.892645	-0.148765	9.59043	12.2183	0.0842279	0.4937	-0.274656	9.59043	93.9017	7.2687e-07	2.96555e-06	-0.188391	9.59043	11.8273	0.0785764	0.275708	0.194433	9.59043	1.09972
CTSZ	E2	0.00549596	9.93894	0.0599448	0.923848	1	-0.0675316	9.93894	52.9202	0.00363851	0.00661858	-0.0157848	9.93894	0.812555	0.730156	0.876305	0.27205	9.93894	25.9423	0.0301524	0.498995	-0.00629745	9.93894	2.09394	0.567287	0.824824	0.0463741	9.93894	3.99925	0.426667	0.888038	0.0496783	9.57479	0.0646982	0.923221	1	-0.176058	9.57479	66.1571	0.000646214	0.00175122	-0.163049	9.57479	25.3774	0.0351829	0.162958	0.730599	9.57479	39.4239
CUL2	E4	-0.0543883	10.0303	0.798506	0.526871	0.886533	-0.187202	10.0303	106.002	1.73011e-14	7.4162e-14	-0.128568	10.0303	11.0279	0.01677	0.0598826	-0.169385	10.0303	3.87232	0.160514	0.739251	0.0344579	10.0303	2.13165	0.299218	0.596895	-0.0325314	10.0303	0.209233	0.739547	1	0.150158	9.69263	0.0993356	0.821389	1	-0.177406	9.69263	14.5216	0.00297586	0.0071527	-0.0146447	9.69263	0.0481917	0.871069	1	-0.554323	9.69263	8.48515
CYB561	E3	-0.133866	9.99974	13.2129	0.0270668	0.272275	-0.234237	9.99974	215.348	1.47654e-21	8.8503e-21	-0.270925	9.99974	67.0787	3.30085e-07	5.11891e-06	-0.062297	9.99974	1.10161	0.521354	0.995923	-0.0141929	9.99974	1.16569	0.512481	0.78234	-0.0816175	9.99974	7.82322	0.0897168	0.616488	-0.36428	9.67368	14.8492	0.00781403	0.149645	-0.120947	9.67368	11.1375	0.0141442	0.0294036	-0.0721635	9.67368	0.687168	0.556549	0.809211	0.0695368	9.67368	1.01695
CYB5B	E2	-0.0529142	10.0946	0.668067	0.488911	0.863797	-0.162405	10.0946	73.3809	3.81288e-13	1.52447e-12	-0.087075	10.0946	4.25304	0.0967499	0.22762	0.13063	10.0946	1.99579	0.264536	0.842645	0.014738	10.0946	0.302962	0.661411	0.893327	-0.14329	10.0946	3.31255	0.142687	0.703168	-0.0137111	9.77998	0.005002	0.945101	1	0.108265	9.77998	7.9076	0.00626089	0.0140757	-0.0652069	9.77998	0.582957	0.495217	0.761237	0.330763	9.77998	1.33051
CYCS	E3E4	0.0119014	10.1471	0.106751	0.790073	1	-0.210171	10.1471	121.551	1.54768e-25	1.10065e-24	-0.0244908	10.1471	0.318463	0.747656	0.887884	0.0500792	10.1471	0.549793	0.541677	1	0.0942435	10.1471	14.5918	0.00128675	0.015599	0.0159885	10.1471	0.0703432	0.837839	1	0.658379	9.92226	3.9757	0.0619468	0.428373	0.499637	9.92226	162.465	6.02163e-37	2.00031e-35	0.457525	9.92226	34.2454	4.9988e-09	4.09395e-07	0.580735	9.92226	2.39263
CYP4V2	E2	-0.0155155	9.95989	0.110027	0.859345	1	-0.152706	9.95989	123.806	1.95747e-09	6.18566e-09	0.00635067	9.95989	0.112313	0.828534	0.937418	0.0129348	9.95989	0.0563963	0.899596	1	0.0171087	9.95989	1.4414	0.522928	0.791204	-0.0576773	9.95989	1.29027	0.538617	0.944852	-0.109765	9.60345	0.909675	0.586407	0.956625	-0.230397	9.60345	46.548	7.57927e-05	0.000237816	-0.202357	9.60345	9.16738	0.0780214	0.274574	-0.156946	9.60345	4.70405
CYSTM1	E4	0.0944359	10.0277	2.43703	0.242364	0.684341	-0.241586	10.0277	168.115	1.76924e-22	1.10676e-21	-0.213389	10.0277	30.166	5.82187e-05	0.000497913	-0.231242	10.0277	7.91568	0.043045	0.563599	-0.0354746	10.0277	1.96544	0.311674	0.609633	-0.123187	10.0277	3.10398	0.200551	0.730424	-0.0162155	9.70565	0.0339547	0.894166	1	-0.00448834	9.70565	0.0861416	0.769147	0.848707	-0.155594	9.70565	3.23667	0.140949	0.386448	-0.450871	9.70565	10.5149
DCLK1	E2E3	-0.012494	10.958	0.0365638	0.848357	1	-0.375151	10.958	685.706	3.89137e-150	2.30525e-147	-0.217899	10.958	49.4176	2.09506e-12	9.8501e-11	-0.0180751	10.958	0.104633	0.758698	1	-0.0931708	10.958	10.2142	0.00365862	0.0352991	-0.115439	10.958	2.11135	0.180503	0.730424	0.315867	10.7451	1.58754	0.280719	0.765057	-0.387285	10.7451	195.275	5.38764e-44	2.49998e-42	-0.0655989	10.7451	1.22739	0.267941	0.555055	0.320207	10.7451	1.11778
DCLRE1C	E3	0.0524465	9.98875	0.817889	0.550266	0.90038	-0.212507	9.98875	153.107	5.35117e-16	2.49021e-15	-0.134004	9.98875	15.1617	0.0106578	0.0416013	0.0369483	9.98875	0.196232	0.773251	1	0.028255	9.98875	1.77345	0.392001	0.694788	0.0383759	9.98875	0.359829	0.698054	1	-0.0284602	9.64451	0.0266909	0.90468	1	-0.234809	9.64451	30.5235	8.16214e-05	0.000254666	-0.184429	9.64451	4.95683	0.1116	0.341133	-0.0105851	9.64451	0.00420666
DCTN6	E3	0.0269428	9.99796	0.531668	0.637124	0.946736	-0.111927	9.99796	41.483	1.31815e-05	3.11974e-05	-0.0296656	9.99796	0.626339	0.603048	0.782404	0.0327816	9.99796	0.446923	0.664911	1	0.141548	9.99796	48.2096	6.2679e-06	0.000175422	0.0673992	9.99796	1.34873	0.44814	0.893472	0.0433828	9.67296	0.841443	0.513006	0.902368	0.143655	9.67296	16.6851	0.00127745	0.00328856	0.0963103	9.67296	1.0949	0.442963	0.715406	0.144176	9.67296	0.00384413
DCUN1D1	E2	-0.180742	10.064	7.40771	0.0257101	0.264833	-0.168929	10.064	75.0762	5.54559e-13	2.19062e-12	-0.161293	10.064	14.8353	0.0016606	0.00890261	0.0979928	10.064	1.20939	0.390083	0.870596	-0.00980253	10.064	0.0784166	0.830068	0.979481	-0.0787342	10.064	0.964734	0.43322	0.890261	0.0167577	9.73122	0.0158405	0.903236	1	0.211691	9.73122	23.4864	2.03399e-05	6.92891e-05	0.284714	9.73122	9.04716	0.0106426	0.0704534	1.01041	9.73122	18.206
DDAH2	E4	0.027243	9.93271	0.354934	0.836171	1	-0.0393625	9.93271	46.592	0.0159137	0.0263946	0.0485438	9.93271	24.4499	0.0882918	0.212589	-0.0368959	9.93271	0.574478	0.78999	1	0.0186854	9.93271	11.8085	0.237547	0.545995	0.000588324	9.93271	0.0114029	0.961373	1	-0.0400517	9.57097	0.0823699	0.917695	1	0.0424519	9.57097	7.85821	0.273718	0.379152	0.0202393	9.57097	0.136763	0.89343	1	0.239579	9.57097	6.26276
DDHD1	E4	-0.0647274	10.1593	0.626304	0.488424	0.863516	-0.282385	10.1593	218.514	6.61497e-47	1.09563e-45	-0.158079	10.1593	14.0453	0.000460033	0.00296329	-0.108347	10.1593	1.03248	0.383007	0.867772	0.127292	10.1593	15.2891	0.000679356	0.00952171	-0.0652207	10.1593	0.619332	0.477603	0.906255	-0.396543	9.84577	4.91801	0.0505776	0.392004	-0.274544	9.84577	39.1116	2.52643e-09	1.34915e-08	-0.0546927	9.84577	0.35816	0.601817	0.843629	-0.117617	9.84577	0.378241
DDR2	E4	-0.17786	9.94796	18.3461	0.0353593	0.311527	-0.0743076	9.94796	65.4372	0.000207334	0.00043684	-0.13421	9.94796	27.9126	0.0144525	0.053156	-0.0370326	9.94796	3.83708	0.376981	0.864711	0.0204556	9.94796	5.52454	0.289025	0.587168	0.02955	9.94796	0.849811	0.676445	1	-0.211814	9.5887	4.29762	0.251947	0.73839	-0.156263	9.5887	45.3838	0.00093753	0.00247608	-0.259308	9.5887	19.7971	0.0277599	0.139574	-0.0798951	9.5887	3.26889
DDX59	E2	0.00785037	9.94402	0.0904541	0.887311	1	-0.0463298	9.94402	19.2836	0.0451573	0.069071	-0.091519	9.94402	20.3391	0.0394309	0.116175	-0.092168	9.94402	4.88872	0.319381	0.842645	0.0110368	9.94402	0.85934	0.676644	0.903866	-0.0882039	9.94402	4.88476	0.312468	0.793711	-0.210076	9.58028	6.94289	0.227515	0.712871	-0.0659359	9.58028	7.38671	0.209829	0.30377	-0.0418799	9.58028	0.761488	0.687751	0.904582	-0.164459	9.58028	2.83107
DENND4C	E4	-0.230926	10.128	10.9389	0.00284167	0.0717361	-0.283335	10.128	197.414	1.75341e-38	2.06095e-37	-0.256892	10.128	37.4007	3.0253e-08	6.00062e-07	-0.0462376	10.128	0.176317	0.71562	1	0.0328886	10.128	0.989055	0.38992	0.692579	-0.20349	10.128	7.00777	0.0152522	0.358549	-0.552567	9.8014	9.11911	0.00543497	0.122577	-0.377169	9.8014	66.4799	2.07263e-14	1.70059e-13	-0.271208	9.8014	8.29699	0.00763878	0.0558898	-0.415851	9.8014	2.45967
DENND5B	E4	-0.0516939	10.4323	0.511385	0.474543	0.851705	-0.287459	10.4323	261.977	8.95286e-59	2.21602e-57	-0.14587	10.4323	15.5851	7.89797e-05	0.000648626	-0.0384017	10.4323	0.142051	0.716582	1	0.0206754	10.4323	0.317411	0.586285	0.838322	-0.0316632	10.4323	0.167708	0.682158	1	-0.348244	10.1717	3.91634	0.0486263	0.384083	-0.134637	10.1717	13.2947	0.000267399	0.000776126	0.214928	10.1717	9.16925	0.00246693	0.0241555	0.270127	10.1717	0.815089
DENR	E3	0.074926	10.0594	1.29231	0.38636	0.780893	-0.238139	10.0594	163.384	7.93024e-25	5.47538e-24	-0.149377	10.0594	13.6216	0.00440578	0.0201324	0.140968	10.0594	2.45149	0.240337	0.811873	0.0322768	10.0594	1.56534	0.347444	0.647386	0.00867778	10.0594	0.0136901	0.938916	1	-0.342221	9.73718	5.53327	0.0585919	0.417514	-0.115308	9.73718	5.52005	0.0673591	0.116484	-0.06519	9.73718	0.614535	0.483125	0.751365	0.213123	9.73718	0.504311
DEXI	E4	0.0230479	9.98333	0.337811	0.723135	0.989494	-0.0610588	9.98333	14.0886	0.0195502	0.0318962	0.0282748	9.98333	0.89928	0.467293	0.66507	0.0693633	9.98333	1.14181	0.517359	0.99538	0.0336338	9.98333	5.35175	0.161524	0.447903	0.038044	9.98333	0.606209	0.637015	0.999915	-0.217254	9.64693	15.2952	0.00873939	0.160617	0.380194	9.64693	97.549	1.35139e-12	9.67642e-12	0.570367	9.64693	59.8383	4.24353e-08	2.70052e-06	0.327653	9.64693	2.50921
DIP2B	E2	-0.303474	10.3433	14.4481	0.000144247	0.00890122	-0.262584	10.3433	155.618	1.15851e-35	1.23287e-34	-0.176231	10.3433	15.6739	7.5358e-05	0.000623512	-0.23511	10.3433	4.99913	0.0253644	0.464639	0.0446116	10.3433	2.83392	0.0922992	0.326907	-0.110914	10.3433	1.88439	0.169842	0.730424	-0.54317	10.0252	6.89093	0.00867555	0.160272	-0.369959	10.0252	64.9491	8.49129e-16	7.73883e-15	-0.0870682	10.0252	0.88872	0.345845	0.64078	-0.436629	10.0252	2.98154
DKK3	E2	0.109334	10.5355	2.99664	0.0834437	0.465411	0.0218383	10.5355	1.61602	0.203654	0.26652	-0.0952439	10.5355	6.35022	0.0117397	0.0449997	-0.0323777	10.5355	0.00167618	0.967804	1	-0.0593397	10.5355	2.62365	0.1388	0.411126	-0.0607082	10.5355	0.344061	0.571817	0.969481	-0.0244267	10.3512	0.0621912	0.80307	1	0.299857	10.3512	87.5183	9.9902e-21	1.30166e-19	0.248973	10.3512	10.9446	0.000941798	0.0115671	0.120194	10.3512	0.000260376
DLG1	E3	-0.314574	10.7332	15.4624	8.42753e-05	0.00599735	-0.269932	10.7332	237.491	1.83551e-53	3.74519e-52	-0.0776388	10.7332	3.06737	0.0798845	0.197446	0.0792023	10.7332	0.410971	0.52148	0.995923	0.0797994	10.7332	9.90687	0.00164759	0.0188788	-0.1309	10.7332	3.04599	0.0809429	0.596895	-0.244023	10.4733	1.7549	0.18529	0.662211	-0.0753804	10.4733	4.76455	0.0290729	0.0557432	0.403001	10.4733	21.7373	3.16379e-06	0.000108546	-0.0583932	10.4733	0.0565638
DLG2	E4	-0.147704	12.1575	8.97371	0.00274025	0.0700284	-0.2395	12.1575	361.157	3.01127e-80	1.64665e-78	-0.171606	12.1575	46.1221	1.12336e-11	4.69748e-10	-0.243905	12.1575	4.6241	0.0438548	0.563599	-0.0522996	12.1575	7.69013	0.00555439	0.0488918	-0.0291619	12.1575	0.372743	0.541516	0.947139	-0.965314	11.9652	66.1692	4.58882e-16	1.16504e-12	-0.0271045	11.9652	1.46128	0.249333	0.350816	0.115302	11.9652	7.12568	0.00761005	0.0557714	-0.2258	11.9652	0.884674
DLGAP4	E2	-0.0198276	10.2051	0.0802364	0.820633	1	-0.245913	10.2051	186.028	1.7616e-39	2.1606e-38	-0.229567	10.2051	36.8424	9.3763e-09	2.07775e-07	-0.0476251	10.2051	0.264857	0.661485	1	-0.024451	10.2051	0.999419	0.406338	0.707845	0.0945077	10.2051	1.6186	0.251781	0.78789	-0.174717	9.88535	0.956819	0.388159	0.857792	-0.3373	9.88535	67.5265	8.35496e-15	7.07742e-14	-0.173573	9.88535	4.32716	0.0501894	0.205191	0.0702045	9.88535	0.0267456
DLK2	E3	0.0118034	9.9427	4.60076	0.371749	0.769835	-0.118323	9.9427	126.239	1.4238e-06	3.65661e-06	-0.0387377	9.9427	5.13848	0.341711	0.53852	0.00837608	9.9427	0.319164	0.813616	1	0.00288282	9.9427	2.15992	0.540478	0.803393	0.0248575	9.9427	0.829707	0.700751	1	0.162018	9.58895	3.15819	0.393827	0.861318	-0.127506	9.58895	12.1901	0.0868345	0.14468	0.0561002	9.58895	0.754036	0.676484	0.896665	0.0680336	9.58895	1.96804e-09
DMPK	E4	0.0269093	9.97322	0.298	0.748728	0.999805	-0.205309	9.97322	179.697	9.94652e-16	4.55826e-15	-0.127873	9.97322	18.9483	0.0100453	0.0395907	-0.0017575	9.97322	0.00017982	0.993114	1	0.000333665	9.97322	0.00235856	0.975821	1	0.151646	9.97322	6.58148	0.126876	0.700312	0.0429578	9.61896	0.0832202	0.854935	1	-0.318894	9.61896	68.1396	1.99812e-07	8.73998e-07	0.0432758	9.61896	0.355993	0.704749	0.916359	-0.0371232	9.61896	1.89764
DNAAF5	E3	0.0459309	9.95975	1.74552	0.490302	0.864486	-0.132066	9.95975	95.5139	1.59255e-07	4.38599e-07	-0.0645085	9.95975	6.40432	0.185358	0.360689	0.0270884	9.95975	1.36825	0.546593	1	-0.0216664	9.95975	3.55102	0.329346	0.627009	0.201183	9.95975	27.3477	0.00655152	0.252134	0.177626	9.60176	3.61137	0.298896	0.777914	-0.246261	9.60176	57.1638	1.77068e-05	6.08086e-05	0.143732	9.60176	5.5568	0.189278	0.457044	0.0539764	9.60176	0.921181
DNAJB1	E2	0.221955	10.0393	12.4558	0.00868024	0.141959	0.0117968	10.0393	0.568228	0.450968	0.527311	0.0740493	10.0393	3.64925	0.137248	0.293734	-0.0191954	10.0393	0.0276939	0.907017	1	0.134053	10.0393	28.1931	9.43002e-05	0.00184165	0.369098	10.0393	27.8823	9.80007e-05	0.0295198	0.967752	9.73983	27.6477	2.36349e-05	0.00260894	0.910404	9.73983	487.471	2.48651e-82	5.1384e-80	0.798865	9.73983	78.5797	2.11167e-13	5.07144e-11	-0.0957775	9.73983	1.13951
DNAJC18	E4	0.0174321	10.0642	0.029589	0.895086	1	-0.247796	10.0642	174.492	4.5092e-26	3.27359e-25	-0.101139	10.0642	6.80341	0.0387248	0.114665	-0.0143085	10.0642	0.219337	0.724151	1	0.0800531	10.0642	8.51878	0.0272788	0.150186	0.135269	10.0642	3.11912	0.17821	0.730424	0.177241	9.73654	0.419916	0.60641	0.969689	-0.345291	9.73654	58.0821	7.84175e-11	4.80896e-10	-0.146778	9.73654	2.62647	0.159611	0.415438	-0.141778	9.73654	3.29425
DNAJC27	E3	-0.0961028	9.98944	3.16651	0.252183	0.695842	-0.186727	9.98944	122.967	1.56803e-13	6.41065e-13	-0.147235	9.98944	18.1935	0.00506571	0.0225781	-0.0136671	9.98944	0.0385349	0.8988	1	0.0216142	9.98944	1.09692	0.504508	0.77667	0.101638	9.98944	3.09237	0.261241	0.78789	-0.103356	9.64331	0.886264	0.517168	0.905138	-0.144866	9.64331	10.5251	0.0215374	0.0427047	0.0489651	9.64331	0.477319	0.608258	0.848372	-0.0700576	9.64331	2.91196
DNAJC5	E4	0.0443291	10.1578	0.397784	0.600524	0.925797	-0.24404	10.1578	181.05	2.17142e-38	2.53885e-37	-0.187	10.1578	21.6253	2.38932e-05	0.000229406	-0.2675	10.1578	6.17602	0.0356972	0.53976	-0.0841606	10.1578	7.80478	0.0207731	0.125061	0.0147277	10.1578	0.0428575	0.867205	1	-0.0418866	9.85875	1.01947	0.378078	0.849672	-0.0341899	9.85875	0.297989	0.625863	0.723112	0.145147	9.85875	2.85261	0.136855	0.381578	-0.300592	9.85875	1.83215
DNAJC6	E2	-0.0651142	10.4909	0.465536	0.500511	0.870786	-0.185834	10.4909	98.7424	3.02087e-23	1.96584e-22	-0.188382	10.4909	21.1715	4.20973e-06	4.96782e-05	-0.0534641	10.4909	0.310929	0.588199	1	-0.0522753	10.4909	3.63063	0.0567312	0.244368	-0.0953775	10.4909	1.12916	0.28796	0.78789	-0.0410399	10.2162	0.329359	0.576393	0.948846	-0.0407098	10.2162	0.999575	0.614711	0.713051	0.259023	10.2162	10.018	0.00155445	0.0170005	0.0371117	10.2162	0.0383349
DNAJC7	E3	-0.174075	10.1235	5.60606	0.0455869	0.355393	-0.165124	10.1235	71.9329	5.00686e-14	2.10558e-13	-0.10778	10.1235	6.74594	0.0240226	0.0791491	-0.0330715	10.1235	0.10479	0.781523	1	0.0263687	10.1235	0.69991	0.480792	0.760899	-0.143709	10.1235	3.09224	0.132409	0.700312	-0.23362	9.80966	1.65227	0.257412	0.743965	-0.106986	9.80966	5.69442	0.0332572	0.0628707	-0.0940967	9.80966	1.05026	0.352208	0.647372	-0.49912	9.80966	4.3613
DNALI1	E4	-0.129508	9.93058	35.1958	0.0493138	0.366697	0.0199379	9.93058	13.8863	0.200701	0.26312	0.0191777	9.93058	4.39403	0.485686	0.68191	0.0159958	9.93058	9.55191	0.315788	0.842645	-0.0188194	9.93058	24.4196	0.108104	0.35931	0.00430491	9.93058	0.0316964	0.954322	1	-0.26821	9.56934	15.5305	0.14778	0.605426	0.137033	9.56934	66.0921	0.0027457	0.00664985	0.180389	9.56934	40.7936	0.019694	0.109273	0.163907	9.56934	18.169
DNASE1	E2	-0.176521	10.0779	6.46547	0.0345066	0.307857	-0.328878	10.0779	276.907	1.17374e-46	1.92078e-45	-0.223423	10.0779	28.9695	5.17716e-06	5.96277e-05	0.118206	10.0779	1.39906	0.345513	0.850144	-0.0196858	10.0779	0.427968	0.593274	0.843786	-0.112344	10.0779	2.01303	0.236018	0.771193	0.0521859	9.74166	0.0758183	0.829395	1	-0.431828	9.74166	82.926	2.71717e-15	2.38114e-14	-0.206026	9.74166	4.79123	0.0562821	0.222808	0.441428	9.74166	2.76331
DOCK7	E3	0.0117599	10.121	0.0629524	0.809989	1	-0.286349	10.121	222.781	1.21788e-38	1.44487e-37	-0.223672	10.121	32.2459	1.07748e-06	1.47974e-05	-0.0505507	10.121	0.251842	0.677808	1	0.0678186	10.121	6.64977	0.0400979	0.193384	-0.266513	10.121	11.4971	0.00485654	0.21637	-0.0644429	9.79634	0.122166	0.726704	1	-0.331325	9.79634	56.1275	2.57628e-11	1.64638e-10	-0.0874985	9.79634	1.00235	0.381391	0.667772	0.095038	9.79634	0.120399
DOCK9	E4	-0.0130506	10.3465	0.0159597	0.910712	1	-0.283244	10.3465	197.02	1.13336e-44	1.70263e-43	-0.227591	10.3465	32.347	1.29665e-08	2.76972e-07	0.117431	10.3465	1.27351	0.279236	0.842645	-0.0107745	10.3465	0.123131	0.725665	0.92794	-0.124897	10.3465	2.83814	0.0920566	0.622301	-0.0102516	10.0564	0.0665143	0.800048	1	-0.176674	10.0564	16.4603	5.00282e-05	0.000160807	0.0511226	10.0564	0.441455	0.506435	0.770579	0.235638	10.0564	0.521578
DONSON	E4	-0.0318037	9.94437	0.874287	0.669597	0.964686	0.0214554	9.94437	4.56061	0.315753	0.389475	-0.00377012	9.94437	0.0917361	0.872595	0.962074	-0.0286334	9.94437	1.28142	0.610026	1	0.0132628	9.94437	1.15248	0.626245	0.868848	0.0910771	9.94437	8.24589	0.193291	0.730424	0.0312271	9.58279	0.155693	0.846683	1	0.143246	9.58279	34.7541	0.00433817	0.0101139	0.0873634	9.58279	3.39346	0.38007	0.666858	0.0340528	9.58279	0.103928
DPY19L4	E4	0.0674831	9.97943	1.61849	0.422406	0.809497	-0.133898	9.97943	69.1496	1.14678e-07	3.19746e-07	-0.146298	9.97943	19.6378	0.00521999	0.0231693	0.0665057	9.97943	0.936559	0.547229	1	0.0793542	9.97943	12.6849	0.0260216	0.145977	-0.0913358	9.97943	2.15163	0.353962	0.840205	-0.390259	9.62091	8.58907	0.0600289	0.42171	-0.200272	9.62091	27.4683	0.000552391	0.00151475	0.00609844	9.62091	0.0134185	0.946537	1	-0.12494	9.62091	1.24305
DPYSL4	E4	-0.0343426	9.97751	0.846344	0.590119	0.920773	-0.0540084	9.97751	12.8689	0.0306602	0.0483422	0.0650974	9.97751	4.26175	0.176205	0.349577	-0.0550234	9.97751	2.72239	0.334541	0.844553	-0.022729	9.97751	1.75518	0.43618	0.727288	0.0869309	9.97751	2.57121	0.341485	0.827813	-0.0558465	9.62926	7.73597	0.077046	0.475108	0.249861	9.62926	48.8718	2.32717e-06	8.92114e-06	0.0462578	9.62926	0.562982	0.603062	0.844705	0.0267039	9.62926	1.59612
DSC2	E2	0.0755769	9.92658	28.6558	0.145102	0.597131	-0.0295457	9.92658	58.607	0.0334994	0.0524723	-0.0275688	9.92658	13.6655	0.313037	0.506444	0.0412794	9.92658	1.92938	0.701731	1	0.00329021	9.92658	17.0315	0.266029	0.576575	0.0284413	9.92658	3.03563	0.636436	0.999915	-0.0880455	9.5625	3.59406	0.541172	0.92204	-0.0860413	9.5625	52.7082	0.0184987	0.0373633	-0.0458335	9.5625	7.82205	0.371201	0.660028	-0.0336362	9.5625	0.0820352
DSCR4	E4	0.0383293	9.92496	14.8948	0.335341	0.7484	-0.0269571	9.92496	50.288	0.0740944	0.108192	-0.0489296	9.92496	94.2838	0.0151827	0.0553263	0.0231284	9.92496	17.4644	0.301244	0.842645	0.0128414	9.92496	17.1026	0.304186	0.602052	-0.13326	9.92496	150.418	0.00222645	0.162166	-0.105838	9.56079	28.7079	0.163395	0.630414	-0.0360137	9.56079	18.1178	0.265965	0.370318	-0.0686639	9.56079	26.616	0.173509	0.436091	0.167835	9.56079	36.3692
DST	E2E3E4	0.0576343	10.913	1.20137	0.273054	0.722392	-0.176707	10.913	110.794	6.98403e-26	5.04553e-25	-0.144216	10.913	17.7393	2.53782e-05	0.000241705	0.0612434	10.913	0.287306	0.591955	1	0.155926	10.913	37.4885	9.26322e-10	5.77635e-08	0.0112126	10.913	0.0316996	0.858689	1	-0.107571	10.6654	0.819361	0.365387	0.839967	-0.103509	10.6654	10.4961	0.00119987	0.00310305	0.0787538	10.6654	1.58076	0.208678	0.482958	-0.24008	10.6654	0.796669
DSTYK	E4	0.118836	10.1268	2.43915	0.1831	0.610743	-0.16482	10.1268	73.1895	1.77999e-13	7.24386e-13	-0.176457	10.1268	17.9049	0.000319645	0.00216987	-0.0929343	10.1268	1.08983	0.388295	0.86916	0.0584097	10.1268	3.19924	0.134376	0.403027	-0.129849	10.1268	2.62084	0.173066	0.730424	0.0743337	9.8079	0.03819	0.870183	1	0.0376286	9.8079	1.02297	0.311837	0.421155	0.080166	9.8079	0.774265	0.411883	0.691278	-0.0869973	9.8079	0.228511
DUOX1	E2	-0.107595	9.99532	4.06689	0.178125	0.605761	-0.254172	9.99532	197.01	2.49694e-20	1.42047e-19	-0.0167145	9.99532	0.287576	0.756307	0.893597	0.0175022	9.99532	0.000725789	0.990941	1	-0.0270909	9.99532	1.33422	0.449028	0.736871	-0.0360581	9.99532	0.23482	0.756107	1	-0.551278	9.64055	12.5708	0.0147255	0.213983	-0.892003	9.64055	446.486	5.71319e-49	3.37325e-47	-0.28822	9.64055	12.2275	0.0157124	0.0930805	-0.19171	9.64055	1.3998
DUOX2	E2	0.000824019	9.92032	-2.92286e-11	1	1	-0.00140274	9.92032	26.343	0.576046	0.646002	-0.00337252	9.92032	8.01097	0.760232	0.896301	0.000890298	9.92032	-1.364e-10	1	1	-0.00826385	9.92032	136.365	0.206741	0.507019	-0.00313998	9.92032	2.51478	0.863702	1	0.00748569	9.55589	2.37317e-09	1	1	0.000379108	9.55589	0.121606	0.964859	1	-0.00598858	9.55589	33.7978	0.46332	0.733819	0.00635023	9.55589	4.08364e-10
DUOXA1	E2	0.00288504	9.92164	1.35133	0.844673	1	-0.0129758	9.92164	81.854	0.127592	0.176574	-0.0167163	9.92164	43.7404	0.267817	0.461116	-0.106218	9.92164	264.292	0.00615359	0.257309	0.0069485	9.92164	17.5141	0.480938	0.760899	0.010655	9.92164	38.7353	0.295919	0.78789	-0.0354588	9.55722	18.4094	0.442077	0.875475	-0.0236922	9.55722	42.2245	0.244266	0.345135	-0.00380552	9.55722	0.000171145	1	1	-0.215313	9.55722	74.0602
DUSP1	E4	0.20473	9.97069	20.6705	0.00869859	0.141959	0.0250692	9.97069	2.93126	0.262098	0.332168	-0.0620659	9.97069	4.29562	0.239644	0.428509	0.0666392	9.97069	0.646825	0.623456	1	0.144462	9.97069	106.44	3.58077e-09	2.03966e-07	0.0998794	9.97069	2.44675	0.322299	0.805662	-0.210009	9.62251	2.37508	0.337856	0.812936	0.292689	9.62251	52.5178	2.56889e-06	9.79918e-06	0.202292	9.62251	6.12142	0.109086	0.336493	-0.473237	9.62251	6.63889
DUSP12	E4	-0.104971	9.96173	8.25485	0.12096	0.554474	-0.111417	9.96173	62.5415	1.39399e-05	3.29047e-05	-0.0342725	9.96173	1.57167	0.478119	0.675067	0.0203292	9.96173	0.155917	0.830982	1	0.0573935	9.96173	15.2581	0.03475	0.174951	0.00576516	9.96173	0.0156312	0.946762	1	0.129086	9.61174	0.372996	0.718894	1	0.0684222	9.61174	5.95258	0.127228	0.200665	0.247933	9.61174	13.7849	0.0247488	0.128532	-0.156057	9.61174	7.01961
DYNC2LI1	E2	-0.068145	10.1087	0.900806	0.454325	0.83425	-0.347767	10.1087	359.979	5.84223e-62	1.59246e-60	-0.14607	10.1087	12.732	0.00290482	0.0142334	-0.0289868	10.1087	0.241463	0.699685	1	-0.0939327	10.1087	12.2579	0.00593432	0.0510449	-0.0142983	10.1087	0.0362868	0.874805	1	-0.278716	9.78107	2.98634	0.15419	0.614254	-0.643824	9.78107	212.041	3.5346e-37	1.17855e-35	-0.0877754	9.78107	1.05989	0.367029	0.657611	0.139898	9.78107	0.0566832
DYNLRB1	E3	0.181127	10.2595	5.49592	0.0301254	0.287812	-0.0800601	10.2595	17.6818	0.000114242	0.000247417	-0.0513951	10.2595	1.32633	0.28106	0.474719	0.431213	10.2595	15.3789	0.000298375	0.0404788	0.115779	10.2595	11.2814	0.00160255	0.0184873	0.128251	10.2595	1.97383	0.188765	0.730424	0.722983	10.0697	7.25401	0.0074217	0.145263	0.827312	10.0697	508.465	4.48659e-110	2.7495e-107	0.572436	10.0697	43.1138	5.40041e-11	6.76973e-09	0.946913	10.0697	10.5955
DYRK2	E3E4	0.0468277	9.95146	3.51866	0.362185	0.762828	-0.058688	9.95146	26.3241	0.00880564	0.0151832	-0.0397516	9.95146	2.62034	0.431483	0.631917	-0.0574863	9.95146	1.28829	0.58072	1	-0.00912993	9.95146	0.50952	0.729531	0.929834	-0.0564776	9.95146	2.27383	0.461432	0.898865	0.0796591	9.59558	0.0636159	0.892791	1	0.120444	9.59558	18.1599	0.0201399	0.0402165	0.0909135	9.59558	2.57091	0.377631	0.665101	0.0630122	9.59558	0.113068
E2F7	E2	-0.0100557	9.92164	1.18021	0.859649	1	-0.00745628	9.92164	14.0806	0.535794	0.608715	-0.011705	9.92164	34.8483	0.328606	0.523684	-0.0134699	9.92164	2.54672	0.792302	1	0.00241545	9.92164	2.28573	0.803391	0.967991	-0.0162717	9.92164	21.116	0.450214	0.894431	0.0120037	9.55697	8.15289e-05	0.997918	1	-0.0318561	9.55697	107.936	0.0534737	0.0952621	-0.0366649	9.55697	70.1942	0.120265	0.35581	-0.0737523	9.55697	23.2249
EDNRB	E3	0.330541	9.93543	93.6042	0.000629097	0.0256165	-0.0560626	9.93543	137.225	0.000262083	0.000545657	-0.0380721	9.93543	42.1333	0.0437846	0.126383	0.0484747	9.93543	13.9218	0.246006	0.821346	-0.0183105	9.93543	58.6988	0.0176577	0.111558	-0.0750741	9.93543	8.31278	0.341719	0.828065	-0.0859218	9.57015	0.0588634	0.98597	1	0.00874801	9.57015	0.0652172	0.983974	1	-0.039177	9.57015	16.447	0.171577	0.433566	0.205236	9.57015	25.2953
EFCAB14	E3	-0.133595	10.0178	4.29738	0.134423	0.584243	-0.162248	10.0178	75.6743	6.44564e-11	2.25097e-10	-0.140765	10.0178	13.6813	0.00506647	0.0225781	0.135219	10.0178	2.45411	0.261847	0.842645	0.127799	10.0178	22.5378	0.000606143	0.00864556	-0.120421	10.0178	2.82425	0.217164	0.74237	-0.054415	9.67539	0.202841	0.737142	1	-0.0896718	9.67539	3.64887	0.161902	0.245045	0.225926	9.67539	6.92919	0.0392503	0.174206	0.245488	9.67539	1.44544
EFCAB6	E2	-0.109379	10.0221	3.24356	0.210376	0.643845	-0.332478	10.0221	354.77	1.09824e-42	1.52842e-41	-0.306364	10.0221	69.9004	2.37706e-09	6.12247e-08	0.00205362	10.0221	0.0434874	0.886353	1	0.00292656	10.0221	0.00146041	0.980093	1	-0.00714656	10.0221	0.0332389	0.898337	1	-0.282948	9.67449	3.70129	0.165976	0.635032	-0.610935	9.67449	196.806	9.64013e-26	1.6936e-24	-0.435583	9.67449	25.4709	0.000195177	0.00331298	0.0367211	9.67449	1.00116e-09
EGFR	E4	0.00606593	10.0093	0.0173797	0.978096	1	-0.000741385	10.0093	0.14603	0.861004	0.893742	-0.318498	10.0093	150.292	2.30664e-14	1.57064e-12	-0.0790378	10.0093	6.0347	0.179195	0.739251	0.124894	10.0093	108.842	1.24075e-08	6.37303e-07	0.0283709	10.0093	0.257101	0.777059	1	0.108932	9.65153	0.42014	0.592731	0.960204	-0.0262171	9.65153	0.0660307	0.913959	0.964141	-0.602632	9.65153	92.1538	3.78461e-09	3.29706e-07	-0.157104	9.65153	4.61531
EHD1	E4	0.172722	9.95004	24.7636	0.0145265	0.195161	0.000137944	9.95004	3.94818e-06	0.998415	1	0.0841926	9.95004	10.8935	0.0955832	0.225442	-0.0327774	9.95004	0.382016	0.761916	1	0.000887157	9.95004	0.00965189	0.961858	1	0.128735	9.95004	11.8775	0.0910027	0.618944	0.0114838	9.58976	0.0784127	0.88656	1	0.0845389	9.58976	9.42093	0.105315	0.170672	0.216706	9.58976	13.7306	0.0534233	0.214836	0.0223618	9.58976	0.0452395
EID1	E3	0.0727905	10.3487	0.739078	0.404754	0.793833	-0.241593	10.3487	160.814	8.55284e-37	9.45869e-36	-0.1223	10.3487	8.73974	0.00311493	0.0151253	-0.114478	10.3487	0.983961	0.322553	0.842645	0.346855	10.3487	87.8446	7.36254e-21	1.89633e-18	0.059555	10.3487	0.385578	0.548152	0.951402	0.225037	10.1487	0.256932	0.612246	0.974333	0.202998	10.1487	31.2182	2.36157e-08	1.14172e-07	0.27316	10.1487	11.8878	0.000567172	0.00791813	-0.0187468	10.1487	0.062675
EID2B	E2	-0.00785854	9.97875	0.330768	0.738412	0.996642	-0.17632	9.97875	119.028	1.55491e-10	5.30604e-10	-0.174488	9.97875	30.0958	0.00112569	0.00642885	0.0141922	9.97875	0.0355066	0.913215	1	-0.0100982	9.97875	1.50693	0.4748	0.75692	0.0747308	9.97875	2.015	0.403042	0.882343	-0.102346	9.62923	3.43979	0.249918	0.736086	-0.336494	9.62923	71.0213	6.83115e-08	3.13703e-07	-0.140664	9.62923	3.50508	0.225594	0.505061	0.125868	9.62923	0.976055
EIF1B	E3	-0.142889	10.17	4.11953	0.0797614	0.456675	-0.155616	10.17	66.8192	1.13449e-12	4.40223e-12	0.014811	10.17	0.178284	0.672854	0.838214	0.2304	10.17	6.90901	0.0245447	0.460621	0.166402	10.17	28.5315	4.18224e-06	0.000122047	0.0886655	10.17	1.05659	0.375061	0.861885	0.111158	9.93351	0.671259	0.458514	0.879202	0.598402	9.93351	245.113	1.19594e-54	9.32202e-53	0.43345	9.93351	26.3065	3.03783e-07	1.42826e-05	0.235837	9.93351	0.0719609
EIF2B3	E2	-0.0505419	10.079	0.548939	0.558985	0.90361	-0.283559	10.079	213.739	4.29039e-35	4.47469e-34	-0.208228	10.079	26.0387	2.09183e-05	0.000203782	0.0810316	10.079	0.60037	0.534715	1	0.0770743	10.079	6.61802	0.0400635	0.193323	-0.059756	10.079	0.586687	0.530559	0.938686	0.0227025	9.75196	0.00505403	0.970856	1	-0.431259	9.75196	87.7656	1.22494e-16	1.18636e-15	-0.384104	9.75196	16.607	0.000414315	0.00615138	0.101514	9.75196	0.111271
EIF4E3	E3	-0.0660842	10.0246	2.14502	0.325744	0.746499	-0.135359	10.0246	61.2635	1.13399e-08	3.40197e-08	-0.0485009	10.0246	1.82755	0.327166	0.522078	0.0101085	10.0246	0.045268	0.887136	1	-0.0162988	10.0246	0.668246	0.58328	0.836579	0.0460677	10.0246	0.661221	0.584886	0.97767	-0.00953496	9.69035	0.924509	0.489246	0.889395	-0.0809694	9.69035	3.17762	0.187886	0.277334	0.0668017	9.69035	0.598976	0.56631	0.816324	0.0456543	9.69035	0.0298662
EIF5A2	E2	-0.0322342	9.9617	0.431819	0.721705	0.989079	-0.0352664	9.9617	7.05875	0.140266	0.191755	-0.0145737	9.9617	0.219474	0.793629	0.915663	0.0565064	9.9617	13.8223	0.0463007	0.567284	0.0560228	9.9617	15.4306	0.0339906	0.172496	0.0696216	9.9617	6.01736	0.187965	0.730424	0.0900651	9.61637	5.90096	0.140562	0.594668	0.445524	9.61637	159.481	1.61753e-15	1.44456e-14	0.397609	9.61637	32.6272	0.000322095	0.00501688	0.284578	9.61637	7.20054
ELF1	E3	0.0822354	10.0046	1.75865	0.352759	0.755854	-0.120366	10.0046	48.1202	2.15999e-06	5.46829e-06	-0.070471	10.0046	3.98535	0.182025	0.356704	-0.17616	10.0046	5.15518	0.0963355	0.690353	0.159199	10.0046	37.0348	1.74642e-05	0.000437146	0.0856516	10.0046	1.50454	0.389863	0.872337	-0.00912007	9.64225	0.00146724	0.988903	1	-0.0717432	9.64225	3.8149	0.175246	0.261721	-0.0519099	9.64225	0.586987	0.598517	0.84134	-0.840292	9.64225	17.4552
ELF3	E4	-0.00566354	9.92082	6.68428	0.731193	0.993635	-0.0111473	9.92082	110.418	0.161885	0.217577	-0.0051753	9.92082	28.156	0.47954	0.676165	0.0360882	9.92082	118.01	0.148223	0.739251	-0.00965645	9.92082	227.296	0.0449765	0.209658	-0.00362569	9.92082	2.14328	0.845426	1	-0.00789276	9.55652	3.6364e-10	1	1	-0.0244381	9.55652	82.7775	0.141361	0.218363	-0.0156107	9.55652	34.4245	0.344057	0.639139	-0.00469102	9.55652	1.86201e-11
ELMO3	E3	-0.0187911	9.92251	11.4167	0.511099	0.877217	0.0154346	9.92251	48.9758	0.168757	0.22589	0.00468362	9.92251	14.2939	0.464142	0.662176	0.0152804	9.92251	26.0725	0.324441	0.842645	0.00576984	9.92251	17.5772	0.418487	0.718237	-0.0470465	9.92251	140.534	0.0219588	0.394949	-0.0835414	9.55822	27.419	0.245323	0.731033	0.099664	9.55822	302.172	9.83645e-05	0.000303654	0.00864886	9.55822	-1.21056e-10	1	1	0.00936763	9.55822	8.61357e-11
ELOVL6	E4	-0.154874	10.1014	4.60528	0.0773149	0.452026	-0.188276	10.1014	94.9468	1.729e-17	8.67525e-17	-0.171545	10.1014	16.9322	0.000424078	0.00276603	-0.196184	10.1014	5.47318	0.0585108	0.602116	-0.119974	10.1014	16.2584	0.00102937	0.0131745	0.0560004	10.1014	0.466282	0.573038	0.970581	-0.26024	9.77701	2.13617	0.20611	0.687648	-0.112766	9.77701	5.85175	0.028215	0.0542856	0.183755	9.77701	3.95321	0.0726706	0.262554	-0.329089	9.77701	3.11223
EML3	E2	0.0944813	9.92896	15.2308	0.234571	0.675217	-0.00712656	9.92896	4.32254	0.529369	0.602533	-0.0867224	9.92896	88.1878	0.00479186	0.0215434	0.148454	9.92896	27.9924	0.114456	0.736627	-0.0161825	9.92896	5.38035	0.484803	0.763214	-0.0276056	9.92896	2.00778	0.665322	1	-0.0714231	9.56217	3.49533	0.605789	0.969588	-0.0262094	9.56217	14.5601	0.298584	0.40656	-0.0617168	9.56217	9.49253	0.395815	0.678475	0.213653	9.56217	19.0945
EMP3	E4	0.234543	9.92872	103.093	0.00159127	0.0497889	-0.059048	9.92872	164.999	0.000106017	0.000230475	-0.016882	9.92872	3.38917	0.58269	0.766183	0.0312106	9.92872	0.895768	0.769288	1	0.0128933	9.92872	6.06734	0.461771	0.748033	0.0405152	9.92872	20.8109	0.172923	0.730424	-0.152843	9.56481	7.59503	0.372194	0.845534	-0.0898627	9.56481	70.6697	0.00790726	0.0174136	0.00467374	9.56481	0.0310694	0.956004	1	-0.0192973	9.56481	0.019811
EN1	E3	-0.00014834	9.91975	4.16662e-10	1	1	-0.000144912	9.91975	1.36164e-11	1	1	-7.82012e-05	9.91975	1.78829e-10	1	1	-0.000170367	9.91975	1.53412e-10	1	1	-0.00229211	9.91975	221	0.188371	0.490725	-0.0304552	9.91975	471.634	0.0544061	0.550845	0.00190083	9.55527	1.11383e-10	0.999992	1	0.00143462	9.55527	1.31825e-09	0.999985	1	0.00133616	9.55527	6.75301e-10	0.999986	1	0.00151753	9.55527	-2.80458e-10
ENC1	E4	-0.1464	10.6779	3.41478	0.0928944	0.485828	-0.23072	10.6779	233.135	1.61942e-52	3.22289e-51	0.0186934	10.6779	0.195861	0.715682	0.867369	-0.0544002	10.6779	0.173469	0.695347	1	-0.0998287	10.6779	10.1062	0.00371945	0.0357116	-0.150997	10.6779	2.60937	0.131509	0.700312	0.23708	10.546	7.93596e-05	0.992892	1	0.187971	10.546	42.1372	8.87975e-11	5.41933e-10	0.609972	10.546	32.4538	1.25232e-08	9.04728e-07	0.0067365	10.546	0.175744
ENDOD1	E2	-0.0976695	10.0068	2.52935	0.262508	0.709874	-0.153863	10.0068	70.265	2.49127e-09	7.83348e-09	-0.160155	10.0068	17.8952	0.00294134	0.0143965	0.00997193	10.0068	0.0431333	0.886366	1	0.0947119	10.0068	12.3607	0.0120518	0.0857488	-0.120036	10.0068	3.20526	0.209494	0.733549	-0.0590197	9.65906	0.211318	0.727756	1	-0.0792152	9.65906	2.99476	0.208947	0.30377	0.0716941	9.65906	0.648144	0.535827	0.793706	-0.0111459	9.65906	1.28606
ENSA	E3	-0.181176	10.3068	6.37644	0.022173	0.242796	-0.211808	10.3068	144.432	1.53563e-32	1.44398e-31	-0.164138	10.3068	18.7711	5.18806e-05	0.000451087	0.0972373	10.3068	0.514182	0.525461	0.997092	0.0452048	10.3068	1.62622	0.261276	0.571057	-0.0508677	10.3068	0.434354	0.559266	0.959078	-0.578591	10.0081	9.66915	0.00446541	0.110682	-0.187559	10.0081	24.1255	2.92884e-06	1.10795e-05	-0.25606	10.0081	9.94725	0.00331041	0.0301242	-0.221618	10.0081	0.686379
EPB41L1	E2	0.0437909	10.2266	0.351006	0.59246	0.921961	-0.0895096	10.2266	23.3566	2.1351e-06	5.40681e-06	-0.155172	10.2266	15.8658	8.88274e-05	0.000721469	-0.150389	10.2266	4.51735	0.0663122	0.624369	0.00999486	10.2266	0.1076	0.772812	0.954368	-0.0145943	10.2266	0.0242979	0.879189	1	-0.226903	9.93413	1.57456	0.251646	0.737872	0.118281	9.93413	9.38496	0.00219313	0.00540737	-0.0105149	9.93413	0.0111704	0.973335	1	-0.281464	9.93413	4.4488
EPC1	E2	-0.154875	10.2855	4.86702	0.0273792	0.273208	-0.203771	10.2855	109.265	1.5077e-25	1.07394e-24	-0.150186	10.2855	12.7182	0.000517055	0.00329358	0.236564	10.2855	4.19523	0.0473485	0.571338	0.130628	10.2855	14.1517	0.000248252	0.00407005	-0.0320811	10.2855	0.178817	0.672394	1	-0.40493	9.99399	5.48708	0.0191754	0.241864	-0.198021	9.99399	22.1042	2.61419e-06	9.95699e-06	0.0292545	9.99399	0.128693	0.719798	0.926773	0.856841	9.99399	10.3222
EPHX2	E4	-0.103219	9.94435	6.34105	0.239213	0.680726	-0.116925	9.94435	184.741	8.62183e-10	2.79204e-09	-0.112854	9.94435	21.0757	0.0374011	0.111469	0.011231	9.94435	0.00602592	0.973483	1	0.0135994	9.94435	1.14756	0.63712	0.876317	-0.101327	9.94435	4.3866	0.332312	0.816848	-0.489477	9.58403	22.437	0.0223067	0.25923	-0.353934	9.58403	273.088	5.03535e-15	4.32101e-14	-0.500109	9.58403	86.6377	7.73072e-06	0.000230521	-0.0415697	9.58403	-6.28593e-10
ERAP1	E3	0.0954952	9.97117	4.63843	0.209356	0.642289	-0.171964	9.97117	123.118	5.04467e-11	1.77673e-10	-0.140487	9.97117	20.5194	0.00733149	0.0304855	0.0918656	9.97117	1.67562	0.450365	0.940232	-0.00683777	9.97117	0.221232	0.78689	0.960863	-0.0711819	9.97117	1.95324	0.413612	0.884719	-0.247471	9.61723	4.87236	0.168551	0.63899	-0.297037	9.61723	60.8951	8.37781e-07	3.39622e-06	-0.17348	9.61723	5.50011	0.137937	0.383334	0.418056	9.61723	6.72031
ERAP2	E4	-0.0024716	9.93569	0.00102381	0.988091	1	-0.0708961	9.93569	79.3996	0.000593981	0.00118863	-0.0447873	9.93569	11.0243	0.202096	0.380692	0.126391	9.93569	8.21032	0.258437	0.842645	0.00308786	9.93569	0.0923234	0.907559	1	0.0534817	9.93569	3.1812	0.486732	0.911478	0.122232	9.57435	2.40653	0.517867	0.905406	-0.0887602	9.57435	17.975	0.0756541	0.128638	0.0711482	9.57435	4.5012	0.381493	0.667772	0.186543	9.57435	2.7325
ERBB2	E3	-0.0703797	9.92968	3.79041	0.525032	0.884946	-0.0222648	9.92968	19.5815	0.179135	0.237989	-0.0430842	9.92968	21.267	0.154784	0.320123	-0.0884034	9.92968	28.4391	0.102728	0.711131	0.019754	9.92968	21.7525	0.153576	0.436209	0.0140184	9.92968	0.722487	0.793133	1	-0.584924	9.56516	74.845	0.00508862	0.118136	-0.0431224	9.56516	15.7155	0.205466	0.299409	-0.150208	9.56516	52.6969	0.0237219	0.12484	-0.17643	9.56516	19.5714
ERG	E4	-0.0293878	9.93809	4.67793	0.394684	0.786448	-0.0985627	9.93809	105.091	4.88919e-05	0.000109863	0.00363137	9.93809	0.0621028	0.932092	0.998388	0.0194941	9.93809	0.271548	0.840178	1	-0.0117164	9.93809	9.20085	0.232071	0.538289	-0.0883881	9.93809	13.3515	0.144712	0.704825	-0.097571	9.5762	12.7018	0.133526	0.582336	-0.309399	9.5762	190.017	3.27346e-09	1.73297e-08	-0.0178113	9.5762	1.61623	0.581619	0.82878	-0.0225195	9.5762	3.61121
ERGIC1	E2	0.0671884	10.0649	0.8931	0.4507	0.831845	-0.258982	10.0649	178.713	2.9385e-28	2.33034e-27	-0.218065	10.0649	29.8137	6.84217e-06	7.61422e-05	0.0559688	10.0649	0.276761	0.684719	1	0.0591231	10.0649	4.12598	0.11415	0.371008	-0.173677	10.0649	5.63818	0.0506669	0.535028	0.0396145	9.72762	0.0801038	0.816175	1	-0.480101	9.72762	111.116	3.4873e-19	4.08276e-18	-0.263008	9.72762	8.42698	0.0142946	0.0870907	0.351346	9.72762	2.32483
ESYT2	E2	-0.269443	10.1855	12.9792	0.00155641	0.0488702	-0.306329	10.1855	267.919	9.43255e-58	2.25014e-56	-0.178265	10.1855	19.7756	2.47343e-05	0.00023646	0.254194	10.1855	5.54872	0.0437852	0.563599	-0.0668135	10.1855	4.38369	0.0715967	0.279039	-0.315681	10.1855	14.4039	0.000740642	0.0907772	-0.735361	9.87434	13.8523	0.000787543	0.03598	-0.351922	9.87434	67.6389	4.18705e-16	3.91043e-15	-0.196527	9.87434	4.96489	0.0307074	0.149066	0.221563	9.87434	0.579572
ETV1	E3	-0.132339	9.99561	5.97303	0.096153	0.49244	-0.325881	9.99561	378.555	1.37304e-40	1.76059e-39	-0.210818	9.99561	38.0291	4.2271e-05	0.00037694	-0.0169006	9.99561	0.0639025	0.874612	1	-0.0175921	9.99561	0.576377	0.625973	0.868706	0.213839	9.99561	11.9352	0.0142291	0.346968	-0.0828598	9.65748	0.0734651	0.821115	1	-0.0418085	9.65748	0.30389	0.662197	0.756295	-0.230896	9.65748	9.05331	0.0273669	0.137908	0.429273	9.65748	10.1284
ETV6	E3	-0.0398744	10.1321	0.306199	0.630198	0.943444	-0.25665	10.1321	161.958	5.21422e-33	5.01446e-32	-0.131807	10.1321	10.297	0.00509678	0.0226847	0.106532	10.1321	1.59436	0.214876	0.76756	0.0683817	10.1321	4.74942	0.0628834	0.259536	-0.176761	10.1321	5.71669	0.0245977	0.41019	-0.130074	9.7947	0.455463	0.525763	0.908671	-0.302121	9.7947	42.6688	4.37085e-10	2.51225e-09	0.0685726	9.7947	0.597496	0.439552	0.712311	0.00115631	9.7947	1.29853e-07
EVI5L	E2	0.0881257	10.0354	1.98843	0.292142	0.742131	-0.196857	10.0354	102.301	4.29672e-15	1.89294e-14	-0.122229	10.0354	9.07185	0.022429	0.075209	0.0446586	10.0354	0.646783	0.553395	1	-0.0500309	10.0354	3.02845	0.181404	0.480463	0.000120313	10.0354	0.000388081	0.984283	1	0.266732	9.68775	2.63997	0.203669	0.684833	-0.321454	9.68775	48.3859	2.16135e-08	1.04692e-07	-0.00789826	9.68775	0.00479448	0.964332	1	-0.226196	9.68775	3.75144
EWSR1	E2	-0.113073	10.0864	2.50953	0.190873	0.618448	-0.197229	10.0864	104.23	3.4322e-18	1.78406e-17	-0.12108	10.0864	8.66556	0.011141	0.0430804	0.0248566	10.0864	0.0976261	0.807067	1	0.0983158	10.0864	11.2757	0.00687157	0.056948	0.0417955	10.0864	0.308019	0.658021	1	-0.0764542	9.77986	0.380142	0.592403	0.960064	0.0383279	9.77986	1.31393	0.25171	0.353348	0.199608	9.77986	4.99713	0.0486662	0.201431	0.212621	9.77986	0.439773
EXOC6	E3	-0.109783	10.3078	1.8919	0.208006	0.64045	-0.344807	10.3078	375.804	2.05416e-83	1.28544e-81	-0.207786	10.3078	22.2377	5.18035e-06	5.96277e-05	-0.0422521	10.3078	0.127257	0.731482	1	0.0655889	10.3078	3.54778	0.082476	0.304163	-0.0205405	10.3078	0.0687579	0.793155	1	0.184763	10.0194	0.510754	0.522474	0.907931	-0.392211	10.0194	102.318	6.03492e-24	9.56758e-23	0.0673768	10.0194	0.432776	0.52666	0.786208	0.0526569	10.0194	0.00701555
EXTL3	E3	-0.0201233	10.0749	0.0757363	0.839084	1	-0.184399	10.0749	97.0435	6.34064e-17	3.08475e-16	-0.127603	10.0749	9.83882	0.0104654	0.0409854	0.0591248	10.0749	0.6658	0.532359	1	0.0800263	10.0749	8.68619	0.0223816	0.131682	-0.11183	10.0749	2.09209	0.255038	0.78789	-0.213887	9.73683	1.74316	0.285467	0.769295	-0.15562	9.73683	11.9438	0.0027217	0.00659711	-0.0595943	9.73683	0.429882	0.585268	0.831379	0.191755	9.73683	1.09902
F12	E4	-0.0110054	9.94365	1.12428	0.656427	0.958731	-0.0233515	9.94365	2.20856	0.629708	0.695276	-0.00630958	9.94365	0.804142	0.702029	0.858315	0.0400604	9.94365	11.665	0.151615	0.739251	-0.0153563	9.94365	24.6111	0.0373063	0.183911	-0.0879093	9.94365	10.0974	0.178186	0.730424	0.180523	9.59384	1.41e-09	1	1	0.506697	9.59384	319.515	2.58806e-21	3.51913e-20	0.0697425	9.59384	0.115641	0.87353	1	0.248625	9.59384	10.6616
FAM102B	E4	-0.00804744	10.0527	0.0103875	0.945155	1	-0.190651	10.0527	119.61	2.38515e-16	1.12676e-15	-0.18747	10.0527	24.3694	0.000326463	0.00221247	0.0488629	10.0527	0.283587	0.704237	1	-0.0336141	10.0527	5.66541	0.0958464	0.334718	-0.10864	10.0527	2.4215	0.264438	0.78789	-0.0802627	9.71872	2.9947	0.197556	0.677531	-0.00844017	9.71872	0.0160581	0.899164	0.953138	0.00192771	9.71872	0.0111182	0.923675	1	-0.26551	9.71872	1.49542
FAM126B	E3	-0.175899	10.3076	5.16657	0.037458	0.322531	-0.207211	10.3076	135.533	2.76859e-31	2.48502e-30	-0.0748928	10.3076	3.65066	0.076749	0.191691	0.146464	10.3076	1.71351	0.242094	0.814557	0.0840148	10.3076	5.99067	0.0263837	0.147265	-0.0957817	10.3076	1.20946	0.296365	0.78789	-0.0444341	10.035	0.219645	0.657193	1	0.173089	10.035	23.5422	1.23906e-06	4.9285e-06	0.461887	10.035	35.7786	2.2803e-09	2.07823e-07	0.447814	10.035	2.4799
FAM129B	E3	0.0411164	9.9323	4.10672	0.486246	0.862044	-0.0819894	9.9323	130.502	7.49461e-05	0.000165603	-0.0088674	9.9323	1.05362	0.728871	0.875828	0.0380744	9.9323	3.6644	0.516317	0.99458	0.00786704	9.9323	3.98654	0.498484	0.772436	-0.101037	9.9323	37.189	0.0376389	0.475393	-0.16854	9.56963	10.1529	0.256279	0.742637	-0.175186	9.56963	105.261	0.000197141	0.000583643	0.00155688	9.56963	0.645489	0.772487	0.961331	-0.016929	9.56963	3.97562e-11
FAM162A	E3	0.0461836	10.0506	0.552432	0.578456	0.914673	-0.2083	10.0506	125.526	4.40219e-18	2.27827e-17	-0.180676	10.0506	21.3975	0.000381674	0.00252536	-0.0183484	10.0506	0.106972	0.807879	1	0.0182363	10.0506	0.627883	0.561009	0.819631	-0.0529472	10.0506	0.599433	0.561634	0.960762	0.556519	9.73208	8.51498	0.0193111	0.242545	-0.043822	9.73208	0.33071	0.731614	0.817803	-0.000898552	9.73208	0.000166246	0.989713	1	-0.0612071	9.73208	1.09244
FAM163A	E3	0.0256888	9.94749	0.91533	0.670843	0.965049	-0.125863	9.94749	99.965	8.28356e-06	1.99614e-05	-0.0142117	9.94749	4.04809	0.369495	0.570024	-0.0152034	9.94749	3.9643	0.376513	0.864435	6.93872e-05	9.94749	2.55283	0.47822	0.759243	0.113547	9.94749	28.1644	0.0181485	0.373558	-0.0741898	9.58583	1.83621e-11	0.999997	1	-0.42524	9.58583	240.458	4.38438e-14	3.51146e-13	-0.0976981	9.58583	10.659	0.122371	0.359469	-0.109601	9.58583	3.60253
FAM181B	E4	0.35875	9.93133	144.853	7.38637e-05	0.00537994	-0.00963803	9.93133	7.41582	0.399816	0.476498	-0.0051618	9.93133	0.699271	0.798335	0.918294	0.0145652	9.93133	10.697	0.317165	0.842645	0.0445756	9.93133	28.2648	0.0987174	0.34048	0.0785777	9.93133	6.2606	0.422746	0.887041	0.724342	9.56437	103.625	0.00181618	0.0620714	0.0143413	9.56437	6.37634	0.472931	0.582987	-0.000660611	9.56437	0.0745456	0.937811	1	0.153846	9.56437	28.2435
FAM193A	E4	-0.120041	10.1598	2.63549	0.145571	0.597892	-0.315705	10.1598	258.452	2.63456e-54	5.53444e-53	-0.28674	10.1598	48.2961	5.78938e-11	2.10932e-09	0.100276	10.1598	0.760439	0.449084	0.938844	-0.034942	10.1598	1.14897	0.346165	0.646359	-0.0830436	10.1598	1.01927	0.354768	0.841295	-0.570255	9.83771	8.29748	0.00812404	0.153596	-0.516089	9.83771	133	1.44483e-29	3.18186e-28	-0.207492	9.83771	5.25473	0.0283525	0.141301	0.136889	9.83771	0.304832
FAM210A	E2	-0.0976584	9.96756	5.35793	0.189473	0.616272	-0.0931756	9.96756	39.9499	0.00023721	0.000496431	-0.000502823	9.96756	0.00474391	0.945089	1	0.0160694	9.96756	0.14012	0.83533	1	0.061017	9.96756	14.4479	0.0316124	0.16437	0.0679272	9.96756	1.61848	0.46921	0.901549	-0.109105	9.6184	2.01891	0.379349	0.850624	0.010682	9.6184	0.419532	0.673766	0.766543	0.0584153	9.6184	1.01381	0.54028	0.796769	0.128378	9.6184	0.158065
FAM3C	E3	-0.0332503	10.1366	0.244902	0.685718	0.972582	-0.129477	10.1366	46.9632	1.2521e-09	4.00151e-09	-0.0390077	10.1366	0.920311	0.592034	0.774104	0.0682648	10.1366	0.779514	0.46955	0.960186	-0.02399	10.1366	0.922032	0.428575	0.724291	0.000224335	10.1366	0.000319483	0.994385	1	0.546506	9.82938	2.87721	0.141338	0.59579	0.0218254	9.82938	0.905337	0.341376	0.453467	0.231112	9.82938	8.49028	0.00701388	0.0523307	0.249328	9.82938	0.17279
FAM57B	E3	-0.0330332	9.9797	1.44562	0.494986	0.86636	-0.0472017	9.9797	10.4235	0.0702661	0.103144	0.0155663	9.9797	0.15908	0.778529	0.906685	-0.0312372	9.9797	0.307005	0.752134	1	-0.0193757	9.9797	5.02043	0.202777	0.503262	-0.0414634	9.9797	0.585725	0.657632	1	0.195014	9.63565	0.809245	0.568263	0.942186	0.245099	9.63565	47.3981	3.38921e-06	1.27289e-05	0.224867	9.63565	9.71868	0.0443177	0.189435	0.251233	9.63565	6.38836
FAM83A	E4	0.038692	9.92774	8.70088	0.385355	0.779896	-0.057844	9.92774	135.401	0.000555085	0.00111469	-0.046593	9.92774	30.9327	0.100271	0.233831	-0.0372729	9.92774	10.4182	0.344879	0.849833	0.0256743	9.92774	30.8882	0.103821	0.350316	0.022016	9.92774	1.80686	0.693724	1	0.00821695	9.56244	0.0328852	0.957822	1	-0.117902	9.56244	145.242	0.000692364	0.0018635	0.0234263	9.56244	1.39389	0.745715	0.943674	-0.0428837	9.56244	7.69317
FANCD2	E3	0.0249402	9.93808	1.07319	0.673329	0.966611	-0.110131	9.93808	140.684	1.5109e-06	3.87081e-06	0.0408441	9.93808	7.6367	0.25148	0.442861	0.127208	9.93808	17.5042	0.0915908	0.675402	0.0264222	9.93808	9.52929	0.214142	0.513664	-0.0376815	9.93808	1.78167	0.588801	0.979608	-0.0470997	9.57505	1.35237	0.629975	0.988803	-0.226819	9.57505	115.442	7.58801e-06	2.73208e-05	0.0474739	9.57505	2.01731	0.555203	0.808445	0.235906	9.57505	6.12312
FANCI	E3	0.0129864	9.94669	0.187382	0.840624	1	-0.143526	9.94669	153.988	5.78637e-09	1.77302e-08	-0.0916719	9.94669	24.6817	0.0210462	0.0714348	-0.0651768	9.94669	4.49966	0.330641	0.843052	0.0446931	9.94669	21.1639	0.0351065	0.176396	-0.102241	9.94669	7.474	0.204466	0.730424	-0.0475548	9.58971	0.434696	0.736833	1	-0.122518	9.58971	16.3837	0.0399433	0.0739373	-0.14786	9.58971	9.04203	0.128557	0.369397	-0.209351	9.58971	8.78834
FARP2	E2	-0.131447	10.0731	3.43848	0.131683	0.578368	-0.170579	10.0731	70.3552	6.76047e-13	2.65636e-12	-0.125185	10.0731	8.69657	0.011841	0.0452945	0.00435017	10.0731	0.000342963	0.991085	1	-0.0152498	10.0731	0.245558	0.688676	0.911101	0.107458	10.0731	2.20342	0.197696	0.730424	-0.172431	9.72501	0.834715	0.427629	0.87506	-0.412858	9.72501	75.5325	4.71e-14	3.75532e-13	-0.14266	9.72501	2.21426	0.200778	0.471363	0.00105829	9.72501	4.25597e-05
FBN1	E3	-0.0475608	10.1718	0.420841	0.569515	0.909295	-0.242213	10.1718	150.061	1.34188e-32	1.2685e-31	-0.114249	10.1718	7.62878	0.00930179	0.0371236	-0.0914702	10.1718	2.20009	0.197418	0.747453	-0.0138576	10.1718	0.175286	0.708614	0.920913	0.0631403	10.1718	0.528732	0.515357	0.928484	-0.345093	9.8464	2.82266	0.124084	0.560884	-0.382457	9.8464	73.4941	1.14714e-17	1.20348e-16	0.010106	9.8464	0.0083156	0.931312	1	-0.402168	9.8464	4.73142
FBP1	E4	0.0548793	9.9284	14.8743	0.239577	0.681329	-0.033814	9.9284	40.8805	0.0518534	0.0784288	-0.0229385	9.9284	6.06321	0.455942	0.654576	-0.0540472	9.9284	5.27883	0.483621	0.972852	0.00780271	9.9284	2.20547	0.652303	0.887514	-0.0402391	9.9284	2.54095	0.619455	0.99268	-0.00189187	9.56424	5.42964	0.472136	0.882921	-0.0398389	9.56424	6.70569	0.40859	0.518639	0.0500527	9.56424	4.16315	0.538249	0.795047	-0.0964052	9.56424	11.6249
FBP2	E4	0.0213378	9.92345	18.8925	0.345209	0.751562	-0.0216734	9.92345	64.9572	0.0774973	0.112726	-0.0236205	9.92345	17.5671	0.365915	0.565579	0.0185846	9.92345	21.8437	0.311127	0.842645	0.00350662	9.92345	2.95378	0.709336	0.921447	0.0110749	9.92345	1.98936	0.75944	1	-0.00128767	9.55868	-4.20817e-10	1	1	-0.0555273	9.55868	107.142	0.0206989	0.0412307	-0.0269473	9.55868	4.95684	0.618638	0.857204	-0.00160959	9.55868	-1.2139e-10
FBXL16	E2E4	-0.0616343	10.1106	0.974609	0.467919	0.846053	-0.125122	10.1106	56.3071	2.62587e-10	8.8284e-10	-0.0860531	10.1106	4.7135	0.0833347	0.203298	0.0656199	10.1106	9.26558	0.0254305	0.464971	-0.0155369	10.1106	0.472171	0.613198	0.859418	0.064748	10.1106	2.10284	0.286331	0.78789	0.0489707	9.81588	0.133674	0.764411	1	-0.0010418	9.81588	0.0810698	0.890431	0.946286	0.198615	9.81588	4.77687	0.072836	0.262831	0.0997786	9.81588	5.63886e-10
FBXL2	E4	-0.31931	10.2445	18.969	0.00021186	0.0118402	-0.310494	10.2445	326.826	8.02583e-73	3.29411e-71	-0.257953	10.2445	42.349	8.57854e-10	2.46696e-08	-0.0376482	10.2445	0.395284	0.595031	1	-0.0939369	10.2445	13.0135	0.0024334	0.0258778	-0.162051	10.2445	3.90268	0.0805851	0.594997	-0.211083	9.97061	2.11751	0.199037	0.679071	-0.286095	9.97061	55.8139	8.57851e-14	6.72804e-13	-0.153158	9.97061	3.31107	0.0753901	0.268611	0.0356135	9.97061	0.0479414
FBXL4	E2	-0.105006	10.0485	2.36503	0.228723	0.666918	-0.272317	10.0485	190.313	8.14122e-29	6.63392e-28	-0.229646	10.0485	31.855	5.7108e-06	6.51427e-05	-0.113536	10.0485	1.47938	0.344491	0.849685	0.0523041	10.0485	3.08063	0.170721	0.463426	-0.151957	10.0485	4.18395	0.0989839	0.641163	-0.440147	9.69936	6.44605	0.0413131	0.355625	-0.672712	9.69936	202.566	3.0131e-31	7.33544e-30	-0.337143	9.69936	13.019	0.00336504	0.030512	0.427673	9.69936	3.01408
FBXO16	E2	-0.0993141	10.1456	2.36635	0.216973	0.650777	-0.429025	10.1456	580.118	1.75841e-106	2.58268e-104	-0.347159	10.1456	84.1986	1.36779e-15	1.14124e-13	0.0631789	10.1456	4.96562	0.0799721	0.652032	-0.0122275	10.1456	0.936079	0.443225	0.732403	-0.0490592	10.1456	0.404596	0.587899	0.97936	-0.107956	9.81939	0.888941	0.432577	0.875067	-0.644899	9.81939	230.812	1.14494e-42	5.04909e-41	-0.396767	9.81939	20.9198	6.87012e-05	0.00140826	0.376054	9.81939	7.44752
FBXO24	E2	0.00716655	9.92219	0.54	0.891313	1	-0.0236272	9.92219	234.04	0.00504242	0.00899286	-0.0460083	9.92219	142.938	0.0285709	0.0904295	-0.0379521	9.92219	29.5347	0.321003	0.842645	-0.0041947	9.92219	7.89379	0.608773	0.855808	0.0281095	9.92219	31.498	0.307316	0.789957	-0.0329018	9.55842	0.575407	0.866564	1	-0.0327058	9.55842	61.5731	0.0938149	0.154564	-0.0764091	9.55842	33.5313	0.218054	0.494861	0.00826557	9.55842	8.9902e-10
FBXW7	E3	-0.0437601	10.6006	0.257835	0.655612	0.958324	-0.291366	10.6006	348.842	1.38509e-77	6.79995e-76	-0.149147	10.6006	13.6147	0.000224651	0.00160149	-0.0609282	10.6006	0.273631	0.61034	1	-0.0511917	10.6006	2.01567	0.195862	0.498868	-0.137214	10.6006	2.53728	0.122555	0.69517	0.259828	10.3812	1.03562	0.348884	0.824076	-0.108726	10.3812	10.9181	0.000955396	0.00251844	0.450951	10.3812	32.5717	1.17882e-08	8.55098e-07	-0.152947	10.3812	0.497388
FBXW8	E2	-0.107466	9.99541	4.13007	0.185139	0.612033	-0.222863	9.99541	167.373	4.43779e-18	2.29602e-17	-0.116845	9.99541	10.936	0.0293342	0.0922705	0.0926415	9.99541	1.24697	0.466093	0.956293	-0.0363267	9.99541	4.30258	0.180684	0.479342	-0.0778883	9.99541	1.42222	0.424861	0.888038	-0.104827	9.64362	0.628756	0.594337	0.961193	-0.402486	9.64362	94.4298	1.63198e-11	1.05968e-10	-0.180505	9.64362	4.9133	0.127951	0.368428	0.00643733	9.64362	0.00288191
FCGR2B	E4	0.000106485	9.9201	9.65973e-10	1	1	-0.00457557	9.9201	158.187	0.213253	0.277407	-0.000237286	9.9201	5.81911e-12	1	1	0.0677039	9.9201	114.869	0.283477	0.842645	0.00350712	9.9201	236.604	0.128383	0.394639	-0.000142895	9.9201	6.63379e-10	1	1	0.00102124	9.55555	3.41794e-10	1	1	-0.00729872	9.55555	38.9291	0.459778	0.570319	0.000649113	9.55555	-2.52806e-11	1	1	0.156211	9.55555	173.478
FCRLA	E4	-0.00193779	9.92013	-1.03574e-09	1	1	-0.00216202	9.92013	13.4718	0.668838	0.730718	0.00227185	9.92013	73.9323	0.316727	0.510462	-0.00231667	9.92013	6.41575e-10	0.999983	1	0.0209617	9.92013	336.82	0.0322191	0.166453	0.00985368	9.92013	68.8617	0.333507	0.817981	-0.00162077	9.55535	1.10439e-07	1	1	-0.00197021	9.55535	2.58961e-08	1	1	-0.00238785	9.55535	3.1553e-08	1	1	-0.00280168	9.55535	5.19829e-08
FCRLB	E4	0.00281212	9.92725	0.000653236	0.994034	1	-0.0249635	9.92725	18.3183	0.232946	0.299625	-0.0427634	9.92725	18.9804	0.215263	0.397843	-0.0552699	9.92725	23.8633	0.169944	0.739251	-0.0140072	9.92725	49.7285	0.047923	0.218662	0.00360198	9.92725	0.0141481	0.97221	1	0.14858	9.56548	10.7958	0.282079	0.765925	0.0881734	9.56548	61.5809	0.00794656	0.0174936	0.160983	9.56548	42.7404	0.0294425	0.144705	0.141978	9.56548	6.30704
FEZF2	E3	-0.0720617	9.9372	6.58374	0.284635	0.734397	-0.0185124	9.9372	3.55533	0.444856	0.521434	0.0200974	9.9372	13.2109	0.135705	0.291416	-0.00660854	9.9372	-8.71859e-11	1	1	-0.00095674	9.9372	6.86994	0.284184	0.586395	-0.019537	9.9372	10.3062	0.189665	0.730424	-0.318329	9.57761	15.8257	0.0554884	0.410151	-0.0754319	9.57761	6.62688	0.204547	0.298384	0.00952857	9.57761	0.0427103	0.923383	1	0.00562247	9.57761	0
FGFR1	E2	0.0793888	10.0223	1.4729	0.37025	0.768343	-0.0661604	10.0223	12.7767	0.0114652	0.0194501	-0.0851859	10.0223	5.5733	0.0930299	0.221063	0.115561	10.0223	3.26151	0.216123	0.768495	-0.00833372	10.0223	0.0177211	0.928856	1	-0.143061	10.0223	7.56659	0.0216983	0.394949	0.135413	9.68594	0.893092	0.489696	0.889442	0.294772	9.68594	47.2502	7.83867e-08	3.57661e-07	0.374821	9.68594	18.1212	0.0012663	0.0145005	-0.0150535	9.68594	0.0833745
FGFR1OP2	E4	0.0289204	10.1904	0.263087	0.658545	0.959514	-0.119793	10.1904	44.4064	5.16671e-10	1.70137e-09	0.0420935	10.1904	1.05076	0.370845	0.571709	-0.0842654	10.1904	0.402362	0.586154	1	0.108968	10.1904	11.7347	0.00291028	0.029845	0.00769834	10.1904	0.0204191	0.911383	1	0.669198	9.92184	8.31573	0.00897559	0.163103	0.532198	9.92184	201.904	2.04583e-45	1.01277e-43	0.430374	9.92184	15.0138	0.000405771	0.00604473	0.285039	9.92184	0.618349
FIG4	E3	-0.068728	10.0465	1.32472	0.398243	0.788117	-0.239158	10.0465	169.208	9.72313e-24	6.44293e-23	-0.146121	10.0465	13.9955	0.00469866	0.0211887	-0.0277743	10.0465	0.104688	0.810475	1	-0.0466261	10.0465	3.76846	0.156085	0.440379	0.112659	10.0465	2.34983	0.255129	0.78789	0.0650756	9.71883	8.70309e-05	0.99708	1	-0.196414	9.71883	18.2723	0.000483812	0.00134223	-0.190822	9.71883	4.664	0.0835925	0.2858	-0.214493	9.71883	1.60452
FKBP14	E4	0.0707791	9.96332	2.78464	0.364536	0.764339	-0.125096	9.96332	70.9664	5.87476e-06	1.43609e-05	0.0343131	9.96332	1.77004	0.450861	0.649749	0.0811171	9.96332	4.71556	0.244936	0.820165	-0.00635219	9.96332	0.552398	0.690608	0.912197	0.0284433	9.96332	0.317271	0.759353	1	0.131704	9.61054	1.22575	0.514421	0.903238	-0.264186	9.61054	52.4049	1.26999e-05	4.4386e-05	0.114501	9.61054	3.01378	0.307266	0.60153	-0.00476314	9.61054	9.51078e-11
FKBP7	E3	0.0152576	9.92791	1.21737	0.742598	0.99752	-0.00135586	9.92791	0.00677413	0.966996	0.978918	-0.0356819	9.92791	10.2389	0.350368	0.548177	-0.0361548	9.92791	10.2091	0.346414	0.850314	0.0235651	9.92791	17.7105	0.212316	0.512063	0.0867975	9.92791	13.2271	0.271685	0.78789	-0.0473399	9.56371	11.6227	0.298262	0.7778	0.0426383	9.56371	18.2353	0.185513	0.274471	0.0369148	9.56371	3.6024	0.55256	0.806628	-0.124741	9.56371	14.2226
FMNL2	E3	-0.243122	10.8853	17.0744	3.60007e-05	0.00308996	-0.354745	10.8853	394.791	1.62283e-87	1.18687e-85	-0.330201	10.8853	62.9281	2.18773e-15	1.75136e-13	0.0231138	10.8853	0.0447792	0.832411	1	0.0695578	10.8853	7.61571	0.00578829	0.0501802	-0.0191198	10.8853	0.0647317	0.799169	1	-0.378568	10.6048	7.85942	0.00506463	0.117967	-0.430554	10.6048	150.372	2.42457e-34	7.2056e-33	-0.154557	10.6048	3.47877	0.0621879	0.237474	0.361514	10.6048	2.00963
FN1	E2	0.00723559	9.96537	0.0530368	0.893368	1	-0.201567	9.96537	196.437	1.41398e-15	6.41708e-15	-0.0307989	9.96537	1.02205	0.581807	0.765423	-0.142195	9.96537	11.0293	0.0635057	0.617071	0.0277183	9.96537	2.3209	0.39593	0.699103	0.0780783	9.96537	2.03437	0.420797	0.886405	-0.0523066	9.61187	0.0699444	0.875834	1	-0.259539	9.61187	50.0476	1.66237e-05	5.72663e-05	0.0577092	9.61187	0.594996	0.627224	0.86391	-0.281416	9.61187	9.46099
FOLR1	E2	0.0162873	9.91985	306.35	0.180319	0.607398	0.0013429	9.91985	72.9704	0.512652	0.586586	5.86093e-05	9.91985	-6.22294e-10	1	1	-9.2556e-05	9.91985	-9.09132e-10	1	1	-9.38941e-05	9.91985	-6.17432e-10	1	1	-5.78534e-05	9.91985	-7.8759e-10	1	1	-0.0015057	9.55532	-2.00329e-09	1	1	0.00720581	9.55532	29.5972	0.60949	0.708311	-0.000911115	9.55532	-6.78809e-10	1	1	-0.00102425	9.55532	-5.47896e-10
FOXJ3	E2	-0.136318	10.2257	3.12581	0.0950973	0.490189	-0.305375	10.2257	248.204	8.69384e-56	1.92173e-54	-0.221638	10.2257	27.9393	2.06991e-07	3.37181e-06	-0.0409488	10.2257	0.118045	0.742298	1	0.0826264	10.2257	5.94534	0.0227818	0.133271	-0.190116	10.2257	5.53913	0.0216058	0.394949	-0.103026	9.93029	0.400026	0.534476	0.917056	-0.294817	9.93029	47.5913	5.54219e-12	3.76801e-11	-0.0957047	9.93029	1.16148	0.308358	0.602374	0.0618322	9.93029	0.0315416
FRAS1	E4	-0.0586907	10.1758	2.54623	0.165092	0.603256	-0.360219	10.1758	357.035	2.34628e-79	1.23003e-77	-0.32961	10.1758	70.4748	2.11839e-16	2.03816e-14	0.0228985	10.1758	0.214653	0.689994	1	-0.00425073	10.1758	0.603135	0.499701	0.773626	0.0378596	10.1758	0.259845	0.659404	1	-0.298729	9.86723	3.54125	0.0721605	0.460771	-0.219814	9.86723	25.2952	4.99857e-07	2.07995e-06	0.0388666	9.86723	0.149176	0.699332	0.91227	-0.138797	9.86723	0.857763
FRYL	E3	-0.0975464	10.4181	1.40773	0.235439	0.676073	-0.357512	10.4181	291.365	3.82359e-65	1.17565e-63	-0.230496	10.4181	29.8514	4.68672e-08	8.83692e-07	-0.0418067	10.4181	0.0986388	0.753471	1	0.17503	10.4181	49.4135	2.09935e-12	1.89389e-10	-0.250554	10.4181	8.73691	0.00311976	0.186958	-0.561245	10.0977	7.06336	0.00787915	0.150406	-0.391288	10.0977	72.7314	1.6825e-17	1.73644e-16	0.0595222	10.0977	0.47646	0.490045	0.756728	0.264162	10.0977	0.871749
FST	E3	0.00102614	9.9211	-9.21815e-12	1	1	-0.00688186	9.9211	142.761	0.0587456	0.0878145	-0.00080662	9.9211	8.83591	0.67873	0.841757	-0.00255078	9.9211	2.12018e-10	0.999992	1	6.52877e-05	9.9211	9.67906e-11	0.999992	1	-0.00169448	9.9211	2.53499e-10	0.999991	1	0.000952809	9.5573	4.27569e-10	1	1	-0.00306019	9.5573	4.07686	0.70887	0.797697	-0.0625868	9.5573	17.8802	0.416812	0.694937	-0.000584304	9.5573	1.92825e-10
FXR1	E2	0.13998	10.1405	3.62828	0.0930798	0.485854	-0.191642	10.1405	92.9361	4.23483e-19	2.27927e-18	-0.205788	10.1405	23.858	1.04003e-05	0.000109889	0.187508	10.1405	3.33711	0.117368	0.739251	0.138335	10.1405	18.3348	0.00016707	0.00296323	0.0150099	10.1405	0.041578	0.867222	1	0.867099	9.85223	20.7871	2.7764e-05	0.00300867	0.296183	9.85223	49.0361	2.66173e-12	1.86531e-11	0.331274	9.85223	14.3084	0.000266395	0.00429617	1.10869	9.85223	17.8744
FZD3	E2	0.100692	10.2769	2.08406	0.20103	0.630664	-0.162539	10.2769	96.9099	1.18972e-22	7.51108e-22	-0.10842	10.2769	7.61044	0.0118863	0.0454148	0.0226538	10.2769	0.581115	0.532897	1	-0.0197344	10.2769	0.43743	0.589435	0.841401	-0.116073	10.2769	1.94246	0.228118	0.760875	-0.0375455	9.997	0.23112	0.68275	1	0.192665	9.997	34.093	5.40446e-09	2.79128e-08	0.422025	9.997	27.216	1.46967e-06	5.59294e-05	0.513163	9.997	5.40106
G3BP2	E2	-0.151367	10.2354	3.34082	0.111116	0.530277	-0.205287	10.2354	132.861	1.05961e-30	9.32708e-30	-0.12879	10.2354	10.7993	0.00138721	0.00765636	0.0712635	10.2354	0.749671	0.464971	0.954983	-0.07122	10.2354	4.0836	0.0777751	0.293194	0.0105775	10.2354	0.0373051	0.888327	1	-0.0343285	9.96606	1.00111	0.371079	0.844624	0.119815	9.96606	11.9113	0.000560066	0.00153438	0.268299	9.96606	11.387	0.000944868	0.0115808	-0.0841331	9.96606	0.58662
GAB2	E4	0.145389	10.2403	2.92518	0.0914832	0.483162	-0.257758	10.2403	134.148	5.55027e-31	4.93444e-30	-0.14814	10.2403	11.7864	0.000597142	0.0037302	-0.164633	10.2403	2.9056	0.0882786	0.665347	0.0269492	10.2403	0.837797	0.360032	0.660387	0.0505639	10.2403	0.387198	0.533779	0.940263	0.206579	9.90237	0.838379	0.362979	0.837486	-0.493977	9.90237	95.1959	2.13101e-22	3.09921e-21	0.166205	9.90237	3.29347	0.0695836	0.256192	-0.151577	9.90237	0.471038
GABRA2	E3	-0.207358	10.2512	13.6359	0.000312056	0.0155346	-0.171398	10.2512	98.1107	1.9592e-20	1.1203e-19	-0.0598335	10.2512	2.09858	0.2012	0.379388	0.036159	10.2512	0.573726	0.533065	1	-0.029176	10.2512	4.12661	0.0927643	0.327907	0.0251711	10.2512	0.124169	0.774572	1	-0.418585	9.93917	7.59096	0.00704956	0.143183	0.0492953	9.93917	2.6203	0.105534	0.171002	0.336676	9.93917	14.0837	0.000553239	0.0077602	0.0806079	9.93917	0.889437
GABRB3	E3E4	-0.0181413	10.7462	0.0488249	0.848357	1	-0.247293	10.7462	295.709	4.38218e-66	1.38577e-64	-0.310835	10.7462	81.9439	1.44857e-19	2.65401e-17	-0.0226357	10.7462	0.252022	0.658979	1	-0.0493532	10.7462	4.41531	0.0691023	0.274371	-0.0334885	10.7462	0.211448	0.645637	1	-0.522984	10.5362	10.9955	0.0047513	0.114382	-0.182293	10.5362	42.8051	6.32192e-11	3.90821e-10	-0.132446	10.5362	3.95781	0.0667404	0.249497	-0.0465494	10.5362	2.00026
GALNT11	E3	-0.167978	10.1791	5.22015	0.0548824	0.3834	-0.279413	10.1791	244.447	1.63138e-49	2.95544e-48	-0.217584	10.1791	30.8294	4.33554e-07	6.52976e-06	-0.411116	10.1791	15.3652	0.00103017	0.0829186	-0.0551607	10.1791	4.55701	0.0795475	0.2975	0.0346766	10.1791	0.175251	0.733794	1	-0.299249	9.8791	3.55144	0.10371	0.526003	-0.379578	9.8791	84.3546	2.67627e-18	2.91081e-17	-0.213764	9.8791	6.23426	0.0196639	0.10914	-0.664942	9.8791	7.18285
GANAB	E2	0.139182	10.0048	5.42602	0.111653	0.531699	-0.138445	10.0048	61.6391	3.48146e-08	1.01066e-07	-0.0261008	10.0048	0.536992	0.613604	0.790725	0.0444286	10.0048	0.486467	0.639799	1	0.0282611	10.0048	1.50072	0.408546	0.709793	-0.0116874	10.0048	0.0258447	0.91214	1	0.134208	9.6584	0.547143	0.598069	0.963897	-0.0433945	9.6584	0.792312	0.551641	0.656869	-0.0751386	9.6584	0.749966	0.527033	0.786434	-0.0578008	9.6584	0.189974
GAP43	E4	-0.0717248	10.4226	1.06484	0.346631	0.751809	-0.273973	10.4226	276.949	5.08685e-62	1.39082e-60	-0.090719	10.4226	4.33805	0.0436629	0.126114	-0.106446	10.4226	2.30874	0.168211	0.739251	-0.0728785	10.4226	8.25033	0.00929621	0.0713691	-0.108905	10.4226	1.79301	0.213727	0.73822	0.357247	10.2554	0.116742	0.750303	1	0.224612	10.2554	49.1504	2.51172e-12	1.76436e-11	0.370378	10.2554	12.9439	0.000322401	0.00501726	0.0937458	10.2554	0.15937
GART	E2E4	-0.17142	10.0022	9.58523	0.0384532	0.327512	-0.220965	10.0022	158.151	2.5425e-18	1.33133e-17	-0.216988	10.0022	36.3311	3.44266e-05	0.000315052	0.0913874	10.0022	1.37489	0.437048	0.924597	0.0115889	10.0022	0.251008	0.738989	0.935088	-0.240809	10.0022	13.1211	0.0138076	0.345132	-0.518141	9.65104	13.714	0.0103134	0.176704	-0.38372	9.65104	80.0861	1.58171e-10	9.44563e-10	-0.370033	9.65104	19.1045	0.00182618	0.0192499	-0.0727018	9.65104	0.504204
GAS7	E4	0.0639138	10.4623	0.687847	0.434977	0.818206	-0.228782	10.4623	178.415	1.26049e-40	1.61978e-39	-0.229256	10.4623	30.6245	3.14666e-08	6.2136e-07	-0.095731	10.4623	0.672629	0.421452	0.90558	-0.134299	10.4623	16.2115	6.43601e-05	0.00133467	-0.286129	10.4623	11.241	0.00163631	0.141167	0.0706712	10.2012	0.185878	0.682785	1	-0.146665	10.2012	16.3904	5.19038e-05	0.000166294	-0.120418	10.2012	2.08146	0.160141	0.416121	0.252387	10.2012	0.650412
GATAD2A	E3	-0.00584723	9.98045	0.0126342	0.943705	1	-0.0863126	9.98045	27.5117	0.00115339	0.00222975	-0.200769	9.98045	35.0222	0.000183842	0.00135627	0.142592	9.98045	3.09343	0.269379	0.842645	0.0114669	9.98045	0.359776	0.710757	0.921569	-0.163049	9.98045	7.96238	0.0786846	0.589075	-0.300852	9.62999	4.17427	0.165812	0.634568	-0.158442	9.62999	16.315	0.00632559	0.0142086	-0.178541	9.62999	5.4456	0.10928	0.336882	-0.286562	9.62999	2.0964
GATM	E2	0.0414925	10.0057	0.42472	0.651515	0.955814	-0.108146	10.0057	37.0717	3.31678e-05	7.57755e-05	-0.0265057	10.0057	0.518993	0.627599	0.80225	0.0736009	10.0057	1.10574	0.478483	0.969181	0.0750267	10.0057	8.06689	0.044232	0.207042	0.0438832	10.0057	0.347253	0.67689	1	-0.00398845	9.65054	0.000262487	0.987775	1	0.168562	9.65054	15.7028	0.0039692	0.00933324	0.144192	9.65054	1.9344	0.333371	0.628545	0.533895	9.65054	6.90141
GBP1	E2	-0.0326095	9.92179	2.00732	0.786719	1	-0.000993827	9.92179	1.38389	0.840341	0.87747	-0.0142067	9.92179	31.9887	0.32201	0.516215	0.0350186	9.92179	12.4512	0.533891	1	-0.007593	9.92179	207.947	0.0117915	0.0845674	-0.0164259	9.92179	3.79902	0.729287	1	-0.0149773	9.55649	1.38586	0.849731	1	-0.0217136	9.55649	127.013	0.0696642	0.119794	0.00340169	9.55649	0.6486	0.895905	1	0.0921179	9.55649	14.4112
GCC1	E4	0.0196904	9.92782	2.82105	0.618936	0.936035	-0.0100392	9.92782	2.78294	0.62986	0.695401	0.0132825	9.92782	2.38102	0.649097	0.819423	0.0902469	9.92782	59.4112	0.0229743	0.449038	0.0248482	9.92782	28.2694	0.115875	0.373474	0.0008445	9.92782	0.000974345	0.991639	1	0.232581	9.56451	32.703	0.0706793	0.457101	0.0437092	9.56451	15.0117	0.213199	0.307896	-0.0918161	9.56451	37.7757	0.0534521	0.214836	0.0124398	9.56451	2.13075e-09
GDF3	E3	0.0010305	9.92014	2.20848e-09	0.999978	1	0.00101721	9.92014	31.0024	0.589758	0.658572	-0.00135192	9.92014	5.75104	0.817382	0.930566	0.000205986	9.92014	9.53523e-10	0.999979	1	0.001582	9.92014	21.9468	0.652398	0.887514	0.0114977	9.92014	123.912	0.284544	0.78789	0.00108227	9.55533	5.2909e-07	1	1	-0.00582925	9.55533	120.502	0.209813	0.30377	-0.000430955	9.55533	1.87181e-07	1	1	-0.00057465	9.55533	1.9317e-07
GFAP	E3E4	0.654851	9.9798	433.894	1.72317e-37	1.02081e-33	0.106076	9.9798	137.207	5.42789e-08	1.55162e-07	0.0650928	9.9798	10.5917	0.139738	0.297341	-0.0820489	9.9798	11.7489	0.120634	0.739251	0.071943	9.9798	55.0914	0.000688321	0.00962458	0.030063	9.9798	0.476183	0.739927	1	0.649306	9.60255	2.47048	0.225183	0.709843	-0.0268583	9.60255	1.39407	0.750173	0.833567	-0.114002	9.60255	6.04377	0.243048	0.524078	-0.29824	9.60255	14.4004
GFM1	E4	-0.0534544	10.0183	1.11391	0.463567	0.842456	-0.231212	10.0183	160.523	5.74686e-20	3.21781e-19	-0.21207	10.0183	31.9459	5.70144e-05	0.000488789	-0.0296139	10.0183	0.358451	0.680734	1	0.0129445	10.0183	0.173289	0.775531	0.955542	0.0378705	10.0183	0.242845	0.728964	1	-0.0638865	9.68188	0.41576	0.633279	0.991322	-0.321525	9.68188	52.1231	3.7239e-08	1.7578e-07	-0.250289	9.68188	8.07396	0.0277045	0.139361	-0.243594	9.68188	2.4403
GGH	E3	0.040436	9.95355	1.50204	0.545879	0.89869	-0.155007	9.95355	143.342	2.03454e-09	6.42236e-09	0.00139923	9.95355	9.90007e-05	0.998599	1	-0.0317938	9.95355	3.63076	0.354294	0.852244	0.0297172	9.95355	13.2098	0.0764592	0.290538	0.0923349	9.95355	8.73933	0.147655	0.708449	-0.0159941	9.601	0.590507	0.670642	1	-0.0794258	9.601	3.80221	0.290919	0.398498	-0.00555825	9.601	0.0244535	0.928737	1	0.0254208	9.601	2.49038e-10
GIMAP5	E3	0.00868056	9.91994	217.012	0.296561	0.745788	-0.000293862	9.91994	28.4473	0.702345	0.75999	-0.00787333	9.91994	685.092	0.0633499	0.166966	0.0180814	9.91994	207.633	0.307631	0.842645	-0.00306676	9.91994	87.2808	0.508304	0.779093	0.0114285	9.91994	225.045	0.288732	0.78789	0.00148274	9.55533	3.17484e-10	1	1	0.000974544	9.55533	1.36654e-10	1	1	-0.0210183	9.55533	97.2017	0.278009	0.56721	0.000891914	9.55533	2.83321e-10
GMFG	E3	0.0018798	9.93632	0.00190158	0.9862	1	-0.0470665	9.93632	30.1468	0.034246	0.053511	0.0176948	9.93632	2.11177	0.572955	0.757405	-0.0470092	9.93632	1.14647	0.668056	1	0.057077	9.93632	45.2986	0.00914557	0.0705447	-0.0425996	9.93632	3.52587	0.465907	0.900598	-0.0234389	9.57395	0.943416	0.694248	1	0.0582566	9.57395	13.4551	0.121353	0.192957	0.0379147	9.57395	0.832503	0.711201	0.920801	-0.315861	9.57395	4.59893
GNB1	E2	0.0141652	10.3903	0.0443925	0.833507	1	-0.229521	10.3903	164.303	1.48694e-37	1.6864e-36	-0.197137	10.3903	25.2874	4.95617e-07	7.32788e-06	-0.188281	10.3903	2.65509	0.103225	0.712434	0.0304614	10.3903	0.801537	0.381851	0.683269	-0.148699	10.3903	2.9035	0.0883936	0.614034	0.120137	10.1604	0.0493845	0.827697	1	0.118357	10.1604	12.0745	0.000513154	0.00141602	0.384439	10.1604	26.1864	3.15287e-07	1.463e-05	-0.169094	10.1604	0.579264
GNB5	E4	-0.116294	10.1951	3.1738	0.149807	0.599769	-0.289556	10.1951	284.284	1.79821e-54	3.81357e-53	-0.179691	10.1951	21.9688	4.15598e-05	0.000371342	0.129263	10.1951	3.32559	0.145924	0.739251	-0.0594489	10.1951	8.05035	0.0231532	0.134445	-0.0538416	10.1951	0.500158	0.554098	0.954857	-0.229484	9.89856	2.90416	0.152491	0.612585	-0.317098	9.89856	66.8387	2.31471e-14	1.88702e-13	-0.0662612	9.89856	0.640659	0.443947	0.716085	0.448715	9.89856	10.3704
GOLPH3L	E3	-0.0729996	9.98038	1.92766	0.397886	0.788117	-0.0487664	9.98038	9.22654	0.0636535	0.0943967	-0.0877308	9.98038	7.40618	0.089031	0.213819	0.10898	9.98038	2.69224	0.32244	0.842645	0.0220478	9.98038	2.7662	0.317672	0.615466	0.095204	9.98038	2.79703	0.308073	0.790624	0.0428422	9.63878	0.001647	0.982729	1	0.21084	9.63878	33.9851	5.45734e-05	0.000174533	0.346243	9.63878	20.6428	0.0020911	0.0213335	0.153178	9.63878	0.360057
GORAB	E2	-0.0080172	9.94313	0.05971	0.915465	1	-0.0592843	9.94313	29.3262	0.0182177	0.0298925	0.0141485	9.94313	0.503446	0.763665	0.898382	-0.00834217	9.94313	0.0789256	0.902452	1	0.00692648	9.94313	1.20553	0.634314	0.874706	-0.0694221	9.94313	4.28816	0.363819	0.850858	0.0699467	9.58546	0.313346	0.793234	1	0.0633762	9.58546	7.36327	0.191327	0.281922	0.00702009	9.58546	0.000451545	0.985248	1	0.0491479	9.58546	0.115858
GPM6A	E4	-0.161242	11.4008	16.3222	5.35135e-05	0.00417124	-0.175087	11.4008	171.492	4.04739e-39	4.89321e-38	-0.167475	11.4008	33.2926	7.97478e-09	1.81238e-07	-0.161613	11.4008	1.97316	0.206027	0.757607	-0.163745	11.4008	22.9602	1.7612e-05	0.000439608	-0.0264984	11.4008	0.278079	0.597965	0.984004	-0.244654	11.2297	8.53105	0.00349856	0.0965472	0.164056	11.2297	51.5713	7.35604e-13	5.36445e-12	0.279647	11.2297	31.0921	2.51957e-08	1.70258e-06	0.18683	11.2297	0.047579
GPR146	E3	-0.0963407	9.93145	18.2702	0.139439	0.590449	-0.0422118	9.93145	53.2305	0.0123429	0.0208455	-0.0878575	9.93145	52.1189	0.0126442	0.0476589	-0.0179719	9.93145	0.913815	0.746382	1	0.0220446	9.93145	8.93682	0.306203	0.603725	0.252951	9.93145	69.8471	0.0036765	0.197398	-0.32317	9.56984	24.8775	0.0584803	0.417172	-0.0558359	9.56984	13.4673	0.164136	0.247856	-0.151815	9.56984	18.8678	0.0975305	0.314006	-0.0022794	9.56984	1.19344e-10
GPR161	E2	-0.148366	9.95211	16.7039	0.0474875	0.361002	-0.112055	9.95211	83.6292	6.86191e-06	1.66758e-05	-0.15206	9.95211	36.1846	0.00299778	0.0146404	0.0482388	9.95211	3.34402	0.381419	0.866431	0.00152643	9.95211	0.777288	0.673263	0.901925	0.203129	9.95211	29.7469	0.00835052	0.28214	-0.172608	9.59684	2.74196	0.381031	0.852213	0.00963072	9.59684	0.247928	0.78047	0.857581	-0.141846	9.59684	4.19656	0.266864	0.553479	0.184444	9.59684	8.75436
GPR22	E3	-0.0474085	10.0907	3.34375	0.178666	0.605761	-0.25261	10.0907	213.749	1.08679e-30	9.56159e-30	-0.0197232	10.0907	0.204568	0.959166	1	-0.0491864	10.0907	3.46683	0.171552	0.739251	-0.0177196	10.0907	2.94497	0.206943	0.507143	-0.0584081	10.0907	0.813518	0.502113	0.920048	0.268034	9.81359	1.52375	0.326018	0.802604	0.20738	9.81359	34.5398	3.78199e-08	1.78427e-07	0.576733	9.81359	47.6443	4.06089e-09	3.44572e-07	0.0984311	9.81359	1.01381
GPR27	E3	-0.0354252	9.95629	7.71537	0.172445	0.604132	-0.0387206	9.95629	9.21565	0.13263	0.182566	-0.146582	9.95629	37.1717	0.00207709	0.0107621	-0.00758734	9.95629	-2.67342e-09	1	1	-0.0254714	9.95629	22.8187	0.0189513	0.117067	0.0274329	9.95629	2.6948	0.419528	0.885913	0.131219	9.60512	9.48586e-10	0.999975	1	0.324384	9.60512	105.062	2.56366e-09	1.36821e-08	0.115638	9.60512	3.09594	0.320554	0.61505	0.0816934	9.60512	4.30637e-10
GPRC5B	E4	0.242497	10.1605	21.9713	2.93949e-05	0.00270677	-0.0325642	10.1605	0.950232	0.457581	0.533849	-0.0538713	10.1605	1.68512	0.311969	0.505453	-0.0363618	10.1605	0.0070176	0.950746	1	0.287777	10.1605	173.006	1.45862e-32	8.1008e-30	0.0806929	10.1605	1.43933	0.328461	0.81165	0.0246928	9.79469	0.00771212	0.930022	1	0.0316159	9.79469	0.992877	0.511417	0.619769	0.242413	9.79469	8.27521	0.0273237	0.137758	0.242133	9.79469	2.84696
GRK4	E4	-0.144514	10.0967	4.19456	0.0938665	0.488348	-0.294108	10.0967	228.702	1.21239e-39	1.49421e-38	-0.2333	10.0967	35.1466	2.00781e-07	3.29178e-06	0.118211	10.0967	2.61569	0.196191	0.744865	0.0221396	10.0967	0.416526	0.598031	0.847409	-0.0446021	10.0967	0.333561	0.621941	0.993741	-0.61944	9.76453	10.4226	0.00566516	0.125538	-0.714025	9.76453	238.169	3.36632e-43	1.51843e-41	-0.507928	9.76453	31.6183	4.48025e-07	1.97576e-05	0.343932	9.76453	3.0038
GSE1	E4	-0.0350815	9.98736	0.532287	0.662474	0.961682	-0.0919442	9.98736	33.2898	0.000324487	0.000669453	0.00753476	9.98736	0.0938797	0.825202	0.93518	-0.133015	9.98736	5.66026	0.155154	0.739251	-0.00954316	9.98736	1.07048	0.539297	0.802242	-0.0373074	9.98736	0.587173	0.645767	1	-0.100297	9.63708	0.895275	0.545633	0.925374	-0.279179	9.63708	50.0767	2.4202e-06	9.25383e-06	0.0367932	9.63708	0.291299	0.697762	0.911274	-0.209541	9.63708	5.50487
GSN	E4	0.0330167	10.1103	0.371476	0.580865	0.915051	-0.131083	10.1103	43.9244	2.38699e-07	6.49344e-07	-0.0253569	10.1103	0.247972	0.713183	0.86558	0.283523	10.1103	9.45259	0.0109637	0.335364	-0.0743468	10.1103	9.58929	0.00627482	0.0531029	-0.103873	10.1103	1.88726	0.267086	0.78789	-0.0570913	9.73539	0.382728	0.567695	0.941848	-0.261421	9.73539	31.1482	7.08333e-06	2.55864e-05	0.11741	9.73539	1.9285	0.281227	0.57061	0.252367	9.73539	1.37693
GSPT1	E2	-0.0480858	10.103	0.436405	0.595803	0.923772	-0.151416	10.103	63.9291	7.19244e-12	2.66689e-11	-0.15871	10.103	14.5084	0.0012839	0.0071708	-0.0217665	10.103	0.0338022	0.879339	1	0.107285	10.103	12.9622	0.00377306	0.0361287	-0.0900543	10.103	1.2455	0.360672	0.847416	0.140382	9.78514	0.229098	0.693652	1	0.164318	9.78514	17.1687	7.65311e-05	0.000239878	0.0834006	9.78514	0.782124	0.415828	0.694128	0.0599331	9.78514	0.00387185
GTDC1	E2	-0.310875	10.4913	13.3967	0.000252329	0.0134342	-0.344239	10.4913	362.038	1.94153e-80	1.08166e-78	-0.112829	10.4913	7.24435	0.00711478	0.0297515	0.101792	10.4913	0.654274	0.418593	0.902162	-0.105224	10.4913	9.76897	0.00177583	0.0200254	-0.186668	10.4913	5.18456	0.0227927	0.398065	-0.0621193	10.2125	0.282913	0.594809	0.961607	-0.381208	10.2125	99.0755	3.05612e-23	4.65011e-22	0.136194	10.2125	2.43879	0.118397	0.353458	0.465815	10.2125	2.52667
GTPBP10	E3	-0.00558776	9.96574	0.0330219	0.919819	1	-0.192903	9.96574	168.898	1.49491e-13	6.11874e-13	-0.169708	9.96574	34.9672	0.000698058	0.00427053	0.018934	9.96574	0.0722135	0.881005	1	0.063038	9.96574	11.9174	0.0513193	0.228421	0.0108252	9.96574	0.0408389	0.908736	1	-0.223326	9.61355	4.80881	0.186841	0.664508	-0.414574	9.61355	126.459	3.38043e-12	2.34676e-11	-0.257728	9.61355	14.262	0.0203912	0.112127	-0.422046	9.61355	7.8388
GUCA1C	E2	-0.0035892	9.92718	0.3109	0.873652	1	-0.0132176	9.92718	3.46785	0.626508	0.692431	-0.058054	9.92718	45.2024	0.0558196	0.152221	-0.04059	9.92718	9.31864	0.386577	0.86916	-0.000810777	9.92718	0.283582	0.882149	0.994831	-0.0747484	9.92718	20.0097	0.201203	0.730424	-0.0149318	9.56295	6.43428	0.461669	0.880436	-0.00579418	9.56295	0.034799	0.961204	1	-0.0920464	9.56295	41.7585	0.058269	0.228096	-0.049432	9.56295	7.27167
GUCY1A2	E2	-0.00461836	10.4146	0.0216558	0.889738	1	-0.181595	10.4146	123.243	1.3317e-28	1.07236e-27	-0.0709514	10.4146	3.1799	0.08774	0.211662	-0.0310853	10.4146	0.0639301	0.825233	1	0.190235	10.4146	43.8773	4.8908e-09	2.70777e-07	-0.0101525	10.4146	0.0157699	0.903774	1	-0.00968744	10.1667	0.609734	0.47733	0.884209	-0.00720343	10.1667	0.00246129	0.960647	1	0.558608	10.1667	51.4272	7.91712e-13	1.63608e-10	-0.121095	10.1667	2.56957
H2AFY	E2	0.05719	10.0943	0.753692	0.488837	0.863752	-0.258527	10.0943	189.242	7.8707e-32	7.2065e-31	-0.111883	10.0943	7.3201	0.0252229	0.0822952	0.0217518	10.0943	0.0509074	0.867167	1	0.034585	10.0943	1.68957	0.304209	0.602052	-0.0941822	10.0943	1.37888	0.337685	0.822776	0.276131	9.78628	0.976994	0.413042	0.869624	-0.0280973	9.78628	0.0972731	0.991293	1	0.317175	9.78628	11.905	0.00337674	0.0305869	0.351663	9.78628	1.76885
HBEGF	E3E4	0.0393354	9.93053	8.85791	0.323501	0.746499	-0.0232333	9.93053	17.9884	0.153393	0.207687	0.030518	9.93053	5.94409	0.423901	0.624674	-0.0512723	9.93053	7.543	0.3627	0.854118	0.0165881	9.93053	4.37046	0.485401	0.763772	-0.0254064	9.93053	5.32307	0.445616	0.8932	0.0873289	9.56984	4.26508	0.441126	0.875475	-0.0066309	9.56984	0.00354508	0.973627	1	0.104685	9.56984	10.5096	0.221924	0.499727	-0.177012	9.56984	13.8431
HCRTR2	E4	-0.00413437	9.93833	0.0977316	0.901911	1	-0.0882475	9.93833	104.797	1.76667e-05	4.13448e-05	-0.188248	9.93833	95.0523	3.33756e-05	0.000307173	0.0260377	9.93833	4.78022	0.38009	0.866354	-0.00640145	9.93833	0.243834	0.84108	0.983723	0.0936483	9.93833	41.1546	0.00982671	0.299694	0.0502681	9.5784	2.40542	0.4875	0.888899	-0.1616	9.5784	44.5639	0.00262708	0.00638833	0.00734069	9.5784	0.67569	0.705534	0.916709	0.0551318	9.5784	1.81581e-10
HDGF	E4	-0.00805059	10.0089	0.00496461	0.963098	1	-0.0772364	10.0089	19.1466	0.00299122	0.0055031	-0.0535786	10.0089	2.18058	0.302047	0.494498	0.0204737	10.0089	0.215621	0.758598	1	0.0793828	10.0089	13.6562	0.0133519	0.0915789	0.0504656	10.0089	0.960615	0.514027	0.927911	0.180034	9.67141	0.506923	0.61056	0.97326	0.191544	9.67141	24.2046	0.00017292	0.000516668	0.114792	9.67141	1.81388	0.335689	0.631242	0.178969	9.67141	0.591448
HECW2	E4	-0.0948948	10.5497	1.97355	0.176408	0.604536	-0.324492	10.5497	338.289	2.65821e-75	1.184e-73	-0.307172	10.5497	67.8317	1.82295e-16	1.79986e-14	0.0168981	10.5497	0.00928586	0.928173	1	-0.101948	10.5497	10.6918	0.00107685	0.0135825	0.0126612	10.5497	0.0183769	0.892317	1	-0.00695183	10.2655	1.14024	0.30131	0.779665	-0.248644	10.2655	46.2244	1.11028e-11	7.31897e-11	0.0880037	10.2655	1.46344	0.22641	0.506077	-0.246123	10.2655	3.75955
HERC4	E2	-0.157792	10.3529	4.57774	0.0323947	0.300128	-0.364152	10.3529	379.278	3.64637e-84	2.37375e-82	-0.21954	10.3529	27.8322	1.32848e-07	2.28999e-06	0.0901896	10.3529	0.603412	0.441148	0.92903	0.0266172	10.3529	0.570221	0.450175	0.737965	0.0385523	10.3529	0.227042	0.633728	0.998813	-0.207464	10.0832	1.3771	0.240622	0.727752	-0.272701	10.0832	46.9245	7.77654e-12	5.20937e-11	-0.0989066	10.0832	1.34658	0.245902	0.527353	0.740693	10.0832	8.90231
HEXIM1	E3	-0.0200111	10.0165	0.000423752	0.991709	1	0.0867485	10.0165	22.7747	0.000152037	0.000325111	0.00849658	10.0165	0.0620024	0.815477	0.929151	0.144946	10.0165	7.07939	0.0748931	0.652032	0.066489	10.0165	19.0119	0.00356593	0.0345738	-0.00136114	10.0165	0.0726059	0.859579	1	0.28875	9.70044	1.4047	0.376626	0.848125	0.742939	9.70044	341.081	2.32433e-50	1.49666e-48	0.565262	9.70044	46.6765	9.86151e-08	5.59932e-06	0.592181	9.70044	9.73482
HFE	E4	0.00382711	9.92651	0.147592	0.917014	1	0.00487447	9.92651	2.3606	0.690467	0.749693	0.00250419	9.92651	0.951599	0.803702	0.921367	0.0206858	9.92651	1.24787	0.767321	1	-0.0171628	9.92651	4.71069	0.574627	0.830419	0.0277702	9.92651	5.21139	0.555454	0.955902	-0.362014	9.56268	83.3514	0.0108404	0.180571	0.000521476	9.56268	6.36846	0.484286	0.594101	0.00231269	9.56268	8.98234	0.409333	0.688693	-0.123298	9.56268	17.2979
HIRA	E2	0.138448	9.97975	8.96757	0.0705933	0.434149	-0.0885182	9.97975	29.9466	0.000839517	0.00165281	-0.0117083	9.97975	0.150941	0.804444	0.921882	-0.0915083	9.97975	2.35289	0.358161	0.852791	0.00499359	9.97975	0.130572	0.826675	0.978411	0.0329516	9.97975	0.406887	0.70101	1	-0.237558	9.63118	5.65125	0.12536	0.563882	0.0153239	9.63118	0.337966	0.696327	0.786493	0.0757723	9.63118	0.92146	0.528247	0.787452	-0.019144	9.63118	0.108595
HIST1H2BD	E4	-0.015279	9.93236	0.85649	0.745851	0.998589	-0.0125848	9.93236	3.24548	0.537604	0.610381	0.0184607	9.93236	2.95706	0.54469	0.733573	0.146094	9.93236	11.8731	0.19883	0.74813	0.0615786	9.93236	48.8618	0.0135736	0.0925705	0.0890741	9.93236	15.2756	0.167469	0.730424	-0.0114634	9.57284	0.000754144	0.996719	1	0.0611802	9.57284	11.6004	0.16658	0.251014	0.0962943	9.57284	9.58744	0.214675	0.490764	0.199184	9.57284	2.3363
HLA-DRA	E2	0.169182	9.92875	268.053	0.000371816	0.0172531	-0.0205681	9.92875	125.191	0.0185081	0.0303241	-0.0209721	9.92875	59.1954	0.102431	0.237867	0.419881	9.92875	173.338	0.00015559	0.0256032	0.00400765	9.92875	8.12129	0.536752	0.800668	0.0555283	9.92875	119.722	0.0182028	0.373558	0.068216	9.56463	5.78294	0.587286	0.956675	0.0160263	9.56463	0.014155	0.955701	0.996906	0.0194472	9.56463	0.300175	0.893193	1	0.656037	9.56463	212.412
HLF	E3	-0.132664	10.1637	3.68866	0.136063	0.586661	-0.00392464	10.1637	0.0777434	0.78038	0.827699	-0.114281	10.1637	7.33038	0.0252563	0.0823436	-0.00889935	10.1637	0.0226138	0.909361	1	0.0112847	10.1637	0.885516	0.46457	0.74965	-0.355306	10.1637	21.7392	0.00023683	0.0472915	-0.10828	9.87293	3.47612	0.122267	0.557992	0.500138	9.87293	198.198	3.70193e-42	1.60075e-40	0.422738	9.87293	18.0906	0.000307255	0.00481529	0.346017	9.87293	3.86934
HNRNPA1	E4	-0.17474	10.084	6.08172	0.0467725	0.359136	-0.131412	10.084	44.8519	4.07767e-08	1.17758e-07	-0.229469	10.084	31.0337	4.66929e-06	5.44255e-05	0.169224	10.084	2.84971	0.174273	0.739251	0.104104	10.084	12.024	0.00497741	0.0447439	0.0171833	10.084	0.0540743	0.852751	1	0.384672	9.78117	1.13883	0.368712	0.842669	0.277146	9.78117	46.1741	5.76973e-11	3.58154e-10	0.063368	9.78117	0.574676	0.567288	0.817005	0.501703	9.78117	2.5494
HNRNPD	E2	-0.000337134	10.0997	0.000458375	0.987294	1	-0.235924	10.0997	141.765	2.00204e-26	1.47513e-25	-0.223908	10.0997	28.0608	4.97867e-06	5.76423e-05	0.121797	10.0997	1.37169	0.332549	0.844173	0.0244076	10.0997	0.670968	0.49441	0.769814	-0.169975	10.0997	4.72008	0.0600013	0.569186	0.153226	9.77532	0.375589	0.598459	0.96409	0.0572758	9.77532	2.14697	0.14288	0.220346	0.207553	9.77532	5.15807	0.0344739	0.160932	0.489711	9.77532	3.40037
HNRNPH1	E2	0.0363808	10.1029	0.312167	0.646114	0.952766	-0.19865	10.1029	105.422	5.78008e-20	3.23539e-19	-0.192427	10.1029	21.8058	4.47998e-05	0.0003969	0.0540695	10.1029	0.326258	0.640715	1	0.115736	10.1029	14.8849	0.00150248	0.0176149	0.0785488	10.1029	1.00374	0.406318	0.884692	0.544316	9.78404	7.51562	0.0171394	0.229888	0.107265	9.78404	7.48099	0.00689853	0.0154002	0.243089	9.78404	7.74859	0.0115473	0.0746521	-0.249017	9.78404	1.2368
HOOK3	E2	-0.122959	10.1625	2.68236	0.14598	0.597908	-0.30704	10.1625	239.714	8.03764e-50	1.47567e-48	-0.26553	10.1625	39.9204	2.8276e-09	7.15843e-08	0.0966715	10.1625	0.668017	0.470076	0.960472	-9.91152e-05	10.1625	0.000980018	0.986058	1	-0.166742	10.1625	4.30067	0.0559932	0.554689	-0.578533	9.83924	8.69498	0.0060801	0.130976	-0.387275	9.83924	73.7762	3.5163e-17	3.54261e-16	-0.254163	9.83924	7.48234	0.0105115	0.069914	0.141847	9.83924	0.263983
HOXB7	E4	2.74907e-05	9.91975	-5.49159e-10	1	1	-0.00105845	9.91975	183.327	0.196784	0.258595	6.08519e-05	9.91975	7.82277e-13	0.999999	1	-0.0534487	9.91975	355.393	0.0717577	0.643105	1.56565e-05	9.91975	-1.42374e-10	1	1	5.56442e-05	9.91975	-2.08868e-10	1	1	1.0251e-14	9.55513	0	1	1	-5.12548e-15	9.55513	0	1	1	-2.56274e-15	9.55513	0	1	1	-7.68822e-15	9.55513	0
HP1BP3	E4	0.259761	10.2963	11.7069	0.00067028	0.026672	-0.0923538	10.2963	23.2611	1.4184e-06	3.64327e-06	-0.0642276	10.2963	2.19426	0.152087	0.315795	0.150045	10.2963	1.77924	0.202435	0.75265	0.283578	10.2963	74.4766	1.09308e-17	2.0027e-15	0.264132	10.2963	10.4849	0.00120429	0.120919	0.731159	10.016	16.6695	5.22625e-05	0.00464404	0.326198	10.016	69.9725	6.74935e-17	6.66385e-16	0.39485	10.016	21.8364	3.00485e-06	0.000103694	0.763671	10.016	7.78766
HS2ST1	E2	-0.188613	10.0406	8.6776	0.023885	0.254945	-0.191652	10.0406	103.539	1.6373e-15	7.38905e-15	-0.200101	10.0406	26.1122	8.43047e-05	0.00068854	0.0536504	10.0406	0.326643	0.675608	1	0.0340579	10.0406	1.90992	0.30915	0.606817	0.209111	10.0406	7.97188	0.0347785	0.466332	-0.653925	9.69141	14.0174	0.00352966	0.0971065	-0.321492	9.69141	48.7059	2.79067e-08	1.33826e-07	-0.00786557	9.69141	0.00759122	0.943692	1	-0.131405	9.69141	0.658516
HS3ST5	E3	-0.121922	10.1622	2.15479	0.143718	0.596628	-0.370238	10.1622	277.719	3.46162e-62	9.5085e-61	-0.561064	10.1622	136.137	2.93707e-31	1.93324e-28	-0.0788772	10.1622	2.38794	0.14911	0.739251	0.0275215	10.1622	0.751108	0.38613	0.688364	-0.0291784	10.1622	0.0946007	0.771594	1	-0.174465	9.84538	0.83001	0.36229	0.837486	-0.310624	9.84538	35.5852	2.51796e-09	1.34503e-08	-0.516687	9.84538	21.206	4.17189e-06	0.000137302	0.0601435	9.84538	0.664127
HSPA12B	E2	-0.0277916	9.9223	56.0268	0.162518	0.602698	-0.00998904	9.9223	23.316	0.355389	0.430566	-0.0253189	9.9223	93.1614	0.0700011	0.179411	0.00128567	9.9223	-6.8256e-10	1	1	-0.00017944	9.9223	1.4093	0.824836	0.978075	-0.014447	9.9223	48.4499	0.194654	0.730424	-0.0303798	9.55798	10.9267	0.452686	0.876653	-0.0360846	9.55798	45.0923	0.124289	0.196873	-0.0403102	9.55798	20.2959	0.302137	0.594572	-0.00136308	9.55798	1.76826e-11
HSPB3	E3E4	-0.00257548	9.93837	0.604086	0.759149	1	-0.216902	9.93837	550.362	8.61679e-22	5.2212e-21	-0.0743501	9.93837	12.9155	0.159178	0.326286	0.0262668	9.93837	6.75752	0.307127	0.842645	-0.00284247	9.93837	3.11033	0.487677	0.76496	-0.0546913	9.93837	43.4286	0.0095201	0.294758	0.106091	9.58159	5.20184e-10	0.999982	1	-0.192493	9.58159	47.0345	0.00106209	0.00277377	0.174844	9.58159	14.3566	0.0725019	0.262233	0.0471181	9.58159	1.43881e-10
HTR1E	E4	-0.0078606	10.2271	2.62578e-05	0.995911	1	-0.119924	10.2271	51.0689	2.76375e-11	9.8947e-11	-0.260523	10.2271	41.7379	4.57596e-09	1.09341e-07	-0.0489353	10.2271	1.36781	0.34331	0.849413	-0.0291899	10.2271	5.32596	0.0619648	0.257419	-0.0420183	10.2271	0.986766	0.420036	0.885926	0.0874847	9.93717	0.107351	0.781345	1	0.0349843	9.93717	1.24215	0.347453	0.460076	0.0589538	9.93717	0.350091	0.639579	0.87214	-0.0640992	9.93717	1.86598
IBA57	E2	-0.0850776	9.92952	20.1264	0.150348	0.600311	-0.0597663	9.92952	117.853	0.000470807	0.0009532	-0.0476756	9.92952	22.2018	0.129776	0.282541	-0.0346727	9.92952	8.64854	0.352184	0.851788	-0.0156225	9.92952	8.11483	0.365558	0.666993	0.0318309	9.92952	3.91159	0.530064	0.938277	-0.227625	9.56694	17.8428	0.147248	0.604361	-0.148364	9.56694	119.622	0.000158124	0.000475012	-0.051457	9.56694	5.44568	0.41744	0.695289	-0.0658745	9.56694	6.21075
ICA1	E3	-0.0567639	10.2265	3.14027	0.145844	0.597908	-0.384253	10.2265	499.202	4.73093e-99	5.22224e-97	-0.359082	10.2265	95.745	4.81726e-19	7.92707e-17	-0.272523	10.2265	8.94692	0.0130238	0.36393	-0.0290281	10.2265	10.5561	0.00797963	0.0641921	-0.130079	10.2265	2.98281	0.133717	0.700312	-0.0263665	9.89998	5.39419	0.0513888	0.393591	-1.13434	9.89998	748.97	5.01226e-147	7.42316e-144	-0.929613	9.89998	118.097	7.01492e-24	1.03891e-20	-0.186854	9.89998	0.733222
IFNLR1	E4	-0.00734702	9.93623	0.0978926	0.904937	1	-0.0455765	9.93623	29.5855	0.0342494	0.053511	-0.0300283	9.93623	3.47041	0.476938	0.67394	0.0163653	9.93623	0.193099	0.864059	1	-0.0271453	9.93623	32.6139	0.0298309	0.158599	-0.0228131	9.93623	1.91294	0.597601	0.983884	-0.111798	9.57177	3.02309	0.506199	0.897552	-0.11501	9.57177	37.1762	0.0172269	0.0351218	0.0262661	9.57177	0.795071	0.736283	0.938048	-0.329567	9.57177	11.8544
IGFBP6	E4	0.0487038	9.94469	12.2235	0.131284	0.577647	-0.0135164	9.94469	0.689483	0.801564	0.844872	0.0280929	9.94469	2.21728	0.478686	0.675443	-0.0334022	9.94469	4.65745	0.35203	0.851788	0.00414534	9.94469	1.01973	0.663372	0.894384	0.00492114	9.94469	0.0843481	0.900568	1	0.112987	9.59303	7.14988e-10	0.999979	1	0.190212	9.59303	44.1213	0.000257357	0.000748323	0.202972	9.59303	12.0583	0.0617627	0.236715	-0.0365001	9.59303	2.60105
IKBKB	E3E4	-0.0633705	9.99923	1.13889	0.468058	0.846218	-0.169918	9.99923	90.9681	3.83082e-11	1.35945e-10	-0.100777	9.99923	7.76535	0.0538531	0.148063	-0.319753	9.99923	13.2898	0.0111756	0.339509	0.0377347	9.99923	2.34461	0.299317	0.596895	-0.148859	9.99923	4.98206	0.127371	0.700312	-0.256893	9.6527	2.2433	0.281289	0.765659	-0.296747	9.6527	48.2774	2.67078e-07	1.15459e-06	-0.08	9.6527	0.797557	0.536555	0.794042	-0.582828	9.6527	7.23731
IL11RA	E4	-0.00818722	9.94124	0.0361251	0.935238	1	-0.0845072	9.94124	84.6703	6.92779e-05	0.00015367	-0.0129217	9.94124	0.416276	0.777697	0.90631	0.00990843	9.94124	0.0774322	0.904986	1	-0.00284996	9.94124	0.0969861	0.893891	0.999525	0.107376	9.94124	9.49182	0.182111	0.730424	-0.0287546	9.57993	0.0902901	0.885566	1	-0.0816163	9.57993	11.8166	0.116092	0.185689	0.117381	9.57993	6.04536	0.25923	0.544245	-0.119697	9.57993	6.81452
IL17RE	E3	-0.000989027	9.93232	0.00407024	0.983156	1	-0.0575387	9.93232	58.1746	0.00870541	0.0150265	0.0387171	9.93232	11.5095	0.233797	0.421062	0.00213456	9.93232	0.530789	0.803118	1	-0.00138138	9.93232	1.23286	0.704658	0.918931	0.0676346	9.93232	7.92707	0.331434	0.816206	0.175561	9.57017	16.5509	0.123108	0.559908	-0.0676507	9.57017	11.986	0.183533	0.271925	-0.0210667	9.57017	0.404951	0.810675	0.983233	-0.00100857	9.57017	3.02867e-10
IL1RAP	E3	0.0577078	10.0235	2.43116	0.288456	0.738467	-0.337019	10.0235	353.56	1.03073e-41	1.38354e-40	-0.137225	10.0235	14.5054	0.00596218	0.0257375	0.348645	10.0235	14.8314	0.00710754	0.268756	0.00477703	10.0235	0.213588	0.754177	0.944022	-0.239479	10.0235	17.6517	0.000969394	0.105694	0.0190373	9.67266	0.815347	0.51803	0.905406	-0.21436	9.67266	23.8096	0.000249723	0.000728389	0.258156	9.67266	10.4978	0.0153223	0.0915012	0.810002	9.67266	14.9182
IL4I1	E2	0.0157629	9.92266	50.4776	0.161727	0.602698	-0.0237623	9.92266	127.448	0.0247255	0.0396412	-0.034456	9.92266	99.5943	0.0476896	0.134915	-0.076393	9.92266	29.1972	0.280101	0.842645	0.00586196	9.92266	17.2815	0.412849	0.712821	-0.0162443	9.92266	5.21331	0.650771	1	-0.00116409	9.55907	-5.11218e-10	1	1	-0.047882	9.55907	63.5678	0.0661473	0.114656	-0.0365304	9.55907	11.4216	0.433844	0.708339	-0.274107	9.55907	54.5736
IL6	E4	-4.56802e-05	9.91975	1.39175e-11	0.999997	1	-1.45707e-05	9.91975	-2.13899e-11	1	1	1.58579e-05	9.91975	-3.73623e-13	1	1	-0.0270214	9.91975	48.0571	0.177225	0.739251	-1.38244e-05	9.91975	-7.09885e-12	1	1	-3.80302e-06	9.91975	-5.60435e-13	1	1	0.00223746	9.5552	1.99454e-09	0.999978	1	0.00190172	9.5552	-2.40175e-10	1	1	0.0019292	9.5552	-2.70538e-10	1	1	-0.0689691	9.5552	-6.49511e-08
ILF3	E3	0.0619098	10.0451	0.95076	0.456339	0.835998	-0.100071	10.0451	27.8976	4.15274e-05	9.39201e-05	-0.069942	10.0451	3.13959	0.172333	0.344986	0.0609183	10.0451	0.502711	0.597254	1	0.0793332	10.0451	9.06636	0.024618	0.14059	-0.0178585	10.0451	0.0532944	0.858938	1	0.241059	9.70524	1.00572	0.426553	0.87506	0.0934692	9.70524	5.95337	0.0314761	0.0598026	0.184856	9.70524	4.72322	0.0790877	0.276389	0.2817	9.70524	1.08867
ING3	E2	-0.0337315	9.97513	0.42925	0.693387	0.977215	-0.105396	9.97513	44.3815	5.28106e-05	0.000118205	-0.18083	9.97513	30.7415	0.000689035	0.00421969	0.0742387	9.97513	2.33612	0.365109	0.855477	0.0879438	9.97513	21.2022	0.00593685	0.0510449	-0.0328792	9.97513	0.357844	0.717613	1	-0.0238635	9.62403	0.0468356	0.883983	1	-0.0901752	9.62403	5.30004	0.130052	0.204357	-0.158575	9.62403	3.96934	0.188291	0.455713	-0.0289256	9.62403	0.123415
INIP	E2	0.0209061	10.0174	0.102938	0.82065	1	-0.244938	10.0174	184.215	7.28933e-23	4.6549e-22	-0.0912976	10.0174	5.84161	0.094046	0.222673	0.137965	10.0174	7.98932	0.0528664	0.596434	-0.0675023	10.0174	7.45121	0.0581681	0.247691	-0.142543	10.0174	5.14912	0.115054	0.678461	0.0491485	9.6798	0.0159684	0.929885	1	-0.116948	9.6798	5.91798	0.0658637	0.114264	0.312474	9.6798	12.31	0.00825106	0.0587962	0.478645	9.6798	6.65308
INO80C	E4	0.000122479	9.91977	1.35659e-10	1	1	0.000141744	9.91977	12.5209	0.832192	0.870803	0.00358955	9.91977	358.04	0.25878	0.451322	0.000348581	9.91977	-4.98747e-10	1	1	6.70786e-05	9.91977	-1.39649e-10	1	1	0.000228225	9.91977	9.97493e-11	1	1	-0.00012582	9.55518	3.24043e-09	1	1	-0.00280231	9.55518	138.23	0.375235	0.484283	-0.00038775	9.55518	1.49239e-09	1	1	-0.000461805	9.55518	1.80462e-09
INPP4A	E4	-0.138262	10.303	3.2857	0.115013	0.539165	-0.239556	10.303	201.14	1.44145e-45	2.24911e-44	-0.163398	10.303	18.8533	2.35611e-05	0.000226462	0.117664	10.303	1.11597	0.357917	0.852698	0.0397195	10.303	2.31377	0.196965	0.499574	-0.238789	10.303	8.52648	0.009509	0.294758	0.00226909	10.0399	0.029731	0.866121	1	-0.161827	10.0399	19.625	1.11205e-05	3.91898e-05	0.201168	10.0399	6.99948	0.0097685	0.0664647	0.0814217	10.0399	0.0688632
INTS5	E2	0.0279383	9.93556	2.45214	0.555217	0.902526	0.0237429	9.93556	9.41857	0.207816	0.271358	0.00318919	9.93556	0.130467	0.878806	0.965872	0.0061843	9.93556	0.361857	0.822416	1	-0.0011734	9.93556	0.110744	0.901873	1	-0.0442205	9.93556	3.90944	0.457299	0.896538	0.29956	9.57471	22.2214	0.0544455	0.406216	0.133552	9.57471	49.3187	0.0031546	0.00753847	0.00634833	9.57471	0.00834115	0.95686	1	0.0446694	9.57471	1.26222e-09
INTS9	E3	-0.264083	10.0087	18.6813	0.00249177	0.0664921	-0.192497	10.0087	112.171	4.15146e-14	1.75416e-13	-0.131083	10.0087	12.3009	0.0133541	0.049804	0.0352608	10.0087	0.181007	0.772688	1	-0.00548638	10.0087	0.0588304	0.867625	0.990232	-0.193663	10.0087	7.89719	0.0471461	0.520746	-0.362415	9.6572	4.80615	0.110245	0.535573	-0.433739	9.6572	99.3567	1.46824e-13	1.12861e-12	-0.227168	9.6572	6.87894	0.0561431	0.222519	0.152087	9.6572	0.725849
IQGAP1	E3	0.00472576	10.0864	0.00229059	0.962683	1	-0.310373	10.0864	232.133	3.08339e-39	3.74816e-38	-0.255347	10.0864	35.0844	1.00533e-06	1.38717e-05	0.147227	10.0864	2.10203	0.240036	0.811791	-0.0316617	10.0864	1.19062	0.346661	0.646606	-0.0276719	10.0864	0.218496	0.704169	1	-0.0344026	9.74094	0.0862698	0.793327	1	-0.338691	9.74094	50.45	4.60394e-10	2.6377e-09	-0.270514	9.74094	7.57185	0.0198716	0.110074	0.299018	9.74094	1.46962
IRGC	E2	0.000600014	9.91978	-2.34718e-10	1	1	0.00123329	9.91978	244.763	0.207985	0.271528	-0.00877026	9.91978	440.296	0.0910832	0.217601	0.000509767	9.91978	-2.19363e-12	1	1	-0.00424281	9.91978	367.72	0.122426	0.38601	0.000329388	9.91978	1.86458e-10	1	1	-0.00345596	9.55521	1.84483e-11	1	1	-0.0017176	9.55521	1.63954e-10	1	1	-0.0135794	9.55521	6.2898e-07	0.999827	1	-0.000959237	9.55521	-4.88255e-12
IRGQ	E2	-0.00058581	9.92012	2.73684e-09	0.999985	1	-0.00264586	9.92012	49.9911	0.464561	0.540538	-0.0084674	9.92012	71.3068	0.384099	0.585467	0.0349194	9.92012	168.855	0.179445	0.739251	0.00150232	9.92012	104.712	0.290819	0.588513	-0.000549388	9.92012	-8.00245e-11	1	1	0.0107532	9.55587	1.39934e-09	1	1	-0.00418288	9.55587	1.95022	0.821831	0.890634	0.00532725	9.55587	1.14086e-09	1	1	0.167976	9.55587	116.397
ISYNA1	E3E4	0.0481387	9.92723	13.5899	0.310568	0.746499	-0.00143539	9.92723	0.0707164	0.947631	0.963639	-0.0469392	9.92723	21.8001	0.194804	0.372304	-0.010186	9.92723	0.390171	0.858586	1	0.00278259	9.92723	2.02598	0.697939	0.915483	0.0614258	9.92723	45.4536	0.0652123	0.569186	0.101733	9.56332	23.9629	0.103236	0.525103	0.00955203	9.56332	1.01542	0.714392	0.802946	-0.0976189	9.56332	9.89083	0.282507	0.5719	-0.0654254	9.56332	6.23358
ITGA5	E2	0.109311	9.92628	124.142	0.00202075	0.0583949	-0.0369576	9.92628	76.8645	0.0142627	0.0238679	0.00549326	9.92628	0.0284707	0.982483	1	0.0621477	9.92628	4.62766	0.546283	1	0.00799534	9.92628	61.2543	0.0309135	0.162398	0.00918634	9.92628	1.56911	0.730488	1	0.0989677	9.5621	25.3694	0.110542	0.536145	-0.133444	9.5621	157.371	4.77143e-05	0.000153759	0.0419406	9.5621	2.63449	0.618758	0.857295	0.161641	9.5621	6.01238
ITGB1	E4	-0.0595942	9.98715	1.08093	0.490625	0.864486	-0.091184	9.98715	29.1171	0.000368389	0.000755482	-0.0769505	9.98715	4.78875	0.144602	0.304666	0.134822	9.98715	2.65514	0.285276	0.842645	0.0904772	9.98715	13.8738	0.0146935	0.0980226	-0.0214816	9.98715	0.117584	0.810207	1	-0.323837	9.6333	4.30257	0.152716	0.612934	-0.011343	9.6333	0.0707729	0.867913	0.927569	0.137229	9.6333	3.12427	0.220301	0.497736	0.0523921	9.6333	0.0477955
ITGB4	E3	0.292694	9.94546	62.8002	0.000255597	0.0135596	-0.0838701	9.94546	178.104	1.54448e-07	4.25757e-07	-0.000255982	9.94546	0.0756573	0.908875	0.984587	0.0273871	9.94546	13.2335	0.158273	0.739251	0.07271	9.94546	55.1811	0.00368572	0.0354643	0.0530977	9.94546	2.19117	0.557784	0.957864	-0.313046	9.57396	5.10119	0.348923	0.824076	0.0158309	9.57396	0.523138	0.826977	0.894565	0.00372	9.57396	0.0650617	0.907567	1	0.0278758	9.57396	-3.10265e-07
ITGB5	E3E4	-0.137936	9.94721	10.3876	0.119557	0.55108	-0.0261	9.94721	13.0856	0.105172	0.14846	-0.196682	9.94721	75.6977	7.53249e-05	0.000623512	0.103794	9.94721	3.40137	0.385552	0.868733	-0.00291148	9.94721	0.0965254	0.88952	0.9977	-0.203694	9.94721	24.6015	0.0255008	0.414456	-0.259403	9.5818	10.3691	0.110934	0.536145	-0.0405846	9.5818	2.69894	0.444155	0.554834	-0.481072	9.5818	100.562	5.81541e-06	0.000182923	-0.13797	9.5818	1.4878
ITGB8	E4	0.287466	10.0772	18.0264	0.00018742	0.0108146	0.0229441	10.0772	1.52234	0.217271	0.281891	-0.120887	10.0772	9.34244	0.0122789	0.0465486	-0.0658782	10.0772	1.34554	0.348038	0.850314	0.124603	10.0772	16.4594	0.000504692	0.00738221	0.142724	10.0772	4.09595	0.0663302	0.569186	0.436997	9.73261	7.10537	0.0150297	0.215218	0.220393	9.73261	21.9971	1.57486e-05	5.44628e-05	0.0639817	9.73261	0.35228	0.608008	0.84809	0.182198	9.73261	0.941384
ITPKB	E3E4	0.133653	10.0162	11.6886	0.0111432	0.167119	-0.0837672	10.0162	43.1926	5.34912e-05	0.000119638	-0.0716932	10.0162	7.10114	0.103989	0.240793	0.0071917	10.0162	0.00852659	0.95384	1	0.373179	10.0162	253.661	9.06589e-25	3.09844e-22	-0.149771	10.0162	8.03564	0.0806399	0.595155	-0.0505962	9.63887	2.67387	0.223967	0.708119	-0.0243053	9.63887	0.0873781	0.855455	0.917732	-0.146818	9.63887	4.61107	0.192616	0.461308	-0.201199	9.63887	1.18023
ITSN1	E4	-0.0397274	10.3252	0.43279	0.510626	0.877217	-0.241667	10.3252	171.691	3.66285e-39	4.43736e-38	-0.271125	10.3252	53.1196	3.18426e-13	1.69433e-11	-0.102026	10.3252	0.783893	0.407597	0.889793	-0.041332	10.3252	1.43693	0.271212	0.581351	-0.119867	10.3252	2.17373	0.144906	0.705197	-0.290026	10.0404	3.92809	0.0475109	0.379886	-0.235522	10.0404	35.8476	2.20121e-09	1.18294e-08	-0.194607	10.0404	6.46447	0.011019	0.0720469	-0.221475	10.0404	0.638473
JADE1	E2	-0.150108	10.0319	5.59897	0.0893476	0.479143	-0.00248493	10.0319	0.0160394	0.998438	1	-0.113213	10.0319	8.72184	0.02682	0.0862681	-0.115994	10.0319	2.23292	0.285374	0.842645	0.0586535	10.0319	6.92768	0.0593902	0.251006	0.0384381	10.0319	0.337637	0.676784	1	0.0389695	9.6944	0.0377888	0.887032	1	0.248746	9.6944	36.128	1.0187e-06	4.09414e-06	0.40557	9.6944	23.843	9.1844e-05	0.00178959	-0.0407914	9.6944	0.294722
JAM2	E4	-0.0139462	9.98206	0.0215212	0.935222	1	-0.247228	9.98206	238.161	3.67443e-22	2.27216e-21	-0.309763	9.98206	88.8438	3.96617e-09	9.68224e-08	0.0752592	9.98206	0.997127	0.544343	1	0.033759	9.98206	8.22788	0.0838471	0.307497	-0.111914	9.98206	3.23499	0.257903	0.78789	-0.351133	9.6289	6.4737	0.0844868	0.49425	-0.265608	9.6289	46.3546	6.09895e-06	2.22112e-05	-0.358715	9.6289	21.2824	0.0025064	0.0244076	-0.406077	9.6289	6.19903
JDP2	E3	-0.0110097	9.98345	0.0330197	0.912305	1	-0.139544	9.98345	80.9991	1.425e-08	4.24563e-08	-0.0494617	9.98345	2.69878	0.287821	0.48121	-0.0835748	9.98345	1.17771	0.492479	0.979119	0.0239634	9.98345	9.37905	0.0681418	0.273244	0.11388	9.98345	4.60738	0.196541	0.730424	0.227588	9.63739	2.50806	0.286543	0.76938	0.00669619	9.63739	0.0635286	0.819606	0.889124	0.116868	9.63739	2.32424	0.301238	0.593395	-0.2516	9.63739	1.58078
JMJD8	E2	0.087758	9.95143	8.45912	0.154158	0.601734	-0.0130921	9.95143	1.17499	0.586309	0.655174	-0.00239272	9.95143	0.00855159	0.961921	1	-0.00451022	9.95143	0.000995857	0.987991	1	0.0379466	9.95143	12.964	0.0798199	0.29803	-0.0366131	9.95143	1.02523	0.622377	0.993741	0.221067	9.59295	6.82293	0.179314	0.65558	-0.03405	9.59295	1.10159	0.575971	0.679106	0.21965	9.59295	14.5595	0.0468906	0.195942	-0.137022	9.59295	5.56256
JPH2	E3	0.0467689	9.92813	11.4908	0.311327	0.746499	-0.059265	9.92813	118.834	0.0010559	0.00205199	-0.042824	9.92813	28.1929	0.108539	0.248449	0.0554996	9.92813	35.4875	0.0780881	0.652032	0.00991234	9.92813	6.22571	0.460252	0.746514	-0.0206177	9.92813	2.65432	0.625434	0.995623	-0.00870651	9.56476	0.0645121	0.934454	1	-0.108234	9.56476	68.299	0.00921181	0.0199795	-0.039235	9.56476	3.57758	0.556777	0.809323	0.00169816	9.56476	-5.80059e-11
KALRN	E2E4	-0.325456	11.2389	23.5216	1.23889e-06	0.000198356	-0.382738	11.2389	773.506	5.89816e-169	6.166e-166	-0.350238	11.2389	111.356	5.26393e-26	1.94897e-23	-0.121554	11.2389	2.16645	0.174456	0.739251	-0.0266905	11.2389	0.799028	0.405233	0.706821	-0.119349	11.2389	2.5042	0.113549	0.674729	-0.370377	11.0383	6.03147	0.0140686	0.210816	-0.499254	11.0383	387.717	7.76131e-85	1.83912e-82	-0.365565	11.0383	33.2927	8.14481e-09	6.23921e-07	-0.0710001	11.0383	0.34903
KANK1	E3	-0.264248	10.1116	29.3399	5.18725e-07	9.03802e-05	-0.139771	10.1116	54.8014	1.32094e-08	3.94418e-08	-0.0289653	10.1116	0.442952	0.627496	0.802207	-0.0519655	10.1116	0.774302	0.507867	0.990009	0.200851	10.1116	63.5005	2.6011e-11	2.03642e-09	-0.120022	10.1116	5.38898	0.0231976	0.400417	-0.305377	9.74855	6.18296	0.0210284	0.252391	-0.0319175	9.74855	0.265007	0.658404	0.753261	0.187076	9.74855	4.17611	0.110436	0.338657	-0.0840006	9.74855	1.20968
KANK2	E4	0.0781799	9.93974	5.37823	0.326349	0.746499	-0.0410127	9.93974	17.7751	0.0916192	0.131247	-0.0811405	9.93974	16.8827	0.0850922	0.206875	0.202586	9.93974	31.4843	0.0200239	0.442312	0.0341619	9.93974	15.6161	0.102972	0.348442	-0.0773629	9.93974	10.4861	0.181146	0.730424	-0.202521	9.57734	4.93333	0.321371	0.798462	-0.102973	9.57734	25.8761	0.0268544	0.0518756	-0.269174	9.57734	32.4842	0.0123228	0.0782702	0.236874	9.57734	9.1577
KANSL1	E2E3	-0.28926	10.5011	17.0219	3.70103e-05	0.00310501	-0.219417	10.5011	141.388	1.46321e-32	1.3788e-31	-0.242463	10.5011	37.3678	9.8538e-10	2.78692e-08	-0.228363	10.5011	4.72241	0.0297766	0.497077	-0.132892	10.5011	15.8775	6.76713e-05	0.00138955	-0.0271011	10.5011	0.132704	0.715646	1	-0.581779	10.1872	10.9303	0.000949112	0.0406448	-0.253196	10.1872	41.6571	1.13403e-10	6.85508e-10	-0.0600869	10.1872	0.579938	0.446353	0.718468	-0.394458	10.1872	2.95516
KAT6A	E2E4	0.0870167	10.1523	1.36958	0.285307	0.735065	-0.157098	10.1523	58.059	2.08971e-13	8.47518e-13	-0.0723313	10.1523	2.85849	0.104564	0.241613	-0.221958	10.1523	4.1994	0.0592099	0.60441	0.0467631	10.1523	2.09826	0.184204	0.484649	0.0405047	10.1523	0.246414	0.651677	1	-0.0446447	9.8225	0.065619	0.813843	1	-0.122424	9.8225	6.90672	0.0103361	0.0221423	0.106349	9.8225	1.35268	0.265778	0.552381	-0.104801	9.8225	0.176545
KATNB1	E3	0.0291545	9.99779	0.737973	0.596647	0.923925	-0.199247	9.99779	148.627	2.04621e-15	9.18779e-15	-0.0265945	9.99779	0.57851	0.640281	0.812524	0.0450698	9.99779	2.01541	0.382444	0.867052	-0.00058122	9.99779	0.000357211	0.992136	1	0.0377552	9.99779	0.738274	0.595883	0.98325	0.376535	9.66304	4.59825	0.145172	0.602521	-0.155997	9.66304	11.3658	0.0163019	0.0333931	0.0145338	9.66304	0.00549305	0.960405	1	0.0133845	9.66304	1.45845
KCNK5	E3	-0.0428817	9.92044	280.914	0.0580916	0.394028	-0.00900656	9.92044	215.629	0.0981337	0.139545	0.00922531	9.92044	61.5022	0.375611	0.576306	0.0164561	9.92044	71.6838	0.339462	0.847647	-0.00563529	9.92044	105.121	0.247456	0.558515	0.0102906	9.92044	80.4824	0.311591	0.793368	-0.0338562	9.55608	30.8868	0.447689	0.876519	-0.0144456	9.55608	51.4491	0.328492	0.439639	-0.00978182	9.55608	37.3669	0.404339	0.684442	0.00149492	9.55608	4.20905e-10
KCNQ3	E4	-0.218825	10.6874	7.25429	0.00707552	0.125746	-0.325749	10.6874	388.993	2.90436e-86	2.03214e-84	-0.300196	10.6874	73.8092	8.84634e-18	1.18208e-15	-0.244162	10.6874	7.77356	0.00530364	0.235641	-0.0683895	10.6874	4.73507	0.0338012	0.171682	0.0582436	10.6874	0.47099	0.492535	0.915334	-0.568398	10.4462	8.31979	0.00392925	0.103147	-0.309909	10.4462	83.9779	5.90328e-20	7.27035e-19	-0.0822695	10.4462	1.36057	0.243464	0.524361	-0.24267	10.4462	1.41561
KCTD13	E4	0.0645628	10.0049	1.12207	0.462459	0.841587	-0.133044	10.0049	55.038	1.14363e-07	3.18917e-07	-0.164865	10.0049	19.8823	0.00192155	0.0100826	0.0584483	10.0049	0.776584	0.552745	1	0.0275095	10.0049	1.20307	0.453818	0.740649	0.0317773	10.0049	0.226362	0.747589	1	0.500343	9.65769	9.8266	0.0222298	0.258722	-0.0798552	9.65769	2.63965	0.247464	0.3486	-0.104725	9.65769	1.61191	0.361088	0.654806	0.0320898	9.65769	0.0501212
KIAA0930	E3	-0.220478	10.4085	10.488	0.00120231	0.0410124	-0.26138	10.4085	203.091	5.43051e-46	8.64795e-45	-0.0111223	10.4085	0.0286683	0.956015	1	0.199135	10.4085	2.73032	0.105589	0.718553	0.0407185	10.4085	1.67888	0.19508	0.498555	0.105238	10.4085	1.38065	0.250713	0.78789	-0.389683	10.1353	5.78569	0.0161738	0.224388	-0.0534018	10.1353	2.07889	0.265259	0.369537	0.274517	10.1353	7.88904	0.00498241	0.0410893	0.178796	10.1353	0.469775
KIAA1147	E3	0.023156	10.0292	0.0919249	0.820254	1	-0.170639	10.0292	79.8391	7.21253e-12	2.67378e-11	-0.10467	10.0292	7.02894	0.0468231	0.133057	-0.1238	10.0292	1.71593	0.327082	0.842645	0.0697776	10.0292	5.97502	0.0675836	0.272083	-0.285299	10.0292	15.5333	0.00327856	0.189683	0.0329171	9.68255	0.020918	0.907748	1	-0.162558	9.68255	11.3568	0.00758649	0.0167862	0.156533	9.68255	2.581	0.206375	0.47945	-0.314272	9.68255	2.58042
KIF6	E2	-0.265543	10.0422	20.6037	0.00132136	0.0442245	-0.275057	10.0422	250.376	6.5512e-30	5.61369e-29	-0.309389	10.0422	68.8894	1.57512e-09	4.24137e-08	-0.00151127	10.0422	7.7332e-05	0.993767	1	0.0187148	10.0422	0.58774	0.547183	0.808021	-0.0155054	10.0422	0.0958998	0.825988	1	-0.386432	9.68255	5.63191	0.0781959	0.478631	-0.665679	9.68255	246.204	5.58403e-32	1.43409e-30	-0.536557	9.68255	34.1205	8.26463e-06	0.000243985	-0.0565562	9.68255	1.13364e-10
KIFC3	E3	-0.0355933	10.02	0.342595	0.67611	0.96777	-0.0290947	10.02	2.6337	0.210277	0.274064	-0.0783657	10.02	4.34929	0.123271	0.272517	0.0141425	10.02	0.0466819	0.875912	1	-0.0584337	10.02	5.48389	0.0965436	0.336249	0.140906	10.02	3.90578	0.152913	0.718602	-0.00836102	9.66359	0.00485295	0.955875	1	-0.169145	9.66359	14.5798	0.00417528	0.0097687	-0.0518378	9.66359	0.374658	0.631597	0.866641	-0.0626293	9.66359	0.196241
KIN	E2	-0.218445	9.99462	17.0448	0.0073963	0.129505	-0.121762	9.99462	47.025	8.40591e-06	2.02508e-05	0.0315593	9.99462	0.851041	0.53003	0.721186	0.127647	9.99462	2.83194	0.275421	0.842645	0.0804024	9.99462	14.0118	0.0154073	0.101377	0.163403	9.99462	6.78174	0.0893861	0.615958	-0.193467	9.65135	1.46633	0.393195	0.860715	-0.143072	9.65135	12.4809	0.0116035	0.0246082	-0.104666	9.65135	1.44835	0.403503	0.683953	0.010331	9.65135	0.0227072
KLF12	E2E3	-0.22726	10.369	11.4287	0.00072372	0.0285187	-0.326035	10.369	279.528	1.40344e-62	3.92786e-61	-0.199283	10.369	32.6976	1.08279e-08	2.35248e-07	-0.139049	10.369	1.28361	0.257234	0.840825	0.0383277	10.369	2.26223	0.154395	0.437625	-0.0632774	10.369	1.03834	0.308213	0.790869	-0.64382	10.0685	12.3395	0.000445266	0.0239796	-0.0688836	10.0685	2.37709	0.15708	0.238621	0.174761	10.0685	6.39239	0.0114751	0.074375	-0.523813	10.0685	3.40883
KLK7	E4	-0.00484091	9.9278	-1.06943e-11	1	1	-0.0305493	9.9278	24.4968	0.148101	0.201196	-0.00906348	9.9278	19.6175	0.196335	0.373703	-0.00141556	9.9278	4.86592e-10	1	1	-0.004723	9.9278	6.28765	0.464627	0.74965	0.0104401	9.9278	13.0228	0.292399	0.78789	0.0537582	9.56818	4.05493e-11	1	1	0.0596726	9.56818	11.9529	0.12141	0.19303	-0.00507726	9.56818	7.72171	0.238847	0.520322	0.0191244	9.56818	0
KPNA1	E2	-0.0242901	10.1161	0.104598	0.795299	1	-0.249423	10.1161	170.244	9.44725e-31	8.32407e-30	-0.135769	10.1161	10.3454	0.00489123	0.0218959	-0.021649	10.1161	0.0423993	0.859033	1	0.00827101	10.1161	0.0743694	0.817687	0.974905	0.0866784	10.1161	1.12987	0.375096	0.861885	-0.256109	9.80045	2.58264	0.167752	0.638207	-0.209247	9.80045	21.7946	3.18429e-05	0.00010564	0.16051	9.80045	2.74002	0.145667	0.393374	-0.305628	9.80045	1.70664
KRT17	E4	-0.0148932	9.95049	0.0503704	0.91641	1	-0.121612	9.95049	93.259	2.63215e-06	6.60621e-06	-0.0898344	9.95049	48.9609	0.000912578	0.00537209	-0.0323579	9.95049	3.88596	0.354774	0.852262	-0.0166456	9.95049	6.97942	0.215161	0.51468	0.0276556	9.95049	2.75425	0.435584	0.890457	0.30797	9.60517	3.10078	0.321261	0.798302	0.175361	9.60517	45.3724	6.66707e-05	0.000210831	0.116479	9.60517	0.162709	0.819607	0.988199	0.0389927	9.60517	3.41746
KTN1	E2	0.0111344	10.4121	0.0246296	0.875294	1	-0.100432	10.4121	28.0265	1.20163e-07	3.3462e-07	0.0090421	10.4121	0.0668733	0.795946	0.917028	0.0433045	10.4121	0.132303	0.716057	1	0.344121	10.4121	103.402	2.88715e-24	9.50195e-22	0.0201485	10.4121	0.0599085	0.806642	1	-0.033914	10.1683	0.0117244	0.913776	1	-0.0183707	10.1683	0.279169	0.611827	0.710447	0.165624	10.1683	4.7155	0.0299134	0.14601	-0.0592995	10.1683	0.0336349
LAMC1	E4	-0.0373646	10.0439	0.313369	0.690884	0.975692	-0.196335	10.0439	121.93	3.1241e-17	1.54613e-16	-0.261239	10.0439	47.0428	4.96449e-07	7.33407e-06	0.00855592	10.0439	0.0395254	0.889516	1	-0.00996042	10.0439	0.580975	0.59329	0.843786	-0.107688	10.0439	2.32413	0.269798	0.78789	-0.396028	9.70757	5.31455	0.0737323	0.463848	-0.264412	9.70757	38.4645	8.00899e-07	3.2519e-06	-0.118242	9.70757	1.79047	0.294423	0.584962	-0.0760057	9.70757	1.32311
LANCL2	E3E4	-0.227135	10.0862	10.6006	0.00917229	0.147052	-0.211139	10.0862	119.741	2.78128e-20	1.58072e-19	-0.0880235	10.0862	4.47788	0.0811943	0.199804	0.0564084	10.0862	0.785925	0.48697	0.974644	0.0414678	10.0862	1.83884	0.27523	0.584885	0.0403829	10.0862	0.252041	0.68226	1	-0.264777	9.75597	2.79157	0.16201	0.627423	-0.193726	9.75597	17.9037	0.000210376	0.000620651	0.060742	9.75597	0.433199	0.58442	0.830452	0.146986	9.75597	0.558093
LAPTM4B	E2	-0.0375756	9.99486	0.493984	0.648487	0.95397	-0.0440018	9.99486	6.83458	0.0826498	0.119458	-0.0760984	9.99486	5.41535	0.137623	0.294289	-0.130626	9.99486	12.1968	0.0260371	0.469082	0.0378959	9.99486	4.28583	0.185399	0.486405	0.0533944	9.99486	0.818535	0.562351	0.961136	-0.0194434	9.64812	1.30655	0.444062	0.875475	0.225222	9.64812	33.9142	2.67237e-05	8.95594e-05	0.336038	9.64812	23.4581	0.000417932	0.00618442	0.0500893	9.64812	1.40833
LARP7	E4	0.299217	10.0573	18.9396	0.000304356	0.0152366	-0.168664	10.0573	68.4241	1.26251e-11	4.61198e-11	-0.11754	10.0573	7.60152	0.0268777	0.0863936	0.273154	10.0573	6.99066	0.0330543	0.518988	0.318754	10.0573	108.22	4.0593e-17	7.07273e-15	0.104154	10.0573	1.75248	0.286744	0.78789	0.315766	9.73874	3.53424	0.0969178	0.513904	-0.0164858	9.73874	0.0780093	0.831188	0.897986	0.224341	9.73874	5.75908	0.0339215	0.159022	0.639382	9.73874	6.57757
LCAT	E3	0.128662	9.92524	53.1294	0.0868571	0.474232	0.0115175	9.92524	49.0837	0.121441	0.16889	-0.0049435	9.92524	3.78737	0.669133	0.834983	-0.0438518	9.92524	16.7116	0.367437	0.856594	-0.0215922	9.92524	41.3968	0.155299	0.438891	-0.00468568	9.92524	0.0986253	0.943895	1	0.332693	9.55938	10.8509	0.491265	0.889813	0.00159517	9.55938	8.90027	0.536128	0.643137	-0.0184233	9.55938	18.665	0.364717	0.655587	-0.00797007	9.55938	-1.94319e-09
LDLR	E3	-0.0548878	9.95988	1.42797	0.524277	0.884481	-0.0613035	9.95988	17.1067	0.0250062	0.0400551	0.000380452	9.95988	0.0226009	0.900707	0.979629	0.01996	9.95988	0.0707801	0.885293	1	0.0872223	9.95988	22.1711	0.00940117	0.0718613	-0.171031	9.95988	16.9575	0.0249886	0.413499	-0.0759418	9.59856	0.37399	0.735426	1	-0.0073936	9.59856	0.03293	0.954844	0.996271	0.0657536	9.59856	1.42883	0.486011	0.753897	-0.0923256	9.59856	2.42864
LDLRAD3	E2	0.0562237	10.0656	0.678329	0.529037	0.887822	-0.251429	10.0656	156.658	3.39468e-25	2.37802e-24	-0.124135	10.0656	14.9145	0.00247622	0.0124569	0.122668	10.0656	2.70039	0.205103	0.756071	0.429516	10.0656	203.097	1.53537e-30	7.79616e-28	-0.0879332	10.0656	2.29885	0.129476	0.700312	0.137139	9.70671	0.742278	0.471905	0.882921	-0.478925	9.70671	104.234	5.60583e-17	5.55024e-16	-0.178933	9.70671	4.5317	0.0914036	0.302179	-0.0501726	9.70671	0.102615
LEPROTL1	E3	-0.0300153	10.0102	0.208791	0.756481	1	-0.175199	10.0102	96.8622	4.88176e-12	1.82765e-11	-0.177932	10.0102	23.6101	0.000676113	0.00415162	0.0349892	10.0102	0.198109	0.764219	1	0.119439	10.0102	31.9846	0.000135112	0.00247803	-0.038958	10.0102	0.335518	0.687985	1	-0.1919	9.67461	5.81173	0.083463	0.491064	0.0948744	9.67461	7.34122	0.0344946	0.0648648	-0.0932662	9.67461	1.08369	0.450395	0.722094	0.0446833	9.67461	0.00459721
LETMD1	E3	-0.14361	10.0111	5.80173	0.0999628	0.50142	-0.258411	10.0111	213.683	4.52297e-25	3.15596e-24	-0.0419943	10.0111	1.16301	0.501367	0.696029	-0.145811	10.0111	3.62304	0.196853	0.746139	-0.0399904	10.0111	3.75971	0.192086	0.495154	-0.0910645	10.0111	1.94139	0.339192	0.82498	-0.51797	9.66571	11.8472	0.0147481	0.214136	-0.265752	9.66571	36.2085	1.10925e-05	3.9122e-05	-0.102563	9.66571	1.45082	0.37852	0.665782	0.039324	9.66571	0.00106103
LGALS13	E2	-0.00010933	9.91984	1.29848e-10	1	1	-0.00493237	9.91984	787.437	0.0339846	0.0531714	0.00298522	9.91984	162.225	0.336747	0.532585	-0.000480303	9.91984	1.60313e-09	1	1	-7.52744e-05	9.91984	5.6434e-10	1	1	-0.000315183	9.91984	2.83169e-09	1	1	-0.000414483	9.55531	1.3903e-10	0.999991	1	-0.00924632	9.55531	159.512	0.124546	0.196873	-0.001279	9.55531	-2.50159e-11	1	1	-0.00152339	9.55531	9.14041e-11
LGALS8	E4	0.0387235	10.0331	1.13596	0.4587	0.838167	-0.0844783	10.0331	22.7742	0.000314178	0.000649253	-0.14599	10.0331	15.6237	0.00287008	0.0140903	-0.0999562	10.0331	1.21981	0.435732	0.922983	-0.0104774	10.0331	0.0861354	0.838244	0.982411	-0.0287341	10.0331	0.160797	0.777135	1	-0.106523	9.70812	6.95732	0.0475949	0.38016	0.0850238	9.70812	4.7603	0.0822905	0.138282	0.0307812	9.70812	0.150203	0.779432	0.965099	-0.702232	9.70812	11.6225
LILRA5	E3	0.00105319	9.92034	-5.69199e-10	1	1	-0.000219492	9.92034	0.0644164	0.977336	0.986887	0.00164082	9.92034	3.88263	0.821662	0.933013	-0.0159505	9.92034	5.13246	0.797513	1	-0.00446911	9.92034	117.744	0.219552	0.52103	0.0124995	9.92034	93.1942	0.274619	0.78789	0.00793438	9.55563	5.06112e-10	1	1	0.0113853	9.55563	68.9056	0.271434	0.376399	-0.00743739	9.55563	28.1512	0.482174	0.750739	0.00442378	9.55563	1.59527e-10
LMO4	E2	0.0438981	10.5576	0.532743	0.503642	0.872731	-0.147525	10.5576	95.3898	1.63718e-22	1.02559e-21	-0.183426	10.5576	15.542	0.000234984	0.00166248	0.0513914	10.5576	0.378752	0.591005	1	0.0950877	10.5576	9.85986	0.00534947	0.0474642	0.110904	10.5576	1.84646	0.214862	0.740169	0.343256	10.3555	0.82345	0.422799	0.873275	0.298095	10.3555	103.281	3.72885e-24	5.99178e-23	0.247748	10.3555	5.14532	0.0347168	0.161557	0.41852	10.3555	1.63342
LMOD1	E4	-0.131968	9.92857	28.1798	0.103256	0.508455	-0.0240368	9.92857	33.8793	0.0784877	0.114026	-0.0117334	9.92857	1.3965	0.721557	0.871162	0.0128031	9.92857	0.776333	0.79426	1	-0.0144805	9.92857	11.3833	0.312038	0.609869	-0.00031186	9.92857	0.0285043	0.958076	1	-0.207656	9.56357	10.7535	0.319914	0.79763	-0.0334765	9.56357	20.7313	0.165882	0.25009	0.0173771	9.56357	0.833105	0.787365	0.969378	0.0229716	9.56357	5.06445e-09
LNPEP	E4	-0.111643	10.149	2.28977	0.182755	0.610701	-0.162343	10.149	69.9262	1.85601e-15	8.35909e-15	-0.22049	10.149	26.5003	4.20109e-06	4.96091e-05	-0.0318832	10.149	0.0602989	0.833528	1	0.0867147	10.149	7.00432	0.0206682	0.124556	-0.20257	10.149	5.66854	0.035671	0.468357	0.182488	9.83775	0.680121	0.446258	0.876519	0.0973591	9.83775	5.75591	0.0182184	0.036885	0.200458	9.83775	4.67349	0.0377327	0.170676	0.284798	9.83775	0.885955
LRFN1	E3	0.0411476	9.97845	2.04571	0.414098	0.802507	0.00128078	9.97845	0.0451309	0.888115	0.915839	0.0374939	9.97845	1.74385	0.429226	0.629494	-0.0260079	9.97845	0.121181	0.843247	1	0.0172217	9.97845	5.93238	0.166642	0.45711	0.258843	9.97845	41.9177	0.000219216	0.0463414	-0.132436	9.62729	2.58722	0.324709	0.801156	0.0976874	9.62729	7.23965	0.0925901	0.152787	0.1177	9.62729	2.67727	0.313782	0.608695	0.041893	9.62729	0.0452175
LRIG3	E4	0.0641448	9.93689	4.81851	0.375742	0.772059	-0.0358272	9.93689	24.3262	0.0514687	0.0778934	-0.0812121	9.93689	39.618	0.0123076	0.0466166	-0.0302938	9.93689	12.0805	0.173022	0.739251	0.0305918	9.93689	5.70408	0.337732	0.637215	0.0262757	9.93689	2.67485	0.519938	0.930922	0.0924017	9.57214	1.69507	0.593131	0.960489	0.0691447	9.57214	17.5344	0.0858311	0.143283	-0.0687973	9.57214	4.58757	0.388908	0.673353	0.0197319	9.57214	6.01797e-10
LRP8	E4	-0.0886945	9.98692	2.81585	0.297115	0.745946	-0.180398	9.98692	132.862	5.34687e-13	2.11825e-12	-0.276375	9.98692	82.692	1.25614e-09	3.46648e-08	-0.0974496	9.98692	1.92788	0.397293	0.877104	-0.0372832	9.98692	23.9471	0.00352164	0.0342514	-0.029024	9.98692	0.218462	0.768831	1	0.265651	9.63948	3.14833	0.243968	0.730471	-0.340508	9.63948	77.1647	6.14411e-09	3.15901e-08	-0.347863	9.63948	17.7204	0.00328746	0.0299614	-0.00320388	9.63948	0.0992326
LRRC1	E3	-0.319713	10.0099	28.2498	0.0001993	0.0113525	-0.0855218	10.0099	25.5665	0.000549328	0.00110387	-0.221068	10.0099	37.6679	2.39204e-05	0.000229543	0.0717838	10.0099	1.79539	0.367311	0.856594	0.12392	10.0099	24.2577	0.000397746	0.00604166	-0.0758259	10.0099	1.29958	0.426662	0.888038	-0.42155	9.6473	6.88463	0.0591237	0.418958	-0.0898136	9.6473	7.36583	0.0551498	0.0977386	-0.058315	9.6473	0.619425	0.567649	0.817164	0.0912834	9.6473	0.106354
LRRC20	E4	0.046611	9.97876	1.04482	0.548259	0.900191	-0.20958	9.97876	177.816	7.32705e-16	3.38601e-15	-0.0727017	9.97876	5.53879	0.167803	0.338386	0.0180375	9.97876	0.0421	0.905134	1	0.000855234	9.97876	0.0436506	0.905144	1	-0.10052	9.97876	3.64993	0.262566	0.78789	-0.0676492	9.6263	1.85398	0.401711	0.864863	-0.212896	9.6263	27.198	0.000959354	0.002527	-0.0752366	9.6263	1.15555	0.501022	0.765686	0.148267	9.6263	0.750198
LRRC8E	E2	-0.00503675	9.9204	8.8198	0.720546	0.988712	-0.011916	9.9204	395.643	0.0164771	0.0272375	-0.000901991	9.9204	0.152554	0.96031	1	-0.0020144	9.9204	2.26882e-09	0.999977	1	0.00143655	9.9204	77.3157	0.292556	0.590456	-0.00524973	9.9204	7.00819	0.750663	1	-0.00103038	9.55598	-7.63795e-11	1	1	0.00912645	9.55598	21.2364	0.508034	0.616847	0.0123574	9.55598	12.9056	0.606333	0.846735	-0.000603139	9.55598	-1.94421e-11
LRRFIP1	E4	0.0305251	10.3214	0.156572	0.72976	0.993422	-0.348915	10.3214	409.608	1.0242e-90	8.38805e-89	-0.284555	10.3214	68.9423	1.03873e-16	1.07955e-14	0.132056	10.3214	1.6007	0.258924	0.842645	-0.0128436	10.3214	0.427661	0.573297	0.830013	-0.0143627	10.3214	0.0400237	0.841435	1	0.106223	10.0358	0.191197	0.711579	1	-0.437978	10.0358	139.781	4.67126e-32	1.20841e-30	-0.329327	10.0358	21.6132	3.37478e-06	0.000114678	0.468849	10.0358	3.98849
LRRFIP2	E3	0.0452942	10.2885	0.302888	0.58208	0.915857	-0.293939	10.2885	217.039	5.06076e-49	8.985e-48	-0.299857	10.2885	51.2728	8.14772e-13	4.11368e-11	0.044492	10.2885	0.109736	0.750106	1	-0.0350713	10.2885	1.10591	0.296721	0.594515	-0.0604069	10.2885	0.487303	0.485136	0.910376	0.257001	9.97776	1.50848	0.219398	0.704624	-0.515682	9.97776	136.42	2.48504e-31	6.0916e-30	-0.257757	9.97776	8.30997	0.00395054	0.0344188	0.442308	9.97776	2.21993
LSM14A	E4	0.0120156	10.2011	0.0314538	0.859232	1	-0.261881	10.2011	174.967	7.09569e-40	8.83705e-39	-0.166358	10.2011	14.8283	0.000218856	0.00156708	-0.149157	10.2011	1.56916	0.248077	0.825158	0.0750089	10.2011	5.12209	0.0347833	0.175019	0.102969	10.2011	1.60059	0.232849	0.766487	0.244128	9.89201	1.46773	0.250348	0.736184	-0.093501	9.89201	4.21022	0.0429861	0.0788796	0.270582	9.89201	8.93376	0.0033232	0.0302097	-0.167281	9.89201	0.498695
LSM2	E4	0.0337649	9.96986	0.7882	0.606839	0.930016	-0.136347	9.96986	78.4667	1.90435e-07	5.22125e-07	-0.0901349	9.96986	8.55642	0.0954714	0.225268	-0.0669382	9.96986	2.04388	0.409089	0.8916	0.122714	9.96986	37.4864	0.00035379	0.00549131	-0.0368325	9.96986	0.446647	0.693512	1	0.232574	9.62662	0.63506	0.606189	0.969597	0.260756	9.62662	52.628	7.26448e-07	2.96519e-06	0.173365	9.62662	4.79704	0.148083	0.397083	0.131644	9.62662	0.137402
LST1	E4	-0.0332977	9.92412	83.0608	0.179324	0.605891	-0.00107484	9.92412	58.583	0.265256	0.335525	-0.00956989	9.92412	121.065	0.107087	0.246013	-0.19607	9.92412	23.6174	0.402886	0.884507	-0.00190083	9.92412	28.7048	0.431587	0.724926	-0.011434	9.92412	5.25581	0.739591	1	-0.0234416	9.55806	17.785	0.473962	0.883459	-0.00926597	9.55806	160.218	0.0308866	0.0588021	-0.000216829	9.55806	20.7261	0.438879	0.711892	-0.504382	9.55806	25.0191
LTBP3	E4	0.0406618	10.0788	0.360715	0.616506	0.935344	-0.0663855	10.0788	11.6976	0.00587292	0.0103761	-0.181406	10.0788	18.546	0.000389811	0.00256868	0.112934	10.0788	2.11823	0.251924	0.831679	-0.00312124	10.0788	0.00469731	0.961302	1	0.0703023	10.0788	0.829282	0.451535	0.894494	-0.250201	9.73357	1.89301	0.241746	0.728336	0.0476424	9.73357	1.16835	0.313982	0.423568	-0.0611665	9.73357	0.408277	0.581606	0.82878	-0.200243	9.73357	0.880954
LTBR	E3	0.0627592	9.9297	10.121	0.30883	0.746499	-0.0426282	9.9297	88.6257	0.00346552	0.00632008	-0.0349381	9.9297	21.0643	0.155541	0.321202	0.162971	9.9297	23.1589	0.114174	0.736622	0.022809	9.9297	14.0184	0.244471	0.55453	-0.0387274	9.9297	0.716798	0.776304	1	0.443688	9.56445	62.6575	0.0149372	0.214475	-0.0976729	9.56445	113.745	0.00109175	0.00284495	0.00263621	9.56445	0.00115907	0.998214	1	-0.191246	9.56445	4.66499
LUC7L3	E3	-0.123329	10.7483	4.29977	0.0381225	0.325728	-0.280885	10.7483	256.643	1.28445e-57	3.05586e-56	-0.152057	10.7483	18.3792	1.81362e-05	0.000180166	0.243167	10.7483	4.56721	0.0325945	0.515823	0.0659505	10.7483	5.05909	0.0245014	0.140185	0.0503852	10.7483	0.584704	0.444478	0.89298	-1.028	10.4634	49.8391	1.77069e-12	2.09792e-09	-0.502143	10.4634	211.519	1.78689e-47	9.86231e-46	-0.309418	10.4634	20.2583	6.83639e-06	0.000208042	-0.0625431	10.4634	0.0572168
LY6G5C	E4	-0.0246727	9.92669	6.71304	0.476124	0.853594	-0.0161807	9.92669	19.1318	0.214685	0.279086	0.00589735	9.92669	0.243049	0.898671	0.97819	-0.00995228	9.92669	1.4115e-09	0.99997	1	0.00787646	9.92669	30.5973	0.129459	0.39597	-0.0323312	9.92669	5.97471	0.499241	0.917509	0.148801	9.56454	31.472	0.0709817	0.458056	-0.0351177	9.56454	2.62601	0.595339	0.697178	0.0558658	9.56454	5.78375	0.437742	0.711045	0.0312553	9.56454	4.37858e-10
LYSMD2	E3	0.0964248	10.0343	3.41982	0.199706	0.629173	-0.0787274	10.0343	19.2566	0.00282505	0.00520979	-0.108241	10.0343	8.54719	0.0319478	0.0986235	0.0108698	10.0343	0.0526094	0.874315	1	0.0206977	10.0343	2.932	0.239338	0.548417	0.16603	10.0343	6.84305	0.0689824	0.569186	0.3269	9.72879	1.02711	0.436495	0.875475	0.368928	9.72879	92.7446	1.00256e-16	9.79523e-16	0.214268	9.72879	6.0893	0.0545942	0.217984	0.117599	9.72879	0.0162482
LYST	E2	-0.0987313	10.2956	1.63458	0.235719	0.676331	-0.25854	10.2956	200.071	2.46057e-45	3.80585e-44	-0.0971664	10.2956	5.75796	0.0172826	0.0613189	0.0817881	10.2956	0.620506	0.430863	0.916932	-0.0100584	10.2956	0.0945038	0.784793	0.959923	-0.0868063	10.2956	1.11582	0.306614	0.789752	-0.107373	9.99647	0.399755	0.54263	0.922594	-0.251091	9.99647	39.029	4.33176e-10	2.49059e-09	0.106325	9.99647	1.58423	0.209164	0.483642	0.102223	9.99647	0.176445
MACF1	E3	-0.12495	10.7041	5.98452	0.0144353	0.194647	-0.261384	10.7041	213.541	2.91165e-48	5.04837e-47	-0.229253	10.7041	39.7204	2.95468e-10	9.39366e-09	-0.118041	10.7041	1.13628	0.286444	0.842645	-0.0246842	10.7041	0.606454	0.43613	0.727288	-0.0956586	10.7041	2.2113	0.13701	0.700748	-0.0652037	10.4174	0.303408	0.581765	0.953354	-0.357044	10.4174	100.132	1.80166e-23	2.77943e-22	-0.068945	10.4174	0.974988	0.323461	0.618178	-0.0896055	10.4174	0.132348
MAF	E4	0.0931093	9.97085	4.98268	0.272669	0.722392	0.0581165	9.97085	109.077	4.6736e-07	1.24471e-06	0.00449857	9.97085	1.32035	0.515814	0.708409	0.0634534	9.97085	0.207384	0.827778	1	-0.0162992	9.97085	1.33184	0.580034	0.834483	0.0279407	9.97085	0.164478	0.84549	1	0.406036	9.61785	14.7123	0.054557	0.406483	0.2137	9.61785	85.2018	3.37086e-06	1.26707e-05	0.272668	9.61785	38.8368	0.000725387	0.00951408	0.438914	9.61785	10.9193
MAFF	E2	0.0770636	9.92557	32.8285	0.135417	0.585699	-0.0286029	9.92557	88.7466	0.0142216	0.023808	-0.0064715	9.92557	0.610532	0.844532	0.946554	0.0433198	9.92557	13.4902	0.342962	0.849139	0.0448958	9.92557	90.7261	0.0135072	0.0923189	-0.125618	9.92557	112.123	0.00602108	0.240464	0.104449	9.56252	5.41274	0.505256	0.89738	-0.072106	9.56252	85.9209	0.0086858	0.018945	-0.00365801	9.56252	0.0753816	0.926084	1	-0.0688467	9.56252	8.92013
MAGI1	E3	-0.337149	10.7943	21.307	3.9227e-06	0.000501542	-0.278794	10.7943	251.045	2.10335e-56	4.74376e-55	-0.217562	10.7943	42.2995	7.90418e-11	2.80946e-09	0.00197609	10.7943	8.35404e-05	0.992707	1	0.0028621	10.7943	0.00753556	0.930825	1	-0.0890798	10.7943	1.41291	0.234579	0.768767	-0.978827	10.5496	28.8942	7.80238e-08	2.47614e-05	-0.188422	10.5496	28.9034	7.76567e-08	3.54603e-07	0.0661924	10.5496	1.19324	0.274701	0.563285	0.379785	10.5496	1.54225
MAML2	E3	-0.0688921	10.2236	2.17461	0.140311	0.591745	-0.166113	10.2236	50.141	1.51618e-11	5.51258e-11	-0.245742	10.2236	25.2603	3.02138e-06	3.67945e-05	0.163865	10.2236	4.11649	0.0424722	0.563599	0.343201	10.2236	109.838	1.7362e-23	5.31997e-21	0.121885	10.2236	4.84653	0.0277063	0.42995	-0.196738	9.86197	2.92765	0.0871028	0.498632	-0.408145	9.86197	58.378	1.05635e-13	8.21954e-13	-0.16168	9.86197	2.36543	0.133313	0.376011	0.19215	9.86197	1.43832
MAP1B	E3	0.0314519	11.263	0.167162	0.682648	0.971416	-0.173848	11.263	122.601	1.83911e-28	1.4703e-27	-0.0117858	11.263	0.105378	0.74547	0.886424	-0.214849	11.263	2.77211	0.0959258	0.69009	0.0849236	11.263	5.66892	0.0172718	0.109901	-0.0975713	11.263	1.09585	0.295184	0.78789	-0.013165	11.1989	0.13902	0.709265	1	0.0747689	11.1989	7.15212	0.00749873	0.0166065	0.309861	11.1989	27.1696	1.89786e-07	9.7482e-06	-0.375336	11.1989	1.71511
MAP1S	E4	0.132209	10.0193	12.6532	0.0189791	0.22258	0.0823338	10.0193	22.2271	0.000257408	0.000536428	0.0570986	10.0193	3.04981	0.26084	0.453353	0.109859	10.0193	3.30488	0.231474	0.794467	0.0235561	10.0193	2.46759	0.299234	0.596895	0.0817236	10.0193	3.28092	0.233447	0.766879	0.459282	9.68211	9.31239	0.0311147	0.30789	0.423167	9.68211	118.486	1.09496e-16	1.06453e-15	0.285783	9.68211	10.7317	0.0191935	0.107199	0.147803	9.68211	0.767689
MAP3K13	E3	-0.142553	10.3156	3.42797	0.0748513	0.445498	-0.3176	10.3156	306.587	1.92998e-68	6.73862e-67	-0.209835	10.3156	30.0995	4.12409e-08	7.89799e-07	0.0525797	10.3156	0.22159	0.68322	1	0.00374391	10.3156	0.0209494	0.900948	1	-0.112892	10.3156	1.98919	0.158431	0.725857	-0.38012	10.0475	4.426	0.0422579	0.360714	-0.214871	10.0475	29.3242	6.25324e-08	2.87685e-07	-0.026499	10.0475	0.0808741	0.776122	0.963282	0.0555548	10.0475	0.00465598
MAP4K4	E3E4	-0.235201	10.5203	13.9154	0.000191438	0.010975	-0.298578	10.5203	234.837	6.91708e-53	1.38747e-51	-0.217265	10.5203	23.1798	1.47969e-06	1.95517e-05	0.101508	10.5203	0.945855	0.330781	0.843052	0.0634094	10.5203	6.09265	0.0135778	0.0925705	0.0258671	10.5203	0.112703	0.737088	1	-0.304778	10.1986	3.57691	0.0586145	0.417514	-0.151666	10.1986	13.8915	0.000194659	0.000577061	0.132203	10.1986	1.78561	0.18149	0.44717	-0.0321169	10.1986	0.0318591
MAPK8	E4	-0.160627	10.3021	4.42757	0.0397972	0.333464	-0.217921	10.3021	135.859	2.34977e-31	2.11765e-30	-0.204017	10.3021	25.5161	4.40223e-07	6.61898e-06	0.108094	10.3021	0.875507	0.390373	0.870916	-0.022636	10.3021	0.356513	0.572748	0.829507	-0.304196	10.3021	16.5279	4.80125e-05	0.0198437	-0.315969	10.0152	2.95773	0.097854	0.514525	-0.0233558	10.0152	0.226247	0.752167	0.835104	0.0225343	10.0152	0.0777931	0.780316	0.965689	-0.241896	10.0152	1.00306
MAPT	E2E3	-0.135628	10.7408	3.2809	0.0700964	0.433246	-0.31363	10.7408	339.401	1.52646e-75	6.86793e-74	-0.169602	10.7408	20.9067	4.8335e-06	5.60711e-05	0.245606	10.7408	5.66765	0.0177291	0.423546	0.113928	10.7408	13.9331	0.000189639	0.00325629	-0.0430865	10.7408	0.347635	0.555458	0.955902	-0.429485	10.5304	5.57902	0.0181945	0.236205	-0.441938	10.5304	181.274	5.4434e-41	2.21881e-39	-0.179291	10.5304	6.50753	0.0107555	0.0709029	0.364338	10.5304	3.59255
MARCH6	E3	0.257909	10.3927	12.527	0.000401475	0.0182015	-0.250121	10.3927	191.145	2.14583e-43	3.06311e-42	-0.141257	10.3927	13.5778	0.000229112	0.00162649	0.0571847	10.3927	0.27929	0.626676	1	0.130739	10.3927	14.045	0.000243233	0.00399514	-0.133479	10.3927	2.46534	0.116389	0.682713	0.0522396	10.1413	0.0251214	0.874068	1	0.00799767	10.1413	0.119718	0.729347	0.815679	0.159973	10.1413	4.45567	0.0348084	0.161814	0.544192	10.1413	3.30792
MARK1	E4	-0.169279	10.2523	4.86522	0.0526246	0.377571	-0.27417	10.2523	241.213	2.85886e-54	5.99854e-53	-0.253882	10.2523	44.1395	1.7665e-10	5.92343e-09	-0.0204414	10.2523	0.341148	0.619682	1	-0.0163114	10.2523	0.321851	0.627357	0.869615	-0.140339	10.2523	3.80712	0.0612942	0.569186	-0.417061	9.96609	5.33164	0.0402797	0.351597	-0.21526	9.96609	30.2178	3.94866e-08	1.85649e-07	-0.102449	9.96609	1.57612	0.230028	0.510262	0.141612	9.96609	0.475629
MARVELD3	E3	-0.0458541	9.92529	12.3685	0.367221	0.766026	-0.0393478	9.92529	145.645	0.00183919	0.00347244	0.0173289	9.92529	7.97977	0.468309	0.666037	0.0168328	9.92529	15.6133	0.317143	0.842645	-0.00666841	9.92529	4.2157	0.60215	0.850263	-0.0194249	9.92529	2.38382	0.691796	1	0.0585528	9.56177	1.60111	0.717857	1	-0.0759417	9.56177	88.9927	0.0104092	0.0222855	-0.0625278	9.56177	27.9784	0.152858	0.404316	0.169335	9.56177	34.1469
MAVS	E2	0.023196	10.0019	0.15381	0.783349	1	-0.187855	10.0019	110.443	1.23302e-13	5.07018e-13	-0.198162	10.0019	29.9946	0.000160188	0.00120222	-0.162327	10.0019	3.90833	0.176588	0.739251	0.0268774	10.0019	1.08193	0.478002	0.759243	0.14335	10.0019	4.5521	0.144382	0.704778	-0.00558034	9.64707	0.000249262	0.996812	1	-0.363017	9.64707	72.7943	8.48701e-10	4.75059e-09	-0.405655	9.64707	23.0356	0.000668277	0.0089298	-0.31756	9.64707	2.51611
MBOAT1	E3	0.0583572	9.92719	22.7334	0.170516	0.604132	-0.0379628	9.92719	70.035	0.0168389	0.0277942	0.0406119	9.92719	63.7382	0.0223559	0.0750489	-0.0774274	9.92719	16.7294	0.239589	0.810887	0.00481798	9.92719	1.03054	0.772683	0.954282	0.0042183	9.92719	0.064602	0.947712	1	-0.0089516	9.56215	0.00236098	0.985647	1	-0.0869985	9.56215	94.8308	0.00630696	0.0141685	0.0245542	9.56215	17.604	0.244198	0.525131	0.0697146	9.56215	2.98179
MBP	E2	0.00180966	10.6938	0.010831	0.934121	1	-0.147085	10.6938	50.5874	1.15484e-12	4.4802e-12	-0.130962	10.6938	8.95345	0.00279014	0.0137553	-0.049802	10.6938	0.208895	0.647637	1	0.00258806	10.6938	0.0151656	0.976942	1	-0.167507	10.6938	5.11051	0.0237856	0.404061	-0.27052	10.3456	3.17495	0.0858099	0.497071	-0.032164	10.3456	0.603841	0.437133	0.548097	-0.121909	10.3456	1.79728	0.18007	0.445447	-0.121503	10.3456	0.271485
MCL1	E2E3	0.0577982	9.95888	1.40177	0.522005	0.883717	-0.045699	9.95888	11.453	0.0736852	0.107615	-0.024367	9.95888	0.969344	0.59129	0.773587	-0.221113	9.95888	11.8638	0.0650409	0.621122	0.0291333	9.95888	4.67875	0.253307	0.564132	-0.0660623	9.95888	2.44502	0.407504	0.884719	-0.0243888	9.60619	0.0837985	0.871437	1	0.31118	9.60619	91.6487	1.36478e-08	6.74121e-08	0.20059	9.60619	9.94619	0.0650461	0.245123	-0.396538	9.60619	6.06605
MCM3	E4	-0.00173638	9.93616	0.00225899	0.985653	1	-0.0510964	9.93616	37.2057	0.0164563	0.0272057	-0.0624777	9.93616	15.889	0.12138	0.269411	0.0286965	9.93616	0.874992	0.717361	1	0.0217448	9.93616	7.84865	0.27847	0.586395	0.0523447	9.93616	5.58474	0.360173	0.846688	0.0798609	9.57877	0.130225	0.875047	1	0.0830388	9.57877	16.5714	0.0606844	0.106276	-0.0356413	9.57877	1.08818	0.64137	0.873442	-0.0708619	9.57877	0.911247
MCM7	E3	0.0422846	9.93871	2.85006	0.485818	0.861813	-0.00509385	9.93871	0.315836	0.813428	0.855071	-0.0724565	9.93871	19.619	0.0677069	0.175421	-0.00245611	9.93871	0.000133768	0.997808	1	0.0537786	9.93871	17.3335	0.0837897	0.30737	0.0976271	9.93871	7.60318	0.250508	0.78789	0.110077	9.57589	2.65093	0.485677	0.887917	0.13118	9.57589	42.4395	0.00477632	0.011036	0.077777	9.57589	4.67407	0.352134	0.647372	-0.203404	9.57589	11.971
MCOLN2	E2	-0.0629381	9.92183	85.5386	0.109325	0.526466	-0.0146358	9.92183	81.2911	0.121043	0.168403	0.00532157	9.92183	1.63688	0.829413	0.937525	-0.0780205	9.92183	180.507	0.0207924	0.442331	0.00345579	9.92183	9.1373	0.60331	0.851143	-0.0476847	9.92183	94.9626	0.0934572	0.62443	-0.0248934	9.55731	16.9297	0.474566	0.883513	-0.0278402	9.55731	119.289	0.0568432	0.100359	0.0139724	9.55731	3.10777	0.761386	0.953585	-0.129228	9.55731	36.8661
MDFIC	E4	-0.29796	9.9571	43.7796	0.000508239	0.0217125	-0.206809	9.9571	242.222	7.56915e-17	3.66237e-16	-0.0679683	9.9571	12.3626	0.0698466	0.179096	-0.0733205	9.9571	1.59135	0.510775	0.992763	-0.0150455	9.9571	7.83743	0.1543	0.437564	0.0513947	9.9571	3.24952	0.358394	0.845305	-0.341841	9.59601	8.83308	0.112603	0.539756	-0.261725	9.59601	61.4057	1.76622e-05	6.06673e-05	0.113	9.59601	4.78354	0.237697	0.519027	0.00283302	9.59601	0.000560131
MDH2	E4	-0.0697501	10.0381	1.32623	0.411992	0.800906	-0.0521395	10.0381	8.1148	0.0609554	0.0908275	0.0310292	10.0381	0.850776	0.391759	0.594005	0.0601064	10.0381	1.17451	0.440666	0.928436	0.110289	10.0381	29.2984	0.000111239	0.00211891	0.0178862	10.0381	0.105977	0.815333	1	0.788686	9.73286	12.0745	0.00619732	0.132434	0.613314	9.73286	239.381	3.79226e-42	1.63583e-40	0.404708	9.73286	21.5819	0.00013309	0.00242095	0.129591	9.73286	0.0145396
MDM4	E2	-0.137804	10.1125	3.55777	0.0969064	0.494757	-0.210994	10.1125	104.474	1.12479e-20	6.4881e-20	-0.237605	10.1125	29.5159	1.14992e-06	1.56961e-05	0.268277	10.1125	6.06767	0.0320672	0.512499	-0.0418279	10.1125	1.68649	0.257809	0.568108	-0.0376222	10.1125	0.227715	0.669657	1	-0.171651	9.76762	0.894412	0.400091	0.863603	-0.33549	9.76762	48.7799	1.88259e-10	1.11636e-09	-0.207794	9.76762	4.60926	0.0513617	0.208879	0.627798	9.76762	6.29904
MDP1	E3	-0.0247053	9.92098	172.022	0.056979	0.389773	-0.00772919	9.92098	40.4188	0.353648	0.428778	0.00968515	9.92098	30.0466	0.42118	0.622186	-0.0259755	9.92098	83.9672	0.183477	0.739251	-0.00232244	9.92098	28.5554	0.438263	0.728178	-0.0145757	9.92098	78.8926	0.19747	0.730424	-0.0300005	9.55647	14.9754	0.493695	0.890664	0.00732423	9.55647	9.70697	0.578907	0.681708	-0.0192362	9.55647	43.8728	0.24092	0.522314	0.00188205	9.55647	8.82742e-11
ME3	E3E4	-0.0748393	10.1661	1.27292	0.369799	0.767945	-0.248423	10.1661	195.999	1.03512e-35	1.10421e-34	-0.16439	10.1661	19.7916	0.000156137	0.00117529	-0.0421303	10.1661	0.717761	0.499916	0.984786	-0.0133112	10.1661	1.83662	0.284272	0.586395	0.17488	10.1661	4.8497	0.0675495	0.569186	-0.282617	9.85316	2.83501	0.150316	0.6088	-0.390464	9.85316	90.823	1.22265e-18	1.36574e-17	-0.014058	9.85316	0.0185328	0.914304	1	-0.00476472	9.85316	0.0682734
MED1	E3	-0.170321	9.99305	10.2215	0.0392396	0.330418	-0.137436	9.99305	64.799	9.21725e-08	2.58782e-07	-0.0637267	9.99305	3.40919	0.232321	0.419134	0.00572322	9.99305	0.000831923	0.986831	1	0.0475215	9.99305	4.88576	0.156358	0.440589	-0.021686	9.99305	0.145196	0.803798	1	-0.280338	9.64038	4.4106	0.156481	0.617858	-0.308443	9.64038	54.5097	2.74214e-07	1.18342e-06	0.0906784	9.64038	1.18625	0.475961	0.744939	-0.252703	9.64038	6.43875
MED13L	E2	-0.272145	10.5473	17.7693	2.49807e-05	0.00236147	-0.296301	10.5473	275.508	1.04366e-61	2.81885e-60	-0.257905	10.5473	46.0594	1.15988e-11	4.82748e-10	-0.0348608	10.5473	0.141364	0.70693	1	0.0849173	10.5473	6.50385	0.010767	0.0792442	-0.178676	10.5473	6.43934	0.011165	0.314564	-0.303099	10.2692	3.82816	0.0504239	0.391325	-0.192865	10.2692	28.13	1.15665e-07	5.20404e-07	-0.0611441	10.2692	0.653049	0.420342	0.696988	-0.131169	10.2692	0.428634
MED25	E2	-0.0760805	9.98012	2.29795	0.358167	0.758876	-0.135093	9.98012	72.5878	8.23314e-08	2.32143e-07	-0.0801066	9.98012	6.22074	0.120101	0.267172	-0.037562	9.98012	0.334842	0.726245	1	-0.0137033	9.98012	0.511959	0.666937	0.897226	-0.120986	9.98012	5.41262	0.158666	0.725857	0.0109231	9.63302	0.00292542	0.965483	1	-0.109088	9.63302	7.32472	0.067923	0.117334	-0.0449443	9.63302	0.353385	0.680445	0.899814	-0.0221016	9.63302	0.030115
MED29	E3	0.019247	9.9898	0.342173	0.71472	0.985297	-0.163025	9.9898	95.5623	9.58286e-11	3.30757e-10	-0.108553	9.9898	9.44354	0.0500396	0.139993	0.0225342	9.9898	0.187109	0.788663	1	0.0214977	9.9898	1.39073	0.460248	0.746514	-0.0662747	9.9898	1.77692	0.400902	0.881649	0.241386	9.65198	0.14749	0.788117	1	0.0927103	9.65198	7.84986	0.0369138	0.0688604	0.10778	9.65198	1.7863	0.355069	0.650248	-0.0681208	9.65198	4.04571
MEF2C	E3	-0.0432425	11.2939	0.375753	0.58627	0.918679	-0.227717	11.2939	272.852	3.92858e-61	1.03589e-59	-0.124732	11.2939	20.3422	6.49017e-06	7.28637e-05	0.0265085	11.2939	0.1323	0.716061	1	-0.0983754	11.2939	10.2366	0.00373429	0.0358153	-0.127845	11.2939	2.44008	0.120768	0.691681	0.269242	11.0952	1.94011	0.215575	0.701477	-0.0207221	11.0952	0.512053	0.474267	0.584391	0.114543	11.0952	5.3821	0.0203628	0.112005	-0.163899	11.0952	1.08519
MEFV	E4	-0.0129011	9.9203	168.376	0.170274	0.604132	-0.00689797	9.9203	198.328	0.135744	0.186289	0.00220612	9.9203	94.5715	0.30404	0.496635	-0.0184437	9.9203	21.0801	0.626615	1	-0.00499436	9.9203	145.345	0.202546	0.503026	-0.000437055	9.9203	2.17456e-09	1	1	-0.0409799	9.55599	52.119	0.347653	0.823886	-0.00904037	9.55599	44.1209	0.385792	0.494789	0.0211092	9.55599	117.524	0.161291	0.417792	-0.142205	9.55599	106.778
MEGF6	E3	0.0401957	9.92814	8.65659	0.381555	0.776559	-0.0310934	9.92814	28.9807	0.107976	0.152068	-0.015308	9.92814	5.13925	0.497308	0.692471	0.00320673	9.92814	5.72812e-10	0.999987	1	-0.0025641	9.92814	1.27869	0.737346	0.93428	0.0815481	9.92814	43.1253	0.051078	0.537135	-0.0163395	9.56465	5.59554	0.455274	0.877788	-0.0629849	9.56465	17.802	0.179793	0.267477	-0.058101	9.56465	18.5822	0.172228	0.434383	0.00582973	9.56465	2.08864e-10
METTL14	E2	-0.096059	10.001	3.08966	0.241381	0.68362	-0.242912	10.001	193.883	3.45519e-22	2.14106e-21	-0.172778	10.001	23.1765	0.00111264	0.00636334	-0.173009	10.001	5.8456	0.10886	0.728666	0.035044	10.001	2.38309	0.304141	0.602052	-0.104553	10.001	2.67567	0.272461	0.78789	-0.173553	9.65607	2.21909	0.293003	0.774081	-0.280953	9.65607	41.1118	2.851e-06	1.07942e-05	-0.0991475	9.65607	1.37872	0.395735	0.678475	-0.050682	9.65607	0.440628
METTL15	E2	-0.17289	10.1259	6.25123	0.022266	0.243515	-0.271002	10.1259	176.821	3.36433e-35	3.51918e-34	-0.219043	10.1259	26.2831	2.12251e-06	2.69437e-05	0.198168	10.1259	3.01091	0.13259	0.739251	-0.0466249	10.1259	2.05169	0.211004	0.510564	-0.0674763	10.1259	0.732238	0.428556	0.888095	-0.837958	9.79471	19.8212	3.92159e-05	0.00381656	-0.464586	9.79471	99.1957	4.49188e-21	6.01127e-20	-0.31757	9.79471	11.0726	0.00176468	0.0188021	0.130588	9.79471	0.242169
METTL7A	E2	0.145494	9.99167	6.25134	0.0680791	0.426837	-0.0866811	9.99167	31.8244	0.00090756	0.00177889	-0.065481	9.99167	4.62499	0.204809	0.383953	0.20832	9.99167	6.60946	0.116198	0.738578	0.375456	9.99167	261.674	7.25079e-23	2.14768e-20	0.225193	9.99167	13.5257	0.0162538	0.364725	-0.22563	9.6313	3.50987	0.189723	0.668412	0.0983329	9.6313	9.37825	0.0504341	0.0905277	0.0644207	9.6313	0.888055	0.543702	0.799361	-0.0859602	9.6313	0.217821
METTL9	E4	-0.101418	10.0743	2.30809	0.242664	0.684651	-0.173511	10.0743	86.6395	1.19047e-13	4.89861e-13	-0.101798	10.0743	6.38467	0.0517633	0.143685	0.164597	10.0743	2.7834	0.197932	0.74798	0.0668174	10.0743	6.74365	0.04783	0.218418	0.113955	10.0743	2.27246	0.245694	0.784773	0.328225	9.75369	2.31341	0.220142	0.704811	0.042272	9.75369	1.74182	0.220666	0.31675	0.397911	9.75369	21.1241	9.9152e-05	0.00190089	0.449773	9.75369	3.006
MFAP3L	E2	0.00830597	10.0075	1.8848e-06	0.998905	1	-0.126655	10.0075	49.3337	4.69733e-07	1.25065e-06	-0.0770849	10.0075	4.82288	0.121367	0.269411	-0.0283656	10.0075	0.134757	0.803827	1	0.0891437	10.0075	10.9805	0.018055	0.113583	-0.0305208	10.0075	0.188978	0.766877	1	0.361902	9.65845	6.39335	0.0527458	0.399744	0.208876	9.65845	23.3588	0.000276789	0.000800635	0.179279	9.65845	3.79288	0.148853	0.397926	-0.0539348	9.65845	2.53822
MITF	E4	-0.255898	10.0165	18.4564	0.00286251	0.0720575	-0.0130658	10.0165	0.0685273	0.845647	0.881508	-0.0940592	10.0165	8.58743	0.0290721	0.0917057	0.253777	10.0165	7.81943	0.049988	0.584822	0.0770779	10.0165	8.3331	0.0377936	0.1858	-0.101663	10.0165	3.05981	0.175611	0.730424	-0.503302	9.66092	9.99878	0.0229145	0.26304	0.211738	9.66092	27.9995	0.000137221	0.000415449	0.166335	9.66092	5.29051	0.0903249	0.299544	0.327494	9.66092	2.49837
MKLN1	E3	-0.0134	10.6683	0.054484	0.815438	1	-0.242738	10.6683	186.171	2.59007e-42	3.55175e-41	-0.184895	10.6683	21.6901	3.21249e-06	3.88647e-05	0.132647	10.6683	1.35847	0.243808	0.818465	0.116229	10.6683	12.8263	0.000342098	0.00533806	0.0282082	10.6683	0.188389	0.664263	1	-0.106018	10.4044	0.665169	0.414759	0.869837	-0.200272	10.4044	31.8537	1.70397e-08	8.31948e-08	0.111309	10.4044	2.13494	0.144005	0.391144	0.219212	10.4044	0.748269
MMD	E3	-0.063868	10.0227	1.321	0.44459	0.82701	-0.0276317	10.0227	3.11247	0.216262	0.280931	-0.0945587	10.0227	7.11472	0.0667887	0.173457	0.341581	10.0227	17.8584	0.00422614	0.210384	-0.00325927	10.0227	0.0725542	0.856101	0.988435	-0.0328247	10.0227	0.20471	0.759484	1	0.0517046	9.69647	6.9526	0.0542805	0.405325	0.178653	9.69647	27.9783	4.08671e-05	0.000133118	0.324691	9.69647	9.44402	0.0229429	0.121714	0.0502263	9.69647	0.514191
MOV10	E3	0.00933211	9.93917	0.109805	0.888756	1	-0.0208747	9.93917	6.31529	0.296703	0.369439	-0.0240721	9.93917	1.86848	0.588504	0.771134	-0.0506871	9.93917	1.5949	0.604423	1	0.0246382	9.93917	11.4798	0.172179	0.46582	0.165624	9.93917	18.0744	0.0764559	0.582025	-0.121931	9.57634	1.53793	0.592283	0.960064	-0.0507829	9.57634	4.2088	0.385204	0.494142	-0.0981286	9.57634	8.09942	0.231524	0.512154	-0.166903	9.57634	11.2119
MPHOSPH8	E2	-0.0824048	10.7202	1.1627	0.280911	0.729953	-0.188862	10.7202	130.7	3.13858e-30	2.72624e-29	-0.0800477	10.7202	5.13638	0.0234336	0.0776113	0.391918	10.7202	10.4819	0.00120629	0.0932094	0.269277	10.7202	65.8747	4.91268e-16	7.15641e-14	0.279539	10.7202	12.918	0.000325739	0.0577351	0.08478	10.5235	0.342597	0.558346	0.935827	-0.110434	10.5235	13.4862	0.000241472	0.000705017	0.118174	10.5235	3.49045	0.0617508	0.236715	0.636036	10.5235	7.72405
MPPED2	E3	-0.318241	10.166	21.5579	5.31103e-05	0.00415805	-0.452739	10.166	614.753	7.32606e-122	2.06665e-119	-0.142178	10.166	11.2545	0.00274819	0.013582	-0.0489542	10.166	0.419408	0.588864	1	-0.0285877	10.166	4.02984	0.102548	0.347709	-0.200782	10.166	12.5542	0.000395683	0.0657203	-0.349233	9.8387	3.95292	0.081128	0.484804	-0.646843	9.8387	213.974	6.35886e-42	2.71658e-40	-0.256995	9.8387	7.80896	0.0125406	0.079257	-0.249082	9.8387	5.55495
MPZL2	E3	3.93907e-05	9.91976	-9.86251e-11	1	1	0.000600089	9.91976	80.2262	0.306638	0.379814	-6.29927e-05	9.91976	-1.15966e-10	1	1	0.0179387	9.91976	75.9995	0.319554	0.842645	6.77373e-06	9.91976	3.27847e-10	1	1	-3.40923e-05	9.91976	2.59568e-10	1	1	-0.00167712	9.55526	-1.77435e-08	1	1	0.0044463	9.55526	-7.71221e-06	1	1	-0.000759776	9.55526	-4.71982e-08	1	1	-0.000832891	9.55526	-1.52607e-08
MRPL19	E2	0.000879217	10.1014	0.00686583	0.939951	1	-0.122678	10.1014	39.2109	5.21255e-08	1.49175e-07	-0.0677746	10.1014	2.6311	0.168261	0.338964	0.00607345	10.1014	0.0944634	0.805294	1	0.120684	10.1014	15.0509	0.00120336	0.0147726	0.0631092	10.1014	0.642237	0.503405	0.920992	-0.116111	9.78902	0.964589	0.393153	0.860715	0.044384	9.78902	1.27511	0.258835	0.362034	0.193434	9.78902	4.48006	0.0619873	0.237115	0.35245	9.78902	2.01607
MRPL24	E4	-0.130119	9.96464	9.26802	0.0870102	0.474333	-0.144846	9.96464	94.9503	4.00323e-08	1.15665e-07	-0.0166216	9.96464	0.315015	0.761626	0.896903	-0.0836122	9.96464	3.65917	0.286258	0.842645	0.0180123	9.96464	0.920134	0.590685	0.841945	-0.134331	9.96464	6.77574	0.141008	0.701145	-0.128382	9.61684	2.38753	0.340526	0.816001	-0.00612436	9.61684	0.0586263	0.81928	0.889029	0.030437	9.61684	0.0757906	0.866271	1	-0.0496082	9.61684	3.40737
MRPL35	E3	-0.00524699	9.97271	0.000623374	0.988235	1	-0.0177845	9.97271	1.33043	0.542759	0.615291	0.0467247	9.97271	2.45	0.360029	0.558864	0.0841373	9.97271	4.96775	0.20689	0.757958	0.018989	9.97271	2.51266	0.36796	0.66947	0.0463182	9.97271	1.55029	0.479926	0.907203	0.45932	9.63297	8.27607	0.0688652	0.451064	0.369981	9.63297	105.736	5.83157e-12	3.95568e-11	0.429864	9.63297	33.2745	0.000164754	0.00289043	0.197375	9.63297	1.14923
MRPL57	E2	-0.0889215	10.0095	3.14395	0.22816	0.66626	-0.159216	10.0095	75.292	4.10002e-09	1.27143e-08	-0.129458	10.0095	11.6436	0.0224696	0.0752743	0.19867	10.0095	11.8438	0.0202525	0.442331	0.0514232	10.0095	5.04962	0.126714	0.392806	-0.12223	10.0095	4.00521	0.170964	0.730424	0.178373	9.6884	0.0131444	0.927003	1	0.200216	9.6884	26.2728	1.306e-05	4.55728e-05	-0.0586858	9.6884	0.402213	0.587281	0.832774	0.166459	9.6884	0.0952068
MRTO4	E2	-0.0573389	9.96554	2.466	0.395335	0.787156	-0.224618	9.96554	240.498	3.10181e-18	1.61327e-17	-0.127037	9.96554	22.8193	0.00892518	0.0359181	-0.069243	9.96554	3.45811	0.316962	0.842645	-0.0187193	9.96554	2.93871	0.356092	0.656533	-0.127558	9.96554	8.75502	0.108445	0.662258	-0.314809	9.61604	11.9545	0.0390501	0.345893	-0.344107	9.61604	81.2821	3.67794e-08	1.73749e-07	-0.108257	9.61604	2.54048	0.33034	0.625151	-0.0338465	9.61604	0.139796
MS4A2	E4	0.00329392	9.92032	1.99581	0.870744	1	-0.0118782	9.92032	508.653	0.00871357	0.0150376	-0.012	9.92032	134.238	0.178174	0.352031	-0.00176515	9.92032	-4.24477e-10	1	1	-0.00918113	9.92032	507.538	0.00909715	0.0702933	-0.0164082	9.92032	140.748	0.169424	0.730424	-0.034729	9.55615	26.289	0.43007	0.875067	-0.0234706	9.55615	284.342	0.00949958	0.0205285	-0.0318017	9.55615	89.0449	0.146726	0.39495	0.00161128	9.55615	3.37519e-11
MS4A4A	E3E4	0.0183075	9.92206	78.896	0.1506	0.600348	0.000947155	9.92206	0.233657	0.935724	0.953975	-0.00951448	9.92206	40.772	0.301758	0.494343	-0.167938	9.92206	41.4473	0.270568	0.842645	-0.00345849	9.92206	16.8687	0.503472	0.776104	0.0352096	9.92206	130.592	0.0634986	0.569186	-0.00877309	9.55758	-9.96504e-10	1	1	0.00311347	9.55758	0.751973	0.821635	0.890634	-0.0160285	9.55758	10.0195	0.596107	0.839805	-0.490692	9.55758	84.9194
MS4A6A	E3E4	0.00312792	9.92754	1.92683	0.825496	1	-0.00498704	9.92754	160.814	0.0487916	0.0741068	0.00291073	9.92754	0.235185	0.942978	1	0.228423	9.92754	141.952	0.0161161	0.40002	-0.00360622	9.92754	26.6225	0.422045	0.720863	0.0137076	9.92754	46.3909	0.288258	0.78789	-0.0172793	9.56371	18.0501	0.459827	0.879664	0.0141069	9.56371	6.42696	0.68088	0.772609	0.0473417	9.56371	62.9909	0.178306	0.44301	0.761718	9.56371	255.953
MS4A6E	E4	0.00909776	9.92022	103.306	0.298798	0.74624	-0.00335951	9.92022	32.2136	0.563732	0.634654	-0.00556219	9.92022	66.0573	0.406596	0.608763	0.0612228	9.92022	156.225	0.196838	0.746139	0.00201815	9.92022	114.533	0.274222	0.584233	0.0116745	9.92022	109.523	0.28491	0.78789	-0.00216735	9.55552	3.8872e-09	0.999978	1	-0.00257261	9.55552	19.1396	0.611405	0.71005	-0.0254324	9.55552	175.3	0.131665	0.373275	0.15302	9.55552	97.8814
MSH3	E3	-0.180734	10.1244	6.04202	0.0348381	0.308954	-0.335878	10.1244	295.124	2.45802e-56	5.52962e-55	-0.149762	10.1244	12.9564	0.00115321	0.00656467	-0.0896673	10.1244	0.714312	0.468207	0.959493	0.0165536	10.1244	0.240976	0.674825	0.903093	-0.174397	10.1244	4.57599	0.0622638	0.569186	-0.334505	9.80383	3.277	0.108874	0.533612	-0.543339	9.80383	145.092	4.94826e-29	1.05444e-27	-0.102283	9.80383	1.19767	0.331708	0.626739	0.0067671	9.80383	0.000906802
MSI2	E2	-0.312655	10.2375	44.0798	3.18441e-11	1.76854e-08	-0.207324	10.2375	94.6296	7.47772e-21	4.34871e-20	-0.190621	10.2375	26.2361	3.0323e-07	4.7522e-06	-0.221678	10.2375	3.81373	0.0714863	0.642557	0.0755963	10.2375	4.98439	0.0429537	0.202823	-0.181007	10.2375	7.74361	0.0053923	0.22631	-0.650391	9.91132	30.4588	3.48854e-08	1.23997e-05	-0.183891	9.91132	15.1056	0.000182665	0.000543408	-0.131155	9.91132	2.80606	0.0966394	0.312743	-0.383151	9.91132	1.92044
MSRB3	E3	-0.173065	10.027	8.08019	0.0399672	0.334188	-0.254878	10.027	202.056	2.49673e-25	1.75939e-24	-0.0617332	10.027	2.63797	0.250629	0.441751	-0.00713524	10.027	0.175362	0.773516	1	0.00812794	10.027	0.711567	0.562763	0.821239	0.0166319	10.027	0.0564708	0.869199	1	-0.283164	9.6828	2.81916	0.200957	0.681839	-0.383576	9.6828	74.1821	2.0123e-11	1.29809e-10	0.0831502	9.6828	1.06989	0.419778	0.696856	0.057215	9.6828	1.27299e-09
MTHFD2	E3	0.0466529	9.9263	23.6442	0.198234	0.627585	-0.013074	9.9263	18.2631	0.256969	0.326647	-0.00545207	9.9263	0.118686	0.915126	0.988369	0.166434	9.9263	38.54	0.0872268	0.663611	0.0186855	9.9263	41.8241	0.08751	0.316039	0.0949106	9.9263	27.5123	0.158317	0.725857	0.0768952	9.56458	12.0242	0.280405	0.765057	-0.0125166	9.56458	0.318663	0.884886	0.941575	0.142438	9.56458	19.2428	0.171311	0.433079	-0.0325451	9.56458	0.960354
MTHFD2L	E2	-0.000515587	10.0527	3.39475e-05	0.995686	1	-0.0873967	10.0527	18.8127	0.000764623	0.00151122	-0.132957	10.0527	9.99033	0.0121387	0.0461552	0.210457	10.0527	5.7023	0.0637285	0.618012	0.0490459	10.0527	2.79077	0.187599	0.489576	-0.0443175	10.0527	0.328463	0.644882	1	-0.222186	9.71365	1.71551	0.284459	0.768299	0.176285	9.71365	16.236	0.000318553	0.000911501	-0.0679929	9.71365	0.589774	0.507008	0.770725	0.22432	9.71365	0.781231
MTMR11	E2E4	0.028586	9.93092	4.0784	0.49871	0.869526	-0.0544182	9.93092	75.259	0.00321368	0.005888	-0.0162174	9.93092	1.84079	0.644999	0.816389	-0.0308207	9.93092	16.8798	0.172299	0.739251	0.00531095	9.93092	1.38016	0.69449	0.914172	0.00442869	9.93092	0.20295	0.880834	1	0.194578	9.56948	13.4387	0.179954	0.656899	-0.114176	9.56948	43.153	0.0144747	0.0300133	-0.0433628	9.56948	1.54598	0.648437	0.878121	0.00427323	9.56948	3.03006e-10
MTMR3	E4	-0.183314	10.1012	7.46623	0.0168481	0.209828	-0.205917	10.1012	105.239	1.75243e-19	9.5799e-19	-0.23014	10.1012	31.1874	8.45831e-07	1.19113e-05	0.256605	10.1012	5.73035	0.0441379	0.563599	0.0558735	10.1012	3.23392	0.134388	0.403027	-0.0766779	10.1012	1.00193	0.378181	0.864167	-0.438549	9.77115	6.10197	0.027248	0.290319	-0.231501	9.77115	24.6586	8.03352e-06	2.88544e-05	-0.148748	9.77115	2.52317	0.161711	0.418514	0.309637	9.77115	1.32748
MTMR6	E4	-0.00213304	10.0509	0.0114801	0.934422	1	-0.0937881	10.0509	24.6788	8.10664e-05	0.000178306	-0.149088	10.0509	14.3399	0.00279023	0.0137553	0.0148556	10.0509	0.0778742	0.836697	1	0.0607548	10.0509	5.08544	0.087552	0.316062	-0.0648039	10.0509	0.694521	0.523547	0.93333	0.0774981	9.72703	0.147512	0.758308	1	0.231079	9.72703	30.3013	1.25765e-06	5.00021e-06	0.259862	9.72703	9.51031	0.0071811	0.0532871	-0.211679	9.72703	2.35009
MTPAP	E3	-0.0893318	9.97157	4.43195	0.228151	0.66626	-0.0766155	9.97157	26.5773	0.00227513	0.00424678	-0.0904676	9.97157	8.70281	0.0809424	0.199395	-0.141911	9.97157	8.05043	0.10484	0.716896	0.0199353	9.97157	2.11149	0.403967	0.705878	-0.0314447	9.97157	0.332124	0.739865	1	0.0684169	9.62084	0.106297	0.842221	1	0.0528092	9.62084	3.42531	0.222168	0.31837	0.00673134	9.62084	0.0597735	0.874257	1	-0.243244	9.62084	8.68147
MTUS1	E4	-0.0407165	10.1173	0.428818	0.554586	0.902321	-0.0300291	10.1173	1.73302	0.30265	0.37579	-0.160644	10.1173	17.1154	0.00105256	0.00609539	0.0662705	10.1173	0.429024	0.598248	1	-0.0216497	10.1173	0.792176	0.42085	0.719929	-0.168217	10.1173	4.6991	0.0737437	0.573124	-0.227416	9.76253	1.84138	0.230578	0.715586	0.0332528	9.76253	0.122344	0.788944	0.864627	0.0761463	9.76253	0.995154	0.362312	0.654806	0.0990875	9.76253	0.1534
MUC4	E3	-0.0244486	9.92331	18.2798	0.361674	0.762204	-0.0274473	9.92331	97.6319	0.0353894	0.0551508	-0.068651	9.92331	182.66	0.00363675	0.0172025	-0.00849656	9.92331	1.71098	0.780391	1	0.00439727	9.92331	4.02418	0.668635	0.898524	0.0735766	9.92331	95.7325	0.0365381	0.471874	-0.0664196	9.55928	21.8764	0.275919	0.761526	-0.063795	9.55928	102.927	0.0176731	0.0359162	-0.0940885	9.55928	61.4898	0.0665246	0.248848	-0.0686591	9.55928	13.046
MUC6	E4	-0.0454263	9.93336	10.3099	0.260201	0.707276	-0.0576526	9.93336	38.9181	0.0372477	0.0578137	-0.0712398	9.93336	41.2547	0.0230787	0.0767649	0.102311	9.93336	43.9745	0.0202756	0.442331	-0.00928343	9.93336	16.9053	0.150723	0.430927	0.0239356	9.93336	2.22087	0.601274	0.985593	-0.120514	9.57277	4.35003	0.405051	0.865733	-0.243639	9.57277	144.048	1.23886e-06	4.9285e-06	-0.166965	9.57277	29.0327	0.0309204	0.149812	0.111771	9.57277	13.5328
MUTYH	E4	-0.0903662	9.95391	3.77238	0.312525	0.746499	-0.0678531	9.95391	30.379	0.00482127	0.00862181	-0.11621	9.95391	20.9436	0.0168069	0.0600024	-0.0283086	9.95391	0.470202	0.724358	1	-0.0292479	9.95391	3.0817	0.365462	0.666906	-0.0916878	9.95391	3.20114	0.351345	0.837774	-0.269822	9.59376	5.04482	0.218382	0.703717	-0.0848086	9.59376	8.50198	0.109922	0.177223	-0.256358	9.59376	19.7976	0.015482	0.0921143	-0.159965	9.59376	2.05879
MXD4	E3	-0.17081	9.98693	9.08102	0.046954	0.359529	-0.0917967	9.98693	30.5434	0.000368686	0.000756004	-0.107786	9.98693	10.1609	0.0391796	0.115645	-0.230199	9.98693	8.17663	0.0666928	0.625078	0.0486974	9.98693	6.46315	0.108946	0.361295	-0.0950564	9.98693	2.32111	0.328002	0.811293	-0.193983	9.62866	1.84998	0.363436	0.838176	-0.0463415	9.62866	1.09258	0.51066	0.619104	0.0757527	9.62866	1.13497	0.462164	0.732962	-0.447517	9.62866	5.52292
MXI1	E4	-0.0698773	10.1908	1.09196	0.296041	0.745536	-0.0932217	10.1908	18.7898	4.34979e-05	9.82143e-05	-0.220881	10.1908	26.8299	2.2303e-07	3.60008e-06	-0.0538641	10.1908	0.137805	0.7358	1	0.00835949	10.1908	0.0816066	0.775133	0.955525	0.125586	10.1908	2.63145	0.109208	0.664444	-0.210259	9.8869	1.38524	0.243878	0.730471	0.311912	9.8869	46.267	1.08609e-11	7.16482e-11	0.249182	9.8869	8.2645	0.00405062	0.0351502	0.671082	9.8869	5.30509
MYH10	E4	-0.185741	10.3468	6.08218	0.0322248	0.299074	-0.309398	10.3468	353.052	1.7025e-78	8.5957e-77	-0.23326	10.3468	38.2064	1.93002e-09	5.05904e-08	-0.0753181	10.3468	2.209	0.205124	0.756071	0.0079992	10.3468	0.0503926	0.846614	0.986911	-0.0942712	10.3468	1.37643	0.284171	0.78789	-0.162458	10.0811	1.39462	0.299238	0.778116	-0.224298	10.0811	40.1482	2.4473e-10	1.44161e-09	0.0325166	10.0811	0.182139	0.676388	0.896604	0.0942954	10.0811	0.0298588
MYLIP	E3	-0.0693525	10.0065	3.01435	0.235782	0.676351	-0.136245	10.0065	56.0976	9.34053e-08	2.62036e-07	-0.0341467	10.0065	0.969546	0.49442	0.690246	-0.0235269	10.0065	0.0936782	0.831496	1	0.156543	10.0065	34.2937	3.19257e-05	0.000737819	0.0129392	10.0065	0.0493451	0.879618	1	-0.0454878	9.65746	0.395439	0.649375	1	-0.146491	9.65746	11.0213	0.0127499	0.0267339	0.0693007	9.65746	0.677847	0.551357	0.805796	-0.514422	9.65746	5.707
MYO5A	E4	-0.133581	10.5851	2.40986	0.120579	0.553586	-0.261371	10.5851	231.673	3.3627e-52	6.62548e-51	-0.171415	10.5851	19.4293	1.04611e-05	0.000110401	0.0134713	10.5851	0.016961	0.907325	1	-0.0139819	10.5851	0.156373	0.692519	0.913387	0.124734	10.5851	3.32032	0.0684345	0.569186	-0.428457	10.3501	5.119	0.0250517	0.276877	-0.0369826	10.3501	0.992164	0.319236	0.42945	0.250458	10.3501	11.6994	0.000627496	0.00853241	0.112192	10.3501	0.103075
MYO9B	E3	0.0353714	10.1088	0.136108	0.742875	0.99752	-0.222868	10.1088	115.415	1.31815e-22	8.30418e-22	-0.216399	10.1088	23.5834	1.86841e-05	0.000184988	-0.0154277	10.1088	0.0176006	0.928106	1	-0.0224728	10.1088	0.510975	0.535944	0.800291	0.00768597	10.1088	0.00871659	0.933732	1	-0.145519	9.75291	0.306131	0.630666	0.989424	-0.509542	9.75291	113.785	2.32806e-22	3.38025e-21	-0.570011	9.75291	30.6334	9.2679e-07	3.76909e-05	-0.675298	9.75291	7.56002
MYOT	E4	-0.102056	9.94318	11.2836	0.132792	0.581073	-0.102496	9.94318	109.558	3.09487e-06	7.72827e-06	-0.0550002	9.94318	8.67304	0.190228	0.366726	0.0537728	9.94318	4.95248	0.323445	0.842645	0.127237	9.94318	72.8645	0.000110279	0.00210288	-0.0841215	9.94318	8.54377	0.191419	0.730424	-0.434518	9.58277	25.1231	0.016061	0.223345	-0.180024	9.58277	59.1996	0.000218544	0.000643467	-0.0697608	9.58277	4.54498	0.307365	0.60153	0.0382672	9.58277	1.39394e-09
N4BP2L1	E4	-0.228415	10.146	9.67212	0.008196	0.137795	-0.149722	10.146	60.4426	1.06156e-11	3.89552e-11	-0.0653862	10.146	2.40628	0.168322	0.33901	0.133426	10.146	1.40291	0.312011	0.842645	0.0256847	10.146	0.574261	0.514134	0.783433	-0.073081	10.146	0.868963	0.419057	0.885913	-0.706795	9.81533	12.9793	0.00143515	0.0526973	-0.270762	9.81533	37.1703	6.76784e-09	3.46029e-08	-0.0928333	9.81533	0.994152	0.346896	0.642392	-0.0169859	9.81533	0.0201071
NADK	E2	0.0767146	9.97061	2.56572	0.355372	0.757274	-0.0938258	9.97061	40.723	0.000109261	0.000237033	-0.0278535	9.97061	0.76648	0.627516	0.802207	0.0992953	9.97061	2.68326	0.348912	0.850481	0.00748632	9.97061	0.224806	0.787585	0.960868	0.125683	9.97061	6.65529	0.139184	0.701145	0.459905	9.61535	13.7368	0.0252748	0.278309	-0.0198554	9.61535	0.25347	0.743449	0.827294	-0.0159411	9.61535	0.0483433	0.892029	1	0.165661	9.61535	1.85003
NAP1L5	E3	-0.0656908	10.0602	1.30665	0.403625	0.792743	-0.276122	10.0602	240.795	1.65782e-35	1.75478e-34	-0.198042	10.0602	29.966	1.13016e-05	0.000118636	-0.0399236	10.0602	0.358559	0.662606	1	-0.0396585	10.0602	5.47377	0.0895231	0.319864	-0.0382296	10.0602	0.258982	0.705442	1	0.351676	9.77545	0.560879	0.551081	0.929927	0.322633	9.77545	71.5237	2.45214e-14	1.99631e-13	0.308281	9.77545	17.2518	0.000569573	0.00794541	0.234054	9.77545	0.890375
NARFL	E2	-0.212637	9.99301	17.5485	0.00792359	0.134625	-0.171695	9.99301	103.288	2.57424e-11	9.22924e-11	-0.0794406	9.99301	5.3313	0.140847	0.299116	0.088279	9.99301	2.29874	0.33919	0.847647	0.0258891	9.99301	1.78671	0.396917	0.70008	-0.10945	9.99301	3.69618	0.222215	0.749338	-0.624728	9.63929	18.7323	0.00370579	0.0992017	-0.397775	9.63929	98.4454	9.16808e-12	6.10244e-11	-0.257188	9.63929	10.1976	0.0310425	0.150119	-0.272156	9.63929	5.45701
NARS2	E4	-0.143034	10.0426	4.49532	0.104866	0.513836	-0.144048	10.0426	54.6302	4.56619e-09	1.41106e-08	-0.065686	10.0426	2.74894	0.173488	0.346158	-0.0805578	10.0426	0.693104	0.520614	0.995923	-0.0566786	10.0426	3.95373	0.130362	0.396457	-0.106768	10.0426	2.00449	0.268348	0.78789	-0.657887	9.70177	14.4459	0.00243139	0.0755822	-0.0720805	9.70177	2.44358	0.205094	0.298985	0.237777	9.70177	7.30025	0.0258823	0.132789	-0.26681	9.70177	1.41076
NAV1	E4	-0.174463	10.3779	5.40718	0.0200581	0.228196	-0.169167	10.3779	67.2736	2.41841e-16	1.14217e-15	-0.151813	10.3779	14.4957	0.000140649	0.00107004	0.0798634	10.3779	0.379316	0.557799	1	-0.0389696	10.3779	1.51147	0.218921	0.520328	-0.00775988	10.3779	0.0165183	0.897735	1	-0.193717	10.0643	1.03303	0.309471	0.788066	-0.307105	10.0643	47.6983	5.24909e-12	3.57695e-11	0.0144045	10.0643	0.0373147	0.846829	1	0.0498493	10.0643	0.0157297
NAV2	E4	0.0996497	10.5816	2.76924	0.0960979	0.49244	-0.369695	10.5816	411.075	4.94025e-91	4.10272e-89	-0.322595	10.5816	84.4794	4.02539e-20	7.776e-18	-0.399782	10.5816	10.9232	0.000950312	0.0785532	0.104797	10.5816	7.39218	0.00655305	0.0548826	-0.236387	10.5816	16.2781	5.4774e-05	0.0207115	0.169128	10.2909	1.56802	0.210521	0.694178	-0.703748	10.2909	337.135	3.53653e-74	5.92936e-72	-0.349912	10.2909	25.8201	3.80996e-07	1.73685e-05	-1.3736	10.2909	20.8384
NCALD	E4	-0.114454	10.4551	2.2001	0.170227	0.604132	-0.288644	10.4551	278.116	2.8399e-62	7.84925e-61	-0.202394	10.4551	31.6804	1.82708e-08	3.76255e-07	-0.289993	10.4551	7.0286	0.0126141	0.360803	0.0575896	10.4551	3.83552	0.067736	0.27244	-0.0129368	10.4551	0.0334159	0.854956	1	0.181381	10.1767	0.0590222	0.83066	1	-0.136189	10.1767	12.6922	0.000368761	0.00104808	0.0886315	10.1767	1.55438	0.21649	0.493568	-0.344934	10.1767	1.84598
NCF4	E3	-0.000811921	9.92106	2.77964e-10	0.999996	1	-0.0019377	9.92106	52.7336	0.404292	0.480604	0.0080318	9.92106	180.871	0.124109	0.27403	0.0508094	9.92106	26.8434	0.5334	1	0.00338081	9.92106	175.46	0.129672	0.39597	0.000889126	9.92106	-8.99039e-10	1	1	0.0013385	9.55702	1.20532e-09	1	1	0.00374812	9.55702	11.2036	0.637969	0.734183	0.025261	9.55702	113.951	0.129041	0.369949	0.0197973	9.55702	0.00504462
NCOA7	E4	-0.178739	10.3861	4.55926	0.03841	0.327512	-0.163857	10.3861	76.0163	2.89722e-18	1.51084e-17	-0.0955552	10.3861	4.3434	0.0501652	0.140283	0.262508	10.3861	4.37569	0.0405694	0.561694	0.214042	10.3861	49.2152	2.32246e-12	2.06373e-10	-0.166426	10.3861	2.99388	0.0897398	0.616488	-0.252584	10.1379	2.47873	0.126493	0.566067	0.171681	10.1379	22.0699	2.66125e-06	1.01211e-05	0.331374	10.1379	12.4963	0.000409448	0.00608929	0.652507	10.1379	4.68639
NCS1	E3	-0.157396	10.167	4.60904	0.0883782	0.476535	-0.119095	10.167	49.8827	3.38282e-11	1.2048e-10	-0.122049	10.167	10.2657	0.00474262	0.0213598	-0.0774922	10.167	1.49222	0.341318	0.847685	-0.012186	10.167	0.0631346	0.847098	0.987188	-0.0518412	10.167	0.342969	0.644145	1	-0.199546	9.85589	1.94039	0.242697	0.729326	0.0778399	9.85589	4.88867	0.029986	0.0572653	0.153859	9.85589	3.65742	0.0830905	0.284499	-0.120645	9.85589	3.03677
NDST3	E4	-0.0212437	10.3495	0.0546121	0.830163	1	-0.319516	10.3495	327.102	7.00248e-73	2.88074e-71	-0.0609011	10.3495	2.28004	0.177172	0.350791	0.00689801	10.3495	0.0130596	0.921668	1	0.0336602	10.3495	1.59381	0.249029	0.560008	-0.0149195	10.3495	0.0438122	0.842233	1	0.296893	10.0704	1.29115	0.285218	0.769063	-0.464725	10.0704	138.583	8.48295e-32	2.14756e-30	0.253154	10.0704	10.0125	0.00155915	0.0170308	0.137932	10.0704	0.399201
NDUFA2	E2	0.0427964	10.0114	0.826514	0.534723	0.891561	-0.118217	10.0114	42.3071	5.14777e-06	1.26327e-05	-0.0339906	10.0114	0.760509	0.522867	0.714799	0.0789873	10.0114	1.21854	0.44978	0.939637	0.0884852	10.0114	17.1501	0.00447818	0.0410874	0.132146	10.0114	4.01882	0.16478	0.730424	0.257249	9.70107	0.241109	0.698479	1	0.550399	9.70107	183.432	3.9205e-30	8.94417e-29	0.486882	9.70107	30.869	1.05823e-05	0.000299949	0.240279	9.70107	0.367759
NDUFA5	E4	-0.0226728	10.1098	0.0660788	0.823158	1	-0.290565	10.1098	252.649	2.79955e-45	4.32264e-44	-0.143701	10.1098	12.5388	0.00302792	0.0147633	0.197241	10.1098	5.7334	0.059557	0.604797	0.0474544	10.1098	3.78474	0.126626	0.392667	-0.132704	10.1098	2.94854	0.165516	0.730424	0.111638	9.83183	0.443265	0.573982	0.946711	0.079877	9.83183	6.3376	0.0118347	0.025024	0.0452786	9.83183	0.187062	0.815136	0.985415	0.543406	9.83183	3.56542
NDUFB3	E3	0.0579275	10.0082	1.10773	0.470031	0.84752	-0.0616444	10.0082	10.9579	0.0340667	0.0532905	-0.114136	10.0082	9.22019	0.0385214	0.114157	0.00601815	10.0082	0.031798	0.906424	1	0.130895	10.0082	35.3684	5.09902e-05	0.00110555	-0.169078	10.0082	6.70778	0.0745791	0.575269	0.761407	9.69298	16.1114	0.00203068	0.0673308	0.452765	9.69298	124.542	5.71534e-20	7.05369e-19	0.145253	9.69298	3.11819	0.16967	0.430459	0.00646602	9.69298	0.591646
NDUFB5	E3E4	0.0954776	10.0344	2.59851	0.246856	0.689644	-0.210341	10.0344	133.807	9.71192e-19	5.15995e-18	-0.141471	10.0344	13.9976	0.00729841	0.0303961	0.0212995	10.0344	0.321609	0.690484	1	0.034733	10.0344	2.92443	0.223358	0.526225	-0.0658954	10.0344	0.796425	0.510331	0.92603	0.366414	9.72448	1.55851	0.319498	0.797601	0.19406	9.72448	25.1232	1.2247e-05	4.28876e-05	0.0740265	9.72448	0.839771	0.471067	0.739821	0.174647	9.72448	0.0840446
NEBL	E4	0.128519	10.5896	7.56432	0.00595563	0.114093	-0.35796	10.5896	490.345	3.93734e-108	6.41967e-106	-0.323714	10.5896	97.3477	6.10154e-23	1.54909e-20	-0.115893	10.5896	2.35146	0.171733	0.739251	-0.0313403	10.5896	2.32724	0.176493	0.472267	-0.12325	10.5896	3.99586	0.0456175	0.512021	-0.00783543	10.3188	0.000231035	0.987873	1	-0.457875	10.3188	191.982	2.7543e-43	1.25511e-41	-0.217194	10.3188	11.5885	0.00066604	0.00891672	-0.376566	10.3188	5.68624
NEGR1	E4	-0.0459741	11.4826	0.261527	0.633266	0.945031	-0.151341	11.4826	112.149	3.53171e-26	2.57553e-25	-0.0592573	11.4826	3.97252	0.046254	0.13182	-0.0266296	11.4826	0.0259782	0.874977	1	0.0117271	11.4826	0.142382	0.705925	0.919547	-0.0721754	11.4826	1.2818	0.257569	0.78789	-0.00957685	11.26	0.0470075	0.828359	1	0.0243607	11.26	0.951431	0.329377	0.440657	0.349303	11.26	41.8042	1.05214e-10	1.23832e-08	0.343645	11.26	1.07919
NEUROD6	E3E4	-0.0482229	9.99859	0.402668	0.704522	0.981232	-0.336563	9.99859	469.275	7.30518e-47	1.20658e-45	-0.047505	9.99859	15.196	0.0202043	0.0691985	0.0301369	9.99859	5.75095	0.154303	0.739251	-0.0396824	9.99859	20.1366	0.00765253	0.0619321	-0.0262768	9.99859	1.73217	0.434464	0.890261	0.195746	9.68323	2.85784	0.23883	0.725429	-0.176137	9.68323	12.0875	0.00808489	0.0177828	0.0859637	9.68323	0.0402227	0.893785	1	0.137575	9.68323	2.00272e-10
NFAT5	E2	-0.113929	10.5071	3.71046	0.0540781	0.381297	-0.329771	10.5071	345.872	6.08113e-77	2.88967e-75	-0.249169	10.5071	38.4365	5.70026e-10	1.7026e-08	-0.117878	10.5071	1.05899	0.303449	0.842645	-0.0102134	10.5071	0.0770255	0.781371	0.958617	-0.144992	10.5071	3.50034	0.0613621	0.569186	0.234868	10.2458	3.2059	0.0734008	0.463017	-0.167223	10.2458	20.4288	6.25459e-06	2.27361e-05	0.0821999	10.2458	1.03776	0.308365	0.602374	0.152571	10.2458	0.274734
NFATC3	E3	-0.204313	10.1194	7.73586	0.0130989	0.184101	-0.201811	10.1194	95.6419	8.99069e-20	4.99165e-19	-0.131839	10.1194	9.39861	0.00524267	0.0232525	-0.132746	10.1194	1.70127	0.229842	0.791488	-0.0443249	10.1194	1.78668	0.241263	0.550413	0.109485	10.1194	1.78179	0.235461	0.77022	0.0110744	9.78927	0.000372157	0.989974	1	-0.00321826	9.78927	0.000525034	0.98172	1	0.159619	9.78927	2.99841	0.100032	0.319165	-0.104454	9.78927	0.176806
NFIB	E4	-0.0422062	10.3623	0.408067	0.522955	0.883802	-0.27396	10.3623	158.838	2.30316e-36	2.50347e-35	-0.331611	10.3623	62.6189	2.55916e-15	2.03042e-13	0.0922561	10.3623	1.09698	0.294935	0.842645	0.114399	10.3623	9.02254	0.00266801	0.0278917	-0.0763824	10.3623	1.16204	0.281047	0.78789	-0.278884	10.0371	2.92199	0.0874093	0.498856	-0.179279	10.0371	12.921	0.000326378	0.00093299	-0.108369	10.0371	1.35575	0.244301	0.525194	0.0494852	10.0371	1.33158e-10
NFKB1	E3E4	0.127146	10.0804	3.18824	0.140016	0.591341	-0.235226	10.0804	136.764	1.33701e-24	9.14952e-24	-0.199953	10.0804	22.961	3.40705e-05	0.000312275	0.344014	10.0804	10.5634	0.00743348	0.274924	0.0626295	10.0804	4.08573	0.0925279	0.327438	-0.242789	10.0804	9.01944	0.012148	0.322387	0.602056	9.74618	9.93701	0.00659214	0.137776	-0.126902	9.74618	6.98479	0.0201084	0.0401626	-0.0424919	9.74618	0.192438	0.694953	0.908911	0.641359	9.74618	6.49128
NIN	E3	-0.100656	10.3901	1.59277	0.225943	0.663742	-0.322445	10.3901	340.081	1.08793e-75	4.93231e-74	-0.241565	10.3901	29.9678	4.41376e-08	8.39843e-07	0.165402	10.3901	1.88983	0.195917	0.744292	0.0499962	10.3901	1.93396	0.182578	0.482485	-0.0214073	10.3901	0.0687145	0.793219	1	-0.0227478	10.1206	0.0349672	0.851668	1	-0.474605	10.1206	165.942	1.07488e-37	3.69492e-36	0.0715022	10.1206	0.606969	0.488556	0.755404	0.165726	10.1206	0.365999
NIPBL	E3	-0.0922808	10.365	1.61852	0.203304	0.633548	-0.239009	10.365	152.017	7.05195e-35	7.26535e-34	-0.186846	10.365	19.9679	7.89238e-06	8.58319e-05	0.0926932	10.365	0.786103	0.375285	0.863542	0.104978	10.365	10.3575	0.0012903	0.01561	0.00551756	10.365	0.00521484	0.942432	1	0.128868	10.0774	0.511739	0.474402	0.883513	-0.0341291	10.0774	0.638291	0.42899	0.539752	0.0860063	10.0774	1.00788	0.315433	0.609665	0.471298	10.0774	4.16566
NIPSNAP1	E3	-0.187069	9.97801	20.94	0.00679598	0.122617	-0.1901	9.97801	141.951	4.77758e-13	1.89949e-12	-0.145798	9.97801	19.3895	0.00805464	0.033006	-0.0352087	9.97801	5.55098	0.16692	0.739251	0.0621732	9.97801	13.8166	0.0284519	0.15452	-0.024229	9.97801	0.453538	0.690508	1	-0.103025	9.62165	0.810681	0.578019	0.950018	-0.515549	9.62165	182.425	1.00506e-17	1.05855e-16	-0.0811	9.62165	1.15198	0.498503	0.763675	-0.00796179	9.62165	1.83059e-10
NKTR	E2	-0.298659	10.4222	18.5137	1.69003e-05	0.00166862	-0.236346	10.4222	157.716	4.04417e-36	4.37183e-35	-0.211593	10.4222	30.346	3.63208e-08	7.07777e-07	0.0255287	10.4222	0.0437579	0.834306	1	0.0178874	10.4222	0.313579	0.575494	0.830844	-0.141773	10.4222	3.37345	0.0662607	0.569186	-0.544131	10.1295	9.81734	0.00173334	0.0602837	-0.559754	10.1295	188.925	1.23947e-42	5.45246e-41	-0.386085	10.1295	23.1047	1.5547e-06	5.82473e-05	0.0127737	10.1295	0.00243999
NKX6-1	E4	0.000121029	9.91976	9.96185e-11	1	1	0.00146064	9.91976	481.538	0.141495	0.193256	-3.05905e-06	9.91976	1.42312e-11	1	1	6.20709e-05	9.91976	-1.23337e-10	1	1	4.06952e-05	9.91976	-9.21867e-10	1	1	3.96012e-05	9.91976	-5.9613e-10	1	1	0.00183675	9.5552	8.22436e-10	0.999978	1	0.0016261	9.5552	3.68083e-10	0.999985	1	0.00169234	9.5552	-4.6814e-10	1	1	0.00195065	9.5552	5.26572e-09
NME1	E3	0.000470983	9.91975	9.73213e-10	1	1	0.00185139	9.91975	182.301	0.0862441	0.124249	-0.00493836	9.91975	107.927	0.187226	0.362856	-0.000282072	9.91975	4.02238e-10	1	1	0.000110937	9.91975	-6.09216e-09	1	1	-0.000190818	9.91975	3.68314e-10	1	1	1.0251e-14	9.55513	0	1	1	-5.12548e-15	9.55513	0	1	1	-2.56274e-15	9.55513	0	1	1	-7.68822e-15	9.55513	0
NMRK1	E2	-0.116212	10.0086	5.19746	0.127383	0.569499	-0.172174	10.0086	95.6623	9.93424e-12	3.65153e-11	-0.0656309	10.0086	3.29748	0.214611	0.396935	-0.0101318	10.0086	0.0156926	0.929296	1	0.00543912	10.0086	0.0977916	0.836529	0.981929	-0.0811682	10.0086	1.89193	0.3548	0.841295	-0.108025	9.6749	3.6728	0.170655	0.641355	-0.0974184	9.6749	3.05476	0.182719	0.270968	-0.0234716	9.6749	0.177755	0.749958	0.946474	0.10291	9.6749	0.0328484
NRGN	E4	-0.163146	10.6487	4.28252	0.078235	0.452339	-0.147154	10.6487	102.298	5.03651e-24	3.36879e-23	-0.0156597	10.6487	0.151579	0.7188	0.86937	-0.0330131	10.6487	0.0783075	0.821461	1	-0.200563	10.6487	44.9078	8.23258e-09	4.36744e-07	-0.121028	10.6487	2.22088	0.198417	0.730424	0.324393	10.4337	0.0847968	0.802725	1	0.55795	10.4337	360.625	3.93372e-79	7.2823e-77	0.864446	10.4337	67.0167	3.65808e-15	1.25022e-12	0.306245	10.4337	0.542859
NRP2	E3	-0.103186	9.95873	11.8582	0.06921	0.43007	-0.115698	9.95873	66.4392	1.03772e-05	2.47949e-05	-0.140029	9.95873	28.3323	0.00440665	0.0201324	-0.384974	9.95873	29.8724	0.00305105	0.16892	0.0523239	9.95873	13.6956	0.0509284	0.227427	0.149356	9.95873	37.1137	0.00137168	0.129667	-0.0391713	9.59949	0.413843	0.721348	1	-0.0769259	9.59949	4.12822	0.256234	0.358934	-0.0585551	9.59949	0.853143	0.589833	0.834915	-0.642366	9.59949	12.8402
NRSN1	E4	0.0146076	10.1082	0.482861	0.598451	0.925002	-0.195695	10.1082	121.145	1.29555e-19	7.1261e-19	-0.15418	10.1082	16.8499	0.000865155	0.0051406	0.0377464	10.1082	5.24096	0.0828497	0.652362	-0.0240997	10.1082	3.66008	0.145894	0.422561	0.0210446	10.1082	0.117821	0.801927	1	0.374021	9.81273	0.647908	0.507343	0.897968	0.309673	9.81273	66.3124	5.33385e-15	4.56615e-14	0.0897861	9.81273	1.24371	0.327014	0.621838	0.136944	9.81273	9.04807e-10
NSF	E2E3	-0.185261	10.6573	4.51801	0.0335447	0.304317	-0.27819	10.6573	285.582	6.84626e-64	2.00118e-62	-0.189743	10.6573	29.9796	4.38683e-08	8.36503e-07	-0.0263022	10.6573	0.0436239	0.834556	1	-0.0449381	10.6573	1.31333	0.251797	0.56299	-0.128194	10.6573	2.27058	0.131857	0.700312	-0.100797	10.5257	0.670465	0.412907	0.869624	-0.0934602	10.5257	8.28444	0.00400643	0.00941206	0.103515	10.5257	2.62985	0.1049	0.328759	-0.032263	10.5257	0.0218921
NSL1	E4	-0.241299	10.0741	12.1076	0.0056843	0.111135	-0.24756	10.0741	160.161	1.02547e-25	7.33978e-25	-0.0754002	10.0741	3.30493	0.137889	0.29468	0.195036	10.0741	3.59483	0.130787	0.739251	0.0451421	10.0741	2.25825	0.228695	0.533453	-0.186399	10.0741	5.71889	0.0520794	0.540313	-0.150004	9.75451	0.997459	0.398666	0.863213	-0.102539	9.75451	4.44356	0.0758237	0.128897	0.105316	9.75451	1.28725	0.314531	0.609304	0.472067	9.75451	3.38689
NSUN4	E2	0.097422	9.98294	3.95488	0.219003	0.65347	-0.160075	9.98294	93.6583	1.1383e-09	3.65557e-09	-0.204107	9.98294	38.4101	0.000105957	0.000835436	-0.113195	9.98294	2.85582	0.299358	0.842645	0.00321768	9.98294	0.0142774	0.940039	1	0.102161	9.98294	3.28359	0.263077	0.78789	0.0929956	9.6307	0.465831	0.662604	1	-0.31882	9.6307	64.1187	9.83123e-08	4.44921e-07	-0.102489	9.6307	1.83779	0.361471	0.654806	-0.337975	9.6307	4.71561
NT5DC2	E2	0.0805258	9.9318	42.5691	0.0258363	0.265532	0.00189598	9.9318	0.277022	0.817617	0.858686	-0.0207648	9.9318	3.96095	0.484461	0.680781	-0.0288355	9.9318	2.29305	0.605833	1	0.0234463	9.9318	23.0505	0.101373	0.344983	0.150542	9.9318	40.1098	0.0289748	0.436389	0.142208	9.56951	21.1961	0.0888045	0.500739	0.170158	9.56951	104.172	0.000100299	0.000309142	0.0327704	9.56951	0.911849	0.728234	0.932568	-0.188361	9.56951	14.6248
NTNG1	E4	-0.0337682	10.2011	0.197237	0.673203	0.966611	-0.362383	10.2011	297.073	2.21859e-66	7.10428e-65	-0.237158	10.2011	26.7838	2.28402e-07	3.67345e-06	-0.0829981	10.2011	3.05186	0.0930615	0.679773	-0.0245418	10.2011	2.93202	0.100727	0.343863	-0.0918186	10.2011	1.82176	0.17711	0.730424	0.264167	9.87964	1.42475	0.23265	0.717108	-0.471917	9.87964	87.2826	1.12582e-20	1.45938e-19	-0.614724	9.87964	29.8128	4.86389e-08	3.02241e-06	-0.197185	9.87964	1.37832
NTPCR	E4	-0.163289	10.0009	8.65765	0.0521634	0.376849	-0.182124	10.0009	110.553	7.31236e-13	2.86561e-12	-0.0462782	10.0009	1.52529	0.430168	0.630563	-0.0315733	10.0009	0.114007	0.824154	1	0.0223546	10.0009	1.43181	0.42965	0.724453	-0.274246	10.0009	17.8934	0.00467199	0.212899	0.10933	9.66696	0.0513763	0.868066	1	0.0497612	9.66696	2.33522	0.215459	0.310604	0.202831	9.66696	5.80212	0.0800829	0.27841	0.201156	9.66696	0.630227
NTRK2	E2	-0.154013	10.8836	9.65239	0.00189211	0.056411	-0.289941	10.8836	321.173	1.34263e-71	5.19851e-70	-0.179268	10.8836	32.4585	1.22441e-08	2.62804e-07	-0.0170535	10.8836	0.0111414	0.915938	1	0.0803585	10.8836	4.87902	0.0271895	0.149833	-0.121576	10.8836	3.56873	0.0588831	0.566516	-0.357547	10.6494	10.4756	0.00121322	0.0474918	-0.185778	10.6494	35.4199	2.7396e-09	1.45904e-08	0.0733967	10.6494	1.68267	0.194598	0.4644	0.0957433	10.6494	0.0680665
NUDT21	E3	0.0864075	10.0519	2.80303	0.216407	0.650611	-0.0468354	10.0519	7.23587	0.0414344	0.0638214	-0.113221	10.0519	8.44874	0.0209068	0.071084	0.196163	10.0519	12.969	0.00853217	0.291863	0.0532853	10.0519	6.25229	0.065688	0.266653	-0.0407129	10.0519	0.215553	0.72556	1	0.366656	9.73783	1.78013	0.289757	0.771689	0.391999	9.73783	93.9489	8.52121e-17	8.37605e-16	0.332505	9.73783	15.5205	0.00135478	0.0152829	0.251501	9.73783	0.750872
NUDT6	E3	0.103457	9.94767	8.14228	0.174559	0.604455	-0.116916	9.94767	107.683	6.62014e-07	1.7443e-06	-0.0299377	9.94767	1.69067	0.546766	0.735644	0.0282651	9.94767	0.914683	0.656029	1	0.0181062	9.94767	3.07106	0.412934	0.712831	0.0727445	9.94767	2.91075	0.417141	0.885726	0.0345933	9.58927	0.0594923	0.894924	1	-0.10868	9.58927	12.7455	0.0666735	0.115444	0.0363117	9.58927	0.517652	0.715777	0.923537	0.111961	9.58927	1.52146
NVL	E3	-0.157816	10.0575	5.36846	0.0718581	0.437993	-0.23888	10.0575	150.355	7.32103e-23	4.67347e-22	-0.127394	10.0575	9.61947	0.013815	0.0512032	-0.175744	10.0575	3.35261	0.154152	0.739251	0.0184853	10.0575	0.382621	0.627467	0.869615	-0.111118	10.0575	2.11972	0.251425	0.78789	-0.468833	9.71623	6.50406	0.0369712	0.335917	-0.513689	9.71623	124.028	2.92755e-21	3.96559e-20	-0.282368	9.71623	8.98491	0.0127442	0.0801165	-0.183763	9.71623	0.558012
OCIAD2	E3	-0.0567902	9.96281	10.1473	0.10015	0.50142	-0.0742951	9.96281	25.1788	0.0116578	0.019758	-0.163621	9.96281	33.7965	0.00206165	0.0106946	0.00389898	9.96281	4.16156e-05	0.997878	1	-0.00257318	9.96281	0.174247	0.82946	0.979464	0.0794617	9.96281	8.31495	0.136106	0.700748	0.0908133	9.6214	4.0291	0.229509	0.715044	0.130819	9.6214	17.8037	0.00505511	0.0116117	-0.0606388	9.6214	0.520845	0.651262	0.879433	-0.0522034	9.6214	3.63044
OPA1	E2E4	-0.246686	10.197	10.3051	0.00463829	0.0983671	-0.233908	10.197	156.512	7.71854e-35	7.9383e-34	-0.227275	10.197	30.6004	1.35758e-07	2.33561e-06	0.106651	10.197	0.974907	0.392664	0.87295	-0.0292643	10.197	0.712072	0.463991	0.749618	-0.146223	10.197	3.14594	0.105323	0.655123	-0.259381	9.9021	2.62828	0.148182	0.605958	0.11247	9.9021	8.84349	0.00294782	0.00708912	0.114335	9.9021	1.78219	0.191848	0.460186	0.364302	9.9021	1.44991
OSBPL10	E2	-0.125011	10.1028	8.85158	0.021108	0.23534	-0.247477	10.1028	175.595	2.391e-28	1.9038e-27	-0.218355	10.1028	35.813	1.82468e-07	3.02785e-06	0.104107	10.1028	2.04142	0.270311	0.842645	-0.00376532	10.1028	0.335898	0.653754	0.88847	-0.180222	10.1028	6.22543	0.0486932	0.525107	-0.000871904	9.76818	0.255291	0.675166	1	-0.466389	9.76818	107.51	1.34176e-19	1.61996e-18	-0.0435934	9.76818	0.226428	0.634195	0.868731	-0.0964957	9.76818	2.12385
OSBPL8	E4	-0.127299	10.3763	2.35466	0.150965	0.600348	-0.307007	10.3763	296.625	2.77367e-66	8.86576e-65	-0.151007	10.3763	17.9754	2.24178e-05	0.000216762	0.337575	10.3763	7.95027	0.00830216	0.287614	0.0519141	10.3763	2.22201	0.163413	0.450958	0.0393524	10.3763	0.21825	0.663398	1	0.0206912	10.1163	0.0619958	0.812523	1	-0.10957	10.1163	8.02586	0.0046199	0.0107158	0.241749	10.1163	12.2955	0.000455893	0.00664458	0.550164	10.1163	3.84384
OTUD4	E2	0.0773775	10.0468	1.39585	0.371374	0.769326	-0.192461	10.0468	104.146	1.19555e-15	5.4508e-15	-0.128558	10.0468	10.0869	0.0154016	0.0559154	-0.0610532	10.0468	0.40946	0.631229	1	0.0645774	10.0468	5.46038	0.079118	0.296642	-0.0660177	10.0468	0.774723	0.503137	0.920785	0.15989	9.71475	0.679569	0.519639	0.906284	0.0211972	9.71475	0.331331	0.594667	0.696436	-0.0232847	9.71475	0.0837022	0.804373	0.97893	-0.554178	9.71475	7.32
OVOL2	E3	-0.0708896	9.95851	4.95716	0.25082	0.694109	-0.259633	9.95851	364.372	1.184e-24	8.11804e-24	-0.0570968	9.95851	6.19084	0.197086	0.374691	0.0793036	9.95851	4.59857	0.270426	0.842645	0.0353201	9.95851	9.56641	0.111547	0.366098	-0.0140266	9.95851	0.103251	0.866519	1	-0.147565	9.598	2.70685	0.374376	0.846933	-0.417804	9.598	165.487	1.37484e-12	9.84039e-12	-0.0600637	9.598	1.47783	0.50307	0.767561	-0.0728972	9.598	2.6269
OXR1	E3	-0.0485655	11.2108	0.387064	0.533849	0.891074	-0.326844	11.2108	464.449	1.50393e-102	1.88224e-100	-0.151237	11.2108	24.8336	6.27053e-07	9.112e-06	0.307714	11.2108	11.286	0.00078152	0.0703654	0.0614428	11.2108	2.7804	0.0954306	0.333594	-0.0640389	11.2108	0.666307	0.414346	0.884719	-0.27896	11.0365	2.72171	0.099021	0.517437	-0.0833989	11.0365	7.94501	0.00483074	0.0111496	0.185071	11.0365	11.634	0.000649914	0.00876845	-0.179539	11.0365	0.779541
PAK1	E3	-0.00295941	10.3562	0.0142881	0.917384	1	-0.325338	10.3562	360.96	3.32376e-80	1.81196e-78	-0.24646	10.3562	34.986	5.61212e-09	1.31755e-07	-0.0281944	10.3562	0.0980239	0.761669	1	-0.0178076	10.3562	0.353557	0.59046	0.841945	-0.0869514	10.3562	1.05888	0.332797	0.817098	0.0313115	10.0902	0.557916	0.496233	0.892075	-0.157226	10.0902	17.18	0.000111709	0.000342468	-0.0886999	10.0902	1.23594	0.26628	0.552907	-0.0837634	10.0902	0.28785
PAK2	E2	0.164018	10.0774	5.0864	0.0600614	0.39993	-0.142578	10.0774	47.9353	4.38507e-09	1.35722e-08	-0.101098	10.0774	5.61581	0.0519912	0.144125	-0.0222666	10.0774	0.0428152	0.855542	1	0.126248	10.0774	16.3137	0.000739537	0.010236	0.124041	10.0774	2.45996	0.186356	0.730424	0.216407	9.73858	1.26746	0.330573	0.806667	-0.0463789	9.73858	0.870586	0.449892	0.560339	0.111049	9.73858	1.4396	0.279332	0.568388	-0.10647	9.73858	0.186943
PALLD	E3	-0.0458297	10.0833	0.529171	0.52241	0.883771	-0.230864	10.0833	135.335	7.47786e-21	4.34871e-20	-0.167361	10.0833	21.9337	0.000107023	0.000841596	0.067267	10.0833	0.845687	0.484574	0.97298	-0.0104399	10.0833	0.380451	0.632905	0.873494	0.00378327	10.0833	0.00306141	0.968768	1	-0.0973169	9.73309	0.367845	0.593438	0.960836	-0.414179	9.73309	80.2522	1.41486e-13	1.089e-12	-0.0117337	9.73309	0.0116695	0.928427	1	0.114586	9.73309	0.341676
PALM2-AKAP2	E4	-0.00887415	10.061	0.186207	0.740449	0.997003	-0.187339	10.061	89.4579	1.33138e-14	5.73885e-14	-0.269343	10.061	42.3416	1.61727e-07	2.71664e-06	0.116803	10.061	10.4461	0.013011	0.36393	-0.048556	10.061	2.71709	0.182755	0.482676	-0.0202861	10.061	0.293129	0.675064	1	0.0808698	9.71786	0.0905392	0.809784	1	-0.134377	9.71786	8.01137	0.0162689	0.0333408	-0.438205	9.71786	20.9738	0.000162497	0.00285647	0.210376	9.71786	3.81582
PAPOLA	E2	-0.122486	10.122	2.42392	0.187821	0.614595	-0.11047	10.122	32.2397	2.17708e-07	5.93875e-07	-0.189685	10.122	21.3419	2.9519e-05	0.000276111	-0.0656234	10.122	0.286155	0.648314	1	0.160657	10.122	26.1108	1.54234e-05	0.000388843	0.102818	10.122	1.63756	0.276525	0.78789	0.39135	9.8345	3.34031	0.0987743	0.516919	0.409753	9.8345	94.8712	1.3359e-21	1.84903e-20	0.585849	9.8345	46.1659	1.3163e-10	1.51904e-08	0.234741	9.8345	0.515278
PAQR5	E4	0.0209809	9.92475	5.34434	0.575206	0.912848	-0.0400336	9.92475	141.172	0.00400131	0.00723191	-0.00911315	9.92475	1.502	0.780603	0.908268	0.108517	9.92475	39.2329	0.125308	0.739251	-0.00768222	9.92475	10.8043	0.42931	0.724432	-0.0066478	9.92475	1.30324	0.786147	1	-0.0926913	9.56057	25.4811	0.189792	0.668412	-0.00265683	9.56057	0.0313085	0.964741	1	-0.00965772	9.56057	2.98447	0.650125	0.878915	-0.194794	9.56057	29.0785
PARD3B	E3	-0.106614	10.0521	5.27358	0.0216556	0.238897	-0.11801	10.0521	41.5468	2.05886e-06	5.22043e-06	-0.282421	10.0521	54.336	5.85795e-08	1.09127e-06	-0.0192342	10.0521	0.0356808	0.87811	1	-0.0963027	10.0521	12.03	0.00941634	0.0719154	0.0382471	10.0521	0.319905	0.687397	1	-0.495691	9.67893	16.3114	0.000540459	0.0270634	-0.314336	9.67893	74.89	3.63256e-10	2.10561e-09	-0.263047	9.67893	9.48507	0.0208084	0.113697	-0.280375	9.67893	1.94282
PATL1	E3	0.0384092	9.95835	1.17791	0.563751	0.905793	-0.0947303	9.95835	51.2766	0.000105606	0.00022969	-0.0419925	9.95835	2.49062	0.39967	0.602351	-0.0690716	9.95835	1.18673	0.554525	1	0.042512	9.95835	8.18831	0.129345	0.39597	-0.191609	9.95835	18.4609	0.0218086	0.394949	-0.224969	9.60328	5.40597	0.184899	0.662211	-0.057173	9.60328	2.47171	0.36692	0.480645	0.19987	9.60328	9.89432	0.0674274	0.251296	-0.056276	9.60328	0.144385
PAWR	E2	0.12639	9.95016	15.2304	0.0777314	0.452306	-0.0182799	9.95016	4.15441	0.336514	0.411119	-0.138996	9.95016	37.6525	0.00198661	0.0103628	0.0442246	9.95016	3.73685	0.3897	0.870596	-0.00467139	9.95016	0.760021	0.695106	0.914406	-0.164161	9.95016	13.5408	0.0833898	0.603626	-0.0396744	9.58997	0.229551	0.823982	1	0.0476614	9.58997	3.39852	0.369553	0.483203	-0.184934	9.58997	6.5281	0.189336	0.457123	0.190768	9.58997	11.4129
PBOV1	E3	0.000123178	9.91996	-1.15544e-11	1	1	-0.000501393	9.91996	5.1242	0.84536	0.881399	-0.0085635	9.91996	461.344	0.0648908	0.16981	6.93977e-05	9.91996	1.74857e-09	1	1	-0.00219197	9.91996	221.008	0.201549	0.501987	0.0114109	9.91996	150.242	0.292063	0.78789	-0.00645542	9.55544	1.61816e-09	1	1	-0.0151116	9.55544	397.175	0.0131901	0.0275684	-0.0142027	9.55544	115.992	0.179734	0.44494	-0.00312908	9.55544	1.51234e-09
PCBP2	E4	-0.011068	10.1636	0.00967644	0.924447	1	-0.15212	10.1636	59.7714	1.43133e-13	5.8693e-13	-0.0759288	10.1636	3.08166	0.110081	0.251022	0.10956	10.1636	0.996274	0.378503	0.865356	0.111081	10.1636	11.5887	0.00235402	0.0252022	0.0735282	10.1636	0.800948	0.41986	0.885926	0.339155	9.87716	2.34966	0.162517	0.628702	0.236348	9.87716	34.3471	4.745e-09	2.46502e-08	0.460598	9.87716	27.6695	1.8673e-07	9.61903e-06	-0.204605	9.87716	0.872053
PCDHB15	E3	-0.0152508	9.92492	2.32919	0.70722	0.982315	-0.014448	9.92492	28.1552	0.193871	0.255089	-0.00736504	9.92492	0.492162	0.872861	0.962074	-0.00227109	9.92492	7.99462e-10	0.999977	1	0.029896	9.92492	41.4681	0.11154	0.366098	-0.105087	9.92492	28.6103	0.176881	0.730424	-0.18878	9.55977	56.04	0.0759	0.471312	-0.0290174	9.55977	36.8223	0.152059	0.232025	0.0747065	9.55977	46.2307	0.102045	0.32281	0.00702897	9.55977	8.45046e-10
PCK1	E2	-0.000269174	9.91979	-5.77669e-10	1	1	-0.00216725	9.91979	465.173	0.0572911	0.0858378	0.000190515	9.91979	1.14426e-10	0.999991	1	7.33869e-05	9.91979	3.5989e-10	0.999985	1	-7.13028e-05	9.91979	-7.15165e-10	1	1	-0.0151382	9.91979	219.103	0.191053	0.730424	-0.00288523	9.55525	8.91757e-09	0.99994	1	-0.00441138	9.55525	233.965	0.184758	0.273547	-0.00120735	9.55525	1.58254e-08	0.99994	1	-0.00131235	9.55525	7.62515e-09
PCSK1	E4	-0.08372	9.99062	5.97059	0.153718	0.601094	-0.333448	9.99062	498.704	8.70351e-47	1.43354e-45	-0.079554	9.99062	13.8263	0.0284672	0.090214	-0.0888191	9.99062	2.89661	0.318591	0.842645	-0.0410335	9.99062	15.4935	0.0217803	0.129036	0.0321435	9.99062	3.28191	0.293183	0.78789	0.212175	9.66324	3.05206	0.24626	0.73235	0.119589	9.66324	15.8882	0.00415288	0.00972397	0.101992	9.66324	0.179305	0.779901	0.965478	0.0697874	9.66324	0.0349401
PDCD2	E2	-0.172352	9.96294	23.2484	0.00893721	0.144393	-0.0891599	9.96294	39.9261	0.000428061	0.000870623	-0.0896107	9.96294	9.49102	0.093719	0.222167	-0.0402862	9.96294	0.619448	0.668938	1	0.0360244	9.96294	6.79536	0.158886	0.4444	0.194071	9.96294	19.1423	0.0174401	0.368982	-0.325408	9.61623	21.4318	0.00489682	0.115992	-0.0502895	9.61623	0.629784	0.653506	0.748621	-0.0999565	9.61623	1.74392	0.415676	0.694128	-0.158098	9.61623	6.78015
PDE4B	E3E4	-0.145915	10.769	4.81978	0.0281395	0.277369	-0.486598	10.769	511.447	1.11928e-112	2.18592e-110	-0.192551	10.769	20.308	6.60721e-06	7.39442e-05	-0.314837	10.769	5.88428	0.0152801	0.389196	-0.059648	10.769	6.43869	0.011169	0.0812892	0.00107351	10.769	0.000196992	0.988802	1	-0.205076	10.4424	1.51036	0.219111	0.704423	-0.351038	10.4424	54.8034	1.43073e-13	1.10073e-12	0.303914	10.4424	11.669	0.000637833	0.00865972	-0.160415	10.4424	0.299446
PDE5A	E4	-0.00155461	10.2383	0.00720719	0.971144	1	-0.213123	10.2383	104.738	6.63831e-19	3.55135e-18	-0.179267	10.2383	15.9305	0.000105171	0.000829972	0.337168	10.2383	6.10267	0.0146383	0.381123	0.126987	10.2383	10.4946	0.00121553	0.0148981	-0.234034	10.2383	7.3879	0.00656864	0.252134	-0.377911	9.87839	3.98805	0.0473584	0.379276	0.0275774	9.87839	0.555633	0.456041	0.566445	0.313869	9.87839	10.9209	0.000953944	0.0116679	-0.306832	9.87839	1.94601
PDIA3	E2	-0.0103171	10.0679	0.0202135	0.908105	1	-0.244687	10.0679	156.064	1.75609e-24	1.19484e-23	-0.197411	10.0679	23.4159	6.95169e-05	0.000582106	0.178792	10.0679	3.05678	0.16751	0.739251	0.0930367	10.0679	9.82852	0.0133597	0.0915789	-0.0646099	10.0679	0.694858	0.495773	0.916984	0.212345	9.75446	0.619961	0.507015	0.897835	-0.0703528	9.75446	1.64772	0.350023	0.462922	0.0929871	9.75446	1.06971	0.392135	0.675818	0.0534104	9.75446	0.0103796
PDIA4	E3	-0.105814	9.94686	7.43014	0.189377	0.616272	-0.0360373	9.94686	10.5151	0.128399	0.177512	-0.0695682	9.94686	10.9891	0.109218	0.249552	0.288103	9.94686	32.7174	0.00656389	0.260387	0.0442991	9.94686	8.79211	0.157764	0.442727	-0.0506393	9.94686	1.55455	0.550531	0.952504	0.263136	9.58907	6.60699	0.1851	0.662211	0.0744445	9.58907	8.66125	0.117828	0.188126	-0.0447527	9.58907	0.831587	0.634995	0.869291	0.57544	9.58907	21.9132
PDLIM5	E2E4	-0.110774	9.9958	6.02648	0.0723655	0.438187	-0.0425468	9.9958	7.11268	0.0927821	0.132699	-0.108534	9.9958	10.8823	0.0366184	0.10967	0.031879	9.9958	0.217251	0.77699	1	0.102986	9.9958	19.8579	0.00548679	0.0484407	-0.257927	9.9958	25.7621	0.000249717	0.048124	-0.227542	9.63693	1.8861	0.349225	0.824123	0.00784739	9.63693	0.144443	0.812356	0.883495	0.0772682	9.63693	0.945393	0.570165	0.819687	0.119395	9.63693	0.308425
PELI1	E2	-0.150849	10.0068	18.7626	0.00356789	0.0829954	-0.134974	10.0068	55.3005	2.52283e-07	6.84724e-07	-0.151239	10.0068	20.1068	0.00205405	0.0106707	-0.0710466	10.0068	0.733742	0.519721	0.995923	0.078112	10.0068	9.9164	0.0310006	0.162664	0.0160657	10.0068	0.0595125	0.862146	1	-0.115063	9.6621	3.29415	0.191857	0.671457	-0.1039	9.6621	5.27097	0.0807845	0.136176	0.0664919	9.6621	0.422456	0.64552	0.876408	0.00883324	9.6621	0.0191047
PEX19	E3	-0.0135507	9.91991	341.026	0.151005	0.600371	-0.00108604	9.91991	52.3249	0.573536	0.643693	0.00710284	9.91991	402.699	0.118927	0.265591	7.28149e-05	9.91991	-5.0111e-09	1	1	-0.0024111	9.91991	274.509	0.198085	0.499574	0.0114182	9.91991	186.147	0.288751	0.78789	-0.0307947	9.55545	22.5725	0.597948	0.963789	0.00274988	9.55545	9.4303	0.734244	0.820175	0.00206141	9.55545	-2.28427e-10	1	1	0.00225785	9.55545	2.17439e-09
PEX5	E3	0.0630879	9.99071	3.6755	0.239657	0.68136	-0.0907748	9.99071	33.2864	0.000174719	0.000371114	-0.0769872	9.99071	5.24283	0.155244	0.320775	-0.0363312	9.99071	0.209865	0.778666	1	0.0128017	9.99071	1.15631	0.509276	0.779888	-0.0331131	9.99071	0.295293	0.737209	1	0.253158	9.64571	2.78397	0.273852	0.760087	-0.00632459	9.64571	0.0332766	0.899238	0.953138	0.119536	9.64571	2.25852	0.31071	0.605002	0.147819	9.64571	0.906531
PEX5L	E4	-0.502289	10.9912	27.718	1.40926e-07	2.94651e-05	-0.315269	10.9912	326.627	8.86241e-73	3.62075e-71	-0.253984	10.9912	35.9244	2.06517e-09	5.35798e-08	0.0689591	10.9912	0.590521	0.442221	0.930408	0.226875	10.9912	75.801	3.23034e-18	6.52382e-16	-0.175484	10.9912	4.15568	0.0415002	0.496182	-0.723123	10.7658	8.14433	0.00432776	0.109762	-0.205501	10.7658	33.8307	6.18192e-09	3.17621e-08	-0.0502412	10.7658	0.307885	0.578992	0.826693	0.382307	10.7658	1.82616
PFDN4	E4	0.0687642	10.0162	2.36895	0.300038	0.746499	-0.172431	10.0162	97.5354	1.78645e-12	6.86462e-12	-0.155005	10.0162	17.8542	0.00316474	0.015342	-0.0206517	10.0162	0.0715548	0.85677	1	0.0890291	10.0162	23.7444	0.00104654	0.01333	0.138432	10.0162	5.21614	0.121681	0.69268	0.328056	9.7006	0.818038	0.50826	0.898338	0.248075	9.7006	44.1825	7.13554e-08	3.2709e-07	0.117136	9.7006	1.61746	0.351223	0.646699	0.0395907	9.7006	2.2796
PGAM1	E4	-0.00299317	10.274	0.0026374	0.959197	1	-0.150558	10.274	67.6274	2.0216e-16	9.58586e-16	-0.0528871	10.274	1.75025	0.45574	0.65434	-0.113302	10.274	0.897946	0.383829	0.868166	0.0756714	10.274	5.64074	0.0300807	0.159466	0.0299283	10.274	0.139595	0.741339	1	0.328876	10.0666	0.543007	0.479242	0.884709	0.272573	10.0666	55.7199	8.9969e-14	7.04064e-13	0.336435	10.0666	19.235	1.16664e-05	0.000325998	0.243252	10.0666	0.24938
PGM2L1	E2E3E4	0.0869262	10.2885	1.7172	0.262023	0.709175	-0.179372	10.2885	111.732	3.3817e-22	2.09771e-21	-0.212067	10.2885	28.9634	1.24563e-06	1.6758e-05	0.0172449	10.2885	0.00996464	0.932837	1	-0.0212176	10.2885	1.37374	0.322711	0.620475	-0.151844	10.2885	3.67772	0.0995584	0.642466	0.515602	10.0319	2.98529	0.12752	0.567944	0.227782	10.0319	45.1032	1.9626e-11	1.26742e-10	0.35959	10.0319	19.41	1.06464e-05	0.000300808	0.243223	10.0319	0.40248
PGR	E4	0.0234333	9.92167	29.7297	0.391523	0.783934	0.00250064	9.92167	2.46687	0.844339	0.880765	-0.00952614	9.92167	12.4271	0.55905	0.745757	-0.0264732	9.92167	72.8284	0.177265	0.739251	-0.00410082	9.92167	19.3242	0.487795	0.76501	0.0585395	9.92167	95.5221	0.126418	0.700257	-0.0348933	9.55676	24.0385	0.452158	0.876653	-0.00203255	9.55676	1.71978	0.848286	0.912023	-0.0545775	9.55676	151.431	0.0559554	0.221928	-0.071521	9.55676	30.3436
PHAX	E4	-0.0342038	10.0293	0.438438	0.642768	0.951113	-0.142353	10.0293	60.6559	2.19983e-08	6.45883e-08	-0.00483585	10.0293	0.00904034	0.985273	1	0.099036	10.0293	2.46017	0.274879	0.842645	0.0720069	10.0293	9.96801	0.0267669	0.148564	0.010284	10.0293	0.0176561	0.929115	1	-0.109122	9.70859	1.57096	0.331488	0.80779	0.00651617	9.70859	0.160284	0.691	0.781647	0.269548	9.70859	9.33119	0.0143089	0.0871273	-0.143341	9.70859	3.54249
PHF10	E2	0.00078374	9.97716	0.0170462	0.938794	1	0.0198287	9.97716	1.11978	0.523354	0.597014	-0.0717642	9.97716	5.36225	0.147513	0.309322	-0.0257333	9.97716	0.0230995	0.927121	1	0.0882711	9.97716	25.4003	0.00257449	0.0270733	0.0306826	9.97716	0.465498	0.683803	1	-0.076491	9.63095	0.812785	0.556792	0.934577	0.34088	9.63095	79.6774	1.76025e-09	9.52591e-09	0.232626	9.63095	10.4107	0.0289206	0.143169	0.0897307	9.63095	0.0872162
PHF11	E3	0.0310761	10.0033	0.274681	0.695058	0.977733	-0.0994022	10.0033	27.218	0.000768476	0.00151816	-0.168351	10.0033	21.7694	0.00146745	0.00802446	0.032318	10.0033	0.0909047	0.835592	1	0.0367795	10.0033	1.89691	0.349948	0.650553	-0.0716494	10.0033	1.15228	0.466649	0.901346	-0.450537	9.64513	8.23861	0.0431162	0.363178	-0.346057	9.64513	68.0111	3.9133e-09	2.04973e-08	-0.501627	9.64513	36.3648	1.90895e-05	0.000483965	-0.109736	9.64513	0.373941
PHF21A	E4	-0.14013	10.2684	4.11599	0.042485	0.344611	-0.284627	10.2684	205.34	1.76229e-46	2.86284e-45	-0.255668	10.2684	33.7794	6.20993e-09	1.44265e-07	0.14654	10.2684	1.55918	0.225587	0.784206	0.0580938	10.2684	2.89102	0.0939025	0.330593	-0.108723	10.2684	2.08832	0.148435	0.710276	-0.329349	9.96342	3.60532	0.0576215	0.415363	-0.300613	9.96342	46.9653	7.617e-12	5.10828e-11	0.0472052	9.96342	0.238873	0.625031	0.862295	0.49076	9.96342	3.42856
PHYHD1	E4	-0.111057	9.93202	6.64152	0.367001	0.765893	-0.0108794	9.93202	7.06654	0.401432	0.478231	-0.0203552	9.93202	10.0363	0.332132	0.527362	0.0430831	9.93202	5.11328	0.488811	0.976408	0.0225064	9.93202	25.9677	0.119323	0.380379	-0.0301136	9.93202	3.53201	0.560046	0.959802	-0.3208	9.56667	44.3514	0.0249678	0.276471	-0.0597629	9.56667	34.2459	0.0767395	0.13016	-0.03249	9.56667	1.58852	0.707374	0.917959	-0.0297419	9.56667	3.14168e-10
PIAS2	E3	-0.0797221	10.1889	1.11067	0.356813	0.758405	-0.275815	10.1889	217.094	1.33497e-45	2.08481e-44	-0.164676	10.1889	17.0474	9.28355e-05	0.000747969	-0.072929	10.1889	0.433463	0.56281	1	-0.0202502	10.1889	0.388213	0.59058	0.841945	-0.1776	10.1889	4.98405	0.0425308	0.497457	-0.250128	9.87703	2.34669	0.171702	0.64291	-0.166046	9.87703	14.5899	0.000380989	0.00107938	0.0712265	9.87703	0.719251	0.42796	0.702995	-0.142204	9.87703	0.539915
PICALM	E3E4	-0.280963	10.3479	13.2536	0.000272328	0.014193	-0.326292	10.3479	257.282	9.33423e-58	2.22968e-56	-0.198062	10.3479	20.2333	6.87028e-06	7.63593e-05	0.254524	10.3479	7.66693	0.00562627	0.244797	0.0339045	10.3479	1.37412	0.241111	0.550303	-0.166988	10.3479	4.20505	0.040309	0.490329	-0.126387	10.0573	0.521262	0.47032	0.882487	-0.141229	10.0573	10.6743	0.00108973	0.00284009	0.0854463	10.0573	0.865807	0.352139	0.647372	0.384865	10.0573	3.51083
PIK3C2B	E3	-0.095274	10.0246	2.28046	0.268398	0.71675	-0.165732	10.0246	79.5973	4.285e-11	1.51428e-10	-0.162598	10.0246	17.5821	0.00186827	0.00984374	0.0858518	10.0246	1.12657	0.446853	0.936392	-0.104963	10.0246	15.6051	0.00266632	0.0278904	-0.116425	10.0246	2.67353	0.231347	0.764885	-0.297719	9.67093	3.1675	0.179121	0.655226	-0.26457	9.67093	34.533	7.1893e-06	2.59586e-05	-0.234843	9.67093	6.61069	0.0492491	0.203217	0.190252	9.67093	0.905353
PIP4K2A	E4	-0.428851	10.4558	34.9155	1.4012e-07	2.94651e-05	-0.336696	10.4558	245.081	1.37007e-46	2.23384e-45	-0.188554	10.4558	17.252	0.000132455	0.00101402	-0.0601922	10.4558	0.352981	0.57462	1	0.0164704	10.4558	0.63098	0.427	0.723693	-0.117675	10.4558	3.02704	0.0853061	0.607318	-0.355382	10.1107	3.6829	0.058014	0.415903	-0.226338	10.1107	22.8108	1.90268e-06	7.38302e-06	0.10159	10.1107	0.99017	0.399208	0.681584	-0.0289256	10.1107	0.0168737
PIP5K1B	E4	-0.0945552	10.1214	1.70499	0.279848	0.728818	-0.26541	10.1214	180.819	1.39753e-33	1.37373e-32	-0.363363	10.1214	111.395	1.5154e-23	4.41503e-21	0.0541621	10.1214	0.299148	0.662558	1	-0.0174117	10.1214	0.762628	0.478223	0.759243	-0.129143	10.1214	2.83087	0.139048	0.701145	-0.0118235	9.79731	0.196131	0.717534	1	-0.0213923	9.79731	0.159693	0.740527	0.825481	-0.15449	9.79731	3.39988	0.0941741	0.307715	0.241105	9.79731	0.697009
PKD2	E3	-0.133539	10.2503	2.89809	0.0945349	0.490054	-0.34544	10.2503	288.779	1.38884e-64	4.15529e-63	-0.296176	10.2503	50.6808	1.10127e-12	5.43658e-11	0.281762	10.2503	5.5064	0.0224235	0.449038	0.0232664	10.2503	0.448756	0.506855	0.778159	-0.249526	10.2503	10.3114	0.00132291	0.127085	-0.363408	9.91643	3.08062	0.0868916	0.498344	-0.634723	9.91643	190.162	6.72943e-43	2.98989e-41	-0.328192	9.91643	13.2297	0.000276829	0.00442409	0.285814	9.91643	1.18735
PLA2G16	E2	0.0705287	10.092	0.962864	0.449983	0.831299	-0.125553	10.092	42.6453	8.4038e-07	2.19733e-06	-0.0577518	10.092	3.32742	0.166216	0.336292	0.243524	10.092	7.37278	0.041019	0.561694	0.176203	10.092	58.513	4.25643e-11	3.28893e-09	-0.114352	10.092	2.71647	0.21175	0.735514	-0.519765	9.74436	8.88091	0.0162341	0.224468	-0.0553549	9.74436	1.91393	0.251908	0.35357	0.0546588	9.74436	0.0937012	0.827023	0.992371	0.59283	9.74436	7.00588
PLAUR	E2	-0.144837	9.93795	31.5437	0.0243282	0.257607	0.00913937	9.93795	1.94144	0.547622	0.619686	0.0870537	9.93795	22.3105	0.0539618	0.148293	-0.259748	9.93795	25.7232	0.0370309	0.544345	0.017125	9.93795	7.73674	0.269506	0.579702	-0.0473212	9.93795	4.83799	0.379709	0.864703	0.0949019	9.57837	1.3539	0.60853	0.971417	0.163989	9.57837	55.3747	0.000922216	0.00243748	0.0716424	9.57837	2.48971	0.487089	0.754434	-0.978185	9.57837	47.881
PLCD3	E4	0.0806237	9.93128	6.00521	0.40658	0.796137	-0.0231493	9.93128	20.4098	0.133742	0.183925	-0.0630256	9.93128	19.8551	0.135769	0.291518	-0.00894658	9.93128	3.84073e-09	1	1	-0.000994617	9.93128	0.48795	0.822321	0.977253	-0.0397967	9.93128	17.5405	0.176972	0.730424	0.551624	9.5698	40.2932	0.00814532	0.153835	0.0188894	9.5698	1.46077	0.62332	0.720652	0.248986	9.5698	27.478	0.0258808	0.132789	-0.00421009	9.5698	-2.57329e-11
PLCE1	E4	0.541854	9.98556	109.049	3.99417e-10	1.61328e-07	-0.0573145	9.98556	20.9821	0.00695645	0.0121683	-0.0576279	9.98556	4.53688	0.31796	0.511753	0.10565	9.98556	7.4592	0.118861	0.739251	-0.00908031	9.98556	1.38737	0.495355	0.770274	0.103632	9.98556	3.8523	0.217976	0.743832	0.907033	9.6257	51.5964	7.31151e-06	0.00112742	-0.0887089	9.6257	12.7193	0.0327969	0.0620929	0.0502241	9.6257	1.29201	0.421118	0.69754	0.195299	9.6257	6.86911
PLCH1	E4	-0.132315	10.0898	2.96596	0.111834	0.53199	-0.232045	10.0898	113.954	9.95209e-26	7.13755e-25	-0.121476	10.0898	7.8894	0.00754445	0.0312686	0.0669145	10.0898	1.0698	0.363671	0.854428	-0.0268469	10.0898	1.39003	0.300669	0.598443	0.00466074	10.0898	0.00106775	0.976522	1	-0.0792525	9.75241	0.146367	0.712345	1	-0.0346604	9.75241	0.310982	0.578017	0.68093	0.0159235	9.75241	0.06853	0.793494	0.972684	-0.0123939	9.75241	0.760234
PLEKHA3	E3	-0.0668464	10.0114	1.36652	0.430409	0.81529	-0.0780614	10.0114	20.2929	0.00138167	0.00264716	-0.0191625	10.0114	0.245128	0.762443	0.897419	0.0174383	10.0114	0.130663	0.81079	1	0.0397496	10.0114	4.41031	0.157099	0.441417	-0.0760193	10.0114	1.3464	0.428782	0.888183	-0.00454094	9.67921	0.487722	0.611938	0.973971	0.176156	9.67921	19.442	0.000480004	0.00133312	0.359495	9.67921	18.7207	0.000891046	0.0111284	0.280127	9.67921	1.58379
PLEKHB2	E4	-0.0949894	10.1345	1.46343	0.322483	0.746499	-0.227187	10.1345	154.658	3.68957e-31	3.29337e-30	-0.099445	10.1345	6.04431	0.0365832	0.109607	-0.108961	10.1345	1.05241	0.400061	0.880984	0.0558729	10.1345	4.35782	0.0896281	0.320111	-0.0197178	10.1345	0.0385098	0.867423	1	0.126026	9.85031	0.331636	0.618007	0.97977	0.194689	9.85031	27.7888	1.37906e-07	6.1533e-07	0.410654	9.85031	23.2734	1.06127e-05	0.000300332	0.13371	9.85031	0.0106638
PLEKHG1	E4	-0.112841	10.0284	4.18327	0.103273	0.508455	-0.247403	10.0284	179.483	2.41393e-24	1.63617e-23	-0.0775682	10.0284	3.56562	0.176	0.349367	-0.238534	10.0284	8.99118	0.0316718	0.509788	0.0665711	10.0284	6.89314	0.0596925	0.251799	0.0215101	10.0284	0.150729	0.784045	1	-0.271426	9.67339	2.93504	0.159523	0.622836	-0.379193	9.67339	73.1464	5.48482e-11	3.41423e-10	-0.170537	9.67339	4.69654	0.109688	0.337787	-0.011634	9.67339	0.084442
PLEKHM1	E3	-0.0160891	9.98277	0.0989861	0.845449	1	-0.14567	9.98277	78.9253	1.04366e-08	3.13998e-08	-0.128853	9.98277	15.3029	0.0127138	0.0478735	-0.206916	9.98277	8.73366	0.065584	0.621589	0.0505428	9.98277	5.75226	0.135155	0.404588	-0.0349826	9.98277	0.376415	0.700321	1	-0.0354247	9.62675	0.196892	0.776785	1	-0.175094	9.62675	18.4453	0.00479559	0.0110742	0.000717293	9.62675	8.73038e-06	0.997643	1	0.0285771	9.62675	0.0147039
PLEKHM3	E2	-0.121256	10.1301	2.80963	0.162312	0.602698	-0.358416	10.1301	355.382	3.88196e-67	1.28104e-65	-0.196761	10.1301	21.267	5.86197e-05	0.000500379	-0.225395	10.1301	5.07524	0.0600528	0.605709	-0.0260473	10.1301	0.710493	0.48152	0.761113	-0.046512	10.1301	0.340587	0.616783	0.992168	-0.527438	9.80916	7.6591	0.0153921	0.217447	-0.517276	9.80916	136.684	1.06406e-28	2.23263e-27	-0.0868943	9.80916	0.849194	0.383932	0.669782	-0.543171	9.80916	5.06348
PML	E3E4	-0.0377157	9.94642	1.09578	0.625718	0.939847	-0.0889694	9.94642	66.0296	0.000114234	0.000247417	-0.063943	9.94642	8.87402	0.164106	0.333199	-0.17626	9.94642	11.5407	0.111722	0.735945	-0.00587918	9.94642	0.32842	0.790824	0.961783	-0.0191869	9.94642	0.269515	0.808399	1	-0.368122	9.58673	19.1125	0.0319503	0.311991	0.0181795	9.58673	0.678854	0.668327	0.761867	0.104456	9.58673	4.11546	0.306736	0.600893	-0.0554996	9.58673	0.160034
PNKP	E2	-0.101598	9.97173	4.17006	0.23624	0.676733	-0.206555	9.97173	180.933	1.83593e-15	8.27075e-15	-0.178576	9.97173	34.9567	0.000613784	0.00382206	0.098751	9.97173	2.18799	0.395423	0.875911	-0.00148576	9.97173	0.0482715	0.899094	1	0.0128272	9.97173	0.0407638	0.910492	1	-0.544518	9.62068	16.4491	0.0119731	0.19195	-0.583311	9.62068	237.994	2.8191e-22	4.05461e-21	-0.465352	9.62068	42.6796	5.10177e-05	0.00110832	-0.390588	9.62068	11.9095
POGK	E2E3	0.0143882	9.99295	0.076466	0.853793	1	-0.0732832	9.99295	17.4349	0.00647656	0.0113759	-0.0240136	9.99295	0.441987	0.672311	0.837919	-0.0181797	9.99295	0.07084	0.862929	1	0.101012	9.99295	19.6322	0.0038046	0.0363915	-0.0214	9.99295	0.112364	0.824322	1	0.237398	9.64518	2.17068	0.311585	0.790391	-0.00679657	9.64518	0.00796407	0.953775	0.995506	0.231929	9.64518	8.09391	0.0430962	0.185719	-0.200741	9.64518	1.98261
POLD3	E3	-0.0387238	10.0297	0.396378	0.648068	0.95394	-0.221176	10.0297	142.933	5.71163e-20	3.19909e-19	-0.201754	10.0297	26.8475	0.000112146	0.00087723	0.048505	10.0297	0.525438	0.607607	1	-0.0940654	10.0297	13.1513	0.00855853	0.067481	-0.0449456	10.0297	0.387503	0.644113	1	-0.421319	9.69428	6.88068	0.041605	0.357256	-0.176657	9.69428	15.61	0.00110736	0.00288225	0.0875019	9.69428	0.934125	0.45458	0.725722	0.348157	9.69428	3.56419
POLDIP3	E3E4	-0.205756	9.9771	15.2961	0.0157659	0.202592	-0.157657	9.9771	96.298	1.15989e-09	3.72154e-09	-0.0892635	9.9771	7.51935	0.0942331	0.223018	0.031244	9.9771	0.228586	0.772225	1	0.089919	9.9771	16.5822	0.01234	0.0869227	-0.0962254	9.9771	2.69219	0.31048	0.792705	-0.170532	9.62732	1.4352	0.429637	0.875067	-0.00142122	9.62732	0.000500158	0.982158	1	-0.173767	9.62732	5.02423	0.136275	0.380844	0.0303444	9.62732	0.0431686
POLR1D	E4	-0.0908644	10.0162	2.36861	0.287714	0.738033	-0.124274	10.0162	47.1306	1.15153e-06	2.98064e-06	-0.11282	10.0162	8.95883	0.0391015	0.11551	-0.0571904	10.0162	0.586301	0.598284	1	0.04549	10.0162	4.53311	0.14513	0.421928	-0.199605	10.0162	9.63615	0.0319035	0.453533	0.0592753	9.68382	0.00173242	0.975917	1	0.154222	9.68382	16.7397	0.0011777	0.00305059	-0.0440399	9.68382	0.369571	0.622911	0.860503	0.195637	9.68382	0.495802
POLR1E	E2	-0.0335902	9.93108	16.6934	0.175415	0.604455	-0.0534939	9.93108	55.7375	0.013775	0.0231105	-0.0441467	9.93108	9.03626	0.315895	0.509676	0.056952	9.93108	28.2906	0.0779277	0.652032	0.00833499	9.93108	3.77012	0.519566	0.788399	-0.0090078	9.93108	0.469291	0.820092	1	-0.0608008	9.57183	10.7303	0.208012	0.690474	-0.0379482	9.57183	2.96924	0.517346	0.625631	-0.0216967	9.57183	0.163614	0.881518	1	0.00514215	9.57183	4.2148e-10
POLR3F	E4	-0.00630047	9.97344	0.115529	0.847255	1	-0.182411	9.97344	137.497	7.65286e-12	2.8317e-11	-0.0689087	9.97344	5.0379	0.200952	0.379202	0.101094	9.97344	5.9618	0.164642	0.739251	0.0401165	9.97344	6.69598	0.139359	0.412507	-0.0629533	9.97344	1.77884	0.444876	0.89298	-0.0641167	9.62029	1.19717	0.497361	0.892762	-0.38082	9.62029	96.099	5.09978e-10	2.91238e-09	-0.0983964	9.62029	1.86483	0.375371	0.663297	0.0380562	9.62029	3.53896e-10
POU2F2	E4	0.042042	10.0468	0.714669	0.55354	0.902126	-0.238726	10.0468	176.465	4.76168e-24	3.18617e-23	-0.159034	10.0468	18.5896	0.00158058	0.00853542	0.222054	10.0468	7.41333	0.0377667	0.549256	-0.00748472	10.0468	1.76954	0.350983	0.651251	0.0391014	10.0468	0.150556	0.781491	1	-0.252653	9.70366	5.1356	0.0942356	0.510855	-0.70195	9.70366	258.325	1.36932e-36	4.46524e-35	-0.34085	9.70366	14.5993	0.00357337	0.0317847	-0.311777	9.70366	2.07987
POU3F2	E2	-0.0882403	9.96189	3.45958	0.302071	0.746499	0.131284	9.96189	88.7531	1.16337e-07	3.24168e-07	0.0107966	9.96189	0.963366	0.610618	0.788484	-0.0233562	9.96189	0.340429	0.755536	1	0.0995034	9.96189	43.2633	0.000410735	0.00620186	-0.0211337	9.96189	0.210347	0.800635	1	-0.312955	9.60004	6.80318	0.144479	0.602012	0.475423	9.60004	198.61	2.24717e-15	1.97804e-14	0.126451	9.60004	16.319	0.0284262	0.141589	0.131493	9.60004	7.73813
PPFIA1	E2E4	0.00653124	10.1284	0.0102304	0.930565	1	-0.273066	10.1284	197.385	2.06705e-38	2.4216e-37	-0.195401	10.1284	20.9315	4.64587e-05	0.000409962	0.0918594	10.1284	0.707076	0.481538	0.971688	0.0306279	10.1284	0.955059	0.410924	0.711257	-0.12251	10.1284	2.32407	0.179807	0.730424	-0.425835	9.81712	5.9221	0.0230612	0.263879	-0.39924	9.81712	80.6091	1.95415e-17	2.00631e-16	-0.247253	9.81712	6.68824	0.0173542	0.0995355	0.534802	9.81712	4.34009
PPHLN1	E2	-0.14839	10.2497	3.72485	0.0796651	0.456418	-0.310616	10.2497	289.484	9.76898e-65	2.94761e-63	-0.222156	10.2497	28.4071	3.8777e-07	5.89516e-06	0.274359	10.2497	5.50104	0.0342284	0.529424	0.0880822	10.2497	6.63381	0.0203109	0.123197	0.103891	10.2497	1.4929	0.258019	0.78789	-0.0946687	9.95426	0.43073	0.530155	0.913331	-0.232577	9.95426	32.8717	1.01072e-08	5.057e-08	0.138804	9.95426	2.49167	0.136484	0.381202	0.416912	9.95426	2.06739
PPIH	E3	0.0366109	9.96238	1.15584	0.566672	0.906552	-0.195105	9.96238	186.619	4.83738e-14	2.03672e-13	-0.242295	9.96238	85.907	4.51685e-07	6.77414e-06	-0.155146	9.96238	8.90251	0.108596	0.727867	0.0294112	9.96238	4.02751	0.2846	0.586395	-0.0225462	9.96238	0.285886	0.771148	1	0.00127894	9.61038	0.629219	0.64843	1	-0.227608	9.61038	36.7521	0.000368535	0.0010476	-0.39215	9.61038	39.96	0.000217318	0.00362986	-0.143715	9.61038	1.59718
PPM1A	E3	-0.178236	10.1218	5.81179	0.0481118	0.362331	-0.111671	10.1218	36.3808	1.09484e-07	3.05695e-07	-0.0751376	10.1218	3.43204	0.117279	0.262603	-0.0178479	10.1218	0.000161389	0.989864	1	0.0021776	10.1218	0.0421965	0.871775	0.990718	-0.0252169	10.1218	0.0701503	0.808734	1	0.109385	9.82642	1.7771e-05	0.996637	1	0.359585	9.82642	81.6816	9.51543e-19	1.07098e-17	0.526571	9.82642	39.0738	4.79048e-09	3.9415e-07	0.322494	9.82642	0.954865
PPM1F	E2	0.0196495	9.98244	0.198531	0.786282	1	-0.0857968	9.98244	26.6984	0.00206655	0.00387699	-0.000455083	9.98244	0.000866918	0.978105	1	-0.0571626	9.98244	0.669089	0.619615	1	0.0213653	9.98244	3.28124	0.282224	0.586395	0.171576	9.98244	9.08492	0.0695277	0.569186	0.149471	9.63528	0.795421	0.569842	0.943296	0.0644643	9.63528	3.53836	0.167714	0.252509	0.328407	9.63528	18.8903	0.00425531	0.0365164	0.136944	9.63528	0.530796
PPM1J	E3	-5.38937e-05	9.91974	-5.56336e-09	1	1	-0.00139637	9.91974	89.7198	0.477228	0.552959	0.000197745	9.91974	3.78971e-09	1	1	0.000198369	9.91974	2.93807e-09	1	1	2.37219e-06	9.91974	-3.25335e-10	1	1	0.000131167	9.91974	3.79348e-10	1	1	-0.000145904	9.5552	6.50121e-10	0.999984	1	-0.00325001	9.5552	128.252	0.375238	0.484283	-0.000449687	9.5552	4.15347e-10	0.999984	1	-0.000535574	9.5552	2.32455e-10
PPM1L	E3	-0.113555	10.4351	2.38747	0.137407	0.587629	-0.308973	10.4351	343.517	1.96513e-76	9.16649e-75	-0.20528	10.4351	25.6641	4.07741e-07	6.16713e-06	0.00281856	10.4351	1.4474e-06	0.99904	1	-0.0513529	10.4351	2.34569	0.162601	0.44949	0.0223437	10.4351	0.0614543	0.821535	1	-0.165264	10.1683	1.06071	0.315588	0.792909	-0.278762	10.1683	59.8889	1.09266e-14	9.18144e-14	0.142932	10.1683	2.90938	0.0880941	0.295546	0.569277	10.1683	3.53393
PPM1M	E2	0.0112798	9.93187	6.86454	0.383412	0.778444	-0.0179015	9.93187	7.57518	0.349741	0.424562	0.00146749	9.93187	0.0925935	0.915709	0.988579	0.0666153	9.93187	6.34328	0.394898	0.875565	-9.2684e-05	9.93187	0.515286	0.811101	0.971953	0.0223557	9.93187	5.08747	0.452639	0.894793	-0.0300934	9.57168	4.41441	0.429482	0.875067	-0.0224355	9.57168	1.54886	0.634265	0.730741	0.0296287	9.57168	1.64063	0.629138	0.865405	0.217831	9.57168	10.7565
PPP2R2A	E2	-0.0944155	10.1653	1.38009	0.297226	0.745946	-0.232831	10.1653	134.335	1.2126e-28	9.78675e-28	-0.172375	10.1653	13.673	0.000849397	0.00505542	0.0629503	10.1653	0.315212	0.614958	1	0.0836566	10.1653	7.01036	0.0136052	0.0926762	-0.0978917	10.1653	1.46792	0.254657	0.78789	0.0883587	9.85082	0.0339297	0.880821	1	-0.151576	9.85082	10.7688	0.00160219	0.00404462	-0.160119	9.85082	2.60467	0.129275	0.370143	0.102784	9.85082	0.096733
PPP4C	E3	0.107019	9.97869	4.93642	0.177008	0.605606	-0.0811233	9.97869	26.3923	0.00135614	0.00259992	-0.0221947	9.97869	0.474206	0.678378	0.841652	0.0958819	9.97869	2.64846	0.325505	0.842645	0.0145502	9.97869	0.614581	0.635247	0.87526	0.0470675	9.97869	0.679938	0.615336	0.991568	0.217471	9.63519	1.85629	0.363799	0.838469	0.169894	9.63519	20.4581	0.00155007	0.00392532	0.0676988	9.63519	0.698881	0.572027	0.821633	0.410144	9.63519	8.33122
PRDM1	E2	0.000962104	9.92968	5.62247e-09	1	1	-0.0370372	9.92968	172.747	0.000148036	0.000316976	-0.00430229	9.92968	0.0460178	0.887776	0.971345	-0.120093	9.92968	12.5995	0.289813	0.842645	-0.000513681	9.92968	0.722806	0.808595	0.970394	-0.0139914	9.92968	20.967	0.192706	0.730424	0.00527502	9.56667	5.73968e-10	1	1	-0.124714	9.56667	189.408	7.78777e-07	3.1657e-06	-0.283436	9.56667	49.9112	0.00563398	0.0448799	-0.328388	9.56667	10.3532
PRICKLE4	E3	0.00175372	9.92669	0.000397766	0.996267	1	-0.022265	9.92669	14.481	0.306078	0.3792	-0.0145644	9.92669	2.37189	0.675363	0.83975	0.00660412	9.92669	4.80622e-10	1	1	0.0044685	9.92669	1.2691	0.754142	0.944022	0.00735643	9.92669	0.245146	0.890801	1	-0.0260767	9.56318	10.4221	0.338468	0.813634	0.0306026	9.56318	14.567	0.248839	0.350258	0.0379313	9.56318	3.6971	0.571165	0.820793	0.0345329	9.56318	3.73623e-09
PRKAA2	E2	-0.330985	10.1437	24.4612	9.00901e-05	0.00622989	-0.284633	10.1437	255.746	4.34337e-46	6.93535e-45	-0.263726	10.1437	49.1988	9.51085e-10	2.70876e-08	0.0632717	10.1437	2.50605	0.216448	0.768883	-0.00122704	10.1437	0.000913451	0.98301	1	-0.248615	10.1437	10.8107	0.00653008	0.252134	-0.253118	9.83151	5.41081	0.0557679	0.410151	-0.205819	9.83151	23.1201	9.18581e-06	3.2768e-05	0.076302	9.83151	0.983481	0.411203	0.690663	0.253484	9.83151	3.72521
PRKAR1B	E3	-0.0825507	10.4108	0.886279	0.429235	0.814212	-0.16044	10.4108	105.961	7.95996e-25	5.49376e-24	-0.0919802	10.4108	6.01603	0.0143959	0.0529806	-0.0720767	10.4108	0.765213	0.464138	0.954376	-0.0384289	10.4108	1.85361	0.255901	0.566145	0.168899	10.4108	4.35436	0.0653952	0.569186	-0.24165	10.1766	2.55624	0.152292	0.612159	0.0490972	10.1766	2.68816	0.101126	0.164942	0.115871	10.1766	2.22726	0.172541	0.434641	-0.0884602	10.1766	1.8572
PRKAR2A	E2	0.0874333	10.1766	1.29614	0.289777	0.739824	-0.254192	10.1766	164.433	1.21177e-36	1.33513e-35	-0.17685	10.1766	18.3677	3.40259e-05	0.000312027	-0.0503241	10.1766	0.208787	0.67659	1	0.021799	10.1766	0.403847	0.562809	0.821239	-0.0499778	10.1766	0.349016	0.581266	0.976117	0.300746	9.85129	2.4007	0.154255	0.614254	-0.317231	9.85129	50.4287	4.22631e-12	2.90786e-11	-0.16626	9.85129	3.45957	0.0674335	0.251296	-0.295891	9.85129	1.31393
PROK2	E3	0.00102462	9.92014	1.56122e-09	1	1	0.000421489	9.92014	3.19122	0.861225	0.893754	0.00841836	9.92014	73.8922	0.410036	0.612007	-0.0250947	9.92014	168.152	0.214339	0.76756	-0.002246	9.92014	63.6773	0.444774	0.733394	0.012623	9.92014	134.756	0.265631	0.78789	-0.00337185	9.55548	-7.09827e-10	1	1	-0.00568582	9.55548	109.576	0.223909	0.32037	0.0472632	9.55548	160.503	0.140728	0.386123	-0.00323687	9.55548	-6.07068e-10
PRR11	E2	-0.0181267	9.92948	0.893769	0.766793	1	-0.0354329	9.92948	34.7032	0.0620044	0.0921973	-0.0552257	9.92948	31.383	0.0729147	0.184514	0.0933002	9.92948	16.8792	0.190355	0.739251	0.0331531	9.92948	34.8917	0.0603832	0.253635	0.000316451	9.92948	4.35851e-05	0.99717	1	-0.00382345	9.56566	0.00557395	0.977931	1	-0.00515863	9.56566	0.0890057	0.91326	0.963518	-0.0896665	9.56566	15.5193	0.186729	0.453476	0.170523	9.56566	22.7729
PSIP1	E2	0.00337403	10.1706	0.0238124	0.885472	1	-0.0655278	10.1706	12.6804	0.00196234	0.00369357	-0.0176204	10.1706	0.166625	0.835551	0.940908	-0.0013313	10.1706	0.0221934	0.900669	1	0.07038	10.1706	5.23481	0.0513471	0.228421	0.102071	10.1706	1.5894	0.27964	0.78789	-0.0949581	9.87594	0.879871	0.419089	0.871923	0.207641	9.87594	28.0723	1.19154e-07	5.35562e-07	0.226133	9.87594	7.22234	0.0112308	0.0732183	-0.23977	9.87594	1.812
PSME3	E3	0.05199	9.97372	1.88015	0.431433	0.816066	-0.130845	9.97372	75.3744	1.75665e-07	4.82819e-07	-0.140172	9.97372	21.226	0.00682808	0.0287761	0.000585363	9.97372	0.00678161	0.965157	1	0.0113929	9.97372	0.842295	0.600864	0.849386	-0.128306	9.97372	7.41188	0.11657	0.683272	0.198386	9.62728	0.791803	0.583872	0.95487	0.0589985	9.62728	4.64855	0.156375	0.237733	-0.0345007	9.62728	0.151285	0.783288	0.967111	-0.0910725	9.62728	4.89892
PTBP1	E4	-0.146991	9.96748	10.2523	0.0665143	0.421424	-0.174037	9.96748	141.915	2.71329e-12	1.03013e-11	-0.116673	9.96748	16.7481	0.0168355	0.0600684	0.229636	9.96748	13.3175	0.0373013	0.545164	0.0298501	9.96748	2.85922	0.334587	0.633388	-0.0598907	9.96748	1.24128	0.517219	0.929564	-0.227702	9.6155	3.14436	0.277035	0.762854	-0.156017	9.6155	18.1644	0.00765072	0.0169178	-0.012896	9.6155	0.0256331	0.921498	1	0.261678	9.6155	4.51811
PTCH2	E2	0.0314724	10.0596	0.222847	0.711475	0.984519	-0.227592	10.0596	151.393	4.34191e-20	2.44656e-19	-0.179586	10.0596	21.6474	0.000504443	0.00322249	0.042039	10.0596	0.0560124	0.863226	1	-0.0283761	10.0596	6.23867	0.0690593	0.274262	0.087547	10.0596	1.24724	0.408068	0.884719	-0.00409268	9.73084	0.000925399	0.975732	1	-0.8802	9.73084	397.065	3.07299e-60	3.03407e-58	-0.356822	9.73084	17.2453	0.000717124	0.00944054	-0.024138	9.73084	0.00701757
PTH2R	E2	0.0363005	10.0341	0.382917	0.664613	0.962952	-0.266152	10.0341	225.163	2.72911e-30	2.37638e-29	-0.00725643	10.0341	0.064087	0.853653	0.951944	0.0734205	10.0341	1.00383	0.485082	0.973257	0.0392317	10.0341	5.67362	0.0971602	0.337522	0.263515	10.0341	16.619	0.00412885	0.201608	0.0941663	9.68335	1.76472	0.345169	0.821266	-0.576252	9.68335	188.845	2.87466e-26	5.23447e-25	0.0821516	9.68335	1.42731	0.396076	0.678791	0.00431255	9.68335	0.0205818
PTK2B	E3	-0.233776	10.3392	8.38183	0.0164106	0.205967	-0.205317	10.3392	178.071	1.49782e-40	1.91643e-39	-0.121585	10.3392	7.10614	0.0245493	0.0805409	0.200592	10.3392	4.11782	0.0924913	0.677683	-0.0828325	10.3392	7.16929	0.027902	0.152577	-0.100334	10.3392	1.25497	0.352609	0.838449	-0.317422	10.0842	4.45572	0.0676436	0.448368	-0.266823	10.0842	60.3633	8.5997e-15	7.28127e-14	0.121748	10.0842	1.32331	0.322553	0.617166	0.444957	10.0842	3.16075
PTOV1	E2	0.241164	10.0228	14.9261	0.00558664	0.110538	0.0198109	10.0228	0.934217	0.431558	0.508159	-0.0639236	10.0228	2.7864	0.220456	0.404453	0.0106216	10.0228	0.20326	0.749553	1	0.0671754	10.0228	7.09903	0.0573511	0.245601	-0.078654	10.0228	1.17101	0.435447	0.890457	0.48997	9.67326	9.52527	0.0231494	0.263879	0.438786	9.67326	111.216	4.82643e-16	4.48098e-15	0.145341	9.67326	2.98514	0.205881	0.478735	0.161496	9.67326	0.501485
PTPN14	E2	-0.179193	10.0221	8.85546	0.0434772	0.348035	-0.449598	10.0221	722.596	1.15285e-85	7.84997e-84	-0.0205398	10.0221	0.257489	0.729602	0.876286	-0.0568507	10.0221	0.374471	0.67262	1	0.00747826	10.0221	1.3398	0.446055	0.734574	-0.143436	10.0221	4.93571	0.134006	0.700312	-0.0651558	9.68321	0.660914	0.571475	0.944768	-0.589011	9.68321	180.969	1.06162e-23	1.66376e-22	0.339998	9.68321	13.4166	0.00992003	0.0671442	-0.0776296	9.68321	0.441464
PTPRA	E3	-0.140534	10.3771	3.74295	0.0539468	0.381297	-0.223539	10.3771	151.467	9.29412e-35	9.53117e-34	-0.222491	10.3771	31.4621	2.04434e-08	4.17609e-07	0.0116643	10.3771	0.00889646	0.932137	1	0.00490079	10.3771	0.0171316	0.895865	1	-0.120243	10.3771	2.20375	0.137682	0.701145	-0.310669	10.0907	3.22655	0.0724811	0.461401	-0.11729	10.0907	8.90997	0.0028425	0.00685625	-0.102325	10.0907	1.54509	0.213888	0.489602	0.231188	10.0907	0.500922
PTPRO	E2	-0.0814394	10.3279	1.62157	0.249307	0.69216	-0.330343	10.3279	347.443	2.78428e-77	1.33108e-75	-0.461029	10.3279	140.978	1.79806e-32	1.33146e-29	0.0915733	10.3279	0.761632	0.434306	0.921501	-0.0156753	10.3279	0.559323	0.4993	0.773228	-0.217123	10.3279	6.79032	0.0104971	0.308355	-0.214523	10.0367	4.23405	0.0503529	0.390944	-0.333009	10.0367	67.5677	2.26785e-16	2.16109e-15	-0.432644	10.0367	24.2087	8.77104e-07	3.59168e-05	0.135357	10.0367	0.102337
PTTG1IP	E3	0.308117	9.98069	32.7788	0.000167613	0.00999601	-0.0672692	9.98069	18.2181	0.00763942	0.0132832	-0.14642	9.98069	21.3377	0.0046269	0.0209341	0.341487	9.98069	19.2298	0.00625102	0.257309	0.147401	9.98069	43.2645	4.53478e-05	0.00100114	0.163036	9.98069	6.75414	0.0989957	0.641163	0.211887	9.62082	2.80371	0.259739	0.74616	-0.287914	9.62082	59.7478	6.63442e-07	2.72428e-06	-0.0231763	9.62082	0.0971342	0.854567	1	0.350901	9.62082	3.57365
PURA	E2E4	-0.111393	10.2638	1.75778	0.231497	0.671474	-0.00156594	10.2638	0.00323416	0.954649	0.969192	-0.0970267	10.2638	5.87367	0.0180138	0.0632817	0.00242849	10.2638	0.00177029	0.976138	1	0.11633	10.2638	12.1633	0.00169062	0.0192601	-0.0420935	10.2638	0.226036	0.657082	1	0.0454909	9.99814	0.00263911	0.964954	1	0.401074	9.99814	113.736	2.0116e-26	3.69321e-25	0.434112	9.99814	30.01	4.39409e-08	2.76544e-06	-0.0121433	9.99814	0.019801
PXDC1	E3	0.0183759	9.92626	1.43021	0.776152	1	0.0122072	9.92626	86.8746	0.0227274	0.0366693	0.0296649	9.92626	11.5564	0.397976	0.600562	-0.031624	9.92626	2.91355	0.673628	1	0.0200789	9.92626	28.7073	0.18918	0.49168	0.0655207	9.92626	3.37973	0.627875	0.996659	-0.132203	9.56136	20.0574	0.274607	0.761077	0.00644858	9.56136	23.801	0.247185	0.348317	0.0669186	9.56136	10.9221	0.427731	0.702868	0.0874011	9.56136	3.73757
PYY	E3	-0.00026025	9.9326	0.14024	0.894476	1	-0.0901697	9.9326	138.851	3.63046e-05	8.25916e-05	0.0229499	9.9326	2.73939	0.560191	0.74681	0.0075454	9.9326	-2.27039e-11	1	1	0.0213642	9.9326	23.136	0.0945878	0.332151	0.0117717	9.9326	0.382436	0.830432	1	-0.0567807	9.56944	1.36945	0.672989	1	-0.164839	9.56944	98.339	0.000270044	0.000783419	0.0693167	9.56944	4.83611	0.420033	0.696941	-0.00587977	9.56944	6.14009e-10
QSER1	E2	0.0264242	10.0393	0.135672	0.78049	1	-0.197124	10.0393	107.176	1.2103e-15	5.51525e-15	-0.190342	10.0393	23.3983	0.000189068	0.00138618	0.143457	10.0393	2.18495	0.267889	0.842645	-0.00824702	10.0393	0.135056	0.784408	0.959915	-0.0115323	10.0393	0.0258453	0.900744	1	-0.000690319	9.69418	0.0163852	0.917203	1	-0.261924	9.69418	32.9813	4.11714e-06	1.53267e-05	-0.0548678	9.69418	0.364834	0.62371	0.861261	0.128542	9.69418	0.286928
R3HDM1	E2	-0.0528765	11.127	0.457402	0.498844	0.869589	-0.348598	11.127	530.426	9.15971e-117	2.11411e-114	-0.216914	11.127	35.1939	3.00393e-09	7.57246e-08	0.438068	11.127	11.6703	0.000635562	0.0631017	0.0129791	11.127	0.109939	0.740214	0.935944	-0.0438916	11.127	0.331982	0.564497	0.963342	-0.119806	10.9069	0.571961	0.449497	0.876519	-0.227394	10.9069	61.5936	4.6186e-15	3.97106e-14	-0.050021	10.9069	0.531954	0.465802	0.735582	0.672075	10.9069	5.89875
RAB2A	E3	-0.0900498	10.3255	1.26981	0.28096	0.729953	-0.15489	10.3255	70.4284	4.89486e-17	2.39514e-16	-0.0939709	10.3255	5.1602	0.0276607	0.0882972	0.0873922	10.3255	0.599933	0.457479	0.947988	0.155287	10.3255	20.1143	1.56385e-05	0.000393665	0.0854672	10.3255	1.20894	0.271548	0.78789	-0.111411	10.0617	0.575387	0.470171	0.882352	0.0293213	10.0617	0.860574	0.353599	0.466495	0.230734	10.0617	7.86614	0.00504586	0.0414012	0.538512	10.0617	3.63588
RAB7A	E2	-0.0123986	10.194	0.0208943	0.897181	1	-0.22627	10.194	134.635	5.05183e-31	4.49355e-30	-0.16917	10.194	15.6021	0.000155184	0.0011701	-0.0385685	10.194	0.121976	0.737095	1	0.0505779	10.194	2.28124	0.166755	0.457199	0.124966	10.194	2.20872	0.167454	0.730424	-0.0152055	9.89975	0.0726547	0.796734	1	-0.0543946	9.89975	1.18466	0.440867	0.551533	-0.0419327	9.89975	0.235216	0.627693	0.864283	-0.266159	9.89975	1.17051
RABGAP1	E2	-0.22784	10.3426	9.24159	0.00268611	0.0696869	-0.299818	10.3426	270.307	1.3991e-60	3.65122e-59	-0.201574	10.3426	23.5243	1.23715e-06	1.66692e-05	0.110421	10.3426	0.724884	0.42022	0.904133	0.0321271	10.3426	0.77424	0.391062	0.69376	-0.00153073	10.3426	0.00165874	0.967513	1	-0.315913	10.0624	3.10352	0.0789093	0.479809	-0.207422	10.0624	28.3491	1.03316e-07	4.66261e-07	0.199507	10.0624	5.73984	0.0166011	0.0964425	0.306293	10.0624	1.03974
RAD54L2	E3	-0.200743	10.0187	12.3311	0.0140957	0.191668	-0.246894	10.0187	184.013	5.19805e-23	3.34467e-22	-0.105482	10.0187	8.06915	0.0380593	0.113128	0.00760214	10.0187	0.000339424	0.986865	1	-0.0390505	10.0187	3.32813	0.205037	0.505258	-0.114675	10.0187	3.08993	0.215076	0.740428	-0.133254	9.66864	0.790475	0.517111	0.905138	-0.630592	9.66864	207.607	8.18975e-27	1.53532e-25	-0.279115	9.66864	10.6687	0.0164322	0.0957894	-0.169162	9.66864	1.7201
RALB	E3	-0.0675888	9.95552	3.6888	0.334752	0.7484	-0.107018	9.95552	70.7689	1.49617e-05	3.51998e-05	0.0484085	9.95552	3.9825	0.293369	0.486511	0.0812763	9.95552	4.14474	0.31207	0.842645	0.00653568	9.95552	1.58067	0.533568	0.798465	0.0479014	9.95552	2.12522	0.467693	0.901357	0.0624914	9.60858	0.0151513	0.949822	1	0.119163	9.60858	16.9019	0.0153077	0.0315711	0.403894	9.60858	39.6761	0.000262383	0.00425463	0.105175	9.60858	0.168365
RALGAPA2	E2	-0.377039	10.13	34.3834	2.31872e-08	5.97221e-06	-0.289239	10.13	198.448	9.19888e-41	1.1907e-39	-0.229986	10.13	30.7323	1.81063e-07	3.00734e-06	-0.126704	10.13	1.39319	0.279609	0.842645	0.0691041	10.13	4.50783	0.0623497	0.258377	-0.118741	10.13	2.06044	0.189692	0.730424	-0.723374	9.80259	16.6478	0.000110943	0.00828629	-0.202496	9.80259	18.4856	3.75384e-05	0.000122766	-0.0280778	9.80259	0.0900493	0.76412	0.955661	-0.800806	9.80259	8.81896
RAPGEF2	E3	-0.114706	10.6558	1.98882	0.15847	0.602421	-0.249141	10.6558	229.159	1.18158e-51	2.28997e-50	-0.240232	10.6558	37.3964	9.71035e-10	2.76116e-08	-0.0285158	10.6558	0.0390774	0.843296	1	-0.00537159	10.6558	0.0116145	0.91757	1	-0.0785023	10.6558	0.894492	0.344267	0.831181	-0.0963918	10.4373	0.434998	0.509561	0.899494	0.0753129	10.4373	5.91561	0.0150234	0.0310496	0.0778119	10.4373	1.00965	0.31501	0.609644	0.298598	10.4373	1.10586
RAPGEF4	E4	-0.0687621	10.4941	0.726601	0.442997	0.825257	-0.317648	10.4941	378.203	6.22736e-84	4.00988e-82	-0.307053	10.4941	82.4632	1.1143e-19	2.06285e-17	-0.0416779	10.4941	0.250952	0.646357	1	0.0756127	10.4941	6.71752	0.0204337	0.123769	-0.208169	10.4941	9.68447	0.00185936	0.149156	0.281103	10.2349	1.06837	0.368599	0.842669	-0.352018	10.2349	108.767	2.40457e-25	4.13288e-24	-0.124081	10.2349	3.48544	0.0619378	0.237028	0.549826	10.2349	4.48746
RASGRF1	E3E4	-0.048249	10.1557	0.380319	0.602404	0.92661	-0.401234	10.1557	466.014	3.1898e-96	3.18478e-94	-0.238086	10.1557	39.2947	1.95282e-09	5.10374e-08	-0.0763648	10.1557	2.61314	0.182276	0.739251	-0.108508	10.1557	11.3971	0.00452387	0.0414424	-0.0125239	10.1557	0.0240965	0.893595	1	0.16813	9.85701	0.0683193	0.816743	1	-0.440432	9.85701	99.8056	7.72751e-23	1.15212e-21	-0.107158	9.85701	1.49441	0.232718	0.513507	0.093492	9.85701	7.65439e-10
RASGRP3	E2	0.0760989	9.99049	2.39037	0.342893	0.750797	-0.110097	9.99049	58.2768	2.43245e-06	6.12316e-06	-0.0147427	9.99049	0.183245	0.809068	0.92464	0.16196	9.99049	4.44878	0.188027	0.739251	0.11627	9.99049	27.6434	0.000622421	0.00880005	-0.0322089	9.99049	0.6571	0.617136	0.992556	-0.115297	9.62483	1.35135	0.473484	0.883273	-0.150464	9.62483	24.6508	0.00198562	0.00493337	-0.111495	9.62483	4.44083	0.193642	0.462989	0.487045	9.62483	7.17963
RASL11B	E4	0.0306665	9.95612	0.562973	0.715777	0.985802	-0.020357	9.95612	0.488004	0.94295	0.95969	-0.0429323	9.95612	6.09618	0.237867	0.426232	0.0341969	9.95612	4.57855	0.305208	0.842645	0.0135234	9.95612	2.68638	0.431137	0.724926	-0.033049	9.95612	2.77792	0.426364	0.888038	0.070946	9.60101	2.85442	0.320111	0.797897	-0.027052	9.60101	0.00762546	0.930416	0.977505	0.0117105	9.60101	0.0317797	0.909097	1	0.0479266	9.60101	1.71502e-11
RASSF1	E2	0.0250702	9.94683	0.810277	0.676375	0.967837	-0.113507	9.94683	99.705	2.74121e-06	6.8683e-06	-0.116389	9.94683	34.9408	0.00567254	0.0247635	-0.0652562	9.94683	1.17401	0.601508	1	0.033181	9.94683	8.93858	0.166378	0.45652	-0.0336877	9.94683	0.916158	0.655192	1	-0.0707625	9.58882	2.08269	0.472091	0.882921	-0.16232	9.58882	29.9584	0.00532255	0.0121631	-0.0429958	9.58882	1.24524	0.566136	0.816271	-0.605513	9.58882	16.6443
RBBP4	E2	-0.0102509	10.0958	0.0176356	0.920784	1	-0.224697	10.0958	131	1.92069e-22	1.20023e-21	-0.0642351	10.0958	2.38958	0.186293	0.361851	0.110159	10.0958	1.18466	0.378639	0.865356	0.0902941	10.0958	8.522	0.0167037	0.107402	-0.0712758	10.0958	0.834276	0.439974	0.892645	-0.349771	9.77416	3.93646	0.0873828	0.498856	-0.225251	9.77416	23.8665	1.63567e-05	5.64012e-05	0.0290049	9.77416	0.103671	0.791114	0.971621	-0.0221606	9.77416	0.0669743
RBBP5	E3	-0.0301682	10.0006	0.353383	0.703857	0.981189	-0.0809536	10.0006	21.8784	0.00233465	0.00435057	-0.0612465	10.0006	3.05688	0.256711	0.449264	-0.022058	10.0006	0.0930861	0.843693	1	0.0346331	10.0006	2.85781	0.271726	0.581611	-0.105393	10.0006	3.27378	0.239486	0.775136	0.0143021	9.6594	0.190913	0.76436	1	0.228465	9.6594	34.7447	9.6252e-06	3.426e-05	0.172678	9.6594	3.98112	0.156095	0.409318	0.0259721	9.6594	0.00403979
RBBP9	E4	-0.0385936	9.93366	8.87951	0.283232	0.732323	-0.0232447	9.93366	8.52699	0.283096	0.354612	-0.118112	9.93366	63.9258	0.00327812	0.0157712	0.00115935	9.93366	0.0678255	0.924417	1	0.00167068	9.93366	0.0242427	0.954343	1	0.148983	9.93366	39.9063	0.0218269	0.394949	-0.0353683	9.56988	7.82634	0.297949	0.77767	-0.0686928	9.56988	13.2937	0.175358	0.261843	-0.160677	9.56988	21.9802	0.0764247	0.271264	-0.0454951	9.56988	4.72611
RBM33	E2	-0.108555	10.1141	2.18107	0.206722	0.638489	-0.15733	10.1141	61.7592	2.688e-12	1.02075e-11	-0.175869	10.1141	17.1573	0.000218209	0.00156372	-0.0322611	10.1141	0.0987424	0.785179	1	0.0111607	10.1141	0.120411	0.765138	0.949823	0.0668784	10.1141	0.658337	0.486888	0.911593	-0.500351	9.78478	6.64195	0.0210326	0.252391	-0.261222	9.78478	33.042	6.91757e-08	3.17508e-07	-0.2008	9.78478	4.45649	0.0522613	0.211506	-0.0314792	9.78478	0.0118014
RBM6	E3	-0.155341	10.4792	5.03371	0.0248629	0.261292	-0.395918	10.4792	467.168	3.89871e-103	4.98473e-101	-0.225554	10.4792	33.8433	6.00955e-09	1.39793e-07	-0.0621913	10.4792	0.315019	0.574619	1	0.0250291	10.4792	0.489227	0.484276	0.762616	-0.0830756	10.4792	1.1319	0.287375	0.78789	-0.477986	10.1994	7.92852	0.00487493	0.11598	-0.706616	10.1994	333.436	2.13792e-73	3.45411e-71	-0.306587	10.1994	15.1311	0.000100896	0.00192189	0.157643	10.1994	0.426667
RBM8A	E2	-4.34558e-05	9.99502	0.00795158	0.953454	1	-0.126416	9.99502	54.1499	7.17581e-07	1.88498e-06	-0.153803	9.99502	19.0537	0.00413702	0.0191516	0.126008	9.99502	3.76606	0.209951	0.761836	0.109716	9.99502	24.0341	0.00142345	0.0169101	0.0081156	9.99502	0.0241071	0.92114	1	0.0725647	9.65785	0.215609	0.745331	1	0.2601	9.65785	44.8613	4.54978e-07	1.90873e-06	0.0617359	9.65785	0.595966	0.573617	0.822654	0.520263	9.65785	6.37348
RBMS1	E2	0.055469	10.0938	2.80591	0.203813	0.634551	-0.224084	10.0938	150.184	5.76959e-25	4.00692e-24	-0.267513	10.0938	50.7824	2.74062e-09	6.968e-08	0.13846	10.0938	1.99118	0.269717	0.842645	-0.0180876	10.0938	0.989486	0.451396	0.738524	-0.0587222	10.0938	0.685838	0.495636	0.916984	0.180462	9.76097	0.833919	0.469139	0.882352	-0.173984	9.76097	15.0522	0.000925661	0.0024455	-0.0931764	9.76097	1.07039	0.357009	0.652277	0.130089	9.76097	0.213242
RBMS2	E2E4	-0.0560335	9.95788	0.797727	0.645787	0.95268	-0.0934056	9.95788	50.4542	0.000151151	0.000323373	-0.131341	9.95788	25.0087	0.00834436	0.0339808	0.35928	9.95788	32.7232	0.00238295	0.143373	0.0106739	9.95788	0.270558	0.784021	0.959769	-0.13167	9.95788	6.22993	0.179274	0.730424	-0.224574	9.59446	4.65822	0.24685	0.733088	-0.190933	9.59446	42.2813	0.000407525	0.00114797	-0.219885	9.59446	14.6569	0.0408058	0.179106	0.194575	9.59446	2.11867
RBPMS	E3	-0.0159842	9.94571	0.0889845	0.898774	1	-0.011675	9.94571	0.0169503	0.896414	0.922311	-0.0248805	9.94571	1.50808	0.595966	0.777473	0.0700908	9.94571	11.5264	0.137764	0.739251	-0.00206042	9.94571	2.51738	0.484142	0.762616	0.112485	9.94571	25.8239	0.0261003	0.419148	-0.183319	9.58341	1.48786	0.538502	0.920313	-0.177501	9.58341	52.1641	0.000684077	0.00184203	-0.107355	9.58341	5.92737	0.254936	0.53934	0.174982	9.58341	11.6356
RBPMS2	E3	0.0432196	9.92617	17.6081	0.260079	0.707178	-0.0297187	9.92617	34.7162	0.116646	0.162975	-0.00650474	9.92617	0.687398	0.829271	0.937525	-0.00603728	9.92617	0.974441	0.792705	1	0.0126504	9.92617	16.8694	0.272853	0.582799	-0.0204046	9.92617	3.08765	0.639111	1	0.175248	9.56219	32.9183	0.0995414	0.518631	0.0101469	9.56219	4.57265	0.515148	0.62327	0.00237042	9.56219	0.0427752	0.950413	1	0.0168692	9.56219	2.96979e-10
RC3H2	E2	-0.0166761	10.0627	0.0768686	0.836819	1	-0.163754	10.0627	76.0161	2.14354e-12	8.19071e-12	-0.141257	10.0627	12.0529	0.00690711	0.0290471	-0.0768542	10.0627	0.667037	0.533757	1	0.0844443	10.0627	9.24723	0.0205659	0.124319	-0.0752048	10.0627	0.977178	0.443312	0.892645	-0.0772901	9.72227	0.448698	0.59497	0.961663	-0.0903879	9.72227	3.26881	0.144031	0.22187	-0.0557498	9.72227	0.450525	0.582816	0.829819	-0.213374	9.72227	1.34145
RCHY1	E3	-0.0456769	10.003	0.582681	0.613732	0.933892	-0.111326	10.003	40.4811	1.77605e-05	4.15535e-05	-0.0992392	10.003	7.78487	0.0534883	0.147383	0.18121	10.003	7.73665	0.0663999	0.624369	0.0289064	10.003	2.38805	0.308334	0.605866	-0.0593126	10.003	0.813942	0.543611	0.947999	0.0816767	9.66886	0.0719739	0.846279	1	0.249482	9.66886	41.9934	7.26637e-07	2.96528e-06	0.0359821	9.66886	0.225383	0.746967	0.944657	0.661288	9.66886	11.6873
RELA	E3	0.18311	9.94893	28.7691	0.00922243	0.147261	0.00200363	9.94893	0.0436025	0.892	0.918886	0.0480632	9.94893	5.35146	0.24571	0.436153	0.0251822	9.94893	0.862619	0.655596	1	0.0887008	9.94893	34.7593	0.00408125	0.0383565	0.0769236	9.94893	3.55981	0.357008	0.844434	0.437241	9.58962	25.1923	0.0105411	0.178325	0.154714	9.58962	28.697	0.0051692	0.0118507	0.0858928	9.58962	2.61686	0.396073	0.678791	0.0789581	9.58962	1.20021
RELB	E2	-0.151251	9.93179	54.2955	0.0109444	0.165255	-0.0815145	9.93179	143.857	3.01193e-05	6.9006e-05	-0.0657819	9.93179	49.1371	0.0157345	0.0568128	-0.0454179	9.93179	1.4697	0.674941	1	0.0154242	9.93179	5.88334	0.405778	0.707286	-0.128325	9.93179	49.079	0.0162898	0.365073	-0.0711292	9.56862	2.70186	0.556415	0.934209	-0.140582	9.56862	70.6849	0.00232252	0.00570265	-0.0317731	9.56862	5.59905	0.399807	0.681674	0.449346	9.56862	58.4378
RERG	E3	-0.574804	10.0159	121.324	3.22564e-17	7.16575e-14	-0.0194798	10.0159	0.881263	0.534728	0.607737	-0.222037	10.0159	46.2377	4.84686e-07	7.19619e-06	0.131168	10.0159	17.8622	0.00450478	0.218144	0.0128794	10.0159	0.952991	0.516022	0.785031	-0.145013	10.0159	7.92932	0.0555933	0.552939	-1.01622	9.66199	47.2642	1.26324e-07	3.80513e-05	-0.0595678	9.66199	2.24761	0.292757	0.400313	-0.424699	9.66199	27.3043	8.1226e-05	0.00161652	0.0326337	9.66199	6.44549e-10
RGS12	E2	-0.0854081	10.1502	1.16661	0.297938	0.746065	-0.25424	10.1502	124.303	8.07835e-28	6.28033e-27	-0.160833	10.1502	19.0966	1.24514e-05	0.000129364	0.0525816	10.1502	0.188673	0.677743	1	-0.104834	10.1502	11.0974	0.00188949	0.0211328	-0.129243	10.1502	2.43294	0.118816	0.687871	-0.322252	9.82187	2.05313	0.151922	0.611405	-0.53977	9.82187	92.8619	6.86039e-22	9.63817e-21	-0.216511	9.82187	6.21085	0.0127117	0.0799692	0.123883	9.82187	0.175983
RGS4	E4	-0.30417	10.283	23.352	3.10761e-05	0.00278931	-0.354912	10.283	449.421	2.62124e-99	2.9484e-97	-0.0188587	10.283	0.133661	0.917468	0.989696	-0.196127	10.283	6.0472	0.0344973	0.53121	-0.111425	10.283	23.4173	3.21645e-05	0.000742373	-0.0742623	10.283	0.944952	0.401204	0.881784	0.264561	10.0851	0.549539	0.488071	0.888997	0.313878	10.0851	83.7016	6.78141e-20	8.34043e-19	0.722704	10.0851	66.9208	3.14167e-16	1.24075e-13	0.328466	10.0851	0.468247
RHOBTB3	E2	0.106296	10.1157	3.25502	0.0712109	0.4361	-0.10376	10.1157	21.5808	4.44923e-05	0.000100358	-0.0938095	10.1157	4.90817	0.0414102	0.120864	0.135413	10.1157	2.11753	0.218096	0.771652	0.251063	10.1157	60.6916	5.37947e-12	4.50962e-10	-0.0573272	10.1157	0.61583	0.446325	0.8932	0.257527	9.78717	3.85263	0.0496934	0.388942	0.172072	9.78717	11.7827	0.000966969	0.00254404	0.376608	9.78717	18.7209	2.29819e-05	0.000562319	0.0111222	9.78717	0.000292535
RHOC	E3	0.190114	9.93113	51.792	0.0216004	0.238585	-0.00141085	9.93113	0.00745904	0.964181	0.976934	0.0160525	9.93113	11.9969	0.283908	0.477353	0.180371	9.93113	53.3713	0.0230034	0.449038	0.0354448	9.93113	38.4348	0.0556582	0.241107	0.312844	9.93113	86.9779	0.00170335	0.142122	0.152463	9.56488	8.84743	0.363669	0.838469	0.0504262	9.56488	34.27	0.0801965	0.1353	0.0545688	9.56488	14.0065	0.26966	0.55721	0.17231	9.56488	29.6696
RHOH	E4	-0.0519291	9.92435	146.493	0.0059576	0.114093	-0.00725274	9.92435	8.21311	0.502982	0.5777	-0.0210398	9.92435	23.9293	0.261269	0.453888	-0.025363	9.92435	0.49903	0.859063	1	-0.0198985	9.92435	79.3247	0.0428314	0.202447	0.00383063	9.92435	0.304848	0.901145	1	-0.0493604	9.56063	15.5662	0.315204	0.792558	-0.00114215	9.56063	0.000223963	0.991336	1	-0.0808616	9.56063	84.6265	0.0182594	0.103247	-0.589785	9.56063	37.9057
RHOQ	E4	0.108121	10.0015	3.07058	0.214847	0.649608	-0.0942124	10.0015	26.8121	0.000377012	0.000772364	-0.15483	10.0015	18.0148	0.00224523	0.0114761	-0.0134712	10.0015	0.0252085	0.906635	1	-0.00972576	10.0015	0.124121	0.807596	0.969968	-0.0594093	10.0015	0.762334	0.536122	0.942057	0.00202132	9.6541	0.0334026	0.919798	1	0.106993	9.6541	6.40745	0.0519555	0.0928926	0.25339	9.6541	9.46175	0.0177682	0.101243	-0.328258	9.6541	2.19731
RIMS2	E4	-0.198553	11.2839	7.39725	0.018209	0.2182	-0.214669	11.2839	268.064	4.28793e-60	1.10442e-58	-0.208763	11.2839	58.8657	1.71829e-14	1.19287e-12	0.207207	11.2839	4.70375	0.0617175	0.611722	-0.0371975	11.2839	1.47799	0.292304	0.590268	-0.0500018	11.2839	0.747731	0.3872	0.869856	-0.0727263	11.0944	0.41046	0.552708	0.931241	-0.0376521	11.0944	2.24173	0.13436	0.209039	-0.0264299	11.0944	0.265519	0.663466	0.887618	0.257518	11.0944	1.12152
RIMS3	E3	-0.0163942	10.1532	0.000756277	0.987488	1	-0.190615	10.1532	136.055	4.28027e-24	2.86728e-23	-0.124611	10.1532	9.35945	0.0154881	0.0561401	-0.0665163	10.1532	0.588562	0.561941	1	-0.00632296	10.1532	0.000625273	0.983733	1	-0.0415431	10.1532	0.297154	0.680248	1	0.220818	9.86202	0.00158025	0.973291	1	0.261669	9.86202	57.7299	3.65524e-13	2.72945e-12	0.347292	9.86202	14.2179	0.00165345	0.0178525	0.297251	9.86202	1.07038
RIN3	E3E4	-0.0164132	9.95938	0.205504	0.805365	1	-0.173217	9.95938	171.587	2.7742e-11	9.93014e-11	-0.076723	9.95938	14.1909	0.058184	0.156983	0.18193	9.95938	13.3987	0.0236326	0.453914	0.0324834	9.95938	10.0074	0.113548	0.369605	0.110051	9.95938	5.57987	0.222329	0.749338	0.159224	9.59452	2.83046	0.400128	0.863603	-0.58111	9.59452	417.987	1.58065e-25	2.74598e-24	-0.0704797	9.59452	2.58144	0.41479	0.693607	-0.743109	9.59452	23.284
RNF144B	E3	-0.0239474	9.94249	0.52156	0.788556	1	-0.0228685	9.94249	23.6415	0.0624161	0.0927629	-0.00562373	9.94249	0.118485	0.933909	0.999731	-0.576444	9.94249	127.968	2.42487e-06	0.00119708	-0.00955988	9.94249	5.63064	0.370738	0.672162	0.00670514	9.94249	0.109685	0.902928	1	-0.206681	9.58237	8.29007	0.231161	0.715903	-0.0356159	9.58237	13.349	0.128537	0.202425	0.207931	9.58237	19.362	0.0727756	0.26272	-1.51273	9.58237	124.752
RNF152	E2	-0.0199977	9.93453	2.41589	0.56363	0.905793	-0.0482414	9.93453	55.8835	0.00486701	0.00869748	-0.0403991	9.93453	9.12743	0.244692	0.434953	0.00194653	9.93453	6.93567	0.327852	0.842645	0.0254073	9.93453	6.24398	0.343832	0.644245	0.00773062	9.93453	0.0615721	0.932829	1	0.185012	9.57057	16.8156	0.114338	0.542883	-0.114453	9.57057	57.3544	0.00323076	0.00770907	-0.0266932	9.57057	0.0569687	0.938052	1	0.0277326	9.57057	7.97441e-10
RNF187	E2	-0.0373556	10.0674	0.174626	0.755054	1	-0.149185	10.0674	68.5444	1.78164e-11	6.44875e-11	-0.0163586	10.0674	0.152016	0.793201	0.915545	-0.139049	10.0674	4.66063	0.108926	0.728666	0.0439832	10.0674	3.85646	0.140926	0.415141	0.211626	10.0674	10.5988	0.0146368	0.349631	0.342808	9.7556	0.101959	0.800459	1	0.529982	9.7556	180.002	1.63635e-32	4.35347e-31	0.584704	9.7556	45.9388	7.643e-09	5.9315e-07	0.197939	9.7556	0.0889096
RNPEP	E4	-0.20456	9.97215	23.5517	0.00504706	0.103456	-0.116282	9.97215	55.0748	1.55614e-05	3.65624e-05	-0.0610949	9.97215	3.90489	0.260421	0.453117	-0.0482144	9.97215	0.510458	0.67632	1	-0.0248318	9.97215	3.23387	0.30185	0.599786	-0.00594212	9.97215	0.0273425	0.924929	1	-0.0857113	9.61368	1.21877	0.514255	0.903187	-0.258826	9.61368	46.518	3.448e-05	0.000113562	-0.121959	9.61368	2.82173	0.31514	0.60966	-0.398003	9.61368	7.48528
ROM1	E2	0.0719247	9.92746	12.0406	0.320761	0.746499	0.0100506	9.92746	17.239	0.24916	0.31804	0.0593265	9.92746	69.6778	0.0196109	0.0675435	0.009481	9.92746	0.759961	0.810169	1	0.0516723	9.92746	52.2742	0.0422975	0.200724	-0.0346748	9.92746	4.0031	0.574622	0.971572	0.000461538	9.56291	1.02266	0.75405	1	0.000373617	9.56291	4.14871	0.564683	0.66917	0.0736406	9.56291	18.4432	0.218841	0.49576	-0.015878	9.56291	-5.57894e-09
RPH3A	E3	-0.0698767	10.2235	0.544023	0.532534	0.890363	-0.407175	10.2235	517.925	4.51547e-114	9.22401e-112	-0.362428	10.2235	97.7234	5.04914e-23	1.31961e-20	-0.165625	10.2235	4.78493	0.0625743	0.614378	-0.0517882	10.2235	3.57383	0.108538	0.36022	-0.10215	10.2235	1.30608	0.318694	0.800766	-0.0840516	9.94885	5.45344	0.0352044	0.327846	-0.13696	9.94885	10.9867	0.0013338	0.00342005	-0.286081	9.94885	12.6587	0.000479301	0.00690286	-0.00648971	9.94885	0.0120668
RPLP0	E3	0.0446755	10.0896	0.544611	0.540536	0.894634	0.00281471	10.0896	0.0631918	0.801521	0.844872	-0.0507914	10.0896	1.51753	0.284253	0.477525	0.273206	10.0896	6.60251	0.0321561	0.513457	0.172819	10.0896	30.6167	3.92272e-06	0.000115998	-0.00201283	10.0896	0.000521367	0.981783	1	0.339924	9.79585	0.838646	0.409164	0.868334	0.640252	9.79585	219.223	8.49447e-49	4.94963e-47	0.266699	9.79585	9.83827	0.00308068	0.0284711	0.130726	9.79585	0.0990164
RPRD2	E4	-0.239294	10.3815	10.3429	0.00134552	0.0446963	-0.260187	10.3815	206.108	1.19973e-46	1.96152e-45	-0.234723	10.3815	36.7421	1.35788e-09	3.71838e-08	-0.0712876	10.3815	0.347499	0.570701	1	-0.0911281	10.3815	6.68587	0.0128839	0.0898636	-0.114015	10.3815	2.2449	0.134062	0.700312	-0.532479	10.0888	8.1978	0.00420215	0.107845	-0.399965	10.0888	107.122	5.46729e-25	9.24498e-24	-0.213338	10.0888	6.98762	0.00821933	0.0586206	-0.20195	10.0888	0.580437
RRBP1	E3	0.189021	9.97189	12.9355	0.0308021	0.290869	-0.0444724	9.97189	9.69365	0.065564	0.0969065	-0.029951	9.97189	1.12178	0.544824	0.733699	0.075897	9.97189	1.0467	0.542611	1	0.210965	9.97189	84.3859	2.94896e-08	1.41646e-06	0.152504	9.97189	6.56686	0.120631	0.691352	-0.0573579	9.61348	0.159127	0.791182	1	-0.0808133	9.61348	4.48986	0.179719	0.267389	-0.0315666	9.61348	0.038083	0.887229	1	0.321338	9.61348	3.14382
RRP12	E4	-0.0169729	10.0164	0.091019	0.843877	1	-0.190803	10.0164	121.148	6.51856e-15	2.84778e-14	-0.00358249	10.0164	0.00193676	0.998919	1	0.0687699	10.0164	1.18029	0.469327	0.960157	-0.0264803	10.0164	2.07744	0.337537	0.636942	-0.104564	10.0164	2.8175	0.257373	0.78789	-0.375465	9.67979	5.69545	0.0833236	0.491064	-0.16723	9.67979	16.7541	0.00169616	0.00426791	0.070535	9.67979	0.695729	0.553569	0.80719	0.0716008	9.67979	0.325938
RSAD1	E4	-0.0293315	10.0109	0.284575	0.722193	0.989079	-0.140591	10.0109	60.8588	1.34587e-07	3.73032e-07	-0.0673424	10.0109	3.26023	0.232974	0.420134	0.139083	10.0109	5.56997	0.115873	0.737637	0.0726776	10.0109	12.3812	0.0185449	0.11548	-0.0195611	10.0109	0.0985506	0.831825	1	-0.122608	9.67634	0.697565	0.542004	0.922299	0.0259894	9.67634	0.361998	0.607382	0.708311	0.21805	9.67634	6.61966	0.0532701	0.214432	0.354903	9.67634	6.35778
RSBN1L	E2	-0.0661995	10.1598	0.807079	0.445996	0.828185	-0.160444	10.1598	66.9191	6.31207e-13	2.48402e-12	-0.0676704	10.1598	2.58604	0.154908	0.32023	0.0535974	10.1598	0.154798	0.732256	1	0.168342	10.1598	25.5388	1.05694e-05	0.000279939	0.176689	10.1598	4.5627	0.0548005	0.551522	-0.178126	9.85904	0.760312	0.419699	0.87218	-0.163182	9.85904	14.3276	0.00024427	0.000713069	0.0341949	9.85904	0.149666	0.698863	0.911908	-0.0411523	9.85904	0.0166681
RSF1	E2	-0.0437414	10.3236	0.343464	0.595146	0.92367	-0.204388	10.3236	118.981	1.1356e-27	8.77855e-27	-0.160777	10.3236	16.005	6.3267e-05	0.000536186	0.0588854	10.3236	0.246826	0.624824	1	0.15247	10.3236	19.4271	1.79741e-05	0.000446762	0.130883	10.3236	2.7476	0.097407	0.635935	-0.154411	10.0441	0.822071	0.372454	0.845534	-0.115756	10.0441	8.32557	0.00677577	0.0151432	0.00639507	10.0441	0.00755768	0.930725	1	-0.0677648	10.0441	0.088031
RTFDC1	E3	0.00496632	9.95726	0.0171714	0.946064	1	-0.14443	9.95726	111.363	1.96752e-08	5.80458e-08	-0.111695	9.95726	21.1117	0.0154502	0.0560599	0.0250053	9.95726	0.151244	0.838724	1	0.0628921	9.95726	16.2645	0.0344941	0.174305	-0.0384555	9.95726	0.749806	0.644201	1	-0.352634	9.60311	11.0856	0.058875	0.417695	-0.288488	9.60311	70.7783	1.18181e-06	4.71449e-06	-0.0955145	9.60311	2.48169	0.366163	0.656654	-0.184734	9.60311	1.72044
RTN3	E3	0.0514141	10.9462	0.467405	0.494187	0.866217	-0.194433	10.9462	151.395	9.63881e-35	9.85621e-34	-0.167551	10.9462	24.5435	7.28838e-07	1.0393e-05	-0.0303051	10.9462	0.0368978	0.847674	1	0.166667	10.9462	25.848	3.70704e-07	1.45113e-05	-0.0501089	10.9462	0.403865	0.525103	0.935064	0.141649	10.8041	0.14941	0.699107	1	0.102512	10.8041	13.1724	0.000285411	0.000823028	0.207037	10.8041	11.4123	0.000732143	0.00958148	-0.101882	10.8041	0.311085
RTN4IP1	E3	-0.170939	9.977	13.6011	0.0270269	0.272137	-0.284772	9.977	320.106	3.5774e-28	2.82442e-27	-0.157816	9.977	24.2847	0.0027365	0.0135355	-0.052204	9.977	1.68753	0.441047	0.928928	-0.0243989	9.977	2.22187	0.373232	0.674656	-0.213736	9.977	15.8718	0.0167733	0.368382	-0.294483	9.62652	5.11802	0.150668	0.609374	-0.518539	9.62652	175.042	3.46807e-18	3.74451e-17	-0.105137	9.62652	1.66593	0.404789	0.684934	-0.0940998	9.62652	0.233904
RUFY3	E2E3	-0.0313502	10.5081	0.195905	0.658049	0.959392	-0.199146	10.5081	125.549	4.17769e-29	3.44209e-28	-0.129234	10.5081	10.9799	0.000921682	0.00541769	0.109499	10.5081	0.821552	0.36679	0.85647	0.0349799	10.5081	1.13057	0.287659	0.587094	-0.0785355	10.5081	0.890208	0.345426	0.832168	0.034468	10.2678	0.0160918	0.899059	1	0.0148372	10.2678	0.26112	0.609362	0.708311	0.176718	10.2678	5.61445	0.0178303	0.101473	0.898068	10.2678	11.092
S1PR3	E4	0.130796	9.92448	212.349	0.000523648	0.0221578	0.00475012	9.92448	3.52095	0.640296	0.705214	0.0527043	9.92448	74.3746	0.0383275	0.113734	0.0320865	9.92448	35.2963	0.160105	0.739251	0.00234584	9.92448	1.66202	0.760572	0.947632	-0.0504831	9.92448	53.9288	0.0818261	0.599923	0.183642	9.56009	86.5266	0.0214367	0.254004	0.00551326	9.56009	0.979819	0.807255	0.879382	0.0875819	9.56009	56.3889	0.0620598	0.237188	0.00358702	9.56009	3.50598e-10
SAMD4B	E3	-0.0786914	10.0712	1.25223	0.36025	0.760801	-0.170284	10.0712	69.9554	1.73276e-12	6.66262e-12	-0.152974	10.0712	13.202	0.00226457	0.0115583	-0.012771	10.0712	0.0448675	0.862694	1	-0.117149	10.0712	15.1406	0.00119267	0.0146788	0.0799522	10.0712	0.975319	0.417482	0.885726	-0.0473694	9.71915	0.0583089	0.855747	1	-0.372906	9.71915	62.0742	1.84846e-11	1.19675e-10	-0.237898	9.71915	5.99786	0.0378791	0.171164	-0.405562	9.71915	3.7855
SAP130	E2	-0.218351	10.029	11.3408	0.0127193	0.181418	-0.221253	10.029	136.501	6.33516e-19	3.39122e-18	-0.110251	10.029	7.90815	0.0340056	0.10359	-0.0534844	10.029	0.421522	0.635163	1	0.0577365	10.029	4.59702	0.115569	0.373094	0.141904	10.029	3.75919	0.150728	0.714901	-0.328547	9.68351	3.73859	0.137952	0.589939	-0.267584	9.68351	34.5876	3.2742e-06	1.23256e-05	0.00605112	9.68351	0.00514829	0.95228	1	-0.352713	9.68351	7.45131
SCAF4	E2	-0.0919582	10.0226	2.01496	0.308161	0.746499	-0.171385	10.0226	86.5068	2.9309e-12	1.11062e-11	-0.103676	10.0226	6.99026	0.0582059	0.157018	-0.083191	10.0226	0.792027	0.522607	0.995923	-0.0154765	10.0226	0.265258	0.715135	0.921879	0.0882064	10.0226	1.56542	0.364255	0.851222	-0.27772	9.68197	3.32316	0.167461	0.63762	-0.00567153	9.68197	0.000432303	0.983412	1	-0.000222718	9.68197	0.000133204	0.995045	1	0.223085	9.68197	0.880471
SCAMP1	E3	-0.040911	10.1449	0.163803	0.736402	0.995985	-0.165464	10.1449	79.7517	8.34044e-17	4.02311e-16	-0.0683006	10.1449	2.98493	0.104347	0.241402	0.201037	10.1449	4.72146	0.0753394	0.652032	0.0129765	10.1449	0.373967	0.616819	0.862348	-0.090898	10.1449	1.21024	0.342204	0.828675	0.187043	9.85887	0.115069	0.759349	1	0.262704	9.85887	45.3668	2.3951e-11	1.53667e-10	0.399138	9.85887	24.1984	4.04251e-06	0.000134287	0.464	9.85887	2.45737
SCARA3	E4	0.0523804	9.96218	1.41137	0.487742	0.863291	0.00554099	9.96218	0.339153	0.69756	0.755917	-0.0702882	9.96218	6.93444	0.167551	0.338168	-0.029442	9.96218	6.66796	0.174719	0.739251	0.0152917	9.96218	1.69535	0.491179	0.767888	-0.118909	9.96218	7.32388	0.150278	0.714132	-0.180685	9.60146	3.25705	0.271772	0.758643	-0.100017	9.60146	11.2877	0.0584473	0.102783	-0.112096	9.60146	3.13297	0.322814	0.617353	-0.132835	9.60146	2.71969
SCD5	E2E3	0.0851596	10.435	1.7333	0.187996	0.614595	-0.243926	10.435	140.968	1.80688e-32	1.69456e-31	-0.151227	10.435	12.3258	0.000447133	0.00289172	0.0349787	10.435	0.170056	0.695434	1	0.160685	10.435	33.0393	9.08338e-09	4.76194e-07	0.110311	10.435	3.81444	0.0508181	0.53567	0.0492464	10.1461	0.0758281	0.836549	1	0.147777	10.1461	12.3098	0.000452398	0.00126276	0.234386	10.1461	6.89615	0.00865027	0.0606679	0.118805	10.1461	0.000283299
SCFD2	E4	-0.168546	10.1695	4.76055	0.0474679	0.361002	-0.325401	10.1695	264.103	8.76178e-57	2.01964e-55	-0.288226	10.1695	44.3811	1.58938e-10	5.4112e-09	0.169095	10.1695	2.31561	0.159695	0.739251	0.010339	10.1695	0.0890158	0.780067	0.958141	-0.166346	10.1695	4.92277	0.0300624	0.444683	-0.31438	9.83923	2.7294	0.126109	0.565817	-0.691481	9.83923	222.094	4.14791e-48	2.36271e-46	-0.32817	9.83923	11.8427	0.000920439	0.0113865	0.482812	9.83923	3.38781
SCG3	E3E4	0.117414	10.166	3.17692	0.10617	0.517656	-0.101618	10.166	28.3828	2.09884e-05	4.87143e-05	-0.0227288	10.166	0.276194	0.875123	0.963359	-0.0781064	10.166	1.67329	0.284945	0.842645	-0.0498301	10.166	6.33836	0.0380501	0.186648	0.114834	10.166	2.51478	0.154225	0.719393	-0.320089	9.89272	3.31559	0.0939059	0.510522	0.176645	9.89272	21.0062	4.62921e-06	1.71254e-05	0.2194	9.89272	7.73069	0.00636294	0.0490383	-0.0458099	9.89272	0.583925
SCLT1	E3	-0.0880592	10.1555	1.35849	0.28852	0.738475	-0.242337	10.1555	150.807	3.04187e-33	2.95733e-32	-0.30654	10.1555	54.8651	2.02872e-12	9.56351e-11	0.0582699	10.1555	0.285106	0.642241	1	0.0228147	10.1555	0.545437	0.52387	0.791704	-0.0935528	10.1555	1.40001	0.265214	0.78789	-0.538982	9.83266	7.46458	0.0115099	0.186808	-0.449958	9.83266	96.669	2.80243e-22	4.03604e-21	-0.293774	9.83266	9.8074	0.00303163	0.0280761	0.699975	9.83266	7.31622
SCN11A	E3E4	0.0408809	9.92532	9.62697	0.422412	0.809497	-0.015386	9.92532	22.2565	0.217388	0.282002	0.0195098	9.92532	9.05078	0.440756	0.640118	0.071083	9.92532	62.7464	0.0433582	0.563599	-0.00976546	9.92532	11.697	0.383197	0.684991	-0.0644834	9.92532	27.3462	0.179507	0.730424	0.0158738	9.56171	0.264196	0.884629	1	-0.0255636	9.56171	8.57621	0.413264	0.523712	0.113168	9.56171	38.5136	0.0880204	0.295429	0.170341	9.56171	34.12
SCN2B	E3E4	-0.0415603	10.0636	0.597236	0.581822	0.915741	-0.155136	10.0636	79.665	1.46104e-12	5.64224e-12	-0.151998	10.0636	17.1591	0.00224982	0.0114962	-0.0347725	10.0636	0.359807	0.668492	1	-0.0590492	10.0636	11.7107	0.0145999	0.097618	0.0391503	10.0636	1.28286	0.419925	0.885926	0.474235	9.75399	8.00975	0.0267594	0.287249	0.174128	9.75399	20.9188	6.39045e-05	0.000202697	0.120856	9.75399	2.35964	0.205426	0.478108	0.109733	9.75399	4.66567e-10
SDC4	E4	0.16458	9.94179	15.3255	0.119623	0.551188	-0.0141324	9.94179	8.8193	0.403484	0.479858	-0.01252	9.94179	5.09365	0.531035	0.721883	0.024303	9.94179	24.8323	0.161751	0.739251	-0.0171461	9.94179	9.85221	0.376058	0.677889	0.0159179	9.94179	27.5742	0.140599	0.701145	-0.243942	9.57038	5.19793	0.345423	0.821582	-0.025962	9.57038	37.9908	0.0868541	0.144692	-0.0429554	9.57038	40.7528	0.0829413	0.284288	0.000252798	9.57038	1.7029e-10
SEC22A	E2	-0.0774916	10.0819	1.17691	0.377903	0.774352	-0.232663	10.0819	136.924	1.47102e-23	9.67898e-23	-0.201826	10.0819	23.269	4.41654e-05	0.00039167	-0.160236	10.0819	2.4119	0.198066	0.74798	0.0420803	10.0819	1.82685	0.269372	0.579702	-4.98237e-05	10.0819	5.09551e-05	0.994305	1	-0.434523	9.7458	5.55761	0.0436763	0.365106	-0.395118	9.7458	70.1111	1.52109e-13	1.16722e-12	-0.171411	9.7458	3.28595	0.100646	0.320152	-0.449611	9.7458	3.23439
SEC23B	E4	-0.103805	9.97986	4.42959	0.19703	0.626207	-0.21571	9.97986	180.455	2.29446e-17	1.14382e-16	-0.163417	9.97986	24.4635	0.00229431	0.0116878	-0.131112	9.97986	4.12599	0.215045	0.76756	0.0302284	9.97986	2.37894	0.346639	0.646606	0.0147538	9.97986	0.0665777	0.876422	1	0.043734	9.62829	0.0563027	0.884007	1	-0.214362	9.62829	25.7093	0.00100669	0.00264034	0.241447	9.62829	10.6747	0.028025	0.14018	-0.0146199	9.62829	0.388171
SEC24D	E3	0.0895389	10.0715	3.9577	0.148019	0.599286	-0.308396	10.0715	320.966	4.75161e-48	8.1986e-47	-0.114533	10.0715	11.1378	0.0147135	0.0539487	-0.103191	10.0715	1.14648	0.418647	0.90217	-0.0218963	10.0715	2.05833	0.298022	0.595777	-0.392363	10.0715	28.9195	5.46541e-05	0.0207115	0.0592077	9.75182	0.121435	0.783295	1	-0.507481	9.75182	142.773	1.52101e-24	2.48909e-23	0.00304918	9.75182	0.196261	0.730349	0.933729	-0.442573	9.75182	3.75862
SECISBP2L	E2	-0.121769	10.3299	2.10917	0.160819	0.602447	-0.311314	10.3299	262.636	6.4432e-59	1.60827e-57	-0.156324	10.3299	12.1663	0.000487025	0.0031247	0.114086	10.3299	0.937105	0.357281	0.852425	0.0120559	10.3299	0.164454	0.68509	0.90912	-0.167781	10.3299	3.54254	0.0603869	0.569186	0.0157172	10.0437	0.0252737	0.87369	1	-0.147716	10.0437	12.6669	0.000373776	0.00106182	0.0677361	10.0437	0.465075	0.495276	0.761237	0.519856	10.0437	2.88291
SEMA4B	E4	-0.0996604	10.0227	2.58426	0.229826	0.668337	-0.22818	10.0227	152.919	7.03509e-20	3.92552e-19	-0.16691	10.0227	19.302	0.00139176	0.00767431	0.0876761	10.0227	1.80332	0.348401	0.850314	0.0321922	10.0227	1.5899	0.374392	0.67563	-0.0854122	10.0227	1.96975	0.320835	0.803647	-0.330593	9.67144	4.76744	0.096263	0.51298	-0.476056	9.67144	117.076	4.21798e-16	3.93501e-15	-0.155541	9.67144	3.17108	0.187688	0.454874	0.0439823	9.67144	0.0298243
SERP1	E3	0.132724	10.1177	3.42589	0.109823	0.52765	-0.160151	10.1177	65.4226	1.49013e-12	5.75209e-12	-0.141738	10.1177	10.9418	0.00428475	0.0196665	0.213157	10.1177	3.79327	0.102262	0.711131	0.0353116	10.1177	1.28897	0.341475	0.641647	-0.00377042	10.1177	0.002727	0.958353	1	0.0590795	9.8248	0.00672895	0.934624	1	0.364415	9.8248	79.1699	6.60281e-19	7.52695e-18	0.273468	9.8248	8.13235	0.00934158	0.0641494	0.645056	9.8248	4.9524
SERPINI1	E4	-0.18095	10.5522	4.04813	0.0458675	0.356262	-0.226515	10.5522	170.394	7.01725e-39	8.41502e-38	-0.0992678	10.5522	7.31034	0.0180658	0.0634266	0.0446949	10.5522	0.379063	0.55334	1	0.132516	10.5522	12.9543	0.000319491	0.00505609	-0.0975327	10.5522	0.888673	0.345842	0.832268	0.25688	10.3852	0.24155	0.623099	0.983685	0.194776	10.3852	33.6521	6.77443e-09	3.46262e-08	0.319202	10.3852	21.3186	3.93409e-06	0.000131422	0.460313	10.3852	1.70648
SEZ6L	E2	-0.151709	10.4133	4.0591	0.0736284	0.442667	-0.20395	10.4133	145.07	2.30423e-33	2.2488e-32	-0.179493	10.4133	22.0614	2.64768e-06	3.28364e-05	-0.14373	10.4133	2.69735	0.144941	0.739251	-0.0348601	10.4133	2.12481	0.198841	0.49976	-0.0169582	10.4133	0.107206	0.743349	1	0.109876	10.1616	0.00165497	0.987104	1	-0.00403796	10.1616	0.0166496	0.991488	1	0.51568	10.1616	44.8548	2.22781e-11	3.14227e-09	-0.0463695	10.1616	2.36574
SEZ6L2	E3E4	0.0136573	10.2477	0.226482	0.680122	0.969502	-0.0770439	10.2477	18.9714	1.32955e-05	3.14422e-05	-0.0516401	10.2477	1.88831	0.295192	0.488059	-0.132081	10.2477	5.19366	0.052946	0.596434	0.0220948	10.2477	0.726987	0.460818	0.747095	-0.0200584	10.2477	0.0461971	0.849383	1	0.112481	9.99557	0.0154389	0.902792	1	0.157973	9.99557	18.4708	1.74043e-05	5.98162e-05	0.120044	9.99557	2.71596	0.101178	0.321155	-0.21236	9.99557	4.07014
SF3B4	E2	-0.0341256	9.95563	0.673989	0.676826	0.967867	-0.000195017	9.95563	0.00423321	0.988122	0.994895	0.0759203	9.95563	9.52705	0.107307	0.246327	0.0490381	9.95563	1.79067	0.496442	0.982556	0.0423849	9.95563	12.4071	0.0722973	0.280294	0.168069	9.95563	14.8592	0.0475742	0.521906	0.091473	9.60149	0.0509403	0.904074	1	0.168612	9.60149	29.3604	0.00174586	0.00438179	0.18262	9.60149	8.15657	0.108415	0.335263	-0.0970717	9.60149	4.45117
SFTPD	E2	-0.00626789	9.93051	0.123721	0.911341	1	-0.0589847	9.93051	83.5962	0.00249364	0.00462744	-0.071929	9.93051	50.8173	0.0215078	0.0727377	0.0256576	9.93051	10.3669	0.303655	0.842645	-0.00354051	9.93051	4.75528	0.486121	0.76407	0.0195986	9.93051	2.47997	0.614081	0.99106	-0.18175	9.56882	12.5658	0.204946	0.68678	-0.21041	9.56882	161.201	4.94709e-06	1.82293e-05	-0.00220936	9.56882	0.000803858	0.994292	1	-0.00254864	9.56882	5.37914e-10
SGCD	E2	-0.291983	10.4632	21.4879	3.56957e-06	0.000469914	-0.378694	10.4632	331.91	6.37413e-74	2.69717e-72	-0.276955	10.4632	32.3319	1.30676e-08	2.78796e-07	0.0512453	10.4632	0.244306	0.621116	1	0.175691	10.4632	18.0076	2.20413e-05	0.000528635	-0.10121	10.4632	2.03769	0.153449	0.718602	-0.726928	10.1659	20.1294	7.31257e-06	0.00112742	-0.634112	10.1659	177.591	3.37914e-40	1.31987e-38	-0.16783	10.1659	2.62642	0.105128	0.329047	-0.10348	10.1659	1.55676
SH3PXD2A	E4	0.161748	10.1569	4.82933	0.0614099	0.404663	-0.16007	10.1569	67.8987	2.48707e-14	1.05996e-13	-0.26159	10.1569	44.9531	4.17204e-10	1.27837e-08	-0.000265587	10.1569	0.00436367	0.955342	1	-0.108056	10.1569	11.2463	0.00382322	0.0365106	-0.00480888	10.1569	0.0222551	0.898057	1	-0.104228	9.83219	0.301242	0.620978	0.982115	-0.364218	9.83219	67.8595	4.20749e-15	3.62812e-14	-0.290478	9.83219	11.5728	0.00109099	0.0129174	-0.823922	9.83219	14.4327
SHC3	E4	-0.123121	10.2731	2.63526	0.16339	0.602783	-0.296493	10.2731	300.568	3.88523e-67	1.28104e-65	-0.331856	10.2731	69.51	3.6984e-15	2.85774e-13	-0.181405	10.2731	5.71821	0.0425169	0.563599	-0.0502113	10.2731	4.86126	0.0622604	0.258252	-0.0982011	10.2731	2.30907	0.128627	0.700312	-0.0704755	9.98995	0.831657	0.407554	0.867327	-0.138727	9.98995	12.9855	0.000315324	0.000902842	-0.144671	9.98995	2.80372	0.121816	0.358488	-0.272795	9.98995	2.32761
SIN3A	E2	-0.206675	9.99212	14.9706	0.012951	0.183106	-0.126125	9.99212	54.4963	1.25325e-06	3.23264e-06	-0.143837	9.99212	17.3334	0.00663871	0.0280645	0.0545129	9.99212	0.644042	0.607889	1	-0.00803149	9.99212	0.155909	0.803012	0.967731	-0.089463	9.99212	2.33838	0.326291	0.809669	-0.61983	9.64	20.498	0.00229619	0.0732264	-0.271937	9.64	43.05	4.86555e-06	1.79511e-05	0.0158178	9.64	0.0479617	0.873653	1	-0.327722	9.64	8.24894
SLAIN2	E2	-0.143911	10.026	5.28204	0.100593	0.502466	-0.207458	10.026	128.926	1.52284e-17	7.66684e-17	-0.163846	10.026	18.2735	0.00177161	0.00939855	0.167507	10.026	3.95143	0.156789	0.739251	-0.0223025	10.026	0.785978	0.530972	0.796821	-0.100708	10.026	1.99647	0.305012	0.788934	-0.386184	9.68271	6.19552	0.0639858	0.435025	-0.283587	9.68271	40.505	6.50764e-07	2.6747e-06	0.14781	9.68271	2.88912	0.187179	0.454137	-0.253007	9.68271	1.96358
SLC12A4	E3	0.0255541	9.9243	1.25317	0.794288	1	-0.0152256	9.9243	56.7545	0.0922614	0.132092	0.00766077	9.9243	5.74192	0.596944	0.778132	0.0411299	9.9243	17.0443	0.357944	0.852698	0.0118874	9.9243	13.9395	0.404503	0.706368	0.0493073	9.9243	6.85567	0.548472	0.951402	-0.224995	9.55895	34.2208	0.204042	0.685333	-0.0152164	9.55895	16.7886	0.378923	0.488057	-0.00483323	9.55895	1.17078	0.814133	0.984739	0.157936	9.55895	52.8851
SLC16A5	E4	0.00731317	9.92218	2.47718	0.774823	1	-0.0289309	9.92218	314.657	0.00114424	0.00221374	-0.00970731	9.92218	6.52255	0.647167	0.818048	0.0733232	9.92218	31.3749	0.306875	0.842645	0.00845416	9.92218	29.4842	0.32552	0.623132	-0.0236951	9.92218	20.4266	0.412365	0.884719	-0.0240048	9.55755	14.7919	0.487925	0.888997	-0.019474	9.55755	34.8229	0.286502	0.393335	-0.0100472	9.55755	1.94707	0.805894	0.980177	0.096941	9.55755	18.9235
SLC16A9	E3E4	0.0836393	9.94824	7.75361	0.169644	0.604132	-0.0877109	9.94824	84.041	4.38102e-05	9.88942e-05	-0.0535432	9.94824	7.5152	0.225856	0.411473	-0.000850918	9.94824	0.082096	0.899833	1	0.0288517	9.94824	11.741	0.132625	0.399291	0.000828045	9.94824	0.0110684	0.958674	1	0.179573	9.58353	5.10465	0.278896	0.76478	-0.171378	9.58353	66.0236	0.000257887	0.000749618	-0.0799138	9.58353	3.85893	0.361122	0.654806	-0.010989	9.58353	3.24595
SLC20A2	E3	0.214043	10.2287	8.46566	0.00397927	0.0886211	-0.297836	10.2287	228.175	1.93237e-51	3.70883e-50	-0.20277	10.2287	21.4441	4.64233e-06	5.42073e-05	0.0153568	10.2287	0.00323358	0.962817	1	0.00819707	10.2287	0.0396177	0.850962	0.988257	0.00434428	10.2287	0.000837682	0.97691	1	0.0375024	9.89369	0.0464328	0.851138	1	-0.426821	9.89369	95.4521	1.87437e-22	2.73716e-21	-0.13581	9.89369	1.94988	0.185345	0.452032	0.19887	9.89369	0.708947
SLC24A4	E2E4	0.0893261	10.0087	2.33427	0.30805	0.746499	-0.127671	10.0087	53.9069	1.66361e-07	4.57887e-07	-0.0367442	10.0087	1.12084	0.454664	0.653365	-0.014815	10.0087	0.112594	0.820522	1	0.0191011	10.0087	3.73841	0.203542	0.503909	-0.125416	10.0087	3.84192	0.183076	0.730424	0.16637	9.65859	0.925386	0.492504	0.890102	-0.262193	9.65859	31.7292	4.95676e-05	0.000159442	-0.0398077	9.65859	0.639127	0.583303	0.829969	-0.0259366	9.65859	2.69366
SLC25A1	E4	0.04554	9.95358	1.33823	0.552696	0.901796	0.0633995	9.95358	27.655	0.00510109	0.00908928	-0.0723618	9.95358	9.18543	0.114972	0.258708	0.144923	9.95358	16.9965	0.0370187	0.544345	0.104554	9.95358	46.5496	0.000503596	0.00737832	0.0591794	9.95358	1.64932	0.50644	0.923691	0.170105	9.60058	1.96582	0.42444	0.874064	0.317044	9.60058	99.9018	6.8307e-09	3.48737e-08	0.0151825	9.60058	0.0330925	0.91953	1	0.278568	9.60058	6.06824
SLC25A16	E2	-0.0922196	10.0402	2.21131	0.273756	0.722803	-0.301786	10.0402	261.207	1.22521e-36	1.3491e-35	-0.283563	10.0402	54.064	1.19083e-08	2.56697e-07	0.148567	10.0402	3.31044	0.18365	0.739251	0.0247441	10.0402	0.832485	0.500856	0.774287	-0.0235197	10.0402	0.105101	0.80542	1	-0.164786	9.70243	1.14545	0.40229	0.864863	-0.462835	9.70243	105.049	1.36366e-16	1.3164e-15	-0.37039	9.70243	17.0052	0.000849397	0.0107671	0.188391	9.70243	0.696414
SLC25A3	E2	0.026764	10.1976	0.0839267	0.78446	1	-0.235081	10.1976	151.879	1.97018e-33	1.92808e-32	-0.074226	10.1976	3.25413	0.212302	0.393886	0.0882168	10.1976	0.56739	0.504676	0.988443	0.0648758	10.1976	3.5576	0.0915241	0.324794	-0.0545799	10.1976	0.405712	0.556428	0.956738	-0.0441455	9.93546	0.86036	0.379574	0.850831	-0.0851595	9.93546	2.98413	0.134491	0.209223	0.072401	9.93546	0.789241	0.406364	0.686362	0.4463	9.93546	1.65524
SLC25A35	E3	0.011052	9.92451	1.5992	0.752126	1	0.00132042	9.92451	0.057502	0.952858	0.967629	0.00146503	9.92451	0.0193923	0.972967	1	0.0216908	9.92451	2.91603	0.6818	1	-0.0035931	9.92451	0.883982	0.82105	0.976502	-0.0651181	9.92451	27.2252	0.211861	0.735514	-0.168068	9.5591	25.66	0.26014	0.74616	-0.0412698	9.5591	112.322	0.0193937	0.0389451	0.0272854	9.5591	4.73012	0.637733	0.870513	-0.138074	9.5591	28.6293
SLC25A37	E2	-0.312155	10.1305	20.4279	7.19841e-05	0.00526461	-0.369914	10.1305	376.599	6.15571e-73	2.54417e-71	-0.357537	10.1305	71.1925	1.57454e-13	8.8834e-12	0.398723	10.1305	17.1394	0.000225064	0.033332	-0.0638717	10.1305	4.67542	0.0718774	0.279596	-0.149694	10.1305	3.49581	0.11246	0.672718	-0.448323	9.81443	5.97064	0.0278484	0.2932	-0.395199	9.81443	77.4652	1.93414e-16	1.84903e-15	-0.318085	9.81443	11.0633	0.00251467	0.0244387	0.625124	9.81443	8.95332
SLC25A4	E2	-0.0705311	10.1469	1.34388	0.326096	0.746499	-0.050654	10.1469	6.196	0.287399	0.359365	0.0212963	10.1469	0.341867	0.558756	0.745567	-0.0202322	10.1469	0.0812918	0.803756	1	0.143004	10.1469	20.2883	0.000102831	0.00198643	0.239259	10.1469	7.69596	0.0157774	0.361801	0.0654359	9.87766	1.33055	0.29529	0.775165	0.397623	9.87766	97.9031	5.49835e-23	8.27406e-22	0.399809	9.87766	22.8895	1.73855e-06	6.38377e-05	0.0465311	9.87766	0.201059
SLC30A3	E3	-0.0223501	10.0244	0.23709	0.760586	1	-0.179959	10.0244	125.669	1.1315e-14	4.89271e-14	-0.0108801	10.0244	0.114443	0.812314	0.927077	-0.0744961	10.0244	5.12828	0.149518	0.739251	-0.0457261	10.0244	21.9125	0.00290425	0.0298004	-0.0198494	10.0244	0.182076	0.786086	1	0.212203	9.68499	4.82045e-10	1	1	0.0504639	9.68499	4.52924	0.0804856	0.135715	0.220108	9.68499	4.19235	0.156151	0.409318	0.0724213	9.68499	1.30629
SLC30A4	E2	0.0859318	9.99634	2.69624	0.280762	0.729916	-0.14783	9.99634	71.316	1.82929e-08	5.41115e-08	0.0509116	9.99634	2.47356	0.309916	0.503228	0.100783	9.99634	3.60933	0.217224	0.770714	0.0206172	9.99634	0.69813	0.579675	0.834236	0.066734	9.99634	1.44818	0.431394	0.889848	-0.308872	9.64774	8.08244	0.0507867	0.392598	-0.0664929	9.64774	1.67541	0.378104	0.487214	0.198377	9.64774	5.46717	0.106878	0.332708	-0.0812275	9.64774	2.92357
SLC35D1	E2	-0.100037	9.98472	3.1649	0.250086	0.693159	-0.168646	9.98472	101.975	4.27301e-11	1.51064e-10	-0.177672	9.98472	27.764	0.000515438	0.00328564	0.0435846	9.98472	0.399151	0.687257	1	-0.050583	9.98472	5.1725	0.147496	0.425743	-0.0794196	9.98472	1.5928	0.413107	0.884719	-0.138189	9.63302	0.815936	0.536318	0.918515	-0.200929	9.63302	23.2207	0.000956381	0.00252028	-0.0231927	9.63302	0.0722644	0.857011	1	-0.153954	9.63302	1.02811
SLC35E2B	E2	-0.0707296	9.98245	1.96939	0.391318	0.783934	-0.0364075	9.98245	4.25361	0.267326	0.337807	-0.109295	9.98245	10.7382	0.0468455	0.1331	-0.0291635	9.98245	0.285911	0.746457	1	0.0312733	9.98245	2.59109	0.320386	0.618297	-0.136892	9.98245	5.50926	0.147033	0.707691	-0.0981611	9.62759	0.408904	0.67746	1	-0.27059	9.62759	46.9748	5.56929e-06	2.03657e-05	-0.270175	9.62759	12.6752	0.0195213	0.108654	-0.0403272	9.62759	0.143455
SLC35F3	E3	-0.107452	10.5401	2.93592	0.0950478	0.490189	-0.324315	10.5401	361.556	2.47173e-80	1.35998e-78	-0.19682	10.5401	21.8189	3.00413e-06	3.66685e-05	-0.0738454	10.5401	0.760363	0.392918	0.873195	0.157432	10.5401	20.8314	7.97931e-06	0.000217164	-0.174842	10.5401	4.56749	0.0325891	0.454967	-0.127775	10.3019	1.21937	0.269508	0.75703	-0.303317	10.3019	67.5081	2.33709e-16	2.22349e-15	-0.196894	10.3019	4.54203	0.0330948	0.156426	-0.205816	10.3019	0.919595
SLC39A10	E4	-0.0217328	10.3603	0.0618173	0.831356	1	-0.382782	10.3603	522.985	3.66558e-115	8.04256e-113	-0.144037	10.3603	11.3475	0.00143481	0.00787992	0.386961	10.3603	10.9003	0.0027282	0.155403	-0.0190456	10.3603	0.316678	0.619411	0.863656	-0.129887	10.3603	2.15995	0.181473	0.730424	0.0592218	10.1143	0.0917677	0.761948	1	-0.244821	10.1143	43.7153	3.97618e-11	2.50673e-10	-0.00602447	10.1143	0.0184077	0.906414	1	0.281038	10.1143	0.697608
SLC41A2	E2	-0.108214	10.1295	2.77078	0.189721	0.616466	-0.335336	10.1295	355.183	2.77444e-61	7.3374e-60	-0.259909	10.1295	45.7823	8.19048e-09	1.85192e-07	0.0356181	10.1295	0.373287	0.638874	1	0.0237079	10.1295	1.50069	0.343242	0.643605	-0.10451	10.1295	1.83579	0.267931	0.78789	0.0842797	9.81575	0.0374281	0.879612	1	-0.30394	9.81575	51.9783	9.45132e-11	5.7563e-10	-0.240146	9.81575	7.52343	0.0168144	0.0974962	0.057232	9.81575	4.75058e-10
SLC43A3	E4	-0.000353251	9.91976	-7.87456e-10	1	1	-0.000154684	9.91976	-3.33944e-10	1	1	6.67826e-05	9.91976	-6.08456e-11	1	1	-0.000114571	9.91976	7.80381e-10	1	1	0.00335649	9.91976	242.055	0.118866	0.379553	-0.0304122	9.91976	349.929	0.0603043	0.569186	-0.000120831	9.5552	4.33293e-09	0.99998	1	-0.000352788	9.5552	5.72086e-09	0.999979	1	-0.000522389	9.5552	3.52972e-09	0.999981	1	-0.000624612	9.5552	2.1312e-09
SLC44A1	E2	-0.0300148	10.7629	0.141082	0.70721	0.982315	-0.368382	10.7629	392.966	4.02384e-87	2.91885e-85	-0.187142	10.7629	17.5097	2.86325e-05	0.000268902	0.194024	10.7629	2.62321	0.124426	0.739251	0.220274	10.7629	111.85	4.10457e-26	1.55205e-23	-0.114493	10.7629	2.43011	0.119031	0.688218	-0.0983277	10.4277	0.249399	0.617509	0.979242	-0.469198	10.4277	138.229	1.01067e-31	2.53694e-30	0.179509	10.4277	3.85567	0.0496037	0.203959	0.513133	10.4277	3.25723
SLC47A2	E3	-0.0702461	9.92609	48.2634	0.0601573	0.400418	-0.043125	9.92609	87.3439	0.0115151	0.019531	-0.0295215	9.92609	22.5484	0.200545	0.378695	0.00363707	9.92609	-2.97561e-09	1	1	0.0216084	9.92609	41.6094	0.0822141	0.303525	0.00925694	9.92609	0.594001	0.836225	1	-0.117868	9.56365	22.1559	0.150164	0.6088	-0.142852	9.56365	149.555	0.00014625	0.000441207	-0.117024	9.56365	82.3514	0.00554392	0.044222	-0.00597312	9.56365	-1.5965e-11
SLC4A9	E3	-0.000846276	9.92645	1.07823	0.775526	1	-0.0416795	9.92645	114.845	0.00269847	0.00499294	-0.0750568	9.92645	93.259	0.00716407	0.0299224	-0.0295616	9.92645	24.8165	0.171345	0.739251	0.028578	9.92645	33.8726	0.107075	0.357292	-0.0314302	9.92645	8.56536	0.418741	0.885831	-0.0218436	9.56315	6.54299	0.44826	0.876519	-0.09561	9.56315	98.3869	0.002977	0.00715445	-0.0226458	9.56315	0.590891	0.816977	0.9863	0.0146288	9.56315	1.78642e-09
SLC6A19	E2	-0.000189558	9.91977	1.85284e-09	1	1	0.00160621	9.91977	119.145	0.459301	0.535575	-0.000213819	9.91977	3.43347e-09	1	1	-0.000348767	9.91977	1.97966e-10	1	1	-8.65604e-05	9.91977	-5.55232e-09	1	1	-0.000227684	9.91977	1.42288e-10	1	1	-0.000142612	9.55519	3.90428e-09	1	1	-0.00317661	9.55519	129.964	0.375237	0.484283	-0.000439533	9.55519	1.39405e-09	1	1	-0.000523481	9.55519	2.15893e-09
SLC7A2	E4	0.0515178	9.94326	1.64569	0.601209	0.9259	0.00210399	9.94326	0.769653	0.747789	0.800103	-0.128538	9.94326	39.4746	0.014891	0.0544533	-0.0306966	9.94326	13.0941	0.173207	0.739251	0.00403899	9.94326	0.632195	0.766672	0.950292	0.100606	9.94326	8.41321	0.264587	0.78789	0.26993	9.58006	12.6628	0.119665	0.553392	0.0547492	9.58006	19.6996	0.0908192	0.150381	0.000722394	9.58006	0.102667	0.967572	1	-0.057615	9.58006	4.63114
SLC8A1	E3	-0.0262927	11.0064	0.055371	0.829571	1	-0.213276	11.0064	207.524	5.90788e-47	9.80344e-46	-0.361904	11.0064	117.064	2.97842e-27	1.2603e-24	0.0503802	11.0064	0.3685	0.543826	1	-0.0180501	11.0064	0.229743	0.654883	0.889	-0.206985	11.0064	12.2538	0.000464703	0.0714566	0.0728351	10.7964	0.00106729	0.973939	1	-0.0625797	10.7964	4.32569	0.0375645	0.0699787	-0.253588	10.7964	14.4117	0.000147688	0.00262997	0.121102	10.7964	0.428641
SLC9A9	E2	0.128592	10.1899	3.49268	0.0616464	0.405534	-0.226248	10.1899	89.945	6.16077e-20	3.44522e-19	-0.102161	10.1899	6.98922	0.00820276	0.0334971	0.00996023	10.1899	0.0171501	0.895809	1	-0.0299142	10.1899	0.88337	0.352406	0.652731	0.0144301	10.1899	0.0450204	0.835837	1	0.0836874	9.85389	0.268373	0.621364	0.982288	-0.0954653	9.85389	3.42148	0.0695669	0.119673	0.126908	9.85389	2.60948	0.106256	0.331694	-0.068907	9.85389	0.115268
SLCO3A1	E3	0.135108	10.3606	2.65747	0.117544	0.546285	-0.0639944	10.3606	9.55088	0.00238077	0.00443094	-0.204592	10.3606	25.4242	4.61707e-07	6.90247e-06	-0.0887006	10.3606	0.742074	0.412755	0.895017	0.0203593	10.3606	0.596156	0.440052	0.729602	-0.0252647	10.3606	0.0832493	0.777895	1	-0.0623724	10.0325	0.0162663	0.898516	1	-0.14585	10.0325	10.6644	0.00109556	0.00285362	-0.160854	10.0325	3.48674	0.0618893	0.236918	0.147691	10.0325	0.463953
SMARCC2	E2	0.00635093	10.0825	0.00679245	0.935465	1	-0.155627	10.0825	63.0985	2.86313e-10	9.59886e-10	-0.0829625	10.0825	4.08673	0.100125	0.233551	0.0343514	10.0825	0.0797768	0.822006	1	0.186834	10.0825	41.6799	3.22638e-07	1.27962e-05	0.0692426	10.0825	0.756565	0.478381	0.906255	-0.384079	9.76024	4.29972	0.0789939	0.479809	-0.166279	9.76024	15.1067	0.000877727	0.00232681	-0.0432928	9.76024	0.247654	0.683373	0.902095	-0.066059	9.76024	0.0349236
SMDT1	E4	-0.0188119	10.0118	0.0859777	0.84053	1	-0.0896425	10.0118	22.7719	0.00162403	0.00308587	-0.0862503	10.0118	5.12557	0.116089	0.260594	-0.00221075	10.0118	0.0133623	0.937182	1	-0.00674399	10.0118	0.0765754	0.849239	0.98798	-0.0299131	10.0118	0.250315	0.729744	1	0.376438	9.69672	2.38347	0.232278	0.71659	0.389373	9.69672	90.4248	1.34443e-15	1.20794e-14	0.224573	9.69672	6.62094	0.0422802	0.182957	0.043092	9.69672	0.0527661
SMG9	E2	0.00683184	9.99412	0.0153595	0.934619	1	-0.158985	9.99412	84.0614	9.41172e-10	3.04063e-09	-0.155255	9.99412	20.0693	0.00241841	0.0122137	0.07075	9.99412	1.10774	0.496931	0.982861	-0.0276007	9.99412	1.54527	0.417804	0.717529	-0.048953	9.99412	0.614504	0.603733	0.986715	0.0822161	9.64946	0.247898	0.727311	1	-0.135323	9.64946	9.98008	0.023788	0.0465801	-0.257906	9.64946	9.2553	0.0303742	0.147731	-0.108403	9.64946	0.595233
SMIM19	E3	-0.0185334	9.9763	0.194701	0.796071	1	-0.139397	9.9763	77.7445	5.99049e-08	1.7045e-07	-0.269363	9.9763	74.0824	2.44374e-07	3.9091e-06	-0.103948	9.9763	6.87367	0.124299	0.739251	-0.00644053	9.9763	0.226632	0.780245	0.958228	-0.0202214	9.9763	0.183402	0.7996	1	-0.205299	9.62928	5.38627	0.137337	0.589189	-0.187186	9.62928	19.3972	0.003796	0.00895678	-0.295859	9.62928	14.934	0.0113246	0.073692	-0.137924	9.62928	5.00121
SMO	E3	-0.0596712	9.93839	0.88088	0.682579	0.971416	-0.037903	9.93839	20.0941	0.0700152	0.102835	-0.0215882	9.93839	1.69092	0.617296	0.79379	-0.0356216	9.93839	1.39575	0.640257	1	-0.00691336	9.93839	2.55491	0.530301	0.796634	-0.0813117	9.93839	5.71619	0.340536	0.826856	-0.180828	9.57312	2.21328	0.564559	0.9391	-0.0913749	9.57312	27.0007	0.0424457	0.0779766	0.0176959	9.57312	0.372082	0.795707	0.973919	-0.128748	9.57312	9.32206
SMOX	E3	0.103676	9.93818	11.6962	0.152987	0.601094	-0.0483041	9.93818	57.8329	0.00374572	0.00679553	-0.0358839	9.93818	6.71175	0.321485	0.515689	0.0226747	9.93818	0.480321	0.786198	1	0.000585103	9.93818	0.00574874	0.977958	1	0.083853	9.93818	5.65617	0.336882	0.822287	0.102076	9.5755	0.433665	0.819417	1	-0.111316	9.5755	42.7378	0.00831674	0.0182273	0.054459	9.5755	2.10987	0.562381	0.813564	-0.261582	9.5755	17.6505
SMYD2	E3	-0.151911	10.0236	12.7385	0.0160365	0.203042	-0.234864	10.0236	186	3.0488e-24	2.06177e-23	-0.107935	10.0236	8.6025	0.0409322	0.119725	-0.216279	10.0236	10.7405	0.0266136	0.472505	-0.0419903	10.0236	9.11441	0.0422314	0.200589	0.041842	10.0236	0.983553	0.502814	0.920321	-0.00121796	9.70101	2.43882	0.242927	0.72952	-0.0981152	9.70101	3.33629	0.131134	0.205858	-0.0307015	9.70101	0.213095	0.708407	0.91863	0.0232248	9.70101	0.0735936
SNAPC3	E2	-0.0894179	10.0708	1.68455	0.314572	0.746499	-0.209149	10.0708	121.034	1.64826e-19	9.03544e-19	-0.11094	10.0708	7.65058	0.0262282	0.0848121	-0.19647	10.0708	5.02666	0.0843174	0.65524	0.0175212	10.0708	0.415316	0.616476	0.862135	-0.0217788	10.0708	0.0809213	0.819543	1	-0.267638	9.74892	3.14294	0.149816	0.60816	-0.13413	9.74892	8.29029	0.0139692	0.0290874	0.130834	9.74892	2.27689	0.196548	0.466674	-0.10017	9.74892	0.77937
SNCA	E3	-0.182749	10.5317	4.40604	0.0395995	0.332414	-0.196442	10.5317	131.216	2.42163e-30	2.11174e-29	-0.136051	10.5317	7.71446	0.00548005	0.0240592	0.491869	10.5317	16.623	4.56647e-05	0.0112716	0.14165	10.5317	15.2408	9.47584e-05	0.00184654	0.218796	10.5317	5.98496	0.0144318	0.348675	0.235806	10.3928	0.0340884	0.853522	1	0.374822	10.3928	130.302	5.22045e-30	1.18339e-28	0.568041	10.3928	30.0265	4.35717e-08	2.75571e-06	0.670075	10.3928	5.33809
SNCG	E4	-0.0263655	10.0784	0.121853	0.758893	1	-0.439405	10.0784	460.062	4.55934e-91	3.80416e-89	-0.154769	10.0784	15.0628	0.000433461	0.00281663	-0.0825176	10.0784	1.68602	0.272448	0.842645	-0.0824098	10.0784	16.6935	0.000592401	0.0084836	-0.127336	10.0784	4.85954	0.0628054	0.569186	0.57001	9.80106	2.92773	0.0932748	0.509498	0.0980853	9.80106	4.79714	0.0285282	0.0548229	0.410965	9.80106	26.9679	2.10606e-07	1.06635e-05	0.0969352	9.80106	0.0185217
SNRPN	E3	-0.279459	10.3169	15.7337	0.000385468	0.0176529	-0.3156	10.3169	293.112	1.60215e-65	4.96918e-64	-0.265506	10.3169	69.5196	7.75527e-17	8.35313e-15	-0.166521	10.3169	5.88038	0.0305855	0.501388	-0.0344534	10.3169	1.71648	0.242542	0.551915	0.163516	10.3169	3.59192	0.0912432	0.619385	-0.41105	10.0485	5.19291	0.032931	0.31601	-0.362044	10.0485	81.0674	2.54879e-19	3.01981e-18	-0.295899	10.0485	19.9161	8.17374e-06	0.000242106	-0.19578	10.0485	2.56234
SNTB2	E4	-0.168439	10.1104	6.26227	0.0464125	0.35785	-0.436603	10.1104	595.97	1.0289e-105	1.47464e-103	-0.212618	10.1104	25.0442	5.23577e-05	0.000454568	0.0357279	10.1104	0.168644	0.754608	1	0.00529215	10.1104	0.00809516	0.947727	1	-0.185691	10.1104	6.31661	0.0455078	0.511877	-0.389031	9.78115	4.90449	0.069596	0.45382	-0.890306	9.78115	411.5	1.01244e-73	1.66602e-71	-0.275756	9.78115	8.34199	0.0170778	0.0984136	-0.289894	9.78115	5.37851
SNX3	E4	0.277358	10.2024	12.7896	0.0014009	0.0454321	-0.167292	10.2024	79.0828	4.38835e-17	2.1562e-16	-0.0916237	10.2024	4.50252	0.0468115	0.133045	0.29423	10.2024	6.85739	0.0201649	0.442331	0.186559	10.2024	30.9518	6.93209e-07	2.56661e-05	-0.042756	10.2024	0.232155	0.658389	1	1.08647	9.96804	23.9273	3.61246e-06	0.000661863	0.487023	9.96804	165.013	1.70329e-37	5.76588e-36	0.558195	9.96804	37.835	1.23315e-09	1.18463e-07	0.778344	9.96804	6.65411
SNX6	E3	-0.032584	10.1195	0.179145	0.726358	0.991304	-0.221342	10.1195	122.157	1.9193e-24	1.30489e-23	-0.0984867	10.1195	5.52122	0.0330189	0.101297	0.244578	10.1195	5.21904	0.0447839	0.563599	0.102032	10.1195	9.97012	0.00605713	0.0518782	0.075198	10.1195	0.827203	0.432006	0.889848	0.113839	9.79774	0.250984	0.658829	1	-0.284483	9.79774	38.1019	1.15958e-08	5.76774e-08	-0.11505	9.79774	1.54128	0.252863	0.536404	0.413693	9.79774	2.59475
SOAT2	E4	-0.0150292	9.92109	33.9732	0.3872	0.781436	0.00714325	9.92109	55.8767	0.262733	0.332831	0.000197988	9.92109	0.0104232	0.985335	1	0.019662	9.92109	48.9452	0.299622	0.842645	-0.0050433	9.92109	44.395	0.323155	0.62101	-0.0292612	9.92109	149.999	0.0693562	0.569186	-0.0341401	9.55661	17.3937	0.455311	0.877788	-0.00288883	9.55661	0.0377303	0.968834	1	-0.00672408	9.55661	0.733096	0.878379	1	0.00294405	9.55661	1.4648e-10
SORBS1	E2E3	-0.050715	10.6172	0.982248	0.321649	0.746499	-0.443504	10.6172	699.91	3.49299e-153	2.3876e-150	-0.231862	10.6172	39.9978	2.56369e-10	8.25398e-09	-0.0313895	10.6172	0.225408	0.641135	1	-0.0555808	10.6172	2.63804	0.116294	0.374348	-0.330877	10.6172	19.036	1.28529e-05	0.00787659	0.0391279	10.3747	0.135255	0.738154	1	-0.542661	10.3747	240.991	9.02423e-54	6.57289e-52	0.0144181	10.3747	0.037984	0.932248	1	-0.117253	10.3747	0.31426
SORBS2	E4	-0.155867	10.6529	5.22716	0.0326561	0.301381	-0.258815	10.6529	259.92	2.5004e-58	6.12925e-57	-0.241873	10.6529	43.9774	3.35533e-11	1.28792e-09	0.00927012	10.6529	0.000104878	0.997979	1	-0.0439643	10.6529	3.6694	0.0739169	0.283971	-0.0426176	10.6529	0.350679	0.553732	0.954638	-0.24805	10.4002	2.11131	0.146243	0.603451	-0.20796	10.4002	37.6037	8.96936e-10	5.00684e-09	0.236955	10.4002	10.8897	0.000970103	0.011833	0.0207155	10.4002	0.00612795
SORD	E2	-0.0142658	9.94739	0.335671	0.785642	1	-0.0514378	9.94739	19.0442	0.0390015	0.0603881	-0.0465152	9.94739	4.58069	0.306975	0.500005	0.108088	9.94739	11.4422	0.113122	0.736298	0.0901378	9.94739	49.6802	0.000904806	0.0118937	-0.0668965	9.94739	3.91898	0.351431	0.837774	-0.102994	9.58581	9.8732	0.127266	0.567734	-0.120539	9.58581	18.0514	0.0355319	0.0666815	-0.090785	9.58581	2.88897	0.399719	0.681674	0.448093	9.58581	30.7124
SP1	E3	0.0138985	9.95834	0.100106	0.860874	1	-0.0227354	9.95834	2.83383	0.368138	0.443985	0.00170206	9.95834	0.00108382	0.973737	1	0.0888668	9.95834	2.21395	0.422777	0.907131	-0.00475465	9.95834	0.0623964	0.895907	1	0.124346	9.95834	8.91813	0.109997	0.665842	-0.273434	9.5973	5.72555	0.181993	0.659169	-0.0435946	9.5973	2.16431	0.407587	0.517625	0.0237623	9.5973	0.122253	0.849777	1	-0.0975061	9.5973	0.402768
SPAG9	E2	-0.0494265	10.2454	0.478719	0.492216	0.86542	-0.259085	10.2454	166.407	5.17733e-38	5.96702e-37	-0.156309	10.2454	13.5166	0.000236709	0.00167069	-0.195772	10.2454	2.526	0.138929	0.739251	0.0749279	10.2454	5.37141	0.0211004	0.126443	0.0166339	10.2454	0.0434996	0.844022	1	-0.678972	9.9348	13.2694	0.000271028	0.0162727	0.0191386	9.9348	0.255648	0.613136	0.711781	0.0900114	9.9348	1.04805	0.305978	0.599939	0.0243638	9.9348	0.00412671
SPATA5L1	E2	0.0138917	9.95685	0.144366	0.841206	1	-0.080489	9.95685	34.371	0.00222233	0.00415564	-0.0444495	9.95685	3.14047	0.351859	0.549881	-0.0529557	9.95685	1.06841	0.588857	1	0.0240738	9.95685	2.72317	0.389486	0.692185	-0.0717211	9.95685	2.40163	0.414403	0.884719	0.00423206	9.59997	0.0268424	0.925474	1	-0.0414098	9.59997	0.806104	0.621434	0.719159	0.00741491	9.59997	0.0113497	0.945513	1	-0.115716	9.59997	1.43714
SPATA7	E2	-0.166419	10.1234	5.39196	0.0546462	0.383027	-0.430755	10.1234	527.528	1.29461e-96	1.32993e-94	-0.28122	10.1234	46.864	1.65e-09	4.40001e-08	-0.119821	10.1234	3.08725	0.152397	0.739251	-0.04507	10.1234	2.44072	0.19813	0.499574	-0.160925	10.1234	4.19028	0.0848216	0.606131	-0.476731	9.80814	6.64862	0.0275226	0.29167	-0.938547	9.80814	445.43	1.28808e-82	2.69314e-80	-0.597411	9.80814	39.2434	2.87079e-08	1.91085e-06	-0.390716	9.80814	3.4829
SPEF1	E2	0.0362066	9.95753	3.05297	0.391095	0.783909	-0.158947	9.95753	135.826	4.82253e-09	1.48795e-08	-0.0520104	9.95753	5.74247	0.233505	0.420707	-0.0167688	9.95753	7.53257	0.178294	0.739251	-0.00537672	9.95753	6.6108	0.207254	0.507275	-0.0272133	9.95753	7.00654	0.193891	0.730424	0.123259	9.60155	0.0590029	0.89135	1	-0.0120906	9.60155	0.119641	0.761711	0.843107	-0.0819718	9.60155	2.8088	0.344209	0.639148	0.052436	9.60155	5.27986e-11
SPEN	E2E3	-0.0990568	10.1021	1.8631	0.244661	0.686858	-0.00153637	10.1021	0.00172602	0.966861	0.978918	0.01555	10.1021	0.141917	0.743813	0.885402	0.0272488	10.1021	0.0722176	0.823852	1	0.0714655	10.1021	5.25888	0.0510709	0.227656	-0.180866	10.1021	4.86099	0.0627982	0.569186	-0.187466	9.7751	1.02236	0.372248	0.845534	0.25388	9.7751	32.5781	9.61304e-08	4.35935e-07	0.199099	9.7751	4.53655	0.0603834	0.233442	0.123064	9.7751	0.218049
SPOP	E4	-0.135218	10.1276	3.55561	0.107689	0.521768	-0.12078	10.1276	39.6943	2.96011e-08	8.63828e-08	0.00511105	10.1276	0.021832	0.882536	0.967878	-0.1291	10.1276	1.42294	0.322671	0.842645	0.0477241	10.1276	2.41115	0.194171	0.497162	-0.151669	10.1276	3.3853	0.118377	0.687871	-0.251707	9.80462	1.91232	0.220367	0.704811	0.0681747	9.80462	2.84107	0.0919119	0.151865	0.189113	9.80462	4.28835	0.0591632	0.230087	-0.394659	9.80462	2.46726
SPPL2C	E3	-0.00116885	9.91996	9.37337e-10	1	1	-0.000340144	9.91996	3.97619	0.86157	0.894016	-0.00215979	9.91996	8.64074	0.792091	0.914807	-0.00115722	9.91996	2.41435e-10	1	1	-0.000443407	9.91996	-5.21926e-09	1	1	-0.00074974	9.91996	5.14825e-10	1	1	0.00347652	9.55545	1.1354e-09	1	1	0.0145031	9.55545	225.821	0.0817964	0.137583	-0.0111945	9.55545	61.5973	0.36386	0.654806	0.000248806	9.55545	5.73014e-10
SRD5A1	E3	-0.0789368	9.9807	2.97686	0.303602	0.746499	-0.198502	9.9807	154.909	1.39419e-14	6.0052e-14	-0.145636	9.9807	20.1828	0.00592318	0.0256436	-0.0401985	9.9807	0.433029	0.692182	1	-0.00685852	9.9807	0.0669259	0.876825	0.992733	-0.0489081	9.9807	0.860984	0.576025	0.972559	0.0289304	9.64312	0.332151	0.701045	1	-0.0967516	9.64312	3.71167	0.194254	0.285667	0.0542304	9.64312	0.478462	0.642674	0.874327	0.194241	9.64312	0.755941
SREK1	E2	-0.0818946	10.147	1.26429	0.322857	0.746499	-0.113503	10.147	33.9543	1.69318e-07	4.65736e-07	-0.0699811	10.147	2.87718	0.120931	0.268599	0.203637	10.147	3.64353	0.106091	0.719498	0.117594	10.147	13.4132	0.00177405	0.0200254	0.183596	10.147	5.12137	0.0469401	0.520731	-0.291543	9.83443	2.3274	0.163156	0.62994	0.0242634	9.83443	0.281868	0.59549	0.697309	-0.0242005	9.83443	0.0732183	0.78956	0.970637	0.235112	9.83443	1.07458
SRGAP1	E2E4	-0.0497722	10.0523	0.66266	0.472681	0.849858	-0.133263	10.0523	42.2832	1.48855e-07	4.10705e-07	-0.159762	10.0523	14.2259	0.00258433	0.0128977	-0.090154	10.0523	1.16065	0.338305	0.847409	0.0894776	10.0523	8.86059	0.0163417	0.105694	0.0775724	10.0523	1.20577	0.355327	0.84187	0.158207	9.69667	1.61629	0.275123	0.761366	0.00666282	9.69667	0.00159898	0.981959	1	-0.0978377	9.69667	1.19795	0.361576	0.654806	0.318843	9.69667	3.2017
SRGAP3	E2	-0.209736	10.4792	9.34087	0.00224217	0.0621349	-0.303204	10.4792	293.954	1.05087e-65	3.29384e-64	-0.259642	10.4792	48.7293	2.97468e-12	1.35554e-10	-0.288149	10.4792	5.94855	0.0147328	0.381123	-0.119291	10.4792	10.9082	0.00122927	0.0150356	-0.219021	10.4792	8.53795	0.00347971	0.192054	-0.382758	10.2111	5.37799	0.0204108	0.249135	-0.439197	10.2111	144.731	3.99212e-33	1.10511e-31	-0.30534	10.2111	16.3789	5.222e-05	0.00112765	-0.649611	10.2111	5.15922
SRPK2	E4	-0.106109	10.6379	1.90789	0.167203	0.603645	-0.231307	10.6379	173.983	1.16166e-39	1.43268e-38	-0.20245	10.6379	29.0662	7.02616e-08	1.29398e-06	0.00386336	10.6379	0.000643439	0.979763	1	0.0859304	10.6379	7.78914	0.0052581	0.0467235	0.104511	10.6379	1.57185	0.209945	0.734044	-0.243936	10.3999	1.93392	0.164358	0.632333	-0.0989289	10.3999	7.77377	0.00531025	0.0121366	-0.0982319	10.3999	1.73833	0.187378	0.45437	0.0689093	10.3999	0.0260666
SRSF1	E3	-0.0652455	9.92474	108.111	0.0117472	0.172396	-0.0355304	9.92474	120.374	0.00746768	0.013005	0.0133331	9.92474	7.7874	0.486696	0.682788	0.0437224	9.92474	37.66	0.137619	0.739251	0.0173668	9.92474	32.4939	0.16711	0.457819	-0.0205821	9.92474	3.30959	0.660803	1	-0.155276	9.56146	37.6653	0.100121	0.519669	-0.0704912	9.56146	85.321	0.0131386	0.027477	0.0735535	9.56146	16.8264	0.265456	0.552034	0.161392	9.56146	34.1235
SSH3	E3	0.0793838	9.94573	6.13956	0.251058	0.694229	-0.0536022	9.94573	23.4012	0.0279089	0.044329	-0.0641452	9.94573	8.27925	0.187809	0.363435	-0.0103376	9.94573	0.0652764	0.906649	1	0.0431246	9.94573	11.1535	0.122411	0.38601	0.0461814	9.94573	7.88605	0.199364	0.730424	0.126922	9.58514	2.23984	0.464314	0.881587	-0.202391	9.58514	57.0798	0.000189099	0.000561248	-0.362449	9.58514	48.0303	0.000589891	0.00817748	0.019462	9.58514	0.0422014
SST	E3E4	-0.0454857	9.96132	14.5314	0.0670809	0.423203	-0.030916	9.96132	52.2661	0.000521274	0.00105047	-0.174353	9.96132	44.5601	0.00184789	0.00974504	0.0390112	9.96132	0.379272	0.764452	1	-0.0293528	9.96132	42.2092	0.00180531	0.0202806	-0.153816	9.96132	85.5959	8.73978e-06	0.00621293	0.249261	9.60857	2.30256	0.404777	0.865456	0.16241	9.60857	0.980128	0.527997	0.635356	-0.301163	9.60857	0.558731	0.693348	0.907942	0.475742	9.60857	11.4728
ST3GAL3	E2	-0.141281	10.1816	3.48875	0.0885426	0.477016	-0.397096	10.1816	416.984	2.2232e-91	1.88146e-89	-0.245213	10.1816	37.8053	9.46202e-10	2.69918e-08	0.0897652	10.1816	0.606719	0.495513	0.98147	-0.0643794	10.1816	3.68664	0.0877477	0.316158	-0.00137546	10.1816	0.000420133	0.983647	1	-0.3517	9.86566	3.35358	0.0881621	0.500318	-0.753679	9.86566	285.372	3.23971e-63	3.71459e-61	-0.506912	9.86566	33.2102	1.64376e-08	1.17321e-06	-0.318135	9.86566	1.29505
ST7L	E3	-0.129073	10.0361	3.85075	0.141824	0.593964	-0.234879	10.0361	152.238	7.39707e-22	4.49438e-21	-0.0940109	10.0361	5.81596	0.0582182	0.157028	0.056699	10.0361	0.444344	0.624123	1	-0.00588289	10.0361	0.0488743	0.872102	0.990732	-0.0821512	10.0361	1.23295	0.397952	0.87893	-0.278533	9.6941	2.66599	0.195326	0.675552	-0.18196	9.6941	15.2447	0.00154807	0.00392082	-0.0485322	9.6941	0.291087	0.652088	0.879914	-0.0660705	9.6941	0.196416
STAT5B	E2	-0.0153706	10.0624	0.0468033	0.863465	1	-0.143443	10.0624	50.2203	5.51834e-09	1.69499e-08	-0.169429	10.0624	18.5944	0.000262891	0.00182647	-0.197748	10.0624	3.64174	0.123974	0.739251	-0.00847584	10.0624	0.0727394	0.825128	0.978222	-0.132233	10.0624	3.53133	0.107668	0.660608	0.0679068	9.7215	0.117208	0.774958	1	-0.0518525	9.7215	1.22065	0.339336	0.451162	0.175963	9.7215	4.1821	0.0650866	0.245224	-0.323391	9.7215	1.70402
STIM2	E2	-0.0917014	10.0886	1.9959	0.212647	0.647007	-0.218195	10.0886	119.545	1.79851e-21	1.07151e-20	-0.220125	10.0886	26.9401	8.14639e-06	8.81715e-05	-0.0882407	10.0886	0.647868	0.500418	0.985203	0.0122275	10.0886	0.188761	0.723759	0.92677	-0.0373656	10.0886	0.25093	0.657105	1	0.216909	9.76159	2.07059	0.200881	0.681839	-0.0557885	9.76159	1.19256	0.313874	0.423519	-0.0323617	9.76159	0.136555	0.724226	0.929847	0.12278	9.76159	0.14666
STK17B	E4	-0.067939	9.94443	3.54763	0.374972	0.771691	0.00578807	9.94443	0.967083	0.653791	0.717145	-0.0446912	9.94443	6.67167	0.273189	0.467468	-0.254965	9.94443	20.764	0.0412648	0.561694	-0.00812677	9.94443	0.685334	0.721727	0.925459	-0.0831307	9.94443	3.92153	0.376791	0.863409	-0.618159	9.58327	29.7619	0.00926093	0.164915	0.022022	9.58327	1.18183	0.630504	0.727429	0.249855	9.58327	39.9092	0.00444405	0.0377532	-0.165111	9.58327	1.41495
STK33	E4	-0.16504	9.96762	16.4639	0.0150849	0.19743	-0.0516524	9.96762	18.2785	0.0290545	0.0460046	-0.0346768	9.96762	2.82354	0.395915	0.598469	0.127773	9.96762	17.9355	0.0339294	0.526761	-0.0200954	9.96762	6.48617	0.200884	0.501139	-0.0420218	9.96762	0.683681	0.653264	1	-0.50361	9.60101	17.5594	0.0137484	0.208392	-0.14592	9.60101	28.8639	0.00445713	0.0103722	-0.0310792	9.60101	0.530647	0.685346	0.902889	0.304246	9.60101	18.2574
STMN1	E3	-0.380798	10.6906	15.1667	9.85486e-05	0.00663098	-0.253915	10.6906	189.879	4.04644e-43	5.72103e-42	-0.170423	10.6906	15.6298	7.71348e-05	0.00063537	0.0492118	10.6906	0.0561574	0.812677	1	0.248849	10.6906	42.0623	8.92286e-11	6.6629e-09	0.0320733	10.6906	0.0611285	0.804722	1	0.414152	10.6321	0.433528	0.510277	0.900055	0.610423	10.6321	329.56	1.41194e-72	2.22061e-70	0.653198	10.6321	67.1243	2.83533e-16	1.14522e-13	0.922918	10.6321	5.48259
STOML1	E4	0.0760536	9.99864	2.5908	0.306838	0.746499	0.00461817	9.99864	0.154224	0.694532	0.753049	-0.0710624	9.99864	3.97672	0.224347	0.409479	-0.164874	9.99864	20.2235	0.00497027	0.227074	0.0125044	9.99864	0.802272	0.57311	0.829963	0.0217976	9.99864	0.193751	0.78155	1	-0.0737436	9.65608	2.16755	0.322173	0.799283	0.139734	9.65608	14.6357	0.00459647	0.0106713	0.137229	9.65608	2.85744	0.235277	0.516088	-0.0355132	9.65608	1.58511
STX16	E2	0.000819415	9.91994	2.21932e-09	1	1	0.000204677	9.91994	1.48161	0.926649	0.946623	-0.00174612	9.91994	7.97159	0.829349	0.937525	0.000381151	9.91994	1.21142e-10	1	1	-0.00244212	9.91994	80.292	0.492284	0.768659	0.000242387	9.91994	-4.70031e-10	1	1	-0.00111465	9.55525	-3.08507e-10	1	1	0.00280313	9.55525	22.0986	0.73761	0.822694	-0.000146042	9.55525	4.50683e-10	1	1	-0.000120227	9.55525	0
STYX	E2	-0.040877	9.94648	2.07049	0.505641	0.873703	-0.060124	9.94648	29.1715	0.0108686	0.0185264	-0.0824303	9.94648	16.316	0.0590473	0.15871	-0.0449751	9.94648	1.43007	0.579306	1	0.00309755	9.94648	0.0596277	0.909874	1	0.067012	9.94648	4.31162	0.33503	0.8193	-0.174715	9.58638	7.01036	0.192402	0.671933	-0.0337299	9.58638	0.644559	0.683151	0.77474	0.0363993	9.58638	0.412069	0.752937	0.948518	0.211295	9.58638	10.7068
SUB1	E4	-0.059257	10.2253	0.342369	0.585695	0.918405	-0.301814	10.2253	270.87	1.05651e-60	2.7653e-59	-0.186778	10.2253	20.4348	8.0497e-06	8.72845e-05	-0.0609996	10.2253	0.257254	0.643747	1	0.0116736	10.2253	0.243738	0.67727	0.904356	-0.17094	10.2253	4.32157	0.0479458	0.522919	0.417966	10.0182	0.340611	0.570523	0.943808	0.380276	10.0182	109.856	1.3952e-25	2.42855e-24	0.379216	10.0182	18.8681	1.41344e-05	0.000383679	0.56557	10.0182	2.0466
SULT4A1	E4	-0.0986961	10.2563	2.05151	0.244658	0.686858	-0.162657	10.2563	97.9333	1.6833e-22	1.05411e-21	-0.0413214	10.2563	1.16987	0.468591	0.666224	-0.0677684	10.2563	0.502154	0.563969	1	-0.0322721	10.2563	1.2521	0.364175	0.665655	-0.0654077	10.2563	0.703113	0.493064	0.915784	0.149428	10.0214	0.710029	0.464677	0.881713	0.363353	10.0214	113.598	2.15477e-26	3.94789e-25	0.388196	10.0214	27.7562	2.16417e-07	1.08597e-05	0.0937671	10.0214	0.0297156
SUMO3	E3	0.0268391	10.0598	1.00459	0.4725	0.849858	0.0418098	10.0598	5.17418	0.0460802	0.0703131	0.016479	10.0598	0.233785	0.66595	0.832414	0.00910474	10.0598	0.120274	0.803912	1	0.00112744	10.0598	0.208101	0.743606	0.938125	0.041558	10.0598	0.901013	0.496231	0.916984	0.302216	9.74881	0.548985	0.56834	0.942215	0.484559	9.74881	155.857	4.02152e-26	7.27065e-25	0.553749	9.74881	42.1862	9.47471e-08	5.44934e-06	0.245491	9.74881	0.765662
SUSD4	E4	-0.175049	10.1838	7.64164	0.0254842	0.263777	-0.24378	10.1838	189.428	5.20221e-40	6.52e-39	-0.143536	10.1838	15.038	0.000350452	0.00234408	-0.0697914	10.1838	1.5706	0.313082	0.842645	-0.0242129	10.1838	1.97998	0.258659	0.568914	-0.37718	10.1838	27.3832	3.84483e-06	0.00310593	-0.32708	9.89607	7.39286	0.0212136	0.252855	-0.337174	9.89607	67.5577	4.22567e-15	3.64203e-14	-0.284463	9.89607	12.0044	0.0013479	0.0152385	0.237877	9.89607	1.05125
SV2A	E2	0.175423	10.3715	8.72322	0.0106506	0.162796	-0.0680887	10.3715	16.5496	4.74665e-05	0.000106755	-0.0702951	10.3715	4.34666	0.0370865	0.110772	-0.0203954	10.3715	0.0270792	0.883378	1	-0.0121464	10.3715	0.0624721	0.826604	0.978411	-0.0611359	10.3715	0.477799	0.518529	0.930108	0.299895	10.1403	0.568878	0.491364	0.889813	0.262658	10.1403	56.985	4.7435e-14	3.78034e-13	0.358407	10.1403	29.9692	4.48722e-08	2.79814e-06	0.331626	10.1403	1.40111
SYNE3	E2	0.0266453	9.94304	0.834834	0.690923	0.975692	-0.0264012	9.94304	12.0955	0.126626	0.175333	0.0179395	9.94304	2.43284	0.495961	0.69142	0.00517709	9.94304	0.0866605	0.899697	1	-0.00706993	9.94304	0.238851	0.825731	0.978411	0.0407117	9.94304	0.876046	0.684751	1	0.035057	9.57983	0.220011	0.838336	1	-0.00390648	9.57983	0.0929292	0.88606	0.942656	0.0993057	9.57983	5.77341	0.285229	0.575053	0.0441626	9.57983	0.134681
SYNGR1	E4	0.0492264	10.15	0.569263	0.520707	0.882742	-0.126161	10.15	49.7194	2.66977e-10	8.9726e-10	-0.113907	10.15	8.09264	0.0121811	0.0462709	0.065243	10.15	1.0422	0.410724	0.89311	0.0200443	10.15	0.951024	0.42631	0.723339	-0.0869725	10.15	1.13358	0.369529	0.856368	0.209829	9.83878	0.403544	0.580903	0.952732	0.297356	9.83878	60.8762	6.71789e-15	5.71519e-14	0.488483	9.83878	33.7873	8.71157e-08	5.04306e-06	0.315472	9.83878	1.2461
SYNJ2	E3	-0.130838	10.2401	6.65704	0.0189744	0.22258	-0.256458	10.2401	162.09	4.50979e-37	5.0471e-36	-0.097948	10.2401	4.35734	0.0537646	0.147888	-0.115952	10.2401	2.91458	0.120359	0.739251	-0.075629	10.2401	7.46414	0.00629621	0.0532332	-0.203294	10.2401	5.63292	0.0284249	0.432781	-0.125016	9.92304	0.194564	0.672633	1	-0.481431	9.92304	110.79	8.75358e-26	1.54795e-24	-0.186678	9.92304	2.38168	0.138445	0.38403	-0.0186063	9.92304	0.00610383
SYNPO2	E2	0.0954681	10.1359	3.04507	0.182074	0.609949	-0.268824	10.1359	253.414	1.34126e-43	1.927e-42	-0.228438	10.1359	31.0029	1.13423e-05	0.000118994	-0.0223495	10.1359	0.42715	0.618197	1	-0.00264026	10.1359	0.0141955	0.927722	1	-0.0928343	10.1359	5.55449	0.0730871	0.573124	0.200288	9.82777	0.333587	0.638269	0.994854	-0.09551	9.82777	3.89938	0.0930399	0.153458	0.392457	9.82777	15.217	0.000977356	0.0118971	0.37418	9.82777	2.97044
SYS1	E4	0.000128904	9.91976	7.37138e-11	1	1	-0.00150644	9.91976	215.77	0.338344	0.41304	0.00263869	9.91976	208.735	0.346207	0.543437	-0.000102321	9.91976	-3.68569e-11	1	1	2.80693e-05	9.91976	-1.74233e-10	1	1	-6.87423e-05	9.91976	7.87397e-11	1	1	1.0251e-14	9.55513	0	1	1	-5.12548e-15	9.55513	0	1	1	-2.56274e-15	9.55513	0	1	1	-7.68822e-15	9.55513	0
TAF1C	E3	-0.0798236	9.97263	2.34848	0.361427	0.761866	-0.136448	9.97263	80.6164	7.16269e-08	2.02958e-07	-0.12339	9.97263	17.945	0.0127145	0.0478735	0.0810101	9.97263	2.52947	0.356459	0.852425	-0.00885631	9.97263	0.259033	0.767203	0.950487	-0.243909	9.97263	18.0525	0.0113403	0.315394	-0.0981131	9.61709	0.637844	0.618561	0.980299	-0.175965	9.61709	20.5562	0.00479523	0.0110742	0.126197	9.61709	3.33033	0.25174	0.534775	-0.016432	9.61709	0.109943
TAF6L	E3	0.0206286	9.95281	0.289495	0.78357	1	-0.0496637	9.95281	14.5113	0.0579038	0.08668	-0.068733	9.95281	7.12008	0.179709	0.354053	-0.115026	9.95281	16.3701	0.0451583	0.563987	0.0204375	9.95281	2.71504	0.412463	0.712478	0.0774182	9.95281	3.81638	0.329612	0.813592	-0.192672	9.59467	3.893	0.290455	0.772041	-0.100408	9.59467	9.43239	0.105076	0.170368	-0.0549454	9.59467	0.582391	0.707327	0.917959	-0.0608431	9.59467	2.5825
TAOK1	E2	-0.0876946	10.3684	1.32717	0.249315	0.69216	-0.285071	10.3684	233.704	1.21845e-52	2.44129e-51	-0.185571	10.3684	20.9074	4.83169e-06	5.60711e-05	0.0760863	10.3684	0.415635	0.519126	0.995923	0.0705889	10.3684	4.21725	0.0400201	0.193219	-0.010473	10.3684	0.0152604	0.901686	1	-0.5716	10.0866	8.53333	0.00366682	0.0991142	-0.286951	10.0866	53.2251	3.18175e-13	2.38994e-12	-0.0767515	10.0866	0.824819	0.424647	0.699947	-0.22945	10.0866	0.715434
TAOK2	E3	0.0218424	9.98553	0.239804	0.756685	1	-0.0499287	9.98553	10.6659	0.0338788	0.0530153	0.0272517	9.98553	0.663099	0.592619	0.774641	-0.1754	9.98553	9.5308	0.0580137	0.601288	0.00229712	9.98553	0.123969	0.827936	0.978916	-0.061039	9.98553	1.04947	0.525649	0.935202	0.35542	9.63625	5.31404	0.128432	0.570053	0.16235	9.63625	19.4175	0.00262328	0.00638119	0.33868	9.63625	19.4609	0.00286641	0.0269249	-0.143737	9.63625	4.81784
TBC1D31	E4	-0.251882	9.97852	24.758	0.00269151	0.0696869	-0.232852	9.97852	214.309	1.41731e-19	7.78621e-19	-0.202627	9.97852	38.6255	0.000154279	0.00116377	-0.135541	9.97852	4.99143	0.182152	0.739251	-0.0457715	9.97852	9.70261	0.0638558	0.26222	-0.148387	9.97852	7.39277	0.101405	0.646631	-0.305899	9.626	4.99311	0.14852	0.605958	-0.364146	9.626	85.5436	1.2606e-09	6.93817e-09	-0.00262703	9.626	2.23182e-06	0.999788	1	-0.163324	9.626	0.848058
TBC1D7	E4	-0.0599673	9.95448	3.66983	0.33984	0.750019	-0.170601	9.95448	177.999	7.67436e-12	2.83907e-11	-0.0390951	9.95448	1.91668	0.512041	0.704606	-0.229318	9.95448	25.0148	0.0127923	0.361044	-0.0198352	9.95448	3.17221	0.377233	0.679179	-0.0607399	9.95448	2.72163	0.410307	0.884719	0.271914	9.60705	4.91639	0.212619	0.697172	-0.213443	9.60705	34.4385	0.000609964	0.00166084	0.110399	9.60705	2.93003	0.334165	0.629441	-0.105893	9.60705	0.738885
TBX6	E3	-0.0664536	9.92541	15.8912	0.310718	0.746499	-0.015753	9.92541	60.5195	0.0535306	0.0806904	-0.0301076	9.92541	33.4201	0.150051	0.312773	-0.00704594	9.92541	0.285781	0.895059	1	0.0202862	9.92541	12.7909	0.371104	0.672437	0.0595865	9.92541	18.5084	0.282707	0.78789	0.366704	9.56258	16.4714	0.21806	0.703702	-0.061634	9.56258	63.5089	0.0274917	0.05298	-0.0786358	9.56258	26.1918	0.157026	0.410997	-0.0925961	9.56258	11.4572
TCAP	E3	0.0378239	9.93028	2.27215	0.618796	0.936016	-0.00299911	9.93028	0.860575	0.757183	0.808062	-0.0201172	9.93028	3.38399	0.55127	0.739353	-0.0619508	9.93028	36.878	0.0510969	0.590055	0.0109871	9.93028	10.6481	0.294126	0.591714	0.0241834	9.93028	10.3381	0.301259	0.788336	0.3972	9.56913	38.6766	0.0214385	0.254004	0.14704	9.56913	93.0377	0.000411391	0.00115776	-0.0300447	9.56913	0.715563	0.75106	0.94715	0.0305414	9.56913	1.19389e-09
TCF3	E2	-0.0397775	9.939	1.4959	0.610477	0.931919	-0.0943276	9.939	119.257	4.87663e-06	1.19822e-05	-0.0884635	9.939	24.9571	0.0360693	0.108483	0.0334817	9.939	0.964795	0.686683	1	0.0254665	9.939	6.21223	0.302522	0.60045	0.0632278	9.939	4.35896	0.386793	0.869679	-0.367535	9.57569	19.8802	0.0587442	0.417695	-0.213385	9.57569	110.518	7.55388e-06	2.72142e-05	-0.0331427	9.57569	0.567821	0.756612	0.950388	-0.0846847	9.57569	4.31392
TCF7L2	E3	-0.16852	10.0909	10.8887	0.00132913	0.0442662	-0.311042	10.0909	246.571	3.32431e-40	4.20795e-39	-0.0583034	10.0909	2.18597	0.243216	0.433066	0.0234604	10.0909	0.0457546	0.868595	1	0.0362235	10.0909	1.40978	0.351582	0.65202	-0.0429219	10.0909	0.41821	0.571558	0.969451	-0.458709	9.73674	11.7147	0.00137578	0.0510446	-0.601559	9.73674	167.551	4.89668e-28	9.94557e-27	-0.159264	9.73674	2.74802	0.173654	0.436239	0.442467	9.73674	3.65663
TESC	E2	-0.00704177	9.99353	0.0379606	0.906819	1	-0.219443	9.99353	192.296	8.30524e-18	4.24262e-17	-0.0234944	9.99353	2.44358	0.354144	0.55214	-0.10024	9.99353	4.87327	0.191177	0.739251	-0.0224774	9.99353	7.27458	0.112501	0.367735	-0.0433461	9.99353	3.28361	0.285185	0.78789	0.0720856	9.66338	4.67462	0.155953	0.617228	-0.00143416	9.66338	0.562728	0.508782	0.61746	0.0799454	9.66338	1.78695e-05	0.999611	1	-0.177716	9.66338	2.54116
TEX38	E3	0.000448845	9.9198	3.12307e-10	1	1	6.39913e-05	9.9198	7.11993	0.854699	0.888998	0.000273137	9.9198	-9.60944e-11	1	1	0.000557598	9.9198	-4.80472e-11	1	1	0.000180598	9.9198	0	1	1	0.000362436	9.9198	4.08401e-10	1	1	1.0251e-14	9.55513	0	1	1	-5.12548e-15	9.55513	0	1	1	-2.56274e-15	9.55513	0	1	1	-7.68822e-15	9.55513	0
TFAP2A	E2	-0.0132357	9.91998	376.354	0.159457	0.602421	0.000832876	9.91998	10.7442	0.805195	0.847995	-0.00518297	9.91998	104.799	0.460171	0.658399	0.000264047	9.91998	-1.5941e-09	1	1	-0.00103312	9.91998	12.5276	0.797014	0.965083	0.000177019	9.91998	1.24943e-09	1	1	0.00204763	9.5554	1.35311e-09	0.999983	1	0.00045601	9.5554	0.0727713	0.975874	1	0.0261629	9.5554	172.381	0.140729	0.386123	-0.000193988	9.5554	9.08855e-10
TFCP2	E3	-0.117958	10.1842	2.33724	0.157724	0.602421	-0.340165	10.1842	291.815	3.05444e-65	9.42424e-64	-0.303155	10.1842	49.0464	1.08825e-11	4.58301e-10	-0.0469053	10.1842	0.184054	0.679655	1	-0.116301	10.1842	11.7672	0.00158365	0.0183233	-0.176997	10.1842	4.7364	0.0366677	0.471874	-0.118634	9.85833	0.441291	0.518701	0.905536	-0.665684	9.85833	212.979	9.27819e-48	5.23467e-46	-0.507747	9.85833	27.3097	5.40041e-07	2.3466e-05	-0.376407	9.85833	2.02939
THUMPD1	E2	0.0313429	10.0418	0.45456	0.621235	0.93676	-0.127108	10.0418	48.0554	1.26285e-07	3.50953e-07	0.0144961	10.0418	0.167235	0.722967	0.872154	0.0982382	10.0418	1.95599	0.311779	0.842645	0.104571	10.0418	17.2678	0.00245455	0.0260031	0.112254	10.0418	2.94952	0.211404	0.735514	0.197525	9.7133	0.203882	0.731694	1	0.213133	9.7133	28.4244	8.13851e-06	2.92079e-05	0.274435	9.7133	9.60449	0.013734	0.0846032	0.58592	9.7133	7.15526
TIMM17A	E4	-0.0640382	10.0084	1.38307	0.431497	0.816066	-0.116838	10.0084	44.0407	6.89971e-06	1.67607e-05	-0.0708834	10.0084	3.60322	0.211015	0.39203	-0.00842872	10.0084	0.00305804	0.967244	1	0.00199911	10.0084	0.0462428	0.889149	0.997556	-0.0953086	10.0084	2.53131	0.285111	0.78789	0.445366	9.68453	3.48097	0.168453	0.63899	0.181474	9.68453	24.6733	4.02561e-05	0.000131224	0.0533528	9.68453	0.29237	0.688352	0.904898	0.132764	9.68453	0.0180097
TJAP1	E3	-0.144652	9.99307	7.74079	0.0716917	0.437687	-0.0735386	9.99307	19.7997	0.0036466	0.00663194	-0.013709	9.99307	0.158063	0.796161	0.917032	-0.0469233	9.99307	0.563463	0.62994	1	-0.00799224	9.99307	0.0823402	0.847284	0.987224	0.196371	9.99307	9.72934	0.0416561	0.496182	-0.368294	9.63264	6.71284	0.0827459	0.489045	-0.0907904	9.63264	5.42943	0.111754	0.179689	0.0751111	9.63264	0.936226	0.526225	0.785756	0.105518	9.63264	0.471539
TLR9	E2	0.00772852	9.91991	166.068	0.352269	0.755373	0.000173561	9.91991	2.11652	0.916526	0.938565	0.00596829	9.91991	432.12	0.133414	0.287921	-0.00030818	9.91991	-2.28869e-09	1	1	0.00504223	9.91991	651.701	0.0654694	0.26609	-0.000196784	9.91991	-8.1934e-11	1	1	0.00289448	9.55539	2.89359e-09	0.999967	1	0.00296901	9.55539	163.386	0.128785	0.202725	0.0267967	9.55539	424.568	0.0142921	0.0870907	0.00414372	9.55539	6.26995e-09
TMCC1	E2	-0.226009	10.3611	9.43039	0.00213532	0.0602169	-0.291536	10.3611	242.439	1.54944e-54	3.28992e-53	-0.257966	10.3611	40.7693	1.72787e-10	5.83796e-09	-0.012873	10.3611	0.0157634	0.900087	1	-0.00704497	10.3611	0.04402	0.837171	0.981929	0.0130457	10.3611	0.0240954	0.882018	1	-0.576302	10.0687	9.78565	0.00176344	0.0605482	-0.334855	10.0687	70.7345	4.5982e-17	4.58068e-16	-0.0399667	10.0687	0.227966	0.648298	0.8781	-0.210207	10.0687	0.721001
TMEM132D	E4	-0.0795937	10.7533	1.1251	0.289014	0.738634	-0.318116	10.7533	363.924	7.59236e-81	4.25651e-79	-0.370556	10.7533	97.7741	4.92144e-23	1.30543e-20	-0.0240616	10.7533	0.106561	0.744095	1	-0.0723615	10.7533	5.622	0.0177402	0.11196	-0.141142	10.7533	4.67258	0.0306525	0.448728	-0.164803	10.5101	0.944516	0.331141	0.807386	-0.404523	10.5101	130.508	4.70779e-30	1.07128e-28	-0.319625	10.5101	15.5541	8.06794e-05	0.00160924	-0.203151	10.5101	1.18062
TMEM144	E2	-0.263175	10.3206	16.3362	0.00191203	0.0565401	-0.197581	10.3206	116.976	4.27182e-16	1.99944e-15	0.0964833	10.3206	5.83125	0.0763656	0.190962	0.224475	10.3206	6.10491	0.0696614	0.636233	0.0505639	10.3206	8.14869	0.00431098	0.0399243	-0.112304	10.3206	5.43709	0.0870089	0.609748	0.0117026	9.95369	0.00430837	0.947667	1	-0.0809225	9.95369	6.80816	0.0384104	0.0713749	0.327224	9.95369	12.197	0.00791932	0.0571426	0.123091	9.95369	0.172471
TMEM163	E4	-0.0277336	10.0553	0.570909	0.581845	0.915741	-0.203844	10.0553	121.993	7.31498e-18	3.74753e-17	-0.0951294	10.0553	6.4252	0.0571475	0.154797	0.0900639	10.0553	1.02605	0.439292	0.926942	0.0499332	10.0553	9.06078	0.028458	0.15452	-0.0538855	10.0553	0.721077	0.466472	0.901102	-0.07502	9.71374	3.12032	0.17365	0.645756	-0.452403	9.71374	106.633	2.01863e-17	2.07131e-16	-0.0670566	9.71374	0.474269	0.574758	0.823594	-0.00879462	9.71374	1.27696e-05
TMEM169	E2	0.0122503	9.95133	0.584028	0.715008	0.985297	-0.125684	9.95133	107.374	2.84834e-07	7.69427e-07	-0.109147	9.95133	19.914	0.0279497	0.0889567	0.122022	9.95133	11.717	0.100534	0.704811	-0.0265244	9.95133	8.2476	0.168054	0.459132	-0.0455767	9.95133	1.17608	0.596347	0.983379	0.0438901	9.59486	1.98716	0.463304	0.881284	-0.137778	9.59486	15.8072	0.0343786	0.0646947	-0.0447784	9.59486	0.345704	0.754592	0.949326	0.143502	9.59486	1.57521
TMEM189-UBE2V1	E4	-0.00029711	9.91996	-2.13403e-10	1	1	0.00364179	9.91996	233.481	0.247128	0.315741	0.00081044	9.91996	5.48531	0.858271	0.954338	7.21045e-05	9.91996	-2.63031e-10	1	1	-0.000564966	9.91996	5.80018	0.855432	0.988435	5.05668e-05	9.91996	5.01248e-10	1	1	0.00354291	9.55532	3.47455e-10	1	1	0.0127937	9.55532	212.247	0.034024	0.0641023	0.0256029	9.55532	102.348	0.140728	0.386123	0.00130819	9.55532	1.82128e-10
TMEM237	E2	-0.0273069	9.96836	0.536036	0.687958	0.973516	-0.0651235	9.96836	17.9621	0.0179021	0.0294098	-0.136627	9.96836	23.5371	0.00576229	0.0250753	0.0518488	9.96836	3.11965	0.333259	0.844237	0.0262115	9.96836	4.89167	0.22407	0.526882	-0.0297024	9.96836	0.49319	0.697978	1	-0.100021	9.62094	1.91814	0.39952	0.863482	0.00359959	9.62094	0.0893719	0.822303	0.890891	-0.146825	9.62094	4.23086	0.196754	0.466718	-0.0515834	9.62094	1.95724
TMEM33	E2	0.0856964	10.0241	2.30899	0.277829	0.727506	-0.131862	10.0241	54.1718	4.93863e-08	1.41609e-07	-0.103935	10.0241	7.35639	0.0501778	0.140283	-0.0280679	10.0241	0.0210804	0.916891	1	0.0217333	10.0241	1.12574	0.453419	0.740281	-0.095058	10.0241	1.72765	0.346243	0.832671	0.0960111	9.69708	0.0355637	0.889793	1	0.254038	9.69708	40.9983	1.69928e-07	7.49741e-07	0.396962	9.69708	20.1963	0.00048022	0.0069105	0.129794	9.69708	0.0140107
TMPO	E2	0.0116295	9.99561	0.0961988	0.84036	1	-0.0774207	9.99561	19.4063	0.004026	0.00727356	0.102294	9.99561	8.79642	0.0502633	0.140455	0.130835	9.99561	2.94893	0.266091	0.842645	0.102678	9.99561	23.9155	0.00155935	0.0180893	-0.0357367	9.99561	0.389763	0.684123	1	0.139939	9.65313	0.296372	0.708371	1	0.189383	9.65313	24.9781	0.000200626	0.000593165	0.407065	9.65313	24.8132	0.000426519	0.00628532	0.130546	9.65313	0.229918
TNFRSF11A	E2	0.002743	9.93571	0.647866	0.774282	1	-0.0835712	9.93571	95.5343	0.000293056	0.000607015	0.0424973	9.93571	45.8411	0.0154606	0.0560788	0.143274	9.93571	19.0286	0.114319	0.736622	-0.000624031	9.93571	3.92808	0.479325	0.759975	0.0176366	9.93571	1.8301	0.629343	0.997742	0.00647796	9.57348	2.92007	0.462671	0.880834	-0.191067	9.57348	56.4414	0.000900313	0.00238313	0.130672	9.57348	28.6926	0.0200659	0.110783	-0.0238806	9.57348	0.126653
TNFRSF11B	E4	0.206591	9.9231	192.109	0.00781777	0.133345	-0.0168003	9.9231	195.594	0.00992759	0.017004	0.000220984	9.9231	1.02299	0.850671	0.950015	0.172487	9.9231	307.702	0.00126462	0.0964582	0.00391518	9.9231	69.5858	0.127314	0.393376	-0.0206914	9.9231	3.83148	0.710511	1	0.198726	9.55783	0.583686	0.897018	1	-0.0221497	9.55783	40.1892	0.184152	0.272752	-0.0075807	9.55783	-2.4205e-10	1	1	0.527147	9.55783	173.504
TNFRSF21	E4	0.0952286	10.0259	17.0684	0.00572336	0.111775	-0.149673	10.0259	75.055	1.92038e-09	6.07385e-09	-0.126955	10.0259	11.7644	0.0194659	0.0672134	-0.0782637	10.0259	3.99647	0.181444	0.739251	-0.0588084	10.0259	14.1608	0.0118362	0.0846976	-0.0978764	10.0259	2.15187	0.302019	0.788336	0.225914	9.69132	1.26477	0.418126	0.871923	0.0359811	9.69132	1.69725	0.27578	0.381472	-0.0455579	9.69132	0.506935	0.59532	0.839271	0.0210869	9.69132	1.29343
TNIP1	E3	-0.131252	9.96946	10.199	0.0688393	0.428574	-0.0915419	9.96946	34.8474	0.000583756	0.00116962	0.0155718	9.96946	0.267783	0.77139	0.902511	0.0781434	9.96946	1.56439	0.476261	0.967719	0.00322099	9.96946	0.0265617	0.926477	1	-0.0995818	9.96946	4.8055	0.211951	0.735514	-0.325775	9.6209	7.19195	0.0961811	0.51298	-0.0264951	9.6209	0.528191	0.697073	0.787164	0.0354948	9.6209	0.252504	0.74786	0.944968	0.130958	9.6209	0.978659
TNIP2	E4	0.108803	9.92939	32.1558	0.0695011	0.431577	0.00790556	9.92939	3.982	0.5011	0.575964	-0.017302	9.92939	6.1834	0.427949	0.628295	0.186434	9.92939	52.6378	0.0207862	0.442331	0.0362179	9.92939	32.1869	0.0718969	0.279596	-0.115913	9.92939	52.879	0.0210973	0.390972	0.384683	9.56554	54.7384	0.0144483	0.212165	1.456e-05	9.56554	0.139706	0.887562	0.944027	-0.0216757	9.56554	1.1749	0.722233	0.928563	0.583201	9.56554	64.7941
TNPO1	E2	0.0232297	10.2061	0.0743304	0.795668	1	-0.267663	10.2061	208.071	9.6681e-46	1.52324e-44	-0.188052	10.2061	18.3664	6.75067e-05	0.000568054	0.211405	10.2061	3.43587	0.102669	0.711131	0.12871	10.2061	14.4739	0.000741652	0.0102573	0.0267051	10.2061	0.0998329	0.781199	1	-0.333245	9.89352	3.43062	0.0938724	0.510496	-0.310615	9.89352	55.4774	1.15443e-13	8.9553e-13	0.0162293	9.89352	0.0219074	0.882336	1	0.646802	9.89352	6.05383
TNRC6A	E3	-0.195056	10.5458	9.49729	0.00205886	0.0587551	-0.306347	10.5458	297.174	2.10956e-66	6.76733e-65	-0.235104	10.5458	44.4082	2.69303e-11	1.04499e-09	-0.0457812	10.5458	0.145152	0.703213	1	0.048448	10.5458	1.9633	0.161167	0.447332	-0.0704211	10.5458	0.901236	0.342455	0.829058	-0.207621	10.2779	1.95985	0.161558	0.62704	-0.399356	10.2779	121.169	4.93463e-28	1.00112e-26	-0.295229	10.2779	17.9984	2.22922e-05	0.000550245	0.191734	10.2779	0.435781
TNS1	E3	-0.20771	9.95289	20.4727	0.0188998	0.222442	-0.0044817	9.95289	0.313548	0.766072	0.815491	0.0119608	9.95289	0.356018	0.764385	0.898753	0.0706293	9.95289	5.33284	0.256413	0.839377	0.113413	9.95289	40.8155	0.00133473	0.0160384	-0.164519	9.95289	10.5393	0.095344	0.629674	-0.637752	9.58623	30.7839	0.00531	0.121142	-0.00529555	9.58623	0.0639412	0.908804	0.96047	-0.0576548	9.58623	1.6949	0.51987	0.781189	0.0134756	9.58623	2.24389e-10
TNXB	E4	0.0154158	9.94297	0.239104	0.835584	1	-0.0412631	9.94297	12.1961	0.14623	0.198989	0.0507335	9.94297	8.92983	0.201839	0.38031	0.0188474	9.94297	0.386929	0.792952	1	-0.0035394	9.94297	2.26872	0.524821	0.792112	0.00832555	9.94297	0.0445269	0.928518	1	0.0933253	9.5794	1.98237	0.539153	0.920779	-0.153315	9.5794	41.7404	0.00399507	0.00938662	-0.0949358	9.5794	6.92878	0.248554	0.530367	-0.0217892	9.5794	2.42044e-11
TOMM40	E2E4	-0.0353725	9.99809	0.442242	0.663026	0.961682	-0.15921	9.99809	83.6412	6.98602e-10	2.28269e-09	-0.123042	9.99809	11.4991	0.0261261	0.0845177	0.156	9.99809	6.73732	0.0922994	0.677269	0.0189888	9.99809	0.834891	0.552	0.812418	-0.00481158	9.99809	0.00725891	0.951911	1	-0.15387	9.65698	2.95902	0.22342	0.708119	-0.0481264	9.65698	0.716318	0.600011	0.701632	-0.216189	9.65698	6.33835	0.0674727	0.251389	-0.0911357	9.65698	2.85507
TP53INP1	E2	0.0475761	9.92951	5.66501	0.463265	0.842331	0.0205545	9.92951	45.7077	0.0392903	0.0607876	-0.0767152	9.92951	57.5828	0.0193498	0.0668958	0.00481625	9.92951	0.0339405	0.951793	1	0.0309841	9.92951	15.1478	0.230378	0.5359	-0.0656158	9.92951	6.02684	0.440851	0.892645	0.031452	9.56394	0.691685	0.809964	1	0.0463024	9.56394	39.0493	0.0692403	0.119273	-0.0898942	9.56394	15.1654	0.249087	0.53117	0.176289	9.56394	8.37188
[truncated: 95 more rows]
[truncated: 72 more columns]
